# Supplementary material for: PacBio Hi-Fi genome assembly of the Iberian dolphin freshwater mussel Unio delphinus Spengler, 1793
Source: PubMed Central journal article supplement (PMC10235117; doi:10.1038/s41597-023-02251-7), 2023-06-01
Supplement: 41597_2023_2251_MOESM1_ESM.pdf [file 41597_2023_2251_MOESM1_ESM.pdf]

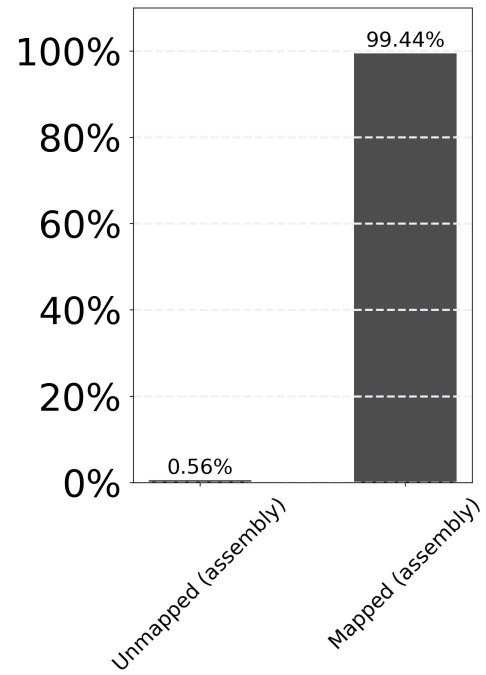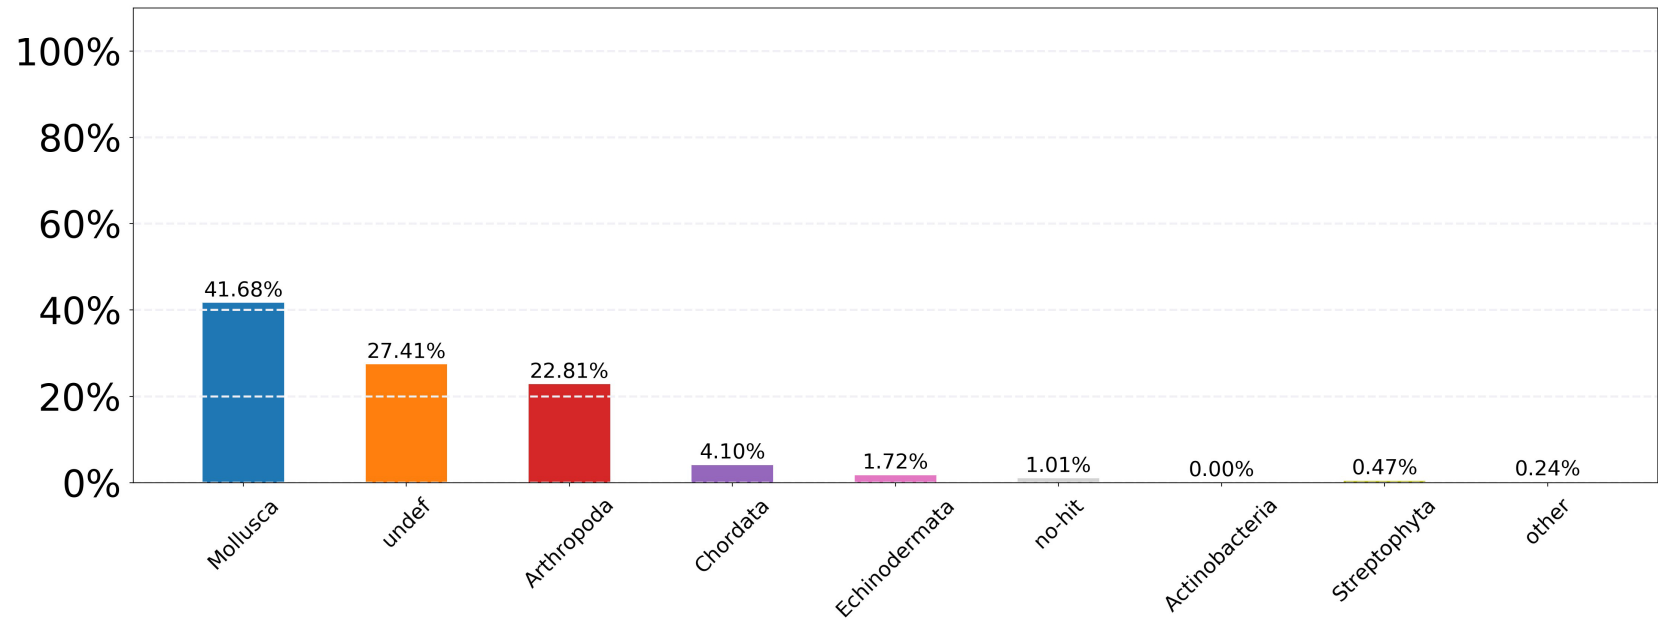

Fig.S1 - Blobtools Read Coverage Plots for the taxonomic level Phylum.

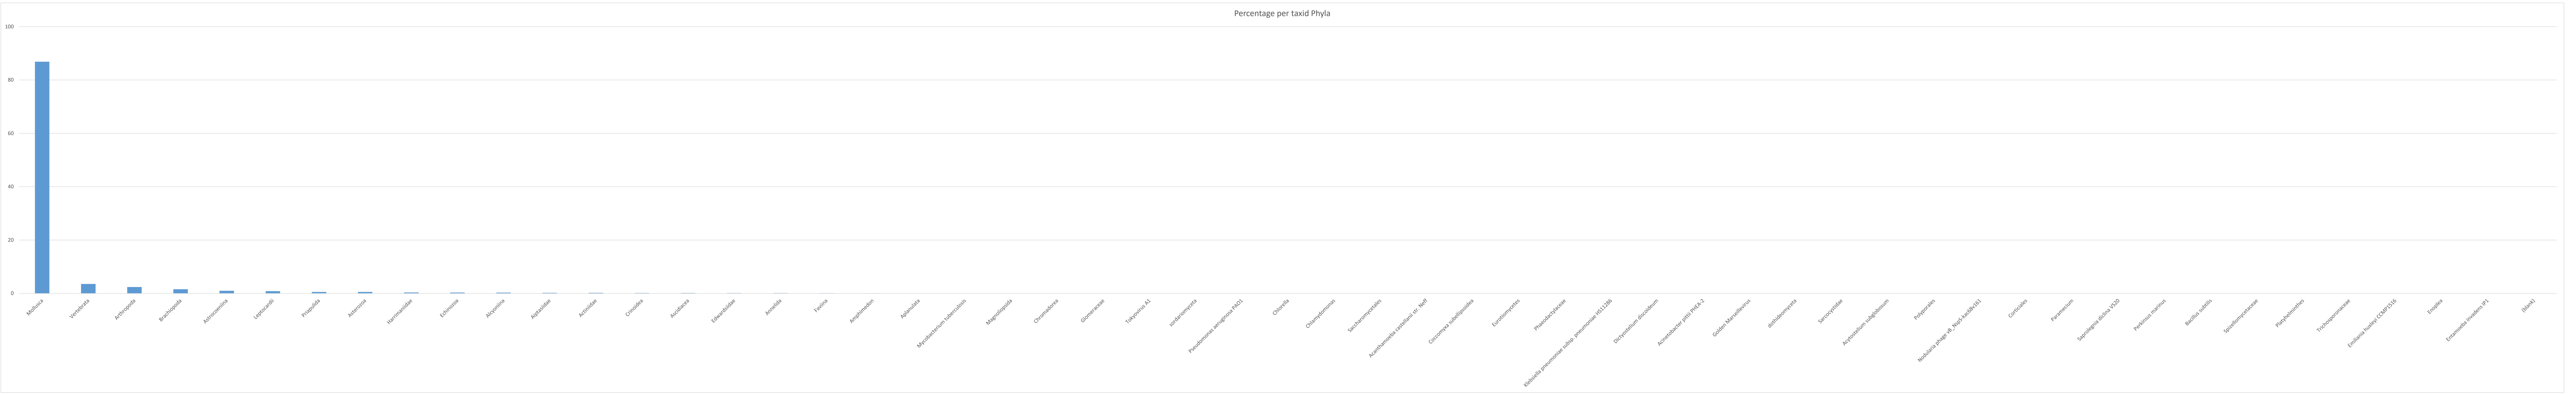

Fig. S2 - Percentage of higher taxonomic level blastp hits of the BRAKER2 predicted protein against RefSeq database.

1. *Aculamprotula scripta* voucher Xiaoping Wu:01-ASF-2017 mitochondrion, complete genome  
15,688 bp circular DNA  
MF991456.1 GI:1331389993
2. *Aculamprotula tientsinensis* mitochondrion, complete genome  
15,695 bp circular DNA  
KR873102.1 GI:954003649
3. *Acuticosta chinensis* mitochondrion, complete genome  
15,653 bp circular DNA  
MF687347.1 GI:1307564826
4. *Acuticosta chinensis* haplotype female mitochondrion, complete genome  
15,652 bp circular DNA  
MH919390.1 GI:1607271201
5. *Alasmidonta heterodon* mitochondrion, complete genome  
15,909 bp circular DNA  
MG905826.1 GI:1354701155
6. *Alasmidonta varicosa* mitochondrion, complete genome  
15,693 bp circular DNA  
MG938673.1 GI:1406947749
7. *Alasmidonta varicosa* voucher NEFC\_B19-499 mitochondrion, complete genome  
15,700 bp circular DNA  
OM736872.1 GI:2325478630
8. *Amblema plicata* isolate BIV2448 mitochondrion, complete genome  
15,946 bp circular DNA  
MT648774.1 GI:1877028245
9. *Anodonta euscaphys* mitochondrion, complete genome  
15,741 bp circular DNA  
KP187851.1 GI:770593144
10. *Anodonta anatina* isolate 247 haplotype M mitochondrion, complete genome  
16,906 bp circular DNA  
KF030962.1 GI:528079477
11. *Anodonta anatina* isolate 320 haplotype M mitochondrion, complete genome  
16,906 bp circular DNA  
KF030963.1 GI:528079492
12. *Anodonta anatina* isolate 106 haplotype F mitochondrion, complete genome  
15,653 bp circular DNA  
KF030964.1 GI:528079507
13. *Anodonta anatina* isolate 218 haplotype F mitochondrion, complete genome

15,637 bp circular DNA  
KF030965.1 GI:528079522

14. *Anodonta anatina* isolate 245 haplotype F mitochondrion, complete genome  
15,640 bp circular DNA  
KF030966.1 GI:528079537

15. *Anodonta anatina* isolate 146 haplotype F mitochondrion, complete genome  
15,645 bp circular DNA  
KF030967.1 GI:528079552

16. *Anodonta anatina* isolate 314 haplotype F mitochondrion, complete genome  
15,645 bp circular DNA  
KF030968.1 GI:528079567

17. *Anodonta anatina* isolate AA1 mitochondrion, complete genome  
15,649 bp circular DNA  
MN594531.1 GI:1958843900

18. *Anodonta arcaeformis* mitochondrion, complete genome  
15,672 bp circular DNA  
KF667530.1 GI:585866289

19. *Anodonta cygnea* mitochondrion, complete genome  
15,613 bp circular DNA  
MG385135.1 GI:1280962892

20. *Anodonta cygnea* mitochondrion, complete genome  
15,610 bp circular DNA  
MF781083.1 GI:1350896077

21. *Anodonta cygnea* isolate AC70 mitochondrion, complete genome  
15,613 bp circular DNA  
MN594532.1 GI:1958843914

22. UNVERIFIED: *Anodonta cygnea* mitochondrion sequence  
15,905 bp linear DNA  
MT874496.1 GI:2248385936

23. *Anodonta exulcerata* isolate AC108 mitochondrion, complete genome  
15,619 bp circular DNA  
MN594533.1 GI:1958843928

24. *Anodonta lucida* mitochondrion, complete genome  
16,285 bp circular DNA  
KF667529.1 GI:585866275

25. *Anodonta nuttalliana* isolate BIV0364 mitochondrion, complete genome  
16,015 bp circular DNA  
MN594534.1 GI:1958843942

26. UNVERIFIED: *Anodontites elongata* isolate AnoElo mitochondrion sequence, sequence  
15,255 bp linear DNA  
MK761136.1 GI:1803023760
27. *Anodontites trapesialis* isolate H2445 mitochondrion, partial genome  
15,117 bp linear DNA  
KU873119.1 GI:1150311665
28. *Beringiana fukuharai* B057 mitochondrial DNA, complete genome  
16,014 bp circular DNA  
LC592401.2 GI:2038456704
29. *Beringiana fukuharai* B103 mitochondrial DNA, complete genome  
16,200 bp circular DNA  
LC592402.2 GI:2038456718
30. *Beringiana fukuharai* B177 mitochondrial DNA, complete genome  
16,092 bp circular DNA  
LC592403.2 GI:2038456732
31. *Beringiana fukuharai* n972 mitochondrial DNA, complete genome  
15,989 bp circular DNA  
LC592408.2 GI:2038456760
32. *Beringiana fukuharai* n997 mitochondrial DNA, complete genome  
16,158 bp circular DNA  
LC592410.2 GI:2038456774
33. UNVERIFIED: *Castalia ambigua* isolate CasAmb mitochondrion sequence, sequence  
17,092 bp linear DNA  
MK761137.1 GI:1803023761
34. UNVERIFIED: *Chambardia rubens* isolate ChaRub mitochondrion sequence, sequence  
16,697 bp linear DNA  
MK761138.1 GI:1803023762
35. *Chamberlainia hainesiana* mitochondrion, complete genome  
16,746 bp circular DNA  
MK994770.1 GI:1695712150
36. *Chamberlainia hainesiana* mitochondrion, complete genome  
17,465 bp circular DNA  
MK994771.1 GI:1695712164
37. *Conradens conradens* isolate Concon\_F voucher BIV1811 mitochondrion, complete genome  
15,956 bp circular DNA  
MW242812.1 GI:2007112088
38. *Conradens conradens* isolate Concon\_M voucher BIV1811 mitochondrion, complete genome

17,057 bp circular DNA  
MW242813.1 GI:2007112102

39. *Lasmigona compressa* isolate H2390 mitochondrion, complete genome  
15,903 bp circular DNA  
HM856638.1 GI:302702158

40. *Cristaria plicata* mitochondrion, complete genome  
15,712 bp circular DNA  
FJ986302.1 GI:229915382

41. *Cristaria plicata* mitochondrion, complete genome  
15,708 bp circular DNA  
GU944476.1 GI:291498580

42. *Cristaria plicata* mitochondrion, complete genome  
15,710 bp circular DNA  
KM233451.1 GI:677285913

43. *Cumberlandia monodonta* isolate H3010 mitochondrion, complete genome  
16,099 bp circular DNA  
KU873123.1 GI:1150311723

44. *Cumberlandia monodonta* isolate H1526g mitochondrion, complete genome  
17,575 bp circular DNA  
KU873124.1 GI:1150311738

45. *Cuneopsis celtiformis* voucher 20-NCU-XPWU-CC01 mitochondrion, complete genome  
15,922 bp circular DNA  
MW464617.1 GI:2028540050

46. *Cuneopsis celtiformis* voucher 21-NCU-XPWU-CCM01 mitochondrion, complete genome  
16,875 bp circular DNA  
MZ571520.1 GI:2296405140

47. *Cuneopsis demangei* voucher 21-NCU-XPWU-CDF01 mitochondrion, complete genome  
15,975 bp circular DNA  
MZ571513.1 GI:2296405080

48. *Cuneopsis heudei* mitochondrion, complete genome  
15,982 bp circular DNA  
MF687348.1 GI:1331389964

49. *Cuneopsis heudei* haplotype female mitochondrion, complete genome  
15,892 bp circular DNA  
MH919389.1 GI:1607271187

50. UNVERIFIED: *Cuneopsis heudei* mitochondrion sequence  
16,744 bp linear DNA  
MZ571514.1 GI:2296405155

51. *Cuneopsis rufescens* voucher 21-NCU-XPWU-CRF01 mitochondrion, complete genome  
15,945 bp circular DNA  
MZ571512.1 GI:2296405065
52. UNVERIFIED: *Diplodon suavidicus* isolate DipSua mitochondrion sequence, sequence  
18,211 bp linear DNA  
MK761139.1 GI:1803023763
53. *Echyridella menziesii* isolate SB11 mitochondrion, complete genome  
16,031 bp circular DNA  
KU873121.1 GI:1150311693
54. *Echyridella menziesii* isolate M9 mitochondrion, complete genome  
18,140 bp circular DNA  
KU873122.1 GI:1150311708
55. UNVERIFIED: *Fossula fossiculifera* isolate FosFos mitochondrion sequence, sequence  
15,632 bp linear DNA  
MK761140.1 GI:1803023764
56. *Margaritifera margaritifera* mitochondrion, complete genome  
16,122 bp circular DNA  
MK421956.1 GI:1678501092
57. *Margaritifera margaritifera* mitochondrion, complete genome  
16,122 bp circular DNA  
MK421957.1 GI:1678501106
58. *Margaritifera margaritifera* mitochondrion, complete genome  
16,122 bp circular DNA  
MK421958.1 GI:1678501120
59. *Margaritifera margaritifera* mitochondrion, complete genome  
17,421 bp circular DNA  
MK421959.1 GI:1678501134
60. *Margaritifera margaritifera* mitochondrion, complete genome  
16,124 bp circular DNA  
MW556443.1 GI:1989769663
61. *Pyganodon grandis* haplotype female mitochondrion, complete genome  
15,848 bp circular DNA  
FJ809754.1 GI:229915704
62. *Pyganodon grandis* haplotype male mitochondrion, complete genome  
17,071 bp circular DNA  
FJ809755.1 GI:229915718
63. *Pyganodon grandis* isolate NEFC\_B19-228 mitochondrion, complete genome

15,851 bp circular DNA  
OM736870.1 GI:2325478600

64. *Gibbosula crassa* mitochondrion, complete genome  
16,196 bp circular DNA  
MH319826.1 GI:1389449463

65. UNVERIFIED: *Gibbosula polysticta* mitochondrion sequence, sequence  
15,714 bp linear DNA  
MK728823.1 GI:1893870070

66. UNVERIFIED: *Gibbosula rochechouartii* mitochondrion sequence, sequence  
16,100 bp linear DNA  
KX378172.1 GI:1194689569

67. *Hyriopsis bialata* isolate HyrBia\_F voucher BIV1774 mitochondrion, complete genome  
15,919 bp circular DNA  
MW242816.1 GI:2007112144

68. *Hyriopsis bialata* isolate HyrBia\_M voucher BIV1774 mitochondrion, complete genome  
16,761 bp circular DNA  
MW242817.1 GI:2007112158

69. *Hyriopsis cumingii* mitochondrion, complete genome  
15,954 bp circular DNA  
FJ529186.1 GI:218135570

70. *Hyriopsis cumingii* mitochondrion, complete genome  
15,957 bp circular DNA  
HM347668.1 GI:298289276

71. UNVERIFIED: *Hyriopsis cumingii* mitochondrion sequence  
17,100 bp linear DNA  
KC150028.1 GI:453040376

72. *Hyriopsis cumingii* mitochondrion, complete genome  
15,958 bp circular DNA  
KM393224.1 GI:697994587

73. *Hyriopsis cumingii* UU-SBD-Unio11 mitochondrial DNA, complete genome  
15,961 bp circular DNA  
LC498621.1 GI:1817956062

74. *Lamellidens marginalis* voucher CIFEFG-LM1 mitochondrion, complete genome  
15,732 bp circular DNA  
MT230549.1 GI:2026652142

75. UNVERIFIED: *Lamproscapha ensiformis* isolate LamEns mitochondrion sequence, sequence  
15,583 bp linear DNA  
MK761141.1 GI:1803023765



76. *Lamprotula caveata* mitochondrion, complete genome  
16,641 bp circular DNA  
KX060991.1 GI:1031877807
77. *Lamprotula caveata* haplotype male mitochondrion, complete genome  
17,179 bp circular DNA  
KX091842.1 GI:1083262520
78. *Lamprotula coreana* mitochondrion, complete genome  
15,697 bp circular DNA  
JX050180.1 GI:390472651
79. *Lamprotula cornuumlunae* voucher Personal:Xiaoping Wu:FM141126 mitochondrion, complete genome  
16,635 bp circular DNA  
MK728822.1 GI:2034420496
80. *Lamprotula gottschei* mitochondrion, complete genome  
15,915 bp circular DNA  
KJ018924.1 GI:589913336
81. *Lamprotula gottschei* mitochondrion, complete genome  
16,851 bp circular DNA  
KJ627225.1 GI:647734893
82. *Lamprotula leai* haplotype F mitochondrion, complete genome  
16,530 bp circular DNA  
JQ691662.1 GI:379317181
83. *Lamprotula leai* mitochondrion, complete genome  
16,852 bp circular DNA  
KC847114.1 GI:511773436
84. *Lamprotula scripta* haplotype female mitochondrion, complete genome  
16,250 bp circular DNA  
KU745294.1 GI:1027254042
85. *Lamprotula tortuosa* mitochondrion, complete genome  
15,722 bp circular DNA  
KC109779.1 GI:441062040
86. *Lamprotula tortuosa* mitochondrion, complete genome  
16,688 bp circular DNA  
KC441487.1 GI:453041969
87. *Lampsilis cardium* isolate NEFC\_B19-224 mitochondrion, complete genome  
16,075 bp circular DNA  
OM736867.1 GI:2325478555
88. *Lampsilis cardium* isolate NEFC\_B19-225 mitochondrion, complete genome

16,057 bp circular DNA  
OM736868.1 GI:2325478570

89. *Lampsilis cariosa* voucher NEFC\_B19-074 mitochondrion, complete genome  
15,981 bp circular DNA  
OM736866.1 GI:2325478540

90. *Lampsilis ornata* mitochondrion, complete genome  
16,060 bp circular DNA  
AY365193.1 GI:39726228

91. *Lampsilis powellii* isolate H2610 mitochondrion, complete genome  
16,043 bp circular DNA  
MF326971.1 GI:1314670215

92. *Lampsilis powellii* isolate H2613 mitochondrion, complete genome  
16,990 bp circular DNA  
MF326972.1 GI:1314670230

93. *Lampsilis siliquoidea* isolate H2655 mitochondrion, complete genome  
16,094 bp circular DNA  
MF326973.1 GI:1314670245

94. *Lampsilis siliquoidea* isolate H3276 mitochondrion, complete genome  
17,008 bp circular DNA  
MF326974.1 GI:1314670260

95. *Lampsilis siliquoidea* isolate NEFC\_B19-227 mitochondrion, complete genome  
16,093 bp circular DNA  
OM736869.1 GI:2325478585

96. *Lampsilis siliquoidea* isolate NEFC\_B19-226 mitochondrion, complete genome  
16,089 bp circular DNA  
OM736873.1 GI:2325478645

97. *Lanceolaria gladiola* haplotype female mitochondrion, complete genome  
15,732 bp circular DNA  
KY067441.1 GI:1186236994

98. *Lanceolaria grayana* mitochondrion, complete genome  
15,736 bp circular DNA  
KJ495725.1 GI:630044994

99. *Arconaia lanceolata* mitochondrion, complete genome  
15,782 bp circular DNA  
KJ144818.1 GI:597568932

100. *Arconaia lanceolata* mitochondrion, complete genome  
16,789 bp circular DNA  
KJ775864.1 GI:669633923

101. *Lasmigona complanata* isolate NEFC\_B19-229 mitochondrion, complete genome  
16,006 bp circular DNA  
OM736871.1 GI:2325478615
102. *Lasmigona subviridis* isolate H2958 mitochondrion, partial genome  
11,969 bp linear DNA  
HM856640.1 GI:302702188
103. *Lepidodesma languilati* mitochondrion, complete genome  
15,754 bp circular DNA  
KT381195.1 GI:992321108
104. *Toxolasma parvus* isolate H1805 mitochondrion, complete genome  
15,949 bp circular DNA  
HM856639.1 GI:302702173
105. *Quadrula quadrula* haplotype female mitochondrion, complete genome  
16,033 bp circular DNA  
FJ809750.1 GI:229915648
106. *Quadrula quadrula* haplotype male mitochondrion, complete genome  
16,970 bp circular DNA  
FJ809751.1 GI:229915662
107. *Dahurinaia dahurica* mitochondrion, complete genome  
16,112 bp circular DNA  
KF514426.1 GI:555298204
108. *Microcondylaea bonellii* mitochondrion, complete genome  
16,020 bp circular DNA  
MK994772.1 GI:1695712178
109. *Microcondylaea bonellii* mitochondrion, complete genome  
16,737 bp circular DNA  
MK994773.1 GI:1695712192
110. UNVERIFIED: *Monocondylaea parchappii* isolate MonPar mitochondrion sequence, sequence  
15,528 bp linear DNA  
MK761142.1 GI:1803023766
111. *Monodontina vondembuschiana* mitochondrion, complete genome  
16,028 bp circular DNA  
MK994774.1 GI:1695712206
112. UNVERIFIED: *Monodontina vondembuschiana* mitochondrion, sequence  
16,364 bp linear DNA  
MK994775.1 GI:1695712220
113. *Mutela dubia* isolate H1495 mitochondrion, complete genome

16,168 bp circular DNA  
KU873120.1 GI:1150311679

114. *Nodularia breviconcha* mitochondrion, complete genome  
15,741 bp circular DNA  
MT955592.1 GI:1914212499

115. *Unio douglasiae* haplotype F mitochondrion, complete genome  
15,767 bp circular DNA  
KM657954.1 GI:731446523

116. *Unio douglasiae* mitochondrion, complete genome  
16,670 bp circular DNA  
KP970613.1 GI:893641264

117. *Nodularia douglasiae* mitochondrion, complete genome  
15,761 bp circular DNA  
MF314443.1 GI:1502979494

118. *Nodularia douglasiae* UU-SBD-Unio08 mitochondrial DNA, complete genome  
15,779 bp circular DNA  
LC496352.1 GI:1782080796

119. *Nodularia douglasiae* isolate MG mitochondrion, complete genome  
15,764 bp circular DNA  
MT764726.1 GI:1893869438

120. *Nodularia douglasiae* mitochondrion, complete genome  
15,746 bp circular DNA  
MT447062.1 GI:2173806703

121. *Nodularia douglasiae biwae* B063 mitochondrial DNA, complete genome  
15,755 bp circular DNA  
LC589171.1 GI:1959241293

122. *Nodularia douglasiae biwae* n975 mitochondrial DNA, complete genome  
15,767 bp circular DNA  
LC589172.1 GI:1959241307

123. *Unio pictorum* isolate 147 mitochondrion, complete genome  
15,760 bp circular DNA  
HM014130.1 GI:291575410

124. *Unio pictorum* isolate 109 mitochondrion, complete genome  
15,762 bp circular DNA  
HM014131.1 GI:291575424

125. *Unio pictorum* isolate 132 mitochondrion, complete genome  
15,761 bp circular DNA  
HM014132.1 GI:291575438

126. *Unio pictorum* isolate 149 mitochondrion, complete genome  
15,761 bp circular DNA  
HM014133.1 GI:291575452
127. *Unio pictorum* isolate 310 mitochondrion, complete genome  
15,761 bp circular DNA  
HM014134.1 GI:291575466
128. *Unio pictorum* haplogroup M mitochondrion, complete genome  
16,632 bp circular DNA  
MH349357.1 GI:1452923080
129. *Unio pictorum* haplogroup M mitochondrion, complete genome  
16,632 bp circular DNA  
MH349358.1 GI:1452923095
130. *Utterbackia imbecillis* isolate 28CD10-86 mitochondrion, complete genome  
16,103 bp circular DNA  
HM856637.1 GI:318088752
131. *Parvasolenia rivularis* haplotype female mitochondrion, complete genome  
16,613 bp circular DNA  
KX966393.1 GI:1079707900
132. *Parvasolenia rivularis* voucher Xiaoping Wu:01-SRM-2012 haplotype male mitochondrion, complete genome  
17,558 bp circular DNA  
KY007142.1 GI:1095467474
133. *Utterbackia peninsularis* isolate 14GCP2-88 mitochondrion, complete genome  
16,803 bp circular DNA  
HM856635.1 GI:302702113
134. *Utterbackia peninsularis* isolate 18HRH6-88 mitochondrion, complete genome  
15,593 bp circular DNA  
HM856636.1 GI:302702128
135. *Physunio superbus* isolate PhySup\_F voucher PhySup mitochondrion, complete genome  
16,057 bp circular DNA  
MW242814.1 GI:2007112116
136. *Physunio superbus* isolate PhySup\_M voucher PhySup mitochondrion, complete genome  
17,282 bp circular DNA  
MW242815.1 GI:2007112130
137. *Pilsbryconcha exilis* mitochondrion, complete genome  
16,168 bp circular DNA  
MK994776.1 GI:1695712232
138. *Pilsbryconcha exilis* mitochondrion, complete genome

16,267 bp circular DNA  
MK994777.1 GI:1695712246

139. Pleurobema oviforme isolate BIV1946 mitochondrion, complete genome  
15,852 bp circular DNA  
MT648775.1 GI:1877028259

140. Popenaias popeii isolate BIV2451 mitochondrion, complete genome  
15,993 bp circular DNA  
MT648776.1 GI:1877028273

141. Potamilus alatus haplotype male mitochondrion, complete genome  
16,560 bp circular DNA  
KU559010.1 GI:1020159465

142. Potamilus alatus haplotype female mitochondrion, complete genome  
16,067 bp circular DNA  
KU559011.1 GI:1020159479

143. Leptodea leptodon voucher LEPT20150810V3 mitochondrion, complete genome  
16,133 bp circular DNA  
KT723012.1 GI:948271079

144. Potamilus streckersoni isolate PohiBra071 voucher UF439535 mitochondrion, complete genome  
16,293 bp circular DNA  
MW413895.1 GI:1958836348

145. Potamilus streckersoni isolate PohiBra085 voucher JBFMC10001.6 mitochondrion, complete genome  
16,152 bp circular DNA  
ON855351.1 GI:2277708024

146. Potamilus streckersoni isolate PohiBra085 voucher JBFMC10001.6 mitochondrion, complete genome  
16,482 bp circular DNA  
ON881148.1 GI:2281572456

147. Potomida littoralis isolate PL702F mitochondrion, complete genome  
15,789 bp circular DNA  
KT247374.1 GI:959093583

148. Potomida littoralis isolate PL702M mitochondrion, complete genome  
16,451 bp circular DNA  
KT247375.1 GI:959093597

149. UNVERIFIED: Prisodon obliquus isolate PriObl mitochondrion sequence, sequence  
16,691 bp linear DNA  
MK761143.1 GI:1803023767

150. Unio japonensis mitochondrial DNA, COIII to CO1 region, haplotype: male type  
16,967 bp linear DNA  
AB055624.1 GI:15128581

151. *Unio japonensis* mitochondrial DNA, ND5 to tRNA-Gln region, haplotype:female type  
16,826 bp linear DNA  
AB055625.1 GI:15128594
152. *Pronodularia japonensis* UU-SBD-Unio-01 mitochondrial DNA, complete genome  
16,803 bp circular DNA  
LC505454.1 GI:1817956097
153. *Pseudanodonta complanata* isolate BIV0186 mitochondrion, complete genome  
16,171 bp circular DNA  
MN594535.1 GI:1958843956
154. *Pseudocuneopsis capitata* haplotype female mitochondrion, complete genome  
15,845 bp circular DNA  
MH919387.1 GI:1607271159
155. *Pseudocuneopsis capitata* voucher 21-NCU-XPWU-PCM01 mitochondrion, complete genome  
16,607 bp circular DNA  
MZ571517.1 GI:2296405095
156. *Pseudocuneopsis sichuanensis* voucher 21-NCU-XPWU-PSF01 mitochondrion, complete genome  
15,839 bp circular DNA  
MZ571510.1 GI:2296405035
157. *Pseudocuneopsis sichuanensis* voucher 21-NCU-XPWU-PSM01 mitochondrion, complete genome  
16,649 bp circular DNA  
MZ571518.1 GI:2296405110
158. UNVERIFIED: *Pseudunio auricularius* isolate PseAur\_F mitochondrion sequence, sequence  
16,195 bp linear DNA  
MK761144.1 GI:1803023768
159. *Margaritifera marocana* isolate BIV1914F mitochondrion, complete genome  
16,001 bp circular DNA  
KY131953.1 GI:1178772179
160. *Margaritifera marocana* isolate BIV1914M mitochondrion, complete genome  
17,562 bp circular DNA  
KY131954.1 GI:1178772396
161. *Ptychorhynchus pfisteri* haplotype female mitochondrion, complete genome  
16,040 bp circular DNA  
KY067440.1 GI:1148297383
162. *Rectidens sumatrensis* isolate RecSum\_F voucher BIV1664 mitochondrion, complete genome  
15,983 bp circular DNA  
MW242818.1 GI:2007112172
163. *Rectidens sumatrensis* isolate RecSum\_M voucher BIV1665 mitochondrion, complete genome

16,934 bp circular DNA  
MW242819.1 GI:2007112186

164. *Schistodesmus lampreyanus* haplotype female mitochondrion, complete genome  
15,855 bp circular DNA  
MH919388.1 GI:1607271173

165. UNVERIFIED: *Schistodesmus lampreyanus* mitochondrion sequence  
16,796 bp linear DNA  
MZ571515.1 GI:2296405156

166. *Schistodesmus spinosus* voucher 21-NCU-XPWU-SSF01 mitochondrion, complete genome  
15,964 bp circular DNA  
MZ571511.1 GI:2296405050

167. UNVERIFIED: *Schistodesmus spinosus* mitochondrion sequence  
16,680 bp linear DNA  
MZ571516.1 GI:2296405157

168. *Sinanodonta tumens* B194 mitochondrial DNA, complete genome  
15,807 bp circular DNA  
LC592406.2 GI:2038456746

169. *Anodonta woodiana* isolate AW19 mitochondrion, complete genome  
16,242 bp circular DNA  
HQ283344.1 GI:310777585

170. *Anodonta woodiana* isolate AW22 mitochondrion, complete genome  
16,243 bp circular DNA  
HQ283345.1 GI:310777600

171. *Anodonta woodiana* isolate AW124 mitochondrion, complete genome  
16,242 bp circular DNA  
HQ283346.1 GI:310777615

172. *Anodonta woodiana* isolate AW123 mitochondrion, complete genome  
16,243 bp circular DNA  
HQ283347.1 GI:310777630

173. *Anodonta woodiana* isolate AW125 mitochondrion, complete genome  
16,243 bp circular DNA  
HQ283348.1 GI:310777645

174. *Sinanodonta woodiana* voucher 2014-phc-si-wo-001 mitochondrion, complete genome  
16,256 bp circular DNA  
KM272949.1 GI:685165083

175. *Sinanodonta woodiana* mitochondrion, complete genome  
17,738 bp circular DNA  
KM434235.1 GI:704002361



176. *Sinanodonta woodiana* haplogroup M mitochondrion, complete genome  
17,615 bp circular DNA  
MH349356.1 GI:1452923064
177. *Sinanodonta woodiana* haplogroup M mitochondrion, complete genome  
17,616 bp circular DNA  
MH349359.1 GI:1452923110
178. *Sinanodonta woodiana* isolate SW032 mitochondrion, complete genome  
16,243 bp circular DNA  
MN594536.1 GI:1958843970
179. *Hyriopsis schlegelii* sex female mitochondrion, complete genome  
15,939 bp circular DNA  
HQ641406.1 GI:316891618
180. *Hyriopsis schlegelii* sex male mitochondrion, complete genome  
15,961 bp circular DNA  
HQ641407.1 GI:316891632
181. *Sinohyriopsis schlegelii* mitochondrial DNA, complete genome, isolate: B225  
15,951 bp circular DNA  
AP018550.1 GI:1605112100
182. *Sinohyriopsis schlegelii* mitochondrial DNA, complete genome, isolate: B227  
15,951 bp circular DNA  
AP018551.1 GI:1605112114
183. *Sinohyriopsis schlegelii* UU-SBD-Unio10 mitochondrial DNA, complete genome  
15,954 bp circular DNA  
LC498622.1 GI:1817956076
184. *Solenia carinata* voucher Xiaoping WU:01-SCF-2012 mitochondrion, complete genome  
16,716 bp circular DNA  
KC848654.1 GI:512393067
185. *Solenia carinata* voucher Xiaoping WU:01-SCM-2012 mitochondrion, complete genome  
17,102 bp circular DNA  
KC848655.1 GI:512393081
186. *Solenia oleivora* haplotype female mitochondrion, complete genome  
16,392 bp circular DNA  
KF296320.1 GI:544584149
187. *Solenia oleivora* voucher Xiaoping Wu:01-SOM-2012 haplotype male mitochondrion, complete  
16,765 bp circular DNA  
KY007143.1 GI:1095467488
188. *Solenia oleivora* mitochondrion, complete genome

16,392 bp circular DNA  
MT477834.1 GI:1929135775

189. *Cuneopsis pisciculus* mitochondrion, complete genome  
15,907 bp circular DNA  
KP273584.1 GI:748995636

190. *Tchangsiniaia piscicula* voucher 21-NCU-XPWU-APM01 mitochondrion, complete genome  
16,652 bp circular DNA  
MZ571519.1 GI:2296405125

191. *Unio crassus* isolate 182 haplogroup F mitochondrion, complete genome  
15,781 bp circular DNA  
KY290446.1 GI:1143271496

192. *Unio crassus* isolate 183 haplogroup F mitochondrion, complete genome  
15,781 bp circular DNA  
KY290447.1 GI:1143271511

193. *Unio crassus* isolate DR14 haplogroup M mitochondrion, complete genome  
16,633 bp circular DNA  
KY290448.1 GI:1143271526

194. *Unio crassus* isolate DR15 haplogroup M mitochondrion, complete genome  
16,633 bp circular DNA  
KY290449.1 GI:1143271541

195. *Unio crassus* isolate 176 haplogroup M mitochondrion, complete genome  
16,646 bp circular DNA  
KY290450.1 GI:1143271556

196. *Unio delphinus* mitochondrion, complete genome  
15,762 bp circular DNA  
KT326917.1 GI:1016561854

197. *Unio delphinus* mitochondrion, complete genome  
16,620 bp circular DNA  
KT326918.1 GI:1016561869

198. *Unio elongatulus* isolate UI146F mitochondrion, complete genome  
15,763 bp circular DNA  
MN594537.1 GI:1958843984

199. *Unio mancus* isolate UM34F mitochondrion, complete genome  
15,756 bp circular DNA  
MN594538.1 GI:1958843998

200. *Unio tumidus* isolate 157 haplogroup M mitochondrion, complete genome  
16,607 bp circular DNA  
KY021073.1 GI:1143271571

201. *Unio tumidus* isolate 159 haplogroup M mitochondrion, complete genome  
16,607 bp circular DNA  
KY021074.1 GI:1143271586
202. *Unio tumidus* isolate 203 haplogroup M mitochondrion, complete genome  
16,607 bp circular DNA  
KY021075.1 GI:1143271601
203. *Unio tumidus* isolate 207 haplogroup F mitochondrion, complete genome  
15,769 bp circular DNA  
KY021076.1 GI:1143271616
204. *Unio tumidus* isolate 155 haplogroup F mitochondrion, complete genome  
15,770 bp circular DNA  
KY021077.1 GI:1143271631
205. *Unio tumidus* isolate 158 haplogroup F mitochondrion, complete genome  
15,769 bp circular DNA  
KY021078.1 GI:1143271646
206. *Venustaconcha ellipsiformis* haplotype male mitochondrion, complete genome  
17,174 bp circular DNA  
FJ809752.1 GI:229915676
207. *Venustaconcha ellipsiformis* haplotype female mitochondrion, complete genome  
15,975 bp circular DNA  
FJ809753.1 GI:229915690
208. *Margaritifera falcata* isolate H2912 mitochondrion, complete genome  
16,121 bp circular DNA  
HM856634.1 GI:302702098
209. UNVERIFIED: *Westralunio carteri* isolate WesCar\_F mitochondrion sequence, sequence  
16,766 bp linear DNA  
MK761145.1 GI:1803023769
210. UNVERIFIED: *Westralunio carteri* isolate WesCar\_M mitochondrion sequence, sequence  
17,942 bp linear DNA  
MK761146.1 GI:1803023770























plete genome











## Supplementary File 2 – Results of BLASTP search of the BRAKER2 predicted protein against RefSeq database.

The results are in tabular format obtaining using DIAMOND with parameters:

"-k 1 -b 20 -e 1e-5 --sensitive

--outfmt 6 qseqid staxids bitscore qseqid sseqid pident length mismatch gapopen qstart qend sstart send eval evalue bitscore"  
 Additionally, taxonomic classification was added to the last column of the table, using the taxids list, with TaxonKit v.0.8.0.

```

UdeM00000044471 225164 409.5 UdeM00000044471 XP_009052905.1 84
231 37 0 18 248 121 351 3.10E-111 409.5 225164
cellular
organisms;Eukaryota;Opisthokonta;Metazoa;Eumetazoa;Bilateria;Protostomia;
Spiralia;Lophotrochozoa;Mollusca;Gastropoda;Patellogastropoda;Lottioidea;
Lottiidae;Lottia;Lottia gigantea
UdeM00000033513 29159 316.2 UdeM00000033513 XP_034317111.1 55.8 283
124 1 2 283 171 453 4.20E-83 316.2 29159 cellular
organisms;Eukaryota;Opisthokonta;Metazoa;Eumetazoa;Bilateria;Protostomia;
Spiralia;Lophotrochozoa;Mollusca;Bivalvia;Autobranchia;Pteriomorphia;Ostr
eida;Ostreoidae;Ostreidae;Crassostrea;Crassostrea gigas
UdeM00000033514 6596 301.6 UdeM00000033514 XP_045161140.1 64.3 221
78 1 8 227 10 230 9.90E-79 301.6 6596 cellular
organisms;Eukaryota;Opisthokonta;Metazoa;Eumetazoa;Bilateria;Protostomia;
Spiralia;Lophotrochozoa;Mollusca;Bivalvia;Autobranchia;Heteroconchia;Euhe
terodonta;Imparidentia;Venerida;Veneroidea;Veneridae;Mercenaria;Mercenari
a mercenaria
UdeM00000033515 6573 110.5 UdeM00000033515 XP_021372591.1 65 80
24 1 39 118 30 105 1.50E-21 110.5 6573 cellular
organisms;Eukaryota;Opisthokonta;Metazoa;Eumetazoa;Bilateria;Protostomia;
Spiralia;Lophotrochozoa;Mollusca;Bivalvia;Autobranchia;Pteriomorphia;Pect
inida;Pectinoidea;Pectinidae;Mizuhopecten;Mizuhopecten yessoensis
UdeM00000033516 6596 206.1 UdeM00000033516 XP_045161140.1 65.8 152
51 1 12 163 87 237 3.50E-50 206.1 6596 cellular
organisms;Eukaryota;Opisthokonta;Metazoa;Eumetazoa;Bilateria;Protostomia;
Spiralia;Lophotrochozoa;Mollusca;Bivalvia;Autobranchia;Heteroconchia;Euhe
terodonta;Imparidentia;Venerida;Veneroidea;Veneridae;Mercenaria;Mercenari
a mercenaria
UdeM00000033517 6596 110.2 UdeM00000033517 XP_045161140.1 69 71
22 0 52 122 53 123 2.00E-21 110.2 6596 cellular
organisms;Eukaryota;Opisthokonta;Metazoa;Eumetazoa;Bilateria;Protostomia;
Spiralia;Lophotrochozoa;Mollusca;Bivalvia;Autobranchia;Heteroconchia;Euhe
terodonta;Imparidentia;Venerida;Veneroidea;Veneridae;Mercenaria;Mercenari
a mercenaria
UdeM00000033518 6579 184.5 UdeM00000033518 XP_033763365.1 33.2 346
214 8 1 342 797 1129 2.40E-43 184.5 6579 cellular
organisms;Eukaryota;Opisthokonta;Metazoa;Eumetazoa;Bilateria;Protostomia;
Spiralia;Lophotrochozoa;Mollusca;Bivalvia;Autobranchia;Pteriomorphia;Pect
inida;Pectinoidea;Pectinidae;Pecten;Pecten maximus
UdeM00000033519 6596 76.6 UdeM00000033519 XP_045162803.1 46.4 97
41 2 22 108 392 487 2.10E-11 76.6 6596 cellular
organisms;Eukaryota;Opisthokonta;Metazoa;Eumetazoa;Bilateria;Protostomia;
Spiralia;Lophotrochozoa;Mollusca;Bivalvia;Autobranchia;Heteroconchia;Euhe
terodonta;Imparidentia;Venerida;Veneroidea;Veneridae;Mercenaria;Mercenari
a mercenaria
UdeM00000033521 6573 1373.2 UdeM00000033521 XP_021368707.1 43.2
1662 918 12 1 1650 1 1648 0.00E+00 1373.2 6573
cellular
organisms;Eukaryota;Opisthokonta;Metazoa;Eumetazoa;Bilateria;Protostomia;
Spiralia;Lophotrochozoa;Mollusca;Bivalvia;Autobranchia;Pteriomorphia;Pect
inida;Pectinoidea;Pectinidae;Mizuhopecten;Mizuhopecten yessoensis
UdeM00000033522 6596 124.4 UdeM00000033522 XP_045190982.1 40.8 142
74 3 18 152 32 170 1.20E-25 124.4 6596 cellular
organisms;Eukaryota;Opisthokonta;Metazoa;Eumetazoa;Bilateria;Protostomia;

```

Spiralia;Lophotrochozoa;Mollusca;Bivalvia;Autobranchia;Heteroconchia;Euheterodonta;Imparidentia;Venerida;Veneroidea;Veneridae;Mercenaria;Mercenaria mercenaria

UdeM00000033523 6596 139 UdeM00000033523 XP\_045206881.1 42.7 164  
82 5 1 159 1 157 5.10E-30 139 6596 cellular

organisms;Eukaryota;Opisthokonta;Metazoa;Eumetazoa;Bilateria;Protostomia;Spiralia;Lophotrochozoa;Mollusca;Bivalvia;Autobranchia;Heteroconchia;Euheterodonta;Imparidentia;Venerida;Veneroidea;Veneridae;Mercenaria;Mercenaria mercenaria

UdeM00000033524 6573 1373.2 UdeM00000033524 XP\_021368707.1 42.6  
1672 925 12 1 1661 1 1648 0.00E+00 1373.2 6573  
cellular

organisms;Eukaryota;Opisthokonta;Metazoa;Eumetazoa;Bilateria;Protostomia;Spiralia;Lophotrochozoa;Mollusca;Bivalvia;Autobranchia;Pteriomorpha;Pectinida;Pectinoidea;Pectinidae;Mizuhopecten;Mizuhopecten yessoensis

UdeM00000033525 6573 1380.5 UdeM00000033525 XP\_021368707.1 42.9  
1661 925 11 1 1650 1 1648 0.00E+00 1380.5 6573  
cellular

organisms;Eukaryota;Opisthokonta;Metazoa;Eumetazoa;Bilateria;Protostomia;Spiralia;Lophotrochozoa;Mollusca;Bivalvia;Autobranchia;Pteriomorpha;Pectinida;Pectinoidea;Pectinidae;Mizuhopecten;Mizuhopecten yessoensis

UdeM00000033526 6565 247.7 UdeM00000033526 XP\_022346198.1 53.4 223  
96 2 79 293 43 265 1.90E-62 247.7 6565 cellular

organisms;Eukaryota;Opisthokonta;Metazoa;Eumetazoa;Bilateria;Protostomia;Spiralia;Lophotrochozoa;Mollusca;Bivalvia;Autobranchia;Pteriomorpha;Ostreida;Ostreoidea;Ostreidae;Crassostrea;Crassostrea virginica

UdeM00000033527 6565 228 UdeM00000033527 XP\_022346195.1 54.4 206  
85 3 1 198 62 266 1.00E-56 228 6565 cellular

organisms;Eukaryota;Opisthokonta;Metazoa;Eumetazoa;Bilateria;Protostomia;Spiralia;Lophotrochozoa;Mollusca;Bivalvia;Autobranchia;Pteriomorpha;Ostreida;Ostreoidea;Ostreidae;Crassostrea;Crassostrea virginica

UdeM00000033528 6565 225.7 UdeM00000033528 XP\_022346195.1 57.8 185  
71 2 6 184 83 266 4.80E-56 225.7 6565 cellular

organisms;Eukaryota;Opisthokonta;Metazoa;Eumetazoa;Bilateria;Protostomia;Spiralia;Lophotrochozoa;Mollusca;Bivalvia;Autobranchia;Pteriomorpha;Ostreida;Ostreoidea;Ostreidae;Crassostrea;Crassostrea virginica

UdeM00000033529 6596 133.7 UdeM00000033529 XP\_045207460.1 42.5 146  
78 3 40 183 45 186 5.70E-28 133.7 6596 cellular

organisms;Eukaryota;Opisthokonta;Metazoa;Eumetazoa;Bilateria;Protostomia;Spiralia;Lophotrochozoa;Mollusca;Bivalvia;Autobranchia;Heteroconchia;Euheterodonta;Imparidentia;Venerida;Veneroidea;Veneridae;Mercenaria;Mercenaria mercenaria

UdeM00000033530 1735272 299.3 UdeM00000033530 XP\_041379055.1 62.4  
221 83 0 24 244 35 255 4.50E-78 299.3 1735272  
cellular

organisms;Eukaryota;Opisthokonta;Metazoa;Eumetazoa;Bilateria;Protostomia;Spiralia;Lophotrochozoa;Mollusca;Gastropoda;Neomphalina;Neomphaloidea;Peltospiridae;Gigantopelta;Gigantopelta aegis

UdeM00000033531 400727 290.4 UdeM00000033531 XP\_025092513.1 63.1  
214 79 0 1 214 29 242 1.80E-75 290.4 400727  
cellular

organisms;Eukaryota;Opisthokonta;Metazoa;Eumetazoa;Bilateria;Protostomia;Spiralia;Lophotrochozoa;Mollusca;Gastropoda;Caenogastropoda;Architaenioglossa;Ampullarioidea;Ampullariidae;Pomacea;Pomacea canaliculata

UdeM00000033532 6596 143.3 UdeM00000033532 XP\_045207460.1 40.1 172  
 93 5 27 191 18 186 5.70E-31 143.3 6596 cellular  
 organisms;Eukaryota;Opisthokonta;Metazoa;Eumetazoa;Bilateria;Protostomia;  
 Spiralia;Lophotrochozoa;Mollusca;Bivalvia;Autobranchia;Heteroconchia;Euhe  
 terodonta;Imparidentia;Venerida;Veneroidea;Veneridae;Mercenaria;Mercenari  
 a mercenaria

UdeM00000033533 6596 143.3 UdeM00000033533 XP\_045207460.1 40.1 172  
 93 5 27 191 18 186 5.20E-31 143.3 6596 cellular  
 organisms;Eukaryota;Opisthokonta;Metazoa;Eumetazoa;Bilateria;Protostomia;  
 Spiralia;Lophotrochozoa;Mollusca;Bivalvia;Autobranchia;Heteroconchia;Euhe  
 terodonta;Imparidentia;Venerida;Veneroidea;Veneridae;Mercenaria;Mercenari  
 a mercenaria

UdeM00000033536 6596 387.1 UdeM00000033536 XP\_045177776.1 33.1 818  
 473 21 300 1072 402 1190 7.20E-104 387.1 6596 cellular  
 organisms;Eukaryota;Opisthokonta;Metazoa;Eumetazoa;Bilateria;Protostomia;  
 Spiralia;Lophotrochozoa;Mollusca;Bivalvia;Autobranchia;Heteroconchia;Euhe  
 terodonta;Imparidentia;Venerida;Veneroidea;Veneridae;Mercenaria;Mercenari  
 a mercenaria

UdeM00000033538 33528 87.4 UdeM00000033538 XP\_043978578.1 28.5 214  
 122 5 2 197 30 230 2.90E-14 87.4 33528 cellular  
 organisms;Eukaryota;Opisthokonta;Metazoa;Eumetazoa;Bilateria;Deuterostomi  
 a;Chordata;Craniata;Vertebrata;Gnathostomata;Teleostomi;Euteleostomi;Acti  
 nopterygii;Actinopteri;Neopterygii;Teleostei;Osteoglossocephalai;Clupeoce  
 phala;Euteleosteomorpha;Neoteleostei;Eurypterygia;Ctenosquamata;Acanthomo  
 rphata;Euacanthomorphacea;Percomorphaceae;Ovalentaria;Atherinomorphae;Cyp  
 rinodontiformes;Cyprinodontoidei;Poeciliidae;Poeciliinae;Gambusia;Gambusi  
 a affinis

UdeM00000033537 13397 88.6 UdeM00000033537 XP\_041062505.1 26.9 305  
 161 9 3 270 26 305 1.30E-14 88.6 13397 cellular  
 organisms;Eukaryota;Opisthokonta;Metazoa;Eumetazoa;Bilateria;Deuterostomi  
 a;Chordata;Craniata;Vertebrata;Gnathostomata;Chondrichthyes;Elasmobranchi  
 i;Selachii;Galeomorphii;Galeoidea;Lamniformes;Alopiidae;Lamninae;Carcharo  
 don;Carcharodon carcharias

UdeM00000033539 8245 59.7 UdeM00000033539 XP\_040007666.1 34.4 90  
 47 2 3 92 101 178 4.70E-06 59.7 8245 cellular  
 organisms;Eukaryota;Opisthokonta;Metazoa;Eumetazoa;Bilateria;Deuterostomi  
 a;Chordata;Craniata;Vertebrata;Gnathostomata;Teleostomi;Euteleostomi;Acti  
 nopterygii;Actinopteri;Neopterygii;Teleostei;Osteoglossocephalai;Clupeoce  
 phala;Euteleosteomorpha;Neoteleostei;Eurypterygia;Ctenosquamata;Acanthomo  
 rphata;Euacanthomorphacea;Percomorphaceae;Carangaria;Istiophoriformes;Xip  
 hiidae;Xiphias;Xiphias gladius

UdeM00000033540 941984 108.6 UdeM00000033540 XP\_040922238.1 37.4  
 163 88 3 4 165 34 183 1.20E-20 108.6 941984  
 cellular  
 organisms;Eukaryota;Opisthokonta;Metazoa;Eumetazoa;Bilateria;Deuterostomi  
 a;Chordata;Craniata;Vertebrata;Gnathostomata;Teleostomi;Euteleostomi;Acti  
 nopterygii;Actinopteri;Neopterygii;Teleostei;Osteoglossocephalai;Clupeoce  
 phala;Euteleosteomorpha;Neoteleostei;Eurypterygia;Ctenosquamata;Acanthomo  
 rphata;Euacanthomorphacea;Percomorphaceae;Carangaria;Carangaria incertae  
 sedis;Toxotidae;Toxotes;Toxotes jaculatrix

UdeM00000033541 433405 81.6 UdeM00000033541 XP\_031701220.1 28.5  
 214 122 5 2 196 30 231 1.60E-12 81.6 433405  
 cellular  
 organisms;Eukaryota;Opisthokonta;Metazoa;Eumetazoa;Bilateria;Deuterostomi

a;Chordata;Craniata;Vertebrata;Gnathostomata;Teleostomi;Euteleostomi;Acti  
nopterygii;Actinopteri;Neopterygii;Teleostei;Osteoglossocephalai;Clupeoce  
phala;Euteleosteomorpha;Neoteleostei;Eurypterygia;Ctenosquamata;Acanthomo  
rphata;Euacanthomorphacea;Percomorphaceae;Eupercaria;Perciformes;Cottioid  
ei;Zoarcales;Anarhichadidae;Anarrhichthys;Anarrhichthys ocellatus  
UdeM00000033542 13397 80.5 UdeM00000033542 XP\_041062505.1 26.8 302  
164 9 3 269 26 305 3.60E-12 80.5 13397 cellular  
organisms;Eukaryota;Opisthokonta;Metazoa;Eumetazoa;Bilateria;Deuterostomi  
a;Chordata;Craniata;Vertebrata;Gnathostomata;Chondrichthyes;Elasmobranchi  
i;Selachii;Galeomorphii;Galeoidea;Lamniformes;Alopiidae;Lamninae;Carcharo  
don;Carcharodon carcharias  
UdeM00000033543 6596 161.8 UdeM00000033543 XP\_045163870.1 46.5 155  
81 2 30 182 21 175 8.50E-37 161.8 6596 cellular  
organisms;Eukaryota;Opisthokonta;Metazoa;Eumetazoa;Bilateria;Protostomia;  
Spiralia;Lophotrochozoa;Mollusca;Bivalvia;Autobranchia;Heteroconchia;Euhe  
terodonta;Imparidentia;Venerida;Veneroidea;Veneridae;Mercenaria;Mercenari  
a mercenaria  
UdeM00000033544 29159 110.2 UdeM00000033544 XP\_011456334.2 43.4 136  
70 1 6 141 19 147 4.20E-21 110.2 29159 cellular  
organisms;Eukaryota;Opisthokonta;Metazoa;Eumetazoa;Bilateria;Protostomia;  
Spiralia;Lophotrochozoa;Mollusca;Bivalvia;Autobranchia;Pteriormorphia;Ostr  
eida;Ostreoidea;Ostreidae;Crassostrea;Crassostrea gigas  
UdeM00000033548 33528 89.4 UdeM00000033548 XP\_043978588.1 29.1 213  
121 4 2 197 30 229 7.60E-15 89.4 33528 cellular  
organisms;Eukaryota;Opisthokonta;Metazoa;Eumetazoa;Bilateria;Deuterostomi  
a;Chordata;Craniata;Vertebrata;Gnathostomata;Teleostomi;Euteleostomi;Acti  
nopterygii;Actinopteri;Neopterygii;Teleostei;Osteoglossocephalai;Clupeoce  
phala;Euteleosteomorpha;Neoteleostei;Eurypterygia;Ctenosquamata;Acanthomo  
rphata;Euacanthomorphacea;Percomorphaceae;Ovalentaria;Atherinomorphae;Cyp  
rinodontiformes;Cyprinodontoidei;Poeciliidae;Poeciliinae;Gambusia;Gambusi  
a affinis  
UdeM00000033550 90988 90.9 UdeM00000033550 XP\_039503614.1 27 278  
158 7 3 268 26 270 2.70E-15 90.9 90988 cellular  
organisms;Eukaryota;Opisthokonta;Metazoa;Eumetazoa;Bilateria;Deuterostomi  
a;Chordata;Craniata;Vertebrata;Gnathostomata;Teleostomi;Euteleostomi;Acti  
nopterygii;Actinopteri;Neopterygii;Teleostei;Osteoglossocephalai;Clupeoce  
phala;Otomorpha;Ostariophysi;Otophysi;Cypriniphysae;Cypriniiformes;Cyprino  
idei;Leuciscidae;Pogonichthyinae;Pimephales;Pimephales promelas  
UdeM00000033551 6596 392.9 UdeM00000033551 XP\_045162242.1 33.8 722  
356 8 18 632 72 778 7.90E-106 392.9 6596 cellular  
organisms;Eukaryota;Opisthokonta;Metazoa;Eumetazoa;Bilateria;Protostomia;  
Spiralia;Lophotrochozoa;Mollusca;Bivalvia;Autobranchia;Heteroconchia;Euhe  
terodonta;Imparidentia;Venerida;Veneroidea;Veneridae;Mercenaria;Mercenari  
a mercenaria  
UdeM00000033552 6596 389.4 UdeM00000033552 XP\_045162242.1 33.4 731  
361 11 12 633 66 779 8.70E-105 389.4 6596 cellular  
organisms;Eukaryota;Opisthokonta;Metazoa;Eumetazoa;Bilateria;Protostomia;  
Spiralia;Lophotrochozoa;Mollusca;Bivalvia;Autobranchia;Heteroconchia;Euhe  
terodonta;Imparidentia;Venerida;Veneroidea;Veneridae;Mercenaria;Mercenari  
a mercenaria  
UdeM00000033553 6596 507.3 UdeM00000033553 XP\_045204674.1 45.1 585  
312 7 9 592 1 577 2.60E-140 507.3 6596 cellular  
organisms;Eukaryota;Opisthokonta;Metazoa;Eumetazoa;Bilateria;Protostomia;  
Spiralia;Lophotrochozoa;Mollusca;Bivalvia;Autobranchia;Heteroconchia;Euhe

terodonta;Imparidentia;Venerida;Veneroidea;Veneridae;Mercenaria;Mercenari  
 a mercenaria  
 UdeM00000033554 6579 66.6 UdeM00000033554 XP\_033742659.1 31.5 124  
 71 3 2 119 466 581 2.40E-08 66.6 6579 cellular  
 organisms;Eukaryota;Opisthokonta;Metazoa;Eumetazoa;Bilateria;Protostomia;  
 Spiralia;Lophotrochozoa;Mollusca;Bivalvia;Autobranhia;Pteriormorphia;Pect  
 inida;Pectinoidea;Pectinidae;Pecten;Pecten maximus  
 UdeM00000033555 6596 86.3 UdeM00000033555 XP\_045173396.1 52.5 80  
 37 1 1 80 92 170 2.70E-14 86.3 6596 cellular  
 organisms;Eukaryota;Opisthokonta;Metazoa;Eumetazoa;Bilateria;Protostomia;  
 Spiralia;Lophotrochozoa;Mollusca;Bivalvia;Autobranhia;Heteroconchia;Euhe  
 terodonta;Imparidentia;Venerida;Veneroidea;Veneridae;Mercenaria;Mercenari  
 a mercenaria  
 UdeM00000033556 6596 205.3 UdeM00000033556 XP\_045173396.1 55.9 170  
 74 1 42 211 2 170 7.90E-50 205.3 6596 cellular  
 organisms;Eukaryota;Opisthokonta;Metazoa;Eumetazoa;Bilateria;Protostomia;  
 Spiralia;Lophotrochozoa;Mollusca;Bivalvia;Autobranhia;Heteroconchia;Euhe  
 terodonta;Imparidentia;Venerida;Veneroidea;Veneridae;Mercenaria;Mercenari  
 a mercenaria  
 UdeM00000033557 6596 470.7 UdeM00000033557 XP\_045204106.1 52.3 455  
 213 3 48 499 5 458 2.50E-129 470.7 6596 cellular  
 organisms;Eukaryota;Opisthokonta;Metazoa;Eumetazoa;Bilateria;Protostomia;  
 Spiralia;Lophotrochozoa;Mollusca;Bivalvia;Autobranhia;Heteroconchia;Euhe  
 terodonta;Imparidentia;Venerida;Veneroidea;Veneridae;Mercenaria;Mercenari  
 a mercenaria  
 UdeM00000033558 6596 237.3 UdeM00000033558 XP\_045204271.1 35.8 338  
 213 4 1 337 245 579 2.90E-59 237.3 6596 cellular  
 organisms;Eukaryota;Opisthokonta;Metazoa;Eumetazoa;Bilateria;Protostomia;  
 Spiralia;Lophotrochozoa;Mollusca;Bivalvia;Autobranhia;Heteroconchia;Euhe  
 terodonta;Imparidentia;Venerida;Veneroidea;Veneridae;Mercenaria;Mercenari  
 a mercenaria  
 UdeM00000033559 6596 253.4 UdeM00000033559 XP\_045173396.1 54.2 227  
 100 3 7 231 2 226 2.90E-64 253.4 6596 cellular  
 organisms;Eukaryota;Opisthokonta;Metazoa;Eumetazoa;Bilateria;Protostomia;  
 Spiralia;Lophotrochozoa;Mollusca;Bivalvia;Autobranhia;Heteroconchia;Euhe  
 terodonta;Imparidentia;Venerida;Veneroidea;Veneridae;Mercenaria;Mercenari  
 a mercenaria  
 UdeM00000033560 6596 378.3 UdeM00000033560 XP\_045204271.1 41.4 466  
 265 5 3 465 119 579 1.50E-101 378.3 6596 cellular  
 organisms;Eukaryota;Opisthokonta;Metazoa;Eumetazoa;Bilateria;Protostomia;  
 Spiralia;Lophotrochozoa;Mollusca;Bivalvia;Autobranhia;Heteroconchia;Euhe  
 terodonta;Imparidentia;Venerida;Veneroidea;Veneridae;Mercenaria;Mercenari  
 a mercenaria  
 UdeM00000033561 6596 379.8 UdeM00000033561 XP\_045204673.1 43.4 470  
 259 5 1 469 115 578 5.00E-102 379.8 6596 cellular  
 organisms;Eukaryota;Opisthokonta;Metazoa;Eumetazoa;Bilateria;Protostomia;  
 Spiralia;Lophotrochozoa;Mollusca;Bivalvia;Autobranhia;Heteroconchia;Euhe  
 terodonta;Imparidentia;Venerida;Veneroidea;Veneridae;Mercenaria;Mercenari  
 a mercenaria  
 UdeM00000033562 6596 287.3 UdeM00000033562 XP\_045162913.1 86.5 171  
 22 1 1 170 1 171 1.20E-74 287.3 6596 cellular  
 organisms;Eukaryota;Opisthokonta;Metazoa;Eumetazoa;Bilateria;Protostomia;  
 Spiralia;Lophotrochozoa;Mollusca;Bivalvia;Autobranhia;Heteroconchia;Euhe

terodonta;Imparidentia;Venerida;Veneroidea;Veneridae;Mercenaria;Mercenari  
 a mercenaria  
 UdeM00000033563 6596 319.3 UdeM00000033563 XP\_045162913.1 87.6 185  
 23 0 1 185 1 185 3.20E-84 319.3 6596 cellular  
 organisms;Eukaryota;Opisthokonta;Metazoa;Eumetazoa;Bilateria;Protostomia;  
 Spiralia;Lophotrochozoa;Mollusca;Bivalvia;Autobranchia;Heteroconchia;Euhe  
 terodonta;Imparidentia;Venerida;Veneroidea;Veneridae;Mercenaria;Mercenari  
 a mercenaria  
 UdeM00000033564 1735272 180.3 UdeM00000033564 XP\_041378161.1 43.9  
 198 107 2 7 200 1 198 2.70E-42 180.3 1735272  
 cellular  
 organisms;Eukaryota;Opisthokonta;Metazoa;Eumetazoa;Bilateria;Protostomia;  
 Spiralia;Lophotrochozoa;Mollusca;Gastropoda;Neomphalina;Neomphaloidea;Pel  
 tospiridae;Gigantopelta;Gigantopelta aegis  
 UdeM00000033565 6565 1270.4 UdeM00000033565 XP\_022342289.1 54.4  
 1551 622 25 1 1503 1 1513 0.00E+00 1270.4 6565  
 cellular  
 organisms;Eukaryota;Opisthokonta;Metazoa;Eumetazoa;Bilateria;Protostomia;  
 Spiralia;Lophotrochozoa;Mollusca;Bivalvia;Autobranchia;Pteriormorphia;Ostr  
 eida;Ostreoidea;Ostreidae;Crassostrea;Crassostrea virginica  
 UdeM00000033566 6565 588.6 UdeM00000033566 XP\_022342288.1 46.7 1104  
 492 27 1 1056 383 1438 1.60E-164 588.6 6565 cellular  
 organisms;Eukaryota;Opisthokonta;Metazoa;Eumetazoa;Bilateria;Protostomia;  
 Spiralia;Lophotrochozoa;Mollusca;Bivalvia;Autobranchia;Pteriormorphia;Ostr  
 eida;Ostreoidea;Ostreidae;Crassostrea;Crassostrea virginica  
 UdeM00000033567 6596 399.1 UdeM00000033567 XP\_045162447.1 75.9 261  
 60 3 1 259 34 293 4.40E-108 399.1 6596 cellular  
 organisms;Eukaryota;Opisthokonta;Metazoa;Eumetazoa;Bilateria;Protostomia;  
 Spiralia;Lophotrochozoa;Mollusca;Bivalvia;Autobranchia;Heteroconchia;Euhe  
 terodonta;Imparidentia;Venerida;Veneroidea;Veneridae;Mercenaria;Mercenari  
 a mercenaria  
 UdeM00000033569 6579 1069.7 UdeM00000033569 XP\_033763612.1 75.3  
 676 167 0 1 676 1 676 0.00E+00 1069.7 6579  
 cellular  
 organisms;Eukaryota;Opisthokonta;Metazoa;Eumetazoa;Bilateria;Protostomia;  
 Spiralia;Lophotrochozoa;Mollusca;Bivalvia;Autobranchia;Pteriormorphia;Pect  
 inida;Pectinoidea;Pectinidae;Pecten;Pecten maximus  
 UdeM00000033570 6596 453.8 UdeM00000033570 XP\_045179877.1 42.5 560  
 310 7 6 555 3 560 3.30E-124 453.8 6596 cellular  
 organisms;Eukaryota;Opisthokonta;Metazoa;Eumetazoa;Bilateria;Protostomia;  
 Spiralia;Lophotrochozoa;Mollusca;Bivalvia;Autobranchia;Heteroconchia;Euhe  
 terodonta;Imparidentia;Venerida;Veneroidea;Veneridae;Mercenaria;Mercenari  
 a mercenaria  
 UdeM00000033571 6596 453.4 UdeM00000033571 XP\_045179877.1 42.6 559  
 309 7 1 549 4 560 4.20E-124 453.4 6596 cellular  
 organisms;Eukaryota;Opisthokonta;Metazoa;Eumetazoa;Bilateria;Protostomia;  
 Spiralia;Lophotrochozoa;Mollusca;Bivalvia;Autobranchia;Heteroconchia;Euhe  
 terodonta;Imparidentia;Venerida;Veneroidea;Veneridae;Mercenaria;Mercenari  
 a mercenaria  
 UdeM00000033574 6596 432.6 UdeM00000033574 XP\_045163662.1 39.5 559  
 326 7 3 552 6 561 7.70E-118 432.6 6596 cellular  
 organisms;Eukaryota;Opisthokonta;Metazoa;Eumetazoa;Bilateria;Protostomia;  
 Spiralia;Lophotrochozoa;Mollusca;Bivalvia;Autobranchia;Heteroconchia;Euhe



terodonta;Imparidentia;Venerida;Veneroidea;Veneridae;Mercenaria;Mercenari  
a mercenaria

UdeM00000033576 1735272 210.7 UdeM00000033576 XP\_041378362.1 43.3  
630 302 17 21 622 21 623 5.40E-51 210.7 1735272  
cellular

organisms;Eukaryota;Opisthokonta;Metazoa;Eumetazoa;Bilateria;Protostomia;  
Spiralia;Lophotrochozoa;Mollusca;Gastropoda;Neomphalina;Neomphaloidea;Pel  
tospiridae;Gigantopelta;Gigantopelta aegis

UdeM00000033577 6573 225.3 UdeM00000033577 XP\_021363050.1 46.1 245  
122 3 62 298 60 302 1.10E-55 225.3 6573 cellular

organisms;Eukaryota;Opisthokonta;Metazoa;Eumetazoa;Bilateria;Protostomia;  
Spiralia;Lophotrochozoa;Mollusca;Bivalvia;Autobranchia;Pteriormorphia;Pect  
inida;Pectinoidea;Pectinidae;Mizuhopecten;Mizuhopecten yessoensis

UdeM00000033580 1735272 207.2 UdeM00000033580 XP\_041356266.1 49.4  
180 91 0 1 180 429 608 1.70E-50 207.2 1735272

cellular

organisms;Eukaryota;Opisthokonta;Metazoa;Eumetazoa;Bilateria;Protostomia;  
Spiralia;Lophotrochozoa;Mollusca;Gastropoda;Neomphalina;Neomphaloidea;Pel  
tospiridae;Gigantopelta;Gigantopelta aegis

UdeM00000033581 6596 80.5 UdeM00000033581 XP\_045192251.1 52.7 91  
39 3 133 220 330 419 3.00E-12 80.5 6596 cellular

organisms;Eukaryota;Opisthokonta;Metazoa;Eumetazoa;Bilateria;Protostomia;  
Spiralia;Lophotrochozoa;Mollusca;Bivalvia;Autobranchia;Heteroconchia;Euhe  
terodonta;Imparidentia;Venerida;Veneroidea;Veneridae;Mercenaria;Mercenari  
a mercenaria

UdeM00000033582 6596 603.2 UdeM00000033582 XP\_045163606.1 69.5 426  
92 2 5 395 98 520 2.40E-169 603.2 6596 cellular

organisms;Eukaryota;Opisthokonta;Metazoa;Eumetazoa;Bilateria;Protostomia;  
Spiralia;Lophotrochozoa;Mollusca;Bivalvia;Autobranchia;Heteroconchia;Euhe  
terodonta;Imparidentia;Venerida;Veneroidea;Veneridae;Mercenaria;Mercenari  
a mercenaria

UdeM00000033583 6579 117.1 UdeM00000033583 XP\_033763904.1 34.6 211  
113 5 906 1099 158 360 1.70E-22 117.1 6579 cellular

organisms;Eukaryota;Opisthokonta;Metazoa;Eumetazoa;Bilateria;Protostomia;  
Spiralia;Lophotrochozoa;Mollusca;Bivalvia;Autobranchia;Pteriormorphia;Pect  
inida;Pectinoidea;Pectinidae;Pecten;Pecten maximus

UdeM00000033585 6573 230.3 UdeM00000033585 XP\_021376553.1 45 260  
138 2 1 256 189 447 3.00E-57 230.3 6573 cellular

organisms;Eukaryota;Opisthokonta;Metazoa;Eumetazoa;Bilateria;Protostomia;  
Spiralia;Lophotrochozoa;Mollusca;Bivalvia;Autobranchia;Pteriormorphia;Pect  
inida;Pectinoidea;Pectinidae;Mizuhopecten;Mizuhopecten yessoensis

UdeM00000033586 6573 142.1 UdeM00000033586 XP\_021376553.1 51.9 133  
60 2 77 207 1 131 7.80E-31 142.1 6573 cellular

organisms;Eukaryota;Opisthokonta;Metazoa;Eumetazoa;Bilateria;Protostomia;  
Spiralia;Lophotrochozoa;Mollusca;Bivalvia;Autobranchia;Pteriormorphia;Pect  
inida;Pectinoidea;Pectinidae;Mizuhopecten;Mizuhopecten yessoensis

UdeM00000033588 29159 68.2 UdeM00000033588 XP\_019918807.2 22 428  
276 12 271 691 650 1026 4.80E-08 68.2 29159 cellular

organisms;Eukaryota;Opisthokonta;Metazoa;Eumetazoa;Bilateria;Protostomia;  
Spiralia;Lophotrochozoa;Mollusca;Bivalvia;Autobranchia;Pteriormorphia;Ostr  
eida;Ostreoidea;Ostreidae;Crassostrea;Crassostrea gigas

UdeM00000033589 6596 748.8 UdeM00000033589 XP\_045161121.1 51.5 699  
332 5 214 907 82 778 8.00E-213 748.8 6596 cellular

organisms;Eukaryota;Opisthokonta;Metazoa;Eumetazoa;Bilateria;Protostomia;

Spiralia;Lophotrochozoa;Mollusca;Bivalvia;Autobranchia;Heteroconchia;Euherodonta;Imparidentia;Venerida;Veneroidea;Veneridae;Mercenaria;Mercenaria mercenaria

UdeM00000033590 6573 2988 UdeM00000033590 XP\_021353290.1 44.4 3472  
1847 34 1 3413 4784 8229 0.00E+00 2988 6573 cellular

organisms;Eukaryota;Opisthokonta;Metazoa;Eumetazoa;Bilateria;Protostomia;Spiralia;Lophotrochozoa;Mollusca;Bivalvia;Autobranchia;Pteriomorpha;Pectinida;Pectinoidea;Pectinidae;Mizuhopecten;Mizuhopecten yessoensis

UdeM00000033591 6579 436.8 UdeM00000033591 XP\_033724554.1 33.3 861  
497 20 8 816 1397 2232 6.40E-119 436.8 6579 cellular

organisms;Eukaryota;Opisthokonta;Metazoa;Eumetazoa;Bilateria;Protostomia;Spiralia;Lophotrochozoa;Mollusca;Bivalvia;Autobranchia;Pteriomorpha;Pectinida;Pectinoidea;Pectinidae;Pecten;Pecten maximus

UdeM00000033592 6596 1321.2 UdeM00000033592 XP\_045156859.1 30.1  
2542 1582 46 277 2708 4897 7352 0.00E+00 1321.2 6596

cellular

organisms;Eukaryota;Opisthokonta;Metazoa;Eumetazoa;Bilateria;Protostomia;Spiralia;Lophotrochozoa;Mollusca;Bivalvia;Autobranchia;Heteroconchia;Euherodonta;Imparidentia;Venerida;Veneroidea;Veneridae;Mercenaria;Mercenaria mercenaria

UdeM00000033593 6573 677.2 UdeM00000033593 XP\_021353290.1 31.3 1339  
852 29 9 1311 169 1475 4.30E-191 677.2 6573 cellular

organisms;Eukaryota;Opisthokonta;Metazoa;Eumetazoa;Bilateria;Protostomia;Spiralia;Lophotrochozoa;Mollusca;Bivalvia;Autobranchia;Pteriomorpha;Pectinida;Pectinoidea;Pectinidae;Mizuhopecten;Mizuhopecten yessoensis

UdeM00000033594 6573 339.3 UdeM00000033594 XP\_021353372.1 28.4 760  
332 17 97 724 2445 3124 1.20E-89 339.3 6573 cellular

organisms;Eukaryota;Opisthokonta;Metazoa;Eumetazoa;Bilateria;Protostomia;Spiralia;Lophotrochozoa;Mollusca;Bivalvia;Autobranchia;Pteriomorpha;Pectinida;Pectinoidea;Pectinidae;Mizuhopecten;Mizuhopecten yessoensis

UdeM00000033595 6565 500.4 UdeM00000033595 XP\_022341753.1 25 1714  
558 29 885 1877 658 2364 1.00E-137 500.4 6565 cellular

organisms;Eukaryota;Opisthokonta;Metazoa;Eumetazoa;Bilateria;Protostomia;Spiralia;Lophotrochozoa;Mollusca;Bivalvia;Autobranchia;Pteriomorpha;Ostreida;Ostreoidea;Ostreidae;Crassostrea;Crassostrea virginica

UdeM00000041278 6596 326.2 UdeM00000041278 XP\_045192847.1 67.2 262  
84 2 9 270 11 270 4.70E-86 326.2 6596 cellular

organisms;Eukaryota;Opisthokonta;Metazoa;Eumetazoa;Bilateria;Protostomia;Spiralia;Lophotrochozoa;Mollusca;Bivalvia;Autobranchia;Heteroconchia;Euherodonta;Imparidentia;Venerida;Veneroidea;Veneridae;Mercenaria;Mercenaria mercenaria

UdeM00000041280 1735272 552.4 UdeM00000041280 XP\_041376948.1 77.9  
321 71 0 84 404 18 338 5.60E-154 552.4 1735272

cellular

organisms;Eukaryota;Opisthokonta;Metazoa;Eumetazoa;Bilateria;Protostomia;Spiralia;Lophotrochozoa;Mollusca;Gastropoda;Neomphalina;Neomphaloidea;Peltospiridae;Gigantopelta;Gigantopelta aegis

UdeM00000043843 29159 305.4 UdeM00000043843 XP\_034308217.1 35.9 443  
257 4 32 448 8 449 1.20E-79 305.4 29159 cellular

organisms;Eukaryota;Opisthokonta;Metazoa;Eumetazoa;Bilateria;Protostomia;Spiralia;Lophotrochozoa;Mollusca;Bivalvia;Autobranchia;Pteriomorpha;Ostreida;Ostreoidea;Ostreidae;Crassostrea;Crassostrea gigas

UdeM00000043844 29159 305.8 UdeM00000043844 XP\_034308217.1 35.9 443  
257 4 37 453 8 449 9.00E-80 305.8 29159 cellular

organisms;Eukaryota;Opisthokonta;Metazoa;Eumetazoa;Bilateria;Protostomia;  
Spiralia;Lophotrochozoa;Mollusca;Bivalvia;Autobranhia;Pteriormorphia;Ostr  
eida;Ostreoidea;Ostreidae;Crassostrea;Crassostrea gigas  
UdeM00000043845 29159 288.1 UdeM00000043845 XP\_034308217.1 34.8 443  
262 4 81 497 8 449 2.20E-74 288.1 29159 cellular  
organisms;Eukaryota;Opisthokonta;Metazoa;Eumetazoa;Bilateria;Protostomia;  
Spiralia;Lophotrochozoa;Mollusca;Bivalvia;Autobranhia;Pteriormorphia;Ostr  
eida;Ostreoidea;Ostreidae;Crassostrea;Crassostrea gigas  
UdeM00000043846 29159 288.1 UdeM00000043846 XP\_034308217.1 34.8 443  
262 4 8 424 8 449 1.80E-74 288.1 29159 cellular  
organisms;Eukaryota;Opisthokonta;Metazoa;Eumetazoa;Bilateria;Protostomia;  
Spiralia;Lophotrochozoa;Mollusca;Bivalvia;Autobranhia;Pteriormorphia;Ostr  
eida;Ostreoidea;Ostreidae;Crassostrea;Crassostrea gigas  
UdeM00000043847 6596 528.5 UdeM00000043847 XP\_045171564.1 35.7 1187  
595 45 2 1132 499 1573 2.10E-146 528.5 6596 cellular  
organisms;Eukaryota;Opisthokonta;Metazoa;Eumetazoa;Bilateria;Protostomia;  
Spiralia;Lophotrochozoa;Mollusca;Bivalvia;Autobranhia;Heteroconchia;Euhe  
terodonta;Imparidentia;Venerida;Veneroidea;Veneridae;Mercenaria;Mercenari  
a mercenaria  
UdeM00000043848 6565 209.9 UdeM00000043848 XP\_022299727.1 46.5 228  
119 2 1 226 46 272 3.60E-51 209.9 6565 cellular  
organisms;Eukaryota;Opisthokonta;Metazoa;Eumetazoa;Bilateria;Protostomia;  
Spiralia;Lophotrochozoa;Mollusca;Bivalvia;Autobranhia;Pteriormorphia;Ostr  
eida;Ostreoidea;Ostreidae;Crassostrea;Crassostrea virginica  
UdeM00000043849 6596 396 UdeM00000043849 XP\_045171564.1 58.6 321  
131 2 9 328 189 508 4.80E-107 396 6596 cellular  
organisms;Eukaryota;Opisthokonta;Metazoa;Eumetazoa;Bilateria;Protostomia;  
Spiralia;Lophotrochozoa;Mollusca;Bivalvia;Autobranhia;Heteroconchia;Euhe  
terodonta;Imparidentia;Venerida;Veneroidea;Veneridae;Mercenaria;Mercenari  
a mercenaria  
UdeM00000043850 6565 134 UdeM00000043850 XP\_022343716.1 43.8 201  
95 6 6 203 4 189 2.10E-28 134 6565 cellular  
organisms;Eukaryota;Opisthokonta;Metazoa;Eumetazoa;Bilateria;Protostomia;  
Spiralia;Lophotrochozoa;Mollusca;Bivalvia;Autobranhia;Pteriormorphia;Ostr  
eida;Ostreoidea;Ostreidae;Crassostrea;Crassostrea virginica  
UdeM00000043852 29159 115.9 UdeM00000043852 XP\_034339168.1 37.5 192  
94 4 1 167 166 356 6.30E-23 115.9 29159 cellular  
organisms;Eukaryota;Opisthokonta;Metazoa;Eumetazoa;Bilateria;Protostomia;  
Spiralia;Lophotrochozoa;Mollusca;Bivalvia;Autobranhia;Pteriormorphia;Ostr  
eida;Ostreoidea;Ostreidae;Crassostrea;Crassostrea gigas  
UdeM00000044348 6596 369 UdeM00000044348 XP\_045201497.1 54.5 321  
136 1 1 321 1 311 6.10E-99 369 6596 cellular  
organisms;Eukaryota;Opisthokonta;Metazoa;Eumetazoa;Bilateria;Protostomia;  
Spiralia;Lophotrochozoa;Mollusca;Bivalvia;Autobranhia;Heteroconchia;Euhe  
terodonta;Imparidentia;Venerida;Veneroidea;Veneridae;Mercenaria;Mercenari  
a mercenaria  
UdeM00000044350 6596 125.2 UdeM00000044350 XP\_045171743.1 44.4 153  
81 2 12 160 54 206 7.70E-26 125.2 6596 cellular  
organisms;Eukaryota;Opisthokonta;Metazoa;Eumetazoa;Bilateria;Protostomia;  
Spiralia;Lophotrochozoa;Mollusca;Bivalvia;Autobranhia;Heteroconchia;Euhe  
terodonta;Imparidentia;Venerida;Veneroidea;Veneridae;Mercenaria;Mercenari  
a mercenaria  
UdeM00000041024 1735272 131.3 UdeM00000041024 XP\_041360711.1 34.7  
199 117 3 2 198 3 190 1.50E-27 131.3 1735272

cellular

organisms;Eukaryota;Opisthokonta;Metazoa;Eumetazoa;Bilateria;Protostomia;Spiralia;Lophotrochozoa;Mollusca;Gastropoda;Neomphalina;Neomphaloidea;Peltospiridae;Gigantopelta;Gigantopelta aegis

UdeM00000041025 6565 87 UdeM00000041025 XP\_022297828.1 54.5 77  
31 3 13 87 70 144 1.30E-14 87 6565 cellular

organisms;Eukaryota;Opisthokonta;Metazoa;Eumetazoa;Bilateria;Protostomia;Spiralia;Lophotrochozoa;Mollusca;Bivalvia;Autobranchia;Pteriormorphia;Ostreida;Ostreioidea;Ostreidae;Crassostrea;Crassostrea virginica

UdeM00000041026 6565 773.5 UdeM00000041026 XP\_022299017.1 29.8 1861  
1165 42 64 1900 377 2119 6.30E-220 773.5 6565 cellular

organisms;Eukaryota;Opisthokonta;Metazoa;Eumetazoa;Bilateria;Protostomia;Spiralia;Lophotrochozoa;Mollusca;Bivalvia;Autobranchia;Pteriormorphia;Ostreida;Ostreioidea;Ostreidae;Crassostrea;Crassostrea virginica

UdeM00000041027 6573 72.8 UdeM00000041027 XP\_021372396.1 27.1 192  
126 6 183 366 281 466 1.10E-09 72.8 6573 cellular

organisms;Eukaryota;Opisthokonta;Metazoa;Eumetazoa;Bilateria;Protostomia;Spiralia;Lophotrochozoa;Mollusca;Bivalvia;Autobranchia;Pteriormorphia;Pectinida;Pectinoidea;Pectinidae;Mizuhopecten;Mizuhopecten yessoensis

UdeM00000041032 6579 855.1 UdeM00000041032 XP\_033739131.1 60.9 645  
250 2 1 644 726 1369 5.60E-245 855.1 6579 cellular

organisms;Eukaryota;Opisthokonta;Metazoa;Eumetazoa;Bilateria;Protostomia;Spiralia;Lophotrochozoa;Mollusca;Bivalvia;Autobranchia;Pteriormorphia;Pectinida;Pectinoidea;Pectinidae;Pecten;Pecten maximus

UdeM00000036145 6596 502.3 UdeM00000036145 XP\_045194118.1 35.2 915  
492 14 74 905 1655 2551 1.60E-138 502.3 6596 cellular

organisms;Eukaryota;Opisthokonta;Metazoa;Eumetazoa;Bilateria;Protostomia;Spiralia;Lophotrochozoa;Mollusca;Bivalvia;Autobranchia;Heteroconchia;Euheterodonta;Imparidentia;Venerida;Veneroidea;Veneridae;Mercenaria;Mercenaria mercenaria

UdeM00000036147 88082 77 UdeM00000036147 XP\_039177253.1 33.3 138  
71 3 1 117 2499 2636 3.60E-11 77 88082 cellular

organisms;Eukaryota;Opisthokonta;Metazoa;Eumetazoa;Bilateria;Deuterostomia;Chordata;Craniata;Vertebrata;Gnathostomata;Teleostomi;Euteleostomi;Sarcopterygii;Dipnotetrapodomorpha;Tetrapoda;Amniota;Sauropsida;Sauria;Lepidosauria;Squamata;Bifurcata;Unidentata;Episquamata;Toxicofera;Serpentes;Colubroidea;Viperidae;Crotalinae;Crotalus;Crotalus tigris

UdeM00000036150 6596 312 UdeM00000036150 XP\_045194118.1 36.2 531  
253 7 1 457 1708 2226 1.30E-81 312 6596 cellular

organisms;Eukaryota;Opisthokonta;Metazoa;Eumetazoa;Bilateria;Protostomia;Spiralia;Lophotrochozoa;Mollusca;Bivalvia;Autobranchia;Heteroconchia;Euheterodonta;Imparidentia;Venerida;Veneroidea;Veneridae;Mercenaria;Mercenaria mercenaria

UdeM00000036151 6596 487.6 UdeM00000036151 XP\_045194118.1 34.3 858  
472 11 1 780 1708 2551 3.40E-134 487.6 6596 cellular

organisms;Eukaryota;Opisthokonta;Metazoa;Eumetazoa;Bilateria;Protostomia;Spiralia;Lophotrochozoa;Mollusca;Bivalvia;Autobranchia;Heteroconchia;Euheterodonta;Imparidentia;Venerida;Veneroidea;Veneridae;Mercenaria;Mercenaria mercenaria

UdeM00000036152 6596 184.5 UdeM00000036152 XP\_045194118.1 31.8 318  
212 3 28 341 2235 2551 3.20E-43 184.5 6596 cellular

organisms;Eukaryota;Opisthokonta;Metazoa;Eumetazoa;Bilateria;Protostomia;Spiralia;Lophotrochozoa;Mollusca;Bivalvia;Autobranchia;Heteroconchia;Euheterodonta;Imparidentia;Venerida;Veneroidea;Veneridae;Mercenaria;Mercenaria mercenaria

terodonta;Imparidentia;Venerida;Veneroidea;Veneridae;Mercenaria;Mercenari  
 a mercenaria  
 UdeM00000035004 6596 128.6 UdeM00000035004 XP\_045204527.1 34.2 202  
 127 2 346 542 206 406 2.30E-26 128.6 6596 cellular  
 organisms;Eukaryota;Opisthokonta;Metazoa;Eumetazoa;Bilateria;Protostomia;  
 Spiralia;Lophotrochozoa;Mollusca;Bivalvia;Autobranchia;Heteroconchia;Euhe  
 terodonta;Imparidentia;Venerida;Veneroidea;Veneridae;Mercenaria;Mercenari  
 a mercenaria  
 UdeM00000035007 6565 157.9 UdeM00000035007 XP\_022320073.1 34.3 236  
 150 3 615 845 443 678 5.60E-35 157.9 6565 cellular  
 organisms;Eukaryota;Opisthokonta;Metazoa;Eumetazoa;Bilateria;Protostomia;  
 Spiralia;Lophotrochozoa;Mollusca;Bivalvia;Autobranchia;Pteriormorphia;Ostr  
 eida;Ostreoidea;Ostreidae;Crassostrea;Crassostrea virginica  
 UdeM00000035008 225164 354.8 UdeM00000035008 XP\_009062152.1 51.5  
 338 145 4 24 356 362 685 1.30E-94 354.8 225164  
 cellular  
 organisms;Eukaryota;Opisthokonta;Metazoa;Eumetazoa;Bilateria;Protostomia;  
 Spiralia;Lophotrochozoa;Mollusca;Gastropoda;Patellogastropoda;Lottioidea;  
 Lottiidae;Lottia;Lottia gigantea  
 UdeM00000035009 225164 362.8 UdeM00000035009 XP\_009062152.1 53  
 328 145 3 24 346 362 685 4.70E-97 362.8 225164  
 cellular  
 organisms;Eukaryota;Opisthokonta;Metazoa;Eumetazoa;Bilateria;Protostomia;  
 Spiralia;Lophotrochozoa;Mollusca;Gastropoda;Patellogastropoda;Lottioidea;  
 Lottiidae;Lottia;Lottia gigantea  
 UdeM00000035011 6596 169.1 UdeM00000035011 XP\_045206665.1 36.8 269  
 143 8 263 521 54 305 1.50E-38 169.1 6596 cellular  
 organisms;Eukaryota;Opisthokonta;Metazoa;Eumetazoa;Bilateria;Protostomia;  
 Spiralia;Lophotrochozoa;Mollusca;Bivalvia;Autobranchia;Heteroconchia;Euhe  
 terodonta;Imparidentia;Venerida;Veneroidea;Veneridae;Mercenaria;Mercenari  
 a mercenaria  
 UdeM00000035013 6596 169.1 UdeM00000035013 XP\_045206665.1 36.8 269  
 143 8 61 319 54 305 9.20E-39 169.1 6596 cellular  
 organisms;Eukaryota;Opisthokonta;Metazoa;Eumetazoa;Bilateria;Protostomia;  
 Spiralia;Lophotrochozoa;Mollusca;Bivalvia;Autobranchia;Heteroconchia;Euhe  
 terodonta;Imparidentia;Venerida;Veneroidea;Veneridae;Mercenaria;Mercenari  
 a mercenaria  
 UdeM00000035014 6565 134.4 UdeM00000035014 XP\_022320730.1 32.5 249  
 143 5 318 544 273 518 4.30E-28 134.4 6565 cellular  
 organisms;Eukaryota;Opisthokonta;Metazoa;Eumetazoa;Bilateria;Protostomia;  
 Spiralia;Lophotrochozoa;Mollusca;Bivalvia;Autobranchia;Pteriormorphia;Ostr  
 eida;Ostreoidea;Ostreidae;Crassostrea;Crassostrea virginica  
 UdeM00000035016 7604 302.4 UdeM00000035016 XP\_033633146.1 41 390  
 212 3 262 633 29 418 2.40E-78 302.4 7604 cellular  
 organisms;Eukaryota;Opisthokonta;Metazoa;Eumetazoa;Bilateria;Deuterostomi  
 a;Echinodermata;Eleutherozoa;Asterozoa;Asteroidea;Forcipulatacea;Forcipul  
 atida;Asteroiidae;Asteroidea;Asteroidea rubens  
 UdeM00000035017 6596 149.4 UdeM00000035017 XP\_045204527.1 30.9 236  
 159 2 48 283 173 404 6.80E-33 149.4 6596 cellular  
 organisms;Eukaryota;Opisthokonta;Metazoa;Eumetazoa;Bilateria;Protostomia;  
 Spiralia;Lophotrochozoa;Mollusca;Bivalvia;Autobranchia;Heteroconchia;Euhe  
 terodonta;Imparidentia;Venerida;Veneroidea;Veneridae;Mercenaria;Mercenari  
 a mercenaria

UdeM00000035018 6596 293.1 UdeM00000035018 XP\_045204528.1 44 336  
 173 4 80 413 74 396 5.50E-76 293.1 6596 cellular  
 organisms;Eukaryota;Opisthokonta;Metazoa;Eumetazoa;Bilateria;Protostomia;  
 Spiralia;Lophotrochozoa;Mollusca;Bivalvia;Autobranchia;Heteroconchia;Euhe  
 terodonta;Imparidentia;Venerida;Veneroidea;Veneridae;Mercenaria;Mercenari  
 a mercenaria

UdeM00000035019 6596 128.6 UdeM00000035019 XP\_045204528.1 32.4 216  
 133 4 48 250 181 396 1.10E-26 128.6 6596 cellular  
 organisms;Eukaryota;Opisthokonta;Metazoa;Eumetazoa;Bilateria;Protostomia;  
 Spiralia;Lophotrochozoa;Mollusca;Bivalvia;Autobranchia;Heteroconchia;Euhe  
 terodonta;Imparidentia;Venerida;Veneroidea;Veneridae;Mercenaria;Mercenari  
 a mercenaria

UdeM00000035022 6596 662.5 UdeM00000035022 XP\_045202954.1 55.1 577  
 247 4 2 567 26 601 4.70E-187 662.5 6596 cellular  
 organisms;Eukaryota;Opisthokonta;Metazoa;Eumetazoa;Bilateria;Protostomia;  
 Spiralia;Lophotrochozoa;Mollusca;Bivalvia;Autobranchia;Heteroconchia;Euhe  
 terodonta;Imparidentia;Venerida;Veneroidea;Veneridae;Mercenaria;Mercenari  
 a mercenaria

UdeM00000035023 75366 446 UdeM00000035023 XP\_016132731.1 63.8 376  
 136 0 1 376 229 604 4.70E-122 446 75366 cellular  
 organisms;Eukaryota;Opisthokonta;Metazoa;Eumetazoa;Bilateria;Deuterostomi  
 a;Chordata;Craniata;Vertebrata;Gnathostomata;Teleostomi;Euteleostomi;Acti  
 nopterygii;Actinopteri;Neopterygii;Teleostei;Osteoglossocephalai;Clupeoce  
 phala;Otomorpha;Ostariophysi;Otophysi;Cypriniphysae;Cypriniformes;Cyprino  
 idei;Cyprinidae;Cyprininae;Sinocyclocheilus;Sinocyclocheilus grahami

UdeM00000035024 6596 455.7 UdeM00000035024 XP\_045184046.1 43.9 508  
 272 4 27 528 11 511 8.90E-125 455.7 6596 cellular  
 organisms;Eukaryota;Opisthokonta;Metazoa;Eumetazoa;Bilateria;Protostomia;  
 Spiralia;Lophotrochozoa;Mollusca;Bivalvia;Autobranchia;Heteroconchia;Euhe  
 terodonta;Imparidentia;Venerida;Veneroidea;Veneridae;Mercenaria;Mercenari  
 a mercenaria

UdeM00000035025 6596 388.3 UdeM00000035025 XP\_045184046.1 38.1 520  
 310 7 1 513 47 561 1.60E-104 388.3 6596 cellular  
 organisms;Eukaryota;Opisthokonta;Metazoa;Eumetazoa;Bilateria;Protostomia;  
 Spiralia;Lophotrochozoa;Mollusca;Bivalvia;Autobranchia;Heteroconchia;Euhe  
 terodonta;Imparidentia;Venerida;Veneroidea;Veneridae;Mercenaria;Mercenari  
 a mercenaria

UdeM00000035026 6596 433.7 UdeM00000035026 XP\_045184046.1 40.6 534  
 302 8 9 534 9 535 3.30E-118 433.7 6596 cellular  
 organisms;Eukaryota;Opisthokonta;Metazoa;Eumetazoa;Bilateria;Protostomia;  
 Spiralia;Lophotrochozoa;Mollusca;Bivalvia;Autobranchia;Heteroconchia;Euhe  
 terodonta;Imparidentia;Venerida;Veneroidea;Veneridae;Mercenaria;Mercenari  
 a mercenaria

UdeM00000035027 6596 402.9 UdeM00000035027 XP\_045184046.1 42.5 475  
 257 8 1 466 47 514 5.80E-109 402.9 6596 cellular  
 organisms;Eukaryota;Opisthokonta;Metazoa;Eumetazoa;Bilateria;Protostomia;  
 Spiralia;Lophotrochozoa;Mollusca;Bivalvia;Autobranchia;Heteroconchia;Euhe  
 terodonta;Imparidentia;Venerida;Veneroidea;Veneridae;Mercenaria;Mercenari  
 a mercenaria

UdeM00000035028 6596 383.6 UdeM00000035028 XP\_045184046.1 38.2 524  
 291 9 1 496 39 557 3.80E-103 383.6 6596 cellular  
 organisms;Eukaryota;Opisthokonta;Metazoa;Eumetazoa;Bilateria;Protostomia;  
 Spiralia;Lophotrochozoa;Mollusca;Bivalvia;Autobranchia;Heteroconchia;Euhe

terodonta;Imparidentia;Venerida;Veneroidea;Veneridae;Mercenaria;Mercenari  
 a mercenaria  
 UdeM00000035029 6596 621.3 UdeM00000035029 XP\_045205200.1 41.6 896  
 427 16 331 1180 194 1039 2.50E-174 621.3 6596 cellular  
 organisms;Eukaryota;Opisthokonta;Metazoa;Eumetazoa;Bilateria;Protostomia;  
 Spiralia;Lophotrochozoa;Mollusca;Bivalvia;Autobranchia;Heteroconchia;Euhe  
 terodonta;Imparidentia;Venerida;Veneroidea;Veneridae;Mercenaria;Mercenari  
 a mercenaria  
 UdeM00000035030 6596 612.1 UdeM00000035030 XP\_045205200.1 40.4 913  
 447 17 331 1213 194 1039 1.60E-171 612.1 6596 cellular  
 organisms;Eukaryota;Opisthokonta;Metazoa;Eumetazoa;Bilateria;Protostomia;  
 Spiralia;Lophotrochozoa;Mollusca;Bivalvia;Autobranchia;Heteroconchia;Euhe  
 terodonta;Imparidentia;Venerida;Veneroidea;Veneridae;Mercenaria;Mercenari  
 a mercenaria  
 UdeM00000035031 6596 626.3 UdeM00000035031 XP\_045205200.1 41.1 913  
 448 16 331 1220 194 1039 8.00E-176 626.3 6596 cellular  
 organisms;Eukaryota;Opisthokonta;Metazoa;Eumetazoa;Bilateria;Protostomia;  
 Spiralia;Lophotrochozoa;Mollusca;Bivalvia;Autobranchia;Heteroconchia;Euhe  
 terodonta;Imparidentia;Venerida;Veneroidea;Veneridae;Mercenaria;Mercenari  
 a mercenaria  
 UdeM00000035032 1735272 1637.1 UdeM00000035032 XP\_041358787.1  
 60.6 1286 497 8 1 1283 3 1281 0.00E+00 1637.1  
 1735272 cellular  
 organisms;Eukaryota;Opisthokonta;Metazoa;Eumetazoa;Bilateria;Protostomia;  
 Spiralia;Lophotrochozoa;Mollusca;Gastropoda;Neomphalina;Neomphaloidea;Pel  
 tospiridae;Gigantopelta;Gigantopelta aegis  
 UdeM00000035033 29159 372.9 UdeM00000035033 XP\_011456426.2 68.6 271  
 82 2 1 270 1 269 3.60E-100 372.9 29159 cellular  
 organisms;Eukaryota;Opisthokonta;Metazoa;Eumetazoa;Bilateria;Protostomia;  
 Spiralia;Lophotrochozoa;Mollusca;Bivalvia;Autobranchia;Pteriomorphia;Ostr  
 eida;Ostreoidea;Ostreidae;Crassostrea;Crassostrea gigas  
 UdeM00000035034 6596 318.2 UdeM00000035034 XP\_045203457.1 63.9 244  
 87 1 1 244 1 243 9.50E-84 318.2 6596 cellular  
 organisms;Eukaryota;Opisthokonta;Metazoa;Eumetazoa;Bilateria;Protostomia;  
 Spiralia;Lophotrochozoa;Mollusca;Bivalvia;Autobranchia;Heteroconchia;Euhe  
 terodonta;Imparidentia;Venerida;Veneroidea;Veneridae;Mercenaria;Mercenari  
 a mercenaria  
 UdeM00000035035 1735272 422.9 UdeM00000035035 XP\_041359277.1 53.9  
 384 174 3 11 394 38 418 4.50E-115 422.9 1735272  
 cellular  
 organisms;Eukaryota;Opisthokonta;Metazoa;Eumetazoa;Bilateria;Protostomia;  
 Spiralia;Lophotrochozoa;Mollusca;Gastropoda;Neomphalina;Neomphaloidea;Pel  
 tospiridae;Gigantopelta;Gigantopelta aegis  
 UdeM00000035036 1735272 466.5 UdeM00000035036 XP\_041359277.1 54.2  
 421 190 3 1 421 1 418 3.80E-128 466.5 1735272  
 cellular  
 organisms;Eukaryota;Opisthokonta;Metazoa;Eumetazoa;Bilateria;Protostomia;  
 Spiralia;Lophotrochozoa;Mollusca;Gastropoda;Neomphalina;Neomphaloidea;Pel  
 tospiridae;Gigantopelta;Gigantopelta aegis  
 UdeM00000035037 225164 374.4 UdeM00000035037 XP\_009062152.1 53.4  
 328 144 3 73 395 362 685 1.90E-100 374.4 225164  
 cellular  
 organisms;Eukaryota;Opisthokonta;Metazoa;Eumetazoa;Bilateria;Protostomia;

Spiralia;Lophotrochozoa;Mollusca;Gastropoda;Patellogastropoda;Lottioidea;Lottiidae;Lottia;Lottia gigantea

UdeM00000035038 225164 366.7 UdeM00000035038 XP\_009062152.1 49.6  
359 169 4 50 403 334 685 3.80E-98 366.7 225164  
cellular

organisms;Eukaryota;Opisthokonta;Metazoa;Eumetazoa;Bilateria;Protostomia;Spiralia;Lophotrochozoa;Mollusca;Gastropoda;Patellogastropoda;Lottioidea;Lottiidae;Lottia;Lottia gigantea

UdeM00000035039 6596 62 UdeM00000035039 XP\_045203144.1 30.6 134  
81 3 5 134 463 588 6.70E-07 62 6596 cellular

organisms;Eukaryota;Opisthokonta;Metazoa;Eumetazoa;Bilateria;Protostomia;Spiralia;Lophotrochozoa;Mollusca;Bivalvia;Autobranchia;Heteroconchia;Euherodonta;Imparidentia;Venerida;Veneroidea;Veneridae;Mercenaria;Mercenaria mercenaria

UdeM00000035040 6596 127.9 UdeM00000035040 XP\_045204673.1 39.2 148  
89 1 1 148 284 430 1.10E-26 127.9 6596 cellular

organisms;Eukaryota;Opisthokonta;Metazoa;Eumetazoa;Bilateria;Protostomia;Spiralia;Lophotrochozoa;Mollusca;Bivalvia;Autobranchia;Heteroconchia;Euherodonta;Imparidentia;Venerida;Veneroidea;Veneridae;Mercenaria;Mercenaria mercenaria

UdeM00000035041 6596 149.1 UdeM00000035041 XP\_045208604.1 54.7 128  
56 1 41 166 7 134 5.10E-33 149.1 6596 cellular

organisms;Eukaryota;Opisthokonta;Metazoa;Eumetazoa;Bilateria;Protostomia;Spiralia;Lophotrochozoa;Mollusca;Bivalvia;Autobranchia;Heteroconchia;Euherodonta;Imparidentia;Venerida;Veneroidea;Veneridae;Mercenaria;Mercenaria mercenaria

UdeM00000035042 6596 496.5 UdeM00000035042 XP\_045204674.1 44.9 581  
310 8 7 585 4 576 4.60E-137 496.5 6596 cellular

organisms;Eukaryota;Opisthokonta;Metazoa;Eumetazoa;Bilateria;Protostomia;Spiralia;Lophotrochozoa;Mollusca;Bivalvia;Autobranchia;Heteroconchia;Euherodonta;Imparidentia;Venerida;Veneroidea;Veneridae;Mercenaria;Mercenaria mercenaria

UdeM00000035044 6579 251.1 UdeM00000035044 XP\_033752673.1 43.5 299  
75 1 11 215 353 651 1.20E-63 251.1 6579 cellular

organisms;Eukaryota;Opisthokonta;Metazoa;Eumetazoa;Bilateria;Protostomia;Spiralia;Lophotrochozoa;Mollusca;Bivalvia;Autobranchia;Pteriomorphia;Pectinida;Pectinoidea;Pectinidae;Pecten;Pecten maximus

UdeM00000035043 225164 90.9 UdeM00000035043 XP\_009058199.1 61.8  
55 21 0 63 117 610 664 1.20E-15 90.9 225164  
cellular

organisms;Eukaryota;Opisthokonta;Metazoa;Eumetazoa;Bilateria;Protostomia;Spiralia;Lophotrochozoa;Mollusca;Gastropoda;Patellogastropoda;Lottioidea;Lottiidae;Lottia;Lottia gigantea

UdeM00000035045 225164 67 UdeM00000035045 XP\_009058199.1 46.8  
79 35 2 1 79 31 102 1.30E-08 67 225164  
cellular

organisms;Eukaryota;Opisthokonta;Metazoa;Eumetazoa;Bilateria;Protostomia;Spiralia;Lophotrochozoa;Mollusca;Gastropoda;Patellogastropoda;Lottioidea;Lottiidae;Lottia;Lottia gigantea

UdeM00000035047 69319 96.7 UdeM00000035047 XP\_008557728.1 52.3 86  
34 2 2 82 701 784 1.50E-17 96.7 69319 cellular

organisms;Eukaryota;Opisthokonta;Metazoa;Eumetazoa;Bilateria;Protostomia;Ecdysozoa;Panarthropoda;Arthropoda;Mandibulata;Pancrustacea;Hexapoda;Insecta;Dicondylia;Pterygota;Neoptera;Endopterygota;Hymenoptera;Apocrita;Para



sitoida; Ichneumonoidea; Braconidae; Microgastrinae; Microplitis; Microplitis demolitor  
 UdeM00000035048 215358 164.9 UdeM00000035048 XP\_027132200.1 33.8  
 293 173 7 1 284 1 281 1.60E-37 164.9 215358  
 cellular  
 organisms; Eukaryota; Opisthokonta; Metazoa; Eumetazoa; Bilateria; Deuterostomia; Chordata; Craniata; Vertebrata; Gnathostomata; Teleostomi; Euteleostomi; Actinopterygii; Actinopteri; Neopterygii; Teleostei; Osteoglossocephalai; Clupeocephala; Euteleostei; Neoteleostei; Eurypterygia; Ctenosquamata; Acanthomorphata; Euacanthomorphacea; Percomorphaceae; Eupercaria; Eupercaria incertae sedis; Sciaenidae; Larimichthys; Larimichthys crocea  
 UdeM00000035049 30732 184.9 UdeM00000035049 XP\_024118320.1 43.8 208  
 115 2 14 221 409 614 1.10E-43 184.9 30732 cellular  
 organisms; Eukaryota; Opisthokonta; Metazoa; Eumetazoa; Bilateria; Deuterostomia; Chordata; Craniata; Vertebrata; Gnathostomata; Teleostomi; Euteleostomi; Actinopterygii; Actinopteri; Neopterygii; Teleostei; Osteoglossocephalai; Clupeocephala; Euteleostei; Neoteleostei; Eurypterygia; Ctenosquamata; Acanthomorphata; Euacanthomorphacea; Percomorphaceae; Ovalentaria; Atherinomorphae; Beloniformes; Adrianichthyoidei; Adrianichthyidae; Oryziinae; Oryzias; Oryzias melastigma  
 UdeM00000035050 375764 126.3 UdeM00000035050 XP\_029977959.1 56.1  
 98 43 0 11 108 34 131 2.40E-26 126.3 375764  
 cellular  
 organisms; Eukaryota; Opisthokonta; Metazoa; Eumetazoa; Bilateria; Deuterostomia; Chordata; Craniata; Vertebrata; Gnathostomata; Teleostomi; Euteleostomi; Actinopterygii; Actinopteri; Neopterygii; Teleostei; Osteoglossocephalai; Clupeocephala; Euteleostei; Neoteleostei; Eurypterygia; Ctenosquamata; Acanthomorphata; Euacanthomorphacea; Percomorphaceae; Gobiaria; Kurtiformes; Apogonoidei; Apogonidae; Apogoninae; Sphaeramia; Sphaeramia orbicularis  
 UdeM00000035051 6596 490.3 UdeM00000035051 XP\_045204674.1 44.1 581  
 315 8 7 585 4 576 3.30E-135 490.3 6596 cellular  
 organisms; Eukaryota; Opisthokonta; Metazoa; Eumetazoa; Bilateria; Protostomia; Spiralia; Lophotrochozoa; Mollusca; Bivalvia; Autobranchia; Heteroconchia; Euheterodonta; Imparidentia; Venerida; Veneroidea; Veneridae; Mercenaria; Mercenaria mercenaria  
 UdeM00000035052 6579 170.2 UdeM00000035052 XP\_033752673.1 62.9 124  
 46 0 21 144 528 651 1.90E-39 170.2 6579 cellular  
 organisms; Eukaryota; Opisthokonta; Metazoa; Eumetazoa; Bilateria; Protostomia; Spiralia; Lophotrochozoa; Mollusca; Bivalvia; Autobranchia; Pteriomorphia; Pectinida; Pectinoidea; Pectinidae; Pecten; Pecten maximus  
 UdeM00000035054 225164 357.8 UdeM00000035054 XP\_009062152.1 53.6  
 323 138 4 2 316 367 685 1.40E-95 357.8 225164  
 cellular  
 organisms; Eukaryota; Opisthokonta; Metazoa; Eumetazoa; Bilateria; Protostomia; Spiralia; Lophotrochozoa; Mollusca; Gastropoda; Patellogastropoda; Lottioidae; Lottiidae; Lottia; Lottia gigantea  
 UdeM00000035055 6596 112.1 UdeM00000035055 XP\_045203146.1 36.2 185  
 114 2 1 185 398 578 7.80E-22 112.1 6596 cellular  
 organisms; Eukaryota; Opisthokonta; Metazoa; Eumetazoa; Bilateria; Protostomia; Spiralia; Lophotrochozoa; Mollusca; Bivalvia; Autobranchia; Heteroconchia; Euheterodonta; Imparidentia; Venerida; Veneroidea; Veneridae; Mercenaria; Mercenaria mercenaria  
 UdeM00000035056 6596 131.7 UdeM00000035056 XP\_045198473.1 58.8 102  
 42 0 16 117 13 114 6.10E-28 131.7 6596 cellular

organisms;Eukaryota;Opisthokonta;Metazoa;Eumetazoa;Bilateria;Protostomia;Spiralia;Lophotrochozoa;Mollusca;Bivalvia;Autobranhia;Heteroconchia;Euherodonta;Imparidentia;Venerida;Veneroidea;Veneridae;Mercenaria;Mercenaria mercenaria

UdeM00000035057 6579 304.3 UdeM00000035057 XP\_033742173.1 40.3 590  
276 9 1 534 1 570 3.10E-79 304.3 6579 cellular

organisms;Eukaryota;Opisthokonta;Metazoa;Eumetazoa;Bilateria;Protostomia;Spiralia;Lophotrochozoa;Mollusca;Bivalvia;Autobranhia;Pteriormorphia;Pectinida;Pectinoidea;Pectinidae;Pecten;Pecten maximus

UdeM00000035058 6565 139.8 UdeM00000035058 XP\_022326746.1 70.3 91  
27 0 1 91 1 91 1.70E-30 139.8 6565 cellular

organisms;Eukaryota;Opisthokonta;Metazoa;Eumetazoa;Bilateria;Protostomia;Spiralia;Lophotrochozoa;Mollusca;Bivalvia;Autobranhia;Pteriormorphia;Ostreida;Ostreoidea;Ostreidae;Crassostrea;Crassostrea virginica

UdeM00000035059 6596 244.6 UdeM00000035059 XP\_045204501.1 44.3 305  
162 4 25 328 24 321 1.90E-61 244.6 6596 cellular

organisms;Eukaryota;Opisthokonta;Metazoa;Eumetazoa;Bilateria;Protostomia;Spiralia;Lophotrochozoa;Mollusca;Bivalvia;Autobranhia;Heteroconchia;Euherodonta;Imparidentia;Venerida;Veneroidea;Veneridae;Mercenaria;Mercenaria mercenaria

UdeM00000035061 6596 194.5 UdeM00000035061 XP\_045205379.1 36.8 321  
179 8 7 306 2 319 4.40E-46 194.5 6596 cellular

organisms;Eukaryota;Opisthokonta;Metazoa;Eumetazoa;Bilateria;Protostomia;Spiralia;Lophotrochozoa;Mollusca;Bivalvia;Autobranhia;Heteroconchia;Euherodonta;Imparidentia;Venerida;Veneroidea;Veneridae;Mercenaria;Mercenaria mercenaria

UdeM00000035062 6596 203 UdeM00000035062 XP\_045205379.1 38 324  
174 10 6 309 3 319 1.40E-48 203 6596 cellular

organisms;Eukaryota;Opisthokonta;Metazoa;Eumetazoa;Bilateria;Protostomia;Spiralia;Lophotrochozoa;Mollusca;Bivalvia;Autobranhia;Heteroconchia;Euherodonta;Imparidentia;Venerida;Veneroidea;Veneridae;Mercenaria;Mercenaria mercenaria

UdeM00000035063 6565 80.5 UdeM00000035063 XP\_022336362.1 40.4 89  
53 0 35 123 23 111 1.80E-12 80.5 6565 cellular

organisms;Eukaryota;Opisthokonta;Metazoa;Eumetazoa;Bilateria;Protostomia;Spiralia;Lophotrochozoa;Mollusca;Bivalvia;Autobranhia;Pteriormorphia;Ostreida;Ostreoidea;Ostreidae;Crassostrea;Crassostrea virginica

UdeM00000035064 6565 129.8 UdeM00000035064 XP\_022325109.1 35.4 198  
127 1 5 202 1007 1203 1.50E-26 129.8 6565 cellular

organisms;Eukaryota;Opisthokonta;Metazoa;Eumetazoa;Bilateria;Protostomia;Spiralia;Lophotrochozoa;Mollusca;Bivalvia;Autobranhia;Pteriormorphia;Ostreida;Ostreoidea;Ostreidae;Crassostrea;Crassostrea virginica

UdeM00000035065 6596 193 UdeM00000035065 XP\_045204557.1 35.9 301  
183 6 13 311 308 600 6.20E-46 193 6596 cellular

organisms;Eukaryota;Opisthokonta;Metazoa;Eumetazoa;Bilateria;Protostomia;Spiralia;Lophotrochozoa;Mollusca;Bivalvia;Autobranhia;Heteroconchia;Euherodonta;Imparidentia;Venerida;Veneroidea;Veneridae;Mercenaria;Mercenaria mercenaria

UdeM00000035066 6596 82.4 UdeM00000035066 XP\_045202434.1 48.8 84  
39 1 29 112 236 315 4.00E-13 82.4 6596 cellular

organisms;Eukaryota;Opisthokonta;Metazoa;Eumetazoa;Bilateria;Protostomia;Spiralia;Lophotrochozoa;Mollusca;Bivalvia;Autobranhia;Heteroconchia;Euherodonta;Imparidentia;Venerida;Veneroidea;Veneridae;Mercenaria;Mercenaria mercenaria

UdeM00000035067 6596 993.4 UdeM00000035067 XP\_045204426.1 76.6 608  
 133 5 1 605 1 602 1.20E-286 993.4 6596 cellular  
 organisms;Eukaryota;Opisthokonta;Metazoa;Eumetazoa;Bilateria;Protostomia;  
 Spiralia;Lophotrochozoa;Mollusca;Bivalvia;Autobranhia;Heteroconchia;Euhe  
 terodonta;Imparidentia;Venerida;Veneroidea;Veneridae;Mercenaria;Mercenari  
 a mercenaria  
 UdeM00000035068 6573 267.7 UdeM00000035068 XP\_021371193.1 60.1 198  
 78 1 13 209 13 210 1.20E-68 267.7 6573 cellular  
 organisms;Eukaryota;Opisthokonta;Metazoa;Eumetazoa;Bilateria;Protostomia;  
 Spiralia;Lophotrochozoa;Mollusca;Bivalvia;Autobranhia;Pteriormorphia;Pect  
 inida;Pectinoidea;Pectinidae;Mizuhopecten;Mizuhopecten yessoensis  
 UdeM00000035069 6573 264.6 UdeM00000035069 XP\_021371194.1 59.7 196  
 78 1 13 207 13 208 1.00E-67 264.6 6573 cellular  
 organisms;Eukaryota;Opisthokonta;Metazoa;Eumetazoa;Bilateria;Protostomia;  
 Spiralia;Lophotrochozoa;Mollusca;Bivalvia;Autobranhia;Pteriormorphia;Pect  
 inida;Pectinoidea;Pectinidae;Mizuhopecten;Mizuhopecten yessoensis  
 UdeM00000035070 6596 509.6 UdeM00000035070 XP\_045204674.1 45.6 581  
 306 8 11 589 4 576 5.30E-141 509.6 6596 cellular  
 organisms;Eukaryota;Opisthokonta;Metazoa;Eumetazoa;Bilateria;Protostomia;  
 Spiralia;Lophotrochozoa;Mollusca;Bivalvia;Autobranhia;Heteroconchia;Euhe  
 terodonta;Imparidentia;Venerida;Veneroidea;Veneridae;Mercenaria;Mercenari  
 a mercenaria  
 UdeM00000035071 6596 386.3 UdeM00000035071 XP\_045204674.1 43.1 490  
 270 7 1 488 94 576 5.60E-104 386.3 6596 cellular  
 organisms;Eukaryota;Opisthokonta;Metazoa;Eumetazoa;Bilateria;Protostomia;  
 Spiralia;Lophotrochozoa;Mollusca;Bivalvia;Autobranhia;Heteroconchia;Euhe  
 terodonta;Imparidentia;Venerida;Veneroidea;Veneridae;Mercenaria;Mercenari  
 a mercenaria  
 UdeM00000035072 41139 171.8 UdeM00000035072 XP\_044760115.1 50.6 170  
 75 3 2 166 735 900 7.40E-40 171.8 41139 cellular  
 organisms;Eukaryota;Opisthokonta;Metazoa;Eumetazoa;Bilateria;Protostomia;  
 Ecdysozoa;Panarthropoda;Arthropoda;Mandibulata;Pancrustacea;Hexapoda;Inse  
 cta;Dicondylia;Pterygota;Neoptera;Endopterygota;Coleoptera;Polyphaga;Cucu  
 jiformia;Cucujoidea;Coccinellidae;Coccinellinae;Coccinellini;Coccinella;C  
 occinella septempunctata  
 UdeM00000035075 6596 485.7 UdeM00000035075 XP\_045173396.1 42.5 583  
 326 6 12 590 2 579 8.20E-134 485.7 6596 cellular  
 organisms;Eukaryota;Opisthokonta;Metazoa;Eumetazoa;Bilateria;Protostomia;  
 Spiralia;Lophotrochozoa;Mollusca;Bivalvia;Autobranhia;Heteroconchia;Euhe  
 terodonta;Imparidentia;Venerida;Veneroidea;Veneridae;Mercenaria;Mercenari  
 a mercenaria  
 UdeM00000035076 225164 365.9 UdeM00000035076 XP\_009062152.1 54.8  
 323 137 3 2 319 367 685 5.10E-98 365.9 225164  
 cellular  
 organisms;Eukaryota;Opisthokonta;Metazoa;Eumetazoa;Bilateria;Protostomia;  
 Spiralia;Lophotrochozoa;Mollusca;Gastropoda;Patellogastropoda;Lottioidae;  
 Lottiidae;Lottia;Lottia gigantea  
 UdeM00000035077 6596 305.8 UdeM00000035077 XP\_045204271.1 35.6 494  
 272 8 1 454 92 579 9.00E-80 305.8 6596 cellular  
 organisms;Eukaryota;Opisthokonta;Metazoa;Eumetazoa;Bilateria;Protostomia;  
 Spiralia;Lophotrochozoa;Mollusca;Bivalvia;Autobranhia;Heteroconchia;Euhe  
 terodonta;Imparidentia;Venerida;Veneroidea;Veneridae;Mercenaria;Mercenari  
 a mercenaria

UdeM00000035078 6596 375.2 UdeM00000035078 XP\_045204106.1 56.1 328  
 140 3 3 326 8 335 9.20E-101 375.2 6596 cellular  
 organisms;Eukaryota;Opisthokonta;Metazoa;Eumetazoa;Bilateria;Protostomia;  
 Spiralia;Lophotrochozoa;Mollusca;Bivalvia;Autobranhia;Heteroconchia;Euhe  
 terodonta;Imparidentia;Venerida;Veneroidea;Veneridae;Mercenaria;Mercenari  
 a mercenaria

UdeM00000035079 6565 148.3 UdeM00000035079 XP\_022321199.1 35.9 223  
 138 3 5 227 364 581 1.20E-32 148.3 6565 cellular  
 organisms;Eukaryota;Opisthokonta;Metazoa;Eumetazoa;Bilateria;Protostomia;  
 Spiralia;Lophotrochozoa;Mollusca;Bivalvia;Autobranhia;Pteriormorphia;Ostr  
 eida;Ostreoidea;Ostreidae;Crassostrea;Crassostrea virginica

UdeM00000035080 225164 370.9 UdeM00000035080 XP\_009062152.1 54  
 328 142 3 23 345 362 685 1.70E-99 370.9 225164  
 cellular  
 organisms;Eukaryota;Opisthokonta;Metazoa;Eumetazoa;Bilateria;Protostomia;  
 Spiralia;Lophotrochozoa;Mollusca;Gastropoda;Patellogastropoda;Lottioidea;  
 Lottiidae;Lottia;Lottia gigantea

UdeM00000035082 6596 309.7 UdeM00000035082 XP\_045204176.1 55.9 261  
 113 1 12 272 2 260 3.70E-81 309.7 6596 cellular  
 organisms;Eukaryota;Opisthokonta;Metazoa;Eumetazoa;Bilateria;Protostomia;  
 Spiralia;Lophotrochozoa;Mollusca;Bivalvia;Autobranhia;Heteroconchia;Euhe  
 terodonta;Imparidentia;Venerida;Veneroidea;Veneridae;Mercenaria;Mercenari  
 a mercenaria

UdeM00000035083 6596 163.3 UdeM00000035083 XP\_045204673.1 38.1 194  
 119 1 1 194 284 476 3.10E-37 163.3 6596 cellular  
 organisms;Eukaryota;Opisthokonta;Metazoa;Eumetazoa;Bilateria;Protostomia;  
 Spiralia;Lophotrochozoa;Mollusca;Bivalvia;Autobranhia;Heteroconchia;Euhe  
 terodonta;Imparidentia;Venerida;Veneroidea;Veneridae;Mercenaria;Mercenari  
 a mercenaria

UdeM00000035084 225164 355.5 UdeM00000035084 XP\_009062152.1 53.3  
 323 142 3 2 319 367 685 6.90E-95 355.5 225164  
 cellular  
 organisms;Eukaryota;Opisthokonta;Metazoa;Eumetazoa;Bilateria;Protostomia;  
 Spiralia;Lophotrochozoa;Mollusca;Gastropoda;Patellogastropoda;Lottioidea;  
 Lottiidae;Lottia;Lottia gigantea

UdeM00000035086 6596 501.1 UdeM00000035086 XP\_045204106.1 50.3 497  
 242 4 1 493 1 496 1.90E-138 501.1 6596 cellular  
 organisms;Eukaryota;Opisthokonta;Metazoa;Eumetazoa;Bilateria;Protostomia;  
 Spiralia;Lophotrochozoa;Mollusca;Bivalvia;Autobranhia;Heteroconchia;Euhe  
 terodonta;Imparidentia;Venerida;Veneroidea;Veneridae;Mercenaria;Mercenari  
 a mercenaria

UdeM00000035087 400727 366.7 UdeM00000035087 XP\_025109728.1 53.9  
 330 143 3 21 345 346 671 3.30E-98 366.7 400727  
 cellular  
 organisms;Eukaryota;Opisthokonta;Metazoa;Eumetazoa;Bilateria;Protostomia;  
 Spiralia;Lophotrochozoa;Mollusca;Gastropoda;Caenogastropoda;Architaeniogl  
 ossa;Ampullarioidea;Ampullariidae;Pomacea;Pomacea canaliculata

UdeM00000035089 6596 376.7 UdeM00000035089 XP\_045204106.1 55.2 330  
 145 2 15 341 14 343 3.10E-101 376.7 6596 cellular  
 organisms;Eukaryota;Opisthokonta;Metazoa;Eumetazoa;Bilateria;Protostomia;  
 Spiralia;Lophotrochozoa;Mollusca;Bivalvia;Autobranhia;Heteroconchia;Euhe  
 terodonta;Imparidentia;Venerida;Veneroidea;Veneridae;Mercenaria;Mercenari  
 a mercenaria

UdeM00000035090 6565 124.4 UdeM00000035090 XP\_022321199.1 36.4 184  
 114 1 1 184 401 581 1.50E-25 124.4 6565 cellular  
 organisms;Eukaryota;Opisthokonta;Metazoa;Eumetazoa;Bilateria;Protostomia;  
 Spiralia;Lophotrochozoa;Mollusca;Bivalvia;Autobranhia;Pteriormorphia;Ostr  
 eida;Ostreoidea;Ostreidae;Crassostrea;Crassostrea virginica  
 UdeM00000035091 6596 256.9 UdeM00000035091 XP\_045204176.1 53.1 245  
 107 2 30 268 2 244 3.30E-65 256.9 6596 cellular  
 organisms;Eukaryota;Opisthokonta;Metazoa;Eumetazoa;Bilateria;Protostomia;  
 Spiralia;Lophotrochozoa;Mollusca;Bivalvia;Autobranhia;Heteroconchia;Euhe  
 terodonta;Imparidentia;Venerida;Veneroidea;Veneridae;Mercenaria;Mercenari  
 a mercenaria  
 UdeM00000035092 6596 498.8 UdeM00000035092 XP\_045204106.1 50.2 488  
 239 3 23 507 10 496 9.60E-138 498.8 6596 cellular  
 organisms;Eukaryota;Opisthokonta;Metazoa;Eumetazoa;Bilateria;Protostomia;  
 Spiralia;Lophotrochozoa;Mollusca;Bivalvia;Autobranhia;Heteroconchia;Euhe  
 terodonta;Imparidentia;Venerida;Veneroidea;Veneridae;Mercenaria;Mercenari  
 a mercenaria  
 UdeM00000035093 225164 363.6 UdeM00000035093 XP\_009062152.1 54.3  
 328 141 3 73 395 362 685 3.10E-97 363.6 225164  
 cellular  
 organisms;Eukaryota;Opisthokonta;Metazoa;Eumetazoa;Bilateria;Protostomia;  
 Spiralia;Lophotrochozoa;Mollusca;Gastropoda;Patellogastropoda;Lottioidea;  
 Lottiidae;Lottia;Lottia gigantea  
 UdeM00000035094 6596 246.9 UdeM00000035094 XP\_045208604.1 52.4 225  
 105 1 31 253 2 226 2.80E-62 246.9 6596 cellular  
 organisms;Eukaryota;Opisthokonta;Metazoa;Eumetazoa;Bilateria;Protostomia;  
 Spiralia;Lophotrochozoa;Mollusca;Bivalvia;Autobranhia;Heteroconchia;Euhe  
 terodonta;Imparidentia;Venerida;Veneroidea;Veneridae;Mercenaria;Mercenari  
 a mercenaria  
 UdeM00000035095 6565 130.6 UdeM00000035095 XP\_022326993.1 36.4 198  
 116 3 3 196 390 581 2.20E-27 130.6 6565 cellular  
 organisms;Eukaryota;Opisthokonta;Metazoa;Eumetazoa;Bilateria;Protostomia;  
 Spiralia;Lophotrochozoa;Mollusca;Bivalvia;Autobranhia;Pteriormorphia;Ostr  
 eida;Ostreoidea;Ostreidae;Crassostrea;Crassostrea virginica  
 UdeM00000035096 326594 93.6 UdeM00000035096 XP\_011496778.1 46.4  
 110 52 2 43 147 582 689 2.30E-16 93.6 326594  
 cellular  
 organisms;Eukaryota;Opisthokonta;Metazoa;Eumetazoa;Bilateria;Protostomia;  
 Ecdysozoa;Panarthropoda;Arthropoda;Mandibulata;Pancrustacea;Hexapoda;Inse  
 cta;Dicondylia;Pterygota;Neoptera;Endopterygota;Hymenoptera;Apocrita;Para  
 sitoida;Chalcidoidea;Agaonidae;Agaoninae;Ceratosolen;Ceratosolen  
 solmsi;Ceratosolen solmsi marchali  
 UdeM00000035097 225164 275.4 UdeM00000035097 XP\_009062152.1 59.4  
 207 84 0 23 229 362 568 6.60E-71 275.4 225164  
 cellular  
 organisms;Eukaryota;Opisthokonta;Metazoa;Eumetazoa;Bilateria;Protostomia;  
 Spiralia;Lophotrochozoa;Mollusca;Gastropoda;Patellogastropoda;Lottioidea;  
 Lottiidae;Lottia;Lottia gigantea  
 UdeM00000035099 6596 488 UdeM00000035099 XP\_045204674.1 43.5 581  
 318 8 12 590 4 576 1.70E-134 488 6596 cellular  
 organisms;Eukaryota;Opisthokonta;Metazoa;Eumetazoa;Bilateria;Protostomia;  
 Spiralia;Lophotrochozoa;Mollusca;Bivalvia;Autobranhia;Heteroconchia;Euhe  
 terodonta;Imparidentia;Venerida;Veneroidea;Veneridae;Mercenaria;Mercenari  
 a mercenaria

UdeM00000029046 6596 795.4 UdeM00000029046 XP\_045192328.1 70 544  
 157 4 1 540 1 542 6.70E-227 795.4 6596 cellular  
 organisms;Eukaryota;Opisthokonta;Metazoa;Eumetazoa;Bilateria;Protostomia;  
 Spiralia;Lophotrochozoa;Mollusca;Bivalvia;Autobranchia;Heteroconchia;Euhe  
 terodonta;Imparidentia;Venerida;Veneroidea;Veneridae;Mercenaria;Mercenari  
 a mercenaria  
 UdeM00000029047 6596 800.4 UdeM00000029047 XP\_045192328.1 70.2 543  
 157 3 1 539 1 542 2.10E-228 800.4 6596 cellular  
 organisms;Eukaryota;Opisthokonta;Metazoa;Eumetazoa;Bilateria;Protostomia;  
 Spiralia;Lophotrochozoa;Mollusca;Bivalvia;Autobranchia;Heteroconchia;Euhe  
 terodonta;Imparidentia;Venerida;Veneroidea;Veneridae;Mercenaria;Mercenari  
 a mercenaria  
 UdeM00000029048 6573 96.3 UdeM00000029048 XP\_021369989.1 61.7 81  
 26 2 1 77 323 402 8.20E-17 96.3 6573 cellular  
 organisms;Eukaryota;Opisthokonta;Metazoa;Eumetazoa;Bilateria;Protostomia;  
 Spiralia;Lophotrochozoa;Mollusca;Bivalvia;Autobranchia;Pteriomorphia;Pect  
 inida;Pectinoidea;Pectinidae;Mizuhopecten;Mizuhopecten yessoensis  
 UdeM00000029049 6596 64.3 UdeM00000029049 XP\_045177042.1 37.9 87  
 50 3 1 85 29 113 1.10E-07 64.3 6596 cellular  
 organisms;Eukaryota;Opisthokonta;Metazoa;Eumetazoa;Bilateria;Protostomia;  
 Spiralia;Lophotrochozoa;Mollusca;Bivalvia;Autobranchia;Heteroconchia;Euhe  
 terodonta;Imparidentia;Venerida;Veneroidea;Veneridae;Mercenaria;Mercenari  
 a mercenaria  
 UdeM00000029050 1735272 458.8 UdeM00000029050 XP\_041348317.1 56.6  
 392 169 1 6 397 148 538 7.50E-126 458.8 1735272  
 cellular  
 organisms;Eukaryota;Opisthokonta;Metazoa;Eumetazoa;Bilateria;Protostomia;  
 Spiralia;Lophotrochozoa;Mollusca;Gastropoda;Neomphalina;Neomphaloidea;Pel  
 tospiridae;Gigantopelta;Gigantopelta aegis  
 UdeM00000029051 6573 76.3 UdeM00000029051 XP\_021370979.1 35.7 126  
 72 2 1 124 1 119 4.70E-11 76.3 6573 cellular  
 organisms;Eukaryota;Opisthokonta;Metazoa;Eumetazoa;Bilateria;Protostomia;  
 Spiralia;Lophotrochozoa;Mollusca;Bivalvia;Autobranchia;Pteriomorphia;Pect  
 inida;Pectinoidea;Pectinidae;Mizuhopecten;Mizuhopecten yessoensis  
 UdeM00000029052 6573 504.6 UdeM00000029052 XP\_021370979.1 31.2 1167  
 617 29 1 1141 510 1516 3.30E-139 504.6 6573 cellular  
 organisms;Eukaryota;Opisthokonta;Metazoa;Eumetazoa;Bilateria;Protostomia;  
 Spiralia;Lophotrochozoa;Mollusca;Bivalvia;Autobranchia;Pteriomorphia;Pect  
 inida;Pectinoidea;Pectinidae;Mizuhopecten;Mizuhopecten yessoensis  
 UdeM00000029053 1735272 132.5 UdeM00000029053 XP\_041350107.1 41  
 188 65 7 2 187 72 215 3.30E-27 132.5 1735272  
 cellular  
 organisms;Eukaryota;Opisthokonta;Metazoa;Eumetazoa;Bilateria;Protostomia;  
 Spiralia;Lophotrochozoa;Mollusca;Gastropoda;Neomphalina;Neomphaloidea;Pel  
 tospiridae;Gigantopelta;Gigantopelta aegis  
 UdeM00000029054 1735272 381.3 UdeM00000029054 XP\_041348497.1 38.1  
 557 330 6 395 947 503 1048 3.50E-102 381.3 1735272  
 cellular  
 organisms;Eukaryota;Opisthokonta;Metazoa;Eumetazoa;Bilateria;Protostomia;  
 Spiralia;Lophotrochozoa;Mollusca;Gastropoda;Neomphalina;Neomphaloidea;Pel  
 tospiridae;Gigantopelta;Gigantopelta aegis  
 UdeM00000029056 6596 229.9 UdeM00000029056 XP\_045164978.1 44.8 391  
 145 8 100 423 88 474 5.90E-57 229.9 6596 cellular  
 organisms;Eukaryota;Opisthokonta;Metazoa;Eumetazoa;Bilateria;Protostomia;

Spiralia;Lophotrochozoa;Mollusca;Bivalvia;Autobranchia;Heteroconchia;Euherodonta;Imparidentia;Venerida;Veneroidea;Veneridae;Mercenaria;Mercenaria mercenaria

UdeM00000029057 6596 251.1 UdeM00000029057 XP\_045164978.1 46.1 408  
149 8 100 440 88 491 2.50E-63 251.1 6596 cellular

organisms;Eukaryota;Opisthokonta;Metazoa;Eumetazoa;Bilateria;Protostomia;Spiralia;Lophotrochozoa;Mollusca;Bivalvia;Autobranchia;Heteroconchia;Euherodonta;Imparidentia;Venerida;Veneroidea;Veneridae;Mercenaria;Mercenaria mercenaria

UdeM00000029058 29159 515.4 UdeM00000029058 XP\_011414388.1 82.9 292  
50 0 1 292 1 292 4.80E-143 515.4 29159 cellular

organisms;Eukaryota;Opisthokonta;Metazoa;Eumetazoa;Bilateria;Protostomia;Spiralia;Lophotrochozoa;Mollusca;Bivalvia;Autobranchia;Pteriormorphia;Ostreida;Ostreoidea;Ostreidae;Crassostrea;Crassostrea gigas

UdeM00000029059 6596 404.8 UdeM00000029059 XP\_045164764.1 71.7 290  
72 2 1 289 1 281 9.00E-110 404.8 6596 cellular

organisms;Eukaryota;Opisthokonta;Metazoa;Eumetazoa;Bilateria;Protostomia;Spiralia;Lophotrochozoa;Mollusca;Bivalvia;Autobranchia;Heteroconchia;Euherodonta;Imparidentia;Venerida;Veneroidea;Veneridae;Mercenaria;Mercenaria mercenaria

UdeM00000029060 6596 573.2 UdeM00000029060 XP\_045165956.1 68.2 400  
126 1 48 446 46 445 3.00E-160 573.2 6596 cellular

organisms;Eukaryota;Opisthokonta;Metazoa;Eumetazoa;Bilateria;Protostomia;Spiralia;Lophotrochozoa;Mollusca;Bivalvia;Autobranchia;Heteroconchia;Euherodonta;Imparidentia;Venerida;Veneroidea;Veneridae;Mercenaria;Mercenaria mercenaria

UdeM00000029068 7739 58.5 UdeM00000029068 XP\_035672209.1 55.3 47  
20 1 23 69 505 550 9.50E-06 58.5 7739 cellular

organisms;Eukaryota;Opisthokonta;Metazoa;Eumetazoa;Bilateria;Deuterostomia;Chordata;Cephalochordata;Leptocardii;Amphioxiformes;Branchiostomidae;Branchiostoma;Branchiostoma floridae

UdeM00000029069 6596 78.2 UdeM00000029069 XP\_045164318.1 35.9 103  
54 3 5 96 6 107 3.60E-11 78.2 6596 cellular

organisms;Eukaryota;Opisthokonta;Metazoa;Eumetazoa;Bilateria;Protostomia;Spiralia;Lophotrochozoa;Mollusca;Bivalvia;Autobranchia;Heteroconchia;Euherodonta;Imparidentia;Venerida;Veneroidea;Veneridae;Mercenaria;Mercenaria mercenaria

UdeM00000029070 6596 78.2 UdeM00000029070 XP\_045164318.1 35.9 103  
54 3 5 96 6 107 1.10E-11 78.2 6596 cellular

organisms;Eukaryota;Opisthokonta;Metazoa;Eumetazoa;Bilateria;Protostomia;Spiralia;Lophotrochozoa;Mollusca;Bivalvia;Autobranchia;Heteroconchia;Euherodonta;Imparidentia;Venerida;Veneroidea;Veneridae;Mercenaria;Mercenaria mercenaria

UdeM00000029071 6596 74.3 UdeM00000029071 XP\_045164318.1 27.6 239  
138 10 5 214 6 238 3.10E-10 74.3 6596 cellular

organisms;Eukaryota;Opisthokonta;Metazoa;Eumetazoa;Bilateria;Protostomia;Spiralia;Lophotrochozoa;Mollusca;Bivalvia;Autobranchia;Heteroconchia;Euherodonta;Imparidentia;Venerida;Veneroidea;Veneridae;Mercenaria;Mercenaria mercenaria

UdeM00000029074 6565 82.8 UdeM00000029074 XP\_022302776.1 36.2 224  
128 6 19 229 25 246 9.50E-13 82.8 6565 cellular

organisms;Eukaryota;Opisthokonta;Metazoa;Eumetazoa;Bilateria;Protostomia;Spiralia;Lophotrochozoa;Mollusca;Bivalvia;Autobranchia;Pteriormorphia;Ostreida;Ostreoidea;Ostreidae;Crassostrea;Crassostrea virginica

UdeM00000029075 6596 70.5 UdeM00000029075 XP\_045196479.1 40.9 88  
 48 2 4 91 109 192 1.30E-09 70.5 6596 cellular  
 organisms;Eukaryota;Opisthokonta;Metazoa;Eumetazoa;Bilateria;Protostomia;  
 Spiralia;Lophotrochozoa;Mollusca;Bivalvia;Autobranhia;Heteroconchia;Euhe  
 terodonta;Imparidentia;Venerida;Veneroidea;Veneridae;Mercenaria;Mercenari  
 a mercenaria  
 UdeM00000029076 6596 289.3 UdeM00000029076 XP\_045175277.1 45.8 319  
 162 3 26 333 11 329 6.40E-75 289.3 6596 cellular  
 organisms;Eukaryota;Opisthokonta;Metazoa;Eumetazoa;Bilateria;Protostomia;  
 Spiralia;Lophotrochozoa;Mollusca;Bivalvia;Autobranhia;Heteroconchia;Euhe  
 terodonta;Imparidentia;Venerida;Veneroidea;Veneridae;Mercenaria;Mercenari  
 a mercenaria  
 UdeM00000029078 6596 248.4 UdeM00000029078 XP\_045188938.1 43.9 280  
 155 2 4 282 20 298 1.10E-62 248.4 6596 cellular  
 organisms;Eukaryota;Opisthokonta;Metazoa;Eumetazoa;Bilateria;Protostomia;  
 Spiralia;Lophotrochozoa;Mollusca;Bivalvia;Autobranhia;Heteroconchia;Euhe  
 terodonta;Imparidentia;Venerida;Veneroidea;Veneridae;Mercenaria;Mercenari  
 a mercenaria  
 UdeM00000029079 6596 203 UdeM00000029079 XP\_045166785.1 40 290  
 158 10 62 344 39 319 6.30E-49 203 6596 cellular  
 organisms;Eukaryota;Opisthokonta;Metazoa;Eumetazoa;Bilateria;Protostomia;  
 Spiralia;Lophotrochozoa;Mollusca;Bivalvia;Autobranhia;Heteroconchia;Euhe  
 terodonta;Imparidentia;Venerida;Veneroidea;Veneridae;Mercenaria;Mercenari  
 a mercenaria  
 UdeM00000029080 6596 271.2 UdeM00000029080 XP\_045167324.1 31.6 561  
 313 17 59 570 41 579 3.40E-69 271.2 6596 cellular  
 organisms;Eukaryota;Opisthokonta;Metazoa;Eumetazoa;Bilateria;Protostomia;  
 Spiralia;Lophotrochozoa;Mollusca;Bivalvia;Autobranhia;Heteroconchia;Euhe  
 terodonta;Imparidentia;Venerida;Veneroidea;Veneridae;Mercenaria;Mercenari  
 a mercenaria  
 UdeM00000029081 6596 548.5 UdeM00000029081 XP\_045167324.1 35.5 941  
 539 28 59 962 41 950 1.70E-152 548.5 6596 cellular  
 organisms;Eukaryota;Opisthokonta;Metazoa;Eumetazoa;Bilateria;Protostomia;  
 Spiralia;Lophotrochozoa;Mollusca;Bivalvia;Autobranhia;Heteroconchia;Euhe  
 terodonta;Imparidentia;Venerida;Veneroidea;Veneridae;Mercenaria;Mercenari  
 a mercenaria  
 UdeM00000029082 6596 542 UdeM00000029082 XP\_045167324.1 34.6 940  
 550 26 31 935 41 950 1.50E-150 542 6596 cellular  
 organisms;Eukaryota;Opisthokonta;Metazoa;Eumetazoa;Bilateria;Protostomia;  
 Spiralia;Lophotrochozoa;Mollusca;Bivalvia;Autobranhia;Heteroconchia;Euhe  
 terodonta;Imparidentia;Venerida;Veneroidea;Veneridae;Mercenaria;Mercenari  
 a mercenaria  
 UdeM00000029083 72036 196.4 UdeM00000029083 XP\_040576246.1 30.7 469  
 181 9 3 335 1 461 5.70E-47 196.4 72036 cellular  
 organisms;Eukaryota;Opisthokonta;Metazoa;Eumetazoa;Bilateria;Protostomia;  
 Ecdysozoa;Panarthropoda;Arthropoda;Mandibulata;Pancrustacea;Crustacea;Mul  
 ticrustacea;Hexanauplia;Copepoda;Neocopepoda;Podoplea;Siphonostomatoida;C  
 aligidae;Lepeophtheirus;Lepeophtheirus salmonis  
 UdeM00000029084 6579 437.6 UdeM00000029084 XP\_033727104.1 40.1 519  
 292 9 3 510 16 526 2.40E-119 437.6 6579 cellular  
 organisms;Eukaryota;Opisthokonta;Metazoa;Eumetazoa;Bilateria;Protostomia;  
 Spiralia;Lophotrochozoa;Mollusca;Bivalvia;Autobranhia;Pteriomorphia;Pect  
 inida;Pectinoidea;Pectinidae;Pecten;Pecten maximus



UdeM00000029085 46731 82.4 UdeM00000029085 XP\_027042029.1 40.5 121  
 68 2 25 144 32 149 5.90E-13 82.4 46731 cellular  
 organisms;Eukaryota;Opisthokonta;Metazoa;Eumetazoa;Cnidaria;Anthozoa;Hexa  
 corallia;Scleractinia;Astrocoeniina;Pocilloporidae;Pocillopora;Pocillopor  
 a damicornis  
 UdeM00000029086 1735272 630.9 UdeM00000029086 XP\_041374928.1 77.3  
 419 91 1 23 441 1078 1492 1.20E-177 630.9 1735272  
 cellular  
 organisms;Eukaryota;Opisthokonta;Metazoa;Eumetazoa;Bilateria;Protostomia;  
 Spiralia;Lophotrochozoa;Mollusca;Gastropoda;Neomphalina;Neomphaloidea;Pel  
 tospiridae;Gigantopelta;Gigantopelta aegis  
 UdeM00000029089 151771 206.8 UdeM00000029089 XP\_028415423.1 28.8  
 511 228 8 3 382 5 510 8.60E-50 206.8 151771  
 cellular  
 organisms;Eukaryota;Opisthokonta;Metazoa;Eumetazoa;Cnidaria;Anthozoa;Octo  
 corallia;Alcyonacea;Alcyoniina;Nephtheidae;Dendronephthya;Dendronephthya  
 gigantea  
 UdeM00000029090 6526 80.9 UdeM00000029090 XP\_013062120.1 52.9 70  
 33 0 28 97 275 344 1.00E-12 80.9 6526 cellular  
 organisms;Eukaryota;Opisthokonta;Metazoa;Eumetazoa;Bilateria;Protostomia;  
 Spiralia;Lophotrochozoa;Mollusca;Gastropoda;Heterobranchia;Euthyneura;Pan  
 pulmonata;Hygrophila;Lymnaeoidea;Planorbidae;Biomphalaria;Biomphalaria  
 glabrata  
 UdeM00000029091 6105 74.3 UdeM00000029091 XP\_031573684.1 41.1 112  
 59 2 179 290 45 149 2.80E-10 74.3 6105 cellular  
 organisms;Eukaryota;Opisthokonta;Metazoa;Eumetazoa;Cnidaria;Anthozoa;Hexa  
 corallia;Actiniaria;Actiniidae;Actinia;Actinia tenebrosa  
 UdeM00000029093 2607531 70.5 UdeM00000029093 XP\_029643184.1 34.3  
 137 78 3 1 134 1 128 2.90E-09 70.5 2607531  
 cellular  
 organisms;Eukaryota;Opisthokonta;Metazoa;Eumetazoa;Bilateria;Protostomia;  
 Spiralia;Lophotrochozoa;Mollusca;Cephalopoda;Coleoidea;Octopodiformes;Oct  
 opoda;Incirrata;Octopodidae;Octopus;Octopus sinensis  
 UdeM00000029094 29159 173.3 UdeM00000029094 XP\_011416080.2 75.8 99  
 24 0 13 111 4 102 1.70E-40 173.3 29159 cellular  
 organisms;Eukaryota;Opisthokonta;Metazoa;Eumetazoa;Bilateria;Protostomia;  
 Spiralia;Lophotrochozoa;Mollusca;Bivalvia;Autobranchia;Pteriomorphia;Ostr  
 eida;Ostreoidea;Ostreidae;Crassostrea;Crassostrea gigas  
 UdeM00000029095 6573 86.7 UdeM00000029095 XP\_021371694.1 34.9 195  
 84 7 58 225 34 212 4.30E-14 86.7 6573 cellular  
 organisms;Eukaryota;Opisthokonta;Metazoa;Eumetazoa;Bilateria;Protostomia;  
 Spiralia;Lophotrochozoa;Mollusca;Bivalvia;Autobranchia;Pteriomorphia;Pect  
 inida;Pectinoidea;Pectinidae;Mizuhopecten;Mizuhopecten yessoensis  
 UdeM00000029096 6573 86.7 UdeM00000029096 XP\_021371694.1 34.9 195  
 84 7 25 192 34 212 3.70E-14 86.7 6573 cellular  
 organisms;Eukaryota;Opisthokonta;Metazoa;Eumetazoa;Bilateria;Protostomia;  
 Spiralia;Lophotrochozoa;Mollusca;Bivalvia;Autobranchia;Pteriomorphia;Pect  
 inida;Pectinoidea;Pectinidae;Mizuhopecten;Mizuhopecten yessoensis  
 UdeM00000029097 6596 58.2 UdeM00000029097 XP\_045206071.1 26.2 141  
 75 2 2 113 184 324 9.40E-06 58.2 6596 cellular  
 organisms;Eukaryota;Opisthokonta;Metazoa;Eumetazoa;Bilateria;Protostomia;  
 Spiralia;Lophotrochozoa;Mollusca;Bivalvia;Autobranchia;Heteroconchia;Euhe  
 terodonta;Imparidentia;Venerida;Veneroidea;Veneridae;Mercenaria;Mercenari  
 a mercenaria

UdeM00000029098 6596 209.1 UdeM00000029098 XP\_045172484.1 23.6 694  
 462 17 62 731 74 723 1.80E-50 209.1 6596 cellular  
 organisms;Eukaryota;Opisthokonta;Metazoa;Eumetazoa;Bilateria;Protostomia;  
 Spiralia;Lophotrochozoa;Mollusca;Bivalvia;Autobranchia;Heteroconchia;Euhe  
 terodonta;Imparidentia;Venerida;Veneroidea;Veneridae;Mercenaria;Mercenari  
 a mercenaria  
 UdeM00000029099 6596 505.8 UdeM00000029099 XP\_045165614.1 42.1 675  
 309 12 47 705 14 622 9.10E-140 505.8 6596 cellular  
 organisms;Eukaryota;Opisthokonta;Metazoa;Eumetazoa;Bilateria;Protostomia;  
 Spiralia;Lophotrochozoa;Mollusca;Bivalvia;Autobranchia;Heteroconchia;Euhe  
 terodonta;Imparidentia;Venerida;Veneroidea;Veneridae;Mercenaria;Mercenari  
 a mercenaria  
 UdeM00000029100 29159 77.8 UdeM00000029100 XP\_034305523.1 54.5 66  
 30 0 1 66 794 859 7.10E-12 77.8 29159 cellular  
 organisms;Eukaryota;Opisthokonta;Metazoa;Eumetazoa;Bilateria;Protostomia;  
 Spiralia;Lophotrochozoa;Mollusca;Bivalvia;Autobranchia;Pteriormorphia;Ostr  
 eida;Ostreoidea;Ostreidae;Crassostrea;Crassostrea gigas  
 UdeM00000029101 6579 402.1 UdeM00000029101 XP\_033739131.1 62.2 294  
 111 0 1 294 1077 1370 6.00E-109 402.1 6579 cellular  
 organisms;Eukaryota;Opisthokonta;Metazoa;Eumetazoa;Bilateria;Protostomia;  
 Spiralia;Lophotrochozoa;Mollusca;Bivalvia;Autobranchia;Pteriormorphia;Pect  
 inida;Pectinoidea;Pectinidae;Pecten;Pecten maximus  
 UdeM00000029102 29159 130.2 UdeM00000029102 XP\_034307199.1 76.5 81  
 17 1 117 195 103 183 2.90E-27 130.2 29159 cellular  
 organisms;Eukaryota;Opisthokonta;Metazoa;Eumetazoa;Bilateria;Protostomia;  
 Spiralia;Lophotrochozoa;Mollusca;Bivalvia;Autobranchia;Pteriormorphia;Ostr  
 eida;Ostreoidea;Ostreidae;Crassostrea;Crassostrea gigas  
 UdeM00000029103 6596 664.1 UdeM00000029103 XP\_045164809.1 84.7 366  
 54 1 114 477 147 512 1.40E-187 664.1 6596 cellular  
 organisms;Eukaryota;Opisthokonta;Metazoa;Eumetazoa;Bilateria;Protostomia;  
 Spiralia;Lophotrochozoa;Mollusca;Bivalvia;Autobranchia;Heteroconchia;Euhe  
 terodonta;Imparidentia;Venerida;Veneroidea;Veneridae;Mercenaria;Mercenari  
 a mercenaria  
 UdeM00000029104 29159 357.5 UdeM00000029104 XP\_034305429.1 59.6 401  
 160 2 1 399 1 401 2.30E-95 357.5 29159 cellular  
 organisms;Eukaryota;Opisthokonta;Metazoa;Eumetazoa;Bilateria;Protostomia;  
 Spiralia;Lophotrochozoa;Mollusca;Bivalvia;Autobranchia;Pteriormorphia;Ostr  
 eida;Ostreoidea;Ostreidae;Crassostrea;Crassostrea gigas  
 UdeM00000029105 80427 118.2 UdeM00000029105 XP\_032998211.1 35.5 197  
 109 4 575 766 367 550 4.50E-23 118.2 80427 cellular  
 organisms;Eukaryota;Opisthokonta;Metazoa;Eumetazoa;Bilateria;Deuterostomi  
 a;Chordata;Craniata;Vertebrata;Gnathostomata;Teleostomi;Euteleostomi;Sarc  
 opterygii;Dipnotetrapodomorpha;Tetrapoda;Amniota;Sauropsida;Sauria;Lepido  
 sauria;Squamata;Bifurcata;Unidentata;Episquamata;Laterata;Lacertibaenia;L  
 accertidae;Lacertinae;Lacerta;Lacerta agilis  
 UdeM00000029106 6596 234.6 UdeM00000029106 XP\_045169782.1 47.6 233  
 121 1 1 232 56 288 1.30E-58 234.6 6596 cellular  
 organisms;Eukaryota;Opisthokonta;Metazoa;Eumetazoa;Bilateria;Protostomia;  
 Spiralia;Lophotrochozoa;Mollusca;Bivalvia;Autobranchia;Heteroconchia;Euhe  
 terodonta;Imparidentia;Venerida;Veneroidea;Veneridae;Mercenaria;Mercenari  
 a mercenaria  
 UdeM00000029107 6526 557.8 UdeM00000029107 XP\_013085681.1 76.8 354  
 81 1 1 353 20 373 1.00E-155 557.8 6526 cellular  
 organisms;Eukaryota;Opisthokonta;Metazoa;Eumetazoa;Bilateria;Protostomia;

Spiralia;Lophotrochozoa;Mollusca;Gastropoda;Heterobranchia;Euthyneura;Panpulmonata;Hygrophila;Lymnaeoidea;Planorbidae;Biomphalaria;Biomphalaria glabrata

UdeM00000029108 6565 14710.4 UdeM00000029108 XP\_022297807.1 44.2  
21403 11001 239 5 20953 12 20917 0.00E+00 14710.4 6565  
cellular

organisms;Eukaryota;Opisthokonta;Metazoa;Eumetazoa;Bilateria;Protostomia;Spiralia;Lophotrochozoa;Mollusca;Bivalvia;Autobranchia;Pteriormorphia;Ostreida;Ostreoidea;Ostreidae;Crassostrea;Crassostrea virginica

UdeM00000029109 6565 14745.8 UdeM00000029109 XP\_022297807.1 44.2  
21403 11001 238 5 20968 12 20917 0.00E+00 14745.8 6565  
cellular

organisms;Eukaryota;Opisthokonta;Metazoa;Eumetazoa;Bilateria;Protostomia;Spiralia;Lophotrochozoa;Mollusca;Bivalvia;Autobranchia;Pteriormorphia;Ostreida;Ostreoidea;Ostreidae;Crassostrea;Crassostrea virginica

UdeM00000029110 6596 132.5 UdeM00000029110 XP\_045164347.1 34.1 270  
155 10 59 318 41 297 1.20E-27 132.5 6596 cellular

organisms;Eukaryota;Opisthokonta;Metazoa;Eumetazoa;Bilateria;Protostomia;Spiralia;Lophotrochozoa;Mollusca;Bivalvia;Autobranchia;Heteroconchia;Euheterodonta;Imparidentia;Venerida;Veneroidea;Veneridae;Mercenaria;Mercenaria mercenaria

UdeM00000029113 6596 429.5 UdeM00000029113 XP\_045167324.1 36.2 674  
370 18 40 668 292 950 7.90E-117 429.5 6596 cellular

organisms;Eukaryota;Opisthokonta;Metazoa;Eumetazoa;Bilateria;Protostomia;Spiralia;Lophotrochozoa;Mollusca;Bivalvia;Autobranchia;Heteroconchia;Euheterodonta;Imparidentia;Venerida;Veneroidea;Veneridae;Mercenaria;Mercenaria mercenaria

UdeM00000029114 6596 143.3 UdeM00000029114 XP\_045167324.1 34.2 199  
121 3 64 252 371 569 4.30E-31 143.3 6596 cellular

organisms;Eukaryota;Opisthokonta;Metazoa;Eumetazoa;Bilateria;Protostomia;Spiralia;Lophotrochozoa;Mollusca;Bivalvia;Autobranchia;Heteroconchia;Euheterodonta;Imparidentia;Venerida;Veneroidea;Veneridae;Mercenaria;Mercenaria mercenaria

UdeM00000029115 1735272 212.6 UdeM00000029115 XP\_041378881.1 38  
363 171 14 5 332 603 946 7.80E-52 212.6 1735272  
cellular

organisms;Eukaryota;Opisthokonta;Metazoa;Eumetazoa;Bilateria;Protostomia;Spiralia;Lophotrochozoa;Mollusca;Gastropoda;Neomphalina;Neomphaloidea;Peltospiridae;Gigantopelta;Gigantopelta aegis

UdeM00000029116 1735272 228 UdeM00000029116 XP\_041378881.1 38.8  
363 174 13 5 338 603 946 1.80E-56 228 1735272  
cellular

organisms;Eukaryota;Opisthokonta;Metazoa;Eumetazoa;Bilateria;Protostomia;Spiralia;Lophotrochozoa;Mollusca;Gastropoda;Neomphalina;Neomphaloidea;Peltospiridae;Gigantopelta;Gigantopelta aegis

UdeM00000029117 6565 63.5 UdeM00000029117 XP\_022302312.1 34.7 75  
49 0 2 76 22 96 1.30E-07 63.5 6565 cellular

organisms;Eukaryota;Opisthokonta;Metazoa;Eumetazoa;Bilateria;Protostomia;Spiralia;Lophotrochozoa;Mollusca;Bivalvia;Autobranchia;Pteriormorphia;Ostreida;Ostreoidea;Ostreidae;Crassostrea;Crassostrea virginica

UdeM00000029119 225164 201.8 UdeM00000029119 XP\_009044734.1 73.5  
136 28 3 1 132 14 145 5.80E-49 201.8 225164  
cellular

organisms;Eukaryota;Opisthokonta;Metazoa;Eumetazoa;Bilateria;Protostomia;

Spiralia;Lophotrochozoa;Mollusca;Gastropoda;Patellogastropoda;Lottioidea;Lottiidae;Lottia;Lottia gigantea

UdeM00000029118 225164 293.9 UdeM00000029118 XP\_009044734.1 75.3  
186 38 3 1 182 14 195 1.90E-76 293.9 225164  
cellular

organisms;Eukaryota;Opisthokonta;Metazoa;Eumetazoa;Bilateria;Protostomia;Spiralia;Lophotrochozoa;Mollusca;Gastropoda;Patellogastropoda;Lottioidea;Lottiidae;Lottia;Lottia gigantea

UdeM00000029120 6596 109 UdeM00000029120 XP\_045165989.1 31.7 186  
118 6 69 250 35 215 1.60E-20 109 6596 cellular

organisms;Eukaryota;Opisthokonta;Metazoa;Eumetazoa;Bilateria;Protostomia;Spiralia;Lophotrochozoa;Mollusca;Bivalvia;Autobranchia;Heteroconchia;Euherodonta;Imparidentia;Venerida;Veneroidea;Veneridae;Mercenaria;Mercenaria mercenaria

UdeM00000029121 6596 107.1 UdeM00000029121 XP\_045165989.1 30.5 210  
134 7 309 512 38 241 6.90E-20 107.1 6596 cellular

organisms;Eukaryota;Opisthokonta;Metazoa;Eumetazoa;Bilateria;Protostomia;Spiralia;Lophotrochozoa;Mollusca;Bivalvia;Autobranchia;Heteroconchia;Euherodonta;Imparidentia;Venerida;Veneroidea;Veneridae;Mercenaria;Mercenaria mercenaria

UdeM00000029122 1735272 204.5 UdeM00000029122 XP\_041348725.1 57.9  
195 63 4 9 200 296 474 1.20E-49 204.5 1735272  
cellular

organisms;Eukaryota;Opisthokonta;Metazoa;Eumetazoa;Bilateria;Protostomia;Spiralia;Lophotrochozoa;Mollusca;Gastropoda;Neomphalina;Neomphaloidea;Peltospiridae;Gigantopelta;Gigantopelta aegis

UdeM00000029123 7574 221.1 UdeM00000029123 XP\_013408784.1 50.5 220  
67 1 47 224 127 346 1.40E-54 221.1 7574 cellular

organisms;Eukaryota;Opisthokonta;Metazoa;Eumetazoa;Bilateria;Protostomia;Spiralia;Lophotrochozoa;Brachiopoda;Linguliformea;Lingulata;Lingulida;Linguloidea;Lingulidae;Lingula;Lingula anatina

UdeM00000029125 6573 499.6 UdeM00000029125 XP\_021371790.1 78 304  
67 0 22 325 96 399 3.10E-138 499.6 6573 cellular

organisms;Eukaryota;Opisthokonta;Metazoa;Eumetazoa;Bilateria;Protostomia;Spiralia;Lophotrochozoa;Mollusca;Bivalvia;Autobranchia;Pteriomorphia;Pectinida;Pectinoidea;Pectinidae;Mizuhopecten;Mizuhopecten yessoensis

UdeM00000029124 6596 529.3 UdeM00000029124 XP\_045165994.1 69.8 374  
108 1 17 385 89 462 1.30E-146 529.3 6596 cellular

organisms;Eukaryota;Opisthokonta;Metazoa;Eumetazoa;Bilateria;Protostomia;Spiralia;Lophotrochozoa;Mollusca;Bivalvia;Autobranchia;Heteroconchia;Euherodonta;Imparidentia;Venerida;Veneroidea;Veneridae;Mercenaria;Mercenaria mercenaria

UdeM00000029126 6573 233.8 UdeM00000029126 XP\_021371790.1 69.4 160  
48 1 19 177 277 436 9.70E-58 233.8 6573 cellular

organisms;Eukaryota;Opisthokonta;Metazoa;Eumetazoa;Bilateria;Protostomia;Spiralia;Lophotrochozoa;Mollusca;Bivalvia;Autobranchia;Pteriomorphia;Pectinida;Pectinoidea;Pectinidae;Mizuhopecten;Mizuhopecten yessoensis

UdeM00000029127 6596 807.4 UdeM00000029127 XP\_045167278.1 57.7 664  
278 2 1 662 10 672 1.40E-230 807.4 6596 cellular

organisms;Eukaryota;Opisthokonta;Metazoa;Eumetazoa;Bilateria;Protostomia;Spiralia;Lophotrochozoa;Mollusca;Bivalvia;Autobranchia;Heteroconchia;Euherodonta;Imparidentia;Venerida;Veneroidea;Veneridae;Mercenaria;Mercenaria mercenaria

UdeM00000029128 6573 815.1 UdeM00000029128 XP\_021364165.1 68 609  
 167 8 1 597 1 593 6.00E-233 815.1 6573 cellular  
 organisms;Eukaryota;Opisthokonta;Metazoa;Eumetazoa;Bilateria;Protostomia;  
 Spiralia;Lophotrochozoa;Mollusca;Bivalvia;Autobranhia;Pteriomorpha;Pect  
 inida;Pectinoidea;Pectinidae;Mizuhopecten;Mizuhopecten yessoensis  
 UdeM00000029129 6579 630.2 UdeM00000029129 XP\_033745226.1 44.7 844  
 378 20 1 803 1 796 3.70E-177 630.2 6579 cellular  
 organisms;Eukaryota;Opisthokonta;Metazoa;Eumetazoa;Bilateria;Protostomia;  
 Spiralia;Lophotrochozoa;Mollusca;Bivalvia;Autobranhia;Pteriomorpha;Pect  
 inida;Pectinoidea;Pectinidae;Pecten;Pecten maximus  
 UdeM00000029130 1735272 221.5 UdeM00000029130 XP\_041347818.1 40.5  
 326 185 4 66 384 69 392 1.90E-54 221.5 1735272  
 cellular  
 organisms;Eukaryota;Opisthokonta;Metazoa;Eumetazoa;Bilateria;Protostomia;  
 Spiralia;Lophotrochozoa;Mollusca;Gastropoda;Neomphalina;Neomphaloidea;Pel  
 tospiridae;Gigantopelta;Gigantopelta aegis  
 UdeM00000029131 400727 257.3 UdeM00000029131 XP\_025106490.1 81.9  
 149 27 0 1 149 1 149 1.20E-65 257.3 400727  
 cellular  
 organisms;Eukaryota;Opisthokonta;Metazoa;Eumetazoa;Bilateria;Protostomia;  
 Spiralia;Lophotrochozoa;Mollusca;Gastropoda;Caenogastropoda;Architaeniogl  
 ossa;Ampullarioidea;Ampullariidae;Pomacea;Pomacea canaliculata  
 UdeM00000029132 37653 168.7 UdeM00000029132 XP\_014782898.1 72.6 106  
 26 1 17 119 331 436 6.40E-39 168.7 37653 cellular  
 organisms;Eukaryota;Opisthokonta;Metazoa;Eumetazoa;Bilateria;Protostomia;  
 Spiralia;Lophotrochozoa;Mollusca;Cephalopoda;Coleoidea;Octopodiformes;Oct  
 opoda;Incirrata;Octopodidae;Octopus;Octopus bimaculoides  
 UdeM00000029133 29159 411.8 UdeM00000029133 XP\_011446959.2 51.2 555  
 202 16 34 528 163 708 1.40E-111 411.8 29159 cellular  
 organisms;Eukaryota;Opisthokonta;Metazoa;Eumetazoa;Bilateria;Protostomia;  
 Spiralia;Lophotrochozoa;Mollusca;Bivalvia;Autobranhia;Pteriomorpha;Ostr  
 eida;Ostreoidea;Ostreidae;Crassostrea;Crassostrea gigas  
 UdeM00000029134 1735272 334.3 UdeM00000029134 XP\_041347144.1 64.1  
 231 83 0 1 231 1 231 1.20E-88 334.3 1735272  
 cellular  
 organisms;Eukaryota;Opisthokonta;Metazoa;Eumetazoa;Bilateria;Protostomia;  
 Spiralia;Lophotrochozoa;Mollusca;Gastropoda;Neomphalina;Neomphaloidea;Pel  
 tospiridae;Gigantopelta;Gigantopelta aegis  
 UdeM00000029135 6579 775.8 UdeM00000029135 XP\_033744943.1 80.5 488  
 74 7 1 481 1 474 3.20E-221 775.8 6579 cellular  
 organisms;Eukaryota;Opisthokonta;Metazoa;Eumetazoa;Bilateria;Protostomia;  
 Spiralia;Lophotrochozoa;Mollusca;Bivalvia;Autobranhia;Pteriomorpha;Pect  
 inida;Pectinoidea;Pectinidae;Pecten;Pecten maximus  
 UdeM00000029136 6596 376.7 UdeM00000029136 XP\_045166545.1 59.1 291  
 117 1 9 297 3 293 2.80E-101 376.7 6596 cellular  
 organisms;Eukaryota;Opisthokonta;Metazoa;Eumetazoa;Bilateria;Protostomia;  
 Spiralia;Lophotrochozoa;Mollusca;Bivalvia;Autobranhia;Heteroconchia;Euhe  
 terodonta;Imparidentia;Venerida;Veneroidea;Veneridae;Mercenaria;Mercenari  
 a mercenaria  
 UdeM00000029137 6596 960.7 UdeM00000029137 XP\_045167176.1 43.8 1269  
 649 16 1 1226 1 1248 1.80E-276 960.7 6596 cellular  
 organisms;Eukaryota;Opisthokonta;Metazoa;Eumetazoa;Bilateria;Protostomia;  
 Spiralia;Lophotrochozoa;Mollusca;Bivalvia;Autobranhia;Heteroconchia;Euhe

terodonta;Imparidentia;Venerida;Veneroidea;Veneridae;Mercenaria;Mercenari  
 a mercenaria  
 UdeM00000029138 6596 466.8 UdeM00000029138 XP\_045167176.1 36.8 1325  
 792 14 1 1307 1275 2571 9.20E-128 466.8 6596 cellular  
 organisms;Eukaryota;Opisthokonta;Metazoa;Eumetazoa;Bilateria;Protostomia;  
 Spiralia;Lophotrochozoa;Mollusca;Bivalvia;Autobranhia;Heteroconchia;Euhe  
 terodonta;Imparidentia;Venerida;Veneroidea;Veneridae;Mercenaria;Mercenari  
 a mercenaria  
 UdeM00000029139 6596 250 UdeM00000029139 XP\_045165356.1 67.7 186  
 55 3 1 185 1 182 2.50E-63 250 6596 cellular  
 organisms;Eukaryota;Opisthokonta;Metazoa;Eumetazoa;Bilateria;Protostomia;  
 Spiralia;Lophotrochozoa;Mollusca;Bivalvia;Autobranhia;Heteroconchia;Euhe  
 terodonta;Imparidentia;Venerida;Veneroidea;Veneridae;Mercenaria;Mercenari  
 a mercenaria  
 UdeM00000029140 6596 526.6 UdeM00000029140 XP\_045165355.1 42.6 779  
 358 19 1 721 1 748 5.50E-146 526.6 6596 cellular  
 organisms;Eukaryota;Opisthokonta;Metazoa;Eumetazoa;Bilateria;Protostomia;  
 Spiralia;Lophotrochozoa;Mollusca;Bivalvia;Autobranhia;Heteroconchia;Euhe  
 terodonta;Imparidentia;Venerida;Veneroidea;Veneridae;Mercenaria;Mercenari  
 a mercenaria  
 UdeM00000029141 6596 906 UdeM00000029141 XP\_045165369.1 82.7 566  
 91 6 1 564 1 561 2.40E-260 906 6596 cellular  
 organisms;Eukaryota;Opisthokonta;Metazoa;Eumetazoa;Bilateria;Protostomia;  
 Spiralia;Lophotrochozoa;Mollusca;Bivalvia;Autobranhia;Heteroconchia;Euhe  
 terodonta;Imparidentia;Venerida;Veneroidea;Veneridae;Mercenaria;Mercenari  
 a mercenaria  
 UdeM00000029142 6573 292 UdeM00000029142 XP\_021344022.1 61.3 230  
 80 3 2 222 3 232 6.60E-76 292 6573 cellular  
 organisms;Eukaryota;Opisthokonta;Metazoa;Eumetazoa;Bilateria;Protostomia;  
 Spiralia;Lophotrochozoa;Mollusca;Bivalvia;Autobranhia;Pteriomorphia;Pect  
 inida;Pectinoidea;Pectinidae;Mizuhopecten;Mizuhopecten yessoensis  
 UdeM00000029143 6573 444.9 UdeM00000029143 XP\_021343957.1 73 281  
 76 0 6 286 8 288 7.80E-122 444.9 6573 cellular  
 organisms;Eukaryota;Opisthokonta;Metazoa;Eumetazoa;Bilateria;Protostomia;  
 Spiralia;Lophotrochozoa;Mollusca;Bivalvia;Autobranhia;Pteriomorphia;Pect  
 inida;Pectinoidea;Pectinidae;Mizuhopecten;Mizuhopecten yessoensis  
 UdeM00000029144 6596 239.2 UdeM00000029144 XP\_045164817.1 36.5 493  
 263 13 10 471 6 479 1.10E-59 239.2 6596 cellular  
 organisms;Eukaryota;Opisthokonta;Metazoa;Eumetazoa;Bilateria;Protostomia;  
 Spiralia;Lophotrochozoa;Mollusca;Bivalvia;Autobranhia;Heteroconchia;Euhe  
 terodonta;Imparidentia;Venerida;Veneroidea;Veneridae;Mercenaria;Mercenari  
 a mercenaria  
 UdeM00000029145 6565 149.8 UdeM00000029145 XP\_022296688.1 50.7 138  
 58 2 1 138 36 163 2.50E-33 149.8 6565 cellular  
 organisms;Eukaryota;Opisthokonta;Metazoa;Eumetazoa;Bilateria;Protostomia;  
 Spiralia;Lophotrochozoa;Mollusca;Bivalvia;Autobranhia;Pteriomorphia;Ostr  
 eida;Ostreoidea;Ostreidae;Crassostrea;Crassostrea virginica  
 UdeM00000029146 6689 186.8 UdeM00000029146 XP\_027207501.1 49.2 177  
 89 1 46 222 1826 2001 3.00E-44 186.8 6689 cellular  
 organisms;Eukaryota;Opisthokonta;Metazoa;Eumetazoa;Bilateria;Protostomia;  
 Ecdysozoa;Panarthropoda;Arthropoda;Mandibulata;Pancrustacea;Crustacea;Mul  
 ticrustacea;Malacostraca;Eumalacostraca;Eucarida;Decapoda;Dendrobranchiat  
 a;Penaeoidea;Penaeidae;Penaeus;Penaeus vannamei

UdeM00000043526 1735272 125.6 UdeM00000043526 XP\_041366888.1 24.6  
 475 284 14 13 429 29 487 1.60E-25 125.6 1735272  
 cellular  
 organisms;Eukaryota;Opisthokonta;Metazoa;Eumetazoa;Bilateria;Protostomia;  
 Spiralia;Lophotrochozoa;Mollusca;Gastropoda;Neomphalina;Neomphaloidea;Pel  
 tospiridae;Gigantopelta;Gigantopelta aegis  
 UdeM00000043527 6596 197.2 UdeM00000043527 XP\_045199754.1 41.5 337  
 144 8 1 289 1 332 2.90E-47 197.2 6596 cellular  
 organisms;Eukaryota;Opisthokonta;Metazoa;Eumetazoa;Bilateria;Protostomia;  
 Spiralia;Lophotrochozoa;Mollusca;Bivalvia;Autobranchia;Heteroconchia;Euhe  
 terodonta;Imparidentia;Venerida;Veneroidea;Veneridae;Mercenaria;Mercenari  
 a mercenaria  
 UdeM00000043528 6596 266.9 UdeM00000043528 XP\_045199754.1 46.7 338  
 151 7 1 317 1 330 3.20E-68 266.9 6596 cellular  
 organisms;Eukaryota;Opisthokonta;Metazoa;Eumetazoa;Bilateria;Protostomia;  
 Spiralia;Lophotrochozoa;Mollusca;Bivalvia;Autobranchia;Heteroconchia;Euhe  
 terodonta;Imparidentia;Venerida;Veneroidea;Veneridae;Mercenaria;Mercenari  
 a mercenaria  
 UdeM00000043529 6565 76.6 UdeM00000043529 XP\_022341888.1 48.6 72  
 37 0 15 86 812 883 6.20E-11 76.6 6565 cellular  
 organisms;Eukaryota;Opisthokonta;Metazoa;Eumetazoa;Bilateria;Protostomia;  
 Spiralia;Lophotrochozoa;Mollusca;Bivalvia;Autobranchia;Pteriormorphia;Ostr  
 eida;Ostreoidea;Ostreidae;Crassostrea;Crassostrea virginica  
 UdeM00000043530 6565 184.1 UdeM00000043530 XP\_022299727.1 45.9 196  
 105 1 5 200 83 277 2.00E-43 184.1 6565 cellular  
 organisms;Eukaryota;Opisthokonta;Metazoa;Eumetazoa;Bilateria;Protostomia;  
 Spiralia;Lophotrochozoa;Mollusca;Bivalvia;Autobranchia;Pteriormorphia;Ostr  
 eida;Ostreoidea;Ostreidae;Crassostrea;Crassostrea virginica  
 UdeM00000043531 29159 511.5 UdeM00000043531 XP\_011435928.2 40.6 835  
 437 15 1 814 1 797 1.90E-141 511.5 29159 cellular  
 organisms;Eukaryota;Opisthokonta;Metazoa;Eumetazoa;Bilateria;Protostomia;  
 Spiralia;Lophotrochozoa;Mollusca;Bivalvia;Autobranchia;Pteriormorphia;Ostr  
 eida;Ostreoidea;Ostreidae;Crassostrea;Crassostrea gigas  
 UdeM00000043532 6596 218 UdeM00000043532 XP\_045199314.1 68.6 159  
 46 2 1 157 1 157 8.50E-54 218 6596 cellular  
 organisms;Eukaryota;Opisthokonta;Metazoa;Eumetazoa;Bilateria;Protostomia;  
 Spiralia;Lophotrochozoa;Mollusca;Bivalvia;Autobranchia;Heteroconchia;Euhe  
 terodonta;Imparidentia;Venerida;Veneroidea;Veneridae;Mercenaria;Mercenari  
 a mercenaria  
 UdeM00000034244 6579 620.9 UdeM00000034244 XP\_033733400.1 57.1 580  
 147 7 14 575 19 514 3.30E-174 620.9 6579 cellular  
 organisms;Eukaryota;Opisthokonta;Metazoa;Eumetazoa;Bilateria;Protostomia;  
 Spiralia;Lophotrochozoa;Mollusca;Bivalvia;Autobranchia;Pteriormorphia;Pect  
 inida;Pectinoidea;Pectinidae;Pecten;Pecten maximus  
 UdeM00000034245 6596 1067.4 UdeM00000034245 XP\_045209371.1 66.3  
 744 249 2 14 757 18 759 0.00E+00 1067.4 6596  
 cellular  
 organisms;Eukaryota;Opisthokonta;Metazoa;Eumetazoa;Bilateria;Protostomia;  
 Spiralia;Lophotrochozoa;Mollusca;Bivalvia;Autobranchia;Heteroconchia;Euhe  
 terodonta;Imparidentia;Venerida;Veneroidea;Veneridae;Mercenaria;Mercenari  
 a mercenaria  
 UdeM00000034246 6596 1065.4 UdeM00000034246 XP\_045209371.1 65.3  
 760 260 3 5 764 4 759 3.20E-308 1065.4 6596  
 cellular

organisms;Eukaryota;Opisthokonta;Metazoa;Eumetazoa;Bilateria;Protostomia;Spiralia;Lophotrochozoa;Mollusca;Bivalvia;Autobranchia;Heteroconchia;Euherodonta;Imparidentia;Venerida;Veneroidea;Veneridae;Mercenaria;Mercenaria mercenaria

UdeM00000034247 6565 72 UdeM00000034247 XP\_022326036.1 74.7 75  
19 0 11 85 5 79 4.10E-10 72 6565 cellular

organisms;Eukaryota;Opisthokonta;Metazoa;Eumetazoa;Bilateria;Protostomia;Spiralia;Lophotrochozoa;Mollusca;Bivalvia;Autobranchia;Pteriormorphia;Ostreida;Ostreoidea;Ostreidae;Crassostrea;Crassostrea virginica

UdeM00000034248 6596 617.8 UdeM00000034248 XP\_045209831.1 73.2 403  
107 1 29 431 4 405 1.00E-173 617.8 6596 cellular

organisms;Eukaryota;Opisthokonta;Metazoa;Eumetazoa;Bilateria;Protostomia;Spiralia;Lophotrochozoa;Mollusca;Bivalvia;Autobranchia;Heteroconchia;Euherodonta;Imparidentia;Venerida;Veneroidea;Veneridae;Mercenaria;Mercenaria mercenaria

UdeM00000034249 6596 208.8 UdeM00000034249 XP\_045208536.1 32.1 389  
211 7 6 369 1 361 1.20E-50 208.8 6596 cellular

organisms;Eukaryota;Opisthokonta;Metazoa;Eumetazoa;Bilateria;Protostomia;Spiralia;Lophotrochozoa;Mollusca;Bivalvia;Autobranchia;Heteroconchia;Euherodonta;Imparidentia;Venerida;Veneroidea;Veneridae;Mercenaria;Mercenaria mercenaria

UdeM00000034250 6596 136.7 UdeM00000034250 XP\_045162869.1 38.7 186  
108 4 52 232 189 373 3.70E-29 136.7 6596 cellular

organisms;Eukaryota;Opisthokonta;Metazoa;Eumetazoa;Bilateria;Protostomia;Spiralia;Lophotrochozoa;Mollusca;Bivalvia;Autobranchia;Heteroconchia;Euherodonta;Imparidentia;Venerida;Veneroidea;Veneridae;Mercenaria;Mercenaria mercenaria

UdeM00000034253 6579 1307.4 UdeM00000034253 XP\_033733003.1 75  
879 172 7 1 865 1 845 0.00E+00 1307.4 6579  
cellular

organisms;Eukaryota;Opisthokonta;Metazoa;Eumetazoa;Bilateria;Protostomia;Spiralia;Lophotrochozoa;Mollusca;Bivalvia;Autobranchia;Pteriormorphia;Pectinida;Pectinoidea;Pectinidae;Pecten;Pecten maximus

UdeM00000034254 6579 1323.5 UdeM00000034254 XP\_033733003.1 75.5  
879 174 6 1 872 1 845 0.00E+00 1323.5 6579  
cellular

organisms;Eukaryota;Opisthokonta;Metazoa;Eumetazoa;Bilateria;Protostomia;Spiralia;Lophotrochozoa;Mollusca;Bivalvia;Autobranchia;Pteriormorphia;Pectinida;Pectinoidea;Pectinidae;Pecten;Pecten maximus

UdeM00000034255 6596 1250.7 UdeM00000034255 XP\_045210369.1 51.3  
1256 583 11 1 1250 62 1294 0.00E+00 1250.7 6596  
cellular

organisms;Eukaryota;Opisthokonta;Metazoa;Eumetazoa;Bilateria;Protostomia;Spiralia;Lophotrochozoa;Mollusca;Bivalvia;Autobranchia;Heteroconchia;Euherodonta;Imparidentia;Venerida;Veneroidea;Veneridae;Mercenaria;Mercenaria mercenaria

UdeM00000034256 6596 1329.7 UdeM00000034256 XP\_045210369.1 51.8  
1301 604 10 37 1331 11 1294 0.00E+00 1329.7 6596  
cellular

organisms;Eukaryota;Opisthokonta;Metazoa;Eumetazoa;Bilateria;Protostomia;Spiralia;Lophotrochozoa;Mollusca;Bivalvia;Autobranchia;Heteroconchia;Euherodonta;Imparidentia;Venerida;Veneroidea;Veneridae;Mercenaria;Mercenaria mercenaria



UdeM00000034257 6596 578.6 UdeM00000034257 XP\_045210369.1 57.8 479  
 202 0 1 479 816 1294 7.60E-162 578.6 6596 cellular  
 organisms;Eukaryota;Opisthokonta;Metazoa;Eumetazoa;Bilateria;Protostomia;  
 Spiralia;Lophotrochozoa;Mollusca;Bivalvia;Autobranhia;Heteroconchia;Euhe  
 terodonta;Imparidentia;Venerida;Veneroidea;Veneridae;Mercenaria;Mercenari  
 a mercenaria  
 UdeM00000034258 6579 213.8 UdeM00000034258 XP\_033745805.1 46.1 269  
 129 6 3 258 29 294 2.70E-52 213.8 6579 cellular  
 organisms;Eukaryota;Opisthokonta;Metazoa;Eumetazoa;Bilateria;Protostomia;  
 Spiralia;Lophotrochozoa;Mollusca;Bivalvia;Autobranhia;Pteriormorphia;Pect  
 inida;Pectinoidea;Pectinidae;Pecten;Pecten maximus  
 UdeM00000034259 6579 308.5 UdeM00000034259 XP\_033730215.1 46.6 322  
 167 3 6 322 264 585 1.00E-80 308.5 6579 cellular  
 organisms;Eukaryota;Opisthokonta;Metazoa;Eumetazoa;Bilateria;Protostomia;  
 Spiralia;Lophotrochozoa;Mollusca;Bivalvia;Autobranhia;Pteriormorphia;Pect  
 inida;Pectinoidea;Pectinidae;Pecten;Pecten maximus  
 UdeM00000034260 6579 142.5 UdeM00000034260 XP\_033745803.1 42 174  
 98 1 6 176 264 437 5.30E-31 142.5 6579 cellular  
 organisms;Eukaryota;Opisthokonta;Metazoa;Eumetazoa;Bilateria;Protostomia;  
 Spiralia;Lophotrochozoa;Mollusca;Bivalvia;Autobranhia;Pteriormorphia;Pect  
 inida;Pectinoidea;Pectinidae;Pecten;Pecten maximus  
 UdeM00000034261 6579 249.2 UdeM00000034261 XP\_033761616.1 55.5 218  
 95 1 4 219 8 225 4.80E-63 249.2 6579 cellular  
 organisms;Eukaryota;Opisthokonta;Metazoa;Eumetazoa;Bilateria;Protostomia;  
 Spiralia;Lophotrochozoa;Mollusca;Bivalvia;Autobranhia;Pteriormorphia;Pect  
 inida;Pectinoidea;Pectinidae;Pecten;Pecten maximus  
 UdeM00000034262 6596 413.7 UdeM00000034262 XP\_045210369.1 45.4 487  
 247 8 1 484 62 532 3.30E-112 413.7 6596 cellular  
 organisms;Eukaryota;Opisthokonta;Metazoa;Eumetazoa;Bilateria;Protostomia;  
 Spiralia;Lophotrochozoa;Mollusca;Bivalvia;Autobranhia;Heteroconchia;Euhe  
 terodonta;Imparidentia;Venerida;Veneroidea;Veneridae;Mercenaria;Mercenari  
 a mercenaria  
 UdeM00000034263 6596 787.7 UdeM00000034263 XP\_045210369.1 53.3 719  
 334 1 1 717 576 1294 1.20E-224 787.7 6596 cellular  
 organisms;Eukaryota;Opisthokonta;Metazoa;Eumetazoa;Bilateria;Protostomia;  
 Spiralia;Lophotrochozoa;Mollusca;Bivalvia;Autobranhia;Heteroconchia;Euhe  
 terodonta;Imparidentia;Venerida;Veneroidea;Veneridae;Mercenaria;Mercenari  
 a mercenaria  
 UdeM00000034264 6596 827.4 UdeM00000034264 XP\_045210369.1 53.9 748  
 343 1 3 748 547 1294 1.50E-236 827.4 6596 cellular  
 organisms;Eukaryota;Opisthokonta;Metazoa;Eumetazoa;Bilateria;Protostomia;  
 Spiralia;Lophotrochozoa;Mollusca;Bivalvia;Autobranhia;Heteroconchia;Euhe  
 terodonta;Imparidentia;Venerida;Veneroidea;Veneridae;Mercenaria;Mercenari  
 a mercenaria  
 UdeM00000034265 6596 218.8 UdeM00000034265 XP\_045209472.1 65.7 327  
 84 12 1 313 1 313 9.90E-54 218.8 6596 cellular  
 organisms;Eukaryota;Opisthokonta;Metazoa;Eumetazoa;Bilateria;Protostomia;  
 Spiralia;Lophotrochozoa;Mollusca;Bivalvia;Autobranhia;Heteroconchia;Euhe  
 terodonta;Imparidentia;Venerida;Veneroidea;Veneridae;Mercenaria;Mercenari  
 a mercenaria  
 UdeM00000034266 6596 165.2 UdeM00000034266 XP\_045209472.1 60.9 174  
 57 6 1 169 1 168 7.10E-38 165.2 6596 cellular  
 organisms;Eukaryota;Opisthokonta;Metazoa;Eumetazoa;Bilateria;Protostomia;  
 Spiralia;Lophotrochozoa;Mollusca;Bivalvia;Autobranhia;Heteroconchia;Euhe

terodonta;Imparidentia;Venerida;Veneroidea;Veneridae;Mercenaria;Mercenari  
 a mercenaria  
 UdeM00000034267 6526 79.7 UdeM00000034267 XP\_013080019.1 46 215  
 108 2 1 213 1 209 4.90E-12 79.7 6526 cellular  
 organisms;Eukaryota;Opisthokonta;Metazoa;Eumetazoa;Bilateria;Protostomia;  
 Spiralia;Lophotrochozoa;Mollusca;Gastropoda;Heterobranchia;Euthyneura;Pan  
 pulmonata;Hygrophila;Lymnaeoidea;Planorbidae;Biomphalaria;Biomphalaria  
 glabrata  
 UdeM00000034268 7574 89 UdeM00000034268 XP\_013384015.1 57.5 87  
 36 1 6 92 186 271 5.50E-15 89 7574 cellular  
 organisms;Eukaryota;Opisthokonta;Metazoa;Eumetazoa;Bilateria;Protostomia;  
 Spiralia;Lophotrochozoa;Brachiopoda;Linguliformea;Lingulata;Lingulida;Lin  
 guloidea;Lingulidae;Lingula;Lingula anatina  
 UdeM00000034271 6596 398.3 UdeM00000034271 XP\_045209230.1 59.6 322  
 125 3 1 317 6 327 9.70E-108 398.3 6596 cellular  
 organisms;Eukaryota;Opisthokonta;Metazoa;Eumetazoa;Bilateria;Protostomia;  
 Spiralia;Lophotrochozoa;Mollusca;Bivalvia;Autobranchia;Heteroconchia;Euhe  
 terodonta;Imparidentia;Venerida;Veneroidea;Veneridae;Mercenaria;Mercenari  
 a mercenaria  
 UdeM00000034270 6596 490.3 UdeM00000034270 XP\_045209230.1 62.8 379  
 135 4 1 373 6 384 2.20E-135 490.3 6596 cellular  
 organisms;Eukaryota;Opisthokonta;Metazoa;Eumetazoa;Bilateria;Protostomia;  
 Spiralia;Lophotrochozoa;Mollusca;Bivalvia;Autobranchia;Heteroconchia;Euhe  
 terodonta;Imparidentia;Venerida;Veneroidea;Veneridae;Mercenaria;Mercenari  
 a mercenaria  
 UdeM00000034272 6596 112.8 UdeM00000034272 XP\_045180427.1 39 177  
 105 2 76 250 98 273 6.50E-22 112.8 6596 cellular  
 organisms;Eukaryota;Opisthokonta;Metazoa;Eumetazoa;Bilateria;Protostomia;  
 Spiralia;Lophotrochozoa;Mollusca;Bivalvia;Autobranchia;Heteroconchia;Euhe  
 terodonta;Imparidentia;Venerida;Veneroidea;Veneridae;Mercenaria;Mercenari  
 a mercenaria  
 UdeM00000034273 6596 1467.6 UdeM00000034273 XP\_045209230.1 72.4  
 937 255 2 2 934 386 1322 0.00E+00 1467.6 6596  
 cellular  
 organisms;Eukaryota;Opisthokonta;Metazoa;Eumetazoa;Bilateria;Protostomia;  
 Spiralia;Lophotrochozoa;Mollusca;Bivalvia;Autobranchia;Heteroconchia;Euhe  
 terodonta;Imparidentia;Venerida;Veneroidea;Veneridae;Mercenaria;Mercenari  
 a mercenaria  
 UdeM00000034274 400727 216.1 UdeM00000034274 XP\_025094200.1 43.2  
 234 131 1 1 234 1 232 4.80E-53 216.1 400727  
 cellular  
 organisms;Eukaryota;Opisthokonta;Metazoa;Eumetazoa;Bilateria;Protostomia;  
 Spiralia;Lophotrochozoa;Mollusca;Gastropoda;Caenogastropoda;Architaeniogl  
 ossa;Ampullarioidea;Ampullariidae;Pomacea;Pomacea canaliculata  
 UdeM00000034275 29159 213 UdeM00000034275 XP\_011423583.2 45.6 206  
 110 2 2 207 29 232 3.60E-52 213 29159 cellular  
 organisms;Eukaryota;Opisthokonta;Metazoa;Eumetazoa;Bilateria;Protostomia;  
 Spiralia;Lophotrochozoa;Mollusca;Bivalvia;Autobranchia;Pteriomorphia;Ostr  
 eida;Ostreoidea;Ostreidae;Crassostrea;Crassostrea gigas  
 UdeM00000034277 6565 364.4 UdeM00000034277 XP\_022329293.1 71.3 254  
 73 0 1 254 841 1094 1.20E-97 364.4 6565 cellular  
 organisms;Eukaryota;Opisthokonta;Metazoa;Eumetazoa;Bilateria;Protostomia;  
 Spiralia;Lophotrochozoa;Mollusca;Bivalvia;Autobranchia;Pteriomorphia;Ostr  
 eida;Ostreoidea;Ostreidae;Crassostrea;Crassostrea virginica

UdeM00000034276 6596 937.6 UdeM00000034276 XP\_045208008.1 68.5 701  
 204 2 78 778 419 1102 1.00E-269 937.6 6596 cellular  
 organisms;Eukaryota;Opisthokonta;Metazoa;Eumetazoa;Bilateria;Protostomia;  
 Spiralia;Lophotrochozoa;Mollusca;Bivalvia;Autobranchia;Heteroconchia;Euhe  
 terodonta;Imparidentia;Venerida;Veneroidea;Veneridae;Mercenaria;Mercenari  
 a mercenaria

UdeM00000034278 7906 119.4 UdeM00000034278 XP\_033868128.2 35.9 198  
 112 8 9 206 8 190 6.20E-24 119.4 7906 cellular  
 organisms;Eukaryota;Opisthokonta;Metazoa;Eumetazoa;Bilateria;Deuterostomi  
 a;Chordata;Craniata;Vertebrata;Gnathostomata;Teleostomi;Euteleostomi;Acti  
 nopterygii;Actinopteri;Chondrostei;Acipenseriformes;Acipenseroidei;Acipen  
 seridae;Acipenserinae;Acipenserini;Acipenser;Acipenser ruthenus

UdeM00000034281 46514 134.4 UdeM00000034281 XP\_038058294.1 80.8 78  
 15 0 1 78 1 78 6.60E-29 134.4 46514 cellular  
 organisms;Eukaryota;Opisthokonta;Metazoa;Eumetazoa;Bilateria;Deuterostomi  
 a;Echinodermata;Eleutherozoa;Asterozoa;Asteroidea;Valvatataceae;Valvatida;As  
 terinidae;Patiria;Patiria miniata

UdeM00000034283 29159 1144.4 UdeM00000034283 XP\_011423958.1 71.1  
 922 225 12 14 909 59 965 0.00E+00 1144.4  
 29159 cellular  
 organisms;Eukaryota;Opisthokonta;Metazoa;Eumetazoa;Bilateria;Protostomia;  
 Spiralia;Lophotrochozoa;Mollusca;Bivalvia;Autobranchia;Pteriormorphia;Ostr  
 eida;Ostreoidea;Ostreidae;Crassostrea;Crassostrea gigas

UdeM00000034284 6596 237.3 UdeM00000034284 XP\_045207983.1 62.5 192  
 69 2 1 192 16 204 6.10E-59 237.3 6596 cellular  
 organisms;Eukaryota;Opisthokonta;Metazoa;Eumetazoa;Bilateria;Protostomia;  
 Spiralia;Lophotrochozoa;Mollusca;Bivalvia;Autobranchia;Heteroconchia;Euhe  
 terodonta;Imparidentia;Venerida;Veneroidea;Veneridae;Mercenaria;Mercenari  
 a mercenaria

UdeM00000034285 6596 375.6 UdeM00000034285 XP\_045208652.1 68.1 301  
 90 4 1 297 1 299 6.00E-101 375.6 6596 cellular  
 organisms;Eukaryota;Opisthokonta;Metazoa;Eumetazoa;Bilateria;Protostomia;  
 Spiralia;Lophotrochozoa;Mollusca;Bivalvia;Autobranchia;Heteroconchia;Euhe  
 terodonta;Imparidentia;Venerida;Veneroidea;Veneridae;Mercenaria;Mercenari  
 a mercenaria

UdeM00000034291 6596 168.7 UdeM00000034291 XP\_045207153.1 46.2 171  
 80 5 4 174 33 191 1.00E-38 168.7 6596 cellular  
 organisms;Eukaryota;Opisthokonta;Metazoa;Eumetazoa;Bilateria;Protostomia;  
 Spiralia;Lophotrochozoa;Mollusca;Bivalvia;Autobranchia;Heteroconchia;Euhe  
 terodonta;Imparidentia;Venerida;Veneroidea;Veneridae;Mercenaria;Mercenari  
 a mercenaria

UdeM00000034290 6596 175.6 UdeM00000034290 XP\_045207153.1 45.4 185  
 89 5 10 194 19 191 8.90E-41 175.6 6596 cellular  
 organisms;Eukaryota;Opisthokonta;Metazoa;Eumetazoa;Bilateria;Protostomia;  
 Spiralia;Lophotrochozoa;Mollusca;Bivalvia;Autobranchia;Heteroconchia;Euhe  
 terodonta;Imparidentia;Venerida;Veneroidea;Veneridae;Mercenaria;Mercenari  
 a mercenaria

UdeM00000034292 6596 322 UdeM00000034292 XP\_045207150.1 45.5 719  
 333 13 10 719 6 674 2.00E-84 322 6596 cellular  
 organisms;Eukaryota;Opisthokonta;Metazoa;Eumetazoa;Bilateria;Protostomia;  
 Spiralia;Lophotrochozoa;Mollusca;Bivalvia;Autobranchia;Heteroconchia;Euhe  
 terodonta;Imparidentia;Venerida;Veneroidea;Veneridae;Mercenaria;Mercenari  
 a mercenaria

UdeM00000034293 6596 119 UdeM00000034293 XP\_045207189.1 72.9 70  
 19 0 1 70 412 481 2.70E-24 119 6596 cellular  
 organisms;Eukaryota;Opisthokonta;Metazoa;Eumetazoa;Bilateria;Protostomia;  
 Spiralia;Lophotrochozoa;Mollusca;Bivalvia;Autobranchia;Heteroconchia;Euhe  
 terodonta;Imparidentia;Venerida;Veneroidea;Veneridae;Mercenaria;Mercenari  
 a mercenaria

UdeM00000034294 6596 143.7 UdeM00000034294 XP\_045207189.1 46.2 156  
 81 1 9 164 116 268 2.10E-31 143.7 6596 cellular  
 organisms;Eukaryota;Opisthokonta;Metazoa;Eumetazoa;Bilateria;Protostomia;  
 Spiralia;Lophotrochozoa;Mollusca;Bivalvia;Autobranchia;Heteroconchia;Euhe  
 terodonta;Imparidentia;Venerida;Veneroidea;Veneridae;Mercenaria;Mercenari  
 a mercenaria

UdeM00000034295 50390 79.3 UdeM00000034295 XP\_028149250.1 33.1 172  
 104 6 1 169 58 221 5.20E-12 79.3 50390 cellular  
 organisms;Eukaryota;Opisthokonta;Metazoa;Eumetazoa;Bilateria;Protostomia;  
 Ecdysozoa;Panarthropoda;Arthropoda;Mandibulata;Pancrustacea;Hexapoda;Inse  
 cta;Dicondylia;Pterygota;Neoptera;Endopterygota;Coleoptera;Polyphaga;Cucu  
 jiformia;Chrysomeloidea;Chrysomelidae;Galerucinae;Luperini;Diabroticina;D  
 iabroticites;Diabrotica;Diabrotica virgifera;Diabrotica virgifera  
 virgifera

UdeM00000034296 6596 530 UdeM00000034296 XP\_045207189.1 54.8 487  
 212 4 68 551 51 532 3.50E-147 530 6596 cellular  
 organisms;Eukaryota;Opisthokonta;Metazoa;Eumetazoa;Bilateria;Protostomia;  
 Spiralia;Lophotrochozoa;Mollusca;Bivalvia;Autobranchia;Heteroconchia;Euhe  
 terodonta;Imparidentia;Venerida;Veneroidea;Veneridae;Mercenaria;Mercenari  
 a mercenaria

UdeM00000034297 6596 394.4 UdeM00000034297 XP\_045207189.1 51.8 398  
 186 3 60 456 51 443 2.00E-106 394.4 6596 cellular  
 organisms;Eukaryota;Opisthokonta;Metazoa;Eumetazoa;Bilateria;Protostomia;  
 Spiralia;Lophotrochozoa;Mollusca;Bivalvia;Autobranchia;Heteroconchia;Euhe  
 terodonta;Imparidentia;Venerida;Veneroidea;Veneridae;Mercenaria;Mercenari  
 a mercenaria

UdeM00000034298 6596 548.9 UdeM00000034298 XP\_045207189.1 55.9 490  
 210 3 39 527 51 535 7.10E-153 548.9 6596 cellular  
 organisms;Eukaryota;Opisthokonta;Metazoa;Eumetazoa;Bilateria;Protostomia;  
 Spiralia;Lophotrochozoa;Mollusca;Bivalvia;Autobranchia;Heteroconchia;Euhe  
 terodonta;Imparidentia;Venerida;Veneroidea;Veneridae;Mercenaria;Mercenari  
 a mercenaria

UdeM00000034299 1735272 369 UdeM00000034299 XP\_041372401.1 50.8  
 455 179 10 255 709 291 700 1.40E-98 369 1735272  
 cellular  
 organisms;Eukaryota;Opisthokonta;Metazoa;Eumetazoa;Bilateria;Protostomia;  
 Spiralia;Lophotrochozoa;Mollusca;Gastropoda;Neomphalina;Neomphaloidea;Pel  
 tospiridae;Gigantopelta;Gigantopelta aegis

UdeM00000034300 29159 145.6 UdeM00000034300 XP\_034311318.1 48.6 142  
 69 3 13 151 1 141 5.80E-32 145.6 29159 cellular  
 organisms;Eukaryota;Opisthokonta;Metazoa;Eumetazoa;Bilateria;Protostomia;  
 Spiralia;Lophotrochozoa;Mollusca;Bivalvia;Autobranchia;Pteriomorphia;Ostr  
 eida;Ostreoidea;Ostreidae;Crassostrea;Crassostrea gigas

UdeM00000034301 29159 133.7 UdeM00000034301 XP\_034311318.1 51.2 127  
 58 2 1 125 167 291 1.80E-28 133.7 29159 cellular  
 organisms;Eukaryota;Opisthokonta;Metazoa;Eumetazoa;Bilateria;Protostomia;  
 Spiralia;Lophotrochozoa;Mollusca;Bivalvia;Autobranchia;Pteriomorphia;Ostr  
 eida;Ostreoidea;Ostreidae;Crassostrea;Crassostrea gigas

UdeM00000034302 29159 98.2 UdeM00000034302 XP\_034311318.1 53.8 91  
 40 1 1 91 322 410 6.00E-18 98.2 29159 cellular  
 organisms;Eukaryota;Opisthokonta;Metazoa;Eumetazoa;Bilateria;Protostomia;  
 Spiralia;Lophotrochozoa;Mollusca;Bivalvia;Autobranchia;Pteriormorphia;Ostr  
 eida;Ostreoidea;Ostreidae;Crassostrea;Crassostrea gigas  
 UdeM00000034303 6596 80.9 UdeM00000034303 XP\_045206295.1 29.3 208  
 123 5 3 196 539 736 2.70E-12 80.9 6596 cellular  
 organisms;Eukaryota;Opisthokonta;Metazoa;Eumetazoa;Bilateria;Protostomia;  
 Spiralia;Lophotrochozoa;Mollusca;Bivalvia;Autobranchia;Heteroconchia;Euhe  
 terodonta;Imparidentia;Venerida;Veneroidea;Veneridae;Mercenaria;Mercenari  
 a mercenaria  
 UdeM00000034304 6579 70.9 UdeM00000034304 XP\_033736448.1 38.8 85  
 50 1 5 87 10 94 3.40E-09 70.9 6579 cellular  
 organisms;Eukaryota;Opisthokonta;Metazoa;Eumetazoa;Bilateria;Protostomia;  
 Spiralia;Lophotrochozoa;Mollusca;Bivalvia;Autobranchia;Pteriormorphia;Pect  
 inida;Pectinoidea;Pectinidae;Pecten;Pecten maximus  
 UdeM00000034305 6596 632.9 UdeM00000034305 XP\_045209776.1 70.1 435  
 129 1 1 434 1 435 3.10E-178 632.9 6596 cellular  
 organisms;Eukaryota;Opisthokonta;Metazoa;Eumetazoa;Bilateria;Protostomia;  
 Spiralia;Lophotrochozoa;Mollusca;Bivalvia;Autobranchia;Heteroconchia;Euhe  
 terodonta;Imparidentia;Venerida;Veneroidea;Veneridae;Mercenaria;Mercenari  
 a mercenaria  
 UdeM00000034306 6596 629.4 UdeM00000034306 XP\_045209776.1 70.5 430  
 126 1 1 429 6 435 3.30E-177 629.4 6596 cellular  
 organisms;Eukaryota;Opisthokonta;Metazoa;Eumetazoa;Bilateria;Protostomia;  
 Spiralia;Lophotrochozoa;Mollusca;Bivalvia;Autobranchia;Heteroconchia;Euhe  
 terodonta;Imparidentia;Venerida;Veneroidea;Veneridae;Mercenaria;Mercenari  
 a mercenaria  
 UdeM00000034308 1735272 156.8 UdeM00000034308 XP\_041357032.1 53.1  
 145 63 3 1 140 38 182 2.20E-35 156.8 1735272  
 cellular  
 organisms;Eukaryota;Opisthokonta;Metazoa;Eumetazoa;Bilateria;Protostomia;  
 Spiralia;Lophotrochozoa;Mollusca;Gastropoda;Neomphalina;Neomphaloidea;Pel  
 tospiridae;Gigantopelta;Gigantopelta aegis  
 UdeM00000034309 6596 94.4 UdeM00000034309 XP\_045180326.1 47.6 103  
 49 1 34 136 62 159 1.40E-16 94.4 6596 cellular  
 organisms;Eukaryota;Opisthokonta;Metazoa;Eumetazoa;Bilateria;Protostomia;  
 Spiralia;Lophotrochozoa;Mollusca;Bivalvia;Autobranchia;Heteroconchia;Euhe  
 terodonta;Imparidentia;Venerida;Veneroidea;Veneridae;Mercenaria;Mercenari  
 a mercenaria  
 UdeM00000034311 6596 1054.3 UdeM00000034311 XP\_045210469.1 50.8  
 1011 416 5 3 933 71 1080 9.10E-305 1054.3 6596  
 cellular  
 organisms;Eukaryota;Opisthokonta;Metazoa;Eumetazoa;Bilateria;Protostomia;  
 Spiralia;Lophotrochozoa;Mollusca;Bivalvia;Autobranchia;Heteroconchia;Euhe  
 terodonta;Imparidentia;Venerida;Veneroidea;Veneridae;Mercenaria;Mercenari  
 a mercenaria  
 UdeM00000034312 6579 1016.1 UdeM00000034312 XP\_033724877.1 79.6  
 587 96 1 15 577 45 631 1.80E-293 1016.1 6579  
 cellular  
 organisms;Eukaryota;Opisthokonta;Metazoa;Eumetazoa;Bilateria;Protostomia;  
 Spiralia;Lophotrochozoa;Mollusca;Bivalvia;Autobranchia;Pteriormorphia;Pect  
 inida;Pectinoidea;Pectinidae;Pecten;Pecten maximus

UdeM00000034313 6500 262.3 UdeM00000034313 XP\_005099787.2 50 264  
 125 4 222 482 63 322 1.20E-66 262.3 6500 cellular  
 organisms;Eukaryota;Opisthokonta;Metazoa;Eumetazoa;Bilateria;Protostomia;  
 Spiralia;Lophotrochozoa;Mollusca;Gastropoda;Heterobranchia;Euthyneura;Tec  
 tipleura;Aplysiida;Aplysioidea;Aplysiidae;Aplysia;Aplysia californica  
 UdeM00000034314 37621 201.1 UdeM00000034314 XP\_014679850.1 51.7 207  
 89 4 1 199 1 204 1.40E-48 201.1 37621 cellular  
 organisms;Eukaryota;Opisthokonta;Metazoa;Eumetazoa;Bilateria;Protostomia;  
 Ecdysozoa;Scalidophora;Priapulida;Priapulimorpha;Priapulimorphida;Priapul  
 idae;Priapulus;Priapulus caudatus  
 UdeM00000034315 37621 334.3 UdeM00000034315 XP\_014679849.1 53.9 282  
 117 4 4 273 343 623 1.40E-88 334.3 37621 cellular  
 organisms;Eukaryota;Opisthokonta;Metazoa;Eumetazoa;Bilateria;Protostomia;  
 Ecdysozoa;Scalidophora;Priapulida;Priapulimorpha;Priapulimorphida;Priapul  
 idae;Priapulus;Priapulus caudatus  
 UdeM00000034316 29159 66.6 UdeM00000034316 XP\_034315424.1 35.4 130  
 73 4 12 134 213 338 2.90E-08 66.6 29159 cellular  
 organisms;Eukaryota;Opisthokonta;Metazoa;Eumetazoa;Bilateria;Protostomia;  
 Spiralia;Lophotrochozoa;Mollusca;Bivalvia;Autobranchia;Pteriomorpha;Ostr  
 eida;Ostreoidea;Ostreidae;Crassostrea;Crassostrea gigas  
 UdeM00000034318 6596 152.1 UdeM00000034318 XP\_045207280.1 53.3 137  
 64 0 2 138 188 324 6.20E-34 152.1 6596 cellular  
 organisms;Eukaryota;Opisthokonta;Metazoa;Eumetazoa;Bilateria;Protostomia;  
 Spiralia;Lophotrochozoa;Mollusca;Bivalvia;Autobranchia;Heteroconchia;Euhe  
 terodonta;Imparidentia;Venerida;Veneroidea;Veneridae;Mercenaria;Mercenari  
 a mercenaria  
 UdeM00000034319 7604 94 UdeM00000034319 XP\_033628627.1 52.9 85  
 39 1 35 119 504 587 1.50E-16 94 7604 cellular  
 organisms;Eukaryota;Opisthokonta;Metazoa;Eumetazoa;Bilateria;Deuterostomi  
 a;Echinodermata;Eleutherozoa;Asterozoa;Asteroidea;Forcipulatacea;Forcipul  
 atida;Asteroidea;Asteroidea;Asterias;Asterias rubens  
 UdeM00000034320 6579 186 UdeM00000034320 XP\_033761495.1 74.8 119  
 24 1 25 143 164 276 7.30E-44 186 6579 cellular  
 organisms;Eukaryota;Opisthokonta;Metazoa;Eumetazoa;Bilateria;Protostomia;  
 Spiralia;Lophotrochozoa;Mollusca;Bivalvia;Autobranchia;Pteriomorpha;Pect  
 inida;Pectinoidea;Pectinidae;Pecten;Pecten maximus  
 UdeM00000034321 70779 108.2 UdeM00000034321 XP\_015759403.1 31.3 243  
 97 5 277 460 145 376 2.80E-20 108.2 70779 cellular  
 organisms;Eukaryota;Opisthokonta;Metazoa;Eumetazoa;Cnidaria;Anthozoa;Hexa  
 corallia;Scleractinia;Astrocoeniina;Acroporidae;Acropora;Acropora  
 digitifera  
 UdeM00000034323 6596 188 UdeM00000034323 XP\_045185473.1 20.8 1507  
 992 42 162 1582 4 1395 1.20E-43 188 6596 cellular  
 organisms;Eukaryota;Opisthokonta;Metazoa;Eumetazoa;Bilateria;Protostomia;  
 Spiralia;Lophotrochozoa;Mollusca;Bivalvia;Autobranchia;Heteroconchia;Euhe  
 terodonta;Imparidentia;Venerida;Veneroidea;Veneridae;Mercenaria;Mercenari  
 a mercenaria  
 UdeM00000000267 6596 391.3 UdeM00000000267 XP\_045168006.1 73.1 245  
 65 1 1 245 107 350 8.80E-106 391.3 6596 cellular  
 organisms;Eukaryota;Opisthokonta;Metazoa;Eumetazoa;Bilateria;Protostomia;  
 Spiralia;Lophotrochozoa;Mollusca;Bivalvia;Autobranchia;Heteroconchia;Euhe  
 terodonta;Imparidentia;Venerida;Veneroidea;Veneridae;Mercenaria;Mercenari  
 a mercenaria

UdeM00000000268 6579 448.4 UdeM00000000268 XP\_033762641.1 55.1 405  
 170 4 37 439 6 400 1.10E-122 448.4 6579 cellular  
 organisms;Eukaryota;Opisthokonta;Metazoa;Eumetazoa;Bilateria;Protostomia;  
 Spiralia;Lophotrochozoa;Mollusca;Bivalvia;Autobranchia;Pteriormorphia;Pect  
 inida;Pectinoidea;Pectinidae;Pecten;Pecten maximus  
 UdeM00000000269 6579 439.1 UdeM00000000269 XP\_033762641.1 53.6 414  
 171 5 37 448 6 400 6.70E-120 439.1 6579 cellular  
 organisms;Eukaryota;Opisthokonta;Metazoa;Eumetazoa;Bilateria;Protostomia;  
 Spiralia;Lophotrochozoa;Mollusca;Bivalvia;Autobranchia;Pteriormorphia;Pect  
 inida;Pectinoidea;Pectinidae;Pecten;Pecten maximus  
 UdeM00000000270 8005 569.7 UdeM00000000270 XP\_035380990.1 48.8 627  
 292 7 1 608 29 645 5.40E-159 569.7 8005 cellular  
 organisms;Eukaryota;Opisthokonta;Metazoa;Eumetazoa;Bilateria;Deuterostomi  
 a;Chordata;Craniata;Vertebrata;Gnathostomata;Teleostomi;Euteleostomi;Acti  
 nopterygii;Actinopteri;Neopterygii;Teleostei;Osteoglossocephalai;Clupeoce  
 phala;Otomorpha;Ostariophysi;Otophysi;Characiphysae;Gymnotiformes;Gymnoto  
 idei;Gymnotidae;Electrophorus;Electrophorus electricus  
 UdeM00000000271 1735272 357.8 UdeM00000000271 XP\_041366148.1 61.7  
 266 99 1 1 263 78 343 1.20E-95 357.8 1735272  
 cellular  
 organisms;Eukaryota;Opisthokonta;Metazoa;Eumetazoa;Bilateria;Protostomia;  
 Spiralia;Lophotrochozoa;Mollusca;Gastropoda;Neomphalina;Neomphaloidea;Pel  
 tospiridae;Gigantopelta;Gigantopelta aegis  
 UdeM00000000272 7739 357.5 UdeM00000000272 XP\_035696678.1 36.4 569  
 195 2 1 402 335 903 2.50E-95 357.5 7739 cellular  
 organisms;Eukaryota;Opisthokonta;Metazoa;Eumetazoa;Bilateria;Deuterostomi  
 a;Chordata;Cephalochordata;Leptocardii;Amphioxiformes;Branchiostomidae;Br  
 anchiostoma;Branchiostoma floridae  
 UdeM00000000273 6596 260.4 UdeM00000000273 XP\_045180379.1 68.6 175  
 55 0 1 175 1 175 1.70E-66 260.4 6596 cellular  
 organisms;Eukaryota;Opisthokonta;Metazoa;Eumetazoa;Bilateria;Protostomia;  
 Spiralia;Lophotrochozoa;Mollusca;Bivalvia;Autobranchia;Heteroconchia;Euhe  
 terodonta;Imparidentia;Venerida;Veneroidea;Veneridae;Mercenaria;Mercenari  
 a mercenaria  
 UdeM00000000274 6596 702.2 UdeM00000000274 XP\_045168651.1 64.2 567  
 202 1 435 1001 47 612 9.50E-199 702.2 6596 cellular  
 organisms;Eukaryota;Opisthokonta;Metazoa;Eumetazoa;Bilateria;Protostomia;  
 Spiralia;Lophotrochozoa;Mollusca;Bivalvia;Autobranchia;Heteroconchia;Euhe  
 terodonta;Imparidentia;Venerida;Veneroidea;Veneridae;Mercenaria;Mercenari  
 a mercenaria  
 UdeM00000000275 7574 152.5 UdeM00000000275 XP\_013396733.1 43.2 206  
 115 2 67 270 43 248 7.50E-34 152.5 7574 cellular  
 organisms;Eukaryota;Opisthokonta;Metazoa;Eumetazoa;Bilateria;Protostomia;  
 Spiralia;Lophotrochozoa;Brachiopoda;Linguliformea;Lingulata;Lingulida;Lin  
 guloidea;Lingulidae;Lingula;Lingula anatina  
 UdeM00000000278 6596 86.7 UdeM00000000278 XP\_045170040.1 32.2 199  
 106 8 10 205 8 180 3.90E-14 86.7 6596 cellular  
 organisms;Eukaryota;Opisthokonta;Metazoa;Eumetazoa;Bilateria;Protostomia;  
 Spiralia;Lophotrochozoa;Mollusca;Bivalvia;Autobranchia;Heteroconchia;Euhe  
 terodonta;Imparidentia;Venerida;Veneroidea;Veneridae;Mercenaria;Mercenari  
 a mercenaria  
 UdeM00000000279 6596 234.6 UdeM00000000279 XP\_045167421.1 46.5 256  
 120 4 49 289 59 312 5.00E-58 234.6 6596 cellular  
 organisms;Eukaryota;Opisthokonta;Metazoa;Eumetazoa;Bilateria;Protostomia;

Spiralia;Lophotrochozoa;Mollusca;Bivalvia;Autobranchia;Heteroconchia;Euherodonta;Imparidentia;Venerida;Veneroidea;Veneridae;Mercenaria;Mercenaria mercenaria

UdeM00000000280 6596 346.3 UdeM00000000280 XP\_045167418.1 51.6 341  
135 2 43 353 347 687 4.80E-92 346.3 6596 cellular

organisms;Eukaryota;Opisthokonta;Metazoa;Eumetazoa;Bilateria;Protostomia;Spiralia;Lophotrochozoa;Mollusca;Bivalvia;Autobranchia;Heteroconchia;Euherodonta;Imparidentia;Venerida;Veneroidea;Veneridae;Mercenaria;Mercenaria mercenaria

UdeM00000000281 1735272 542 UdeM00000000281 XP\_041365615.1 61.3  
401 153 2 1 401 2 400 6.60E-151 542 1735272  
cellular

organisms;Eukaryota;Opisthokonta;Metazoa;Eumetazoa;Bilateria;Protostomia;Spiralia;Lophotrochozoa;Mollusca;Gastropoda;Neomphalina;Neomphaloidea;Peltospiridae;Gigantopelta;Gigantopelta aegis

UdeM00000000282 1735272 77.8 UdeM00000000282 XP\_041349428.1 41.2  
97 48 1 23 110 136 232 9.90E-12 77.8 1735272  
cellular

organisms;Eukaryota;Opisthokonta;Metazoa;Eumetazoa;Bilateria;Protostomia;Spiralia;Lophotrochozoa;Mollusca;Gastropoda;Neomphalina;Neomphaloidea;Peltospiridae;Gigantopelta;Gigantopelta aegis

UdeM00000000283 6596 275.4 UdeM00000000283 XP\_045168190.1 70.6 177  
52 0 4 180 5 181 5.20E-71 275.4 6596 cellular

organisms;Eukaryota;Opisthokonta;Metazoa;Eumetazoa;Bilateria;Protostomia;Spiralia;Lophotrochozoa;Mollusca;Bivalvia;Autobranchia;Heteroconchia;Euherodonta;Imparidentia;Venerida;Veneroidea;Veneridae;Mercenaria;Mercenaria mercenaria

UdeM00000000286 6596 637.5 UdeM00000000286 XP\_045170379.1 64.2 508  
169 5 34 533 21 523 1.50E-179 637.5 6596 cellular

organisms;Eukaryota;Opisthokonta;Metazoa;Eumetazoa;Bilateria;Protostomia;Spiralia;Lophotrochozoa;Mollusca;Bivalvia;Autobranchia;Heteroconchia;Euherodonta;Imparidentia;Venerida;Veneroidea;Veneridae;Mercenaria;Mercenaria mercenaria

UdeM00000000287 6579 353.2 UdeM00000000287 XP\_033761881.1 50.2 426  
183 10 1 410 1 413 2.30E-93 353.2 6579 cellular

organisms;Eukaryota;Opisthokonta;Metazoa;Eumetazoa;Bilateria;Protostomia;Spiralia;Lophotrochozoa;Mollusca;Bivalvia;Autobranchia;Pteriomorphia;Pectinida;Pectinoidea;Pectinidae;Pecten;Pecten maximus

UdeM00000000288 6573 421.4 UdeM00000000288 XP\_021376345.1 54.6 370  
161 3 1 366 1 367 1.30E-114 421.4 6573 cellular

organisms;Eukaryota;Opisthokonta;Metazoa;Eumetazoa;Bilateria;Protostomia;Spiralia;Lophotrochozoa;Mollusca;Bivalvia;Autobranchia;Pteriomorphia;Pectinida;Pectinoidea;Pectinidae;Mizuhopecten;Mizuhopecten yessoensis

UdeM00000000289 6579 790.8 UdeM00000000289 XP\_033762188.1 78.9 465  
98 0 1 465 1 465 9.50E-226 790.8 6579 cellular

organisms;Eukaryota;Opisthokonta;Metazoa;Eumetazoa;Bilateria;Protostomia;Spiralia;Lophotrochozoa;Mollusca;Bivalvia;Autobranchia;Pteriomorphia;Pectinida;Pectinoidea;Pectinidae;Pecten;Pecten maximus

UdeM00000000290 6596 419.1 UdeM00000000290 XP\_045168429.1 65.7 350  
99 5 2 340 98 437 8.60E-114 419.1 6596 cellular

organisms;Eukaryota;Opisthokonta;Metazoa;Eumetazoa;Bilateria;Protostomia;Spiralia;Lophotrochozoa;Mollusca;Bivalvia;Autobranchia;Heteroconchia;Euherodonta;Imparidentia;Venerida;Veneroidea;Veneridae;Mercenaria;Mercenaria mercenaria



UdeM00000000291 6596 466.1 UdeM00000000291 XP\_045168431.1 64.1 384  
 121 7 27 408 31 399 7.40E-128 466.1 6596 cellular  
 organisms;Eukaryota;Opisthokonta;Metazoa;Eumetazoa;Bilateria;Protostomia;  
 Spiralia;Lophotrochozoa;Mollusca;Bivalvia;Autobranchia;Heteroconchia;Euhe  
 terodonta;Imparidentia;Venerida;Veneroidea;Veneridae;Mercenaria;Mercenari  
 a mercenaria  
 UdeM00000000293 7888 149.8 UdeM00000000293 XP\_043916349.1 58.1 124  
 52 0 64 187 413 536 3.40E-33 149.8 7888 cellular  
 organisms;Eukaryota;Opisthokonta;Metazoa;Eumetazoa;Bilateria;Deuterostomi  
 a;Chordata;Craniata;Vertebrata;Gnathostomata;Teleostomi;Euteleostomi;Sarc  
 opterygii;Dipnotetrapodomorpha;Dipnomorpha;Ceratodontae;Ceratodontiformes  
 ;Lepidosirenoidei;Protopteridae;Protopterus;Protopterus annectens  
 UdeM00000000297 6596 94 UdeM00000000297 XP\_045167967.1 38.2 136  
 74 3 39 174 57 182 2.10E-16 94 6596 cellular  
 organisms;Eukaryota;Opisthokonta;Metazoa;Eumetazoa;Bilateria;Protostomia;  
 Spiralia;Lophotrochozoa;Mollusca;Bivalvia;Autobranchia;Heteroconchia;Euhe  
 terodonta;Imparidentia;Venerida;Veneroidea;Veneridae;Mercenaria;Mercenari  
 a mercenaria  
 UdeM00000000300 6596 138.3 UdeM00000000300 XP\_045169969.1 43.6 243  
 122 5 1 238 1 233 1.30E-29 138.3 6596 cellular  
 organisms;Eukaryota;Opisthokonta;Metazoa;Eumetazoa;Bilateria;Protostomia;  
 Spiralia;Lophotrochozoa;Mollusca;Bivalvia;Autobranchia;Heteroconchia;Euhe  
 terodonta;Imparidentia;Venerida;Veneroidea;Veneridae;Mercenaria;Mercenari  
 a mercenaria  
 UdeM00000000301 6596 212.2 UdeM00000000301 XP\_045168681.1 36.3 267  
 168 2 457 722 605 870 2.20E-51 212.2 6596 cellular  
 organisms;Eukaryota;Opisthokonta;Metazoa;Eumetazoa;Bilateria;Protostomia;  
 Spiralia;Lophotrochozoa;Mollusca;Bivalvia;Autobranchia;Heteroconchia;Euhe  
 terodonta;Imparidentia;Venerida;Veneroidea;Veneridae;Mercenaria;Mercenari  
 a mercenaria  
 UdeM00000000302 6565 182.6 UdeM00000000302 XP\_022305129.1 36.5 345  
 203 4 1 334 1 340 9.60E-43 182.6 6565 cellular  
 organisms;Eukaryota;Opisthokonta;Metazoa;Eumetazoa;Bilateria;Protostomia;  
 Spiralia;Lophotrochozoa;Mollusca;Bivalvia;Autobranchia;Pteriormorphia;Ostr  
 eida;Ostreoidea;Ostreidae;Crassostrea;Crassostrea virginica  
 UdeM00000000303 6573 245 UdeM00000000303 XP\_021356369.1 42.4 403  
 190 8 1089 1467 6127 6511 6.10E-61 245 6573 cellular  
 organisms;Eukaryota;Opisthokonta;Metazoa;Eumetazoa;Bilateria;Protostomia;  
 Spiralia;Lophotrochozoa;Mollusca;Bivalvia;Autobranchia;Pteriormorphia;Pect  
 inida;Pectinoidea;Pectinidae;Mizuhopecten;Mizuhopecten yessoensis  
 UdeM00000000304 6573 245 UdeM00000000304 XP\_021356369.1 42.4 403  
 190 8 104 482 6127 6511 2.00E-61 245 6573 cellular  
 organisms;Eukaryota;Opisthokonta;Metazoa;Eumetazoa;Bilateria;Protostomia;  
 Spiralia;Lophotrochozoa;Mollusca;Bivalvia;Autobranchia;Pteriormorphia;Pect  
 inida;Pectinoidea;Pectinidae;Mizuhopecten;Mizuhopecten yessoensis  
 UdeM00000000305 6596 624 UdeM00000000305 XP\_045167922.1 46 1381  
 646 23 1599 2928 2 1333 9.60E-175 624 6596 cellular  
 organisms;Eukaryota;Opisthokonta;Metazoa;Eumetazoa;Bilateria;Protostomia;  
 Spiralia;Lophotrochozoa;Mollusca;Bivalvia;Autobranchia;Heteroconchia;Euhe  
 terodonta;Imparidentia;Venerida;Veneroidea;Veneridae;Mercenaria;Mercenari  
 a mercenaria  
 UdeM00000000306 6596 636.3 UdeM00000000306 XP\_045167913.1 49.2 1186  
 534 20 1795 2939 352 1510 1.90E-178 636.3 6596 cellular  
 organisms;Eukaryota;Opisthokonta;Metazoa;Eumetazoa;Bilateria;Protostomia;

Spiralia;Lophotrochozoa;Mollusca;Bivalvia;Autobranchia;Heteroconchia;Euherodonta;Imparidentia;Venerida;Veneroidea;Veneridae;Mercenaria;Mercenaria mercenaria

UdeM00000000307 29159 67.4 UdeM00000000307 XP\_034310663.1 43.7 71  
40 0 11 81 4 74 1.20E-08 67.4 29159 cellular

organisms;Eukaryota;Opisthokonta;Metazoa;Eumetazoa;Bilateria;Protostomia;Spiralia;Lophotrochozoa;Mollusca;Bivalvia;Autobranchia;Pteriormorphia;Ostreida;Ostreoidea;Ostreidae;Crassostrea;Crassostrea gigas

UdeM00000000308 2607531 109.8 UdeM00000000308 XP\_029633614.1 52.8  
89 41 1 1 88 1 89 1.90E-21 109.8 2607531  
cellular

organisms;Eukaryota;Opisthokonta;Metazoa;Eumetazoa;Bilateria;Protostomia;Spiralia;Lophotrochozoa;Mollusca;Cephalopoda;Coleoidea;Octopodiformes;Octopoda;Incirrata;Octopodidae;Octopus;Octopus sinensis

UdeM00000000310 34632 94 UdeM00000000310 XP\_037515180.1 38.4 125  
77 0 6 130 269 393 1.60E-16 94 34632 cellular

organisms;Eukaryota;Opisthokonta;Metazoa;Eumetazoa;Bilateria;Protostomia;Ecdysozoa;Panarthropoda;Arthropoda;Chelicerata;Arachnida;Acari;Parasitiformes;Ixodida;Ixodoidea;Ixodidae;Rhipicephalinae;Rhipicephalus;Rhipicephalus;Rhipicephalus sanguineus group;Rhipicephalus sanguineus

UdeM00000000311 37621 183 UdeM00000000311 XP\_014676995.1 58.3 139  
57 1 1 139 1 138 2.70E-43 183 37621 cellular

organisms;Eukaryota;Opisthokonta;Metazoa;Eumetazoa;Bilateria;Protostomia;Ecdysozoa;Scalidophora;Priapulida;Priapulimorpha;Priapulimorphida;Priapulidae;Priapululus;Priapululus caudatus

UdeM00000000312 6596 558.5 UdeM00000000312 XP\_045214662.1 40.9 743  
395 16 12 725 50 777 1.20E-155 558.5 6596 cellular

organisms;Eukaryota;Opisthokonta;Metazoa;Eumetazoa;Bilateria;Protostomia;Spiralia;Lophotrochozoa;Mollusca;Bivalvia;Autobranchia;Heteroconchia;Euherodonta;Imparidentia;Venerida;Veneroidea;Veneridae;Mercenaria;Mercenaria mercenaria

UdeM00000000313 6596 314.7 UdeM00000000313 XP\_045214662.1 42.7 398  
203 7 2 383 389 777 1.60E-82 314.7 6596 cellular

organisms;Eukaryota;Opisthokonta;Metazoa;Eumetazoa;Bilateria;Protostomia;Spiralia;Lophotrochozoa;Mollusca;Bivalvia;Autobranchia;Heteroconchia;Euherodonta;Imparidentia;Venerida;Veneroidea;Veneridae;Mercenaria;Mercenaria mercenaria

UdeM00000000315 7668 73.9 UdeM00000000315 XP\_030841875.1 48.4 64  
32 1 3 66 71 133 1.40E-10 73.9 7668 cellular

organisms;Eukaryota;Opisthokonta;Metazoa;Eumetazoa;Bilateria;Deuterostomia;Echinodermata;Eleutherozoa;Echinozoa;Echinoidea;Euechinoidea;Echinacea;Camarodonta;Echinidea;Strongylocentrotidae;Strongylocentrotus;Strongylocentrotus purpuratus

UdeM00000000316 225164 94 UdeM00000000316 XP\_009052182.1 45  
100 49 2 16 114 132 226 1.40E-16 94 225164  
cellular

organisms;Eukaryota;Opisthokonta;Metazoa;Eumetazoa;Bilateria;Protostomia;Spiralia;Lophotrochozoa;Mollusca;Gastropoda;Patellogastropoda;Lottioida;Lottiidae;Lottia;Lottia gigantea

UdeM00000000317 29159 156.8 UdeM00000000317 XP\_034309946.1 54.5 176  
67 3 382 548 5323 5494 9.00E-35 156.8 29159 cellular

organisms;Eukaryota;Opisthokonta;Metazoa;Eumetazoa;Bilateria;Protostomia;Spiralia;Lophotrochozoa;Mollusca;Bivalvia;Autobranchia;Pteriormorphia;Ostreida;Ostreoidea;Ostreidae;Crassostrea;Crassostrea gigas

UdeM00000000318 6596 1018.5 UdeM00000000318 XP\_045214662.1 45.2  
1277 627 28 11 1234 11 1267 7.30E-294 1018.5 6596  
cellular

organisms;Eukaryota;Opisthokonta;Metazoa;Eumetazoa;Bilateria;Protostomia;  
Spiralia;Lophotrochozoa;Mollusca;Bivalvia;Autobranchia;Heteroconchia;Euhe  
terodonta;Imparidentia;Venerida;Veneroidea;Veneridae;Mercenaria;Mercenari  
a mercenaria

UdeM00000000319 6706 146 UdeM00000000319 XP\_042235765.1 43.9 157  
88 0 1 157 1 157 4.20E-32 146 6706 cellular

organisms;Eukaryota;Opisthokonta;Metazoa;Eumetazoa;Bilateria;Protostomia;  
Ecdysozoa;Panarthropoda;Arthropoda;Mandibulata;Pancrustacea;Crustacea;Mul  
ticrustacea;Malacostraca;Eumalacostraca;Eucarida;Decapoda;Pleocyemata;Ast  
acidea;Nephropoidea;Nephropidae;Homarus;Homarus americanus

UdeM00000000320 72036 264.6 UdeM00000000320 XP\_040576246.1 45.8 297  
155 3 3 297 1 293 1.50E-67 264.6 72036 cellular

organisms;Eukaryota;Opisthokonta;Metazoa;Eumetazoa;Bilateria;Protostomia;  
Ecdysozoa;Panarthropoda;Arthropoda;Mandibulata;Pancrustacea;Crustacea;Mul  
ticrustacea;Hexanauplia;Copepoda;Neocopepoda;Podoplea;Siphonostomatoida;C  
aligidae;Lepeophtheirus;Lepeophtheirus salmonis

UdeM00000000322 6579 111.7 UdeM00000000322 XP\_033761790.1 26.7 300  
166 8 14 268 154 444 2.00E-21 111.7 6579 cellular

organisms;Eukaryota;Opisthokonta;Metazoa;Eumetazoa;Bilateria;Protostomia;  
Spiralia;Lophotrochozoa;Mollusca;Bivalvia;Autobranchia;Pteriormorphia;Pect  
inida;Pectinoidea;Pectinidae;Pecten;Pecten maximus

UdeM00000000323 6596 138.7 UdeM00000000323 XP\_045168928.1 38.5 213  
123 4 111 317 640 850 1.40E-29 138.7 6596 cellular

organisms;Eukaryota;Opisthokonta;Metazoa;Eumetazoa;Bilateria;Protostomia;  
Spiralia;Lophotrochozoa;Mollusca;Bivalvia;Autobranchia;Heteroconchia;Euhe  
terodonta;Imparidentia;Venerida;Veneroidea;Veneridae;Mercenaria;Mercenari  
a mercenaria

UdeM00000000324 6596 104.8 UdeM00000000324 XP\_045214662.1 67.9 78  
21 2 1 78 1107 1180 5.30E-20 104.8 6596 cellular

organisms;Eukaryota;Opisthokonta;Metazoa;Eumetazoa;Bilateria;Protostomia;  
Spiralia;Lophotrochozoa;Mollusca;Bivalvia;Autobranchia;Heteroconchia;Euhe  
terodonta;Imparidentia;Venerida;Veneroidea;Veneridae;Mercenaria;Mercenari  
a mercenaria

UdeM00000000325 6596 147.9 UdeM00000000325 XP\_045214662.1 57.9 121  
51 0 1 121 972 1092 8.40E-33 147.9 6596 cellular

organisms;Eukaryota;Opisthokonta;Metazoa;Eumetazoa;Bilateria;Protostomia;  
Spiralia;Lophotrochozoa;Mollusca;Bivalvia;Autobranchia;Heteroconchia;Euhe  
terodonta;Imparidentia;Venerida;Veneroidea;Veneridae;Mercenaria;Mercenari  
a mercenaria

UdeM00000000327 6596 237.7 UdeM00000000327 XP\_045214662.1 39.5 347  
185 7 1 331 415 752 2.20E-59 237.7 6596 cellular

organisms;Eukaryota;Opisthokonta;Metazoa;Eumetazoa;Bilateria;Protostomia;  
Spiralia;Lophotrochozoa;Mollusca;Bivalvia;Autobranchia;Heteroconchia;Euhe  
terodonta;Imparidentia;Venerida;Veneroidea;Veneridae;Mercenaria;Mercenari  
a mercenaria

UdeM00000000328 6596 1008.4 UdeM00000000328 XP\_045214662.1 45.2  
1278 585 27 11 1194 11 1267 7.40E-291 1008.4 6596  
cellular

organisms;Eukaryota;Opisthokonta;Metazoa;Eumetazoa;Bilateria;Protostomia;  
Spiralia;Lophotrochozoa;Mollusca;Bivalvia;Autobranchia;Heteroconchia;Euhe

terodonta;Imparidentia;Venerida;Veneroidea;Veneridae;Mercenaria;Mercenaria mercenaria

UdeM00000000329 6596 693.7 UdeM00000000329 XP\_045169298.1 43.9 852  
438 17 26 855 25 858 2.90E-196 693.7 6596 cellular

organisms;Eukaryota;Opisthokonta;Metazoa;Eumetazoa;Bilateria;Protostomia;Spiralia;Lophotrochozoa;Mollusca;Bivalvia;Autobranchia;Heteroconchia;Euherodonta;Imparidentia;Venerida;Veneroidea;Veneridae;Mercenaria;Mercenaria mercenaria

UdeM00000000330 6596 84.3 UdeM00000000330 XP\_045211012.1 44.4 90  
49 1 10 98 321 410 9.40E-14 84.3 6596 cellular

organisms;Eukaryota;Opisthokonta;Metazoa;Eumetazoa;Bilateria;Protostomia;Spiralia;Lophotrochozoa;Mollusca;Bivalvia;Autobranchia;Heteroconchia;Euherodonta;Imparidentia;Venerida;Veneroidea;Veneridae;Mercenaria;Mercenaria mercenaria

UdeM00000000331 6596 1077 UdeM00000000331 XP\_045168803.1 48.2 1142  
548 15 30 1143 107 1233 0.00E+00 1077 6596 cellular

organisms;Eukaryota;Opisthokonta;Metazoa;Eumetazoa;Bilateria;Protostomia;Spiralia;Lophotrochozoa;Mollusca;Bivalvia;Autobranchia;Heteroconchia;Euherodonta;Imparidentia;Venerida;Veneroidea;Veneridae;Mercenaria;Mercenaria mercenaria

UdeM00000000332 1735272 346.7 UdeM00000000332 XP\_041378840.1 51.1  
319 155 1 100 418 2 319 4.20E-92 346.7 1735272  
cellular

organisms;Eukaryota;Opisthokonta;Metazoa;Eumetazoa;Bilateria;Protostomia;Spiralia;Lophotrochozoa;Mollusca;Gastropoda;Neomphalina;Neomphaloidea;Peltospiridae;Gigantopelta;Gigantopelta aegis

UdeM00000000333 1735272 424.5 UdeM00000000333 XP\_041347065.1 66.3  
309 103 1 1 308 179 487 1.20E-115 424.5 1735272  
cellular

organisms;Eukaryota;Opisthokonta;Metazoa;Eumetazoa;Bilateria;Protostomia;Spiralia;Lophotrochozoa;Mollusca;Gastropoda;Neomphalina;Neomphaloidea;Peltospiridae;Gigantopelta;Gigantopelta aegis

UdeM00000000334 1735272 97.8 UdeM00000000334 XP\_041347065.1 37.9  
140 44 2 1 97 1 140 8.40E-18 97.8 1735272  
cellular

organisms;Eukaryota;Opisthokonta;Metazoa;Eumetazoa;Bilateria;Protostomia;Spiralia;Lophotrochozoa;Mollusca;Gastropoda;Neomphalina;Neomphaloidea;Peltospiridae;Gigantopelta;Gigantopelta aegis

UdeM00000000335 6579 100.5 UdeM00000000335 XP\_033725865.1 30 267  
96 2 1 176 1 267 2.30E-18 100.5 6579 cellular

organisms;Eukaryota;Opisthokonta;Metazoa;Eumetazoa;Bilateria;Protostomia;Spiralia;Lophotrochozoa;Mollusca;Bivalvia;Autobranchia;Pteriomorphia;Pectinida;Pectinoidea;Pectinidae;Pecten;Pecten maximus

UdeM00000000336 6596 882.5 UdeM00000000336 XP\_045214662.1 43.5 1174  
600 22 39 1164 104 1262 5.90E-253 882.5 6596 cellular

organisms;Eukaryota;Opisthokonta;Metazoa;Eumetazoa;Bilateria;Protostomia;Spiralia;Lophotrochozoa;Mollusca;Bivalvia;Autobranchia;Heteroconchia;Euherodonta;Imparidentia;Venerida;Veneroidea;Veneridae;Mercenaria;Mercenaria mercenaria

UdeM00000000337 400727 345.1 UdeM00000000337 XP\_025109728.1 50.7  
353 159 4 45 386 323 671 1.10E-91 345.1 400727  
cellular

organisms;Eukaryota;Opisthokonta;Metazoa;Eumetazoa;Bilateria;Protostomia;

Spiralia;Lophotrochozoa;Mollusca;Gastropoda;Caenogastropoda;Architaenioglossa;Ampullarioidea;Ampullariidae;Pomacea;Pomacea canaliculata  
UdeM00000000338 6596 686.4 UdeM00000000338 XP\_045167551.1 60.3 595  
203 3 54 648 35 596 3.50E-194 686.4 6596 cellular  
organisms;Eukaryota;Opisthokonta;Metazoa;Eumetazoa;Bilateria;Protostomia;Spiralia;Lophotrochozoa;Mollusca;Bivalvia;Autobranchia;Heteroconchia;Euherodonta;Imparidentia;Venerida;Veneroidea;Veneridae;Mercenaria;Mercenaria mercenaria  
UdeM00000000339 6596 578.2 UdeM00000000339 XP\_045167628.1 42 757  
395 12 16 735 180 929 2.20E-161 578.2 6596 cellular  
organisms;Eukaryota;Opisthokonta;Metazoa;Eumetazoa;Bilateria;Protostomia;Spiralia;Lophotrochozoa;Mollusca;Bivalvia;Autobranchia;Heteroconchia;Euherodonta;Imparidentia;Venerida;Veneroidea;Veneridae;Mercenaria;Mercenaria mercenaria  
UdeM00000000340 6596 976.1 UdeM00000000340 XP\_045168803.1 45.7 1117  
550 16 18 1092 132 1233 3.70E-281 976.1 6596 cellular  
organisms;Eukaryota;Opisthokonta;Metazoa;Eumetazoa;Bilateria;Protostomia;Spiralia;Lophotrochozoa;Mollusca;Bivalvia;Autobranchia;Heteroconchia;Euherodonta;Imparidentia;Venerida;Veneroidea;Veneridae;Mercenaria;Mercenaria mercenaria  
UdeM00000000341 151771 240 UdeM00000000341 XP\_028406951.1 34  
441 242 7 3 397 148 585 5.50E-60 240 151771  
cellular  
organisms;Eukaryota;Opisthokonta;Metazoa;Eumetazoa;Cnidaria;Anthozoa;Octocorallia;Alcyonacea;Alcyoniina;Nephtheidae;Dendronephthya;Dendronephthya gigantea  
UdeM00000000344 451745 96.7 UdeM00000000344 XP\_037534902.1 24.6  
521 316 14 536 1022 170 647 3.00E-16 96.7 451745  
cellular  
organisms;Eukaryota;Opisthokonta;Metazoa;Eumetazoa;Bilateria;Deuterostomia;Chordata;Craniata;Vertebrata;Gnathostomata;Teleostomi;Euteleostomi;Actinopterygii;Actinopteri;Neopterygii;Teleostei;Osteoglossocephalai;Clupeocephala;Euteleostei;Neoteleostei;Eurypterygia;Ctenosquamata;Acanthomorpha;Euacanthomorpha;Percomorphaceae;Ovalentaria;Atherinomorpha;Cypriodontiformes;Aplocheiloidei;Rivulidae;Nematolebias;Nematolebias whitei  
UdeM00000000345 6596 66.2 UdeM00000000345 XP\_045169919.1 63.2 144  
23 2 42 155 63 206 4.10E-08 66.2 6596 cellular  
organisms;Eukaryota;Opisthokonta;Metazoa;Eumetazoa;Bilateria;Protostomia;Spiralia;Lophotrochozoa;Mollusca;Bivalvia;Autobranchia;Heteroconchia;Euherodonta;Imparidentia;Venerida;Veneroidea;Veneridae;Mercenaria;Mercenaria mercenaria  
UdeM00000000346 6596 114 UdeM00000000346 XP\_045169918.1 70.5 149  
40 2 36 182 63 209 2.00E-22 114 6596 cellular  
organisms;Eukaryota;Opisthokonta;Metazoa;Eumetazoa;Bilateria;Protostomia;Spiralia;Lophotrochozoa;Mollusca;Bivalvia;Autobranchia;Heteroconchia;Euherodonta;Imparidentia;Venerida;Veneroidea;Veneridae;Mercenaria;Mercenaria mercenaria  
UdeM00000000349 6412 184.1 UdeM00000000349 XP\_009025211.1 98.9 89  
1 0 1 89 1 89 7.80E-44 184.1 6412 cellular  
organisms;Eukaryota;Opisthokonta;Metazoa;Eumetazoa;Bilateria;Protostomia;Spiralia;Lophotrochozoa;Annelida;Clitellata;Hirudinea;Rhynchobdellida;Glossosiphoniidae;Helobdella;Helobdella robusta  
UdeM00000000351 6573 160.2 UdeM00000000351 XP\_021350458.1 44.3 194  
101 2 173 360 253 445 6.10E-36 160.2 6573 cellular

organisms;Eukaryota;Opisthokonta;Metazoa;Eumetazoa;Bilateria;Protostomia;  
Spiralia;Lophotrochozoa;Mollusca;Bivalvia;Autobranchia;Pteriomorpha;Pect  
inida;Pectinoidea;Pectinidae;Mizuhopecten;Mizuhopecten yessoensis  
UdeM00000000353 6596 123.2 UdeM00000000353 XP\_045169387.1 69.3 88  
26 1 54 140 106 193 3.00E-25 123.2 6596 cellular  
organisms;Eukaryota;Opisthokonta;Metazoa;Eumetazoa;Bilateria;Protostomia;  
Spiralia;Lophotrochozoa;Mollusca;Bivalvia;Autobranchia;Heteroconchia;Euhe  
terodonta;Imparidentia;Venerida;Veneroidea;Veneridae;Mercenaria;Mercenari  
a mercenaria  
UdeM00000000354 6579 204.9 UdeM00000000354 XP\_033729790.1 39.8 274  
160 2 10 283 17 285 2.50E-49 204.9 6579 cellular  
organisms;Eukaryota;Opisthokonta;Metazoa;Eumetazoa;Bilateria;Protostomia;  
Spiralia;Lophotrochozoa;Mollusca;Bivalvia;Autobranchia;Pteriomorpha;Pect  
inida;Pectinoidea;Pectinidae;Pecten;Pecten maximus  
UdeM00000000357 6596 518.5 UdeM00000000357 XP\_045169387.1 64.3 389  
135 1 4 388 193 581 7.70E-144 518.5 6596 cellular  
organisms;Eukaryota;Opisthokonta;Metazoa;Eumetazoa;Bilateria;Protostomia;  
Spiralia;Lophotrochozoa;Mollusca;Bivalvia;Autobranchia;Heteroconchia;Euhe  
terodonta;Imparidentia;Venerida;Veneroidea;Veneridae;Mercenaria;Mercenari  
a mercenaria  
UdeM00000000358 6526 347.4 UdeM00000000358 XP\_013079593.1 52.6 323  
144 3 2 319 90 408 1.90E-92 347.4 6526 cellular  
organisms;Eukaryota;Opisthokonta;Metazoa;Eumetazoa;Bilateria;Protostomia;  
Spiralia;Lophotrochozoa;Mollusca;Gastropoda;Heterobranchia;Euthyneura;Pan  
pulmonata;Hygrophila;Lymnaeoidea;Planorbidae;Biomphalaria;Biomphalaria  
glabrata  
UdeM00000000360 6596 295.8 UdeM00000000360 XP\_045168877.1 34.4 572  
337 9 1 553 1 553 1.30E-76 295.8 6596 cellular  
organisms;Eukaryota;Opisthokonta;Metazoa;Eumetazoa;Bilateria;Protostomia;  
Spiralia;Lophotrochozoa;Mollusca;Bivalvia;Autobranchia;Heteroconchia;Euhe  
terodonta;Imparidentia;Venerida;Veneroidea;Veneridae;Mercenaria;Mercenari  
a mercenaria  
UdeM00000000361 6596 471.5 UdeM00000000361 XP\_045167594.1 54.1 427  
145 3 1 376 43 469 1.20E-129 471.5 6596 cellular  
organisms;Eukaryota;Opisthokonta;Metazoa;Eumetazoa;Bilateria;Protostomia;  
Spiralia;Lophotrochozoa;Mollusca;Bivalvia;Autobranchia;Heteroconchia;Euhe  
terodonta;Imparidentia;Venerida;Veneroidea;Veneridae;Mercenaria;Mercenari  
a mercenaria  
UdeM00000000362 6596 6378.1 UdeM00000000362 XP\_045170173.1 84.1  
3887 570 14 8 3880 47 3899 0.00E+00 6378.1 6596  
cellular  
organisms;Eukaryota;Opisthokonta;Metazoa;Eumetazoa;Bilateria;Protostomia;  
Spiralia;Lophotrochozoa;Mollusca;Bivalvia;Autobranchia;Heteroconchia;Euhe  
terodonta;Imparidentia;Venerida;Veneroidea;Veneridae;Mercenaria;Mercenari  
a mercenaria  
UdeM00000000363 29159 194.9 UdeM00000000363 XP\_034315421.1 51.9 206  
93 3 122 323 271 474 1.60E-46 194.9 29159 cellular  
organisms;Eukaryota;Opisthokonta;Metazoa;Eumetazoa;Bilateria;Protostomia;  
Spiralia;Lophotrochozoa;Mollusca;Bivalvia;Autobranchia;Pteriomorpha;Ostr  
eida;Ostreoidea;Ostreidae;Crassostrea;Crassostrea gigas  
UdeM00000000364 6565 149.4 UdeM00000000364 XP\_022306954.1 52.9 121  
57 0 126 246 828 948 5.80E-33 149.4 6565 cellular  
organisms;Eukaryota;Opisthokonta;Metazoa;Eumetazoa;Bilateria;Protostomia;

Spiralia;Lophotrochozoa;Mollusca;Bivalvia;Autobranchia;Pteriormorphia;Ostr  
eida;Ostreoidea;Ostreidae;Crassostrea;Crassostrea virginica  
UdeM000000000365 29159 383.6 UdeM000000000365 XP\_034318666.1 60.1 288  
115 0 1 288 482 769 2.30E-103 383.6 29159 cellular  
organisms;Eukaryota;Opisthokonta;Metazoa;Eumetazoa;Bilateria;Protostomia;  
Spiralia;Lophotrochozoa;Mollusca;Bivalvia;Autobranchia;Pteriormorphia;Ostr  
eida;Ostreoidea;Ostreidae;Crassostrea;Crassostrea gigas  
UdeM000000000366 37653 152.9 UdeM000000000366 XP\_014777319.1 52.2 134  
62 1 9 140 27 160 3.40E-34 152.9 37653 cellular  
organisms;Eukaryota;Opisthokonta;Metazoa;Eumetazoa;Bilateria;Protostomia;  
Spiralia;Lophotrochozoa;Mollusca;Cephalopoda;Coleoidea;Octopodiformes;Oct  
opoda;Incirrata;Octopodidae;Octopus;Octopus bimaculoides  
UdeM000000000367 6565 280 UdeM000000000367 XP\_022326235.1 42.9 310  
174 2 12 321 138 444 3.70E-72 280 6565 cellular  
organisms;Eukaryota;Opisthokonta;Metazoa;Eumetazoa;Bilateria;Protostomia;  
Spiralia;Lophotrochozoa;Mollusca;Bivalvia;Autobranchia;Pteriormorphia;Ostr  
eida;Ostreoidea;Ostreidae;Crassostrea;Crassostrea virginica  
UdeM000000000368 6596 194.5 UdeM000000000368 XP\_045168504.1 29.8 876  
403 34 3 720 11 832 1.00E-45 194.5 6596 cellular  
organisms;Eukaryota;Opisthokonta;Metazoa;Eumetazoa;Bilateria;Protostomia;  
Spiralia;Lophotrochozoa;Mollusca;Bivalvia;Autobranchia;Heteroconchia;Euhe  
terodonta;Imparidentia;Venerida;Veneroidea;Veneridae;Mercenaria;Mercenari  
a mercenaria  
UdeM000000000373 7604 303.5 UdeM000000000373 XP\_033633146.1 41 390  
212 3 262 633 29 418 7.00E-79 303.5 7604 cellular  
organisms;Eukaryota;Opisthokonta;Metazoa;Eumetazoa;Bilateria;Deuterostomi  
a;Echinodermata;Eleutherozoa;Asterozoa;Asteroidea;Forcipulatacea;Forcipul  
atida;Asteroidea;Asteroidea;Asteroidea;Asteroidea;Asteroidea;Asteroidea  
UdeM000000000375 6596 547 UdeM000000000375 XP\_045213752.1 47.2 589  
281 3 1 588 83 642 5.70E-152 547 6596 cellular  
organisms;Eukaryota;Opisthokonta;Metazoa;Eumetazoa;Bilateria;Protostomia;  
Spiralia;Lophotrochozoa;Mollusca;Bivalvia;Autobranchia;Heteroconchia;Euhe  
terodonta;Imparidentia;Venerida;Veneroidea;Veneridae;Mercenaria;Mercenari  
a mercenaria  
UdeM000000000376 6596 151.8 UdeM000000000376 XP\_045188603.1 28.4 464  
287 17 499 935 361 806 4.70E-33 151.8 6596 cellular  
organisms;Eukaryota;Opisthokonta;Metazoa;Eumetazoa;Bilateria;Protostomia;  
Spiralia;Lophotrochozoa;Mollusca;Bivalvia;Autobranchia;Heteroconchia;Euhe  
terodonta;Imparidentia;Venerida;Veneroidea;Veneridae;Mercenaria;Mercenari  
a mercenaria  
UdeM000000000377 6596 311.2 UdeM000000000377 XP\_045169811.1 35.8 492  
298 9 38 516 25 511 2.50E-81 311.2 6596 cellular  
organisms;Eukaryota;Opisthokonta;Metazoa;Eumetazoa;Bilateria;Protostomia;  
Spiralia;Lophotrochozoa;Mollusca;Bivalvia;Autobranchia;Heteroconchia;Euhe  
terodonta;Imparidentia;Venerida;Veneroidea;Veneridae;Mercenaria;Mercenari  
a mercenaria  
UdeM000000000378 6596 361.7 UdeM000000000378 XP\_045167569.1 44.7 376  
199 4 14 381 38 412 1.20E-96 361.7 6596 cellular  
organisms;Eukaryota;Opisthokonta;Metazoa;Eumetazoa;Bilateria;Protostomia;  
Spiralia;Lophotrochozoa;Mollusca;Bivalvia;Autobranchia;Heteroconchia;Euhe  
terodonta;Imparidentia;Venerida;Veneroidea;Veneridae;Mercenaria;Mercenari  
a mercenaria  
UdeM000000000379 6596 124 UdeM000000000379 XP\_045167569.1 55 120  
49 2 4 120 424 541 1.50E-25 124 6596 cellular

organisms;Eukaryota;Opisthokonta;Metazoa;Eumetazoa;Bilateria;Protostomia;Spiralia;Lophotrochozoa;Mollusca;Bivalvia;Autobranhia;Heteroconchia;Euherodonta;Imparidentia;Venerida;Veneroidea;Veneridae;Mercenaria;Mercenaria mercenaria

UdeM00000000380 6596 591.3 UdeM00000000380 XP\_045168540.1 39.6 849  
400 17 35 791 117 944 1.90E-165 591.3 6596 cellular

organisms;Eukaryota;Opisthokonta;Metazoa;Eumetazoa;Bilateria;Protostomia;Spiralia;Lophotrochozoa;Mollusca;Bivalvia;Autobranhia;Heteroconchia;Euherodonta;Imparidentia;Venerida;Veneroidea;Veneridae;Mercenaria;Mercenaria mercenaria

UdeM00000000382 400727 916.4 UdeM00000000382 XP\_025093892.1 69.9  
638 180 5 5 633 2 636 2.00E-263 916.4 400727  
cellular

organisms;Eukaryota;Opisthokonta;Metazoa;Eumetazoa;Bilateria;Protostomia;Spiralia;Lophotrochozoa;Mollusca;Gastropoda;Caenogastropoda;Architaenioglossa;Ampullarioidea;Ampullariidae;Pomacea;Pomacea canaliculata

UdeM00000000383 6596 67.8 UdeM00000000383 XP\_045169096.1 43.2 88  
41 2 35 122 426 504 1.20E-08 67.8 6596 cellular

organisms;Eukaryota;Opisthokonta;Metazoa;Eumetazoa;Bilateria;Protostomia;Spiralia;Lophotrochozoa;Mollusca;Bivalvia;Autobranhia;Heteroconchia;Euherodonta;Imparidentia;Venerida;Veneroidea;Veneridae;Mercenaria;Mercenaria mercenaria

UdeM00000000385 6596 166.8 UdeM00000000385 XP\_045169096.1 62.1 132  
34 2 1 131 194 310 1.90E-38 166.8 6596 cellular

organisms;Eukaryota;Opisthokonta;Metazoa;Eumetazoa;Bilateria;Protostomia;Spiralia;Lophotrochozoa;Mollusca;Bivalvia;Autobranhia;Heteroconchia;Euherodonta;Imparidentia;Venerida;Veneroidea;Veneridae;Mercenaria;Mercenaria mercenaria

UdeM00000000384 6596 298.9 UdeM00000000384 XP\_045169096.1 67 206  
66 2 19 222 105 310 5.40E-78 298.9 6596 cellular

organisms;Eukaryota;Opisthokonta;Metazoa;Eumetazoa;Bilateria;Protostomia;Spiralia;Lophotrochozoa;Mollusca;Bivalvia;Autobranhia;Heteroconchia;Euherodonta;Imparidentia;Venerida;Veneroidea;Veneridae;Mercenaria;Mercenaria mercenaria

UdeM00000000386 6596 108.6 UdeM00000000386 XP\_045170409.1 40.2 326  
139 7 1 321 1 275 1.50E-20 108.6 6596 cellular

organisms;Eukaryota;Opisthokonta;Metazoa;Eumetazoa;Bilateria;Protostomia;Spiralia;Lophotrochozoa;Mollusca;Bivalvia;Autobranhia;Heteroconchia;Euherodonta;Imparidentia;Venerida;Veneroidea;Veneridae;Mercenaria;Mercenaria mercenaria

UdeM00000000387 6596 309.7 UdeM00000000387 XP\_045169621.1 76.6 201  
43 2 1 200 1 198 2.70E-81 309.7 6596 cellular

organisms;Eukaryota;Opisthokonta;Metazoa;Eumetazoa;Bilateria;Protostomia;Spiralia;Lophotrochozoa;Mollusca;Bivalvia;Autobranhia;Heteroconchia;Euherodonta;Imparidentia;Venerida;Veneroidea;Veneridae;Mercenaria;Mercenaria mercenaria

UdeM00000000388 218467 207.2 UdeM00000000388 XP\_023229324.1 86.8  
114 15 0 1 114 1 114 1.10E-50 207.2 218467  
cellular

organisms;Eukaryota;Opisthokonta;Metazoa;Eumetazoa;Bilateria;Protostomia;Ecdysozoa;Panarthropoda;Arthropoda;Chelicerata;Arachnida;Scorpiones;Buthida;Buthoidea;Buthidae;Centruroides;Centruroides sculpturatus

UdeM00000000389 6596 319.7 UdeM00000000389 XP\_045168366.1 48.1 308  
159 1 10 316 11 318 4.20E-84 319.7 6596 cellular



organisms;Eukaryota;Opisthokonta;Metazoa;Eumetazoa;Bilateria;Protostomia;Spiralia;Lophotrochozoa;Mollusca;Bivalvia;Autobranhia;Heteroconchia;Euherodonta;Imparidentia;Venerida;Veneroidea;Veneridae;Mercenaria;Mercenaria mercenaria

UdeM00000000390 6596 1060.8 UdeM00000000390 XP\_045169674.1 66.4  
821 212 5 1 782 368 1163 8.30E-307 1060.8 6596  
cellular

organisms;Eukaryota;Opisthokonta;Metazoa;Eumetazoa;Bilateria;Protostomia;Spiralia;Lophotrochozoa;Mollusca;Bivalvia;Autobranhia;Heteroconchia;Euherodonta;Imparidentia;Venerida;Veneroidea;Veneridae;Mercenaria;Mercenaria mercenaria

UdeM00000000391 6579 189.5 UdeM00000000391 XP\_033762111.1 44.3 255  
132 4 48 296 24 274 6.10E-45 189.5 6579 cellular

organisms;Eukaryota;Opisthokonta;Metazoa;Eumetazoa;Bilateria;Protostomia;Spiralia;Lophotrochozoa;Mollusca;Bivalvia;Autobranhia;Pteriormorphia;Pectinida;Pectinoidea;Pectinidae;Pecten;Pecten maximus

UdeM00000000392 471704 149.4 UdeM00000000392 XP\_018365076.1 35.2  
256 98 2 1 188 233 488 4.50E-33 149.4 471704  
cellular

organisms;Eukaryota;Opisthokonta;Metazoa;Eumetazoa;Bilateria;Protostomia;Ecdysozoa;Panarthropoda;Arthropoda;Mandibulata;Pancrustacea;Hexapoda;Insecta;Dicondylia;Pterygota;Neoptera;Endopterygota;Hymenoptera;Apocrita;Aculeata;Formicoidea;Formicidae;Myrmicinae;Attini;Trachymyrmex;Trachymyrmex cornetzi

UdeM00000000393 6565 304.7 UdeM00000000393 XP\_022306142.1 55 289  
119 4 1 279 276 563 1.20E-79 304.7 6565 cellular

organisms;Eukaryota;Opisthokonta;Metazoa;Eumetazoa;Bilateria;Protostomia;Spiralia;Lophotrochozoa;Mollusca;Bivalvia;Autobranhia;Pteriormorphia;Ostreida;Ostreioidea;Ostreidae;Crassostrea;Crassostrea virginica

UdeM00000000394 29159 548.1 UdeM00000000394 XP\_034309569.1 54.6 538  
217 7 6 522 30 561 1.20E-152 548.1 29159 cellular

organisms;Eukaryota;Opisthokonta;Metazoa;Eumetazoa;Bilateria;Protostomia;Spiralia;Lophotrochozoa;Mollusca;Bivalvia;Autobranhia;Pteriormorphia;Ostreida;Ostreioidea;Ostreidae;Crassostrea;Crassostrea gigas

UdeM00000000395 6596 69.7 UdeM00000000395 XP\_045169584.1 37.1 89  
49 3 1 83 75 162 2.30E-09 69.7 6596 cellular

organisms;Eukaryota;Opisthokonta;Metazoa;Eumetazoa;Bilateria;Protostomia;Spiralia;Lophotrochozoa;Mollusca;Bivalvia;Autobranhia;Heteroconchia;Euherodonta;Imparidentia;Venerida;Veneroidea;Veneridae;Mercenaria;Mercenaria mercenaria

UdeM00000000396 6596 498.4 UdeM00000000396 XP\_045181503.1 32 968  
594 23 14 952 113 1045 2.00E-137 498.4 6596 cellular

organisms;Eukaryota;Opisthokonta;Metazoa;Eumetazoa;Bilateria;Protostomia;Spiralia;Lophotrochozoa;Mollusca;Bivalvia;Autobranhia;Heteroconchia;Euherodonta;Imparidentia;Venerida;Veneroidea;Veneridae;Mercenaria;Mercenaria mercenaria

UdeM00000000397 6596 501.5 UdeM00000000397 XP\_045181503.1 32.2 970  
592 25 14 954 113 1045 2.40E-138 501.5 6596 cellular

organisms;Eukaryota;Opisthokonta;Metazoa;Eumetazoa;Bilateria;Protostomia;Spiralia;Lophotrochozoa;Mollusca;Bivalvia;Autobranhia;Heteroconchia;Euherodonta;Imparidentia;Venerida;Veneroidea;Veneridae;Mercenaria;Mercenaria mercenaria

UdeM00000000399 6596 337.4 UdeM00000000399 XP\_045169584.1 39 480  
272 10 4 478 60 523 3.10E-89 337.4 6596 cellular

organisms;Eukaryota;Opisthokonta;Metazoa;Eumetazoa;Bilateria;Protostomia;Spiralia;Lophotrochozoa;Mollusca;Bivalvia;Autobranhia;Heteroconchia;Euherodonta;Imparidentia;Venerida;Veneroidea;Veneridae;Mercenaria;Mercenaria mercenaria

UdeM00000000400 6596 325.5 UdeM00000000400 XP\_045169584.1 36.6 511  
272 10 4 509 60 523 1.30E-85 325.5 6596 cellular

organisms;Eukaryota;Opisthokonta;Metazoa;Eumetazoa;Bilateria;Protostomia;Spiralia;Lophotrochozoa;Mollusca;Bivalvia;Autobranhia;Heteroconchia;Euherodonta;Imparidentia;Venerida;Veneroidea;Veneridae;Mercenaria;Mercenaria mercenaria

UdeM00000000401 6596 212.2 UdeM00000000401 XP\_045181503.1 28.8 510  
334 10 47 539 544 1041 1.70E-51 212.2 6596 cellular

organisms;Eukaryota;Opisthokonta;Metazoa;Eumetazoa;Bilateria;Protostomia;Spiralia;Lophotrochozoa;Mollusca;Bivalvia;Autobranhia;Heteroconchia;Euherodonta;Imparidentia;Venerida;Veneroidea;Veneridae;Mercenaria;Mercenaria mercenaria

UdeM00000000402 6596 553.5 UdeM00000000402 XP\_045167908.1 33 1001  
612 23 3 964 24 1004 5.70E-154 553.5 6596 cellular

organisms;Eukaryota;Opisthokonta;Metazoa;Eumetazoa;Bilateria;Protostomia;Spiralia;Lophotrochozoa;Mollusca;Bivalvia;Autobranhia;Heteroconchia;Euherodonta;Imparidentia;Venerida;Veneroidea;Veneridae;Mercenaria;Mercenaria mercenaria

UdeM00000000403 6596 419.5 UdeM00000000403 XP\_045169585.1 60.3 315  
125 0 1 315 1 315 3.90E-114 419.5 6596 cellular

organisms;Eukaryota;Opisthokonta;Metazoa;Eumetazoa;Bilateria;Protostomia;Spiralia;Lophotrochozoa;Mollusca;Bivalvia;Autobranhia;Heteroconchia;Euherodonta;Imparidentia;Venerida;Veneroidea;Veneridae;Mercenaria;Mercenaria mercenaria

UdeM00000000404 6596 927.9 UdeM00000000404 XP\_045166183.1 100 451  
0 0 1 451 1 451 4.80E-267 927.9 6596 cellular

organisms;Eukaryota;Opisthokonta;Metazoa;Eumetazoa;Bilateria;Protostomia;Spiralia;Lophotrochozoa;Mollusca;Bivalvia;Autobranhia;Heteroconchia;Euherodonta;Imparidentia;Venerida;Veneroidea;Veneridae;Mercenaria;Mercenaria mercenaria

UdeM00000000405 6596 1543.1 UdeM00000000405 XP\_045170179.1 75.3  
983 237 3 18 995 30 1011 0.00E+00 1543.1 6596  
cellular

organisms;Eukaryota;Opisthokonta;Metazoa;Eumetazoa;Bilateria;Protostomia;Spiralia;Lophotrochozoa;Mollusca;Bivalvia;Autobranhia;Heteroconchia;Euherodonta;Imparidentia;Venerida;Veneroidea;Veneridae;Mercenaria;Mercenaria mercenaria

UdeM00000000413 6579 439.1 UdeM00000000413 XP\_033761282.1 70 303  
75 3 1 296 1 294 4.40E-120 439.1 6579 cellular

organisms;Eukaryota;Opisthokonta;Metazoa;Eumetazoa;Bilateria;Protostomia;Spiralia;Lophotrochozoa;Mollusca;Bivalvia;Autobranhia;Pteriomorphia;Pectinida;Pectinoidea;Pectinidae;Pecten;Pecten maximus

UdeM00000000414 6596 739.6 UdeM00000000414 XP\_045168279.1 85.2 420  
62 0 1 420 1 420 2.30E-210 739.6 6596 cellular

organisms;Eukaryota;Opisthokonta;Metazoa;Eumetazoa;Bilateria;Protostomia;Spiralia;Lophotrochozoa;Mollusca;Bivalvia;Autobranhia;Heteroconchia;Euherodonta;Imparidentia;Venerida;Veneroidea;Veneridae;Mercenaria;Mercenaria mercenaria

UdeM00000000415 6596 685.3 UdeM00000000415 XP\_045170358.1 85.3 416  
61 0 6 421 3 418 5.00E-194 685.3 6596 cellular

organisms;Eukaryota;Opisthokonta;Metazoa;Eumetazoa;Bilateria;Protostomia;Spiralia;Lophotrochozoa;Mollusca;Bivalvia;Autobranchia;Heteroconchia;Euherodonta;Imparidentia;Venerida;Veneroidea;Veneridae;Mercenaria;Mercenaria mercenaria

UdeM00000000416 6579 142.1 UdeM00000000416 XP\_033761302.1 76 100  
24 0 7 106 4 103 4.20E-31 142.1 6579 cellular

organisms;Eukaryota;Opisthokonta;Metazoa;Eumetazoa;Bilateria;Protostomia;Spiralia;Lophotrochozoa;Mollusca;Bivalvia;Autobranchia;Pteriormorphia;Pectinida;Pectinoidea;Pectinidae;Pecten;Pecten maximus

UdeM00000000417 6596 464.9 UdeM00000000417 XP\_045167959.1 66.3 338  
111 2 1 335 1 338 8.50E-128 464.9 6596 cellular

organisms;Eukaryota;Opisthokonta;Metazoa;Eumetazoa;Bilateria;Protostomia;Spiralia;Lophotrochozoa;Mollusca;Bivalvia;Autobranchia;Heteroconchia;Euherodonta;Imparidentia;Venerida;Veneroidea;Veneridae;Mercenaria;Mercenaria mercenaria

UdeM00000000418 6596 330.1 UdeM00000000418 XP\_045168165.1 70.7 229  
49 1 227 455 8 218 4.50E-87 330.1 6596 cellular

organisms;Eukaryota;Opisthokonta;Metazoa;Eumetazoa;Bilateria;Protostomia;Spiralia;Lophotrochozoa;Mollusca;Bivalvia;Autobranchia;Heteroconchia;Euherodonta;Imparidentia;Venerida;Veneroidea;Veneridae;Mercenaria;Mercenaria mercenaria

UdeM00000000420 6596 423.7 UdeM00000000420 XP\_045167906.1 48.5 507  
214 12 4 467 14 516 3.00E-115 423.7 6596 cellular

organisms;Eukaryota;Opisthokonta;Metazoa;Eumetazoa;Bilateria;Protostomia;Spiralia;Lophotrochozoa;Mollusca;Bivalvia;Autobranchia;Heteroconchia;Euherodonta;Imparidentia;Venerida;Veneroidea;Veneridae;Mercenaria;Mercenaria mercenaria

UdeM00000000421 29159 411 UdeM00000000421 XP\_034309544.1 48.8 455  
192 10 1 453 13 428 2.00E-111 411 29159 cellular

organisms;Eukaryota;Opisthokonta;Metazoa;Eumetazoa;Bilateria;Protostomia;Spiralia;Lophotrochozoa;Mollusca;Bivalvia;Autobranchia;Pteriormorphia;Ostreida;Ostreoidea;Ostreidae;Crassostrea;Crassostrea gigas

UdeM00000000422 6596 422.2 UdeM00000000422 XP\_045167906.1 47.9 507  
207 11 4 457 14 516 8.60E-115 422.2 6596 cellular

organisms;Eukaryota;Opisthokonta;Metazoa;Eumetazoa;Bilateria;Protostomia;Spiralia;Lophotrochozoa;Mollusca;Bivalvia;Autobranchia;Heteroconchia;Euherodonta;Imparidentia;Venerida;Veneroidea;Veneridae;Mercenaria;Mercenaria mercenaria

UdeM00000000424 1735272 212.2 UdeM00000000424 XP\_041367509.1 79.7  
123 21 1 127 245 1 123 8.90E-52 212.2 1735272  
cellular

organisms;Eukaryota;Opisthokonta;Metazoa;Eumetazoa;Bilateria;Protostomia;Spiralia;Lophotrochozoa;Mollusca;Gastropoda;Neomphalina;Neomphaloidea;Peltospiridae;Gigantopelta;Gigantopelta aegis

UdeM00000000425 6579 359 UdeM00000000425 XP\_033761765.1 25.4 1609  
867 38 9 1395 2 1499 2.80E-95 359 6579 cellular

organisms;Eukaryota;Opisthokonta;Metazoa;Eumetazoa;Bilateria;Protostomia;Spiralia;Lophotrochozoa;Mollusca;Bivalvia;Autobranchia;Pteriormorphia;Pectinida;Pectinoidea;Pectinidae;Pecten;Pecten maximus

UdeM00000000426 6579 220.3 UdeM00000000426 XP\_033762438.1 43.3 342  
171 7 6 342 4 327 4.00E-54 220.3 6579 cellular

organisms;Eukaryota;Opisthokonta;Metazoa;Eumetazoa;Bilateria;Protostomia;Spiralia;Lophotrochozoa;Mollusca;Bivalvia;Autobranchia;Pteriormorphia;Pectinida;Pectinoidea;Pectinidae;Pecten;Pecten maximus

UdeM00000000427 6596 542 UdeM00000000427 XP\_045170013.1 55.7 551  
 225 10 18 556 392 935 9.10E-151 542 6596 cellular  
 organisms;Eukaryota;Opisthokonta;Metazoa;Eumetazoa;Bilateria;Protostomia;  
 Spiralia;Lophotrochozoa;Mollusca;Bivalvia;Autobranchia;Heteroconchia;Euhe  
 terodonta;Imparidentia;Venerida;Veneroidea;Veneridae;Mercenaria;Mercenari  
 a mercenaria  
 UdeM00000000428 1735272 149.1 UdeM00000000428 XP\_041349588.1 55  
 120 54 0 10 129 65 184 4.20E-33 149.1 1735272  
 cellular  
 organisms;Eukaryota;Opisthokonta;Metazoa;Eumetazoa;Bilateria;Protostomia;  
 Spiralia;Lophotrochozoa;Mollusca;Gastropoda;Neomphalina;Neomphaloidea;Pel  
 tospiridae;Gigantopelta;Gigantopelta aegis  
 UdeM00000000429 1735272 144.1 UdeM00000000429 XP\_041357032.1 56.3  
 119 48 1 8 126 63 177 1.70E-31 144.1 1735272  
 cellular  
 organisms;Eukaryota;Opisthokonta;Metazoa;Eumetazoa;Bilateria;Protostomia;  
 Spiralia;Lophotrochozoa;Mollusca;Gastropoda;Neomphalina;Neomphaloidea;Pel  
 tospiridae;Gigantopelta;Gigantopelta aegis  
 UdeM00000000431 1735272 159.1 UdeM00000000431 XP\_041367303.1 22.6  
 1104 650 31 6 1035 12 985 3.30E-35 159.1 1735272  
 cellular  
 organisms;Eukaryota;Opisthokonta;Metazoa;Eumetazoa;Bilateria;Protostomia;  
 Spiralia;Lophotrochozoa;Mollusca;Gastropoda;Neomphalina;Neomphaloidea;Pel  
 tospiridae;Gigantopelta;Gigantopelta aegis  
 UdeM00000000432 6573 237.3 UdeM00000000432 XP\_021375283.1 31.2 541  
 319 8 5 530 756 1258 4.80E-59 237.3 6573 cellular  
 organisms;Eukaryota;Opisthokonta;Metazoa;Eumetazoa;Bilateria;Protostomia;  
 Spiralia;Lophotrochozoa;Mollusca;Bivalvia;Autobranchia;Pteriomorphia;Pect  
 inida;Pectinoidea;Pectinidae;Mizuhopecten;Mizuhopecten yessoensis  
 UdeM00000000433 29159 111.3 UdeM00000000433 XP\_011421628.2 28.4 313  
 189 9 36 324 558 859 2.40E-21 111.3 29159 cellular  
 organisms;Eukaryota;Opisthokonta;Metazoa;Eumetazoa;Bilateria;Protostomia;  
 Spiralia;Lophotrochozoa;Mollusca;Bivalvia;Autobranchia;Pteriomorphia;Ostr  
 eida;Ostreoidea;Ostreidae;Crassostrea;Crassostrea gigas  
 UdeM00000000434 6573 235.7 UdeM00000000434 XP\_021375283.1 31.2 539  
 338 10 5 538 756 1266 1.40E-58 235.7 6573 cellular  
 organisms;Eukaryota;Opisthokonta;Metazoa;Eumetazoa;Bilateria;Protostomia;  
 Spiralia;Lophotrochozoa;Mollusca;Bivalvia;Autobranchia;Pteriomorphia;Pect  
 inida;Pectinoidea;Pectinidae;Mizuhopecten;Mizuhopecten yessoensis  
 UdeM00000000435 29159 88.2 UdeM00000000435 XP\_019928550.2 43 86  
 49 0 46 131 173 258 1.10E-14 88.2 29159 cellular  
 organisms;Eukaryota;Opisthokonta;Metazoa;Eumetazoa;Bilateria;Protostomia;  
 Spiralia;Lophotrochozoa;Mollusca;Bivalvia;Autobranchia;Pteriomorphia;Ostr  
 eida;Ostreoidea;Ostreidae;Crassostrea;Crassostrea gigas  
 UdeM00000000436 6573 69.3 UdeM00000000436 XP\_021375283.1 33.3 90  
 49 2 36 124 244 323 4.60E-09 69.3 6573 cellular  
 organisms;Eukaryota;Opisthokonta;Metazoa;Eumetazoa;Bilateria;Protostomia;  
 Spiralia;Lophotrochozoa;Mollusca;Bivalvia;Autobranchia;Pteriomorphia;Pect  
 inida;Pectinoidea;Pectinidae;Mizuhopecten;Mizuhopecten yessoensis  
 UdeM00000000438 6573 228.8 UdeM00000000438 XP\_021358437.1 29.8 557  
 350 12 2 546 756 1283 1.70E-56 228.8 6573 cellular  
 organisms;Eukaryota;Opisthokonta;Metazoa;Eumetazoa;Bilateria;Protostomia;  
 Spiralia;Lophotrochozoa;Mollusca;Bivalvia;Autobranchia;Pteriomorphia;Pect  
 inida;Pectinoidea;Pectinidae;Mizuhopecten;Mizuhopecten yessoensis

UdeM00000000439 7604 462.6 UdeM00000000439 XP\_033641066.1 56.3 378  
 165 0 4 381 3 380 4.90E-127 462.6 7604 cellular  
 organisms;Eukaryota;Opisthokonta;Metazoa;Eumetazoa;Bilateria;Deuterostomi  
 a;Echinodermata;Eleutherozoa;Asterozoa;Asteroidea;Forcipulatacea;Forcipul  
 atida;Asteroidea;Asterias;Asterias rubens  
 UdeM00000000443 6573 432.6 UdeM00000000443 XP\_021375283.1 26.8 1328  
 838 33 38 1327 49 1280 1.90E-117 432.6 6573 cellular  
 organisms;Eukaryota;Opisthokonta;Metazoa;Eumetazoa;Bilateria;Protostomia;  
 Spiralia;Lophotrochozoa;Mollusca;Bivalvia;Autobranhia;Pteriormorphia;Pect  
 inida;Pectinoidea;Pectinidae;Mizuhopecten;Mizuhopecten yessoensis  
 UdeM00000000444 6573 132.1 UdeM00000000444 XP\_021353057.1 61.6 99  
 38 0 1 99 1 99 4.70E-28 132.1 6573 cellular  
 organisms;Eukaryota;Opisthokonta;Metazoa;Eumetazoa;Bilateria;Protostomia;  
 Spiralia;Lophotrochozoa;Mollusca;Bivalvia;Autobranhia;Pteriormorphia;Pect  
 inida;Pectinoidea;Pectinidae;Mizuhopecten;Mizuhopecten yessoensis  
 UdeM00000000445 6565 249.2 UdeM00000000445 XP\_022343208.1 31.2 560  
 327 21 24 543 21 562 1.20E-62 249.2 6565 cellular  
 organisms;Eukaryota;Opisthokonta;Metazoa;Eumetazoa;Bilateria;Protostomia;  
 Spiralia;Lophotrochozoa;Mollusca;Bivalvia;Autobranhia;Pteriormorphia;Ostr  
 eida;Ostreioidea;Ostreidae;Crassostrea;Crassostrea virginica  
 UdeM00000000446 29159 508.8 UdeM00000000446 XP\_034310304.1 82.6 299  
 52 0 1 299 1 299 4.60E-141 508.8 29159 cellular  
 organisms;Eukaryota;Opisthokonta;Metazoa;Eumetazoa;Bilateria;Protostomia;  
 Spiralia;Lophotrochozoa;Mollusca;Bivalvia;Autobranhia;Pteriormorphia;Ostr  
 eida;Ostreioidea;Ostreidae;Crassostrea;Crassostrea gigas  
 UdeM00000000447 6579 75.9 UdeM00000000447 XP\_033762025.1 32.1 212  
 118 9 3 200 43 242 7.20E-11 75.9 6579 cellular  
 organisms;Eukaryota;Opisthokonta;Metazoa;Eumetazoa;Bilateria;Protostomia;  
 Spiralia;Lophotrochozoa;Mollusca;Bivalvia;Autobranhia;Pteriormorphia;Pect  
 inida;Pectinoidea;Pectinidae;Pecten;Pecten maximus  
 UdeM00000000448 6565 726.9 UdeM00000000448 XP\_022309008.1 90.7 389  
 36 0 77 465 132 520 1.70E-206 726.9 6565 cellular  
 organisms;Eukaryota;Opisthokonta;Metazoa;Eumetazoa;Bilateria;Protostomia;  
 Spiralia;Lophotrochozoa;Mollusca;Bivalvia;Autobranhia;Pteriormorphia;Ostr  
 eida;Ostreioidea;Ostreidae;Crassostrea;Crassostrea virginica  
 UdeM00000000449 29159 275 UdeM00000000449 XP\_034329844.1 32.6 503  
 313 7 32 519 5 496 1.90E-70 275 29159 cellular  
 organisms;Eukaryota;Opisthokonta;Metazoa;Eumetazoa;Bilateria;Protostomia;  
 Spiralia;Lophotrochozoa;Mollusca;Bivalvia;Autobranhia;Pteriormorphia;Ostr  
 eida;Ostreioidea;Ostreidae;Crassostrea;Crassostrea gigas  
 UdeM00000000450 29159 273.5 UdeM00000000450 XP\_034329844.1 32.6 503  
 313 7 4 491 5 496 5.40E-70 273.5 29159 cellular  
 organisms;Eukaryota;Opisthokonta;Metazoa;Eumetazoa;Bilateria;Protostomia;  
 Spiralia;Lophotrochozoa;Mollusca;Bivalvia;Autobranhia;Pteriormorphia;Ostr  
 eida;Ostreioidea;Ostreidae;Crassostrea;Crassostrea gigas  
 UdeM00000000451 6596 563.9 UdeM00000000451 XP\_045169405.1 89.6 299  
 31 0 1 299 1 299 1.20E-157 563.9 6596 cellular  
 organisms;Eukaryota;Opisthokonta;Metazoa;Eumetazoa;Bilateria;Protostomia;  
 Spiralia;Lophotrochozoa;Mollusca;Bivalvia;Autobranhia;Heteroconchia;Euhe  
 terodonta;Imparidentia;Venerida;Veneroidea;Veneridae;Mercenaria;Mercenari  
 a mercenaria  
 UdeM00000000452 1735272 226.1 UdeM00000000452 XP\_041365495.1 60.1  
 193 77 0 1 193 4 196 4.60E-56 226.1 1735272  
 cellular

organisms;Eukaryota;Opisthokonta;Metazoa;Eumetazoa;Bilateria;Protostomia;Spiralia;Lophotrochozoa;Mollusca;Gastropoda;Neomphalina;Neomphaloidea;Peltospiridae;Gigantopelta;Gigantopelta aegis  
UdeM00000000453 6565 258.8 UdeM00000000453 XP\_022327962.1 49.3 272  
134 3 1 269 448 718 7.50E-66 258.8 6565 cellular  
organisms;Eukaryota;Opisthokonta;Metazoa;Eumetazoa;Bilateria;Protostomia;Spiralia;Lophotrochozoa;Mollusca;Bivalvia;Autobranchia;Pteriormorphia;Ostreida;Ostreoidea;Ostreidae;Crassostrea;Crassostrea virginica  
UdeM00000000454 6565 65.5 UdeM00000000454 XP\_022327962.1 35.3 139  
23 2 1 72 295 433 3.30E-08 65.5 6565 cellular  
organisms;Eukaryota;Opisthokonta;Metazoa;Eumetazoa;Bilateria;Protostomia;Spiralia;Lophotrochozoa;Mollusca;Bivalvia;Autobranchia;Pteriormorphia;Ostreida;Ostreoidea;Ostreidae;Crassostrea;Crassostrea virginica  
UdeM00000000455 6596 148.7 UdeM00000000455 XP\_045198374.1 45.2 177  
83 4 1 173 1 167 7.00E-33 148.7 6596 cellular  
organisms;Eukaryota;Opisthokonta;Metazoa;Eumetazoa;Bilateria;Protostomia;Spiralia;Lophotrochozoa;Mollusca;Bivalvia;Autobranchia;Heteroconchia;Euheterodonta;Imparidentia;Venerida;Veneroidea;Veneridae;Mercenaria;Mercenaria mercenaria  
UdeM00000000458 2607531 163.3 UdeM00000000458 XP\_036365360.1 79.6  
98 20 0 13 110 305 402 1.80E-37 163.3 2607531  
cellular  
organisms;Eukaryota;Opisthokonta;Metazoa;Eumetazoa;Bilateria;Protostomia;Spiralia;Lophotrochozoa;Mollusca;Cephalopoda;Coleoidea;Octopodiformes;Octopoda;Incirrata;Octopodidae;Octopus;Octopus sinensis  
UdeM00000000459 6596 472.6 UdeM00000000459 XP\_045170613.1 74.4 316  
74 4 31 340 281 595 4.50E-130 472.6 6596 cellular  
organisms;Eukaryota;Opisthokonta;Metazoa;Eumetazoa;Bilateria;Protostomia;Spiralia;Lophotrochozoa;Mollusca;Bivalvia;Autobranchia;Heteroconchia;Euheterodonta;Imparidentia;Venerida;Veneroidea;Veneridae;Mercenaria;Mercenaria mercenaria  
UdeM00000000460 6596 846.3 UdeM00000000460 XP\_045170613.1 45.2 1274  
565 28 1 1177 792 2029 4.80E-242 846.3 6596 cellular  
organisms;Eukaryota;Opisthokonta;Metazoa;Eumetazoa;Bilateria;Protostomia;Spiralia;Lophotrochozoa;Mollusca;Bivalvia;Autobranchia;Heteroconchia;Euheterodonta;Imparidentia;Venerida;Veneroidea;Veneridae;Mercenaria;Mercenaria mercenaria  
UdeM00000000461 6596 154.1 UdeM00000000461 XP\_045169926.1 35.1 305  
161 9 16 298 11 300 2.90E-34 154.1 6596 cellular  
organisms;Eukaryota;Opisthokonta;Metazoa;Eumetazoa;Bilateria;Protostomia;Spiralia;Lophotrochozoa;Mollusca;Bivalvia;Autobranchia;Heteroconchia;Euheterodonta;Imparidentia;Venerida;Veneroidea;Veneridae;Mercenaria;Mercenaria mercenaria  
UdeM00000000462 6596 370.2 UdeM00000000462 XP\_045177776.1 41.4 527  
293 9 1 519 405 923 6.70E-99 370.2 6596 cellular  
organisms;Eukaryota;Opisthokonta;Metazoa;Eumetazoa;Bilateria;Protostomia;Spiralia;Lophotrochozoa;Mollusca;Bivalvia;Autobranchia;Heteroconchia;Euheterodonta;Imparidentia;Venerida;Veneroidea;Veneridae;Mercenaria;Mercenaria mercenaria  
UdeM00000000463 6579 694.1 UdeM00000000463 XP\_033729085.1 35.7 1657  
780 44 1 1507 1 1522 3.90E-196 694.1 6579 cellular  
organisms;Eukaryota;Opisthokonta;Metazoa;Eumetazoa;Bilateria;Protostomia;Spiralia;Lophotrochozoa;Mollusca;Bivalvia;Autobranchia;Pteriormorphia;Pectinida;Pectinoidea;Pectinidae;Pecten;Pecten maximus

UdeM00000000464 6573 568.5 UdeM00000000464 XP\_021363465.1 39.3 1033  
 481 19 1 929 1 991 1.50E-158 568.5 6573 cellular  
 organisms;Eukaryota;Opisthokonta;Metazoa;Eumetazoa;Bilateria;Protostomia;  
 Spiralia;Lophotrochozoa;Mollusca;Bivalvia;Autobranhia;Pteriomorphia;Pect  
 inida;Pectinoidea;Pectinidae;Mizuhopecten;Mizuhopecten yessoensis  
 UdeM00000000465 6565 233 UdeM00000000465 XP\_022320421.1 53.7 231  
 97 4 3 233 8 228 3.80E-58 233 6565 cellular  
 organisms;Eukaryota;Opisthokonta;Metazoa;Eumetazoa;Bilateria;Protostomia;  
 Spiralia;Lophotrochozoa;Mollusca;Bivalvia;Autobranhia;Pteriomorphia;Ostr  
 eida;Ostreoidea;Ostreidae;Crassostrea;Crassostrea virginica  
 UdeM00000000466 6596 567.4 UdeM00000000466 XP\_045178508.1 79.3 363  
 69 4 1 358 1 362 1.30E-158 567.4 6596 cellular  
 organisms;Eukaryota;Opisthokonta;Metazoa;Eumetazoa;Bilateria;Protostomia;  
 Spiralia;Lophotrochozoa;Mollusca;Bivalvia;Autobranhia;Heteroconchia;Euhe  
 terodonta;Imparidentia;Venerida;Veneroidea;Veneridae;Mercenaria;Mercenari  
 a mercenaria  
 UdeM00000000467 29159 547.4 UdeM00000000467 XP\_034330259.1 46.7 585  
 294 8 6 588 133 701 2.30E-152 547.4 29159 cellular  
 organisms;Eukaryota;Opisthokonta;Metazoa;Eumetazoa;Bilateria;Protostomia;  
 Spiralia;Lophotrochozoa;Mollusca;Bivalvia;Autobranhia;Pteriomorphia;Ostr  
 eida;Ostreoidea;Ostreidae;Crassostrea;Crassostrea gigas  
 UdeM00000000470 6596 215.3 UdeM00000000470 XP\_045172074.1 71.2 132  
 38 0 2 133 249 380 4.90E-53 215.3 6596 cellular  
 organisms;Eukaryota;Opisthokonta;Metazoa;Eumetazoa;Bilateria;Protostomia;  
 Spiralia;Lophotrochozoa;Mollusca;Bivalvia;Autobranhia;Heteroconchia;Euhe  
 terodonta;Imparidentia;Venerida;Veneroidea;Veneridae;Mercenaria;Mercenari  
 a mercenaria  
 UdeM00000000471 6596 184.9 UdeM00000000471 XP\_045172453.1 56.4 156  
 68 0 1 156 7 162 9.60E-44 184.9 6596 cellular  
 organisms;Eukaryota;Opisthokonta;Metazoa;Eumetazoa;Bilateria;Protostomia;  
 Spiralia;Lophotrochozoa;Mollusca;Bivalvia;Autobranhia;Heteroconchia;Euhe  
 terodonta;Imparidentia;Venerida;Veneroidea;Veneridae;Mercenaria;Mercenari  
 a mercenaria  
 UdeM00000000473 6579 273.5 UdeM00000000473 XP\_033728617.1 62.7 212  
 69 2 1 211 1 203 2.30E-70 273.5 6579 cellular  
 organisms;Eukaryota;Opisthokonta;Metazoa;Eumetazoa;Bilateria;Protostomia;  
 Spiralia;Lophotrochozoa;Mollusca;Bivalvia;Autobranhia;Pteriomorphia;Pect  
 inida;Pectinoidea;Pectinidae;Pecten;Pecten maximus  
 UdeM00000000472 6596 342.8 UdeM00000000472 XP\_045178232.1 62.9 259  
 87 1 1 259 1 250 3.80E-91 342.8 6596 cellular  
 organisms;Eukaryota;Opisthokonta;Metazoa;Eumetazoa;Bilateria;Protostomia;  
 Spiralia;Lophotrochozoa;Mollusca;Bivalvia;Autobranhia;Heteroconchia;Euhe  
 terodonta;Imparidentia;Venerida;Veneroidea;Veneridae;Mercenaria;Mercenari  
 a mercenaria  
 UdeM00000000474 6596 424.1 UdeM00000000474 XP\_045178964.1 76.1 243  
 58 0 23 265 240 482 1.30E-115 424.1 6596 cellular  
 organisms;Eukaryota;Opisthokonta;Metazoa;Eumetazoa;Bilateria;Protostomia;  
 Spiralia;Lophotrochozoa;Mollusca;Bivalvia;Autobranhia;Heteroconchia;Euhe  
 terodonta;Imparidentia;Venerida;Veneroidea;Veneridae;Mercenaria;Mercenari  
 a mercenaria  
 UdeM00000000475 6573 156 UdeM00000000475 XP\_021342433.1 78.4 88  
 19 0 17 104 75 162 2.80E-35 156 6573 cellular  
 organisms;Eukaryota;Opisthokonta;Metazoa;Eumetazoa;Bilateria;Protostomia;

Spiralia;Lophotrochozoa;Mollusca;Bivalvia;Autobranchia;Pteriormorphia;Pectinida;Pectinoidea;Pectinidae;Mizuhopecten;Mizuhopecten yessoensis  
 UdeM00000000478 400727 496.9 UdeM00000000478 XP\_025086682.1 72.2  
 313 85 1 1 311 33 345 1.90E-137 496.9 400727  
 cellular  
 organisms;Eukaryota;Opisthokonta;Metazoa;Eumetazoa;Bilateria;Protostomia;  
 Spiralia;Lophotrochozoa;Mollusca;Gastropoda;Caenogastropoda;Architaenioglossa;Ampullarioidea;Ampullariidae;Pomacea;Pomacea canaliculata  
 UdeM00000000479 6596 623.6 UdeM00000000479 XP\_045178482.1 75.1 377  
 91 2 1 374 1 377 1.60E-175 623.6 6596 cellular  
 organisms;Eukaryota;Opisthokonta;Metazoa;Eumetazoa;Bilateria;Protostomia;  
 Spiralia;Lophotrochozoa;Mollusca;Bivalvia;Autobranchia;Heteroconchia;Euherodonta;Imparidentia;Venerida;Veneroidea;Veneridae;Mercenaria;Mercenaria mercenaria  
 UdeM00000000480 6596 889.8 UdeM00000000480 XP\_045177600.1 60.4 793  
 268 12 8 783 51 814 2.50E-255 889.8 6596 cellular  
 organisms;Eukaryota;Opisthokonta;Metazoa;Eumetazoa;Bilateria;Protostomia;  
 Spiralia;Lophotrochozoa;Mollusca;Bivalvia;Autobranchia;Heteroconchia;Euherodonta;Imparidentia;Venerida;Veneroidea;Veneridae;Mercenaria;Mercenaria mercenaria  
 UdeM00000000481 6596 479.6 UdeM00000000481 XP\_045178607.1 52.5 434  
 191 3 11 439 1 424 4.40E-132 479.6 6596 cellular  
 organisms;Eukaryota;Opisthokonta;Metazoa;Eumetazoa;Bilateria;Protostomia;  
 Spiralia;Lophotrochozoa;Mollusca;Bivalvia;Autobranchia;Heteroconchia;Euherodonta;Imparidentia;Venerida;Veneroidea;Veneridae;Mercenaria;Mercenaria mercenaria  
 UdeM00000000482 6596 920.2 UdeM00000000482 XP\_045199866.1 39.6 1211  
 647 19 13 1150 308 1506 2.80E-264 920.2 6596 cellular  
 organisms;Eukaryota;Opisthokonta;Metazoa;Eumetazoa;Bilateria;Protostomia;  
 Spiralia;Lophotrochozoa;Mollusca;Bivalvia;Autobranchia;Heteroconchia;Euherodonta;Imparidentia;Venerida;Veneroidea;Veneridae;Mercenaria;Mercenaria mercenaria  
 UdeM00000000483 29159 676.4 UdeM00000000483 XP\_011414437.2 44.8 734  
 373 16 43 765 29 741 4.40E-191 676.4 29159 cellular  
 organisms;Eukaryota;Opisthokonta;Metazoa;Eumetazoa;Bilateria;Protostomia;  
 Spiralia;Lophotrochozoa;Mollusca;Bivalvia;Autobranchia;Pteriormorphia;Ostreida;Ostreoidea;Ostreidae;Crassostrea;Crassostrea gigas  
 UdeM00000000484 29159 359.4 UdeM00000000484 XP\_011414437.2 47.3 353  
 178 4 16 368 343 687 6.40E-96 359.4 29159 cellular  
 organisms;Eukaryota;Opisthokonta;Metazoa;Eumetazoa;Bilateria;Protostomia;  
 Spiralia;Lophotrochozoa;Mollusca;Bivalvia;Autobranchia;Pteriormorphia;Ostreida;Ostreoidea;Ostreidae;Crassostrea;Crassostrea gigas  
 UdeM00000000485 6579 191 UdeM00000000485 XP\_033727198.1 37.1 259  
 119 5 30 245 518 775 1.90E-45 191 6579 cellular  
 organisms;Eukaryota;Opisthokonta;Metazoa;Eumetazoa;Bilateria;Protostomia;  
 Spiralia;Lophotrochozoa;Mollusca;Bivalvia;Autobranchia;Pteriormorphia;Pectinida;Pectinoidea;Pectinidae;Pecten;Pecten maximus  
 UdeM00000000486 29159 434.5 UdeM00000000486 XP\_011414437.2 44.9 470  
 243 7 14 477 291 750 1.80E-118 434.5 29159 cellular  
 organisms;Eukaryota;Opisthokonta;Metazoa;Eumetazoa;Bilateria;Protostomia;  
 Spiralia;Lophotrochozoa;Mollusca;Bivalvia;Autobranchia;Pteriormorphia;Ostreida;Ostreoidea;Ostreidae;Crassostrea;Crassostrea gigas  
 UdeM00000000487 46514 601.7 UdeM00000000487 XP\_038061742.1 52 612  
 263 14 2 599 92 686 1.10E-168 601.7 46514 cellular



organisms;Eukaryota;Opisthokonta;Metazoa;Eumetazoa;Bilateria;Deuterostomi  
a;Echinodermata;Eleutherozoa;Asterozoa;Asteroidea;Valvatacea;Valvatida;As  
terinidae;Patiria;Patiria miniata

UdeM00000000488 6596 307.4 UdeM00000000488 XP\_045179280.1 39.2 429  
241 6 3 427 17 429 2.90E-80 307.4 6596 cellular

organisms;Eukaryota;Opisthokonta;Metazoa;Eumetazoa;Bilateria;Protostomia;  
Spiralia;Lophotrochozoa;Mollusca;Bivalvia;Autobranhia;Heteroconchia;Euhe  
terodonta;Imparidentia;Venerida;Veneroidea;Veneridae;Mercenaria;Mercenari  
a mercenaria

UdeM00000000490 6565 252.3 UdeM00000000490 XP\_022327962.1 36 472  
100 4 1 270 247 718 7.00E-64 252.3 6565 cellular

organisms;Eukaryota;Opisthokonta;Metazoa;Eumetazoa;Bilateria;Protostomia;  
Spiralia;Lophotrochozoa;Mollusca;Bivalvia;Autobranhia;Pteriormorphia;Ostr  
eida;Ostreoidea;Ostreidae;Crassostrea;Crassostrea virginica

UdeM00000000491 6579 671 UdeM00000000491 XP\_033729078.1 63.6 566  
177 13 260 803 57 615 1.90E-189 671 6579 cellular

organisms;Eukaryota;Opisthokonta;Metazoa;Eumetazoa;Bilateria;Protostomia;  
Spiralia;Lophotrochozoa;Mollusca;Bivalvia;Autobranhia;Pteriormorphia;Pect  
inida;Pectinoidea;Pectinidae;Pecten;Pecten maximus

UdeM00000000493 6596 548.5 UdeM00000000493 XP\_045180074.1 47.3 579  
280 9 9 576 3 567 1.00E-152 548.5 6596 cellular

organisms;Eukaryota;Opisthokonta;Metazoa;Eumetazoa;Bilateria;Protostomia;  
Spiralia;Lophotrochozoa;Mollusca;Bivalvia;Autobranhia;Heteroconchia;Euhe  
terodonta;Imparidentia;Venerida;Veneroidea;Veneridae;Mercenaria;Mercenari  
a mercenaria

UdeM00000000494 6596 149.4 UdeM00000000494 XP\_045179100.1 32.4 293  
193 4 21 309 46 337 7.80E-33 149.4 6596 cellular

organisms;Eukaryota;Opisthokonta;Metazoa;Eumetazoa;Bilateria;Protostomia;  
Spiralia;Lophotrochozoa;Mollusca;Bivalvia;Autobranhia;Heteroconchia;Euhe  
terodonta;Imparidentia;Venerida;Veneroidea;Veneridae;Mercenaria;Mercenari  
a mercenaria

UdeM00000000495 1735272 426.8 UdeM00000000495 XP\_041374782.1 69.4  
288 86 1 1 288 1 286 2.20E-116 426.8 1735272  
cellular

organisms;Eukaryota;Opisthokonta;Metazoa;Eumetazoa;Bilateria;Protostomia;  
Spiralia;Lophotrochozoa;Mollusca;Gastropoda;Neomphalina;Neomphaloidea;Pel  
tospiridae;Gigantopelta;Gigantopelta aegis

UdeM00000000496 1735272 2044.2 UdeM00000000496 XP\_041374199.1  
40.5 3100 1444 47 14 2951 1494 4353 0.00E+00 2044.2  
1735272 cellular

organisms;Eukaryota;Opisthokonta;Metazoa;Eumetazoa;Bilateria;Protostomia;  
Spiralia;Lophotrochozoa;Mollusca;Gastropoda;Neomphalina;Neomphaloidea;Pel  
tospiridae;Gigantopelta;Gigantopelta aegis

UdeM00000000497 6596 1812 UdeM00000000497 XP\_045179037.1 47.4 2012  
831 14 44 1843 2309 4304 0.00E+00 1812 6596 cellular

organisms;Eukaryota;Opisthokonta;Metazoa;Eumetazoa;Bilateria;Protostomia;  
Spiralia;Lophotrochozoa;Mollusca;Bivalvia;Autobranhia;Heteroconchia;Euhe  
terodonta;Imparidentia;Venerida;Veneroidea;Veneridae;Mercenaria;Mercenari  
a mercenaria

UdeM00000000498 400727 70.1 UdeM00000000498 XP\_025091829.1 37.5  
88 55 0 30 117 35 122 2.50E-09 70.1 400727  
cellular

organisms;Eukaryota;Opisthokonta;Metazoa;Eumetazoa;Bilateria;Protostomia;

Spiralia; Lophotrochozoa; Mollusca; Gastropoda; Caenogastropoda; Architaenioglossa; Ampullarioidea; Ampullariidae; Pomacea; Pomacea canaliculata

UdeM00000000499 29159 836.3 UdeM00000000499 XP\_034301291.1 39.6 1262  
613 24 150 1335 230 1418 6.20E-239 836.3 29159 cellular  
organisms; Eukaryota; Opisthokonta; Metazoa; Eumetazoa; Bilateria; Protostomia; Spiralia; Lophotrochozoa; Mollusca; Bivalvia; Autobranchia; Pteriomorpha; Ostreida; Ostreioidea; Ostreidae; Crassostrea; Crassostrea gigas

UdeM00000000500 29159 890.2 UdeM00000000500 XP\_034301293.1 38.5 1403  
701 29 117 1438 62 1383 3.90E-255 890.2 29159 cellular  
organisms; Eukaryota; Opisthokonta; Metazoa; Eumetazoa; Bilateria; Protostomia; Spiralia; Lophotrochozoa; Mollusca; Bivalvia; Autobranchia; Pteriomorpha; Ostreida; Ostreioidea; Ostreidae; Crassostrea; Crassostrea gigas

UdeM00000000501 6579 802.7 UdeM00000000501 XP\_033728979.1 36.9 1385  
676 29 115 1376 70 1379 7.90E-229 802.7 6579 cellular  
organisms; Eukaryota; Opisthokonta; Metazoa; Eumetazoa; Bilateria; Protostomia; Spiralia; Lophotrochozoa; Mollusca; Bivalvia; Autobranchia; Pteriomorpha; Pectinida; Pectinoidea; Pectinidae; Pecten; Pecten maximus

UdeM00000000502 29159 945.7 UdeM00000000502 XP\_034301291.1 40 1405  
677 28 116 1437 97 1418 7.80E-272 945.7 29159 cellular  
organisms; Eukaryota; Opisthokonta; Metazoa; Eumetazoa; Bilateria; Protostomia; Spiralia; Lophotrochozoa; Mollusca; Bivalvia; Autobranchia; Pteriomorpha; Ostreida; Ostreioidea; Ostreidae; Crassostrea; Crassostrea gigas

UdeM00000000504 29159 178.3 UdeM00000000504 XP\_034317111.1 29.1 471  
221 11 2 363 171 637 4.00E-41 178.3 29159 cellular  
organisms; Eukaryota; Opisthokonta; Metazoa; Eumetazoa; Bilateria; Protostomia; Spiralia; Lophotrochozoa; Mollusca; Bivalvia; Autobranchia; Pteriomorpha; Ostreida; Ostreioidea; Ostreidae; Crassostrea; Crassostrea gigas

UdeM00000000505 6596 526.2 UdeM00000000505 XP\_045177776.1 37.2 833  
453 16 107 921 153 933 9.50E-146 526.2 6596 cellular  
organisms; Eukaryota; Opisthokonta; Metazoa; Eumetazoa; Bilateria; Protostomia; Spiralia; Lophotrochozoa; Mollusca; Bivalvia; Autobranchia; Heteroconchia; Euheterodonta; Imparidentia; Venerida; Veneroidea; Veneridae; Mercenaria; Mercenaria mercenaria

UdeM00000000506 6596 317.4 UdeM00000000506 XP\_045177903.1 55.1 272  
114 2 1049 1314 907 1176 8.60E-83 317.4 6596 cellular  
organisms; Eukaryota; Opisthokonta; Metazoa; Eumetazoa; Bilateria; Protostomia; Spiralia; Lophotrochozoa; Mollusca; Bivalvia; Autobranchia; Heteroconchia; Euheterodonta; Imparidentia; Venerida; Veneroidea; Veneridae; Mercenaria; Mercenaria mercenaria

UdeM00000000507 6596 78.2 UdeM00000000507 XP\_045212464.1 46.6 73  
38 1 90 162 31 102 1.20E-11 78.2 6596 cellular  
organisms; Eukaryota; Opisthokonta; Metazoa; Eumetazoa; Bilateria; Protostomia; Spiralia; Lophotrochozoa; Mollusca; Bivalvia; Autobranchia; Heteroconchia; Euheterodonta; Imparidentia; Venerida; Veneroidea; Veneridae; Mercenaria; Mercenaria mercenaria

UdeM00000000509 6565 84.7 UdeM00000000509 XP\_022288562.1 46.6 88  
47 0 1 88 73 160 1.30E-13 84.7 6565 cellular  
organisms; Eukaryota; Opisthokonta; Metazoa; Eumetazoa; Bilateria; Protostomia; Spiralia; Lophotrochozoa; Mollusca; Bivalvia; Autobranchia; Pteriomorpha; Ostreida; Ostreioidea; Ostreidae; Crassostrea; Crassostrea virginica

UdeM00000000510 6573 218.4 UdeM00000000510 XP\_021346189.1 56.1 189  
77 2 1 187 22 206 7.90E-54 218.4 6573 cellular  
organisms; Eukaryota; Opisthokonta; Metazoa; Eumetazoa; Bilateria; Protostomia;

Spiralia;Lophotrochozoa;Mollusca;Bivalvia;Autobranchia;Pteriomorpha;Pectinida;Pectinoidea;Pectinidae;Mizuhopecten;Mizuhopecten yessoensis

UdeM00000000511 6596 335.9 UdeM00000000511 XP\_045179152.1 55.1 314  
131 3 1 307 71 381 6.10E-89 335.9 6596 cellular  
organisms;Eukaryota;Opisthokonta;Metazoa;Eumetazoa;Bilateria;Protostomia;  
Spiralia;Lophotrochozoa;Mollusca;Bivalvia;Autobranchia;Heteroconchia;Euherodonta;Imparidentia;Venerida;Veneroidea;Veneridae;Mercenaria;Mercenaria mercenaria

UdeM00000000513 6596 325.5 UdeM00000000513 XP\_045179603.1 47.2 377  
181 5 1 363 1 373 9.60E-86 325.5 6596 cellular  
organisms;Eukaryota;Opisthokonta;Metazoa;Eumetazoa;Bilateria;Protostomia;  
Spiralia;Lophotrochozoa;Mollusca;Bivalvia;Autobranchia;Heteroconchia;Euherodonta;Imparidentia;Venerida;Veneroidea;Veneridae;Mercenaria;Mercenaria mercenaria

UdeM00000000514 6596 166.4 UdeM00000000514 XP\_045164742.1 52 125  
60 0 8 132 6 130 2.50E-38 166.4 6596 cellular  
organisms;Eukaryota;Opisthokonta;Metazoa;Eumetazoa;Bilateria;Protostomia;  
Spiralia;Lophotrochozoa;Mollusca;Bivalvia;Autobranchia;Heteroconchia;Euherodonta;Imparidentia;Venerida;Veneroidea;Veneridae;Mercenaria;Mercenaria mercenaria

UdeM00000000515 6565 186.8 UdeM00000000515 XP\_022324251.1 48.6 181  
89 3 25 203 18 196 2.80E-44 186.8 6565 cellular  
organisms;Eukaryota;Opisthokonta;Metazoa;Eumetazoa;Bilateria;Protostomia;  
Spiralia;Lophotrochozoa;Mollusca;Bivalvia;Autobranchia;Pteriomorpha;Ostreida;Ostreoidea;Ostreidae;Crassostrea;Crassostrea virginica

UdeM00000000516 6565 206.8 UdeM00000000516 XP\_022324251.1 54.6 183  
79 3 24 204 18 198 2.60E-50 206.8 6565 cellular  
organisms;Eukaryota;Opisthokonta;Metazoa;Eumetazoa;Bilateria;Protostomia;  
Spiralia;Lophotrochozoa;Mollusca;Bivalvia;Autobranchia;Pteriomorpha;Ostreida;Ostreoidea;Ostreidae;Crassostrea;Crassostrea virginica

UdeM00000000517 6412 111.7 UdeM00000000517 XP\_009015452.1 51 98  
48 0 1 98 1 98 5.60E-21 111.7 6412 cellular  
organisms;Eukaryota;Opisthokonta;Metazoa;Eumetazoa;Bilateria;Protostomia;  
Spiralia;Lophotrochozoa;Annelida;Clitellata;Hirudinea;Rhynchobdellida;Glossiphoniidae;Helobdella;Helobdella robusta

UdeM00000000518 6596 625.2 UdeM00000000518 XP\_045180021.1 71.6 405  
113 1 11 415 3 405 6.20E-176 625.2 6596 cellular  
organisms;Eukaryota;Opisthokonta;Metazoa;Eumetazoa;Bilateria;Protostomia;  
Spiralia;Lophotrochozoa;Mollusca;Bivalvia;Autobranchia;Heteroconchia;Euherodonta;Imparidentia;Venerida;Veneroidea;Veneridae;Mercenaria;Mercenaria mercenaria

UdeM00000000519 6596 535.8 UdeM00000000519 XP\_045180026.1 66.5 388  
125 2 1 388 27 409 4.60E-149 535.8 6596 cellular  
organisms;Eukaryota;Opisthokonta;Metazoa;Eumetazoa;Bilateria;Protostomia;  
Spiralia;Lophotrochozoa;Mollusca;Bivalvia;Autobranchia;Heteroconchia;Euherodonta;Imparidentia;Venerida;Veneroidea;Veneridae;Mercenaria;Mercenaria mercenaria

UdeM00000000520 6596 605.1 UdeM00000000520 XP\_045180021.1 69.8 404  
120 1 26 429 5 406 6.80E-170 605.1 6596 cellular  
organisms;Eukaryota;Opisthokonta;Metazoa;Eumetazoa;Bilateria;Protostomia;  
Spiralia;Lophotrochozoa;Mollusca;Bivalvia;Autobranchia;Heteroconchia;Euherodonta;Imparidentia;Venerida;Veneroidea;Veneridae;Mercenaria;Mercenaria mercenaria

UdeM00000000521 6565 147.9 UdeM00000000521 XP\_022342298.1 55.4 130  
 53 1 156 285 399 523 2.10E-32 147.9 6565 cellular  
 organisms;Eukaryota;Opisthokonta;Metazoa;Eumetazoa;Bilateria;Protostomia;  
 Spiralia;Lophotrochozoa;Mollusca;Bivalvia;Autobranchia;Pteriomorphia;Ostr  
 eida;Ostreoidea;Ostreidae;Crassostrea;Crassostrea virginica  
 UdeM00000000522 202533 336.3 UdeM00000000522 XP\_035218899.1 38.3  
 470 263 8 1 447 1 466 6.10E-89 336.3 202533  
 cellular  
 organisms;Eukaryota;Opisthokonta;Metazoa;Eumetazoa;Bilateria;Protostomia;  
 Ecdysozoa;Panarthropoda;Arthropoda;Chelicerata;Arachnida;Araneae;Araneomo  
 rphae;Entelegynae;Eresoidea;Eresidae;Stegodyphus;Stegodyphus dumicola  
 UdeM00000000523 6596 105.1 UdeM00000000523 XP\_045178915.1 30.5 643  
 323 15 1 547 1 615 2.80E-19 105.1 6596 cellular  
 organisms;Eukaryota;Opisthokonta;Metazoa;Eumetazoa;Bilateria;Protostomia;  
 Spiralia;Lophotrochozoa;Mollusca;Bivalvia;Autobranchia;Heteroconchia;Euhe  
 terodonta;Imparidentia;Venerida;Veneroidea;Veneridae;Mercenaria;Mercenari  
 a mercenaria  
 UdeM00000000524 6596 622.1 UdeM00000000524 XP\_045178916.1 69.7 403  
 121 1 1 403 1 402 5.00E-175 622.1 6596 cellular  
 organisms;Eukaryota;Opisthokonta;Metazoa;Eumetazoa;Bilateria;Protostomia;  
 Spiralia;Lophotrochozoa;Mollusca;Bivalvia;Autobranchia;Heteroconchia;Euhe  
 terodonta;Imparidentia;Venerida;Veneroidea;Veneridae;Mercenaria;Mercenari  
 a mercenaria  
 UdeM00000000525 6596 65.9 UdeM00000000525 XP\_045179474.1 52.9 85  
 18 4 1 82 1 66 2.90E-08 65.9 6596 cellular  
 organisms;Eukaryota;Opisthokonta;Metazoa;Eumetazoa;Bilateria;Protostomia;  
 Spiralia;Lophotrochozoa;Mollusca;Bivalvia;Autobranchia;Heteroconchia;Euhe  
 terodonta;Imparidentia;Venerida;Veneroidea;Veneridae;Mercenaria;Mercenari  
 a mercenaria  
 UdeM00000000526 6596 268.5 UdeM00000000526 XP\_045179474.1 95.4 130  
 6 0 100 229 68 197 8.00E-69 268.5 6596 cellular  
 organisms;Eukaryota;Opisthokonta;Metazoa;Eumetazoa;Bilateria;Protostomia;  
 Spiralia;Lophotrochozoa;Mollusca;Bivalvia;Autobranchia;Heteroconchia;Euhe  
 terodonta;Imparidentia;Venerida;Veneroidea;Veneridae;Mercenaria;Mercenari  
 a mercenaria  
 UdeM00000000527 6596 242.7 UdeM00000000527 XP\_045179765.1 51.5 233  
 106 4 8 233 39 271 4.80E-61 242.7 6596 cellular  
 organisms;Eukaryota;Opisthokonta;Metazoa;Eumetazoa;Bilateria;Protostomia;  
 Spiralia;Lophotrochozoa;Mollusca;Bivalvia;Autobranchia;Heteroconchia;Euhe  
 terodonta;Imparidentia;Venerida;Veneroidea;Veneridae;Mercenaria;Mercenari  
 a mercenaria  
 UdeM00000000528 6596 261.5 UdeM00000000528 XP\_045179766.1 52 248  
 108 5 10 246 18 265 1.10E-66 261.5 6596 cellular  
 organisms;Eukaryota;Opisthokonta;Metazoa;Eumetazoa;Bilateria;Protostomia;  
 Spiralia;Lophotrochozoa;Mollusca;Bivalvia;Autobranchia;Heteroconchia;Euhe  
 terodonta;Imparidentia;Venerida;Veneroidea;Veneridae;Mercenaria;Mercenari  
 a mercenaria  
 UdeM00000000529 6596 107.8 UdeM00000000529 XP\_045194227.1 48.4 126  
 61 3 2 125 16 139 1.40E-20 107.8 6596 cellular  
 organisms;Eukaryota;Opisthokonta;Metazoa;Eumetazoa;Bilateria;Protostomia;  
 Spiralia;Lophotrochozoa;Mollusca;Bivalvia;Autobranchia;Heteroconchia;Euhe  
 terodonta;Imparidentia;Venerida;Veneroidea;Veneridae;Mercenaria;Mercenari  
 a mercenaria

UdeM00000000530 6596 85.5 UdeM00000000530 XP\_045194227.1 44.9 107  
 55 3 2 106 35 139 5.90E-14 85.5 6596 cellular  
 organisms;Eukaryota;Opisthokonta;Metazoa;Eumetazoa;Bilateria;Protostomia;  
 Spiralia;Lophotrochozoa;Mollusca;Bivalvia;Autobranchia;Heteroconchia;Euhe  
 terodonta;Imparidentia;Venerida;Veneroidea;Veneridae;Mercenaria;Mercenari  
 a mercenaria  
 UdeM00000000531 29159 374.4 UdeM00000000531 XP\_034299474.1 45.2 445  
 227 5 6 447 247 677 2.10E-100 374.4 29159 cellular  
 organisms;Eukaryota;Opisthokonta;Metazoa;Eumetazoa;Bilateria;Protostomia;  
 Spiralia;Lophotrochozoa;Mollusca;Bivalvia;Autobranchia;Pteriormorphia;Ostr  
 eida;Ostreoidea;Ostreidae;Crassostrea;Crassostrea gigas  
 UdeM00000000532 6565 168.3 UdeM00000000532 XP\_022290343.1 50 180  
 80 5 1 171 126 304 8.50E-39 168.3 6565 cellular  
 organisms;Eukaryota;Opisthokonta;Metazoa;Eumetazoa;Bilateria;Protostomia;  
 Spiralia;Lophotrochozoa;Mollusca;Bivalvia;Autobranchia;Pteriormorphia;Ostr  
 eida;Ostreoidea;Ostreidae;Crassostrea;Crassostrea virginica  
 UdeM00000000533 29159 142.5 UdeM00000000533 XP\_034330911.1 52.9 138  
 62 2 1 137 1 136 4.40E-31 142.5 29159 cellular  
 organisms;Eukaryota;Opisthokonta;Metazoa;Eumetazoa;Bilateria;Protostomia;  
 Spiralia;Lophotrochozoa;Mollusca;Bivalvia;Autobranchia;Pteriormorphia;Ostr  
 eida;Ostreoidea;Ostreidae;Crassostrea;Crassostrea gigas  
 UdeM00000000534 1735272 174.1 UdeM00000000534 XP\_041347065.1 57.9  
 145 59 2 1 143 1 145 1.40E-40 174.1 1735272  
 cellular  
 organisms;Eukaryota;Opisthokonta;Metazoa;Eumetazoa;Bilateria;Protostomia;  
 Spiralia;Lophotrochozoa;Mollusca;Gastropoda;Neomphalina;Neomphaloidea;Pel  
 tospiridae;Gigantopelta;Gigantopelta aegis  
 UdeM00000000535 7757 287.7 UdeM00000000535 XP\_032835197.1 80.1 176  
 35 0 1 176 52 227 9.90E-75 287.7 7757 cellular  
 organisms;Eukaryota;Opisthokonta;Metazoa;Eumetazoa;Bilateria;Deuterostomi  
 a;Chordata;Craniata;Vertebrata;Cyclostomata;Hyperoartia;Petromyzontiforme  
 s;Petromyzontidae;Petromyzon;Petromyzon marinus  
 UdeM00000000537 7574 338.2 UdeM00000000537 XP\_013382110.1 51.5 328  
 148 4 14 340 45 362 1.30E-89 338.2 7574 cellular  
 organisms;Eukaryota;Opisthokonta;Metazoa;Eumetazoa;Bilateria;Protostomia;  
 Spiralia;Lophotrochozoa;Brachiopoda;Linguliformea;Lingulata;Lingulida;Lin  
 guloidea;Lingulidae;Lingula;Lingula anatina  
 UdeM00000000538 7574 168.3 UdeM00000000538 XP\_013384628.1 65.8 120  
 39 1 1 120 33 150 8.10E-39 168.3 7574 cellular  
 organisms;Eukaryota;Opisthokonta;Metazoa;Eumetazoa;Bilateria;Protostomia;  
 Spiralia;Lophotrochozoa;Brachiopoda;Linguliformea;Lingulata;Lingulida;Lin  
 guloidea;Lingulidae;Lingula;Lingula anatina  
 UdeM00000000538 7574 53.5 UdeM00000000538 XP\_013384628.1 75 32  
 8 0 134 165 529 560 2.90E-04 53.5 7574 cellular  
 organisms;Eukaryota;Opisthokonta;Metazoa;Eumetazoa;Bilateria;Protostomia;  
 Spiralia;Lophotrochozoa;Brachiopoda;Linguliformea;Lingulata;Lingulida;Lin  
 guloidea;Lingulidae;Lingula;Lingula anatina  
 UdeM00000000540 1735272 82.8 UdeM00000000540 XP\_041363681.1 39.6  
 101 56 1 3 103 513 608 3.10E-13 82.8 1735272  
 cellular  
 organisms;Eukaryota;Opisthokonta;Metazoa;Eumetazoa;Bilateria;Protostomia;  
 Spiralia;Lophotrochozoa;Mollusca;Gastropoda;Neomphalina;Neomphaloidea;Pel  
 tospiridae;Gigantopelta;Gigantopelta aegis

UdeM00000000541 8078 94 UdeM00000000541 XP\_036006874.1 32.3 186  
 111 5 38 209 21 205 3.10E-16 94 8078 cellular  
 organisms;Eukaryota;Opisthokonta;Metazoa;Eumetazoa;Bilateria;Deuterostomi  
 a;Chordata;Craniata;Vertebrata;Gnathostomata;Teleostomi;Euteleostomi;Acti  
 nopterygii;Actinopteri;Neopterygii;Teleostei;Osteoglossocephalai;Clupeoce  
 phala;Euteleostomorpha;Neoteleostei;Eurypterygia;Ctenosquamata;Acanthomo  
 rphata;Euacanthomorphacea;Percomorphaceae;Ovalentaria;Atherinomorphae;Cyp  
 rinodontiformes;Cyprinodontoidei;Fundulidae;Fundulus;Fundulus  
 heteroclitus

UdeM00000000542 6596 374 UdeM00000000542 XP\_045179225.1 64 317  
 90 5 1 307 39 341 1.80E-100 374 6596 cellular  
 organisms;Eukaryota;Opisthokonta;Metazoa;Eumetazoa;Bilateria;Protostomia;  
 Spiralia;Lophotrochozoa;Mollusca;Bivalvia;Autobranchia;Heteroconchia;Euhe  
 terodonta;Imparidentia;Venerida;Veneroidea;Veneridae;Mercenaria;Mercenari  
 a mercenaria

UdeM00000000543 6596 109.4 UdeM00000000543 XP\_045192592.1 26.5 298  
 193 7 11 290 348 637 8.40E-21 109.4 6596 cellular  
 organisms;Eukaryota;Opisthokonta;Metazoa;Eumetazoa;Bilateria;Protostomia;  
 Spiralia;Lophotrochozoa;Mollusca;Bivalvia;Autobranchia;Heteroconchia;Euhe  
 terodonta;Imparidentia;Venerida;Veneroidea;Veneridae;Mercenaria;Mercenari  
 a mercenaria

UdeM00000000544 6596 110.2 UdeM00000000544 XP\_045191996.1 28.6 234  
 159 2 33 261 354 584 4.40E-21 110.2 6596 cellular  
 organisms;Eukaryota;Opisthokonta;Metazoa;Eumetazoa;Bilateria;Protostomia;  
 Spiralia;Lophotrochozoa;Mollusca;Bivalvia;Autobranchia;Heteroconchia;Euhe  
 terodonta;Imparidentia;Venerida;Veneroidea;Veneridae;Mercenaria;Mercenari  
 a mercenaria

UdeM00000000545 6579 194.5 UdeM00000000545 XP\_033758968.1 25.6 609  
 412 15 13 610 63 641 4.20E-46 194.5 6579 cellular  
 organisms;Eukaryota;Opisthokonta;Metazoa;Eumetazoa;Bilateria;Protostomia;  
 Spiralia;Lophotrochozoa;Mollusca;Bivalvia;Autobranchia;Pteriormorphia;Pect  
 inida;Pectinoidea;Pectinidae;Pecten;Pecten maximus

UdeM00000000546 6596 152.9 UdeM00000000546 XP\_045215484.1 31.8 318  
 171 7 1 278 6 317 5.90E-34 152.9 6596 cellular  
 organisms;Eukaryota;Opisthokonta;Metazoa;Eumetazoa;Bilateria;Protostomia;  
 Spiralia;Lophotrochozoa;Mollusca;Bivalvia;Autobranchia;Heteroconchia;Euhe  
 terodonta;Imparidentia;Venerida;Veneroidea;Veneridae;Mercenaria;Mercenari  
 a mercenaria

UdeM00000000547 6579 161.8 UdeM00000000547 XP\_033758968.1 23.8 646  
 441 16 1 605 44 679 2.80E-36 161.8 6579 cellular  
 organisms;Eukaryota;Opisthokonta;Metazoa;Eumetazoa;Bilateria;Protostomia;  
 Spiralia;Lophotrochozoa;Mollusca;Bivalvia;Autobranchia;Pteriormorphia;Pect  
 inida;Pectinoidea;Pectinidae;Pecten;Pecten maximus

UdeM00000000548 6573 216.1 UdeM00000000548 XP\_021341731.1 23.9 695  
 473 11 10 679 8 671 1.40E-52 216.1 6573 cellular  
 organisms;Eukaryota;Opisthokonta;Metazoa;Eumetazoa;Bilateria;Protostomia;  
 Spiralia;Lophotrochozoa;Mollusca;Bivalvia;Autobranchia;Pteriormorphia;Pect  
 inida;Pectinoidea;Pectinidae;Mizuhopecten;Mizuhopecten yessoensis

UdeM00000000549 6596 222.2 UdeM00000000549 XP\_045172484.1 25 688  
 455 18 5 677 66 707 2.00E-54 222.2 6596 cellular  
 organisms;Eukaryota;Opisthokonta;Metazoa;Eumetazoa;Bilateria;Protostomia;  
 Spiralia;Lophotrochozoa;Mollusca;Bivalvia;Autobranchia;Heteroconchia;Euhe  
 terodonta;Imparidentia;Venerida;Veneroidea;Veneridae;Mercenaria;Mercenari  
 a mercenaria

UdeM00000000550 7493 126.3 UdeM00000000550 XP\_014238511.1 25.6 425  
 253 13 904 1301 25 413 4.40E-25 126.3 7493 cellular  
 organisms;Eukaryota;Opisthokonta;Metazoa;Eumetazoa;Bilateria;Protostomia;  
 Ecdysozoa;Panarthropoda;Arthropoda;Mandibulata;Pancrustacea;Hexapoda;Inse  
 cta;Dicondylia;Pterygota;Neoptera;Endopterygota;Hymenoptera;Apocrita;Para  
 sitoida;Chalcidoidea;Trichogrammatidae;Trichogramma;Trichogramma  
 pretiosum  
 UdeM00000000551 210409 81.3 UdeM00000000551 XP\_045125380.1 25.1  
 315 187 11 1584 1881 82 364 1.50E-11 81.3 210409  
 cellular  
 organisms;Eukaryota;Opisthokonta;Metazoa;Eumetazoa;Bilateria;Protostomia;  
 Ecdysozoa;Panarthropoda;Arthropoda;Mandibulata;Pancrustacea;Crustacea;Mul  
 ticrustacea;Malacostraca;Eumalacostraca;Eucarida;Decapoda;Pleocyemata;Bra  
 chyura;Eubranchyura;Heterotremata;Portunoidea;Portunidae;Portunus;Portunus  
 trituberculatus  
 UdeM00000000552 6579 537.3 UdeM00000000552 XP\_033728415.1 51.7 565  
 247 8 19 580 14 555 2.30E-149 537.3 6579 cellular  
 organisms;Eukaryota;Opisthokonta;Metazoa;Eumetazoa;Bilateria;Protostomia;  
 Spiralia;Lophotrochozoa;Mollusca;Bivalvia;Autobranchia;Pteriormorphia;Pect  
 inida;Pectinoidea;Pectinidae;Pecten;Pecten maximus  
 UdeM00000000553 6596 370.9 UdeM00000000553 XP\_045178425.1 41.7 472  
 234 6 41 506 38 474 2.60E-99 370.9 6596 cellular  
 organisms;Eukaryota;Opisthokonta;Metazoa;Eumetazoa;Bilateria;Protostomia;  
 Spiralia;Lophotrochozoa;Mollusca;Bivalvia;Autobranchia;Heteroconchia;Euhe  
 terodonta;Imparidentia;Venerida;Veneroidea;Veneridae;Mercenaria;Mercenari  
 a mercenaria  
 UdeM00000000554 6596 287.7 UdeM00000000554 XP\_045187594.1 44.9 356  
 162 10 36 371 35 376 2.10E-74 287.7 6596 cellular  
 organisms;Eukaryota;Opisthokonta;Metazoa;Eumetazoa;Bilateria;Protostomia;  
 Spiralia;Lophotrochozoa;Mollusca;Bivalvia;Autobranchia;Heteroconchia;Euhe  
 terodonta;Imparidentia;Venerida;Veneroidea;Veneridae;Mercenaria;Mercenari  
 a mercenaria  
 UdeM00000000555 6596 287.7 UdeM00000000555 XP\_045187594.1 44.9 356  
 162 10 45 380 35 376 2.20E-74 287.7 6596 cellular  
 organisms;Eukaryota;Opisthokonta;Metazoa;Eumetazoa;Bilateria;Protostomia;  
 Spiralia;Lophotrochozoa;Mollusca;Bivalvia;Autobranchia;Heteroconchia;Euhe  
 terodonta;Imparidentia;Venerida;Veneroidea;Veneridae;Mercenaria;Mercenari  
 a mercenaria  
 UdeM00000000556 35525 249.2 UdeM00000000556 XP\_032777945.1 41.6 351  
 170 10 74 406 35 368 9.10E-63 249.2 35525 cellular  
 organisms;Eukaryota;Opisthokonta;Metazoa;Eumetazoa;Bilateria;Protostomia;  
 Ecdysozoa;Panarthropoda;Arthropoda;Mandibulata;Pancrustacea;Crustacea;Bra  
 nchiopoda;Phylloppoda;Diplostraca;Cladocera;Anomopoda;Daphniidae;Daphnia;D  
 aphnia magna  
 UdeM00000000557 35525 264.6 UdeM00000000557 XP\_032777945.1 43.3 351  
 171 10 74 413 35 368 2.10E-67 264.6 35525 cellular  
 organisms;Eukaryota;Opisthokonta;Metazoa;Eumetazoa;Bilateria;Protostomia;  
 Ecdysozoa;Panarthropoda;Arthropoda;Mandibulata;Pancrustacea;Crustacea;Bra  
 nchiopoda;Phylloppoda;Diplostraca;Cladocera;Anomopoda;Daphniidae;Daphnia;D  
 aphnia magna  
 UdeM00000000558 6596 521.9 UdeM00000000558 XP\_045178985.1 60.4 386  
 153 0 21 406 5 390 7.50E-145 521.9 6596 cellular  
 organisms;Eukaryota;Opisthokonta;Metazoa;Eumetazoa;Bilateria;Protostomia;  
 Spiralia;Lophotrochozoa;Mollusca;Bivalvia;Autobranchia;Heteroconchia;Euhe

terodonta;Imparidentia;Venerida;Veneroidea;Veneridae;Mercenaria;Mercenari  
 a mercenaria  
 UdeM00000000559 6573 394 UdeM00000000559 XP\_021351760.1 39.6 904  
 404 36 1 808 1 858 6.80E-106 394 6573 cellular  
 organisms;Eukaryota;Opisthokonta;Metazoa;Eumetazoa;Bilateria;Protostomia;  
 Spiralia;Lophotrochozoa;Mollusca;Bivalvia;Autobranhia;Pteriormorphia;Pect  
 inida;Pectinoidea;Pectinidae;Mizuhopecten;Mizuhopecten yessoensis  
 UdeM00000000559 6573 65.5 UdeM00000000559 XP\_021351760.1 57.4 54  
 23 0 1187 1240 1158 1211 5.60E-07 65.5 6573 cellular  
 organisms;Eukaryota;Opisthokonta;Metazoa;Eumetazoa;Bilateria;Protostomia;  
 Spiralia;Lophotrochozoa;Mollusca;Bivalvia;Autobranhia;Pteriormorphia;Pect  
 inida;Pectinoidea;Pectinidae;Mizuhopecten;Mizuhopecten yessoensis  
 UdeM00000000560 6579 220.3 UdeM00000000560 XP\_033758968.1 24.8 686  
 468 13 15 679 13 671 7.50E-54 220.3 6579 cellular  
 organisms;Eukaryota;Opisthokonta;Metazoa;Eumetazoa;Bilateria;Protostomia;  
 Spiralia;Lophotrochozoa;Mollusca;Bivalvia;Autobranhia;Pteriormorphia;Pect  
 inida;Pectinoidea;Pectinidae;Pecten;Pecten maximus  
 UdeM00000000562 6579 119.8 UdeM00000000562 XP\_033758968.1 23.7 405  
 284 5 8 411 141 521 8.40E-24 119.8 6579 cellular  
 organisms;Eukaryota;Opisthokonta;Metazoa;Eumetazoa;Bilateria;Protostomia;  
 Spiralia;Lophotrochozoa;Mollusca;Bivalvia;Autobranhia;Pteriormorphia;Pect  
 inida;Pectinoidea;Pectinidae;Pecten;Pecten maximus  
 UdeM00000000563 6573 227.3 UdeM00000000563 XP\_021351761.1 41.8 390  
 181 12 14 382 761 1125 3.40E-56 227.3 6573 cellular  
 organisms;Eukaryota;Opisthokonta;Metazoa;Eumetazoa;Bilateria;Protostomia;  
 Spiralia;Lophotrochozoa;Mollusca;Bivalvia;Autobranhia;Pteriormorphia;Pect  
 inida;Pectinoidea;Pectinidae;Mizuhopecten;Mizuhopecten yessoensis  
 UdeM00000000564 6596 305.4 UdeM00000000564 XP\_045179164.1 53.3 418  
 176 6 20 433 19 421 1.10E-79 305.4 6596 cellular  
 organisms;Eukaryota;Opisthokonta;Metazoa;Eumetazoa;Bilateria;Protostomia;  
 Spiralia;Lophotrochozoa;Mollusca;Bivalvia;Autobranhia;Heteroconchia;Euhe  
 terodonta;Imparidentia;Venerida;Veneroidea;Veneridae;Mercenaria;Mercenari  
 a mercenaria  
 UdeM00000000565 6573 248.4 UdeM00000000565 XP\_021373014.1 25.7 1331  
 735 40 3 1184 10 1235 4.40E-62 248.4 6573 cellular  
 organisms;Eukaryota;Opisthokonta;Metazoa;Eumetazoa;Bilateria;Protostomia;  
 Spiralia;Lophotrochozoa;Mollusca;Bivalvia;Autobranhia;Pteriormorphia;Pect  
 inida;Pectinoidea;Pectinidae;Mizuhopecten;Mizuhopecten yessoensis  
 UdeM00000000566 6573 394.8 UdeM00000000566 XP\_021341105.1 44.6 894  
 329 24 1 837 1 785 2.70E-106 394.8 6573 cellular  
 organisms;Eukaryota;Opisthokonta;Metazoa;Eumetazoa;Bilateria;Protostomia;  
 Spiralia;Lophotrochozoa;Mollusca;Bivalvia;Autobranhia;Pteriormorphia;Pect  
 inida;Pectinoidea;Pectinidae;Mizuhopecten;Mizuhopecten yessoensis  
 UdeM00000000569 6565 172.6 UdeM00000000569 XP\_022327991.1 58.7 126  
 52 0 36 161 34 159 4.70E-40 172.6 6565 cellular  
 organisms;Eukaryota;Opisthokonta;Metazoa;Eumetazoa;Bilateria;Protostomia;  
 Spiralia;Lophotrochozoa;Mollusca;Bivalvia;Autobranhia;Pteriormorphia;Ostr  
 eida;Ostreoidea;Ostreidae;Crassostrea;Crassostrea virginica  
 UdeM00000000571 6596 458 UdeM00000000571 XP\_045180079.1 76.2 281  
 67 0 1 281 1 281 8.70E-126 458 6596 cellular  
 organisms;Eukaryota;Opisthokonta;Metazoa;Eumetazoa;Bilateria;Protostomia;  
 Spiralia;Lophotrochozoa;Mollusca;Bivalvia;Autobranhia;Heteroconchia;Euhe  
 terodonta;Imparidentia;Venerida;Veneroidea;Veneridae;Mercenaria;Mercenari  
 a mercenaria



UdeM00000000572 29159 60.8 UdeM00000000572 XP\_034313251.1 43.3 67  
 38 0 76 142 6 72 1.70E-06 60.8 29159 cellular  
 organisms;Eukaryota;Opisthokonta;Metazoa;Eumetazoa;Bilateria;Protostomia;  
 Spiralia;Lophotrochozoa;Mollusca;Bivalvia;Autobranchia;Pteriormorphia;Ostr  
 eida;Ostreoidea;Ostreidae;Crassostrea;Crassostrea gigas  
 UdeM00000000573 6573 554.3 UdeM00000000573 XP\_021351753.1 60.4 450  
 153 4 4 428 3 452 1.40E-154 554.3 6573 cellular  
 organisms;Eukaryota;Opisthokonta;Metazoa;Eumetazoa;Bilateria;Protostomia;  
 Spiralia;Lophotrochozoa;Mollusca;Bivalvia;Autobranchia;Pteriormorphia;Pect  
 inida;Pectinoidea;Pectinidae;Mizuhopecten;Mizuhopecten yessoensis  
 UdeM00000000574 1735272 462.6 UdeM00000000574 XP\_041374046.1 61  
 362 132 3 13 367 13 372 4.60E-127 462.6 1735272  
 cellular  
 organisms;Eukaryota;Opisthokonta;Metazoa;Eumetazoa;Bilateria;Protostomia;  
 Spiralia;Lophotrochozoa;Mollusca;Gastropoda;Neomphalina;Neomphaloidea;Pel  
 tospiridae;Gigantopelta;Gigantopelta aegis  
 UdeM00000000576 90988 118.2 UdeM00000000576 XP\_039535825.1 58.9 95  
 38 1 1 95 111 204 6.20E-24 118.2 90988 cellular  
 organisms;Eukaryota;Opisthokonta;Metazoa;Eumetazoa;Bilateria;Deuterostomi  
 a;Chordata;Craniata;Vertebrata;Gnathostomata;Teleostomi;Euteleostomi;Acti  
 nopterygii;Actinopteri;Neopterygii;Teleostei;Osteoglossocephalai;Clupeoce  
 phala;Otomorpha;Ostariophysi;Otophysi;Cypriniphysae;Cypriniiformes;Cyprino  
 idei;Leuciscidae;Pogonichthyinae;Pimephales;Pimephales promelas  
 UdeM00000000578 6579 1333.2 UdeM00000000578 XP\_033728526.1 85.3  
 842 97 15 1 821 1 836 0.00E+00 1333.2 6579  
 cellular  
 organisms;Eukaryota;Opisthokonta;Metazoa;Eumetazoa;Bilateria;Protostomia;  
 Spiralia;Lophotrochozoa;Mollusca;Bivalvia;Autobranchia;Pteriormorphia;Pect  
 inida;Pectinoidea;Pectinidae;Pecten;Pecten maximus  
 UdeM00000000579 6579 1327.4 UdeM00000000579 XP\_033728526.1 85.8  
 830 94 14 5 816 13 836 0.00E+00 1327.4 6579  
 cellular  
 organisms;Eukaryota;Opisthokonta;Metazoa;Eumetazoa;Bilateria;Protostomia;  
 Spiralia;Lophotrochozoa;Mollusca;Bivalvia;Autobranchia;Pteriormorphia;Pect  
 inida;Pectinoidea;Pectinidae;Pecten;Pecten maximus  
 UdeM00000000580 6565 398.3 UdeM00000000580 XP\_022327156.1 61.4 308  
 102 1 1 308 1 291 9.10E-108 398.3 6565 cellular  
 organisms;Eukaryota;Opisthokonta;Metazoa;Eumetazoa;Bilateria;Protostomia;  
 Spiralia;Lophotrochozoa;Mollusca;Bivalvia;Autobranchia;Pteriormorphia;Ostr  
 eida;Ostreoidea;Ostreidae;Crassostrea;Crassostrea virginica  
 UdeM00000000581 6596 146.7 UdeM00000000581 XP\_045178328.1 67.6 105  
 34 0 39 143 47 151 2.20E-32 146.7 6596 cellular  
 organisms;Eukaryota;Opisthokonta;Metazoa;Eumetazoa;Bilateria;Protostomia;  
 Spiralia;Lophotrochozoa;Mollusca;Bivalvia;Autobranchia;Heteroconchia;Euhe  
 terodonta;Imparidentia;Venerida;Veneroidea;Veneridae;Mercenaria;Mercenari  
 a mercenaria  
 UdeM00000000583 6596 239.6 UdeM00000000583 XP\_045179812.1 26.8 1226  
 581 40 1 936 1 1199 1.80E-59 239.6 6596 cellular  
 organisms;Eukaryota;Opisthokonta;Metazoa;Eumetazoa;Bilateria;Protostomia;  
 Spiralia;Lophotrochozoa;Mollusca;Bivalvia;Autobranchia;Heteroconchia;Euhe  
 terodonta;Imparidentia;Venerida;Veneroidea;Veneridae;Mercenaria;Mercenari  
 a mercenaria  
 UdeM00000000584 6596 1248.4 UdeM00000000584 XP\_045178526.1 58.2  
 1160 428 15 8 1145 11 1135 0.00E+00 1248.4 6596

cellular  
organisms;Eukaryota;Opisthokonta;Metazoa;Eumetazoa;Bilateria;Protostomia;  
Spiralia;Lophotrochozoa;Mollusca;Bivalvia;Autobranhia;Heteroconchia;Euhe  
terodonta;Imparidentia;Venerida;Veneroidea;Veneridae;Mercenaria;Mercenari  
a mercenaria  
UdeM00000000585 6596 167.9 UdeM00000000585 XP\_045178526.1 52.7 169  
67 3 1 162 936 1098 1.10E-38 167.9 6596 cellular  
organisms;Eukaryota;Opisthokonta;Metazoa;Eumetazoa;Bilateria;Protostomia;  
Spiralia;Lophotrochozoa;Mollusca;Bivalvia;Autobranhia;Heteroconchia;Euhe  
terodonta;Imparidentia;Venerida;Veneroidea;Veneridae;Mercenaria;Mercenari  
a mercenaria  
UdeM00000000589 29159 1440.6 UdeM00000000589 XP\_034302242.1 82.9  
875 149 1 1 874 1 875 0.00E+00 1440.6  
29159 cellular  
organisms;Eukaryota;Opisthokonta;Metazoa;Eumetazoa;Bilateria;Protostomia;  
Spiralia;Lophotrochozoa;Mollusca;Bivalvia;Autobranhia;Pteriormorphia;Ostr  
eida;Ostreoidea;Ostreidae;Crassostrea;Crassostrea gigas  
UdeM00000000590 29159 367.5 UdeM00000000590 XP\_034302240.1 78.5 228  
48 1 6 232 651 878 1.30E-98 367.5 29159 cellular  
organisms;Eukaryota;Opisthokonta;Metazoa;Eumetazoa;Bilateria;Protostomia;  
Spiralia;Lophotrochozoa;Mollusca;Bivalvia;Autobranhia;Pteriormorphia;Ostr  
eida;Ostreoidea;Ostreidae;Crassostrea;Crassostrea gigas  
UdeM00000000591 29159 614.4 UdeM00000000591 XP\_034302950.1 79.1 422  
85 2 3 421 68 489 1.10E-172 614.4 29159 cellular  
organisms;Eukaryota;Opisthokonta;Metazoa;Eumetazoa;Bilateria;Protostomia;  
Spiralia;Lophotrochozoa;Mollusca;Bivalvia;Autobranhia;Pteriormorphia;Ostr  
eida;Ostreoidea;Ostreidae;Crassostrea;Crassostrea gigas  
UdeM00000000592 6579 407.1 UdeM00000000592 XP\_033728032.1 38.6 741  
368 21 1 679 1 716 4.30E-110 407.1 6579 cellular  
organisms;Eukaryota;Opisthokonta;Metazoa;Eumetazoa;Bilateria;Protostomia;  
Spiralia;Lophotrochozoa;Mollusca;Bivalvia;Autobranhia;Pteriormorphia;Pect  
inida;Pectinoidea;Pectinidae;Pecten;Pecten maximus  
UdeM00000000593 6579 67.4 UdeM00000000593 XP\_033728710.1 26.5 181  
128 2 193 370 307 485 4.40E-08 67.4 6579 cellular  
organisms;Eukaryota;Opisthokonta;Metazoa;Eumetazoa;Bilateria;Protostomia;  
Spiralia;Lophotrochozoa;Mollusca;Bivalvia;Autobranhia;Pteriormorphia;Pect  
inida;Pectinoidea;Pectinidae;Pecten;Pecten maximus  
UdeM00000000594 6579 67.4 UdeM00000000594 XP\_033728710.1 25.9 185  
130 3 193 376 307 485 4.50E-08 67.4 6579 cellular  
organisms;Eukaryota;Opisthokonta;Metazoa;Eumetazoa;Bilateria;Protostomia;  
Spiralia;Lophotrochozoa;Mollusca;Bivalvia;Autobranhia;Pteriormorphia;Pect  
inida;Pectinoidea;Pectinidae;Pecten;Pecten maximus  
UdeM00000000595 6579 73.2 UdeM00000000595 XP\_033728710.1 22.2 334  
193 6 4 270 724 1057 7.80E-10 73.2 6579 cellular  
organisms;Eukaryota;Opisthokonta;Metazoa;Eumetazoa;Bilateria;Protostomia;  
Spiralia;Lophotrochozoa;Mollusca;Bivalvia;Autobranhia;Pteriormorphia;Pect  
inida;Pectinoidea;Pectinidae;Pecten;Pecten maximus  
UdeM00000000596 7054 238.4 UdeM00000000596 XP\_031350480.1 54.3 186  
85 0 44 229 224 409 9.10E-60 238.4 7054 cellular  
organisms;Eukaryota;Opisthokonta;Metazoa;Eumetazoa;Bilateria;Protostomia;  
Ecdysozoa;Panarthropoda;Arthropoda;Mandibulata;Pancrustacea;Hexapoda;Inse  
cta;Dicondylia;Pterygota;Neoptera;Endopterygota;Coleoptera;Polyphaga;Elat  
eriformia;Elateroidea;Lampyridae;Lampyrinae;Photinus;Photinus pyralis

UdeM00000000597 310752 62.8 UdeM00000000597 XP\_028019109.1 44.2  
77 37 3 24 98 297 369 1.60E-06 62.8 310752  
cellular

organisms;Eukaryota;Opisthokonta;Metazoa;Eumetazoa;Bilateria;Deuterostomi  
a;Chordata;Craniata;Vertebrata;Gnathostomata;Teleostomi;Euteleostomi;Sarc  
opterygii;Dipnotetrapodomorpha;Tetrapoda;Amniota;Mammalia;Theria;Eutheria  
;Boreoeutheria;Laurasiatheria;Artiodactyla;Whippomorpha;Cetacea;Mysticeti  
;Balaenopteridae;Balaenoptera;Balaenoptera acutorostrata;Balaenoptera  
acutorostrata scammoni

UdeM00000000600 6596 115.9 UdeM00000000600 XP\_045179133.1 72 75  
20 1 1 74 41 115 2.20E-23 115.9 6596 cellular

organisms;Eukaryota;Opisthokonta;Metazoa;Eumetazoa;Bilateria;Protostomia;  
Spiralia;Lophotrochozoa;Mollusca;Bivalvia;Autobranchia;Heteroconchia;Euhe  
terodonta;Imparidentia;Venerida;Veneroidea;Veneridae;Mercenaria;Mercenari  
a mercenaria

UdeM00000000601 6596 965.7 UdeM00000000601 XP\_045180000.1 71.2 677  
193 2 1 675 1 677 3.10E-278 965.7 6596 cellular

organisms;Eukaryota;Opisthokonta;Metazoa;Eumetazoa;Bilateria;Protostomia;  
Spiralia;Lophotrochozoa;Mollusca;Bivalvia;Autobranchia;Heteroconchia;Euhe  
terodonta;Imparidentia;Venerida;Veneroidea;Veneridae;Mercenaria;Mercenari  
a mercenaria

UdeM00000000602 6573 63.2 UdeM00000000602 XP\_021366893.1 34.3 102  
61 3 65 166 11 106 3.90E-07 63.2 6573 cellular

organisms;Eukaryota;Opisthokonta;Metazoa;Eumetazoa;Bilateria;Protostomia;  
Spiralia;Lophotrochozoa;Mollusca;Bivalvia;Autobranchia;Pteriomorphia;Pect  
inida;Pectinoidea;Pectinidae;Mizuhopecten;Mizuhopecten yessoensis

UdeM00000000603 6573 62.8 UdeM00000000603 XP\_021366893.1 34.3 102  
61 3 10 111 11 106 3.50E-07 62.8 6573 cellular

organisms;Eukaryota;Opisthokonta;Metazoa;Eumetazoa;Bilateria;Protostomia;  
Spiralia;Lophotrochozoa;Mollusca;Bivalvia;Autobranchia;Pteriomorphia;Pect  
inida;Pectinoidea;Pectinidae;Mizuhopecten;Mizuhopecten yessoensis

UdeM00000000604 6573 278.9 UdeM00000000604 XP\_021355158.1 49.3 361  
150 9 1 347 1 342 9.90E-72 278.9 6573 cellular

organisms;Eukaryota;Opisthokonta;Metazoa;Eumetazoa;Bilateria;Protostomia;  
Spiralia;Lophotrochozoa;Mollusca;Bivalvia;Autobranchia;Pteriomorphia;Pect  
inida;Pectinoidea;Pectinidae;Mizuhopecten;Mizuhopecten yessoensis

UdeM00000000605 6565 211.8 UdeM00000000605 XP\_022321940.1 24.5 575  
427 5 5 578 114 682 2.30E-51 211.8 6565 cellular

organisms;Eukaryota;Opisthokonta;Metazoa;Eumetazoa;Bilateria;Protostomia;  
Spiralia;Lophotrochozoa;Mollusca;Bivalvia;Autobranchia;Pteriomorphia;Ostr  
eida;Ostreoidea;Ostreidae;Crassostrea;Crassostrea virginica

UdeM00000000607 6596 1067 UdeM00000000607 XP\_045178438.1 64.4 944  
294 20 1 920 1 926 0.00E+00 1067 6596 cellular

organisms;Eukaryota;Opisthokonta;Metazoa;Eumetazoa;Bilateria;Protostomia;  
Spiralia;Lophotrochozoa;Mollusca;Bivalvia;Autobranchia;Heteroconchia;Euhe  
terodonta;Imparidentia;Venerida;Veneroidea;Veneridae;Mercenaria;Mercenari  
a mercenaria

UdeM00000000608 278856 185.7 UdeM00000000608 XP\_032528089.1 37.7  
300 162 10 151 433 323 614 2.00E-43 185.7 278856

cellular

organisms;Eukaryota;Opisthokonta;Metazoa;Eumetazoa;Bilateria;Protostomia;  
Ecdysozoa;Panarthropoda;Arthropoda;Mandibulata;Pancrustacea;Hexapoda;Inse  
cta;Dicondylia;Pterygota;Neoptera;Endopterygota;Amphiesmenoptera;Lepidopt  
era;Glossata;Neolepidoptera;Heteroneura;Ditrysia;Obtectomera;Papilionoide

a;Nymphalidae;Danainae;Danaini;Danaina;Danaus;Danaus;Danaus  
plexippus;Danaus plexippus plexippus  
UdeM00000000609 6596 431.8 UdeM00000000609 XP\_045178776.1 56 389  
170 1 107 495 134 521 1.20E-117 431.8 6596 cellular  
organisms;Eukaryota;Opisthokonta;Metazoa;Eumetazoa;Bilateria;Protostomia;  
Spiralia;Lophotrochozoa;Mollusca;Bivalvia;Autobranhia;Heteroconchia;Euhe  
terodonta;Imparidentia;Venerida;Veneroidea;Veneridae;Mercenaria;Mercenari  
a mercenaria  
UdeM00000000611 400727 296.2 UdeM00000000611 XP\_025086782.1 44.5  
330 183 0 17 346 28 357 5.50E-77 296.2 400727  
cellular  
organisms;Eukaryota;Opisthokonta;Metazoa;Eumetazoa;Bilateria;Protostomia;  
Spiralia;Lophotrochozoa;Mollusca;Gastropoda;Caenogastropoda;Architaeniogl  
ossa;Ampullarioidea;Ampullariidae;Pomacea;Pomacea canaliculata  
UdeM00000000612 6596 411.8 UdeM00000000612 XP\_045179478.1 69.6 299  
91 0 13 311 5 303 8.00E-112 411.8 6596 cellular  
organisms;Eukaryota;Opisthokonta;Metazoa;Eumetazoa;Bilateria;Protostomia;  
Spiralia;Lophotrochozoa;Mollusca;Bivalvia;Autobranhia;Heteroconchia;Euhe  
terodonta;Imparidentia;Venerida;Veneroidea;Veneridae;Mercenaria;Mercenari  
a mercenaria  
UdeM00000000613 6573 700.7 UdeM00000000613 XP\_021365386.1 52.4 704  
313 9 2 687 4 703 2.10E-198 700.7 6573 cellular  
organisms;Eukaryota;Opisthokonta;Metazoa;Eumetazoa;Bilateria;Protostomia;  
Spiralia;Lophotrochozoa;Mollusca;Bivalvia;Autobranhia;Pteriormorphia;Pect  
inida;Pectinoidea;Pectinidae;Mizuhopecten;Mizuhopecten yessoensis  
UdeM00000000616 6596 547 UdeM00000000616 XP\_045177552.1 73.4 379  
92 3 11 389 39 408 2.00E-152 547 6596 cellular  
organisms;Eukaryota;Opisthokonta;Metazoa;Eumetazoa;Bilateria;Protostomia;  
Spiralia;Lophotrochozoa;Mollusca;Bivalvia;Autobranhia;Heteroconchia;Euhe  
terodonta;Imparidentia;Venerida;Veneroidea;Veneridae;Mercenaria;Mercenari  
a mercenaria  
UdeM00000000615 6596 546.2 UdeM00000000615 XP\_045177552.1 73.4 379  
92 3 11 389 39 408 3.60E-152 546.2 6596 cellular  
organisms;Eukaryota;Opisthokonta;Metazoa;Eumetazoa;Bilateria;Protostomia;  
Spiralia;Lophotrochozoa;Mollusca;Bivalvia;Autobranhia;Heteroconchia;Euhe  
terodonta;Imparidentia;Venerida;Veneroidea;Veneridae;Mercenaria;Mercenari  
a mercenaria  
UdeM00000000622 6596 112.8 UdeM00000000622 XP\_045178614.1 50 118  
55 2 1 116 1 116 2.90E-22 112.8 6596 cellular  
organisms;Eukaryota;Opisthokonta;Metazoa;Eumetazoa;Bilateria;Protostomia;  
Spiralia;Lophotrochozoa;Mollusca;Bivalvia;Autobranhia;Heteroconchia;Euhe  
terodonta;Imparidentia;Venerida;Veneroidea;Veneridae;Mercenaria;Mercenari  
a mercenaria  
UdeM00000000623 6596 1531.9 UdeM00000000623 XP\_045177754.1 58.9  
1384 449 25 1 1326 1 1322 0.00E+00 1531.9 6596  
cellular  
organisms;Eukaryota;Opisthokonta;Metazoa;Eumetazoa;Bilateria;Protostomia;  
Spiralia;Lophotrochozoa;Mollusca;Bivalvia;Autobranhia;Heteroconchia;Euhe  
terodonta;Imparidentia;Venerida;Veneroidea;Veneridae;Mercenaria;Mercenari  
a mercenaria  
UdeM00000000624 6579 141 UdeM00000000624 XP\_033727998.1 54 161  
59 5 1 152 2 156 1.30E-30 141 6579 cellular  
organisms;Eukaryota;Opisthokonta;Metazoa;Eumetazoa;Bilateria;Protostomia;

Spiralia;Lophotrochozoa;Mollusca;Bivalvia;Autobranchia;Pteriormorphia;Pectinida;Pectinoidea;Pectinidae;Pecten;Pecten maximus

|                 |      |       |                 |                |          |          |
|-----------------|------|-------|-----------------|----------------|----------|----------|
| UdeM00000000625 | 6596 | 165.6 | UdeM00000000625 | XP_045177846.1 | 76       | 100      |
| 24              | 0    | 46    | 145             | 73             | 172      | 4.90E-38 |
|                 |      |       | 165.6           | 6596           | cellular |          |

organisms;Eukaryota;Opisthokonta;Metazoa;Eumetazoa;Bilateria;Protostomia;Spiralia;Lophotrochozoa;Mollusca;Bivalvia;Autobranchia;Heteroconchia;Euheterodonta;Imparidentia;Venerida;Veneroidea;Veneridae;Mercenaria;Mercenaria mercenaria

|                 |      |       |                 |                |          |          |
|-----------------|------|-------|-----------------|----------------|----------|----------|
| UdeM00000000626 | 6596 | 221.9 | UdeM00000000626 | XP_045177846.1 | 76.6     | 137      |
| 32              | 0    | 46    | 182             | 73             | 209      | 6.90E-55 |
|                 |      |       | 221.9           | 6596           | cellular |          |

organisms;Eukaryota;Opisthokonta;Metazoa;Eumetazoa;Bilateria;Protostomia;Spiralia;Lophotrochozoa;Mollusca;Bivalvia;Autobranchia;Heteroconchia;Euheterodonta;Imparidentia;Venerida;Veneroidea;Veneridae;Mercenaria;Mercenaria mercenaria

|                 |         |     |                 |                |         |          |
|-----------------|---------|-----|-----------------|----------------|---------|----------|
| UdeM00000000627 | 1735272 | 228 | UdeM00000000627 | XP_041379265.1 | 48.2    |          |
| 220             | 88      | 2   | 148             | 343            | 282     | 499      |
|                 |         |     | 1.80E-56        | 228            | 1735272 | cellular |

organisms;Eukaryota;Opisthokonta;Metazoa;Eumetazoa;Bilateria;Protostomia;Spiralia;Lophotrochozoa;Mollusca;Gastropoda;Neomphalina;Neomphaloidea;Peltospiridae;Gigantopelta;Gigantopelta aegis

|                 |      |       |                 |                |          |           |
|-----------------|------|-------|-----------------|----------------|----------|-----------|
| UdeM00000000628 | 6596 | 750.4 | UdeM00000000628 | XP_045177846.1 | 67.2     | 579       |
| 189             | 1    | 45    | 623             | 248            | 825      | 2.50E-213 |
|                 |      |       | 750.4           | 6596           | cellular |           |

organisms;Eukaryota;Opisthokonta;Metazoa;Eumetazoa;Bilateria;Protostomia;Spiralia;Lophotrochozoa;Mollusca;Bivalvia;Autobranchia;Heteroconchia;Euheterodonta;Imparidentia;Venerida;Veneroidea;Veneridae;Mercenaria;Mercenaria mercenaria

|                 |      |        |                 |                |      |          |
|-----------------|------|--------|-----------------|----------------|------|----------|
| UdeM00000000629 | 6596 | 5659.7 | UdeM00000000629 | XP_045177846.1 | 60.1 |          |
| 5422            | 1917 | 60     | 8               | 5341           | 1218 | 6481     |
|                 |      |        | 0.00E+00        | 5659.7         | 6596 | cellular |

organisms;Eukaryota;Opisthokonta;Metazoa;Eumetazoa;Bilateria;Protostomia;Spiralia;Lophotrochozoa;Mollusca;Bivalvia;Autobranchia;Heteroconchia;Euheterodonta;Imparidentia;Venerida;Veneroidea;Veneridae;Mercenaria;Mercenaria mercenaria

|                 |      |        |                 |                |      |          |
|-----------------|------|--------|-----------------|----------------|------|----------|
| UdeM00000000630 | 6596 | 5659.7 | UdeM00000000630 | XP_045177846.1 | 60.1 |          |
| 5422            | 1917 | 60     | 8               | 5341           | 1218 | 6481     |
|                 |      |        | 0.00E+00        | 5659.7         | 6596 | cellular |

organisms;Eukaryota;Opisthokonta;Metazoa;Eumetazoa;Bilateria;Protostomia;Spiralia;Lophotrochozoa;Mollusca;Bivalvia;Autobranchia;Heteroconchia;Euheterodonta;Imparidentia;Venerida;Veneroidea;Veneridae;Mercenaria;Mercenaria mercenaria

|                 |      |        |                 |                |       |          |
|-----------------|------|--------|-----------------|----------------|-------|----------|
| UdeM00000000631 | 6573 | 9050.2 | UdeM00000000631 | XP_021365920.1 | 45.7  |          |
| 10458           | 4131 | 52     | 15              | 9319           | 10840 | 20900    |
|                 |      |        | 0.00E+00        | 9050.2         | 6573  | cellular |

organisms;Eukaryota;Opisthokonta;Metazoa;Eumetazoa;Bilateria;Protostomia;Spiralia;Lophotrochozoa;Mollusca;Bivalvia;Autobranchia;Pteriormorphia;Pectinida;Pectinoidea;Pectinidae;Mizuhopecten;Mizuhopecten yessoensis

|                 |      |       |                 |                |          |          |
|-----------------|------|-------|-----------------|----------------|----------|----------|
| UdeM00000000632 | 6596 | 256.5 | UdeM00000000632 | XP_045177641.1 | 38       | 469      |
| 215             | 13   | 1     | 411             | 1              | 451      | 5.60E-65 |
|                 |      |       | 256.5           | 6596           | cellular |          |

organisms;Eukaryota;Opisthokonta;Metazoa;Eumetazoa;Bilateria;Protostomia;Spiralia;Lophotrochozoa;Mollusca;Bivalvia;Autobranchia;Heteroconchia;Euheterodonta;Imparidentia;Venerida;Veneroidea;Veneridae;Mercenaria;Mercenaria mercenaria

|                 |      |     |                 |                |          |           |
|-----------------|------|-----|-----------------|----------------|----------|-----------|
| UdeM00000000633 | 6596 | 557 | UdeM00000000633 | XP_045177635.1 | 61.6     | 445       |
| 161             | 4    | 61  | 504             | 10             | 445      | 2.50E-155 |
|                 |      |     | 557             | 6596           | cellular |           |

organisms;Eukaryota;Opisthokonta;Metazoa;Eumetazoa;Bilateria;Protostomia;Spiralia;Lophotrochozoa;Mollusca;Bivalvia;Autobranchia;Heteroconchia;Euherodonta;Imparidentia;Venerida;Veneroidea;Veneridae;Mercenaria;Mercenaria mercenaria

UdeM00000000634 6596 870.9 UdeM00000000634 XP\_045177632.1 52.3 961  
414 14 326 1257 1110 2055 1.90E-249 870.9 6596 cellular

organisms;Eukaryota;Opisthokonta;Metazoa;Eumetazoa;Bilateria;Protostomia;Spiralia;Lophotrochozoa;Mollusca;Bivalvia;Autobranchia;Heteroconchia;Euherodonta;Imparidentia;Venerida;Veneroidea;Veneridae;Mercenaria;Mercenaria mercenaria

UdeM00000000634 6596 68.6 UdeM00000000634 XP\_045177632.1 33.3 99  
63 1 22 117 586 684 6.70E-08 68.6 6596 cellular

organisms;Eukaryota;Opisthokonta;Metazoa;Eumetazoa;Bilateria;Protostomia;Spiralia;Lophotrochozoa;Mollusca;Bivalvia;Autobranchia;Heteroconchia;Euherodonta;Imparidentia;Venerida;Veneroidea;Veneridae;Mercenaria;Mercenaria mercenaria

UdeM00000000635 6579 347.1 UdeM00000000635 XP\_033748001.1 45.9 381  
186 6 10 383 9 376 3.00E-92 347.1 6579 cellular

organisms;Eukaryota;Opisthokonta;Metazoa;Eumetazoa;Bilateria;Protostomia;Spiralia;Lophotrochozoa;Mollusca;Bivalvia;Autobranchia;Pteriomorphia;Pectinida;Pectinoidea;Pectinidae;Pecten;Pecten maximus

UdeM00000000636 6500 291.2 UdeM00000000636 XP\_035826907.1 42.6 385  
212 5 1 383 300 677 2.40E-75 291.2 6500 cellular

organisms;Eukaryota;Opisthokonta;Metazoa;Eumetazoa;Bilateria;Protostomia;Spiralia;Lophotrochozoa;Mollusca;Gastropoda;Heterobranchia;Euthyneura;Tectipleura;Aplysiida;Aplysioidea;Aplysiidae;Aplysia;Aplysia californica

UdeM00000000637 6579 343.2 UdeM00000000637 XP\_033748001.1 45.1 377  
196 4 46 420 9 376 4.70E-91 343.2 6579 cellular

organisms;Eukaryota;Opisthokonta;Metazoa;Eumetazoa;Bilateria;Protostomia;Spiralia;Lophotrochozoa;Mollusca;Bivalvia;Autobranchia;Pteriomorphia;Pectinida;Pectinoidea;Pectinidae;Pecten;Pecten maximus

UdeM00000000638 6573 330.5 UdeM00000000638 XP\_021364790.1 40.8 380  
214 4 5 382 6 376 2.90E-87 330.5 6573 cellular

organisms;Eukaryota;Opisthokonta;Metazoa;Eumetazoa;Bilateria;Protostomia;Spiralia;Lophotrochozoa;Mollusca;Bivalvia;Autobranchia;Pteriomorphia;Pectinida;Pectinoidea;Pectinidae;Mizuhopecten;Mizuhopecten yessoensis

UdeM00000000639 400727 316.6 UdeM00000000639 XP\_025110836.1 42.3  
385 198 7 13 383 53 427 4.30E-83 316.6 400727  
cellular

organisms;Eukaryota;Opisthokonta;Metazoa;Eumetazoa;Bilateria;Protostomia;Spiralia;Lophotrochozoa;Mollusca;Gastropoda;Caenogastropoda;Architaenioglossa;Ampullarioidea;Ampullariidae;Pomacea;Pomacea canaliculata

UdeM00000000641 6579 305.1 UdeM00000000641 XP\_033748001.1 41.2 381  
210 7 7 383 6 376 1.30E-79 305.1 6579 cellular

organisms;Eukaryota;Opisthokonta;Metazoa;Eumetazoa;Bilateria;Protostomia;Spiralia;Lophotrochozoa;Mollusca;Bivalvia;Autobranchia;Pteriomorphia;Pectinida;Pectinoidea;Pectinidae;Pecten;Pecten maximus

UdeM00000000642 6579 314.3 UdeM00000000642 XP\_033748001.1 42 381  
207 7 7 383 6 376 2.10E-82 314.3 6579 cellular

organisms;Eukaryota;Opisthokonta;Metazoa;Eumetazoa;Bilateria;Protostomia;Spiralia;Lophotrochozoa;Mollusca;Bivalvia;Autobranchia;Pteriomorphia;Pectinida;Pectinoidea;Pectinidae;Pecten;Pecten maximus

UdeM00000000643 6579 321.2 UdeM00000000643 XP\_033748001.1 41.3 380  
208 4 2 375 6 376 1.70E-84 321.2 6579 cellular

organisms;Eukaryota;Opisthokonta;Metazoa;Eumetazoa;Bilateria;Protostomia;Spiralia;Lophotrochozoa;Mollusca;Bivalvia;Autobranchia;Pteriormorphia;Pectinida;Pectinoidea;Pectinidae;Pecten;Pecten maximus

UdeM000000000644 6596 384 UdeM000000000644 XP\_045179786.1 50.8 366  
178 2 1 364 1 366 2.10E-103 384 6596 cellular

organisms;Eukaryota;Opisthokonta;Metazoa;Eumetazoa;Bilateria;Protostomia;Spiralia;Lophotrochozoa;Mollusca;Bivalvia;Autobranchia;Heteroconchia;Euheterodonta;Imparidentia;Venerida;Veneroidea;Veneridae;Mercenaria;Mercenaria mercenaria

UdeM000000000645 6526 749.2 UdeM000000000645 XP\_013081401.1 62.9 620  
225 2 51 669 43 658 4.60E-213 749.2 6526 cellular

organisms;Eukaryota;Opisthokonta;Metazoa;Eumetazoa;Bilateria;Protostomia;Spiralia;Lophotrochozoa;Mollusca;Gastropoda;Heterobranchia;Euthyneura;Panpulmonata;Hygrophila;Lymnaeioidea;Planorbidae;Biomphalaria;Biomphalaria glabrata

UdeM000000000646 6596 271.9 UdeM000000000646 XP\_045179024.1 69.3 192  
59 0 13 204 874 1065 6.60E-70 271.9 6596 cellular

organisms;Eukaryota;Opisthokonta;Metazoa;Eumetazoa;Bilateria;Protostomia;Spiralia;Lophotrochozoa;Mollusca;Bivalvia;Autobranchia;Heteroconchia;Euheterodonta;Imparidentia;Venerida;Veneroidea;Veneridae;Mercenaria;Mercenaria mercenaria

UdeM000000000647 6500 723 UdeM000000000647 XP\_035828416.1 33.4 1361  
779 20 20 1262 179 1530 6.50E-205 723 6500 cellular

organisms;Eukaryota;Opisthokonta;Metazoa;Eumetazoa;Bilateria;Protostomia;Spiralia;Lophotrochozoa;Mollusca;Gastropoda;Heterobranchia;Euthyneura;Tectipleura;Aplysiida;Aplysioidea;Aplysiidae;Aplysia;Aplysia californica

UdeM000000000648 6596 104.4 UdeM000000000648 XP\_045179786.1 45 109  
59 1 31 138 258 366 1.20E-19 104.4 6596 cellular

organisms;Eukaryota;Opisthokonta;Metazoa;Eumetazoa;Bilateria;Protostomia;Spiralia;Lophotrochozoa;Mollusca;Bivalvia;Autobranchia;Heteroconchia;Euheterodonta;Imparidentia;Venerida;Veneroidea;Veneridae;Mercenaria;Mercenaria mercenaria

UdeM000000000649 6596 79.7 UdeM000000000649 XP\_045179786.1 46.9 96  
42 2 3 89 143 238 2.10E-12 79.7 6596 cellular

organisms;Eukaryota;Opisthokonta;Metazoa;Eumetazoa;Bilateria;Protostomia;Spiralia;Lophotrochozoa;Mollusca;Bivalvia;Autobranchia;Heteroconchia;Euheterodonta;Imparidentia;Venerida;Veneroidea;Veneridae;Mercenaria;Mercenaria mercenaria

UdeM000000000650 6596 114 UdeM000000000650 XP\_045179786.1 56.7 90  
39 0 16 105 79 168 1.30E-22 114 6596 cellular

organisms;Eukaryota;Opisthokonta;Metazoa;Eumetazoa;Bilateria;Protostomia;Spiralia;Lophotrochozoa;Mollusca;Bivalvia;Autobranchia;Heteroconchia;Euheterodonta;Imparidentia;Venerida;Veneroidea;Veneridae;Mercenaria;Mercenaria mercenaria

UdeM000000000651 400727 214.2 UdeM000000000651 XP\_025081052.1 92.5  
120 7 1 1 120 1 118 9.40E-53 214.2 400727  
cellular

organisms;Eukaryota;Opisthokonta;Metazoa;Eumetazoa;Bilateria;Protostomia;Spiralia;Lophotrochozoa;Mollusca;Gastropoda;Caenogastropoda;Architaenioglossa;Ampullarioidea;Ampullariidae;Pomacea;Pomacea canaliculata

UdeM000000000652 400727 154.1 UdeM000000000652 XP\_025087839.1 45.2  
155 83 2 19 171 116 270 1.70E-34 154.1 400727  
cellular

organisms;Eukaryota;Opisthokonta;Metazoa;Eumetazoa;Bilateria;Protostomia;

Spiralia;Lophotrochozoa;Mollusca;Gastropoda;Caenogastropoda;Architaenioglossa;Ampullarioidea;Ampullariidae;Pomacea;Pomacea canaliculata  
UdeM00000000655 6596 1947.9 UdeM00000000655 XP\_045179002.1 49.1  
2505 1030 52 74 2502 2087 4423 0.00E+00 1947.9 6596  
cellular

organisms;Eukaryota;Opisthokonta;Metazoa;Eumetazoa;Bilateria;Protostomia;Spiralia;Lophotrochozoa;Mollusca;Bivalvia;Autobranchia;Heteroconchia;Euheterodonta;Imparidentia;Venerida;Veneroidea;Veneridae;Mercenaria;Mercenaria mercenaria

UdeM00000000659 6596 639.8 UdeM00000000659 XP\_045177666.1 64.8 494  
165 5 247 733 50 541 4.20E-180 639.8 6596 cellular

organisms;Eukaryota;Opisthokonta;Metazoa;Eumetazoa;Bilateria;Protostomia;Spiralia;Lophotrochozoa;Mollusca;Bivalvia;Autobranchia;Heteroconchia;Euheterodonta;Imparidentia;Venerida;Veneroidea;Veneridae;Mercenaria;Mercenaria mercenaria

UdeM00000000660 6573 101.3 UdeM00000000660 XP\_021354117.1 40.3 119  
71 0 59 177 12 130 1.70E-18 101.3 6573 cellular

organisms;Eukaryota;Opisthokonta;Metazoa;Eumetazoa;Bilateria;Protostomia;Spiralia;Lophotrochozoa;Mollusca;Bivalvia;Autobranchia;Pteriormorphia;Pectinida;Pectinoidea;Pectinidae;Mizuhopecten;Mizuhopecten yessoensis

UdeM00000000661 6596 74.7 UdeM00000000661 XP\_045179604.1 55.9 59  
26 0 29 87 123 181 7.70E-11 74.7 6596 cellular

organisms;Eukaryota;Opisthokonta;Metazoa;Eumetazoa;Bilateria;Protostomia;Spiralia;Lophotrochozoa;Mollusca;Bivalvia;Autobranchia;Heteroconchia;Euheterodonta;Imparidentia;Venerida;Veneroidea;Veneridae;Mercenaria;Mercenaria mercenaria

UdeM00000000662 6579 95.9 UdeM00000000662 XP\_033728432.1 33 188  
116 4 3 190 415 592 6.50E-17 95.9 6579 cellular

organisms;Eukaryota;Opisthokonta;Metazoa;Eumetazoa;Bilateria;Protostomia;Spiralia;Lophotrochozoa;Mollusca;Bivalvia;Autobranchia;Pteriormorphia;Pectinida;Pectinoidea;Pectinidae;Pecten;Pecten maximus

UdeM00000000664 6596 78.2 UdeM00000000664 XP\_045178180.1 30.5 239  
134 8 34 270 245 453 3.90E-11 78.2 6596 cellular

organisms;Eukaryota;Opisthokonta;Metazoa;Eumetazoa;Bilateria;Protostomia;Spiralia;Lophotrochozoa;Mollusca;Bivalvia;Autobranchia;Heteroconchia;Euheterodonta;Imparidentia;Venerida;Veneroidea;Veneridae;Mercenaria;Mercenaria mercenaria

UdeM00000000665 6596 264.2 UdeM00000000665 XP\_045178181.1 28 1283  
614 44 30 1275 12 1021 8.40E-67 264.2 6596 cellular

organisms;Eukaryota;Opisthokonta;Metazoa;Eumetazoa;Bilateria;Protostomia;Spiralia;Lophotrochozoa;Mollusca;Bivalvia;Autobranchia;Heteroconchia;Euheterodonta;Imparidentia;Venerida;Veneroidea;Veneridae;Mercenaria;Mercenaria mercenaria

UdeM00000000668 1735272 591.7 UdeM00000000668 XP\_041374670.1 76  
425 85 9 16 430 28 445 7.80E-166 591.7 1735272  
cellular

organisms;Eukaryota;Opisthokonta;Metazoa;Eumetazoa;Bilateria;Protostomia;Spiralia;Lophotrochozoa;Mollusca;Gastropoda;Neomphalina;Neomphaloidea;Peltospiridae;Gigantopelta;Gigantopelta aegis

UdeM00000000666 6596 627.1 UdeM00000000666 XP\_045179012.1 74.8 456  
102 7 1 444 1 455 1.70E-176 627.1 6596 cellular

organisms;Eukaryota;Opisthokonta;Metazoa;Eumetazoa;Bilateria;Protostomia;Spiralia;Lophotrochozoa;Mollusca;Bivalvia;Autobranchia;Heteroconchia;Euheterodonta



terodonta;Imparidentia;Venerida;Veneroidea;Veneridae;Mercenaria;Mercenaria mercenaria

UdeM000000000667 6596 622.5 UdeM000000000667 XP\_045179012.1 74.8 456  
101 8 1 443 1 455 4.20E-175 622.5 6596 cellular

organisms;Eukaryota;Opisthokonta;Metazoa;Eumetazoa;Bilateria;Protostomia;Spiralia;Lophotrochozoa;Mollusca;Bivalvia;Autobranhia;Heteroconchia;Euheterodonta;Imparidentia;Venerida;Veneroidea;Veneridae;Mercenaria;Mercenaria mercenaria

UdeM000000000669 114398 213.4 UdeM000000000669 XP\_015930873.1 36.2  
348 137 4 1 267 1 344 4.10E-52 213.4 114398  
cellular

organisms;Eukaryota;Opisthokonta;Metazoa;Eumetazoa;Bilateria;Protostomia;Ecdysozoa;Panarthropoda;Arthropoda;Chelicerata;Arachnida;Araneae;Araneomorphae;Entelegynae;Orbiculariae;Araneoidea;Theridiidae;Parasteatoda;Parasteatoda tepidariorum

UdeM000000000670 1529436 126.7 UdeM000000000670 XP\_033114794.1 40.9  
193 78 6 1 160 581 770 3.60E-26 126.7 1529436  
cellular

organisms;Eukaryota;Opisthokonta;Metazoa;Eumetazoa;Bilateria;Deuterostomia;Echinodermata;Pelmatozoa;Crinoidea;Articulata;Comatulida;Comatulidae;Comatulinae;Anneissia;Anneissia japonica

UdeM000000000671 1735272 79.7 UdeM000000000671 XP\_041347149.1 43.6  
101 50 2 1 96 257 355 2.40E-12 79.7 1735272  
cellular

organisms;Eukaryota;Opisthokonta;Metazoa;Eumetazoa;Bilateria;Protostomia;Spiralia;Lophotrochozoa;Mollusca;Gastropoda;Neomphalina;Neomphaloidea;Peltospiridae;Gigantopelta;Gigantopelta aegis

UdeM000000000672 37621 140.6 UdeM000000000672 XP\_014679100.1 37.4 230  
130 7 129 353 82 302 3.90E-30 140.6 37621 cellular

organisms;Eukaryota;Opisthokonta;Metazoa;Eumetazoa;Bilateria;Protostomia;Ecdysozoa;Scalidophora;Priapulida;Priapulimorpha;Priapulimorphida;Priapulidae;Priapululus;Priapululus caudatus

UdeM000000000674 6565 166.4 UdeM000000000674 XP\_022287521.1 46 187  
66 1 275 426 180 366 8.00E-38 166.4 6565 cellular

organisms;Eukaryota;Opisthokonta;Metazoa;Eumetazoa;Bilateria;Protostomia;Spiralia;Lophotrochozoa;Mollusca;Bivalvia;Autobranhia;Pteriomorphia;Ostreida;Ostreoidea;Ostreidae;Crassostrea;Crassostrea virginica

UdeM000000000676 6596 188.3 UdeM000000000676 XP\_045161133.1 81.9 94  
17 0 1 94 1 94 4.40E-45 188.3 6596 cellular

organisms;Eukaryota;Opisthokonta;Metazoa;Eumetazoa;Bilateria;Protostomia;Spiralia;Lophotrochozoa;Mollusca;Bivalvia;Autobranhia;Heteroconchia;Euheterodonta;Imparidentia;Venerida;Veneroidea;Veneridae;Mercenaria;Mercenaria mercenaria

UdeM000000000678 1529436 203.8 UdeM000000000678 XP\_033114794.1 44.9  
263 130 6 1 251 581 840 3.10E-49 203.8 1529436  
cellular

organisms;Eukaryota;Opisthokonta;Metazoa;Eumetazoa;Bilateria;Deuterostomia;Echinodermata;Pelmatozoa;Crinoidea;Articulata;Comatulida;Comatulidae;Comatulinae;Anneissia;Anneissia japonica

UdeM000000000681 6565 61.6 UdeM000000000681 XP\_022329522.1 70.3 37  
11 0 138 174 426 462 1.10E-06 61.6 6565 cellular

organisms;Eukaryota;Opisthokonta;Metazoa;Eumetazoa;Bilateria;Protostomia;Spiralia;Lophotrochozoa;Mollusca;Bivalvia;Autobranhia;Pteriomorphia;Ostreida;Ostreoidea;Ostreidae;Crassostrea;Crassostrea virginica

UdeM00000000683 6596 71.2 UdeM00000000683 XP\_045192251.1 40.4 99  
 58 1 77 175 323 420 1.50E-09 71.2 6596 cellular  
 organisms;Eukaryota;Opisthokonta;Metazoa;Eumetazoa;Bilateria;Protostomia;  
 Spiralia;Lophotrochozoa;Mollusca;Bivalvia;Autobranchia;Heteroconchia;Euhe  
 terodonta;Imparidentia;Venerida;Veneroidea;Veneridae;Mercenaria;Mercenari  
 a mercenaria  
 UdeM00000000684 7739 78.2 UdeM00000000684 XP\_035661789.1 29.8 248  
 140 8 1 228 354 587 1.60E-11 78.2 7739 cellular  
 organisms;Eukaryota;Opisthokonta;Metazoa;Eumetazoa;Bilateria;Deuterostomi  
 a;Chordata;Cephalochordata;Leptocardii;Amphioxiformes;Branchiostomidae;Br  
 anchiostoma;Branchiostoma floridae  
 UdeM00000000687 6596 2239.9 UdeM00000000687 XP\_045179806.1 48  
 2541 1141 60 19 2449 102 2572 0.00E+00 2239.9 6596  
 cellular  
 organisms;Eukaryota;Opisthokonta;Metazoa;Eumetazoa;Bilateria;Protostomia;  
 Spiralia;Lophotrochozoa;Mollusca;Bivalvia;Autobranchia;Heteroconchia;Euhe  
 terodonta;Imparidentia;Venerida;Veneroidea;Veneridae;Mercenaria;Mercenari  
 a mercenaria  
 UdeM00000000686 6596 2266.9 UdeM00000000686 XP\_045179806.1 46  
 2729 1194 62 19 2606 102 2692 0.00E+00 2266.9 6596  
 cellular  
 organisms;Eukaryota;Opisthokonta;Metazoa;Eumetazoa;Bilateria;Protostomia;  
 Spiralia;Lophotrochozoa;Mollusca;Bivalvia;Autobranchia;Heteroconchia;Euhe  
 terodonta;Imparidentia;Venerida;Veneroidea;Veneridae;Mercenaria;Mercenari  
 a mercenaria  
 UdeM00000000688 6573 1255.7 UdeM00000000688 XP\_021351871.1 46.2  
 1733 798 47 63 1724 2575 4243 0.00E+00 1255.7 6573  
 cellular  
 organisms;Eukaryota;Opisthokonta;Metazoa;Eumetazoa;Bilateria;Protostomia;  
 Spiralia;Lophotrochozoa;Mollusca;Bivalvia;Autobranchia;Pteriomorphia;Pect  
 inida;Pectinoidea;Pectinidae;Mizuhopecten;Mizuhopecten yessoensis  
 UdeM00000000689 6579 286.6 UdeM00000000689 XP\_033731015.1 37.3 440  
 271 3 1 439 6 441 5.40E-74 286.6 6579 cellular  
 organisms;Eukaryota;Opisthokonta;Metazoa;Eumetazoa;Bilateria;Protostomia;  
 Spiralia;Lophotrochozoa;Mollusca;Bivalvia;Autobranchia;Pteriomorphia;Pect  
 inida;Pectinoidea;Pectinidae;Pecten;Pecten maximus  
 UdeM00000000690 6579 295 UdeM00000000690 XP\_033731015.1 39.3 440  
 258 5 7 446 13 443 1.60E-76 295 6579 cellular  
 organisms;Eukaryota;Opisthokonta;Metazoa;Eumetazoa;Bilateria;Protostomia;  
 Spiralia;Lophotrochozoa;Mollusca;Bivalvia;Autobranchia;Pteriomorphia;Pect  
 inida;Pectinoidea;Pectinidae;Pecten;Pecten maximus  
 UdeM00000000691 6596 293.1 UdeM00000000691 XP\_045179280.1 39.9 406  
 220 3 5 410 48 429 5.50E-76 293.1 6596 cellular  
 organisms;Eukaryota;Opisthokonta;Metazoa;Eumetazoa;Bilateria;Protostomia;  
 Spiralia;Lophotrochozoa;Mollusca;Bivalvia;Autobranchia;Heteroconchia;Euhe  
 terodonta;Imparidentia;Venerida;Veneroidea;Veneridae;Mercenaria;Mercenari  
 a mercenaria  
 UdeM00000000692 7741 285 UdeM00000000692 XP\_019622111.1 51.1 280  
 134 3 5 283 1 278 1.00E-73 285 7741 cellular  
 organisms;Eukaryota;Opisthokonta;Metazoa;Eumetazoa;Bilateria;Deuterostomi  
 a;Chordata;Cephalochordata;Leptocardii;Amphioxiformes;Branchiostomidae;Br  
 anchiostoma;Branchiostoma belcheri  
 UdeM00000000693 6596 987.6 UdeM00000000693 XP\_045178348.1 67 815  
 220 13 5 797 60 847 1.10E-284 987.6 6596 cellular

organisms;Eukaryota;Opisthokonta;Metazoa;Eumetazoa;Bilateria;Protostomia; Spiralia;Lophotrochozoa;Mollusca;Bivalvia;Autobranchia;Heteroconchia;Euherodonta;Imparidentia;Venerida;Veneroidea;Veneridae;Mercenaria;Mercenaria mercenaria

UdeM00000000694 6596 1048.1 UdeM00000000694 XP\_045178348.1 65.3  
886 256 15 5 867 60 917 7.70E-303 1048.1 6596  
cellular

organisms;Eukaryota;Opisthokonta;Metazoa;Eumetazoa;Bilateria;Protostomia; Spiralia;Lophotrochozoa;Mollusca;Bivalvia;Autobranchia;Heteroconchia;Euherodonta;Imparidentia;Venerida;Veneroidea;Veneridae;Mercenaria;Mercenaria mercenaria

UdeM00000000696 6596 380.9 UdeM00000000696 XP\_045162792.1 46.5 477  
235 5 11 487 14 470 2.40E-102 380.9 6596 cellular

organisms;Eukaryota;Opisthokonta;Metazoa;Eumetazoa;Bilateria;Protostomia; Spiralia;Lophotrochozoa;Mollusca;Bivalvia;Autobranchia;Heteroconchia;Euherodonta;Imparidentia;Venerida;Veneroidea;Veneridae;Mercenaria;Mercenaria mercenaria

UdeM00000000697 1735272 481.9 UdeM00000000697 XP\_041365458.1 44.3  
578 302 7 6 580 31 591 1.20E-132 481.9 1735272  
cellular

organisms;Eukaryota;Opisthokonta;Metazoa;Eumetazoa;Bilateria;Protostomia; Spiralia;Lophotrochozoa;Mollusca;Gastropoda;Neomphalina;Neomphaloidea;Peltopspiridae;Gigantopelta;Gigantopelta aegis

UdeM00000000698 6596 469.2 UdeM00000000698 XP\_045177468.1 50.6 539  
223 11 1 533 2 503 7.20E-129 469.2 6596 cellular

organisms;Eukaryota;Opisthokonta;Metazoa;Eumetazoa;Bilateria;Protostomia; Spiralia;Lophotrochozoa;Mollusca;Bivalvia;Autobranchia;Heteroconchia;Euherodonta;Imparidentia;Venerida;Veneroidea;Veneridae;Mercenaria;Mercenaria mercenaria

UdeM00000000699 6596 129.4 UdeM00000000699 XP\_045168144.1 29.6 324  
208 7 77 390 551 864 1.10E-26 129.4 6596 cellular

organisms;Eukaryota;Opisthokonta;Metazoa;Eumetazoa;Bilateria;Protostomia; Spiralia;Lophotrochozoa;Mollusca;Bivalvia;Autobranchia;Heteroconchia;Euherodonta;Imparidentia;Venerida;Veneroidea;Veneridae;Mercenaria;Mercenaria mercenaria

UdeM00000000699 6596 79.3 UdeM00000000699 XP\_045168144.1 33.7 104  
69 0 4 107 17 120 1.30E-11 79.3 6596 cellular

organisms;Eukaryota;Opisthokonta;Metazoa;Eumetazoa;Bilateria;Protostomia; Spiralia;Lophotrochozoa;Mollusca;Bivalvia;Autobranchia;Heteroconchia;Euherodonta;Imparidentia;Venerida;Veneroidea;Veneridae;Mercenaria;Mercenaria mercenaria

UdeM00000000700 6596 129.4 UdeM00000000700 XP\_045168144.1 29.6 324  
208 7 77 390 551 864 1.10E-26 129.4 6596 cellular

organisms;Eukaryota;Opisthokonta;Metazoa;Eumetazoa;Bilateria;Protostomia; Spiralia;Lophotrochozoa;Mollusca;Bivalvia;Autobranchia;Heteroconchia;Euherodonta;Imparidentia;Venerida;Veneroidea;Veneridae;Mercenaria;Mercenaria mercenaria

UdeM00000000700 6596 79.3 UdeM00000000700 XP\_045168144.1 33.7 104  
69 0 4 107 17 120 1.30E-11 79.3 6596 cellular

organisms;Eukaryota;Opisthokonta;Metazoa;Eumetazoa;Bilateria;Protostomia; Spiralia;Lophotrochozoa;Mollusca;Bivalvia;Autobranchia;Heteroconchia;Euherodonta;Imparidentia;Venerida;Veneroidea;Veneridae;Mercenaria;Mercenaria mercenaria

UdeM00000000701 6596 129.4 UdeM00000000701 XP\_045168144.1 29.6 324  
 208 7 77 390 551 864 1.10E-26 129.4 6596 cellular  
 organisms;Eukaryota;Opisthokonta;Metazoa;Eumetazoa;Bilateria;Protostomia;  
 Spiralia;Lophotrochozoa;Mollusca;Bivalvia;Autobranchia;Heteroconchia;Euhe  
 terodonta;Imparidentia;Venerida;Veneroidea;Veneridae;Mercenaria;Mercenari  
 a mercenaria  
 UdeM00000000701 6596 79.3 UdeM00000000701 XP\_045168144.1 33.7 104  
 69 0 4 107 17 120 1.30E-11 79.3 6596 cellular  
 organisms;Eukaryota;Opisthokonta;Metazoa;Eumetazoa;Bilateria;Protostomia;  
 Spiralia;Lophotrochozoa;Mollusca;Bivalvia;Autobranchia;Heteroconchia;Euhe  
 terodonta;Imparidentia;Venerida;Veneroidea;Veneridae;Mercenaria;Mercenari  
 a mercenaria  
 UdeM00000000702 6596 328.9 UdeM00000000702 XP\_045162799.1 45 456  
 222 5 12 439 15 469 9.90E-87 328.9 6596 cellular  
 organisms;Eukaryota;Opisthokonta;Metazoa;Eumetazoa;Bilateria;Protostomia;  
 Spiralia;Lophotrochozoa;Mollusca;Bivalvia;Autobranchia;Heteroconchia;Euhe  
 terodonta;Imparidentia;Venerida;Veneroidea;Veneridae;Mercenaria;Mercenari  
 a mercenaria  
 UdeM00000000703 6596 401.7 UdeM00000000703 XP\_045162799.1 48.2 483  
 220 4 10 487 13 470 1.30E-108 401.7 6596 cellular  
 organisms;Eukaryota;Opisthokonta;Metazoa;Eumetazoa;Bilateria;Protostomia;  
 Spiralia;Lophotrochozoa;Mollusca;Bivalvia;Autobranchia;Heteroconchia;Euhe  
 terodonta;Imparidentia;Venerida;Veneroidea;Veneridae;Mercenaria;Mercenari  
 a mercenaria  
 UdeM00000000704 6573 283.9 UdeM00000000704 XP\_021354145.1 45 322  
 171 3 1 318 269 588 2.60E-73 283.9 6573 cellular  
 organisms;Eukaryota;Opisthokonta;Metazoa;Eumetazoa;Bilateria;Protostomia;  
 Spiralia;Lophotrochozoa;Mollusca;Bivalvia;Autobranchia;Pteriomorphia;Pect  
 inida;Pectinoidea;Pectinidae;Mizuhopecten;Mizuhopecten yessoensis  
 UdeM00000000705 400727 369 UdeM00000000705 XP\_025091384.1 42.8  
 458 247 6 5 459 148 593 8.70E-99 369 400727  
 cellular  
 organisms;Eukaryota;Opisthokonta;Metazoa;Eumetazoa;Bilateria;Protostomia;  
 Spiralia;Lophotrochozoa;Mollusca;Gastropoda;Caenogastropoda;Architaeniogl  
 ossa;Ampullarioidea;Ampullariidae;Pomacea;Pomacea canaliculata  
 UdeM00000000706 307959 235.7 UdeM00000000706 XP\_016384368.1 40.6  
 281 136 2 34 314 83 332 1.10E-58 235.7 307959  
 cellular  
 organisms;Eukaryota;Opisthokonta;Metazoa;Eumetazoa;Bilateria;Deuterostomi  
 a;Chordata;Craniata;Vertebrata;Gnathostomata;Teleostomi;Euteleostomi;Acti  
 nopterygii;Actinopteri;Neopterygii;Teleostei;Osteoglossocephalai;Clupeoce  
 phala;Otomorpha;Ostariophysi;Otophysi;Cypriniphysae;Cypriniformes;Cyprino  
 idei;Cyprinidae;Cyprininae;Sinocyclocheilus;Sinocyclocheilus rhinoceros  
 UdeM00000000707 6596 426 UdeM00000000707 XP\_045209095.1 50.1 441  
 205 7 1 430 1 437 8.70E-116 426 6596 cellular  
 organisms;Eukaryota;Opisthokonta;Metazoa;Eumetazoa;Bilateria;Protostomia;  
 Spiralia;Lophotrochozoa;Mollusca;Bivalvia;Autobranchia;Heteroconchia;Euhe  
 terodonta;Imparidentia;Venerida;Veneroidea;Veneridae;Mercenaria;Mercenari  
 a mercenaria  
 UdeM00000000708 6565 683.3 UdeM00000000708 XP\_022327155.1 44.7 1095  
 488 16 4139 5138 3239 4311 2.30E-192 683.3 6565 cellular  
 organisms;Eukaryota;Opisthokonta;Metazoa;Eumetazoa;Bilateria;Protostomia;  
 Spiralia;Lophotrochozoa;Mollusca;Bivalvia;Autobranchia;Pteriomorphia;Ostr  
 eida;Ostreoidea;Ostreidae;Crassostrea;Crassostrea virginica

UdeM00000000709 29159 177.6 UdeM00000000709 XP\_011423571.1 74.4 117  
 26 2 1 116 1 114 9.50E-42 177.6 29159 cellular  
 organisms;Eukaryota;Opisthokonta;Metazoa;Eumetazoa;Bilateria;Protostomia;  
 Spiralia;Lophotrochozoa;Mollusca;Bivalvia;Autobranchia;Pteriomorpha;Ostr  
 eida;Ostreoidea;Ostreidae;Crassostrea;Crassostrea gigas  
 UdeM00000000710 6579 269.6 UdeM00000000710 XP\_033729083.1 48.3 478  
 222 8 15 476 10 478 9.50E-69 269.6 6579 cellular  
 organisms;Eukaryota;Opisthokonta;Metazoa;Eumetazoa;Bilateria;Protostomia;  
 Spiralia;Lophotrochozoa;Mollusca;Bivalvia;Autobranchia;Pteriomorpha;Pect  
 inida;Pectinoidea;Pectinidae;Pecten;Pecten maximus  
 UdeM00000000711 6596 347.4 UdeM00000000711 XP\_045178021.1 47 696  
 258 19 83 690 584 1256 5.60E-92 347.4 6596 cellular  
 organisms;Eukaryota;Opisthokonta;Metazoa;Eumetazoa;Bilateria;Protostomia;  
 Spiralia;Lophotrochozoa;Mollusca;Bivalvia;Autobranchia;Heteroconchia;Euhe  
 terodonta;Imparidentia;Venerida;Veneroidea;Veneridae;Mercenaria;Mercenari  
 a mercenaria  
 UdeM00000000712 7654 81.3 UdeM00000000712 XP\_041484611.1 37.1 132  
 62 2 11 121 392 523 1.10E-12 81.3 7654 cellular  
 organisms;Eukaryota;Opisthokonta;Metazoa;Eumetazoa;Bilateria;Deuterostomi  
 a;Echinodermata;Eleutherozoa;Echinozoa;Echinoidea;Euechinoidea;Echinacea;  
 Temnopleuroidea;Toxopneustidae;Lytechinus;Lytechinus variegatus  
 UdeM00000000713 6596 236.1 UdeM00000000713 XP\_045178682.1 49.2 242  
 122 1 21 262 31 271 5.00E-59 236.1 6596 cellular  
 organisms;Eukaryota;Opisthokonta;Metazoa;Eumetazoa;Bilateria;Protostomia;  
 Spiralia;Lophotrochozoa;Mollusca;Bivalvia;Autobranchia;Heteroconchia;Euhe  
 terodonta;Imparidentia;Venerida;Veneroidea;Veneridae;Mercenaria;Mercenari  
 a mercenaria  
 UdeM00000000714 29159 463 UdeM00000000714 XP\_011442807.3 48.9 481  
 214 8 9 486 10 461 4.80E-127 463 29159 cellular  
 organisms;Eukaryota;Opisthokonta;Metazoa;Eumetazoa;Bilateria;Protostomia;  
 Spiralia;Lophotrochozoa;Mollusca;Bivalvia;Autobranchia;Pteriomorpha;Ostr  
 eida;Ostreoidea;Ostreidae;Crassostrea;Crassostrea gigas  
 UdeM00000000715 37653 657.5 UdeM00000000715 XP\_014768102.1 65.8 447  
 142 2 1 438 1 445 1.20E-185 657.5 37653 cellular  
 organisms;Eukaryota;Opisthokonta;Metazoa;Eumetazoa;Bilateria;Protostomia;  
 Spiralia;Lophotrochozoa;Mollusca;Cephalopoda;Coleoidea;Octopodiformes;Oct  
 opoda;Incirrata;Octopodidae;Octopus;Octopus bimaculoides  
 UdeM00000000716 6565 725.3 UdeM00000000716 XP\_022336131.1 36.3 1323  
 738 49 120 1401 147 1405 1.50E-205 725.3 6565 cellular  
 organisms;Eukaryota;Opisthokonta;Metazoa;Eumetazoa;Bilateria;Protostomia;  
 Spiralia;Lophotrochozoa;Mollusca;Bivalvia;Autobranchia;Pteriomorpha;Ostr  
 eida;Ostreoidea;Ostreidae;Crassostrea;Crassostrea virginica  
 UdeM00000000717 6579 150.2 UdeM00000000717 XP\_033756913.1 38.5 200  
 110 5 80 276 132 321 4.00E-33 150.2 6579 cellular  
 organisms;Eukaryota;Opisthokonta;Metazoa;Eumetazoa;Bilateria;Protostomia;  
 Spiralia;Lophotrochozoa;Mollusca;Bivalvia;Autobranchia;Pteriomorpha;Pect  
 inida;Pectinoidea;Pectinidae;Pecten;Pecten maximus  
 UdeM00000000718 6596 268.5 UdeM00000000718 XP\_045216525.1 42.3 385  
 196 14 1 378 315 680 1.50E-68 268.5 6596 cellular  
 organisms;Eukaryota;Opisthokonta;Metazoa;Eumetazoa;Bilateria;Protostomia;  
 Spiralia;Lophotrochozoa;Mollusca;Bivalvia;Autobranchia;Heteroconchia;Euhe  
 terodonta;Imparidentia;Venerida;Veneroidea;Veneridae;Mercenaria;Mercenari  
 a mercenaria

UdeM00000000719 6596 303.9 UdeM00000000719 XP\_045216525.1 40.9 491  
 227 21 77 529 160 625 4.20E-79 303.9 6596 cellular  
 organisms;Eukaryota;Opisthokonta;Metazoa;Eumetazoa;Bilateria;Protostomia;  
 Spiralia;Lophotrochozoa;Mollusca;Bivalvia;Autobranchia;Heteroconchia;Euhe  
 terodonta;Imparidentia;Venerida;Veneroidea;Veneridae;Mercenaria;Mercenari  
 a mercenaria  
 UdeM000000044262 6573 109.4 UdeM000000044262 XP\_021359218.1 50 104  
 52 0 82 185 375 478 5.10E-21 109.4 6573 cellular  
 organisms;Eukaryota;Opisthokonta;Metazoa;Eumetazoa;Bilateria;Protostomia;  
 Spiralia;Lophotrochozoa;Mollusca;Bivalvia;Autobranchia;Pteriormorphia;Pect  
 inida;Pectinoidea;Pectinidae;Mizuhopecten;Mizuhopecten yessoensis  
 UdeM000000044263 6596 126.7 UdeM000000044263 XP\_045204839.1 29.8 305  
 191 8 217 506 325 621 8.50E-26 126.7 6596 cellular  
 organisms;Eukaryota;Opisthokonta;Metazoa;Eumetazoa;Bilateria;Protostomia;  
 Spiralia;Lophotrochozoa;Mollusca;Bivalvia;Autobranchia;Heteroconchia;Euhe  
 terodonta;Imparidentia;Venerida;Veneroidea;Veneridae;Mercenaria;Mercenari  
 a mercenaria  
 UdeM000000044264 6596 93.6 UdeM000000044264 XP\_045204839.1 34.7 118  
 73 1 619 736 508 621 1.20E-15 93.6 6596 cellular  
 organisms;Eukaryota;Opisthokonta;Metazoa;Eumetazoa;Bilateria;Protostomia;  
 Spiralia;Lophotrochozoa;Mollusca;Bivalvia;Autobranchia;Heteroconchia;Euhe  
 terodonta;Imparidentia;Venerida;Veneroidea;Veneridae;Mercenaria;Mercenari  
 a mercenaria  
 UdeM000000044265 6596 93.6 UdeM000000044265 XP\_045204839.1 34.7 118  
 73 1 616 733 508 621 1.10E-15 93.6 6596 cellular  
 organisms;Eukaryota;Opisthokonta;Metazoa;Eumetazoa;Bilateria;Protostomia;  
 Spiralia;Lophotrochozoa;Mollusca;Bivalvia;Autobranchia;Heteroconchia;Euhe  
 terodonta;Imparidentia;Venerida;Veneroidea;Veneridae;Mercenaria;Mercenari  
 a mercenaria  
 UdeM000000044267 6596 93.6 UdeM000000044267 XP\_045204839.1 34.7 118  
 73 1 380 497 508 621 7.80E-16 93.6 6596 cellular  
 organisms;Eukaryota;Opisthokonta;Metazoa;Eumetazoa;Bilateria;Protostomia;  
 Spiralia;Lophotrochozoa;Mollusca;Bivalvia;Autobranchia;Heteroconchia;Euhe  
 terodonta;Imparidentia;Venerida;Veneroidea;Veneridae;Mercenaria;Mercenari  
 a mercenaria  
 UdeM000000044268 6565 100.1 UdeM000000044268 XP\_022324784.1 49 102  
 52 0 537 638 594 695 1.40E-17 100.1 6565 cellular  
 organisms;Eukaryota;Opisthokonta;Metazoa;Eumetazoa;Bilateria;Protostomia;  
 Spiralia;Lophotrochozoa;Mollusca;Bivalvia;Autobranchia;Pteriormorphia;Ostr  
 eida;Ostreoidea;Ostreidae;Crassostrea;Crassostrea virginica  
 UdeM000000044269 6565 100.1 UdeM000000044269 XP\_022324784.1 49 102  
 52 0 546 647 594 695 1.40E-17 100.1 6565 cellular  
 organisms;Eukaryota;Opisthokonta;Metazoa;Eumetazoa;Bilateria;Protostomia;  
 Spiralia;Lophotrochozoa;Mollusca;Bivalvia;Autobranchia;Pteriormorphia;Ostr  
 eida;Ostreoidea;Ostreidae;Crassostrea;Crassostrea virginica  
 UdeM000000044270 6565 100.1 UdeM000000044270 XP\_022324784.1 49 102  
 52 0 484 585 594 695 1.30E-17 100.1 6565 cellular  
 organisms;Eukaryota;Opisthokonta;Metazoa;Eumetazoa;Bilateria;Protostomia;  
 Spiralia;Lophotrochozoa;Mollusca;Bivalvia;Autobranchia;Pteriormorphia;Ostr  
 eida;Ostreoidea;Ostreidae;Crassostrea;Crassostrea virginica  
 UdeM000000041109 6579 124.4 UdeM000000041109 XP\_033742496.1 37.4 163  
 98 2 1 159 255 417 1.30E-25 124.4 6579 cellular  
 organisms;Eukaryota;Opisthokonta;Metazoa;Eumetazoa;Bilateria;Protostomia;

Spiralia; Lophotrochozoa; Mollusca; Bivalvia; Autobranchia; Pteriomorpha; Pectinida; Pectinoidea; Pectinidae; Pecten; Pecten maximus

UdeM00000033841 6579 515.8 UdeM00000033841 XP\_033734426.1 77.1 423  
85 4 83 502 99 512 6.30E-143 515.8 6579 cellular  
organisms; Eukaryota; Opisthokonta; Metazoa; Eumetazoa; Bilateria; Protostomia; Spiralia; Lophotrochozoa; Mollusca; Bivalvia; Autobranchia; Pteriomorpha; Pectinida; Pectinoidea; Pectinidae; Pecten; Pecten maximus

UdeM00000033842 6596 956.8 UdeM00000033842 XP\_045182299.1 58.9 757  
303 3 18 773 15 764 1.60E-275 956.8 6596 cellular  
organisms; Eukaryota; Opisthokonta; Metazoa; Eumetazoa; Bilateria; Protostomia; Spiralia; Lophotrochozoa; Mollusca; Bivalvia; Autobranchia; Heteroconchia; Euheterodonta; Imparidentia; Venerida; Veneroidea; Veneridae; Mercenaria; Mercenaria mercenaria

UdeM00000033843 29159 84.7 UdeM00000033843 XP\_011415139.2 34.2 158  
33 1 41 127 61 218 9.10E-14 84.7 29159 cellular  
organisms; Eukaryota; Opisthokonta; Metazoa; Eumetazoa; Bilateria; Protostomia; Spiralia; Lophotrochozoa; Mollusca; Bivalvia; Autobranchia; Pteriomorpha; Ostreida; Ostreoidea; Ostreidae; Crassostrea; Crassostrea gigas

UdeM00000033844 6596 871.7 UdeM00000033844 XP\_045182299.1 55.7 734  
288 5 35 738 38 764 6.60E-250 871.7 6596 cellular  
organisms; Eukaryota; Opisthokonta; Metazoa; Eumetazoa; Bilateria; Protostomia; Spiralia; Lophotrochozoa; Mollusca; Bivalvia; Autobranchia; Heteroconchia; Euheterodonta; Imparidentia; Venerida; Veneroidea; Veneridae; Mercenaria; Mercenaria mercenaria

UdeM00000033848 6596 106.7 UdeM00000033848 XP\_045213058.1 28.3 279  
113 8 286 481 87 361 9.20E-20 106.7 6596 cellular  
organisms; Eukaryota; Opisthokonta; Metazoa; Eumetazoa; Bilateria; Protostomia; Spiralia; Lophotrochozoa; Mollusca; Bivalvia; Autobranchia; Heteroconchia; Euheterodonta; Imparidentia; Venerida; Veneroidea; Veneridae; Mercenaria; Mercenaria mercenaria

UdeM00000033849 6596 223.8 UdeM00000033849 XP\_045198257.1 37.2 285  
177 1 3 287 123 405 2.80E-55 223.8 6596 cellular  
organisms; Eukaryota; Opisthokonta; Metazoa; Eumetazoa; Bilateria; Protostomia; Spiralia; Lophotrochozoa; Mollusca; Bivalvia; Autobranchia; Heteroconchia; Euheterodonta; Imparidentia; Venerida; Veneroidea; Veneridae; Mercenaria; Mercenaria mercenaria

UdeM00000033850 6573 72 UdeM00000033850 XP\_021352480.1 30.2 278  
169 11 34 302 49 310 1.40E-09 72 6573 cellular  
organisms; Eukaryota; Opisthokonta; Metazoa; Eumetazoa; Bilateria; Protostomia; Spiralia; Lophotrochozoa; Mollusca; Bivalvia; Autobranchia; Pteriomorpha; Pectinida; Pectinoidea; Pectinidae; Mizuhopecten; Mizuhopecten yessoensis

UdeM00000033851 6596 157.5 UdeM00000033851 XP\_045165790.1 58.5 118  
49 0 1 118 61 178 1.10E-35 157.5 6596 cellular  
organisms; Eukaryota; Opisthokonta; Metazoa; Eumetazoa; Bilateria; Protostomia; Spiralia; Lophotrochozoa; Mollusca; Bivalvia; Autobranchia; Heteroconchia; Euheterodonta; Imparidentia; Venerida; Veneroidea; Veneridae; Mercenaria; Mercenaria mercenaria

UdeM00000033852 6596 240 UdeM00000033852 XP\_045165790.1 65.5 168  
57 1 1 167 11 178 2.30E-60 240 6596 cellular  
organisms; Eukaryota; Opisthokonta; Metazoa; Eumetazoa; Bilateria; Protostomia; Spiralia; Lophotrochozoa; Mollusca; Bivalvia; Autobranchia; Heteroconchia; Euheterodonta; Imparidentia; Venerida; Veneroidea; Veneridae; Mercenaria; Mercenaria mercenaria

UdeM00000033853 6596 182.2 UdeM00000033853 XP\_045188028.1 57.5 134  
 57 0 1 134 12 145 4.50E-43 182.2 6596 cellular  
 organisms;Eukaryota;Opisthokonta;Metazoa;Eumetazoa;Bilateria;Protostomia;  
 Spiralia;Lophotrochozoa;Mollusca;Bivalvia;Autobranchia;Heteroconchia;Euhe  
 terodonta;Imparidentia;Venerida;Veneroidea;Veneridae;Mercenaria;Mercenari  
 a mercenaria

UdeM00000033854 6596 160.6 UdeM00000033854 XP\_045188028.1 53.6 125  
 58 0 21 145 21 145 1.50E-36 160.6 6596 cellular  
 organisms;Eukaryota;Opisthokonta;Metazoa;Eumetazoa;Bilateria;Protostomia;  
 Spiralia;Lophotrochozoa;Mollusca;Bivalvia;Autobranchia;Heteroconchia;Euhe  
 terodonta;Imparidentia;Venerida;Veneroidea;Veneridae;Mercenaria;Mercenari  
 a mercenaria

UdeM00000033855 6596 361.3 UdeM00000033855 XP\_045167151.1 35.3 641  
 394 13 201 832 136 764 3.70E-96 361.3 6596 cellular  
 organisms;Eukaryota;Opisthokonta;Metazoa;Eumetazoa;Bilateria;Protostomia;  
 Spiralia;Lophotrochozoa;Mollusca;Bivalvia;Autobranchia;Heteroconchia;Euhe  
 terodonta;Imparidentia;Venerida;Veneroidea;Veneridae;Mercenaria;Mercenari  
 a mercenaria

UdeM00000033856 6596 1015 UdeM00000033856 XP\_045187456.1 74 701  
 180 2 10 709 8 707 4.70E-293 1015 6596 cellular  
 organisms;Eukaryota;Opisthokonta;Metazoa;Eumetazoa;Bilateria;Protostomia;  
 Spiralia;Lophotrochozoa;Mollusca;Bivalvia;Autobranchia;Heteroconchia;Euhe  
 terodonta;Imparidentia;Venerida;Veneroidea;Veneridae;Mercenaria;Mercenari  
 a mercenaria

UdeM00000033857 6596 402.1 UdeM00000033857 XP\_045187456.1 74.8 305  
 76 1 6 310 404 707 6.30E-109 402.1 6596 cellular  
 organisms;Eukaryota;Opisthokonta;Metazoa;Eumetazoa;Bilateria;Protostomia;  
 Spiralia;Lophotrochozoa;Mollusca;Bivalvia;Autobranchia;Heteroconchia;Euhe  
 terodonta;Imparidentia;Venerida;Veneroidea;Veneridae;Mercenaria;Mercenari  
 a mercenaria

UdeM00000033858 6565 530 UdeM00000033858 XP\_022331125.1 82.6 299  
 51 1 12 309 57 355 2.00E-147 530 6565 cellular  
 organisms;Eukaryota;Opisthokonta;Metazoa;Eumetazoa;Bilateria;Protostomia;  
 Spiralia;Lophotrochozoa;Mollusca;Bivalvia;Autobranchia;Pteriomorphia;Ostr  
 eida;Ostreoidea;Ostreidae;Crassostrea;Crassostrea virginica

UdeM00000033859 29159 186.8 UdeM00000033859 XP\_034331441.1 43.4 219  
 119 3 15 230 1 217 6.40E-44 186.8 29159 cellular  
 organisms;Eukaryota;Opisthokonta;Metazoa;Eumetazoa;Bilateria;Protostomia;  
 Spiralia;Lophotrochozoa;Mollusca;Bivalvia;Autobranchia;Pteriomorphia;Ostr  
 eida;Ostreoidea;Ostreidae;Crassostrea;Crassostrea gigas

UdeM00000033860 7739 154.5 UdeM00000033860 XP\_035659254.1 43.3 180  
 96 2 5 178 753 932 1.80E-34 154.5 7739 cellular  
 organisms;Eukaryota;Opisthokonta;Metazoa;Eumetazoa;Bilateria;Deuterostomi  
 a;Chordata;Cephalochordata;Leptocardii;Amphioxiformes;Branchiostomidae;Br  
 anchiostoma;Branchiostoma floridae

UdeM00000033861 6596 231.9 UdeM00000033861 XP\_045187458.1 56.6 272  
 110 2 91 354 53 324 1.40E-57 231.9 6596 cellular  
 organisms;Eukaryota;Opisthokonta;Metazoa;Eumetazoa;Bilateria;Protostomia;  
 Spiralia;Lophotrochozoa;Mollusca;Bivalvia;Autobranchia;Heteroconchia;Euhe  
 terodonta;Imparidentia;Venerida;Veneroidea;Veneridae;Mercenaria;Mercenari  
 a mercenaria

UdeM00000033862 6596 171.8 UdeM00000033862 XP\_045186984.1 39.1 294  
 126 10 1 246 5 293 1.20E-39 171.8 6596 cellular  
 organisms;Eukaryota;Opisthokonta;Metazoa;Eumetazoa;Bilateria;Protostomia;



Spiralia;Lophotrochozoa;Mollusca;Bivalvia;Autobranchia;Heteroconchia;Euheterodonta;Imparidentia;Venerida;Veneroidea;Veneridae;Mercenaria;Mercenaria mercenaria

UdeM00000033863 6596 200.7 UdeM00000033863 XP\_045186985.1 41.9 296  
127 11 1 256 5 295 2.30E-48 200.7 6596 cellular

organisms;Eukaryota;Opisthokonta;Metazoa;Eumetazoa;Bilateria;Protostomia;Spiralia;Lophotrochozoa;Mollusca;Bivalvia;Autobranchia;Heteroconchia;Euheterodonta;Imparidentia;Venerida;Veneroidea;Veneridae;Mercenaria;Mercenaria mercenaria

UdeM00000033864 6565 107.5 UdeM00000033864 XP\_022331458.1 31.5 248  
151 5 41 284 63 295 4.40E-20 107.5 6565 cellular

organisms;Eukaryota;Opisthokonta;Metazoa;Eumetazoa;Bilateria;Protostomia;Spiralia;Lophotrochozoa;Mollusca;Bivalvia;Autobranchia;Pteriomorpha;Ostreida;Ostreoidea;Ostreidae;Crassostrea;Crassostrea virginica

UdeM00000033865 1735272 59.7 UdeM00000033865 XP\_041373661.1 38.8  
67 40 1 1 66 4 70 4.30E-06 59.7 1735272  
cellular

organisms;Eukaryota;Opisthokonta;Metazoa;Eumetazoa;Bilateria;Protostomia;Spiralia;Lophotrochozoa;Mollusca;Gastropoda;Neomphalina;Neomphaloidea;Peltospiridae;Gigantopelta;Gigantopelta aegis

UdeM00000033866 6579 1127.5 UdeM00000033866 XP\_033734163.1 51.4  
1085 512 8 1 1078 1 1077 0.00E+00 1127.5 6579  
cellular

organisms;Eukaryota;Opisthokonta;Metazoa;Eumetazoa;Bilateria;Protostomia;Spiralia;Lophotrochozoa;Mollusca;Bivalvia;Autobranchia;Pteriomorpha;Pectinida;Pectinoidea;Pectinidae;Pecten;Pecten maximus

UdeM00000033868 225164 139 UdeM00000033868 XP\_009060494.1 35.4  
209 123 4 33 229 62 270 7.60E-30 139 225164  
cellular

organisms;Eukaryota;Opisthokonta;Metazoa;Eumetazoa;Bilateria;Protostomia;Spiralia;Lophotrochozoa;Mollusca;Gastropoda;Patellogastropoda;Lottiidae;Lottia;Lottia gigantea

UdeM00000033869 6565 162.2 UdeM00000033869 XP\_022333543.1 33.9 239  
151 3 14 249 51 285 8.80E-37 162.2 6565 cellular

organisms;Eukaryota;Opisthokonta;Metazoa;Eumetazoa;Bilateria;Protostomia;Spiralia;Lophotrochozoa;Mollusca;Bivalvia;Autobranchia;Pteriomorpha;Ostreida;Ostreoidea;Ostreidae;Crassostrea;Crassostrea virginica

UdeM00000033870 1735272 157.9 UdeM00000033870 XP\_041351938.1 39.8  
259 140 7 3 249 464 718 1.70E-35 157.9 1735272  
cellular

organisms;Eukaryota;Opisthokonta;Metazoa;Eumetazoa;Bilateria;Protostomia;Spiralia;Lophotrochozoa;Mollusca;Gastropoda;Neomphalina;Neomphaloidea;Peltospiridae;Gigantopelta;Gigantopelta aegis

UdeM00000033871 1735272 63.9 UdeM00000033871 XP\_041351938.1 23.7  
262 178 7 35 286 223 472 4.20E-07 63.9 1735272  
cellular

organisms;Eukaryota;Opisthokonta;Metazoa;Eumetazoa;Bilateria;Protostomia;Spiralia;Lophotrochozoa;Mollusca;Gastropoda;Neomphalina;Neomphaloidea;Peltospiridae;Gigantopelta;Gigantopelta aegis

UdeM00000033872 400727 125.2 UdeM00000033872 XP\_025105569.1 41.2  
148 86 1 15 162 49 195 7.90E-26 125.2 400727  
cellular

organisms;Eukaryota;Opisthokonta;Metazoa;Eumetazoa;Bilateria;Protostomia;

Spiralia; Lophotrochozoa; Mollusca; Gastropoda; Caenogastropoda; Architaenioglossa; Ampullarioidea; Ampullariidae; Pomacea; Pomacea canaliculata  
UdeM00000033873 6565 1333.2 UdeM00000033873 XP\_022332215.1 68.9  
936 279 4 1 933 16 942 0.00E+00 1333.2 6565  
cellular  
organisms; Eukaryota; Opisthokonta; Metazoa; Eumetazoa; Bilateria; Protostomia; Spiralia; Lophotrochozoa; Mollusca; Bivalvia; Autobranchia; Pteriomorpha; Ostracida; Ostreidae; Crassostrea; Crassostrea virginica  
UdeM00000033874 6579 365.5 UdeM00000033874 XP\_033735988.1 64.4 250  
89 0 7 256 38 287 5.40E-98 365.5 6579 cellular  
organisms; Eukaryota; Opisthokonta; Metazoa; Eumetazoa; Bilateria; Protostomia; Spiralia; Lophotrochozoa; Mollusca; Bivalvia; Autobranchia; Pteriomorpha; Pectinida; Pectinoidea; Pectinidae; Pecten; Pecten maximus  
UdeM00000033875 29159 64.7 UdeM00000033875 XP\_034336196.1 28.6 112  
75 2 35 143 565 674 1.20E-07 64.7 29159 cellular  
organisms; Eukaryota; Opisthokonta; Metazoa; Eumetazoa; Bilateria; Protostomia; Spiralia; Lophotrochozoa; Mollusca; Bivalvia; Autobranchia; Pteriomorpha; Ostracida; Ostreidae; Crassostrea; Crassostrea gigas  
UdeM00000033877 6565 65.5 UdeM00000033877 XP\_022334490.1 36.6 101  
59 3 45 144 245 341 6.70E-08 65.5 6565 cellular  
organisms; Eukaryota; Opisthokonta; Metazoa; Eumetazoa; Bilateria; Protostomia; Spiralia; Lophotrochozoa; Mollusca; Bivalvia; Autobranchia; Pteriomorpha; Ostracida; Ostreidae; Crassostrea; Crassostrea virginica  
UdeM00000033878 6596 82.4 UdeM00000033878 XP\_045177449.1 42.2 135  
63 7 14 138 368 497 5.00E-13 82.4 6596 cellular  
organisms; Eukaryota; Opisthokonta; Metazoa; Eumetazoa; Bilateria; Protostomia; Spiralia; Lophotrochozoa; Mollusca; Bivalvia; Autobranchia; Heteroconchia; Euheterodonta; Imparidentia; Venerida; Veneroidea; Veneridae; Mercenaria; Mercenaria mercenaria  
UdeM00000033879 7739 775 UdeM00000033879 XP\_035696678.1 55.3 683  
299 3 208 884 202 884 1.00E-220 775 7739 cellular  
organisms; Eukaryota; Opisthokonta; Metazoa; Eumetazoa; Bilateria; Deuterostomia; Chordata; Cephalochordata; Leptocardii; Amphioxiformes; Branchiostomidae; Branchiostoma; Branchiostoma floridae  
UdeM00000033880 6596 379.4 UdeM00000033880 XP\_045169901.1 41.2 514  
292 4 8 518 5 511 7.50E-102 379.4 6596 cellular  
organisms; Eukaryota; Opisthokonta; Metazoa; Eumetazoa; Bilateria; Protostomia; Spiralia; Lophotrochozoa; Mollusca; Bivalvia; Autobranchia; Heteroconchia; Euheterodonta; Imparidentia; Venerida; Veneroidea; Veneridae; Mercenaria; Mercenaria mercenaria  
UdeM00000033881 6596 112.1 UdeM00000033881 XP\_045179939.1 42.3 130  
72 2 57 183 251 380 7.70E-22 112.1 6596 cellular  
organisms; Eukaryota; Opisthokonta; Metazoa; Eumetazoa; Bilateria; Protostomia; Spiralia; Lophotrochozoa; Mollusca; Bivalvia; Autobranchia; Heteroconchia; Euheterodonta; Imparidentia; Venerida; Veneroidea; Veneridae; Mercenaria; Mercenaria mercenaria  
UdeM00000033883 6596 118.2 UdeM00000033883 XP\_045179939.1 43.8 130  
70 2 260 386 251 380 2.30E-23 118.2 6596 cellular  
organisms; Eukaryota; Opisthokonta; Metazoa; Eumetazoa; Bilateria; Protostomia; Spiralia; Lophotrochozoa; Mollusca; Bivalvia; Autobranchia; Heteroconchia; Euheterodonta; Imparidentia; Venerida; Veneroidea; Veneridae; Mercenaria; Mercenaria mercenaria  
UdeM00000033884 6565 276.2 UdeM00000033884 XP\_022341974.1 49.8 281  
120 6 14 293 198 458 5.00E-71 276.2 6565 cellular

organisms;Eukaryota;Opisthokonta;Metazoa;Eumetazoa;Bilateria;Protostomia;Spiralia;Lophotrochozoa;Mollusca;Bivalvia;Autobranchia;Pteriormorphia;Ostr  
eida;Ostreoidea;Ostreidae;Crassostrea;Crassostrea virginica  
UdeM00000033885 6565 275.4 UdeM00000033885 XP\_022341974.1 49.8 281  
120 6 14 293 198 458 8.50E-71 275.4 6565 cellular  
organisms;Eukaryota;Opisthokonta;Metazoa;Eumetazoa;Bilateria;Protostomia;Spiralia;Lophotrochozoa;Mollusca;Bivalvia;Autobranchia;Pteriormorphia;Ostr  
eida;Ostreoidea;Ostreidae;Crassostrea;Crassostrea virginica  
UdeM00000033886 6596 263.1 UdeM00000033886 XP\_045175116.1 34.9 373  
227 3 18 376 25 395 5.50E-67 263.1 6596 cellular  
organisms;Eukaryota;Opisthokonta;Metazoa;Eumetazoa;Bilateria;Protostomia;Spiralia;Lophotrochozoa;Mollusca;Bivalvia;Autobranchia;Heteroconchia;Euhe  
terodonta;Imparidentia;Venerida;Veneroidea;Veneridae;Mercenaria;Mercenari  
a mercenaria  
UdeM00000033887 6596 308.9 UdeM00000033887 XP\_045212714.1 30.5 696  
452 11 2 670 3 693 1.60E-80 308.9 6596 cellular  
organisms;Eukaryota;Opisthokonta;Metazoa;Eumetazoa;Bilateria;Protostomia;Spiralia;Lophotrochozoa;Mollusca;Bivalvia;Autobranchia;Heteroconchia;Euhe  
terodonta;Imparidentia;Venerida;Veneroidea;Veneridae;Mercenaria;Mercenari  
a mercenaria  
UdeM00000033888 6105 82.8 UdeM00000033888 XP\_031557194.1 44.6 83  
46 0 1 83 299 381 2.80E-13 82.8 6105 cellular  
organisms;Eukaryota;Opisthokonta;Metazoa;Eumetazoa;Cnidaria;Anthozoa;Hexa  
corallia;Actiniaria;Actiniidae;Actinia;Actinia tenebrosa  
UdeM00000033889 6596 69.7 UdeM00000033889 XP\_045202967.1 46.3 67  
34 1 3 67 9 75 2.00E-09 69.7 6596 cellular  
organisms;Eukaryota;Opisthokonta;Metazoa;Eumetazoa;Bilateria;Protostomia;Spiralia;Lophotrochozoa;Mollusca;Bivalvia;Autobranchia;Heteroconchia;Euhe  
terodonta;Imparidentia;Venerida;Veneroidea;Veneridae;Mercenaria;Mercenari  
a mercenaria  
UdeM00000033890 6596 310.5 UdeM00000033890 XP\_045212714.1 31.8 695  
444 11 4 674 5 693 5.50E-81 310.5 6596 cellular  
organisms;Eukaryota;Opisthokonta;Metazoa;Eumetazoa;Bilateria;Protostomia;Spiralia;Lophotrochozoa;Mollusca;Bivalvia;Autobranchia;Heteroconchia;Euhe  
terodonta;Imparidentia;Venerida;Veneroidea;Veneridae;Mercenaria;Mercenari  
a mercenaria  
UdeM00000033891 6596 209.9 UdeM00000033891 XP\_045201862.1 31.1 472  
280 11 2 442 222 679 7.10E-51 209.9 6596 cellular  
organisms;Eukaryota;Opisthokonta;Metazoa;Eumetazoa;Bilateria;Protostomia;Spiralia;Lophotrochozoa;Mollusca;Bivalvia;Autobranchia;Heteroconchia;Euhe  
terodonta;Imparidentia;Venerida;Veneroidea;Veneridae;Mercenaria;Mercenari  
a mercenaria  
UdeM00000033892 6596 75.9 UdeM00000033892 XP\_045160626.1 34 150  
97 2 2 150 17 165 5.60E-11 75.9 6596 cellular  
organisms;Eukaryota;Opisthokonta;Metazoa;Eumetazoa;Bilateria;Protostomia;Spiralia;Lophotrochozoa;Mollusca;Bivalvia;Autobranchia;Heteroconchia;Euhe  
terodonta;Imparidentia;Venerida;Veneroidea;Veneridae;Mercenaria;Mercenari  
a mercenaria  
UdeM00000033893 6105 104.4 UdeM00000033893 XP\_031557194.1 45.6 114  
59 2 1 114 299 409 1.00E-19 104.4 6105 cellular  
organisms;Eukaryota;Opisthokonta;Metazoa;Eumetazoa;Cnidaria;Anthozoa;Hexa  
corallia;Actiniaria;Actiniidae;Actinia;Actinia tenebrosa  
UdeM00000033894 6105 148.3 UdeM00000033894 XP\_031557194.1 38.4 245  
128 6 7 248 4 228 1.30E-32 148.3 6105 cellular

organisms;Eukaryota;Opisthokonta;Metazoa;Eumetazoa;Cnidaria;Anthozoa;Hexa  
corallia;Actiniaria;Actiniidae;Actinia;Actinia tenebrosa  
UdeM00000033895 6573 359 UdeM00000033895 XP\_021358036.1 79.6 206  
42 0 1 206 1 206 4.10E-96 359 6573 cellular  
organisms;Eukaryota;Opisthokonta;Metazoa;Eumetazoa;Bilateria;Protostomia;  
Spiralia;Lophotrochozoa;Mollusca;Bivalvia;Autobranchia;Pteriormorphia;Pect  
inida;Pectinoidea;Pectinidae;Mizuhopecten;Mizuhopecten yessoensis  
UdeM00000033896 1735272 353.6 UdeM00000033896 XP\_041376080.1 57.5  
360 103 5 2 361 3 312 3.00E-94 353.6 1735272  
cellular  
organisms;Eukaryota;Opisthokonta;Metazoa;Eumetazoa;Bilateria;Protostomia;  
Spiralia;Lophotrochozoa;Mollusca;Gastropoda;Neomphalina;Neomphaloidea;Pel  
tospiridae;Gigantopelta;Gigantopelta aegis  
UdeM00000033897 6596 498 UdeM00000033897 XP\_045192822.1 86.4 273  
37 0 1 273 1 273 7.40E-138 498 6596 cellular  
organisms;Eukaryota;Opisthokonta;Metazoa;Eumetazoa;Bilateria;Protostomia;  
Spiralia;Lophotrochozoa;Mollusca;Bivalvia;Autobranchia;Heteroconchia;Euhe  
terodonta;Imparidentia;Venerida;Veneroidea;Veneridae;Mercenaria;Mercenari  
a mercenaria  
UdeM00000033898 6596 260.4 UdeM00000033898 XP\_045192822.1 82.3 147  
26 0 23 169 127 273 1.60E-66 260.4 6596 cellular  
organisms;Eukaryota;Opisthokonta;Metazoa;Eumetazoa;Bilateria;Protostomia;  
Spiralia;Lophotrochozoa;Mollusca;Bivalvia;Autobranchia;Heteroconchia;Euhe  
terodonta;Imparidentia;Venerida;Veneroidea;Veneridae;Mercenaria;Mercenari  
a mercenaria  
UdeM00000041513 400727 468.8 UdeM00000041513 XP\_025092305.1 53.3  
420 186 6 13 427 29 443 7.50E-129 468.8 400727  
cellular  
organisms;Eukaryota;Opisthokonta;Metazoa;Eumetazoa;Bilateria;Protostomia;  
Spiralia;Lophotrochozoa;Mollusca;Gastropoda;Caenogastropoda;Architaeniogl  
ossa;Ampullarioidea;Ampullariidae;Pomacea;Pomacea canaliculata  
UdeM00000041515 1735272 80.1 UdeM00000041515 XP\_041360874.1 30.1  
186 115 6 10 184 16 197 3.20E-12 80.1 1735272  
cellular  
organisms;Eukaryota;Opisthokonta;Metazoa;Eumetazoa;Bilateria;Protostomia;  
Spiralia;Lophotrochozoa;Mollusca;Gastropoda;Neomphalina;Neomphaloidea;Pel  
tospiridae;Gigantopelta;Gigantopelta aegis  
UdeM00000041516 1735272 270.8 UdeM00000041516 XP\_041360874.1 39.3  
420 240 7 12 429 13 419 3.00E-69 270.8 1735272  
cellular  
organisms;Eukaryota;Opisthokonta;Metazoa;Eumetazoa;Bilateria;Protostomia;  
Spiralia;Lophotrochozoa;Mollusca;Gastropoda;Neomphalina;Neomphaloidea;Pel  
tospiridae;Gigantopelta;Gigantopelta aegis  
UdeM00000041517 2607531 274.6 UdeM00000041517 XP\_036368557.1 40.1  
387 220 8 35 413 44 426 2.00E-70 274.6 2607531  
cellular  
organisms;Eukaryota;Opisthokonta;Metazoa;Eumetazoa;Bilateria;Protostomia;  
Spiralia;Lophotrochozoa;Mollusca;Cephalopoda;Coleoidea;Octopodiformes;Oct  
opoda;Incirrata;Octopodidae;Octopus;Octopus sinensis  
UdeM00000041518 1735272 288.5 UdeM00000041518 XP\_041360874.1 43.9  
367 198 5 1 361 55 419 1.20E-74 288.5 1735272  
cellular  
organisms;Eukaryota;Opisthokonta;Metazoa;Eumetazoa;Bilateria;Protostomia;

Spiralia;Lophotrochozoa;Mollusca;Gastropoda;Neomphalina;Neomphaloidea;Pel  
tospiridae;Gigantopelta;Gigantopelta aegis  
UdeM00000041519 29159 245.7 UdeM00000041519 XP\_019919189.2 31.2 641  
329 17 82 712 85 623 1.80E-61 245.7 29159 cellular  
organisms;Eukaryota;Opisthokonta;Metazoa;Eumetazoa;Bilateria;Protostomia;  
Spiralia;Lophotrochozoa;Mollusca;Bivalvia;Autobranchia;Pteriormorphia;Ostr  
eida;Ostreoidea;Ostreidae;Crassostrea;Crassostrea gigas  
UdeM00000041520 6596 496.9 UdeM00000041520 XP\_045182242.1 53.4 470  
188 5 9 459 16 473 3.10E-137 496.9 6596 cellular  
organisms;Eukaryota;Opisthokonta;Metazoa;Eumetazoa;Bilateria;Protostomia;  
Spiralia;Lophotrochozoa;Mollusca;Bivalvia;Autobranchia;Heteroconchia;Euhe  
terodonta;Imparidentia;Venerida;Veneroidea;Veneridae;Mercenaria;Mercenari  
a mercenaria  
UdeM00000041521 6596 212.2 UdeM00000041521 XP\_045181187.1 62.3 183  
57 3 13 191 1 175 5.70E-52 212.2 6596 cellular  
organisms;Eukaryota;Opisthokonta;Metazoa;Eumetazoa;Bilateria;Protostomia;  
Spiralia;Lophotrochozoa;Mollusca;Bivalvia;Autobranchia;Heteroconchia;Euhe  
terodonta;Imparidentia;Venerida;Veneroidea;Veneridae;Mercenaria;Mercenari  
a mercenaria  
UdeM00000041522 6596 186.4 UdeM00000041522 XP\_045181193.1 63.5 159  
48 2 8 162 11 163 2.80E-44 186.4 6596 cellular  
organisms;Eukaryota;Opisthokonta;Metazoa;Eumetazoa;Bilateria;Protostomia;  
Spiralia;Lophotrochozoa;Mollusca;Bivalvia;Autobranchia;Heteroconchia;Euhe  
terodonta;Imparidentia;Venerida;Veneroidea;Veneridae;Mercenaria;Mercenari  
a mercenaria  
UdeM00000041523 6596 295.8 UdeM00000041523 XP\_045180623.1 51.6 285  
106 4 8 262 132 414 5.40E-77 295.8 6596 cellular  
organisms;Eukaryota;Opisthokonta;Metazoa;Eumetazoa;Bilateria;Protostomia;  
Spiralia;Lophotrochozoa;Mollusca;Bivalvia;Autobranchia;Heteroconchia;Euhe  
terodonta;Imparidentia;Venerida;Veneroidea;Veneridae;Mercenaria;Mercenari  
a mercenaria  
UdeM00000041524 6596 300.4 UdeM00000041524 XP\_045180623.1 53.3 285  
104 4 8 265 132 414 2.20E-78 300.4 6596 cellular  
organisms;Eukaryota;Opisthokonta;Metazoa;Eumetazoa;Bilateria;Protostomia;  
Spiralia;Lophotrochozoa;Mollusca;Bivalvia;Autobranchia;Heteroconchia;Euhe  
terodonta;Imparidentia;Venerida;Veneroidea;Veneridae;Mercenaria;Mercenari  
a mercenaria  
UdeM00000041527 6573 535 UdeM00000041527 XP\_021373061.1 77 330  
75 1 1 329 507 836 6.60E-149 535 6573 cellular  
organisms;Eukaryota;Opisthokonta;Metazoa;Eumetazoa;Bilateria;Protostomia;  
Spiralia;Lophotrochozoa;Mollusca;Bivalvia;Autobranchia;Pteriormorphia;Pect  
inida;Pectinoidea;Pectinidae;Mizuhopecten;Mizuhopecten yessoensis  
UdeM00000041526 6573 657.9 UdeM00000041526 XP\_021373065.1 76.5 413  
96 1 19 430 404 816 8.80E-186 657.9 6573 cellular  
organisms;Eukaryota;Opisthokonta;Metazoa;Eumetazoa;Bilateria;Protostomia;  
Spiralia;Lophotrochozoa;Mollusca;Bivalvia;Autobranchia;Pteriormorphia;Pect  
inida;Pectinoidea;Pectinidae;Mizuhopecten;Mizuhopecten yessoensis  
UdeM00000041528 29159 213.8 UdeM00000041528 XP\_034317505.1 84 125  
20 0 265 389 288 412 4.00E-52 213.8 29159 cellular  
organisms;Eukaryota;Opisthokonta;Metazoa;Eumetazoa;Bilateria;Protostomia;  
Spiralia;Lophotrochozoa;Mollusca;Bivalvia;Autobranchia;Pteriormorphia;Ostr  
eida;Ostreoidea;Ostreidae;Crassostrea;Crassostrea gigas  
UdeM00000041529 6573 445.7 UdeM00000041529 XP\_021373061.1 83.3 257  
43 0 20 276 21 277 4.50E-122 445.7 6573 cellular

organisms;Eukaryota;Opisthokonta;Metazoa;Eumetazoa;Bilateria;Protostomia; Spiralia;Lophotrochozoa;Mollusca;Bivalvia;Autobranchia;Pteriomorpha;Pect inida;Pectinoidea;Pectinidae;Mizuhopecten;Mizuhopecten yessoensis

UdeM00000041530 400727 330.1 UdeM00000041530 XP\_025091729.1 87.8  
197 24 0 1 197 1 197 1.90E-87 330.1 400727

cellular

organisms;Eukaryota;Opisthokonta;Metazoa;Eumetazoa;Bilateria;Protostomia; Spiralia;Lophotrochozoa;Mollusca;Gastropoda;Caenogastropoda;Architaeniogl ossa;Ampullarioidea;Ampullariidae;Pomacea;Pomacea canaliculata

UdeM00000041531 6596 313.5 UdeM00000041531 XP\_045166991.1 41.6 411  
161 5 57 423 265 640 8.70E-82 313.5 6596 cellular

organisms;Eukaryota;Opisthokonta;Metazoa;Eumetazoa;Bilateria;Protostomia; Spiralia;Lophotrochozoa;Mollusca;Bivalvia;Autobranchia;Heteroconchia;Euhe terodonta;Imparidentia;Venerida;Veneroidea;Veneridae;Mercenaria;Mercenari a mercenaria

UdeM00000041532 29159 242.7 UdeM00000041532 XP\_019919189.2 29.7 663  
342 12 98 760 85 623 1.60E-60 242.7 29159 cellular

organisms;Eukaryota;Opisthokonta;Metazoa;Eumetazoa;Bilateria;Protostomia; Spiralia;Lophotrochozoa;Mollusca;Bivalvia;Autobranchia;Pteriomorpha;Ostr eida;Ostreoidea;Ostreidae;Crassostrea;Crassostrea gigas

UdeM00000041533 6596 725.7 UdeM00000041533 XP\_045180675.1 50.3 748  
341 8 5 734 301 1035 5.90E-206 725.7 6596 cellular

organisms;Eukaryota;Opisthokonta;Metazoa;Eumetazoa;Bilateria;Protostomia; Spiralia;Lophotrochozoa;Mollusca;Bivalvia;Autobranchia;Heteroconchia;Euhe terodonta;Imparidentia;Venerida;Veneroidea;Veneridae;Mercenaria;Mercenari a mercenaria

UdeM00000041534 1735272 113.6 UdeM00000041534 XP\_041361447.1 41.7  
163 76 5 82 244 116 259 3.70E-22 113.6 1735272

cellular

organisms;Eukaryota;Opisthokonta;Metazoa;Eumetazoa;Bilateria;Protostomia; Spiralia;Lophotrochozoa;Mollusca;Gastropoda;Neomphalina;Neomphaloidea;Pel tospiridae;Gigantopelta;Gigantopelta aegis

UdeM00000041535 6579 451.4 UdeM00000041535 XP\_033727368.1 50.6 462  
158 6 1 393 1 461 1.10E-123 451.4 6579 cellular

organisms;Eukaryota;Opisthokonta;Metazoa;Eumetazoa;Bilateria;Protostomia; Spiralia;Lophotrochozoa;Mollusca;Bivalvia;Autobranchia;Pteriomorpha;Pect inida;Pectinoidea;Pectinidae;Pecten;Pecten maximus

UdeM00000041536 45351 92.4 UdeM00000041536 XP\_032236999.1 35.8 151  
81 2 37 172 11 160 6.20E-16 92.4 45351 cellular

organisms;Eukaryota;Opisthokonta;Metazoa;Eumetazoa;Cnidaria;Anthozoa;Hexa corallia;Actiniaria;Edwardsiidae;Nematostella;Nematostella vectensis

UdeM00000041537 6596 290.4 UdeM00000041537 XP\_045177776.1 40.6 433  
235 8 1 427 405 821 3.70E-75 290.4 6596 cellular

organisms;Eukaryota;Opisthokonta;Metazoa;Eumetazoa;Bilateria;Protostomia; Spiralia;Lophotrochozoa;Mollusca;Bivalvia;Autobranchia;Heteroconchia;Euhe terodonta;Imparidentia;Venerida;Veneroidea;Veneridae;Mercenaria;Mercenari a mercenaria

UdeM00000041538 6596 108.6 UdeM00000041538 XP\_045209482.1 41.7 168  
86 2 149 316 7 162 1.60E-20 108.6 6596 cellular

organisms;Eukaryota;Opisthokonta;Metazoa;Eumetazoa;Bilateria;Protostomia; Spiralia;Lophotrochozoa;Mollusca;Bivalvia;Autobranchia;Heteroconchia;Euhe terodonta;Imparidentia;Venerida;Veneroidea;Veneridae;Mercenaria;Mercenari a mercenaria

UdeM00000041539 6596 270.8 UdeM00000041539 XP\_045195540.1 49.2 256  
 129 1 5 260 46 300 2.10E-69 270.8 6596 cellular  
 organisms;Eukaryota;Opisthokonta;Metazoa;Eumetazoa;Bilateria;Protostomia;  
 Spiralia;Lophotrochozoa;Mollusca;Bivalvia;Autobranchia;Heteroconchia;Euhe  
 terodonta;Imparidentia;Venerida;Veneroidea;Veneridae;Mercenaria;Mercenari  
 a mercenaria  
 UdeM00000041540 1735272 115.5 UdeM00000041540 XP\_041374221.1 34.6  
 214 124 1 25 238 25 222 1.60E-22 115.5 1735272  
 cellular  
 organisms;Eukaryota;Opisthokonta;Metazoa;Eumetazoa;Bilateria;Protostomia;  
 Spiralia;Lophotrochozoa;Mollusca;Gastropoda;Neomphalina;Neomphaloidea;Pel  
 tospiridae;Gigantopelta;Gigantopelta aegis  
 UdeM00000041541 6596 390.6 UdeM00000041541 XP\_045177776.1 41.4 553  
 304 10 1 539 405 951 4.80E-105 390.6 6596 cellular  
 organisms;Eukaryota;Opisthokonta;Metazoa;Eumetazoa;Bilateria;Protostomia;  
 Spiralia;Lophotrochozoa;Mollusca;Bivalvia;Autobranchia;Heteroconchia;Euhe  
 terodonta;Imparidentia;Venerida;Veneroidea;Veneridae;Mercenaria;Mercenari  
 a mercenaria  
 UdeM00000041542 6596 295.4 UdeM00000041542 XP\_045177779.1 41 432  
 223 8 1 406 97 522 1.10E-76 295.4 6596 cellular  
 organisms;Eukaryota;Opisthokonta;Metazoa;Eumetazoa;Bilateria;Protostomia;  
 Spiralia;Lophotrochozoa;Mollusca;Bivalvia;Autobranchia;Heteroconchia;Euhe  
 terodonta;Imparidentia;Venerida;Veneroidea;Veneridae;Mercenaria;Mercenari  
 a mercenaria  
 UdeM00000041543 6579 559.7 UdeM00000041543 XP\_033761495.1 77.1 336  
 77 0 36 371 24 359 3.70E-156 559.7 6579 cellular  
 organisms;Eukaryota;Opisthokonta;Metazoa;Eumetazoa;Bilateria;Protostomia;  
 Spiralia;Lophotrochozoa;Mollusca;Bivalvia;Autobranchia;Pteriormorphia;Pect  
 inida;Pectinoidea;Pectinidae;Pecten;Pecten maximus  
 UdeM00000041544 6596 111.3 UdeM00000041544 XP\_045188177.1 53.5 99  
 40 1 1 99 65 157 7.30E-22 111.3 6596 cellular  
 organisms;Eukaryota;Opisthokonta;Metazoa;Eumetazoa;Bilateria;Protostomia;  
 Spiralia;Lophotrochozoa;Mollusca;Bivalvia;Autobranchia;Heteroconchia;Euhe  
 terodonta;Imparidentia;Venerida;Veneroidea;Veneridae;Mercenaria;Mercenari  
 a mercenaria  
 UdeM00000041545 6596 98.6 UdeM00000041545 XP\_045162187.1 46.6 103  
 55 0 26 128 26 128 9.80E-18 98.6 6596 cellular  
 organisms;Eukaryota;Opisthokonta;Metazoa;Eumetazoa;Bilateria;Protostomia;  
 Spiralia;Lophotrochozoa;Mollusca;Bivalvia;Autobranchia;Heteroconchia;Euhe  
 terodonta;Imparidentia;Venerida;Veneroidea;Veneridae;Mercenaria;Mercenari  
 a mercenaria  
 UdeM00000041552 6596 172.6 UdeM00000041552 XP\_045200961.1 35.5 279  
 158 6 2 271 3 268 7.10E-40 172.6 6596 cellular  
 organisms;Eukaryota;Opisthokonta;Metazoa;Eumetazoa;Bilateria;Protostomia;  
 Spiralia;Lophotrochozoa;Mollusca;Bivalvia;Autobranchia;Heteroconchia;Euhe  
 terodonta;Imparidentia;Venerida;Veneroidea;Veneridae;Mercenaria;Mercenari  
 a mercenaria  
 UdeM00000041553 6596 161 UdeM00000041553 XP\_045200961.1 35.3 252  
 141 6 1 243 30 268 1.90E-36 161 6596 cellular  
 organisms;Eukaryota;Opisthokonta;Metazoa;Eumetazoa;Bilateria;Protostomia;  
 Spiralia;Lophotrochozoa;Mollusca;Bivalvia;Autobranchia;Heteroconchia;Euhe  
 terodonta;Imparidentia;Venerida;Veneroidea;Veneridae;Mercenaria;Mercenari  
 a mercenaria

UdeM00000041554 29159 91.3 UdeM00000041554 XP\_011453058.2 26.5 238  
 157 9 26 248 76 310 1.90E-15 91.3 29159 cellular  
 organisms;Eukaryota;Opisthokonta;Metazoa;Eumetazoa;Bilateria;Protostomia;  
 Spiralia;Lophotrochozoa;Mollusca;Bivalvia;Autobranchia;Pteriormorphia;Ostr  
 eida;Ostreoidea;Ostreidae;Crassostrea;Crassostrea gigas  
 UdeM00000041555 1735272 64.3 UdeM00000041555 XP\_041375509.1 50  
 62 31 0 33 94 931 992 1.20E-07 64.3 1735272  
 cellular  
 organisms;Eukaryota;Opisthokonta;Metazoa;Eumetazoa;Bilateria;Protostomia;  
 Spiralia;Lophotrochozoa;Mollusca;Gastropoda;Neomphalina;Neomphaloidea;Pel  
 tospiridae;Gigantopelta;Gigantopelta aegis  
 UdeM00000041557 6596 367.5 UdeM00000041557 XP\_045175691.1 47.8 389  
 199 4 3 387 17 405 2.20E-98 367.5 6596 cellular  
 organisms;Eukaryota;Opisthokonta;Metazoa;Eumetazoa;Bilateria;Protostomia;  
 Spiralia;Lophotrochozoa;Mollusca;Bivalvia;Autobranchia;Heteroconchia;Euhe  
 terodonta;Imparidentia;Venerida;Veneroidea;Veneridae;Mercenaria;Mercenari  
 a mercenaria  
 UdeM00000041558 6565 427.6 UdeM00000041558 XP\_022291405.1 65.9 299  
 102 0 14 312 12 310 1.40E-116 427.6 6565 cellular  
 organisms;Eukaryota;Opisthokonta;Metazoa;Eumetazoa;Bilateria;Protostomia;  
 Spiralia;Lophotrochozoa;Mollusca;Bivalvia;Autobranchia;Pteriormorphia;Ostr  
 eida;Ostreoidea;Ostreidae;Crassostrea;Crassostrea virginica  
 UdeM00000041559 29159 248.8 UdeM00000041559 XP\_011449844.1 23.3 716  
 490 14 3 695 6 685 2.00E-62 248.8 29159 cellular  
 organisms;Eukaryota;Opisthokonta;Metazoa;Eumetazoa;Bilateria;Protostomia;  
 Spiralia;Lophotrochozoa;Mollusca;Bivalvia;Autobranchia;Pteriormorphia;Ostr  
 eida;Ostreoidea;Ostreidae;Crassostrea;Crassostrea gigas  
 UdeM00000041560 6596 199.1 UdeM00000041560 XP\_045169960.1 21.8 705  
 434 16 8 696 7 610 1.80E-47 199.1 6596 cellular  
 organisms;Eukaryota;Opisthokonta;Metazoa;Eumetazoa;Bilateria;Protostomia;  
 Spiralia;Lophotrochozoa;Mollusca;Bivalvia;Autobranchia;Heteroconchia;Euhe  
 terodonta;Imparidentia;Venerida;Veneroidea;Veneridae;Mercenaria;Mercenari  
 a mercenaria  
 UdeM00000041561 6596 172.9 UdeM00000041561 XP\_045181403.1 58.2 158  
 61 2 1 154 765 921 3.10E-40 172.9 6596 cellular  
 organisms;Eukaryota;Opisthokonta;Metazoa;Eumetazoa;Bilateria;Protostomia;  
 Spiralia;Lophotrochozoa;Mollusca;Bivalvia;Autobranchia;Heteroconchia;Euhe  
 terodonta;Imparidentia;Venerida;Veneroidea;Veneridae;Mercenaria;Mercenari  
 a mercenaria  
 UdeM00000041562 6596 407.9 UdeM00000041562 XP\_045181407.1 50.6 468  
 177 14 3 446 1 438 1.70E-110 407.9 6596 cellular  
 organisms;Eukaryota;Opisthokonta;Metazoa;Eumetazoa;Bilateria;Protostomia;  
 Spiralia;Lophotrochozoa;Mollusca;Bivalvia;Autobranchia;Heteroconchia;Euhe  
 terodonta;Imparidentia;Venerida;Veneroidea;Veneridae;Mercenaria;Mercenari  
 a mercenaria  
 UdeM00000041564 6596 429.9 UdeM00000041564 XP\_045181968.1 58.8 328  
 134 1 1 327 1 328 3.00E-117 429.9 6596 cellular  
 organisms;Eukaryota;Opisthokonta;Metazoa;Eumetazoa;Bilateria;Protostomia;  
 Spiralia;Lophotrochozoa;Mollusca;Bivalvia;Autobranchia;Heteroconchia;Euhe  
 terodonta;Imparidentia;Venerida;Veneroidea;Veneridae;Mercenaria;Mercenari  
 a mercenaria  
 UdeM00000041565 1735272 205.3 UdeM00000041565 XP\_041360720.1 37.8  
 378 209 9 1076 1444 1387 1747 5.50E-49 205.3 1735272  
 cellular



organisms;Eukaryota;Opisthokonta;Metazoa;Eumetazoa;Bilateria;Protostomia; Spiralia;Lophotrochozoa;Mollusca;Gastropoda;Neomphalina;Neomphaloidea;Pel tospiridae;Gigantopelta;Gigantopelta aegis

UdeM00000041565 1735272 132.5 UdeM00000041565 XP\_041360720.1 39.4  
198 109 3 1 198 1 187 4.50E-27 132.5 1735272

cellular

organisms;Eukaryota;Opisthokonta;Metazoa;Eumetazoa;Bilateria;Protostomia; Spiralia;Lophotrochozoa;Mollusca;Gastropoda;Neomphalina;Neomphaloidea;Pel tospiridae;Gigantopelta;Gigantopelta aegis

UdeM00000041569 6596 424.1 UdeM00000041569 XP\_045181968.1 57.9 328  
137 1 1 327 1 328 1.60E-115 424.1 6596 cellular

organisms;Eukaryota;Opisthokonta;Metazoa;Eumetazoa;Bilateria;Protostomia; Spiralia;Lophotrochozoa;Mollusca;Bivalvia;Autobranchia;Heteroconchia;Euhe terodonta;Imparidentia;Venerida;Veneroidea;Veneridae;Mercenaria;Mercenari a mercenaria

UdeM00000041570 6596 275.4 UdeM00000041570 XP\_045181968.1 54.8 228  
102 1 1 227 1 228 7.00E-71 275.4 6596 cellular

organisms;Eukaryota;Opisthokonta;Metazoa;Eumetazoa;Bilateria;Protostomia; Spiralia;Lophotrochozoa;Mollusca;Bivalvia;Autobranchia;Heteroconchia;Euhe terodonta;Imparidentia;Venerida;Veneroidea;Veneridae;Mercenaria;Mercenari a mercenaria

UdeM00000041571 6596 417.9 UdeM00000041571 XP\_045206084.1 30.5 931  
593 21 155 1057 79 983 5.90E-113 417.9 6596 cellular

organisms;Eukaryota;Opisthokonta;Metazoa;Eumetazoa;Bilateria;Protostomia; Spiralia;Lophotrochozoa;Mollusca;Bivalvia;Autobranchia;Heteroconchia;Euhe terodonta;Imparidentia;Venerida;Veneroidea;Veneridae;Mercenaria;Mercenari a mercenaria

UdeM00000041572 6596 403.7 UdeM00000041572 XP\_045206084.1 30.2 933  
593 21 131 1033 79 983 8.50E-109 403.7 6596 cellular

organisms;Eukaryota;Opisthokonta;Metazoa;Eumetazoa;Bilateria;Protostomia; Spiralia;Lophotrochozoa;Mollusca;Bivalvia;Autobranchia;Heteroconchia;Euhe terodonta;Imparidentia;Venerida;Veneroidea;Veneridae;Mercenaria;Mercenari a mercenaria

UdeM00000041574 6596 186.4 UdeM00000041574 XP\_045206055.1 33.7 365  
192 11 382 699 79 440 1.20E-43 186.4 6596 cellular

organisms;Eukaryota;Opisthokonta;Metazoa;Eumetazoa;Bilateria;Protostomia; Spiralia;Lophotrochozoa;Mollusca;Bivalvia;Autobranchia;Heteroconchia;Euhe terodonta;Imparidentia;Venerida;Veneroidea;Veneridae;Mercenaria;Mercenari a mercenaria

UdeM00000041575 6596 112.5 UdeM00000041575 XP\_045206084.1 32 222  
139 8 39 250 221 440 8.40E-22 112.5 6596 cellular

organisms;Eukaryota;Opisthokonta;Metazoa;Eumetazoa;Bilateria;Protostomia; Spiralia;Lophotrochozoa;Mollusca;Bivalvia;Autobranchia;Heteroconchia;Euhe terodonta;Imparidentia;Venerida;Veneroidea;Veneridae;Mercenaria;Mercenari a mercenaria

UdeM00000041576 118200 60.1 UdeM00000041576 XP\_009906001.1 26.4  
129 93 2 34 162 1954 2080 3.50E-06 60.1 118200

cellular

organisms;Eukaryota;Opisthokonta;Metazoa;Eumetazoa;Bilateria;Deuterostomi a;Chordata;Craniata;Vertebrata;Gnathostomata;Teleostomi;Euteleostomi;Sarc opterygii;Dipnotetrapodomorpha;Tetrapoda;Amniota;Sauropsida;Sauria;Archel osauria;Archosauria;Dinosauria;Saurischia;Theropoda;Coelurosauria;Aves;Ne ognathae;Piciformes;Picidae;Dryobates;Dryobates pubescens

UdeM00000041577 6565 86.3 UdeM00000041577 XP\_022324486.1 36.1 133  
 74 6 6 131 319 447 3.30E-14 86.3 6565 cellular  
 organisms;Eukaryota;Opisthokonta;Metazoa;Eumetazoa;Bilateria;Protostomia;  
 Spiralia;Lophotrochozoa;Mollusca;Bivalvia;Autobranchia;Pteriormorphia;Ostr  
 eida;Ostreoidea;Ostreidae;Crassostrea;Crassostrea virginica  
 UdeM00000041578 6596 412.9 UdeM00000041578 XP\_045206084.1 30.8 933  
 588 21 131 1033 79 983 1.90E-111 412.9 6596 cellular  
 organisms;Eukaryota;Opisthokonta;Metazoa;Eumetazoa;Bilateria;Protostomia;  
 Spiralia;Lophotrochozoa;Mollusca;Bivalvia;Autobranchia;Heteroconchia;Euhe  
 terodonta;Imparidentia;Venerida;Veneroidea;Veneridae;Mercenaria;Mercenari  
 a mercenaria  
 UdeM00000041579 6565 167.9 UdeM00000041579 XP\_022326775.1 26.7 430  
 289 13 2 414 202 622 2.70E-38 167.9 6565 cellular  
 organisms;Eukaryota;Opisthokonta;Metazoa;Eumetazoa;Bilateria;Protostomia;  
 Spiralia;Lophotrochozoa;Mollusca;Bivalvia;Autobranchia;Pteriormorphia;Ostr  
 eida;Ostreoidea;Ostreidae;Crassostrea;Crassostrea virginica  
 UdeM00000041582 6596 265.4 UdeM00000041582 XP\_045206055.1 32.8 518  
 317 15 383 879 79 586 2.70E-67 265.4 6596 cellular  
 organisms;Eukaryota;Opisthokonta;Metazoa;Eumetazoa;Bilateria;Protostomia;  
 Spiralia;Lophotrochozoa;Mollusca;Bivalvia;Autobranchia;Heteroconchia;Euhe  
 terodonta;Imparidentia;Venerida;Veneroidea;Veneridae;Mercenaria;Mercenari  
 a mercenaria  
 UdeM00000041583 29159 219.9 UdeM00000041583 XP\_019927830.2 27.9 559  
 341 15 377 881 74 624 1.30E-53 219.9 29159 cellular  
 organisms;Eukaryota;Opisthokonta;Metazoa;Eumetazoa;Bilateria;Protostomia;  
 Spiralia;Lophotrochozoa;Mollusca;Bivalvia;Autobranchia;Pteriormorphia;Ostr  
 eida;Ostreoidea;Ostreidae;Crassostrea;Crassostrea gigas  
 UdeM00000041584 6596 413.3 UdeM00000041584 XP\_045206084.1 30.8 933  
 588 21 43 945 79 983 1.20E-111 413.3 6596 cellular  
 organisms;Eukaryota;Opisthokonta;Metazoa;Eumetazoa;Bilateria;Protostomia;  
 Spiralia;Lophotrochozoa;Mollusca;Bivalvia;Autobranchia;Heteroconchia;Euhe  
 terodonta;Imparidentia;Venerida;Veneroidea;Veneridae;Mercenaria;Mercenari  
 a mercenaria  
 UdeM00000041589 6596 371.7 UdeM00000041589 XP\_045206065.1 29.1 925  
 552 21 43 877 79 989 3.90E-99 371.7 6596 cellular  
 organisms;Eukaryota;Opisthokonta;Metazoa;Eumetazoa;Bilateria;Protostomia;  
 Spiralia;Lophotrochozoa;Mollusca;Bivalvia;Autobranchia;Heteroconchia;Euhe  
 terodonta;Imparidentia;Venerida;Veneroidea;Veneridae;Mercenaria;Mercenari  
 a mercenaria  
 UdeM00000041588 6596 413.3 UdeM00000041588 XP\_045206084.1 30.8 933  
 588 21 133 1035 79 983 1.30E-111 413.3 6596 cellular  
 organisms;Eukaryota;Opisthokonta;Metazoa;Eumetazoa;Bilateria;Protostomia;  
 Spiralia;Lophotrochozoa;Mollusca;Bivalvia;Autobranchia;Heteroconchia;Euhe  
 terodonta;Imparidentia;Venerida;Veneroidea;Veneridae;Mercenaria;Mercenari  
 a mercenaria  
 UdeM00000041590 6596 413.7 UdeM00000041590 XP\_045206084.1 30.8 933  
 588 21 131 1033 79 983 8.00E-112 413.7 6596 cellular  
 organisms;Eukaryota;Opisthokonta;Metazoa;Eumetazoa;Bilateria;Protostomia;  
 Spiralia;Lophotrochozoa;Mollusca;Bivalvia;Autobranchia;Heteroconchia;Euhe  
 terodonta;Imparidentia;Venerida;Veneroidea;Veneridae;Mercenaria;Mercenari  
 a mercenaria  
 UdeM00000041591 6596 123.2 UdeM00000041591 XP\_045206055.1 25.8 396  
 233 13 2 342 197 586 7.00E-25 123.2 6596 cellular  
 organisms;Eukaryota;Opisthokonta;Metazoa;Eumetazoa;Bilateria;Protostomia;

Spiralia;Lophotrochozoa;Mollusca;Bivalvia;Autobranchia;Heteroconchia;Euherodonta;Imparidentia;Venerida;Veneroidea;Veneridae;Mercenaria;Mercenaria mercenaria

UdeM00000041592 6596 413.7 UdeM00000041592 XP\_045206084.1 30.8 933  
588 21 133 1035 79 983 1.00E-111 413.7 6596 cellular

organisms;Eukaryota;Opisthokonta;Metazoa;Eumetazoa;Bilateria;Protostomia;Spiralia;Lophotrochozoa;Mollusca;Bivalvia;Autobranchia;Heteroconchia;Euherodonta;Imparidentia;Venerida;Veneroidea;Veneridae;Mercenaria;Mercenaria mercenaria

UdeM00000043816 6596 209.5 UdeM00000043816 XP\_045177053.1 33.4 338  
209 7 61 390 92 421 7.90E-51 209.5 6596 cellular

organisms;Eukaryota;Opisthokonta;Metazoa;Eumetazoa;Bilateria;Protostomia;Spiralia;Lophotrochozoa;Mollusca;Bivalvia;Autobranchia;Heteroconchia;Euherodonta;Imparidentia;Venerida;Veneroidea;Veneridae;Mercenaria;Mercenaria mercenaria

UdeM00000043818 6596 229.2 UdeM00000043818 XP\_045176664.1 31.4 506  
293 13 44 518 32 514 1.30E-56 229.2 6596 cellular

organisms;Eukaryota;Opisthokonta;Metazoa;Eumetazoa;Bilateria;Protostomia;Spiralia;Lophotrochozoa;Mollusca;Bivalvia;Autobranchia;Heteroconchia;Euherodonta;Imparidentia;Venerida;Veneroidea;Veneridae;Mercenaria;Mercenaria mercenaria

UdeM00000043819 6596 127.1 UdeM00000043819 XP\_045176094.1 43.4 152  
81 3 212 359 83 233 4.60E-26 127.1 6596 cellular

organisms;Eukaryota;Opisthokonta;Metazoa;Eumetazoa;Bilateria;Protostomia;Spiralia;Lophotrochozoa;Mollusca;Bivalvia;Autobranchia;Heteroconchia;Euherodonta;Imparidentia;Venerida;Veneroidea;Veneridae;Mercenaria;Mercenaria mercenaria

UdeM00000043820 6596 77 UdeM00000043820 XP\_045176664.1 25.4 256  
177 6 47 291 35 287 4.40E-11 77 6596 cellular

organisms;Eukaryota;Opisthokonta;Metazoa;Eumetazoa;Bilateria;Protostomia;Spiralia;Lophotrochozoa;Mollusca;Bivalvia;Autobranchia;Heteroconchia;Euherodonta;Imparidentia;Venerida;Veneroidea;Veneridae;Mercenaria;Mercenaria mercenaria

UdeM00000043821 6596 153.7 UdeM00000043821 XP\_045176094.1 43.6 188  
98 4 17 200 83 266 2.50E-34 153.7 6596 cellular

organisms;Eukaryota;Opisthokonta;Metazoa;Eumetazoa;Bilateria;Protostomia;Spiralia;Lophotrochozoa;Mollusca;Bivalvia;Autobranchia;Heteroconchia;Euherodonta;Imparidentia;Venerida;Veneroidea;Veneridae;Mercenaria;Mercenaria mercenaria

UdeM00000043826 10228 191.8 UdeM00000043826 XP\_002118406.1 30.9 433  
266 11 12 428 172 587 2.00E-45 191.8 10228 cellular

organisms;Eukaryota;Opisthokonta;Metazoa;Eumetazoa;Placozoa;Trichoplacidae;Trichoplax;Trichoplax adhaerens

UdeM00000040979 6596 202.2 UdeM00000040979 XP\_045213493.1 51.1 182  
85 2 2 180 137 317 5.60E-49 202.2 6596 cellular

organisms;Eukaryota;Opisthokonta;Metazoa;Eumetazoa;Bilateria;Protostomia;Spiralia;Lophotrochozoa;Mollusca;Bivalvia;Autobranchia;Heteroconchia;Euherodonta;Imparidentia;Venerida;Veneroidea;Veneridae;Mercenaria;Mercenaria mercenaria

UdeM00000009145 6596 668.7 UdeM00000009145 XP\_045162867.1 50.8 711  
271 9 18 660 363 1062 7.60E-189 668.7 6596 cellular

organisms;Eukaryota;Opisthokonta;Metazoa;Eumetazoa;Bilateria;Protostomia;Spiralia;Lophotrochozoa;Mollusca;Bivalvia;Autobranchia;Heteroconchia;Euherodonta;Imparidentia;Venerida;Veneroidea;Veneridae;Mercenaria;Mercenaria mercenaria

terodonta;Imparidentia;Venerida;Veneroidea;Veneridae;Mercenaria;Mercenari  
 a mercenaria  
 UdeM00000009146 6596 251.5 UdeM00000009146 XP\_045207443.1 69 171  
 53 0 1 171 880 1050 7.60E-64 251.5 6596 cellular  
 organisms;Eukaryota;Opisthokonta;Metazoa;Eumetazoa;Bilateria;Protostomia;  
 Spiralia;Lophotrochozoa;Mollusca;Bivalvia;Autobranchia;Heteroconchia;Euhe  
 terodonta;Imparidentia;Venerida;Veneroidea;Veneridae;Mercenaria;Mercenari  
 a mercenaria  
 UdeM00000009147 6596 926.8 UdeM00000009147 XP\_045207446.1 52.1 887  
 410 9 6 888 7 882 2.10E-266 926.8 6596 cellular  
 organisms;Eukaryota;Opisthokonta;Metazoa;Eumetazoa;Bilateria;Protostomia;  
 Spiralia;Lophotrochozoa;Mollusca;Bivalvia;Autobranchia;Heteroconchia;Euhe  
 terodonta;Imparidentia;Venerida;Veneroidea;Veneridae;Mercenaria;Mercenari  
 a mercenaria  
 UdeM00000009149 6596 567 UdeM00000009149 XP\_045161482.1 70.7 423  
 91 6 1 421 380 771 2.00E-158 567 6596 cellular  
 organisms;Eukaryota;Opisthokonta;Metazoa;Eumetazoa;Bilateria;Protostomia;  
 Spiralia;Lophotrochozoa;Mollusca;Bivalvia;Autobranchia;Heteroconchia;Euhe  
 terodonta;Imparidentia;Venerida;Veneroidea;Veneridae;Mercenaria;Mercenari  
 a mercenaria  
 UdeM00000009150 6596 577.8 UdeM00000009150 XP\_045161482.1 71.1 426  
 89 6 1 426 380 771 1.10E-161 577.8 6596 cellular  
 organisms;Eukaryota;Opisthokonta;Metazoa;Eumetazoa;Bilateria;Protostomia;  
 Spiralia;Lophotrochozoa;Mollusca;Bivalvia;Autobranchia;Heteroconchia;Euhe  
 terodonta;Imparidentia;Venerida;Veneroidea;Veneridae;Mercenaria;Mercenari  
 a mercenaria  
 UdeM00000009151 6596 484.2 UdeM00000009151 XP\_045161482.1 67.6 373  
 120 1 1 372 1 373 1.50E-133 484.2 6596 cellular  
 organisms;Eukaryota;Opisthokonta;Metazoa;Eumetazoa;Bilateria;Protostomia;  
 Spiralia;Lophotrochozoa;Mollusca;Bivalvia;Autobranchia;Heteroconchia;Euhe  
 terodonta;Imparidentia;Venerida;Veneroidea;Veneridae;Mercenaria;Mercenari  
 a mercenaria  
 UdeM00000009152 6579 411.4 UdeM00000009152 XP\_033724832.1 86.9 213  
 28 0 5 217 3 215 7.30E-112 411.4 6579 cellular  
 organisms;Eukaryota;Opisthokonta;Metazoa;Eumetazoa;Bilateria;Protostomia;  
 Spiralia;Lophotrochozoa;Mollusca;Bivalvia;Autobranchia;Pteriomorphia;Pect  
 inida;Pectinoidea;Pectinidae;Pecten;Pecten maximus  
 UdeM00000009153 29159 85.5 UdeM00000009153 XP\_034317111.1 31.1 164  
 107 3 28 188 445 605 1.30E-13 85.5 29159 cellular  
 organisms;Eukaryota;Opisthokonta;Metazoa;Eumetazoa;Bilateria;Protostomia;  
 Spiralia;Lophotrochozoa;Mollusca;Bivalvia;Autobranchia;Pteriomorphia;Ostr  
 eida;Ostreoidea;Ostreidae;Crassostrea;Crassostrea gigas  
 UdeM00000009154 29159 157.5 UdeM00000009154 XP\_034317111.1 59 122  
 50 0 1 122 1 122 1.10E-35 157.5 29159 cellular  
 organisms;Eukaryota;Opisthokonta;Metazoa;Eumetazoa;Bilateria;Protostomia;  
 Spiralia;Lophotrochozoa;Mollusca;Bivalvia;Autobranchia;Pteriomorphia;Ostr  
 eida;Ostreoidea;Ostreidae;Crassostrea;Crassostrea gigas  
 UdeM00000009155 1735272 136 UdeM00000009155 XP\_041377984.1 88  
 75 9 0 33 107 20 94 3.00E-29 136 1735272  
 cellular  
 organisms;Eukaryota;Opisthokonta;Metazoa;Eumetazoa;Bilateria;Protostomia;  
 Spiralia;Lophotrochozoa;Mollusca;Gastropoda;Neomphalina;Neomphaloidea;Pel  
 tospiridae;Gigantopelta;Gigantopelta aegis

UdeM00000009156 29159 77 UdeM00000009156 XP\_034335954.1 32.2 146  
 93 4 63 204 32 175 1.80E-10 77 29159 cellular  
 organisms;Eukaryota;Opisthokonta;Metazoa;Eumetazoa;Bilateria;Protostomia;  
 Spiralia;Lophotrochozoa;Mollusca;Bivalvia;Autobranhia;Pteriormorphia;Ostr  
 eida;Ostreioidea;Ostreidae;Crassostrea;Crassostrea gigas  
 UdeM00000009157 29159 77 UdeM00000009157 XP\_034335954.1 32.2 146  
 93 4 92 233 32 175 1.90E-10 77 29159 cellular  
 organisms;Eukaryota;Opisthokonta;Metazoa;Eumetazoa;Bilateria;Protostomia;  
 Spiralia;Lophotrochozoa;Mollusca;Bivalvia;Autobranhia;Pteriormorphia;Ostr  
 eida;Ostreioidea;Ostreidae;Crassostrea;Crassostrea gigas  
 UdeM00000009158 29159 84.7 UdeM00000009158 XP\_034335954.1 36.4 140  
 82 4 99 233 38 175 4.70E-13 84.7 29159 cellular  
 organisms;Eukaryota;Opisthokonta;Metazoa;Eumetazoa;Bilateria;Protostomia;  
 Spiralia;Lophotrochozoa;Mollusca;Bivalvia;Autobranhia;Pteriormorphia;Ostr  
 eida;Ostreioidea;Ostreidae;Crassostrea;Crassostrea gigas  
 UdeM00000009160 29159 84.3 UdeM00000009160 XP\_034335954.1 36.4 140  
 82 4 92 226 38 175 6.00E-13 84.3 29159 cellular  
 organisms;Eukaryota;Opisthokonta;Metazoa;Eumetazoa;Bilateria;Protostomia;  
 Spiralia;Lophotrochozoa;Mollusca;Bivalvia;Autobranhia;Pteriormorphia;Ostr  
 eida;Ostreioidea;Ostreidae;Crassostrea;Crassostrea gigas  
 UdeM00000009159 29159 84.3 UdeM00000009159 XP\_034335954.1 36.4 140  
 82 4 99 233 38 175 6.00E-13 84.3 29159 cellular  
 organisms;Eukaryota;Opisthokonta;Metazoa;Eumetazoa;Bilateria;Protostomia;  
 Spiralia;Lophotrochozoa;Mollusca;Bivalvia;Autobranhia;Pteriormorphia;Ostr  
 eida;Ostreioidea;Ostreidae;Crassostrea;Crassostrea gigas  
 UdeM00000009161 6596 86.3 UdeM00000009161 XP\_045215532.1 32.2 152  
 100 2 87 236 24 174 1.80E-13 86.3 6596 cellular  
 organisms;Eukaryota;Opisthokonta;Metazoa;Eumetazoa;Bilateria;Protostomia;  
 Spiralia;Lophotrochozoa;Mollusca;Bivalvia;Autobranhia;Heteroconchia;Euhe  
 terodonta;Imparidentia;Venerida;Veneroidea;Veneridae;Mercenaria;Mercenari  
 a mercenaria  
 UdeM00000009162 6596 607.1 UdeM00000009162 XP\_045163368.1 63.9 463  
 163 3 1 460 69 530 1.90E-170 607.1 6596 cellular  
 organisms;Eukaryota;Opisthokonta;Metazoa;Eumetazoa;Bilateria;Protostomia;  
 Spiralia;Lophotrochozoa;Mollusca;Bivalvia;Autobranhia;Heteroconchia;Euhe  
 terodonta;Imparidentia;Venerida;Veneroidea;Veneridae;Mercenaria;Mercenari  
 a mercenaria  
 UdeM00000009163 6596 256.1 UdeM00000009163 XP\_045163368.1 60.8 199  
 78 0 22 220 24 222 4.10E-65 256.1 6596 cellular  
 organisms;Eukaryota;Opisthokonta;Metazoa;Eumetazoa;Bilateria;Protostomia;  
 Spiralia;Lophotrochozoa;Mollusca;Bivalvia;Autobranhia;Heteroconchia;Euhe  
 terodonta;Imparidentia;Venerida;Veneroidea;Veneridae;Mercenaria;Mercenari  
 a mercenaria  
 UdeM00000009164 6596 604 UdeM00000009164 XP\_045163368.1 58.9 511  
 202 5 22 526 24 532 1.90E-169 604 6596 cellular  
 organisms;Eukaryota;Opisthokonta;Metazoa;Eumetazoa;Bilateria;Protostomia;  
 Spiralia;Lophotrochozoa;Mollusca;Bivalvia;Autobranhia;Heteroconchia;Euhe  
 terodonta;Imparidentia;Venerida;Veneroidea;Veneridae;Mercenaria;Mercenari  
 a mercenaria  
 UdeM00000009165 6573 256.1 UdeM00000009165 XP\_021360957.1 59.9 202  
 79 1 1 200 8 209 4.10E-65 256.1 6573 cellular  
 organisms;Eukaryota;Opisthokonta;Metazoa;Eumetazoa;Bilateria;Protostomia;  
 Spiralia;Lophotrochozoa;Mollusca;Bivalvia;Autobranhia;Pteriormorphia;Pect  
 inida;Pectinoidea;Pectinidae;Mizuhopecten;Mizuhopecten yessoensis

UdeM00000009166 6850 139.8 UdeM00000009166 XP\_022252575.1 71.9 96  
 27 0 1 96 126 221 1.90E-30 139.8 6850 cellular  
 organisms;Eukaryota;Opisthokonta;Metazoa;Eumetazoa;Bilateria;Protostomia;  
 Ecdysozoa;Panarthropoda;Arthropoda;Chelicerata;Merostomata;Xiphosura;Limu  
 lidae;Limulus;Limulus polyphemus  
 UdeM00000009167 6850 95.9 UdeM00000009167 XP\_022254320.1 66.2 71  
 21 1 19 86 413 483 3.70E-17 95.9 6850 cellular  
 organisms;Eukaryota;Opisthokonta;Metazoa;Eumetazoa;Bilateria;Protostomia;  
 Ecdysozoa;Panarthropoda;Arthropoda;Chelicerata;Merostomata;Xiphosura;Limu  
 lidae;Limulus;Limulus polyphemus  
 UdeM00000009168 6596 148.7 UdeM00000009168 XP\_045163015.1 30.8 273  
 154 3 24 262 24 295 1.10E-32 148.7 6596 cellular  
 organisms;Eukaryota;Opisthokonta;Metazoa;Eumetazoa;Bilateria;Protostomia;  
 Spiralia;Lophotrochozoa;Mollusca;Bivalvia;Autobranchia;Heteroconchia;Euhe  
 terodonta;Imparidentia;Venerida;Veneroidea;Veneridae;Mercenaria;Mercenari  
 a mercenaria  
 UdeM00000009169 6565 852.8 UdeM00000009169 XP\_022346113.1 97.5 433  
 11 0 1 433 1 433 1.90E-244 852.8 6565 cellular  
 organisms;Eukaryota;Opisthokonta;Metazoa;Eumetazoa;Bilateria;Protostomia;  
 Spiralia;Lophotrochozoa;Mollusca;Bivalvia;Autobranchia;Pteriormorphia;Ostr  
 eida;Ostreoidea;Ostreidae;Crassostrea;Crassostrea virginica  
 UdeM00000009170 6565 680.6 UdeM00000009170 XP\_022286351.1 55.5 650  
 279 5 1 645 1 645 1.90E-192 680.6 6565 cellular  
 organisms;Eukaryota;Opisthokonta;Metazoa;Eumetazoa;Bilateria;Protostomia;  
 Spiralia;Lophotrochozoa;Mollusca;Bivalvia;Autobranchia;Pteriormorphia;Ostr  
 eida;Ostreoidea;Ostreidae;Crassostrea;Crassostrea virginica  
 UdeM00000009171 1232801 191.8 UdeM00000009171 XP\_043193789.1 36  
 292 178 3 559 848 32 316 3.50E-45 191.8 1232801  
 cellular  
 organisms;Eukaryota;Opisthokonta;Metazoa;Eumetazoa;Bilateria;Protostomia;  
 Ecdysozoa;Panarthropoda;Arthropoda;Mandibulata;Pancrustacea;Crustacea;Mul  
 ticrustacea;Hexanauplia;Thecostraca;Cirripedia;Thoracica;Sessilia;Balanid  
 ae;Amphibalanus;Amphibalanus amphitrite  
 UdeM00000009172 6412 200.7 UdeM00000009172 XP\_009014029.1 73.9 119  
 31 0 16 134 73 191 1.20E-48 200.7 6412 cellular  
 organisms;Eukaryota;Opisthokonta;Metazoa;Eumetazoa;Bilateria;Protostomia;  
 Spiralia;Lophotrochozoa;Annelida;Clitellata;Hirudinea;Rhynchobdellida;Glo  
 ssisphoniidae;Helobdella;Helobdella robusta  
 UdeM00000009173 1735272 319.7 UdeM00000009173 XP\_041377683.1 77.9  
 190 42 0 3 192 5 194 2.50E-84 319.7 1735272  
 cellular  
 organisms;Eukaryota;Opisthokonta;Metazoa;Eumetazoa;Bilateria;Protostomia;  
 Spiralia;Lophotrochozoa;Mollusca;Gastropoda;Neomphalina;Neomphaloidea;Pel  
 tospiridae;Gigantopelta;Gigantopelta aegis  
 UdeM00000009174 6596 842 UdeM00000009174 XP\_045162561.1 78.5 498  
 96 4 45 537 8 499 5.30E-241 842 6596 cellular  
 organisms;Eukaryota;Opisthokonta;Metazoa;Eumetazoa;Bilateria;Protostomia;  
 Spiralia;Lophotrochozoa;Mollusca;Bivalvia;Autobranchia;Heteroconchia;Euhe  
 terodonta;Imparidentia;Venerida;Veneroidea;Veneridae;Mercenaria;Mercenari  
 a mercenaria  
 UdeM00000009175 6596 736.1 UdeM00000009175 XP\_045163744.1 45.6 1004  
 362 23 453 1304 766 1737 7.70E-209 736.1 6596 cellular  
 organisms;Eukaryota;Opisthokonta;Metazoa;Eumetazoa;Bilateria;Protostomia;  
 Spiralia;Lophotrochozoa;Mollusca;Bivalvia;Autobranchia;Heteroconchia;Euhe

terodonta;Imparidentia;Venerida;Veneroidea;Veneridae;Mercenaria;Mercenaria mercenaria  
 UdeM00000009177 34506 165.2 UdeM00000009177 XP\_024502180.1 36.1 233  
 145 3 102 333 14 243 1.80E-37 165.2 34506 cellular  
 organisms;Eukaryota;Opisthokonta;Metazoa;Eumetazoa;Bilateria;Protostomia;  
 Ecdysozoa;Nematoda;Chromadorea;Rhabditida;Tylenchina;Panagrolaimomorpha;Strongyloidea;  
 Strongyloidea;Strongyloides;Strongyloides ratti  
 UdeM00000009178 45264 336.3 UdeM00000009178 XP\_044179091.1 63.1 233  
 85 1 1 233 202 433 3.20E-89 336.3 45264 cellular  
 organisms;Eukaryota;Opisthokonta;Metazoa;Eumetazoa;Cnidaria;Anthozoa;Hexacorallia;  
 Scleractinia;Astrocoeniina;Acroporidae;Acropora;Acropora millepora  
 UdeM00000009179 36176 218 UdeM00000009179 XP\_043534371.1 65.5 139  
 48 0 1 139 279 417 7.70E-54 218 36176 cellular  
 organisms;Eukaryota;Opisthokonta;Metazoa;Eumetazoa;Bilateria;Deuterostomia;  
 Chordata;Craniata;Vertebrata;Gnathostomata;Chondrichthyes;Elasmobranchii;  
 Selachii;Galeomorphii;Galeoidea;Orectolobiformes;Hemiscylliidae;Chiloscyllium;  
 Chiloscyllium plagiosum  
 UdeM00000009180 50390 362.5 UdeM00000009180 XP\_028142380.1 55 260  
 117 0 1 260 31 290 4.60E-97 362.5 50390 cellular  
 organisms;Eukaryota;Opisthokonta;Metazoa;Eumetazoa;Bilateria;Protostomia;  
 Ecdysozoa;Panarthropoda;Arthropoda;Mandibulata;Pancrustacea;Hexapoda;Insecta;  
 Dicondylia;Pterygota;Neoptera;Endopterygota;Coleoptera;Polyphaga;Cucujiformia;  
 Chrysomeloidea;Chrysomelidae;Galerucinae;Luperini;Diabroticina;Diabroticites;  
 Diabrotica;Diabrotica virgifera;Diabrotica virgifera virgifera  
 UdeM00000009181 50390 362.5 UdeM00000009181 XP\_028142380.1 55.4 258  
 115 0 2 259 33 290 4.60E-97 362.5 50390 cellular  
 organisms;Eukaryota;Opisthokonta;Metazoa;Eumetazoa;Bilateria;Protostomia;  
 Ecdysozoa;Panarthropoda;Arthropoda;Mandibulata;Pancrustacea;Hexapoda;Insecta;  
 Dicondylia;Pterygota;Neoptera;Endopterygota;Coleoptera;Polyphaga;Cucujiformia;  
 Chrysomeloidea;Chrysomelidae;Galerucinae;Luperini;Diabroticina;Diabroticites;  
 Diabrotica;Diabrotica virgifera;Diabrotica virgifera virgifera  
 UdeM00000009183 481459 182.2 UdeM00000009183 XP\_040031014.1 34.8  
 267 163 3 2 268 198 453 8.90E-43 182.2 481459 cellular  
 organisms;Eukaryota;Opisthokonta;Metazoa;Eumetazoa;Bilateria;Deuterostomia;  
 Chordata;Craniata;Vertebrata;Gnathostomata;Teleostomi;Euteleostomi;Actinopterygii;  
 Actinopteri;Neopterygii;Teleostei;Osteoglossocephalai;Clupeocephala;Euteleostei;  
 Eurypterygia;Ctenosquamata;Acanthopterygii;Euacanthopterygii;Percomorphaceae;  
 Eupercaria;Perciformes;Cottioidei;Gasterosteales;Gasterosteidae;Gasterosteus;  
 Gasterosteus aculeatus;Gasterosteus aculeatus aculeatus  
 UdeM00000009184 6573 509.6 UdeM00000009184 XP\_021367898.1 68.1 376  
 105 4 1 375 1 362 3.40E-141 509.6 6573 cellular  
 organisms;Eukaryota;Opisthokonta;Metazoa;Eumetazoa;Bilateria;Protostomia;  
 Spiralia;Lophotrochozoa;Mollusca;Bivalvia;Autobranchia;Pteriomorpha;Pectinida;  
 Pectinoidea;Pectinidae;Mizuhopecten;Mizuhopecten yessoensis  
 UdeM00000009186 6573 222.6 UdeM00000009186 XP\_021372552.1 63.1 187  
 32 3 30 215 30 180 7.60E-55 222.6 6573 cellular  
 organisms;Eukaryota;Opisthokonta;Metazoa;Eumetazoa;Bilateria;Protostomia;  
 Spiralia;Lophotrochozoa;Mollusca;Bivalvia;Autobranchia;Pteriomorpha;Pectinida;  
 Pectinoidea;Pectinidae;Mizuhopecten;Mizuhopecten yessoensis

UdeM00000009185 6573 273.9 UdeM00000009185 XP\_021372552.1 66.7 213  
 34 3 6 217 4 180 2.90E-70 273.9 6573 cellular  
 organisms;Eukaryota;Opisthokonta;Metazoa;Eumetazoa;Bilateria;Protostomia;  
 Spiralia;Lophotrochozoa;Mollusca;Bivalvia;Autobranhia;Pteriomorpha;Pect  
 inida;Pectinoidea;Pectinidae;Mizuhopecten;Mizuhopecten yessoensis  
 UdeM00000009188 6565 284.6 UdeM00000009188 XP\_022337637.1 42.1 667  
 286 21 213 848 187 784 4.60E-73 284.6 6565 cellular  
 organisms;Eukaryota;Opisthokonta;Metazoa;Eumetazoa;Bilateria;Protostomia;  
 Spiralia;Lophotrochozoa;Mollusca;Bivalvia;Autobranhia;Pteriomorpha;Ostr  
 eida;Ostreoidea;Ostreidae;Crassostrea;Crassostrea virginica  
 UdeM00000009189 6596 228.8 UdeM00000009189 XP\_045161222.1 67.6 179  
 57 1 9 187 6 183 6.00E-57 228.8 6596 cellular  
 organisms;Eukaryota;Opisthokonta;Metazoa;Eumetazoa;Bilateria;Protostomia;  
 Spiralia;Lophotrochozoa;Mollusca;Bivalvia;Autobranhia;Heteroconchia;Euhe  
 terodonta;Imparidentia;Venerida;Veneroidea;Veneridae;Mercenaria;Mercenari  
 a mercenaria  
 UdeM00000009190 29159 119.4 UdeM00000009190 XP\_011422610.1 46.2 173  
 69 6 1 169 1 153 4.50E-24 119.4 29159 cellular  
 organisms;Eukaryota;Opisthokonta;Metazoa;Eumetazoa;Bilateria;Protostomia;  
 Spiralia;Lophotrochozoa;Mollusca;Bivalvia;Autobranhia;Pteriomorpha;Ostr  
 eida;Ostreoidea;Ostreidae;Crassostrea;Crassostrea gigas  
 UdeM00000009191 6596 114 UdeM00000009191 XP\_045163784.1 46.9 147  
 71 4 7 152 18 158 1.70E-22 114 6596 cellular  
 organisms;Eukaryota;Opisthokonta;Metazoa;Eumetazoa;Bilateria;Protostomia;  
 Spiralia;Lophotrochozoa;Mollusca;Bivalvia;Autobranhia;Heteroconchia;Euhe  
 terodonta;Imparidentia;Venerida;Veneroidea;Veneridae;Mercenaria;Mercenari  
 a mercenaria  
 UdeM00000009192 6596 1376.7 UdeM00000009192 XP\_045163785.1 60.8  
 1200 440 11 160 1353 6 1180 0.00E+00 1376.7 6596  
 cellular  
 organisms;Eukaryota;Opisthokonta;Metazoa;Eumetazoa;Bilateria;Protostomia;  
 Spiralia;Lophotrochozoa;Mollusca;Bivalvia;Autobranhia;Heteroconchia;Euhe  
 terodonta;Imparidentia;Venerida;Veneroidea;Veneridae;Mercenaria;Mercenari  
 a mercenaria  
 UdeM00000009193 6500 411.8 UdeM00000009193 XP\_012939659.1 66.6 314  
 103 1 80 393 15 326 1.00E-111 411.8 6500 cellular  
 organisms;Eukaryota;Opisthokonta;Metazoa;Eumetazoa;Bilateria;Protostomia;  
 Spiralia;Lophotrochozoa;Mollusca;Gastropoda;Heterobranhia;Euthyneura;Tec  
 tipleura;Aplysiida;Aplysioidea;Aplysiidae;Aplysia;Aplysia californica  
 UdeM00000009194 6500 411.8 UdeM00000009194 XP\_012939659.1 66.6 314  
 103 1 23 336 15 326 8.70E-112 411.8 6500 cellular  
 organisms;Eukaryota;Opisthokonta;Metazoa;Eumetazoa;Bilateria;Protostomia;  
 Spiralia;Lophotrochozoa;Mollusca;Gastropoda;Heterobranhia;Euthyneura;Tec  
 tipleura;Aplysiida;Aplysioidea;Aplysiidae;Aplysia;Aplysia californica  
 UdeM00000009195 400727 1048.9 UdeM00000009195 XP\_025081660.1  
 74.9 676 167 1 13 688 13 685 2.80E-303 1048.9  
 400727 cellular  
 organisms;Eukaryota;Opisthokonta;Metazoa;Eumetazoa;Bilateria;Protostomia;  
 Spiralia;Lophotrochozoa;Mollusca;Gastropoda;Caenogastropoda;Architaeniogl  
 ossa;Ampullarioidea;Ampullariidae;Pomacea;Pomacea canaliculata  
 UdeM00000009196 29159 335.5 UdeM00000009196 XP\_011429477.2 60.3 247  
 95 2 31 275 2 247 6.50E-89 335.5 29159 cellular  
 organisms;Eukaryota;Opisthokonta;Metazoa;Eumetazoa;Bilateria;Protostomia;



Spiralia;Lophotrochozoa;Mollusca;Bivalvia;Autobranchia;Pteriormorphia;Ostr  
eida;Ostreoidea;Ostreidae;Crassostrea;Crassostrea gigas  
UdeM00000009197 29159 335.9 UdeM00000009197 XP\_011429477.2 60.3 247  
95 2 6 250 2 247 4.50E-89 335.9 29159 cellular  
organisms;Eukaryota;Opisthokonta;Metazoa;Eumetazoa;Bilateria;Protostomia;  
Spiralia;Lophotrochozoa;Mollusca;Bivalvia;Autobranchia;Pteriormorphia;Ostr  
eida;Ostreoidea;Ostreidae;Crassostrea;Crassostrea gigas  
UdeM00000009199 6596 672.5 UdeM00000009199 XP\_045161419.1 50.9 636  
301 3 17 647 32 661 5.20E-190 672.5 6596 cellular  
organisms;Eukaryota;Opisthokonta;Metazoa;Eumetazoa;Bilateria;Protostomia;  
Spiralia;Lophotrochozoa;Mollusca;Bivalvia;Autobranchia;Heteroconchia;Euhe  
terodonta;Imparidentia;Venerida;Veneroidea;Veneridae;Mercenaria;Mercenari  
a mercenaria  
UdeM00000009200 6596 847.4 UdeM00000009200 XP\_045161419.1 51.1 792  
309 3 24 778 23 773 1.40E-242 847.4 6596 cellular  
organisms;Eukaryota;Opisthokonta;Metazoa;Eumetazoa;Bilateria;Protostomia;  
Spiralia;Lophotrochozoa;Mollusca;Bivalvia;Autobranchia;Heteroconchia;Euhe  
terodonta;Imparidentia;Venerida;Veneroidea;Veneridae;Mercenaria;Mercenari  
a mercenaria  
UdeM00000009203 6596 906.4 UdeM00000009203 XP\_045161419.1 55.7 752  
332 1 8 759 23 773 2.50E-260 906.4 6596 cellular  
organisms;Eukaryota;Opisthokonta;Metazoa;Eumetazoa;Bilateria;Protostomia;  
Spiralia;Lophotrochozoa;Mollusca;Bivalvia;Autobranchia;Heteroconchia;Euhe  
terodonta;Imparidentia;Venerida;Veneroidea;Veneridae;Mercenaria;Mercenari  
a mercenaria  
UdeM00000009204 9337 62 UdeM00000009204 XP\_036612368.1 30.4 135  
67 4 58 168 170 301 8.40E-07 62 9337 cellular  
organisms;Eukaryota;Opisthokonta;Metazoa;Eumetazoa;Bilateria;Deuterostomi  
a;Chordata;Craniata;Vertebrata;Gnathostomata;Teleostomi;Euteleostomi;Sarc  
opterygii;Dipnotetrapodomorpha;Tetrapoda;Amniota;Mammalia;Theria;Metather  
ia;Diprotodontia;Phalangeridae;Trichosurus;Trichosurus vulpecula  
UdeM00000009205 6573 223.4 UdeM00000009205 XP\_021362041.1 40.1 279  
164 3 21 298 15 291 3.90E-55 223.4 6573 cellular  
organisms;Eukaryota;Opisthokonta;Metazoa;Eumetazoa;Bilateria;Protostomia;  
Spiralia;Lophotrochozoa;Mollusca;Bivalvia;Autobranchia;Pteriormorphia;Pect  
inida;Pectinoidea;Pectinidae;Mizuhopecten;Mizuhopecten yessoensis  
UdeM00000009206 6573 190.7 UdeM00000009206 XP\_021362041.1 32.4 346  
164 4 21 365 15 291 3.40E-45 190.7 6573 cellular  
organisms;Eukaryota;Opisthokonta;Metazoa;Eumetazoa;Bilateria;Protostomia;  
Spiralia;Lophotrochozoa;Mollusca;Bivalvia;Autobranchia;Pteriormorphia;Pect  
inida;Pectinoidea;Pectinidae;Mizuhopecten;Mizuhopecten yessoensis  
UdeM00000009209 6596 1371.3 UdeM00000009209 XP\_045161717.1 51.9  
1426 499 22 62 1355 469 1839 0.00E+00 1371.3 6596  
cellular  
organisms;Eukaryota;Opisthokonta;Metazoa;Eumetazoa;Bilateria;Protostomia;  
Spiralia;Lophotrochozoa;Mollusca;Bivalvia;Autobranchia;Heteroconchia;Euhe  
terodonta;Imparidentia;Venerida;Veneroidea;Veneridae;Mercenaria;Mercenari  
a mercenaria  
UdeM00000009210 6596 85.5 UdeM00000009210 XP\_045161717.1 30.7 469  
280 13 4 447 3 451 1.90E-13 85.5 6596 cellular  
organisms;Eukaryota;Opisthokonta;Metazoa;Eumetazoa;Bilateria;Protostomia;  
Spiralia;Lophotrochozoa;Mollusca;Bivalvia;Autobranchia;Heteroconchia;Euhe  
terodonta;Imparidentia;Venerida;Veneroidea;Veneridae;Mercenaria;Mercenari  
a mercenaria

UdeM00000009211 225164 409.5 UdeM00000009211 XP\_009060553.1 73.5  
 268 71 0 76 343 48 315 5.00E-111 409.5 225164  
 cellular  
 organisms;Eukaryota;Opisthokonta;Metazoa;Eumetazoa;Bilateria;Protostomia;  
 Spiralia;Lophotrochozoa;Mollusca;Gastropoda;Patellogastropoda;Lottioidea;  
 Lottiidae;Lottia;Lottia gigantea  
 UdeM00000009213 225164 421.4 UdeM00000009213 XP\_009060553.1 72.5  
 287 79 0 76 362 48 334 1.20E-114 421.4 225164  
 cellular  
 organisms;Eukaryota;Opisthokonta;Metazoa;Eumetazoa;Bilateria;Protostomia;  
 Spiralia;Lophotrochozoa;Mollusca;Gastropoda;Patellogastropoda;Lottioidea;  
 Lottiidae;Lottia;Lottia gigantea  
 UdeM00000009212 225164 417.5 UdeM00000009212 XP\_009060553.1 73.2  
 276 74 0 76 351 48 323 1.70E-113 417.5 225164  
 cellular  
 organisms;Eukaryota;Opisthokonta;Metazoa;Eumetazoa;Bilateria;Protostomia;  
 Spiralia;Lophotrochozoa;Mollusca;Gastropoda;Patellogastropoda;Lottioidea;  
 Lottiidae;Lottia;Lottia gigantea  
 UdeM00000009215 6596 388.3 UdeM00000009215 XP\_045161723.1 65.6 302  
 93 1 51 352 51 341 1.10E-104 388.3 6596 cellular  
 organisms;Eukaryota;Opisthokonta;Metazoa;Eumetazoa;Bilateria;Protostomia;  
 Spiralia;Lophotrochozoa;Mollusca;Bivalvia;Autobranchia;Heteroconchia;Euhe  
 terodonta;Imparidentia;Venerida;Veneroidea;Veneridae;Mercenaria;Mercenari  
 a mercenaria  
 UdeM00000009214 6596 389 UdeM00000009214 XP\_045161723.1 68.9 280  
 87 0 51 330 51 330 6.20E-105 389 6596 cellular  
 organisms;Eukaryota;Opisthokonta;Metazoa;Eumetazoa;Bilateria;Protostomia;  
 Spiralia;Lophotrochozoa;Mollusca;Bivalvia;Autobranchia;Heteroconchia;Euhe  
 terodonta;Imparidentia;Venerida;Veneroidea;Veneridae;Mercenaria;Mercenari  
 a mercenaria  
 UdeM00000009216 6596 142.5 UdeM00000009216 XP\_045162514.1 67.9 106  
 33 1 6 111 491 595 3.40E-31 142.5 6596 cellular  
 organisms;Eukaryota;Opisthokonta;Metazoa;Eumetazoa;Bilateria;Protostomia;  
 Spiralia;Lophotrochozoa;Mollusca;Bivalvia;Autobranchia;Heteroconchia;Euhe  
 terodonta;Imparidentia;Venerida;Veneroidea;Veneridae;Mercenaria;Mercenari  
 a mercenaria  
 UdeM00000009217 6596 142.5 UdeM00000009217 XP\_045162514.1 67.9 106  
 33 1 96 201 491 595 6.00E-31 142.5 6596 cellular  
 organisms;Eukaryota;Opisthokonta;Metazoa;Eumetazoa;Bilateria;Protostomia;  
 Spiralia;Lophotrochozoa;Mollusca;Bivalvia;Autobranchia;Heteroconchia;Euhe  
 terodonta;Imparidentia;Venerida;Veneroidea;Veneridae;Mercenaria;Mercenari  
 a mercenaria  
 UdeM00000009218 6596 1052 UdeM00000009218 XP\_045162514.1 84.7 587  
 87 2 23 607 10 595 3.00E-304 1052 6596 cellular  
 organisms;Eukaryota;Opisthokonta;Metazoa;Eumetazoa;Bilateria;Protostomia;  
 Spiralia;Lophotrochozoa;Mollusca;Bivalvia;Autobranchia;Heteroconchia;Euhe  
 terodonta;Imparidentia;Venerida;Veneroidea;Veneridae;Mercenaria;Mercenari  
 a mercenaria  
 UdeM00000009219 29159 312.8 UdeM00000009219 XP\_011456876.2 31.8 629  
 266 16 23 638 114 592 1.00E-81 312.8 29159 cellular  
 organisms;Eukaryota;Opisthokonta;Metazoa;Eumetazoa;Bilateria;Protostomia;  
 Spiralia;Lophotrochozoa;Mollusca;Bivalvia;Autobranchia;Pteriomorphia;Ostr  
 eida;Ostreoidea;Ostreidae;Crassostrea;Crassostrea gigas

UdeM00000009220 6596 85.5 UdeM00000009220 XP\_045162568.1 56.2 89  
 33 3 2 89 548 631 4.30E-14 85.5 6596 cellular  
 organisms;Eukaryota;Opisthokonta;Metazoa;Eumetazoa;Bilateria;Protostomia;  
 Spiralia;Lophotrochozoa;Mollusca;Bivalvia;Autobranchia;Heteroconchia;Euhe  
 terodonta;Imparidentia;Venerida;Veneroidea;Veneridae;Mercenaria;Mercenari  
 a mercenaria

UdeM00000009222 29159 162.2 UdeM00000009222 XP\_011456876.2 41.4 203  
 112 4 91 288 404 604 1.00E-36 162.2 29159 cellular  
 organisms;Eukaryota;Opisthokonta;Metazoa;Eumetazoa;Bilateria;Protostomia;  
 Spiralia;Lophotrochozoa;Mollusca;Bivalvia;Autobranchia;Pteriormorphia;Ostr  
 eida;Ostreoidea;Ostreidae;Crassostrea;Crassostrea gigas

UdeM00000009223 29159 521.2 UdeM00000009223 XP\_011456876.2 37.1 901  
 367 22 24 899 116 841 2.70E-144 521.2 29159 cellular  
 organisms;Eukaryota;Opisthokonta;Metazoa;Eumetazoa;Bilateria;Protostomia;  
 Spiralia;Lophotrochozoa;Mollusca;Bivalvia;Autobranchia;Pteriormorphia;Ostr  
 eida;Ostreoidea;Ostreidae;Crassostrea;Crassostrea gigas

UdeM00000009224 151771 318.5 UdeM00000009224 XP\_028415423.1 32.6  
 607 273 8 2 477 23 624 1.40E-83 318.5 151771  
 cellular  
 organisms;Eukaryota;Opisthokonta;Metazoa;Eumetazoa;Cnidaria;Anthozoa;Octo  
 corallia;Alcyonacea;Alcyoniina;Nephtheidae;Dendronephthya;Dendronephthya  
 gigantea

UdeM00000009225 29159 169.9 UdeM00000009225 XP\_011456876.2 64.6 130  
 45 1 1 130 713 841 2.30E-39 169.9 29159 cellular  
 organisms;Eukaryota;Opisthokonta;Metazoa;Eumetazoa;Bilateria;Protostomia;  
 Spiralia;Lophotrochozoa;Mollusca;Bivalvia;Autobranchia;Pteriormorphia;Ostr  
 eida;Ostreoidea;Ostreidae;Crassostrea;Crassostrea gigas

UdeM00000009226 6573 87.4 UdeM00000009226 XP\_021365625.1 51.2 86  
 42 0 16 101 41 126 2.40E-14 87.4 6573 cellular  
 organisms;Eukaryota;Opisthokonta;Metazoa;Eumetazoa;Bilateria;Protostomia;  
 Spiralia;Lophotrochozoa;Mollusca;Bivalvia;Autobranchia;Pteriormorphia;Pect  
 inida;Pectinoidea;Pectinidae;Mizuhopecten;Mizuhopecten yessoensis

UdeM00000009227 29159 400.6 UdeM00000009227 XP\_011456876.2 36.1 675  
 329 18 24 671 116 715 4.50E-108 400.6 29159 cellular  
 organisms;Eukaryota;Opisthokonta;Metazoa;Eumetazoa;Bilateria;Protostomia;  
 Spiralia;Lophotrochozoa;Mollusca;Bivalvia;Autobranchia;Pteriormorphia;Ostr  
 eida;Ostreoidea;Ostreidae;Crassostrea;Crassostrea gigas

UdeM00000009228 400727 288.1 UdeM00000009228 XP\_025107489.1 53.2  
 293 133 3 88 377 147 438 1.60E-74 288.1 400727  
 cellular  
 organisms;Eukaryota;Opisthokonta;Metazoa;Eumetazoa;Bilateria;Protostomia;  
 Spiralia;Lophotrochozoa;Mollusca;Gastropoda;Caenogastropoda;Architaeniogl  
 ossa;Ampullarioidea;Ampullariidae;Pomacea;Pomacea canaliculata

UdeM00000009229 29159 522.3 UdeM00000009229 XP\_011456876.2 42.2 747  
 370 24 22 731 121 842 9.90E-145 522.3 29159 cellular  
 organisms;Eukaryota;Opisthokonta;Metazoa;Eumetazoa;Bilateria;Protostomia;  
 Spiralia;Lophotrochozoa;Mollusca;Bivalvia;Autobranchia;Pteriormorphia;Ostr  
 eida;Ostreoidea;Ostreidae;Crassostrea;Crassostrea gigas

UdeM00000009230 6573 210.3 UdeM00000009230 XP\_021376553.1 36.5 323  
 149 1 1 267 81 403 3.00E-51 210.3 6573 cellular  
 organisms;Eukaryota;Opisthokonta;Metazoa;Eumetazoa;Bilateria;Protostomia;  
 Spiralia;Lophotrochozoa;Mollusca;Bivalvia;Autobranchia;Pteriormorphia;Pect  
 inida;Pectinoidea;Pectinidae;Mizuhopecten;Mizuhopecten yessoensis

UdeM00000009234 6596 916.4 UdeM00000009234 XP\_045163454.1 73.4 623  
 153 4 2 615 11 629 2.00E-263 916.4 6596 cellular  
 organisms;Eukaryota;Opisthokonta;Metazoa;Eumetazoa;Bilateria;Protostomia;  
 Spiralia;Lophotrochozoa;Mollusca;Bivalvia;Autobranchia;Heteroconchia;Euhe  
 terodonta;Imparidentia;Venerida;Veneroidea;Veneridae;Mercenaria;Mercenari  
 a mercenaria  
 UdeM00000009235 6565 193 UdeM00000009235 XP\_022299727.1 31.8 377  
 230 9 39 401 434 797 8.00E-46 193 6565 cellular  
 organisms;Eukaryota;Opisthokonta;Metazoa;Eumetazoa;Bilateria;Protostomia;  
 Spiralia;Lophotrochozoa;Mollusca;Bivalvia;Autobranchia;Pteriormorphia;Ostr  
 eida;Ostreoidea;Ostreidae;Crassostrea;Crassostrea virginica  
 UdeM00000009236 29159 245.7 UdeM00000009236 XP\_011430393.1 46.4 276  
 138 3 20 290 11 281 7.10E-62 245.7 29159 cellular  
 organisms;Eukaryota;Opisthokonta;Metazoa;Eumetazoa;Bilateria;Protostomia;  
 Spiralia;Lophotrochozoa;Mollusca;Bivalvia;Autobranchia;Pteriormorphia;Ostr  
 eida;Ostreoidea;Ostreidae;Crassostrea;Crassostrea gigas  
 UdeM00000009237 6596 98.2 UdeM00000009237 XP\_045162188.1 34.6 153  
 95 3 25 173 74 225 2.60E-17 98.2 6596 cellular  
 organisms;Eukaryota;Opisthokonta;Metazoa;Eumetazoa;Bilateria;Protostomia;  
 Spiralia;Lophotrochozoa;Mollusca;Bivalvia;Autobranchia;Heteroconchia;Euhe  
 terodonta;Imparidentia;Venerida;Veneroidea;Veneridae;Mercenaria;Mercenari  
 a mercenaria  
 UdeM00000009241 1735272 193.7 UdeM00000009241 XP\_041355121.1 50.2  
 215 96 5 1 207 1 212 3.10E-46 193.7 1735272  
 cellular  
 organisms;Eukaryota;Opisthokonta;Metazoa;Eumetazoa;Bilateria;Protostomia;  
 Spiralia;Lophotrochozoa;Mollusca;Gastropoda;Neomphalina;Neomphaloidea;Pel  
 tospiridae;Gigantopelta;Gigantopelta aegis  
 UdeM00000009248 45264 270.4 UdeM00000009248 XP\_044165143.1 40 412  
 149 7 27 361 35 425 3.30E-69 270.4 45264 cellular  
 organisms;Eukaryota;Opisthokonta;Metazoa;Eumetazoa;Cnidaria;Anthozoa;Hexa  
 corallia;Scleractinia;Astrocoeniina;Acroporidae;Acropora;Acropora  
 millepora  
 UdeM00000009249 45264 172.9 UdeM00000009249 XP\_044184031.1 48.7 191  
 88 5 1 185 300 486 3.70E-40 172.9 45264 cellular  
 organisms;Eukaryota;Opisthokonta;Metazoa;Eumetazoa;Cnidaria;Anthozoa;Hexa  
 corallia;Scleractinia;Astrocoeniina;Acroporidae;Acropora;Acropora  
 millepora  
 UdeM00000009250 6596 456.8 UdeM00000009250 XP\_045162568.1 46 658  
 304 19 3 639 4 631 4.50E-125 456.8 6596 cellular  
 organisms;Eukaryota;Opisthokonta;Metazoa;Eumetazoa;Bilateria;Protostomia;  
 Spiralia;Lophotrochozoa;Mollusca;Bivalvia;Autobranchia;Heteroconchia;Euhe  
 terodonta;Imparidentia;Venerida;Veneroidea;Veneridae;Mercenaria;Mercenari  
 a mercenaria  
 UdeM00000009251 6596 409.1 UdeM00000009251 XP\_045162570.1 56.1 367  
 151 4 19 383 19 377 6.30E-111 409.1 6596 cellular  
 organisms;Eukaryota;Opisthokonta;Metazoa;Eumetazoa;Bilateria;Protostomia;  
 Spiralia;Lophotrochozoa;Mollusca;Bivalvia;Autobranchia;Heteroconchia;Euhe  
 terodonta;Imparidentia;Venerida;Veneroidea;Veneridae;Mercenaria;Mercenari  
 a mercenaria  
 UdeM00000009252 1735272 105.1 UdeM00000009252 XP\_041378199.1 58.3  
 108 42 2 1 107 1 106 5.50E-20 105.1 1735272  
 cellular  
 organisms;Eukaryota;Opisthokonta;Metazoa;Eumetazoa;Bilateria;Protostomia;

Spiralia;Lophotrochozoa;Mollusca;Gastropoda;Neomphalina;Neomphaloidea;Pel  
tospiridae;Gigantopelta;Gigantopelta aegis  
UdeM00000009253 6579 396.4 UdeM00000009253 XP\_033764004.1 41.2 537  
291 9 1 519 1 530 6.10E-107 396.4 6579 cellular  
organisms;Eukaryota;Opisthokonta;Metazoa;Eumetazoa;Bilateria;Protostomia;  
Spiralia;Lophotrochozoa;Mollusca;Bivalvia;Autobranhia;Pteriormorphia;Pect  
inida;Pectinoidea;Pectinidae;Pecten;Pecten maximus  
UdeM00000009254 6596 280 UdeM00000009254 XP\_045161114.1 86.3 153  
21 0 34 186 655 807 2.20E-72 280 6596 cellular  
organisms;Eukaryota;Opisthokonta;Metazoa;Eumetazoa;Bilateria;Protostomia;  
Spiralia;Lophotrochozoa;Mollusca;Bivalvia;Autobranhia;Heteroconchia;Euhe  
terodonta;Imparidentia;Venerida;Veneroidea;Veneridae;Mercenaria;Mercenari  
a mercenaria  
UdeM00000009255 6596 281.2 UdeM00000009255 XP\_045161115.1 50.8 368  
150 11 15 363 176 531 2.30E-72 281.2 6596 cellular  
organisms;Eukaryota;Opisthokonta;Metazoa;Eumetazoa;Bilateria;Protostomia;  
Spiralia;Lophotrochozoa;Mollusca;Bivalvia;Autobranhia;Heteroconchia;Euhe  
terodonta;Imparidentia;Venerida;Veneroidea;Veneridae;Mercenaria;Mercenari  
a mercenaria  
UdeM00000009256 6579 125.9 UdeM00000009256 XP\_033763686.1 73.8 80  
20 1 5 84 117 195 2.40E-26 125.9 6579 cellular  
organisms;Eukaryota;Opisthokonta;Metazoa;Eumetazoa;Bilateria;Protostomia;  
Spiralia;Lophotrochozoa;Mollusca;Bivalvia;Autobranhia;Pteriormorphia;Pect  
inida;Pectinoidea;Pectinidae;Pecten;Pecten maximus  
UdeM00000009257 6596 1410.6 UdeM00000009257 XP\_045161334.1 58.9  
1256 432 12 11 1205 17 1249 0.00E+00 1410.6 6596  
cellular  
organisms;Eukaryota;Opisthokonta;Metazoa;Eumetazoa;Bilateria;Protostomia;  
Spiralia;Lophotrochozoa;Mollusca;Bivalvia;Autobranhia;Heteroconchia;Euhe  
terodonta;Imparidentia;Venerida;Veneroidea;Veneridae;Mercenaria;Mercenari  
a mercenaria  
UdeM00000009259 6596 262.3 UdeM00000009259 XP\_045192050.1 50.6 239  
118 0 123 361 18 256 9.20E-67 262.3 6596 cellular  
organisms;Eukaryota;Opisthokonta;Metazoa;Eumetazoa;Bilateria;Protostomia;  
Spiralia;Lophotrochozoa;Mollusca;Bivalvia;Autobranhia;Heteroconchia;Euhe  
terodonta;Imparidentia;Venerida;Veneroidea;Veneridae;Mercenaria;Mercenari  
a mercenaria  
UdeM00000009260 6596 1218.8 UdeM00000009260 XP\_045161330.1 62.5  
1018 285 7 16 1024 201 1130 0.00E+00 1218.8 6596  
cellular  
organisms;Eukaryota;Opisthokonta;Metazoa;Eumetazoa;Bilateria;Protostomia;  
Spiralia;Lophotrochozoa;Mollusca;Bivalvia;Autobranhia;Heteroconchia;Euhe  
terodonta;Imparidentia;Venerida;Veneroidea;Veneridae;Mercenaria;Mercenari  
a mercenaria  
UdeM00000009261 6596 1406 UdeM00000009261 XP\_045161330.1 59.1 1231  
435 11 14 1190 3 1219 0.00E+00 1406 6596 cellular  
organisms;Eukaryota;Opisthokonta;Metazoa;Eumetazoa;Bilateria;Protostomia;  
Spiralia;Lophotrochozoa;Mollusca;Bivalvia;Autobranhia;Heteroconchia;Euhe  
terodonta;Imparidentia;Venerida;Veneroidea;Veneridae;Mercenaria;Mercenari  
a mercenaria  
UdeM00000009262 6596 1379.4 UdeM00000009262 XP\_045161330.1 59  
1214 427 11 9 1165 20 1219 0.00E+00 1379.4 6596  
cellular  
organisms;Eukaryota;Opisthokonta;Metazoa;Eumetazoa;Bilateria;Protostomia;

Spiralia;Lophotrochozoa;Mollusca;Bivalvia;Autobranchia;Heteroconchia;Euherodonta;Imparidentia;Venerida;Veneroidea;Veneridae;Mercenaria;Mercenaria mercenaria

UdeM00000009263 6596 1379.4 UdeM00000009263 XP\_045161330.1 59  
1214 427 11 9 1165 20 1219 0.00E+00 1379.4 6596  
cellular

organisms;Eukaryota;Opisthokonta;Metazoa;Eumetazoa;Bilateria;Protostomia;Spiralia;Lophotrochozoa;Mollusca;Bivalvia;Autobranchia;Heteroconchia;Euherodonta;Imparidentia;Venerida;Veneroidea;Veneridae;Mercenaria;Mercenaria mercenaria

UdeM00000009265 45264 393.3 UdeM00000009265 XP\_044165535.1 49.6 367  
181 1 1 363 158 524 5.80E-106 393.3 45264 cellular

organisms;Eukaryota;Opisthokonta;Metazoa;Eumetazoa;Cnidaria;Anthozoa;Hexacorallia;Scleractinia;Astrocoeniina;Acroporidae;Acropora;Acropora millepora

UdeM00000009267 6596 119.8 UdeM00000009267 XP\_045161772.1 35.6 267  
131 8 1 261 1 232 5.30E-24 119.8 6596 cellular

organisms;Eukaryota;Opisthokonta;Metazoa;Eumetazoa;Bilateria;Protostomia;Spiralia;Lophotrochozoa;Mollusca;Bivalvia;Autobranchia;Heteroconchia;Euherodonta;Imparidentia;Venerida;Veneroidea;Veneridae;Mercenaria;Mercenaria mercenaria

UdeM00000009268 225164 248.4 UdeM00000009268 XP\_009058076.1 58  
212 89 0 5 216 4 215 8.10E-63 248.4 225164  
cellular

organisms;Eukaryota;Opisthokonta;Metazoa;Eumetazoa;Bilateria;Protostomia;Spiralia;Lophotrochozoa;Mollusca;Gastropoda;Patellogastropoda;Lottioidea;Lottiidae;Lottia;Lottia gigantea

UdeM00000009269 6565 684.9 UdeM00000009269 XP\_022343652.1 77.7 489  
103 3 107 589 138 626 9.40E-194 684.9 6565 cellular

organisms;Eukaryota;Opisthokonta;Metazoa;Eumetazoa;Bilateria;Protostomia;Spiralia;Lophotrochozoa;Mollusca;Bivalvia;Autobranchia;Pteriomorpha;Ostreida;Ostreioidea;Ostreidae;Crassostrea;Crassostrea virginica

UdeM00000009270 6596 125.9 UdeM00000009270 XP\_045180427.1 33.6 274  
127 4 1 220 1 273 6.60E-26 125.9 6596 cellular

organisms;Eukaryota;Opisthokonta;Metazoa;Eumetazoa;Bilateria;Protostomia;Spiralia;Lophotrochozoa;Mollusca;Bivalvia;Autobranchia;Heteroconchia;Euherodonta;Imparidentia;Venerida;Veneroidea;Veneridae;Mercenaria;Mercenaria mercenaria

UdeM00000009271 6596 90.9 UdeM00000009271 XP\_045163075.1 40.7 140  
78 3 1 137 1 138 2.80E-15 90.9 6596 cellular

organisms;Eukaryota;Opisthokonta;Metazoa;Eumetazoa;Bilateria;Protostomia;Spiralia;Lophotrochozoa;Mollusca;Bivalvia;Autobranchia;Heteroconchia;Euherodonta;Imparidentia;Venerida;Veneroidea;Veneridae;Mercenaria;Mercenaria mercenaria

UdeM00000009272 6596 283.1 UdeM00000009272 XP\_045162299.1 67.8 208  
58 2 1 199 1 208 2.80E-73 283.1 6596 cellular

organisms;Eukaryota;Opisthokonta;Metazoa;Eumetazoa;Bilateria;Protostomia;Spiralia;Lophotrochozoa;Mollusca;Bivalvia;Autobranchia;Heteroconchia;Euherodonta;Imparidentia;Venerida;Veneroidea;Veneridae;Mercenaria;Mercenaria mercenaria

UdeM00000009273 6596 112.1 UdeM00000009273 XP\_045161599.1 29.7 263  
154 7 20 260 27 280 1.40E-21 112.1 6596 cellular

organisms;Eukaryota;Opisthokonta;Metazoa;Eumetazoa;Bilateria;Protostomia;Spiralia;Lophotrochozoa;Mollusca;Bivalvia;Autobranchia;Heteroconchia;Euherodonta;Imparidentia;Venerida;Veneroidea;Veneridae;Mercenaria;Mercenaria mercenaria

terodonta;Imparidentia;Venerida;Veneroidea;Veneridae;Mercenaria;Mercenari  
 a mercenaria  
 UdeM00000009274 7574 143.7 UdeM00000009274 XP\_013405563.1 34.5 267  
 138 6 1 264 146 378 3.50E-31 143.7 7574 cellular  
 organisms;Eukaryota;Opisthokonta;Metazoa;Eumetazoa;Bilateria;Protostomia;  
 Spiralia;Lophotrochozoa;Brachiopoda;Linguliformea;Lingulata;Lingulida;Lin  
 guloidea;Lingulidae;Lingula;Lingula anatina  
 UdeM00000009275 45264 328.9 UdeM00000009275 XP\_044182736.1 39.4 485  
 261 8 2 469 385 853 1.00E-86 328.9 45264 cellular  
 organisms;Eukaryota;Opisthokonta;Metazoa;Eumetazoa;Cnidaria;Anthozoa;Hexa  
 corallia;Scleractinia;Astrocoeniina;Acroporidae;Acropora;Acropora  
 millepora  
 UdeM00000009276 6579 243.8 UdeM00000009276 XP\_033739209.1 48.4 258  
 117 2 9 261 2 248 2.40E-61 243.8 6579 cellular  
 organisms;Eukaryota;Opisthokonta;Metazoa;Eumetazoa;Bilateria;Protostomia;  
 Spiralia;Lophotrochozoa;Mollusca;Bivalvia;Autobranchia;Pteriormorphia;Pect  
 inida;Pectinoidea;Pectinidae;Pecten;Pecten maximus  
 UdeM00000009277 6579 331.3 UdeM00000009277 XP\_033724599.1 51 402  
 175 8 12 405 14 401 1.80E-87 331.3 6579 cellular  
 organisms;Eukaryota;Opisthokonta;Metazoa;Eumetazoa;Bilateria;Protostomia;  
 Spiralia;Lophotrochozoa;Mollusca;Bivalvia;Autobranchia;Pteriormorphia;Pect  
 inida;Pectinoidea;Pectinidae;Pecten;Pecten maximus  
 UdeM00000009278 6596 312.8 UdeM00000009278 XP\_045162550.1 43.1 429  
 226 7 4 416 3 429 6.70E-82 312.8 6596 cellular  
 organisms;Eukaryota;Opisthokonta;Metazoa;Eumetazoa;Bilateria;Protostomia;  
 Spiralia;Lophotrochozoa;Mollusca;Bivalvia;Autobranchia;Heteroconchia;Euhe  
 terodonta;Imparidentia;Venerida;Veneroidea;Veneridae;Mercenaria;Mercenari  
 a mercenaria  
 UdeM00000009279 6596 889.8 UdeM00000009279 XP\_045162356.1 69.8 625  
 187 1 11 635 12 634 2.00E-255 889.8 6596 cellular  
 organisms;Eukaryota;Opisthokonta;Metazoa;Eumetazoa;Bilateria;Protostomia;  
 Spiralia;Lophotrochozoa;Mollusca;Bivalvia;Autobranchia;Heteroconchia;Euhe  
 terodonta;Imparidentia;Venerida;Veneroidea;Veneridae;Mercenaria;Mercenari  
 a mercenaria  
 UdeM00000009281 29159 259.6 UdeM00000009281 XP\_034309752.1 49.1 269  
 133 3 2 266 689 957 4.30E-66 259.6 29159 cellular  
 organisms;Eukaryota;Opisthokonta;Metazoa;Eumetazoa;Bilateria;Protostomia;  
 Spiralia;Lophotrochozoa;Mollusca;Bivalvia;Autobranchia;Pteriormorphia;Ostr  
 eida;Ostreoidea;Ostreidae;Crassostrea;Crassostrea gigas  
 UdeM00000009280 6565 224.6 UdeM00000009280 XP\_022306954.1 40.3 303  
 144 6 165 435 651 948 2.50E-55 224.6 6565 cellular  
 organisms;Eukaryota;Opisthokonta;Metazoa;Eumetazoa;Bilateria;Protostomia;  
 Spiralia;Lophotrochozoa;Mollusca;Bivalvia;Autobranchia;Pteriormorphia;Ostr  
 eida;Ostreoidea;Ostreidae;Crassostrea;Crassostrea virginica  
 UdeM00000009280 6565 120.2 UdeM00000009280 XP\_022306954.1 33.5 227  
 118 4 1 214 4 210 6.70E-24 120.2 6565 cellular  
 organisms;Eukaryota;Opisthokonta;Metazoa;Eumetazoa;Bilateria;Protostomia;  
 Spiralia;Lophotrochozoa;Mollusca;Bivalvia;Autobranchia;Pteriormorphia;Ostr  
 eida;Ostreoidea;Ostreidae;Crassostrea;Crassostrea virginica  
 UdeM00000009283 29159 194.5 UdeM00000009283 XP\_034315421.1 51.9 206  
 93 3 135 336 271 474 2.20E-46 194.5 29159 cellular  
 organisms;Eukaryota;Opisthokonta;Metazoa;Eumetazoa;Bilateria;Protostomia;  
 Spiralia;Lophotrochozoa;Mollusca;Bivalvia;Autobranchia;Pteriormorphia;Ostr  
 eida;Ostreoidea;Ostreidae;Crassostrea;Crassostrea gigas

UdeM00000009287 6565 559.3 UdeM00000009287 XP\_022306197.1 47 698  
 314 14 9 681 16 682 6.70E-156 559.3 6565 cellular  
 organisms;Eukaryota;Opisthokonta;Metazoa;Eumetazoa;Bilateria;Protostomia;  
 Spiralia;Lophotrochozoa;Mollusca;Bivalvia;Autobranchia;Pteriomorpha;Ostr  
 eida;Ostreoidea;Ostreidae;Crassostrea;Crassostrea virginica  
 UdeM00000009288 6596 152.9 UdeM00000009288 XP\_045161746.1 88.8 89  
 10 0 48 136 47 135 2.90E-34 152.9 6596 cellular  
 organisms;Eukaryota;Opisthokonta;Metazoa;Eumetazoa;Bilateria;Protostomia;  
 Spiralia;Lophotrochozoa;Mollusca;Bivalvia;Autobranchia;Heteroconchia;Euhe  
 terodonta;Imparidentia;Venerida;Veneroidea;Veneridae;Mercenaria;Mercenari  
 a mercenaria  
 UdeM00000009290 1735272 86.3 UdeM00000009290 XP\_041366951.1 44.4  
 81 45 0 44 124 163 243 3.50E-14 86.3 1735272  
 cellular  
 organisms;Eukaryota;Opisthokonta;Metazoa;Eumetazoa;Bilateria;Protostomia;  
 Spiralia;Lophotrochozoa;Mollusca;Gastropoda;Neomphalina;Neomphaloidea;Pel  
 tospiridae;Gigantopelta;Gigantopelta aegis  
 UdeM00000009291 1735272 158.3 UdeM00000009291 XP\_041362472.1 35.8  
 243 150 2 224 462 3 243 2.40E-35 158.3 1735272  
 cellular  
 organisms;Eukaryota;Opisthokonta;Metazoa;Eumetazoa;Bilateria;Protostomia;  
 Spiralia;Lophotrochozoa;Mollusca;Gastropoda;Neomphalina;Neomphaloidea;Pel  
 tospiridae;Gigantopelta;Gigantopelta aegis  
 UdeM00000009292 400727 819.3 UdeM00000009292 XP\_025081017.1 93.9  
 441 25 1 1 441 1 439 2.30E-234 819.3 400727  
 cellular  
 organisms;Eukaryota;Opisthokonta;Metazoa;Eumetazoa;Bilateria;Protostomia;  
 Spiralia;Lophotrochozoa;Mollusca;Gastropoda;Caenogastropoda;Architaeniogl  
 ossa;Ampullarioidea;Ampullariidae;Pomacea;Pomacea canaliculata  
 UdeM00000009293 1735272 333.2 UdeM00000009293 XP\_041377542.1 84.1  
 176 28 0 4 179 6 181 2.10E-88 333.2 1735272  
 cellular  
 organisms;Eukaryota;Opisthokonta;Metazoa;Eumetazoa;Bilateria;Protostomia;  
 Spiralia;Lophotrochozoa;Mollusca;Gastropoda;Neomphalina;Neomphaloidea;Pel  
 tospiridae;Gigantopelta;Gigantopelta aegis  
 UdeM00000009295 1735272 188 UdeM00000009295 XP\_041377542.1 82.8  
 99 17 0 8 106 83 181 6.40E-45 188 1735272  
 cellular  
 organisms;Eukaryota;Opisthokonta;Metazoa;Eumetazoa;Bilateria;Protostomia;  
 Spiralia;Lophotrochozoa;Mollusca;Gastropoda;Neomphalina;Neomphaloidea;Pel  
 tospiridae;Gigantopelta;Gigantopelta aegis  
 UdeM00000009294 6579 127.1 UdeM00000009294 XP\_033741736.1 58.6 99  
 41 0 24 122 796 894 1.70E-26 127.1 6579 cellular  
 organisms;Eukaryota;Opisthokonta;Metazoa;Eumetazoa;Bilateria;Protostomia;  
 Spiralia;Lophotrochozoa;Mollusca;Bivalvia;Autobranchia;Pteriomorpha;Pect  
 inida;Pectinoidea;Pectinidae;Pecten;Pecten maximus  
 UdeM00000009297 6596 329.3 UdeM00000009297 XP\_045161674.1 89.2 158  
 17 0 1 158 180 337 2.70E-87 329.3 6596 cellular  
 organisms;Eukaryota;Opisthokonta;Metazoa;Eumetazoa;Bilateria;Protostomia;  
 Spiralia;Lophotrochozoa;Mollusca;Bivalvia;Autobranchia;Heteroconchia;Euhe  
 terodonta;Imparidentia;Venerida;Veneroidea;Veneridae;Mercenaria;Mercenari  
 a mercenaria  
 UdeM00000009296 6596 369 UdeM00000009296 XP\_045161675.1 87.8 181  
 22 0 67 247 127 307 4.70E-99 369 6596 cellular



organisms;Eukaryota;Opisthokonta;Metazoa;Eumetazoa;Bilateria;Protostomia;Spiralia;Lophotrochozoa;Mollusca;Bivalvia;Autobranchia;Heteroconchia;Euheterodonta;Imparidentia;Venerida;Veneroidea;Veneridae;Mercenaria;Mercenaria mercenaria

UdeM00000009298 6573 89.4 UdeM00000009298 XP\_021366544.1 47.3 93  
49 0 6 98 5 97 2.90E-15 89.4 6573 cellular

organisms;Eukaryota;Opisthokonta;Metazoa;Eumetazoa;Bilateria;Protostomia;Spiralia;Lophotrochozoa;Mollusca;Bivalvia;Autobranchia;Pteriormorphia;Pectinida;Pectinoidea;Pectinidae;Mizuhopecten;Mizuhopecten yessoensis

UdeM00000009299 2652724 139.4 UdeM00000009299 XP\_028513771.1 36.2  
243 123 4 1 243 73 283 6.70E-30 139.4 2652724  
cellular

organisms;Eukaryota;Opisthokonta;Metazoa;Eumetazoa;Cnidaria;Anthozoa;Hexacorallia;Actiniaria;Aiptasiidae;Exaiptasia;Exaiptasia diaphana

UdeM00000009300 6579 228 UdeM00000009300 XP\_033724701.1 50.5 202  
100 0 313 514 134 335 2.70E-56 228 6579 cellular

organisms;Eukaryota;Opisthokonta;Metazoa;Eumetazoa;Bilateria;Protostomia;Spiralia;Lophotrochozoa;Mollusca;Bivalvia;Autobranchia;Pteriormorphia;Pectinida;Pectinoidea;Pectinidae;Pecten;Pecten maximus

UdeM00000009301 6596 404.1 UdeM00000009301 XP\_045163841.1 58.9 355  
137 3 16 364 7 358 2.00E-109 404.1 6596 cellular

organisms;Eukaryota;Opisthokonta;Metazoa;Eumetazoa;Bilateria;Protostomia;Spiralia;Lophotrochozoa;Mollusca;Bivalvia;Autobranchia;Heteroconchia;Euheterodonta;Imparidentia;Venerida;Veneroidea;Veneridae;Mercenaria;Mercenaria mercenaria

UdeM00000009302 6579 639.8 UdeM00000009302 XP\_033741736.1 55.5 535  
226 4 82 610 347 875 3.70E-180 639.8 6579 cellular

organisms;Eukaryota;Opisthokonta;Metazoa;Eumetazoa;Bilateria;Protostomia;Spiralia;Lophotrochozoa;Mollusca;Bivalvia;Autobranchia;Pteriormorphia;Pectinida;Pectinoidea;Pectinidae;Pecten;Pecten maximus

UdeM00000009303 6579 292.7 UdeM00000009303 XP\_033744278.1 53.4 247  
114 1 1 246 726 972 4.40E-76 292.7 6579 cellular

organisms;Eukaryota;Opisthokonta;Metazoa;Eumetazoa;Bilateria;Protostomia;Spiralia;Lophotrochozoa;Mollusca;Bivalvia;Autobranchia;Pteriormorphia;Pectinida;Pectinoidea;Pectinidae;Pecten;Pecten maximus

UdeM00000009304 6579 211.5 UdeM00000009304 XP\_033763899.1 40.1 374  
202 9 3 368 299 658 2.10E-51 211.5 6579 cellular

organisms;Eukaryota;Opisthokonta;Metazoa;Eumetazoa;Bilateria;Protostomia;Spiralia;Lophotrochozoa;Mollusca;Bivalvia;Autobranchia;Heteroconchia;Euheterodonta;Imparidentia;Venerida;Veneroidea;Veneridae;Mercenaria;Mercenaria mercenaria

UdeM00000009305 6596 161.8 UdeM00000009305 XP\_045162477.1 50.6 247  
101 7 2 245 296 524 1.20E-36 161.8 6596 cellular

organisms;Eukaryota;Opisthokonta;Metazoa;Eumetazoa;Bilateria;Protostomia;Spiralia;Lophotrochozoa;Mollusca;Bivalvia;Autobranchia;Heteroconchia;Euheterodonta;Imparidentia;Venerida;Veneroidea;Veneridae;Mercenaria;Mercenaria mercenaria

UdeM00000009306 6579 464.9 UdeM00000009306 XP\_033763474.1 74.2 310  
67 6 6 311 7 307 8.50E-128 464.9 6579 cellular

organisms;Eukaryota;Opisthokonta;Metazoa;Eumetazoa;Bilateria;Protostomia;Spiralia;Lophotrochozoa;Mollusca;Bivalvia;Autobranchia;Pteriormorphia;Pectinida;Pectinoidea;Pectinidae;Pecten;Pecten maximus

UdeM00000009307 29159 132.1 UdeM00000009307 XP\_034331441.1 41.4 181  
103 3 1 181 1 178 7.60E-28 132.1 29159 cellular

organisms;Eukaryota;Opisthokonta;Metazoa;Eumetazoa;Bilateria;Protostomia;

Spiralia;Lophotrochozoa;Mollusca;Bivalvia;Autobranchia;Pteriormorphia;Ostr  
eida;Ostreoidea;Ostreidae;Crassostrea;Crassostrea gigas  
UdeM00000009309 6596 94.7 UdeM00000009309 XP\_045163642.1 40 160  
79 9 11 160 13 165 1.20E-16 94.7 6596 cellular  
organisms;Eukaryota;Opisthokonta;Metazoa;Eumetazoa;Bilateria;Protostomia;  
Spiralia;Lophotrochozoa;Mollusca;Bivalvia;Autobranchia;Heteroconchia;Euhe  
terodonta;Imparidentia;Venerida;Veneroidea;Veneridae;Mercenaria;Mercenari  
a mercenaria  
UdeM00000009310 6579 496.1 UdeM00000009310 XP\_033731203.1 60.1 376  
147 2 2 376 4 377 3.90E-137 496.1 6579 cellular  
organisms;Eukaryota;Opisthokonta;Metazoa;Eumetazoa;Bilateria;Protostomia;  
Spiralia;Lophotrochozoa;Mollusca;Bivalvia;Autobranchia;Pteriormorphia;Pect  
inida;Pectinoidea;Pectinidae;Pecten;Pecten maximus  
UdeM00000008863 6573 201.8 UdeM00000008863 XP\_021355224.1 36.4 341  
163 7 9 340 17 312 2.80E-48 201.8 6573 cellular  
organisms;Eukaryota;Opisthokonta;Metazoa;Eumetazoa;Bilateria;Protostomia;  
Spiralia;Lophotrochozoa;Mollusca;Bivalvia;Autobranchia;Pteriormorphia;Pect  
inida;Pectinoidea;Pectinidae;Mizuhopecten;Mizuhopecten yessoensis  
UdeM00000008864 6573 205.7 UdeM00000008864 XP\_021355224.1 39.5 334  
155 10 9 333 17 312 2.00E-49 205.7 6573 cellular  
organisms;Eukaryota;Opisthokonta;Metazoa;Eumetazoa;Bilateria;Protostomia;  
Spiralia;Lophotrochozoa;Mollusca;Bivalvia;Autobranchia;Pteriormorphia;Pect  
inida;Pectinoidea;Pectinidae;Mizuhopecten;Mizuhopecten yessoensis  
UdeM00000008866 1735272 167.5 UdeM00000008866 XP\_041361370.1 24  
730 485 21 8 695 8 709 6.30E-38 167.5 1735272  
cellular  
organisms;Eukaryota;Opisthokonta;Metazoa;Eumetazoa;Bilateria;Protostomia;  
Spiralia;Lophotrochozoa;Mollusca;Gastropoda;Neomphalina;Neomphaloidea;Pel  
tospiridae;Gigantopelta;Gigantopelta aegis  
UdeM00000008867 1735272 173.7 UdeM00000008867 XP\_041361369.1 25.1  
740 484 23 6 705 7 716 8.80E-40 173.7 1735272  
cellular  
organisms;Eukaryota;Opisthokonta;Metazoa;Eumetazoa;Bilateria;Protostomia;  
Spiralia;Lophotrochozoa;Mollusca;Gastropoda;Neomphalina;Neomphaloidea;Pel  
tospiridae;Gigantopelta;Gigantopelta aegis  
UdeM00000008868 29159 146 UdeM00000008868 XP\_034320422.1 75 84  
21 0 46 129 141 224 3.70E-32 146 29159 cellular  
organisms;Eukaryota;Opisthokonta;Metazoa;Eumetazoa;Bilateria;Protostomia;  
Spiralia;Lophotrochozoa;Mollusca;Bivalvia;Autobranchia;Pteriormorphia;Ostr  
eida;Ostreoidea;Ostreidae;Crassostrea;Crassostrea gigas  
UdeM00000008869 6596 837 UdeM00000008869 XP\_045209790.1 55 789  
326 9 217 981 1 784 2.50E-239 837 6596 cellular  
organisms;Eukaryota;Opisthokonta;Metazoa;Eumetazoa;Bilateria;Protostomia;  
Spiralia;Lophotrochozoa;Mollusca;Bivalvia;Autobranchia;Heteroconchia;Euhe  
terodonta;Imparidentia;Venerida;Veneroidea;Veneridae;Mercenaria;Mercenari  
a mercenaria  
UdeM00000008872 6579 76.3 UdeM00000008872 XP\_033744239.1 53.2 79  
35 1 54 132 356 432 3.80E-11 76.3 6579 cellular  
organisms;Eukaryota;Opisthokonta;Metazoa;Eumetazoa;Bilateria;Protostomia;  
Spiralia;Lophotrochozoa;Mollusca;Bivalvia;Autobranchia;Pteriormorphia;Pect  
inida;Pectinoidea;Pectinidae;Pecten;Pecten maximus  
UdeM00000008874 2652724 167.5 UdeM00000008874 XP\_028514361.1 58.1  
117 49 0 10 126 790 906 1.20E-38 167.5 2652724  
cellular

organisms;Eukaryota;Opisthokonta;Metazoa;Eumetazoa;Cnidaria;Anthozoa;Hexa  
corallia;Actiniaria;Aiptasiidae;Exaiptasia;Exaiptasia diaphana  
UdeM00000008875 6596 234.6 UdeM00000008875 XP\_045199866.1 46.1 228  
122 1 4 231 1914 2140 1.40E-58 234.6 6596 cellular  
organisms;Eukaryota;Opisthokonta;Metazoa;Eumetazoa;Bilateria;Protostomia;  
Spiralia;Lophotrochozoa;Mollusca;Bivalvia;Autobranchia;Heteroconchia;Euhe  
terodonta;Imparidentia;Venerida;Veneroidea;Veneridae;Mercenaria;Mercenari  
a mercenaria  
UdeM00000008876 29159 85.1 UdeM00000008876 XP\_011433261.2 54.1 74  
34 0 52 125 1972 2045 7.20E-14 85.1 29159 cellular  
organisms;Eukaryota;Opisthokonta;Metazoa;Eumetazoa;Bilateria;Protostomia;  
Spiralia;Lophotrochozoa;Mollusca;Bivalvia;Autobranchia;Pteriormorphia;Ostr  
eida;Ostreoidea;Ostreidae;Crassostrea;Crassostrea gigas  
UdeM00000008877 1735272 342.4 UdeM00000008877 XP\_041357551.1 39.5  
433 258 3 1 433 41 469 8.20E-91 342.4 1735272  
cellular  
organisms;Eukaryota;Opisthokonta;Metazoa;Eumetazoa;Bilateria;Protostomia;  
Spiralia;Lophotrochozoa;Mollusca;Gastropoda;Neomphalina;Neomphaloidea;Pel  
tospiridae;Gigantopelta;Gigantopelta aegis  
UdeM00000008878 6579 62 UdeM00000008878 XP\_033725862.1 40.8 76  
45 0 125 200 215 290 1.00E-06 62 6579 cellular  
organisms;Eukaryota;Opisthokonta;Metazoa;Eumetazoa;Bilateria;Protostomia;  
Spiralia;Lophotrochozoa;Mollusca;Bivalvia;Autobranchia;Pteriormorphia;Pect  
inida;Pectinoidea;Pectinidae;Pecten;Pecten maximus  
UdeM00000008879 6596 1195.3 UdeM00000008879 XP\_045157300.1 38.6  
1584 912 31 197 1755 3 1551 0.00E+00 1195.3 6596  
cellular  
organisms;Eukaryota;Opisthokonta;Metazoa;Eumetazoa;Bilateria;Protostomia;  
Spiralia;Lophotrochozoa;Mollusca;Bivalvia;Autobranchia;Heteroconchia;Euhe  
terodonta;Imparidentia;Venerida;Veneroidea;Veneridae;Mercenaria;Mercenari  
a mercenaria  
UdeM00000008880 6596 1129.4 UdeM00000008880 XP\_045157300.1 37.4  
1584 887 32 197 1710 3 1551 0.00E+00 1129.4 6596  
cellular  
organisms;Eukaryota;Opisthokonta;Metazoa;Eumetazoa;Bilateria;Protostomia;  
Spiralia;Lophotrochozoa;Mollusca;Bivalvia;Autobranchia;Heteroconchia;Euhe  
terodonta;Imparidentia;Venerida;Veneroidea;Veneridae;Mercenaria;Mercenari  
a mercenaria  
UdeM00000008884 1735272 480.3 UdeM00000008884 XP\_041357551.1 39.3  
616 368 5 14 629 25 634 3.70E-132 480.3 1735272  
cellular  
organisms;Eukaryota;Opisthokonta;Metazoa;Eumetazoa;Bilateria;Protostomia;  
Spiralia;Lophotrochozoa;Mollusca;Gastropoda;Neomphalina;Neomphaloidea;Pel  
tospiridae;Gigantopelta;Gigantopelta aegis  
UdeM00000008882 1735272 481.5 UdeM00000008882 XP\_041357551.1 39.1  
632 375 6 11 642 13 634 1.70E-132 481.5 1735272  
cellular  
organisms;Eukaryota;Opisthokonta;Metazoa;Eumetazoa;Bilateria;Protostomia;  
Spiralia;Lophotrochozoa;Mollusca;Gastropoda;Neomphalina;Neomphaloidea;Pel  
tospiridae;Gigantopelta;Gigantopelta aegis  
UdeM00000008883 1735272 481.5 UdeM00000008883 XP\_041357551.1 39.1  
632 375 6 11 642 13 634 1.70E-132 481.5 1735272  
cellular  
organisms;Eukaryota;Opisthokonta;Metazoa;Eumetazoa;Bilateria;Protostomia;

Spiralia;Lophotrochozoa;Mollusca;Gastropoda;Neomphalina;Neomphaloidea;Pel  
tospiridae;Gigantopelta;Gigantopelta aegis  
UdeM00000008887 6579 807 UdeM00000008887 XP\_033724854.1 38 1321  
695 26 34 1272 59 1337 3.70E-230 807 6579 cellular  
organisms;Eukaryota;Opisthokonta;Metazoa;Eumetazoa;Bilateria;Protostomia;  
Spiralia;Lophotrochozoa;Mollusca;Bivalvia;Autobranchia;Pteriomorpha;Pect  
inida;Pectinoidea;Pectinidae;Pecten;Pecten maximus  
UdeM00000008888 6579 685.6 UdeM00000008888 XP\_033724854.1 32.8 1480  
690 32 19 1402 54 1324 1.30E-193 685.6 6579 cellular  
organisms;Eukaryota;Opisthokonta;Metazoa;Eumetazoa;Bilateria;Protostomia;  
Spiralia;Lophotrochozoa;Mollusca;Bivalvia;Autobranchia;Pteriomorpha;Pect  
inida;Pectinoidea;Pectinidae;Pecten;Pecten maximus  
UdeM00000008889 1735272 392.1 UdeM00000008889 XP\_041371976.1 35.5  
662 357 18 43 660 55 690 1.40E-105 392.1 1735272  
cellular  
organisms;Eukaryota;Opisthokonta;Metazoa;Eumetazoa;Bilateria;Protostomia;  
Spiralia;Lophotrochozoa;Mollusca;Gastropoda;Neomphalina;Neomphaloidea;Pel  
tospiridae;Gigantopelta;Gigantopelta aegis  
UdeM00000008890 6596 241.9 UdeM00000008890 XP\_045207155.1 51 296  
115 5 471 762 145 414 2.70E-60 241.9 6596 cellular  
organisms;Eukaryota;Opisthokonta;Metazoa;Eumetazoa;Bilateria;Protostomia;  
Spiralia;Lophotrochozoa;Mollusca;Bivalvia;Autobranchia;Heteroconchia;Euhe  
terodonta;Imparidentia;Venerida;Veneroidea;Veneridae;Mercenaria;Mercenari  
a mercenaria  
UdeM00000008891 6596 78.6 UdeM00000008891 XP\_045207155.1 62.9 62  
23 0 91 152 414 475 1.00E-11 78.6 6596 cellular  
organisms;Eukaryota;Opisthokonta;Metazoa;Eumetazoa;Bilateria;Protostomia;  
Spiralia;Lophotrochozoa;Mollusca;Bivalvia;Autobranchia;Heteroconchia;Euhe  
terodonta;Imparidentia;Venerida;Veneroidea;Veneridae;Mercenaria;Mercenari  
a mercenaria  
UdeM00000008892 6573 335.1 UdeM00000008892 XP\_021368827.1 44.2 387  
190 9 22 387 11 392 1.20E-88 335.1 6573 cellular  
organisms;Eukaryota;Opisthokonta;Metazoa;Eumetazoa;Bilateria;Protostomia;  
Spiralia;Lophotrochozoa;Mollusca;Bivalvia;Autobranchia;Pteriomorpha;Pect  
inida;Pectinoidea;Pectinidae;Mizuhopecten;Mizuhopecten yessoensis  
UdeM00000008893 6565 401.4 UdeM00000008893 XP\_022344684.1 50.6 389  
191 1 12 399 19 407 1.50E-108 401.4 6565 cellular  
organisms;Eukaryota;Opisthokonta;Metazoa;Eumetazoa;Bilateria;Protostomia;  
Spiralia;Lophotrochozoa;Mollusca;Bivalvia;Autobranchia;Pteriomorpha;Ostr  
eida;Ostreoidea;Ostreidae;Crassostrea;Crassostrea virginica  
UdeM00000008894 6565 343.6 UdeM00000008894 XP\_022344684.1 42.9 399  
190 5 10 373 19 414 3.70E-91 343.6 6565 cellular  
organisms;Eukaryota;Opisthokonta;Metazoa;Eumetazoa;Bilateria;Protostomia;  
Spiralia;Lophotrochozoa;Mollusca;Bivalvia;Autobranchia;Pteriomorpha;Ostr  
eida;Ostreoidea;Ostreidae;Crassostrea;Crassostrea virginica  
UdeM00000008895 6579 141.7 UdeM00000008895 XP\_033733231.1 29.9 395  
257 10 53 434 73 460 3.20E-30 141.7 6579 cellular  
organisms;Eukaryota;Opisthokonta;Metazoa;Eumetazoa;Bilateria;Protostomia;  
Spiralia;Lophotrochozoa;Mollusca;Bivalvia;Autobranchia;Pteriomorpha;Pect  
inida;Pectinoidea;Pectinidae;Pecten;Pecten maximus  
UdeM00000008896 6596 167.9 UdeM00000008896 XP\_045207757.1 50 168  
82 2 8 174 19 185 1.20E-38 167.9 6596 cellular  
organisms;Eukaryota;Opisthokonta;Metazoa;Eumetazoa;Bilateria;Protostomia;  
Spiralia;Lophotrochozoa;Mollusca;Bivalvia;Autobranchia;Heteroconchia;Euhe

terodonta;Imparidentia;Venerida;Veneroidea;Veneridae;Mercenaria;Mercenari  
 a mercenaria  
 UdeM00000008897 6596 452.2 UdeM00000008897 XP\_045208451.1 65.6 314  
 105 1 4 314 3 316 5.40E-124 452.2 6596 cellular  
 organisms;Eukaryota;Opisthokonta;Metazoa;Eumetazoa;Bilateria;Protostomia;  
 Spiralia;Lophotrochozoa;Mollusca;Bivalvia;Autobranhia;Heteroconchia;Euhe  
 terodonta;Imparidentia;Venerida;Veneroidea;Veneridae;Mercenaria;Mercenari  
 a mercenaria  
 UdeM00000008898 6579 620.2 UdeM00000008898 XP\_033732800.1 50.1 609  
 290 9 50 652 41 641 3.10E-174 620.2 6579 cellular  
 organisms;Eukaryota;Opisthokonta;Metazoa;Eumetazoa;Bilateria;Protostomia;  
 Spiralia;Lophotrochozoa;Mollusca;Bivalvia;Autobranhia;Pteriormorphia;Pect  
 inida;Pectinoidea;Pectinidae;Pecten;Pecten maximus  
 UdeM00000008899 6596 181.8 UdeM00000008899 XP\_045162238.1 29 341  
 225 5 2 336 141 470 1.50E-42 181.8 6596 cellular  
 organisms;Eukaryota;Opisthokonta;Metazoa;Eumetazoa;Bilateria;Protostomia;  
 Spiralia;Lophotrochozoa;Mollusca;Bivalvia;Autobranhia;Heteroconchia;Euhe  
 terodonta;Imparidentia;Venerida;Veneroidea;Veneridae;Mercenaria;Mercenari  
 a mercenaria  
 UdeM00000008900 6596 782.3 UdeM00000008900 XP\_045208328.1 34.2 1432  
 766 28 19 1369 12 1348 1.00E-222 782.3 6596 cellular  
 organisms;Eukaryota;Opisthokonta;Metazoa;Eumetazoa;Bilateria;Protostomia;  
 Spiralia;Lophotrochozoa;Mollusca;Bivalvia;Autobranhia;Heteroconchia;Euhe  
 terodonta;Imparidentia;Venerida;Veneroidea;Veneridae;Mercenaria;Mercenari  
 a mercenaria  
 UdeM00000008901 6573 66.6 UdeM00000008901 XP\_021364034.1 38.2 68  
 42 0 3 70 1219 1286 1.60E-08 66.6 6573 cellular  
 organisms;Eukaryota;Opisthokonta;Metazoa;Eumetazoa;Bilateria;Protostomia;  
 Spiralia;Lophotrochozoa;Mollusca;Bivalvia;Autobranhia;Pteriormorphia;Pect  
 inida;Pectinoidea;Pectinidae;Mizuhopecten;Mizuhopecten yessoensis  
 UdeM00000008902 6565 284.3 UdeM00000008902 XP\_022341886.1 75.4 179  
 42 1 3 179 2 180 1.10E-73 284.3 6565 cellular  
 organisms;Eukaryota;Opisthokonta;Metazoa;Eumetazoa;Bilateria;Protostomia;  
 Spiralia;Lophotrochozoa;Mollusca;Bivalvia;Autobranhia;Pteriormorphia;Ostr  
 eida;Ostreoidea;Ostreidae;Crassostrea;Crassostrea virginica  
 UdeM00000008903 6596 586.6 UdeM00000008903 XP\_045210366.1 51.5 623  
 261 12 20 621 19 621 3.60E-164 586.6 6596 cellular  
 organisms;Eukaryota;Opisthokonta;Metazoa;Eumetazoa;Bilateria;Protostomia;  
 Spiralia;Lophotrochozoa;Mollusca;Bivalvia;Autobranhia;Heteroconchia;Euhe  
 terodonta;Imparidentia;Venerida;Veneroidea;Veneridae;Mercenaria;Mercenari  
 a mercenaria  
 UdeM00000008905 6596 207.2 UdeM00000008905 XP\_045208495.1 52.7 169  
 73 3 1 168 10 172 1.60E-50 207.2 6596 cellular  
 organisms;Eukaryota;Opisthokonta;Metazoa;Eumetazoa;Bilateria;Protostomia;  
 Spiralia;Lophotrochozoa;Mollusca;Bivalvia;Autobranhia;Heteroconchia;Euhe  
 terodonta;Imparidentia;Venerida;Veneroidea;Veneridae;Mercenaria;Mercenari  
 a mercenaria  
 UdeM00000008906 400727 59.7 UdeM00000008906 XP\_025082576.1 45.8  
 83 36 3 1 83 1 74 3.30E-06 59.7 400727  
 cellular  
 organisms;Eukaryota;Opisthokonta;Metazoa;Eumetazoa;Bilateria;Protostomia;  
 Spiralia;Lophotrochozoa;Mollusca;Gastropoda;Caenogastropoda;Architaeniogl  
 ossa;Ampullarioidea;Ampullariidae;Pomacea;Pomacea canaliculata

UdeM00000008907 400727 780 UdeM00000008907 XP\_025081089.1 65.4  
 584 196 2 20 603 321 898 2.20E-222 780 400727  
 cellular  
 organisms;Eukaryota;Opisthokonta;Metazoa;Eumetazoa;Bilateria;Protostomia;  
 Spiralia;Lophotrochozoa;Mollusca;Gastropoda;Caenogastropoda;Architaenioglossa;  
 Ampullarioidea;Ampullariidae;Pomacea;Pomacea canaliculata  
 UdeM00000008908 29159 104.8 UdeM00000008908 XP\_011450739.2 70.1 67  
 20 0 1 67 844 910 4.50E-20 104.8 29159 cellular  
 organisms;Eukaryota;Opisthokonta;Metazoa;Eumetazoa;Bilateria;Protostomia;  
 Spiralia;Lophotrochozoa;Mollusca;Bivalvia;Autobranchia;Pteriormorphia;Ostreida;  
 Ostreidae;Crassostrea;Crassostrea gigas  
 UdeM00000008909 6596 308.9 UdeM00000008909 XP\_045207456.1 36.7 507  
 181 6 240 607 339 844 1.40E-80 308.9 6596 cellular  
 organisms;Eukaryota;Opisthokonta;Metazoa;Eumetazoa;Bilateria;Protostomia;  
 Spiralia;Lophotrochozoa;Mollusca;Bivalvia;Autobranchia;Heteroconchia;Euheterodonta;  
 Imparidentia;Venerida;Veneroidea;Veneridae;Mercenaria;Mercenaria mercenaria  
 UdeM00000008910 6596 469.9 UdeM00000008910 XP\_045207456.1 47.3 791  
 354 17 45 792 75 845 6.20E-129 469.9 6596 cellular  
 organisms;Eukaryota;Opisthokonta;Metazoa;Eumetazoa;Bilateria;Protostomia;  
 Spiralia;Lophotrochozoa;Mollusca;Bivalvia;Autobranchia;Heteroconchia;Euheterodonta;  
 Imparidentia;Venerida;Veneroidea;Veneridae;Mercenaria;Mercenaria mercenaria  
 UdeM00000008911 6596 251.1 UdeM00000008911 XP\_045207456.1 50.7 278  
 112 7 4 269 581 845 1.60E-63 251.1 6596 cellular  
 organisms;Eukaryota;Opisthokonta;Metazoa;Eumetazoa;Bilateria;Protostomia;  
 Spiralia;Lophotrochozoa;Mollusca;Bivalvia;Autobranchia;Heteroconchia;Euheterodonta;  
 Imparidentia;Venerida;Veneroidea;Veneridae;Mercenaria;Mercenaria mercenaria  
 UdeM00000008912 6573 67.4 UdeM00000008912 XP\_021354703.1 26.3 175  
 95 2 21 162 17 190 2.20E-08 67.4 6573 cellular  
 organisms;Eukaryota;Opisthokonta;Metazoa;Eumetazoa;Bilateria;Protostomia;  
 Spiralia;Lophotrochozoa;Mollusca;Bivalvia;Autobranchia;Pteriormorphia;Pectinida;  
 Pectinoidea;Pectinidae;Mizuhopecten;Mizuhopecten yessoensis  
 UdeM00000008913 6596 870.2 UdeM00000008913 XP\_045188050.1 46 1035  
 501 9 7 1022 421 1416 2.70E-249 870.2 6596 cellular  
 organisms;Eukaryota;Opisthokonta;Metazoa;Eumetazoa;Bilateria;Protostomia;  
 Spiralia;Lophotrochozoa;Mollusca;Bivalvia;Autobranchia;Heteroconchia;Euheterodonta;  
 Imparidentia;Venerida;Veneroidea;Veneridae;Mercenaria;Mercenaria mercenaria  
 UdeM00000008914 2607531 288.9 UdeM00000008914 XP\_036359723.1 32.8  
 545 355 7 89 628 119 657 1.60E-74 288.9 2607531  
 cellular  
 organisms;Eukaryota;Opisthokonta;Metazoa;Eumetazoa;Bilateria;Protostomia;  
 Spiralia;Lophotrochozoa;Mollusca;Cephalopoda;Coleoidea;Octopodiformes;Octopoda;  
 Incirrata;Octopodidae;Octopus;Octopus sinensis  
 UdeM00000008915 2607531 288.9 UdeM00000008915 XP\_036359723.1 32.8  
 545 355 7 79 618 119 657 1.60E-74 288.9 2607531  
 cellular  
 organisms;Eukaryota;Opisthokonta;Metazoa;Eumetazoa;Bilateria;Protostomia;  
 Spiralia;Lophotrochozoa;Mollusca;Cephalopoda;Coleoidea;Octopodiformes;Octopoda;  
 Incirrata;Octopodidae;Octopus;Octopus sinensis  
 UdeM00000008916 6596 184.1 UdeM00000008916 XP\_045176613.1 46.2 199  
 100 5 53 247 147 342 2.30E-43 184.1 6596 cellular

organisms;Eukaryota;Opisthokonta;Metazoa;Eumetazoa;Bilateria;Protostomia;Spiralia;Lophotrochozoa;Mollusca;Bivalvia;Autobranchia;Heteroconchia;Euherodonta;Imparidentia;Venerida;Veneroidea;Veneridae;Mercenaria;Mercenaria mercenaria

UdeM00000008917 6565 143.7 UdeM00000008917 XP\_022344143.1 47.7 153  
77 3 13 164 17 167 2.20E-31 143.7 6565 cellular

organisms;Eukaryota;Opisthokonta;Metazoa;Eumetazoa;Bilateria;Protostomia;Spiralia;Lophotrochozoa;Mollusca;Bivalvia;Autobranchia;Pteriormorphia;Ostreida;Ostreoidea;Ostreidae;Crassostrea;Crassostrea virginica

UdeM00000008918 6596 332.8 UdeM00000008918 XP\_045176613.1 48.6 346  
168 8 3 343 4 344 5.20E-88 332.8 6596 cellular

organisms;Eukaryota;Opisthokonta;Metazoa;Eumetazoa;Bilateria;Protostomia;Spiralia;Lophotrochozoa;Mollusca;Bivalvia;Autobranchia;Heteroconchia;Euherodonta;Imparidentia;Venerida;Veneroidea;Veneridae;Mercenaria;Mercenaria mercenaria

UdeM00000008920 6596 64.7 UdeM00000008920 XP\_045208681.1 34.5 142  
76 5 14 141 5 143 1.40E-07 64.7 6596 cellular

organisms;Eukaryota;Opisthokonta;Metazoa;Eumetazoa;Bilateria;Protostomia;Spiralia;Lophotrochozoa;Mollusca;Bivalvia;Autobranchia;Heteroconchia;Euherodonta;Imparidentia;Venerida;Veneroidea;Veneridae;Mercenaria;Mercenaria mercenaria

UdeM00000008922 6596 117.9 UdeM00000008922 XP\_045202576.1 55.6 108  
47 1 1 107 87 194 1.40E-23 117.9 6596 cellular

organisms;Eukaryota;Opisthokonta;Metazoa;Eumetazoa;Bilateria;Protostomia;Spiralia;Lophotrochozoa;Mollusca;Bivalvia;Autobranchia;Heteroconchia;Euherodonta;Imparidentia;Venerida;Veneroidea;Veneridae;Mercenaria;Mercenaria mercenaria

UdeM00000008923 6596 101.3 UdeM00000008923 XP\_045202346.1 36.2 152  
93 2 6 156 16 164 1.20E-18 101.3 6596 cellular

organisms;Eukaryota;Opisthokonta;Metazoa;Eumetazoa;Bilateria;Protostomia;Spiralia;Lophotrochozoa;Mollusca;Bivalvia;Autobranchia;Heteroconchia;Euherodonta;Imparidentia;Venerida;Veneroidea;Veneridae;Mercenaria;Mercenaria mercenaria

UdeM00000008924 6596 65.9 UdeM00000008924 XP\_045202346.1 50 54  
27 0 2 55 94 147 3.50E-08 65.9 6596 cellular

organisms;Eukaryota;Opisthokonta;Metazoa;Eumetazoa;Bilateria;Protostomia;Spiralia;Lophotrochozoa;Mollusca;Bivalvia;Autobranchia;Heteroconchia;Euherodonta;Imparidentia;Venerida;Veneroidea;Veneridae;Mercenaria;Mercenaria mercenaria

UdeM00000008929 29159 452.2 UdeM00000008929 XP\_034330911.1 48.8 461  
217 8 8 456 13 466 7.80E-124 452.2 29159 cellular

organisms;Eukaryota;Opisthokonta;Metazoa;Eumetazoa;Bilateria;Protostomia;Spiralia;Lophotrochozoa;Mollusca;Bivalvia;Autobranchia;Pteriormorphia;Ostreida;Ostreoidea;Ostreidae;Crassostrea;Crassostrea gigas

UdeM00000008930 6565 102.1 UdeM00000008930 XP\_022322655.1 48.5 99  
51 0 2 100 650 748 4.40E-19 102.1 6565 cellular

organisms;Eukaryota;Opisthokonta;Metazoa;Eumetazoa;Bilateria;Protostomia;Spiralia;Lophotrochozoa;Mollusca;Bivalvia;Autobranchia;Pteriormorphia;Ostreida;Ostreoidea;Ostreidae;Crassostrea;Crassostrea virginica

UdeM00000008931 6565 144.8 UdeM00000008931 XP\_022322655.1 35.8 246  
103 5 1 194 417 659 1.20E-31 144.8 6565 cellular

organisms;Eukaryota;Opisthokonta;Metazoa;Eumetazoa;Bilateria;Protostomia;Spiralia;Lophotrochozoa;Mollusca;Bivalvia;Autobranchia;Pteriormorphia;Ostreida;Ostreoidea;Ostreidae;Crassostrea;Crassostrea virginica

UdeM00000008932 29159 62 UdeM00000008932 XP\_011426086.2 25.2 139  
 99 3 3 137 35 172 6.90E-07 62 29159 cellular  
 organisms;Eukaryota;Opisthokonta;Metazoa;Eumetazoa;Bilateria;Protostomia;  
 Spiralia;Lophotrochozoa;Mollusca;Bivalvia;Autobranchia;Pteriormorphia;Ostr  
 eida;Ostreoidea;Ostreidae;Crassostrea;Crassostrea gigas  
 UdeM00000008938 29159 59.7 UdeM00000008938 XP\_011426086.2 26.7 135  
 94 3 3 133 35 168 4.50E-06 59.7 29159 cellular  
 organisms;Eukaryota;Opisthokonta;Metazoa;Eumetazoa;Bilateria;Protostomia;  
 Spiralia;Lophotrochozoa;Mollusca;Bivalvia;Autobranchia;Pteriormorphia;Ostr  
 eida;Ostreoidea;Ostreidae;Crassostrea;Crassostrea gigas  
 UdeM00000008940 29159 73.2 UdeM00000008940 XP\_011426086.2 26.6 154  
 111 2 33 184 35 188 1.10E-09 73.2 29159 cellular  
 organisms;Eukaryota;Opisthokonta;Metazoa;Eumetazoa;Bilateria;Protostomia;  
 Spiralia;Lophotrochozoa;Mollusca;Bivalvia;Autobranchia;Pteriormorphia;Ostr  
 eida;Ostreoidea;Ostreidae;Crassostrea;Crassostrea gigas  
 UdeM00000008941 1735272 268.5 UdeM00000008941 XP\_041357551.1 28.8  
 619 397 13 4 600 38 634 2.40E-68 268.5 1735272  
 cellular  
 organisms;Eukaryota;Opisthokonta;Metazoa;Eumetazoa;Bilateria;Protostomia;  
 Spiralia;Lophotrochozoa;Mollusca;Gastropoda;Neomphalina;Neomphaloidea;Pel  
 tospiridae;Gigantopelta;Gigantopelta aegis  
 UdeM00000008943 6573 94.7 UdeM00000008943 XP\_021340830.1 43.8 121  
 61 3 4 119 1929 2047 8.90E-17 94.7 6573 cellular  
 organisms;Eukaryota;Opisthokonta;Metazoa;Eumetazoa;Bilateria;Protostomia;  
 Spiralia;Lophotrochozoa;Mollusca;Bivalvia;Autobranchia;Pteriormorphia;Pect  
 inida;Pectinoidea;Pectinidae;Mizuhopecten;Mizuhopecten yessoensis  
 UdeM00000008946 29159 73.9 UdeM00000008946 XP\_011426086.2 22.8 311  
 200 11 6 298 35 323 4.00E-10 73.9 29159 cellular  
 organisms;Eukaryota;Opisthokonta;Metazoa;Eumetazoa;Bilateria;Protostomia;  
 Spiralia;Lophotrochozoa;Mollusca;Bivalvia;Autobranchia;Pteriormorphia;Ostr  
 eida;Ostreoidea;Ostreidae;Crassostrea;Crassostrea gigas  
 UdeM00000008947 412133 81.3 UdeM00000008947 XP\_001580069.1 33.8  
 142 88 3 532 670 326 464 5.40E-12 81.3 412133  
 cellular  
 organisms;Eukaryota;Metamonada;Parabasalia;Trichomonadida;Trichomonadidae  
 ;Trichomonas;Trichomonas vaginalis;Trichomonas vaginalis G3  
 UdeM00000008948 29159 216.1 UdeM00000008948 XP\_011433261.2 42.1 252  
 140 4 336 581 1973 2224 1.40E-52 216.1 29159 cellular  
 organisms;Eukaryota;Opisthokonta;Metazoa;Eumetazoa;Bilateria;Protostomia;  
 Spiralia;Lophotrochozoa;Mollusca;Bivalvia;Autobranchia;Pteriormorphia;Ostr  
 eida;Ostreoidea;Ostreidae;Crassostrea;Crassostrea gigas  
 UdeM00000008949 1735272 260.4 UdeM00000008949 XP\_041357551.1 29  
 601 404 13 7 596 46 634 6.60E-66 260.4 1735272  
 cellular  
 organisms;Eukaryota;Opisthokonta;Metazoa;Eumetazoa;Bilateria;Protostomia;  
 Spiralia;Lophotrochozoa;Mollusca;Gastropoda;Neomphalina;Neomphaloidea;Pel  
 tospiridae;Gigantopelta;Gigantopelta aegis  
 UdeM00000008950 6596 452.6 UdeM00000008950 XP\_045168479.1 36.4 707  
 422 7 11 709 30 716 9.30E-124 452.6 6596 cellular  
 organisms;Eukaryota;Opisthokonta;Metazoa;Eumetazoa;Bilateria;Protostomia;  
 Spiralia;Lophotrochozoa;Mollusca;Bivalvia;Autobranchia;Heteroconchia;Euhe  
 terodonta;Imparidentia;Venerida;Veneroidea;Veneridae;Mercenaria;Mercenari  
 a mercenaria



UdeM00000008951 6565 69.7 UdeM00000008951 XP\_022291841.1 39.8 83  
 50 0 52 134 53 135 7.20E-09 69.7 6565 cellular  
 organisms;Eukaryota;Opisthokonta;Metazoa;Eumetazoa;Bilateria;Protostomia;  
 Spiralia;Lophotrochozoa;Mollusca;Bivalvia;Autobranchia;Pteriormorphia;Ostr  
 eida;Ostreoidea;Ostreidae;Crassostrea;Crassostrea virginica  
 UdeM00000008952 6596 300.4 UdeM00000008952 XP\_045168479.1 36.9 472  
 277 5 3 467 259 716 3.90E-78 300.4 6596 cellular  
 organisms;Eukaryota;Opisthokonta;Metazoa;Eumetazoa;Bilateria;Protostomia;  
 Spiralia;Lophotrochozoa;Mollusca;Bivalvia;Autobranchia;Heteroconchia;Euhe  
 terodonta;Imparidentia;Venerida;Veneroidea;Veneridae;Mercenaria;Mercenari  
 a mercenaria  
 UdeM00000008953 6596 84 UdeM00000008953 XP\_045169256.1 29.2 185  
 120 4 5 185 3 180 2.30E-13 84 6596 cellular  
 organisms;Eukaryota;Opisthokonta;Metazoa;Eumetazoa;Bilateria;Protostomia;  
 Spiralia;Lophotrochozoa;Mollusca;Bivalvia;Autobranchia;Heteroconchia;Euhe  
 terodonta;Imparidentia;Venerida;Veneroidea;Veneridae;Mercenaria;Mercenari  
 a mercenaria  
 UdeM00000008954 6105 157.5 UdeM00000008954 XP\_031551063.1 31.8 277  
 168 4 3 261 449 722 2.30E-35 157.5 6105 cellular  
 organisms;Eukaryota;Opisthokonta;Metazoa;Eumetazoa;Cnidaria;Anthozoa;Hexa  
 corallia;Actiniaria;Actiniidae;Actinia;Actinia tenebrosa  
 UdeM00000008955 6596 312 UdeM00000008955 XP\_045168479.1 37.9 404  
 238 3 11 414 30 420 1.20E-81 312 6596 cellular  
 organisms;Eukaryota;Opisthokonta;Metazoa;Eumetazoa;Bilateria;Protostomia;  
 Spiralia;Lophotrochozoa;Mollusca;Bivalvia;Autobranchia;Heteroconchia;Euhe  
 terodonta;Imparidentia;Venerida;Veneroidea;Veneridae;Mercenaria;Mercenari  
 a mercenaria  
 UdeM00000008956 6596 463.4 UdeM00000008956 XP\_045168479.1 37.1 715  
 423 6 3 710 22 716 5.30E-127 463.4 6596 cellular  
 organisms;Eukaryota;Opisthokonta;Metazoa;Eumetazoa;Bilateria;Protostomia;  
 Spiralia;Lophotrochozoa;Mollusca;Bivalvia;Autobranchia;Heteroconchia;Euhe  
 terodonta;Imparidentia;Venerida;Veneroidea;Veneridae;Mercenaria;Mercenari  
 a mercenaria  
 UdeM00000008957 6105 116.7 UdeM00000008957 XP\_031551063.1 41 139  
 74 1 34 164 584 722 2.90E-23 116.7 6105 cellular  
 organisms;Eukaryota;Opisthokonta;Metazoa;Eumetazoa;Cnidaria;Anthozoa;Hexa  
 corallia;Actiniaria;Actiniidae;Actinia;Actinia tenebrosa  
 UdeM00000008958 6596 134.4 UdeM00000008958 XP\_045168479.1 30.9 223  
 153 1 43 265 298 519 2.10E-28 134.4 6596 cellular  
 organisms;Eukaryota;Opisthokonta;Metazoa;Eumetazoa;Bilateria;Protostomia;  
 Spiralia;Lophotrochozoa;Mollusca;Bivalvia;Autobranchia;Heteroconchia;Euhe  
 terodonta;Imparidentia;Venerida;Veneroidea;Veneridae;Mercenaria;Mercenari  
 a mercenaria  
 UdeM00000008959 6596 88.2 UdeM00000008959 XP\_045168478.1 36.8 133  
 68 3 39 171 103 219 1.10E-14 88.2 6596 cellular  
 organisms;Eukaryota;Opisthokonta;Metazoa;Eumetazoa;Bilateria;Protostomia;  
 Spiralia;Lophotrochozoa;Mollusca;Bivalvia;Autobranchia;Heteroconchia;Euhe  
 terodonta;Imparidentia;Venerida;Veneroidea;Veneridae;Mercenaria;Mercenari  
 a mercenaria  
 UdeM00000008961 6596 75.1 UdeM00000008961 XP\_045168479.1 42.5 80  
 46 0 55 134 583 662 8.00E-11 75.1 6596 cellular  
 organisms;Eukaryota;Opisthokonta;Metazoa;Eumetazoa;Bilateria;Protostomia;  
 Spiralia;Lophotrochozoa;Mollusca;Bivalvia;Autobranchia;Heteroconchia;Euhe

terodonta;Imparidentia;Venerida;Veneroidea;Veneridae;Mercenaria;Mercenari  
 a mercenaria  
 UdeM00000008962 6105 125.9 UdeM00000008962 XP\_031551063.1 46.9 130  
 61 1 1 122 591 720 3.60E-26 125.9 6105 cellular  
 organisms;Eukaryota;Opisthokonta;Metazoa;Eumetazoa;Cnidaria;Anthozoa;Hexa  
 corallia;Actiniaria;Actiniidae;Actinia;Actinia tenebrosa  
 UdeM00000008963 6596 287.7 UdeM00000008963 XP\_045168479.1 40.6 342  
 202 1 1 342 170 510 1.90E-74 287.7 6596 cellular  
 organisms;Eukaryota;Opisthokonta;Metazoa;Eumetazoa;Bilateria;Protostomia;  
 Spiralia;Lophotrochozoa;Mollusca;Bivalvia;Autobranchia;Heteroconchia;Euhe  
 terodonta;Imparidentia;Venerida;Veneroidea;Veneridae;Mercenaria;Mercenari  
 a mercenaria  
 UdeM00000008964 6596 58.2 UdeM00000008964 XP\_045169256.1 31.3 99  
 68 0 3 101 4 102 7.40E-06 58.2 6596 cellular  
 organisms;Eukaryota;Opisthokonta;Metazoa;Eumetazoa;Bilateria;Protostomia;  
 Spiralia;Lophotrochozoa;Mollusca;Bivalvia;Autobranchia;Heteroconchia;Euhe  
 terodonta;Imparidentia;Venerida;Veneroidea;Veneridae;Mercenaria;Mercenari  
 a mercenaria  
 UdeM00000008965 6596 457.2 UdeM00000008965 XP\_045168479.1 34.7 709  
 443 6 11 719 30 718 3.80E-125 457.2 6596 cellular  
 organisms;Eukaryota;Opisthokonta;Metazoa;Eumetazoa;Bilateria;Protostomia;  
 Spiralia;Lophotrochozoa;Mollusca;Bivalvia;Autobranchia;Heteroconchia;Euhe  
 terodonta;Imparidentia;Venerida;Veneroidea;Veneridae;Mercenaria;Mercenari  
 a mercenaria  
 UdeM00000008966 6596 458 UdeM00000008966 XP\_045168479.1 35.1 713  
 439 7 11 723 30 718 2.30E-125 458 6596 cellular  
 organisms;Eukaryota;Opisthokonta;Metazoa;Eumetazoa;Bilateria;Protostomia;  
 Spiralia;Lophotrochozoa;Mollusca;Bivalvia;Autobranchia;Heteroconchia;Euhe  
 terodonta;Imparidentia;Venerida;Veneroidea;Veneridae;Mercenaria;Mercenari  
 a mercenaria  
 UdeM00000008967 7654 176.4 UdeM00000008967 XP\_041483378.1 27.7 415  
 274 5 1120 1524 532 930 2.80E-40 176.4 7654 cellular  
 organisms;Eukaryota;Opisthokonta;Metazoa;Eumetazoa;Bilateria;Deuterostomi  
 a;Echinodermata;Eleutherozoa;Echinozoa;Echinoidea;Euechinoidea;Echinacea;  
 Temnopleuroidea;Toxopneustidae;Lytechinus;Lytechinus variegatus  
 UdeM00000008968 6596 483 UdeM00000008968 XP\_045208579.1 48.9 483  
 245 1 16 498 16 496 4.60E-133 483 6596 cellular  
 organisms;Eukaryota;Opisthokonta;Metazoa;Eumetazoa;Bilateria;Protostomia;  
 Spiralia;Lophotrochozoa;Mollusca;Bivalvia;Autobranchia;Heteroconchia;Euhe  
 terodonta;Imparidentia;Venerida;Veneroidea;Veneridae;Mercenaria;Mercenari  
 a mercenaria  
 UdeM00000008969 37653 256.1 UdeM00000008969 XP\_014770564.1 90 140  
 14 0 1 140 1 140 2.50E-65 256.1 37653 cellular  
 organisms;Eukaryota;Opisthokonta;Metazoa;Eumetazoa;Bilateria;Protostomia;  
 Spiralia;Lophotrochozoa;Mollusca;Cephalopoda;Coleoidea;Octopodiformes;Oct  
 opoda;Incirrata;Octopodidae;Octopus;Octopus bimaculoides  
 UdeM00000008970 6596 220.3 UdeM00000008970 XP\_045209851.1 72.5 138  
 38 0 2 139 4 141 1.80E-54 220.3 6596 cellular  
 organisms;Eukaryota;Opisthokonta;Metazoa;Eumetazoa;Bilateria;Protostomia;  
 Spiralia;Lophotrochozoa;Mollusca;Bivalvia;Autobranchia;Heteroconchia;Euhe  
 terodonta;Imparidentia;Venerida;Veneroidea;Veneridae;Mercenaria;Mercenari  
 a mercenaria  
 UdeM00000008971 6596 198.7 UdeM00000008971 XP\_045209839.1 62 229  
 70 7 21 232 187 415 7.90E-48 198.7 6596 cellular

organisms;Eukaryota;Opisthokonta;Metazoa;Eumetazoa;Bilateria;Protostomia;Spiralia;Lophotrochozoa;Mollusca;Bivalvia;Autobranchia;Heteroconchia;Euherodonta;Imparidentia;Venerida;Veneroidea;Veneridae;Mercenaria;Mercenaria mercenaria

UdeM00000008972 7574 84.7 UdeM00000008972 XP\_013401704.1 42.9 84  
43 1 17 95 748 831 7.10E-14 84.7 7574 cellular

organisms;Eukaryota;Opisthokonta;Metazoa;Eumetazoa;Bilateria;Protostomia;Spiralia;Lophotrochozoa;Brachiopoda;Linguliformea;Lingulata;Lingulida;Linguloidea;Lingulidae;Lingula;Lingula anatina

UdeM00000008973 6565 155.2 UdeM00000008973 XP\_022290947.1 43.1 197  
110 2 5 200 26 221 8.60E-35 155.2 6565 cellular

organisms;Eukaryota;Opisthokonta;Metazoa;Eumetazoa;Bilateria;Protostomia;Spiralia;Lophotrochozoa;Mollusca;Bivalvia;Autobranchia;Pteriormorphia;Ostreida;Ostreoidea;Ostreidae;Crassostrea;Crassostrea virginica

UdeM00000008974 1735272 127.1 UdeM00000008974 XP\_041372244.1 39.1  
156 95 0 6 161 6 161 2.10E-26 127.1 1735272  
cellular

organisms;Eukaryota;Opisthokonta;Metazoa;Eumetazoa;Bilateria;Protostomia;Spiralia;Lophotrochozoa;Mollusca;Gastropoda;Neomphalina;Neomphaloidea;Peltospiridae;Gigantopelta;Gigantopelta aegis

UdeM00000008975 6596 439.1 UdeM00000008975 XP\_045210465.1 70.7 294  
79 2 51 339 37 328 5.10E-120 439.1 6596 cellular

organisms;Eukaryota;Opisthokonta;Metazoa;Eumetazoa;Bilateria;Protostomia;Spiralia;Lophotrochozoa;Mollusca;Bivalvia;Autobranchia;Heteroconchia;Euherodonta;Imparidentia;Venerida;Veneroidea;Veneridae;Mercenaria;Mercenaria mercenaria

UdeM00000008976 6596 192.6 UdeM00000008976 XP\_045213108.1 38.3 371  
190 11 18 359 11 371 8.90E-46 192.6 6596 cellular

organisms;Eukaryota;Opisthokonta;Metazoa;Eumetazoa;Bilateria;Protostomia;Spiralia;Lophotrochozoa;Mollusca;Bivalvia;Autobranchia;Heteroconchia;Euherodonta;Imparidentia;Venerida;Veneroidea;Veneridae;Mercenaria;Mercenaria mercenaria

UdeM00000008977 6596 481.9 UdeM00000008977 XP\_045208245.1 78.3 290  
62 1 1 289 1 290 5.90E-133 481.9 6596 cellular

organisms;Eukaryota;Opisthokonta;Metazoa;Eumetazoa;Bilateria;Protostomia;Spiralia;Lophotrochozoa;Mollusca;Bivalvia;Autobranchia;Heteroconchia;Euherodonta;Imparidentia;Venerida;Veneroidea;Veneridae;Mercenaria;Mercenaria mercenaria

UdeM00000008978 6596 870.5 UdeM00000008978 XP\_045209202.1 37.9 1243  
689 28 374 1559 631 1847 3.30E-249 870.5 6596 cellular

organisms;Eukaryota;Opisthokonta;Metazoa;Eumetazoa;Bilateria;Protostomia;Spiralia;Lophotrochozoa;Mollusca;Bivalvia;Autobranchia;Heteroconchia;Euherodonta;Imparidentia;Venerida;Veneroidea;Veneridae;Mercenaria;Mercenaria mercenaria

UdeM00000008979 6596 134.8 UdeM00000008979 XP\_045189898.1 29.2 332  
214 8 537 861 2017 2334 5.60E-28 134.8 6596 cellular

organisms;Eukaryota;Opisthokonta;Metazoa;Eumetazoa;Bilateria;Protostomia;Spiralia;Lophotrochozoa;Mollusca;Bivalvia;Autobranchia;Heteroconchia;Euherodonta;Imparidentia;Venerida;Veneroidea;Veneridae;Mercenaria;Mercenaria mercenaria

UdeM00000008980 6596 597 UdeM00000008980 XP\_045209202.1 32.9 1084  
582 23 22 983 631 1691 4.20E-167 597 6596 cellular

organisms;Eukaryota;Opisthokonta;Metazoa;Eumetazoa;Bilateria;Protostomia;Spiralia;Lophotrochozoa;Mollusca;Bivalvia;Autobranchia;Heteroconchia;Euherodonta;Imparidentia;Venerida;Veneroidea;Veneridae;Mercenaria;Mercenaria mercenaria

terodonta;Imparidentia;Venerida;Veneroidea;Veneridae;Mercenaria;Mercenari  
 a mercenaria  
 UdeM00000008981 6596 78.6 UdeM00000008981 XP\_045208001.1 31 142  
 97 1 261 401 2204 2345 2.10E-11 78.6 6596 cellular  
 organisms;Eukaryota;Opisthokonta;Metazoa;Eumetazoa;Bilateria;Protostomia;  
 Spiralia;Lophotrochozoa;Mollusca;Bivalvia;Autobranchia;Heteroconchia;Euhe  
 terodonta;Imparidentia;Venerida;Veneroidea;Veneridae;Mercenaria;Mercenari  
 a mercenaria  
 UdeM00000008982 6596 201.8 UdeM00000008982 XP\_045207645.1 33 352  
 95 5 299 510 774 1124 3.30E-48 201.8 6596 cellular  
 organisms;Eukaryota;Opisthokonta;Metazoa;Eumetazoa;Bilateria;Protostomia;  
 Spiralia;Lophotrochozoa;Mollusca;Bivalvia;Autobranchia;Heteroconchia;Euhe  
 terodonta;Imparidentia;Venerida;Veneroidea;Veneridae;Mercenaria;Mercenari  
 a mercenaria  
 UdeM00000008983 6596 894.4 UdeM00000008983 XP\_045189898.1 35.2 1409  
 857 22 376 1750 289 1675 3.80E-256 894.4 6596 cellular  
 organisms;Eukaryota;Opisthokonta;Metazoa;Eumetazoa;Bilateria;Protostomia;  
 Spiralia;Lophotrochozoa;Mollusca;Bivalvia;Autobranchia;Heteroconchia;Euhe  
 terodonta;Imparidentia;Venerida;Veneroidea;Veneridae;Mercenaria;Mercenari  
 a mercenaria  
 UdeM00000008984 6596 187.6 UdeM00000008984 XP\_045209202.1 25.3 479  
 163 7 206 490 1275 1752 5.30E-44 187.6 6596 cellular  
 organisms;Eukaryota;Opisthokonta;Metazoa;Eumetazoa;Bilateria;Protostomia;  
 Spiralia;Lophotrochozoa;Mollusca;Bivalvia;Autobranchia;Heteroconchia;Euhe  
 terodonta;Imparidentia;Venerida;Veneroidea;Veneridae;Mercenaria;Mercenari  
 a mercenaria  
 UdeM00000008985 6500 291.2 UdeM00000008985 XP\_035826907.1 42.6 385  
 212 5 1 383 300 677 2.30E-75 291.2 6500 cellular  
 organisms;Eukaryota;Opisthokonta;Metazoa;Eumetazoa;Bilateria;Protostomia;  
 Spiralia;Lophotrochozoa;Mollusca;Gastropoda;Heterobranchia;Euthyneura;Tec  
 tipleura;Aplysiida;Aplysioidea;Aplysiidae;Aplysia;Aplysia californica  
 UdeM00000008986 1735272 287.7 UdeM00000008986 XP\_041361403.1 44.5  
 346 178 8 11 348 23 362 2.00E-74 287.7 1735272  
 cellular  
 organisms;Eukaryota;Opisthokonta;Metazoa;Eumetazoa;Bilateria;Protostomia;  
 Spiralia;Lophotrochozoa;Mollusca;Gastropoda;Neomphalina;Neomphaloidea;Pel  
 tospiridae;Gigantopelta;Gigantopelta aegis  
 UdeM00000008987 1529436 298.9 UdeM00000008987 XP\_033103324.1 43.5  
 372 200 6 1 366 12 379 1.30E-77 298.9 1529436  
 cellular  
 organisms;Eukaryota;Opisthokonta;Metazoa;Eumetazoa;Bilateria;Deuterostomi  
 a;Echinodermata;Pelmatozoa;Crinoidea;Articulata;Comatulida;Comatulidae;Co  
 matulinae;Anneissia;Anneissia japonica  
 UdeM00000008988 225164 120.9 UdeM00000008988 XP\_009052905.1 80.9  
 68 13 0 30 97 284 351 8.80E-25 120.9 225164  
 cellular  
 organisms;Eukaryota;Opisthokonta;Metazoa;Eumetazoa;Bilateria;Protostomia;  
 Spiralia;Lophotrochozoa;Mollusca;Gastropoda;Patellogastropoda;Lottioidae;  
 Lottiidae;Lottia;Lottia gigantea  
 UdeM00000008989 1735272 257.7 UdeM00000008989 XP\_041347279.1 34.2  
 430 248 9 1 400 1 425 2.80E-65 257.7 1735272  
 cellular  
 organisms;Eukaryota;Opisthokonta;Metazoa;Eumetazoa;Bilateria;Protostomia;

Spiralia;Lophotrochozoa;Mollusca;Gastropoda;Neomphalina;Neomphaloidea;Pel  
tospiridae;Gigantopelta;Gigantopelta aegis  
UdeM00000008990 6573 65.5 UdeM00000008990 XP\_021368863.1 71.4 42  
12 0 1 42 41 82 7.40E-08 65.5 6573 cellular  
organisms;Eukaryota;Opisthokonta;Metazoa;Eumetazoa;Bilateria;Protostomia;  
Spiralia;Lophotrochozoa;Mollusca;Bivalvia;Autobranchia;Pteriormorphia;Pect  
inida;Pectinoidea;Pectinidae;Mizuhopecten;Mizuhopecten yessoensis  
UdeM00000008991 1529436 304.7 UdeM00000008991 XP\_033103324.1 43.5  
379 201 7 3 373 6 379 2.50E-79 304.7 1529436  
cellular  
organisms;Eukaryota;Opisthokonta;Metazoa;Eumetazoa;Bilateria;Deuterostomi  
a;Echinodermata;Pelmatozoa;Crinoidea;Articulata;Comatulida;Comatulidae;Co  
matulinae;Anneissia;Anneissia japonica  
UdeM00000008992 6596 168.3 UdeM00000008992 XP\_045209201.1 34.3 271  
138 5 318 549 4008 4277 3.20E-38 168.3 6596 cellular  
organisms;Eukaryota;Opisthokonta;Metazoa;Eumetazoa;Bilateria;Protostomia;  
Spiralia;Lophotrochozoa;Mollusca;Bivalvia;Autobranchia;Heteroconchia;Euhe  
terodonta;Imparidentia;Venerida;Veneroidea;Veneridae;Mercenaria;Mercenari  
a mercenaria  
UdeM00000008995 6596 147.5 UdeM00000008995 XP\_045207645.1 30.9 265  
177 4 3 264 1812 2073 3.50E-32 147.5 6596 cellular  
organisms;Eukaryota;Opisthokonta;Metazoa;Eumetazoa;Bilateria;Protostomia;  
Spiralia;Lophotrochozoa;Mollusca;Bivalvia;Autobranchia;Heteroconchia;Euhe  
terodonta;Imparidentia;Venerida;Veneroidea;Veneridae;Mercenaria;Mercenari  
a mercenaria  
UdeM00000008996 225164 588.2 UdeM00000008996 XP\_009052905.1 78.6  
355 72 1 1 355 1 351 7.10E-165 588.2 225164  
cellular  
organisms;Eukaryota;Opisthokonta;Metazoa;Eumetazoa;Bilateria;Protostomia;  
Spiralia;Lophotrochozoa;Mollusca;Gastropoda;Patellogastropoda;Lottioidea;  
Lottiidae;Lottia;Lottia gigantea  
UdeM00000008997 1735272 284.6 UdeM00000008997 XP\_041361403.1 42  
357 193 7 7 354 11 362 1.70E-73 284.6 1735272  
cellular  
organisms;Eukaryota;Opisthokonta;Metazoa;Eumetazoa;Bilateria;Protostomia;  
Spiralia;Lophotrochozoa;Mollusca;Gastropoda;Neomphalina;Neomphaloidea;Pel  
tospiridae;Gigantopelta;Gigantopelta aegis  
UdeM00000008998 1735272 302 UdeM00000008998 XP\_041361403.1 47.5  
337 169 6 3 337 47 377 1.30E-78 302 1735272  
cellular  
organisms;Eukaryota;Opisthokonta;Metazoa;Eumetazoa;Bilateria;Protostomia;  
Spiralia;Lophotrochozoa;Mollusca;Gastropoda;Neomphalina;Neomphaloidea;Pel  
tospiridae;Gigantopelta;Gigantopelta aegis  
UdeM00000008999 225164 596.3 UdeM00000008999 XP\_009052905.1 80.1  
351 70 0 1 351 1 351 2.60E-167 596.3 225164  
cellular  
organisms;Eukaryota;Opisthokonta;Metazoa;Eumetazoa;Bilateria;Protostomia;  
Spiralia;Lophotrochozoa;Mollusca;Gastropoda;Patellogastropoda;Lottioidea;  
Lottiidae;Lottia;Lottia gigantea  
UdeM00000009000 6596 727.2 UdeM00000009000 XP\_045208088.1 64 586  
177 6 4 576 99 663 1.60E-206 727.2 6596 cellular  
organisms;Eukaryota;Opisthokonta;Metazoa;Eumetazoa;Bilateria;Protostomia;  
Spiralia;Lophotrochozoa;Mollusca;Bivalvia;Autobranchia;Heteroconchia;Euhe

terodonta;Imparidentia;Venerida;Veneroidea;Veneridae;Mercenaria;Mercenari  
 a mercenaria  
 UdeM00000009001 6596 132.5 UdeM00000009001 XP\_045163868.1 50.7 136  
 60 2 4 132 3 138 4.00E-28 132.5 6596 cellular  
 organisms;Eukaryota;Opisthokonta;Metazoa;Eumetazoa;Bilateria;Protostomia;  
 Spiralia;Lophotrochozoa;Mollusca;Bivalvia;Autobranhia;Heteroconchia;Euhe  
 terodonta;Imparidentia;Venerida;Veneroidea;Veneridae;Mercenaria;Mercenari  
 a mercenaria  
 UdeM00000009005 6596 466.5 UdeM00000009005 XP\_045207527.1 79.5 292  
 59 1 8 299 12 302 2.70E-128 466.5 6596 cellular  
 organisms;Eukaryota;Opisthokonta;Metazoa;Eumetazoa;Bilateria;Protostomia;  
 Spiralia;Lophotrochozoa;Mollusca;Bivalvia;Autobranhia;Heteroconchia;Euhe  
 terodonta;Imparidentia;Venerida;Veneroidea;Veneridae;Mercenaria;Mercenari  
 a mercenaria  
 UdeM00000009006 6596 401.4 UdeM00000009006 XP\_045207527.1 67.2 302  
 92 3 5 300 8 308 1.00E-108 401.4 6596 cellular  
 organisms;Eukaryota;Opisthokonta;Metazoa;Eumetazoa;Bilateria;Protostomia;  
 Spiralia;Lophotrochozoa;Mollusca;Bivalvia;Autobranhia;Heteroconchia;Euhe  
 terodonta;Imparidentia;Venerida;Veneroidea;Veneridae;Mercenaria;Mercenari  
 a mercenaria  
 UdeM00000009007 6596 94.4 UdeM00000009007 XP\_045188729.1 25.5 424  
 254 14 29 404 1085 1494 3.80E-16 94.4 6596 cellular  
 organisms;Eukaryota;Opisthokonta;Metazoa;Eumetazoa;Bilateria;Protostomia;  
 Spiralia;Lophotrochozoa;Mollusca;Bivalvia;Autobranhia;Heteroconchia;Euhe  
 terodonta;Imparidentia;Venerida;Veneroidea;Veneridae;Mercenaria;Mercenari  
 a mercenaria  
 UdeM00000009008 7574 80.5 UdeM00000009008 XP\_013384015.1 51.1 94  
 45 1 6 99 186 278 1.50E-12 80.5 7574 cellular  
 organisms;Eukaryota;Opisthokonta;Metazoa;Eumetazoa;Bilateria;Protostomia;  
 Spiralia;Lophotrochozoa;Brachiopoda;Linguliformea;Lingulata;Lingulida;Lin  
 guloidea;Lingulidae;Lingula;Lingula anatina  
 UdeM00000009009 9545 96.3 UdeM00000009009 XP\_011720398.1 24.3 412  
 269 13 17 414 1000 1382 9.90E-17 96.3 9545 cellular  
 organisms;Eukaryota;Opisthokonta;Metazoa;Eumetazoa;Bilateria;Deuterostomi  
 a;Chordata;Craniata;Vertebrata;Gnathostomata;Teleostomi;Euteleostomi;Sarc  
 opterygii;Dipnotetrapodomorpha;Tetrapoda;Amniota;Mammalia;Theria;Eutheria  
 ;Boreoeutheria;Euarchontoglires;Primates;Haplorrhini;Simiiformes;Catarri  
 ni;Cercopithecoidea;Cercopithecidae;Cercopithecinae;Macaca;Macaca  
 nemestrina  
 UdeM00000009010 6596 302.4 UdeM00000009010 XP\_045209334.1 52.3 325  
 130 7 4 322 9 314 7.00E-79 302.4 6596 cellular  
 organisms;Eukaryota;Opisthokonta;Metazoa;Eumetazoa;Bilateria;Protostomia;  
 Spiralia;Lophotrochozoa;Mollusca;Bivalvia;Autobranhia;Heteroconchia;Euhe  
 terodonta;Imparidentia;Venerida;Veneroidea;Veneridae;Mercenaria;Mercenari  
 a mercenaria  
 UdeM00000009011 29159 586.3 UdeM00000009011 XP\_011449002.2 61.6 445  
 171 0 1 445 1 445 3.40E-164 586.3 29159 cellular  
 organisms;Eukaryota;Opisthokonta;Metazoa;Eumetazoa;Bilateria;Protostomia;  
 Spiralia;Lophotrochozoa;Mollusca;Bivalvia;Autobranhia;Pteriomorpha;Ostr  
 eida;Ostreoidea;Ostreidae;Crassostrea;Crassostrea gigas  
 UdeM00000009012 6596 169.5 UdeM00000009012 XP\_045210186.1 64.2 120  
 39 2 34 153 55 170 4.10E-39 169.5 6596 cellular  
 organisms;Eukaryota;Opisthokonta;Metazoa;Eumetazoa;Bilateria;Protostomia;  
 Spiralia;Lophotrochozoa;Mollusca;Bivalvia;Autobranhia;Heteroconchia;Euhe

terodonta;Imparidentia;Venerida;Veneroidea;Veneridae;Mercenaria;Mercenari  
 a mercenaria  
 UdeM00000009013 6579 340.1 UdeM00000009013 XP\_033732980.1 51.7 360  
 140 10 1 336 1 350 3.20E-90 340.1 6579 cellular  
 organisms;Eukaryota;Opisthokonta;Metazoa;Eumetazoa;Bilateria;Protostomia;  
 Spiralia;Lophotrochozoa;Mollusca;Bivalvia;Autobranchia;Pteriomorpha;Pect  
 inida;Pectinoidea;Pectinidae;Pecten;Pecten maximus  
 UdeM00000009014 6579 709.9 UdeM00000009014 XP\_033729842.1 65.3 519  
 178 1 7 525 8 524 2.40E-201 709.9 6579 cellular  
 organisms;Eukaryota;Opisthokonta;Metazoa;Eumetazoa;Bilateria;Protostomia;  
 Spiralia;Lophotrochozoa;Mollusca;Bivalvia;Autobranchia;Pteriomorpha;Pect  
 inida;Pectinoidea;Pectinidae;Pecten;Pecten maximus  
 UdeM00000009015 6596 482.3 UdeM00000009015 XP\_045208023.1 49.9 537  
 257 5 1 529 1 533 8.30E-133 482.3 6596 cellular  
 organisms;Eukaryota;Opisthokonta;Metazoa;Eumetazoa;Bilateria;Protostomia;  
 Spiralia;Lophotrochozoa;Mollusca;Bivalvia;Autobranchia;Heteroconchia;Euhe  
 terodonta;Imparidentia;Venerida;Veneroidea;Veneridae;Mercenaria;Mercenari  
 a mercenaria  
 UdeM00000009017 7574 79.3 UdeM00000009017 XP\_013405563.1 34.7 144  
 81 1 2 145 247 377 4.50E-12 79.3 7574 cellular  
 organisms;Eukaryota;Opisthokonta;Metazoa;Eumetazoa;Bilateria;Protostomia;  
 Spiralia;Lophotrochozoa;Brachiopoda;Linguliformea;Lingulata;Lingulida;Lin  
 guloidea;Lingulidae;Lingula;Lingula anatina  
 UdeM00000009018 6596 345.5 UdeM00000009018 XP\_045170511.1 31 670  
 402 18 365 995 281 929 2.60E-91 345.5 6596 cellular  
 organisms;Eukaryota;Opisthokonta;Metazoa;Eumetazoa;Bilateria;Protostomia;  
 Spiralia;Lophotrochozoa;Mollusca;Bivalvia;Autobranchia;Heteroconchia;Euhe  
 terodonta;Imparidentia;Venerida;Veneroidea;Veneridae;Mercenaria;Mercenari  
 a mercenaria  
 UdeM00000009022 6596 80.5 UdeM00000009022 XP\_045208558.1 28.6 238  
 149 10 14 245 63 285 4.60E-12 80.5 6596 cellular  
 organisms;Eukaryota;Opisthokonta;Metazoa;Eumetazoa;Bilateria;Protostomia;  
 Spiralia;Lophotrochozoa;Mollusca;Bivalvia;Autobranchia;Heteroconchia;Euhe  
 terodonta;Imparidentia;Venerida;Veneroidea;Veneridae;Mercenaria;Mercenari  
 a mercenaria  
 UdeM00000009023 218467 61.6 UdeM00000009023 XP\_023231487.1 27.8  
 180 119 4 297 468 928 1104 3.50E-06 61.6 218467  
 cellular  
 organisms;Eukaryota;Opisthokonta;Metazoa;Eumetazoa;Bilateria;Protostomia;  
 Ecdysozoa;Panarthropoda;Arthropoda;Chelicerata;Arachnida;Scorpiones;Buthi  
 da;Buthoidea;Buthidae;Centruroides;Centruroides sculpturatus  
 UdeM00000009024 218467 61.6 UdeM00000009024 XP\_023231487.1 27.8  
 180 119 4 195 366 928 1104 2.80E-06 61.6 218467  
 cellular  
 organisms;Eukaryota;Opisthokonta;Metazoa;Eumetazoa;Bilateria;Protostomia;  
 Ecdysozoa;Panarthropoda;Arthropoda;Chelicerata;Arachnida;Scorpiones;Buthi  
 da;Buthoidea;Buthidae;Centruroides;Centruroides sculpturatus  
 UdeM00000009027 6596 72.4 UdeM00000009027 XP\_045207213.1 28.1 146  
 83 5 46 188 594 720 7.60E-10 72.4 6596 cellular  
 organisms;Eukaryota;Opisthokonta;Metazoa;Eumetazoa;Bilateria;Protostomia;  
 Spiralia;Lophotrochozoa;Mollusca;Bivalvia;Autobranchia;Heteroconchia;Euhe  
 terodonta;Imparidentia;Venerida;Veneroidea;Veneridae;Mercenaria;Mercenari  
 a mercenaria

UdeM00000009028 6596 72.4 UdeM00000009028 XP\_045207213.1 28.1 146  
 83 5 95 237 594 720 9.40E-10 72.4 6596 cellular  
 organisms;Eukaryota;Opisthokonta;Metazoa;Eumetazoa;Bilateria;Protostomia;  
 Spiralia;Lophotrochozoa;Mollusca;Bivalvia;Autobranchia;Heteroconchia;Euhe  
 terodonta;Imparidentia;Venerida;Veneroidea;Veneridae;Mercenaria;Mercenari  
 a mercenaria  
 UdeM00000009031 118141 65.9 UdeM00000009031 XP\_036394471.1 30.2  
 149 88 4 159 299 908 1048 1.40E-07 65.9 118141  
 cellular  
 organisms;Eukaryota;Opisthokonta;Metazoa;Eumetazoa;Bilateria;Deuterostomi  
 a;Chordata;Craniata;Vertebrata;Gnathostomata;Teleostomi;Euteleostomi;Acti  
 nopterygii;Actinopteri;Neopterygii;Teleostei;Elopocephalai;Elopocephala;E  
 lopomorpha;Elopiiformes;Megalopidae;Megalops;Megalops cyprinoides  
 UdeM00000009034 6596 77 UdeM00000009034 XP\_045207213.1 21.6 306  
 212 9 46 348 594 874 9.50E-11 77 6596 cellular  
 organisms;Eukaryota;Opisthokonta;Metazoa;Eumetazoa;Bilateria;Protostomia;  
 Spiralia;Lophotrochozoa;Mollusca;Bivalvia;Autobranchia;Heteroconchia;Euhe  
 terodonta;Imparidentia;Venerida;Veneroidea;Veneridae;Mercenaria;Mercenari  
 a mercenaria  
 UdeM00000009035 29159 58.9 UdeM00000009035 XP\_034322739.1 32.1 134  
 83 4 52 181 589 718 8.80E-06 58.9 29159 cellular  
 organisms;Eukaryota;Opisthokonta;Metazoa;Eumetazoa;Bilateria;Protostomia;  
 Spiralia;Lophotrochozoa;Mollusca;Bivalvia;Autobranchia;Pteriormorphia;Ostr  
 eida;Ostreoidea;Ostreidae;Crassostrea;Crassostrea gigas  
 UdeM00000009036 6596 100.1 UdeM00000009036 XP\_045210115.1 27.4 266  
 154 11 46 294 328 571 7.90E-18 100.1 6596 cellular  
 organisms;Eukaryota;Opisthokonta;Metazoa;Eumetazoa;Bilateria;Protostomia;  
 Spiralia;Lophotrochozoa;Mollusca;Bivalvia;Autobranchia;Heteroconchia;Euhe  
 terodonta;Imparidentia;Venerida;Veneroidea;Veneridae;Mercenaria;Mercenari  
 a mercenaria  
 UdeM00000009039 6596 67 UdeM00000009039 XP\_045208558.1 32.7 104  
 59 3 14 117 63 155 4.20E-08 67 6596 cellular  
 organisms;Eukaryota;Opisthokonta;Metazoa;Eumetazoa;Bilateria;Protostomia;  
 Spiralia;Lophotrochozoa;Mollusca;Bivalvia;Autobranchia;Heteroconchia;Euhe  
 terodonta;Imparidentia;Venerida;Veneroidea;Veneridae;Mercenaria;Mercenari  
 a mercenaria  
 UdeM00000009042 7957 63.2 UdeM00000009042 XP\_026135560.1 33 103  
 64 2 50 152 202 299 4.60E-07 63.2 7957 cellular  
 organisms;Eukaryota;Opisthokonta;Metazoa;Eumetazoa;Bilateria;Deuterostomi  
 a;Chordata;Craniata;Vertebrata;Gnathostomata;Teleostomi;Euteleostomi;Acti  
 nopterygii;Actinopteri;Neopterygii;Teleostei;Osteoglossocephalai;Clupeoce  
 phala;Otomorpha;Ostariophysii;Otophysi;Cypriniphysae;Cypriniformes;Cyprino  
 ideii;Cyprinidae;Cyprininae;Carassius;Carassius auratus  
 UdeM00000009046 6596 189.1 UdeM00000009046 XP\_045183440.1 52.6 190  
 85 3 1 189 198 383 7.20E-45 189.1 6596 cellular  
 organisms;Eukaryota;Opisthokonta;Metazoa;Eumetazoa;Bilateria;Protostomia;  
 Spiralia;Lophotrochozoa;Mollusca;Bivalvia;Autobranchia;Heteroconchia;Euhe  
 terodonta;Imparidentia;Venerida;Veneroidea;Veneridae;Mercenaria;Mercenari  
 a mercenaria  
 UdeM00000009047 151771 120.9 UdeM00000009047 XP\_028417951.1 43.2  
 139 78 1 43 181 7 144 1.60E-24 120.9 151771  
 cellular  
 organisms;Eukaryota;Opisthokonta;Metazoa;Eumetazoa;Cnidaria;Anthozoa;Octo



corallia;Alcyonacea;Alcyoniina;Nephtheidae;Dendronephthya;Dendronephthya gigantea  
 UdeM00000009050 6596 430.6 UdeM00000009050 XP\_045208747.1 67.2 287  
 85 4 280 565 273 551 3.30E-117 430.6 6596 cellular  
 organisms;Eukaryota;Opisthokonta;Metazoa;Eumetazoa;Bilateria;Protostomia;  
 Spiralia;Lophotrochozoa;Mollusca;Bivalvia;Autobranhia;Heteroconchia;Euhe  
 terodonta;Imparidentia;Venerida;Veneroidea;Veneridae;Mercenaria;Mercenari  
 a mercenaria  
 UdeM00000009051 6573 1038.9 UdeM00000009051 XP\_021368837.1 34.7  
 6630 2801 131 103 5769 919 6983 2.70E-299 1038.9 6573  
 cellular  
 organisms;Eukaryota;Opisthokonta;Metazoa;Eumetazoa;Bilateria;Protostomia;  
 Spiralia;Lophotrochozoa;Mollusca;Bivalvia;Autobranhia;Pteriormorphia;Pect  
 inida;Pectinoidea;Pectinidae;Mizuhopecten;Mizuhopecten yessoensis  
 UdeM00000009052 6579 668.7 UdeM00000009052 XP\_033732984.1 74.8 420  
 103 3 5 423 6599 7016 4.90E-189 668.7 6579 cellular  
 organisms;Eukaryota;Opisthokonta;Metazoa;Eumetazoa;Bilateria;Protostomia;  
 Spiralia;Lophotrochozoa;Mollusca;Bivalvia;Autobranhia;Pteriormorphia;Pect  
 inida;Pectinoidea;Pectinidae;Pecten;Pecten maximus  
 UdeM00000009053 6579 328.2 UdeM00000009053 XP\_033733025.1 49 484  
 198 18 6 463 29 489 2.60E-86 328.2 6579 cellular  
 organisms;Eukaryota;Opisthokonta;Metazoa;Eumetazoa;Bilateria;Protostomia;  
 Spiralia;Lophotrochozoa;Mollusca;Bivalvia;Autobranhia;Pteriormorphia;Pect  
 inida;Pectinoidea;Pectinidae;Pecten;Pecten maximus  
 UdeM00000009054 6579 329.3 UdeM00000009054 XP\_033733025.1 49.3 483  
 197 18 6 462 29 489 1.20E-86 329.3 6579 cellular  
 organisms;Eukaryota;Opisthokonta;Metazoa;Eumetazoa;Bilateria;Protostomia;  
 Spiralia;Lophotrochozoa;Mollusca;Bivalvia;Autobranhia;Pteriormorphia;Pect  
 inida;Pectinoidea;Pectinidae;Pecten;Pecten maximus  
 UdeM00000009055 6579 93.6 UdeM00000009055 XP\_033733025.1 33 312  
 155 12 1107 1407 789 1057 2.20E-15 93.6 6579 cellular  
 organisms;Eukaryota;Opisthokonta;Metazoa;Eumetazoa;Bilateria;Protostomia;  
 Spiralia;Lophotrochozoa;Mollusca;Bivalvia;Autobranhia;Pteriormorphia;Pect  
 inida;Pectinoidea;Pectinidae;Pecten;Pecten maximus  
 UdeM00000009056 6596 127.5 UdeM00000009056 XP\_045202576.1 56.5 124  
 46 2 1 116 87 210 2.00E-26 127.5 6596 cellular  
 organisms;Eukaryota;Opisthokonta;Metazoa;Eumetazoa;Bilateria;Protostomia;  
 Spiralia;Lophotrochozoa;Mollusca;Bivalvia;Autobranhia;Heteroconchia;Euhe  
 terodonta;Imparidentia;Venerida;Veneroidea;Veneridae;Mercenaria;Mercenari  
 a mercenaria  
 UdeM00000009057 6596 172.6 UdeM00000009057 XP\_045206316.1 53.6 151  
 69 1 2 151 128 278 4.00E-40 172.6 6596 cellular  
 organisms;Eukaryota;Opisthokonta;Metazoa;Eumetazoa;Bilateria;Protostomia;  
 Spiralia;Lophotrochozoa;Mollusca;Bivalvia;Autobranhia;Heteroconchia;Euhe  
 terodonta;Imparidentia;Venerida;Veneroidea;Veneridae;Mercenaria;Mercenari  
 a mercenaria  
 UdeM00000009059 90988 125.2 UdeM00000009059 XP\_039535825.1 58.8 102  
 40 1 1 100 111 212 5.20E-26 125.2 90988 cellular  
 organisms;Eukaryota;Opisthokonta;Metazoa;Eumetazoa;Bilateria;Deuterostomi  
 a;Chordata;Craniata;Vertebrata;Gnathostomata;Teleostomi;Euteleostomi;Acti  
 nopterygii;Actinopteri;Neopterygii;Teleostei;Osteoglossocephalai;Clupeoce  
 phala;Otomorpha;Ostariophysi;Otophysi;Cypriniphysae;Cypriniiformes;Cyprino  
 idei;Leuciscidae;Pogonichthyinae;Pimephales;Pimephales promelas

UdeM00000009060 260615 300.1 UdeM00000009060 XP\_039386738.1 88.9  
180 18 1 1 178 347 526 1.90E-78 300.1 260615  
cellular

organisms;Eukaryota;Opisthokonta;Metazoa;Eumetazoa;Bilateria;Deuterostomi  
a;Chordata;Craniata;Vertebrata;Gnathostomata;Teleostomi;Euteleostomi;Sarc  
opterygii;Dipnotetrapodomorpha;Tetrapoda;Amniota;Sauropsida;Sauria;Archel  
osauria;Testudinata;Testudines;Cryptodira;Durocryptodira;Testudinoidea;Ge  
oemydidae;Geoemydinae;Mauremys;Mauremys reevesii

UdeM00000009061 225164 404.4 UdeM00000009061 XP\_009052844.1 63.2  
323 118 1 39 360 25 347 1.50E-109 404.4 225164  
cellular

organisms;Eukaryota;Opisthokonta;Metazoa;Eumetazoa;Bilateria;Protostomia;  
Spiralia;Lophotrochozoa;Mollusca;Gastropoda;Patellogastropoda;Lottioidea;  
Lottiidae;Lottia;Lottia gigantea

UdeM00000009062 70779 189.5 UdeM00000009062 XP\_015749887.1 38.8 325  
152 9 30 316 22 337 6.50E-45 189.5 70779 cellular

organisms;Eukaryota;Opisthokonta;Metazoa;Eumetazoa;Cnidaria;Anthozoa;Hexa  
corallia;Scleractinia;Astrocoeniina;Acroporidae;Acropora;Acropora  
digitifera

UdeM00000009063 27687 155.2 UdeM00000009063 XP\_028657992.1 30.5 377  
229 8 25 385 104 463 1.70E-34 155.2 27687 cellular

organisms;Eukaryota;Opisthokonta;Metazoa;Eumetazoa;Bilateria;Deuterostomi  
a;Chordata;Craniata;Vertebrata;Gnathostomata;Teleostomi;Euteleostomi;Acti  
nopterygii;Cladistia;Polypteriformes;Polypteridae;Erpetoichthys;Erpetoich  
thys calabaricus

UdeM00000009064 6596 1280.4 UdeM00000009064 XP\_045157300.1 36.9  
1988 1073 45 46 1898 6 1946 0.00E+00 1280.4 6596  
cellular

organisms;Eukaryota;Opisthokonta;Metazoa;Eumetazoa;Bilateria;Protostomia;  
Spiralia;Lophotrochozoa;Mollusca;Bivalvia;Autobranchia;Heteroconchia;Euhe  
terodonta;Imparidentia;Venerida;Veneroidea;Veneridae;Mercenaria;Mercenari  
a mercenaria

UdeM00000009065 7757 376.7 UdeM00000009065 XP\_032835197.1 80.3 233  
46 0 77 309 3 235 2.80E-101 376.7 7757 cellular

organisms;Eukaryota;Opisthokonta;Metazoa;Eumetazoa;Bilateria;Deuterostomi  
a;Chordata;Craniata;Vertebrata;Cyclostomata;Hyperoartia;Petromyzontiforme  
s;Petromyzontidae;Petromyzon;Petromyzon marinus

UdeM00000009066 7757 109.8 UdeM00000009066 XP\_032835197.1 67.9 81  
19 1 1 74 251 331 1.70E-21 109.8 7757 cellular

organisms;Eukaryota;Opisthokonta;Metazoa;Eumetazoa;Bilateria;Deuterostomi  
a;Chordata;Craniata;Vertebrata;Cyclostomata;Hyperoartia;Petromyzontiforme  
s;Petromyzontidae;Petromyzon;Petromyzon marinus

UdeM00000009067 1415580 170.6 UdeM00000009067 XP\_030075314.1 46.7  
214 96 3 1 211 427 625 2.10E-39 170.6 1415580  
cellular

organisms;Eukaryota;Opisthokonta;Metazoa;Eumetazoa;Bilateria;Deuterostomi  
a;Chordata;Craniata;Vertebrata;Gnathostomata;Teleostomi;Euteleostomi;Sarc  
opterygii;Dipnotetrapodomorpha;Tetrapoda;Amphibia;Gymnophiona;Siphonopida  
e;Microcaecilia;Microcaecilia unicolor

UdeM00000009068 6596 1310.8 UdeM00000009068 XP\_045157300.1 35.7  
2084 1107 39 97 2094 10 1946 0.00E+00 1310.8 6596  
cellular

organisms;Eukaryota;Opisthokonta;Metazoa;Eumetazoa;Bilateria;Protostomia;  
Spiralia;Lophotrochozoa;Mollusca;Bivalvia;Autobranchia;Heteroconchia;Euhe

terodonta;Imparidentia;Venerida;Veneroidea;Veneridae;Mercenaria;Mercenari  
 a mercenaria  
 UdeM00000009069 6596 418.7 UdeM00000009069 XP\_045208069.1 35.9 647  
 383 15 105 733 369 1001 3.20E-113 418.7 6596 cellular  
 organisms;Eukaryota;Opisthokonta;Metazoa;Eumetazoa;Bilateria;Protostomia;  
 Spiralia;Lophotrochozoa;Mollusca;Bivalvia;Autobranchia;Heteroconchia;Euhe  
 terodonta;Imparidentia;Venerida;Veneroidea;Veneridae;Mercenaria;Mercenari  
 a mercenaria  
 UdeM00000009070 6596 103.6 UdeM00000009070 XP\_045209997.1 44.4 108  
 57 1 4 108 37 144 1.60E-19 103.6 6596 cellular  
 organisms;Eukaryota;Opisthokonta;Metazoa;Eumetazoa;Bilateria;Protostomia;  
 Spiralia;Lophotrochozoa;Mollusca;Bivalvia;Autobranchia;Heteroconchia;Euhe  
 terodonta;Imparidentia;Venerida;Veneroidea;Veneridae;Mercenaria;Mercenari  
 a mercenaria  
 UdeM00000009071 29159 265.8 UdeM00000009071 XP\_034316161.1 45 291  
 159 1 1 290 718 1008 6.60E-68 265.8 29159 cellular  
 organisms;Eukaryota;Opisthokonta;Metazoa;Eumetazoa;Bilateria;Protostomia;  
 Spiralia;Lophotrochozoa;Mollusca;Bivalvia;Autobranchia;Pteriormorphia;Ostr  
 eida;Ostreoidea;Ostreidae;Crassostrea;Crassostrea gigas  
 UdeM00000009072 6596 360.1 UdeM00000009072 XP\_045208459.1 52.8 305  
 144 0 11 315 7 311 2.80E-96 360.1 6596 cellular  
 organisms;Eukaryota;Opisthokonta;Metazoa;Eumetazoa;Bilateria;Protostomia;  
 Spiralia;Lophotrochozoa;Mollusca;Bivalvia;Autobranchia;Heteroconchia;Euhe  
 terodonta;Imparidentia;Venerida;Veneroidea;Veneridae;Mercenaria;Mercenari  
 a mercenaria  
 UdeM00000009073 400727 93.2 UdeM00000009073 XP\_025084528.1 49.5  
 95 39 1 1 86 46 140 1.80E-16 93.2 400727  
 cellular  
 organisms;Eukaryota;Opisthokonta;Metazoa;Eumetazoa;Bilateria;Protostomia;  
 Spiralia;Lophotrochozoa;Mollusca;Gastropoda;Caenogastropoda;Architaeniogl  
 ossa;Ampullarioidea;Ampullariidae;Pomacea;Pomacea canaliculata  
 UdeM00000009074 6596 413.3 UdeM00000009074 XP\_045207043.1 67 291  
 93 2 12 302 307 594 2.70E-112 413.3 6596 cellular  
 organisms;Eukaryota;Opisthokonta;Metazoa;Eumetazoa;Bilateria;Protostomia;  
 Spiralia;Lophotrochozoa;Mollusca;Bivalvia;Autobranchia;Heteroconchia;Euhe  
 terodonta;Imparidentia;Venerida;Veneroidea;Veneridae;Mercenaria;Mercenari  
 a mercenaria  
 UdeM00000009075 6579 402.9 UdeM00000009075 XP\_033732370.1 69.6 293  
 87 2 1 291 1 293 3.60E-109 402.9 6579 cellular  
 organisms;Eukaryota;Opisthokonta;Metazoa;Eumetazoa;Bilateria;Protostomia;  
 Spiralia;Lophotrochozoa;Mollusca;Bivalvia;Autobranchia;Pteriormorphia;Pect  
 inida;Pectinoidea;Pectinidae;Pecten;Pecten maximus  
 UdeM00000009077 6596 286.2 UdeM00000009077 XP\_045210146.1 74 192  
 43 2 11 200 3 189 3.20E-74 286.2 6596 cellular  
 organisms;Eukaryota;Opisthokonta;Metazoa;Eumetazoa;Bilateria;Protostomia;  
 Spiralia;Lophotrochozoa;Mollusca;Bivalvia;Autobranchia;Heteroconchia;Euhe  
 terodonta;Imparidentia;Venerida;Veneroidea;Veneridae;Mercenaria;Mercenari  
 a mercenaria  
 UdeM00000009078 6596 116.3 UdeM00000009078 XP\_045210141.1 62.1 87  
 33 0 1 87 169 255 1.90E-23 116.3 6596 cellular  
 organisms;Eukaryota;Opisthokonta;Metazoa;Eumetazoa;Bilateria;Protostomia;  
 Spiralia;Lophotrochozoa;Mollusca;Bivalvia;Autobranchia;Heteroconchia;Euhe  
 terodonta;Imparidentia;Venerida;Veneroidea;Veneridae;Mercenaria;Mercenari  
 a mercenaria

UdeM00000009080 6579 114.4 UdeM00000009080 XP\_033733263.1 63.4 82  
 30 0 1 82 37 118 8.90E-23 114.4 6579 cellular  
 organisms;Eukaryota;Opisthokonta;Metazoa;Eumetazoa;Bilateria;Protostomia;  
 Spiralia;Lophotrochozoa;Mollusca;Bivalvia;Autobranhia;Pteriormorphia;Pect  
 inida;Pectinoidea;Pectinidae;Pecten;Pecten maximus  
 UdeM00000009081 6596 493.4 UdeM00000009081 XP\_045207548.1 74.5 318  
 80 1 1 317 1 318 2.10E-136 493.4 6596 cellular  
 organisms;Eukaryota;Opisthokonta;Metazoa;Eumetazoa;Bilateria;Protostomia;  
 Spiralia;Lophotrochozoa;Mollusca;Bivalvia;Autobranhia;Heteroconchia;Euhe  
 terodonta;Imparidentia;Venerida;Veneroidea;Veneridae;Mercenaria;Mercenari  
 a mercenaria  
 UdeM00000009082 29159 105.1 UdeM00000009082 XP\_019919120.2 24.2 400  
 274 11 20 412 46 423 2.20E-19 105.1 29159 cellular  
 organisms;Eukaryota;Opisthokonta;Metazoa;Eumetazoa;Bilateria;Protostomia;  
 Spiralia;Lophotrochozoa;Mollusca;Bivalvia;Autobranhia;Pteriormorphia;Ostr  
 eida;Ostreoidea;Ostreidae;Crassostrea;Crassostrea gigas  
 UdeM00000009083 2607531 101.7 UdeM00000009083 XP\_029658399.1 30.2  
 192 126 4 67 255 104 290 1.50E-18 101.7 2607531  
 cellular  
 organisms;Eukaryota;Opisthokonta;Metazoa;Eumetazoa;Bilateria;Protostomia;  
 Spiralia;Lophotrochozoa;Mollusca;Cephalopoda;Coleoidea;Octopodiformes;Oct  
 opoda;Incirrata;Octopodidae;Octopus;Octopus sinensis  
 UdeM00000009087 6579 182.2 UdeM00000009087 XP\_033729137.1 31.5 362  
 220 9 6 354 13 359 1.20E-42 182.2 6579 cellular  
 organisms;Eukaryota;Opisthokonta;Metazoa;Eumetazoa;Bilateria;Protostomia;  
 Spiralia;Lophotrochozoa;Mollusca;Bivalvia;Autobranhia;Pteriormorphia;Pect  
 inida;Pectinoidea;Pectinidae;Pecten;Pecten maximus  
 UdeM00000009088 225164 443 UdeM00000009088 XP\_009063875.1 65  
 306 107 0 1 306 1 306 3.20E-121 443 225164  
 cellular  
 organisms;Eukaryota;Opisthokonta;Metazoa;Eumetazoa;Bilateria;Protostomia;  
 Spiralia;Lophotrochozoa;Mollusca;Gastropoda;Patellogastropoda;Lottioidea;  
 Lottiidae;Lottia;Lottia gigantea  
 UdeM00000009089 6596 278.1 UdeM00000009089 XP\_045210361.1 76.2 164  
 39 0 4 167 3 166 7.90E-72 278.1 6596 cellular  
 organisms;Eukaryota;Opisthokonta;Metazoa;Eumetazoa;Bilateria;Protostomia;  
 Spiralia;Lophotrochozoa;Mollusca;Bivalvia;Autobranhia;Heteroconchia;Euhe  
 terodonta;Imparidentia;Venerida;Veneroidea;Veneridae;Mercenaria;Mercenari  
 a mercenaria  
 UdeM00000009090 6596 481.1 UdeM00000009090 XP\_045208226.1 58.9 423  
 155 3 17 438 8 412 1.50E-132 481.1 6596 cellular  
 organisms;Eukaryota;Opisthokonta;Metazoa;Eumetazoa;Bilateria;Protostomia;  
 Spiralia;Lophotrochozoa;Mollusca;Bivalvia;Autobranhia;Heteroconchia;Euhe  
 terodonta;Imparidentia;Venerida;Veneroidea;Veneridae;Mercenaria;Mercenari  
 a mercenaria  
 UdeM00000009091 6500 200.7 UdeM00000009091 XP\_012935509.1 43.6 250  
 127 7 1157 1405 1072 1308 1.30E-47 200.7 6500 cellular  
 organisms;Eukaryota;Opisthokonta;Metazoa;Eumetazoa;Bilateria;Protostomia;  
 Spiralia;Lophotrochozoa;Mollusca;Gastropoda;Heterobranhia;Euthyneura;Tec  
 tipleura;Aplysiida;Aplysioidea;Aplysiidae;Aplysia;Aplysia californica  
 UdeM00000009092 6573 658.7 UdeM00000009092 XP\_021342727.1 59.4 493  
 199 1 5 497 32 523 6.00E-186 658.7 6573 cellular  
 organisms;Eukaryota;Opisthokonta;Metazoa;Eumetazoa;Bilateria;Protostomia;

Spiralia; Lophotrochozoa; Mollusca; Bivalvia; Autobranchia; Pteriomorpha; Pectinida; Pectinoidea; Pectinidae; Mizuhopecten; Mizuhopecten yessoensis  
UdeM00000009093 6565 210.3 UdeM00000009093 XP\_022341069.1 39.2 260  
155 1 1186 1445 1181 1437 1.60E-50 210.3 6565 cellular  
organisms; Eukaryota; Opisthokonta; Metazoa; Eumetazoa; Bilateria; Protostomia; Spiralia; Lophotrochozoa; Mollusca; Bivalvia; Autobranchia; Pteriomorpha; Ostr  
eida; Ostreidae; Crassostrea; Crassostrea virginica  
UdeM00000009095 6579 228 UdeM00000009095 XP\_033726761.1 62.9 197  
69 2 1 193 7 203 1.00E-56 228 6579 cellular  
organisms; Eukaryota; Opisthokonta; Metazoa; Eumetazoa; Bilateria; Protostomia; Spiralia; Lophotrochozoa; Mollusca; Bivalvia; Autobranchia; Pteriomorpha; Pect  
inida; Pectinoidea; Pectinidae; Pecten; Pecten maximus  
UdeM00000009094 6579 240.7 UdeM00000009094 XP\_033726761.1 62.9 205  
72 2 1 201 7 211 1.60E-60 240.7 6579 cellular  
organisms; Eukaryota; Opisthokonta; Metazoa; Eumetazoa; Bilateria; Protostomia; Spiralia; Lophotrochozoa; Mollusca; Bivalvia; Autobranchia; Pteriomorpha; Pect  
inida; Pectinoidea; Pectinidae; Pecten; Pecten maximus  
UdeM00000009096 6596 904 UdeM00000009096 XP\_045209739.1 77.4 636  
140 4 1 633 1 635 1.00E-259 904 6596 cellular  
organisms; Eukaryota; Opisthokonta; Metazoa; Eumetazoa; Bilateria; Protostomia; Spiralia; Lophotrochozoa; Mollusca; Bivalvia; Autobranchia; Heteroconchia; Eue  
terodonta; Imparidentia; Venerida; Veneroidea; Veneridae; Mercenaria; Mercenari  
a mercenaria  
UdeM00000009097 29159 215.7 UdeM00000009097 XP\_011420009.2 24.6 670  
451 19 21 668 16 653 1.80E-52 215.7 29159 cellular  
organisms; Eukaryota; Opisthokonta; Metazoa; Eumetazoa; Bilateria; Protostomia; Spiralia; Lophotrochozoa; Mollusca; Bivalvia; Autobranchia; Pteriomorpha; Ostr  
eida; Ostreidae; Crassostrea; Crassostrea gigas  
UdeM00000009098 6565 102.8 UdeM00000009098 XP\_022321940.1 25.6 250  
178 5 24 270 428 672 7.20E-19 102.8 6565 cellular  
organisms; Eukaryota; Opisthokonta; Metazoa; Eumetazoa; Bilateria; Protostomia; Spiralia; Lophotrochozoa; Mollusca; Bivalvia; Autobranchia; Pteriomorpha; Ostr  
eida; Ostreidae; Crassostrea; Crassostrea virginica  
UdeM00000009099 29159 64.3 UdeM00000009099 XP\_034315424.1 36.1 108  
60 3 12 116 213 314 1.40E-07 64.3 29159 cellular  
organisms; Eukaryota; Opisthokonta; Metazoa; Eumetazoa; Bilateria; Protostomia; Spiralia; Lophotrochozoa; Mollusca; Bivalvia; Autobranchia; Pteriomorpha; Ostr  
eida; Ostreidae; Crassostrea; Crassostrea gigas  
UdeM00000009100 1735272 330.5 UdeM00000009100 XP\_041372048.1 54.8  
301 127 3 9 303 10 307 2.80E-87 330.5 1735272  
cellular  
organisms; Eukaryota; Opisthokonta; Metazoa; Eumetazoa; Bilateria; Protostomia; Spiralia; Lophotrochozoa; Mollusca; Gastropoda; Neomphalina; Neomphaloidea; Pel  
tospiridae; Gigantopelta; Gigantopelta aegis  
UdeM00000009102 1735272 86.3 UdeM00000009102 XP\_041379412.1 40.6  
106 62 1 29 133 11 116 3.50E-14 86.3 1735272  
cellular  
organisms; Eukaryota; Opisthokonta; Metazoa; Eumetazoa; Bilateria; Protostomia; Spiralia; Lophotrochozoa; Mollusca; Gastropoda; Neomphalina; Neomphaloidea; Pel  
tospiridae; Gigantopelta; Gigantopelta aegis  
UdeM00000009103 8005 72.4 UdeM00000009103 XP\_026860382.2 40.9 93  
52 2 51 140 367 459 5.60E-10 72.4 8005 cellular  
organisms; Eukaryota; Opisthokonta; Metazoa; Eumetazoa; Bilateria; Deuterostomi  
a; Chordata; Craniata; Vertebrata; Gnathostomata; Teleostomi; Euteleostomi; Acti

nopterygii;Actinopteri;Neopterygii;Teleostei;Osteoglossocephalai;Clupeocephala;Otomorpha;Ostariophysi;Otophysi;Characiphysae;Gymnotiformes;Gymnotoidei;Gymnotidae;Electrophorus;Electrophorus electricus  
 UdeM00000009104 6579 72.4 UdeM00000009104 XP\_033732841.1 60 45  
 18 0 3 47 6 50 2.20E-09 72.4 6579 cellular  
 organisms;Eukaryota;Opisthokonta;Metazoa;Eumetazoa;Bilateria;Protostomia;Spiralia;Lophotrochozoa;Mollusca;Bivalvia;Autobranchia;Pteriormorphia;Pectinida;Pectinoidea;Pectinidae;Pecten;Pecten maximus  
 UdeM00000009106 134920 132.5 UdeM00000009106 XP\_037324962.1 55.8  
 113 49 1 4 116 133 244 3.70E-28 132.5 134920  
 cellular  
 organisms;Eukaryota;Opisthokonta;Metazoa;Eumetazoa;Bilateria;Deuterostomia;Chordata;Craniata;Vertebrata;Gnathostomata;Teleostomi;Euteleostomi;Actinopterygii;Actinopteri;Neopterygii;Teleostei;Osteoglossocephalai;Clupeocephala;Euteleosteomorpha;Neoteleostei;Eurypterygia;Ctenosquamata;Acanthomorphata;Euacanthomorphacea;Percomorphaceae;Eupercaria;Perciformes;Cottioidei;Gasterosteales;Gasterosteidae;Pungitius;Pungitius pungitius  
 UdeM00000009107 260995 130.6 UdeM00000009107 XP\_033809097.1 48.3  
 120 62 0 1 120 136 255 1.40E-27 130.6 260995  
 cellular  
 organisms;Eukaryota;Opisthokonta;Metazoa;Eumetazoa;Bilateria;Deuterostomia;Chordata;Craniata;Vertebrata;Gnathostomata;Teleostomi;Euteleostomi;Sarcopterygii;Dipnotetrapodomorpha;Tetrapoda;Amphibia;Gymnophiona;Dermophiidae;Geotrypetes;Geotrypetes seraphini  
 UdeM00000009108 260995 130.6 UdeM00000009108 XP\_033809097.1 48.3  
 120 62 0 1 120 136 255 1.40E-27 130.6 260995  
 cellular  
 organisms;Eukaryota;Opisthokonta;Metazoa;Eumetazoa;Bilateria;Deuterostomia;Chordata;Craniata;Vertebrata;Gnathostomata;Teleostomi;Euteleostomi;Sarcopterygii;Dipnotetrapodomorpha;Tetrapoda;Amphibia;Gymnophiona;Dermophiidae;Geotrypetes;Geotrypetes seraphini  
 UdeM00000009109 6596 209.9 UdeM00000009109 XP\_045208340.1 63.1 233  
 75 4 1 225 6 235 3.40E-51 209.9 6596 cellular  
 organisms;Eukaryota;Opisthokonta;Metazoa;Eumetazoa;Bilateria;Protostomia;Spiralia;Lophotrochozoa;Mollusca;Bivalvia;Autobranchia;Heteroconchia;Euheterodonta;Imparidentia;Venerida;Veneroidea;Veneridae;Mercenaria;Mercenaria mercenaria  
 UdeM00000009110 6573 756.1 UdeM00000009110 XP\_021352765.1 55.8 650  
 274 7 33 671 31 678 3.70E-215 756.1 6573 cellular  
 organisms;Eukaryota;Opisthokonta;Metazoa;Eumetazoa;Bilateria;Protostomia;Spiralia;Lophotrochozoa;Mollusca;Bivalvia;Autobranchia;Pteriormorphia;Pectinida;Pectinoidea;Pectinidae;Mizuhopecten;Mizuhopecten yessoensis  
 UdeM00000009111 6596 422.9 UdeM00000009111 XP\_045207726.1 62.2 328  
 115 1 10 337 9 327 3.70E-115 422.9 6596 cellular  
 organisms;Eukaryota;Opisthokonta;Metazoa;Eumetazoa;Bilateria;Protostomia;Spiralia;Lophotrochozoa;Mollusca;Bivalvia;Autobranchia;Heteroconchia;Euheterodonta;Imparidentia;Venerida;Veneroidea;Veneridae;Mercenaria;Mercenaria mercenaria  
 UdeM00000009112 6596 423.3 UdeM00000009112 XP\_045207726.1 62.2 328  
 115 1 7 334 9 327 2.80E-115 423.3 6596 cellular  
 organisms;Eukaryota;Opisthokonta;Metazoa;Eumetazoa;Bilateria;Protostomia;Spiralia;Lophotrochozoa;Mollusca;Bivalvia;Autobranchia;Heteroconchia;Euheterodonta;Imparidentia;Venerida;Veneroidea;Veneridae;Mercenaria;Mercenaria mercenaria

UdeM00000009113 6596 367.1 UdeM00000009113 XP\_045208156.1 77.7 211  
 47 0 10 220 6 216 1.60E-98 367.1 6596 cellular  
 organisms;Eukaryota;Opisthokonta;Metazoa;Eumetazoa;Bilateria;Protostomia;  
 Spiralia;Lophotrochozoa;Mollusca;Bivalvia;Autobranhia;Heteroconchia;Euhe  
 terodonta;Imparidentia;Venerida;Veneroidea;Veneridae;Mercenaria;Mercenari  
 a mercenaria  
 UdeM00000009115 29159 93.6 UdeM00000009115 XP\_011453423.2 35.6 101  
 64 1 1 100 714 814 1.60E-16 93.6 29159 cellular  
 organisms;Eukaryota;Opisthokonta;Metazoa;Eumetazoa;Bilateria;Protostomia;  
 Spiralia;Lophotrochozoa;Mollusca;Bivalvia;Autobranhia;Pteriormorphia;Ostr  
 eida;Ostreoidea;Ostreidae;Crassostrea;Crassostrea gigas  
 UdeM00000009116 6573 84.3 UdeM00000009116 XP\_021374089.1 30.3 132  
 58 3 50 148 548 678 1.40E-13 84.3 6573 cellular  
 organisms;Eukaryota;Opisthokonta;Metazoa;Eumetazoa;Bilateria;Protostomia;  
 Spiralia;Lophotrochozoa;Mollusca;Bivalvia;Autobranhia;Pteriormorphia;Pect  
 inida;Pectinoidea;Pectinidae;Mizuhopecten;Mizuhopecten yessoensis  
 UdeM00000009118 6596 181.8 UdeM00000009118 XP\_045194326.1 43.5 207  
 106 4 20 215 23 229 9.60E-43 181.8 6596 cellular  
 organisms;Eukaryota;Opisthokonta;Metazoa;Eumetazoa;Bilateria;Protostomia;  
 Spiralia;Lophotrochozoa;Mollusca;Bivalvia;Autobranhia;Heteroconchia;Euhe  
 terodonta;Imparidentia;Venerida;Veneroidea;Veneridae;Mercenaria;Mercenari  
 a mercenaria  
 UdeM00000009119 6573 187.2 UdeM00000009119 XP\_021359532.1 32.5 302  
 193 5 4 295 346 646 3.00E-44 187.2 6573 cellular  
 organisms;Eukaryota;Opisthokonta;Metazoa;Eumetazoa;Bilateria;Protostomia;  
 Spiralia;Lophotrochozoa;Mollusca;Bivalvia;Autobranhia;Pteriormorphia;Pect  
 inida;Pectinoidea;Pectinidae;Mizuhopecten;Mizuhopecten yessoensis  
 UdeM00000009120 6596 207.6 UdeM00000009120 XP\_045209563.1 32.7 336  
 162 6 82 373 19 334 2.90E-50 207.6 6596 cellular  
 organisms;Eukaryota;Opisthokonta;Metazoa;Eumetazoa;Bilateria;Protostomia;  
 Spiralia;Lophotrochozoa;Mollusca;Bivalvia;Autobranhia;Heteroconchia;Euhe  
 terodonta;Imparidentia;Venerida;Veneroidea;Veneridae;Mercenaria;Mercenari  
 a mercenaria  
 UdeM00000009121 6596 80.1 UdeM00000009121 XP\_045209326.1 47.7 132  
 49 6 52 171 60 183 3.20E-12 80.1 6596 cellular  
 organisms;Eukaryota;Opisthokonta;Metazoa;Eumetazoa;Bilateria;Protostomia;  
 Spiralia;Lophotrochozoa;Mollusca;Bivalvia;Autobranhia;Heteroconchia;Euhe  
 terodonta;Imparidentia;Venerida;Veneroidea;Veneridae;Mercenaria;Mercenari  
 a mercenaria  
 UdeM00000034008 6596 248.4 UdeM00000034008 XP\_045179850.1 56.2 208  
 90 1 25 232 19 225 8.80E-63 248.4 6596 cellular  
 organisms;Eukaryota;Opisthokonta;Metazoa;Eumetazoa;Bilateria;Protostomia;  
 Spiralia;Lophotrochozoa;Mollusca;Bivalvia;Autobranhia;Heteroconchia;Euhe  
 terodonta;Imparidentia;Venerida;Veneroidea;Veneridae;Mercenaria;Mercenari  
 a mercenaria  
 UdeM00000034009 6596 220.3 UdeM00000034009 XP\_045198179.1 33.1 405  
 237 6 11 382 675 1078 4.20E-54 220.3 6596 cellular  
 organisms;Eukaryota;Opisthokonta;Metazoa;Eumetazoa;Bilateria;Protostomia;  
 Spiralia;Lophotrochozoa;Mollusca;Bivalvia;Autobranhia;Heteroconchia;Euhe  
 terodonta;Imparidentia;Venerida;Veneroidea;Veneridae;Mercenaria;Mercenari  
 a mercenaria  
 UdeM00000034010 6596 432.2 UdeM00000034010 XP\_045156280.1 54 411  
 183 5 1 408 389 796 7.70E-118 432.2 6596 cellular  
 organisms;Eukaryota;Opisthokonta;Metazoa;Eumetazoa;Bilateria;Protostomia;

Spiralia;Lophotrochozoa;Mollusca;Bivalvia;Autobranchia;Heteroconchia;Euherodonta;Imparidentia;Venerida;Veneroidea;Veneridae;Mercenaria;Mercenaria mercenaria

UdeM00000034011 6573 362.1 UdeM00000034011 XP\_021349151.1 52.9 333  
154 2 2 334 30 359 7.90E-97 362.1 6573 cellular

organisms;Eukaryota;Opisthokonta;Metazoa;Eumetazoa;Bilateria;Protostomia;Spiralia;Lophotrochozoa;Mollusca;Bivalvia;Autobranchia;Pteriomorpha;Pectinida;Pectinoidea;Pectinidae;Mizuhopecten;Mizuhopecten yessoensis

UdeM00000034012 29159 97.4 UdeM00000034012 XP\_034330259.1 34 150  
82 5 8 153 403 539 1.70E-17 97.4 29159 cellular

organisms;Eukaryota;Opisthokonta;Metazoa;Eumetazoa;Bilateria;Protostomia;Spiralia;Lophotrochozoa;Mollusca;Bivalvia;Autobranchia;Pteriomorpha;Ostreida;Ostreoidea;Ostreidae;Crassostrea;Crassostrea gigas

UdeM00000034013 6596 174.9 UdeM00000034013 XP\_045193479.1 53.9 152  
70 0 1 152 28 179 8.00E-41 174.9 6596 cellular

organisms;Eukaryota;Opisthokonta;Metazoa;Eumetazoa;Bilateria;Protostomia;Spiralia;Lophotrochozoa;Mollusca;Bivalvia;Autobranchia;Heteroconchia;Euherodonta;Imparidentia;Venerida;Veneroidea;Veneridae;Mercenaria;Mercenaria mercenaria

UdeM00000034014 6573 134.4 UdeM00000034014 XP\_021357372.1 53.1 128  
54 4 1 128 154 275 1.10E-28 134.4 6573 cellular

organisms;Eukaryota;Opisthokonta;Metazoa;Eumetazoa;Bilateria;Protostomia;Spiralia;Lophotrochozoa;Mollusca;Bivalvia;Autobranchia;Pteriomorpha;Pectinida;Pectinoidea;Pectinidae;Mizuhopecten;Mizuhopecten yessoensis

UdeM00000034016 7668 149.8 UdeM00000034016 XP\_030845483.1 61.1 126  
49 0 1 126 384 509 2.30E-33 149.8 7668 cellular

organisms;Eukaryota;Opisthokonta;Metazoa;Eumetazoa;Bilateria;Deuterostomia;Echinodermata;Eleutherozoa;Echinozoa;Echinoidea;Euechinoidea;Echinacea;Camarodonta;Echinidea;Strongylocentrotidae;Strongylocentrotus;Strongylocentrotus purpuratus

UdeM00000034017 6579 110.5 UdeM00000034017 XP\_033753599.1 57.5 106  
34 3 12 106 174 279 1.30E-21 110.5 6579 cellular

organisms;Eukaryota;Opisthokonta;Metazoa;Eumetazoa;Bilateria;Protostomia;Spiralia;Lophotrochozoa;Mollusca;Bivalvia;Autobranchia;Pteriomorpha;Pectinida;Pectinoidea;Pectinidae;Pecten;Pecten maximus

UdeM00000034018 37653 184.5 UdeM00000034018 XP\_014784938.1 53.9 152  
69 1 5 156 212 362 1.10E-43 184.5 37653 cellular

organisms;Eukaryota;Opisthokonta;Metazoa;Eumetazoa;Bilateria;Protostomia;Spiralia;Lophotrochozoa;Mollusca;Cephalopoda;Coleoidea;Octopodiformes;Octopoda;Incirrata;Octopodidae;Octopus;Octopus bimaculoides

UdeM00000034019 151771 90.5 UdeM00000034019 XP\_028397269.1 51.2  
80 33 1 1 74 206 285 3.10E-15 90.5 151771

cellular

organisms;Eukaryota;Opisthokonta;Metazoa;Eumetazoa;Cnidaria;Anthozoa;Octocorallia;Alcyonacea;Alcyoniina;Nephtheidae;Dendronephthya;Dendronephthya gigantea

UdeM00000034020 6565 76.6 UdeM00000034020 XP\_022298030.1 30.5 131  
91 0 6 136 11 141 3.10E-11 76.6 6565 cellular

organisms;Eukaryota;Opisthokonta;Metazoa;Eumetazoa;Bilateria;Protostomia;Spiralia;Lophotrochozoa;Mollusca;Bivalvia;Autobranchia;Pteriomorpha;Ostreida;Ostreoidea;Ostreidae;Crassostrea;Crassostrea virginica

UdeM00000034021 6565 130.2 UdeM00000034021 XP\_022297037.1 64.5 93  
33 0 1 93 228 320 1.50E-27 130.2 6565 cellular

organisms;Eukaryota;Opisthokonta;Metazoa;Eumetazoa;Bilateria;Protostomia;



Spiralia; Lophotrochozoa; Mollusca; Bivalvia; Autobranchia; Pteriomorpha; Ostr  
eida; Ostreidae; Crassostrea; Crassostrea virginica  
UdeM00000034022 6565 223.8 UdeM00000034022 XP\_022286598.1 40.8 348  
140 7 1 292 1 338 3.50E-55 223.8 6565 cellular  
organisms; Eukaryota; Opisthokonta; Metazoa; Eumetazoa; Bilateria; Protostomia;  
Spiralia; Lophotrochozoa; Mollusca; Bivalvia; Autobranchia; Pteriomorpha; Ostr  
eida; Ostreidae; Crassostrea; Crassostrea virginica  
UdeM00000034023 6579 221.5 UdeM00000034023 XP\_033729837.1 58.8 170  
70 0 14 183 17 186 9.70E-55 221.5 6579 cellular  
organisms; Eukaryota; Opisthokonta; Metazoa; Eumetazoa; Bilateria; Protostomia;  
Spiralia; Lophotrochozoa; Mollusca; Bivalvia; Autobranchia; Pteriomorpha; Pect  
inida; Pectinoidea; Pectinidae; Pecten; Pecten maximus  
UdeM00000034024 10224 62.4 UdeM00000034024 XP\_002737779.1 57.1 49  
21 0 1 49 437 485 3.00E-07 62.4 10224 cellular  
organisms; Eukaryota; Opisthokonta; Metazoa; Eumetazoa; Bilateria; Deuterostomi  
a; Hemichordata; Enteropneusta; Harrimaniidae; Saccoglossus; Saccoglossus  
kowalevskii  
UdeM00000034025 6565 179.5 UdeM00000034025 XP\_022286598.1 50 174  
85 1 40 213 266 437 4.90E-42 179.5 6565 cellular  
organisms; Eukaryota; Opisthokonta; Metazoa; Eumetazoa; Bilateria; Protostomia;  
Spiralia; Lophotrochozoa; Mollusca; Bivalvia; Autobranchia; Pteriomorpha; Ostr  
eida; Ostreidae; Crassostrea; Crassostrea virginica  
UdeM00000034026 6565 122.5 UdeM00000034026 XP\_022342298.1 31.4 318  
98 4 48 249 200 513 8.60E-25 122.5 6565 cellular  
organisms; Eukaryota; Opisthokonta; Metazoa; Eumetazoa; Bilateria; Protostomia;  
Spiralia; Lophotrochozoa; Mollusca; Bivalvia; Autobranchia; Pteriomorpha; Ostr  
eida; Ostreidae; Crassostrea; Crassostrea virginica  
UdeM00000034027 390379 95.1 UdeM00000034027 XP\_034039899.1 51.4  
70 34 0 5 74 4 73 4.50E-17 95.1 390379  
cellular  
organisms; Eukaryota; Opisthokonta; Metazoa; Eumetazoa; Bilateria; Deuterostomi  
a; Chordata; Craniata; Vertebrata; Gnathostomata; Teleostomi; Euteleostomi; Acti  
nopterygii; Actinopteri; Neopterygii; Teleostei; Osteoglossocephalai; Clupeoce  
phala; Euteleosteomorpha; Neoteleostei; Eurypterygia; Ctenosquamata; Acanthomo  
rphata; Euacanthomorphacea; Percomorphaceae; Batrachoidaria; Batrachoidiforme  
s; Batrachoididae; Thalassophyrinae; Thalassophryne; Thalassophryne  
amazonica  
UdeM00000034028 2652724 393.7 UdeM00000034028 XP\_020903442.1 41.8  
519 284 8 9 515 2 514 3.80E-106 393.7 2652724  
cellular  
organisms; Eukaryota; Opisthokonta; Metazoa; Eumetazoa; Cnidaria; Anthozoa; Hexa  
corallia; Actiniaria; Aiptasiidae; Exaiptasia; Exaiptasia diaphana  
UdeM00000034030 1203425 71.6 UdeM00000034030 XP\_034530357.1 60.8  
51 20 0 1 51 72 122 3.70E-10 71.6 1203425  
cellular  
organisms; Eukaryota; Opisthokonta; Metazoa; Eumetazoa; Bilateria; Deuterostomi  
a; Chordata; Craniata; Vertebrata; Gnathostomata; Teleostomi; Euteleostomi; Acti  
nopterygii; Actinopteri; Neopterygii; Teleostei; Osteoglossocephalai; Clupeoce  
phala; Euteleosteomorpha; Neoteleostei; Eurypterygia; Ctenosquamata; Acanthomo  
rphata; Euacanthomorphacea; Percomorphaceae; Eupercaria; Labriformes; Labridae  
; Notolabrus; Notolabrus celidotus  
UdeM00000034029 29159 82.8 UdeM00000034029 XP\_034334268.1 62.3 61  
20 1 1 61 160 217 1.90E-13 82.8 29159 cellular  
organisms; Eukaryota; Opisthokonta; Metazoa; Eumetazoa; Bilateria; Protostomia;

Spiralia;Lophotrochozoa;Mollusca;Bivalvia;Autobranchia;Pteriormorphia;Ostr  
eida;Ostreoidea;Ostreidae;Crassostrea;Crassostrea gigas  
UdeM00000034031 29159 119 UdeM00000034031 XP\_034334268.1 59.4 96  
36 1 1 96 160 252 3.30E-24 119 29159 cellular  
organisms;Eukaryota;Opisthokonta;Metazoa;Eumetazoa;Bilateria;Protostomia;  
Spiralia;Lophotrochozoa;Mollusca;Bivalvia;Autobranchia;Pteriormorphia;Ostr  
eida;Ostreoidea;Ostreidae;Crassostrea;Crassostrea gigas  
UdeM00000034033 46514 132.9 UdeM00000034033 XP\_038073135.1 36.4 530  
231 9 1 434 14 533 1.00E-27 132.9 46514 cellular  
organisms;Eukaryota;Opisthokonta;Metazoa;Eumetazoa;Bilateria;Deuterostomi  
a;Echinodermata;Eleutherozoa;Asterozoa;Asteroidea;Valvatacea;Valvatida;As  
terinidae;Patiria;Patiria miniata  
UdeM00000034034 6596 198.7 UdeM00000034034 XP\_045179821.1 40.4 277  
161 3 9 283 31 305 9.70E-48 198.7 6596 cellular  
organisms;Eukaryota;Opisthokonta;Metazoa;Eumetazoa;Bilateria;Protostomia;  
Spiralia;Lophotrochozoa;Mollusca;Bivalvia;Autobranchia;Heteroconchia;Euhe  
terodonta;Imparidentia;Venerida;Veneroidea;Veneridae;Mercenaria;Mercenari  
a mercenaria  
UdeM00000034035 1735272 61.6 UdeM00000034035 XP\_041359107.1 27.6  
214 111 7 4 191 8 203 1.30E-06 61.6 1735272  
cellular  
organisms;Eukaryota;Opisthokonta;Metazoa;Eumetazoa;Bilateria;Protostomia;  
Spiralia;Lophotrochozoa;Mollusca;Gastropoda;Neomphalina;Neomphaloidea;Pel  
tospiridae;Gigantopelta;Gigantopelta aegis  
UdeM00000034036 1735272 61.6 UdeM00000034036 XP\_041359107.1 27.6  
217 113 7 22 212 5 203 1.40E-06 61.6 1735272  
cellular  
organisms;Eukaryota;Opisthokonta;Metazoa;Eumetazoa;Bilateria;Protostomia;  
Spiralia;Lophotrochozoa;Mollusca;Gastropoda;Neomphalina;Neomphaloidea;Pel  
tospiridae;Gigantopelta;Gigantopelta aegis  
UdeM00000034038 6579 373.6 UdeM00000034038 XP\_033743002.1 50 344  
171 1 92 434 10 353 3.40E-100 373.6 6579 cellular  
organisms;Eukaryota;Opisthokonta;Metazoa;Eumetazoa;Bilateria;Protostomia;  
Spiralia;Lophotrochozoa;Mollusca;Bivalvia;Autobranchia;Pteriormorphia;Pect  
inida;Pectinoidea;Pectinidae;Pecten;Pecten maximus  
UdeM00000034037 6579 373.6 UdeM00000034037 XP\_033743002.1 50 344  
171 1 113 455 10 353 3.60E-100 373.6 6579 cellular  
organisms;Eukaryota;Opisthokonta;Metazoa;Eumetazoa;Bilateria;Protostomia;  
Spiralia;Lophotrochozoa;Mollusca;Bivalvia;Autobranchia;Pteriormorphia;Pect  
inida;Pectinoidea;Pectinidae;Pecten;Pecten maximus  
UdeM00000034039 6596 198.7 UdeM00000034039 XP\_045175762.1 36.4 368  
202 10 4 354 5 357 1.20E-47 198.7 6596 cellular  
organisms;Eukaryota;Opisthokonta;Metazoa;Eumetazoa;Bilateria;Protostomia;  
Spiralia;Lophotrochozoa;Mollusca;Bivalvia;Autobranchia;Heteroconchia;Euhe  
terodonta;Imparidentia;Venerida;Veneroidea;Veneridae;Mercenaria;Mercenari  
a mercenaria  
UdeM00000034040 6596 188 UdeM00000034040 XP\_045175763.1 32.1 399  
208 10 54 436 5 356 2.60E-44 188 6596 cellular  
organisms;Eukaryota;Opisthokonta;Metazoa;Eumetazoa;Bilateria;Protostomia;  
Spiralia;Lophotrochozoa;Mollusca;Bivalvia;Autobranchia;Heteroconchia;Euhe  
terodonta;Imparidentia;Venerida;Veneroidea;Veneridae;Mercenaria;Mercenari  
a mercenaria  
UdeM00000034041 6596 168.7 UdeM00000034041 XP\_045175761.1 34.9 292  
162 8 54 329 82 361 1.30E-38 168.7 6596 cellular

organisms;Eukaryota;Opisthokonta;Metazoa;Eumetazoa;Bilateria;Protostomia;Spiralia;Lophotrochozoa;Mollusca;Bivalvia;Autobranhia;Heteroconchia;Euherodonta;Imparidentia;Venerida;Veneroidea;Veneridae;Mercenaria;Mercenaria mercenaria

UdeM00000034042 34632 65.5 UdeM00000034042 XP\_037504739.1 42.4 66  
38 0 8 73 365 430 3.30E-08 65.5 34632 cellular

organisms;Eukaryota;Opisthokonta;Metazoa;Eumetazoa;Bilateria;Protostomia;Ecdysozoa;Panarthropoda;Arthropoda;Chelicerata;Arachnida;Acari;Parasitiformes;Ixodida;Ixodoidea;Ixodidae;Rhipicephalinae;Rhipicephalus;Rhipicephalus;Rhipicephalus sanguineus group;Rhipicephalus sanguineus

UdeM00000034043 6596 87 UdeM00000034043 XP\_045175117.1 37.4 147  
89 2 3 148 4 148 3.70E-14 87 6596 cellular

organisms;Eukaryota;Opisthokonta;Metazoa;Eumetazoa;Bilateria;Protostomia;Spiralia;Lophotrochozoa;Mollusca;Bivalvia;Autobranhia;Heteroconchia;Euherodonta;Imparidentia;Venerida;Veneroidea;Veneridae;Mercenaria;Mercenaria mercenaria

UdeM00000034044 6596 273.9 UdeM00000034044 XP\_045206316.1 51.9 268  
125 2 11 277 169 433 3.10E-70 273.9 6596 cellular

organisms;Eukaryota;Opisthokonta;Metazoa;Eumetazoa;Bilateria;Protostomia;Spiralia;Lophotrochozoa;Mollusca;Bivalvia;Autobranhia;Heteroconchia;Euherodonta;Imparidentia;Venerida;Veneroidea;Veneridae;Mercenaria;Mercenaria mercenaria

UdeM00000034045 6596 114.8 UdeM00000034045 XP\_045175117.1 40.5 158  
80 5 12 167 192 337 1.20E-22 114.8 6596 cellular

organisms;Eukaryota;Opisthokonta;Metazoa;Eumetazoa;Bilateria;Protostomia;Spiralia;Lophotrochozoa;Mollusca;Bivalvia;Autobranhia;Heteroconchia;Euherodonta;Imparidentia;Venerida;Veneroidea;Veneridae;Mercenaria;Mercenaria mercenaria

UdeM00000034046 6596 298.1 UdeM00000034046 XP\_045201856.1 56.6 244  
101 2 27 266 25 267 1.10E-77 298.1 6596 cellular

organisms;Eukaryota;Opisthokonta;Metazoa;Eumetazoa;Bilateria;Protostomia;Spiralia;Lophotrochozoa;Mollusca;Bivalvia;Autobranhia;Heteroconchia;Euherodonta;Imparidentia;Venerida;Veneroidea;Veneridae;Mercenaria;Mercenaria mercenaria

UdeM00000034047 6596 299.7 UdeM00000034047 XP\_045201856.1 56.6 242  
99 2 29 266 28 267 3.80E-78 299.7 6596 cellular

organisms;Eukaryota;Opisthokonta;Metazoa;Eumetazoa;Bilateria;Protostomia;Spiralia;Lophotrochozoa;Mollusca;Bivalvia;Autobranhia;Heteroconchia;Euherodonta;Imparidentia;Venerida;Veneroidea;Veneridae;Mercenaria;Mercenaria mercenaria

UdeM00000034048 6596 232.6 UdeM00000034048 XP\_045201856.1 57.6 184  
76 1 2 185 86 267 3.90E-58 232.6 6596 cellular

organisms;Eukaryota;Opisthokonta;Metazoa;Eumetazoa;Bilateria;Protostomia;Spiralia;Lophotrochozoa;Mollusca;Bivalvia;Autobranhia;Heteroconchia;Euherodonta;Imparidentia;Venerida;Veneroidea;Veneridae;Mercenaria;Mercenaria mercenaria

UdeM00000034050 6596 150.6 UdeM00000034050 XP\_045175117.1 36.3 273  
146 9 3 259 77 337 3.00E-33 150.6 6596 cellular

organisms;Eukaryota;Opisthokonta;Metazoa;Eumetazoa;Bilateria;Protostomia;Spiralia;Lophotrochozoa;Mollusca;Bivalvia;Autobranhia;Heteroconchia;Euherodonta;Imparidentia;Venerida;Veneroidea;Veneridae;Mercenaria;Mercenaria mercenaria

UdeM00000034051 6596 244.2 UdeM00000034051 XP\_045201856.1 52.5 217  
98 3 12 224 52 267 1.60E-61 244.2 6596 cellular

organisms;Eukaryota;Opisthokonta;Metazoa;Eumetazoa;Bilateria;Protostomia;Spiralia;Lophotrochozoa;Mollusca;Bivalvia;Autobranhia;Heteroconchia;Euherodonta;Imparidentia;Venerida;Veneroidea;Veneridae;Mercenaria;Mercenaria mercenaria

UdeM00000034052 6596 253.8 UdeM00000034052 XP\_045201856.1 56 207  
85 2 9 211 63 267 1.90E-64 253.8 6596 cellular

organisms;Eukaryota;Opisthokonta;Metazoa;Eumetazoa;Bilateria;Protostomia;Spiralia;Lophotrochozoa;Mollusca;Bivalvia;Autobranhia;Heteroconchia;Euherodonta;Imparidentia;Venerida;Veneroidea;Veneridae;Mercenaria;Mercenaria mercenaria

UdeM00000034053 2652724 153.7 UdeM00000034053 XP\_028512668.1 45.2  
166 86 2 29 193 97 258 3.40E-34 153.7 2652724  
cellular

organisms;Eukaryota;Opisthokonta;Metazoa;Eumetazoa;Cnidaria;Anthozoa;Hexacorallia;Actiniaria;Aiptasiidae;Exaiptasia;Exaiptasia diaphana

UdeM00000034054 6596 101.3 UdeM00000034054 XP\_045179845.1 31.9 160  
107 2 8 166 1325 1483 1.40E-18 101.3 6596 cellular

organisms;Eukaryota;Opisthokonta;Metazoa;Eumetazoa;Bilateria;Protostomia;Spiralia;Lophotrochozoa;Mollusca;Bivalvia;Autobranhia;Heteroconchia;Euherodonta;Imparidentia;Venerida;Veneroidea;Veneridae;Mercenaria;Mercenaria mercenaria

UdeM00000034055 6573 58.2 UdeM00000034055 XP\_021364203.1 31.2 109  
71 3 7 114 193 298 8.20E-06 58.2 6573 cellular

organisms;Eukaryota;Opisthokonta;Metazoa;Eumetazoa;Bilateria;Protostomia;Spiralia;Lophotrochozoa;Mollusca;Bivalvia;Autobranhia;Pteriormorphia;Pectinida;Pectinoidea;Pectinidae;Mizuhopecten;Mizuhopecten yessoensis

UdeM00000034056 6596 213.4 UdeM00000034056 XP\_045179019.1 34.5 412  
235 11 14 407 23 417 6.50E-52 213.4 6596 cellular

organisms;Eukaryota;Opisthokonta;Metazoa;Eumetazoa;Bilateria;Protostomia;Spiralia;Lophotrochozoa;Mollusca;Bivalvia;Autobranhia;Heteroconchia;Euherodonta;Imparidentia;Venerida;Veneroidea;Veneridae;Mercenaria;Mercenaria mercenaria

UdeM00000034058 6596 908.3 UdeM00000034058 XP\_045177368.1 55.7 795  
336 10 38 821 44 833 7.10E-261 908.3 6596 cellular

organisms;Eukaryota;Opisthokonta;Metazoa;Eumetazoa;Bilateria;Protostomia;Spiralia;Lophotrochozoa;Mollusca;Bivalvia;Autobranhia;Heteroconchia;Euherodonta;Imparidentia;Venerida;Veneroidea;Veneridae;Mercenaria;Mercenaria mercenaria

UdeM00000034057 6596 908.3 UdeM00000034057 XP\_045177368.1 55.7 795  
336 10 59 842 44 833 7.30E-261 908.3 6596 cellular

organisms;Eukaryota;Opisthokonta;Metazoa;Eumetazoa;Bilateria;Protostomia;Spiralia;Lophotrochozoa;Mollusca;Bivalvia;Autobranhia;Heteroconchia;Euherodonta;Imparidentia;Venerida;Veneroidea;Veneridae;Mercenaria;Mercenaria mercenaria

UdeM00000034059 37621 102.8 UdeM00000034059 XP\_014670052.1 50 102  
42 1 2 94 6 107 3.70E-19 102.8 37621 cellular

organisms;Eukaryota;Opisthokonta;Metazoa;Eumetazoa;Bilateria;Protostomia;Ecdysozoa;Scalidophora;Priapulida;Priapulimorpha;Priapulimorphida;Priapulidae;Priapululus;Priapululus caudatus

UdeM00000034060 210409 102.4 UdeM00000034060 XP\_045107160.1 40.7  
113 65 1 1 111 171 283 3.80E-19 102.4 210409  
cellular

organisms;Eukaryota;Opisthokonta;Metazoa;Eumetazoa;Bilateria;Protostomia;Ecdysozoa;Panarthropoda;Arthropoda;Mandibulata;Pancrustacea;Crustacea;Mul

ticrustacea;Malacostraca;Eumalacostraca;Eucarida;Decapoda;Pleocyemata;Brachyura;Eubrachyura;Heterotremata;Portunoidea;Portunidae;Portunus;Portunus trituberculatus

UdeM00000034063 6500 504.6 UdeM00000034063 XP\_005100247.1 80.4 285  
56 0 1 285 53 337 8.40E-140 504.6 6500 cellular

organisms;Eukaryota;Opisthokonta;Metazoa;Eumetazoa;Bilateria;Protostomia;Spiralia;Lophotrochozoa;Mollusca;Gastropoda;Heterobranchia;Euthyneura;Tectipleura;Aplysiida;Aplysioidea;Aplysiidae;Aplysia;Aplysia californica

UdeM00000034064 6596 298.1 UdeM00000034064 XP\_045177776.1 38.9 460  
249 11 3 446 481 924 1.90E-77 298.1 6596 cellular

organisms;Eukaryota;Opisthokonta;Metazoa;Eumetazoa;Bilateria;Protostomia;Spiralia;Lophotrochozoa;Mollusca;Bivalvia;Autobranchia;Heteroconchia;Euheterodonta;Imparidentia;Venerida;Veneroidea;Veneridae;Mercenaria;Mercenaria mercenaria

UdeM00000034065 6238 112.1 UdeM00000034065 XP\_002638250.1 31.9 226  
127 5 2 202 4 227 9.20E-22 112.1 6238 cellular

organisms;Eukaryota;Opisthokonta;Metazoa;Eumetazoa;Bilateria;Protostomia;Ecdysozoa;Nematoda;Chromadorea;Rhabditida;Rhabditina;Rhabditomorpha;Rhabditoidea;Rhabditidae;Peloderinae;Caenorhabditis;Caenorhabditis briggsae

UdeM00000034066 45351 84.3 UdeM00000034066 XP\_001623471.2 27.6 221  
131 5 3 207 6 213 2.00E-13 84.3 45351 cellular

organisms;Eukaryota;Opisthokonta;Metazoa;Eumetazoa;Cnidaria;Anthozoa;Hexacorallia;Actiniaria;Edwardsiidae;Nematostella;Nematostella vectensis

UdeM00000034067 6596 303.5 UdeM00000034067 XP\_045177776.1 42.9 378  
202 7 9 378 552 923 5.80E-79 303.5 6596 cellular

organisms;Eukaryota;Opisthokonta;Metazoa;Eumetazoa;Bilateria;Protostomia;Spiralia;Lophotrochozoa;Mollusca;Bivalvia;Autobranchia;Heteroconchia;Euheterodonta;Imparidentia;Venerida;Veneroidea;Veneridae;Mercenaria;Mercenaria mercenaria

UdeM00000034068 6579 232.6 UdeM00000034068 XP\_033729769.1 42.7 288  
130 4 48 304 32 315 7.60E-58 232.6 6579 cellular

organisms;Eukaryota;Opisthokonta;Metazoa;Eumetazoa;Bilateria;Protostomia;Spiralia;Lophotrochozoa;Mollusca;Bivalvia;Autobranchia;Pteriomorpha;Pectinida;Pectinoidea;Pectinidae;Pecten;Pecten maximus

UdeM00000034069 6579 146 UdeM00000034069 XP\_033747958.1 58.4 101  
42 0 1 101 57 157 3.30E-32 146 6579 cellular

organisms;Eukaryota;Opisthokonta;Metazoa;Eumetazoa;Bilateria;Protostomia;Spiralia;Lophotrochozoa;Mollusca;Bivalvia;Autobranchia;Pteriomorpha;Pectinida;Pectinoidea;Pectinidae;Pecten;Pecten maximus

UdeM00000034070 6579 159.8 UdeM00000034070 XP\_033747958.1 58.2 110  
46 0 18 127 48 157 2.70E-36 159.8 6579 cellular

organisms;Eukaryota;Opisthokonta;Metazoa;Eumetazoa;Bilateria;Protostomia;Spiralia;Lophotrochozoa;Mollusca;Bivalvia;Autobranchia;Pteriomorpha;Pectinida;Pectinoidea;Pectinidae;Pecten;Pecten maximus

UdeM00000034073 6526 219.2 UdeM00000034073 XP\_013063620.1 34.8 480  
226 12 14 416 60 529 1.00E-53 219.2 6526 cellular

organisms;Eukaryota;Opisthokonta;Metazoa;Eumetazoa;Bilateria;Protostomia;Spiralia;Lophotrochozoa;Mollusca;Gastropoda;Heterobranchia;Euthyneura;Pulmonata;Hygrophila;Lymnaeioidea;Planorbidae;Biomphalaria;Biomphalaria glabrata

UdeM00000034075 29159 443 UdeM00000034075 XP\_019924536.2 43.8 537  
282 7 90 624 680 1198 6.70E-121 443 29159 cellular

organisms;Eukaryota;Opisthokonta;Metazoa;Eumetazoa;Bilateria;Protostomia;

Spiralia; Lophotrochozoa; Mollusca; Bivalvia; Autobranchia; Pteriomorpha; Ostr  
 eida; Ostreoidea; Ostreidae; Crassostrea; Crassostrea gigas  
 UdeM00000034076 6573 530.4 UdeM00000034076 XP\_021362500.1 33.9 1097  
 525 24 81 997 103 1179 5.40E-147 530.4 6573 cellular  
 organisms; Eukaryota; Opisthokonta; Metazoa; Eumetazoa; Bilateria; Protostomia;  
 Spiralia; Lophotrochozoa; Mollusca; Bivalvia; Autobranchia; Pteriomorpha; Pect  
 inida; Pectinoidea; Pectinidae; Mizuhopecten; Mizuhopecten yessoensis  
 UdeM00000034077 6526 231.5 UdeM00000034077 XP\_013063620.1 34.6 514  
 233 14 45 469 30 529 2.20E-57 231.5 6526 cellular  
 organisms; Eukaryota; Opisthokonta; Metazoa; Eumetazoa; Bilateria; Protostomia;  
 Spiralia; Lophotrochozoa; Mollusca; Gastropoda; Heterobranchia; Euthyneura; Pan  
 pulmonata; Hygrophila; Lymnaeidae; Planorbidae; Biomphalaria; Biomphalaria  
 glabrata  
 UdeM00000034079 6573 389.8 UdeM00000034079 XP\_021362500.1 38.7 571  
 275 9 79 582 652 1214 6.40E-105 389.8 6573 cellular  
 organisms; Eukaryota; Opisthokonta; Metazoa; Eumetazoa; Bilateria; Protostomia;  
 Spiralia; Lophotrochozoa; Mollusca; Bivalvia; Autobranchia; Pteriomorpha; Pect  
 inida; Pectinoidea; Pectinidae; Mizuhopecten; Mizuhopecten yessoensis  
 UdeM00000034080 7739 194.9 UdeM00000034080 XP\_035700323.1 31.2 528  
 252 15 85 506 134 656 4.70E-46 194.9 7739 cellular  
 organisms; Eukaryota; Opisthokonta; Metazoa; Eumetazoa; Bilateria; Deuterostomi  
 a; Chordata; Cephalochordata; Leptocardii; Amphioxiformes; Branchiostomidae; Br  
 anchiostoma; Branchiostoma floridae  
 UdeM00000034081 6596 116.7 UdeM00000034081 XP\_045189228.1 53 100  
 47 0 77 176 236 335 4.70E-23 116.7 6596 cellular  
 organisms; Eukaryota; Opisthokonta; Metazoa; Eumetazoa; Bilateria; Protostomia;  
 Spiralia; Lophotrochozoa; Mollusca; Bivalvia; Autobranchia; Heteroconchia; Eue  
 terodonta; Imparidentia; Venerida; Veneroidea; Veneridae; Mercenaria; Mercenari  
 a mercenaria  
 UdeM00000034084 6596 112.1 UdeM00000034084 XP\_045202349.1 24.1 370  
 252 9 585 929 404 769 4.00E-21 112.1 6596 cellular  
 organisms; Eukaryota; Opisthokonta; Metazoa; Eumetazoa; Bilateria; Protostomia;  
 Spiralia; Lophotrochozoa; Mollusca; Bivalvia; Autobranchia; Heteroconchia; Eue  
 terodonta; Imparidentia; Venerida; Veneroidea; Veneridae; Mercenaria; Mercenari  
 a mercenaria  
 UdeM00000034085 29159 147.1 UdeM00000034085 XP\_034320422.1 65 103  
 33 1 86 185 122 224 2.30E-32 147.1 29159 cellular  
 organisms; Eukaryota; Opisthokonta; Metazoa; Eumetazoa; Bilateria; Protostomia;  
 Spiralia; Lophotrochozoa; Mollusca; Bivalvia; Autobranchia; Pteriomorpha; Ostr  
 eida; Ostreoidea; Ostreidae; Crassostrea; Crassostrea gigas  
 UdeM00000034086 6573 124 UdeM00000034086 XP\_021355633.1 48.5 130  
 66 1 9 137 11 140 2.90E-25 124 6573 cellular  
 organisms; Eukaryota; Opisthokonta; Metazoa; Eumetazoa; Bilateria; Protostomia;  
 Spiralia; Lophotrochozoa; Mollusca; Bivalvia; Autobranchia; Pteriomorpha; Pect  
 inida; Pectinoidea; Pectinidae; Mizuhopecten; Mizuhopecten yessoensis  
 UdeM00000034088 6596 201.8 UdeM00000034088 XP\_045200918.1 23 1071  
 737 32 1993 3005 1723 2763 1.20E-47 201.8 6596 cellular  
 organisms; Eukaryota; Opisthokonta; Metazoa; Eumetazoa; Bilateria; Protostomia;  
 Spiralia; Lophotrochozoa; Mollusca; Bivalvia; Autobranchia; Heteroconchia; Eue  
 terodonta; Imparidentia; Venerida; Veneroidea; Veneridae; Mercenaria; Mercenari  
 a mercenaria  
 UdeM00000034091 6573 79 UdeM00000034091 XP\_021372170.1 27.1 255  
 121 9 518 711 809 1059 2.90E-11 79 6573 cellular  
 organisms; Eukaryota; Opisthokonta; Metazoa; Eumetazoa; Bilateria; Protostomia;

Spiralia; Lophotrochozoa; Mollusca; Bivalvia; Autobranchia; Pteriomorpha; Pectinida; Pectinoidea; Pectinidae; Mizuhopecten; Mizuhopecten yessoensis  
UdeM00000034092 6573 139 UdeM00000034092 XP\_021372109.1 37.1 178  
106 1 11 182 57 234 7.70E-30 139 6573 cellular  
organisms; Eukaryota; Opisthokonta; Metazoa; Eumetazoa; Bilateria; Protostomia; Spiralia; Lophotrochozoa; Mollusca; Bivalvia; Autobranchia; Pteriomorpha; Pectinida; Pectinoidea; Pectinidae; Mizuhopecten; Mizuhopecten yessoensis  
UdeM00000034093 6596 276.6 UdeM00000034093 XP\_045182756.1 64.2 204  
72 1 1 203 1 204 2.60E-71 276.6 6596 cellular  
organisms; Eukaryota; Opisthokonta; Metazoa; Eumetazoa; Bilateria; Protostomia; Spiralia; Lophotrochozoa; Mollusca; Bivalvia; Autobranchia; Heteroconchia; Euheterodonta; Imparidentia; Venerida; Veneroidea; Veneridae; Mercenaria; Mercenaria mercenaria  
UdeM00000034094 6596 189.5 UdeM00000034094 XP\_045171694.1 61.1 144  
55 1 80 223 223 365 4.60E-45 189.5 6596 cellular  
organisms; Eukaryota; Opisthokonta; Metazoa; Eumetazoa; Bilateria; Protostomia; Spiralia; Lophotrochozoa; Mollusca; Bivalvia; Autobranchia; Heteroconchia; Euheterodonta; Imparidentia; Venerida; Veneroidea; Veneridae; Mercenaria; Mercenaria mercenaria  
UdeM00000034096 6565 197.6 UdeM00000034096 XP\_022315923.1 39.4 259  
156 1 5 262 149 407 2.10E-47 197.6 6565 cellular  
organisms; Eukaryota; Opisthokonta; Metazoa; Eumetazoa; Bilateria; Protostomia; Spiralia; Lophotrochozoa; Mollusca; Bivalvia; Autobranchia; Pteriomorpha; Ostreida; Ostreidae; Crassostrea; Crassostrea virginica  
UdeM00000034097 6596 188.3 UdeM00000034097 XP\_045214901.1 31.8 400  
262 4 15 410 61 453 3.70E-44 188.3 6596 cellular  
organisms; Eukaryota; Opisthokonta; Metazoa; Eumetazoa; Bilateria; Protostomia; Spiralia; Lophotrochozoa; Mollusca; Bivalvia; Autobranchia; Heteroconchia; Euheterodonta; Imparidentia; Venerida; Veneroidea; Veneridae; Mercenaria; Mercenaria mercenaria  
UdeM00000034098 45351 83.6 UdeM00000034098 XP\_001623471.2 35.9 145  
75 3 11 139 14 156 3.40E-13 83.6 45351 cellular  
organisms; Eukaryota; Opisthokonta; Metazoa; Eumetazoa; Cnidaria; Anthozoa; Hexacorallia; Actiniaria; Edwardsiidae; Nematostella; Nematostella vectensis  
UdeM00000034099 1735272 206.1 UdeM00000034099 XP\_041374260.1 65.8  
155 46 2 1 151 244 395 3.20E-50 206.1 1735272  
cellular  
organisms; Eukaryota; Opisthokonta; Metazoa; Eumetazoa; Bilateria; Protostomia; Spiralia; Lophotrochozoa; Mollusca; Gastropoda; Neomphalina; Neomphaloidea; Peltopspiridae; Gigantopelta; Gigantopelta aegis  
UdeM00000034100 6573 449.1 UdeM00000034100 XP\_021370830.1 82.3 249  
44 0 6 254 7 255 3.80E-123 449.1 6573 cellular  
organisms; Eukaryota; Opisthokonta; Metazoa; Eumetazoa; Bilateria; Protostomia; Spiralia; Lophotrochozoa; Mollusca; Bivalvia; Autobranchia; Pteriomorpha; Pectinida; Pectinoidea; Pectinidae; Mizuhopecten; Mizuhopecten yessoensis  
UdeM00000034101 6596 191.8 UdeM00000034101 XP\_045164125.1 41.8 273  
91 2 1 205 320 592 8.50E-46 191.8 6596 cellular  
organisms; Eukaryota; Opisthokonta; Metazoa; Eumetazoa; Bilateria; Protostomia; Spiralia; Lophotrochozoa; Mollusca; Bivalvia; Autobranchia; Heteroconchia; Euheterodonta; Imparidentia; Venerida; Veneroidea; Veneridae; Mercenaria; Mercenaria mercenaria  
UdeM00000034102 6573 278.1 UdeM00000034102 XP\_021351807.1 59.8 229  
83 1 1 220 242 470 1.00E-71 278.1 6573 cellular  
organisms; Eukaryota; Opisthokonta; Metazoa; Eumetazoa; Bilateria; Protostomia;

Spiralia;Lophotrochozoa;Mollusca;Bivalvia;Autobranchia;Pteriomorpha;Pectinida;Pectinoidea;Pectinidae;Mizuhopecten;Mizuhopecten yessoensis  
UdeM00000034103 225164 200.7 UdeM00000034103 XP\_009047395.1 44.1  
204 113 1 4 207 1 203 1.90E-48 200.7 225164  
cellular  
organisms;Eukaryota;Opisthokonta;Metazoa;Eumetazoa;Bilateria;Protostomia;  
Spiralia;Lophotrochozoa;Mollusca;Gastropoda;Patellogastropoda;Lottioidea;  
Lottiidae;Lottia;Lottia gigantea  
UdeM00000034104 6596 4286.9 UdeM00000034104 XP\_045177825.1 64.2  
3399 1169 16 36 3421 24 3388 0.00E+00 4286.9 6596  
cellular  
organisms;Eukaryota;Opisthokonta;Metazoa;Eumetazoa;Bilateria;Protostomia;  
Spiralia;Lophotrochozoa;Mollusca;Bivalvia;Autobranchia;Heteroconchia;Euhe  
terodonta;Imparidentia;Venerida;Veneroidea;Veneridae;Mercenaria;Mercenari  
a mercenaria  
UdeM00000034105 6573 1775.8 UdeM00000034105 XP\_021351806.1 68.5  
1320 399 9 1 1314 1 1309 0.00E+00 1775.8 6573  
cellular  
organisms;Eukaryota;Opisthokonta;Metazoa;Eumetazoa;Bilateria;Protostomia;  
Spiralia;Lophotrochozoa;Mollusca;Bivalvia;Autobranchia;Pteriomorpha;Pect  
inida;Pectinoidea;Pectinidae;Mizuhopecten;Mizuhopecten yessoensis  
UdeM00000034106 6573 1776.9 UdeM00000034106 XP\_021351806.1 68.5  
1319 400 8 1 1313 1 1309 0.00E+00 1776.9 6573  
cellular  
organisms;Eukaryota;Opisthokonta;Metazoa;Eumetazoa;Bilateria;Protostomia;  
Spiralia;Lophotrochozoa;Mollusca;Bivalvia;Autobranchia;Pteriomorpha;Pect  
inida;Pectinoidea;Pectinidae;Mizuhopecten;Mizuhopecten yessoensis  
UdeM00000034107 6596 686.8 UdeM00000034107 XP\_045178323.1 72.7 479  
123 3 27 499 27 503 2.10E-194 686.8 6596 cellular  
organisms;Eukaryota;Opisthokonta;Metazoa;Eumetazoa;Bilateria;Protostomia;  
Spiralia;Lophotrochozoa;Mollusca;Bivalvia;Autobranchia;Heteroconchia;Euhe  
terodonta;Imparidentia;Venerida;Veneroidea;Veneridae;Mercenaria;Mercenari  
a mercenaria  
UdeM00000034108 29159 261.5 UdeM00000034108 XP\_034300378.1 44 327  
178 2 6 328 5 330 1.40E-66 261.5 29159 cellular  
organisms;Eukaryota;Opisthokonta;Metazoa;Eumetazoa;Bilateria;Protostomia;  
Spiralia;Lophotrochozoa;Mollusca;Bivalvia;Autobranchia;Pteriomorpha;Ostr  
eida;Ostreoidea;Ostreidae;Crassostrea;Crassostrea gigas  
UdeM00000034109 6596 2400.9 UdeM00000034109 XP\_045177982.1 52.7  
2889 1145 21 7 2879 7094 9776 0.00E+00 2400.9 6596  
cellular  
organisms;Eukaryota;Opisthokonta;Metazoa;Eumetazoa;Bilateria;Protostomia;  
Spiralia;Lophotrochozoa;Mollusca;Bivalvia;Autobranchia;Heteroconchia;Euhe  
terodonta;Imparidentia;Venerida;Veneroidea;Veneridae;Mercenaria;Mercenari  
a mercenaria  
UdeM00000034110 29159 1822.8 UdeM00000034110 XP\_011451330.2 57.8  
1548 640 6 173 1717 5545 7081 0.00E+00 1822.8  
29159 cellular  
organisms;Eukaryota;Opisthokonta;Metazoa;Eumetazoa;Bilateria;Protostomia;  
Spiralia;Lophotrochozoa;Mollusca;Bivalvia;Autobranchia;Pteriomorpha;Ostr  
eida;Ostreoidea;Ostreidae;Crassostrea;Crassostrea gigas  
UdeM00000034111 6565 795.4 UdeM00000034111 XP\_022322952.1 56.8 703  
303 1 1 703 4836 5537 5.80E-227 795.4 6565 cellular  
organisms;Eukaryota;Opisthokonta;Metazoa;Eumetazoa;Bilateria;Protostomia;



Spiralia;Lophotrochozoa;Mollusca;Bivalvia;Autobranchia;Pteriormorphia;Ostr  
eida;Ostreoidea;Ostreidae;Crassostrea;Crassostrea virginica  
UdeM00000034112 6565 831.6 UdeM00000034112 XP\_022322952.1 56.9 728  
313 1 6 733 4811 5537 7.60E-238 831.6 6565 cellular  
organisms;Eukaryota;Opisthokonta;Metazoa;Eumetazoa;Bilateria;Protostomia;  
Spiralia;Lophotrochozoa;Mollusca;Bivalvia;Autobranchia;Pteriormorphia;Ostr  
eida;Ostreoidea;Ostreidae;Crassostrea;Crassostrea virginica  
UdeM00000034113 1735272 3068.9 UdeM00000034113 XP\_041374694.1  
58.9 2391 960 6 7 2377 2435 4823 0.00E+00 3068.9  
1735272 cellular  
organisms;Eukaryota;Opisthokonta;Metazoa;Eumetazoa;Bilateria;Protostomia;  
Spiralia;Lophotrochozoa;Mollusca;Gastropoda;Neomphalina;Neomphaloidea;Pel  
tospiridae;Gigantopelta;Gigantopelta aegis  
UdeM00000034114 6565 5623.5 UdeM00000034114 XP\_022322952.1 56.5  
4768 1934 18 4 4635 54 4815 0.00E+00 5623.5 6565  
cellular  
organisms;Eukaryota;Opisthokonta;Metazoa;Eumetazoa;Bilateria;Protostomia;  
Spiralia;Lophotrochozoa;Mollusca;Bivalvia;Autobranchia;Pteriormorphia;Ostr  
eida;Ostreoidea;Ostreidae;Crassostrea;Crassostrea virginica  
UdeM00000034115 6596 1136.7 UdeM00000034115 XP\_045177827.1 77.1  
737 168 1 41 777 36 771 0.00E+00 1136.7 6596  
cellular  
organisms;Eukaryota;Opisthokonta;Metazoa;Eumetazoa;Bilateria;Protostomia;  
Spiralia;Lophotrochozoa;Mollusca;Bivalvia;Autobranchia;Heteroconchia;Euhe  
terodonta;Imparidentia;Venerida;Veneroidea;Veneridae;Mercenaria;Mercenari  
a mercenaria  
UdeM00000034116 6596 73.9 UdeM00000034116 XP\_045207416.1 32.1 137  
90 1 3 139 1 134 2.40E-10 73.9 6596 cellular  
organisms;Eukaryota;Opisthokonta;Metazoa;Eumetazoa;Bilateria;Protostomia;  
Spiralia;Lophotrochozoa;Mollusca;Bivalvia;Autobranchia;Heteroconchia;Euhe  
terodonta;Imparidentia;Venerida;Veneroidea;Veneridae;Mercenaria;Mercenari  
a mercenaria  
UdeM00000034117 6596 73.6 UdeM00000034117 XP\_045207416.1 32.4 170  
104 4 6 175 4 162 3.20E-10 73.6 6596 cellular  
organisms;Eukaryota;Opisthokonta;Metazoa;Eumetazoa;Bilateria;Protostomia;  
Spiralia;Lophotrochozoa;Mollusca;Bivalvia;Autobranchia;Heteroconchia;Euhe  
terodonta;Imparidentia;Venerida;Veneroidea;Veneridae;Mercenaria;Mercenari  
a mercenaria  
UdeM00000034119 7719 70.5 UdeM00000034119 XP\_004227365.1 50.9 57  
28 0 37 93 106 162 1.30E-09 70.5 7719 cellular  
organisms;Eukaryota;Opisthokonta;Metazoa;Eumetazoa;Bilateria;Deuterostomi  
a;Chordata;Tunicata;Ascidiacea;Phlebobranchia;Cionidae;Ciona;Ciona  
intestinalis  
UdeM00000034118 7719 70.5 UdeM00000034118 XP\_004227365.1 50.9 57  
28 0 21 77 106 162 1.10E-09 70.5 7719 cellular  
organisms;Eukaryota;Opisthokonta;Metazoa;Eumetazoa;Bilateria;Deuterostomi  
a;Chordata;Tunicata;Ascidiacea;Phlebobranchia;Cionidae;Ciona;Ciona  
intestinalis  
UdeM00000034120 7054 112.1 UdeM00000034120 XP\_031346849.1 45.2 135  
74 0 19 153 33 167 7.40E-22 112.1 7054 cellular  
organisms;Eukaryota;Opisthokonta;Metazoa;Eumetazoa;Bilateria;Protostomia;  
Ecdysozoa;Panarthropoda;Arthropoda;Mandibulata;Pancrustacea;Hexapoda;Inse  
cta;Dicondylia;Pterygota;Neoptera;Endopterygota;Coleoptera;Polyphaga;Elat  
eriformia;Elateroidea;Lampyridae;Lampyrinae;Photinus;Photinus pyralis

UdeM00000034121 225164 198.4 UdeM00000034121 XP\_009057312.1 62.5  
 152 57 0 13 164 13 164 7.40E-48 198.4 225164  
 cellular  
 organisms;Eukaryota;Opisthokonta;Metazoa;Eumetazoa;Bilateria;Protostomia;  
 Spiralia;Lophotrochozoa;Mollusca;Gastropoda;Patellogastropoda;Lottioidea;  
 Lottiidae;Lottia;Lottia gigantea  
 UdeM00000034122 6579 1022.7 UdeM00000034122 XP\_033728096.1 66.4  
 742 221 4 1 737 1 719 2.30E-295 1022.7 6579  
 cellular  
 organisms;Eukaryota;Opisthokonta;Metazoa;Eumetazoa;Bilateria;Protostomia;  
 Spiralia;Lophotrochozoa;Mollusca;Bivalvia;Autobranchia;Pteriormorphia;Pect  
 inida;Pectinoidea;Pectinidae;Pecten;Pecten maximus  
 UdeM00000034123 6573 726.1 UdeM00000034123 XP\_021348393.1 48.9 880  
 184 5 21 899 29 643 5.60E-206 726.1 6573 cellular  
 organisms;Eukaryota;Opisthokonta;Metazoa;Eumetazoa;Bilateria;Protostomia;  
 Spiralia;Lophotrochozoa;Mollusca;Bivalvia;Autobranchia;Pteriormorphia;Pect  
 inida;Pectinoidea;Pectinidae;Mizuhopecten;Mizuhopecten yessoensis  
 UdeM00000034125 6596 252.7 UdeM00000034125 XP\_045177475.1 47.2 324  
 145 7 2 309 11 324 7.10E-64 252.7 6596 cellular  
 organisms;Eukaryota;Opisthokonta;Metazoa;Eumetazoa;Bilateria;Protostomia;  
 Spiralia;Lophotrochozoa;Mollusca;Bivalvia;Autobranchia;Heteroconchia;Euhe  
 terodonta;Imparidentia;Venerida;Veneroidea;Veneridae;Mercenaria;Mercenari  
 a mercenaria  
 UdeM00000034126 6596 263.5 UdeM00000034126 XP\_045178904.1 67 188  
 62 0 4 191 2 189 2.20E-67 263.5 6596 cellular  
 organisms;Eukaryota;Opisthokonta;Metazoa;Eumetazoa;Bilateria;Protostomia;  
 Spiralia;Lophotrochozoa;Mollusca;Bivalvia;Autobranchia;Heteroconchia;Euhe  
 terodonta;Imparidentia;Venerida;Veneroidea;Veneridae;Mercenaria;Mercenari  
 a mercenaria  
 UdeM00000034127 6596 339 UdeM00000034127 XP\_045180077.1 52.9 363  
 125 6 26 348 23 379 9.80E-90 339 6596 cellular  
 organisms;Eukaryota;Opisthokonta;Metazoa;Eumetazoa;Bilateria;Protostomia;  
 Spiralia;Lophotrochozoa;Mollusca;Bivalvia;Autobranchia;Heteroconchia;Euhe  
 terodonta;Imparidentia;Venerida;Veneroidea;Veneridae;Mercenaria;Mercenari  
 a mercenaria  
 UdeM00000034128 6573 251.9 UdeM00000034128 XP\_021366101.1 64.2 165  
 59 0 1 165 447 611 5.60E-64 251.9 6573 cellular  
 organisms;Eukaryota;Opisthokonta;Metazoa;Eumetazoa;Bilateria;Protostomia;  
 Spiralia;Lophotrochozoa;Mollusca;Bivalvia;Autobranchia;Pteriormorphia;Pect  
 inida;Pectinoidea;Pectinidae;Mizuhopecten;Mizuhopecten yessoensis  
 UdeM00000034130 6596 252.7 UdeM00000034130 XP\_045179257.1 69.9 163  
 49 0 1 163 48 210 3.20E-64 252.7 6596 cellular  
 organisms;Eukaryota;Opisthokonta;Metazoa;Eumetazoa;Bilateria;Protostomia;  
 Spiralia;Lophotrochozoa;Mollusca;Bivalvia;Autobranchia;Heteroconchia;Euhe  
 terodonta;Imparidentia;Venerida;Veneroidea;Veneridae;Mercenaria;Mercenari  
 a mercenaria  
 UdeM00000034129 6596 286.2 UdeM00000034129 XP\_045179257.1 64.9 205  
 71 1 10 214 7 210 3.50E-74 286.2 6596 cellular  
 organisms;Eukaryota;Opisthokonta;Metazoa;Eumetazoa;Bilateria;Protostomia;  
 Spiralia;Lophotrochozoa;Mollusca;Bivalvia;Autobranchia;Heteroconchia;Euhe  
 terodonta;Imparidentia;Venerida;Veneroidea;Veneridae;Mercenaria;Mercenari  
 a mercenaria  
 UdeM00000034132 6579 63.9 UdeM00000034132 XP\_033745803.1 38.6 88  
 51 1 17 101 284 371 2.40E-07 63.9 6579 cellular

organisms;Eukaryota;Opisthokonta;Metazoa;Eumetazoa;Bilateria;Protostomia;  
Spiralia;Lophotrochozoa;Mollusca;Bivalvia;Autobranchia;Pteriomorpha;Pect  
inida;Pectinoidea;Pectinidae;Pecten;Pecten maximus  
UdeM00000034133 29159 129.8 UdeM00000034133 XP\_011443561.2 45.5 178  
67 4 11 164 10 181 3.20E-27 129.8 29159 cellular  
organisms;Eukaryota;Opisthokonta;Metazoa;Eumetazoa;Bilateria;Protostomia;  
Spiralia;Lophotrochozoa;Mollusca;Bivalvia;Autobranchia;Pteriomorpha;Ostr  
eida;Ostreoidea;Ostreidae;Crassostrea;Crassostrea gigas  
UdeM00000034134 29159 124.8 UdeM00000034134 XP\_011443561.2 45.5 134  
49 2 32 141 48 181 8.80E-26 124.8 29159 cellular  
organisms;Eukaryota;Opisthokonta;Metazoa;Eumetazoa;Bilateria;Protostomia;  
Spiralia;Lophotrochozoa;Mollusca;Bivalvia;Autobranchia;Pteriomorpha;Ostr  
eida;Ostreoidea;Ostreidae;Crassostrea;Crassostrea gigas  
UdeM00000034135 6596 367.9 UdeM00000034135 XP\_045201099.1 65.2 250  
87 0 25 274 1 250 1.20E-98 367.9 6596 cellular  
organisms;Eukaryota;Opisthokonta;Metazoa;Eumetazoa;Bilateria;Protostomia;  
Spiralia;Lophotrochozoa;Mollusca;Bivalvia;Autobranchia;Heteroconchia;Euhe  
terodonta;Imparidentia;Venerida;Veneroidea;Veneridae;Mercenaria;Mercenari  
a mercenaria  
UdeM00000034136 6596 96.7 UdeM00000034136 XP\_045188256.1 40.9 132  
72 3 145 270 245 376 5.10E-17 96.7 6596 cellular  
organisms;Eukaryota;Opisthokonta;Metazoa;Eumetazoa;Bilateria;Protostomia;  
Spiralia;Lophotrochozoa;Mollusca;Bivalvia;Autobranchia;Heteroconchia;Euhe  
terodonta;Imparidentia;Venerida;Veneroidea;Veneridae;Mercenaria;Mercenari  
a mercenaria  
UdeM00000034137 6579 167.5 UdeM00000034137 XP\_033729693.1 66.7 105  
35 0 1 105 68 172 3.40E-38 167.5 6579 cellular  
organisms;Eukaryota;Opisthokonta;Metazoa;Eumetazoa;Bilateria;Protostomia;  
Spiralia;Lophotrochozoa;Mollusca;Bivalvia;Autobranchia;Pteriomorpha;Pect  
inida;Pectinoidea;Pectinidae;Pecten;Pecten maximus  
UdeM00000034138 6573 99.4 UdeM00000034138 XP\_021365625.1 47.6 105  
55 0 27 131 22 126 6.40E-18 99.4 6573 cellular  
organisms;Eukaryota;Opisthokonta;Metazoa;Eumetazoa;Bilateria;Protostomia;  
Spiralia;Lophotrochozoa;Mollusca;Bivalvia;Autobranchia;Pteriomorpha;Pect  
inida;Pectinoidea;Pectinidae;Mizuhopecten;Mizuhopecten yessoensis  
UdeM00000034139 37621 150.6 UdeM00000034139 XP\_014677462.1 69.6 92  
28 0 1 92 1 92 9.90E-34 150.6 37621 cellular  
organisms;Eukaryota;Opisthokonta;Metazoa;Eumetazoa;Bilateria;Protostomia;  
Ecdysozoa;Scalidophora;Priapulida;Priapulimorpha;Priapulimorphida;Priapul  
idae;Priapululus;Priapululus caudatus  
UdeM00000034141 6579 259.2 UdeM00000034141 XP\_033754238.1 57.6 217  
91 1 1 217 1 216 4.60E-66 259.2 6579 cellular  
organisms;Eukaryota;Opisthokonta;Metazoa;Eumetazoa;Bilateria;Protostomia;  
Spiralia;Lophotrochozoa;Mollusca;Bivalvia;Autobranchia;Pteriomorpha;Pect  
inida;Pectinoidea;Pectinidae;Pecten;Pecten maximus  
UdeM00000034143 1529436 147.1 UdeM00000034143 XP\_033121366.1 45.9  
135 73 0 1 135 85 219 1.70E-32 147.1 1529436  
cellular  
organisms;Eukaryota;Opisthokonta;Metazoa;Eumetazoa;Bilateria;Deuterostomi  
a;Echinodermata;Pelmatozoa;Crinoidea;Articulata;Comatulida;Comatulidae;Co  
matulinae;Anneissia;Anneissia japonica  
UdeM00000034144 29159 228.8 UdeM00000034144 XP\_034305523.1 50.5 200  
97 2 1 198 737 936 6.60E-57 228.8 29159 cellular  
organisms;Eukaryota;Opisthokonta;Metazoa;Eumetazoa;Bilateria;Protostomia;

Spiralia; Lophotrochozoa; Mollusca; Bivalvia; Autobranchia; Pteriomorpha; Ostr  
eida; Ostreidae; Crassostrea; Crassostrea gigas  
UdeM00000034145 37653 88.6 UdeM00000034145 XP\_014784938.1 57.1 63  
27 0 1 63 300 362 3.70E-15 88.6 37653 cellular  
organisms; Eukaryota; Opisthokonta; Metazoa; Eumetazoa; Bilateria; Protostomia;  
Spiralia; Lophotrochozoa; Mollusca; Cephalopoda; Coleoidea; Octopodiformes; Oct  
opoda; Incirrata; Octopodidae; Octopus; Octopus bimaculoides  
UdeM00000034146 6573 165.6 UdeM00000034146 XP\_021373558.1 54.7 161  
70 3 114 273 158 316 8.90E-38 165.6 6573 cellular  
organisms; Eukaryota; Opisthokonta; Metazoa; Eumetazoa; Bilateria; Protostomia;  
Spiralia; Lophotrochozoa; Mollusca; Bivalvia; Autobranchia; Pteriomorpha; Pect  
inida; Pectinoidea; Pectinidae; Mizuhopecten; Mizuhopecten yessoensis  
UdeM00000034147 6565 301.2 UdeM00000034147 XP\_022314529.1 40 412  
162 4 1 327 37 448 1.60E-78 301.2 6565 cellular  
organisms; Eukaryota; Opisthokonta; Metazoa; Eumetazoa; Bilateria; Protostomia;  
Spiralia; Lophotrochozoa; Mollusca; Bivalvia; Autobranchia; Pteriomorpha; Ostr  
eida; Ostreidae; Crassostrea; Crassostrea virginica  
UdeM00000034148 6573 263.8 UdeM00000034148 XP\_021342558.1 36 483  
255 11 1 442 1 470 3.90E-67 263.8 6573 cellular  
organisms; Eukaryota; Opisthokonta; Metazoa; Eumetazoa; Bilateria; Protostomia;  
Spiralia; Lophotrochozoa; Mollusca; Bivalvia; Autobranchia; Pteriomorpha; Pect  
inida; Pectinoidea; Pectinidae; Mizuhopecten; Mizuhopecten yessoensis  
UdeM00000034149 6565 1171 UdeM00000034149 XP\_022320464.1 75 853  
201 7 1 848 1 846 0.00E+00 1171 6565 cellular  
organisms; Eukaryota; Opisthokonta; Metazoa; Eumetazoa; Bilateria; Protostomia;  
Spiralia; Lophotrochozoa; Mollusca; Bivalvia; Autobranchia; Pteriomorpha; Ostr  
eida; Ostreidae; Crassostrea; Crassostrea virginica  
UdeM00000034150 6565 1163.7 UdeM00000034150 XP\_022320464.1 74.5  
859 201 8 1 854 1 846 0.00E+00 1163.7 6565  
cellular  
organisms; Eukaryota; Opisthokonta; Metazoa; Eumetazoa; Bilateria; Protostomia;  
Spiralia; Lophotrochozoa; Mollusca; Bivalvia; Autobranchia; Pteriomorpha; Ostr  
eida; Ostreidae; Crassostrea; Crassostrea virginica  
UdeM00000034151 6596 399.8 UdeM00000034151 XP\_045179125.1 47.8 473  
213 9 1 462 1 450 4.70E-108 399.8 6596 cellular  
organisms; Eukaryota; Opisthokonta; Metazoa; Eumetazoa; Bilateria; Protostomia;  
Spiralia; Lophotrochozoa; Mollusca; Bivalvia; Autobranchia; Heteroconchia; Euhe  
terodonta; Imparidentia; Venerida; Veneroidea; Veneridae; Mercenaria; Mercenari  
a mercenaria  
UdeM00000034152 6579 3677.9 UdeM00000034152 XP\_033727987.1 80.2  
2242 428 6 1 2237 1 2230 0.00E+00 3677.9 6579  
cellular  
organisms; Eukaryota; Opisthokonta; Metazoa; Eumetazoa; Bilateria; Protostomia;  
Spiralia; Lophotrochozoa; Mollusca; Bivalvia; Autobranchia; Pteriomorpha; Pect  
inida; Pectinoidea; Pectinidae; Pecten; Pecten maximus  
UdeM00000034153 6579 884.8 UdeM00000034153 XP\_033728365.1 58.9 740  
301 1 5 744 39 775 7.60E-254 884.8 6579 cellular  
organisms; Eukaryota; Opisthokonta; Metazoa; Eumetazoa; Bilateria; Protostomia;  
Spiralia; Lophotrochozoa; Mollusca; Bivalvia; Autobranchia; Pteriomorpha; Pect  
inida; Pectinoidea; Pectinidae; Pecten; Pecten maximus  
UdeM00000034154 6596 301.6 UdeM00000034154 XP\_045177776.1 33.2 639  
243 12 1 623 405 875 2.30E-78 301.6 6596 cellular  
organisms; Eukaryota; Opisthokonta; Metazoa; Eumetazoa; Bilateria; Protostomia;  
Spiralia; Lophotrochozoa; Mollusca; Bivalvia; Autobranchia; Heteroconchia; Euhe

terodonta;Imparidentia;Venerida;Veneroidea;Veneridae;Mercenaria;Mercenari  
 a mercenaria  
 UdeM00000034155 45351 86.7 UdeM00000034155 XP\_001623471.2 31.9 235  
 127 7 3 208 6 236 4.00E-14 86.7 45351 cellular  
 organisms;Eukaryota;Opisthokonta;Metazoa;Eumetazoa;Cnidaria;Anthozoa;Hexa  
 corallia;Actiniaria;Edwardsiidae;Nematostella;Nematostella vectensis  
 UdeM00000034156 6596 534.6 UdeM00000034156 XP\_045177700.1 76.5 378  
 80 4 2 379 3 371 1.10E-148 534.6 6596 cellular  
 organisms;Eukaryota;Opisthokonta;Metazoa;Eumetazoa;Bilateria;Protostomia;  
 Spiralia;Lophotrochozoa;Mollusca;Bivalvia;Autobranchia;Heteroconchia;Euhe  
 terodonta;Imparidentia;Venerida;Veneroidea;Veneridae;Mercenaria;Mercenari  
 a mercenaria  
 UdeM00000034157 6596 815.5 UdeM00000034157 XP\_045177696.1 54.2 708  
 303 4 1 693 7 708 5.30E-233 815.5 6596 cellular  
 organisms;Eukaryota;Opisthokonta;Metazoa;Eumetazoa;Bilateria;Protostomia;  
 Spiralia;Lophotrochozoa;Mollusca;Bivalvia;Autobranchia;Heteroconchia;Euhe  
 terodonta;Imparidentia;Venerida;Veneroidea;Veneridae;Mercenaria;Mercenari  
 a mercenaria  
 UdeM00000034158 6573 147.5 UdeM00000034158 XP\_021341696.1 54.6 152  
 49 5 1 148 483 618 1.30E-32 147.5 6573 cellular  
 organisms;Eukaryota;Opisthokonta;Metazoa;Eumetazoa;Bilateria;Protostomia;  
 Spiralia;Lophotrochozoa;Mollusca;Bivalvia;Autobranchia;Pteriormorphia;Pect  
 inida;Pectinoidea;Pectinidae;Mizuhopecten;Mizuhopecten yessoensis  
 UdeM00000034159 29159 340.9 UdeM00000034159 XP\_034301291.1 37.7 509  
 294 11 89 579 97 600 3.20E-90 340.9 29159 cellular  
 organisms;Eukaryota;Opisthokonta;Metazoa;Eumetazoa;Bilateria;Protostomia;  
 Spiralia;Lophotrochozoa;Mollusca;Bivalvia;Autobranchia;Pteriormorphia;Ostr  
 eida;Ostreoidea;Ostreidae;Crassostrea;Crassostrea gigas  
 UdeM00000034160 29159 1046.2 UdeM00000034160 XP\_034301291.1 54.8  
 1044 427 18 2 1032 618 1629 3.10E-302 1046.2  
 29159 cellular  
 organisms;Eukaryota;Opisthokonta;Metazoa;Eumetazoa;Bilateria;Protostomia;  
 Spiralia;Lophotrochozoa;Mollusca;Bivalvia;Autobranchia;Pteriormorphia;Ostr  
 eida;Ostreoidea;Ostreidae;Crassostrea;Crassostrea gigas  
 UdeM00000034161 6596 193.7 UdeM00000034161 XP\_045178320.1 24.8 1265  
 685 41 25 1118 849 2018 1.20E-45 193.7 6596 cellular  
 organisms;Eukaryota;Opisthokonta;Metazoa;Eumetazoa;Bilateria;Protostomia;  
 Spiralia;Lophotrochozoa;Mollusca;Bivalvia;Autobranchia;Heteroconchia;Euhe  
 terodonta;Imparidentia;Venerida;Veneroidea;Veneridae;Mercenaria;Mercenari  
 a mercenaria  
 UdeM00000034162 6596 93.6 UdeM00000034162 XP\_045178322.1 41.9 117  
 62 3 14 126 708 822 4.80E-16 93.6 6596 cellular  
 organisms;Eukaryota;Opisthokonta;Metazoa;Eumetazoa;Bilateria;Protostomia;  
 Spiralia;Lophotrochozoa;Mollusca;Bivalvia;Autobranchia;Heteroconchia;Euhe  
 terodonta;Imparidentia;Venerida;Veneroidea;Veneridae;Mercenaria;Mercenari  
 a mercenaria  
 UdeM00000034164 6526 102.1 UdeM00000034164 XP\_013078966.1 26.8 317  
 223 5 72 379 56 372 1.70E-18 102.1 6526 cellular  
 organisms;Eukaryota;Opisthokonta;Metazoa;Eumetazoa;Bilateria;Protostomia;  
 Spiralia;Lophotrochozoa;Mollusca;Gastropoda;Heterobranchia;Euthyneura;Pan  
 pulmonata;Hygrophila;Lymnaeioidea;Planorbidae;Biophalaria;Biophalaria  
 glabrata  
 UdeM00000040543 6596 191 UdeM00000040543 XP\_045180677.1 76.3 118  
 24 1 3 116 1090 1207 2.10E-45 191 6596 cellular

organisms;Eukaryota;Opisthokonta;Metazoa;Eumetazoa;Bilateria;Protostomia;Spiralia;Lophotrochozoa;Mollusca;Bivalvia;Autobranchia;Heteroconchia;Euheterodonta;Imparidentia;Venerida;Veneroidea;Veneridae;Mercenaria;Mercenaria mercenaria

UdeM00000040543 6596 162.2 UdeM00000040543 XP\_045180677.1 62.3 154  
51 3 143 290 2724 2876 1.00E-36 162.2 6596 cellular

organisms;Eukaryota;Opisthokonta;Metazoa;Eumetazoa;Bilateria;Protostomia;Spiralia;Lophotrochozoa;Mollusca;Bivalvia;Autobranchia;Heteroconchia;Euheterodonta;Imparidentia;Venerida;Veneroidea;Veneridae;Mercenaria;Mercenaria mercenaria

UdeM00000040544 6565 146 UdeM00000040544 XP\_022289882.1 88 75  
9 0 2 76 2700 2774 2.20E-32 146 6565 cellular

organisms;Eukaryota;Opisthokonta;Metazoa;Eumetazoa;Bilateria;Protostomia;Spiralia;Lophotrochozoa;Mollusca;Bivalvia;Autobranchia;Pteriormorphia;Ostreida;Ostreoidea;Ostreidae;Crassostrea;Crassostrea virginica

UdeM00000040545 6573 300.1 UdeM00000040545 XP\_021377534.1 92.3 156  
12 0 1 156 2893 3048 1.70E-78 300.1 6573 cellular

organisms;Eukaryota;Opisthokonta;Metazoa;Eumetazoa;Bilateria;Protostomia;Spiralia;Lophotrochozoa;Mollusca;Bivalvia;Autobranchia;Pteriormorphia;Pectinida;Pectinoidea;Pectinidae;Mizuhopecten;Mizuhopecten yessoensis

UdeM00000040546 6565 766.5 UdeM00000040546 XP\_022311347.1 59.5 657  
248 8 1 656 148 787 2.70E-218 766.5 6565 cellular

organisms;Eukaryota;Opisthokonta;Metazoa;Eumetazoa;Bilateria;Protostomia;Spiralia;Lophotrochozoa;Mollusca;Bivalvia;Autobranchia;Pteriormorphia;Ostreida;Ostreoidea;Ostreidae;Crassostrea;Crassostrea virginica

UdeM00000040547 6565 65.5 UdeM00000040547 XP\_022316733.1 66.7 39  
13 0 1 39 188 226 8.80E-08 65.5 6565 cellular

organisms;Eukaryota;Opisthokonta;Metazoa;Eumetazoa;Bilateria;Protostomia;Spiralia;Lophotrochozoa;Mollusca;Bivalvia;Autobranchia;Pteriormorphia;Ostreida;Ostreoidea;Ostreidae;Crassostrea;Crassostrea virginica

UdeM00000040548 6596 96.7 UdeM00000040548 XP\_045180822.1 48.5 99  
38 2 1 86 1 99 1.80E-17 96.7 6596 cellular

organisms;Eukaryota;Opisthokonta;Metazoa;Eumetazoa;Bilateria;Protostomia;Spiralia;Lophotrochozoa;Mollusca;Bivalvia;Autobranchia;Heteroconchia;Euheterodonta;Imparidentia;Venerida;Veneroidea;Veneridae;Mercenaria;Mercenaria mercenaria

UdeM00000040551 2607531 193.7 UdeM00000040551 XP\_036371126.1 62.3  
130 49 0 2 131 453 582 1.50E-46 193.7 2607531  
cellular

organisms;Eukaryota;Opisthokonta;Metazoa;Eumetazoa;Bilateria;Protostomia;Spiralia;Lophotrochozoa;Mollusca;Cephalopoda;Coleoidea;Octopodiformes;Octopoda;Incirrata;Octopodidae;Octopus;Octopus sinensis

UdeM00000040552 441366 611.3 UdeM00000040552 XP\_028318211.1 56.5  
455 197 1 1 454 163 617 1.00E-171 611.3 441366

cellular  
organisms;Eukaryota;Opisthokonta;Metazoa;Eumetazoa;Bilateria;Deuterostomia;Chordata;Craniata;Vertebrata;Gnathostomata;Teleostomi;Euteleostomi;Actinopterygii;Actinopteri;Neopterygii;Teleostei;Osteoglossocephalai;Clupeocephala;Euteleostei;Neoteleostei;Eurypterygia;Ctenosquamata;Acanthomorphata;Euacanthomorphacea;Percomorphaceae;Ovalentaria;Blenniiformes;Blenniiformes;Gobiesocidae;Gobiesocinae;Gouania;Gouania willdenowi

UdeM00000040553 1735272 255.8 UdeM00000040553 XP\_041352907.1 48.2  
257 119 4 92 337 93 346 7.90E-65 255.8 1735272

cellular  
organisms;Eukaryota;Opisthokonta;Metazoa;Eumetazoa;Bilateria;Protostomia;  
Spiralia;Lophotrochozoa;Mollusca;Gastropoda;Neomphalina;Neomphaloidea;Pel  
tospiridae;Gigantopelta;Gigantopelta aegis  
UdeM00000005100 6565 184.5 UdeM00000005100 XP\_022313739.1 65.1 146  
47 2 81 223 180 324 1.50E-43 184.5 6565 cellular  
organisms;Eukaryota;Opisthokonta;Metazoa;Eumetazoa;Bilateria;Protostomia;  
Spiralia;Lophotrochozoa;Mollusca;Bivalvia;Autobranchia;Pteriormorphia;Ostr  
eida;Ostreoidea;Ostreidae;Crassostrea;Crassostrea virginica  
UdeM00000005101 6565 229.9 UdeM00000005101 XP\_022317541.1 34.7 714  
448 10 9 707 7 717 2.10E-56 229.9 6565 cellular  
organisms;Eukaryota;Opisthokonta;Metazoa;Eumetazoa;Bilateria;Protostomia;  
Spiralia;Lophotrochozoa;Mollusca;Bivalvia;Autobranchia;Pteriormorphia;Ostr  
eida;Ostreoidea;Ostreidae;Crassostrea;Crassostrea virginica  
UdeM00000005102 6573 840.9 UdeM00000005102 XP\_021343599.1 65.5 663  
209 7 1 655 1 651 1.10E-240 840.9 6573 cellular  
organisms;Eukaryota;Opisthokonta;Metazoa;Eumetazoa;Bilateria;Protostomia;  
Spiralia;Lophotrochozoa;Mollusca;Bivalvia;Autobranchia;Pteriormorphia;Pect  
inida;Pectinoidea;Pectinidae;Mizuhopecten;Mizuhopecten yessoensis  
UdeM00000005103 6565 313.9 UdeM00000005103 XP\_022314297.1 53.5 271  
125 1 1 271 116 385 2.00E-82 313.9 6565 cellular  
organisms;Eukaryota;Opisthokonta;Metazoa;Eumetazoa;Bilateria;Protostomia;  
Spiralia;Lophotrochozoa;Mollusca;Bivalvia;Autobranchia;Pteriormorphia;Ostr  
eida;Ostreoidea;Ostreidae;Crassostrea;Crassostrea virginica  
UdeM00000005104 6596 152.9 UdeM00000005104 XP\_045158376.1 71.7 99  
27 1 14 111 10 108 2.40E-34 152.9 6596 cellular  
organisms;Eukaryota;Opisthokonta;Metazoa;Eumetazoa;Bilateria;Protostomia;  
Spiralia;Lophotrochozoa;Mollusca;Bivalvia;Autobranchia;Heteroconchia;Euhe  
terodonta;Imparidentia;Venerida;Veneroidea;Veneridae;Mercenaria;Mercenari  
a mercenaria  
UdeM00000005105 6596 704.1 UdeM00000005105 XP\_045158955.1 78.2 440  
95 1 1 440 1 439 1.10E-199 704.1 6596 cellular  
organisms;Eukaryota;Opisthokonta;Metazoa;Eumetazoa;Bilateria;Protostomia;  
Spiralia;Lophotrochozoa;Mollusca;Bivalvia;Autobranchia;Heteroconchia;Euhe  
terodonta;Imparidentia;Venerida;Veneroidea;Veneridae;Mercenaria;Mercenari  
a mercenaria  
UdeM00000005106 6596 320.5 UdeM00000005106 XP\_045158957.1 50.7 341  
158 6 2 338 461 795 2.60E-84 320.5 6596 cellular  
organisms;Eukaryota;Opisthokonta;Metazoa;Eumetazoa;Bilateria;Protostomia;  
Spiralia;Lophotrochozoa;Mollusca;Bivalvia;Autobranchia;Heteroconchia;Euhe  
terodonta;Imparidentia;Venerida;Veneroidea;Veneridae;Mercenaria;Mercenari  
a mercenaria  
UdeM00000005107 31138 79.3 UdeM00000005107 XP\_034615470.1 40.4 114  
58 1 26 129 949 1062 4.70E-12 79.3 31138 cellular  
organisms;Eukaryota;Opisthokonta;Metazoa;Eumetazoa;Bilateria;Deuterostomi  
a;Chordata;Craniata;Vertebrata;Gnathostomata;Teleostomi;Euteleostomi;Sarc  
opterygii;Dipnotetrapodomorpha;Tetrapoda;Amniota;Sauropsida;Sauria;Archel  
osauria;Testudinata;Testudines;Cryptodira;Durocryptodira;Testudinoidea;Em  
ydididae;Trachemys;Trachemys scripta;Trachemys scripta elegans  
UdeM00000005108 6573 143.7 UdeM00000005108 XP\_021363148.1 43.8 320  
153 7 23 332 4 306 4.80E-31 143.7 6573 cellular  
organisms;Eukaryota;Opisthokonta;Metazoa;Eumetazoa;Bilateria;Protostomia;  
Spiralia;Lophotrochozoa;Mollusca;Bivalvia;Autobranchia;Pteriormorphia;Pect  
inida;Pectinoidea;Pectinidae;Mizuhopecten;Mizuhopecten yessoensis

UdeM00000005109 6565 126.3 UdeM00000005109 XP\_022318049.1 63.5 115  
 33 3 1 115 1 106 2.50E-26 126.3 6565 cellular  
 organisms;Eukaryota;Opisthokonta;Metazoa;Eumetazoa;Bilateria;Protostomia;  
 Spiralia;Lophotrochozoa;Mollusca;Bivalvia;Autobranchia;Pteriomorpha;Ostr  
 eida;Ostreoidea;Ostreidae;Crassostrea;Crassostrea virginica  
 UdeM00000005110 6565 110.2 UdeM00000005110 XP\_022318050.1 60.7 107  
 33 3 1 107 8 105 1.70E-21 110.2 6565 cellular  
 organisms;Eukaryota;Opisthokonta;Metazoa;Eumetazoa;Bilateria;Protostomia;  
 Spiralia;Lophotrochozoa;Mollusca;Bivalvia;Autobranchia;Pteriomorpha;Ostr  
 eida;Ostreoidea;Ostreidae;Crassostrea;Crassostrea virginica  
 UdeM00000005111 6596 238.4 UdeM00000005111 XP\_045160421.1 46.3 283  
 151 1 43 324 3 285 1.30E-59 238.4 6596 cellular  
 organisms;Eukaryota;Opisthokonta;Metazoa;Eumetazoa;Bilateria;Protostomia;  
 Spiralia;Lophotrochozoa;Mollusca;Bivalvia;Autobranchia;Heteroconchia;Euhe  
 terodonta;Imparidentia;Venerida;Veneroidea;Veneridae;Mercenaria;Mercenari  
 a mercenaria  
 UdeM00000005112 6596 196.4 UdeM00000005112 XP\_045160427.1 45.2 434  
 210 11 1 425 24 438 7.20E-47 196.4 6596 cellular  
 organisms;Eukaryota;Opisthokonta;Metazoa;Eumetazoa;Bilateria;Protostomia;  
 Spiralia;Lophotrochozoa;Mollusca;Bivalvia;Autobranchia;Heteroconchia;Euhe  
 terodonta;Imparidentia;Venerida;Veneroidea;Veneridae;Mercenaria;Mercenari  
 a mercenaria  
 UdeM00000005113 400727 241.1 UdeM00000005113 XP\_025109700.1 52.5  
 219 101 2 48 265 25 241 2.00E-60 241.1 400727  
 cellular  
 organisms;Eukaryota;Opisthokonta;Metazoa;Eumetazoa;Bilateria;Protostomia;  
 Spiralia;Lophotrochozoa;Mollusca;Gastropoda;Caenogastropoda;Architaeniogl  
 ossa;Ampullarioidea;Ampullariidae;Pomacea;Pomacea canaliculata  
 UdeM00000005114 6596 132.1 UdeM00000005114 XP\_045160951.1 66.3 98  
 29 2 42 138 979 1073 5.80E-28 132.1 6596 cellular  
 organisms;Eukaryota;Opisthokonta;Metazoa;Eumetazoa;Bilateria;Protostomia;  
 Spiralia;Lophotrochozoa;Mollusca;Bivalvia;Autobranchia;Heteroconchia;Euhe  
 terodonta;Imparidentia;Venerida;Veneroidea;Veneridae;Mercenaria;Mercenari  
 a mercenaria  
 UdeM00000005115 6596 131.7 UdeM00000005115 XP\_045160951.1 66.3 98  
 29 2 42 138 979 1073 8.10E-28 131.7 6596 cellular  
 organisms;Eukaryota;Opisthokonta;Metazoa;Eumetazoa;Bilateria;Protostomia;  
 Spiralia;Lophotrochozoa;Mollusca;Bivalvia;Autobranchia;Heteroconchia;Euhe  
 terodonta;Imparidentia;Venerida;Veneroidea;Veneridae;Mercenaria;Mercenari  
 a mercenaria  
 UdeM00000005117 6596 79.3 UdeM00000005117 XP\_045160951.1 45.8 120  
 49 5 81 193 862 972 6.90E-12 79.3 6596 cellular  
 organisms;Eukaryota;Opisthokonta;Metazoa;Eumetazoa;Bilateria;Protostomia;  
 Spiralia;Lophotrochozoa;Mollusca;Bivalvia;Autobranchia;Heteroconchia;Euhe  
 terodonta;Imparidentia;Venerida;Veneroidea;Veneridae;Mercenaria;Mercenari  
 a mercenaria  
 UdeM00000005116 6596 79.3 UdeM00000005116 XP\_045160951.1 45.8 120  
 49 5 119 231 862 972 8.10E-12 79.3 6596 cellular  
 organisms;Eukaryota;Opisthokonta;Metazoa;Eumetazoa;Bilateria;Protostomia;  
 Spiralia;Lophotrochozoa;Mollusca;Bivalvia;Autobranchia;Heteroconchia;Euhe  
 terodonta;Imparidentia;Venerida;Veneroidea;Veneridae;Mercenaria;Mercenari  
 a mercenaria  
 UdeM00000005118 6596 494.6 UdeM00000005118 XP\_045159996.1 56.3 449  
 192 2 1 446 19 466 1.30E-136 494.6 6596 cellular



organisms;Eukaryota;Opisthokonta;Metazoa;Eumetazoa;Bilateria;Protostomia;Spiralia;Lophotrochozoa;Mollusca;Bivalvia;Autobranhia;Heteroconchia;Euherodonta;Imparidentia;Venerida;Veneroidea;Veneridae;Mercenaria;Mercenaria mercenaria

UdeM00000005119 6596 295 UdeM00000005119 XP\_045160951.1 44.4 396  
167 10 1 375 401 764 1.40E-76 295 6596 cellular

organisms;Eukaryota;Opisthokonta;Metazoa;Eumetazoa;Bilateria;Protostomia;Spiralia;Lophotrochozoa;Mollusca;Bivalvia;Autobranhia;Heteroconchia;Euherodonta;Imparidentia;Venerida;Veneroidea;Veneridae;Mercenaria;Mercenaria mercenaria

UdeM00000005120 6579 645.6 UdeM00000005120 XP\_033738021.1 75 400  
100 0 1 400 1 400 4.30E-182 645.6 6579 cellular

organisms;Eukaryota;Opisthokonta;Metazoa;Eumetazoa;Bilateria;Protostomia;Spiralia;Lophotrochozoa;Mollusca;Bivalvia;Autobranhia;Pteriormorphia;Pectinida;Pectinoidea;Pectinidae;Pecten;Pecten maximus

UdeM00000005121 400727 327.8 UdeM00000005121 XP\_025079053.1 55.7  
316 136 2 1 315 1 313 1.50E-86 327.8 400727  
cellular

organisms;Eukaryota;Opisthokonta;Metazoa;Eumetazoa;Bilateria;Protostomia;Spiralia;Lophotrochozoa;Mollusca;Gastropoda;Caenogastropoda;Architaenioglossa;Ampullarioidea;Ampullariidae;Pomacea;Pomacea canaliculata

UdeM00000005122 6596 390.6 UdeM00000005122 XP\_045159547.1 30.5 2180  
1097 72 42 2121 11 1871 1.30E-104 390.6 6596 cellular

organisms;Eukaryota;Opisthokonta;Metazoa;Eumetazoa;Bilateria;Protostomia;Spiralia;Lophotrochozoa;Mollusca;Bivalvia;Autobranhia;Heteroconchia;Euherodonta;Imparidentia;Venerida;Veneroidea;Veneridae;Mercenaria;Mercenaria mercenaria

UdeM00000005123 6596 389 UdeM00000005123 XP\_045159547.1 30.4 2152  
1086 70 1 2059 11 1843 3.70E-104 389 6596 cellular

organisms;Eukaryota;Opisthokonta;Metazoa;Eumetazoa;Bilateria;Protostomia;Spiralia;Lophotrochozoa;Mollusca;Bivalvia;Autobranhia;Heteroconchia;Euherodonta;Imparidentia;Venerida;Veneroidea;Veneridae;Mercenaria;Mercenaria mercenaria

UdeM00000005124 6596 603.6 UdeM00000005124 XP\_045160646.1 69.5 410  
124 1 50 459 4 412 2.10E-169 603.6 6596 cellular

organisms;Eukaryota;Opisthokonta;Metazoa;Eumetazoa;Bilateria;Protostomia;Spiralia;Lophotrochozoa;Mollusca;Bivalvia;Autobranhia;Heteroconchia;Euherodonta;Imparidentia;Venerida;Veneroidea;Veneridae;Mercenaria;Mercenaria mercenaria

UdeM00000005125 1735272 761.5 UdeM00000005125 XP\_041357023.1 46.7  
836 404 20 1 808 37 858 1.10E-216 761.5 1735272  
cellular

organisms;Eukaryota;Opisthokonta;Metazoa;Eumetazoa;Bilateria;Protostomia;Spiralia;Lophotrochozoa;Mollusca;Gastropoda;Neomphalina;Neomphaloidea;Peltospiridae;Gigantopelta;Gigantopelta aegis

UdeM00000005126 6596 887.9 UdeM00000005126 XP\_045159523.1 63.5 657  
235 3 19 673 7 660 8.20E-255 887.9 6596 cellular

organisms;Eukaryota;Opisthokonta;Metazoa;Eumetazoa;Bilateria;Protostomia;Spiralia;Lophotrochozoa;Mollusca;Bivalvia;Autobranhia;Heteroconchia;Euherodonta;Imparidentia;Venerida;Veneroidea;Veneridae;Mercenaria;Mercenaria mercenaria

UdeM00000005127 7574 121.3 UdeM00000005127 XP\_013404165.1 53.2 111  
52 0 2 112 666 776 8.20E-25 121.3 7574 cellular

organisms;Eukaryota;Opisthokonta;Metazoa;Eumetazoa;Bilateria;Protostomia;

Spiralia;Lophotrochozoa;Brachiopoda;Linguliformea;Lingulata;Lingulida;Linguloidea;Lingulidae;Lingula;Lingula anatina

UdeM00000005128 7574 121.7 UdeM00000005128 XP\_013404165.1 53.2 111  
52 0 2 112 666 776 7.20E-25 121.7 7574 cellular  
organisms;Eukaryota;Opisthokonta;Metazoa;Eumetazoa;Bilateria;Protostomia;  
Spiralia;Lophotrochozoa;Brachiopoda;Linguliformea;Lingulata;Lingulida;Linguloidea;Lingulidae;Lingula;Lingula anatina

UdeM00000005129 6596 1010 UdeM00000005129 XP\_045159523.1 61.3 776  
294 4 9 781 3 775 1.70E-291 1010 6596 cellular  
organisms;Eukaryota;Opisthokonta;Metazoa;Eumetazoa;Bilateria;Protostomia;  
Spiralia;Lophotrochozoa;Mollusca;Bivalvia;Autobranchia;Heteroconchia;Euherodonta;Imparidentia;Venerida;Veneroidea;Veneridae;Mercenaria;Mercenaria mercenaria

UdeM00000005130 6596 794.7 UdeM00000005130 XP\_045160278.1 70.5 563  
149 2 140 693 1 555 9.70E-227 794.7 6596 cellular  
organisms;Eukaryota;Opisthokonta;Metazoa;Eumetazoa;Bilateria;Protostomia;  
Spiralia;Lophotrochozoa;Mollusca;Bivalvia;Autobranchia;Heteroconchia;Euherodonta;Imparidentia;Venerida;Veneroidea;Veneridae;Mercenaria;Mercenaria mercenaria

UdeM00000005132 400727 927.2 UdeM00000005132 XP\_025111001.1 58.2  
1017 399 7 86 1096 70 1066 2.00E-266 927.2 400727  
cellular  
organisms;Eukaryota;Opisthokonta;Metazoa;Eumetazoa;Bilateria;Protostomia;  
Spiralia;Lophotrochozoa;Mollusca;Gastropoda;Caenogastropoda;Architaenioglossa;Ampullarioidea;Ampullariidae;Pomacea;Pomacea canaliculata

UdeM00000005133 6579 326.2 UdeM00000005133 XP\_033738116.1 60 240  
96 0 1 240 7 246 3.40E-86 326.2 6579 cellular  
organisms;Eukaryota;Opisthokonta;Metazoa;Eumetazoa;Bilateria;Protostomia;  
Spiralia;Lophotrochozoa;Mollusca;Bivalvia;Autobranchia;Pteriomorphia;Pectinida;Pectinoidea;Pectinidae;Pecten;Pecten maximus

UdeM00000005134 6565 170.2 UdeM00000005134 XP\_022313153.1 52.8 176  
69 4 57 228 55 220 3.00E-39 170.2 6565 cellular  
organisms;Eukaryota;Opisthokonta;Metazoa;Eumetazoa;Bilateria;Protostomia;  
Spiralia;Lophotrochozoa;Mollusca;Bivalvia;Autobranchia;Pteriomorphia;Ostreida;Ostreoidea;Ostreidae;Crassostrea;Crassostrea virginica

UdeM00000005135 29159 511.5 UdeM00000005135 XP\_034313958.1 55.7 521  
201 7 3 506 2 509 6.10E-141 511.5 29159 cellular  
organisms;Eukaryota;Opisthokonta;Metazoa;Eumetazoa;Bilateria;Protostomia;  
Spiralia;Lophotrochozoa;Mollusca;Bivalvia;Autobranchia;Pteriomorphia;Ostreida;Ostreoidea;Ostreidae;Crassostrea;Crassostrea gigas

UdeM00000005136 6596 1707.2 UdeM00000005136 XP\_045160034.1 74.4  
1094 276 4 7 1098 19 1110 0.00E+00 1707.2 6596  
cellular  
organisms;Eukaryota;Opisthokonta;Metazoa;Eumetazoa;Bilateria;Protostomia;  
Spiralia;Lophotrochozoa;Mollusca;Bivalvia;Autobranchia;Heteroconchia;Euherodonta;Imparidentia;Venerida;Veneroidea;Veneridae;Mercenaria;Mercenaria mercenaria

UdeM00000005137 6596 291.6 UdeM00000005137 XP\_045159157.1 34.9 519  
272 15 10 471 35 544 1.90E-75 291.6 6596 cellular  
organisms;Eukaryota;Opisthokonta;Metazoa;Eumetazoa;Bilateria;Protostomia;  
Spiralia;Lophotrochozoa;Mollusca;Bivalvia;Autobranchia;Heteroconchia;Euherodonta;Imparidentia;Venerida;Veneroidea;Veneridae;Mercenaria;Mercenaria mercenaria

UdeM00000005138 6579 278.1 UdeM00000005138 XP\_033737835.1 33.6 547  
 284 17 26 511 56 584 2.30E-71 278.1 6579 cellular  
 organisms;Eukaryota;Opisthokonta;Metazoa;Eumetazoa;Bilateria;Protostomia;  
 Spiralia;Lophotrochozoa;Mollusca;Bivalvia;Autobranhia;Pteriormorphia;Pect  
 inida;Pectinoidea;Pectinidae;Pecten;Pecten maximus  
 UdeM00000005139 6579 305.8 UdeM00000005139 XP\_033737835.1 47.8 335  
 154 6 124 445 272 598 1.00E-79 305.8 6579 cellular  
 organisms;Eukaryota;Opisthokonta;Metazoa;Eumetazoa;Bilateria;Protostomia;  
 Spiralia;Lophotrochozoa;Mollusca;Bivalvia;Autobranhia;Pteriormorphia;Pect  
 inida;Pectinoidea;Pectinidae;Pecten;Pecten maximus  
 UdeM00000005141 29159 91.7 UdeM00000005141 XP\_034324494.1 35.9 156  
 92 3 1 155 675 823 9.70E-16 91.7 29159 cellular  
 organisms;Eukaryota;Opisthokonta;Metazoa;Eumetazoa;Bilateria;Protostomia;  
 Spiralia;Lophotrochozoa;Mollusca;Bivalvia;Autobranhia;Pteriormorphia;Ostr  
 eida;Ostreoidea;Ostreidae;Crassostrea;Crassostrea gigas  
 UdeM00000005142 6579 307.4 UdeM00000005142 XP\_033737835.1 51.1 311  
 136 5 36 338 282 584 2.80E-80 307.4 6579 cellular  
 organisms;Eukaryota;Opisthokonta;Metazoa;Eumetazoa;Bilateria;Protostomia;  
 Spiralia;Lophotrochozoa;Mollusca;Bivalvia;Autobranhia;Pteriormorphia;Pect  
 inida;Pectinoidea;Pectinidae;Pecten;Pecten maximus  
 UdeM00000005143 6579 307.4 UdeM00000005143 XP\_033737835.1 51.1 311  
 136 5 23 325 282 584 2.70E-80 307.4 6579 cellular  
 organisms;Eukaryota;Opisthokonta;Metazoa;Eumetazoa;Bilateria;Protostomia;  
 Spiralia;Lophotrochozoa;Mollusca;Bivalvia;Autobranhia;Pteriormorphia;Pect  
 inida;Pectinoidea;Pectinidae;Pecten;Pecten maximus  
 UdeM00000005144 6579 305.4 UdeM00000005144 XP\_033737835.1 50.8 311  
 137 5 36 338 282 584 1.00E-79 305.4 6579 cellular  
 organisms;Eukaryota;Opisthokonta;Metazoa;Eumetazoa;Bilateria;Protostomia;  
 Spiralia;Lophotrochozoa;Mollusca;Bivalvia;Autobranhia;Pteriormorphia;Pect  
 inida;Pectinoidea;Pectinidae;Pecten;Pecten maximus  
 UdeM00000005145 50429 268.1 UdeM00000005145 XP\_022786616.1 78.7 164  
 35 0 32 195 29 192 9.10E-69 268.1 50429 cellular  
 organisms;Eukaryota;Opisthokonta;Metazoa;Eumetazoa;Cnidaria;Anthozoa;Hexa  
 corallia;Scleractinia;Astrocoeniina;Pocilloporidae;Stylophora;Stylophora  
 pistillata  
 UdeM00000005146 6596 68.2 UdeM00000005146 XP\_045157989.1 32.7 107  
 69 1 1 104 11 117 9.90E-09 68.2 6596 cellular  
 organisms;Eukaryota;Opisthokonta;Metazoa;Eumetazoa;Bilateria;Protostomia;  
 Spiralia;Lophotrochozoa;Mollusca;Bivalvia;Autobranhia;Heteroconchia;Euhe  
 terodonta;Imparidentia;Venerida;Veneroidea;Veneridae;Mercenaria;Mercenari  
 a mercenaria  
 UdeM00000005147 6596 97.8 UdeM00000005147 XP\_045157989.1 54.2 96  
 42 1 3 96 174 269 1.10E-17 97.8 6596 cellular  
 organisms;Eukaryota;Opisthokonta;Metazoa;Eumetazoa;Bilateria;Protostomia;  
 Spiralia;Lophotrochozoa;Mollusca;Bivalvia;Autobranhia;Heteroconchia;Euhe  
 terodonta;Imparidentia;Venerida;Veneroidea;Veneridae;Mercenaria;Mercenari  
 a mercenaria  
 UdeM00000005148 6596 195.3 UdeM00000005148 XP\_045157989.1 41.3 259  
 147 3 1 254 11 269 1.10E-46 195.3 6596 cellular  
 organisms;Eukaryota;Opisthokonta;Metazoa;Eumetazoa;Bilateria;Protostomia;  
 Spiralia;Lophotrochozoa;Mollusca;Bivalvia;Autobranhia;Heteroconchia;Euhe  
 terodonta;Imparidentia;Venerida;Veneroidea;Veneridae;Mercenaria;Mercenari  
 a mercenaria

UdeM00000005149 133434 495.4 UdeM00000005149 XP\_022109439.1 74.9  
 319 80 0 1 319 207 525 5.70E-137 495.4 133434  
 cellular  
 organisms;Eukaryota;Opisthokonta;Metazoa;Eumetazoa;Bilateria;Deuterostomi  
 a;Echinodermata;Eleutherozoa;Asterozoa;Asteroidea;Valvatacea;Valvatida;Ac  
 anthasteridae;Acanthaster;Acanthaster planci  
 UdeM00000005150 6596 244.2 UdeM00000005150 XP\_045158063.1 32.4 534  
 280 12 23 543 23 488 3.90E-61 244.2 6596 cellular  
 organisms;Eukaryota;Opisthokonta;Metazoa;Eumetazoa;Bilateria;Protostomia;  
 Spiralia;Lophotrochozoa;Mollusca;Bivalvia;Autobranchia;Heteroconchia;Euhe  
 terodonta;Imparidentia;Venerida;Veneroidea;Veneridae;Mercenaria;Mercenari  
 a mercenaria  
 UdeM00000005152 225164 366.7 UdeM00000005152 XP\_009043916.1 90.9  
 198 17 1 1 198 1 197 1.90E-98 366.7 225164  
 cellular  
 organisms;Eukaryota;Opisthokonta;Metazoa;Eumetazoa;Bilateria;Protostomia;  
 Spiralia;Lophotrochozoa;Mollusca;Gastropoda;Patellogastropoda;Lottioidea;  
 Lottiidae;Lottia;Lottia gigantea  
 UdeM00000005153 6596 699.1 UdeM00000005153 XP\_045157372.1 71.7 580  
 151 10 1 574 1 573 4.60E-198 699.1 6596 cellular  
 organisms;Eukaryota;Opisthokonta;Metazoa;Eumetazoa;Bilateria;Protostomia;  
 Spiralia;Lophotrochozoa;Mollusca;Bivalvia;Autobranchia;Heteroconchia;Euhe  
 terodonta;Imparidentia;Venerida;Veneroidea;Veneridae;Mercenaria;Mercenari  
 a mercenaria  
 UdeM00000005154 6579 923.3 UdeM00000005154 XP\_033737731.1 53 895  
 329 14 765 1638 629 1452 4.30E-265 923.3 6579 cellular  
 organisms;Eukaryota;Opisthokonta;Metazoa;Eumetazoa;Bilateria;Protostomia;  
 Spiralia;Lophotrochozoa;Mollusca;Bivalvia;Autobranchia;Pteriomorpha;Pect  
 inida;Pectinoidea;Pectinidae;Pecten;Pecten maximus  
 UdeM00000005155 6579 945.3 UdeM00000005155 XP\_033737731.1 55.8 850  
 329 13 765 1593 629 1452 1.00E-271 945.3 6579 cellular  
 organisms;Eukaryota;Opisthokonta;Metazoa;Eumetazoa;Bilateria;Protostomia;  
 Spiralia;Lophotrochozoa;Mollusca;Bivalvia;Autobranchia;Pteriomorpha;Pect  
 inida;Pectinoidea;Pectinidae;Pecten;Pecten maximus  
 UdeM00000005156 6596 349 UdeM00000005156 XP\_045157375.1 82.5 194  
 34 0 1 194 1 194 1.20E-92 349 6596 cellular  
 organisms;Eukaryota;Opisthokonta;Metazoa;Eumetazoa;Bilateria;Protostomia;  
 Spiralia;Lophotrochozoa;Mollusca;Bivalvia;Autobranchia;Heteroconchia;Euhe  
 terodonta;Imparidentia;Venerida;Veneroidea;Veneridae;Mercenaria;Mercenari  
 a mercenaria  
 UdeM00000005157 400727 111.3 UdeM00000005157 XP\_025108844.1 32.8  
 436 237 15 2 411 195 600 2.90E-21 111.3 400727  
 cellular  
 organisms;Eukaryota;Opisthokonta;Metazoa;Eumetazoa;Bilateria;Protostomia;  
 Spiralia;Lophotrochozoa;Mollusca;Gastropoda;Caenogastropoda;Architaeniogl  
 ossa;Ampullarioidea;Ampullariidae;Pomacea;Pomacea canaliculata  
 UdeM00000005158 6573 674.9 UdeM00000005158 XP\_021363122.1 46.2 1150  
 453 26 3 1074 133 1194 1.70E-190 674.9 6573 cellular  
 organisms;Eukaryota;Opisthokonta;Metazoa;Eumetazoa;Bilateria;Protostomia;  
 Spiralia;Lophotrochozoa;Mollusca;Bivalvia;Autobranchia;Pteriomorpha;Pect  
 inida;Pectinoidea;Pectinidae;Mizuhopecten;Mizuhopecten yessoensis  
 UdeM00000005159 6579 435.6 UdeM00000005159 XP\_033737724.1 78.5 251  
 53 1 27 277 133 382 4.60E-119 435.6 6579 cellular  
 organisms;Eukaryota;Opisthokonta;Metazoa;Eumetazoa;Bilateria;Protostomia;

Spiralia;Lophotrochozoa;Mollusca;Bivalvia;Autobranchia;Pteriormorphia;Pectinida;Pectinoidea;Pectinidae;Pecten;Pecten maximus  
UdeM00000005160 6596 222.6 UdeM00000005160 XP\_045157932.1 72.1 147  
41 0 1 147 1 147 4.50E-55 222.6 6596 cellular  
organisms;Eukaryota;Opisthokonta;Metazoa;Eumetazoa;Bilateria;Protostomia;  
Spiralia;Lophotrochozoa;Mollusca;Bivalvia;Autobranchia;Heteroconchia;Euherodonta;Imparidentia;Venerida;Veneroidea;Veneridae;Mercenaria;Mercenaria mercenaria  
UdeM00000005161 6573 638.6 UdeM00000005161 XP\_021363080.1 43.7 935  
380 23 1 889 2 836 1.10E-179 638.6 6573 cellular  
organisms;Eukaryota;Opisthokonta;Metazoa;Eumetazoa;Bilateria;Protostomia;  
Spiralia;Lophotrochozoa;Mollusca;Bivalvia;Autobranchia;Pteriormorphia;Pectinida;Pectinoidea;Pectinidae;Mizuhopecten;Mizuhopecten yessoensis  
UdeM00000005162 6565 173.7 UdeM00000005162 XP\_022319806.1 34.8 290  
177 4 22 308 1 281 3.90E-40 173.7 6565 cellular  
organisms;Eukaryota;Opisthokonta;Metazoa;Eumetazoa;Bilateria;Protostomia;  
Spiralia;Lophotrochozoa;Mollusca;Bivalvia;Autobranchia;Pteriormorphia;Ostreida;Ostreoidea;Ostreidae;Crassostrea;Crassostrea virginica  
UdeM00000005163 6565 303.9 UdeM00000005163 XP\_022314461.1 53.7 246  
112 2 62 306 64 308 2.30E-79 303.9 6565 cellular  
organisms;Eukaryota;Opisthokonta;Metazoa;Eumetazoa;Bilateria;Protostomia;  
Spiralia;Lophotrochozoa;Mollusca;Bivalvia;Autobranchia;Pteriormorphia;Ostreida;Ostreoidea;Ostreidae;Crassostrea;Crassostrea virginica  
UdeM00000005164 29159 193.4 UdeM00000005164 XP\_034317111.1 52.2 186  
87 1 2 185 171 356 2.70E-46 193.4 29159 cellular  
organisms;Eukaryota;Opisthokonta;Metazoa;Eumetazoa;Bilateria;Protostomia;  
Spiralia;Lophotrochozoa;Mollusca;Bivalvia;Autobranchia;Pteriormorphia;Ostreida;Ostreoidea;Ostreidae;Crassostrea;Crassostrea gigas  
UdeM00000005165 6596 899.4 UdeM00000005165 XP\_045157954.1 63.3 660  
209 9 12 649 10 658 2.60E-258 899.4 6596 cellular  
organisms;Eukaryota;Opisthokonta;Metazoa;Eumetazoa;Bilateria;Protostomia;  
Spiralia;Lophotrochozoa;Mollusca;Bivalvia;Autobranchia;Heteroconchia;Euherodonta;Imparidentia;Venerida;Veneroidea;Veneridae;Mercenaria;Mercenaria mercenaria  
UdeM00000005166 6596 269.6 UdeM00000005166 XP\_045184088.1 34.6 471  
284 4 3 454 12 477 7.50E-69 269.6 6596 cellular  
organisms;Eukaryota;Opisthokonta;Metazoa;Eumetazoa;Bilateria;Protostomia;  
Spiralia;Lophotrochozoa;Mollusca;Bivalvia;Autobranchia;Heteroconchia;Euherodonta;Imparidentia;Venerida;Veneroidea;Veneridae;Mercenaria;Mercenaria mercenaria  
UdeM00000005167 6596 267.7 UdeM00000005167 XP\_045184088.1 36.7 428  
270 1 26 452 48 475 2.70E-68 267.7 6596 cellular  
organisms;Eukaryota;Opisthokonta;Metazoa;Eumetazoa;Bilateria;Protostomia;  
Spiralia;Lophotrochozoa;Mollusca;Bivalvia;Autobranchia;Heteroconchia;Euherodonta;Imparidentia;Venerida;Veneroidea;Veneridae;Mercenaria;Mercenaria mercenaria  
UdeM00000005168 6596 276.2 UdeM00000005168 XP\_045184088.1 37.4 439  
266 3 26 459 48 482 8.00E-71 276.2 6596 cellular  
organisms;Eukaryota;Opisthokonta;Metazoa;Eumetazoa;Bilateria;Protostomia;  
Spiralia;Lophotrochozoa;Mollusca;Bivalvia;Autobranchia;Heteroconchia;Euherodonta;Imparidentia;Venerida;Veneroidea;Veneridae;Mercenaria;Mercenaria mercenaria  
UdeM00000005169 6573 288.1 UdeM00000005169 XP\_021360416.1 36.4 431  
268 4 27 453 50 478 1.90E-74 288.1 6573 cellular

organisms;Eukaryota;Opisthokonta;Metazoa;Eumetazoa;Bilateria;Protostomia;Spiralia;Lophotrochozoa;Mollusca;Bivalvia;Autobranchia;Pteriomorpha;Pectinida;Pectinoidea;Pectinidae;Mizuhopecten;Mizuhopecten yessoensis

UdeM00000005170 6596 712.6 UdeM00000005170 XP\_045160623.1 65.2 537  
174 4 19 547 66 597 3.80E-202 712.6 6596 cellular

organisms;Eukaryota;Opisthokonta;Metazoa;Eumetazoa;Bilateria;Protostomia;Spiralia;Lophotrochozoa;Mollusca;Bivalvia;Autobranchia;Heteroconchia;Euheterodonta;Imparidentia;Venerida;Veneroidea;Veneridae;Mercenaria;Mercenaria mercenaria

UdeM00000005171 6596 85.5 UdeM00000005171 XP\_045159333.1 26.5 306  
179 12 158 436 54 340 2.00E-13 85.5 6596 cellular

organisms;Eukaryota;Opisthokonta;Metazoa;Eumetazoa;Bilateria;Protostomia;Spiralia;Lophotrochozoa;Mollusca;Bivalvia;Autobranchia;Heteroconchia;Euheterodonta;Imparidentia;Venerida;Veneroidea;Veneridae;Mercenaria;Mercenaria mercenaria

UdeM00000005173 6596 228.4 UdeM00000005173 XP\_045159063.1 38.3 347  
206 5 3 344 177 520 1.40E-56 228.4 6596 cellular

organisms;Eukaryota;Opisthokonta;Metazoa;Eumetazoa;Bilateria;Protostomia;Spiralia;Lophotrochozoa;Mollusca;Bivalvia;Autobranchia;Heteroconchia;Euheterodonta;Imparidentia;Venerida;Veneroidea;Veneridae;Mercenaria;Mercenaria mercenaria

UdeM00000005174 6596 109.4 UdeM00000005174 XP\_045159063.1 48 98  
48 1 27 121 35 132 3.40E-21 109.4 6596 cellular

organisms;Eukaryota;Opisthokonta;Metazoa;Eumetazoa;Bilateria;Protostomia;Spiralia;Lophotrochozoa;Mollusca;Bivalvia;Autobranchia;Heteroconchia;Euheterodonta;Imparidentia;Venerida;Veneroidea;Veneridae;Mercenaria;Mercenaria mercenaria

UdeM00000005175 1735272 307.8 UdeM00000005175 XP\_041358755.1 56.5  
269 110 2 1 269 1 262 1.40E-80 307.8 1735272  
cellular

organisms;Eukaryota;Opisthokonta;Metazoa;Eumetazoa;Bilateria;Protostomia;Spiralia;Lophotrochozoa;Mollusca;Gastropoda;Neomphalina;Neomphaloidea;Peltospiridae;Gigantopelta;Gigantopelta aegis

UdeM00000005176 1735272 663.3 UdeM00000005176 XP\_041358489.1 52.2  
712 315 9 102 792 78 785 3.90E-187 663.3 1735272  
cellular

organisms;Eukaryota;Opisthokonta;Metazoa;Eumetazoa;Bilateria;Protostomia;Spiralia;Lophotrochozoa;Mollusca;Gastropoda;Neomphalina;Neomphaloidea;Peltospiridae;Gigantopelta;Gigantopelta aegis

UdeM00000005177 29159 104.4 UdeM00000005177 XP\_011419361.2 39.7 131  
66 3 4 125 3 129 1.80E-19 104.4 29159 cellular

organisms;Eukaryota;Opisthokonta;Metazoa;Eumetazoa;Bilateria;Protostomia;Spiralia;Lophotrochozoa;Mollusca;Bivalvia;Autobranchia;Pteriomorpha;Ostreida;Ostreoidea;Ostreidae;Crassostrea;Crassostrea gigas

UdeM00000005178 1735272 504.6 UdeM00000005178 XP\_041358411.1 81.7  
290 53 0 1 290 1 290 8.50E-140 504.6 1735272  
cellular

organisms;Eukaryota;Opisthokonta;Metazoa;Eumetazoa;Bilateria;Protostomia;Spiralia;Lophotrochozoa;Mollusca;Gastropoda;Neomphalina;Neomphaloidea;Peltospiridae;Gigantopelta;Gigantopelta aegis

UdeM00000005179 6596 1382.1 UdeM00000005179 XP\_045160228.1 78.2  
870 190 0 1 870 295 1164 0.00E+00 1382.1 6596  
cellular

organisms;Eukaryota;Opisthokonta;Metazoa;Eumetazoa;Bilateria;Protostomia;

Spiralia; Lophotrochozoa; Mollusca; Bivalvia; Autobranchia; Heteroconchia; Euheterodonta; Imparidentia; Venerida; Veneroidea; Veneridae; Mercenaria; Mercenaria mercenaria

UdeM00000005180 6596 316.2 UdeM00000005180 XP\_045160217.1 71.2 208  
60 0 1 208 1 208 3.00E-83 316.2 6596 cellular

organisms; Eukaryota; Opisthokonta; Metazoa; Eumetazoa; Bilateria; Protostomia; Spiralia; Lophotrochozoa; Mollusca; Bivalvia; Autobranchia; Heteroconchia; Euheterodonta; Imparidentia; Venerida; Veneroidea; Veneridae; Mercenaria; Mercenaria mercenaria

UdeM00000005182 29159 280.8 UdeM00000005182 XP\_019918003.1 70.6 187  
55 0 1 187 1 187 1.30E-72 280.8 29159 cellular

organisms; Eukaryota; Opisthokonta; Metazoa; Eumetazoa; Bilateria; Protostomia; Spiralia; Lophotrochozoa; Mollusca; Bivalvia; Autobranchia; Pteriomorpha; Ostreida; Ostreidae; Crassostrea; Crassostrea gigas

UdeM00000005181 6596 317.4 UdeM00000005181 XP\_045160214.1 71.3 209  
60 0 1 209 1 209 1.40E-83 317.4 6596 cellular

organisms; Eukaryota; Opisthokonta; Metazoa; Eumetazoa; Bilateria; Protostomia; Spiralia; Lophotrochozoa; Mollusca; Bivalvia; Autobranchia; Heteroconchia; Euheterodonta; Imparidentia; Venerida; Veneroidea; Veneridae; Mercenaria; Mercenaria mercenaria

UdeM00000005183 6579 224.2 UdeM00000005183 XP\_033737551.1 44.3 323  
166 5 883 1195 1381 1699 9.10E-55 224.2 6579 cellular

organisms; Eukaryota; Opisthokonta; Metazoa; Eumetazoa; Bilateria; Protostomia; Spiralia; Lophotrochozoa; Mollusca; Bivalvia; Autobranchia; Pteriomorpha; Pectinida; Pectinoidea; Pectinidae; Pecten; Pecten maximus

UdeM00000005185 29159 232.3 UdeM00000005185 XP\_019926412.2 52.4 231  
103 3 155 383 2 227 1.10E-57 232.3 29159 cellular

organisms; Eukaryota; Opisthokonta; Metazoa; Eumetazoa; Bilateria; Protostomia; Spiralia; Lophotrochozoa; Mollusca; Bivalvia; Autobranchia; Pteriomorpha; Ostreida; Ostreidae; Crassostrea; Crassostrea gigas

UdeM00000005184 1735272 140.2 UdeM00000005184 XP\_041349280.1 38.3  
235 126 6 53 277 51 276 5.10E-30 140.2 1735272  
cellular

organisms; Eukaryota; Opisthokonta; Metazoa; Eumetazoa; Bilateria; Protostomia; Spiralia; Lophotrochozoa; Mollusca; Gastropoda; Neomphalina; Neomphaloidea; Peltospiridae; Gigantopelta; Gigantopelta aegis

UdeM00000005186 6579 188 UdeM00000005186 XP\_033761495.1 62.6 139  
52 0 8 146 24 162 9.00E-45 188 6579 cellular

organisms; Eukaryota; Opisthokonta; Metazoa; Eumetazoa; Bilateria; Protostomia; Spiralia; Lophotrochozoa; Mollusca; Bivalvia; Autobranchia; Pteriomorpha; Pectinida; Pectinoidea; Pectinidae; Pecten; Pecten maximus

UdeM00000005187 80966 184.5 UdeM00000005187 XP\_022077561.1 55.8 156  
69 0 1 156 116 271 1.00E-43 184.5 80966 cellular

organisms; Eukaryota; Opisthokonta; Metazoa; Eumetazoa; Bilateria; Deuterostomia; Chordata; Craniata; Vertebrata; Gnathostomata; Teleostomi; Euteleostomi; Actinopterygii; Actinopteri; Neopterygii; Teleostei; Osteoglossocephalai; Clupeocephala; Euteleostei; Neoteleostei; Eurypterygia; Ctenosquamata; Acanthomorpha; Euacanthomorpha; Percomorphaceae; Ovalentaria; Ovalentaria incertae sedis; Pomacentridae; Acanthochromis; Acanthochromis polyacanthus

UdeM00000005188 6573 71.6 UdeM00000005188 XP\_021377276.1 35.5 121  
69 2 25 136 98 218 1.10E-09 71.6 6573 cellular

organisms; Eukaryota; Opisthokonta; Metazoa; Eumetazoa; Bilateria; Protostomia; Spiralia; Lophotrochozoa; Mollusca; Bivalvia; Autobranchia; Pteriomorpha; Pectinida; Pectinoidea; Pectinidae; Mizuhopecten; Mizuhopecten yessoensis

UdeM00000005189 6596 622.1 UdeM00000005189 XP\_045160227.1 52.5 628  
 283 2 1 628 1 613 7.80E-175 622.1 6596 cellular  
 organisms;Eukaryota;Opisthokonta;Metazoa;Eumetazoa;Bilateria;Protostomia;  
 Spiralia;Lophotrochozoa;Mollusca;Bivalvia;Autobranchia;Heteroconchia;Euhe  
 terodonta;Imparidentia;Venerida;Veneroidea;Veneridae;Mercenaria;Mercenari  
 a mercenaria  
 UdeM00000005190 6573 812 UdeM00000005190 XP\_021370693.1 71.7 555  
 147 4 220 766 217 769 6.70E-232 812 6573 cellular  
 organisms;Eukaryota;Opisthokonta;Metazoa;Eumetazoa;Bilateria;Protostomia;  
 Spiralia;Lophotrochozoa;Mollusca;Bivalvia;Autobranchia;Pteriormorphia;Pect  
 inida;Pectinoidea;Pectinidae;Mizuhopecten;Mizuhopecten yessoensis  
 UdeM00000005191 260615 176.8 UdeM00000005191 XP\_039398742.1 74.5  
 137 11 1 1 113 246 382 1.70E-41 176.8 260615  
 cellular  
 organisms;Eukaryota;Opisthokonta;Metazoa;Eumetazoa;Bilateria;Deuterostomi  
 a;Chordata;Craniata;Vertebrata;Gnathostomata;Teleostomi;Euteleostomi;Sarc  
 opterygii;Dipnotetrapodomorpha;Tetrapoda;Amniota;Sauropsida;Sauria;Archel  
 osauria;Testudinata;Testudines;Cryptodira;Durocryptodira;Testudinoidea;Ge  
 oemydidae;Geoemydinae;Mauremys;Mauremys reevesii  
 UdeM00000005192 6573 657.1 UdeM00000005192 XP\_021370781.1 74.5 423  
 107 1 1 423 1 422 1.50E-185 657.1 6573 cellular  
 organisms;Eukaryota;Opisthokonta;Metazoa;Eumetazoa;Bilateria;Protostomia;  
 Spiralia;Lophotrochozoa;Mollusca;Bivalvia;Autobranchia;Pteriormorphia;Pect  
 inida;Pectinoidea;Pectinidae;Mizuhopecten;Mizuhopecten yessoensis  
 UdeM00000005193 6579 1382.9 UdeM00000005193 XP\_033738813.1 71.9  
 980 264 5 1 978 895 1865 0.00E+00 1382.9 6579  
 cellular  
 organisms;Eukaryota;Opisthokonta;Metazoa;Eumetazoa;Bilateria;Protostomia;  
 Spiralia;Lophotrochozoa;Mollusca;Bivalvia;Autobranchia;Pteriormorphia;Pect  
 inida;Pectinoidea;Pectinidae;Pecten;Pecten maximus  
 UdeM00000005194 218467 105.9 UdeM00000005194 XP\_023212519.1 53.3  
 105 48 1 1 105 1 104 4.70E-20 105.9 218467  
 cellular  
 organisms;Eukaryota;Opisthokonta;Metazoa;Eumetazoa;Bilateria;Protostomia;  
 Ecdysozoa;Panarthropoda;Arthropoda;Chelicerata;Arachnida;Scorpiones;Buthi  
 da;Buthoidea;Buthidae;Centruroides;Centruroides sculpturatus  
 UdeM00000005195 6573 829.7 UdeM00000005195 XP\_021370716.1 59.5 923  
 305 13 1 913 4 867 3.60E-237 829.7 6573 cellular  
 organisms;Eukaryota;Opisthokonta;Metazoa;Eumetazoa;Bilateria;Protostomia;  
 Spiralia;Lophotrochozoa;Mollusca;Bivalvia;Autobranchia;Pteriormorphia;Pect  
 inida;Pectinoidea;Pectinidae;Mizuhopecten;Mizuhopecten yessoensis  
 UdeM00000005196 6579 876.3 UdeM00000005196 XP\_033738818.1 76.3 540  
 125 1 2 538 1 540 2.50E-251 876.3 6579 cellular  
 organisms;Eukaryota;Opisthokonta;Metazoa;Eumetazoa;Bilateria;Protostomia;  
 Spiralia;Lophotrochozoa;Mollusca;Bivalvia;Autobranchia;Pteriormorphia;Pect  
 inida;Pectinoidea;Pectinidae;Pecten;Pecten maximus  
 UdeM00000005197 6579 876.3 UdeM00000005197 XP\_033738818.1 76.3 540  
 125 1 1 537 1 540 2.50E-251 876.3 6579 cellular  
 organisms;Eukaryota;Opisthokonta;Metazoa;Eumetazoa;Bilateria;Protostomia;  
 Spiralia;Lophotrochozoa;Mollusca;Bivalvia;Autobranchia;Pteriormorphia;Pect  
 inida;Pectinoidea;Pectinidae;Pecten;Pecten maximus  
 UdeM00000005198 6579 557.8 UdeM00000005198 XP\_033738819.1 50.8 506  
 242 3 10 515 40 538 1.50E-155 557.8 6579 cellular  
 organisms;Eukaryota;Opisthokonta;Metazoa;Eumetazoa;Bilateria;Protostomia;



Spiralia; Lophotrochozoa; Mollusca; Bivalvia; Autobranchia; Pteriomorpha; Pectinida; Pectinoidea; Pectinidae; Pecten; Pecten maximus

UdeM00000005199 37653 501.5 UdeM00000005199 XP\_014784610.1 60.3 408  
148 4 1 395 1 407 9.80E-139 501.5 37653 cellular  
organisms; Eukaryota; Opisthokonta; Metazoa; Eumetazoa; Bilateria; Protostomia; Spiralia; Lophotrochozoa; Mollusca; Cephalopoda; Coleoidea; Octopodiformes; Octopoda; Incirrata; Octopodidae; Octopus; Octopus bimaculoides

UdeM00000005200 6596 523.5 UdeM00000005200 XP\_045160651.1 56 464  
196 3 37 498 24 481 3.10E-145 523.5 6596 cellular  
organisms; Eukaryota; Opisthokonta; Metazoa; Eumetazoa; Bilateria; Protostomia; Spiralia; Lophotrochozoa; Mollusca; Bivalvia; Autobranchia; Heteroconchia; Euheterodonta; Imparidentia; Venerida; Veneroidea; Veneridae; Mercenaria; Mercenaria mercenaria

UdeM00000005201 6526 332.4 UdeM00000005201 XP\_013078356.1 52.6 369  
98 5 1 363 1 298 7.10E-88 332.4 6526 cellular  
organisms; Eukaryota; Opisthokonta; Metazoa; Eumetazoa; Bilateria; Protostomia; Spiralia; Lophotrochozoa; Mollusca; Gastropoda; Heterobranchia; Euthyneura; Panpulmonata; Hygrophila; Lymnaeoidea; Planorbidae; Biomphalaria; Biomphalaria glabrata

UdeM00000005202 6526 359.4 UdeM00000005202 XP\_013078356.1 63 308  
98 4 1 302 1 298 4.50E-96 359.4 6526 cellular  
organisms; Eukaryota; Opisthokonta; Metazoa; Eumetazoa; Bilateria; Protostomia; Spiralia; Lophotrochozoa; Mollusca; Gastropoda; Heterobranchia; Euthyneura; Panpulmonata; Hygrophila; Lymnaeoidea; Planorbidae; Biomphalaria; Biomphalaria glabrata

UdeM00000005203 1735272 215.3 UdeM00000005203 XP\_041359327.1 57.8  
185 74 2 5 189 3 183 6.70E-53 215.3 1735272  
cellular  
organisms; Eukaryota; Opisthokonta; Metazoa; Eumetazoa; Bilateria; Protostomia; Spiralia; Lophotrochozoa; Mollusca; Gastropoda; Neomphalina; Neomphaloidea; Peltospiridae; Gigantopelta; Gigantopelta aegis

UdeM00000005204 6579 192.6 UdeM00000005204 XP\_033730245.1 40.8 233  
134 4 24 254 22 252 6.20E-46 192.6 6579 cellular  
organisms; Eukaryota; Opisthokonta; Metazoa; Eumetazoa; Bilateria; Protostomia; Spiralia; Lophotrochozoa; Mollusca; Bivalvia; Autobranchia; Pteriomorpha; Pectinida; Pectinoidea; Pectinidae; Pecten; Pecten maximus

UdeM00000005205 6596 148.3 UdeM00000005205 XP\_045171942.1 39.6 192  
113 3 18 208 16 205 1.10E-32 148.3 6596 cellular  
organisms; Eukaryota; Opisthokonta; Metazoa; Eumetazoa; Bilateria; Protostomia; Spiralia; Lophotrochozoa; Mollusca; Bivalvia; Autobranchia; Heteroconchia; Euheterodonta; Imparidentia; Venerida; Veneroidea; Veneridae; Mercenaria; Mercenaria mercenaria

UdeM00000005206 6596 201.8 UdeM00000005206 XP\_045173451.1 41.2 255  
140 6 6 255 8 257 1.00E-48 201.8 6596 cellular  
organisms; Eukaryota; Opisthokonta; Metazoa; Eumetazoa; Bilateria; Protostomia; Spiralia; Lophotrochozoa; Mollusca; Bivalvia; Autobranchia; Heteroconchia; Euheterodonta; Imparidentia; Venerida; Veneroidea; Veneridae; Mercenaria; Mercenaria mercenaria

UdeM00000005207 6565 130.2 UdeM00000005207 XP\_022318637.1 54.9 102  
44 1 7 106 3 104 1.60E-27 130.2 6565 cellular  
organisms; Eukaryota; Opisthokonta; Metazoa; Eumetazoa; Bilateria; Protostomia; Spiralia; Lophotrochozoa; Mollusca; Bivalvia; Autobranchia; Pteriomorpha; Ostreida; Ostreoidea; Ostreidae; Crassostrea; Crassostrea virginica

UdeM00000005208 6579 211.5 UdeM00000005208 XP\_033730245.1 42.5 233  
 130 4 24 254 22 252 1.30E-51 211.5 6579 cellular  
 organisms;Eukaryota;Opisthokonta;Metazoa;Eumetazoa;Bilateria;Protostomia;  
 Spiralia;Lophotrochozoa;Mollusca;Bivalvia;Autobranhia;Pteriomorphia;Pect  
 inida;Pectinoidea;Pectinidae;Pecten;Pecten maximus  
 UdeM00000005209 6579 204.9 UdeM00000005209 XP\_033730245.1 42.9 231  
 126 5 27 254 25 252 1.20E-49 204.9 6579 cellular  
 organisms;Eukaryota;Opisthokonta;Metazoa;Eumetazoa;Bilateria;Protostomia;  
 Spiralia;Lophotrochozoa;Mollusca;Bivalvia;Autobranhia;Pteriomorphia;Pect  
 inida;Pectinoidea;Pectinidae;Pecten;Pecten maximus  
 UdeM00000005210 6565 766.9 UdeM00000005210 XP\_022318582.1 61.5 702  
 260 6 1 694 1 700 2.20E-218 766.9 6565 cellular  
 organisms;Eukaryota;Opisthokonta;Metazoa;Eumetazoa;Bilateria;Protostomia;  
 Spiralia;Lophotrochozoa;Mollusca;Bivalvia;Autobranhia;Pteriomorphia;Ostr  
 eida;Ostreoidea;Ostreidae;Crassostrea;Crassostrea virginica  
 UdeM00000005211 6565 773.1 UdeM00000005211 XP\_022318582.1 61.5 709  
 261 7 1 701 1 705 3.10E-220 773.1 6565 cellular  
 organisms;Eukaryota;Opisthokonta;Metazoa;Eumetazoa;Bilateria;Protostomia;  
 Spiralia;Lophotrochozoa;Mollusca;Bivalvia;Autobranhia;Pteriomorphia;Ostr  
 eida;Ostreoidea;Ostreidae;Crassostrea;Crassostrea virginica  
 UdeM00000005213 6565 87.8 UdeM00000005213 XP\_022313560.1 54.4 79  
 35 1 193 271 95 172 2.30E-14 87.8 6565 cellular  
 organisms;Eukaryota;Opisthokonta;Metazoa;Eumetazoa;Bilateria;Protostomia;  
 Spiralia;Lophotrochozoa;Mollusca;Bivalvia;Autobranhia;Pteriomorphia;Ostr  
 eida;Ostreoidea;Ostreidae;Crassostrea;Crassostrea virginica  
 UdeM00000005214 6596 134 UdeM00000005214 XP\_045157588.1 58.4 113  
 45 2 79 189 84 196 1.90E-28 134 6596 cellular  
 organisms;Eukaryota;Opisthokonta;Metazoa;Eumetazoa;Bilateria;Protostomia;  
 Spiralia;Lophotrochozoa;Mollusca;Bivalvia;Autobranhia;Heteroconchia;Euhe  
 terodonta;Imparidentia;Venerida;Veneroidea;Veneridae;Mercenaria;Mercenari  
 a mercenaria  
 UdeM00000005215 6596 589 UdeM00000005215 XP\_045157590.1 44.4 730  
 371 11 1 704 6 726 8.20E-165 589 6596 cellular  
 organisms;Eukaryota;Opisthokonta;Metazoa;Eumetazoa;Bilateria;Protostomia;  
 Spiralia;Lophotrochozoa;Mollusca;Bivalvia;Autobranhia;Heteroconchia;Euhe  
 terodonta;Imparidentia;Venerida;Veneroidea;Veneridae;Mercenaria;Mercenari  
 a mercenaria  
 UdeM00000005217 6573 120.6 UdeM00000005217 XP\_021350883.1 68.3 82  
 23 2 1 80 23 103 1.10E-24 120.6 6573 cellular  
 organisms;Eukaryota;Opisthokonta;Metazoa;Eumetazoa;Bilateria;Protostomia;  
 Spiralia;Lophotrochozoa;Mollusca;Bivalvia;Autobranhia;Pteriomorphia;Pect  
 inida;Pectinoidea;Pectinidae;Mizuhopecten;Mizuhopecten yessoensis  
 UdeM00000005218 400727 137.1 UdeM00000005218 XP\_025109747.1 66.4  
 107 31 1 1 107 138 239 1.60E-29 137.1 400727  
 cellular  
 organisms;Eukaryota;Opisthokonta;Metazoa;Eumetazoa;Bilateria;Protostomia;  
 Spiralia;Lophotrochozoa;Mollusca;Gastropoda;Caenogastropoda;Architaeniogl  
 ossa;Ampullarioidea;Ampullariidae;Pomacea;Pomacea canaliculata  
 UdeM00000005219 6526 321.6 UdeM00000005219 XP\_013089196.1 62.6 396  
 125 6 32 415 34 418 1.40E-84 321.6 6526 cellular  
 organisms;Eukaryota;Opisthokonta;Metazoa;Eumetazoa;Bilateria;Protostomia;  
 Spiralia;Lophotrochozoa;Mollusca;Gastropoda;Heterobranhia;Euthyneura;Pan  
 pulmonata;Hygrophila;Lymnaeidae;Planorbidae;Biophalaria;Biophalaria  
 glabrata

UdeM00000005221 6596 117.1 UdeM00000005221 XP\_045159813.1 59.1 93  
 38 0 7 99 145 237 1.30E-23 117.1 6596 cellular  
 organisms;Eukaryota;Opisthokonta;Metazoa;Eumetazoa;Bilateria;Protostomia;  
 Spiralia;Lophotrochozoa;Mollusca;Bivalvia;Autobranchia;Heteroconchia;Euhe  
 terodonta;Imparidentia;Venerida;Veneroidea;Veneridae;Mercenaria;Mercenari  
 a mercenaria  
 UdeM00000005223 6596 121.3 UdeM00000005223 XP\_045159813.1 50 110  
 55 0 4 113 364 473 9.60E-25 121.3 6596 cellular  
 organisms;Eukaryota;Opisthokonta;Metazoa;Eumetazoa;Bilateria;Protostomia;  
 Spiralia;Lophotrochozoa;Mollusca;Bivalvia;Autobranchia;Heteroconchia;Euhe  
 terodonta;Imparidentia;Venerida;Veneroidea;Veneridae;Mercenaria;Mercenari  
 a mercenaria  
 UdeM00000005224 6596 438.7 UdeM00000005224 XP\_045159814.1 52.7 419  
 194 4 48 464 60 476 9.10E-120 438.7 6596 cellular  
 organisms;Eukaryota;Opisthokonta;Metazoa;Eumetazoa;Bilateria;Protostomia;  
 Spiralia;Lophotrochozoa;Mollusca;Bivalvia;Autobranchia;Heteroconchia;Euhe  
 terodonta;Imparidentia;Venerida;Veneroidea;Veneridae;Mercenaria;Mercenari  
 a mercenaria  
 UdeM00000005225 6596 464.5 UdeM00000005225 XP\_045159814.1 50.1 483  
 232 6 1 481 1 476 1.60E-127 464.5 6596 cellular  
 organisms;Eukaryota;Opisthokonta;Metazoa;Eumetazoa;Bilateria;Protostomia;  
 Spiralia;Lophotrochozoa;Mollusca;Bivalvia;Autobranchia;Heteroconchia;Euhe  
 terodonta;Imparidentia;Venerida;Veneroidea;Veneridae;Mercenaria;Mercenari  
 a mercenaria  
 UdeM00000005226 6596 463.8 UdeM00000005226 XP\_045159814.1 50.3 483  
 231 6 1 481 1 476 2.70E-127 463.8 6596 cellular  
 organisms;Eukaryota;Opisthokonta;Metazoa;Eumetazoa;Bilateria;Protostomia;  
 Spiralia;Lophotrochozoa;Mollusca;Bivalvia;Autobranchia;Heteroconchia;Euhe  
 terodonta;Imparidentia;Venerida;Veneroidea;Veneridae;Mercenaria;Mercenari  
 a mercenaria  
 UdeM00000005227 6573 179.1 UdeM00000005227 XP\_021363161.1 38.1 270  
 154 4 11 271 6 271 7.70E-42 179.1 6573 cellular  
 organisms;Eukaryota;Opisthokonta;Metazoa;Eumetazoa;Bilateria;Protostomia;  
 Spiralia;Lophotrochozoa;Mollusca;Bivalvia;Autobranchia;Pteriomorphia;Pect  
 inida;Pectinoidea;Pectinidae;Mizuhopecten;Mizuhopecten yessoensis  
 UdeM00000005228 6596 533.9 UdeM00000005228 XP\_045160558.1 56.7 432  
 173 5 1 431 1 419 1.90E-148 533.9 6596 cellular  
 organisms;Eukaryota;Opisthokonta;Metazoa;Eumetazoa;Bilateria;Protostomia;  
 Spiralia;Lophotrochozoa;Mollusca;Bivalvia;Autobranchia;Heteroconchia;Euhe  
 terodonta;Imparidentia;Venerida;Veneroidea;Veneridae;Mercenaria;Mercenari  
 a mercenaria  
 UdeM00000005229 1735272 145.6 UdeM00000005229 XP\_041358954.1 55  
 131 58 1 1 131 4 133 4.90E-32 145.6 1735272  
 cellular  
 organisms;Eukaryota;Opisthokonta;Metazoa;Eumetazoa;Bilateria;Protostomia;  
 Spiralia;Lophotrochozoa;Mollusca;Gastropoda;Neomphalina;Neomphaloidea;Pel  
 tospiridae;Gigantopelta;Gigantopelta aegis  
 UdeM00000005230 6565 167.5 UdeM00000005230 XP\_022308193.1 43.4 205  
 60 3 1 151 352 554 1.30E-38 167.5 6565 cellular  
 organisms;Eukaryota;Opisthokonta;Metazoa;Eumetazoa;Bilateria;Protostomia;  
 Spiralia;Lophotrochozoa;Mollusca;Bivalvia;Autobranchia;Pteriomorphia;Ostr  
 eida;Ostreoidea;Ostreidae;Crassostrea;Crassostrea virginica  
 UdeM00000005232 64793 59.7 UdeM00000005232 XP\_011690608.1 34.3 102  
 60 1 40 141 1963 2057 3.50E-06 59.7 64793 cellular

organisms;Eukaryota;Opisthokonta;Metazoa;Eumetazoa;Bilateria;Protostomia;Ecdysozoa;Panarthropoda;Arthropoda;Mandibulata;Pancrustacea;Hexapoda;Insecta;Dicondylia;Pterygota;Neoptera;Endopterygota;Hymenoptera;Apocrita;Aculeata;Formicoidea;Formicidae;Myrmicinae;Blepharidattini;Wasmannia;Wasmannia auro-punctata

UdeM00000005233 6573 242.7 UdeM00000005233 XP\_021362424.1 48.7 273  
128 7 9 276 2 267 5.80E-61 242.7 6573 cellular

organisms;Eukaryota;Opisthokonta;Metazoa;Eumetazoa;Bilateria;Protostomia;Spiralia;Lophotrochozoa;Mollusca;Bivalvia;Autobranchia;Pteriormorphia;Pectinida;Pectinoidea;Pectinidae;Mizuhopecten;Mizuhopecten yessoensis

UdeM00000005234 6596 239.6 UdeM00000005234 XP\_045159970.1 52.8 252  
117 2 2 252 169 419 4.50E-60 239.6 6596 cellular

organisms;Eukaryota;Opisthokonta;Metazoa;Eumetazoa;Bilateria;Protostomia;Spiralia;Lophotrochozoa;Mollusca;Bivalvia;Autobranchia;Heteroconchia;Euheterodonta;Imparidentia;Venerida;Veneroidea;Veneridae;Mercenaria;Mercenaria mercenaria

UdeM00000005235 6573 394 UdeM00000005235 XP\_021373425.1 52.3 478  
198 10 1 459 1 467 2.60E-106 394 6573 cellular

organisms;Eukaryota;Opisthokonta;Metazoa;Eumetazoa;Bilateria;Protostomia;Spiralia;Lophotrochozoa;Mollusca;Bivalvia;Autobranchia;Pteriormorphia;Pectinida;Pectinoidea;Pectinidae;Mizuhopecten;Mizuhopecten yessoensis

UdeM00000005236 400727 369.4 UdeM00000005236 XP\_025109371.1 52  
446 177 10 1 412 1 443 6.10E-99 369.4 400727

cellular

organisms;Eukaryota;Opisthokonta;Metazoa;Eumetazoa;Bilateria;Protostomia;Spiralia;Lophotrochozoa;Mollusca;Gastropoda;Caenogastropoda;Architaenioglossa;Ampullarioidea;Ampullariidae;Pomacea;Pomacea canaliculata

UdeM00000005237 400727 370.2 UdeM00000005237 XP\_025109371.1 48.8  
496 177 11 1 472 1 443 4.10E-99 370.2 400727

cellular

organisms;Eukaryota;Opisthokonta;Metazoa;Eumetazoa;Bilateria;Protostomia;Spiralia;Lophotrochozoa;Mollusca;Gastropoda;Caenogastropoda;Architaenioglossa;Ampullarioidea;Ampullariidae;Pomacea;Pomacea canaliculata

UdeM00000005238 6596 1560.8 UdeM00000005238 XP\_045157497.1 56.7  
1347 500 12 1 1282 167 1495 0.00E+00 1560.8 6596

cellular

organisms;Eukaryota;Opisthokonta;Metazoa;Eumetazoa;Bilateria;Protostomia;Spiralia;Lophotrochozoa;Mollusca;Bivalvia;Autobranchia;Heteroconchia;Euheterodonta;Imparidentia;Venerida;Veneroidea;Veneridae;Mercenaria;Mercenaria mercenaria

UdeM00000005244 6565 479.6 UdeM00000005244 XP\_022313144.1 51.2 480  
227 6 3 479 302 777 4.90E-132 479.6 6565 cellular

organisms;Eukaryota;Opisthokonta;Metazoa;Eumetazoa;Bilateria;Protostomia;Spiralia;Lophotrochozoa;Mollusca;Bivalvia;Autobranchia;Pteriormorphia;Ostreida;Ostreoidea;Ostreidae;Crassostrea;Crassostrea virginica

UdeM00000005245 37621 149.8 UdeM00000005245 XP\_014673981.1 43.9 198  
71 5 9 169 24 218 3.40E-33 149.8 37621 cellular

organisms;Eukaryota;Opisthokonta;Metazoa;Eumetazoa;Bilateria;Protostomia;Ecdysozoa;Scalidophora;Priapulida;Priapulimorpha;Priapulimorphida;Priapulidae;Priapululus;Priapululus caudatus

UdeM00000005246 37621 210.7 UdeM00000005246 XP\_014672567.1 51.7 174  
84 0 10 183 345 518 2.00E-51 210.7 37621 cellular

organisms;Eukaryota;Opisthokonta;Metazoa;Eumetazoa;Bilateria;Protostomia;

Ecdysozoa; Scalidophora; Priapulida; Priapulimorpha; Priapulimorphida; Priapulidae; Priapululus; Priapululus caudatus

UdeM00000005247 6596 483.8 UdeM00000005247 XP\_045157493.1 76.9 286  
66 0 1 286 1 286 1.50E-133 483.8 6596 cellular  
organisms; Eukaryota; Opisthokonta; Metazoa; Eumetazoa; Bilateria; Protostomia; Spiralia; Lophotrochozoa; Mollusca; Bivalvia; Autobranchia; Heteroconchia; Euheterodonta; Imparidentia; Venerida; Veneroidea; Veneridae; Mercenaria; Mercenaria mercenaria

UdeM00000005248 6579 981.9 UdeM00000005248 XP\_033737646.1 47.8 1037  
516 6 20 1048 20 1039 6.50E-283 981.9 6579 cellular  
organisms; Eukaryota; Opisthokonta; Metazoa; Eumetazoa; Bilateria; Protostomia; Spiralia; Lophotrochozoa; Mollusca; Bivalvia; Autobranchia; Pteriomorpha; Pectinida; Pectinoidea; Pectinidae; Pecten; Pecten maximus

UdeM00000005249 225164 352.1 UdeM00000005249 XP\_009056741.1 55.2  
335 131 2 13 336 60 386 8.50E-94 352.1 225164  
cellular  
organisms; Eukaryota; Opisthokonta; Metazoa; Eumetazoa; Bilateria; Protostomia; Spiralia; Lophotrochozoa; Mollusca; Gastropoda; Patellogastropoda; Lottioidea; Lottiidae; Lottia; Lottia gigantea

UdeM00000005250 6579 494.6 UdeM00000005250 XP\_033737646.1 54.2 463  
202 3 15 468 20 481 1.40E-136 494.6 6579 cellular  
organisms; Eukaryota; Opisthokonta; Metazoa; Eumetazoa; Bilateria; Protostomia; Spiralia; Lophotrochozoa; Mollusca; Bivalvia; Autobranchia; Pteriomorpha; Pectinida; Pectinoidea; Pectinidae; Pecten; Pecten maximus

UdeM00000005251 6573 342.8 UdeM00000005251 XP\_021359218.1 54.5 297  
134 1 1 297 469 764 4.60E-91 342.8 6573 cellular  
organisms; Eukaryota; Opisthokonta; Metazoa; Eumetazoa; Bilateria; Protostomia; Spiralia; Lophotrochozoa; Mollusca; Bivalvia; Autobranchia; Pteriomorpha; Pectinida; Pectinoidea; Pectinidae; Mizuhopecten; Mizuhopecten yessoensis

UdeM00000005252 6565 126.3 UdeM00000005252 XP\_022314272.1 47.5 141  
70 3 1 140 1 138 4.10E-26 126.3 6565 cellular  
organisms; Eukaryota; Opisthokonta; Metazoa; Eumetazoa; Bilateria; Protostomia; Spiralia; Lophotrochozoa; Mollusca; Bivalvia; Autobranchia; Pteriomorpha; Ostreida; Ostreioidea; Ostreidae; Crassostrea; Crassostrea virginica

UdeM00000005254 6565 125.6 UdeM00000005254 XP\_022314272.1 53.7 108  
50 0 1 108 1 108 5.00E-26 125.6 6565 cellular  
organisms; Eukaryota; Opisthokonta; Metazoa; Eumetazoa; Bilateria; Protostomia; Spiralia; Lophotrochozoa; Mollusca; Bivalvia; Autobranchia; Pteriomorpha; Ostreida; Ostreioidea; Ostreidae; Crassostrea; Crassostrea virginica

UdeM00000005253 6573 122.1 UdeM00000005253 XP\_021359218.1 51.9 108  
52 0 1 108 352 459 5.10E-25 122.1 6573 cellular  
organisms; Eukaryota; Opisthokonta; Metazoa; Eumetazoa; Bilateria; Protostomia; Spiralia; Lophotrochozoa; Mollusca; Bivalvia; Autobranchia; Pteriomorpha; Pectinida; Pectinoidea; Pectinidae; Mizuhopecten; Mizuhopecten yessoensis

UdeM00000005255 6596 447.2 UdeM00000005255 XP\_045158333.1 42.4 540  
302 4 1 537 517 1050 2.90E-122 447.2 6596 cellular  
organisms; Eukaryota; Opisthokonta; Metazoa; Eumetazoa; Bilateria; Protostomia; Spiralia; Lophotrochozoa; Mollusca; Bivalvia; Autobranchia; Heteroconchia; Euheterodonta; Imparidentia; Venerida; Veneroidea; Veneridae; Mercenaria; Mercenaria mercenaria

UdeM00000005256 6579 590.5 UdeM00000005256 XP\_033737643.1 73.1 372  
100 0 5 376 4 375 1.50E-165 590.5 6579 cellular  
organisms; Eukaryota; Opisthokonta; Metazoa; Eumetazoa; Bilateria; Protostomia;

Spiralia; Lophotrochozoa; Mollusca; Bivalvia; Autobranchia; Pteriomorpha; Pectinida; Pectinoidea; Pectinidae; Pecten; Pecten maximus  
UdeM00000005257 6573 424.5 UdeM00000005257 XP\_021372819.1 55.7 352  
149 4 196 541 56 406 2.10E-115 424.5 6573 cellular  
organisms; Eukaryota; Opisthokonta; Metazoa; Eumetazoa; Bilateria; Protostomia; Spiralia; Lophotrochozoa; Mollusca; Bivalvia; Autobranchia; Pteriomorpha; Pectinida; Pectinoidea; Pectinidae; Mizuhopecten; Mizuhopecten yessoensis  
UdeM00000005258 6596 336.7 UdeM00000005258 XP\_045157461.1 63 257  
88 2 15 269 4 255 3.30E-89 336.7 6596 cellular  
organisms; Eukaryota; Opisthokonta; Metazoa; Eumetazoa; Bilateria; Protostomia; Spiralia; Lophotrochozoa; Mollusca; Bivalvia; Autobranchia; Heteroconchia; Euheterodonta; Imparidentia; Venerida; Veneroidea; Veneridae; Mercenaria; Mercenaria mercenaria  
UdeM00000005259 6565 185.3 UdeM00000005259 XP\_022318671.1 45.6 180  
98 0 18 197 10 189 8.30E-44 185.3 6565 cellular  
organisms; Eukaryota; Opisthokonta; Metazoa; Eumetazoa; Bilateria; Protostomia; Spiralia; Lophotrochozoa; Mollusca; Bivalvia; Autobranchia; Pteriomorpha; Ostreida; Ostreoidea; Ostreidae; Crassostrea; Crassostrea virginica  
UdeM00000005260 151771 255.4 UdeM00000005260 XP\_028408207.1 49.4  
235 117 2 2 236 280 512 8.20E-65 255.4 151771  
cellular  
organisms; Eukaryota; Opisthokonta; Metazoa; Eumetazoa; Cnidaria; Anthozoa; Octocorallia; Alcyonacea; Alcyoniina; Nephtheidae; Dendronephthya; Dendronephthya gigantea  
UdeM00000005262 6565 62.4 UdeM00000005262 XP\_022290403.1 53 66  
23 2 1 66 73 130 3.60E-07 62.4 6565 cellular  
organisms; Eukaryota; Opisthokonta; Metazoa; Eumetazoa; Bilateria; Protostomia; Spiralia; Lophotrochozoa; Mollusca; Bivalvia; Autobranchia; Pteriomorpha; Ostreida; Ostreoidea; Ostreidae; Crassostrea; Crassostrea virginica  
UdeM00000005263 6596 516.5 UdeM00000005263 XP\_045157890.1 73.9 348  
85 4 1 345 1 345 2.50E-143 516.5 6596 cellular  
organisms; Eukaryota; Opisthokonta; Metazoa; Eumetazoa; Bilateria; Protostomia; Spiralia; Lophotrochozoa; Mollusca; Bivalvia; Autobranchia; Heteroconchia; Euheterodonta; Imparidentia; Venerida; Veneroidea; Veneridae; Mercenaria; Mercenaria mercenaria  
UdeM00000005264 29159 380.9 UdeM00000005264 XP\_011428029.1 76.5 234  
55 0 1 234 115 348 1.10E-102 380.9 29159 cellular  
organisms; Eukaryota; Opisthokonta; Metazoa; Eumetazoa; Bilateria; Protostomia; Spiralia; Lophotrochozoa; Mollusca; Bivalvia; Autobranchia; Pteriomorpha; Ostreida; Ostreoidea; Ostreidae; Crassostrea; Crassostrea gigas  
UdeM00000005266 6565 233.4 UdeM00000005266 XP\_022314854.1 26.7 746  
458 32 23 729 28 723 1.50E-57 233.4 6565 cellular  
organisms; Eukaryota; Opisthokonta; Metazoa; Eumetazoa; Bilateria; Protostomia; Spiralia; Lophotrochozoa; Mollusca; Bivalvia; Autobranchia; Pteriomorpha; Ostreida; Ostreoidea; Ostreidae; Crassostrea; Crassostrea virginica  
UdeM00000005267 6565 218.4 UdeM00000005267 XP\_022314854.1 28.4 630  
383 25 46 650 8 594 2.70E-53 218.4 6565 cellular  
organisms; Eukaryota; Opisthokonta; Metazoa; Eumetazoa; Bilateria; Protostomia; Spiralia; Lophotrochozoa; Mollusca; Bivalvia; Autobranchia; Pteriomorpha; Ostreida; Ostreoidea; Ostreidae; Crassostrea; Crassostrea virginica  
UdeM00000005268 6565 219.9 UdeM00000005268 XP\_022314854.1 28.7 627  
384 24 46 649 8 594 9.30E-54 219.9 6565 cellular  
organisms; Eukaryota; Opisthokonta; Metazoa; Eumetazoa; Bilateria; Protostomia;

Spiralia; Lophotrochozoa; Mollusca; Bivalvia; Autobranchia; Pteriomorpha; Ostr  
eida; Ostreidae; Crassostrea; Crassostrea virginica  
UdeM00000005271 6579 218.8 UdeM00000005271 XP\_033738178.1 26 731  
441 29 2 699 9 672 3.20E-53 218.8 6579 cellular  
organisms; Eukaryota; Opisthokonta; Metazoa; Eumetazoa; Bilateria; Protostomia;  
Spiralia; Lophotrochozoa; Mollusca; Bivalvia; Autobranchia; Pteriomorpha; Pect  
inida; Pectinoidea; Pectinidae; Pecten; Pecten maximus  
UdeM00000005272 6565 237.3 UdeM00000005272 XP\_022314854.1 28.5 720  
434 29 34 721 28 698 9.60E-59 237.3 6565 cellular  
organisms; Eukaryota; Opisthokonta; Metazoa; Eumetazoa; Bilateria; Protostomia;  
Spiralia; Lophotrochozoa; Mollusca; Bivalvia; Autobranchia; Pteriomorpha; Ostr  
eida; Ostreidae; Crassostrea; Crassostrea virginica  
UdeM00000005273 6596 495 UdeM00000005273 XP\_045159893.1 61.8 382  
141 3 8 384 9 390 9.20E-137 495 6596 cellular  
organisms; Eukaryota; Opisthokonta; Metazoa; Eumetazoa; Bilateria; Protostomia;  
Spiralia; Lophotrochozoa; Mollusca; Bivalvia; Autobranchia; Heteroconchia; Eue  
terodonta; Imparidentia; Venerida; Veneroidea; Veneridae; Mercenaria; Mercenari  
a mercenaria  
UdeM00000005274 6596 272.3 UdeM00000005274 XP\_045156993.1 48.3 360  
163 6 1 344 2 354 9.50E-70 272.3 6596 cellular  
organisms; Eukaryota; Opisthokonta; Metazoa; Eumetazoa; Bilateria; Protostomia;  
Spiralia; Lophotrochozoa; Mollusca; Bivalvia; Autobranchia; Heteroconchia; Eue  
terodonta; Imparidentia; Venerida; Veneroidea; Veneridae; Mercenaria; Mercenari  
a mercenaria  
UdeM00000005276 114398 428.7 UdeM00000005276 XP\_042903861.1 39.1  
609 360 6 1 605 1 602 1.20E-116 428.7 114398  
cellular  
organisms; Eukaryota; Opisthokonta; Metazoa; Eumetazoa; Bilateria; Protostomia;  
Ecdysozoa; Panarthropoda; Arthropoda; Chelicerata; Arachnida; Araneae; Araneomo  
rphae; Entelegynae; Orbiculariae; Araneoidea; Theridiidae; Parasteatoda; Parast  
eatoda tepidariorum  
UdeM00000005277 400727 198.7 UdeM00000005277 XP\_025110918.1 65.1  
146 50 1 1 145 28 173 4.90E-48 198.7 400727  
cellular  
organisms; Eukaryota; Opisthokonta; Metazoa; Eumetazoa; Bilateria; Protostomia;  
Spiralia; Lophotrochozoa; Mollusca; Gastropoda; Caenogastropoda; Architaeniogl  
ossa; Ampullarioidea; Ampullariidae; Pomacea; Pomacea canaliculata  
UdeM00000005278 29159 532.3 UdeM00000005278 XP\_019926413.2 53.5 559  
142 4 4 445 52 609 6.30E-148 532.3 29159 cellular  
organisms; Eukaryota; Opisthokonta; Metazoa; Eumetazoa; Bilateria; Protostomia;  
Spiralia; Lophotrochozoa; Mollusca; Bivalvia; Autobranchia; Pteriomorpha; Ostr  
eida; Ostreidae; Crassostrea; Crassostrea gigas  
UdeM00000005279 6596 1529.6 UdeM00000005279 XP\_045158550.1 36.8  
3458 1558 62 6 2928 6 3371 0.00E+00 1529.6 6596  
cellular  
organisms; Eukaryota; Opisthokonta; Metazoa; Eumetazoa; Bilateria; Protostomia;  
Spiralia; Lophotrochozoa; Mollusca; Bivalvia; Autobranchia; Heteroconchia; Eue  
terodonta; Imparidentia; Venerida; Veneroidea; Veneridae; Mercenaria; Mercenari  
a mercenaria  
UdeM00000005281 6565 82.4 UdeM00000005281 XP\_022335959.1 41.9 93  
46 3 15 104 681 768 3.70E-13 82.4 6565 cellular  
organisms; Eukaryota; Opisthokonta; Metazoa; Eumetazoa; Bilateria; Protostomia;  
Spiralia; Lophotrochozoa; Mollusca; Bivalvia; Autobranchia; Pteriomorpha; Ostr  
eida; Ostreidae; Crassostrea; Crassostrea virginica

UdeM00000005282 6596 186.4 UdeM00000005282 XP\_045158553.1 38.5 291  
 142 8 49 302 80 370 5.70E-44 186.4 6596 cellular  
 organisms;Eukaryota;Opisthokonta;Metazoa;Eumetazoa;Bilateria;Protostomia;  
 Spiralia;Lophotrochozoa;Mollusca;Bivalvia;Autobranchia;Heteroconchia;Euhe  
 terodonta;Imparidentia;Venerida;Veneroidea;Veneridae;Mercenaria;Mercenari  
 a mercenaria  
 UdeM00000005283 6596 227.6 UdeM00000005283 XP\_045157040.1 48.7 238  
 108 4 5 229 118 354 1.60E-56 227.6 6596 cellular  
 organisms;Eukaryota;Opisthokonta;Metazoa;Eumetazoa;Bilateria;Protostomia;  
 Spiralia;Lophotrochozoa;Mollusca;Bivalvia;Autobranchia;Heteroconchia;Euhe  
 terodonta;Imparidentia;Venerida;Veneroidea;Veneridae;Mercenaria;Mercenari  
 a mercenaria  
 UdeM00000005284 6596 228.4 UdeM00000005284 XP\_045157040.1 48.5 239  
 113 4 5 235 118 354 9.70E-57 228.4 6596 cellular  
 organisms;Eukaryota;Opisthokonta;Metazoa;Eumetazoa;Bilateria;Protostomia;  
 Spiralia;Lophotrochozoa;Mollusca;Bivalvia;Autobranchia;Heteroconchia;Euhe  
 terodonta;Imparidentia;Venerida;Veneroidea;Veneridae;Mercenaria;Mercenari  
 a mercenaria  
 UdeM00000005285 6596 310.1 UdeM00000005285 XP\_045158553.1 57.9 252  
 104 1 26 275 110 361 6.70E-81 310.1 6596 cellular  
 organisms;Eukaryota;Opisthokonta;Metazoa;Eumetazoa;Bilateria;Protostomia;  
 Spiralia;Lophotrochozoa;Mollusca;Bivalvia;Autobranchia;Heteroconchia;Euhe  
 terodonta;Imparidentia;Venerida;Veneroidea;Veneridae;Mercenaria;Mercenari  
 a mercenaria  
 UdeM00000005286 6596 317.8 UdeM00000005286 XP\_045157040.1 47.1 331  
 159 4 17 332 25 354 1.70E-83 317.8 6596 cellular  
 organisms;Eukaryota;Opisthokonta;Metazoa;Eumetazoa;Bilateria;Protostomia;  
 Spiralia;Lophotrochozoa;Mollusca;Bivalvia;Autobranchia;Heteroconchia;Euhe  
 terodonta;Imparidentia;Venerida;Veneroidea;Veneridae;Mercenaria;Mercenari  
 a mercenaria  
 UdeM00000005287 6596 298.9 UdeM00000005287 XP\_045158432.1 49.4 328  
 152 5 24 339 26 351 8.40E-78 298.9 6596 cellular  
 organisms;Eukaryota;Opisthokonta;Metazoa;Eumetazoa;Bilateria;Protostomia;  
 Spiralia;Lophotrochozoa;Mollusca;Bivalvia;Autobranchia;Heteroconchia;Euhe  
 terodonta;Imparidentia;Venerida;Veneroidea;Veneridae;Mercenaria;Mercenari  
 a mercenaria  
 UdeM00000005288 6596 317 UdeM00000005288 XP\_045157040.1 47.7 331  
 157 4 23 338 25 354 2.90E-83 317 6596 cellular  
 organisms;Eukaryota;Opisthokonta;Metazoa;Eumetazoa;Bilateria;Protostomia;  
 Spiralia;Lophotrochozoa;Mollusca;Bivalvia;Autobranchia;Heteroconchia;Euhe  
 terodonta;Imparidentia;Venerida;Veneroidea;Veneridae;Mercenaria;Mercenari  
 a mercenaria  
 UdeM00000005289 29159 288.5 UdeM00000005289 XP\_019926217.2 46.1 343  
 150 7 324 650 25 348 2.20E-74 288.5 29159 cellular  
 organisms;Eukaryota;Opisthokonta;Metazoa;Eumetazoa;Bilateria;Protostomia;  
 Spiralia;Lophotrochozoa;Mollusca;Bivalvia;Autobranchia;Pteriomorphia;Ostr  
 eida;Ostreoidea;Ostreidae;Crassostrea;Crassostrea gigas  
 UdeM00000005290 6596 304.3 UdeM00000005290 XP\_045157040.1 47.3 332  
 159 5 2 318 22 352 1.90E-79 304.3 6596 cellular  
 organisms;Eukaryota;Opisthokonta;Metazoa;Eumetazoa;Bilateria;Protostomia;  
 Spiralia;Lophotrochozoa;Mollusca;Bivalvia;Autobranchia;Heteroconchia;Euhe  
 terodonta;Imparidentia;Venerida;Veneroidea;Veneridae;Mercenaria;Mercenari  
 a mercenaria



UdeM00000005291 6596 96.7 UdeM00000005291 XP\_045157040.1 59 83  
 33 1 85 167 119 200 3.00E-17 96.7 6596 cellular  
 organisms;Eukaryota;Opisthokonta;Metazoa;Eumetazoa;Bilateria;Protostomia;  
 Spiralia;Lophotrochozoa;Mollusca;Bivalvia;Autobranchia;Heteroconchia;Euhe  
 terodonta;Imparidentia;Venerida;Veneroidea;Veneridae;Mercenaria;Mercenari  
 a mercenaria  
 UdeM00000005292 29159 61.2 UdeM00000005292 XP\_034315424.1 36.4 107  
 61 3 12 115 213 315 1.00E-06 61.2 29159 cellular  
 organisms;Eukaryota;Opisthokonta;Metazoa;Eumetazoa;Bilateria;Protostomia;  
 Spiralia;Lophotrochozoa;Mollusca;Bivalvia;Autobranchia;Pteriormorphia;Ostr  
 eida;Ostreoidea;Ostreidae;Crassostrea;Crassostrea gigas  
 UdeM00000005293 6565 144.8 UdeM00000005293 XP\_022306954.1 51.7 116  
 56 0 1 116 833 948 6.90E-32 144.8 6565 cellular  
 organisms;Eukaryota;Opisthokonta;Metazoa;Eumetazoa;Bilateria;Protostomia;  
 Spiralia;Lophotrochozoa;Mollusca;Bivalvia;Autobranchia;Pteriormorphia;Ostr  
 eida;Ostreoidea;Ostreidae;Crassostrea;Crassostrea virginica  
 UdeM00000005294 29159 84.7 UdeM00000005294 XP\_034319609.1 57.4 61  
 26 0 86 146 894 954 1.10E-13 84.7 29159 cellular  
 organisms;Eukaryota;Opisthokonta;Metazoa;Eumetazoa;Bilateria;Protostomia;  
 Spiralia;Lophotrochozoa;Mollusca;Bivalvia;Autobranchia;Pteriormorphia;Ostr  
 eida;Ostreoidea;Ostreidae;Crassostrea;Crassostrea gigas  
 UdeM00000005295 29159 103.6 UdeM00000005295 XP\_034318948.1 40.2 132  
 77 1 1 130 686 817 1.90E-19 103.6 29159 cellular  
 organisms;Eukaryota;Opisthokonta;Metazoa;Eumetazoa;Bilateria;Protostomia;  
 Spiralia;Lophotrochozoa;Mollusca;Bivalvia;Autobranchia;Pteriormorphia;Ostr  
 eida;Ostreoidea;Ostreidae;Crassostrea;Crassostrea gigas  
 UdeM00000005297 29159 194.9 UdeM00000005297 XP\_034315421.1 51.9 206  
 93 3 194 395 271 474 1.90E-46 194.9 29159 cellular  
 organisms;Eukaryota;Opisthokonta;Metazoa;Eumetazoa;Bilateria;Protostomia;  
 Spiralia;Lophotrochozoa;Mollusca;Bivalvia;Autobranchia;Pteriormorphia;Ostr  
 eida;Ostreoidea;Ostreidae;Crassostrea;Crassostrea gigas  
 UdeM00000005298 6596 306.2 UdeM00000005298 XP\_045157040.1 47.8 339  
 160 5 5 328 18 354 5.00E-80 306.2 6596 cellular  
 organisms;Eukaryota;Opisthokonta;Metazoa;Eumetazoa;Bilateria;Protostomia;  
 Spiralia;Lophotrochozoa;Mollusca;Bivalvia;Autobranchia;Heteroconchia;Euhe  
 terodonta;Imparidentia;Venerida;Veneroidea;Veneridae;Mercenaria;Mercenari  
 a mercenaria  
 UdeM00000005300 6596 316.6 UdeM00000005300 XP\_045158432.1 50.5 333  
 146 6 23 339 22 351 4.40E-83 316.6 6596 cellular  
 organisms;Eukaryota;Opisthokonta;Metazoa;Eumetazoa;Bilateria;Protostomia;  
 Spiralia;Lophotrochozoa;Mollusca;Bivalvia;Autobranchia;Heteroconchia;Euhe  
 terodonta;Imparidentia;Venerida;Veneroidea;Veneridae;Mercenaria;Mercenari  
 a mercenaria  
 UdeM00000005301 6596 285 UdeM00000005301 XP\_045158432.1 50.7 304  
 135 5 36 327 51 351 1.20E-73 285 6596 cellular  
 organisms;Eukaryota;Opisthokonta;Metazoa;Eumetazoa;Bilateria;Protostomia;  
 Spiralia;Lophotrochozoa;Mollusca;Bivalvia;Autobranchia;Heteroconchia;Euhe  
 terodonta;Imparidentia;Venerida;Veneroidea;Veneridae;Mercenaria;Mercenari  
 a mercenaria  
 UdeM00000005302 6565 516.2 UdeM00000005302 XP\_022320668.1 59.5 405  
 164 0 23 427 310 714 1.60E-142 516.2 6565 cellular  
 organisms;Eukaryota;Opisthokonta;Metazoa;Eumetazoa;Bilateria;Protostomia;  
 Spiralia;Lophotrochozoa;Mollusca;Bivalvia;Autobranchia;Pteriormorphia;Ostr  
 eida;Ostreoidea;Ostreidae;Crassostrea;Crassostrea virginica

UdeM00000005304 6596 118.2 UdeM00000005304 XP\_045157040.1 42.6 122  
 61 2 12 125 234 354 7.80E-24 118.2 6596 cellular  
 organisms;Eukaryota;Opisthokonta;Metazoa;Eumetazoa;Bilateria;Protostomia;  
 Spiralia;Lophotrochozoa;Mollusca;Bivalvia;Autobranhia;Heteroconchia;Euhe  
 terodonta;Imparidentia;Venerida;Veneroidea;Veneridae;Mercenaria;Mercenari  
 a mercenaria  
 UdeM00000005305 6596 93.2 UdeM00000005305 XP\_045216961.1 26.6 379  
 237 14 395 751 417 776 2.60E-15 93.2 6596 cellular  
 organisms;Eukaryota;Opisthokonta;Metazoa;Eumetazoa;Bilateria;Protostomia;  
 Spiralia;Lophotrochozoa;Mollusca;Bivalvia;Autobranhia;Heteroconchia;Euhe  
 terodonta;Imparidentia;Venerida;Veneroidea;Veneridae;Mercenaria;Mercenari  
 a mercenaria  
 UdeM00000005307 6596 317.4 UdeM00000005307 XP\_045157040.1 45.8 354  
 173 5 3 338 2 354 2.20E-83 317.4 6596 cellular  
 organisms;Eukaryota;Opisthokonta;Metazoa;Eumetazoa;Bilateria;Protostomia;  
 Spiralia;Lophotrochozoa;Mollusca;Bivalvia;Autobranhia;Heteroconchia;Euhe  
 terodonta;Imparidentia;Venerida;Veneroidea;Veneridae;Mercenaria;Mercenari  
 a mercenaria  
 UdeM00000005308 6596 291.2 UdeM00000005308 XP\_045158432.1 49.2 329  
 149 7 32 345 26 351 1.80E-75 291.2 6596 cellular  
 organisms;Eukaryota;Opisthokonta;Metazoa;Eumetazoa;Bilateria;Protostomia;  
 Spiralia;Lophotrochozoa;Mollusca;Bivalvia;Autobranhia;Heteroconchia;Euhe  
 terodonta;Imparidentia;Venerida;Veneroidea;Veneridae;Mercenaria;Mercenari  
 a mercenaria  
 UdeM00000005309 6596 226.9 UdeM00000005309 XP\_045157040.1 48.7 232  
 105 3 2 220 122 352 2.70E-56 226.9 6596 cellular  
 organisms;Eukaryota;Opisthokonta;Metazoa;Eumetazoa;Bilateria;Protostomia;  
 Spiralia;Lophotrochozoa;Mollusca;Bivalvia;Autobranhia;Heteroconchia;Euhe  
 terodonta;Imparidentia;Venerida;Veneroidea;Veneridae;Mercenaria;Mercenari  
 a mercenaria  
 UdeM00000005310 6596 170.2 UdeM00000005310 XP\_045157040.1 54.7 159  
 66 2 27 180 119 276 2.40E-39 170.2 6596 cellular  
 organisms;Eukaryota;Opisthokonta;Metazoa;Eumetazoa;Bilateria;Protostomia;  
 Spiralia;Lophotrochozoa;Mollusca;Bivalvia;Autobranhia;Heteroconchia;Euhe  
 terodonta;Imparidentia;Venerida;Veneroidea;Veneridae;Mercenaria;Mercenari  
 a mercenaria  
 UdeM00000005311 6596 307 UdeM00000005311 XP\_045158553.1 57.5 252  
 105 1 8 257 110 361 5.50E-80 307 6596 cellular  
 organisms;Eukaryota;Opisthokonta;Metazoa;Eumetazoa;Bilateria;Protostomia;  
 Spiralia;Lophotrochozoa;Mollusca;Bivalvia;Autobranhia;Heteroconchia;Euhe  
 terodonta;Imparidentia;Venerida;Veneroidea;Veneridae;Mercenaria;Mercenari  
 a mercenaria  
 UdeM00000005312 1735272 72.8 UdeM00000005312 XP\_041347149.1 50.6  
 87 36 3 1 82 257 341 3.30E-10 72.8 1735272  
 cellular  
 organisms;Eukaryota;Opisthokonta;Metazoa;Eumetazoa;Bilateria;Protostomia;  
 Spiralia;Lophotrochozoa;Mollusca;Gastropoda;Neomphalina;Neomphaloidea;Pel  
 tospiridae;Gigantopelta;Gigantopelta aegis  
 UdeM00000005313 37621 181.8 UdeM00000005313 XP\_014676995.1 58.2 141  
 56 2 1 141 1 138 6.10E-43 181.8 37621 cellular  
 organisms;Eukaryota;Opisthokonta;Metazoa;Eumetazoa;Bilateria;Protostomia;  
 Ecdysozoa;Scalidophora;Priapulida;Priapulimorpha;Priapulimorphida;Priapul  
 idae;Priapululus;Priapululus caudatus

UdeM00000005314 29159 181.8 UdeM00000005314 XP\_019926217.2 42.5 247  
 93 5 21 221 11 254 1.20E-42 181.8 29159 cellular  
 organisms;Eukaryota;Opisthokonta;Metazoa;Eumetazoa;Bilateria;Protostomia;  
 Spiralia;Lophotrochozoa;Mollusca;Bivalvia;Autobranchia;Pteriormorphia;Ostr  
 eida;Ostreoidea;Ostreidae;Crassostrea;Crassostrea gigas  
 UdeM00000005315 6596 316.6 UdeM00000005315 XP\_045157040.1 49.1 330  
 152 4 26 340 26 354 3.80E-83 316.6 6596 cellular  
 organisms;Eukaryota;Opisthokonta;Metazoa;Eumetazoa;Bilateria;Protostomia;  
 Spiralia;Lophotrochozoa;Mollusca;Bivalvia;Autobranchia;Heteroconchia;Euhe  
 terodonta;Imparidentia;Venerida;Veneroidea;Veneridae;Mercenaria;Mercenari  
 a mercenaria  
 UdeM00000005316 6596 95.5 UdeM00000005316 XP\_045158553.1 48.8 121  
 60 1 22 142 94 212 6.10E-17 95.5 6596 cellular  
 organisms;Eukaryota;Opisthokonta;Metazoa;Eumetazoa;Bilateria;Protostomia;  
 Spiralia;Lophotrochozoa;Mollusca;Bivalvia;Autobranchia;Heteroconchia;Euhe  
 terodonta;Imparidentia;Venerida;Veneroidea;Veneridae;Mercenaria;Mercenari  
 a mercenaria  
 UdeM00000005318 6579 148.7 UdeM00000005318 XP\_033738723.1 59.4 128  
 48 2 4 128 106 232 6.30E-33 148.7 6579 cellular  
 organisms;Eukaryota;Opisthokonta;Metazoa;Eumetazoa;Bilateria;Protostomia;  
 Spiralia;Lophotrochozoa;Mollusca;Bivalvia;Autobranchia;Pteriormorphia;Pect  
 inida;Pectinoidea;Pectinidae;Pecten;Pecten maximus  
 UdeM00000005319 6579 147.5 UdeM00000005319 XP\_033738723.1 61.5 122  
 43 2 4 122 106 226 1.20E-32 147.5 6579 cellular  
 organisms;Eukaryota;Opisthokonta;Metazoa;Eumetazoa;Bilateria;Protostomia;  
 Spiralia;Lophotrochozoa;Mollusca;Bivalvia;Autobranchia;Pteriormorphia;Pect  
 inida;Pectinoidea;Pectinidae;Pecten;Pecten maximus  
 UdeM00000005321 6596 95.1 UdeM00000005321 XP\_045216961.1 26.1 379  
 239 14 395 751 417 776 6.70E-16 95.1 6596 cellular  
 organisms;Eukaryota;Opisthokonta;Metazoa;Eumetazoa;Bilateria;Protostomia;  
 Spiralia;Lophotrochozoa;Mollusca;Bivalvia;Autobranchia;Heteroconchia;Euhe  
 terodonta;Imparidentia;Venerida;Veneroidea;Veneridae;Mercenaria;Mercenari  
 a mercenaria  
 UdeM00000005322 1735272 97.1 UdeM00000005322 XP\_041359644.1 26.6  
 350 224 14 12 357 354 674 5.10E-17 97.1 1735272  
 cellular  
 organisms;Eukaryota;Opisthokonta;Metazoa;Eumetazoa;Bilateria;Protostomia;  
 Spiralia;Lophotrochozoa;Mollusca;Gastropoda;Neomphalina;Neomphaloidea;Pel  
 tospiridae;Gigantopelta;Gigantopelta aegis  
 UdeM00000005323 6596 260 UdeM00000005323 XP\_045158432.1 51 261  
 117 4 17 269 92 349 3.40E-66 260 6596 cellular  
 organisms;Eukaryota;Opisthokonta;Metazoa;Eumetazoa;Bilateria;Protostomia;  
 Spiralia;Lophotrochozoa;Mollusca;Bivalvia;Autobranchia;Heteroconchia;Euhe  
 terodonta;Imparidentia;Venerida;Veneroidea;Veneridae;Mercenaria;Mercenari  
 a mercenaria  
 UdeM00000005324 6596 99.8 UdeM00000005324 XP\_045216883.1 26.9 375  
 247 12 370 729 10 372 2.70E-17 99.8 6596 cellular  
 organisms;Eukaryota;Opisthokonta;Metazoa;Eumetazoa;Bilateria;Protostomia;  
 Spiralia;Lophotrochozoa;Mollusca;Bivalvia;Autobranchia;Heteroconchia;Euhe  
 terodonta;Imparidentia;Venerida;Veneroidea;Veneridae;Mercenaria;Mercenari  
 a mercenaria  
 UdeM00000005325 10224 210.7 UdeM00000005325 XP\_002736880.1 51.3 195  
 93 1 14 206 36 230 2.20E-51 210.7 10224 cellular  
 organisms;Eukaryota;Opisthokonta;Metazoa;Eumetazoa;Bilateria;Deuterostomi

a;Hemichordata;Enteropneusta;Harrimaniidae;Saccoglossus;Saccoglossus  
kowalevskii

UdeM00000005327 6579 148.7 UdeM00000005327 XP\_033738723.1 59.4 128  
48 2 4 128 106 232 6.30E-33 148.7 6579 cellular  
organisms;Eukaryota;Opisthokonta;Metazoa;Eumetazoa;Bilateria;Protostomia;  
Spiralia;Lophotrochozoa;Mollusca;Bivalvia;Autobranchia;Pteriormorphia;Pect  
inida;Pectinoidea;Pectinidae;Pecten;Pecten maximus

UdeM00000005329 6596 94.7 UdeM00000005329 XP\_045216961.1 26.1 379  
239 14 395 751 417 776 8.80E-16 94.7 6596 cellular  
organisms;Eukaryota;Opisthokonta;Metazoa;Eumetazoa;Bilateria;Protostomia;  
Spiralia;Lophotrochozoa;Mollusca;Bivalvia;Autobranchia;Heteroconchia;Euhe  
terodonta;Imparidentia;Venerida;Veneroidea;Veneridae;Mercenaria;Mercenari  
a mercenaria

UdeM00000005331 6596 253.1 UdeM00000005331 XP\_045157040.1 49.8 255  
109 4 1 247 111 354 3.80E-64 253.1 6596 cellular  
organisms;Eukaryota;Opisthokonta;Metazoa;Eumetazoa;Bilateria;Protostomia;  
Spiralia;Lophotrochozoa;Mollusca;Bivalvia;Autobranchia;Heteroconchia;Euhe  
terodonta;Imparidentia;Venerida;Veneroidea;Veneridae;Mercenaria;Mercenari  
a mercenaria

UdeM00000005332 6596 198.4 UdeM00000005332 XP\_045157040.1 44.5 245  
81 3 1 191 111 354 8.70E-48 198.4 6596 cellular  
organisms;Eukaryota;Opisthokonta;Metazoa;Eumetazoa;Bilateria;Protostomia;  
Spiralia;Lophotrochozoa;Mollusca;Bivalvia;Autobranchia;Heteroconchia;Euhe  
terodonta;Imparidentia;Venerida;Veneroidea;Veneridae;Mercenaria;Mercenari  
a mercenaria

UdeM00000005334 6596 82.4 UdeM00000005334 XP\_045185328.1 23.2 457  
296 16 254 686 9 434 4.20E-12 82.4 6596 cellular  
organisms;Eukaryota;Opisthokonta;Metazoa;Eumetazoa;Bilateria;Protostomia;  
Spiralia;Lophotrochozoa;Mollusca;Bivalvia;Autobranchia;Heteroconchia;Euhe  
terodonta;Imparidentia;Venerida;Veneroidea;Veneridae;Mercenaria;Mercenari  
a mercenaria

UdeM00000005335 6596 82.4 UdeM00000005335 XP\_045185328.1 23.2 457  
296 16 249 681 9 434 4.20E-12 82.4 6596 cellular  
organisms;Eukaryota;Opisthokonta;Metazoa;Eumetazoa;Bilateria;Protostomia;  
Spiralia;Lophotrochozoa;Mollusca;Bivalvia;Autobranchia;Heteroconchia;Euhe  
terodonta;Imparidentia;Venerida;Veneroidea;Veneridae;Mercenaria;Mercenari  
a mercenaria

UdeM00000005337 6596 251.5 UdeM00000005337 XP\_045158432.1 42.9 347  
127 5 23 315 22 351 1.40E-63 251.5 6596 cellular  
organisms;Eukaryota;Opisthokonta;Metazoa;Eumetazoa;Bilateria;Protostomia;  
Spiralia;Lophotrochozoa;Mollusca;Bivalvia;Autobranchia;Heteroconchia;Euhe  
terodonta;Imparidentia;Venerida;Veneroidea;Veneridae;Mercenaria;Mercenari  
a mercenaria

UdeM00000005339 6596 91.3 UdeM00000005339 XP\_045185328.1 23.2 457  
296 16 289 721 9 434 9.40E-15 91.3 6596 cellular  
organisms;Eukaryota;Opisthokonta;Metazoa;Eumetazoa;Bilateria;Protostomia;  
Spiralia;Lophotrochozoa;Mollusca;Bivalvia;Autobranchia;Heteroconchia;Euhe  
terodonta;Imparidentia;Venerida;Veneroidea;Veneridae;Mercenaria;Mercenari  
a mercenaria

UdeM00000005340 1735272 116.3 UdeM00000005340 XP\_041356266.1 49.5  
91 46 0 33 123 473 563 2.70E-23 116.3 1735272  
cellular  
organisms;Eukaryota;Opisthokonta;Metazoa;Eumetazoa;Bilateria;Protostomia;

Spiralia; Lophotrochozoa; Mollusca; Gastropoda; Neomphalina; Neomphaloidea; Peltospiridae; Gigantopelta; Gigantopelta aegis

UdeM00000005341 6596 91.3 UdeM00000005341 XP\_045160186.1 28.2 202  
130 3 132 330 62 251 2.50E-15 91.3 6596 cellular  
organisms; Eukaryota; Opisthokonta; Metazoa; Eumetazoa; Bilateria; Protostomia; Spiralia; Lophotrochozoa; Mollusca; Bivalvia; Autobranchia; Heteroconchia; Euheterodonta; Imparidentia; Venerida; Veneroidea; Veneridae; Mercenaria; Mercenaria mercenaria

UdeM00000005342 6596 117.5 UdeM00000005342 XP\_045160186.1 26.9 249  
163 3 92 339 21 251 3.40E-23 117.5 6596 cellular  
organisms; Eukaryota; Opisthokonta; Metazoa; Eumetazoa; Bilateria; Protostomia; Spiralia; Lophotrochozoa; Mollusca; Bivalvia; Autobranchia; Heteroconchia; Euheterodonta; Imparidentia; Venerida; Veneroidea; Veneridae; Mercenaria; Mercenaria mercenaria

UdeM00000005343 29159 153.3 UdeM00000005343 XP\_034299474.1 53.4 148  
66 2 1 145 329 476 2.60E-34 153.3 29159 cellular  
organisms; Eukaryota; Opisthokonta; Metazoa; Eumetazoa; Bilateria; Protostomia; Spiralia; Lophotrochozoa; Mollusca; Bivalvia; Autobranchia; Pteriomorphia; Ostreida; Ostreioidea; Ostreidae; Crassostrea; Crassostrea gigas

UdeM00000005346 6565 90.1 UdeM00000005346 XP\_022322655.1 40.9 110  
62 2 1 107 639 748 1.80E-15 90.1 6565 cellular  
organisms; Eukaryota; Opisthokonta; Metazoa; Eumetazoa; Bilateria; Protostomia; Spiralia; Lophotrochozoa; Mollusca; Bivalvia; Autobranchia; Pteriomorphia; Ostreida; Ostreioidea; Ostreidae; Crassostrea; Crassostrea virginica

UdeM00000005347 6596 95.1 UdeM00000005347 XP\_045160186.1 27.1 210  
130 3 85 291 62 251 1.50E-16 95.1 6596 cellular  
organisms; Eukaryota; Opisthokonta; Metazoa; Eumetazoa; Bilateria; Protostomia; Spiralia; Lophotrochozoa; Mollusca; Bivalvia; Autobranchia; Heteroconchia; Euheterodonta; Imparidentia; Venerida; Veneroidea; Veneridae; Mercenaria; Mercenaria mercenaria

UdeM00000005348 37653 149.1 UdeM00000005348 XP\_014773381.1 37.2 215  
105 5 96 309 58 243 9.70E-33 149.1 37653 cellular  
organisms; Eukaryota; Opisthokonta; Metazoa; Eumetazoa; Bilateria; Protostomia; Spiralia; Lophotrochozoa; Mollusca; Cephalopoda; Coleoidea; Octopodiformes; Octopoda; Incirrata; Octopodidae; Octopus; Octopus bimaculoides

UdeM00000005349 6579 100.1 UdeM00000005349 XP\_033736975.1 28.6 175  
118 4 46 216 69 240 3.70E-18 100.1 6579 cellular  
organisms; Eukaryota; Opisthokonta; Metazoa; Eumetazoa; Bilateria; Protostomia; Spiralia; Lophotrochozoa; Mollusca; Bivalvia; Autobranchia; Pteriomorphia; Pectinida; Pectinoidea; Pectinidae; Pecten; Pecten maximus

UdeM00000005351 7574 97.1 UdeM00000005351 XP\_013396873.1 29.4 177  
120 3 42 216 61 234 3.10E-17 97.1 7574 cellular  
organisms; Eukaryota; Opisthokonta; Metazoa; Eumetazoa; Bilateria; Protostomia; Spiralia; Lophotrochozoa; Brachiopoda; Linguliformea; Lingulata; Lingulida; Linguloidea; Lingulidae; Lingula; Lingula anatina

UdeM00000005352 29053 118.2 UdeM00000005352 XP\_023246665.1 51.8 110  
53 0 9 118 216 325 6.90E-24 118.2 29053 cellular  
organisms; Eukaryota; Opisthokonta; Metazoa; Eumetazoa; Bilateria; Protostomia; Ecdysozoa; Panarthropoda; Arthropoda; Mandibulata; Pancrustacea; Hexapoda; Insecta; Dicondylia; Pterygota; Neoptera; Endopterygota; Hymenoptera; Apocrita; Parasitoida; Chalcidoidea; Encyrtidae; Encyrtinae; Copidosoma; Copidosoma floridanum

UdeM00000005353 6596 419.5 UdeM00000005353 XP\_045159559.1 52.2 379  
174 6 31 409 22 393 5.00E-114 419.5 6596 cellular

organisms;Eukaryota;Opisthokonta;Metazoa;Eumetazoa;Bilateria;Protostomia;Spiralia;Lophotrochozoa;Mollusca;Bivalvia;Autobranchia;Heteroconchia;Euherodonta;Imparidentia;Venerida;Veneroidea;Veneridae;Mercenaria;Mercenaria mercenaria

UdeM00000005354 6596 565.5 UdeM00000005354 XP\_045159560.1 53.8 545  
227 4 1 524 1 541 7.20E-158 565.5 6596 cellular

organisms;Eukaryota;Opisthokonta;Metazoa;Eumetazoa;Bilateria;Protostomia;Spiralia;Lophotrochozoa;Mollusca;Bivalvia;Autobranchia;Heteroconchia;Euherodonta;Imparidentia;Venerida;Veneroidea;Veneridae;Mercenaria;Mercenaria mercenaria

UdeM00000005355 6573 197.2 UdeM00000005355 XP\_021341342.1 98.9 93  
1 0 1 93 1 93 1.40E-47 197.2 6573 cellular

organisms;Eukaryota;Opisthokonta;Metazoa;Eumetazoa;Bilateria;Protostomia;Spiralia;Lophotrochozoa;Mollusca;Bivalvia;Autobranchia;Pteriormorphia;Pectinida;Pectinoidea;Pectinidae;Mizuhopecten;Mizuhopecten yessoensis

UdeM00000005356 6596 341.3 UdeM00000005356 XP\_045160898.1 74.5 204  
51 1 6 208 162 365 9.20E-91 341.3 6596 cellular

organisms;Eukaryota;Opisthokonta;Metazoa;Eumetazoa;Bilateria;Protostomia;Spiralia;Lophotrochozoa;Mollusca;Bivalvia;Autobranchia;Heteroconchia;Euherodonta;Imparidentia;Venerida;Veneroidea;Veneridae;Mercenaria;Mercenaria mercenaria

UdeM00000005357 6596 320.5 UdeM00000005357 XP\_045160898.1 53.6 293  
131 3 14 303 365 655 2.50E-84 320.5 6596 cellular

organisms;Eukaryota;Opisthokonta;Metazoa;Eumetazoa;Bilateria;Protostomia;Spiralia;Lophotrochozoa;Mollusca;Bivalvia;Autobranchia;Heteroconchia;Euherodonta;Imparidentia;Venerida;Veneroidea;Veneridae;Mercenaria;Mercenaria mercenaria

UdeM00000005359 161584 95.9 UdeM00000005359 XP\_037104184.1 51  
100 49 0 2 101 215 314 4.00E-17 95.9 161584  
cellular

organisms;Eukaryota;Opisthokonta;Metazoa;Eumetazoa;Bilateria;Deuterostomia;Chordata;Craniata;Vertebrata;Gnathostomata;Teleostomi;Euteleostomi;Actinopterygii;Actinopteri;Neopterygii;Teleostei;Osteoglossocephalai;Clupeocephala;Euteleosteomorpha;Neoteleostei;Eurypterygia;Ctenosquamata;Acanthomorphata;Euacanthomorphacea;Percomorphaceae;Syngnathiaria;Syngnathiformes;Syngnathoidei;Syngnathidae;Syngnathinae;Syngnathus;Syngnathus acus

UdeM00000005360 77115 63.5 UdeM00000005360 XP\_038157148.1 38.1 84  
50 1 7 90 2 83 1.90E-07 63.5 77115 cellular

organisms;Eukaryota;Opisthokonta;Metazoa;Eumetazoa;Bilateria;Deuterostomia;Chordata;Craniata;Vertebrata;Gnathostomata;Teleostomi;Euteleostomi;Actinopterygii;Actinopteri;Neopterygii;Teleostei;Osteoglossocephalai;Clupeocephala;Euteleosteomorpha;Neoteleostei;Eurypterygia;Ctenosquamata;Acanthomorphata;Euacanthomorphacea;Percomorphaceae;Ovalentaria;Atherinomorphae;Cyprinodontiformes;Cyprinodontoidei;Cyprinodontidae;Cyprinodontinae;Cyprinodontini;Cyprinodon;Cyprinodon tularosa

UdeM00000005361 6565 308.1 UdeM00000005361 XP\_022317798.1 85.7 161  
23 0 1 161 1 161 6.40E-81 308.1 6565 cellular

organisms;Eukaryota;Opisthokonta;Metazoa;Eumetazoa;Bilateria;Protostomia;Spiralia;Lophotrochozoa;Mollusca;Bivalvia;Autobranchia;Pteriormorphia;Ostreida;Ostreoidea;Ostreidae;Crassostrea;Crassostrea virginica

UdeM00000005362 6596 405.2 UdeM00000005362 XP\_045159561.1 63.5 293  
100 3 4 294 13 300 7.50E-110 405.2 6596 cellular

organisms;Eukaryota;Opisthokonta;Metazoa;Eumetazoa;Bilateria;Protostomia;Spiralia;Lophotrochozoa;Mollusca;Bivalvia;Autobranchia;Heteroconchia;Euherodonta

terodonta;Imparidentia;Venerida;Veneroidea;Veneridae;Mercenaria;Mercenaria mercenaria

UdeM00000005363 6573 455.3 UdeM00000005363 XP\_021374817.1 39.7 695  
344 15 17 656 9 683 1.30E-124 455.3 6573 cellular

organisms;Eukaryota;Opisthokonta;Metazoa;Eumetazoa;Bilateria;Protostomia;Spiralia;Lophotrochozoa;Mollusca;Bivalvia;Autobranchia;Pteriormorphia;Pectinida;Pectinoidea;Pectinidae;Mizuhopecten;Mizuhopecten yessoensis

UdeM00000005365 6596 274.2 UdeM00000005365 XP\_045160931.1 50.5 277  
135 1 1 277 201 475 1.80E-70 274.2 6596 cellular

organisms;Eukaryota;Opisthokonta;Metazoa;Eumetazoa;Bilateria;Protostomia;Spiralia;Lophotrochozoa;Mollusca;Bivalvia;Autobranchia;Heteroconchia;Euheterodonta;Imparidentia;Venerida;Veneroidea;Veneridae;Mercenaria;Mercenaria mercenaria

UdeM00000005364 6596 391.3 UdeM00000005364 XP\_045160931.1 45 471  
245 4 14 480 15 475 1.70E-105 391.3 6596 cellular

organisms;Eukaryota;Opisthokonta;Metazoa;Eumetazoa;Bilateria;Protostomia;Spiralia;Lophotrochozoa;Mollusca;Bivalvia;Autobranchia;Heteroconchia;Euheterodonta;Imparidentia;Venerida;Veneroidea;Veneridae;Mercenaria;Mercenaria mercenaria

UdeM00000005366 6565 124.8 UdeM00000005366 XP\_022315755.1 50.7 136  
60 2 67 201 65 194 1.30E-25 124.8 6565 cellular

organisms;Eukaryota;Opisthokonta;Metazoa;Eumetazoa;Bilateria;Protostomia;Spiralia;Lophotrochozoa;Mollusca;Bivalvia;Autobranchia;Pteriormorphia;Ostreida;Ostreoidea;Ostreidae;Crassostrea;Crassostrea virginica

UdeM00000005367 6596 1052.4 UdeM00000005367 XP\_045158822.1 92.7  
549 40 0 1 549 1 549 2.00E-304 1052.4 6596  
cellular

organisms;Eukaryota;Opisthokonta;Metazoa;Eumetazoa;Bilateria;Protostomia;Spiralia;Lophotrochozoa;Mollusca;Bivalvia;Autobranchia;Heteroconchia;Euheterodonta;Imparidentia;Venerida;Veneroidea;Veneridae;Mercenaria;Mercenaria mercenaria

UdeM00000005369 1735272 409.5 UdeM00000005369 XP\_041358009.1 64  
292 105 0 4 295 17 308 3.70E-111 409.5 1735272  
cellular

organisms;Eukaryota;Opisthokonta;Metazoa;Eumetazoa;Bilateria;Protostomia;Spiralia;Lophotrochozoa;Mollusca;Gastropoda;Neomphalina;Neomphaloidea;Peltospiridae;Gigantopelta;Gigantopelta aegis

UdeM00000005370 6573 170.2 UdeM00000005370 XP\_021377013.1 67.9 131  
41 1 1 131 1 130 1.90E-39 170.2 6573 cellular

organisms;Eukaryota;Opisthokonta;Metazoa;Eumetazoa;Bilateria;Protostomia;Spiralia;Lophotrochozoa;Mollusca;Bivalvia;Autobranchia;Pteriormorphia;Pectinida;Pectinoidea;Pectinidae;Mizuhopecten;Mizuhopecten yessoensis

UdeM00000005371 1735272 112.8 UdeM00000005371 XP\_041366822.1 44.4  
133 74 0 10 142 2 134 1.10E-21 112.8 1735272  
cellular

organisms;Eukaryota;Opisthokonta;Metazoa;Eumetazoa;Bilateria;Protostomia;Spiralia;Lophotrochozoa;Mollusca;Gastropoda;Neomphalina;Neomphaloidea;Peltospiridae;Gigantopelta;Gigantopelta aegis

UdeM00000005372 6596 957.2 UdeM00000005372 XP\_045160538.1 65.2 784  
195 11 1 773 1 717 1.30E-275 957.2 6596 cellular

organisms;Eukaryota;Opisthokonta;Metazoa;Eumetazoa;Bilateria;Protostomia;Spiralia;Lophotrochozoa;Mollusca;Bivalvia;Autobranchia;Heteroconchia;Euheterodonta;Imparidentia;Venerida;Veneroidea;Veneridae;Mercenaria;Mercenaria mercenaria

UdeM00000005373 6596 253.8 UdeM00000005373 XP\_045172766.1 41.7 319  
 179 4 67 384 138 450 3.50E-64 253.8 6596 cellular  
 organisms;Eukaryota;Opisthokonta;Metazoa;Eumetazoa;Bilateria;Protostomia;  
 Spiralia;Lophotrochozoa;Mollusca;Bivalvia;Autobranchia;Heteroconchia;Euhe  
 terodonta;Imparidentia;Venerida;Veneroidea;Veneridae;Mercenaria;Mercenari  
 a mercenaria

UdeM00000005374 6573 157.1 UdeM00000005374 XP\_021377015.1 62 100  
 38 0 2 101 1455 1554 1.30E-35 157.1 6573 cellular  
 organisms;Eukaryota;Opisthokonta;Metazoa;Eumetazoa;Bilateria;Protostomia;  
 Spiralia;Lophotrochozoa;Mollusca;Bivalvia;Autobranchia;Pteriormorphia;Pect  
 inida;Pectinoidea;Pectinidae;Mizuhopecten;Mizuhopecten yessoensis

UdeM00000005375 6573 2129 UdeM00000005375 XP\_021377015.1 64.1 1559  
 549 8 1 1553 1 1554 0.00E+00 2129 6573 cellular  
 organisms;Eukaryota;Opisthokonta;Metazoa;Eumetazoa;Bilateria;Protostomia;  
 Spiralia;Lophotrochozoa;Mollusca;Bivalvia;Autobranchia;Pteriormorphia;Pect  
 inida;Pectinoidea;Pectinidae;Mizuhopecten;Mizuhopecten yessoensis

UdeM00000005378 1735272 68.2 UdeM00000005378 XP\_041364761.1 42.1  
 76 44 0 37 112 70 145 8.30E-09 68.2 1735272  
 cellular  
 organisms;Eukaryota;Opisthokonta;Metazoa;Eumetazoa;Bilateria;Protostomia;  
 Spiralia;Lophotrochozoa;Mollusca;Gastropoda;Neomphalina;Neomphaloidea;Pel  
 tospiridae;Gigantopelta;Gigantopelta aegis

UdeM00000005379 1735272 82 UdeM00000005379 XP\_041364761.1 45  
 80 44 0 37 116 70 149 5.50E-13 82 1735272  
 cellular  
 organisms;Eukaryota;Opisthokonta;Metazoa;Eumetazoa;Bilateria;Protostomia;  
 Spiralia;Lophotrochozoa;Mollusca;Gastropoda;Neomphalina;Neomphaloidea;Pel  
 tospiridae;Gigantopelta;Gigantopelta aegis

UdeM00000005380 6596 291.6 UdeM00000005380 XP\_045159679.1 44.9 312  
 161 3 35 346 35 335 1.40E-75 291.6 6596 cellular  
 organisms;Eukaryota;Opisthokonta;Metazoa;Eumetazoa;Bilateria;Protostomia;  
 Spiralia;Lophotrochozoa;Mollusca;Bivalvia;Autobranchia;Heteroconchia;Euhe  
 terodonta;Imparidentia;Venerida;Veneroidea;Veneridae;Mercenaria;Mercenari  
 a mercenaria

UdeM00000005381 742174 216.1 UdeM00000005381 XP\_025199557.1 34.8  
 342 201 6 1 320 12 353 6.60E-53 216.1 742174  
 cellular  
 organisms;Eukaryota;Opisthokonta;Metazoa;Eumetazoa;Bilateria;Protostomia;  
 Ecdysozoa;Panarthropoda;Arthropoda;Mandibulata;Pancrustacea;Hexapoda;Inse  
 cta;Dicondylia;Pterygota;Neoptera;Paraneoptera;Hemiptera;Sternorrhyncha;A  
 phidomorpha;Aphidoidea;Aphididae;Aphidinae;Aphidini;Melanaphis;Melanaphis  
 sacchari

UdeM00000005382 29159 773.9 UdeM00000005382 XP\_011436709.1 69 603  
 166 8 1 592 1 593 1.50E-220 773.9 29159 cellular  
 organisms;Eukaryota;Opisthokonta;Metazoa;Eumetazoa;Bilateria;Protostomia;  
 Spiralia;Lophotrochozoa;Mollusca;Bivalvia;Autobranchia;Pteriormorphia;Ostr  
 eida;Ostreoidea;Ostreidae;Crassostrea;Crassostrea gigas

UdeM00000005383 29159 785.8 UdeM00000005383 XP\_011436709.1 69.9 601  
 161 9 1 589 1 593 3.80E-224 785.8 29159 cellular  
 organisms;Eukaryota;Opisthokonta;Metazoa;Eumetazoa;Bilateria;Protostomia;  
 Spiralia;Lophotrochozoa;Mollusca;Bivalvia;Autobranchia;Pteriormorphia;Ostr  
 eida;Ostreoidea;Ostreidae;Crassostrea;Crassostrea gigas

UdeM00000005384 7741 295.8 UdeM00000005384 XP\_019645671.1 46.2 344  
 162 4 187 526 96 420 1.10E-76 295.8 7741 cellular



organisms;Eukaryota;Opisthokonta;Metazoa;Eumetazoa;Bilateria;Deuterostomi  
a;Chordata;Cephalochordata;Leptocardii;Amphioxiformes;Branchiostomidae;Br  
anchiostoma;Branchiostoma belcheri

UdeM00000005385 6579 289.7 UdeM00000005385 XP\_033737045.1 39.6 419  
206 8 122 502 12 421 7.60E-75 289.7 6579 cellular

organisms;Eukaryota;Opisthokonta;Metazoa;Eumetazoa;Bilateria;Protostomia;  
Spiralia;Lophotrochozoa;Mollusca;Bivalvia;Autobranchia;Pteriormorphia;Pect  
inida;Pectinoidea;Pectinidae;Pecten;Pecten maximus

UdeM00000005386 6596 221.9 UdeM00000005386 XP\_045157090.1 48.6 218  
110 1 4 219 2 219 8.40E-55 221.9 6596 cellular

organisms;Eukaryota;Opisthokonta;Metazoa;Eumetazoa;Bilateria;Protostomia;  
Spiralia;Lophotrochozoa;Mollusca;Bivalvia;Autobranchia;Heteroconchia;Euhe  
terodonta;Imparidentia;Venerida;Veneroidea;Veneridae;Mercenaria;Mercenari  
a mercenaria

UdeM00000005387 6596 216.5 UdeM00000005387 XP\_045157090.1 49.8 205  
101 1 4 206 15 219 3.30E-53 216.5 6596 cellular

organisms;Eukaryota;Opisthokonta;Metazoa;Eumetazoa;Bilateria;Protostomia;  
Spiralia;Lophotrochozoa;Mollusca;Bivalvia;Autobranchia;Heteroconchia;Euhe  
terodonta;Imparidentia;Venerida;Veneroidea;Veneridae;Mercenaria;Mercenari  
a mercenaria

UdeM00000005388 6596 330.1 UdeM00000005388 XP\_045159695.1 59.6 260  
104 1 1 259 1 260 2.60E-87 330.1 6596 cellular

organisms;Eukaryota;Opisthokonta;Metazoa;Eumetazoa;Bilateria;Protostomia;  
Spiralia;Lophotrochozoa;Mollusca;Bivalvia;Autobranchia;Heteroconchia;Euhe  
terodonta;Imparidentia;Venerida;Veneroidea;Veneridae;Mercenaria;Mercenari  
a mercenaria

UdeM00000005389 6596 91.3 UdeM00000005389 XP\_045159473.1 30.7 163  
81 3 396 556 273 405 4.50E-15 91.3 6596 cellular

organisms;Eukaryota;Opisthokonta;Metazoa;Eumetazoa;Bilateria;Protostomia;  
Spiralia;Lophotrochozoa;Mollusca;Bivalvia;Autobranchia;Heteroconchia;Euhe  
terodonta;Imparidentia;Venerida;Veneroidea;Veneridae;Mercenaria;Mercenari  
a mercenaria

UdeM00000005391 6573 198 UdeM00000005391 XP\_021372817.1 31.8 478  
273 18 145 593 249 702 4.60E-47 198 6573 cellular

organisms;Eukaryota;Opisthokonta;Metazoa;Eumetazoa;Bilateria;Protostomia;  
Spiralia;Lophotrochozoa;Mollusca;Bivalvia;Autobranchia;Pteriormorphia;Pect  
inida;Pectinoidea;Pectinidae;Mizuhopecten;Mizuhopecten yessoensis

UdeM00000005392 6596 124.4 UdeM00000005392 XP\_045160870.1 65.8 76  
26 0 140 215 356 431 1.80E-25 124.4 6596 cellular

organisms;Eukaryota;Opisthokonta;Metazoa;Eumetazoa;Bilateria;Protostomia;  
Spiralia;Lophotrochozoa;Mollusca;Bivalvia;Autobranchia;Heteroconchia;Euhe  
terodonta;Imparidentia;Venerida;Veneroidea;Veneridae;Mercenaria;Mercenari  
a mercenaria

UdeM00000005394 6596 176.4 UdeM00000005394 XP\_045159473.1 24.7 510  
247 16 192 639 42 476 1.50E-40 176.4 6596 cellular

organisms;Eukaryota;Opisthokonta;Metazoa;Eumetazoa;Bilateria;Protostomia;  
Spiralia;Lophotrochozoa;Mollusca;Bivalvia;Autobranchia;Heteroconchia;Euhe  
terodonta;Imparidentia;Venerida;Veneroidea;Veneridae;Mercenaria;Mercenari  
a mercenaria

UdeM00000005395 6596 124.4 UdeM00000005395 XP\_045160870.1 43 151  
45 3 105 219 286 431 1.80E-25 124.4 6596 cellular

organisms;Eukaryota;Opisthokonta;Metazoa;Eumetazoa;Bilateria;Protostomia;  
Spiralia;Lophotrochozoa;Mollusca;Bivalvia;Autobranchia;Heteroconchia;Euhe

terodonta;Imparidentia;Venerida;Veneroidea;Veneridae;Mercenaria;Mercenari  
 a mercenaria  
 UdeM00000005396 6565 171.8 UdeM00000005396 XP\_022311830.1 32 306  
 159 10 331 633 58 317 3.70E-39 171.8 6565 cellular  
 organisms;Eukaryota;Opisthokonta;Metazoa;Eumetazoa;Bilateria;Protostomia;  
 Spiralia;Lophotrochozoa;Mollusca;Bivalvia;Autobranhia;Pteriormorphia;Ostr  
 eida;Ostreoidea;Ostreidae;Crassostrea;Crassostrea virginica  
 UdeM00000005397 6596 127.5 UdeM00000005397 XP\_045160870.1 67.1 76  
 25 0 140 215 356 431 2.10E-26 127.5 6596 cellular  
 organisms;Eukaryota;Opisthokonta;Metazoa;Eumetazoa;Bilateria;Protostomia;  
 Spiralia;Lophotrochozoa;Mollusca;Bivalvia;Autobranhia;Heteroconchia;Euhe  
 terodonta;Imparidentia;Venerida;Veneroidea;Veneridae;Mercenaria;Mercenari  
 a mercenaria  
 UdeM00000005399 6596 182.2 UdeM00000005399 XP\_045159473.1 28.5 365  
 201 11 329 638 117 476 2.80E-42 182.2 6596 cellular  
 organisms;Eukaryota;Opisthokonta;Metazoa;Eumetazoa;Bilateria;Protostomia;  
 Spiralia;Lophotrochozoa;Mollusca;Bivalvia;Autobranhia;Heteroconchia;Euhe  
 terodonta;Imparidentia;Venerida;Veneroidea;Veneridae;Mercenaria;Mercenari  
 a mercenaria  
 UdeM00000005400 6596 182.2 UdeM00000005400 XP\_045159473.1 28.5 365  
 201 11 329 638 117 476 2.80E-42 182.2 6596 cellular  
 organisms;Eukaryota;Opisthokonta;Metazoa;Eumetazoa;Bilateria;Protostomia;  
 Spiralia;Lophotrochozoa;Mollusca;Bivalvia;Autobranhia;Heteroconchia;Euhe  
 terodonta;Imparidentia;Venerida;Veneroidea;Veneridae;Mercenaria;Mercenari  
 a mercenaria  
 UdeM00000005403 6596 153.3 UdeM00000005403 XP\_045159473.1 35 254  
 140 10 2 232 103 354 3.80E-34 153.3 6596 cellular  
 organisms;Eukaryota;Opisthokonta;Metazoa;Eumetazoa;Bilateria;Protostomia;  
 Spiralia;Lophotrochozoa;Mollusca;Bivalvia;Autobranhia;Heteroconchia;Euhe  
 terodonta;Imparidentia;Venerida;Veneroidea;Veneridae;Mercenaria;Mercenari  
 a mercenaria  
 UdeM00000005405 6565 180.6 UdeM00000005405 XP\_022311830.1 35 286  
 150 10 359 633 57 317 8.00E-42 180.6 6565 cellular  
 organisms;Eukaryota;Opisthokonta;Metazoa;Eumetazoa;Bilateria;Protostomia;  
 Spiralia;Lophotrochozoa;Mollusca;Bivalvia;Autobranhia;Pteriormorphia;Ostr  
 eida;Ostreoidea;Ostreidae;Crassostrea;Crassostrea virginica  
 UdeM00000005406 6565 180.6 UdeM00000005406 XP\_022311830.1 35 286  
 150 10 320 594 57 317 7.70E-42 180.6 6565 cellular  
 organisms;Eukaryota;Opisthokonta;Metazoa;Eumetazoa;Bilateria;Protostomia;  
 Spiralia;Lophotrochozoa;Mollusca;Bivalvia;Autobranhia;Pteriormorphia;Ostr  
 eida;Ostreoidea;Ostreidae;Crassostrea;Crassostrea virginica  
 UdeM00000005407 6596 492.7 UdeM00000005407 XP\_045169782.1 50.7 477  
 205 2 1 448 56 531 5.30E-136 492.7 6596 cellular  
 organisms;Eukaryota;Opisthokonta;Metazoa;Eumetazoa;Bilateria;Protostomia;  
 Spiralia;Lophotrochozoa;Mollusca;Bivalvia;Autobranhia;Heteroconchia;Euhe  
 terodonta;Imparidentia;Venerida;Veneroidea;Veneridae;Mercenaria;Mercenari  
 a mercenaria  
 UdeM00000005409 6573 206.1 UdeM00000005409 XP\_021353855.1 43 416  
 202 12 6 403 6 404 8.60E-50 206.1 6573 cellular  
 organisms;Eukaryota;Opisthokonta;Metazoa;Eumetazoa;Bilateria;Protostomia;  
 Spiralia;Lophotrochozoa;Mollusca;Bivalvia;Autobranhia;Pteriormorphia;Pect  
 inida;Pectinoidea;Pectinidae;Mizuhopecten;Mizuhopecten yessoensis  
 UdeM00000005410 6596 429.9 UdeM00000005410 XP\_045158303.1 54.8 526  
 194 15 1 508 1 500 4.60E-117 429.9 6596 cellular

organisms;Eukaryota;Opisthokonta;Metazoa;Eumetazoa;Bilateria;Protostomia; Spiralia;Lophotrochozoa;Mollusca;Bivalvia;Autobranchia;Heteroconchia;Euherodonta;Imparidentia;Venerida;Veneroidea;Veneridae;Mercenaria;Mercenaria mercenaria

UdeM00000005411 6565 94.7 UdeM00000005411 XP\_022308193.1 42.1 126  
69 2 10 133 6 129 1.00E-16 94.7 6565 cellular

organisms;Eukaryota;Opisthokonta;Metazoa;Eumetazoa;Bilateria;Protostomia; Spiralia;Lophotrochozoa;Mollusca;Bivalvia;Autobranchia;Pteriormorphia;Ostreida;Ostreoidea;Ostreidae;Crassostrea;Crassostrea virginica

UdeM00000005412 6565 134.8 UdeM00000005412 XP\_022308193.1 53.1 113  
52 1 1 113 445 556 7.00E-29 134.8 6565 cellular

organisms;Eukaryota;Opisthokonta;Metazoa;Eumetazoa;Bilateria;Protostomia; Spiralia;Lophotrochozoa;Mollusca;Bivalvia;Autobranchia;Pteriormorphia;Ostreida;Ostreoidea;Ostreidae;Crassostrea;Crassostrea virginica

UdeM00000005413 6565 162.5 UdeM00000005413 XP\_022299727.1 48 173  
89 1 1 173 106 277 5.40E-37 162.5 6565 cellular

organisms;Eukaryota;Opisthokonta;Metazoa;Eumetazoa;Bilateria;Protostomia; Spiralia;Lophotrochozoa;Mollusca;Bivalvia;Autobranchia;Pteriormorphia;Ostreida;Ostreoidea;Ostreidae;Crassostrea;Crassostrea virginica

UdeM00000005414 6596 555.1 UdeM00000005414 XP\_045158296.1 58.9 443  
176 3 1 442 1 438 8.30E-155 555.1 6596 cellular

organisms;Eukaryota;Opisthokonta;Metazoa;Eumetazoa;Bilateria;Protostomia; Spiralia;Lophotrochozoa;Mollusca;Bivalvia;Autobranchia;Heteroconchia;Euherodonta;Imparidentia;Venerida;Veneroidea;Veneridae;Mercenaria;Mercenaria mercenaria

UdeM00000005415 30033 127.1 UdeM00000005415 XP\_041631336.1 59.8 97  
37 1 3 99 20 114 1.30E-26 127.1 30033 cellular

organisms;Eukaryota;Opisthokonta;Metazoa;Eumetazoa;Bilateria;Protostomia; Ecdysozoa;Panarthropoda;Arthropoda;Mandibulata;Pancrustacea;Hexapoda;Insecta;Dicondylia;Pterygota;Neoptera;Endopterygota;Diptera;Brachycera;Muscomorpha;Eremoneura;Cyclorrhapha;Schizophora;Acalyptratae;Ephydroidea;Drosophilidae;Drosophilinae;Drosophilini;Drosophila;Sophophora;melanogaster group;montium subgroup;Drosophila kikkawai

UdeM00000005416 6579 100.1 UdeM00000005416 XP\_033737997.1 26 647  
366 27 1 585 14 609 1.20E-17 100.1 6579 cellular

organisms;Eukaryota;Opisthokonta;Metazoa;Eumetazoa;Bilateria;Protostomia; Spiralia;Lophotrochozoa;Mollusca;Bivalvia;Autobranchia;Pteriormorphia;Pectinida;Pectinoidea;Pectinidae;Pecten;Pecten maximus

UdeM00000005417 6573 75.5 UdeM00000005417 XP\_021342304.1 29 231  
129 6 60 264 8 229 1.40E-10 75.5 6573 cellular

organisms;Eukaryota;Opisthokonta;Metazoa;Eumetazoa;Bilateria;Protostomia; Spiralia;Lophotrochozoa;Mollusca;Bivalvia;Autobranchia;Pteriormorphia;Pectinida;Pectinoidea;Pectinidae;Mizuhopecten;Mizuhopecten yessoensis

UdeM00000005418 6579 635.2 UdeM00000005418 XP\_033738335.1 55.6 572  
249 2 6 576 4 571 8.30E-179 635.2 6579 cellular

organisms;Eukaryota;Opisthokonta;Metazoa;Eumetazoa;Bilateria;Protostomia; Spiralia;Lophotrochozoa;Mollusca;Bivalvia;Autobranchia;Pteriormorphia;Pectinida;Pectinoidea;Pectinidae;Pecten;Pecten maximus

UdeM00000005419 6596 616.7 UdeM00000005419 XP\_045160765.1 49.9 851  
399 3 1 827 1 848 5.20E-173 616.7 6596 cellular

organisms;Eukaryota;Opisthokonta;Metazoa;Eumetazoa;Bilateria;Protostomia; Spiralia;Lophotrochozoa;Mollusca;Bivalvia;Autobranchia;Heteroconchia;Euherodonta;Imparidentia;Venerida;Veneroidea;Veneridae;Mercenaria;Mercenaria mercenaria

UdeM00000005420 1735272 290.8 UdeM00000005420 XP\_041356784.1 49.8  
 321 161 0 11 331 1057 1377 6.90E-75 290.8 1735272  
 cellular  
 organisms;Eukaryota;Opisthokonta;Metazoa;Eumetazoa;Bilateria;Protostomia;  
 Spiralia;Lophotrochozoa;Mollusca;Gastropoda;Neomphalina;Neomphaloidea;Pel  
 tospiridae;Gigantopelta;Gigantopelta aegis  
 UdeM00000005421 46514 185.3 UdeM00000005421 XP\_038075667.1 39.4 274  
 140 5 1 258 301 564 1.00E-43 185.3 46514 cellular  
 organisms;Eukaryota;Opisthokonta;Metazoa;Eumetazoa;Bilateria;Deuterostomi  
 a;Echinodermata;Eleutherozoa;Asterozoa;Asteroidea;Valvatacea;Valvatida;As  
 terinidae;Patiria;Patiria miniata  
 UdeM00000005422 441366 203.4 UdeM00000005422 XP\_028296753.1 41.3  
 305 162 9 6 308 32 321 4.30E-49 203.4 441366  
 cellular  
 organisms;Eukaryota;Opisthokonta;Metazoa;Eumetazoa;Bilateria;Deuterostomi  
 a;Chordata;Craniata;Vertebrata;Gnathostomata;Teleostomi;Euteleostomi;Acti  
 nopterygii;Actinopteri;Neopterygii;Teleostei;Osteoglossocephalai;Clupeoce  
 phala;Euteleosteomorpha;Neoteleostei;Eurypterygia;Ctenosquamata;Acanthomo  
 rphata;Euacanthomorphacea;Percomorphaceae;Ovalentaria;Blenniimorphae;Blen  
 niiformes;Gobiesocoidi;Gobiesocidae;Gobiesocinae;Gouania;Gouania  
 willdenowi  
 UdeM00000005424 29159 142.5 UdeM00000005424 XP\_034314103.1 50.6 176  
 73 5 10 181 2186 2351 1.00E-30 142.5 29159 cellular  
 organisms;Eukaryota;Opisthokonta;Metazoa;Eumetazoa;Bilateria;Protostomia;  
 Spiralia;Lophotrochozoa;Mollusca;Bivalvia;Autobranchia;Pteriormorphia;Ostr  
 eida;Ostreioidea;Ostreidae;Crassostrea;Crassostrea gigas  
 UdeM00000005425 6565 713.8 UdeM00000005425 XP\_022314135.1 87.2 422  
 54 0 1 422 1 422 1.30E-202 713.8 6565 cellular  
 organisms;Eukaryota;Opisthokonta;Metazoa;Eumetazoa;Bilateria;Protostomia;  
 Spiralia;Lophotrochozoa;Mollusca;Bivalvia;Autobranchia;Pteriormorphia;Ostr  
 eida;Ostreioidea;Ostreidae;Crassostrea;Crassostrea virginica  
 UdeM00000005426 6596 235.3 UdeM00000005426 XP\_045158518.1 29.5 675  
 362 16 1 670 1 566 2.30E-58 235.3 6596 cellular  
 organisms;Eukaryota;Opisthokonta;Metazoa;Eumetazoa;Bilateria;Protostomia;  
 Spiralia;Lophotrochozoa;Mollusca;Bivalvia;Autobranchia;Heteroconchia;Euhe  
 terodonta;Imparidentia;Venerida;Veneroidea;Veneridae;Mercenaria;Mercenari  
 a mercenaria  
 UdeM00000005427 6596 155.6 UdeM00000005427 XP\_045158523.1 54.9 142  
 57 3 11 149 442 579 4.90E-35 155.6 6596 cellular  
 organisms;Eukaryota;Opisthokonta;Metazoa;Eumetazoa;Bilateria;Protostomia;  
 Spiralia;Lophotrochozoa;Mollusca;Bivalvia;Autobranchia;Heteroconchia;Euhe  
 terodonta;Imparidentia;Venerida;Veneroidea;Veneridae;Mercenaria;Mercenari  
 a mercenaria  
 UdeM00000005428 6596 396 UdeM00000005428 XP\_045158523.1 62 337  
 113 8 3 332 251 579 4.80E-107 396 6596 cellular  
 organisms;Eukaryota;Opisthokonta;Metazoa;Eumetazoa;Bilateria;Protostomia;  
 Spiralia;Lophotrochozoa;Mollusca;Bivalvia;Autobranchia;Heteroconchia;Euhe  
 terodonta;Imparidentia;Venerida;Veneroidea;Veneridae;Mercenaria;Mercenari  
 a mercenaria  
 UdeM00000005429 2607531 72.8 UdeM00000005429 XP\_029640194.1 57.9  
 57 20 1 28 80 221 277 2.30E-10 72.8 2607531  
 cellular  
 organisms;Eukaryota;Opisthokonta;Metazoa;Eumetazoa;Bilateria;Protostomia;

Spiralia;Lophotrochozoa;Mollusca;Cephalopoda;Coleoidea;Octopodiiformes;Octopoda;Incirrata;Octopodidae;Octopus;Octopus sinensis

UdeM00000005431 6579 184.5 UdeM00000005431 XP\_033737234.1 58.2 196  
69 8 1 187 57 248 1.20E-43 184.5 6579 cellular  
organisms;Eukaryota;Opisthokonta;Metazoa;Eumetazoa;Bilateria;Protostomia;  
Spiralia;Lophotrochozoa;Mollusca;Bivalvia;Autobranchia;Pteriormorphia;Pectinida;  
Pectinoidea;Pectinidae;Pecten;Pecten maximus

UdeM00000005430 6596 234.6 UdeM00000005430 XP\_045158523.1 57.4 223  
86 5 1 219 1 218 1.20E-58 234.6 6596 cellular  
organisms;Eukaryota;Opisthokonta;Metazoa;Eumetazoa;Bilateria;Protostomia;  
Spiralia;Lophotrochozoa;Mollusca;Bivalvia;Autobranchia;Heteroconchia;Euherodonta;  
Imparidentia;Venerida;Veneroidea;Veneridae;Mercenaria;Mercenaria mercenaria

UdeM00000005432 6596 138.7 UdeM00000005432 XP\_045158522.1 34.5 594  
337 16 23 582 6 581 2.40E-29 138.7 6596 cellular  
organisms;Eukaryota;Opisthokonta;Metazoa;Eumetazoa;Bilateria;Protostomia;  
Spiralia;Lophotrochozoa;Mollusca;Bivalvia;Autobranchia;Heteroconchia;Euherodonta;  
Imparidentia;Venerida;Veneroidea;Veneridae;Mercenaria;Mercenaria mercenaria

UdeM00000005433 6596 359.4 UdeM00000005433 XP\_045176367.1 44.6 361  
196 4 139 498 335 692 7.80E-96 359.4 6596 cellular  
organisms;Eukaryota;Opisthokonta;Metazoa;Eumetazoa;Bilateria;Protostomia;  
Spiralia;Lophotrochozoa;Mollusca;Bivalvia;Autobranchia;Heteroconchia;Euherodonta;  
Imparidentia;Venerida;Veneroidea;Veneridae;Mercenaria;Mercenaria mercenaria

UdeM00000005434 6579 309.7 UdeM00000005434 XP\_033737835.1 46.3 376  
169 9 48 410 235 590 6.00E-81 309.7 6579 cellular  
organisms;Eukaryota;Opisthokonta;Metazoa;Eumetazoa;Bilateria;Protostomia;  
Spiralia;Lophotrochozoa;Mollusca;Bivalvia;Autobranchia;Pteriormorphia;Pectinida;  
Pectinoidea;Pectinidae;Pecten;Pecten maximus

UdeM00000005435 6565 83.2 UdeM00000005435 XP\_022314056.1 29.4 211  
111 10 12 188 8 214 4.00E-13 83.2 6565 cellular  
organisms;Eukaryota;Opisthokonta;Metazoa;Eumetazoa;Bilateria;Protostomia;  
Spiralia;Lophotrochozoa;Mollusca;Bivalvia;Autobranchia;Pteriormorphia;Ostreida;  
Ostreoidea;Ostreidae;Crassostrea;Crassostrea virginica

UdeM00000005436 6596 508.4 UdeM00000005436 XP\_045159515.1 63.7 383  
139 0 33 415 274 656 8.40E-141 508.4 6596 cellular  
organisms;Eukaryota;Opisthokonta;Metazoa;Eumetazoa;Bilateria;Protostomia;  
Spiralia;Lophotrochozoa;Mollusca;Bivalvia;Autobranchia;Heteroconchia;Euherodonta;  
Imparidentia;Venerida;Veneroidea;Veneridae;Mercenaria;Mercenaria mercenaria

UdeM00000005437 6596 275.4 UdeM00000005437 XP\_045159519.1 40.3 392  
223 5 4 393 32 414 1.10E-70 275.4 6596 cellular  
organisms;Eukaryota;Opisthokonta;Metazoa;Eumetazoa;Bilateria;Protostomia;  
Spiralia;Lophotrochozoa;Mollusca;Bivalvia;Autobranchia;Heteroconchia;Euherodonta;  
Imparidentia;Venerida;Veneroidea;Veneridae;Mercenaria;Mercenaria mercenaria

UdeM00000005438 6596 157.5 UdeM00000005438 XP\_045159515.1 50.6 178  
83 3 9 185 102 275 1.70E-35 157.5 6596 cellular  
organisms;Eukaryota;Opisthokonta;Metazoa;Eumetazoa;Bilateria;Protostomia;  
Spiralia;Lophotrochozoa;Mollusca;Bivalvia;Autobranchia;Heteroconchia;Euherodonta;  
Imparidentia;Venerida;Veneroidea;Veneridae;Mercenaria;Mercenaria mercenaria

UdeM00000005439 6596 83.6 UdeM00000005439 XP\_045201747.1 27.2 228  
 130 6 14 235 11 208 3.80E-13 83.6 6596 cellular  
 organisms;Eukaryota;Opisthokonta;Metazoa;Eumetazoa;Bilateria;Protostomia;  
 Spiralia;Lophotrochozoa;Mollusca;Bivalvia;Autobranchia;Heteroconchia;Euhe  
 terodonta;Imparidentia;Venerida;Veneroidea;Veneridae;Mercenaria;Mercenari  
 a mercenaria  
 UdeM00000005440 6596 88.6 UdeM00000005440 XP\_045198326.1 27.8 227  
 121 6 6 224 159 350 1.20E-14 88.6 6596 cellular  
 organisms;Eukaryota;Opisthokonta;Metazoa;Eumetazoa;Bilateria;Protostomia;  
 Spiralia;Lophotrochozoa;Mollusca;Bivalvia;Autobranchia;Heteroconchia;Euhe  
 terodonta;Imparidentia;Venerida;Veneroidea;Veneridae;Mercenaria;Mercenari  
 a mercenaria  
 UdeM00000005441 6579 608.6 UdeM00000005441 XP\_033737507.1 64.1 501  
 162 4 1 487 1 497 8.20E-17 608.6 6579 cellular  
 organisms;Eukaryota;Opisthokonta;Metazoa;Eumetazoa;Bilateria;Protostomia;  
 Spiralia;Lophotrochozoa;Mollusca;Bivalvia;Autobranchia;Pteriormorphia;Pect  
 inida;Pectinoidea;Pectinidae;Pecten;Pecten maximus  
 UdeM00000005442 6579 379 UdeM00000005442 XP\_033729593.1 50.6 391  
 191 1 81 469 852 1242 8.60E-10 379 6579 cellular  
 organisms;Eukaryota;Opisthokonta;Metazoa;Eumetazoa;Bilateria;Protostomia;  
 Spiralia;Lophotrochozoa;Mollusca;Bivalvia;Autobranchia;Pteriormorphia;Pect  
 inida;Pectinoidea;Pectinidae;Pecten;Pecten maximus  
 UdeM00000005443 6579 384.8 UdeM00000005443 XP\_033729593.1 50.9 391  
 190 1 81 469 852 1242 1.60E-10 384.8 6579 cellular  
 organisms;Eukaryota;Opisthokonta;Metazoa;Eumetazoa;Bilateria;Protostomia;  
 Spiralia;Lophotrochozoa;Mollusca;Bivalvia;Autobranchia;Pteriormorphia;Pect  
 inida;Pectinoidea;Pectinidae;Pecten;Pecten maximus  
 UdeM00000005444 6579 419.5 UdeM00000005444 XP\_033729593.1 51.8 425  
 203 1 47 469 818 1242 5.70E-11 419.5 6579 cellular  
 organisms;Eukaryota;Opisthokonta;Metazoa;Eumetazoa;Bilateria;Protostomia;  
 Spiralia;Lophotrochozoa;Mollusca;Bivalvia;Autobranchia;Pteriormorphia;Pect  
 inida;Pectinoidea;Pectinidae;Pecten;Pecten maximus  
 UdeM00000005445 29159 78.2 UdeM00000005445 XP\_034316161.1 37.4 91  
 57 0 56 146 644 734 9.80E-12 78.2 29159 cellular  
 organisms;Eukaryota;Opisthokonta;Metazoa;Eumetazoa;Bilateria;Protostomia;  
 Spiralia;Lophotrochozoa;Mollusca;Bivalvia;Autobranchia;Pteriormorphia;Ostr  
 eida;Ostreoidea;Ostreidae;Crassostrea;Crassostrea gigas  
 UdeM00000005446 6596 461.5 UdeM00000005446 XP\_045160038.1 60.9 373  
 140 3 1 368 1 372 1.00E-12 461.5 6596 cellular  
 organisms;Eukaryota;Opisthokonta;Metazoa;Eumetazoa;Bilateria;Protostomia;  
 Spiralia;Lophotrochozoa;Mollusca;Bivalvia;Autobranchia;Heteroconchia;Euhe  
 terodonta;Imparidentia;Venerida;Veneroidea;Veneridae;Mercenaria;Mercenari  
 a mercenaria  
 UdeM00000005447 6412 110.2 UdeM00000005447 XP\_009012269.1 37.9 161  
 93 2 62 216 2 161 4.20E-21 110.2 6412 cellular  
 organisms;Eukaryota;Opisthokonta;Metazoa;Eumetazoa;Bilateria;Protostomia;  
 Spiralia;Lophotrochozoa;Annelida;Clitellata;Hirudinea;Rhynchobdellida;Glo  
 ssisphoniidae;Helobdella;Helobdella robusta  
 UdeM00000005448 6596 270.8 UdeM00000005448 XP\_045160546.1 44.6 287  
 154 2 1 282 1 287 2.00E-69 270.8 6596 cellular  
 organisms;Eukaryota;Opisthokonta;Metazoa;Eumetazoa;Bilateria;Protostomia;  
 Spiralia;Lophotrochozoa;Mollusca;Bivalvia;Autobranchia;Heteroconchia;Euhe  
 terodonta;Imparidentia;Venerida;Veneroidea;Veneridae;Mercenaria;Mercenari  
 a mercenaria

UdeM00000005449 225164 278.5 UdeM00000005449 XP\_009044134.1 48.2  
 284 146 1 29 312 18 300 1.10E-71 278.5 225164  
 cellular  
 organisms;Eukaryota;Opisthokonta;Metazoa;Eumetazoa;Bilateria;Protostomia;  
 Spiralia;Lophotrochozoa;Mollusca;Gastropoda;Patellogastropoda;Lottioidea;  
 Lottiidae;Lottia;Lottia gigantea  
 UdeM00000005450 29159 153.3 UdeM00000005450 XP\_011414040.3 66.4 128  
 40 2 73 198 98 224 3.80E-34 153.3 29159 cellular  
 organisms;Eukaryota;Opisthokonta;Metazoa;Eumetazoa;Bilateria;Protostomia;  
 Spiralia;Lophotrochozoa;Mollusca;Bivalvia;Autobranchia;Pteriomorpha;Ostr  
 eida;Ostreoidea;Ostreidae;Crassostrea;Crassostrea gigas  
 UdeM00000005451 6596 320.1 UdeM00000005451 XP\_045160399.1 57.7 239  
 99 2 43 281 14 250 2.80E-84 320.1 6596 cellular  
 organisms;Eukaryota;Opisthokonta;Metazoa;Eumetazoa;Bilateria;Protostomia;  
 Spiralia;Lophotrochozoa;Mollusca;Bivalvia;Autobranchia;Heteroconchia;Euhe  
 terodonta;Imparidentia;Venerida;Veneroidea;Veneridae;Mercenaria;Mercenari  
 a mercenaria  
 UdeM00000005452 6565 578.2 UdeM00000005452 XP\_022306197.1 47.9 698  
 311 13 9 684 16 682 1.40E-161 578.2 6565 cellular  
 organisms;Eukaryota;Opisthokonta;Metazoa;Eumetazoa;Bilateria;Protostomia;  
 Spiralia;Lophotrochozoa;Mollusca;Bivalvia;Autobranchia;Pteriomorpha;Ostr  
 eida;Ostreoidea;Ostreidae;Crassostrea;Crassostrea virginica  
 UdeM00000005453 6565 174.1 UdeM00000005453 XP\_022316207.1 41.4 526  
 253 16 1 524 1 473 4.70E-40 174.1 6565 cellular  
 organisms;Eukaryota;Opisthokonta;Metazoa;Eumetazoa;Bilateria;Protostomia;  
 Spiralia;Lophotrochozoa;Mollusca;Bivalvia;Autobranchia;Pteriomorpha;Ostr  
 eida;Ostreoidea;Ostreidae;Crassostrea;Crassostrea virginica  
 UdeM00000005454 6596 374 UdeM00000005454 XP\_045160273.1 37.3 526  
 244 5 5 447 21 543 3.00E-100 374 6596 cellular  
 organisms;Eukaryota;Opisthokonta;Metazoa;Eumetazoa;Bilateria;Protostomia;  
 Spiralia;Lophotrochozoa;Mollusca;Bivalvia;Autobranchia;Heteroconchia;Euhe  
 terodonta;Imparidentia;Venerida;Veneroidea;Veneridae;Mercenaria;Mercenari  
 a mercenaria  
 UdeM000000040756 6573 93.2 UdeM000000040756 XP\_021365625.1 51.7 89  
 43 0 17 105 40 128 2.70E-16 93.2 6573 cellular  
 organisms;Eukaryota;Opisthokonta;Metazoa;Eumetazoa;Bilateria;Protostomia;  
 Spiralia;Lophotrochozoa;Mollusca;Bivalvia;Autobranchia;Pteriomorpha;Pect  
 inida;Pectinoidea;Pectinidae;Mizuhopecten;Mizuhopecten yessoensis  
 UdeM000000040757 29159 97.4 UdeM000000040757 XP\_034307807.1 32.7 199  
 123 6 65 261 21 210 2.90E-17 97.4 29159 cellular  
 organisms;Eukaryota;Opisthokonta;Metazoa;Eumetazoa;Bilateria;Protostomia;  
 Spiralia;Lophotrochozoa;Mollusca;Bivalvia;Autobranchia;Pteriomorpha;Ostr  
 eida;Ostreoidea;Ostreidae;Crassostrea;Crassostrea gigas  
 UdeM000000040758 6596 294.3 UdeM000000040758 XP\_045177776.1 36.8 508  
 270 9 1 461 405 908 2.80E-76 294.3 6596 cellular  
 organisms;Eukaryota;Opisthokonta;Metazoa;Eumetazoa;Bilateria;Protostomia;  
 Spiralia;Lophotrochozoa;Mollusca;Bivalvia;Autobranchia;Heteroconchia;Euhe  
 terodonta;Imparidentia;Venerida;Veneroidea;Veneridae;Mercenaria;Mercenari  
 a mercenaria  
 UdeM000000040759 29159 117.5 UdeM000000040759 XP\_034307341.1 34 197  
 115 3 8 190 57 252 2.80E-23 117.5 29159 cellular  
 organisms;Eukaryota;Opisthokonta;Metazoa;Eumetazoa;Bilateria;Protostomia;  
 Spiralia;Lophotrochozoa;Mollusca;Bivalvia;Autobranchia;Pteriomorpha;Ostr  
 eida;Ostreoidea;Ostreidae;Crassostrea;Crassostrea gigas

UdeM00000040762 6565 90.5 UdeM00000040762 XP\_022318775.1 46.4 110  
 55 3 1 107 1 109 1.70E-15 90.5 6565 cellular  
 organisms;Eukaryota;Opisthokonta;Metazoa;Eumetazoa;Bilateria;Protostomia;  
 Spiralia;Lophotrochozoa;Mollusca;Bivalvia;Autobranchia;Pteriormorphia;Ostr  
 eida;Ostreoidea;Ostreidae;Crassostrea;Crassostrea virginica  
 UdeM00000040763 37621 250 UdeM00000040763 XP\_014673981.1 48.9 278  
 124 8 53 314 37 312 4.10E-63 250 37621 cellular  
 organisms;Eukaryota;Opisthokonta;Metazoa;Eumetazoa;Bilateria;Protostomia;  
 Ecdysozoa;Scalidophora;Priapulida;Priapulimorpha;Priapulimorphida;Priapul  
 idae;Priapulus;Priapulus caudatus  
 UdeM00000040764 6596 93.2 UdeM00000040764 XP\_045179120.1 57.3 75  
 31 1 1 75 1 74 1.60E-16 93.2 6596 cellular  
 organisms;Eukaryota;Opisthokonta;Metazoa;Eumetazoa;Bilateria;Protostomia;  
 Spiralia;Lophotrochozoa;Mollusca;Bivalvia;Autobranchia;Heteroconchia;Euhe  
 terodonta;Imparidentia;Venerida;Veneroidea;Veneridae;Mercenaria;Mercenari  
 a mercenaria  
 UdeM00000040765 50429 158.7 UdeM00000040765 XP\_022801251.1 39.3 224  
 123 7 2 217 798 1016 9.10E-36 158.7 50429 cellular  
 organisms;Eukaryota;Opisthokonta;Metazoa;Eumetazoa;Cnidaria;Anthozoa;Hexa  
 corallia;Scleractinia;Astrocoeniina;Pocilloporidae;Stylophora;Stylophora  
 pistillata  
 UdeM00000040767 7574 138.3 UdeM00000040767 XP\_013390464.1 36.9 225  
 123 7 2 215 770 986 1.20E-29 138.3 7574 cellular  
 organisms;Eukaryota;Opisthokonta;Metazoa;Eumetazoa;Bilateria;Protostomia;  
 Spiralia;Lophotrochozoa;Brachiopoda;Linguliformea;Lingulata;Lingulida;Lin  
 guloidea;Lingulidae;Lingula;Lingula anatina  
 UdeM00000040766 7574 137.9 UdeM00000040766 XP\_013390464.1 36.9 225  
 123 7 2 215 770 986 1.60E-29 137.9 7574 cellular  
 organisms;Eukaryota;Opisthokonta;Metazoa;Eumetazoa;Bilateria;Protostomia;  
 Spiralia;Lophotrochozoa;Brachiopoda;Linguliformea;Lingulata;Lingulida;Lin  
 guloidea;Lingulidae;Lingula;Lingula anatina  
 UdeM00000040768 7574 134 UdeM00000040768 XP\_013390464.1 35.2 219  
 132 5 2 212 770 986 2.30E-28 134 7574 cellular  
 organisms;Eukaryota;Opisthokonta;Metazoa;Eumetazoa;Bilateria;Protostomia;  
 Spiralia;Lophotrochozoa;Brachiopoda;Linguliformea;Lingulata;Lingulida;Lin  
 guloidea;Lingulidae;Lingula;Lingula anatina  
 UdeM00000040770 6596 159.5 UdeM00000040770 XP\_045189228.1 33.3 336  
 178 7 1 334 50 341 1.40E-35 159.5 6596 cellular  
 organisms;Eukaryota;Opisthokonta;Metazoa;Eumetazoa;Bilateria;Protostomia;  
 Spiralia;Lophotrochozoa;Mollusca;Bivalvia;Autobranchia;Heteroconchia;Euhe  
 terodonta;Imparidentia;Venerida;Veneroidea;Veneridae;Mercenaria;Mercenari  
 a mercenaria  
 UdeM00000040771 6573 114.4 UdeM00000040771 XP\_021354477.1 43.2 132  
 75 0 85 216 1988 2119 1.80E-22 114.4 6573 cellular  
 organisms;Eukaryota;Opisthokonta;Metazoa;Eumetazoa;Bilateria;Protostomia;  
 Spiralia;Lophotrochozoa;Mollusca;Bivalvia;Autobranchia;Pteriormorphia;Pect  
 inida;Pectinoidea;Pectinidae;Mizuhopecten;Mizuhopecten yessoensis  
 UdeM00000040772 6596 226.9 UdeM00000040772 XP\_045164107.1 52.9 221  
 100 2 2 221 2620 2837 2.60E-56 226.9 6596 cellular  
 organisms;Eukaryota;Opisthokonta;Metazoa;Eumetazoa;Bilateria;Protostomia;  
 Spiralia;Lophotrochozoa;Mollusca;Bivalvia;Autobranchia;Heteroconchia;Euhe  
 terodonta;Imparidentia;Venerida;Veneroidea;Veneridae;Mercenaria;Mercenari  
 a mercenaria



UdeM00000040773 6596 172.6 UdeM00000040773 XP\_045164107.1 48.9 180  
 84 1 44 223 2239 2410 5.90E-40 172.6 6596 cellular  
 organisms;Eukaryota;Opisthokonta;Metazoa;Eumetazoa;Bilateria;Protostomia;  
 Spiralia;Lophotrochozoa;Mollusca;Bivalvia;Autobranchia;Heteroconchia;Euhe  
 terodonta;Imparidentia;Venerida;Veneroidea;Veneridae;Mercenaria;Mercenari  
 a mercenaria  
 UdeM00000040774 6596 359.8 UdeM00000040774 XP\_045177776.1 39.4 528  
 313 6 1 523 405 930 8.90E-96 359.8 6596 cellular  
 organisms;Eukaryota;Opisthokonta;Metazoa;Eumetazoa;Bilateria;Protostomia;  
 Spiralia;Lophotrochozoa;Mollusca;Bivalvia;Autobranchia;Heteroconchia;Euhe  
 terodonta;Imparidentia;Venerida;Veneroidea;Veneridae;Mercenaria;Mercenari  
 a mercenaria  
 UdeM00000040775 6579 508.8 UdeM00000040775 XP\_033761495.1 78.9 294  
 62 0 53 346 66 359 8.60E-141 508.8 6579 cellular  
 organisms;Eukaryota;Opisthokonta;Metazoa;Eumetazoa;Bilateria;Protostomia;  
 Spiralia;Lophotrochozoa;Mollusca;Bivalvia;Autobranchia;Pteriormorphia;Pect  
 inida;Pectinoidea;Pectinidae;Pecten;Pecten maximus  
 UdeM00000040776 7574 132.1 UdeM00000040776 XP\_013389395.1 37.1 224  
 107 7 2 198 749 965 8.30E-28 132.1 7574 cellular  
 organisms;Eukaryota;Opisthokonta;Metazoa;Eumetazoa;Bilateria;Protostomia;  
 Spiralia;Lophotrochozoa;Brachiopoda;Linguliformea;Lingulata;Lingulida;Lin  
 guloidea;Lingulidae;Lingula;Lingula anatina  
 UdeM00000040777 7574 146 UdeM00000040777 XP\_013390464.1 37.3 225  
 122 7 2 215 770 986 6.00E-32 146 7574 cellular  
 organisms;Eukaryota;Opisthokonta;Metazoa;Eumetazoa;Bilateria;Protostomia;  
 Spiralia;Lophotrochozoa;Brachiopoda;Linguliformea;Lingulata;Lingulida;Lin  
 guloidea;Lingulidae;Lingula;Lingula anatina  
 UdeM00000040778 7574 134.4 UdeM00000040778 XP\_013389395.1 35.3 221  
 129 6 2 212 749 965 1.80E-28 134.4 7574 cellular  
 organisms;Eukaryota;Opisthokonta;Metazoa;Eumetazoa;Bilateria;Protostomia;  
 Spiralia;Lophotrochozoa;Brachiopoda;Linguliformea;Lingulata;Lingulida;Lin  
 guloidea;Lingulidae;Lingula;Lingula anatina  
 UdeM00000040779 7574 139.8 UdeM00000040779 XP\_013389395.1 36.1 219  
 130 5 2 212 749 965 4.30E-30 139.8 7574 cellular  
 organisms;Eukaryota;Opisthokonta;Metazoa;Eumetazoa;Bilateria;Protostomia;  
 Spiralia;Lophotrochozoa;Brachiopoda;Linguliformea;Lingulata;Lingulida;Lin  
 guloidea;Lingulidae;Lingula;Lingula anatina  
 UdeM00000040780 37653 201.8 UdeM00000040780 XP\_014767494.1 81.5 119  
 22 0 34 152 939 1057 6.10E-49 201.8 37653 cellular  
 organisms;Eukaryota;Opisthokonta;Metazoa;Eumetazoa;Bilateria;Protostomia;  
 Spiralia;Lophotrochozoa;Mollusca;Cephalopoda;Coleoidea;Octopodiformes;Oct  
 opoda;Incirrata;Octopodidae;Octopus;Octopus bimaculoides  
 UdeM00000040781 37621 184.5 UdeM00000040781 XP\_014679849.1 38.7 230  
 55 2 2 145 394 623 9.70E-44 184.5 37621 cellular  
 organisms;Eukaryota;Opisthokonta;Metazoa;Eumetazoa;Bilateria;Protostomia;  
 Ecdysozoa;Scalidophora;Priapulida;Priapulimorpha;Priapulimorphida;Priapul  
 idae;Priapululus;Priapululus caudatus  
 UdeM00000040782 37621 144.8 UdeM00000040782 XP\_014679849.1 40.4 213  
 51 2 1 137 17 229 8.50E-32 144.8 37621 cellular  
 organisms;Eukaryota;Opisthokonta;Metazoa;Eumetazoa;Bilateria;Protostomia;  
 Ecdysozoa;Scalidophora;Priapulida;Priapulimorpha;Priapulimorphida;Priapul  
 idae;Priapululus;Priapululus caudatus  
 UdeM00000040783 6596 309.3 UdeM00000040783 XP\_045189084.1 32.3 626  
 317 12 1 616 1350 1878 1.40E-80 309.3 6596 cellular

organisms;Eukaryota;Opisthokonta;Metazoa;Eumetazoa;Bilateria;Protostomia;Spiralia;Lophotrochozoa;Mollusca;Bivalvia;Autobranchia;Heteroconchia;Euherodonta;Imparidentia;Venerida;Veneroidea;Veneridae;Mercenaria;Mercenaria mercenaria

UdeM00000040784 6579 92.8 UdeM00000040784 XP\_033729770.1 41.4 133  
51 4 1 117 1 122 3.20E-16 92.8 6579 cellular

organisms;Eukaryota;Opisthokonta;Metazoa;Eumetazoa;Bilateria;Protostomia;Spiralia;Lophotrochozoa;Mollusca;Bivalvia;Autobranchia;Pteriormorphia;Pectinida;Pectinoidea;Pectinidae;Pecten;Pecten maximus

UdeM00000040785 6579 197.2 UdeM00000040785 XP\_033764274.1 40.3 233  
138 1 2 234 238 469 2.40E-47 197.2 6579 cellular

organisms;Eukaryota;Opisthokonta;Metazoa;Eumetazoa;Bilateria;Protostomia;Spiralia;Lophotrochozoa;Mollusca;Bivalvia;Autobranchia;Pteriormorphia;Pectinida;Pectinoidea;Pectinidae;Pecten;Pecten maximus

UdeM00000040786 6579 165.6 UdeM00000040786 XP\_033747958.1 55.3 132  
59 0 15 146 28 159 4.70E-38 165.6 6579 cellular

organisms;Eukaryota;Opisthokonta;Metazoa;Eumetazoa;Bilateria;Protostomia;Spiralia;Lophotrochozoa;Mollusca;Bivalvia;Autobranchia;Pteriormorphia;Pectinida;Pectinoidea;Pectinidae;Pecten;Pecten maximus

UdeM00000040787 6596 94.4 UdeM00000040787 XP\_045164107.1 47.9 94  
49 0 1 94 1241 1334 8.70E-17 94.4 6596 cellular

organisms;Eukaryota;Opisthokonta;Metazoa;Eumetazoa;Bilateria;Protostomia;Spiralia;Lophotrochozoa;Mollusca;Bivalvia;Autobranchia;Heteroconchia;Euherodonta;Imparidentia;Venerida;Veneroidea;Veneridae;Mercenaria;Mercenaria mercenaria

UdeM00000040790 6596 385.6 UdeM00000040790 XP\_045177776.1 38.7 550  
307 12 1 541 405 933 1.50E-103 385.6 6596 cellular

organisms;Eukaryota;Opisthokonta;Metazoa;Eumetazoa;Bilateria;Protostomia;Spiralia;Lophotrochozoa;Mollusca;Bivalvia;Autobranchia;Heteroconchia;Euherodonta;Imparidentia;Venerida;Veneroidea;Veneridae;Mercenaria;Mercenaria mercenaria

UdeM00000040791 6596 888.6 UdeM00000040791 XP\_045164107.1 54.5 846  
324 6 26 865 2180 2970 6.20E-255 888.6 6596 cellular

organisms;Eukaryota;Opisthokonta;Metazoa;Eumetazoa;Bilateria;Protostomia;Spiralia;Lophotrochozoa;Mollusca;Bivalvia;Autobranchia;Heteroconchia;Euherodonta;Imparidentia;Venerida;Veneroidea;Veneridae;Mercenaria;Mercenaria mercenaria

UdeM00000040792 1735272 459.1 UdeM00000040792 XP\_041360663.1 35.3  
914 475 24 115 969 848 1704 1.40E-125 459.1 1735272  
cellular

organisms;Eukaryota;Opisthokonta;Metazoa;Eumetazoa;Bilateria;Protostomia;Spiralia;Lophotrochozoa;Mollusca;Gastropoda;Neomphalina;Neomphaloidea;Peltospiridae;Gigantopelta;Gigantopelta aegis

UdeM00000040793 6596 70.1 UdeM00000040793 XP\_045206414.1 30.9 97  
67 0 44 140 109 205 4.60E-09 70.1 6596 cellular

organisms;Eukaryota;Opisthokonta;Metazoa;Eumetazoa;Bilateria;Protostomia;Spiralia;Lophotrochozoa;Mollusca;Bivalvia;Autobranchia;Heteroconchia;Euherodonta;Imparidentia;Venerida;Veneroidea;Veneridae;Mercenaria;Mercenaria mercenaria

UdeM00000040794 6596 161.8 UdeM00000040794 XP\_045156273.1 34.9 352  
188 10 1 347 569 884 2.30E-36 161.8 6596 cellular

organisms;Eukaryota;Opisthokonta;Metazoa;Eumetazoa;Bilateria;Protostomia;Spiralia;Lophotrochozoa;Mollusca;Bivalvia;Autobranchia;Heteroconchia;Euherodonta;Imparidentia;Venerida;Veneroidea;Veneridae;Mercenaria;Mercenaria mercenaria

terodonta;Imparidentia;Venerida;Veneroidea;Veneridae;Mercenaria;Mercenaria mercenaria  
 UdeM00000040795 6596 153.7 UdeM00000040795 XP\_045177776.1 39.8 201  
 101 2 1 201 695 875 2.70E-34 153.7 6596 cellular  
 organisms;Eukaryota;Opisthokonta;Metazoa;Eumetazoa;Bilateria;Protostomia;  
 Spiralia;Lophotrochozoa;Mollusca;Bivalvia;Autobranhia;Heteroconchia;Euhe  
 terodonta;Imparidentia;Venerida;Veneroidea;Veneridae;Mercenaria;Mercenari  
 a mercenaria  
 UdeM00000040796 6565 95.5 UdeM00000040796 XP\_022308598.1 37.7 162  
 92 5 170 331 15 167 1.40E-16 95.5 6565 cellular  
 organisms;Eukaryota;Opisthokonta;Metazoa;Eumetazoa;Bilateria;Protostomia;  
 Spiralia;Lophotrochozoa;Mollusca;Bivalvia;Autobranhia;Pteriormorphia;Ostr  
 eida;Ostreoidea;Ostreidae;Crassostrea;Crassostrea virginica  
 UdeM00000040797 6565 95.5 UdeM00000040797 XP\_022308598.1 37.7 162  
 92 5 23 184 15 167 8.40E-17 95.5 6565 cellular  
 organisms;Eukaryota;Opisthokonta;Metazoa;Eumetazoa;Bilateria;Protostomia;  
 Spiralia;Lophotrochozoa;Mollusca;Bivalvia;Autobranhia;Pteriormorphia;Ostr  
 eida;Ostreoidea;Ostreidae;Crassostrea;Crassostrea virginica  
 UdeM00000040798 7739 723 UdeM00000040798 XP\_035696678.1 56.9 613  
 261 1 7 616 299 911 3.30E-205 723 7739 cellular  
 organisms;Eukaryota;Opisthokonta;Metazoa;Eumetazoa;Bilateria;Deuterostomi  
 a;Chordata;Cephalochordata;Leptocardii;Amphioxiformes;Branchiostomidae;Br  
 anchiostoma;Branchiostoma floridae  
 UdeM00000040799 6565 229.9 UdeM00000040799 XP\_022327931.1 36.8 359  
 208 7 38 387 26 374 5.40E-57 229.9 6565 cellular  
 organisms;Eukaryota;Opisthokonta;Metazoa;Eumetazoa;Bilateria;Protostomia;  
 Spiralia;Lophotrochozoa;Mollusca;Bivalvia;Autobranhia;Pteriormorphia;Ostr  
 eida;Ostreoidea;Ostreidae;Crassostrea;Crassostrea virginica  
 UdeM00000040800 29159 109.8 UdeM00000040800 XP\_034305547.1 32.4 204  
 127 6 25 226 21 215 4.90E-21 109.8 29159 cellular  
 organisms;Eukaryota;Opisthokonta;Metazoa;Eumetazoa;Bilateria;Protostomia;  
 Spiralia;Lophotrochozoa;Mollusca;Bivalvia;Autobranhia;Pteriormorphia;Ostr  
 eida;Ostreoidea;Ostreidae;Crassostrea;Crassostrea gigas  
 UdeM00000040801 6596 179.1 UdeM00000040801 XP\_045164107.1 32.1 439  
 104 4 22 268 1811 2247 1.30E-41 179.1 6596 cellular  
 organisms;Eukaryota;Opisthokonta;Metazoa;Eumetazoa;Bilateria;Protostomia;  
 Spiralia;Lophotrochozoa;Mollusca;Bivalvia;Autobranhia;Heteroconchia;Euhe  
 terodonta;Imparidentia;Venerida;Veneroidea;Veneridae;Mercenaria;Mercenari  
 a mercenaria  
 UdeM00000040801 6596 124.8 UdeM00000040801 XP\_045164107.1 55.6 108  
 48 0 308 415 2730 2837 2.90E-25 124.8 6596 cellular  
 organisms;Eukaryota;Opisthokonta;Metazoa;Eumetazoa;Bilateria;Protostomia;  
 Spiralia;Lophotrochozoa;Mollusca;Bivalvia;Autobranhia;Heteroconchia;Euhe  
 terodonta;Imparidentia;Venerida;Veneroidea;Veneridae;Mercenaria;Mercenari  
 a mercenaria  
 UdeM00000044273 6579 430.3 UdeM00000044273 XP\_033761812.1 40.7 575  
 319 12 123 686 151 714 4.80E-117 430.3 6579 cellular  
 organisms;Eukaryota;Opisthokonta;Metazoa;Eumetazoa;Bilateria;Protostomia;  
 Spiralia;Lophotrochozoa;Mollusca;Bivalvia;Autobranhia;Pteriormorphia;Pect  
 inida;Pectinoidea;Pectinidae;Pecten;Pecten maximus  
 UdeM00000044274 7574 79 UdeM00000044274 XP\_013401006.1 60.6 66  
 26 0 19 84 422 487 4.60E-12 79 7574 cellular  
 organisms;Eukaryota;Opisthokonta;Metazoa;Eumetazoa;Bilateria;Protostomia;

Spiralia;Lophotrochozoa;Brachiopoda;Linguliformea;Lingulata;Lingulida;Linguloidea;Lingulidae;Lingula;Lingula anatina  
UdeM00000044275 6579 306.6 UdeM00000044275 XP\_033757668.1 42.2 405  
222 8 1 397 310 710 4.70E-80 306.6 6579 cellular  
organisms;Eukaryota;Opisthokonta;Metazoa;Eumetazoa;Bilateria;Protostomia;  
Spiralia;Lophotrochozoa;Mollusca;Bivalvia;Autobranhia;Pteriormorphia;Pect  
inida;Pectinoidea;Pectinidae;Pecten;Pecten maximus  
UdeM00000044190 29159 117.5 UdeM00000044190 XP\_034329650.1 45.6 103  
56 0 1 103 276 378 1.00E-23 117.5 29159 cellular  
organisms;Eukaryota;Opisthokonta;Metazoa;Eumetazoa;Bilateria;Protostomia;  
Spiralia;Lophotrochozoa;Mollusca;Bivalvia;Autobranhia;Pteriormorphia;Ostr  
eida;Ostreoidea;Ostreidae;Crassostrea;Crassostrea gigas  
UdeM00000044191 6573 258.1 UdeM00000044191 XP\_021352044.1 68 172  
55 0 1 172 98 269 9.10E-66 258.1 6573 cellular  
organisms;Eukaryota;Opisthokonta;Metazoa;Eumetazoa;Bilateria;Protostomia;  
Spiralia;Lophotrochozoa;Mollusca;Bivalvia;Autobranhia;Pteriormorphia;Pect  
inida;Pectinoidea;Pectinidae;Mizuhopecten;Mizuhopecten yessoensis  
UdeM00000034378 6579 137.1 UdeM00000034378 XP\_033736448.1 35.8 218  
129 5 5 213 10 225 2.60E-29 137.1 6579 cellular  
organisms;Eukaryota;Opisthokonta;Metazoa;Eumetazoa;Bilateria;Protostomia;  
Spiralia;Lophotrochozoa;Mollusca;Bivalvia;Autobranhia;Pteriormorphia;Pect  
inida;Pectinoidea;Pectinidae;Pecten;Pecten maximus  
UdeM00000034379 29159 338.2 UdeM00000034379 XP\_034305965.1 44.2 416  
204 12 6 412 6 402 1.50E-89 338.2 29159 cellular  
organisms;Eukaryota;Opisthokonta;Metazoa;Eumetazoa;Bilateria;Protostomia;  
Spiralia;Lophotrochozoa;Mollusca;Bivalvia;Autobranhia;Pteriormorphia;Ostr  
eida;Ostreoidea;Ostreidae;Crassostrea;Crassostrea gigas  
UdeM00000034381 6596 88.2 UdeM00000034381 XP\_045175388.1 34.1 132  
72 3 5 121 257 388 8.30E-15 88.2 6596 cellular  
organisms;Eukaryota;Opisthokonta;Metazoa;Eumetazoa;Bilateria;Protostomia;  
Spiralia;Lophotrochozoa;Mollusca;Bivalvia;Autobranhia;Heteroconchia;Euhe  
terodonta;Imparidentia;Venerida;Veneroidea;Veneridae;Mercenaria;Mercenari  
a mercenaria  
UdeM00000034384 6565 515 UdeM00000034384 XP\_022322118.1 37.8 1293  
475 22 17 1273 16 1015 2.90E-142 515 6565 cellular  
organisms;Eukaryota;Opisthokonta;Metazoa;Eumetazoa;Bilateria;Protostomia;  
Spiralia;Lophotrochozoa;Mollusca;Bivalvia;Autobranhia;Pteriormorphia;Ostr  
eida;Ostreoidea;Ostreidae;Crassostrea;Crassostrea virginica  
UdeM00000034385 46514 63.9 UdeM00000034385 XP\_038062328.1 29.6 152  
105 1 1 150 225 376 2.00E-07 63.9 46514 cellular  
organisms;Eukaryota;Opisthokonta;Metazoa;Eumetazoa;Bilateria;Deuterostomi  
a;Echinodermata;Eleutherozoa;Asterozoa;Asteroidea;Valvatacea;Valvatida;As  
terinidae;Patiria;Patiria miniata  
UdeM00000034387 6596 919.5 UdeM00000034387 XP\_045207427.1 66.3 664  
221 2 56 716 8 671 2.70E-264 919.5 6596 cellular  
organisms;Eukaryota;Opisthokonta;Metazoa;Eumetazoa;Bilateria;Protostomia;  
Spiralia;Lophotrochozoa;Mollusca;Bivalvia;Autobranhia;Heteroconchia;Euhe  
terodonta;Imparidentia;Venerida;Veneroidea;Veneridae;Mercenaria;Mercenari  
a mercenaria  
UdeM00000034388 6596 183 UdeM00000034388 XP\_045209523.1 72.8 114  
31 0 18 131 11 124 2.60E-43 183 6596 cellular  
organisms;Eukaryota;Opisthokonta;Metazoa;Eumetazoa;Bilateria;Protostomia;  
Spiralia;Lophotrochozoa;Mollusca;Bivalvia;Autobranhia;Heteroconchia;Euhe

terodonta;Imparidentia;Venerida;Veneroidea;Veneridae;Mercenaria;Mercenaria mercenaria

UdeM00000034390 1735272 63.5 UdeM00000034390 XP\_041350990.1 46.8  
62 33 0 125 186 461 522 3.20E-07 63.5 1735272  
cellular

organisms;Eukaryota;Opisthokonta;Metazoa;Eumetazoa;Bilateria;Protostomia;Spiralia;Lophotrochozoa;Mollusca;Gastropoda;Neomphalina;Neomphaloidea;Peltospiridae;Gigantopelta;Gigantopelta aegis

UdeM00000034391 6105 120.6 UdeM00000034391 XP\_031551974.1 49.6 129  
64 1 1 129 525 652 1.70E-24 120.6 6105 cellular

organisms;Eukaryota;Opisthokonta;Metazoa;Eumetazoa;Cnidaria;Anthozoa;Hexacorallia;Actiniaria;Actiniidae;Actinia;Actinia tenebrosa

UdeM00000034394 50390 221.5 UdeM00000034394 XP\_028150043.1 41.5 275  
153 3 1 268 26 299 1.40E-54 221.5 50390 cellular

organisms;Eukaryota;Opisthokonta;Metazoa;Eumetazoa;Bilateria;Protostomia;Ecdysozoa;Panarthropoda;Arthropoda;Mandibulata;Pancrustacea;Hexapoda;Insecta;Dicondylia;Pterygota;Neoptera;Endopterygota;Coleoptera;Polyphaga;Cucujiformia;Chrysomeloidea;Chrysomelidae;Galerucinae;Luperini;Diabroticina;Diabroticites;Diabrotica;Diabrotica virgifera;Diabrotica virgifera virgifera

UdeM00000034395 6596 172.6 UdeM00000034395 XP\_045160979.1 45.9 209  
109 2 6 212 8 214 5.80E-40 172.6 6596 cellular

organisms;Eukaryota;Opisthokonta;Metazoa;Eumetazoa;Bilateria;Protostomia;Spiralia;Lophotrochozoa;Mollusca;Bivalvia;Autobranchia;Heteroconchia;Euheterodonta;Imparidentia;Venerida;Veneroidea;Veneridae;Mercenaria;Mercenaria mercenaria

UdeM00000034396 6105 193.7 UdeM00000034396 XP\_031571719.1 26 792  
490 22 234 969 40 791 1.30E-45 193.7 6105 cellular

organisms;Eukaryota;Opisthokonta;Metazoa;Eumetazoa;Cnidaria;Anthozoa;Hexacorallia;Actiniaria;Actiniidae;Actinia;Actinia tenebrosa

UdeM00000034400 6579 1328.2 UdeM00000034400 XP\_033750824.1 55.3  
1208 490 13 1 1196 302 1471 0.00E+00 1328.2 6579  
cellular

organisms;Eukaryota;Opisthokonta;Metazoa;Eumetazoa;Bilateria;Protostomia;Spiralia;Lophotrochozoa;Mollusca;Bivalvia;Autobranchia;Pteriormorphia;Pectinida;Pectinoidea;Pectinidae;Pecten;Pecten maximus

UdeM00000034402 1437191 172.9 UdeM00000034402 XP\_029054816.1 29.5  
403 160 6 3 282 61 462 5.70E-40 172.9 1437191  
cellular

organisms;Eukaryota;Opisthokonta;Metazoa;Eumetazoa;Bilateria;Protostomia;Ecdysozoa;Panarthropoda;Arthropoda;Mandibulata;Pancrustacea;Hexapoda;Insecta;Dicondylia;Pterygota;Neoptera;Endopterygota;Hymenoptera;Apocrita;Aculeata;Apoidea;Megachilidae;Megachilinae;Osmiini;Osmia;Osmia bicornis;Osmia bicornis bicornis

UdeM00000034404 6596 915.2 UdeM00000034404 XP\_045210363.1 54.6 852  
378 4 206 1053 118 964 7.50E-263 915.2 6596 cellular

organisms;Eukaryota;Opisthokonta;Metazoa;Eumetazoa;Bilateria;Protostomia;Spiralia;Lophotrochozoa;Mollusca;Bivalvia;Autobranchia;Heteroconchia;Euheterodonta;Imparidentia;Venerida;Veneroidea;Veneridae;Mercenaria;Mercenaria mercenaria

UdeM00000034406 6596 278.1 UdeM00000034406 XP\_045183805.1 59 205  
83 1 1 204 45 249 9.00E-72 278.1 6596 cellular

organisms;Eukaryota;Opisthokonta;Metazoa;Eumetazoa;Bilateria;Protostomia;Spiralia;Lophotrochozoa;Mollusca;Bivalvia;Autobranchia;Heteroconchia;Euheterodonta

terodonta;Imparidentia;Venerida;Veneroidea;Veneridae;Mercenaria;Mercenari  
 a mercenaria  
 UdeM00000034405 6596 279.6 UdeM00000034405 XP\_045183805.1 58.7 206  
 84 1 20 224 44 249 3.40E-72 279.6 6596 cellular  
 organisms;Eukaryota;Opisthokonta;Metazoa;Eumetazoa;Bilateria;Protostomia;  
 Spiralia;Lophotrochozoa;Mollusca;Bivalvia;Autobranchia;Heteroconchia;Euhe  
 terodonta;Imparidentia;Venerida;Veneroidea;Veneridae;Mercenaria;Mercenari  
 a mercenaria  
 UdeM00000034407 6596 309.3 UdeM00000034407 XP\_045183805.1 65.6 209  
 71 1 1 208 41 249 3.70E-81 309.3 6596 cellular  
 organisms;Eukaryota;Opisthokonta;Metazoa;Eumetazoa;Bilateria;Protostomia;  
 Spiralia;Lophotrochozoa;Mollusca;Bivalvia;Autobranchia;Heteroconchia;Euhe  
 terodonta;Imparidentia;Venerida;Veneroidea;Veneridae;Mercenaria;Mercenari  
 a mercenaria  
 UdeM00000034408 6596 415.2 UdeM00000034408 XP\_045184513.1 44.5 1013  
 503 14 17 988 19 1013 2.50E-112 415.2 6596 cellular  
 organisms;Eukaryota;Opisthokonta;Metazoa;Eumetazoa;Bilateria;Protostomia;  
 Spiralia;Lophotrochozoa;Mollusca;Bivalvia;Autobranchia;Heteroconchia;Euhe  
 terodonta;Imparidentia;Venerida;Veneroidea;Veneridae;Mercenaria;Mercenari  
 a mercenaria  
 UdeM00000034409 6596 187.2 UdeM00000034409 XP\_045183513.1 36.3 582  
 338 7 544 1105 416 984 1.40E-43 187.2 6596 cellular  
 organisms;Eukaryota;Opisthokonta;Metazoa;Eumetazoa;Bilateria;Protostomia;  
 Spiralia;Lophotrochozoa;Mollusca;Bivalvia;Autobranchia;Heteroconchia;Euhe  
 terodonta;Imparidentia;Venerida;Veneroidea;Veneridae;Mercenaria;Mercenari  
 a mercenaria  
 UdeM00000034410 6596 295.4 UdeM00000034410 XP\_045173349.1 27.7 860  
 481 23 142 878 69 910 2.80E-76 295.4 6596 cellular  
 organisms;Eukaryota;Opisthokonta;Metazoa;Eumetazoa;Bilateria;Protostomia;  
 Spiralia;Lophotrochozoa;Mollusca;Bivalvia;Autobranchia;Heteroconchia;Euhe  
 terodonta;Imparidentia;Venerida;Veneroidea;Veneridae;Mercenaria;Mercenari  
 a mercenaria  
 UdeM00000034411 225164 325.5 UdeM00000034411 XP\_009057189.1 42.8  
 397 223 2 60 456 9 401 1.10E-85 325.5 225164  
 cellular  
 organisms;Eukaryota;Opisthokonta;Metazoa;Eumetazoa;Bilateria;Protostomia;  
 Spiralia;Lophotrochozoa;Mollusca;Gastropoda;Patellogastropoda;Lottioidea;  
 Lottiidae;Lottia;Lottia gigantea  
 UdeM00000034412 6596 503.8 UdeM00000034412 XP\_045207654.1 51.7 536  
 234 9 263 784 156 680 3.90E-139 503.8 6596 cellular  
 organisms;Eukaryota;Opisthokonta;Metazoa;Eumetazoa;Bilateria;Protostomia;  
 Spiralia;Lophotrochozoa;Mollusca;Bivalvia;Autobranchia;Heteroconchia;Euhe  
 terodonta;Imparidentia;Venerida;Veneroidea;Veneridae;Mercenaria;Mercenari  
 a mercenaria  
 UdeM00000034413 6596 172.2 UdeM00000034413 XP\_045207747.1 34.8 287  
 177 5 1 278 1 286 9.60E-40 172.2 6596 cellular  
 organisms;Eukaryota;Opisthokonta;Metazoa;Eumetazoa;Bilateria;Protostomia;  
 Spiralia;Lophotrochozoa;Mollusca;Bivalvia;Autobranchia;Heteroconchia;Euhe  
 terodonta;Imparidentia;Venerida;Veneroidea;Veneridae;Mercenaria;Mercenari  
 a mercenaria  
 UdeM00000034414 6596 298.9 UdeM00000034414 XP\_045209765.1 26 850  
 463 20 533 1342 251 974 3.30E-77 298.9 6596 cellular  
 organisms;Eukaryota;Opisthokonta;Metazoa;Eumetazoa;Bilateria;Protostomia;  
 Spiralia;Lophotrochozoa;Mollusca;Bivalvia;Autobranchia;Heteroconchia;Euhe

terodonta;Imparidentia;Venerida;Veneroidea;Veneridae;Mercenaria;Mercenari  
 a mercenaria  
 UdeM00000034415 6596 172.9 UdeM00000034415 XP\_045209769.1 23.8 583  
 394 12 45 587 449 1021 1.20E-39 172.9 6596 cellular  
 organisms;Eukaryota;Opisthokonta;Metazoa;Eumetazoa;Bilateria;Protostomia;  
 Spiralia;Lophotrochozoa;Mollusca;Bivalvia;Autobranhia;Heteroconchia;Euhe  
 terodonta;Imparidentia;Venerida;Veneroidea;Veneridae;Mercenaria;Mercenari  
 a mercenaria  
 UdeM00000034416 6596 131 UdeM00000034416 XP\_045209768.1 23.3 520  
 357 11 122 609 449 958 5.70E-27 131 6596 cellular  
 organisms;Eukaryota;Opisthokonta;Metazoa;Eumetazoa;Bilateria;Protostomia;  
 Spiralia;Lophotrochozoa;Mollusca;Bivalvia;Autobranhia;Heteroconchia;Euhe  
 terodonta;Imparidentia;Venerida;Veneroidea;Veneridae;Mercenaria;Mercenari  
 a mercenaria  
 UdeM00000034417 6596 414.1 UdeM00000034417 XP\_045209768.1 28.8 1060  
 606 26 223 1249 33 976 7.00E-112 414.1 6596 cellular  
 organisms;Eukaryota;Opisthokonta;Metazoa;Eumetazoa;Bilateria;Protostomia;  
 Spiralia;Lophotrochozoa;Mollusca;Bivalvia;Autobranhia;Heteroconchia;Euhe  
 terodonta;Imparidentia;Venerida;Veneroidea;Veneridae;Mercenaria;Mercenari  
 a mercenaria  
 UdeM00000034419 6596 171 UdeM00000034419 XP\_045209765.1 24 578  
 393 10 149 687 560 1130 5.20E-39 171 6596 cellular  
 organisms;Eukaryota;Opisthokonta;Metazoa;Eumetazoa;Bilateria;Protostomia;  
 Spiralia;Lophotrochozoa;Mollusca;Bivalvia;Autobranhia;Heteroconchia;Euhe  
 terodonta;Imparidentia;Venerida;Veneroidea;Veneridae;Mercenaria;Mercenari  
 a mercenaria  
 UdeM00000034420 6596 155.6 UdeM00000034420 XP\_045209769.1 25.7 460  
 310 10 64 501 474 923 2.10E-34 155.6 6596 cellular  
 organisms;Eukaryota;Opisthokonta;Metazoa;Eumetazoa;Bilateria;Protostomia;  
 Spiralia;Lophotrochozoa;Mollusca;Bivalvia;Autobranhia;Heteroconchia;Euhe  
 terodonta;Imparidentia;Venerida;Veneroidea;Veneridae;Mercenaria;Mercenari  
 a mercenaria  
 UdeM00000034422 6596 162.2 UdeM00000034422 XP\_045209760.1 52.6 133  
 63 0 1027 1159 533 665 4.70E-36 162.2 6596 cellular  
 organisms;Eukaryota;Opisthokonta;Metazoa;Eumetazoa;Bilateria;Protostomia;  
 Spiralia;Lophotrochozoa;Mollusca;Bivalvia;Autobranhia;Heteroconchia;Euhe  
 terodonta;Imparidentia;Venerida;Veneroidea;Veneridae;Mercenaria;Mercenari  
 a mercenaria  
 UdeM00000034423 6596 94.4 UdeM00000034423 XP\_045210122.1 38.8 134  
 72 5 129 258 57 184 2.40E-16 94.4 6596 cellular  
 organisms;Eukaryota;Opisthokonta;Metazoa;Eumetazoa;Bilateria;Protostomia;  
 Spiralia;Lophotrochozoa;Mollusca;Bivalvia;Autobranhia;Heteroconchia;Euhe  
 terodonta;Imparidentia;Venerida;Veneroidea;Veneridae;Mercenaria;Mercenari  
 a mercenaria  
 UdeM00000034424 6956 63.5 UdeM00000034424 XP\_027204985.1 28.8 125  
 73 4 35 145 131 253 2.80E-07 63.5 6956 cellular  
 organisms;Eukaryota;Opisthokonta;Metazoa;Eumetazoa;Bilateria;Protostomia;  
 Ecdysozoa;Panarthropoda;Arthropoda;Chelicerata;Arachnida;Acari;Acariforme  
 s;Sarcoptiformes;Astigmata;Psoroptidia;Analgoidea;Pyroglyphidae;Dermatoph  
 agoidinae;Dermatophagoides;Dermatophagoides pteronyssinus  
 UdeM00000034425 6565 5670.5 UdeM00000034425 XP\_022322144.1 41.4  
 7220 3597 92 2 6821 215 7198 0.00E+00 5670.5 6565  
 cellular  
 organisms;Eukaryota;Opisthokonta;Metazoa;Eumetazoa;Bilateria;Protostomia;

Spiralia;Lophotrochozoa;Mollusca;Bivalvia;Autobranchia;Pteriormorphia;Ostr  
eida;Ostreoidea;Ostreidae;Crassostrea;Crassostrea virginica  
UdeM00000034426 6596 220.3 UdeM00000034426 XP\_045208827.1 52.4 210  
95 2 9 218 9 213 2.50E-54 220.3 6596 cellular  
organisms;Eukaryota;Opisthokonta;Metazoa;Eumetazoa;Bilateria;Protostomia;  
Spiralia;Lophotrochozoa;Mollusca;Bivalvia;Autobranchia;Heteroconchia;Euhe  
terodonta;Imparidentia;Venerida;Veneroidea;Veneridae;Mercenaria;Mercenari  
a mercenaria  
UdeM00000034429 6596 96.3 UdeM00000034429 XP\_045180326.1 40.3 144  
80 2 20 162 32 170 5.10E-17 96.3 6596 cellular  
organisms;Eukaryota;Opisthokonta;Metazoa;Eumetazoa;Bilateria;Protostomia;  
Spiralia;Lophotrochozoa;Mollusca;Bivalvia;Autobranchia;Heteroconchia;Euhe  
terodonta;Imparidentia;Venerida;Veneroidea;Veneridae;Mercenaria;Mercenari  
a mercenaria  
UdeM00000034430 6596 96.3 UdeM00000034430 XP\_045180326.1 40.3 144  
80 2 20 162 32 170 4.50E-17 96.3 6596 cellular  
organisms;Eukaryota;Opisthokonta;Metazoa;Eumetazoa;Bilateria;Protostomia;  
Spiralia;Lophotrochozoa;Mollusca;Bivalvia;Autobranchia;Heteroconchia;Euhe  
terodonta;Imparidentia;Venerida;Veneroidea;Veneridae;Mercenaria;Mercenari  
a mercenaria  
UdeM00000034431 32264 141.7 UdeM00000034431 XP\_015790859.1 41.1 192  
49 1 5 132 119 310 6.60E-31 141.7 32264 cellular  
organisms;Eukaryota;Opisthokonta;Metazoa;Eumetazoa;Bilateria;Protostomia;  
Ecdysozoa;Panarthropoda;Arthropoda;Chelicerata;Arachnida;Acari;Acariforme  
s;Trombidiformes;Prostigmata;Eleutherengona;Raphignathae;Tetranychoidae;T  
etranychidae;Tetranychus;Tetranychus urticae  
UdeM00000034432 88015 65.5 UdeM00000034432 XP\_023337768.1 45.5 66  
31 1 27 92 277 337 4.20E-08 65.5 88015 cellular  
organisms;Eukaryota;Opisthokonta;Metazoa;Eumetazoa;Bilateria;Protostomia;  
Ecdysozoa;Panarthropoda;Arthropoda;Mandibulata;Pancrustacea;Crustacea;Mul  
ticrustacea;Hexanauplia;Copepoda;Neocopepoda;Gymnoplea;Calanoida;Temorida  
e;Eurytemora;Eurytemora affinis  
UdeM00000034433 29159 384.8 UdeM00000034433 XP\_034331235.1 55.6 342  
132 6 25 349 22 360 1.20E-103 384.8 29159 cellular  
organisms;Eukaryota;Opisthokonta;Metazoa;Eumetazoa;Bilateria;Protostomia;  
Spiralia;Lophotrochozoa;Mollusca;Bivalvia;Autobranchia;Pteriormorphia;Ostr  
eida;Ostreoidea;Ostreidae;Crassostrea;Crassostrea gigas  
UdeM00000034434 225164 334.7 UdeM00000034434 XP\_009063479.1 50.8  
321 137 6 2 321 77 377 1.30E-88 334.7 225164  
cellular  
organisms;Eukaryota;Opisthokonta;Metazoa;Eumetazoa;Bilateria;Protostomia;  
Spiralia;Lophotrochozoa;Mollusca;Gastropoda;Patellogastropoda;Lottioidae;  
Lottiidae;Lottia;Lottia gigantea  
UdeM00000034436 6596 509.6 UdeM00000034436 XP\_045207945.1 53.5 548  
226 8 17 547 64 599 5.10E-141 509.6 6596 cellular  
organisms;Eukaryota;Opisthokonta;Metazoa;Eumetazoa;Bilateria;Protostomia;  
Spiralia;Lophotrochozoa;Mollusca;Bivalvia;Autobranchia;Heteroconchia;Euhe  
terodonta;Imparidentia;Venerida;Veneroidea;Veneridae;Mercenaria;Mercenari  
a mercenaria  
UdeM00000034437 6596 442.2 UdeM00000034437 XP\_045209937.1 59.5 373  
143 6 14 379 15 386 6.70E-121 442.2 6596 cellular  
organisms;Eukaryota;Opisthokonta;Metazoa;Eumetazoa;Bilateria;Protostomia;  
Spiralia;Lophotrochozoa;Mollusca;Bivalvia;Autobranchia;Heteroconchia;Euhe



terodonta;Imparidentia;Venerida;Veneroidea;Veneridae;Mercenaria;Mercenaria mercenaria

UdeM00000034438 6596 724.9 UdeM00000034438 XP\_045209936.1 74.8 511  
121 4 2 507 5 512 6.90E-206 724.9 6596 cellular

organisms;Eukaryota;Opisthokonta;Metazoa;Eumetazoa;Bilateria;Protostomia;Spiralia;Lophotrochozoa;Mollusca;Bivalvia;Autobranhia;Heteroconchia;Euherodonta;Imparidentia;Venerida;Veneroidea;Veneridae;Mercenaria;Mercenaria mercenaria

UdeM00000034439 6596 1246.1 UdeM00000034439 XP\_045208750.1 36.4  
2970 1319 81 39 2784 100 2723 0.00E+00 1246.1 6596  
cellular

organisms;Eukaryota;Opisthokonta;Metazoa;Eumetazoa;Bilateria;Protostomia;Spiralia;Lophotrochozoa;Mollusca;Bivalvia;Autobranhia;Heteroconchia;Euherodonta;Imparidentia;Venerida;Veneroidea;Veneridae;Mercenaria;Mercenaria mercenaria

UdeM00000034440 6596 244.2 UdeM00000034440 XP\_045209546.1 83.9 137  
22 0 1 137 430 566 9.70E-62 244.2 6596 cellular

organisms;Eukaryota;Opisthokonta;Metazoa;Eumetazoa;Bilateria;Protostomia;Spiralia;Lophotrochozoa;Mollusca;Bivalvia;Autobranhia;Heteroconchia;Euherodonta;Imparidentia;Venerida;Veneroidea;Veneridae;Mercenaria;Mercenaria mercenaria

UdeM00000034441 6596 490.7 UdeM00000034441 XP\_045209546.1 71.3 369  
99 3 48 415 77 439 1.80E-135 490.7 6596 cellular

organisms;Eukaryota;Opisthokonta;Metazoa;Eumetazoa;Bilateria;Protostomia;Spiralia;Lophotrochozoa;Mollusca;Bivalvia;Autobranhia;Heteroconchia;Euherodonta;Imparidentia;Venerida;Veneroidea;Veneridae;Mercenaria;Mercenaria mercenaria

UdeM00000034442 441366 277.3 UdeM00000034442 XP\_028318799.1 60.3  
199 79 0 2 200 271 469 1.50E-71 277.3 441366  
cellular

organisms;Eukaryota;Opisthokonta;Metazoa;Eumetazoa;Bilateria;Deuterostomia;Chordata;Craniata;Vertebrata;Gnathostomata;Teleostomi;Euteleostomi;Actinopterygii;Actinopteri;Neopterygii;Teleostei;Osteoglossocephalai;Clupeocephala;Euteleostei;Neoteleostei;Eurypterygia;Ctenosquamata;Acanthopterygii;Euacanthopterygii;Percomorphaceae;Ovalentaria;Blenniiformes;Blenniiformes;Gobiesocoidei;Gobiesocidae;Gobiesocinae;Gouania;Gouania willdenowi

UdeM00000034443 441366 149.1 UdeM00000034443 XP\_028298353.1 61.9  
105 40 0 1 105 558 662 3.40E-33 149.1 441366  
cellular

organisms;Eukaryota;Opisthokonta;Metazoa;Eumetazoa;Bilateria;Deuterostomia;Chordata;Craniata;Vertebrata;Gnathostomata;Teleostomi;Euteleostomi;Actinopterygii;Actinopteri;Neopterygii;Teleostei;Osteoglossocephalai;Clupeocephala;Euteleostei;Neoteleostei;Eurypterygia;Ctenosquamata;Acanthopterygii;Euacanthopterygii;Percomorphaceae;Ovalentaria;Blenniiformes;Blenniiformes;Gobiesocoidei;Gobiesocidae;Gobiesocinae;Gouania;Gouania willdenowi

UdeM00000034444 50429 78.2 UdeM00000034444 XP\_022790680.1 48.6 72  
36 1 3 74 40 110 1.20E-11 78.2 50429 cellular

organisms;Eukaryota;Opisthokonta;Metazoa;Eumetazoa;Cnidaria;Anthozoa;Hexacorallia;Scleractinia;Astrocoeniina;Pocilloporidae;Stylophora;Stylophora pistillata

UdeM00000034445 7654 73.9 UdeM00000034445 XP\_041463467.1 41.6 101  
55 3 42 139 162 261 2.00E-10 73.9 7654 cellular

organisms;Eukaryota;Opisthokonta;Metazoa;Eumetazoa;Bilateria;Deuterostomi  
a;Echinodermata;Eleutherozoa;Echinozoa;Echinoidea;Euechinoidea;Echinacea;  
Temnopleuroida;Toxopneustidae;Lytechinus;Lytechinus variegatus

UdeM00000034446 6596 308.9 UdeM00000034446 XP\_045215232.1 47.6 347  
176 4 61 405 111 453 1.00E-80 308.9 6596 cellular

organisms;Eukaryota;Opisthokonta;Metazoa;Eumetazoa;Bilateria;Protostomia;  
Spiralia;Lophotrochozoa;Mollusca;Bivalvia;Autobranchia;Heteroconchia;Euhe  
terodonta;Imparidentia;Venerida;Veneroidea;Veneridae;Mercenaria;Mercenari  
a mercenaria

UdeM00000034447 6596 307.4 UdeM00000034447 XP\_045215232.1 47.8 345  
174 4 61 403 111 451 2.70E-80 307.4 6596 cellular

organisms;Eukaryota;Opisthokonta;Metazoa;Eumetazoa;Bilateria;Protostomia;  
Spiralia;Lophotrochozoa;Mollusca;Bivalvia;Autobranchia;Heteroconchia;Euhe  
terodonta;Imparidentia;Venerida;Veneroidea;Veneridae;Mercenaria;Mercenari  
a mercenaria

UdeM00000034448 441366 550.4 UdeM00000034448 XP\_028318216.1 59.7  
402 162 0 8 409 154 555 1.90E-153 550.4 441366  
cellular

organisms;Eukaryota;Opisthokonta;Metazoa;Eumetazoa;Bilateria;Deuterostomi  
a;Chordata;Craniata;Vertebrata;Gnathostomata;Teleostomi;Euteleostomi;Acti  
nopterygii;Actinopteri;Neopterygii;Teleostei;Osteoglossocephalai;Clupeoce  
phala;Euteleosteomorpha;Neoteleostei;Eurypterygia;Ctenosquamata;Acanthomo  
rphata;Euacanthomorphacea;Percomorphaceae;Ovalentaria;Blenniimorphae;Blen  
niiformes;Gobiesocoidei;Gobiesocidae;Gobiesocinae;Gouania;Gouania  
willdenowi

UdeM00000034450 6596 308.9 UdeM00000034450 XP\_045215232.1 47.6 347  
176 4 61 405 111 453 1.00E-80 308.9 6596 cellular

organisms;Eukaryota;Opisthokonta;Metazoa;Eumetazoa;Bilateria;Protostomia;  
Spiralia;Lophotrochozoa;Mollusca;Bivalvia;Autobranchia;Heteroconchia;Euhe  
terodonta;Imparidentia;Venerida;Veneroidea;Veneridae;Mercenaria;Mercenari  
a mercenaria

UdeM00000034449 6596 307.4 UdeM00000034449 XP\_045215232.1 47.8 345  
174 4 61 403 111 451 2.70E-80 307.4 6596 cellular

organisms;Eukaryota;Opisthokonta;Metazoa;Eumetazoa;Bilateria;Protostomia;  
Spiralia;Lophotrochozoa;Mollusca;Bivalvia;Autobranchia;Heteroconchia;Euhe  
terodonta;Imparidentia;Venerida;Veneroidea;Veneridae;Mercenaria;Mercenari  
a mercenaria

UdeM00000034451 441366 548.9 UdeM00000034451 XP\_028318216.1 59.5  
402 163 0 8 409 154 555 5.50E-153 548.9 441366  
cellular

organisms;Eukaryota;Opisthokonta;Metazoa;Eumetazoa;Bilateria;Deuterostomi  
a;Chordata;Craniata;Vertebrata;Gnathostomata;Teleostomi;Euteleostomi;Acti  
nopterygii;Actinopteri;Neopterygii;Teleostei;Osteoglossocephalai;Clupeoce  
phala;Euteleosteomorpha;Neoteleostei;Eurypterygia;Ctenosquamata;Acanthomo  
rphata;Euacanthomorphacea;Percomorphaceae;Ovalentaria;Blenniimorphae;Blen  
niiformes;Gobiesocoidei;Gobiesocidae;Gobiesocinae;Gouania;Gouania  
willdenowi

UdeM00000034453 6596 308.9 UdeM00000034453 XP\_045215232.1 47.6 347  
176 4 61 405 111 453 1.00E-80 308.9 6596 cellular

organisms;Eukaryota;Opisthokonta;Metazoa;Eumetazoa;Bilateria;Protostomia;  
Spiralia;Lophotrochozoa;Mollusca;Bivalvia;Autobranchia;Heteroconchia;Euhe  
terodonta;Imparidentia;Venerida;Veneroidea;Veneridae;Mercenaria;Mercenari  
a mercenaria

UdeM00000034452 6596 307.4 UdeM00000034452 XP\_045215232.1 47.8 345  
 174 4 61 403 111 451 2.70E-80 307.4 6596 cellular  
 organisms;Eukaryota;Opisthokonta;Metazoa;Eumetazoa;Bilateria;Protostomia;  
 Spiralia;Lophotrochozoa;Mollusca;Bivalvia;Autobranchia;Heteroconchia;Euhe-  
 terodonta;Imparidentia;Venerida;Veneroidea;Veneridae;Mercenaria;Mercenari-  
 a mercenaria

UdeM00000034454 50390 393.7 UdeM00000034454 XP\_028142380.1 52.3 300  
 143 0 2 301 49 348 2.20E-106 393.7 50390 cellular  
 organisms;Eukaryota;Opisthokonta;Metazoa;Eumetazoa;Bilateria;Protostomia;  
 Ecdysozoa;Panarthropoda;Arthropoda;Mandibulata;Pancrustacea;Hexapoda;Inse-  
 cta;Dicondylia;Pterygota;Neoptera;Endopterygota;Coleoptera;Polyphaga;Cucu-  
 jiformia;Chrysomeloidea;Chrysomelidae;Galerucinae;Luperini;Diabroticina;D-  
 iabroticites;Diabrotica;Diabrotica virgifera;Diabrotica virgifera  
 virgifera

UdeM00000034455 50429 77.4 UdeM00000034455 XP\_022790680.1 47.2 72  
 37 1 3 74 40 110 2.10E-11 77.4 50429 cellular  
 organisms;Eukaryota;Opisthokonta;Metazoa;Eumetazoa;Cnidaria;Anthozoa;Hexa-  
 corallia;Scleractinia;Astrocoeniina;Pocilloporidae;Stylophora;Stylophora  
 pistillata

UdeM00000034456 7741 186.4 UdeM00000034456 XP\_019626645.1 44.9 236  
 69 3 1 178 96 328 3.20E-44 186.4 7741 cellular  
 organisms;Eukaryota;Opisthokonta;Metazoa;Eumetazoa;Bilateria;Deuterostomi-  
 a;Chordata;Cephalochordata;Leptocardii;Amphioxiformes;Branchiostomidae;Br-  
 anchiostoma;Branchiostoma belcheri

UdeM00000034457 52239 147.5 UdeM00000034457 XP\_033947251.1 58.1 105  
 44 0 2 106 124 228 9.70E-33 147.5 52239 cellular  
 organisms;Eukaryota;Opisthokonta;Metazoa;Eumetazoa;Bilateria;Deuterostomi-  
 a;Chordata;Craniata;Vertebrata;Gnathostomata;Teleostomi;Euteleostomi;Acti-  
 nopterygii;Actinopteri;Neopterygii;Teleostei;Osteoglossocephalai;Clupeoce-  
 phala;Euteleosteomorpha;Neoteleostei;Eurypterygia;Ctenosquamata;Acanthomo-  
 rphata;Euacanthomorphacea;Percomorphaceae;Eupercaria;Perciformes;Notothen-  
 ioidei;Channichthyidae;Pseudochaenichthys;Pseudochaenichthys georgianus

UdeM00000034458 400682 73.6 UdeM00000034458 XP\_019861952.1 38.2  
 89 53 2 3 90 336 423 1.90E-10 73.6 400682  
 cellular  
 organisms;Eukaryota;Opisthokonta;Metazoa;Porifera;Demospongiae;Heteroscle-  
 romorpha;Haplosclerida;Niphatidae;Amphimedon;Amphimedon queenslandica

UdeM00000034461 7739 129 UdeM00000034461 XP\_035659254.1 39.3 168  
 96 2 1 162 765 932 6.40E-27 129 7739 cellular  
 organisms;Eukaryota;Opisthokonta;Metazoa;Eumetazoa;Bilateria;Deuterostomi-  
 a;Chordata;Cephalochordata;Leptocardii;Amphioxiformes;Branchiostomidae;Br-  
 anchiostoma;Branchiostoma floridae

UdeM00000034462 7574 73.2 UdeM00000034462 XP\_013400898.1 38.9 90  
 53 1 100 189 212 299 4.10E-10 73.2 7574 cellular  
 organisms;Eukaryota;Opisthokonta;Metazoa;Eumetazoa;Bilateria;Protostomia;  
 Spiralia;Lophotrochozoa;Brachiopoda;Linguliformea;Lingulata;Lingulida;Lin-  
 guloidea;Lingulidae;Lingula;Lingula anatina

UdeM00000034463 441366 226.9 UdeM00000034463 XP\_028318792.1 63.5  
 159 56 1 2 160 612 768 1.90E-56 226.9 441366  
 cellular  
 organisms;Eukaryota;Opisthokonta;Metazoa;Eumetazoa;Bilateria;Deuterostomi-  
 a;Chordata;Craniata;Vertebrata;Gnathostomata;Teleostomi;Euteleostomi;Acti-  
 nopterygii;Actinopteri;Neopterygii;Teleostei;Osteoglossocephalai;Clupeoce-  
 phala;Euteleosteomorpha;Neoteleostei;Eurypterygia;Ctenosquamata;Acanthomo-

rphata;Euacanthomorpha;Percomorphaceae;Ovalentaria;Blenniiformes;Blenniiformes;Gobiesocoidei;Gobiesocidae;Gobiesocinae;Gouania;Gouania willdenowi

UdeM00000034465 6565 91.3 UdeM00000034465 XP\_022307899.1 35.1 168  
87 5 17 183 11 157 1.60E-15 91.3 6565 cellular  
organisms;Eukaryota;Opisthokonta;Metazoa;Eumetazoa;Bilateria;Protostomia;  
Spiralia;Lophotrochozoa;Mollusca;Bivalvia;Autobranchia;Pteriormorphia;Ostr  
eida;Ostreioidea;Ostreidae;Crassostrea;Crassostrea virginica

UdeM00000034464 6565 91.3 UdeM00000034464 XP\_022307899.1 35.1 168  
87 5 133 299 11 157 2.50E-15 91.3 6565 cellular  
organisms;Eukaryota;Opisthokonta;Metazoa;Eumetazoa;Bilateria;Protostomia;  
Spiralia;Lophotrochozoa;Mollusca;Bivalvia;Autobranchia;Pteriormorphia;Ostr  
eida;Ostreioidea;Ostreidae;Crassostrea;Crassostrea virginica

UdeM00000034466 6596 345.1 UdeM00000034466 XP\_045177776.1 38.4 524  
261 8 9 514 398 877 1.50E-91 345.1 6596 cellular  
organisms;Eukaryota;Opisthokonta;Metazoa;Eumetazoa;Bilateria;Protostomia;  
Spiralia;Lophotrochozoa;Mollusca;Bivalvia;Autobranchia;Heteroconchia;Euhe  
terodonta;Imparidentia;Venerida;Veneroidea;Veneridae;Mercenaria;Mercenari  
a mercenaria

UdeM00000034467 50390 330.9 UdeM00000034467 XP\_028152422.1 54.9 255  
114 1 2 256 188 441 1.50E-87 330.9 50390 cellular  
organisms;Eukaryota;Opisthokonta;Metazoa;Eumetazoa;Bilateria;Protostomia;  
Ecdysozoa;Panarthropoda;Arthropoda;Mandibulata;Pancrustacea;Hexapoda;Inse  
cta;Dicondylia;Pterygota;Neoptera;Endopterygota;Coleoptera;Polyphaga;Cucu  
jiformia;Chrysomeloidea;Chrysomelidae;Galerucinae;Luperini;Diabroticina;D  
iabroticites;Diabrotica;Diabrotica virgifera;Diabrotica virgifera  
virgifera

UdeM00000034468 6565 419.9 UdeM00000034468 XP\_022309566.1 54.8 301  
136 0 2 302 717 1017 2.80E-114 419.9 6565 cellular  
organisms;Eukaryota;Opisthokonta;Metazoa;Eumetazoa;Bilateria;Protostomia;  
Spiralia;Lophotrochozoa;Mollusca;Bivalvia;Autobranchia;Pteriormorphia;Ostr  
eida;Ostreioidea;Ostreidae;Crassostrea;Crassostrea virginica

UdeM00000034469 50390 552 UdeM00000034469 XP\_028154228.1 51.8 452  
217 1 4 454 158 609 7.20E-154 552 50390 cellular  
organisms;Eukaryota;Opisthokonta;Metazoa;Eumetazoa;Bilateria;Protostomia;  
Ecdysozoa;Panarthropoda;Arthropoda;Mandibulata;Pancrustacea;Hexapoda;Inse  
cta;Dicondylia;Pterygota;Neoptera;Endopterygota;Coleoptera;Polyphaga;Cucu  
jiformia;Chrysomeloidea;Chrysomelidae;Galerucinae;Luperini;Diabroticina;D  
iabroticites;Diabrotica;Diabrotica virgifera;Diabrotica virgifera  
virgifera

UdeM00000034470 29159 309.3 UdeM00000034470 XP\_011419884.2 71.4 203  
58 0 1 203 1 203 3.70E-81 309.3 29159 cellular  
organisms;Eukaryota;Opisthokonta;Metazoa;Eumetazoa;Bilateria;Protostomia;  
Spiralia;Lophotrochozoa;Mollusca;Bivalvia;Autobranchia;Pteriormorphia;Ostr  
eida;Ostreioidea;Ostreidae;Crassostrea;Crassostrea gigas

UdeM00000034472 6573 160.6 UdeM00000034472 XP\_021358714.1 58.3 139  
54 2 1 139 1 135 1.90E-36 160.6 6573 cellular  
organisms;Eukaryota;Opisthokonta;Metazoa;Eumetazoa;Bilateria;Protostomia;  
Spiralia;Lophotrochozoa;Mollusca;Bivalvia;Autobranchia;Pteriormorphia;Pect  
inida;Pectinoidea;Pectinidae;Mizuhopecten;Mizuhopecten yessoensis

UdeM00000034473 29159 69.7 UdeM00000034473 XP\_011435817.2 56.1 57  
25 0 7 63 146 202 5.90E-09 69.7 29159 cellular  
organisms;Eukaryota;Opisthokonta;Metazoa;Eumetazoa;Bilateria;Protostomia;

Spiralia;Lophotrochozoa;Mollusca;Bivalvia;Autobranchia;Pteriomorpha;Ostr  
 eida;Ostreoidea;Ostreidae;Crassostrea;Crassostrea gigas  
 UdeM00000034474 6596 786.2 UdeM00000034474 XP\_045183696.1 78.6 509  
 104 3 1 507 2738 3243 2.50E-224 786.2 6596 cellular  
 organisms;Eukaryota;Opisthokonta;Metazoa;Eumetazoa;Bilateria;Protostomia;  
 Spiralia;Lophotrochozoa;Mollusca;Bivalvia;Autobranchia;Heteroconchia;Euhe  
 terodonta;Imparidentia;Venerida;Veneroidea;Veneridae;Mercenaria;Mercenari  
 a mercenaria  
 UdeM00000034475 6596 564.7 UdeM00000034475 XP\_045183696.1 68.3 398  
 123 3 14 410 2327 2722 9.90E-158 564.7 6596 cellular  
 organisms;Eukaryota;Opisthokonta;Metazoa;Eumetazoa;Bilateria;Protostomia;  
 Spiralia;Lophotrochozoa;Mollusca;Bivalvia;Autobranchia;Heteroconchia;Euhe  
 terodonta;Imparidentia;Venerida;Veneroidea;Veneridae;Mercenaria;Mercenari  
 a mercenaria  
 UdeM00000034476 6596 1375.5 UdeM00000034476 XP\_045183696.1 53  
 1396 585 20 13 1391 945 2286 0.00E+00 1375.5 6596  
 cellular  
 organisms;Eukaryota;Opisthokonta;Metazoa;Eumetazoa;Bilateria;Protostomia;  
 Spiralia;Lophotrochozoa;Mollusca;Bivalvia;Autobranchia;Heteroconchia;Euhe  
 terodonta;Imparidentia;Venerida;Veneroidea;Veneridae;Mercenaria;Mercenari  
 a mercenaria  
 UdeM00000034477 6596 875.9 UdeM00000034477 XP\_045183696.1 68.4 712  
 207 6 39 736 65 772 6.00E-251 875.9 6596 cellular  
 organisms;Eukaryota;Opisthokonta;Metazoa;Eumetazoa;Bilateria;Protostomia;  
 Spiralia;Lophotrochozoa;Mollusca;Bivalvia;Autobranchia;Heteroconchia;Euhe  
 terodonta;Imparidentia;Venerida;Veneroidea;Veneridae;Mercenaria;Mercenari  
 a mercenaria  
 UdeM00000034478 6565 89.7 UdeM00000034478 XP\_022327962.1 47.3 93  
 47 1 3 93 626 718 2.10E-15 89.7 6565 cellular  
 organisms;Eukaryota;Opisthokonta;Metazoa;Eumetazoa;Bilateria;Protostomia;  
 Spiralia;Lophotrochozoa;Mollusca;Bivalvia;Autobranchia;Pteriomorpha;Ostr  
 eida;Ostreoidea;Ostreidae;Crassostrea;Crassostrea virginica  
 UdeM00000034479 6565 231.9 UdeM00000034479 XP\_022327962.1 52.4 227  
 106 2 73 297 361 587 1.10E-57 231.9 6565 cellular  
 organisms;Eukaryota;Opisthokonta;Metazoa;Eumetazoa;Bilateria;Protostomia;  
 Spiralia;Lophotrochozoa;Mollusca;Bivalvia;Autobranchia;Pteriomorpha;Ostr  
 eida;Ostreoidea;Ostreidae;Crassostrea;Crassostrea virginica  
 UdeM00000034480 160734 96.7 UdeM00000034480 XP\_042370962.1 50  
 78 38 1 429 505 177 254 9.20E-17 96.7 160734  
 cellular  
 organisms;Eukaryota;Opisthokonta;Metazoa;Eumetazoa;Bilateria;Deuterostomi  
 a;Chordata;Craniata;Vertebrata;Gnathostomata;Teleostomi;Euteleostomi;Acti  
 nopterygii;Actinopteri;Neopterygii;Teleostei;Osteoglossocephalai;Clupeoce  
 phala;Euteleosteomorpha;Neoteleostei;Eurypterygia;Ctenosquamata;Acanthomo  
 rphata;Euacanthomorphacea;Percomorphaceae;Eupercaria;Perciformes;Serranoi  
 dei;Serranidae;Epinephelinae;Epinephelini;Plectropomus;Plectropomus  
 leopardus  
 UdeM00000034481 7054 101.3 UdeM00000034481 XP\_031332239.1 42.2 102  
 59 0 597 698 464 565 5.20E-18 101.3 7054 cellular  
 organisms;Eukaryota;Opisthokonta;Metazoa;Eumetazoa;Bilateria;Protostomia;  
 Ecdysozoa;Panarthropoda;Arthropoda;Mandibulata;Pancrustacea;Hexapoda;Inse  
 cta;Dicondylia;Pterygota;Neoptera;Endopterygota;Coleoptera;Polyphaga;Elat  
 eriformia;Elateroidea;Lampyridae;Lampyrinae;Photinus;Photinus pyralis

UdeM00000034482 45351 110.5 UdeM00000034482 XP\_032232593.1 53.6 84  
 39 0 493 576 441 524 7.80E-21 110.5 45351 cellular  
 organisms;Eukaryota;Opisthokonta;Metazoa;Eumetazoa;Cnidaria;Anthozoa;Hexa  
 corallia;Actiniaria;Edwardsiidae;Nematostella;Nematostella vectensis  
 UdeM00000034483 37653 122.5 UdeM00000034483 XP\_014769226.1 40.6 143  
 77 3 648 785 333 472 2.40E-24 122.5 37653 cellular  
 organisms;Eukaryota;Opisthokonta;Metazoa;Eumetazoa;Bilateria;Protostomia;  
 Spiralia;Lophotrochozoa;Mollusca;Cephalopoda;Coleoidea;Octopodiformes;Oct  
 opoda;Incirrata;Octopodidae;Octopus;Octopus bimaculoides  
 UdeM00000034484 6596 317 UdeM00000034484 XP\_045216733.1 50.3 288  
 141 2 47 334 227 512 2.90E-83 317 6596 cellular  
 organisms;Eukaryota;Opisthokonta;Metazoa;Eumetazoa;Bilateria;Protostomia;  
 Spiralia;Lophotrochozoa;Mollusca;Bivalvia;Autobranchia;Heteroconchia;Euhe  
 terodonta;Imparidentia;Venerida;Veneroidea;Veneridae;Mercenaria;Mercenari  
 a mercenaria  
 UdeM00000034485 6596 275 UdeM00000034485 XP\_045216732.1 50 272  
 126 4 24 295 201 462 1.10E-70 275 6596 cellular  
 organisms;Eukaryota;Opisthokonta;Metazoa;Eumetazoa;Bilateria;Protostomia;  
 Spiralia;Lophotrochozoa;Mollusca;Bivalvia;Autobranchia;Heteroconchia;Euhe  
 terodonta;Imparidentia;Venerida;Veneroidea;Veneridae;Mercenaria;Mercenari  
 a mercenaria  
 UdeM00000034486 6596 274.6 UdeM00000034486 XP\_045216732.1 49.8 271  
 126 4 24 294 201 461 1.80E-70 274.6 6596 cellular  
 organisms;Eukaryota;Opisthokonta;Metazoa;Eumetazoa;Bilateria;Protostomia;  
 Spiralia;Lophotrochozoa;Mollusca;Bivalvia;Autobranchia;Heteroconchia;Euhe  
 terodonta;Imparidentia;Venerida;Veneroidea;Veneridae;Mercenaria;Mercenari  
 a mercenaria  
 UdeM00000034487 29159 177.6 UdeM00000034487 XP\_034314481.1 48.9 184  
 93 1 173 356 224 406 3.00E-41 177.6 29159 cellular  
 organisms;Eukaryota;Opisthokonta;Metazoa;Eumetazoa;Bilateria;Protostomia;  
 Spiralia;Lophotrochozoa;Mollusca;Bivalvia;Autobranchia;Pteriomorphia;Ostr  
 eida;Ostreoidea;Ostreidae;Crassostrea;Crassostrea gigas  
 UdeM00000034489 29159 352.8 UdeM00000034489 XP\_034318412.1 52.6 344  
 161 2 39 381 11 353 5.50E-94 352.8 29159 cellular  
 organisms;Eukaryota;Opisthokonta;Metazoa;Eumetazoa;Bilateria;Protostomia;  
 Spiralia;Lophotrochozoa;Mollusca;Bivalvia;Autobranchia;Pteriomorphia;Ostr  
 eida;Ostreoidea;Ostreidae;Crassostrea;Crassostrea gigas  
 UdeM00000034490 6596 244.6 UdeM00000034490 XP\_045206286.1 47.9 238  
 85 1 1 199 663 900 1.20E-61 244.6 6596 cellular  
 organisms;Eukaryota;Opisthokonta;Metazoa;Eumetazoa;Bilateria;Protostomia;  
 Spiralia;Lophotrochozoa;Mollusca;Bivalvia;Autobranchia;Heteroconchia;Euhe  
 terodonta;Imparidentia;Venerida;Veneroidea;Veneridae;Mercenaria;Mercenari  
 a mercenaria  
 UdeM00000034493 29159 154.8 UdeM00000034493 XP\_034327176.1 33.8 328  
 135 11 52 369 407 662 2.30E-34 154.8 29159 cellular  
 organisms;Eukaryota;Opisthokonta;Metazoa;Eumetazoa;Bilateria;Protostomia;  
 Spiralia;Lophotrochozoa;Mollusca;Bivalvia;Autobranchia;Pteriomorphia;Ostr  
 eida;Ostreoidea;Ostreidae;Crassostrea;Crassostrea gigas  
 UdeM00000034492 6596 472.2 UdeM00000034492 XP\_045204155.1 38.6 721  
 353 13 43 741 592 1244 1.20E-129 472.2 6596 cellular  
 organisms;Eukaryota;Opisthokonta;Metazoa;Eumetazoa;Bilateria;Protostomia;  
 Spiralia;Lophotrochozoa;Mollusca;Bivalvia;Autobranchia;Heteroconchia;Euhe  
 terodonta;Imparidentia;Venerida;Veneroidea;Veneridae;Mercenaria;Mercenari  
 a mercenaria

UdeM00000034494 29159 235 UdeM00000034494 XP\_034327176.1 36.8 402  
 170 13 22 407 407 740 1.90E-58 235 29159 cellular  
 organisms;Eukaryota;Opisthokonta;Metazoa;Eumetazoa;Bilateria;Protostomia;  
 Spiralia;Lophotrochozoa;Mollusca;Bivalvia;Autobranhia;Pteriomorphia;Ostr  
 eida;Ostreoidea;Ostreidae;Crassostrea;Crassostrea gigas  
 UdeM00000034495 6596 317 UdeM00000034495 XP\_045206286.1 58.2 244  
 101 1 1 244 663 905 2.30E-83 317 6596 cellular  
 organisms;Eukaryota;Opisthokonta;Metazoa;Eumetazoa;Bilateria;Protostomia;  
 Spiralia;Lophotrochozoa;Mollusca;Bivalvia;Autobranhia;Heteroconchia;Euhe  
 terodonta;Imparidentia;Venerida;Veneroidea;Veneridae;Mercenaria;Mercenari  
 a mercenaria  
 UdeM00000034496 6596 316.6 UdeM00000034496 XP\_045206286.1 59.4 239  
 96 1 1 239 663 900 3.00E-83 316.6 6596 cellular  
 organisms;Eukaryota;Opisthokonta;Metazoa;Eumetazoa;Bilateria;Protostomia;  
 Spiralia;Lophotrochozoa;Mollusca;Bivalvia;Autobranhia;Heteroconchia;Euhe  
 terodonta;Imparidentia;Venerida;Veneroidea;Veneridae;Mercenaria;Mercenari  
 a mercenaria  
 UdeM00000034497 6565 216.5 UdeM00000034497 XP\_022324984.1 47.6 212  
 107 3 5 214 65 274 3.80E-53 216.5 6565 cellular  
 organisms;Eukaryota;Opisthokonta;Metazoa;Eumetazoa;Bilateria;Protostomia;  
 Spiralia;Lophotrochozoa;Mollusca;Bivalvia;Autobranhia;Pteriomorphia;Ostr  
 eida;Ostreoidea;Ostreidae;Crassostrea;Crassostrea virginica  
 UdeM00000044433 224308 105.9 UdeM00000044433 NP\_390979.1 32.5 191  
 118 4 4 184 27 216 1.10E-19 105.9 224308  
 cellular organisms;Bacteria;Terrabacteria  
 group;Firmicutes;Bacilli;Bacillales;Bacillaceae;Bacillus;Bacillus  
 subtilis group;Bacillus subtilis;Bacillus subtilis subsp.  
 subtilis;Bacillus subtilis subsp. subtilis str. 168  
 UdeM00000043808 6565 102.1 UdeM00000043808 XP\_022325431.1 28.1 217  
 132 8 17 227 1134 1332 1.70E-18 102.1 6565 cellular  
 organisms;Eukaryota;Opisthokonta;Metazoa;Eumetazoa;Bilateria;Protostomia;  
 Spiralia;Lophotrochozoa;Mollusca;Bivalvia;Autobranhia;Pteriomorphia;Ostr  
 eida;Ostreoidea;Ostreidae;Crassostrea;Crassostrea virginica  
 UdeM00000043809 6579 116.7 UdeM00000043809 XP\_033744257.1 41.4 140  
 82 0 1 140 154 293 2.60E-23 116.7 6579 cellular  
 organisms;Eukaryota;Opisthokonta;Metazoa;Eumetazoa;Bilateria;Protostomia;  
 Spiralia;Lophotrochozoa;Mollusca;Bivalvia;Autobranhia;Pteriomorphia;Pect  
 inida;Pectinoidea;Pectinidae;Pecten;Pecten maximus  
 UdeM00000043812 6565 85.5 UdeM00000043812 XP\_022288855.1 39.5 119  
 62 5 12 129 979 1088 1.20E-13 85.5 6565 cellular  
 organisms;Eukaryota;Opisthokonta;Metazoa;Eumetazoa;Bilateria;Protostomia;  
 Spiralia;Lophotrochozoa;Mollusca;Bivalvia;Autobranhia;Pteriomorphia;Ostr  
 eida;Ostreoidea;Ostreidae;Crassostrea;Crassostrea virginica  
 UdeM00000044443 7574 352.4 UdeM00000044443 XP\_013399327.1 92.7 193  
 14 0 1 193 2 194 3.60E-94 352.4 7574 cellular  
 organisms;Eukaryota;Opisthokonta;Metazoa;Eumetazoa;Bilateria;Protostomia;  
 Spiralia;Lophotrochozoa;Brachiopoda;Linguliformea;Lingulata;Lingulida;Lin  
 guloidea;Lingulidae;Lingula;Lingula anatina  
 UdeM00000038944 6596 285.8 UdeM00000038944 XP\_045213047.1 29.3 607  
 392 20 11 593 1168 1761 3.00E-73 285.8 6596 cellular  
 organisms;Eukaryota;Opisthokonta;Metazoa;Eumetazoa;Bilateria;Protostomia;  
 Spiralia;Lophotrochozoa;Mollusca;Bivalvia;Autobranhia;Heteroconchia;Euhe  
 terodonta;Imparidentia;Venerida;Veneroidea;Veneridae;Mercenaria;Mercenari  
 a mercenaria

UdeM00000038945 400727 391.7 UdeM00000038945 XP\_025103830.1 43.4  
 431 233 4 41 464 23 449 1.30E-105 391.7 400727  
 cellular  
 organisms;Eukaryota;Opisthokonta;Metazoa;Eumetazoa;Bilateria;Protostomia;  
 Spiralia;Lophotrochozoa;Mollusca;Gastropoda;Caenogastropoda;Architaenioglossa;  
 Ampullarioidea;Ampullariidae;Pomacea;Pomacea canaliculata  
 UdeM00000038946 400727 387.1 UdeM00000038946 XP\_025103830.1 43  
 449 245 4 1 442 1 445 3.00E-104 387.1 400727  
 cellular  
 organisms;Eukaryota;Opisthokonta;Metazoa;Eumetazoa;Bilateria;Protostomia;  
 Spiralia;Lophotrochozoa;Mollusca;Gastropoda;Caenogastropoda;Architaenioglossa;  
 Ampullarioidea;Ampullariidae;Pomacea;Pomacea canaliculata  
 UdeM00000038947 400727 387.9 UdeM00000038947 XP\_025103830.1 45.3  
 428 220 7 41 458 23 446 1.80E-104 387.9 400727  
 cellular  
 organisms;Eukaryota;Opisthokonta;Metazoa;Eumetazoa;Bilateria;Protostomia;  
 Spiralia;Lophotrochozoa;Mollusca;Gastropoda;Caenogastropoda;Architaenioglossa;  
 Ampullarioidea;Ampullariidae;Pomacea;Pomacea canaliculata  
 UdeM00000038948 400727 391 UdeM00000038948 XP\_025103830.1 45.3  
 428 221 6 41 459 23 446 2.20E-105 391 400727  
 cellular  
 organisms;Eukaryota;Opisthokonta;Metazoa;Eumetazoa;Bilateria;Protostomia;  
 Spiralia;Lophotrochozoa;Mollusca;Gastropoda;Caenogastropoda;Architaenioglossa;  
 Ampullarioidea;Ampullariidae;Pomacea;Pomacea canaliculata  
 UdeM00000038949 6596 1001.1 UdeM00000038949 XP\_045187389.1 73.4  
 627 155 5 1 621 1 621 6.10E-289 1001.1 6596  
 cellular  
 organisms;Eukaryota;Opisthokonta;Metazoa;Eumetazoa;Bilateria;Protostomia;  
 Spiralia;Lophotrochozoa;Mollusca;Bivalvia;Autobranchia;Heteroconchia;Euheterodonta;  
 Imparidentia;Venerida;Veneroidea;Veneridae;Mercenaria;Mercenaria mercenaria  
 UdeM00000038950 400727 75.9 UdeM00000038950 XP\_025104291.1 40  
 75 45 0 30 104 2 76 3.90E-11 75.9 400727  
 cellular  
 organisms;Eukaryota;Opisthokonta;Metazoa;Eumetazoa;Bilateria;Protostomia;  
 Spiralia;Lophotrochozoa;Mollusca;Gastropoda;Caenogastropoda;Architaenioglossa;  
 Ampullarioidea;Ampullariidae;Pomacea;Pomacea canaliculata  
 UdeM00000038951 225164 501.5 UdeM00000038951 XP\_009055041.1 62.1  
 396 143 4 1 391 1 394 9.60E-139 501.5 225164  
 cellular  
 organisms;Eukaryota;Opisthokonta;Metazoa;Eumetazoa;Bilateria;Protostomia;  
 Spiralia;Lophotrochozoa;Mollusca;Gastropoda;Patellogastropoda;Lottiidae;  
 Lottia;Lottia gigantea  
 UdeM00000038952 6573 848.2 UdeM00000038952 XP\_021378004.1 41.3 2427  
 1163 35 5 2329 28 2295 2.50E-242 848.2 6573 cellular  
 organisms;Eukaryota;Opisthokonta;Metazoa;Eumetazoa;Bilateria;Protostomia;  
 Spiralia;Lophotrochozoa;Mollusca;Bivalvia;Autobranchia;Pteriomorpha;Pectinida;  
 Pectinoidea;Pectinidae;Mizuhopecten;Mizuhopecten yessoensis  
 UdeM00000038954 6596 699.5 UdeM00000038954 XP\_045164128.1 67.3 514  
 90 4 1 509 1 441 3.10E-198 699.5 6596 cellular  
 organisms;Eukaryota;Opisthokonta;Metazoa;Eumetazoa;Bilateria;Protostomia;  
 Spiralia;Lophotrochozoa;Mollusca;Bivalvia;Autobranchia;Heteroconchia;Euheterodonta;  
 Imparidentia;Venerida;Veneroidea;Veneridae;Mercenaria;Mercenaria mercenaria



UdeM00000038955 6596 245 UdeM00000038955 XP\_045168446.1 62 192  
 54 3 26 215 18 192 9.40E-62 245 6596 cellular  
 organisms;Eukaryota;Opisthokonta;Metazoa;Eumetazoa;Bilateria;Protostomia;  
 Spiralia;Lophotrochozoa;Mollusca;Bivalvia;Autobranhia;Heteroconchia;Euhe  
 terodonta;Imparidentia;Venerida;Veneroidea;Veneridae;Mercenaria;Mercenari  
 a mercenaria  
 UdeM00000038956 6596 309.7 UdeM00000038956 XP\_045168360.1 32.1 676  
 366 15 1 660 1 599 9.50E-81 309.7 6596 cellular  
 organisms;Eukaryota;Opisthokonta;Metazoa;Eumetazoa;Bilateria;Protostomia;  
 Spiralia;Lophotrochozoa;Mollusca;Bivalvia;Autobranhia;Heteroconchia;Euhe  
 terodonta;Imparidentia;Venerida;Veneroidea;Veneridae;Mercenaria;Mercenari  
 a mercenaria  
 UdeM00000038957 6596 503.4 UdeM00000038957 XP\_045168379.1 45.2 639  
 258 11 5 568 599 1220 3.70E-139 503.4 6596 cellular  
 organisms;Eukaryota;Opisthokonta;Metazoa;Eumetazoa;Bilateria;Protostomia;  
 Spiralia;Lophotrochozoa;Mollusca;Bivalvia;Autobranhia;Heteroconchia;Euhe  
 terodonta;Imparidentia;Venerida;Veneroidea;Veneridae;Mercenaria;Mercenari  
 a mercenaria  
 UdeM00000038958 6579 387.5 UdeM00000038958 XP\_033734740.1 51.5 412  
 182 7 1 400 11 416 2.10E-104 387.5 6579 cellular  
 organisms;Eukaryota;Opisthokonta;Metazoa;Eumetazoa;Bilateria;Protostomia;  
 Spiralia;Lophotrochozoa;Mollusca;Bivalvia;Autobranhia;Pteriormorphia;Pect  
 inida;Pectinoidea;Pectinidae;Pecten;Pecten maximus  
 UdeM00000038960 6596 424.1 UdeM00000038960 XP\_045214148.1 59.8 343  
 134 3 4 345 565 904 1.70E-115 424.1 6596 cellular  
 organisms;Eukaryota;Opisthokonta;Metazoa;Eumetazoa;Bilateria;Protostomia;  
 Spiralia;Lophotrochozoa;Mollusca;Bivalvia;Autobranhia;Heteroconchia;Euhe  
 terodonta;Imparidentia;Venerida;Veneroidea;Veneridae;Mercenaria;Mercenari  
 a mercenaria  
 UdeM00000038961 6596 326.6 UdeM00000038961 XP\_045214148.1 42.6 350  
 177 3 8 335 145 492 3.80E-86 326.6 6596 cellular  
 organisms;Eukaryota;Opisthokonta;Metazoa;Eumetazoa;Bilateria;Protostomia;  
 Spiralia;Lophotrochozoa;Mollusca;Bivalvia;Autobranhia;Heteroconchia;Euhe  
 terodonta;Imparidentia;Venerida;Veneroidea;Veneridae;Mercenaria;Mercenari  
 a mercenaria  
 UdeM00000038962 6596 71.2 UdeM00000038962 XP\_045214148.1 38.7 106  
 51 4 24 117 40 143 1.30E-09 71.2 6596 cellular  
 organisms;Eukaryota;Opisthokonta;Metazoa;Eumetazoa;Bilateria;Protostomia;  
 Spiralia;Lophotrochozoa;Mollusca;Bivalvia;Autobranhia;Heteroconchia;Euhe  
 terodonta;Imparidentia;Venerida;Veneroidea;Veneridae;Mercenaria;Mercenari  
 a mercenaria  
 UdeM00000038963 1735272 156.4 UdeM00000038963 XP\_041354039.1 55.4  
 148 59 2 2 144 3 148 2.80E-35 156.4 1735272  
 cellular  
 organisms;Eukaryota;Opisthokonta;Metazoa;Eumetazoa;Bilateria;Protostomia;  
 Spiralia;Lophotrochozoa;Mollusca;Gastropoda;Neomphalina;Neomphaloidea;Pel  
 tospiridae;Gigantopelta;Gigantopelta aegis  
 UdeM00000038964 6573 235.7 UdeM00000038964 XP\_021349576.1 45.3 413  
 178 10 5 388 1 394 9.80E-59 235.7 6573 cellular  
 organisms;Eukaryota;Opisthokonta;Metazoa;Eumetazoa;Bilateria;Protostomia;  
 Spiralia;Lophotrochozoa;Mollusca;Bivalvia;Autobranhia;Pteriormorphia;Pect  
 inida;Pectinoidea;Pectinidae;Mizuhopecten;Mizuhopecten yessoensis  
 UdeM00000038965 6573 236.9 UdeM00000038965 XP\_021349576.1 45.8 413  
 175 11 5 387 1 394 4.40E-59 236.9 6573 cellular

organisms;Eukaryota;Opisthokonta;Metazoa;Eumetazoa;Bilateria;Protostomia; Spiralia;Lophotrochozoa;Mollusca;Bivalvia;Autobranchia;Pteriomorpha;Pectinida;Pectinoidea;Pectinidae;Mizuhopecten;Mizuhopecten yessoensis

UdeM00000038966 1735272 91.7 UdeM00000038966 XP\_041354510.1 38.5  
104 64 0 7 110 11 114 8.00E-16 91.7 1735272

cellular

organisms;Eukaryota;Opisthokonta;Metazoa;Eumetazoa;Bilateria;Protostomia; Spiralia;Lophotrochozoa;Mollusca;Gastropoda;Neomphalina;Neomphaloidea;Peltospiridae;Gigantopelta;Gigantopelta aegis

UdeM00000038967 6596 487.6 UdeM00000038967 XP\_045168176.1 64.4 376  
128 2 1 372 1 374 1.50E-134 487.6 6596 cellular

organisms;Eukaryota;Opisthokonta;Metazoa;Eumetazoa;Bilateria;Protostomia; Spiralia;Lophotrochozoa;Mollusca;Bivalvia;Autobranchia;Heteroconchia;Euheterodonta;Imparidentia;Venerida;Veneroidea;Veneridae;Mercenaria;Mercenaria mercenaria

UdeM00000038969 6596 140.2 UdeM00000038969 XP\_045165354.1 54.5 123  
55 1 2 124 3 124 1.80E-30 140.2 6596 cellular

organisms;Eukaryota;Opisthokonta;Metazoa;Eumetazoa;Bilateria;Protostomia; Spiralia;Lophotrochozoa;Mollusca;Bivalvia;Autobranchia;Heteroconchia;Euheterodonta;Imparidentia;Venerida;Veneroidea;Veneridae;Mercenaria;Mercenaria mercenaria

UdeM00000038970 6596 548.1 UdeM00000038970 XP\_045165354.1 51.7 551  
257 5 1 547 127 672 1.20E-152 548.1 6596 cellular

organisms;Eukaryota;Opisthokonta;Metazoa;Eumetazoa;Bilateria;Protostomia; Spiralia;Lophotrochozoa;Mollusca;Bivalvia;Autobranchia;Heteroconchia;Euheterodonta;Imparidentia;Venerida;Veneroidea;Veneridae;Mercenaria;Mercenaria mercenaria

UdeM00000038971 6596 1025.8 UdeM00000038971 XP\_045165343.1 56.1  
906 380 9 1 899 148 1042 3.40E-296 1025.8 6596

cellular

organisms;Eukaryota;Opisthokonta;Metazoa;Eumetazoa;Bilateria;Protostomia; Spiralia;Lophotrochozoa;Mollusca;Bivalvia;Autobranchia;Heteroconchia;Euheterodonta;Imparidentia;Venerida;Veneroidea;Veneridae;Mercenaria;Mercenaria mercenaria

UdeM00000038972 6596 103.2 UdeM00000038972 XP\_045165343.1 72.7 66  
18 0 1 66 1 66 2.90E-19 103.2 6596 cellular

organisms;Eukaryota;Opisthokonta;Metazoa;Eumetazoa;Bilateria;Protostomia; Spiralia;Lophotrochozoa;Mollusca;Bivalvia;Autobranchia;Heteroconchia;Euheterodonta;Imparidentia;Venerida;Veneroidea;Veneridae;Mercenaria;Mercenaria mercenaria

UdeM00000038973 6596 300.8 UdeM00000038973 XP\_045187985.1 42.8 339  
193 1 41 379 3 340 2.40E-78 300.8 6596 cellular

organisms;Eukaryota;Opisthokonta;Metazoa;Eumetazoa;Bilateria;Protostomia; Spiralia;Lophotrochozoa;Mollusca;Bivalvia;Autobranchia;Heteroconchia;Euheterodonta;Imparidentia;Venerida;Veneroidea;Veneridae;Mercenaria;Mercenaria mercenaria

UdeM00000038974 6596 132.1 UdeM00000038974 XP\_045187703.1 24.1 506  
256 13 13 506 57 446 2.20E-27 132.1 6596 cellular

organisms;Eukaryota;Opisthokonta;Metazoa;Eumetazoa;Bilateria;Protostomia; Spiralia;Lophotrochozoa;Mollusca;Bivalvia;Autobranchia;Heteroconchia;Euheterodonta;Imparidentia;Venerida;Veneroidea;Veneridae;Mercenaria;Mercenaria mercenaria

UdeM00000038976 6596 614.4 UdeM00000038976 XP\_045188035.1 60.3 532  
196 6 18 539 19 545 1.50E-172 614.4 6596 cellular

organisms;Eukaryota;Opisthokonta;Metazoa;Eumetazoa;Bilateria;Protostomia;Spiralia;Lophotrochozoa;Mollusca;Bivalvia;Autobranchia;Heteroconchia;Euherodonta;Imparidentia;Venerida;Veneroidea;Veneridae;Mercenaria;Mercenaria mercenaria

UdeM00000038977 451745 105.9 UdeM00000038977 XP\_037531102.1 31.5  
181 118 3 73 253 212 386 7.80E-20 105.9 451745  
cellular

organisms;Eukaryota;Opisthokonta;Metazoa;Eumetazoa;Bilateria;Deuterostomia;Chordata;Craniata;Vertebrata;Gnathostomata;Teleostomi;Euteleostomi;Actinopterygii;Actinopteri;Neopterygii;Teleostei;Osteoglossocephalai;Clupeocephala;Euteleostei;Neoteleostei;Eurypterygia;Ctenosquamata;Acanthomorpha;Euacanthomorpha;Percomorphaceae;Ovalentaria;Atherinomorpha;Cypriodontiformes;Aplocheiloidei;Rivulidae;Nematolebias;Nematolebias whitei

UdeM00000038978 6596 672.9 UdeM00000038978 XP\_045172382.1 64.2 565  
175 9 3 561 33 576 3.60E-190 672.9 6596 cellular

organisms;Eukaryota;Opisthokonta;Metazoa;Eumetazoa;Bilateria;Protostomia;Spiralia;Lophotrochozoa;Mollusca;Bivalvia;Autobranchia;Heteroconchia;Euherodonta;Imparidentia;Venerida;Veneroidea;Veneridae;Mercenaria;Mercenaria mercenaria

UdeM00000038979 6596 700.7 UdeM00000038979 XP\_045172382.1 65.2 586  
173 8 20 599 19 579 1.70E-198 700.7 6596 cellular

organisms;Eukaryota;Opisthokonta;Metazoa;Eumetazoa;Bilateria;Protostomia;Spiralia;Lophotrochozoa;Mollusca;Bivalvia;Autobranchia;Heteroconchia;Euherodonta;Imparidentia;Venerida;Veneroidea;Veneridae;Mercenaria;Mercenaria mercenaria

UdeM00000038980 6596 694.5 UdeM00000038980 XP\_045172382.1 64.3 594  
180 10 68 655 19 586 1.30E-196 694.5 6596 cellular

organisms;Eukaryota;Opisthokonta;Metazoa;Eumetazoa;Bilateria;Protostomia;Spiralia;Lophotrochozoa;Mollusca;Bivalvia;Autobranchia;Heteroconchia;Euherodonta;Imparidentia;Venerida;Veneroidea;Veneridae;Mercenaria;Mercenaria mercenaria

UdeM00000038981 6596 682.6 UdeM00000038981 XP\_045172400.1 65.7 566  
184 7 77 637 39 599 5.00E-193 682.6 6596 cellular

organisms;Eukaryota;Opisthokonta;Metazoa;Eumetazoa;Bilateria;Protostomia;Spiralia;Lophotrochozoa;Mollusca;Bivalvia;Autobranchia;Heteroconchia;Euherodonta;Imparidentia;Venerida;Veneroidea;Veneridae;Mercenaria;Mercenaria mercenaria

UdeM00000038982 6596 515.8 UdeM00000038982 XP\_045172365.1 67 352  
116 0 1 352 64 415 4.40E-143 515.8 6596 cellular

organisms;Eukaryota;Opisthokonta;Metazoa;Eumetazoa;Bilateria;Protostomia;Spiralia;Lophotrochozoa;Mollusca;Bivalvia;Autobranchia;Heteroconchia;Euherodonta;Imparidentia;Venerida;Veneroidea;Veneridae;Mercenaria;Mercenaria mercenaria

UdeM00000038983 6596 547.4 UdeM00000038983 XP\_045172365.1 67.7 371  
120 0 5 375 45 415 1.50E-152 547.4 6596 cellular

organisms;Eukaryota;Opisthokonta;Metazoa;Eumetazoa;Bilateria;Protostomia;Spiralia;Lophotrochozoa;Mollusca;Bivalvia;Autobranchia;Heteroconchia;Euherodonta;Imparidentia;Venerida;Veneroidea;Veneridae;Mercenaria;Mercenaria mercenaria

UdeM00000038984 6596 280 UdeM00000038984 XP\_045162613.1 59.7 216  
85 1 1 214 1 216 2.60E-72 280 6596 cellular

organisms;Eukaryota;Opisthokonta;Metazoa;Eumetazoa;Bilateria;Protostomia;Spiralia;Lophotrochozoa;Mollusca;Bivalvia;Autobranchia;Heteroconchia;Euherodonta;Imparidentia;Venerida;Veneroidea;Veneridae;Mercenaria;Mercenaria mercenaria

terodonta;Imparidentia;Venerida;Veneroidea;Veneridae;Mercenaria;Mercenaria mercenaria

UdeM00000038985 7741 292.4 UdeM00000038985 XP\_019647976.1 63.8 210  
76 0 6 215 358 567 4.90E-76 292.4 7741 cellular

organisms;Eukaryota;Opisthokonta;Metazoa;Eumetazoa;Bilateria;Deuterostomia;Chordata;Cephalochordata;Leptocardii;Amphioxiformes;Branchiostomidae;Branchiostoma;Branchiostoma belcheri

UdeM00000038986 6579 113.2 UdeM00000038986 XP\_033733871.1 70.7 75  
22 0 1 75 1 75 1.40E-22 113.2 6579 cellular

organisms;Eukaryota;Opisthokonta;Metazoa;Eumetazoa;Bilateria;Protostomia;Spiralia;Lophotrochozoa;Mollusca;Bivalvia;Autobranhia;Pteriormorphia;Pectinida;Pectinoidea;Pectinidae;Pecten;Pecten maximus

UdeM00000038987 1735272 991.1 UdeM00000038987 XP\_041353357.1 62.1  
766 285 4 1 765 7 768 7.80E-286 991.1 1735272  
cellular

organisms;Eukaryota;Opisthokonta;Metazoa;Eumetazoa;Bilateria;Protostomia;Spiralia;Lophotrochozoa;Mollusca;Gastropoda;Neomphalina;Neomphaloidea;Peltospiridae;Gigantopelta;Gigantopelta aegis

UdeM00000038988 6596 322.8 UdeM00000038988 XP\_045174735.1 41.5 414  
219 8 15 427 28 419 6.70E-85 322.8 6596 cellular

organisms;Eukaryota;Opisthokonta;Metazoa;Eumetazoa;Bilateria;Protostomia;Spiralia;Lophotrochozoa;Mollusca;Bivalvia;Autobranhia;Heteroconchia;Euheterodonta;Imparidentia;Venerida;Veneroidea;Veneridae;Mercenaria;Mercenaria mercenaria

UdeM00000038989 48498 993 UdeM00000038989 XP\_020618976.1 46.1 942  
492 5 215 1154 1327 2254 3.30E-286 993 48498 cellular

organisms;Eukaryota;Opisthokonta;Metazoa;Eumetazoa;Cnidaria;Anthozoa;Hexacorallia;Scleractinia;Faviina;Merulinidae;Orbicella;Orbicella faveolata

UdeM00000038991 29159 472.2 UdeM00000038991 XP\_034336072.1 52.4 389  
182 2 334 719 1447 1835 1.20E-129 472.2 29159 cellular

organisms;Eukaryota;Opisthokonta;Metazoa;Eumetazoa;Bilateria;Protostomia;Spiralia;Lophotrochozoa;Mollusca;Bivalvia;Autobranhia;Pteriormorphia;Ostreida;Ostreioidea;Ostreidae;Crassostrea;Crassostrea gigas

UdeM00000038991 29159 155.6 UdeM00000038991 XP\_034336072.1 27.6 655  
396 21 31 645 221 837 2.50E-34 155.6 29159 cellular

organisms;Eukaryota;Opisthokonta;Metazoa;Eumetazoa;Bilateria;Protostomia;Spiralia;Lophotrochozoa;Mollusca;Bivalvia;Autobranhia;Pteriormorphia;Ostreida;Ostreioidea;Ostreidae;Crassostrea;Crassostrea gigas

UdeM00000038992 6596 1689.9 UdeM00000038992 XP\_045164211.1 59.7  
1283 503 9 1 1273 1 1279 0.00E+00 1689.9 6596

cellular  
organisms;Eukaryota;Opisthokonta;Metazoa;Eumetazoa;Bilateria;Protostomia;Spiralia;Lophotrochozoa;Mollusca;Bivalvia;Autobranhia;Heteroconchia;Euheterodonta;Imparidentia;Venerida;Veneroidea;Veneridae;Mercenaria;Mercenaria mercenaria

UdeM00000038993 6573 110.9 UdeM00000038993 XP\_021340561.1 44.4 135  
66 4 1 127 34 167 3.10E-21 110.9 6573 cellular

organisms;Eukaryota;Opisthokonta;Metazoa;Eumetazoa;Bilateria;Protostomia;Spiralia;Lophotrochozoa;Mollusca;Bivalvia;Autobranhia;Pteriormorphia;Pectinida;Pectinoidea;Pectinidae;Mizuhopecten;Mizuhopecten yessoensis

UdeM00000038994 225164 274.6 UdeM00000038994 XP\_009063678.1 79  
162 34 0 43 204 1 162 1.00E-70 274.6 225164

cellular  
organisms;Eukaryota;Opisthokonta;Metazoa;Eumetazoa;Bilateria;Protostomia;

Spiralia;Lophotrochozoa;Mollusca;Gastropoda;Patellogastropoda;Lottioidea;Lottiidae;Lottia;Lottia gigantea

UdeM00000038995 6596 1165.2 UdeM00000038995 XP\_045178583.1 67.9  
920 269 9 1 902 188 1099 0.00E+00 1165.2 6596  
cellular

organisms;Eukaryota;Opisthokonta;Metazoa;Eumetazoa;Bilateria;Protostomia;Spiralia;Lophotrochozoa;Mollusca;Bivalvia;Autobranchia;Heteroconchia;Euheterodonta;Imparidentia;Venerida;Veneroidea;Veneridae;Mercenaria;Mercenaria mercenaria

UdeM00000038997 6526 68.2 UdeM00000038997 XP\_013094521.1 39.1 128  
77 1 1 127 169 296 1.60E-08 68.2 6526 cellular

organisms;Eukaryota;Opisthokonta;Metazoa;Eumetazoa;Bilateria;Protostomia;Spiralia;Lophotrochozoa;Mollusca;Gastropoda;Heterobranchia;Euthyneura;Panpulmonata;Hygrophila;Lymnaeoidea;Planorbidae;Biomphalaria;Biomphalaria glabrata

UdeM00000038998 6596 317.4 UdeM00000038998 XP\_045176506.1 58 264  
103 4 1 257 125 387 1.70E-83 317.4 6596 cellular

organisms;Eukaryota;Opisthokonta;Metazoa;Eumetazoa;Bilateria;Protostomia;Spiralia;Lophotrochozoa;Mollusca;Bivalvia;Autobranchia;Heteroconchia;Euheterodonta;Imparidentia;Venerida;Veneroidea;Veneridae;Mercenaria;Mercenaria mercenaria

UdeM00000038999 6526 178.7 UdeM00000038999 XP\_013079253.1 57.7 142  
60 0 1 142 1 142 5.20E-42 178.7 6526 cellular

organisms;Eukaryota;Opisthokonta;Metazoa;Eumetazoa;Bilateria;Protostomia;Spiralia;Lophotrochozoa;Mollusca;Gastropoda;Heterobranchia;Euthyneura;Panpulmonata;Hygrophila;Lymnaeoidea;Planorbidae;Biomphalaria;Biomphalaria glabrata

UdeM00000039000 6565 133.3 UdeM00000039000 XP\_022329085.1 68.2 110  
32 1 27 136 8 114 2.40E-28 133.3 6565 cellular

organisms;Eukaryota;Opisthokonta;Metazoa;Eumetazoa;Bilateria;Protostomia;Spiralia;Lophotrochozoa;Mollusca;Bivalvia;Autobranchia;Pteriomorphia;Ostreida;Ostreoidea;Ostreidae;Crassostrea;Crassostrea virginica

UdeM00000039001 29159 575.9 UdeM00000039001 XP\_034325001.1 63.5 414  
148 2 22 433 18 430 4.40E-161 575.9 29159 cellular

organisms;Eukaryota;Opisthokonta;Metazoa;Eumetazoa;Bilateria;Protostomia;Spiralia;Lophotrochozoa;Mollusca;Bivalvia;Autobranchia;Pteriomorphia;Ostreida;Ostreoidea;Ostreidae;Crassostrea;Crassostrea gigas

UdeM00000039002 29159 550.8 UdeM00000039002 XP\_034325001.1 63.5 394  
141 2 1 392 38 430 1.40E-153 550.8 29159 cellular

organisms;Eukaryota;Opisthokonta;Metazoa;Eumetazoa;Bilateria;Protostomia;Spiralia;Lophotrochozoa;Mollusca;Bivalvia;Autobranchia;Pteriomorphia;Ostreida;Ostreoidea;Ostreidae;Crassostrea;Crassostrea gigas

UdeM00000039003 29159 253.4 UdeM00000039003 XP\_011426298.2 62.5 200  
67 3 1 193 1 199 2.60E-64 253.4 29159 cellular

organisms;Eukaryota;Opisthokonta;Metazoa;Eumetazoa;Bilateria;Protostomia;Spiralia;Lophotrochozoa;Mollusca;Bivalvia;Autobranchia;Pteriomorphia;Ostreida;Ostreoidea;Ostreidae;Crassostrea;Crassostrea gigas

UdeM00000039004 6596 1399 UdeM00000039004 XP\_045187193.1 71.1 1000  
274 6 1 986 1 999 0.00E+00 1399 6596 cellular

organisms;Eukaryota;Opisthokonta;Metazoa;Eumetazoa;Bilateria;Protostomia;Spiralia;Lophotrochozoa;Mollusca;Bivalvia;Autobranchia;Heteroconchia;Euheterodonta;Imparidentia;Venerida;Veneroidea;Veneridae;Mercenaria;Mercenaria mercenaria

UdeM00000039005 6565 304.7 UdeM00000039005 XP\_022333584.1 53.9 282  
 118 4 9 287 385 657 1.30E-79 304.7 6565 cellular  
 organisms;Eukaryota;Opisthokonta;Metazoa;Eumetazoa;Bilateria;Protostomia;  
 Spiralia;Lophotrochozoa;Mollusca;Bivalvia;Autobranchia;Pteriomorpha;Ostr  
 eida;Ostreoidea;Ostreidae;Crassostrea;Crassostrea virginica  
 UdeM00000039006 6565 132.9 UdeM00000039006 XP\_022333584.1 51.2 127  
 62 0 14 140 262 388 3.20E-28 132.9 6565 cellular  
 organisms;Eukaryota;Opisthokonta;Metazoa;Eumetazoa;Bilateria;Protostomia;  
 Spiralia;Lophotrochozoa;Mollusca;Bivalvia;Autobranchia;Pteriomorpha;Ostr  
 eida;Ostreoidea;Ostreidae;Crassostrea;Crassostrea virginica  
 UdeM00000039007 6565 132.9 UdeM00000039007 XP\_022333584.1 51.2 127  
 62 0 17 143 262 388 3.30E-28 132.9 6565 cellular  
 organisms;Eukaryota;Opisthokonta;Metazoa;Eumetazoa;Bilateria;Protostomia;  
 Spiralia;Lophotrochozoa;Mollusca;Bivalvia;Autobranchia;Pteriomorpha;Ostr  
 eida;Ostreoidea;Ostreidae;Crassostrea;Crassostrea virginica  
 UdeM00000039008 6565 151.8 UdeM00000039008 XP\_022310266.1 33.4 353  
 192 10 1 337 1 326 1.60E-33 151.8 6565 cellular  
 organisms;Eukaryota;Opisthokonta;Metazoa;Eumetazoa;Bilateria;Protostomia;  
 Spiralia;Lophotrochozoa;Mollusca;Bivalvia;Autobranchia;Pteriomorpha;Ostr  
 eida;Ostreoidea;Ostreidae;Crassostrea;Crassostrea virginica  
 UdeM00000039009 6565 151.8 UdeM00000039009 XP\_022310266.1 33.4 353  
 192 10 1 337 1 326 1.60E-33 151.8 6565 cellular  
 organisms;Eukaryota;Opisthokonta;Metazoa;Eumetazoa;Bilateria;Protostomia;  
 Spiralia;Lophotrochozoa;Mollusca;Bivalvia;Autobranchia;Pteriomorpha;Ostr  
 eida;Ostreoidea;Ostreidae;Crassostrea;Crassostrea virginica  
 UdeM00000039010 6565 151.8 UdeM00000039010 XP\_022310266.1 33.4 353  
 192 10 1 337 1 326 1.60E-33 151.8 6565 cellular  
 organisms;Eukaryota;Opisthokonta;Metazoa;Eumetazoa;Bilateria;Protostomia;  
 Spiralia;Lophotrochozoa;Mollusca;Bivalvia;Autobranchia;Pteriomorpha;Ostr  
 eida;Ostreoidea;Ostreidae;Crassostrea;Crassostrea virginica  
 UdeM00000039011 6565 151.8 UdeM00000039011 XP\_022310266.1 33.4 353  
 192 10 1 337 1 326 1.60E-33 151.8 6565 cellular  
 organisms;Eukaryota;Opisthokonta;Metazoa;Eumetazoa;Bilateria;Protostomia;  
 Spiralia;Lophotrochozoa;Mollusca;Bivalvia;Autobranchia;Pteriomorpha;Ostr  
 eida;Ostreoidea;Ostreidae;Crassostrea;Crassostrea virginica  
 UdeM00000039012 6579 132.9 UdeM00000039012 XP\_033736434.1 72.8 81  
 22 0 36 116 197 277 2.70E-28 132.9 6579 cellular  
 organisms;Eukaryota;Opisthokonta;Metazoa;Eumetazoa;Bilateria;Protostomia;  
 Spiralia;Lophotrochozoa;Mollusca;Bivalvia;Autobranchia;Pteriomorpha;Pect  
 inida;Pectinoidea;Pectinidae;Pecten;Pecten maximus  
 UdeM00000039013 6579 179.9 UdeM00000039013 XP\_033734181.1 57.3 157  
 57 2 34 190 19 165 3.40E-42 179.9 6579 cellular  
 organisms;Eukaryota;Opisthokonta;Metazoa;Eumetazoa;Bilateria;Protostomia;  
 Spiralia;Lophotrochozoa;Mollusca;Bivalvia;Autobranchia;Pteriomorpha;Pect  
 inida;Pectinoidea;Pectinidae;Pecten;Pecten maximus  
 UdeM00000039014 13164 70.1 UdeM00000039014 XP\_022164283.1 35.1 94  
 61 0 1 94 1 94 2.10E-09 70.1 13164 cellular  
 organisms;Eukaryota;Opisthokonta;Metazoa;Eumetazoa;Bilateria;Protostomia;  
 Ecdysozoa;Panarthropoda;Arthropoda;Mandibulata;Pancrustacea;Hexapoda;Inse  
 cta;Dicondylia;Pterygota;Neoptera;Paraneoptera;Hemiptera;Sternorrhyncha;A  
 phidomorpha;Aphidoidea;Aphididae;Aphidinae;Macrosiphini;Myzus;Myzus  
 persicae  
 UdeM00000039015 6596 278.1 UdeM00000039015 XP\_045213934.1 50.3 300  
 133 3 5 300 4 291 1.30E-71 278.1 6596 cellular

organisms;Eukaryota;Opisthokonta;Metazoa;Eumetazoa;Bilateria;Protostomia;Spiralia;Lophotrochozoa;Mollusca;Bivalvia;Autobranchia;Heteroconchia;Euherodonta;Imparidentia;Venerida;Veneroidea;Veneridae;Mercenaria;Mercenaria mercenaria

UdeM00000039017 146911 57.4 UdeM00000039017 XP\_015270826.1 38.6  
83 47 2 1 79 1 83 9.80E-06 57.4 146911  
cellular

organisms;Eukaryota;Opisthokonta;Metazoa;Eumetazoa;Bilateria;Deuterostomia;Chordata;Craniata;Vertebrata;Gnathostomata;Teleostomi;Euteleostomi;Sarcopterygii;Dipnotetrapodomorpha;Tetrapoda;Amniota;Sauropsida;Sauria;Lepidosauria;Squamata;Bifurcata;Gekkota;Gekkonidae;Gekkoninae;Gekko;Gekko japonicus

UdeM00000039020 29144 365.2 UdeM00000039020 XP\_030650271.1 59.4 325  
130 2 7 331 6 328 1.40E-97 365.2 29144 cellular

organisms;Eukaryota;Opisthokonta;Metazoa;Eumetazoa;Bilateria;Deuterostomia;Chordata;Craniata;Vertebrata;Gnathostomata;Teleostomi;Euteleostomi;Actinopterygii;Actinopteri;Neopterygii;Teleostei;Osteoglossocephalai;Clupeocephala;Otomorpha;Ostariophysi;Anotopterygii;Gonorynchiformes;Chanoidei;Chanidae;Chanos;Chanos chanos

UdeM00000039021 6596 648.7 UdeM00000039021 XP\_045162993.1 56.6 722  
258 15 73 771 95 784 9.60E-183 648.7 6596 cellular

organisms;Eukaryota;Opisthokonta;Metazoa;Eumetazoa;Bilateria;Protostomia;Spiralia;Lophotrochozoa;Mollusca;Bivalvia;Autobranchia;Heteroconchia;Euherodonta;Imparidentia;Venerida;Veneroidea;Veneridae;Mercenaria;Mercenaria mercenaria

UdeM00000039022 6596 639 UdeM00000039022 XP\_045162993.1 56.2 726  
261 15 73 777 95 784 7.70E-180 639 6596 cellular

organisms;Eukaryota;Opisthokonta;Metazoa;Eumetazoa;Bilateria;Protostomia;Spiralia;Lophotrochozoa;Mollusca;Bivalvia;Autobranchia;Heteroconchia;Euherodonta;Imparidentia;Venerida;Veneroidea;Veneridae;Mercenaria;Mercenaria mercenaria

UdeM00000039023 6579 426.8 UdeM00000039023 XP\_033733718.1 43.6 582  
282 13 1 553 22 586 4.30E-116 426.8 6579 cellular

organisms;Eukaryota;Opisthokonta;Metazoa;Eumetazoa;Bilateria;Protostomia;Spiralia;Lophotrochozoa;Mollusca;Bivalvia;Autobranchia;Pteriomorpha;Pectinida;Pectinoidea;Pectinidae;Pecten;Pecten maximus

UdeM00000039025 6596 287 UdeM00000039025 XP\_045184098.1 43.8 322  
170 5 84 405 48 358 3.90E-74 287 6596 cellular

organisms;Eukaryota;Opisthokonta;Metazoa;Eumetazoa;Bilateria;Protostomia;Spiralia;Lophotrochozoa;Mollusca;Bivalvia;Autobranchia;Heteroconchia;Euherodonta;Imparidentia;Venerida;Veneroidea;Veneridae;Mercenaria;Mercenaria mercenaria

UdeM00000039026 6596 167.2 UdeM00000039026 XP\_045169960.1 24.5 633  
424 21 13 629 16 610 6.90E-38 167.2 6596 cellular

organisms;Eukaryota;Opisthokonta;Metazoa;Eumetazoa;Bilateria;Protostomia;Spiralia;Lophotrochozoa;Mollusca;Bivalvia;Autobranchia;Heteroconchia;Euherodonta;Imparidentia;Venerida;Veneroidea;Veneridae;Mercenaria;Mercenaria mercenaria

UdeM00000039027 9515 146.7 UdeM00000039027 XP\_032127860.1 63.5 115  
40 2 39 153 24 136 2.50E-32 146.7 9515 cellular

organisms;Eukaryota;Opisthokonta;Metazoa;Eumetazoa;Bilateria;Deuterostomia;Chordata;Craniata;Vertebrata;Gnathostomata;Teleostomi;Euteleostomi;Sarcopterygii;Dipnotetrapodomorpha;Tetrapoda;Amniota;Mammalia;Theria;Eutheria

;Boreoeutheria;Euarchontoglires;Primates;Haplorrhini;Simiiformes;Platyrrhini;Cebidae;Cebinae;Sapajus;Sapajus apella  
UdeM00000039028 9515 146.7 UdeM00000039028 XP\_032127860.1 63.5 115  
40 2 27 141 24 136 2.30E-32 146.7 9515 cellular  
organisms;Eukaryota;Opisthokonta;Metazoa;Eumetazoa;Bilateria;Deuterostomia;Chordata;Craniata;Vertebrata;Gnathostomata;Teleostomi;Euteleostomi;Sarcopterygii;Dipnotetrapodomorpha;Tetrapoda;Amniota;Mammalia;Theria;Eutheria;Boreoeutheria;Euarchontoglires;Primates;Haplorrhini;Simiiformes;Platyrrhini;Cebidae;Cebinae;Sapajus;Sapajus apella  
UdeM00000039030 6573 205.7 UdeM00000039030 XP\_021370611.1 71.1 152  
44 0 1 152 1 152 4.20E-50 205.7 6573 cellular  
organisms;Eukaryota;Opisthokonta;Metazoa;Eumetazoa;Bilateria;Protostomia;Spiralia;Lophotrochozoa;Mollusca;Bivalvia;Autobranchia;Pteriormorphia;Pectinida;Pectinoidea;Pectinidae;Mizuhopecten;Mizuhopecten yessoensis  
UdeM00000039029 6596 300.4 UdeM00000039029 XP\_045164917.1 56.6 362  
142 4 6 360 11 364 3.00E-78 300.4 6596 cellular  
organisms;Eukaryota;Opisthokonta;Metazoa;Eumetazoa;Bilateria;Protostomia;Spiralia;Lophotrochozoa;Mollusca;Bivalvia;Autobranchia;Heteroconchia;Euheterodonta;Imparidentia;Venerida;Veneroidea;Veneridae;Mercenaria;Mercenaria mercenaria  
UdeM00000039031 6579 326.2 UdeM00000039031 XP\_033734833.1 47.7 478  
221 12 1 462 1 465 8.70E-86 326.2 6579 cellular  
organisms;Eukaryota;Opisthokonta;Metazoa;Eumetazoa;Bilateria;Protostomia;Spiralia;Lophotrochozoa;Mollusca;Bivalvia;Autobranchia;Pteriormorphia;Pectinida;Pectinoidea;Pectinidae;Pecten;Pecten maximus  
UdeM00000039032 6579 330.9 UdeM00000039032 XP\_033734833.1 47.7 478  
222 11 1 463 1 465 3.50E-87 330.9 6579 cellular  
organisms;Eukaryota;Opisthokonta;Metazoa;Eumetazoa;Bilateria;Protostomia;Spiralia;Lophotrochozoa;Mollusca;Bivalvia;Autobranchia;Pteriormorphia;Pectinida;Pectinoidea;Pectinidae;Pecten;Pecten maximus  
UdeM00000039033 6596 707.6 UdeM00000039033 XP\_045164872.1 81.8 495  
88 1 1 495 1 493 1.20E-200 707.6 6596 cellular  
organisms;Eukaryota;Opisthokonta;Metazoa;Eumetazoa;Bilateria;Protostomia;Spiralia;Lophotrochozoa;Mollusca;Bivalvia;Autobranchia;Heteroconchia;Euheterodonta;Imparidentia;Venerida;Veneroidea;Veneridae;Mercenaria;Mercenaria mercenaria  
UdeM00000039034 6573 292.4 UdeM00000039034 XP\_021370558.1 70 180  
54 0 25 204 533 712 4.70E-76 292.4 6573 cellular  
organisms;Eukaryota;Opisthokonta;Metazoa;Eumetazoa;Bilateria;Protostomia;Spiralia;Lophotrochozoa;Mollusca;Bivalvia;Autobranchia;Pteriormorphia;Pectinida;Pectinoidea;Pectinidae;Mizuhopecten;Mizuhopecten yessoensis  
UdeM00000039035 400727 492.7 UdeM00000039035 XP\_025104969.1 66.8  
346 68 2 1 342 390 692 3.90E-136 492.7 400727  
cellular  
organisms;Eukaryota;Opisthokonta;Metazoa;Eumetazoa;Bilateria;Protostomia;Spiralia;Lophotrochozoa;Mollusca;Gastropoda;Caenogastropoda;Architaenioglossa;Ampullarioidea;Ampullariidae;Pomacea;Pomacea canaliculata  
UdeM00000039036 6579 163.3 UdeM00000039036 XP\_033734829.1 74.1 112  
29 0 74 185 276 387 3.40E-37 163.3 6579 cellular  
organisms;Eukaryota;Opisthokonta;Metazoa;Eumetazoa;Bilateria;Protostomia;Spiralia;Lophotrochozoa;Mollusca;Bivalvia;Autobranchia;Pteriormorphia;Pectinida;Pectinoidea;Pectinidae;Pecten;Pecten maximus  
UdeM00000039037 6596 365.9 UdeM00000039037 XP\_045164833.1 65.4 257  
84 3 1 252 1 257 4.30E-98 365.9 6596 cellular



organisms;Eukaryota;Opisthokonta;Metazoa;Eumetazoa;Bilateria;Protostomia;Spiralia;Lophotrochozoa;Mollusca;Bivalvia;Autobranchia;Heteroconchia;Euheterodonta;Imparidentia;Venerida;Veneroidea;Veneridae;Mercenaria;Mercenaria mercenaria

UdeM00000039038 6579 669.5 UdeM00000039038 XP\_033734828.1 68.5 461  
139 3 1 457 1 459 3.10E-189 669.5 6579 cellular

organisms;Eukaryota;Opisthokonta;Metazoa;Eumetazoa;Bilateria;Protostomia;Spiralia;Lophotrochozoa;Mollusca;Bivalvia;Autobranchia;Pteriormorphia;Pectinida;Pectinoidea;Pectinidae;Pecten;Pecten maximus

UdeM00000039039 6596 666 UdeM00000039039 XP\_045164800.1 59.4 498  
201 1 36 533 42 538 4.00E-188 666 6596 cellular

organisms;Eukaryota;Opisthokonta;Metazoa;Eumetazoa;Bilateria;Protostomia;Spiralia;Lophotrochozoa;Mollusca;Bivalvia;Autobranchia;Heteroconchia;Euheterodonta;Imparidentia;Venerida;Veneroidea;Veneridae;Mercenaria;Mercenaria mercenaria

UdeM00000039040 6596 666 UdeM00000039040 XP\_045164800.1 59.4 498  
201 1 27 524 42 538 3.90E-188 666 6596 cellular

organisms;Eukaryota;Opisthokonta;Metazoa;Eumetazoa;Bilateria;Protostomia;Spiralia;Lophotrochozoa;Mollusca;Bivalvia;Autobranchia;Heteroconchia;Euheterodonta;Imparidentia;Venerida;Veneroidea;Veneridae;Mercenaria;Mercenaria mercenaria

UdeM00000039041 29159 323.2 UdeM00000039041 XP\_034326737.1 56.8 324  
124 6 10 328 7 319 4.20E-85 323.2 29159 cellular

organisms;Eukaryota;Opisthokonta;Metazoa;Eumetazoa;Bilateria;Protostomia;Spiralia;Lophotrochozoa;Mollusca;Bivalvia;Autobranchia;Pteriormorphia;Ostreida;Ostreoidea;Ostreidae;Crassostrea;Crassostrea gigas

UdeM00000039042 6565 203 UdeM00000039042 XP\_022334649.1 38.7 315  
180 5 24 330 4 313 6.20E-49 203 6565 cellular

organisms;Eukaryota;Opisthokonta;Metazoa;Eumetazoa;Bilateria;Protostomia;Spiralia;Lophotrochozoa;Mollusca;Bivalvia;Autobranchia;Pteriormorphia;Ostreida;Ostreoidea;Ostreidae;Crassostrea;Crassostrea virginica

UdeM00000039043 6596 166 UdeM00000039043 XP\_045166071.1 38.1 286  
161 7 14 291 321 598 7.60E-38 166 6596 cellular

organisms;Eukaryota;Opisthokonta;Metazoa;Eumetazoa;Bilateria;Protostomia;Spiralia;Lophotrochozoa;Mollusca;Bivalvia;Autobranchia;Heteroconchia;Euheterodonta;Imparidentia;Venerida;Veneroidea;Veneridae;Mercenaria;Mercenaria mercenaria

UdeM00000039044 6596 388.3 UdeM00000039044 XP\_045166082.1 32.7 947  
521 20 23 958 17 858 3.00E-104 388.3 6596 cellular

organisms;Eukaryota;Opisthokonta;Metazoa;Eumetazoa;Bilateria;Protostomia;Spiralia;Lophotrochozoa;Mollusca;Bivalvia;Autobranchia;Heteroconchia;Euheterodonta;Imparidentia;Venerida;Veneroidea;Veneridae;Mercenaria;Mercenaria mercenaria

UdeM00000039045 6579 303.1 UdeM00000039045 XP\_033756871.1 31.8 655  
410 16 4 642 22 655 1.00E-78 303.1 6579 cellular

organisms;Eukaryota;Opisthokonta;Metazoa;Eumetazoa;Bilateria;Protostomia;Spiralia;Lophotrochozoa;Mollusca;Bivalvia;Autobranchia;Pteriormorphia;Pectinida;Pectinoidea;Pectinidae;Pecten;Pecten maximus

UdeM00000039047 6596 352.1 UdeM00000039047 XP\_045166082.1 31.6 895  
487 19 23 900 17 803 2.20E-93 352.1 6596 cellular

organisms;Eukaryota;Opisthokonta;Metazoa;Eumetazoa;Bilateria;Protostomia;Spiralia;Lophotrochozoa;Mollusca;Bivalvia;Autobranchia;Heteroconchia;Euheterodonta;Imparidentia;Venerida;Veneroidea;Veneridae;Mercenaria;Mercenaria mercenaria

UdeM00000039049 29159 284.3 UdeM00000039049 XP\_011428416.3 32.4 584  
 360 16 29 588 20 592 3.80E-73 284.3 29159 cellular  
 organisms;Eukaryota;Opisthokonta;Metazoa;Eumetazoa;Bilateria;Protostomia;  
 Spiralia;Lophotrochozoa;Mollusca;Bivalvia;Autobranchia;Pteriomorphia;Ostr  
 eida;Ostreoidea;Ostreidae;Crassostrea;Crassostrea gigas  
 UdeM00000039050 29159 266.9 UdeM00000039050 XP\_011428416.3 31.1 575  
 347 16 29 565 20 583 5.90E-68 266.9 29159 cellular  
 organisms;Eukaryota;Opisthokonta;Metazoa;Eumetazoa;Bilateria;Protostomia;  
 Spiralia;Lophotrochozoa;Mollusca;Bivalvia;Autobranchia;Pteriomorphia;Ostr  
 eida;Ostreoidea;Ostreidae;Crassostrea;Crassostrea gigas  
 UdeM00000044202 554065 165.6 UdeM00000044202 XP\_005849672.1 39.9  
 253 144 4 6 255 3 250 8.90E-38 165.6 554065  
 cellular organisms;Eukaryota;Viridiplantae;Chlorophyta;core  
 chlorophytes;Trebouxiophyceae;Chlorellales;Chlorellaceae;Chlorella  
 clade;Chlorella;Chlorella variabilis  
 UdeM00000025039 6596 531.2 UdeM00000025039 XP\_045204475.1 72.8 334  
 90 1 22 355 23 355 1.00E-147 531.2 6596 cellular  
 organisms;Eukaryota;Opisthokonta;Metazoa;Eumetazoa;Bilateria;Protostomia;  
 Spiralia;Lophotrochozoa;Mollusca;Bivalvia;Autobranchia;Heteroconchia;Euhe  
 terodonta;Imparidentia;Venerida;Veneroidea;Veneridae;Mercenaria;Mercenari  
 a mercenaria  
 UdeM00000025038 6596 805.4 UdeM00000025038 XP\_045204475.1 61.4 622  
 223 8 22 635 23 635 5.20E-230 805.4 6596 cellular  
 organisms;Eukaryota;Opisthokonta;Metazoa;Eumetazoa;Bilateria;Protostomia;  
 Spiralia;Lophotrochozoa;Mollusca;Bivalvia;Autobranchia;Heteroconchia;Euhe  
 terodonta;Imparidentia;Venerida;Veneroidea;Veneridae;Mercenaria;Mercenari  
 a mercenaria  
 UdeM00000025040 400727 341.3 UdeM00000025040 XP\_025094507.1 53.4  
 313 142 4 5 315 325 635 1.40E-90 341.3 400727  
 cellular  
 organisms;Eukaryota;Opisthokonta;Metazoa;Eumetazoa;Bilateria;Protostomia;  
 Spiralia;Lophotrochozoa;Mollusca;Gastropoda;Caenogastropoda;Architaeniogl  
 ossa;Ampullarioidea;Ampullariidae;Pomacea;Pomacea canaliculata  
 UdeM00000025041 6573 322 UdeM00000025041 XP\_021346252.1 35.5 625  
 317 19 1 560 1 604 1.50E-84 322 6573 cellular  
 organisms;Eukaryota;Opisthokonta;Metazoa;Eumetazoa;Bilateria;Protostomia;  
 Spiralia;Lophotrochozoa;Mollusca;Bivalvia;Autobranchia;Pteriomorphia;Pect  
 inida;Pectinoidea;Pectinidae;Mizuhopecten;Mizuhopecten yessoensis  
 UdeM00000025042 6573 624.8 UdeM00000025042 XP\_021346253.1 87 355  
 46 0 1 355 1 355 6.80E-176 624.8 6573 cellular  
 organisms;Eukaryota;Opisthokonta;Metazoa;Eumetazoa;Bilateria;Protostomia;  
 Spiralia;Lophotrochozoa;Mollusca;Bivalvia;Autobranchia;Pteriomorphia;Pect  
 inida;Pectinoidea;Pectinidae;Mizuhopecten;Mizuhopecten yessoensis  
 UdeM00000025044 10224 59.3 UdeM00000025044 XP\_002733294.1 53.7 54  
 25 0 35 88 23 76 6.40E-06 59.3 10224 cellular  
 organisms;Eukaryota;Opisthokonta;Metazoa;Eumetazoa;Bilateria;Deuterostomi  
 a;Hemichordata;Enteropneusta;Harrimaniidae;Saccoglossus;Saccoglossus  
 kowalevskii  
 UdeM00000025046 6573 851.3 UdeM00000025046 XP\_021346254.1 79.7 512  
 100 2 15 523 342 852 6.90E-244 851.3 6573 cellular  
 organisms;Eukaryota;Opisthokonta;Metazoa;Eumetazoa;Bilateria;Protostomia;  
 Spiralia;Lophotrochozoa;Mollusca;Bivalvia;Autobranchia;Pteriomorphia;Pect  
 inida;Pectinoidea;Pectinidae;Mizuhopecten;Mizuhopecten yessoensis

UdeM00000025047 29159 481.9 UdeM00000025047 XP\_034318405.1 76.7 318  
 68 3 1 313 38 354 6.50E-133 481.9 29159 cellular  
 organisms;Eukaryota;Opisthokonta;Metazoa;Eumetazoa;Bilateria;Protostomia;  
 Spiralia;Lophotrochozoa;Mollusca;Bivalvia;Autobranchia;Pteriormorphia;Ostr  
 eida;Ostreoidea;Ostreidae;Crassostrea;Crassostrea gigas  
 UdeM00000025050 6596 300.1 UdeM00000025050 XP\_045204216.1 49 294  
 136 4 26 318 36 316 3.50E-78 300.1 6596 cellular  
 organisms;Eukaryota;Opisthokonta;Metazoa;Eumetazoa;Bilateria;Protostomia;  
 Spiralia;Lophotrochozoa;Mollusca;Bivalvia;Autobranchia;Heteroconchia;Euhe  
 terodonta;Imparidentia;Venerida;Veneroidea;Veneridae;Mercenaria;Mercenari  
 a mercenaria  
 UdeM00000025052 6573 181.4 UdeM00000025052 XP\_021364077.1 45.3 278  
 131 6 690 955 1136 1404 5.40E-42 181.4 6573 cellular  
 organisms;Eukaryota;Opisthokonta;Metazoa;Eumetazoa;Bilateria;Protostomia;  
 Spiralia;Lophotrochozoa;Mollusca;Bivalvia;Autobranchia;Pteriormorphia;Pect  
 inida;Pectinoidea;Pectinidae;Mizuhopecten;Mizuhopecten yessoensis  
 UdeM00000025053 8040 70.9 UdeM00000025053 XP\_038848645.1 28.7 178  
 126 1 180 357 1306 1482 6.50E-09 70.9 8040 cellular  
 organisms;Eukaryota;Opisthokonta;Metazoa;Eumetazoa;Bilateria;Deuterostomi  
 a;Chordata;Craniata;Vertebrata;Gnathostomata;Teleostomi;Euteleostomi;Acti  
 nopterygii;Actinopteri;Neopterygii;Teleostei;Osteoglossocephalai;Clupeoce  
 phala;Euteleosteomorpha;Protacanthopterygii;Salmoniformes;Salmonidae;Salm  
 oninae;Salvelinus;Salvelinus namaycush  
 UdeM00000025056 6596 684.1 UdeM00000025056 XP\_045203147.1 70.2 473  
 136 1 1 468 1 473 1.20E-193 684.1 6596 cellular  
 organisms;Eukaryota;Opisthokonta;Metazoa;Eumetazoa;Bilateria;Protostomia;  
 Spiralia;Lophotrochozoa;Mollusca;Bivalvia;Autobranchia;Heteroconchia;Euhe  
 terodonta;Imparidentia;Venerida;Veneroidea;Veneridae;Mercenaria;Mercenari  
 a mercenaria  
 UdeM00000025057 2587831 130.2 UdeM00000025057 XP\_026503620.1 45.3  
 139 76 0 8 146 4 142 2.60E-27 130.2 2587831  
 cellular  
 organisms;Eukaryota;Opisthokonta;Metazoa;Eumetazoa;Bilateria;Deuterostomi  
 a;Chordata;Craniata;Vertebrata;Gnathostomata;Teleostomi;Euteleostomi;Sarc  
 opterygii;Dipnotetrapodomorpha;Tetrapoda;Amniota;Sauropsida;Sauria;Archel  
 osauria;Testudinata;Testudines;Cryptodira;Durocryptodira;Testudinoidea;Em  
 ydidae;Terrapene;Terrapene carolina;Terrapene carolina triunguis  
 UdeM00000025058 6596 1109 UdeM00000025058 XP\_045202911.1 78 699  
 125 2 1 698 1 671 0.00E+00 1109 6596 cellular  
 organisms;Eukaryota;Opisthokonta;Metazoa;Eumetazoa;Bilateria;Protostomia;  
 Spiralia;Lophotrochozoa;Mollusca;Bivalvia;Autobranchia;Heteroconchia;Euhe  
 terodonta;Imparidentia;Venerida;Veneroidea;Veneridae;Mercenaria;Mercenari  
 a mercenaria  
 UdeM00000025059 6596 1125.5 UdeM00000025059 XP\_045202910.1 81.2  
 672 124 2 1 671 1 671 0.00E+00 1125.5 6596  
 cellular  
 organisms;Eukaryota;Opisthokonta;Metazoa;Eumetazoa;Bilateria;Protostomia;  
 Spiralia;Lophotrochozoa;Mollusca;Bivalvia;Autobranchia;Heteroconchia;Euhe  
 terodonta;Imparidentia;Venerida;Veneroidea;Veneridae;Mercenaria;Mercenari  
 a mercenaria  
 UdeM00000025060 6579 120.2 UdeM00000025060 XP\_033736263.1 45.2 124  
 67 1 11 133 451 574 2.10E-24 120.2 6579 cellular  
 organisms;Eukaryota;Opisthokonta;Metazoa;Eumetazoa;Bilateria;Protostomia;

Spiralia;Lophotrochozoa;Mollusca;Bivalvia;Autobranchia;Pteriormorphia;Pectinida;Pectinoidea;Pectinidae;Pecten;Pecten maximus

UdeM00000025061 6596 194.5 UdeM00000025061 XP\_045177053.1 39.1 253  
139 6 267 514 189 431 3.30E-46 194.5 6596 cellular  
organisms;Eukaryota;Opisthokonta;Metazoa;Eumetazoa;Bilateria;Protostomia;Spiralia;Lophotrochozoa;Mollusca;Bivalvia;Autobranchia;Heteroconchia;Euherodonta;Imparidentia;Venerida;Veneroidea;Veneridae;Mercenaria;Mercenaria mercenaria

UdeM00000025062 6579 112.1 UdeM00000025062 XP\_033736263.1 45.5 112  
60 1 20 130 463 574 5.50E-22 112.1 6579 cellular  
organisms;Eukaryota;Opisthokonta;Metazoa;Eumetazoa;Bilateria;Protostomia;Spiralia;Lophotrochozoa;Mollusca;Bivalvia;Autobranchia;Pteriormorphia;Pectinida;Pectinoidea;Pectinidae;Pecten;Pecten maximus

UdeM00000025063 6596 199.9 UdeM00000025063 XP\_045181277.1 37.3 292  
167 8 134 418 139 421 6.40E-48 199.9 6596 cellular  
organisms;Eukaryota;Opisthokonta;Metazoa;Eumetazoa;Bilateria;Protostomia;Spiralia;Lophotrochozoa;Mollusca;Bivalvia;Autobranchia;Heteroconchia;Euherodonta;Imparidentia;Venerida;Veneroidea;Veneridae;Mercenaria;Mercenaria mercenaria

UdeM00000025064 6579 110.9 UdeM00000025064 XP\_033736263.1 45.5 110  
59 1 9 117 465 574 1.10E-21 110.9 6579 cellular  
organisms;Eukaryota;Opisthokonta;Metazoa;Eumetazoa;Bilateria;Protostomia;Spiralia;Lophotrochozoa;Mollusca;Bivalvia;Autobranchia;Pteriormorphia;Pectinida;Pectinoidea;Pectinidae;Pecten;Pecten maximus

UdeM00000025065 6596 154.1 UdeM00000025065 XP\_045177053.1 42.2 185  
95 4 303 483 255 431 4.60E-34 154.1 6596 cellular  
organisms;Eukaryota;Opisthokonta;Metazoa;Eumetazoa;Bilateria;Protostomia;Spiralia;Lophotrochozoa;Mollusca;Bivalvia;Autobranchia;Heteroconchia;Euherodonta;Imparidentia;Venerida;Veneroidea;Veneridae;Mercenaria;Mercenaria mercenaria

UdeM00000025066 225164 129.4 UdeM00000025066 XP\_009046882.1 53.8  
106 49 0 218 323 27 132 8.20E-27 129.4 225164  
cellular  
organisms;Eukaryota;Opisthokonta;Metazoa;Eumetazoa;Bilateria;Protostomia;Spiralia;Lophotrochozoa;Mollusca;Gastropoda;Patellogastropoda;Lottioida;Lottiidae;Lottia;Lottia gigantea

UdeM00000025067 6596 120.2 UdeM00000025067 XP\_045205692.1 28.8 386  
185 9 627 996 540 851 1.50E-23 120.2 6596 cellular  
organisms;Eukaryota;Opisthokonta;Metazoa;Eumetazoa;Bilateria;Protostomia;Spiralia;Lophotrochozoa;Mollusca;Bivalvia;Autobranchia;Heteroconchia;Euherodonta;Imparidentia;Venerida;Veneroidea;Veneridae;Mercenaria;Mercenaria mercenaria

UdeM00000025068 6596 120.2 UdeM00000025068 XP\_045205692.1 28.8 386  
185 9 600 969 540 851 1.50E-23 120.2 6596 cellular  
organisms;Eukaryota;Opisthokonta;Metazoa;Eumetazoa;Bilateria;Protostomia;Spiralia;Lophotrochozoa;Mollusca;Bivalvia;Autobranchia;Heteroconchia;Euherodonta;Imparidentia;Venerida;Veneroidea;Veneridae;Mercenaria;Mercenaria mercenaria

UdeM00000025069 6596 973.4 UdeM00000025069 XP\_045206013.1 46.9 897  
466 6 177 1068 953 1844 3.40E-280 973.4 6596 cellular  
organisms;Eukaryota;Opisthokonta;Metazoa;Eumetazoa;Bilateria;Protostomia;Spiralia;Lophotrochozoa;Mollusca;Bivalvia;Autobranchia;Heteroconchia;Euherodonta;Imparidentia;Venerida;Veneroidea;Veneridae;Mercenaria;Mercenaria mercenaria

UdeM00000025070 6596 1239.2 UdeM00000025070 XP\_045205123.1 77.9  
 757 152 3 39 782 78 832 0.00E+00 1239.2 6596  
 cellular  
 organisms;Eukaryota;Opisthokonta;Metazoa;Eumetazoa;Bilateria;Protostomia;  
 Spiralia;Lophotrochozoa;Mollusca;Bivalvia;Autobranchia;Heteroconchia;Euhe  
 terodonta;Imparidentia;Venerida;Veneroidea;Veneridae;Mercenaria;Mercenari  
 a mercenaria  
 UdeM00000025072 7574 98.6 UdeM00000025072 XP\_023931656.1 36.8 144  
 88 3 7 149 119 260 8.90E-18 98.6 7574 cellular  
 organisms;Eukaryota;Opisthokonta;Metazoa;Eumetazoa;Bilateria;Protostomia;  
 Spiralia;Lophotrochozoa;Brachiopoda;Linguliformea;Lingulata;Lingulida;Lin  
 guloidea;Lingulidae;Lingula;Lingula anatina  
 UdeM00000025073 6596 278.9 UdeM00000025073 XP\_045176230.1 32.6 565  
 338 19 9 556 36 574 1.50E-71 278.9 6596 cellular  
 organisms;Eukaryota;Opisthokonta;Metazoa;Eumetazoa;Bilateria;Protostomia;  
 Spiralia;Lophotrochozoa;Mollusca;Bivalvia;Autobranchia;Heteroconchia;Euhe  
 terodonta;Imparidentia;Venerida;Veneroidea;Veneridae;Mercenaria;Mercenari  
 a mercenaria  
 UdeM00000025074 6596 117.9 UdeM00000025074 XP\_045167526.1 30.6 252  
 158 8 6 241 196 446 1.90E-23 117.9 6596 cellular  
 organisms;Eukaryota;Opisthokonta;Metazoa;Eumetazoa;Bilateria;Protostomia;  
 Spiralia;Lophotrochozoa;Mollusca;Bivalvia;Autobranchia;Heteroconchia;Euhe  
 terodonta;Imparidentia;Venerida;Veneroidea;Veneridae;Mercenaria;Mercenari  
 a mercenaria  
 UdeM00000025075 6596 58.2 UdeM00000025075 XP\_045161740.1 33.3 96  
 54 2 43 132 26 117 9.90E-06 58.2 6596 cellular  
 organisms;Eukaryota;Opisthokonta;Metazoa;Eumetazoa;Bilateria;Protostomia;  
 Spiralia;Lophotrochozoa;Mollusca;Bivalvia;Autobranchia;Heteroconchia;Euhe  
 terodonta;Imparidentia;Venerida;Veneroidea;Veneridae;Mercenaria;Mercenari  
 a mercenaria  
 UdeM00000025076 6596 232.6 UdeM00000025076 XP\_045176230.1 30.4 487  
 303 14 106 578 57 521 1.20E-57 232.6 6596 cellular  
 organisms;Eukaryota;Opisthokonta;Metazoa;Eumetazoa;Bilateria;Protostomia;  
 Spiralia;Lophotrochozoa;Mollusca;Bivalvia;Autobranchia;Heteroconchia;Euhe  
 terodonta;Imparidentia;Venerida;Veneroidea;Veneridae;Mercenaria;Mercenari  
 a mercenaria  
 UdeM00000025077 6596 94.4 UdeM00000025077 XP\_045181544.1 30 180  
 113 4 3 171 280 457 1.50E-16 94.4 6596 cellular  
 organisms;Eukaryota;Opisthokonta;Metazoa;Eumetazoa;Bilateria;Protostomia;  
 Spiralia;Lophotrochozoa;Mollusca;Bivalvia;Autobranchia;Heteroconchia;Euhe  
 terodonta;Imparidentia;Venerida;Veneroidea;Veneridae;Mercenaria;Mercenari  
 a mercenaria  
 UdeM00000025080 6596 304.3 UdeM00000025080 XP\_045208657.1 32.9 638  
 369 24 14 623 21 627 3.60E-79 304.3 6596 cellular  
 organisms;Eukaryota;Opisthokonta;Metazoa;Eumetazoa;Bilateria;Protostomia;  
 Spiralia;Lophotrochozoa;Mollusca;Bivalvia;Autobranchia;Heteroconchia;Euhe  
 terodonta;Imparidentia;Venerida;Veneroidea;Veneridae;Mercenaria;Mercenari  
 a mercenaria  
 UdeM00000025081 6596 115.9 UdeM00000025081 XP\_045176230.1 36.7 169  
 104 3 1 167 193 360 5.10E-23 115.9 6596 cellular  
 organisms;Eukaryota;Opisthokonta;Metazoa;Eumetazoa;Bilateria;Protostomia;  
 Spiralia;Lophotrochozoa;Mollusca;Bivalvia;Autobranchia;Heteroconchia;Euhe  
 terodonta;Imparidentia;Venerida;Veneroidea;Veneridae;Mercenaria;Mercenari  
 a mercenaria

UdeM00000025082 6596 189.5 UdeM00000025082 XP\_045176230.1 31.6 393  
 241 12 36 419 57 430 9.20E-45 189.5 6596 cellular  
 organisms;Eukaryota;Opisthokonta;Metazoa;Eumetazoa;Bilateria;Protostomia;  
 Spiralia;Lophotrochozoa;Mollusca;Bivalvia;Autobranchia;Heteroconchia;Euhe  
 terodonta;Imparidentia;Venerida;Veneroidea;Veneridae;Mercenaria;Mercenari  
 a mercenaria  
 UdeM00000025083 6687 78.2 UdeM00000025083 XP\_037797021.1 42.9 112  
 57 5 16 122 41 150 8.20E-12 78.2 6687 cellular  
 organisms;Eukaryota;Opisthokonta;Metazoa;Eumetazoa;Bilateria;Protostomia;  
 Ecdysozoa;Panarthropoda;Arthropoda;Mandibulata;Pancrustacea;Crustacea;Mul  
 ticrustacea;Malacostraca;Eumalacostraca;Eucarida;Decapoda;Dendrobranchiat  
 a;Penaeoidea;Penaeidae;Penaeus;Penaeus monodon  
 UdeM00000025084 441366 75.1 UdeM00000025084 XP\_028296543.1 45.1  
 71 39 0 15 85 768 838 5.00E-11 75.1 441366  
 cellular  
 organisms;Eukaryota;Opisthokonta;Metazoa;Eumetazoa;Bilateria;Deuterostomi  
 a;Chordata;Craniata;Vertebrata;Gnathostomata;Teleostomi;Euteleostomi;Acti  
 nopterygii;Actinopteri;Neopterygii;Teleostei;Osteoglossocephalai;Clupeoce  
 phala;Euteleosteomorpha;Neoteleostei;Eurypterygia;Ctenosquamata;Acanthomo  
 rphata;Euacanthomorphacea;Percomorphaceae;Ovalentaria;Blenniimorphae;Blen  
 niiformes;Gobiesocoiidei;Gobiesocidae;Gobiesocinae;Gouania;Gouania  
 willdenowi  
 UdeM00000025087 29159 70.1 UdeM00000025087 XP\_034322711.1 33.1 163  
 102 4 7 168 168 324 3.40E-09 70.1 29159 cellular  
 organisms;Eukaryota;Opisthokonta;Metazoa;Eumetazoa;Bilateria;Protostomia;  
 Spiralia;Lophotrochozoa;Mollusca;Bivalvia;Autobranchia;Pteriormorphia;Ostr  
 eida;Ostreoidea;Ostreidae;Crassostrea;Crassostrea gigas  
 UdeM00000025088 1232801 97.8 UdeM00000025088 XP\_043203304.1 41.1  
 141 81 2 8 147 597 736 1.90E-17 97.8 1232801  
 cellular  
 organisms;Eukaryota;Opisthokonta;Metazoa;Eumetazoa;Bilateria;Protostomia;  
 Ecdysozoa;Panarthropoda;Arthropoda;Mandibulata;Pancrustacea;Crustacea;Mul  
 ticrustacea;Hexanauplia;Thecostraca;Cirripedia;Thoracica;Sessilia;Balanid  
 ae;Amphibalanus;Amphibalanus amphitrite  
 UdeM00000025090 37653 121.3 UdeM00000025090 XP\_014784938.1 52.4 103  
 48 1 1 102 164 266 9.00E-25 121.3 37653 cellular  
 organisms;Eukaryota;Opisthokonta;Metazoa;Eumetazoa;Bilateria;Protostomia;  
 Spiralia;Lophotrochozoa;Mollusca;Cephalopoda;Coleoidea;Octopodiformes;Oct  
 opoda;Incirrata;Octopodidae;Octopus;Octopus bimaculoides  
 UdeM00000025091 6596 651 UdeM00000025091 XP\_045204508.1 37.6 1185  
 668 25 57 1220 8 1142 3.00E-183 651 6596 cellular  
 organisms;Eukaryota;Opisthokonta;Metazoa;Eumetazoa;Bilateria;Protostomia;  
 Spiralia;Lophotrochozoa;Mollusca;Bivalvia;Autobranchia;Heteroconchia;Euhe  
 terodonta;Imparidentia;Venerida;Veneroidea;Veneridae;Mercenaria;Mercenari  
 a mercenaria  
 UdeM00000025092 6596 129.4 UdeM00000025092 XP\_045180427.1 33.3 273  
 117 4 1 208 1 273 5.70E-27 129.4 6596 cellular  
 organisms;Eukaryota;Opisthokonta;Metazoa;Eumetazoa;Bilateria;Protostomia;  
 Spiralia;Lophotrochozoa;Mollusca;Bivalvia;Autobranchia;Heteroconchia;Euhe  
 terodonta;Imparidentia;Venerida;Veneroidea;Veneridae;Mercenaria;Mercenari  
 a mercenaria  
 UdeM00000025093 29159 72.4 UdeM00000025093 XP\_034307860.1 64.2 53  
 19 0 1 53 1 53 3.50E-10 72.4 29159 cellular  
 organisms;Eukaryota;Opisthokonta;Metazoa;Eumetazoa;Bilateria;Protostomia;

Spiralia; Lophotrochozoa; Mollusca; Bivalvia; Autobranchia; Pteriomorphia; Ostr  
 eida; Ostreoida; Ostreidae; Crassostrea; Crassostrea gigas  
 UdeM00000025094 6596 188 UdeM00000025094 XP\_045167526.1 31.1 409  
 264 8 60 462 50 446 2.80E-44 188 6596 cellular  
 organisms; Eukaryota; Opisthokonta; Metazoa; Eumetazoa; Bilateria; Protostomia;  
 Spiralia; Lophotrochozoa; Mollusca; Bivalvia; Autobranchia; Heteroconchia; Eue  
 terodonta; Imparidentia; Venerida; Veneroidea; Veneridae; Mercenaria; Mercenari  
 a mercenaria  
 UdeM00000025095 6526 187.6 UdeM00000025095 XP\_013072228.1 29.8 486  
 223 9 15 387 19 499 3.00E-44 187.6 6526 cellular  
 organisms; Eukaryota; Opisthokonta; Metazoa; Eumetazoa; Bilateria; Protostomia;  
 Spiralia; Lophotrochozoa; Mollusca; Gastropoda; Heterobranchia; Euthyneura; Pan  
 pulmonata; Hygrophila; Lymnaeoida; Planorbidae; Biomphalaria; Biomphalaria  
 glabrata  
 UdeM00000025096 6596 184.9 UdeM00000025096 XP\_045176230.1 29.5 417  
 264 11 12 417 33 430 2.30E-43 184.9 6596 cellular  
 organisms; Eukaryota; Opisthokonta; Metazoa; Eumetazoa; Bilateria; Protostomia;  
 Spiralia; Lophotrochozoa; Mollusca; Bivalvia; Autobranchia; Heteroconchia; Eue  
 terodonta; Imparidentia; Venerida; Veneroidea; Veneridae; Mercenaria; Mercenari  
 a mercenaria  
 UdeM00000025097 6596 243.8 UdeM00000025097 XP\_045176230.1 29.7 556  
 316 15 30 548 57 574 5.50E-61 243.8 6596 cellular  
 organisms; Eukaryota; Opisthokonta; Metazoa; Eumetazoa; Bilateria; Protostomia;  
 Spiralia; Lophotrochozoa; Mollusca; Bivalvia; Autobranchia; Heteroconchia; Eue  
 terodonta; Imparidentia; Venerida; Veneroidea; Veneridae; Mercenaria; Mercenari  
 a mercenaria  
 UdeM00000025098 6596 146 UdeM00000025098 XP\_045184527.1 39.8 171  
 95 5 1 166 111 278 4.60E-32 146 6596 cellular  
 organisms; Eukaryota; Opisthokonta; Metazoa; Eumetazoa; Bilateria; Protostomia;  
 Spiralia; Lophotrochozoa; Mollusca; Bivalvia; Autobranchia; Heteroconchia; Eue  
 terodonta; Imparidentia; Venerida; Veneroidea; Veneridae; Mercenaria; Mercenari  
 a mercenaria  
 UdeM00000025100 6579 578.9 UdeM00000025100 XP\_033742376.1 38.2 997  
 570 15 22 1010 14 972 1.40E-161 578.9 6579 cellular  
 organisms; Eukaryota; Opisthokonta; Metazoa; Eumetazoa; Bilateria; Protostomia;  
 Spiralia; Lophotrochozoa; Mollusca; Bivalvia; Autobranchia; Pteriomorphia; Pect  
 inida; Pectinoidea; Pectinidae; Pecten; Pecten maximus  
 UdeM00000025101 6579 578.9 UdeM00000025101 XP\_033742376.1 38.2 997  
 570 15 7 995 14 972 1.40E-161 578.9 6579 cellular  
 organisms; Eukaryota; Opisthokonta; Metazoa; Eumetazoa; Bilateria; Protostomia;  
 Spiralia; Lophotrochozoa; Mollusca; Bivalvia; Autobranchia; Pteriomorphia; Pect  
 inida; Pectinoidea; Pectinidae; Pecten; Pecten maximus  
 UdeM00000025102 50390 76.3 UdeM00000025102 XP\_028127913.1 44.9 78  
 42 1 1 78 1 77 2.00E-11 76.3 50390 cellular  
 organisms; Eukaryota; Opisthokonta; Metazoa; Eumetazoa; Bilateria; Protostomia;  
 Ecdysozoa; Panarthropoda; Arthropoda; Mandibulata; Pancrustacea; Hexapoda; Inse  
 cta; Dicondylia; Pterygota; Neoptera; Endopterygota; Coleoptera; Polyphaga; Cucu  
 jiformia; Chrysomeloidea; Chrysomelidae; Galerucinae; Luperini; Diabroticina; D  
 iabroticites; Diabrotica; Diabrotica virgifera; Diabrotica virgifera  
 virgifera  
 UdeM00000025103 2607531 242.3 UdeM00000025103 XP\_029657406.1 56.7  
 208 90 0 4 211 43 250 5.70E-61 242.3 2607531  
 cellular  
 organisms; Eukaryota; Opisthokonta; Metazoa; Eumetazoa; Bilateria; Protostomia;

Spiralia;Lophotrochozoa;Mollusca;Cephalopoda;Coleoidea;Octopodiformes;Octopoda;Incirrata;Octopodidae;Octopus;Octopus sinensis

UdeM00000025104 7725 146 UdeM00000025104 XP\_039263221.1 62.5 112  
42 0 48 159 9 120 5.10E-32 146 7725 cellular  
organisms;Eukaryota;Opisthokonta;Metazoa;Eumetazoa;Bilateria;Deuterostomia;Chordata;Tunicata;Ascidiacea;Stolidobranchia;Styelidae;Styela;Styela clava

UdeM00000025106 6579 585.5 UdeM00000025106 XP\_033742376.1 37.7 1002  
569 16 18 1010 15 970 1.50E-163 585.5 6579 cellular  
organisms;Eukaryota;Opisthokonta;Metazoa;Eumetazoa;Bilateria;Protostomia;Spiralia;Lophotrochozoa;Mollusca;Bivalvia;Autobranchia;Pteriomorpha;Pectinida;Pectinoidea;Pectinidae;Pecten;Pecten maximus

UdeM00000025107 6579 580.1 UdeM00000025107 XP\_033742376.1 38.9 978  
545 15 32 999 23 957 6.20E-162 580.1 6579 cellular  
organisms;Eukaryota;Opisthokonta;Metazoa;Eumetazoa;Bilateria;Protostomia;Spiralia;Lophotrochozoa;Mollusca;Bivalvia;Autobranchia;Pteriomorpha;Pectinida;Pectinoidea;Pectinidae;Pecten;Pecten maximus

UdeM00000025108 6579 579.7 UdeM00000025108 XP\_033742376.1 38.7 951  
543 13 27 960 24 951 7.80E-162 579.7 6579 cellular  
organisms;Eukaryota;Opisthokonta;Metazoa;Eumetazoa;Bilateria;Protostomia;Spiralia;Lophotrochozoa;Mollusca;Bivalvia;Autobranchia;Pteriomorpha;Pectinida;Pectinoidea;Pectinidae;Pecten;Pecten maximus

UdeM00000025109 6573 184.5 UdeM00000025109 XP\_021354853.1 29.6 439  
116 3 1 246 355 793 2.50E-43 184.5 6573 cellular  
organisms;Eukaryota;Opisthokonta;Metazoa;Eumetazoa;Bilateria;Protostomia;Spiralia;Lophotrochozoa;Mollusca;Bivalvia;Autobranchia;Pteriomorpha;Pectinida;Pectinoidea;Pectinidae;Mizuhopecten;Mizuhopecten yessoensis

UdeM00000025110 29159 61.6 UdeM00000025110 XP\_034322709.1 42.2 64  
37 0 18 81 66 129 1.30E-06 61.6 29159 cellular  
organisms;Eukaryota;Opisthokonta;Metazoa;Eumetazoa;Bilateria;Protostomia;Spiralia;Lophotrochozoa;Mollusca;Bivalvia;Autobranchia;Pteriomorpha;Ostreida;Ostreoidea;Ostreidae;Crassostrea;Crassostrea gigas

UdeM00000025115 6596 592 UdeM00000025115 XP\_045204974.1 37.7 1002  
608 10 6 1001 15 1006 1.60E-165 592 6596 cellular  
organisms;Eukaryota;Opisthokonta;Metazoa;Eumetazoa;Bilateria;Protostomia;Spiralia;Lophotrochozoa;Mollusca;Bivalvia;Autobranchia;Heteroconchia;Euheterodonta;Imparidentia;Venerida;Veneroidea;Veneridae;Mercenaria;Mercenaria mercenaria

UdeM00000025119 6579 544.3 UdeM00000025119 XP\_033760558.1 30.5 942  
655 0 745 1686 1852 2793 5.60E-151 544.3 6579 cellular  
organisms;Eukaryota;Opisthokonta;Metazoa;Eumetazoa;Bilateria;Protostomia;Spiralia;Lophotrochozoa;Mollusca;Bivalvia;Autobranchia;Pteriomorpha;Pectinida;Pectinoidea;Pectinidae;Pecten;Pecten maximus

UdeM00000025122 6596 757.3 UdeM00000025122 XP\_045205574.1 43.8 1116  
559 17 9 1086 21 1106 2.70E-215 757.3 6596 cellular  
organisms;Eukaryota;Opisthokonta;Metazoa;Eumetazoa;Bilateria;Protostomia;Spiralia;Lophotrochozoa;Mollusca;Bivalvia;Autobranchia;Heteroconchia;Euheterodonta;Imparidentia;Venerida;Veneroidea;Veneridae;Mercenaria;Mercenaria mercenaria

UdeM00000025124 6596 714.9 UdeM00000025124 XP\_045205573.1 40.6 1094  
604 16 5 1074 41 1112 1.50E-202 714.9 6596 cellular  
organisms;Eukaryota;Opisthokonta;Metazoa;Eumetazoa;Bilateria;Protostomia;Spiralia;Lophotrochozoa;Mollusca;Bivalvia;Autobranchia;Heteroconchia;Euheterodonta;Imparidentia;Venerida;Veneroidea;Veneridae;Mercenaria;Mercenaria mercenaria



terodonta;Imparidentia;Venerida;Veneroidea;Veneridae;Mercenaria;Mercenari  
 a mercenaria  
 UdeM00000025123 6596 728.4 UdeM00000025123 XP\_045205573.1 40.5 1122  
 622 16 8 1105 13 1112 1.40E-206 728.4 6596 cellular  
 organisms;Eukaryota;Opisthokonta;Metazoa;Eumetazoa;Bilateria;Protostomia;  
 Spiralia;Lophotrochozoa;Mollusca;Bivalvia;Autobranchia;Heteroconchia;Euhe  
 terodonta;Imparidentia;Venerida;Veneroidea;Veneridae;Mercenaria;Mercenari  
 a mercenaria  
 UdeM00000025125 6596 768.5 UdeM00000025125 XP\_045205574.1 48.4 953  
 470 12 9 953 11 949 1.20E-218 768.5 6596 cellular  
 organisms;Eukaryota;Opisthokonta;Metazoa;Eumetazoa;Bilateria;Protostomia;  
 Spiralia;Lophotrochozoa;Mollusca;Bivalvia;Autobranchia;Heteroconchia;Euhe  
 terodonta;Imparidentia;Venerida;Veneroidea;Veneridae;Mercenaria;Mercenari  
 a mercenaria  
 UdeM00000025127 6596 96.3 UdeM00000025127 XP\_045215739.1 34.5 177  
 101 4 2 174 328 493 5.30E-17 96.3 6596 cellular  
 organisms;Eukaryota;Opisthokonta;Metazoa;Eumetazoa;Bilateria;Protostomia;  
 Spiralia;Lophotrochozoa;Mollusca;Bivalvia;Autobranchia;Heteroconchia;Euhe  
 terodonta;Imparidentia;Venerida;Veneroidea;Veneridae;Mercenaria;Mercenari  
 a mercenaria  
 UdeM00000025128 6573 206.8 UdeM00000025128 XP\_021378643.1 37.4 297  
 180 4 38 330 939 1233 4.80E-50 206.8 6573 cellular  
 organisms;Eukaryota;Opisthokonta;Metazoa;Eumetazoa;Bilateria;Protostomia;  
 Spiralia;Lophotrochozoa;Mollusca;Bivalvia;Autobranchia;Pteriormorphia;Pect  
 inida;Pectinoidea;Pectinidae;Mizuhopecten;Mizuhopecten yessoensis  
 UdeM00000025129 29159 352.1 UdeM00000025129 XP\_034322969.1 31.9 626  
 340 14 29 594 210 809 1.40E-93 352.1 29159 cellular  
 organisms;Eukaryota;Opisthokonta;Metazoa;Eumetazoa;Bilateria;Protostomia;  
 Spiralia;Lophotrochozoa;Mollusca;Bivalvia;Autobranchia;Pteriormorphia;Ostr  
 eida;Ostreoidea;Ostreidae;Crassostrea;Crassostrea gigas  
 UdeM00000025131 6596 61.6 UdeM00000025131 XP\_045183346.1 46.6 58  
 27 1 10 63 76 133 1.10E-06 61.6 6596 cellular  
 organisms;Eukaryota;Opisthokonta;Metazoa;Eumetazoa;Bilateria;Protostomia;  
 Spiralia;Lophotrochozoa;Mollusca;Bivalvia;Autobranchia;Heteroconchia;Euhe  
 terodonta;Imparidentia;Venerida;Veneroidea;Veneridae;Mercenaria;Mercenari  
 a mercenaria  
 UdeM00000025132 400727 452.2 UdeM00000025132 XP\_025087586.1 64  
 317 113 1 24 340 5 320 5.80E-124 452.2 400727  
 cellular  
 organisms;Eukaryota;Opisthokonta;Metazoa;Eumetazoa;Bilateria;Protostomia;  
 Spiralia;Lophotrochozoa;Mollusca;Gastropoda;Caenogastropoda;Architaeniogl  
 ossa;Ampullarioidea;Ampullariidae;Pomacea;Pomacea canaliculata  
 UdeM00000025133 42434 58.9 UdeM00000025133 XP\_039453121.1 42.5 73  
 37 2 92 160 494 565 9.10E-06 58.9 42434 cellular  
 organisms;Eukaryota;Opisthokonta;Metazoa;Eumetazoa;Bilateria;Protostomia;  
 Ecdysozoa;Panarthropoda;Arthropoda;Mandibulata;Pancrustacea;Hexapoda;Inse  
 cta;Dicondylia;Pterygota;Neoptera;Endopterygota;Diptera;Nematocera;Culico  
 morpha;Culicoidea;Culicidae;Culicinae;Culicini;Culex;Culex;Culex pipiens  
 complex;Culex pipiens;Culex pipiens pallens  
 UdeM00000025134 6573 933.7 UdeM00000025134 XP\_021346238.1 67.1 812  
 251 2 1 805 1 803 1.70E-268 933.7 6573 cellular  
 organisms;Eukaryota;Opisthokonta;Metazoa;Eumetazoa;Bilateria;Protostomia;  
 Spiralia;Lophotrochozoa;Mollusca;Bivalvia;Autobranchia;Pteriormorphia;Pect  
 inida;Pectinoidea;Pectinidae;Mizuhopecten;Mizuhopecten yessoensis

UdeM00000025135 6596 137.9 UdeM00000025135 XP\_045204103.1 67.8 121  
 37 2 1 121 3 121 8.70E-30 137.9 6596 cellular  
 organisms;Eukaryota;Opisthokonta;Metazoa;Eumetazoa;Bilateria;Protostomia;  
 Spiralia;Lophotrochozoa;Mollusca;Bivalvia;Autobranchia;Heteroconchia;Euhe  
 terodonta;Imparidentia;Venerida;Veneroidea;Veneridae;Mercenaria;Mercenari  
 a mercenaria  
 UdeM00000025136 6565 224.2 UdeM00000025136 XP\_022327024.1 76 129  
 31 0 29 157 35 163 1.20E-55 224.2 6565 cellular  
 organisms;Eukaryota;Opisthokonta;Metazoa;Eumetazoa;Bilateria;Protostomia;  
 Spiralia;Lophotrochozoa;Mollusca;Bivalvia;Autobranchia;Pteriormorphia;Ostr  
 eida;Ostreoidea;Ostreidae;Crassostrea;Crassostrea virginica  
 UdeM00000025137 1735272 463.8 UdeM00000025137 XP\_041357055.1 69.9  
 336 100 1 55 390 178 512 2.40E-127 463.8 1735272  
 cellular  
 organisms;Eukaryota;Opisthokonta;Metazoa;Eumetazoa;Bilateria;Protostomia;  
 Spiralia;Lophotrochozoa;Mollusca;Gastropoda;Neomphalina;Neomphaloidea;Pel  
 tospiridae;Gigantopelta;Gigantopelta aegis  
 UdeM00000025138 6573 349.7 UdeM00000025138 XP\_021346245.1 31.7 1244  
 628 36 7 1182 595 1684 1.40E-92 349.7 6573 cellular  
 organisms;Eukaryota;Opisthokonta;Metazoa;Eumetazoa;Bilateria;Protostomia;  
 Spiralia;Lophotrochozoa;Mollusca;Bivalvia;Autobranchia;Pteriormorphia;Pect  
 inida;Pectinoidea;Pectinidae;Mizuhopecten;Mizuhopecten yessoensis  
 UdeM00000025139 7574 280 UdeM00000025139 XP\_023932810.1 38.4 440  
 240 15 15 431 51 482 6.00E-72 280 7574 cellular  
 organisms;Eukaryota;Opisthokonta;Metazoa;Eumetazoa;Bilateria;Protostomia;  
 Spiralia;Lophotrochozoa;Brachiopoda;Linguliformea;Lingulata;Lingulida;Lin  
 guloidea;Lingulidae;Lingula;Lingula anatina  
 UdeM00000025140 6573 261.9 UdeM00000025140 XP\_021378643.1 45 311  
 153 6 32 338 562 858 1.10E-66 261.9 6573 cellular  
 organisms;Eukaryota;Opisthokonta;Metazoa;Eumetazoa;Bilateria;Protostomia;  
 Spiralia;Lophotrochozoa;Mollusca;Bivalvia;Autobranchia;Pteriormorphia;Pect  
 inida;Pectinoidea;Pectinidae;Mizuhopecten;Mizuhopecten yessoensis  
 UdeM00000025141 6573 481.1 UdeM00000025141 XP\_021378643.1 38.7 693  
 387 14 32 707 562 1233 2.60E-132 481.1 6573 cellular  
 organisms;Eukaryota;Opisthokonta;Metazoa;Eumetazoa;Bilateria;Protostomia;  
 Spiralia;Lophotrochozoa;Mollusca;Bivalvia;Autobranchia;Pteriormorphia;Pect  
 inida;Pectinoidea;Pectinidae;Mizuhopecten;Mizuhopecten yessoensis  
 UdeM00000025142 6579 253.8 UdeM00000025142 XP\_033751112.1 42.8 283  
 154 5 92 371 84 361 3.40E-64 253.8 6579 cellular  
 organisms;Eukaryota;Opisthokonta;Metazoa;Eumetazoa;Bilateria;Protostomia;  
 Spiralia;Lophotrochozoa;Mollusca;Bivalvia;Autobranchia;Pteriormorphia;Pect  
 inida;Pectinoidea;Pectinidae;Pecten;Pecten maximus  
 UdeM00000025143 6579 250.8 UdeM00000025143 XP\_033751112.1 42.3 293  
 160 5 69 359 76 361 2.80E-63 250.8 6579 cellular  
 organisms;Eukaryota;Opisthokonta;Metazoa;Eumetazoa;Bilateria;Protostomia;  
 Spiralia;Lophotrochozoa;Mollusca;Bivalvia;Autobranchia;Pteriormorphia;Pect  
 inida;Pectinoidea;Pectinidae;Pecten;Pecten maximus  
 UdeM00000025144 6579 255.8 UdeM00000025144 XP\_033751112.1 43.4 281  
 154 4 90 368 84 361 9.00E-65 255.8 6579 cellular  
 organisms;Eukaryota;Opisthokonta;Metazoa;Eumetazoa;Bilateria;Protostomia;  
 Spiralia;Lophotrochozoa;Mollusca;Bivalvia;Autobranchia;Pteriormorphia;Pect  
 inida;Pectinoidea;Pectinidae;Pecten;Pecten maximus  
 UdeM00000025146 6579 265.4 UdeM00000025146 XP\_033751112.1 44.5 281  
 151 4 90 368 84 361 1.10E-67 265.4 6579 cellular

organisms;Eukaryota;Opisthokonta;Metazoa;Eumetazoa;Bilateria;Protostomia;  
Spiralia;Lophotrochozoa;Mollusca;Bivalvia;Autobranhia;Pteriormorphia;Pect  
inida;Pectinoidea;Pectinidae;Pecten;Pecten maximus  
UdeM00000025145 6579 234.6 UdeM00000025145 XP\_033751112.1 49.3 207  
103 1 90 296 84 288 1.70E-58 234.6 6579 cellular  
organisms;Eukaryota;Opisthokonta;Metazoa;Eumetazoa;Bilateria;Protostomia;  
Spiralia;Lophotrochozoa;Mollusca;Bivalvia;Autobranhia;Pteriormorphia;Pect  
inida;Pectinoidea;Pectinidae;Pecten;Pecten maximus  
UdeM00000025147 6596 823.9 UdeM00000025147 XP\_045206700.1 61.8 662  
240 5 1 657 1 654 1.50E-235 823.9 6596 cellular  
organisms;Eukaryota;Opisthokonta;Metazoa;Eumetazoa;Bilateria;Protostomia;  
Spiralia;Lophotrochozoa;Mollusca;Bivalvia;Autobranhia;Heteroconchia;Euhe  
terodonta;Imparidentia;Venerida;Veneroidea;Veneridae;Mercenaria;Mercenari  
a mercenaria  
UdeM00000025148 6565 1092 UdeM00000025148 XP\_022322186.1 65.6 785  
267 3 33 815 28 811 0.00E+00 1092 6565 cellular  
organisms;Eukaryota;Opisthokonta;Metazoa;Eumetazoa;Bilateria;Protostomia;  
Spiralia;Lophotrochozoa;Mollusca;Bivalvia;Autobranhia;Pteriormorphia;Ostr  
eida;Ostreoidea;Ostreidae;Crassostrea;Crassostrea virginica  
UdeM00000025150 6596 440.3 UdeM00000025150 XP\_045205536.1 43.9 709  
290 17 13 639 15 697 4.40E-120 440.3 6596 cellular  
organisms;Eukaryota;Opisthokonta;Metazoa;Eumetazoa;Bilateria;Protostomia;  
Spiralia;Lophotrochozoa;Mollusca;Bivalvia;Autobranhia;Heteroconchia;Euhe  
terodonta;Imparidentia;Venerida;Veneroidea;Veneridae;Mercenaria;Mercenari  
a mercenaria  
UdeM00000025151 8496 86.3 UdeM00000025151 XP\_014461102.1 36.1 122  
74 3 4 122 228 348 3.10E-14 86.3 8496 cellular  
organisms;Eukaryota;Opisthokonta;Metazoa;Eumetazoa;Bilateria;Deuterostomi  
a;Chordata;Craniata;Vertebrata;Gnathostomata;Teleostomi;Euteleostomi;Sarc  
opterygii;Dipnotetrapodomorpha;Tetrapoda;Amniota;Sauropsida;Sauria;Archel  
osauria;Archosauria;Crocodylia;Alligatoridae;Alligatorinae;Alligator;Alli  
gator mississippiensis  
UdeM00000025152 6596 392.9 UdeM00000025152 XP\_045205536.1 38.3 724  
344 22 1 697 753 1400 8.70E-106 392.9 6596 cellular  
organisms;Eukaryota;Opisthokonta;Metazoa;Eumetazoa;Bilateria;Protostomia;  
Spiralia;Lophotrochozoa;Mollusca;Bivalvia;Autobranhia;Heteroconchia;Euhe  
terodonta;Imparidentia;Venerida;Veneroidea;Veneridae;Mercenaria;Mercenari  
a mercenaria  
UdeM00000025153 6596 150.6 UdeM00000025153 XP\_045205536.1 33.9 448  
194 21 3 424 1029 1400 4.60E-33 150.6 6596 cellular  
organisms;Eukaryota;Opisthokonta;Metazoa;Eumetazoa;Bilateria;Protostomia;  
Spiralia;Lophotrochozoa;Mollusca;Bivalvia;Autobranhia;Heteroconchia;Euhe  
terodonta;Imparidentia;Venerida;Veneroidea;Veneridae;Mercenaria;Mercenari  
a mercenaria  
UdeM00000025155 6596 540 UdeM00000025155 XP\_045203192.1 58.9 467  
192 0 34 500 19 485 3.10E-150 540 6596 cellular  
organisms;Eukaryota;Opisthokonta;Metazoa;Eumetazoa;Bilateria;Protostomia;  
Spiralia;Lophotrochozoa;Mollusca;Bivalvia;Autobranhia;Heteroconchia;Euhe  
terodonta;Imparidentia;Venerida;Veneroidea;Veneridae;Mercenaria;Mercenari  
a mercenaria  
UdeM00000025156 6573 557 UdeM00000025156 XP\_021358726.1 53.7 521  
218 7 1 510 1 509 2.90E-155 557 6573 cellular  
organisms;Eukaryota;Opisthokonta;Metazoa;Eumetazoa;Bilateria;Protostomia;

Spiralia;Lophotrochozoa;Mollusca;Bivalvia;Autobranchia;Pteriormorphia;Pectinida;Pectinoidea;Pectinidae;Mizuhopecten;Mizuhopecten yessoensis  
UdeM00000025157 1735272 164.5 UdeM00000025157 XP\_041359832.1 30  
444 264 17 9 422 7 433 4.00E-37 164.5 1735272  
cellular

organisms;Eukaryota;Opisthokonta;Metazoa;Eumetazoa;Bilateria;Protostomia;Spiralia;Lophotrochozoa;Mollusca;Gastropoda;Neomphalina;Neomphaloidea;Peltospiridae;Gigantopelta;Gigantopelta aegis  
UdeM00000025158 29159 189.9 UdeM00000025158 XP\_034302756.1 62.5 136  
51 0 4 139 9 144 2.20E-45 189.9 29159 cellular

organisms;Eukaryota;Opisthokonta;Metazoa;Eumetazoa;Bilateria;Protostomia;Spiralia;Lophotrochozoa;Mollusca;Bivalvia;Autobranchia;Pteriormorphia;Ostreida;Ostreoidea;Ostreidae;Crassostrea;Crassostrea gigas  
UdeM00000025159 6596 1158.3 UdeM00000025159 XP\_045205163.1 46  
1466 654 37 27 1399 28 1448 0.00E+00 1158.3 6596  
cellular

organisms;Eukaryota;Opisthokonta;Metazoa;Eumetazoa;Bilateria;Protostomia;Spiralia;Lophotrochozoa;Mollusca;Bivalvia;Autobranchia;Heteroconchia;Euheterodonta;Imparidentia;Venerida;Veneroidea;Veneridae;Mercenaria;Mercenaria mercenaria  
UdeM00000025160 6596 1060.1 UdeM00000025160 XP\_045205832.1 79.5  
658 122 5 1 645 1 658 1.20E-306 1060.1 6596  
cellular

organisms;Eukaryota;Opisthokonta;Metazoa;Eumetazoa;Bilateria;Protostomia;Spiralia;Lophotrochozoa;Mollusca;Bivalvia;Autobranchia;Heteroconchia;Euheterodonta;Imparidentia;Venerida;Veneroidea;Veneridae;Mercenaria;Mercenaria mercenaria  
UdeM00000025161 6596 5430.1 UdeM00000025161 XP\_045204551.1 57.4  
5222 1883 92 14 5064 6 5056 0.00E+00 5430.1 6596  
cellular

organisms;Eukaryota;Opisthokonta;Metazoa;Eumetazoa;Bilateria;Protostomia;Spiralia;Lophotrochozoa;Mollusca;Bivalvia;Autobranchia;Heteroconchia;Euheterodonta;Imparidentia;Venerida;Veneroidea;Veneridae;Mercenaria;Mercenaria mercenaria  
UdeM00000025162 6596 526.2 UdeM00000025162 XP\_045204541.1 78.7 497  
96 3 1 489 212 706 4.50E-146 526.2 6596 cellular

organisms;Eukaryota;Opisthokonta;Metazoa;Eumetazoa;Bilateria;Protostomia;Spiralia;Lophotrochozoa;Mollusca;Bivalvia;Autobranchia;Heteroconchia;Euheterodonta;Imparidentia;Venerida;Veneroidea;Veneridae;Mercenaria;Mercenaria mercenaria  
UdeM00000025163 6596 685.6 UdeM00000025163 XP\_045204541.1 79.2 600  
101 4 1 578 109 706 5.30E-194 685.6 6596 cellular

organisms;Eukaryota;Opisthokonta;Metazoa;Eumetazoa;Bilateria;Protostomia;Spiralia;Lophotrochozoa;Mollusca;Bivalvia;Autobranchia;Heteroconchia;Euheterodonta;Imparidentia;Venerida;Veneroidea;Veneridae;Mercenaria;Mercenaria mercenaria  
UdeM00000025164 303518 129 UdeM00000025164 XP\_005751641.1 49.3  
142 69 2 3 141 291 432 4.70E-27 129 303518  
cellular

organisms;Eukaryota;Opisthokonta;Metazoa;Eumetazoa;Bilateria;Deuterostomia;Chordata;Craniata;Vertebrata;Gnathostomata;Teleostomi;Euteleostomi;Actinopterygii;Actinopteri;Neopterygii;Teleostei;Osteoglossocephalai;Clupeocephala;Euteleostei;Neoteleostei;Eurypterygia;Ctenosquamata;Acanthopterygii;Euacanthopterygii;Percomorphaceae;Ovalentaria;Cichlomorphae;Cichl

iformes;Cichlidae;African  
cichlids;Pseudocrenilabrinae;Haplochromini;Pundamilia;Pundamilia nyererei  
UdeM00000025165 7574 137.1 UdeM00000025165 XP\_013384614.1 71.7 92  
23 1 1 89 1 92 1.50E-29 137.1 7574 cellular  
organisms;Eukaryota;Opisthokonta;Metazoa;Eumetazoa;Bilateria;Protostomia;  
Spiralia;Lophotrochozoa;Brachiopoda;Linguliformea;Lingulata;Lingulida;Lin  
guloidea;Lingulidae;Lingula;Lingula anatina  
UdeM00000025166 400727 115.2 UdeM00000025166 XP\_025086911.1 63.8  
80 26 1 5 84 9 85 4.30E-23 115.2 400727  
cellular  
organisms;Eukaryota;Opisthokonta;Metazoa;Eumetazoa;Bilateria;Protostomia;  
Spiralia;Lophotrochozoa;Mollusca;Gastropoda;Caenogastropoda;Architaeniogl  
ossa;Ampullarioidea;Ampullariidae;Pomacea;Pomacea canaliculata  
UdeM00000025167 6596 692.6 UdeM00000025167 XP\_045204430.1 77.5 512  
97 3 992 1500 487 983 1.10E-195 692.6 6596 cellular  
organisms;Eukaryota;Opisthokonta;Metazoa;Eumetazoa;Bilateria;Protostomia;  
Spiralia;Lophotrochozoa;Mollusca;Bivalvia;Autobranchia;Heteroconchia;Euhe  
terodonta;Imparidentia;Venerida;Veneroidea;Veneridae;Mercenaria;Mercenari  
a mercenaria  
UdeM00000025168 29159 718 UdeM00000025168 XP\_011448163.2 84.8 461  
65 1 1 461 1 456 7.70E-204 718 29159 cellular  
organisms;Eukaryota;Opisthokonta;Metazoa;Eumetazoa;Bilateria;Protostomia;  
Spiralia;Lophotrochozoa;Mollusca;Bivalvia;Autobranchia;Pteriormorphia;Ostr  
eida;Ostreoidea;Ostreidae;Crassostrea;Crassostrea gigas  
UdeM00000025169 151771 111.3 UdeM00000025169 XP\_028408207.1 39.5  
157 94 1 84 240 138 293 1.70E-21 111.3 151771  
cellular  
organisms;Eukaryota;Opisthokonta;Metazoa;Eumetazoa;Cnidaria;Anthozoa;Octo  
corallia;Alcyonacea;Alcyoniina;Nephtheidae;Dendronephthya;Dendronephthya  
gigantea  
UdeM00000025170 6596 140.2 UdeM00000025170 XP\_045204433.1 44 159  
84 3 1 155 1 158 2.40E-30 140.2 6596 cellular  
organisms;Eukaryota;Opisthokonta;Metazoa;Eumetazoa;Bilateria;Protostomia;  
Spiralia;Lophotrochozoa;Mollusca;Bivalvia;Autobranchia;Heteroconchia;Euhe  
terodonta;Imparidentia;Venerida;Veneroidea;Veneridae;Mercenaria;Mercenari  
a mercenaria  
UdeM00000025171 29159 520.4 UdeM00000025171 XP\_011456694.2 68.2 381  
118 1 1 381 1 378 1.90E-144 520.4 29159 cellular  
organisms;Eukaryota;Opisthokonta;Metazoa;Eumetazoa;Bilateria;Protostomia;  
Spiralia;Lophotrochozoa;Mollusca;Bivalvia;Autobranchia;Pteriormorphia;Ostr  
eida;Ostreoidea;Ostreidae;Crassostrea;Crassostrea gigas  
UdeM00000025172 6526 73.9 UdeM00000025172 XP\_013095497.1 38.3 94  
56 2 10 102 30 122 1.50E-10 73.9 6526 cellular  
organisms;Eukaryota;Opisthokonta;Metazoa;Eumetazoa;Bilateria;Protostomia;  
Spiralia;Lophotrochozoa;Mollusca;Gastropoda;Heterobranchia;Euthyneura;Pan  
pulmonata;Hygrophila;Lymnaeioidea;Planorbidae;Biomphalaria;Biomphalaria  
glabrata  
UdeM00000025173 1735272 604.7 UdeM00000025173 XP\_041358113.1 60  
493 179 5 74 548 17 509 1.10E-169 604.7 1735272  
cellular  
organisms;Eukaryota;Opisthokonta;Metazoa;Eumetazoa;Bilateria;Protostomia;  
Spiralia;Lophotrochozoa;Mollusca;Gastropoda;Neomphalina;Neomphaloidea;Pel  
tospiridae;Gigantopelta;Gigantopelta aegis

UdeM00000025176 6596 390.6 UdeM00000025176 XP\_045203973.1 42.8 479  
 269 4 27 503 39 514 3.10E-105 390.6 6596 cellular  
 organisms;Eukaryota;Opisthokonta;Metazoa;Eumetazoa;Bilateria;Protostomia;  
 Spiralia;Lophotrochozoa;Mollusca;Bivalvia;Autobranhia;Heteroconchia;Euhe  
 terodonta;Imparidentia;Venerida;Veneroidea;Veneridae;Mercenaria;Mercenari  
 a mercenaria  
 UdeM00000025177 6596 145.6 UdeM00000025177 XP\_045203974.1 65 100  
 35 0 10 109 36 135 3.70E-32 145.6 6596 cellular  
 organisms;Eukaryota;Opisthokonta;Metazoa;Eumetazoa;Bilateria;Protostomia;  
 Spiralia;Lophotrochozoa;Mollusca;Bivalvia;Autobranhia;Heteroconchia;Euhe  
 terodonta;Imparidentia;Venerida;Veneroidea;Veneridae;Mercenaria;Mercenari  
 a mercenaria  
 UdeM00000025178 6596 285 UdeM00000025178 XP\_045203961.1 71.5 193  
 55 0 2 194 6 198 7.00E-74 285 6596 cellular  
 organisms;Eukaryota;Opisthokonta;Metazoa;Eumetazoa;Bilateria;Protostomia;  
 Spiralia;Lophotrochozoa;Mollusca;Bivalvia;Autobranhia;Heteroconchia;Euhe  
 terodonta;Imparidentia;Venerida;Veneroidea;Veneridae;Mercenaria;Mercenari  
 a mercenaria  
 UdeM00000025179 6573 1024.6 UdeM00000025179 XP\_021375935.1 78.9  
 587 121 1 43 626 25 611 5.20E-296 1024.6 6573  
 cellular  
 organisms;Eukaryota;Opisthokonta;Metazoa;Eumetazoa;Bilateria;Protostomia;  
 Spiralia;Lophotrochozoa;Mollusca;Bivalvia;Autobranhia;Pteriormorphia;Pect  
 inida;Pectinoidea;Pectinidae;Mizuhopecten;Mizuhopecten yessoensis  
 UdeM00000025180 6596 482.6 UdeM00000025180 XP\_045205224.1 57.6 422  
 171 3 8 421 17 438 5.00E-133 482.6 6596 cellular  
 organisms;Eukaryota;Opisthokonta;Metazoa;Eumetazoa;Bilateria;Protostomia;  
 Spiralia;Lophotrochozoa;Mollusca;Bivalvia;Autobranhia;Heteroconchia;Euhe  
 terodonta;Imparidentia;Venerida;Veneroidea;Veneridae;Mercenaria;Mercenari  
 a mercenaria  
 UdeM00000025181 6579 339.3 UdeM00000025181 XP\_033743800.1 53.8 329  
 152 0 2 330 6 334 5.30E-90 339.3 6579 cellular  
 organisms;Eukaryota;Opisthokonta;Metazoa;Eumetazoa;Bilateria;Protostomia;  
 Spiralia;Lophotrochozoa;Mollusca;Bivalvia;Autobranhia;Pteriormorphia;Pect  
 inida;Pectinoidea;Pectinidae;Pecten;Pecten maximus  
 UdeM00000025182 6596 857.4 UdeM00000025182 XP\_045204610.1 71.9 563  
 143 3 17 564 59 621 1.10E-245 857.4 6596 cellular  
 organisms;Eukaryota;Opisthokonta;Metazoa;Eumetazoa;Bilateria;Protostomia;  
 Spiralia;Lophotrochozoa;Mollusca;Bivalvia;Autobranhia;Heteroconchia;Euhe  
 terodonta;Imparidentia;Venerida;Veneroidea;Veneridae;Mercenaria;Mercenari  
 a mercenaria  
 UdeM00000025183 37653 94 UdeM00000025183 XP\_014781215.1 62.7 67  
 25 0 14 80 31 97 9.80E-17 94 37653 cellular  
 organisms;Eukaryota;Opisthokonta;Metazoa;Eumetazoa;Bilateria;Protostomia;  
 Spiralia;Lophotrochozoa;Mollusca;Cephalopoda;Coleoidea;Octopodiformes;Oct  
 opoda;Incirrata;Octopodidae;Octopus;Octopus bimaculoides  
 UdeM00000025184 225164 623.6 UdeM00000025184 XP\_009047116.1 73.1  
 417 111 1 12 427 204 620 1.90E-175 623.6 225164  
 cellular  
 organisms;Eukaryota;Opisthokonta;Metazoa;Eumetazoa;Bilateria;Protostomia;  
 Spiralia;Lophotrochozoa;Mollusca;Gastropoda;Patellogastropoda;Lottioida;  
 Lottiidae;Lottia;Lottia gigantea  
 UdeM00000025185 1735272 272.7 UdeM00000025185 XP\_041356928.1 62.3  
 223 70 4 44 264 29 239 4.90E-70 272.7 1735272

cellular  
organisms;Eukaryota;Opisthokonta;Metazoa;Eumetazoa;Bilateria;Protostomia;  
Spiralia;Lophotrochozoa;Mollusca;Gastropoda;Neomphalina;Neomphaloidea;Pel  
tospiridae;Gigantopelta;Gigantopelta aegis  
UdeM00000025186 29159 1017.3 UdeM00000025186 XP\_011423016.2 79.9  
616 124 0 792 1407 623 1238 1.90E-293 1017.3  
29159 cellular  
organisms;Eukaryota;Opisthokonta;Metazoa;Eumetazoa;Bilateria;Protostomia;  
Spiralia;Lophotrochozoa;Mollusca;Bivalvia;Autobranchia;Pteriormorphia;Ostr  
eida;Ostreoidea;Ostreidae;Crassostrea;Crassostrea gigas  
UdeM00000025189 6596 124.4 UdeM00000025189 XP\_045202738.1 45.7 164  
74 4 22 181 19 171 2.20E-25 124.4 6596 cellular  
organisms;Eukaryota;Opisthokonta;Metazoa;Eumetazoa;Bilateria;Protostomia;  
Spiralia;Lophotrochozoa;Mollusca;Bivalvia;Autobranchia;Heteroconchia;Euhe  
terodonta;Imparidentia;Venerida;Veneroidea;Veneridae;Mercenaria;Mercenari  
a mercenaria  
UdeM00000025191 6596 238.8 UdeM00000025191 XP\_045202740.1 59.5 205  
71 4 13 214 10 205 6.40E-60 238.8 6596 cellular  
organisms;Eukaryota;Opisthokonta;Metazoa;Eumetazoa;Bilateria;Protostomia;  
Spiralia;Lophotrochozoa;Mollusca;Bivalvia;Autobranchia;Heteroconchia;Euhe  
terodonta;Imparidentia;Venerida;Veneroidea;Veneridae;Mercenaria;Mercenari  
a mercenaria  
UdeM00000025194 6596 394.4 UdeM00000025194 XP\_045204909.1 47 428  
210 5 3 425 10 425 2.00E-106 394.4 6596 cellular  
organisms;Eukaryota;Opisthokonta;Metazoa;Eumetazoa;Bilateria;Protostomia;  
Spiralia;Lophotrochozoa;Mollusca;Bivalvia;Autobranchia;Heteroconchia;Euhe  
terodonta;Imparidentia;Venerida;Veneroidea;Veneridae;Mercenaria;Mercenari  
a mercenaria  
UdeM00000025195 6573 513.5 UdeM00000025195 XP\_021339020.1 67 424  
131 1 1 424 1 415 2.70E-142 513.5 6573 cellular  
organisms;Eukaryota;Opisthokonta;Metazoa;Eumetazoa;Bilateria;Protostomia;  
Spiralia;Lophotrochozoa;Mollusca;Bivalvia;Autobranchia;Pteriormorphia;Pect  
inida;Pectinoidea;Pectinidae;Mizuhopecten;Mizuhopecten yessoensis  
UdeM00000025196 6596 698 UdeM00000025196 XP\_045203692.1 64.1 577  
196 3 1 577 1 566 1.00E-197 698 6596 cellular  
organisms;Eukaryota;Opisthokonta;Metazoa;Eumetazoa;Bilateria;Protostomia;  
Spiralia;Lophotrochozoa;Mollusca;Bivalvia;Autobranchia;Heteroconchia;Euhe  
terodonta;Imparidentia;Venerida;Veneroidea;Veneridae;Mercenaria;Mercenari  
a mercenaria  
UdeM00000025197 6596 195.3 UdeM00000025197 XP\_045203692.1 55.8 163  
71 1 28 190 405 566 7.20E-47 195.3 6596 cellular  
organisms;Eukaryota;Opisthokonta;Metazoa;Eumetazoa;Bilateria;Protostomia;  
Spiralia;Lophotrochozoa;Mollusca;Bivalvia;Autobranchia;Heteroconchia;Euhe  
terodonta;Imparidentia;Venerida;Veneroidea;Veneridae;Mercenaria;Mercenari  
a mercenaria  
UdeM00000025198 6579 95.9 UdeM00000025198 XP\_033743710.1 83.3 48  
8 0 9 56 11 58 4.90E-17 95.9 6579 cellular  
organisms;Eukaryota;Opisthokonta;Metazoa;Eumetazoa;Bilateria;Protostomia;  
Spiralia;Lophotrochozoa;Mollusca;Bivalvia;Autobranchia;Pteriormorphia;Pect  
inida;Pectinoidea;Pectinidae;Pecten;Pecten maximus  
UdeM00000025199 77115 118.6 UdeM00000025199 XP\_038140435.1 22.2 535  
316 17 332 775 12 537 4.50E-23 118.6 77115 cellular  
organisms;Eukaryota;Opisthokonta;Metazoa;Eumetazoa;Bilateria;Deuterostomi  
a;Chordata;Craniata;Vertebrata;Gnathostomata;Teleostomi;Euteleostomi;Acti

nopterygii;Actinopteri;Neopterygii;Teleostei;Osteoglossocephalai;Clupeocephala;Euteleostomorpha;Neoteleostei;Eurypterygia;Ctenosquamata;Acanthomorphata;Euacanthomorphacea;Percomorphaceae;Ovalentaria;Atherinomorphae;Cyprinodontiformes;Cyprinodontoidei;Cyprinodontidae;Cyprinodontinae;Cyprinodontini;Cyprinodon;Cyprinodon tularosa

UdeM00000025200 77115 86.7 UdeM00000025200 XP\_038140435.1 29.4 204  
127 8 91 284 341 537 6.70E-14 86.7 77115 cellular

organisms;Eukaryota;Opisthokonta;Metazoa;Eumetazoa;Bilateria;Deuterostomia;Chordata;Craniata;Vertebrata;Gnathostomata;Teleostomi;Euteleostomi;Actinopterygii;Actinopteri;Neopterygii;Teleostei;Osteoglossocephalai;Clupeocephala;Euteleostomorpha;Neoteleostei;Eurypterygia;Ctenosquamata;Acanthomorphata;Euacanthomorphacea;Percomorphaceae;Ovalentaria;Atherinomorphae;Cyprinodontiformes;Cyprinodontoidei;Cyprinodontidae;Cyprinodontinae;Cyprinodontini;Cyprinodon;Cyprinodon tularosa

UdeM00000025202 6596 604 UdeM00000025202 XP\_045206270.1 41.6 844  
415 17 58 864 27 829 3.50E-169 604 6596 cellular

organisms;Eukaryota;Opisthokonta;Metazoa;Eumetazoa;Bilateria;Protostomia;Spiralia;Lophotrochozoa;Mollusca;Bivalvia;Autobranchia;Heteroconchia;Euheterodonta;Imparidentia;Venerida;Veneroidea;Veneridae;Mercenaria;Mercenaria mercenaria

UdeM00000025205 6565 842.4 UdeM00000025205 XP\_022323119.1 56.8 701  
267 9 5 682 15 702 4.00E-241 842.4 6565 cellular

organisms;Eukaryota;Opisthokonta;Metazoa;Eumetazoa;Bilateria;Protostomia;Spiralia;Lophotrochozoa;Mollusca;Bivalvia;Autobranchia;Pteriormorphia;Ostreida;Ostreioidea;Ostreidae;Crassostrea;Crassostrea virginica

UdeM00000025206 6565 1037.3 UdeM00000025206 XP\_022323119.1 70.1  
712 200 5 3 713 4 703 8.80E-300 1037.3 6565  
cellular

organisms;Eukaryota;Opisthokonta;Metazoa;Eumetazoa;Bilateria;Protostomia;Spiralia;Lophotrochozoa;Mollusca;Bivalvia;Autobranchia;Pteriormorphia;Ostreida;Ostreioidea;Ostreidae;Crassostrea;Crassostrea virginica

UdeM00000025207 6565 1042 UdeM00000025207 XP\_022323119.1 69.5 727  
194 5 3 728 4 703 3.70E-301 1042 6565 cellular

organisms;Eukaryota;Opisthokonta;Metazoa;Eumetazoa;Bilateria;Protostomia;Spiralia;Lophotrochozoa;Mollusca;Bivalvia;Autobranchia;Pteriormorphia;Ostreida;Ostreioidea;Ostreidae;Crassostrea;Crassostrea virginica

UdeM00000025208 6573 1947.6 UdeM00000025208 XP\_021348278.1 58.9  
2043 658 28 1 1993 1 1911 0.00E+00 1947.6 6573  
cellular

organisms;Eukaryota;Opisthokonta;Metazoa;Eumetazoa;Bilateria;Protostomia;Spiralia;Lophotrochozoa;Mollusca;Bivalvia;Autobranchia;Pteriormorphia;Pectinida;Pectinoidea;Pectinidae;Mizuhopecten;Mizuhopecten yessoensis

UdeM00000025209 400727 312.8 UdeM00000025209 XP\_025088528.1 60.3  
297 105 8 1 289 1 292 5.20E-82 312.8 400727  
cellular

organisms;Eukaryota;Opisthokonta;Metazoa;Eumetazoa;Bilateria;Protostomia;Spiralia;Lophotrochozoa;Mollusca;Gastropoda;Caenogastropoda;Architaenioglossa;Ampullarioidea;Ampullariidae;Pomacea;Pomacea canaliculata

UdeM00000025224 6500 408.3 UdeM00000025224 XP\_005103080.1 58.1 375  
146 4 2 365 110 484 1.30E-110 408.3 6500 cellular

organisms;Eukaryota;Opisthokonta;Metazoa;Eumetazoa;Bilateria;Protostomia;Spiralia;Lophotrochozoa;Mollusca;Gastropoda;Heterobranchia;Euthyneura;Tectipleura;Aplysiida;Aplysioidea;Aplysiidae;Aplysia;Aplysia californica



UdeM00000025225 6565 360.5 UdeM00000025225 XP\_022324860.1 49.4 401  
 188 4 54 449 314 704 3.20E-96 360.5 6565 cellular  
 organisms;Eukaryota;Opisthokonta;Metazoa;Eumetazoa;Bilateria;Protostomia;  
 Spiralia;Lophotrochozoa;Mollusca;Bivalvia;Autobranchia;Pteriomorpha;Ostr  
 eida;Ostreoidea;Ostreidae;Crassostrea;Crassostrea virginica  
 UdeM00000025227 6579 308.1 UdeM00000025227 XP\_033743895.1 50.9 383  
 148 10 1 376 1 350 1.50E-80 308.1 6579 cellular  
 organisms;Eukaryota;Opisthokonta;Metazoa;Eumetazoa;Bilateria;Protostomia;  
 Spiralia;Lophotrochozoa;Mollusca;Bivalvia;Autobranchia;Pteriomorpha;Pect  
 inida;Pectinoidea;Pectinidae;Pecten;Pecten maximus  
 UdeM00000025228 6579 99.4 UdeM00000025228 XP\_033743219.1 46.2 93  
 49 1 2 93 140 232 2.60E-18 99.4 6579 cellular  
 organisms;Eukaryota;Opisthokonta;Metazoa;Eumetazoa;Bilateria;Protostomia;  
 Spiralia;Lophotrochozoa;Mollusca;Bivalvia;Autobranchia;Pteriomorpha;Pect  
 inida;Pectinoidea;Pectinidae;Pecten;Pecten maximus  
 UdeM00000025229 6573 342.4 UdeM00000025229 XP\_021361341.1 46.2 539  
 208 17 56 559 92 583 1.10E-90 342.4 6573 cellular  
 organisms;Eukaryota;Opisthokonta;Metazoa;Eumetazoa;Bilateria;Protostomia;  
 Spiralia;Lophotrochozoa;Mollusca;Bivalvia;Autobranchia;Pteriomorpha;Pect  
 inida;Pectinoidea;Pectinidae;Mizuhopecten;Mizuhopecten yessoensis  
 UdeM00000025230 6573 455.3 UdeM00000025230 XP\_021360284.1 57.3 393  
 163 4 260 651 50 438 1.30E-124 455.3 6573 cellular  
 organisms;Eukaryota;Opisthokonta;Metazoa;Eumetazoa;Bilateria;Protostomia;  
 Spiralia;Lophotrochozoa;Mollusca;Bivalvia;Autobranchia;Pteriomorpha;Pect  
 inida;Pectinoidea;Pectinidae;Mizuhopecten;Mizuhopecten yessoensis  
 UdeM00000025231 2607531 1501.9 UdeM00000025231 XP\_029638531.1  
 57.7 1316 465 13 23 1322 469 1708 0.00E+00 1501.9  
 2607531 cellular  
 organisms;Eukaryota;Opisthokonta;Metazoa;Eumetazoa;Bilateria;Protostomia;  
 Spiralia;Lophotrochozoa;Mollusca;Cephalopoda;Coleoidea;Octopodiformes;Oct  
 opoda;Incirrata;Octopodidae;Octopus;Octopus sinensis  
 UdeM00000025232 6596 550.8 UdeM00000025232 XP\_045204753.1 63 414  
 149 3 3 413 1437 1849 1.50E-153 550.8 6596 cellular  
 organisms;Eukaryota;Opisthokonta;Metazoa;Eumetazoa;Bilateria;Protostomia;  
 Spiralia;Lophotrochozoa;Mollusca;Bivalvia;Autobranchia;Heteroconchia;Euhe  
 terodonta;Imparidentia;Venerida;Veneroidea;Veneridae;Mercenaria;Mercenari  
 a mercenaria  
 UdeM00000025233 6579 209.1 UdeM00000025233 XP\_033744344.1 54.4 160  
 73 0 2 161 149 308 4.10E-51 209.1 6579 cellular  
 organisms;Eukaryota;Opisthokonta;Metazoa;Eumetazoa;Bilateria;Protostomia;  
 Spiralia;Lophotrochozoa;Mollusca;Bivalvia;Autobranchia;Pteriomorpha;Pect  
 inida;Pectinoidea;Pectinidae;Pecten;Pecten maximus  
 UdeM00000025234 6579 107.8 UdeM00000025234 XP\_033744344.1 45.5 145  
 65 6 3 134 1 144 1.10E-20 107.8 6579 cellular  
 organisms;Eukaryota;Opisthokonta;Metazoa;Eumetazoa;Bilateria;Protostomia;  
 Spiralia;Lophotrochozoa;Mollusca;Bivalvia;Autobranchia;Pteriomorpha;Pect  
 inida;Pectinoidea;Pectinidae;Pecten;Pecten maximus  
 UdeM00000025235 6596 357.5 UdeM00000025235 XP\_045206384.1 50.3 340  
 123 4 14 352 36 330 2.00E-95 357.5 6596 cellular  
 organisms;Eukaryota;Opisthokonta;Metazoa;Eumetazoa;Bilateria;Protostomia;  
 Spiralia;Lophotrochozoa;Mollusca;Bivalvia;Autobranchia;Heteroconchia;Euhe  
 terodonta;Imparidentia;Venerida;Veneroidea;Veneridae;Mercenaria;Mercenari  
 a mercenaria

UdeM00000025236 6573 394.8 UdeM00000025236 XP\_021352157.1 45.1 812  
 364 15 1 763 1 779 3.90E-106 394.8 6573 cellular  
 organisms;Eukaryota;Opisthokonta;Metazoa;Eumetazoa;Bilateria;Protostomia;  
 Spiralia;Lophotrochozoa;Mollusca;Bivalvia;Autobranhia;Pteriomorphia;Pect  
 inida;Pectinoidea;Pectinidae;Mizuhopecten;Mizuhopecten yessoensis  
 UdeM00000025237 29159 184.9 UdeM00000025237 XP\_011429648.2 68.9 122  
 33 1 65 186 961 1077 9.80E-44 184.9 29159 cellular  
 organisms;Eukaryota;Opisthokonta;Metazoa;Eumetazoa;Bilateria;Protostomia;  
 Spiralia;Lophotrochozoa;Mollusca;Bivalvia;Autobranhia;Pteriomorphia;Ostr  
 eida;Ostreoidea;Ostreidae;Crassostrea;Crassostrea gigas  
 UdeM00000025238 6596 117.9 UdeM00000025238 XP\_045203996.1 61.9 97  
 36 1 1098 1194 420 515 9.10E-23 117.9 6596 cellular  
 organisms;Eukaryota;Opisthokonta;Metazoa;Eumetazoa;Bilateria;Protostomia;  
 Spiralia;Lophotrochozoa;Mollusca;Bivalvia;Autobranhia;Heteroconchia;Euhe  
 terodonta;Imparidentia;Venerida;Veneroidea;Veneridae;Mercenaria;Mercenari  
 a mercenaria  
 UdeM00000025239 6596 834.7 UdeM00000025239 XP\_045204006.1 59.4 756  
 260 15 1 754 56 766 9.20E-239 834.7 6596 cellular  
 organisms;Eukaryota;Opisthokonta;Metazoa;Eumetazoa;Bilateria;Protostomia;  
 Spiralia;Lophotrochozoa;Mollusca;Bivalvia;Autobranhia;Heteroconchia;Euhe  
 terodonta;Imparidentia;Venerida;Veneroidea;Veneridae;Mercenaria;Mercenari  
 a mercenaria  
 UdeM00000025240 6596 615.9 UdeM00000025240 XP\_045204007.1 61.1 537  
 195 6 2 532 161 689 4.70E-173 615.9 6596 cellular  
 organisms;Eukaryota;Opisthokonta;Metazoa;Eumetazoa;Bilateria;Protostomia;  
 Spiralia;Lophotrochozoa;Mollusca;Bivalvia;Autobranhia;Heteroconchia;Euhe  
 terodonta;Imparidentia;Venerida;Veneroidea;Veneridae;Mercenaria;Mercenari  
 a mercenaria  
 UdeM00000025241 6596 644 UdeM00000025241 XP\_045205866.1 51.5 681  
 293 11 4 670 7 664 2.10E-181 644 6596 cellular  
 organisms;Eukaryota;Opisthokonta;Metazoa;Eumetazoa;Bilateria;Protostomia;  
 Spiralia;Lophotrochozoa;Mollusca;Bivalvia;Autobranhia;Heteroconchia;Euhe  
 terodonta;Imparidentia;Venerida;Veneroidea;Veneridae;Mercenaria;Mercenari  
 a mercenaria  
 UdeM00000025242 6596 365.2 UdeM00000025242 XP\_045206603.1 43.7 428  
 236 4 2 429 11 433 1.30E-97 365.2 6596 cellular  
 organisms;Eukaryota;Opisthokonta;Metazoa;Eumetazoa;Bilateria;Protostomia;  
 Spiralia;Lophotrochozoa;Mollusca;Bivalvia;Autobranhia;Heteroconchia;Euhe  
 terodonta;Imparidentia;Venerida;Veneroidea;Veneridae;Mercenaria;Mercenari  
 a mercenaria  
 UdeM00000025243 6596 371.3 UdeM00000025243 XP\_045206603.1 45.3 422  
 225 4 4 424 13 429 1.70E-99 371.3 6596 cellular  
 organisms;Eukaryota;Opisthokonta;Metazoa;Eumetazoa;Bilateria;Protostomia;  
 Spiralia;Lophotrochozoa;Mollusca;Bivalvia;Autobranhia;Heteroconchia;Euhe  
 terodonta;Imparidentia;Venerida;Veneroidea;Veneridae;Mercenaria;Mercenari  
 a mercenaria  
 UdeM00000025244 6596 741.5 UdeM00000025244 XP\_045203583.1 47 879  
 397 18 34 878 38 881 1.20E-210 741.5 6596 cellular  
 organisms;Eukaryota;Opisthokonta;Metazoa;Eumetazoa;Bilateria;Protostomia;  
 Spiralia;Lophotrochozoa;Mollusca;Bivalvia;Autobranhia;Heteroconchia;Euhe  
 terodonta;Imparidentia;Venerida;Veneroidea;Veneridae;Mercenaria;Mercenari  
 a mercenaria  
 UdeM00000025245 1937702 68.9 UdeM00000025245 XP\_043053154.1 26.9  
 171 115 4 292 455 210 377 1.90E-08 68.9 1937702

cellular  
organisms;Eukaryota;Opisthokonta;Fungi;Dikarya;Ascomycota;saccharomyceta;  
Saccharomycotina;Saccharomycetes;Saccharomycetales;Pichiaceae;Ogataea;Oga  
taea haglerorum  
UdeM00000025246 6596 84.7 UdeM00000025246 XP\_045204036.1 48.8 86  
37 2 28 109 135 217 8.40E-14 84.7 6596 cellular  
organisms;Eukaryota;Opisthokonta;Metazoa;Eumetazoa;Bilateria;Protostomia;  
Spiralia;Lophotrochozoa;Mollusca;Bivalvia;Autobranchia;Heteroconchia;Euhe  
terodonta;Imparidentia;Venerida;Veneroidea;Veneridae;Mercenaria;Mercenari  
a mercenaria  
UdeM00000025247 2652724 114.4 UdeM00000025247 XP\_020900102.1 32.5  
209 100 6 27 197 45 250 1.80E-22 114.4 2652724  
cellular  
organisms;Eukaryota;Opisthokonta;Metazoa;Eumetazoa;Cnidaria;Anthozoa;Hexa  
corallia;Actiniaria;Aiptasiidae;Exaiptasia;Exaiptasia diaphana  
UdeM00000025248 6596 150.2 UdeM00000025248 XP\_045204036.1 57 114  
48 1 31 144 105 217 2.10E-33 150.2 6596 cellular  
organisms;Eukaryota;Opisthokonta;Metazoa;Eumetazoa;Bilateria;Protostomia;  
Spiralia;Lophotrochozoa;Mollusca;Bivalvia;Autobranchia;Heteroconchia;Euhe  
terodonta;Imparidentia;Venerida;Veneroidea;Veneridae;Mercenaria;Mercenari  
a mercenaria  
UdeM00000025249 1735272 160.6 UdeM00000025249 XP\_041367532.1 39.9  
258 142 3 87 338 30 280 3.50E-36 160.6 1735272  
cellular  
organisms;Eukaryota;Opisthokonta;Metazoa;Eumetazoa;Bilateria;Protostomia;  
Spiralia;Lophotrochozoa;Mollusca;Gastropoda;Neomphalina;Neomphaloidea;Pel  
tospiridae;Gigantopelta;Gigantopelta aegis  
UdeM00000025250 1735272 183.7 UdeM00000025250 XP\_041354040.1 45.3  
212 101 1 109 305 150 361 3.60E-43 183.7 1735272  
cellular  
organisms;Eukaryota;Opisthokonta;Metazoa;Eumetazoa;Bilateria;Protostomia;  
Spiralia;Lophotrochozoa;Mollusca;Gastropoda;Neomphalina;Neomphaloidea;Pel  
tospiridae;Gigantopelta;Gigantopelta aegis  
UdeM00000025251 1735272 186.8 UdeM00000025251 XP\_041354040.1 45.3  
214 102 1 95 293 148 361 4.20E-44 186.8 1735272  
cellular  
organisms;Eukaryota;Opisthokonta;Metazoa;Eumetazoa;Bilateria;Protostomia;  
Spiralia;Lophotrochozoa;Mollusca;Gastropoda;Neomphalina;Neomphaloidea;Pel  
tospiridae;Gigantopelta;Gigantopelta aegis  
UdeM00000025252 6596 114.8 UdeM00000025252 XP\_045156958.1 39.1 197  
107 4 9 203 7 192 1.30E-22 114.8 6596 cellular  
organisms;Eukaryota;Opisthokonta;Metazoa;Eumetazoa;Bilateria;Protostomia;  
Spiralia;Lophotrochozoa;Mollusca;Bivalvia;Autobranchia;Heteroconchia;Euhe  
terodonta;Imparidentia;Venerida;Veneroidea;Veneridae;Mercenaria;Mercenari  
a mercenaria  
UdeM00000025254 6565 357.1 UdeM00000025254 XP\_022327050.1 55.6 306  
136 0 1 306 1 306 2.40E-95 357.1 6565 cellular  
organisms;Eukaryota;Opisthokonta;Metazoa;Eumetazoa;Bilateria;Protostomia;  
Spiralia;Lophotrochozoa;Mollusca;Bivalvia;Autobranchia;Pteriomorphia;Ostr  
eida;Ostreoidea;Ostreidae;Crassostrea;Crassostrea virginica  
UdeM00000025255 1735272 645.6 UdeM00000025255 XP\_041358501.1 53.1  
606 258 6 1 592 318 911 7.10E-182 645.6 1735272  
cellular  
organisms;Eukaryota;Opisthokonta;Metazoa;Eumetazoa;Bilateria;Protostomia;

Spiralia;Lophotrochozoa;Mollusca;Gastropoda;Neomphalina;Neomphaloidea;Pel  
tospiridae;Gigantopelta;Gigantopelta aegis  
UdeM00000025256 6565 96.7 UdeM00000025256 XP\_022327050.1 75.8 62  
15 0 126 187 907 968 3.40E-17 96.7 6565 cellular  
organisms;Eukaryota;Opisthokonta;Metazoa;Eumetazoa;Bilateria;Protostomia;  
Spiralia;Lophotrochozoa;Mollusca;Bivalvia;Autobranchia;Pteriormorphia;Ostr  
eida;Ostreoidea;Ostreidae;Crassostrea;Crassostrea virginica  
UdeM00000025257 6596 230.7 UdeM00000025257 XP\_045189699.1 42.6 495  
187 9 54 451 859 1353 3.70E-57 230.7 6596 cellular  
organisms;Eukaryota;Opisthokonta;Metazoa;Eumetazoa;Bilateria;Protostomia;  
Spiralia;Lophotrochozoa;Mollusca;Bivalvia;Autobranchia;Heteroconchia;Euhe  
terodonta;Imparidentia;Venerida;Veneroidea;Veneridae;Mercenaria;Mercenari  
a mercenaria  
UdeM00000025258 6596 230.7 UdeM00000025258 XP\_045189699.1 42.6 495  
187 9 54 451 859 1353 3.70E-57 230.7 6596 cellular  
organisms;Eukaryota;Opisthokonta;Metazoa;Eumetazoa;Bilateria;Protostomia;  
Spiralia;Lophotrochozoa;Mollusca;Bivalvia;Autobranchia;Heteroconchia;Euhe  
terodonta;Imparidentia;Venerida;Veneroidea;Veneridae;Mercenaria;Mercenari  
a mercenaria  
UdeM00000025259 6596 159.5 UdeM00000025259 XP\_045171063.1 35.3 252  
158 5 15 264 7 255 6.10E-36 159.5 6596 cellular  
organisms;Eukaryota;Opisthokonta;Metazoa;Eumetazoa;Bilateria;Protostomia;  
Spiralia;Lophotrochozoa;Mollusca;Bivalvia;Autobranchia;Heteroconchia;Euhe  
terodonta;Imparidentia;Venerida;Veneroidea;Veneridae;Mercenaria;Mercenari  
a mercenaria  
UdeM00000025260 6596 130.6 UdeM00000025260 XP\_045171063.1 36 211  
130 5 14 222 48 255 2.60E-27 130.6 6596 cellular  
organisms;Eukaryota;Opisthokonta;Metazoa;Eumetazoa;Bilateria;Protostomia;  
Spiralia;Lophotrochozoa;Mollusca;Bivalvia;Autobranchia;Heteroconchia;Euhe  
terodonta;Imparidentia;Venerida;Veneroidea;Veneridae;Mercenaria;Mercenari  
a mercenaria  
UdeM00000025261 7994 163.3 UdeM00000025261 XP\_022537161.1 94.2 86  
5 0 32 117 1 86 1.90E-37 163.3 7994 cellular  
organisms;Eukaryota;Opisthokonta;Metazoa;Eumetazoa;Bilateria;Deuterostomi  
a;Chordata;Craniata;Vertebrata;Gnathostomata;Teleostomi;Euteleostomi;Acti  
nopterygii;Actinopteri;Neopterygii;Teleostei;Osteoglossocephalai;Clupeoce  
phala;Otomorpha;Ostariophysi;Otophysi;Characiphysae;Characiformes;Characo  
idei;Characidae;Stethaprioninae;Astyanax;Astyanax mexicanus  
UdeM00000025262 37003 87 UdeM00000025262 XP\_017260744.1 55 60  
27 0 141 200 78 137 2.90E-14 87 37003 cellular  
organisms;Eukaryota;Opisthokonta;Metazoa;Eumetazoa;Bilateria;Deuterostomi  
a;Chordata;Craniata;Vertebrata;Gnathostomata;Teleostomi;Euteleostomi;Acti  
nopterygii;Actinopteri;Neopterygii;Teleostei;Osteoglossocephalai;Clupeoce  
phala;Euteleosteomorpha;Neoteleostei;Eurypterygia;Ctenosquamata;Acanthomo  
rphata;Euacanthomorphacea;Percomorphaceae;Ovalentaria;Atherinomorphae;Cyp  
rinodontiformes;Aplocheiloidei;Rivulidae;Kryptolebias;Kryptolebias  
marmoratus  
UdeM00000025264 6596 583.2 UdeM00000025264 XP\_045203022.1 43.9 585  
284 6 19 599 29 573 4.20E-163 583.2 6596 cellular  
organisms;Eukaryota;Opisthokonta;Metazoa;Eumetazoa;Bilateria;Protostomia;  
Spiralia;Lophotrochozoa;Mollusca;Bivalvia;Autobranchia;Heteroconchia;Euhe  
terodonta;Imparidentia;Venerida;Veneroidea;Veneridae;Mercenaria;Mercenari  
a mercenaria

UdeM00000025265 6596 142.9 UdeM00000025265 XP\_045202791.1 41.9 198  
 98 6 5 199 7 190 4.40E-31 142.9 6596 cellular  
 organisms;Eukaryota;Opisthokonta;Metazoa;Eumetazoa;Bilateria;Protostomia;  
 Spiralia;Lophotrochozoa;Mollusca;Bivalvia;Autobranchia;Heteroconchia;Euhe  
 terodonta;Imparidentia;Venerida;Veneroidea;Veneridae;Mercenaria;Mercenari  
 a mercenaria  
 UdeM00000025266 6579 248.8 UdeM00000025266 XP\_033742790.1 37 395  
 234 6 71 461 16 399 2.40E-62 248.8 6579 cellular  
 organisms;Eukaryota;Opisthokonta;Metazoa;Eumetazoa;Bilateria;Protostomia;  
 Spiralia;Lophotrochozoa;Mollusca;Bivalvia;Autobranchia;Pteriormorphia;Pect  
 inida;Pectinoidea;Pectinidae;Pecten;Pecten maximus  
 UdeM00000025268 6565 535 UdeM00000025268 XP\_022327844.1 58.5 487  
 190 3 1 482 58 537 9.80E-149 535 6565 cellular  
 organisms;Eukaryota;Opisthokonta;Metazoa;Eumetazoa;Bilateria;Protostomia;  
 Spiralia;Lophotrochozoa;Mollusca;Bivalvia;Autobranchia;Pteriormorphia;Ostr  
 eida;Ostreoidea;Ostreidae;Crassostrea;Crassostrea virginica  
 UdeM00000025269 6565 559.7 UdeM00000025269 XP\_022328337.1 56.5 522  
 213 4 26 540 21 535 6.80E-156 559.7 6565 cellular  
 organisms;Eukaryota;Opisthokonta;Metazoa;Eumetazoa;Bilateria;Protostomia;  
 Spiralia;Lophotrochozoa;Mollusca;Bivalvia;Autobranchia;Pteriormorphia;Ostr  
 eida;Ostreoidea;Ostreidae;Crassostrea;Crassostrea virginica  
 UdeM00000025270 6596 439.5 UdeM00000025270 XP\_045204896.1 58.3 393  
 147 6 34 420 28 409 4.80E-120 439.5 6596 cellular  
 organisms;Eukaryota;Opisthokonta;Metazoa;Eumetazoa;Bilateria;Protostomia;  
 Spiralia;Lophotrochozoa;Mollusca;Bivalvia;Autobranchia;Heteroconchia;Euhe  
 terodonta;Imparidentia;Venerida;Veneroidea;Veneridae;Mercenaria;Mercenari  
 a mercenaria  
 UdeM00000025271 6565 176.4 UdeM00000025271 XP\_022320066.1 49.5 182  
 88 3 4 185 2 179 3.50E-41 176.4 6565 cellular  
 organisms;Eukaryota;Opisthokonta;Metazoa;Eumetazoa;Bilateria;Protostomia;  
 Spiralia;Lophotrochozoa;Mollusca;Bivalvia;Autobranchia;Pteriormorphia;Ostr  
 eida;Ostreoidea;Ostreidae;Crassostrea;Crassostrea virginica  
 UdeM00000025272 6596 467.6 UdeM00000025272 XP\_045204917.1 58.7 407  
 159 3 5 406 37 439 1.60E-128 467.6 6596 cellular  
 organisms;Eukaryota;Opisthokonta;Metazoa;Eumetazoa;Bilateria;Protostomia;  
 Spiralia;Lophotrochozoa;Mollusca;Bivalvia;Autobranchia;Heteroconchia;Euhe  
 terodonta;Imparidentia;Venerida;Veneroidea;Veneridae;Mercenaria;Mercenari  
 a mercenaria  
 UdeM00000025273 6596 487.6 UdeM00000025273 XP\_045204271.1 42.5 595  
 313 9 55 638 4 580 2.30E-134 487.6 6596 cellular  
 organisms;Eukaryota;Opisthokonta;Metazoa;Eumetazoa;Bilateria;Protostomia;  
 Spiralia;Lophotrochozoa;Mollusca;Bivalvia;Autobranchia;Heteroconchia;Euhe  
 terodonta;Imparidentia;Venerida;Veneroidea;Veneridae;Mercenaria;Mercenari  
 a mercenaria  
 UdeM00000025274 6596 610.9 UdeM00000025274 XP\_045202781.1 53 577  
 261 6 6 575 8 581 1.60E-171 610.9 6596 cellular  
 organisms;Eukaryota;Opisthokonta;Metazoa;Eumetazoa;Bilateria;Protostomia;  
 Spiralia;Lophotrochozoa;Mollusca;Bivalvia;Autobranchia;Heteroconchia;Euhe  
 terodonta;Imparidentia;Venerida;Veneroidea;Veneridae;Mercenaria;Mercenari  
 a mercenaria  
 UdeM00000025275 6596 600.9 UdeM00000025275 XP\_045203759.1 51 574  
 275 5 7 576 19 590 1.70E-168 600.9 6596 cellular  
 organisms;Eukaryota;Opisthokonta;Metazoa;Eumetazoa;Bilateria;Protostomia;  
 Spiralia;Lophotrochozoa;Mollusca;Bivalvia;Autobranchia;Heteroconchia;Euhe

terodonta;Imparidentia;Venerida;Veneroidea;Veneridae;Mercenaria;Mercenari  
 a mercenaria  
 UdeM00000025276 6412 195.7 UdeM00000025276 XP\_009008669.1 39.1 266  
 150 4 137 402 133 386 1.20E-46 195.7 6412 cellular  
 organisms;Eukaryota;Opisthokonta;Metazoa;Eumetazoa;Bilateria;Protostomia;  
 Spiralia;Lophotrochozoa;Annelida;Clitellata;Hirudinea;Rhynchobdellida;Glo  
 ssisphoniidae;Helobdella;Helobdella robusta  
 UdeM00000025278 6596 315.5 UdeM00000025278 XP\_045205084.1 46.9 343  
 166 3 8 350 11 337 1.20E-82 315.5 6596 cellular  
 organisms;Eukaryota;Opisthokonta;Metazoa;Eumetazoa;Bilateria;Protostomia;  
 Spiralia;Lophotrochozoa;Mollusca;Bivalvia;Autobranchia;Heteroconchia;Euhe  
 terodonta;Imparidentia;Venerida;Veneroidea;Veneridae;Mercenaria;Mercenari  
 a mercenaria  
 UdeM00000025277 6596 262.7 UdeM00000025277 XP\_045205084.1 46.3 298  
 144 3 32 329 56 337 8.60E-67 262.7 6596 cellular  
 organisms;Eukaryota;Opisthokonta;Metazoa;Eumetazoa;Bilateria;Protostomia;  
 Spiralia;Lophotrochozoa;Mollusca;Bivalvia;Autobranchia;Heteroconchia;Euhe  
 terodonta;Imparidentia;Venerida;Veneroidea;Veneridae;Mercenaria;Mercenari  
 a mercenaria  
 UdeM00000025280 6573 119.8 UdeM00000025280 XP\_021345821.1 38.8 196  
 112 2 6 196 5 197 3.60E-23 119.8 6573 cellular  
 organisms;Eukaryota;Opisthokonta;Metazoa;Eumetazoa;Bilateria;Protostomia;  
 Spiralia;Lophotrochozoa;Mollusca;Bivalvia;Autobranchia;Pteriormorphia;Pect  
 inida;Pectinoidea;Pectinidae;Mizuhopecten;Mizuhopecten yessoensis  
 UdeM00000025281 6596 291.6 UdeM00000025281 XP\_045203447.1 60.7 270  
 94 4 24 283 347 614 2.00E-75 291.6 6596 cellular  
 organisms;Eukaryota;Opisthokonta;Metazoa;Eumetazoa;Bilateria;Protostomia;  
 Spiralia;Lophotrochozoa;Mollusca;Bivalvia;Autobranchia;Heteroconchia;Euhe  
 terodonta;Imparidentia;Venerida;Veneroidea;Veneridae;Mercenaria;Mercenari  
 a mercenaria  
 UdeM00000025282 6573 102.1 UdeM00000025282 XP\_021371245.1 46.9 179  
 91 3 42 219 1242 1417 1.50E-18 102.1 6573 cellular  
 organisms;Eukaryota;Opisthokonta;Metazoa;Eumetazoa;Bilateria;Protostomia;  
 Spiralia;Lophotrochozoa;Mollusca;Bivalvia;Autobranchia;Pteriormorphia;Pect  
 inida;Pectinoidea;Pectinidae;Mizuhopecten;Mizuhopecten yessoensis  
 UdeM00000025283 6596 354.8 UdeM00000025283 XP\_045206000.1 41.4 967  
 389 29 63 889 134 1062 4.10E-94 354.8 6596 cellular  
 organisms;Eukaryota;Opisthokonta;Metazoa;Eumetazoa;Bilateria;Protostomia;  
 Spiralia;Lophotrochozoa;Mollusca;Bivalvia;Autobranchia;Heteroconchia;Euhe  
 terodonta;Imparidentia;Venerida;Veneroidea;Veneridae;Mercenaria;Mercenari  
 a mercenaria  
 UdeM00000025284 29159 329.7 UdeM00000025284 XP\_011442674.1 63.4 265  
 97 0 1 265 1 265 3.40E-87 329.7 29159 cellular  
 organisms;Eukaryota;Opisthokonta;Metazoa;Eumetazoa;Bilateria;Protostomia;  
 Spiralia;Lophotrochozoa;Mollusca;Bivalvia;Autobranchia;Pteriormorphia;Ostr  
 eida;Ostreoidea;Ostreidae;Crassostrea;Crassostrea gigas  
 UdeM00000025286 6596 304.3 UdeM00000025286 XP\_045206720.1 63 216  
 68 1 197 412 240 443 2.40E-79 304.3 6596 cellular  
 organisms;Eukaryota;Opisthokonta;Metazoa;Eumetazoa;Bilateria;Protostomia;  
 Spiralia;Lophotrochozoa;Mollusca;Bivalvia;Autobranchia;Heteroconchia;Euhe  
 terodonta;Imparidentia;Venerida;Veneroidea;Veneridae;Mercenaria;Mercenari  
 a mercenaria  
 UdeM00000025287 6596 301.2 UdeM00000025287 XP\_045206720.1 63.6 217  
 64 3 197 411 240 443 2.00E-78 301.2 6596 cellular

organisms;Eukaryota;Opisthokonta;Metazoa;Eumetazoa;Bilateria;Protostomia;Spiralia;Lophotrochozoa;Mollusca;Bivalvia;Autobranhia;Heteroconchia;Euheterodonta;Imparidentia;Venerida;Veneroidea;Veneridae;Mercenaria;Mercenaria mercenaria

UdeM00000025289 6596 291.6 UdeM00000025289 XP\_045204760.1 43 874  
420 22 1 844 1 826 3.20E-75 291.6 6596 cellular

organisms;Eukaryota;Opisthokonta;Metazoa;Eumetazoa;Bilateria;Protostomia;Spiralia;Lophotrochozoa;Mollusca;Bivalvia;Autobranhia;Heteroconchia;Euheterodonta;Imparidentia;Venerida;Veneroidea;Veneridae;Mercenaria;Mercenaria mercenaria

UdeM00000025290 6579 250 UdeM00000025290 XP\_033751799.1 37.2 398  
233 8 114 504 21 408 7.20E-63 250 6579 cellular

organisms;Eukaryota;Opisthokonta;Metazoa;Eumetazoa;Bilateria;Protostomia;Spiralia;Lophotrochozoa;Mollusca;Bivalvia;Autobranhia;Pteriomorphia;Pectinida;Pectinoidea;Pectinidae;Pecten;Pecten maximus

UdeM00000025291 6579 250 UdeM00000025291 XP\_033751799.1 37.2 398  
233 8 115 505 21 408 7.20E-63 250 6579 cellular

organisms;Eukaryota;Opisthokonta;Metazoa;Eumetazoa;Bilateria;Protostomia;Spiralia;Lophotrochozoa;Mollusca;Bivalvia;Autobranhia;Pteriomorphia;Pectinida;Pectinoidea;Pectinidae;Pecten;Pecten maximus

UdeM00000025292 6596 364 UdeM00000025292 XP\_045205172.1 45.6 406  
215 5 227 629 197 599 3.80E-97 364 6596 cellular

organisms;Eukaryota;Opisthokonta;Metazoa;Eumetazoa;Bilateria;Protostomia;Spiralia;Lophotrochozoa;Mollusca;Bivalvia;Autobranhia;Heteroconchia;Euheterodonta;Imparidentia;Venerida;Veneroidea;Veneridae;Mercenaria;Mercenaria mercenaria

UdeM00000025293 1735272 1406.3 UdeM00000025293 XP\_041360351.1  
39 2478 1298 50 102 2439 2560 4963 0.00E+00 1406.3  
1735272 cellular

organisms;Eukaryota;Opisthokonta;Metazoa;Eumetazoa;Bilateria;Protostomia;Spiralia;Lophotrochozoa;Mollusca;Gastropoda;Neomphalina;Neomphaloidea;Peltospiridae;Gigantopelta;Gigantopelta aegis

UdeM00000025294 6850 235.7 UdeM00000025294 XP\_022249667.1 48.4 248  
126 2 33 278 1696 1943 7.30E-59 235.7 6850 cellular

organisms;Eukaryota;Opisthokonta;Metazoa;Eumetazoa;Bilateria;Protostomia;Ecdysozoa;Panarthropoda;Arthropoda;Chelicerata;Merostomata;Xiphosura;Limulidae;Limulus;Limulus polyphemus

UdeM00000025295 6573 1369.4 UdeM00000025295 XP\_021352384.1 44.5  
1731 925 20 14 1729 14 1724 0.00E+00 1369.4 6573  
cellular

organisms;Eukaryota;Opisthokonta;Metazoa;Eumetazoa;Bilateria;Protostomia;Spiralia;Lophotrochozoa;Mollusca;Bivalvia;Autobranhia;Pteriomorphia;Pectinida;Pectinoidea;Pectinidae;Mizuhopecten;Mizuhopecten yessoensis

UdeM00000025299 1735272 820.1 UdeM00000025299 XP\_041359038.1 66.3  
576 191 3 37 612 112 684 1.90E-234 820.1 1735272  
cellular

organisms;Eukaryota;Opisthokonta;Metazoa;Eumetazoa;Bilateria;Protostomia;Spiralia;Lophotrochozoa;Mollusca;Gastropoda;Neomphalina;Neomphaloidea;Peltospiridae;Gigantopelta;Gigantopelta aegis

UdeM00000025300 6500 364 UdeM00000025300 XP\_005109735.2 54.5 347  
150 5 8 349 20 363 2.50E-97 364 6500 cellular

organisms;Eukaryota;Opisthokonta;Metazoa;Eumetazoa;Bilateria;Protostomia;Spiralia;Lophotrochozoa;Mollusca;Gastropoda;Heterobranhia;Euthyneura;Tectipleura;Aplysiida;Aplysioidae;Aplysiidae;Aplysia;Aplysia californica

UdeM00000025301 6579 692.2 UdeM00000025301 XP\_033742952.1 47 956  
 423 20 151 1081 169 1065 1.10E-195 692.2 6579 cellular  
 organisms;Eukaryota;Opisthokonta;Metazoa;Eumetazoa;Bilateria;Protostomia;  
 Spiralia;Lophotrochozoa;Mollusca;Bivalvia;Autobranhia;Pteriomorphia;Pect  
 inida;Pectinoidea;Pectinidae;Pecten;Pecten maximus  
 UdeM00000025302 6596 474.9 UdeM00000025302 XP\_045202907.1 77.5 298  
 66 1 1 298 27 323 7.30E-131 474.9 6596 cellular  
 organisms;Eukaryota;Opisthokonta;Metazoa;Eumetazoa;Bilateria;Protostomia;  
 Spiralia;Lophotrochozoa;Mollusca;Bivalvia;Autobranhia;Heteroconchia;Euhe  
 terodonta;Imparidentia;Venerida;Veneroidea;Veneridae;Mercenaria;Mercenari  
 a mercenaria  
 UdeM00000025303 7159 156.4 UdeM00000025303 XP\_021712114.1 26.6 403  
 277 6 11 409 1191 1578 9.90E-35 156.4 7159 cellular  
 organisms;Eukaryota;Opisthokonta;Metazoa;Eumetazoa;Bilateria;Protostomia;  
 Ecdysozoa;Panarthropoda;Arthropoda;Mandibulata;Pancrustacea;Hexapoda;Inse  
 cta;Dicondylia;Pterygota;Neoptera;Endopterygota;Diptera;Nematocera;Culico  
 morpha;Culicoidea;Culicidae;Culicinae;Aedini;Aedes;Stegomyia;Aedes  
 aegypti  
 UdeM00000025304 1220207 71.6 UdeM00000025304 XP\_041549944.1 32.7  
 113 75 1 14 125 635 747 9.50E-10 71.6 1220207  
 cellular  
 organisms;Eukaryota;Opisthokonta;Fungi;Dikarya;Ascomycota;saccharomyceta;  
 Pezizomycotina;leotiomyceta;Eurotiomycetes;Eurotiomycetidae;Eurotiales;As  
 pergillaceae;Aspergillus;Aspergillus puulaauensis  
 UdeM00000025305 50390 196.4 UdeM00000025305 XP\_028127913.1 43.7 231  
 129 1 1 231 1 230 4.10E-47 196.4 50390 cellular  
 organisms;Eukaryota;Opisthokonta;Metazoa;Eumetazoa;Bilateria;Protostomia;  
 Ecdysozoa;Panarthropoda;Arthropoda;Mandibulata;Pancrustacea;Hexapoda;Inse  
 cta;Dicondylia;Pterygota;Neoptera;Endopterygota;Coleoptera;Polyphaga;Cucu  
 jiformia;Chrysomeloidea;Chrysomelidae;Galerucinae;Luperini;Diabroticina;D  
 iabroticites;Diabrotica;Diabrotica virgifera;Diabrotica virgifera  
 virgifera  
 UdeM00000025306 8267 233.8 UdeM00000025306 XP\_034459057.1 39.2 344  
 199 4 1 341 485 821 3.30E-58 233.8 8267 cellular  
 organisms;Eukaryota;Opisthokonta;Metazoa;Eumetazoa;Bilateria;Deuterostomi  
 a;Chordata;Craniata;Vertebrata;Gnathostomata;Teleostomi;Euteleostomi;Acti  
 nopterygii;Actinopteri;Neopterygii;Teleostei;Osteoglossocephalai;Clupeoce  
 phala;Euteleosteomorpha;Neoteleostei;Eurypterygia;Ctenosquamata;Acanthomo  
 rphata;Euacanthomorphacea;Percomorphaceae;Carangaria;Pleuronectiformes;Pl  
 euronectoidei;Pleuronectidae;Hippoglossus;Hippoglossus hippoglossus  
 UdeM00000025307 6596 592 UdeM00000025307 XP\_045205529.1 80.2 435  
 63 2 1 414 1 433 5.70E-166 592 6596 cellular  
 organisms;Eukaryota;Opisthokonta;Metazoa;Eumetazoa;Bilateria;Protostomia;  
 Spiralia;Lophotrochozoa;Mollusca;Bivalvia;Autobranhia;Heteroconchia;Euhe  
 terodonta;Imparidentia;Venerida;Veneroidea;Veneridae;Mercenaria;Mercenari  
 a mercenaria  
 UdeM00000025308 6596 2356.3 UdeM00000025308 XP\_045206430.1 67.7  
 2134 567 16 1 2115 1 2031 0.00E+00 2356.3 6596  
 cellular  
 organisms;Eukaryota;Opisthokonta;Metazoa;Eumetazoa;Bilateria;Protostomia;  
 Spiralia;Lophotrochozoa;Mollusca;Bivalvia;Autobranhia;Heteroconchia;Euhe  
 terodonta;Imparidentia;Venerida;Veneroidea;Veneridae;Mercenaria;Mercenari  
 a mercenaria



UdeM00000025309 6565 701.8 UdeM00000025309 XP\_022326504.1 91 368  
 33 0 1 368 1 368 4.50E-199 701.8 6565 cellular  
 organisms;Eukaryota;Opisthokonta;Metazoa;Eumetazoa;Bilateria;Protostomia;  
 Spiralia;Lophotrochozoa;Mollusca;Bivalvia;Autobranchia;Pteriormorphia;Ostr  
 eida;Ostreoidea;Ostreidae;Crassostrea;Crassostrea virginica  
 UdeM00000025311 6596 705.3 UdeM00000025311 XP\_045206430.1 82.9 403  
 68 1 42 443 1961 2363 5.40E-200 705.3 6596 cellular  
 organisms;Eukaryota;Opisthokonta;Metazoa;Eumetazoa;Bilateria;Protostomia;  
 Spiralia;Lophotrochozoa;Mollusca;Bivalvia;Autobranchia;Heteroconchia;Euhe  
 terodonta;Imparidentia;Venerida;Veneroidea;Veneridae;Mercenaria;Mercenari  
 a mercenaria  
 UdeM00000025310 6579 1330.5 UdeM00000025310 XP\_033742934.1 81.7  
 765 137 2 42 805 2163 2925 0.00E+00 1330.5 6579  
 cellular  
 organisms;Eukaryota;Opisthokonta;Metazoa;Eumetazoa;Bilateria;Protostomia;  
 Spiralia;Lophotrochozoa;Mollusca;Bivalvia;Autobranchia;Pteriormorphia;Pect  
 inida;Pectinoidea;Pectinidae;Pecten;Pecten maximus  
 UdeM00000025312 2607531 670.6 UdeM00000025312 XP\_029643971.1 43.2  
 850 407 15 1 835 1 789 2.50E-189 670.6 2607531  
 cellular  
 organisms;Eukaryota;Opisthokonta;Metazoa;Eumetazoa;Bilateria;Protostomia;  
 Spiralia;Lophotrochozoa;Mollusca;Cephalopoda;Coleoidea;Octopodiformes;Oct  
 opoda;Incirrata;Octopodidae;Octopus;Octopus sinensis  
 UdeM00000025313 6596 197.6 UdeM00000025313 XP\_045206368.1 61.4 127  
 48 1 10 135 1 127 1.20E-47 197.6 6596 cellular  
 organisms;Eukaryota;Opisthokonta;Metazoa;Eumetazoa;Bilateria;Protostomia;  
 Spiralia;Lophotrochozoa;Mollusca;Bivalvia;Autobranchia;Heteroconchia;Euhe  
 terodonta;Imparidentia;Venerida;Veneroidea;Veneridae;Mercenaria;Mercenari  
 a mercenaria  
 UdeM00000025314 7574 152.5 UdeM00000025314 XP\_023932663.1 29.6 429  
 274 11 15 426 39 456 1.40E-33 152.5 7574 cellular  
 organisms;Eukaryota;Opisthokonta;Metazoa;Eumetazoa;Bilateria;Protostomia;  
 Spiralia;Lophotrochozoa;Brachiopoda;Linguliformea;Lingulata;Lingulida;Lin  
 guloidea;Lingulidae;Lingula;Lingula anatina  
 UdeM00000025315 6573 268.5 UdeM00000025315 XP\_021359539.1 42.5 400  
 186 11 215 579 282 672 2.10E-68 268.5 6573 cellular  
 organisms;Eukaryota;Opisthokonta;Metazoa;Eumetazoa;Bilateria;Protostomia;  
 Spiralia;Lophotrochozoa;Mollusca;Bivalvia;Autobranchia;Pteriormorphia;Pect  
 inida;Pectinoidea;Pectinidae;Mizuhopecten;Mizuhopecten yessoensis  
 UdeM00000025317 6596 110.2 UdeM00000025317 XP\_045203123.1 57.9 95  
 34 2 209 300 668 759 8.00E-21 110.2 6596 cellular  
 organisms;Eukaryota;Opisthokonta;Metazoa;Eumetazoa;Bilateria;Protostomia;  
 Spiralia;Lophotrochozoa;Mollusca;Bivalvia;Autobranchia;Heteroconchia;Euhe  
 terodonta;Imparidentia;Venerida;Veneroidea;Veneridae;Mercenaria;Mercenari  
 a mercenaria  
 UdeM00000025316 6596 153.3 UdeM00000025316 XP\_045203123.1 30.6 467  
 242 15 37 476 348 759 1.10E-33 153.3 6596 cellular  
 organisms;Eukaryota;Opisthokonta;Metazoa;Eumetazoa;Bilateria;Protostomia;  
 Spiralia;Lophotrochozoa;Mollusca;Bivalvia;Autobranchia;Heteroconchia;Euhe  
 terodonta;Imparidentia;Venerida;Veneroidea;Veneridae;Mercenaria;Mercenari  
 a mercenaria  
 UdeM00000025318 6596 66.2 UdeM00000025318 XP\_045203123.1 34.7 150  
 74 5 41 175 348 488 4.90E-08 66.2 6596 cellular  
 organisms;Eukaryota;Opisthokonta;Metazoa;Eumetazoa;Bilateria;Protostomia;

Spiralia;Lophotrochozoa;Mollusca;Bivalvia;Autobranchia;Heteroconchia;Euherodonta;Imparidentia;Venerida;Veneroidea;Veneridae;Mercenaria;Mercenaria mercenaria

UdeM00000025319 52670 82.4 UdeM00000025319 XP\_013874439.1 56.7 60  
26 0 46 105 1714 1773 3.90E-13 82.4 52670 cellular  
organisms;Eukaryota;Opisthokonta;Metazoa;Eumetazoa;Bilateria;Deuterostomia;Chordata;Craniata;Vertebrata;Gnathostomata;Teleostomi;Euteleostomi;Actinopterygii;Actinopteri;Neopterygii;Teleostei;Osteoglossocephalai;Clupeocephala;Euteleosteomorpha;Neoteleostei;Eurypterygia;Ctenosquamata;Acanthomorphata;Euacanthomorphacea;Percomorphaceae;Ovalentaria;Atherinomorphae;Cypriodontiformes;Aplocheiloidei;Rivulidae;Austrofundulus;Austrofundulus limnaeus

UdeM00000025320 52670 82.4 UdeM00000025320 XP\_013874439.1 56.7 60  
26 0 44 103 1714 1773 3.80E-13 82.4 52670 cellular  
organisms;Eukaryota;Opisthokonta;Metazoa;Eumetazoa;Bilateria;Deuterostomia;Chordata;Craniata;Vertebrata;Gnathostomata;Teleostomi;Euteleostomi;Actinopterygii;Actinopteri;Neopterygii;Teleostei;Osteoglossocephalai;Clupeocephala;Euteleosteomorpha;Neoteleostei;Eurypterygia;Ctenosquamata;Acanthomorphata;Euacanthomorphacea;Percomorphaceae;Ovalentaria;Atherinomorphae;Cypriodontiformes;Aplocheiloidei;Rivulidae;Austrofundulus;Austrofundulus limnaeus

UdeM00000025321 6596 183.7 UdeM00000025321 XP\_045203123.1 55.8 165  
65 3 12 175 83 240 3.20E-43 183.7 6596 cellular  
organisms;Eukaryota;Opisthokonta;Metazoa;Eumetazoa;Bilateria;Protostomia;Spiralia;Lophotrochozoa;Mollusca;Bivalvia;Autobranchia;Heteroconchia;Euherodonta;Imparidentia;Venerida;Veneroidea;Veneridae;Mercenaria;Mercenaria mercenaria

UdeM00000025322 6596 95.1 UdeM00000025322 XP\_045203123.1 64.2 67  
24 0 1 67 5 71 4.60E-17 95.1 6596 cellular  
organisms;Eukaryota;Opisthokonta;Metazoa;Eumetazoa;Bilateria;Protostomia;Spiralia;Lophotrochozoa;Mollusca;Bivalvia;Autobranchia;Heteroconchia;Euherodonta;Imparidentia;Venerida;Veneroidea;Veneridae;Mercenaria;Mercenaria mercenaria

UdeM00000025323 13686 204.1 UdeM00000025323 XP\_039302821.1 40.8 262  
153 1 1 262 364 623 2.10E-49 204.1 13686 cellular  
organisms;Eukaryota;Opisthokonta;Metazoa;Eumetazoa;Bilateria;Protostomia;Ecdysozoa;Panarthropoda;Arthropoda;Mandibulata;Pancrustacea;Hexapoda;Insecta;Dicondylia;Pterygota;Neoptera;Endopterygota;Hymenoptera;Apocrita;Aculeata;Formicoidea;Formicidae;Myrmicinae;Solenopsidini;Solenopsis;Solenopsis invicta

UdeM00000025324 13686 175.6 UdeM00000025324 XP\_011170408.3 38.9 283  
146 10 110 373 115 389 1.20E-40 175.6 13686 cellular  
organisms;Eukaryota;Opisthokonta;Metazoa;Eumetazoa;Bilateria;Protostomia;Ecdysozoa;Panarthropoda;Arthropoda;Mandibulata;Pancrustacea;Hexapoda;Insecta;Dicondylia;Pterygota;Neoptera;Endopterygota;Hymenoptera;Apocrita;Aculeata;Formicoidea;Formicidae;Myrmicinae;Solenopsidini;Solenopsis;Solenopsis invicta

UdeM00000025325 6596 625.9 UdeM00000025325 XP\_045203122.1 49.6 1015  
446 23 1 992 1 972 8.50E-176 625.9 6596 cellular  
organisms;Eukaryota;Opisthokonta;Metazoa;Eumetazoa;Bilateria;Protostomia;Spiralia;Lophotrochozoa;Mollusca;Bivalvia;Autobranchia;Heteroconchia;Euherodonta;Imparidentia;Venerida;Veneroidea;Veneridae;Mercenaria;Mercenaria mercenaria

UdeM00000025327 6596 647.1 UdeM00000025327 XP\_045204100.1 58.3 581  
 224 7 22 596 10 578 2.30E-182 647.1 6596 cellular  
 organisms;Eukaryota;Opisthokonta;Metazoa;Eumetazoa;Bilateria;Protostomia;  
 Spiralia;Lophotrochozoa;Mollusca;Bivalvia;Autobranchia;Heteroconchia;Euhe  
 terodonta;Imparidentia;Venerida;Veneroidea;Veneridae;Mercenaria;Mercenari  
 a mercenaria

UdeM00000025326 6596 647.9 UdeM00000025326 XP\_045204100.1 59.2 571  
 215 7 150 714 20 578 1.60E-182 647.9 6596 cellular  
 organisms;Eukaryota;Opisthokonta;Metazoa;Eumetazoa;Bilateria;Protostomia;  
 Spiralia;Lophotrochozoa;Mollusca;Bivalvia;Autobranchia;Heteroconchia;Euhe  
 terodonta;Imparidentia;Venerida;Veneroidea;Veneridae;Mercenaria;Mercenari  
 a mercenaria

UdeM00000025328 6596 667.9 UdeM00000025328 XP\_045179825.1 79.9 394  
 79 0 1 394 1 394 7.80E-189 667.9 6596 cellular  
 organisms;Eukaryota;Opisthokonta;Metazoa;Eumetazoa;Bilateria;Protostomia;  
 Spiralia;Lophotrochozoa;Mollusca;Bivalvia;Autobranchia;Heteroconchia;Euhe  
 terodonta;Imparidentia;Venerida;Veneroidea;Veneridae;Mercenaria;Mercenari  
 a mercenaria

UdeM00000025329 50390 380.9 UdeM00000025329 XP\_028154228.1 52.3 323  
 145 2 1 320 126 442 1.50E-102 380.9 50390 cellular  
 organisms;Eukaryota;Opisthokonta;Metazoa;Eumetazoa;Bilateria;Protostomia;  
 Ecdysozoa;Panarthropoda;Arthropoda;Mandibulata;Pancrustacea;Hexapoda;Inse  
 cta;Dicondylia;Pterygota;Neoptera;Endopterygota;Coleoptera;Polyphaga;Cucu  
 jiformia;Chrysomeloidea;Chrysomelidae;Galerucinae;Luperini;Diabroticina;D  
 iabroticites;Diabrotica;Diabrotica virgifera;Diabrotica virgifera  
 virgifera

UdeM00000025330 105023 92 UdeM00000025330 XP\_015797448.1 33.9  
 118 77 1 106 222 29 146 1.00E-15 92 105023  
 cellular  
 organisms;Eukaryota;Opisthokonta;Metazoa;Eumetazoa;Bilateria;Deuterostomi  
 a;Chordata;Craniata;Vertebrata;Gnathostomata;Teleostomi;Euteleostomi;Acti  
 nopterygii;Actinopteri;Neopterygii;Teleostei;Osteoglossocephalai;Clupeoce  
 phala;Euteleosteomorpha;Neoteleostei;Eurypterygia;Ctenosquamata;Acanthomo  
 rphata;Euacanthomorphacea;Percomorphaceae;Ovalentaria;Atherinomorphae;Cyp  
 rinodontiformes;Aplocheiloidei;Nothobranchiidae;Nothobranchius;Nothbranc  
 hius furzeri

UdeM00000025331 105023 92 UdeM00000025331 XP\_015797448.1 33.9  
 118 77 1 75 191 29 146 8.80E-16 92 105023  
 cellular  
 organisms;Eukaryota;Opisthokonta;Metazoa;Eumetazoa;Bilateria;Deuterostomi  
 a;Chordata;Craniata;Vertebrata;Gnathostomata;Teleostomi;Euteleostomi;Acti  
 nopterygii;Actinopteri;Neopterygii;Teleostei;Osteoglossocephalai;Clupeoce  
 phala;Euteleosteomorpha;Neoteleostei;Eurypterygia;Ctenosquamata;Acanthomo  
 rphata;Euacanthomorphacea;Percomorphaceae;Ovalentaria;Atherinomorphae;Cyp  
 rinodontiformes;Aplocheiloidei;Nothobranchiidae;Nothobranchius;Nothbranc  
 hius furzeri

UdeM00000025332 50390 456.4 UdeM00000025332 XP\_028142380.1 52.3 348  
 166 0 1 348 5 352 3.10E-125 456.4 50390 cellular  
 organisms;Eukaryota;Opisthokonta;Metazoa;Eumetazoa;Bilateria;Protostomia;  
 Ecdysozoa;Panarthropoda;Arthropoda;Mandibulata;Pancrustacea;Hexapoda;Inse  
 cta;Dicondylia;Pterygota;Neoptera;Endopterygota;Coleoptera;Polyphaga;Cucu  
 jiformia;Chrysomeloidea;Chrysomelidae;Galerucinae;Luperini;Diabroticina;D  
 iabroticites;Diabrotica;Diabrotica virgifera;Diabrotica virgifera  
 virgifera

UdeM00000025333 6596 226.9 UdeM00000025333 XP\_045187824.1 40.7 295  
 171 2 10 304 42 332 4.10E-56 226.9 6596 cellular  
 organisms;Eukaryota;Opisthokonta;Metazoa;Eumetazoa;Bilateria;Protostomia;  
 Spiralia;Lophotrochozoa;Mollusca;Bivalvia;Autobranchia;Heteroconchia;Euhe  
 terodonta;Imparidentia;Venerida;Veneroidea;Veneridae;Mercenaria;Mercenari  
 a mercenaria  
 UdeM00000025334 50390 416.8 UdeM00000025334 XP\_028142380.1 55 320  
 140 1 1 316 89 408 2.50E-113 416.8 50390 cellular  
 organisms;Eukaryota;Opisthokonta;Metazoa;Eumetazoa;Bilateria;Protostomia;  
 Ecdysozoa;Panarthropoda;Arthropoda;Mandibulata;Pancrustacea;Hexapoda;Inse  
 cta;Dicondylia;Pterygota;Neoptera;Endopterygota;Coleoptera;Polyphaga;Cucu  
 jiformia;Chrysomeloidea;Chrysomelidae;Galerucinae;Luperini;Diabroticina;D  
 iabroticites;Diabrotica;Diabrotica virgifera;Diabrotica virgifera  
 virgifera  
 UdeM00000025335 50390 475.3 UdeM00000025335 XP\_028142380.1 53.1 377  
 167 3 26 392 2 378 7.40E-131 475.3 50390 cellular  
 organisms;Eukaryota;Opisthokonta;Metazoa;Eumetazoa;Bilateria;Protostomia;  
 Ecdysozoa;Panarthropoda;Arthropoda;Mandibulata;Pancrustacea;Hexapoda;Inse  
 cta;Dicondylia;Pterygota;Neoptera;Endopterygota;Coleoptera;Polyphaga;Cucu  
 jiformia;Chrysomeloidea;Chrysomelidae;Galerucinae;Luperini;Diabroticina;D  
 iabroticites;Diabrotica;Diabrotica virgifera;Diabrotica virgifera  
 virgifera  
 UdeM00000025336 29159 197.2 UdeM00000025336 XP\_034331441.1 44.7 219  
 116 3 1 216 1 217 4.50E-47 197.2 29159 cellular  
 organisms;Eukaryota;Opisthokonta;Metazoa;Eumetazoa;Bilateria;Protostomia;  
 Spiralia;Lophotrochozoa;Mollusca;Bivalvia;Autobranchia;Pteriormorphia;Ostr  
 eida;Ostreoidea;Ostreidae;Crassostrea;Crassostrea gigas  
 UdeM00000025337 50390 547.4 UdeM00000025337 XP\_028154228.1 56.4 413  
 180 0 1 413 154 566 1.60E-152 547.4 50390 cellular  
 organisms;Eukaryota;Opisthokonta;Metazoa;Eumetazoa;Bilateria;Protostomia;  
 Ecdysozoa;Panarthropoda;Arthropoda;Mandibulata;Pancrustacea;Hexapoda;Inse  
 cta;Dicondylia;Pterygota;Neoptera;Endopterygota;Coleoptera;Polyphaga;Cucu  
 jiformia;Chrysomeloidea;Chrysomelidae;Galerucinae;Luperini;Diabroticina;D  
 iabroticites;Diabrotica;Diabrotica virgifera;Diabrotica virgifera  
 virgifera  
 UdeM00000025338 50390 612.5 UdeM00000025338 XP\_028154228.1 54.9 481  
 212 1 2 482 91 566 4.70E-172 612.5 50390 cellular  
 organisms;Eukaryota;Opisthokonta;Metazoa;Eumetazoa;Bilateria;Protostomia;  
 Ecdysozoa;Panarthropoda;Arthropoda;Mandibulata;Pancrustacea;Hexapoda;Inse  
 cta;Dicondylia;Pterygota;Neoptera;Endopterygota;Coleoptera;Polyphaga;Cucu  
 jiformia;Chrysomeloidea;Chrysomelidae;Galerucinae;Luperini;Diabroticina;D  
 iabroticites;Diabrotica;Diabrotica virgifera;Diabrotica virgifera  
 virgifera  
 UdeM00000025339 6573 125.6 UdeM00000025339 XP\_021346496.1 46.3 134  
 68 1 1 134 406 535 9.10E-26 125.6 6573 cellular  
 organisms;Eukaryota;Opisthokonta;Metazoa;Eumetazoa;Bilateria;Protostomia;  
 Spiralia;Lophotrochozoa;Mollusca;Bivalvia;Autobranchia;Pteriormorphia;Pect  
 inida;Pectinoidea;Pectinidae;Mizuhopecten;Mizuhopecten yessoensis  
 UdeM00000025340 6579 251.5 UdeM00000025340 XP\_033739209.1 50.4 258  
 112 2 9 261 2 248 2.20E-63 251.5 6579 cellular  
 organisms;Eukaryota;Opisthokonta;Metazoa;Eumetazoa;Bilateria;Protostomia;  
 Spiralia;Lophotrochozoa;Mollusca;Bivalvia;Autobranchia;Pteriormorphia;Pect  
 inida;Pectinoidea;Pectinidae;Pecten;Pecten maximus

UdeM00000025341 50390 417.5 UdeM00000025341 XP\_028154228.1 52 344  
 142 1 1 321 126 469 1.50E-113 417.5 50390 cellular  
 organisms;Eukaryota;Opisthokonta;Metazoa;Eumetazoa;Bilateria;Protostomia;  
 Ecdysozoa;Panarthropoda;Arthropoda;Mandibulata;Pancrustacea;Hexapoda;Inse  
 cta;Dicondylia;Pterygota;Neoptera;Endopterygota;Coleoptera;Polyphaga;Cucu  
 jiformia;Chrysomeloidea;Chrysomelidae;Galerucinae;Luperini;Diabroticina;D  
 iabroticites;Diabrotica;Diabrotica virgifera;Diabrotica virgifera  
 virgifera  
 UdeM00000025342 45264 238.4 UdeM00000025342 XP\_044177087.1 50.2 231  
 112 2 2 232 234 461 9.20E-60 238.4 45264 cellular  
 organisms;Eukaryota;Opisthokonta;Metazoa;Eumetazoa;Cnidaria;Anthozoa;Hexa  
 corallia;Scleractinia;Astrocoeniina;Acroporidae;Acropora;Acropora  
 millepora  
 UdeM00000025343 29159 95.1 UdeM00000025343 XP\_011428553.1 42.3 123  
 64 3 12 134 11 126 7.20E-17 95.1 29159 cellular  
 organisms;Eukaryota;Opisthokonta;Metazoa;Eumetazoa;Bilateria;Protostomia;  
 Spiralia;Lophotrochozoa;Mollusca;Bivalvia;Autobranchia;Pteriormorphia;Ostr  
 eida;Ostreoidea;Ostreidae;Crassostrea;Crassostrea gigas  
 UdeM00000025344 6573 906 UdeM00000025344 XP\_021352139.1 49.1 1416  
 587 33 1 1369 1 1329 6.00E-260 906 6573 cellular  
 organisms;Eukaryota;Opisthokonta;Metazoa;Eumetazoa;Bilateria;Protostomia;  
 Spiralia;Lophotrochozoa;Mollusca;Bivalvia;Autobranchia;Pteriormorphia;Pect  
 inida;Pectinoidea;Pectinidae;Mizuhopecten;Mizuhopecten yessoensis  
 UdeM00000025345 6573 902.9 UdeM00000025345 XP\_021352139.1 49.6 1412  
 578 33 1 1361 1 1329 5.10E-259 902.9 6573 cellular  
 organisms;Eukaryota;Opisthokonta;Metazoa;Eumetazoa;Bilateria;Protostomia;  
 Spiralia;Lophotrochozoa;Mollusca;Bivalvia;Autobranchia;Pteriormorphia;Pect  
 inida;Pectinoidea;Pectinidae;Mizuhopecten;Mizuhopecten yessoensis  
 UdeM00000025346 6596 441.8 UdeM00000025346 XP\_045202893.1 80.4 271  
 53 0 1 271 1 271 6.30E-121 441.8 6596 cellular  
 organisms;Eukaryota;Opisthokonta;Metazoa;Eumetazoa;Bilateria;Protostomia;  
 Spiralia;Lophotrochozoa;Mollusca;Bivalvia;Autobranchia;Heteroconchia;Euhe  
 terodonta;Imparidentia;Venerida;Veneroidea;Veneridae;Mercenaria;Mercenari  
 a mercenaria  
 UdeM00000025347 6579 292.7 UdeM00000025347 XP\_033742514.1 83.2 173  
 27 2 1 172 77 248 3.00E-76 292.7 6579 cellular  
 organisms;Eukaryota;Opisthokonta;Metazoa;Eumetazoa;Bilateria;Protostomia;  
 Spiralia;Lophotrochozoa;Mollusca;Bivalvia;Autobranchia;Pteriormorphia;Pect  
 inida;Pectinoidea;Pectinidae;Pecten;Pecten maximus  
 UdeM00000025348 133901 153.3 UdeM00000025348 XP\_026278027.1 53  
 166 76 1 1 164 183 348 3.60E-34 153.3 133901  
 cellular  
 organisms;Eukaryota;Opisthokonta;Metazoa;Eumetazoa;Bilateria;Protostomia;  
 Ecdysozoa;Panarthropoda;Arthropoda;Mandibulata;Pancrustacea;Hexapoda;Inse  
 cta;Dicondylia;Pterygota;Neoptera;Paraneoptera;Thysanoptera;Terebrantia;T  
 hripoidea;Thripidae;Thripinae;Frankliniella;Frankliniella occidentalis  
 UdeM00000025349 6596 310.1 UdeM00000025349 XP\_045202898.1 52.1 267  
 123 1 104 365 82 348 3.80E-81 310.1 6596 cellular  
 organisms;Eukaryota;Opisthokonta;Metazoa;Eumetazoa;Bilateria;Protostomia;  
 Spiralia;Lophotrochozoa;Mollusca;Bivalvia;Autobranchia;Heteroconchia;Euhe  
 terodonta;Imparidentia;Venerida;Veneroidea;Veneridae;Mercenaria;Mercenari  
 a mercenaria  
 UdeM00000025350 6596 375.9 UdeM00000025350 XP\_045203987.1 33.3 768  
 457 17 5 745 7 746 1.20E-100 375.9 6596 cellular

organisms;Eukaryota;Opisthokonta;Metazoa;Eumetazoa;Bilateria;Protostomia; Spiralia;Lophotrochozoa;Mollusca;Bivalvia;Autobranchia;Heteroconchia;Euherodonta;Imparidentia;Venerida;Veneroidea;Veneridae;Mercenaria;Mercenaria mercenaria

UdeM00000025351 225164 145.2 UdeM00000025351 XP\_009047492.1 50  
134 66 1 1 134 52 184 6.00E-32 145.2 225164  
cellular

organisms;Eukaryota;Opisthokonta;Metazoa;Eumetazoa;Bilateria;Protostomia; Spiralia;Lophotrochozoa;Mollusca;Gastropoda;Patellogastropoda;Lottioidea; Lottiidae;Lottia;Lottia gigantea

UdeM00000025352 6596 236.9 UdeM00000025352 XP\_045167641.1 54.4 195  
86 1 75 269 31 222 3.00E-59 236.9 6596 cellular

organisms;Eukaryota;Opisthokonta;Metazoa;Eumetazoa;Bilateria;Protostomia; Spiralia;Lophotrochozoa;Mollusca;Bivalvia;Autobranchia;Heteroconchia;Euherodonta;Imparidentia;Venerida;Veneroidea;Veneridae;Mercenaria;Mercenaria mercenaria

UdeM00000025354 7719 189.9 UdeM00000025354 XP\_004227365.1 54 150  
69 0 49 198 13 162 3.10E-45 189.9 7719 cellular

organisms;Eukaryota;Opisthokonta;Metazoa;Eumetazoa;Bilateria;Deuterostomia;Chordata;Tunicata;Ascidiacea;Phlebobranchia;Cionidae;Ciona;Ciona intestinalis

UdeM00000025355 6596 154.1 UdeM00000025355 XP\_045203987.1 46.9 177  
86 3 56 224 298 474 2.90E-34 154.1 6596 cellular

organisms;Eukaryota;Opisthokonta;Metazoa;Eumetazoa;Bilateria;Protostomia; Spiralia;Lophotrochozoa;Mollusca;Bivalvia;Autobranchia;Heteroconchia;Euherodonta;Imparidentia;Venerida;Veneroidea;Veneridae;Mercenaria;Mercenaria mercenaria

UdeM00000025356 225164 161.4 UdeM00000025356 XP\_009047492.1 51  
145 70 1 11 155 41 184 9.40E-37 161.4 225164  
cellular

organisms;Eukaryota;Opisthokonta;Metazoa;Eumetazoa;Bilateria;Protostomia; Spiralia;Lophotrochozoa;Mollusca;Gastropoda;Patellogastropoda;Lottioidea; Lottiidae;Lottia;Lottia gigantea

UdeM00000025357 6596 229.6 UdeM00000025357 XP\_045167641.1 53.9 193  
86 1 131 323 33 222 5.80E-57 229.6 6596 cellular

organisms;Eukaryota;Opisthokonta;Metazoa;Eumetazoa;Bilateria;Protostomia; Spiralia;Lophotrochozoa;Mollusca;Bivalvia;Autobranchia;Heteroconchia;Euherodonta;Imparidentia;Venerida;Veneroidea;Veneridae;Mercenaria;Mercenaria mercenaria

UdeM00000025358 6596 232.3 UdeM00000025358 XP\_045203987.1 44.4 304  
153 6 2 289 224 527 1.60E-57 232.3 6596 cellular

organisms;Eukaryota;Opisthokonta;Metazoa;Eumetazoa;Bilateria;Protostomia; Spiralia;Lophotrochozoa;Mollusca;Bivalvia;Autobranchia;Heteroconchia;Euherodonta;Imparidentia;Venerida;Veneroidea;Veneridae;Mercenaria;Mercenaria mercenaria

UdeM00000025359 225164 162.5 UdeM00000025359 XP\_009047492.1 51.7  
145 69 1 18 162 41 184 4.40E-37 162.5 225164  
cellular

organisms;Eukaryota;Opisthokonta;Metazoa;Eumetazoa;Bilateria;Protostomia; Spiralia;Lophotrochozoa;Mollusca;Gastropoda;Patellogastropoda;Lottioidea; Lottiidae;Lottia;Lottia gigantea

UdeM00000025360 6596 228.8 UdeM00000025360 XP\_045167641.1 56.1 187  
79 1 137 323 39 222 9.90E-57 228.8 6596 cellular

organisms;Eukaryota;Opisthokonta;Metazoa;Eumetazoa;Bilateria;Protostomia;

Spiralia;Lophotrochozoa;Mollusca;Bivalvia;Autobranchia;Heteroconchia;Euherodonta;Imparidentia;Venerida;Veneroidea;Veneridae;Mercenaria;Mercenaria mercenaria

UdeM00000025361 6596 224.6 UdeM00000025361 XP\_045176520.1 55.7 185  
77 3 96 280 41 220 1.60E-55 224.6 6596 cellular

organisms;Eukaryota;Opisthokonta;Metazoa;Eumetazoa;Bilateria;Protostomia;Spiralia;Lophotrochozoa;Mollusca;Bivalvia;Autobranchia;Heteroconchia;Euherodonta;Imparidentia;Venerida;Veneroidea;Veneridae;Mercenaria;Mercenaria mercenaria

UdeM00000025362 299321 75.1 UdeM00000025362 XP\_028821593.1 39  
100 52 4 276 368 315 412 2.10E-10 75.1 299321  
cellular

organisms;Eukaryota;Opisthokonta;Metazoa;Eumetazoa;Bilateria;Deuterostomia;Chordata;Craniata;Vertebrata;Gnathostomata;Teleostomi;Euteleostomi;Actinopterygii;Actinopteri;Neopterygii;Teleostei;Osteoglossocephalai;Clupeocephala;Otomorpha;Clupei;Clupeiformes;Denticipitoidei;Denticipitidae;Denticeps;Denticeps clupeoides

UdeM00000044401 83332 1920.6 UdeM00000044401 NP\_216564.2 52.1 2042  
926 29 12 2039 32 2034 0.00E+00 1920.6 83332  
cellular organisms;Bacteria;Terrabacteria

group;Actinobacteria;Actinomycetia;Corynebacteriales;Mycobacteriaceae;Mycobacterium;Mycobacterium tuberculosis complex;Mycobacterium tuberculosis;Mycobacterium tuberculosis H37Rv

UdeM00000044402 83332 431.4 UdeM00000044402 NP\_217615.1 75.2 278 69  
0 4 281 6 283 8.80E-118 431.4 83332 cellular

organisms;Bacteria;Terrabacteria group;Actinobacteria;Actinomycetia;Corynebacteriales;Mycobacteriaceae;Mycobacterium;Mycobacterium tuberculosis complex;Mycobacterium tuberculosis;Mycobacterium tuberculosis H37Rv

UdeM00000044403 83332 717.6 UdeM00000044403 NP\_217655.1 87.7 407 50  
0 1 407 62 468 8.90E-204 717.6 83332 cellular

organisms;Bacteria;Terrabacteria group;Actinobacteria;Actinomycetia;Corynebacteriales;Mycobacteriaceae;Mycobacterium;Mycobacterium tuberculosis complex;Mycobacterium tuberculosis;Mycobacterium tuberculosis H37Rv

UdeM00000044272 6596 275.4 UdeM00000044272 XP\_045164400.1 46.3 354  
166 9 1 336 1 348 9.80E-71 275.4 6596 cellular

organisms;Eukaryota;Opisthokonta;Metazoa;Eumetazoa;Bilateria;Protostomia;Spiralia;Lophotrochozoa;Mollusca;Bivalvia;Autobranchia;Heteroconchia;Euherodonta;Imparidentia;Venerida;Veneroidea;Veneridae;Mercenaria;Mercenaria mercenaria

UdeM00000042648 29159 297 UdeM00000042648 XP\_034308217.1 36.2 450  
260 4 27 450 1 449 4.20E-77 297 29159 cellular

organisms;Eukaryota;Opisthokonta;Metazoa;Eumetazoa;Bilateria;Protostomia;Spiralia;Lophotrochozoa;Mollusca;Bivalvia;Autobranchia;Pteriomorpha;Ostreida;Ostreoidea;Ostreidae;Crassostrea;Crassostrea gigas

UdeM00000042649 6596 227.3 UdeM00000042649 XP\_045172539.1 29.4 449  
271 6 16 419 24 471 3.70E-56 227.3 6596 cellular

organisms;Eukaryota;Opisthokonta;Metazoa;Eumetazoa;Bilateria;Protostomia;Spiralia;Lophotrochozoa;Mollusca;Bivalvia;Autobranchia;Heteroconchia;Euherodonta;Imparidentia;Venerida;Veneroidea;Veneridae;Mercenaria;Mercenaria mercenaria

UdeM00000042650 6596 226.5 UdeM00000042650 XP\_045172539.1 29.5 448  
270 6 1 403 25 471 6.10E-56 226.5 6596 cellular

organisms;Eukaryota;Opisthokonta;Metazoa;Eumetazoa;Bilateria;Protostomia;Spiralia;Lophotrochozoa;Mollusca;Bivalvia;Autobranhia;Heteroconchia;Euherodonta;Imparidentia;Venerida;Veneroidea;Veneridae;Mercenaria;Mercenaria mercenaria

UdeM00000042651 6596 1432.2 UdeM00000042651 XP\_045171548.1 67.5  
1290 368 8 35 1278 24 1308 0.00E+00 1432.2 6596  
cellular

organisms;Eukaryota;Opisthokonta;Metazoa;Eumetazoa;Bilateria;Protostomia;Spiralia;Lophotrochozoa;Mollusca;Bivalvia;Autobranhia;Heteroconchia;Euherodonta;Imparidentia;Venerida;Veneroidea;Veneridae;Mercenaria;Mercenaria mercenaria

UdeM00000042652 6573 469.2 UdeM00000042652 XP\_021357899.1 61.5 403  
142 4 1 397 1 396 7.70E-129 469.2 6573 cellular

organisms;Eukaryota;Opisthokonta;Metazoa;Eumetazoa;Bilateria;Protostomia;Spiralia;Lophotrochozoa;Mollusca;Bivalvia;Autobranhia;Pteriomorphia;Pectinida;Pectinoidea;Pectinidae;Mizuhopecten;Mizuhopecten yessoensis

UdeM00000042653 6579 560.5 UdeM00000042653 XP\_033748878.1 39.3 1008  
383 28 54 1042 20 817 4.90E-156 560.5 6579 cellular

organisms;Eukaryota;Opisthokonta;Metazoa;Eumetazoa;Bilateria;Protostomia;Spiralia;Lophotrochozoa;Mollusca;Bivalvia;Autobranhia;Pteriomorphia;Pectinida;Pectinoidea;Pectinidae;Pecten;Pecten maximus

UdeM00000042654 6596 179.5 UdeM00000042654 XP\_045173316.1 30.8 701  
329 24 30 640 905 1539 1.40E-41 179.5 6596 cellular

organisms;Eukaryota;Opisthokonta;Metazoa;Eumetazoa;Bilateria;Protostomia;Spiralia;Lophotrochozoa;Mollusca;Bivalvia;Autobranhia;Heteroconchia;Euherodonta;Imparidentia;Venerida;Veneroidea;Veneridae;Mercenaria;Mercenaria mercenaria

UdeM00000042655 7741 168.3 UdeM00000042655 XP\_019633445.1 34.6 269  
148 3 3 243 13 281 1.50E-38 168.3 7741 cellular

organisms;Eukaryota;Opisthokonta;Metazoa;Eumetazoa;Bilateria;Deuterostomia;Chordata;Cephalochordata;Leptocardii;Amphioxiformes;Branchiostomidae;Branchiostoma;Branchiostoma belcheri

UdeM00000042656 6565 72.4 UdeM00000042656 XP\_022345136.1 71.8 294  
75 3 10 300 11 299 1.30E-09 72.4 6565 cellular

organisms;Eukaryota;Opisthokonta;Metazoa;Eumetazoa;Bilateria;Protostomia;Spiralia;Lophotrochozoa;Mollusca;Bivalvia;Autobranhia;Pteriomorphia;Ostreida;Ostreioidea;Ostreidae;Crassostrea;Crassostrea virginica

UdeM00000042657 6596 194.5 UdeM00000042657 XP\_045172099.1 77 178  
29 4 13 181 25 199 1.20E-46 194.5 6596 cellular

organisms;Eukaryota;Opisthokonta;Metazoa;Eumetazoa;Bilateria;Protostomia;Spiralia;Lophotrochozoa;Mollusca;Bivalvia;Autobranhia;Heteroconchia;Euherodonta;Imparidentia;Venerida;Veneroidea;Veneridae;Mercenaria;Mercenaria mercenaria

UdeM00000042658 29159 78.2 UdeM00000042658 XP\_034339368.1 68.5 143  
40 2 1 139 1 142 9.50E-12 78.2 29159 cellular

organisms;Eukaryota;Opisthokonta;Metazoa;Eumetazoa;Bilateria;Protostomia;Spiralia;Lophotrochozoa;Mollusca;Bivalvia;Autobranhia;Pteriomorphia;Ostreida;Ostreioidea;Ostreidae;Crassostrea;Crassostrea gigas

UdeM00000042659 29159 327 UdeM00000042659 XP\_034339368.1 57.5 327  
118 6 18 333 364 680 2.80E-86 327 29159 cellular

organisms;Eukaryota;Opisthokonta;Metazoa;Eumetazoa;Bilateria;Protostomia;Spiralia;Lophotrochozoa;Mollusca;Bivalvia;Autobranhia;Pteriomorphia;Ostreida;Ostreioidea;Ostreidae;Crassostrea;Crassostrea gigas



UdeM00000042660 6596 235 UdeM00000042660 XP\_045172084.1 45.6 298  
 152 3 6 297 1311 1604 1.40E-58 235 6596 cellular  
 organisms;Eukaryota;Opisthokonta;Metazoa;Eumetazoa;Bilateria;Protostomia;  
 Spiralia;Lophotrochozoa;Mollusca;Bivalvia;Autobranchia;Heteroconchia;Euhe  
 terodonta;Imparidentia;Venerida;Veneroidea;Veneridae;Mercenaria;Mercenari  
 a mercenaria

UdeM00000042661 6596 362.8 UdeM00000042661 XP\_045172084.1 57.2 341  
 126 6 206 531 1819 2154 7.20E-97 362.8 6596 cellular  
 organisms;Eukaryota;Opisthokonta;Metazoa;Eumetazoa;Bilateria;Protostomia;  
 Spiralia;Lophotrochozoa;Mollusca;Bivalvia;Autobranchia;Heteroconchia;Euhe  
 terodonta;Imparidentia;Venerida;Veneroidea;Veneridae;Mercenaria;Mercenari  
 a mercenaria

UdeM00000042662 6596 176.8 UdeM00000042662 XP\_045187622.1 36 328  
 187 5 1 309 72 395 4.30E-41 176.8 6596 cellular  
 organisms;Eukaryota;Opisthokonta;Metazoa;Eumetazoa;Bilateria;Protostomia;  
 Spiralia;Lophotrochozoa;Mollusca;Bivalvia;Autobranchia;Heteroconchia;Euhe  
 terodonta;Imparidentia;Venerida;Veneroidea;Veneridae;Mercenaria;Mercenari  
 a mercenaria

UdeM00000042663 6596 239.6 UdeM00000042663 XP\_045165062.1 38.6 370  
 203 3 10 373 7 358 6.60E-60 239.6 6596 cellular  
 organisms;Eukaryota;Opisthokonta;Metazoa;Eumetazoa;Bilateria;Protostomia;  
 Spiralia;Lophotrochozoa;Mollusca;Bivalvia;Autobranchia;Heteroconchia;Euhe  
 terodonta;Imparidentia;Venerida;Veneroidea;Veneridae;Mercenaria;Mercenari  
 a mercenaria

UdeM00000042664 6596 284.6 UdeM00000042664 XP\_045173842.1 81.7 164  
 30 0 45 208 413 576 9.90E-74 284.6 6596 cellular  
 organisms;Eukaryota;Opisthokonta;Metazoa;Eumetazoa;Bilateria;Protostomia;  
 Spiralia;Lophotrochozoa;Mollusca;Bivalvia;Autobranchia;Heteroconchia;Euhe  
 terodonta;Imparidentia;Venerida;Veneroidea;Veneridae;Mercenaria;Mercenari  
 a mercenaria

UdeM00000042665 6596 217.6 UdeM00000042665 XP\_045165713.1 36.2 398  
 224 6 7 383 4 392 2.80E-53 217.6 6596 cellular  
 organisms;Eukaryota;Opisthokonta;Metazoa;Eumetazoa;Bilateria;Protostomia;  
 Spiralia;Lophotrochozoa;Mollusca;Bivalvia;Autobranchia;Heteroconchia;Euhe  
 terodonta;Imparidentia;Venerida;Veneroidea;Veneridae;Mercenaria;Mercenari  
 a mercenaria

UdeM00000042666 6596 475.3 UdeM00000042666 XP\_045173842.1 65.2 405  
 124 6 2 390 9 412 9.90E-131 475.3 6596 cellular  
 organisms;Eukaryota;Opisthokonta;Metazoa;Eumetazoa;Bilateria;Protostomia;  
 Spiralia;Lophotrochozoa;Mollusca;Bivalvia;Autobranchia;Heteroconchia;Euhe  
 terodonta;Imparidentia;Venerida;Veneroidea;Veneridae;Mercenaria;Mercenari  
 a mercenaria

UdeM00000042667 6596 576.6 UdeM00000042667 XP\_045171724.1 40.5 1112  
 437 22 16 1007 24 1030 6.10E-161 576.6 6596 cellular  
 organisms;Eukaryota;Opisthokonta;Metazoa;Eumetazoa;Bilateria;Protostomia;  
 Spiralia;Lophotrochozoa;Mollusca;Bivalvia;Autobranchia;Heteroconchia;Euhe  
 terodonta;Imparidentia;Venerida;Veneroidea;Veneridae;Mercenaria;Mercenari  
 a mercenaria

UdeM00000042668 6596 417.9 UdeM00000042668 XP\_045171724.1 39.1 911  
 377 18 1 792 179 1030 2.80E-113 417.9 6596 cellular  
 organisms;Eukaryota;Opisthokonta;Metazoa;Eumetazoa;Bilateria;Protostomia;  
 Spiralia;Lophotrochozoa;Mollusca;Bivalvia;Autobranchia;Heteroconchia;Euhe  
 terodonta;Imparidentia;Venerida;Veneroidea;Veneridae;Mercenaria;Mercenari  
 a mercenaria

UdeM00000042670 6596 489.2 UdeM00000042670 XP\_045173683.1 55.4 415  
 175 3 36 440 40 454 5.60E-135 489.2 6596 cellular  
 organisms;Eukaryota;Opisthokonta;Metazoa;Eumetazoa;Bilateria;Protostomia;  
 Spiralia;Lophotrochozoa;Mollusca;Bivalvia;Autobranchia;Heteroconchia;Euhe  
 terodonta;Imparidentia;Venerida;Veneroidea;Veneridae;Mercenaria;Mercenari  
 a mercenaria  
 UdeM00000042669 6596 493.8 UdeM00000042669 XP\_045173683.1 51.5 470  
 193 5 5 463 9 454 2.40E-136 493.8 6596 cellular  
 organisms;Eukaryota;Opisthokonta;Metazoa;Eumetazoa;Bilateria;Protostomia;  
 Spiralia;Lophotrochozoa;Mollusca;Bivalvia;Autobranchia;Heteroconchia;Euhe  
 terodonta;Imparidentia;Venerida;Veneroidea;Veneridae;Mercenaria;Mercenari  
 a mercenaria  
 UdeM00000042671 6596 450.7 UdeM00000042671 XP\_045171372.1 59.4 340  
 131 3 308 642 226 563 3.70E-123 450.7 6596 cellular  
 organisms;Eukaryota;Opisthokonta;Metazoa;Eumetazoa;Bilateria;Protostomia;  
 Spiralia;Lophotrochozoa;Mollusca;Bivalvia;Autobranchia;Heteroconchia;Euhe  
 terodonta;Imparidentia;Venerida;Veneroidea;Veneridae;Mercenaria;Mercenari  
 a mercenaria  
 UdeM00000042672 6596 81.6 UdeM00000042672 XP\_045173596.1 40 115  
 69 0 15 129 12 126 2.60E-12 81.6 6596 cellular  
 organisms;Eukaryota;Opisthokonta;Metazoa;Eumetazoa;Bilateria;Protostomia;  
 Spiralia;Lophotrochozoa;Mollusca;Bivalvia;Autobranchia;Heteroconchia;Euhe  
 terodonta;Imparidentia;Venerida;Veneroidea;Veneridae;Mercenaria;Mercenari  
 a mercenaria  
 UdeM00000042673 6596 334 UdeM00000042673 XP\_045171372.1 38.5 410  
 112 1 39 448 268 537 3.80E-88 334 6596 cellular  
 organisms;Eukaryota;Opisthokonta;Metazoa;Eumetazoa;Bilateria;Protostomia;  
 Spiralia;Lophotrochozoa;Mollusca;Bivalvia;Autobranchia;Heteroconchia;Euhe  
 terodonta;Imparidentia;Venerida;Veneroidea;Veneridae;Mercenaria;Mercenari  
 a mercenaria  
 UdeM00000042674 6565 116.3 UdeM00000042674 XP\_022336588.1 37.7 159  
 79 3 5 163 88 226 3.80E-23 116.3 6565 cellular  
 organisms;Eukaryota;Opisthokonta;Metazoa;Eumetazoa;Bilateria;Protostomia;  
 Spiralia;Lophotrochozoa;Mollusca;Bivalvia;Autobranchia;Pteriomorphia;Ostr  
 eida;Ostreoidea;Ostreidae;Crassostrea;Crassostrea virginica  
 UdeM00000042675 6596 312.4 UdeM00000042675 XP\_045171505.1 41.5 407  
 224 6 1 397 180 582 8.40E-82 312.4 6596 cellular  
 organisms;Eukaryota;Opisthokonta;Metazoa;Eumetazoa;Bilateria;Protostomia;  
 Spiralia;Lophotrochozoa;Mollusca;Bivalvia;Autobranchia;Heteroconchia;Euhe  
 terodonta;Imparidentia;Venerida;Veneroidea;Veneridae;Mercenaria;Mercenari  
 a mercenaria  
 UdeM00000042676 45351 1013.8 UdeM00000042676 XP\_032218909.1 43.3  
 1029 499 3 89 1112 850 1799 1.90E-292 1013.8  
 45351 cellular  
 organisms;Eukaryota;Opisthokonta;Metazoa;Eumetazoa;Cnidaria;Anthozoa;Hexa  
 corallia;Actiniaria;Edwardsiidae;Nematostella;Nematostella vectensis  
 UdeM00000043793 6579 500.4 UdeM00000043793 XP\_033742825.1 49.7 541  
 183 8 19 492 304 822 2.70E-138 500.4 6579 cellular  
 organisms;Eukaryota;Opisthokonta;Metazoa;Eumetazoa;Bilateria;Protostomia;  
 Spiralia;Lophotrochozoa;Mollusca;Bivalvia;Autobranchia;Pteriomorphia;Pect  
 inida;Pectinoidea;Pectinidae;Pecten;Pecten maximus  
 UdeM00000043794 6500 118.2 UdeM00000043794 XP\_012944219.2 50.8 118  
 44 1 1 104 720 837 1.10E-23 118.2 6500 cellular  
 organisms;Eukaryota;Opisthokonta;Metazoa;Eumetazoa;Bilateria;Protostomia;

Spiralia; Lophotrochozoa; Mollusca; Gastropoda; Heterobranchia; Euthyneura; Tectipleura; Aplysiida; Aplysioidea; Aplysiidae; Aplysia; Aplysia californica

UdeM00000043795 6596 136 UdeM00000043795 XP\_045165299.1 37.6 189  
110 6 2 187 110 293 5.30E-29 136 6596 cellular  
organisms; Eukaryota; Opisthokonta; Metazoa; Eumetazoa; Bilateria; Protostomia; Spiralia; Lophotrochozoa; Mollusca; Bivalvia; Autobranchia; Heteroconchia; Euheterodonta; Imparidentia; Venerida; Veneroidea; Veneridae; Mercenaria; Mercenaria mercenaria

UdeM00000043796 6579 436.8 UdeM00000043796 XP\_033742373.1 43.7 460  
253 3 12 467 24 481 3.50E-119 436.8 6579 cellular  
organisms; Eukaryota; Opisthokonta; Metazoa; Eumetazoa; Bilateria; Protostomia; Spiralia; Lophotrochozoa; Mollusca; Bivalvia; Autobranchia; Pteriomorphia; Pectinida; Pectinoidea; Pectinidae; Pecten; Pecten maximus

UdeM00000043797 7604 760.4 UdeM00000043797 XP\_033647599.1 31.2 2202  
1308 58 636 2712 326 2446 8.10E-216 760.4 7604 cellular  
organisms; Eukaryota; Opisthokonta; Metazoa; Eumetazoa; Bilateria; Deuterostomia; Echinodermata; Eleutherozoa; Asterozoa; Asteroidea; Forcipulatacea; Forcipulatacida; Asteroidea; Asterias; Asterias rubens

UdeM00000043798 6579 138.3 UdeM00000043798 XP\_033743120.1 38.1 215  
91 5 1 180 1 208 1.70E-29 138.3 6579 cellular  
organisms; Eukaryota; Opisthokonta; Metazoa; Eumetazoa; Bilateria; Protostomia; Spiralia; Lophotrochozoa; Mollusca; Bivalvia; Autobranchia; Pteriomorphia; Pectinida; Pectinoidea; Pectinidae; Pecten; Pecten maximus

UdeM00000043801 6596 137.5 UdeM00000043801 XP\_045204388.1 35.5 273  
156 8 24 280 22 290 2.80E-29 137.5 6596 cellular  
organisms; Eukaryota; Opisthokonta; Metazoa; Eumetazoa; Bilateria; Protostomia; Spiralia; Lophotrochozoa; Mollusca; Bivalvia; Autobranchia; Heteroconchia; Euheterodonta; Imparidentia; Venerida; Veneroidea; Veneridae; Mercenaria; Mercenaria mercenaria

UdeM00000043802 6565 112.5 UdeM00000043802 XP\_022334997.1 39.9 153  
85 3 33 181 29 178 9.70E-22 112.5 6565 cellular  
organisms; Eukaryota; Opisthokonta; Metazoa; Eumetazoa; Bilateria; Protostomia; Spiralia; Lophotrochozoa; Mollusca; Bivalvia; Autobranchia; Pteriomorphia; Ostreida; Ostreidae; Crassostrea; Crassostrea virginica

UdeM00000043803 7604 114.8 UdeM00000043803 XP\_033647599.1 39.9 288  
157 1 3 274 1405 1692 1.80E-22 114.8 7604 cellular  
organisms; Eukaryota; Opisthokonta; Metazoa; Eumetazoa; Bilateria; Deuterostomia; Echinodermata; Eleutherozoa; Asterozoa; Asteroidea; Forcipulatacea; Forcipulatacida; Asteroidea; Asterias; Asterias rubens

UdeM00000043805 6596 122.5 UdeM00000043805 XP\_045202576.1 59.3 108  
43 1 1 107 87 194 3.80E-25 122.5 6596 cellular  
organisms; Eukaryota; Opisthokonta; Metazoa; Eumetazoa; Bilateria; Protostomia; Spiralia; Lophotrochozoa; Mollusca; Bivalvia; Autobranchia; Heteroconchia; Euheterodonta; Imparidentia; Venerida; Veneroidea; Veneridae; Mercenaria; Mercenaria mercenaria

UdeM00000043806 6596 177.6 UdeM00000043806 XP\_045206316.1 47.6 191  
99 1 13 202 70 260 1.60E-41 177.6 6596 cellular  
organisms; Eukaryota; Opisthokonta; Metazoa; Eumetazoa; Bilateria; Protostomia; Spiralia; Lophotrochozoa; Mollusca; Bivalvia; Autobranchia; Heteroconchia; Euheterodonta; Imparidentia; Venerida; Veneroidea; Veneridae; Mercenaria; Mercenaria mercenaria

UdeM00000035947 29159 62.8 UdeM00000035947 XP\_034307341.1 30.5 128  
63 2 2 109 48 169 3.20E-07 62.8 29159 cellular  
organisms; Eukaryota; Opisthokonta; Metazoa; Eumetazoa; Bilateria; Protostomia;

Spiralia; Lophotrochozoa; Mollusca; Bivalvia; Autobranchia; Pteriomorphia; Ostr  
eida; Ostreoida; Ostreidae; Crassostrea; Crassostrea gigas  
UdeM00000035948 1735272 80.9 UdeM00000035948 XP\_041353177.1 44.3  
79 44 0 1 79 148 226 1.90E-12 80.9 1735272  
cellular  
organisms; Eukaryota; Opisthokonta; Metazoa; Eumetazoa; Bilateria; Protostomia;  
Spiralia; Lophotrochozoa; Mollusca; Gastropoda; Neomphalina; Neomphaloidea; Pel  
tospiridae; Gigantopelta; Gigantopelta aegis  
UdeM00000035951 29159 310.8 UdeM00000035951 XP\_034305965.1 38.8 466  
215 15 6 433 7 440 2.80E-81 310.8 29159 cellular  
organisms; Eukaryota; Opisthokonta; Metazoa; Eumetazoa; Bilateria; Protostomia;  
Spiralia; Lophotrochozoa; Mollusca; Bivalvia; Autobranchia; Pteriomorphia; Ostr  
eida; Ostreoida; Ostreidae; Crassostrea; Crassostrea gigas  
UdeM00000035953 6565 198.7 UdeM00000035953 XP\_022333382.1 52.6 173  
81 1 1 173 189 360 9.90E-48 198.7 6565 cellular  
organisms; Eukaryota; Opisthokonta; Metazoa; Eumetazoa; Bilateria; Protostomia;  
Spiralia; Lophotrochozoa; Mollusca; Bivalvia; Autobranchia; Pteriomorphia; Ostr  
eida; Ostreoida; Ostreidae; Crassostrea; Crassostrea virginica  
UdeM00000035954 46514 115.5 UdeM00000035954 XP\_038071378.1 56.5 108  
47 0 7 114 6 113 4.40E-23 115.5 46514 cellular  
organisms; Eukaryota; Opisthokonta; Metazoa; Eumetazoa; Bilateria; Deuterostomi  
a; Echinodermata; Eleutherozoa; Asterozoa; Asteroidea; Valvatacea; Valvatida; As  
terinidae; Patiria; Patiria miniata  
UdeM00000035955 6706 152.1 UdeM00000035955 XP\_042235765.1 43.9 157  
88 0 1 157 1 157 5.80E-34 152.1 6706 cellular  
organisms; Eukaryota; Opisthokonta; Metazoa; Eumetazoa; Bilateria; Protostomia;  
Ecdysozoa; Panarthropoda; Arthropoda; Mandibulata; Pancrustacea; Crustacea; Mul  
ticrustacea; Malacostraca; Eumalacostraca; Eucarida; Decapoda; Pleocyemata; Ast  
acidea; Nephropoidea; Nephropidae; Homarus; Homarus americanus  
UdeM00000035959 6565 216.9 UdeM00000035959 XP\_022298930.1 42 276  
142 6 26 287 10 281 3.70E-53 216.9 6565 cellular  
organisms; Eukaryota; Opisthokonta; Metazoa; Eumetazoa; Bilateria; Protostomia;  
Spiralia; Lophotrochozoa; Mollusca; Bivalvia; Autobranchia; Pteriomorphia; Ostr  
eida; Ostreoida; Ostreidae; Crassostrea; Crassostrea virginica  
UdeM00000035960 7998 437.2 UdeM00000035960 XP\_017334791.1 64.6 319  
113 0 1 319 62 380 1.80E-119 437.2 7998 cellular  
organisms; Eukaryota; Opisthokonta; Metazoa; Eumetazoa; Bilateria; Deuterostomi  
a; Chordata; Craniata; Vertebrata; Gnathostomata; Teleostomi; Euteleostomi; Acti  
nopterygii; Actinopteri; Neopterygii; Teleostei; Osteoglossocephalai; Clupeoce  
phala; Otomorpha; Ostariophysi; Otophysi; Characiphysae; Siluriformes; Siluroid  
ei; Ictaluridae; Ictalurus; Ictalurus punctatus  
UdeM00000035961 6579 157.9 UdeM00000035961 XP\_033752778.1 40.9 264  
128 7 2 255 15 260 1.70E-35 157.9 6579 cellular  
organisms; Eukaryota; Opisthokonta; Metazoa; Eumetazoa; Bilateria; Protostomia;  
Spiralia; Lophotrochozoa; Mollusca; Bivalvia; Autobranchia; Pteriomorphia; Pect  
inida; Pectinoidea; Pectinidae; Pecten; Pecten maximus  
UdeM00000035962 6565 93.6 UdeM00000035962 XP\_022312527.1 44.8 96  
52 1 69 163 70 165 2.70E-16 93.6 6565 cellular  
organisms; Eukaryota; Opisthokonta; Metazoa; Eumetazoa; Bilateria; Protostomia;  
Spiralia; Lophotrochozoa; Mollusca; Bivalvia; Autobranchia; Pteriomorphia; Ostr  
eida; Ostreoida; Ostreidae; Crassostrea; Crassostrea virginica  
UdeM00000035963 7054 480.7 UdeM00000035963 XP\_031328250.1 49.7 467  
233 2 1 465 1 467 2.10E-132 480.7 7054 cellular  
organisms; Eukaryota; Opisthokonta; Metazoa; Eumetazoa; Bilateria; Protostomia;

Ecdysozoa; Panarthropoda; Arthropoda; Mandibulata; Pancrustacea; Hexapoda; Insecta; Dicondylia; Pterygota; Neoptera; Endopterygota; Coleoptera; Polyphaga; Elateriformia; Elateroidea; Lampyridae; Lampyrinae; Photinus; Photinus pyralis

UdeM00000035965 6706 151 UdeM00000035965 XP\_042235765.1 43.9 157  
88 0 1 157 1 157 1.30E-33 151 6706 cellular  
organisms; Eukaryota; Opisthokonta; Metazoa; Eumetazoa; Bilateria; Protostomia;  
Ecdysozoa; Panarthropoda; Arthropoda; Mandibulata; Pancrustacea; Crustacea; Multicrustacea; Malacostraca; Eumalacostraca; Eucarida; Decapoda; Pleocyemata; Astacidea; Nephropoidea; Nephropidae; Homarus; Homarus americanus

UdeM00000035966 6596 62.4 UdeM00000035966 XP\_045210831.1 31.2 141  
40 2 1 84 1 141 3.20E-07 62.4 6596 cellular  
organisms; Eukaryota; Opisthokonta; Metazoa; Eumetazoa; Bilateria; Protostomia;  
Spiralia; Lophotrochozoa; Mollusca; Bivalvia; Autobranchia; Heteroconchia; Euheterodonta; Imparidentia; Venerida; Veneroidea; Veneridae; Mercenaria; Mercenaria mercenaria

UdeM00000035967 6596 481.1 UdeM00000035967 XP\_045187150.1 49.4 488  
242 2 1 488 135 617 1.70E-132 481.1 6596 cellular  
organisms; Eukaryota; Opisthokonta; Metazoa; Eumetazoa; Bilateria; Protostomia;  
Spiralia; Lophotrochozoa; Mollusca; Bivalvia; Autobranchia; Heteroconchia; Euheterodonta; Imparidentia; Venerida; Veneroidea; Veneridae; Mercenaria; Mercenaria mercenaria

UdeM00000035968 6596 622.1 UdeM00000035968 XP\_045190527.1 48 656  
330 5 57 707 3 652 8.80E-175 622.1 6596 cellular  
organisms; Eukaryota; Opisthokonta; Metazoa; Eumetazoa; Bilateria; Protostomia;  
Spiralia; Lophotrochozoa; Mollusca; Bivalvia; Autobranchia; Heteroconchia; Euheterodonta; Imparidentia; Venerida; Veneroidea; Veneridae; Mercenaria; Mercenaria mercenaria

UdeM00000035969 6565 836.6 UdeM00000035969 XP\_022334993.1 49.4 887  
413 13 39 914 8 869 2.90E-239 836.6 6565 cellular  
organisms; Eukaryota; Opisthokonta; Metazoa; Eumetazoa; Bilateria; Protostomia;  
Spiralia; Lophotrochozoa; Mollusca; Bivalvia; Autobranchia; Pteriomorphia; Ostreida; Ostreioidea; Ostreidae; Crassostrea; Crassostrea virginica

UdeM00000035970 6565 212.6 UdeM00000035970 XP\_022287303.1 34.2 310  
190 7 6 303 443 750 6.90E-52 212.6 6565 cellular  
organisms; Eukaryota; Opisthokonta; Metazoa; Eumetazoa; Bilateria; Protostomia;  
Spiralia; Lophotrochozoa; Mollusca; Bivalvia; Autobranchia; Pteriomorphia; Ostreida; Ostreioidea; Ostreidae; Crassostrea; Crassostrea virginica

UdeM00000035971 6565 132.1 UdeM00000035971 XP\_022334997.1 44.8 154  
80 3 6 156 29 180 6.20E-28 132.1 6565 cellular  
organisms; Eukaryota; Opisthokonta; Metazoa; Eumetazoa; Bilateria; Protostomia;  
Spiralia; Lophotrochozoa; Mollusca; Bivalvia; Autobranchia; Pteriomorphia; Ostreida; Ostreioidea; Ostreidae; Crassostrea; Crassostrea virginica

UdeM00000035972 6565 129.8 UdeM00000035972 XP\_022334997.1 44.7 152  
79 3 6 154 29 178 8.60E-27 129.8 6565 cellular  
organisms; Eukaryota; Opisthokonta; Metazoa; Eumetazoa; Bilateria; Protostomia;  
Spiralia; Lophotrochozoa; Mollusca; Bivalvia; Autobranchia; Pteriomorphia; Ostreida; Ostreioidea; Ostreidae; Crassostrea; Crassostrea virginica

UdeM00000035973 6565 746.9 UdeM00000035973 XP\_022334994.1 46.8 870  
364 13 36 811 4 868 2.70E-212 746.9 6565 cellular  
organisms; Eukaryota; Opisthokonta; Metazoa; Eumetazoa; Bilateria; Protostomia;  
Spiralia; Lophotrochozoa; Mollusca; Bivalvia; Autobranchia; Pteriomorphia; Ostreida; Ostreioidea; Ostreidae; Crassostrea; Crassostrea virginica

UdeM00000035974 6596 145.2 UdeM00000035974 XP\_045209729.1 46.4 168  
77 5 2 157 570 736 7.00E-32 145.2 6596 cellular

organisms;Eukaryota;Opisthokonta;Metazoa;Eumetazoa;Bilateria;Protostomia;Spiralia;Lophotrochozoa;Mollusca;Bivalvia;Autobranhia;Heteroconchia;Euheterodonta;Imparidentia;Venerida;Veneroidea;Veneridae;Mercenaria;Mercenaria mercenaria

UdeM00000035975 29159 68.6 UdeM00000035975 XP\_034318137.1 42.6 61  
35 0 39 99 811 871 5.30E-09 68.6 29159 cellular

organisms;Eukaryota;Opisthokonta;Metazoa;Eumetazoa;Bilateria;Protostomia;Spiralia;Lophotrochozoa;Mollusca;Bivalvia;Autobranhia;Pteriormorphia;Ostreida;Ostreoidea;Ostreidae;Crassostrea;Crassostrea gigas

UdeM00000035976 6596 86.3 UdeM00000035976 XP\_045208792.1 37.6 109  
67 1 1 109 1 108 2.80E-14 86.3 6596 cellular

organisms;Eukaryota;Opisthokonta;Metazoa;Eumetazoa;Bilateria;Protostomia;Spiralia;Lophotrochozoa;Mollusca;Bivalvia;Autobranhia;Heteroconchia;Euheterodonta;Imparidentia;Venerida;Veneroidea;Veneridae;Mercenaria;Mercenaria mercenaria

UdeM00000035977 6565 169.1 UdeM00000035977 XP\_022337267.1 40.1 267  
99 6 56 261 300 566 7.80E-39 169.1 6565 cellular

organisms;Eukaryota;Opisthokonta;Metazoa;Eumetazoa;Bilateria;Protostomia;Spiralia;Lophotrochozoa;Mollusca;Bivalvia;Autobranhia;Pteriormorphia;Ostreida;Ostreoidea;Ostreidae;Crassostrea;Crassostrea virginica

UdeM00000035978 6565 163.3 UdeM00000035978 XP\_022337267.1 50.3 167  
81 1 49 213 400 566 3.50E-37 163.3 6565 cellular

organisms;Eukaryota;Opisthokonta;Metazoa;Eumetazoa;Bilateria;Protostomia;Spiralia;Lophotrochozoa;Mollusca;Bivalvia;Autobranhia;Pteriormorphia;Ostreida;Ostreoidea;Ostreidae;Crassostrea;Crassostrea virginica

UdeM00000035979 6565 154.1 UdeM00000035979 XP\_022337267.1 65.5 113  
39 0 2 114 454 566 1.20E-34 154.1 6565 cellular

organisms;Eukaryota;Opisthokonta;Metazoa;Eumetazoa;Bilateria;Protostomia;Spiralia;Lophotrochozoa;Mollusca;Bivalvia;Autobranhia;Pteriormorphia;Ostreida;Ostreoidea;Ostreidae;Crassostrea;Crassostrea virginica

UdeM00000035982 6596 375.2 UdeM00000035982 XP\_045169782.1 53.9 332  
151 2 1 331 56 386 8.90E-101 375.2 6596 cellular

organisms;Eukaryota;Opisthokonta;Metazoa;Eumetazoa;Bilateria;Protostomia;Spiralia;Lophotrochozoa;Mollusca;Bivalvia;Autobranhia;Heteroconchia;Euheterodonta;Imparidentia;Venerida;Veneroidea;Veneridae;Mercenaria;Mercenaria mercenaria

UdeM00000035986 6596 326.6 UdeM00000035986 XP\_045181000.1 60 452  
113 4 2 399 1140 1577 4.40E-86 326.6 6596 cellular

organisms;Eukaryota;Opisthokonta;Metazoa;Eumetazoa;Bilateria;Protostomia;Spiralia;Lophotrochozoa;Mollusca;Bivalvia;Autobranhia;Heteroconchia;Euheterodonta;Imparidentia;Venerida;Veneroidea;Veneridae;Mercenaria;Mercenaria mercenaria

UdeM00000035987 6596 192.2 UdeM00000035987 XP\_045181000.1 56 193  
49 4 2 176 868 1042 5.80E-46 192.2 6596 cellular

organisms;Eukaryota;Opisthokonta;Metazoa;Eumetazoa;Bilateria;Protostomia;Spiralia;Lophotrochozoa;Mollusca;Bivalvia;Autobranhia;Heteroconchia;Euheterodonta;Imparidentia;Venerida;Veneroidea;Veneridae;Mercenaria;Mercenaria mercenaria

UdeM00000035989 7054 402.1 UdeM00000035989 XP\_031328250.1 45 467  
221 4 1 431 1 467 8.70E-109 402.1 7054 cellular

organisms;Eukaryota;Opisthokonta;Metazoa;Eumetazoa;Bilateria;Protostomia;Ecdysozoa;Panarthropoda;Arthropoda;Mandibulata;Pancrustacea;Hexapoda;Insecta;Dicondylia;Pterygota;Neoptera;Endopterygota;Coleoptera;Polyphaga;Elaterriformia;Elateroidea;Lampyridae;Lampyrinae;Photinus;Photinus pyralis

UdeM00000028285 50390 427.9 UdeM00000028285 XP\_028154228.1 58.4 296  
 123 0 3 298 326 621 1.00E-116 427.9 50390 cellular  
 organisms;Eukaryota;Opisthokonta;Metazoa;Eumetazoa;Bilateria;Protostomia;  
 Ecdysozoa;Panarthropoda;Arthropoda;Mandibulata;Pancrustacea;Hexapoda;Inse  
 cta;Dicondylia;Pterygota;Neoptera;Endopterygota;Coleoptera;Polyphaga;Cucu  
 jiformia;Chrysomeloidea;Chrysomelidae;Galerucinae;Luperini;Diabroticina;D  
 iabroticites;Diabrotica;Diabrotica virgifera;Diabrotica virgifera  
 virgifera

UdeM00000028286 50390 401.4 UdeM00000028286 XP\_028142044.1 57.1 294  
 126 0 2 295 334 627 1.00E-108 401.4 50390 cellular  
 organisms;Eukaryota;Opisthokonta;Metazoa;Eumetazoa;Bilateria;Protostomia;  
 Ecdysozoa;Panarthropoda;Arthropoda;Mandibulata;Pancrustacea;Hexapoda;Inse  
 cta;Dicondylia;Pterygota;Neoptera;Endopterygota;Coleoptera;Polyphaga;Cucu  
 jiformia;Chrysomeloidea;Chrysomelidae;Galerucinae;Luperini;Diabroticina;D  
 iabroticites;Diabrotica;Diabrotica virgifera;Diabrotica virgifera  
 virgifera

UdeM00000028287 80966 184.5 UdeM00000028287 XP\_022077561.1 54.5 156  
 71 0 1 156 116 271 1.00E-43 184.5 80966 cellular  
 organisms;Eukaryota;Opisthokonta;Metazoa;Eumetazoa;Bilateria;Deuterostomi  
 a;Chordata;Craniata;Vertebrata;Gnathostomata;Teleostomi;Euteleostomi;Acti  
 nopterygii;Actinopteri;Neopterygii;Teleostei;Osteoglossocephalai;Clupeoce  
 phala;Euteleosteomorpha;Neoteleostei;Eurypterygia;Ctenosquamata;Acanthomo  
 rphata;Euacanthomorpha;Percomorphaceae;Ovalentaria;Ovalentaria  
 incertae sedis;Pomacentridae;Acanthochromis;Acanthochromis polyacanthus

UdeM00000028288 6596 426.4 UdeM00000028288 XP\_045159152.1 66.1 327  
 111 0 55 381 52 378 3.90E-116 426.4 6596 cellular  
 organisms;Eukaryota;Opisthokonta;Metazoa;Eumetazoa;Bilateria;Protostomia;  
 Spiralia;Lophotrochozoa;Mollusca;Bivalvia;Autobranchia;Heteroconchia;Euhe  
 terodonta;Imparidentia;Venerida;Veneroidea;Veneridae;Mercenaria;Mercenari  
 a mercenaria

UdeM00000028291 6596 1008.1 UdeM00000028291 XP\_045162416.1 70.5  
 803 199 8 1 784 1 784 6.30E-291 1008.1 6596  
 cellular  
 organisms;Eukaryota;Opisthokonta;Metazoa;Eumetazoa;Bilateria;Protostomia;  
 Spiralia;Lophotrochozoa;Mollusca;Bivalvia;Autobranchia;Heteroconchia;Euhe  
 terodonta;Imparidentia;Venerida;Veneroidea;Veneridae;Mercenaria;Mercenari  
 a mercenaria

UdeM00000028290 6596 989.6 UdeM00000028290 XP\_045162416.1 70.1 792  
 199 8 1 773 1 773 2.40E-285 989.6 6596 cellular  
 organisms;Eukaryota;Opisthokonta;Metazoa;Eumetazoa;Bilateria;Protostomia;  
 Spiralia;Lophotrochozoa;Mollusca;Bivalvia;Autobranchia;Heteroconchia;Euhe  
 terodonta;Imparidentia;Venerida;Veneroidea;Veneridae;Mercenaria;Mercenari  
 a mercenaria

UdeM00000028292 225164 367.9 UdeM00000028292 XP\_009058784.1 39  
 549 321 10 15 555 5 547 2.40E-98 367.9 225164  
 cellular  
 organisms;Eukaryota;Opisthokonta;Metazoa;Eumetazoa;Bilateria;Protostomia;  
 Spiralia;Lophotrochozoa;Mollusca;Gastropoda;Patellogastropoda;Lottioidae;  
 Lottiidae;Lottia;Lottia gigantea

UdeM00000028293 7574 72.8 UdeM00000028293 XP\_013383769.1 32.3 124  
 80 2 12 131 172 295 3.80E-10 72.8 7574 cellular  
 organisms;Eukaryota;Opisthokonta;Metazoa;Eumetazoa;Bilateria;Protostomia;  
 Spiralia;Lophotrochozoa;Brachiopoda;Linguliformea;Lingulata;Lingulida;Lin  
 guloidea;Lingulidae;Lingula;Lingula anatina

UdeM00000028294 7668 83.6 UdeM00000028294 XP\_030847066.1 42.9 105  
 52 1 5 101 469 573 1.60E-13 83.6 7668 cellular  
 organisms;Eukaryota;Opisthokonta;Metazoa;Eumetazoa;Bilateria;Deuterostomi  
 a;Echinodermata;Eleutherozoa;Echinozoa;Echinoidea;Euechinoidea;Echinacea;  
 Camarodonta;Echinidea;Strongylocentrotidae;Strongylocentrotus;Strongyloce  
 ntrotus purpuratus

UdeM00000028295 6573 168.3 UdeM00000028295 XP\_021372870.1 40 205  
 121 2 6 209 624 827 1.10E-38 168.3 6573 cellular  
 organisms;Eukaryota;Opisthokonta;Metazoa;Eumetazoa;Bilateria;Protostomia;  
 Spiralia;Lophotrochozoa;Mollusca;Bivalvia;Autobranchia;Pteriormorphia;Pect  
 inida;Pectinoidea;Pectinidae;Mizuhopecten;Mizuhopecten yessoensis

UdeM00000028296 27687 448 UdeM00000028296 XP\_028667911.1 28.8 1082  
 684 27 10 1062 29 1053 3.40E-122 448 27687 cellular  
 organisms;Eukaryota;Opisthokonta;Metazoa;Eumetazoa;Bilateria;Deuterostomi  
 a;Chordata;Craniata;Vertebrata;Gnathostomata;Teleostomi;Euteleostomi;Acti  
 nopterygii;Cladistia;Polypteriformes;Polypteridae;Erpetoichthys;Erpetoich  
 thys calabaricus

UdeM00000028297 45264 146.4 UdeM00000028297 XP\_044165535.1 39 205  
 117 4 99 297 322 524 6.00E-32 146.4 45264 cellular  
 organisms;Eukaryota;Opisthokonta;Metazoa;Eumetazoa;Cnidaria;Anthozoa;Hexa  
 corallia;Scleractinia;Astrocoeniina;Acroporidae;Acropora;Acropora  
 millepora

UdeM00000028298 29159 802.4 UdeM00000028298 XP\_034298913.1 70.7 543  
 156 2 351 893 1155 1694 6.00E-229 802.4 29159 cellular  
 organisms;Eukaryota;Opisthokonta;Metazoa;Eumetazoa;Bilateria;Protostomia;  
 Spiralia;Lophotrochozoa;Mollusca;Bivalvia;Autobranchia;Pteriormorphia;Ostr  
 eida;Ostreoidea;Ostreidae;Crassostrea;Crassostrea gigas

UdeM00000028299 6565 692.2 UdeM00000028299 XP\_022343829.1 97.1 341  
 10 0 1 341 1 341 3.30E-196 692.2 6565 cellular  
 organisms;Eukaryota;Opisthokonta;Metazoa;Eumetazoa;Bilateria;Protostomia;  
 Spiralia;Lophotrochozoa;Mollusca;Bivalvia;Autobranchia;Pteriormorphia;Ostr  
 eida;Ostreoidea;Ostreidae;Crassostrea;Crassostrea virginica

UdeM00000028300 6565 369.4 UdeM00000028300 XP\_022343829.1 98.3 174  
 3 0 8 181 168 341 2.60E-99 369.4 6565 cellular  
 organisms;Eukaryota;Opisthokonta;Metazoa;Eumetazoa;Bilateria;Protostomia;  
 Spiralia;Lophotrochozoa;Mollusca;Bivalvia;Autobranchia;Pteriormorphia;Ostr  
 eida;Ostreoidea;Ostreidae;Crassostrea;Crassostrea virginica

UdeM00000028301 6579 436.8 UdeM00000028301 XP\_033763717.1 45.3 523  
 223 9 28 525 28 512 3.90E-119 436.8 6579 cellular  
 organisms;Eukaryota;Opisthokonta;Metazoa;Eumetazoa;Bilateria;Protostomia;  
 Spiralia;Lophotrochozoa;Mollusca;Bivalvia;Autobranchia;Pteriormorphia;Pect  
 inida;Pectinoidea;Pectinidae;Pecten;Pecten maximus

UdeM00000028302 6596 456.1 UdeM00000028302 XP\_045161195.1 70.7 311  
 91 0 1 311 1 311 3.70E-125 456.1 6596 cellular  
 organisms;Eukaryota;Opisthokonta;Metazoa;Eumetazoa;Bilateria;Protostomia;  
 Spiralia;Lophotrochozoa;Mollusca;Bivalvia;Autobranchia;Heteroconchia;Euhe  
 terodonta;Imparidentia;Venerida;Veneroidea;Veneridae;Mercenaria;Mercenari  
 a mercenaria

UdeM00000028303 6565 92.4 UdeM00000028303 XP\_022303441.1 29.7 306  
 174 7 1 291 1 280 1.00E-15 92.4 6565 cellular  
 organisms;Eukaryota;Opisthokonta;Metazoa;Eumetazoa;Bilateria;Protostomia;  
 Spiralia;Lophotrochozoa;Mollusca;Bivalvia;Autobranchia;Pteriormorphia;Ostr  
 eida;Ostreoidea;Ostreidae;Crassostrea;Crassostrea virginica



UdeM00000028304 6579 271.6 UdeM00000028304 XP\_033724809.1 45.3 327  
 160 4 1 326 1 309 1.40E-69 271.6 6579 cellular  
 organisms;Eukaryota;Opisthokonta;Metazoa;Eumetazoa;Bilateria;Protostomia;  
 Spiralia;Lophotrochozoa;Mollusca;Bivalvia;Autobranchia;Pteriomorpha;Pect  
 inida;Pectinoidea;Pectinidae;Pecten;Pecten maximus  
 UdeM00000028305 6596 510.8 UdeM00000028305 XP\_045162872.1 73.1 316  
 85 0 71 386 5 320 1.60E-141 510.8 6596 cellular  
 organisms;Eukaryota;Opisthokonta;Metazoa;Eumetazoa;Bilateria;Protostomia;  
 Spiralia;Lophotrochozoa;Mollusca;Bivalvia;Autobranchia;Heteroconchia;Euhe  
 terodonta;Imparidentia;Venerida;Veneroidea;Veneridae;Mercenaria;Mercenari  
 a mercenaria  
 UdeM00000028306 6596 89.4 UdeM00000028306 XP\_045161495.1 55.1 78  
 32 1 77 154 46 120 4.50E-15 89.4 6596 cellular  
 organisms;Eukaryota;Opisthokonta;Metazoa;Eumetazoa;Bilateria;Protostomia;  
 Spiralia;Lophotrochozoa;Mollusca;Bivalvia;Autobranchia;Heteroconchia;Euhe  
 terodonta;Imparidentia;Venerida;Veneroidea;Veneridae;Mercenaria;Mercenari  
 a mercenaria  
 UdeM00000028307 6596 374 UdeM00000028307 XP\_045177776.1 31.4 781  
 463 18 285 1047 398 1123 7.00E-100 374 6596 cellular  
 organisms;Eukaryota;Opisthokonta;Metazoa;Eumetazoa;Bilateria;Protostomia;  
 Spiralia;Lophotrochozoa;Mollusca;Bivalvia;Autobranchia;Heteroconchia;Euhe  
 terodonta;Imparidentia;Venerida;Veneroidea;Veneridae;Mercenaria;Mercenari  
 a mercenaria  
 UdeM00000028308 50429 158.3 UdeM00000028308 XP\_022789961.1 68.5 92  
 29 0 1 92 78 169 4.70E-36 158.3 50429 cellular  
 organisms;Eukaryota;Opisthokonta;Metazoa;Eumetazoa;Cnidaria;Anthozoa;Hexa  
 corallia;Scleractinia;Astrocoeniina;Pocilloporidae;Stylophora;Stylophora  
 pistillata  
 UdeM00000028309 6596 410.2 UdeM00000028309 XP\_045170511.1 31.3 951  
 485 32 19 861 90 980 6.70E-111 410.2 6596 cellular  
 organisms;Eukaryota;Opisthokonta;Metazoa;Eumetazoa;Bilateria;Protostomia;  
 Spiralia;Lophotrochozoa;Mollusca;Bivalvia;Autobranchia;Heteroconchia;Euhe  
 terodonta;Imparidentia;Venerida;Veneroidea;Veneridae;Mercenaria;Mercenari  
 a mercenaria  
 UdeM00000028310 6579 69.3 UdeM00000028310 XP\_033761099.1 22.1 249  
 171 4 134 363 68 312 1.20E-08 69.3 6579 cellular  
 organisms;Eukaryota;Opisthokonta;Metazoa;Eumetazoa;Bilateria;Protostomia;  
 Spiralia;Lophotrochozoa;Mollusca;Bivalvia;Autobranchia;Pteriomorpha;Pect  
 inida;Pectinoidea;Pectinidae;Pecten;Pecten maximus  
 UdeM00000028311 6579 321.6 UdeM00000028311 XP\_033724622.1 77.7 202  
 45 0 18 219 1482 1683 7.60E-85 321.6 6579 cellular  
 organisms;Eukaryota;Opisthokonta;Metazoa;Eumetazoa;Bilateria;Protostomia;  
 Spiralia;Lophotrochozoa;Mollusca;Bivalvia;Autobranchia;Pteriomorpha;Pect  
 inida;Pectinoidea;Pectinidae;Pecten;Pecten maximus  
 UdeM00000028312 390379 96.3 UdeM00000028312 XP\_034039899.1 52.1  
 73 34 1 3 74 1 73 2.40E-17 96.3 390379  
 cellular  
 organisms;Eukaryota;Opisthokonta;Metazoa;Eumetazoa;Bilateria;Deuterostomi  
 a;Chordata;Craniata;Vertebrata;Gnathostomata;Teleostomi;Euteleostomi;Acti  
 nopterygii;Actinopteri;Neopterygii;Teleostei;Osteoglossocephalai;Clupeoce  
 phala;Euteleostei;Neoteleostei;Eurypterygia;Ctenosquamata;Acanthomo  
 rphata;Euacanthomorpha;Percomorphaceae;Batrachoidaria;Batrachoidiforme  
 s;Batrachoididae;Thalassophyrinae;Thalassophryne;Thalassophryne  
 amazonica

UdeM00000028313 6565 631.7 UdeM00000028313 XP\_022343862.1 46.1 647  
 286 5 24 610 661 1304 1.20E-177 631.7 6565 cellular  
 organisms;Eukaryota;Opisthokonta;Metazoa;Eumetazoa;Bilateria;Protostomia;  
 Spiralia;Lophotrochozoa;Mollusca;Bivalvia;Autobranchia;Pteriomorphia;Ostr  
 eida;Ostreoidea;Ostreidae;Crassostrea;Crassostrea virginica  
 UdeM00000028316 6596 235 UdeM00000028316 XP\_045185723.1 42.4 304  
 157 5 7 308 455 742 2.00E-58 235 6596 cellular  
 organisms;Eukaryota;Opisthokonta;Metazoa;Eumetazoa;Bilateria;Protostomia;  
 Spiralia;Lophotrochozoa;Mollusca;Bivalvia;Autobranchia;Heteroconchia;Euhe  
 terodonta;Imparidentia;Venerida;Veneroidea;Veneridae;Mercenaria;Mercenari  
 a mercenaria  
 UdeM00000028317 6596 122.1 UdeM00000028317 XP\_045206982.1 51 104  
 51 0 4 107 80 183 4.80E-25 122.1 6596 cellular  
 organisms;Eukaryota;Opisthokonta;Metazoa;Eumetazoa;Bilateria;Protostomia;  
 Spiralia;Lophotrochozoa;Mollusca;Bivalvia;Autobranchia;Heteroconchia;Euhe  
 terodonta;Imparidentia;Venerida;Veneroidea;Veneridae;Mercenaria;Mercenari  
 a mercenaria  
 UdeM00000028318 6565 191 UdeM00000028318 XP\_022343862.1 32.9 295  
 191 6 82 371 275 567 3.10E-45 191 6565 cellular  
 organisms;Eukaryota;Opisthokonta;Metazoa;Eumetazoa;Bilateria;Protostomia;  
 Spiralia;Lophotrochozoa;Mollusca;Bivalvia;Autobranchia;Pteriomorphia;Ostr  
 eida;Ostreoidea;Ostreidae;Crassostrea;Crassostrea virginica  
 UdeM00000028319 6579 166 UdeM00000028319 XP\_033724622.1 37.8 270  
 138 7 4 256 140 396 6.30E-38 166 6579 cellular  
 organisms;Eukaryota;Opisthokonta;Metazoa;Eumetazoa;Bilateria;Protostomia;  
 Spiralia;Lophotrochozoa;Mollusca;Bivalvia;Autobranchia;Pteriomorphia;Pect  
 inida;Pectinoidea;Pectinidae;Pecten;Pecten maximus  
 UdeM00000028320 151771 325.9 UdeM00000028320 XP\_028406951.1 36  
 555 311 10 1 518 119 666 9.60E-86 325.9 151771  
 cellular  
 organisms;Eukaryota;Opisthokonta;Metazoa;Eumetazoa;Cnidaria;Anthozoa;Octo  
 corallia;Alcyonacea;Alcyoniina;Nephtheidae;Dendronephthya;Dendronephthya  
 gigantea  
 UdeM00000028321 45264 403.3 UdeM00000028321 XP\_044165143.1 49 443  
 171 5 42 433 35 473 4.00E-109 403.3 45264 cellular  
 organisms;Eukaryota;Opisthokonta;Metazoa;Eumetazoa;Cnidaria;Anthozoa;Hexa  
 corallia;Scleractinia;Astrocoeniina;Acroporidae;Acropora;Acropora  
 millepora  
 UdeM00000028322 29159 428.3 UdeM00000028322 XP\_034336553.1 58.8 369  
 144 3 22 383 27 394 1.00E-116 428.3 29159 cellular  
 organisms;Eukaryota;Opisthokonta;Metazoa;Eumetazoa;Bilateria;Protostomia;  
 Spiralia;Lophotrochozoa;Mollusca;Bivalvia;Autobranchia;Pteriomorphia;Ostr  
 eida;Ostreoidea;Ostreidae;Crassostrea;Crassostrea gigas  
 UdeM00000028323 29159 500 UdeM00000028323 XP\_034336553.1 60.3 416  
 157 3 22 430 27 441 3.10E-138 500 29159 cellular  
 organisms;Eukaryota;Opisthokonta;Metazoa;Eumetazoa;Bilateria;Protostomia;  
 Spiralia;Lophotrochozoa;Mollusca;Bivalvia;Autobranchia;Pteriomorphia;Ostr  
 eida;Ostreoidea;Ostreidae;Crassostrea;Crassostrea gigas  
 UdeM00000028324 6579 242.7 UdeM00000028324 XP\_033763289.1 75.7 152  
 36 1 6 156 289 440 3.30E-61 242.7 6579 cellular  
 organisms;Eukaryota;Opisthokonta;Metazoa;Eumetazoa;Bilateria;Protostomia;  
 Spiralia;Lophotrochozoa;Mollusca;Bivalvia;Autobranchia;Pteriomorphia;Pect  
 inida;Pectinoidea;Pectinidae;Pecten;Pecten maximus

UdeM00000028325 37621 331.3 UdeM00000028325 XP\_014679474.1 42.9 464  
 150 6 1 349 1 464 1.50E-87 331.3 37621 cellular  
 organisms;Eukaryota;Opisthokonta;Metazoa;Eumetazoa;Bilateria;Protostomia;  
 Ecdysozoa;Scalidophora;Priapulida;Priapulimorpha;Priapulimorphida;Priapul  
 idae;Priapululus;Priapululus caudatus  
 UdeM00000028326 1735272 402.5 UdeM00000028326 XP\_041366048.1 47.9  
 443 188 4 7 443 8 413 6.90E-109 402.5 1735272  
 cellular  
 organisms;Eukaryota;Opisthokonta;Metazoa;Eumetazoa;Bilateria;Protostomia;  
 Spiralia;Lophotrochozoa;Mollusca;Gastropoda;Neomphalina;Neomphaloidea;Pel  
 tospiridae;Gigantopelta;Gigantopelta aegis  
 UdeM00000028327 6579 916 UdeM00000028327 XP\_033724659.1 60.7 792  
 299 5 40 820 478 1268 3.80E-263 916 6579 cellular  
 organisms;Eukaryota;Opisthokonta;Metazoa;Eumetazoa;Bilateria;Protostomia;  
 Spiralia;Lophotrochozoa;Mollusca;Bivalvia;Autobranchia;Pteriormorpha;Pect  
 inida;Pectinoidea;Pectinidae;Pecten;Pecten maximus  
 UdeM00000028328 6579 191 UdeM00000028328 XP\_033724608.1 60.1 153  
 56 1 1 148 389 541 1.10E-45 191 6579 cellular  
 organisms;Eukaryota;Opisthokonta;Metazoa;Eumetazoa;Bilateria;Protostomia;  
 Spiralia;Lophotrochozoa;Mollusca;Bivalvia;Autobranchia;Pteriormorpha;Pect  
 inida;Pectinoidea;Pectinidae;Pecten;Pecten maximus  
 UdeM00000028329 6579 189.1 UdeM00000028329 XP\_033724608.1 68 128  
 41 0 14 141 414 541 3.80E-45 189.1 6579 cellular  
 organisms;Eukaryota;Opisthokonta;Metazoa;Eumetazoa;Bilateria;Protostomia;  
 Spiralia;Lophotrochozoa;Mollusca;Bivalvia;Autobranchia;Pteriormorpha;Pect  
 inida;Pectinoidea;Pectinidae;Pecten;Pecten maximus  
 UdeM00000028330 6596 213.8 UdeM00000028330 XP\_045162854.1 39 315  
 159 2 1 282 1 315 3.00E-52 213.8 6596 cellular  
 organisms;Eukaryota;Opisthokonta;Metazoa;Eumetazoa;Bilateria;Protostomia;  
 Spiralia;Lophotrochozoa;Mollusca;Bivalvia;Autobranchia;Heteroconchia;Euhe  
 terodonta;Imparidentia;Venerida;Veneroidea;Veneridae;Mercenaria;Mercenari  
 a mercenaria  
 UdeM00000028331 6596 287.7 UdeM00000028331 XP\_045162854.1 50.6 314  
 152 2 5 315 4 317 1.90E-74 287.7 6596 cellular  
 organisms;Eukaryota;Opisthokonta;Metazoa;Eumetazoa;Bilateria;Protostomia;  
 Spiralia;Lophotrochozoa;Mollusca;Bivalvia;Autobranchia;Heteroconchia;Euhe  
 terodonta;Imparidentia;Venerida;Veneroidea;Veneridae;Mercenaria;Mercenari  
 a mercenaria  
 UdeM00000028332 1735272 961.1 UdeM00000028332 XP\_041378073.1 83.5  
 546 90 0 27 572 26 571 6.50E-277 961.1 1735272  
 cellular  
 organisms;Eukaryota;Opisthokonta;Metazoa;Eumetazoa;Bilateria;Protostomia;  
 Spiralia;Lophotrochozoa;Mollusca;Gastropoda;Neomphalina;Neomphaloidea;Pel  
 tospiridae;Gigantopelta;Gigantopelta aegis  
 UdeM00000028333 6500 93.2 UdeM00000028333 XP\_012940823.2 29.6 189  
 133 0 19 207 98 286 1.00E-15 93.2 6500 cellular  
 organisms;Eukaryota;Opisthokonta;Metazoa;Eumetazoa;Bilateria;Protostomia;  
 Spiralia;Lophotrochozoa;Mollusca;Gastropoda;Heterobranchia;Euthyneura;Tec  
 tipleura;Aplysiida;Aplysioidea;Aplysiidae;Aplysia;Aplysia californica  
 UdeM00000028336 29159 756.5 UdeM00000028336 XP\_011446697.1 80.8 556  
 106 1 1 555 1 556 2.30E-215 756.5 29159 cellular  
 organisms;Eukaryota;Opisthokonta;Metazoa;Eumetazoa;Bilateria;Protostomia;  
 Spiralia;Lophotrochozoa;Mollusca;Bivalvia;Autobranchia;Pteriormorpha;Ostr  
 eida;Ostreoidea;Ostreidae;Crassostrea;Crassostrea gigas

UdeM00000028337 6596 1681.8 UdeM00000028337 XP\_045161165.1 57.6  
 1508 557 22 61 1549 72 1516 0.00E+00 1681.8 6596  
 cellular  
 organisms;Eukaryota;Opisthokonta;Metazoa;Eumetazoa;Bilateria;Protostomia;  
 Spiralia;Lophotrochozoa;Mollusca;Bivalvia;Autobranchia;Heteroconchia;Euhe  
 terodonta;Imparidentia;Venerida;Veneroidea;Veneridae;Mercenaria;Mercenari  
 a mercenaria  
 UdeM00000028338 1735272 375.6 UdeM00000028338 XP\_041377628.1 60.3  
 290 109 3 18 302 11 299 6.10E-101 375.6 1735272  
 cellular  
 organisms;Eukaryota;Opisthokonta;Metazoa;Eumetazoa;Bilateria;Protostomia;  
 Spiralia;Lophotrochozoa;Mollusca;Gastropoda;Neomphalina;Neomphaloidea;Pel  
 tospiridae;Gigantopelta;Gigantopelta aegis  
 UdeM00000028339 6573 849.4 UdeM00000028339 XP\_021372599.1 67 628  
 189 9 1 621 1 617 3.00E-243 849.4 6573 cellular  
 organisms;Eukaryota;Opisthokonta;Metazoa;Eumetazoa;Bilateria;Protostomia;  
 Spiralia;Lophotrochozoa;Mollusca;Bivalvia;Autobranchia;Pteriormorphia;Pect  
 inida;Pectinoidea;Pectinidae;Mizuhopecten;Mizuhopecten yessoensis  
 UdeM00000028340 400727 244.2 UdeM00000028340 XP\_025081221.1 89.3  
 131 14 0 1 131 17 147 9.30E-62 244.2 400727  
 cellular  
 organisms;Eukaryota;Opisthokonta;Metazoa;Eumetazoa;Bilateria;Protostomia;  
 Spiralia;Lophotrochozoa;Mollusca;Gastropoda;Caenogastropoda;Architaeniogl  
 ossa;Ampullarioidea;Ampullariidae;Pomacea;Pomacea canaliculata  
 UdeM00000028341 400727 123.2 UdeM00000028341 XP\_025081502.1 70.4  
 81 23 1 1 81 13 92 1.70E-25 123.2 400727  
 cellular  
 organisms;Eukaryota;Opisthokonta;Metazoa;Eumetazoa;Bilateria;Protostomia;  
 Spiralia;Lophotrochozoa;Mollusca;Gastropoda;Caenogastropoda;Architaeniogl  
 ossa;Ampullarioidea;Ampullariidae;Pomacea;Pomacea canaliculata  
 UdeM00000028343 6573 429.1 UdeM00000028343 XP\_021366465.1 97.2 216  
 6 0 1 216 1 216 7.00E-117 429.1 6573 cellular  
 organisms;Eukaryota;Opisthokonta;Metazoa;Eumetazoa;Bilateria;Protostomia;  
 Spiralia;Lophotrochozoa;Mollusca;Bivalvia;Autobranchia;Pteriormorphia;Pect  
 inida;Pectinoidea;Pectinidae;Mizuhopecten;Mizuhopecten yessoensis  
 UdeM00000028344 6596 786.9 UdeM00000028344 XP\_045160149.1 34.2 1687  
 846 42 6 1506 3 1611 5.10E-224 786.9 6596 cellular  
 organisms;Eukaryota;Opisthokonta;Metazoa;Eumetazoa;Bilateria;Protostomia;  
 Spiralia;Lophotrochozoa;Mollusca;Bivalvia;Autobranchia;Heteroconchia;Euhe  
 terodonta;Imparidentia;Venerida;Veneroidea;Veneridae;Mercenaria;Mercenari  
 a mercenaria  
 UdeM00000028345 6596 1040.8 UdeM00000028345 XP\_045162321.1 60.3  
 882 270 7 396 1268 692 1502 1.40E-300 1040.8 6596  
 cellular  
 organisms;Eukaryota;Opisthokonta;Metazoa;Eumetazoa;Bilateria;Protostomia;  
 Spiralia;Lophotrochozoa;Mollusca;Bivalvia;Autobranchia;Heteroconchia;Euhe  
 terodonta;Imparidentia;Venerida;Veneroidea;Veneridae;Mercenaria;Mercenari  
 a mercenaria  
 UdeM00000028347 6596 333.2 UdeM00000028347 XP\_045162321.1 66.8 241  
 79 1 1 241 1263 1502 2.80E-88 333.2 6596 cellular  
 organisms;Eukaryota;Opisthokonta;Metazoa;Eumetazoa;Bilateria;Protostomia;  
 Spiralia;Lophotrochozoa;Mollusca;Bivalvia;Autobranchia;Heteroconchia;Euhe  
 terodonta;Imparidentia;Venerida;Veneroidea;Veneridae;Mercenaria;Mercenari  
 a mercenaria

UdeM00000028346 7574 359.8 UdeM00000028346 XP\_023933247.1 78.8 222  
 47 0 77 298 848 1069 3.50E-96 359.8 7574 cellular  
 organisms;Eukaryota;Opisthokonta;Metazoa;Eumetazoa;Bilateria;Protostomia;  
 Spiralia;Lophotrochozoa;Brachiopoda;Linguliformea;Lingulata;Lingulida;Lin  
 guloidea;Lingulidae;Lingula;Lingula anatina  
 UdeM00000028348 6596 127.9 UdeM00000028348 XP\_045200228.1 30.5 311  
 181 8 54 336 30 333 3.00E-26 127.9 6596 cellular  
 organisms;Eukaryota;Opisthokonta;Metazoa;Eumetazoa;Bilateria;Protostomia;  
 Spiralia;Lophotrochozoa;Mollusca;Bivalvia;Autobranchia;Heteroconchia;Euhe  
 terodonta;Imparidentia;Venerida;Veneroidea;Veneridae;Mercenaria;Mercenari  
 a mercenaria  
 UdeM00000028349 6579 745.7 UdeM00000028349 XP\_033739131.1 59.2 588  
 237 2 1 585 783 1370 4.40E-212 745.7 6579 cellular  
 organisms;Eukaryota;Opisthokonta;Metazoa;Eumetazoa;Bilateria;Protostomia;  
 Spiralia;Lophotrochozoa;Mollusca;Bivalvia;Autobranchia;Pteriormorphia;Pect  
 inida;Pectinoidea;Pectinidae;Pecten;Pecten maximus  
 UdeM00000041777 7574 186.4 UdeM00000041777 XP\_013384628.1 58.4 161  
 58 2 1 161 33 184 3.20E-44 186.4 7574 cellular  
 organisms;Eukaryota;Opisthokonta;Metazoa;Eumetazoa;Bilateria;Protostomia;  
 Spiralia;Lophotrochozoa;Brachiopoda;Linguliformea;Lingulata;Lingulida;Lin  
 guloidea;Lingulidae;Lingula;Lingula anatina  
 UdeM00000041778 7574 255.8 UdeM00000041778 XP\_013382110.1 47.4 234  
 119 2 3 236 386 615 5.50E-65 255.8 7574 cellular  
 organisms;Eukaryota;Opisthokonta;Metazoa;Eumetazoa;Bilateria;Protostomia;  
 Spiralia;Lophotrochozoa;Brachiopoda;Linguliformea;Lingulata;Lingulida;Lin  
 guloidea;Lingulidae;Lingula;Lingula anatina  
 UdeM00000041780 7574 260.8 UdeM00000041780 XP\_013382110.1 61.9 194  
 74 0 14 207 45 238 1.50E-66 260.8 7574 cellular  
 organisms;Eukaryota;Opisthokonta;Metazoa;Eumetazoa;Bilateria;Protostomia;  
 Spiralia;Lophotrochozoa;Brachiopoda;Linguliformea;Lingulata;Lingulida;Lin  
 guloidea;Lingulidae;Lingula;Lingula anatina  
 UdeM00000041779 7574 260.8 UdeM00000041779 XP\_013382110.1 59.6 208  
 78 1 1 208 37 238 1.50E-66 260.8 7574 cellular  
 organisms;Eukaryota;Opisthokonta;Metazoa;Eumetazoa;Bilateria;Protostomia;  
 Spiralia;Lophotrochozoa;Brachiopoda;Linguliformea;Lingulata;Lingulida;Lin  
 guloidea;Lingulidae;Lingula;Lingula anatina  
 UdeM00000041781 6596 82.4 UdeM00000041781 XP\_045192251.1 51.1 92  
 42 2 122 210 328 419 7.50E-13 82.4 6596 cellular  
 organisms;Eukaryota;Opisthokonta;Metazoa;Eumetazoa;Bilateria;Protostomia;  
 Spiralia;Lophotrochozoa;Mollusca;Bivalvia;Autobranchia;Heteroconchia;Euhe  
 terodonta;Imparidentia;Venerida;Veneroidea;Veneridae;Mercenaria;Mercenari  
 a mercenaria  
 UdeM00000041782 6573 264.2 UdeM00000041782 XP\_021354853.1 50 266  
 123 3 185 447 147 405 2.90E-67 264.2 6573 cellular  
 organisms;Eukaryota;Opisthokonta;Metazoa;Eumetazoa;Bilateria;Protostomia;  
 Spiralia;Lophotrochozoa;Mollusca;Bivalvia;Autobranchia;Pteriormorphia;Pect  
 inida;Pectinoidea;Pectinidae;Mizuhopecten;Mizuhopecten yessoensis  
 UdeM00000041783 6573 442.2 UdeM00000041783 XP\_021354853.1 46.3 497  
 208 4 4 445 396 888 7.80E-121 442.2 6573 cellular  
 organisms;Eukaryota;Opisthokonta;Metazoa;Eumetazoa;Bilateria;Protostomia;  
 Spiralia;Lophotrochozoa;Mollusca;Bivalvia;Autobranchia;Pteriormorphia;Pect  
 inida;Pectinoidea;Pectinidae;Mizuhopecten;Mizuhopecten yessoensis  
 UdeM00000041784 6596 176.4 UdeM00000041784 XP\_045206152.1 52.6 175  
 77 2 70 244 381 549 4.50E-41 176.4 6596 cellular

organisms;Eukaryota;Opisthokonta;Metazoa;Eumetazoa;Bilateria;Protostomia;Spiralia;Lophotrochozoa;Mollusca;Bivalvia;Autobranchia;Heteroconchia;Euherodonta;Imparidentia;Venerida;Veneroidea;Veneridae;Mercenaria;Mercenaria mercenaria

UdeM00000041786 6596 82.8 UdeM00000041786 XP\_045186008.1 42 81  
46 1 4 83 221 301 5.80E-13 82.8 6596 cellular

organisms;Eukaryota;Opisthokonta;Metazoa;Eumetazoa;Bilateria;Protostomia;Spiralia;Lophotrochozoa;Mollusca;Bivalvia;Autobranchia;Heteroconchia;Euherodonta;Imparidentia;Venerida;Veneroidea;Veneridae;Mercenaria;Mercenaria mercenaria

UdeM00000041787 7739 105.1 UdeM00000041787 XP\_035662552.1 38.8 129  
77 1 2 130 390 516 1.30E-19 105.1 7739 cellular

organisms;Eukaryota;Opisthokonta;Metazoa;Eumetazoa;Bilateria;Deuterostomia;Chordata;Cephalochordata;Leptocardii;Amphioxiformes;Branchiostomidae;Branchiostoma;Branchiostoma floridae

UdeM00000041788 34773 106.7 UdeM00000041788 XP\_041958816.1 32.8 180  
102 6 3 165 153 330 3.40E-20 106.7 34773 cellular

organisms;Eukaryota;Opisthokonta;Metazoa;Eumetazoa;Bilateria;Deuterostomia;Chordata;Craniata;Vertebrata;Gnathostomata;Teleostomi;Euteleostomi;Actinopterygii;Actinopteri;Neopterygii;Teleostei;Osteoglossocephalai;Clupeocephala;Otomorpha;Clupei;Clupeiformes;Clupeoidei;Clupeidae;Alosinae;Alosa;Alosa sapidissima

UdeM00000031609 6596 184.9 UdeM00000031609 XP\_045176664.1 26.5 543  
309 14 32 496 35 565 2.50E-43 184.9 6596 cellular

organisms;Eukaryota;Opisthokonta;Metazoa;Eumetazoa;Bilateria;Protostomia;Spiralia;Lophotrochozoa;Mollusca;Bivalvia;Autobranchia;Heteroconchia;Euherodonta;Imparidentia;Venerida;Veneroidea;Veneridae;Mercenaria;Mercenaria mercenaria

UdeM00000031610 6596 129 UdeM00000031610 XP\_045214418.1 40.8 147  
84 2 154 298 110 255 1.00E-26 129 6596 cellular

organisms;Eukaryota;Opisthokonta;Metazoa;Eumetazoa;Bilateria;Protostomia;Spiralia;Lophotrochozoa;Mollusca;Bivalvia;Autobranchia;Heteroconchia;Euherodonta;Imparidentia;Venerida;Veneroidea;Veneridae;Mercenaria;Mercenaria mercenaria

UdeM00000031611 6565 63.9 UdeM00000031611 XP\_022322825.1 46.9 64  
34 0 4 67 401 464 1.40E-07 63.9 6565 cellular

organisms;Eukaryota;Opisthokonta;Metazoa;Eumetazoa;Bilateria;Protostomia;Spiralia;Lophotrochozoa;Mollusca;Bivalvia;Autobranchia;Pteriomorphia;Ostreida;Ostreoidea;Ostreidae;Crassostrea;Crassostrea virginica

UdeM00000031612 29159 67.8 UdeM00000031612 XP\_034322772.1 28.8 205  
94 6 1 187 1 171 1.70E-08 67.8 29159 cellular

organisms;Eukaryota;Opisthokonta;Metazoa;Eumetazoa;Bilateria;Protostomia;Spiralia;Lophotrochozoa;Mollusca;Bivalvia;Autobranchia;Pteriomorphia;Ostreida;Ostreoidea;Ostreidae;Crassostrea;Crassostrea gigas

UdeM00000031613 6596 464.9 UdeM00000031613 XP\_045188551.1 30 1320  
821 39 2 1278 2218 3477 3.20E-127 464.9 6596 cellular

organisms;Eukaryota;Opisthokonta;Metazoa;Eumetazoa;Bilateria;Protostomia;Spiralia;Lophotrochozoa;Mollusca;Bivalvia;Autobranchia;Heteroconchia;Euherodonta;Imparidentia;Venerida;Veneroidea;Veneridae;Mercenaria;Mercenaria mercenaria

UdeM00000031614 6596 199.9 UdeM00000031614 XP\_045190673.1 43.6 243  
130 4 11 248 589 829 5.40E-48 199.9 6596 cellular

organisms;Eukaryota;Opisthokonta;Metazoa;Eumetazoa;Bilateria;Protostomia;Spiralia;Lophotrochozoa;Mollusca;Bivalvia;Autobranchia;Heteroconchia;Euherodonta;Imparidentia;Venerida;Veneroidea;Veneridae;Mercenaria;Mercenaria mercenaria

terodonta;Imparidentia;Venerida;Veneroidea;Veneridae;Mercenaria;Mercenaria mercenaria

UdeM00000031617 151771 420.6 UdeM00000031617 XP\_028419301.1 54.5  
380 144 3 42 394 34 411 2.30E-114 420.6 151771  
cellular

organisms;Eukaryota;Opisthokonta;Metazoa;Eumetazoa;Cnidaria;Anthozoa;Octocorallia;Alcyonacea;Alcyoniina;Nephtheidae;Dendronephthya;Dendronephthya gigantea

UdeM00000031618 45264 172.9 UdeM00000031618 XP\_044184031.1 48.7 191  
88 5 1 185 300 486 3.70E-40 172.9 45264 cellular

organisms;Eukaryota;Opisthokonta;Metazoa;Eumetazoa;Cnidaria;Anthozoa;Hexacorallia;Scleractinia;Astrocoeniina;Acroporidae;Acropora;Acropora millepora

UdeM00000031619 6596 198.4 UdeM00000031619 XP\_045190673.1 42.6 242  
133 4 11 248 589 828 1.10E-47 198.4 6596 cellular

organisms;Eukaryota;Opisthokonta;Metazoa;Eumetazoa;Bilateria;Protostomia;Spiralia;Lophotrochozoa;Mollusca;Bivalvia;Autobranchia;Heteroconchia;Euterodonta;Imparidentia;Venerida;Veneroidea;Veneridae;Mercenaria;Mercenaria mercenaria

UdeM00000031620 6579 208.8 UdeM00000031620 XP\_033764133.1 27.5 665  
415 15 484 1093 490 1142 3.60E-50 208.8 6579 cellular

organisms;Eukaryota;Opisthokonta;Metazoa;Eumetazoa;Bilateria;Protostomia;Spiralia;Lophotrochozoa;Mollusca;Bivalvia;Autobranchia;Pteriormorphia;Pectinida;Pectinoidea;Pectinidae;Pecten;Pecten maximus

UdeM00000031621 6573 303.9 UdeM00000031621 XP\_021355423.1 40.7 427  
221 9 13 424 2093 2502 3.20E-79 303.9 6573 cellular

organisms;Eukaryota;Opisthokonta;Metazoa;Eumetazoa;Bilateria;Protostomia;Spiralia;Lophotrochozoa;Mollusca;Bivalvia;Autobranchia;Pteriormorphia;Pectinida;Pectinoidea;Pectinidae;Mizuhopecten;Mizuhopecten yessoensis

UdeM00000031622 1735272 337.4 UdeM00000031622 XP\_041347204.1 39.8  
465 252 14 2 460 207 649 2.80E-89 337.4 1735272

cellular

organisms;Eukaryota;Opisthokonta;Metazoa;Eumetazoa;Bilateria;Protostomia;Spiralia;Lophotrochozoa;Mollusca;Gastropoda;Neomphalina;Neomphaloidea;Peltospiridae;Gigantopelta;Gigantopelta aegis

UdeM00000031623 1735272 492.7 UdeM00000031623 XP\_041347279.1 35  
907 521 28 265 1131 1 878 1.30E-135 492.7 1735272

cellular

organisms;Eukaryota;Opisthokonta;Metazoa;Eumetazoa;Bilateria;Protostomia;Spiralia;Lophotrochozoa;Mollusca;Gastropoda;Neomphalina;Neomphaloidea;Peltospiridae;Gigantopelta;Gigantopelta aegis

UdeM00000031625 6565 266.5 UdeM00000031625 XP\_022335825.1 24 1279  
772 40 20 1248 550 1678 2.00E-67 266.5 6565 cellular

organisms;Eukaryota;Opisthokonta;Metazoa;Eumetazoa;Bilateria;Protostomia;Spiralia;Lophotrochozoa;Mollusca;Bivalvia;Autobranchia;Pteriormorphia;Ostreida;Ostreoidea;Ostreidae;Crassostrea;Crassostrea virginica

UdeM00000031626 7574 73.2 UdeM00000031626 XP\_023932230.1 46.1 89  
47 1 2 89 780 868 6.70E-10 73.2 7574 cellular

organisms;Eukaryota;Opisthokonta;Metazoa;Eumetazoa;Bilateria;Protostomia;Spiralia;Lophotrochozoa;Brachiopoda;Linguliformea;Lingulata;Lingulida;Linguloidea;Lingulidae;Lingula;Lingula anatina

UdeM00000031627 6565 201.1 UdeM00000031627 XP\_022335825.1 42.7 241  
133 4 11 249 550 787 5.30E-48 201.1 6565 cellular

organisms;Eukaryota;Opisthokonta;Metazoa;Eumetazoa;Bilateria;Protostomia;

Spiralia;Lophotrochozoa;Mollusca;Bivalvia;Autobranchia;Pteriormorphia;Ostr  
eida;Ostreoidea;Ostreidae;Crassostrea;Crassostrea virginica  
UdeM00000031629 29159 438.7 UdeM00000031629 XP\_011425943.2 25.4 1757  
974 44 474 1972 809 2486 3.90E-119 438.7 29159 cellular  
organisms;Eukaryota;Opisthokonta;Metazoa;Eumetazoa;Bilateria;Protostomia;  
Spiralia;Lophotrochozoa;Mollusca;Bivalvia;Autobranchia;Pteriormorphia;Ostr  
eida;Ostreoidea;Ostreidae;Crassostrea;Crassostrea gigas  
UdeM00000031630 6573 198 UdeM00000031630 XP\_021354329.1 42 245  
137 4 10 251 481 723 4.00E-47 198 6573 cellular  
organisms;Eukaryota;Opisthokonta;Metazoa;Eumetazoa;Bilateria;Protostomia;  
Spiralia;Lophotrochozoa;Mollusca;Bivalvia;Autobranchia;Pteriormorphia;Pect  
inida;Pectinoidea;Pectinidae;Mizuhopecten;Mizuhopecten yessoensis  
UdeM00000031631 29159 146.7 UdeM00000031631 XP\_034317326.1 31.4 370  
215 10 408 740 1640 2007 1.50E-31 146.7 29159 cellular  
organisms;Eukaryota;Opisthokonta;Metazoa;Eumetazoa;Bilateria;Protostomia;  
Spiralia;Lophotrochozoa;Mollusca;Bivalvia;Autobranchia;Pteriormorphia;Ostr  
eida;Ostreoidea;Ostreidae;Crassostrea;Crassostrea gigas  
UdeM00000031632 6596 123.6 UdeM00000031632 XP\_045188551.1 59.4 101  
40 1 3 102 3377 3477 1.50E-25 123.6 6596 cellular  
organisms;Eukaryota;Opisthokonta;Metazoa;Eumetazoa;Bilateria;Protostomia;  
Spiralia;Lophotrochozoa;Mollusca;Bivalvia;Autobranchia;Heteroconchia;Euhe  
terodonta;Imparidentia;Venerida;Veneroidea;Veneridae;Mercenaria;Mercenari  
a mercenaria  
UdeM00000031634 6565 177.9 UdeM00000031634 XP\_022335825.1 40.8 240  
128 5 26 253 550 787 2.70E-41 177.9 6565 cellular  
organisms;Eukaryota;Opisthokonta;Metazoa;Eumetazoa;Bilateria;Protostomia;  
Spiralia;Lophotrochozoa;Mollusca;Bivalvia;Autobranchia;Pteriormorphia;Ostr  
eida;Ostreoidea;Ostreidae;Crassostrea;Crassostrea virginica  
UdeM00000031636 114398 258.1 UdeM00000031636 XP\_042913678.1 41.2  
323 184 2 1 319 108 428 1.50E-65 258.1 114398  
cellular  
organisms;Eukaryota;Opisthokonta;Metazoa;Eumetazoa;Bilateria;Protostomia;  
Ecdysozoa;Panarthropoda;Arthropoda;Chelicerata;Arachnida;Araneae;Araneomo  
rphae;Entelegynae;Orbiculariae;Araneoidea;Theridiidae;Parasteatoda;Parast  
eatoda tepidariorum  
UdeM00000031637 6579 357.1 UdeM00000031637 XP\_033764133.1 30.4 951  
516 27 1 823 491 1423 6.20E-95 357.1 6579 cellular  
organisms;Eukaryota;Opisthokonta;Metazoa;Eumetazoa;Bilateria;Protostomia;  
Spiralia;Lophotrochozoa;Mollusca;Bivalvia;Autobranchia;Pteriormorphia;Pect  
inida;Pectinoidea;Pectinidae;Pecten;Pecten maximus  
UdeM00000031638 6596 200.7 UdeM00000031638 XP\_045190515.1 33.5 394  
222 11 809 1164 1582 1973 1.00E-47 200.7 6596 cellular  
organisms;Eukaryota;Opisthokonta;Metazoa;Eumetazoa;Bilateria;Protostomia;  
Spiralia;Lophotrochozoa;Mollusca;Bivalvia;Autobranchia;Heteroconchia;Euhe  
terodonta;Imparidentia;Venerida;Veneroidea;Veneridae;Mercenaria;Mercenari  
a mercenaria  
UdeM00000031640 6596 186.4 UdeM00000031640 XP\_045190673.1 40.6 261  
131 5 11 267 589 829 6.10E-44 186.4 6596 cellular  
organisms;Eukaryota;Opisthokonta;Metazoa;Eumetazoa;Bilateria;Protostomia;  
Spiralia;Lophotrochozoa;Mollusca;Bivalvia;Autobranchia;Heteroconchia;Euhe  
terodonta;Imparidentia;Venerida;Veneroidea;Veneridae;Mercenaria;Mercenari  
a mercenaria  
UdeM00000031641 6596 235 UdeM00000031641 XP\_045188486.1 38.7 390  
216 7 89 459 1693 2078 2.70E-58 235 6596 cellular



organisms;Eukaryota;Opisthokonta;Metazoa;Eumetazoa;Bilateria;Protostomia;Spiralia;Lophotrochozoa;Mollusca;Bivalvia;Autobranhia;Heteroconchia;Euherodonta;Imparidentia;Venerida;Veneroidea;Veneridae;Mercenaria;Mercenaria mercenaria

UdeM00000031642 6596 202.6 UdeM00000031642 XP\_045190673.1 43.6 243  
131 4 20 258 589 829 2.20E-48 202.6 6596 cellular

organisms;Eukaryota;Opisthokonta;Metazoa;Eumetazoa;Bilateria;Protostomia;Spiralia;Lophotrochozoa;Mollusca;Bivalvia;Autobranhia;Heteroconchia;Euherodonta;Imparidentia;Venerida;Veneroidea;Veneridae;Mercenaria;Mercenaria mercenaria

UdeM00000031643 6596 479.6 UdeM00000031643 XP\_045188486.1 38.2 759  
437 16 3 742 1804 2549 7.40E-132 479.6 6596 cellular

organisms;Eukaryota;Opisthokonta;Metazoa;Eumetazoa;Bilateria;Protostomia;Spiralia;Lophotrochozoa;Mollusca;Bivalvia;Autobranhia;Heteroconchia;Euherodonta;Imparidentia;Venerida;Veneroidea;Veneridae;Mercenaria;Mercenaria mercenaria

UdeM00000031644 6573 261.2 UdeM00000031644 XP\_021355423.1 34.3 502  
280 13 11 481 1965 2447 2.70E-66 261.2 6573 cellular

organisms;Eukaryota;Opisthokonta;Metazoa;Eumetazoa;Bilateria;Protostomia;Spiralia;Lophotrochozoa;Mollusca;Bivalvia;Autobranhia;Pteriormorphia;Pectinida;Pectinoidea;Pectinidae;Mizuhopecten;Mizuhopecten yessoensis

UdeM00000031649 6596 154.8 UdeM00000031649 XP\_045188551.1 55.2 125  
56 0 9 133 3353 3477 7.60E-35 154.8 6596 cellular

organisms;Eukaryota;Opisthokonta;Metazoa;Eumetazoa;Bilateria;Protostomia;Spiralia;Lophotrochozoa;Mollusca;Bivalvia;Autobranhia;Heteroconchia;Euherodonta;Imparidentia;Venerida;Veneroidea;Veneridae;Mercenaria;Mercenaria mercenaria

UdeM00000031645 6596 497.3 UdeM00000031645 XP\_045188551.1 28.8 1615  
890 47 594 1997 1912 3477 9.20E-137 497.3 6596 cellular

organisms;Eukaryota;Opisthokonta;Metazoa;Eumetazoa;Bilateria;Protostomia;Spiralia;Lophotrochozoa;Mollusca;Bivalvia;Autobranhia;Heteroconchia;Euherodonta;Imparidentia;Venerida;Veneroidea;Veneridae;Mercenaria;Mercenaria mercenaria

UdeM00000031646 6596 497.3 UdeM00000031646 XP\_045188551.1 28.8 1615  
890 47 609 2012 1912 3477 9.30E-137 497.3 6596 cellular

organisms;Eukaryota;Opisthokonta;Metazoa;Eumetazoa;Bilateria;Protostomia;Spiralia;Lophotrochozoa;Mollusca;Bivalvia;Autobranhia;Heteroconchia;Euherodonta;Imparidentia;Venerida;Veneroidea;Veneridae;Mercenaria;Mercenaria mercenaria

UdeM00000031647 6596 500.4 UdeM00000031647 XP\_045188551.1 28.5 1657  
919 49 496 1937 1872 3477 1.10E-137 500.4 6596 cellular

organisms;Eukaryota;Opisthokonta;Metazoa;Eumetazoa;Bilateria;Protostomia;Spiralia;Lophotrochozoa;Mollusca;Bivalvia;Autobranhia;Heteroconchia;Euherodonta;Imparidentia;Venerida;Veneroidea;Veneridae;Mercenaria;Mercenaria mercenaria

UdeM00000031648 6596 497.7 UdeM00000031648 XP\_045188551.1 28.8 1615  
890 47 549 1952 1912 3477 6.90E-137 497.7 6596 cellular

organisms;Eukaryota;Opisthokonta;Metazoa;Eumetazoa;Bilateria;Protostomia;Spiralia;Lophotrochozoa;Mollusca;Bivalvia;Autobranhia;Heteroconchia;Euherodonta;Imparidentia;Venerida;Veneroidea;Veneridae;Mercenaria;Mercenaria mercenaria

UdeM00000031651 7962 203.8 UdeM00000031651 XP\_042578941.1 32 397  
246 8 125 507 38 424 6.60E-49 203.8 7962 cellular

organisms;Eukaryota;Opisthokonta;Metazoa;Eumetazoa;Bilateria;Deuterostomi

a;Chordata;Craniata;Vertebrata;Gnathostomata;Teleostomi;Euteleostomi;Actinopterygii;Actinopteri;Neopterygii;Teleostei;Osteoglossocephalai;Clupeocephala;Otomorpha;Ostariophysi;Otophysi;Cypriniphysae;Cypriniiformes;Cyprinidae;Cyprininae;Cyprinus;Cyprinus carpio  
 UdeM00000031652 6565 359.8 UdeM00000031652 XP\_022316307.1 38.4 570  
 320 10 1 550 5 563 6.70E-96 359.8 6565 cellular  
 organisms;Eukaryota;Opisthokonta;Metazoa;Eumetazoa;Bilateria;Protostomia;Spiralia;Lophotrochozoa;Mollusca;Bivalvia;Autobranchia;Pteriomorpha;Ostreida;Ostreioidea;Ostreidae;Crassostrea;Crassostrea virginica  
 UdeM00000031654 6565 199.5 UdeM00000031654 XP\_022335825.1 44 243  
 129 5 23 263 550 787 6.90E-48 199.5 6565 cellular  
 organisms;Eukaryota;Opisthokonta;Metazoa;Eumetazoa;Bilateria;Protostomia;Spiralia;Lophotrochozoa;Mollusca;Bivalvia;Autobranchia;Pteriomorpha;Ostreida;Ostreioidea;Ostreidae;Crassostrea;Crassostrea virginica  
 UdeM00000031656 29159 152.5 UdeM00000031656 XP\_034336526.1 69.1 97  
 30 0 223 319 1839 1935 8.90E-34 152.5 29159 cellular  
 organisms;Eukaryota;Opisthokonta;Metazoa;Eumetazoa;Bilateria;Protostomia;Spiralia;Lophotrochozoa;Mollusca;Bivalvia;Autobranchia;Pteriomorpha;Ostreida;Ostreioidea;Ostreidae;Crassostrea;Crassostrea gigas  
 UdeM00000031657 1735272 95.1 UdeM00000031657 XP\_041347065.1 32.8  
 204 101 6 1 171 1 201 9.40E-17 95.1 1735272  
 cellular  
 organisms;Eukaryota;Opisthokonta;Metazoa;Eumetazoa;Bilateria;Protostomia;Spiralia;Lophotrochozoa;Mollusca;Gastropoda;Neomphalina;Neomphaloidea;Peltospiridae;Gigantopelta;Gigantopelta aegis  
 UdeM00000031658 37621 389.4 UdeM00000031658 XP\_014679849.1 35.8 614  
 225 6 10 464 14 617 6.30E-105 389.4 37621 cellular  
 organisms;Eukaryota;Opisthokonta;Metazoa;Eumetazoa;Bilateria;Protostomia;Ecdysozoa;Scalidophora;Priapulida;Priapulimorpha;Priapulimorphida;Priapulidae;Priapululus;Priapululus caudatus  
 UdeM00000031659 6579 142.5 UdeM00000031659 XP\_033764133.1 29.5 424  
 254 13 158 543 493 909 1.60E-30 142.5 6579 cellular  
 organisms;Eukaryota;Opisthokonta;Metazoa;Eumetazoa;Bilateria;Protostomia;Spiralia;Lophotrochozoa;Mollusca;Bivalvia;Autobranchia;Pteriomorpha;Pectinida;Pectinoidea;Pectinidae;Pecten;Pecten maximus  
 UdeM00000031660 6596 327.4 UdeM00000031660 XP\_045190515.1 34.7 547  
 323 11 14 549 1450 1973 3.50E-86 327.4 6596 cellular  
 organisms;Eukaryota;Opisthokonta;Metazoa;Eumetazoa;Bilateria;Protostomia;Spiralia;Lophotrochozoa;Mollusca;Bivalvia;Autobranchia;Heteroconchia;Euheterodonta;Imparidentia;Venerida;Veneroidea;Veneridae;Mercenaria;Mercenaria mercenaria  
 UdeM00000031661 6573 154.1 UdeM00000031661 XP\_021361223.1 71.1 97  
 28 0 291 387 975 1071 3.70E-34 154.1 6573 cellular  
 organisms;Eukaryota;Opisthokonta;Metazoa;Eumetazoa;Bilateria;Protostomia;Spiralia;Lophotrochozoa;Mollusca;Bivalvia;Autobranchia;Pteriomorpha;Pectinida;Pectinoidea;Pectinidae;Mizuhopecten;Mizuhopecten yessoensis  
 UdeM00000031662 6573 98.6 UdeM00000031662 XP\_021371061.1 36.7 188  
 90 7 29 196 58 236 9.60E-18 98.6 6573 cellular  
 organisms;Eukaryota;Opisthokonta;Metazoa;Eumetazoa;Bilateria;Protostomia;Spiralia;Lophotrochozoa;Mollusca;Bivalvia;Autobranchia;Pteriomorpha;Pectinida;Pectinoidea;Pectinidae;Mizuhopecten;Mizuhopecten yessoensis  
 UdeM00000031663 37621 216.1 UdeM00000031663 XP\_014679849.1 51.9 181  
 73 3 16 192 447 617 4.00E-53 216.1 37621 cellular  
 organisms;Eukaryota;Opisthokonta;Metazoa;Eumetazoa;Bilateria;Protostomia;

Ecdysozoa; Scalidophora; Priapulida; Priapulimorpha; Priapulimorphida; Priapulidae; Priapululus; Priapululus caudatus

UdeM00000031664 6573 137.1 UdeM00000031664 XP\_021375729.1 57.8 102  
43 0 10 111 9 110 1.50E-29 137.1 6573 cellular  
organisms; Eukaryota; Opisthokonta; Metazoa; Eumetazoa; Bilateria; Protostomia; Spiralia; Lophotrochozoa; Mollusca; Bivalvia; Autobranchia; Pteriomorpha; Pectinida; Pectinoidea; Pectinidae; Mizuhopecten; Mizuhopecten yessoensis

UdeM00000031665 6579 350.9 UdeM00000031665 XP\_033731448.1 26.1 1363  
833 36 658 1875 81 1414 1.00E-92 350.9 6579 cellular  
organisms; Eukaryota; Opisthokonta; Metazoa; Eumetazoa; Bilateria; Protostomia; Spiralia; Lophotrochozoa; Mollusca; Bivalvia; Autobranchia; Pteriomorpha; Pectinida; Pectinoidea; Pectinidae; Pecten; Pecten maximus

UdeM00000031667 6596 330.5 UdeM00000031667 XP\_045158356.1 32.4 608  
391 8 1 588 959 1566 4.40E-87 330.5 6596 cellular  
organisms; Eukaryota; Opisthokonta; Metazoa; Eumetazoa; Bilateria; Protostomia; Spiralia; Lophotrochozoa; Mollusca; Bivalvia; Autobranchia; Heteroconchia; Euheterodonta; Imparidentia; Venerida; Veneroidea; Veneridae; Mercenaria; Mercenaria mercenaria

UdeM00000031668 8932 100.5 UdeM00000031668 XP\_021146887.1 44.6 92  
51 0 18 109 532 623 1.60E-18 100.5 8932 cellular  
organisms; Eukaryota; Opisthokonta; Metazoa; Eumetazoa; Bilateria; Deuterostomia; Chordata; Craniata; Vertebrata; Gnathostomata; Teleostomi; Euteleostomi; Sarcopterygii; Dipnotetrapodomorpha; Tetrapoda; Amniota; Sauropsida; Sauria; Archelosauria; Archosauria; Dinosauria; Saurischia; Theropoda; Coelurosauria; Aves; Neognathae; Columbiformes; Columbidae; Columba; Columba livia

UdeM00000031669 6579 304.7 UdeM00000031669 XP\_033731448.1 27 1245  
748 43 172 1287 80 1292 5.70E-79 304.7 6579 cellular  
organisms; Eukaryota; Opisthokonta; Metazoa; Eumetazoa; Bilateria; Protostomia; Spiralia; Lophotrochozoa; Mollusca; Bivalvia; Autobranchia; Pteriomorpha; Pectinida; Pectinoidea; Pectinidae; Pecten; Pecten maximus

UdeM00000044057 595528 246.5 UdeM00000044057 XP\_004349202.2 44.2  
308 150 4 4 310 2 288 4.60E-62 246.5 595528  
cellular  
organisms; Eukaryota; Opisthokonta; Filasterea; Capsaspora; Capsaspora owczarzaki; Capsaspora owczarzaki ATCC 30864

UdeM00000044058 83332 434.1 UdeM00000044058 NP\_216556.1 81.4 263 49  
0 1 263 37 299 1.30E-118 434.1 83332 cellular  
organisms; Bacteria; Terrabacteria  
group; Actinobacteria; Actinomycetia; Corynebacteriales; Mycobacteriaceae; Mycobacterium; Mycobacterium tuberculosis complex; Mycobacterium tuberculosis; Mycobacterium tuberculosis H37Rv

UdeM00000044059 83332 427.9 UdeM00000044059 NP\_216554.1 82.2 264 47  
0 1 264 92 355 9.20E-117 427.9 83332 cellular  
organisms; Bacteria; Terrabacteria  
group; Actinobacteria; Actinomycetia; Corynebacteriales; Mycobacteriaceae; Mycobacterium; Mycobacterium tuberculosis complex; Mycobacterium tuberculosis; Mycobacterium tuberculosis H37Rv

UdeM00000044060 208964 352.8 UdeM00000044060 NP\_251247.1 39.3 544  
293 10 24 537 18 554 7.60E-94 352.8 208964  
cellular  
organisms; Bacteria; Proteobacteria; Gammaproteobacteria; Pseudomonadales; Pseudomonadaceae; Pseudomonas; Pseudomonas aeruginosa group; Pseudomonas aeruginosa; Pseudomonas aeruginosa PA01

UdeM00000007718 6596 126.7 UdeM00000007718 XP\_045181277.1 26.2 390  
 199 12 9 325 46 419 5.40E-26 126.7 6596 cellular  
 organisms;Eukaryota;Opisthokonta;Metazoa;Eumetazoa;Bilateria;Protostomia;  
 Spiralia;Lophotrochozoa;Mollusca;Bivalvia;Autobranchia;Heteroconchia;Euhe  
 terodonta;Imparidentia;Venerida;Veneroidea;Veneridae;Mercenaria;Mercenari  
 a mercenaria

UdeM00000007719 6596 137.1 UdeM00000007719 XP\_045181277.1 32.8 256  
 155 7 112 355 143 393 4.30E-29 137.1 6596 cellular  
 organisms;Eukaryota;Opisthokonta;Metazoa;Eumetazoa;Bilateria;Protostomia;  
 Spiralia;Lophotrochozoa;Mollusca;Bivalvia;Autobranchia;Heteroconchia;Euhe  
 terodonta;Imparidentia;Venerida;Veneroidea;Veneridae;Mercenaria;Mercenari  
 a mercenaria

UdeM00000007720 6596 131.7 UdeM00000007720 XP\_045181277.1 32.5 234  
 147 6 99 325 143 372 1.80E-27 131.7 6596 cellular  
 organisms;Eukaryota;Opisthokonta;Metazoa;Eumetazoa;Bilateria;Protostomia;  
 Spiralia;Lophotrochozoa;Mollusca;Bivalvia;Autobranchia;Heteroconchia;Euhe  
 terodonta;Imparidentia;Venerida;Veneroidea;Veneridae;Mercenaria;Mercenari  
 a mercenaria

UdeM00000007722 6596 87.8 UdeM00000007722 XP\_045177372.1 40.2 102  
 56 1 12 108 401 502 1.10E-14 87.8 6596 cellular  
 organisms;Eukaryota;Opisthokonta;Metazoa;Eumetazoa;Bilateria;Protostomia;  
 Spiralia;Lophotrochozoa;Mollusca;Bivalvia;Autobranchia;Heteroconchia;Euhe  
 terodonta;Imparidentia;Venerida;Veneroidea;Veneridae;Mercenaria;Mercenari  
 a mercenaria

UdeM00000007723 6596 80.5 UdeM00000007723 XP\_045202346.1 46.8 77  
 41 0 8 84 68 144 1.10E-12 80.5 6596 cellular  
 organisms;Eukaryota;Opisthokonta;Metazoa;Eumetazoa;Bilateria;Protostomia;  
 Spiralia;Lophotrochozoa;Mollusca;Bivalvia;Autobranchia;Heteroconchia;Euhe  
 terodonta;Imparidentia;Venerida;Veneroidea;Veneridae;Mercenaria;Mercenari  
 a mercenaria

UdeM00000007724 6596 179.1 UdeM00000007724 XP\_045183440.1 42.3 239  
 106 3 2 211 145 380 7.90E-42 179.1 6596 cellular  
 organisms;Eukaryota;Opisthokonta;Metazoa;Eumetazoa;Bilateria;Protostomia;  
 Spiralia;Lophotrochozoa;Mollusca;Bivalvia;Autobranchia;Heteroconchia;Euhe  
 terodonta;Imparidentia;Venerida;Veneroidea;Veneridae;Mercenaria;Mercenari  
 a mercenaria

UdeM00000007725 6596 132.1 UdeM00000007725 XP\_045181277.1 31.5 260  
 141 9 67 304 143 387 1.20E-27 132.1 6596 cellular  
 organisms;Eukaryota;Opisthokonta;Metazoa;Eumetazoa;Bilateria;Protostomia;  
 Spiralia;Lophotrochozoa;Mollusca;Bivalvia;Autobranchia;Heteroconchia;Euhe  
 terodonta;Imparidentia;Venerida;Veneroidea;Veneridae;Mercenaria;Mercenari  
 a mercenaria

UdeM00000007726 6596 97.4 UdeM00000007726 XP\_045202346.1 41.3 109  
 62 1 26 134 36 142 1.50E-17 97.4 6596 cellular  
 organisms;Eukaryota;Opisthokonta;Metazoa;Eumetazoa;Bilateria;Protostomia;  
 Spiralia;Lophotrochozoa;Mollusca;Bivalvia;Autobranchia;Heteroconchia;Euhe  
 terodonta;Imparidentia;Venerida;Veneroidea;Veneridae;Mercenaria;Mercenari  
 a mercenaria

UdeM00000007728 6596 186 UdeM00000007728 XP\_045187052.1 52.6 175  
 78 3 2 175 145 315 4.40E-44 186 6596 cellular  
 organisms;Eukaryota;Opisthokonta;Metazoa;Eumetazoa;Bilateria;Protostomia;  
 Spiralia;Lophotrochozoa;Mollusca;Bivalvia;Autobranchia;Heteroconchia;Euhe  
 terodonta;Imparidentia;Venerida;Veneroidea;Veneridae;Mercenaria;Mercenari  
 a mercenaria

UdeM00000007727 6596 187.2 UdeM00000007727 XP\_045187052.1 50 188  
 89 3 2 188 145 328 2.60E-44 187.2 6596 cellular  
 organisms;Eukaryota;Opisthokonta;Metazoa;Eumetazoa;Bilateria;Protostomia;  
 Spiralia;Lophotrochozoa;Mollusca;Bivalvia;Autobranchia;Heteroconchia;Euhe  
 terodonta;Imparidentia;Venerida;Veneroidea;Veneridae;Mercenaria;Mercenari  
 a mercenaria  
 UdeM00000007731 50429 139 UdeM00000007731 XP\_022808032.1 50.4 131  
 61 2 1 127 556 686 4.20E-30 139 50429 cellular  
 organisms;Eukaryota;Opisthokonta;Metazoa;Eumetazoa;Cnidaria;Anthozoa;Hexa  
 corallia;Scleractinia;Astrocoeniina;Pocilloporidae;Stylophora;Stylophora  
 pistillata  
 UdeM00000007732 151771 81.3 UdeM00000007732 XP\_028412660.1 38.2  
 131 80 1 2 132 942 1071 1.10E-12 81.3 151771  
 cellular  
 organisms;Eukaryota;Opisthokonta;Metazoa;Eumetazoa;Cnidaria;Anthozoa;Octo  
 corallia;Alcyonacea;Alcyoniina;Nephtheidae;Dendronephthya;Dendronephthya  
 gigantea  
 UdeM00000007733 7654 117.9 UdeM00000007733 XP\_041481100.1 38.1 147  
 88 3 156 302 1460 1603 2.30E-23 117.9 7654 cellular  
 organisms;Eukaryota;Opisthokonta;Metazoa;Eumetazoa;Bilateria;Deuterostomi  
 a;Echinodermata;Eleutherozoa;Echinozoa;Echinoidea;Euechinoidea;Echinacea;  
 Temnopleuroida;Toxopneustidae;Lytechinus;Lytechinus variegatus  
 UdeM00000007735 6596 78.6 UdeM00000007735 XP\_045176094.1 59.7 62  
 25 0 58 119 108 169 9.80E-12 78.6 6596 cellular  
 organisms;Eukaryota;Opisthokonta;Metazoa;Eumetazoa;Bilateria;Protostomia;  
 Spiralia;Lophotrochozoa;Mollusca;Bivalvia;Autobranchia;Heteroconchia;Euhe  
 terodonta;Imparidentia;Venerida;Veneroidea;Veneridae;Mercenaria;Mercenari  
 a mercenaria  
 UdeM00000007736 6596 78.6 UdeM00000007736 XP\_045176094.1 59.7 62  
 25 0 14 75 108 169 7.60E-12 78.6 6596 cellular  
 organisms;Eukaryota;Opisthokonta;Metazoa;Eumetazoa;Bilateria;Protostomia;  
 Spiralia;Lophotrochozoa;Mollusca;Bivalvia;Autobranchia;Heteroconchia;Euhe  
 terodonta;Imparidentia;Venerida;Veneroidea;Veneridae;Mercenaria;Mercenari  
 a mercenaria  
 UdeM00000007737 6596 155.6 UdeM00000007737 XP\_045181277.1 34.3 280  
 158 9 19 285 106 372 1.00E-34 155.6 6596 cellular  
 organisms;Eukaryota;Opisthokonta;Metazoa;Eumetazoa;Bilateria;Protostomia;  
 Spiralia;Lophotrochozoa;Mollusca;Bivalvia;Autobranchia;Heteroconchia;Euhe  
 terodonta;Imparidentia;Venerida;Veneroidea;Veneridae;Mercenaria;Mercenari  
 a mercenaria  
 UdeM00000007738 6596 97.1 UdeM00000007738 XP\_045192683.1 55.4 83  
 37 0 1 83 199 281 1.20E-17 97.1 6596 cellular  
 organisms;Eukaryota;Opisthokonta;Metazoa;Eumetazoa;Bilateria;Protostomia;  
 Spiralia;Lophotrochozoa;Mollusca;Bivalvia;Autobranchia;Heteroconchia;Euhe  
 terodonta;Imparidentia;Venerida;Veneroidea;Veneridae;Mercenaria;Mercenari  
 a mercenaria  
 UdeM00000007739 6596 133.7 UdeM00000007739 XP\_045181277.1 35.8 201  
 122 5 17 214 176 372 4.00E-28 133.7 6596 cellular  
 organisms;Eukaryota;Opisthokonta;Metazoa;Eumetazoa;Bilateria;Protostomia;  
 Spiralia;Lophotrochozoa;Mollusca;Bivalvia;Autobranchia;Heteroconchia;Euhe  
 terodonta;Imparidentia;Venerida;Veneroidea;Veneridae;Mercenaria;Mercenari  
 a mercenaria  
 UdeM00000007740 6596 164.5 UdeM00000007740 XP\_045192683.1 42.7 232  
 123 2 34 257 52 281 1.80E-37 164.5 6596 cellular

organisms;Eukaryota;Opisthokonta;Metazoa;Eumetazoa;Bilateria;Protostomia;Spiralia;Lophotrochozoa;Mollusca;Bivalvia;Autobranchia;Heteroconchia;Euheterodonta;Imparidentia;Venerida;Veneroidea;Veneridae;Mercenaria;Mercenaria mercenaria

UdeM00000007741 6579 78.6 UdeM00000007741 XP\_033739131.1 46.4 69  
37 0 14 82 1118 1186 4.20E-12 78.6 6579 cellular

organisms;Eukaryota;Opisthokonta;Metazoa;Eumetazoa;Bilateria;Protostomia;Spiralia;Lophotrochozoa;Mollusca;Bivalvia;Autobranchia;Pteriormorphia;Pectinida;Pectinoidea;Pectinidae;Pecten;Pecten maximus

UdeM00000007742 6596 184.1 UdeM00000007742 XP\_045192683.1 42.2 249  
123 5 18 251 39 281 2.20E-43 184.1 6596 cellular

organisms;Eukaryota;Opisthokonta;Metazoa;Eumetazoa;Bilateria;Protostomia;Spiralia;Lophotrochozoa;Mollusca;Bivalvia;Autobranchia;Heteroconchia;Euheterodonta;Imparidentia;Venerida;Veneroidea;Veneridae;Mercenaria;Mercenaria mercenaria

UdeM00000007743 6596 182.2 UdeM00000007743 XP\_045192683.1 44.5 245  
101 6 19 240 49 281 7.90E-43 182.2 6596 cellular

organisms;Eukaryota;Opisthokonta;Metazoa;Eumetazoa;Bilateria;Protostomia;Spiralia;Lophotrochozoa;Mollusca;Bivalvia;Autobranchia;Heteroconchia;Euheterodonta;Imparidentia;Venerida;Veneroidea;Veneridae;Mercenaria;Mercenaria mercenaria

UdeM00000007744 6596 346.3 UdeM00000007744 XP\_045212389.1 44.9 365  
191 6 54 415 61 418 5.50E-92 346.3 6596 cellular

organisms;Eukaryota;Opisthokonta;Metazoa;Eumetazoa;Bilateria;Protostomia;Spiralia;Lophotrochozoa;Mollusca;Bivalvia;Autobranchia;Heteroconchia;Euheterodonta;Imparidentia;Venerida;Veneroidea;Veneridae;Mercenaria;Mercenaria mercenaria

UdeM00000007746 6573 219.9 UdeM00000007746 XP\_021377528.1 66.2 157  
53 0 1 157 18 174 2.30E-54 219.9 6573 cellular

organisms;Eukaryota;Opisthokonta;Metazoa;Eumetazoa;Bilateria;Protostomia;Spiralia;Lophotrochozoa;Mollusca;Bivalvia;Autobranchia;Pteriormorphia;Pectinida;Pectinoidea;Pectinidae;Mizuhopecten;Mizuhopecten yessoensis

UdeM00000007748 6565 629 UdeM00000007748 XP\_022328027.1 84.1 383  
59 1 1 381 174 556 3.90E-177 629 6565 cellular

organisms;Eukaryota;Opisthokonta;Metazoa;Eumetazoa;Bilateria;Protostomia;Spiralia;Lophotrochozoa;Mollusca;Bivalvia;Autobranchia;Pteriormorphia;Ostreida;Ostreioidea;Ostreidae;Crassostrea;Crassostrea virginica

UdeM00000007747 6565 927.2 UdeM00000007747 XP\_022328027.1 85.4 556  
79 1 1 554 1 556 1.00E-266 927.2 6565 cellular

organisms;Eukaryota;Opisthokonta;Metazoa;Eumetazoa;Bilateria;Protostomia;Spiralia;Lophotrochozoa;Mollusca;Bivalvia;Autobranchia;Pteriormorphia;Ostreida;Ostreioidea;Ostreidae;Crassostrea;Crassostrea virginica

UdeM00000007749 29159 254.2 UdeM00000007749 XP\_034303596.1 89.5 143  
15 0 19 161 24 166 1.10E-64 254.2 29159 cellular

organisms;Eukaryota;Opisthokonta;Metazoa;Eumetazoa;Bilateria;Protostomia;Spiralia;Lophotrochozoa;Mollusca;Bivalvia;Autobranchia;Pteriormorphia;Ostreida;Ostreioidea;Ostreidae;Crassostrea;Crassostrea gigas

UdeM00000007750 225164 76.3 UdeM00000007750 XP\_009063340.1 60  
60 24 0 4 63 28 87 1.70E-11 76.3 225164  
cellular

organisms;Eukaryota;Opisthokonta;Metazoa;Eumetazoa;Bilateria;Protostomia;Spiralia;Lophotrochozoa;Mollusca;Gastropoda;Patellogastropoda;Lottiioidea;Lottiidae;Lottia;Lottia gigantea

UdeM00000007751 29159 292.4 UdeM00000007751 XP\_034333743.1 67.5 209  
 68 0 47 255 86 294 5.80E-76 292.4 29159 cellular  
 organisms;Eukaryota;Opisthokonta;Metazoa;Eumetazoa;Bilateria;Protostomia;  
 Spiralia;Lophotrochozoa;Mollusca;Bivalvia;Autobranchia;Pteriomorphia;Ostr  
 eida;Ostreoidea;Ostreidae;Crassostrea;Crassostrea gigas  
 UdeM00000007752 6596 328.6 UdeM00000007752 XP\_045177776.1 38.7 475  
 271 10 1 470 405 864 2.10E-86 328.6 6596 cellular  
 organisms;Eukaryota;Opisthokonta;Metazoa;Eumetazoa;Bilateria;Protostomia;  
 Spiralia;Lophotrochozoa;Mollusca;Bivalvia;Autobranchia;Heteroconchia;Euhe  
 terodonta;Imparidentia;Venerida;Veneroidea;Veneridae;Mercenaria;Mercenari  
 a mercenaria  
 UdeM00000007753 6596 78.2 UdeM00000007753 XP\_045179120.1 53.8 65  
 29 1 1 65 1 64 4.50E-12 78.2 6596 cellular  
 organisms;Eukaryota;Opisthokonta;Metazoa;Eumetazoa;Bilateria;Protostomia;  
 Spiralia;Lophotrochozoa;Mollusca;Bivalvia;Autobranchia;Heteroconchia;Euhe  
 terodonta;Imparidentia;Venerida;Veneroidea;Veneridae;Mercenaria;Mercenari  
 a mercenaria  
 UdeM00000007754 6596 81.6 UdeM00000007754 XP\_045179120.1 53.7 67  
 30 1 1 67 1 66 6.40E-13 81.6 6596 cellular  
 organisms;Eukaryota;Opisthokonta;Metazoa;Eumetazoa;Bilateria;Protostomia;  
 Spiralia;Lophotrochozoa;Mollusca;Bivalvia;Autobranchia;Heteroconchia;Euhe  
 terodonta;Imparidentia;Venerida;Veneroidea;Veneridae;Mercenaria;Mercenari  
 a mercenaria  
 UdeM00000007757 6596 166.8 UdeM00000007757 XP\_045194272.1 61.3 142  
 54 1 3 144 23 163 2.10E-38 166.8 6596 cellular  
 organisms;Eukaryota;Opisthokonta;Metazoa;Eumetazoa;Bilateria;Protostomia;  
 Spiralia;Lophotrochozoa;Mollusca;Bivalvia;Autobranchia;Heteroconchia;Euhe  
 terodonta;Imparidentia;Venerida;Veneroidea;Veneridae;Mercenaria;Mercenari  
 a mercenaria  
 UdeM00000007758 1735272 88.6 UdeM00000007758 XP\_041361245.1 56  
 75 33 0 123 197 217 291 1.00E-14 88.6 1735272  
 cellular  
 organisms;Eukaryota;Opisthokonta;Metazoa;Eumetazoa;Bilateria;Protostomia;  
 Spiralia;Lophotrochozoa;Mollusca;Gastropoda;Neomphalina;Neomphaloidea;Pel  
 tospiridae;Gigantopelta;Gigantopelta aegis  
 UdeM00000007759 6596 87.4 UdeM00000007759 XP\_045182578.1 50.6 79  
 39 0 121 199 214 292 2.20E-14 87.4 6596 cellular  
 organisms;Eukaryota;Opisthokonta;Metazoa;Eumetazoa;Bilateria;Protostomia;  
 Spiralia;Lophotrochozoa;Mollusca;Bivalvia;Autobranchia;Heteroconchia;Euhe  
 terodonta;Imparidentia;Venerida;Veneroidea;Veneridae;Mercenaria;Mercenari  
 a mercenaria  
 UdeM00000007761 29159 219.9 UdeM00000007761 XP\_034339165.1 37.7 334  
 194 8 1 331 186 508 4.70E-54 219.9 29159 cellular  
 organisms;Eukaryota;Opisthokonta;Metazoa;Eumetazoa;Bilateria;Protostomia;  
 Spiralia;Lophotrochozoa;Mollusca;Bivalvia;Autobranchia;Pteriomorphia;Ostr  
 eida;Ostreoidea;Ostreidae;Crassostrea;Crassostrea gigas  
 UdeM00000007762 29159 502.3 UdeM00000007762 XP\_034299474.1 43.6 610  
 328 8 94 696 155 755 1.00E-138 502.3 29159 cellular  
 organisms;Eukaryota;Opisthokonta;Metazoa;Eumetazoa;Bilateria;Protostomia;  
 Spiralia;Lophotrochozoa;Mollusca;Bivalvia;Autobranchia;Pteriomorphia;Ostr  
 eida;Ostreoidea;Ostreidae;Crassostrea;Crassostrea gigas  
 UdeM00000007765 6579 177.2 UdeM00000007765 XP\_033744238.1 37.2 331  
 161 10 329 649 133 426 7.10E-41 177.2 6579 cellular  
 organisms;Eukaryota;Opisthokonta;Metazoa;Eumetazoa;Bilateria;Protostomia;

Spiralia; Lophotrochozoa; Mollusca; Bivalvia; Autobranchia; Pteriomorphia; Pectinida; Pectinoidea; Pectinidae; Pecten; Pecten maximus

UdeM00000007767 30019 58.9 UdeM00000007767 XP\_017846261.1 34.5 139  
74 5 1 132 168 296 5.60E-06 58.9 30019 cellular

organisms; Eukaryota; Opisthokonta; Metazoa; Eumetazoa; Bilateria; Protostomia; Ecdysozoa; Panarthropoda; Arthropoda; Mandibulata; Pancrustacea; Hexapoda; Insecta; Dicondylia; Pterygota; Neoptera; Endopterygota; Diptera; Brachycera; Muscomorpha; Eremoneura; Cyclorrhapha; Schizophora; Acalyptratae; Ephydroidea; Drosophilidae; Drosophilinae; Drosophilini; Drosophila; Dorsilopha; Drosophila busckii

UdeM00000007768 1735272 153.7 UdeM00000007768 XP\_041361243.1 49  
198 89 5 18 205 81 276 3.10E-33 153.7 1735272  
cellular

organisms; Eukaryota; Opisthokonta; Metazoa; Eumetazoa; Bilateria; Protostomia; Spiralia; Lophotrochozoa; Mollusca; Gastropoda; Neomphalina; Neomphaloidea; Peltopspiridae; Gigantopelta; Gigantopelta aegis

UdeM00000007769 29159 180.3 UdeM00000007769 XP\_019926413.2 81.8 110  
18 2 1 108 97 206 1.40E-42 180.3 29159 cellular

organisms; Eukaryota; Opisthokonta; Metazoa; Eumetazoa; Bilateria; Protostomia; Spiralia; Lophotrochozoa; Mollusca; Bivalvia; Autobranchia; Pteriomorphia; Ostreida; Ostreioidea; Ostreidae; Crassostrea; Crassostrea gigas

UdeM00000007770 29159 369.4 UdeM00000007770 XP\_019926413.2 83.6 219  
35 1 1 219 292 509 3.40E-99 369.4 29159 cellular

organisms; Eukaryota; Opisthokonta; Metazoa; Eumetazoa; Bilateria; Protostomia; Spiralia; Lophotrochozoa; Mollusca; Bivalvia; Autobranchia; Pteriomorphia; Ostreida; Ostreioidea; Ostreidae; Crassostrea; Crassostrea gigas

UdeM00000007771 7574 97.8 UdeM00000007771 XP\_013401704.1 46.4 84  
45 0 17 100 748 831 8.50E-18 97.8 7574 cellular

organisms; Eukaryota; Opisthokonta; Metazoa; Eumetazoa; Bilateria; Protostomia; Spiralia; Lophotrochozoa; Brachiopoda; Linguliformea; Lingulata; Lingulida; Linguloidea; Lingulidae; Lingula; Lingula anatina

UdeM00000007773 45264 198.4 UdeM00000007773 XP\_044165143.1 76.9 117  
27 0 1 117 217 333 5.30E-48 198.4 45264 cellular

organisms; Eukaryota; Opisthokonta; Metazoa; Eumetazoa; Cnidaria; Anthozoa; Hexacorallia; Scleractinia; Astrocoeniina; Acroporidae; Acropora; Acropora millepora

UdeM00000007775 6565 281.2 UdeM00000007775 XP\_022303385.1 44.9 303  
155 7 29 322 547 846 1.70E-72 281.2 6565 cellular

organisms; Eukaryota; Opisthokonta; Metazoa; Eumetazoa; Bilateria; Protostomia; Spiralia; Lophotrochozoa; Mollusca; Bivalvia; Autobranchia; Pteriomorphia; Ostreida; Ostreioidea; Ostreidae; Crassostrea; Crassostrea virginica

UdeM00000007776 6565 108.2 UdeM00000007776 XP\_022321940.1 26 292  
199 7 31 312 399 683 1.90E-20 108.2 6565 cellular

organisms; Eukaryota; Opisthokonta; Metazoa; Eumetazoa; Bilateria; Protostomia; Spiralia; Lophotrochozoa; Mollusca; Bivalvia; Autobranchia; Pteriomorphia; Ostreida; Ostreioidea; Ostreidae; Crassostrea; Crassostrea virginica

UdeM00000037872 1735272 126.3 UdeM00000037872 XP\_041371877.1 82.1  
67 12 0 2 68 952 1018 1.60E-26 126.3 1735272

cellular

organisms; Eukaryota; Opisthokonta; Metazoa; Eumetazoa; Bilateria; Protostomia; Spiralia; Lophotrochozoa; Mollusca; Gastropoda; Neomphalina; Neomphaloidea; Peltopspiridae; Gigantopelta; Gigantopelta aegis

UdeM00000037873 6596 402.5 UdeM00000037873 XP\_045156903.1 39.4 872  
512 2 88 957 1981 2838 1.60E-108 402.5 6596 cellular



organisms;Eukaryota;Opisthokonta;Metazoa;Eumetazoa;Bilateria;Protostomia; Spiralia;Lophotrochozoa;Mollusca;Bivalvia;Autobranchia;Heteroconchia;Euherodonta;Imparidentia;Venerida;Veneroidea;Veneridae;Mercenaria;Mercenaria mercenaria

UdeM00000037874 6596 357.1 UdeM00000037874 XP\_045156903.1 38.2 872  
388 10 3967 4831 1155 1882 3.60E-94 357.1 6596 cellular

organisms;Eukaryota;Opisthokonta;Metazoa;Eumetazoa;Bilateria;Protostomia; Spiralia;Lophotrochozoa;Mollusca;Bivalvia;Autobranchia;Heteroconchia;Euherodonta;Imparidentia;Venerida;Veneroidea;Veneridae;Mercenaria;Mercenaria mercenaria

UdeM00000037875 37621 186.4 UdeM00000037875 XP\_014673010.1 52.3 176  
81 2 3 176 363 537 3.50E-44 186.4 37621 cellular

organisms;Eukaryota;Opisthokonta;Metazoa;Eumetazoa;Bilateria;Protostomia; Ecdysozoa;Scalidophora;Priapulida;Priapulimorpha;Priapulimorphida;Priapulidae;Priapululus;Priapululus caudatus

UdeM00000037876 1735272 975.7 UdeM00000037876 XP\_041372967.1 79.1  
728 125 10 1 715 1 714 3.20E-281 975.7 1735272  
cellular

organisms;Eukaryota;Opisthokonta;Metazoa;Eumetazoa;Bilateria;Protostomia; Spiralia;Lophotrochozoa;Mollusca;Gastropoda;Neomphalina;Neomphaloidea;Peltospiridae;Gigantopelta;Gigantopelta aegis

UdeM00000037877 1735272 956.1 UdeM00000037877 XP\_041372967.1 77.7  
726 146 7 1 722 1 714 2.60E-275 956.1 1735272

organisms;Eukaryota;Opisthokonta;Metazoa;Eumetazoa;Bilateria;Protostomia; Spiralia;Lophotrochozoa;Mollusca;Gastropoda;Neomphalina;Neomphaloidea;Peltospiridae;Gigantopelta;Gigantopelta aegis

UdeM00000037878 6596 1127.1 UdeM00000037878 XP\_045216647.1 62  
1091 388 10 1 1081 1 1074 0.00E+00 1127.1 6596

cellular  
organisms;Eukaryota;Opisthokonta;Metazoa;Eumetazoa;Bilateria;Protostomia; Spiralia;Lophotrochozoa;Mollusca;Bivalvia;Autobranchia;Heteroconchia;Euherodonta;Imparidentia;Venerida;Veneroidea;Veneridae;Mercenaria;Mercenaria mercenaria

UdeM00000037879 6565 1119.4 UdeM00000037879 XP\_022332341.1 48.5  
1207 614 5 28 1232 62 1262 0.00E+00 1119.4 6565

cellular  
organisms;Eukaryota;Opisthokonta;Metazoa;Eumetazoa;Bilateria;Protostomia; Spiralia;Lophotrochozoa;Mollusca;Bivalvia;Autobranchia;Pteriomorpha;Ostreida;Ostreoidea;Ostreidae;Crassostrea;Crassostrea virginica

UdeM00000037880 6596 356.3 UdeM00000037880 XP\_045215300.1 55.2 335  
144 2 22 351 1504 1837 5.70E-95 356.3 6596 cellular

organisms;Eukaryota;Opisthokonta;Metazoa;Eumetazoa;Bilateria;Protostomia; Spiralia;Lophotrochozoa;Mollusca;Bivalvia;Autobranchia;Heteroconchia;Euherodonta;Imparidentia;Venerida;Veneroidea;Veneridae;Mercenaria;Mercenaria mercenaria

UdeM00000037881 1735272 205.7 UdeM00000037881 XP\_041373245.1 45.8  
216 103 3 23 225 44 258 6.30E-50 205.7 1735272

cellular  
organisms;Eukaryota;Opisthokonta;Metazoa;Eumetazoa;Bilateria;Protostomia; Spiralia;Lophotrochozoa;Mollusca;Gastropoda;Neomphalina;Neomphaloidea;Peltospiridae;Gigantopelta;Gigantopelta aegis

UdeM00000037882 1735272 205.7 UdeM00000037882 XP\_041373245.1 45.8  
216 103 3 72 274 44 258 7.70E-50 205.7 1735272

cellular  
organisms;Eukaryota;Opisthokonta;Metazoa;Eumetazoa;Bilateria;Protostomia;  
Spiralia;Lophotrochozoa;Mollusca;Gastropoda;Neomphalina;Neomphaloidea;Pel  
tospiridae;Gigantopelta;Gigantopelta aegis  
UdeM00000037883 6596 476.5 UdeM00000037883 XP\_045215300.1 51.2 488  
235 2 8 495 1835 2319 4.30E-131 476.5 6596 cellular  
organisms;Eukaryota;Opisthokonta;Metazoa;Eumetazoa;Bilateria;Protostomia;  
Spiralia;Lophotrochozoa;Mollusca;Bivalvia;Autobranchia;Heteroconchia;Euhe  
terodonta;Imparidentia;Venerida;Veneroidea;Veneridae;Mercenaria;Mercenari  
a mercenaria  
UdeM00000037884 6596 723.8 UdeM00000037884 XP\_045215300.1 51.6 733  
301 3 24 702 2322 3054 2.10E-205 723.8 6596 cellular  
organisms;Eukaryota;Opisthokonta;Metazoa;Eumetazoa;Bilateria;Protostomia;  
Spiralia;Lophotrochozoa;Mollusca;Bivalvia;Autobranchia;Heteroconchia;Euhe  
terodonta;Imparidentia;Venerida;Veneroidea;Veneridae;Mercenaria;Mercenari  
a mercenaria  
UdeM00000037885 6596 3783 UdeM00000037885 XP\_045215300.1 52.2 3770  
1310 10 13 3769 3054 6344 0.00E+00 3783 6596 cellular  
organisms;Eukaryota;Opisthokonta;Metazoa;Eumetazoa;Bilateria;Protostomia;  
Spiralia;Lophotrochozoa;Mollusca;Bivalvia;Autobranchia;Heteroconchia;Euhe  
terodonta;Imparidentia;Venerida;Veneroidea;Veneridae;Mercenaria;Mercenari  
a mercenaria  
UdeM00000037886 29159 631.3 UdeM00000037886 XP\_011453961.2 50.7 598  
291 3 18 611 28 625 1.30E-177 631.3 29159 cellular  
organisms;Eukaryota;Opisthokonta;Metazoa;Eumetazoa;Bilateria;Protostomia;  
Spiralia;Lophotrochozoa;Mollusca;Bivalvia;Autobranchia;Pteriormorphia;Ostr  
eida;Ostreoidea;Ostreidae;Crassostrea;Crassostrea gigas  
UdeM00000037887 6579 161 UdeM00000037887 XP\_033750444.1 59.5 131  
51 2 31 161 36 164 1.30E-36 161 6579 cellular  
organisms;Eukaryota;Opisthokonta;Metazoa;Eumetazoa;Bilateria;Protostomia;  
Spiralia;Lophotrochozoa;Mollusca;Bivalvia;Autobranchia;Pteriormorphia;Pect  
inida;Pectinoidea;Pectinidae;Pecten;Pecten maximus  
UdeM00000037888 6596 191 UdeM00000037888 XP\_045156705.1 97.4 78  
2 0 4 81 24 101 5.90E-46 191 6596 cellular  
organisms;Eukaryota;Opisthokonta;Metazoa;Eumetazoa;Bilateria;Protostomia;  
Spiralia;Lophotrochozoa;Mollusca;Bivalvia;Autobranchia;Heteroconchia;Euhe  
terodonta;Imparidentia;Venerida;Veneroidea;Veneridae;Mercenaria;Mercenari  
a mercenaria  
UdeM00000037889 6596 334.7 UdeM00000037889 XP\_045156707.1 30.3 801  
477 20 5 764 27 787 3.90E-88 334.7 6596 cellular  
organisms;Eukaryota;Opisthokonta;Metazoa;Eumetazoa;Bilateria;Protostomia;  
Spiralia;Lophotrochozoa;Mollusca;Bivalvia;Autobranchia;Heteroconchia;Euhe  
terodonta;Imparidentia;Venerida;Veneroidea;Veneridae;Mercenaria;Mercenari  
a mercenaria  
UdeM00000037890 6596 434.9 UdeM00000037890 XP\_045215244.1 67.3 330  
106 2 9 336 5 334 1.00E-118 434.9 6596 cellular  
organisms;Eukaryota;Opisthokonta;Metazoa;Eumetazoa;Bilateria;Protostomia;  
Spiralia;Lophotrochozoa;Mollusca;Bivalvia;Autobranchia;Heteroconchia;Euhe  
terodonta;Imparidentia;Venerida;Veneroidea;Veneridae;Mercenaria;Mercenari  
a mercenaria  
UdeM00000037891 1735272 392.9 UdeM00000037891 XP\_041367886.1 72.3  
267 72 1 106 372 115 379 4.60E-106 392.9 1735272  
cellular  
organisms;Eukaryota;Opisthokonta;Metazoa;Eumetazoa;Bilateria;Protostomia;

Spiralia;Lophotrochozoa;Mollusca;Gastropoda;Neomphalina;Neomphaloidea;Pel  
tospiridae;Gigantopelta;Gigantopelta aegis

UdeM00000037892 1735272 92 UdeM00000037892 XP\_041367886.1 63  
73 25 1 106 178 115 185 8.70E-16 92 1735272  
cellular

organisms;Eukaryota;Opisthokonta;Metazoa;Eumetazoa;Bilateria;Protostomia;  
Spiralia;Lophotrochozoa;Mollusca;Gastropoda;Neomphalina;Neomphaloidea;Pel  
tospiridae;Gigantopelta;Gigantopelta aegis

UdeM00000037894 6579 452.2 UdeM00000037894 XP\_033750186.1 75.2 282  
69 1 8 289 95 375 6.00E-123 452.2 6579 cellular

organisms;Eukaryota;Opisthokonta;Metazoa;Eumetazoa;Bilateria;Protostomia;  
Spiralia;Lophotrochozoa;Mollusca;Bivalvia;Autobranchia;Pteriomorpha;Pect  
inida;Pectinoidea;Pectinidae;Pecten;Pecten maximus

UdeM00000037896 29159 216.9 UdeM00000037896 XP\_011450518.2 59.3 172  
70 0 147 318 58 229 1.50E-52 216.9 29159 cellular

organisms;Eukaryota;Opisthokonta;Metazoa;Eumetazoa;Bilateria;Protostomia;  
Spiralia;Lophotrochozoa;Mollusca;Bivalvia;Autobranchia;Pteriomorpha;Ostr  
eida;Ostreoidea;Ostreidae;Crassostrea;Crassostrea gigas

UdeM00000037898 29159 170.6 UdeM00000037898 XP\_011450518.2 39.7 277  
150 4 1 271 1 266 4.80E-39 170.6 29159 cellular

organisms;Eukaryota;Opisthokonta;Metazoa;Eumetazoa;Bilateria;Protostomia;  
Spiralia;Lophotrochozoa;Mollusca;Bivalvia;Autobranchia;Pteriomorpha;Ostr  
eida;Ostreoidea;Ostreidae;Crassostrea;Crassostrea gigas

UdeM00000037897 29159 170.6 UdeM00000037897 XP\_011450518.2 39.7 277  
150 4 1 271 1 266 7.30E-39 170.6 29159 cellular

organisms;Eukaryota;Opisthokonta;Metazoa;Eumetazoa;Bilateria;Protostomia;  
Spiralia;Lophotrochozoa;Mollusca;Bivalvia;Autobranchia;Pteriomorpha;Ostr  
eida;Ostreoidea;Ostreidae;Crassostrea;Crassostrea gigas

UdeM00000037900 29159 159.1 UdeM00000037900 XP\_011450518.2 48.2 166  
84 1 4 167 63 228 1.90E-35 159.1 29159 cellular

organisms;Eukaryota;Opisthokonta;Metazoa;Eumetazoa;Bilateria;Protostomia;  
Spiralia;Lophotrochozoa;Mollusca;Bivalvia;Autobranchia;Pteriomorpha;Ostr  
eida;Ostreoidea;Ostreidae;Crassostrea;Crassostrea gigas

UdeM00000037901 1735272 273.5 UdeM00000037901 XP\_041371855.1 39.7  
421 215 7 2 421 1 383 4.60E-70 273.5 1735272

cellular

organisms;Eukaryota;Opisthokonta;Metazoa;Eumetazoa;Bilateria;Protostomia;  
Spiralia;Lophotrochozoa;Mollusca;Gastropoda;Neomphalina;Neomphaloidea;Pel  
tospiridae;Gigantopelta;Gigantopelta aegis

UdeM00000037902 6573 404.4 UdeM00000037902 XP\_021359356.1 70.4 406  
115 2 1 405 1 402 1.70E-109 404.4 6573 cellular

organisms;Eukaryota;Opisthokonta;Metazoa;Eumetazoa;Bilateria;Protostomia;  
Spiralia;Lophotrochozoa;Mollusca;Bivalvia;Autobranchia;Pteriomorpha;Pect  
inida;Pectinoidea;Pectinidae;Mizuhopecten;Mizuhopecten yessoensis

UdeM00000037903 6579 109.4 UdeM00000037903 XP\_033751022.1 60 80  
32 0 2 81 288 367 2.30E-21 109.4 6579 cellular

organisms;Eukaryota;Opisthokonta;Metazoa;Eumetazoa;Bilateria;Protostomia;  
Spiralia;Lophotrochozoa;Mollusca;Bivalvia;Autobranchia;Pteriomorpha;Pect  
inida;Pectinoidea;Pectinidae;Pecten;Pecten maximus

UdeM00000037904 6579 238 UdeM00000037904 XP\_033751022.1 67.9 162  
52 0 1 162 206 367 8.40E-60 238 6579 cellular

organisms;Eukaryota;Opisthokonta;Metazoa;Eumetazoa;Bilateria;Protostomia;  
Spiralia;Lophotrochozoa;Mollusca;Bivalvia;Autobranchia;Pteriomorpha;Pect  
inida;Pectinoidea;Pectinidae;Pecten;Pecten maximus

UdeM00000037905 6596 464.2 UdeM00000037905 XP\_045156914.1 61.5 364  
 132 4 6 364 2578 2938 1.80E-127 464.2 6596 cellular  
 organisms;Eukaryota;Opisthokonta;Metazoa;Eumetazoa;Bilateria;Protostomia;  
 Spiralia;Lophotrochozoa;Mollusca;Bivalvia;Autobranchia;Heteroconchia;Euhe  
 terodonta;Imparidentia;Venerida;Veneroidea;Veneridae;Mercenaria;Mercenari  
 a mercenaria

UdeM00000037906 6596 3640.1 UdeM00000037906 XP\_045156914.1 62.5  
 2466 898 15 11 2470 120 2564 0.00E+00 3640.1 6596  
 cellular  
 organisms;Eukaryota;Opisthokonta;Metazoa;Eumetazoa;Bilateria;Protostomia;  
 Spiralia;Lophotrochozoa;Mollusca;Bivalvia;Autobranchia;Heteroconchia;Euhe  
 terodonta;Imparidentia;Venerida;Veneroidea;Veneridae;Mercenaria;Mercenari  
 a mercenaria

UdeM00000037907 6596 3618.2 UdeM00000037907 XP\_045156914.1 61.8  
 2493 887 16 1 2449 93 2564 0.00E+00 3618.2 6596  
 cellular  
 organisms;Eukaryota;Opisthokonta;Metazoa;Eumetazoa;Bilateria;Protostomia;  
 Spiralia;Lophotrochozoa;Mollusca;Bivalvia;Autobranchia;Heteroconchia;Euhe  
 terodonta;Imparidentia;Venerida;Veneroidea;Veneridae;Mercenaria;Mercenari  
 a mercenaria

UdeM00000037908 6579 429.9 UdeM00000037908 XP\_033725915.1 52.7 419  
 193 5 10 426 2 417 3.90E-117 429.9 6579 cellular  
 organisms;Eukaryota;Opisthokonta;Metazoa;Eumetazoa;Bilateria;Protostomia;  
 Spiralia;Lophotrochozoa;Mollusca;Bivalvia;Autobranchia;Pteriormorphia;Pect  
 inida;Pectinoidea;Pectinidae;Pecten;Pecten maximus

UdeM00000037909 6579 412.9 UdeM00000037909 XP\_033725915.1 52.4 410  
 190 5 1 408 11 417 4.80E-112 412.9 6579 cellular  
 organisms;Eukaryota;Opisthokonta;Metazoa;Eumetazoa;Bilateria;Protostomia;  
 Spiralia;Lophotrochozoa;Mollusca;Bivalvia;Autobranchia;Pteriormorphia;Pect  
 inida;Pectinoidea;Pectinidae;Pecten;Pecten maximus

UdeM00000037910 6579 407.1 UdeM00000037910 XP\_033725915.1 49.3 418  
 207 5 17 432 2 416 2.80E-110 407.1 6579 cellular  
 organisms;Eukaryota;Opisthokonta;Metazoa;Eumetazoa;Bilateria;Protostomia;  
 Spiralia;Lophotrochozoa;Mollusca;Bivalvia;Autobranchia;Pteriormorphia;Pect  
 inida;Pectinoidea;Pectinidae;Pecten;Pecten maximus

UdeM00000037911 6573 180.6 UdeM00000037911 XP\_021365673.1 32.7 269  
 177 4 5 273 153 417 2.70E-42 180.6 6573 cellular  
 organisms;Eukaryota;Opisthokonta;Metazoa;Eumetazoa;Bilateria;Protostomia;  
 Spiralia;Lophotrochozoa;Mollusca;Bivalvia;Autobranchia;Pteriormorphia;Pect  
 inida;Pectinoidea;Pectinidae;Mizuhopecten;Mizuhopecten yessoensis

UdeM00000037912 6596 276.9 UdeM00000037912 XP\_045216411.1 35.9 429  
 259 9 1 428 9 422 5.00E-71 276.9 6596 cellular  
 organisms;Eukaryota;Opisthokonta;Metazoa;Eumetazoa;Bilateria;Protostomia;  
 Spiralia;Lophotrochozoa;Mollusca;Bivalvia;Autobranchia;Heteroconchia;Euhe  
 terodonta;Imparidentia;Venerida;Veneroidea;Veneridae;Mercenaria;Mercenari  
 a mercenaria

UdeM00000037913 6596 129.8 UdeM00000037913 XP\_045216866.1 54.5 290  
 107 7 1 284 1 271 5.50E-27 129.8 6596 cellular  
 organisms;Eukaryota;Opisthokonta;Metazoa;Eumetazoa;Bilateria;Protostomia;  
 Spiralia;Lophotrochozoa;Mollusca;Bivalvia;Autobranchia;Heteroconchia;Euhe  
 terodonta;Imparidentia;Venerida;Veneroidea;Veneridae;Mercenaria;Mercenari  
 a mercenaria

UdeM00000037914 6565 487.3 UdeM00000037914 XP\_022332212.1 57.5 452  
 157 9 658 1102 590 1013 5.30E-134 487.3 6565 cellular

organisms;Eukaryota;Opisthokonta;Metazoa;Eumetazoa;Bilateria;Protostomia;  
Spiralia;Lophotrochozoa;Mollusca;Bivalvia;Autobranchia;Pteriomorpha;Ostr  
eida;Ostreoidea;Ostreidae;Crassostrea;Crassostrea virginica  
UdeM00000037915 6565 627.9 UdeM00000037915 XP\_022334577.1 48.3 650  
207 4 12 659 8 530 1.50E-176 627.9 6565 cellular  
organisms;Eukaryota;Opisthokonta;Metazoa;Eumetazoa;Bilateria;Protostomia;  
Spiralia;Lophotrochozoa;Mollusca;Bivalvia;Autobranchia;Pteriomorpha;Ostr  
eida;Ostreoidea;Ostreidae;Crassostrea;Crassostrea virginica  
UdeM00000037916 6579 323.6 UdeM00000037916 XP\_033750900.1 56.5 336  
135 5 1 327 2 335 3.10E-85 323.6 6579 cellular  
organisms;Eukaryota;Opisthokonta;Metazoa;Eumetazoa;Bilateria;Protostomia;  
Spiralia;Lophotrochozoa;Mollusca;Bivalvia;Autobranchia;Pteriomorpha;Pect  
inida;Pectinoidea;Pectinidae;Pecten;Pecten maximus  
UdeM00000037917 6579 589 UdeM00000037917 XP\_033749902.1 77.6 370  
81 1 6 373 1 370 4.40E-165 589 6579 cellular  
organisms;Eukaryota;Opisthokonta;Metazoa;Eumetazoa;Bilateria;Protostomia;  
Spiralia;Lophotrochozoa;Mollusca;Bivalvia;Autobranchia;Pteriomorpha;Pect  
inida;Pectinoidea;Pectinidae;Pecten;Pecten maximus  
UdeM00000037918 6579 205.7 UdeM00000037918 XP\_033746397.1 38.5 265  
161 1 1 263 1 265 7.40E-50 205.7 6579 cellular  
organisms;Eukaryota;Opisthokonta;Metazoa;Eumetazoa;Bilateria;Protostomia;  
Spiralia;Lophotrochozoa;Mollusca;Bivalvia;Autobranchia;Pteriomorpha;Pect  
inida;Pectinoidea;Pectinidae;Pecten;Pecten maximus  
UdeM00000037919 54343 113.2 UdeM00000037919 XP\_032366298.1 27.9 301  
78 3 1 163 184 483 3.20E-22 113.2 54343 cellular  
organisms;Eukaryota;Opisthokonta;Metazoa;Eumetazoa;Bilateria;Deuterostomi  
a;Chordata;Craniata;Vertebrata;Gnathostomata;Teleostomi;Euteleostomi;Acti  
nopterygii;Actinopteri;Neopterygii;Teleostei;Osteoglossocephalai;Clupeoce  
phala;Euteleosteomorpha;Neoteleostei;Eurypterygia;Ctenosquamata;Acanthomo  
rphata;Euacanthomorphacea;Percomorphaceae;Eupercaria;Perciformes;Percoide  
i;Percidae;Etheostomatinae;Etheostoma;Oligocephalus;Etheostoma spectabile  
UdeM00000037920 6596 224.6 UdeM00000037920 XP\_045216171.1 48.1 231  
99 2 39 269 35 244 1.80E-55 224.6 6596 cellular  
organisms;Eukaryota;Opisthokonta;Metazoa;Eumetazoa;Bilateria;Protostomia;  
Spiralia;Lophotrochozoa;Mollusca;Bivalvia;Autobranchia;Heteroconchia;Euhe  
terodonta;Imparidentia;Venerida;Veneroidea;Veneridae;Mercenaria;Mercenari  
a mercenaria  
UdeM00000023390 176946 65.5 UdeM00000023390 XP\_015745591.2 41.2  
85 43 2 1 78 2514 2598 5.00E-08 65.5 176946  
cellular  
organisms;Eukaryota;Opisthokonta;Metazoa;Eumetazoa;Bilateria;Deuterostomi  
a;Chordata;Craniata;Vertebrata;Gnathostomata;Teleostomi;Euteleostomi;Sarc  
opterygii;Dipnotetrapodomorpha;Tetrapoda;Amniota;Sauropsida;Sauria;Lepido  
sauria;Squamata;Bifurcata;Unidentata;Episquamata;Toxicofera;Serpentes;Hen  
ophidia;Pythonidae;Python;Python bivittatus  
UdeM00000023391 6596 228.8 UdeM00000023391 XP\_045194118.1 39 372  
202 10 41 399 1544 1903 1.20E-56 228.8 6596 cellular  
organisms;Eukaryota;Opisthokonta;Metazoa;Eumetazoa;Bilateria;Protostomia;  
Spiralia;Lophotrochozoa;Mollusca;Bivalvia;Autobranchia;Heteroconchia;Euhe  
terodonta;Imparidentia;Venerida;Veneroidea;Veneridae;Mercenaria;Mercenari  
a mercenaria  
UdeM00000023392 6596 3577.7 UdeM00000023392 XP\_045189836.1 61.9  
3061 1074 32 1 3022 1 3007 0.00E+00 3577.7 6596  
cellular

organisms;Eukaryota;Opisthokonta;Metazoa;Eumetazoa;Bilateria;Protostomia;Spiralia;Lophotrochozoa;Mollusca;Bivalvia;Autobranhia;Heteroconchia;Euheterodonta;Imparidentia;Venerida;Veneroidea;Veneridae;Mercenaria;Mercenaria mercenaria

UdeM00000023393 6596 281.2 UdeM00000023393 XP\_045188529.1 52.2 356  
103 10 1 302 8 350 1.60E-72 281.2 6596 cellular

organisms;Eukaryota;Opisthokonta;Metazoa;Eumetazoa;Bilateria;Protostomia;Spiralia;Lophotrochozoa;Mollusca;Bivalvia;Autobranhia;Heteroconchia;Euheterodonta;Imparidentia;Venerida;Veneroidea;Veneridae;Mercenaria;Mercenaria mercenaria

UdeM00000023394 6579 238.4 UdeM00000023394 XP\_033757210.1 54.8 263  
93 6 58 303 65 318 1.20E-59 238.4 6579 cellular

organisms;Eukaryota;Opisthokonta;Metazoa;Eumetazoa;Bilateria;Protostomia;Spiralia;Lophotrochozoa;Mollusca;Bivalvia;Autobranhia;Pteriomorphia;Pectinida;Pectinoidea;Pectinidae;Pecten;Pecten maximus

UdeM00000023395 6565 232.3 UdeM00000023395 XP\_022339812.1 56.1 239  
94 7 58 289 59 293 8.00E-58 232.3 6565 cellular

organisms;Eukaryota;Opisthokonta;Metazoa;Eumetazoa;Bilateria;Protostomia;Spiralia;Lophotrochozoa;Mollusca;Bivalvia;Autobranhia;Pteriomorphia;Ostreida;Ostreoidea;Ostreidae;Crassostrea;Crassostrea virginica

UdeM00000023396 6565 232.6 UdeM00000023396 XP\_022339812.1 56.1 239  
94 7 58 289 59 293 6.20E-58 232.6 6565 cellular

organisms;Eukaryota;Opisthokonta;Metazoa;Eumetazoa;Bilateria;Protostomia;Spiralia;Lophotrochozoa;Mollusca;Bivalvia;Autobranhia;Pteriomorphia;Ostreida;Ostreoidea;Ostreidae;Crassostrea;Crassostrea virginica

UdeM00000023397 6579 228.4 UdeM00000023397 XP\_033757210.1 58.2 244  
92 7 48 283 65 306 1.10E-56 228.4 6579 cellular

organisms;Eukaryota;Opisthokonta;Metazoa;Eumetazoa;Bilateria;Protostomia;Spiralia;Lophotrochozoa;Mollusca;Bivalvia;Autobranhia;Pteriomorphia;Pectinida;Pectinoidea;Pectinidae;Pecten;Pecten maximus

UdeM00000023398 218467 87.4 UdeM00000023398 XP\_023232316.1 36.2  
138 84 2 61 197 64 198 2.30E-14 87.4 218467  
cellular

organisms;Eukaryota;Opisthokonta;Metazoa;Eumetazoa;Bilateria;Protostomia;Ecdysozoa;Panarthropoda;Arthropoda;Chelicerata;Arachnida;Scorpiones;Buthida;Buthoidea;Buthidae;Centruroides;Centruroides sculpturatus

UdeM00000023401 6596 322.8 UdeM00000023401 XP\_045167151.1 33.1 707  
438 14 28 725 94 774 1.20E-84 322.8 6596 cellular

organisms;Eukaryota;Opisthokonta;Metazoa;Eumetazoa;Bilateria;Protostomia;Spiralia;Lophotrochozoa;Mollusca;Bivalvia;Autobranhia;Heteroconchia;Euheterodonta;Imparidentia;Venerida;Veneroidea;Veneridae;Mercenaria;Mercenaria mercenaria

UdeM00000023402 29159 295.8 UdeM00000023402 XP\_019922954.2 46.7 347  
159 7 18 342 632 974 7.10E-77 295.8 29159 cellular

organisms;Eukaryota;Opisthokonta;Metazoa;Eumetazoa;Bilateria;Protostomia;Spiralia;Lophotrochozoa;Mollusca;Bivalvia;Autobranhia;Pteriomorphia;Ostreida;Ostreoidea;Ostreidae;Crassostrea;Crassostrea gigas

UdeM00000023404 29159 335.9 UdeM00000023404 XP\_034333436.1 31.7 854  
517 22 3 838 73 878 1.60E-88 335.9 29159 cellular

organisms;Eukaryota;Opisthokonta;Metazoa;Eumetazoa;Bilateria;Protostomia;Spiralia;Lophotrochozoa;Mollusca;Bivalvia;Autobranhia;Pteriomorphia;Ostreida;Ostreoidea;Ostreidae;Crassostrea;Crassostrea gigas

UdeM00000023405 6579 290.8 UdeM00000023405 XP\_033756471.1 44.8 337  
173 4 18 342 657 992 2.30E-75 290.8 6579 cellular

organisms;Eukaryota;Opisthokonta;Metazoa;Eumetazoa;Bilateria;Protostomia;  
Spiralia;Lophotrochozoa;Mollusca;Bivalvia;Autobranchia;Pteriomorphia;Pect  
inida;Pectinoidea;Pectinidae;Pecten;Pecten maximus  
UdeM00000023406 6945 87.8 UdeM00000023406 XP\_040065097.1 29.5 210  
117 6 24 207 50 254 1.80E-14 87.8 6945 cellular  
organisms;Eukaryota;Opisthokonta;Metazoa;Eumetazoa;Bilateria;Protostomia;  
Ecdysozoa;Panarthropoda;Arthropoda;Chelicerata;Arachnida;Acari;Parasitifo  
rmes;Ixodida;Ixodoidea;Ixodidae;Ixodinae;Ixodes;Ixodes scapularis  
UdeM00000023407 218467 67.8 UdeM00000023407 XP\_023219246.1 31.1  
132 74 2 47 161 87 218 1.80E-08 67.8 218467  
cellular  
organisms;Eukaryota;Opisthokonta;Metazoa;Eumetazoa;Bilateria;Protostomia;  
Ecdysozoa;Panarthropoda;Arthropoda;Chelicerata;Arachnida;Scorpiones;Buthi  
da;Buthoidea;Buthidae;Centruroides;Centruroides sculpturatus  
UdeM00000023408 6945 87 UdeM00000023408 XP\_040065097.1 31.2 170  
91 4 59 202 85 254 4.50E-14 87 6945 cellular  
organisms;Eukaryota;Opisthokonta;Metazoa;Eumetazoa;Bilateria;Protostomia;  
Ecdysozoa;Panarthropoda;Arthropoda;Chelicerata;Arachnida;Acari;Parasitifo  
rmes;Ixodida;Ixodoidea;Ixodidae;Ixodinae;Ixodes;Ixodes scapularis  
UdeM00000023409 6579 84.3 UdeM00000023409 XP\_033727573.1 31.3 179  
111 3 28 195 66 243 2.90E-13 84.3 6579 cellular  
organisms;Eukaryota;Opisthokonta;Metazoa;Eumetazoa;Bilateria;Protostomia;  
Spiralia;Lophotrochozoa;Mollusca;Bivalvia;Autobranchia;Pteriomorphia;Pect  
inida;Pectinoidea;Pectinidae;Pecten;Pecten maximus  
UdeM00000023410 29159 345.1 UdeM00000023410 XP\_034333436.1 31.2 901  
547 25 36 912 27 878 2.90E-91 345.1 29159 cellular  
organisms;Eukaryota;Opisthokonta;Metazoa;Eumetazoa;Bilateria;Protostomia;  
Spiralia;Lophotrochozoa;Mollusca;Bivalvia;Autobranchia;Pteriomorphia;Ostr  
eida;Ostreoidea;Ostreidae;Crassostrea;Crassostrea gigas  
UdeM00000023411 29159 297 UdeM00000023411 XP\_019922954.2 46.4 347  
160 7 18 342 632 974 3.20E-77 297 29159 cellular  
organisms;Eukaryota;Opisthokonta;Metazoa;Eumetazoa;Bilateria;Protostomia;  
Spiralia;Lophotrochozoa;Mollusca;Bivalvia;Autobranchia;Pteriomorphia;Ostr  
eida;Ostreoidea;Ostreidae;Crassostrea;Crassostrea gigas  
UdeM00000023412 6565 349.7 UdeM00000023412 XP\_022295767.1 41.6 490  
271 10 38 516 43 528 6.50E-93 349.7 6565 cellular  
organisms;Eukaryota;Opisthokonta;Metazoa;Eumetazoa;Bilateria;Protostomia;  
Spiralia;Lophotrochozoa;Mollusca;Bivalvia;Autobranchia;Pteriomorphia;Ostr  
eida;Ostreoidea;Ostreidae;Crassostrea;Crassostrea virginica  
UdeM00000023413 6565 133.7 UdeM00000023413 XP\_022292556.1 53.4 116  
53 1 7 121 61 176 1.70E-28 133.7 6565 cellular  
organisms;Eukaryota;Opisthokonta;Metazoa;Eumetazoa;Bilateria;Protostomia;  
Spiralia;Lophotrochozoa;Mollusca;Bivalvia;Autobranchia;Pteriomorphia;Ostr  
eida;Ostreoidea;Ostreidae;Crassostrea;Crassostrea virginica  
UdeM00000023414 29159 347.8 UdeM00000023414 XP\_034302097.1 32.7 712  
325 13 4 597 188 863 2.80E-92 347.8 29159 cellular  
organisms;Eukaryota;Opisthokonta;Metazoa;Eumetazoa;Bilateria;Protostomia;  
Spiralia;Lophotrochozoa;Mollusca;Bivalvia;Autobranchia;Pteriomorphia;Ostr  
eida;Ostreoidea;Ostreidae;Crassostrea;Crassostrea gigas  
UdeM00000023416 6573 147.1 UdeM00000023416 XP\_021355903.1 25 643  
307 14 5 488 67 693 6.60E-32 147.1 6573 cellular  
organisms;Eukaryota;Opisthokonta;Metazoa;Eumetazoa;Bilateria;Protostomia;  
Spiralia;Lophotrochozoa;Mollusca;Bivalvia;Autobranchia;Pteriomorphia;Pect  
inida;Pectinoidea;Pectinidae;Mizuhopecten;Mizuhopecten yessoensis

UdeM00000023417 6596 944.9 UdeM00000023417 XP\_045189722.1 51.5 956  
 434 12 3 952 6 937 8.00E-272 944.9 6596 cellular  
 organisms;Eukaryota;Opisthokonta;Metazoa;Eumetazoa;Bilateria;Protostomia;  
 Spiralia;Lophotrochozoa;Mollusca;Bivalvia;Autobranchia;Heteroconchia;Euhe  
 terodonta;Imparidentia;Venerida;Veneroidea;Veneridae;Mercenaria;Mercenari  
 a mercenaria  
 UdeM00000023418 6596 632.5 UdeM00000023418 XP\_045189404.1 69.1 489  
 149 1 7 493 47 535 4.60E-178 632.5 6596 cellular  
 organisms;Eukaryota;Opisthokonta;Metazoa;Eumetazoa;Bilateria;Protostomia;  
 Spiralia;Lophotrochozoa;Mollusca;Bivalvia;Autobranchia;Heteroconchia;Euhe  
 terodonta;Imparidentia;Venerida;Veneroidea;Veneridae;Mercenaria;Mercenari  
 a mercenaria  
 UdeM00000023419 6565 147.1 UdeM00000023419 XP\_022338736.1 35.8 218  
 134 4 64 279 261 474 4.00E-32 147.1 6565 cellular  
 organisms;Eukaryota;Opisthokonta;Metazoa;Eumetazoa;Bilateria;Protostomia;  
 Spiralia;Lophotrochozoa;Mollusca;Bivalvia;Autobranchia;Pteriormorphia;Ostr  
 eida;Ostreoidea;Ostreidae;Crassostrea;Crassostrea virginica  
 UdeM00000023420 6596 70.9 UdeM00000023420 XP\_045190852.1 33.3 207  
 110 8 27 216 465 660 3.60E-09 70.9 6596 cellular  
 organisms;Eukaryota;Opisthokonta;Metazoa;Eumetazoa;Bilateria;Protostomia;  
 Spiralia;Lophotrochozoa;Mollusca;Bivalvia;Autobranchia;Heteroconchia;Euhe  
 terodonta;Imparidentia;Venerida;Veneroidea;Veneridae;Mercenaria;Mercenari  
 a mercenaria  
 UdeM00000023421 6579 684.1 UdeM00000023421 XP\_033757509.1 69.1 476  
 143 2 75 548 22 495 1.80E-193 684.1 6579 cellular  
 organisms;Eukaryota;Opisthokonta;Metazoa;Eumetazoa;Bilateria;Protostomia;  
 Spiralia;Lophotrochozoa;Mollusca;Bivalvia;Autobranchia;Pteriormorphia;Pect  
 inida;Pectinoidea;Pectinidae;Pecten;Pecten maximus  
 UdeM00000023422 7936 90.5 UdeM00000023422 XP\_035247672.1 30.7 202  
 120 3 4 205 22 203 4.40E-15 90.5 7936 cellular  
 organisms;Eukaryota;Opisthokonta;Metazoa;Eumetazoa;Bilateria;Deuterostomi  
 a;Chordata;Craniata;Vertebrata;Gnathostomata;Teleostomi;Euteleostomi;Acti  
 nopterygii;Actinopteri;Neopterygii;Teleostei;Elopocephalai;Elopocephala;E  
 lopomorpha;Anguilliformes;Anguillidae;Anguilla;Anguilla anguilla  
 UdeM00000023423 6596 354.4 UdeM00000023423 XP\_045190446.1 59 317  
 116 5 38 344 5 317 1.70E-94 354.4 6596 cellular  
 organisms;Eukaryota;Opisthokonta;Metazoa;Eumetazoa;Bilateria;Protostomia;  
 Spiralia;Lophotrochozoa;Mollusca;Bivalvia;Autobranchia;Heteroconchia;Euhe  
 terodonta;Imparidentia;Venerida;Veneroidea;Veneridae;Mercenaria;Mercenari  
 a mercenaria  
 UdeM00000023424 6596 640.6 UdeM00000023424 XP\_045190456.1 59.3 533  
 196 6 40 553 66 596 1.90E-180 640.6 6596 cellular  
 organisms;Eukaryota;Opisthokonta;Metazoa;Eumetazoa;Bilateria;Protostomia;  
 Spiralia;Lophotrochozoa;Mollusca;Bivalvia;Autobranchia;Heteroconchia;Euhe  
 terodonta;Imparidentia;Venerida;Veneroidea;Veneridae;Mercenaria;Mercenari  
 a mercenaria  
 UdeM00000023425 29159 86.3 UdeM00000023425 XP\_011423601.2 23.6 301  
 204 9 29 323 4 284 8.30E-14 86.3 29159 cellular  
 organisms;Eukaryota;Opisthokonta;Metazoa;Eumetazoa;Bilateria;Protostomia;  
 Spiralia;Lophotrochozoa;Mollusca;Bivalvia;Autobranchia;Pteriormorphia;Ostr  
 eida;Ostreoidea;Ostreidae;Crassostrea;Crassostrea gigas  
 UdeM00000023426 6596 692.2 UdeM00000023426 XP\_045189100.1 66 664  
 179 13 1 659 1 622 6.50E-196 692.2 6596 cellular  
 organisms;Eukaryota;Opisthokonta;Metazoa;Eumetazoa;Bilateria;Protostomia;



Spiralia;Lophotrochozoa;Mollusca;Bivalvia;Autobranchia;Heteroconchia;Euherodonta;Imparidentia;Venerida;Veneroidea;Veneridae;Mercenaria;Mercenaria mercenaria

UdeM00000023429 225164 224.6 UdeM00000023429 XP\_009052279.1 44.7  
284 130 6 1 268 1 273 2.00E-55 224.6 225164  
cellular

organisms;Eukaryota;Opisthokonta;Metazoa;Eumetazoa;Bilateria;Protostomia;Spiralia;Lophotrochozoa;Mollusca;Gastropoda;Patellogastropoda;Lottioidea;Lottiidae;Lottia;Lottia gigantea

UdeM00000023432 6573 196.8 UdeM00000023432 XP\_021364000.1 33.3 480  
279 14 1 463 1 456 7.00E-47 196.8 6573 cellular

organisms;Eukaryota;Opisthokonta;Metazoa;Eumetazoa;Bilateria;Protostomia;Spiralia;Lophotrochozoa;Mollusca;Bivalvia;Autobranchia;Pteriormorphia;Pectinida;Pectinoidea;Pectinidae;Mizuhopecten;Mizuhopecten yessoensis

UdeM00000023433 46514 120.6 UdeM00000023433 XP\_038064356.1 33.6 220  
141 4 7 226 45 259 3.00E-24 120.6 46514 cellular

organisms;Eukaryota;Opisthokonta;Metazoa;Eumetazoa;Bilateria;Deuterostomia;Echinodermata;Eleutherozoa;Asterozoa;Asteroidea;Valvataceae;Valvatida;Asterinidae;Patiria;Patiria miniata

UdeM00000023434 7668 156 UdeM00000023434 XP\_798461.5 52.2 134 63  
1 236 369 24 156 1.90E-34 156 7668 cellular

organisms;Eukaryota;Opisthokonta;Metazoa;Eumetazoa;Bilateria;Deuterostomia;Echinodermata;Eleutherozoa;Echinozoa;Echinoidea;Euechinoidea;Echinacea;Camarodonta;Echinidea;Strongylocentrotidae;Strongylocentrotus;Strongylocentrotus purpuratus

UdeM00000023435 7668 205.7 UdeM00000023435 XP\_798461.5 51.6 192 87  
2 1 187 14 204 9.00E-50 205.7 7668 cellular

organisms;Eukaryota;Opisthokonta;Metazoa;Eumetazoa;Bilateria;Deuterostomia;Echinodermata;Eleutherozoa;Echinozoa;Echinoidea;Euechinoidea;Echinacea;Camarodonta;Echinidea;Strongylocentrotidae;Strongylocentrotus;Strongylocentrotus purpuratus

UdeM00000023436 50429 663.3 UdeM00000023436 XP\_022788227.1 35.5 1055  
591 26 24 999 30 1074 4.90E-187 663.3 50429 cellular

organisms;Eukaryota;Opisthokonta;Metazoa;Eumetazoa;Cnidaria;Anthozoa;Hexacorallia;Scleractinia;Astrocoeniina;Pocilloporidae;Stylophora;Stylophora pistillata

UdeM00000023437 6596 271.2 UdeM00000023437 XP\_045189601.1 44.9 356  
182 3 4 346 22 376 1.90E-69 271.2 6596 cellular

organisms;Eukaryota;Opisthokonta;Metazoa;Eumetazoa;Bilateria;Protostomia;Spiralia;Lophotrochozoa;Mollusca;Bivalvia;Autobranchia;Heteroconchia;Euherodonta;Imparidentia;Venerida;Veneroidea;Veneridae;Mercenaria;Mercenaria mercenaria

UdeM00000023438 6596 131.3 UdeM00000023438 XP\_045189601.1 52.9 121  
55 1 11 131 45 163 1.00E-27 131.3 6596 cellular

organisms;Eukaryota;Opisthokonta;Metazoa;Eumetazoa;Bilateria;Protostomia;Spiralia;Lophotrochozoa;Mollusca;Bivalvia;Autobranchia;Heteroconchia;Euherodonta;Imparidentia;Venerida;Veneroidea;Veneridae;Mercenaria;Mercenaria mercenaria

UdeM00000023440 1735272 449.9 UdeM00000023440 XP\_041370240.1 61.1  
352 131 1 5 350 13 364 3.30E-123 449.9 1735272  
cellular

organisms;Eukaryota;Opisthokonta;Metazoa;Eumetazoa;Bilateria;Protostomia;Spiralia;Lophotrochozoa;Mollusca;Gastropoda;Neomphalina;Neomphaloidea;Peltopiridae;Gigantopelta;Gigantopelta aegis

UdeM00000023439 1735272 455.3 UdeM00000023439 XP\_041370240.1 60.5  
 362 137 1 5 360 13 374 9.30E-125 455.3 1735272  
 cellular  
 organisms;Eukaryota;Opisthokonta;Metazoa;Eumetazoa;Bilateria;Protostomia;  
 Spiralia;Lophotrochozoa;Mollusca;Gastropoda;Neomphalina;Neomphaloidea;Pel  
 tospiridae;Gigantopelta;Gigantopelta aegis  
 UdeM00000023441 1735272 705.3 UdeM00000023441 XP\_041370245.1 43.2  
 907 376 15 23 898 76 874 1.00E-199 705.3 1735272  
 cellular  
 organisms;Eukaryota;Opisthokonta;Metazoa;Eumetazoa;Bilateria;Protostomia;  
 Spiralia;Lophotrochozoa;Mollusca;Gastropoda;Neomphalina;Neomphaloidea;Pel  
 tospiridae;Gigantopelta;Gigantopelta aegis  
 UdeM00000023442 1735272 706.4 UdeM00000023442 XP\_041370245.1 43.3  
 906 375 15 35 909 77 874 4.60E-200 706.4 1735272  
 cellular  
 organisms;Eukaryota;Opisthokonta;Metazoa;Eumetazoa;Bilateria;Protostomia;  
 Spiralia;Lophotrochozoa;Mollusca;Gastropoda;Neomphalina;Neomphaloidea;Pel  
 tospiridae;Gigantopelta;Gigantopelta aegis  
 UdeM00000023443 6579 593.6 UdeM00000023443 XP\_033757345.1 54.7 547  
 171 3 1 545 1 472 2.60E-166 593.6 6579 cellular  
 organisms;Eukaryota;Opisthokonta;Metazoa;Eumetazoa;Bilateria;Protostomia;  
 Spiralia;Lophotrochozoa;Mollusca;Bivalvia;Autobranchia;Pteriormorphia;Pect  
 inida;Pectinoidea;Pectinidae;Pecten;Pecten maximus  
 UdeM00000023444 6596 344.7 UdeM00000023444 XP\_045188673.1 35.9 496  
 312 3 124 618 186 676 2.40E-91 344.7 6596 cellular  
 organisms;Eukaryota;Opisthokonta;Metazoa;Eumetazoa;Bilateria;Protostomia;  
 Spiralia;Lophotrochozoa;Mollusca;Bivalvia;Autobranchia;Heteroconchia;Euhe  
 terodonta;Imparidentia;Venerida;Veneroidea;Veneridae;Mercenaria;Mercenari  
 a mercenaria  
 UdeM00000023445 6596 365.2 UdeM00000023445 XP\_045188673.1 36.2 497  
 309 5 113 607 186 676 1.70E-97 365.2 6596 cellular  
 organisms;Eukaryota;Opisthokonta;Metazoa;Eumetazoa;Bilateria;Protostomia;  
 Spiralia;Lophotrochozoa;Mollusca;Bivalvia;Autobranchia;Heteroconchia;Euhe  
 terodonta;Imparidentia;Venerida;Veneroidea;Veneridae;Mercenaria;Mercenari  
 a mercenaria  
 UdeM00000023446 6596 334.7 UdeM00000023446 XP\_045188673.1 32.4 612  
 385 7 10 612 85 676 2.40E-88 334.7 6596 cellular  
 organisms;Eukaryota;Opisthokonta;Metazoa;Eumetazoa;Bilateria;Protostomia;  
 Spiralia;Lophotrochozoa;Mollusca;Bivalvia;Autobranchia;Heteroconchia;Euhe  
 terodonta;Imparidentia;Venerida;Veneroidea;Veneridae;Mercenaria;Mercenari  
 a mercenaria  
 UdeM00000023447 6596 337 UdeM00000023447 XP\_045188673.1 32.3 592  
 376 5 35 618 102 676 4.90E-89 337 6596 cellular  
 organisms;Eukaryota;Opisthokonta;Metazoa;Eumetazoa;Bilateria;Protostomia;  
 Spiralia;Lophotrochozoa;Mollusca;Bivalvia;Autobranchia;Heteroconchia;Euhe  
 terodonta;Imparidentia;Venerida;Veneroidea;Veneridae;Mercenaria;Mercenari  
 a mercenaria  
 UdeM00000023448 6596 365.5 UdeM00000023448 XP\_045188673.1 36.4 497  
 308 5 113 607 186 676 1.30E-97 365.5 6596 cellular  
 organisms;Eukaryota;Opisthokonta;Metazoa;Eumetazoa;Bilateria;Protostomia;  
 Spiralia;Lophotrochozoa;Mollusca;Bivalvia;Autobranchia;Heteroconchia;Euhe  
 terodonta;Imparidentia;Venerida;Veneroidea;Veneridae;Mercenaria;Mercenari  
 a mercenaria

UdeM00000023449 6596 336.7 UdeM00000023449 XP\_045188673.1 32.5 616  
 379 7 10 612 85 676 6.40E-89 336.7 6596 cellular  
 organisms;Eukaryota;Opisthokonta;Metazoa;Eumetazoa;Bilateria;Protostomia;  
 Spiralia;Lophotrochozoa;Mollusca;Bivalvia;Autobranhia;Heteroconchia;Euhe  
 terodonta;Imparidentia;Venerida;Veneroidea;Veneridae;Mercenaria;Mercenari  
 a mercenaria  
 UdeM00000023450 6596 312.4 UdeM00000023450 XP\_045188673.1 38 416  
 252 3 8 422 266 676 8.90E-82 312.4 6596 cellular  
 organisms;Eukaryota;Opisthokonta;Metazoa;Eumetazoa;Bilateria;Protostomia;  
 Spiralia;Lophotrochozoa;Mollusca;Bivalvia;Autobranhia;Heteroconchia;Euhe  
 terodonta;Imparidentia;Venerida;Veneroidea;Veneridae;Mercenaria;Mercenari  
 a mercenaria  
 UdeM00000023451 6596 362.5 UdeM00000023451 XP\_045188673.1 36.2 497  
 309 5 113 607 186 676 1.10E-96 362.5 6596 cellular  
 organisms;Eukaryota;Opisthokonta;Metazoa;Eumetazoa;Bilateria;Protostomia;  
 Spiralia;Lophotrochozoa;Mollusca;Bivalvia;Autobranhia;Heteroconchia;Euhe  
 terodonta;Imparidentia;Venerida;Veneroidea;Veneridae;Mercenaria;Mercenari  
 a mercenaria  
 UdeM00000023452 6596 393.7 UdeM00000023452 XP\_045189606.1 70.7 263  
 77 0 1 263 5 267 1.90E-106 393.7 6596 cellular  
 organisms;Eukaryota;Opisthokonta;Metazoa;Eumetazoa;Bilateria;Protostomia;  
 Spiralia;Lophotrochozoa;Mollusca;Bivalvia;Autobranhia;Heteroconchia;Euhe  
 terodonta;Imparidentia;Venerida;Veneroidea;Veneridae;Mercenaria;Mercenari  
 a mercenaria  
 UdeM00000023453 6573 168.7 UdeM00000023453 XP\_021373558.1 51.7 172  
 82 1 8 178 170 341 6.80E-39 168.7 6573 cellular  
 organisms;Eukaryota;Opisthokonta;Metazoa;Eumetazoa;Bilateria;Protostomia;  
 Spiralia;Lophotrochozoa;Mollusca;Bivalvia;Autobranhia;Pteriormorphia;Pect  
 inida;Pectinoidea;Pectinidae;Mizuhopecten;Mizuhopecten yessoensis  
 UdeM00000023454 6573 256.5 UdeM00000023454 XP\_021374592.1 57.6 236  
 87 1 5 227 1 236 3.10E-65 256.5 6573 cellular  
 organisms;Eukaryota;Opisthokonta;Metazoa;Eumetazoa;Bilateria;Protostomia;  
 Spiralia;Lophotrochozoa;Mollusca;Bivalvia;Autobranhia;Pteriormorphia;Pect  
 inida;Pectinoidea;Pectinidae;Mizuhopecten;Mizuhopecten yessoensis  
 UdeM00000023455 6596 672.9 UdeM00000023455 XP\_045189092.1 69.6 494  
 126 6 4 497 41 510 3.10E-190 672.9 6596 cellular  
 organisms;Eukaryota;Opisthokonta;Metazoa;Eumetazoa;Bilateria;Protostomia;  
 Spiralia;Lophotrochozoa;Mollusca;Bivalvia;Autobranhia;Heteroconchia;Euhe  
 terodonta;Imparidentia;Venerida;Veneroidea;Veneridae;Mercenaria;Mercenari  
 a mercenaria  
 UdeM00000023456 6573 316.2 UdeM00000023456 XP\_021376429.1 59.3 243  
 99 0 17 259 18 260 3.80E-83 316.2 6573 cellular  
 organisms;Eukaryota;Opisthokonta;Metazoa;Eumetazoa;Bilateria;Protostomia;  
 Spiralia;Lophotrochozoa;Mollusca;Bivalvia;Autobranhia;Pteriormorphia;Pect  
 inida;Pectinoidea;Pectinidae;Mizuhopecten;Mizuhopecten yessoensis  
 UdeM00000023457 6596 317 UdeM00000023457 XP\_045189438.1 59.6 277  
 112 0 34 310 32 308 2.70E-83 317 6596 cellular  
 organisms;Eukaryota;Opisthokonta;Metazoa;Eumetazoa;Bilateria;Protostomia;  
 Spiralia;Lophotrochozoa;Mollusca;Bivalvia;Autobranhia;Heteroconchia;Euhe  
 terodonta;Imparidentia;Venerida;Veneroidea;Veneridae;Mercenaria;Mercenari  
 a mercenaria  
 UdeM00000023458 6596 75.9 UdeM00000023458 XP\_045207486.1 42.2 83  
 47 1 1 82 95 177 5.70E-11 75.9 6596 cellular  
 organisms;Eukaryota;Opisthokonta;Metazoa;Eumetazoa;Bilateria;Protostomia;

Spiralia;Lophotrochozoa;Mollusca;Bivalvia;Autobranchia;Heteroconchia;Euherodonta;Imparidentia;Venerida;Veneroidea;Veneridae;Mercenaria;Mercenaria mercenaria

UdeM00000023459 50429 104.8 UdeM00000023459 XP\_022783431.1 54.3 94  
43 0 1 94 627 720 7.50E-20 104.8 50429 cellular

organisms;Eukaryota;Opisthokonta;Metazoa;Eumetazoa;Cnidaria;Anthozoa;Hexacorallia;Scleractinia;Astrocoeniina;Pocilloporidae;Stylophora;Stylophora pistillata

UdeM00000023460 29159 136 UdeM00000023460 XP\_011451097.2 28.2 369  
204 11 1 330 1 347 1.20E-28 136 29159 cellular

organisms;Eukaryota;Opisthokonta;Metazoa;Eumetazoa;Bilateria;Protostomia;Spiralia;Lophotrochozoa;Mollusca;Bivalvia;Autobranchia;Pteriormorphia;Ostreida;Ostreoidea;Ostreidae;Crassostrea;Crassostrea gigas

UdeM00000023461 70779 68.6 UdeM00000023461 XP\_015777172.1 41.1 73  
43 0 7 79 65 137 4.80E-09 68.6 70779 cellular

organisms;Eukaryota;Opisthokonta;Metazoa;Eumetazoa;Cnidaria;Anthozoa;Hexacorallia;Scleractinia;Astrocoeniina;Acroporidae;Acropora;Acropora digitifera

UdeM00000023462 6596 632.1 UdeM00000023462 XP\_045188501.1 76.5 387  
91 0 44 430 40 426 5.20E-178 632.1 6596 cellular

organisms;Eukaryota;Opisthokonta;Metazoa;Eumetazoa;Bilateria;Protostomia;Spiralia;Lophotrochozoa;Mollusca;Bivalvia;Autobranchia;Heteroconchia;Euherodonta;Imparidentia;Venerida;Veneroidea;Veneridae;Mercenaria;Mercenaria mercenaria

UdeM00000023463 7574 73.6 UdeM00000023463 XP\_013393409.1 48.7 76  
34 1 19 89 200 275 2.80E-10 73.6 7574 cellular

organisms;Eukaryota;Opisthokonta;Metazoa;Eumetazoa;Bilateria;Protostomia;Spiralia;Lophotrochozoa;Brachiopoda;Linguliformea;Lingulata;Lingulida;Linguloidea;Lingulidae;Lingula;Lingula anatina

UdeM00000023464 1735272 100.9 UdeM00000023464 XP\_041370402.1 46.7  
107 52 2 12 118 103 204 1.40E-18 100.9 1735272

cellular

organisms;Eukaryota;Opisthokonta;Metazoa;Eumetazoa;Bilateria;Protostomia;Spiralia;Lophotrochozoa;Mollusca;Gastropoda;Neomphalina;Neomphaloidea;Peltospiridae;Gigantopelta;Gigantopelta aegis

UdeM00000023465 1735272 576.2 UdeM00000023465 XP\_041369149.1 70.1  
391 117 0 1 391 1 391 3.10E-161 576.2 1735272

cellular

organisms;Eukaryota;Opisthokonta;Metazoa;Eumetazoa;Bilateria;Protostomia;Spiralia;Lophotrochozoa;Mollusca;Gastropoda;Neomphalina;Neomphaloidea;Peltospiridae;Gigantopelta;Gigantopelta aegis

UdeM00000023466 6596 371.3 UdeM00000023466 XP\_045190075.1 54.3 300  
134 1 1 300 1 297 1.30E-99 371.3 6596 cellular

organisms;Eukaryota;Opisthokonta;Metazoa;Eumetazoa;Bilateria;Protostomia;Spiralia;Lophotrochozoa;Mollusca;Bivalvia;Autobranchia;Heteroconchia;Euherodonta;Imparidentia;Venerida;Veneroidea;Veneridae;Mercenaria;Mercenaria mercenaria

UdeM00000023467 6596 205.7 UdeM00000023467 XP\_045190219.1 62.3 162  
57 2 1 158 485 646 4.40E-50 205.7 6596 cellular

organisms;Eukaryota;Opisthokonta;Metazoa;Eumetazoa;Bilateria;Protostomia;Spiralia;Lophotrochozoa;Mollusca;Bivalvia;Autobranchia;Heteroconchia;Euherodonta;Imparidentia;Venerida;Veneroidea;Veneridae;Mercenaria;Mercenaria mercenaria

UdeM00000023468 6596 399.1 UdeM00000023468 XP\_045190220.1 63.7 322  
 109 2 75 388 41 362 6.70E-108 399.1 6596 cellular  
 organisms;Eukaryota;Opisthokonta;Metazoa;Eumetazoa;Bilateria;Protostomia;  
 Spiralia;Lophotrochozoa;Mollusca;Bivalvia;Autobranchia;Heteroconchia;Euhe  
 terodonta;Imparidentia;Venerida;Veneroidea;Veneridae;Mercenaria;Mercenari  
 a mercenaria  
 UdeM00000023469 6596 384 UdeM00000023469 XP\_045190220.1 66 297  
 93 2 75 363 41 337 2.20E-103 384 6596 cellular  
 organisms;Eukaryota;Opisthokonta;Metazoa;Eumetazoa;Bilateria;Protostomia;  
 Spiralia;Lophotrochozoa;Mollusca;Bivalvia;Autobranchia;Heteroconchia;Euhe  
 terodonta;Imparidentia;Venerida;Veneroidea;Veneridae;Mercenaria;Mercenari  
 a mercenaria  
 UdeM00000023470 6596 230.3 UdeM00000023470 XP\_045188559.1 31.2 504  
 306 9 1 484 1 483 5.40E-57 230.3 6596 cellular  
 organisms;Eukaryota;Opisthokonta;Metazoa;Eumetazoa;Bilateria;Protostomia;  
 Spiralia;Lophotrochozoa;Mollusca;Bivalvia;Autobranchia;Heteroconchia;Euhe  
 terodonta;Imparidentia;Venerida;Veneroidea;Veneridae;Mercenaria;Mercenari  
 a mercenaria  
 UdeM00000023472 6596 276.9 UdeM00000023472 XP\_045189058.1 29.4 718  
 411 18 1 694 1 646 7.00E-71 276.9 6596 cellular  
 organisms;Eukaryota;Opisthokonta;Metazoa;Eumetazoa;Bilateria;Protostomia;  
 Spiralia;Lophotrochozoa;Mollusca;Bivalvia;Autobranchia;Heteroconchia;Euhe  
 terodonta;Imparidentia;Venerida;Veneroidea;Veneridae;Mercenaria;Mercenari  
 a mercenaria  
 UdeM00000023473 6596 272.7 UdeM00000023473 XP\_045189058.1 24.4 1215  
 613 36 1 1146 1 978 2.10E-69 272.7 6596 cellular  
 organisms;Eukaryota;Opisthokonta;Metazoa;Eumetazoa;Bilateria;Protostomia;  
 Spiralia;Lophotrochozoa;Mollusca;Bivalvia;Autobranchia;Heteroconchia;Euhe  
 terodonta;Imparidentia;Venerida;Veneroidea;Veneridae;Mercenaria;Mercenari  
 a mercenaria  
 UdeM00000023474 6596 388.7 UdeM00000023474 XP\_045189058.1 26.8 1271  
 631 35 1 1202 35 1075 2.80E-104 388.7 6596 cellular  
 organisms;Eukaryota;Opisthokonta;Metazoa;Eumetazoa;Bilateria;Protostomia;  
 Spiralia;Lophotrochozoa;Mollusca;Bivalvia;Autobranchia;Heteroconchia;Euhe  
 terodonta;Imparidentia;Venerida;Veneroidea;Veneridae;Mercenaria;Mercenari  
 a mercenaria  
 UdeM00000023475 6579 521.5 UdeM00000023475 XP\_033752369.1 38.2 1014  
 497 27 3 926 29 1002 2.10E-144 521.5 6579 cellular  
 organisms;Eukaryota;Opisthokonta;Metazoa;Eumetazoa;Bilateria;Protostomia;  
 Spiralia;Lophotrochozoa;Mollusca;Bivalvia;Autobranchia;Pteriomorphia;Pect  
 inida;Pectinoidea;Pectinidae;Pecten;Pecten maximus  
 UdeM00000023476 29159 242.3 UdeM00000023476 XP\_034329372.1 24.5 1079  
 648 25 89 1086 7 999 3.80E-60 242.3 29159 cellular  
 organisms;Eukaryota;Opisthokonta;Metazoa;Eumetazoa;Bilateria;Protostomia;  
 Spiralia;Lophotrochozoa;Mollusca;Bivalvia;Autobranchia;Pteriomorphia;Ostr  
 eida;Ostreoidea;Ostreidae;Crassostrea;Crassostrea gigas  
 UdeM00000023481 6596 239.2 UdeM00000023481 XP\_045185723.1 43.1 304  
 155 5 7 308 455 742 1.00E-59 239.2 6596 cellular  
 organisms;Eukaryota;Opisthokonta;Metazoa;Eumetazoa;Bilateria;Protostomia;  
 Spiralia;Lophotrochozoa;Mollusca;Bivalvia;Autobranchia;Heteroconchia;Euhe  
 terodonta;Imparidentia;Venerida;Veneroidea;Veneridae;Mercenaria;Mercenari  
 a mercenaria  
 UdeM00000023480 6596 458 UdeM00000023480 XP\_045188223.1 48.9 454  
 228 2 408 861 216 665 2.70E-125 458 6596 cellular

organisms;Eukaryota;Opisthokonta;Metazoa;Eumetazoa;Bilateria;Protostomia;Spiralia;Lophotrochozoa;Mollusca;Bivalvia;Autobranchia;Heteroconchia;Euherodonta;Imparidentia;Venerida;Veneroidea;Veneridae;Mercenaria;Mercenaria mercenaria

UdeM00000023482 6596 123.2 UdeM00000023482 XP\_045206982.1 52.9 104  
49 0 4 107 80 183 2.20E-25 123.2 6596 cellular

organisms;Eukaryota;Opisthokonta;Metazoa;Eumetazoa;Bilateria;Protostomia;Spiralia;Lophotrochozoa;Mollusca;Bivalvia;Autobranchia;Heteroconchia;Euherodonta;Imparidentia;Venerida;Veneroidea;Veneridae;Mercenaria;Mercenaria mercenaria

UdeM00000023486 6596 239.2 UdeM00000023486 XP\_045185723.1 43.1 304  
155 5 7 308 455 742 1.00E-59 239.2 6596 cellular

organisms;Eukaryota;Opisthokonta;Metazoa;Eumetazoa;Bilateria;Protostomia;Spiralia;Lophotrochozoa;Mollusca;Bivalvia;Autobranchia;Heteroconchia;Euherodonta;Imparidentia;Venerida;Veneroidea;Veneridae;Mercenaria;Mercenaria mercenaria

UdeM00000023485 6596 458 UdeM00000023485 XP\_045188223.1 48.9 454  
228 2 408 861 216 665 2.70E-125 458 6596 cellular

organisms;Eukaryota;Opisthokonta;Metazoa;Eumetazoa;Bilateria;Protostomia;Spiralia;Lophotrochozoa;Mollusca;Bivalvia;Autobranchia;Heteroconchia;Euherodonta;Imparidentia;Venerida;Veneroidea;Veneridae;Mercenaria;Mercenaria mercenaria

UdeM00000023487 6596 123.2 UdeM00000023487 XP\_045206982.1 52.9 104  
49 0 4 107 80 183 2.20E-25 123.2 6596 cellular

organisms;Eukaryota;Opisthokonta;Metazoa;Eumetazoa;Bilateria;Protostomia;Spiralia;Lophotrochozoa;Mollusca;Bivalvia;Autobranchia;Heteroconchia;Euherodonta;Imparidentia;Venerida;Veneroidea;Veneridae;Mercenaria;Mercenaria mercenaria

UdeM00000023490 6565 224.2 UdeM00000023490 XP\_022317300.1 33.4 401  
247 5 6 392 14 408 3.00E-55 224.2 6565 cellular

organisms;Eukaryota;Opisthokonta;Metazoa;Eumetazoa;Bilateria;Protostomia;Spiralia;Lophotrochozoa;Mollusca;Bivalvia;Autobranchia;Pteriomorphia;Ostreida;Ostreoidea;Ostreidae;Crassostrea;Crassostrea virginica

UdeM00000023492 6596 306.6 UdeM00000023492 XP\_045190922.1 59.2 260  
106 0 1 260 163 422 3.00E-80 306.6 6596 cellular

organisms;Eukaryota;Opisthokonta;Metazoa;Eumetazoa;Bilateria;Protostomia;Spiralia;Lophotrochozoa;Mollusca;Bivalvia;Autobranchia;Heteroconchia;Euherodonta;Imparidentia;Venerida;Veneroidea;Veneridae;Mercenaria;Mercenaria mercenaria

UdeM00000023493 29159 294.3 UdeM00000023493 XP\_011431649.2 50.9 279  
128 5 3 279 8 279 1.70E-76 294.3 29159 cellular

organisms;Eukaryota;Opisthokonta;Metazoa;Eumetazoa;Bilateria;Protostomia;Spiralia;Lophotrochozoa;Mollusca;Bivalvia;Autobranchia;Pteriomorphia;Ostreida;Ostreoidea;Ostreidae;Crassostrea;Crassostrea gigas

UdeM00000023494 6579 287.7 UdeM00000023494 XP\_033756999.1 51.1 272  
126 4 10 279 12 278 1.60E-74 287.7 6579 cellular

organisms;Eukaryota;Opisthokonta;Metazoa;Eumetazoa;Bilateria;Protostomia;Spiralia;Lophotrochozoa;Mollusca;Bivalvia;Autobranchia;Pteriomorphia;Pectinida;Pectinoidea;Pectinidae;Pecten;Pecten maximus

UdeM00000023495 6579 308.9 UdeM00000023495 XP\_033756999.1 53.7 272  
120 3 10 280 12 278 6.50E-81 308.9 6579 cellular

organisms;Eukaryota;Opisthokonta;Metazoa;Eumetazoa;Bilateria;Protostomia;Spiralia;Lophotrochozoa;Mollusca;Bivalvia;Autobranchia;Pteriomorphia;Pectinida;Pectinoidea;Pectinidae;Pecten;Pecten maximus

UdeM00000023496 6596 545.8 UdeM00000023496 XP\_045188477.1 62.9 456  
 155 7 26 474 27 475 5.40E-152 545.8 6596 cellular  
 organisms;Eukaryota;Opisthokonta;Metazoa;Eumetazoa;Bilateria;Protostomia;  
 Spiralia;Lophotrochozoa;Mollusca;Bivalvia;Autobranhia;Heteroconchia;Euhe  
 terodonta;Imparidentia;Venerida;Veneroidea;Veneridae;Mercenaria;Mercenari  
 a mercenaria  
 UdeM00000023498 6596 1019.6 UdeM00000023498 XP\_045190725.1 33.8  
 3313 1627 63 634 3657 295 3329 9.80E-294 1019.6 6596  
 cellular  
 organisms;Eukaryota;Opisthokonta;Metazoa;Eumetazoa;Bilateria;Protostomia;  
 Spiralia;Lophotrochozoa;Mollusca;Bivalvia;Autobranhia;Heteroconchia;Euhe  
 terodonta;Imparidentia;Venerida;Veneroidea;Veneridae;Mercenaria;Mercenari  
 a mercenaria  
 UdeM00000023499 6596 573.9 UdeM00000023499 XP\_045188783.1 82.1 319  
 57 0 1 319 1 319 1.20E-160 573.9 6596 cellular  
 organisms;Eukaryota;Opisthokonta;Metazoa;Eumetazoa;Bilateria;Protostomia;  
 Spiralia;Lophotrochozoa;Mollusca;Bivalvia;Autobranhia;Heteroconchia;Euhe  
 terodonta;Imparidentia;Venerida;Veneroidea;Veneridae;Mercenaria;Mercenari  
 a mercenaria  
 UdeM00000023500 6565 178.7 UdeM00000023500 XP\_022289764.1 72.6 117  
 30 2 1 116 1 116 4.20E-42 178.7 6565 cellular  
 organisms;Eukaryota;Opisthokonta;Metazoa;Eumetazoa;Bilateria;Protostomia;  
 Spiralia;Lophotrochozoa;Mollusca;Bivalvia;Autobranhia;Pteriormorphia;Ostr  
 eida;Ostreoidea;Ostreidae;Crassostrea;Crassostrea virginica  
 UdeM00000023501 6565 176.8 UdeM00000023501 XP\_022289764.1 72.4 116  
 30 2 1 115 2 116 1.60E-41 176.8 6565 cellular  
 organisms;Eukaryota;Opisthokonta;Metazoa;Eumetazoa;Bilateria;Protostomia;  
 Spiralia;Lophotrochozoa;Mollusca;Bivalvia;Autobranhia;Pteriormorphia;Ostr  
 eida;Ostreoidea;Ostreidae;Crassostrea;Crassostrea virginica  
 UdeM00000023502 6596 335.1 UdeM00000023502 XP\_045190578.1 69.6 227  
 65 2 33 259 43 265 7.90E-89 335.1 6596 cellular  
 organisms;Eukaryota;Opisthokonta;Metazoa;Eumetazoa;Bilateria;Protostomia;  
 Spiralia;Lophotrochozoa;Mollusca;Bivalvia;Autobranhia;Heteroconchia;Euhe  
 terodonta;Imparidentia;Venerida;Veneroidea;Veneridae;Mercenaria;Mercenari  
 a mercenaria  
 UdeM00000023503 45264 353.6 UdeM00000023503 XP\_044165143.1 55.9 313  
 135 3 20 329 161 473 2.80E-94 353.6 45264 cellular  
 organisms;Eukaryota;Opisthokonta;Metazoa;Eumetazoa;Cnidaria;Anthozoa;Hexa  
 corallia;Scleractinia;Astrocoeniina;Acroporidae;Acropora;Acropora  
 millepora  
 UdeM00000023505 45264 127.5 UdeM00000023505 XP\_044164583.1 49.3 146  
 67 3 1 143 130 271 1.40E-26 127.5 45264 cellular  
 organisms;Eukaryota;Opisthokonta;Metazoa;Eumetazoa;Cnidaria;Anthozoa;Hexa  
 corallia;Scleractinia;Astrocoeniina;Acroporidae;Acropora;Acropora  
 millepora  
 UdeM00000023504 1529436 140.6 UdeM00000023504 XP\_033095325.1 45.8  
 155 82 1 57 209 26 180 3.20E-30 140.6 1529436  
 cellular  
 organisms;Eukaryota;Opisthokonta;Metazoa;Eumetazoa;Bilateria;Deuterostomi  
 a;Echinodermata;Pelmatozoa;Crinoidea;Articulata;Comatulida;Comatulidae;Co  
 matulinae;Anneissia;Anneissia japonica  
 UdeM00000023506 1529436 173.7 UdeM00000023506 XP\_033095325.1 49.7  
 171 84 1 57 225 26 196 2.60E-40 173.7 1529436  
 cellular

organisms;Eukaryota;Opisthokonta;Metazoa;Eumetazoa;Bilateria;Deuterostomi  
a;Echinodermata;Pelmatozoa;Crinoidea;Articulata;Comatulida;Comatulidae;Co  
matulinae;Anneissia;Anneissia japonica

UdeM00000023507 1735272 250 UdeM00000023507 XP\_041371067.1 32.5  
511 334 7 1 506 2 506 6.50E-63 250 1735272  
cellular

organisms;Eukaryota;Opisthokonta;Metazoa;Eumetazoa;Bilateria;Protostomia;  
Spiralia;Lophotrochozoa;Mollusca;Gastropoda;Neomphalina;Neomphaloidea;Pel  
tospiridae;Gigantopelta;Gigantopelta aegis

UdeM00000023508 6596 193.4 UdeM00000023508 XP\_045191266.1 84.3 121  
15 2 160 280 198 314 4.10E-46 193.4 6596 cellular

organisms;Eukaryota;Opisthokonta;Metazoa;Eumetazoa;Bilateria;Protostomia;  
Spiralia;Lophotrochozoa;Mollusca;Bivalvia;Autobranchia;Heteroconchia;Euhe  
terodonta;Imparidentia;Venerida;Veneroidea;Veneridae;Mercenaria;Mercenari  
a mercenaria

UdeM00000023509 6596 62 UdeM00000023509 XP\_045191266.1 37.3 102  
46 3 16 99 21 122 8.30E-07 62 6596 cellular

organisms;Eukaryota;Opisthokonta;Metazoa;Eumetazoa;Bilateria;Protostomia;  
Spiralia;Lophotrochozoa;Mollusca;Bivalvia;Autobranchia;Heteroconchia;Euhe  
terodonta;Imparidentia;Venerida;Veneroidea;Veneridae;Mercenaria;Mercenari  
a mercenaria

UdeM00000023510 6596 165.2 UdeM00000023510 XP\_045188238.1 62.3 162  
48 4 136 295 166 316 1.20E-37 165.2 6596 cellular

organisms;Eukaryota;Opisthokonta;Metazoa;Eumetazoa;Bilateria;Protostomia;  
Spiralia;Lophotrochozoa;Mollusca;Bivalvia;Autobranchia;Heteroconchia;Euhe  
terodonta;Imparidentia;Venerida;Veneroidea;Veneridae;Mercenaria;Mercenari  
a mercenaria

UdeM00000023511 6596 738 UdeM00000023511 XP\_045188471.1 71.7 526  
134 5 1 525 3036 3547 8.80E-210 738 6596 cellular

organisms;Eukaryota;Opisthokonta;Metazoa;Eumetazoa;Bilateria;Protostomia;  
Spiralia;Lophotrochozoa;Mollusca;Bivalvia;Autobranchia;Heteroconchia;Euhe  
terodonta;Imparidentia;Venerida;Veneroidea;Veneridae;Mercenaria;Mercenari  
a mercenaria

UdeM00000023512 6596 1843.6 UdeM00000023512 XP\_045188471.1 63.8  
1569 533 15 2 1551 1485 3037 0.00E+00 1843.6 6596  
cellular

organisms;Eukaryota;Opisthokonta;Metazoa;Eumetazoa;Bilateria;Protostomia;  
Spiralia;Lophotrochozoa;Mollusca;Bivalvia;Autobranchia;Heteroconchia;Euhe  
terodonta;Imparidentia;Venerida;Veneroidea;Veneridae;Mercenaria;Mercenari  
a mercenaria

UdeM00000023513 6596 443 UdeM00000023513 XP\_045188471.1 49.1 584  
244 16 1 570 942 1486 6.10E-121 443 6596 cellular

organisms;Eukaryota;Opisthokonta;Metazoa;Eumetazoa;Bilateria;Protostomia;  
Spiralia;Lophotrochozoa;Mollusca;Bivalvia;Autobranchia;Heteroconchia;Euhe  
terodonta;Imparidentia;Venerida;Veneroidea;Veneridae;Mercenaria;Mercenari  
a mercenaria

UdeM00000023514 6596 297.4 UdeM00000023514 XP\_045188471.1 39.8 565  
289 14 1 547 1 532 3.80E-77 297.4 6596 cellular

organisms;Eukaryota;Opisthokonta;Metazoa;Eumetazoa;Bilateria;Protostomia;  
Spiralia;Lophotrochozoa;Mollusca;Bivalvia;Autobranchia;Heteroconchia;Euhe  
terodonta;Imparidentia;Venerida;Veneroidea;Veneridae;Mercenaria;Mercenari  
a mercenaria

UdeM00000023515 6596 263.1 UdeM00000023515 XP\_045183440.1 54.2 240  
105 3 2 240 145 380 4.30E-67 263.1 6596 cellular



organisms;Eukaryota;Opisthokonta;Metazoa;Eumetazoa;Bilateria;Protostomia; Spiralia;Lophotrochozoa;Mollusca;Bivalvia;Autobranhia;Heteroconchia;Euhe terodonta;Imparidentia;Venerida;Veneroidea;Veneridae;Mercenaria;Mercenari a mercenaria

UdeM00000023516 6596 263.1 UdeM00000023516 XP\_045183440.1 54.2 240  
105 3 2 240 145 380 4.30E-67 263.1 6596 cellular

organisms;Eukaryota;Opisthokonta;Metazoa;Eumetazoa;Bilateria;Protostomia; Spiralia;Lophotrochozoa;Mollusca;Bivalvia;Autobranhia;Heteroconchia;Euhe terodonta;Imparidentia;Venerida;Veneroidea;Veneridae;Mercenaria;Mercenari a mercenaria

UdeM00000023517 6596 69.7 UdeM00000023517 XP\_045202346.1 37.4 91  
53 2 25 114 35 122 3.10E-09 69.7 6596 cellular

organisms;Eukaryota;Opisthokonta;Metazoa;Eumetazoa;Bilateria;Protostomia; Spiralia;Lophotrochozoa;Mollusca;Bivalvia;Autobranhia;Heteroconchia;Euhe terodonta;Imparidentia;Venerida;Veneroidea;Veneridae;Mercenaria;Mercenari a mercenaria

UdeM00000023519 6596 599 UdeM00000023519 XP\_045191253.1 61.1 475  
175 3 1 472 37 504 5.40E-168 599 6596 cellular

organisms;Eukaryota;Opisthokonta;Metazoa;Eumetazoa;Bilateria;Protostomia; Spiralia;Lophotrochozoa;Mollusca;Bivalvia;Autobranhia;Heteroconchia;Euhe terodonta;Imparidentia;Venerida;Veneroidea;Veneridae;Mercenaria;Mercenari a mercenaria

UdeM00000023518 6596 645.2 UdeM00000023518 XP\_045191253.1 61.7 506  
184 3 3 505 6 504 7.00E-182 645.2 6596 cellular

organisms;Eukaryota;Opisthokonta;Metazoa;Eumetazoa;Bilateria;Protostomia; Spiralia;Lophotrochozoa;Mollusca;Bivalvia;Autobranhia;Heteroconchia;Euhe terodonta;Imparidentia;Venerida;Veneroidea;Veneridae;Mercenaria;Mercenari a mercenaria

UdeM00000023520 6596 72 UdeM00000023520 XP\_045191040.1 38.5 91  
56 0 175 265 238 328 1.30E-09 72 6596 cellular

organisms;Eukaryota;Opisthokonta;Metazoa;Eumetazoa;Bilateria;Protostomia; Spiralia;Lophotrochozoa;Mollusca;Bivalvia;Autobranhia;Heteroconchia;Euhe terodonta;Imparidentia;Venerida;Veneroidea;Veneridae;Mercenaria;Mercenari a mercenaria

UdeM00000023521 6596 75.5 UdeM00000023521 XP\_045191040.1 37.4 91  
57 0 169 259 238 328 1.10E-10 75.5 6596 cellular

organisms;Eukaryota;Opisthokonta;Metazoa;Eumetazoa;Bilateria;Protostomia; Spiralia;Lophotrochozoa;Mollusca;Bivalvia;Autobranhia;Heteroconchia;Euhe terodonta;Imparidentia;Venerida;Veneroidea;Veneridae;Mercenaria;Mercenari a mercenaria

UdeM00000023522 6596 73.9 UdeM00000023522 XP\_045191040.1 37.5 88  
55 0 171 258 241 328 3.30E-10 73.9 6596 cellular

organisms;Eukaryota;Opisthokonta;Metazoa;Eumetazoa;Bilateria;Protostomia; Spiralia;Lophotrochozoa;Mollusca;Bivalvia;Autobranhia;Heteroconchia;Euhe terodonta;Imparidentia;Venerida;Veneroidea;Veneridae;Mercenaria;Mercenari a mercenaria

UdeM00000023523 6596 74.3 UdeM00000023523 XP\_045191040.1 33.6 146  
88 3 113 254 185 325 2.50E-10 74.3 6596 cellular

organisms;Eukaryota;Opisthokonta;Metazoa;Eumetazoa;Bilateria;Protostomia; Spiralia;Lophotrochozoa;Mollusca;Bivalvia;Autobranhia;Heteroconchia;Euhe terodonta;Imparidentia;Venerida;Veneroidea;Veneridae;Mercenaria;Mercenari a mercenaria

UdeM00000023524 7741 193 UdeM00000023524 XP\_019622111.1 52.2 180  
84 2 17 196 101 278 3.70E-46 193 7741 cellular

organisms;Eukaryota;Opisthokonta;Metazoa;Eumetazoa;Bilateria;Deuterostomi  
a;Chordata;Cephalochordata;Leptocardii;Amphioxiformes;Branchiostomidae;Br  
anchiostoma;Branchiostoma belcheri

UdeM00000023525 6596 421.4 UdeM00000023525 XP\_045197972.1 59.8 321  
127 2 6 325 3 322 1.00E-114 421.4 6596 cellular

organisms;Eukaryota;Opisthokonta;Metazoa;Eumetazoa;Bilateria;Protostomia;  
Spiralia;Lophotrochozoa;Mollusca;Bivalvia;Autobranhia;Heteroconchia;Euhe  
terodonta;Imparidentia;Venerida;Veneroidea;Veneridae;Mercenaria;Mercenari  
a mercenaria

UdeM00000023526 6596 166.4 UdeM00000023526 XP\_045176664.1 46.9 177  
88 4 13 185 393 567 3.50E-38 166.4 6596 cellular

organisms;Eukaryota;Opisthokonta;Metazoa;Eumetazoa;Bilateria;Protostomia;  
Spiralia;Lophotrochozoa;Mollusca;Bivalvia;Autobranhia;Heteroconchia;Euhe  
terodonta;Imparidentia;Venerida;Veneroidea;Veneridae;Mercenaria;Mercenari  
a mercenaria

UdeM00000023527 114398 304.7 UdeM00000023527 XP\_015906392.2 39.1  
422 250 4 1 420 1 417 2.00E-79 304.7 114398  
cellular

organisms;Eukaryota;Opisthokonta;Metazoa;Eumetazoa;Bilateria;Protostomia;  
Ecdysozoa;Panarthropoda;Arthropoda;Chelicerata;Arachnida;Araneae;Araneomo  
rphae;Entelegynae;Orbiculariae;Araneoidea;Theridiidae;Parasteatoda;Parast  
eatoda tepidariorum

UdeM00000023528 1735272 132.1 UdeM00000023528 XP\_041373570.1 52.1  
121 58 0 6 126 5 125 5.10E-28 132.1 1735272  
cellular

organisms;Eukaryota;Opisthokonta;Metazoa;Eumetazoa;Bilateria;Protostomia;  
Spiralia;Lophotrochozoa;Mollusca;Gastropoda;Neomphalina;Neomphaloidea;Pel  
tospiridae;Gigantopelta;Gigantopelta aegis

UdeM00000023529 225164 1060.1 UdeM00000023529 XP\_009046752.1  
68.8 794 248 0 8 801 17 810 1.50E-306 1060.1  
225164 cellular

organisms;Eukaryota;Opisthokonta;Metazoa;Eumetazoa;Bilateria;Protostomia;  
Spiralia;Lophotrochozoa;Mollusca;Gastropoda;Patellogastropoda;Lottioidea;  
Lottiidae;Lottia;Lottia gigantea

UdeM00000023530 6596 1865.1 UdeM00000023530 XP\_045170889.1 48.7  
1911 939 21 340 2228 77 1968 0.00E+00 1865.1 6596  
cellular

organisms;Eukaryota;Opisthokonta;Metazoa;Eumetazoa;Bilateria;Protostomia;  
Spiralia;Lophotrochozoa;Mollusca;Bivalvia;Autobranhia;Heteroconchia;Euhe  
terodonta;Imparidentia;Venerida;Veneroidea;Veneridae;Mercenaria;Mercenari  
a mercenaria

UdeM00000023531 6573 745.3 UdeM00000023531 XP\_021358192.1 47.7 841  
407 17 1 825 1977 2800 8.10E-212 745.3 6573 cellular

organisms;Eukaryota;Opisthokonta;Metazoa;Eumetazoa;Bilateria;Protostomia;  
Spiralia;Lophotrochozoa;Mollusca;Bivalvia;Autobranhia;Pteriomorphia;Pect  
inida;Pectinoidea;Pectinidae;Mizuhopecten;Mizuhopecten yessoensis

UdeM00000023532 6573 792.3 UdeM00000023532 XP\_021358192.1 47.8 901  
441 15 7 893 1918 2803 6.20E-226 792.3 6573 cellular

organisms;Eukaryota;Opisthokonta;Metazoa;Eumetazoa;Bilateria;Protostomia;  
Spiralia;Lophotrochozoa;Mollusca;Bivalvia;Autobranhia;Pteriomorphia;Pect  
inida;Pectinoidea;Pectinidae;Mizuhopecten;Mizuhopecten yessoensis

UdeM00000023533 6596 2074.7 UdeM00000023533 XP\_045170890.1 50.6  
2055 930 19 1 2025 1 1999 0.00E+00 2074.7 6596  
cellular

organisms;Eukaryota;Opisthokonta;Metazoa;Eumetazoa;Bilateria;Protostomia;Spiralia;Lophotrochozoa;Mollusca;Bivalvia;Autobranchia;Heteroconchia;Euherodonta;Imparidentia;Venerida;Veneroidea;Veneridae;Mercenaria;Mercenaria mercenaria

|                 |      |        |                 |                |      |      |          |        |      |
|-----------------|------|--------|-----------------|----------------|------|------|----------|--------|------|
| UdeM00000023534 | 6596 | 1089.7 | UdeM00000023534 | XP_045170890.1 | 61.8 |      |          |        |      |
| 828             | 314  | 1      | 5               | 832            | 1999 | 2824 | 0.00E+00 | 1089.7 | 6596 |

cellular

organisms;Eukaryota;Opisthokonta;Metazoa;Eumetazoa;Bilateria;Protostomia;Spiralia;Lophotrochozoa;Mollusca;Bivalvia;Autobranchia;Heteroconchia;Euherodonta;Imparidentia;Venerida;Veneroidea;Veneridae;Mercenaria;Mercenaria mercenaria

|                 |      |       |                 |                |      |          |       |      |          |
|-----------------|------|-------|-----------------|----------------|------|----------|-------|------|----------|
| UdeM00000023536 | 6596 | 312.8 | UdeM00000023536 | XP_045174044.1 | 37.9 | 485      |       |      |          |
| 271             | 11   | 11    | 477             | 7              | 479  | 7.90E-82 | 312.8 | 6596 | cellular |

organisms;Eukaryota;Opisthokonta;Metazoa;Eumetazoa;Bilateria;Protostomia;Spiralia;Lophotrochozoa;Mollusca;Bivalvia;Autobranchia;Heteroconchia;Euherodonta;Imparidentia;Venerida;Veneroidea;Veneridae;Mercenaria;Mercenaria mercenaria

|                 |      |       |                 |                |      |           |       |      |          |
|-----------------|------|-------|-----------------|----------------|------|-----------|-------|------|----------|
| UdeM00000023535 | 6596 | 961.8 | UdeM00000023535 | XP_045174045.1 | 52.7 | 1011      |       |      |          |
| 429             | 21   | 11    | 988             | 7              | 1001 | 6.50E-277 | 961.8 | 6596 | cellular |

organisms;Eukaryota;Opisthokonta;Metazoa;Eumetazoa;Bilateria;Protostomia;Spiralia;Lophotrochozoa;Mollusca;Bivalvia;Autobranchia;Heteroconchia;Euherodonta;Imparidentia;Venerida;Veneroidea;Veneridae;Mercenaria;Mercenaria mercenaria

|                 |      |      |                 |                |      |          |      |      |          |
|-----------------|------|------|-----------------|----------------|------|----------|------|------|----------|
| UdeM00000023537 | 6579 | 89.7 | UdeM00000023537 | XP_033732752.1 | 39.2 | 148      |      |      |          |
| 74              | 6    | 220  | 362             | 216            | 352  | 8.30E-15 | 89.7 | 6579 | cellular |

organisms;Eukaryota;Opisthokonta;Metazoa;Eumetazoa;Bilateria;Protostomia;Spiralia;Lophotrochozoa;Mollusca;Bivalvia;Autobranchia;Pteriomorphia;Pectinida;Pectinoidea;Pectinidae;Pecten;Pecten maximus

|                 |      |      |                 |                |      |          |      |      |          |
|-----------------|------|------|-----------------|----------------|------|----------|------|------|----------|
| UdeM00000023538 | 6596 | 90.9 | UdeM00000023538 | XP_045168532.1 | 32.2 | 177      |      |      |          |
| 105             | 3    | 234  | 410             | 46             | 207  | 4.20E-15 | 90.9 | 6596 | cellular |

organisms;Eukaryota;Opisthokonta;Metazoa;Eumetazoa;Bilateria;Protostomia;Spiralia;Lophotrochozoa;Mollusca;Bivalvia;Autobranchia;Heteroconchia;Euherodonta;Imparidentia;Venerida;Veneroidea;Veneridae;Mercenaria;Mercenaria mercenaria

|                 |      |      |                 |                |     |          |      |      |          |
|-----------------|------|------|-----------------|----------------|-----|----------|------|------|----------|
| UdeM00000023539 | 6573 | 83.2 | UdeM00000023539 | XP_021348414.1 | 31  | 203      |      |      |          |
| 116             | 6    | 8    | 207             | 23             | 204 | 4.50E-13 | 83.2 | 6573 | cellular |

organisms;Eukaryota;Opisthokonta;Metazoa;Eumetazoa;Bilateria;Protostomia;Spiralia;Lophotrochozoa;Mollusca;Bivalvia;Autobranchia;Pteriomorphia;Pectinida;Pectinoidea;Pectinidae;Mizuhopecten;Mizuhopecten yessoensis

|                 |      |      |                 |                |     |          |      |      |          |
|-----------------|------|------|-----------------|----------------|-----|----------|------|------|----------|
| UdeM00000023540 | 6579 | 81.3 | UdeM00000023540 | XP_033732751.1 | 37  | 146      |      |      |          |
| 79              | 6    | 9    | 149             | 226            | 363 | 1.30E-12 | 81.3 | 6579 | cellular |

organisms;Eukaryota;Opisthokonta;Metazoa;Eumetazoa;Bilateria;Protostomia;Spiralia;Lophotrochozoa;Mollusca;Bivalvia;Autobranchia;Pteriomorphia;Pectinida;Pectinoidea;Pectinidae;Pecten;Pecten maximus

|                 |      |       |                 |                |      |          |       |      |          |
|-----------------|------|-------|-----------------|----------------|------|----------|-------|------|----------|
| UdeM00000023545 | 6579 | 144.1 | UdeM00000023545 | XP_033748699.1 | 51.4 | 177      |       |      |          |
| 69              | 5    | 14    | 181             | 17             | 185  | 2.20E-31 | 144.1 | 6579 | cellular |

organisms;Eukaryota;Opisthokonta;Metazoa;Eumetazoa;Bilateria;Protostomia;Spiralia;Lophotrochozoa;Mollusca;Bivalvia;Autobranchia;Pteriomorphia;Pectinida;Pectinoidea;Pectinidae;Pecten;Pecten maximus

|                 |      |       |                 |                |      |          |       |      |          |
|-----------------|------|-------|-----------------|----------------|------|----------|-------|------|----------|
| UdeM00000023544 | 6596 | 299.3 | UdeM00000023544 | XP_045171445.1 | 83.4 | 181      |       |      |          |
| 29              | 1    | 1     | 180             | 1              | 181  | 4.10E-78 | 299.3 | 6596 | cellular |

organisms;Eukaryota;Opisthokonta;Metazoa;Eumetazoa;Bilateria;Protostomia;Spiralia;Lophotrochozoa;Mollusca;Bivalvia;Autobranchia;Heteroconchia;Euherodonta

terodonta;Imparidentia;Venerida;Veneroidea;Veneridae;Mercenaria;Mercenaria mercenaria

UdeM00000023546 1735272 572.4 UdeM00000023546 XP\_041348257.1 79.2  
336 67 1 10 342 4 339 3.90E-160 572.4 1735272  
cellular

organisms;Eukaryota;Opisthokonta;Metazoa;Eumetazoa;Bilateria;Protostomia;Spiralia;Lophotrochozoa;Mollusca;Gastropoda;Neomphalina;Neomphaloidea;Peltospiridae;Gigantopelta;Gigantopelta aegis

UdeM00000023547 400727 490 UdeM00000023547 XP\_025091190.1 82.9  
269 46 0 1 269 68 336 2.00E-135 490 400727  
cellular

organisms;Eukaryota;Opisthokonta;Metazoa;Eumetazoa;Bilateria;Protostomia;Spiralia;Lophotrochozoa;Mollusca;Gastropoda;Caenogastropoda;Architaenioglossa;Ampullarioidea;Ampullariidae;Pomacea;Pomacea canaliculata

UdeM00000023548 6596 492.7 UdeM00000023548 XP\_045170916.1 70.8 332  
87 4 34 360 51 377 5.60E-136 492.7 6596 cellular

organisms;Eukaryota;Opisthokonta;Metazoa;Eumetazoa;Bilateria;Protostomia;Spiralia;Lophotrochozoa;Mollusca;Bivalvia;Autobranchia;Heteroconchia;Euheterodonta;Imparidentia;Venerida;Veneroidea;Veneridae;Mercenaria;Mercenaria mercenaria

UdeM00000023549 6596 978.8 UdeM00000023549 XP\_045171420.1 54.3 899  
332 13 118 982 132 985 5.30E-282 978.8 6596 cellular

organisms;Eukaryota;Opisthokonta;Metazoa;Eumetazoa;Bilateria;Protostomia;Spiralia;Lophotrochozoa;Mollusca;Bivalvia;Autobranchia;Heteroconchia;Euheterodonta;Imparidentia;Venerida;Veneroidea;Veneridae;Mercenaria;Mercenaria mercenaria

UdeM00000023550 6596 193.7 UdeM00000023550 XP\_045177053.1 42.2 244  
129 6 114 350 193 431 3.90E-46 193.7 6596 cellular

organisms;Eukaryota;Opisthokonta;Metazoa;Eumetazoa;Bilateria;Protostomia;Spiralia;Lophotrochozoa;Mollusca;Bivalvia;Autobranchia;Heteroconchia;Euheterodonta;Imparidentia;Venerida;Veneroidea;Veneridae;Mercenaria;Mercenaria mercenaria

UdeM00000023551 29159 152.1 UdeM00000023551 XP\_034310219.1 32.1 352  
208 13 459 803 268 595 3.00E-33 152.1 29159 cellular

organisms;Eukaryota;Opisthokonta;Metazoa;Eumetazoa;Bilateria;Protostomia;Spiralia;Lophotrochozoa;Mollusca;Bivalvia;Autobranchia;Pteriomorphia;Ostreida;Ostreoidea;Ostreidae;Crassostrea;Crassostrea gigas

UdeM00000023552 29159 220.7 UdeM00000023552 XP\_034337829.1 89.4 132  
14 0 1 132 1 132 1.10E-54 220.7 29159 cellular

organisms;Eukaryota;Opisthokonta;Metazoa;Eumetazoa;Bilateria;Protostomia;Spiralia;Lophotrochozoa;Mollusca;Bivalvia;Autobranchia;Pteriomorphia;Ostreida;Ostreoidea;Ostreidae;Crassostrea;Crassostrea gigas

UdeM00000023553 6596 478.8 UdeM00000023553 XP\_045170652.1 80.4 291  
55 1 1 291 1 289 5.00E-132 478.8 6596 cellular

organisms;Eukaryota;Opisthokonta;Metazoa;Eumetazoa;Bilateria;Protostomia;Spiralia;Lophotrochozoa;Mollusca;Bivalvia;Autobranchia;Heteroconchia;Euheterodonta;Imparidentia;Venerida;Veneroidea;Veneridae;Mercenaria;Mercenaria mercenaria

UdeM00000023554 6596 395.6 UdeM00000023554 XP\_045197399.1 59.9 314  
126 0 1 314 1 314 5.90E-107 395.6 6596 cellular

organisms;Eukaryota;Opisthokonta;Metazoa;Eumetazoa;Bilateria;Protostomia;Spiralia;Lophotrochozoa;Mollusca;Bivalvia;Autobranchia;Heteroconchia;Euheterodonta;Imparidentia;Venerida;Veneroidea;Veneridae;Mercenaria;Mercenaria mercenaria

UdeM00000023556 1735272 647.9 UdeM00000023556 XP\_041348893.1 74.1  
 397 103 0 1 397 1 397 1.10E-182 647.9 1735272  
 cellular  
 organisms;Eukaryota;Opisthokonta;Metazoa;Eumetazoa;Bilateria;Protostomia;  
 Spiralia;Lophotrochozoa;Mollusca;Gastropoda;Neomphalina;Neomphaloidea;Pel  
 tospiridae;Gigantopelta;Gigantopelta aegis  
 UdeM00000023557 6596 154.1 UdeM00000023557 XP\_045172863.1 63.7 102  
 37 0 5 106 4 105 1.00E-34 154.1 6596 cellular  
 organisms;Eukaryota;Opisthokonta;Metazoa;Eumetazoa;Bilateria;Protostomia;  
 Spiralia;Lophotrochozoa;Mollusca;Bivalvia;Autobranchia;Heteroconchia;Euhe  
 terodonta;Imparidentia;Venerida;Veneroidea;Veneridae;Mercenaria;Mercenari  
 a mercenaria  
 UdeM00000023558 29159 201.8 UdeM00000023558 XP\_011444790.1 72.3 130  
 34 1 57 184 76 205 7.50E-49 201.8 29159 cellular  
 organisms;Eukaryota;Opisthokonta;Metazoa;Eumetazoa;Bilateria;Protostomia;  
 Spiralia;Lophotrochozoa;Mollusca;Bivalvia;Autobranchia;Pteriormorphia;Ostr  
 eida;Ostreoidea;Ostreidae;Crassostrea;Crassostrea gigas  
 UdeM00000023559 1735272 273.1 UdeM00000023559 XP\_041367923.1 56.3  
 229 98 1 1 229 46 272 5.70E-70 273.1 1735272  
 cellular  
 organisms;Eukaryota;Opisthokonta;Metazoa;Eumetazoa;Bilateria;Protostomia;  
 Spiralia;Lophotrochozoa;Mollusca;Gastropoda;Neomphalina;Neomphaloidea;Pel  
 tospiridae;Gigantopelta;Gigantopelta aegis  
 UdeM00000023560 29159 74.3 UdeM00000023560 XP\_019926413.2 42 69  
 40 0 1 69 153 221 7.60E-11 74.3 29159 cellular  
 organisms;Eukaryota;Opisthokonta;Metazoa;Eumetazoa;Bilateria;Protostomia;  
 Spiralia;Lophotrochozoa;Mollusca;Bivalvia;Autobranchia;Pteriormorphia;Ostr  
 eida;Ostreoidea;Ostreidae;Crassostrea;Crassostrea gigas  
 UdeM00000023562 6596 150.6 UdeM00000023562 XP\_045172863.1 61.8 102  
 39 0 5 106 4 105 1.10E-33 150.6 6596 cellular  
 organisms;Eukaryota;Opisthokonta;Metazoa;Eumetazoa;Bilateria;Protostomia;  
 Spiralia;Lophotrochozoa;Mollusca;Bivalvia;Autobranchia;Heteroconchia;Euhe  
 terodonta;Imparidentia;Venerida;Veneroidea;Veneridae;Mercenaria;Mercenari  
 a mercenaria  
 UdeM00000023563 6573 365.5 UdeM00000023563 XP\_021346288.1 62.2 288  
 85 2 1 288 1 264 6.10E-98 365.5 6573 cellular  
 organisms;Eukaryota;Opisthokonta;Metazoa;Eumetazoa;Bilateria;Protostomia;  
 Spiralia;Lophotrochozoa;Mollusca;Bivalvia;Autobranchia;Pteriormorphia;Pect  
 inida;Pectinoidea;Pectinidae;Mizuhopecten;Mizuhopecten yessoensis  
 UdeM00000023564 6579 396 UdeM00000023564 XP\_033747923.1 56.4 362  
 154 2 1 362 1 358 5.50E-107 396 6579 cellular  
 organisms;Eukaryota;Opisthokonta;Metazoa;Eumetazoa;Bilateria;Protostomia;  
 Spiralia;Lophotrochozoa;Mollusca;Bivalvia;Autobranchia;Pteriormorphia;Pect  
 inida;Pectinoidea;Pectinidae;Pecten;Pecten maximus  
 UdeM00000023565 1735272 148.7 UdeM00000023565 XP\_041350324.1 46.3  
 175 79 3 1 167 16 183 7.80E-33 148.7 1735272  
 cellular  
 organisms;Eukaryota;Opisthokonta;Metazoa;Eumetazoa;Bilateria;Protostomia;  
 Spiralia;Lophotrochozoa;Mollusca;Gastropoda;Neomphalina;Neomphaloidea;Pel  
 tospiridae;Gigantopelta;Gigantopelta aegis  
 UdeM00000023566 1735272 167.9 UdeM00000023566 XP\_041350324.1 47.9  
 190 84 3 1 182 1 183 1.30E-38 167.9 1735272  
 cellular  
 organisms;Eukaryota;Opisthokonta;Metazoa;Eumetazoa;Bilateria;Protostomia;

Spiralia;Lophotrochozoa;Mollusca;Gastropoda;Neomphalina;Neomphaloidea;Pel  
tospiridae;Gigantopelta;Gigantopelta aegis  
UdeM00000023567 6596 275.8 UdeM00000023567 XP\_045170696.1 39.1 603  
255 20 1 566 1 528 1.30E-70 275.8 6596 cellular  
organisms;Eukaryota;Opisthokonta;Metazoa;Eumetazoa;Bilateria;Protostomia;  
Spiralia;Lophotrochozoa;Mollusca;Bivalvia;Autobranchia;Heteroconchia;Euhe  
terodonta;Imparidentia;Venerida;Veneroidea;Veneridae;Mercenaria;Mercenari  
a mercenaria  
UdeM00000023569 29159 199.5 UdeM00000023569 XP\_034338217.1 72.3 130  
35 1 1 130 595 723 2.60E-48 199.5 29159 cellular  
organisms;Eukaryota;Opisthokonta;Metazoa;Eumetazoa;Bilateria;Protostomia;  
Spiralia;Lophotrochozoa;Mollusca;Bivalvia;Autobranchia;Pteriomorpha;Ostr  
eida;Ostreoidea;Ostreidae;Crassostrea;Crassostrea gigas  
UdeM00000023568 6596 1100.9 UdeM00000023568 XP\_045172714.1 72.2  
712 195 2 19 728 16 726 0.00E+00 1100.9 6596  
cellular  
organisms;Eukaryota;Opisthokonta;Metazoa;Eumetazoa;Bilateria;Protostomia;  
Spiralia;Lophotrochozoa;Mollusca;Bivalvia;Autobranchia;Heteroconchia;Euhe  
terodonta;Imparidentia;Venerida;Veneroidea;Veneridae;Mercenaria;Mercenari  
a mercenaria  
UdeM00000023570 6565 300.8 UdeM00000023570 XP\_022340977.1 83.8 167  
27 0 1 167 1 167 1.10E-78 300.8 6565 cellular  
organisms;Eukaryota;Opisthokonta;Metazoa;Eumetazoa;Bilateria;Protostomia;  
Spiralia;Lophotrochozoa;Mollusca;Bivalvia;Autobranchia;Pteriomorpha;Ostr  
eida;Ostreoidea;Ostreidae;Crassostrea;Crassostrea virginica  
UdeM00000023571 29159 265.8 UdeM00000023571 XP\_034324494.1 45.8 321  
167 4 12 328 252 569 7.60E-68 265.8 29159 cellular  
organisms;Eukaryota;Opisthokonta;Metazoa;Eumetazoa;Bilateria;Protostomia;  
Spiralia;Lophotrochozoa;Mollusca;Bivalvia;Autobranchia;Pteriomorpha;Ostr  
eida;Ostreoidea;Ostreidae;Crassostrea;Crassostrea gigas  
UdeM00000023572 29159 218 UdeM00000023572 XP\_034324494.1 54.6 207  
93 1 12 217 252 458 1.60E-53 218 29159 cellular  
organisms;Eukaryota;Opisthokonta;Metazoa;Eumetazoa;Bilateria;Protostomia;  
Spiralia;Lophotrochozoa;Mollusca;Bivalvia;Autobranchia;Pteriomorpha;Ostr  
eida;Ostreoidea;Ostreidae;Crassostrea;Crassostrea gigas  
UdeM00000023573 6573 283.9 UdeM00000023573 XP\_021360672.1 37.1 396  
229 7 12 388 13 407 3.10E-73 283.9 6573 cellular  
organisms;Eukaryota;Opisthokonta;Metazoa;Eumetazoa;Bilateria;Protostomia;  
Spiralia;Lophotrochozoa;Mollusca;Bivalvia;Autobranchia;Pteriomorpha;Pect  
inida;Pectinoidea;Pectinidae;Mizuhopecten;Mizuhopecten yessoensis  
UdeM00000023574 6596 551.6 UdeM00000023574 XP\_045172568.1 70.8 356  
103 1 1 356 1 355 7.50E-154 551.6 6596 cellular  
organisms;Eukaryota;Opisthokonta;Metazoa;Eumetazoa;Bilateria;Protostomia;  
Spiralia;Lophotrochozoa;Mollusca;Bivalvia;Autobranchia;Heteroconchia;Euhe  
terodonta;Imparidentia;Venerida;Veneroidea;Veneridae;Mercenaria;Mercenari  
a mercenaria  
UdeM00000023575 6596 485 UdeM00000023575 XP\_045172568.1 62.1 356  
134 1 3 358 1 355 8.70E-134 485 6596 cellular  
organisms;Eukaryota;Opisthokonta;Metazoa;Eumetazoa;Bilateria;Protostomia;  
Spiralia;Lophotrochozoa;Mollusca;Bivalvia;Autobranchia;Heteroconchia;Euhe  
terodonta;Imparidentia;Venerida;Veneroidea;Veneridae;Mercenaria;Mercenari  
a mercenaria  
UdeM00000023576 6596 441.8 UdeM00000023576 XP\_045172568.1 68.9 289  
90 0 1 289 67 355 6.80E-121 441.8 6596 cellular

organisms;Eukaryota;Opisthokonta;Metazoa;Eumetazoa;Bilateria;Protostomia;Spiralia;Lophotrochozoa;Mollusca;Bivalvia;Autobranchia;Heteroconchia;Euheterodonta;Imparidentia;Venerida;Veneroidea;Veneridae;Mercenaria;Mercenaria mercenaria

UdeM00000023577 6596 672.5 UdeM00000023577 XP\_045172811.1 64.4 562  
176 8 80 620 127 685 5.10E-190 672.5 6596 cellular

organisms;Eukaryota;Opisthokonta;Metazoa;Eumetazoa;Bilateria;Protostomia;Spiralia;Lophotrochozoa;Mollusca;Bivalvia;Autobranchia;Heteroconchia;Euheterodonta;Imparidentia;Venerida;Veneroidea;Veneridae;Mercenaria;Mercenaria mercenaria

UdeM00000023578 6573 1008.4 UdeM00000023578 XP\_021375644.1 56  
1069 463 3 1 1067 1 1064 6.70E-291 1008.4 6573  
cellular

organisms;Eukaryota;Opisthokonta;Metazoa;Eumetazoa;Bilateria;Protostomia;Spiralia;Lophotrochozoa;Mollusca;Bivalvia;Autobranchia;Pteriomorphia;Pectinida;Pectinoidea;Pectinidae;Mizuhopecten;Mizuhopecten yessoensis

UdeM00000023579 6573 1084.3 UdeM00000023579 XP\_021375638.1 50  
1161 540 11 344 1476 44 1191 0.00E+00 1084.3 6573  
cellular

organisms;Eukaryota;Opisthokonta;Metazoa;Eumetazoa;Bilateria;Protostomia;Spiralia;Lophotrochozoa;Mollusca;Bivalvia;Autobranchia;Pteriomorphia;Pectinida;Pectinoidea;Pectinidae;Mizuhopecten;Mizuhopecten yessoensis

UdeM00000023580 6596 397.1 UdeM00000023580 XP\_045171678.1 60.3 340  
127 4 1 337 1 335 2.20E-107 397.1 6596 cellular

organisms;Eukaryota;Opisthokonta;Metazoa;Eumetazoa;Bilateria;Protostomia;Spiralia;Lophotrochozoa;Mollusca;Bivalvia;Autobranchia;Heteroconchia;Euheterodonta;Imparidentia;Venerida;Veneroidea;Veneridae;Mercenaria;Mercenaria mercenaria

UdeM00000023581 6565 302 UdeM00000023581 XP\_022342998.1 87.9 198  
20 2 4 201 3 196 7.00E-79 302 6565 cellular

organisms;Eukaryota;Opisthokonta;Metazoa;Eumetazoa;Bilateria;Protostomia;Spiralia;Lophotrochozoa;Mollusca;Bivalvia;Autobranchia;Pteriomorphia;Ostreida;Ostreoidea;Ostreidae;Crassostrea;Crassostrea virginica

UdeM00000023582 50390 360.1 UdeM00000023582 XP\_028154228.1 55.8 267  
114 1 2 264 340 606 2.40E-96 360.1 50390 cellular

organisms;Eukaryota;Opisthokonta;Metazoa;Eumetazoa;Bilateria;Protostomia;Ecdysozoa;Panarthropoda;Arthropoda;Mandibulata;Pancrustacea;Hexapoda;Insecta;Dicondylia;Pterygota;Neoptera;Endopterygota;Coleoptera;Polyphaga;Cucujiformia;Chrysomeloidea;Chrysomelidae;Galerucinae;Luperini;Diabroticina;Diabroticites;Diabrotica;Diabrotica virgifera;Diabrotica virgifera

UdeM00000023583 1735272 63.2 UdeM00000023583 XP\_041347447.1 46.7  
60 32 0 71 130 38 97 3.80E-07 63.2 1735272

cellular

organisms;Eukaryota;Opisthokonta;Metazoa;Eumetazoa;Bilateria;Protostomia;Spiralia;Lophotrochozoa;Mollusca;Gastropoda;Neomphalina;Neomphaloidea;Peltospiridae;Gigantopelta;Gigantopelta aegis

UdeM00000023584 6573 256.1 UdeM00000023584 XP\_021373211.1 32.5 495  
319 7 119 608 550 1034 1.10E-64 256.1 6573 cellular

organisms;Eukaryota;Opisthokonta;Metazoa;Eumetazoa;Bilateria;Protostomia;Spiralia;Lophotrochozoa;Mollusca;Bivalvia;Autobranchia;Pteriomorphia;Pectinida;Pectinoidea;Pectinidae;Mizuhopecten;Mizuhopecten yessoensis

UdeM00000023585 6596 295.8 UdeM00000023585 XP\_045171284.1 90.6 160  
15 0 1 160 45 204 3.30E-77 295.8 6596 cellular

organisms;Eukaryota;Opisthokonta;Metazoa;Eumetazoa;Bilateria;Protostomia;Spiralia;Lophotrochozoa;Mollusca;Bivalvia;Autobranhia;Heteroconchia;Euherodonta;Imparidentia;Venerida;Veneroidea;Veneridae;Mercenaria;Mercenaria mercenaria

UdeM00000023586 6596 287.3 UdeM00000023586 XP\_045171195.1 51.4 383  
177 3 1 379 1 378 2.80E-74 287.3 6596 cellular

organisms;Eukaryota;Opisthokonta;Metazoa;Eumetazoa;Bilateria;Protostomia;Spiralia;Lophotrochozoa;Mollusca;Bivalvia;Autobranhia;Heteroconchia;Euherodonta;Imparidentia;Venerida;Veneroidea;Veneridae;Mercenaria;Mercenaria mercenaria

UdeM00000023587 6596 299.3 UdeM00000023587 XP\_045171191.1 49.9 415  
196 4 1 405 1 413 7.90E-78 299.3 6596 cellular

organisms;Eukaryota;Opisthokonta;Metazoa;Eumetazoa;Bilateria;Protostomia;Spiralia;Lophotrochozoa;Mollusca;Bivalvia;Autobranhia;Heteroconchia;Euherodonta;Imparidentia;Venerida;Veneroidea;Veneridae;Mercenaria;Mercenaria mercenaria

UdeM00000023588 29159 788.9 UdeM00000023588 XP\_034338517.1 69.4 581  
137 3 1 581 1049 1588 4.50E-225 788.9 29159 cellular

organisms;Eukaryota;Opisthokonta;Metazoa;Eumetazoa;Bilateria;Protostomia;Spiralia;Lophotrochozoa;Mollusca;Bivalvia;Autobranhia;Pteriormorphia;Ostracida;Ostreioidea;Ostreidae;Crassostrea;Crassostrea gigas

UdeM00000023589 6596 902.9 UdeM00000023589 XP\_045171259.1 54.6 1004  
292 27 3 880 2 967 3.70E-259 902.9 6596 cellular

organisms;Eukaryota;Opisthokonta;Metazoa;Eumetazoa;Bilateria;Protostomia;Spiralia;Lophotrochozoa;Mollusca;Bivalvia;Autobranhia;Heteroconchia;Euherodonta;Imparidentia;Venerida;Veneroidea;Veneridae;Mercenaria;Mercenaria mercenaria

UdeM00000023590 6596 262.7 UdeM00000023590 XP\_045171124.1 48.2 334  
153 5 11 333 10 334 6.40E-67 262.7 6596 cellular

organisms;Eukaryota;Opisthokonta;Metazoa;Eumetazoa;Bilateria;Protostomia;Spiralia;Lophotrochozoa;Mollusca;Bivalvia;Autobranhia;Heteroconchia;Euherodonta;Imparidentia;Venerida;Veneroidea;Veneridae;Mercenaria;Mercenaria mercenaria

UdeM00000023591 6596 157.5 UdeM00000023591 XP\_045171799.1 66 103  
35 0 3 105 315 417 9.20E-36 157.5 6596 cellular

organisms;Eukaryota;Opisthokonta;Metazoa;Eumetazoa;Bilateria;Protostomia;Spiralia;Lophotrochozoa;Mollusca;Bivalvia;Autobranhia;Heteroconchia;Euherodonta;Imparidentia;Venerida;Veneroidea;Veneridae;Mercenaria;Mercenaria mercenaria

UdeM00000023592 6596 111.3 UdeM00000023592 XP\_045171801.1 43 149  
70 3 161 299 123 266 2.20E-21 111.3 6596 cellular

organisms;Eukaryota;Opisthokonta;Metazoa;Eumetazoa;Bilateria;Protostomia;Spiralia;Lophotrochozoa;Mollusca;Bivalvia;Autobranhia;Heteroconchia;Euherodonta;Imparidentia;Venerida;Veneroidea;Veneridae;Mercenaria;Mercenaria mercenaria

UdeM00000023593 6596 418.3 UdeM00000023593 XP\_045171800.1 66.7 312  
97 2 4 314 3 308 8.60E-114 418.3 6596 cellular

organisms;Eukaryota;Opisthokonta;Metazoa;Eumetazoa;Bilateria;Protostomia;Spiralia;Lophotrochozoa;Mollusca;Bivalvia;Autobranhia;Heteroconchia;Euherodonta;Imparidentia;Venerida;Veneroidea;Veneridae;Mercenaria;Mercenaria mercenaria

UdeM00000023594 6573 227.6 UdeM00000023594 XP\_021374761.1 75 128  
32 0 12 139 5 132 9.70E-57 227.6 6573 cellular

organisms;Eukaryota;Opisthokonta;Metazoa;Eumetazoa;Bilateria;Protostomia;



Spiralia; Lophotrochozoa; Mollusca; Bivalvia; Autobranchia; Pteriomorpha; Pectinida; Pectinoidea; Pectinidae; Mizuhopecten; Mizuhopecten yessoensis

UdeM00000023595 6573 373.6 UdeM00000023595 XP\_021374724.1 80 240  
47 1 1 239 1 240 1.90E-100 373.6 6573 cellular  
organisms; Eukaryota; Opisthokonta; Metazoa; Eumetazoa; Bilateria; Protostomia; Spiralia; Lophotrochozoa; Mollusca; Bivalvia; Autobranchia; Pteriomorpha; Pectinida; Pectinoidea; Pectinidae; Mizuhopecten; Mizuhopecten yessoensis

UdeM00000023596 6573 273.1 UdeM00000023596 XP\_021374724.1 84.6 162  
24 1 1 161 1 162 2.30E-70 273.1 6573 cellular  
organisms; Eukaryota; Opisthokonta; Metazoa; Eumetazoa; Bilateria; Protostomia; Spiralia; Lophotrochozoa; Mollusca; Bivalvia; Autobranchia; Pteriomorpha; Pectinida; Pectinoidea; Pectinidae; Mizuhopecten; Mizuhopecten yessoensis

UdeM00000023597 6596 128.3 UdeM00000023597 XP\_045175390.1 37.6 205  
113 6 106 297 185 387 1.70E-26 128.3 6596 cellular  
organisms; Eukaryota; Opisthokonta; Metazoa; Eumetazoa; Bilateria; Protostomia; Spiralia; Lophotrochozoa; Mollusca; Bivalvia; Autobranchia; Heteroconchia; Euheterodonta; Imparidentia; Venerida; Veneroidea; Veneridae; Mercenaria; Mercenaria mercenaria

UdeM00000023598 6596 109.8 UdeM00000023598 XP\_045175390.1 45.1 133  
70 2 6 137 257 387 2.90E-21 109.8 6596 cellular  
organisms; Eukaryota; Opisthokonta; Metazoa; Eumetazoa; Bilateria; Protostomia; Spiralia; Lophotrochozoa; Mollusca; Bivalvia; Autobranchia; Heteroconchia; Euheterodonta; Imparidentia; Venerida; Veneroidea; Veneridae; Mercenaria; Mercenaria mercenaria

UdeM00000023599 6596 126.3 UdeM00000023599 XP\_045175390.1 34.2 269  
159 7 56 312 125 387 6.80E-26 126.3 6596 cellular  
organisms; Eukaryota; Opisthokonta; Metazoa; Eumetazoa; Bilateria; Protostomia; Spiralia; Lophotrochozoa; Mollusca; Bivalvia; Autobranchia; Heteroconchia; Euheterodonta; Imparidentia; Venerida; Veneroidea; Veneridae; Mercenaria; Mercenaria mercenaria

UdeM00000023601 6596 122.1 UdeM00000023601 XP\_045175390.1 32.3 316  
187 11 12 307 79 387 1.30E-24 122.1 6596 cellular  
organisms; Eukaryota; Opisthokonta; Metazoa; Eumetazoa; Bilateria; Protostomia; Spiralia; Lophotrochozoa; Mollusca; Bivalvia; Autobranchia; Heteroconchia; Euheterodonta; Imparidentia; Venerida; Veneroidea; Veneridae; Mercenaria; Mercenaria mercenaria

UdeM00000023602 6596 124 UdeM00000023602 XP\_045175390.1 33.2 268  
152 8 18 274 136 387 2.90E-25 124 6596 cellular  
organisms; Eukaryota; Opisthokonta; Metazoa; Eumetazoa; Bilateria; Protostomia; Spiralia; Lophotrochozoa; Mollusca; Bivalvia; Autobranchia; Heteroconchia; Euheterodonta; Imparidentia; Venerida; Veneroidea; Veneridae; Mercenaria; Mercenaria mercenaria

UdeM00000023603 6596 146.7 UdeM00000023603 XP\_045171683.1 41.1 202  
112 5 4 203 2 198 4.30E-32 146.7 6596 cellular  
organisms; Eukaryota; Opisthokonta; Metazoa; Eumetazoa; Bilateria; Protostomia; Spiralia; Lophotrochozoa; Mollusca; Bivalvia; Autobranchia; Heteroconchia; Euheterodonta; Imparidentia; Venerida; Veneroidea; Veneridae; Mercenaria; Mercenaria mercenaria

UdeM00000023604 29159 102.4 UdeM00000023604 XP\_034315421.1 51.8 114  
48 3 3 112 364 474 3.80E-19 102.4 29159 cellular  
organisms; Eukaryota; Opisthokonta; Metazoa; Eumetazoa; Bilateria; Protostomia; Spiralia; Lophotrochozoa; Mollusca; Bivalvia; Autobranchia; Pteriomorpha; Ostreida; Ostreoidea; Ostreidae; Crassostrea; Crassostrea gigas

UdeM00000023605 29159 161.4 UdeM00000023605 XP\_034318948.1 72.9 96  
 26 0 1 96 374 469 5.90E-37 161.4 29159 cellular  
 organisms;Eukaryota;Opisthokonta;Metazoa;Eumetazoa;Bilateria;Protostomia;  
 Spiralia;Lophotrochozoa;Mollusca;Bivalvia;Autobranchia;Pteriormorphia;Ostr  
 eida;Ostreoidea;Ostreidae;Crassostrea;Crassostrea gigas  
 UdeM00000023606 29159 375.6 UdeM00000023606 XP\_034319609.1 41.6 473  
 140 2 1 337 482 954 6.90E-101 375.6 29159 cellular  
 organisms;Eukaryota;Opisthokonta;Metazoa;Eumetazoa;Bilateria;Protostomia;  
 Spiralia;Lophotrochozoa;Mollusca;Bivalvia;Autobranchia;Pteriormorphia;Ostr  
 eida;Ostreoidea;Ostreidae;Crassostrea;Crassostrea gigas  
 UdeM00000023607 6596 117.9 UdeM00000023607 XP\_045175388.1 43.2 139  
 77 2 175 312 251 388 2.40E-23 117.9 6596 cellular  
 organisms;Eukaryota;Opisthokonta;Metazoa;Eumetazoa;Bilateria;Protostomia;  
 Spiralia;Lophotrochozoa;Mollusca;Bivalvia;Autobranchia;Heteroconchia;Euhe  
 terodonta;Imparidentia;Venerida;Veneroidea;Veneridae;Mercenaria;Mercenari  
 a mercenaria  
 UdeM00000023608 6596 117.9 UdeM00000023608 XP\_045175388.1 43.2 139  
 77 2 137 274 251 388 2.10E-23 117.9 6596 cellular  
 organisms;Eukaryota;Opisthokonta;Metazoa;Eumetazoa;Bilateria;Protostomia;  
 Spiralia;Lophotrochozoa;Mollusca;Bivalvia;Autobranchia;Heteroconchia;Euhe  
 terodonta;Imparidentia;Venerida;Veneroidea;Veneridae;Mercenaria;Mercenari  
 a mercenaria  
 UdeM00000023609 6596 164.1 UdeM00000023609 XP\_045171683.1 42.2 199  
 107 3 8 199 7 204 2.50E-37 164.1 6596 cellular  
 organisms;Eukaryota;Opisthokonta;Metazoa;Eumetazoa;Bilateria;Protostomia;  
 Spiralia;Lophotrochozoa;Mollusca;Bivalvia;Autobranchia;Heteroconchia;Euhe  
 terodonta;Imparidentia;Venerida;Veneroidea;Veneridae;Mercenaria;Mercenari  
 a mercenaria  
 UdeM00000023610 6596 152.1 UdeM00000023610 XP\_045171683.1 40.6 202  
 114 4 8 207 7 204 1.00E-33 152.1 6596 cellular  
 organisms;Eukaryota;Opisthokonta;Metazoa;Eumetazoa;Bilateria;Protostomia;  
 Spiralia;Lophotrochozoa;Mollusca;Bivalvia;Autobranchia;Heteroconchia;Euhe  
 terodonta;Imparidentia;Venerida;Veneroidea;Veneridae;Mercenaria;Mercenari  
 a mercenaria  
 UdeM00000023611 6596 61.2 UdeM00000023611 XP\_045209009.1 37 92  
 51 3 27 112 12 102 1.80E-06 61.2 6596 cellular  
 organisms;Eukaryota;Opisthokonta;Metazoa;Eumetazoa;Bilateria;Protostomia;  
 Spiralia;Lophotrochozoa;Mollusca;Bivalvia;Autobranchia;Heteroconchia;Euhe  
 terodonta;Imparidentia;Venerida;Veneroidea;Veneridae;Mercenaria;Mercenari  
 a mercenaria  
 UdeM00000023612 6573 123.6 UdeM00000023612 XP\_021354173.1 39.5 185  
 106 5 1 182 1 182 3.20E-25 123.6 6573 cellular  
 organisms;Eukaryota;Opisthokonta;Metazoa;Eumetazoa;Bilateria;Protostomia;  
 Spiralia;Lophotrochozoa;Mollusca;Bivalvia;Autobranchia;Pteriormorphia;Pect  
 inida;Pectinoidea;Pectinidae;Mizuhopecten;Mizuhopecten yessoensis  
 UdeM00000023613 6596 119.8 UdeM00000023613 XP\_045172473.1 40.4 178  
 97 4 7 181 6 177 4.50E-24 119.8 6596 cellular  
 organisms;Eukaryota;Opisthokonta;Metazoa;Eumetazoa;Bilateria;Protostomia;  
 Spiralia;Lophotrochozoa;Mollusca;Bivalvia;Autobranchia;Heteroconchia;Euhe  
 terodonta;Imparidentia;Venerida;Veneroidea;Veneridae;Mercenaria;Mercenari  
 a mercenaria  
 UdeM00000023614 6596 152.1 UdeM00000023614 XP\_045171683.1 45.3 181  
 92 5 5 183 32 207 9.20E-34 152.1 6596 cellular  
 organisms;Eukaryota;Opisthokonta;Metazoa;Eumetazoa;Bilateria;Protostomia;

Spiralia;Lophotrochozoa;Mollusca;Bivalvia;Autobranchia;Heteroconchia;Euherodonta;Imparidentia;Venerida;Veneroidea;Veneridae;Mercenaria;Mercenaria mercenaria

UdeM00000023615 6573 207.2 UdeM00000023615 XP\_021342392.1 27.3 933  
522 24 15 873 10 860 8.60E-50 207.2 6573 cellular

organisms;Eukaryota;Opisthokonta;Metazoa;Eumetazoa;Bilateria;Protostomia;Spiralia;Lophotrochozoa;Mollusca;Bivalvia;Autobranchia;Pteriormorphia;Pectinida;Pectinoidea;Pectinidae;Mizuhopecten;Mizuhopecten yessoensis

UdeM00000023616 29159 394 UdeM00000023616 XP\_034298998.1 47.6 466  
191 7 6 419 135 599 2.30E-106 394 29159 cellular

organisms;Eukaryota;Opisthokonta;Metazoa;Eumetazoa;Bilateria;Protostomia;Spiralia;Lophotrochozoa;Mollusca;Bivalvia;Autobranchia;Pteriormorphia;Ostreida;Ostreoidea;Ostreidae;Crassostrea;Crassostrea gigas

UdeM00000023617 6573 167.2 UdeM00000023617 XP\_021378264.1 57 151  
59 2 1 145 509 659 1.60E-38 167.2 6573 cellular

organisms;Eukaryota;Opisthokonta;Metazoa;Eumetazoa;Bilateria;Protostomia;Spiralia;Lophotrochozoa;Mollusca;Bivalvia;Autobranchia;Pteriormorphia;Pectinida;Pectinoidea;Pectinidae;Mizuhopecten;Mizuhopecten yessoensis

UdeM00000023618 1735272 232.6 UdeM00000023618 XP\_041350169.1 65.5  
177 55 2 14 184 13 189 3.90E-58 232.6 1735272

cellular

organisms;Eukaryota;Opisthokonta;Metazoa;Eumetazoa;Bilateria;Protostomia;Spiralia;Lophotrochozoa;Mollusca;Gastropoda;Neomphalina;Neomphaloidea;Peltospiridae;Gigantopelta;Gigantopelta aegis

UdeM00000023619 1735272 250.8 UdeM00000023619 XP\_041350169.1 69.7  
178 52 2 14 190 13 189 1.40E-63 250.8 1735272

cellular

organisms;Eukaryota;Opisthokonta;Metazoa;Eumetazoa;Bilateria;Protostomia;Spiralia;Lophotrochozoa;Mollusca;Gastropoda;Neomphalina;Neomphaloidea;Peltospiridae;Gigantopelta;Gigantopelta aegis

UdeM00000023620 29159 185.3 UdeM00000023620 XP\_034298998.1 59.3 167  
65 1 30 193 433 599 7.60E-44 185.3 29159 cellular

organisms;Eukaryota;Opisthokonta;Metazoa;Eumetazoa;Bilateria;Protostomia;Spiralia;Lophotrochozoa;Mollusca;Bivalvia;Autobranchia;Pteriormorphia;Ostreida;Ostreoidea;Ostreidae;Crassostrea;Crassostrea gigas

UdeM00000023621 29159 270.8 UdeM00000023621 XP\_034298998.1 46.1 317  
153 4 1 300 125 440 2.20E-69 270.8 29159 cellular

organisms;Eukaryota;Opisthokonta;Metazoa;Eumetazoa;Bilateria;Protostomia;Spiralia;Lophotrochozoa;Mollusca;Bivalvia;Autobranchia;Pteriormorphia;Ostreida;Ostreoidea;Ostreidae;Crassostrea;Crassostrea gigas

UdeM00000023622 6565 384.8 UdeM00000023622 XP\_022335717.1 45.9 377  
196 5 940 1314 1195 1565 4.40E-103 384.8 6565 cellular

organisms;Eukaryota;Opisthokonta;Metazoa;Eumetazoa;Bilateria;Protostomia;Spiralia;Lophotrochozoa;Mollusca;Bivalvia;Autobranchia;Pteriormorphia;Ostreida;Ostreoidea;Ostreidae;Crassostrea;Crassostrea virginica

UdeM00000023625 6596 211.8 UdeM00000023625 XP\_045171930.1 40.7 236  
138 1 4 237 697 932 9.40E-52 211.8 6596 cellular

organisms;Eukaryota;Opisthokonta;Metazoa;Eumetazoa;Bilateria;Protostomia;Spiralia;Lophotrochozoa;Mollusca;Bivalvia;Autobranchia;Heteroconchia;Euherodonta;Imparidentia;Venerida;Veneroidea;Veneridae;Mercenaria;Mercenaria mercenaria

UdeM00000023626 6596 478.8 UdeM00000023626 XP\_045171930.1 32.6 932  
519 14 7 838 10 932 1.40E-131 478.8 6596 cellular

organisms;Eukaryota;Opisthokonta;Metazoa;Eumetazoa;Bilateria;Protostomia;

Spiralia;Lophotrochozoa;Mollusca;Bivalvia;Autobranchia;Heteroconchia;Euherodonta;Imparidentia;Venerida;Veneroidea;Veneridae;Mercenaria;Mercenaria mercenaria

UdeM00000023627 6596 117.1 UdeM00000023627 XP\_045173872.1 71.8 71  
20 0 1 71 18 88 1.10E-23 117.1 6596 cellular

organisms;Eukaryota;Opisthokonta;Metazoa;Eumetazoa;Bilateria;Protostomia;Spiralia;Lophotrochozoa;Mollusca;Bivalvia;Autobranchia;Heteroconchia;Euherodonta;Imparidentia;Venerida;Veneroidea;Veneridae;Mercenaria;Mercenaria mercenaria

UdeM00000023629 7574 309.3 UdeM00000023629 XP\_013381563.1 47.7 342  
162 7 1 332 60 394 6.20E-81 309.3 7574 cellular

organisms;Eukaryota;Opisthokonta;Metazoa;Eumetazoa;Bilateria;Protostomia;Spiralia;Lophotrochozoa;Brachiopoda;Linguliformea;Lingulata;Lingulida;Linguloidea;Lingulidae;Lingula;Lingula anatina

UdeM00000023630 10224 112.8 UdeM00000023630 XP\_006816668.1 35.5 169  
106 2 40 208 291 456 7.60E-22 112.8 10224 cellular

organisms;Eukaryota;Opisthokonta;Metazoa;Eumetazoa;Bilateria;Deuterostomia;Hemichordata;Enteropneusta;Harrimaniidae;Saccoglossus;Saccoglossus kowalevskii

UdeM00000023631 29159 112.1 UdeM00000023631 XP\_034305965.1 43.2 111  
63 0 53 163 63 173 7.50E-22 112.1 29159 cellular

organisms;Eukaryota;Opisthokonta;Metazoa;Eumetazoa;Bilateria;Protostomia;Spiralia;Lophotrochozoa;Mollusca;Bivalvia;Autobranchia;Pteriomorphia;Ostreida;Ostreoidea;Ostreidae;Crassostrea;Crassostrea gigas

UdeM00000023632 29159 115.5 UdeM00000023632 XP\_034305965.1 42.6 115  
66 0 53 167 63 177 6.40E-23 115.5 29159 cellular

organisms;Eukaryota;Opisthokonta;Metazoa;Eumetazoa;Bilateria;Protostomia;Spiralia;Lophotrochozoa;Mollusca;Bivalvia;Autobranchia;Pteriomorphia;Ostreida;Ostreoidea;Ostreidae;Crassostrea;Crassostrea gigas

UdeM00000023633 29159 112.1 UdeM00000023633 XP\_034305965.1 43.2 111  
63 0 53 163 63 173 7.60E-22 112.1 29159 cellular

organisms;Eukaryota;Opisthokonta;Metazoa;Eumetazoa;Bilateria;Protostomia;Spiralia;Lophotrochozoa;Mollusca;Bivalvia;Autobranchia;Pteriomorphia;Ostreida;Ostreoidea;Ostreidae;Crassostrea;Crassostrea gigas

UdeM00000023634 7574 308.1 UdeM00000023634 XP\_013381563.1 44.1 365  
182 8 62 411 55 412 1.60E-80 308.1 7574 cellular

organisms;Eukaryota;Opisthokonta;Metazoa;Eumetazoa;Bilateria;Protostomia;Spiralia;Lophotrochozoa;Brachiopoda;Linguliformea;Lingulata;Lingulida;Linguloidea;Lingulidae;Lingula;Lingula anatina

UdeM00000023635 6596 544.7 UdeM00000023635 XP\_045171251.1 45.7 788  
376 17 3 780 4 749 2.00E-151 544.7 6596 cellular

organisms;Eukaryota;Opisthokonta;Metazoa;Eumetazoa;Bilateria;Protostomia;Spiralia;Lophotrochozoa;Mollusca;Bivalvia;Autobranchia;Heteroconchia;Euherodonta;Imparidentia;Venerida;Veneroidea;Veneridae;Mercenaria;Mercenaria mercenaria

UdeM00000023636 6596 253.8 UdeM00000023636 XP\_045172696.1 32.6 487  
242 12 21 438 21 490 3.90E-64 253.8 6596 cellular

organisms;Eukaryota;Opisthokonta;Metazoa;Eumetazoa;Bilateria;Protostomia;Spiralia;Lophotrochozoa;Mollusca;Bivalvia;Autobranchia;Heteroconchia;Euherodonta;Imparidentia;Venerida;Veneroidea;Veneridae;Mercenaria;Mercenaria mercenaria

UdeM00000023637 6579 490.3 UdeM00000023637 XP\_033747378.1 56.3 481  
167 10 2 453 3 469 5.30E-135 490.3 6579 cellular

organisms;Eukaryota;Opisthokonta;Metazoa;Eumetazoa;Bilateria;Protostomia;

Spiralia;Lophotrochozoa;Mollusca;Bivalvia;Autobranchia;Pteriormorphia;Pectinida;Pectinoidea;Pectinidae;Pecten;Pecten maximus  
UdeM00000023638 6596 156.4 UdeM00000023638 XP\_045172783.1 51.4 140  
68 0 56 195 52 191 3.80E-35 156.4 6596 cellular  
organisms;Eukaryota;Opisthokonta;Metazoa;Eumetazoa;Bilateria;Protostomia;  
Spiralia;Lophotrochozoa;Mollusca;Bivalvia;Autobranchia;Heteroconchia;Euherodonta;Imparidentia;Venerida;Veneroidea;Veneridae;Mercenaria;Mercenaria mercenaria  
UdeM00000023640 6596 219.2 UdeM00000023640 XP\_045173266.1 35.7 311  
185 6 10 319 12 308 7.80E-54 219.2 6596 cellular  
organisms;Eukaryota;Opisthokonta;Metazoa;Eumetazoa;Bilateria;Protostomia;  
Spiralia;Lophotrochozoa;Mollusca;Bivalvia;Autobranchia;Heteroconchia;Euherodonta;Imparidentia;Venerida;Veneroidea;Veneridae;Mercenaria;Mercenaria mercenaria  
UdeM00000023641 1735272 531.9 UdeM00000023641 XP\_041348019.1 57  
433 183 2 40 472 1 430 8.00E-148 531.9 1735272  
cellular  
organisms;Eukaryota;Opisthokonta;Metazoa;Eumetazoa;Bilateria;Protostomia;  
Spiralia;Lophotrochozoa;Mollusca;Gastropoda;Neomphalina;Neomphaloidea;Peltospiridae;Gigantopelta;Gigantopelta aegis  
UdeM00000023642 29159 131.3 UdeM00000023642 XP\_034337601.1 50.9 116  
48 3 14 120 8 123 8.20E-28 131.3 29159 cellular  
organisms;Eukaryota;Opisthokonta;Metazoa;Eumetazoa;Bilateria;Protostomia;  
Spiralia;Lophotrochozoa;Mollusca;Bivalvia;Autobranchia;Pteriormorphia;Ostreida;Ostreoidea;Ostreidae;Crassostrea;Crassostrea gigas  
UdeM00000023643 6596 446.4 UdeM00000023643 XP\_045172121.1 45.7 588  
271 11 8 560 113 687 5.70E-122 446.4 6596 cellular  
organisms;Eukaryota;Opisthokonta;Metazoa;Eumetazoa;Bilateria;Protostomia;  
Spiralia;Lophotrochozoa;Mollusca;Bivalvia;Autobranchia;Heteroconchia;Euherodonta;Imparidentia;Venerida;Veneroidea;Veneridae;Mercenaria;Mercenaria mercenaria  
UdeM00000023644 6596 132.9 UdeM00000023644 XP\_045163627.1 25.4 480  
323 13 59 519 507 970 1.60E-27 132.9 6596 cellular  
organisms;Eukaryota;Opisthokonta;Metazoa;Eumetazoa;Bilateria;Protostomia;  
Spiralia;Lophotrochozoa;Mollusca;Bivalvia;Autobranchia;Heteroconchia;Euherodonta;Imparidentia;Venerida;Veneroidea;Veneridae;Mercenaria;Mercenaria mercenaria  
UdeM00000023645 6596 117.5 UdeM00000023645 XP\_045162069.1 22.9 733  
494 23 4 698 282 981 7.60E-23 117.5 6596 cellular  
organisms;Eukaryota;Opisthokonta;Metazoa;Eumetazoa;Bilateria;Protostomia;  
Spiralia;Lophotrochozoa;Mollusca;Bivalvia;Autobranchia;Heteroconchia;Euherodonta;Imparidentia;Venerida;Veneroidea;Veneridae;Mercenaria;Mercenaria mercenaria  
UdeM00000023646 33528 134.4 UdeM00000023646 XP\_043957434.1 45.3 139  
75 1 1 139 247 384 1.10E-28 134.4 33528 cellular  
organisms;Eukaryota;Opisthokonta;Metazoa;Eumetazoa;Bilateria;Deuterostomia;Chordata;Craniata;Vertebrata;Gnathostomata;Teleostomi;Euteleostomi;Actinopterygii;Actinopteri;Neopterygii;Teleostei;Osteoglossocephalai;Clupeocephala;Euteleostei;Neoteleostei;Eurypterygia;Ctenosquamata;Acanthopterygii;Euacanthopterygii;Percomorphaceae;Ovalentaria;Atherinomorphae;Cyprinodontiformes;Cyprinodontoides;Poeciliidae;Poeciliinae;Gambusia;Gambusia affinis  
UdeM00000023647 29159 292.7 UdeM00000023647 XP\_034334268.1 62.6 211  
76 1 32 242 1 208 4.20E-76 292.7 29159 cellular

organisms;Eukaryota;Opisthokonta;Metazoa;Eumetazoa;Bilateria;Protostomia;Spiralia;Lophotrochozoa;Mollusca;Bivalvia;Autobranchia;Pteriormorphia;Ostr

UdeM00000041679 6596 763.1 UdeM00000041679 XP\_045201368.1 52.4 825  
362 10 4 815 3 809 4.40E-217 763.1 6596 cellular

organisms;Eukaryota;Opisthokonta;Metazoa;Eumetazoa;Bilateria;Protostomia;Spiralia;Lophotrochozoa;Mollusca;Bivalvia;Autobranchia;Heteroconchia;Euhe

UdeM00000041681 6596 429.1 UdeM00000041681 XP\_045201815.1 37.4 708  
409 12 14 707 17 704 1.30E-116 429.1 6596 cellular

organisms;Eukaryota;Opisthokonta;Metazoa;Eumetazoa;Bilateria;Protostomia;Spiralia;Lophotrochozoa;Mollusca;Bivalvia;Autobranchia;Heteroconchia;Euhe

UdeM00000041682 6596 423.7 UdeM00000041682 XP\_045201815.1 37.1 712  
412 15 14 710 17 707 5.40E-115 423.7 6596 cellular

organisms;Eukaryota;Opisthokonta;Metazoa;Eumetazoa;Bilateria;Protostomia;Spiralia;Lophotrochozoa;Mollusca;Bivalvia;Autobranchia;Heteroconchia;Euhe

UdeM00000041683 6596 73.9 UdeM00000041683 XP\_045170001.1 47.5 101  
48 3 1 98 242 340 3.30E-10 73.9 6596 cellular

organisms;Eukaryota;Opisthokonta;Metazoa;Eumetazoa;Bilateria;Protostomia;Spiralia;Lophotrochozoa;Mollusca;Bivalvia;Autobranchia;Heteroconchia;Euhe

UdeM00000041684 6596 146 UdeM00000041684 XP\_045201815.1 36.3 259  
150 6 4 259 261 507 7.10E-32 146 6596 cellular

organisms;Eukaryota;Opisthokonta;Metazoa;Eumetazoa;Bilateria;Protostomia;Spiralia;Lophotrochozoa;Mollusca;Bivalvia;Autobranchia;Heteroconchia;Euhe

UdeM00000041686 6596 118.2 UdeM00000041686 XP\_045201815.1 37.6 181  
88 3 1 172 166 330 1.10E-23 118.2 6596 cellular

organisms;Eukaryota;Opisthokonta;Metazoa;Eumetazoa;Bilateria;Protostomia;Spiralia;Lophotrochozoa;Mollusca;Bivalvia;Autobranchia;Heteroconchia;Euhe

UdeM00000041688 6596 436.4 UdeM00000041688 XP\_045201815.1 38.2 725  
408 14 14 723 17 716 8.10E-119 436.4 6596 cellular

organisms;Eukaryota;Opisthokonta;Metazoa;Eumetazoa;Bilateria;Protostomia;Spiralia;Lophotrochozoa;Mollusca;Bivalvia;Autobranchia;Heteroconchia;Euhe

UdeM00000041689 6596 442.2 UdeM00000041689 XP\_045201815.1 38.6 725  
405 14 14 723 17 716 1.50E-120 442.2 6596 cellular

organisms;Eukaryota;Opisthokonta;Metazoa;Eumetazoa;Bilateria;Protostomia;Spiralia;Lophotrochozoa;Mollusca;Bivalvia;Autobranchia;Heteroconchia;Euhe

UdeM00000041690 6596 438 UdeM00000041690 XP\_045201815.1 38.8 706  
399 12 14 704 17 704 2.80E-119 438 6596 cellular

organisms;Eukaryota;Opisthokonta;Metazoa;Eumetazoa;Bilateria;Protostomia;

Spiralia;Lophotrochozoa;Mollusca;Bivalvia;Autobranchia;Heteroconchia;Euherodonta;Imparidentia;Venerida;Veneroidea;Veneridae;Mercenaria;Mercenaria mercenaria

UdeM00000041691 6573 263.8 UdeM00000041691 XP\_021380242.1 55.3 282  
112 6 1 279 1 271 2.40E-67 263.8 6573 cellular

organisms;Eukaryota;Opisthokonta;Metazoa;Eumetazoa;Bilateria;Protostomia;Spiralia;Lophotrochozoa;Mollusca;Bivalvia;Autobranchia;Pteriormorphia;Pectinida;Pectinoidea;Pectinidae;Mizuhopecten;Mizuhopecten yessoensis

UdeM00000041692 6579 179.5 UdeM00000041692 XP\_033732123.1 56.5 138  
60 0 15 152 3 140 3.50E-42 179.5 6579 cellular

organisms;Eukaryota;Opisthokonta;Metazoa;Eumetazoa;Bilateria;Protostomia;Spiralia;Lophotrochozoa;Mollusca;Bivalvia;Autobranchia;Pteriormorphia;Pectinida;Pectinoidea;Pectinidae;Pecten;Pecten maximus

UdeM00000041693 1735272 510 UdeM00000041693 XP\_041368427.1 43.5  
545 283 6 16 544 32 567 4.10E-141 510 1735272

cellular

organisms;Eukaryota;Opisthokonta;Metazoa;Eumetazoa;Bilateria;Protostomia;Spiralia;Lophotrochozoa;Mollusca;Gastropoda;Neomphalina;Neomphaloidea;Peltospiridae;Gigantopelta;Gigantopelta aegis

UdeM00000041694 1735272 287 UdeM00000041694 XP\_041368427.1 38.7  
331 181 4 3 317 243 567 3.40E-74 287 1735272

cellular

organisms;Eukaryota;Opisthokonta;Metazoa;Eumetazoa;Bilateria;Protostomia;Spiralia;Lophotrochozoa;Mollusca;Gastropoda;Neomphalina;Neomphaloidea;Peltospiridae;Gigantopelta;Gigantopelta aegis

UdeM00000041696 6579 580.5 UdeM00000041696 XP\_033732123.1 49.1 534  
253 5 20 542 13 538 2.80E-162 580.5 6579 cellular

organisms;Eukaryota;Opisthokonta;Metazoa;Eumetazoa;Bilateria;Protostomia;Spiralia;Lophotrochozoa;Mollusca;Bivalvia;Autobranchia;Pteriormorphia;Pectinida;Pectinoidea;Pectinidae;Pecten;Pecten maximus

UdeM00000041697 6579 438.7 UdeM00000041697 XP\_033732123.1 45.9 460  
232 7 4 455 88 538 9.80E-120 438.7 6579 cellular

organisms;Eukaryota;Opisthokonta;Metazoa;Eumetazoa;Bilateria;Protostomia;Spiralia;Lophotrochozoa;Mollusca;Bivalvia;Autobranchia;Pteriormorphia;Pectinida;Pectinoidea;Pectinidae;Pecten;Pecten maximus

UdeM00000041698 6579 584.7 UdeM00000041698 XP\_033732123.1 49.1 538  
260 5 10 539 6 537 1.30E-163 584.7 6579 cellular

organisms;Eukaryota;Opisthokonta;Metazoa;Eumetazoa;Bilateria;Protostomia;Spiralia;Lophotrochozoa;Mollusca;Bivalvia;Autobranchia;Pteriormorphia;Pectinida;Pectinoidea;Pectinidae;Pecten;Pecten maximus

UdeM00000041699 6579 601.7 UdeM00000041699 XP\_033732123.1 49.8 544  
259 6 10 545 6 543 1.00E-168 601.7 6579 cellular

organisms;Eukaryota;Opisthokonta;Metazoa;Eumetazoa;Bilateria;Protostomia;Spiralia;Lophotrochozoa;Mollusca;Bivalvia;Autobranchia;Pteriormorphia;Pectinida;Pectinoidea;Pectinidae;Pecten;Pecten maximus

UdeM00000041700 64144 199.9 UdeM00000041700 XP\_026225028.1 34.2 292  
172 3 202 477 5 292 7.30E-48 199.9 64144 cellular

organisms;Eukaryota;Opisthokonta;Metazoa;Eumetazoa;Bilateria;Deuterostomia;Chordata;Craniata;Vertebrata;Gnathostomata;Teleostomi;Euteleostomi;Actinopterygii;Actinopteri;Neopterygii;Teleostei;Osteoglossocephalai;Clupeocephala;Euteleostei;Neoteleostei;Eurypterygia;Ctenosquamata;Acanthopterygii;Euacanthopterygii;Percomorphaceae;Anabantaria;Anabantiformes;Anabantoidae;Anabantidae;Anabas;Anabas testudineus

UdeM00000041701 6596 661.8 UdeM00000041701 XP\_045204505.1 74.8 405  
 102 0 4 408 17 421 5.90E-187 661.8 6596 cellular  
 organisms;Eukaryota;Opisthokonta;Metazoa;Eumetazoa;Bilateria;Protostomia;  
 Spiralia;Lophotrochozoa;Mollusca;Bivalvia;Autobranhia;Heteroconchia;Euhe  
 terodonta;Imparidentia;Venerida;Veneroidea;Veneridae;Mercenaria;Mercenari  
 a mercenaria  
 UdeM00000041702 29159 87.4 UdeM00000041702 XP\_034331441.1 47.8 90  
 45 2 1 89 722 810 9.90E-15 87.4 29159 cellular  
 organisms;Eukaryota;Opisthokonta;Metazoa;Eumetazoa;Bilateria;Protostomia;  
 Spiralia;Lophotrochozoa;Mollusca;Bivalvia;Autobranhia;Pteriormorphia;Ostr  
 eida;Ostreioidea;Ostreidae;Crassostrea;Crassostrea gigas  
 UdeM00000041703 29159 133.7 UdeM00000041703 XP\_034331441.1 46 139  
 72 3 1 138 674 810 1.90E-28 133.7 29159 cellular  
 organisms;Eukaryota;Opisthokonta;Metazoa;Eumetazoa;Bilateria;Protostomia;  
 Spiralia;Lophotrochozoa;Mollusca;Bivalvia;Autobranhia;Pteriormorphia;Ostr  
 eida;Ostreioidea;Ostreidae;Crassostrea;Crassostrea gigas  
 UdeM00000041705 6596 58.2 UdeM00000041705 XP\_045199492.1 31.1 106  
 69 3 21 123 97 201 8.90E-06 58.2 6596 cellular  
 organisms;Eukaryota;Opisthokonta;Metazoa;Eumetazoa;Bilateria;Protostomia;  
 Spiralia;Lophotrochozoa;Mollusca;Bivalvia;Autobranhia;Heteroconchia;Euhe  
 terodonta;Imparidentia;Venerida;Veneroidea;Veneridae;Mercenaria;Mercenari  
 a mercenaria  
 UdeM00000041706 6596 58.5 UdeM00000041706 XP\_045208321.1 27.2 114  
 67 3 67 173 137 241 9.60E-06 58.5 6596 cellular  
 organisms;Eukaryota;Opisthokonta;Metazoa;Eumetazoa;Bilateria;Protostomia;  
 Spiralia;Lophotrochozoa;Mollusca;Bivalvia;Autobranhia;Heteroconchia;Euhe  
 terodonta;Imparidentia;Venerida;Veneroidea;Veneridae;Mercenaria;Mercenari  
 a mercenaria  
 UdeM00000041708 6596 123.2 UdeM00000041708 XP\_045194453.1 34.1 211  
 128 5 1 204 56 262 3.80E-25 123.2 6596 cellular  
 organisms;Eukaryota;Opisthokonta;Metazoa;Eumetazoa;Bilateria;Protostomia;  
 Spiralia;Lophotrochozoa;Mollusca;Bivalvia;Autobranhia;Heteroconchia;Euhe  
 terodonta;Imparidentia;Venerida;Veneroidea;Veneridae;Mercenaria;Mercenari  
 a mercenaria  
 UdeM00000041709 6596 118.6 UdeM00000041709 XP\_045194453.1 33.2 196  
 120 5 1 189 56 247 8.50E-24 118.6 6596 cellular  
 organisms;Eukaryota;Opisthokonta;Metazoa;Eumetazoa;Bilateria;Protostomia;  
 Spiralia;Lophotrochozoa;Mollusca;Bivalvia;Autobranhia;Heteroconchia;Euhe  
 terodonta;Imparidentia;Venerida;Veneroidea;Veneridae;Mercenaria;Mercenari  
 a mercenaria  
 UdeM00000041710 6573 176.8 UdeM00000041710 XP\_021356708.1 60.4 144  
 55 1 4 145 6 149 2.10E-41 176.8 6573 cellular  
 organisms;Eukaryota;Opisthokonta;Metazoa;Eumetazoa;Bilateria;Protostomia;  
 Spiralia;Lophotrochozoa;Mollusca;Bivalvia;Autobranhia;Pteriormorphia;Pect  
 inida;Pectinoidea;Pectinidae;Mizuhopecten;Mizuhopecten yessoensis  
 UdeM00000041711 400727 164.5 UdeM00000041711 XP\_025111853.1 58.9  
 146 59 1 7 152 8 152 1.10E-37 164.5 400727  
 cellular  
 organisms;Eukaryota;Opisthokonta;Metazoa;Eumetazoa;Bilateria;Protostomia;  
 Spiralia;Lophotrochozoa;Mollusca;Gastropoda;Caenogastropoda;Architaeniogl  
 ossa;Ampullarioidea;Ampullariidae;Pomacea;Pomacea canaliculata  
 UdeM00000041712 6565 953.4 UdeM00000041712 XP\_022324969.1 68 716  
 201 7 7 710 3 702 1.70E-274 953.4 6565 cellular  
 organisms;Eukaryota;Opisthokonta;Metazoa;Eumetazoa;Bilateria;Protostomia;



Spiralia;Lophotrochozoa;Mollusca;Bivalvia;Autobranchia;Pteriormorphia;Ostr  
eida;Ostreoidea;Ostreidae;Crassostrea;Crassostrea virginica  
UdeM00000041713 6579 330.9 UdeM00000041713 XP\_033730706.1 38.1 533  
240 8 2 532 12 456 3.10E-87 330.9 6579 cellular  
organisms;Eukaryota;Opisthokonta;Metazoa;Eumetazoa;Bilateria;Protostomia;  
Spiralia;Lophotrochozoa;Mollusca;Bivalvia;Autobranchia;Pteriormorphia;Pect  
inida;Pectinoidea;Pectinidae;Pecten;Pecten maximus  
UdeM00000041714 6565 142.5 UdeM00000041714 XP\_022321863.1 33.7 279  
159 11 78 348 275 535 1.10E-30 142.5 6565 cellular  
organisms;Eukaryota;Opisthokonta;Metazoa;Eumetazoa;Bilateria;Protostomia;  
Spiralia;Lophotrochozoa;Mollusca;Bivalvia;Autobranchia;Pteriormorphia;Ostr  
eida;Ostreoidea;Ostreidae;Crassostrea;Crassostrea virginica  
UdeM00000041715 6596 67 UdeM00000041715 XP\_045171512.1 24.6 260  
161 12 39 289 403 636 4.70E-08 67 6596 cellular  
organisms;Eukaryota;Opisthokonta;Metazoa;Eumetazoa;Bilateria;Protostomia;  
Spiralia;Lophotrochozoa;Mollusca;Bivalvia;Autobranchia;Heteroconchia;Euhe  
terodonta;Imparidentia;Venerida;Veneroidea;Veneridae;Mercenaria;Mercenari  
a mercenaria  
UdeM00000025567 29159 302.4 UdeM00000025567 XP\_034303860.1 41.2 393  
160 7 11 342 110 492 7.50E-79 302.4 29159 cellular  
organisms;Eukaryota;Opisthokonta;Metazoa;Eumetazoa;Bilateria;Protostomia;  
Spiralia;Lophotrochozoa;Mollusca;Bivalvia;Autobranchia;Pteriormorphia;Ostr  
eida;Ostreoidea;Ostreidae;Crassostrea;Crassostrea gigas  
UdeM00000025568 29159 125.9 UdeM00000025568 XP\_011451530.1 48.3 116  
58 2 45 158 96 211 4.40E-26 125.9 29159 cellular  
organisms;Eukaryota;Opisthokonta;Metazoa;Eumetazoa;Bilateria;Protostomia;  
Spiralia;Lophotrochozoa;Mollusca;Bivalvia;Autobranchia;Pteriormorphia;Ostr  
eida;Ostreoidea;Ostreidae;Crassostrea;Crassostrea gigas  
UdeM00000025570 6596 117.9 UdeM00000025570 XP\_045205318.1 32 281  
162 10 1 257 1 276 2.00E-23 117.9 6596 cellular  
organisms;Eukaryota;Opisthokonta;Metazoa;Eumetazoa;Bilateria;Protostomia;  
Spiralia;Lophotrochozoa;Mollusca;Bivalvia;Autobranchia;Heteroconchia;Euhe  
terodonta;Imparidentia;Venerida;Veneroidea;Veneridae;Mercenaria;Mercenari  
a mercenaria  
UdeM00000025571 50429 167.2 UdeM00000025571 XP\_022807755.1 53.5 159  
71 2 2 160 5 160 1.90E-38 167.2 50429 cellular  
organisms;Eukaryota;Opisthokonta;Metazoa;Eumetazoa;Cnidaria;Anthozoa;Hexa  
corallia;Scleractinia;Astrocoeniina;Pocilloporidae;Stylophora;Stylophora  
pistillata  
UdeM00000025572 6573 282.3 UdeM00000025572 XP\_021346251.1 54.6 249  
109 2 1 249 1 245 5.90E-73 282.3 6573 cellular  
organisms;Eukaryota;Opisthokonta;Metazoa;Eumetazoa;Bilateria;Protostomia;  
Spiralia;Lophotrochozoa;Mollusca;Bivalvia;Autobranchia;Pteriormorphia;Pect  
inida;Pectinoidea;Pectinidae;Mizuhopecten;Mizuhopecten yessoensis  
UdeM00000025573 6579 543.1 UdeM00000025573 XP\_033743925.1 64.5 408  
143 1 19 426 27 432 3.10E-151 543.1 6579 cellular  
organisms;Eukaryota;Opisthokonta;Metazoa;Eumetazoa;Bilateria;Protostomia;  
Spiralia;Lophotrochozoa;Mollusca;Bivalvia;Autobranchia;Pteriormorphia;Pect  
inida;Pectinoidea;Pectinidae;Pecten;Pecten maximus  
UdeM00000025574 6596 84.3 UdeM00000025574 XP\_045158901.1 48.1 81  
41 1 1 80 10 90 7.50E-14 84.3 6596 cellular  
organisms;Eukaryota;Opisthokonta;Metazoa;Eumetazoa;Bilateria;Protostomia;  
Spiralia;Lophotrochozoa;Mollusca;Bivalvia;Autobranchia;Heteroconchia;Euhe

terodonta;Imparidentia;Venerida;Veneroidea;Veneridae;Mercenaria;Mercenari  
 a mercenaria  
 UdeM00000025575 6596 405.2 UdeM00000025575 XP\_045187150.1 45.1 477  
 226 5 1 449 135 603 1.10E-109 405.2 6596 cellular  
 organisms;Eukaryota;Opisthokonta;Metazoa;Eumetazoa;Bilateria;Protostomia;  
 Spiralia;Lophotrochozoa;Mollusca;Bivalvia;Autobranhia;Heteroconchia;Euhe  
 terodonta;Imparidentia;Venerida;Veneroidea;Veneridae;Mercenaria;Mercenari  
 a mercenaria  
 UdeM00000025576 29159 301.2 UdeM00000025576 XP\_011426907.2 55 309  
 107 9 10 301 9 302 4.20E-78 301.2 29159 cellular  
 organisms;Eukaryota;Opisthokonta;Metazoa;Eumetazoa;Bilateria;Protostomia;  
 Spiralia;Lophotrochozoa;Mollusca;Bivalvia;Autobranhia;Pteriormorphia;Ostr  
 eida;Ostreoidea;Ostreidae;Crassostrea;Crassostrea gigas  
 UdeM00000025577 6596 862.8 UdeM00000025577 XP\_045204260.1 63.6 681  
 229 11 25 694 111 783 2.90E-247 862.8 6596 cellular  
 organisms;Eukaryota;Opisthokonta;Metazoa;Eumetazoa;Bilateria;Protostomia;  
 Spiralia;Lophotrochozoa;Mollusca;Bivalvia;Autobranhia;Heteroconchia;Euhe  
 terodonta;Imparidentia;Venerida;Veneroidea;Veneridae;Mercenaria;Mercenari  
 a mercenaria  
 UdeM00000025578 6579 149.1 UdeM00000025578 XP\_033743043.1 46.7 152  
 75 2 1 151 119 265 4.90E-33 149.1 6579 cellular  
 organisms;Eukaryota;Opisthokonta;Metazoa;Eumetazoa;Bilateria;Protostomia;  
 Spiralia;Lophotrochozoa;Mollusca;Bivalvia;Autobranhia;Pteriormorphia;Pect  
 inida;Pectinoidea;Pectinidae;Pecten;Pecten maximus  
 UdeM00000025579 6573 592.4 UdeM00000025579 XP\_021359067.1 49.3 604  
 290 9 1 594 10 607 6.30E-166 592.4 6573 cellular  
 organisms;Eukaryota;Opisthokonta;Metazoa;Eumetazoa;Bilateria;Protostomia;  
 Spiralia;Lophotrochozoa;Mollusca;Bivalvia;Autobranhia;Pteriormorphia;Pect  
 inida;Pectinoidea;Pectinidae;Mizuhopecten;Mizuhopecten yessoensis  
 UdeM00000025580 6596 308.1 UdeM00000025580 XP\_045204011.1 82.4 187  
 3 1 1 187 1 157 7.50E-81 308.1 6596 cellular  
 organisms;Eukaryota;Opisthokonta;Metazoa;Eumetazoa;Bilateria;Protostomia;  
 Spiralia;Lophotrochozoa;Mollusca;Bivalvia;Autobranhia;Heteroconchia;Euhe  
 terodonta;Imparidentia;Venerida;Veneroidea;Veneridae;Mercenaria;Mercenari  
 a mercenaria  
 UdeM00000018225 6596 788.5 UdeM00000018225 XP\_045199770.1 52 777  
 322 13 73 837 78 815 8.40E-225 788.5 6596 cellular  
 organisms;Eukaryota;Opisthokonta;Metazoa;Eumetazoa;Bilateria;Protostomia;  
 Spiralia;Lophotrochozoa;Mollusca;Bivalvia;Autobranhia;Heteroconchia;Euhe  
 terodonta;Imparidentia;Venerida;Veneroidea;Veneridae;Mercenaria;Mercenari  
 a mercenaria  
 UdeM00000018226 6596 748.4 UdeM00000018226 XP\_045199770.1 53 727  
 292 12 1 715 127 815 8.20E-213 748.4 6596 cellular  
 organisms;Eukaryota;Opisthokonta;Metazoa;Eumetazoa;Bilateria;Protostomia;  
 Spiralia;Lophotrochozoa;Mollusca;Bivalvia;Autobranhia;Heteroconchia;Euhe  
 terodonta;Imparidentia;Venerida;Veneroidea;Veneridae;Mercenaria;Mercenari  
 a mercenaria  
 UdeM00000018227 6596 501.5 UdeM00000018227 XP\_045199771.1 36.3 1836  
 799 54 1 1633 31 1699 4.70E-138 501.5 6596 cellular  
 organisms;Eukaryota;Opisthokonta;Metazoa;Eumetazoa;Bilateria;Protostomia;  
 Spiralia;Lophotrochozoa;Mollusca;Bivalvia;Autobranhia;Heteroconchia;Euhe  
 terodonta;Imparidentia;Venerida;Veneroidea;Veneridae;Mercenaria;Mercenari  
 a mercenaria

UdeM00000018228 6579 229.9 UdeM00000018228 XP\_033758968.1 24.6 679  
 467 14 15 670 14 670 9.60E-57 229.9 6579 cellular  
 organisms;Eukaryota;Opisthokonta;Metazoa;Eumetazoa;Bilateria;Protostomia;  
 Spiralia;Lophotrochozoa;Mollusca;Bivalvia;Autobranchia;Pteriomorpha;Pect  
 inida;Pectinoidea;Pectinidae;Pecten;Pecten maximus  
 UdeM00000018229 6596 595.9 UdeM00000018229 XP\_045200069.1 78.3 374  
 76 3 1 370 1 373 3.70E-167 595.9 6596 cellular  
 organisms;Eukaryota;Opisthokonta;Metazoa;Eumetazoa;Bilateria;Protostomia;  
 Spiralia;Lophotrochozoa;Mollusca;Bivalvia;Autobranchia;Heteroconchia;Euhe  
 terodonta;Imparidentia;Venerida;Veneroidea;Veneridae;Mercenaria;Mercenari  
 a mercenaria  
 UdeM00000018230 29159 142.9 UdeM00000018230 XP\_011450416.1 68 103  
 33 0 1 103 381 483 2.40E-31 142.9 29159 cellular  
 organisms;Eukaryota;Opisthokonta;Metazoa;Eumetazoa;Bilateria;Protostomia;  
 Spiralia;Lophotrochozoa;Mollusca;Bivalvia;Autobranchia;Pteriomorpha;Ostr  
 eida;Ostreoidea;Ostreidae;Crassostrea;Crassostrea gigas  
 UdeM00000018232 29159 547 UdeM00000018232 XP\_011450418.2 75.1 354  
 87 1 24 376 54 407 1.90E-152 547 29159 cellular  
 organisms;Eukaryota;Opisthokonta;Metazoa;Eumetazoa;Bilateria;Protostomia;  
 Spiralia;Lophotrochozoa;Mollusca;Bivalvia;Autobranchia;Pteriomorpha;Ostr  
 eida;Ostreoidea;Ostreidae;Crassostrea;Crassostrea gigas  
 UdeM00000018234 6596 632.1 UdeM00000018234 XP\_045201105.1 70.3 481  
 115 8 1 465 1 469 5.60E-178 632.1 6596 cellular  
 organisms;Eukaryota;Opisthokonta;Metazoa;Eumetazoa;Bilateria;Protostomia;  
 Spiralia;Lophotrochozoa;Mollusca;Bivalvia;Autobranchia;Heteroconchia;Euhe  
 terodonta;Imparidentia;Venerida;Veneroidea;Veneridae;Mercenaria;Mercenari  
 a mercenaria  
 UdeM00000018235 1735272 200.3 UdeM00000018235 XP\_041351430.1 70.1  
 134 36 2 9 139 18 150 1.60E-48 200.3 1735272  
 cellular  
 organisms;Eukaryota;Opisthokonta;Metazoa;Eumetazoa;Bilateria;Protostomia;  
 Spiralia;Lophotrochozoa;Mollusca;Gastropoda;Neomphalina;Neomphaloidea;Pel  
 tospiridae;Gigantopelta;Gigantopelta aegis  
 UdeM00000018236 6596 604.7 UdeM00000018236 XP\_045200638.1 44.3 778  
 181 7 2 702 155 757 1.40E-169 604.7 6596 cellular  
 organisms;Eukaryota;Opisthokonta;Metazoa;Eumetazoa;Bilateria;Protostomia;  
 Spiralia;Lophotrochozoa;Mollusca;Bivalvia;Autobranchia;Heteroconchia;Euhe  
 terodonta;Imparidentia;Venerida;Veneroidea;Veneridae;Mercenaria;Mercenari  
 a mercenaria  
 UdeM00000018237 29159 240.7 UdeM00000018237 XP\_011412587.1 78 223  
 40 2 1 220 1 217 1.70E-60 240.7 29159 cellular  
 organisms;Eukaryota;Opisthokonta;Metazoa;Eumetazoa;Bilateria;Protostomia;  
 Spiralia;Lophotrochozoa;Mollusca;Bivalvia;Autobranchia;Pteriomorpha;Ostr  
 eida;Ostreoidea;Ostreidae;Crassostrea;Crassostrea gigas  
 UdeM00000018239 1735272 228 UdeM00000018239 XP\_041356261.1 59  
 217 76 4 11 227 27 230 1.90E-56 228 1735272  
 cellular  
 organisms;Eukaryota;Opisthokonta;Metazoa;Eumetazoa;Bilateria;Protostomia;  
 Spiralia;Lophotrochozoa;Mollusca;Gastropoda;Neomphalina;Neomphaloidea;Pel  
 tospiridae;Gigantopelta;Gigantopelta aegis  
 UdeM00000018240 6579 510.8 UdeM00000018240 XP\_033760964.1 70.5 359  
 88 4 85 441 250 592 1.80E-141 510.8 6579 cellular  
 organisms;Eukaryota;Opisthokonta;Metazoa;Eumetazoa;Bilateria;Protostomia;

Spiralia;Lophotrochozoa;Mollusca;Bivalvia;Autobranchia;Pteriomorpha;Pectinida;Pectinoidea;Pectinidae;Pecten;Pecten maximus

UdeM00000018241 6596 1229.2 UdeM00000018241 XP\_045199640.1 57.1  
1148 428 15 37 1156 21 1132 0.00E+00 1229.2 6596  
cellular

organisms;Eukaryota;Opisthokonta;Metazoa;Eumetazoa;Bilateria;Protostomia;Spiralia;Lophotrochozoa;Mollusca;Bivalvia;Autobranchia;Heteroconchia;Euherodonta;Imparidentia;Venerida;Veneroidea;Veneridae;Mercenaria;Mercenaria mercenaria

UdeM00000018242 29159 90.9 UdeM00000018242 XP\_011453058.2 26.5 245  
165 7 44 276 67 308 2.80E-15 90.9 29159 cellular

organisms;Eukaryota;Opisthokonta;Metazoa;Eumetazoa;Bilateria;Protostomia;Spiralia;Lophotrochozoa;Mollusca;Bivalvia;Autobranchia;Pteriomorpha;Ostreida;Ostreoidea;Ostreidae;Crassostrea;Crassostrea gigas

UdeM00000018243 6596 159.8 UdeM00000018243 XP\_045174908.1 40 235  
136 3 153 387 340 569 6.90E-36 159.8 6596 cellular

organisms;Eukaryota;Opisthokonta;Metazoa;Eumetazoa;Bilateria;Protostomia;Spiralia;Lophotrochozoa;Mollusca;Bivalvia;Autobranchia;Heteroconchia;Euherodonta;Imparidentia;Venerida;Veneroidea;Veneridae;Mercenaria;Mercenaria mercenaria

UdeM00000018244 6596 158.7 UdeM00000018244 XP\_045174908.1 40.4 235  
135 3 153 387 340 569 1.50E-35 158.7 6596 cellular

organisms;Eukaryota;Opisthokonta;Metazoa;Eumetazoa;Bilateria;Protostomia;Spiralia;Lophotrochozoa;Mollusca;Bivalvia;Autobranchia;Heteroconchia;Euherodonta;Imparidentia;Venerida;Veneroidea;Veneridae;Mercenaria;Mercenaria mercenaria

UdeM00000018245 6596 155.6 UdeM00000018245 XP\_045174908.1 42 231  
125 5 161 387 344 569 1.30E-34 155.6 6596 cellular

organisms;Eukaryota;Opisthokonta;Metazoa;Eumetazoa;Bilateria;Protostomia;Spiralia;Lophotrochozoa;Mollusca;Bivalvia;Autobranchia;Heteroconchia;Euherodonta;Imparidentia;Venerida;Veneroidea;Veneridae;Mercenaria;Mercenaria mercenaria

UdeM00000018247 6596 135.6 UdeM00000018247 XP\_045174908.1 45.1 175  
91 3 2 176 400 569 6.40E-29 135.6 6596 cellular

organisms;Eukaryota;Opisthokonta;Metazoa;Eumetazoa;Bilateria;Protostomia;Spiralia;Lophotrochozoa;Mollusca;Bivalvia;Autobranchia;Heteroconchia;Euherodonta;Imparidentia;Venerida;Veneroidea;Veneridae;Mercenaria;Mercenaria mercenaria

UdeM00000018248 6596 418.7 UdeM00000018248 XP\_045201065.1 63.1 317  
115 1 1 317 1 315 6.60E-114 418.7 6596 cellular

organisms;Eukaryota;Opisthokonta;Metazoa;Eumetazoa;Bilateria;Protostomia;Spiralia;Lophotrochozoa;Mollusca;Bivalvia;Autobranchia;Heteroconchia;Euherodonta;Imparidentia;Venerida;Veneroidea;Veneridae;Mercenaria;Mercenaria mercenaria

UdeM00000018249 6596 109.8 UdeM00000018249 XP\_045201067.1 26.5 502  
273 12 3 430 4 483 1.40E-20 109.8 6596 cellular

organisms;Eukaryota;Opisthokonta;Metazoa;Eumetazoa;Bilateria;Protostomia;Spiralia;Lophotrochozoa;Mollusca;Bivalvia;Autobranchia;Heteroconchia;Euherodonta;Imparidentia;Venerida;Veneroidea;Veneridae;Mercenaria;Mercenaria mercenaria

UdeM00000018250 6565 183.7 UdeM00000018250 XP\_022297447.1 52.5 158  
73 1 1 158 211 366 1.80E-43 183.7 6565 cellular

organisms;Eukaryota;Opisthokonta;Metazoa;Eumetazoa;Bilateria;Protostomia;

Spiralia;Lophotrochozoa;Mollusca;Bivalvia;Autobranchia;Pteriormorphia;Ostr  
eida;Ostreoidea;Ostreidae;Crassostrea;Crassostrea virginica  
UdeM00000018253 6596 207.6 UdeM00000018253 XP\_045184729.1 28.8 513  
305 10 1 460 193 698 3.40E-50 207.6 6596 cellular  
organisms;Eukaryota;Opisthokonta;Metazoa;Eumetazoa;Bilateria;Protostomia;  
Spiralia;Lophotrochozoa;Mollusca;Bivalvia;Autobranchia;Heteroconchia;Euhe  
terodonta;Imparidentia;Venerida;Veneroidea;Veneridae;Mercenaria;Mercenari  
a mercenaria  
UdeM00000018254 6596 81.6 UdeM00000018254 XP\_045194475.1 39 118  
72 0 4 121 3 120 1.00E-12 81.6 6596 cellular  
organisms;Eukaryota;Opisthokonta;Metazoa;Eumetazoa;Bilateria;Protostomia;  
Spiralia;Lophotrochozoa;Mollusca;Bivalvia;Autobranchia;Heteroconchia;Euhe  
terodonta;Imparidentia;Venerida;Veneroidea;Veneridae;Mercenaria;Mercenari  
a mercenaria  
UdeM00000018255 6596 100.5 UdeM00000018255 XP\_045156670.1 33.7 163  
107 1 43 205 541 702 2.70E-18 100.5 6596 cellular  
organisms;Eukaryota;Opisthokonta;Metazoa;Eumetazoa;Bilateria;Protostomia;  
Spiralia;Lophotrochozoa;Mollusca;Bivalvia;Autobranchia;Heteroconchia;Euhe  
terodonta;Imparidentia;Venerida;Veneroidea;Veneridae;Mercenaria;Mercenari  
a mercenaria  
UdeM00000018256 6596 292.7 UdeM00000018256 XP\_045199387.1 30.6 722  
447 18 6 704 5 695 1.20E-75 292.7 6596 cellular  
organisms;Eukaryota;Opisthokonta;Metazoa;Eumetazoa;Bilateria;Protostomia;  
Spiralia;Lophotrochozoa;Mollusca;Bivalvia;Autobranchia;Heteroconchia;Euhe  
terodonta;Imparidentia;Venerida;Veneroidea;Veneridae;Mercenaria;Mercenari  
a mercenaria  
UdeM00000018257 6596 138.7 UdeM00000018257 XP\_045159530.1 38.8 165  
100 1 5 169 226 389 1.30E-29 138.7 6596 cellular  
organisms;Eukaryota;Opisthokonta;Metazoa;Eumetazoa;Bilateria;Protostomia;  
Spiralia;Lophotrochozoa;Mollusca;Bivalvia;Autobranchia;Heteroconchia;Euhe  
terodonta;Imparidentia;Venerida;Veneroidea;Veneridae;Mercenaria;Mercenari  
a mercenaria  
UdeM00000018258 6596 82 UdeM00000018258 XP\_045194475.1 39 118  
72 0 4 121 3 120 8.00E-13 82 6596 cellular  
organisms;Eukaryota;Opisthokonta;Metazoa;Eumetazoa;Bilateria;Protostomia;  
Spiralia;Lophotrochozoa;Mollusca;Bivalvia;Autobranchia;Heteroconchia;Euhe  
terodonta;Imparidentia;Venerida;Veneroidea;Veneridae;Mercenaria;Mercenari  
a mercenaria  
UdeM00000018259 6596 122.5 UdeM00000018259 XP\_045160626.1 31.5 257  
168 3 87 343 442 690 1.10E-24 122.5 6596 cellular  
organisms;Eukaryota;Opisthokonta;Metazoa;Eumetazoa;Bilateria;Protostomia;  
Spiralia;Lophotrochozoa;Mollusca;Bivalvia;Autobranchia;Heteroconchia;Euhe  
terodonta;Imparidentia;Venerida;Veneroidea;Veneridae;Mercenaria;Mercenari  
a mercenaria  
UdeM00000018260 6596 290.8 UdeM00000018260 XP\_045157317.1 30.2 725  
455 14 4 704 3 700 4.70E-75 290.8 6596 cellular  
organisms;Eukaryota;Opisthokonta;Metazoa;Eumetazoa;Bilateria;Protostomia;  
Spiralia;Lophotrochozoa;Mollusca;Bivalvia;Autobranchia;Heteroconchia;Euhe  
terodonta;Imparidentia;Venerida;Veneroidea;Veneridae;Mercenaria;Mercenari  
a mercenaria  
UdeM00000018261 6596 291.2 UdeM00000018261 XP\_045199387.1 30.7 720  
462 11 6 716 5 696 3.60E-75 291.2 6596 cellular  
organisms;Eukaryota;Opisthokonta;Metazoa;Eumetazoa;Bilateria;Protostomia;  
Spiralia;Lophotrochozoa;Mollusca;Bivalvia;Autobranchia;Heteroconchia;Euhe

terodonta;Imparidentia;Venerida;Veneroidea;Veneridae;Mercenaria;Mercenari  
 a mercenaria  
 UdeM00000018262 6596 284.6 UdeM00000018262 XP\_045199387.1 29.9 718  
 456 16 6 703 5 695 3.40E-73 284.6 6596 cellular  
 organisms;Eukaryota;Opisthokonta;Metazoa;Eumetazoa;Bilateria;Protostomia;  
 Spiralia;Lophotrochozoa;Mollusca;Bivalvia;Autobranchia;Heteroconchia;Euhe  
 terodonta;Imparidentia;Venerida;Veneroidea;Veneridae;Mercenaria;Mercenari  
 a mercenaria  
 UdeM00000018264 6596 290 UdeM00000018264 XP\_045202537.1 64.8 386  
 122 8 1 380 1320 1697 6.20E-75 290 6596 cellular  
 organisms;Eukaryota;Opisthokonta;Metazoa;Eumetazoa;Bilateria;Protostomia;  
 Spiralia;Lophotrochozoa;Mollusca;Bivalvia;Autobranchia;Heteroconchia;Euhe  
 terodonta;Imparidentia;Venerida;Veneroidea;Veneridae;Mercenaria;Mercenari  
 a mercenaria  
 UdeM00000018263 6579 2232.6 UdeM00000018263 XP\_033759998.1 65.3  
 1765 575 21 1 1752 1 1740 0.00E+00 2232.6 6579  
 cellular  
 organisms;Eukaryota;Opisthokonta;Metazoa;Eumetazoa;Bilateria;Protostomia;  
 Spiralia;Lophotrochozoa;Mollusca;Bivalvia;Autobranchia;Pteriormorphia;Pect  
 inida;Pectinoidea;Pectinidae;Pecten;Pecten maximus  
 UdeM00000018265 6579 237.7 UdeM00000018265 XP\_033761214.1 52.8 216  
 101 1 1 215 1 216 1.40E-59 237.7 6579 cellular  
 organisms;Eukaryota;Opisthokonta;Metazoa;Eumetazoa;Bilateria;Protostomia;  
 Spiralia;Lophotrochozoa;Mollusca;Bivalvia;Autobranchia;Pteriormorphia;Pect  
 inida;Pectinoidea;Pectinidae;Pecten;Pecten maximus  
 UdeM00000018266 6596 147.5 UdeM00000018266 XP\_045164042.1 55 131  
 58 1 178 308 107 236 2.80E-32 147.5 6596 cellular  
 organisms;Eukaryota;Opisthokonta;Metazoa;Eumetazoa;Bilateria;Protostomia;  
 Spiralia;Lophotrochozoa;Mollusca;Bivalvia;Autobranchia;Heteroconchia;Euhe  
 terodonta;Imparidentia;Venerida;Veneroidea;Veneridae;Mercenaria;Mercenari  
 a mercenaria  
 UdeM00000018267 6596 104.4 UdeM00000018267 XP\_045157086.1 93.9 49  
 3 0 1 49 19 67 6.70E-20 104.4 6596 cellular  
 organisms;Eukaryota;Opisthokonta;Metazoa;Eumetazoa;Bilateria;Protostomia;  
 Spiralia;Lophotrochozoa;Mollusca;Bivalvia;Autobranchia;Heteroconchia;Euhe  
 terodonta;Imparidentia;Venerida;Veneroidea;Veneridae;Mercenaria;Mercenari  
 a mercenaria  
 UdeM00000018268 6596 443 UdeM00000018268 XP\_045157086.1 55.9 442  
 135 4 1 440 76 459 4.60E-121 443 6596 cellular  
 organisms;Eukaryota;Opisthokonta;Metazoa;Eumetazoa;Bilateria;Protostomia;  
 Spiralia;Lophotrochozoa;Mollusca;Bivalvia;Autobranchia;Heteroconchia;Euhe  
 terodonta;Imparidentia;Venerida;Veneroidea;Veneridae;Mercenaria;Mercenari  
 a mercenaria  
 UdeM00000018269 6596 330.5 UdeM00000018269 XP\_045157086.1 52.8 360  
 110 4 1 358 158 459 2.70E-87 330.5 6596 cellular  
 organisms;Eukaryota;Opisthokonta;Metazoa;Eumetazoa;Bilateria;Protostomia;  
 Spiralia;Lophotrochozoa;Mollusca;Bivalvia;Autobranchia;Heteroconchia;Euhe  
 terodonta;Imparidentia;Venerida;Veneroidea;Veneridae;Mercenaria;Mercenari  
 a mercenaria  
 UdeM00000018270 6596 506.5 UdeM00000018270 XP\_045157086.1 53.7 495  
 190 8 1 492 1 459 3.80E-140 506.5 6596 cellular  
 organisms;Eukaryota;Opisthokonta;Metazoa;Eumetazoa;Bilateria;Protostomia;  
 Spiralia;Lophotrochozoa;Mollusca;Bivalvia;Autobranchia;Heteroconchia;Euhe

terodonta;Imparidentia;Venerida;Veneroidea;Veneridae;Mercenaria;Mercenaria mercenaria

UdeM00000018271 6500 113.2 UdeM00000018271 XP\_012942302.1 30.3 304  
190 5 5 286 7 310 5.50E-22 113.2 6500 cellular

organisms;Eukaryota;Opisthokonta;Metazoa;Eumetazoa;Bilateria;Protostomia;Spiralia;Lophotrochozoa;Mollusca;Gastropoda;Heterobranchia;Euthyneura;Tectipleura;Aplysiida;Aplysioidea;Aplysiidae;Aplysia;Aplysia californica

UdeM00000018272 225164 376.3 UdeM00000018272 XP\_009063422.1 45.2  
440 226 7 38 475 1 427 5.90E-101 376.3 225164  
cellular

organisms;Eukaryota;Opisthokonta;Metazoa;Eumetazoa;Bilateria;Protostomia;Spiralia;Lophotrochozoa;Mollusca;Gastropoda;Patellogastropoda;Lottioidea;Lottiidae;Lottia;Lottia gigantea

UdeM00000018273 6596 160.2 UdeM00000018273 XP\_045174734.1 32.8 299  
179 8 8 297 11 296 6.00E-36 160.2 6596 cellular

organisms;Eukaryota;Opisthokonta;Metazoa;Eumetazoa;Bilateria;Protostomia;Spiralia;Lophotrochozoa;Mollusca;Bivalvia;Autobranchia;Heteroconchia;Euheterodonta;Imparidentia;Venerida;Veneroidea;Veneridae;Mercenaria;Mercenaria mercenaria

UdeM00000018274 6573 78.6 UdeM00000018274 XP\_021374915.1 33.7 98  
65 0 8 105 15 112 7.00E-12 78.6 6573 cellular

organisms;Eukaryota;Opisthokonta;Metazoa;Eumetazoa;Bilateria;Protostomia;Spiralia;Lophotrochozoa;Mollusca;Bivalvia;Autobranchia;Pteriormorphia;Pectinida;Pectinoidea;Pectinidae;Mizuhopecten;Mizuhopecten yessoensis

UdeM00000018275 6596 146.4 UdeM00000018275 XP\_045201917.1 30.2 262  
176 4 8 264 14 273 1.00E-31 146.4 6596 cellular

organisms;Eukaryota;Opisthokonta;Metazoa;Eumetazoa;Bilateria;Protostomia;Spiralia;Lophotrochozoa;Mollusca;Bivalvia;Autobranchia;Heteroconchia;Euheterodonta;Imparidentia;Venerida;Veneroidea;Veneridae;Mercenaria;Mercenaria mercenaria

UdeM00000018276 6596 146.7 UdeM00000018276 XP\_045174734.1 28.6 350  
199 10 1 333 4 319 5.60E-32 146.7 6596 cellular

organisms;Eukaryota;Opisthokonta;Metazoa;Eumetazoa;Bilateria;Protostomia;Spiralia;Lophotrochozoa;Mollusca;Bivalvia;Autobranchia;Heteroconchia;Euheterodonta;Imparidentia;Venerida;Veneroidea;Veneridae;Mercenaria;Mercenaria mercenaria

UdeM00000018277 29159 57.8 UdeM00000018277 XP\_034339171.1 34.1 91  
57 2 1 91 653 740 9.50E-06 57.8 29159 cellular

organisms;Eukaryota;Opisthokonta;Metazoa;Eumetazoa;Bilateria;Protostomia;Spiralia;Lophotrochozoa;Mollusca;Bivalvia;Autobranchia;Pteriormorphia;Ostreida;Ostreioidea;Ostreidae;Crassostrea;Crassostrea gigas

UdeM00000018278 6596 158.3 UdeM00000018278 XP\_045174734.1 30 307  
187 6 8 303 11 300 2.30E-35 158.3 6596 cellular

organisms;Eukaryota;Opisthokonta;Metazoa;Eumetazoa;Bilateria;Protostomia;Spiralia;Lophotrochozoa;Mollusca;Bivalvia;Autobranchia;Heteroconchia;Euheterodonta;Imparidentia;Venerida;Veneroidea;Veneridae;Mercenaria;Mercenaria mercenaria

UdeM00000018279 7955 81.6 UdeM00000018279 NP\_001092898.1 33.7 163  
83 6 1 139 1 162 2.30E-12 81.6 7955 cellular

organisms;Eukaryota;Opisthokonta;Metazoa;Eumetazoa;Bilateria;Deuterostomia;Chordata;Craniata;Vertebrata;Gnathostomata;Teleostomi;Euteleostomi;Actinopterygii;Actinopteri;Neopterygii;Teleostei;Osteoglossocephalai;Clupeocephala;Otomorpha;Ostariophysi;Otophysi;Cypriniphysae;Cypriniformes;Cyprinidae;Danionidae;Danioninae;Danio;Danio rerio

UdeM00000018280 6596 151.4 UdeM00000018280 XP\_045174734.1 29.2 305  
 205 4 1 302 4 300 2.70E-33 151.4 6596 cellular  
 organisms;Eukaryota;Opisthokonta;Metazoa;Eumetazoa;Bilateria;Protostomia;  
 Spiralia;Lophotrochozoa;Mollusca;Bivalvia;Autobranchia;Heteroconchia;Euhe  
 terodonta;Imparidentia;Venerida;Veneroidea;Veneridae;Mercenaria;Mercenari  
 a mercenaria  
 UdeM00000018281 6596 151.4 UdeM00000018281 XP\_045174734.1 29.2 305  
 205 4 1 302 4 300 2.70E-33 151.4 6596 cellular  
 organisms;Eukaryota;Opisthokonta;Metazoa;Eumetazoa;Bilateria;Protostomia;  
 Spiralia;Lophotrochozoa;Mollusca;Bivalvia;Autobranchia;Heteroconchia;Euhe  
 terodonta;Imparidentia;Venerida;Veneroidea;Veneridae;Mercenaria;Mercenari  
 a mercenaria  
 UdeM00000018282 6596 171 UdeM00000018282 XP\_045201090.1 61.9 139  
 51 2 1 137 1 139 1.00E-39 171 6596 cellular  
 organisms;Eukaryota;Opisthokonta;Metazoa;Eumetazoa;Bilateria;Protostomia;  
 Spiralia;Lophotrochozoa;Mollusca;Bivalvia;Autobranchia;Heteroconchia;Euhe  
 terodonta;Imparidentia;Venerida;Veneroidea;Veneridae;Mercenaria;Mercenari  
 a mercenaria  
 UdeM00000018284 1735272 98.6 UdeM00000018284 XP\_041349006.1 39.5  
 114 69 0 358 471 46 159 2.30E-17 98.6 1735272  
 cellular  
 organisms;Eukaryota;Opisthokonta;Metazoa;Eumetazoa;Bilateria;Protostomia;  
 Spiralia;Lophotrochozoa;Mollusca;Gastropoda;Neomphalina;Neomphaloidea;Pel  
 tospiridae;Gigantopelta;Gigantopelta aegis  
 UdeM00000018285 6596 547 UdeM00000018285 XP\_045201547.1 43.6 615  
 332 7 59 668 48 652 3.90E-152 547 6596 cellular  
 organisms;Eukaryota;Opisthokonta;Metazoa;Eumetazoa;Bilateria;Protostomia;  
 Spiralia;Lophotrochozoa;Mollusca;Bivalvia;Autobranchia;Heteroconchia;Euhe  
 terodonta;Imparidentia;Venerida;Veneroidea;Veneridae;Mercenaria;Mercenari  
 a mercenaria  
 UdeM00000018286 29159 65.5 UdeM00000018286 XP\_011412090.2 41 83  
 34 2 1 69 222 303 6.40E-08 65.5 29159 cellular  
 organisms;Eukaryota;Opisthokonta;Metazoa;Eumetazoa;Bilateria;Protostomia;  
 Spiralia;Lophotrochozoa;Mollusca;Bivalvia;Autobranchia;Pteriormorphia;Ostr  
 eida;Ostreoidea;Ostreidae;Crassostrea;Crassostrea gigas  
 UdeM00000018287 6596 305.1 UdeM00000018287 XP\_045200551.1 69.1 207  
 64 0 11 217 1 207 8.10E-80 305.1 6596 cellular  
 organisms;Eukaryota;Opisthokonta;Metazoa;Eumetazoa;Bilateria;Protostomia;  
 Spiralia;Lophotrochozoa;Mollusca;Bivalvia;Autobranchia;Heteroconchia;Euhe  
 terodonta;Imparidentia;Venerida;Veneroidea;Veneridae;Mercenaria;Mercenari  
 a mercenaria  
 UdeM00000018288 1735272 198.7 UdeM00000018288 XP\_041357818.1 48.4  
 219 98 4 4 220 2 207 7.50E-48 198.7 1735272  
 cellular  
 organisms;Eukaryota;Opisthokonta;Metazoa;Eumetazoa;Bilateria;Protostomia;  
 Spiralia;Lophotrochozoa;Mollusca;Gastropoda;Neomphalina;Neomphaloidea;Pel  
 tospiridae;Gigantopelta;Gigantopelta aegis  
 UdeM00000018289 6573 470.7 UdeM00000018289 XP\_021377752.1 32.7 887  
 543 9 4 867 1 856 4.00E-129 470.7 6573 cellular  
 organisms;Eukaryota;Opisthokonta;Metazoa;Eumetazoa;Bilateria;Protostomia;  
 Spiralia;Lophotrochozoa;Mollusca;Bivalvia;Autobranchia;Pteriormorphia;Pect  
 inida;Pectinoidea;Pectinidae;Mizuhopecten;Mizuhopecten yessoensis  
 UdeM00000018291 6579 475.3 UdeM00000018291 XP\_033730327.1 69.5 361  
 110 0 1 361 19 379 7.10E-131 475.3 6579 cellular



organisms;Eukaryota;Opisthokonta;Metazoa;Eumetazoa;Bilateria;Protostomia; Spiralia;Lophotrochozoa;Mollusca;Bivalvia;Autobranchia;Pteriomorphia;Pectinida;Pectinoidea;Pectinidae;Pecten;Pecten maximus

UdeM00000018290 6579 486.1 UdeM00000018290 XP\_033730327.1 69.4 369  
113 0 40 408 11 379 4.50E-134 486.1 6579 cellular

organisms;Eukaryota;Opisthokonta;Metazoa;Eumetazoa;Bilateria;Protostomia; Spiralia;Lophotrochozoa;Mollusca;Bivalvia;Autobranchia;Pteriomorphia;Pectinida;Pectinoidea;Pectinidae;Pecten;Pecten maximus

UdeM00000018292 6526 213.8 UdeM00000018292 XP\_013067574.1 82.8 122  
21 0 4 125 2 123 1.30E-52 213.8 6526 cellular

organisms;Eukaryota;Opisthokonta;Metazoa;Eumetazoa;Bilateria;Protostomia; Spiralia;Lophotrochozoa;Mollusca;Gastropoda;Heterobranchia;Euthyneura;Panpulmonata;Hygrophila;Lymnaeioidea;Planorbidae;Biomphalaria;Biomphalaria glabrata

UdeM00000018293 1735272 169.9 UdeM00000018293 XP\_041371917.1 39  
336 183 7 55 383 99 419 6.60E-39 169.9 1735272  
cellular

organisms;Eukaryota;Opisthokonta;Metazoa;Eumetazoa;Bilateria;Protostomia; Spiralia;Lophotrochozoa;Mollusca;Gastropoda;Neomphalina;Neomphaloidea;Peltospiridae;Gigantopelta;Gigantopelta aegis

UdeM00000018294 7668 120.9 UdeM00000018294 XP\_003729577.2 32.5 209  
88 2 9 168 712 916 1.60E-24 120.9 7668 cellular

organisms;Eukaryota;Opisthokonta;Metazoa;Eumetazoa;Bilateria;Deuterostomia;Echinodermata;Eleutherozoa;Echinozoa;Echinoidea;Euechinoidea;Echinacea;Camarodonta;Echinidea;Strongylocentrotidae;Strongylocentrotus;Strongylocentrotus purpuratus

UdeM00000018295 37621 96.3 UdeM00000018295 XP\_014678940.1 61.4 70  
27 0 1 70 499 568 2.10E-17 96.3 37621 cellular

organisms;Eukaryota;Opisthokonta;Metazoa;Eumetazoa;Bilateria;Protostomia; Ecdysozoa;Scalidophora;Priapulida;Priapulimorpha;Priapulimorphida;Priapulidae;Priapululus;Priapululus caudatus

UdeM00000018296 37621 98.2 UdeM00000018296 XP\_014678940.1 53.3 92  
42 1 1 92 499 589 8.30E-18 98.2 37621 cellular

organisms;Eukaryota;Opisthokonta;Metazoa;Eumetazoa;Bilateria;Protostomia; Ecdysozoa;Scalidophora;Priapulida;Priapulimorpha;Priapulimorphida;Priapulidae;Priapululus;Priapululus caudatus

UdeM00000018297 37621 104 UdeM00000018297 XP\_014673981.1 63.2 76  
28 0 1 76 76 151 8.70E-20 104 37621 cellular

organisms;Eukaryota;Opisthokonta;Metazoa;Eumetazoa;Bilateria;Protostomia; Ecdysozoa;Scalidophora;Priapulida;Priapulimorpha;Priapulimorphida;Priapulidae;Priapululus;Priapululus caudatus

UdeM00000018298 6596 192.2 UdeM00000018298 XP\_045202462.1 40.6 286  
150 7 1 271 151 431 8.70E-46 192.2 6596 cellular

organisms;Eukaryota;Opisthokonta;Metazoa;Eumetazoa;Bilateria;Protostomia; Spiralia;Lophotrochozoa;Mollusca;Bivalvia;Autobranchia;Heteroconchia;Euheterodonta;Imparidentia;Venerida;Veneroidea;Veneridae;Mercenaria;Mercenaria mercenaria

UdeM00000018299 29159 153.7 UdeM00000018299 XP\_034320422.1 71.7 92  
26 0 28 119 133 224 1.70E-34 153.7 29159 cellular

organisms;Eukaryota;Opisthokonta;Metazoa;Eumetazoa;Bilateria;Protostomia; Spiralia;Lophotrochozoa;Mollusca;Bivalvia;Autobranchia;Pteriomorphia;Ostreida;Ostreioidea;Ostreidae;Crassostrea;Crassostrea gigas

UdeM00000018300 6573 124 UdeM00000018300 XP\_021355633.1 48.5 130  
66 1 9 137 11 140 2.90E-25 124 6573 cellular

organisms;Eukaryota;Opisthokonta;Metazoa;Eumetazoa;Bilateria;Protostomia;  
Spiralia;Lophotrochozoa;Mollusca;Bivalvia;Autobranchia;Pteriomorpha;Pect  
inida;Pectinoidea;Pectinidae;Mizuhopecten;Mizuhopecten yessoensis  
UdeM00000018301 6573 124 UdeM00000018301 XP\_021355633.1 48.5 130  
66 1 9 137 11 140 2.90E-25 124 6573 cellular  
organisms;Eukaryota;Opisthokonta;Metazoa;Eumetazoa;Bilateria;Protostomia;  
Spiralia;Lophotrochozoa;Mollusca;Bivalvia;Autobranchia;Pteriomorpha;Pect  
inida;Pectinoidea;Pectinidae;Mizuhopecten;Mizuhopecten yessoensis  
UdeM00000018302 1735272 73.6 UdeM00000018302 XP\_041358777.1 27  
230 150 6 1 220 1 222 6.10E-10 73.6 1735272  
cellular  
organisms;Eukaryota;Opisthokonta;Metazoa;Eumetazoa;Bilateria;Protostomia;  
Spiralia;Lophotrochozoa;Mollusca;Gastropoda;Neomphalina;Neomphaloidea;Pel  
tospiridae;Gigantopelta;Gigantopelta aegis  
UdeM00000018303 1735272 172.6 UdeM00000018303 XP\_041356772.1 29.1  
385 251 7 24 402 39 407 1.10E-39 172.6 1735272  
cellular  
organisms;Eukaryota;Opisthokonta;Metazoa;Eumetazoa;Bilateria;Protostomia;  
Spiralia;Lophotrochozoa;Mollusca;Gastropoda;Neomphalina;Neomphaloidea;Pel  
tospiridae;Gigantopelta;Gigantopelta aegis  
UdeM00000018304 6565 282.7 UdeM00000018304 XP\_022290234.1 53.6 248  
109 3 26 273 44 285 5.00E-73 282.7 6565 cellular  
organisms;Eukaryota;Opisthokonta;Metazoa;Eumetazoa;Bilateria;Protostomia;  
Spiralia;Lophotrochozoa;Mollusca;Bivalvia;Autobranchia;Pteriomorpha;Ostr  
eida;Ostreoidea;Ostreidae;Crassostrea;Crassostrea virginica  
UdeM00000018305 6596 427.2 UdeM00000018305 XP\_045201850.1 29.1 1103  
695 37 67 1123 7 1068 6.90E-116 427.2 6596 cellular  
organisms;Eukaryota;Opisthokonta;Metazoa;Eumetazoa;Bilateria;Protostomia;  
Spiralia;Lophotrochozoa;Mollusca;Bivalvia;Autobranchia;Heteroconchia;Euhe  
terodonta;Imparidentia;Venerida;Veneroidea;Veneridae;Mercenaria;Mercenari  
a mercenaria  
UdeM00000018306 6573 414.1 UdeM00000018306 XP\_021349077.1 40.5 560  
322 3 11 560 96 654 2.90E-112 414.1 6573 cellular  
organisms;Eukaryota;Opisthokonta;Metazoa;Eumetazoa;Bilateria;Protostomia;  
Spiralia;Lophotrochozoa;Mollusca;Bivalvia;Autobranchia;Pteriomorpha;Pect  
inida;Pectinoidea;Pectinidae;Mizuhopecten;Mizuhopecten yessoensis  
UdeM00000018307 6573 413.3 UdeM00000018307 XP\_021371609.1 47.4 454  
224 1 12 450 14 467 4.00E-112 413.3 6573 cellular  
organisms;Eukaryota;Opisthokonta;Metazoa;Eumetazoa;Bilateria;Protostomia;  
Spiralia;Lophotrochozoa;Mollusca;Bivalvia;Autobranchia;Pteriomorpha;Pect  
inida;Pectinoidea;Pectinidae;Mizuhopecten;Mizuhopecten yessoensis  
UdeM00000018308 6573 206.5 UdeM00000018308 XP\_021349207.1 36.3 325  
189 9 68 380 101 419 6.30E-50 206.5 6573 cellular  
organisms;Eukaryota;Opisthokonta;Metazoa;Eumetazoa;Bilateria;Protostomia;  
Spiralia;Lophotrochozoa;Mollusca;Bivalvia;Autobranchia;Pteriomorpha;Pect  
inida;Pectinoidea;Pectinidae;Mizuhopecten;Mizuhopecten yessoensis  
UdeM00000018309 6573 108.2 UdeM00000018309 XP\_021371608.1 54.3 105  
48 0 12 116 14 118 7.10E-21 108.2 6573 cellular  
organisms;Eukaryota;Opisthokonta;Metazoa;Eumetazoa;Bilateria;Protostomia;  
Spiralia;Lophotrochozoa;Mollusca;Bivalvia;Autobranchia;Pteriomorpha;Pect  
inida;Pectinoidea;Pectinidae;Mizuhopecten;Mizuhopecten yessoensis  
UdeM00000018310 29159 207.2 UdeM00000018310 XP\_034332822.1 39 310  
163 8 100 400 119 411 4.00E-50 207.2 29159 cellular  
organisms;Eukaryota;Opisthokonta;Metazoa;Eumetazoa;Bilateria;Protostomia;

Spiralia;Lophotrochozoa;Mollusca;Bivalvia;Autobranchia;Pteriormorphia;Ostr  
eida;Ostreoidea;Ostreidae;Crassostrea;Crassostrea gigas  
UdeM00000018311 1735272 323.9 UdeM00000018311 XP\_041374187.1 48.1  
349 158 9 1 335 1 340 2.40E-85 323.9 1735272  
cellular  
organisms;Eukaryota;Opisthokonta;Metazoa;Eumetazoa;Bilateria;Protostomia;  
Spiralia;Lophotrochozoa;Mollusca;Gastropoda;Neomphalina;Neomphaloidea;Pel  
tospiridae;Gigantopelta;Gigantopelta aegis  
UdeM00000018312 6579 164.1 UdeM00000018312 XP\_033747958.1 55.9 127  
56 0 8 134 18 144 1.40E-37 164.1 6579 cellular  
organisms;Eukaryota;Opisthokonta;Metazoa;Eumetazoa;Bilateria;Protostomia;  
Spiralia;Lophotrochozoa;Mollusca;Bivalvia;Autobranchia;Pteriormorphia;Pect  
inida;Pectinoidea;Pectinidae;Pecten;Pecten maximus  
UdeM00000018313 6579 164.1 UdeM00000018313 XP\_033747958.1 55.9 127  
56 0 24 150 18 144 1.60E-37 164.1 6579 cellular  
organisms;Eukaryota;Opisthokonta;Metazoa;Eumetazoa;Bilateria;Protostomia;  
Spiralia;Lophotrochozoa;Mollusca;Bivalvia;Autobranchia;Pteriormorphia;Pect  
inida;Pectinoidea;Pectinidae;Pecten;Pecten maximus  
UdeM00000018314 6565 205.7 UdeM00000018314 XP\_022294078.1 39.9 296  
168 6 100 388 147 439 1.10E-49 205.7 6565 cellular  
organisms;Eukaryota;Opisthokonta;Metazoa;Eumetazoa;Bilateria;Protostomia;  
Spiralia;Lophotrochozoa;Mollusca;Bivalvia;Autobranchia;Pteriormorphia;Ostr  
eida;Ostreoidea;Ostreidae;Crassostrea;Crassostrea virginica  
UdeM00000018315 6596 479.2 UdeM00000018315 XP\_045201087.1 53 432  
197 5 1 430 1 428 5.60E-132 479.2 6596 cellular  
organisms;Eukaryota;Opisthokonta;Metazoa;Eumetazoa;Bilateria;Protostomia;  
Spiralia;Lophotrochozoa;Mollusca;Bivalvia;Autobranchia;Heteroconchia;Euhe  
terodonta;Imparidentia;Venerida;Veneroidea;Veneridae;Mercenaria;Mercenari  
a mercenaria  
UdeM00000018316 6596 410.6 UdeM00000018316 XP\_045202300.1 35 738  
454 12 1 726 1 724 4.10E-111 410.6 6596 cellular  
organisms;Eukaryota;Opisthokonta;Metazoa;Eumetazoa;Bilateria;Protostomia;  
Spiralia;Lophotrochozoa;Mollusca;Bivalvia;Autobranchia;Heteroconchia;Euhe  
terodonta;Imparidentia;Venerida;Veneroidea;Veneridae;Mercenaria;Mercenari  
a mercenaria  
UdeM00000018317 29159 212.6 UdeM00000018317 XP\_034329879.1 62.3 167  
59 2 1 167 3 165 3.80E-52 212.6 29159 cellular  
organisms;Eukaryota;Opisthokonta;Metazoa;Eumetazoa;Bilateria;Protostomia;  
Spiralia;Lophotrochozoa;Mollusca;Bivalvia;Autobranchia;Pteriormorphia;Ostr  
eida;Ostreoidea;Ostreidae;Crassostrea;Crassostrea gigas  
UdeM00000018318 6596 544.3 UdeM00000018318 XP\_045200175.1 52.9 1052  
361 24 1 1010 1 959 3.40E-151 544.3 6596 cellular  
organisms;Eukaryota;Opisthokonta;Metazoa;Eumetazoa;Bilateria;Protostomia;  
Spiralia;Lophotrochozoa;Mollusca;Bivalvia;Autobranchia;Heteroconchia;Euhe  
terodonta;Imparidentia;Venerida;Veneroidea;Veneridae;Mercenaria;Mercenari  
a mercenaria  
UdeM00000018319 6596 278.9 UdeM00000018319 XP\_045200175.1 58.9 246  
84 7 12 245 964 1204 6.40E-72 278.9 6596 cellular  
organisms;Eukaryota;Opisthokonta;Metazoa;Eumetazoa;Bilateria;Protostomia;  
Spiralia;Lophotrochozoa;Mollusca;Bivalvia;Autobranchia;Heteroconchia;Euhe  
terodonta;Imparidentia;Venerida;Veneroidea;Veneridae;Mercenaria;Mercenari  
a mercenaria  
UdeM00000018320 6579 435.3 UdeM00000018320 XP\_033759836.1 45.6 509  
265 4 24 523 108 613 1.10E-118 435.3 6579 cellular

organisms;Eukaryota;Opisthokonta;Metazoa;Eumetazoa;Bilateria;Protostomia;Spiralia;Lophotrochozoa;Mollusca;Bivalvia;Autobranhia;Pteriormorphia;Pectinida;Pectinoidea;Pectinidae;Pecten;Pecten maximus

UdeM00000018321 32264 112.8 UdeM00000018321 XP\_015783371.1 26.6 364  
227 15 224 570 367 707 1.60E-21 112.8 32264 cellular

organisms;Eukaryota;Opisthokonta;Metazoa;Eumetazoa;Bilateria;Protostomia;Ecdysozoa;Panarthropoda;Arthropoda;Chelicerata;Arachnida;Acari;Acariformes;Trombidiformes;Prostigmata;Eleutherengona;Raphignathae;Tetranychoida;Tetranychidae;Tetranychus;Tetranychus urticae

UdeM00000018322 6579 79 UdeM00000018322 XP\_033762031.1 32.4 142  
94 2 5 144 384 525 1.00E-11 79 6579 cellular

organisms;Eukaryota;Opisthokonta;Metazoa;Eumetazoa;Bilateria;Protostomia;Spiralia;Lophotrochozoa;Mollusca;Bivalvia;Autobranhia;Pteriormorphia;Pectinida;Pectinoidea;Pectinidae;Pecten;Pecten maximus

UdeM00000018323 6596 212.6 UdeM00000018323 XP\_045182620.1 39.5 299  
170 6 97 389 90 383 9.10E-52 212.6 6596 cellular

organisms;Eukaryota;Opisthokonta;Metazoa;Eumetazoa;Bilateria;Protostomia;Spiralia;Lophotrochozoa;Mollusca;Bivalvia;Autobranhia;Heteroconchia;Euheterodonta;Imparidentia;Venerida;Veneroidea;Veneridae;Mercenaria;Mercenaria mercenaria

UdeM00000018326 6596 403.7 UdeM00000018326 XP\_045170750.1 65.7 283  
90 2 7 289 6 281 2.00E-109 403.7 6596 cellular

organisms;Eukaryota;Opisthokonta;Metazoa;Eumetazoa;Bilateria;Protostomia;Spiralia;Lophotrochozoa;Mollusca;Bivalvia;Autobranhia;Heteroconchia;Euheterodonta;Imparidentia;Venerida;Veneroidea;Veneridae;Mercenaria;Mercenaria mercenaria

UdeM00000018325 6596 512.7 UdeM00000018325 XP\_045170750.1 66.1 366  
116 3 7 372 6 363 4.00E-142 512.7 6596 cellular

organisms;Eukaryota;Opisthokonta;Metazoa;Eumetazoa;Bilateria;Protostomia;Spiralia;Lophotrochozoa;Mollusca;Bivalvia;Autobranhia;Heteroconchia;Euheterodonta;Imparidentia;Venerida;Veneroidea;Veneridae;Mercenaria;Mercenaria mercenaria

UdeM00000018327 6596 213 UdeM00000018327 XP\_045192227.1 39.7 290  
162 6 67 354 159 437 6.20E-52 213 6596 cellular

organisms;Eukaryota;Opisthokonta;Metazoa;Eumetazoa;Bilateria;Protostomia;Spiralia;Lophotrochozoa;Mollusca;Bivalvia;Autobranhia;Heteroconchia;Euheterodonta;Imparidentia;Venerida;Veneroidea;Veneridae;Mercenaria;Mercenaria mercenaria

UdeM00000018328 6596 204.5 UdeM00000018328 XP\_045170750.1 66.7 135  
45 0 1 135 143 277 9.30E-50 204.5 6596 cellular

organisms;Eukaryota;Opisthokonta;Metazoa;Eumetazoa;Bilateria;Protostomia;Spiralia;Lophotrochozoa;Mollusca;Bivalvia;Autobranhia;Heteroconchia;Euheterodonta;Imparidentia;Venerida;Veneroidea;Veneridae;Mercenaria;Mercenaria mercenaria

UdeM00000018329 6596 499.6 UdeM00000018329 XP\_045170750.1 63.9 371  
119 3 9 379 8 363 3.50E-138 499.6 6596 cellular

organisms;Eukaryota;Opisthokonta;Metazoa;Eumetazoa;Bilateria;Protostomia;Spiralia;Lophotrochozoa;Mollusca;Bivalvia;Autobranhia;Heteroconchia;Euheterodonta;Imparidentia;Venerida;Veneroidea;Veneridae;Mercenaria;Mercenaria mercenaria

UdeM00000018330 400727 176.4 UdeM00000018330 XP\_025113942.1 73  
111 30 0 1 111 1 111 2.10E-41 176.4 400727  
cellular

organisms;Eukaryota;Opisthokonta;Metazoa;Eumetazoa;Bilateria;Protostomia;

Spiralia;Lophotrochozoa;Mollusca;Gastropoda;Caenogastropoda;Architaenioglossa;Ampullarioidea;Ampullariidae;Pomacea;Pomacea canaliculata  
UdeM00000018333 2652724 68.2 UdeM00000018333 XP\_020900815.1 54.7  
53 24 0 1 53 698 750 9.70E-09 68.2 2652724  
cellular  
organisms;Eukaryota;Opisthokonta;Metazoa;Eumetazoa;Cnidaria;Anthozoa;Hexacorallia;Actiniaria;Aiptasiidae;Exaiptasia;Exaiptasia diaphana  
UdeM00000018335 6596 382.1 UdeM00000018335 XP\_045201453.1 50.6 389  
171 11 23 403 7 382 8.80E-103 382.1 6596 cellular  
organisms;Eukaryota;Opisthokonta;Metazoa;Eumetazoa;Bilateria;Protostomia;Spiralia;Lophotrochozoa;Mollusca;Bivalvia;Autobranchia;Heteroconchia;Euheterodonta;Imparidentia;Venerida;Veneroidea;Veneridae;Mercenaria;Mercenaria mercenaria  
UdeM00000018334 6596 381.7 UdeM00000018334 XP\_045201453.1 50.6 389  
171 11 28 408 7 382 1.20E-102 381.7 6596 cellular  
organisms;Eukaryota;Opisthokonta;Metazoa;Eumetazoa;Bilateria;Protostomia;Spiralia;Lophotrochozoa;Mollusca;Bivalvia;Autobranchia;Heteroconchia;Euheterodonta;Imparidentia;Venerida;Veneroidea;Veneridae;Mercenaria;Mercenaria mercenaria  
UdeM00000018336 6596 414.8 UdeM00000018336 XP\_045199319.1 80.5 226  
44 0 1567 1792 1533 1758 5.40E-112 414.8 6596 cellular  
organisms;Eukaryota;Opisthokonta;Metazoa;Eumetazoa;Bilateria;Protostomia;Spiralia;Lophotrochozoa;Mollusca;Bivalvia;Autobranchia;Heteroconchia;Euheterodonta;Imparidentia;Venerida;Veneroidea;Veneridae;Mercenaria;Mercenaria mercenaria  
UdeM00000018338 1735272 197.2 UdeM00000018338 XP\_041362472.1 41.4  
251 141 3 263 507 68 318 5.70E-47 197.2 1735272  
cellular  
organisms;Eukaryota;Opisthokonta;Metazoa;Eumetazoa;Bilateria;Protostomia;Spiralia;Lophotrochozoa;Mollusca;Gastropoda;Neomphalina;Neomphaloidea;Peltospiridae;Gigantopelta;Gigantopelta aegis  
UdeM00000018339 6596 395.2 UdeM00000018339 XP\_045199317.1 78.9 223  
47 0 100 322 1539 1761 8.00E-107 395.2 6596 cellular  
organisms;Eukaryota;Opisthokonta;Metazoa;Eumetazoa;Bilateria;Protostomia;Spiralia;Lophotrochozoa;Mollusca;Bivalvia;Autobranchia;Heteroconchia;Euheterodonta;Imparidentia;Venerida;Veneroidea;Veneridae;Mercenaria;Mercenaria mercenaria  
UdeM00000018340 29159 118.6 UdeM00000018340 XP\_011419183.2 30.5 200  
126 2 26 221 77 267 2.00E-23 118.6 29159 cellular  
organisms;Eukaryota;Opisthokonta;Metazoa;Eumetazoa;Bilateria;Protostomia;Spiralia;Lophotrochozoa;Mollusca;Bivalvia;Autobranchia;Pteriomorphia;Ostreida;Ostreoidea;Ostreidae;Crassostrea;Crassostrea gigas  
UdeM00000018341 6579 134.8 UdeM00000018341 XP\_033750238.1 29.5 217  
141 3 4 219 52 257 1.30E-28 134.8 6579 cellular  
organisms;Eukaryota;Opisthokonta;Metazoa;Eumetazoa;Bilateria;Protostomia;Spiralia;Lophotrochozoa;Mollusca;Bivalvia;Autobranchia;Pteriomorphia;Pectinida;Pectinoidea;Pectinidae;Pecten;Pecten maximus  
UdeM00000018342 6579 139.4 UdeM00000018342 XP\_033750238.1 30.5 220  
141 3 1 219 49 257 5.40E-30 139.4 6579 cellular  
organisms;Eukaryota;Opisthokonta;Metazoa;Eumetazoa;Bilateria;Protostomia;Spiralia;Lophotrochozoa;Mollusca;Bivalvia;Autobranchia;Pteriomorphia;Pectinida;Pectinoidea;Pectinidae;Pecten;Pecten maximus  
UdeM00000018343 6579 143.3 UdeM00000018343 XP\_033750238.1 30.9 223  
142 3 45 266 46 257 4.50E-31 143.3 6579 cellular

organisms;Eukaryota;Opisthokonta;Metazoa;Eumetazoa;Bilateria;Protostomia;Spiralia;Lophotrochozoa;Mollusca;Bivalvia;Autobranchia;Pteriormorphia;Pectinida;Pectinoidea;Pectinidae;Pecten;Pecten maximus

UdeM00000018347 6596 377.1 UdeM00000018347 XP\_045201156.1 31.3 860  
524 16 1 836 32 848 5.80E-101 377.1 6596 cellular

organisms;Eukaryota;Opisthokonta;Metazoa;Eumetazoa;Bilateria;Protostomia;Spiralia;Lophotrochozoa;Mollusca;Bivalvia;Autobranchia;Heteroconchia;Euheterodonta;Imparidentia;Venerida;Veneroidea;Veneridae;Mercenaria;Mercenaria mercenaria

UdeM00000018348 6596 1453 UdeM00000018348 XP\_045202557.1 52.7 1422  
556 23 1 1379 1 1348 0.00E+00 1453 6596 cellular

organisms;Eukaryota;Opisthokonta;Metazoa;Eumetazoa;Bilateria;Protostomia;Spiralia;Lophotrochozoa;Mollusca;Bivalvia;Autobranchia;Heteroconchia;Euheterodonta;Imparidentia;Venerida;Veneroidea;Veneridae;Mercenaria;Mercenaria mercenaria

UdeM00000018349 6706 150.2 UdeM00000018349 XP\_042235765.1 43.3 157  
89 0 1 157 1 157 2.20E-33 150.2 6706 cellular

organisms;Eukaryota;Opisthokonta;Metazoa;Eumetazoa;Bilateria;Protostomia;Ecdysozoa;Panarthropoda;Arthropoda;Mandibulata;Pancrustacea;Crustacea;Multicrustacea;Malacostraca;Eumalacostraca;Eucarida;Decapoda;Pleocyemata;Astacidea;Nephropoidea;Nephropidae;Homarus;Homarus americanus

UdeM00000018350 6573 356.3 UdeM00000018350 XP\_021359188.1 64.4 253  
87 1 1 253 1 250 3.50E-95 356.3 6573 cellular

organisms;Eukaryota;Opisthokonta;Metazoa;Eumetazoa;Bilateria;Protostomia;Spiralia;Lophotrochozoa;Mollusca;Bivalvia;Autobranchia;Pteriormorphia;Pectinida;Pectinoidea;Pectinidae;Mizuhopecten;Mizuhopecten yessoensis

UdeM00000018351 2607531 543.5 UdeM00000018351 XP\_029642003.1 50.2  
528 258 4 1 526 112 636 3.00E-151 543.5 2607531  
cellular

organisms;Eukaryota;Opisthokonta;Metazoa;Eumetazoa;Bilateria;Protostomia;Spiralia;Lophotrochozoa;Mollusca;Cephalopoda;Coleoidea;Octopodiformes;Octopoda;Incirrata;Octopodidae;Octopus;Octopus sinensis

UdeM00000044396 6573 98.6 UdeM00000044396 XP\_021364275.1 50.4 121  
52 3 161 277 279 395 1.30E-17 98.6 6573 cellular

organisms;Eukaryota;Opisthokonta;Metazoa;Eumetazoa;Bilateria;Protostomia;Spiralia;Lophotrochozoa;Mollusca;Bivalvia;Autobranchia;Pteriormorphia;Pectinida;Pectinoidea;Pectinidae;Mizuhopecten;Mizuhopecten yessoensis

UdeM00000019423 29159 70.9 UdeM00000019423 XP\_011412814.1 40.2 102  
57 2 5 105 9 107 1.10E-09 70.9 29159 cellular

organisms;Eukaryota;Opisthokonta;Metazoa;Eumetazoa;Bilateria;Protostomia;Spiralia;Lophotrochozoa;Mollusca;Bivalvia;Autobranchia;Pteriormorphia;Ostreida;Ostreoidea;Ostreidae;Crassostrea;Crassostrea gigas

UdeM00000019424 29159 316.6 UdeM00000019424 XP\_034317111.1 55.8 283  
124 1 2 283 171 453 3.20E-83 316.6 29159 cellular

organisms;Eukaryota;Opisthokonta;Metazoa;Eumetazoa;Bilateria;Protostomia;Spiralia;Lophotrochozoa;Mollusca;Bivalvia;Autobranchia;Pteriormorphia;Ostreida;Ostreoidea;Ostreidae;Crassostrea;Crassostrea gigas

UdeM00000019425 2652724 58.9 UdeM00000019425 XP\_020895639.1 29.2  
89 63 0 79 167 73 161 7.20E-06 58.9 2652724  
cellular

organisms;Eukaryota;Opisthokonta;Metazoa;Eumetazoa;Cnidaria;Anthozoa;Hexacorallia;Actiniaria;Aiptasiidae;Exaiptasia;Exaiptasia diaphana

UdeM00000019426 7574 234.6 UdeM00000019426 XP\_013384628.1 47.5 276  
119 4 1 260 33 298 1.50E-58 234.6 7574 cellular

organisms;Eukaryota;Opisthokonta;Metazoa;Eumetazoa;Bilateria;Protostomia; Spiralia;Lophotrochozoa;Brachiopoda;Linguliformea;Lingulata;Lingulida;Linguloidea;Lingulidae;Lingula;Lingula anatina

UdeM00000019427 7574 604.7 UdeM00000019427 XP\_013382110.1 48.4 603  
286 8 1 602 37 615 1.20E-169 604.7 7574 cellular

organisms;Eukaryota;Opisthokonta;Metazoa;Eumetazoa;Bilateria;Protostomia; Spiralia;Lophotrochozoa;Brachiopoda;Linguliformea;Lingulata;Lingulida;Linguloidea;Lingulidae;Lingula;Lingula anatina

UdeM00000019428 8218 66.6 UdeM00000019428 XP\_034081603.1 32.6 138  
84 3 63 195 158 291 4.30E-08 66.6 8218 cellular

organisms;Eukaryota;Opisthokonta;Metazoa;Eumetazoa;Bilateria;Deuterostomia;Chordata;Craniata;Vertebrata;Gnathostomata;Teleostomi;Euteleostomi;Actinopterygii;Actinopteri;Neopterygii;Teleostei;Osteoglossocephalai;Clupeocephala;Euteleostei;Neoteleostei;Eurypterygia;Ctenosquamata;Acanthomorphata;Euacanthomorphacea;Percomorphaceae;Eupercaria;Perciformes;Notothenioidei;Bathydraconidae;Gymnodraco;Gymnodraco acuticeps

UdeM00000019429 7830 90.1 UdeM00000019429 XP\_038646175.1 35.2 125  
79 1 1 125 410 532 2.20E-15 90.1 7830 cellular

organisms;Eukaryota;Opisthokonta;Metazoa;Eumetazoa;Bilateria;Deuterostomia;Chordata;Craniata;Vertebrata;Gnathostomata;Chondrichthyes;Elasmobranchii;Selachii;Galeomorphii;Galeoidea;Carcharhiniformes;Scyliorhinidae;Scyliorhinus;Scyliorhinus canicula

UdeM00000019430 7830 63.2 UdeM00000019430 XP\_038646175.1 30.4 102  
69 1 3 104 433 532 2.40E-07 63.2 7830 cellular

organisms;Eukaryota;Opisthokonta;Metazoa;Eumetazoa;Bilateria;Deuterostomia;Chordata;Craniata;Vertebrata;Gnathostomata;Chondrichthyes;Elasmobranchii;Selachii;Galeomorphii;Galeoidea;Carcharhiniformes;Scyliorhinidae;Scyliorhinus;Scyliorhinus canicula

UdeM00000019431 45264 430.3 UdeM00000019431 XP\_044179186.1 54.4 386  
173 2 36 421 87 469 2.90E-117 430.3 45264 cellular

organisms;Eukaryota;Opisthokonta;Metazoa;Eumetazoa;Cnidaria;Anthozoa;Hexacorallia;Scleractinia;Astrocoeniina;Acroporidae;Acropora;Acropora millepora

UdeM00000019432 6596 1145.6 UdeM00000019432 XP\_045162681.1 63.5  
937 293 11 7 932 8 906 0.00E+00 1145.6 6596  
cellular

organisms;Eukaryota;Opisthokonta;Metazoa;Eumetazoa;Bilateria;Protostomia; Spiralia;Lophotrochozoa;Mollusca;Bivalvia;Autobranchia;Heteroconchia;Euheterodonta;Imparidentia;Venerida;Veneroidea;Veneridae;Mercenaria;Mercenaria mercenaria

UdeM00000019433 6596 1132.5 UdeM00000019433 XP\_045162681.1 61.9  
961 293 12 7 956 8 906 0.00E+00 1132.5 6596  
cellular

organisms;Eukaryota;Opisthokonta;Metazoa;Eumetazoa;Bilateria;Protostomia; Spiralia;Lophotrochozoa;Mollusca;Bivalvia;Autobranchia;Heteroconchia;Euheterodonta;Imparidentia;Venerida;Veneroidea;Veneridae;Mercenaria;Mercenaria mercenaria

UdeM00000019434 6596 295.4 UdeM00000019434 XP\_045163570.1 73.7 281  
69 2 20 300 111 386 1.00E-76 295.4 6596 cellular

organisms;Eukaryota;Opisthokonta;Metazoa;Eumetazoa;Bilateria;Protostomia; Spiralia;Lophotrochozoa;Mollusca;Bivalvia;Autobranchia;Heteroconchia;Euheterodonta;Imparidentia;Venerida;Veneroidea;Veneridae;Mercenaria;Mercenaria mercenaria

UdeM00000019435 6596 714.1 UdeM00000019435 XP\_045161386.1 53.7 1302  
 452 28 30 1278 160 1363 3.10E-202 714.1 6596 cellular  
 organisms;Eukaryota;Opisthokonta;Metazoa;Eumetazoa;Bilateria;Protostomia;  
 Spiralia;Lophotrochozoa;Mollusca;Bivalvia;Autobranhia;Heteroconchia;Euhe  
 terodonta;Imparidentia;Venerida;Veneroidea;Veneridae;Mercenaria;Mercenari  
 a mercenaria  
 UdeM00000019436 6596 725.7 UdeM00000019436 XP\_045161387.1 54.2 1293  
 402 27 30 1255 160 1329 1.00E-205 725.7 6596 cellular  
 organisms;Eukaryota;Opisthokonta;Metazoa;Eumetazoa;Bilateria;Protostomia;  
 Spiralia;Lophotrochozoa;Mollusca;Bivalvia;Autobranhia;Heteroconchia;Euhe  
 terodonta;Imparidentia;Venerida;Veneroidea;Veneridae;Mercenaria;Mercenari  
 a mercenaria  
 UdeM00000019437 6579 72 UdeM00000019437 XP\_033730355.1 30.8 182  
 114 7 1 172 1 180 9.00E-10 72 6579 cellular  
 organisms;Eukaryota;Opisthokonta;Metazoa;Eumetazoa;Bilateria;Protostomia;  
 Spiralia;Lophotrochozoa;Mollusca;Bivalvia;Autobranhia;Pteriormorphia;Pect  
 inida;Pectinoidea;Pectinidae;Pecten;Pecten maximus  
 UdeM00000019440 6596 115.9 UdeM00000019440 XP\_045177372.1 29.5 275  
 177 9 159 425 273 538 1.20E-22 115.9 6596 cellular  
 organisms;Eukaryota;Opisthokonta;Metazoa;Eumetazoa;Bilateria;Protostomia;  
 Spiralia;Lophotrochozoa;Mollusca;Bivalvia;Autobranhia;Heteroconchia;Euhe  
 terodonta;Imparidentia;Venerida;Veneroidea;Veneridae;Mercenaria;Mercenari  
 a mercenaria  
 UdeM00000019441 6596 130.2 UdeM00000019441 XP\_045181277.1 34.1 205  
 129 5 31 232 124 325 3.60E-27 130.2 6596 cellular  
 organisms;Eukaryota;Opisthokonta;Metazoa;Eumetazoa;Bilateria;Protostomia;  
 Spiralia;Lophotrochozoa;Mollusca;Bivalvia;Autobranhia;Heteroconchia;Euhe  
 terodonta;Imparidentia;Venerida;Veneroidea;Veneridae;Mercenaria;Mercenari  
 a mercenaria  
 UdeM00000019442 6596 109.4 UdeM00000019442 XP\_045181277.1 30.9 188  
 110 6 438 615 142 319 1.70E-20 109.4 6596 cellular  
 organisms;Eukaryota;Opisthokonta;Metazoa;Eumetazoa;Bilateria;Protostomia;  
 Spiralia;Lophotrochozoa;Mollusca;Bivalvia;Autobranhia;Heteroconchia;Euhe  
 terodonta;Imparidentia;Venerida;Veneroidea;Veneridae;Mercenaria;Mercenari  
 a mercenaria  
 UdeM00000019443 6596 145.6 UdeM00000019443 XP\_045181277.1 31.9 238  
 142 6 4 231 92 319 8.10E-32 145.6 6596 cellular  
 organisms;Eukaryota;Opisthokonta;Metazoa;Eumetazoa;Bilateria;Protostomia;  
 Spiralia;Lophotrochozoa;Mollusca;Bivalvia;Autobranhia;Heteroconchia;Euhe  
 terodonta;Imparidentia;Venerida;Veneroidea;Veneridae;Mercenaria;Mercenari  
 a mercenaria  
 UdeM00000019445 7739 72.8 UdeM00000019445 XP\_035659254.1 37.3 126  
 74 2 2 124 649 772 3.50E-10 72.8 7739 cellular  
 organisms;Eukaryota;Opisthokonta;Metazoa;Eumetazoa;Bilateria;Deuterostomi  
 a;Chordata;Cephalochordata;Leptocardii;Amphioxiformes;Branchiostomidae;Br  
 anchiostoma;Branchiostoma floridae  
 UdeM00000019447 6579 112.5 UdeM00000019447 XP\_033728927.1 35.9 156  
 88 2 2 156 29 173 1.10E-21 112.5 6579 cellular  
 organisms;Eukaryota;Opisthokonta;Metazoa;Eumetazoa;Bilateria;Protostomia;  
 Spiralia;Lophotrochozoa;Mollusca;Bivalvia;Autobranhia;Pteriormorphia;Pect  
 inida;Pectinoidea;Pectinidae;Pecten;Pecten maximus  
 UdeM00000019448 6573 241.5 UdeM00000019448 XP\_021363050.1 50.2 237  
 108 4 16 243 63 298 1.20E-60 241.5 6573 cellular  
 organisms;Eukaryota;Opisthokonta;Metazoa;Eumetazoa;Bilateria;Protostomia;



Spiralia; Lophotrochozoa; Mollusca; Bivalvia; Autobranchia; Pteriomorpha; Pectinida; Pectinoidea; Pectinidae; Mizuhopecten; Mizuhopecten yessoensis

UdeM00000019449 6596 806.2 UdeM00000019449 XP\_045162989.1 54.1 706  
314 5 3 700 102 805 3.30E-230 806.2 6596 cellular  
organisms; Eukaryota; Opisthokonta; Metazoa; Eumetazoa; Bilateria; Protostomia; Spiralia; Lophotrochozoa; Mollusca; Bivalvia; Autobranchia; Heteroconchia; Euheterodonta; Imparidentia; Venerida; Veneroidea; Veneridae; Mercenaria; Mercenaria mercenaria

UdeM00000019450 400727 90.1 UdeM00000019450 XP\_025081733.1 59.8  
82 30 3 1 81 13 92 2.30E-15 90.1 400727  
cellular  
organisms; Eukaryota; Opisthokonta; Metazoa; Eumetazoa; Bilateria; Protostomia; Spiralia; Lophotrochozoa; Mollusca; Gastropoda; Caenogastropoda; Architaenioglossa; Ampullarioidea; Ampullariidae; Pomacea; Pomacea canaliculata

UdeM00000019451 29159 368.6 UdeM00000019451 XP\_034338513.1 80.3 218  
42 1 1 218 1 217 5.80E-99 368.6 29159 cellular  
organisms; Eukaryota; Opisthokonta; Metazoa; Eumetazoa; Bilateria; Protostomia; Spiralia; Lophotrochozoa; Mollusca; Bivalvia; Autobranchia; Pteriomorpha; Ostreida; Ostreoidea; Ostreidae; Crassostrea; Crassostrea gigas

UdeM00000019452 6596 506.1 UdeM00000019452 XP\_045163117.1 55.2 435  
179 4 2 427 94 521 4.40E-140 506.1 6596 cellular  
organisms; Eukaryota; Opisthokonta; Metazoa; Eumetazoa; Bilateria; Protostomia; Spiralia; Lophotrochozoa; Mollusca; Bivalvia; Autobranchia; Heteroconchia; Euheterodonta; Imparidentia; Venerida; Veneroidea; Veneridae; Mercenaria; Mercenaria mercenaria

UdeM00000019453 400727 145.2 UdeM00000019453 XP\_025082559.1 42.5  
181 91 6 38 205 40 220 1.10E-31 145.2 400727  
cellular  
organisms; Eukaryota; Opisthokonta; Metazoa; Eumetazoa; Bilateria; Protostomia; Spiralia; Lophotrochozoa; Mollusca; Gastropoda; Caenogastropoda; Architaenioglossa; Ampullarioidea; Ampullariidae; Pomacea; Pomacea canaliculata

UdeM00000019454 29159 517.7 UdeM00000019454 XP\_011418417.1 65.3 461  
144 5 1 449 1 457 1.50E-143 517.7 29159 cellular  
organisms; Eukaryota; Opisthokonta; Metazoa; Eumetazoa; Bilateria; Protostomia; Spiralia; Lophotrochozoa; Mollusca; Bivalvia; Autobranchia; Pteriomorpha; Ostreida; Ostreoidea; Ostreidae; Crassostrea; Crassostrea gigas

UdeM00000019455 13686 375.2 UdeM00000019455 XP\_011170408.3 41.3 494  
265 9 97 573 125 610 1.50E-100 375.2 13686 cellular  
organisms; Eukaryota; Opisthokonta; Metazoa; Eumetazoa; Bilateria; Protostomia; Ecdysozoa; Panarthropoda; Arthropoda; Mandibulata; Pancrustacea; Hexapoda; Insecta; Dicondylia; Pterygota; Neoptera; Endopterygota; Hymenoptera; Apocrita; Aculeata; Formicoidea; Formicidae; Myrmicinae; Solenopsidini; Solenopsis; Solenopsis invicta

UdeM00000019456 6565 469.9 UdeM00000019456 XP\_022286359.1 47.6 468  
236 2 3 461 5 472 3.70E-129 469.9 6565 cellular  
organisms; Eukaryota; Opisthokonta; Metazoa; Eumetazoa; Bilateria; Protostomia; Spiralia; Lophotrochozoa; Mollusca; Bivalvia; Autobranchia; Pteriomorpha; Ostreida; Ostreoidea; Ostreidae; Crassostrea; Crassostrea virginica

UdeM00000019457 6596 196.8 UdeM00000019457 XP\_045176388.1 27.6 446  
311 7 23 464 13 450 6.00E-47 196.8 6596 cellular  
organisms; Eukaryota; Opisthokonta; Metazoa; Eumetazoa; Bilateria; Protostomia; Spiralia; Lophotrochozoa; Mollusca; Bivalvia; Autobranchia; Heteroconchia; Euheterodonta; Imparidentia; Venerida; Veneroidea; Veneridae; Mercenaria; Mercenaria mercenaria

UdeM00000019458 6596 217.2 UdeM00000019458 XP\_045164036.1 31.6 459  
 299 9 14 462 9 462 4.30E-53 217.2 6596 cellular  
 organisms;Eukaryota;Opisthokonta;Metazoa;Eumetazoa;Bilateria;Protostomia;  
 Spiralia;Lophotrochozoa;Mollusca;Bivalvia;Autobranchia;Heteroconchia;Euhe  
 terodonta;Imparidentia;Venerida;Veneroidea;Veneridae;Mercenaria;Mercenari  
 a mercenaria  
 UdeM00000019459 6596 306.6 UdeM00000019459 XP\_045161550.1 42.7 522  
 230 19 1 477 1 498 5.50E-80 306.6 6596 cellular  
 organisms;Eukaryota;Opisthokonta;Metazoa;Eumetazoa;Bilateria;Protostomia;  
 Spiralia;Lophotrochozoa;Mollusca;Bivalvia;Autobranchia;Heteroconchia;Euhe  
 terodonta;Imparidentia;Venerida;Veneroidea;Veneridae;Mercenaria;Mercenari  
 a mercenaria  
 UdeM00000019460 29159 471.1 UdeM00000019460 XP\_011445975.1 81.1 270  
 48 2 17 285 17 284 1.00E-129 471.1 29159 cellular  
 organisms;Eukaryota;Opisthokonta;Metazoa;Eumetazoa;Bilateria;Protostomia;  
 Spiralia;Lophotrochozoa;Mollusca;Bivalvia;Autobranchia;Pteriormorphia;Ostr  
 eida;Ostreoidea;Ostreidae;Crassostrea;Crassostrea gigas  
 UdeM00000019461 6596 166.8 UdeM00000019461 XP\_045163253.1 48.9 190  
 86 7 3 189 6 187 2.70E-38 166.8 6596 cellular  
 organisms;Eukaryota;Opisthokonta;Metazoa;Eumetazoa;Bilateria;Protostomia;  
 Spiralia;Lophotrochozoa;Mollusca;Bivalvia;Autobranchia;Heteroconchia;Euhe  
 terodonta;Imparidentia;Venerida;Veneroidea;Veneridae;Mercenaria;Mercenari  
 a mercenaria  
 UdeM00000019462 6596 157.9 UdeM00000019462 XP\_045163901.1 40.8 201  
 118 1 1 201 20 219 1.40E-35 157.9 6596 cellular  
 organisms;Eukaryota;Opisthokonta;Metazoa;Eumetazoa;Bilateria;Protostomia;  
 Spiralia;Lophotrochozoa;Mollusca;Bivalvia;Autobranchia;Heteroconchia;Euhe  
 terodonta;Imparidentia;Venerida;Veneroidea;Veneridae;Mercenaria;Mercenari  
 a mercenaria  
 UdeM00000019463 225164 292.4 UdeM00000019463 XP\_009063653.1 30.6  
 627 389 17 3 620 8 597 1.40E-75 292.4 225164  
 cellular  
 organisms;Eukaryota;Opisthokonta;Metazoa;Eumetazoa;Bilateria;Protostomia;  
 Spiralia;Lophotrochozoa;Mollusca;Gastropoda;Patellogastropoda;Lottioidea;  
 Lottiidae;Lottia;Lottia gigantea  
 UdeM00000019464 45264 464.2 UdeM00000019464 XP\_044165535.1 49.1 450  
 223 2 175 620 123 570 3.60E-127 464.2 45264 cellular  
 organisms;Eukaryota;Opisthokonta;Metazoa;Eumetazoa;Cnidaria;Anthozoa;Hexa  
 corallia;Scleractinia;Astrocoeniina;Acroporidae;Acropora;Acropora  
 millepora  
 UdeM00000019465 6565 181.8 UdeM00000019465 XP\_022344733.1 60.7 150  
 59 0 4 153 218 367 7.60E-43 181.8 6565 cellular  
 organisms;Eukaryota;Opisthokonta;Metazoa;Eumetazoa;Bilateria;Protostomia;  
 Spiralia;Lophotrochozoa;Mollusca;Bivalvia;Autobranchia;Pteriormorphia;Ostr  
 eida;Ostreoidea;Ostreidae;Crassostrea;Crassostrea virginica  
 UdeM00000019466 6573 717.2 UdeM00000019466 XP\_021366468.1 82.3 423  
 73 2 410 830 364 786 2.40E-203 717.2 6573 cellular  
 organisms;Eukaryota;Opisthokonta;Metazoa;Eumetazoa;Bilateria;Protostomia;  
 Spiralia;Lophotrochozoa;Mollusca;Bivalvia;Autobranchia;Pteriormorphia;Pect  
 inida;Pectinoidea;Pectinidae;Mizuhopecten;Mizuhopecten yessoensis  
 UdeM00000019467 94827 142.1 UdeM00000019467 XP\_010214492.1 35.7 221  
 140 2 1 220 616 835 1.10E-30 142.1 94827 cellular  
 organisms;Eukaryota;Opisthokonta;Metazoa;Eumetazoa;Bilateria;Deuterostomi  
 a;Chordata;Craniata;Vertebrata;Gnathostomata;Teleostomi;Euteleostomi;Sarc

opterygii;Dipnotetrapodomorpha;Tetrapoda;Amniota;Sauropsida;Sauria;Archel  
osauria;Archosauria;Dinosauria;Saurischia;Theropoda;Coelurosauria;Aves;Pa  
laeognathae;Tinamiformes;Tinamidae;Tinamus;Tinamus guttatus

UdeM00000019468 143995 83.2 UdeM00000019468 XP\_012136805.1 32.1  
159 98 3 81 239 56 204 1.10E-12 83.2 143995

cellular

organisms;Eukaryota;Opisthokonta;Metazoa;Eumetazoa;Bilateria;Protostomia;  
Ecdysozoa;Panarthropoda;Arthropoda;Mandibulata;Pancrustacea;Hexapoda;Inse  
cta;Dicondylia;Pterygota;Neoptera;Endopterygota;Hymenoptera;Apocrita;Acul  
eata;Apoidea;Megachilidae;Megachilinae;Megachilini;Megachile;Megachile  
rotundata

UdeM00000019469 7460 132.9 UdeM00000019469 XP\_026301736.1 27.7 430  
255 15 1 393 740 1150 1.00E-27 132.9 7460 cellular

organisms;Eukaryota;Opisthokonta;Metazoa;Eumetazoa;Bilateria;Protostomia;  
Ecdysozoa;Panarthropoda;Arthropoda;Mandibulata;Pancrustacea;Hexapoda;Inse  
cta;Dicondylia;Pterygota;Neoptera;Endopterygota;Hymenoptera;Apocrita;Acul  
eata;Apoidea;Apidae;Apinae;Apini;Apis;Apis mellifera

UdeM00000019470 6565 306.6 UdeM00000019470 XP\_022335580.1 53.6 265  
122 1 21 285 39 302 3.30E-80 306.6 6565 cellular

organisms;Eukaryota;Opisthokonta;Metazoa;Eumetazoa;Bilateria;Protostomia;  
Spiralia;Lophotrochozoa;Mollusca;Bivalvia;Autobranchia;Pteriormorphia;Ostr  
eida;Ostreoidea;Ostreidae;Crassostrea;Crassostrea virginica

UdeM00000019471 6579 523.5 UdeM00000019471 XP\_033724839.1 64.5 409  
142 2 190 595 5 413 3.60E-145 523.5 6579 cellular

organisms;Eukaryota;Opisthokonta;Metazoa;Eumetazoa;Bilateria;Protostomia;  
Spiralia;Lophotrochozoa;Mollusca;Bivalvia;Autobranchia;Pteriormorphia;Pect  
inida;Pectinoidea;Pectinidae;Pecten;Pecten maximus

UdeM00000019472 6565 72.8 UdeM00000019472 XP\_022297447.1 50 66  
33 0 1 66 301 366 1.90E-10 72.8 6565 cellular

organisms;Eukaryota;Opisthokonta;Metazoa;Eumetazoa;Bilateria;Protostomia;  
Spiralia;Lophotrochozoa;Mollusca;Bivalvia;Autobranchia;Pteriormorphia;Ostr  
eida;Ostreoidea;Ostreidae;Crassostrea;Crassostrea virginica

UdeM00000019473 6087 88.6 UdeM00000019473 XP\_012558072.1 33.6 146  
85 3 40 185 70 203 9.20E-15 88.6 6087 cellular

organisms;Eukaryota;Opisthokonta;Metazoa;Eumetazoa;Cnidaria;Hydrozoa;Hydr  
oidolina;Anthoathecata;Aplanulata;Hydridae;Hydra;Hydra vulgaris

UdeM00000019474 352472 59.7 UdeM00000019474 XP\_640087.1 28.1 121  
72 3 1 109 236 353 2.70E-06 59.7 352472

cellular

organisms;Eukaryota;Amoebozoa;Evosea;Eumycetozoa;Dictyostelia;Dictyosteli  
ales;Dictyosteliaceae;Dictyostelium;Dictyostelium

discoideum;Dictyostelium discoideum AX4

UdeM00000019475 29159 253.8 UdeM00000019475 XP\_011419833.1 69.5 187  
51 2 1 185 230 412 1.70E-64 253.8 29159 cellular

organisms;Eukaryota;Opisthokonta;Metazoa;Eumetazoa;Bilateria;Protostomia;  
Spiralia;Lophotrochozoa;Mollusca;Bivalvia;Autobranchia;Pteriormorphia;Ostr  
eida;Ostreoidea;Ostreidae;Crassostrea;Crassostrea gigas

UdeM00000019476 29159 287 UdeM00000019476 XP\_011419833.1 70.5 207  
55 2 1 205 210 412 2.00E-74 287 29159 cellular

organisms;Eukaryota;Opisthokonta;Metazoa;Eumetazoa;Bilateria;Protostomia;  
Spiralia;Lophotrochozoa;Mollusca;Bivalvia;Autobranchia;Pteriormorphia;Ostr  
eida;Ostreoidea;Ostreidae;Crassostrea;Crassostrea gigas

UdeM00000019477 6500 168.3 UdeM00000019477 XP\_005089155.2 61.7 141  
43 3 42 176 64 199 9.70E-39 168.3 6500 cellular

organisms;Eukaryota;Opisthokonta;Metazoa;Eumetazoa;Bilateria;Protostomia;Spiralia;Lophotrochozoa;Mollusca;Gastropoda;Heterobranchia;Euthyneura;Tectipleura;Aplysiida;Aplysioidea;Aplysiidae;Aplysia;Aplysia californica  
UdeM00000019478 151771 356.3 UdeM00000019478 XP\_028406951.1 37.6  
591 326 11 47 606 88 666 7.70E-95 356.3 151771

cellular

organisms;Eukaryota;Opisthokonta;Metazoa;Eumetazoa;Cnidaria;Anthozoa;Octocorallia;Alcyonacea;Alcyoniina;Nephtheidae;Dendronephthya;Dendronephthya gigantea

UdeM00000019481 6945 62.4 UdeM00000019481 XP\_040078187.1 29.9 117  
81 1 76 191 38 154 1.30E-06 62.4 6945 cellular

organisms;Eukaryota;Opisthokonta;Metazoa;Eumetazoa;Bilateria;Protostomia;Ecdysozoa;Panarthropoda;Arthropoda;Chelicerata;Arachnida;Acari;Parasitiformes;Ixodida;Ixodoidea;Ixodidae;Ixodinae;Ixodes;Ixodes scapularis

UdeM00000019482 6945 62.4 UdeM00000019482 XP\_040078187.1 29.9 117  
81 1 55 170 38 154 1.20E-06 62.4 6945 cellular

organisms;Eukaryota;Opisthokonta;Metazoa;Eumetazoa;Bilateria;Protostomia;Ecdysozoa;Panarthropoda;Arthropoda;Chelicerata;Arachnida;Acari;Parasitiformes;Ixodida;Ixodoidea;Ixodidae;Ixodinae;Ixodes;Ixodes scapularis

UdeM00000019483 6596 102.4 UdeM00000019483 XP\_045161259.1 41.9 124  
64 4 25 143 26 146 5.70E-19 102.4 6596 cellular

organisms;Eukaryota;Opisthokonta;Metazoa;Eumetazoa;Bilateria;Protostomia;Spiralia;Lophotrochozoa;Mollusca;Bivalvia;Autobranchia;Heteroconchia;Euheterodonta;Imparidentia;Venerida;Veneroidea;Veneridae;Mercenaria;Mercenaria mercenaria

UdeM00000019484 6596 102.4 UdeM00000019484 XP\_045161259.1 38.3 149  
77 5 14 153 26 168 5.30E-19 102.4 6596 cellular

organisms;Eukaryota;Opisthokonta;Metazoa;Eumetazoa;Bilateria;Protostomia;Spiralia;Lophotrochozoa;Mollusca;Bivalvia;Autobranchia;Heteroconchia;Euheterodonta;Imparidentia;Venerida;Veneroidea;Veneridae;Mercenaria;Mercenaria mercenaria

UdeM00000019485 6596 104.8 UdeM00000019485 XP\_045161260.1 37.2 137  
79 3 17 149 15 148 1.20E-19 104.8 6596 cellular

organisms;Eukaryota;Opisthokonta;Metazoa;Eumetazoa;Bilateria;Protostomia;Spiralia;Lophotrochozoa;Mollusca;Bivalvia;Autobranchia;Heteroconchia;Euheterodonta;Imparidentia;Venerida;Veneroidea;Veneridae;Mercenaria;Mercenaria mercenaria

UdeM00000019487 6596 111.3 UdeM00000019487 XP\_045161259.1 39.7 146  
79 4 25 164 26 168 1.20E-21 111.3 6596 cellular

organisms;Eukaryota;Opisthokonta;Metazoa;Eumetazoa;Bilateria;Protostomia;Spiralia;Lophotrochozoa;Mollusca;Bivalvia;Autobranchia;Heteroconchia;Euheterodonta;Imparidentia;Venerida;Veneroidea;Veneridae;Mercenaria;Mercenaria mercenaria

UdeM00000019488 6596 554.3 UdeM00000019488 XP\_045162509.1 64.8 423  
143 3 1 420 1 420 1.30E-154 554.3 6596 cellular

organisms;Eukaryota;Opisthokonta;Metazoa;Eumetazoa;Bilateria;Protostomia;Spiralia;Lophotrochozoa;Mollusca;Bivalvia;Autobranchia;Heteroconchia;Euheterodonta;Imparidentia;Venerida;Veneroidea;Veneridae;Mercenaria;Mercenaria mercenaria

UdeM00000019489 6596 670.2 UdeM00000019489 XP\_045161143.1 69.7 446  
135 0 35 480 237 682 1.90E-189 670.2 6596 cellular

organisms;Eukaryota;Opisthokonta;Metazoa;Eumetazoa;Bilateria;Protostomia;Spiralia;Lophotrochozoa;Mollusca;Bivalvia;Autobranchia;Heteroconchia;Euheterodonta;Imparidentia;Venerida;Veneroidea;Veneridae;Mercenaria;Mercenaria mercenaria

terodonta;Imparidentia;Venerida;Veneroidea;Veneridae;Mercenaria;Mercenari  
 a mercenaria  
 UdeM00000019490 6596 393.7 UdeM00000019490 XP\_045161143.1 48 444  
 80 2 1 293 239 682 2.10E-106 393.7 6596 cellular  
 organisms;Eukaryota;Opisthokonta;Metazoa;Eumetazoa;Bilateria;Protostomia;  
 Spiralia;Lophotrochozoa;Mollusca;Bivalvia;Autobranhia;Heteroconchia;Euhe  
 terodonta;Imparidentia;Venerida;Veneroidea;Veneridae;Mercenaria;Mercenari  
 a mercenaria  
 UdeM00000019491 6596 786.6 UdeM00000019491 XP\_045161143.1 61 616  
 211 3 5 594 70 682 2.30E-224 786.6 6596 cellular  
 organisms;Eukaryota;Opisthokonta;Metazoa;Eumetazoa;Bilateria;Protostomia;  
 Spiralia;Lophotrochozoa;Mollusca;Bivalvia;Autobranhia;Heteroconchia;Euhe  
 terodonta;Imparidentia;Venerida;Veneroidea;Veneridae;Mercenaria;Mercenari  
 a mercenaria  
 UdeM00000019492 6596 636.7 UdeM00000019492 XP\_045161143.1 66.4 444  
 147 1 1 442 239 682 2.20E-179 636.7 6596 cellular  
 organisms;Eukaryota;Opisthokonta;Metazoa;Eumetazoa;Bilateria;Protostomia;  
 Spiralia;Lophotrochozoa;Mollusca;Bivalvia;Autobranhia;Heteroconchia;Euhe  
 terodonta;Imparidentia;Venerida;Veneroidea;Veneridae;Mercenaria;Mercenari  
 a mercenaria  
 UdeM00000019493 6565 102.4 UdeM00000019493 XP\_022338490.1 36.3 135  
 84 2 1 134 4 137 5.00E-19 102.4 6565 cellular  
 organisms;Eukaryota;Opisthokonta;Metazoa;Eumetazoa;Bilateria;Protostomia;  
 Spiralia;Lophotrochozoa;Mollusca;Bivalvia;Autobranhia;Pteriormorphia;Ostr  
 eida;Ostreoidea;Ostreidae;Crassostrea;Crassostrea virginica  
 UdeM00000019494 6596 689.9 UdeM00000019494 XP\_045161143.1 71.2 444  
 128 0 1 444 239 682 2.20E-195 689.9 6596 cellular  
 organisms;Eukaryota;Opisthokonta;Metazoa;Eumetazoa;Bilateria;Protostomia;  
 Spiralia;Lophotrochozoa;Mollusca;Bivalvia;Autobranhia;Heteroconchia;Euhe  
 terodonta;Imparidentia;Venerida;Veneroidea;Veneridae;Mercenaria;Mercenari  
 a mercenaria  
 UdeM00000019495 6596 105.1 UdeM00000019495 XP\_045161143.1 43.6 110  
 60 1 6 115 70 177 7.30E-20 105.1 6596 cellular  
 organisms;Eukaryota;Opisthokonta;Metazoa;Eumetazoa;Bilateria;Protostomia;  
 Spiralia;Lophotrochozoa;Mollusca;Bivalvia;Autobranhia;Heteroconchia;Euhe  
 terodonta;Imparidentia;Venerida;Veneroidea;Veneridae;Mercenaria;Mercenari  
 a mercenaria  
 UdeM00000019496 6573 758.8 UdeM00000019496 XP\_021363497.1 62 566  
 210 3 4 565 15 579 4.80E-216 758.8 6573 cellular  
 organisms;Eukaryota;Opisthokonta;Metazoa;Eumetazoa;Bilateria;Protostomia;  
 Spiralia;Lophotrochozoa;Mollusca;Bivalvia;Autobranhia;Pteriormorphia;Pect  
 inida;Pectinoidea;Pectinidae;Mizuhopecten;Mizuhopecten yessoensis  
 UdeM00000019497 6565 719.9 UdeM00000019497 XP\_022336153.1 60 565  
 221 5 5 567 8 569 2.50E-204 719.9 6565 cellular  
 organisms;Eukaryota;Opisthokonta;Metazoa;Eumetazoa;Bilateria;Protostomia;  
 Spiralia;Lophotrochozoa;Mollusca;Bivalvia;Autobranhia;Pteriormorphia;Ostr  
 eida;Ostreoidea;Ostreidae;Crassostrea;Crassostrea virginica  
 UdeM00000019498 6596 862.4 UdeM00000019498 XP\_045162475.1 71.2 556  
 158 2 1 554 41 596 3.00E-247 862.4 6596 cellular  
 organisms;Eukaryota;Opisthokonta;Metazoa;Eumetazoa;Bilateria;Protostomia;  
 Spiralia;Lophotrochozoa;Mollusca;Bivalvia;Autobranhia;Heteroconchia;Euhe  
 terodonta;Imparidentia;Venerida;Veneroidea;Veneridae;Mercenaria;Mercenari  
 a mercenaria

UdeM00000019499 6596 109.8 UdeM00000019499 XP\_045208478.1 42.1 133  
 74 2 151 281 213 344 5.90E-21 109.8 6596 cellular  
 organisms;Eukaryota;Opisthokonta;Metazoa;Eumetazoa;Bilateria;Protostomia;  
 Spiralia;Lophotrochozoa;Mollusca;Bivalvia;Autobranhia;Heteroconchia;Euhe  
 terodonta;Imparidentia;Venerida;Veneroidea;Veneridae;Mercenaria;Mercenari  
 a mercenaria  
 UdeM00000019500 6596 621.3 UdeM00000019500 XP\_045160149.1 31.3 1703  
 722 35 6 1311 3 1654 2.80E-174 621.3 6596 cellular  
 organisms;Eukaryota;Opisthokonta;Metazoa;Eumetazoa;Bilateria;Protostomia;  
 Spiralia;Lophotrochozoa;Mollusca;Bivalvia;Autobranhia;Heteroconchia;Euhe  
 terodonta;Imparidentia;Venerida;Veneroidea;Veneridae;Mercenaria;Mercenari  
 a mercenaria  
 UdeM00000019501 151771 248.1 UdeM00000019501 XP\_028406951.1 31.7  
 492 215 7 1 396 119 585 2.00E-62 248.1 151771  
 cellular  
 organisms;Eukaryota;Opisthokonta;Metazoa;Eumetazoa;Cnidaria;Anthozoa;Octo  
 corallia;Alcyonacea;Alcyoniina;Nephtheidae;Dendronephthya;Dendronephthya  
 gigantea  
 UdeM00000019503 6579 232.3 UdeM00000019503 XP\_033764002.1 54.5 202  
 91 1 6 206 12 213 5.80E-58 232.3 6579 cellular  
 organisms;Eukaryota;Opisthokonta;Metazoa;Eumetazoa;Bilateria;Protostomia;  
 Spiralia;Lophotrochozoa;Mollusca;Bivalvia;Autobranhia;Pteriormorphia;Pect  
 inida;Pectinoidea;Pectinidae;Pecten;Pecten maximus  
 UdeM00000019504 6596 323.2 UdeM00000019504 XP\_045162910.1 65.8 231  
 77 2 4 234 60 288 2.90E-85 323.2 6596 cellular  
 organisms;Eukaryota;Opisthokonta;Metazoa;Eumetazoa;Bilateria;Protostomia;  
 Spiralia;Lophotrochozoa;Mollusca;Bivalvia;Autobranhia;Heteroconchia;Euhe  
 terodonta;Imparidentia;Venerida;Veneroidea;Veneridae;Mercenaria;Mercenari  
 a mercenaria  
 UdeM00000019507 6573 84 UdeM00000019507 XP\_021360986.1 70.4 54  
 16 0 9 62 11 64 1.20E-13 84 6573 cellular  
 organisms;Eukaryota;Opisthokonta;Metazoa;Eumetazoa;Bilateria;Protostomia;  
 Spiralia;Lophotrochozoa;Mollusca;Bivalvia;Autobranhia;Pteriormorphia;Pect  
 inida;Pectinoidea;Pectinidae;Mizuhopecten;Mizuhopecten yessoensis  
 UdeM00000019508 6573 156.4 UdeM00000019508 XP\_021360982.1 75.9 112  
 26 1 4 115 3 113 2.20E-35 156.4 6573 cellular  
 organisms;Eukaryota;Opisthokonta;Metazoa;Eumetazoa;Bilateria;Protostomia;  
 Spiralia;Lophotrochozoa;Mollusca;Bivalvia;Autobranhia;Pteriormorphia;Pect  
 inida;Pectinoidea;Pectinidae;Mizuhopecten;Mizuhopecten yessoensis  
 UdeM00000019509 6573 1409.8 UdeM00000019509 XP\_021360979.1 63.7  
 2065 681 14 55 2095 422 2442 0.00E+00 1409.8 6573  
 cellular  
 organisms;Eukaryota;Opisthokonta;Metazoa;Eumetazoa;Bilateria;Protostomia;  
 Spiralia;Lophotrochozoa;Mollusca;Bivalvia;Autobranhia;Pteriormorphia;Pect  
 inida;Pectinoidea;Pectinidae;Mizuhopecten;Mizuhopecten yessoensis  
 UdeM00000019510 6565 3369.7 UdeM00000019510 XP\_022339234.1 73.4  
 2253 566 13 1 2234 1 2238 0.00E+00 3369.7 6565  
 cellular  
 organisms;Eukaryota;Opisthokonta;Metazoa;Eumetazoa;Bilateria;Protostomia;  
 Spiralia;Lophotrochozoa;Mollusca;Bivalvia;Autobranhia;Pteriormorphia;Ostr  
 eida;Ostreoidea;Ostreidae;Crassostrea;Crassostrea virginica  
 UdeM00000019511 6596 212.6 UdeM00000019511 XP\_045163028.1 37.3 354  
 209 6 19 372 26 366 9.30E-52 212.6 6596 cellular  
 organisms;Eukaryota;Opisthokonta;Metazoa;Eumetazoa;Bilateria;Protostomia;

Spiralia;Lophotrochozoa;Mollusca;Bivalvia;Autobranchia;Heteroconchia;Euherodonta;Imparidentia;Venerida;Veneroidea;Veneridae;Mercenaria;Mercenaria mercenaria

UdeM00000019512 6596 125.2 UdeM00000019512 XP\_045163028.1 46.8 154  
77 3 95 247 73 222 1.50E-25 125.2 6596 cellular

organisms;Eukaryota;Opisthokonta;Metazoa;Eumetazoa;Bilateria;Protostomia;Spiralia;Lophotrochozoa;Mollusca;Bivalvia;Autobranchia;Heteroconchia;Euherodonta;Imparidentia;Venerida;Veneroidea;Veneridae;Mercenaria;Mercenaria mercenaria

UdeM00000019513 143950 128.3 UdeM00000019513 XP\_025407409.1 44.5  
137 71 2 1 132 70 206 7.50E-27 128.3 143950  
cellular

organisms;Eukaryota;Opisthokonta;Metazoa;Eumetazoa;Bilateria;Protostomia;Ecdysozoa;Panarthropoda;Arthropoda;Mandibulata;Pancrustacea;Hexapoda;Insecta;Dicondylia;Pterygota;Neoptera;Paraneoptera;Hemiptera;Sternorrhyncha;Aphidomorpha;Aphidoidea;Aphididae;Chaitophorinae;Sipha;Sipha flava

UdeM00000019514 143950 111.7 UdeM00000019514 XP\_025407409.1 44.8  
116 60 1 1 112 70 185 6.30E-22 111.7 143950  
cellular

organisms;Eukaryota;Opisthokonta;Metazoa;Eumetazoa;Bilateria;Protostomia;Ecdysozoa;Panarthropoda;Arthropoda;Mandibulata;Pancrustacea;Hexapoda;Insecta;Dicondylia;Pterygota;Neoptera;Paraneoptera;Hemiptera;Sternorrhyncha;Aphidomorpha;Aphidoidea;Aphididae;Chaitophorinae;Sipha;Sipha flava

UdeM00000019515 6596 237.7 UdeM00000019515 XP\_045163028.1 40.9 372  
208 7 1 371 8 368 2.70E-59 237.7 6596 cellular

organisms;Eukaryota;Opisthokonta;Metazoa;Eumetazoa;Bilateria;Protostomia;Spiralia;Lophotrochozoa;Mollusca;Bivalvia;Autobranchia;Heteroconchia;Euherodonta;Imparidentia;Venerida;Veneroidea;Veneridae;Mercenaria;Mercenaria mercenaria

UdeM00000019516 6596 245.7 UdeM00000019516 XP\_045163028.1 41 356  
197 4 17 372 26 368 1.00E-61 245.7 6596 cellular

organisms;Eukaryota;Opisthokonta;Metazoa;Eumetazoa;Bilateria;Protostomia;Spiralia;Lophotrochozoa;Mollusca;Bivalvia;Autobranchia;Heteroconchia;Euherodonta;Imparidentia;Venerida;Veneroidea;Veneridae;Mercenaria;Mercenaria mercenaria

UdeM00000019517 6596 229.2 UdeM00000019517 XP\_045163028.1 37.6 356  
218 3 5 360 15 366 9.30E-57 229.2 6596 cellular

organisms;Eukaryota;Opisthokonta;Metazoa;Eumetazoa;Bilateria;Protostomia;Spiralia;Lophotrochozoa;Mollusca;Bivalvia;Autobranchia;Heteroconchia;Euherodonta;Imparidentia;Venerida;Veneroidea;Veneridae;Mercenaria;Mercenaria mercenaria

UdeM00000019519 8090 100.9 UdeM00000019519 XP\_023821816.1 66.7 66  
22 0 4 69 675 740 7.30E-19 100.9 8090 cellular

organisms;Eukaryota;Opisthokonta;Metazoa;Eumetazoa;Bilateria;Deuterostomia;Chordata;Craniata;Vertebrata;Gnathostomata;Teleostomi;Euteleostomi;Actinopterygii;Actinopteri;Neopterygii;Teleostei;Osteoglossocephalai;Clupeocephala;Euteleostei;Neoteleostei;Eurypterygia;Ctenosquamata;Acanthopterygii;Euacanthopterygii;Percomorphaceae;Ovalentaria;Atherinomorpha;Belontiiformes;Adrianichthyoidei;Adrianichthyidae;Oryziinae;Oryzias;Oryzias latipes

UdeM00000019521 6596 149.8 UdeM00000019521 XP\_045181277.1 34.4 294  
175 10 20 303 120 405 5.70E-33 149.8 6596 cellular

organisms;Eukaryota;Opisthokonta;Metazoa;Eumetazoa;Bilateria;Protostomia;Spiralia;Lophotrochozoa;Mollusca;Bivalvia;Autobranchia;Heteroconchia;Euherodonta;Imparidentia;Venerida;Veneroidea;Veneridae;Mercenaria;Mercenaria mercenaria

terodonta;Imparidentia;Venerida;Veneroidea;Veneridae;Mercenaria;Mercenari  
 a mercenaria  
 UdeM00000019522 6596 92.4 UdeM00000019522 XP\_045181277.1 26 269  
 131 6 165 368 55 320 1.30E-15 92.4 6596 cellular  
 organisms;Eukaryota;Opisthokonta;Metazoa;Eumetazoa;Bilateria;Protostomia;  
 Spiralia;Lophotrochozoa;Mollusca;Bivalvia;Autobranchia;Heteroconchia;Euhe  
 terodonta;Imparidentia;Venerida;Veneroidea;Veneridae;Mercenaria;Mercenari  
 a mercenaria  
 UdeM00000019523 6596 92.4 UdeM00000019523 XP\_045181277.1 26 269  
 131 6 43 246 55 320 9.00E-16 92.4 6596 cellular  
 organisms;Eukaryota;Opisthokonta;Metazoa;Eumetazoa;Bilateria;Protostomia;  
 Spiralia;Lophotrochozoa;Mollusca;Bivalvia;Autobranchia;Heteroconchia;Euhe  
 terodonta;Imparidentia;Venerida;Veneroidea;Veneridae;Mercenaria;Mercenari  
 a mercenaria  
 UdeM00000019524 6596 72.8 UdeM00000019524 XP\_045177153.1 29.6 186  
 109 8 46 214 22 202 6.20E-10 72.8 6596 cellular  
 organisms;Eukaryota;Opisthokonta;Metazoa;Eumetazoa;Bilateria;Protostomia;  
 Spiralia;Lophotrochozoa;Mollusca;Bivalvia;Autobranchia;Heteroconchia;Euhe  
 terodonta;Imparidentia;Venerida;Veneroidea;Veneridae;Mercenaria;Mercenari  
 a mercenaria  
 UdeM00000019525 6596 76.3 UdeM00000019525 XP\_045177153.1 31.7 183  
 107 8 60 227 23 202 5.90E-11 76.3 6596 cellular  
 organisms;Eukaryota;Opisthokonta;Metazoa;Eumetazoa;Bilateria;Protostomia;  
 Spiralia;Lophotrochozoa;Mollusca;Bivalvia;Autobranchia;Heteroconchia;Euhe  
 terodonta;Imparidentia;Venerida;Veneroidea;Veneridae;Mercenaria;Mercenari  
 a mercenaria  
 UdeM00000019527 6596 71.2 UdeM00000019527 XP\_045163252.1 30.3 198  
 115 7 74 257 263 451 2.10E-09 71.2 6596 cellular  
 organisms;Eukaryota;Opisthokonta;Metazoa;Eumetazoa;Bilateria;Protostomia;  
 Spiralia;Lophotrochozoa;Mollusca;Bivalvia;Autobranchia;Heteroconchia;Euhe  
 terodonta;Imparidentia;Venerida;Veneroidea;Veneridae;Mercenaria;Mercenari  
 a mercenaria  
 UdeM00000019526 6596 71.2 UdeM00000019526 XP\_045163252.1 30.3 198  
 115 7 109 292 263 451 2.40E-09 71.2 6596 cellular  
 organisms;Eukaryota;Opisthokonta;Metazoa;Eumetazoa;Bilateria;Protostomia;  
 Spiralia;Lophotrochozoa;Mollusca;Bivalvia;Autobranchia;Heteroconchia;Euhe  
 terodonta;Imparidentia;Venerida;Veneroidea;Veneridae;Mercenaria;Mercenari  
 a mercenaria  
 UdeM00000019528 6596 71.2 UdeM00000019528 XP\_045163252.1 30.3 198  
 115 7 182 365 263 451 3.00E-09 71.2 6596 cellular  
 organisms;Eukaryota;Opisthokonta;Metazoa;Eumetazoa;Bilateria;Protostomia;  
 Spiralia;Lophotrochozoa;Mollusca;Bivalvia;Autobranchia;Heteroconchia;Euhe  
 terodonta;Imparidentia;Venerida;Veneroidea;Veneridae;Mercenaria;Mercenari  
 a mercenaria  
 UdeM00000019529 29159 112.8 UdeM00000019529 XP\_011453536.2 46.7 105  
 56 0 9 113 13 117 2.90E-22 112.8 29159 cellular  
 organisms;Eukaryota;Opisthokonta;Metazoa;Eumetazoa;Bilateria;Protostomia;  
 Spiralia;Lophotrochozoa;Mollusca;Bivalvia;Autobranchia;Pteriomorphia;Ostr  
 eida;Ostreoidea;Ostreidae;Crassostrea;Crassostrea gigas  
 UdeM00000019530 6596 288.5 UdeM00000019530 XP\_045175151.1 37.4 457  
 252 9 28 468 38 476 1.50E-74 288.5 6596 cellular  
 organisms;Eukaryota;Opisthokonta;Metazoa;Eumetazoa;Bilateria;Protostomia;  
 Spiralia;Lophotrochozoa;Mollusca;Bivalvia;Autobranchia;Heteroconchia;Euhe



terodonta;Imparidentia;Venerida;Veneroidea;Veneridae;Mercenaria;Mercenaria mercenaria  
 UdeM00000019531 6596 290.4 UdeM00000019531 XP\_045175151.1 37.1 458  
 257 8 23 468 38 476 4.00E-75 290.4 6596 cellular  
 organisms;Eukaryota;Opisthokonta;Metazoa;Eumetazoa;Bilateria;Protostomia;  
 Spiralia;Lophotrochozoa;Mollusca;Bivalvia;Autobranchia;Heteroconchia;Euhe  
 terodonta;Imparidentia;Venerida;Veneroidea;Veneridae;Mercenaria;Mercenari  
 a mercenaria  
 UdeM00000019532 400727 145.2 UdeM00000019532 XP\_025082564.1 31.2  
 560 308 21 26 544 59 582 3.10E-31 145.2 400727  
 cellular  
 organisms;Eukaryota;Opisthokonta;Metazoa;Eumetazoa;Bilateria;Protostomia;  
 Spiralia;Lophotrochozoa;Mollusca;Gastropoda;Caenogastropoda;Architaeniogl  
 ossa;Ampullarioidea;Ampullariidae;Pomacea;Pomacea canaliculata  
 UdeM00000019534 6579 375.6 UdeM00000019534 XP\_033764119.1 76 229  
 54 1 1 228 1 229 4.70E-101 375.6 6579 cellular  
 organisms;Eukaryota;Opisthokonta;Metazoa;Eumetazoa;Bilateria;Protostomia;  
 Spiralia;Lophotrochozoa;Mollusca;Bivalvia;Autobranchia;Pteriormorphia;Pect  
 inida;Pectinoidea;Pectinidae;Pecten;Pecten maximus  
 UdeM00000019535 225164 581.6 UdeM00000019535 XP\_009060418.1 80.1  
 361 71 1 216 576 215 574 1.10E-162 581.6 225164  
 cellular  
 organisms;Eukaryota;Opisthokonta;Metazoa;Eumetazoa;Bilateria;Protostomia;  
 Spiralia;Lophotrochozoa;Mollusca;Gastropoda;Patellogastropoda;Lottioidea;  
 Lottiidae;Lottia;Lottia gigantea  
 UdeM00000019536 6596 904 UdeM00000019536 XP\_045163494.1 69.8 692  
 206 2 1 690 1 691 1.10E-259 904 6596 cellular  
 organisms;Eukaryota;Opisthokonta;Metazoa;Eumetazoa;Bilateria;Protostomia;  
 Spiralia;Lophotrochozoa;Mollusca;Bivalvia;Autobranchia;Heteroconchia;Euhe  
 terodonta;Imparidentia;Venerida;Veneroidea;Veneridae;Mercenaria;Mercenari  
 a mercenaria  
 UdeM00000019537 6565 225.3 UdeM00000019537 XP\_022342749.1 48.8 256  
 120 4 3 247 4 259 1.20E-55 225.3 6565 cellular  
 organisms;Eukaryota;Opisthokonta;Metazoa;Eumetazoa;Bilateria;Protostomia;  
 Spiralia;Lophotrochozoa;Mollusca;Bivalvia;Autobranchia;Pteriormorphia;Ostr  
 eida;Ostreoidea;Ostreidae;Crassostrea;Crassostrea virginica  
 UdeM00000019538 6596 253.4 UdeM00000019538 XP\_045162729.1 63.4 202  
 73 1 1 202 1 201 2.40E-64 253.4 6596 cellular  
 organisms;Eukaryota;Opisthokonta;Metazoa;Eumetazoa;Bilateria;Protostomia;  
 Spiralia;Lophotrochozoa;Mollusca;Bivalvia;Autobranchia;Heteroconchia;Euhe  
 terodonta;Imparidentia;Venerida;Veneroidea;Veneridae;Mercenaria;Mercenari  
 a mercenaria  
 UdeM00000019539 6596 565.1 UdeM00000019539 XP\_045162684.1 57.1 452  
 189 1 5 451 30 481 8.10E-158 565.1 6596 cellular  
 organisms;Eukaryota;Opisthokonta;Metazoa;Eumetazoa;Bilateria;Protostomia;  
 Spiralia;Lophotrochozoa;Mollusca;Bivalvia;Autobranchia;Heteroconchia;Euhe  
 terodonta;Imparidentia;Venerida;Veneroidea;Veneridae;Mercenaria;Mercenari  
 a mercenaria  
 UdeM00000019540 6573 409.1 UdeM00000019540 XP\_021340170.1 55.5 366  
 161 2 63 427 109 473 7.10E-111 409.1 6573 cellular  
 organisms;Eukaryota;Opisthokonta;Metazoa;Eumetazoa;Bilateria;Protostomia;  
 Spiralia;Lophotrochozoa;Mollusca;Bivalvia;Autobranchia;Pteriormorphia;Pect  
 inida;Pectinoidea;Pectinidae;Mizuhopecten;Mizuhopecten yessoensis

UdeM00000019541 1735272 442.2 UdeM00000019541 XP\_041377515.1 48.7  
 415 202 4 26 434 154 563 2.60E-120 442.2 1735272  
 cellular  
 organisms;Eukaryota;Opisthokonta;Metazoa;Eumetazoa;Bilateria;Protostomia;  
 Spiralia;Lophotrochozoa;Mollusca;Gastropoda;Neomphalina;Neomphaloidea;Pel  
 tospiridae;Gigantopelta;Gigantopelta aegis  
 UdeM00000019542 1735272 442.2 UdeM00000019542 XP\_041377515.1 48.7  
 415 202 4 26 434 154 563 2.60E-120 442.2 1735272  
 cellular  
 organisms;Eukaryota;Opisthokonta;Metazoa;Eumetazoa;Bilateria;Protostomia;  
 Spiralia;Lophotrochozoa;Mollusca;Gastropoda;Neomphalina;Neomphaloidea;Pel  
 tospiridae;Gigantopelta;Gigantopelta aegis  
 UdeM00000019543 6596 113.2 UdeM00000019543 XP\_045177735.1 60.8 74  
 29 0 32 105 76 149 2.00E-22 113.2 6596 cellular  
 organisms;Eukaryota;Opisthokonta;Metazoa;Eumetazoa;Bilateria;Protostomia;  
 Spiralia;Lophotrochozoa;Mollusca;Bivalvia;Autobranchia;Heteroconchia;Euhe  
 terodonta;Imparidentia;Venerida;Veneroidea;Veneridae;Mercenaria;Mercenari  
 a mercenaria  
 UdeM00000019544 400727 100.1 UdeM00000019544 XP\_025080280.1 64.2  
 67 24 0 27 93 7 73 1.50E-18 100.1 400727  
 cellular  
 organisms;Eukaryota;Opisthokonta;Metazoa;Eumetazoa;Bilateria;Protostomia;  
 Spiralia;Lophotrochozoa;Mollusca;Gastropoda;Caenogastropoda;Architaeniogl  
 ossa;Ampullarioidea;Ampullariidae;Pomacea;Pomacea canaliculata  
 UdeM00000019545 1735272 1879 UdeM00000019545 XP\_041358414.1 63.1  
 1459 515 9 1 1446 7 1454 0.00E+00 1879 1735272  
 cellular  
 organisms;Eukaryota;Opisthokonta;Metazoa;Eumetazoa;Bilateria;Protostomia;  
 Spiralia;Lophotrochozoa;Mollusca;Gastropoda;Neomphalina;Neomphaloidea;Pel  
 tospiridae;Gigantopelta;Gigantopelta aegis  
 UdeM00000019546 6565 170.2 UdeM00000019546 XP\_022299727.1 47.4 171  
 89 1 1 171 106 275 2.60E-39 170.2 6565 cellular  
 organisms;Eukaryota;Opisthokonta;Metazoa;Eumetazoa;Bilateria;Protostomia;  
 Spiralia;Lophotrochozoa;Mollusca;Bivalvia;Autobranchia;Pteriomorphia;Ostr  
 eida;Ostreoidea;Ostreidae;Crassostrea;Crassostrea virginica  
 UdeM00000019547 6579 685.3 UdeM00000019547 XP\_033760107.1 76.9 433  
 100 0 1 433 1451 1883 5.20E-194 685.3 6579 cellular  
 organisms;Eukaryota;Opisthokonta;Metazoa;Eumetazoa;Bilateria;Protostomia;  
 Spiralia;Lophotrochozoa;Mollusca;Bivalvia;Autobranchia;Pteriomorphia;Pect  
 inida;Pectinoidea;Pectinidae;Pecten;Pecten maximus  
 UdeM00000019548 6596 523.1 UdeM00000019548 XP\_045161770.1 87.8 278  
 33 1 1 277 1 278 2.20E-145 523.1 6596 cellular  
 organisms;Eukaryota;Opisthokonta;Metazoa;Eumetazoa;Bilateria;Protostomia;  
 Spiralia;Lophotrochozoa;Mollusca;Bivalvia;Autobranchia;Heteroconchia;Euhe  
 terodonta;Imparidentia;Venerida;Veneroidea;Veneridae;Mercenaria;Mercenari  
 a mercenaria  
 UdeM00000019549 29159 84.3 UdeM00000019549 XP\_034338503.1 68.4 95  
 30 0 55 149 2 96 1.80E-13 84.3 29159 cellular  
 organisms;Eukaryota;Opisthokonta;Metazoa;Eumetazoa;Bilateria;Protostomia;  
 Spiralia;Lophotrochozoa;Mollusca;Bivalvia;Autobranchia;Pteriomorphia;Ostr  
 eida;Ostreoidea;Ostreidae;Crassostrea;Crassostrea gigas  
 UdeM00000019550 6596 300.8 UdeM00000019550 XP\_045162257.1 49.7 300  
 148 2 1 297 1 300 1.90E-78 300.8 6596 cellular  
 organisms;Eukaryota;Opisthokonta;Metazoa;Eumetazoa;Bilateria;Protostomia;

Spiralia;Lophotrochozoa;Mollusca;Bivalvia;Autobranchia;Heteroconchia;Euherodonta;Imparidentia;Venerida;Veneroidea;Veneridae;Mercenaria;Mercenaria mercenaria

UdeM00000019551 37621 146 UdeM00000019551 XP\_014678940.1 75.3 85  
21 0 21 105 484 568 4.00E-32 146 37621 cellular

organisms;Eukaryota;Opisthokonta;Metazoa;Eumetazoa;Bilateria;Protostomia;Ecdysozoa;Scalidophora;Priapulida;Priapulimorpha;Priapulimorphida;Priapulidae;Priapulus;Priapulus caudatus

UdeM00000019552 29159 77.4 UdeM00000019552 XP\_034339168.1 80 45  
9 0 1 45 883 927 5.20E-12 77.4 29159 cellular

organisms;Eukaryota;Opisthokonta;Metazoa;Eumetazoa;Bilateria;Protostomia;Spiralia;Lophotrochozoa;Mollusca;Bivalvia;Autobranchia;Pteriormorpha;Ostreida;Ostreoidea;Ostreidae;Crassostrea;Crassostrea gigas

UdeM00000019553 29159 103.6 UdeM00000019553 XP\_034339168.1 46.5 129  
40 1 1 100 883 1011 1.50E-19 103.6 29159 cellular

organisms;Eukaryota;Opisthokonta;Metazoa;Eumetazoa;Bilateria;Protostomia;Spiralia;Lophotrochozoa;Mollusca;Bivalvia;Autobranchia;Pteriormorpha;Ostreida;Ostreoidea;Ostreidae;Crassostrea;Crassostrea gigas

UdeM00000019554 29159 160.6 UdeM00000019554 XP\_034338151.1 40.5 220  
58 2 3 149 131 350 1.70E-36 160.6 29159 cellular

organisms;Eukaryota;Opisthokonta;Metazoa;Eumetazoa;Bilateria;Protostomia;Spiralia;Lophotrochozoa;Mollusca;Bivalvia;Autobranchia;Pteriormorpha;Ostreida;Ostreoidea;Ostreidae;Crassostrea;Crassostrea gigas

UdeM00000019556 6579 957.6 UdeM00000019556 XP\_033760558.1 26.6 2212  
1521 20 20 2202 730 2867 4.70E-275 957.6 6579 cellular

organisms;Eukaryota;Opisthokonta;Metazoa;Eumetazoa;Bilateria;Protostomia;Spiralia;Lophotrochozoa;Mollusca;Bivalvia;Autobranchia;Pteriormorpha;Pectinida;Pectinoidea;Pectinidae;Pecten;Pecten maximus

UdeM00000019557 6596 265.4 UdeM00000019557 XP\_045162858.1 51.2 256  
121 3 1 255 1449 1701 1.10E-67 265.4 6596 cellular

organisms;Eukaryota;Opisthokonta;Metazoa;Eumetazoa;Bilateria;Protostomia;Spiralia;Lophotrochozoa;Mollusca;Bivalvia;Autobranchia;Heteroconchia;Euherodonta;Imparidentia;Venerida;Veneroidea;Veneridae;Mercenaria;Mercenaria mercenaria

UdeM00000019558 6596 67.4 UdeM00000019558 XP\_045162855.1 40.5 84  
46 3 43 125 34 114 1.90E-08 67.4 6596 cellular

organisms;Eukaryota;Opisthokonta;Metazoa;Eumetazoa;Bilateria;Protostomia;Spiralia;Lophotrochozoa;Mollusca;Bivalvia;Autobranchia;Heteroconchia;Euherodonta;Imparidentia;Venerida;Veneroidea;Veneridae;Mercenaria;Mercenaria mercenaria

UdeM00000019559 1735272 229.9 UdeM00000019559 XP\_041357458.1 51  
247 62 4 1 188 197 443 2.60E-57 229.9 1735272

cellular

organisms;Eukaryota;Opisthokonta;Metazoa;Eumetazoa;Bilateria;Protostomia;Spiralia;Lophotrochozoa;Mollusca;Gastropoda;Neomphalina;Neomphaloidea;Peltospiridae;Gigantopelta;Gigantopelta aegis

UdeM00000019560 6579 776.5 UdeM00000019560 XP\_033760558.1 25.6 2102  
1422 28 3 2016 441 2489 7.90E-221 776.5 6579 cellular

organisms;Eukaryota;Opisthokonta;Metazoa;Eumetazoa;Bilateria;Protostomia;Spiralia;Lophotrochozoa;Mollusca;Bivalvia;Autobranchia;Pteriormorpha;Pectinida;Pectinoidea;Pectinidae;Pecten;Pecten maximus

UdeM00000019561 6596 244.6 UdeM00000019561 XP\_045162858.1 51.3 236  
105 4 22 251 1480 1711 2.00E-61 244.6 6596 cellular

organisms;Eukaryota;Opisthokonta;Metazoa;Eumetazoa;Bilateria;Protostomia;

Spiralia;Lophotrochozoa;Mollusca;Bivalvia;Autobranchia;Heteroconchia;Euherodonta;Imparidentia;Venerida;Veneroidea;Veneridae;Mercenaria;Mercenaria mercenaria

UdeM00000019562 6579 289.7 UdeM00000019562 XP\_033763324.1 31.6 629  
362 13 576 1193 507 1078 1.70E-74 289.7 6579 cellular  
organisms;Eukaryota;Opisthokonta;Metazoa;Eumetazoa;Bilateria;Protostomia;  
Spiralia;Lophotrochozoa;Mollusca;Bivalvia;Autobranchia;Pteriomorpha;Pect  
inida;Pectinoidea;Pectinidae;Pecten;Pecten maximus

UdeM00000019563 6596 167.2 UdeM00000019563 XP\_045162858.1 52.5 158  
69 3 6 162 1549 1701 3.60E-38 167.2 6596 cellular  
organisms;Eukaryota;Opisthokonta;Metazoa;Eumetazoa;Bilateria;Protostomia;  
Spiralia;Lophotrochozoa;Mollusca;Bivalvia;Autobranchia;Heteroconchia;Euherodonta;Imparidentia;Venerida;Veneroidea;Veneridae;Mercenaria;Mercenaria mercenaria

UdeM00000019564 6596 234.2 UdeM00000019564 XP\_045162858.1 50.4 230  
108 3 13 241 1480 1704 2.40E-58 234.2 6596 cellular  
organisms;Eukaryota;Opisthokonta;Metazoa;Eumetazoa;Bilateria;Protostomia;  
Spiralia;Lophotrochozoa;Mollusca;Bivalvia;Autobranchia;Heteroconchia;Euherodonta;Imparidentia;Venerida;Veneroidea;Veneridae;Mercenaria;Mercenaria mercenaria

UdeM00000019565 6565 75.5 UdeM00000019565 XP\_022339292.1 58.1 62  
25 1 5 66 982 1042 2.90E-11 75.5 6565 cellular  
organisms;Eukaryota;Opisthokonta;Metazoa;Eumetazoa;Bilateria;Protostomia;  
Spiralia;Lophotrochozoa;Mollusca;Bivalvia;Autobranchia;Pteriomorpha;Ostr  
eida;Ostreoidea;Ostreidae;Crassostrea;Crassostrea virginica

UdeM00000019566 6565 61.6 UdeM00000019566 XP\_022339292.1 31.2 112  
68 2 7 114 870 976 8.50E-07 61.6 6565 cellular  
organisms;Eukaryota;Opisthokonta;Metazoa;Eumetazoa;Bilateria;Protostomia;  
Spiralia;Lophotrochozoa;Mollusca;Bivalvia;Autobranchia;Pteriomorpha;Ostr  
eida;Ostreoidea;Ostreidae;Crassostrea;Crassostrea virginica

UdeM00000019567 6579 499.2 UdeM00000019567 XP\_033763324.1 37.4 819  
455 18 223 1018 521 1304 1.90E-137 499.2 6579 cellular  
organisms;Eukaryota;Opisthokonta;Metazoa;Eumetazoa;Bilateria;Protostomia;  
Spiralia;Lophotrochozoa;Mollusca;Bivalvia;Autobranchia;Pteriomorpha;Pect  
inida;Pectinoidea;Pectinidae;Pecten;Pecten maximus

UdeM00000019569 6579 481.9 UdeM00000019569 XP\_033763324.1 36.7 825  
473 15 286 1089 521 1317 2.40E-132 481.9 6579 cellular  
organisms;Eukaryota;Opisthokonta;Metazoa;Eumetazoa;Bilateria;Protostomia;  
Spiralia;Lophotrochozoa;Mollusca;Bivalvia;Autobranchia;Pteriomorpha;Pect  
inida;Pectinoidea;Pectinidae;Pecten;Pecten maximus

UdeM00000019570 6579 483.8 UdeM00000019570 XP\_033763324.1 37.9 780  
451 16 132 885 521 1293 5.40E-133 483.8 6579 cellular  
organisms;Eukaryota;Opisthokonta;Metazoa;Eumetazoa;Bilateria;Protostomia;  
Spiralia;Lophotrochozoa;Mollusca;Bivalvia;Autobranchia;Pteriomorpha;Pect  
inida;Pectinoidea;Pectinidae;Pecten;Pecten maximus

UdeM00000019572 6565 169.1 UdeM00000019572 XP\_022345276.1 44.7 190  
52 1 47 183 212 401 7.00E-39 169.1 6565 cellular  
organisms;Eukaryota;Opisthokonta;Metazoa;Eumetazoa;Bilateria;Protostomia;  
Spiralia;Lophotrochozoa;Mollusca;Bivalvia;Autobranchia;Pteriomorpha;Ostr  
eida;Ostreoidea;Ostreidae;Crassostrea;Crassostrea virginica

UdeM00000019573 6565 760.8 UdeM00000019573 XP\_022336997.1 58.1 604  
242 5 9 611 74 667 1.40E-216 760.8 6565 cellular  
organisms;Eukaryota;Opisthokonta;Metazoa;Eumetazoa;Bilateria;Protostomia;

Spiralia;Lophotrochozoa;Mollusca;Bivalvia;Autobranchia;Pteriormorphia;Ostr  
 eida;Ostreoidea;Ostreidae;Crassostrea;Crassostrea virginica  
 UdeM00000019575 2607531 563.1 UdeM00000019575 XP\_029643579.1 39  
 698 413 5 55 749 51 738 5.10E-157 563.1 2607531  
 cellular  
 organisms;Eukaryota;Opisthokonta;Metazoa;Eumetazoa;Bilateria;Protostomia;  
 Spiralia;Lophotrochozoa;Mollusca;Cephalopoda;Coleoidea;Octopodiformes;Oct  
 opoda;Incirrata;Octopodidae;Octopus;Octopus sinensis  
 UdeM00000019576 225164 265.8 UdeM00000019576 XP\_009049950.1 34.2  
 377 238 2 57 433 48 414 1.00E-67 265.8 225164  
 cellular  
 organisms;Eukaryota;Opisthokonta;Metazoa;Eumetazoa;Bilateria;Protostomia;  
 Spiralia;Lophotrochozoa;Mollusca;Gastropoda;Patellogastropoda;Lottioidea;  
 Lottiidae;Lottia;Lottia gigantea  
 UdeM00000019577 6596 1495.3 UdeM00000019577 XP\_045161724.1 76.5  
 925 204 5 1 920 1 917 0.00E+00 1495.3 6596  
 cellular  
 organisms;Eukaryota;Opisthokonta;Metazoa;Eumetazoa;Bilateria;Protostomia;  
 Spiralia;Lophotrochozoa;Mollusca;Bivalvia;Autobranchia;Heteroconchia;Euhe  
 terodonta;Imparidentia;Venerida;Veneroidea;Veneridae;Mercenaria;Mercenari  
 a mercenaria  
 UdeM00000019578 6596 902.5 UdeM00000019578 XP\_045161732.1 75.8 782  
 153 10 1 755 4 776 3.60E-259 902.5 6596 cellular  
 organisms;Eukaryota;Opisthokonta;Metazoa;Eumetazoa;Bilateria;Protostomia;  
 Spiralia;Lophotrochozoa;Mollusca;Bivalvia;Autobranchia;Heteroconchia;Euhe  
 terodonta;Imparidentia;Venerida;Veneroidea;Veneridae;Mercenaria;Mercenari  
 a mercenaria  
 UdeM00000019579 6596 917.5 UdeM00000019579 XP\_045161732.1 76.1 788  
 152 10 1 761 4 782 1.10E-263 917.5 6596 cellular  
 organisms;Eukaryota;Opisthokonta;Metazoa;Eumetazoa;Bilateria;Protostomia;  
 Spiralia;Lophotrochozoa;Mollusca;Bivalvia;Autobranchia;Heteroconchia;Euhe  
 terodonta;Imparidentia;Venerida;Veneroidea;Veneridae;Mercenaria;Mercenari  
 a mercenaria  
 UdeM00000019591 6579 84 UdeM00000019591 XP\_033728927.1 32.4 136  
 78 3 45 166 3 138 2.10E-13 84 6579 cellular  
 organisms;Eukaryota;Opisthokonta;Metazoa;Eumetazoa;Bilateria;Protostomia;  
 Spiralia;Lophotrochozoa;Mollusca;Bivalvia;Autobranchia;Pteriormorphia;Pect  
 inida;Pectinoidea;Pectinidae;Pecten;Pecten maximus  
 UdeM00000019592 50429 68.2 UdeM00000019592 XP\_022804186.1 43.1 72  
 41 0 1 72 430 501 5.50E-09 68.2 50429 cellular  
 organisms;Eukaryota;Opisthokonta;Metazoa;Eumetazoa;Cnidaria;Anthozoa;Hexa  
 corallia;Scleractinia;Astrocoeniina;Pocilloporidae;Stylophora;Stylophora  
 pistillata  
 UdeM00000019594 6596 475.3 UdeM00000019594 XP\_045163816.1 44.6 561  
 308 2 25 583 36 595 1.10E-130 475.3 6596 cellular  
 organisms;Eukaryota;Opisthokonta;Metazoa;Eumetazoa;Bilateria;Protostomia;  
 Spiralia;Lophotrochozoa;Mollusca;Bivalvia;Autobranchia;Heteroconchia;Euhe  
 terodonta;Imparidentia;Venerida;Veneroidea;Veneridae;Mercenaria;Mercenari  
 a mercenaria  
 UdeM00000019595 6596 469.9 UdeM00000019595 XP\_045163816.1 44.1 567  
 314 2 25 589 36 601 4.70E-129 469.9 6596 cellular  
 organisms;Eukaryota;Opisthokonta;Metazoa;Eumetazoa;Bilateria;Protostomia;  
 Spiralia;Lophotrochozoa;Mollusca;Bivalvia;Autobranchia;Heteroconchia;Euhe

terodonta;Imparidentia;Venerida;Veneroidea;Veneridae;Mercenaria;Mercenari  
 a mercenaria  
 UdeM00000019596 6596 143.3 UdeM00000019596 XP\_045163816.1 37 216  
 134 2 7 221 21 235 4.70E-31 143.3 6596 cellular  
 organisms;Eukaryota;Opisthokonta;Metazoa;Eumetazoa;Bilateria;Protostomia;  
 Spiralia;Lophotrochozoa;Mollusca;Bivalvia;Autobranhia;Heteroconchia;Euhe  
 terodonta;Imparidentia;Venerida;Veneroidea;Veneridae;Mercenaria;Mercenari  
 a mercenaria  
 UdeM00000019598 6596 476.5 UdeM00000019598 XP\_045163816.1 44.1 567  
 314 2 25 589 36 601 5.00E-131 476.5 6596 cellular  
 organisms;Eukaryota;Opisthokonta;Metazoa;Eumetazoa;Bilateria;Protostomia;  
 Spiralia;Lophotrochozoa;Mollusca;Bivalvia;Autobranhia;Heteroconchia;Euhe  
 terodonta;Imparidentia;Venerida;Veneroidea;Veneridae;Mercenaria;Mercenari  
 a mercenaria  
 UdeM00000019599 6579 104.8 UdeM00000019599 XP\_033761495.1 65.8 73  
 25 0 36 108 24 96 9.50E-20 104.8 6579 cellular  
 organisms;Eukaryota;Opisthokonta;Metazoa;Eumetazoa;Bilateria;Protostomia;  
 Spiralia;Lophotrochozoa;Mollusca;Bivalvia;Autobranhia;Pteriormorphia;Pect  
 inida;Pectinoidea;Pectinidae;Pecten;Pecten maximus  
 UdeM00000019600 6579 331.6 UdeM00000019600 XP\_033761495.1 83.6 183  
 30 0 1 183 177 359 1.50E-87 331.6 6579 cellular  
 organisms;Eukaryota;Opisthokonta;Metazoa;Eumetazoa;Bilateria;Protostomia;  
 Spiralia;Lophotrochozoa;Mollusca;Bivalvia;Autobranhia;Pteriormorphia;Pect  
 inida;Pectinoidea;Pectinidae;Pecten;Pecten maximus  
 UdeM00000019601 1735272 82.4 UdeM00000019601 XP\_041362151.1 37.2  
 113 70 1 9 120 563 675 4.30E-13 82.4 1735272  
 cellular  
 organisms;Eukaryota;Opisthokonta;Metazoa;Eumetazoa;Bilateria;Protostomia;  
 Spiralia;Lophotrochozoa;Mollusca;Gastropoda;Neomphalina;Neomphaloidea;Pel  
 tospiridae;Gigantopelta;Gigantopelta aegis  
 UdeM00000019602 6579 990.7 UdeM00000019602 XP\_033744655.1 75.9 636  
 153 0 1 636 1 636 8.60E-286 990.7 6579 cellular  
 organisms;Eukaryota;Opisthokonta;Metazoa;Eumetazoa;Bilateria;Protostomia;  
 Spiralia;Lophotrochozoa;Mollusca;Bivalvia;Autobranhia;Pteriormorphia;Pect  
 inida;Pectinoidea;Pectinidae;Pecten;Pecten maximus  
 UdeM00000019603 7574 68.9 UdeM00000019603 XP\_013408145.1 26.2 229  
 113 10 233 451 2275 2457 1.90E-08 68.9 7574 cellular  
 organisms;Eukaryota;Opisthokonta;Metazoa;Eumetazoa;Bilateria;Protostomia;  
 Spiralia;Lophotrochozoa;Brachiopoda;Linguliformea;Lingulata;Lingulida;Lin  
 guloidea;Lingulidae;Lingula;Lingula anatina  
 UdeM00000019605 6596 229.9 UdeM00000019605 XP\_045209202.1 28 507  
 258 9 27 433 1217 1716 6.10E-57 229.9 6596 cellular  
 organisms;Eukaryota;Opisthokonta;Metazoa;Eumetazoa;Bilateria;Protostomia;  
 Spiralia;Lophotrochozoa;Mollusca;Bivalvia;Autobranhia;Heteroconchia;Euhe  
 terodonta;Imparidentia;Venerida;Veneroidea;Veneridae;Mercenaria;Mercenari  
 a mercenaria  
 UdeM00000019606 6526 120.9 UdeM00000019606 XP\_013068176.1 45.5 121  
 64 2 10 129 677 796 1.30E-24 120.9 6526 cellular  
 organisms;Eukaryota;Opisthokonta;Metazoa;Eumetazoa;Bilateria;Protostomia;  
 Spiralia;Lophotrochozoa;Mollusca;Gastropoda;Heterobranhia;Euthyneura;Pan  
 pulmonata;Hygrophila;Lymnaeioidea;Planorbidae;Biomphalaria;Biomphalaria  
 glabrata  
 UdeM00000019607 1735272 141.4 UdeM00000019607 XP\_041361861.1 45.7  
 151 53 3 1 122 71 221 8.10E-31 141.4 1735272

cellular

organisms;Eukaryota;Opisthokonta;Metazoa;Eumetazoa;Bilateria;Protostomia;Spiralia;Lophotrochozoa;Mollusca;Gastropoda;Neomphalina;Neomphaloidea;Peltospiridae;Gigantopelta;Gigantopelta aegis

|                 |       |      |                 |                |      |          |
|-----------------|-------|------|-----------------|----------------|------|----------|
| UdeM00000019608 | 29159 | 83.2 | UdeM00000019608 | XP_034317111.1 | 60.7 | 61       |
| 24              | 0     | 2    | 62              | 171            | 231  | 1.70E-13 |

83.2 29159 cellular

organisms;Eukaryota;Opisthokonta;Metazoa;Eumetazoa;Bilateria;Protostomia;Spiralia;Lophotrochozoa;Mollusca;Bivalvia;Autobranchia;Pteriomorphia;Ostreida;Ostreoidea;Ostreidae;Crassostrea;Crassostrea gigas

|                 |      |    |                 |                |      |          |
|-----------------|------|----|-----------------|----------------|------|----------|
| UdeM00000019609 | 6565 | 62 | UdeM00000019609 | XP_022299838.1 | 48.8 | 41       |
| 21              | 0    | 61 | 101             | 67             | 107  | 5.10E-07 |

62 6565 cellular

organisms;Eukaryota;Opisthokonta;Metazoa;Eumetazoa;Bilateria;Protostomia;Spiralia;Lophotrochozoa;Mollusca;Bivalvia;Autobranchia;Pteriomorphia;Ostreida;Ostreoidea;Ostreidae;Crassostrea;Crassostrea virginica

|                 |      |       |                 |                |      |          |
|-----------------|------|-------|-----------------|----------------|------|----------|
| UdeM00000019611 | 6579 | 199.1 | UdeM00000019611 | XP_033748473.1 | 51.3 | 193      |
| 90              | 3    | 202   | 392             | 1              | 191  | 1.00E-47 |

199.1 6579 cellular

organisms;Eukaryota;Opisthokonta;Metazoa;Eumetazoa;Bilateria;Protostomia;Spiralia;Lophotrochozoa;Mollusca;Bivalvia;Autobranchia;Pteriomorphia;Pectinida;Pectinoidea;Pectinidae;Pecten;Pecten maximus

|                 |       |       |                 |                |      |          |
|-----------------|-------|-------|-----------------|----------------|------|----------|
| UdeM00000019612 | 50390 | 193.7 | UdeM00000019612 | XP_028127913.1 | 43.3 | 231      |
| 130             | 1     | 1     | 231             | 1              | 230  | 2.60E-46 |

193.7 50390 cellular

organisms;Eukaryota;Opisthokonta;Metazoa;Eumetazoa;Bilateria;Protostomia;Ecdysozoa;Panarthropoda;Arthropoda;Mandibulata;Pancrustacea;Hexapoda;Insecta;Dicondylia;Pterygota;Neoptera;Endopterygota;Coleoptera;Polyphaga;Cucujiformia;Chrysomeloidea;Chrysomelidae;Galerucinae;Luperini;Diabroticina;Diabroticites;Diabrotica;Diabrotica virgifera;Diabrotica virgifera virgifera

|                 |      |       |                 |                |      |           |
|-----------------|------|-------|-----------------|----------------|------|-----------|
| UdeM00000019613 | 6596 | 479.9 | UdeM00000019613 | XP_045163816.1 | 44.4 | 567       |
| 312             | 2    | 25    | 589             | 36             | 601  | 4.50E-132 |

479.9 6596 cellular

organisms;Eukaryota;Opisthokonta;Metazoa;Eumetazoa;Bilateria;Protostomia;Spiralia;Lophotrochozoa;Mollusca;Bivalvia;Autobranchia;Heteroconchia;Euheterodonta;Imparidentia;Venerida;Veneroidea;Veneridae;Mercenaria;Mercenaria mercenaria

|                 |      |       |                 |                |      |          |
|-----------------|------|-------|-----------------|----------------|------|----------|
| UdeM00000019615 | 6596 | 340.9 | UdeM00000019615 | XP_045163816.1 | 46.9 | 375      |
| 198             | 1    | 20    | 394             | 228            | 601  | 2.20E-90 |

340.9 6596 cellular

organisms;Eukaryota;Opisthokonta;Metazoa;Eumetazoa;Bilateria;Protostomia;Spiralia;Lophotrochozoa;Mollusca;Bivalvia;Autobranchia;Heteroconchia;Euheterodonta;Imparidentia;Venerida;Veneroidea;Veneridae;Mercenaria;Mercenaria mercenaria

|                 |      |       |                 |                |      |          |
|-----------------|------|-------|-----------------|----------------|------|----------|
| UdeM00000019616 | 6596 | 139.4 | UdeM00000019616 | XP_045163816.1 | 38.4 | 198      |
| 120             | 1    | 25    | 220             | 36             | 233  | 6.90E-30 |

139.4 6596 cellular

organisms;Eukaryota;Opisthokonta;Metazoa;Eumetazoa;Bilateria;Protostomia;Spiralia;Lophotrochozoa;Mollusca;Bivalvia;Autobranchia;Heteroconchia;Euheterodonta;Imparidentia;Venerida;Veneroidea;Veneridae;Mercenaria;Mercenaria mercenaria

|                 |      |       |                 |                |      |          |
|-----------------|------|-------|-----------------|----------------|------|----------|
| UdeM00000019617 | 7604 | 157.5 | UdeM00000019617 | XP_033638534.1 | 43.2 | 190      |
| 100             | 2    | 314   | 495             | 1              | 190  | 5.80E-35 |

157.5 7604 cellular

organisms;Eukaryota;Opisthokonta;Metazoa;Eumetazoa;Bilateria;Deuterostomia;Echinodermata;Eleutherozoa;Asterozoa;Asteroidea;Forcipulatacea;Forcipulatida;Asteroiidae;Asterias;Asterias rubens

|                 |      |      |                 |                |      |          |
|-----------------|------|------|-----------------|----------------|------|----------|
| UdeM00000019619 | 6087 | 77.8 | UdeM00000019619 | XP_012561779.1 | 44.9 | 89       |
| 46              | 1    | 29   | 114             | 686            | 774  | 3.00E-11 |

77.8 6087 cellular

organisms;Eukaryota;Opisthokonta;Metazoa;Eumetazoa;Cnidaria;Hydrozoa;Hydrozoa;Anthoathecata;Aplanulata;Hydridae;Hydra;Hydra vulgaris

UdeM00000019623 1735272 154.5 UdeM00000019623 XP\_041365752.1 33.9  
 286 173 4 25 303 165 441 2.30E-34 154.5 1735272  
 cellular  
 organisms;Eukaryota;Opisthokonta;Metazoa;Eumetazoa;Bilateria;Protostomia;  
 Spiralia;Lophotrochozoa;Mollusca;Gastropoda;Neomphalina;Neomphaloidea;Pel  
 tospiridae;Gigantopelta;Gigantopelta aegis  
 UdeM00000019625 6565 94 UdeM00000019625 XP\_022322825.1 41.8 110  
 63 1 4 112 343 452 1.40E-16 94 6565 cellular  
 organisms;Eukaryota;Opisthokonta;Metazoa;Eumetazoa;Bilateria;Protostomia;  
 Spiralia;Lophotrochozoa;Mollusca;Bivalvia;Autobranchia;Pteriormorphia;Ostr  
 eida;Ostreoidea;Ostreidae;Crassostrea;Crassostrea virginica  
 UdeM00000019626 29159 104.4 UdeM00000019626 XP\_011453536.2 37 165  
 54 5 7 126 14 173 2.20E-19 104.4 29159 cellular  
 organisms;Eukaryota;Opisthokonta;Metazoa;Eumetazoa;Bilateria;Protostomia;  
 Spiralia;Lophotrochozoa;Mollusca;Bivalvia;Autobranchia;Pteriormorphia;Ostr  
 eida;Ostreoidea;Ostreidae;Crassostrea;Crassostrea gigas  
 UdeM00000019630 6579 86.7 UdeM00000019630 XP\_033753277.1 43.4 113  
 63 1 20 131 43 155 4.40E-14 86.7 6579 cellular  
 organisms;Eukaryota;Opisthokonta;Metazoa;Eumetazoa;Bilateria;Protostomia;  
 Spiralia;Lophotrochozoa;Mollusca;Bivalvia;Autobranchia;Pteriormorphia;Pect  
 inida;Pectinoidea;Pectinidae;Pecten;Pecten maximus  
 UdeM00000019631 6565 115.2 UdeM00000019631 XP\_022322825.1 45.5 132  
 70 2 2 132 377 507 7.00E-23 115.2 6565 cellular  
 organisms;Eukaryota;Opisthokonta;Metazoa;Eumetazoa;Bilateria;Protostomia;  
 Spiralia;Lophotrochozoa;Mollusca;Bivalvia;Autobranchia;Pteriormorphia;Ostr  
 eida;Ostreoidea;Ostreidae;Crassostrea;Crassostrea virginica  
 UdeM00000019632 6596 161.8 UdeM00000019632 XP\_045162108.1 54.7 128  
 55 3 2 129 52 176 1.20E-36 161.8 6596 cellular  
 organisms;Eukaryota;Opisthokonta;Metazoa;Eumetazoa;Bilateria;Protostomia;  
 Spiralia;Lophotrochozoa;Mollusca;Bivalvia;Autobranchia;Heteroconchia;Euhe  
 terodonta;Imparidentia;Venerida;Veneroidea;Veneridae;Mercenaria;Mercenari  
 a mercenaria  
 UdeM00000019633 6596 91.7 UdeM00000019633 XP\_045163252.1 34.4 195  
 111 5 220 403 263 451 2.40E-15 91.7 6596 cellular  
 organisms;Eukaryota;Opisthokonta;Metazoa;Eumetazoa;Bilateria;Protostomia;  
 Spiralia;Lophotrochozoa;Mollusca;Bivalvia;Autobranchia;Heteroconchia;Euhe  
 terodonta;Imparidentia;Venerida;Veneroidea;Veneridae;Mercenaria;Mercenari  
 a mercenaria  
 UdeM00000019634 6596 75.1 UdeM00000019634 XP\_045177153.1 31.5 181  
 102 8 37 200 27 202 1.20E-10 75.1 6596 cellular  
 organisms;Eukaryota;Opisthokonta;Metazoa;Eumetazoa;Bilateria;Protostomia;  
 Spiralia;Lophotrochozoa;Mollusca;Bivalvia;Autobranchia;Heteroconchia;Euhe  
 terodonta;Imparidentia;Venerida;Veneroidea;Veneridae;Mercenaria;Mercenari  
 a mercenaria  
 UdeM00000019635 6596 73.2 UdeM00000019635 XP\_045177153.1 31.6 158  
 89 5 6 147 48 202 3.30E-10 73.2 6596 cellular  
 organisms;Eukaryota;Opisthokonta;Metazoa;Eumetazoa;Bilateria;Protostomia;  
 Spiralia;Lophotrochozoa;Mollusca;Bivalvia;Autobranchia;Heteroconchia;Euhe  
 terodonta;Imparidentia;Venerida;Veneroidea;Veneridae;Mercenaria;Mercenari  
 a mercenaria  
 UdeM00000019636 6596 397.1 UdeM00000019636 XP\_045163074.1 51 439  
 184 10 72 486 243 674 3.60E-107 397.1 6596 cellular  
 organisms;Eukaryota;Opisthokonta;Metazoa;Eumetazoa;Bilateria;Protostomia;  
 Spiralia;Lophotrochozoa;Mollusca;Bivalvia;Autobranchia;Heteroconchia;Euhe



terodonta;Imparidentia;Venerida;Veneroidea;Veneridae;Mercenaria;Mercenari  
 a mercenaria  
 UdeM00000019637 29159 622.1 UdeM00000019637 XP\_034299214.1 49.4 708  
 324 9 30 704 889 1595 8.80E-175 622.1 29159 cellular  
 organisms;Eukaryota;Opisthokonta;Metazoa;Eumetazoa;Bilateria;Protostomia;  
 Spiralia;Lophotrochozoa;Mollusca;Bivalvia;Autobranchia;Pteriormorphia;Ostr  
 eida;Ostreoidea;Ostreidae;Crassostrea;Crassostrea gigas  
 UdeM00000019638 6596 750.7 UdeM00000019638 XP\_045163568.1 50.1 875  
 383 12 88 921 733 1594 2.10E-213 750.7 6596 cellular  
 organisms;Eukaryota;Opisthokonta;Metazoa;Eumetazoa;Bilateria;Protostomia;  
 Spiralia;Lophotrochozoa;Mollusca;Bivalvia;Autobranchia;Heteroconchia;Euhe  
 terodonta;Imparidentia;Venerida;Veneroidea;Veneridae;Mercenaria;Mercenari  
 a mercenaria  
 UdeM00000019639 75366 186 UdeM00000019639 XP\_016148261.1 47.1 242  
 107 6 11 245 757 984 6.10E-44 186 75366 cellular  
 organisms;Eukaryota;Opisthokonta;Metazoa;Eumetazoa;Bilateria;Deuterostomi  
 a;Chordata;Craniata;Vertebrata;Gnathostomata;Teleostomi;Euteleostomi;Acti  
 nopterygii;Actinopteri;Neopterygii;Teleostei;Osteoglossocephalai;Clupeoce  
 phala;Otomorpha;Ostariophysi;Otophysi;Cypriniphysae;Cypriniiformes;Cyprino  
 ideii;Cyprinidae;Cyprininae;Sinocyclocheilus;Sinocyclocheilus grahami  
 UdeM00000019641 45264 392.9 UdeM00000019641 XP\_044165535.1 49.6 367  
 181 1 1 363 158 524 4.90E-106 392.9 45264 cellular  
 organisms;Eukaryota;Opisthokonta;Metazoa;Eumetazoa;Cnidaria;Anthozoa;Hexa  
 corallia;Scleractinia;Astrocoeniina;Acroporidae;Acropora;Acropora  
 millepora  
 UdeM00000019642 6596 790.8 UdeM00000019642 XP\_045163568.1 54.5 888  
 361 15 6 858 715 1594 1.70E-225 790.8 6596 cellular  
 organisms;Eukaryota;Opisthokonta;Metazoa;Eumetazoa;Bilateria;Protostomia;  
 Spiralia;Lophotrochozoa;Mollusca;Bivalvia;Autobranchia;Heteroconchia;Euhe  
 terodonta;Imparidentia;Venerida;Veneroidea;Veneridae;Mercenaria;Mercenari  
 a mercenaria  
 UdeM00000019643 6596 501.1 UdeM00000019643 XP\_045163568.1 56.1 611  
 229 13 10 589 733 1335 1.90E-138 501.1 6596 cellular  
 organisms;Eukaryota;Opisthokonta;Metazoa;Eumetazoa;Bilateria;Protostomia;  
 Spiralia;Lophotrochozoa;Mollusca;Bivalvia;Autobranchia;Heteroconchia;Euhe  
 terodonta;Imparidentia;Venerida;Veneroidea;Veneridae;Mercenaria;Mercenari  
 a mercenaria  
 UdeM00000019644 29159 299.3 UdeM00000019644 XP\_019929897.2 57.9 252  
 105 1 1 252 1360 1610 4.70E-78 299.3 29159 cellular  
 organisms;Eukaryota;Opisthokonta;Metazoa;Eumetazoa;Bilateria;Protostomia;  
 Spiralia;Lophotrochozoa;Mollusca;Bivalvia;Autobranchia;Pteriormorphia;Ostr  
 eida;Ostreoidea;Ostreidae;Crassostrea;Crassostrea gigas  
 UdeM00000019645 6579 69.7 UdeM00000019645 XP\_033763913.1 61.7 60  
 22 1 1 60 1565 1623 1.50E-09 69.7 6579 cellular  
 organisms;Eukaryota;Opisthokonta;Metazoa;Eumetazoa;Bilateria;Protostomia;  
 Spiralia;Lophotrochozoa;Mollusca;Bivalvia;Autobranchia;Pteriormorphia;Pect  
 inida;Pectinoidea;Pectinidae;Pecten;Pecten maximus  
 UdeM00000019646 6565 246.1 UdeM00000019646 XP\_022336762.1 38.6 396  
 191 9 5 348 1068 1463 6.60E-62 246.1 6565 cellular  
 organisms;Eukaryota;Opisthokonta;Metazoa;Eumetazoa;Bilateria;Protostomia;  
 Spiralia;Lophotrochozoa;Mollusca;Bivalvia;Autobranchia;Pteriormorphia;Ostr  
 eida;Ostreoidea;Ostreidae;Crassostrea;Crassostrea virginica  
 UdeM00000019647 6596 103.2 UdeM00000019647 XP\_045163568.1 79.7 64  
 13 0 1 64 977 1040 1.50E-19 103.2 6596 cellular

organisms;Eukaryota;Opisthokonta;Metazoa;Eumetazoa;Bilateria;Protostomia;Spiralia;Lophotrochozoa;Mollusca;Bivalvia;Autobranchia;Heteroconchia;Euherodonta;Imparidentia;Venerida;Veneroidea;Veneridae;Mercenaria;Mercenaria mercenaria

UdeM00000019648 6596 208.4 UdeM00000019648 XP\_045163568.1 55.5 218  
64 4 12 196 733 950 8.50E-51 208.4 6596 cellular

organisms;Eukaryota;Opisthokonta;Metazoa;Eumetazoa;Bilateria;Protostomia;Spiralia;Lophotrochozoa;Mollusca;Bivalvia;Autobranchia;Heteroconchia;Euherodonta;Imparidentia;Venerida;Veneroidea;Veneridae;Mercenaria;Mercenaria mercenaria

UdeM00000019649 6596 878.2 UdeM00000019649 XP\_045163568.1 53.2 977  
343 19 1106 1978 628 1594 1.90E-251 878.2 6596 cellular

organisms;Eukaryota;Opisthokonta;Metazoa;Eumetazoa;Bilateria;Protostomia;Spiralia;Lophotrochozoa;Mollusca;Bivalvia;Autobranchia;Heteroconchia;Euherodonta;Imparidentia;Venerida;Veneroidea;Veneridae;Mercenaria;Mercenaria mercenaria

UdeM00000019650 6596 941 UdeM00000019650 XP\_045163568.1 58.6 977  
355 17 728 1665 628 1594 2.00E-270 941 6596 cellular

organisms;Eukaryota;Opisthokonta;Metazoa;Eumetazoa;Bilateria;Protostomia;Spiralia;Lophotrochozoa;Mollusca;Bivalvia;Autobranchia;Heteroconchia;Euherodonta;Imparidentia;Venerida;Veneroidea;Veneridae;Mercenaria;Mercenaria mercenaria

UdeM00000019651 6573 100.5 UdeM00000019651 XP\_021365625.1 54.1 85  
39 0 76 160 22 106 2.80E-18 100.5 6573 cellular

organisms;Eukaryota;Opisthokonta;Metazoa;Eumetazoa;Bilateria;Protostomia;Spiralia;Lophotrochozoa;Mollusca;Bivalvia;Autobranchia;Pteriomorphia;Pectinida;Pectinoidea;Pectinidae;Mizuhopecten;Mizuhopecten yessoensis

UdeM00000019652 6596 426 UdeM00000019652 XP\_045163568.1 62.1 398  
125 8 432 809 628 1019 1.20E-115 426 6596 cellular

organisms;Eukaryota;Opisthokonta;Metazoa;Eumetazoa;Bilateria;Protostomia;Spiralia;Lophotrochozoa;Mollusca;Bivalvia;Autobranchia;Heteroconchia;Euherodonta;Imparidentia;Venerida;Veneroidea;Veneridae;Mercenaria;Mercenaria mercenaria

UdeM00000019653 6596 186.8 UdeM00000019653 XP\_045163568.1 53.9 204  
70 6 432 616 628 826 8.30E-44 186.8 6596 cellular

organisms;Eukaryota;Opisthokonta;Metazoa;Eumetazoa;Bilateria;Protostomia;Spiralia;Lophotrochozoa;Mollusca;Bivalvia;Autobranchia;Heteroconchia;Euherodonta;Imparidentia;Venerida;Veneroidea;Veneridae;Mercenaria;Mercenaria mercenaria

UdeM00000019655 6579 128.3 UdeM00000019655 XP\_033761495.1 59.4 101  
40 1 36 136 24 123 7.70E-27 128.3 6579 cellular

organisms;Eukaryota;Opisthokonta;Metazoa;Eumetazoa;Bilateria;Protostomia;Spiralia;Lophotrochozoa;Mollusca;Bivalvia;Autobranchia;Pteriomorphia;Pectinida;Pectinoidea;Pectinidae;Pecten;Pecten maximus

UdeM00000019656 1735272 87.4 UdeM00000019656 XP\_041362151.1 39.8  
113 67 1 9 120 563 675 1.50E-14 87.4 1735272  
cellular

organisms;Eukaryota;Opisthokonta;Metazoa;Eumetazoa;Bilateria;Protostomia;Spiralia;Lophotrochozoa;Mollusca;Gastropoda;Neomphalina;Neomphaloidea;Peltospiridae;Gigantopelta;Gigantopelta aegis

UdeM00000019657 6596 293.1 UdeM00000019657 XP\_045161225.1 62.8 239  
81 2 1 238 64 295 3.40E-76 293.1 6596 cellular

organisms;Eukaryota;Opisthokonta;Metazoa;Eumetazoa;Bilateria;Protostomia;Spiralia;Lophotrochozoa;Mollusca;Bivalvia;Autobranchia;Heteroconchia;Euherodonta

terodonta;Imparidentia;Venerida;Veneroidea;Veneridae;Mercenaria;Mercenaria mercenaria  
 UdeM00000019658 6579 954.5 UdeM00000019658 XP\_033763909.1 65 695  
 238 1 197 891 103 792 9.40E-275 954.5 6579 cellular  
 organisms;Eukaryota;Opisthokonta;Metazoa;Eumetazoa;Bilateria;Protostomia;  
 Spiralia;Lophotrochozoa;Mollusca;Bivalvia;Autobranchia;Pteriormorphia;Pectinida;  
 Pectinoidea;Pectinidae;Pecten;Pecten maximus  
 UdeM00000019659 400727 303.1 UdeM00000019659 XP\_025080913.1 65.3  
 216 72 1 3 215 16 231 2.80E-79 303.1 400727  
 cellular  
 organisms;Eukaryota;Opisthokonta;Metazoa;Eumetazoa;Bilateria;Protostomia;  
 Spiralia;Lophotrochozoa;Mollusca;Gastropoda;Caenogastropoda;Architaenioglossa;  
 Ampullarioidea;Ampullariidae;Pomacea;Pomacea canaliculata  
 UdeM00000019660 2607531 282.7 UdeM00000019660 XP\_029638331.1 38.3  
 384 230 6 1 382 161 539 6.90E-73 282.7 2607531  
 cellular  
 organisms;Eukaryota;Opisthokonta;Metazoa;Eumetazoa;Bilateria;Protostomia;  
 Spiralia;Lophotrochozoa;Mollusca;Cephalopoda;Coleoidea;Octopodiformes;Octopoda;  
 Incirrata;Octopodidae;Octopus;Octopus sinensis  
 UdeM00000019661 6573 143.7 UdeM00000019661 XP\_021368946.1 31.9 263  
 165 3 112 367 1 256 5.60E-31 143.7 6573 cellular  
 organisms;Eukaryota;Opisthokonta;Metazoa;Eumetazoa;Bilateria;Protostomia;  
 Spiralia;Lophotrochozoa;Mollusca;Bivalvia;Autobranchia;Pteriormorphia;Pectinida;  
 Pectinoidea;Pectinidae;Mizuhopecten;Mizuhopecten yessoensis  
 UdeM00000019662 6596 266.2 UdeM00000019662 XP\_045161679.1 59 222  
 76 5 10 219 4 222 4.20E-68 266.2 6596 cellular  
 organisms;Eukaryota;Opisthokonta;Metazoa;Eumetazoa;Bilateria;Protostomia;  
 Spiralia;Lophotrochozoa;Mollusca;Bivalvia;Autobranchia;Heteroconchia;Euheterodonta;  
 Imparidentia;Venerida;Veneroidea;Veneridae;Mercenaria;Mercenaria mercenaria  
 UdeM00000019664 158441 291.6 UdeM00000019664 XP\_021955985.1 93.2  
 147 10 0 1 147 45 191 5.70E-76 291.6 158441  
 cellular  
 organisms;Eukaryota;Opisthokonta;Metazoa;Eumetazoa;Bilateria;Protostomia;  
 Ecdysozoa;Panarthropoda;Arthropoda;Mandibulata;Pancrustacea;Hexapoda;Collincombola;  
 Entomobryomorpha;Isotomoidea;Isotomidae;Proisotominae;Folsomia;Folsomia candida  
 UdeM00000019663 158441 379.8 UdeM00000019663 XP\_021955985.1 94.8  
 191 10 0 1 191 1 191 2.10E-102 379.8 158441  
 cellular  
 organisms;Eukaryota;Opisthokonta;Metazoa;Eumetazoa;Bilateria;Protostomia;  
 Ecdysozoa;Panarthropoda;Arthropoda;Mandibulata;Pancrustacea;Hexapoda;Collincombola;  
 Entomobryomorpha;Isotomoidea;Isotomidae;Proisotominae;Folsomia;Folsomia candida  
 UdeM00000044490 6596 67.8 UdeM00000044490 XP\_045198465.1 42.2 83  
 47 1 14 95 25 107 1.10E-08 67.8 6596 cellular  
 organisms;Eukaryota;Opisthokonta;Metazoa;Eumetazoa;Bilateria;Protostomia;  
 Spiralia;Lophotrochozoa;Mollusca;Bivalvia;Autobranchia;Heteroconchia;Euheterodonta;  
 Imparidentia;Venerida;Veneroidea;Veneridae;Mercenaria;Mercenaria mercenaria  
 UdeM00000044213 50429 174.5 UdeM00000044213 XP\_022795673.1 59.9 142  
 56 1 1 141 196 337 9.90E-41 174.5 50429 cellular  
 organisms;Eukaryota;Opisthokonta;Metazoa;Eumetazoa;Cnidaria;Anthozoa;Hexa

corallia;Scleractinia;Astrocoeniina;Pocilloporidae;Stylophora;Stylophora  
 pistillata  
 UdeM00000016568 6596 355.9 UdeM00000016568 XP\_045177659.1 76.7 210  
 49 0 1 210 1 210 3.70E-95 355.9 6596 cellular  
 organisms;Eukaryota;Opisthokonta;Metazoa;Eumetazoa;Bilateria;Protostomia;  
 Spiralia;Lophotrochozoa;Mollusca;Bivalvia;Autobranchia;Heteroconchia;Euhe  
 terodonta;Imparidentia;Venerida;Veneroidea;Veneridae;Mercenaria;Mercenari  
 a mercenaria  
 UdeM00000016569 6596 633.6 UdeM00000016569 XP\_045177659.1 70 434  
 118 2 1 433 1 423 1.80E-178 633.6 6596 cellular  
 organisms;Eukaryota;Opisthokonta;Metazoa;Eumetazoa;Bilateria;Protostomia;  
 Spiralia;Lophotrochozoa;Mollusca;Bivalvia;Autobranchia;Heteroconchia;Euhe  
 terodonta;Imparidentia;Venerida;Veneroidea;Veneridae;Mercenaria;Mercenari  
 a mercenaria  
 UdeM00000016570 6596 166 UdeM00000016570 XP\_045179875.1 56.2 169  
 70 3 9 175 148 314 4.50E-38 166 6596 cellular  
 organisms;Eukaryota;Opisthokonta;Metazoa;Eumetazoa;Bilateria;Protostomia;  
 Spiralia;Lophotrochozoa;Mollusca;Bivalvia;Autobranchia;Heteroconchia;Euhe  
 terodonta;Imparidentia;Venerida;Veneroidea;Veneridae;Mercenaria;Mercenari  
 a mercenaria  
 UdeM00000016571 6596 162.2 UdeM00000016571 XP\_045179875.1 56.5 161  
 66 3 113 271 156 314 9.80E-37 162.2 6596 cellular  
 organisms;Eukaryota;Opisthokonta;Metazoa;Eumetazoa;Bilateria;Protostomia;  
 Spiralia;Lophotrochozoa;Mollusca;Bivalvia;Autobranchia;Heteroconchia;Euhe  
 terodonta;Imparidentia;Venerida;Veneroidea;Veneridae;Mercenaria;Mercenari  
 a mercenaria  
 UdeM00000016572 6596 150.2 UdeM00000016572 XP\_045179875.1 77.1 96  
 22 0 1 96 1 96 1.80E-33 150.2 6596 cellular  
 organisms;Eukaryota;Opisthokonta;Metazoa;Eumetazoa;Bilateria;Protostomia;  
 Spiralia;Lophotrochozoa;Mollusca;Bivalvia;Autobranchia;Heteroconchia;Euhe  
 terodonta;Imparidentia;Venerida;Veneroidea;Veneridae;Mercenaria;Mercenari  
 a mercenaria  
 UdeM00000016573 6565 526.6 UdeM00000016573 XP\_022308439.1 48.3 580  
 286 7 298 874 604 1172 6.50E-146 526.6 6565 cellular  
 organisms;Eukaryota;Opisthokonta;Metazoa;Eumetazoa;Bilateria;Protostomia;  
 Spiralia;Lophotrochozoa;Mollusca;Bivalvia;Autobranchia;Pteriomorphia;Ostr  
 eida;Ostreoidea;Ostreidae;Crassostrea;Crassostrea virginica  
 UdeM00000016574 6565 580.5 UdeM00000016574 XP\_022308439.1 46.3 698  
 339 10 298 980 604 1280 4.10E-162 580.5 6565 cellular  
 organisms;Eukaryota;Opisthokonta;Metazoa;Eumetazoa;Bilateria;Protostomia;  
 Spiralia;Lophotrochozoa;Mollusca;Bivalvia;Autobranchia;Pteriomorphia;Ostr  
 eida;Ostreoidea;Ostreidae;Crassostrea;Crassostrea virginica  
 UdeM00000016576 6573 226.1 UdeM00000016576 XP\_021368945.1 47.7 281  
 142 2 26 302 45 324 6.00E-56 226.1 6573 cellular  
 organisms;Eukaryota;Opisthokonta;Metazoa;Eumetazoa;Bilateria;Protostomia;  
 Spiralia;Lophotrochozoa;Mollusca;Bivalvia;Autobranchia;Pteriomorphia;Pect  
 inida;Pectinoidea;Pectinidae;Mizuhopecten;Mizuhopecten yessoensis  
 UdeM00000016578 6579 498.4 UdeM00000016578 XP\_033763088.1 48.9 1052  
 518 4 1 1036 2 1049 2.20E-137 498.4 6579 cellular  
 organisms;Eukaryota;Opisthokonta;Metazoa;Eumetazoa;Bilateria;Protostomia;  
 Spiralia;Lophotrochozoa;Mollusca;Bivalvia;Autobranchia;Pteriomorphia;Pect  
 inida;Pectinoidea;Pectinidae;Pecten;Pecten maximus  
 UdeM00000016579 6579 491.5 UdeM00000016579 XP\_033763088.1 48.5 1048  
 524 3 1 1032 2 1049 2.60E-135 491.5 6579 cellular

organisms;Eukaryota;Opisthokonta;Metazoa;Eumetazoa;Bilateria;Protostomia;Spiralia;Lophotrochozoa;Mollusca;Bivalvia;Autobranchia;Pteriormorphia;Pectinida;Pectinoidea;Pectinidae;Pecten;Pecten maximus

UdeM00000016580 6596 194.9 UdeM00000016580 XP\_045161683.1 44.3 282  
151 3 2 279 3 282 1.40E-46 194.9 6596 cellular

organisms;Eukaryota;Opisthokonta;Metazoa;Eumetazoa;Bilateria;Protostomia;Spiralia;Lophotrochozoa;Mollusca;Bivalvia;Autobranchia;Heteroconchia;Euherodonta;Imparidentia;Venerida;Veneroidea;Veneridae;Mercenaria;Mercenaria mercenaria

UdeM00000016582 6596 768.1 UdeM00000016582 XP\_045162259.1 39.5 1247  
663 26 261 1452 139 1348 2.00E-218 768.1 6596 cellular

organisms;Eukaryota;Opisthokonta;Metazoa;Eumetazoa;Bilateria;Protostomia;Spiralia;Lophotrochozoa;Mollusca;Bivalvia;Autobranchia;Heteroconchia;Euherodonta;Imparidentia;Venerida;Veneroidea;Veneridae;Mercenaria;Mercenaria mercenaria

UdeM00000016583 6596 458 UdeM00000016583 XP\_045162261.1 35.3 781  
450 15 1 739 177 944 3.10E-125 458 6596 cellular

organisms;Eukaryota;Opisthokonta;Metazoa;Eumetazoa;Bilateria;Protostomia;Spiralia;Lophotrochozoa;Mollusca;Bivalvia;Autobranchia;Heteroconchia;Euherodonta;Imparidentia;Venerida;Veneroidea;Veneridae;Mercenaria;Mercenaria mercenaria

UdeM00000016584 6596 455.7 UdeM00000016584 XP\_045162261.1 35.3 771  
445 14 20 749 187 944 1.50E-124 455.7 6596 cellular

organisms;Eukaryota;Opisthokonta;Metazoa;Eumetazoa;Bilateria;Protostomia;Spiralia;Lophotrochozoa;Mollusca;Bivalvia;Autobranchia;Heteroconchia;Euherodonta;Imparidentia;Venerida;Veneroidea;Veneridae;Mercenaria;Mercenaria mercenaria

UdeM00000016585 6596 458 UdeM00000016585 XP\_045162261.1 35.3 781  
450 15 1 739 177 944 3.10E-125 458 6596 cellular

organisms;Eukaryota;Opisthokonta;Metazoa;Eumetazoa;Bilateria;Protostomia;Spiralia;Lophotrochozoa;Mollusca;Bivalvia;Autobranchia;Heteroconchia;Euherodonta;Imparidentia;Venerida;Veneroidea;Veneridae;Mercenaria;Mercenaria mercenaria

UdeM00000016586 6596 455.7 UdeM00000016586 XP\_045162261.1 35.3 771  
445 14 20 749 187 944 1.50E-124 455.7 6596 cellular

organisms;Eukaryota;Opisthokonta;Metazoa;Eumetazoa;Bilateria;Protostomia;Spiralia;Lophotrochozoa;Mollusca;Bivalvia;Autobranchia;Heteroconchia;Euherodonta;Imparidentia;Venerida;Veneroidea;Veneridae;Mercenaria;Mercenaria mercenaria

UdeM00000016587 6596 422.2 UdeM00000016587 XP\_045162261.1 29 1225  
672 31 17 1061 123 1329 2.00E-114 422.2 6596 cellular

organisms;Eukaryota;Opisthokonta;Metazoa;Eumetazoa;Bilateria;Protostomia;Spiralia;Lophotrochozoa;Mollusca;Bivalvia;Autobranchia;Heteroconchia;Euherodonta;Imparidentia;Venerida;Veneroidea;Veneridae;Mercenaria;Mercenaria mercenaria

UdeM00000016588 6596 448.7 UdeM00000016588 XP\_045162261.1 33.3 807  
473 16 67 820 177 971 2.00E-122 448.7 6596 cellular

organisms;Eukaryota;Opisthokonta;Metazoa;Eumetazoa;Bilateria;Protostomia;Spiralia;Lophotrochozoa;Mollusca;Bivalvia;Autobranchia;Heteroconchia;Euherodonta;Imparidentia;Venerida;Veneroidea;Veneridae;Mercenaria;Mercenaria mercenaria

UdeM00000016589 6596 471.1 UdeM00000016589 XP\_045162261.1 34.4 826  
491 16 32 818 177 990 3.70E-129 471.1 6596 cellular

organisms;Eukaryota;Opisthokonta;Metazoa;Eumetazoa;Bilateria;Protostomia;

Spiralia;Lophotrochozoa;Mollusca;Bivalvia;Autobranchia;Heteroconchia;Euherodonta;Imparidentia;Venerida;Veneroidea;Veneridae;Mercenaria;Mercenaria mercenaria

UdeM00000016590 6596 473.4 UdeM00000016590 XP\_045162261.1 34.3 826  
499 14 32 825 177 990 7.40E-130 473.4 6596 cellular

organisms;Eukaryota;Opisthokonta;Metazoa;Eumetazoa;Bilateria;Protostomia;Spiralia;Lophotrochozoa;Mollusca;Bivalvia;Autobranchia;Heteroconchia;Euherodonta;Imparidentia;Venerida;Veneroidea;Veneridae;Mercenaria;Mercenaria mercenaria

UdeM00000016591 6596 195.3 UdeM00000016591 XP\_045173241.1 33.2 467  
265 14 186 631 433 873 2.60E-46 195.3 6596 cellular

organisms;Eukaryota;Opisthokonta;Metazoa;Eumetazoa;Bilateria;Protostomia;Spiralia;Lophotrochozoa;Mollusca;Bivalvia;Autobranchia;Heteroconchia;Euherodonta;Imparidentia;Venerida;Veneroidea;Veneridae;Mercenaria;Mercenaria mercenaria

UdeM00000016593 6596 158.3 UdeM00000016593 XP\_045162256.1 35 592  
304 14 19 544 64 640 2.80E-35 158.3 6596 cellular

organisms;Eukaryota;Opisthokonta;Metazoa;Eumetazoa;Bilateria;Protostomia;Spiralia;Lophotrochozoa;Mollusca;Bivalvia;Autobranchia;Heteroconchia;Euherodonta;Imparidentia;Venerida;Veneroidea;Veneridae;Mercenaria;Mercenaria mercenaria

UdeM00000016594 6579 282 UdeM00000016594 XP\_033763324.1 32.2 597  
354 15 545 1132 524 1078 3.50E-72 282 6579 cellular

organisms;Eukaryota;Opisthokonta;Metazoa;Eumetazoa;Bilateria;Protostomia;Spiralia;Lophotrochozoa;Mollusca;Bivalvia;Autobranchia;Pteriomorphia;Pectinida;Pectinoidea;Pectinidae;Pecten;Pecten maximus

UdeM00000016595 6596 258.8 UdeM00000016595 XP\_045162858.1 52.3 239  
108 3 9 246 1480 1713 1.30E-65 258.8 6596 cellular

organisms;Eukaryota;Opisthokonta;Metazoa;Eumetazoa;Bilateria;Protostomia;Spiralia;Lophotrochozoa;Mollusca;Bivalvia;Autobranchia;Heteroconchia;Euherodonta;Imparidentia;Venerida;Veneroidea;Veneridae;Mercenaria;Mercenaria mercenaria

UdeM00000016596 6565 216.1 UdeM00000016596 XP\_022297447.1 53.2 201  
78 2 8 192 81 281 5.00E-53 216.1 6565 cellular

organisms;Eukaryota;Opisthokonta;Metazoa;Eumetazoa;Bilateria;Protostomia;Spiralia;Lophotrochozoa;Mollusca;Bivalvia;Autobranchia;Pteriomorphia;Ostreida;Ostreoidea;Ostreidae;Crassostrea;Crassostrea virginica

UdeM00000016597 45264 167.2 UdeM00000016597 XP\_044166166.1 49.3 150  
75 1 1 149 667 816 2.20E-38 167.2 45264 cellular

organisms;Eukaryota;Opisthokonta;Metazoa;Eumetazoa;Cnidaria;Anthozoa;Hexacorallia;Scleractinia;Astrocoeniina;Acroporidae;Acropora;Acropora millepora

UdeM00000016598 6596 547 UdeM00000016598 XP\_045191668.1 30.2 1262  
737 43 527 1687 81 1299 9.20E-152 547 6596 cellular

organisms;Eukaryota;Opisthokonta;Metazoa;Eumetazoa;Bilateria;Protostomia;Spiralia;Lophotrochozoa;Mollusca;Bivalvia;Autobranchia;Heteroconchia;Euherodonta;Imparidentia;Venerida;Veneroidea;Veneridae;Mercenaria;Mercenaria mercenaria

UdeM00000016599 6565 61.6 UdeM00000016599 XP\_022343311.1 35.4 99  
57 3 3 100 103 195 7.30E-07 61.6 6565 cellular

organisms;Eukaryota;Opisthokonta;Metazoa;Eumetazoa;Bilateria;Protostomia;Spiralia;Lophotrochozoa;Mollusca;Bivalvia;Autobranchia;Pteriomorphia;Ostreida;Ostreoidea;Ostreidae;Crassostrea;Crassostrea virginica

UdeM00000016602 225164 99.4 UdeM00000016602 XP\_009062103.1 27.2  
 195 139 2 1 194 1 193 6.00E-18 99.4 225164  
 cellular  
 organisms;Eukaryota;Opisthokonta;Metazoa;Eumetazoa;Bilateria;Protostomia;  
 Spiralia;Lophotrochozoa;Mollusca;Gastropoda;Patellogastropoda;Lottioidea;  
 Lottiidae;Lottia;Lottia gigantea  
 UdeM00000016605 6596 59.7 UdeM00000016605 XP\_045163980.1 36.5 126  
 68 3 75 192 49 170 4.90E-06 59.7 6596 cellular  
 organisms;Eukaryota;Opisthokonta;Metazoa;Eumetazoa;Bilateria;Protostomia;  
 Spiralia;Lophotrochozoa;Mollusca;Bivalvia;Autobranchia;Heteroconchia;Euhe  
 terodonta;Imparidentia;Venerida;Veneroidea;Veneridae;Mercenaria;Mercenari  
 a mercenaria  
 UdeM00000016606 6596 202.6 UdeM00000016606 XP\_045167035.1 46.8 186  
 98 1 192 377 155 339 9.00E-49 202.6 6596 cellular  
 organisms;Eukaryota;Opisthokonta;Metazoa;Eumetazoa;Bilateria;Protostomia;  
 Spiralia;Lophotrochozoa;Mollusca;Bivalvia;Autobranchia;Heteroconchia;Euhe  
 terodonta;Imparidentia;Venerida;Veneroidea;Veneridae;Mercenaria;Mercenari  
 a mercenaria  
 UdeM00000016607 6565 223.4 UdeM00000016607 XP\_022286598.1 44.3 323  
 149 9 1 310 1 305 4.00E-55 223.4 6565 cellular  
 organisms;Eukaryota;Opisthokonta;Metazoa;Eumetazoa;Bilateria;Protostomia;  
 Spiralia;Lophotrochozoa;Mollusca;Bivalvia;Autobranchia;Pteriormorphia;Ostr  
 eida;Ostreoidea;Ostreidae;Crassostrea;Crassostrea virginica  
 UdeM00000016609 6565 404.4 UdeM00000016609 XP\_022320668.1 69.6 270  
 82 0 20 289 441 710 1.20E-109 404.4 6565 cellular  
 organisms;Eukaryota;Opisthokonta;Metazoa;Eumetazoa;Bilateria;Protostomia;  
 Spiralia;Lophotrochozoa;Mollusca;Bivalvia;Autobranchia;Pteriormorphia;Ostr  
 eida;Ostreoidea;Ostreidae;Crassostrea;Crassostrea virginica  
 UdeM00000016610 6596 190.3 UdeM00000016610 XP\_045167035.1 44.1 186  
 103 1 218 403 155 339 4.90E-45 190.3 6596 cellular  
 organisms;Eukaryota;Opisthokonta;Metazoa;Eumetazoa;Bilateria;Protostomia;  
 Spiralia;Lophotrochozoa;Mollusca;Bivalvia;Autobranchia;Heteroconchia;Euhe  
 terodonta;Imparidentia;Venerida;Veneroidea;Veneridae;Mercenaria;Mercenari  
 a mercenaria  
 UdeM00000016611 6596 202.6 UdeM00000016611 XP\_045167035.1 41.3 242  
 117 4 190 408 100 339 9.70E-49 202.6 6596 cellular  
 organisms;Eukaryota;Opisthokonta;Metazoa;Eumetazoa;Bilateria;Protostomia;  
 Spiralia;Lophotrochozoa;Mollusca;Bivalvia;Autobranchia;Heteroconchia;Euhe  
 terodonta;Imparidentia;Venerida;Veneroidea;Veneridae;Mercenaria;Mercenari  
 a mercenaria  
 UdeM00000016613 6596 863.2 UdeM00000016613 XP\_045161992.1 40.2 1178  
 597 23 8 1116 16 1155 3.60E-247 863.2 6596 cellular  
 organisms;Eukaryota;Opisthokonta;Metazoa;Eumetazoa;Bilateria;Protostomia;  
 Spiralia;Lophotrochozoa;Mollusca;Bivalvia;Autobranchia;Heteroconchia;Euhe  
 terodonta;Imparidentia;Venerida;Veneroidea;Veneridae;Mercenaria;Mercenari  
 a mercenaria  
 UdeM00000016614 6596 781.6 UdeM00000016614 XP\_045161992.1 37.4 1226  
 506 19 8 1002 16 1211 1.20E-222 781.6 6596 cellular  
 organisms;Eukaryota;Opisthokonta;Metazoa;Eumetazoa;Bilateria;Protostomia;  
 Spiralia;Lophotrochozoa;Mollusca;Bivalvia;Autobranchia;Heteroconchia;Euhe  
 terodonta;Imparidentia;Venerida;Veneroidea;Veneridae;Mercenaria;Mercenari  
 a mercenaria  
 UdeM00000016615 6596 199.1 UdeM00000016615 XP\_045161738.1 89.9 109  
 11 0 1 109 1 109 6.60E-48 199.1 6596 cellular

organisms;Eukaryota;Opisthokonta;Metazoa;Eumetazoa;Bilateria;Protostomia; Spiralia;Lophotrochozoa;Mollusca;Bivalvia;Autobranchia;Heteroconchia;Euherodonta;Imparidentia;Venerida;Veneroidea;Veneridae;Mercenaria;Mercenaria mercenaria

UdeM00000016616 6579 320.9 UdeM00000016616 XP\_033764146.1 64.5 228  
80 1 1 227 1 228 1.30E-84 320.9 6579 cellular

organisms;Eukaryota;Opisthokonta;Metazoa;Eumetazoa;Bilateria;Protostomia; Spiralia;Lophotrochozoa;Mollusca;Bivalvia;Autobranchia;Pteriormorphia;Pectinida;Pectinoidea;Pectinidae;Pecten;Pecten maximus

UdeM00000016620 6596 1208.4 UdeM00000016620 XP\_045162575.1 80  
734 146 1 2 734 122 855 0.00E+00 1208.4 6596  
cellular

organisms;Eukaryota;Opisthokonta;Metazoa;Eumetazoa;Bilateria;Protostomia; Spiralia;Lophotrochozoa;Mollusca;Bivalvia;Autobranchia;Heteroconchia;Euherodonta;Imparidentia;Venerida;Veneroidea;Veneridae;Mercenaria;Mercenaria mercenaria

UdeM00000016621 2607531 310.1 UdeM00000016621 XP\_029657462.1 56.9  
276 119 0 92 367 7 282 3.80E-81 310.1 2607531  
cellular

organisms;Eukaryota;Opisthokonta;Metazoa;Eumetazoa;Bilateria;Protostomia; Spiralia;Lophotrochozoa;Mollusca;Cephalopoda;Coleoidea;Octopodiformes;Octopoda;Incirrata;Octopodidae;Octopus;Octopus sinensis

UdeM00000016622 29159 84 UdeM00000016622 XP\_011452539.2 43.6 117  
59 4 1 111 1 116 1.40E-13 84 29159 cellular

organisms;Eukaryota;Opisthokonta;Metazoa;Eumetazoa;Bilateria;Protostomia; Spiralia;Lophotrochozoa;Mollusca;Bivalvia;Autobranchia;Pteriormorphia;Ostreida;Ostreoidea;Ostreidae;Crassostrea;Crassostrea gigas

UdeM00000016623 6596 141 UdeM00000016623 XP\_045215532.1 32.4 262  
162 8 16 269 2 256 2.80E-30 141 6596 cellular

organisms;Eukaryota;Opisthokonta;Metazoa;Eumetazoa;Bilateria;Protostomia; Spiralia;Lophotrochozoa;Mollusca;Bivalvia;Autobranchia;Heteroconchia;Euherodonta;Imparidentia;Venerida;Veneroidea;Veneridae;Mercenaria;Mercenaria mercenaria

UdeM00000016624 6596 141 UdeM00000016624 XP\_045215532.1 32.4 262  
162 8 6 259 2 256 2.70E-30 141 6596 cellular

organisms;Eukaryota;Opisthokonta;Metazoa;Eumetazoa;Bilateria;Protostomia; Spiralia;Lophotrochozoa;Mollusca;Bivalvia;Autobranchia;Heteroconchia;Euherodonta;Imparidentia;Venerida;Veneroidea;Veneridae;Mercenaria;Mercenaria mercenaria

UdeM00000016625 189513 217.6 UdeM00000016625 XP\_044740614.1 67.8  
152 48 1 3 153 5 156 1.10E-53 217.6 189513  
cellular

organisms;Eukaryota;Opisthokonta;Metazoa;Eumetazoa;Bilateria;Protostomia; Ecdysozoa;Panarthropoda;Arthropoda;Mandibulata;Pancrustacea;Hexapoda;Insecta;Dicondylia;Pterygota;Neoptera;Endopterygota;Neuropterida;Neoptera;Hemerobiiiformia;Chrysopidae;Chrysopinae;Chrysoperla;Chrysoperla carnea

UdeM00000016626 400727 2246.9 UdeM00000016626 XP\_025081588.1  
80 1810 315 12 118 1893 77 1873 0.00E+00 2246.9  
400727 cellular

organisms;Eukaryota;Opisthokonta;Metazoa;Eumetazoa;Bilateria;Protostomia; Spiralia;Lophotrochozoa;Mollusca;Gastropoda;Caenogastropoda;Architaenioglossa;Ampullarioidea;Ampullariidae;Pomacea;Pomacea canaliculata

UdeM00000016627 6596 255 UdeM00000016627 XP\_045162558.1 81 142  
27 0 1 142 2 143 5.80E-65 255 6596 cellular



organisms;Eukaryota;Opisthokonta;Metazoa;Eumetazoa;Bilateria;Protostomia;Spiralia;Lophotrochozoa;Mollusca;Bivalvia;Autobranhia;Heteroconchia;Euherodonta;Imparidentia;Venerida;Veneroidea;Veneridae;Mercenaria;Mercenaria mercenaria

UdeM00000016628 6573 254.6 UdeM00000016628 XP\_021355436.1 73.1 175  
45 1 1 173 171 345 9.10E-65 254.6 6573 cellular

organisms;Eukaryota;Opisthokonta;Metazoa;Eumetazoa;Bilateria;Protostomia;Spiralia;Lophotrochozoa;Mollusca;Bivalvia;Autobranhia;Pteriormorphia;Pectinida;Pectinoidea;Pectinidae;Mizuhopecten;Mizuhopecten yessoensis

UdeM00000016629 6579 157.1 UdeM00000016629 XP\_033764276.1 42.3 194  
105 2 1 194 14 200 2.30E-35 157.1 6579 cellular

organisms;Eukaryota;Opisthokonta;Metazoa;Eumetazoa;Bilateria;Protostomia;Spiralia;Lophotrochozoa;Mollusca;Bivalvia;Autobranhia;Pteriormorphia;Pectinida;Pectinoidea;Pectinidae;Pecten;Pecten maximus

UdeM00000016630 6596 220.3 UdeM00000016630 XP\_045163995.1 47.6 225  
117 1 211 434 16 240 4.70E-54 220.3 6596 cellular

organisms;Eukaryota;Opisthokonta;Metazoa;Eumetazoa;Bilateria;Protostomia;Spiralia;Lophotrochozoa;Mollusca;Bivalvia;Autobranhia;Heteroconchia;Euherodonta;Imparidentia;Venerida;Veneroidea;Veneridae;Mercenaria;Mercenaria mercenaria

UdeM00000016631 6596 220.7 UdeM00000016631 XP\_045163995.1 47.2 218  
114 1 167 383 23 240 3.20E-54 220.7 6596 cellular

organisms;Eukaryota;Opisthokonta;Metazoa;Eumetazoa;Bilateria;Protostomia;Spiralia;Lophotrochozoa;Mollusca;Bivalvia;Autobranhia;Heteroconchia;Euherodonta;Imparidentia;Venerida;Veneroidea;Veneridae;Mercenaria;Mercenaria mercenaria

UdeM00000016632 6596 245 UdeM00000016632 XP\_045163995.1 55.1 214  
95 1 27 239 27 240 9.90E-62 245 6596 cellular

organisms;Eukaryota;Opisthokonta;Metazoa;Eumetazoa;Bilateria;Protostomia;Spiralia;Lophotrochozoa;Mollusca;Bivalvia;Autobranhia;Heteroconchia;Euherodonta;Imparidentia;Venerida;Veneroidea;Veneridae;Mercenaria;Mercenaria mercenaria

UdeM00000016634 6565 231.1 UdeM00000016634 XP\_022286723.1 39.9 311  
175 6 7 317 4 302 2.00E-57 231.1 6565 cellular

organisms;Eukaryota;Opisthokonta;Metazoa;Eumetazoa;Bilateria;Protostomia;Spiralia;Lophotrochozoa;Mollusca;Bivalvia;Autobranhia;Pteriormorphia;Ostreida;Ostreoidea;Ostreidae;Crassostrea;Crassostrea virginica

UdeM00000016635 45264 395.2 UdeM00000016635 XP\_044165535.1 49.6 371  
183 1 1 367 158 528 9.90E-107 395.2 45264 cellular

organisms;Eukaryota;Opisthokonta;Metazoa;Eumetazoa;Cnidaria;Anthozoa;Hexacorallia;Scleractinia;Astrocoeniina;Acroporidae;Acropora;Acropora millepora

UdeM00000016636 6565 276.2 UdeM00000016636 XP\_022339386.1 95.9 145  
6 0 1 145 1 145 2.50E-71 276.2 6565 cellular

organisms;Eukaryota;Opisthokonta;Metazoa;Eumetazoa;Bilateria;Protostomia;Spiralia;Lophotrochozoa;Mollusca;Bivalvia;Autobranhia;Pteriormorphia;Ostreida;Ostreoidea;Ostreidae;Crassostrea;Crassostrea virginica

UdeM00000016637 6596 194.9 UdeM00000016637 XP\_045176664.1 34.7 346  
212 9 20 356 227 567 2.50E-46 194.9 6596 cellular

organisms;Eukaryota;Opisthokonta;Metazoa;Eumetazoa;Bilateria;Protostomia;Spiralia;Lophotrochozoa;Mollusca;Bivalvia;Autobranhia;Heteroconchia;Euherodonta;Imparidentia;Venerida;Veneroidea;Veneridae;Mercenaria;Mercenaria mercenaria

UdeM00000016638 6596 112.5 UdeM00000016638 XP\_045163991.1 35.9 220  
 114 4 41 260 56 248 8.50E-22 112.5 6596 cellular  
 organisms;Eukaryota;Opisthokonta;Metazoa;Eumetazoa;Bilateria;Protostomia;  
 Spiralia;Lophotrochozoa;Mollusca;Bivalvia;Autobranchia;Heteroconchia;Euhe  
 terodonta;Imparidentia;Venerida;Veneroidea;Veneridae;Mercenaria;Mercenari  
 a mercenaria

UdeM00000016639 6596 112.5 UdeM00000016639 XP\_045163991.1 35.9 220  
 114 4 42 261 56 248 8.50E-22 112.5 6596 cellular  
 organisms;Eukaryota;Opisthokonta;Metazoa;Eumetazoa;Bilateria;Protostomia;  
 Spiralia;Lophotrochozoa;Mollusca;Bivalvia;Autobranchia;Heteroconchia;Euhe  
 terodonta;Imparidentia;Venerida;Veneroidea;Veneridae;Mercenaria;Mercenari  
 a mercenaria

UdeM00000016640 6596 550.8 UdeM00000016640 XP\_045163440.1 70.2 372  
 111 0 1 372 50 421 1.30E-153 550.8 6596 cellular  
 organisms;Eukaryota;Opisthokonta;Metazoa;Eumetazoa;Bilateria;Protostomia;  
 Spiralia;Lophotrochozoa;Mollusca;Bivalvia;Autobranchia;Heteroconchia;Euhe  
 terodonta;Imparidentia;Venerida;Veneroidea;Veneridae;Mercenaria;Mercenari  
 a mercenaria

UdeM00000016641 6596 595.9 UdeM00000016641 XP\_045163440.1 67.2 421  
 138 0 1 421 1 421 4.10E-167 595.9 6596 cellular  
 organisms;Eukaryota;Opisthokonta;Metazoa;Eumetazoa;Bilateria;Protostomia;  
 Spiralia;Lophotrochozoa;Mollusca;Bivalvia;Autobranchia;Heteroconchia;Euhe  
 terodonta;Imparidentia;Venerida;Veneroidea;Veneridae;Mercenaria;Mercenari  
 a mercenaria

UdeM00000016642 6565 186.4 UdeM00000016642 XP\_022335889.1 71.5 123  
 34 1 11 133 12 133 2.90E-44 186.4 6565 cellular  
 organisms;Eukaryota;Opisthokonta;Metazoa;Eumetazoa;Bilateria;Protostomia;  
 Spiralia;Lophotrochozoa;Mollusca;Bivalvia;Autobranchia;Pteriormorphia;Ostr  
 eida;Ostreoidea;Ostreidae;Crassostrea;Crassostrea virginica

UdeM00000016643 6596 1039.3 UdeM00000016643 XP\_045161343.1 68  
 731 222 5 1 726 213 936 2.40E-300 1039.3 6596  
 cellular  
 organisms;Eukaryota;Opisthokonta;Metazoa;Eumetazoa;Bilateria;Protostomia;  
 Spiralia;Lophotrochozoa;Mollusca;Bivalvia;Autobranchia;Heteroconchia;Euhe  
 terodonta;Imparidentia;Venerida;Veneroidea;Veneridae;Mercenaria;Mercenari  
 a mercenaria

UdeM00000016644 29159 224.2 UdeM00000016644 XP\_011432760.1 60.7 178  
 69 1 6 182 8 185 1.40E-55 224.2 29159 cellular  
 organisms;Eukaryota;Opisthokonta;Metazoa;Eumetazoa;Bilateria;Protostomia;  
 Spiralia;Lophotrochozoa;Mollusca;Bivalvia;Autobranchia;Pteriormorphia;Ostr  
 eida;Ostreoidea;Ostreidae;Crassostrea;Crassostrea gigas

UdeM00000016645 1735272 198.4 UdeM00000016645 XP\_041377218.1 64.8  
 142 50 0 1 142 1 142 6.30E-48 198.4 1735272  
 cellular  
 organisms;Eukaryota;Opisthokonta;Metazoa;Eumetazoa;Bilateria;Protostomia;  
 Spiralia;Lophotrochozoa;Mollusca;Gastropoda;Neomphalina;Neomphaloidea;Pel  
 tospiridae;Gigantopelta;Gigantopelta aegis

UdeM00000016646 6596 194.1 UdeM00000016646 XP\_045162566.1 66.9 133  
 44 0 11 143 10 142 1.20E-46 194.1 6596 cellular  
 organisms;Eukaryota;Opisthokonta;Metazoa;Eumetazoa;Bilateria;Protostomia;  
 Spiralia;Lophotrochozoa;Mollusca;Bivalvia;Autobranchia;Heteroconchia;Euhe  
 terodonta;Imparidentia;Venerida;Veneroidea;Veneridae;Mercenaria;Mercenari  
 a mercenaria

UdeM00000016647 29159 236.1 UdeM00000016647 XP\_034335856.1 35.9 463  
 246 8 1 446 89 517 1.10E-58 236.1 29159 cellular  
 organisms;Eukaryota;Opisthokonta;Metazoa;Eumetazoa;Bilateria;Protostomia;  
 Spiralia;Lophotrochozoa;Mollusca;Bivalvia;Autobranchia;Pteriormorphia;Ostr  
 eida;Ostreoidea;Ostreidae;Crassostrea;Crassostrea gigas  
 UdeM00000016648 6596 491.1 UdeM00000016648 XP\_045162705.1 74.8 301  
 75 1 1 301 1 300 1.00E-135 491.1 6596 cellular  
 organisms;Eukaryota;Opisthokonta;Metazoa;Eumetazoa;Bilateria;Protostomia;  
 Spiralia;Lophotrochozoa;Mollusca;Bivalvia;Autobranchia;Heteroconchia;Euhe  
 terodonta;Imparidentia;Venerida;Veneroidea;Veneridae;Mercenaria;Mercenari  
 a mercenaria  
 UdeM00000016649 6596 129.8 UdeM00000016649 XP\_045209459.1 41.2 165  
 94 1 77 241 32 193 4.70E-27 129.8 6596 cellular  
 organisms;Eukaryota;Opisthokonta;Metazoa;Eumetazoa;Bilateria;Protostomia;  
 Spiralia;Lophotrochozoa;Mollusca;Bivalvia;Autobranchia;Heteroconchia;Euhe  
 terodonta;Imparidentia;Venerida;Veneroidea;Veneridae;Mercenaria;Mercenari  
 a mercenaria  
 UdeM00000016650 6596 237.7 UdeM00000016650 XP\_045163027.1 90.9 143  
 11 1 1 143 1 141 9.50E-60 237.7 6596 cellular  
 organisms;Eukaryota;Opisthokonta;Metazoa;Eumetazoa;Bilateria;Protostomia;  
 Spiralia;Lophotrochozoa;Mollusca;Bivalvia;Autobranchia;Heteroconchia;Euhe  
 terodonta;Imparidentia;Venerida;Veneroidea;Veneridae;Mercenaria;Mercenari  
 a mercenaria  
 UdeM00000016651 6596 612.8 UdeM00000016651 XP\_045162994.1 63.7 499  
 170 4 20 508 32 529 3.90E-172 612.8 6596 cellular  
 organisms;Eukaryota;Opisthokonta;Metazoa;Eumetazoa;Bilateria;Protostomia;  
 Spiralia;Lophotrochozoa;Mollusca;Bivalvia;Autobranchia;Heteroconchia;Euhe  
 terodonta;Imparidentia;Venerida;Veneroidea;Veneridae;Mercenaria;Mercenari  
 a mercenaria  
 UdeM00000016652 225164 328.2 UdeM00000016652 XP\_009048161.1 48.6  
 385 113 2 35 334 83 467 1.20E-86 328.2 225164  
 cellular  
 organisms;Eukaryota;Opisthokonta;Metazoa;Eumetazoa;Bilateria;Protostomia;  
 Spiralia;Lophotrochozoa;Mollusca;Gastropoda;Patellogastropoda;Lottioidea;  
 Lottiidae;Lottia;Lottia gigantea  
 UdeM00000016653 6596 493.8 UdeM00000016653 XP\_045161412.1 71.4 322  
 64 1 1 294 39 360 1.50E-136 493.8 6596 cellular  
 organisms;Eukaryota;Opisthokonta;Metazoa;Eumetazoa;Bilateria;Protostomia;  
 Spiralia;Lophotrochozoa;Mollusca;Bivalvia;Autobranchia;Heteroconchia;Euhe  
 terodonta;Imparidentia;Venerida;Veneroidea;Veneridae;Mercenaria;Mercenari  
 a mercenaria  
 UdeM00000016654 6596 431.8 UdeM00000016654 XP\_045161409.1 66.2 296  
 97 1 2 294 54 349 7.70E-118 431.8 6596 cellular  
 organisms;Eukaryota;Opisthokonta;Metazoa;Eumetazoa;Bilateria;Protostomia;  
 Spiralia;Lophotrochozoa;Mollusca;Bivalvia;Autobranchia;Heteroconchia;Euhe  
 terodonta;Imparidentia;Venerida;Veneroidea;Veneridae;Mercenaria;Mercenari  
 a mercenaria  
 UdeM00000016655 6596 444.1 UdeM00000016655 XP\_045161409.1 66 306  
 101 1 1 303 44 349 1.50E-121 444.1 6596 cellular  
 organisms;Eukaryota;Opisthokonta;Metazoa;Eumetazoa;Bilateria;Protostomia;  
 Spiralia;Lophotrochozoa;Mollusca;Bivalvia;Autobranchia;Heteroconchia;Euhe  
 terodonta;Imparidentia;Venerida;Veneroidea;Veneridae;Mercenaria;Mercenari  
 a mercenaria

UdeM00000016656 6596 106.7 UdeM00000016656 XP\_045200636.1 28.2 238  
 155 7 215 448 117 342 1.20E-19 106.7 6596 cellular  
 organisms;Eukaryota;Opisthokonta;Metazoa;Eumetazoa;Bilateria;Protostomia;  
 Spiralia;Lophotrochozoa;Mollusca;Bivalvia;Autobranchia;Heteroconchia;Euhe  
 terodonta;Imparidentia;Venerida;Veneroidea;Veneridae;Mercenaria;Mercenari  
 a mercenaria  
 UdeM00000016657 6596 496.9 UdeM00000016657 XP\_045161310.1 49 598  
 259 7 23 590 3 584 3.60E-137 496.9 6596 cellular  
 organisms;Eukaryota;Opisthokonta;Metazoa;Eumetazoa;Bilateria;Protostomia;  
 Spiralia;Lophotrochozoa;Mollusca;Bivalvia;Autobranchia;Heteroconchia;Euhe  
 terodonta;Imparidentia;Venerida;Veneroidea;Veneridae;Mercenaria;Mercenari  
 a mercenaria  
 UdeM00000016658 225164 445.3 UdeM00000016658 XP\_009064943.1 53.2  
 412 175 3 30 423 2 413 8.80E-122 445.3 225164  
 cellular  
 organisms;Eukaryota;Opisthokonta;Metazoa;Eumetazoa;Bilateria;Protostomia;  
 Spiralia;Lophotrochozoa;Mollusca;Gastropoda;Patellogastropoda;Lottioidea;  
 Lottiidae;Lottia;Lottia gigantea  
 UdeM00000016659 6579 102.1 UdeM00000016659 XP\_033764037.1 46 126  
 60 1 20 137 18 143 6.90E-19 102.1 6579 cellular  
 organisms;Eukaryota;Opisthokonta;Metazoa;Eumetazoa;Bilateria;Protostomia;  
 Spiralia;Lophotrochozoa;Mollusca;Bivalvia;Autobranchia;Pteriormorphia;Pect  
 inida;Pectinoidea;Pectinidae;Pecten;Pecten maximus  
 UdeM00000016661 6573 543.1 UdeM00000016661 XP\_021353256.1 89 292  
 32 0 1 292 1 292 2.50E-151 543.1 6573 cellular  
 organisms;Eukaryota;Opisthokonta;Metazoa;Eumetazoa;Bilateria;Protostomia;  
 Spiralia;Lophotrochozoa;Mollusca;Bivalvia;Autobranchia;Pteriormorphia;Pect  
 inida;Pectinoidea;Pectinidae;Mizuhopecten;Mizuhopecten yessoensis  
 UdeM00000016662 1735272 849.7 UdeM00000016662 XP\_041377555.1 71.9  
 559 146 2 1 555 119 670 2.20E-243 849.7 1735272  
 cellular  
 organisms;Eukaryota;Opisthokonta;Metazoa;Eumetazoa;Bilateria;Protostomia;  
 Spiralia;Lophotrochozoa;Mollusca;Gastropoda;Neomphalina;Neomphaloidea;Pel  
 tospiridae;Gigantopelta;Gigantopelta aegis  
 UdeM00000016663 1735272 374.4 UdeM00000016663 XP\_041355564.1 52.9  
 306 143 1 25 329 17 322 1.50E-100 374.4 1735272  
 cellular  
 organisms;Eukaryota;Opisthokonta;Metazoa;Eumetazoa;Bilateria;Protostomia;  
 Spiralia;Lophotrochozoa;Mollusca;Gastropoda;Neomphalina;Neomphaloidea;Pel  
 tospiridae;Gigantopelta;Gigantopelta aegis  
 UdeM00000016664 6573 919.8 UdeM00000016664 XP\_021366576.1 70.7 628  
 175 4 6 628 20 643 1.80E-264 919.8 6573 cellular  
 organisms;Eukaryota;Opisthokonta;Metazoa;Eumetazoa;Bilateria;Protostomia;  
 Spiralia;Lophotrochozoa;Mollusca;Bivalvia;Autobranchia;Pteriormorphia;Pect  
 inida;Pectinoidea;Pectinidae;Mizuhopecten;Mizuhopecten yessoensis  
 UdeM00000016665 6573 928.7 UdeM00000016665 XP\_021366576.1 70.2 642  
 182 4 8 644 6 643 4.00E-267 928.7 6573 cellular  
 organisms;Eukaryota;Opisthokonta;Metazoa;Eumetazoa;Bilateria;Protostomia;  
 Spiralia;Lophotrochozoa;Mollusca;Bivalvia;Autobranchia;Pteriormorphia;Pect  
 inida;Pectinoidea;Pectinidae;Mizuhopecten;Mizuhopecten yessoensis  
 UdeM00000016666 6579 924.5 UdeM00000016666 XP\_033763798.1 70.6 630  
 175 5 5 626 4 631 7.60E-266 924.5 6579 cellular  
 organisms;Eukaryota;Opisthokonta;Metazoa;Eumetazoa;Bilateria;Protostomia;

Spiralia; Lophotrochozoa; Mollusca; Bivalvia; Autobranchia; Pteriomorpha; Pectinida; Pectinoidea; Pectinidae; Pecten; Pecten maximus  
UdeM00000016667 6579 884.8 UdeM00000016667 XP\_033763798.1 69.1 605  
181 3 42 642 43 645 6.70E-254 884.8 6579 cellular  
organisms; Eukaryota; Opisthokonta; Metazoa; Eumetazoa; Bilateria; Protostomia; Spiralia; Lophotrochozoa; Mollusca; Bivalvia; Autobranchia; Pteriomorpha; Pectinida; Pectinoidea; Pectinidae; Pecten; Pecten maximus  
UdeM00000016668 6596 610.1 UdeM00000016668 XP\_045161926.1 69.4 405  
123 1 3 407 265 668 2.00E-171 610.1 6596 cellular  
organisms; Eukaryota; Opisthokonta; Metazoa; Eumetazoa; Bilateria; Protostomia; Spiralia; Lophotrochozoa; Mollusca; Bivalvia; Autobranchia; Heteroconchia; Euheterodonta; Imparidentia; Venerida; Veneroidea; Veneridae; Mercenaria; Mercenaria mercenaria  
UdeM00000016669 6579 273.9 UdeM00000016669 XP\_033763798.1 66.7 192  
60 2 28 215 42 233 1.80E-70 273.9 6579 cellular  
organisms; Eukaryota; Opisthokonta; Metazoa; Eumetazoa; Bilateria; Protostomia; Spiralia; Lophotrochozoa; Mollusca; Bivalvia; Autobranchia; Pteriomorpha; Pectinida; Pectinoidea; Pectinidae; Pecten; Pecten maximus  
UdeM00000016670 1415580 646.7 UdeM00000016670 XP\_030075314.1 52.2  
642 287 4 1 639 1 625 3.00E-182 646.7 1415580  
cellular  
organisms; Eukaryota; Opisthokonta; Metazoa; Eumetazoa; Bilateria; Deuterostomia; Chordata; Craniata; Vertebrata; Gnathostomata; Teleostomi; Euteleostomi; Sarcopterygii; Dipnotetrapodomorpha; Tetrapoda; Amphibia; Gymnophiona; Siphonopidae; Microcaecilia; Microcaecilia unicolor  
UdeM00000016671 6579 916.4 UdeM00000016671 XP\_033763798.1 70.1 648  
174 8 5 640 6 645 2.10E-263 916.4 6579 cellular  
organisms; Eukaryota; Opisthokonta; Metazoa; Eumetazoa; Bilateria; Protostomia; Spiralia; Lophotrochozoa; Mollusca; Bivalvia; Autobranchia; Pteriomorpha; Pectinida; Pectinoidea; Pectinidae; Pecten; Pecten maximus  
UdeM00000016672 6596 375.6 UdeM00000016672 XP\_045161926.1 64.8 267  
92 2 1 267 406 670 5.80E-101 375.6 6596 cellular  
organisms; Eukaryota; Opisthokonta; Metazoa; Eumetazoa; Bilateria; Protostomia; Spiralia; Lophotrochozoa; Mollusca; Bivalvia; Autobranchia; Heteroconchia; Euheterodonta; Imparidentia; Venerida; Veneroidea; Veneridae; Mercenaria; Mercenaria mercenaria  
UdeM00000016673 6579 339.7 UdeM00000016673 XP\_033763798.1 64.7 255  
82 5 24 271 28 281 3.40E-90 339.7 6579 cellular  
organisms; Eukaryota; Opisthokonta; Metazoa; Eumetazoa; Bilateria; Protostomia; Spiralia; Lophotrochozoa; Mollusca; Bivalvia; Autobranchia; Pteriomorpha; Pectinida; Pectinoidea; Pectinidae; Pecten; Pecten maximus  
UdeM00000016674 6573 848.6 UdeM00000016674 XP\_021366576.1 64.7 646  
210 8 5 640 6 643 5.30E-243 848.6 6573 cellular  
organisms; Eukaryota; Opisthokonta; Metazoa; Eumetazoa; Bilateria; Protostomia; Spiralia; Lophotrochozoa; Mollusca; Bivalvia; Autobranchia; Pteriomorpha; Pectinida; Pectinoidea; Pectinidae; Mizuhopecten; Mizuhopecten yessoensis  
UdeM00000016676 6596 67.8 UdeM00000016676 XP\_045161926.1 61.7 47  
18 0 22 68 457 503 7.50E-09 67.8 6596 cellular  
organisms; Eukaryota; Opisthokonta; Metazoa; Eumetazoa; Bilateria; Protostomia; Spiralia; Lophotrochozoa; Mollusca; Bivalvia; Autobranchia; Heteroconchia; Euheterodonta; Imparidentia; Venerida; Veneroidea; Veneridae; Mercenaria; Mercenaria mercenaria  
UdeM00000016675 6596 67.4 UdeM00000016675 XP\_045161926.1 63 46  
17 0 30 75 458 503 1.10E-08 67.4 6596 cellular

organisms;Eukaryota;Opisthokonta;Metazoa;Eumetazoa;Bilateria;Protostomia;Spiralia;Lophotrochozoa;Mollusca;Bivalvia;Autobranchia;Heteroconchia;Euheterodonta;Imparidentia;Venerida;Veneroidea;Veneridae;Mercenaria;Mercenaria mercenaria

UdeM00000016678 6579 827.4 UdeM00000016678 XP\_033763798.1 62.4 644  
230 8 64 700 7 645 1.40E-236 827.4 6579 cellular

organisms;Eukaryota;Opisthokonta;Metazoa;Eumetazoa;Bilateria;Protostomia;Spiralia;Lophotrochozoa;Mollusca;Bivalvia;Autobranchia;Pteriormorphia;Pectinida;Pectinoidea;Pectinidae;Pecten;Pecten maximus

UdeM00000016680 6579 870.9 UdeM00000016680 XP\_033763798.1 65.1 645  
211 9 5 640 6 645 1.00E-249 870.9 6579 cellular

organisms;Eukaryota;Opisthokonta;Metazoa;Eumetazoa;Bilateria;Protostomia;Spiralia;Lophotrochozoa;Mollusca;Bivalvia;Autobranchia;Pteriormorphia;Pectinida;Pectinoidea;Pectinidae;Pecten;Pecten maximus

UdeM00000016679 6579 869.4 UdeM00000016679 XP\_033763798.1 65 645  
212 9 5 640 6 645 2.90E-249 869.4 6579 cellular

organisms;Eukaryota;Opisthokonta;Metazoa;Eumetazoa;Bilateria;Protostomia;Spiralia;Lophotrochozoa;Mollusca;Bivalvia;Autobranchia;Pteriormorphia;Pectinida;Pectinoidea;Pectinidae;Pecten;Pecten maximus

UdeM00000016681 29159 141.7 UdeM00000016681 XP\_011436201.2 47.9 188  
79 6 304 483 552 728 2.40E-30 141.7 29159 cellular

organisms;Eukaryota;Opisthokonta;Metazoa;Eumetazoa;Bilateria;Protostomia;Spiralia;Lophotrochozoa;Mollusca;Bivalvia;Autobranchia;Pteriormorphia;Ostreida;Ostreoidea;Ostreidae;Crassostrea;Crassostrea gigas

UdeM00000016682 6579 409.8 UdeM00000016682 XP\_033764060.1 57.4 319  
136 0 5 323 5 323 3.20E-111 409.8 6579 cellular

organisms;Eukaryota;Opisthokonta;Metazoa;Eumetazoa;Bilateria;Protostomia;Spiralia;Lophotrochozoa;Mollusca;Bivalvia;Autobranchia;Pteriormorphia;Pectinida;Pectinoidea;Pectinidae;Pecten;Pecten maximus

UdeM00000016683 6579 350.1 UdeM00000016683 XP\_033764060.1 55.4 280  
125 0 5 284 5 284 2.80E-93 350.1 6579 cellular

organisms;Eukaryota;Opisthokonta;Metazoa;Eumetazoa;Bilateria;Protostomia;Spiralia;Lophotrochozoa;Mollusca;Bivalvia;Autobranchia;Pteriormorphia;Pectinida;Pectinoidea;Pectinidae;Pecten;Pecten maximus

UdeM00000016684 6579 350.5 UdeM00000016684 XP\_033764060.1 55.4 280  
125 0 5 284 5 284 2.10E-93 350.5 6579 cellular

organisms;Eukaryota;Opisthokonta;Metazoa;Eumetazoa;Bilateria;Protostomia;Spiralia;Lophotrochozoa;Mollusca;Bivalvia;Autobranchia;Pteriormorphia;Pectinida;Pectinoidea;Pectinidae;Pecten;Pecten maximus

UdeM00000016685 6596 454.9 UdeM00000016685 XP\_045163575.1 73.1 301  
81 0 1 301 338 638 8.30E-125 454.9 6596 cellular

organisms;Eukaryota;Opisthokonta;Metazoa;Eumetazoa;Bilateria;Protostomia;Spiralia;Lophotrochozoa;Mollusca;Bivalvia;Autobranchia;Heteroconchia;Euheterodonta;Imparidentia;Venerida;Veneroidea;Veneridae;Mercenaria;Mercenaria mercenaria

UdeM00000016687 6596 828.9 UdeM00000016687 XP\_045161994.1 47 945  
412 11 3 888 4 918 5.90E-237 828.9 6596 cellular

organisms;Eukaryota;Opisthokonta;Metazoa;Eumetazoa;Bilateria;Protostomia;Spiralia;Lophotrochozoa;Mollusca;Bivalvia;Autobranchia;Heteroconchia;Euheterodonta;Imparidentia;Venerida;Veneroidea;Veneridae;Mercenaria;Mercenaria mercenaria

UdeM00000016688 29159 633.6 UdeM00000016688 XP\_011424866.2 38.2 895  
523 11 27 899 1 887 3.70E-178 633.6 29159 cellular

organisms;Eukaryota;Opisthokonta;Metazoa;Eumetazoa;Bilateria;Protostomia;

Spiralia; Lophotrochozoa; Mollusca; Bivalvia; Autobranchia; Pteriomorpha; Ostr  
eida; Ostreidae; Crassostrea; Crassostrea gigas  
UdeM00000016689 29159 569.7 UdeM00000016689 XP\_034335858.1 39.6 685  
391 6 1 671 120 795 4.90E-159 569.7 29159 cellular  
organisms; Eukaryota; Opisthokonta; Metazoa; Eumetazoa; Bilateria; Protostomia;  
Spiralia; Lophotrochozoa; Mollusca; Bivalvia; Autobranchia; Pteriomorpha; Ostr  
eida; Ostreidae; Crassostrea; Crassostrea gigas  
UdeM00000016690 29159 574.3 UdeM00000016690 XP\_034335858.1 39.6 684  
391 5 1 670 120 795 2.00E-160 574.3 29159 cellular  
organisms; Eukaryota; Opisthokonta; Metazoa; Eumetazoa; Bilateria; Protostomia;  
Spiralia; Lophotrochozoa; Mollusca; Bivalvia; Autobranchia; Pteriomorpha; Ostr  
eida; Ostreidae; Crassostrea; Crassostrea gigas  
UdeM00000016691 6579 201.4 UdeM00000016691 XP\_033763903.1 39.7 209  
125 1 14 221 552 760 1.40E-48 201.4 6579 cellular  
organisms; Eukaryota; Opisthokonta; Metazoa; Eumetazoa; Bilateria; Protostomia;  
Spiralia; Lophotrochozoa; Mollusca; Bivalvia; Autobranchia; Pteriomorpha; Pect  
inida; Pectinoidea; Pectinidae; Pecten; Pecten maximus  
UdeM00000016693 29159 348.2 UdeM00000016693 XP\_034335858.1 44.7 342  
184 2 1 337 197 538 1.20E-92 348.2 29159 cellular  
organisms; Eukaryota; Opisthokonta; Metazoa; Eumetazoa; Bilateria; Protostomia;  
Spiralia; Lophotrochozoa; Mollusca; Bivalvia; Autobranchia; Pteriomorpha; Ostr  
eida; Ostreidae; Crassostrea; Crassostrea gigas  
UdeM00000016692 6565 503.8 UdeM00000016692 XP\_022336349.1 44.9 506  
274 2 15 515 23 528 2.60E-139 503.8 6565 cellular  
organisms; Eukaryota; Opisthokonta; Metazoa; Eumetazoa; Bilateria; Protostomia;  
Spiralia; Lophotrochozoa; Mollusca; Bivalvia; Autobranchia; Pteriomorpha; Ostr  
eida; Ostreidae; Crassostrea; Crassostrea virginica  
UdeM00000016694 6565 166.4 UdeM00000016694 XP\_022336349.1 47.5 158  
83 0 15 172 23 180 3.20E-38 166.4 6565 cellular  
organisms; Eukaryota; Opisthokonta; Metazoa; Eumetazoa; Bilateria; Protostomia;  
Spiralia; Lophotrochozoa; Mollusca; Bivalvia; Autobranchia; Pteriomorpha; Ostr  
eida; Ostreidae; Crassostrea; Crassostrea virginica  
UdeM00000016695 6579 501.9 UdeM00000016695 XP\_033763903.1 40.8 566  
318 5 1 557 224 781 1.10E-138 501.9 6579 cellular  
organisms; Eukaryota; Opisthokonta; Metazoa; Eumetazoa; Bilateria; Protostomia;  
Spiralia; Lophotrochozoa; Mollusca; Bivalvia; Autobranchia; Pteriomorpha; Pect  
inida; Pectinoidea; Pectinidae; Pecten; Pecten maximus  
UdeM00000016696 6565 145.2 UdeM00000016696 XP\_022336349.1 41.8 158  
92 0 241 398 23 180 1.80E-31 145.2 6565 cellular  
organisms; Eukaryota; Opisthokonta; Metazoa; Eumetazoa; Bilateria; Protostomia;  
Spiralia; Lophotrochozoa; Mollusca; Bivalvia; Autobranchia; Pteriomorpha; Ostr  
eida; Ostreidae; Crassostrea; Crassostrea virginica  
UdeM00000016698 6596 312 UdeM00000016698 XP\_045179858.1 32.1 652  
167 7 2 390 199 837 1.40E-81 312 6596 cellular  
organisms; Eukaryota; Opisthokonta; Metazoa; Eumetazoa; Bilateria; Protostomia;  
Spiralia; Lophotrochozoa; Mollusca; Bivalvia; Autobranchia; Heteroconchia; Eue  
terodonta; Imparidentia; Venerida; Veneroidea; Veneridae; Mercenaria; Mercenari  
a mercenaria  
UdeM00000016699 6573 203.8 UdeM00000016699 XP\_021366586.1 46 211  
109 1 3 213 1 206 2.50E-49 203.8 6573 cellular  
organisms; Eukaryota; Opisthokonta; Metazoa; Eumetazoa; Bilateria; Protostomia;  
Spiralia; Lophotrochozoa; Mollusca; Bivalvia; Autobranchia; Pteriomorpha; Pect  
inida; Pectinoidea; Pectinidae; Mizuhopecten; Mizuhopecten yessoensis

UdeM00000016700 37653 299.7 UdeM00000016700 XP\_014771786.1 36.4 626  
 317 12 78 658 48 637 9.40E-78 299.7 37653 cellular  
 organisms;Eukaryota;Opisthokonta;Metazoa;Eumetazoa;Bilateria;Protostomia;  
 Spiralia;Lophotrochozoa;Mollusca;Cephalopoda;Coleoidea;Octopodiformes;Oct  
 opoda;Incirrata;Octopodidae;Octopus;Octopus bimaculoides  
 UdeM00000016702 29159 372.1 UdeM00000016702 XP\_011434453.2 27.4 1342  
 612 32 74 1355 33 1072 3.70E-99 372.1 29159 cellular  
 organisms;Eukaryota;Opisthokonta;Metazoa;Eumetazoa;Bilateria;Protostomia;  
 Spiralia;Lophotrochozoa;Mollusca;Bivalvia;Autobranchia;Pteriormorphia;Ostr  
 eida;Ostreoidea;Ostreidae;Crassostrea;Crassostrea gigas  
 UdeM00000016703 6596 621.7 UdeM00000016703 XP\_045163414.1 69.8 411  
 124 0 1 411 1 411 6.70E-175 621.7 6596 cellular  
 organisms;Eukaryota;Opisthokonta;Metazoa;Eumetazoa;Bilateria;Protostomia;  
 Spiralia;Lophotrochozoa;Mollusca;Bivalvia;Autobranchia;Heteroconchia;Euhe  
 terodonta;Imparidentia;Venerida;Veneroidea;Veneridae;Mercenaria;Mercenari  
 a mercenaria  
 UdeM00000016704 6596 1565.1 UdeM00000016704 XP\_045163414.1 70.7  
 1045 304 2 1 1043 1 1045 0.00E+00 1565.1 6596  
 cellular  
 organisms;Eukaryota;Opisthokonta;Metazoa;Eumetazoa;Bilateria;Protostomia;  
 Spiralia;Lophotrochozoa;Mollusca;Bivalvia;Autobranchia;Heteroconchia;Euhe  
 terodonta;Imparidentia;Venerida;Veneroidea;Veneridae;Mercenaria;Mercenari  
 a mercenaria  
 UdeM00000016705 6596 948.7 UdeM00000016705 XP\_045163414.1 71.3 635  
 180 2 6 638 411 1045 3.70E-273 948.7 6596 cellular  
 organisms;Eukaryota;Opisthokonta;Metazoa;Eumetazoa;Bilateria;Protostomia;  
 Spiralia;Lophotrochozoa;Mollusca;Bivalvia;Autobranchia;Heteroconchia;Euhe  
 terodonta;Imparidentia;Venerida;Veneroidea;Veneridae;Mercenaria;Mercenari  
 a mercenaria  
 UdeM00000016706 409849 122.9 UdeM00000016706 XP\_033839884.1 34  
 194 128 0 50 243 23 216 6.50E-25 122.9 409849  
 cellular  
 organisms;Eukaryota;Opisthokonta;Metazoa;Eumetazoa;Bilateria;Deuterostomi  
 a;Chordata;Craniata;Vertebrata;Gnathostomata;Teleostomi;Euteleostomi;Acti  
 nopterygii;Actinopteri;Neopterygii;Teleostei;Osteoglossocephalai;Clupeoce  
 phala;Euteleosteomorpha;Neoteleostei;Eurypterygia;Ctenosquamata;Acanthomo  
 rphata;Euacanthomorphacea;Percomorphaceae;Gobiaria;Gobiiformes;Gobioidei;  
 Gobiidae;Oxudercinae;Periophthalmus;Periophthalmus magnuspinnatus  
 UdeM00000016707 1735272 598.6 UdeM00000016707 XP\_041377444.1 40.2  
 809 451 12 41 826 250 1048 1.20E-167 598.6 1735272  
 cellular  
 organisms;Eukaryota;Opisthokonta;Metazoa;Eumetazoa;Bilateria;Protostomia;  
 Spiralia;Lophotrochozoa;Mollusca;Gastropoda;Neomphalina;Neomphaloidea;Pel  
 tospiridae;Gigantopelta;Gigantopelta aegis  
 UdeM00000016708 210632 651.4 UdeM00000016708 XP\_028283034.1 32.3  
 1195 629 14 1 1169 26 1066 2.20E-183 651.4 210632  
 cellular  
 organisms;Eukaryota;Opisthokonta;Metazoa;Eumetazoa;Bilateria;Deuterostomi  
 a;Chordata;Craniata;Vertebrata;Gnathostomata;Teleostomi;Euteleostomi;Acti  
 nopterygii;Actinopteri;Neopterygii;Teleostei;Osteoglossocephalai;Clupeoce  
 phala;Euteleosteomorpha;Neoteleostei;Eurypterygia;Ctenosquamata;Acanthomo  
 rphata;Euacanthomorphacea;Percomorphaceae;Ovalentaria;Ovalentaria  
 incertae sedis;Ambassidae;Parambassis;Parambassis ranga



UdeM00000016709 210632 651.4 UdeM00000016709 XP\_028283034.1 32.8  
 1201 614 17 1 1168 26 1066 2.20E-183 651.4 210632  
 cellular  
 organisms;Eukaryota;Opisthokonta;Metazoa;Eumetazoa;Bilateria;Deuterostomi  
 a;Chordata;Craniata;Vertebrata;Gnathostomata;Teleostomi;Euteleostomi;Acti  
 nopterygii;Actinopteri;Neopterygii;Teleostei;Osteoglossocephalai;Clupeoce  
 phala;Euteleostei;Neoteleostei;Eurypterygia;Ctenosquamata;Acanthomo  
 rphata;Euacanthomorpha;Percomorphaceae;Ovalentaria;Ovalentaria  
 incertae sedis;Ambassidae;Parambassis;Parambassis ranga  
 UdeM00000016710 6573 554.7 UdeM00000016710 XP\_021340202.1 58.2 452  
 188 1 35 486 62 512 1.20E-154 554.7 6573 cellular  
 organisms;Eukaryota;Opisthokonta;Metazoa;Eumetazoa;Bilateria;Protostomia;  
 Spiralia;Lophotrochozoa;Mollusca;Bivalvia;Autobranhia;Pteriomorpha;Pect  
 inida;Pectinoidea;Pectinidae;Mizuhopecten;Mizuhopecten yessoensis  
 UdeM00000042474 29159 67.4 UdeM00000042474 XP\_034319609.1 55.1 49  
 22 0 35 83 906 954 1.00E-08 67.4 29159 cellular  
 organisms;Eukaryota;Opisthokonta;Metazoa;Eumetazoa;Bilateria;Protostomia;  
 Spiralia;Lophotrochozoa;Mollusca;Bivalvia;Autobranhia;Pteriomorpha;Ostr  
 eida;Ostreidae;Crassostrea;Crassostrea gigas  
 UdeM00000042477 6565 214.5 UdeM00000042477 XP\_022306954.1 64.6 144  
 51 0 1 144 367 510 9.10E-53 214.5 6565 cellular  
 organisms;Eukaryota;Opisthokonta;Metazoa;Eumetazoa;Bilateria;Protostomia;  
 Spiralia;Lophotrochozoa;Mollusca;Bivalvia;Autobranhia;Pteriomorpha;Ostr  
 eida;Ostreidae;Crassostrea;Crassostrea virginica  
 UdeM00000042478 29159 93.2 UdeM00000042478 XP\_034319609.1 39.7 116  
 46 1 1 92 839 954 1.90E-16 93.2 29159 cellular  
 organisms;Eukaryota;Opisthokonta;Metazoa;Eumetazoa;Bilateria;Protostomia;  
 Spiralia;Lophotrochozoa;Mollusca;Bivalvia;Autobranhia;Pteriomorpha;Ostr  
 eida;Ostreidae;Crassostrea;Crassostrea gigas  
 UdeM00000042479 6596 164.1 UdeM00000042479 XP\_045177053.1 34.7 291  
 168 11 4 281 150 431 2.60E-37 164.1 6596 cellular  
 organisms;Eukaryota;Opisthokonta;Metazoa;Eumetazoa;Bilateria;Protostomia;  
 Spiralia;Lophotrochozoa;Mollusca;Bivalvia;Autobranhia;Heteroconchia;Euhe  
 terodonta;Imparidentia;Venerida;Veneroidea;Veneridae;Mercenaria;Mercenari  
 a mercenaria  
 UdeM00000042482 29159 73.2 UdeM00000042482 XP\_034321668.1 73.9 46  
 12 0 1 46 483 528 2.10E-10 73.2 29159 cellular  
 organisms;Eukaryota;Opisthokonta;Metazoa;Eumetazoa;Bilateria;Protostomia;  
 Spiralia;Lophotrochozoa;Mollusca;Bivalvia;Autobranhia;Pteriomorpha;Ostr  
 eida;Ostreidae;Crassostrea;Crassostrea gigas  
 UdeM00000042484 6565 108.2 UdeM00000042484 XP\_022307853.1 34 212  
 125 8 18 225 376 576 1.50E-20 108.2 6565 cellular  
 organisms;Eukaryota;Opisthokonta;Metazoa;Eumetazoa;Bilateria;Protostomia;  
 Spiralia;Lophotrochozoa;Mollusca;Bivalvia;Autobranhia;Pteriomorpha;Ostr  
 eida;Ostreidae;Crassostrea;Crassostrea virginica  
 UdeM00000042485 6596 153.3 UdeM00000042485 XP\_045177053.1 34.2 257  
 156 7 3 250 124 376 4.20E-34 153.3 6596 cellular  
 organisms;Eukaryota;Opisthokonta;Metazoa;Eumetazoa;Bilateria;Protostomia;  
 Spiralia;Lophotrochozoa;Mollusca;Bivalvia;Autobranhia;Heteroconchia;Euhe  
 terodonta;Imparidentia;Venerida;Veneroidea;Veneridae;Mercenaria;Mercenari  
 a mercenaria  
 UdeM00000042488 7741 60.1 UdeM00000042488 XP\_019620205.1 29.7 138  
 85 5 89 223 748 876 4.30E-06 60.1 7741 cellular  
 organisms;Eukaryota;Opisthokonta;Metazoa;Eumetazoa;Bilateria;Deuterostomi

a;Chordata;Cephalochordata;Leptocardii;Amphioxiformes;Branchiostomidae;Branchiostoma;Branchiostoma belcheri  
UdeM00000042489 7741 60.1 UdeM00000042489 XP\_019620205.1 29.7 138  
85 5 13 147 748 876 2.90E-06 60.1 7741 cellular  
organisms;Eukaryota;Opisthokonta;Metazoa;Eumetazoa;Bilateria;Deuterostomia;Chordata;Cephalochordata;Leptocardii;Amphioxiformes;Branchiostomidae;Branchiostoma;Branchiostoma belcheri  
UdeM00000042490 45351 88.2 UdeM00000042490 XP\_032239173.1 28.1 256  
159 6 79 324 100 340 3.50E-14 88.2 45351 cellular  
organisms;Eukaryota;Opisthokonta;Metazoa;Eumetazoa;Cnidaria;Anthozoa;Hexacorallia;Actiniaria;Edwardsiidae;Nematostella;Nematostella vectensis  
UdeM00000042492 29159 246.1 UdeM00000042492 XP\_011424053.2 77.6 147  
33 0 1 147 1 147 2.70E-62 246.1 29159 cellular  
organisms;Eukaryota;Opisthokonta;Metazoa;Eumetazoa;Bilateria;Protostomia;Spiralia;Lophotrochozoa;Mollusca;Bivalvia;Autobranchia;Pteriormorphia;Ostreida;Ostreoidea;Ostreidae;Crassostrea;Crassostrea gigas  
UdeM00000042493 6579 220.3 UdeM00000042493 XP\_033758968.1 26.2 679  
450 17 33 684 15 669 7.60E-54 220.3 6579 cellular  
organisms;Eukaryota;Opisthokonta;Metazoa;Eumetazoa;Bilateria;Protostomia;Spiralia;Lophotrochozoa;Mollusca;Bivalvia;Autobranchia;Pteriormorphia;Pectinida;Pectinoidea;Pectinidae;Pecten;Pecten maximus  
UdeM00000042494 6579 218.4 UdeM00000042494 XP\_033758968.1 26.3 681  
452 17 23 675 11 669 2.90E-53 218.4 6579 cellular  
organisms;Eukaryota;Opisthokonta;Metazoa;Eumetazoa;Bilateria;Protostomia;Spiralia;Lophotrochozoa;Mollusca;Bivalvia;Autobranchia;Pteriormorphia;Pectinida;Pectinoidea;Pectinidae;Pecten;Pecten maximus  
UdeM00000042495 6573 211.5 UdeM00000042495 XP\_021341731.1 24.7 675  
474 13 27 681 15 675 3.50E-51 211.5 6573 cellular  
organisms;Eukaryota;Opisthokonta;Metazoa;Eumetazoa;Bilateria;Protostomia;Spiralia;Lophotrochozoa;Mollusca;Bivalvia;Autobranchia;Pteriormorphia;Pectinida;Pectinoidea;Pectinidae;Mizuhopecten;Mizuhopecten yessoensis  
UdeM00000042497 6596 64.3 UdeM00000042497 XP\_045177458.1 30.8 107  
73 1 366 471 77 183 6.70E-07 64.3 6596 cellular  
organisms;Eukaryota;Opisthokonta;Metazoa;Eumetazoa;Bilateria;Protostomia;Spiralia;Lophotrochozoa;Mollusca;Bivalvia;Autobranchia;Heteroconchia;Euheterodonta;Imparidentia;Venerida;Veneroidea;Veneridae;Mercenaria;Mercenaria mercenaria  
UdeM00000042498 6565 84.7 UdeM00000042498 XP\_022330482.1 26.1 234  
156 7 686 916 406 625 6.80E-13 84.7 6565 cellular  
organisms;Eukaryota;Opisthokonta;Metazoa;Eumetazoa;Bilateria;Protostomia;Spiralia;Lophotrochozoa;Mollusca;Bivalvia;Autobranchia;Pteriormorphia;Ostreida;Ostreoidea;Ostreidae;Crassostrea;Crassostrea virginica  
UdeM00000042499 7741 201.4 UdeM00000042499 XP\_019646171.1 45.7 208  
109 2 31 238 255 458 1.30E-48 201.4 7741 cellular  
organisms;Eukaryota;Opisthokonta;Metazoa;Eumetazoa;Bilateria;Deuterostomia;Chordata;Cephalochordata;Leptocardii;Amphioxiformes;Branchiostomidae;Branchiostoma;Branchiostoma belcheri  
UdeM00000042500 7574 141 UdeM00000042500 XP\_013397768.1 27.6 424  
243 14 1 364 103 522 3.20E-30 141 7574 cellular  
organisms;Eukaryota;Opisthokonta;Metazoa;Eumetazoa;Bilateria;Protostomia;Spiralia;Lophotrochozoa;Brachiopoda;Linguliformea;Lingulata;Lingulida;Linguloidea;Lingulidae;Lingula;Lingula anatina  
UdeM00000042501 29159 98.2 UdeM00000042501 XP\_034310917.1 34.1 167  
100 5 2 160 572 736 1.00E-17 98.2 29159 cellular

organisms;Eukaryota;Opisthokonta;Metazoa;Eumetazoa;Bilateria;Protostomia;Spiralia;Lophotrochozoa;Mollusca;Bivalvia;Autobranhia;Pteriormorphia;Ostreida;Ostreioidea;Ostreidae;Crassostrea;Crassostrea gigas  
UdeM00000042502 29159 130.6 UdeM00000042502 XP\_034333290.1 35.6 239  
139 8 1 228 1910 2144 5.50E-27 130.6 29159 cellular

organisms;Eukaryota;Opisthokonta;Metazoa;Eumetazoa;Bilateria;Protostomia;Spiralia;Lophotrochozoa;Mollusca;Bivalvia;Autobranhia;Pteriormorphia;Ostreida;Ostreioidea;Ostreidae;Crassostrea;Crassostrea gigas  
UdeM00000042504 6579 151 UdeM00000042504 XP\_033738785.1 45.5 189  
98 4 64 248 252 439 3.00E-33 151 6579 cellular

organisms;Eukaryota;Opisthokonta;Metazoa;Eumetazoa;Bilateria;Protostomia;Spiralia;Lophotrochozoa;Mollusca;Bivalvia;Autobranhia;Pteriormorphia;Pectinida;Pectinoidea;Pectinidae;Pecten;Pecten maximus  
UdeM00000042505 6579 151 UdeM00000042505 XP\_033738785.1 45.5 189  
98 4 64 248 252 439 3.00E-33 151 6579 cellular

organisms;Eukaryota;Opisthokonta;Metazoa;Eumetazoa;Bilateria;Protostomia;Spiralia;Lophotrochozoa;Mollusca;Bivalvia;Autobranhia;Pteriormorphia;Pectinida;Pectinoidea;Pectinidae;Pecten;Pecten maximus  
UdeM00000042506 70779 70.1 UdeM00000042506 XP\_015777172.1 38.8 80  
49 0 7 86 58 137 1.80E-09 70.1 70779 cellular

organisms;Eukaryota;Opisthokonta;Metazoa;Eumetazoa;Cnidaria;Anthozoa;Hexacorallia;Scleractinia;Astrocoeniina;Acroporidae;Acropora;Acropora digitifera  
UdeM00000042507 6596 251.5 UdeM00000042507 XP\_045180379.1 69.1 175  
52 1 1 173 1 175 7.70E-64 251.5 6596 cellular

organisms;Eukaryota;Opisthokonta;Metazoa;Eumetazoa;Bilateria;Protostomia;Spiralia;Lophotrochozoa;Mollusca;Bivalvia;Autobranhia;Heteroconchia;Euheterodonta;Imparidentia;Venerida;Veneroidea;Veneridae;Mercenaria;Mercenaria mercenaria  
UdeM00000042509 37621 154.1 UdeM00000042509 XP\_014673981.1 43.2 206  
77 5 6 174 16 218 1.80E-34 154.1 37621 cellular

organisms;Eukaryota;Opisthokonta;Metazoa;Eumetazoa;Bilateria;Protostomia;Ecdysozoa;Scalidophora;Priapulida;Priapulimorpha;Priapulimorphida;Priapulidae;Priapululus;Priapululus caudatus  
UdeM00000042510 37621 213.4 UdeM00000042510 XP\_014672567.1 52.3 174  
83 0 10 183 345 518 2.90E-52 213.4 37621 cellular

organisms;Eukaryota;Opisthokonta;Metazoa;Eumetazoa;Bilateria;Protostomia;Ecdysozoa;Scalidophora;Priapulida;Priapulimorpha;Priapulimorphida;Priapulidae;Priapululus;Priapululus caudatus  
UdeM00000042511 7668 119.8 UdeM00000042511 XP\_011671223.1 47.6 124  
63 2 8 131 10 131 3.40E-24 119.8 7668 cellular

organisms;Eukaryota;Opisthokonta;Metazoa;Eumetazoa;Bilateria;Deuterostomia;Echinodermata;Eleutherozoa;Echinozoa;Echinoidea;Euechinoidea;Echinacea;Camarodonta;Echinidea;Strongylocentrotidae;Strongylocentrotus;Strongylocentrotus purpuratus  
UdeM00000042512 6596 85.9 UdeM00000042512 XP\_045209828.1 68.8 64  
19 1 107 169 99 162 5.50E-14 85.9 6596 cellular

organisms;Eukaryota;Opisthokonta;Metazoa;Eumetazoa;Bilateria;Protostomia;Spiralia;Lophotrochozoa;Mollusca;Bivalvia;Autobranhia;Heteroconchia;Euheterodonta;Imparidentia;Venerida;Veneroidea;Veneridae;Mercenaria;Mercenaria mercenaria  
UdeM00000042513 6596 1330.1 UdeM00000042513 XP\_045209751.1 86.8  
775 100 2 1 774 1 774 0.00E+00 1330.1 6596  
cellular

organisms;Eukaryota;Opisthokonta;Metazoa;Eumetazoa;Bilateria;Protostomia;Spiralia;Lophotrochozoa;Mollusca;Bivalvia;Autobranhia;Heteroconchia;Euherodonta;Imparidentia;Venerida;Veneroidea;Veneridae;Mercenaria;Mercenaria mercenaria

UdeM00000042514 6596 239.6 UdeM00000042514 XP\_045201323.1 44.3 325  
171 5 50 371 106 423 7.30E-60 239.6 6596 cellular

organisms;Eukaryota;Opisthokonta;Metazoa;Eumetazoa;Bilateria;Protostomia;Spiralia;Lophotrochozoa;Mollusca;Bivalvia;Autobranhia;Heteroconchia;Euherodonta;Imparidentia;Venerida;Veneroidea;Veneridae;Mercenaria;Mercenaria mercenaria

UdeM00000042515 6596 222.6 UdeM00000042515 XP\_045201320.1 41 315  
178 4 59 371 119 427 9.60E-55 222.6 6596 cellular

organisms;Eukaryota;Opisthokonta;Metazoa;Eumetazoa;Bilateria;Protostomia;Spiralia;Lophotrochozoa;Mollusca;Bivalvia;Autobranhia;Heteroconchia;Euherodonta;Imparidentia;Venerida;Veneroidea;Veneridae;Mercenaria;Mercenaria mercenaria

UdeM00000042516 400727 66.2 UdeM00000042516 XP\_025110088.1 36.1  
83 53 0 15 97 89 171 4.00E-08 66.2 400727  
cellular

organisms;Eukaryota;Opisthokonta;Metazoa;Eumetazoa;Bilateria;Protostomia;Spiralia;Lophotrochozoa;Mollusca;Gastropoda;Caenogastropoda;Architaenioglossa;Ampullarioidea;Ampullariidae;Pomacea;Pomacea canaliculata

UdeM00000042517 400727 66.2 UdeM00000042517 XP\_025110088.1 36.1  
83 53 0 15 97 89 171 4.00E-08 66.2 400727  
cellular

organisms;Eukaryota;Opisthokonta;Metazoa;Eumetazoa;Bilateria;Protostomia;Spiralia;Lophotrochozoa;Mollusca;Gastropoda;Caenogastropoda;Architaenioglossa;Ampullarioidea;Ampullariidae;Pomacea;Pomacea canaliculata

UdeM00000042518 6596 222.6 UdeM00000042518 XP\_045201320.1 41 315  
178 4 59 371 119 427 9.60E-55 222.6 6596 cellular

organisms;Eukaryota;Opisthokonta;Metazoa;Eumetazoa;Bilateria;Protostomia;Spiralia;Lophotrochozoa;Mollusca;Bivalvia;Autobranhia;Heteroconchia;Euherodonta;Imparidentia;Venerida;Veneroidea;Veneridae;Mercenaria;Mercenaria mercenaria

UdeM00000042520 6596 94.4 UdeM00000042520 XP\_045201323.1 39.5 177  
87 2 3 159 40 216 1.40E-16 94.4 6596 cellular

organisms;Eukaryota;Opisthokonta;Metazoa;Eumetazoa;Bilateria;Protostomia;Spiralia;Lophotrochozoa;Mollusca;Bivalvia;Autobranhia;Heteroconchia;Euherodonta;Imparidentia;Venerida;Veneroidea;Veneridae;Mercenaria;Mercenaria mercenaria

UdeM00000042521 7719 101.3 UdeM00000042521 NP\_001027676.1 86.2 58  
8 0 80 137 11 68 1.00E-18 101.3 7719 cellular

organisms;Eukaryota;Opisthokonta;Metazoa;Eumetazoa;Bilateria;Deuterostomia;Chordata;Tunicata;Ascidiacea;Phlebobranchia;Cionidae;Ciona;Ciona intestinalis

UdeM00000042522 6579 129.4 UdeM00000042522 XP\_033733095.1 50 126  
56 3 8 127 9 133 3.80E-27 129.4 6579 cellular

organisms;Eukaryota;Opisthokonta;Metazoa;Eumetazoa;Bilateria;Protostomia;Spiralia;Lophotrochozoa;Mollusca;Bivalvia;Autobranhia;Pteriomorphia;Pectinida;Pectinoidea;Pectinidae;Pecten;Pecten maximus

UdeM00000044290 6565 866.3 UdeM00000044290 XP\_022308715.1 77.3 516  
116 1 8 523 6 520 2.00E-248 866.3 6565 cellular

organisms;Eukaryota;Opisthokonta;Metazoa;Eumetazoa;Bilateria;Protostomia;

Spiralia;Lophotrochozoa;Mollusca;Bivalvia;Autobranchia;Pteriormorphia;Ostr  
eida;Ostreoidea;Ostreidae;Crassostrea;Crassostrea virginica  
UdeM00000019257 6500 108.2 UdeM00000019257 XP\_035824657.1 61.4 88  
34 0 31 118 22 109 2.00E-20 108.2 6500 cellular  
organisms;Eukaryota;Opisthokonta;Metazoa;Eumetazoa;Bilateria;Protostomia;  
Spiralia;Lophotrochozoa;Mollusca;Gastropoda;Heterobranchia;Euthyneura;Tec  
tipleura;Aplysiida;Aplysioidea;Aplysiidae;Aplysia;Aplysia californica  
UdeM00000019258 6596 112.8 UdeM00000019258 XP\_045165187.1 33.6 295  
171 6 47 328 14 296 8.20E-22 112.8 6596 cellular  
organisms;Eukaryota;Opisthokonta;Metazoa;Eumetazoa;Bilateria;Protostomia;  
Spiralia;Lophotrochozoa;Mollusca;Bivalvia;Autobranchia;Heteroconchia;Euhe  
terodonta;Imparidentia;Venerida;Veneroidea;Veneridae;Mercenaria;Mercenari  
a mercenaria  
UdeM00000019259 6596 162.5 UdeM00000019259 XP\_045165957.1 42.8 187  
100 4 11 193 8 191 5.70E-37 162.5 6596 cellular  
organisms;Eukaryota;Opisthokonta;Metazoa;Eumetazoa;Bilateria;Protostomia;  
Spiralia;Lophotrochozoa;Mollusca;Bivalvia;Autobranchia;Heteroconchia;Euhe  
terodonta;Imparidentia;Venerida;Veneroidea;Veneridae;Mercenaria;Mercenari  
a mercenaria  
UdeM00000019260 6596 772.7 UdeM00000019260 XP\_045166343.1 65.2 595  
186 7 1 591 18 595 3.50E-220 772.7 6596 cellular  
organisms;Eukaryota;Opisthokonta;Metazoa;Eumetazoa;Bilateria;Protostomia;  
Spiralia;Lophotrochozoa;Mollusca;Bivalvia;Autobranchia;Heteroconchia;Euhe  
terodonta;Imparidentia;Venerida;Veneroidea;Veneridae;Mercenaria;Mercenari  
a mercenaria  
UdeM00000019261 6596 706.8 UdeM00000019261 XP\_045164785.1 61.7 595  
205 5 2 580 6 593 2.40E-200 706.8 6596 cellular  
organisms;Eukaryota;Opisthokonta;Metazoa;Eumetazoa;Bilateria;Protostomia;  
Spiralia;Lophotrochozoa;Mollusca;Bivalvia;Autobranchia;Heteroconchia;Euhe  
terodonta;Imparidentia;Venerida;Veneroidea;Veneridae;Mercenaria;Mercenari  
a mercenaria  
UdeM00000019263 6596 721.1 UdeM00000019263 XP\_045164785.1 64.1 579  
183 4 19 584 17 583 1.30E-204 721.1 6596 cellular  
organisms;Eukaryota;Opisthokonta;Metazoa;Eumetazoa;Bilateria;Protostomia;  
Spiralia;Lophotrochozoa;Mollusca;Bivalvia;Autobranchia;Heteroconchia;Euhe  
terodonta;Imparidentia;Venerida;Veneroidea;Veneridae;Mercenaria;Mercenari  
a mercenaria  
UdeM00000019262 6596 721.1 UdeM00000019262 XP\_045164785.1 64.1 579  
183 4 19 584 17 583 1.30E-204 721.1 6596 cellular  
organisms;Eukaryota;Opisthokonta;Metazoa;Eumetazoa;Bilateria;Protostomia;  
Spiralia;Lophotrochozoa;Mollusca;Bivalvia;Autobranchia;Heteroconchia;Euhe  
terodonta;Imparidentia;Venerida;Veneroidea;Veneridae;Mercenaria;Mercenari  
a mercenaria  
UdeM00000019264 6596 354.8 UdeM00000019264 XP\_045207182.1 57.8 296  
113 3 61 352 5 292 1.70E-94 354.8 6596 cellular  
organisms;Eukaryota;Opisthokonta;Metazoa;Eumetazoa;Bilateria;Protostomia;  
Spiralia;Lophotrochozoa;Mollusca;Bivalvia;Autobranchia;Heteroconchia;Euhe  
terodonta;Imparidentia;Venerida;Veneroidea;Veneridae;Mercenaria;Mercenari  
a mercenaria  
UdeM00000019265 6596 320.1 UdeM00000019265 XP\_045165300.1 52.2 335  
153 2 24 354 23 354 3.60E-84 320.1 6596 cellular  
organisms;Eukaryota;Opisthokonta;Metazoa;Eumetazoa;Bilateria;Protostomia;  
Spiralia;Lophotrochozoa;Mollusca;Bivalvia;Autobranchia;Heteroconchia;Euhe

terodonta;Imparidentia;Venerida;Veneroidea;Veneridae;Mercenaria;Mercenari  
 a mercenaria  
 UdeM00000019266 6596 316.6 UdeM00000019266 XP\_045165300.1 52.3 331  
 151 2 2 328 27 354 3.70E-83 316.6 6596 cellular  
 organisms;Eukaryota;Opisthokonta;Metazoa;Eumetazoa;Bilateria;Protostomia;  
 Spiralia;Lophotrochozoa;Mollusca;Bivalvia;Autobranchia;Heteroconchia;Euhe  
 terodonta;Imparidentia;Venerida;Veneroidea;Veneridae;Mercenaria;Mercenari  
 a mercenaria  
 UdeM00000019267 1735272 284.3 UdeM00000019267 XP\_041349062.1 62.9  
 229 83 1 27 255 37 263 1.60E-73 284.3 1735272  
 cellular  
 organisms;Eukaryota;Opisthokonta;Metazoa;Eumetazoa;Bilateria;Protostomia;  
 Spiralia;Lophotrochozoa;Mollusca;Gastropoda;Neomphalina;Neomphaloidea;Pel  
 tospiridae;Gigantopelta;Gigantopelta aegis  
 UdeM00000019268 1735272 284.3 UdeM00000019268 XP\_041349062.1 62.9  
 229 83 1 25 253 37 263 1.60E-73 284.3 1735272  
 cellular  
 organisms;Eukaryota;Opisthokonta;Metazoa;Eumetazoa;Bilateria;Protostomia;  
 Spiralia;Lophotrochozoa;Mollusca;Gastropoda;Neomphalina;Neomphaloidea;Pel  
 tospiridae;Gigantopelta;Gigantopelta aegis  
 UdeM00000019269 2607531 203.8 UdeM00000019269 XP\_036362952.1 36.6  
 309 188 4 51 352 80 387 3.70E-49 203.8 2607531  
 cellular  
 organisms;Eukaryota;Opisthokonta;Metazoa;Eumetazoa;Bilateria;Protostomia;  
 Spiralia;Lophotrochozoa;Mollusca;Cephalopoda;Coleoidea;Octopodiformes;Oct  
 opoda;Incirrata;Octopodidae;Octopus;Octopus sinensis  
 UdeM00000019270 6565 903.3 UdeM00000019270 XP\_022300211.1 42.6 1137  
 609 21 12 1135 9 1114 3.30E-259 903.3 6565 cellular  
 organisms;Eukaryota;Opisthokonta;Metazoa;Eumetazoa;Bilateria;Protostomia;  
 Spiralia;Lophotrochozoa;Mollusca;Bivalvia;Autobranchia;Pteriormorphia;Ostr  
 eida;Ostreoidea;Ostreidae;Crassostrea;Crassostrea virginica  
 UdeM00000019271 6596 75.9 UdeM00000019271 XP\_045197826.1 33.5 173  
 89 3 28 199 46 193 6.80E-11 75.9 6596 cellular  
 organisms;Eukaryota;Opisthokonta;Metazoa;Eumetazoa;Bilateria;Protostomia;  
 Spiralia;Lophotrochozoa;Mollusca;Bivalvia;Autobranchia;Heteroconchia;Euhe  
 terodonta;Imparidentia;Venerida;Veneroidea;Veneridae;Mercenaria;Mercenari  
 a mercenaria  
 UdeM00000019272 6596 451.4 UdeM00000019272 XP\_045166715.1 67.7 356  
 105 5 1 354 1 348 1.00E-123 451.4 6596 cellular  
 organisms;Eukaryota;Opisthokonta;Metazoa;Eumetazoa;Bilateria;Protostomia;  
 Spiralia;Lophotrochozoa;Mollusca;Bivalvia;Autobranchia;Heteroconchia;Euhe  
 terodonta;Imparidentia;Venerida;Veneroidea;Veneridae;Mercenaria;Mercenari  
 a mercenaria  
 UdeM00000019273 6596 407.1 UdeM00000019273 XP\_045166716.1 44.4 453  
 243 6 1 451 34 479 2.80E-110 407.1 6596 cellular  
 organisms;Eukaryota;Opisthokonta;Metazoa;Eumetazoa;Bilateria;Protostomia;  
 Spiralia;Lophotrochozoa;Mollusca;Bivalvia;Autobranchia;Heteroconchia;Euhe  
 terodonta;Imparidentia;Venerida;Veneroidea;Veneridae;Mercenaria;Mercenari  
 a mercenaria  
 UdeM00000019274 6596 576.6 UdeM00000019274 XP\_045174038.1 54.7 530  
 238 2 5 532 46 575 3.20E-161 576.6 6596 cellular  
 organisms;Eukaryota;Opisthokonta;Metazoa;Eumetazoa;Bilateria;Protostomia;  
 Spiralia;Lophotrochozoa;Mollusca;Bivalvia;Autobranchia;Heteroconchia;Euhe

terodonta;Imparidentia;Venerida;Veneroidea;Veneridae;Mercenaria;Mercenari  
 a mercenaria  
 UdeM00000019275 29159 92.4 UdeM00000019275 XP\_011427550.2 84.6 52  
 8 0 1 52 391 442 1.80E-16 92.4 29159 cellular  
 organisms;Eukaryota;Opisthokonta;Metazoa;Eumetazoa;Bilateria;Protostomia;  
 Spiralia;Lophotrochozoa;Mollusca;Bivalvia;Autobranhia;Pteriormorphia;Ostr  
 eida;Ostreoidea;Ostreidae;Crassostrea;Crassostrea gigas  
 UdeM00000019276 6565 582.4 UdeM00000019276 XP\_022296668.1 83 323  
 55 0 64 386 113 435 4.20E-163 582.4 6565 cellular  
 organisms;Eukaryota;Opisthokonta;Metazoa;Eumetazoa;Bilateria;Protostomia;  
 Spiralia;Lophotrochozoa;Mollusca;Bivalvia;Autobranhia;Pteriormorphia;Ostr  
 eida;Ostreoidea;Ostreidae;Crassostrea;Crassostrea virginica  
 UdeM00000019277 6579 211.1 UdeM00000019277 XP\_033745913.1 78.2 119  
 26 0 1 119 1 119 8.50E-52 211.1 6579 cellular  
 organisms;Eukaryota;Opisthokonta;Metazoa;Eumetazoa;Bilateria;Protostomia;  
 Spiralia;Lophotrochozoa;Mollusca;Bivalvia;Autobranhia;Pteriormorphia;Pect  
 inida;Pectinoidea;Pectinidae;Pecten;Pecten maximus  
 UdeM00000019278 6596 275.8 UdeM00000019278 XP\_045166365.1 75.3 178  
 44 0 1 178 1 178 3.90E-71 275.8 6596 cellular  
 organisms;Eukaryota;Opisthokonta;Metazoa;Eumetazoa;Bilateria;Protostomia;  
 Spiralia;Lophotrochozoa;Mollusca;Bivalvia;Autobranhia;Heteroconchia;Euhe  
 terodonta;Imparidentia;Venerida;Veneroidea;Veneridae;Mercenaria;Mercenari  
 a mercenaria  
 UdeM00000019279 6596 158.3 UdeM00000019279 XP\_045166365.1 67.9 112  
 36 0 1 112 67 178 5.70E-36 158.3 6596 cellular  
 organisms;Eukaryota;Opisthokonta;Metazoa;Eumetazoa;Bilateria;Protostomia;  
 Spiralia;Lophotrochozoa;Mollusca;Bivalvia;Autobranhia;Heteroconchia;Euhe  
 terodonta;Imparidentia;Venerida;Veneroidea;Veneridae;Mercenaria;Mercenari  
 a mercenaria  
 UdeM00000019280 6596 809.7 UdeM00000019280 XP\_045166400.1 45.4 923  
 456 14 115 1013 815 1713 4.40E-231 809.7 6596 cellular  
 organisms;Eukaryota;Opisthokonta;Metazoa;Eumetazoa;Bilateria;Protostomia;  
 Spiralia;Lophotrochozoa;Mollusca;Bivalvia;Autobranhia;Heteroconchia;Euhe  
 terodonta;Imparidentia;Venerida;Veneroidea;Veneridae;Mercenaria;Mercenari  
 a mercenaria  
 UdeM00000019281 6596 357.5 UdeM00000019281 XP\_045166400.1 56 573  
 195 9 1 568 30 550 3.30E-95 357.5 6596 cellular  
 organisms;Eukaryota;Opisthokonta;Metazoa;Eumetazoa;Bilateria;Protostomia;  
 Spiralia;Lophotrochozoa;Mollusca;Bivalvia;Autobranhia;Heteroconchia;Euhe  
 terodonta;Imparidentia;Venerida;Veneroidea;Veneridae;Mercenaria;Mercenari  
 a mercenaria  
 UdeM00000019282 6596 614.4 UdeM00000019282 XP\_045164743.1 62.1 459  
 173 1 1 459 56 513 1.20E-172 614.4 6596 cellular  
 organisms;Eukaryota;Opisthokonta;Metazoa;Eumetazoa;Bilateria;Protostomia;  
 Spiralia;Lophotrochozoa;Mollusca;Bivalvia;Autobranhia;Heteroconchia;Euhe  
 terodonta;Imparidentia;Venerida;Veneroidea;Veneridae;Mercenaria;Mercenari  
 a mercenaria  
 UdeM00000019283 1735272 126.3 UdeM00000019283 XP\_041348272.1 66.7  
 96 29 2 1 93 1 96 5.60E-26 126.3 1735272  
 cellular  
 organisms;Eukaryota;Opisthokonta;Metazoa;Eumetazoa;Bilateria;Protostomia;  
 Spiralia;Lophotrochozoa;Mollusca;Gastropoda;Neomphalina;Neomphaloidea;Pel  
 tospiridae;Gigantopelta;Gigantopelta aegis

UdeM00000019284 6573 572 UdeM00000019284 XP\_021357770.1 60 477  
 187 2 1 473 1 477 7.00E-160 572 6573 cellular  
 organisms;Eukaryota;Opisthokonta;Metazoa;Eumetazoa;Bilateria;Protostomia;  
 Spiralia;Lophotrochozoa;Mollusca;Bivalvia;Autobranchia;Pteriomorpha;Pect  
 inida;Pectinoidea;Pectinidae;Mizuhopecten;Mizuhopecten yessoensis  
 UdeM00000019285 400727 288.9 UdeM00000019285 XP\_025107315.1 56.7  
 254 103 2 4 251 3 255 6.30E-75 288.9 400727  
 cellular  
 organisms;Eukaryota;Opisthokonta;Metazoa;Eumetazoa;Bilateria;Protostomia;  
 Spiralia;Lophotrochozoa;Mollusca;Gastropoda;Caenogastropoda;Architaeniogl  
 ossa;Ampullarioidea;Ampullariidae;Pomacea;Pomacea canaliculata  
 UdeM00000019286 6579 176.8 UdeM00000019286 XP\_033744861.1 69 113  
 35 0 4 116 2 114 1.60E-41 176.8 6579 cellular  
 organisms;Eukaryota;Opisthokonta;Metazoa;Eumetazoa;Bilateria;Protostomia;  
 Spiralia;Lophotrochozoa;Mollusca;Bivalvia;Autobranchia;Pteriomorpha;Pect  
 inida;Pectinoidea;Pectinidae;Pecten;Pecten maximus  
 UdeM00000019287 6573 558.9 UdeM00000019287 XP\_021370987.1 47.6 694  
 208 14 203 751 88 770 9.80E-156 558.9 6573 cellular  
 organisms;Eukaryota;Opisthokonta;Metazoa;Eumetazoa;Bilateria;Protostomia;  
 Spiralia;Lophotrochozoa;Mollusca;Bivalvia;Autobranchia;Pteriomorpha;Pect  
 inida;Pectinoidea;Pectinidae;Mizuhopecten;Mizuhopecten yessoensis  
 UdeM00000019288 1735272 424.1 UdeM00000019288 XP\_041356266.1 51.1  
 407 189 4 51 454 209 608 2.30E-115 424.1 1735272  
 cellular  
 organisms;Eukaryota;Opisthokonta;Metazoa;Eumetazoa;Bilateria;Protostomia;  
 Spiralia;Lophotrochozoa;Mollusca;Gastropoda;Neomphalina;Neomphaloidea;Pel  
 tospiridae;Gigantopelta;Gigantopelta aegis  
 UdeM00000019289 6596 154.5 UdeM00000019289 XP\_045185048.1 35 260  
 129 5 7 250 8 243 2.10E-34 154.5 6596 cellular  
 organisms;Eukaryota;Opisthokonta;Metazoa;Eumetazoa;Bilateria;Protostomia;  
 Spiralia;Lophotrochozoa;Mollusca;Bivalvia;Autobranchia;Heteroconchia;Euhe  
 terodonta;Imparidentia;Venerida;Veneroidea;Veneridae;Mercenaria;Mercenari  
 a mercenaria  
 UdeM00000019290 6596 573.5 UdeM00000019290 XP\_045164236.1 72.7 396  
 108 0 50 445 33 428 2.30E-160 573.5 6596 cellular  
 organisms;Eukaryota;Opisthokonta;Metazoa;Eumetazoa;Bilateria;Protostomia;  
 Spiralia;Lophotrochozoa;Mollusca;Bivalvia;Autobranchia;Heteroconchia;Euhe  
 terodonta;Imparidentia;Venerida;Veneroidea;Veneridae;Mercenaria;Mercenari  
 a mercenaria  
 UdeM00000019291 6565 350.1 UdeM00000019291 XP\_022338762.1 36.9 572  
 309 9 6 554 23 565 5.20E-93 350.1 6565 cellular  
 organisms;Eukaryota;Opisthokonta;Metazoa;Eumetazoa;Bilateria;Protostomia;  
 Spiralia;Lophotrochozoa;Mollusca;Bivalvia;Autobranchia;Pteriomorpha;Ostr  
 eida;Ostreoidea;Ostreidae;Crassostrea;Crassostrea virginica  
 UdeM00000019292 218467 108.6 UdeM00000019292 XP\_023212519.1 55.4  
 101 44 1 1 101 1 100 4.70E-21 108.6 218467  
 cellular  
 organisms;Eukaryota;Opisthokonta;Metazoa;Eumetazoa;Bilateria;Protostomia;  
 Ecdysozoa;Panarthropoda;Arthropoda;Chelicerata;Arachnida;Scorpiones;Buthi  
 da;Buthoidea;Buthidae;Centruroides;Centruroides sculpturatus  
 UdeM00000019293 6596 71.2 UdeM00000019293 XP\_045164744.1 33 224  
 115 11 31 242 50 250 3.00E-09 71.2 6596 cellular  
 organisms;Eukaryota;Opisthokonta;Metazoa;Eumetazoa;Bilateria;Protostomia;  
 Spiralia;Lophotrochozoa;Mollusca;Bivalvia;Autobranchia;Heteroconchia;Euhe



terodonta;Imparidentia;Venerida;Veneroidea;Veneridae;Mercenaria;Mercenari  
 a mercenaria  
 UdeM00000019294 6596 370.2 UdeM00000019294 XP\_045165546.1 63.8 268  
 96 1 4 270 1 268 2.30E-99 370.2 6596 cellular  
 organisms;Eukaryota;Opisthokonta;Metazoa;Eumetazoa;Bilateria;Protostomia;  
 Spiralia;Lophotrochozoa;Mollusca;Bivalvia;Autobranchia;Heteroconchia;Euhe  
 terodonta;Imparidentia;Venerida;Veneroidea;Veneridae;Mercenaria;Mercenari  
 a mercenaria  
 UdeM00000019295 6596 175.3 UdeM00000019295 XP\_045165545.1 59 139  
 55 1 1 139 1 137 5.70E-41 175.3 6596 cellular  
 organisms;Eukaryota;Opisthokonta;Metazoa;Eumetazoa;Bilateria;Protostomia;  
 Spiralia;Lophotrochozoa;Mollusca;Bivalvia;Autobranchia;Heteroconchia;Euhe  
 terodonta;Imparidentia;Venerida;Veneroidea;Veneridae;Mercenaria;Mercenari  
 a mercenaria  
 UdeM00000019296 6596 593.2 UdeM00000019296 XP\_045165544.1 64.6 441  
 149 4 17 457 3 436 2.80E-166 593.2 6596 cellular  
 organisms;Eukaryota;Opisthokonta;Metazoa;Eumetazoa;Bilateria;Protostomia;  
 Spiralia;Lophotrochozoa;Mollusca;Bivalvia;Autobranchia;Heteroconchia;Euhe  
 terodonta;Imparidentia;Venerida;Veneroidea;Veneridae;Mercenaria;Mercenari  
 a mercenaria  
 UdeM00000019297 6596 4773 UdeM00000019297 XP\_045165547.1 61.2 3589  
 1323 20 7 3573 10 3549 0.00E+00 4773 6596 cellular  
 organisms;Eukaryota;Opisthokonta;Metazoa;Eumetazoa;Bilateria;Protostomia;  
 Spiralia;Lophotrochozoa;Mollusca;Bivalvia;Autobranchia;Heteroconchia;Euhe  
 terodonta;Imparidentia;Venerida;Veneroidea;Veneridae;Mercenaria;Mercenari  
 a mercenaria  
 UdeM00000019298 6596 1888.6 UdeM00000019298 XP\_045165547.1 59.3  
 1432 547 10 17 1437 2143 3549 0.00E+00 1888.6 6596  
 cellular  
 organisms;Eukaryota;Opisthokonta;Metazoa;Eumetazoa;Bilateria;Protostomia;  
 Spiralia;Lophotrochozoa;Mollusca;Bivalvia;Autobranchia;Heteroconchia;Euhe  
 terodonta;Imparidentia;Venerida;Veneroidea;Veneridae;Mercenaria;Mercenari  
 a mercenaria  
 UdeM00000019299 6579 669.1 UdeM00000019299 XP\_033745766.1 47.9 1034  
 420 31 1 972 1 977 8.60E-189 669.1 6579 cellular  
 organisms;Eukaryota;Opisthokonta;Metazoa;Eumetazoa;Bilateria;Protostomia;  
 Spiralia;Lophotrochozoa;Mollusca;Bivalvia;Autobranchia;Pteriomorphia;Pect  
 inida;Pectinoidea;Pectinidae;Pecten;Pecten maximus  
 UdeM00000019300 6596 713.4 UdeM00000019300 XP\_045164368.1 70.7 488  
 141 2 3 489 57 543 2.00E-202 713.4 6596 cellular  
 organisms;Eukaryota;Opisthokonta;Metazoa;Eumetazoa;Bilateria;Protostomia;  
 Spiralia;Lophotrochozoa;Mollusca;Bivalvia;Autobranchia;Heteroconchia;Euhe  
 terodonta;Imparidentia;Venerida;Veneroidea;Veneridae;Mercenaria;Mercenari  
 a mercenaria  
 UdeM00000019301 7994 334 UdeM00000019301 XP\_007244151.1 91.1 180  
 16 0 1 180 1 180 1.20E-88 334 7994 cellular  
 organisms;Eukaryota;Opisthokonta;Metazoa;Eumetazoa;Bilateria;Deuterostomi  
 a;Chordata;Craniata;Vertebrata;Gnathostomata;Teleostomi;Euteleostomi;Acti  
 nopterygii;Actinopteri;Neopterygii;Teleostei;Osteoglossocephalai;Clupeoce  
 phala;Otomorpha;Ostariophysi;Otophysi;Characiphysae;Characiformes;Characo  
 idei;Characidae;Stethaprioninae;Astyanax;Astyanax mexicanus  
 UdeM00000019302 6596 236.1 UdeM00000019302 XP\_045164259.1 63.9 166  
 60 0 3 168 2 167 3.50E-59 236.1 6596 cellular  
 organisms;Eukaryota;Opisthokonta;Metazoa;Eumetazoa;Bilateria;Protostomia;

Spiralia;Lophotrochozoa;Mollusca;Bivalvia;Autobranchia;Heteroconchia;Euherodonta;Imparidentia;Venerida;Veneroidea;Veneridae;Mercenaria;Mercenaria mercenaria

UdeM00000019303 6596 1107 UdeM00000019303 XP\_045164272.1 67.3 795  
240 5 3 778 2 795 0.00E+00 1107 6596 cellular

organisms;Eukaryota;Opisthokonta;Metazoa;Eumetazoa;Bilateria;Protostomia;Spiralia;Lophotrochozoa;Mollusca;Bivalvia;Autobranchia;Heteroconchia;Euherodonta;Imparidentia;Venerida;Veneroidea;Veneridae;Mercenaria;Mercenaria mercenaria

UdeM00000019304 37653 279.6 UdeM00000019304 XP\_014767589.1 55 222  
98 1 288 507 278 499 9.50E-72 279.6 37653 cellular

organisms;Eukaryota;Opisthokonta;Metazoa;Eumetazoa;Bilateria;Protostomia;Spiralia;Lophotrochozoa;Mollusca;Cephalopoda;Coleoidea;Octopodiformes;Octopoda;Incirrata;Octopodidae;Octopus;Octopus bimaculoides

UdeM00000019305 6573 274.6 UdeM00000019305 XP\_021374318.1 91.5 142  
12 0 34 175 1 142 8.60E-71 274.6 6573 cellular

organisms;Eukaryota;Opisthokonta;Metazoa;Eumetazoa;Bilateria;Protostomia;Spiralia;Lophotrochozoa;Mollusca;Bivalvia;Autobranchia;Pteriomorphia;Pectinida;Pectinoidea;Pectinidae;Mizuhopecten;Mizuhopecten yessoensis

UdeM00000019306 6565 299.7 UdeM00000019306 XP\_022296870.1 42.5 468  
214 15 1 456 10 434 6.40E-78 299.7 6565 cellular

organisms;Eukaryota;Opisthokonta;Metazoa;Eumetazoa;Bilateria;Protostomia;Spiralia;Lophotrochozoa;Mollusca;Bivalvia;Autobranchia;Pteriomorphia;Ostreida;Ostreoidea;Ostreidae;Crassostrea;Crassostrea virginica

UdeM00000019307 6596 214.9 UdeM00000019307 XP\_045165897.1 58.5 159  
66 0 298 456 172 330 2.10E-52 214.9 6596 cellular

organisms;Eukaryota;Opisthokonta;Metazoa;Eumetazoa;Bilateria;Protostomia;Spiralia;Lophotrochozoa;Mollusca;Bivalvia;Autobranchia;Heteroconchia;Euherodonta;Imparidentia;Venerida;Veneroidea;Veneridae;Mercenaria;Mercenaria mercenaria

UdeM00000019308 6596 218 UdeM00000019308 XP\_045165897.1 53.1 177  
83 0 11 187 154 330 1.10E-53 218 6596 cellular

organisms;Eukaryota;Opisthokonta;Metazoa;Eumetazoa;Bilateria;Protostomia;Spiralia;Lophotrochozoa;Mollusca;Bivalvia;Autobranchia;Heteroconchia;Euherodonta;Imparidentia;Venerida;Veneroidea;Veneridae;Mercenaria;Mercenaria mercenaria

UdeM00000019309 6579 191.4 UdeM00000019309 XP\_033744636.1 50.6 176  
84 3 3 177 9 182 9.60E-46 191.4 6579 cellular

organisms;Eukaryota;Opisthokonta;Metazoa;Eumetazoa;Bilateria;Protostomia;Spiralia;Lophotrochozoa;Mollusca;Bivalvia;Autobranchia;Pteriomorphia;Pectinida;Pectinoidea;Pectinidae;Pecten;Pecten maximus

UdeM00000019310 6596 2083.1 UdeM00000019310 XP\_045164400.1 61.1  
1785 633 19 1 1739 1 1770 0.00E+00 2083.1 6596

cellular  
organisms;Eukaryota;Opisthokonta;Metazoa;Eumetazoa;Bilateria;Protostomia;Spiralia;Lophotrochozoa;Mollusca;Bivalvia;Autobranchia;Heteroconchia;Euherodonta;Imparidentia;Venerida;Veneroidea;Veneridae;Mercenaria;Mercenaria mercenaria

UdeM00000019311 6573 646 UdeM00000019311 XP\_021367542.1 69.6 624  
185 4 5 623 1 624 5.00E-182 646 6573 cellular

organisms;Eukaryota;Opisthokonta;Metazoa;Eumetazoa;Bilateria;Protostomia;Spiralia;Lophotrochozoa;Mollusca;Bivalvia;Autobranchia;Pteriomorphia;Pectinida;Pectinoidea;Pectinidae;Mizuhopecten;Mizuhopecten yessoensis

UdeM00000019312 6596 202.6 UdeM00000019312 XP\_045165451.1 71.7 127  
 36 0 3 129 580 706 3.30E-49 202.6 6596 cellular  
 organisms;Eukaryota;Opisthokonta;Metazoa;Eumetazoa;Bilateria;Protostomia;  
 Spiralia;Lophotrochozoa;Mollusca;Bivalvia;Autobranchia;Heteroconchia;Euhe  
 terodonta;Imparidentia;Venerida;Veneroidea;Veneridae;Mercenaria;Mercenari  
 a mercenaria  
 UdeM00000019313 6596 622.1 UdeM00000019313 XP\_045165452.1 51.6 591  
 276 4 6 594 3 585 7.70E-175 622.1 6596 cellular  
 organisms;Eukaryota;Opisthokonta;Metazoa;Eumetazoa;Bilateria;Protostomia;  
 Spiralia;Lophotrochozoa;Mollusca;Bivalvia;Autobranchia;Heteroconchia;Euhe  
 terodonta;Imparidentia;Venerida;Veneroidea;Veneridae;Mercenaria;Mercenari  
 a mercenaria  
 UdeM00000019317 6596 3854.3 UdeM00000019317 XP\_045167257.1 51.9  
 3885 974 36 1 3809 50 3114 0.00E+00 3854.3 6596  
 cellular  
 organisms;Eukaryota;Opisthokonta;Metazoa;Eumetazoa;Bilateria;Protostomia;  
 Spiralia;Lophotrochozoa;Mollusca;Bivalvia;Autobranchia;Heteroconchia;Euhe  
 terodonta;Imparidentia;Venerida;Veneroidea;Veneridae;Mercenaria;Mercenari  
 a mercenaria  
 UdeM00000019318 6579 653.3 UdeM00000019318 XP\_033744745.1 81 389  
 74 0 1 389 1 389 2.00E-184 653.3 6579 cellular  
 organisms;Eukaryota;Opisthokonta;Metazoa;Eumetazoa;Bilateria;Protostomia;  
 Spiralia;Lophotrochozoa;Mollusca;Bivalvia;Autobranchia;Pteriormorphia;Pect  
 inida;Pectinoidea;Pectinidae;Pecten;Pecten maximus  
 UdeM00000019319 6565 207.2 UdeM00000019319 XP\_022299270.1 82 122  
 22 0 3 124 2 123 1.20E-50 207.2 6565 cellular  
 organisms;Eukaryota;Opisthokonta;Metazoa;Eumetazoa;Bilateria;Protostomia;  
 Spiralia;Lophotrochozoa;Mollusca;Bivalvia;Autobranchia;Pteriormorphia;Ostr  
 eida;Ostreoidea;Ostreidae;Crassostrea;Crassostrea virginica  
 UdeM00000019320 29159 253.8 UdeM00000019320 XP\_011412152.2 55 218  
 93 4 25 242 31 243 2.20E-64 253.8 29159 cellular  
 organisms;Eukaryota;Opisthokonta;Metazoa;Eumetazoa;Bilateria;Protostomia;  
 Spiralia;Lophotrochozoa;Mollusca;Bivalvia;Autobranchia;Pteriormorphia;Ostr  
 eida;Ostreoidea;Ostreidae;Crassostrea;Crassostrea gigas  
 UdeM00000019321 6565 513.1 UdeM00000019321 XP\_022299276.1 56.6 495  
 206 4 19 506 236 728 4.10E-142 513.1 6565 cellular  
 organisms;Eukaryota;Opisthokonta;Metazoa;Eumetazoa;Bilateria;Protostomia;  
 Spiralia;Lophotrochozoa;Mollusca;Bivalvia;Autobranchia;Pteriormorphia;Ostr  
 eida;Ostreoidea;Ostreidae;Crassostrea;Crassostrea virginica  
 UdeM00000019322 6596 600.1 UdeM00000019322 XP\_045167238.1 43.8 950  
 442 17 1 899 1 909 4.60E-168 600.1 6596 cellular  
 organisms;Eukaryota;Opisthokonta;Metazoa;Eumetazoa;Bilateria;Protostomia;  
 Spiralia;Lophotrochozoa;Mollusca;Bivalvia;Autobranchia;Heteroconchia;Euhe  
 terodonta;Imparidentia;Venerida;Veneroidea;Veneridae;Mercenaria;Mercenari  
 a mercenaria  
 UdeM00000019323 6596 733.4 UdeM00000019323 XP\_045166452.1 42.4 945  
 523 13 71 1000 73 1011 3.80E-208 733.4 6596 cellular  
 organisms;Eukaryota;Opisthokonta;Metazoa;Eumetazoa;Bilateria;Protostomia;  
 Spiralia;Lophotrochozoa;Mollusca;Bivalvia;Autobranchia;Heteroconchia;Euhe  
 terodonta;Imparidentia;Venerida;Veneroidea;Veneridae;Mercenaria;Mercenari  
 a mercenaria  
 UdeM00000019325 6573 140.6 UdeM00000019325 XP\_021375759.1 37.8 241  
 117 4 1 241 1 208 3.00E-30 140.6 6573 cellular  
 organisms;Eukaryota;Opisthokonta;Metazoa;Eumetazoa;Bilateria;Protostomia;

Spiralia;Lophotrochozoa;Mollusca;Bivalvia;Autobranchia;Pteriomorpha;Pectinida;Pectinoidea;Pectinidae;Mizuhopecten;Mizuhopecten yessoensis  
UdeM00000019326 6596 1999.6 UdeM00000019326 XP\_045164400.1 60.6  
1710 603 16 44 1724 103 1770 0.00E+00 1999.6 6596  
cellular  
organisms;Eukaryota;Opisthokonta;Metazoa;Eumetazoa;Bilateria;Protostomia;  
Spiralia;Lophotrochozoa;Mollusca;Bivalvia;Autobranchia;Heteroconchia;Euherodonta;Imparidentia;Venerida;Veneroidea;Veneridae;Mercenaria;Mercenaria mercenaria  
UdeM00000019327 6596 1898.6 UdeM00000019327 XP\_045164400.1 62.2  
1588 522 17 1 1561 220 1756 0.00E+00 1898.6 6596  
cellular  
organisms;Eukaryota;Opisthokonta;Metazoa;Eumetazoa;Bilateria;Protostomia;  
Spiralia;Lophotrochozoa;Mollusca;Bivalvia;Autobranchia;Heteroconchia;Euherodonta;Imparidentia;Venerida;Veneroidea;Veneridae;Mercenaria;Mercenaria mercenaria  
UdeM00000019328 6596 164.1 UdeM00000019328 XP\_045164400.1 65.3 124  
43 0 1 124 272 395 1.20E-37 164.1 6596 cellular  
organisms;Eukaryota;Opisthokonta;Metazoa;Eumetazoa;Bilateria;Protostomia;  
Spiralia;Lophotrochozoa;Mollusca;Bivalvia;Autobranchia;Heteroconchia;Euherodonta;Imparidentia;Venerida;Veneroidea;Veneridae;Mercenaria;Mercenaria mercenaria  
UdeM00000019329 6565 128.3 UdeM00000019329 XP\_022298399.1 57.6 99  
37 1 1 94 1354 1452 7.70E-27 128.3 6565 cellular  
organisms;Eukaryota;Opisthokonta;Metazoa;Eumetazoa;Bilateria;Protostomia;  
Spiralia;Lophotrochozoa;Mollusca;Bivalvia;Autobranchia;Pteriomorpha;Ostreida;Ostreoidea;Ostreidae;Crassostrea;Crassostrea virginica  
UdeM00000019330 6596 1023.5 UdeM00000019330 XP\_045164400.1 62.3  
848 284 10 2 826 931 1765 1.50E-295 1023.5 6596  
cellular  
organisms;Eukaryota;Opisthokonta;Metazoa;Eumetazoa;Bilateria;Protostomia;  
Spiralia;Lophotrochozoa;Mollusca;Bivalvia;Autobranchia;Heteroconchia;Euherodonta;Imparidentia;Venerida;Veneroidea;Veneridae;Mercenaria;Mercenaria mercenaria  
UdeM00000019331 6579 117.5 UdeM00000019331 XP\_033746445.1 50.4 139  
62 2 1 132 735 873 1.80E-23 117.5 6579 cellular  
organisms;Eukaryota;Opisthokonta;Metazoa;Eumetazoa;Bilateria;Protostomia;  
Spiralia;Lophotrochozoa;Mollusca;Bivalvia;Autobranchia;Pteriomorpha;Pectinida;Pectinoidea;Pectinidae;Pecten;Pecten maximus  
UdeM00000019332 6596 682.2 UdeM00000019332 XP\_045164400.1 72.4 468  
117 2 1 457 271 737 5.50E-193 682.2 6596 cellular  
organisms;Eukaryota;Opisthokonta;Metazoa;Eumetazoa;Bilateria;Protostomia;  
Spiralia;Lophotrochozoa;Mollusca;Bivalvia;Autobranchia;Heteroconchia;Euherodonta;Imparidentia;Venerida;Veneroidea;Veneridae;Mercenaria;Mercenaria mercenaria  
UdeM00000019333 6596 228.8 UdeM00000019333 XP\_045164400.1 65.4 179  
60 1 1 177 220 398 6.90E-57 228.8 6596 cellular  
organisms;Eukaryota;Opisthokonta;Metazoa;Eumetazoa;Bilateria;Protostomia;  
Spiralia;Lophotrochozoa;Mollusca;Bivalvia;Autobranchia;Heteroconchia;Euherodonta;Imparidentia;Venerida;Veneroidea;Veneridae;Mercenaria;Mercenaria mercenaria  
UdeM00000019334 6596 72.8 UdeM00000019334 XP\_045164400.1 59.4 69  
24 1 27 91 201 269 2.70E-10 72.8 6596 cellular  
organisms;Eukaryota;Opisthokonta;Metazoa;Eumetazoa;Bilateria;Protostomia;

Spiralia;Lophotrochozoa;Mollusca;Bivalvia;Autobranchia;Heteroconchia;Euherodonta;Imparidentia;Venerida;Veneroidea;Veneridae;Mercenaria;Mercenaria mercenaria

UdeM00000019335 6565 152.9 UdeM00000019335 XP\_022298399.1 60.9 115  
40 1 1 110 1354 1468 2.80E-34 152.9 6565 cellular

organisms;Eukaryota;Opisthokonta;Metazoa;Eumetazoa;Bilateria;Protostomia;Spiralia;Lophotrochozoa;Mollusca;Bivalvia;Autobranchia;Pteriomorphia;Ostreida;Ostreoidea;Ostreidae;Crassostrea;Crassostrea virginica

UdeM00000019336 6596 2066.6 UdeM00000019336 XP\_045164400.1 60.5  
1808 627 24 1 1772 1 1756 0.00E+00 2066.6 6596  
cellular

organisms;Eukaryota;Opisthokonta;Metazoa;Eumetazoa;Bilateria;Protostomia;Spiralia;Lophotrochozoa;Mollusca;Bivalvia;Autobranchia;Heteroconchia;Euherodonta;Imparidentia;Venerida;Veneroidea;Veneridae;Mercenaria;Mercenaria mercenaria

UdeM00000019337 6565 132.1 UdeM00000019337 XP\_022299305.1 90.3 72  
7 0 6 77 13 84 3.00E-28 132.1 6565 cellular

organisms;Eukaryota;Opisthokonta;Metazoa;Eumetazoa;Bilateria;Protostomia;Spiralia;Lophotrochozoa;Mollusca;Bivalvia;Autobranchia;Pteriomorphia;Ostreida;Ostreoidea;Ostreidae;Crassostrea;Crassostrea virginica

UdeM00000019338 6596 215.7 UdeM00000019338 XP\_045166851.1 56.3 174  
73 2 1 171 1 174 5.30E-53 215.7 6596 cellular

organisms;Eukaryota;Opisthokonta;Metazoa;Eumetazoa;Bilateria;Protostomia;Spiralia;Lophotrochozoa;Mollusca;Bivalvia;Autobranchia;Heteroconchia;Euherodonta;Imparidentia;Venerida;Veneroidea;Veneridae;Mercenaria;Mercenaria mercenaria

UdeM00000019339 6596 233 UdeM00000019339 XP\_045167134.1 44.7 331  
97 6 1 327 1 249 5.50E-58 233 6596 cellular

organisms;Eukaryota;Opisthokonta;Metazoa;Eumetazoa;Bilateria;Protostomia;Spiralia;Lophotrochozoa;Mollusca;Bivalvia;Autobranchia;Heteroconchia;Euherodonta;Imparidentia;Venerida;Veneroidea;Veneridae;Mercenaria;Mercenaria mercenaria

UdeM00000019340 6596 146.7 UdeM00000019340 XP\_045167134.1 34.8 382  
186 10 40 377 353 715 7.70E-32 146.7 6596 cellular

organisms;Eukaryota;Opisthokonta;Metazoa;Eumetazoa;Bilateria;Protostomia;Spiralia;Lophotrochozoa;Mollusca;Bivalvia;Autobranchia;Heteroconchia;Euherodonta;Imparidentia;Venerida;Veneroidea;Veneridae;Mercenaria;Mercenaria mercenaria

UdeM00000019341 6596 494.2 UdeM00000019341 XP\_045167134.1 63.1 398  
139 5 8 401 851 1244 1.60E-136 494.2 6596 cellular

organisms;Eukaryota;Opisthokonta;Metazoa;Eumetazoa;Bilateria;Protostomia;Spiralia;Lophotrochozoa;Mollusca;Bivalvia;Autobranchia;Heteroconchia;Euherodonta;Imparidentia;Venerida;Veneroidea;Veneridae;Mercenaria;Mercenaria mercenaria

UdeM00000019342 6596 1221.8 UdeM00000019342 XP\_045166252.1 67.1  
916 273 6 19 908 13 926 0.00E+00 1221.8 6596  
cellular

organisms;Eukaryota;Opisthokonta;Metazoa;Eumetazoa;Bilateria;Protostomia;Spiralia;Lophotrochozoa;Mollusca;Bivalvia;Autobranchia;Heteroconchia;Euherodonta;Imparidentia;Venerida;Veneroidea;Veneridae;Mercenaria;Mercenaria mercenaria

UdeM00000019343 6596 233.4 UdeM00000019343 XP\_045165769.1 75.3 146  
36 0 13 158 27 172 2.20E-58 233.4 6596 cellular

organisms;Eukaryota;Opisthokonta;Metazoa;Eumetazoa;Bilateria;Protostomia;

Spiralia;Lophotrochozoa;Mollusca;Bivalvia;Autobranchia;Heteroconchia;Euherodonta;Imparidentia;Venerida;Veneroidea;Veneridae;Mercenaria;Mercenaria mercenaria

UdeM00000019344 6596 964.9 UdeM00000019344 XP\_045165769.1 63.3 739  
250 5 1 723 204 937 5.70E-278 964.9 6596 cellular

organisms;Eukaryota;Opisthokonta;Metazoa;Eumetazoa;Bilateria;Protostomia;Spiralia;Lophotrochozoa;Mollusca;Bivalvia;Autobranchia;Heteroconchia;Euherodonta;Imparidentia;Venerida;Veneroidea;Veneridae;Mercenaria;Mercenaria mercenaria

UdeM00000019348 29159 79 UdeM00000019348 XP\_034305523.1 41.7 96  
48 2 20 108 90 184 4.40E-12 79 29159 cellular

organisms;Eukaryota;Opisthokonta;Metazoa;Eumetazoa;Bilateria;Protostomia;Spiralia;Lophotrochozoa;Mollusca;Bivalvia;Autobranchia;Pteriomorpha;Ostreida;Ostreoidea;Ostreidae;Crassostrea;Crassostrea gigas

UdeM00000019350 29159 201.8 UdeM00000019350 XP\_034305523.1 54.2 166  
76 0 1 166 737 902 6.80E-49 201.8 29159 cellular

organisms;Eukaryota;Opisthokonta;Metazoa;Eumetazoa;Bilateria;Protostomia;Spiralia;Lophotrochozoa;Mollusca;Bivalvia;Autobranchia;Pteriomorpha;Ostreida;Ostreoidea;Ostreidae;Crassostrea;Crassostrea gigas

UdeM00000019351 6596 780.8 UdeM00000019351 XP\_045167316.1 47 815  
414 4 6 816 5 805 1.70E-222 780.8 6596 cellular

organisms;Eukaryota;Opisthokonta;Metazoa;Eumetazoa;Bilateria;Protostomia;Spiralia;Lophotrochozoa;Mollusca;Bivalvia;Autobranchia;Heteroconchia;Euherodonta;Imparidentia;Venerida;Veneroidea;Veneridae;Mercenaria;Mercenaria mercenaria

UdeM00000019352 6596 367.5 UdeM00000019352 XP\_045165397.1 49.2 317  
152 2 3 315 4 315 1.70E-98 367.5 6596 cellular

organisms;Eukaryota;Opisthokonta;Metazoa;Eumetazoa;Bilateria;Protostomia;Spiralia;Lophotrochozoa;Mollusca;Bivalvia;Autobranchia;Heteroconchia;Euherodonta;Imparidentia;Venerida;Veneroidea;Veneridae;Mercenaria;Mercenaria mercenaria

UdeM00000019353 6596 370.2 UdeM00000019353 XP\_045165397.1 49.4 318  
152 2 3 316 4 316 2.70E-99 370.2 6596 cellular

organisms;Eukaryota;Opisthokonta;Metazoa;Eumetazoa;Bilateria;Protostomia;Spiralia;Lophotrochozoa;Mollusca;Bivalvia;Autobranchia;Heteroconchia;Euherodonta;Imparidentia;Venerida;Veneroidea;Veneridae;Mercenaria;Mercenaria mercenaria

UdeM00000019354 6596 369 UdeM00000019354 XP\_045165397.1 53.4 311  
142 3 11 320 8 316 6.10E-99 369 6596 cellular

organisms;Eukaryota;Opisthokonta;Metazoa;Eumetazoa;Bilateria;Protostomia;Spiralia;Lophotrochozoa;Mollusca;Bivalvia;Autobranchia;Heteroconchia;Euherodonta;Imparidentia;Venerida;Veneroidea;Veneridae;Mercenaria;Mercenaria mercenaria

UdeM00000019355 6596 337.4 UdeM00000019355 XP\_045165397.1 52.6 291  
137 1 3 293 27 316 1.80E-89 337.4 6596 cellular

organisms;Eukaryota;Opisthokonta;Metazoa;Eumetazoa;Bilateria;Protostomia;Spiralia;Lophotrochozoa;Mollusca;Bivalvia;Autobranchia;Heteroconchia;Euherodonta;Imparidentia;Venerida;Veneroidea;Veneridae;Mercenaria;Mercenaria mercenaria

UdeM00000019356 6596 397.5 UdeM00000019356 XP\_045165397.1 55 309  
138 1 7 315 8 315 1.60E-107 397.5 6596 cellular

organisms;Eukaryota;Opisthokonta;Metazoa;Eumetazoa;Bilateria;Protostomia;Spiralia;Lophotrochozoa;Mollusca;Bivalvia;Autobranchia;Heteroconchia;Euherodonta;Imparidentia;Venerida;Veneroidea;Veneridae;Mercenaria;Mercenaria mercenaria

terodonta;Imparidentia;Venerida;Veneroidea;Veneridae;Mercenaria;Mercenari  
 a mercenaria  
 UdeM00000019357 6596 157.9 UdeM00000019357 XP\_045165397.1 45 151  
 82 1 29 179 92 241 1.20E-35 157.9 6596 cellular  
 organisms;Eukaryota;Opisthokonta;Metazoa;Eumetazoa;Bilateria;Protostomia;  
 Spiralia;Lophotrochozoa;Mollusca;Bivalvia;Autobranchia;Heteroconchia;Euhe  
 terodonta;Imparidentia;Venerida;Veneroidea;Veneridae;Mercenaria;Mercenari  
 a mercenaria  
 UdeM00000019358 6596 322 UdeM00000019358 XP\_045165424.1 38.1 528  
 298 11 24 534 87 602 1.80E-84 322 6596 cellular  
 organisms;Eukaryota;Opisthokonta;Metazoa;Eumetazoa;Bilateria;Protostomia;  
 Spiralia;Lophotrochozoa;Mollusca;Bivalvia;Autobranchia;Heteroconchia;Euhe  
 terodonta;Imparidentia;Venerida;Veneroidea;Veneridae;Mercenaria;Mercenari  
 a mercenaria  
 UdeM00000019359 6579 473 UdeM00000019359 XP\_033744665.1 62.5 381  
 137 3 1 375 1 381 3.50E-130 473 6579 cellular  
 organisms;Eukaryota;Opisthokonta;Metazoa;Eumetazoa;Bilateria;Protostomia;  
 Spiralia;Lophotrochozoa;Mollusca;Bivalvia;Autobranchia;Pteriormorphia;Pect  
 inida;Pectinoidea;Pectinidae;Pecten;Pecten maximus  
 UdeM00000019360 6565 102.4 UdeM00000019360 XP\_022301665.1 30.9 265  
 153 7 9 250 27 284 8.50E-19 102.4 6565 cellular  
 organisms;Eukaryota;Opisthokonta;Metazoa;Eumetazoa;Bilateria;Protostomia;  
 Spiralia;Lophotrochozoa;Mollusca;Bivalvia;Autobranchia;Pteriormorphia;Ostr  
 eida;Ostreoidea;Ostreidae;Crassostrea;Crassostrea virginica  
 UdeM00000019361 6596 547.4 UdeM00000019361 XP\_045166763.1 63.5 430  
 154 2 1 427 1 430 1.70E-152 547.4 6596 cellular  
 organisms;Eukaryota;Opisthokonta;Metazoa;Eumetazoa;Bilateria;Protostomia;  
 Spiralia;Lophotrochozoa;Mollusca;Bivalvia;Autobranchia;Heteroconchia;Euhe  
 terodonta;Imparidentia;Venerida;Veneroidea;Veneridae;Mercenaria;Mercenari  
 a mercenaria  
 UdeM00000019362 6596 319.7 UdeM00000019362 XP\_045166331.1 52.6 369  
 151 8 1 366 1 348 4.80E-84 319.7 6596 cellular  
 organisms;Eukaryota;Opisthokonta;Metazoa;Eumetazoa;Bilateria;Protostomia;  
 Spiralia;Lophotrochozoa;Mollusca;Bivalvia;Autobranchia;Heteroconchia;Euhe  
 terodonta;Imparidentia;Venerida;Veneroidea;Veneridae;Mercenaria;Mercenari  
 a mercenaria  
 UdeM00000019363 6596 595.1 UdeM00000019363 XP\_045166333.1 75.3 392  
 90 5 3 388 350 740 6.30E-167 595.1 6596 cellular  
 organisms;Eukaryota;Opisthokonta;Metazoa;Eumetazoa;Bilateria;Protostomia;  
 Spiralia;Lophotrochozoa;Mollusca;Bivalvia;Autobranchia;Heteroconchia;Euhe  
 terodonta;Imparidentia;Venerida;Veneroidea;Veneridae;Mercenaria;Mercenari  
 a mercenaria  
 UdeM00000019368 6596 200.3 UdeM00000019368 XP\_045165360.1 57.1 154  
 66 0 1 154 1 154 1.80E-48 200.3 6596 cellular  
 organisms;Eukaryota;Opisthokonta;Metazoa;Eumetazoa;Bilateria;Protostomia;  
 Spiralia;Lophotrochozoa;Mollusca;Bivalvia;Autobranchia;Heteroconchia;Euhe  
 terodonta;Imparidentia;Venerida;Veneroidea;Veneridae;Mercenaria;Mercenari  
 a mercenaria  
 UdeM00000019367 6596 202.6 UdeM00000019367 XP\_045165360.1 58.8 153  
 63 0 9 161 2 154 3.80E-49 202.6 6596 cellular  
 organisms;Eukaryota;Opisthokonta;Metazoa;Eumetazoa;Bilateria;Protostomia;  
 Spiralia;Lophotrochozoa;Mollusca;Bivalvia;Autobranchia;Heteroconchia;Euhe  
 terodonta;Imparidentia;Venerida;Veneroidea;Veneridae;Mercenaria;Mercenari  
 a mercenaria

UdeM00000019369 6596 191.8 UdeM00000019369 XP\_045164846.1 56.6 159  
 68 1 3 161 2 159 6.70E-46 191.8 6596 cellular  
 organisms;Eukaryota;Opisthokonta;Metazoa;Eumetazoa;Bilateria;Protostomia;  
 Spiralia;Lophotrochozoa;Mollusca;Bivalvia;Autobranhia;Heteroconchia;Euhe  
 terodonta;Imparidentia;Venerida;Veneroidea;Veneridae;Mercenaria;Mercenari  
 a mercenaria  
 UdeM00000019370 6596 238.8 UdeM00000019370 XP\_045164850.1 74.1 158  
 40 1 1 157 1 158 4.70E-60 238.8 6596 cellular  
 organisms;Eukaryota;Opisthokonta;Metazoa;Eumetazoa;Bilateria;Protostomia;  
 Spiralia;Lophotrochozoa;Mollusca;Bivalvia;Autobranhia;Heteroconchia;Euhe  
 terodonta;Imparidentia;Venerida;Veneroidea;Veneridae;Mercenaria;Mercenari  
 a mercenaria  
 UdeM00000019371 29159 140.2 UdeM00000019371 XP\_034317709.1 42.4 191  
 100 6 6 193 303 486 2.90E-30 140.2 29159 cellular  
 organisms;Eukaryota;Opisthokonta;Metazoa;Eumetazoa;Bilateria;Protostomia;  
 Spiralia;Lophotrochozoa;Mollusca;Bivalvia;Autobranhia;Pteriormorphia;Ostr  
 eida;Ostreioidea;Ostreidae;Crassostrea;Crassostrea gigas  
 UdeM00000019372 29159 95.1 UdeM00000019372 XP\_034317709.1 33 218  
 116 7 14 230 202 390 1.70E-16 95.1 29159 cellular  
 organisms;Eukaryota;Opisthokonta;Metazoa;Eumetazoa;Bilateria;Protostomia;  
 Spiralia;Lophotrochozoa;Mollusca;Bivalvia;Autobranhia;Pteriormorphia;Ostr  
 eida;Ostreioidea;Ostreidae;Crassostrea;Crassostrea gigas  
 UdeM00000019373 6573 177.2 UdeM00000019373 XP\_021356984.1 52.3 176  
 81 3 44 216 32 207 2.40E-41 177.2 6573 cellular  
 organisms;Eukaryota;Opisthokonta;Metazoa;Eumetazoa;Bilateria;Protostomia;  
 Spiralia;Lophotrochozoa;Mollusca;Bivalvia;Autobranhia;Pteriormorphia;Pect  
 inida;Pectinoidea;Pectinidae;Mizuhopecten;Mizuhopecten yessoensis  
 UdeM00000019374 6596 414.1 UdeM00000019374 XP\_045164956.1 49.8 402  
 195 3 10 408 6 403 2.10E-112 414.1 6596 cellular  
 organisms;Eukaryota;Opisthokonta;Metazoa;Eumetazoa;Bilateria;Protostomia;  
 Spiralia;Lophotrochozoa;Mollusca;Bivalvia;Autobranhia;Heteroconchia;Euhe  
 terodonta;Imparidentia;Venerida;Veneroidea;Veneridae;Mercenaria;Mercenari  
 a mercenaria  
 UdeM00000019376 6565 1289.2 UdeM00000019376 XP\_022297721.1 67.8  
 1390 411 12 166 1535 86 1459 0.00E+00 1289.2 6565  
 cellular  
 organisms;Eukaryota;Opisthokonta;Metazoa;Eumetazoa;Bilateria;Protostomia;  
 Spiralia;Lophotrochozoa;Mollusca;Bivalvia;Autobranhia;Pteriormorphia;Ostr  
 eida;Ostreioidea;Ostreidae;Crassostrea;Crassostrea virginica  
 UdeM00000019377 6596 883.6 UdeM00000019377 XP\_045165907.1 58.8 687  
 268 7 9 684 8 690 1.60E-253 883.6 6596 cellular  
 organisms;Eukaryota;Opisthokonta;Metazoa;Eumetazoa;Bilateria;Protostomia;  
 Spiralia;Lophotrochozoa;Mollusca;Bivalvia;Autobranhia;Heteroconchia;Euhe  
 terodonta;Imparidentia;Venerida;Veneroidea;Veneridae;Mercenaria;Mercenari  
 a mercenaria  
 UdeM00000019378 6596 912.1 UdeM00000019378 XP\_045165907.1 58 712  
 283 6 8 707 7 714 4.30E-262 912.1 6596 cellular  
 organisms;Eukaryota;Opisthokonta;Metazoa;Eumetazoa;Bilateria;Protostomia;  
 Spiralia;Lophotrochozoa;Mollusca;Bivalvia;Autobranhia;Heteroconchia;Euhe  
 terodonta;Imparidentia;Venerida;Veneroidea;Veneridae;Mercenaria;Mercenari  
 a mercenaria  
 UdeM00000019379 7574 105.5 UdeM00000019379 XP\_013396733.1 35.1 194  
 89 2 108 264 55 248 1.00E-19 105.5 7574 cellular  
 organisms;Eukaryota;Opisthokonta;Metazoa;Eumetazoa;Bilateria;Protostomia;



Spiralia;Lophotrochozoa;Brachiopoda;Linguliformea;Lingulata;Lingulida;Linguloidea;Lingulidae;Lingula;Lingula anatina

UdeM00000019380 6596 120.2 UdeM00000019380 XP\_045216733.1 42.2 135  
71 1 5 139 385 512 2.20E-24 120.2 6596 cellular  
organisms;Eukaryota;Opisthokonta;Metazoa;Eumetazoa;Bilateria;Protostomia;  
Spiralia;Lophotrochozoa;Mollusca;Bivalvia;Autobranhia;Heteroconchia;Euherodonta;Imparidentia;Venerida;Veneroidea;Veneridae;Mercenaria;Mercenaria mercenaria

UdeM00000019381 6596 238 UdeM00000019381 XP\_045216732.1 44.5 272  
130 3 7 272 248 504 1.60E-59 238 6596 cellular  
organisms;Eukaryota;Opisthokonta;Metazoa;Eumetazoa;Bilateria;Protostomia;  
Spiralia;Lophotrochozoa;Mollusca;Bivalvia;Autobranhia;Heteroconchia;Euherodonta;Imparidentia;Venerida;Veneroidea;Veneridae;Mercenaria;Mercenaria mercenaria

UdeM00000019382 6596 170.6 UdeM00000019382 XP\_045216732.1 52 150  
71 1 96 245 234 382 2.50E-39 170.6 6596 cellular  
organisms;Eukaryota;Opisthokonta;Metazoa;Eumetazoa;Bilateria;Protostomia;  
Spiralia;Lophotrochozoa;Mollusca;Bivalvia;Autobranhia;Heteroconchia;Euherodonta;Imparidentia;Venerida;Veneroidea;Veneridae;Mercenaria;Mercenaria mercenaria

UdeM00000019383 6596 66.2 UdeM00000019383 XP\_045216733.1 35.6 87  
49 1 43 129 433 512 3.60E-08 66.2 6596 cellular  
organisms;Eukaryota;Opisthokonta;Metazoa;Eumetazoa;Bilateria;Protostomia;  
Spiralia;Lophotrochozoa;Mollusca;Bivalvia;Autobranhia;Heteroconchia;Euherodonta;Imparidentia;Venerida;Veneroidea;Veneridae;Mercenaria;Mercenaria mercenaria

UdeM00000019385 6573 88.2 UdeM00000019385 XP\_021370045.1 26.7 243  
158 6 105 333 730 966 2.90E-14 88.2 6573 cellular  
organisms;Eukaryota;Opisthokonta;Metazoa;Eumetazoa;Bilateria;Protostomia;  
Spiralia;Lophotrochozoa;Mollusca;Bivalvia;Autobranhia;Pteriomorphia;Pectinida;Pectinoidea;Pectinidae;Mizuhopecten;Mizuhopecten yessoensis

UdeM00000019384 6573 88.2 UdeM00000019384 XP\_021370045.1 26.7 243  
158 6 182 410 730 966 3.40E-14 88.2 6573 cellular  
organisms;Eukaryota;Opisthokonta;Metazoa;Eumetazoa;Bilateria;Protostomia;  
Spiralia;Lophotrochozoa;Mollusca;Bivalvia;Autobranhia;Pteriomorphia;Pectinida;Pectinoidea;Pectinidae;Mizuhopecten;Mizuhopecten yessoensis

UdeM00000019386 29159 371.3 UdeM00000019386 XP\_011415226.1 61.8 296  
112 1 1 295 1 296 1.30E-99 371.3 29159 cellular  
organisms;Eukaryota;Opisthokonta;Metazoa;Eumetazoa;Bilateria;Protostomia;  
Spiralia;Lophotrochozoa;Mollusca;Bivalvia;Autobranhia;Pteriomorphia;Ostreida;Ostreoidea;Ostreidae;Crassostrea;Crassostrea gigas

UdeM00000019388 6573 380.9 UdeM00000019388 XP\_021351964.1 56 316  
128 5 13 321 15 326 1.60E-102 380.9 6573 cellular  
organisms;Eukaryota;Opisthokonta;Metazoa;Eumetazoa;Bilateria;Protostomia;  
Spiralia;Lophotrochozoa;Mollusca;Bivalvia;Autobranhia;Pteriomorphia;Pectinida;Pectinoidea;Pectinidae;Mizuhopecten;Mizuhopecten yessoensis

UdeM00000019387 6573 503.4 UdeM00000019387 XP\_021351964.1 57.5 407  
162 5 13 412 15 417 2.80E-139 503.4 6573 cellular  
organisms;Eukaryota;Opisthokonta;Metazoa;Eumetazoa;Bilateria;Protostomia;  
Spiralia;Lophotrochozoa;Mollusca;Bivalvia;Autobranhia;Pteriomorphia;Pectinida;Pectinoidea;Pectinidae;Mizuhopecten;Mizuhopecten yessoensis

UdeM00000019389 6596 588.2 UdeM00000019389 XP\_045164321.1 43.3 781  
418 14 10 778 36 803 1.60E-164 588.2 6596 cellular  
organisms;Eukaryota;Opisthokonta;Metazoa;Eumetazoa;Bilateria;Protostomia;

Spiralia;Lophotrochozoa;Mollusca;Bivalvia;Autobranchia;Heteroconchia;Euherodonta;Imparidentia;Venerida;Veneroidea;Veneridae;Mercenaria;Mercenaria mercenaria

UdeM00000019390 6596 580.9 UdeM00000019390 XP\_045164321.1 44 702  
379 7 5 698 36 731 2.50E-162 580.9 6596 cellular

organisms;Eukaryota;Opisthokonta;Metazoa;Eumetazoa;Bilateria;Protostomia;Spiralia;Lophotrochozoa;Mollusca;Bivalvia;Autobranchia;Heteroconchia;Euherodonta;Imparidentia;Venerida;Veneroidea;Veneridae;Mercenaria;Mercenaria mercenaria

UdeM00000019391 143950 61.2 UdeM00000019391 XP\_025407278.1 35  
123 67 4 272 390 117 230 3.30E-06 61.2 143950  
cellular

organisms;Eukaryota;Opisthokonta;Metazoa;Eumetazoa;Bilateria;Protostomia;Ecdysozoa;Panarthropoda;Arthropoda;Mandibulata;Pancrustacea;Hexapoda;Insecta;Dicondylia;Pterygota;Neoptera;Paraneoptera;Hemiptera;Sternorrhyncha;Aphidomorpha;Aphidoidea;Aphididae;Chaitophorinae;Sipha;Sipha flava

UdeM00000019392 6412 144.4 UdeM00000019392 XP\_009015452.1 47.3 146  
77 0 1 146 1 146 1.10E-31 144.4 6412 cellular

organisms;Eukaryota;Opisthokonta;Metazoa;Eumetazoa;Bilateria;Protostomia;Spiralia;Lophotrochozoa;Annelida;Clitellata;Hirudinea;Rhynchobdellida;Glossiphoniidae;Helobdella;Helobdella robusta

UdeM00000019393 7719 204.5 UdeM00000019393 XP\_004227365.1 54.7 161  
73 0 6 166 2 162 1.00E-49 204.5 7719 cellular

organisms;Eukaryota;Opisthokonta;Metazoa;Eumetazoa;Bilateria;Deuterostomia;Chordata;Tunicata;Ascidiacea;Phlebobranchia;Cionidae;Ciona;Ciona intestinalis

UdeM00000019394 6573 109.8 UdeM00000019394 XP\_021368922.1 57.1 98  
39 2 5 100 21 117 6.90E-21 109.8 6573 cellular

organisms;Eukaryota;Opisthokonta;Metazoa;Eumetazoa;Bilateria;Protostomia;Spiralia;Lophotrochozoa;Mollusca;Bivalvia;Autobranchia;Pteriomorpha;Pectinida;Pectinoidea;Pectinidae;Mizuhopecten;Mizuhopecten yessoensis

UdeM00000019395 6596 432.6 UdeM00000019395 XP\_045167166.1 78.7 268  
56 1 37 304 223 489 4.30E-118 432.6 6596 cellular

organisms;Eukaryota;Opisthokonta;Metazoa;Eumetazoa;Bilateria;Protostomia;Spiralia;Lophotrochozoa;Mollusca;Bivalvia;Autobranchia;Heteroconchia;Euherodonta;Imparidentia;Venerida;Veneroidea;Veneridae;Mercenaria;Mercenaria mercenaria

UdeM00000019396 6596 429.9 UdeM00000019396 XP\_045167166.1 81.7 252  
46 0 12 263 238 489 2.40E-117 429.9 6596 cellular

organisms;Eukaryota;Opisthokonta;Metazoa;Eumetazoa;Bilateria;Protostomia;Spiralia;Lophotrochozoa;Mollusca;Bivalvia;Autobranchia;Heteroconchia;Euherodonta;Imparidentia;Venerida;Veneroidea;Veneridae;Mercenaria;Mercenaria mercenaria

UdeM00000019397 211228 164.5 UdeM00000019397 XP\_015592401.1 32.4  
315 184 5 15 312 3 305 2.50E-37 164.5 211228  
cellular

organisms;Eukaryota;Opisthokonta;Metazoa;Eumetazoa;Bilateria;Protostomia;Ecdysozoa;Panarthropoda;Arthropoda;Mandibulata;Pancrustacea;Hexapoda;Insecta;Dicondylia;Pterygota;Neoptera;Endopterygota;Hymenoptera;Cephoidea;Cephididae;Cephus;Cephus cinctus

UdeM00000019398 29159 236.5 UdeM00000019398 XP\_034306524.1 53.7 246  
104 3 1 245 1 237 3.60E-59 236.5 29159 cellular

organisms;Eukaryota;Opisthokonta;Metazoa;Eumetazoa;Bilateria;Protostomia;

Spiralia;Lophotrochozoa;Mollusca;Bivalvia;Autobranchia;Pteriomorpha;Ostr  
 eida;Ostreoidea;Ostreidae;Crassostrea;Crassostrea gigas  
 UdeM00000019399 6596 1168.3 UdeM00000019399 XP\_045166623.1 79.1  
 818 165 3 1 812 1 818 0.00E+00 1168.3 6596  
 cellular  
 organisms;Eukaryota;Opisthokonta;Metazoa;Eumetazoa;Bilateria;Protostomia;  
 Spiralia;Lophotrochozoa;Mollusca;Bivalvia;Autobranchia;Heteroconchia;Euhe  
 terodonta;Imparidentia;Venerida;Veneroidea;Veneridae;Mercenaria;Mercenari  
 a mercenaria  
 UdeM00000019400 6596 1196 UdeM00000019400 XP\_045166623.1 83.4 821  
 133 2 1 821 1 818 0.00E+00 1196 6596 cellular  
 organisms;Eukaryota;Opisthokonta;Metazoa;Eumetazoa;Bilateria;Protostomia;  
 Spiralia;Lophotrochozoa;Mollusca;Bivalvia;Autobranchia;Heteroconchia;Euhe  
 terodonta;Imparidentia;Venerida;Veneroidea;Veneridae;Mercenaria;Mercenari  
 a mercenaria  
 UdeM00000019401 6596 641 UdeM00000019401 XP\_045166493.1 61.5 592  
 200 6 471 1059 529 1095 2.70E-180 641 6596 cellular  
 organisms;Eukaryota;Opisthokonta;Metazoa;Eumetazoa;Bilateria;Protostomia;  
 Spiralia;Lophotrochozoa;Mollusca;Bivalvia;Autobranchia;Heteroconchia;Euhe  
 terodonta;Imparidentia;Venerida;Veneroidea;Veneridae;Mercenaria;Mercenari  
 a mercenaria  
 UdeM00000019402 6596 272.3 UdeM00000019402 XP\_045166493.1 54.2 347  
 124 3 47 361 1096 1439 9.70E-70 272.3 6596 cellular  
 organisms;Eukaryota;Opisthokonta;Metazoa;Eumetazoa;Bilateria;Protostomia;  
 Spiralia;Lophotrochozoa;Mollusca;Bivalvia;Autobranchia;Heteroconchia;Euhe  
 terodonta;Imparidentia;Venerida;Veneroidea;Veneridae;Mercenaria;Mercenari  
 a mercenaria  
 UdeM00000019403 29159 591.7 UdeM00000019403 XP\_011444116.2 65.5 490  
 146 7 5 490 26 496 8.80E-166 591.7 29159 cellular  
 organisms;Eukaryota;Opisthokonta;Metazoa;Eumetazoa;Bilateria;Protostomia;  
 Spiralia;Lophotrochozoa;Mollusca;Bivalvia;Autobranchia;Pteriomorpha;Ostr  
 eida;Ostreoidea;Ostreidae;Crassostrea;Crassostrea gigas  
 UdeM00000019404 29159 554.7 UdeM00000019404 XP\_011444116.2 65.8 453  
 132 7 5 453 26 459 1.20E-154 554.7 29159 cellular  
 organisms;Eukaryota;Opisthokonta;Metazoa;Eumetazoa;Bilateria;Protostomia;  
 Spiralia;Lophotrochozoa;Mollusca;Bivalvia;Autobranchia;Pteriomorpha;Ostr  
 eida;Ostreoidea;Ostreidae;Crassostrea;Crassostrea gigas  
 UdeM00000019407 29159 74.3 UdeM00000019407 XP\_034307878.1 32.3 99  
 67 0 1 99 92 190 2.90E-10 74.3 29159 cellular  
 organisms;Eukaryota;Opisthokonta;Metazoa;Eumetazoa;Bilateria;Protostomia;  
 Spiralia;Lophotrochozoa;Mollusca;Bivalvia;Autobranchia;Pteriomorpha;Ostr  
 eida;Ostreoidea;Ostreidae;Crassostrea;Crassostrea gigas  
 UdeM00000019408 29159 212.2 UdeM00000019408 XP\_034312908.1 28 649  
 343 21 9 564 6 623 1.70E-51 212.2 29159 cellular  
 organisms;Eukaryota;Opisthokonta;Metazoa;Eumetazoa;Bilateria;Protostomia;  
 Spiralia;Lophotrochozoa;Mollusca;Bivalvia;Autobranchia;Pteriomorpha;Ostr  
 eida;Ostreoidea;Ostreidae;Crassostrea;Crassostrea gigas  
 UdeM00000019409 6579 76.3 UdeM00000019409 XP\_033744435.1 47.3 93  
 46 3 10 101 462 552 2.80E-11 76.3 6579 cellular  
 organisms;Eukaryota;Opisthokonta;Metazoa;Eumetazoa;Bilateria;Protostomia;  
 Spiralia;Lophotrochozoa;Mollusca;Bivalvia;Autobranchia;Pteriomorpha;Pect  
 inida;Pectinoidea;Pectinidae;Pecten;Pecten maximus  
 UdeM00000019410 6573 67.4 UdeM00000019410 XP\_021345511.1 67.9 53  
 17 0 4 56 43 95 1.30E-08 67.4 6573 cellular

organisms;Eukaryota;Opisthokonta;Metazoa;Eumetazoa;Bilateria;Protostomia;Spiralia;Lophotrochozoa;Mollusca;Bivalvia;Autobranchia;Pteriomorpha;Pectinida;Pectinoidea;Pectinidae;Mizuhopecten;Mizuhopecten yessoensis  
UdeM00000019411 6596 747.7 UdeM00000019411 XP\_045167219.1 68.9 556  
144 5 1 555 87 614 1.10E-212 747.7 6596 cellular

organisms;Eukaryota;Opisthokonta;Metazoa;Eumetazoa;Bilateria;Protostomia;Spiralia;Lophotrochozoa;Mollusca;Bivalvia;Autobranchia;Heteroconchia;Euheterodonta;Imparidentia;Venerida;Veneroidea;Veneridae;Mercenaria;Mercenaria mercenaria  
UdeM00000019412 6596 808.5 UdeM00000019412 XP\_045165346.1 48.3 1095  
414 28 612 1636 652 1664 1.50E-230 808.5 6596 cellular

organisms;Eukaryota;Opisthokonta;Metazoa;Eumetazoa;Bilateria;Protostomia;Spiralia;Lophotrochozoa;Mollusca;Bivalvia;Autobranchia;Heteroconchia;Euheterodonta;Imparidentia;Venerida;Veneroidea;Veneridae;Mercenaria;Mercenaria mercenaria  
UdeM00000019413 1735272 134 UdeM00000019413 XP\_041352779.1 43.6  
156 81 3 2 155 55 205 2.60E-28 134 1735272  
cellular

organisms;Eukaryota;Opisthokonta;Metazoa;Eumetazoa;Bilateria;Protostomia;Spiralia;Lophotrochozoa;Mollusca;Gastropoda;Neomphalina;Neomphaloidea;Peltospiridae;Gigantopelta;Gigantopelta aegis  
UdeM00000019414 1735272 131.3 UdeM00000019414 XP\_041352779.1 43.2  
155 81 3 2 154 55 204 1.00E-27 131.3 1735272  
cellular

organisms;Eukaryota;Opisthokonta;Metazoa;Eumetazoa;Bilateria;Protostomia;Spiralia;Lophotrochozoa;Mollusca;Gastropoda;Neomphalina;Neomphaloidea;Peltospiridae;Gigantopelta;Gigantopelta aegis  
UdeM00000019416 6596 1120.5 UdeM00000019416 XP\_045166222.1 61.1  
906 333 9 17 908 396 1296 0.00E+00 1120.5 6596  
cellular

organisms;Eukaryota;Opisthokonta;Metazoa;Eumetazoa;Bilateria;Protostomia;Spiralia;Lophotrochozoa;Mollusca;Bivalvia;Autobranchia;Heteroconchia;Euheterodonta;Imparidentia;Venerida;Veneroidea;Veneridae;Mercenaria;Mercenaria mercenaria  
UdeM00000019418 6500 98.6 UdeM00000019418 XP\_012938236.1 34.6 156  
95 2 13 161 19 174 7.70E-18 98.6 6500 cellular

organisms;Eukaryota;Opisthokonta;Metazoa;Eumetazoa;Bilateria;Protostomia;Spiralia;Lophotrochozoa;Mollusca;Gastropoda;Heterobranchia;Euthyneura;Tectipleura;Aplysiida;Aplysioidea;Aplysiidae;Aplysia;Aplysia californica  
UdeM00000019417 6500 98.6 UdeM00000019417 XP\_012938236.1 33.5 167  
101 3 7 166 11 174 8.00E-18 98.6 6500 cellular

organisms;Eukaryota;Opisthokonta;Metazoa;Eumetazoa;Bilateria;Protostomia;Spiralia;Lophotrochozoa;Mollusca;Gastropoda;Heterobranchia;Euthyneura;Tectipleura;Aplysiida;Aplysioidea;Aplysiidae;Aplysia;Aplysia californica  
UdeM00000019419 29159 231.5 UdeM00000019419 XP\_034317976.1 59 178  
72 1 1 177 484 661 8.40E-58 231.5 29159 cellular

organisms;Eukaryota;Opisthokonta;Metazoa;Eumetazoa;Bilateria;Protostomia;Spiralia;Lophotrochozoa;Mollusca;Bivalvia;Autobranchia;Pteriomorpha;Ostreida;Ostreoidea;Ostreidae;Crassostrea;Crassostrea gigas  
UdeM00000019420 29159 599.7 UdeM00000019420 XP\_034317976.1 48.5 655  
304 8 2 626 10 661 4.10E-168 599.7 29159 cellular

organisms;Eukaryota;Opisthokonta;Metazoa;Eumetazoa;Bilateria;Protostomia;Spiralia;Lophotrochozoa;Mollusca;Bivalvia;Autobranchia;Pteriomorpha;Ostreida;Ostreoidea;Ostreidae;Crassostrea;Crassostrea gigas

UdeM00000019421 6596 441.4 UdeM00000019421 XP\_045164186.1 62.6 356  
 126 2 1 350 1 355 1.10E-120 441.4 6596 cellular  
 organisms;Eukaryota;Opisthokonta;Metazoa;Eumetazoa;Bilateria;Protostomia;  
 Spiralia;Lophotrochozoa;Mollusca;Bivalvia;Autobranhia;Heteroconchia;Euhe  
 terodonta;Imparidentia;Venerida;Veneroidea;Veneridae;Mercenaria;Mercenari  
 a mercenaria  
 UdeM00000019422 6596 1166.8 UdeM00000019422 XP\_045164511.1 75.6  
 766 181 3 39 798 29 794 0.00E+00 1166.8 6596  
 cellular  
 organisms;Eukaryota;Opisthokonta;Metazoa;Eumetazoa;Bilateria;Protostomia;  
 Spiralia;Lophotrochozoa;Mollusca;Bivalvia;Autobranhia;Heteroconchia;Euhe  
 terodonta;Imparidentia;Venerida;Veneroidea;Veneridae;Mercenaria;Mercenari  
 a mercenaria  
 UdeM00000044476 441366 170.2 UdeM00000044476 XP\_028296753.1 38.4  
 284 158 9 6 285 32 302 3.70E-39 170.2 441366  
 cellular  
 organisms;Eukaryota;Opisthokonta;Metazoa;Eumetazoa;Bilateria;Deuterostomi  
 a;Chordata;Craniata;Vertebrata;Gnathostomata;Teleostomi;Euteleostomi;Acti  
 nopterygii;Actinopteri;Neopterygii;Teleostei;Osteoglossocephalai;Clupeoce  
 phala;Euteleosteomorpha;Neoteleostei;Eurypterygia;Ctenosquamata;Acanthomo  
 rphata;Euacanthomorphacea;Percomorphaceae;Ovalentaria;Blenniimorphae;Blen  
 niiformes;Gobiesocoidei;Gobiesocidae;Gobiesocinae;Gouania;Gouania  
 willdenowi  
 UdeM00000044477 441366 132.9 UdeM00000044477 XP\_028326620.1 40.6  
 197 107 5 1 194 48 237 4.50E-28 132.9 441366  
 cellular  
 organisms;Eukaryota;Opisthokonta;Metazoa;Eumetazoa;Bilateria;Deuterostomi  
 a;Chordata;Craniata;Vertebrata;Gnathostomata;Teleostomi;Euteleostomi;Acti  
 nopterygii;Actinopteri;Neopterygii;Teleostei;Osteoglossocephalai;Clupeoce  
 phala;Euteleosteomorpha;Neoteleostei;Eurypterygia;Ctenosquamata;Acanthomo  
 rphata;Euacanthomorphacea;Percomorphaceae;Ovalentaria;Blenniimorphae;Blen  
 niiformes;Gobiesocoidei;Gobiesocidae;Gobiesocinae;Gouania;Gouania  
 willdenowi  
 UdeM00000044478 6573 235.3 UdeM00000044478 XP\_021355947.1 52.4 267  
 104 7 4 258 3 258 9.00E-59 235.3 6573 cellular  
 organisms;Eukaryota;Opisthokonta;Metazoa;Eumetazoa;Bilateria;Protostomia;  
 Spiralia;Lophotrochozoa;Mollusca;Bivalvia;Autobranhia;Pteriormorphia;Pect  
 inida;Pectinoidea;Pectinidae;Mizuhopecten;Mizuhopecten yessoensis  
 UdeM00000029713 6565 80.9 UdeM00000029713 XP\_022291345.1 59.6 52  
 21 0 613 664 555 606 6.90E-12 80.9 6565 cellular  
 organisms;Eukaryota;Opisthokonta;Metazoa;Eumetazoa;Bilateria;Protostomia;  
 Spiralia;Lophotrochozoa;Mollusca;Bivalvia;Autobranhia;Pteriormorphia;Ostr  
 eida;Ostreoidea;Ostreidae;Crassostrea;Crassostrea virginica  
 UdeM00000029714 6579 72.8 UdeM00000029714 XP\_033742581.1 38.7 93  
 54 1 10 99 95 187 3.10E-10 72.8 6579 cellular  
 organisms;Eukaryota;Opisthokonta;Metazoa;Eumetazoa;Bilateria;Protostomia;  
 Spiralia;Lophotrochozoa;Mollusca;Bivalvia;Autobranhia;Pteriormorphia;Pect  
 inida;Pectinoidea;Pectinidae;Pecten;Pecten maximus  
 UdeM00000029715 6565 98.2 UdeM00000029715 XP\_022302274.1 37.9 145  
 54 2 154 263 159 302 1.60E-17 98.2 6565 cellular  
 organisms;Eukaryota;Opisthokonta;Metazoa;Eumetazoa;Bilateria;Protostomia;  
 Spiralia;Lophotrochozoa;Mollusca;Bivalvia;Autobranhia;Pteriormorphia;Ostr  
 eida;Ostreoidea;Ostreidae;Crassostrea;Crassostrea virginica

UdeM00000029716 6596 116.3 UdeM00000029716 XP\_045199965.1 42.3 137  
 77 1 2223 2357 1245 1381 5.20E-22 116.3 6596 cellular  
 organisms;Eukaryota;Opisthokonta;Metazoa;Eumetazoa;Bilateria;Protostomia;  
 Spiralia;Lophotrochozoa;Mollusca;Bivalvia;Autobranchia;Heteroconchia;Euhe  
 terodonta;Imparidentia;Venerida;Veneroidea;Veneridae;Mercenaria;Mercenari  
 a mercenaria  
 UdeM00000029718 6579 127.9 UdeM00000029718 XP\_033736443.1 64.1 92  
 33 0 1 92 194 285 7.30E-27 127.9 6579 cellular  
 organisms;Eukaryota;Opisthokonta;Metazoa;Eumetazoa;Bilateria;Protostomia;  
 Spiralia;Lophotrochozoa;Mollusca;Bivalvia;Autobranchia;Pteriormorphia;Pect  
 inida;Pectinoidea;Pectinidae;Pecten;Pecten maximus  
 UdeM00000029719 6596 254.2 UdeM00000029719 XP\_045197663.1 31.9 448  
 189 6 107 547 1149 1487 8.30E-64 254.2 6596 cellular  
 organisms;Eukaryota;Opisthokonta;Metazoa;Eumetazoa;Bilateria;Protostomia;  
 Spiralia;Lophotrochozoa;Mollusca;Bivalvia;Autobranchia;Heteroconchia;Euhe  
 terodonta;Imparidentia;Venerida;Veneroidea;Veneridae;Mercenaria;Mercenari  
 a mercenaria  
 UdeM00000029720 6573 64.7 UdeM00000029720 XP\_021362785.1 40.3 77  
 42 2 293 366 1146 1221 2.80E-07 64.7 6573 cellular  
 organisms;Eukaryota;Opisthokonta;Metazoa;Eumetazoa;Bilateria;Protostomia;  
 Spiralia;Lophotrochozoa;Mollusca;Bivalvia;Autobranchia;Pteriormorphia;Pect  
 inida;Pectinoidea;Pectinidae;Mizuhopecten;Mizuhopecten yessoensis  
 UdeM00000029722 6596 371.3 UdeM00000029722 XP\_045197606.1 34.6 624  
 300 12 411 1004 1835 2380 3.80E-99 371.3 6596 cellular  
 organisms;Eukaryota;Opisthokonta;Metazoa;Eumetazoa;Bilateria;Protostomia;  
 Spiralia;Lophotrochozoa;Mollusca;Bivalvia;Autobranchia;Heteroconchia;Euhe  
 terodonta;Imparidentia;Venerida;Veneroidea;Veneridae;Mercenaria;Mercenari  
 a mercenaria  
 UdeM00000029721 6596 371.3 UdeM00000029721 XP\_045197606.1 34.6 624  
 300 12 589 1182 1835 2380 4.50E-99 371.3 6596 cellular  
 organisms;Eukaryota;Opisthokonta;Metazoa;Eumetazoa;Bilateria;Protostomia;  
 Spiralia;Lophotrochozoa;Mollusca;Bivalvia;Autobranchia;Heteroconchia;Euhe  
 terodonta;Imparidentia;Venerida;Veneroidea;Veneridae;Mercenaria;Mercenari  
 a mercenaria  
 UdeM00000029724 6596 359.4 UdeM00000029724 XP\_045197598.1 37.2 521  
 227 7 585 1065 1524 1984 1.60E-95 359.4 6596 cellular  
 organisms;Eukaryota;Opisthokonta;Metazoa;Eumetazoa;Bilateria;Protostomia;  
 Spiralia;Lophotrochozoa;Mollusca;Bivalvia;Autobranchia;Heteroconchia;Euhe  
 terodonta;Imparidentia;Venerida;Veneroidea;Veneridae;Mercenaria;Mercenari  
 a mercenaria  
 UdeM00000029728 6596 360.9 UdeM00000029728 XP\_045197598.1 37.5 526  
 225 6 525 1011 1524 1984 5.20E-96 360.9 6596 cellular  
 organisms;Eukaryota;Opisthokonta;Metazoa;Eumetazoa;Bilateria;Protostomia;  
 Spiralia;Lophotrochozoa;Mollusca;Bivalvia;Autobranchia;Heteroconchia;Euhe  
 terodonta;Imparidentia;Venerida;Veneroidea;Veneridae;Mercenaria;Mercenari  
 a mercenaria  
 UdeM00000029730 6579 207.6 UdeM00000029730 XP\_033741736.1 53.6 196  
 89 1 1 194 671 866 1.50E-50 207.6 6579 cellular  
 organisms;Eukaryota;Opisthokonta;Metazoa;Eumetazoa;Bilateria;Protostomia;  
 Spiralia;Lophotrochozoa;Mollusca;Bivalvia;Autobranchia;Pteriormorphia;Pect  
 inida;Pectinoidea;Pectinidae;Pecten;Pecten maximus  
 UdeM00000029733 1415580 80.9 UdeM00000029733 XP\_030066010.1 27.2  
 246 133 8 9 217 247 483 2.30E-12 80.9 1415580  
 cellular

organisms;Eukaryota;Opisthokonta;Metazoa;Eumetazoa;Bilateria;Deuterostomi  
a;Chordata;Craniata;Vertebrata;Gnathostomata;Teleostomi;Euteleostomi;Sarc  
opterygii;Dipnotetrapodomorpha;Tetrapoda;Amphibia;Gymnophiona;Siphonopida  
e;Microcaecilia;Microcaecilia unicolor

UdeM00000029734 6596 139.8 UdeM00000029734 XP\_045197598.1 36.1 219  
97 2 63 243 1773 1986 4.60E-30 139.8 6596 cellular

organisms;Eukaryota;Opisthokonta;Metazoa;Eumetazoa;Bilateria;Protostomia;  
Spiralia;Lophotrochozoa;Mollusca;Bivalvia;Autobranchia;Heteroconchia;Euhe  
terodonta;Imparidentia;Venerida;Veneroidea;Veneridae;Mercenaria;Mercenari  
a mercenaria

UdeM00000029735 6596 215.3 UdeM00000029735 XP\_045197621.1 35.1 345  
160 8 175 516 61 344 1.80E-52 215.3 6596 cellular

organisms;Eukaryota;Opisthokonta;Metazoa;Eumetazoa;Bilateria;Protostomia;  
Spiralia;Lophotrochozoa;Mollusca;Bivalvia;Autobranchia;Heteroconchia;Euhe  
terodonta;Imparidentia;Venerida;Veneroidea;Veneridae;Mercenaria;Mercenari  
a mercenaria

UdeM00000029739 6596 355.1 UdeM00000029739 XP\_045197606.1 37.5 573  
239 8 660 1188 1883 2380 3.40E-94 355.1 6596 cellular

organisms;Eukaryota;Opisthokonta;Metazoa;Eumetazoa;Bilateria;Protostomia;  
Spiralia;Lophotrochozoa;Mollusca;Bivalvia;Autobranchia;Heteroconchia;Euhe  
terodonta;Imparidentia;Venerida;Veneroidea;Veneridae;Mercenaria;Mercenari  
a mercenaria

UdeM00000029741 6596 66.6 UdeM00000029741 XP\_045195775.1 32.7 110  
69 3 19 126 190 296 2.60E-08 66.6 6596 cellular

organisms;Eukaryota;Opisthokonta;Metazoa;Eumetazoa;Bilateria;Protostomia;  
Spiralia;Lophotrochozoa;Mollusca;Bivalvia;Autobranchia;Heteroconchia;Euhe  
terodonta;Imparidentia;Venerida;Veneroidea;Veneridae;Mercenaria;Mercenari  
a mercenaria

UdeM00000029742 6596 351.3 UdeM00000029742 XP\_045197598.1 35.5 547  
235 5 860 1368 1520 1986 5.60E-93 351.3 6596 cellular

organisms;Eukaryota;Opisthokonta;Metazoa;Eumetazoa;Bilateria;Protostomia;  
Spiralia;Lophotrochozoa;Mollusca;Bivalvia;Autobranchia;Heteroconchia;Euhe  
terodonta;Imparidentia;Venerida;Veneroidea;Veneridae;Mercenaria;Mercenari  
a mercenaria

UdeM00000029743 10224 68.9 UdeM00000029743 XP\_006820186.1 50.8 59  
29 0 29 87 175 233 3.60E-09 68.9 10224 cellular

organisms;Eukaryota;Opisthokonta;Metazoa;Eumetazoa;Bilateria;Deuterostomi  
a;Hemichordata;Enteropneusta;Harrimaniidae;Saccoglossus;Saccoglossus  
kowalevskii

UdeM00000029744 151771 132.1 UdeM00000029744 XP\_028415423.1 30.4  
369 210 11 4 334 7 366 1.40E-27 132.1 151771

cellular

organisms;Eukaryota;Opisthokonta;Metazoa;Eumetazoa;Cnidaria;Anthozoa;Octo  
corallia;Alcyonacea;Alcyoniina;Nephtheidae;Dendronephthya;Dendronephthya  
gigantea

UdeM00000029745 6596 164.5 UdeM00000029745 XP\_045197621.1 30.4 335  
199 6 564 892 7 313 7.40E-37 164.5 6596 cellular

organisms;Eukaryota;Opisthokonta;Metazoa;Eumetazoa;Bilateria;Protostomia;  
Spiralia;Lophotrochozoa;Mollusca;Bivalvia;Autobranchia;Heteroconchia;Euhe  
terodonta;Imparidentia;Venerida;Veneroidea;Veneridae;Mercenaria;Mercenari  
a mercenaria

UdeM00000029747 6596 357.1 UdeM00000029747 XP\_045197598.1 36.8 519  
231 6 596 1075 1524 1984 8.00E-95 357.1 6596 cellular

organisms;Eukaryota;Opisthokonta;Metazoa;Eumetazoa;Bilateria;Protostomia;

Spiralia;Lophotrochozoa;Mollusca;Bivalvia;Autobranchia;Heteroconchia;Euherodonta;Imparidentia;Venerida;Veneroidea;Veneridae;Mercenaria;Mercenaria mercenaria

UdeM00000029750 27794 87.4 UdeM00000029750 XP\_043351520.1 30.6 206  
118 7 13 211 150 337 2.40E-14 87.4 27794 cellular

organisms;Eukaryota;Opisthokonta;Metazoa;Eumetazoa;Bilateria;Deuterostomia;Chordata;Craniata;Vertebrata;Gnathostomata;Teleostomi;Euteleostomi;Sarcopterygii;Dipnotetrapodomorpha;Tetrapoda;Amniota;Sauropsida;Sauria;Archelosauria;Testudinata;Testudines;Cryptodira;Durocryptodira;Americhelydia;Chelonioidea;Dermochelyidae;Dermochelys;Dermochelys coriacea

UdeM00000029751 6596 352.4 UdeM00000029751 XP\_045197598.1 36.1 548  
230 6 1166 1674 1520 1986 3.10E-93 352.4 6596 cellular

organisms;Eukaryota;Opisthokonta;Metazoa;Eumetazoa;Bilateria;Protostomia;Spiralia;Lophotrochozoa;Mollusca;Bivalvia;Autobranchia;Heteroconchia;Euherodonta;Imparidentia;Venerida;Veneroidea;Veneridae;Mercenaria;Mercenaria mercenaria

UdeM00000029752 6565 90.5 UdeM00000029752 XP\_022318775.1 46.4 110  
55 3 1 107 1 109 1.70E-15 90.5 6565 cellular

organisms;Eukaryota;Opisthokonta;Metazoa;Eumetazoa;Bilateria;Protostomia;Spiralia;Lophotrochozoa;Mollusca;Bivalvia;Autobranchia;Pteriormorphia;Ostreida;Ostreoidea;Ostreidae;Crassostrea;Crassostrea virginica

UdeM00000029753 37621 253.4 UdeM00000029753 XP\_014673981.1 48.9 278  
124 7 47 308 37 312 3.70E-64 253.4 37621 cellular

organisms;Eukaryota;Opisthokonta;Metazoa;Eumetazoa;Bilateria;Protostomia;Ecdysozoa;Scalidophora;Priapulida;Priapulimorpha;Priapulimorphida;Priapulidae;Priapululus;Priapululus caudatus

UdeM00000029755 6596 167.2 UdeM00000029755 XP\_045197621.1 34.5 255  
138 4 454 705 84 312 9.80E-38 167.2 6596 cellular

organisms;Eukaryota;Opisthokonta;Metazoa;Eumetazoa;Bilateria;Protostomia;Spiralia;Lophotrochozoa;Mollusca;Bivalvia;Autobranchia;Heteroconchia;Euherodonta;Imparidentia;Venerida;Veneroidea;Veneridae;Mercenaria;Mercenaria mercenaria

UdeM00000029756 50429 73.2 UdeM00000029756 XP\_022790680.1 46.2 80  
37 3 3 80 40 115 4.40E-10 73.2 50429 cellular

organisms;Eukaryota;Opisthokonta;Metazoa;Eumetazoa;Cnidaria;Anthozoa;Hexacorallia;Scleractinia;Astrocoeniina;Pocilloporidae;Stylophora;Stylophora pistillata

UdeM00000029757 2652724 119 UdeM00000029757 XP\_028515960.1 30.9  
262 89 5 3 173 4 264 6.20E-24 119 2652724

cellular

organisms;Eukaryota;Opisthokonta;Metazoa;Eumetazoa;Cnidaria;Anthozoa;Hexacorallia;Actiniaria;Aiptasiidae;Exaiptasia;Exaiptasia diaphana

UdeM00000029758 6596 365.9 UdeM00000029758 XP\_045197598.1 37.3 531  
228 7 676 1167 1520 1984 1.90E-97 365.9 6596 cellular

organisms;Eukaryota;Opisthokonta;Metazoa;Eumetazoa;Bilateria;Protostomia;Spiralia;Lophotrochozoa;Mollusca;Bivalvia;Autobranchia;Heteroconchia;Euherodonta;Imparidentia;Venerida;Veneroidea;Veneridae;Mercenaria;Mercenaria mercenaria

UdeM00000029760 1234273 78.6 UdeM00000029760 XP\_027000537.1 29.6  
135 91 2 18 152 70 200 9.10E-12 78.6 1234273

cellular

organisms;Eukaryota;Opisthokonta;Metazoa;Eumetazoa;Bilateria;Deuterostomia;Chordata;Craniata;Vertebrata;Gnathostomata;Teleostomi;Euteleostomi;Actinopterygii;Actinopteri;Neopterygii;Teleostei;Osteoglossoccephalai;Clupeoce



phala;Otomorpha;Ostariophysii;Otophysi;Characiphysae;Siluriformes;Siluroid  
ei;Bagridae;Tachysurus;Tachysurus fulvidraco

UdeM00000029759 1234273 78.6 UdeM00000029759 XP\_027000537.1 29.6  
135 91 2 18 152 70 200 9.80E-12 78.6 1234273  
cellular

organisms;Eukaryota;Opisthokonta;Metazoa;Eumetazoa;Bilateria;Deuterostomi  
a;Chordata;Craniata;Vertebrata;Gnathostomata;Teleostomi;Euteleostomi;Acti  
nopterygii;Actinopteri;Neopterygii;Teleostei;Osteoglossocephalai;Clupeoce  
phala;Otomorpha;Ostariophysii;Otophysi;Characiphysae;Siluriformes;Siluroid  
ei;Bagridae;Tachysurus;Tachysurus fulvidraco

UdeM00000029762 6596 207.6 UdeM00000029762 XP\_045196404.1 28.4 633  
370 18 11 591 188 789 4.30E-50 207.6 6596 cellular

organisms;Eukaryota;Opisthokonta;Metazoa;Eumetazoa;Bilateria;Protostomia;  
Spiralia;Lophotrochozoa;Mollusca;Bivalvia;Autobranchia;Heteroconchia;Euhe  
terodonta;Imparidentia;Venerida;Veneroidea;Veneridae;Mercenaria;Mercenari  
a mercenaria

UdeM00000029763 6596 1331.2 UdeM00000029763 XP\_045178231.1 51.8  
1428 576 9 10 1420 217 1548 0.00E+00 1331.2 6596  
cellular

organisms;Eukaryota;Opisthokonta;Metazoa;Eumetazoa;Bilateria;Protostomia;  
Spiralia;Lophotrochozoa;Mollusca;Bivalvia;Autobranchia;Heteroconchia;Euhe  
terodonta;Imparidentia;Venerida;Veneroidea;Veneridae;Mercenaria;Mercenari  
a mercenaria

UdeM00000029764 6596 1428.3 UdeM00000029764 XP\_045178231.1 50.4  
1572 671 12 51 1611 74 1548 0.00E+00 1428.3 6596  
cellular

organisms;Eukaryota;Opisthokonta;Metazoa;Eumetazoa;Bilateria;Protostomia;  
Spiralia;Lophotrochozoa;Mollusca;Bivalvia;Autobranchia;Heteroconchia;Euhe  
terodonta;Imparidentia;Venerida;Veneroidea;Veneridae;Mercenaria;Mercenari  
a mercenaria

UdeM00000029765 6596 379.4 UdeM00000029765 XP\_045195620.1 58.5 301  
124 1 29 329 40 339 4.60E-102 379.4 6596 cellular

organisms;Eukaryota;Opisthokonta;Metazoa;Eumetazoa;Bilateria;Protostomia;  
Spiralia;Lophotrochozoa;Mollusca;Bivalvia;Autobranchia;Heteroconchia;Euhe  
terodonta;Imparidentia;Venerida;Veneroidea;Veneridae;Mercenaria;Mercenari  
a mercenaria

UdeM00000029766 1735272 503.4 UdeM00000029766 XP\_041374187.1 53.9  
488 197 9 1 480 1 468 3.10E-139 503.4 1735272  
cellular

organisms;Eukaryota;Opisthokonta;Metazoa;Eumetazoa;Bilateria;Protostomia;  
Spiralia;Lophotrochozoa;Mollusca;Gastropoda;Neomphalina;Neomphaloidea;Pel  
tospiridae;Gigantopelta;Gigantopelta aegis

UdeM00000029767 6579 265.8 UdeM00000029767 XP\_033764274.1 49.2 236  
115 2 1 233 361 594 5.30E-68 265.8 6579 cellular

organisms;Eukaryota;Opisthokonta;Metazoa;Eumetazoa;Bilateria;Protostomia;  
Spiralia;Lophotrochozoa;Mollusca;Bivalvia;Autobranchia;Pteriomorphia;Pect  
inida;Pectinoidea;Pectinidae;Pecten;Pecten maximus

UdeM00000029768 6596 239.6 UdeM00000029768 XP\_045173143.1 54.5 224  
94 4 1 220 89 308 3.80E-60 239.6 6596 cellular

organisms;Eukaryota;Opisthokonta;Metazoa;Eumetazoa;Bilateria;Protostomia;  
Spiralia;Lophotrochozoa;Mollusca;Bivalvia;Autobranchia;Heteroconchia;Euhe  
terodonta;Imparidentia;Venerida;Veneroidea;Veneridae;Mercenaria;Mercenari  
a mercenaria

UdeM00000029769 6596 273.5 UdeM00000029769 XP\_045173143.1 53.6 252  
 109 4 3 250 61 308 2.70E-70 273.5 6596 cellular  
 organisms;Eukaryota;Opisthokonta;Metazoa;Eumetazoa;Bilateria;Protostomia;  
 Spiralia;Lophotrochozoa;Mollusca;Bivalvia;Autobranchia;Heteroconchia;Euhe  
 terodonta;Imparidentia;Venerida;Veneroidea;Veneridae;Mercenaria;Mercenari  
 a mercenaria

UdeM00000029770 6596 95.9 UdeM00000029770 XP\_045179943.1 29.9 174  
 107 2 32 190 10 183 8.40E-17 95.9 6596 cellular  
 organisms;Eukaryota;Opisthokonta;Metazoa;Eumetazoa;Bilateria;Protostomia;  
 Spiralia;Lophotrochozoa;Mollusca;Bivalvia;Autobranchia;Heteroconchia;Euhe  
 terodonta;Imparidentia;Venerida;Veneroidea;Veneridae;Mercenaria;Mercenari  
 a mercenaria

UdeM00000029771 6565 555.8 UdeM00000029771 XP\_022287588.1 63.3 392  
 144 0 6 397 2 393 4.40E-155 555.8 6565 cellular  
 organisms;Eukaryota;Opisthokonta;Metazoa;Eumetazoa;Bilateria;Protostomia;  
 Spiralia;Lophotrochozoa;Mollusca;Bivalvia;Autobranchia;Pteriormorphia;Ostr  
 eida;Ostreoidea;Ostreidae;Crassostrea;Crassostrea virginica

UdeM00000029772 6579 968.8 UdeM00000029772 XP\_033741161.1 67.4 733  
 214 4 1 725 1 716 3.90E-279 968.8 6579 cellular  
 organisms;Eukaryota;Opisthokonta;Metazoa;Eumetazoa;Bilateria;Protostomia;  
 Spiralia;Lophotrochozoa;Mollusca;Bivalvia;Autobranchia;Pteriormorphia;Pect  
 inida;Pectinoidea;Pectinidae;Pecten;Pecten maximus

UdeM00000029773 6596 265 UdeM00000029773 XP\_045197939.1 66.7 186  
 57 1 9 189 33 218 7.80E-68 265 6596 cellular  
 organisms;Eukaryota;Opisthokonta;Metazoa;Eumetazoa;Bilateria;Protostomia;  
 Spiralia;Lophotrochozoa;Mollusca;Bivalvia;Autobranchia;Heteroconchia;Euhe  
 terodonta;Imparidentia;Venerida;Veneroidea;Veneridae;Mercenaria;Mercenari  
 a mercenaria

UdeM00000029774 7604 303.5 UdeM00000029774 XP\_033633146.1 41 390  
 212 3 262 633 29 418 6.40E-79 303.5 7604 cellular  
 organisms;Eukaryota;Opisthokonta;Metazoa;Eumetazoa;Bilateria;Deuterostomi  
 a;Echinodermata;Eleutherozoa;Asterozoa;Asteroidea;Forcipulatacea;Forcipul  
 atida;Asteroiidae;Asterias;Asterias rubens

UdeM00000029775 6596 451.4 UdeM00000029775 XP\_045197939.1 67.4 322  
 102 2 46 366 220 539 1.10E-123 451.4 6596 cellular  
 organisms;Eukaryota;Opisthokonta;Metazoa;Eumetazoa;Bilateria;Protostomia;  
 Spiralia;Lophotrochozoa;Mollusca;Bivalvia;Autobranchia;Heteroconchia;Euhe  
 terodonta;Imparidentia;Venerida;Veneroidea;Veneridae;Mercenaria;Mercenari  
 a mercenaria

UdeM00000029776 29159 163.3 UdeM00000029776 XP\_034319761.1 39.1 207  
 116 4 595 800 1556 1753 1.70E-36 163.3 29159 cellular  
 organisms;Eukaryota;Opisthokonta;Metazoa;Eumetazoa;Bilateria;Protostomia;  
 Spiralia;Lophotrochozoa;Mollusca;Bivalvia;Autobranchia;Pteriormorphia;Ostr  
 eida;Ostreoidea;Ostreidae;Crassostrea;Crassostrea gigas

UdeM00000029777 6565 72.8 UdeM00000029777 XP\_022294141.1 48.5 68  
 34 1 75 142 27 93 4.00E-10 72.8 6565 cellular  
 organisms;Eukaryota;Opisthokonta;Metazoa;Eumetazoa;Bilateria;Protostomia;  
 Spiralia;Lophotrochozoa;Mollusca;Bivalvia;Autobranchia;Pteriormorphia;Ostr  
 eida;Ostreoidea;Ostreidae;Crassostrea;Crassostrea virginica

UdeM00000029778 6596 347.4 UdeM00000029778 XP\_045196451.1 47.1 448  
 196 14 8 433 91 519 2.60E-92 347.4 6596 cellular  
 organisms;Eukaryota;Opisthokonta;Metazoa;Eumetazoa;Bilateria;Protostomia;  
 Spiralia;Lophotrochozoa;Mollusca;Bivalvia;Autobranchia;Heteroconchia;Euhe

terodonta;Imparidentia;Venerida;Veneroidea;Veneridae;Mercenaria;Mercenari  
a mercenaria

UdeM00000029779 6596 793.5 UdeM00000029779 XP\_045197470.1 52.6 734  
345 3 1 732 1 733 2.30E-226 793.5 6596 cellular

organisms;Eukaryota;Opisthokonta;Metazoa;Eumetazoa;Bilateria;Protostomia;  
Spiralia;Lophotrochozoa;Mollusca;Bivalvia;Autobranchia;Heteroconchia;Euhe  
terodonta;Imparidentia;Venerida;Veneroidea;Veneridae;Mercenaria;Mercenari  
a mercenaria

UdeM00000029780 1735272 337.8 UdeM00000029780 XP\_041368620.1 51.1  
331 145 3 8 338 7 320 1.60E-89 337.8 1735272  
cellular

organisms;Eukaryota;Opisthokonta;Metazoa;Eumetazoa;Bilateria;Protostomia;  
Spiralia;Lophotrochozoa;Mollusca;Gastropoda;Neomphalina;Neomphaloidea;Pel  
tospiridae;Gigantopelta;Gigantopelta aegis

UdeM00000029781 6596 447.2 UdeM00000029781 XP\_045178889.1 28.2 1350  
770 50 73 1286 126 1412 7.10E-122 447.2 6596 cellular

organisms;Eukaryota;Opisthokonta;Metazoa;Eumetazoa;Bilateria;Protostomia;  
Spiralia;Lophotrochozoa;Mollusca;Bivalvia;Autobranchia;Heteroconchia;Euhe  
terodonta;Imparidentia;Venerida;Veneroidea;Veneridae;Mercenaria;Mercenari  
a mercenaria

UdeM00000029782 6596 1149.8 UdeM00000029782 XP\_045197475.1 55.8  
1014 430 9 7 1013 30 1032 0.00E+00 1149.8 6596  
cellular

organisms;Eukaryota;Opisthokonta;Metazoa;Eumetazoa;Bilateria;Protostomia;  
Spiralia;Lophotrochozoa;Mollusca;Bivalvia;Autobranchia;Heteroconchia;Euhe  
terodonta;Imparidentia;Venerida;Veneroidea;Veneridae;Mercenaria;Mercenari  
a mercenaria

UdeM00000029783 6596 927.5 UdeM00000029783 XP\_045159593.1 67.1 689  
220 3 1 689 1 682 9.50E-267 927.5 6596 cellular

organisms;Eukaryota;Opisthokonta;Metazoa;Eumetazoa;Bilateria;Protostomia;  
Spiralia;Lophotrochozoa;Mollusca;Bivalvia;Autobranchia;Heteroconchia;Euhe  
terodonta;Imparidentia;Venerida;Veneroidea;Veneridae;Mercenaria;Mercenari  
a mercenaria

UdeM00000029784 6596 343.6 UdeM00000029784 XP\_045195330.1 38.9 447  
243 6 4 424 50 492 3.60E-91 343.6 6596 cellular

organisms;Eukaryota;Opisthokonta;Metazoa;Eumetazoa;Bilateria;Protostomia;  
Spiralia;Lophotrochozoa;Mollusca;Bivalvia;Autobranchia;Heteroconchia;Euhe  
terodonta;Imparidentia;Venerida;Veneroidea;Veneridae;Mercenaria;Mercenari  
a mercenaria

UdeM00000029786 6579 379 UdeM00000029786 XP\_033749291.1 37.1 626  
380 7 11 626 823 1444 1.20E-101 379 6579 cellular

organisms;Eukaryota;Opisthokonta;Metazoa;Eumetazoa;Bilateria;Protostomia;  
Spiralia;Lophotrochozoa;Mollusca;Bivalvia;Autobranchia;Pteriomorphia;Pect  
inida;Pectinoidea;Pectinidae;Pecten;Pecten maximus

UdeM00000029787 222816 183.3 UdeM00000029787 XP\_012285318.1 35.5  
355 212 5 1 338 289 643 5.10E-43 183.3 222816  
cellular

organisms;Eukaryota;Opisthokonta;Metazoa;Eumetazoa;Bilateria;Protostomia;  
Ecdysozoa;Panarthropoda;Arthropoda;Mandibulata;Pancrustacea;Hexapoda;Inse  
cta;Dicondylia;Pterygota;Neoptera;Endopterygota;Hymenoptera;Orussoidea;Or  
ussidae;Orussus;Orussus abietinus

UdeM00000029788 6596 151 UdeM00000029788 XP\_045216663.1 41.7 168  
98 0 16 183 2 169 1.50E-33 151 6596 cellular

organisms;Eukaryota;Opisthokonta;Metazoa;Eumetazoa;Bilateria;Protostomia;

Spiralia;Lophotrochozoa;Mollusca;Bivalvia;Autobranchia;Heteroconchia;Euherodonta;Imparidentia;Venerida;Veneroidea;Veneridae;Mercenaria;Mercenaria mercenaria

UdeM00000029790 6565 313.9 UdeM00000029790 XP\_022329040.1 36 519  
319 6 11 520 14 528 4.00E-82 313.9 6565 cellular

organisms;Eukaryota;Opisthokonta;Metazoa;Eumetazoa;Bilateria;Protostomia;Spiralia;Lophotrochozoa;Mollusca;Bivalvia;Autobranchia;Pteriormorphia;Ostreida;Ostreoidea;Ostreidae;Crassostrea;Crassostrea virginica

UdeM00000029792 202533 316.2 UdeM00000029792 XP\_035214221.1 38.1  
507 291 6 9 499 19 518 7.70E-83 316.2 202533  
cellular

organisms;Eukaryota;Opisthokonta;Metazoa;Eumetazoa;Bilateria;Protostomia;Ecdysozoa;Panarthropoda;Arthropoda;Chelicerata;Arachnida;Araneae;Araneomorphae;Entelegynae;Eresoidea;Eresidae;Stegodyphus;Stegodyphus dumicola

UdeM00000029794 136037 384.8 UdeM00000029794 XP\_021919438.1 36.7  
633 384 7 8 626 5 634 2.30E-103 384.8 136037  
cellular

organisms;Eukaryota;Opisthokonta;Metazoa;Eumetazoa;Bilateria;Protostomia;Ecdysozoa;Panarthropoda;Arthropoda;Mandibulata;Pancrustacea;Hexapoda;Insecta;Dicondylia;Pterygota;Neoptera;Polyneoptera;Dictyoptera;Blattodea;Blattoidea;Termitoidae;Termopsidae;Termopsinae;Termopsini;Zootermopsis;Zootermopsis nevadensis

UdeM00000029796 136037 392.1 UdeM00000029796 XP\_021919438.1 36.8  
633 383 7 8 626 5 634 1.30E-105 392.1 136037  
cellular

organisms;Eukaryota;Opisthokonta;Metazoa;Eumetazoa;Bilateria;Protostomia;Ecdysozoa;Panarthropoda;Arthropoda;Mandibulata;Pancrustacea;Hexapoda;Insecta;Dicondylia;Pterygota;Neoptera;Polyneoptera;Dictyoptera;Blattodea;Blattoidea;Termitoidae;Termopsidae;Termopsinae;Termopsini;Zootermopsis;Zootermopsis nevadensis

UdeM00000029797 8673 118.6 UdeM00000029797 XP\_026565175.1 38.8 178  
104 3 10 183 515 691 8.60E-24 118.6 8673 cellular

organisms;Eukaryota;Opisthokonta;Metazoa;Eumetazoa;Bilateria;Deuterostomia;Chordata;Craniata;Vertebrata;Gnathostomata;Teleostomi;Euteleostomi;Sarcopterygii;Dipnotetrapodomorpha;Tetrapoda;Amniota;Sauropsida;Sauria;Lepidosauria;Squamata;Bifurcata;Unidentata;Episquamata;Toxicofera;Serpentes;Colubroidea;Elapidae;Acanthophiinae;Pseudonaja;Pseudonaja textilis

UdeM00000029798 202533 271.6 UdeM00000029798 XP\_035214221.1 43.3  
335 186 3 9 342 19 350 1.40E-69 271.6 202533  
cellular

organisms;Eukaryota;Opisthokonta;Metazoa;Eumetazoa;Bilateria;Protostomia;Ecdysozoa;Panarthropoda;Arthropoda;Chelicerata;Arachnida;Araneae;Araneomorphae;Entelegynae;Eresoidea;Eresidae;Stegodyphus;Stegodyphus dumicola

UdeM00000029799 6579 374.8 UdeM00000029799 XP\_033749291.1 36.7 616  
376 7 11 616 823 1434 2.10E-100 374.8 6579 cellular

organisms;Eukaryota;Opisthokonta;Metazoa;Eumetazoa;Bilateria;Protostomia;Spiralia;Lophotrochozoa;Mollusca;Bivalvia;Autobranchia;Pteriormorphia;Pectinida;Pectinoidea;Pectinidae;Pecten;Pecten maximus

UdeM00000029800 136037 385.6 UdeM00000029800 XP\_021919438.1 36.5  
633 385 7 8 626 5 634 1.20E-103 385.6 136037  
cellular

organisms;Eukaryota;Opisthokonta;Metazoa;Eumetazoa;Bilateria;Protostomia;Ecdysozoa;Panarthropoda;Arthropoda;Mandibulata;Pancrustacea;Hexapoda;Insecta;Dicondylia;Pterygota;Neoptera;Polyneoptera;Dictyoptera;Blattodea;Blattoidea

toidea;Termitoidae;Termopsidae;Termopsinae;Termopsini;Zootermopsis;Zootermopsis nevadensis

UdeM00000029801 136037 384 UdeM00000029801 XP\_021919437.1 36.8  
634 383 8 8 626 5 635 3.60E-103 384 136037  
cellular

organisms;Eukaryota;Opisthokonta;Metazoa;Eumetazoa;Bilateria;Protostomia;Ecdysozoa;Panarthropoda;Arthropoda;Mandibulata;Pancrustacea;Hexapoda;Insecta;Dicondylia;Pterygota;Neoptera;Polyneoptera;Dictyoptera;Blattodea;Blattoidea;Termitoidae;Termopsidae;Termopsinae;Termopsini;Zootermopsis;Zootermopsis nevadensis

UdeM00000029802 136037 383.6 UdeM00000029802 XP\_021919438.1 36.3  
633 386 7 8 626 5 634 4.70E-103 383.6 136037  
cellular

organisms;Eukaryota;Opisthokonta;Metazoa;Eumetazoa;Bilateria;Protostomia;Ecdysozoa;Panarthropoda;Arthropoda;Mandibulata;Pancrustacea;Hexapoda;Insecta;Dicondylia;Pterygota;Neoptera;Polyneoptera;Dictyoptera;Blattodea;Blattoidea;Termitoidae;Termopsidae;Termopsinae;Termopsini;Zootermopsis;Zootermopsis nevadensis

UdeM00000029804 136037 383.3 UdeM00000029804 XP\_021919438.1 36.7  
633 384 7 8 626 5 634 6.20E-103 383.3 136037  
cellular

organisms;Eukaryota;Opisthokonta;Metazoa;Eumetazoa;Bilateria;Protostomia;Ecdysozoa;Panarthropoda;Arthropoda;Mandibulata;Pancrustacea;Hexapoda;Insecta;Dicondylia;Pterygota;Neoptera;Polyneoptera;Dictyoptera;Blattodea;Blattoidea;Termitoidae;Termopsidae;Termopsinae;Termopsini;Zootermopsis;Zootermopsis nevadensis

UdeM00000029806 136037 391 UdeM00000029806 XP\_021919438.1 36.7  
633 384 7 8 626 5 634 3.00E-105 391 136037  
cellular

organisms;Eukaryota;Opisthokonta;Metazoa;Eumetazoa;Bilateria;Protostomia;Ecdysozoa;Panarthropoda;Arthropoda;Mandibulata;Pancrustacea;Hexapoda;Insecta;Dicondylia;Pterygota;Neoptera;Polyneoptera;Dictyoptera;Blattodea;Blattoidea;Termitoidae;Termopsidae;Termopsinae;Termopsini;Zootermopsis;Zootermopsis nevadensis

UdeM00000029807 6596 386.7 UdeM00000029807 XP\_045216663.1 35.8 626  
390 5 11 626 13 636 5.60E-104 386.7 6596 cellular

organisms;Eukaryota;Opisthokonta;Metazoa;Eumetazoa;Bilateria;Protostomia;Spiralia;Lophotrochozoa;Mollusca;Bivalvia;Autobranchia;Heteroconchia;Euheterodonta;Imparidentia;Venerida;Veneroidea;Veneridae;Mercenaria;Mercenaria mercenaria

UdeM00000029808 136037 383.3 UdeM00000029808 XP\_021919437.1 36.6  
634 384 8 8 626 5 635 6.20E-103 383.3 136037  
cellular

organisms;Eukaryota;Opisthokonta;Metazoa;Eumetazoa;Bilateria;Protostomia;Ecdysozoa;Panarthropoda;Arthropoda;Mandibulata;Pancrustacea;Hexapoda;Insecta;Dicondylia;Pterygota;Neoptera;Polyneoptera;Dictyoptera;Blattodea;Blattoidea;Termitoidae;Termopsidae;Termopsinae;Termopsini;Zootermopsis;Zootermopsis nevadensis

UdeM00000029809 118141 204.9 UdeM00000029809 XP\_036393933.1 32.7  
364 242 3 1 363 127 488 1.90E-49 204.9 118141  
cellular

organisms;Eukaryota;Opisthokonta;Metazoa;Eumetazoa;Bilateria;Deuterostomia;Chordata;Craniata;Vertebrata;Gnathostomata;Teleostomi;Euteleostomi;Acti

nopterygii;Actinopteri;Neopterygii;Teleostei;Elopocephalai;Elopocephala;E  
 lopomorpha;Elopiformes;Megalopidae;Megalops;Megalops cyprinoides  
 UdeM00000029810 6596 285 UdeM00000029810 XP\_045195422.1 37.3 408  
 232 7 77 476 125 516 1.70E-73 285 6596 cellular  
 organisms;Eukaryota;Opisthokonta;Metazoa;Eumetazoa;Bilateria;Protostomia;  
 Spiralia;Lophotrochozoa;Mollusca;Bivalvia;Autobranchia;Heteroconchia;Euhe  
 terodonta;Imparidentia;Venerida;Veneroidea;Veneridae;Mercenaria;Mercenari  
 a mercenaria  
 UdeM00000029811 6596 284.6 UdeM00000029811 XP\_045195422.1 37 416  
 222 6 8 407 125 516 1.90E-73 284.6 6596 cellular  
 organisms;Eukaryota;Opisthokonta;Metazoa;Eumetazoa;Bilateria;Protostomia;  
 Spiralia;Lophotrochozoa;Mollusca;Bivalvia;Autobranchia;Heteroconchia;Euhe  
 terodonta;Imparidentia;Venerida;Veneroidea;Veneridae;Mercenaria;Mercenari  
 a mercenaria  
 UdeM00000029812 400727 939.1 UdeM00000029812 XP\_025112799.1 75.5  
 612 149 1 76 686 37 648 3.20E-270 939.1 400727  
 cellular  
 organisms;Eukaryota;Opisthokonta;Metazoa;Eumetazoa;Bilateria;Protostomia;  
 Spiralia;Lophotrochozoa;Mollusca;Gastropoda;Caenogastropoda;Architaeniogl  
 ossa;Ampullarioidea;Ampullariidae;Pomacea;Pomacea canaliculata  
 UdeM00000029813 6596 1112.1 UdeM00000029813 XP\_045196540.1 49.7  
 1400 612 37 12 1387 211 1542 0.00E+00 1112.1 6596  
 cellular  
 organisms;Eukaryota;Opisthokonta;Metazoa;Eumetazoa;Bilateria;Protostomia;  
 Spiralia;Lophotrochozoa;Mollusca;Bivalvia;Autobranchia;Heteroconchia;Euhe  
 terodonta;Imparidentia;Venerida;Veneroidea;Veneridae;Mercenaria;Mercenari  
 a mercenaria  
 UdeM00000029814 6579 1375.9 UdeM00000029814 XP\_033741190.1 60.8  
 1212 447 19 110 1310 578 1772 0.00E+00 1375.9 6579  
 cellular  
 organisms;Eukaryota;Opisthokonta;Metazoa;Eumetazoa;Bilateria;Protostomia;  
 Spiralia;Lophotrochozoa;Mollusca;Bivalvia;Autobranchia;Pteriomorphia;Pect  
 inida;Pectinoidea;Pectinidae;Pecten;Pecten maximus  
 UdeM00000029815 6596 385.2 UdeM00000029815 XP\_045196390.1 44.7 573  
 224 14 12 571 32 524 1.50E-103 385.2 6596 cellular  
 organisms;Eukaryota;Opisthokonta;Metazoa;Eumetazoa;Bilateria;Protostomia;  
 Spiralia;Lophotrochozoa;Mollusca;Bivalvia;Autobranchia;Heteroconchia;Euhe  
 terodonta;Imparidentia;Venerida;Veneroidea;Veneridae;Mercenaria;Mercenari  
 a mercenaria  
 UdeM00000029816 6596 502.3 UdeM00000029816 XP\_045198045.1 61.2 400  
 155 0 1 400 144 543 6.00E-139 502.3 6596 cellular  
 organisms;Eukaryota;Opisthokonta;Metazoa;Eumetazoa;Bilateria;Protostomia;  
 Spiralia;Lophotrochozoa;Mollusca;Bivalvia;Autobranchia;Heteroconchia;Euhe  
 terodonta;Imparidentia;Venerida;Veneroidea;Veneridae;Mercenaria;Mercenari  
 a mercenaria  
 UdeM00000029817 6596 177.6 UdeM00000029817 XP\_045198045.1 62.8 129  
 46 2 1 128 1 128 1.10E-41 177.6 6596 cellular  
 organisms;Eukaryota;Opisthokonta;Metazoa;Eumetazoa;Bilateria;Protostomia;  
 Spiralia;Lophotrochozoa;Mollusca;Bivalvia;Autobranchia;Heteroconchia;Euhe  
 terodonta;Imparidentia;Venerida;Veneroidea;Veneridae;Mercenaria;Mercenari  
 a mercenaria  
 UdeM00000029818 6596 131 UdeM00000029818 XP\_045198045.1 49.2 126  
 51 1 26 138 418 543 1.40E-27 131 6596 cellular  
 organisms;Eukaryota;Opisthokonta;Metazoa;Eumetazoa;Bilateria;Protostomia;

Spiralia;Lophotrochozoa;Mollusca;Bivalvia;Autobranchia;Heteroconchia;Euherodonta;Imparidentia;Venerida;Veneroidea;Veneridae;Mercenaria;Mercenaria mercenaria

UdeM00000029819 6573 91.3 UdeM00000029819 XP\_021380018.1 59.4 69  
28 0 1 69 173 241 5.40E-16 91.3 6573 cellular  
organisms;Eukaryota;Opisthokonta;Metazoa;Eumetazoa;Bilateria;Protostomia;  
Spiralia;Lophotrochozoa;Mollusca;Bivalvia;Autobranchia;Pteriomorpha;Pectinida;  
Pectinoidea;Pectinidae;Mizuhopecten;Mizuhopecten yessoensis

UdeM00000029820 6596 736.9 UdeM00000029820 XP\_045198045.1 64.9 544  
189 2 1 543 1 543 1.90E-209 736.9 6596 cellular  
organisms;Eukaryota;Opisthokonta;Metazoa;Eumetazoa;Bilateria;Protostomia;  
Spiralia;Lophotrochozoa;Mollusca;Bivalvia;Autobranchia;Heteroconchia;Euherodonta;  
Imparidentia;Venerida;Veneroidea;Veneridae;Mercenaria;Mercenaria mercenaria

UdeM00000029821 6579 59.7 UdeM00000029821 XP\_033761099.1 22.7 321  
213 10 79 377 5 312 9.60E-06 59.7 6579 cellular  
organisms;Eukaryota;Opisthokonta;Metazoa;Eumetazoa;Bilateria;Protostomia;  
Spiralia;Lophotrochozoa;Mollusca;Bivalvia;Autobranchia;Pteriomorpha;Pectinida;  
Pectinoidea;Pectinidae;Pecten;Pecten maximus

UdeM00000029822 6596 715.7 UdeM00000029822 XP\_045198045.1 63.8 544  
192 3 1 540 1 543 4.60E-203 715.7 6596 cellular  
organisms;Eukaryota;Opisthokonta;Metazoa;Eumetazoa;Bilateria;Protostomia;  
Spiralia;Lophotrochozoa;Mollusca;Bivalvia;Autobranchia;Heteroconchia;Euherodonta;  
Imparidentia;Venerida;Veneroidea;Veneridae;Mercenaria;Mercenaria mercenaria

UdeM00000029823 6579 540 UdeM00000029823 XP\_033739920.1 49.7 537  
239 5 1 507 1 536 3.30E-150 540 6579 cellular  
organisms;Eukaryota;Opisthokonta;Metazoa;Eumetazoa;Bilateria;Protostomia;  
Spiralia;Lophotrochozoa;Mollusca;Bivalvia;Autobranchia;Pteriomorpha;Pectinida;  
Pectinoidea;Pectinidae;Pecten;Pecten maximus

UdeM00000029824 6596 97.4 UdeM00000029824 XP\_045198045.1 57.5 73  
31 0 1 73 471 543 9.80E-18 97.4 6596 cellular  
organisms;Eukaryota;Opisthokonta;Metazoa;Eumetazoa;Bilateria;Protostomia;  
Spiralia;Lophotrochozoa;Mollusca;Bivalvia;Autobranchia;Heteroconchia;Euherodonta;  
Imparidentia;Venerida;Veneroidea;Veneridae;Mercenaria;Mercenaria mercenaria

UdeM00000029825 6596 548.5 UdeM00000029825 XP\_045198045.1 63.1 425  
154 2 1 423 1 424 7.70E-153 548.5 6596 cellular  
organisms;Eukaryota;Opisthokonta;Metazoa;Eumetazoa;Bilateria;Protostomia;  
Spiralia;Lophotrochozoa;Mollusca;Bivalvia;Autobranchia;Heteroconchia;Euherodonta;  
Imparidentia;Venerida;Veneroidea;Veneridae;Mercenaria;Mercenaria mercenaria

UdeM00000029826 29159 548.1 UdeM00000029826 XP\_011428614.2 50 550  
243 5 1 524 1 544 1.20E-152 548.1 29159 cellular  
organisms;Eukaryota;Opisthokonta;Metazoa;Eumetazoa;Bilateria;Protostomia;  
Spiralia;Lophotrochozoa;Mollusca;Bivalvia;Autobranchia;Pteriomorpha;Ostreida;  
Ostreoidea;Ostreidae;Crassostrea;Crassostrea gigas

UdeM00000029827 6596 274.2 UdeM00000029827 XP\_045196350.1 64.4 208  
71 3 52 259 53 257 1.70E-70 274.2 6596 cellular  
organisms;Eukaryota;Opisthokonta;Metazoa;Eumetazoa;Bilateria;Protostomia;  
Spiralia;Lophotrochozoa;Mollusca;Bivalvia;Autobranchia;Heteroconchia;Euherodonta;  
Imparidentia;Venerida;Veneroidea;Veneridae;Mercenaria;Mercenaria mercenaria

UdeM00000029828 6573 1037.7 UdeM00000029828 XP\_021354033.1 47.5  
 1188 558 17 1 1172 1 1138 1.10E-299 1037.7 6573  
 cellular  
 organisms;Eukaryota;Opisthokonta;Metazoa;Eumetazoa;Bilateria;Protostomia;  
 Spiralia;Lophotrochozoa;Mollusca;Bivalvia;Autobranhia;Pteriomorphia;Pect  
 inida;Pectinoidea;Pectinidae;Mizuhopecten;Mizuhopecten yessoensis  
 UdeM00000029829 6596 272.7 UdeM00000029829 XP\_045196345.1 59.8 219  
 85 1 1 219 34 249 4.10E-70 272.7 6596 cellular  
 organisms;Eukaryota;Opisthokonta;Metazoa;Eumetazoa;Bilateria;Protostomia;  
 Spiralia;Lophotrochozoa;Mollusca;Bivalvia;Autobranhia;Heteroconchia;Euhe  
 terodonta;Imparidentia;Venerida;Veneroidea;Veneridae;Mercenaria;Mercenari  
 a mercenaria  
 UdeM00000029830 400727 332.8 UdeM00000029830 XP\_025097668.1 86.7  
 180 24 0 1 180 1 180 2.70E-88 332.8 400727  
 cellular  
 organisms;Eukaryota;Opisthokonta;Metazoa;Eumetazoa;Bilateria;Protostomia;  
 Spiralia;Lophotrochozoa;Mollusca;Gastropoda;Caenogastropoda;Architaeniogl  
 ossa;Ampullarioidea;Ampullariidae;Pomacea;Pomacea canaliculata  
 UdeM00000029831 6573 624.8 UdeM00000029831 XP\_021359228.1 33.9 1108  
 698 15 134 1218 24 1120 2.30E-175 624.8 6573 cellular  
 organisms;Eukaryota;Opisthokonta;Metazoa;Eumetazoa;Bilateria;Protostomia;  
 Spiralia;Lophotrochozoa;Mollusca;Bivalvia;Autobranhia;Pteriomorphia;Pect  
 inida;Pectinoidea;Pectinidae;Mizuhopecten;Mizuhopecten yessoensis  
 UdeM00000029832 37621 131.7 UdeM00000029832 XP\_014676916.1 29.7 350  
 174 10 34 327 7 340 2.20E-27 131.7 37621 cellular  
 organisms;Eukaryota;Opisthokonta;Metazoa;Eumetazoa;Bilateria;Protostomia;  
 Ecdysozoa;Scalidophora;Priapulida;Priapulimorpha;Priapulimorphida;Priapul  
 idae;Priapulul;Priapulul caudatus  
 UdeM00000029833 1735272 243 UdeM00000029833 XP\_041353997.1 83.2  
 137 23 0 18 154 44 180 2.40E-61 243 1735272  
 cellular  
 organisms;Eukaryota;Opisthokonta;Metazoa;Eumetazoa;Bilateria;Protostomia;  
 Spiralia;Lophotrochozoa;Mollusca;Gastropoda;Neomphalina;Neomphaloidea;Pel  
 tospiridae;Gigantopelta;Gigantopelta aegis  
 UdeM00000029834 6573 614.8 UdeM00000029834 XP\_021359228.1 33.1 1111  
 703 15 122 1206 24 1120 2.40E-172 614.8 6573 cellular  
 organisms;Eukaryota;Opisthokonta;Metazoa;Eumetazoa;Bilateria;Protostomia;  
 Spiralia;Lophotrochozoa;Mollusca;Bivalvia;Autobranhia;Pteriomorphia;Pect  
 inida;Pectinoidea;Pectinidae;Mizuhopecten;Mizuhopecten yessoensis  
 UdeM00000029835 6573 501.9 UdeM00000029835 XP\_021359228.1 30.7 1218  
 770 24 118 1317 26 1187 2.50E-138 501.9 6573 cellular  
 organisms;Eukaryota;Opisthokonta;Metazoa;Eumetazoa;Bilateria;Protostomia;  
 Spiralia;Lophotrochozoa;Mollusca;Bivalvia;Autobranhia;Pteriomorphia;Pect  
 inida;Pectinoidea;Pectinidae;Mizuhopecten;Mizuhopecten yessoensis  
 UdeM00000029836 6565 293.1 UdeM00000029836 XP\_022291971.1 63.6 236  
 75 2 2 227 3 237 3.10E-76 293.1 6565 cellular  
 organisms;Eukaryota;Opisthokonta;Metazoa;Eumetazoa;Bilateria;Protostomia;  
 Spiralia;Lophotrochozoa;Mollusca;Bivalvia;Autobranhia;Pteriomorphia;Ostr  
 eida;Ostreoidea;Ostreidae;Crassostrea;Crassostrea virginica  
 UdeM00000029837 6596 601.3 UdeM00000029837 XP\_045197593.1 51.9 626  
 262 10 22 621 287 899 1.40E-168 601.3 6596 cellular  
 organisms;Eukaryota;Opisthokonta;Metazoa;Eumetazoa;Bilateria;Protostomia;  
 Spiralia;Lophotrochozoa;Mollusca;Bivalvia;Autobranhia;Heteroconchia;Euhe



terodonta;Imparidentia;Venerida;Veneroidea;Veneridae;Mercenaria;Mercenari  
 a mercenaria  
 UdeM00000029838 7741 278.5 UdeM00000029838 XP\_019622111.1 50.5 281  
 134 4 5 283 1 278 9.60E-72 278.5 7741 cellular  
 organisms;Eukaryota;Opisthokonta;Metazoa;Eumetazoa;Bilateria;Deuterostomi  
 a;Chordata;Cephalochordata;Leptocardii;Amphioxiformes;Branchiostomidae;Br  
 anchiostoma;Branchiostoma belcheri  
 UdeM00000029840 6596 479.6 UdeM00000029840 XP\_045197069.1 41.3 659  
 293 10 8 661 100 669 6.60E-132 479.6 6596 cellular  
 organisms;Eukaryota;Opisthokonta;Metazoa;Eumetazoa;Bilateria;Protostomia;  
 Spiralia;Lophotrochozoa;Mollusca;Bivalvia;Autobranchia;Heteroconchia;Euhe  
 terodonta;Imparidentia;Venerida;Veneroidea;Veneridae;Mercenaria;Mercenari  
 a mercenaria  
 UdeM00000029839 6596 596.3 UdeM00000029839 XP\_045197069.1 43 758  
 337 11 1 752 1 669 5.50E-167 596.3 6596 cellular  
 organisms;Eukaryota;Opisthokonta;Metazoa;Eumetazoa;Bilateria;Protostomia;  
 Spiralia;Lophotrochozoa;Mollusca;Bivalvia;Autobranchia;Heteroconchia;Euhe  
 terodonta;Imparidentia;Venerida;Veneroidea;Veneridae;Mercenaria;Mercenari  
 a mercenaria  
 UdeM00000029841 6596 101.3 UdeM00000029841 XP\_045197068.1 52 98  
 44 2 1 98 468 562 7.40E-19 101.3 6596 cellular  
 organisms;Eukaryota;Opisthokonta;Metazoa;Eumetazoa;Bilateria;Protostomia;  
 Spiralia;Lophotrochozoa;Mollusca;Bivalvia;Autobranchia;Heteroconchia;Euhe  
 terodonta;Imparidentia;Venerida;Veneroidea;Veneridae;Mercenaria;Mercenari  
 a mercenaria  
 UdeM00000029842 6596 77 UdeM00000029842 XP\_045201878.1 56.7 67  
 25 1 1 63 1 67 1.50E-11 77 6596 cellular  
 organisms;Eukaryota;Opisthokonta;Metazoa;Eumetazoa;Bilateria;Protostomia;  
 Spiralia;Lophotrochozoa;Mollusca;Bivalvia;Autobranchia;Heteroconchia;Euhe  
 terodonta;Imparidentia;Venerida;Veneroidea;Veneridae;Mercenaria;Mercenari  
 a mercenaria  
 UdeM00000029843 6596 272.7 UdeM00000029843 XP\_045197050.1 61.6 198  
 75 1 66 262 710 907 8.50E-70 272.7 6596 cellular  
 organisms;Eukaryota;Opisthokonta;Metazoa;Eumetazoa;Bilateria;Protostomia;  
 Spiralia;Lophotrochozoa;Mollusca;Bivalvia;Autobranchia;Heteroconchia;Euhe  
 terodonta;Imparidentia;Venerida;Veneroidea;Veneridae;Mercenaria;Mercenari  
 a mercenaria  
 UdeM00000029844 6596 725.3 UdeM00000029844 XP\_045197050.1 52.6 701  
 302 9 23 707 24 710 7.50E-206 725.3 6596 cellular  
 organisms;Eukaryota;Opisthokonta;Metazoa;Eumetazoa;Bilateria;Protostomia;  
 Spiralia;Lophotrochozoa;Mollusca;Bivalvia;Autobranchia;Heteroconchia;Euhe  
 terodonta;Imparidentia;Venerida;Veneroidea;Veneridae;Mercenaria;Mercenari  
 a mercenaria  
 UdeM00000029845 1735272 151.4 UdeM00000029845 XP\_041351901.1 61.5  
 122 45 1 1 120 1 122 7.50E-34 151.4 1735272  
 cellular  
 organisms;Eukaryota;Opisthokonta;Metazoa;Eumetazoa;Bilateria;Protostomia;  
 Spiralia;Lophotrochozoa;Mollusca;Gastropoda;Neomphalina;Neomphaloidea;Pel  
 tospiridae;Gigantopelta;Gigantopelta aegis  
 UdeM00000029846 6596 496.1 UdeM00000029846 XP\_045197821.1 47.4 546  
 270 9 20 557 9 545 5.80E-137 496.1 6596 cellular  
 organisms;Eukaryota;Opisthokonta;Metazoa;Eumetazoa;Bilateria;Protostomia;  
 Spiralia;Lophotrochozoa;Mollusca;Bivalvia;Autobranchia;Heteroconchia;Euhe

terodonta;Imparidentia;Venerida;Veneroidea;Veneridae;Mercenaria;Mercenari  
 a mercenaria  
 UdeM00000029847 6596 581.3 UdeM00000029847 XP\_045195290.1 40 821  
 456 11 5 820 27 815 2.00E-162 581.3 6596 cellular  
 organisms;Eukaryota;Opisthokonta;Metazoa;Eumetazoa;Bilateria;Protostomia;  
 Spiralia;Lophotrochozoa;Mollusca;Bivalvia;Autobranchia;Heteroconchia;Euhe  
 terodonta;Imparidentia;Venerida;Veneroidea;Veneridae;Mercenaria;Mercenari  
 a mercenaria  
 UdeM00000029849 6596 96.3 UdeM00000029849 XP\_045195284.1 31.3 201  
 118 7 1 198 7 190 4.80E-17 96.3 6596 cellular  
 organisms;Eukaryota;Opisthokonta;Metazoa;Eumetazoa;Bilateria;Protostomia;  
 Spiralia;Lophotrochozoa;Mollusca;Bivalvia;Autobranchia;Heteroconchia;Euhe  
 terodonta;Imparidentia;Venerida;Veneroidea;Veneridae;Mercenaria;Mercenari  
 a mercenaria  
 UdeM00000029850 6596 394.8 UdeM00000029850 XP\_045195290.1 39.6 553  
 291 4 1 553 233 742 3.00E-106 394.8 6596 cellular  
 organisms;Eukaryota;Opisthokonta;Metazoa;Eumetazoa;Bilateria;Protostomia;  
 Spiralia;Lophotrochozoa;Mollusca;Bivalvia;Autobranchia;Heteroconchia;Euhe  
 terodonta;Imparidentia;Venerida;Veneroidea;Veneridae;Mercenaria;Mercenari  
 a mercenaria  
 UdeM00000029851 6596 194.9 UdeM00000029851 XP\_045195297.1 33.9 363  
 222 3 377 739 97 441 9.10E-46 194.9 6596 cellular  
 organisms;Eukaryota;Opisthokonta;Metazoa;Eumetazoa;Bilateria;Protostomia;  
 Spiralia;Lophotrochozoa;Mollusca;Bivalvia;Autobranchia;Heteroconchia;Euhe  
 terodonta;Imparidentia;Venerida;Veneroidea;Veneridae;Mercenaria;Mercenari  
 a mercenaria  
 UdeM00000029852 6596 198.4 UdeM00000029852 XP\_045195290.1 33.7 365  
 223 4 308 672 472 817 7.90E-47 198.4 6596 cellular  
 organisms;Eukaryota;Opisthokonta;Metazoa;Eumetazoa;Bilateria;Protostomia;  
 Spiralia;Lophotrochozoa;Mollusca;Bivalvia;Autobranchia;Heteroconchia;Euhe  
 terodonta;Imparidentia;Venerida;Veneroidea;Veneridae;Mercenaria;Mercenari  
 a mercenaria  
 UdeM00000029853 6596 194.5 UdeM00000029853 XP\_045195297.1 33.9 363  
 222 3 686 1048 97 441 1.10E-45 194.5 6596 cellular  
 organisms;Eukaryota;Opisthokonta;Metazoa;Eumetazoa;Bilateria;Protostomia;  
 Spiralia;Lophotrochozoa;Mollusca;Bivalvia;Autobranchia;Heteroconchia;Euhe  
 terodonta;Imparidentia;Venerida;Veneroidea;Veneridae;Mercenaria;Mercenari  
 a mercenaria  
 UdeM00000029854 6596 553.5 UdeM00000029854 XP\_045195290.1 39 820  
 465 9 5 820 27 815 4.50E-154 553.5 6596 cellular  
 organisms;Eukaryota;Opisthokonta;Metazoa;Eumetazoa;Bilateria;Protostomia;  
 Spiralia;Lophotrochozoa;Mollusca;Bivalvia;Autobranchia;Heteroconchia;Euhe  
 terodonta;Imparidentia;Venerida;Veneroidea;Veneridae;Mercenaria;Mercenari  
 a mercenaria  
 UdeM00000029856 6596 117.1 UdeM00000029856 XP\_045195290.1 47.5 122  
 64 0 1 122 195 316 1.70E-23 117.1 6596 cellular  
 organisms;Eukaryota;Opisthokonta;Metazoa;Eumetazoa;Bilateria;Protostomia;  
 Spiralia;Lophotrochozoa;Mollusca;Bivalvia;Autobranchia;Heteroconchia;Euhe  
 terodonta;Imparidentia;Venerida;Veneroidea;Veneridae;Mercenaria;Mercenari  
 a mercenaria  
 UdeM00000029857 6596 288.1 UdeM00000029857 XP\_045195290.1 34.4 508  
 283 7 1 477 327 815 2.10E-74 288.1 6596 cellular  
 organisms;Eukaryota;Opisthokonta;Metazoa;Eumetazoa;Bilateria;Protostomia;  
 Spiralia;Lophotrochozoa;Mollusca;Bivalvia;Autobranchia;Heteroconchia;Euhe

terodonta;Imparidentia;Venerida;Veneroidea;Veneridae;Mercenaria;Mercenari  
 a mercenaria  
 UdeM00000029858 6596 564.7 UdeM00000029858 XP\_045195290.1 39 821  
 464 11 5 820 27 815 1.90E-157 564.7 6596 cellular  
 organisms;Eukaryota;Opisthokonta;Metazoa;Eumetazoa;Bilateria;Protostomia;  
 Spiralia;Lophotrochozoa;Mollusca;Bivalvia;Autobranchia;Heteroconchia;Euhe  
 terodonta;Imparidentia;Venerida;Veneroidea;Veneridae;Mercenaria;Mercenari  
 a mercenaria  
 UdeM00000029859 6596 400.2 UdeM00000029859 XP\_045195290.1 37.8 624  
 357 7 1 599 195 812 4.70E-108 400.2 6596 cellular  
 organisms;Eukaryota;Opisthokonta;Metazoa;Eumetazoa;Bilateria;Protostomia;  
 Spiralia;Lophotrochozoa;Mollusca;Bivalvia;Autobranchia;Heteroconchia;Euhe  
 terodonta;Imparidentia;Venerida;Veneroidea;Veneridae;Mercenaria;Mercenari  
 a mercenaria  
 UdeM00000029860 6596 549.7 UdeM00000029860 XP\_045195290.1 38.5 820  
 469 8 5 820 27 815 6.50E-153 549.7 6596 cellular  
 organisms;Eukaryota;Opisthokonta;Metazoa;Eumetazoa;Bilateria;Protostomia;  
 Spiralia;Lophotrochozoa;Mollusca;Bivalvia;Autobranchia;Heteroconchia;Euhe  
 terodonta;Imparidentia;Venerida;Veneroidea;Veneridae;Mercenaria;Mercenari  
 a mercenaria  
 UdeM00000029862 6596 520.8 UdeM00000029862 XP\_045195290.1 40.1 735  
 405 9 7 736 29 733 2.90E-144 520.8 6596 cellular  
 organisms;Eukaryota;Opisthokonta;Metazoa;Eumetazoa;Bilateria;Protostomia;  
 Spiralia;Lophotrochozoa;Mollusca;Bivalvia;Autobranchia;Heteroconchia;Euhe  
 terodonta;Imparidentia;Venerida;Veneroidea;Veneridae;Mercenaria;Mercenari  
 a mercenaria  
 UdeM00000029864 6596 560.8 UdeM00000029864 XP\_045195290.1 39.2 821  
 462 11 5 820 27 815 2.80E-156 560.8 6596 cellular  
 organisms;Eukaryota;Opisthokonta;Metazoa;Eumetazoa;Bilateria;Protostomia;  
 Spiralia;Lophotrochozoa;Mollusca;Bivalvia;Autobranchia;Heteroconchia;Euhe  
 terodonta;Imparidentia;Venerida;Veneroidea;Veneridae;Mercenaria;Mercenari  
 a mercenaria  
 UdeM00000029866 6565 62.4 UdeM00000029866 XP\_022334943.1 43.3 67  
 38 0 2 68 112 178 3.10E-07 62.4 6565 cellular  
 organisms;Eukaryota;Opisthokonta;Metazoa;Eumetazoa;Bilateria;Protostomia;  
 Spiralia;Lophotrochozoa;Mollusca;Bivalvia;Autobranchia;Pteriomorphia;Ostr  
 eida;Ostreoidea;Ostreidae;Crassostrea;Crassostrea virginica  
 UdeM00000029868 6596 570.9 UdeM00000029868 XP\_045197246.1 33.3 1300  
 536 31 7 991 754 2037 3.30E-159 570.9 6596 cellular  
 organisms;Eukaryota;Opisthokonta;Metazoa;Eumetazoa;Bilateria;Protostomia;  
 Spiralia;Lophotrochozoa;Mollusca;Bivalvia;Autobranchia;Heteroconchia;Euhe  
 terodonta;Imparidentia;Venerida;Veneroidea;Veneridae;Mercenaria;Mercenari  
 a mercenaria  
 UdeM00000029869 6596 391 UdeM00000029869 XP\_045170511.1 31.7 773  
 445 22 264 975 179 929 5.30E-105 391 6596 cellular  
 organisms;Eukaryota;Opisthokonta;Metazoa;Eumetazoa;Bilateria;Protostomia;  
 Spiralia;Lophotrochozoa;Mollusca;Bivalvia;Autobranchia;Heteroconchia;Euhe  
 terodonta;Imparidentia;Venerida;Veneroidea;Veneridae;Mercenaria;Mercenari  
 a mercenaria  
 UdeM00000029870 6596 109.4 UdeM00000029870 XP\_045196093.1 37.9 190  
 112 5 10 196 290 476 5.40E-21 109.4 6596 cellular  
 organisms;Eukaryota;Opisthokonta;Metazoa;Eumetazoa;Bilateria;Protostomia;  
 Spiralia;Lophotrochozoa;Mollusca;Bivalvia;Autobranchia;Heteroconchia;Euhe

terodonta;Imparidentia;Venerida;Veneroidea;Veneridae;Mercenaria;Mercenaria mercenaria

UdeM00000029872 6596 325.1 UdeM00000029872 XP\_045197245.1 33.2 707  
425 22 128 804 664 1353 2.60E-85 325.1 6596 cellular

organisms;Eukaryota;Opisthokonta;Metazoa;Eumetazoa;Bilateria;Protostomia;Spiralia;Lophotrochozoa;Mollusca;Bivalvia;Autobranhia;Heteroconchia;Euherodonta;Imparidentia;Venerida;Veneroidea;Veneridae;Mercenaria;Mercenaria mercenaria

UdeM00000029873 6596 122.9 UdeM00000029873 XP\_045197368.1 32.1 243  
160 4 19 259 163 402 6.40E-25 122.9 6596 cellular

organisms;Eukaryota;Opisthokonta;Metazoa;Eumetazoa;Bilateria;Protostomia;Spiralia;Lophotrochozoa;Mollusca;Bivalvia;Autobranhia;Heteroconchia;Euherodonta;Imparidentia;Venerida;Veneroidea;Veneridae;Mercenaria;Mercenaria mercenaria

UdeM00000029874 6573 188.7 UdeM00000029874 XP\_021358159.1 37.2 298  
174 7 6 293 366 660 1.60E-44 188.7 6573 cellular

organisms;Eukaryota;Opisthokonta;Metazoa;Eumetazoa;Bilateria;Protostomia;Spiralia;Lophotrochozoa;Mollusca;Bivalvia;Autobranhia;Pteriomorphia;Pectinida;Pectinoidea;Pectinidae;Mizuhopecten;Mizuhopecten yessoensis

UdeM00000029875 6596 189.5 UdeM00000029875 XP\_045197249.1 42.3 253  
137 4 220 468 438 685 1.10E-44 189.5 6596 cellular

organisms;Eukaryota;Opisthokonta;Metazoa;Eumetazoa;Bilateria;Protostomia;Spiralia;Lophotrochozoa;Mollusca;Bivalvia;Autobranhia;Heteroconchia;Euherodonta;Imparidentia;Venerida;Veneroidea;Veneridae;Mercenaria;Mercenaria mercenaria

UdeM00000029876 6596 77.4 UdeM00000029876 XP\_045197385.1 28.9 204  
131 6 2 201 379 572 2.50E-11 77.4 6596 cellular

organisms;Eukaryota;Opisthokonta;Metazoa;Eumetazoa;Bilateria;Protostomia;Spiralia;Lophotrochozoa;Mollusca;Bivalvia;Autobranhia;Heteroconchia;Euherodonta;Imparidentia;Venerida;Veneroidea;Veneridae;Mercenaria;Mercenaria mercenaria

UdeM00000029877 6596 67.4 UdeM00000029877 XP\_045197368.1 38 100  
60 2 4 101 336 435 1.30E-08 67.4 6596 cellular

organisms;Eukaryota;Opisthokonta;Metazoa;Eumetazoa;Bilateria;Protostomia;Spiralia;Lophotrochozoa;Mollusca;Bivalvia;Autobranhia;Heteroconchia;Euherodonta;Imparidentia;Venerida;Veneroidea;Veneridae;Mercenaria;Mercenaria mercenaria

UdeM00000029880 6573 448.4 UdeM00000029880 XP\_021344066.1 60.1 343  
135 1 69 411 150 490 1.10E-122 448.4 6573 cellular

organisms;Eukaryota;Opisthokonta;Metazoa;Eumetazoa;Bilateria;Protostomia;Spiralia;Lophotrochozoa;Mollusca;Bivalvia;Autobranhia;Pteriomorphia;Pectinida;Pectinoidea;Pectinidae;Mizuhopecten;Mizuhopecten yessoensis

UdeM00000029881 441366 391.7 UdeM00000029881 XP\_028296753.1 39.3  
596 332 13 6 593 32 605 1.60E-105 391.7 441366  
cellular

organisms;Eukaryota;Opisthokonta;Metazoa;Eumetazoa;Bilateria;Deuterostomia;Chordata;Craniata;Vertebrata;Gnathostomata;Teleostomi;Euteleostomi;Actinopterygii;Actinopteri;Neopterygii;Teleostei;Osteoglossocephalai;Clupeocephala;Euteleostei;Neoteleostei;Eurypterygia;Ctenosquamata;Acanthopterygii;Euacanthopterygii;Percomorphaceae;Ovalentaria;Blenniiformes;Blenniiformes;Gobiesocidae;Gobiesocinae;Gouania;Gouania willdenowi

UdeM00000029882 6596 513.5 UdeM00000029882 XP\_045197246.1 39.6 826  
357 14 7 704 1226 2037 4.40E-142 513.5 6596 cellular

organisms;Eukaryota;Opisthokonta;Metazoa;Eumetazoa;Bilateria;Protostomia;Spiralia;Lophotrochozoa;Mollusca;Bivalvia;Autobranchia;Heteroconchia;Euheterodonta;Imparidentia;Venerida;Veneroidea;Veneridae;Mercenaria;Mercenaria mercenaria

UdeM00000029883 29159 329.7 UdeM00000029883 XP\_034332444.1 48.9 350  
163 5 378 720 1779 2119 9.20E-87 329.7 29159 cellular

organisms;Eukaryota;Opisthokonta;Metazoa;Eumetazoa;Bilateria;Protostomia;Spiralia;Lophotrochozoa;Mollusca;Bivalvia;Autobranchia;Pteriomorphia;Ostreida;Ostreoidea;Ostreidae;Crassostrea;Crassostrea gigas

UdeM00000029884 29159 407.9 UdeM00000029884 XP\_034332444.1 60 320  
119 3 7 317 1792 2111 1.20E-110 407.9 29159 cellular

organisms;Eukaryota;Opisthokonta;Metazoa;Eumetazoa;Bilateria;Protostomia;Spiralia;Lophotrochozoa;Mollusca;Bivalvia;Autobranchia;Pteriomorphia;Ostreida;Ostreoidea;Ostreidae;Crassostrea;Crassostrea gigas

UdeM00000029885 29159 405.2 UdeM00000029885 XP\_034332444.1 57.9 337  
127 4 7 337 1792 2119 8.10E-110 405.2 29159 cellular

organisms;Eukaryota;Opisthokonta;Metazoa;Eumetazoa;Bilateria;Protostomia;Spiralia;Lophotrochozoa;Mollusca;Bivalvia;Autobranchia;Pteriomorphia;Ostreida;Ostreoidea;Ostreidae;Crassostrea;Crassostrea gigas

UdeM00000029886 6596 408.7 UdeM00000029886 XP\_045197249.1 36.8 684  
397 20 29 685 438 1113 1.50E-110 408.7 6596 cellular

organisms;Eukaryota;Opisthokonta;Metazoa;Eumetazoa;Bilateria;Protostomia;Spiralia;Lophotrochozoa;Mollusca;Bivalvia;Autobranchia;Heteroconchia;Euheterodonta;Imparidentia;Venerida;Veneroidea;Veneridae;Mercenaria;Mercenaria mercenaria

UdeM00000029887 29159 215.3 UdeM00000029887 XP\_034332444.1 53.5 187  
78 3 51 229 1926 2111 8.80E-53 215.3 29159 cellular

organisms;Eukaryota;Opisthokonta;Metazoa;Eumetazoa;Bilateria;Protostomia;Spiralia;Lophotrochozoa;Mollusca;Bivalvia;Autobranchia;Pteriomorphia;Ostreida;Ostreoidea;Ostreidae;Crassostrea;Crassostrea gigas

UdeM00000029888 29159 212.2 UdeM00000029888 XP\_034332444.1 53.5 187  
77 3 51 228 1926 2111 7.40E-52 212.2 29159 cellular

organisms;Eukaryota;Opisthokonta;Metazoa;Eumetazoa;Bilateria;Protostomia;Spiralia;Lophotrochozoa;Mollusca;Bivalvia;Autobranchia;Pteriomorphia;Ostreida;Ostreoidea;Ostreidae;Crassostrea;Crassostrea gigas

UdeM00000029890 6596 381.7 UdeM00000029890 XP\_045197249.1 25.8 1471  
498 36 123 1010 500 1959 3.00E-102 381.7 6596 cellular

organisms;Eukaryota;Opisthokonta;Metazoa;Eumetazoa;Bilateria;Protostomia;Spiralia;Lophotrochozoa;Mollusca;Bivalvia;Autobranchia;Heteroconchia;Euheterodonta;Imparidentia;Venerida;Veneroidea;Veneridae;Mercenaria;Mercenaria mercenaria

UdeM00000029891 6596 201.8 UdeM00000029891 XP\_045197245.1 31 630  
357 18 634 1248 441 1007 5.00E-48 201.8 6596 cellular

organisms;Eukaryota;Opisthokonta;Metazoa;Eumetazoa;Bilateria;Protostomia;Spiralia;Lophotrochozoa;Mollusca;Bivalvia;Autobranchia;Heteroconchia;Euheterodonta;Imparidentia;Venerida;Veneroidea;Veneridae;Mercenaria;Mercenaria mercenaria

UdeM00000029892 29159 411.4 UdeM00000029892 XP\_034332444.1 55.8 346  
143 4 6 341 1766 2111 1.20E-111 411.4 29159 cellular

organisms;Eukaryota;Opisthokonta;Metazoa;Eumetazoa;Bilateria;Protostomia;Spiralia;Lophotrochozoa;Mollusca;Bivalvia;Autobranchia;Pteriomorphia;Ostreida;Ostreoidea;Ostreidae;Crassostrea;Crassostrea gigas

UdeM00000029893 6596 599.4 UdeM00000029893 XP\_045196094.1 35.1 1151  
598 30 38 1096 268 1361 9.50E-168 599.4 6596 cellular

organisms;Eukaryota;Opisthokonta;Metazoa;Eumetazoa;Bilateria;Protostomia;Spiralia;Lophotrochozoa;Mollusca;Bivalvia;Autobranhia;Heteroconchia;Euherodonta;Imparidentia;Venerida;Veneroidea;Veneridae;Mercenaria;Mercenaria mercenaria

UdeM00000029894 6596 221.9 UdeM00000029894 XP\_045195374.1 52.4 208  
97 1 22 227 19 226 8.60E-55 221.9 6596 cellular

organisms;Eukaryota;Opisthokonta;Metazoa;Eumetazoa;Bilateria;Protostomia;Spiralia;Lophotrochozoa;Mollusca;Bivalvia;Autobranhia;Heteroconchia;Euherodonta;Imparidentia;Venerida;Veneroidea;Veneridae;Mercenaria;Mercenaria mercenaria

UdeM00000029895 6573 526.9 UdeM00000029895 XP\_021360724.1 57.5 699  
274 8 4 695 10 692 3.80E-146 526.9 6573 cellular

organisms;Eukaryota;Opisthokonta;Metazoa;Eumetazoa;Bilateria;Protostomia;Spiralia;Lophotrochozoa;Mollusca;Bivalvia;Autobranhia;Pteriormorphia;Pectinida;Pectinoidea;Pectinidae;Mizuhopecten;Mizuhopecten yessoensis

UdeM00000029896 6573 519.6 UdeM00000029896 XP\_021360724.1 55.5 722  
275 8 4 718 10 692 6.30E-144 519.6 6573 cellular

organisms;Eukaryota;Opisthokonta;Metazoa;Eumetazoa;Bilateria;Protostomia;Spiralia;Lophotrochozoa;Mollusca;Bivalvia;Autobranhia;Pteriormorphia;Pectinida;Pectinoidea;Pectinidae;Mizuhopecten;Mizuhopecten yessoensis

UdeM00000029898 6596 173.7 UdeM00000029898 XP\_045197682.1 54.2 203  
82 5 1 201 4 197 2.50E-40 173.7 6596 cellular

organisms;Eukaryota;Opisthokonta;Metazoa;Eumetazoa;Bilateria;Protostomia;Spiralia;Lophotrochozoa;Mollusca;Bivalvia;Autobranhia;Heteroconchia;Euherodonta;Imparidentia;Venerida;Veneroidea;Veneridae;Mercenaria;Mercenaria mercenaria

UdeM00000029899 6596 320.1 UdeM00000029899 XP\_045196432.1 47.3 336  
142 3 43 343 26 361 3.50E-84 320.1 6596 cellular

organisms;Eukaryota;Opisthokonta;Metazoa;Eumetazoa;Bilateria;Protostomia;Spiralia;Lophotrochozoa;Mollusca;Bivalvia;Autobranhia;Heteroconchia;Euherodonta;Imparidentia;Venerida;Veneroidea;Veneridae;Mercenaria;Mercenaria mercenaria

UdeM00000029900 6596 425.6 UdeM00000029900 XP\_045196429.1 74 262  
68 0 62 323 83 344 5.50E-116 425.6 6596 cellular

organisms;Eukaryota;Opisthokonta;Metazoa;Eumetazoa;Bilateria;Protostomia;Spiralia;Lophotrochozoa;Mollusca;Bivalvia;Autobranhia;Heteroconchia;Euherodonta;Imparidentia;Venerida;Veneroidea;Veneridae;Mercenaria;Mercenaria mercenaria

UdeM00000029901 6596 1147.9 UdeM00000029901 XP\_045197475.1 55.4  
1014 434 10 7 1013 30 1032 0.00E+00 1147.9 6596  
cellular

organisms;Eukaryota;Opisthokonta;Metazoa;Eumetazoa;Bilateria;Protostomia;Spiralia;Lophotrochozoa;Mollusca;Bivalvia;Autobranhia;Heteroconchia;Euherodonta;Imparidentia;Venerida;Veneroidea;Veneridae;Mercenaria;Mercenaria mercenaria

UdeM00000029902 6596 1120.5 UdeM00000029902 XP\_045197475.1 54.6  
1007 431 9 7 991 30 1032 0.00E+00 1120.5 6596  
cellular

organisms;Eukaryota;Opisthokonta;Metazoa;Eumetazoa;Bilateria;Protostomia;Spiralia;Lophotrochozoa;Mollusca;Bivalvia;Autobranhia;Heteroconchia;Euherodonta;Imparidentia;Venerida;Veneroidea;Veneridae;Mercenaria;Mercenaria mercenaria

UdeM00000029903 6596 1115.5 UdeM00000029903 XP\_045197475.1 54.4  
1007 433 9 7 991 30 1032 0.00E+00 1115.5 6596

cellular  
organisms;Eukaryota;Opisthokonta;Metazoa;Eumetazoa;Bilateria;Protostomia;  
Spiralia;Lophotrochozoa;Mollusca;Bivalvia;Autobranchia;Heteroconchia;Euhe  
terodonta;Imparidentia;Venerida;Veneroidea;Veneridae;Mercenaria;Mercenari  
a mercenaria

|                 |      |        |   |                 |                |      |          |        |      |  |
|-----------------|------|--------|---|-----------------|----------------|------|----------|--------|------|--|
| UdeM00000029904 | 6596 | 1143.3 |   | UdeM00000029904 | XP_045197475.1 | 55.2 |          |        |      |  |
| 1014            | 436  | 10     | 7 | 1013            | 30             | 1032 | 0.00E+00 | 1143.3 | 6596 |  |

cellular  
organisms;Eukaryota;Opisthokonta;Metazoa;Eumetazoa;Bilateria;Protostomia;  
Spiralia;Lophotrochozoa;Mollusca;Bivalvia;Autobranchia;Heteroconchia;Euhe  
terodonta;Imparidentia;Venerida;Veneroidea;Veneridae;Mercenaria;Mercenari  
a mercenaria

|                 |      |     |     |                 |                |           |     |      |          |  |
|-----------------|------|-----|-----|-----------------|----------------|-----------|-----|------|----------|--|
| UdeM00000029905 | 6579 | 505 |     | UdeM00000029905 | XP_033738649.1 | 63.2      | 383 |      |          |  |
| 139             | 1    | 1   | 383 | 1               | 381            | 8.60E-140 | 505 | 6579 | cellular |  |

organisms;Eukaryota;Opisthokonta;Metazoa;Eumetazoa;Bilateria;Protostomia;  
Spiralia;Lophotrochozoa;Mollusca;Bivalvia;Autobranchia;Pteriormorphia;Pect  
inida;Pectinoidea;Pectinidae;Pecten;Pecten maximus

|                 |      |     |     |                 |                |           |     |      |          |  |
|-----------------|------|-----|-----|-----------------|----------------|-----------|-----|------|----------|--|
| UdeM00000029906 | 6579 | 619 |     | UdeM00000029906 | XP_033738649.1 | 64.7      | 453 |      |          |  |
| 157             | 2    | 1   | 453 | 1               | 450            | 5.10E-174 | 619 | 6579 | cellular |  |

organisms;Eukaryota;Opisthokonta;Metazoa;Eumetazoa;Bilateria;Protostomia;  
Spiralia;Lophotrochozoa;Mollusca;Bivalvia;Autobranchia;Pteriormorphia;Pect  
inida;Pectinoidea;Pectinidae;Pecten;Pecten maximus

|                 |       |      |     |                 |                |          |      |       |          |  |
|-----------------|-------|------|-----|-----------------|----------------|----------|------|-------|----------|--|
| UdeM00000029908 | 29159 | 79.3 |     | UdeM00000029908 | XP_011427293.2 | 35.1     | 154  |       |          |  |
| 83              | 4     | 1    | 138 | 45              | 197            | 4.20E-12 | 79.3 | 29159 | cellular |  |

organisms;Eukaryota;Opisthokonta;Metazoa;Eumetazoa;Bilateria;Protostomia;  
Spiralia;Lophotrochozoa;Mollusca;Bivalvia;Autobranchia;Pteriormorphia;Ostr  
eida;Ostreoidea;Ostreidae;Crassostrea;Crassostrea gigas

|                 |      |       |     |                 |                |          |       |      |          |  |
|-----------------|------|-------|-----|-----------------|----------------|----------|-------|------|----------|--|
| UdeM00000029907 | 6596 | 110.5 |     | UdeM00000029907 | XP_045209482.1 | 44.2     | 147   |      |          |  |
| 79              | 1    | 25    | 168 | 20              | 166            | 2.50E-21 | 110.5 | 6596 | cellular |  |

organisms;Eukaryota;Opisthokonta;Metazoa;Eumetazoa;Bilateria;Protostomia;  
Spiralia;Lophotrochozoa;Mollusca;Bivalvia;Autobranchia;Heteroconchia;Euhe  
terodonta;Imparidentia;Venerida;Veneroidea;Veneridae;Mercenaria;Mercenari  
a mercenaria

|                 |      |      |     |                 |                |          |      |      |          |  |
|-----------------|------|------|-----|-----------------|----------------|----------|------|------|----------|--|
| UdeM00000029911 | 6596 | 76.6 |     | UdeM00000029911 | XP_045209482.1 | 36.4     | 132  |      |          |  |
| 81              | 1    | 1    | 129 | 59              | 190            | 2.80E-11 | 76.6 | 6596 | cellular |  |

organisms;Eukaryota;Opisthokonta;Metazoa;Eumetazoa;Bilateria;Protostomia;  
Spiralia;Lophotrochozoa;Mollusca;Bivalvia;Autobranchia;Heteroconchia;Euhe  
terodonta;Imparidentia;Venerida;Veneroidea;Veneridae;Mercenaria;Mercenari  
a mercenaria

|                 |      |       |     |                 |                |          |       |      |          |  |
|-----------------|------|-------|-----|-----------------|----------------|----------|-------|------|----------|--|
| UdeM00000029910 | 6596 | 111.3 |     | UdeM00000029910 | XP_045169739.1 | 36.9     | 198   |      |          |  |
| 122             | 1    | 5     | 202 | 7               | 201            | 1.50E-21 | 111.3 | 6596 | cellular |  |

organisms;Eukaryota;Opisthokonta;Metazoa;Eumetazoa;Bilateria;Protostomia;  
Spiralia;Lophotrochozoa;Mollusca;Bivalvia;Autobranchia;Heteroconchia;Euhe  
terodonta;Imparidentia;Venerida;Veneroidea;Veneridae;Mercenaria;Mercenari  
a mercenaria

|                 |      |       |     |                 |                |           |       |      |          |  |
|-----------------|------|-------|-----|-----------------|----------------|-----------|-------|------|----------|--|
| UdeM00000029914 | 6579 | 602.8 |     | UdeM00000029914 | XP_033738649.1 | 62.5      | 464   |      |          |  |
| 160             | 3    | 1     | 464 | 1               | 450            | 3.90E-169 | 602.8 | 6579 | cellular |  |

organisms;Eukaryota;Opisthokonta;Metazoa;Eumetazoa;Bilateria;Protostomia;  
Spiralia;Lophotrochozoa;Mollusca;Bivalvia;Autobranchia;Pteriormorphia;Pect  
inida;Pectinoidea;Pectinidae;Pecten;Pecten maximus

|                 |      |      |     |                 |                |          |      |      |          |  |
|-----------------|------|------|-----|-----------------|----------------|----------|------|------|----------|--|
| UdeM00000029915 | 6596 | 80.5 |     | UdeM00000029915 | XP_045187509.1 | 31.9     | 141  |      |          |  |
| 95              | 1    | 1    | 141 | 65              | 204            | 2.10E-12 | 80.5 | 6596 | cellular |  |

organisms;Eukaryota;Opisthokonta;Metazoa;Eumetazoa;Bilateria;Protostomia;  
Spiralia;Lophotrochozoa;Mollusca;Bivalvia;Autobranchia;Heteroconchia;Euhe

terodonta;Imparidentia;Venerida;Veneroidea;Veneridae;Mercenaria;Mercenari  
 a mercenaria  
 UdeM00000029916 6596 112.8 UdeM00000029916 XP\_045209482.1 46.2 143  
 74 1 25 164 20 162 5.40E-22 112.8 6596 cellular  
 organisms;Eukaryota;Opisthokonta;Metazoa;Eumetazoa;Bilateria;Protostomia;  
 Spiralia;Lophotrochozoa;Mollusca;Bivalvia;Autobranchia;Heteroconchia;Euhe  
 terodonta;Imparidentia;Venerida;Veneroidea;Veneridae;Mercenaria;Mercenari  
 a mercenaria  
 UdeM00000029917 6596 72 UdeM00000029917 XP\_045185101.1 30.6 144  
 84 3 34 164 23 163 7.90E-10 72 6596 cellular  
 organisms;Eukaryota;Opisthokonta;Metazoa;Eumetazoa;Bilateria;Protostomia;  
 Spiralia;Lophotrochozoa;Mollusca;Bivalvia;Autobranchia;Heteroconchia;Euhe  
 terodonta;Imparidentia;Venerida;Veneroidea;Veneridae;Mercenaria;Mercenari  
 a mercenaria  
 UdeM00000029918 6596 107.8 UdeM00000029918 XP\_045209482.1 43.8 144  
 75 2 1 144 1 138 1.80E-20 107.8 6596 cellular  
 organisms;Eukaryota;Opisthokonta;Metazoa;Eumetazoa;Bilateria;Protostomia;  
 Spiralia;Lophotrochozoa;Mollusca;Bivalvia;Autobranchia;Heteroconchia;Euhe  
 terodonta;Imparidentia;Venerida;Veneroidea;Veneridae;Mercenaria;Mercenari  
 a mercenaria  
 UdeM00000029919 1735272 109.4 UdeM00000029919 XP\_041374221.1 35.8  
 187 110 3 20 202 12 192 5.50E-21 109.4 1735272  
 cellular  
 organisms;Eukaryota;Opisthokonta;Metazoa;Eumetazoa;Bilateria;Protostomia;  
 Spiralia;Lophotrochozoa;Mollusca;Gastropoda;Neomphalina;Neomphaloidea;Pel  
 tospiridae;Gigantopelta;Gigantopelta aegis  
 UdeM00000029920 1735272 111.3 UdeM00000029920 XP\_041357433.1 42.1  
 152 85 2 39 189 14 163 1.60E-21 111.3 1735272  
 cellular  
 organisms;Eukaryota;Opisthokonta;Metazoa;Eumetazoa;Bilateria;Protostomia;  
 Spiralia;Lophotrochozoa;Mollusca;Gastropoda;Neomphalina;Neomphaloidea;Pel  
 tospiridae;Gigantopelta;Gigantopelta aegis  
 UdeM00000029921 747089 85.5 UdeM00000029921 XP\_025175728.1 27.2  
 305 191 10 10 290 532 829 2.50E-13 85.5 747089  
 cellular organisms;Eukaryota;Opisthokonta;Fungi;Fungi incertae  
 sedis;Mucoromycota;Glomeromycotina;Glomeromycetes;Glomerales;Glomeraceae;  
 Rhizophagus;Rhizophagus irregularis;Rhizophagus irregularis DAOM  
 181602=DAOM 197198  
 UdeM00000029922 747089 95.9 UdeM00000029922 XP\_025174809.1 28  
 311 196 10 10 299 504 807 1.80E-16 95.9 747089  
 cellular organisms;Eukaryota;Opisthokonta;Fungi;Fungi incertae  
 sedis;Mucoromycota;Glomeromycotina;Glomeromycetes;Glomerales;Glomeraceae;  
 Rhizophagus;Rhizophagus irregularis;Rhizophagus irregularis DAOM  
 181602=DAOM 197198  
 UdeM00000029926 1735272 110.2 UdeM00000029926 XP\_041374221.1 36.2  
 185 110 3 19 199 12 192 3.20E-21 110.2 1735272  
 cellular  
 organisms;Eukaryota;Opisthokonta;Metazoa;Eumetazoa;Bilateria;Protostomia;  
 Spiralia;Lophotrochozoa;Mollusca;Gastropoda;Neomphalina;Neomphaloidea;Pel  
 tospiridae;Gigantopelta;Gigantopelta aegis  
 UdeM00000029927 225164 108.2 UdeM00000029927 XP\_009058199.1 49.2  
 118 52 3 1 117 1 111 7.10E-21 108.2 225164  
 cellular  
 organisms;Eukaryota;Opisthokonta;Metazoa;Eumetazoa;Bilateria;Protostomia;



Spiralia;Lophotrochozoa;Mollusca;Gastropoda;Patellogastropoda;Lottioidea;Lottiidae;Lottia;Lottia gigantea

|                 |      |       |                 |                |     |          |
|-----------------|------|-------|-----------------|----------------|-----|----------|
| UdeM00000029928 | 6579 | 216.5 | UdeM00000029928 | XP_033752673.1 | 56  | 200      |
| 70              | 1    | 1     | 182             | 453            | 652 | 2.90E-53 |

216.5 6579 cellular organisms;Eukaryota;Opisthokonta;Metazoa;Eumetazoa;Bilateria;Protostomia;Spiralia;Lophotrochozoa;Mollusca;Bivalvia;Autobranchia;Pteriormorphia;Pectinida;Pectinoidea;Pectinidae;Pecten;Pecten maximus

|                 |        |       |                 |                |      |     |
|-----------------|--------|-------|-----------------|----------------|------|-----|
| UdeM00000029929 | 225164 | 121.7 | UdeM00000029929 | XP_009058200.1 | 50.9 |     |
| 108             | 53     | 0     | 4               | 111            | 108  | 215 |

5.90E-25 121.7 225164 cellular organisms;Eukaryota;Opisthokonta;Metazoa;Eumetazoa;Bilateria;Protostomia;Spiralia;Lophotrochozoa;Mollusca;Gastropoda;Patellogastropoda;Lottioidea;Lottiidae;Lottia;Lottia gigantea

|                 |      |       |                 |                |      |          |
|-----------------|------|-------|-----------------|----------------|------|----------|
| UdeM00000029930 | 8175 | 234.2 | UdeM00000029930 | XP_030292627.1 | 57.5 | 181      |
| 77              | 0    | 9     | 189             | 11             | 191  | 1.40E-58 |

234.2 8175 cellular organisms;Eukaryota;Opisthokonta;Metazoa;Eumetazoa;Bilateria;Deuterostomia;Chordata;Craniata;Vertebrata;Gnathostomata;Teleostomi;Euteleostomi;Actinopterygii;Actinopteri;Neopterygii;Teleostei;Osteoglossocephalai;Clupeocephala;Euteleostei;Neoteleostei;Eurypterygia;Ctenosquamata;Acanthomorphata;Euacanthomorphacea;Percomorphaceae;Eupercaria;Spariformes;Sparidae;Sparus;Sparus aurata

|                 |      |       |                 |                |     |          |
|-----------------|------|-------|-----------------|----------------|-----|----------|
| UdeM00000029931 | 6596 | 112.1 | UdeM00000029931 | XP_045209482.1 | 46  | 139      |
| 72              | 1    | 29    | 164             | 24             | 162 | 8.80E-22 |

112.1 6596 cellular organisms;Eukaryota;Opisthokonta;Metazoa;Eumetazoa;Bilateria;Protostomia;Spiralia;Lophotrochozoa;Mollusca;Bivalvia;Autobranchia;Heteroconchia;Euheterodonta;Imparidentia;Venerida;Veneroidea;Veneridae;Mercenaria;Mercenaria mercenaria

|                 |      |       |                 |                |      |          |
|-----------------|------|-------|-----------------|----------------|------|----------|
| UdeM00000029934 | 6596 | 107.5 | UdeM00000029934 | XP_045209482.1 | 43.8 | 144      |
| 75              | 2    | 1     | 144             | 1              | 138  | 2.30E-20 |

107.5 6596 cellular organisms;Eukaryota;Opisthokonta;Metazoa;Eumetazoa;Bilateria;Protostomia;Spiralia;Lophotrochozoa;Mollusca;Bivalvia;Autobranchia;Heteroconchia;Euheterodonta;Imparidentia;Venerida;Veneroidea;Veneridae;Mercenaria;Mercenaria mercenaria

|                 |         |       |                 |                |      |     |
|-----------------|---------|-------|-----------------|----------------|------|-----|
| UdeM00000029935 | 1735272 | 112.8 | UdeM00000029935 | XP_041374221.1 | 37.7 |     |
| 167             | 96      | 1     | 1               | 167            | 34   | 192 |

4.20E-22 112.8 1735272 cellular organisms;Eukaryota;Opisthokonta;Metazoa;Eumetazoa;Bilateria;Protostomia;Spiralia;Lophotrochozoa;Mollusca;Gastropoda;Neomphalina;Neomphaloidea;Peltospiridae;Gigantopelta;Gigantopelta aegis

|                 |         |       |                 |                |      |     |
|-----------------|---------|-------|-----------------|----------------|------|-----|
| UdeM00000029936 | 1735272 | 117.9 | UdeM00000029936 | XP_041374221.1 | 36.8 |     |
| 190             | 107     | 3     | 27              | 212            | 12   | 192 |

1.60E-23 117.9 1735272 cellular organisms;Eukaryota;Opisthokonta;Metazoa;Eumetazoa;Bilateria;Protostomia;Spiralia;Lophotrochozoa;Mollusca;Gastropoda;Neomphalina;Neomphaloidea;Peltospiridae;Gigantopelta;Gigantopelta aegis

|                 |      |       |                 |                |      |          |
|-----------------|------|-------|-----------------|----------------|------|----------|
| UdeM00000029937 | 6596 | 105.9 | UdeM00000029937 | XP_045209482.1 | 40.7 | 167      |
| 84              | 3    | 13    | 175             | 8              | 163  | 6.50E-20 |

105.9 6596 cellular organisms;Eukaryota;Opisthokonta;Metazoa;Eumetazoa;Bilateria;Protostomia;Spiralia;Lophotrochozoa;Mollusca;Bivalvia;Autobranchia;Heteroconchia;Euheterodonta;Imparidentia;Venerida;Veneroidea;Veneridae;Mercenaria;Mercenaria mercenaria

|                 |      |      |                 |                |      |          |
|-----------------|------|------|-----------------|----------------|------|----------|
| UdeM00000029938 | 6596 | 99.8 | UdeM00000029938 | XP_045183938.1 | 36.7 | 177      |
| 93              | 4    | 5    | 177             | 14             | 175  | 4.70E-18 |

99.8 6596 cellular organisms;Eukaryota;Opisthokonta;Metazoa;Eumetazoa;Bilateria;Protostomia;

Spiralia;Lophotrochozoa;Mollusca;Bivalvia;Autobranchia;Heteroconchia;Euheterodonta;Imparidentia;Venerida;Veneroidea;Veneridae;Mercenaria;Mercenaria mercenaria

UdeM00000029939 6596 114 UdeM00000029939 XP\_045209482.1 44 159  
79 3 24 177 14 167 2.30E-22 114 6596 cellular

organisms;Eukaryota;Opisthokonta;Metazoa;Eumetazoa;Bilateria;Protostomia;Spiralia;Lophotrochozoa;Mollusca;Bivalvia;Autobranchia;Heteroconchia;Euheterodonta;Imparidentia;Venerida;Veneroidea;Veneridae;Mercenaria;Mercenaria mercenaria

UdeM00000029940 747089 95.9 UdeM00000029940 XP\_025174809.1 28.9  
315 188 12 10 299 504 807 1.80E-16 95.9 747089

cellular organisms;Eukaryota;Opisthokonta;Fungi;Fungi incertae sedis;Mucoromycota;Glomeromycotina;Glomeromycetes;Glomerales;Glomeraceae;Rhizophagus;Rhizophagus irregularis;Rhizophagus irregularis DAOM 181602=DAOM 197198

UdeM00000029941 1735272 105.5 UdeM00000029941 XP\_041374221.1 38  
163 96 2 1 162 34 192 6.40E-20 105.5 1735272

cellular organisms;Eukaryota;Opisthokonta;Metazoa;Eumetazoa;Bilateria;Protostomia;Spiralia;Lophotrochozoa;Mollusca;Gastropoda;Neomphalina;Neomphaloidea;Peltospiridae;Gigantopelta;Gigantopelta aegis

UdeM00000029942 225164 107.1 UdeM00000029942 XP\_009058199.1 48.3  
118 53 3 1 117 1 111 1.60E-20 107.1 225164

cellular organisms;Eukaryota;Opisthokonta;Metazoa;Eumetazoa;Bilateria;Protostomia;Spiralia;Lophotrochozoa;Mollusca;Gastropoda;Patellogastropoda;Lottioidea;Lottiidae;Lottia;Lottia gigantea

UdeM00000029943 6579 265.4 UdeM00000029943 XP\_033752673.1 63.5 200  
73 0 1 200 453 652 5.90E-68 265.4 6579 cellular

organisms;Eukaryota;Opisthokonta;Metazoa;Eumetazoa;Bilateria;Protostomia;Spiralia;Lophotrochozoa;Mollusca;Bivalvia;Autobranchia;Pteriomorpha;Pectinida;Pectinoidea;Pectinidae;Pecten;Pecten maximus

UdeM00000029944 205130 82.8 UdeM00000029944 XP\_026180020.1 50.8  
65 32 0 1 65 197 261 2.10E-13 82.8 205130

cellular organisms;Eukaryota;Opisthokonta;Metazoa;Eumetazoa;Bilateria;Deuterostomia;Chordata;Craniata;Vertebrata;Gnathostomata;Teleostomi;Euteleostomi;Actinopterygii;Actinopteri;Neopterygii;Teleostei;Osteoglossocephalai;Clupeocephala;Euteleosteomorpha;Neoteleostei;Eurypterygia;Ctenosquamata;Acanthomorphata;Euacanthomorphacea;Percomorphaceae;Anabantaria;Synbranchiformes;Mastacembeloidei;Mastacembelidae;Mastacembelus;Mastacembelus armatus

UdeM00000029945 8175 231.9 UdeM00000029945 XP\_030292627.1 56.9 181  
78 0 9 189 11 191 6.90E-58 231.9 8175 cellular

organisms;Eukaryota;Opisthokonta;Metazoa;Eumetazoa;Bilateria;Deuterostomia;Chordata;Craniata;Vertebrata;Gnathostomata;Teleostomi;Euteleostomi;Actinopterygii;Actinopteri;Neopterygii;Teleostei;Osteoglossocephalai;Clupeocephala;Euteleosteomorpha;Neoteleostei;Eurypterygia;Ctenosquamata;Acanthomorphata;Euacanthomorphacea;Percomorphaceae;Eupercaria;Spariformes;Sparidae;Sparus;Sparus aurata

UdeM00000029946 6596 112.1 UdeM00000029946 XP\_045209482.1 46.8 139  
71 1 29 164 24 162 8.80E-22 112.1 6596 cellular

organisms;Eukaryota;Opisthokonta;Metazoa;Eumetazoa;Bilateria;Protostomia;Spiralia;Lophotrochozoa;Mollusca;Bivalvia;Autobranchia;Heteroconchia;Euheterodonta

terodonta;Imparidentia;Venerida;Veneroidea;Veneridae;Mercenaria;Mercenaria mercenaria  
 UdeM00000029948 6596 107.8 UdeM00000029948 XP\_045209482.1 43.8 144  
 75 2 1 144 1 138 1.50E-20 107.8 6596 cellular  
 organisms;Eukaryota;Opisthokonta;Metazoa;Eumetazoa;Bilateria;Protostomia;  
 Spiralia;Lophotrochozoa;Mollusca;Bivalvia;Autobranchia;Heteroconchia;Euhe  
 terodonta;Imparidentia;Venerida;Veneroidea;Veneridae;Mercenaria;Mercenari  
 a mercenaria  
 UdeM00000029950 1735272 116.7 UdeM00000029950 XP\_041374221.1 36.3  
 190 108 3 22 207 12 192 3.60E-23 116.7 1735272  
 cellular  
 organisms;Eukaryota;Opisthokonta;Metazoa;Eumetazoa;Bilateria;Protostomia;  
 Spiralia;Lophotrochozoa;Mollusca;Gastropoda;Neomphalina;Neomphaloidea;Pel  
 tospiridae;Gigantopelta;Gigantopelta aegis  
 UdeM00000029951 1735272 107.5 UdeM00000029951 XP\_041357433.1 35.6  
 188 113 5 48 231 11 194 2.40E-20 107.5 1735272  
 cellular  
 organisms;Eukaryota;Opisthokonta;Metazoa;Eumetazoa;Bilateria;Protostomia;  
 Spiralia;Lophotrochozoa;Mollusca;Gastropoda;Neomphalina;Neomphaloidea;Pel  
 tospiridae;Gigantopelta;Gigantopelta aegis  
 UdeM00000029952 6412 79.7 UdeM00000029952 XP\_009017487.1 61.4 57  
 22 0 1 57 151 207 3.20E-12 79.7 6412 cellular  
 organisms;Eukaryota;Opisthokonta;Metazoa;Eumetazoa;Bilateria;Protostomia;  
 Spiralia;Lophotrochozoa;Annelida;Clitellata;Hirudinea;Rhynchobdellida;Glo  
 ssisphoniidae;Helobdella;Helobdella robusta  
 UdeM00000029954 1735272 101.3 UdeM00000029954 XP\_041370461.1 37  
 189 104 5 64 248 13 190 1.90E-18 101.3 1735272  
 cellular  
 organisms;Eukaryota;Opisthokonta;Metazoa;Eumetazoa;Bilateria;Protostomia;  
 Spiralia;Lophotrochozoa;Mollusca;Gastropoda;Neomphalina;Neomphaloidea;Pel  
 tospiridae;Gigantopelta;Gigantopelta aegis  
 UdeM00000029955 6596 97.8 UdeM00000029955 XP\_045169739.1 38.1 155  
 78 1 33 187 5 141 2.20E-17 97.8 6596 cellular  
 organisms;Eukaryota;Opisthokonta;Metazoa;Eumetazoa;Bilateria;Protostomia;  
 Spiralia;Lophotrochozoa;Mollusca;Bivalvia;Autobranchia;Heteroconchia;Euhe  
 terodonta;Imparidentia;Venerida;Veneroidea;Veneridae;Mercenaria;Mercenari  
 a mercenaria  
 UdeM00000029956 6850 67.8 UdeM00000029956 XP\_013781880.1 37.5 80  
 50 0 2 81 218 297 7.80E-09 67.8 6850 cellular  
 organisms;Eukaryota;Opisthokonta;Metazoa;Eumetazoa;Bilateria;Protostomia;  
 Ecdysozoa;Panarthropoda;Arthropoda;Chelicerata;Merostomata;Xiphosura;Limu  
 lidae;Limulus;Limulus polyphemus  
 UdeM00000029957 6850 68.6 UdeM00000029957 XP\_013778022.1 39.5 76  
 46 0 3 78 138 213 5.30E-09 68.6 6850 cellular  
 organisms;Eukaryota;Opisthokonta;Metazoa;Eumetazoa;Bilateria;Protostomia;  
 Ecdysozoa;Panarthropoda;Arthropoda;Chelicerata;Merostomata;Xiphosura;Limu  
 lidae;Limulus;Limulus polyphemus  
 UdeM00000029960 6596 602.1 UdeM00000029960 XP\_045197169.1 75.4 394  
 80 4 2 393 79 457 5.20E-169 602.1 6596 cellular  
 organisms;Eukaryota;Opisthokonta;Metazoa;Eumetazoa;Bilateria;Protostomia;  
 Spiralia;Lophotrochozoa;Mollusca;Bivalvia;Autobranchia;Heteroconchia;Euhe  
 terodonta;Imparidentia;Venerida;Veneroidea;Veneridae;Mercenaria;Mercenari  
 a mercenaria

UdeM00000029961 6579 190.3 UdeM00000029961 XP\_033739677.1 84.2 101  
 16 0 44 144 376 476 1.70E-45 190.3 6579 cellular  
 organisms;Eukaryota;Opisthokonta;Metazoa;Eumetazoa;Bilateria;Protostomia;  
 Spiralia;Lophotrochozoa;Mollusca;Bivalvia;Autobranchia;Pteriormorphia;Pect  
 inida;Pectinoidea;Pectinidae;Pecten;Pecten maximus  
 UdeM00000029962 6579 654.8 UdeM00000029962 XP\_033739684.1 65.8 570  
 160 15 1 551 1 554 9.50E-185 654.8 6579 cellular  
 organisms;Eukaryota;Opisthokonta;Metazoa;Eumetazoa;Bilateria;Protostomia;  
 Spiralia;Lophotrochozoa;Mollusca;Bivalvia;Autobranchia;Pteriormorphia;Pect  
 inida;Pectinoidea;Pectinidae;Pecten;Pecten maximus  
 UdeM00000029963 6596 362.1 UdeM00000029963 XP\_045199074.1 62.2 270  
 101 1 1 269 1 270 6.20E-97 362.1 6596 cellular  
 organisms;Eukaryota;Opisthokonta;Metazoa;Eumetazoa;Bilateria;Protostomia;  
 Spiralia;Lophotrochozoa;Mollusca;Bivalvia;Autobranchia;Heteroconchia;Euhe  
 terodonta;Imparidentia;Venerida;Veneroidea;Veneridae;Mercenaria;Mercenari  
 a mercenaria  
 UdeM00000029964 6579 634 UdeM00000029964 XP\_033741164.1 78.1 401  
 81 4 11 405 61 460 1.30E-178 634 6579 cellular  
 organisms;Eukaryota;Opisthokonta;Metazoa;Eumetazoa;Bilateria;Protostomia;  
 Spiralia;Lophotrochozoa;Mollusca;Bivalvia;Autobranchia;Pteriormorphia;Pect  
 inida;Pectinoidea;Pectinidae;Pecten;Pecten maximus  
 UdeM00000029966 225164 60.5 UdeM00000029966 XP\_009062033.1 40.4  
 89 43 4 22 105 83 166 1.70E-06 60.5 225164  
 cellular  
 organisms;Eukaryota;Opisthokonta;Metazoa;Eumetazoa;Bilateria;Protostomia;  
 Spiralia;Lophotrochozoa;Mollusca;Gastropoda;Patellogastropoda;Lottioidea;  
 Lottiidae;Lottia;Lottia gigantea  
 UdeM00000029968 6596 316.2 UdeM00000029968 XP\_045169256.1 31.3 633  
 393 14 1 620 96 699 9.20E-83 316.2 6596 cellular  
 organisms;Eukaryota;Opisthokonta;Metazoa;Eumetazoa;Bilateria;Protostomia;  
 Spiralia;Lophotrochozoa;Mollusca;Bivalvia;Autobranchia;Heteroconchia;Euhe  
 terodonta;Imparidentia;Venerida;Veneroidea;Veneridae;Mercenaria;Mercenari  
 a mercenaria  
 UdeM00000029969 225164 73.9 UdeM00000029969 XP\_009063181.1 32.7  
 205 109 4 1 182 1 199 2.40E-10 73.9 225164  
 cellular  
 organisms;Eukaryota;Opisthokonta;Metazoa;Eumetazoa;Bilateria;Protostomia;  
 Spiralia;Lophotrochozoa;Mollusca;Gastropoda;Patellogastropoda;Lottioidea;  
 Lottiidae;Lottia;Lottia gigantea  
 UdeM00000029970 8218 107.1 UdeM00000029970 XP\_034071052.1 46.7 105  
 55 1 3 106 137 241 1.50E-20 107.1 8218 cellular  
 organisms;Eukaryota;Opisthokonta;Metazoa;Eumetazoa;Bilateria;Deuterostomi  
 a;Chordata;Craniata;Vertebrata;Gnathostomata;Teleostomi;Euteleostomi;Acti  
 nopterygii;Actinopteri;Neopterygii;Teleostei;Osteoglossocephalai;Clupeoce  
 phala;Euteleosteomorpha;Neoteleostei;Eurypterygia;Ctenosquamata;Acanthomo  
 rphata;Euacanthomorphacea;Percomorphaceae;Eupercaria;Perciformes;Notothen  
 ioidei;Bathydraconidae;Gymnodraco;Gymnodraco acuticeps  
 UdeM00000029971 6596 65.9 UdeM00000029971 XP\_045211214.1 27.3 172  
 118 2 35 203 529 696 7.40E-08 65.9 6596 cellular  
 organisms;Eukaryota;Opisthokonta;Metazoa;Eumetazoa;Bilateria;Protostomia;  
 Spiralia;Lophotrochozoa;Mollusca;Bivalvia;Autobranchia;Heteroconchia;Euhe  
 terodonta;Imparidentia;Venerida;Veneroidea;Veneridae;Mercenaria;Mercenari  
 a mercenaria

UdeM00000029972 6596 595.9 UdeM00000029972 XP\_045198007.1 81.2 346  
 65 0 29 374 28 373 3.60E-167 595.9 6596 cellular  
 organisms;Eukaryota;Opisthokonta;Metazoa;Eumetazoa;Bilateria;Protostomia;  
 Spiralia;Lophotrochozoa;Mollusca;Bivalvia;Autobranchia;Heteroconchia;Euhe  
 terodonta;Imparidentia;Venerida;Veneroidea;Veneridae;Mercenaria;Mercenari  
 a mercenaria

UdeM00000029974 6573 115.5 UdeM00000029974 XP\_021362122.1 36.6 183  
 88 3 3 157 2 184 7.70E-23 115.5 6573 cellular  
 organisms;Eukaryota;Opisthokonta;Metazoa;Eumetazoa;Bilateria;Protostomia;  
 Spiralia;Lophotrochozoa;Mollusca;Bivalvia;Autobranchia;Pteriormorphia;Pect  
 inida;Pectinoidea;Pectinidae;Mizuhopecten;Mizuhopecten yessoensis

UdeM00000029975 225164 540.8 UdeM00000029975 XP\_009055944.1 51  
 576 215 8 1 563 1 522 2.10E-150 540.8 225164  
 cellular  
 organisms;Eukaryota;Opisthokonta;Metazoa;Eumetazoa;Bilateria;Protostomia;  
 Spiralia;Lophotrochozoa;Mollusca;Gastropoda;Patellogastropoda;Lottioidea;  
 Lottiidae;Lottia;Lottia gigantea

UdeM00000029976 10224 114 UdeM00000029976 XP\_006811529.1 49.1 116  
 50 2 59 165 5 120 1.80E-22 114 10224 cellular  
 organisms;Eukaryota;Opisthokonta;Metazoa;Eumetazoa;Bilateria;Deuterostomi  
 a;Hemichordata;Enteropneusta;Harrimaniidae;Saccoglossus;Saccoglossus  
 kowalevskii

UdeM00000029977 2607531 455.7 UdeM00000029977 XP\_029645990.1 60.5  
 702 226 8 1 654 1 699 2.00E-124 455.7 2607531  
 cellular  
 organisms;Eukaryota;Opisthokonta;Metazoa;Eumetazoa;Bilateria;Protostomia;  
 Spiralia;Lophotrochozoa;Mollusca;Cephalopoda;Coleoidea;Octopodiformes;Oct  
 opoda;Incirrata;Octopodidae;Octopus;Octopus sinensis

UdeM00000029978 6579 493.8 UdeM00000029978 XP\_033740915.1 61.2 358  
 135 3 101 454 110 467 2.30E-136 493.8 6579 cellular  
 organisms;Eukaryota;Opisthokonta;Metazoa;Eumetazoa;Bilateria;Protostomia;  
 Spiralia;Lophotrochozoa;Mollusca;Bivalvia;Autobranchia;Pteriormorphia;Pect  
 inida;Pectinoidea;Pectinidae;Pecten;Pecten maximus

UdeM00000029979 6579 493.8 UdeM00000029979 XP\_033740915.1 61.2 358  
 135 3 87 440 110 467 2.30E-136 493.8 6579 cellular  
 organisms;Eukaryota;Opisthokonta;Metazoa;Eumetazoa;Bilateria;Protostomia;  
 Spiralia;Lophotrochozoa;Mollusca;Bivalvia;Autobranchia;Pteriormorphia;Pect  
 inida;Pectinoidea;Pectinidae;Pecten;Pecten maximus

UdeM00000029980 6596 214.2 UdeM00000029980 XP\_045204166.1 35.3 300  
 190 4 22 321 43 338 2.60E-52 214.2 6596 cellular  
 organisms;Eukaryota;Opisthokonta;Metazoa;Eumetazoa;Bilateria;Protostomia;  
 Spiralia;Lophotrochozoa;Mollusca;Bivalvia;Autobranchia;Heteroconchia;Euhe  
 terodonta;Imparidentia;Venerida;Veneroidea;Veneridae;Mercenaria;Mercenari  
 a mercenaria

UdeM00000029982 6596 216.1 UdeM00000029982 XP\_045204166.1 34.1 337  
 214 6 18 354 10 338 7.50E-53 216.1 6596 cellular  
 organisms;Eukaryota;Opisthokonta;Metazoa;Eumetazoa;Bilateria;Protostomia;  
 Spiralia;Lophotrochozoa;Mollusca;Bivalvia;Autobranchia;Heteroconchia;Euhe  
 terodonta;Imparidentia;Venerida;Veneroidea;Veneridae;Mercenaria;Mercenari  
 a mercenaria

UdeM00000029985 6596 100.5 UdeM00000029985 XP\_045204166.1 32.2 152  
 101 2 18 169 189 338 2.30E-18 100.5 6596 cellular  
 organisms;Eukaryota;Opisthokonta;Metazoa;Eumetazoa;Bilateria;Protostomia;  
 Spiralia;Lophotrochozoa;Mollusca;Bivalvia;Autobranchia;Heteroconchia;Euhe

terodonta;Imparidentia;Venerida;Veneroidea;Veneridae;Mercenaria;Mercenari  
 a mercenaria  
 UdeM00000029984 6596 120.6 UdeM00000029984 XP\_045204166.1 33.3 201  
 128 4 21 221 144 338 2.70E-24 120.6 6596 cellular  
 organisms;Eukaryota;Opisthokonta;Metazoa;Eumetazoa;Bilateria;Protostomia;  
 Spiralia;Lophotrochozoa;Mollusca;Bivalvia;Autobranhia;Heteroconchia;Euhe  
 terodonta;Imparidentia;Venerida;Veneroidea;Veneridae;Mercenaria;Mercenari  
 a mercenaria  
 UdeM00000029988 6596 224.2 UdeM00000029988 XP\_045204166.1 36.4 302  
 188 4 43 344 32 329 2.70E-55 224.2 6596 cellular  
 organisms;Eukaryota;Opisthokonta;Metazoa;Eumetazoa;Bilateria;Protostomia;  
 Spiralia;Lophotrochozoa;Mollusca;Bivalvia;Autobranhia;Heteroconchia;Euhe  
 terodonta;Imparidentia;Venerida;Veneroidea;Veneridae;Mercenaria;Mercenari  
 a mercenaria  
 UdeM00000029991 6596 225.7 UdeM00000029991 XP\_045204166.1 35.6 334  
 202 6 18 351 16 336 9.40E-56 225.7 6596 cellular  
 organisms;Eukaryota;Opisthokonta;Metazoa;Eumetazoa;Bilateria;Protostomia;  
 Spiralia;Lophotrochozoa;Mollusca;Bivalvia;Autobranhia;Heteroconchia;Euhe  
 terodonta;Imparidentia;Venerida;Veneroidea;Veneridae;Mercenaria;Mercenari  
 a mercenaria  
 UdeM00000029992 6596 225.3 UdeM00000029992 XP\_045204166.1 33.2 316  
 184 3 42 357 29 317 1.30E-55 225.3 6596 cellular  
 organisms;Eukaryota;Opisthokonta;Metazoa;Eumetazoa;Bilateria;Protostomia;  
 Spiralia;Lophotrochozoa;Mollusca;Bivalvia;Autobranhia;Heteroconchia;Euhe  
 terodonta;Imparidentia;Venerida;Veneroidea;Veneridae;Mercenaria;Mercenari  
 a mercenaria  
 UdeM00000029993 1735272 246.9 UdeM00000029993 XP\_041354081.1 46.4  
 461 217 11 1 450 116 557 4.90E-62 246.9 1735272  
 cellular  
 organisms;Eukaryota;Opisthokonta;Metazoa;Eumetazoa;Bilateria;Protostomia;  
 Spiralia;Lophotrochozoa;Mollusca;Gastropoda;Neomphalina;Neomphaloidea;Pel  
 tospiridae;Gigantopelta;Gigantopelta aegis  
 UdeM00000029994 1735272 278.5 UdeM00000029994 XP\_041354081.1 46.3  
 525 245 16 1 514 59 557 1.70E-71 278.5 1735272  
 cellular  
 organisms;Eukaryota;Opisthokonta;Metazoa;Eumetazoa;Bilateria;Protostomia;  
 Spiralia;Lophotrochozoa;Mollusca;Gastropoda;Neomphalina;Neomphaloidea;Pel  
 tospiridae;Gigantopelta;Gigantopelta aegis  
 UdeM00000029995 7574 186 UdeM00000029995 XP\_013384628.1 59 161  
 57 2 1 161 33 184 3.80E-44 186 7574 cellular  
 organisms;Eukaryota;Opisthokonta;Metazoa;Eumetazoa;Bilateria;Protostomia;  
 Spiralia;Lophotrochozoa;Brachiopoda;Linguliformea;Lingulata;Lingulida;Lin  
 guloidea;Lingulidae;Lingula;Lingula anatina  
 UdeM00000029996 6596 6917.4 UdeM00000029996 XP\_045195814.1 81.2  
 4213 780 6 1 4206 1 4208 0.00E+00 6917.4 6596  
 cellular  
 organisms;Eukaryota;Opisthokonta;Metazoa;Eumetazoa;Bilateria;Protostomia;  
 Spiralia;Lophotrochozoa;Mollusca;Bivalvia;Autobranhia;Heteroconchia;Euhe  
 terodonta;Imparidentia;Venerida;Veneroidea;Veneridae;Mercenaria;Mercenari  
 a mercenaria  
 UdeM00000029997 6596 6714.4 UdeM00000029997 XP\_045195814.1 81.1  
 4106 762 7 1 4099 1 4100 0.00E+00 6714.4 6596  
 cellular  
 organisms;Eukaryota;Opisthokonta;Metazoa;Eumetazoa;Bilateria;Protostomia;

Spiralia;Lophotrochozoa;Mollusca;Bivalvia;Autobranchia;Heteroconchia;Euherodonta;Imparidentia;Venerida;Veneroidea;Veneridae;Mercenaria;Mercenaria mercenaria

UdeM00000029998 6596 198.4 UdeM00000029998 XP\_045197627.1 34.4 393  
245 8 1 387 10 395 2.00E-47 198.4 6596 cellular

organisms;Eukaryota;Opisthokonta;Metazoa;Eumetazoa;Bilateria;Protostomia;Spiralia;Lophotrochozoa;Mollusca;Bivalvia;Autobranchia;Heteroconchia;Euherodonta;Imparidentia;Venerida;Veneroidea;Veneridae;Mercenaria;Mercenaria mercenaria

UdeM00000029999 6596 132.5 UdeM00000029999 XP\_045196362.1 31.6 351  
207 14 57 391 48 381 1.30E-27 132.5 6596 cellular

organisms;Eukaryota;Opisthokonta;Metazoa;Eumetazoa;Bilateria;Protostomia;Spiralia;Lophotrochozoa;Mollusca;Bivalvia;Autobranchia;Heteroconchia;Euherodonta;Imparidentia;Venerida;Veneroidea;Veneridae;Mercenaria;Mercenaria mercenaria

UdeM00000030000 29159 68.9 UdeM00000030000 XP\_011438591.2 31.9 163  
100 6 19 174 18 176 2.70E-08 68.9 29159 cellular

organisms;Eukaryota;Opisthokonta;Metazoa;Eumetazoa;Bilateria;Protostomia;Spiralia;Lophotrochozoa;Mollusca;Bivalvia;Autobranchia;Pteriomorphia;Ostreida;Ostreoidea;Ostreidae;Crassostrea;Crassostrea gigas

UdeM00000030001 6573 124.8 UdeM00000030001 XP\_021345507.1 47.4 135  
67 2 4 138 5 135 8.60E-26 124.8 6573 cellular

organisms;Eukaryota;Opisthokonta;Metazoa;Eumetazoa;Bilateria;Protostomia;Spiralia;Lophotrochozoa;Mollusca;Bivalvia;Autobranchia;Pteriomorphia;Pectinida;Pectinoidea;Pectinidae;Mizuhopecten;Mizuhopecten yessoensis

UdeM00000030002 6596 103.2 UdeM00000030002 XP\_045169370.1 38.6 153  
83 4 4 154 15 158 3.00E-19 103.2 6596 cellular

organisms;Eukaryota;Opisthokonta;Metazoa;Eumetazoa;Bilateria;Protostomia;Spiralia;Lophotrochozoa;Mollusca;Bivalvia;Autobranchia;Heteroconchia;Euherodonta;Imparidentia;Venerida;Veneroidea;Veneridae;Mercenaria;Mercenaria mercenaria

UdeM00000030003 6573 165.2 UdeM00000030003 XP\_021347733.1 30.9 320  
206 6 1 316 332 640 1.40E-37 165.2 6573 cellular

organisms;Eukaryota;Opisthokonta;Metazoa;Eumetazoa;Bilateria;Protostomia;Spiralia;Lophotrochozoa;Mollusca;Bivalvia;Autobranchia;Pteriomorphia;Pectinida;Pectinoidea;Pectinidae;Mizuhopecten;Mizuhopecten yessoensis

UdeM00000030004 6579 440.7 UdeM00000030004 XP\_033740238.1 37 646  
386 8 20 653 20 656 3.40E-120 440.7 6579 cellular

organisms;Eukaryota;Opisthokonta;Metazoa;Eumetazoa;Bilateria;Protostomia;Spiralia;Lophotrochozoa;Mollusca;Bivalvia;Autobranchia;Pteriomorphia;Pectinida;Pectinoidea;Pectinidae;Pecten;Pecten maximus

UdeM00000030005 6573 439.9 UdeM00000030005 XP\_021347733.1 36.8 639  
384 8 7 636 5 632 5.70E-120 439.9 6573 cellular

organisms;Eukaryota;Opisthokonta;Metazoa;Eumetazoa;Bilateria;Protostomia;Spiralia;Lophotrochozoa;Mollusca;Bivalvia;Autobranchia;Pteriomorphia;Pectinida;Pectinoidea;Pectinidae;Mizuhopecten;Mizuhopecten yessoensis

UdeM00000030006 6596 261.2 UdeM00000030006 XP\_045169370.1 44.4 295  
151 5 18 310 27 310 1.80E-66 261.2 6596 cellular

organisms;Eukaryota;Opisthokonta;Metazoa;Eumetazoa;Bilateria;Protostomia;Spiralia;Lophotrochozoa;Mollusca;Bivalvia;Autobranchia;Heteroconchia;Euherodonta;Imparidentia;Venerida;Veneroidea;Veneridae;Mercenaria;Mercenaria mercenaria

UdeM00000030008 6573 441.8 UdeM00000030008 XP\_021347733.1 36.1 640  
387 8 7 636 5 632 1.50E-120 441.8 6573 cellular

organisms;Eukaryota;Opisthokonta;Metazoa;Eumetazoa;Bilateria;Protostomia;Spiralia;Lophotrochozoa;Mollusca;Bivalvia;Autobranchia;Pteriormorphia;Pectinida;Pectinoidea;Pectinidae;Mizuhopecten;Mizuhopecten yessoensis  
UdeM00000030009 6596 956.1 UdeM00000030009 XP\_045197367.1 49.5 1058  
440 18 3 1030 2 995 3.80E-275 956.1 6596 cellular  
organisms;Eukaryota;Opisthokonta;Metazoa;Eumetazoa;Bilateria;Protostomia;Spiralia;Lophotrochozoa;Mollusca;Bivalvia;Autobranchia;Heteroconchia;Euheterodonta;Imparidentia;Venerida;Veneroidea;Veneridae;Mercenaria;Mercenaria mercenaria  
UdeM00000030010 6596 955.3 UdeM00000030010 XP\_045197367.1 49.6 1058  
445 18 3 1036 2 995 6.40E-275 955.3 6596 cellular  
organisms;Eukaryota;Opisthokonta;Metazoa;Eumetazoa;Bilateria;Protostomia;Spiralia;Lophotrochozoa;Mollusca;Bivalvia;Autobranchia;Heteroconchia;Euheterodonta;Imparidentia;Venerida;Veneroidea;Veneridae;Mercenaria;Mercenaria mercenaria  
UdeM00000030011 6579 278.1 UdeM00000030011 XP\_033741736.1 54.9 244  
108 1 1 242 614 857 1.10E-71 278.1 6579 cellular  
organisms;Eukaryota;Opisthokonta;Metazoa;Eumetazoa;Bilateria;Protostomia;Spiralia;Lophotrochozoa;Mollusca;Bivalvia;Autobranchia;Pteriormorphia;Pectinida;Pectinoidea;Pectinidae;Pecten;Pecten maximus  
UdeM00000030012 109280 110.5 UdeM00000030012 XP\_019729826.1 32.1  
212 105 3 3 175 7 218 2.20E-21 110.5 109280  
cellular  
organisms;Eukaryota;Opisthokonta;Metazoa;Eumetazoa;Bilateria;Deuterostomia;Chordata;Craniata;Vertebrata;Gnathostomata;Teleostomi;Euteleostomi;Actinopterygii;Actinopteri;Neopterygii;Teleostei;Osteoglossocephalai;Clupeocephala;Euteleostei;Neoteleostei;Eurypterygia;Ctenosquamata;Acanthomorphata;Euacanthomorphacea;Percomorphaceae;Syngnathiaria;Syngnathiformes;Syngnathoidei;Syngnathidae;Hippocampinae;Hippocampus;Hippocampus comes  
UdeM00000030014 6526 71.2 UdeM00000030014 XP\_013078803.1 37.6 109  
60 3 1 109 18 118 1.00E-09 71.2 6526 cellular  
organisms;Eukaryota;Opisthokonta;Metazoa;Eumetazoa;Bilateria;Protostomia;Spiralia;Lophotrochozoa;Mollusca;Gastropoda;Heterobranchia;Euthyneura;Panpulmonata;Hygrophila;Lymnaeioidea;Planorbidae;Biomphalaria;Biomphalaria glabrata  
UdeM00000030015 70779 135.6 UdeM00000030015 XP\_015755194.1 68.4 98  
30 1 5 101 52 149 3.60E-29 135.6 70779 cellular  
organisms;Eukaryota;Opisthokonta;Metazoa;Eumetazoa;Cnidaria;Anthozoa;Hexacorallia;Scleractinia;Astrocoeniina;Acroporidae;Acropora;Acropora digitifera  
UdeM00000030016 70779 135.2 UdeM00000030016 XP\_015755194.1 68.4 98  
30 1 16 112 52 149 5.20E-29 135.2 70779 cellular  
organisms;Eukaryota;Opisthokonta;Metazoa;Eumetazoa;Cnidaria;Anthozoa;Hexacorallia;Scleractinia;Astrocoeniina;Acroporidae;Acropora;Acropora digitifera  
UdeM00000030017 6596 70.9 UdeM00000030017 XP\_045197368.1 34.1 129  
82 3 110 237 434 560 3.40E-09 70.9 6596 cellular  
organisms;Eukaryota;Opisthokonta;Metazoa;Eumetazoa;Bilateria;Protostomia;Spiralia;Lophotrochozoa;Mollusca;Bivalvia;Autobranchia;Heteroconchia;Euheterodonta;Imparidentia;Venerida;Veneroidea;Veneridae;Mercenaria;Mercenaria mercenaria  
UdeM00000030019 7574 83.6 UdeM00000030019 XP\_013413319.1 33.6 125  
70 4 3 127 522 633 6.00E-13 83.6 7574 cellular  
organisms;Eukaryota;Opisthokonta;Metazoa;Eumetazoa;Bilateria;Protostomia;



Spiralia;Lophotrochozoa;Brachiopoda;Linguliformea;Lingulata;Lingulida;Linguloidea;Lingulidae;Lingula;Lingula anatina

UdeM00000030020 6596 273.9 UdeM00000030020 XP\_045168024.1 46.1 308  
152 4 40 346 13 307 3.00E-70 273.9 6596 cellular

organisms;Eukaryota;Opisthokonta;Metazoa;Eumetazoa;Bilateria;Protostomia;Spiralia;Lophotrochozoa;Mollusca;Bivalvia;Autobranhia;Heteroconchia;Euherodonta;Imparidentia;Venerida;Veneroidea;Veneridae;Mercenaria;Mercenaria mercenaria

UdeM00000030021 6596 274.2 UdeM00000030021 XP\_045168024.1 46.1 308  
152 4 40 346 13 307 2.30E-70 274.2 6596 cellular

organisms;Eukaryota;Opisthokonta;Metazoa;Eumetazoa;Bilateria;Protostomia;Spiralia;Lophotrochozoa;Mollusca;Bivalvia;Autobranhia;Heteroconchia;Euherodonta;Imparidentia;Venerida;Veneroidea;Veneridae;Mercenaria;Mercenaria mercenaria

UdeM00000030022 6596 74.3 UdeM00000030022 XP\_045197390.1 35.7 129  
80 3 48 175 1 127 2.50E-10 74.3 6596 cellular

organisms;Eukaryota;Opisthokonta;Metazoa;Eumetazoa;Bilateria;Protostomia;Spiralia;Lophotrochozoa;Mollusca;Bivalvia;Autobranhia;Heteroconchia;Euherodonta;Imparidentia;Venerida;Veneroidea;Veneridae;Mercenaria;Mercenaria mercenaria

UdeM00000030023 70779 91.3 UdeM00000030023 XP\_015755194.1 63.4 71  
25 1 16 85 52 122 6.70E-16 91.3 70779 cellular

organisms;Eukaryota;Opisthokonta;Metazoa;Eumetazoa;Cnidaria;Anthozoa;Hexacorallia;Scleractinia;Astrocoeniina;Acroporidae;Acropora;Acropora digitifera

UdeM00000030024 6596 67.8 UdeM00000030024 XP\_045205019.1 29.9 167  
110 6 73 237 221 382 2.80E-08 67.8 6596 cellular

organisms;Eukaryota;Opisthokonta;Metazoa;Eumetazoa;Bilateria;Protostomia;Spiralia;Lophotrochozoa;Mollusca;Bivalvia;Autobranhia;Heteroconchia;Euherodonta;Imparidentia;Venerida;Veneroidea;Veneridae;Mercenaria;Mercenaria mercenaria

UdeM00000030025 70779 177.2 UdeM00000030025 XP\_015755194.1 61.5 148  
53 2 4 147 2 149 1.60E-41 177.2 70779 cellular

organisms;Eukaryota;Opisthokonta;Metazoa;Eumetazoa;Cnidaria;Anthozoa;Hexacorallia;Scleractinia;Astrocoeniina;Acroporidae;Acropora;Acropora digitifera

UdeM00000030027 6596 394.8 UdeM00000030027 XP\_045169235.1 38.6 596  
316 15 20 603 22 579 2.00E-106 394.8 6596 cellular

organisms;Eukaryota;Opisthokonta;Metazoa;Eumetazoa;Bilateria;Protostomia;Spiralia;Lophotrochozoa;Mollusca;Bivalvia;Autobranhia;Heteroconchia;Euherodonta;Imparidentia;Venerida;Veneroidea;Veneridae;Mercenaria;Mercenaria mercenaria

UdeM00000030029 6596 393.3 UdeM00000030029 XP\_045195510.1 38.2 597  
330 11 2 588 5 572 5.70E-106 393.3 6596 cellular

organisms;Eukaryota;Opisthokonta;Metazoa;Eumetazoa;Bilateria;Protostomia;Spiralia;Lophotrochozoa;Mollusca;Bivalvia;Autobranhia;Heteroconchia;Euherodonta;Imparidentia;Venerida;Veneroidea;Veneridae;Mercenaria;Mercenaria mercenaria

UdeM00000030030 29159 2068.1 UdeM00000030030 XP\_034333968.1 87.5  
1139 137 1 1 1134 1 1139 0.00E+00 2068.1

29159 cellular  
organisms;Eukaryota;Opisthokonta;Metazoa;Eumetazoa;Bilateria;Protostomia;Spiralia;Lophotrochozoa;Mollusca;Bivalvia;Autobranhia;Pteriomorphia;Ostreida;Ostreoidea;Ostreidae;Crassostrea;Crassostrea gigas

UdeM00000030031 6596 2113.2 UdeM00000030031 XP\_045198448.1 58.4  
 2517 936 12 1 2503 1 2419 0.00E+00 2113.2 6596  
 cellular  
 organisms;Eukaryota;Opisthokonta;Metazoa;Eumetazoa;Bilateria;Protostomia;  
 Spiralia;Lophotrochozoa;Mollusca;Bivalvia;Autobranchia;Heteroconchia;Euhe  
 terodonta;Imparidentia;Venerida;Veneroidea;Veneridae;Mercenaria;Mercenari  
 a mercenaria  
 UdeM00000030032 1735272 232.3 UdeM00000030032 XP\_041354771.1 40.7  
 290 172 0 1 290 175 464 8.10E-58 232.3 1735272  
 cellular  
 organisms;Eukaryota;Opisthokonta;Metazoa;Eumetazoa;Bilateria;Protostomia;  
 Spiralia;Lophotrochozoa;Mollusca;Gastropoda;Neomphalina;Neomphaloidea;Pel  
 tospiridae;Gigantopelta;Gigantopelta aegis  
 UdeM00000030033 1735272 231.9 UdeM00000030033 XP\_041354771.1 41.1  
 287 169 0 1 287 178 464 1.10E-57 231.9 1735272  
 cellular  
 organisms;Eukaryota;Opisthokonta;Metazoa;Eumetazoa;Bilateria;Protostomia;  
 Spiralia;Lophotrochozoa;Mollusca;Gastropoda;Neomphalina;Neomphaloidea;Pel  
 tospiridae;Gigantopelta;Gigantopelta aegis  
 UdeM00000030034 29159 879.8 UdeM00000030034 XP\_019925622.2 85 533  
 77 1 1 533 1 530 1.80E-252 879.8 29159 cellular  
 organisms;Eukaryota;Opisthokonta;Metazoa;Eumetazoa;Bilateria;Protostomia;  
 Spiralia;Lophotrochozoa;Mollusca;Bivalvia;Autobranchia;Pteriormorphia;Ostr  
 eida;Ostreoidea;Ostreidae;Crassostrea;Crassostrea gigas  
 UdeM00000030035 400727 193.7 UdeM00000030035 XP\_025098134.1 54.7  
 161 72 1 7 166 5 165 1.80E-46 193.7 400727  
 cellular  
 organisms;Eukaryota;Opisthokonta;Metazoa;Eumetazoa;Bilateria;Protostomia;  
 Spiralia;Lophotrochozoa;Mollusca;Gastropoda;Caenogastropoda;Architaeniogl  
 ossa;Ampullarioidea;Ampullariidae;Pomacea;Pomacea canaliculata  
 UdeM00000030036 6596 789.6 UdeM00000030036 XP\_045198229.1 76 508  
 111 3 11 512 63 565 2.30E-225 789.6 6596 cellular  
 organisms;Eukaryota;Opisthokonta;Metazoa;Eumetazoa;Bilateria;Protostomia;  
 Spiralia;Lophotrochozoa;Mollusca;Bivalvia;Autobranchia;Heteroconchia;Euhe  
 terodonta;Imparidentia;Venerida;Veneroidea;Veneridae;Mercenaria;Mercenari  
 a mercenaria  
 UdeM00000030037 6596 78.2 UdeM00000030037 XP\_045158584.1 44.2 95  
 50 2 15 109 50 141 8.90E-12 78.2 6596 cellular  
 organisms;Eukaryota;Opisthokonta;Metazoa;Eumetazoa;Bilateria;Protostomia;  
 Spiralia;Lophotrochozoa;Mollusca;Bivalvia;Autobranchia;Heteroconchia;Euhe  
 terodonta;Imparidentia;Venerida;Veneroidea;Veneridae;Mercenaria;Mercenari  
 a mercenaria  
 UdeM00000030038 6573 152.1 UdeM00000030038 XP\_021357585.1 56.2 128  
 54 2 26 151 3 130 9.40E-34 152.1 6573 cellular  
 organisms;Eukaryota;Opisthokonta;Metazoa;Eumetazoa;Bilateria;Protostomia;  
 Spiralia;Lophotrochozoa;Mollusca;Bivalvia;Autobranchia;Pteriormorphia;Pect  
 inida;Pectinoidea;Pectinidae;Mizuhopecten;Mizuhopecten yessoensis  
 UdeM00000030040 6579 469.2 UdeM00000030040 XP\_033740037.1 36.9 821  
 456 14 11 811 1473 2251 1.20E-128 469.2 6579 cellular  
 organisms;Eukaryota;Opisthokonta;Metazoa;Eumetazoa;Bilateria;Protostomia;  
 Spiralia;Lophotrochozoa;Mollusca;Bivalvia;Autobranchia;Pteriormorphia;Pect  
 inida;Pectinoidea;Pectinidae;Pecten;Pecten maximus  
 UdeM00000030041 6573 438.7 UdeM00000030041 XP\_021359425.1 27.9 1217  
 761 24 4 1116 253 1456 2.20E-119 438.7 6573 cellular

organisms;Eukaryota;Opisthokonta;Metazoa;Eumetazoa;Bilateria;Protostomia; Spiralia;Lophotrochozoa;Mollusca;Bivalvia;Autobranchia;Pteriormorphia;Pect inida;Pectinoidea;Pectinidae;Mizuhopecten;Mizuhopecten yessoensis

UdeM00000030042 400727 257.7 UdeM00000030042 XP\_025099514.1 78.8  
198 41 1 1 197 3 200 1.20E-65 257.7 400727

cellular

organisms;Eukaryota;Opisthokonta;Metazoa;Eumetazoa;Bilateria;Protostomia; Spiralia;Lophotrochozoa;Mollusca;Gastropoda;Caenogastropoda;Architaeniogl ossa;Ampullarioidea;Ampullariidae;Pomacea;Pomacea canaliculata

UdeM00000030043 6579 370.5 UdeM00000030043 XP\_033740146.1 39.3 552  
284 9 2 505 3 551 3.30E-99 370.5 6579 cellular

organisms;Eukaryota;Opisthokonta;Metazoa;Eumetazoa;Bilateria;Protostomia; Spiralia;Lophotrochozoa;Mollusca;Bivalvia;Autobranchia;Pteriormorphia;Pect inida;Pectinoidea;Pectinidae;Pecten;Pecten maximus

UdeM00000030044 6565 72.8 UdeM00000030044 XP\_022290295.1 29.6 199  
130 5 369 562 5 198 2.70E-09 72.8 6565 cellular

organisms;Eukaryota;Opisthokonta;Metazoa;Eumetazoa;Bilateria;Protostomia; Spiralia;Lophotrochozoa;Mollusca;Bivalvia;Autobranchia;Pteriormorphia;Ostr eida;Ostreoidea;Ostreidae;Crassostrea;Crassostrea virginica

UdeM00000030045 29159 420.2 UdeM00000030045 XP\_011418174.2 40.9 580  
301 9 3 541 4 582 3.90E-114 420.2 29159 cellular

organisms;Eukaryota;Opisthokonta;Metazoa;Eumetazoa;Bilateria;Protostomia; Spiralia;Lophotrochozoa;Mollusca;Bivalvia;Autobranchia;Pteriormorphia;Ostr eida;Ostreoidea;Ostreidae;Crassostrea;Crassostrea gigas

UdeM00000030046 1735272 287.3 UdeM00000030046 XP\_041373141.1 36.6  
434 252 7 7 425 12 437 3.30E-74 287.3 1735272

cellular

organisms;Eukaryota;Opisthokonta;Metazoa;Eumetazoa;Bilateria;Protostomia; Spiralia;Lophotrochozoa;Mollusca;Gastropoda;Neomphalina;Neomphaloidea;Pel tospiridae;Gigantopelta;Gigantopelta aegis

UdeM00000030047 6573 388.7 UdeM00000030047 XP\_021349278.1 41.7 636  
299 17 45 642 59 660 1.50E-104 388.7 6573 cellular

organisms;Eukaryota;Opisthokonta;Metazoa;Eumetazoa;Bilateria;Protostomia; Spiralia;Lophotrochozoa;Mollusca;Bivalvia;Autobranchia;Pteriormorphia;Pect inida;Pectinoidea;Pectinidae;Mizuhopecten;Mizuhopecten yessoensis

UdeM00000030048 6579 365.2 UdeM00000030048 XP\_033740146.1 38.8 551  
277 10 2 494 3 551 1.40E-97 365.2 6579 cellular

organisms;Eukaryota;Opisthokonta;Metazoa;Eumetazoa;Bilateria;Protostomia; Spiralia;Lophotrochozoa;Mollusca;Bivalvia;Autobranchia;Pteriormorphia;Pect inida;Pectinoidea;Pectinidae;Pecten;Pecten maximus

UdeM00000030049 6579 429.5 UdeM00000030049 XP\_033740146.1 42.7 553  
305 7 1 543 1 551 6.40E-117 429.5 6579 cellular

organisms;Eukaryota;Opisthokonta;Metazoa;Eumetazoa;Bilateria;Protostomia; Spiralia;Lophotrochozoa;Mollusca;Bivalvia;Autobranchia;Pteriormorphia;Pect inida;Pectinoidea;Pectinidae;Pecten;Pecten maximus

UdeM00000030050 6596 395.6 UdeM00000030050 XP\_045165662.1 61 310  
116 3 3 312 8 312 5.90E-107 395.6 6596 cellular

organisms;Eukaryota;Opisthokonta;Metazoa;Eumetazoa;Bilateria;Protostomia; Spiralia;Lophotrochozoa;Mollusca;Bivalvia;Autobranchia;Heteroconchia;Euhe terodonta;Imparidentia;Venerida;Veneroidea;Veneridae;Mercenaria;Mercenari a mercenaria

UdeM00000030053 7574 376.7 UdeM00000030053 XP\_013397625.1 46.8 387  
199 4 4 386 5 388 3.50E-101 376.7 7574 cellular

organisms;Eukaryota;Opisthokonta;Metazoa;Eumetazoa;Bilateria;Protostomia;

Spiralia;Lophotrochozoa;Brachiopoda;Linguliformea;Lingulata;Lingulida;Linguloidea;Lingulidae;Lingula;Lingula anatina

|                 |      |       |                 |                |      |           |
|-----------------|------|-------|-----------------|----------------|------|-----------|
| UdeM00000030051 | 7574 | 379.8 | UdeM00000030051 | XP_013397625.1 | 45.9 | 401       |
| 207             | 5    | 4     | 397             | 5              | 402  | 4.90E-102 |

379.8 7574 cellular organisms;Eukaryota;Opisthokonta;Metazoa;Eumetazoa;Bilateria;Protostomia;Spiralia;Lophotrochozoa;Brachiopoda;Linguliformea;Lingulata;Lingulida;Linguloidea;Lingulidae;Lingula;Lingula anatina

|                 |      |       |                 |                |      |           |
|-----------------|------|-------|-----------------|----------------|------|-----------|
| UdeM00000030052 | 7574 | 571.2 | UdeM00000030052 | XP_013397625.1 | 48.7 | 579       |
| 289             | 5    | 4     | 577             | 5              | 580  | 1.50E-159 |

571.2 7574 cellular organisms;Eukaryota;Opisthokonta;Metazoa;Eumetazoa;Bilateria;Protostomia;Spiralia;Lophotrochozoa;Brachiopoda;Linguliformea;Lingulata;Lingulida;Linguloidea;Lingulidae;Lingula;Lingula anatina

|                 |      |       |                 |                |      |          |
|-----------------|------|-------|-----------------|----------------|------|----------|
| UdeM00000030054 | 7574 | 205.7 | UdeM00000030054 | XP_023933057.1 | 50.2 | 201      |
| 99              | 1    | 20    | 219             | 185            | 385  | 6.20E-50 |

205.7 7574 cellular organisms;Eukaryota;Opisthokonta;Metazoa;Eumetazoa;Bilateria;Protostomia;Spiralia;Lophotrochozoa;Brachiopoda;Linguliformea;Lingulata;Lingulida;Linguloidea;Lingulidae;Lingula;Lingula anatina

|                 |      |       |                 |                |      |           |
|-----------------|------|-------|-----------------|----------------|------|-----------|
| UdeM00000030056 | 7574 | 434.5 | UdeM00000030056 | XP_013397625.1 | 47.9 | 447       |
| 227             | 3    | 4     | 447             | 5              | 448  | 1.70E-118 |

434.5 7574 cellular organisms;Eukaryota;Opisthokonta;Metazoa;Eumetazoa;Bilateria;Protostomia;Spiralia;Lophotrochozoa;Brachiopoda;Linguliformea;Lingulata;Lingulida;Linguloidea;Lingulidae;Lingula;Lingula anatina

|                 |      |       |                 |                |      |           |
|-----------------|------|-------|-----------------|----------------|------|-----------|
| UdeM00000030055 | 7574 | 545.4 | UdeM00000030055 | XP_013397625.1 | 47.3 | 584       |
| 300             | 5    | 4     | 582             | 5              | 585  | 8.60E-152 |

545.4 7574 cellular organisms;Eukaryota;Opisthokonta;Metazoa;Eumetazoa;Bilateria;Protostomia;Spiralia;Lophotrochozoa;Brachiopoda;Linguliformea;Lingulata;Lingulida;Linguloidea;Lingulidae;Lingula;Lingula anatina

|                 |      |       |                 |                |      |          |
|-----------------|------|-------|-----------------|----------------|------|----------|
| UdeM00000030057 | 7574 | 109.4 | UdeM00000030057 | XP_013391382.1 | 45.6 | 125      |
| 67              | 1    | 1     | 124             | 459            | 583  | 3.40E-21 |

109.4 7574 cellular organisms;Eukaryota;Opisthokonta;Metazoa;Eumetazoa;Bilateria;Protostomia;Spiralia;Lophotrochozoa;Brachiopoda;Linguliformea;Lingulata;Lingulida;Linguloidea;Lingulidae;Lingula;Lingula anatina

|                 |         |       |                 |                |      |     |
|-----------------|---------|-------|-----------------|----------------|------|-----|
| UdeM00000030058 | 1735272 | 324.3 | UdeM00000030058 | XP_041351917.1 | 74.4 |     |
| 203             | 51      | 1     | 1               | 203            | 1    | 202 |

1.10E-85 324.3 1735272 cellular organisms;Eukaryota;Opisthokonta;Metazoa;Eumetazoa;Bilateria;Protostomia;Spiralia;Lophotrochozoa;Mollusca;Gastropoda;Neomphalina;Neomphaloidea;Peltospiridae;Gigantopelta;Gigantopelta aegis

|                 |      |       |                 |                |      |          |
|-----------------|------|-------|-----------------|----------------|------|----------|
| UdeM00000030059 | 6596 | 184.5 | UdeM00000030059 | XP_045196404.1 | 35.1 | 276      |
| 170             | 5    | 160   | 430             | 518            | 789  | 2.90E-43 |

184.5 6596 cellular organisms;Eukaryota;Opisthokonta;Metazoa;Eumetazoa;Bilateria;Protostomia;Spiralia;Lophotrochozoa;Mollusca;Bivalvia;Autobranchia;Heteroconchia;Euheterodonta;Imparidentia;Venerida;Veneroidea;Veneridae;Mercenaria;Mercenaria mercenaria

|                 |      |       |                 |                |      |          |
|-----------------|------|-------|-----------------|----------------|------|----------|
| UdeM00000030060 | 6596 | 183.7 | UdeM00000030060 | XP_045186528.1 | 35.9 | 276      |
| 148             | 4    | 162   | 437             | 415            | 661  | 4.90E-43 |

183.7 6596 cellular organisms;Eukaryota;Opisthokonta;Metazoa;Eumetazoa;Bilateria;Protostomia;Spiralia;Lophotrochozoa;Mollusca;Bivalvia;Autobranchia;Heteroconchia;Euheterodonta;Imparidentia;Venerida;Veneroidea;Veneridae;Mercenaria;Mercenaria mercenaria

|                 |      |       |                 |                |      |          |
|-----------------|------|-------|-----------------|----------------|------|----------|
| UdeM00000030061 | 6596 | 362.1 | UdeM00000030061 | XP_045199078.1 | 35.1 | 596      |
| 338             | 14   | 8     | 580             | 10             | 579  | 1.50E-96 |

362.1 6596 cellular organisms;Eukaryota;Opisthokonta;Metazoa;Eumetazoa;Bilateria;Protostomia;Spiralia;Lophotrochozoa;Mollusca;Bivalvia;Autobranchia;Heteroconchia;Euheterodonta;Imparidentia;Venerida;Veneroidea;Veneridae;Mercenaria;Mercenaria mercenaria

terodonta;Imparidentia;Venerida;Veneroidea;Veneridae;Mercenaria;Mercenari  
 a mercenaria  
 UdeM00000030062 6596 186.4 UdeM00000030062 XP\_045176508.1 36.6 273  
 149 5 159 430 249 498 7.50E-44 186.4 6596 cellular  
 organisms;Eukaryota;Opisthokonta;Metazoa;Eumetazoa;Bilateria;Protostomia;  
 Spiralia;Lophotrochozoa;Mollusca;Bivalvia;Autobranchia;Heteroconchia;Euhe  
 terodonta;Imparidentia;Venerida;Veneroidea;Veneridae;Mercenaria;Mercenari  
 a mercenaria  
 UdeM00000030063 6579 689.5 UdeM00000030063 XP\_033746880.1 52.1 674  
 295 7 1 646 815 1488 4.10E-195 689.5 6579 cellular  
 organisms;Eukaryota;Opisthokonta;Metazoa;Eumetazoa;Bilateria;Protostomia;  
 Spiralia;Lophotrochozoa;Mollusca;Bivalvia;Autobranchia;Pteriormorphia;Pect  
 inida;Pectinoidea;Pectinidae;Pecten;Pecten maximus  
 UdeM00000030064 6565 158.7 UdeM00000030064 XP\_022328252.1 44.1 211  
 100 5 1 193 1105 1315 7.50E-36 158.7 6565 cellular  
 organisms;Eukaryota;Opisthokonta;Metazoa;Eumetazoa;Bilateria;Protostomia;  
 Spiralia;Lophotrochozoa;Mollusca;Bivalvia;Autobranchia;Pteriormorphia;Ostr  
 eida;Ostreoidea;Ostreidae;Crassostrea;Crassostrea virginica  
 UdeM00000030066 6596 71.2 UdeM00000030066 XP\_045215232.1 50 56  
 27 1 4 59 7 61 2.00E-09 71.2 6596 cellular  
 organisms;Eukaryota;Opisthokonta;Metazoa;Eumetazoa;Bilateria;Protostomia;  
 Spiralia;Lophotrochozoa;Mollusca;Bivalvia;Autobranchia;Heteroconchia;Euhe  
 terodonta;Imparidentia;Venerida;Veneroidea;Veneridae;Mercenaria;Mercenari  
 a mercenaria  
 UdeM00000030065 6596 71.2 UdeM00000030065 XP\_045215232.1 50 56  
 27 1 4 59 7 61 2.30E-09 71.2 6596 cellular  
 organisms;Eukaryota;Opisthokonta;Metazoa;Eumetazoa;Bilateria;Protostomia;  
 Spiralia;Lophotrochozoa;Mollusca;Bivalvia;Autobranchia;Heteroconchia;Euhe  
 terodonta;Imparidentia;Venerida;Veneroidea;Veneridae;Mercenaria;Mercenari  
 a mercenaria  
 UdeM00000030067 6596 188 UdeM00000030067 XP\_045176508.1 36.8 280  
 154 5 184 463 242 498 2.80E-44 188 6596 cellular  
 organisms;Eukaryota;Opisthokonta;Metazoa;Eumetazoa;Bilateria;Protostomia;  
 Spiralia;Lophotrochozoa;Mollusca;Bivalvia;Autobranchia;Heteroconchia;Euhe  
 terodonta;Imparidentia;Venerida;Veneroidea;Veneridae;Mercenaria;Mercenari  
 a mercenaria  
 UdeM00000030068 6596 188.3 UdeM00000030068 XP\_045176508.1 36.9 279  
 154 5 184 462 242 498 2.10E-44 188.3 6596 cellular  
 organisms;Eukaryota;Opisthokonta;Metazoa;Eumetazoa;Bilateria;Protostomia;  
 Spiralia;Lophotrochozoa;Mollusca;Bivalvia;Autobranchia;Heteroconchia;Euhe  
 terodonta;Imparidentia;Venerida;Veneroidea;Veneridae;Mercenaria;Mercenari  
 a mercenaria  
 UdeM00000030069 6596 188.7 UdeM00000030069 XP\_045176508.1 36.3 278  
 146 6 155 429 249 498 1.50E-44 188.7 6596 cellular  
 organisms;Eukaryota;Opisthokonta;Metazoa;Eumetazoa;Bilateria;Protostomia;  
 Spiralia;Lophotrochozoa;Mollusca;Bivalvia;Autobranchia;Heteroconchia;Euhe  
 terodonta;Imparidentia;Venerida;Veneroidea;Veneridae;Mercenaria;Mercenari  
 a mercenaria  
 UdeM00000030070 6579 250 UdeM00000030070 XP\_033740793.1 38.1 367  
 190 7 539 871 531 894 1.10E-62 250 6579 cellular  
 organisms;Eukaryota;Opisthokonta;Metazoa;Eumetazoa;Bilateria;Protostomia;  
 Spiralia;Lophotrochozoa;Mollusca;Bivalvia;Autobranchia;Pteriormorphia;Pect  
 inida;Pectinoidea;Pectinidae;Pecten;Pecten maximus

UdeM00000030071 29159 62.4 UdeM00000030071 XP\_034315424.1 37.6 109  
 58 4 12 116 213 315 1.00E-06 62.4 29159 cellular  
 organisms;Eukaryota;Opisthokonta;Metazoa;Eumetazoa;Bilateria;Protostomia;  
 Spiralia;Lophotrochozoa;Mollusca;Bivalvia;Autobranchia;Pteriormorphia;Ostr  
 eida;Ostreoidea;Ostreidae;Crassostrea;Crassostrea gigas  
 UdeM00000030072 6596 191.4 UdeM00000030072 XP\_045195920.1 62.8 145  
 53 1 2 145 722 866 7.90E-46 191.4 6596 cellular  
 organisms;Eukaryota;Opisthokonta;Metazoa;Eumetazoa;Bilateria;Protostomia;  
 Spiralia;Lophotrochozoa;Mollusca;Bivalvia;Autobranchia;Heteroconchia;Euhe  
 terodonta;Imparidentia;Venerida;Veneroidea;Veneridae;Mercenaria;Mercenari  
 a mercenaria  
 UdeM00000030073 7574 360.1 UdeM00000030073 XP\_013381040.1 67.2 256  
 78 3 16 270 56 306 2.40E-96 360.1 7574 cellular  
 organisms;Eukaryota;Opisthokonta;Metazoa;Eumetazoa;Bilateria;Protostomia;  
 Spiralia;Lophotrochozoa;Brachiopoda;Linguliformea;Lingulata;Lingulida;Lin  
 guloidea;Lingulidae;Lingula;Lingula anatina  
 UdeM00000030074 400727 474.2 UdeM00000030074 XP\_025081071.1 41.9  
 640 341 8 85 715 108 725 3.00E-130 474.2 400727  
 cellular  
 organisms;Eukaryota;Opisthokonta;Metazoa;Eumetazoa;Bilateria;Protostomia;  
 Spiralia;Lophotrochozoa;Mollusca;Gastropoda;Caenogastropoda;Architaeniogl  
 ossa;Ampullarioidea;Ampullariidae;Pomacea;Pomacea canaliculata  
 UdeM00000030075 6596 807 UdeM00000030075 XP\_045196641.1 69.7 792  
 212 2 3 794 4 767 2.20E-230 807 6596 cellular  
 organisms;Eukaryota;Opisthokonta;Metazoa;Eumetazoa;Bilateria;Protostomia;  
 Spiralia;Lophotrochozoa;Mollusca;Bivalvia;Autobranchia;Heteroconchia;Euhe  
 terodonta;Imparidentia;Venerida;Veneroidea;Veneridae;Mercenaria;Mercenari  
 a mercenaria  
 UdeM00000030076 6596 679.5 UdeM00000030076 XP\_045196646.1 66.7 558  
 141 15 67 611 62 587 4.00E-192 679.5 6596 cellular  
 organisms;Eukaryota;Opisthokonta;Metazoa;Eumetazoa;Bilateria;Protostomia;  
 Spiralia;Lophotrochozoa;Mollusca;Bivalvia;Autobranchia;Heteroconchia;Euhe  
 terodonta;Imparidentia;Venerida;Veneroidea;Veneridae;Mercenaria;Mercenari  
 a mercenaria  
 UdeM00000030077 6596 677.2 UdeM00000030077 XP\_045196646.1 66.5 558  
 141 15 67 610 62 587 2.00E-191 677.2 6596 cellular  
 organisms;Eukaryota;Opisthokonta;Metazoa;Eumetazoa;Bilateria;Protostomia;  
 Spiralia;Lophotrochozoa;Mollusca;Bivalvia;Autobranchia;Heteroconchia;Euhe  
 terodonta;Imparidentia;Venerida;Veneroidea;Veneridae;Mercenaria;Mercenari  
 a mercenaria  
 UdeM00000030078 6596 681.4 UdeM00000030078 XP\_045196646.1 67 557  
 139 15 67 609 62 587 1.10E-192 681.4 6596 cellular  
 organisms;Eukaryota;Opisthokonta;Metazoa;Eumetazoa;Bilateria;Protostomia;  
 Spiralia;Lophotrochozoa;Mollusca;Bivalvia;Autobranchia;Heteroconchia;Euhe  
 terodonta;Imparidentia;Venerida;Veneroidea;Veneridae;Mercenaria;Mercenari  
 a mercenaria  
 UdeM00000030079 6596 232.6 UdeM00000030079 XP\_045195277.1 89.7 126  
 13 0 63 188 2026 2151 4.00E-58 232.6 6596 cellular  
 organisms;Eukaryota;Opisthokonta;Metazoa;Eumetazoa;Bilateria;Protostomia;  
 Spiralia;Lophotrochozoa;Mollusca;Bivalvia;Autobranchia;Heteroconchia;Euhe  
 terodonta;Imparidentia;Venerida;Veneroidea;Veneridae;Mercenaria;Mercenari  
 a mercenaria  
 UdeM00000030080 37653 288.1 UdeM00000030080 XP\_014784607.1 67 206  
 65 1 1 203 141 346 8.70E-75 288.1 37653 cellular

organisms;Eukaryota;Opisthokonta;Metazoa;Eumetazoa;Bilateria;Protostomia;Spiralia;Lophotrochozoa;Mollusca;Cephalopoda;Coleoidea;Octopodiformes;Octopoda;Incirrata;Octopodidae;Octopus;Octopus bimaculoides  
UdeM00000030081 6596 82.4 UdeM00000030081 XP\_045195285.1 24.9 422  
272 12 17 429 35 420 1.60E-12 82.4 6596 cellular  
organisms;Eukaryota;Opisthokonta;Metazoa;Eumetazoa;Bilateria;Protostomia;Spiralia;Lophotrochozoa;Mollusca;Bivalvia;Autobranchia;Heteroconchia;Euheterodonta;Imparidentia;Venerida;Veneroidea;Veneridae;Mercenaria;Mercenaria mercenaria  
UdeM00000030082 6596 81.6 UdeM00000030082 XP\_045195285.1 24.9 422  
272 12 17 429 35 420 4.70E-12 81.6 6596 cellular  
organisms;Eukaryota;Opisthokonta;Metazoa;Eumetazoa;Bilateria;Protostomia;Spiralia;Lophotrochozoa;Mollusca;Bivalvia;Autobranchia;Heteroconchia;Euheterodonta;Imparidentia;Venerida;Veneroidea;Veneridae;Mercenaria;Mercenaria mercenaria  
UdeM00000030083 6579 61.2 UdeM00000030083 XP\_033741021.1 28.1 228  
135 6 11 222 41 255 2.00E-06 61.2 6579 cellular  
organisms;Eukaryota;Opisthokonta;Metazoa;Eumetazoa;Bilateria;Protostomia;Spiralia;Lophotrochozoa;Mollusca;Bivalvia;Autobranchia;Pteriormorphia;Pectinida;Pectinoidea;Pectinidae;Pecten;Pecten maximus  
UdeM00000030085 6596 184.9 UdeM00000030085 XP\_045195291.1 32.6 347  
223 7 10 353 8 346 2.10E-43 184.9 6596 cellular  
organisms;Eukaryota;Opisthokonta;Metazoa;Eumetazoa;Bilateria;Protostomia;Spiralia;Lophotrochozoa;Mollusca;Bivalvia;Autobranchia;Heteroconchia;Euheterodonta;Imparidentia;Venerida;Veneroidea;Veneridae;Mercenaria;Mercenaria mercenaria  
UdeM00000030086 6596 183.7 UdeM00000030086 XP\_045195291.1 32.3 347  
224 7 10 353 8 346 4.70E-43 183.7 6596 cellular  
organisms;Eukaryota;Opisthokonta;Metazoa;Eumetazoa;Bilateria;Protostomia;Spiralia;Lophotrochozoa;Mollusca;Bivalvia;Autobranchia;Heteroconchia;Euheterodonta;Imparidentia;Venerida;Veneroidea;Veneridae;Mercenaria;Mercenaria mercenaria  
UdeM00000030087 6596 180.6 UdeM00000030087 XP\_045195291.1 32.4 346  
223 7 3 345 9 346 3.90E-42 180.6 6596 cellular  
organisms;Eukaryota;Opisthokonta;Metazoa;Eumetazoa;Bilateria;Protostomia;Spiralia;Lophotrochozoa;Mollusca;Bivalvia;Autobranchia;Heteroconchia;Euheterodonta;Imparidentia;Venerida;Veneroidea;Veneridae;Mercenaria;Mercenaria mercenaria  
UdeM00000030088 6596 958.4 UdeM00000030088 XP\_045196538.1 44.8 1508  
670 36 1 1433 1 1421 1.20E-275 958.4 6596 cellular  
organisms;Eukaryota;Opisthokonta;Metazoa;Eumetazoa;Bilateria;Protostomia;Spiralia;Lophotrochozoa;Mollusca;Bivalvia;Autobranchia;Heteroconchia;Euheterodonta;Imparidentia;Venerida;Veneroidea;Veneridae;Mercenaria;Mercenaria mercenaria  
UdeM00000030089 6596 692.2 UdeM00000030089 XP\_045197843.1 58.6 534  
212 5 5 535 65 592 5.60E-196 692.2 6596 cellular  
organisms;Eukaryota;Opisthokonta;Metazoa;Eumetazoa;Bilateria;Protostomia;Spiralia;Lophotrochozoa;Mollusca;Bivalvia;Autobranchia;Heteroconchia;Euheterodonta;Imparidentia;Venerida;Veneroidea;Veneridae;Mercenaria;Mercenaria mercenaria  
UdeM00000030090 37653 520.4 UdeM00000030090 XP\_014784610.1 63 408  
133 5 1 391 1 407 2.00E-144 520.4 37653 cellular  
organisms;Eukaryota;Opisthokonta;Metazoa;Eumetazoa;Bilateria;Protostomia;

Spiralia;Lophotrochozoa;Mollusca;Cephalopoda;Coleoidea;Octopodiformes;Octopoda;Incirrata;Octopodidae;Octopus;Octopus bimaculoides  
UdeM00000030092 6573 360.5 UdeM00000030092 XP\_021380096.1 40.3 588  
281 15 131 662 77 650 4.60E-96 360.5 6573 cellular  
organisms;Eukaryota;Opisthokonta;Metazoa;Eumetazoa;Bilateria;Protostomia;  
Spiralia;Lophotrochozoa;Mollusca;Bivalvia;Autobranchia;Pteriormorphia;Pectinida;  
Pectinoidea;Pectinidae;Mizuhopecten;Mizuhopecten yessoensis  
UdeM00000030093 6596 216.9 UdeM00000030093 XP\_045195162.1 65.4 162  
56 0 4 165 1 162 2.00E-53 216.9 6596 cellular  
organisms;Eukaryota;Opisthokonta;Metazoa;Eumetazoa;Bilateria;Protostomia;  
Spiralia;Lophotrochozoa;Mollusca;Bivalvia;Autobranchia;Heteroconchia;Euheterodonta;  
Imparidentia;Venerida;Veneroidea;Veneridae;Mercenaria;Mercenaria mercenaria  
UdeM00000030094 6596 476.5 UdeM00000030094 XP\_045195164.1 87.2 337  
43 0 1 337 1 337 3.40E-131 476.5 6596 cellular  
organisms;Eukaryota;Opisthokonta;Metazoa;Eumetazoa;Bilateria;Protostomia;  
Spiralia;Lophotrochozoa;Mollusca;Bivalvia;Autobranchia;Heteroconchia;Euheterodonta;  
Imparidentia;Venerida;Veneroidea;Veneridae;Mercenaria;Mercenaria mercenaria  
UdeM00000030095 29159 306.2 UdeM00000030095 XP\_011424929.3 40 448  
216 9 8 442 27 434 6.80E-80 306.2 29159 cellular  
organisms;Eukaryota;Opisthokonta;Metazoa;Eumetazoa;Bilateria;Protostomia;  
Spiralia;Lophotrochozoa;Mollusca;Bivalvia;Autobranchia;Pteriormorphia;Ostreida;  
Ostreoidea;Ostreidae;Crassostrea;Crassostrea gigas  
UdeM00000030096 6579 477.2 UdeM00000030096 XP\_033739932.1 66.6 341  
108 1 1 335 1 341 1.70E-131 477.2 6579 cellular  
organisms;Eukaryota;Opisthokonta;Metazoa;Eumetazoa;Bilateria;Protostomia;  
Spiralia;Lophotrochozoa;Mollusca;Bivalvia;Autobranchia;Pteriormorphia;Pectinida;  
Pectinoidea;Pectinidae;Pecten;Pecten maximus  
UdeM00000030097 37653 1667.1 UdeM00000030097 XP\_014779463.1 62.8  
1450 486 14 45 1472 17 1434 0.00E+00 1667.1  
37653 cellular  
organisms;Eukaryota;Opisthokonta;Metazoa;Eumetazoa;Bilateria;Protostomia;  
Spiralia;Lophotrochozoa;Mollusca;Cephalopoda;Coleoidea;Octopodiformes;Octopoda;  
Incirrata;Octopodidae;Octopus;Octopus bimaculoides  
UdeM00000030098 37653 1670.2 UdeM00000030098 XP\_014779463.1 62.7  
1449 487 13 45 1471 17 1434 0.00E+00 1670.2  
37653 cellular  
organisms;Eukaryota;Opisthokonta;Metazoa;Eumetazoa;Bilateria;Protostomia;  
Spiralia;Lophotrochozoa;Mollusca;Cephalopoda;Coleoidea;Octopodiformes;Octopoda;  
Incirrata;Octopodidae;Octopus;Octopus bimaculoides  
UdeM00000030099 6596 7445.1 UdeM00000030099 XP\_045195277.1 81.4  
4552 832 3 63 4602 70 4619 0.00E+00 7445.1 6596  
cellular  
organisms;Eukaryota;Opisthokonta;Metazoa;Eumetazoa;Bilateria;Protostomia;  
Spiralia;Lophotrochozoa;Mollusca;Bivalvia;Autobranchia;Heteroconchia;Euheterodonta;  
Imparidentia;Venerida;Veneroidea;Veneridae;Mercenaria;Mercenaria mercenaria  
UdeM00000030100 6596 100.5 UdeM00000030100 XP\_045195265.1 41.3 167  
84 6 22 177 13 176 2.40E-18 100.5 6596 cellular  
organisms;Eukaryota;Opisthokonta;Metazoa;Eumetazoa;Bilateria;Protostomia;  
Spiralia;Lophotrochozoa;Mollusca;Bivalvia;Autobranchia;Heteroconchia;Euheterodonta;  
Imparidentia;Venerida;Veneroidea;Veneridae;Mercenaria;Mercenaria mercenaria



UdeM00000030101 225164 123.6 UdeM00000030101 XP\_009060400.1 28  
 446 271 11 12 426 1 427 6.60E-25 123.6 225164  
 cellular  
 organisms;Eukaryota;Opisthokonta;Metazoa;Eumetazoa;Bilateria;Protostomia;  
 Spiralia;Lophotrochozoa;Mollusca;Gastropoda;Patellogastropoda;Lottioidea;  
 Lottiidae;Lottia;Lottia gigantea  
 UdeM00000030102 6565 531.9 UdeM00000030102 XP\_022286442.1 80.2 318  
 63 0 1 318 1 318 5.40E-148 531.9 6565 cellular  
 organisms;Eukaryota;Opisthokonta;Metazoa;Eumetazoa;Bilateria;Protostomia;  
 Spiralia;Lophotrochozoa;Mollusca;Bivalvia;Autobranchia;Pteriormorphia;Ostr  
 eida;Ostreoidea;Ostreidae;Crassostrea;Crassostrea virginica  
 UdeM00000030103 6500 85.1 UdeM00000030103 XP\_005091192.1 51.4 74  
 36 0 20 93 7 80 5.10E-14 85.1 6500 cellular  
 organisms;Eukaryota;Opisthokonta;Metazoa;Eumetazoa;Bilateria;Protostomia;  
 Spiralia;Lophotrochozoa;Mollusca;Gastropoda;Heterobranchia;Euthyneura;Tec  
 tipleura;Aplysiida;Aplysioidea;Aplysiidae;Aplysia;Aplysia californica  
 UdeM00000030105 1735272 84.7 UdeM00000030105 XP\_041351986.1 49.4  
 85 41 1 5 87 1 85 6.30E-14 84.7 1735272  
 cellular  
 organisms;Eukaryota;Opisthokonta;Metazoa;Eumetazoa;Bilateria;Protostomia;  
 Spiralia;Lophotrochozoa;Mollusca;Gastropoda;Neomphalina;Neomphaloidea;Pel  
 tospiridae;Gigantopelta;Gigantopelta aegis  
 UdeM00000030104 225164 61.6 UdeM00000030104 XP\_009060322.1 47.5  
 59 31 0 5 63 1 59 5.90E-07 61.6 225164  
 cellular  
 organisms;Eukaryota;Opisthokonta;Metazoa;Eumetazoa;Bilateria;Protostomia;  
 Spiralia;Lophotrochozoa;Mollusca;Gastropoda;Patellogastropoda;Lottioidea;  
 Lottiidae;Lottia;Lottia gigantea  
 UdeM00000030106 6596 238.4 UdeM00000030106 XP\_045182143.1 55.9 195  
 85 1 17 211 21 214 8.20E-60 238.4 6596 cellular  
 organisms;Eukaryota;Opisthokonta;Metazoa;Eumetazoa;Bilateria;Protostomia;  
 Spiralia;Lophotrochozoa;Mollusca;Bivalvia;Autobranchia;Heteroconchia;Euhe  
 terodonta;Imparidentia;Venerida;Veneroidea;Veneridae;Mercenaria;Mercenari  
 a mercenaria  
 UdeM00000030107 6105 304.3 UdeM00000030107 XP\_031572471.1 42.5 369  
 200 7 6 366 9 373 2.40E-79 304.3 6105 cellular  
 organisms;Eukaryota;Opisthokonta;Metazoa;Eumetazoa;Cnidaria;Anthozoa;Hexa  
 corallia;Actiniaria;Actiniidae;Actinia;Actinia tenebrosa  
 UdeM00000030108 46731 315.1 UdeM00000030108 XP\_027048652.1 43.4 371  
 195 8 6 364 10 377 1.60E-82 315.1 46731 cellular  
 organisms;Eukaryota;Opisthokonta;Metazoa;Eumetazoa;Cnidaria;Anthozoa;Hexa  
 corallia;Scleractinia;Astrocoeniina;Pocilloporidae;Pocillopora;Pocillopor  
 a damicornis  
 UdeM00000030109 7574 357.5 UdeM00000030109 XP\_023932609.1 37.4 548  
 304 16 1 517 13 552 3.10E-95 357.5 7574 cellular  
 organisms;Eukaryota;Opisthokonta;Metazoa;Eumetazoa;Bilateria;Protostomia;  
 Spiralia;Lophotrochozoa;Brachiopoda;Linguliformea;Lingulata;Lingulida;Lin  
 guloidea;Lingulidae;Lingula;Lingula anatina  
 UdeM00000030110 6596 115.2 UdeM00000030110 XP\_045182143.1 41.4 152  
 59 2 5 127 64 214 6.30E-23 115.2 6596 cellular  
 organisms;Eukaryota;Opisthokonta;Metazoa;Eumetazoa;Bilateria;Protostomia;  
 Spiralia;Lophotrochozoa;Mollusca;Bivalvia;Autobranchia;Heteroconchia;Euhe  
 terodonta;Imparidentia;Venerida;Veneroidea;Veneridae;Mercenaria;Mercenari  
 a mercenaria

UdeM00000030111 48498 254.2 UdeM00000030111 XP\_020620504.1 54.5 189  
 85 1 9 196 576 764 1.90E-64 254.2 48498 cellular  
 organisms;Eukaryota;Opisthokonta;Metazoa;Eumetazoa;Cnidaria;Anthozoa;Hexa  
 corallia;Scleractinia;Faviina;Merulinidae;Orbicella;Orbicella faveolata  
 UdeM00000030113 6105 322.8 UdeM00000030113 XP\_031572471.1 46.3 356  
 180 7 10 358 22 373 7.90E-85 322.8 6105 cellular  
 organisms;Eukaryota;Opisthokonta;Metazoa;Eumetazoa;Cnidaria;Anthozoa;Hexa  
 corallia;Actiniaria;Actiniidae;Actinia;Actinia tenebrosa  
 UdeM00000030115 6573 327.4 UdeM00000030115 XP\_021362608.1 36.8 494  
 279 12 1 472 16 498 3.20E-86 327.4 6573 cellular  
 organisms;Eukaryota;Opisthokonta;Metazoa;Eumetazoa;Bilateria;Protostomia;  
 Spiralia;Lophotrochozoa;Mollusca;Bivalvia;Autobranchia;Pteriormorphia;Pect  
 inida;Pectinoidea;Pectinidae;Mizuhopecten;Mizuhopecten yessoensis  
 UdeM00000030114 6573 327.4 UdeM00000030114 XP\_021362608.1 36.8 494  
 279 12 1 472 16 498 3.50E-86 327.4 6573 cellular  
 organisms;Eukaryota;Opisthokonta;Metazoa;Eumetazoa;Bilateria;Protostomia;  
 Spiralia;Lophotrochozoa;Mollusca;Bivalvia;Autobranchia;Pteriormorphia;Pect  
 inida;Pectinoidea;Pectinidae;Mizuhopecten;Mizuhopecten yessoensis  
 UdeM00000030118 6573 322.8 UdeM00000030118 XP\_021362608.1 35.9 501  
 286 13 2 479 9 497 8.00E-85 322.8 6573 cellular  
 organisms;Eukaryota;Opisthokonta;Metazoa;Eumetazoa;Bilateria;Protostomia;  
 Spiralia;Lophotrochozoa;Mollusca;Bivalvia;Autobranchia;Pteriormorphia;Pect  
 inida;Pectinoidea;Pectinidae;Mizuhopecten;Mizuhopecten yessoensis  
 UdeM00000030117 6573 322.8 UdeM00000030117 XP\_021362608.1 35.9 501  
 286 13 2 479 9 497 8.80E-85 322.8 6573 cellular  
 organisms;Eukaryota;Opisthokonta;Metazoa;Eumetazoa;Bilateria;Protostomia;  
 Spiralia;Lophotrochozoa;Mollusca;Bivalvia;Autobranchia;Pteriormorphia;Pect  
 inida;Pectinoidea;Pectinidae;Mizuhopecten;Mizuhopecten yessoensis  
 UdeM00000030119 7574 413.3 UdeM00000030119 XP\_023932609.1 39.2 584  
 322 14 1 557 13 590 5.60E-112 413.3 7574 cellular  
 organisms;Eukaryota;Opisthokonta;Metazoa;Eumetazoa;Bilateria;Protostomia;  
 Spiralia;Lophotrochozoa;Brachiopoda;Linguliformea;Lingulata;Lingulida;Lin  
 guloidea;Lingulidae;Lingula;Lingula anatina  
 UdeM00000030120 7574 413.3 UdeM00000030120 XP\_023932609.1 39.2 584  
 322 14 1 557 13 590 5.60E-112 413.3 7574 cellular  
 organisms;Eukaryota;Opisthokonta;Metazoa;Eumetazoa;Bilateria;Protostomia;  
 Spiralia;Lophotrochozoa;Brachiopoda;Linguliformea;Lingulata;Lingulida;Lin  
 guloidea;Lingulidae;Lingula;Lingula anatina  
 UdeM00000030121 6573 326.6 UdeM00000030121 XP\_021362608.1 36.2 505  
 288 12 2 484 9 501 5.20E-86 326.6 6573 cellular  
 organisms;Eukaryota;Opisthokonta;Metazoa;Eumetazoa;Bilateria;Protostomia;  
 Spiralia;Lophotrochozoa;Mollusca;Bivalvia;Autobranchia;Pteriormorphia;Pect  
 inida;Pectinoidea;Pectinidae;Mizuhopecten;Mizuhopecten yessoensis  
 UdeM00000030122 6105 319.7 UdeM00000030122 XP\_031572471.1 44.4 369  
 194 7 6 367 9 373 5.60E-84 319.7 6105 cellular  
 organisms;Eukaryota;Opisthokonta;Metazoa;Eumetazoa;Cnidaria;Anthozoa;Hexa  
 corallia;Actiniaria;Actiniidae;Actinia;Actinia tenebrosa  
 UdeM00000030123 1735272 327.4 UdeM00000030123 XP\_041361403.1 46.2  
 357 181 7 17 366 21 373 3.20E-86 327.4 1735272  
 cellular  
 organisms;Eukaryota;Opisthokonta;Metazoa;Eumetazoa;Bilateria;Protostomia;  
 Spiralia;Lophotrochozoa;Mollusca;Gastropoda;Neomphalina;Neomphaloidea;Pel  
 tospiridae;Gigantopelta;Gigantopelta aegis

UdeM00000030124 6596 75.1 UdeM00000030124 XP\_045173548.1 47.4 57  
 28 1 95 151 613 667 8.60E-11 75.1 6596 cellular  
 organisms;Eukaryota;Opisthokonta;Metazoa;Eumetazoa;Bilateria;Protostomia;  
 Spiralia;Lophotrochozoa;Mollusca;Bivalvia;Autobranchia;Heteroconchia;Euhe  
 terodonta;Imparidentia;Venerida;Veneroidea;Veneridae;Mercenaria;Mercenari  
 a mercenaria  
 UdeM00000030125 48498 112.1 UdeM00000030125 XP\_020620494.1 42.5 134  
 62 2 131 260 728 850 1.20E-21 112.1 48498 cellular  
 organisms;Eukaryota;Opisthokonta;Metazoa;Eumetazoa;Cnidaria;Anthozoa;Hexa  
 corallia;Scleractinia;Faviina;Merulinidae;Orbicella;Orbicella faveolata  
 UdeM00000030126 45351 122.9 UdeM00000030126 XP\_032224987.1 47.5 122  
 63 1 32 152 94 215 3.80E-25 122.9 45351 cellular  
 organisms;Eukaryota;Opisthokonta;Metazoa;Eumetazoa;Cnidaria;Anthozoa;Hexa  
 corallia;Actiniaria;Edwardsiidae;Nematostella;Nematostella vectensis  
 UdeM00000030127 7574 578.9 UdeM00000030127 XP\_023932609.1 41.8 717  
 385 14 16 707 33 742 9.60E-162 578.9 7574 cellular  
 organisms;Eukaryota;Opisthokonta;Metazoa;Eumetazoa;Bilateria;Protostomia;  
 Spiralia;Lophotrochozoa;Brachiopoda;Linguliformea;Lingulata;Lingulida;Lin  
 guloidea;Lingulidae;Lingula;Lingula anatina  
 UdeM00000030129 29159 3488.7 UdeM00000030129 XP\_034333407.1 75.3  
 2258 541 11 75 2327 103 2349 0.00E+00 3488.7  
 29159 cellular  
 organisms;Eukaryota;Opisthokonta;Metazoa;Eumetazoa;Bilateria;Protostomia;  
 Spiralia;Lophotrochozoa;Mollusca;Bivalvia;Autobranchia;Pteriormorphia;Ostr  
 eida;Ostreoidea;Ostreidae;Crassostrea;Crassostrea gigas  
 UdeM00000030130 6596 306.2 UdeM00000030130 XP\_045187105.1 48.3 333  
 160 5 11 343 5 325 5.20E-80 306.2 6596 cellular  
 organisms;Eukaryota;Opisthokonta;Metazoa;Eumetazoa;Bilateria;Protostomia;  
 Spiralia;Lophotrochozoa;Mollusca;Bivalvia;Autobranchia;Heteroconchia;Euhe  
 terodonta;Imparidentia;Venerida;Veneroidea;Veneridae;Mercenaria;Mercenari  
 a mercenaria  
 UdeM00000030131 6596 620.5 UdeM00000030131 XP\_045212567.1 90 329  
 33 0 20 348 443 771 1.30E-174 620.5 6596 cellular  
 organisms;Eukaryota;Opisthokonta;Metazoa;Eumetazoa;Bilateria;Protostomia;  
 Spiralia;Lophotrochozoa;Mollusca;Bivalvia;Autobranchia;Heteroconchia;Euhe  
 terodonta;Imparidentia;Venerida;Veneroidea;Veneridae;Mercenaria;Mercenari  
 a mercenaria  
 UdeM00000030132 6596 1197.2 UdeM00000030132 XP\_045212567.1 81.5  
 728 82 1 67 794 97 771 0.00E+00 1197.2 6596  
 cellular  
 organisms;Eukaryota;Opisthokonta;Metazoa;Eumetazoa;Bilateria;Protostomia;  
 Spiralia;Lophotrochozoa;Mollusca;Bivalvia;Autobranchia;Heteroconchia;Euhe  
 terodonta;Imparidentia;Venerida;Veneroidea;Veneridae;Mercenaria;Mercenari  
 a mercenaria  
 UdeM00000030133 6596 370.9 UdeM00000030133 XP\_045198089.1 39.7 774  
 409 21 1 752 37 774 3.80E-99 370.9 6596 cellular  
 organisms;Eukaryota;Opisthokonta;Metazoa;Eumetazoa;Bilateria;Protostomia;  
 Spiralia;Lophotrochozoa;Mollusca;Bivalvia;Autobranchia;Heteroconchia;Euhe  
 terodonta;Imparidentia;Venerida;Veneroidea;Veneridae;Mercenaria;Mercenari  
 a mercenaria  
 UdeM00000030134 6596 86.3 UdeM00000030134 XP\_045196666.1 33 194  
 87 6 70 248 143 308 6.10E-14 86.3 6596 cellular  
 organisms;Eukaryota;Opisthokonta;Metazoa;Eumetazoa;Bilateria;Protostomia;  
 Spiralia;Lophotrochozoa;Mollusca;Bivalvia;Autobranchia;Heteroconchia;Euhe

terodonta;Imparidentia;Venerida;Veneroidea;Veneridae;Mercenaria;Mercenari  
 a mercenaria  
 UdeM00000030135 6596 159.8 UdeM00000030135 XP\_045198458.1 73.7 99  
 26 0 1 99 1 99 1.80E-36 159.8 6596 cellular  
 organisms;Eukaryota;Opisthokonta;Metazoa;Eumetazoa;Bilateria;Protostomia;  
 Spiralia;Lophotrochozoa;Mollusca;Bivalvia;Autobranchia;Heteroconchia;Euhe  
 terodonta;Imparidentia;Venerida;Veneroidea;Veneridae;Mercenaria;Mercenari  
 a mercenaria  
 UdeM00000030136 225164 123.6 UdeM00000030136 XP\_009062162.1 63.8  
 127 34 2 8 127 102 223 1.80E-25 123.6 225164  
 cellular  
 organisms;Eukaryota;Opisthokonta;Metazoa;Eumetazoa;Bilateria;Protostomia;  
 Spiralia;Lophotrochozoa;Mollusca;Gastropoda;Patellogastropoda;Lottioidea;  
 Lottiidae;Lottia;Lottia gigantea  
 UdeM00000030137 6596 1437.2 UdeM00000030137 XP\_045198458.1 46.4  
 2766 819 55 1 2674 128 2322 0.00E+00 1437.2 6596  
 cellular  
 organisms;Eukaryota;Opisthokonta;Metazoa;Eumetazoa;Bilateria;Protostomia;  
 Spiralia;Lophotrochozoa;Mollusca;Bivalvia;Autobranchia;Heteroconchia;Euhe  
 terodonta;Imparidentia;Venerida;Veneroidea;Veneridae;Mercenaria;Mercenari  
 a mercenaria  
 UdeM00000030138 6596 266.5 UdeM00000030138 XP\_045167863.1 61.8 199  
 73 2 169 367 106 301 4.90E-68 266.5 6596 cellular  
 organisms;Eukaryota;Opisthokonta;Metazoa;Eumetazoa;Bilateria;Protostomia;  
 Spiralia;Lophotrochozoa;Mollusca;Bivalvia;Autobranchia;Heteroconchia;Euhe  
 terodonta;Imparidentia;Venerida;Veneroidea;Veneridae;Mercenaria;Mercenari  
 a mercenaria  
 UdeM00000030139 6596 1279.2 UdeM00000030139 XP\_045196090.1 85.3  
 843 116 4 1 838 1 840 0.00E+00 1279.2 6596  
 cellular  
 organisms;Eukaryota;Opisthokonta;Metazoa;Eumetazoa;Bilateria;Protostomia;  
 Spiralia;Lophotrochozoa;Mollusca;Bivalvia;Autobranchia;Heteroconchia;Euhe  
 terodonta;Imparidentia;Venerida;Veneroidea;Veneridae;Mercenaria;Mercenari  
 a mercenaria  
 UdeM00000030140 6579 315.1 UdeM00000030140 XP\_033740054.1 41.7 446  
 248 7 9 446 6 447 1.50E-82 315.1 6579 cellular  
 organisms;Eukaryota;Opisthokonta;Metazoa;Eumetazoa;Bilateria;Protostomia;  
 Spiralia;Lophotrochozoa;Mollusca;Bivalvia;Autobranchia;Pteriomorphia;Pect  
 inida;Pectinoidea;Pectinidae;Pecten;Pecten maximus  
 UdeM00000030141 6573 193.4 UdeM00000030141 XP\_021377366.1 75.8 128  
 27 2 1 127 1 125 1.90E-46 193.4 6573 cellular  
 organisms;Eukaryota;Opisthokonta;Metazoa;Eumetazoa;Bilateria;Protostomia;  
 Spiralia;Lophotrochozoa;Mollusca;Bivalvia;Autobranchia;Pteriomorphia;Pect  
 inida;Pectinoidea;Pectinidae;Mizuhopecten;Mizuhopecten yessoensis  
 UdeM00000030142 37621 113.6 UdeM00000030142 XP\_014672134.1 41.6 137  
 77 1 2 135 139 275 2.10E-22 113.6 37621 cellular  
 organisms;Eukaryota;Opisthokonta;Metazoa;Eumetazoa;Bilateria;Protostomia;  
 Ecdysozoa;Scalidophora;Priapulida;Priapulimorpha;Priapulimorphida;Priapul  
 idae;Priapululus;Priapululus caudatus  
 UdeM00000030147 6579 234.2 UdeM00000030147 XP\_033740844.1 49.4 344  
 138 16 1 319 130 462 2.40E-58 234.2 6579 cellular  
 organisms;Eukaryota;Opisthokonta;Metazoa;Eumetazoa;Bilateria;Protostomia;  
 Spiralia;Lophotrochozoa;Mollusca;Bivalvia;Autobranchia;Pteriomorphia;Pect  
 inida;Pectinoidea;Pectinidae;Pecten;Pecten maximus

UdeM00000030146 6579 263.1 UdeM00000030146 XP\_033740844.1 45 556  
 229 22 1 507 130 657 7.40E-67 263.1 6579 cellular  
 organisms;Eukaryota;Opisthokonta;Metazoa;Eumetazoa;Bilateria;Protostomia;  
 Spiralia;Lophotrochozoa;Mollusca;Bivalvia;Autobranchia;Pteriomorpha;Pect  
 inida;Pectinoidea;Pectinidae;Pecten;Pecten maximus  
 UdeM00000030148 6596 69.3 UdeM00000030148 XP\_045181585.1 35.9 92  
 57 2 1 91 1 91 1.70E-08 69.3 6596 cellular  
 organisms;Eukaryota;Opisthokonta;Metazoa;Eumetazoa;Bilateria;Protostomia;  
 Spiralia;Lophotrochozoa;Mollusca;Bivalvia;Autobranchia;Heteroconchia;Euhe  
 terodonta;Imparidentia;Venerida;Veneroidea;Veneridae;Mercenaria;Mercenari  
 a mercenaria  
 UdeM00000030149 6565 81.3 UdeM00000030149 XP\_022329491.1 39.8 98  
 58 1 1 97 1 98 5.80E-12 81.3 6565 cellular  
 organisms;Eukaryota;Opisthokonta;Metazoa;Eumetazoa;Bilateria;Protostomia;  
 Spiralia;Lophotrochozoa;Mollusca;Bivalvia;Autobranchia;Pteriomorpha;Ostr  
 eida;Ostreoidea;Ostreidae;Crassostrea;Crassostrea virginica  
 UdeM00000030150 29159 173.3 UdeM00000030150 XP\_034323800.1 23.9 750  
 448 22 15 737 27 680 1.10E-39 173.3 29159 cellular  
 organisms;Eukaryota;Opisthokonta;Metazoa;Eumetazoa;Bilateria;Protostomia;  
 Spiralia;Lophotrochozoa;Mollusca;Bivalvia;Autobranchia;Pteriomorpha;Ostr  
 eida;Ostreoidea;Ostreidae;Crassostrea;Crassostrea gigas  
 UdeM00000030152 6596 4008.4 UdeM00000030152 XP\_045195413.1 46.9  
 4656 2006 68 1 4255 1077 5665 0.00E+00 4008.4 6596  
 cellular  
 organisms;Eukaryota;Opisthokonta;Metazoa;Eumetazoa;Bilateria;Protostomia;  
 Spiralia;Lophotrochozoa;Mollusca;Bivalvia;Autobranchia;Heteroconchia;Euhe  
 terodonta;Imparidentia;Venerida;Veneroidea;Veneridae;Mercenaria;Mercenari  
 a mercenaria  
 UdeM00000030154 6596 114.8 UdeM00000030154 XP\_045198336.1 42.6 122  
 69 1 5 125 579 700 8.70E-23 114.8 6596 cellular  
 organisms;Eukaryota;Opisthokonta;Metazoa;Eumetazoa;Bilateria;Protostomia;  
 Spiralia;Lophotrochozoa;Mollusca;Bivalvia;Autobranchia;Heteroconchia;Euhe  
 terodonta;Imparidentia;Venerida;Veneroidea;Veneridae;Mercenaria;Mercenari  
 a mercenaria  
 UdeM00000030153 6596 246.9 UdeM00000030153 XP\_045195418.1 32.1 455  
 289 8 575 1019 736 1180 1.10E-61 246.9 6596 cellular  
 organisms;Eukaryota;Opisthokonta;Metazoa;Eumetazoa;Bilateria;Protostomia;  
 Spiralia;Lophotrochozoa;Mollusca;Bivalvia;Autobranchia;Heteroconchia;Euhe  
 terodonta;Imparidentia;Venerida;Veneroidea;Veneridae;Mercenaria;Mercenari  
 a mercenaria  
 UdeM00000030155 6596 854.4 UdeM00000030155 XP\_045195413.1 48.6 933  
 446 10 698 1603 4740 5665 2.40E-244 854.4 6596 cellular  
 organisms;Eukaryota;Opisthokonta;Metazoa;Eumetazoa;Bilateria;Protostomia;  
 Spiralia;Lophotrochozoa;Mollusca;Bivalvia;Autobranchia;Heteroconchia;Euhe  
 terodonta;Imparidentia;Venerida;Veneroidea;Veneridae;Mercenaria;Mercenari  
 a mercenaria  
 UdeM00000030155 6596 444.5 UdeM00000030155 XP\_045195413.1 42.4 568  
 315 6 165 724 1230 1793 5.70E-121 444.5 6596 cellular  
 organisms;Eukaryota;Opisthokonta;Metazoa;Eumetazoa;Bilateria;Protostomia;  
 Spiralia;Lophotrochozoa;Mollusca;Bivalvia;Autobranchia;Heteroconchia;Euhe  
 terodonta;Imparidentia;Venerida;Veneroidea;Veneridae;Mercenaria;Mercenari  
 a mercenaria  
 UdeM00000010343 6579 250.8 UdeM00000010343 XP\_033757472.1 53.6 401  
 142 5 1 401 1 357 3.00E-63 250.8 6579 cellular

organisms;Eukaryota;Opisthokonta;Metazoa;Eumetazoa;Bilateria;Protostomia;Spiralia;Lophotrochozoa;Mollusca;Bivalvia;Autobranchia;Pteriomorphia;Pectinida;Pectinoidea;Pectinidae;Pecten;Pecten maximus  
UdeM00000010345 7574 236.1 UdeM00000010345 XP\_013405909.1 72.6 146  
40 0 1 146 1 146 5.80E-59 236.1 7574 cellular  
organisms;Eukaryota;Opisthokonta;Metazoa;Eumetazoa;Bilateria;Protostomia;Spiralia;Lophotrochozoa;Brachiopoda;Linguliformea;Lingulata;Lingulida;Linguloidea;Lingulidae;Lingula;Lingula anatina  
UdeM00000010344 31138 65.9 UdeM00000010344 XP\_034648626.1 30.7 114  
65 3 4 103 206 319 3.80E-08 65.9 31138 cellular  
organisms;Eukaryota;Opisthokonta;Metazoa;Eumetazoa;Bilateria;Deuterostomia;Chordata;Craniata;Vertebrata;Gnathostomata;Teleostomi;Euteleostomi;Sarcopterygii;Dipnotetrapodomorpha;Tetrapoda;Amniota;Sauropsida;Sauria;Archelosauria;Testudinata;Testudines;Cryptodira;Durocryptodira;Testudinoidea;Emydidae;Trachemys;Trachemys scripta;Trachemys scripta elegans  
UdeM00000010346 6596 850.5 UdeM00000010346 XP\_045188151.1 49.7 845  
349 13 1 773 85 925 1.70E-243 850.5 6596 cellular  
organisms;Eukaryota;Opisthokonta;Metazoa;Eumetazoa;Bilateria;Protostomia;Spiralia;Lophotrochozoa;Mollusca;Bivalvia;Autobranchia;Heteroconchia;Euheterodonta;Imparidentia;Venerida;Veneroidea;Veneridae;Mercenaria;Mercenaria mercenaria  
UdeM00000010347 225164 320.5 UdeM00000010347 XP\_009051864.1 36.2  
464 284 7 43 499 41 499 3.90E-84 320.5 225164  
cellular  
organisms;Eukaryota;Opisthokonta;Metazoa;Eumetazoa;Bilateria;Protostomia;Spiralia;Lophotrochozoa;Mollusca;Gastropoda;Patellogastropoda;Lottioidea;Lottiidae;Lottia;Lottia gigantea  
UdeM00000010348 1735272 392.1 UdeM00000010348 XP\_041368965.1 46.2  
487 210 10 19 497 16 458 1.10E-105 392.1 1735272  
cellular  
organisms;Eukaryota;Opisthokonta;Metazoa;Eumetazoa;Bilateria;Protostomia;Spiralia;Lophotrochozoa;Mollusca;Gastropoda;Neomphalina;Neomphaloidea;Peltospiridae;Gigantopelta;Gigantopelta aegis  
UdeM00000010349 6596 244.6 UdeM00000010349 XP\_045189419.1 75.2 157  
39 0 63 219 4 160 1.20E-61 244.6 6596 cellular  
organisms;Eukaryota;Opisthokonta;Metazoa;Eumetazoa;Bilateria;Protostomia;Spiralia;Lophotrochozoa;Mollusca;Bivalvia;Autobranchia;Heteroconchia;Euheterodonta;Imparidentia;Venerida;Veneroidea;Veneridae;Mercenaria;Mercenaria mercenaria  
UdeM00000010350 6596 569.3 UdeM00000010350 XP\_045189999.1 77.6 375  
83 1 24 397 15 389 3.80E-159 569.3 6596 cellular  
organisms;Eukaryota;Opisthokonta;Metazoa;Eumetazoa;Bilateria;Protostomia;Spiralia;Lophotrochozoa;Mollusca;Bivalvia;Autobranchia;Heteroconchia;Euheterodonta;Imparidentia;Venerida;Veneroidea;Veneridae;Mercenaria;Mercenaria mercenaria  
UdeM00000010351 6579 708.4 UdeM00000010351 XP\_033756445.1 72.2 474  
127 2 172 640 203 676 8.40E-201 708.4 6579 cellular  
organisms;Eukaryota;Opisthokonta;Metazoa;Eumetazoa;Bilateria;Protostomia;Spiralia;Lophotrochozoa;Mollusca;Bivalvia;Autobranchia;Pteriomorphia;Pectinida;Pectinoidea;Pectinidae;Pecten;Pecten maximus  
UdeM00000010352 6579 201.1 UdeM00000010352 XP\_033756445.1 69.9 146  
42 1 1 144 222 367 9.90E-49 201.1 6579 cellular  
organisms;Eukaryota;Opisthokonta;Metazoa;Eumetazoa;Bilateria;Protostomia;

Spiralia;Lophotrochozoa;Mollusca;Bivalvia;Autobranchia;Pteriormorphia;Pectinida;Pectinoidea;Pectinidae;Pecten;Pecten maximus  
 UdeM00000010353 6596 240.7 UdeM00000010353 XP\_045189995.1 61 210  
 80 2 1 209 1 209 1.60E-60 240.7 6596 cellular  
 organisms;Eukaryota;Opisthokonta;Metazoa;Eumetazoa;Bilateria;Protostomia;  
 Spiralia;Lophotrochozoa;Mollusca;Bivalvia;Autobranchia;Heteroconchia;Euherodonta;Imparidentia;Venerida;Veneroidea;Veneridae;Mercenaria;Mercenaria mercenaria  
 UdeM00000010354 6596 586.6 UdeM00000010354 XP\_045189708.1 55 540  
 236 4 8 547 10 542 3.20E-164 586.6 6596 cellular  
 organisms;Eukaryota;Opisthokonta;Metazoa;Eumetazoa;Bilateria;Protostomia;  
 Spiralia;Lophotrochozoa;Mollusca;Bivalvia;Autobranchia;Heteroconchia;Euherodonta;Imparidentia;Venerida;Veneroidea;Veneridae;Mercenaria;Mercenaria mercenaria  
 UdeM00000010355 6596 269.2 UdeM00000010355 XP\_045189377.1 68.9 196  
 49 3 1 196 1 184 4.00E-69 269.2 6596 cellular  
 organisms;Eukaryota;Opisthokonta;Metazoa;Eumetazoa;Bilateria;Protostomia;  
 Spiralia;Lophotrochozoa;Mollusca;Bivalvia;Autobranchia;Heteroconchia;Euherodonta;Imparidentia;Venerida;Veneroidea;Veneridae;Mercenaria;Mercenaria mercenaria  
 UdeM00000010356 29159 123.6 UdeM00000010356 XP\_034327695.1 65.3 75  
 26 0 12 86 11 85 1.20E-25 123.6 29159 cellular  
 organisms;Eukaryota;Opisthokonta;Metazoa;Eumetazoa;Bilateria;Protostomia;  
 Spiralia;Lophotrochozoa;Mollusca;Bivalvia;Autobranchia;Pteriormorphia;Ostreida;Ostreoidea;Ostreidae;Crassostrea;Crassostrea gigas  
 UdeM00000010357 29159 216.1 UdeM00000010357 XP\_034327699.1 52.5 221  
 76 4 11 222 49 249 4.60E-53 216.1 29159 cellular  
 organisms;Eukaryota;Opisthokonta;Metazoa;Eumetazoa;Bilateria;Protostomia;  
 Spiralia;Lophotrochozoa;Mollusca;Bivalvia;Autobranchia;Pteriormorphia;Ostreida;Ostreoidea;Ostreidae;Crassostrea;Crassostrea gigas  
 UdeM00000010358 6565 132.9 UdeM00000010358 XP\_022344103.1 48.7 156  
 68 2 1 144 117 272 3.30E-28 132.9 6565 cellular  
 organisms;Eukaryota;Opisthokonta;Metazoa;Eumetazoa;Bilateria;Protostomia;  
 Spiralia;Lophotrochozoa;Mollusca;Bivalvia;Autobranchia;Pteriormorphia;Ostreida;Ostreoidea;Ostreidae;Crassostrea;Crassostrea virginica  
 UdeM00000010360 6573 564.3 UdeM00000010360 XP\_021371958.1 79.2 389  
 58 4 8 395 18 384 1.20E-157 564.3 6573 cellular  
 organisms;Eukaryota;Opisthokonta;Metazoa;Eumetazoa;Bilateria;Protostomia;  
 Spiralia;Lophotrochozoa;Mollusca;Bivalvia;Autobranchia;Pteriormorphia;Pectinida;Pectinoidea;Pectinidae;Mizuhopecten;Mizuhopecten yessoensis  
 UdeM00000010359 6579 553.9 UdeM00000010359 XP\_033756090.1 79.4 383  
 50 5 7 388 15 369 1.60E-154 553.9 6579 cellular  
 organisms;Eukaryota;Opisthokonta;Metazoa;Eumetazoa;Bilateria;Protostomia;  
 Spiralia;Lophotrochozoa;Mollusca;Bivalvia;Autobranchia;Pteriormorphia;Pectinida;Pectinoidea;Pectinidae;Pecten;Pecten maximus  
 UdeM00000010361 6596 613.6 UdeM00000010361 XP\_045187267.1 51.1 569  
 261 5 6 571 4 558 2.50E-172 613.6 6596 cellular  
 organisms;Eukaryota;Opisthokonta;Metazoa;Eumetazoa;Bilateria;Protostomia;  
 Spiralia;Lophotrochozoa;Mollusca;Bivalvia;Autobranchia;Heteroconchia;Euherodonta;Imparidentia;Venerida;Veneroidea;Veneridae;Mercenaria;Mercenaria mercenaria  
 UdeM00000010362 6596 505 UdeM00000010362 XP\_045187267.1 50.3 481  
 230 4 1 478 84 558 1.10E-139 505 6596 cellular  
 organisms;Eukaryota;Opisthokonta;Metazoa;Eumetazoa;Bilateria;Protostomia;

Spiralia;Lophotrochozoa;Mollusca;Bivalvia;Autobranchia;Heteroconchia;Euherodonta;Imparidentia;Venerida;Veneroidea;Veneridae;Mercenaria;Mercenaria mercenaria

UdeM00000010363 6579 69.3 UdeM00000010363 XP\_033752062.1 33.9 109  
72 0 40 148 57 165 7.10E-09 69.3 6579 cellular

organisms;Eukaryota;Opisthokonta;Metazoa;Eumetazoa;Bilateria;Protostomia;Spiralia;Lophotrochozoa;Mollusca;Bivalvia;Autobranchia;Pteriomorpha;Pectinida;Pectinoidea;Pectinidae;Pecten;Pecten maximus

UdeM00000010364 6596 184.1 UdeM00000010364 XP\_045176664.1 35.9 290  
176 7 9 293 267 551 2.70E-43 184.1 6596 cellular

organisms;Eukaryota;Opisthokonta;Metazoa;Eumetazoa;Bilateria;Protostomia;Spiralia;Lophotrochozoa;Mollusca;Bivalvia;Autobranchia;Heteroconchia;Euherodonta;Imparidentia;Venerida;Veneroidea;Veneridae;Mercenaria;Mercenaria mercenaria

UdeM00000010365 6596 90.1 UdeM00000010365 XP\_045177372.1 29.5 193  
112 5 36 205 364 555 3.50E-15 90.1 6596 cellular

organisms;Eukaryota;Opisthokonta;Metazoa;Eumetazoa;Bilateria;Protostomia;Spiralia;Lophotrochozoa;Mollusca;Bivalvia;Autobranchia;Heteroconchia;Euherodonta;Imparidentia;Venerida;Veneroidea;Veneridae;Mercenaria;Mercenaria mercenaria

UdeM00000010366 6596 133.7 UdeM00000010366 XP\_045176094.1 40.8 174  
98 4 36 208 83 252 3.10E-28 133.7 6596 cellular

organisms;Eukaryota;Opisthokonta;Metazoa;Eumetazoa;Bilateria;Protostomia;Spiralia;Lophotrochozoa;Mollusca;Bivalvia;Autobranchia;Heteroconchia;Euherodonta;Imparidentia;Venerida;Veneroidea;Veneridae;Mercenaria;Mercenaria mercenaria

UdeM00000010367 6596 85.9 UdeM00000010367 XP\_045177372.1 27.7 184  
87 3 11 148 372 555 4.80E-14 85.9 6596 cellular

organisms;Eukaryota;Opisthokonta;Metazoa;Eumetazoa;Bilateria;Protostomia;Spiralia;Lophotrochozoa;Mollusca;Bivalvia;Autobranchia;Heteroconchia;Euherodonta;Imparidentia;Venerida;Veneroidea;Veneridae;Mercenaria;Mercenaria mercenaria

UdeM00000010368 6596 108.6 UdeM00000010368 XP\_045176094.1 42 138  
76 3 17 153 115 249 7.10E-21 108.6 6596 cellular

organisms;Eukaryota;Opisthokonta;Metazoa;Eumetazoa;Bilateria;Protostomia;Spiralia;Lophotrochozoa;Mollusca;Bivalvia;Autobranchia;Heteroconchia;Euherodonta;Imparidentia;Venerida;Veneroidea;Veneridae;Mercenaria;Mercenaria mercenaria

UdeM00000010370 6596 82.4 UdeM00000010370 XP\_045176094.1 39.8 113  
64 3 1 112 140 249 4.00E-13 82.4 6596 cellular

organisms;Eukaryota;Opisthokonta;Metazoa;Eumetazoa;Bilateria;Protostomia;Spiralia;Lophotrochozoa;Mollusca;Bivalvia;Autobranchia;Heteroconchia;Euherodonta;Imparidentia;Venerida;Veneroidea;Veneridae;Mercenaria;Mercenaria mercenaria

UdeM00000010369 6596 108.6 UdeM00000010369 XP\_045176094.1 42 138  
76 3 17 153 115 249 7.10E-21 108.6 6596 cellular

organisms;Eukaryota;Opisthokonta;Metazoa;Eumetazoa;Bilateria;Protostomia;Spiralia;Lophotrochozoa;Mollusca;Bivalvia;Autobranchia;Heteroconchia;Euherodonta;Imparidentia;Venerida;Veneroidea;Veneridae;Mercenaria;Mercenaria mercenaria

UdeM00000010371 6596 117.9 UdeM00000010371 XP\_045176094.1 43.5 138  
74 3 6 142 115 249 1.10E-23 117.9 6596 cellular

organisms;Eukaryota;Opisthokonta;Metazoa;Eumetazoa;Bilateria;Protostomia;Spiralia;Lophotrochozoa;Mollusca;Bivalvia;Autobranchia;Heteroconchia;Euherodonta;Imparidentia;Venerida;Veneroidea;Veneridae;Mercenaria;Mercenaria mercenaria



terodonta;Imparidentia;Venerida;Veneroidea;Veneridae;Mercenaria;Mercenari  
 a mercenaria  
 UdeM00000010373 6596 236.5 UdeM00000010373 XP\_045177373.1 30.2 569  
 346 21 9 561 21 554 8.30E-59 236.5 6596 cellular  
 organisms;Eukaryota;Opisthokonta;Metazoa;Eumetazoa;Bilateria;Protostomia;  
 Spiralia;Lophotrochozoa;Mollusca;Bivalvia;Autobranchia;Heteroconchia;Euhe  
 terodonta;Imparidentia;Venerida;Veneroidea;Veneridae;Mercenaria;Mercenari  
 a mercenaria  
 UdeM00000010375 6596 230.7 UdeM00000010375 XP\_045187272.1 52.7 205  
 91 1 2 206 231 429 2.00E-57 230.7 6596 cellular  
 organisms;Eukaryota;Opisthokonta;Metazoa;Eumetazoa;Bilateria;Protostomia;  
 Spiralia;Lophotrochozoa;Mollusca;Bivalvia;Autobranchia;Heteroconchia;Euhe  
 terodonta;Imparidentia;Venerida;Veneroidea;Veneridae;Mercenaria;Mercenari  
 a mercenaria  
 UdeM00000010374 6596 234.6 UdeM00000010374 XP\_045187272.1 52.9 210  
 93 1 3 212 226 429 1.40E-58 234.6 6596 cellular  
 organisms;Eukaryota;Opisthokonta;Metazoa;Eumetazoa;Bilateria;Protostomia;  
 Spiralia;Lophotrochozoa;Mollusca;Bivalvia;Autobranchia;Heteroconchia;Euhe  
 terodonta;Imparidentia;Venerida;Veneroidea;Veneridae;Mercenaria;Mercenari  
 a mercenaria  
 UdeM00000010376 6579 213.4 UdeM00000010376 XP\_033736263.1 47.6 208  
 108 1 106 312 367 574 4.20E-52 213.4 6579 cellular  
 organisms;Eukaryota;Opisthokonta;Metazoa;Eumetazoa;Bilateria;Protostomia;  
 Spiralia;Lophotrochozoa;Mollusca;Bivalvia;Autobranchia;Pteriormorphia;Pect  
 inida;Pectinoidea;Pectinidae;Pecten;Pecten maximus  
 UdeM00000010377 6596 211.8 UdeM00000010377 XP\_045176664.1 29 496  
 325 10 23 500 35 521 2.10E-51 211.8 6596 cellular  
 organisms;Eukaryota;Opisthokonta;Metazoa;Eumetazoa;Bilateria;Protostomia;  
 Spiralia;Lophotrochozoa;Mollusca;Bivalvia;Autobranchia;Heteroconchia;Euhe  
 terodonta;Imparidentia;Venerida;Veneroidea;Veneridae;Mercenaria;Mercenari  
 a mercenaria  
 UdeM00000010378 6596 127.9 UdeM00000010378 XP\_045176094.1 39.2 171  
 100 3 27 196 95 262 1.80E-26 127.9 6596 cellular  
 organisms;Eukaryota;Opisthokonta;Metazoa;Eumetazoa;Bilateria;Protostomia;  
 Spiralia;Lophotrochozoa;Mollusca;Bivalvia;Autobranchia;Heteroconchia;Euhe  
 terodonta;Imparidentia;Venerida;Veneroidea;Veneridae;Mercenaria;Mercenari  
 a mercenaria  
 UdeM00000010379 6596 191.8 UdeM00000010379 XP\_045177373.1 29.3 540  
 269 23 8 455 20 538 2.00E-45 191.8 6596 cellular  
 organisms;Eukaryota;Opisthokonta;Metazoa;Eumetazoa;Bilateria;Protostomia;  
 Spiralia;Lophotrochozoa;Mollusca;Bivalvia;Autobranchia;Heteroconchia;Euhe  
 terodonta;Imparidentia;Venerida;Veneroidea;Veneridae;Mercenaria;Mercenari  
 a mercenaria  
 UdeM00000010380 6596 471.1 UdeM00000010380 XP\_045187267.1 48.2 481  
 240 4 1 478 84 558 1.70E-129 471.1 6596 cellular  
 organisms;Eukaryota;Opisthokonta;Metazoa;Eumetazoa;Bilateria;Protostomia;  
 Spiralia;Lophotrochozoa;Mollusca;Bivalvia;Autobranchia;Heteroconchia;Euhe  
 terodonta;Imparidentia;Venerida;Veneroidea;Veneridae;Mercenaria;Mercenari  
 a mercenaria  
 UdeM00000010382 6579 128.3 UdeM00000010382 XP\_033736263.1 51.8 112  
 53 1 20 130 463 574 7.40E-27 128.3 6579 cellular  
 organisms;Eukaryota;Opisthokonta;Metazoa;Eumetazoa;Bilateria;Protostomia;  
 Spiralia;Lophotrochozoa;Mollusca;Bivalvia;Autobranchia;Pteriormorphia;Pect  
 inida;Pectinoidea;Pectinidae;Pecten;Pecten maximus

UdeM00000010383 6596 156.4 UdeM00000010383 XP\_045214418.1 36.9 236  
 140 5 104 332 22 255 6.60E-35 156.4 6596 cellular  
 organisms;Eukaryota;Opisthokonta;Metazoa;Eumetazoa;Bilateria;Protostomia;  
 Spiralia;Lophotrochozoa;Mollusca;Bivalvia;Autobranchia;Heteroconchia;Euhe  
 terodonta;Imparidentia;Venerida;Veneroidea;Veneridae;Mercenaria;Mercenari  
 a mercenaria  
 UdeM00000010384 225164 127.5 UdeM00000010384 XP\_009046505.1 47.2  
 142 47 1 1 114 241 382 1.10E-26 127.5 225164  
 cellular  
 organisms;Eukaryota;Opisthokonta;Metazoa;Eumetazoa;Bilateria;Protostomia;  
 Spiralia;Lophotrochozoa;Mollusca;Gastropoda;Patellogastropoda;Lottioidea;  
 Lottiidae;Lottia;Lottia gigantea  
 UdeM00000010385 6596 177.2 UdeM00000010385 XP\_045177373.1 28.2 503  
 290 19 1 452 22 504 4.90E-41 177.2 6596 cellular  
 organisms;Eukaryota;Opisthokonta;Metazoa;Eumetazoa;Bilateria;Protostomia;  
 Spiralia;Lophotrochozoa;Mollusca;Bivalvia;Autobranchia;Heteroconchia;Euhe  
 terodonta;Imparidentia;Venerida;Veneroidea;Veneridae;Mercenaria;Mercenari  
 a mercenaria  
 UdeM00000010386 6596 227.3 UdeM00000010386 XP\_045177373.1 31 545  
 323 23 1 520 22 538 4.80E-56 227.3 6596 cellular  
 organisms;Eukaryota;Opisthokonta;Metazoa;Eumetazoa;Bilateria;Protostomia;  
 Spiralia;Lophotrochozoa;Mollusca;Bivalvia;Autobranchia;Heteroconchia;Euhe  
 terodonta;Imparidentia;Venerida;Veneroidea;Veneridae;Mercenaria;Mercenari  
 a mercenaria  
 UdeM00000010388 6596 102.8 UdeM00000010388 XP\_045214418.1 37.7 146  
 79 3 18 152 129 273 3.90E-19 102.8 6596 cellular  
 organisms;Eukaryota;Opisthokonta;Metazoa;Eumetazoa;Bilateria;Protostomia;  
 Spiralia;Lophotrochozoa;Mollusca;Bivalvia;Autobranchia;Heteroconchia;Euhe  
 terodonta;Imparidentia;Venerida;Veneroidea;Veneridae;Mercenaria;Mercenari  
 a mercenaria  
 UdeM00000010389 6596 219.2 UdeM00000010389 XP\_045176664.1 29.3 559  
 340 15 9 540 21 551 1.40E-53 219.2 6596 cellular  
 organisms;Eukaryota;Opisthokonta;Metazoa;Eumetazoa;Bilateria;Protostomia;  
 Spiralia;Lophotrochozoa;Mollusca;Bivalvia;Autobranchia;Heteroconchia;Euhe  
 terodonta;Imparidentia;Venerida;Veneroidea;Veneridae;Mercenaria;Mercenari  
 a mercenaria  
 UdeM00000010390 6596 191 UdeM00000010390 XP\_045181277.1 36.7 283  
 168 7 27 302 127 405 2.30E-45 191 6596 cellular  
 organisms;Eukaryota;Opisthokonta;Metazoa;Eumetazoa;Bilateria;Protostomia;  
 Spiralia;Lophotrochozoa;Mollusca;Bivalvia;Autobranchia;Heteroconchia;Euhe  
 terodonta;Imparidentia;Venerida;Veneroidea;Veneridae;Mercenaria;Mercenari  
 a mercenaria  
 UdeM00000010391 6596 112.8 UdeM00000010391 XP\_045187267.1 51.1 88  
 43 0 44 131 359 446 3.30E-22 112.8 6596 cellular  
 organisms;Eukaryota;Opisthokonta;Metazoa;Eumetazoa;Bilateria;Protostomia;  
 Spiralia;Lophotrochozoa;Mollusca;Bivalvia;Autobranchia;Heteroconchia;Euhe  
 terodonta;Imparidentia;Venerida;Veneroidea;Veneridae;Mercenaria;Mercenari  
 a mercenaria  
 UdeM00000010392 225164 173.3 UdeM00000010392 XP\_009058769.1 37.6  
 263 139 5 144 406 531 768 6.20E-40 173.3 225164  
 cellular  
 organisms;Eukaryota;Opisthokonta;Metazoa;Eumetazoa;Bilateria;Protostomia;  
 Spiralia;Lophotrochozoa;Mollusca;Gastropoda;Patellogastropoda;Lottioidea;  
 Lottiidae;Lottia;Lottia gigantea

UdeM00000010393 6596 74.3 UdeM00000010393 XP\_045176094.1 41.2 80  
 47 0 1 80 140 219 8.70E-11 74.3 6596 cellular  
 organisms;Eukaryota;Opisthokonta;Metazoa;Eumetazoa;Bilateria;Protostomia;  
 Spiralia;Lophotrochozoa;Mollusca;Bivalvia;Autobranchia;Heteroconchia;Euhe  
 terodonta;Imparidentia;Venerida;Veneroidea;Veneridae;Mercenaria;Mercenari  
 a mercenaria  
 UdeM00000010394 1735272 80.9 UdeM00000010394 XP\_041352309.1 62.1  
 58 22 0 2 59 301 358 6.20E-13 80.9 1735272  
 cellular  
 organisms;Eukaryota;Opisthokonta;Metazoa;Eumetazoa;Bilateria;Protostomia;  
 Spiralia;Lophotrochozoa;Mollusca;Gastropoda;Neomphalina;Neomphaloidea;Pel  
 tospiridae;Gigantopelta;Gigantopelta aegis  
 UdeM00000010395 225164 123.2 UdeM00000010395 XP\_009046505.1 53.6  
 97 45 0 2 98 411 507 1.90E-25 123.2 225164  
 cellular  
 organisms;Eukaryota;Opisthokonta;Metazoa;Eumetazoa;Bilateria;Protostomia;  
 Spiralia;Lophotrochozoa;Mollusca;Gastropoda;Patellogastropoda;Lottioidea;  
 Lottiidae;Lottia;Lottia gigantea  
 UdeM00000010396 7054 98.6 UdeM00000010396 XP\_031337031.1 33.1 166  
 64 2 1 119 302 467 5.70E-18 98.6 7054 cellular  
 organisms;Eukaryota;Opisthokonta;Metazoa;Eumetazoa;Bilateria;Protostomia;  
 Ecdysozoa;Panarthropoda;Arthropoda;Mandibulata;Pancrustacea;Hexapoda;Inse  
 cta;Dicondylia;Pterygota;Neoptera;Endopterygota;Coleoptera;Polyphaga;Elat  
 eriformia;Elateroidea;Lampyridae;Lampyrinae;Photinus;Photinus pyralis  
 UdeM00000010397 202533 190.3 UdeM00000010397 XP\_035231949.1 35  
 331 99 4 1 217 115 443 2.70E-45 190.3 202533  
 cellular  
 organisms;Eukaryota;Opisthokonta;Metazoa;Eumetazoa;Bilateria;Protostomia;  
 Ecdysozoa;Panarthropoda;Arthropoda;Chelicerata;Arachnida;Araneae;Araneomo  
 rphae;Entelegynae;Eresoidea;Eresidae;Stegodyphus;Stegodyphus dumaticola  
 UdeM00000010398 6596 177.6 UdeM00000010398 XP\_045177372.1 26.5 563  
 336 19 1 530 22 539 4.40E-41 177.6 6596 cellular  
 organisms;Eukaryota;Opisthokonta;Metazoa;Eumetazoa;Bilateria;Protostomia;  
 Spiralia;Lophotrochozoa;Mollusca;Bivalvia;Autobranchia;Heteroconchia;Euhe  
 terodonta;Imparidentia;Venerida;Veneroidea;Veneridae;Mercenaria;Mercenari  
 a mercenaria  
 UdeM00000010399 6596 154.8 UdeM00000010399 XP\_045177373.1 26.5 490  
 276 15 9 420 21 504 2.60E-34 154.8 6596 cellular  
 organisms;Eukaryota;Opisthokonta;Metazoa;Eumetazoa;Bilateria;Protostomia;  
 Spiralia;Lophotrochozoa;Mollusca;Bivalvia;Autobranchia;Heteroconchia;Euhe  
 terodonta;Imparidentia;Venerida;Veneroidea;Veneridae;Mercenaria;Mercenari  
 a mercenaria  
 UdeM00000010400 6596 88.6 UdeM00000010400 XP\_045174482.1 24.5 323  
 206 8 9 305 21 331 1.70E-14 88.6 6596 cellular  
 organisms;Eukaryota;Opisthokonta;Metazoa;Eumetazoa;Bilateria;Protostomia;  
 Spiralia;Lophotrochozoa;Mollusca;Bivalvia;Autobranchia;Heteroconchia;Euhe  
 terodonta;Imparidentia;Venerida;Veneroidea;Veneridae;Mercenaria;Mercenari  
 a mercenaria  
 UdeM00000010401 6596 184.9 UdeM00000010401 XP\_045176664.1 26.5 543  
 309 14 32 496 35 565 2.50E-43 184.9 6596 cellular  
 organisms;Eukaryota;Opisthokonta;Metazoa;Eumetazoa;Bilateria;Protostomia;  
 Spiralia;Lophotrochozoa;Mollusca;Bivalvia;Autobranchia;Heteroconchia;Euhe  
 terodonta;Imparidentia;Venerida;Veneroidea;Veneridae;Mercenaria;Mercenari  
 a mercenaria

UdeM00000010402 6579 63.2 UdeM00000010402 XP\_033736263.1 45.2 62  
 33 1 6 66 464 525 1.60E-07 63.2 6579 cellular  
 organisms;Eukaryota;Opisthokonta;Metazoa;Eumetazoa;Bilateria;Protostomia;  
 Spiralia;Lophotrochozoa;Mollusca;Bivalvia;Autobranchia;Pteriomorpha;Pect  
 inida;Pectinoidea;Pectinidae;Pecten;Pecten maximus  
 UdeM00000010403 6596 162.2 UdeM00000010403 XP\_045177373.1 26.9 506  
 275 16 1 487 78 507 1.70E-36 162.2 6596 cellular  
 organisms;Eukaryota;Opisthokonta;Metazoa;Eumetazoa;Bilateria;Protostomia;  
 Spiralia;Lophotrochozoa;Mollusca;Bivalvia;Autobranchia;Heteroconchia;Euhe  
 terodonta;Imparidentia;Venerida;Veneroidea;Veneridae;Mercenaria;Mercenari  
 a mercenaria  
 UdeM00000010404 6565 71.6 UdeM00000010404 XP\_022322825.1 36.8 114  
 61 3 5 107 344 457 6.80E-10 71.6 6565 cellular  
 organisms;Eukaryota;Opisthokonta;Metazoa;Eumetazoa;Bilateria;Protostomia;  
 Spiralia;Lophotrochozoa;Mollusca;Bivalvia;Autobranchia;Pteriomorpha;Ostr  
 eida;Ostreoidea;Ostreidae;Crassostrea;Crassostrea virginica  
 UdeM00000010405 29159 74.3 UdeM00000010405 XP\_034322772.1 54.2 59  
 27 0 1 59 1 59 1.70E-10 74.3 29159 cellular  
 organisms;Eukaryota;Opisthokonta;Metazoa;Eumetazoa;Bilateria;Protostomia;  
 Spiralia;Lophotrochozoa;Mollusca;Bivalvia;Autobranchia;Pteriomorpha;Ostr  
 eida;Ostreoidea;Ostreidae;Crassostrea;Crassostrea gigas  
 UdeM00000010406 6596 540.8 UdeM00000010406 XP\_045188551.1 29.1 1613  
 1010 51 398 1958 1947 3477 8.10E-150 540.8 6596 cellular  
 organisms;Eukaryota;Opisthokonta;Metazoa;Eumetazoa;Bilateria;Protostomia;  
 Spiralia;Lophotrochozoa;Mollusca;Bivalvia;Autobranchia;Heteroconchia;Euhe  
 terodonta;Imparidentia;Venerida;Veneroidea;Veneridae;Mercenaria;Mercenari  
 a mercenaria  
 UdeM00000010407 6573 286.6 UdeM00000010407 XP\_021355424.1 26 1267  
 670 44 11 1060 428 1643 1.30E-73 286.6 6573 cellular  
 organisms;Eukaryota;Opisthokonta;Metazoa;Eumetazoa;Bilateria;Protostomia;  
 Spiralia;Lophotrochozoa;Mollusca;Bivalvia;Autobranchia;Pteriomorpha;Pect  
 inida;Pectinoidea;Pectinidae;Mizuhopecten;Mizuhopecten yessoensis  
 UdeM00000010411 29159 125.9 UdeM00000010411 XP\_034329356.1 59.5 116  
 46 1 276 390 117 232 1.10E-25 125.9 29159 cellular  
 organisms;Eukaryota;Opisthokonta;Metazoa;Eumetazoa;Bilateria;Protostomia;  
 Spiralia;Lophotrochozoa;Mollusca;Bivalvia;Autobranchia;Pteriomorpha;Ostr  
 eida;Ostreoidea;Ostreidae;Crassostrea;Crassostrea gigas  
 UdeM00000010412 29159 156 UdeM00000010412 XP\_034329176.1 32.1 315  
 180 6 63 359 1217 1515 1.60E-34 156 29159 cellular  
 organisms;Eukaryota;Opisthokonta;Metazoa;Eumetazoa;Bilateria;Protostomia;  
 Spiralia;Lophotrochozoa;Mollusca;Bivalvia;Autobranchia;Pteriomorpha;Ostr  
 eida;Ostreoidea;Ostreidae;Crassostrea;Crassostrea gigas  
 UdeM00000010413 29159 112.8 UdeM00000010413 XP\_034317326.1 44.3 131  
 70 2 20 148 680 809 3.70E-22 112.8 29159 cellular  
 organisms;Eukaryota;Opisthokonta;Metazoa;Eumetazoa;Bilateria;Protostomia;  
 Spiralia;Lophotrochozoa;Mollusca;Bivalvia;Autobranchia;Pteriomorpha;Ostr  
 eida;Ostreoidea;Ostreidae;Crassostrea;Crassostrea gigas  
 UdeM00000010414 6596 104.4 UdeM00000010414 XP\_045190830.1 28.1 306  
 191 10 1 293 889 1178 3.30E-19 104.4 6596 cellular  
 organisms;Eukaryota;Opisthokonta;Metazoa;Eumetazoa;Bilateria;Protostomia;  
 Spiralia;Lophotrochozoa;Mollusca;Bivalvia;Autobranchia;Heteroconchia;Euhe  
 terodonta;Imparidentia;Venerida;Veneroidea;Veneridae;Mercenaria;Mercenari  
 a mercenaria

UdeM00000010416 45264 309.3 UdeM00000010416 XP\_044165143.1 66.7 210  
 70 0 1 210 217 426 4.30E-81 309.3 45264 cellular  
 organisms;Eukaryota;Opisthokonta;Metazoa;Eumetazoa;Cnidaria;Anthozoa;Hexa  
 corallia;Scleractinia;Astrocoeniina;Acroporidae;Acropora;Acropora  
 millepora  
 UdeM00000010417 151771 220.3 UdeM00000010417 XP\_028406951.1 27.9  
 613 301 9 2 516 97 666 5.60E-54 220.3 151771  
 cellular  
 organisms;Eukaryota;Opisthokonta;Metazoa;Eumetazoa;Cnidaria;Anthozoa;Octo  
 corallia;Alcyonacea;Alcyoniina;Nephtheidae;Dendronephthya;Dendronephthya  
 gigantea  
 UdeM00000010418 6579 449.5 UdeM00000010418 XP\_033731448.1 27.3 1662  
 772 44 9 1623 244 1515 1.80E-122 449.5 6579 cellular  
 organisms;Eukaryota;Opisthokonta;Metazoa;Eumetazoa;Bilateria;Protostomia;  
 Spiralia;Lophotrochozoa;Mollusca;Bivalvia;Autobranchia;Pteriormorphia;Pect  
 inida;Pectinoidea;Pectinidae;Pecten;Pecten maximus  
 UdeM00000010419 6579 253.1 UdeM00000010419 XP\_033731448.1 25.2 1300  
 715 45 9 1080 244 1514 1.60E-63 253.1 6579 cellular  
 organisms;Eukaryota;Opisthokonta;Metazoa;Eumetazoa;Bilateria;Protostomia;  
 Spiralia;Lophotrochozoa;Mollusca;Bivalvia;Autobranchia;Pteriormorphia;Pect  
 inida;Pectinoidea;Pectinidae;Pecten;Pecten maximus  
 UdeM00000010420 6596 473.4 UdeM00000010420 XP\_045172093.1 32 1054  
 614 24 569 1567 720 1725 1.20E-129 473.4 6596 cellular  
 organisms;Eukaryota;Opisthokonta;Metazoa;Eumetazoa;Bilateria;Protostomia;  
 Spiralia;Lophotrochozoa;Mollusca;Bivalvia;Autobranchia;Heteroconchia;Euhe  
 terodonta;Imparidentia;Venerida;Veneroidea;Veneridae;Mercenaria;Mercenari  
 a mercenaria  
 UdeM00000010421 6596 198.7 UdeM00000010421 XP\_045188486.1 52.4 187  
 78 4 11 187 2365 2550 6.40E-48 198.7 6596 cellular  
 organisms;Eukaryota;Opisthokonta;Metazoa;Eumetazoa;Bilateria;Protostomia;  
 Spiralia;Lophotrochozoa;Mollusca;Bivalvia;Autobranchia;Heteroconchia;Euhe  
 terodonta;Imparidentia;Venerida;Veneroidea;Veneridae;Mercenaria;Mercenari  
 a mercenaria  
 UdeM00000039089 6596 120.9 UdeM00000039089 XP\_045162656.1 28.7 334  
 201 9 8 314 402 725 2.80E-24 120.9 6596 cellular  
 organisms;Eukaryota;Opisthokonta;Metazoa;Eumetazoa;Bilateria;Protostomia;  
 Spiralia;Lophotrochozoa;Mollusca;Bivalvia;Autobranchia;Heteroconchia;Euhe  
 terodonta;Imparidentia;Venerida;Veneroidea;Veneridae;Mercenaria;Mercenari  
 a mercenaria  
 UdeM00000039090 6596 98.6 UdeM00000039090 XP\_045162610.1 30.5 210  
 119 5 5 197 546 745 9.50E-18 98.6 6596 cellular  
 organisms;Eukaryota;Opisthokonta;Metazoa;Eumetazoa;Bilateria;Protostomia;  
 Spiralia;Lophotrochozoa;Mollusca;Bivalvia;Autobranchia;Heteroconchia;Euhe  
 terodonta;Imparidentia;Venerida;Veneroidea;Veneridae;Mercenaria;Mercenari  
 a mercenaria  
 UdeM00000039091 6579 73.2 UdeM00000039091 XP\_033759012.1 38.1 97  
 56 2 10 106 709 801 2.40E-10 73.2 6579 cellular  
 organisms;Eukaryota;Opisthokonta;Metazoa;Eumetazoa;Bilateria;Protostomia;  
 Spiralia;Lophotrochozoa;Mollusca;Bivalvia;Autobranchia;Pteriormorphia;Pect  
 inida;Pectinoidea;Pectinidae;Pecten;Pecten maximus  
 UdeM00000039092 45264 132.9 UdeM00000039092 XP\_044184031.1 47.2 142  
 68 2 1 139 300 437 3.40E-28 132.9 45264 cellular  
 organisms;Eukaryota;Opisthokonta;Metazoa;Eumetazoa;Cnidaria;Anthozoa;Hexa

corallia;Scleractinia;Astrocoeniina;Acroporidae;Acropora;Acropora  
 millepora  
 UdeM00000039093 151771 325.5 UdeM00000039093 XP\_028419301.1 58.2  
 263 109 1 1 262 217 479 6.40E-86 325.5 151771  
 cellular  
 organisms;Eukaryota;Opisthokonta;Metazoa;Eumetazoa;Cnidaria;Anthozoa;Octo  
 corallia;Alcyonacea;Alcyoniina;Nephtheidae;Dendronephthya;Dendronephthya  
 gigantea  
 UdeM00000039094 45264 138.7 UdeM00000039094 XP\_044184028.1 47.6 166  
 82 3 42 206 68 229 8.60E-30 138.7 45264 cellular  
 organisms;Eukaryota;Opisthokonta;Metazoa;Eumetazoa;Cnidaria;Anthozoa;Hexa  
 corallia;Scleractinia;Astrocoeniina;Acroporidae;Acropora;Acropora  
 millepora  
 UdeM00000039097 29159 365.9 UdeM00000039097 XP\_034299474.1 43.2 461  
 249 6 1 456 178 630 7.40E-98 365.9 29159 cellular  
 organisms;Eukaryota;Opisthokonta;Metazoa;Eumetazoa;Bilateria;Protostomia;  
 Spiralia;Lophotrochozoa;Mollusca;Bivalvia;Autobranchia;Pteriormorphia;Ostr  
 eida;Ostreoidea;Ostreidae;Crassostrea;Crassostrea gigas  
 UdeM00000039098 6596 132.5 UdeM00000039098 XP\_045163314.1 32.7 284  
 179 6 30 301 4 287 9.50E-28 132.5 6596 cellular  
 organisms;Eukaryota;Opisthokonta;Metazoa;Eumetazoa;Bilateria;Protostomia;  
 Spiralia;Lophotrochozoa;Mollusca;Bivalvia;Autobranchia;Heteroconchia;Euhe  
 terodonta;Imparidentia;Venerida;Veneroidea;Veneridae;Mercenaria;Mercenari  
 a mercenaria  
 UdeM00000039099 48701 74.7 UdeM00000039099 XP\_014842330.1 25.5 278  
 158 13 75 348 195 427 2.70E-10 74.7 48701 cellular  
 organisms;Eukaryota;Opisthokonta;Metazoa;Eumetazoa;Bilateria;Deuterostomi  
 a;Chordata;Craniata;Vertebrata;Gnathostomata;Teleostomi;Euteleostomi;Acti  
 nopterygii;Actinopteri;Neopterygii;Teleostei;Osteoglossocephalai;Clupeoce  
 phala;Euteleosteomorpha;Neoteleostei;Eurypterygia;Ctenosquamata;Acanthomo  
 rphata;Euacanthomorphacea;Percomorphaceae;Ovalentaria;Atherinomorphae;Cyp  
 rinodontiformes;Cyprinodontoidei;Poeciliidae;Poeciliinae;Poecilia;Poecili  
 a mexicana  
 UdeM00000039100 6565 66.2 UdeM00000039100 XP\_022316733.1 67.5 40  
 13 0 1 40 188 227 1.90E-08 66.2 6565 cellular  
 organisms;Eukaryota;Opisthokonta;Metazoa;Eumetazoa;Bilateria;Protostomia;  
 Spiralia;Lophotrochozoa;Mollusca;Bivalvia;Autobranchia;Pteriormorphia;Ostr  
 eida;Ostreoidea;Ostreidae;Crassostrea;Crassostrea virginica  
 UdeM00000039101 6596 74.3 UdeM00000039101 XP\_045208720.1 33 185  
 91 6 9 167 1115 1292 1.70E-10 74.3 6596 cellular  
 organisms;Eukaryota;Opisthokonta;Metazoa;Eumetazoa;Bilateria;Protostomia;  
 Spiralia;Lophotrochozoa;Mollusca;Bivalvia;Autobranchia;Heteroconchia;Euhe  
 terodonta;Imparidentia;Venerida;Veneroidea;Veneridae;Mercenaria;Mercenari  
 a mercenaria  
 UdeM00000039102 6596 71.6 UdeM00000039102 XP\_045192251.1 44.7 85  
 46 1 61 145 337 420 9.40E-10 71.6 6596 cellular  
 organisms;Eukaryota;Opisthokonta;Metazoa;Eumetazoa;Bilateria;Protostomia;  
 Spiralia;Lophotrochozoa;Mollusca;Bivalvia;Autobranchia;Heteroconchia;Euhe  
 terodonta;Imparidentia;Venerida;Veneroidea;Veneridae;Mercenaria;Mercenari  
 a mercenaria  
 UdeM00000039103 6596 303.1 UdeM00000039103 XP\_045162129.1 30 826  
 499 26 8 773 119 925 1.10E-78 303.1 6596 cellular  
 organisms;Eukaryota;Opisthokonta;Metazoa;Eumetazoa;Bilateria;Protostomia;  
 Spiralia;Lophotrochozoa;Mollusca;Bivalvia;Autobranchia;Heteroconchia;Euhe

terodonta;Imparidentia;Venerida;Veneroidea;Veneridae;Mercenaria;Mercenaria mercenaria

UdeM00000039105 6596 301.2 UdeM00000039105 XP\_045162129.1 30.3 813  
488 26 8 760 119 912 3.80E-78 301.2 6596 cellular

organisms;Eukaryota;Opisthokonta;Metazoa;Eumetazoa;Bilateria;Protostomia;Spiralia;Lophotrochozoa;Mollusca;Bivalvia;Autobranchia;Heteroconchia;Euherodonta;Imparidentia;Venerida;Veneroidea;Veneridae;Mercenaria;Mercenaria mercenaria

UdeM00000039106 114398 427.6 UdeM00000039106 XP\_042903861.1 39.1  
609 360 6 1 605 1 602 2.70E-116 427.6 114398  
cellular

organisms;Eukaryota;Opisthokonta;Metazoa;Eumetazoa;Bilateria;Protostomia;Ecdysozoa;Panarthropoda;Arthropoda;Chelicerata;Arachnida;Araneae;Araneomorphae;Entelegynae;Orbiculariae;Araneoidea;Theridiidae;Parasteatoda;Parasteatoda tepidariorum

UdeM00000039107 8187 73.2 UdeM00000039107 XP\_018528006.1 27.3 209  
109 11 133 336 1432 1602 7.90E-10 73.2 8187 cellular

organisms;Eukaryota;Opisthokonta;Metazoa;Eumetazoa;Bilateria;Deuterostomia;Chordata;Craniata;Vertebrata;Gnathostomata;Teleostomi;Euteleostomi;Actinopterygii;Actinopteri;Neopterygii;Teleostei;Osteoglossocephalai;Clupeocephala;Euteleostei;Neoteleostei;Eurypterygia;Ctenosquamata;Acanthomorpha;Euacanthomorpha;Percomorphaceae;Carangaria;Carangaria incertae sedis;Centropomidae;Lates;Lates calcarifer

UdeM00000039108 7054 79.3 UdeM00000039108 XP\_031350480.1 46.2 78  
41 1 2 78 390 467 2.40E-12 79.3 7054 cellular

organisms;Eukaryota;Opisthokonta;Metazoa;Eumetazoa;Bilateria;Protostomia;Ecdysozoa;Panarthropoda;Arthropoda;Mandibulata;Pancrustacea;Hexapoda;Insecta;Dicondylia;Pterygota;Neoptera;Endopterygota;Coleoptera;Polyphaga;Elateriformia;Elateroidea;Lampyridae;Lampyrinae;Photinus;Photinus pyralis

UdeM00000039109 1234273 99 UdeM00000039109 XP\_027006834.1 46  
100 53 1 3 101 290 389 3.80E-18 99 1234273  
cellular

organisms;Eukaryota;Opisthokonta;Metazoa;Eumetazoa;Bilateria;Deuterostomia;Chordata;Craniata;Vertebrata;Gnathostomata;Teleostomi;Euteleostomi;Actinopterygii;Actinopteri;Neopterygii;Teleostei;Osteoglossocephalai;Clupeocephala;Otomorpha;Ostariophysi;Otophysi;Characiphysae;Siluriformes;Siluridei;Bagridae;Tachysurus;Tachysurus fulvidraco

UdeM00000039110 6573 102.8 UdeM00000039110 XP\_021347744.1 44.7 114  
63 0 1 114 6 119 2.90E-19 102.8 6573 cellular

organisms;Eukaryota;Opisthokonta;Metazoa;Eumetazoa;Bilateria;Protostomia;Spiralia;Lophotrochozoa;Mollusca;Bivalvia;Autobranchia;Pteriormorpha;Pectinida;Pectinoidea;Pectinidae;Mizuhopecten;Mizuhopecten yessoensis

UdeM00000039111 6596 99 UdeM00000039111 XP\_045163314.1 36.1 180  
106 5 30 200 4 183 7.40E-18 99 6596 cellular

organisms;Eukaryota;Opisthokonta;Metazoa;Eumetazoa;Bilateria;Protostomia;Spiralia;Lophotrochozoa;Mollusca;Bivalvia;Autobranchia;Heteroconchia;Euherodonta;Imparidentia;Venerida;Veneroidea;Veneridae;Mercenaria;Mercenaria mercenaria

UdeM00000039112 6596 128.3 UdeM00000039112 XP\_045162610.1 25.3 407  
256 11 72 458 264 642 2.60E-26 128.3 6596 cellular

organisms;Eukaryota;Opisthokonta;Metazoa;Eumetazoa;Bilateria;Protostomia;Spiralia;Lophotrochozoa;Mollusca;Bivalvia;Autobranchia;Heteroconchia;Euherodonta;Imparidentia;Venerida;Veneroidea;Veneridae;Mercenaria;Mercenaria mercenaria

UdeM00000039113 6596 133.3 UdeM00000039113 XP\_045162610.1 26.6 384  
 252 11 72 430 264 642 7.50E-28 133.3 6596 cellular  
 organisms;Eukaryota;Opisthokonta;Metazoa;Eumetazoa;Bilateria;Protostomia;  
 Spiralia;Lophotrochozoa;Mollusca;Bivalvia;Autobranchia;Heteroconchia;Euhe  
 terodonta;Imparidentia;Venerida;Veneroidea;Veneridae;Mercenaria;Mercenari  
 a mercenaria  
 UdeM00000039116 6596 236.9 UdeM00000039116 XP\_045162129.1 29.2 705  
 439 22 246 902 139 831 1.20E-58 236.9 6596 cellular  
 organisms;Eukaryota;Opisthokonta;Metazoa;Eumetazoa;Bilateria;Protostomia;  
 Spiralia;Lophotrochozoa;Mollusca;Bivalvia;Autobranchia;Heteroconchia;Euhe  
 terodonta;Imparidentia;Venerida;Veneroidea;Veneridae;Mercenaria;Mercenari  
 a mercenaria  
 UdeM00000039118 29159 66.2 UdeM00000039118 XP\_034310431.1 65.3 49  
 16 1 24 71 74 122 1.90E-08 66.2 29159 cellular  
 organisms;Eukaryota;Opisthokonta;Metazoa;Eumetazoa;Bilateria;Protostomia;  
 Spiralia;Lophotrochozoa;Mollusca;Bivalvia;Autobranchia;Pteriormorphia;Ostr  
 eida;Ostreoidea;Ostreidae;Crassostrea;Crassostrea gigas  
 UdeM00000039120 6573 181.8 UdeM00000039120 XP\_021358159.1 35.3 303  
 183 7 1 293 361 660 2.00E-42 181.8 6573 cellular  
 organisms;Eukaryota;Opisthokonta;Metazoa;Eumetazoa;Bilateria;Protostomia;  
 Spiralia;Lophotrochozoa;Mollusca;Bivalvia;Autobranchia;Pteriormorphia;Pect  
 inida;Pectinoidea;Pectinidae;Mizuhopecten;Mizuhopecten yessoensis  
 UdeM00000039121 6565 68.6 UdeM00000039121 XP\_022299838.1 46.9 49  
 26 0 152 200 59 107 1.10E-08 68.6 6565 cellular  
 organisms;Eukaryota;Opisthokonta;Metazoa;Eumetazoa;Bilateria;Protostomia;  
 Spiralia;Lophotrochozoa;Mollusca;Bivalvia;Autobranchia;Pteriormorphia;Ostr  
 eida;Ostreoidea;Ostreidae;Crassostrea;Crassostrea virginica  
 UdeM00000039128 202533 84.7 UdeM00000039128 XP\_035216523.1 32.8  
 125 84 0 1 125 1 125 1.30E-13 84.7 202533  
 cellular  
 organisms;Eukaryota;Opisthokonta;Metazoa;Eumetazoa;Bilateria;Protostomia;  
 Ecdysozoa;Panarthropoda;Arthropoda;Chelicerata;Arachnida;Araneae;Araneomo  
 rphae;Entelegynae;Eresoidea;Eresidae;Stegodyphus;Stegodyphus dumicola  
 UdeM00000039130 50429 271.2 UdeM00000039130 XP\_022799197.1 29.6 597  
 375 13 11 580 14 592 3.20E-69 271.2 50429 cellular  
 organisms;Eukaryota;Opisthokonta;Metazoa;Eumetazoa;Cnidaria;Anthozoa;Hexa  
 corallia;Scleractinia;Astrocoeniina;Pocilloporidae;Stylophora;Stylophora  
 pistillata  
 UdeM00000039131 50429 214.9 UdeM00000039131 XP\_022799197.1 29.9 418  
 275 7 4 414 5 411 2.00E-52 214.9 50429 cellular  
 organisms;Eukaryota;Opisthokonta;Metazoa;Eumetazoa;Cnidaria;Anthozoa;Hexa  
 corallia;Scleractinia;Astrocoeniina;Pocilloporidae;Stylophora;Stylophora  
 pistillata  
 UdeM00000039133 1529436 192.2 UdeM00000039133 XP\_033123577.1 46.4  
 224 113 5 1 222 339 557 7.90E-46 192.2 1529436  
 cellular  
 organisms;Eukaryota;Opisthokonta;Metazoa;Eumetazoa;Bilateria;Deuterostomi  
 a;Echinodermata;Pelmatozoa;Crinoidea;Articulata;Comatulida;Comatulidae;Co  
 matulinae;Anneissia;Anneissia japonica  
 UdeM00000039134 6596 204.9 UdeM00000039134 XP\_045177776.1 40.8 260  
 150 2 11 269 695 951 2.40E-49 204.9 6596 cellular  
 organisms;Eukaryota;Opisthokonta;Metazoa;Eumetazoa;Bilateria;Protostomia;  
 Spiralia;Lophotrochozoa;Mollusca;Bivalvia;Autobranchia;Heteroconchia;Euhe



terodonta;Imparidentia;Venerida;Veneroidea;Veneridae;Mercenaria;Mercenaria mercenaria  
 UdeM00000039135 6596 293.9 UdeM00000039135 XP\_045177776.1 37.3 418  
 249 6 11 425 695 1102 4.90E-76 293.9 6596 cellular  
 organisms;Eukaryota;Opisthokonta;Metazoa;Eumetazoa;Bilateria;Protostomia;  
 Spiralia;Lophotrochozoa;Mollusca;Bivalvia;Autobranchia;Heteroconchia;Euhe  
 terodonta;Imparidentia;Venerida;Veneroidea;Veneridae;Mercenaria;Mercenari  
 a mercenaria  
 UdeM00000039139 7741 233 UdeM00000039139 XP\_019640655.1 51.1 221  
 107 1 39 258 1 221 4.20E-58 233 7741 cellular  
 organisms;Eukaryota;Opisthokonta;Metazoa;Eumetazoa;Bilateria;Deuterostomi  
 a;Chordata;Cephalochordata;Leptocardii;Amphioxiformes;Branchiostomidae;Br  
 anchiostoma;Branchiostoma belcheri  
 UdeM00000039140 7739 475.7 UdeM00000039140 XP\_035696678.1 51.8 450  
 176 2 2 410 423 872 5.90E-131 475.7 7739 cellular  
 organisms;Eukaryota;Opisthokonta;Metazoa;Eumetazoa;Bilateria;Deuterostomi  
 a;Chordata;Cephalochordata;Leptocardii;Amphioxiformes;Branchiostomidae;Br  
 anchiostoma;Branchiostoma floridae  
 UdeM00000039141 6596 141 UdeM00000039141 XP\_045163314.1 34.3 283  
 174 6 7 277 4 286 3.50E-30 141 6596 cellular  
 organisms;Eukaryota;Opisthokonta;Metazoa;Eumetazoa;Bilateria;Protostomia;  
 Spiralia;Lophotrochozoa;Mollusca;Bivalvia;Autobranchia;Heteroconchia;Euhe  
 terodonta;Imparidentia;Venerida;Veneroidea;Veneridae;Mercenaria;Mercenari  
 a mercenaria  
 UdeM00000039142 6596 99.4 UdeM00000039142 XP\_045162663.1 33 200  
 126 7 27 220 337 534 6.20E-18 99.4 6596 cellular  
 organisms;Eukaryota;Opisthokonta;Metazoa;Eumetazoa;Bilateria;Protostomia;  
 Spiralia;Lophotrochozoa;Mollusca;Bivalvia;Autobranchia;Heteroconchia;Euhe  
 terodonta;Imparidentia;Venerida;Veneroidea;Veneridae;Mercenaria;Mercenari  
 a mercenaria  
 UdeM00000039143 34506 93.6 UdeM00000039143 XP\_024499529.1 39.2 166  
 88 9 295 457 241 396 7.40E-16 93.6 34506 cellular  
 organisms;Eukaryota;Opisthokonta;Metazoa;Eumetazoa;Bilateria;Protostomia;  
 Ecdysozoa;Nematoda;Chromadorea;Rhabditida;Tylenchina;Panagrolaimomorpha;S  
 trongyloidoidea;Strongyloididae;Strongyloides;Strongyloides ratti  
 UdeM00000039144 34506 93.6 UdeM00000039144 XP\_024499529.1 39.2 166  
 88 9 295 457 241 396 7.40E-16 93.6 34506 cellular  
 organisms;Eukaryota;Opisthokonta;Metazoa;Eumetazoa;Bilateria;Protostomia;  
 Ecdysozoa;Nematoda;Chromadorea;Rhabditida;Tylenchina;Panagrolaimomorpha;S  
 trongyloidoidea;Strongyloididae;Strongyloides;Strongyloides ratti  
 UdeM00000039145 6573 124 UdeM00000039145 XP\_021354853.1 65.5 84  
 29 0 1 84 532 615 3.20E-25 124 6573 cellular  
 organisms;Eukaryota;Opisthokonta;Metazoa;Eumetazoa;Bilateria;Protostomia;  
 Spiralia;Lophotrochozoa;Mollusca;Bivalvia;Autobranchia;Pteriomorpha;Pect  
 inida;Pectinoidea;Pectinidae;Mizuhopecten;Mizuhopecten yessoensis  
 UdeM00000039147 6596 144.1 UdeM00000039147 XP\_045188256.1 39.8 259  
 129 6 91 341 101 340 3.40E-31 144.1 6596 cellular  
 organisms;Eukaryota;Opisthokonta;Metazoa;Eumetazoa;Bilateria;Protostomia;  
 Spiralia;Lophotrochozoa;Mollusca;Bivalvia;Autobranchia;Heteroconchia;Euhe  
 terodonta;Imparidentia;Venerida;Veneroidea;Veneridae;Mercenaria;Mercenari  
 a mercenaria  
 UdeM00000039148 6596 151.8 UdeM00000039148 XP\_045177915.1 61.8 110  
 41 1 1 110 234 342 5.30E-34 151.8 6596 cellular  
 organisms;Eukaryota;Opisthokonta;Metazoa;Eumetazoa;Bilateria;Protostomia;

Spiralia; Lophotrochozoa; Mollusca; Bivalvia; Autobranchia; Heteroconchia; Euheterodonta; Imparidentia; Venerida; Veneroidea; Veneridae; Mercenaria; Mercenaria mercenaria

UdeM00000039149 6596 275.4 UdeM00000039149 XP\_045201099.1 65 200  
70 0 1 200 101 300 6.00E-71 275.4 6596 cellular

organisms; Eukaryota; Opisthokonta; Metazoa; Eumetazoa; Bilateria; Protostomia; Spiralia; Lophotrochozoa; Mollusca; Bivalvia; Autobranchia; Heteroconchia; Euheterodonta; Imparidentia; Venerida; Veneroidea; Veneridae; Mercenaria; Mercenaria mercenaria

UdeM00000039150 7897 76.6 UdeM00000039150 XP\_014349537.1 50.7 67  
33 0 28 94 52 118 1.80E-11 76.6 7897 cellular

organisms; Eukaryota; Opisthokonta; Metazoa; Eumetazoa; Bilateria; Deuterostomia; Chordata; Craniata; Vertebrata; Gnathostomata; Teleostomi; Euteleostomi; Sarcopterygii; Coelacanthimorpha; Coelacanthiformes; Coelacanthidae; Latimeria; Latimeria chalumnae

UdeM00000039154 6596 211.1 UdeM00000039154 XP\_045209246.1 27 708  
440 29 33 688 38 720 4.60E-51 211.1 6596 cellular

organisms; Eukaryota; Opisthokonta; Metazoa; Eumetazoa; Bilateria; Protostomia; Spiralia; Lophotrochozoa; Mollusca; Bivalvia; Autobranchia; Heteroconchia; Euheterodonta; Imparidentia; Venerida; Veneroidea; Veneridae; Mercenaria; Mercenaria mercenaria

UdeM00000039155 6573 485.3 UdeM00000039155 XP\_021375728.1 49.7 531  
189 9 1 461 1 523 8.40E-134 485.3 6573 cellular

organisms; Eukaryota; Opisthokonta; Metazoa; Eumetazoa; Bilateria; Protostomia; Spiralia; Lophotrochozoa; Mollusca; Bivalvia; Autobranchia; Pteriomorpha; Pectinida; Pectinoidea; Pectinidae; Mizuhopecten; Mizuhopecten yessoensis

UdeM00000039156 6579 218.4 UdeM00000039156 XP\_033739209.1 48.3 236  
106 2 9 239 2 226 1.00E-53 218.4 6579 cellular

organisms; Eukaryota; Opisthokonta; Metazoa; Eumetazoa; Bilateria; Protostomia; Spiralia; Lophotrochozoa; Mollusca; Bivalvia; Autobranchia; Pteriomorpha; Pectinida; Pectinoidea; Pectinidae; Pecten; Pecten maximus

UdeM00000025492 8168 89 UdeM00000025492 XP\_039662215.1 31.9 160  
100 4 114 270 311 464 1.20E-14 89 8168 cellular

organisms; Eukaryota; Opisthokonta; Metazoa; Eumetazoa; Bilateria; Deuterostomia; Chordata; Craniata; Vertebrata; Gnathostomata; Teleostomi; Euteleostomi; Actinopterygii; Actinopteri; Neopterygii; Teleostei; Osteoglossocephalai; Clupeocephala; Euteleosteomorpha; Neoteleostei; Eurypterygia; Ctenosquamata; Acanthomorphata; Euacanthomorphacea; Percomorphaceae; Eupercaria; Perciformes; Percoidi; Percidae; Percinae; Perca; Perca fluviatilis

UdeM00000025493 303518 69.7 UdeM00000025493 XP\_013763448.1 30.7  
150 89 3 20 159 176 320 4.20E-09 69.7 303518

cellular

organisms; Eukaryota; Opisthokonta; Metazoa; Eumetazoa; Bilateria; Deuterostomia; Chordata; Craniata; Vertebrata; Gnathostomata; Teleostomi; Euteleostomi; Actinopterygii; Actinopteri; Neopterygii; Teleostei; Osteoglossocephalai; Clupeocephala; Euteleosteomorpha; Neoteleostei; Eurypterygia; Ctenosquamata; Acanthomorphata; Euacanthomorphacea; Percomorphaceae; Ovalentaria; Cichlomorphae; Cichliformes; Cichlidae; African

cichlids; Pseudocrenilabrinae; Haplochromini; Pundamilia; Pundamilia nyererei

UdeM00000025494 6596 85.1 UdeM00000025494 XP\_045208720.1 33.7 258  
126 11 4 228 1044 1289 1.30E-13 85.1 6596 cellular

organisms; Eukaryota; Opisthokonta; Metazoa; Eumetazoa; Bilateria; Protostomia; Spiralia; Lophotrochozoa; Mollusca; Bivalvia; Autobranchia; Heteroconchia; Euheterodonta

terodonta;Imparidentia;Venerida;Veneroidea;Veneridae;Mercenaria;Mercenaria mercenaria

UdeM00000025495 158441 174.9 UdeM00000025495 XP\_021944704.1 26.7  
618 378 20 11 575 229 824 3.00E-40 174.9 158441  
cellular

organisms;Eukaryota;Opisthokonta;Metazoa;Eumetazoa;Bilateria;Protostomia;Ecdysozoa;Panarthropoda;Arthropoda;Mandibulata;Pancrustacea;Hexapoda;Coll embola;Entomobryomorpha;Isotomoidea;Isotomidae;Proisotominae;Folsomia;Folsomia candida

UdeM00000025496 158441 186.8 UdeM00000025496 XP\_021944704.1 27.3  
619 383 20 11 585 229 824 7.80E-44 186.8 158441  
cellular

organisms;Eukaryota;Opisthokonta;Metazoa;Eumetazoa;Bilateria;Protostomia;Ecdysozoa;Panarthropoda;Arthropoda;Mandibulata;Pancrustacea;Hexapoda;Coll embola;Entomobryomorpha;Isotomoidea;Isotomidae;Proisotominae;Folsomia;Folsomia candida

UdeM00000025497 1735272 171.4 UdeM00000025497 XP\_041378242.1 43.3  
224 124 3 64 286 435 656 1.70E-39 171.4 1735272  
cellular

organisms;Eukaryota;Opisthokonta;Metazoa;Eumetazoa;Bilateria;Protostomia;Spiralia;Lophotrochozoa;Mollusca;Gastropoda;Neomphalina;Neomphaloidea;Pel tospiridae;Gigantopelta;Gigantopelta aegis

UdeM00000025498 6573 133.7 UdeM00000025498 XP\_021361564.1 33.5 272  
158 6 270 535 5 259 7.30E-28 133.7 6573 cellular

organisms;Eukaryota;Opisthokonta;Metazoa;Eumetazoa;Bilateria;Protostomia;Spiralia;Lophotrochozoa;Mollusca;Bivalvia;Autobranchia;Pteriomorphia;Pect inida;Pectinoidea;Pectinidae;Mizuhopecten;Mizuhopecten yessoensis

UdeM00000025499 6596 75.5 UdeM00000025499 XP\_045198179.1 27.2 202  
136 3 5 201 883 1078 8.80E-11 75.5 6596 cellular

organisms;Eukaryota;Opisthokonta;Metazoa;Eumetazoa;Bilateria;Protostomia;Spiralia;Lophotrochozoa;Mollusca;Bivalvia;Autobranchia;Heteroconchia;Euhe terodonta;Imparidentia;Venerida;Veneroidea;Veneridae;Mercenaria;Mercenaria mercenaria

UdeM00000025500 10224 355.1 UdeM00000025500 XP\_006820181.1 41.9 477  
258 6 1 465 164 633 2.00E-94 355.1 10224 cellular

organisms;Eukaryota;Opisthokonta;Metazoa;Eumetazoa;Bilateria;Deuterostomi a;Hemichordata;Enteropneusta;Harrimaniidae;Saccoglossus;Saccoglossus kowalevskii

UdeM00000025501 29159 209.1 UdeM00000025501 XP\_019924327.2 24.6 708  
223 9 1 408 360 1056 1.00E-50 209.1 29159 cellular

organisms;Eukaryota;Opisthokonta;Metazoa;Eumetazoa;Bilateria;Protostomia;Spiralia;Lophotrochozoa;Mollusca;Bivalvia;Autobranchia;Pteriomorphia;Ostr eida;Ostreoidea;Ostreidae;Crassostrea;Crassostrea gigas

UdeM00000025504 29159 395.6 UdeM00000025504 XP\_019926412.2 45 496  
201 8 1 435 1 485 8.60E-107 395.6 29159 cellular

organisms;Eukaryota;Opisthokonta;Metazoa;Eumetazoa;Bilateria;Protostomia;Spiralia;Lophotrochozoa;Mollusca;Bivalvia;Autobranchia;Pteriomorphia;Ostr eida;Ostreoidea;Ostreidae;Crassostrea;Crassostrea gigas

UdeM00000025508 202533 184.1 UdeM00000025508 XP\_035216523.1 33.3  
321 206 5 1 314 1 320 3.10E-43 184.1 202533  
cellular

organisms;Eukaryota;Opisthokonta;Metazoa;Eumetazoa;Bilateria;Protostomia;Ecdysozoa;Panarthropoda;Arthropoda;Chelicerata;Arachnida;Araneae;Araneomo rphae;Entelegynae;Eresoidea;Eresidae;Stegodyphus;Stegodyphus dumicola

UdeM00000025509 50429 266.5 UdeM00000025509 XP\_022799197.1 29.6 594  
 377 13 11 579 14 591 7.80E-68 266.5 50429 cellular  
 organisms;Eukaryota;Opisthokonta;Metazoa;Eumetazoa;Cnidaria;Anthozoa;Hexa  
 corallia;Scleractinia;Astrocoeniina;Pocilloporidae;Stylophora;Stylophora  
 pistillata  
 UdeM00000025510 114398 84.7 UdeM00000025510 XP\_042913023.1 55.4  
 74 33 0 1 74 122 195 5.30E-14 84.7 114398  
 cellular  
 organisms;Eukaryota;Opisthokonta;Metazoa;Eumetazoa;Bilateria;Protostomia;  
 Ecdysozoa;Panarthropoda;Arthropoda;Chelicerata;Arachnida;Araneae;Araneomo  
 rphae;Entelegynae;Orbiculariae;Araneoidea;Theridiidae;Parasteatoda;Parast  
 eatoda tepidariorum  
 UdeM00000025511 1735272 62.8 UdeM00000025511 XP\_041355798.1 32.4  
 105 70 1 20 124 52 155 5.00E-07 62.8 1735272  
 cellular  
 organisms;Eukaryota;Opisthokonta;Metazoa;Eumetazoa;Bilateria;Protostomia;  
 Spiralia;Lophotrochozoa;Mollusca;Gastropoda;Neomphalina;Neomphaloidea;Pel  
 tospiridae;Gigantopelta;Gigantopelta aegis  
 UdeM00000025512 1735272 96.7 UdeM00000025512 XP\_041355798.1 35.4  
 144 91 2 20 163 52 193 3.00E-17 96.7 1735272  
 cellular  
 organisms;Eukaryota;Opisthokonta;Metazoa;Eumetazoa;Bilateria;Protostomia;  
 Spiralia;Lophotrochozoa;Mollusca;Gastropoda;Neomphalina;Neomphaloidea;Pel  
 tospiridae;Gigantopelta;Gigantopelta aegis  
 UdeM00000025513 50429 256.1 UdeM00000025513 XP\_022799197.1 29 601  
 381 13 4 571 5 592 1.00E-64 256.1 50429 cellular  
 organisms;Eukaryota;Opisthokonta;Metazoa;Eumetazoa;Cnidaria;Anthozoa;Hexa  
 corallia;Scleractinia;Astrocoeniina;Pocilloporidae;Stylophora;Stylophora  
 pistillata  
 UdeM00000025514 50429 253.4 UdeM00000025514 XP\_022799197.1 28.7 592  
 378 12 1 561 14 592 6.60E-64 253.4 50429 cellular  
 organisms;Eukaryota;Opisthokonta;Metazoa;Eumetazoa;Cnidaria;Anthozoa;Hexa  
 corallia;Scleractinia;Astrocoeniina;Pocilloporidae;Stylophora;Stylophora  
 pistillata  
 UdeM00000025517 7574 161 UdeM00000025517 XP\_013401097.1 48.6 185  
 94 1 6 190 544 727 1.50E-36 161 7574 cellular  
 organisms;Eukaryota;Opisthokonta;Metazoa;Eumetazoa;Bilateria;Protostomia;  
 Spiralia;Lophotrochozoa;Brachiopoda;Linguliformea;Lingulata;Lingulida;Lin  
 guloidea;Lingulidae;Lingula;Lingula anatina  
 UdeM00000025518 6500 59.7 UdeM00000025518 XP\_035828412.1 30.4 102  
 65 2 24 119 33 134 5.30E-06 59.7 6500 cellular  
 organisms;Eukaryota;Opisthokonta;Metazoa;Eumetazoa;Bilateria;Protostomia;  
 Spiralia;Lophotrochozoa;Mollusca;Gastropoda;Heterobranchia;Euthynea;Tec  
 tipleura;Aplysiida;Aplysioidea;Aplysiidae;Aplysia;Aplysia californica  
 UdeM00000025519 6596 121.3 UdeM00000025519 XP\_045180427.1 34.7 274  
 146 5 1 242 1 273 1.80E-24 121.3 6596 cellular  
 organisms;Eukaryota;Opisthokonta;Metazoa;Eumetazoa;Bilateria;Protostomia;  
 Spiralia;Lophotrochozoa;Mollusca;Bivalvia;Autobranchia;Heteroconchia;Euhe  
 terodonta;Imparidentia;Venerida;Veneroidea;Veneridae;Mercenaria;Mercenari  
 a mercenaria  
 UdeM00000025520 6596 286.2 UdeM00000025520 XP\_045208720.1 33.2 584  
 336 17 166 734 190 734 1.20E-73 286.2 6596 cellular  
 organisms;Eukaryota;Opisthokonta;Metazoa;Eumetazoa;Bilateria;Protostomia;  
 Spiralia;Lophotrochozoa;Mollusca;Bivalvia;Autobranchia;Heteroconchia;Euhe

terodonta;Imparidentia;Venerida;Veneroidea;Veneridae;Mercenaria;Mercenaria mercenaria  
 UdeM00000025523 29159 485.7 UdeM00000025523 XP\_034317101.1 48.8 494  
 227 8 30 515 116 591 7.20E-134 485.7 29159 cellular  
 organisms;Eukaryota;Opisthokonta;Metazoa;Eumetazoa;Bilateria;Protostomia;  
 Spiralia;Lophotrochozoa;Mollusca;Bivalvia;Autobranchia;Pteriomorpha;Ostreida;  
 Ostreidae;Crassostrea;Crassostrea gigas  
 UdeM00000025524 37621 96.7 UdeM00000025524 XP\_014672570.1 58 81  
 34 0 11 91 40 120 2.00E-17 96.7 37621 cellular  
 organisms;Eukaryota;Opisthokonta;Metazoa;Eumetazoa;Bilateria;Protostomia;  
 Ecdysozoa;Scalidophora;Priapulida;Priapulimorpha;Priapulimorphida;Priapulidae;  
 Priapulus;Priapulus caudatus  
 UdeM00000025525 37621 104.4 UdeM00000025525 XP\_014673981.1 59.1 88  
 36 0 1 88 76 163 1.10E-19 104.4 37621 cellular  
 organisms;Eukaryota;Opisthokonta;Metazoa;Eumetazoa;Bilateria;Protostomia;  
 Ecdysozoa;Scalidophora;Priapulida;Priapulimorpha;Priapulimorphida;Priapulidae;  
 Priapulus;Priapulus caudatus  
 UdeM00000025526 37621 128.6 UdeM00000025526 XP\_014672567.1 52.3 111  
 48 2 5 114 370 476 5.30E-27 128.6 37621 cellular  
 organisms;Eukaryota;Opisthokonta;Metazoa;Eumetazoa;Bilateria;Protostomia;  
 Ecdysozoa;Scalidophora;Priapulida;Priapulimorpha;Priapulimorphida;Priapulidae;  
 Priapulus;Priapulus caudatus  
 UdeM00000025528 6596 144.8 UdeM00000025528 XP\_045157297.1 53.3 122  
 54 2 47 168 907 1025 3.00E-31 144.8 6596 cellular  
 organisms;Eukaryota;Opisthokonta;Metazoa;Eumetazoa;Bilateria;Protostomia;  
 Spiralia;Lophotrochozoa;Mollusca;Bivalvia;Autobranchia;Heteroconchia;Euterodonta;  
 Imparidentia;Venerida;Veneroidea;Veneridae;Mercenaria;Mercenaria mercenaria  
 UdeM00000025530 7913 181 UdeM00000025530 XP\_041082893.1 64.4 135  
 48 0 20 154 33 167 1.10E-42 181 7913 cellular  
 organisms;Eukaryota;Opisthokonta;Metazoa;Eumetazoa;Bilateria;Deuterostomia;  
 Chordata;Craniata;Vertebrata;Gnathostomata;Teleostomi;Euteleostomi;Actinopterygii;  
 Actinopteri;Chondrostei;Acipenseriformes;Acipenseridae;Polyodontidae;Polyodontinae;  
 Polyodontini;Polyodon;Polyodon spathula  
 UdeM00000025534 29159 117.9 UdeM00000025534 XP\_011451530.1 43 135  
 70 2 70 203 78 206 1.60E-23 117.9 29159 cellular  
 organisms;Eukaryota;Opisthokonta;Metazoa;Eumetazoa;Bilateria;Protostomia;  
 Spiralia;Lophotrochozoa;Mollusca;Bivalvia;Autobranchia;Pteriomorpha;Ostreida;  
 Ostreidae;Crassostrea;Crassostrea gigas  
 UdeM00000025535 29159 128.6 UdeM00000025535 XP\_034316164.1 56.6 99  
 38 2 1 97 1 96 4.70E-27 128.6 29159 cellular  
 organisms;Eukaryota;Opisthokonta;Metazoa;Eumetazoa;Bilateria;Protostomia;  
 Spiralia;Lophotrochozoa;Mollusca;Bivalvia;Autobranchia;Pteriomorpha;Ostreida;  
 Ostreidae;Crassostrea;Crassostrea gigas  
 UdeM00000025536 6565 112.1 UdeM00000025536 XP\_022312527.1 47 115  
 60 1 69 182 70 184 7.70E-22 112.1 6565 cellular  
 organisms;Eukaryota;Opisthokonta;Metazoa;Eumetazoa;Bilateria;Protostomia;  
 Spiralia;Lophotrochozoa;Mollusca;Bivalvia;Autobranchia;Pteriomorpha;Ostreida;  
 Ostreidae;Crassostrea;Crassostrea virginica  
 UdeM00000025537 10224 63.5 UdeM00000025537 XP\_006819348.1 40.5 74  
 44 0 93 166 369 442 2.80E-07 63.5 10224 cellular  
 organisms;Eukaryota;Opisthokonta;Metazoa;Eumetazoa;Bilateria;Deuterostomia;  
 Hemichordata;Enteropneusta;Harrimaniidae;Saccoglossus;Saccoglossus kowalevskii

UdeM00000025538 10224 63.2 UdeM00000025538 XP\_006819348.1 40.5 74  
 44 0 55 128 369 442 2.90E-07 63.2 10224 cellular  
 organisms;Eukaryota;Opisthokonta;Metazoa;Eumetazoa;Bilateria;Deuterostomi  
 a;Hemichordata;Enteropneusta;Harrimaniidae;Saccoglossus;Saccoglossus  
 kowalevskii

UdeM00000025539 6565 90.1 UdeM00000025539 XP\_022290516.1 50.5 103  
 37 2 3 91 254 356 1.60E-15 90.1 6565 cellular  
 organisms;Eukaryota;Opisthokonta;Metazoa;Eumetazoa;Bilateria;Protostomia;  
 Spiralia;Lophotrochozoa;Mollusca;Bivalvia;Autobranchia;Pteriomorpha;Ostr  
 eida;Ostreoidea;Ostreidae;Crassostrea;Crassostrea virginica

UdeM00000025540 6573 182.6 UdeM00000025540 XP\_021356047.1 52.4 164  
 77 1 47 209 148 311 5.40E-43 182.6 6573 cellular  
 organisms;Eukaryota;Opisthokonta;Metazoa;Eumetazoa;Bilateria;Protostomia;  
 Spiralia;Lophotrochozoa;Mollusca;Bivalvia;Autobranchia;Pteriomorpha;Pect  
 inida;Pectinoidea;Pectinidae;Mizuhopecten;Mizuhopecten yessoensis

UdeM00000025541 1735272 84.7 UdeM00000025541 XP\_041349488.1 47.3  
 112 46 4 1 111 1 100 9.10E-14 84.7 1735272  
 cellular  
 organisms;Eukaryota;Opisthokonta;Metazoa;Eumetazoa;Bilateria;Protostomia;  
 Spiralia;Lophotrochozoa;Mollusca;Gastropoda;Neomphalina;Neomphaloidea;Pel  
 tospiridae;Gigantopelta;Gigantopelta aegis

UdeM00000025542 6573 102.8 UdeM00000025542 XP\_021351151.1 59.5 74  
 28 1 21 92 975 1048 6.00E-19 102.8 6573 cellular  
 organisms;Eukaryota;Opisthokonta;Metazoa;Eumetazoa;Bilateria;Protostomia;  
 Spiralia;Lophotrochozoa;Mollusca;Bivalvia;Autobranchia;Pteriomorpha;Pect  
 inida;Pectinoidea;Pectinidae;Mizuhopecten;Mizuhopecten yessoensis

UdeM00000025543 6596 82.8 UdeM00000025543 XP\_045208696.1 25.3 356  
 199 10 2 306 51 390 8.30E-13 82.8 6596 cellular  
 organisms;Eukaryota;Opisthokonta;Metazoa;Eumetazoa;Bilateria;Protostomia;  
 Spiralia;Lophotrochozoa;Mollusca;Bivalvia;Autobranchia;Heteroconchia;Euhe  
 terodonta;Imparidentia;Venerida;Veneroidea;Veneridae;Mercenaria;Mercenari  
 a mercenaria

UdeM00000025544 6573 263.5 UdeM00000025544 XP\_021352851.1 31.1 707  
 417 28 92 763 132 803 8.90E-67 263.5 6573 cellular  
 organisms;Eukaryota;Opisthokonta;Metazoa;Eumetazoa;Bilateria;Protostomia;  
 Spiralia;Lophotrochozoa;Mollusca;Bivalvia;Autobranchia;Pteriomorpha;Pect  
 inida;Pectinoidea;Pectinidae;Mizuhopecten;Mizuhopecten yessoensis

UdeM00000025545 29159 211.8 UdeM00000025545 XP\_034313077.1 64.4 160  
 57 0 2 161 107 266 6.40E-52 211.8 29159 cellular  
 organisms;Eukaryota;Opisthokonta;Metazoa;Eumetazoa;Bilateria;Protostomia;  
 Spiralia;Lophotrochozoa;Mollusca;Bivalvia;Autobranchia;Pteriomorpha;Ostr  
 eida;Ostreoidea;Ostreidae;Crassostrea;Crassostrea gigas

UdeM00000025547 6565 132.9 UdeM00000025547 XP\_022295065.1 55 109  
 49 0 1 109 187 295 2.50E-28 132.9 6565 cellular  
 organisms;Eukaryota;Opisthokonta;Metazoa;Eumetazoa;Bilateria;Protostomia;  
 Spiralia;Lophotrochozoa;Mollusca;Bivalvia;Autobranchia;Pteriomorpha;Ostr  
 eida;Ostreoidea;Ostreidae;Crassostrea;Crassostrea virginica

UdeM00000025549 6565 252.7 UdeM00000025549 XP\_022297447.1 51.2 248  
 105 2 1 232 117 364 4.70E-64 252.7 6565 cellular  
 organisms;Eukaryota;Opisthokonta;Metazoa;Eumetazoa;Bilateria;Protostomia;  
 Spiralia;Lophotrochozoa;Mollusca;Bivalvia;Autobranchia;Pteriomorpha;Ostr  
 eida;Ostreoidea;Ostreidae;Crassostrea;Crassostrea virginica

UdeM00000025550 70779 120.6 UdeM00000025550 XP\_015764363.1 31.4 229  
 137 4 1 210 21 248 2.50E-24 120.6 70779 cellular

organisms;Eukaryota;Opisthokonta;Metazoa;Eumetazoa;Cnidaria;Anthozoa;Hexa  
corallia;Scleractinia;Astrocoeniina;Acroporidae;Acropora;Acropora  
digitifera

UdeM00000025554 202533 184.9 UdeM00000025554 XP\_035216523.1 33.3  
321 206 5 1 314 1 320 1.80E-43 184.9 202533  
cellular

organisms;Eukaryota;Opisthokonta;Metazoa;Eumetazoa;Bilateria;Protostomia;  
Ecdysozoa;Panarthropoda;Arthropoda;Chelicerata;Arachnida;Araneae;Araneomo  
rphae;Entelegynae;Eresoidea;Eresidae;Stegodyphus;Stegodyphus dumicola

UdeM00000025555 50429 266.2 UdeM00000025555 XP\_022799197.1 29.6 594  
377 13 11 579 14 591 1.00E-67 266.2 50429 cellular

organisms;Eukaryota;Opisthokonta;Metazoa;Eumetazoa;Cnidaria;Anthozoa;Hexa  
corallia;Scleractinia;Astrocoeniina;Pocilloporidae;Stylophora;Stylophora  
pistillata

UdeM00000025556 1735272 62.8 UdeM00000025556 XP\_041355798.1 32.4  
105 70 1 20 124 52 155 5.00E-07 62.8 1735272  
cellular

organisms;Eukaryota;Opisthokonta;Metazoa;Eumetazoa;Bilateria;Protostomia;  
Spiralia;Lophotrochozoa;Mollusca;Gastropoda;Neomphalina;Neomphaloidea;Pel  
tospiridae;Gigantopelta;Gigantopelta aegis

UdeM00000025557 1735272 96.7 UdeM00000025557 XP\_041355798.1 35.4  
144 91 2 20 163 52 193 3.00E-17 96.7 1735272  
cellular

organisms;Eukaryota;Opisthokonta;Metazoa;Eumetazoa;Bilateria;Protostomia;  
Spiralia;Lophotrochozoa;Mollusca;Gastropoda;Neomphalina;Neomphaloidea;Pel  
tospiridae;Gigantopelta;Gigantopelta aegis

UdeM00000025558 50429 256.5 UdeM00000025558 XP\_022799197.1 28.8 601  
382 13 4 571 5 592 8.00E-65 256.5 50429 cellular

organisms;Eukaryota;Opisthokonta;Metazoa;Eumetazoa;Cnidaria;Anthozoa;Hexa  
corallia;Scleractinia;Astrocoeniina;Pocilloporidae;Stylophora;Stylophora  
pistillata

UdeM00000025559 50429 253.4 UdeM00000025559 XP\_022799197.1 28.5 592  
379 12 1 561 14 592 6.60E-64 253.4 50429 cellular

organisms;Eukaryota;Opisthokonta;Metazoa;Eumetazoa;Cnidaria;Anthozoa;Hexa  
corallia;Scleractinia;Astrocoeniina;Pocilloporidae;Stylophora;Stylophora  
pistillata

UdeM00000025562 6565 126.7 UdeM00000025562 XP\_022335449.1 72.5 80  
22 0 189 268 7 86 1.00E-25 126.7 6565 cellular

organisms;Eukaryota;Opisthokonta;Metazoa;Eumetazoa;Bilateria;Protostomia;  
Spiralia;Lophotrochozoa;Mollusca;Bivalvia;Autobranchia;Pteriomorphia;Ostr  
eida;Ostreoidea;Ostreidae;Crassostrea;Crassostrea virginica

UdeM00000025563 6500 59.7 UdeM00000025563 XP\_035828412.1 30.4 102  
65 2 24 119 33 134 3.90E-06 59.7 6500 cellular

organisms;Eukaryota;Opisthokonta;Metazoa;Eumetazoa;Bilateria;Protostomia;  
Spiralia;Lophotrochozoa;Mollusca;Gastropoda;Heterobranchia;Euthyneura;Tec  
tipleura;Aplysiida;Aplysioidea;Aplysiidae;Aplysia;Aplysia californica

UdeM00000025564 6596 198 UdeM00000025564 XP\_045181571.1 28.9 551  
347 16 61 576 342 882 3.40E-47 198 6596 cellular

organisms;Eukaryota;Opisthokonta;Metazoa;Eumetazoa;Bilateria;Protostomia;  
Spiralia;Lophotrochozoa;Mollusca;Bivalvia;Autobranchia;Heteroconchia;Euhe  
terodonta;Imparidentia;Venerida;Veneroidea;Veneridae;Mercenaria;Mercenari  
a mercenaria

UdeM00000025565 37293 202.2 UdeM00000025565 XP\_021527228.1 69.3 150  
19 1 13 135 11 160 4.20E-49 202.2 37293 cellular

organisms;Eukaryota;Opisthokonta;Metazoa;Eumetazoa;Bilateria;Deuterostomi  
a;Chordata;Craniata;Vertebrata;Gnathostomata;Teleostomi;Euteleostomi;Sarc  
opterygii;Dipnotetrapodomorpha;Tetrapoda;Amniota;Mammalia;Theria;Eutheria  
;Boreoeutheria;Euarchontoglires;Primates;Haplorrhini;Simiiformes;Platyrrh  
ini;Aotidae;Aotus;Aotus nancymaae

UdeM00000025566 1735272 115.2 UdeM00000025566 XP\_041379632.1 33.2  
262 161 6 59 317 243 493 1.70E-22 115.2 1735272  
cellular

organisms;Eukaryota;Opisthokonta;Metazoa;Eumetazoa;Bilateria;Protostomia;  
Spiralia;Lophotrochozoa;Mollusca;Gastropoda;Neomphalina;Neomphaloidea;Pel  
tospiridae;Gigantopelta;Gigantopelta aegis

UdeM00000030591 6596 228 UdeM00000030591 XP\_045194118.1 39 372  
202 10 41 399 1544 1903 2.10E-56 228 6596 cellular

organisms;Eukaryota;Opisthokonta;Metazoa;Eumetazoa;Bilateria;Protostomia;  
Spiralia;Lophotrochozoa;Mollusca;Bivalvia;Autobranchia;Heteroconchia;Euhe  
terodonta;Imparidentia;Venerida;Veneroidea;Veneridae;Mercenaria;Mercenari  
a mercenaria

UdeM00000030592 176946 66.2 UdeM00000030592 XP\_015745591.2 41.2  
85 43 2 1 78 2514 2598 2.90E-08 66.2 176946  
cellular

organisms;Eukaryota;Opisthokonta;Metazoa;Eumetazoa;Bilateria;Deuterostomi  
a;Chordata;Craniata;Vertebrata;Gnathostomata;Teleostomi;Euteleostomi;Sarc  
opterygii;Dipnotetrapodomorpha;Tetrapoda;Amniota;Sauropsida;Sauria;Lepido  
sauria;Squamata;Bifurcata;Unidentata;Episquamata;Toxicofera;Serpentes;Hen  
ophidia;Pythonidae;Python;Python bivittatus

UdeM00000039606 6596 191.8 UdeM00000039606 XP\_045161174.1 61.1 149  
54 2 46 193 39 184 8.20E-46 191.8 6596 cellular

organisms;Eukaryota;Opisthokonta;Metazoa;Eumetazoa;Bilateria;Protostomia;  
Spiralia;Lophotrochozoa;Mollusca;Bivalvia;Autobranchia;Heteroconchia;Euhe  
terodonta;Imparidentia;Venerida;Veneroidea;Veneridae;Mercenaria;Mercenari  
a mercenaria

UdeM00000039607 6596 169.5 UdeM00000039607 XP\_045162518.1 71.8 124  
34 1 25 148 199 321 3.30E-39 169.5 6596 cellular

organisms;Eukaryota;Opisthokonta;Metazoa;Eumetazoa;Bilateria;Protostomia;  
Spiralia;Lophotrochozoa;Mollusca;Bivalvia;Autobranchia;Heteroconchia;Euhe  
terodonta;Imparidentia;Venerida;Veneroidea;Veneridae;Mercenaria;Mercenari  
a mercenaria

UdeM00000039608 6596 191.8 UdeM00000039608 XP\_045161174.1 61.1 149  
54 2 46 193 39 184 8.20E-46 191.8 6596 cellular

organisms;Eukaryota;Opisthokonta;Metazoa;Eumetazoa;Bilateria;Protostomia;  
Spiralia;Lophotrochozoa;Mollusca;Bivalvia;Autobranchia;Heteroconchia;Euhe  
terodonta;Imparidentia;Venerida;Veneroidea;Veneridae;Mercenaria;Mercenari  
a mercenaria

UdeM00000039609 6596 169.5 UdeM00000039609 XP\_045162518.1 71.8 124  
34 1 25 148 199 321 3.30E-39 169.5 6596 cellular

organisms;Eukaryota;Opisthokonta;Metazoa;Eumetazoa;Bilateria;Protostomia;  
Spiralia;Lophotrochozoa;Mollusca;Bivalvia;Autobranchia;Heteroconchia;Euhe  
terodonta;Imparidentia;Venerida;Veneroidea;Veneridae;Mercenaria;Mercenari  
a mercenaria

UdeM00000039610 6596 191.8 UdeM00000039610 XP\_045161174.1 61.1 149  
54 2 46 193 39 184 8.20E-46 191.8 6596 cellular

organisms;Eukaryota;Opisthokonta;Metazoa;Eumetazoa;Bilateria;Protostomia;  
Spiralia;Lophotrochozoa;Mollusca;Bivalvia;Autobranchia;Heteroconchia;Euhe



terodonta;Imparidentia;Venerida;Veneroidea;Veneridae;Mercenaria;Mercenari  
 a mercenaria  
 UdeM00000039611 6596 169.5 UdeM00000039611 XP\_045162518.1 71.8 124  
 34 1 25 148 199 321 3.30E-39 169.5 6596 cellular  
 organisms;Eukaryota;Opisthokonta;Metazoa;Eumetazoa;Bilateria;Protostomia;  
 Spiralia;Lophotrochozoa;Mollusca;Bivalvia;Autobranhia;Heteroconchia;Euhe  
 terodonta;Imparidentia;Venerida;Veneroidea;Veneridae;Mercenaria;Mercenari  
 a mercenaria  
 UdeM00000039612 6596 191.8 UdeM00000039612 XP\_045161174.1 61.1 149  
 54 2 46 193 39 184 8.20E-46 191.8 6596 cellular  
 organisms;Eukaryota;Opisthokonta;Metazoa;Eumetazoa;Bilateria;Protostomia;  
 Spiralia;Lophotrochozoa;Mollusca;Bivalvia;Autobranhia;Heteroconchia;Euhe  
 terodonta;Imparidentia;Venerida;Veneroidea;Veneridae;Mercenaria;Mercenari  
 a mercenaria  
 UdeM00000039613 6596 169.5 UdeM00000039613 XP\_045162518.1 71.8 124  
 34 1 25 148 199 321 3.30E-39 169.5 6596 cellular  
 organisms;Eukaryota;Opisthokonta;Metazoa;Eumetazoa;Bilateria;Protostomia;  
 Spiralia;Lophotrochozoa;Mollusca;Bivalvia;Autobranhia;Heteroconchia;Euhe  
 terodonta;Imparidentia;Venerida;Veneroidea;Veneridae;Mercenaria;Mercenari  
 a mercenaria  
 UdeM00000039614 6596 191.8 UdeM00000039614 XP\_045161174.1 61.1 149  
 54 2 46 193 39 184 8.20E-46 191.8 6596 cellular  
 organisms;Eukaryota;Opisthokonta;Metazoa;Eumetazoa;Bilateria;Protostomia;  
 Spiralia;Lophotrochozoa;Mollusca;Bivalvia;Autobranhia;Heteroconchia;Euhe  
 terodonta;Imparidentia;Venerida;Veneroidea;Veneridae;Mercenaria;Mercenari  
 a mercenaria  
 UdeM00000039615 6596 169.5 UdeM00000039615 XP\_045162518.1 71.8 124  
 34 1 25 148 199 321 3.30E-39 169.5 6596 cellular  
 organisms;Eukaryota;Opisthokonta;Metazoa;Eumetazoa;Bilateria;Protostomia;  
 Spiralia;Lophotrochozoa;Mollusca;Bivalvia;Autobranhia;Heteroconchia;Euhe  
 terodonta;Imparidentia;Venerida;Veneroidea;Veneridae;Mercenaria;Mercenari  
 a mercenaria  
 UdeM00000039616 6596 191.8 UdeM00000039616 XP\_045161174.1 61.1 149  
 54 2 46 193 39 184 8.20E-46 191.8 6596 cellular  
 organisms;Eukaryota;Opisthokonta;Metazoa;Eumetazoa;Bilateria;Protostomia;  
 Spiralia;Lophotrochozoa;Mollusca;Bivalvia;Autobranhia;Heteroconchia;Euhe  
 terodonta;Imparidentia;Venerida;Veneroidea;Veneridae;Mercenaria;Mercenari  
 a mercenaria  
 UdeM00000039617 6596 169.5 UdeM00000039617 XP\_045162518.1 67.4 135  
 33 1 25 148 199 333 3.30E-39 169.5 6596 cellular  
 organisms;Eukaryota;Opisthokonta;Metazoa;Eumetazoa;Bilateria;Protostomia;  
 Spiralia;Lophotrochozoa;Mollusca;Bivalvia;Autobranhia;Heteroconchia;Euhe  
 terodonta;Imparidentia;Venerida;Veneroidea;Veneridae;Mercenaria;Mercenari  
 a mercenaria  
 UdeM00000039618 6596 191.8 UdeM00000039618 XP\_045161174.1 61.1 149  
 54 2 46 193 39 184 8.20E-46 191.8 6596 cellular  
 organisms;Eukaryota;Opisthokonta;Metazoa;Eumetazoa;Bilateria;Protostomia;  
 Spiralia;Lophotrochozoa;Mollusca;Bivalvia;Autobranhia;Heteroconchia;Euhe  
 terodonta;Imparidentia;Venerida;Veneroidea;Veneridae;Mercenaria;Mercenari  
 a mercenaria  
 UdeM00000039619 6596 169.5 UdeM00000039619 XP\_045162518.1 71.8 124  
 34 1 25 148 199 321 3.30E-39 169.5 6596 cellular  
 organisms;Eukaryota;Opisthokonta;Metazoa;Eumetazoa;Bilateria;Protostomia;  
 Spiralia;Lophotrochozoa;Mollusca;Bivalvia;Autobranhia;Heteroconchia;Euhe

terodonta;Imparidentia;Venerida;Veneroidea;Veneridae;Mercenaria;Mercenari  
 a mercenaria  
 UdeM00000039620 6596 191.8 UdeM00000039620 XP\_045161174.1 61.1 149  
 54 2 46 193 39 184 8.20E-46 191.8 6596 cellular  
 organisms;Eukaryota;Opisthokonta;Metazoa;Eumetazoa;Bilateria;Protostomia;  
 Spiralia;Lophotrochozoa;Mollusca;Bivalvia;Autobranchia;Heteroconchia;Euhe  
 terodonta;Imparidentia;Venerida;Veneroidea;Veneridae;Mercenaria;Mercenari  
 a mercenaria  
 UdeM00000039621 6596 169.5 UdeM00000039621 XP\_045162518.1 71.8 124  
 34 1 25 148 199 321 3.30E-39 169.5 6596 cellular  
 organisms;Eukaryota;Opisthokonta;Metazoa;Eumetazoa;Bilateria;Protostomia;  
 Spiralia;Lophotrochozoa;Mollusca;Bivalvia;Autobranchia;Heteroconchia;Euhe  
 terodonta;Imparidentia;Venerida;Veneroidea;Veneridae;Mercenaria;Mercenari  
 a mercenaria  
 UdeM00000039622 6596 191.8 UdeM00000039622 XP\_045161174.1 61.1 149  
 54 2 46 193 39 184 8.20E-46 191.8 6596 cellular  
 organisms;Eukaryota;Opisthokonta;Metazoa;Eumetazoa;Bilateria;Protostomia;  
 Spiralia;Lophotrochozoa;Mollusca;Bivalvia;Autobranchia;Heteroconchia;Euhe  
 terodonta;Imparidentia;Venerida;Veneroidea;Veneridae;Mercenaria;Mercenari  
 a mercenaria  
 UdeM00000039623 6596 169.5 UdeM00000039623 XP\_045162518.1 71.8 124  
 34 1 25 148 199 321 3.30E-39 169.5 6596 cellular  
 organisms;Eukaryota;Opisthokonta;Metazoa;Eumetazoa;Bilateria;Protostomia;  
 Spiralia;Lophotrochozoa;Mollusca;Bivalvia;Autobranchia;Heteroconchia;Euhe  
 terodonta;Imparidentia;Venerida;Veneroidea;Veneridae;Mercenaria;Mercenari  
 a mercenaria  
 UdeM00000039624 6596 191.4 UdeM00000039624 XP\_045161175.1 66.2 133  
 44 1 62 193 12 144 1.10E-45 191.4 6596 cellular  
 organisms;Eukaryota;Opisthokonta;Metazoa;Eumetazoa;Bilateria;Protostomia;  
 Spiralia;Lophotrochozoa;Mollusca;Bivalvia;Autobranchia;Heteroconchia;Euhe  
 terodonta;Imparidentia;Venerida;Veneroidea;Veneridae;Mercenaria;Mercenari  
 a mercenaria  
 UdeM00000039625 6596 169.5 UdeM00000039625 XP\_045162518.1 71.8 124  
 34 1 25 148 199 321 3.30E-39 169.5 6596 cellular  
 organisms;Eukaryota;Opisthokonta;Metazoa;Eumetazoa;Bilateria;Protostomia;  
 Spiralia;Lophotrochozoa;Mollusca;Bivalvia;Autobranchia;Heteroconchia;Euhe  
 terodonta;Imparidentia;Venerida;Veneroidea;Veneridae;Mercenaria;Mercenari  
 a mercenaria  
 UdeM00000039626 6596 191.8 UdeM00000039626 XP\_045161174.1 61.1 149  
 54 2 46 193 39 184 8.20E-46 191.8 6596 cellular  
 organisms;Eukaryota;Opisthokonta;Metazoa;Eumetazoa;Bilateria;Protostomia;  
 Spiralia;Lophotrochozoa;Mollusca;Bivalvia;Autobranchia;Heteroconchia;Euhe  
 terodonta;Imparidentia;Venerida;Veneroidea;Veneridae;Mercenaria;Mercenari  
 a mercenaria  
 UdeM00000039627 6596 169.5 UdeM00000039627 XP\_045162518.1 71.8 124  
 34 1 25 148 199 321 3.30E-39 169.5 6596 cellular  
 organisms;Eukaryota;Opisthokonta;Metazoa;Eumetazoa;Bilateria;Protostomia;  
 Spiralia;Lophotrochozoa;Mollusca;Bivalvia;Autobranchia;Heteroconchia;Euhe  
 terodonta;Imparidentia;Venerida;Veneroidea;Veneridae;Mercenaria;Mercenari  
 a mercenaria  
 UdeM00000039628 6596 191.8 UdeM00000039628 XP\_045161174.1 61.1 149  
 54 2 46 193 39 184 8.20E-46 191.8 6596 cellular  
 organisms;Eukaryota;Opisthokonta;Metazoa;Eumetazoa;Bilateria;Protostomia;  
 Spiralia;Lophotrochozoa;Mollusca;Bivalvia;Autobranchia;Heteroconchia;Euhe

terodonta;Imparidentia;Venerida;Veneroidea;Veneridae;Mercenaria;Mercenari  
 a mercenaria  
 UdeM00000039629 6596 169.5 UdeM00000039629 XP\_045162518.1 71.8 124  
 34 1 25 148 199 321 3.30E-39 169.5 6596 cellular  
 organisms;Eukaryota;Opisthokonta;Metazoa;Eumetazoa;Bilateria;Protostomia;  
 Spiralia;Lophotrochozoa;Mollusca;Bivalvia;Autobranhia;Heteroconchia;Euhe  
 terodonta;Imparidentia;Venerida;Veneroidea;Veneridae;Mercenaria;Mercenari  
 a mercenaria  
 UdeM00000039630 6596 191.8 UdeM00000039630 XP\_045161174.1 61.1 149  
 54 2 46 193 39 184 8.20E-46 191.8 6596 cellular  
 organisms;Eukaryota;Opisthokonta;Metazoa;Eumetazoa;Bilateria;Protostomia;  
 Spiralia;Lophotrochozoa;Mollusca;Bivalvia;Autobranhia;Heteroconchia;Euhe  
 terodonta;Imparidentia;Venerida;Veneroidea;Veneridae;Mercenaria;Mercenari  
 a mercenaria  
 UdeM00000039631 6596 169.1 UdeM00000039631 XP\_045162518.1 71.8 124  
 34 1 386 509 199 321 1.50E-38 169.1 6596 cellular  
 organisms;Eukaryota;Opisthokonta;Metazoa;Eumetazoa;Bilateria;Protostomia;  
 Spiralia;Lophotrochozoa;Mollusca;Bivalvia;Autobranhia;Heteroconchia;Euhe  
 terodonta;Imparidentia;Venerida;Veneroidea;Veneridae;Mercenaria;Mercenari  
 a mercenaria  
 UdeM00000039632 6596 191.8 UdeM00000039632 XP\_045161174.1 61.1 149  
 54 2 46 193 39 184 8.20E-46 191.8 6596 cellular  
 organisms;Eukaryota;Opisthokonta;Metazoa;Eumetazoa;Bilateria;Protostomia;  
 Spiralia;Lophotrochozoa;Mollusca;Bivalvia;Autobranhia;Heteroconchia;Euhe  
 terodonta;Imparidentia;Venerida;Veneroidea;Veneridae;Mercenaria;Mercenari  
 a mercenaria  
 UdeM00000039633 6596 169.5 UdeM00000039633 XP\_045162518.1 71.8 124  
 34 1 25 148 199 321 3.30E-39 169.5 6596 cellular  
 organisms;Eukaryota;Opisthokonta;Metazoa;Eumetazoa;Bilateria;Protostomia;  
 Spiralia;Lophotrochozoa;Mollusca;Bivalvia;Autobranhia;Heteroconchia;Euhe  
 terodonta;Imparidentia;Venerida;Veneroidea;Veneridae;Mercenaria;Mercenari  
 a mercenaria  
 UdeM00000039634 6596 191.8 UdeM00000039634 XP\_045161174.1 61.1 149  
 54 2 46 193 39 184 8.20E-46 191.8 6596 cellular  
 organisms;Eukaryota;Opisthokonta;Metazoa;Eumetazoa;Bilateria;Protostomia;  
 Spiralia;Lophotrochozoa;Mollusca;Bivalvia;Autobranhia;Heteroconchia;Euhe  
 terodonta;Imparidentia;Venerida;Veneroidea;Veneridae;Mercenaria;Mercenari  
 a mercenaria  
 UdeM00000039635 6596 169.5 UdeM00000039635 XP\_045162518.1 71.8 124  
 34 1 25 148 199 321 3.30E-39 169.5 6596 cellular  
 organisms;Eukaryota;Opisthokonta;Metazoa;Eumetazoa;Bilateria;Protostomia;  
 Spiralia;Lophotrochozoa;Mollusca;Bivalvia;Autobranhia;Heteroconchia;Euhe  
 terodonta;Imparidentia;Venerida;Veneroidea;Veneridae;Mercenaria;Mercenari  
 a mercenaria  
 UdeM00000019967 6596 127.5 UdeM00000019967 XP\_045161434.1 50.8 130  
 64 0 64 193 98 227 2.00E-26 127.5 6596 cellular  
 organisms;Eukaryota;Opisthokonta;Metazoa;Eumetazoa;Bilateria;Protostomia;  
 Spiralia;Lophotrochozoa;Mollusca;Bivalvia;Autobranhia;Heteroconchia;Euhe  
 terodonta;Imparidentia;Venerida;Veneroidea;Veneridae;Mercenaria;Mercenari  
 a mercenaria  
 UdeM00000019968 6596 649.8 UdeM00000019968 XP\_045160149.1 31.8 1588  
 644 29 6 1197 3 1547 6.80E-183 649.8 6596 cellular  
 organisms;Eukaryota;Opisthokonta;Metazoa;Eumetazoa;Bilateria;Protostomia;  
 Spiralia;Lophotrochozoa;Mollusca;Bivalvia;Autobranhia;Heteroconchia;Euhe

terodonta;Imparidentia;Venerida;Veneroidea;Veneridae;Mercenaria;Mercenaria mercenaria  
 UdeM00000019969 29159 310.5 UdeM00000019969 XP\_034332465.1 47.1 363  
 180 5 24 375 204 565 3.90E-81 310.5 29159 cellular  
 organisms;Eukaryota;Opisthokonta;Metazoa;Eumetazoa;Bilateria;Protostomia;  
 Spiralia;Lophotrochozoa;Mollusca;Bivalvia;Autobranhia;Pteriomorphia;Ostr  
 eida;Ostreoidea;Ostreidae;Crassostrea;Crassostrea gigas  
 UdeM00000019970 29159 131 UdeM00000019970 XP\_034332465.1 45.1 144  
 73 2 77 219 74 212 1.90E-27 131 29159 cellular  
 organisms;Eukaryota;Opisthokonta;Metazoa;Eumetazoa;Bilateria;Protostomia;  
 Spiralia;Lophotrochozoa;Mollusca;Bivalvia;Autobranhia;Pteriomorphia;Ostr  
 eida;Ostreoidea;Ostreidae;Crassostrea;Crassostrea gigas  
 UdeM00000019971 29159 444.5 UdeM00000019971 XP\_034332465.1 49.3 475  
 226 6 5 470 74 542 2.00E-121 444.5 29159 cellular  
 organisms;Eukaryota;Opisthokonta;Metazoa;Eumetazoa;Bilateria;Protostomia;  
 Spiralia;Lophotrochozoa;Mollusca;Bivalvia;Autobranhia;Pteriomorphia;Ostr  
 eida;Ostreoidea;Ostreidae;Crassostrea;Crassostrea gigas  
 UdeM00000019973 29159 442.6 UdeM00000019973 XP\_034332465.1 48 498  
 241 7 77 562 74 565 8.80E-121 442.6 29159 cellular  
 organisms;Eukaryota;Opisthokonta;Metazoa;Eumetazoa;Bilateria;Protostomia;  
 Spiralia;Lophotrochozoa;Mollusca;Bivalvia;Autobranhia;Pteriomorphia;Ostr  
 eida;Ostreoidea;Ostreidae;Crassostrea;Crassostrea gigas  
 UdeM00000019975 29159 424.9 UdeM00000019975 XP\_034332465.1 48.8 475  
 228 7 77 542 74 542 2.00E-115 424.9 29159 cellular  
 organisms;Eukaryota;Opisthokonta;Metazoa;Eumetazoa;Bilateria;Protostomia;  
 Spiralia;Lophotrochozoa;Mollusca;Bivalvia;Autobranhia;Pteriomorphia;Ostr  
 eida;Ostreoidea;Ostreidae;Crassostrea;Crassostrea gigas  
 UdeM00000019976 29159 437.6 UdeM00000019976 XP\_034332465.1 48.1 493  
 237 7 77 560 74 556 3.10E-119 437.6 29159 cellular  
 organisms;Eukaryota;Opisthokonta;Metazoa;Eumetazoa;Bilateria;Protostomia;  
 Spiralia;Lophotrochozoa;Mollusca;Bivalvia;Autobranhia;Pteriomorphia;Ostr  
 eida;Ostreoidea;Ostreidae;Crassostrea;Crassostrea gigas  
 UdeM00000019977 6596 164.1 UdeM00000019977 XP\_045160157.1 38.2 267  
 137 5 6 249 3 264 2.40E-37 164.1 6596 cellular  
 organisms;Eukaryota;Opisthokonta;Metazoa;Eumetazoa;Bilateria;Protostomia;  
 Spiralia;Lophotrochozoa;Mollusca;Bivalvia;Autobranhia;Heteroconchia;Euhe  
 terodonta;Imparidentia;Venerida;Veneroidea;Veneridae;Mercenaria;Mercenari  
 a mercenaria  
 UdeM00000019980 29159 352.1 UdeM00000019980 XP\_034332465.1 51.7 362  
 166 5 14 367 182 542 1.10E-93 352.1 29159 cellular  
 organisms;Eukaryota;Opisthokonta;Metazoa;Eumetazoa;Bilateria;Protostomia;  
 Spiralia;Lophotrochozoa;Mollusca;Bivalvia;Autobranhia;Pteriomorphia;Ostr  
 eida;Ostreoidea;Ostreidae;Crassostrea;Crassostrea gigas  
 UdeM00000019981 37621 497.7 UdeM00000019981 XP\_014678940.1 43.5 591  
 312 8 93 663 367 955 2.40E-137 497.7 37621 cellular  
 organisms;Eukaryota;Opisthokonta;Metazoa;Eumetazoa;Bilateria;Protostomia;  
 Ecdysozoa;Scalidophora;Priapulida;Priapulimorpha;Priapulimorphida;Priapul  
 idae;Priapulid;Priapulid caudatus  
 UdeM00000019983 37621 500.4 UdeM00000019983 XP\_014678940.1 43.7 591  
 311 8 93 663 367 955 3.70E-138 500.4 37621 cellular  
 organisms;Eukaryota;Opisthokonta;Metazoa;Eumetazoa;Bilateria;Protostomia;  
 Ecdysozoa;Scalidophora;Priapulida;Priapulimorpha;Priapulimorphida;Priapul  
 idae;Priapulid;Priapulid caudatus

UdeM00000019984 29159 109.8 UdeM00000019984 XP\_011440881.2 43.2 148  
 80 1 27 170 8 155 3.80E-21 109.8 29159 cellular  
 organisms;Eukaryota;Opisthokonta;Metazoa;Eumetazoa;Bilateria;Protostomia;  
 Spiralia;Lophotrochozoa;Mollusca;Bivalvia;Autobranchia;Pteriormorphia;Ostr  
 eida;Ostreoidea;Ostreidae;Crassostrea;Crassostrea gigas  
 UdeM00000019985 29159 99 UdeM00000019985 XP\_011440881.2 48 123  
 63 1 48 169 33 155 7.20E-18 99 29159 cellular  
 organisms;Eukaryota;Opisthokonta;Metazoa;Eumetazoa;Bilateria;Protostomia;  
 Spiralia;Lophotrochozoa;Mollusca;Bivalvia;Autobranchia;Pteriormorphia;Ostr  
 eida;Ostreoidea;Ostreidae;Crassostrea;Crassostrea gigas  
 UdeM00000019986 6596 79.7 UdeM00000019986 XP\_045161434.1 36 125  
 80 0 46 170 100 224 4.10E-12 79.7 6596 cellular  
 organisms;Eukaryota;Opisthokonta;Metazoa;Eumetazoa;Bilateria;Protostomia;  
 Spiralia;Lophotrochozoa;Mollusca;Bivalvia;Autobranchia;Heteroconchia;Euhe  
 terodonta;Imparidentia;Venerida;Veneroidea;Veneridae;Mercenaria;Mercenari  
 a mercenaria  
 UdeM00000019987 6596 98.6 UdeM00000019987 XP\_045161434.1 42.5 146  
 80 2 38 181 94 237 8.80E-18 98.6 6596 cellular  
 organisms;Eukaryota;Opisthokonta;Metazoa;Eumetazoa;Bilateria;Protostomia;  
 Spiralia;Lophotrochozoa;Mollusca;Bivalvia;Autobranchia;Heteroconchia;Euhe  
 terodonta;Imparidentia;Venerida;Veneroidea;Veneridae;Mercenaria;Mercenari  
 a mercenaria  
 UdeM00000019988 150288 166 UdeM00000019988 XP\_020788097.1 66  
 106 36 0 2 107 383 488 2.60E-38 166 150288  
 cellular  
 organisms;Eukaryota;Opisthokonta;Metazoa;Eumetazoa;Bilateria;Deuterostomi  
 a;Chordata;Craniata;Vertebrata;Gnathostomata;Teleostomi;Euteleostomi;Acti  
 nopterygii;Actinopteri;Neopterygii;Teleostei;Osteoglossocephalai;Clupeoce  
 phala;Euteleosteomorpha;Neoteleostei;Eurypterygia;Ctenosquamata;Acanthomo  
 rphata;Euacanthomorphacea;Percomorphaceae;Gobiaria;Gobiiformes;Gobioidei;  
 Gobiidae;Oxudercinae;Boleophthalmus;Boleophthalmus pectinirostris  
 UdeM00000019989 50390 319.7 UdeM00000019989 XP\_028142380.1 57.3 234  
 99 1 2 235 170 402 3.10E-84 319.7 50390 cellular  
 organisms;Eukaryota;Opisthokonta;Metazoa;Eumetazoa;Bilateria;Protostomia;  
 Ecdysozoa;Panarthropoda;Arthropoda;Mandibulata;Pancrustacea;Hexapoda;Inse  
 cta;Dicondylia;Pterygota;Neoptera;Endopterygota;Coleoptera;Polyphaga;Cucu  
 jiformia;Chrysomeloidea;Chrysomelidae;Galerucinae;Luperini;Diabroticina;D  
 iabroticites;Diabrotica;Diabrotica virgifera;Diabrotica virgifera  
 virgifera  
 UdeM00000019990 29159 72 UdeM00000019990 XP\_011440881.2 37.2 129  
 80 1 43 171 28 155 1.00E-09 72 29159 cellular  
 organisms;Eukaryota;Opisthokonta;Metazoa;Eumetazoa;Bilateria;Protostomia;  
 Spiralia;Lophotrochozoa;Mollusca;Bivalvia;Autobranchia;Pteriormorphia;Ostr  
 eida;Ostreoidea;Ostreidae;Crassostrea;Crassostrea gigas  
 UdeM00000019992 29159 79.7 UdeM00000019992 XP\_011440881.2 35.1 134  
 87 0 41 174 26 159 4.20E-12 79.7 29159 cellular  
 organisms;Eukaryota;Opisthokonta;Metazoa;Eumetazoa;Bilateria;Protostomia;  
 Spiralia;Lophotrochozoa;Mollusca;Bivalvia;Autobranchia;Pteriormorphia;Ostr  
 eida;Ostreoidea;Ostreidae;Crassostrea;Crassostrea gigas  
 UdeM00000019993 29159 72.8 UdeM00000019993 XP\_011440881.2 33.6 134  
 89 0 41 174 26 159 5.20E-10 72.8 29159 cellular  
 organisms;Eukaryota;Opisthokonta;Metazoa;Eumetazoa;Bilateria;Protostomia;  
 Spiralia;Lophotrochozoa;Mollusca;Bivalvia;Autobranchia;Pteriormorphia;Ostr  
 eida;Ostreoidea;Ostreidae;Crassostrea;Crassostrea gigas

UdeM00000019994 29159 105.9 UdeM00000019994 XP\_011440881.2 54.9 113  
 51 0 61 173 46 158 5.50E-20 105.9 29159 cellular  
 organisms;Eukaryota;Opisthokonta;Metazoa;Eumetazoa;Bilateria;Protostomia;  
 Spiralia;Lophotrochozoa;Mollusca;Bivalvia;Autobranchia;Pteriomorphia;Ostr  
 eida;Ostreoidea;Ostreidae;Crassostrea;Crassostrea gigas  
 UdeM00000019995 6573 476.9 UdeM00000019995 XP\_021368737.1 59.7 1346  
 445 27 90 1377 1 1307 8.90E-131 476.9 6573 cellular  
 organisms;Eukaryota;Opisthokonta;Metazoa;Eumetazoa;Bilateria;Protostomia;  
 Spiralia;Lophotrochozoa;Mollusca;Bivalvia;Autobranchia;Pteriomorphia;Pect  
 inida;Pectinoidea;Pectinidae;Mizuhopecten;Mizuhopecten yessoensis  
 UdeM00000019996 6596 481.5 UdeM00000019996 XP\_045162753.1 57.3 405  
 162 4 40 443 34 428 1.20E-132 481.5 6596 cellular  
 organisms;Eukaryota;Opisthokonta;Metazoa;Eumetazoa;Bilateria;Protostomia;  
 Spiralia;Lophotrochozoa;Mollusca;Bivalvia;Autobranchia;Heteroconchia;Euhe  
 terodonta;Imparidentia;Venerida;Veneroidea;Veneridae;Mercenaria;Mercenari  
 a mercenaria  
 UdeM00000019997 29159 128.6 UdeM00000019997 XP\_034307878.1 32.6 178  
 120 0 70 247 6 183 1.20E-26 128.6 29159 cellular  
 organisms;Eukaryota;Opisthokonta;Metazoa;Eumetazoa;Bilateria;Protostomia;  
 Spiralia;Lophotrochozoa;Mollusca;Bivalvia;Autobranchia;Pteriomorphia;Ostr  
 eida;Ostreoidea;Ostreidae;Crassostrea;Crassostrea gigas  
 UdeM00000020000 6596 106.7 UdeM00000020000 XP\_045161226.1 38.5 143  
 72 5 7 143 86 218 3.20E-20 106.7 6596 cellular  
 organisms;Eukaryota;Opisthokonta;Metazoa;Eumetazoa;Bilateria;Protostomia;  
 Spiralia;Lophotrochozoa;Mollusca;Bivalvia;Autobranchia;Heteroconchia;Euhe  
 terodonta;Imparidentia;Venerida;Veneroidea;Veneridae;Mercenaria;Mercenari  
 a mercenaria  
 UdeM00000020001 6579 275.4 UdeM00000020001 XP\_033732603.1 50.5 279  
 137 1 9 287 8 285 8.90E-71 275.4 6579 cellular  
 organisms;Eukaryota;Opisthokonta;Metazoa;Eumetazoa;Bilateria;Protostomia;  
 Spiralia;Lophotrochozoa;Mollusca;Bivalvia;Autobranchia;Pteriomorphia;Pect  
 inida;Pectinoidea;Pectinidae;Pecten;Pecten maximus  
 UdeM00000020002 6596 341.3 UdeM00000020002 XP\_045163591.1 63.7 256  
 91 2 1 255 10 264 1.10E-90 341.3 6596 cellular  
 organisms;Eukaryota;Opisthokonta;Metazoa;Eumetazoa;Bilateria;Protostomia;  
 Spiralia;Lophotrochozoa;Mollusca;Bivalvia;Autobranchia;Heteroconchia;Euhe  
 terodonta;Imparidentia;Venerida;Veneroidea;Veneridae;Mercenaria;Mercenari  
 a mercenaria  
 UdeM00000020003 6596 303.9 UdeM00000020003 XP\_045163591.1 67.9 212  
 67 1 2 213 54 264 1.60E-79 303.9 6596 cellular  
 organisms;Eukaryota;Opisthokonta;Metazoa;Eumetazoa;Bilateria;Protostomia;  
 Spiralia;Lophotrochozoa;Mollusca;Bivalvia;Autobranchia;Heteroconchia;Euhe  
 terodonta;Imparidentia;Venerida;Veneroidea;Veneridae;Mercenaria;Mercenari  
 a mercenaria  
 UdeM00000020004 6565 209.9 UdeM00000020004 XP\_022317300.1 33.6 387  
 247 4 17 393 25 411 5.80E-51 209.9 6565 cellular  
 organisms;Eukaryota;Opisthokonta;Metazoa;Eumetazoa;Bilateria;Protostomia;  
 Spiralia;Lophotrochozoa;Mollusca;Bivalvia;Autobranchia;Pteriomorphia;Ostr  
 eida;Ostreoidea;Ostreidae;Crassostrea;Crassostrea virginica  
 UdeM00000020005 6573 209.5 UdeM00000020005 XP\_021363743.1 34.4 299  
 192 2 2 297 16 313 7.30E-51 209.5 6573 cellular  
 organisms;Eukaryota;Opisthokonta;Metazoa;Eumetazoa;Bilateria;Protostomia;  
 Spiralia;Lophotrochozoa;Mollusca;Bivalvia;Autobranchia;Pteriomorphia;Pect  
 inida;Pectinoidea;Pectinidae;Mizuhopecten;Mizuhopecten yessoensis

UdeM00000020006 6596 136.7 UdeM00000020006 XP\_045208720.1 30.9 307  
 194 7 106 401 432 731 8.90E-29 136.7 6596 cellular  
 organisms;Eukaryota;Opisthokonta;Metazoa;Eumetazoa;Bilateria;Protostomia;  
 Spiralia;Lophotrochozoa;Mollusca;Bivalvia;Autobranchia;Heteroconchia;Euhe  
 terodonta;Imparidentia;Venerida;Veneroidea;Veneridae;Mercenaria;Mercenari  
 a mercenaria  
 UdeM00000020007 6596 212.2 UdeM00000020007 XP\_045159519.1 31 394  
 261 5 4 389 16 406 1.20E-51 212.2 6596 cellular  
 organisms;Eukaryota;Opisthokonta;Metazoa;Eumetazoa;Bilateria;Protostomia;  
 Spiralia;Lophotrochozoa;Mollusca;Bivalvia;Autobranchia;Heteroconchia;Euhe  
 terodonta;Imparidentia;Venerida;Veneroidea;Veneridae;Mercenaria;Mercenari  
 a mercenaria  
 UdeM00000020008 6596 637.1 UdeM00000020008 XP\_045161661.1 75.4 394  
 96 1 1 394 1 393 1.50E-179 637.1 6596 cellular  
 organisms;Eukaryota;Opisthokonta;Metazoa;Eumetazoa;Bilateria;Protostomia;  
 Spiralia;Lophotrochozoa;Mollusca;Bivalvia;Autobranchia;Heteroconchia;Euhe  
 terodonta;Imparidentia;Venerida;Veneroidea;Veneridae;Mercenaria;Mercenari  
 a mercenaria  
 UdeM00000020009 6573 332.8 UdeM00000020009 XP\_021374258.1 46.6 393  
 195 4 30 421 12 390 6.30E-88 332.8 6573 cellular  
 organisms;Eukaryota;Opisthokonta;Metazoa;Eumetazoa;Bilateria;Protostomia;  
 Spiralia;Lophotrochozoa;Mollusca;Bivalvia;Autobranchia;Pteriormorphia;Pect  
 inida;Pectinoidea;Pectinidae;Mizuhopecten;Mizuhopecten yessoensis  
 UdeM00000020010 6596 97.8 UdeM00000020010 XP\_045163443.1 46.7 210  
 90 6 122 326 2562 2754 2.70E-17 97.8 6596 cellular  
 organisms;Eukaryota;Opisthokonta;Metazoa;Eumetazoa;Bilateria;Protostomia;  
 Spiralia;Lophotrochozoa;Mollusca;Bivalvia;Autobranchia;Heteroconchia;Euhe  
 terodonta;Imparidentia;Venerida;Veneroidea;Veneridae;Mercenaria;Mercenari  
 a mercenaria  
 UdeM00000020011 6596 89.4 UdeM00000020011 XP\_045163443.1 25.3 451  
 276 8 1425 1826 1904 2342 5.50E-14 89.4 6596 cellular  
 organisms;Eukaryota;Opisthokonta;Metazoa;Eumetazoa;Bilateria;Protostomia;  
 Spiralia;Lophotrochozoa;Mollusca;Bivalvia;Autobranchia;Heteroconchia;Euhe  
 terodonta;Imparidentia;Venerida;Veneroidea;Veneridae;Mercenaria;Mercenari  
 a mercenaria  
 UdeM00000020012 6579 742.7 UdeM00000020012 XP\_033763361.1 47.3 1132  
 405 18 19 1133 12 968 7.10E-211 742.7 6579 cellular  
 organisms;Eukaryota;Opisthokonta;Metazoa;Eumetazoa;Bilateria;Protostomia;  
 Spiralia;Lophotrochozoa;Mollusca;Bivalvia;Autobranchia;Pteriormorphia;Pect  
 inida;Pectinoidea;Pectinidae;Pecten;Pecten maximus  
 UdeM00000020013 13397 472.2 UdeM00000020013 XP\_041068243.1 58.6 367  
 150 1 2 366 222 588 5.90E-130 472.2 13397 cellular  
 organisms;Eukaryota;Opisthokonta;Metazoa;Eumetazoa;Bilateria;Deuterostomi  
 a;Chordata;Craniata;Vertebrata;Gnathostomata;Chondrichthyes;Elasmobranchi  
 i;Selachii;Galeomorphii;Galeoidea;Lamniformes;Alopiidae;Lamninae;Carcharo  
 don;Carcharodon carcharias  
 UdeM00000020015 13397 583.6 UdeM00000020015 XP\_041068243.1 59.4 429  
 174 0 2 430 166 594 2.10E-163 583.6 13397 cellular  
 organisms;Eukaryota;Opisthokonta;Metazoa;Eumetazoa;Bilateria;Deuterostomi  
 a;Chordata;Craniata;Vertebrata;Gnathostomata;Chondrichthyes;Elasmobranchi  
 i;Selachii;Galeomorphii;Galeoidea;Lamniformes;Alopiidae;Lamninae;Carcharo  
 don;Carcharodon carcharias  
 UdeM00000020016 7830 596.3 UdeM00000020016 XP\_038673199.1 59.6 450  
 180 1 1 448 186 635 3.30E-167 596.3 7830 cellular

organisms;Eukaryota;Opisthokonta;Metazoa;Eumetazoa;Bilateria;Deuterostomi  
a;Chordata;Craniata;Vertebrata;Gnathostomata;Chondrichthyes;Elasmobranchi  
i;Selachii;Galeomorphii;Galeoidea;Carcharhiniformes;Scyliorhinidae;Scylio  
rhinus;Scyliorhinus canicula

UdeM00000020017 259920 278.1 UdeM00000020017 XP\_020376696.1 61.4  
207 76 2 2 208 185 387 9.30E-72 278.1 259920  
cellular

organisms;Eukaryota;Opisthokonta;Metazoa;Eumetazoa;Bilateria;Deuterostomi  
a;Chordata;Craniata;Vertebrata;Gnathostomata;Chondrichthyes;Elasmobranchi  
i;Selachii;Galeomorphii;Galeoidea;Orectolobiformes;Rhincodontidae;Rhincod  
on;Rhincodon typus

UdeM00000020018 6565 305.8 UdeM00000020018 XP\_022297447.1 53.2 284  
117 2 8 275 81 364 5.50E-80 305.8 6565 cellular

organisms;Eukaryota;Opisthokonta;Metazoa;Eumetazoa;Bilateria;Protostomia;  
Spiralia;Lophotrochozoa;Mollusca;Bivalvia;Autobranchia;Pteriormorphia;Ostr  
eida;Ostreoidea;Ostreidae;Crassostrea;Crassostrea virginica

UdeM00000020019 6565 253.8 UdeM00000020019 XP\_022297447.1 51.2 248  
105 2 1 232 117 364 2.10E-64 253.8 6565 cellular

organisms;Eukaryota;Opisthokonta;Metazoa;Eumetazoa;Bilateria;Protostomia;  
Spiralia;Lophotrochozoa;Mollusca;Bivalvia;Autobranchia;Pteriormorphia;Ostr  
eida;Ostreoidea;Ostreidae;Crassostrea;Crassostrea virginica

UdeM00000020020 13397 366.3 UdeM00000020020 XP\_041068243.1 61.9 260  
99 0 1 260 111 370 3.20E-98 366.3 13397 cellular

organisms;Eukaryota;Opisthokonta;Metazoa;Eumetazoa;Bilateria;Deuterostomi  
a;Chordata;Craniata;Vertebrata;Gnathostomata;Chondrichthyes;Elasmobranchi  
i;Selachii;Galeomorphii;Galeoidea;Lamniformes;Alopiidae;Lamninae;Carcharo  
don;Carcharodon carcharias

UdeM00000020021 105023 335.5 UdeM00000020021 XP\_015796544.1 59.1  
235 96 0 1 235 254 488 5.80E-89 335.5 105023  
cellular

organisms;Eukaryota;Opisthokonta;Metazoa;Eumetazoa;Bilateria;Deuterostomi  
a;Chordata;Craniata;Vertebrata;Gnathostomata;Teleostomi;Euteleostomi;Acti  
nopterygii;Actinopteri;Neopterygii;Teleostei;Osteoglossocephalai;Clupeoce  
phala;Euteleosteomorpha;Neoteleostei;Eurypterygia;Ctenosquamata;Acanthomo  
rphata;Euacanthomorphacea;Percomorphaceae;Ovalentaria;Atherinomorphae;Cyp  
rinodontiformes;Aplocheiloidei;Nothobranchiidae;Nothobranchius;Nothbranc  
hius furzeri

UdeM00000020022 7830 798.5 UdeM00000020022 XP\_038673199.1 57.8 618  
253 1 1 610 130 747 5.90E-228 798.5 7830 cellular

organisms;Eukaryota;Opisthokonta;Metazoa;Eumetazoa;Bilateria;Deuterostomi  
a;Chordata;Craniata;Vertebrata;Gnathostomata;Chondrichthyes;Elasmobranchi  
i;Selachii;Galeomorphii;Galeoidea;Carcharhiniformes;Scyliorhinidae;Scylio  
rhinus;Scyliorhinus canicula

UdeM00000020023 13397 202.2 UdeM00000020023 XP\_041068243.1 59.4 155  
55 1 2 148 238 392 4.60E-49 202.2 13397 cellular

organisms;Eukaryota;Opisthokonta;Metazoa;Eumetazoa;Bilateria;Deuterostomi  
a;Chordata;Craniata;Vertebrata;Gnathostomata;Chondrichthyes;Elasmobranchi  
i;Selachii;Galeomorphii;Galeoidea;Lamniformes;Alopiidae;Lamninae;Carcharo  
don;Carcharodon carcharias

UdeM00000020024 37621 142.9 UdeM00000020024 XP\_014679100.1 37.9 232  
130 8 768 994 78 300 2.20E-30 142.9 37621 cellular

organisms;Eukaryota;Opisthokonta;Metazoa;Eumetazoa;Bilateria;Protostomia;  
Ecdysozoa;Scalidophora;Priapulida;Priapulimorpha;Priapulimorphida;Priapul  
idae;Priapulus;Priapulus caudatus



UdeM00000020025 50390 385.2 UdeM00000020025 XP\_028142380.1 57 263  
 113 0 3 265 30 292 6.80E-104 385.2 50390 cellular  
 organisms;Eukaryota;Opisthokonta;Metazoa;Eumetazoa;Bilateria;Protostomia;  
 Ecdysozoa;Panarthropoda;Arthropoda;Mandibulata;Pancrustacea;Hexapoda;Inse  
 cta;Dicondylia;Pterygota;Neoptera;Endopterygota;Coleoptera;Polyphaga;Cucu  
 jiformia;Chrysomeloidea;Chrysomelidae;Galerucinae;Luperini;Diabroticina;D  
 iabroticites;Diabrotica;Diabrotica virgifera;Diabrotica virgifera  
 virgifera

UdeM00000020026 50390 236.5 UdeM00000020026 XP\_028154228.1 55.2 174  
 76 1 1 174 126 297 2.80E-59 236.5 50390 cellular  
 organisms;Eukaryota;Opisthokonta;Metazoa;Eumetazoa;Bilateria;Protostomia;  
 Ecdysozoa;Panarthropoda;Arthropoda;Mandibulata;Pancrustacea;Hexapoda;Inse  
 cta;Dicondylia;Pterygota;Neoptera;Endopterygota;Coleoptera;Polyphaga;Cucu  
 jiformia;Chrysomeloidea;Chrysomelidae;Galerucinae;Luperini;Diabroticina;D  
 iabroticites;Diabrotica;Diabrotica virgifera;Diabrotica virgifera  
 virgifera

UdeM00000020027 50390 232.3 UdeM00000020027 XP\_028154228.1 55.2 174  
 76 1 1 174 126 297 5.30E-58 232.3 50390 cellular  
 organisms;Eukaryota;Opisthokonta;Metazoa;Eumetazoa;Bilateria;Protostomia;  
 Ecdysozoa;Panarthropoda;Arthropoda;Mandibulata;Pancrustacea;Hexapoda;Inse  
 cta;Dicondylia;Pterygota;Neoptera;Endopterygota;Coleoptera;Polyphaga;Cucu  
 jiformia;Chrysomeloidea;Chrysomelidae;Galerucinae;Luperini;Diabroticina;D  
 iabroticites;Diabrotica;Diabrotica virgifera;Diabrotica virgifera  
 virgifera

UdeM00000020028 51655 116.3 UdeM00000020028 XP\_037966588.1 56.5 92  
 40 0 1 92 673 764 2.10E-23 116.3 51655 cellular  
 organisms;Eukaryota;Opisthokonta;Metazoa;Eumetazoa;Bilateria;Protostomia;  
 Ecdysozoa;Panarthropoda;Arthropoda;Mandibulata;Pancrustacea;Hexapoda;Inse  
 cta;Dicondylia;Pterygota;Neoptera;Endopterygota;Amphiesmenoptera;Lepidopt  
 era;Glossata;Neolepidoptera;Heteroneura;Ditrysia;Yponomeutoidea;Plutellid  
 ae;Plutella;Plutella xylostella

UdeM00000020029 6596 1008.4 UdeM00000020029 XP\_045161992.1 44.7  
 1187 605 21 125 1291 56 1211 8.00E-291 1008.4 6596  
 cellular  
 organisms;Eukaryota;Opisthokonta;Metazoa;Eumetazoa;Bilateria;Protostomia;  
 Spiralia;Lophotrochozoa;Mollusca;Bivalvia;Autobranchia;Heteroconchia;Euhe  
 terodonta;Imparidentia;Venerida;Veneroidea;Veneridae;Mercenaria;Mercenari  
 a mercenaria

UdeM00000020030 6596 988 UdeM00000020030 XP\_045161992.1 43.9 1185  
 591 19 125 1264 56 1211 1.10E-284 988 6596 cellular  
 organisms;Eukaryota;Opisthokonta;Metazoa;Eumetazoa;Bilateria;Protostomia;  
 Spiralia;Lophotrochozoa;Mollusca;Bivalvia;Autobranchia;Heteroconchia;Euhe  
 terodonta;Imparidentia;Venerida;Veneroidea;Veneridae;Mercenaria;Mercenari  
 a mercenaria

UdeM00000020031 6596 1027.7 UdeM00000020031 XP\_045161992.1 44.9  
 1208 590 21 29 1189 33 1211 1.20E-296 1027.7 6596  
 cellular  
 organisms;Eukaryota;Opisthokonta;Metazoa;Eumetazoa;Bilateria;Protostomia;  
 Spiralia;Lophotrochozoa;Mollusca;Bivalvia;Autobranchia;Heteroconchia;Euhe  
 terodonta;Imparidentia;Venerida;Veneroidea;Veneridae;Mercenaria;Mercenari  
 a mercenaria

UdeM00000020032 6565 129.8 UdeM00000020032 XP\_022321863.1 33.2 217  
 135 5 180 389 324 537 7.60E-27 129.8 6565 cellular  
 organisms;Eukaryota;Opisthokonta;Metazoa;Eumetazoa;Bilateria;Protostomia;

Spiralia;Lophotrochozoa;Mollusca;Bivalvia;Autobranchia;Pteriormorphia;Ostr  
eida;Ostreoidea;Ostreidae;Crassostrea;Crassostrea virginica  
UdeM00000020033 6596 1046.6 UdeM00000020033 XP\_045161992.1 45.9  
1216 597 20 27 1216 31 1211 2.50E-302 1046.6 6596  
cellular  
organisms;Eukaryota;Opisthokonta;Metazoa;Eumetazoa;Bilateria;Protostomia;  
Spiralia;Lophotrochozoa;Mollusca;Bivalvia;Autobranchia;Heteroconchia;Euhe  
terodonta;Imparidentia;Venerida;Veneroidea;Veneridae;Mercenaria;Mercenari  
a mercenaria  
UdeM00000020034 6596 910.2 UdeM00000020034 XP\_045161992.1 42.1 1230  
574 26 27 1167 31 1211 2.70E-261 910.2 6596 cellular  
organisms;Eukaryota;Opisthokonta;Metazoa;Eumetazoa;Bilateria;Protostomia;  
Spiralia;Lophotrochozoa;Mollusca;Bivalvia;Autobranchia;Heteroconchia;Euhe  
terodonta;Imparidentia;Venerida;Veneroidea;Veneridae;Mercenaria;Mercenari  
a mercenaria  
UdeM00000020035 6596 933.3 UdeM00000020035 XP\_045161992.1 42.8 1232  
590 27 27 1194 31 1211 3.00E-268 933.3 6596 cellular  
organisms;Eukaryota;Opisthokonta;Metazoa;Eumetazoa;Bilateria;Protostomia;  
Spiralia;Lophotrochozoa;Mollusca;Bivalvia;Autobranchia;Heteroconchia;Euhe  
terodonta;Imparidentia;Venerida;Veneroidea;Veneridae;Mercenaria;Mercenari  
a mercenaria  
UdeM00000020036 6596 1047.3 UdeM00000020036 XP\_045161992.1 45.9  
1219 592 22 27 1216 31 1211 1.50E-302 1047.3 6596  
cellular  
organisms;Eukaryota;Opisthokonta;Metazoa;Eumetazoa;Bilateria;Protostomia;  
Spiralia;Lophotrochozoa;Mollusca;Bivalvia;Autobranchia;Heteroconchia;Euhe  
terodonta;Imparidentia;Venerida;Veneroidea;Veneridae;Mercenaria;Mercenari  
a mercenaria  
UdeM00000020037 6573 107.5 UdeM00000020037 XP\_021365372.1 39 141  
78 3 84 219 19 156 2.30E-20 107.5 6573 cellular  
organisms;Eukaryota;Opisthokonta;Metazoa;Eumetazoa;Bilateria;Protostomia;  
Spiralia;Lophotrochozoa;Mollusca;Bivalvia;Autobranchia;Pteriormorphia;Pect  
inida;Pectinoidea;Pectinidae;Mizuhopecten;Mizuhopecten yessoensis  
UdeM00000020038 6596 1037.3 UdeM00000020038 XP\_045158027.1 38  
1655 900 38 83 1666 184 1783 2.10E-299 1037.3 6596  
cellular  
organisms;Eukaryota;Opisthokonta;Metazoa;Eumetazoa;Bilateria;Protostomia;  
Spiralia;Lophotrochozoa;Mollusca;Bivalvia;Autobranchia;Heteroconchia;Euhe  
terodonta;Imparidentia;Venerida;Veneroidea;Veneridae;Mercenaria;Mercenari  
a mercenaria  
UdeM00000020039 6565 354.4 UdeM00000020039 XP\_022344976.1 57.1 336  
134 4 22 350 23 355 2.00E-94 354.4 6565 cellular  
organisms;Eukaryota;Opisthokonta;Metazoa;Eumetazoa;Bilateria;Protostomia;  
Spiralia;Lophotrochozoa;Mollusca;Bivalvia;Autobranchia;Pteriormorphia;Ostr  
eida;Ostreoidea;Ostreidae;Crassostrea;Crassostrea virginica  
UdeM00000020040 6596 145.6 UdeM00000020040 XP\_045204064.1 50.4 139  
69 0 25 163 26 164 5.70E-32 145.6 6596 cellular  
organisms;Eukaryota;Opisthokonta;Metazoa;Eumetazoa;Bilateria;Protostomia;  
Spiralia;Lophotrochozoa;Mollusca;Bivalvia;Autobranchia;Heteroconchia;Euhe  
terodonta;Imparidentia;Venerida;Veneroidea;Veneridae;Mercenaria;Mercenari  
a mercenaria  
UdeM00000020041 6596 586.3 UdeM00000020041 XP\_045204064.1 61.8 566  
195 3 25 570 26 590 5.50E-164 586.3 6596 cellular  
organisms;Eukaryota;Opisthokonta;Metazoa;Eumetazoa;Bilateria;Protostomia;

Spiralia;Lophotrochozoa;Mollusca;Bivalvia;Autobranchia;Heteroconchia;Euherodonta;Imparidentia;Venerida;Veneroidea;Veneridae;Mercenaria;Mercenaria mercenaria

UdeM00000020042 6596 98.2 UdeM00000020042 XP\_045160441.1 30.8 182  
123 2 11 192 7 185 1.20E-17 98.2 6596 cellular

organisms;Eukaryota;Opisthokonta;Metazoa;Eumetazoa;Bilateria;Protostomia;Spiralia;Lophotrochozoa;Mollusca;Bivalvia;Autobranchia;Heteroconchia;Euherodonta;Imparidentia;Venerida;Veneroidea;Veneridae;Mercenaria;Mercenaria mercenaria

UdeM00000020043 6596 341.3 UdeM00000020043 XP\_045160441.1 28.5 861  
555 24 32 855 192 1028 3.70E-90 341.3 6596 cellular

organisms;Eukaryota;Opisthokonta;Metazoa;Eumetazoa;Bilateria;Protostomia;Spiralia;Lophotrochozoa;Mollusca;Bivalvia;Autobranchia;Heteroconchia;Euherodonta;Imparidentia;Venerida;Veneroidea;Veneridae;Mercenaria;Mercenaria mercenaria

UdeM00000020044 6596 354 UdeM00000020044 XP\_045160441.1 26.7 1054  
676 28 11 999 7 1028 6.40E-94 354 6596 cellular

organisms;Eukaryota;Opisthokonta;Metazoa;Eumetazoa;Bilateria;Protostomia;Spiralia;Lophotrochozoa;Mollusca;Bivalvia;Autobranchia;Heteroconchia;Euherodonta;Imparidentia;Venerida;Veneroidea;Veneridae;Mercenaria;Mercenaria mercenaria

UdeM00000020045 6596 444.9 UdeM00000020045 XP\_045173249.1 34.1 787  
450 15 24 753 32 806 2.00E-121 444.9 6596 cellular

organisms;Eukaryota;Opisthokonta;Metazoa;Eumetazoa;Bilateria;Protostomia;Spiralia;Lophotrochozoa;Mollusca;Bivalvia;Autobranchia;Heteroconchia;Euherodonta;Imparidentia;Venerida;Veneroidea;Veneridae;Mercenaria;Mercenaria mercenaria

UdeM00000020046 6596 451.1 UdeM00000020046 XP\_045173249.1 34.3 788  
448 16 13 743 32 806 2.80E-123 451.1 6596 cellular

organisms;Eukaryota;Opisthokonta;Metazoa;Eumetazoa;Bilateria;Protostomia;Spiralia;Lophotrochozoa;Mollusca;Bivalvia;Autobranchia;Heteroconchia;Euherodonta;Imparidentia;Venerida;Veneroidea;Veneridae;Mercenaria;Mercenaria mercenaria

UdeM00000020048 6596 202.2 UdeM00000020048 XP\_045173249.1 31.2 385  
202 7 653 977 16 397 3.00E-48 202.2 6596 cellular

organisms;Eukaryota;Opisthokonta;Metazoa;Eumetazoa;Bilateria;Protostomia;Spiralia;Lophotrochozoa;Mollusca;Bivalvia;Autobranchia;Heteroconchia;Euherodonta;Imparidentia;Venerida;Veneroidea;Veneridae;Mercenaria;Mercenaria mercenaria

UdeM00000020047 6596 202.2 UdeM00000020047 XP\_045173249.1 31.2 385  
202 7 651 975 16 397 3.00E-48 202.2 6596 cellular

organisms;Eukaryota;Opisthokonta;Metazoa;Eumetazoa;Bilateria;Protostomia;Spiralia;Lophotrochozoa;Mollusca;Bivalvia;Autobranchia;Heteroconchia;Euherodonta;Imparidentia;Venerida;Veneroidea;Veneridae;Mercenaria;Mercenaria mercenaria

UdeM00000020049 6596 436 UdeM00000020049 XP\_045173249.1 33.2 788  
456 14 23 753 32 806 9.50E-119 436 6596 cellular

organisms;Eukaryota;Opisthokonta;Metazoa;Eumetazoa;Bilateria;Protostomia;Spiralia;Lophotrochozoa;Mollusca;Bivalvia;Autobranchia;Heteroconchia;Euherodonta;Imparidentia;Venerida;Veneroidea;Veneridae;Mercenaria;Mercenaria mercenaria

UdeM00000020050 6596 217.6 UdeM00000020050 XP\_045173249.1 32.7 388  
218 8 624 973 16 398 6.90E-53 217.6 6596 cellular

organisms;Eukaryota;Opisthokonta;Metazoa;Eumetazoa;Bilateria;Protostomia;

Spiralia;Lophotrochozoa;Mollusca;Bivalvia;Autobranchia;Heteroconchia;Euherodonta;Imparidentia;Venerida;Veneroidea;Veneridae;Mercenaria;Mercenaria mercenaria

UdeM00000020051 6596 633.3 UdeM00000020051 XP\_045162684.1 69.6 437  
126 2 8 438 32 467 2.50E-178 633.3 6596 cellular

organisms;Eukaryota;Opisthokonta;Metazoa;Eumetazoa;Bilateria;Protostomia;Spiralia;Lophotrochozoa;Mollusca;Bivalvia;Autobranchia;Heteroconchia;Euherodonta;Imparidentia;Venerida;Veneroidea;Veneridae;Mercenaria;Mercenaria mercenaria

UdeM00000020052 6579 689.1 UdeM00000020052 XP\_033764361.1 75.7 445  
108 0 1 445 1 445 3.70E-195 689.1 6579 cellular

organisms;Eukaryota;Opisthokonta;Metazoa;Eumetazoa;Bilateria;Protostomia;Spiralia;Lophotrochozoa;Mollusca;Bivalvia;Autobranchia;Pteriomorpha;Pectinida;Pectinoidea;Pectinidae;Pecten;Pecten maximus

UdeM00000020054 6596 568.5 UdeM00000020054 XP\_045163865.1 66.8 458  
131 6 1 439 1 456 7.20E-159 568.5 6596 cellular

organisms;Eukaryota;Opisthokonta;Metazoa;Eumetazoa;Bilateria;Protostomia;Spiralia;Lophotrochozoa;Mollusca;Bivalvia;Autobranchia;Heteroconchia;Euherodonta;Imparidentia;Venerida;Veneroidea;Veneridae;Mercenaria;Mercenaria mercenaria

UdeM00000020055 6596 347.1 UdeM00000020055 XP\_045161198.1 45.7 431  
203 7 1 404 1 427 3.10E-92 347.1 6596 cellular

organisms;Eukaryota;Opisthokonta;Metazoa;Eumetazoa;Bilateria;Protostomia;Spiralia;Lophotrochozoa;Mollusca;Bivalvia;Autobranchia;Heteroconchia;Euherodonta;Imparidentia;Venerida;Veneroidea;Veneridae;Mercenaria;Mercenaria mercenaria

UdeM00000020056 6596 370.2 UdeM00000020056 XP\_045161198.1 45.6 432  
220 7 1 422 1 427 3.60E-99 370.2 6596 cellular

organisms;Eukaryota;Opisthokonta;Metazoa;Eumetazoa;Bilateria;Protostomia;Spiralia;Lophotrochozoa;Mollusca;Bivalvia;Autobranchia;Heteroconchia;Euherodonta;Imparidentia;Venerida;Veneroidea;Veneridae;Mercenaria;Mercenaria mercenaria

UdeM00000020057 6573 260.4 UdeM00000020057 XP\_021366537.1 33.6 645  
364 22 13 625 12 624 6.00E-66 260.4 6573 cellular

organisms;Eukaryota;Opisthokonta;Metazoa;Eumetazoa;Bilateria;Protostomia;Spiralia;Lophotrochozoa;Mollusca;Bivalvia;Autobranchia;Pteriomorpha;Pectinida;Pectinoidea;Pectinidae;Mizuhopecten;Mizuhopecten yessoensis

UdeM00000020058 8175 126.7 UdeM00000020058 XP\_030274546.1 26.7 442  
267 11 589 990 27 451 1.60E-25 126.7 8175 cellular

organisms;Eukaryota;Opisthokonta;Metazoa;Eumetazoa;Bilateria;Deuterostomia;Chordata;Craniata;Vertebrata;Gnathostomata;Teleostomi;Euteleostomi;Actinopterygii;Actinopteri;Neopterygii;Teleostei;Osteoglossocephalai;Clupeocephala;Euteleostei;Neoteleostei;Eurypterygia;Ctenosquamata;Acanthopterygii;Euacanthopterygii;Percomorphaceae;Eupercaria;Spariformes;Sparidae;Sparus;Sparus aurata

UdeM00000020059 6596 700.7 UdeM00000020059 XP\_045157300.1 36.1 1001  
606 15 2 989 317 1296 2.70E-198 700.7 6596 cellular

organisms;Eukaryota;Opisthokonta;Metazoa;Eumetazoa;Bilateria;Protostomia;Spiralia;Lophotrochozoa;Mollusca;Bivalvia;Autobranchia;Heteroconchia;Euherodonta;Imparidentia;Venerida;Veneroidea;Veneridae;Mercenaria;Mercenaria mercenaria

UdeM00000020061 6596 172.9 UdeM00000020061 XP\_045157647.1 28.2 308  
206 4 462 761 2210 2510 1.50E-39 172.9 6596 cellular

organisms;Eukaryota;Opisthokonta;Metazoa;Eumetazoa;Bilateria;Protostomia;

Spiralia;Lophotrochozoa;Mollusca;Bivalvia;Autobranchia;Heteroconchia;Euherodonta;Imparidentia;Venerida;Veneroidea;Veneridae;Mercenaria;Mercenaria mercenaria

UdeM00000020060 6596 172.9 UdeM00000020060 XP\_045157647.1 28.2 308  
206 4 624 923 2210 2510 1.80E-39 172.9 6596 cellular

organisms;Eukaryota;Opisthokonta;Metazoa;Eumetazoa;Bilateria;Protostomia;Spiralia;Lophotrochozoa;Mollusca;Bivalvia;Autobranchia;Heteroconchia;Euherodonta;Imparidentia;Venerida;Veneroidea;Veneridae;Mercenaria;Mercenaria mercenaria

UdeM00000020064 1203425 94.7 UdeM00000020064 XP\_034551711.1 29.6  
318 179 10 577 863 139 442 6.00E-16 94.7 1203425  
cellular

organisms;Eukaryota;Opisthokonta;Metazoa;Eumetazoa;Bilateria;Deuterostomia;Chordata;Craniata;Vertebrata;Gnathostomata;Teleostomi;Euteleostomi;Actinopterygii;Actinopteri;Neopterygii;Teleostei;Osteoglossocephalai;Clupeocephala;Euteleostei;Neoteleostei;Eurypterygia;Ctenosquamata;Acanthomorphata;Euacanthomorphacea;Percomorphaceae;Eupercaria;Labriformes;Labridae;Notolabrus;Notolabrus celidotus

UdeM00000020065 6596 478 UdeM00000020065 XP\_045157300.1 33.5 777  
466 7 2 734 317 1086 2.50E-131 478 6596 cellular

organisms;Eukaryota;Opisthokonta;Metazoa;Eumetazoa;Bilateria;Protostomia;Spiralia;Lophotrochozoa;Mollusca;Bivalvia;Autobranchia;Heteroconchia;Euherodonta;Imparidentia;Venerida;Veneroidea;Veneridae;Mercenaria;Mercenaria mercenaria

UdeM00000020066 6596 199.1 UdeM00000020066 XP\_045157647.1 23.7 751  
460 30 149 863 1837 2510 2.30E-47 199.1 6596 cellular

organisms;Eukaryota;Opisthokonta;Metazoa;Eumetazoa;Bilateria;Protostomia;Spiralia;Lophotrochozoa;Mollusca;Bivalvia;Autobranchia;Heteroconchia;Euherodonta;Imparidentia;Venerida;Veneroidea;Veneridae;Mercenaria;Mercenaria mercenaria

UdeM00000020067 215358 86.3 UdeM00000020067 XP\_027138606.1 33.3  
174 56 1 1 114 596 769 2.90E-14 86.3 215358  
cellular

organisms;Eukaryota;Opisthokonta;Metazoa;Eumetazoa;Bilateria;Deuterostomia;Chordata;Craniata;Vertebrata;Gnathostomata;Teleostomi;Euteleostomi;Actinopterygii;Actinopteri;Neopterygii;Teleostei;Osteoglossocephalai;Clupeocephala;Euteleostei;Neoteleostei;Eurypterygia;Ctenosquamata;Acanthomorphata;Euacanthomorphacea;Percomorphaceae;Eupercaria;Eupercaria incertae sedis;Sciaenidae;Larimichthys;Larimichthys crocea

UdeM00000020070 6596 146.4 UdeM00000020070 XP\_045162258.1 37.4 206  
101 2 5 182 13 218 3.90E-32 146.4 6596 cellular

organisms;Eukaryota;Opisthokonta;Metazoa;Eumetazoa;Bilateria;Protostomia;Spiralia;Lophotrochozoa;Mollusca;Bivalvia;Autobranchia;Heteroconchia;Euherodonta;Imparidentia;Venerida;Veneroidea;Veneridae;Mercenaria;Mercenaria mercenaria

UdeM00000020072 37621 191.8 UdeM00000020072 XP\_014678940.1 65.4 133  
45 1 1 132 510 642 5.60E-46 191.8 37621 cellular

organisms;Eukaryota;Opisthokonta;Metazoa;Eumetazoa;Bilateria;Protostomia;Ecdysozoa;Scalidophora;Priapulida;Priapulimorpha;Priapulimorphida;Priapulidae;Priapululus;Priapululus caudatus

UdeM00000020073 29159 84.3 UdeM00000020073 XP\_034339168.1 71.2 59  
17 0 1 59 879 937 6.50E-14 84.3 29159 cellular

organisms;Eukaryota;Opisthokonta;Metazoa;Eumetazoa;Bilateria;Protostomia;

Spiralia; Lophotrochozoa; Mollusca; Bivalvia; Autobranchia; Pteriomorpha; Ostr  
eida; Ostreidae; Crassostrea; Crassostrea gigas  
UdeM00000020074 29159 104.8 UdeM00000020074 XP\_034338151.1 69.8 63  
19 0 1 63 285 347 5.60E-20 104.8 29159 cellular  
organisms; Eukaryota; Opisthokonta; Metazoa; Eumetazoa; Bilateria; Protostomia;  
Spiralia; Lophotrochozoa; Mollusca; Bivalvia; Autobranchia; Pteriomorpha; Ostr  
eida; Ostreidae; Crassostrea; Crassostrea gigas  
UdeM00000020075 45351 81.6 UdeM00000020075 XP\_032227196.1 35.1 151  
90 5 2 146 10 158 1.50E-12 81.6 45351 cellular  
organisms; Eukaryota; Opisthokonta; Metazoa; Eumetazoa; Cnidaria; Anthozoa; Hexa  
corallia; Actiniaria; Edwardsiidae; Nematostella; Nematostella vectensis  
UdeM00000020076 50429 75.9 UdeM00000020076 XP\_022804128.1 30 223  
140 8 4 222 12 222 8.60E-11 75.9 50429 cellular  
organisms; Eukaryota; Opisthokonta; Metazoa; Eumetazoa; Cnidaria; Anthozoa; Hexa  
corallia; Scleractinia; Astrocoeniina; Pocilloporidae; Stylophora; Stylophora  
pistillata  
UdeM00000020077 6573 719.2 UdeM00000020077 XP\_021376771.1 26.5 1590  
1084 12 201 1740 58 1612 1.30E-203 719.2 6573 cellular  
organisms; Eukaryota; Opisthokonta; Metazoa; Eumetazoa; Bilateria; Protostomia;  
Spiralia; Lophotrochozoa; Mollusca; Bivalvia; Autobranchia; Pteriomorpha; Pect  
inida; Pectinoidea; Pectinidae; Mizuhopecten; Mizuhopecten yessoensis  
UdeM00000020078 6565 169.1 UdeM00000020078 XP\_022339292.1 36.9 279  
94 5 27 227 982 1256 1.00E-38 169.1 6565 cellular  
organisms; Eukaryota; Opisthokonta; Metazoa; Eumetazoa; Bilateria; Protostomia;  
Spiralia; Lophotrochozoa; Mollusca; Bivalvia; Autobranchia; Pteriomorpha; Ostr  
eida; Ostreidae; Crassostrea; Crassostrea virginica  
UdeM00000020080 6596 342.4 UdeM00000020080 XP\_045162770.1 86.6 179  
24 0 1 179 34 212 3.40E-91 342.4 6596 cellular  
organisms; Eukaryota; Opisthokonta; Metazoa; Eumetazoa; Bilateria; Protostomia;  
Spiralia; Lophotrochozoa; Mollusca; Bivalvia; Autobranchia; Heteroconchia; Eue  
terodonta; Imparidentia; Venerida; Veneroidea; Veneridae; Mercenaria; Mercenari  
a mercenaria  
UdeM00000020082 29159 113.2 UdeM00000020082 XP\_019922882.2 36.3 182  
103 2 154 335 240 408 6.30E-22 113.2 29159 cellular  
organisms; Eukaryota; Opisthokonta; Metazoa; Eumetazoa; Bilateria; Protostomia;  
Spiralia; Lophotrochozoa; Mollusca; Bivalvia; Autobranchia; Pteriomorpha; Ostr  
eida; Ostreidae; Crassostrea; Crassostrea gigas  
UdeM00000020084 29159 67.4 UdeM00000020084 XP\_034307878.1 28.2 131  
92 2 1 131 92 220 2.10E-08 67.4 29159 cellular  
organisms; Eukaryota; Opisthokonta; Metazoa; Eumetazoa; Bilateria; Protostomia;  
Spiralia; Lophotrochozoa; Mollusca; Bivalvia; Autobranchia; Pteriomorpha; Ostr  
eida; Ostreidae; Crassostrea; Crassostrea gigas  
UdeM00000020085 29159 132.5 UdeM00000020085 XP\_034312908.1 30.5 338  
179 15 9 328 6 305 1.10E-27 132.5 29159 cellular  
organisms; Eukaryota; Opisthokonta; Metazoa; Eumetazoa; Bilateria; Protostomia;  
Spiralia; Lophotrochozoa; Mollusca; Bivalvia; Autobranchia; Pteriomorpha; Ostr  
eida; Ostreidae; Crassostrea; Crassostrea gigas  
UdeM00000020086 29159 102.4 UdeM00000020086 XP\_034312908.1 38.1 155  
91 3 1 153 472 623 5.20E-19 102.4 29159 cellular  
organisms; Eukaryota; Opisthokonta; Metazoa; Eumetazoa; Bilateria; Protostomia;  
Spiralia; Lophotrochozoa; Mollusca; Bivalvia; Autobranchia; Pteriomorpha; Ostr  
eida; Ostreidae; Crassostrea; Crassostrea gigas  
UdeM00000020087 6573 188.3 UdeM00000020087 XP\_021366593.1 40.6 286  
140 5 1 260 174 455 1.20E-44 188.3 6573 cellular

organisms;Eukaryota;Opisthokonta;Metazoa;Eumetazoa;Bilateria;Protostomia;Spiralia;Lophotrochozoa;Mollusca;Bivalvia;Autobranchia;Pteriomorphia;Pectinida;Pectinoidea;Pectinidae;Mizuhopecten;Mizuhopecten yessoensis  
UdeM00000020088 6596 197.2 UdeM00000020088 XP\_045162038.1 52.9 204  
95 1 1 203 144 347 2.10E-47 197.2 6596 cellular  
organisms;Eukaryota;Opisthokonta;Metazoa;Eumetazoa;Bilateria;Protostomia;Spiralia;Lophotrochozoa;Mollusca;Bivalvia;Autobranchia;Heteroconchia;Euheterodonta;Imparidentia;Venerida;Veneroidea;Veneridae;Mercenaria;Mercenaria mercenaria  
UdeM00000020089 6596 377.1 UdeM00000020089 XP\_045162794.1 41.8 534  
246 13 4 497 2 510 3.90E-101 377.1 6596 cellular  
organisms;Eukaryota;Opisthokonta;Metazoa;Eumetazoa;Bilateria;Protostomia;Spiralia;Lophotrochozoa;Mollusca;Bivalvia;Autobranchia;Heteroconchia;Euheterodonta;Imparidentia;Venerida;Veneroidea;Veneridae;Mercenaria;Mercenaria mercenaria  
UdeM00000020090 6573 727.6 UdeM00000020090 XP\_021372834.1 44.6 984  
454 23 21 960 6 942 2.00E-206 727.6 6573 cellular  
organisms;Eukaryota;Opisthokonta;Metazoa;Eumetazoa;Bilateria;Protostomia;Spiralia;Lophotrochozoa;Mollusca;Bivalvia;Autobranchia;Pteriomorphia;Pectinida;Pectinoidea;Pectinidae;Mizuhopecten;Mizuhopecten yessoensis  
UdeM00000020091 1415580 143.3 UdeM00000020091 XP\_030075314.1 43  
214 99 4 1 206 427 625 3.50E-31 143.3 1415580  
cellular  
organisms;Eukaryota;Opisthokonta;Metazoa;Eumetazoa;Bilateria;Deuterostomia;Chordata;Craniata;Vertebrata;Gnathostomata;Teleostomi;Euteleostomi;Sarcopterygii;Dipnotetrapodomorpha;Tetrapoda;Amphibia;Gymnophiona;Siphonopidae;Microcaecilia;Microcaecilia unicolor  
UdeM00000020092 7757 282.7 UdeM00000020092 XP\_032835197.1 77 183  
42 0 2 184 149 331 3.40E-73 282.7 7757 cellular  
organisms;Eukaryota;Opisthokonta;Metazoa;Eumetazoa;Bilateria;Deuterostomia;Chordata;Craniata;Vertebrata;Cyclostomata;Hyperoartia;Petromyzontiformes;Petromyzontidae;Petromyzon;Petromyzon marinus  
UdeM00000020093 7757 125.2 UdeM00000020093 XP\_032835197.1 86.4 66  
9 0 1 66 52 117 3.20E-26 125.2 7757 cellular  
organisms;Eukaryota;Opisthokonta;Metazoa;Eumetazoa;Bilateria;Deuterostomia;Chordata;Craniata;Vertebrata;Cyclostomata;Hyperoartia;Petromyzontiformes;Petromyzontidae;Petromyzon;Petromyzon marinus  
UdeM00000020095 6579 1099.3 UdeM00000020095 XP\_033739131.1 54.8  
971 402 6 1 942 408 1370 0.00E+00 1099.3 6579  
cellular  
organisms;Eukaryota;Opisthokonta;Metazoa;Eumetazoa;Bilateria;Protostomia;Spiralia;Lophotrochozoa;Mollusca;Bivalvia;Autobranchia;Pteriomorphia;Pectinida;Pectinoidea;Pectinidae;Pecten;Pecten maximus  
UdeM00000020098 6565 532.3 UdeM00000020098 XP\_022341603.1 72.7 377  
89 9 9 376 92 463 4.90E-148 532.3 6565 cellular  
organisms;Eukaryota;Opisthokonta;Metazoa;Eumetazoa;Bilateria;Protostomia;Spiralia;Lophotrochozoa;Mollusca;Bivalvia;Autobranchia;Pteriomorphia;Ostreida;Ostreoidea;Ostreidae;Crassostrea;Crassostrea virginica  
UdeM00000020100 37653 299.7 UdeM00000020100 XP\_014769083.1 45.4 403  
203 4 486 878 1 396 1.20E-77 299.7 37653 cellular  
organisms;Eukaryota;Opisthokonta;Metazoa;Eumetazoa;Bilateria;Protostomia;Spiralia;Lophotrochozoa;Mollusca;Cephalopoda;Coleoidea;Octopodiformes;Octopoda;Incirrata;Octopodidae;Octopus;Octopus bimaculoides

UdeM00000020099 37653 299.7 UdeM00000020099 XP\_014769083.1 45.4 403  
 203 4 497 889 1 396 1.30E-77 299.7 37653 cellular  
 organisms;Eukaryota;Opisthokonta;Metazoa;Eumetazoa;Bilateria;Protostomia;  
 Spiralia;Lophotrochozoa;Mollusca;Cephalopoda;Coleoidea;Octopodiformes;Oct  
 opoda;Incirrata;Octopodidae;Octopus;Octopus bimaculoides  
 UdeM00000020101 29159 245.7 UdeM00000020101 XP\_011446387.1 61.9 226  
 63 3 1 226 250 452 5.50E-62 245.7 29159 cellular  
 organisms;Eukaryota;Opisthokonta;Metazoa;Eumetazoa;Bilateria;Protostomia;  
 Spiralia;Lophotrochozoa;Mollusca;Bivalvia;Autobranchia;Pteriormorphia;Ostr  
 eida;Ostreoidea;Ostreidae;Crassostrea;Crassostrea gigas  
 UdeM00000020102 6596 258.8 UdeM00000020102 XP\_045163405.1 56.5 253  
 95 4 1 247 1 244 7.10E-66 258.8 6596 cellular  
 organisms;Eukaryota;Opisthokonta;Metazoa;Eumetazoa;Bilateria;Protostomia;  
 Spiralia;Lophotrochozoa;Mollusca;Bivalvia;Autobranchia;Heteroconchia;Euhe  
 terodonta;Imparidentia;Venerida;Veneroidea;Veneridae;Mercenaria;Mercenari  
 a mercenaria  
 UdeM00000020103 6596 266.2 UdeM00000020103 XP\_045161589.1 53.1 254  
 107 5 774 1017 26 277 1.80E-67 266.2 6596 cellular  
 organisms;Eukaryota;Opisthokonta;Metazoa;Eumetazoa;Bilateria;Protostomia;  
 Spiralia;Lophotrochozoa;Mollusca;Bivalvia;Autobranchia;Heteroconchia;Euhe  
 terodonta;Imparidentia;Venerida;Veneroidea;Veneridae;Mercenaria;Mercenari  
 a mercenaria  
 UdeM00000020104 6596 306.6 UdeM00000020104 XP\_045162842.1 80.7 181  
 35 0 44 224 44 224 2.60E-80 306.6 6596 cellular  
 organisms;Eukaryota;Opisthokonta;Metazoa;Eumetazoa;Bilateria;Protostomia;  
 Spiralia;Lophotrochozoa;Mollusca;Bivalvia;Autobranchia;Heteroconchia;Euhe  
 terodonta;Imparidentia;Venerida;Veneroidea;Veneridae;Mercenaria;Mercenari  
 a mercenaria  
 UdeM00000020105 6596 242.3 UdeM00000020105 XP\_045162021.1 67.6 176  
 57 0 1 176 1 176 5.20E-61 242.3 6596 cellular  
 organisms;Eukaryota;Opisthokonta;Metazoa;Eumetazoa;Bilateria;Protostomia;  
 Spiralia;Lophotrochozoa;Mollusca;Bivalvia;Autobranchia;Heteroconchia;Euhe  
 terodonta;Imparidentia;Venerida;Veneroidea;Veneridae;Mercenaria;Mercenari  
 a mercenaria  
 UdeM00000020106 6596 1137.5 UdeM00000020106 XP\_045162021.1 68.6  
 814 248 3 2 815 186 991 0.00E+00 1137.5 6596  
 cellular  
 organisms;Eukaryota;Opisthokonta;Metazoa;Eumetazoa;Bilateria;Protostomia;  
 Spiralia;Lophotrochozoa;Mollusca;Bivalvia;Autobranchia;Heteroconchia;Euhe  
 terodonta;Imparidentia;Venerida;Veneroidea;Veneridae;Mercenaria;Mercenari  
 a mercenaria  
 UdeM00000020107 45264 429.5 UdeM00000020107 XP\_044165535.1 49.8 402  
 198 1 1 398 136 537 5.40E-117 429.5 45264 cellular  
 organisms;Eukaryota;Opisthokonta;Metazoa;Eumetazoa;Cnidaria;Anthozoa;Hexa  
 corallia;Scleractinia;Astrocoeniina;Acroporidae;Acropora;Acropora  
 millepora  
 UdeM00000020108 6573 415.6 UdeM00000020108 XP\_021361079.1 70.4 270  
 80 0 4 273 6 275 4.80E-113 415.6 6573 cellular  
 organisms;Eukaryota;Opisthokonta;Metazoa;Eumetazoa;Bilateria;Protostomia;  
 Spiralia;Lophotrochozoa;Mollusca;Bivalvia;Autobranchia;Pteriormorphia;Pect  
 inida;Pectinoidea;Pectinidae;Mizuhopecten;Mizuhopecten yessoensis  
 UdeM00000020109 6500 912.9 UdeM00000020109 XP\_035829419.1 63.1 773  
 259 8 1 770 1 750 2.70E-262 912.9 6500 cellular  
 organisms;Eukaryota;Opisthokonta;Metazoa;Eumetazoa;Bilateria;Protostomia;



Spiralia;Lophotrochozoa;Mollusca;Gastropoda;Heterobranchia;Euthyneura;Tectipleura;Aplysiida;Aplysioidea;Aplysiidae;Aplysia;Aplysia californica  
UdeM00000020110 6500 1129 UdeM00000020110 XP\_035829419.1 65.2 891  
284 8 1 888 1 868 0.00E+00 1129 6500 cellular  
organisms;Eukaryota;Opisthokonta;Metazoa;Eumetazoa;Bilateria;Protostomia;  
Spiralia;Lophotrochozoa;Mollusca;Gastropoda;Heterobranchia;Euthyneura;Tectipleura;Aplysiida;Aplysioidea;Aplysiidae;Aplysia;Aplysia californica  
UdeM00000020111 400727 198 UdeM00000020111 XP\_025083756.1 73.5  
132 35 0 1 132 1 132 7.90E-48 198 400727  
cellular  
organisms;Eukaryota;Opisthokonta;Metazoa;Eumetazoa;Bilateria;Protostomia;  
Spiralia;Lophotrochozoa;Mollusca;Gastropoda;Caenogastropoda;Architaenioglossa;Ampullarioidea;Ampullariidae;Pomacea;Pomacea canaliculata  
UdeM00000020112 6565 105.5 UdeM00000020112 XP\_022297447.1 53.6 97  
43 2 1 96 150 245 3.80E-20 105.5 6565 cellular  
organisms;Eukaryota;Opisthokonta;Metazoa;Eumetazoa;Bilateria;Protostomia;  
Spiralia;Lophotrochozoa;Mollusca;Bivalvia;Autobranchia;Pteriomorphia;Ostreida;Ostreioidea;Ostreidae;Crassostrea;Crassostrea virginica  
UdeM00000020113 400727 1527.3 UdeM00000020113 XP\_025082598.1  
84.1 863 135 1 1 861 1 863 0.00E+00 1527.3  
400727 cellular  
organisms;Eukaryota;Opisthokonta;Metazoa;Eumetazoa;Bilateria;Protostomia;  
Spiralia;Lophotrochozoa;Mollusca;Gastropoda;Caenogastropoda;Architaenioglossa;Ampullarioidea;Ampullariidae;Pomacea;Pomacea canaliculata  
UdeM00000020114 6579 483.4 UdeM00000020114 XP\_033731191.1 51.4 457  
174 2 1 409 2 458 2.80E-133 483.4 6579 cellular  
organisms;Eukaryota;Opisthokonta;Metazoa;Eumetazoa;Bilateria;Protostomia;  
Spiralia;Lophotrochozoa;Mollusca;Bivalvia;Autobranchia;Pteriomorphia;Pectinida;Pectinoidea;Pectinidae;Pecten;Pecten maximus  
UdeM00000020115 6579 86.3 UdeM00000020115 XP\_033735423.1 33 109  
67 2 6 109 18 125 2.80E-14 86.3 6579 cellular  
organisms;Eukaryota;Opisthokonta;Metazoa;Eumetazoa;Bilateria;Protostomia;  
Spiralia;Lophotrochozoa;Mollusca;Bivalvia;Autobranchia;Pteriomorphia;Pectinida;Pectinoidea;Pectinidae;Pecten;Pecten maximus  
UdeM00000020116 6596 238.4 UdeM00000020116 XP\_045161545.1 56.7 201  
87 0 3 203 20 220 7.90E-60 238.4 6596 cellular  
organisms;Eukaryota;Opisthokonta;Metazoa;Eumetazoa;Bilateria;Protostomia;  
Spiralia;Lophotrochozoa;Mollusca;Bivalvia;Autobranchia;Heteroconchia;Euheterodonta;Imparidentia;Venerida;Veneroidea;Veneridae;Mercenaria;Mercenaria mercenaria  
UdeM00000042427 6596 97.1 UdeM00000042427 XP\_045206069.1 23.6 501  
281 16 426 914 236 646 1.30E-16 97.1 6596 cellular  
organisms;Eukaryota;Opisthokonta;Metazoa;Eumetazoa;Bilateria;Protostomia;  
Spiralia;Lophotrochozoa;Mollusca;Bivalvia;Autobranchia;Heteroconchia;Euheterodonta;Imparidentia;Venerida;Veneroidea;Veneridae;Mercenaria;Mercenaria mercenaria  
UdeM00000042428 6565 119 UdeM00000042428 XP\_022324765.1 26.7 329  
213 8 227 540 936 1251 1.90E-23 119 6565 cellular  
organisms;Eukaryota;Opisthokonta;Metazoa;Eumetazoa;Bilateria;Protostomia;  
Spiralia;Lophotrochozoa;Mollusca;Bivalvia;Autobranchia;Pteriomorphia;Ostreida;Ostreioidea;Ostreidae;Crassostrea;Crassostrea virginica  
UdeM00000042429 6565 119 UdeM00000042429 XP\_022324765.1 26.7 329  
213 8 192 505 936 1251 1.80E-23 119 6565 cellular  
organisms;Eukaryota;Opisthokonta;Metazoa;Eumetazoa;Bilateria;Protostomia;

Spiralia;Lophotrochozoa;Mollusca;Bivalvia;Autobranchia;Pteriormorphia;Ostr  
eida;Ostreoidea;Ostreidae;Crassostrea;Crassostrea virginica  
UdeM00000042431 6596 240 UdeM00000042431 XP\_045206207.1 58.1 198  
76 1 185 375 5 202 5.10E-60 240 6596 cellular  
organisms;Eukaryota;Opisthokonta;Metazoa;Eumetazoa;Bilateria;Protostomia;  
Spiralia;Lophotrochozoa;Mollusca;Bivalvia;Autobranchia;Heteroconchia;Euhe  
terodonta;Imparidentia;Venerida;Veneroidea;Veneridae;Mercenaria;Mercenari  
a mercenaria  
UdeM00000042432 6596 631.3 UdeM00000042432 XP\_045204309.1 52.8 627  
272 11 7 623 275 887 1.30E-177 631.3 6596 cellular  
organisms;Eukaryota;Opisthokonta;Metazoa;Eumetazoa;Bilateria;Protostomia;  
Spiralia;Lophotrochozoa;Mollusca;Bivalvia;Autobranchia;Heteroconchia;Euhe  
terodonta;Imparidentia;Venerida;Veneroidea;Veneridae;Mercenaria;Mercenari  
a mercenaria  
UdeM00000042433 6565 146 UdeM00000042433 XP\_022326041.1 30.4 345  
173 9 129 473 94 371 1.30E-31 146 6565 cellular  
organisms;Eukaryota;Opisthokonta;Metazoa;Eumetazoa;Bilateria;Protostomia;  
Spiralia;Lophotrochozoa;Mollusca;Bivalvia;Autobranchia;Pteriormorphia;Ostr  
eida;Ostreoidea;Ostreidae;Crassostrea;Crassostrea virginica  
UdeM00000042435 10224 134 UdeM00000042435 XP\_006813844.1 51.7 116  
56 0 44 159 247 362 1.70E-28 134 10224 cellular  
organisms;Eukaryota;Opisthokonta;Metazoa;Eumetazoa;Bilateria;Deuterostomi  
a;Hemichordata;Enteropneusta;Harrimaniidae;Saccoglossus;Saccoglossus  
kowalevskii  
UdeM00000042436 400727 168.3 UdeM00000042436 XP\_025108466.1 41.2  
250 135 3 2 251 305 542 1.30E-38 168.3 400727  
cellular  
organisms;Eukaryota;Opisthokonta;Metazoa;Eumetazoa;Bilateria;Protostomia;  
Spiralia;Lophotrochozoa;Mollusca;Gastropoda;Caenogastropoda;Architaeniogl  
ossa;Ampullarioidea;Ampullariidae;Pomacea;Pomacea canaliculata  
UdeM00000042437 29159 136.3 UdeM00000042437 XP\_034300836.1 29.6 362  
209 10 28 375 458 787 7.80E-29 136.3 29159 cellular  
organisms;Eukaryota;Opisthokonta;Metazoa;Eumetazoa;Bilateria;Protostomia;  
Spiralia;Lophotrochozoa;Mollusca;Bivalvia;Autobranchia;Pteriormorphia;Ostr  
eida;Ostreoidea;Ostreidae;Crassostrea;Crassostrea gigas  
UdeM00000042438 29159 62 UdeM00000042438 XP\_034311339.1 27 159  
105 5 25 173 179 336 2.10E-06 62 29159 cellular  
organisms;Eukaryota;Opisthokonta;Metazoa;Eumetazoa;Bilateria;Protostomia;  
Spiralia;Lophotrochozoa;Mollusca;Bivalvia;Autobranchia;Pteriormorphia;Ostr  
eida;Ostreoidea;Ostreidae;Crassostrea;Crassostrea gigas  
UdeM00000042439 6596 130.2 UdeM00000042439 XP\_045206721.1 33.8 263  
144 10 124 372 31 277 7.40E-27 130.2 6596 cellular  
organisms;Eukaryota;Opisthokonta;Metazoa;Eumetazoa;Bilateria;Protostomia;  
Spiralia;Lophotrochozoa;Mollusca;Bivalvia;Autobranchia;Heteroconchia;Euhe  
terodonta;Imparidentia;Venerida;Veneroidea;Veneridae;Mercenaria;Mercenari  
a mercenaria  
UdeM00000042440 6596 77.4 UdeM00000042440 XP\_045206721.1 34 147  
81 5 1 137 584 724 4.50E-11 77.4 6596 cellular  
organisms;Eukaryota;Opisthokonta;Metazoa;Eumetazoa;Bilateria;Protostomia;  
Spiralia;Lophotrochozoa;Mollusca;Bivalvia;Autobranchia;Heteroconchia;Euhe  
terodonta;Imparidentia;Venerida;Veneroidea;Veneridae;Mercenaria;Mercenari  
a mercenaria  
UdeM00000042441 225164 95.9 UdeM00000042441 XP\_009051404.1 34.8  
198 107 8 1 182 47 238 7.10E-17 95.9 225164

cellular  
organisms;Eukaryota;Opisthokonta;Metazoa;Eumetazoa;Bilateria;Protostomia;  
Spiralia;Lophotrochozoa;Mollusca;Gastropoda;Patellogastropoda;Lottioidea;  
Lottiidae;Lottia;Lottia gigantea  
UdeM00000042442 6596 143.7 UdeM00000042442 XP\_045206721.1 22.2 747  
435 22 128 759 54 769 1.10E-30 143.7 6596 cellular  
organisms;Eukaryota;Opisthokonta;Metazoa;Eumetazoa;Bilateria;Protostomia;  
Spiralia;Lophotrochozoa;Mollusca;Bivalvia;Autobranchia;Heteroconchia;Euhe  
terodonta;Imparidentia;Venerida;Veneroidea;Veneridae;Mercenaria;Mercenari  
a mercenaria  
UdeM00000042444 1606681 70.5 UdeM00000042444 XP\_043100876.1 34.7  
144 76 7 18 148 162 300 3.40E-09 70.5 1606681  
cellular  
organisms;Eukaryota;Opisthokonta;Metazoa;Eumetazoa;Bilateria;Deuterostomi  
a;Chordata;Craniata;Vertebrata;Gnathostomata;Teleostomi;Euteleostomi;Acti  
nopterygii;Actinopteri;Neopterygii;Teleostei;Osteoglossocephalai;Clupeoce  
phala;Otomorpha;Ostariophysi;Otophysi;Cypriniphysae;Cypriniiformes;Cyprino  
idei;Cyprinidae;Smiliogastrinae;Puntigrus;Puntigrus tetrazona  
UdeM00000042448 6596 181.8 UdeM00000042448 XP\_045182760.1 39 267  
159 3 1 265 375 639 4.10E-42 181.8 6596 cellular  
organisms;Eukaryota;Opisthokonta;Metazoa;Eumetazoa;Bilateria;Protostomia;  
Spiralia;Lophotrochozoa;Mollusca;Bivalvia;Autobranchia;Heteroconchia;Euhe  
terodonta;Imparidentia;Venerida;Veneroidea;Veneridae;Mercenaria;Mercenari  
a mercenaria  
UdeM00000042449 6596 96.3 UdeM00000042449 XP\_045209795.1 36.3 179  
109 3 56 230 1071 1248 8.80E-17 96.3 6596 cellular  
organisms;Eukaryota;Opisthokonta;Metazoa;Eumetazoa;Bilateria;Protostomia;  
Spiralia;Lophotrochozoa;Mollusca;Bivalvia;Autobranchia;Heteroconchia;Euhe  
terodonta;Imparidentia;Venerida;Veneroidea;Veneridae;Mercenaria;Mercenari  
a mercenaria  
UdeM00000042450 6565 577.8 UdeM00000042450 XP\_022315266.1 47.8 642  
307 11 140 763 508 1139 2.10E-161 577.8 6565 cellular  
organisms;Eukaryota;Opisthokonta;Metazoa;Eumetazoa;Bilateria;Protostomia;  
Spiralia;Lophotrochozoa;Mollusca;Bivalvia;Autobranchia;Pteriomorphia;Ostr  
eida;Ostreoidea;Ostreidae;Crassostrea;Crassostrea virginica  
UdeM00000042451 37621 104 UdeM00000042451 XP\_014675741.1 50.5 103  
49 2 5 106 39 140 1.20E-19 104 37621 cellular  
organisms;Eukaryota;Opisthokonta;Metazoa;Eumetazoa;Bilateria;Protostomia;  
Ecdysozoa;Scalidophora;Priapulida;Priapulimorpha;Priapulimorphida;Priapul  
idae;Priapululus;Priapululus caudatus  
UdeM00000042452 6565 239.6 UdeM00000042452 XP\_022295544.1 43.3 314  
125 6 55 323 53 358 5.70E-60 239.6 6565 cellular  
organisms;Eukaryota;Opisthokonta;Metazoa;Eumetazoa;Bilateria;Protostomia;  
Spiralia;Lophotrochozoa;Mollusca;Bivalvia;Autobranchia;Pteriomorphia;Ostr  
eida;Ostreoidea;Ostreidae;Crassostrea;Crassostrea virginica  
UdeM00000042453 6596 801.2 UdeM00000042453 XP\_045204149.1 75.1 555  
135 3 124 676 105 658 1.00E-228 801.2 6596 cellular  
organisms;Eukaryota;Opisthokonta;Metazoa;Eumetazoa;Bilateria;Protostomia;  
Spiralia;Lophotrochozoa;Mollusca;Bivalvia;Autobranchia;Heteroconchia;Euhe  
terodonta;Imparidentia;Venerida;Veneroidea;Veneridae;Mercenaria;Mercenari  
a mercenaria  
UdeM00000042454 6573 219.9 UdeM00000042454 XP\_021339071.1 53.7 203  
87 2 48 248 39 236 3.50E-54 219.9 6573 cellular  
organisms;Eukaryota;Opisthokonta;Metazoa;Eumetazoa;Bilateria;Protostomia;

Spiralia;Lophotrochozoa;Mollusca;Bivalvia;Autobranchia;Pteriormorphia;Pectinida;Pectinoidea;Pectinidae;Mizuhopecten;Mizuhopecten yessoensis  
UdeM00000042455 6596 371.7 UdeM00000042455 XP\_045204146.1 81 221  
42 0 1 221 1 221 6.50E-100 371.7 6596 cellular  
organisms;Eukaryota;Opisthokonta;Metazoa;Eumetazoa;Bilateria;Protostomia;  
Spiralia;Lophotrochozoa;Mollusca;Bivalvia;Autobranchia;Heteroconchia;Euherodonta;Imparidentia;Venerida;Veneroidea;Veneridae;Mercenaria;Mercenaria mercenaria  
UdeM00000042456 29159 285.4 UdeM00000042456 XP\_034302273.1 76.2 185  
43 1 1 184 1 185 5.10E-74 285.4 29159 cellular  
organisms;Eukaryota;Opisthokonta;Metazoa;Eumetazoa;Bilateria;Protostomia;  
Spiralia;Lophotrochozoa;Mollusca;Bivalvia;Autobranchia;Pteriormorphia;Ostreida;Ostreoidea;Ostreidae;Crassostrea;Crassostrea gigas  
UdeM00000042457 6573 265.4 UdeM00000042457 XP\_021341452.1 61 218  
84 1 6 222 13 230 6.60E-68 265.4 6573 cellular  
organisms;Eukaryota;Opisthokonta;Metazoa;Eumetazoa;Bilateria;Protostomia;  
Spiralia;Lophotrochozoa;Mollusca;Bivalvia;Autobranchia;Pteriormorphia;Pectinida;Pectinoidea;Pectinidae;Mizuhopecten;Mizuhopecten yessoensis  
UdeM00000042458 6596 625.5 UdeM00000042458 XP\_045192044.1 47.9 658  
327 7 108 752 108 762 9.20E-176 625.5 6596 cellular  
organisms;Eukaryota;Opisthokonta;Metazoa;Eumetazoa;Bilateria;Protostomia;  
Spiralia;Lophotrochozoa;Mollusca;Bivalvia;Autobranchia;Heteroconchia;Euherodonta;Imparidentia;Venerida;Veneroidea;Veneridae;Mercenaria;Mercenaria mercenaria  
UdeM00000042459 6596 443 UdeM00000042459 XP\_045205754.1 36.9 907  
474 22 1155 2054 1792 2607 2.10E-120 443 6596 cellular  
organisms;Eukaryota;Opisthokonta;Metazoa;Eumetazoa;Bilateria;Protostomia;  
Spiralia;Lophotrochozoa;Mollusca;Bivalvia;Autobranchia;Heteroconchia;Euherodonta;Imparidentia;Venerida;Veneroidea;Veneridae;Mercenaria;Mercenaria mercenaria  
UdeM00000042460 6500 254.2 UdeM00000042460 XP\_005095954.2 71 169  
46 1 1 166 1 169 1.10E-64 254.2 6500 cellular  
organisms;Eukaryota;Opisthokonta;Metazoa;Eumetazoa;Bilateria;Protostomia;  
Spiralia;Lophotrochozoa;Mollusca;Gastropoda;Heterobranchia;Euthyneura;Tectipleura;Aplysiida;Aplysioidea;Aplysiidae;Aplysia;Aplysia californica  
UdeM00000042461 6596 1138.3 UdeM00000042461 XP\_045205756.1 60.8  
954 353 11 4 945 52 996 0.00E+00 1138.3 6596  
cellular  
organisms;Eukaryota;Opisthokonta;Metazoa;Eumetazoa;Bilateria;Protostomia;  
Spiralia;Lophotrochozoa;Mollusca;Bivalvia;Autobranchia;Heteroconchia;Euherodonta;Imparidentia;Venerida;Veneroidea;Veneridae;Mercenaria;Mercenaria mercenaria  
UdeM00000042462 6596 915.6 UdeM00000042462 XP\_045205756.1 58.8 786  
304 10 4 777 52 829 4.30E-263 915.6 6596 cellular  
organisms;Eukaryota;Opisthokonta;Metazoa;Eumetazoa;Bilateria;Protostomia;  
Spiralia;Lophotrochozoa;Mollusca;Bivalvia;Autobranchia;Heteroconchia;Euherodonta;Imparidentia;Venerida;Veneroidea;Veneridae;Mercenaria;Mercenaria mercenaria  
UdeM00000042463 386614 110.2 UdeM00000042463 XP\_032889954.1 29  
272 156 8 7 272 6 246 6.40E-21 110.2 386614  
cellular  
organisms;Eukaryota;Opisthokonta;Metazoa;Eumetazoa;Bilateria;Deuterostomia;Chordata;Craniata;Vertebrata;Gnathostomata;Chondrichthyes;Elasmobranchii;Batoidea;Rajiformes;Rajidae;Amblyraja;Amblyraja radiata

UdeM00000042464 386614 109 UdeM00000042464 XP\_032889954.1 29  
 276 156 10 7 277 6 246 1.40E-20 109 386614  
 cellular  
 organisms;Eukaryota;Opisthokonta;Metazoa;Eumetazoa;Bilateria;Deuterostomi  
 a;Chordata;Craniata;Vertebrata;Gnathostomata;Chondrichthyes;Elasmobranchi  
 i;Batoidea;Rajiformes;Rajidae;Amblyraja;Amblyraja radiata  
 UdeM00000042465 32507 67.4 UdeM00000042465 XP\_006809938.1 32.1 112  
 69 1 59 170 51 155 2.00E-08 67.4 32507 cellular  
 organisms;Eukaryota;Opisthokonta;Metazoa;Eumetazoa;Bilateria;Deuterostomi  
 a;Chordata;Craniata;Vertebrata;Gnathostomata;Teleostomi;Euteleostomi;Acti  
 nopterygii;Actinopteri;Neopterygii;Teleostei;Osteoglossocephalai;Clupeoce  
 phala;Euteleosteomorpha;Neoteleostei;Eurypterygia;Ctenosquamata;Acanthomo  
 rphata;Euacanthomorphacea;Percomorphaceae;Ovalentaria;Cichlomorphae;Cichl  
 iformes;Cichlidae;African  
 cichlids;Pseudocrenilabrinae;Lamprologini;Neolamprologus;Neolamprologus  
 brichardi  
 UdeM00000042466 6596 128.3 UdeM00000042466 XP\_045186727.1 40.6 175  
 95 2 176 349 396 562 2.10E-26 128.3 6596 cellular  
 organisms;Eukaryota;Opisthokonta;Metazoa;Eumetazoa;Bilateria;Protostomia;  
 Spiralia;Lophotrochozoa;Mollusca;Bivalvia;Autobranchia;Heteroconchia;Euhe  
 terodonta;Imparidentia;Venerida;Veneroidea;Veneridae;Mercenaria;Mercenari  
 a mercenaria  
 UdeM00000042467 386614 97.1 UdeM00000042467 XP\_032889954.1 34.9  
 169 91 5 27 192 94 246 4.20E-17 97.1 386614  
 cellular  
 organisms;Eukaryota;Opisthokonta;Metazoa;Eumetazoa;Bilateria;Deuterostomi  
 a;Chordata;Craniata;Vertebrata;Gnathostomata;Chondrichthyes;Elasmobranchi  
 i;Batoidea;Rajiformes;Rajidae;Amblyraja;Amblyraja radiata  
 UdeM00000042469 29159 226.5 UdeM00000042469 XP\_034334367.1 46.5 254  
 130 4 6 253 126 379 4.10E-56 226.5 29159 cellular  
 organisms;Eukaryota;Opisthokonta;Metazoa;Eumetazoa;Bilateria;Protostomia;  
 Spiralia;Lophotrochozoa;Mollusca;Bivalvia;Autobranchia;Pteriormorphia;Ostr  
 eida;Ostreoidea;Ostreidae;Crassostrea;Crassostrea gigas  
 UdeM00000042470 386614 72 UdeM00000042470 XP\_032889954.1 32.1  
 140 84 5 68 206 58 187 1.00E-09 72 386614  
 cellular  
 organisms;Eukaryota;Opisthokonta;Metazoa;Eumetazoa;Bilateria;Deuterostomi  
 a;Chordata;Craniata;Vertebrata;Gnathostomata;Chondrichthyes;Elasmobranchi  
 i;Batoidea;Rajiformes;Rajidae;Amblyraja;Amblyraja radiata  
 UdeM00000042471 386614 115.9 UdeM00000042471 XP\_032889954.1 29.6  
 270 156 10 4 267 6 247 1.20E-22 115.9 386614  
 cellular  
 organisms;Eukaryota;Opisthokonta;Metazoa;Eumetazoa;Bilateria;Deuterostomi  
 a;Chordata;Craniata;Vertebrata;Gnathostomata;Chondrichthyes;Elasmobranchi  
 i;Batoidea;Rajiformes;Rajidae;Amblyraja;Amblyraja radiata  
 UdeM00000042473 32507 89.4 UdeM00000042473 XP\_006809938.1 34.8 164  
 92 5 64 225 55 205 8.90E-15 89.4 32507 cellular  
 organisms;Eukaryota;Opisthokonta;Metazoa;Eumetazoa;Bilateria;Deuterostomi  
 a;Chordata;Craniata;Vertebrata;Gnathostomata;Teleostomi;Euteleostomi;Acti  
 nopterygii;Actinopteri;Neopterygii;Teleostei;Osteoglossocephalai;Clupeoce  
 phala;Euteleosteomorpha;Neoteleostei;Eurypterygia;Ctenosquamata;Acanthomo  
 rphata;Euacanthomorphacea;Percomorphaceae;Ovalentaria;Cichlomorphae;Cichl  
 iformes;Cichlidae;African

cichlids;Pseudocrenilabrinae;Lamprologini;Neolamprologus;Neolamprologus  
brichardi

UdeM00000015884 6573 3919 UdeM00000015884 XP\_021353290.1 39.1 5383  
3029 77 1 5252 2963 8229 0.00E+00 3919 6573 cellular  
organisms;Eukaryota;Opisthokonta;Metazoa;Eumetazoa;Bilateria;Protostomia;  
Spiralia;Lophotrochozoa;Mollusca;Bivalvia;Autobranchia;Pteriomorpha;Pect  
inida;Pectinoidea;Pectinidae;Mizuhopecten;Mizuhopecten yessoensis

UdeM00000015885 6573 3892.4 UdeM00000015885 XP\_021353290.1 39  
5382 3005 77 1 5219 2963 8229 0.00E+00 3892.4 6573  
cellular  
organisms;Eukaryota;Opisthokonta;Metazoa;Eumetazoa;Bilateria;Protostomia;  
Spiralia;Lophotrochozoa;Mollusca;Bivalvia;Autobranchia;Pteriomorpha;Pect  
inida;Pectinoidea;Pectinidae;Mizuhopecten;Mizuhopecten yessoensis

UdeM00000015886 6596 1173.3 UdeM00000015886 XP\_045156859.1 31.5  
2117 1351 39 26 2109 4307 6356 0.00E+00 1173.3 6596  
cellular  
organisms;Eukaryota;Opisthokonta;Metazoa;Eumetazoa;Bilateria;Protostomia;  
Spiralia;Lophotrochozoa;Mollusca;Bivalvia;Autobranchia;Heteroconchia;Euhe  
terodonta;Imparidentia;Venerida;Veneroidea;Veneridae;Mercenaria;Mercenari  
a mercenaria

UdeM00000015887 6596 214.9 UdeM00000015887 XP\_045171866.1 25.6 793  
557 13 9 795 14 779 3.70E-52 214.9 6596 cellular  
organisms;Eukaryota;Opisthokonta;Metazoa;Eumetazoa;Bilateria;Protostomia;  
Spiralia;Lophotrochozoa;Mollusca;Bivalvia;Autobranchia;Heteroconchia;Euhe  
terodonta;Imparidentia;Venerida;Veneroidea;Veneridae;Mercenaria;Mercenari  
a mercenaria

UdeM00000015888 6565 2603.9 UdeM00000015888 XP\_022341753.1 35.7  
4161 2417 88 1 3997 362 4428 0.00E+00 2603.9 6565  
cellular  
organisms;Eukaryota;Opisthokonta;Metazoa;Eumetazoa;Bilateria;Protostomia;  
Spiralia;Lophotrochozoa;Mollusca;Bivalvia;Autobranchia;Pteriomorpha;Ostr  
eida;Ostreoidea;Ostreidae;Crassostrea;Crassostrea virginica

UdeM00000015889 6565 2548.5 UdeM00000015889 XP\_022341753.1 35.4  
4161 2412 88 1 3981 362 4428 0.00E+00 2548.5 6565  
cellular  
organisms;Eukaryota;Opisthokonta;Metazoa;Eumetazoa;Bilateria;Protostomia;  
Spiralia;Lophotrochozoa;Mollusca;Bivalvia;Autobranchia;Pteriomorpha;Ostr  
eida;Ostreoidea;Ostreidae;Crassostrea;Crassostrea virginica

UdeM00000015890 6573 353.2 UdeM00000015890 XP\_021353372.1 52.2 347  
157 6 11 356 13 351 3.90E-94 353.2 6573 cellular  
organisms;Eukaryota;Opisthokonta;Metazoa;Eumetazoa;Bilateria;Protostomia;  
Spiralia;Lophotrochozoa;Mollusca;Bivalvia;Autobranchia;Pteriomorpha;Pect  
inida;Pectinoidea;Pectinidae;Mizuhopecten;Mizuhopecten yessoensis

UdeM00000015891 6596 257.3 UdeM00000015891 XP\_045189535.1 40.9 386  
209 5 11 378 19 403 3.10E-65 257.3 6596 cellular  
organisms;Eukaryota;Opisthokonta;Metazoa;Eumetazoa;Bilateria;Protostomia;  
Spiralia;Lophotrochozoa;Mollusca;Bivalvia;Autobranchia;Heteroconchia;Euhe  
terodonta;Imparidentia;Venerida;Veneroidea;Veneridae;Mercenaria;Mercenari  
a mercenaria

UdeM00000015892 6596 715.7 UdeM00000015892 XP\_045163192.1 58.5 588  
229 6 1 584 1 577 6.90E-203 715.7 6596 cellular  
organisms;Eukaryota;Opisthokonta;Metazoa;Eumetazoa;Bilateria;Protostomia;  
Spiralia;Lophotrochozoa;Mollusca;Bivalvia;Autobranchia;Heteroconchia;Euhe

terodonta;Imparidentia;Venerida;Veneroidea;Veneridae;Mercenaria;Mercenari  
 a mercenaria  
 UdeM00000015893 6596 740.3 UdeM00000015893 XP\_045163959.1 71.8 493  
 138 1 49 540 58 550 1.70E-210 740.3 6596 cellular  
 organisms;Eukaryota;Opisthokonta;Metazoa;Eumetazoa;Bilateria;Protostomia;  
 Spiralia;Lophotrochozoa;Mollusca;Bivalvia;Autobranhia;Heteroconchia;Euhe  
 terodonta;Imparidentia;Venerida;Veneroidea;Veneridae;Mercenaria;Mercenari  
 a mercenaria  
 UdeM00000015894 6596 699.1 UdeM00000015894 XP\_045163959.1 68.7 486  
 151 1 56 540 65 550 4.30E-198 699.1 6596 cellular  
 organisms;Eukaryota;Opisthokonta;Metazoa;Eumetazoa;Bilateria;Protostomia;  
 Spiralia;Lophotrochozoa;Mollusca;Bivalvia;Autobranhia;Heteroconchia;Euhe  
 terodonta;Imparidentia;Venerida;Veneroidea;Veneridae;Mercenaria;Mercenari  
 a mercenaria  
 UdeM00000015895 6596 547.4 UdeM00000015895 XP\_045163959.1 67.3 392  
 127 1 1 391 159 550 1.50E-152 547.4 6596 cellular  
 organisms;Eukaryota;Opisthokonta;Metazoa;Eumetazoa;Bilateria;Protostomia;  
 Spiralia;Lophotrochozoa;Mollusca;Bivalvia;Autobranhia;Heteroconchia;Euhe  
 terodonta;Imparidentia;Venerida;Veneroidea;Veneridae;Mercenaria;Mercenari  
 a mercenaria  
 UdeM00000015896 6596 447.2 UdeM00000015896 XP\_045198610.1 46.7 533  
 223 12 1 514 2278 2768 2.80E-122 447.2 6596 cellular  
 organisms;Eukaryota;Opisthokonta;Metazoa;Eumetazoa;Bilateria;Protostomia;  
 Spiralia;Lophotrochozoa;Mollusca;Bivalvia;Autobranhia;Heteroconchia;Euhe  
 terodonta;Imparidentia;Venerida;Veneroidea;Veneridae;Mercenaria;Mercenari  
 a mercenaria  
 UdeM00000015897 6596 1512.3 UdeM00000015897 XP\_045198610.1 44.8  
 1901 899 34 7 1823 445 2278 0.00E+00 1512.3 6596  
 cellular  
 organisms;Eukaryota;Opisthokonta;Metazoa;Eumetazoa;Bilateria;Protostomia;  
 Spiralia;Lophotrochozoa;Mollusca;Bivalvia;Autobranhia;Heteroconchia;Euhe  
 terodonta;Imparidentia;Venerida;Veneroidea;Veneridae;Mercenaria;Mercenari  
 a mercenaria  
 UdeM00000015898 6579 699.9 UdeM00000015898 XP\_033763693.1 51.9 775  
 314 23 1 733 138 895 3.80E-198 699.9 6579 cellular  
 organisms;Eukaryota;Opisthokonta;Metazoa;Eumetazoa;Bilateria;Protostomia;  
 Spiralia;Lophotrochozoa;Mollusca;Bivalvia;Autobranhia;Pteriomorphia;Pect  
 inida;Pectinoidea;Pectinidae;Pecten;Pecten maximus  
 UdeM00000015899 6579 479.9 UdeM00000015899 XP\_033763693.1 46.6 648  
 312 16 66 685 253 894 6.10E-132 479.9 6579 cellular  
 organisms;Eukaryota;Opisthokonta;Metazoa;Eumetazoa;Bilateria;Protostomia;  
 Spiralia;Lophotrochozoa;Mollusca;Bivalvia;Autobranhia;Pteriomorphia;Pect  
 inida;Pectinoidea;Pectinidae;Pecten;Pecten maximus  
 UdeM00000015900 6238 78.2 UdeM00000015900 XP\_002634025.1 23.8 235  
 140 7 33 233 27 256 2.90E-11 78.2 6238 cellular  
 organisms;Eukaryota;Opisthokonta;Metazoa;Eumetazoa;Bilateria;Protostomia;  
 Ecdysozoa;Nematoda;Chromadorea;Rhabditida;Rhabditina;Rhabditomorpha;Rhabd  
 itoidea;Rhabditidae;Peloderinae;Caenorhabditis;Caenorhabditis briggsae  
 UdeM00000015901 6579 415.2 UdeM00000015901 XP\_033763967.1 66.6 323  
 99 4 1 317 1 320 9.10E-113 415.2 6579 cellular  
 organisms;Eukaryota;Opisthokonta;Metazoa;Eumetazoa;Bilateria;Protostomia;  
 Spiralia;Lophotrochozoa;Mollusca;Bivalvia;Autobranhia;Pteriomorphia;Pect  
 inida;Pectinoidea;Pectinidae;Pecten;Pecten maximus

UdeM00000015902 6573 776.5 UdeM00000015902 XP\_021364536.1 82.8 436  
 75 0 1 436 1 436 2.00E-221 776.5 6573 cellular  
 organisms;Eukaryota;Opisthokonta;Metazoa;Eumetazoa;Bilateria;Protostomia;  
 Spiralia;Lophotrochozoa;Mollusca;Bivalvia;Autobranhia;Pteriormorphia;Pect  
 inida;Pectinoidea;Pectinidae;Mizuhopecten;Mizuhopecten yessoensis  
 UdeM00000015903 6573 369.4 UdeM00000015903 XP\_021372507.1 60.7 285  
 111 1 7 290 6 290 4.20E-99 369.4 6573 cellular  
 organisms;Eukaryota;Opisthokonta;Metazoa;Eumetazoa;Bilateria;Protostomia;  
 Spiralia;Lophotrochozoa;Mollusca;Bivalvia;Autobranhia;Pteriormorphia;Pect  
 inida;Pectinoidea;Pectinidae;Mizuhopecten;Mizuhopecten yessoensis  
 UdeM00000015904 6596 189.1 UdeM00000015904 XP\_045161175.1 65.4 133  
 45 1 62 193 12 144 5.30E-45 189.1 6596 cellular  
 organisms;Eukaryota;Opisthokonta;Metazoa;Eumetazoa;Bilateria;Protostomia;  
 Spiralia;Lophotrochozoa;Mollusca;Bivalvia;Autobranhia;Heteroconchia;Euhe  
 terodonta;Imparidentia;Venerida;Veneroidea;Veneridae;Mercenaria;Mercenari  
 a mercenaria  
 UdeM00000015905 6596 157.9 UdeM00000015905 XP\_045162518.1 71.6 116  
 32 1 1 116 207 321 7.80E-36 157.9 6596 cellular  
 organisms;Eukaryota;Opisthokonta;Metazoa;Eumetazoa;Bilateria;Protostomia;  
 Spiralia;Lophotrochozoa;Mollusca;Bivalvia;Autobranhia;Heteroconchia;Euhe  
 terodonta;Imparidentia;Venerida;Veneroidea;Veneridae;Mercenaria;Mercenari  
 a mercenaria  
 UdeM00000015906 6596 191.8 UdeM00000015906 XP\_045161174.1 61.1 149  
 54 2 46 193 39 184 8.20E-46 191.8 6596 cellular  
 organisms;Eukaryota;Opisthokonta;Metazoa;Eumetazoa;Bilateria;Protostomia;  
 Spiralia;Lophotrochozoa;Mollusca;Bivalvia;Autobranhia;Heteroconchia;Euhe  
 terodonta;Imparidentia;Venerida;Veneroidea;Veneridae;Mercenaria;Mercenari  
 a mercenaria  
 UdeM00000015907 6596 169.5 UdeM00000015907 XP\_045162518.1 71.8 124  
 34 1 25 148 199 321 3.30E-39 169.5 6596 cellular  
 organisms;Eukaryota;Opisthokonta;Metazoa;Eumetazoa;Bilateria;Protostomia;  
 Spiralia;Lophotrochozoa;Mollusca;Bivalvia;Autobranhia;Heteroconchia;Euhe  
 terodonta;Imparidentia;Venerida;Veneroidea;Veneridae;Mercenaria;Mercenari  
 a mercenaria  
 UdeM00000015908 6596 191.8 UdeM00000015908 XP\_045161174.1 61.1 149  
 54 2 46 193 39 184 8.20E-46 191.8 6596 cellular  
 organisms;Eukaryota;Opisthokonta;Metazoa;Eumetazoa;Bilateria;Protostomia;  
 Spiralia;Lophotrochozoa;Mollusca;Bivalvia;Autobranhia;Heteroconchia;Euhe  
 terodonta;Imparidentia;Venerida;Veneroidea;Veneridae;Mercenaria;Mercenari  
 a mercenaria  
 UdeM00000015909 6596 169.5 UdeM00000015909 XP\_045162518.1 71.8 124  
 34 1 25 148 199 321 3.30E-39 169.5 6596 cellular  
 organisms;Eukaryota;Opisthokonta;Metazoa;Eumetazoa;Bilateria;Protostomia;  
 Spiralia;Lophotrochozoa;Mollusca;Bivalvia;Autobranhia;Heteroconchia;Euhe  
 terodonta;Imparidentia;Venerida;Veneroidea;Veneridae;Mercenaria;Mercenari  
 a mercenaria  
 UdeM00000015910 6596 191.8 UdeM00000015910 XP\_045161174.1 61.1 149  
 54 2 46 193 39 184 8.20E-46 191.8 6596 cellular  
 organisms;Eukaryota;Opisthokonta;Metazoa;Eumetazoa;Bilateria;Protostomia;  
 Spiralia;Lophotrochozoa;Mollusca;Bivalvia;Autobranhia;Heteroconchia;Euhe  
 terodonta;Imparidentia;Venerida;Veneroidea;Veneridae;Mercenaria;Mercenari  
 a mercenaria  
 UdeM00000015911 6596 169.5 UdeM00000015911 XP\_045162518.1 71.8 124  
 34 1 25 148 199 321 3.30E-39 169.5 6596 cellular



organisms;Eukaryota;Opisthokonta;Metazoa;Eumetazoa;Bilateria;Protostomia;Spiralia;Lophotrochozoa;Mollusca;Bivalvia;Autobranhia;Heteroconchia;Euherodonta;Imparidentia;Venerida;Veneroidea;Veneridae;Mercenaria;Mercenaria mercenaria

UdeM00000015912 6596 191.8 UdeM00000015912 XP\_045161174.1 61.1 149  
54 2 46 193 39 184 8.20E-46 191.8 6596 cellular

organisms;Eukaryota;Opisthokonta;Metazoa;Eumetazoa;Bilateria;Protostomia;Spiralia;Lophotrochozoa;Mollusca;Bivalvia;Autobranhia;Heteroconchia;Euherodonta;Imparidentia;Venerida;Veneroidea;Veneridae;Mercenaria;Mercenaria mercenaria

UdeM00000015913 6596 169.5 UdeM00000015913 XP\_045162518.1 71.8 124  
34 1 25 148 199 321 3.30E-39 169.5 6596 cellular

organisms;Eukaryota;Opisthokonta;Metazoa;Eumetazoa;Bilateria;Protostomia;Spiralia;Lophotrochozoa;Mollusca;Bivalvia;Autobranhia;Heteroconchia;Euherodonta;Imparidentia;Venerida;Veneroidea;Veneridae;Mercenaria;Mercenaria mercenaria

UdeM00000015914 6596 191.8 UdeM00000015914 XP\_045161174.1 61.1 149  
54 2 46 193 39 184 8.20E-46 191.8 6596 cellular

organisms;Eukaryota;Opisthokonta;Metazoa;Eumetazoa;Bilateria;Protostomia;Spiralia;Lophotrochozoa;Mollusca;Bivalvia;Autobranhia;Heteroconchia;Euherodonta;Imparidentia;Venerida;Veneroidea;Veneridae;Mercenaria;Mercenaria mercenaria

UdeM00000015915 6596 169.5 UdeM00000015915 XP\_045162518.1 71.8 124  
34 1 25 148 199 321 3.30E-39 169.5 6596 cellular

organisms;Eukaryota;Opisthokonta;Metazoa;Eumetazoa;Bilateria;Protostomia;Spiralia;Lophotrochozoa;Mollusca;Bivalvia;Autobranhia;Heteroconchia;Euherodonta;Imparidentia;Venerida;Veneroidea;Veneridae;Mercenaria;Mercenaria mercenaria

UdeM00000015916 6596 191.8 UdeM00000015916 XP\_045161174.1 61.1 149  
54 2 46 193 39 184 8.20E-46 191.8 6596 cellular

organisms;Eukaryota;Opisthokonta;Metazoa;Eumetazoa;Bilateria;Protostomia;Spiralia;Lophotrochozoa;Mollusca;Bivalvia;Autobranhia;Heteroconchia;Euherodonta;Imparidentia;Venerida;Veneroidea;Veneridae;Mercenaria;Mercenaria mercenaria

UdeM00000015917 6596 169.5 UdeM00000015917 XP\_045162518.1 71.8 124  
34 1 25 148 199 321 3.30E-39 169.5 6596 cellular

organisms;Eukaryota;Opisthokonta;Metazoa;Eumetazoa;Bilateria;Protostomia;Spiralia;Lophotrochozoa;Mollusca;Bivalvia;Autobranhia;Heteroconchia;Euherodonta;Imparidentia;Venerida;Veneroidea;Veneridae;Mercenaria;Mercenaria mercenaria

UdeM00000015918 6596 191.8 UdeM00000015918 XP\_045161174.1 61.1 149  
54 2 46 193 39 184 8.20E-46 191.8 6596 cellular

organisms;Eukaryota;Opisthokonta;Metazoa;Eumetazoa;Bilateria;Protostomia;Spiralia;Lophotrochozoa;Mollusca;Bivalvia;Autobranhia;Heteroconchia;Euherodonta;Imparidentia;Venerida;Veneroidea;Veneridae;Mercenaria;Mercenaria mercenaria

UdeM00000015919 6596 169.5 UdeM00000015919 XP\_045162518.1 71.8 124  
34 1 25 148 199 321 3.30E-39 169.5 6596 cellular

organisms;Eukaryota;Opisthokonta;Metazoa;Eumetazoa;Bilateria;Protostomia;Spiralia;Lophotrochozoa;Mollusca;Bivalvia;Autobranhia;Heteroconchia;Euherodonta;Imparidentia;Venerida;Veneroidea;Veneridae;Mercenaria;Mercenaria mercenaria

UdeM00000015920 6596 191.8 UdeM00000015920 XP\_045161174.1 61.1 149  
54 2 46 193 39 184 8.20E-46 191.8 6596 cellular

organisms;Eukaryota;Opisthokonta;Metazoa;Eumetazoa;Bilateria;Protostomia;Spiralia;Lophotrochozoa;Mollusca;Bivalvia;Autobranhia;Heteroconchia;Euherodonta;Imparidentia;Venerida;Veneroidea;Veneridae;Mercenaria;Mercenaria mercenaria

UdeM00000015921 6596 169.5 UdeM00000015921 XP\_045162518.1 71.8 124  
34 1 25 148 199 321 3.30E-39 169.5 6596 cellular

organisms;Eukaryota;Opisthokonta;Metazoa;Eumetazoa;Bilateria;Protostomia;Spiralia;Lophotrochozoa;Mollusca;Bivalvia;Autobranhia;Heteroconchia;Euherodonta;Imparidentia;Venerida;Veneroidea;Veneridae;Mercenaria;Mercenaria mercenaria

UdeM00000015922 6596 191.8 UdeM00000015922 XP\_045161174.1 61.1 149  
54 2 46 193 39 184 8.20E-46 191.8 6596 cellular

organisms;Eukaryota;Opisthokonta;Metazoa;Eumetazoa;Bilateria;Protostomia;Spiralia;Lophotrochozoa;Mollusca;Bivalvia;Autobranhia;Heteroconchia;Euherodonta;Imparidentia;Venerida;Veneroidea;Veneridae;Mercenaria;Mercenaria mercenaria

UdeM00000015923 6596 169.5 UdeM00000015923 XP\_045162518.1 71.8 124  
34 1 25 148 199 321 3.30E-39 169.5 6596 cellular

organisms;Eukaryota;Opisthokonta;Metazoa;Eumetazoa;Bilateria;Protostomia;Spiralia;Lophotrochozoa;Mollusca;Bivalvia;Autobranhia;Heteroconchia;Euherodonta;Imparidentia;Venerida;Veneroidea;Veneridae;Mercenaria;Mercenaria mercenaria

UdeM00000015924 6596 191.8 UdeM00000015924 XP\_045161174.1 61.1 149  
54 2 46 193 39 184 8.20E-46 191.8 6596 cellular

organisms;Eukaryota;Opisthokonta;Metazoa;Eumetazoa;Bilateria;Protostomia;Spiralia;Lophotrochozoa;Mollusca;Bivalvia;Autobranhia;Heteroconchia;Euherodonta;Imparidentia;Venerida;Veneroidea;Veneridae;Mercenaria;Mercenaria mercenaria

UdeM00000015925 6596 169.5 UdeM00000015925 XP\_045162518.1 71.8 124  
34 1 25 148 199 321 3.30E-39 169.5 6596 cellular

organisms;Eukaryota;Opisthokonta;Metazoa;Eumetazoa;Bilateria;Protostomia;Spiralia;Lophotrochozoa;Mollusca;Bivalvia;Autobranhia;Heteroconchia;Euherodonta;Imparidentia;Venerida;Veneroidea;Veneridae;Mercenaria;Mercenaria mercenaria

UdeM00000015926 6596 191.8 UdeM00000015926 XP\_045161174.1 61.1 149  
54 2 46 193 39 184 8.20E-46 191.8 6596 cellular

organisms;Eukaryota;Opisthokonta;Metazoa;Eumetazoa;Bilateria;Protostomia;Spiralia;Lophotrochozoa;Mollusca;Bivalvia;Autobranhia;Heteroconchia;Euherodonta;Imparidentia;Venerida;Veneroidea;Veneridae;Mercenaria;Mercenaria mercenaria

UdeM00000015927 6596 169.5 UdeM00000015927 XP\_045162518.1 71.8 124  
34 1 25 148 199 321 3.30E-39 169.5 6596 cellular

organisms;Eukaryota;Opisthokonta;Metazoa;Eumetazoa;Bilateria;Protostomia;Spiralia;Lophotrochozoa;Mollusca;Bivalvia;Autobranhia;Heteroconchia;Euherodonta;Imparidentia;Venerida;Veneroidea;Veneridae;Mercenaria;Mercenaria mercenaria

UdeM00000015928 6596 191.8 UdeM00000015928 XP\_045161174.1 61.1 149  
54 2 46 193 39 184 8.20E-46 191.8 6596 cellular

organisms;Eukaryota;Opisthokonta;Metazoa;Eumetazoa;Bilateria;Protostomia;Spiralia;Lophotrochozoa;Mollusca;Bivalvia;Autobranhia;Heteroconchia;Euherodonta;Imparidentia;Venerida;Veneroidea;Veneridae;Mercenaria;Mercenaria mercenaria

UdeM00000015929 6596 169.5 UdeM00000015929 XP\_045162518.1 71.8 124  
34 1 25 148 199 321 3.30E-39 169.5 6596 cellular

organisms;Eukaryota;Opisthokonta;Metazoa;Eumetazoa;Bilateria;Protostomia;Spiralia;Lophotrochozoa;Mollusca;Bivalvia;Autobranhia;Heteroconchia;Euherodonta;Imparidentia;Venerida;Veneroidea;Veneridae;Mercenaria;Mercenaria mercenaria

UdeM00000015930 6596 191.8 UdeM00000015930 XP\_045161174.1 61.1 149  
54 2 46 193 39 184 8.20E-46 191.8 6596 cellular

organisms;Eukaryota;Opisthokonta;Metazoa;Eumetazoa;Bilateria;Protostomia;Spiralia;Lophotrochozoa;Mollusca;Bivalvia;Autobranhia;Heteroconchia;Euherodonta;Imparidentia;Venerida;Veneroidea;Veneridae;Mercenaria;Mercenaria mercenaria

UdeM00000015931 6596 169.5 UdeM00000015931 XP\_045162518.1 71.8 124  
34 1 25 148 199 321 3.30E-39 169.5 6596 cellular

organisms;Eukaryota;Opisthokonta;Metazoa;Eumetazoa;Bilateria;Protostomia;Spiralia;Lophotrochozoa;Mollusca;Bivalvia;Autobranhia;Heteroconchia;Euherodonta;Imparidentia;Venerida;Veneroidea;Veneridae;Mercenaria;Mercenaria mercenaria

UdeM00000015932 6596 191.8 UdeM00000015932 XP\_045161174.1 61.1 149  
54 2 46 193 39 184 8.20E-46 191.8 6596 cellular

organisms;Eukaryota;Opisthokonta;Metazoa;Eumetazoa;Bilateria;Protostomia;Spiralia;Lophotrochozoa;Mollusca;Bivalvia;Autobranhia;Heteroconchia;Euherodonta;Imparidentia;Venerida;Veneroidea;Veneridae;Mercenaria;Mercenaria mercenaria

UdeM00000015933 6596 169.5 UdeM00000015933 XP\_045162518.1 71.8 124  
34 1 25 148 199 321 3.30E-39 169.5 6596 cellular

organisms;Eukaryota;Opisthokonta;Metazoa;Eumetazoa;Bilateria;Protostomia;Spiralia;Lophotrochozoa;Mollusca;Bivalvia;Autobranhia;Heteroconchia;Euherodonta;Imparidentia;Venerida;Veneroidea;Veneridae;Mercenaria;Mercenaria mercenaria

UdeM00000015934 6596 191.8 UdeM00000015934 XP\_045161174.1 61.1 149  
54 2 46 193 39 184 8.20E-46 191.8 6596 cellular

organisms;Eukaryota;Opisthokonta;Metazoa;Eumetazoa;Bilateria;Protostomia;Spiralia;Lophotrochozoa;Mollusca;Bivalvia;Autobranhia;Heteroconchia;Euherodonta;Imparidentia;Venerida;Veneroidea;Veneridae;Mercenaria;Mercenaria mercenaria

UdeM00000015935 6596 167.9 UdeM00000015935 XP\_045162518.1 71 124  
35 1 25 148 199 321 9.50E-39 167.9 6596 cellular

organisms;Eukaryota;Opisthokonta;Metazoa;Eumetazoa;Bilateria;Protostomia;Spiralia;Lophotrochozoa;Mollusca;Bivalvia;Autobranhia;Heteroconchia;Euherodonta;Imparidentia;Venerida;Veneroidea;Veneridae;Mercenaria;Mercenaria mercenaria

UdeM00000015936 6596 191.8 UdeM00000015936 XP\_045161174.1 61.1 149  
54 2 46 193 39 184 8.20E-46 191.8 6596 cellular

organisms;Eukaryota;Opisthokonta;Metazoa;Eumetazoa;Bilateria;Protostomia;Spiralia;Lophotrochozoa;Mollusca;Bivalvia;Autobranhia;Heteroconchia;Euherodonta;Imparidentia;Venerida;Veneroidea;Veneridae;Mercenaria;Mercenaria mercenaria

UdeM00000015937 6596 169.1 UdeM00000015937 XP\_045162518.1 71.8 124  
34 1 386 509 199 321 1.50E-38 169.1 6596 cellular

organisms;Eukaryota;Opisthokonta;Metazoa;Eumetazoa;Bilateria;Protostomia;Spiralia;Lophotrochozoa;Mollusca;Bivalvia;Autobranhia;Heteroconchia;Euherodonta;Imparidentia;Venerida;Veneroidea;Veneridae;Mercenaria;Mercenaria mercenaria

UdeM00000015938 6596 191.8 UdeM00000015938 XP\_045161174.1 61.1 149  
54 2 46 193 39 184 8.20E-46 191.8 6596 cellular

organisms;Eukaryota;Opisthokonta;Metazoa;Eumetazoa;Bilateria;Protostomia; Spiralia;Lophotrochozoa;Mollusca;Bivalvia;Autobranchia;Heteroconchia;Euherodonta;Imparidentia;Venerida;Veneroidea;Veneridae;Mercenaria;Mercenaria mercenaria

UdeM00000015939 1735272 470.3 UdeM00000015939 XP\_041377214.1 75.4  
313 77 0 35 347 53 365 2.20E-129 470.3 1735272  
cellular

organisms;Eukaryota;Opisthokonta;Metazoa;Eumetazoa;Bilateria;Protostomia; Spiralia;Lophotrochozoa;Mollusca;Gastropoda;Neomphalina;Neomphaloidea;Peltospiridae;Gigantopelta;Gigantopelta aegis

UdeM00000015940 1735272 486.5 UdeM00000015940 XP\_041377214.1 79.2  
308 64 0 44 351 60 367 3.00E-134 486.5 1735272  
cellular

organisms;Eukaryota;Opisthokonta;Metazoa;Eumetazoa;Bilateria;Protostomia; Spiralia;Lophotrochozoa;Mollusca;Gastropoda;Neomphalina;Neomphaloidea;Peltospiridae;Gigantopelta;Gigantopelta aegis

UdeM00000015941 1735272 487.3 UdeM00000015941 XP\_041377214.1 78.3  
314 68 0 44 357 60 373 1.80E-134 487.3 1735272  
cellular

organisms;Eukaryota;Opisthokonta;Metazoa;Eumetazoa;Bilateria;Protostomia; Spiralia;Lophotrochozoa;Mollusca;Gastropoda;Neomphalina;Neomphaloidea;Peltospiridae;Gigantopelta;Gigantopelta aegis

UdeM00000015942 6565 1380.5 UdeM00000015942 XP\_022342025.1 67.2  
1013 324 6 119 1128 97 1104 0.00E+00 1380.5 6565  
cellular

organisms;Eukaryota;Opisthokonta;Metazoa;Eumetazoa;Bilateria;Protostomia; Spiralia;Lophotrochozoa;Mollusca;Bivalvia;Autobranchia;Pteriormorphia;Ostreida;Ostreoidea;Ostreidae;Crassostrea;Crassostrea virginica

UdeM00000015943 6596 265.4 UdeM00000015943 XP\_045213493.1 47.2 254  
124 3 2 246 137 389 7.80E-68 265.4 6596 cellular

organisms;Eukaryota;Opisthokonta;Metazoa;Eumetazoa;Bilateria;Protostomia; Spiralia;Lophotrochozoa;Mollusca;Bivalvia;Autobranchia;Heteroconchia;Euherodonta;Imparidentia;Venerida;Veneroidea;Veneridae;Mercenaria;Mercenaria mercenaria

UdeM00000015944 6596 172.2 UdeM00000015944 XP\_045213493.1 46.5 159  
78 2 5 157 232 389 5.90E-40 172.2 6596 cellular

organisms;Eukaryota;Opisthokonta;Metazoa;Eumetazoa;Bilateria;Protostomia; Spiralia;Lophotrochozoa;Mollusca;Bivalvia;Autobranchia;Heteroconchia;Euherodonta;Imparidentia;Venerida;Veneroidea;Veneridae;Mercenaria;Mercenaria mercenaria

UdeM00000015945 6596 337.4 UdeM00000015945 XP\_045213493.1 47.2 343  
168 6 59 393 37 374 2.60E-89 337.4 6596 cellular

organisms;Eukaryota;Opisthokonta;Metazoa;Eumetazoa;Bilateria;Protostomia; Spiralia;Lophotrochozoa;Mollusca;Bivalvia;Autobranchia;Heteroconchia;Euherodonta;Imparidentia;Venerida;Veneroidea;Veneridae;Mercenaria;Mercenaria mercenaria

UdeM00000015946 6596 324.3 UdeM00000015946 XP\_045163858.1 45.3 327  
173 2 6 326 65 391 1.80E-85 324.3 6596 cellular

organisms;Eukaryota;Opisthokonta;Metazoa;Eumetazoa;Bilateria;Protostomia; Spiralia;Lophotrochozoa;Mollusca;Bivalvia;Autobranchia;Heteroconchia;Euherodonta;Imparidentia;Venerida;Veneroidea;Veneridae;Mercenaria;Mercenaria mercenaria

UdeM00000015947 6500 291.6 UdeM00000015947 XP\_005095133.1 56.1 237  
102 2 9 244 1 236 9.40E-76 291.6 6500 cellular

organisms;Eukaryota;Opisthokonta;Metazoa;Eumetazoa;Bilateria;Protostomia;Spiralia;Lophotrochozoa;Mollusca;Gastropoda;Heterobranchia;Euthyneura;Tectipleura;Aplysiida;Aplysioidea;Aplysiidae;Aplysia;Aplysia californica  
UdeM00000015948 6596 529.3 UdeM00000015948 XP\_045163475.1 51.1 507  
232 6 14 507 21 524 7.70E-147 529.3 6596 cellular  
organisms;Eukaryota;Opisthokonta;Metazoa;Eumetazoa;Bilateria;Protostomia;Spiralia;Lophotrochozoa;Mollusca;Bivalvia;Autobranchia;Heteroconchia;Euheterodonta;Imparidentia;Venerida;Veneroidea;Veneridae;Mercenaria;Mercenaria mercenaria  
UdeM00000015950 6596 352.8 UdeM00000015950 XP\_045162203.1 49.6 361  
163 6 1 342 659 1019 5.20E-94 352.8 6596 cellular  
organisms;Eukaryota;Opisthokonta;Metazoa;Eumetazoa;Bilateria;Protostomia;Spiralia;Lophotrochozoa;Mollusca;Bivalvia;Autobranchia;Heteroconchia;Euheterodonta;Imparidentia;Venerida;Veneroidea;Veneridae;Mercenaria;Mercenaria mercenaria  
UdeM00000015951 1735272 416.8 UdeM00000015951 XP\_041356266.1 50.4  
409 189 4 51 454 209 608 3.60E-113 416.8 1735272  
cellular  
organisms;Eukaryota;Opisthokonta;Metazoa;Eumetazoa;Bilateria;Protostomia;Spiralia;Lophotrochozoa;Mollusca;Gastropoda;Neomphalina;Neomphaloidea;Peltospiridae;Gigantopelta;Gigantopelta aegis  
UdeM00000015953 225164 75.5 UdeM00000015953 XP\_009054454.1 39.7  
121 68 3 2 121 56 172 6.10E-11 75.5 225164  
cellular  
organisms;Eukaryota;Opisthokonta;Metazoa;Eumetazoa;Bilateria;Protostomia;Spiralia;Lophotrochozoa;Mollusca;Gastropoda;Patellogastropoda;Lottiidae;Lottia;Lottia gigantea  
UdeM00000015952 6596 142.5 UdeM00000015952 XP\_045185048.1 39.3 178  
92 2 7 168 8 185 5.60E-31 142.5 6596 cellular  
organisms;Eukaryota;Opisthokonta;Metazoa;Eumetazoa;Bilateria;Protostomia;Spiralia;Lophotrochozoa;Mollusca;Bivalvia;Autobranchia;Heteroconchia;Euheterodonta;Imparidentia;Venerida;Veneroidea;Veneridae;Mercenaria;Mercenaria mercenaria  
UdeM00000015954 6596 751.1 UdeM00000015954 XP\_045162203.1 43.8 938  
434 19 11 863 1084 2013 1.50E-213 751.1 6596 cellular  
organisms;Eukaryota;Opisthokonta;Metazoa;Eumetazoa;Bilateria;Protostomia;Spiralia;Lophotrochozoa;Mollusca;Bivalvia;Autobranchia;Heteroconchia;Euheterodonta;Imparidentia;Venerida;Veneroidea;Veneridae;Mercenaria;Mercenaria mercenaria  
UdeM00000015955 6596 746.9 UdeM00000015955 XP\_045162203.1 43.9 922  
425 18 6 843 1100 2013 2.80E-212 746.9 6596 cellular  
organisms;Eukaryota;Opisthokonta;Metazoa;Eumetazoa;Bilateria;Protostomia;Spiralia;Lophotrochozoa;Mollusca;Bivalvia;Autobranchia;Heteroconchia;Euheterodonta;Imparidentia;Venerida;Veneroidea;Veneridae;Mercenaria;Mercenaria mercenaria  
UdeM00000015956 6596 751.5 UdeM00000015956 XP\_045162203.1 43.6 920  
428 16 5 840 1099 2011 1.20E-213 751.5 6596 cellular  
organisms;Eukaryota;Opisthokonta;Metazoa;Eumetazoa;Bilateria;Protostomia;Spiralia;Lophotrochozoa;Mollusca;Bivalvia;Autobranchia;Heteroconchia;Euheterodonta;Imparidentia;Venerida;Veneroidea;Veneridae;Mercenaria;Mercenaria mercenaria  
UdeM00000015957 6596 548.5 UdeM00000015957 XP\_045183751.1 49.7 527  
248 7 3 520 23 541 9.10E-153 548.5 6596 cellular  
organisms;Eukaryota;Opisthokonta;Metazoa;Eumetazoa;Bilateria;Protostomia;

Spiralia;Lophotrochozoa;Mollusca;Bivalvia;Autobranchia;Heteroconchia;Euherodonta;Imparidentia;Venerida;Veneroidea;Veneridae;Mercenaria;Mercenaria mercenaria

UdeM00000015960 6596 538.9 UdeM00000015960 XP\_045162442.1 64.5 566  
178 4 120 679 30 578 9.40E-150 538.9 6596 cellular

organisms;Eukaryota;Opisthokonta;Metazoa;Eumetazoa;Bilateria;Protostomia;Spiralia;Lophotrochozoa;Mollusca;Bivalvia;Autobranchia;Heteroconchia;Euherodonta;Imparidentia;Venerida;Veneroidea;Veneridae;Mercenaria;Mercenaria mercenaria

UdeM00000015961 6596 464.9 UdeM00000015961 XP\_045162442.1 67.4 337  
107 2 1 335 36 371 1.00E-127 464.9 6596 cellular

organisms;Eukaryota;Opisthokonta;Metazoa;Eumetazoa;Bilateria;Protostomia;Spiralia;Lophotrochozoa;Mollusca;Bivalvia;Autobranchia;Heteroconchia;Euherodonta;Imparidentia;Venerida;Veneroidea;Veneridae;Mercenaria;Mercenaria mercenaria

UdeM00000015962 6596 117.9 UdeM00000015962 XP\_045162442.1 52.2 113  
50 1 28 136 466 578 1.10E-23 117.9 6596 cellular

organisms;Eukaryota;Opisthokonta;Metazoa;Eumetazoa;Bilateria;Protostomia;Spiralia;Lophotrochozoa;Mollusca;Bivalvia;Autobranchia;Heteroconchia;Euherodonta;Imparidentia;Venerida;Veneroidea;Veneridae;Mercenaria;Mercenaria mercenaria

UdeM00000015963 6596 178.7 UdeM00000015963 XP\_045162962.1 45.3 448  
213 6 7 424 16 461 1.50E-41 178.7 6596 cellular

organisms;Eukaryota;Opisthokonta;Metazoa;Eumetazoa;Bilateria;Protostomia;Spiralia;Lophotrochozoa;Mollusca;Bivalvia;Autobranchia;Heteroconchia;Euherodonta;Imparidentia;Venerida;Veneroidea;Veneridae;Mercenaria;Mercenaria mercenaria

UdeM00000015964 6596 170.6 UdeM00000015964 XP\_045178436.1 37.2 266  
158 4 478 738 52 313 7.40E-39 170.6 6596 cellular

organisms;Eukaryota;Opisthokonta;Metazoa;Eumetazoa;Bilateria;Protostomia;Spiralia;Lophotrochozoa;Mollusca;Bivalvia;Autobranchia;Heteroconchia;Euherodonta;Imparidentia;Venerida;Veneroidea;Veneridae;Mercenaria;Mercenaria mercenaria

UdeM00000015965 6596 213.4 UdeM00000015965 XP\_045178436.1 36.4 319  
191 6 538 852 7 317 1.20E-51 213.4 6596 cellular

organisms;Eukaryota;Opisthokonta;Metazoa;Eumetazoa;Bilateria;Protostomia;Spiralia;Lophotrochozoa;Mollusca;Bivalvia;Autobranchia;Heteroconchia;Euherodonta;Imparidentia;Venerida;Veneroidea;Veneridae;Mercenaria;Mercenaria mercenaria

UdeM00000015966 6573 390.2 UdeM00000015966 XP\_021369816.1 76.7 266  
60 1 2 265 3 268 2.10E-105 390.2 6573 cellular

organisms;Eukaryota;Opisthokonta;Metazoa;Eumetazoa;Bilateria;Protostomia;Spiralia;Lophotrochozoa;Mollusca;Bivalvia;Autobranchia;Pteriomorphia;Pectinida;Pectinoidea;Pectinidae;Mizuhopecten;Mizuhopecten yessoensis

UdeM00000015967 6579 704.1 UdeM00000015967 XP\_033763222.1 66.7 510  
130 3 1 505 1 475 1.30E-199 704.1 6579 cellular

organisms;Eukaryota;Opisthokonta;Metazoa;Eumetazoa;Bilateria;Protostomia;Spiralia;Lophotrochozoa;Mollusca;Bivalvia;Autobranchia;Pteriomorphia;Pectinida;Pectinoidea;Pectinidae;Pecten;Pecten maximus

UdeM00000015968 215358 117.9 UdeM00000015968 XP\_027132797.1 48.2  
114 59 0 1 114 138 251 9.90E-24 117.9 215358

cellular organisms;Eukaryota;Opisthokonta;Metazoa;Eumetazoa;Bilateria;Deuterostomia;Chordata;Craniata;Vertebrata;Gnathostomata;Teleostomi;Euteleostomi;Acti

nopterygii;Actinopteri;Neopterygii;Teleostei;Osteoglossocephalai;Clupeocephala;Euteleostei;Neoteleostei;Eurypterygia;Ctenosquamata;Acanthomorphata;Euacanthomorphacea;Percomorphaceae;Eupercaria;Eupercaria incertae sedis;Sciaenidae;Larimichthys;Larimichthys crocea

UdeM00000015969 106582 90.5 UdeM00000015969 XP\_012779827.2 53.6  
69 32 0 1 69 293 361 9.10E-16 90.5 106582  
cellular

organisms;Eukaryota;Opisthokonta;Metazoa;Eumetazoa;Bilateria;Deuterostomia;Chordata;Craniata;Vertebrata;Gnathostomata;Teleostomi;Euteleostomi;Actinopterygii;Actinopteri;Neopterygii;Teleostei;Osteoglossocephalai;Clupeocephala;Euteleostei;Neoteleostei;Eurypterygia;Ctenosquamata;Acanthomorphata;Euacanthomorphacea;Percomorphaceae;Ovalentaria;Cichlomorphae;Cichliformes;Cichlidae;African

cichlids;Pseudocrenilabrinae;Haplochromini;Maylandia;Maylandia zebra complex;Maylandia zebra

UdeM00000015970 51655 105.5 UdeM00000015970 XP\_037976812.1 29.9 214  
102 3 5 170 93 306 6.70E-20 105.5 51655 cellular

organisms;Eukaryota;Opisthokonta;Metazoa;Eumetazoa;Bilateria;Protostomia;Ecdysozoa;Panarthropoda;Arthropoda;Mandibulata;Pancrustacea;Hexapoda;Insecta;Dicondylia;Pterygota;Neoptera;Endopterygota;Amphiesmenoptera;Lepidoptera;Glossata;Neolepidoptera;Heteroneura;Ditrysia;Yponomeutoidea;Plutellidae;Plutella;Plutella xylostella

UdeM00000015971 6565 531.9 UdeM00000015971 XP\_022306197.1 46.1 698  
293 14 9 654 16 682 1.10E-147 531.9 6565 cellular

organisms;Eukaryota;Opisthokonta;Metazoa;Eumetazoa;Bilateria;Protostomia;Spiralia;Lophotrochozoa;Mollusca;Bivalvia;Autobranchia;Pteriormorphia;Ostracoda;Ostreoidae;Ostreidae;Crassostrea;Crassostrea virginica

UdeM00000015972 6596 384.4 UdeM00000015972 XP\_045163264.1 73.3 243  
64 1 61 302 82 324 1.30E-103 384.4 6596 cellular

organisms;Eukaryota;Opisthokonta;Metazoa;Eumetazoa;Bilateria;Protostomia;Spiralia;Lophotrochozoa;Mollusca;Bivalvia;Autobranchia;Heteroconchia;Euheterodonta;Imparidentia;Venerida;Veneroidea;Veneridae;Mercenaria;Mercenaria mercenaria

UdeM00000015973 6573 172.9 UdeM00000015973 XP\_021372846.1 64.9 114  
40 0 95 208 138 251 1.10E-39 172.9 6573 cellular

organisms;Eukaryota;Opisthokonta;Metazoa;Eumetazoa;Bilateria;Protostomia;Spiralia;Lophotrochozoa;Mollusca;Bivalvia;Autobranchia;Pteriormorphia;Pectinida;Pectinoidea;Pectinidae;Mizuhopecten;Mizuhopecten yessoensis

UdeM00000015974 1735272 176.8 UdeM00000015974 XP\_041377869.1 40  
280 150 5 16 287 486 755 4.00E-41 176.8 1735272

cellular

organisms;Eukaryota;Opisthokonta;Metazoa;Eumetazoa;Bilateria;Protostomia;Spiralia;Lophotrochozoa;Mollusca;Gastropoda;Neomphalina;Neomphaloidea;Peltospiridae;Gigantopelta;Gigantopelta aegis

UdeM00000015975 6596 1559.7 UdeM00000015975 XP\_045177443.1 63.1  
1293 447 11 3 1281 2 1278 0.00E+00 1559.7 6596

cellular

organisms;Eukaryota;Opisthokonta;Metazoa;Eumetazoa;Bilateria;Protostomia;Spiralia;Lophotrochozoa;Mollusca;Bivalvia;Autobranchia;Heteroconchia;Euheterodonta;Imparidentia;Venerida;Veneroidea;Veneridae;Mercenaria;Mercenaria mercenaria

UdeM00000015978 6596 717.6 UdeM00000015978 XP\_045171655.1 60.1 584  
225 2 52 627 41 624 1.40E-203 717.6 6596 cellular

organisms;Eukaryota;Opisthokonta;Metazoa;Eumetazoa;Bilateria;Protostomia;

Spiralia;Lophotrochozoa;Mollusca;Bivalvia;Autobranchia;Heteroconchia;Euherodonta;Imparidentia;Venerida;Veneroidea;Veneridae;Mercenaria;Mercenaria mercenaria

UdeM00000015979 6596 612.5 UdeM00000015979 XP\_045171655.1 60.7 484  
186 1 2 481 141 624 4.70E-172 612.5 6596 cellular

organisms;Eukaryota;Opisthokonta;Metazoa;Eumetazoa;Bilateria;Protostomia;Spiralia;Lophotrochozoa;Mollusca;Bivalvia;Autobranchia;Heteroconchia;Euherodonta;Imparidentia;Venerida;Veneroidea;Veneridae;Mercenaria;Mercenaria mercenaria

UdeM00000015980 6500 295 UdeM00000015980 XP\_005092455.1 57.5 221  
94 0 3 223 8 228 1.00E-76 295 6500 cellular

organisms;Eukaryota;Opisthokonta;Metazoa;Eumetazoa;Bilateria;Protostomia;Spiralia;Lophotrochozoa;Mollusca;Gastropoda;Heterobranchia;Euthyneura;Tectipleura;Aplysiida;Aplysioidea;Aplysiidae;Aplysia;Aplysia californica

UdeM00000015981 225164 412.9 UdeM00000015981 XP\_009057084.1 45.3  
470 248 6 35 499 43 508 5.80E-112 412.9 225164  
cellular

organisms;Eukaryota;Opisthokonta;Metazoa;Eumetazoa;Bilateria;Protostomia;Spiralia;Lophotrochozoa;Mollusca;Gastropoda;Patellogastropoda;Lottioidea;Lottiidae;Lottia;Lottia gigantea

UdeM00000015982 400727 226.1 UdeM00000015982 XP\_025099511.1 48.5  
202 102 1 20 221 93 292 4.50E-56 226.1 400727  
cellular

organisms;Eukaryota;Opisthokonta;Metazoa;Eumetazoa;Bilateria;Protostomia;Spiralia;Lophotrochozoa;Mollusca;Gastropoda;Caenogastropoda;Architaenioglossa;Ampullarioidea;Ampullariidae;Pomacea;Pomacea canaliculata

UdeM00000015983 225164 184.5 UdeM00000015983 XP\_009057084.1 43.2  
234 127 4 18 246 25 257 1.70E-43 184.5 225164  
cellular

organisms;Eukaryota;Opisthokonta;Metazoa;Eumetazoa;Bilateria;Protostomia;Spiralia;Lophotrochozoa;Mollusca;Gastropoda;Patellogastropoda;Lottioidea;Lottiidae;Lottia;Lottia gigantea

UdeM00000015984 6500 292.4 UdeM00000015984 XP\_005092455.1 61.1 203  
79 0 21 223 26 228 6.50E-76 292.4 6500 cellular

organisms;Eukaryota;Opisthokonta;Metazoa;Eumetazoa;Bilateria;Protostomia;Spiralia;Lophotrochozoa;Mollusca;Gastropoda;Heterobranchia;Euthyneura;Tectipleura;Aplysiida;Aplysioidea;Aplysiidae;Aplysia;Aplysia californica

UdeM00000015985 6500 291.6 UdeM00000015985 XP\_005092455.1 56.6 221  
96 0 3 223 8 228 1.10E-75 291.6 6500 cellular

organisms;Eukaryota;Opisthokonta;Metazoa;Eumetazoa;Bilateria;Protostomia;Spiralia;Lophotrochozoa;Mollusca;Gastropoda;Heterobranchia;Euthyneura;Tectipleura;Aplysiida;Aplysioidea;Aplysiidae;Aplysia;Aplysia californica

UdeM00000015986 225164 389.4 UdeM00000015986 XP\_009065179.1 41.3  
460 263 4 24 477 4 462 6.50E-105 389.4 225164  
cellular

organisms;Eukaryota;Opisthokonta;Metazoa;Eumetazoa;Bilateria;Protostomia;Spiralia;Lophotrochozoa;Mollusca;Gastropoda;Patellogastropoda;Lottioidea;Lottiidae;Lottia;Lottia gigantea

UdeM00000015987 6565 107.1 UdeM00000015987 XP\_022292180.1 70.5 78  
19 2 6 82 96 170 1.10E-20 107.1 6565 cellular

organisms;Eukaryota;Opisthokonta;Metazoa;Eumetazoa;Bilateria;Protostomia;Spiralia;Lophotrochozoa;Mollusca;Bivalvia;Autobranchia;Pteriormorphia;Ostreida;Ostreioidea;Ostreidae;Crassostrea;Crassostrea virginica



UdeM00000015988 400727 226.9 UdeM00000015988 XP\_025099511.1 43.4  
 244 132 3 21 261 52 292 3.10E-56 226.9 400727  
 cellular  
 organisms;Eukaryota;Opisthokonta;Metazoa;Eumetazoa;Bilateria;Protostomia;  
 Spiralia;Lophotrochozoa;Mollusca;Gastropoda;Caenogastropoda;Architaenioglossa;  
 Ampullarioidea;Ampullariidae;Pomacea;Pomacea canaliculata  
 UdeM00000015989 225164 386.7 UdeM00000015989 XP\_009065179.1 41.3  
 470 265 6 37 501 19 482 4.40E-104 386.7 225164  
 cellular  
 organisms;Eukaryota;Opisthokonta;Metazoa;Eumetazoa;Bilateria;Protostomia;  
 Spiralia;Lophotrochozoa;Mollusca;Gastropoda;Patellogastropoda;Lottioidea;  
 Lottiidae;Lottia;Lottia gigantea  
 UdeM00000015990 400727 296.6 UdeM00000015990 XP\_025099197.1 45.3  
 322 173 2 7 327 189 508 3.90E-77 296.6 400727  
 cellular  
 organisms;Eukaryota;Opisthokonta;Metazoa;Eumetazoa;Bilateria;Protostomia;  
 Spiralia;Lophotrochozoa;Mollusca;Gastropoda;Caenogastropoda;Architaenioglossa;  
 Ampullarioidea;Ampullariidae;Pomacea;Pomacea canaliculata  
 UdeM00000015991 225164 116.3 UdeM00000015991 XP\_009057084.1 44  
 150 75 4 16 157 20 168 3.60E-23 116.3 225164  
 cellular  
 organisms;Eukaryota;Opisthokonta;Metazoa;Eumetazoa;Bilateria;Protostomia;  
 Spiralia;Lophotrochozoa;Mollusca;Gastropoda;Patellogastropoda;Lottioidea;  
 Lottiidae;Lottia;Lottia gigantea  
 UdeM00000015993 7574 74.3 UdeM00000015993 XP\_013400906.1 41.1 95  
 55 1 18 112 226 319 1.20E-10 74.3 7574 cellular  
 organisms;Eukaryota;Opisthokonta;Metazoa;Eumetazoa;Bilateria;Protostomia;  
 Spiralia;Lophotrochozoa;Brachiopoda;Linguliformea;Lingulata;Lingulida;Linguloidea;  
 Lingulidae;Lingula;Lingula anatina  
 UdeM00000015998 6596 223.8 UdeM00000015998 XP\_045216699.1 66.3 169  
 55 2 27 193 4 172 8.30E-55 223.8 6596 cellular  
 organisms;Eukaryota;Opisthokonta;Metazoa;Eumetazoa;Bilateria;Protostomia;  
 Spiralia;Lophotrochozoa;Mollusca;Bivalvia;Autobranchia;Heteroconchia;Euheterodonta;  
 Imparidentia;Venerida;Veneroidea;Veneridae;Mercenaria;Mercenaria mercenaria  
 UdeM00000016000 6596 151.4 UdeM00000016000 XP\_045163791.1 27.8 540  
 290 14 1 504 21 496 3.20E-33 151.4 6596 cellular  
 organisms;Eukaryota;Opisthokonta;Metazoa;Eumetazoa;Bilateria;Protostomia;  
 Spiralia;Lophotrochozoa;Mollusca;Bivalvia;Autobranchia;Heteroconchia;Euheterodonta;  
 Imparidentia;Venerida;Veneroidea;Veneridae;Mercenaria;Mercenaria mercenaria  
 UdeM00000016003 6565 778.1 UdeM00000016003 XP\_022337369.1 55.6 773  
 304 12 4 764 693 1438 1.00E-221 778.1 6565 cellular  
 organisms;Eukaryota;Opisthokonta;Metazoa;Eumetazoa;Bilateria;Protostomia;  
 Spiralia;Lophotrochozoa;Mollusca;Bivalvia;Autobranchia;Pteriomorphia;Ostreida;  
 Ostreioidea;Ostreidae;Crassostrea;Crassostrea virginica  
 UdeM00000016004 29159 64.3 UdeM00000016004 XP\_034299542.1 32.7 110  
 66 2 38 144 31 135 2.90E-07 64.3 29159 cellular  
 organisms;Eukaryota;Opisthokonta;Metazoa;Eumetazoa;Bilateria;Protostomia;  
 Spiralia;Lophotrochozoa;Mollusca;Bivalvia;Autobranchia;Pteriomorphia;Ostreida;  
 Ostreioidea;Ostreidae;Crassostrea;Crassostrea gigas  
 UdeM00000016005 29159 65.5 UdeM00000016005 XP\_034299542.1 33 109  
 66 2 38 143 31 135 1.30E-07 65.5 29159 cellular  
 organisms;Eukaryota;Opisthokonta;Metazoa;Eumetazoa;Bilateria;Protostomia;

Spiralia;Lophotrochozoa;Mollusca;Bivalvia;Autobranchia;Pteriormorphia;Ostr  
eida;Ostreoidea;Ostreidae;Crassostrea;Crassostrea gigas  
UdeM00000016006 6573 126.3 UdeM00000016006 XP\_021372906.1 47.9 144  
70 3 24 166 19 158 3.80E-26 126.3 6573 cellular  
organisms;Eukaryota;Opisthokonta;Metazoa;Eumetazoa;Bilateria;Protostomia;  
Spiralia;Lophotrochozoa;Mollusca;Bivalvia;Autobranchia;Pteriormorphia;Pect  
inida;Pectinoidea;Pectinidae;Mizuhopecten;Mizuhopecten yessoensis  
UdeM00000016007 6573 100.5 UdeM00000016007 XP\_021372906.1 54.5 99  
42 2 6 103 62 158 1.40E-18 100.5 6573 cellular  
organisms;Eukaryota;Opisthokonta;Metazoa;Eumetazoa;Bilateria;Protostomia;  
Spiralia;Lophotrochozoa;Mollusca;Bivalvia;Autobranchia;Pteriormorphia;Pect  
inida;Pectinoidea;Pectinidae;Mizuhopecten;Mizuhopecten yessoensis  
UdeM00000016008 1735272 303.1 UdeM00000016008 XP\_041377845.1 49  
298 149 1 56 353 20 314 4.60E-79 303.1 1735272  
cellular  
organisms;Eukaryota;Opisthokonta;Metazoa;Eumetazoa;Bilateria;Protostomia;  
Spiralia;Lophotrochozoa;Mollusca;Gastropoda;Neomphalina;Neomphaloidea;Pel  
tospiridae;Gigantopelta;Gigantopelta aegis  
UdeM00000016009 1735272 283.1 UdeM00000016009 XP\_041377845.1 49.8  
267 134 0 56 322 20 286 4.40E-73 283.1 1735272  
cellular  
organisms;Eukaryota;Opisthokonta;Metazoa;Eumetazoa;Bilateria;Protostomia;  
Spiralia;Lophotrochozoa;Mollusca;Gastropoda;Neomphalina;Neomphaloidea;Pel  
tospiridae;Gigantopelta;Gigantopelta aegis  
UdeM00000016010 6596 356.7 UdeM00000016010 XP\_045162975.1 71 217  
63 0 1 217 1 217 2.20E-95 356.7 6596 cellular  
organisms;Eukaryota;Opisthokonta;Metazoa;Eumetazoa;Bilateria;Protostomia;  
Spiralia;Lophotrochozoa;Mollusca;Bivalvia;Autobranchia;Heteroconchia;Euhe  
terodonta;Imparidentia;Venerida;Veneroidea;Veneridae;Mercenaria;Mercenari  
a mercenaria  
UdeM00000016011 6596 848.6 UdeM00000016011 XP\_045161432.1 55.6 772  
321 6 4 768 10 766 6.30E-243 848.6 6596 cellular  
organisms;Eukaryota;Opisthokonta;Metazoa;Eumetazoa;Bilateria;Protostomia;  
Spiralia;Lophotrochozoa;Mollusca;Bivalvia;Autobranchia;Heteroconchia;Euhe  
terodonta;Imparidentia;Venerida;Veneroidea;Veneridae;Mercenaria;Mercenari  
a mercenaria  
UdeM00000016012 6596 682.9 UdeM00000016012 XP\_045161433.1 78.9 422  
88 1 80 500 96 517 3.00E-193 682.9 6596 cellular  
organisms;Eukaryota;Opisthokonta;Metazoa;Eumetazoa;Bilateria;Protostomia;  
Spiralia;Lophotrochozoa;Mollusca;Bivalvia;Autobranchia;Heteroconchia;Euhe  
terodonta;Imparidentia;Venerida;Veneroidea;Veneridae;Mercenaria;Mercenari  
a mercenaria  
UdeM00000016014 6579 158.3 UdeM00000016014 XP\_033724604.1 28.8 490  
259 13 1 461 1 429 2.40E-35 158.3 6579 cellular  
organisms;Eukaryota;Opisthokonta;Metazoa;Eumetazoa;Bilateria;Protostomia;  
Spiralia;Lophotrochozoa;Mollusca;Bivalvia;Autobranchia;Pteriormorphia;Pect  
inida;Pectinoidea;Pectinidae;Pecten;Pecten maximus  
UdeM00000016015 6596 141 UdeM00000016015 XP\_045162709.1 31.5 381  
219 6 1 342 1 378 2.90E-30 141 6596 cellular  
organisms;Eukaryota;Opisthokonta;Metazoa;Eumetazoa;Bilateria;Protostomia;  
Spiralia;Lophotrochozoa;Mollusca;Bivalvia;Autobranchia;Heteroconchia;Euhe  
terodonta;Imparidentia;Venerida;Veneroidea;Veneridae;Mercenaria;Mercenari  
a mercenaria

UdeM00000016016 6596 300.4 UdeM00000016016 XP\_045213379.1 59.8 244  
 98 0 4 247 1 244 2.10E-78 300.4 6596 cellular  
 organisms;Eukaryota;Opisthokonta;Metazoa;Eumetazoa;Bilateria;Protostomia;  
 Spiralia;Lophotrochozoa;Mollusca;Bivalvia;Autobranhia;Heteroconchia;Euhe  
 terodonta;Imparidentia;Venerida;Veneroidea;Veneridae;Mercenaria;Mercenari  
 a mercenaria  
 UdeM00000016018 6596 829.3 UdeM00000016018 XP\_045162289.1 70.9 601  
 171 4 3 601 2 600 3.20E-237 829.3 6596 cellular  
 organisms;Eukaryota;Opisthokonta;Metazoa;Eumetazoa;Bilateria;Protostomia;  
 Spiralia;Lophotrochozoa;Mollusca;Bivalvia;Autobranhia;Heteroconchia;Euhe  
 terodonta;Imparidentia;Venerida;Veneroidea;Veneridae;Mercenaria;Mercenari  
 a mercenaria  
 UdeM00000016017 6596 828.9 UdeM00000016017 XP\_045162290.1 70.3 606  
 176 4 3 606 2 605 4.20E-237 828.9 6596 cellular  
 organisms;Eukaryota;Opisthokonta;Metazoa;Eumetazoa;Bilateria;Protostomia;  
 Spiralia;Lophotrochozoa;Mollusca;Bivalvia;Autobranhia;Heteroconchia;Euhe  
 terodonta;Imparidentia;Venerida;Veneroidea;Veneridae;Mercenaria;Mercenari  
 a mercenaria  
 UdeM00000016019 6596 804.7 UdeM00000016019 XP\_045162289.1 68.7 601  
 185 3 37 636 2 600 9.00E-230 804.7 6596 cellular  
 organisms;Eukaryota;Opisthokonta;Metazoa;Eumetazoa;Bilateria;Protostomia;  
 Spiralia;Lophotrochozoa;Mollusca;Bivalvia;Autobranhia;Heteroconchia;Euhe  
 terodonta;Imparidentia;Venerida;Veneroidea;Veneridae;Mercenaria;Mercenari  
 a mercenaria  
 UdeM00000016020 6596 804.7 UdeM00000016020 XP\_045162289.1 68.7 601  
 185 3 46 645 2 600 9.10E-230 804.7 6596 cellular  
 organisms;Eukaryota;Opisthokonta;Metazoa;Eumetazoa;Bilateria;Protostomia;  
 Spiralia;Lophotrochozoa;Mollusca;Bivalvia;Autobranhia;Heteroconchia;Euhe  
 terodonta;Imparidentia;Venerida;Veneroidea;Veneridae;Mercenaria;Mercenari  
 a mercenaria  
 UdeM00000016021 6596 804.7 UdeM00000016021 XP\_045162289.1 68.7 601  
 185 3 3 602 2 600 8.50E-230 804.7 6596 cellular  
 organisms;Eukaryota;Opisthokonta;Metazoa;Eumetazoa;Bilateria;Protostomia;  
 Spiralia;Lophotrochozoa;Mollusca;Bivalvia;Autobranhia;Heteroconchia;Euhe  
 terodonta;Imparidentia;Venerida;Veneroidea;Veneridae;Mercenaria;Mercenari  
 a mercenaria  
 UdeM00000016025 6573 221.9 UdeM00000016025 XP\_021362715.1 39.7 287  
 173 0 2 288 41 327 1.10E-54 221.9 6573 cellular  
 organisms;Eukaryota;Opisthokonta;Metazoa;Eumetazoa;Bilateria;Protostomia;  
 Spiralia;Lophotrochozoa;Mollusca;Bivalvia;Autobranhia;Pteriomorphia;Pect  
 inida;Pectinoidea;Pectinidae;Mizuhopecten;Mizuhopecten yessoensis  
 UdeM00000016026 6573 198.7 UdeM00000016026 XP\_021362715.1 40.6 254  
 151 0 1 254 74 327 9.20E-48 198.7 6573 cellular  
 organisms;Eukaryota;Opisthokonta;Metazoa;Eumetazoa;Bilateria;Protostomia;  
 Spiralia;Lophotrochozoa;Mollusca;Bivalvia;Autobranhia;Pteriomorphia;Pect  
 inida;Pectinoidea;Pectinidae;Mizuhopecten;Mizuhopecten yessoensis  
 UdeM00000016027 6579 594.3 UdeM00000016027 XP\_033763139.1 54 589  
 235 7 22 575 29 616 1.60E-166 594.3 6579 cellular  
 organisms;Eukaryota;Opisthokonta;Metazoa;Eumetazoa;Bilateria;Protostomia;  
 Spiralia;Lophotrochozoa;Mollusca;Bivalvia;Autobranhia;Pteriomorphia;Pect  
 inida;Pectinoidea;Pectinidae;Pecten;Pecten maximus  
 UdeM00000016029 6579 103.6 UdeM00000016029 XP\_033763846.1 40.5 148  
 87 1 12 158 11 158 2.40E-19 103.6 6579 cellular  
 organisms;Eukaryota;Opisthokonta;Metazoa;Eumetazoa;Bilateria;Protostomia;

Spiralia; Lophotrochozoa; Mollusca; Bivalvia; Autobranchia; Pteriomorpha; Pectinida; Pectinoidea; Pectinidae; Pecten; Pecten maximus  
UdeM00000016032 1735272 139.4 UdeM00000016032 XP\_041378082.1 64.8  
91 29 1 1 91 67 154 2.60E-30 139.4 1735272  
cellular  
organisms; Eukaryota; Opisthokonta; Metazoa; Eumetazoa; Bilateria; Protostomia; Spiralia; Lophotrochozoa; Mollusca; Gastropoda; Neomphalina; Neomphaloidea; Peltopspiridae; Gigantopelta; Gigantopelta aegis  
UdeM00000016033 6596 381.3 UdeM00000016033 XP\_045163108.1 49.8 448  
202 8 1 433 46 485 1.60E-102 381.3 6596 cellular  
organisms; Eukaryota; Opisthokonta; Metazoa; Eumetazoa; Bilateria; Protostomia; Spiralia; Lophotrochozoa; Mollusca; Bivalvia; Autobranchia; Heteroconchia; Euheterodonta; Imparidentia; Venerida; Veneroidea; Veneridae; Mercenaria; Mercenaria mercenaria  
UdeM00000016034 6579 240.7 UdeM00000016034 XP\_033763223.1 45.1 346  
173 6 1 333 154 495 2.60E-60 240.7 6579 cellular  
organisms; Eukaryota; Opisthokonta; Metazoa; Eumetazoa; Bilateria; Protostomia; Spiralia; Lophotrochozoa; Mollusca; Bivalvia; Autobranchia; Pteriomorpha; Pectinida; Pectinoidea; Pectinidae; Pecten; Pecten maximus  
UdeM00000016035 6596 406 UdeM00000016035 XP\_045156248.1 37.1 626  
298 9 4 565 7 600 7.90E-110 406 6596 cellular  
organisms; Eukaryota; Opisthokonta; Metazoa; Eumetazoa; Bilateria; Protostomia; Spiralia; Lophotrochozoa; Mollusca; Bivalvia; Autobranchia; Heteroconchia; Euheterodonta; Imparidentia; Venerida; Veneroidea; Veneridae; Mercenaria; Mercenaria mercenaria  
UdeM00000016036 6596 258.1 UdeM00000016036 XP\_045164043.1 46.6 341  
133 9 1 334 1 299 1.80E-65 258.1 6596 cellular  
organisms; Eukaryota; Opisthokonta; Metazoa; Eumetazoa; Bilateria; Protostomia; Spiralia; Lophotrochozoa; Mollusca; Bivalvia; Autobranchia; Heteroconchia; Euheterodonta; Imparidentia; Venerida; Veneroidea; Veneridae; Mercenaria; Mercenaria mercenaria  
UdeM00000016037 6596 360.5 UdeM00000016037 XP\_045163895.1 52 429  
188 7 29 440 34 461 3.00E-96 360.5 6596 cellular  
organisms; Eukaryota; Opisthokonta; Metazoa; Eumetazoa; Bilateria; Protostomia; Spiralia; Lophotrochozoa; Mollusca; Bivalvia; Autobranchia; Heteroconchia; Euheterodonta; Imparidentia; Venerida; Veneroidea; Veneridae; Mercenaria; Mercenaria mercenaria  
UdeM00000016039 29159 246.9 UdeM00000016039 XP\_034319278.1 60.6 198  
63 4 8 196 7 198 2.20E-62 246.9 29159 cellular  
organisms; Eukaryota; Opisthokonta; Metazoa; Eumetazoa; Bilateria; Protostomia; Spiralia; Lophotrochozoa; Mollusca; Bivalvia; Autobranchia; Pteriomorpha; Ostreida; Ostreidae; Crassostrea; Crassostrea gigas  
UdeM00000016040 6565 270.4 UdeM00000016040 XP\_022329522.1 59.8 241  
84 4 1 233 1 236 2.20E-69 270.4 6565 cellular  
organisms; Eukaryota; Opisthokonta; Metazoa; Eumetazoa; Bilateria; Protostomia; Spiralia; Lophotrochozoa; Mollusca; Bivalvia; Autobranchia; Pteriomorpha; Ostreida; Ostreidae; Crassostrea; Crassostrea virginica  
UdeM00000016041 29159 116.7 UdeM00000016041 XP\_034311349.1 58.1 105  
39 2 2 101 25 129 1.70E-23 116.7 29159 cellular  
organisms; Eukaryota; Opisthokonta; Metazoa; Eumetazoa; Bilateria; Protostomia; Spiralia; Lophotrochozoa; Mollusca; Bivalvia; Autobranchia; Pteriomorpha; Ostreida; Ostreidae; Crassostrea; Crassostrea gigas  
UdeM00000016045 6579 352.4 UdeM00000016045 XP\_033725098.1 41.1 506  
235 6 40 483 259 763 8.90E-94 352.4 6579 cellular

organisms;Eukaryota;Opisthokonta;Metazoa;Eumetazoa;Bilateria;Protostomia;  
Spiralia;Lophotrochozoa;Mollusca;Bivalvia;Autobranchia;Pteriomorpha;Pect  
inida;Pectinoidea;Pectinidae;Pecten;Pecten maximus  
UdeM00000044183 29159 91.7 UdeM00000044183 XP\_034315421.1 36.4 143  
83 2 91 226 333 474 1.30E-15 91.7 29159 cellular  
organisms;Eukaryota;Opisthokonta;Metazoa;Eumetazoa;Bilateria;Protostomia;  
Spiralia;Lophotrochozoa;Mollusca;Bivalvia;Autobranchia;Pteriomorpha;Ostr  
eida;Ostreoidea;Ostreidae;Crassostrea;Crassostrea gigas  
UdeM00000044184 6238 108.2 UdeM00000044184 XP\_045091372.1 31.9 226  
127 7 2 202 4 227 1.30E-20 108.2 6238 cellular  
organisms;Eukaryota;Opisthokonta;Metazoa;Eumetazoa;Bilateria;Protostomia;  
Ecdysozoa;Nematoda;Chromadorea;Rhabditida;Rhabditina;Rhabditomorpha;Rhabd  
itoidea;Rhabditidae;Peloderinae;Caenorhabditis;Caenorhabditis briggsae  
UdeM00000012421 6579 788.1 UdeM00000012421 XP\_033751572.1 44.7 1094  
480 36 1 1027 1 1036 1.30E-224 788.1 6579 cellular  
organisms;Eukaryota;Opisthokonta;Metazoa;Eumetazoa;Bilateria;Protostomia;  
Spiralia;Lophotrochozoa;Mollusca;Bivalvia;Autobranchia;Pteriomorpha;Pect  
inida;Pectinoidea;Pectinidae;Pecten;Pecten maximus  
UdeM00000012422 6596 718.4 UdeM00000012422 XP\_045175535.1 76.1 477  
108 1 1 471 1 477 6.20E-204 718.4 6596 cellular  
organisms;Eukaryota;Opisthokonta;Metazoa;Eumetazoa;Bilateria;Protostomia;  
Spiralia;Lophotrochozoa;Mollusca;Bivalvia;Autobranchia;Heteroconchia;Euhe  
terodonta;Imparidentia;Venerida;Veneroidea;Veneridae;Mercenaria;Mercenari  
a mercenaria  
UdeM00000012423 6579 391.3 UdeM00000012423 XP\_033752662.1 57.2 594  
221 11 7 588 666 1238 2.20E-105 391.3 6579 cellular  
organisms;Eukaryota;Opisthokonta;Metazoa;Eumetazoa;Bilateria;Protostomia;  
Spiralia;Lophotrochozoa;Mollusca;Bivalvia;Autobranchia;Pteriomorpha;Pect  
inida;Pectinoidea;Pectinidae;Pecten;Pecten maximus  
UdeM00000012424 6573 201.8 UdeM00000012424 XP\_021347988.1 39.3 412  
218 13 1 401 250 640 1.60E-48 201.8 6573 cellular  
organisms;Eukaryota;Opisthokonta;Metazoa;Eumetazoa;Bilateria;Protostomia;  
Spiralia;Lophotrochozoa;Mollusca;Bivalvia;Autobranchia;Pteriomorpha;Pect  
inida;Pectinoidea;Pectinidae;Mizuhopecten;Mizuhopecten yessoensis  
UdeM00000012425 6596 514.2 UdeM00000012425 XP\_045175535.1 65.8 383  
127 4 30 409 1294 1675 1.50E-142 514.2 6596 cellular  
organisms;Eukaryota;Opisthokonta;Metazoa;Eumetazoa;Bilateria;Protostomia;  
Spiralia;Lophotrochozoa;Mollusca;Bivalvia;Autobranchia;Heteroconchia;Euhe  
terodonta;Imparidentia;Venerida;Veneroidea;Veneridae;Mercenaria;Mercenari  
a mercenaria  
UdeM00000012426 7741 177.6 UdeM00000012426 XP\_019639753.1 52.9 155  
70 1 2 153 29 183 1.30E-41 177.6 7741 cellular  
organisms;Eukaryota;Opisthokonta;Metazoa;Eumetazoa;Bilateria;Deuterostomi  
a;Chordata;Cephalochordata;Leptocardii;Amphioxiformes;Branchiostomidae;Br  
anchiostoma;Branchiostoma belcheri  
UdeM00000012427 29159 689.9 UdeM00000012427 XP\_011434736.2 50.6 725  
325 11 140 841 15 729 4.10E-195 689.9 29159 cellular  
organisms;Eukaryota;Opisthokonta;Metazoa;Eumetazoa;Bilateria;Protostomia;  
Spiralia;Lophotrochozoa;Mollusca;Bivalvia;Autobranchia;Pteriomorpha;Ostr  
eida;Ostreoidea;Ostreidae;Crassostrea;Crassostrea gigas  
UdeM00000012429 6596 793.1 UdeM00000012429 XP\_045174290.1 56.5 774  
171 3 92 863 95 704 3.50E-226 793.1 6596 cellular  
organisms;Eukaryota;Opisthokonta;Metazoa;Eumetazoa;Bilateria;Protostomia;  
Spiralia;Lophotrochozoa;Mollusca;Bivalvia;Autobranchia;Heteroconchia;Euhe

terodonta;Imparidentia;Venerida;Veneroidea;Veneridae;Mercenaria;Mercenari  
 a mercenaria  
 UdeM00000012430 6596 90.9 UdeM00000012430 XP\_045176774.1 28.4 264  
 150 6 47 287 297 544 2.90E-15 90.9 6596 cellular  
 organisms;Eukaryota;Opisthokonta;Metazoa;Eumetazoa;Bilateria;Protostomia;  
 Spiralia;Lophotrochozoa;Mollusca;Bivalvia;Autobranhia;Heteroconchia;Euhe  
 terodonta;Imparidentia;Venerida;Veneroidea;Veneridae;Mercenaria;Mercenari  
 a mercenaria  
 UdeM00000012431 6596 217.6 UdeM00000012431 XP\_045176774.1 46.7 255  
 128 6 13 264 39 288 2.40E-53 217.6 6596 cellular  
 organisms;Eukaryota;Opisthokonta;Metazoa;Eumetazoa;Bilateria;Protostomia;  
 Spiralia;Lophotrochozoa;Mollusca;Bivalvia;Autobranhia;Heteroconchia;Euhe  
 terodonta;Imparidentia;Venerida;Veneroidea;Veneridae;Mercenaria;Mercenari  
 a mercenaria  
 UdeM00000012432 6573 339 UdeM00000012432 XP\_021342594.1 67.5 231  
 74 1 17 247 7 236 5.30E-90 339 6573 cellular  
 organisms;Eukaryota;Opisthokonta;Metazoa;Eumetazoa;Bilateria;Protostomia;  
 Spiralia;Lophotrochozoa;Mollusca;Bivalvia;Autobranhia;Pteriormorphia;Pect  
 inida;Pectinoidea;Pectinidae;Mizuhopecten;Mizuhopecten yessoensis  
 UdeM00000012433 1735272 1465.7 UdeM00000012433 XP\_041367703.1  
 82.6 861 150 0 1 861 245 1105 0.00E+00 1465.7  
 1735272 cellular  
 organisms;Eukaryota;Opisthokonta;Metazoa;Eumetazoa;Bilateria;Protostomia;  
 Spiralia;Lophotrochozoa;Mollusca;Gastropoda;Neomphalina;Neomphaloidea;Pel  
 tospiridae;Gigantopelta;Gigantopelta aegis  
 UdeM00000012434 6596 109.8 UdeM00000012434 XP\_045174713.1 64.4 87  
 30 1 17 103 394 479 4.00E-21 109.8 6596 cellular  
 organisms;Eukaryota;Opisthokonta;Metazoa;Eumetazoa;Bilateria;Protostomia;  
 Spiralia;Lophotrochozoa;Mollusca;Bivalvia;Autobranhia;Heteroconchia;Euhe  
 terodonta;Imparidentia;Venerida;Veneroidea;Veneridae;Mercenaria;Mercenari  
 a mercenaria  
 UdeM00000012435 6596 81.6 UdeM00000012435 XP\_045174280.1 37.6 109  
 64 2 18 123 27 134 8.20E-13 81.6 6596 cellular  
 organisms;Eukaryota;Opisthokonta;Metazoa;Eumetazoa;Bilateria;Protostomia;  
 Spiralia;Lophotrochozoa;Mollusca;Bivalvia;Autobranhia;Heteroconchia;Euhe  
 terodonta;Imparidentia;Venerida;Veneroidea;Veneridae;Mercenaria;Mercenari  
 a mercenaria  
 UdeM00000012436 6596 74.3 UdeM00000012436 XP\_045174280.1 38 92  
 54 1 2 90 43 134 9.90E-11 74.3 6596 cellular  
 organisms;Eukaryota;Opisthokonta;Metazoa;Eumetazoa;Bilateria;Protostomia;  
 Spiralia;Lophotrochozoa;Mollusca;Bivalvia;Autobranhia;Heteroconchia;Euhe  
 terodonta;Imparidentia;Venerida;Veneroidea;Veneridae;Mercenaria;Mercenari  
 a mercenaria  
 UdeM00000012437 400727 335.1 UdeM00000012437 XP\_025088253.1 68.5  
 235 71 2 183 417 230 461 1.30E-88 335.1 400727  
 cellular  
 organisms;Eukaryota;Opisthokonta;Metazoa;Eumetazoa;Bilateria;Protostomia;  
 Spiralia;Lophotrochozoa;Mollusca;Gastropoda;Caenogastropoda;Architaeniogl  
 ossa;Ampullarioidea;Ampullariidae;Pomacea;Pomacea canaliculata  
 UdeM00000012438 6596 973 UdeM00000012438 XP\_045174274.1 73.6 682  
 137 13 28 693 9 663 2.00E-280 973 6596 cellular  
 organisms;Eukaryota;Opisthokonta;Metazoa;Eumetazoa;Bilateria;Protostomia;  
 Spiralia;Lophotrochozoa;Mollusca;Bivalvia;Autobranhia;Heteroconchia;Euhe

terodonta;Imparidentia;Venerida;Veneroidea;Veneridae;Mercenaria;Mercenaria mercenaria

UdeM00000012439 6596 844.3 UdeM00000012439 XP\_045174275.1 50 996  
136 13 7 989 17 663 1.50E-241 844.3 6596 cellular

organisms;Eukaryota;Opisthokonta;Metazoa;Eumetazoa;Bilateria;Protostomia;Spiralia;Lophotrochozoa;Mollusca;Bivalvia;Autobranhia;Heteroconchia;Euherodonta;Imparidentia;Venerida;Veneroidea;Veneridae;Mercenaria;Mercenaria mercenaria

UdeM00000012440 6596 666.8 UdeM00000012440 XP\_045174293.1 70.1 461  
136 2 1 460 753 1212 3.00E-188 666.8 6596 cellular

organisms;Eukaryota;Opisthokonta;Metazoa;Eumetazoa;Bilateria;Protostomia;Spiralia;Lophotrochozoa;Mollusca;Bivalvia;Autobranhia;Heteroconchia;Euherodonta;Imparidentia;Venerida;Veneroidea;Veneridae;Mercenaria;Mercenaria mercenaria

UdeM00000012441 6596 788.9 UdeM00000012441 XP\_045174293.1 77.8 505  
112 0 38 542 34 538 4.20E-225 788.9 6596 cellular

organisms;Eukaryota;Opisthokonta;Metazoa;Eumetazoa;Bilateria;Protostomia;Spiralia;Lophotrochozoa;Mollusca;Bivalvia;Autobranhia;Heteroconchia;Euherodonta;Imparidentia;Venerida;Veneroidea;Veneridae;Mercenaria;Mercenaria mercenaria

UdeM00000012442 2607531 270 UdeM00000012442 XP\_029642573.2 29.3  
600 330 16 23 549 712 1290 7.00E-69 270 2607531  
cellular

organisms;Eukaryota;Opisthokonta;Metazoa;Eumetazoa;Bilateria;Protostomia;Spiralia;Lophotrochozoa;Mollusca;Cephalopoda;Coleoidea;Octopodiformes;Octopoda;Incirrata;Octopodidae;Octopus;Octopus sinensis

UdeM00000012447 6573 157.9 UdeM00000012447 XP\_021368660.1 33.8 240  
141 4 8 231 13 250 1.60E-35 157.9 6573 cellular

organisms;Eukaryota;Opisthokonta;Metazoa;Eumetazoa;Bilateria;Protostomia;Spiralia;Lophotrochozoa;Mollusca;Bivalvia;Autobranhia;Pteriomorphia;Pectinida;Pectinoidea;Pectinidae;Mizuhopecten;Mizuhopecten yessoensis

UdeM00000012448 6596 496.9 UdeM00000012448 XP\_045176042.1 44.6 518  
277 6 191 703 50 562 4.30E-137 496.9 6596 cellular

organisms;Eukaryota;Opisthokonta;Metazoa;Eumetazoa;Bilateria;Protostomia;Spiralia;Lophotrochozoa;Mollusca;Bivalvia;Autobranhia;Heteroconchia;Euherodonta;Imparidentia;Venerida;Veneroidea;Veneridae;Mercenaria;Mercenaria mercenaria

UdeM00000012449 6596 139.4 UdeM00000012449 XP\_045175306.1 39 213  
115 3 1 211 24 223 5.30E-30 139.4 6596 cellular

organisms;Eukaryota;Opisthokonta;Metazoa;Eumetazoa;Bilateria;Protostomia;Spiralia;Lophotrochozoa;Mollusca;Bivalvia;Autobranhia;Heteroconchia;Euherodonta;Imparidentia;Venerida;Veneroidea;Veneridae;Mercenaria;Mercenaria mercenaria

UdeM00000012450 6573 84.3 UdeM00000012450 XP\_021353116.1 30.2 252  
135 9 13 241 38 271 2.60E-13 84.3 6573 cellular

organisms;Eukaryota;Opisthokonta;Metazoa;Eumetazoa;Bilateria;Protostomia;Spiralia;Lophotrochozoa;Mollusca;Bivalvia;Autobranhia;Pteriomorphia;Pectinida;Pectinoidea;Pectinidae;Mizuhopecten;Mizuhopecten yessoensis

UdeM00000012451 6596 151.4 UdeM00000012451 XP\_045175679.1 32.9 462  
159 16 55 414 49 461 2.70E-33 151.4 6596 cellular

organisms;Eukaryota;Opisthokonta;Metazoa;Eumetazoa;Bilateria;Protostomia;Spiralia;Lophotrochozoa;Mollusca;Bivalvia;Autobranhia;Heteroconchia;Euherodonta;Imparidentia;Venerida;Veneroidea;Veneridae;Mercenaria;Mercenaria mercenaria

UdeM00000012452 6596 152.9 UdeM00000012452 XP\_045175679.1 32.1 483  
 177 16 33 413 28 461 9.30E-34 152.9 6596 cellular  
 organisms;Eukaryota;Opisthokonta;Metazoa;Eumetazoa;Bilateria;Protostomia;  
 Spiralia;Lophotrochozoa;Mollusca;Bivalvia;Autobranchia;Heteroconchia;Euhe  
 terodonta;Imparidentia;Venerida;Veneroidea;Veneridae;Mercenaria;Mercenari  
 a mercenaria  
 UdeM00000012453 29159 429.1 UdeM00000012453 XP\_011444138.2 49 527  
 249 7 30 541 3 524 8.40E-117 429.1 29159 cellular  
 organisms;Eukaryota;Opisthokonta;Metazoa;Eumetazoa;Bilateria;Protostomia;  
 Spiralia;Lophotrochozoa;Mollusca;Bivalvia;Autobranchia;Pteriormorphia;Ostr  
 eida;Ostreoidea;Ostreidae;Crassostrea;Crassostrea gigas  
 UdeM00000012454 29159 282.3 UdeM00000012454 XP\_011442603.1 75 164  
 41 0 1 164 1 164 3.80E-73 282.3 29159 cellular  
 organisms;Eukaryota;Opisthokonta;Metazoa;Eumetazoa;Bilateria;Protostomia;  
 Spiralia;Lophotrochozoa;Mollusca;Bivalvia;Autobranchia;Pteriormorphia;Ostr  
 eida;Ostreoidea;Ostreidae;Crassostrea;Crassostrea gigas  
 UdeM00000012455 29159 273.1 UdeM00000012455 XP\_011442603.1 72.6 164  
 45 0 1 164 1 164 2.30E-70 273.1 29159 cellular  
 organisms;Eukaryota;Opisthokonta;Metazoa;Eumetazoa;Bilateria;Protostomia;  
 Spiralia;Lophotrochozoa;Mollusca;Bivalvia;Autobranchia;Pteriormorphia;Ostr  
 eida;Ostreoidea;Ostreidae;Crassostrea;Crassostrea gigas  
 UdeM00000012457 6573 772.3 UdeM00000012457 XP\_021345779.1 45.6 1032  
 460 22 54 1007 178 1186 7.50E-220 772.3 6573 cellular  
 organisms;Eukaryota;Opisthokonta;Metazoa;Eumetazoa;Bilateria;Protostomia;  
 Spiralia;Lophotrochozoa;Mollusca;Bivalvia;Autobranchia;Pteriormorphia;Pect  
 inida;Pectinoidea;Pectinidae;Mizuhopecten;Mizuhopecten yessoensis  
 UdeM00000012458 6579 326.6 UdeM00000012458 XP\_033753032.1 27 1385  
 772 50 21 1353 2 1199 1.50E-85 326.6 6579 cellular  
 organisms;Eukaryota;Opisthokonta;Metazoa;Eumetazoa;Bilateria;Protostomia;  
 Spiralia;Lophotrochozoa;Mollusca;Bivalvia;Autobranchia;Pteriormorphia;Pect  
 inida;Pectinoidea;Pectinidae;Pecten;Pecten maximus  
 UdeM00000012459 6596 97.1 UdeM00000012459 XP\_045177102.1 48 127  
 55 3 36 152 34 159 2.20E-17 97.1 6596 cellular  
 organisms;Eukaryota;Opisthokonta;Metazoa;Eumetazoa;Bilateria;Protostomia;  
 Spiralia;Lophotrochozoa;Mollusca;Bivalvia;Autobranchia;Heteroconchia;Euhe  
 terodonta;Imparidentia;Venerida;Veneroidea;Veneridae;Mercenaria;Mercenari  
 a mercenaria  
 UdeM00000012460 6573 150.2 UdeM00000012460 XP\_021356433.1 54 139  
 63 1 1 138 330 468 2.90E-33 150.2 6573 cellular  
 organisms;Eukaryota;Opisthokonta;Metazoa;Eumetazoa;Bilateria;Protostomia;  
 Spiralia;Lophotrochozoa;Mollusca;Bivalvia;Autobranchia;Pteriormorphia;Pect  
 inida;Pectinoidea;Pectinidae;Mizuhopecten;Mizuhopecten yessoensis  
 UdeM00000012461 6579 122.1 UdeM00000012461 XP\_033751890.1 34.7 199  
 110 4 8 196 109 297 8.10E-25 122.1 6579 cellular  
 organisms;Eukaryota;Opisthokonta;Metazoa;Eumetazoa;Bilateria;Protostomia;  
 Spiralia;Lophotrochozoa;Mollusca;Bivalvia;Autobranchia;Pteriormorphia;Pect  
 inida;Pectinoidea;Pectinidae;Pecten;Pecten maximus  
 UdeM00000012463 6596 1290.8 UdeM00000012463 XP\_045175283.1 77.5  
 835 184 3 1 834 165 996 0.00E+00 1290.8 6596  
 cellular  
 organisms;Eukaryota;Opisthokonta;Metazoa;Eumetazoa;Bilateria;Protostomia;  
 Spiralia;Lophotrochozoa;Mollusca;Bivalvia;Autobranchia;Heteroconchia;Euhe  
 terodonta;Imparidentia;Venerida;Veneroidea;Veneridae;Mercenaria;Mercenari  
 a mercenaria



UdeM00000012464 225164 75.9 UdeM00000012464 XP\_009051402.1 32.5  
 154 89 5 15 159 215 362 3.60E-10 75.9 225164  
 cellular  
 organisms;Eukaryota;Opisthokonta;Metazoa;Eumetazoa;Bilateria;Protostomia;  
 Spiralia;Lophotrochozoa;Mollusca;Gastropoda;Patellogastropoda;Lottioidea;  
 Lottiidae;Lottia;Lottia gigantea  
 UdeM00000012465 6573 607.4 UdeM00000012465 XP\_021368124.1 52.7 674  
 257 17 56 682 24 682 2.20E-170 607.4 6573 cellular  
 organisms;Eukaryota;Opisthokonta;Metazoa;Eumetazoa;Bilateria;Protostomia;  
 Spiralia;Lophotrochozoa;Mollusca;Bivalvia;Autobranchia;Pteriormorphia;Pect  
 inida;Pectinoidea;Pectinidae;Mizuhopecten;Mizuhopecten yessoensis  
 UdeM00000012466 6596 286.6 UdeM00000012466 XP\_045174259.1 61.8 220  
 82 1 1 218 1831 2050 2.80E-74 286.6 6596 cellular  
 organisms;Eukaryota;Opisthokonta;Metazoa;Eumetazoa;Bilateria;Protostomia;  
 Spiralia;Lophotrochozoa;Mollusca;Bivalvia;Autobranchia;Heteroconchia;Euhe  
 terodonta;Imparidentia;Venerida;Veneroidea;Veneridae;Mercenaria;Mercenari  
 a mercenaria  
 UdeM00000012467 1735272 141 UdeM00000012467 XP\_041367077.1 42  
 176 51 2 4 128 726 901 1.10E-30 141 1735272  
 cellular  
 organisms;Eukaryota;Opisthokonta;Metazoa;Eumetazoa;Bilateria;Protostomia;  
 Spiralia;Lophotrochozoa;Mollusca;Gastropoda;Neomphalina;Neomphaloidea;Pel  
 tospiridae;Gigantopelta;Gigantopelta aegis  
 UdeM00000012468 225164 147.9 UdeM00000012468 XP\_009066022.1 26.3  
 577 286 12 5 477 115 656 3.30E-32 147.9 225164  
 cellular  
 organisms;Eukaryota;Opisthokonta;Metazoa;Eumetazoa;Bilateria;Protostomia;  
 Spiralia;Lophotrochozoa;Mollusca;Gastropoda;Patellogastropoda;Lottioidea;  
 Lottiidae;Lottia;Lottia gigantea  
 UdeM00000012469 6596 349.7 UdeM00000012469 XP\_045174259.1 63.1 268  
 97 1 1 266 1783 2050 3.30E-93 349.7 6596 cellular  
 organisms;Eukaryota;Opisthokonta;Metazoa;Eumetazoa;Bilateria;Protostomia;  
 Spiralia;Lophotrochozoa;Mollusca;Bivalvia;Autobranchia;Heteroconchia;Euhe  
 terodonta;Imparidentia;Venerida;Veneroidea;Veneridae;Mercenaria;Mercenari  
 a mercenaria  
 UdeM00000012470 6596 1498.8 UdeM00000012470 XP\_045174259.1 52.6  
 1382 620 9 158 1533 261 1613 0.00E+00 1498.8 6596  
 cellular  
 organisms;Eukaryota;Opisthokonta;Metazoa;Eumetazoa;Bilateria;Protostomia;  
 Spiralia;Lophotrochozoa;Mollusca;Bivalvia;Autobranchia;Heteroconchia;Euhe  
 terodonta;Imparidentia;Venerida;Veneroidea;Veneridae;Mercenaria;Mercenari  
 a mercenaria  
 UdeM00000012471 6596 2095.9 UdeM00000012471 XP\_045174259.1 56.2  
 1819 761 10 158 1969 261 2050 0.00E+00 2095.9 6596  
 cellular  
 organisms;Eukaryota;Opisthokonta;Metazoa;Eumetazoa;Bilateria;Protostomia;  
 Spiralia;Lophotrochozoa;Mollusca;Bivalvia;Autobranchia;Heteroconchia;Euhe  
 terodonta;Imparidentia;Venerida;Veneroidea;Veneridae;Mercenaria;Mercenari  
 a mercenaria  
 UdeM00000012472 6596 2167.5 UdeM00000012472 XP\_045174259.1 53  
 2075 910 19 1 2061 28 2050 0.00E+00 2167.5 6596  
 cellular  
 organisms;Eukaryota;Opisthokonta;Metazoa;Eumetazoa;Bilateria;Protostomia;  
 Spiralia;Lophotrochozoa;Mollusca;Bivalvia;Autobranchia;Heteroconchia;Euhe

terodonta;Imparidentia;Venerida;Veneroidea;Veneridae;Mercenaria;Mercenaria mercenaria  
 UdeM00000012473 6573 259.2 UdeM00000012473 XP\_021368296.1 34.5 632  
 313 20 1 573 1 590 1.80E-65 259.2 6573 cellular  
 organisms;Eukaryota;Opisthokonta;Metazoa;Eumetazoa;Bilateria;Protostomia;  
 Spiralia;Lophotrochozoa;Mollusca;Bivalvia;Autobranchia;Pteriomorpha;Pectinida;  
 Pectinoidea;Pectinidae;Mizuhopecten;Mizuhopecten yessoensis  
 UdeM00000012474 6579 198.7 UdeM00000012474 XP\_033752953.1 40.2 264  
 143 3 3 266 560 808 9.30E-48 198.7 6579 cellular  
 organisms;Eukaryota;Opisthokonta;Metazoa;Eumetazoa;Bilateria;Protostomia;  
 Spiralia;Lophotrochozoa;Mollusca;Bivalvia;Autobranchia;Pteriomorpha;Pectinida;  
 Pectinoidea;Pectinidae;Pecten;Pecten maximus  
 UdeM00000012475 6596 65.5 UdeM00000012475 XP\_045176763.1 58.6 58  
 18 2 10 61 19 76 5.60E-08 65.5 6596 cellular  
 organisms;Eukaryota;Opisthokonta;Metazoa;Eumetazoa;Bilateria;Protostomia;  
 Spiralia;Lophotrochozoa;Mollusca;Bivalvia;Autobranchia;Heteroconchia;Euheterodonta;  
 Imparidentia;Venerida;Veneroidea;Veneridae;Mercenaria;Mercenaria mercenaria  
 UdeM00000012476 1735272 522.7 UdeM00000012476 XP\_041356796.1 50.8  
 543 252 8 83 619 59 592 6.40E-145 522.7 1735272  
 cellular  
 organisms;Eukaryota;Opisthokonta;Metazoa;Eumetazoa;Bilateria;Protostomia;  
 Spiralia;Lophotrochozoa;Mollusca;Gastropoda;Neomphalina;Neomphaloidea;Pelto-  
 spiridae;Gigantopelta;Gigantopelta aegis  
 UdeM00000012477 6596 698.4 UdeM00000012477 XP\_045176730.1 65.3 487  
 169 0 1 487 1 487 6.70E-198 698.4 6596 cellular  
 organisms;Eukaryota;Opisthokonta;Metazoa;Eumetazoa;Bilateria;Protostomia;  
 Spiralia;Lophotrochozoa;Mollusca;Bivalvia;Autobranchia;Heteroconchia;Euheterodonta;  
 Imparidentia;Venerida;Veneroidea;Veneridae;Mercenaria;Mercenaria mercenaria  
 UdeM00000012478 6596 699.9 UdeM00000012478 XP\_045176730.1 64.9 490  
 172 0 1 490 1 490 2.30E-198 699.9 6596 cellular  
 organisms;Eukaryota;Opisthokonta;Metazoa;Eumetazoa;Bilateria;Protostomia;  
 Spiralia;Lophotrochozoa;Mollusca;Bivalvia;Autobranchia;Heteroconchia;Euheterodonta;  
 Imparidentia;Venerida;Veneroidea;Veneridae;Mercenaria;Mercenaria mercenaria  
 UdeM00000012479 6596 217.6 UdeM00000012479 XP\_045176442.1 34.5 368  
 166 4 19 313 65 430 2.20E-53 217.6 6596 cellular  
 organisms;Eukaryota;Opisthokonta;Metazoa;Eumetazoa;Bilateria;Protostomia;  
 Spiralia;Lophotrochozoa;Mollusca;Bivalvia;Autobranchia;Heteroconchia;Euheterodonta;  
 Imparidentia;Venerida;Veneroidea;Veneridae;Mercenaria;Mercenaria mercenaria  
 UdeM00000012480 46514 136.3 UdeM00000012480 XP\_038053347.1 33.3 210  
 137 3 2 210 574 781 4.50E-29 136.3 46514 cellular  
 organisms;Eukaryota;Opisthokonta;Metazoa;Eumetazoa;Bilateria;Deuterostomia;  
 Echinodermata;Eleutherozoa;Asterozoa;Asteroidea;Valvatacea;Valvatida;Asterinidae;  
 Patiria;Patiria miniata  
 UdeM00000012481 7998 590.9 UdeM00000012481 XP\_017334791.1 66.6 422  
 141 0 1 422 1 422 2.10E-165 590.9 7998 cellular  
 organisms;Eukaryota;Opisthokonta;Metazoa;Eumetazoa;Bilateria;Deuterostomia;  
 Chordata;Craniata;Vertebrata;Gnathostomata;Teleostomi;Euteleostomi;Actinopterygii;  
 Actinopteri;Neopterygii;Teleostei;Osteoglossocephalai;Clupeocephala;Otomorpha;  
 Ostariophysi;Otophysi;Characiphysae;Siluriformes;Siluridae;Ictaluridae;Ictalurus;  
 Ictalurus punctatus

UdeM00000012482 6596 283.1 UdeM00000012482 XP\_045174627.1 43.3 323  
 175 3 4 318 1511 1833 4.40E-73 283.1 6596 cellular  
 organisms;Eukaryota;Opisthokonta;Metazoa;Eumetazoa;Bilateria;Protostomia;  
 Spiralia;Lophotrochozoa;Mollusca;Bivalvia;Autobranchia;Heteroconchia;Euhe  
 terodonta;Imparidentia;Venerida;Veneroidea;Veneridae;Mercenaria;Mercenari  
 a mercenaria  
 UdeM00000012483 6579 136 UdeM00000012483 XP\_033751294.1 63.6 88  
 32 0 3 90 1875 1962 2.80E-29 136 6579 cellular  
 organisms;Eukaryota;Opisthokonta;Metazoa;Eumetazoa;Bilateria;Protostomia;  
 Spiralia;Lophotrochozoa;Mollusca;Bivalvia;Autobranchia;Pteriormorphia;Pect  
 inida;Pectinoidea;Pectinidae;Pecten;Pecten maximus  
 UdeM00000012484 6579 447.2 UdeM00000012484 XP\_033751294.1 43.6 518  
 225 8 3 455 1875 2390 2.60E-122 447.2 6579 cellular  
 organisms;Eukaryota;Opisthokonta;Metazoa;Eumetazoa;Bilateria;Protostomia;  
 Spiralia;Lophotrochozoa;Mollusca;Bivalvia;Autobranchia;Pteriormorphia;Pect  
 inida;Pectinoidea;Pectinidae;Pecten;Pecten maximus  
 UdeM00000012485 6579 326.6 UdeM00000012485 XP\_033751294.1 41.7 412  
 173 8 4 350 1981 2390 3.90E-86 326.6 6579 cellular  
 organisms;Eukaryota;Opisthokonta;Metazoa;Eumetazoa;Bilateria;Protostomia;  
 Spiralia;Lophotrochozoa;Mollusca;Bivalvia;Autobranchia;Pteriormorphia;Pect  
 inida;Pectinoidea;Pectinidae;Pecten;Pecten maximus  
 UdeM00000009127 6565 193 UdeM00000009127 XP\_022287659.1 42.1 247  
 136 4 11 253 8 251 5.50E-46 193 6565 cellular  
 organisms;Eukaryota;Opisthokonta;Metazoa;Eumetazoa;Bilateria;Protostomia;  
 Spiralia;Lophotrochozoa;Mollusca;Bivalvia;Autobranchia;Pteriormorphia;Ostr  
 eida;Ostreoidea;Ostreidae;Crassostrea;Crassostrea virginica  
 UdeM00000009128 29159 565.8 UdeM00000009128 XP\_034330259.1 41.6 735  
 381 13 245 964 2 703 1.00E-157 565.8 29159 cellular  
 organisms;Eukaryota;Opisthokonta;Metazoa;Eumetazoa;Bilateria;Protostomia;  
 Spiralia;Lophotrochozoa;Mollusca;Bivalvia;Autobranchia;Pteriormorphia;Ostr  
 eida;Ostreoidea;Ostreidae;Crassostrea;Crassostrea gigas  
 UdeM00000009130 29159 135.6 UdeM00000009130 XP\_034315421.1 35.7 258  
 107 5 40 242 221 474 8.60E-29 135.6 29159 cellular  
 organisms;Eukaryota;Opisthokonta;Metazoa;Eumetazoa;Bilateria;Protostomia;  
 Spiralia;Lophotrochozoa;Mollusca;Bivalvia;Autobranchia;Pteriormorphia;Ostr  
 eida;Ostreoidea;Ostreidae;Crassostrea;Crassostrea gigas  
 UdeM00000009132 29159 321.2 UdeM00000009132 XP\_034318666.1 65.8 219  
 75 0 1 219 482 700 1.00E-84 321.2 29159 cellular  
 organisms;Eukaryota;Opisthokonta;Metazoa;Eumetazoa;Bilateria;Protostomia;  
 Spiralia;Lophotrochozoa;Mollusca;Bivalvia;Autobranchia;Pteriormorphia;Ostr  
 eida;Ostreoidea;Ostreidae;Crassostrea;Crassostrea gigas  
 UdeM00000009133 29159 351.3 UdeM00000009133 XP\_034318948.1 41.6 473  
 160 3 1 357 481 953 1.50E-93 351.3 29159 cellular  
 organisms;Eukaryota;Opisthokonta;Metazoa;Eumetazoa;Bilateria;Protostomia;  
 Spiralia;Lophotrochozoa;Mollusca;Bivalvia;Autobranchia;Pteriormorphia;Ostr  
 eida;Ostreoidea;Ostreidae;Crassostrea;Crassostrea gigas  
 UdeM00000009134 6565 200.3 UdeM00000009134 XP\_022306954.1 44.3 212  
 116 1 1 210 737 948 2.50E-48 200.3 6565 cellular  
 organisms;Eukaryota;Opisthokonta;Metazoa;Eumetazoa;Bilateria;Protostomia;  
 Spiralia;Lophotrochozoa;Mollusca;Bivalvia;Autobranchia;Pteriormorphia;Ostr  
 eida;Ostreoidea;Ostreidae;Crassostrea;Crassostrea virginica  
 UdeM00000009135 6706 151 UdeM00000009135 XP\_042235765.1 43.9 157  
 88 0 1 157 1 157 1.30E-33 151 6706 cellular  
 organisms;Eukaryota;Opisthokonta;Metazoa;Eumetazoa;Bilateria;Protostomia;

Ecdysozoa; Panarthropoda; Arthropoda; Mandibulata; Pancrustacea; Crustacea; Multicrustacea; Malacostraca; Eumalacostraca; Eucarida; Decapoda; Pleocyemata; Astacidea; Nephropoidea; Nephropidae; Homarus; Homarus americanus

UdeM00000009136 7906 119 UdeM00000009136 XP\_034783435.1 26.8 384  
248 7 60 414 46 425 1.80E-23 119 7906 cellular  
organisms; Eukaryota; Opisthokonta; Metazoa; Eumetazoa; Bilateria; Deuterostomia; Chordata; Craniata; Vertebrata; Gnathostomata; Teleostomi; Euteleostomi; Actinopterygii; Actinopteri; Chondrostei; Acipenseriformes; Acipenseroides; Acipenseridae; Acipenserinae; Acipenserini; Acipenser; Acipenser ruthenus

UdeM00000009137 6596 68.9 UdeM00000009137 XP\_045208259.1 50.7 67  
30 1 8 71 239 305 3.80E-09 68.9 6596 cellular  
organisms; Eukaryota; Opisthokonta; Metazoa; Eumetazoa; Bilateria; Protostomia; Spiralia; Lophotrochozoa; Mollusca; Bivalvia; Autobranchia; Heteroconchia; Euheterodonta; Imparidentia; Venerida; Veneroidea; Veneridae; Mercenaria; Mercenaria mercenaria

UdeM00000009143 6596 132.1 UdeM00000009143 XP\_045181000.1 62.6 99  
37 0 8 106 856 954 4.30E-28 132.1 6596 cellular  
organisms; Eukaryota; Opisthokonta; Metazoa; Eumetazoa; Bilateria; Protostomia; Spiralia; Lophotrochozoa; Mollusca; Bivalvia; Autobranchia; Heteroconchia; Euheterodonta; Imparidentia; Venerida; Veneroidea; Veneridae; Mercenaria; Mercenaria mercenaria

UdeM00000009144 6596 185.3 UdeM00000009144 XP\_045182316.1 45.8 227  
119 3 1 227 392 614 1.40E-43 185.3 6596 cellular  
organisms; Eukaryota; Opisthokonta; Metazoa; Eumetazoa; Bilateria; Protostomia; Spiralia; Lophotrochozoa; Mollusca; Bivalvia; Autobranchia; Heteroconchia; Euheterodonta; Imparidentia; Venerida; Veneroidea; Veneridae; Mercenaria; Mercenaria mercenaria

UdeM00000012032 7741 282.3 UdeM00000012032 XP\_019622111.1 50.4 280  
136 3 5 283 1 278 6.60E-73 282.3 7741 cellular  
organisms; Eukaryota; Opisthokonta; Metazoa; Eumetazoa; Bilateria; Deuterostomia; Chordata; Cephalochordata; Leptocardii; Amphioxiformes; Branchiostomidae; Branchiostoma; Branchiostoma belcheri

UdeM00000012033 6596 102.1 UdeM00000012033 XP\_045181091.1 30.2 298  
167 10 6 286 121 394 1.70E-18 102.1 6596 cellular  
organisms; Eukaryota; Opisthokonta; Metazoa; Eumetazoa; Bilateria; Protostomia; Spiralia; Lophotrochozoa; Mollusca; Bivalvia; Autobranchia; Heteroconchia; Euheterodonta; Imparidentia; Venerida; Veneroidea; Veneridae; Mercenaria; Mercenaria mercenaria

UdeM00000012034 6596 201.1 UdeM00000012034 XP\_045181091.1 34.8 376  
219 6 31 397 28 386 3.30E-48 201.1 6596 cellular  
organisms; Eukaryota; Opisthokonta; Metazoa; Eumetazoa; Bilateria; Protostomia; Spiralia; Lophotrochozoa; Mollusca; Bivalvia; Autobranchia; Heteroconchia; Euheterodonta; Imparidentia; Venerida; Veneroidea; Veneridae; Mercenaria; Mercenaria mercenaria

UdeM00000012035 6573 1653.6 UdeM00000012035 XP\_021354423.1 65.2  
1195 403 8 2 1186 3 1194 0.00E+00 1653.6 6573  
cellular  
organisms; Eukaryota; Opisthokonta; Metazoa; Eumetazoa; Bilateria; Protostomia; Spiralia; Lophotrochozoa; Mollusca; Bivalvia; Autobranchia; Pteriomorpha; Pectinida; Pectinoidea; Pectinidae; Mizuhopecten; Mizuhopecten yessoensis

UdeM00000012036 6596 458.8 UdeM00000012036 XP\_045182653.1 49.6 448  
215 5 12 448 1180 1627 8.40E-126 458.8 6596 cellular  
organisms; Eukaryota; Opisthokonta; Metazoa; Eumetazoa; Bilateria; Protostomia; Spiralia; Lophotrochozoa; Mollusca; Bivalvia; Autobranchia; Heteroconchia; Euheterodonta; Imparidentia; Venerida; Veneroidea; Veneridae; Mercenaria; Mercenaria mercenaria

terodonta;Imparidentia;Venerida;Veneroidea;Veneridae;Mercenaria;Mercenari  
 a mercenaria  
 UdeM00000012037 6579 558.9 UdeM00000012037 XP\_033726516.1 42.9 758  
 382 12 1 734 1 731 9.50E-156 558.9 6579 cellular  
 organisms;Eukaryota;Opisthokonta;Metazoa;Eumetazoa;Bilateria;Protostomia;  
 Spiralia;Lophotrochozoa;Mollusca;Bivalvia;Autobranhia;Pteriormorphia;Pect  
 inida;Pectinoidea;Pectinidae;Pecten;Pecten maximus  
 UdeM00000012038 6596 461.5 UdeM00000012038 XP\_045182653.1 59.9 416  
 158 7 1 409 1635 2048 1.10E-126 461.5 6596 cellular  
 organisms;Eukaryota;Opisthokonta;Metazoa;Eumetazoa;Bilateria;Protostomia;  
 Spiralia;Lophotrochozoa;Mollusca;Bivalvia;Autobranhia;Heteroconchia;Euhe  
 terodonta;Imparidentia;Venerida;Veneroidea;Veneridae;Mercenaria;Mercenari  
 a mercenaria  
 UdeM00000012039 6596 469.5 UdeM00000012039 XP\_045182653.1 60.3 416  
 158 6 1 411 1635 2048 4.20E-129 469.5 6596 cellular  
 organisms;Eukaryota;Opisthokonta;Metazoa;Eumetazoa;Bilateria;Protostomia;  
 Spiralia;Lophotrochozoa;Mollusca;Bivalvia;Autobranhia;Heteroconchia;Euhe  
 terodonta;Imparidentia;Venerida;Veneroidea;Veneridae;Mercenaria;Mercenari  
 a mercenaria  
 UdeM00000012040 6596 350.1 UdeM00000012040 XP\_045170643.1 49.6 357  
 166 4 31 379 32 382 3.50E-93 350.1 6596 cellular  
 organisms;Eukaryota;Opisthokonta;Metazoa;Eumetazoa;Bilateria;Protostomia;  
 Spiralia;Lophotrochozoa;Mollusca;Bivalvia;Autobranhia;Heteroconchia;Euhe  
 terodonta;Imparidentia;Venerida;Veneroidea;Veneridae;Mercenaria;Mercenari  
 a mercenaria  
 UdeM00000012041 34638 72 UdeM00000012041 XP\_003738265.1 53.5 71  
 30 1 9 76 10 80 4.50E-10 72 34638 cellular  
 organisms;Eukaryota;Opisthokonta;Metazoa;Eumetazoa;Bilateria;Protostomia;  
 Ecdysozoa;Panarthropoda;Arthropoda;Chelicerata;Arachnida;Acari;Parasitifo  
 rmes;Mesostigmata;Monogynaspida;Gamasina;Phytoseioidea;Phytoseiidae;Typhl  
 odrominae;Galendromus;Galendromus occidentalis  
 UdeM00000012042 6596 573.2 UdeM00000012042 XP\_045182120.1 67.7 462  
 120 3 1 433 1 462 2.90E-160 573.2 6596 cellular  
 organisms;Eukaryota;Opisthokonta;Metazoa;Eumetazoa;Bilateria;Protostomia;  
 Spiralia;Lophotrochozoa;Mollusca;Bivalvia;Autobranhia;Heteroconchia;Euhe  
 terodonta;Imparidentia;Venerida;Veneroidea;Veneridae;Mercenaria;Mercenari  
 a mercenaria  
 UdeM00000012043 6596 622.1 UdeM00000012043 XP\_045182118.1 72.2 439  
 105 4 1 428 40 472 5.30E-175 622.1 6596 cellular  
 organisms;Eukaryota;Opisthokonta;Metazoa;Eumetazoa;Bilateria;Protostomia;  
 Spiralia;Lophotrochozoa;Mollusca;Bivalvia;Autobranhia;Heteroconchia;Euhe  
 terodonta;Imparidentia;Venerida;Veneroidea;Veneridae;Mercenaria;Mercenari  
 a mercenaria  
 UdeM00000012044 6596 225.3 UdeM00000012044 XP\_045172484.1 25.3 668  
 458 17 16 667 78 720 2.30E-55 225.3 6596 cellular  
 organisms;Eukaryota;Opisthokonta;Metazoa;Eumetazoa;Bilateria;Protostomia;  
 Spiralia;Lophotrochozoa;Mollusca;Bivalvia;Autobranhia;Heteroconchia;Euhe  
 terodonta;Imparidentia;Venerida;Veneroidea;Veneridae;Mercenaria;Mercenari  
 a mercenaria  
 UdeM00000012045 6596 246.9 UdeM00000012045 XP\_045182096.1 41.4 370  
 173 9 1 353 118 460 4.00E-62 246.9 6596 cellular  
 organisms;Eukaryota;Opisthokonta;Metazoa;Eumetazoa;Bilateria;Protostomia;  
 Spiralia;Lophotrochozoa;Mollusca;Bivalvia;Autobranhia;Heteroconchia;Euhe

terodonta;Imparidentia;Venerida;Veneroidea;Veneridae;Mercenaria;Mercenari  
 a mercenaria  
 UdeM00000012047 6579 68.6 UdeM00000012047 XP\_033755850.1 42.4 85  
 49 0 9 93 321 405 6.30E-09 68.6 6579 cellular  
 organisms;Eukaryota;Opisthokonta;Metazoa;Eumetazoa;Bilateria;Protostomia;  
 Spiralia;Lophotrochozoa;Mollusca;Bivalvia;Autobranhia;Pteriormorphia;Pect  
 inida;Pectinoidea;Pectinidae;Pecten;Pecten maximus  
 UdeM00000012049 6596 283.9 UdeM00000012049 XP\_045182305.1 46.1 323  
 166 3 2 318 3 323 3.30E-73 283.9 6596 cellular  
 organisms;Eukaryota;Opisthokonta;Metazoa;Eumetazoa;Bilateria;Protostomia;  
 Spiralia;Lophotrochozoa;Mollusca;Bivalvia;Autobranhia;Heteroconchia;Euhe  
 terodonta;Imparidentia;Venerida;Veneroidea;Veneridae;Mercenaria;Mercenari  
 a mercenaria  
 UdeM00000012050 6596 880.2 UdeM00000012050 XP\_045180223.1 65.2 741  
 217 13 2 708 3 736 2.10E-252 880.2 6596 cellular  
 organisms;Eukaryota;Opisthokonta;Metazoa;Eumetazoa;Bilateria;Protostomia;  
 Spiralia;Lophotrochozoa;Mollusca;Bivalvia;Autobranhia;Heteroconchia;Euhe  
 terodonta;Imparidentia;Venerida;Veneroidea;Veneridae;Mercenaria;Mercenari  
 a mercenaria  
 UdeM00000012051 6573 773.9 UdeM00000012051 XP\_021343413.1 69.3 534  
 164 0 3 536 5 538 1.40E-220 773.9 6573 cellular  
 organisms;Eukaryota;Opisthokonta;Metazoa;Eumetazoa;Bilateria;Protostomia;  
 Spiralia;Lophotrochozoa;Mollusca;Bivalvia;Autobranhia;Pteriormorphia;Pect  
 inida;Pectinoidea;Pectinidae;Mizuhopecten;Mizuhopecten yessoensis  
 UdeM00000012052 29159 204.1 UdeM00000012052 XP\_011445135.2 45.7 258  
 135 3 94 347 172 428 2.90E-49 204.1 29159 cellular  
 organisms;Eukaryota;Opisthokonta;Metazoa;Eumetazoa;Bilateria;Protostomia;  
 Spiralia;Lophotrochozoa;Mollusca;Bivalvia;Autobranhia;Pteriormorphia;Ostr  
 eida;Ostreoidea;Ostreidae;Crassostrea;Crassostrea gigas  
 UdeM00000012054 6565 213.4 UdeM00000012054 XP\_022345146.1 29.8 413  
 287 2 5 414 761 1173 5.80E-52 213.4 6565 cellular  
 organisms;Eukaryota;Opisthokonta;Metazoa;Eumetazoa;Bilateria;Protostomia;  
 Spiralia;Lophotrochozoa;Mollusca;Bivalvia;Autobranhia;Pteriormorphia;Ostr  
 eida;Ostreoidea;Ostreidae;Crassostrea;Crassostrea virginica  
 UdeM00000012055 6565 285.4 UdeM00000012055 XP\_022337165.1 65.3 216  
 66 1 8 223 6 212 6.20E-74 285.4 6565 cellular  
 organisms;Eukaryota;Opisthokonta;Metazoa;Eumetazoa;Bilateria;Protostomia;  
 Spiralia;Lophotrochozoa;Mollusca;Bivalvia;Autobranhia;Pteriormorphia;Ostr  
 eida;Ostreoidea;Ostreidae;Crassostrea;Crassostrea virginica  
 UdeM00000012056 6573 375.6 UdeM00000012056 XP\_021371458.1 38.9 565  
 281 8 158 690 251 783 1.40E-100 375.6 6573 cellular  
 organisms;Eukaryota;Opisthokonta;Metazoa;Eumetazoa;Bilateria;Protostomia;  
 Spiralia;Lophotrochozoa;Mollusca;Bivalvia;Autobranhia;Pteriormorphia;Pect  
 inida;Pectinoidea;Pectinidae;Mizuhopecten;Mizuhopecten yessoensis  
 UdeM00000012057 6596 323.6 UdeM00000012057 XP\_045177781.1 36.2 541  
 283 7 1 498 97 618 6.60E-85 323.6 6596 cellular  
 organisms;Eukaryota;Opisthokonta;Metazoa;Eumetazoa;Bilateria;Protostomia;  
 Spiralia;Lophotrochozoa;Mollusca;Bivalvia;Autobranhia;Heteroconchia;Euhe  
 terodonta;Imparidentia;Venerida;Veneroidea;Veneridae;Mercenaria;Mercenari  
 a mercenaria  
 UdeM00000012058 6596 374.4 UdeM00000012058 XP\_045182203.1 38.1 598  
 334 10 114 691 187 768 3.10E-100 374.4 6596 cellular  
 organisms;Eukaryota;Opisthokonta;Metazoa;Eumetazoa;Bilateria;Protostomia;  
 Spiralia;Lophotrochozoa;Mollusca;Bivalvia;Autobranhia;Heteroconchia;Euhe

terodonta;Imparidentia;Venerida;Veneroidea;Veneridae;Mercenaria;Mercenari  
 a mercenaria  
 UdeM00000012059 6596 367.5 UdeM00000012059 XP\_045177776.1 40.5 524  
 293 4 1 520 405 913 2.90E-98 367.5 6596 cellular  
 organisms;Eukaryota;Opisthokonta;Metazoa;Eumetazoa;Bilateria;Protostomia;  
 Spiralia;Lophotrochozoa;Mollusca;Bivalvia;Autobranhia;Heteroconchia;Euhe  
 terodonta;Imparidentia;Venerida;Veneroidea;Veneridae;Mercenaria;Mercenari  
 a mercenaria  
 UdeM00000012060 6565 111.3 UdeM00000012060 XP\_022308598.1 34.1 220  
 136 5 31 246 15 229 1.80E-21 111.3 6565 cellular  
 organisms;Eukaryota;Opisthokonta;Metazoa;Eumetazoa;Bilateria;Protostomia;  
 Spiralia;Lophotrochozoa;Mollusca;Bivalvia;Autobranhia;Pteriormorphia;Ostr  
 eida;Ostreoidea;Ostreidae;Crassostrea;Crassostrea virginica  
 UdeM00000012061 6573 380.9 UdeM00000012061 XP\_021371458.1 42.7 503  
 241 6 266 745 305 783 3.60E-102 380.9 6573 cellular  
 organisms;Eukaryota;Opisthokonta;Metazoa;Eumetazoa;Bilateria;Protostomia;  
 Spiralia;Lophotrochozoa;Mollusca;Bivalvia;Autobranhia;Pteriormorphia;Pect  
 inida;Pectinoidea;Pectinidae;Mizuhopecten;Mizuhopecten yessoensis  
 UdeM00000012062 6596 429.9 UdeM00000012062 XP\_045177776.1 41.8 577  
 295 11 360 929 393 935 1.10E-116 429.9 6596 cellular  
 organisms;Eukaryota;Opisthokonta;Metazoa;Eumetazoa;Bilateria;Protostomia;  
 Spiralia;Lophotrochozoa;Mollusca;Bivalvia;Autobranhia;Heteroconchia;Euhe  
 terodonta;Imparidentia;Venerida;Veneroidea;Veneridae;Mercenaria;Mercenari  
 a mercenaria  
 UdeM00000012063 6596 435.6 UdeM00000012063 XP\_045177776.1 41.9 575  
 295 10 360 927 393 935 1.90E-118 435.6 6596 cellular  
 organisms;Eukaryota;Opisthokonta;Metazoa;Eumetazoa;Bilateria;Protostomia;  
 Spiralia;Lophotrochozoa;Mollusca;Bivalvia;Autobranhia;Heteroconchia;Euhe  
 terodonta;Imparidentia;Venerida;Veneroidea;Veneridae;Mercenaria;Mercenari  
 a mercenaria  
 UdeM00000012064 29159 115.2 UdeM00000012064 XP\_011430296.2 38.4 164  
 81 1 7 150 8 171 7.50E-23 115.2 29159 cellular  
 organisms;Eukaryota;Opisthokonta;Metazoa;Eumetazoa;Bilateria;Protostomia;  
 Spiralia;Lophotrochozoa;Mollusca;Bivalvia;Autobranhia;Pteriormorphia;Ostr  
 eida;Ostreoidea;Ostreidae;Crassostrea;Crassostrea gigas  
 UdeM00000012065 1735272 140.6 UdeM00000012065 XP\_041362167.1 40.5  
 173 99 2 7 175 9 181 1.90E-30 140.6 1735272  
 cellular  
 organisms;Eukaryota;Opisthokonta;Metazoa;Eumetazoa;Bilateria;Protostomia;  
 Spiralia;Lophotrochozoa;Mollusca;Gastropoda;Neomphalina;Neomphaloidea;Pel  
 tospiridae;Gigantopelta;Gigantopelta aegis  
 UdeM00000012066 6500 87 UdeM00000012066 XP\_012946233.1 58.5 65  
 26 1 4 68 3 66 1.20E-14 87 6500 cellular  
 organisms;Eukaryota;Opisthokonta;Metazoa;Eumetazoa;Bilateria;Protostomia;  
 Spiralia;Lophotrochozoa;Mollusca;Gastropoda;Heterobranhia;Euthyneura;Tec  
 tipleura;Aplysiida;Aplysiioidea;Aplysiidae;Aplysia;Aplysia californica  
 UdeM00000012073 1735272 288.1 UdeM00000012073 XP\_041352907.1 55.6  
 248 106 2 45 289 90 336 1.30E-74 288.1 1735272  
 cellular  
 organisms;Eukaryota;Opisthokonta;Metazoa;Eumetazoa;Bilateria;Protostomia;  
 Spiralia;Lophotrochozoa;Mollusca;Gastropoda;Neomphalina;Neomphaloidea;Pel  
 tospiridae;Gigantopelta;Gigantopelta aegis  
 UdeM00000012074 7757 324.3 UdeM00000012074 XP\_032815300.1 59.9 257  
 100 3 115 369 677 932 2.00E-85 324.3 7757 cellular

organisms;Eukaryota;Opisthokonta;Metazoa;Eumetazoa;Bilateria;Deuterostomia;Chordata;Craniata;Vertebrata;Cyclostomata;Hyperoartia;Petromyzontiformes;Petromyzontidae;Petromyzon;Petromyzon marinus

UdeM00000012075 6596 275.4 UdeM00000012075 XP\_045180737.1 35.1 864  
310 17 182 808 593 1442 2.30E-70 275.4 6596 cellular

organisms;Eukaryota;Opisthokonta;Metazoa;Eumetazoa;Bilateria;Protostomia;Spiralia;Lophotrochozoa;Mollusca;Bivalvia;Autobranchia;Heteroconchia;Euheterodonta;Imparidentia;Venerida;Veneroidea;Veneridae;Mercenaria;Mercenaria mercenaria

UdeM00000012076 6596 110.5 UdeM00000012076 XP\_045180737.1 49.2 130  
59 2 216 344 584 707 6.10E-21 110.5 6596 cellular

organisms;Eukaryota;Opisthokonta;Metazoa;Eumetazoa;Bilateria;Protostomia;Spiralia;Lophotrochozoa;Mollusca;Bivalvia;Autobranchia;Heteroconchia;Euheterodonta;Imparidentia;Venerida;Veneroidea;Veneridae;Mercenaria;Mercenaria mercenaria

UdeM00000012077 6596 118.6 UdeM00000012077 XP\_045180737.1 58.7 109  
43 1 13 119 14 122 7.30E-24 118.6 6596 cellular

organisms;Eukaryota;Opisthokonta;Metazoa;Eumetazoa;Bilateria;Protostomia;Spiralia;Lophotrochozoa;Mollusca;Bivalvia;Autobranchia;Heteroconchia;Euheterodonta;Imparidentia;Venerida;Veneroidea;Veneridae;Mercenaria;Mercenaria mercenaria

UdeM00000012079 1735272 502.7 UdeM00000012079 XP\_041361294.1 66  
341 116 0 4 344 125 465 3.80E-139 502.7 1735272  
cellular

organisms;Eukaryota;Opisthokonta;Metazoa;Eumetazoa;Bilateria;Protostomia;Spiralia;Lophotrochozoa;Mollusca;Gastropoda;Neomphalina;Neomphaloidea;Peltospiridae;Gigantopelta;Gigantopelta aegis

UdeM00000012078 1735272 655.6 UdeM00000012078 XP\_041361294.1 64.1  
465 167 0 1 465 1 465 4.70E-185 655.6 1735272  
cellular

organisms;Eukaryota;Opisthokonta;Metazoa;Eumetazoa;Bilateria;Protostomia;Spiralia;Lophotrochozoa;Mollusca;Gastropoda;Neomphalina;Neomphaloidea;Peltospiridae;Gigantopelta;Gigantopelta aegis

UdeM00000012080 1735272 161 UdeM00000012080 XP\_041361294.1 60.8  
120 47 0 1 120 1 120 9.50E-37 161 1735272  
cellular

organisms;Eukaryota;Opisthokonta;Metazoa;Eumetazoa;Bilateria;Protostomia;Spiralia;Lophotrochozoa;Mollusca;Gastropoda;Neomphalina;Neomphaloidea;Peltospiridae;Gigantopelta;Gigantopelta aegis

UdeM00000012081 6596 2433.3 UdeM00000012081 XP\_045193558.1 34.4  
4508 2704 94 1 4405 41 4399 0.00E+00 2433.3 6596  
cellular

organisms;Eukaryota;Opisthokonta;Metazoa;Eumetazoa;Bilateria;Protostomia;Spiralia;Lophotrochozoa;Mollusca;Bivalvia;Autobranchia;Heteroconchia;Euheterodonta;Imparidentia;Venerida;Veneroidea;Veneridae;Mercenaria;Mercenaria mercenaria

UdeM00000012082 6573 94.4 UdeM00000012082 XP\_021365625.1 52.9 87  
41 0 8 94 40 126 1.90E-16 94.4 6573 cellular

organisms;Eukaryota;Opisthokonta;Metazoa;Eumetazoa;Bilateria;Protostomia;Spiralia;Lophotrochozoa;Mollusca;Bivalvia;Autobranchia;Pteriomorphia;Pectinida;Pectinoidea;Pectinidae;Mizuhopecten;Mizuhopecten yessoensis

UdeM00000012083 29159 108.6 UdeM00000012083 XP\_034313077.1 53.5 99  
45 1 17 114 126 224 5.30E-21 108.6 29159 cellular

organisms;Eukaryota;Opisthokonta;Metazoa;Eumetazoa;Bilateria;Protostomia;



Spiralia; Lophotrochozoa; Mollusca; Bivalvia; Autobranchia; Pteriomorpha; Ostr  
 eida; Ostreoidae; Ostreidae; Crassostrea; Crassostrea gigas  
 UdeM00000012084 6596 409.8 UdeM00000012084 XP\_045182480.1 58.5 371  
 144 5 43 407 44 410 3.90E-111 409.8 6596 cellular  
 organisms; Eukaryota; Opisthokonta; Metazoa; Eumetazoa; Bilateria; Protostomia;  
 Spiralia; Lophotrochozoa; Mollusca; Bivalvia; Autobranchia; Heteroconchia; Eue  
 terodonta; Imparidentia; Venerida; Veneroidea; Veneridae; Mercenaria; Mercenari  
 a mercenaria  
 UdeM00000012085 1437191 80.9 UdeM00000012085 XP\_029054816.1 42.3  
 78 44 1 2 78 386 463 8.10E-13 80.9 1437191  
 cellular  
 organisms; Eukaryota; Opisthokonta; Metazoa; Eumetazoa; Bilateria; Protostomia;  
 Ecdysozoa; Panarthropoda; Arthropoda; Mandibulata; Pancrustacea; Hexapoda; Inse  
 cta; Dicondylia; Pterygota; Neoptera; Endopterygota; Hymenoptera; Apocrita; Acul  
 eata; Apoidea; Megachilidae; Megachilinae; Osmiini; Osmia; Osmia bicornis; Osmia  
 bicornis bicornis  
 UdeM00000012086 45264 251.1 UdeM00000012086 XP\_044177087.1 49.8 249  
 122 2 5 253 216 461 1.50E-63 251.1 45264 cellular  
 organisms; Eukaryota; Opisthokonta; Metazoa; Eumetazoa; Cnidaria; Anthozoa; Hexa  
 corallia; Scleractinia; Astrocoeniina; Acroporidae; Acropora; Acropora  
 millepora  
 UdeM00000012087 400727 389.4 UdeM00000012087 XP\_025091401.1 36.2  
 702 369 15 11 688 27 673 9.60E-105 389.4 400727  
 cellular  
 organisms; Eukaryota; Opisthokonta; Metazoa; Eumetazoa; Bilateria; Protostomia;  
 Spiralia; Lophotrochozoa; Mollusca; Gastropoda; Caenogastropoda; Architaeniogl  
 ossa; Ampullarioidea; Ampullariidae; Pomacea; Pomacea canaliculata  
 UdeM00000012088 6596 342 UdeM00000012088 XP\_045209667.1 45.4 326  
 177 1 85 410 191 515 1.00E-90 342 6596 cellular  
 organisms; Eukaryota; Opisthokonta; Metazoa; Eumetazoa; Bilateria; Protostomia;  
 Spiralia; Lophotrochozoa; Mollusca; Bivalvia; Autobranchia; Heteroconchia; Eue  
 terodonta; Imparidentia; Venerida; Veneroidea; Veneridae; Mercenaria; Mercenari  
 a mercenaria  
 UdeM00000012089 6596 342 UdeM00000012089 XP\_045209667.1 45.4 326  
 177 1 123 448 191 515 1.10E-90 342 6596 cellular  
 organisms; Eukaryota; Opisthokonta; Metazoa; Eumetazoa; Bilateria; Protostomia;  
 Spiralia; Lophotrochozoa; Mollusca; Bivalvia; Autobranchia; Heteroconchia; Eue  
 terodonta; Imparidentia; Venerida; Veneroidea; Veneridae; Mercenaria; Mercenari  
 a mercenaria  
 UdeM00000012090 6596 343.6 UdeM00000012090 XP\_045209667.1 45.1 324  
 177 1 93 416 191 513 3.60E-91 343.6 6596 cellular  
 organisms; Eukaryota; Opisthokonta; Metazoa; Eumetazoa; Bilateria; Protostomia;  
 Spiralia; Lophotrochozoa; Mollusca; Bivalvia; Autobranchia; Heteroconchia; Eue  
 terodonta; Imparidentia; Venerida; Veneroidea; Veneridae; Mercenaria; Mercenari  
 a mercenaria  
 UdeM00000012091 6565 158.3 UdeM00000012091 XP\_022328252.1 44.1 211  
 100 5 1 193 1105 1315 9.80E-36 158.3 6565 cellular  
 organisms; Eukaryota; Opisthokonta; Metazoa; Eumetazoa; Bilateria; Protostomia;  
 Spiralia; Lophotrochozoa; Mollusca; Bivalvia; Autobranchia; Pteriomorpha; Ostr  
 eida; Ostreoidae; Ostreidae; Crassostrea; Crassostrea virginica  
 UdeM00000012092 6565 864 UdeM00000012092 XP\_022308715.1 76.9 516  
 118 1 8 523 6 520 9.80E-248 864 6565 cellular  
 organisms; Eukaryota; Opisthokonta; Metazoa; Eumetazoa; Bilateria; Protostomia;

Spiralia;Lophotrochozoa;Mollusca;Bivalvia;Autobranchia;Pteriomorpha;Ostr  
eida;Ostreoidea;Ostreidae;Crassostrea;Crassostrea virginica  
UdeM00000012093 6565 866.3 UdeM00000012093 XP\_022308715.1 77.3 516  
116 1 8 523 6 520 2.00E-248 866.3 6565 cellular  
organisms;Eukaryota;Opisthokonta;Metazoa;Eumetazoa;Bilateria;Protostomia;  
Spiralia;Lophotrochozoa;Mollusca;Bivalvia;Autobranchia;Pteriomorpha;Ostr  
eida;Ostreoidea;Ostreidae;Crassostrea;Crassostrea virginica  
UdeM00000012094 6596 206.1 UdeM00000012094 XP\_045180504.1 52.5 198  
90 3 10 203 17 214 4.40E-50 206.1 6596 cellular  
organisms;Eukaryota;Opisthokonta;Metazoa;Eumetazoa;Bilateria;Protostomia;  
Spiralia;Lophotrochozoa;Mollusca;Bivalvia;Autobranchia;Heteroconchia;Euhe  
terodonta;Imparidentia;Venerida;Veneroidea;Veneridae;Mercenaria;Mercenari  
a mercenaria  
UdeM00000012096 6596 102.1 UdeM00000012096 XP\_045180504.1 51.2 84  
41 0 24 107 214 297 6.50E-19 102.1 6596 cellular  
organisms;Eukaryota;Opisthokonta;Metazoa;Eumetazoa;Bilateria;Protostomia;  
Spiralia;Lophotrochozoa;Mollusca;Bivalvia;Autobranchia;Heteroconchia;Euhe  
terodonta;Imparidentia;Venerida;Veneroidea;Veneridae;Mercenaria;Mercenari  
a mercenaria  
UdeM00000012097 6596 122.9 UdeM00000012097 XP\_045181496.1 43.9 155  
84 1 95 246 345 499 5.90E-25 122.9 6596 cellular  
organisms;Eukaryota;Opisthokonta;Metazoa;Eumetazoa;Bilateria;Protostomia;  
Spiralia;Lophotrochozoa;Mollusca;Bivalvia;Autobranchia;Heteroconchia;Euhe  
terodonta;Imparidentia;Venerida;Veneroidea;Veneridae;Mercenaria;Mercenari  
a mercenaria  
UdeM00000012098 6596 237.3 UdeM00000012098 XP\_045181496.1 43.4 286  
158 2 95 376 345 630 3.20E-59 237.3 6596 cellular  
organisms;Eukaryota;Opisthokonta;Metazoa;Eumetazoa;Bilateria;Protostomia;  
Spiralia;Lophotrochozoa;Mollusca;Bivalvia;Autobranchia;Heteroconchia;Euhe  
terodonta;Imparidentia;Venerida;Veneroidea;Veneridae;Mercenaria;Mercenari  
a mercenaria  
UdeM00000012099 6596 644 UdeM00000012099 XP\_045181496.1 47.4 645  
334 3 17 656 83 727 2.10E-181 644 6596 cellular  
organisms;Eukaryota;Opisthokonta;Metazoa;Eumetazoa;Bilateria;Protostomia;  
Spiralia;Lophotrochozoa;Mollusca;Bivalvia;Autobranchia;Heteroconchia;Euhe  
terodonta;Imparidentia;Venerida;Veneroidea;Veneridae;Mercenaria;Mercenari  
a mercenaria  
UdeM00000012100 6596 851.7 UdeM00000012100 XP\_045181496.1 60.1 704  
260 6 15 702 17 715 7.00E-244 851.7 6596 cellular  
organisms;Eukaryota;Opisthokonta;Metazoa;Eumetazoa;Bilateria;Protostomia;  
Spiralia;Lophotrochozoa;Mollusca;Bivalvia;Autobranchia;Heteroconchia;Euhe  
terodonta;Imparidentia;Venerida;Veneroidea;Veneridae;Mercenaria;Mercenari  
a mercenaria  
UdeM00000012101 6573 212.2 UdeM00000012101 XP\_021354348.1 50.9 289  
129 3 1 289 1 276 1.30E-51 212.2 6573 cellular  
organisms;Eukaryota;Opisthokonta;Metazoa;Eumetazoa;Bilateria;Protostomia;  
Spiralia;Lophotrochozoa;Mollusca;Bivalvia;Autobranchia;Pteriomorpha;Pect  
inida;Pectinoidea;Pectinidae;Mizuhopecten;Mizuhopecten yessoensis  
UdeM00000012102 6565 190.7 UdeM00000012102 XP\_022336632.1 24.2 652  
442 15 1 634 63 680 5.90E-45 190.7 6565 cellular  
organisms;Eukaryota;Opisthokonta;Metazoa;Eumetazoa;Bilateria;Protostomia;  
Spiralia;Lophotrochozoa;Mollusca;Bivalvia;Autobranchia;Pteriomorpha;Ostr  
eida;Ostreoidea;Ostreidae;Crassostrea;Crassostrea virginica

UdeM00000012103 8078 126.3 UdeM00000012103 XP\_035996634.1 57 93  
 40 0 1 93 214 306 2.40E-26 126.3 8078 cellular  
 organisms;Eukaryota;Opisthokonta;Metazoa;Eumetazoa;Bilateria;Deuterostomi  
 a;Chordata;Craniata;Vertebrata;Gnathostomata;Teleostomi;Euteleostomi;Acti  
 nopterygii;Actinopteri;Neopterygii;Teleostei;Osteoglossocephalai;Clupeoce  
 phala;Euteleosteomorpha;Neoteleostei;Eurypterygia;Ctenosquamata;Acanthomo  
 rphata;Euacanthomorphacea;Percomorphaceae;Ovalentaria;Atherinomorphae;Cyp  
 rinodontiformes;Cyprinodontoidei;Fundulidae;Fundulus;Fundulus  
 heteroclitus

UdeM00000012104 63155 147.9 UdeM00000012104 XP\_030580630.1 53.5 129  
 60 0 14 142 8 136 9.80E-33 147.9 63155 cellular  
 organisms;Eukaryota;Opisthokonta;Metazoa;Eumetazoa;Bilateria;Deuterostomi  
 a;Chordata;Craniata;Vertebrata;Gnathostomata;Teleostomi;Euteleostomi;Acti  
 nopterygii;Actinopteri;Neopterygii;Teleostei;Osteoglossocephalai;Clupeoce  
 phala;Euteleosteomorpha;Neoteleostei;Eurypterygia;Ctenosquamata;Acanthomo  
 rphata;Euacanthomorphacea;Percomorphaceae;Ovalentaria;Cichlomorphae;Cichl  
 iformes;Cichlidae;New World  
 cichlids;Cichlasomatinae;Heroini;Archocentrus;Archocentrus centrarchus

UdeM00000012105 6596 661.8 UdeM00000012105 XP\_045180584.1 52.3 583  
 271 4 51 633 95 670 9.00E-187 661.8 6596 cellular  
 organisms;Eukaryota;Opisthokonta;Metazoa;Eumetazoa;Bilateria;Protostomia;  
 Spiralia;Lophotrochozoa;Mollusca;Bivalvia;Autobranchia;Heteroconchia;Euhe  
 terodonta;Imparidentia;Venerida;Veneroidea;Veneridae;Mercenaria;Mercenari  
 a mercenaria

UdeM00000012106 29159 60.1 UdeM00000012106 XP\_019918370.2 48.3 58  
 28 1 116 171 37 94 3.40E-06 60.1 29159 cellular  
 organisms;Eukaryota;Opisthokonta;Metazoa;Eumetazoa;Bilateria;Protostomia;  
 Spiralia;Lophotrochozoa;Mollusca;Bivalvia;Autobranchia;Pteriormorphia;Ostr  
 eida;Ostreoidea;Ostreidae;Crassostrea;Crassostrea gigas

UdeM00000012107 7739 449.5 UdeM00000012107 XP\_035696678.1 57.5 374  
 156 1 13 383 530 903 4.60E-123 449.5 7739 cellular  
 organisms;Eukaryota;Opisthokonta;Metazoa;Eumetazoa;Bilateria;Deuterostomi  
 a;Chordata;Cephalochordata;Leptocardii;Amphioxiformes;Branchiostomidae;Br  
 anchiostoma;Branchiostoma floridae

UdeM00000012108 6596 142.1 UdeM00000012108 XP\_045182223.1 26.2 362  
 250 10 36 384 30 387 1.50E-30 142.1 6596 cellular  
 organisms;Eukaryota;Opisthokonta;Metazoa;Eumetazoa;Bilateria;Protostomia;  
 Spiralia;Lophotrochozoa;Mollusca;Bivalvia;Autobranchia;Heteroconchia;Euhe  
 terodonta;Imparidentia;Venerida;Veneroidea;Veneridae;Mercenaria;Mercenari  
 a mercenaria

UdeM00000012109 6596 82 UdeM00000012109 XP\_045182223.1 30.6 157  
 102 4 36 186 30 185 1.50E-12 82 6596 cellular  
 organisms;Eukaryota;Opisthokonta;Metazoa;Eumetazoa;Bilateria;Protostomia;  
 Spiralia;Lophotrochozoa;Mollusca;Bivalvia;Autobranchia;Heteroconchia;Euhe  
 terodonta;Imparidentia;Venerida;Veneroidea;Veneridae;Mercenaria;Mercenari  
 a mercenaria

UdeM00000012111 6579 123.6 UdeM00000012111 XP\_033727138.1 46.3 121  
 63 1 476 594 563 683 9.40E-25 123.6 6579 cellular  
 organisms;Eukaryota;Opisthokonta;Metazoa;Eumetazoa;Bilateria;Protostomia;  
 Spiralia;Lophotrochozoa;Mollusca;Bivalvia;Autobranchia;Pteriormorphia;Pect  
 inida;Pectinoidea;Pectinidae;Pecten;Pecten maximus

UdeM00000012112 6596 209.1 UdeM00000012112 XP\_045181411.1 22.6 780  
 424 12 27 798 677 1284 2.00E-50 209.1 6596 cellular  
 organisms;Eukaryota;Opisthokonta;Metazoa;Eumetazoa;Bilateria;Protostomia;

Spiralia;Lophotrochozoa;Mollusca;Bivalvia;Autobranchia;Heteroconchia;Euherodonta;Imparidentia;Venerida;Veneroidea;Veneridae;Mercenaria;Mercenaria mercenaria

UdeM00000012113 6579 534.6 UdeM00000012113 XP\_033726652.1 47.2 629  
300 10 11 620 15 630 1.60E-148 534.6 6579 cellular

organisms;Eukaryota;Opisthokonta;Metazoa;Eumetazoa;Bilateria;Protostomia;Spiralia;Lophotrochozoa;Mollusca;Bivalvia;Autobranchia;Pteriormorphia;Pectinida;Pectinoidea;Pectinidae;Pecten;Pecten maximus

UdeM00000012118 6596 368.2 UdeM00000012118 XP\_045181639.1 79.2 212  
44 0 1 212 1 212 6.90E-99 368.2 6596 cellular

organisms;Eukaryota;Opisthokonta;Metazoa;Eumetazoa;Bilateria;Protostomia;Spiralia;Lophotrochozoa;Mollusca;Bivalvia;Autobranchia;Heteroconchia;Euherodonta;Imparidentia;Venerida;Veneroidea;Veneridae;Mercenaria;Mercenaria mercenaria

UdeM00000012119 6596 403.3 UdeM00000012119 XP\_045181259.1 45.6 579  
217 18 6 547 5 522 5.00E-109 403.3 6596 cellular

organisms;Eukaryota;Opisthokonta;Metazoa;Eumetazoa;Bilateria;Protostomia;Spiralia;Lophotrochozoa;Mollusca;Bivalvia;Autobranchia;Heteroconchia;Euherodonta;Imparidentia;Venerida;Veneroidea;Veneridae;Mercenaria;Mercenaria mercenaria

UdeM00000012120 6573 235.3 UdeM00000012120 XP\_021355947.1 52.4 267  
104 7 4 258 3 258 9.00E-59 235.3 6573 cellular

organisms;Eukaryota;Opisthokonta;Metazoa;Eumetazoa;Bilateria;Protostomia;Spiralia;Lophotrochozoa;Mollusca;Bivalvia;Autobranchia;Pteriormorphia;Pectinida;Pectinoidea;Pectinidae;Mizuhopecten;Mizuhopecten yessoensis

UdeM00000012122 441366 132.9 UdeM00000012122 XP\_028326620.1 40.6  
197 107 5 1 194 48 237 4.50E-28 132.9 441366

cellular

organisms;Eukaryota;Opisthokonta;Metazoa;Eumetazoa;Bilateria;Deuterostomia;Chordata;Craniata;Vertebrata;Gnathostomata;Teleostomi;Euteleostomi;Actinopterygii;Actinopteri;Neopterygii;Teleostei;Osteoglossocephalai;Clupeocephala;Euteleosteomorpha;Neoteleostei;Eurypterygia;Ctenosquamata;Acanthomorphata;Euacanthomorphacea;Percomorphaceae;Ovalentaria;Blenniimorphae;Blenniiformes;Gobiesocoidei;Gobiesocidae;Gobiesocinae;Gouania;Gouania willdenowi

UdeM00000012121 441366 170.2 UdeM00000012121 XP\_028296753.1 38.4  
284 158 9 6 285 32 302 3.70E-39 170.2 441366

cellular

organisms;Eukaryota;Opisthokonta;Metazoa;Eumetazoa;Bilateria;Deuterostomia;Chordata;Craniata;Vertebrata;Gnathostomata;Teleostomi;Euteleostomi;Actinopterygii;Actinopteri;Neopterygii;Teleostei;Osteoglossocephalai;Clupeocephala;Euteleosteomorpha;Neoteleostei;Eurypterygia;Ctenosquamata;Acanthomorphata;Euacanthomorphacea;Percomorphaceae;Ovalentaria;Blenniimorphae;Blenniiformes;Gobiesocoidei;Gobiesocidae;Gobiesocinae;Gouania;Gouania willdenowi

UdeM00000012123 6596 742.3 UdeM00000012123 XP\_045182167.1 61 649  
230 11 18 656 309 944 5.40E-211 742.3 6596 cellular

organisms;Eukaryota;Opisthokonta;Metazoa;Eumetazoa;Bilateria;Protostomia;Spiralia;Lophotrochozoa;Mollusca;Bivalvia;Autobranchia;Heteroconchia;Euherodonta;Imparidentia;Venerida;Veneroidea;Veneridae;Mercenaria;Mercenaria mercenaria

UdeM00000012124 29159 423.7 UdeM00000012124 XP\_034316358.1 42.9 508  
274 10 1 504 5 500 3.30E-115 423.7 29159 cellular

organisms;Eukaryota;Opisthokonta;Metazoa;Eumetazoa;Bilateria;Protostomia;

Spiralia;Lophotrochozoa;Mollusca;Bivalvia;Autobranchia;Pteriormorphia;Ostr  
eida;Ostreoidea;Ostreidae;Crassostrea;Crassostrea gigas  
UdeM00000012125 29159 423.7 UdeM00000012125 XP\_034316358.1 42.8 509  
275 10 62 566 4 500 3.70E-115 423.7 29159 cellular  
organisms;Eukaryota;Opisthokonta;Metazoa;Eumetazoa;Bilateria;Protostomia;  
Spiralia;Lophotrochozoa;Mollusca;Bivalvia;Autobranchia;Pteriormorphia;Ostr  
eida;Ostreoidea;Ostreidae;Crassostrea;Crassostrea gigas  
UdeM00000012126 6565 202.6 UdeM00000012126 XP\_022344978.1 34 430  
215 11 1 398 1 393 9.40E-49 202.6 6565 cellular  
organisms;Eukaryota;Opisthokonta;Metazoa;Eumetazoa;Bilateria;Protostomia;  
Spiralia;Lophotrochozoa;Mollusca;Bivalvia;Autobranchia;Pteriormorphia;Ostr  
eida;Ostreoidea;Ostreidae;Crassostrea;Crassostrea virginica  
UdeM00000012131 6596 227.3 UdeM00000012131 XP\_045181493.1 50.8 266  
113 4 10 274 465 713 2.60E-56 227.3 6596 cellular  
organisms;Eukaryota;Opisthokonta;Metazoa;Eumetazoa;Bilateria;Protostomia;  
Spiralia;Lophotrochozoa;Mollusca;Bivalvia;Autobranchia;Heteroconchia;Euhe  
terodonta;Imparidentia;Venerida;Veneroidea;Veneridae;Mercenaria;Mercenari  
a mercenaria  
UdeM00000012134 1735272 124.4 UdeM00000012134 XP\_041360768.1 51.7  
116 56 0 9 124 6 121 1.10E-25 124.4 1735272  
cellular  
organisms;Eukaryota;Opisthokonta;Metazoa;Eumetazoa;Bilateria;Protostomia;  
Spiralia;Lophotrochozoa;Mollusca;Gastropoda;Neomphalina;Neomphaloidea;Pel  
tospiridae;Gigantopelta;Gigantopelta aegis  
UdeM00000012136 29159 622.1 UdeM00000012136 XP\_034323675.1 72.3 415  
98 4 1 399 1 414 6.50E-175 622.1 29159 cellular  
organisms;Eukaryota;Opisthokonta;Metazoa;Eumetazoa;Bilateria;Protostomia;  
Spiralia;Lophotrochozoa;Mollusca;Bivalvia;Autobranchia;Pteriormorphia;Ostr  
eida;Ostreoidea;Ostreidae;Crassostrea;Crassostrea gigas  
UdeM00000012137 29159 600.9 UdeM00000012137 XP\_034323675.1 65.5 458  
98 5 1 442 1 414 1.70E-168 600.9 29159 cellular  
organisms;Eukaryota;Opisthokonta;Metazoa;Eumetazoa;Bilateria;Protostomia;  
Spiralia;Lophotrochozoa;Mollusca;Bivalvia;Autobranchia;Pteriormorphia;Ostr  
eida;Ostreoidea;Ostreidae;Crassostrea;Crassostrea gigas  
UdeM00000012138 6596 164.5 UdeM00000012138 XP\_045171211.1 52 125  
60 0 16 140 19 143 1.00E-37 164.5 6596 cellular  
organisms;Eukaryota;Opisthokonta;Metazoa;Eumetazoa;Bilateria;Protostomia;  
Spiralia;Lophotrochozoa;Mollusca;Bivalvia;Autobranchia;Heteroconchia;Euhe  
terodonta;Imparidentia;Venerida;Veneroidea;Veneridae;Mercenaria;Mercenari  
a mercenaria  
UdeM00000012139 6596 120.2 UdeM00000012139 XP\_045180931.1 49.2 132  
66 1 1 131 1 132 2.50E-24 120.2 6596 cellular  
organisms;Eukaryota;Opisthokonta;Metazoa;Eumetazoa;Bilateria;Protostomia;  
Spiralia;Lophotrochozoa;Mollusca;Bivalvia;Autobranchia;Heteroconchia;Euhe  
terodonta;Imparidentia;Venerida;Veneroidea;Veneridae;Mercenaria;Mercenari  
a mercenaria  
UdeM00000012140 6596 120.2 UdeM00000012140 XP\_045180931.1 49.2 132  
66 1 1 131 1 132 3.40E-24 120.2 6596 cellular  
organisms;Eukaryota;Opisthokonta;Metazoa;Eumetazoa;Bilateria;Protostomia;  
Spiralia;Lophotrochozoa;Mollusca;Bivalvia;Autobranchia;Heteroconchia;Euhe  
terodonta;Imparidentia;Venerida;Veneroidea;Veneridae;Mercenaria;Mercenari  
a mercenaria  
UdeM00000018533 6596 291.6 UdeM00000018533 XP\_045201488.1 31.6 589  
364 10 82 640 67 646 2.50E-75 291.6 6596 cellular

organisms;Eukaryota;Opisthokonta;Metazoa;Eumetazoa;Bilateria;Protostomia;Spiralia;Lophotrochozoa;Mollusca;Bivalvia;Autobranhia;Heteroconchia;Euherodonta;Imparidentia;Venerida;Veneroidea;Veneridae;Mercenaria;Mercenaria mercenaria

UdeM00000018534 6596 386.3 UdeM00000018534 XP\_045177776.1 41.4 543  
287 11 13 539 396 923 9.20E-104 386.3 6596 cellular

organisms;Eukaryota;Opisthokonta;Metazoa;Eumetazoa;Bilateria;Protostomia;Spiralia;Lophotrochozoa;Mollusca;Bivalvia;Autobranhia;Heteroconchia;Euherodonta;Imparidentia;Venerida;Veneroidea;Veneridae;Mercenaria;Mercenaria mercenaria

UdeM00000018536 133434 98.2 UdeM00000018536 XP\_022091439.1 37.3  
161 83 3 3 146 524 683 9.40E-18 98.2 133434  
cellular

organisms;Eukaryota;Opisthokonta;Metazoa;Eumetazoa;Bilateria;Deuterostomia;Echinodermata;Eleutherozoa;Asterozoa;Asteroidea;Valvatacea;Valvatida;Acanthasteridae;Acanthaster;Acanthaster planci

UdeM00000018537 45351 83.6 UdeM00000018537 XP\_001623471.2 31.4 188  
102 4 10 181 12 188 3.40E-13 83.6 45351 cellular

organisms;Eukaryota;Opisthokonta;Metazoa;Eumetazoa;Cnidaria;Anthozoa;Hexacorallia;Actiniaria;Edwardsiidae;Nematostella;Nematostella vectensis

UdeM00000018538 6596 376.3 UdeM00000018538 XP\_045177776.1 41.2 532  
288 10 1 519 405 924 7.00E-101 376.3 6596 cellular

organisms;Eukaryota;Opisthokonta;Metazoa;Eumetazoa;Bilateria;Protostomia;Spiralia;Lophotrochozoa;Mollusca;Bivalvia;Autobranhia;Heteroconchia;Euherodonta;Imparidentia;Venerida;Veneroidea;Veneridae;Mercenaria;Mercenaria mercenaria

UdeM00000018539 6596 250.8 UdeM00000018539 XP\_045177776.1 42.4 335  
183 6 62 394 549 875 3.00E-63 250.8 6596 cellular

organisms;Eukaryota;Opisthokonta;Metazoa;Eumetazoa;Bilateria;Protostomia;Spiralia;Lophotrochozoa;Mollusca;Bivalvia;Autobranhia;Heteroconchia;Euherodonta;Imparidentia;Venerida;Veneroidea;Veneridae;Mercenaria;Mercenaria mercenaria

UdeM00000018541 6596 728.4 UdeM00000018541 XP\_045179300.1 65.9 555  
119 5 22 575 22 507 7.20E-207 728.4 6596 cellular

organisms;Eukaryota;Opisthokonta;Metazoa;Eumetazoa;Bilateria;Protostomia;Spiralia;Lophotrochozoa;Mollusca;Bivalvia;Autobranhia;Heteroconchia;Euherodonta;Imparidentia;Venerida;Veneroidea;Veneridae;Mercenaria;Mercenaria mercenaria

UdeM00000018542 59861 176.4 UdeM00000018542 XP\_041731387.1 45.6 193  
101 2 1 189 13 205 3.40E-41 176.4 59861 cellular

organisms;Eukaryota;Opisthokonta;Metazoa;Eumetazoa;Bilateria;Deuterostomia;Chordata;Craniata;Vertebrata;Gnathostomata;Teleostomi;Euteleostomi;Actinopterygii;Actinopteri;Neopterygii;Teleostei;Osteoglossocephalai;Clupeocephala;Euteleostei;Protacanthopterygii;Salmoniformes;Salmonidae;Coregoninae;Coregonus;Coregonus clupeaformis

UdeM00000018543 7741 290 UdeM00000018543 XP\_019622111.1 52.7 281  
128 4 5 283 1 278 3.20E-75 290 7741 cellular

organisms;Eukaryota;Opisthokonta;Metazoa;Eumetazoa;Bilateria;Deuterostomia;Chordata;Cephalochordata;Leptocardii;Amphioxiformes;Branchiostomidae;Branchiostoma;Branchiostoma belcheri

UdeM00000018544 6565 142.9 UdeM00000018544 XP\_022286553.1 31.6 269  
178 2 17 282 14 279 7.20E-31 142.9 6565 cellular

organisms;Eukaryota;Opisthokonta;Metazoa;Eumetazoa;Bilateria;Protostomia;

Spiralia;Lophotrochozoa;Mollusca;Bivalvia;Autobranchia;Pteriormorphia;Ostr  
eida;Ostreoidea;Ostreidae;Crassostrea;Crassostrea virginica  
UdeM00000018545 6565 104.8 UdeM00000018545 XP\_022336926.1 30.3 231  
144 6 86 308 516 737 2.20E-19 104.8 6565 cellular  
organisms;Eukaryota;Opisthokonta;Metazoa;Eumetazoa;Bilateria;Protostomia;  
Spiralia;Lophotrochozoa;Mollusca;Bivalvia;Autobranchia;Pteriormorphia;Ostr  
eida;Ostreoidea;Ostreidae;Crassostrea;Crassostrea virginica  
UdeM00000018546 6596 387.9 UdeM00000018546 XP\_045162172.1 25.8 1386  
623 18 90 1433 36 1057 5.70E-104 387.9 6596 cellular  
organisms;Eukaryota;Opisthokonta;Metazoa;Eumetazoa;Bilateria;Protostomia;  
Spiralia;Lophotrochozoa;Mollusca;Bivalvia;Autobranchia;Heteroconchia;Euhe  
terodonta;Imparidentia;Venerida;Veneroidea;Veneridae;Mercenaria;Mercenari  
a mercenaria  
UdeM00000018547 6596 276.2 UdeM00000018547 XP\_045177590.1 44.3 323  
144 7 18 309 45 362 5.90E-71 276.2 6596 cellular  
organisms;Eukaryota;Opisthokonta;Metazoa;Eumetazoa;Bilateria;Protostomia;  
Spiralia;Lophotrochozoa;Mollusca;Bivalvia;Autobranchia;Heteroconchia;Euhe  
terodonta;Imparidentia;Venerida;Veneroidea;Veneridae;Mercenaria;Mercenari  
a mercenaria  
UdeM00000018548 6596 811.6 UdeM00000018548 XP\_045177590.1 54.2 688  
304 8 2 683 326 1008 7.80E-232 811.6 6596 cellular  
organisms;Eukaryota;Opisthokonta;Metazoa;Eumetazoa;Bilateria;Protostomia;  
Spiralia;Lophotrochozoa;Mollusca;Bivalvia;Autobranchia;Heteroconchia;Euhe  
terodonta;Imparidentia;Venerida;Veneroidea;Veneridae;Mercenaria;Mercenari  
a mercenaria  
UdeM00000018549 6596 511.5 UdeM00000018549 XP\_045177590.1 61.6 476  
133 13 5 465 1080 1520 1.10E-141 511.5 6596 cellular  
organisms;Eukaryota;Opisthokonta;Metazoa;Eumetazoa;Bilateria;Protostomia;  
Spiralia;Lophotrochozoa;Mollusca;Bivalvia;Autobranchia;Heteroconchia;Euhe  
terodonta;Imparidentia;Venerida;Veneroidea;Veneridae;Mercenaria;Mercenari  
a mercenaria  
UdeM00000018550 6596 452.6 UdeM00000018550 XP\_045177655.1 50.5 442  
213 3 1 436 1 442 5.80E-124 452.6 6596 cellular  
organisms;Eukaryota;Opisthokonta;Metazoa;Eumetazoa;Bilateria;Protostomia;  
Spiralia;Lophotrochozoa;Mollusca;Bivalvia;Autobranchia;Heteroconchia;Euhe  
terodonta;Imparidentia;Venerida;Veneroidea;Veneridae;Mercenaria;Mercenari  
a mercenaria  
UdeM00000018552 6596 347.1 UdeM00000018552 XP\_045177776.1 38.8 536  
280 10 1 505 405 923 4.40E-92 347.1 6596 cellular  
organisms;Eukaryota;Opisthokonta;Metazoa;Eumetazoa;Bilateria;Protostomia;  
Spiralia;Lophotrochozoa;Mollusca;Bivalvia;Autobranchia;Heteroconchia;Euhe  
terodonta;Imparidentia;Venerida;Veneroidea;Veneridae;Mercenaria;Mercenari  
a mercenaria  
UdeM00000018553 45351 87.4 UdeM00000018553 XP\_001623471.2 31 200  
109 5 10 192 12 199 2.20E-14 87.4 45351 cellular  
organisms;Eukaryota;Opisthokonta;Metazoa;Eumetazoa;Cnidaria;Anthozoa;Hexa  
corallia;Actiniaria;Edwardsiidae;Nematostella;Nematostella vectensis  
UdeM00000018554 6596 278.1 UdeM00000018554 XP\_045178146.1 37.6 415  
207 4 22 384 18 432 2.00E-71 278.1 6596 cellular  
organisms;Eukaryota;Opisthokonta;Metazoa;Eumetazoa;Bilateria;Protostomia;  
Spiralia;Lophotrochozoa;Mollusca;Bivalvia;Autobranchia;Heteroconchia;Euhe  
terodonta;Imparidentia;Venerida;Veneroidea;Veneridae;Mercenaria;Mercenari  
a mercenaria

UdeM00000018555 6596 81.6 UdeM00000018555 XP\_045179680.1 34.3 181  
 100 7 223 391 201 374 2.40E-12 81.6 6596 cellular  
 organisms;Eukaryota;Opisthokonta;Metazoa;Eumetazoa;Bilateria;Protostomia;  
 Spiralia;Lophotrochozoa;Mollusca;Bivalvia;Autobranchia;Heteroconchia;Euhe  
 terodonta;Imparidentia;Venerida;Veneroidea;Veneridae;Mercenaria;Mercenari  
 a mercenaria  
 UdeM00000018556 6573 110.9 UdeM00000018556 XP\_021339818.1 40.3 144  
 82 3 191 331 40 182 4.00E-21 110.9 6573 cellular  
 organisms;Eukaryota;Opisthokonta;Metazoa;Eumetazoa;Bilateria;Protostomia;  
 Spiralia;Lophotrochozoa;Mollusca;Bivalvia;Autobranchia;Pteriormorphia;Pect  
 inida;Pectinoidea;Pectinidae;Mizuhopecten;Mizuhopecten yessoensis  
 UdeM00000018557 6596 944.1 UdeM00000018557 XP\_045177690.1 69.7 661  
 197 2 1 659 1 660 9.40E-272 944.1 6596 cellular  
 organisms;Eukaryota;Opisthokonta;Metazoa;Eumetazoa;Bilateria;Protostomia;  
 Spiralia;Lophotrochozoa;Mollusca;Bivalvia;Autobranchia;Heteroconchia;Euhe  
 terodonta;Imparidentia;Venerida;Veneroidea;Veneridae;Mercenaria;Mercenari  
 a mercenaria  
 UdeM00000018558 6596 937.9 UdeM00000018558 XP\_045177690.1 69.1 667  
 197 3 1 665 1 660 6.80E-270 937.9 6596 cellular  
 organisms;Eukaryota;Opisthokonta;Metazoa;Eumetazoa;Bilateria;Protostomia;  
 Spiralia;Lophotrochozoa;Mollusca;Bivalvia;Autobranchia;Heteroconchia;Euhe  
 terodonta;Imparidentia;Venerida;Veneroidea;Veneridae;Mercenaria;Mercenari  
 a mercenaria  
 UdeM00000018559 6596 934.9 UdeM00000018559 XP\_045177690.1 69.3 662  
 194 3 1 660 6 660 5.70E-269 934.9 6596 cellular  
 organisms;Eukaryota;Opisthokonta;Metazoa;Eumetazoa;Bilateria;Protostomia;  
 Spiralia;Lophotrochozoa;Mollusca;Bivalvia;Autobranchia;Heteroconchia;Euhe  
 terodonta;Imparidentia;Venerida;Veneroidea;Veneridae;Mercenaria;Mercenari  
 a mercenaria  
 UdeM00000018560 6596 288.9 UdeM00000018560 XP\_045179222.1 51.5 268  
 125 3 31 297 17 280 7.50E-75 288.9 6596 cellular  
 organisms;Eukaryota;Opisthokonta;Metazoa;Eumetazoa;Bilateria;Protostomia;  
 Spiralia;Lophotrochozoa;Mollusca;Bivalvia;Autobranchia;Heteroconchia;Euhe  
 terodonta;Imparidentia;Venerida;Veneroidea;Veneridae;Mercenaria;Mercenari  
 a mercenaria  
 UdeM00000018561 29159 314.3 UdeM00000018561 XP\_011432228.2 49.8 492  
 240 4 6 494 108 595 2.80E-82 314.3 29159 cellular  
 organisms;Eukaryota;Opisthokonta;Metazoa;Eumetazoa;Bilateria;Protostomia;  
 Spiralia;Lophotrochozoa;Mollusca;Bivalvia;Autobranchia;Pteriormorphia;Ostr  
 eida;Ostreoidea;Ostreidae;Crassostrea;Crassostrea gigas  
 UdeM00000018562 29159 322 UdeM00000018562 XP\_011432228.2 50 496  
 244 3 46 541 104 595 1.40E-84 322 29159 cellular  
 organisms;Eukaryota;Opisthokonta;Metazoa;Eumetazoa;Bilateria;Protostomia;  
 Spiralia;Lophotrochozoa;Mollusca;Bivalvia;Autobranchia;Pteriormorphia;Ostr  
 eida;Ostreoidea;Ostreidae;Crassostrea;Crassostrea gigas  
 UdeM00000018563 6412 118.6 UdeM00000018563 XP\_009014168.1 58.4 89  
 33 1 1 85 1 89 4.70E-24 118.6 6412 cellular  
 organisms;Eukaryota;Opisthokonta;Metazoa;Eumetazoa;Bilateria;Protostomia;  
 Spiralia;Lophotrochozoa;Annelida;Clitellata;Hirudinea;Rhynchobdellida;Glo  
 ssiphoniidae;Helobdella;Helobdella robusta  
 UdeM00000018564 6596 667.2 UdeM00000018564 XP\_045178501.1 74.1 409  
 101 2 1 409 1 404 1.40E-188 667.2 6596 cellular  
 organisms;Eukaryota;Opisthokonta;Metazoa;Eumetazoa;Bilateria;Protostomia;  
 Spiralia;Lophotrochozoa;Mollusca;Bivalvia;Autobranchia;Heteroconchia;Euhe



terodonta;Imparidentia;Venerida;Veneroidea;Veneridae;Mercenaria;Mercenari  
 a mercenaria  
 UdeM00000018565 6596 276.2 UdeM00000018565 XP\_045179389.1 48.5 295  
 125 4 25 301 33 318 5.10E-71 276.2 6596 cellular  
 organisms;Eukaryota;Opisthokonta;Metazoa;Eumetazoa;Bilateria;Protostomia;  
 Spiralia;Lophotrochozoa;Mollusca;Bivalvia;Autobranchia;Heteroconchia;Euhe  
 terodonta;Imparidentia;Venerida;Veneroidea;Veneridae;Mercenaria;Mercenari  
 a mercenaria  
 UdeM00000018566 225164 370.5 UdeM00000018566 XP\_009062152.1 53.4  
 328 144 3 73 395 362 685 2.60E-99 370.5 225164  
 cellular  
 organisms;Eukaryota;Opisthokonta;Metazoa;Eumetazoa;Bilateria;Protostomia;  
 Spiralia;Lophotrochozoa;Mollusca;Gastropoda;Patellogastropoda;Lottioidea;  
 Lottiidae;Lottia;Lottia gigantea  
 UdeM00000018567 29159 266.5 UdeM00000018567 XP\_034315989.1 67.5 191  
 62 0 6 196 31 221 2.60E-68 266.5 29159 cellular  
 organisms;Eukaryota;Opisthokonta;Metazoa;Eumetazoa;Bilateria;Protostomia;  
 Spiralia;Lophotrochozoa;Mollusca;Bivalvia;Autobranchia;Pteriormorphia;Ostr  
 eida;Ostreoidea;Ostreidae;Crassostrea;Crassostrea gigas  
 UdeM00000018568 151771 59.7 UdeM00000018568 XP\_028412199.1 37  
 92 55 2 2 92 3 92 2.50E-06 59.7 151771  
 cellular  
 organisms;Eukaryota;Opisthokonta;Metazoa;Eumetazoa;Cnidaria;Anthozoa;Octo  
 corallia;Alcyonacea;Alcyoniina;Nephtheidae;Dendronephthya;Dendronephthya  
 gigantea  
 UdeM00000018569 45351 82.8 UdeM00000018569 XP\_001623471.2 32.6 172  
 95 4 3 155 6 175 5.80E-13 82.8 45351 cellular  
 organisms;Eukaryota;Opisthokonta;Metazoa;Eumetazoa;Cnidaria;Anthozoa;Hexa  
 corallia;Actiniaria;Edwardsiidae;Nematostella;Nematostella vectensis  
 UdeM00000018570 6596 548.9 UdeM00000018570 XP\_045178302.1 71.5 432  
 120 2 24 453 13 443 6.10E-153 548.9 6596 cellular  
 organisms;Eukaryota;Opisthokonta;Metazoa;Eumetazoa;Bilateria;Protostomia;  
 Spiralia;Lophotrochozoa;Mollusca;Bivalvia;Autobranchia;Heteroconchia;Euhe  
 terodonta;Imparidentia;Venerida;Veneroidea;Veneridae;Mercenaria;Mercenari  
 a mercenaria  
 UdeM00000018571 6573 91.7 UdeM00000018571 XP\_021365625.1 51.7 87  
 42 0 53 139 40 126 9.20E-16 91.7 6573 cellular  
 organisms;Eukaryota;Opisthokonta;Metazoa;Eumetazoa;Bilateria;Protostomia;  
 Spiralia;Lophotrochozoa;Mollusca;Bivalvia;Autobranchia;Pteriormorphia;Pect  
 inida;Pectinoidea;Pectinidae;Mizuhopecten;Mizuhopecten yessoensis  
 UdeM00000018572 6596 783.9 UdeM00000018572 XP\_045209346.1 41.1 1039  
 603 8 23 1052 35 1073 2.70E-223 783.9 6596 cellular  
 organisms;Eukaryota;Opisthokonta;Metazoa;Eumetazoa;Bilateria;Protostomia;  
 Spiralia;Lophotrochozoa;Mollusca;Bivalvia;Autobranchia;Heteroconchia;Euhe  
 terodonta;Imparidentia;Venerida;Veneroidea;Veneridae;Mercenaria;Mercenari  
 a mercenaria  
 UdeM00000018573 6596 787.7 UdeM00000018573 XP\_045209346.1 40.8 1061  
 616 9 2 1051 14 1073 1.80E-224 787.7 6596 cellular  
 organisms;Eukaryota;Opisthokonta;Metazoa;Eumetazoa;Bilateria;Protostomia;  
 Spiralia;Lophotrochozoa;Mollusca;Bivalvia;Autobranchia;Heteroconchia;Euhe  
 terodonta;Imparidentia;Venerida;Veneroidea;Veneridae;Mercenaria;Mercenari  
 a mercenaria  
 UdeM00000018574 6596 125.9 UdeM00000018574 XP\_045209346.1 41.3 150  
 87 1 2 150 924 1073 4.90E-26 125.9 6596 cellular

organisms;Eukaryota;Opisthokonta;Metazoa;Eumetazoa;Bilateria;Protostomia;Spiralia;Lophotrochozoa;Mollusca;Bivalvia;Autobranhia;Heteroconchia;Euherodonta;Imparidentia;Venerida;Veneroidea;Veneridae;Mercenaria;Mercenaria mercenaria

UdeM00000018578 6596 377.9 UdeM00000018578 XP\_045177776.1 40.8 534  
289 10 1 522 405 923 3.20E-101 377.9 6596 cellular

organisms;Eukaryota;Opisthokonta;Metazoa;Eumetazoa;Bilateria;Protostomia;Spiralia;Lophotrochozoa;Mollusca;Bivalvia;Autobranhia;Heteroconchia;Euherodonta;Imparidentia;Venerida;Veneroidea;Veneridae;Mercenaria;Mercenaria mercenaria

UdeM00000018580 45351 83.6 UdeM00000018580 XP\_001623471.2 32.5 197  
100 6 3 180 6 188 3.50E-13 83.6 45351 cellular

organisms;Eukaryota;Opisthokonta;Metazoa;Eumetazoa;Cnidaria;Anthozoa;Hexacorallia;Actiniaria;Edwardsiidae;Nematostella;Nematostella vectensis

UdeM00000018581 6596 166.8 UdeM00000018581 XP\_045177695.1 48.6 177  
89 2 15 190 172 347 2.80E-38 166.8 6596 cellular

organisms;Eukaryota;Opisthokonta;Metazoa;Eumetazoa;Bilateria;Protostomia;Spiralia;Lophotrochozoa;Mollusca;Bivalvia;Autobranhia;Heteroconchia;Euherodonta;Imparidentia;Venerida;Veneroidea;Veneridae;Mercenaria;Mercenaria mercenaria

UdeM00000018582 6579 78.2 UdeM00000018582 XP\_033725557.1 67.4 43  
14 0 1 43 59 101 9.30E-12 78.2 6579 cellular

organisms;Eukaryota;Opisthokonta;Metazoa;Eumetazoa;Bilateria;Protostomia;Spiralia;Lophotrochozoa;Mollusca;Bivalvia;Autobranhia;Pteriormorphia;Pectinida;Pectinoidea;Pectinidae;Pecten;Pecten maximus

UdeM00000018583 6596 201.4 UdeM00000018583 XP\_045177778.1 41.4 302  
155 7 1 291 405 695 2.60E-48 201.4 6596 cellular

organisms;Eukaryota;Opisthokonta;Metazoa;Eumetazoa;Bilateria;Protostomia;Spiralia;Lophotrochozoa;Mollusca;Bivalvia;Autobranhia;Heteroconchia;Euherodonta;Imparidentia;Venerida;Veneroidea;Veneridae;Mercenaria;Mercenaria mercenaria

UdeM00000018584 1250792 153.3 UdeM00000018584 XP\_041861569.1 37.5  
224 101 5 76 265 449 667 4.30E-34 153.3 1250792

cellular

organisms;Eukaryota;Opisthokonta;Metazoa;Eumetazoa;Bilateria;Deuterostomia;Chordata;Craniata;Vertebrata;Gnathostomata;Teleostomi;Euteleostomi;Actinopterygii;Actinopteri;Neopterygii;Teleostei;Osteoglossocephalai;Clupeocephala;Euteleostei;Neoteleostei;Eurypterygia;Ctenosquamata;Acanthomorphata;Euacanthomorphacea;Percomorphaceae;Ovalentaria;Atherinomorphae;Atheriniformes;Melanotaeniidae;Melanotaenia;Melanotaenia boesemani

UdeM00000018587 45351 86.7 UdeM00000018587 XP\_001623471.2 32.8 189  
98 5 10 181 12 188 4.00E-14 86.7 45351 cellular

organisms;Eukaryota;Opisthokonta;Metazoa;Eumetazoa;Cnidaria;Anthozoa;Hexacorallia;Actiniaria;Edwardsiidae;Nematostella;Nematostella vectensis

UdeM00000018588 6596 152.1 UdeM00000018588 XP\_045177590.1 68 100  
32 0 125 224 826 925 9.50E-34 152.1 6596 cellular

organisms;Eukaryota;Opisthokonta;Metazoa;Eumetazoa;Bilateria;Protostomia;Spiralia;Lophotrochozoa;Mollusca;Bivalvia;Autobranhia;Heteroconchia;Euherodonta;Imparidentia;Venerida;Veneroidea;Veneridae;Mercenaria;Mercenaria mercenaria

UdeM00000018589 1735272 122.5 UdeM00000018589 XP\_041356959.1 63.3  
98 35 1 125 222 116 212 6.90E-25 122.5 1735272

cellular

organisms;Eukaryota;Opisthokonta;Metazoa;Eumetazoa;Bilateria;Protostomia;

Spiralia;Lophotrochozoa;Mollusca;Gastropoda;Neomphalina;Neomphaloidea;Pel  
tospiridae;Gigantopelta;Gigantopelta aegis  
UdeM00000018590 6500 78.2 UdeM00000018590 XP\_035825129.1 37.7 77  
48 0 1 77 703 779 5.50E-12 78.2 6500 cellular  
organisms;Eukaryota;Opisthokonta;Metazoa;Eumetazoa;Bilateria;Protostomia;  
Spiralia;Lophotrochozoa;Mollusca;Gastropoda;Heterobranchia;Euthyneura;Tec  
tipleura;Aplysiida;Aplysioidea;Aplysiidae;Aplysia;Aplysia californica  
UdeM00000018591 7739 185.7 UdeM00000018591 XP\_035662901.1 50.5 190  
90 2 1 189 403 589 5.60E-44 185.7 7739 cellular  
organisms;Eukaryota;Opisthokonta;Metazoa;Eumetazoa;Bilateria;Deuterostomi  
a;Chordata;Cephalochordata;Leptocardii;Amphioxiformes;Branchiostomidae;Br  
anchiostoma;Branchiostoma floridae  
UdeM00000018592 6596 540.4 UdeM00000018592 XP\_045177590.1 50.6 478  
230 6 14 488 249 723 2.60E-150 540.4 6596 cellular  
organisms;Eukaryota;Opisthokonta;Metazoa;Eumetazoa;Bilateria;Protostomia;  
Spiralia;Lophotrochozoa;Mollusca;Bivalvia;Autobranchia;Heteroconchia;Euhe  
terodonta;Imparidentia;Venerida;Veneroidea;Veneridae;Mercenaria;Mercenari  
a mercenaria  
UdeM00000018594 6596 166.4 UdeM00000018594 XP\_045177590.1 41.5 217  
112 5 4 211 45 255 4.50E-38 166.4 6596 cellular  
organisms;Eukaryota;Opisthokonta;Metazoa;Eumetazoa;Bilateria;Protostomia;  
Spiralia;Lophotrochozoa;Mollusca;Bivalvia;Autobranchia;Heteroconchia;Euhe  
terodonta;Imparidentia;Venerida;Veneroidea;Veneridae;Mercenaria;Mercenari  
a mercenaria  
UdeM00000018595 29159 108.2 UdeM00000018595 XP\_034319609.1 26.1 268  
106 2 1 176 687 954 1.10E-20 108.2 29159 cellular  
organisms;Eukaryota;Opisthokonta;Metazoa;Eumetazoa;Bilateria;Protostomia;  
Spiralia;Lophotrochozoa;Mollusca;Bivalvia;Autobranchia;Pteriomorphia;Ostr  
eida;Ostreoidea;Ostreidae;Crassostrea;Crassostrea gigas  
UdeM00000018596 29159 66.2 UdeM00000018596 XP\_034322147.1 28.2 177  
28 1 1 78 374 550 2.10E-08 66.2 29159 cellular  
organisms;Eukaryota;Opisthokonta;Metazoa;Eumetazoa;Bilateria;Protostomia;  
Spiralia;Lophotrochozoa;Mollusca;Bivalvia;Autobranchia;Pteriomorphia;Ostr  
eida;Ostreoidea;Ostreidae;Crassostrea;Crassostrea gigas  
UdeM00000018599 6596 187.6 UdeM00000018599 XP\_045177781.1 43.6 220  
121 3 49 267 401 618 4.40E-44 187.6 6596 cellular  
organisms;Eukaryota;Opisthokonta;Metazoa;Eumetazoa;Bilateria;Protostomia;  
Spiralia;Lophotrochozoa;Mollusca;Bivalvia;Autobranchia;Heteroconchia;Euhe  
terodonta;Imparidentia;Venerida;Veneroidea;Veneridae;Mercenaria;Mercenari  
a mercenaria  
UdeM00000018600 29159 201.8 UdeM00000018600 XP\_011449140.2 50.9 163  
80 0 8 170 107 269 7.00E-49 201.8 29159 cellular  
organisms;Eukaryota;Opisthokonta;Metazoa;Eumetazoa;Bilateria;Protostomia;  
Spiralia;Lophotrochozoa;Mollusca;Bivalvia;Autobranchia;Pteriomorphia;Ostr  
eida;Ostreoidea;Ostreidae;Crassostrea;Crassostrea gigas  
UdeM00000018601 6596 190.7 UdeM00000018601 XP\_045177778.1 38.1 299  
168 5 1 290 405 695 4.30E-45 190.7 6596 cellular  
organisms;Eukaryota;Opisthokonta;Metazoa;Eumetazoa;Bilateria;Protostomia;  
Spiralia;Lophotrochozoa;Mollusca;Bivalvia;Autobranchia;Heteroconchia;Euhe  
terodonta;Imparidentia;Venerida;Veneroidea;Veneridae;Mercenaria;Mercenari  
a mercenaria  
UdeM00000018603 1250792 139.8 UdeM00000018603 XP\_041861569.1 43.7  
167 86 4 3 168 508 667 3.20E-30 139.8 1250792  
cellular

organisms;Eukaryota;Opisthokonta;Metazoa;Eumetazoa;Bilateria;Deuterostomi  
a;Chordata;Craniata;Vertebrata;Gnathostomata;Teleostomi;Euteleostomi;Acti  
nopterygii;Actinopteri;Neopterygii;Teleostei;Osteoglossocephalai;Clupeoce  
phala;Euteleostomorpha;Neoteleostei;Eurypterygia;Ctenosquamata;Acanthomo  
rphata;Euacanthomorpha;Percomorphaceae;Ovalentaria;Atherinomorphae;Ath  
eriniiformes;Melanotaeniidae;Melanotaenia;Melanotaenia boesemani

UdeM00000018604 7962 91.7 UdeM00000018604 XP\_042606186.1 35.3 150  
80 6 5 138 273 421 8.10E-16 91.7 7962 cellular

organisms;Eukaryota;Opisthokonta;Metazoa;Eumetazoa;Bilateria;Deuterostomi  
a;Chordata;Craniata;Vertebrata;Gnathostomata;Teleostomi;Euteleostomi;Acti  
nopterygii;Actinopteri;Neopterygii;Teleostei;Osteoglossocephalai;Clupeoce  
phala;Otomorpha;Ostariophysi;Otophysi;Cypriniphysae;Cypriniiformes;Cyprino  
idei;Cyprinidae;Cyprininae;Cyprinus;Cyprinus carpio

UdeM00000018605 6596 165.2 UdeM00000018605 XP\_045200121.1 37.9 253  
147 3 40 283 51 302 1.30E-37 165.2 6596 cellular

organisms;Eukaryota;Opisthokonta;Metazoa;Eumetazoa;Bilateria;Protostomia;  
Spiralia;Lophotrochozoa;Mollusca;Bivalvia;Autobranchia;Heteroconchia;Euhe  
terodonta;Imparidentia;Venerida;Veneroidea;Veneridae;Mercenaria;Mercenari  
a mercenaria

UdeM00000018606 6579 149.1 UdeM00000018606 XP\_033732676.1 32.9 298  
180 10 17 306 121 406 9.50E-33 149.1 6579 cellular

organisms;Eukaryota;Opisthokonta;Metazoa;Eumetazoa;Bilateria;Protostomia;  
Spiralia;Lophotrochozoa;Mollusca;Bivalvia;Autobranchia;Pteriormorpha;Pect  
inida;Pectinoidea;Pectinidae;Pecten;Pecten maximus

UdeM00000018607 6596 197.2 UdeM00000018607 XP\_045177776.1 43.2 234  
128 3 11 243 696 925 5.70E-47 197.2 6596 cellular

organisms;Eukaryota;Opisthokonta;Metazoa;Eumetazoa;Bilateria;Protostomia;  
Spiralia;Lophotrochozoa;Mollusca;Bivalvia;Autobranchia;Heteroconchia;Euhe  
terodonta;Imparidentia;Venerida;Veneroidea;Veneridae;Mercenaria;Mercenari  
a mercenaria

UdeM00000018608 6565 63.9 UdeM00000018608 XP\_022320668.1 30.1 166  
82 6 5 138 627 790 1.80E-07 63.9 6565 cellular

organisms;Eukaryota;Opisthokonta;Metazoa;Eumetazoa;Bilateria;Protostomia;  
Spiralia;Lophotrochozoa;Mollusca;Bivalvia;Autobranchia;Pteriormorpha;Ostr  
eida;Ostreoidea;Ostreidae;Crassostrea;Crassostrea virginica

UdeM00000018609 6579 163.3 UdeM00000018609 XP\_033725289.1 40.7 204  
74 2 1 157 316 519 2.70E-37 163.3 6579 cellular

organisms;Eukaryota;Opisthokonta;Metazoa;Eumetazoa;Bilateria;Protostomia;  
Spiralia;Lophotrochozoa;Mollusca;Bivalvia;Autobranchia;Pteriormorpha;Pect  
inida;Pectinoidea;Pectinidae;Pecten;Pecten maximus

UdeM00000018610 6596 214.5 UdeM00000018610 XP\_045177778.1 41.1 319  
166 7 386 693 388 695 5.00E-52 214.5 6596 cellular

organisms;Eukaryota;Opisthokonta;Metazoa;Eumetazoa;Bilateria;Protostomia;  
Spiralia;Lophotrochozoa;Mollusca;Bivalvia;Autobranchia;Heteroconchia;Euhe  
terodonta;Imparidentia;Venerida;Veneroidea;Veneridae;Mercenaria;Mercenari  
a mercenaria

UdeM00000018611 6596 400.6 UdeM00000018611 XP\_045174460.1 33.6 679  
342 10 6 659 5 599 3.90E-108 400.6 6596 cellular

organisms;Eukaryota;Opisthokonta;Metazoa;Eumetazoa;Bilateria;Protostomia;  
Spiralia;Lophotrochozoa;Mollusca;Bivalvia;Autobranchia;Heteroconchia;Euhe  
terodonta;Imparidentia;Venerida;Veneroidea;Veneridae;Mercenaria;Mercenari  
a mercenaria

UdeM00000018612 6573 172.9 UdeM00000018612 XP\_021363425.1 52.7 150  
71 0 2 151 4 153 3.90E-40 172.9 6573 cellular

organisms;Eukaryota;Opisthokonta;Metazoa;Eumetazoa;Bilateria;Protostomia;Spiralia;Lophotrochozoa;Mollusca;Bivalvia;Autobranhia;Pteriomorphia;Pectinida;Pectinoidea;Pectinidae;Mizuhopecten;Mizuhopecten yessoensis

UdeM00000018613 456900 70.9 UdeM00000018613 XP\_018394401.1 32.8  
137 84 2 17 152 15 144 1.60E-09 70.9 456900

cellular

organisms;Eukaryota;Opisthokonta;Metazoa;Eumetazoa;Bilateria;Protostomia;Ecdysozoa;Panarthropoda;Arthropoda;Mandibulata;Pancrustacea;Hexapoda;Insecta;Dicondylia;Pterygota;Neoptera;Endopterygota;Hymenoptera;Apocrita;Aculeata;Formicoidea;Formicidae;Myrmicinae;Attini;Cyphomyrmex;Cyphomyrmex

costatus

UdeM00000018614 6596 439.9 UdeM00000018614 XP\_045178493.1 53.3 381  
173 3 1 379 1 378 3.30E-120 439.9 6596 cellular

organisms;Eukaryota;Opisthokonta;Metazoa;Eumetazoa;Bilateria;Protostomia;Spiralia;Lophotrochozoa;Mollusca;Bivalvia;Autobranhia;Heteroconchia;Euheterodonta;Imparidentia;Venerida;Veneroidea;Veneridae;Mercenaria;Mercenaria

UdeM00000018615 6596 436 UdeM00000018615 XP\_045178493.1 53.8 381  
171 3 1 379 1 378 4.80E-119 436 6596 cellular

organisms;Eukaryota;Opisthokonta;Metazoa;Eumetazoa;Bilateria;Protostomia;Spiralia;Lophotrochozoa;Mollusca;Bivalvia;Autobranhia;Heteroconchia;Euheterodonta;Imparidentia;Venerida;Veneroidea;Veneridae;Mercenaria;Mercenaria

UdeM00000018616 6573 580.5 UdeM00000018616 XP\_021367864.1 88.6 315  
36 0 1 315 1 315 1.30E-162 580.5 6573 cellular

organisms;Eukaryota;Opisthokonta;Metazoa;Eumetazoa;Bilateria;Protostomia;Spiralia;Lophotrochozoa;Mollusca;Bivalvia;Autobranhia;Pteriomorphia;Pectinida;Pectinoidea;Pectinidae;Mizuhopecten;Mizuhopecten yessoensis

UdeM00000018617 6526 244.2 UdeM00000018617 XP\_013060793.1 52.4 225  
107 0 56 280 1 225 2.00E-61 244.2 6526 cellular

organisms;Eukaryota;Opisthokonta;Metazoa;Eumetazoa;Bilateria;Protostomia;Spiralia;Lophotrochozoa;Mollusca;Gastropoda;Heterobranhia;Euthyneura;Planorbata;Hygrophila;Lymnaeidae;Planorbidae;Biomphalaria;Biomphalaria

UdeM00000018619 6573 142.9 UdeM00000018619 XP\_021367172.1 37.8 336  
179 6 51 363 394 722 8.00E-31 142.9 6573 cellular

organisms;Eukaryota;Opisthokonta;Metazoa;Eumetazoa;Bilateria;Protostomia;Spiralia;Lophotrochozoa;Mollusca;Bivalvia;Autobranhia;Pteriomorphia;Pectinida;Pectinoidea;Pectinidae;Mizuhopecten;Mizuhopecten yessoensis

UdeM00000018618 6596 254.2 UdeM00000018618 XP\_045178535.1 39.2 725  
317 15 1 668 1 658 4.60E-64 254.2 6596 cellular

organisms;Eukaryota;Opisthokonta;Metazoa;Eumetazoa;Bilateria;Protostomia;Spiralia;Lophotrochozoa;Mollusca;Bivalvia;Autobranhia;Heteroconchia;Euheterodonta;Imparidentia;Venerida;Veneroidea;Veneridae;Mercenaria;Mercenaria

UdeM00000018620 6565 161.8 UdeM00000018620 XP\_022324511.1 40.3 278  
138 5 1 270 1 258 1.60E-36 161.8 6565 cellular

organisms;Eukaryota;Opisthokonta;Metazoa;Eumetazoa;Bilateria;Protostomia;Spiralia;Lophotrochozoa;Mollusca;Bivalvia;Autobranhia;Pteriomorphia;Ostreida;Ostreidae;Crassostrea;Crassostrea virginica

UdeM00000018621 6596 280 UdeM00000018621 XP\_045179111.1 33.3 670  
179 15 13 425 70 728 5.10E-72 280 6596 cellular

organisms;Eukaryota;Opisthokonta;Metazoa;Eumetazoa;Bilateria;Protostomia;Spiralia;Lophotrochozoa;Mollusca;Bivalvia;Autobranhia;Heteroconchia;Euheterodonta

terodonta;Imparidentia;Venerida;Veneroidea;Veneridae;Mercenaria;Mercenaria mercenaria

UdeM00000018622 400727 184.5 UdeM00000018622 XP\_025089150.1 38.6  
259 148 6 24 271 4 262 1.80E-43 184.5 400727  
cellular

organisms;Eukaryota;Opisthokonta;Metazoa;Eumetazoa;Bilateria;Protostomia;Spiralia;Lophotrochozoa;Mollusca;Gastropoda;Caenogastropoda;Architaenioglossa;Ampullarioidea;Ampullariidae;Pomacea;Pomacea canaliculata

UdeM00000018624 6573 177.9 UdeM00000018624 XP\_021371412.1 41.7 223  
124 4 42 262 1118 1336 3.80E-41 177.9 6573 cellular

organisms;Eukaryota;Opisthokonta;Metazoa;Eumetazoa;Bilateria;Protostomia;Spiralia;Lophotrochozoa;Mollusca;Bivalvia;Autobranchia;Pteriormorphia;Pectinida;Pectinoidea;Pectinidae;Mizuhopecten;Mizuhopecten yessoensis

UdeM00000018625 70779 91.7 UdeM00000018625 XP\_015772592.1 37.9 174  
93 3 1 159 185 358 9.60E-16 91.7 70779 cellular

organisms;Eukaryota;Opisthokonta;Metazoa;Eumetazoa;Cnidaria;Anthozoa;Hexacorallia;Scleractinia;Astrocoeniina;Acroporidae;Acropora;Acropora digitifera

UdeM00000018626 1735272 101.7 UdeM00000018626 XP\_041354133.1 39.3  
145 73 4 25 169 1 130 1.00E-18 101.7 1735272  
cellular

organisms;Eukaryota;Opisthokonta;Metazoa;Eumetazoa;Bilateria;Protostomia;Spiralia;Lophotrochozoa;Mollusca;Gastropoda;Neomphalina;Neomphaloidea;Peltospiridae;Gigantopelta;Gigantopelta aegis

UdeM00000018627 6579 84.7 UdeM00000018627 XP\_033727573.1 31.7 202  
114 7 13 193 45 243 2.00E-13 84.7 6579 cellular

organisms;Eukaryota;Opisthokonta;Metazoa;Eumetazoa;Bilateria;Protostomia;Spiralia;Lophotrochozoa;Mollusca;Bivalvia;Autobranchia;Pteriormorphia;Pectinida;Pectinoidea;Pectinidae;Pecten;Pecten maximus

UdeM00000018628 225164 75.5 UdeM00000018628 XP\_009057862.1 28  
175 112 7 266 433 30 197 2.00E-10 75.5 225164  
cellular

organisms;Eukaryota;Opisthokonta;Metazoa;Eumetazoa;Bilateria;Protostomia;Spiralia;Lophotrochozoa;Mollusca;Gastropoda;Patellogastropoda;Lottioidae;Lottiidae;Lottia;Lottia gigantea

UdeM00000018629 29159 155.6 UdeM00000018629 XP\_011419444.2 40.4 213  
123 3 10 220 21 231 7.50E-35 155.6 29159 cellular

organisms;Eukaryota;Opisthokonta;Metazoa;Eumetazoa;Bilateria;Protostomia;Spiralia;Lophotrochozoa;Mollusca;Bivalvia;Autobranchia;Pteriormorphia;Ostreida;Ostreoidea;Ostreidae;Crassostrea;Crassostrea gigas

UdeM00000018630 6596 170.2 UdeM00000018630 XP\_045158722.1 42.3 215  
113 3 1 215 48 251 3.20E-39 170.2 6596 cellular

organisms;Eukaryota;Opisthokonta;Metazoa;Eumetazoa;Bilateria;Protostomia;Spiralia;Lophotrochozoa;Mollusca;Bivalvia;Autobranchia;Heteroconchia;Euterodonta;Imparidentia;Venerida;Veneroidea;Veneridae;Mercenaria;Mercenaria mercenaria

UdeM00000018631 7054 67.4 UdeM00000018631 XP\_031350403.1 46.7 60  
31 1 4 62 225 284 9.50E-09 67.4 7054 cellular

organisms;Eukaryota;Opisthokonta;Metazoa;Eumetazoa;Bilateria;Protostomia;Ecdysozoa;Panarthropoda;Arthropoda;Mandibulata;Pancrustacea;Hexapoda;Insecta;Dicondylia;Pterygota;Neoptera;Endopterygota;Coleoptera;Polyphaga;Elateriformia;Elateroidea;Lampyridae;Lampyrinae;Photinus;Photinus pyralis

UdeM00000018632 37621 84 UdeM00000018632 XP\_014671072.1 47.4 78  
39 1 24 101 106 181 1.20E-13 84 37621 cellular

organisms;Eukaryota;Opisthokonta;Metazoa;Eumetazoa;Bilateria;Protostomia;Ecdysozoa;Scalidophora;Priapulida;Priapulimorpha;Priapulimorphida;Priapulidae;Priapululus;Priapululus caudatus

UdeM00000018633 6596 161 UdeM00000018633 XP\_045158722.1 45.6 182  
88 3 3 184 75 245 1.80E-36 161 6596 cellular

organisms;Eukaryota;Opisthokonta;Metazoa;Eumetazoa;Bilateria;Protostomia;Spiralia;Lophotrochozoa;Mollusca;Bivalvia;Autobranhia;Heteroconchia;Euheterodonta;Imparidentia;Venerida;Veneroidea;Veneridae;Mercenaria;Mercenaria mercenaria

UdeM00000018634 6573 92.4 UdeM00000018634 XP\_021354128.1 60.6 66  
26 0 22 87 21 86 3.00E-16 92.4 6573 cellular

organisms;Eukaryota;Opisthokonta;Metazoa;Eumetazoa;Bilateria;Protostomia;Spiralia;Lophotrochozoa;Mollusca;Bivalvia;Autobranhia;Pteriormorpha;Pectinida;Pectinoidea;Pectinidae;Mizuhopecten;Mizuhopecten yessoensis

UdeM00000018635 6596 1231.1 UdeM00000018635 XP\_045179723.1 63.9  
917 326 1 1 912 100 1016 0.00E+00 1231.1 6596  
cellular

organisms;Eukaryota;Opisthokonta;Metazoa;Eumetazoa;Bilateria;Protostomia;Spiralia;Lophotrochozoa;Mollusca;Bivalvia;Autobranhia;Heteroconchia;Euheterodonta;Imparidentia;Venerida;Veneroidea;Veneridae;Mercenaria;Mercenaria mercenaria

UdeM00000018636 400727 537 UdeM00000018636 XP\_025092893.1 61.4  
420 147 2 21 426 27 445 2.20E-149 537 400727  
cellular

organisms;Eukaryota;Opisthokonta;Metazoa;Eumetazoa;Bilateria;Protostomia;Spiralia;Lophotrochozoa;Mollusca;Gastropoda;Caenogastropoda;Architaenioglossa;Ampullarioidea;Ampullariidae;Pomacea;Pomacea canaliculata

UdeM00000018637 400727 539.7 UdeM00000018637 XP\_025092893.1 57.9  
454 156 2 21 474 27 445 3.80E-150 539.7 400727  
cellular

organisms;Eukaryota;Opisthokonta;Metazoa;Eumetazoa;Bilateria;Protostomia;Spiralia;Lophotrochozoa;Mollusca;Gastropoda;Caenogastropoda;Architaenioglossa;Ampullarioidea;Ampullariidae;Pomacea;Pomacea canaliculata

UdeM00000018638 6596 1280 UdeM00000018638 XP\_045177686.1 67.5 944  
267 5 1 907 1 941 0.00E+00 1280 6596 cellular

organisms;Eukaryota;Opisthokonta;Metazoa;Eumetazoa;Bilateria;Protostomia;Spiralia;Lophotrochozoa;Mollusca;Bivalvia;Autobranhia;Heteroconchia;Euheterodonta;Imparidentia;Venerida;Veneroidea;Veneridae;Mercenaria;Mercenaria mercenaria

UdeM00000018639 6596 721.1 UdeM00000018639 XP\_045178731.1 55.3 573  
251 4 40 610 120 689 1.20E-204 721.1 6596 cellular

organisms;Eukaryota;Opisthokonta;Metazoa;Eumetazoa;Bilateria;Protostomia;Spiralia;Lophotrochozoa;Mollusca;Bivalvia;Autobranhia;Heteroconchia;Euheterodonta;Imparidentia;Venerida;Veneroidea;Veneridae;Mercenaria;Mercenaria mercenaria

UdeM00000018640 29159 208.4 UdeM00000018640 XP\_011447117.2 42 319  
148 8 10 305 2 306 1.30E-50 208.4 29159 cellular

organisms;Eukaryota;Opisthokonta;Metazoa;Eumetazoa;Bilateria;Protostomia;Spiralia;Lophotrochozoa;Mollusca;Bivalvia;Autobranhia;Pteriormorpha;Ostreida;Ostreioidea;Ostreidae;Crassostrea;Crassostrea gigas

UdeM00000018641 6579 194.9 UdeM00000018641 XP\_033749282.1 43 270  
129 8 30 282 54 315 1.40E-46 194.9 6579 cellular

organisms;Eukaryota;Opisthokonta;Metazoa;Eumetazoa;Bilateria;Protostomia;

Spiralia;Lophotrochozoa;Mollusca;Bivalvia;Autobranchia;Pteriormorphia;Pectinida;Pectinoidea;Pectinidae;Pecten;Pecten maximus  
UdeM00000018642 6579 221.1 UdeM00000018642 XP\_033749282.1 40.2 321  
167 8 7 310 3 315 2.00E-54 221.1 6579 cellular  
organisms;Eukaryota;Opisthokonta;Metazoa;Eumetazoa;Bilateria;Protostomia;  
Spiralia;Lophotrochozoa;Mollusca;Bivalvia;Autobranchia;Pteriormorphia;Pectinida;Pectinoidea;Pectinidae;Pecten;Pecten maximus  
UdeM00000018643 6596 297.7 UdeM00000018643 XP\_045201862.1 31.3 707  
428 19 5 669 4 694 3.60E-77 297.7 6596 cellular  
organisms;Eukaryota;Opisthokonta;Metazoa;Eumetazoa;Bilateria;Protostomia;  
Spiralia;Lophotrochozoa;Mollusca;Bivalvia;Autobranchia;Heteroconchia;Euherodonta;Imparidentia;Venerida;Veneroidea;Veneridae;Mercenaria;Mercenaria mercenaria  
UdeM00000018644 6596 179.5 UdeM00000018644 XP\_045156925.1 35.2 307  
181 7 6 297 5 308 6.40E-42 179.5 6596 cellular  
organisms;Eukaryota;Opisthokonta;Metazoa;Eumetazoa;Bilateria;Protostomia;  
Spiralia;Lophotrochozoa;Mollusca;Bivalvia;Autobranchia;Heteroconchia;Euherodonta;Imparidentia;Venerida;Veneroidea;Veneridae;Mercenaria;Mercenaria mercenaria  
UdeM00000018645 6596 100.5 UdeM00000018645 XP\_045157494.1 26.4 368  
226 12 14 349 347 701 4.50E-18 100.5 6596 cellular  
organisms;Eukaryota;Opisthokonta;Metazoa;Eumetazoa;Bilateria;Protostomia;  
Spiralia;Lophotrochozoa;Mollusca;Bivalvia;Autobranchia;Heteroconchia;Euherodonta;Imparidentia;Venerida;Veneroidea;Veneridae;Mercenaria;Mercenaria mercenaria  
UdeM00000018646 6596 288.5 UdeM00000018646 XP\_045201862.1 30.1 700  
434 17 5 658 4 694 2.20E-74 288.5 6596 cellular  
organisms;Eukaryota;Opisthokonta;Metazoa;Eumetazoa;Bilateria;Protostomia;  
Spiralia;Lophotrochozoa;Mollusca;Bivalvia;Autobranchia;Heteroconchia;Euherodonta;Imparidentia;Venerida;Veneroidea;Veneridae;Mercenaria;Mercenaria mercenaria  
UdeM00000018647 6596 233.8 UdeM00000018647 XP\_045157409.1 32 466  
289 7 6 444 5 469 4.30E-58 233.8 6596 cellular  
organisms;Eukaryota;Opisthokonta;Metazoa;Eumetazoa;Bilateria;Protostomia;  
Spiralia;Lophotrochozoa;Mollusca;Bivalvia;Autobranchia;Heteroconchia;Euherodonta;Imparidentia;Venerida;Veneroidea;Veneridae;Mercenaria;Mercenaria mercenaria  
UdeM00000018648 6596 61.6 UdeM00000018648 XP\_045156697.1 29.2 137  
94 2 41 174 571 707 1.20E-06 61.6 6596 cellular  
organisms;Eukaryota;Opisthokonta;Metazoa;Eumetazoa;Bilateria;Protostomia;  
Spiralia;Lophotrochozoa;Mollusca;Bivalvia;Autobranchia;Heteroconchia;Euherodonta;Imparidentia;Venerida;Veneroidea;Veneridae;Mercenaria;Mercenaria mercenaria  
UdeM00000018650 6596 293.5 UdeM00000018650 XP\_045201862.1 30.1 710  
432 18 5 669 4 694 6.90E-76 293.5 6596 cellular  
organisms;Eukaryota;Opisthokonta;Metazoa;Eumetazoa;Bilateria;Protostomia;  
Spiralia;Lophotrochozoa;Mollusca;Bivalvia;Autobranchia;Heteroconchia;Euherodonta;Imparidentia;Venerida;Veneroidea;Veneridae;Mercenaria;Mercenaria mercenaria  
UdeM00000018651 6596 791.6 UdeM00000018651 XP\_045178731.1 55.9 621  
256 4 16 621 72 689 7.40E-226 791.6 6596 cellular  
organisms;Eukaryota;Opisthokonta;Metazoa;Eumetazoa;Bilateria;Protostomia;  
Spiralia;Lophotrochozoa;Mollusca;Bivalvia;Autobranchia;Heteroconchia;Euherodonta;Imparidentia;Venerida;Veneroidea;Veneridae;Mercenaria;Mercenaria mercenaria



terodonta;Imparidentia;Venerida;Veneroidea;Veneridae;Mercenaria;Mercenari  
 a mercenaria  
 UdeM00000018652 6596 405.2 UdeM00000018652 XP\_045214637.1 49.7 384  
 189 3 9 392 14 393 9.40E-110 405.2 6596 cellular  
 organisms;Eukaryota;Opisthokonta;Metazoa;Eumetazoa;Bilateria;Protostomia;  
 Spiralia;Lophotrochozoa;Mollusca;Bivalvia;Autobranhia;Heteroconchia;Euhe  
 terodonta;Imparidentia;Venerida;Veneroidea;Veneridae;Mercenaria;Mercenari  
 a mercenaria  
 UdeM00000018653 6596 370.5 UdeM00000018653 XP\_045214637.1 49.6 343  
 170 2 11 353 16 355 2.30E-99 370.5 6596 cellular  
 organisms;Eukaryota;Opisthokonta;Metazoa;Eumetazoa;Bilateria;Protostomia;  
 Spiralia;Lophotrochozoa;Mollusca;Bivalvia;Autobranhia;Heteroconchia;Euhe  
 terodonta;Imparidentia;Venerida;Veneroidea;Veneridae;Mercenaria;Mercenari  
 a mercenaria  
 UdeM00000018654 6596 424.9 UdeM00000018654 XP\_045214637.1 51.2 383  
 184 2 9 391 14 393 1.10E-115 424.9 6596 cellular  
 organisms;Eukaryota;Opisthokonta;Metazoa;Eumetazoa;Bilateria;Protostomia;  
 Spiralia;Lophotrochozoa;Mollusca;Bivalvia;Autobranhia;Heteroconchia;Euhe  
 terodonta;Imparidentia;Venerida;Veneroidea;Veneridae;Mercenaria;Mercenari  
 a mercenaria  
 UdeM00000018655 6596 402.9 UdeM00000018655 XP\_045211006.1 51.2 383  
 184 2 19 401 11 390 4.80E-109 402.9 6596 cellular  
 organisms;Eukaryota;Opisthokonta;Metazoa;Eumetazoa;Bilateria;Protostomia;  
 Spiralia;Lophotrochozoa;Mollusca;Bivalvia;Autobranhia;Heteroconchia;Euhe  
 terodonta;Imparidentia;Venerida;Veneroidea;Veneridae;Mercenaria;Mercenari  
 a mercenaria  
 UdeM00000018656 6596 302.8 UdeM00000018656 XP\_045214637.1 49.5 293  
 145 2 1 293 106 395 4.90E-79 302.8 6596 cellular  
 organisms;Eukaryota;Opisthokonta;Metazoa;Eumetazoa;Bilateria;Protostomia;  
 Spiralia;Lophotrochozoa;Mollusca;Bivalvia;Autobranhia;Heteroconchia;Euhe  
 terodonta;Imparidentia;Venerida;Veneroidea;Veneridae;Mercenaria;Mercenari  
 a mercenaria  
 UdeM00000018657 6596 397.1 UdeM00000018657 XP\_045214637.1 50.9 373  
 180 2 7 379 26 395 2.50E-107 397.1 6596 cellular  
 organisms;Eukaryota;Opisthokonta;Metazoa;Eumetazoa;Bilateria;Protostomia;  
 Spiralia;Lophotrochozoa;Mollusca;Bivalvia;Autobranhia;Heteroconchia;Euhe  
 terodonta;Imparidentia;Venerida;Veneroidea;Veneridae;Mercenaria;Mercenari  
 a mercenaria  
 UdeM00000018658 6596 392.1 UdeM00000018658 XP\_045211006.1 50.5 374  
 182 2 4 377 20 390 7.90E-106 392.1 6596 cellular  
 organisms;Eukaryota;Opisthokonta;Metazoa;Eumetazoa;Bilateria;Protostomia;  
 Spiralia;Lophotrochozoa;Mollusca;Bivalvia;Autobranhia;Heteroconchia;Euhe  
 terodonta;Imparidentia;Venerida;Veneroidea;Veneridae;Mercenaria;Mercenari  
 a mercenaria  
 UdeM00000018659 6596 414.8 UdeM00000018659 XP\_045214637.1 51.7 373  
 177 2 7 379 26 395 1.10E-112 414.8 6596 cellular  
 organisms;Eukaryota;Opisthokonta;Metazoa;Eumetazoa;Bilateria;Protostomia;  
 Spiralia;Lophotrochozoa;Mollusca;Bivalvia;Autobranhia;Heteroconchia;Euhe  
 terodonta;Imparidentia;Venerida;Veneroidea;Veneridae;Mercenaria;Mercenari  
 a mercenaria  
 UdeM00000018660 6596 421.4 UdeM00000018660 XP\_045214637.1 51.2 385  
 185 2 19 403 14 395 1.30E-114 421.4 6596 cellular  
 organisms;Eukaryota;Opisthokonta;Metazoa;Eumetazoa;Bilateria;Protostomia;  
 Spiralia;Lophotrochozoa;Mollusca;Bivalvia;Autobranhia;Heteroconchia;Euhe

terodonta;Imparidentia;Venerida;Veneroidea;Veneridae;Mercenaria;Mercenari  
a mercenaria

UdeM00000018667 1735272 61.6 UdeM00000018667 XP\_041355104.1 21.4  
294 214 6 189 478 5 285 5.00E-06 61.6 1735272  
cellular

organisms;Eukaryota;Opisthokonta;Metazoa;Eumetazoa;Bilateria;Protostomia;  
Spiralia;Lophotrochozoa;Mollusca;Gastropoda;Neomphalina;Neomphaloidea;Pel  
tospiridae;Gigantopelta;Gigantopelta aegis

UdeM00000018668 1735272 68.9 UdeM00000018668 XP\_041355104.1 21  
271 200 4 12 272 19 285 2.30E-08 68.9 1735272  
cellular

organisms;Eukaryota;Opisthokonta;Metazoa;Eumetazoa;Bilateria;Protostomia;  
Spiralia;Lophotrochozoa;Mollusca;Gastropoda;Neomphalina;Neomphaloidea;Pel  
tospiridae;Gigantopelta;Gigantopelta aegis

UdeM00000018669 6596 73.9 UdeM00000018669 XP\_045209248.1 20.1 463  
341 12 156 602 137 586 9.20E-10 73.9 6596 cellular

organisms;Eukaryota;Opisthokonta;Metazoa;Eumetazoa;Bilateria;Protostomia;  
Spiralia;Lophotrochozoa;Mollusca;Bivalvia;Autobranchia;Heteroconchia;Euhe  
terodonta;Imparidentia;Venerida;Veneroidea;Veneridae;Mercenaria;Mercenari  
a mercenaria

UdeM00000018670 6596 403.7 UdeM00000018670 XP\_045214637.1 49.7 382  
190 1 9 390 14 393 2.70E-109 403.7 6596 cellular

organisms;Eukaryota;Opisthokonta;Metazoa;Eumetazoa;Bilateria;Protostomia;  
Spiralia;Lophotrochozoa;Mollusca;Bivalvia;Autobranchia;Heteroconchia;Euhe  
terodonta;Imparidentia;Venerida;Veneroidea;Veneridae;Mercenaria;Mercenari  
a mercenaria

UdeM00000018671 6596 390.6 UdeM00000018671 XP\_045211006.1 48.7 382  
194 1 19 400 11 390 2.40E-105 390.6 6596 cellular

organisms;Eukaryota;Opisthokonta;Metazoa;Eumetazoa;Bilateria;Protostomia;  
Spiralia;Lophotrochozoa;Mollusca;Bivalvia;Autobranchia;Heteroconchia;Euhe  
terodonta;Imparidentia;Venerida;Veneroidea;Veneridae;Mercenaria;Mercenari  
a mercenaria

UdeM00000018672 6596 1359.7 UdeM00000018672 XP\_045177518.1 53.6  
2591 910 33 1 2342 1 2549 0.00E+00 1359.7 6596  
cellular

organisms;Eukaryota;Opisthokonta;Metazoa;Eumetazoa;Bilateria;Protostomia;  
Spiralia;Lophotrochozoa;Mollusca;Bivalvia;Autobranchia;Heteroconchia;Euhe  
terodonta;Imparidentia;Venerida;Veneroidea;Veneridae;Mercenaria;Mercenari  
a mercenaria

UdeM00000018673 1735272 379 UdeM00000018673 XP\_041374422.1 41.6  
846 377 18 2521 3343 938 1689 6.20E-101 379 1735272  
cellular

organisms;Eukaryota;Opisthokonta;Metazoa;Eumetazoa;Bilateria;Protostomia;  
Spiralia;Lophotrochozoa;Mollusca;Gastropoda;Neomphalina;Neomphaloidea;Pel  
tospiridae;Gigantopelta;Gigantopelta aegis

UdeM00000018674 29159 236.1 UdeM00000018674 XP\_034300416.1 67.7 195  
56 2 102 296 759 946 5.70E-59 236.1 29159 cellular

organisms;Eukaryota;Opisthokonta;Metazoa;Eumetazoa;Bilateria;Protostomia;  
Spiralia;Lophotrochozoa;Mollusca;Bivalvia;Autobranchia;Pteriomorphia;Ostr  
eida;Ostreoidea;Ostreidae;Crassostrea;Crassostrea gigas

UdeM00000018675 6596 192.2 UdeM00000018675 XP\_045177919.1 37.6 580  
279 16 8 529 7 561 2.20E-45 192.2 6596 cellular

organisms;Eukaryota;Opisthokonta;Metazoa;Eumetazoa;Bilateria;Protostomia;  
Spiralia;Lophotrochozoa;Mollusca;Bivalvia;Autobranchia;Heteroconchia;Euhe

terodonta;Imparidentia;Venerida;Veneroidea;Veneridae;Mercenaria;Mercenaria mercenaria

UdeM00000018676 6579 562 UdeM00000018676 XP\_033741736.1 59.1 443  
174 2 2 442 420 857 7.00E-157 562 6579 cellular

organisms;Eukaryota;Opisthokonta;Metazoa;Eumetazoa;Bilateria;Protostomia;Spiralia;Lophotrochozoa;Mollusca;Bivalvia;Autobranhia;Pteriormorphia;Pectinida;Pectinoidea;Pectinidae;Pecten;Pecten maximus

UdeM00000018677 6579 277.7 UdeM00000018677 XP\_033741736.1 54.9 244  
108 1 1 242 614 857 1.50E-71 277.7 6579 cellular

organisms;Eukaryota;Opisthokonta;Metazoa;Eumetazoa;Bilateria;Protostomia;Spiralia;Lophotrochozoa;Mollusca;Bivalvia;Autobranhia;Pteriormorphia;Pectinida;Pectinoidea;Pectinidae;Pecten;Pecten maximus

UdeM00000018678 6579 1265.8 UdeM00000018678 XP\_033756411.1 70.6  
867 254 1 1 867 69 934 0.00E+00 1265.8 6579  
cellular

organisms;Eukaryota;Opisthokonta;Metazoa;Eumetazoa;Bilateria;Protostomia;Spiralia;Lophotrochozoa;Mollusca;Bivalvia;Autobranhia;Pteriormorphia;Pectinida;Pectinoidea;Pectinidae;Pecten;Pecten maximus

UdeM00000018681 29159 63.9 UdeM00000018681 XP\_034300301.1 35.9 103  
61 2 35 133 7 108 6.80E-07 63.9 29159 cellular

organisms;Eukaryota;Opisthokonta;Metazoa;Eumetazoa;Bilateria;Protostomia;Spiralia;Lophotrochozoa;Mollusca;Bivalvia;Autobranhia;Pteriormorphia;Ostreida;Ostreioidea;Ostreidae;Crassostrea;Crassostrea gigas

UdeM00000018682 6573 131 UdeM00000018682 XP\_021352025.1 63.2 87  
32 0 1 87 1 87 7.80E-28 131 6573 cellular

organisms;Eukaryota;Opisthokonta;Metazoa;Eumetazoa;Bilateria;Protostomia;Spiralia;Lophotrochozoa;Mollusca;Bivalvia;Autobranhia;Pteriormorphia;Pectinida;Pectinoidea;Pectinidae;Mizuhopecten;Mizuhopecten yessoensis

UdeM00000018683 6565 1964.9 UdeM00000018683 XP\_022325329.1 48  
2034 905 26 56 1958 1648 3659 0.00E+00 1964.9 6565  
cellular

organisms;Eukaryota;Opisthokonta;Metazoa;Eumetazoa;Bilateria;Protostomia;Spiralia;Lophotrochozoa;Mollusca;Bivalvia;Autobranhia;Pteriormorphia;Ostreida;Ostreioidea;Ostreidae;Crassostrea;Crassostrea virginica

UdeM00000018684 6565 286.6 UdeM00000018684 XP\_022325330.1 53 247  
105 3 4 248 3645 3882 3.20E-74 286.6 6565 cellular

organisms;Eukaryota;Opisthokonta;Metazoa;Eumetazoa;Bilateria;Protostomia;Spiralia;Lophotrochozoa;Mollusca;Bivalvia;Autobranhia;Pteriormorphia;Ostreida;Ostreioidea;Ostreidae;Crassostrea;Crassostrea virginica

UdeM00000018685 6596 1253.4 UdeM00000018685 XP\_045179073.1 44.3  
1517 772 18 157 1656 436 1896 0.00E+00 1253.4 6596  
cellular

organisms;Eukaryota;Opisthokonta;Metazoa;Eumetazoa;Bilateria;Protostomia;Spiralia;Lophotrochozoa;Mollusca;Bivalvia;Autobranhia;Heteroconchia;Euheterodonta;Imparidentia;Venerida;Veneroidea;Veneridae;Mercenaria;Mercenaria mercenaria

UdeM00000018686 1735272 825.5 UdeM00000018686 XP\_041374928.1 76.7  
558 125 2 16 572 954 1507 6.30E-236 825.5 1735272  
cellular

organisms;Eukaryota;Opisthokonta;Metazoa;Eumetazoa;Bilateria;Protostomia;Spiralia;Lophotrochozoa;Mollusca;Gastropoda;Neomphalina;Neomphaloidea;Peltospiridae;Gigantopelta;Gigantopelta aegis

UdeM00000018688 6579 592 UdeM00000018688 XP\_033728944.1 56 611  
196 11 6 553 68 668 7.60E-166 592 6579 cellular

organisms;Eukaryota;Opisthokonta;Metazoa;Eumetazoa;Bilateria;Protostomia;Spiralia;Lophotrochozoa;Mollusca;Bivalvia;Autobranchia;Pteriormorphia;Pectinida;Pectinoidea;Pectinidae;Pecten;Pecten maximus

UdeM00000018689 6596 214.5 UdeM00000018689 XP\_045176664.1 29 556  
336 15 25 543 13 546 3.40E-52 214.5 6596 cellular

organisms;Eukaryota;Opisthokonta;Metazoa;Eumetazoa;Bilateria;Protostomia;Spiralia;Lophotrochozoa;Mollusca;Bivalvia;Autobranchia;Heteroconchia;Euheterodonta;Imparidentia;Venerida;Veneroidea;Veneridae;Mercenaria;Mercenaria mercenaria

UdeM00000018692 6596 122.1 UdeM00000018692 XP\_045177550.1 55.6 117  
51 1 1 117 1 116 4.80E-25 122.1 6596 cellular

organisms;Eukaryota;Opisthokonta;Metazoa;Eumetazoa;Bilateria;Protostomia;Spiralia;Lophotrochozoa;Mollusca;Bivalvia;Autobranchia;Heteroconchia;Euheterodonta;Imparidentia;Venerida;Veneroidea;Veneridae;Mercenaria;Mercenaria mercenaria

UdeM00000018693 29159 659.4 UdeM00000018693 XP\_034300049.1 64.6 531  
178 5 1 531 1 521 4.20E-186 659.4 29159 cellular

organisms;Eukaryota;Opisthokonta;Metazoa;Eumetazoa;Bilateria;Protostomia;Spiralia;Lophotrochozoa;Mollusca;Bivalvia;Autobranchia;Pteriormorphia;Ostreida;Ostreoidea;Ostreidae;Crassostrea;Crassostrea gigas

UdeM00000018694 6596 672.9 UdeM00000018694 XP\_045177538.1 68.5 511  
151 7 1 504 1 508 3.70E-190 672.9 6596 cellular

organisms;Eukaryota;Opisthokonta;Metazoa;Eumetazoa;Bilateria;Protostomia;Spiralia;Lophotrochozoa;Mollusca;Bivalvia;Autobranchia;Heteroconchia;Euheterodonta;Imparidentia;Venerida;Veneroidea;Veneridae;Mercenaria;Mercenaria mercenaria

UdeM00000018695 6596 383.3 UdeM00000018695 XP\_045179364.1 40 518  
301 8 1 514 1 512 5.00E-103 383.3 6596 cellular

organisms;Eukaryota;Opisthokonta;Metazoa;Eumetazoa;Bilateria;Protostomia;Spiralia;Lophotrochozoa;Mollusca;Bivalvia;Autobranchia;Heteroconchia;Euheterodonta;Imparidentia;Venerida;Veneroidea;Veneridae;Mercenaria;Mercenaria mercenaria

UdeM00000018696 6596 661.8 UdeM00000018696 XP\_045191450.1 71.9 417  
117 0 22 438 21 437 6.20E-187 661.8 6596 cellular

organisms;Eukaryota;Opisthokonta;Metazoa;Eumetazoa;Bilateria;Protostomia;Spiralia;Lophotrochozoa;Mollusca;Bivalvia;Autobranchia;Heteroconchia;Euheterodonta;Imparidentia;Venerida;Veneroidea;Veneridae;Mercenaria;Mercenaria mercenaria

UdeM00000018697 6596 553.9 UdeM00000018697 XP\_045178492.1 62.4 407  
153 0 1 407 1 407 1.70E-154 553.9 6596 cellular

organisms;Eukaryota;Opisthokonta;Metazoa;Eumetazoa;Bilateria;Protostomia;Spiralia;Lophotrochozoa;Mollusca;Bivalvia;Autobranchia;Heteroconchia;Euheterodonta;Imparidentia;Venerida;Veneroidea;Veneridae;Mercenaria;Mercenaria mercenaria

UdeM00000018698 1735272 84 UdeM00000018698 XP\_041374001.1 29.1  
179 124 1 13 188 367 545 3.30E-13 84 1735272  
cellular

organisms;Eukaryota;Opisthokonta;Metazoa;Eumetazoa;Bilateria;Protostomia;Spiralia;Lophotrochozoa;Mollusca;Gastropoda;Neomphalina;Neomphaloidea;Peltospiridae;Gigantopelta;Gigantopelta aegis

UdeM00000018699 1735272 83.6 UdeM00000018699 XP\_041374001.1 30.2  
205 119 7 21 214 367 558 5.00E-13 83.6 1735272  
cellular

organisms;Eukaryota;Opisthokonta;Metazoa;Eumetazoa;Bilateria;Protostomia;

Spiralia; Lophotrochozoa; Mollusca; Gastropoda; Neomphalina; Neomphaloidea; Pelto-  
 tospiridae; Gigantopelta; Gigantopelta aegis

UdeM00000018700 6596 282.7 UdeM00000018700 XP\_045216733.1 45.4 317  
 157 5 129 442 209 512 8.00E-73 282.7 6596 cellular  
 organisms; Eukaryota; Opisthokonta; Metazoa; Eumetazoa; Bilateria; Protostomia;  
 Spiralia; Lophotrochozoa; Mollusca; Bivalvia; Autobranchia; Heteroconchia; Eue-  
 terodonta; Imparidentia; Venerida; Veneroidea; Veneridae; Mercenaria; Mercenari-  
 a mercenaria

UdeM00000018702 1735272 92.4 UdeM00000018702 XP\_041374001.1 32.4  
 256 145 8 511 750 361 604 2.90E-15 92.4 1735272  
 cellular  
 organisms; Eukaryota; Opisthokonta; Metazoa; Eumetazoa; Bilateria; Protostomia;  
 Spiralia; Lophotrochozoa; Mollusca; Gastropoda; Neomphalina; Neomphaloidea; Pel-  
 tospiridae; Gigantopelta; Gigantopelta aegis

UdeM00000018703 13397 72.8 UdeM00000018703 XP\_041070135.1 38 108  
 57 4 131 233 129 231 1.50E-09 72.8 13397 cellular  
 organisms; Eukaryota; Opisthokonta; Metazoa; Eumetazoa; Bilateria; Deuterostomi-  
 a; Chordata; Craniata; Vertebrata; Gnathostomata; Chondrichthyes; Elasmobranchi-  
 i; Selachii; Galeomorphii; Galeoidea; Lamniformes; Alopiidae; Lamninae; Carcharo-  
 don; Carcharodon carcharias

UdeM00000018704 6596 135.6 UdeM00000018704 XP\_045181277.1 36 203  
 120 5 219 414 222 421 1.50E-28 135.6 6596 cellular  
 organisms; Eukaryota; Opisthokonta; Metazoa; Eumetazoa; Bilateria; Protostomia;  
 Spiralia; Lophotrochozoa; Mollusca; Bivalvia; Autobranchia; Heteroconchia; Eue-  
 terodonta; Imparidentia; Venerida; Veneroidea; Veneridae; Mercenaria; Mercenari-  
 a mercenaria

UdeM00000018706 6596 64.7 UdeM00000018706 XP\_045179674.1 35.9 103  
 63 3 47 148 434 534 2.10E-07 64.7 6596 cellular  
 organisms; Eukaryota; Opisthokonta; Metazoa; Eumetazoa; Bilateria; Protostomia;  
 Spiralia; Lophotrochozoa; Mollusca; Bivalvia; Autobranchia; Heteroconchia; Eue-  
 terodonta; Imparidentia; Venerida; Veneroidea; Veneridae; Mercenaria; Mercenari-  
 a mercenaria

UdeM00000018707 6596 58.5 UdeM00000018707 XP\_045189070.1 40.2 87  
 50 2 43 128 1 86 7.10E-06 58.5 6596 cellular  
 organisms; Eukaryota; Opisthokonta; Metazoa; Eumetazoa; Bilateria; Protostomia;  
 Spiralia; Lophotrochozoa; Mollusca; Bivalvia; Autobranchia; Heteroconchia; Eue-  
 terodonta; Imparidentia; Venerida; Veneroidea; Veneridae; Mercenaria; Mercenari-  
 a mercenaria

UdeM00000018708 6596 522.3 UdeM00000018708 XP\_045177528.1 40.7 1024  
 425 32 119 1005 115 1093 1.30E-144 522.3 6596 cellular  
 organisms; Eukaryota; Opisthokonta; Metazoa; Eumetazoa; Bilateria; Protostomia;  
 Spiralia; Lophotrochozoa; Mollusca; Bivalvia; Autobranchia; Heteroconchia; Eue-  
 terodonta; Imparidentia; Venerida; Veneroidea; Veneridae; Mercenaria; Mercenari-  
 a mercenaria

UdeM00000018709 7515 90.1 UdeM00000018709 XP\_026482378.1 21.7 474  
 289 14 1011 1447 113 541 2.50E-14 90.1 7515 cellular  
 organisms; Eukaryota; Opisthokonta; Metazoa; Eumetazoa; Bilateria; Protostomia;  
 Ecdysozoa; Panarthropoda; Arthropoda; Mandibulata; Pancrustacea; Hexapoda; Inse-  
 cta; Dicondylia; Pterygota; Neoptera; Endopterygota; Siphonaptera; Pulicomorpha;  
 Pulicoidea; Pulicidae; Archaeopsyllinae; Ctenocephalides; Ctenocephalides  
 felis

UdeM00000018711 6565 58.2 UdeM00000018711 XP\_022299727.1 37.8 82  
 47 2 1 80 46 125 5.80E-06 58.2 6565 cellular  
 organisms; Eukaryota; Opisthokonta; Metazoa; Eumetazoa; Bilateria; Protostomia;

Spiralia;Lophotrochozoa;Mollusca;Bivalvia;Autobranchia;Pteriormorphia;Ostr  
eida;Ostreoidea;Ostreidae;Crassostrea;Crassostrea virginica  
UdeM00000018712 2607531 169.9 UdeM00000018712 XP\_029635924.1 55.4  
157 54 3 58 203 33 184 3.70E-39 169.9 2607531  
cellular

organisms;Eukaryota;Opisthokonta;Metazoa;Eumetazoa;Bilateria;Protostomia;  
Spiralia;Lophotrochozoa;Mollusca;Cephalopoda;Coleoidea;Octopodiformes;Oct  
opoda;Incirrata;Octopodidae;Octopus;Octopus sinensis  
UdeM00000018713 400727 1048.5 UdeM00000018713 XP\_025080030.1  
61.3 911 302 12 40 942 363 1230 5.10E-303 1048.5  
400727 cellular

organisms;Eukaryota;Opisthokonta;Metazoa;Eumetazoa;Bilateria;Protostomia;  
Spiralia;Lophotrochozoa;Mollusca;Gastropoda;Caenogastropoda;Architaeniogl  
ossa;Ampullarioidea;Ampullariidae;Pomacea;Pomacea canaliculata  
UdeM00000018714 400727 1048.5 UdeM00000018714 XP\_025080030.1  
61.3 911 302 12 39 941 363 1230 5.10E-303 1048.5  
400727 cellular

organisms;Eukaryota;Opisthokonta;Metazoa;Eumetazoa;Bilateria;Protostomi  
a;Echinodermata;Pelmatozoa;Crinoidea;Articulata;Comatulida;Comatulidae;Co  
matulinae;Anneissia;Anneissia japonica  
UdeM00000018715 1529436 174.5 UdeM00000018715 XP\_033095325.1 41.7  
211 107 1 105 299 48 258 2.30E-40 174.5 1529436  
cellular

organisms;Eukaryota;Opisthokonta;Metazoa;Eumetazoa;Bilateria;Deuterostomi  
a;Echinodermata;Pelmatozoa;Crinoidea;Articulata;Comatulida;Comatulidae;Co  
matulinae;Anneissia;Anneissia japonica  
UdeM00000018716 6573 679.1 UdeM00000018716 XP\_021363533.1 60.7 588  
209 8 1 576 579 1156 5.80E-192 679.1 6573 cellular

organisms;Eukaryota;Opisthokonta;Metazoa;Eumetazoa;Bilateria;Protostomia;  
Spiralia;Lophotrochozoa;Mollusca;Bivalvia;Autobranchia;Pteriormorphia;Pect  
inida;Pectinoidea;Pectinidae;Mizuhopecten;Mizuhopecten yessoensis  
UdeM00000018717 6573 674.5 UdeM00000018717 XP\_021363533.1 57.2 631  
211 9 1 625 579 1156 1.50E-190 674.5 6573 cellular

organisms;Eukaryota;Opisthokonta;Metazoa;Eumetazoa;Bilateria;Protostomia;  
Spiralia;Lophotrochozoa;Mollusca;Bivalvia;Autobranchia;Pteriormorphia;Pect  
inida;Pectinoidea;Pectinidae;Mizuhopecten;Mizuhopecten yessoensis  
UdeM00000018718 2607531 469.5 UdeM00000018718 XP\_029635924.1 59.9  
397 146 6 162 552 86 475 5.70E-129 469.5 2607531  
cellular

organisms;Eukaryota;Opisthokonta;Metazoa;Eumetazoa;Bilateria;Protostomia;  
Spiralia;Lophotrochozoa;Mollusca;Cephalopoda;Coleoidea;Octopodiformes;Oct  
opoda;Incirrata;Octopodidae;Octopus;Octopus sinensis  
UdeM00000018720 1735272 144.8 UdeM00000018720 XP\_041374691.1 46.8  
154 82 0 1 154 85 238 9.60E-32 144.8 1735272  
cellular

organisms;Eukaryota;Opisthokonta;Metazoa;Eumetazoa;Bilateria;Protostomia;  
Spiralia;Lophotrochozoa;Mollusca;Gastropoda;Neomphalina;Neomphaloidea;Pel  
tospiridae;Gigantopelta;Gigantopelta aegis  
UdeM00000018719 1735272 200.3 UdeM00000018719 XP\_041374691.1 44.1  
238 131 2 3 239 2 238 2.90E-48 200.3 1735272  
cellular

organisms;Eukaryota;Opisthokonta;Metazoa;Eumetazoa;Bilateria;Protostomia;  
Spiralia;Lophotrochozoa;Mollusca;Gastropoda;Neomphalina;Neomphaloidea;Pel  
tospiridae;Gigantopelta;Gigantopelta aegis

UdeM00000018721 6596 514.2 UdeM00000018721 XP\_045179310.1 42.9 729  
 319 23 27 678 20 728 2.50E-142 514.2 6596 cellular  
 organisms;Eukaryota;Opisthokonta;Metazoa;Eumetazoa;Bilateria;Protostomia;  
 Spiralia;Lophotrochozoa;Mollusca;Bivalvia;Autobranhia;Heteroconchia;Euhe  
 terodonta;Imparidentia;Venerida;Veneroidea;Veneridae;Mercenaria;Mercenari  
 a mercenaria

UdeM00000018722 6596 581.6 UdeM00000018722 XP\_045179013.1 76.4 415  
 91 6 11 419 22 435 1.00E-162 581.6 6596 cellular  
 organisms;Eukaryota;Opisthokonta;Metazoa;Eumetazoa;Bilateria;Protostomia;  
 Spiralia;Lophotrochozoa;Mollusca;Bivalvia;Autobranhia;Heteroconchia;Euhe  
 terodonta;Imparidentia;Venerida;Veneroidea;Veneridae;Mercenaria;Mercenari  
 a mercenaria

UdeM00000018723 6945 66.6 UdeM00000018723 XP\_040065097.1 28.2 170  
 88 5 59 194 85 254 6.10E-08 66.6 6945 cellular  
 organisms;Eukaryota;Opisthokonta;Metazoa;Eumetazoa;Bilateria;Protostomia;  
 Ecdysozoa;Panarthropoda;Arthropoda;Chelicerata;Arachnida;Acari;Parasitifo  
 rmes;Ixodida;Ixodoidea;Ixodidae;Ixodinae;Ixodes;Ixodes scapularis

UdeM00000018724 6565 479.6 UdeM00000018724 XP\_022320474.1 59.8 348  
 137 2 64 410 59 404 4.10E-132 479.6 6565 cellular  
 organisms;Eukaryota;Opisthokonta;Metazoa;Eumetazoa;Bilateria;Protostomia;  
 Spiralia;Lophotrochozoa;Mollusca;Bivalvia;Autobranhia;Pteriormorphia;Ostr  
 eida;Ostreoidea;Ostreidae;Crassostrea;Crassostrea virginica

UdeM00000018726 6596 314.7 UdeM00000018726 XP\_045178771.1 81.6 179  
 33 0 1 179 1 179 7.60E-83 314.7 6596 cellular  
 organisms;Eukaryota;Opisthokonta;Metazoa;Eumetazoa;Bilateria;Protostomia;  
 Spiralia;Lophotrochozoa;Mollusca;Bivalvia;Autobranhia;Heteroconchia;Euhe  
 terodonta;Imparidentia;Venerida;Veneroidea;Veneridae;Mercenaria;Mercenari  
 a mercenaria

UdeM00000018727 6596 741.9 UdeM00000018727 XP\_045178291.1 48.2 1094  
 431 33 1 1013 113 1151 1.10E-210 741.9 6596 cellular  
 organisms;Eukaryota;Opisthokonta;Metazoa;Eumetazoa;Bilateria;Protostomia;  
 Spiralia;Lophotrochozoa;Mollusca;Bivalvia;Autobranhia;Heteroconchia;Euhe  
 terodonta;Imparidentia;Venerida;Veneroidea;Veneridae;Mercenaria;Mercenari  
 a mercenaria

UdeM00000018728 1735272 171.4 UdeM00000018728 XP\_041356145.1 53.6  
 140 64 1 33 172 48 186 1.10E-39 171.4 1735272  
 cellular  
 organisms;Eukaryota;Opisthokonta;Metazoa;Eumetazoa;Bilateria;Protostomia;  
 Spiralia;Lophotrochozoa;Mollusca;Gastropoda;Neomphalina;Neomphaloidea;Pel  
 tospiridae;Gigantopelta;Gigantopelta aegis

UdeM00000018729 114398 427.2 UdeM00000018729 XP\_042903861.1 38.8  
 609 362 6 1 605 1 602 3.50E-116 427.2 114398  
 cellular  
 organisms;Eukaryota;Opisthokonta;Metazoa;Eumetazoa;Bilateria;Protostomia;  
 Ecdysozoa;Panarthropoda;Arthropoda;Chelicerata;Arachnida;Araneae;Araneomo  
 rphae;Entelegynae;Orbiculariae;Araneoidea;Theridiidae;Parasteatoda;Parast  
 eatoda tepidariorum

UdeM00000018730 1735272 167.5 UdeM00000018730 XP\_041374781.1 43.3  
 245 116 5 35 269 97 328 2.30E-38 167.5 1735272  
 cellular  
 organisms;Eukaryota;Opisthokonta;Metazoa;Eumetazoa;Bilateria;Protostomia;  
 Spiralia;Lophotrochozoa;Mollusca;Gastropoda;Neomphalina;Neomphaloidea;Pel  
 tospiridae;Gigantopelta;Gigantopelta aegis

UdeM00000018733 6579 85.9 UdeM00000018733 XP\_033761616.1 52.7 74  
 34 1 2 75 167 239 2.50E-14 85.9 6579 cellular  
 organisms;Eukaryota;Opisthokonta;Metazoa;Eumetazoa;Bilateria;Protostomia;  
 Spiralia;Lophotrochozoa;Mollusca;Bivalvia;Autobranchia;Pteriomorpha;Pect  
 inida;Pectinoidea;Pectinidae;Pecten;Pecten maximus  
 UdeM00000018735 6565 89.4 UdeM00000018735 XP\_022322655.1 47.4 95  
 50 0 8 102 339 433 3.00E-15 89.4 6565 cellular  
 organisms;Eukaryota;Opisthokonta;Metazoa;Eumetazoa;Bilateria;Protostomia;  
 Spiralia;Lophotrochozoa;Mollusca;Bivalvia;Autobranchia;Pteriomorpha;Ostr  
 eida;Ostreoidea;Ostreidae;Crassostrea;Crassostrea virginica  
 UdeM00000018739 1735272 409.1 UdeM00000018739 XP\_041374003.1 95.8  
 213 9 0 1 213 1 213 3.50E-111 409.1 1735272  
 cellular  
 organisms;Eukaryota;Opisthokonta;Metazoa;Eumetazoa;Bilateria;Protostomia;  
 Spiralia;Lophotrochozoa;Mollusca;Gastropoda;Neomphalina;Neomphaloidea;Pel  
 tospiridae;Gigantopelta;Gigantopelta aegis  
 UdeM00000018740 29159 849 UdeM00000018740 XP\_011426045.1 68.4 602  
 179 3 1 591 1 602 3.70E-243 849 29159 cellular  
 organisms;Eukaryota;Opisthokonta;Metazoa;Eumetazoa;Bilateria;Protostomia;  
 Spiralia;Lophotrochozoa;Mollusca;Bivalvia;Autobranchia;Pteriomorpha;Ostr  
 eida;Ostreoidea;Ostreidae;Crassostrea;Crassostrea gigas  
 UdeM00000018741 6596 609.8 UdeM00000018741 XP\_045179322.1 45.1 809  
 339 14 22 769 16 780 4.90E-171 609.8 6596 cellular  
 organisms;Eukaryota;Opisthokonta;Metazoa;Eumetazoa;Bilateria;Protostomia;  
 Spiralia;Lophotrochozoa;Mollusca;Bivalvia;Autobranchia;Heteroconchia;Euhe  
 terodonta;Imparidentia;Venerida;Veneroidea;Veneridae;Mercenaria;Mercenari  
 a mercenaria  
 UdeM00000018742 6596 1038.5 UdeM00000018742 XP\_045178359.1 73.2  
 657 172 3 1 656 1 654 3.60E-300 1038.5 6596  
 cellular  
 organisms;Eukaryota;Opisthokonta;Metazoa;Eumetazoa;Bilateria;Protostomia;  
 Spiralia;Lophotrochozoa;Mollusca;Bivalvia;Autobranchia;Heteroconchia;Euhe  
 terodonta;Imparidentia;Venerida;Veneroidea;Veneridae;Mercenaria;Mercenari  
 a mercenaria  
 UdeM00000018743 6579 497.3 UdeM00000018743 XP\_033728865.1 78 300  
 66 0 1 300 3721 4020 1.40E-137 497.3 6579 cellular  
 organisms;Eukaryota;Opisthokonta;Metazoa;Eumetazoa;Bilateria;Protostomia;  
 Spiralia;Lophotrochozoa;Mollusca;Bivalvia;Autobranchia;Pteriomorpha;Pect  
 inida;Pectinoidea;Pectinidae;Pecten;Pecten maximus  
 UdeM00000018744 6596 6884.7 UdeM00000018744 XP\_045178280.1 83.6  
 4011 653 4 1 4010 1 4008 0.00E+00 6884.7 6596  
 cellular  
 organisms;Eukaryota;Opisthokonta;Metazoa;Eumetazoa;Bilateria;Protostomia;  
 Spiralia;Lophotrochozoa;Mollusca;Bivalvia;Autobranchia;Heteroconchia;Euhe  
 terodonta;Imparidentia;Venerida;Veneroidea;Veneridae;Mercenaria;Mercenari  
 a mercenaria  
 UdeM00000018745 1735272 152.5 UdeM00000018745 XP\_041374447.1 50.4  
 139 69 0 6 144 5 143 4.10E-34 152.5 1735272  
 cellular  
 organisms;Eukaryota;Opisthokonta;Metazoa;Eumetazoa;Bilateria;Protostomia;  
 Spiralia;Lophotrochozoa;Mollusca;Gastropoda;Neomphalina;Neomphaloidea;Pel  
 tospiridae;Gigantopelta;Gigantopelta aegis  
 UdeM00000018746 6565 264.2 UdeM00000018746 XP\_022325420.1 42 283  
 161 2 139 418 86 368 2.80E-67 264.2 6565 cellular



organisms;Eukaryota;Opisthokonta;Metazoa;Eumetazoa;Bilateria;Protostomia;Spiralia;Lophotrochozoa;Mollusca;Bivalvia;Autobranchia;Pteriomorpha;Ostr  
eida;Ostreoidea;Ostreidae;Crassostrea;Crassostrea virginica  
UdeM00000018747 6579 264.2 UdeM00000018747 XP\_033742496.1 39.5 362  
200 6 66 419 64 414 2.80E-67 264.2 6579 cellular  
organisms;Eukaryota;Opisthokonta;Metazoa;Eumetazoa;Bilateria;Protostomia;Spiralia;Lophotrochozoa;Mollusca;Bivalvia;Autobranchia;Pteriomorpha;Pect  
inida;Pectinoidea;Pectinidae;Pecten;Pecten maximus  
UdeM00000018748 6579 265.4 UdeM00000018748 XP\_033742496.1 39.5 362  
200 6 66 419 64 414 1.30E-67 265.4 6579 cellular  
organisms;Eukaryota;Opisthokonta;Metazoa;Eumetazoa;Bilateria;Protostomia;Spiralia;Lophotrochozoa;Mollusca;Bivalvia;Autobranchia;Pteriomorpha;Pect  
inida;Pectinoidea;Pectinidae;Pecten;Pecten maximus  
UdeM00000018749 37621 179.5 UdeM00000018749 XP\_014677460.1 36.7 311  
62 2 14 189 20 330 4.00E-42 179.5 37621 cellular  
organisms;Eukaryota;Opisthokonta;Metazoa;Eumetazoa;Bilateria;Protostomia;Ecdysozoa;Scalidophora;Priapulida;Priapulimorpha;Priapulimorphida;Priapul  
idae;Priapulus;Priapulus caudatus  
UdeM00000018751 6565 279.3 UdeM00000018751 XP\_022325420.1 44.9 285  
153 2 202 482 84 368 9.60E-72 279.3 6565 cellular  
organisms;Eukaryota;Opisthokonta;Metazoa;Eumetazoa;Bilateria;Protostomia;Spiralia;Lophotrochozoa;Mollusca;Bivalvia;Autobranchia;Pteriomorpha;Ostr  
eida;Ostreoidea;Ostreidae;Crassostrea;Crassostrea virginica  
UdeM00000018752 6565 274.6 UdeM00000018752 XP\_022325420.1 44 284  
155 2 233 512 84 367 2.50E-70 274.6 6565 cellular  
organisms;Eukaryota;Opisthokonta;Metazoa;Eumetazoa;Bilateria;Protostomia;Spiralia;Lophotrochozoa;Mollusca;Bivalvia;Autobranchia;Pteriomorpha;Ostr  
eida;Ostreoidea;Ostreidae;Crassostrea;Crassostrea virginica  
UdeM00000018753 6579 133.7 UdeM00000018753 XP\_033742496.1 45.8 142  
66 1 89 219 100 241 3.70E-28 133.7 6579 cellular  
organisms;Eukaryota;Opisthokonta;Metazoa;Eumetazoa;Bilateria;Protostomia;Spiralia;Lophotrochozoa;Mollusca;Bivalvia;Autobranchia;Pteriomorpha;Pect  
inida;Pectinoidea;Pectinidae;Pecten;Pecten maximus  
UdeM00000018754 6579 289.3 UdeM00000018754 XP\_033742496.1 44.8 319  
159 4 113 415 100 417 8.00E-75 289.3 6579 cellular  
organisms;Eukaryota;Opisthokonta;Metazoa;Eumetazoa;Bilateria;Protostomia;Spiralia;Lophotrochozoa;Mollusca;Bivalvia;Autobranchia;Pteriomorpha;Pect  
inida;Pectinoidea;Pectinidae;Pecten;Pecten maximus  
UdeM00000018755 6565 278.1 UdeM00000018755 XP\_022325420.1 43.3 289  
160 2 161 445 84 372 2.00E-71 278.1 6565 cellular  
organisms;Eukaryota;Opisthokonta;Metazoa;Eumetazoa;Bilateria;Protostomia;Spiralia;Lophotrochozoa;Mollusca;Bivalvia;Autobranchia;Pteriomorpha;Ostr  
eida;Ostreoidea;Ostreidae;Crassostrea;Crassostrea virginica  
UdeM00000018756 29159 415.6 UdeM00000018756 XP\_034331441.1 29.4 1039  
604 25 97 1043 1 1001 1.80E-112 415.6 29159 cellular  
organisms;Eukaryota;Opisthokonta;Metazoa;Eumetazoa;Bilateria;Protostomia;Spiralia;Lophotrochozoa;Mollusca;Bivalvia;Autobranchia;Pteriomorpha;Ostr  
eida;Ostreoidea;Ostreidae;Crassostrea;Crassostrea gigas  
UdeM00000018757 6596 709.1 UdeM00000018757 XP\_045179358.1 83.5 406  
62 3 1 401 72 477 3.10E-201 709.1 6596 cellular  
organisms;Eukaryota;Opisthokonta;Metazoa;Eumetazoa;Bilateria;Protostomia;Spiralia;Lophotrochozoa;Mollusca;Bivalvia;Autobranchia;Heteroconchia;Euhe  
terodonta;Imparidentia;Venerida;Veneroidea;Veneridae;Mercenaria;Mercenari  
a mercenaria

UdeM00000018758 37621 803.9 UdeM00000018758 XP\_014679849.1 61 621  
 234 4 1 613 3 623 1.40E-229 803.9 37621 cellular  
 organisms;Eukaryota;Opisthokonta;Metazoa;Eumetazoa;Bilateria;Protostomia;  
 Ecdysozoa;Scalidophora;Priapulida;Priapulimorpha;Priapulimorphida;Priapul  
 idae;Priapulus;Priapulus caudatus

UdeM00000018759 37621 640.2 UdeM00000018759 XP\_014679849.1 51.5 621  
 218 5 1 538 3 623 2.40E-180 640.2 37621 cellular  
 organisms;Eukaryota;Opisthokonta;Metazoa;Eumetazoa;Bilateria;Protostomia;  
 Ecdysozoa;Scalidophora;Priapulida;Priapulimorpha;Priapulimorphida;Priapul  
 idae;Priapulus;Priapulus caudatus

UdeM00000018760 37621 724.9 UdeM00000018760 XP\_014679850.1 69.9 512  
 144 3 1 504 1 510 6.90E-206 724.9 37621 cellular  
 organisms;Eukaryota;Opisthokonta;Metazoa;Eumetazoa;Bilateria;Protostomia;  
 Ecdysozoa;Scalidophora;Priapulida;Priapulimorpha;Priapulimorphida;Priapul  
 idae;Priapulus;Priapulus caudatus

UdeM00000018761 6596 444.5 UdeM00000018761 XP\_045177986.1 51 408  
 191 3 19 423 3 404 1.50E-121 444.5 6596 cellular  
 organisms;Eukaryota;Opisthokonta;Metazoa;Eumetazoa;Bilateria;Protostomia;  
 Spiralia;Lophotrochozoa;Mollusca;Bivalvia;Autobranchia;Heteroconchia;Euhe  
 terodonta;Imparidentia;Venerida;Veneroidea;Veneridae;Mercenaria;Mercenari  
 a mercenaria

UdeM00000018762 29159 355.5 UdeM00000018762 XP\_011419561.2 41.7 424  
 235 5 1 416 1 420 9.10E-95 355.5 29159 cellular  
 organisms;Eukaryota;Opisthokonta;Metazoa;Eumetazoa;Bilateria;Protostomia;  
 Spiralia;Lophotrochozoa;Mollusca;Bivalvia;Autobranchia;Pteriormorphia;Ostr  
 eida;Ostreoidea;Ostreidae;Crassostrea;Crassostrea gigas

UdeM00000018763 6565 320.1 UdeM00000018763 XP\_022322406.1 41.1 397  
 226 3 9 404 15 404 4.20E-84 320.1 6565 cellular  
 organisms;Eukaryota;Opisthokonta;Metazoa;Eumetazoa;Bilateria;Protostomia;  
 Spiralia;Lophotrochozoa;Mollusca;Bivalvia;Autobranchia;Pteriormorphia;Ostr  
 eida;Ostreoidea;Ostreidae;Crassostrea;Crassostrea virginica

UdeM00000018764 1735272 1504.2 UdeM00000018764 XP\_041374427.1  
 61.1 1303 456 12 48 1346 1787 3042 0.00E+00 1504.2  
 1735272 cellular  
 organisms;Eukaryota;Opisthokonta;Metazoa;Eumetazoa;Bilateria;Protostomia;  
 Spiralia;Lophotrochozoa;Mollusca;Gastropoda;Neomphalina;Neomphaloidea;Pel  
 tospiridae;Gigantopelta;Gigantopelta aegis

UdeM00000018765 7741 287 UdeM00000018765 XP\_019622111.1 51.3 275  
 132 2 5 278 1 274 2.70E-74 287 7741 cellular  
 organisms;Eukaryota;Opisthokonta;Metazoa;Eumetazoa;Bilateria;Deuterostomi  
 a;Chordata;Cephalochordata;Leptocardii;Amphioxiformes;Branchiostomidae;Br  
 anchiostoma;Branchiostoma belcheri

UdeM00000018766 6596 184.9 UdeM00000018766 XP\_045178474.1 61.2 160  
 55 3 31 188 1632 1786 1.70E-43 184.9 6596 cellular  
 organisms;Eukaryota;Opisthokonta;Metazoa;Eumetazoa;Bilateria;Protostomia;  
 Spiralia;Lophotrochozoa;Mollusca;Bivalvia;Autobranchia;Heteroconchia;Euhe  
 terodonta;Imparidentia;Venerida;Veneroidea;Veneridae;Mercenaria;Mercenari  
 a mercenaria

UdeM00000018767 6596 1493 UdeM00000018767 XP\_045178474.1 82.8 905  
 147 4 465 1365 713 1612 0.00E+00 1493 6596 cellular  
 organisms;Eukaryota;Opisthokonta;Metazoa;Eumetazoa;Bilateria;Protostomia;  
 Spiralia;Lophotrochozoa;Mollusca;Bivalvia;Autobranchia;Heteroconchia;Euhe  
 terodonta;Imparidentia;Venerida;Veneroidea;Veneridae;Mercenaria;Mercenari  
 a mercenaria

|                                                                                                                                                                                                                                       |      |        |                 |                |           |
|---------------------------------------------------------------------------------------------------------------------------------------------------------------------------------------------------------------------------------------|------|--------|-----------------|----------------|-----------|
| UdeM00000018768                                                                                                                                                                                                                       | 6596 | 1185.2 | UdeM00000018768 | XP_045178474.1 | 86.4      |
| 691                                                                                                                                                                                                                                   | 93   | 1      | 13              | 703            | 23        |
|                                                                                                                                                                                                                                       |      |        |                 |                | 712       |
|                                                                                                                                                                                                                                       |      |        |                 |                | 0.00E+00  |
|                                                                                                                                                                                                                                       |      |        |                 |                | 1185.2    |
|                                                                                                                                                                                                                                       |      |        |                 |                | 6596      |
| cellular                                                                                                                                                                                                                              |      |        |                 |                |           |
| organisms;Eukaryota;Opisthokonta;Metazoa;Eumetazoa;Bilateria;Protostomia;Spiralia;Lophotrochozoa;Mollusca;Bivalvia;Autobranchia;Heteroconchia;Euherodonta;Imparidentia;Venerida;Veneroidea;Veneridae;Mercenaria;Mercenaria mercenaria |      |        |                 |                |           |
| UdeM00000018769                                                                                                                                                                                                                       | 6573 | 180.3  | UdeM00000018769 | XP_021366307.1 | 96.7      |
| 3                                                                                                                                                                                                                                     | 0    | 1      | 90              | 1              | 90        |
|                                                                                                                                                                                                                                       |      |        |                 |                | 1.10E-42  |
|                                                                                                                                                                                                                                       |      |        |                 |                | 180.3     |
|                                                                                                                                                                                                                                       |      |        |                 |                | 6573      |
|                                                                                                                                                                                                                                       |      |        |                 |                | cellular  |
| organisms;Eukaryota;Opisthokonta;Metazoa;Eumetazoa;Bilateria;Protostomia;Spiralia;Lophotrochozoa;Mollusca;Bivalvia;Autobranchia;Pteriormorphia;Pectinida;Pectinoidea;Pectinidae;Mizuhopecten;Mizuhopecten yessoensis                  |      |        |                 |                |           |
| UdeM00000018770                                                                                                                                                                                                                       | 6596 | 69.7   | UdeM00000018770 | XP_045178533.1 | 68        |
| 13                                                                                                                                                                                                                                    | 1    | 487    | 533             | 638            | 687       |
|                                                                                                                                                                                                                                       |      |        |                 |                | 1.30E-08  |
|                                                                                                                                                                                                                                       |      |        |                 |                | 69.7      |
|                                                                                                                                                                                                                                       |      |        |                 |                | 6596      |
|                                                                                                                                                                                                                                       |      |        |                 |                | cellular  |
| organisms;Eukaryota;Opisthokonta;Metazoa;Eumetazoa;Bilateria;Protostomia;Spiralia;Lophotrochozoa;Mollusca;Bivalvia;Autobranchia;Heteroconchia;Euherodonta;Imparidentia;Venerida;Veneroidea;Veneridae;Mercenaria;Mercenaria mercenaria |      |        |                 |                |           |
| UdeM00000018771                                                                                                                                                                                                                       | 6596 | 109    | UdeM00000018771 | XP_045178533.1 | 67.8      |
| 26                                                                                                                                                                                                                                    | 2    | 1      | 87              | 1              | 85        |
|                                                                                                                                                                                                                                       |      |        |                 |                | 4.90E-20  |
|                                                                                                                                                                                                                                       |      |        |                 |                | 109       |
|                                                                                                                                                                                                                                       |      |        |                 |                | 6596      |
|                                                                                                                                                                                                                                       |      |        |                 |                | cellular  |
| organisms;Eukaryota;Opisthokonta;Metazoa;Eumetazoa;Bilateria;Protostomia;Spiralia;Lophotrochozoa;Mollusca;Bivalvia;Autobranchia;Heteroconchia;Euherodonta;Imparidentia;Venerida;Veneroidea;Veneridae;Mercenaria;Mercenaria mercenaria |      |        |                 |                |           |
| UdeM00000018772                                                                                                                                                                                                                       | 6579 | 118.6  | UdeM00000018772 | XP_033729096.1 | 57.9      |
| 39                                                                                                                                                                                                                                    | 2    | 6      | 112             | 5              | 105       |
|                                                                                                                                                                                                                                       |      |        |                 |                | 5.10E-24  |
|                                                                                                                                                                                                                                       |      |        |                 |                | 118.6     |
|                                                                                                                                                                                                                                       |      |        |                 |                | 6579      |
|                                                                                                                                                                                                                                       |      |        |                 |                | cellular  |
| organisms;Eukaryota;Opisthokonta;Metazoa;Eumetazoa;Bilateria;Protostomia;Spiralia;Lophotrochozoa;Mollusca;Bivalvia;Autobranchia;Pteriormorphia;Pectinida;Pectinoidea;Pectinidae;Pecten;Pecten maximus                                 |      |        |                 |                |           |
| UdeM00000018774                                                                                                                                                                                                                       | 6596 | 458.4  | UdeM00000018774 | XP_045179542.1 | 63.8      |
| 122                                                                                                                                                                                                                                   | 2    | 16     | 359             | 17             | 359       |
|                                                                                                                                                                                                                                       |      |        |                 |                | 8.50E-126 |
|                                                                                                                                                                                                                                       |      |        |                 |                | 458.4     |
|                                                                                                                                                                                                                                       |      |        |                 |                | 6596      |
|                                                                                                                                                                                                                                       |      |        |                 |                | cellular  |
| organisms;Eukaryota;Opisthokonta;Metazoa;Eumetazoa;Bilateria;Protostomia;Spiralia;Lophotrochozoa;Mollusca;Bivalvia;Autobranchia;Heteroconchia;Euherodonta;Imparidentia;Venerida;Veneroidea;Veneridae;Mercenaria;Mercenaria mercenaria |      |        |                 |                |           |
| UdeM00000018776                                                                                                                                                                                                                       | 6596 | 176    | UdeM00000018776 | XP_045179542.1 | 91.8      |
| 7                                                                                                                                                                                                                                     | 0    | 39     | 123             | 21             | 105       |
|                                                                                                                                                                                                                                       |      |        |                 |                | 2.90E-41  |
|                                                                                                                                                                                                                                       |      |        |                 |                | 176       |
|                                                                                                                                                                                                                                       |      |        |                 |                | 6596      |
|                                                                                                                                                                                                                                       |      |        |                 |                | cellular  |
| organisms;Eukaryota;Opisthokonta;Metazoa;Eumetazoa;Bilateria;Protostomia;Spiralia;Lophotrochozoa;Mollusca;Bivalvia;Autobranchia;Heteroconchia;Euherodonta;Imparidentia;Venerida;Veneroidea;Veneridae;Mercenaria;Mercenaria mercenaria |      |        |                 |                |           |
| UdeM00000018777                                                                                                                                                                                                                       | 6596 | 203.8  | UdeM00000018777 | XP_045179542.1 | 49.8      |
| 101                                                                                                                                                                                                                                   | 2    | 2      | 207             | 155            | 359       |
|                                                                                                                                                                                                                                       |      |        |                 |                | 2.20E-49  |
|                                                                                                                                                                                                                                       |      |        |                 |                | 203.8     |
|                                                                                                                                                                                                                                       |      |        |                 |                | 6596      |
|                                                                                                                                                                                                                                       |      |        |                 |                | cellular  |
| organisms;Eukaryota;Opisthokonta;Metazoa;Eumetazoa;Bilateria;Protostomia;Spiralia;Lophotrochozoa;Mollusca;Bivalvia;Autobranchia;Heteroconchia;Euherodonta;Imparidentia;Venerida;Veneroidea;Veneridae;Mercenaria;Mercenaria mercenaria |      |        |                 |                |           |
| UdeM00000018779                                                                                                                                                                                                                       | 6596 | 300.8  | UdeM00000018779 | XP_045179897.1 | 73.9      |
| 49                                                                                                                                                                                                                                    | 0    | 1      | 188             | 1              | 188       |
|                                                                                                                                                                                                                                       |      |        |                 |                | 1.20E-78  |
|                                                                                                                                                                                                                                       |      |        |                 |                | 300.8     |
|                                                                                                                                                                                                                                       |      |        |                 |                | 6596      |
|                                                                                                                                                                                                                                       |      |        |                 |                | cellular  |
| organisms;Eukaryota;Opisthokonta;Metazoa;Eumetazoa;Bilateria;Protostomia;Spiralia;Lophotrochozoa;Mollusca;Bivalvia;Autobranchia;Heteroconchia;Euherodonta;Imparidentia;Venerida;Veneroidea;Veneridae;Mercenaria;Mercenaria mercenaria |      |        |                 |                |           |

UdeM00000018780 6579 367.5 UdeM00000018780 XP\_033728412.1 50.8 366  
 172 5 1 363 1 361 2.00E-98 367.5 6579 cellular  
 organisms;Eukaryota;Opisthokonta;Metazoa;Eumetazoa;Bilateria;Protostomia;  
 Spiralia;Lophotrochozoa;Mollusca;Bivalvia;Autobranchia;Pteriomorphia;Pect  
 inida;Pectinoidea;Pectinidae;Pecten;Pecten maximus  
 UdeM00000018781 46514 112.8 UdeM00000018781 XP\_038065360.1 42.5 120  
 69 0 4 123 626 745 4.50E-22 112.8 46514 cellular  
 organisms;Eukaryota;Opisthokonta;Metazoa;Eumetazoa;Bilateria;Deuterostomi  
 a;Echinodermata;Eleutherozoa;Asterozoa;Asteroidea;Valvatacea;Valvatida;As  
 terinidae;Patiria;Patiria miniata  
 UdeM00000018782 114398 137.5 UdeM00000018782 XP\_042910816.1 43.8  
 144 81 0 19 162 25 168 1.50E-29 137.5 114398  
 cellular  
 organisms;Eukaryota;Opisthokonta;Metazoa;Eumetazoa;Bilateria;Protostomia;  
 Ecdysozoa;Panarthropoda;Arthropoda;Chelicerata;Arachnida;Araneae;Araneomo  
 rphae;Entelegynae;Orbiculariae;Araneoidea;Theridiidae;Parasteatoda;Parast  
 eatoda tepidariorum  
 UdeM00000018783 29159 115.2 UdeM00000018783 XP\_011451530.1 47.2 108  
 56 1 15 121 88 195 7.20E-23 115.2 29159 cellular  
 organisms;Eukaryota;Opisthokonta;Metazoa;Eumetazoa;Bilateria;Protostomia;  
 Spiralia;Lophotrochozoa;Mollusca;Bivalvia;Autobranchia;Pteriomorphia;Ostr  
 eida;Ostreoidea;Ostreidae;Crassostrea;Crassostrea gigas  
 UdeM00000018784 29159 527.3 UdeM00000018784 XP\_034303860.1 53.9 458  
 173 3 1 422 293 748 1.80E-146 527.3 29159 cellular  
 organisms;Eukaryota;Opisthokonta;Metazoa;Eumetazoa;Bilateria;Protostomia;  
 Spiralia;Lophotrochozoa;Mollusca;Bivalvia;Autobranchia;Pteriomorphia;Ostr  
 eida;Ostreoidea;Ostreidae;Crassostrea;Crassostrea gigas  
 UdeM00000018785 29159 131.3 UdeM00000018785 XP\_034303860.1 43.5 200  
 96 7 5 199 21 208 1.70E-27 131.3 29159 cellular  
 organisms;Eukaryota;Opisthokonta;Metazoa;Eumetazoa;Bilateria;Protostomia;  
 Spiralia;Lophotrochozoa;Mollusca;Bivalvia;Autobranchia;Pteriomorphia;Ostr  
 eida;Ostreoidea;Ostreidae;Crassostrea;Crassostrea gigas  
 UdeM00000018786 6573 198.4 UdeM00000018786 XP\_021359218.1 60.7 150  
 55 2 1 147 445 593 6.60E-48 198.4 6573 cellular  
 organisms;Eukaryota;Opisthokonta;Metazoa;Eumetazoa;Bilateria;Protostomia;  
 Spiralia;Lophotrochozoa;Mollusca;Bivalvia;Autobranchia;Pteriomorphia;Pect  
 inida;Pectinoidea;Pectinidae;Mizuhopecten;Mizuhopecten yessoensis  
 UdeM00000018787 5762 99.8 UdeM00000018787 XP\_002670566.1 29.4 255  
 163 7 32 270 80 333 6.60E-18 99.8 5762 cellular  
 organisms;Eukaryota;Discoba;Heterolobosea;Tetramitida;Eutetramitida;Vahlkam  
 pfiidae;Naegleria;Naegleria gruberi  
 UdeM00000018788 6596 403.3 UdeM00000018788 XP\_045216525.1 41.1 604  
 315 22 110 701 110 684 6.70E-109 403.3 6596 cellular  
 organisms;Eukaryota;Opisthokonta;Metazoa;Eumetazoa;Bilateria;Protostomia;  
 Spiralia;Lophotrochozoa;Mollusca;Bivalvia;Autobranchia;Heteroconchia;Euhe  
 terodonta;Imparidentia;Venerida;Veneroidea;Veneridae;Mercenaria;Mercenari  
 a mercenaria  
 UdeM00000018789 6596 458.4 UdeM00000018789 XP\_045216525.1 42.4 651  
 330 21 119 747 60 687 1.80E-125 458.4 6596 cellular  
 organisms;Eukaryota;Opisthokonta;Metazoa;Eumetazoa;Bilateria;Protostomia;  
 Spiralia;Lophotrochozoa;Mollusca;Bivalvia;Autobranchia;Heteroconchia;Euhe  
 terodonta;Imparidentia;Venerida;Veneroidea;Veneridae;Mercenaria;Mercenari  
 a mercenaria

UdeM00000018790 6596 471.5 UdeM00000018790 XP\_045216525.1 42.6 707  
 357 25 26 708 6 687 2.00E-129 471.5 6596 cellular  
 organisms;Eukaryota;Opisthokonta;Metazoa;Eumetazoa;Bilateria;Protostomia;  
 Spiralia;Lophotrochozoa;Mollusca;Bivalvia;Autobranchia;Heteroconchia;Euhe  
 terodonta;Imparidentia;Venerida;Veneroidea;Veneridae;Mercenaria;Mercenari  
 a mercenaria  
 UdeM00000018791 6596 424.5 UdeM00000018791 XP\_045216525.1 42.5 643  
 319 27 62 687 72 680 2.80E-115 424.5 6596 cellular  
 organisms;Eukaryota;Opisthokonta;Metazoa;Eumetazoa;Bilateria;Protostomia;  
 Spiralia;Lophotrochozoa;Mollusca;Bivalvia;Autobranchia;Heteroconchia;Euhe  
 terodonta;Imparidentia;Venerida;Veneroidea;Veneridae;Mercenaria;Mercenari  
 a mercenaria  
 UdeM00000018792 6596 437.2 UdeM00000018792 XP\_045216525.1 42 643  
 322 26 61 686 72 680 4.10E-119 437.2 6596 cellular  
 organisms;Eukaryota;Opisthokonta;Metazoa;Eumetazoa;Bilateria;Protostomia;  
 Spiralia;Lophotrochozoa;Mollusca;Bivalvia;Autobranchia;Heteroconchia;Euhe  
 terodonta;Imparidentia;Venerida;Veneroidea;Veneridae;Mercenaria;Mercenari  
 a mercenaria  
 UdeM00000044341 77166 68.6 UdeM00000044341 XP\_019769193.1 46.6 73  
 31 1 2 74 190 254 4.90E-09 68.6 77166 cellular  
 organisms;Eukaryota;Opisthokonta;Metazoa;Eumetazoa;Bilateria;Protostomia;  
 Ecdysozoa;Panarthropoda;Arthropoda;Mandibulata;Pancrustacea;Hexapoda;Inse  
 cta;Dicondylia;Pterygota;Neoptera;Endopterygota;Coleoptera;Polyphaga;Cucu  
 jiformia;Curculionoidea;Curculionidae;Scolytinae;Dendroctonus;Dendroctonu  
 s ponderosae  
 UdeM00000044342 37621 142.9 UdeM00000044342 XP\_014679100.1 37.9 232  
 130 8 768 994 78 300 2.20E-30 142.9 37621 cellular  
 organisms;Eukaryota;Opisthokonta;Metazoa;Eumetazoa;Bilateria;Protostomia;  
 Ecdysozoa;Scalidophora;Priapulida;Priapulimorpha;Priapulimorphida;Priapul  
 idae;Priapululus;Priapululus caudatus  
 UdeM00000042523 6596 637.5 UdeM00000042523 XP\_045171884.1 55 729  
 249 15 2 670 11 720 1.90E-179 637.5 6596 cellular  
 organisms;Eukaryota;Opisthokonta;Metazoa;Eumetazoa;Bilateria;Protostomia;  
 Spiralia;Lophotrochozoa;Mollusca;Bivalvia;Autobranchia;Heteroconchia;Euhe  
 terodonta;Imparidentia;Venerida;Veneroidea;Veneridae;Mercenaria;Mercenari  
 a mercenaria  
 UdeM00000042525 6579 238.8 UdeM00000042525 XP\_033743128.1 35.5 422  
 258 4 4 412 7 427 1.20E-59 238.8 6579 cellular  
 organisms;Eukaryota;Opisthokonta;Metazoa;Eumetazoa;Bilateria;Protostomia;  
 Spiralia;Lophotrochozoa;Mollusca;Bivalvia;Autobranchia;Pteriomorpha;Pect  
 inida;Pectinoidea;Pectinidae;Pecten;Pecten maximus  
 UdeM00000042526 6596 172.9 UdeM00000042526 XP\_045165713.1 41.5 212  
 123 1 16 226 4 215 4.70E-40 172.9 6596 cellular  
 organisms;Eukaryota;Opisthokonta;Metazoa;Eumetazoa;Bilateria;Protostomia;  
 Spiralia;Lophotrochozoa;Mollusca;Bivalvia;Autobranchia;Heteroconchia;Euhe  
 terodonta;Imparidentia;Venerida;Veneroidea;Veneridae;Mercenaria;Mercenari  
 a mercenaria  
 UdeM00000042527 6596 82 UdeM00000042527 XP\_045182758.1 29.2 250  
 155 8 2 237 137 378 1.10E-12 82 6596 cellular  
 organisms;Eukaryota;Opisthokonta;Metazoa;Eumetazoa;Bilateria;Protostomia;  
 Spiralia;Lophotrochozoa;Mollusca;Bivalvia;Autobranchia;Heteroconchia;Euhe  
 terodonta;Imparidentia;Venerida;Veneroidea;Veneridae;Mercenaria;Mercenari  
 a mercenaria

UdeM00000042528 6579 232.3 UdeM00000042528 XP\_033743128.1 35 397  
 235 2 5 387 29 416 1.10E-57 232.3 6579 cellular  
 organisms;Eukaryota;Opisthokonta;Metazoa;Eumetazoa;Bilateria;Protostomia;  
 Spiralia;Lophotrochozoa;Mollusca;Bivalvia;Autobranhia;Pteriormorphia;Pect  
 inida;Pectinoidea;Pectinidae;Pecten;Pecten maximus  
 UdeM00000042529 6596 60.1 UdeM00000042529 XP\_045165062.1 37.3 75  
 47 0 21 95 287 361 2.00E-06 60.1 6596 cellular  
 organisms;Eukaryota;Opisthokonta;Metazoa;Eumetazoa;Bilateria;Protostomia;  
 Spiralia;Lophotrochozoa;Mollusca;Bivalvia;Autobranhia;Heteroconchia;Euhe  
 terodonta;Imparidentia;Venerida;Veneroidea;Veneridae;Mercenaria;Mercenari  
 a mercenaria  
 UdeM00000042530 6573 160.2 UdeM00000042530 XP\_021372444.1 35.3 235  
 152 0 14 248 20 254 4.50E-36 160.2 6573 cellular  
 organisms;Eukaryota;Opisthokonta;Metazoa;Eumetazoa;Bilateria;Protostomia;  
 Spiralia;Lophotrochozoa;Mollusca;Bivalvia;Autobranhia;Pteriormorphia;Pect  
 inida;Pectinoidea;Pectinidae;Mizuhopecten;Mizuhopecten yessoensis  
 UdeM00000042531 6579 226.5 UdeM00000042531 XP\_033743128.1 34.7 401  
 256 2 1 396 17 416 6.10E-56 226.5 6579 cellular  
 organisms;Eukaryota;Opisthokonta;Metazoa;Eumetazoa;Bilateria;Protostomia;  
 Spiralia;Lophotrochozoa;Mollusca;Bivalvia;Autobranhia;Pteriormorphia;Pect  
 inida;Pectinoidea;Pectinidae;Pecten;Pecten maximus  
 UdeM00000042532 6565 95.9 UdeM00000042532 XP\_022315793.1 50.5 99  
 47 1 8 104 2 100 3.30E-17 95.9 6565 cellular  
 organisms;Eukaryota;Opisthokonta;Metazoa;Eumetazoa;Bilateria;Protostomia;  
 Spiralia;Lophotrochozoa;Mollusca;Bivalvia;Autobranhia;Pteriormorphia;Ostr  
 eida;Ostreoidea;Ostreidae;Crassostrea;Crassostrea virginica  
 UdeM00000042533 6565 96.3 UdeM00000042533 XP\_022315793.1 50.5 99  
 47 1 4 100 2 100 2.40E-17 96.3 6565 cellular  
 organisms;Eukaryota;Opisthokonta;Metazoa;Eumetazoa;Bilateria;Protostomia;  
 Spiralia;Lophotrochozoa;Mollusca;Bivalvia;Autobranhia;Pteriormorphia;Ostr  
 eida;Ostreoidea;Ostreidae;Crassostrea;Crassostrea virginica  
 UdeM00000042534 6596 107.8 UdeM00000042534 XP\_045187622.1 29.9 281  
 153 7 1 257 132 392 2.10E-20 107.8 6596 cellular  
 organisms;Eukaryota;Opisthokonta;Metazoa;Eumetazoa;Bilateria;Protostomia;  
 Spiralia;Lophotrochozoa;Mollusca;Bivalvia;Autobranhia;Heteroconchia;Euhe  
 terodonta;Imparidentia;Venerida;Veneroidea;Veneridae;Mercenaria;Mercenari  
 a mercenaria  
 UdeM00000042535 6596 131.3 UdeM00000042535 XP\_045165713.1 42.9 156  
 86 1 7 162 3 155 1.20E-27 131.3 6596 cellular  
 organisms;Eukaryota;Opisthokonta;Metazoa;Eumetazoa;Bilateria;Protostomia;  
 Spiralia;Lophotrochozoa;Mollusca;Bivalvia;Autobranhia;Heteroconchia;Euhe  
 terodonta;Imparidentia;Venerida;Veneroidea;Veneridae;Mercenaria;Mercenari  
 a mercenaria  
 UdeM00000042536 6573 92.8 UdeM00000042536 XP\_021372444.1 60.3 73  
 29 0 103 175 339 411 4.60E-16 92.8 6573 cellular  
 organisms;Eukaryota;Opisthokonta;Metazoa;Eumetazoa;Bilateria;Protostomia;  
 Spiralia;Lophotrochozoa;Mollusca;Bivalvia;Autobranhia;Pteriormorphia;Pect  
 inida;Pectinoidea;Pectinidae;Mizuhopecten;Mizuhopecten yessoensis  
 UdeM00000042538 6579 176.8 UdeM00000042538 XP\_033743128.1 32.3 387  
 225 2 20 371 33 417 5.30E-41 176.8 6579 cellular  
 organisms;Eukaryota;Opisthokonta;Metazoa;Eumetazoa;Bilateria;Protostomia;  
 Spiralia;Lophotrochozoa;Mollusca;Bivalvia;Autobranhia;Pteriormorphia;Pect  
 inida;Pectinoidea;Pectinidae;Pecten;Pecten maximus

UdeM00000042539 6596 222.6 UdeM00000042539 XP\_045165713.1 34.4 398  
 227 5 18 398 7 387 8.90E-55 222.6 6596 cellular  
 organisms;Eukaryota;Opisthokonta;Metazoa;Eumetazoa;Bilateria;Protostomia;  
 Spiralia;Lophotrochozoa;Mollusca;Bivalvia;Autobranchia;Heteroconchia;Euhe  
 terodonta;Imparidentia;Venerida;Veneroidea;Veneridae;Mercenaria;Mercenari  
 a mercenaria

UdeM00000042540 6579 91.7 UdeM00000042540 XP\_033743128.1 46.7 105  
 55 1 94 198 324 427 1.20E-15 91.7 6579 cellular  
 organisms;Eukaryota;Opisthokonta;Metazoa;Eumetazoa;Bilateria;Protostomia;  
 Spiralia;Lophotrochozoa;Mollusca;Bivalvia;Autobranchia;Pteriomorpha;Pect  
 inida;Pectinoidea;Pectinidae;Pecten;Pecten maximus

UdeM00000042542 6579 120.9 UdeM00000042542 XP\_033743128.1 34.3 268  
 162 4 1 255 154 420 2.60E-24 120.9 6579 cellular  
 organisms;Eukaryota;Opisthokonta;Metazoa;Eumetazoa;Bilateria;Protostomia;  
 Spiralia;Lophotrochozoa;Mollusca;Bivalvia;Autobranchia;Pteriomorpha;Pect  
 inida;Pectinoidea;Pectinidae;Pecten;Pecten maximus

UdeM00000042543 6596 166.8 UdeM00000042543 XP\_045187622.1 31.6 348  
 216 5 15 348 8 347 5.10E-38 166.8 6596 cellular  
 organisms;Eukaryota;Opisthokonta;Metazoa;Eumetazoa;Bilateria;Protostomia;  
 Spiralia;Lophotrochozoa;Mollusca;Bivalvia;Autobranchia;Heteroconchia;Euhe  
 terodonta;Imparidentia;Venerida;Veneroidea;Veneridae;Mercenaria;Mercenari  
 a mercenaria

UdeM00000042548 6579 162.5 UdeM00000042548 XP\_033743128.1 36.4 220  
 140 0 14 233 29 248 7.50E-37 162.5 6579 cellular  
 organisms;Eukaryota;Opisthokonta;Metazoa;Eumetazoa;Bilateria;Protostomia;  
 Spiralia;Lophotrochozoa;Mollusca;Bivalvia;Autobranchia;Pteriomorpha;Pect  
 inida;Pectinoidea;Pectinidae;Pecten;Pecten maximus

UdeM00000042550 6579 65.5 UdeM00000042550 XP\_033743128.1 40 75  
 45 0 3 77 166 240 7.70E-08 65.5 6579 cellular  
 organisms;Eukaryota;Opisthokonta;Metazoa;Eumetazoa;Bilateria;Protostomia;  
 Spiralia;Lophotrochozoa;Mollusca;Bivalvia;Autobranchia;Pteriomorpha;Pect  
 inida;Pectinoidea;Pectinidae;Pecten;Pecten maximus

UdeM00000042551 6579 220.7 UdeM00000042551 XP\_033743128.1 33.7 395  
 243 2 14 396 29 416 3.30E-54 220.7 6579 cellular  
 organisms;Eukaryota;Opisthokonta;Metazoa;Eumetazoa;Bilateria;Protostomia;  
 Spiralia;Lophotrochozoa;Mollusca;Bivalvia;Autobranchia;Pteriomorpha;Pect  
 inida;Pectinoidea;Pectinidae;Pecten;Pecten maximus

UdeM00000042552 6596 177.6 UdeM00000042552 XP\_045165713.1 31.9 354  
 207 6 1 337 62 398 2.70E-41 177.6 6596 cellular  
 organisms;Eukaryota;Opisthokonta;Metazoa;Eumetazoa;Bilateria;Protostomia;  
 Spiralia;Lophotrochozoa;Mollusca;Bivalvia;Autobranchia;Heteroconchia;Euhe  
 terodonta;Imparidentia;Venerida;Veneroidea;Veneridae;Mercenaria;Mercenari  
 a mercenaria

UdeM00000042553 6596 207.6 UdeM00000042553 XP\_045165713.1 33.3 405  
 223 4 15 393 3 386 3.00E-50 207.6 6596 cellular  
 organisms;Eukaryota;Opisthokonta;Metazoa;Eumetazoa;Bilateria;Protostomia;  
 Spiralia;Lophotrochozoa;Mollusca;Bivalvia;Autobranchia;Heteroconchia;Euhe  
 terodonta;Imparidentia;Venerida;Veneroidea;Veneridae;Mercenaria;Mercenari  
 a mercenaria

UdeM00000042554 6579 225.7 UdeM00000042554 XP\_033743128.1 36.3 408  
 240 6 2 392 12 416 1.00E-55 225.7 6579 cellular  
 organisms;Eukaryota;Opisthokonta;Metazoa;Eumetazoa;Bilateria;Protostomia;  
 Spiralia;Lophotrochozoa;Mollusca;Bivalvia;Autobranchia;Pteriomorpha;Pect  
 inida;Pectinoidea;Pectinidae;Pecten;Pecten maximus

UdeM00000042555 6579 217.2 UdeM00000042555 XP\_033743128.1 35.4 407  
 248 5 2 395 12 416 3.70E-53 217.2 6579 cellular  
 organisms;Eukaryota;Opisthokonta;Metazoa;Eumetazoa;Bilateria;Protostomia;  
 Spiralia;Lophotrochozoa;Mollusca;Bivalvia;Autobranchia;Pteriormorphia;Pect  
 inida;Pectinoidea;Pectinidae;Pecten;Pecten maximus  
 UdeM00000042556 6596 1030.4 UdeM00000042556 XP\_045171157.1 48.6  
 1168 255 8 1 1166 28 852 1.90E-297 1030.4 6596  
 cellular  
 organisms;Eukaryota;Opisthokonta;Metazoa;Eumetazoa;Bilateria;Protostomia;  
 Spiralia;Lophotrochozoa;Mollusca;Bivalvia;Autobranchia;Heteroconchia;Euhe  
 terodonta;Imparidentia;Venerida;Veneroidea;Veneridae;Mercenaria;Mercenari  
 a mercenaria  
 UdeM00000042557 6596 1035 UdeM00000042557 XP\_045171157.1 48.7 1167  
 255 7 1 1165 28 852 7.90E-299 1035 6596 cellular  
 organisms;Eukaryota;Opisthokonta;Metazoa;Eumetazoa;Bilateria;Protostomia;  
 Spiralia;Lophotrochozoa;Mollusca;Bivalvia;Autobranchia;Heteroconchia;Euhe  
 terodonta;Imparidentia;Venerida;Veneroidea;Veneridae;Mercenaria;Mercenari  
 a mercenaria  
 UdeM00000042558 6596 310.1 UdeM00000042558 XP\_045171553.1 29 1053  
 630 26 12 1002 88 1084 1.10E-80 310.1 6596 cellular  
 organisms;Eukaryota;Opisthokonta;Metazoa;Eumetazoa;Bilateria;Protostomia;  
 Spiralia;Lophotrochozoa;Mollusca;Bivalvia;Autobranchia;Heteroconchia;Euhe  
 terodonta;Imparidentia;Venerida;Veneroidea;Veneridae;Mercenaria;Mercenari  
 a mercenaria  
 UdeM00000042559 6596 300.4 UdeM00000042559 XP\_045171692.1 50.9 273  
 133 1 1 273 1 272 2.90E-78 300.4 6596 cellular  
 organisms;Eukaryota;Opisthokonta;Metazoa;Eumetazoa;Bilateria;Protostomia;  
 Spiralia;Lophotrochozoa;Mollusca;Bivalvia;Autobranchia;Heteroconchia;Euhe  
 terodonta;Imparidentia;Venerida;Veneroidea;Veneridae;Mercenaria;Mercenari  
 a mercenaria  
 UdeM00000042560 6565 634.4 UdeM00000042560 XP\_022339184.1 80.2 388  
 77 0 26 413 28 415 1.00E-178 634.4 6565 cellular  
 organisms;Eukaryota;Opisthokonta;Metazoa;Eumetazoa;Bilateria;Protostomia;  
 Spiralia;Lophotrochozoa;Mollusca;Bivalvia;Autobranchia;Pteriormorphia;Ostr  
 eida;Ostreoidea;Ostreidae;Crassostrea;Crassostrea virginica  
 UdeM00000042561 29159 399.1 UdeM00000042561 XP\_011455039.2 40.8 493  
 276 8 1 486 41 524 8.50E-108 399.1 29159 cellular  
 organisms;Eukaryota;Opisthokonta;Metazoa;Eumetazoa;Bilateria;Protostomia;  
 Spiralia;Lophotrochozoa;Mollusca;Bivalvia;Autobranchia;Pteriormorphia;Ostr  
 eida;Ostreoidea;Ostreidae;Crassostrea;Crassostrea gigas  
 UdeM00000042562 6573 407.1 UdeM00000042562 XP\_021340121.1 51.1 378  
 180 3 73 446 326 702 2.90E-110 407.1 6573 cellular  
 organisms;Eukaryota;Opisthokonta;Metazoa;Eumetazoa;Bilateria;Protostomia;  
 Spiralia;Lophotrochozoa;Mollusca;Bivalvia;Autobranchia;Pteriormorphia;Pect  
 inida;Pectinoidea;Pectinidae;Mizuhopecten;Mizuhopecten yessoensis  
 UdeM00000042563 6573 386.7 UdeM00000042563 XP\_021363050.1 48.5 379  
 188 4 71 444 322 698 4.00E-104 386.7 6573 cellular  
 organisms;Eukaryota;Opisthokonta;Metazoa;Eumetazoa;Bilateria;Protostomia;  
 Spiralia;Lophotrochozoa;Mollusca;Bivalvia;Autobranchia;Pteriormorphia;Pect  
 inida;Pectinoidea;Pectinidae;Mizuhopecten;Mizuhopecten yessoensis  
 UdeM00000042564 29159 165.6 UdeM00000042564 XP\_011435143.2 33.7 270  
 168 4 2 264 117 382 8.60E-38 165.6 29159 cellular  
 organisms;Eukaryota;Opisthokonta;Metazoa;Eumetazoa;Bilateria;Protostomia;



Spiralia;Lophotrochozoa;Mollusca;Bivalvia;Autobranchia;Pteriormorphia;Ostr  
eida;Ostreoidea;Ostreidae;Crassostrea;Crassostrea gigas  
UdeM00000042566 6596 148.7 UdeM00000042566 XP\_045202146.1 44.9 147  
79 1 63 209 76 220 8.50E-33 148.7 6596 cellular  
organisms;Eukaryota;Opisthokonta;Metazoa;Eumetazoa;Bilateria;Protostomia;  
Spiralia;Lophotrochozoa;Mollusca;Bivalvia;Autobranchia;Heteroconchia;Euhe  
terodonta;Imparidentia;Venerida;Veneroidea;Veneridae;Mercenaria;Mercenari  
a mercenaria  
UdeM00000042565 6596 140.2 UdeM00000042565 XP\_045202146.1 46.3 134  
70 1 63 196 76 207 2.90E-30 140.2 6596 cellular  
organisms;Eukaryota;Opisthokonta;Metazoa;Eumetazoa;Bilateria;Protostomia;  
Spiralia;Lophotrochozoa;Mollusca;Bivalvia;Autobranchia;Heteroconchia;Euhe  
terodonta;Imparidentia;Venerida;Veneroidea;Veneridae;Mercenaria;Mercenari  
a mercenaria  
UdeM00000042567 6579 231.9 UdeM00000042567 XP\_033751112.1 39.9 301  
158 3 74 354 67 364 1.30E-57 231.9 6579 cellular  
organisms;Eukaryota;Opisthokonta;Metazoa;Eumetazoa;Bilateria;Protostomia;  
Spiralia;Lophotrochozoa;Mollusca;Bivalvia;Autobranchia;Pteriormorphia;Pect  
inida;Pectinoidea;Pectinidae;Pecten;Pecten maximus  
UdeM00000042568 6526 173.3 UdeM00000042568 XP\_013073210.1 35.9 256  
161 3 57 312 105 357 4.90E-40 173.3 6526 cellular  
organisms;Eukaryota;Opisthokonta;Metazoa;Eumetazoa;Bilateria;Protostomia;  
Spiralia;Lophotrochozoa;Mollusca;Gastropoda;Heterobranchia;Euthyneura;Pan  
pulmonata;Hygrophila;Lymnaeoidea;Planorbidae;Biomphalaria;Biomphalaria  
glabrata  
UdeM00000042571 6596 295.8 UdeM00000042571 XP\_045172292.1 52.2 270  
124 1 20 289 10 274 5.90E-77 295.8 6596 cellular  
organisms;Eukaryota;Opisthokonta;Metazoa;Eumetazoa;Bilateria;Protostomia;  
Spiralia;Lophotrochozoa;Mollusca;Bivalvia;Autobranchia;Heteroconchia;Euhe  
terodonta;Imparidentia;Venerida;Veneroidea;Veneridae;Mercenaria;Mercenari  
a mercenaria  
UdeM00000042572 6596 131.3 UdeM00000042572 XP\_045172978.1 74.7 79  
20 0 46 124 179 257 8.60E-28 131.3 6596 cellular  
organisms;Eukaryota;Opisthokonta;Metazoa;Eumetazoa;Bilateria;Protostomia;  
Spiralia;Lophotrochozoa;Mollusca;Bivalvia;Autobranchia;Heteroconchia;Euhe  
terodonta;Imparidentia;Venerida;Veneroidea;Veneridae;Mercenaria;Mercenari  
a mercenaria  
UdeM00000042573 6596 726.9 UdeM00000042573 XP\_045172978.1 55.4 673  
269 13 46 710 179 828 2.60E-206 726.9 6596 cellular  
organisms;Eukaryota;Opisthokonta;Metazoa;Eumetazoa;Bilateria;Protostomia;  
Spiralia;Lophotrochozoa;Mollusca;Bivalvia;Autobranchia;Heteroconchia;Euhe  
terodonta;Imparidentia;Venerida;Veneroidea;Veneridae;Mercenaria;Mercenari  
a mercenaria  
UdeM00000042576 6579 419.9 UdeM00000042576 XP\_033748360.1 57 388  
147 6 39 426 111 478 4.00E-114 419.9 6579 cellular  
organisms;Eukaryota;Opisthokonta;Metazoa;Eumetazoa;Bilateria;Protostomia;  
Spiralia;Lophotrochozoa;Mollusca;Bivalvia;Autobranchia;Pteriormorphia;Pect  
inida;Pectinoidea;Pectinidae;Pecten;Pecten maximus  
UdeM00000026946 7574 150.6 UdeM00000026946 XP\_013396733.1 40.4 228  
133 3 74 299 22 248 3.20E-33 150.6 7574 cellular  
organisms;Eukaryota;Opisthokonta;Metazoa;Eumetazoa;Bilateria;Protostomia;  
Spiralia;Lophotrochozoa;Brachiopoda;Linguliformea;Lingulata;Lingulida;Lin  
guloidea;Lingulidae;Lingula;Lingula anatina

UdeM00000026947 29159 919.1 UdeM00000026947 XP\_034302988.1 70.8 612  
 175 1 40 651 65 672 3.40E-264 919.1 29159 cellular  
 organisms;Eukaryota;Opisthokonta;Metazoa;Eumetazoa;Bilateria;Protostomia;  
 Spiralia;Lophotrochozoa;Mollusca;Bivalvia;Autobranhia;Pteriomorphia;Ostr  
 eida;Ostreoidea;Ostreidae;Crassostrea;Crassostrea gigas  
 UdeM00000026948 6565 236.5 UdeM00000026948 XP\_022321940.1 24.8 674  
 471 14 12 661 16 677 9.90E-59 236.5 6565 cellular  
 organisms;Eukaryota;Opisthokonta;Metazoa;Eumetazoa;Bilateria;Protostomia;  
 Spiralia;Lophotrochozoa;Mollusca;Bivalvia;Autobranhia;Pteriomorphia;Ostr  
 eida;Ostreoidea;Ostreidae;Crassostrea;Crassostrea virginica  
 UdeM00000026949 6596 133.7 UdeM00000026949 XP\_045206389.1 51.2 127  
 51 4 12 131 161 283 1.90E-28 133.7 6596 cellular  
 organisms;Eukaryota;Opisthokonta;Metazoa;Eumetazoa;Bilateria;Protostomia;  
 Spiralia;Lophotrochozoa;Mollusca;Bivalvia;Autobranhia;Heteroconchia;Euhe  
 terodonta;Imparidentia;Venerida;Veneroidea;Veneridae;Mercenaria;Mercenari  
 a mercenaria  
 UdeM00000026950 6596 969.1 UdeM00000026950 XP\_045206940.1 57.9 907  
 258 19 37 869 1 857 3.70E-279 969.1 6596 cellular  
 organisms;Eukaryota;Opisthokonta;Metazoa;Eumetazoa;Bilateria;Protostomia;  
 Spiralia;Lophotrochozoa;Mollusca;Bivalvia;Autobranhia;Heteroconchia;Euhe  
 terodonta;Imparidentia;Venerida;Veneroidea;Veneridae;Mercenaria;Mercenari  
 a mercenaria  
 UdeM00000026951 6596 979.5 UdeM00000026951 XP\_045206940.1 58.9 892  
 258 18 37 854 1 857 2.70E-282 979.5 6596 cellular  
 organisms;Eukaryota;Opisthokonta;Metazoa;Eumetazoa;Bilateria;Protostomia;  
 Spiralia;Lophotrochozoa;Mollusca;Bivalvia;Autobranhia;Heteroconchia;Euhe  
 terodonta;Imparidentia;Venerida;Veneroidea;Veneridae;Mercenaria;Mercenari  
 a mercenaria  
 UdeM00000026952 6850 77.8 UdeM00000026952 XP\_013783731.1 32.9 146  
 91 2 5 150 846 984 1.30E-11 77.8 6850 cellular  
 organisms;Eukaryota;Opisthokonta;Metazoa;Eumetazoa;Bilateria;Protostomia;  
 Ecdysozoa;Panarthropoda;Arthropoda;Chelicerata;Merostomata;Xiphosura;Limu  
 lidae;Limulus;Limulus polyphemus  
 UdeM00000026953 6596 368.6 UdeM00000026953 XP\_045206584.1 63.5 274  
 97 2 1 272 1 273 6.80E-99 368.6 6596 cellular  
 organisms;Eukaryota;Opisthokonta;Metazoa;Eumetazoa;Bilateria;Protostomia;  
 Spiralia;Lophotrochozoa;Mollusca;Bivalvia;Autobranhia;Heteroconchia;Euhe  
 terodonta;Imparidentia;Venerida;Veneroidea;Veneridae;Mercenaria;Mercenari  
 a mercenaria  
 UdeM00000026954 6565 471.9 UdeM00000026954 XP\_022320194.1 55.5 476  
 196 6 1 476 1 460 1.70E-129 471.9 6565 cellular  
 organisms;Eukaryota;Opisthokonta;Metazoa;Eumetazoa;Bilateria;Protostomia;  
 Spiralia;Lophotrochozoa;Mollusca;Bivalvia;Autobranhia;Pteriomorphia;Ostr  
 eida;Ostreoidea;Ostreidae;Crassostrea;Crassostrea virginica  
 UdeM00000026955 6596 485.7 UdeM00000026955 XP\_045206044.1 44.3 628  
 284 9 127 749 932 1498 1.10E-133 485.7 6596 cellular  
 organisms;Eukaryota;Opisthokonta;Metazoa;Eumetazoa;Bilateria;Protostomia;  
 Spiralia;Lophotrochozoa;Mollusca;Bivalvia;Autobranhia;Heteroconchia;Euhe  
 terodonta;Imparidentia;Venerida;Veneroidea;Veneridae;Mercenaria;Mercenari  
 a mercenaria  
 UdeM00000026956 6565 646 UdeM00000026956 XP\_022325799.1 76.2 491  
 111 4 7 495 356 842 4.10E-182 646 6565 cellular  
 organisms;Eukaryota;Opisthokonta;Metazoa;Eumetazoa;Bilateria;Protostomia;

Spiralia; Lophotrochozoa; Mollusca; Bivalvia; Autobranchia; Pteriomorpha; Ostr  
eida; Ostreoida; Ostreidae; Crassostrea; Crassostrea virginica  
UdeM00000026957 6596 302.8 UdeM00000026957 XP\_045206044.1 48.4 395  
141 13 12 367 8 378 6.20E-79 302.8 6596 cellular  
organisms; Eukaryota; Opisthokonta; Metazoa; Eumetazoa; Bilateria; Protostomia;  
Spiralia; Lophotrochozoa; Mollusca; Bivalvia; Autobranchia; Heteroconchia; Eue  
terodonta; Imparidentia; Venerida; Veneroidea; Veneridae; Mercenaria; Mercenari  
a mercenaria  
UdeM00000026958 29159 103.2 UdeM00000026958 XP\_034300565.1 55.6 99  
43 1 14 112 468 565 1.30E-18 103.2 29159 cellular  
organisms; Eukaryota; Opisthokonta; Metazoa; Eumetazoa; Bilateria; Protostomia;  
Spiralia; Lophotrochozoa; Mollusca; Bivalvia; Autobranchia; Pteriomorpha; Ostr  
eida; Ostreoida; Ostreidae; Crassostrea; Crassostrea gigas  
UdeM00000026959 400727 504.2 UdeM00000026959 XP\_025113774.1 71.9  
363 98 3 7 368 214 573 1.40E-139 504.2 400727  
cellular  
organisms; Eukaryota; Opisthokonta; Metazoa; Eumetazoa; Bilateria; Protostomia;  
Spiralia; Lophotrochozoa; Mollusca; Gastropoda; Caenogastropoda; Architaeniogl  
ossa; Ampullarioidea; Ampullariidae; Pomacea; Pomacea canaliculata  
UdeM00000026960 6596 354.8 UdeM00000026960 XP\_045201815.1 34.5 730  
428 18 68 769 76 783 3.00E-94 354.8 6596 cellular  
organisms; Eukaryota; Opisthokonta; Metazoa; Eumetazoa; Bilateria; Protostomia;  
Spiralia; Lophotrochozoa; Mollusca; Bivalvia; Autobranchia; Heteroconchia; Eue  
terodonta; Imparidentia; Venerida; Veneroidea; Veneridae; Mercenaria; Mercenari  
a mercenaria  
UdeM00000026961 6596 339.3 UdeM00000026961 XP\_045201815.1 33.4 718  
427 16 17 703 18 715 1.20E-89 339.3 6596 cellular  
organisms; Eukaryota; Opisthokonta; Metazoa; Eumetazoa; Bilateria; Protostomia;  
Spiralia; Lophotrochozoa; Mollusca; Bivalvia; Autobranchia; Heteroconchia; Eue  
terodonta; Imparidentia; Venerida; Veneroidea; Veneridae; Mercenaria; Mercenari  
a mercenaria  
UdeM00000026962 6596 332 UdeM00000026962 XP\_045201815.1 31.8 824  
486 19 11 798 9 792 2.10E-87 332 6596 cellular  
organisms; Eukaryota; Opisthokonta; Metazoa; Eumetazoa; Bilateria; Protostomia;  
Spiralia; Lophotrochozoa; Mollusca; Bivalvia; Autobranchia; Heteroconchia; Eue  
terodonta; Imparidentia; Venerida; Veneroidea; Veneridae; Mercenaria; Mercenari  
a mercenaria  
UdeM00000026963 6596 1325.1 UdeM00000026963 XP\_045203422.1 72  
1005 238 12 1 994 32 1004 0.00E+00 1325.1 6596  
cellular  
organisms; Eukaryota; Opisthokonta; Metazoa; Eumetazoa; Bilateria; Protostomia;  
Spiralia; Lophotrochozoa; Mollusca; Bivalvia; Autobranchia; Heteroconchia; Eue  
terodonta; Imparidentia; Venerida; Veneroidea; Veneridae; Mercenaria; Mercenari  
a mercenaria  
UdeM00000026964 6579 272.3 UdeM00000026964 XP\_033730189.1 48.3 294  
104 5 1 251 1 289 6.30E-70 272.3 6579 cellular  
organisms; Eukaryota; Opisthokonta; Metazoa; Eumetazoa; Bilateria; Protostomia;  
Spiralia; Lophotrochozoa; Mollusca; Bivalvia; Autobranchia; Pteriomorpha; Pect  
inida; Pectinoidea; Pectinidae; Pecten; Pecten maximus  
UdeM00000026965 6579 434.5 UdeM00000026965 XP\_033730189.1 54.1 399  
135 5 1 356 1 394 1.80E-118 434.5 6579 cellular  
organisms; Eukaryota; Opisthokonta; Metazoa; Eumetazoa; Bilateria; Protostomia;  
Spiralia; Lophotrochozoa; Mollusca; Bivalvia; Autobranchia; Pteriomorpha; Pect  
inida; Pectinoidea; Pectinidae; Pecten; Pecten maximus

UdeM00000026966 6596 123.6 UdeM00000026966 XP\_045194560.1 39 136  
 72 1 102 237 21 145 3.30E-25 123.6 6596 cellular  
 organisms;Eukaryota;Opisthokonta;Metazoa;Eumetazoa;Bilateria;Protostomia;  
 Spiralia;Lophotrochozoa;Mollusca;Bivalvia;Autobranchia;Heteroconchia;Euhe  
 terodonta;Imparidentia;Venerida;Veneroidea;Veneridae;Mercenaria;Mercenari  
 a mercenaria  
 UdeM00000026967 6596 136.7 UdeM00000026967 XP\_045194557.1 43 165  
 75 4 999 1152 746 902 1.80E-28 136.7 6596 cellular  
 organisms;Eukaryota;Opisthokonta;Metazoa;Eumetazoa;Bilateria;Protostomia;  
 Spiralia;Lophotrochozoa;Mollusca;Bivalvia;Autobranchia;Heteroconchia;Euhe  
 terodonta;Imparidentia;Venerida;Veneroidea;Veneridae;Mercenaria;Mercenari  
 a mercenaria  
 UdeM00000026968 6596 136.7 UdeM00000026968 XP\_045194557.1 43 165  
 75 4 1001 1154 746 902 1.80E-28 136.7 6596 cellular  
 organisms;Eukaryota;Opisthokonta;Metazoa;Eumetazoa;Bilateria;Protostomia;  
 Spiralia;Lophotrochozoa;Mollusca;Bivalvia;Autobranchia;Heteroconchia;Euhe  
 terodonta;Imparidentia;Venerida;Veneroidea;Veneridae;Mercenaria;Mercenari  
 a mercenaria  
 UdeM00000026969 6565 148.3 UdeM00000026969 XP\_022302274.1 47.9 146  
 74 2 154 299 159 302 1.60E-32 148.3 6565 cellular  
 organisms;Eukaryota;Opisthokonta;Metazoa;Eumetazoa;Bilateria;Protostomia;  
 Spiralia;Lophotrochozoa;Mollusca;Bivalvia;Autobranchia;Pteriormorphia;Ostr  
 eida;Ostreoidea;Ostreidae;Crassostrea;Crassostrea virginica  
 UdeM00000026970 6596 817.8 UdeM00000026970 XP\_045194546.1 66.6 580  
 193 1 1 580 26 604 9.50E-234 817.8 6596 cellular  
 organisms;Eukaryota;Opisthokonta;Metazoa;Eumetazoa;Bilateria;Protostomia;  
 Spiralia;Lophotrochozoa;Mollusca;Bivalvia;Autobranchia;Heteroconchia;Euhe  
 terodonta;Imparidentia;Venerida;Veneroidea;Veneridae;Mercenaria;Mercenari  
 a mercenaria  
 UdeM00000026971 6596 639.4 UdeM00000026971 XP\_045164241.1 69.3 436  
 134 0 4 439 2 437 3.30E-180 639.4 6596 cellular  
 organisms;Eukaryota;Opisthokonta;Metazoa;Eumetazoa;Bilateria;Protostomia;  
 Spiralia;Lophotrochozoa;Mollusca;Bivalvia;Autobranchia;Heteroconchia;Euhe  
 terodonta;Imparidentia;Venerida;Veneroidea;Veneridae;Mercenaria;Mercenari  
 a mercenaria  
 UdeM00000026972 225164 660.2 UdeM00000026972 XP\_009065481.1 55.9  
 590 257 1 3 592 426 1012 2.40E-186 660.2 225164  
 cellular  
 organisms;Eukaryota;Opisthokonta;Metazoa;Eumetazoa;Bilateria;Protostomia;  
 Spiralia;Lophotrochozoa;Mollusca;Gastropoda;Patellogastropoda;Lottioidea;  
 Lottiidae;Lottia;Lottia gigantea  
 UdeM00000026973 1735272 1181.8 UdeM00000026973 XP\_041369326.1  
 57.5 1011 427 2 7 1015 6 1015 0.00E+00 1181.8  
 1735272 cellular  
 organisms;Eukaryota;Opisthokonta;Metazoa;Eumetazoa;Bilateria;Protostomia;  
 Spiralia;Lophotrochozoa;Mollusca;Gastropoda;Neomphalina;Neomphaloidea;Pel  
 tospiridae;Gigantopelta;Gigantopelta aegis  
 UdeM00000026974 6596 912.5 UdeM00000026974 XP\_045164241.1 61.1 712  
 257 2 8 714 6 702 3.40E-262 912.5 6596 cellular  
 organisms;Eukaryota;Opisthokonta;Metazoa;Eumetazoa;Bilateria;Protostomia;  
 Spiralia;Lophotrochozoa;Mollusca;Bivalvia;Autobranchia;Heteroconchia;Euhe  
 terodonta;Imparidentia;Venerida;Veneroidea;Veneridae;Mercenaria;Mercenari  
 a mercenaria

UdeM00000026975 6596 325.9 UdeM00000026975 XP\_045186701.1 56.1 289  
 127 0 1 289 213 501 5.30E-86 325.9 6596 cellular  
 organisms;Eukaryota;Opisthokonta;Metazoa;Eumetazoa;Bilateria;Protostomia;  
 Spiralia;Lophotrochozoa;Mollusca;Bivalvia;Autobranchia;Heteroconchia;Euhe  
 terodonta;Imparidentia;Venerida;Veneroidea;Veneridae;Mercenaria;Mercenari  
 a mercenaria  
 UdeM00000026977 6596 198.4 UdeM00000026977 XP\_045187823.1 45.3 192  
 103 2 1 192 1 190 1.20E-47 198.4 6596 cellular  
 organisms;Eukaryota;Opisthokonta;Metazoa;Eumetazoa;Bilateria;Protostomia;  
 Spiralia;Lophotrochozoa;Mollusca;Bivalvia;Autobranchia;Heteroconchia;Euhe  
 terodonta;Imparidentia;Venerida;Veneroidea;Veneridae;Mercenaria;Mercenari  
 a mercenaria  
 UdeM00000026976 6596 276.9 UdeM00000026976 XP\_045187823.1 39.1 419  
 237 7 1 403 1 417 4.00E-71 276.9 6596 cellular  
 organisms;Eukaryota;Opisthokonta;Metazoa;Eumetazoa;Bilateria;Protostomia;  
 Spiralia;Lophotrochozoa;Mollusca;Bivalvia;Autobranchia;Heteroconchia;Euhe  
 terodonta;Imparidentia;Venerida;Veneroidea;Veneridae;Mercenaria;Mercenari  
 a mercenaria  
 UdeM00000026978 6596 610.1 UdeM00000026978 XP\_045199866.1 70.9 381  
 106 2 2 377 36 416 1.90E-171 610.1 6596 cellular  
 organisms;Eukaryota;Opisthokonta;Metazoa;Eumetazoa;Bilateria;Protostomia;  
 Spiralia;Lophotrochozoa;Mollusca;Bivalvia;Autobranchia;Heteroconchia;Euhe  
 terodonta;Imparidentia;Venerida;Veneroidea;Veneridae;Mercenaria;Mercenari  
 a mercenaria  
 UdeM00000026979 6596 2640.9 UdeM00000026979 XP\_045199866.1 58.3  
 2093 773 10 3 2089 404 2402 0.00E+00 2640.9 6596  
 cellular  
 organisms;Eukaryota;Opisthokonta;Metazoa;Eumetazoa;Bilateria;Protostomia;  
 Spiralia;Lophotrochozoa;Mollusca;Bivalvia;Autobranchia;Heteroconchia;Euhe  
 terodonta;Imparidentia;Venerida;Veneroidea;Veneridae;Mercenaria;Mercenari  
 a mercenaria  
 UdeM00000026980 1735272 130.6 UdeM00000026980 XP\_041369835.1 46.5  
 142 69 4 4 141 9 147 1.70E-27 130.6 1735272  
 cellular  
 organisms;Eukaryota;Opisthokonta;Metazoa;Eumetazoa;Bilateria;Protostomia;  
 Spiralia;Lophotrochozoa;Mollusca;Gastropoda;Neomphalina;Neomphaloidea;Pel  
 tospiridae;Gigantopelta;Gigantopelta aegis  
 UdeM00000026981 6596 658.7 UdeM00000026981 XP\_045209562.1 68.6 439  
 136 1 21 457 90 528 5.70E-186 658.7 6596 cellular  
 organisms;Eukaryota;Opisthokonta;Metazoa;Eumetazoa;Bilateria;Protostomia;  
 Spiralia;Lophotrochozoa;Mollusca;Bivalvia;Autobranchia;Heteroconchia;Euhe  
 terodonta;Imparidentia;Venerida;Veneroidea;Veneridae;Mercenaria;Mercenari  
 a mercenaria  
 UdeM00000026982 225164 267.3 UdeM00000026982 XP\_009050560.1 86.4  
 147 20 0 1 147 1 147 1.20E-68 267.3 225164  
 cellular  
 organisms;Eukaryota;Opisthokonta;Metazoa;Eumetazoa;Bilateria;Protostomia;  
 Spiralia;Lophotrochozoa;Mollusca;Gastropoda;Patellogastropoda;Lottiidae;  
 Lottiidae;Lottia;Lottia gigantea  
 UdeM00000026983 6596 430.6 UdeM00000026983 XP\_045198983.1 52.1 455  
 190 8 2 444 9 447 2.40E-117 430.6 6596 cellular  
 organisms;Eukaryota;Opisthokonta;Metazoa;Eumetazoa;Bilateria;Protostomia;  
 Spiralia;Lophotrochozoa;Mollusca;Bivalvia;Autobranchia;Heteroconchia;Euhe

terodonta;Imparidentia;Venerida;Veneroidea;Veneridae;Mercenaria;Mercenaria mercenaria  
 UdeM00000026984 29159 75.9 UdeM00000026984 XP\_011457094.1 35.1 131  
 80 2 4 133 2 128 5.70E-11 75.9 29159 cellular  
 organisms;Eukaryota;Opisthokonta;Metazoa;Eumetazoa;Bilateria;Protostomia;  
 Spiralia;Lophotrochozoa;Mollusca;Bivalvia;Autobranchia;Pteriormorphia;Ostr  
 eida;Ostreoidea;Ostreidae;Crassostrea;Crassostrea gigas  
 UdeM00000026985 1735272 492.3 UdeM00000026985 XP\_041369682.1 53.8  
 450 186 8 16 454 296 734 6.80E-136 492.3 1735272  
 cellular  
 organisms;Eukaryota;Opisthokonta;Metazoa;Eumetazoa;Bilateria;Protostomia;  
 Spiralia;Lophotrochozoa;Mollusca;Gastropoda;Neomphalina;Neomphaloidea;Pel  
 tospiridae;Gigantopelta;Gigantopelta aegis  
 UdeM00000026986 6596 284.6 UdeM00000026986 XP\_045162844.1 50.2 263  
 129 1 11 273 44 304 1.40E-73 284.6 6596 cellular  
 organisms;Eukaryota;Opisthokonta;Metazoa;Eumetazoa;Bilateria;Protostomia;  
 Spiralia;Lophotrochozoa;Mollusca;Bivalvia;Autobranchia;Heteroconchia;Euhe  
 terodonta;Imparidentia;Venerida;Veneroidea;Veneridae;Mercenaria;Mercenari  
 a mercenaria  
 UdeM00000026987 29159 94.4 UdeM00000026987 XP\_011422012.2 39.4 142  
 70 5 6 141 5 136 1.30E-16 94.4 29159 cellular  
 organisms;Eukaryota;Opisthokonta;Metazoa;Eumetazoa;Bilateria;Protostomia;  
 Spiralia;Lophotrochozoa;Mollusca;Bivalvia;Autobranchia;Pteriormorphia;Ostr  
 eida;Ostreoidea;Ostreidae;Crassostrea;Crassostrea gigas  
 UdeM00000026988 29159 90.1 UdeM00000026988 XP\_034300135.1 43.3 120  
 62 4 24 141 21 136 2.40E-15 90.1 29159 cellular  
 organisms;Eukaryota;Opisthokonta;Metazoa;Eumetazoa;Bilateria;Protostomia;  
 Spiralia;Lophotrochozoa;Mollusca;Bivalvia;Autobranchia;Pteriormorphia;Ostr  
 eida;Ostreoidea;Ostreidae;Crassostrea;Crassostrea gigas  
 UdeM00000026989 29159 110.5 UdeM00000026989 XP\_034315424.1 31.6 253  
 151 6 43 284 73 314 6.00E-21 110.5 29159 cellular  
 organisms;Eukaryota;Opisthokonta;Metazoa;Eumetazoa;Bilateria;Protostomia;  
 Spiralia;Lophotrochozoa;Mollusca;Bivalvia;Autobranchia;Pteriormorphia;Ostr  
 eida;Ostreoidea;Ostreidae;Crassostrea;Crassostrea gigas  
 UdeM00000026991 50390 183 UdeM00000026991 XP\_028127913.1 42.9 217  
 123 1 1 217 1 216 4.30E-43 183 50390 cellular  
 organisms;Eukaryota;Opisthokonta;Metazoa;Eumetazoa;Bilateria;Protostomia;  
 Ecdysozoa;Panarthropoda;Arthropoda;Mandibulata;Pancrustacea;Hexapoda;Inse  
 cta;Dicondylia;Pterygota;Neoptera;Endopterygota;Coleoptera;Polyphaga;Cucu  
 jiformia;Chrysomeloidea;Chrysomelidae;Galerucinae;Luperini;Diabroticina;D  
 iabroticites;Diabrotica;Diabrotica virgifera;Diabrotica virgifera  
 virgifera  
 UdeM00000026992 50390 149.1 UdeM00000026992 XP\_028127913.1 43.9 164  
 91 1 1 164 1 163 5.30E-33 149.1 50390 cellular  
 organisms;Eukaryota;Opisthokonta;Metazoa;Eumetazoa;Bilateria;Protostomia;  
 Ecdysozoa;Panarthropoda;Arthropoda;Mandibulata;Pancrustacea;Hexapoda;Inse  
 cta;Dicondylia;Pterygota;Neoptera;Endopterygota;Coleoptera;Polyphaga;Cucu  
 jiformia;Chrysomeloidea;Chrysomelidae;Galerucinae;Luperini;Diabroticina;D  
 iabroticites;Diabrotica;Diabrotica virgifera;Diabrotica virgifera  
 virgifera  
 UdeM00000026993 50390 161.4 UdeM00000026993 XP\_028127913.1 42.9 191  
 106 2 1 189 1 190 1.10E-36 161.4 50390 cellular  
 organisms;Eukaryota;Opisthokonta;Metazoa;Eumetazoa;Bilateria;Protostomia;  
 Ecdysozoa;Panarthropoda;Arthropoda;Mandibulata;Pancrustacea;Hexapoda;Inse

cta;Dicondylia;Pterygota;Neoptera;Endopterygota;Coleoptera;Polyphaga;Cucujiformia;Chrysomeloidea;Chrysomelidae;Galerucinae;Luperini;Diabroticina;Diabroticites;Diabrotica;Diabrotica virgifera;Diabrotica virgifera virgifera

UdeM00000026995 1735272 220.7 UdeM00000026995 XP\_041369281.1 54.5  
191 86 1 1 191 82 271 1.60E-54 220.7 1735272  
cellular

organisms;Eukaryota;Opisthokonta;Metazoa;Eumetazoa;Bilateria;Protostomia;Spiralia;Lophotrochozoa;Mollusca;Gastropoda;Neomphalina;Neomphaloidea;Peltospiridae;Gigantopelta;Gigantopelta aegis

UdeM00000026994 1735272 234.6 UdeM00000026994 XP\_041369281.1 54.1  
218 95 3 78 295 59 271 1.70E-58 234.6 1735272  
cellular

organisms;Eukaryota;Opisthokonta;Metazoa;Eumetazoa;Bilateria;Protostomia;Spiralia;Lophotrochozoa;Mollusca;Gastropoda;Neomphalina;Neomphaloidea;Peltospiridae;Gigantopelta;Gigantopelta aegis

UdeM00000026996 6573 170.6 UdeM00000026996 XP\_021355484.1 64.7 119  
42 0 83 201 106 224 2.00E-39 170.6 6573 cellular

organisms;Eukaryota;Opisthokonta;Metazoa;Eumetazoa;Bilateria;Protostomia;Spiralia;Lophotrochozoa;Mollusca;Bivalvia;Autobranchia;Pteriormorphia;Pectinida;Pectinoidea;Pectinidae;Mizuhopecten;Mizuhopecten yessoensis

UdeM00000026997 6573 181 UdeM00000026997 XP\_021355484.1 50 226  
80 7 1 195 1 224 1.40E-42 181 6573 cellular

organisms;Eukaryota;Opisthokonta;Metazoa;Eumetazoa;Bilateria;Protostomia;Spiralia;Lophotrochozoa;Mollusca;Bivalvia;Autobranchia;Pteriormorphia;Pectinida;Pectinoidea;Pectinidae;Mizuhopecten;Mizuhopecten yessoensis

UdeM00000026999 6579 551.6 UdeM00000026999 XP\_033732865.1 50.9 603  
263 12 9 597 35 618 1.50E-153 551.6 6579 cellular

organisms;Eukaryota;Opisthokonta;Metazoa;Eumetazoa;Bilateria;Protostomia;Spiralia;Lophotrochozoa;Mollusca;Bivalvia;Autobranchia;Pteriormorphia;Pectinida;Pectinoidea;Pectinidae;Pecten;Pecten maximus

UdeM00000027000 6596 337.8 UdeM00000027000 XP\_045203827.1 54.8 305  
137 1 7 311 8 311 1.50E-89 337.8 6596 cellular

organisms;Eukaryota;Opisthokonta;Metazoa;Eumetazoa;Bilateria;Protostomia;Spiralia;Lophotrochozoa;Mollusca;Bivalvia;Autobranchia;Heteroconchia;Euheterodonta;Imparidentia;Venerida;Veneroidea;Veneridae;Mercenaria;Mercenaria mercenaria

UdeM00000027001 1735272 85.1 UdeM00000027001 XP\_041362151.1 38.1  
113 69 1 9 120 563 675 7.20E-14 85.1 1735272  
cellular

organisms;Eukaryota;Opisthokonta;Metazoa;Eumetazoa;Bilateria;Protostomia;Spiralia;Lophotrochozoa;Mollusca;Gastropoda;Neomphalina;Neomphaloidea;Peltospiridae;Gigantopelta;Gigantopelta aegis

UdeM00000027002 6579 58.5 UdeM00000027002 XP\_033761495.1 61.4 44  
17 0 36 79 24 67 4.40E-06 58.5 6579 cellular

organisms;Eukaryota;Opisthokonta;Metazoa;Eumetazoa;Bilateria;Protostomia;Spiralia;Lophotrochozoa;Mollusca;Bivalvia;Autobranchia;Pteriormorphia;Pectinida;Pectinoidea;Pectinidae;Pecten;Pecten maximus

UdeM00000027003 6596 377.5 UdeM00000027003 XP\_045203827.1 57.7 310  
131 0 3 312 4 313 1.70E-101 377.5 6596 cellular

organisms;Eukaryota;Opisthokonta;Metazoa;Eumetazoa;Bilateria;Protostomia;Spiralia;Lophotrochozoa;Mollusca;Bivalvia;Autobranchia;Heteroconchia;Euheterodonta;Imparidentia;Venerida;Veneroidea;Veneridae;Mercenaria;Mercenaria mercenaria

UdeM00000027004 6596 500.7 UdeM00000027004 XP\_045164893.1 66.3 365  
 122 1 4 368 3 366 1.50E-138 500.7 6596 cellular  
 organisms;Eukaryota;Opisthokonta;Metazoa;Eumetazoa;Bilateria;Protostomia;  
 Spiralia;Lophotrochozoa;Mollusca;Bivalvia;Autobranchia;Heteroconchia;Euhe  
 terodonta;Imparidentia;Venerida;Veneroidea;Veneridae;Mercenaria;Mercenari  
 a mercenaria

UdeM00000027005 6596 105.5 UdeM00000027005 XP\_045208672.1 36.6 134  
 81 4 160 292 22 152 1.20E-19 105.5 6596 cellular  
 organisms;Eukaryota;Opisthokonta;Metazoa;Eumetazoa;Bilateria;Protostomia;  
 Spiralia;Lophotrochozoa;Mollusca;Bivalvia;Autobranchia;Heteroconchia;Euhe  
 terodonta;Imparidentia;Venerida;Veneroidea;Veneridae;Mercenaria;Mercenari  
 a mercenaria

UdeM00000027006 6596 105.1 UdeM00000027006 XP\_045208672.1 36.6 134  
 81 4 223 355 22 152 1.80E-19 105.1 6596 cellular  
 organisms;Eukaryota;Opisthokonta;Metazoa;Eumetazoa;Bilateria;Protostomia;  
 Spiralia;Lophotrochozoa;Mollusca;Bivalvia;Autobranchia;Heteroconchia;Euhe  
 terodonta;Imparidentia;Venerida;Veneroidea;Veneridae;Mercenaria;Mercenari  
 a mercenaria

UdeM00000027008 6500 213.4 UdeM00000027008 XP\_012939160.1 59.4 180  
 47 2 19 173 4 182 5.50E-52 213.4 6500 cellular  
 organisms;Eukaryota;Opisthokonta;Metazoa;Eumetazoa;Bilateria;Protostomia;  
 Spiralia;Lophotrochozoa;Mollusca;Gastropoda;Heterobranchia;Euthyneura;Tec  
 tipleura;Aplysiida;Aplysioidea;Aplysiidae;Aplysia;Aplysia californica

UdeM00000027013 6596 105.5 UdeM00000027013 XP\_045208672.1 36.6 134  
 81 4 160 292 22 152 1.20E-19 105.5 6596 cellular  
 organisms;Eukaryota;Opisthokonta;Metazoa;Eumetazoa;Bilateria;Protostomia;  
 Spiralia;Lophotrochozoa;Mollusca;Bivalvia;Autobranchia;Heteroconchia;Euhe  
 terodonta;Imparidentia;Venerida;Veneroidea;Veneridae;Mercenaria;Mercenari  
 a mercenaria

UdeM00000027012 6596 105.5 UdeM00000027012 XP\_045208672.1 36.6 134  
 81 4 166 298 22 152 1.20E-19 105.5 6596 cellular  
 organisms;Eukaryota;Opisthokonta;Metazoa;Eumetazoa;Bilateria;Protostomia;  
 Spiralia;Lophotrochozoa;Mollusca;Bivalvia;Autobranchia;Heteroconchia;Euhe  
 terodonta;Imparidentia;Venerida;Veneroidea;Veneridae;Mercenaria;Mercenari  
 a mercenaria

UdeM00000027014 218467 78.2 UdeM00000027014 XP\_023220707.1 22.8  
 364 215 14 13 356 92 409 2.40E-11 78.2 218467  
 cellular  
 organisms;Eukaryota;Opisthokonta;Metazoa;Eumetazoa;Bilateria;Protostomia;  
 Ecdysozoa;Panarthropoda;Arthropoda;Chelicerata;Arachnida;Scorpiones;Buthi  
 da;Buthoidea;Buthidae;Centruroides;Centruroides sculpturatus

UdeM00000027015 6596 119.4 UdeM00000027015 XP\_045157325.1 27.6 344  
 199 15 148 484 2286 2586 1.50E-23 119.4 6596 cellular  
 organisms;Eukaryota;Opisthokonta;Metazoa;Eumetazoa;Bilateria;Protostomia;  
 Spiralia;Lophotrochozoa;Mollusca;Bivalvia;Autobranchia;Heteroconchia;Euhe  
 terodonta;Imparidentia;Venerida;Veneroidea;Veneridae;Mercenaria;Mercenari  
 a mercenaria

UdeM00000027016 8236 62.4 UdeM00000027016 XP\_044217658.1 26.2 168  
 100 7 56 218 200 348 8.60E-07 62.4 8236 cellular  
 organisms;Eukaryota;Opisthokonta;Metazoa;Eumetazoa;Bilateria;Deuterostomi  
 a;Chordata;Craniata;Vertebrata;Gnathostomata;Teleostomi;Euteleostomi;Acti  
 nopterygii;Actinopteri;Neopterygii;Teleostei;Osteoglossocephalai;Clupeoce  
 phala;Euteleosteomorpha;Neoteleostei;Eurypterygia;Ctenosquamata;Acanthomo



rphata;Euacanthomorpha;Percomorphaceae;Pelagiaria;Scombriformes;Scombridae;Scombrinae;Thunnini;Thunnus;Thunnus albacares

UdeM00000027017 6596 100.1 UdeM00000027017 XP\_045192613.1 26.8 366  
220 18 7 349 992 1332 5.90E-18 100.1 6596 cellular  
organisms;Eukaryota;Opisthokonta;Metazoa;Eumetazoa;Bilateria;Protostomia;Spiralia;Lophotrochozoa;Mollusca;Bivalvia;Autobranchia;Heteroconchia;Euheterodonta;Imparidentia;Venerida;Veneroidea;Veneridae;Mercenaria;Mercenaria mercenaria

UdeM00000027018 37653 255 UdeM00000027018 XP\_014773075.1 22.2 1915  
1096 90 235 2045 1622 3247 8.40E-64 255 37653 cellular  
organisms;Eukaryota;Opisthokonta;Metazoa;Eumetazoa;Bilateria;Protostomia;Spiralia;Lophotrochozoa;Mollusca;Cephalopoda;Coleoidea;Octopodiformes;Octopoda;Incirrata;Octopodidae;Octopus;Octopus bimaculoides

UdeM00000027019 6596 187.2 UdeM00000027019 XP\_045210928.1 63.2 144  
53 0 1 144 4 147 2.00E-44 187.2 6596 cellular  
organisms;Eukaryota;Opisthokonta;Metazoa;Eumetazoa;Bilateria;Protostomia;Spiralia;Lophotrochozoa;Mollusca;Bivalvia;Autobranchia;Heteroconchia;Euheterodonta;Imparidentia;Venerida;Veneroidea;Veneridae;Mercenaria;Mercenaria mercenaria

UdeM00000027020 6596 226.5 UdeM00000027020 XP\_045189940.1 63.4 175  
61 2 1 173 1 174 2.60E-56 226.5 6596 cellular  
organisms;Eukaryota;Opisthokonta;Metazoa;Eumetazoa;Bilateria;Protostomia;Spiralia;Lophotrochozoa;Mollusca;Bivalvia;Autobranchia;Heteroconchia;Euheterodonta;Imparidentia;Venerida;Veneroidea;Veneridae;Mercenaria;Mercenaria mercenaria

UdeM00000027021 6573 343.2 UdeM00000027021 XP\_021376136.1 44.1 476  
211 15 1 435 1 462 4.90E-91 343.2 6573 cellular  
organisms;Eukaryota;Opisthokonta;Metazoa;Eumetazoa;Bilateria;Protostomia;Spiralia;Lophotrochozoa;Mollusca;Bivalvia;Autobranchia;Pteriomorpha;Pectinida;Pectinoidea;Pectinidae;Mizuhopecten;Mizuhopecten yessoensis

UdeM00000027022 6596 600.1 UdeM00000027022 XP\_045204483.1 52.3 623  
255 9 1 583 1 621 2.90E-168 600.1 6596 cellular  
organisms;Eukaryota;Opisthokonta;Metazoa;Eumetazoa;Bilateria;Protostomia;Spiralia;Lophotrochozoa;Mollusca;Bivalvia;Autobranchia;Heteroconchia;Euheterodonta;Imparidentia;Venerida;Veneroidea;Veneridae;Mercenaria;Mercenaria mercenaria

UdeM00000027023 6565 583.2 UdeM00000027023 XP\_022321940.1 43.5 671  
370 5 10 672 13 682 4.30E-163 583.2 6565 cellular  
organisms;Eukaryota;Opisthokonta;Metazoa;Eumetazoa;Bilateria;Protostomia;Spiralia;Lophotrochozoa;Mollusca;Bivalvia;Autobranchia;Pteriomorpha;Ostreida;Ostreoidea;Ostreidae;Crassostrea;Crassostrea virginica

UdeM00000027024 6596 130.2 UdeM00000027024 XP\_045211321.1 55.3 103  
46 0 3 105 66 168 1.60E-27 130.2 6596 cellular  
organisms;Eukaryota;Opisthokonta;Metazoa;Eumetazoa;Bilateria;Protostomia;Spiralia;Lophotrochozoa;Mollusca;Bivalvia;Autobranchia;Heteroconchia;Euheterodonta;Imparidentia;Venerida;Veneroidea;Veneridae;Mercenaria;Mercenaria mercenaria

UdeM00000027025 6573 107.8 UdeM00000027025 XP\_021370619.1 44.1 118  
66 0 10 127 9 126 1.20E-20 107.8 6573 cellular  
organisms;Eukaryota;Opisthokonta;Metazoa;Eumetazoa;Bilateria;Protostomia;Spiralia;Lophotrochozoa;Mollusca;Bivalvia;Autobranchia;Pteriomorpha;Pectinida;Pectinoidea;Pectinidae;Mizuhopecten;Mizuhopecten yessoensis

UdeM00000027026 6596 211.8 UdeM00000027026 XP\_045211321.1 57.1 168  
70 2 1 166 1 168 6.60E-52 211.8 6596 cellular

organisms;Eukaryota;Opisthokonta;Metazoa;Eumetazoa;Bilateria;Protostomia;Spiralia;Lophotrochozoa;Mollusca;Bivalvia;Autobranchia;Heteroconchia;Euherodonta;Imparidentia;Venerida;Veneroidea;Veneridae;Mercenaria;Mercenaria mercenaria

UdeM00000027027 1735272 195.3 UdeM00000027027 XP\_041371017.1 60  
155 59 1 20 174 27 178 6.60E-47 195.3 1735272  
cellular

organisms;Eukaryota;Opisthokonta;Metazoa;Eumetazoa;Bilateria;Protostomia;Spiralia;Lophotrochozoa;Mollusca;Gastropoda;Neomphalina;Neomphaloidea;Peltospiridae;Gigantopelta;Gigantopelta aegis

UdeM00000027028 6573 134.8 UdeM00000027028 XP\_021360339.1 46.8 156  
75 3 9 157 4 158 1.10E-28 134.8 6573 cellular

organisms;Eukaryota;Opisthokonta;Metazoa;Eumetazoa;Bilateria;Protostomia;Spiralia;Lophotrochozoa;Mollusca;Bivalvia;Autobranchia;Pteriormorphia;Pectinida;Pectinoidea;Pectinidae;Mizuhopecten;Mizuhopecten yessoensis

UdeM00000027030 6596 88.6 UdeM00000027030 XP\_045194463.1 31.8 151  
90 3 1 138 115 265 6.90E-15 88.6 6596 cellular

organisms;Eukaryota;Opisthokonta;Metazoa;Eumetazoa;Bilateria;Protostomia;Spiralia;Lophotrochozoa;Mollusca;Bivalvia;Autobranchia;Heteroconchia;Euherodonta;Imparidentia;Venerida;Veneroidea;Veneridae;Mercenaria;Mercenaria mercenaria

UdeM00000027031 6596 372.1 UdeM00000027031 XP\_045196406.1 66.9 260  
84 2 1 259 32 290 6.10E-100 372.1 6596 cellular

organisms;Eukaryota;Opisthokonta;Metazoa;Eumetazoa;Bilateria;Protostomia;Spiralia;Lophotrochozoa;Mollusca;Bivalvia;Autobranchia;Heteroconchia;Euherodonta;Imparidentia;Venerida;Veneroidea;Veneridae;Mercenaria;Mercenaria mercenaria

UdeM00000027033 6596 372.1 UdeM00000027033 XP\_045196406.1 66.9 260  
84 2 1 259 32 290 6.00E-100 372.1 6596 cellular

organisms;Eukaryota;Opisthokonta;Metazoa;Eumetazoa;Bilateria;Protostomia;Spiralia;Lophotrochozoa;Mollusca;Bivalvia;Autobranchia;Heteroconchia;Euherodonta;Imparidentia;Venerida;Veneroidea;Veneridae;Mercenaria;Mercenaria mercenaria

UdeM00000027035 225164 288.5 UdeM00000027035 XP\_009067154.1 63.4  
205 73 2 1 204 81 284 6.80E-75 288.5 225164  
cellular

organisms;Eukaryota;Opisthokonta;Metazoa;Eumetazoa;Bilateria;Protostomia;Spiralia;Lophotrochozoa;Mollusca;Gastropoda;Patellogastropoda;Lottiidae;Lottia;Lottia gigantea

UdeM00000027036 6596 210.3 UdeM00000027036 XP\_045196406.1 66.4 137  
46 0 1 137 32 168 1.60E-51 210.3 6596 cellular

organisms;Eukaryota;Opisthokonta;Metazoa;Eumetazoa;Bilateria;Protostomia;Spiralia;Lophotrochozoa;Mollusca;Bivalvia;Autobranchia;Heteroconchia;Euherodonta;Imparidentia;Venerida;Veneroidea;Veneridae;Mercenaria;Mercenaria mercenaria

UdeM00000027037 225164 147.5 UdeM00000027037 XP\_009067154.1 65.3  
101 34 1 17 117 154 253 1.20E-32 147.5 225164  
cellular

organisms;Eukaryota;Opisthokonta;Metazoa;Eumetazoa;Bilateria;Protostomia;Spiralia;Lophotrochozoa;Mollusca;Gastropoda;Patellogastropoda;Lottiidae;Lottia;Lottia gigantea

UdeM00000027038 6596 387.5 UdeM00000027038 XP\_045196300.1 62.9 267  
98 1 193 458 6 272 2.40E-104 387.5 6596 cellular

organisms;Eukaryota;Opisthokonta;Metazoa;Eumetazoa;Bilateria;Protostomia;

Spiralia;Lophotrochozoa;Mollusca;Bivalvia;Autobranchia;Heteroconchia;Euherodonta;Imparidentia;Venerida;Veneroidea;Veneridae;Mercenaria;Mercenaria mercenaria

UdeM00000027039 27687 377.5 UdeM00000027039 XP\_028657207.1 40.6 545  
270 11 4 508 194 724 2.70E-101 377.5 27687 cellular

organisms;Eukaryota;Opisthokonta;Metazoa;Eumetazoa;Bilateria;Deuterostomia;Chordata;Craniata;Vertebrata;Gnathostomata;Teleostomi;Euteleostomi;Actinopterygii;Cladistia;Polypteriformes;Polypteridae;Erpetoichthys;Erpetoichthys calabaricus

UdeM00000027040 6596 315.1 UdeM00000027040 XP\_045210908.1 71 200  
58 0 20 219 36 235 1.10E-82 315.1 6596 cellular

organisms;Eukaryota;Opisthokonta;Metazoa;Eumetazoa;Bilateria;Protostomia;Spiralia;Lophotrochozoa;Mollusca;Bivalvia;Autobranchia;Heteroconchia;Euherodonta;Imparidentia;Venerida;Veneroidea;Veneridae;Mercenaria;Mercenaria mercenaria

UdeM00000027041 6596 388.3 UdeM00000027041 XP\_045163613.1 52.6 346  
155 6 1 338 1 345 1.00E-104 388.3 6596 cellular

organisms;Eukaryota;Opisthokonta;Metazoa;Eumetazoa;Bilateria;Protostomia;Spiralia;Lophotrochozoa;Mollusca;Bivalvia;Autobranchia;Heteroconchia;Euherodonta;Imparidentia;Venerida;Veneroidea;Veneridae;Mercenaria;Mercenaria mercenaria

UdeM00000027042 6596 387.5 UdeM00000027042 XP\_045196300.1 59.9 284  
113 1 8 290 6 289 1.50E-104 387.5 6596 cellular

organisms;Eukaryota;Opisthokonta;Metazoa;Eumetazoa;Bilateria;Protostomia;Spiralia;Lophotrochozoa;Mollusca;Bivalvia;Autobranchia;Heteroconchia;Euherodonta;Imparidentia;Venerida;Veneroidea;Veneridae;Mercenaria;Mercenaria mercenaria

UdeM00000027043 6596 236.5 UdeM00000027043 XP\_045201450.1 57.1 226  
93 3 1 225 1 223 3.40E-59 236.5 6596 cellular

organisms;Eukaryota;Opisthokonta;Metazoa;Eumetazoa;Bilateria;Protostomia;Spiralia;Lophotrochozoa;Mollusca;Bivalvia;Autobranchia;Heteroconchia;Euherodonta;Imparidentia;Venerida;Veneroidea;Veneridae;Mercenaria;Mercenaria mercenaria

UdeM00000027044 6596 538.1 UdeM00000027044 XP\_045201406.1 49.3 574  
291 0 15 588 17 590 1.40E-149 538.1 6596 cellular

organisms;Eukaryota;Opisthokonta;Metazoa;Eumetazoa;Bilateria;Protostomia;Spiralia;Lophotrochozoa;Mollusca;Bivalvia;Autobranchia;Heteroconchia;Euherodonta;Imparidentia;Venerida;Veneroidea;Veneridae;Mercenaria;Mercenaria mercenaria

UdeM00000027045 6579 119 UdeM00000027045 XP\_033729601.1 68.4 114  
36 0 1 114 1 114 4.00E-24 119 6579 cellular

organisms;Eukaryota;Opisthokonta;Metazoa;Eumetazoa;Bilateria;Protostomia;Spiralia;Lophotrochozoa;Mollusca;Bivalvia;Autobranchia;Pteriomorphia;Pectinida;Pectinoidea;Pectinidae;Pecten;Pecten maximus

UdeM00000027046 45264 238.4 UdeM00000027046 XP\_044165535.1 47.2 231  
118 1 1 227 294 524 1.00E-59 238.4 45264 cellular

organisms;Eukaryota;Opisthokonta;Metazoa;Eumetazoa;Cnidaria;Anthozoa;Hexacorallia;Scleractinia;Astrocoeniina;Acroporidae;Acropora;Acropora millepora

UdeM00000027047 6573 167.5 UdeM00000027047 XP\_021376971.1 29.3 533  
320 17 3 507 402 905 4.30E-38 167.5 6573 cellular

organisms;Eukaryota;Opisthokonta;Metazoa;Eumetazoa;Bilateria;Protostomia;Spiralia;Lophotrochozoa;Mollusca;Bivalvia;Autobranchia;Pteriomorphia;Pectinida;Pectinoidea;Pectinidae;Mizuhopecten;Mizuhopecten yessoensis

UdeM00000041302 7998 246.5 UdeM00000041302 XP\_017334791.1 68.5 162  
 51 0 1 162 62 223 2.30E-62 246.5 7998 cellular  
 organisms;Eukaryota;Opisthokonta;Metazoa;Eumetazoa;Bilateria;Deuterostomi  
 a;Chordata;Craniata;Vertebrata;Gnathostomata;Teleostomi;Euteleostomi;Acti  
 nopterygii;Actinopteri;Neopterygii;Teleostei;Osteoglossocephalai;Clupeoce  
 phala;Otomorpha;Ostariophysi;Otophysi;Characiphysae;Siluriformes;Siluroid  
 ei;Ictaluridae;Ictalurus;Ictalurus punctatus

UdeM00000041303 6579 218 UdeM00000041303 XP\_033732173.1 64.8 159  
 51 5 1 156 1 157 8.60E-54 218 6579 cellular  
 organisms;Eukaryota;Opisthokonta;Metazoa;Eumetazoa;Bilateria;Protostomia;  
 Spiralia;Lophotrochozoa;Mollusca;Bivalvia;Autobranhia;Pteriormorphia;Pect  
 inida;Pectinoidea;Pectinidae;Pecten;Pecten maximus

UdeM00000041304 29159 229.6 UdeM00000041304 XP\_011429223.2 59.2 211  
 81 3 1 210 153 359 3.80E-57 229.6 29159 cellular  
 organisms;Eukaryota;Opisthokonta;Metazoa;Eumetazoa;Bilateria;Protostomia;  
 Spiralia;Lophotrochozoa;Mollusca;Bivalvia;Autobranhia;Pteriormorphia;Ostr  
 eida;Ostreioidea;Ostreidae;Crassostrea;Crassostrea gigas

UdeM00000041305 29159 418.7 UdeM00000041305 XP\_011429223.2 60 360  
 139 3 6 364 4 359 7.60E-114 418.7 29159 cellular  
 organisms;Eukaryota;Opisthokonta;Metazoa;Eumetazoa;Bilateria;Protostomia;  
 Spiralia;Lophotrochozoa;Mollusca;Bivalvia;Autobranhia;Pteriormorphia;Ostr  
 eida;Ostreioidea;Ostreidae;Crassostrea;Crassostrea gigas

UdeM00000041306 6565 139.4 UdeM00000041306 XP\_022305948.1 65.6 90  
 31 0 1 90 103 192 2.20E-30 139.4 6565 cellular  
 organisms;Eukaryota;Opisthokonta;Metazoa;Eumetazoa;Bilateria;Protostomia;  
 Spiralia;Lophotrochozoa;Mollusca;Bivalvia;Autobranhia;Pteriormorphia;Ostr  
 eida;Ostreioidea;Ostreidae;Crassostrea;Crassostrea virginica

UdeM00000041307 6573 303.1 UdeM00000041307 XP\_021345141.1 87 177  
 23 0 1 177 1 177 2.30E-79 303.1 6573 cellular  
 organisms;Eukaryota;Opisthokonta;Metazoa;Eumetazoa;Bilateria;Protostomia;  
 Spiralia;Lophotrochozoa;Mollusca;Bivalvia;Autobranhia;Pteriormorphia;Pect  
 inida;Pectinoidea;Pectinidae;Mizuhopecten;Mizuhopecten yessoensis

UdeM00000041308 6596 67.4 UdeM00000041308 XP\_045211374.1 36.7 98  
 60 2 2 98 33 129 1.30E-08 67.4 6596 cellular  
 organisms;Eukaryota;Opisthokonta;Metazoa;Eumetazoa;Bilateria;Protostomia;  
 Spiralia;Lophotrochozoa;Mollusca;Bivalvia;Autobranhia;Heteroconchia;Euhe  
 terodonta;Imparidentia;Venerida;Veneroidea;Veneridae;Mercenaria;Mercenari  
 a mercenaria

UdeM00000041309 29159 368.6 UdeM00000041309 XP\_019925641.2 57.1 352  
 141 3 44 390 33 379 1.20E-98 368.6 29159 cellular  
 organisms;Eukaryota;Opisthokonta;Metazoa;Eumetazoa;Bilateria;Protostomia;  
 Spiralia;Lophotrochozoa;Mollusca;Bivalvia;Autobranhia;Pteriormorphia;Ostr  
 eida;Ostreioidea;Ostreidae;Crassostrea;Crassostrea gigas

UdeM00000041310 6596 68.9 UdeM00000041310 XP\_045210055.1 50 88  
 38 3 2 84 21 107 4.00E-08 68.9 6596 cellular  
 organisms;Eukaryota;Opisthokonta;Metazoa;Eumetazoa;Bilateria;Protostomia;  
 Spiralia;Lophotrochozoa;Mollusca;Bivalvia;Autobranhia;Heteroconchia;Euhe  
 terodonta;Imparidentia;Venerida;Veneroidea;Veneridae;Mercenaria;Mercenari  
 a mercenaria

UdeM00000041311 6596 109.4 UdeM00000041311 XP\_045198590.1 34.4 209  
 123 7 265 466 431 632 1.30E-20 109.4 6596 cellular  
 organisms;Eukaryota;Opisthokonta;Metazoa;Eumetazoa;Bilateria;Protostomia;  
 Spiralia;Lophotrochozoa;Mollusca;Bivalvia;Autobranhia;Heteroconchia;Euhe

terodonta;Imparidentia;Venerida;Veneroidea;Veneridae;Mercenaria;Mercenaria mercenaria

UdeM00000041312 260615 159.5 UdeM00000041312 XP\_039342393.1 67.4  
144 21 2 5 122 382 525 2.80E-36 159.5 260615  
cellular

organisms;Eukaryota;Opisthokonta;Metazoa;Eumetazoa;Bilateria;Deuterostomia;Chordata;Craniata;Vertebrata;Gnathostomata;Teleostomi;Euteleostomi;Sarcopterygii;Dipnotetrapodomorpha;Tetrapoda;Amniota;Sauropsida;Sauria;Archelosauria;Testudinata;Testudines;Cryptodira;Durocryptodira;Testudinoidea;Geoemydidae;Geoemydinae;Mauremys;Mauremys reevesii

UdeM00000041313 260615 130.6 UdeM00000041313 XP\_039342393.1 64.2  
123 18 2 1 97 403 525 1.10E-27 130.6 260615  
cellular

organisms;Eukaryota;Opisthokonta;Metazoa;Eumetazoa;Bilateria;Deuterostomia;Chordata;Craniata;Vertebrata;Gnathostomata;Teleostomi;Euteleostomi;Sarcopterygii;Dipnotetrapodomorpha;Tetrapoda;Amniota;Sauropsida;Sauria;Archelosauria;Testudinata;Testudines;Cryptodira;Durocryptodira;Testudinoidea;Geoemydidae;Geoemydinae;Mauremys;Mauremys reevesii

UdeM00000041314 6573 396 UdeM00000041314 XP\_021347801.1 69.8 404  
109 6 1 400 1 395 2.10E-106 396 6573 cellular

organisms;Eukaryota;Opisthokonta;Metazoa;Eumetazoa;Bilateria;Protostomia;Spiralia;Lophotrochozoa;Mollusca;Bivalvia;Autobranchia;Pteriormorphia;Pectinida;Pectinoidea;Pectinidae;Mizuhopecten;Mizuhopecten yessoensis

UdeM00000041315 6596 146.7 UdeM00000041315 XP\_045192805.1 32.2 264  
177 2 37 298 59 322 4.80E-32 146.7 6596 cellular

organisms;Eukaryota;Opisthokonta;Metazoa;Eumetazoa;Bilateria;Protostomia;Spiralia;Lophotrochozoa;Mollusca;Bivalvia;Autobranchia;Heteroconchia;Euterodonta;Imparidentia;Venerida;Veneroidea;Veneridae;Mercenaria;Mercenaria mercenaria

UdeM00000041316 29159 256.5 UdeM00000041316 XP\_034316161.1 43.6 291  
163 1 1 290 718 1008 4.00E-65 256.5 29159 cellular

organisms;Eukaryota;Opisthokonta;Metazoa;Eumetazoa;Bilateria;Protostomia;Spiralia;Lophotrochozoa;Mollusca;Bivalvia;Autobranchia;Pteriormorphia;Ostreida;Ostreoidea;Ostreidae;Crassostrea;Crassostrea gigas

UdeM00000041319 1437191 144.4 UdeM00000041319 XP\_029054816.1 43.2  
162 89 2 1 159 302 463 1.30E-31 144.4 1437191  
cellular

organisms;Eukaryota;Opisthokonta;Metazoa;Eumetazoa;Bilateria;Protostomia;Ecdysozoa;Panarthropoda;Arthropoda;Mandibulata;Pancrustacea;Hexapoda;Insecta;Dicondylia;Pterygota;Neoptera;Endopterygota;Hymenoptera;Apocrita;Aculeata;Apoidea;Megachilidae;Megachilinae;Osmiini;Osmia;Osmia bicornis;Osmia bicornis bicornis

UdeM00000041320 1415580 143.7 UdeM00000041320 XP\_030075314.1 46.4  
153 81 1 1 153 1 152 2.00E-31 143.7 1415580  
cellular

organisms;Eukaryota;Opisthokonta;Metazoa;Eumetazoa;Bilateria;Deuterostomia;Chordata;Craniata;Vertebrata;Gnathostomata;Teleostomi;Euteleostomi;Sarcopterygii;Dipnotetrapodomorpha;Tetrapoda;Amphibia;Gymnophiona;Siphonopidae;Microcaecilia;Microcaecilia unicolor

UdeM00000041321 1415580 504.6 UdeM00000041321 XP\_030075314.1 54.3  
479 200 4 1 476 163 625 1.40E-139 504.6 1415580  
cellular

organisms;Eukaryota;Opisthokonta;Metazoa;Eumetazoa;Bilateria;Deuterostomia;Chordata;Craniata;Vertebrata;Gnathostomata;Teleostomi;Euteleostomi;Sarc

opterygii;Dipnotetrapodomorpha;Tetrapoda;Amphibia;Gymnophiona;Siphonopida  
 e;Microcaecilia;Microcaecilia unicolor  
 UdeM00000041322 6596 152.1 UdeM00000041322 XP\_045158316.1 48.3 145  
 66 6 40 182 177 314 6.70E-34 152.1 6596 cellular  
 organisms;Eukaryota;Opisthokonta;Metazoa;Eumetazoa;Bilateria;Protostomia;  
 Spiralia;Lophotrochozoa;Mollusca;Bivalvia;Autobranchia;Heteroconchia;Euhe  
 terodonta;Imparidentia;Venerida;Veneroidea;Veneridae;Mercenaria;Mercenari  
 a mercenaria  
 UdeM00000041325 6565 1407.9 UdeM00000041325 XP\_022329293.1 71.6  
 1117 291 8 1 1104 1 1104 0.00E+00 1407.9 6565  
 cellular  
 organisms;Eukaryota;Opisthokonta;Metazoa;Eumetazoa;Bilateria;Protostomia;  
 Spiralia;Lophotrochozoa;Mollusca;Bivalvia;Autobranchia;Pteriormorphia;Ostr  
 eida;Ostreoidea;Ostreidae;Crassostrea;Crassostrea virginica  
 UdeM00000041327 6596 90.9 UdeM00000041327 XP\_045208010.1 70.4 81  
 18 2 1 80 1 76 8.50E-16 90.9 6596 cellular  
 organisms;Eukaryota;Opisthokonta;Metazoa;Eumetazoa;Bilateria;Protostomia;  
 Spiralia;Lophotrochozoa;Mollusca;Bivalvia;Autobranchia;Heteroconchia;Euhe  
 terodonta;Imparidentia;Venerida;Veneroidea;Veneridae;Mercenaria;Mercenari  
 a mercenaria  
 UdeM00000041326 6573 282.3 UdeM00000041326 XP\_021341993.1 76.2 214  
 45 2 1 212 1 210 5.00E-73 282.3 6573 cellular  
 organisms;Eukaryota;Opisthokonta;Metazoa;Eumetazoa;Bilateria;Protostomia;  
 Spiralia;Lophotrochozoa;Mollusca;Bivalvia;Autobranchia;Pteriormorphia;Pect  
 inida;Pectinoidea;Pectinidae;Mizuhopecten;Mizuhopecten yessoensis  
 UdeM00000041328 29159 196.4 UdeM00000041328 XP\_011450032.1 64.3 171  
 60 1 113 282 38 208 4.80E-47 196.4 29159 cellular  
 organisms;Eukaryota;Opisthokonta;Metazoa;Eumetazoa;Bilateria;Protostomia;  
 Spiralia;Lophotrochozoa;Mollusca;Bivalvia;Autobranchia;Pteriormorphia;Ostr  
 eida;Ostreoidea;Ostreidae;Crassostrea;Crassostrea gigas  
 UdeM00000041329 6596 1008.1 UdeM00000041329 XP\_045209793.1 52.5  
 1060 487 8 2 1049 245 1299 1.60E-290 1008.1 6596  
 cellular  
 organisms;Eukaryota;Opisthokonta;Metazoa;Eumetazoa;Bilateria;Protostomia;  
 Spiralia;Lophotrochozoa;Mollusca;Bivalvia;Autobranchia;Heteroconchia;Euhe  
 terodonta;Imparidentia;Venerida;Veneroidea;Veneridae;Mercenaria;Mercenari  
 a mercenaria  
 UdeM00000041332 6596 138.7 UdeM00000041332 XP\_045209793.1 49.5 111  
 56 0 2 112 1188 1298 7.90E-30 138.7 6596 cellular  
 organisms;Eukaryota;Opisthokonta;Metazoa;Eumetazoa;Bilateria;Protostomia;  
 Spiralia;Lophotrochozoa;Mollusca;Bivalvia;Autobranchia;Heteroconchia;Euhe  
 terodonta;Imparidentia;Venerida;Veneroidea;Veneridae;Mercenaria;Mercenari  
 a mercenaria  
 UdeM00000041333 6596 104.4 UdeM00000041333 XP\_045209793.1 54.5 77  
 35 0 2 78 1188 1264 8.90E-20 104.4 6596 cellular  
 organisms;Eukaryota;Opisthokonta;Metazoa;Eumetazoa;Bilateria;Protostomia;  
 Spiralia;Lophotrochozoa;Mollusca;Bivalvia;Autobranchia;Heteroconchia;Euhe  
 terodonta;Imparidentia;Venerida;Veneroidea;Veneridae;Mercenaria;Mercenari  
 a mercenaria  
 UdeM00000041334 6596 870.2 UdeM00000041334 XP\_045209793.1 42 1149  
 547 14 26 1058 34 1179 2.80E-249 870.2 6596 cellular  
 organisms;Eukaryota;Opisthokonta;Metazoa;Eumetazoa;Bilateria;Protostomia;  
 Spiralia;Lophotrochozoa;Mollusca;Bivalvia;Autobranchia;Heteroconchia;Euhe

terodonta;Imparidentia;Venerida;Veneroidea;Veneridae;Mercenaria;Mercenari  
a mercenaria

|                 |      |        |                 |                |           |
|-----------------|------|--------|-----------------|----------------|-----------|
| UdeM00000041335 | 6596 | 1056.6 | UdeM00000041335 | XP_045209793.1 | 45.2      |
| 1285            | 636  | 14     | 79              | 1322           | 40        |
|                 |      |        |                 | 1297           | 2.60E-305 |
|                 |      |        |                 |                | 1056.6    |
|                 |      |        |                 |                | 6596      |

cellular

organisms;Eukaryota;Opisthokonta;Metazoa;Eumetazoa;Bilateria;Protostomia;  
Spiralia;Lophotrochozoa;Mollusca;Bivalvia;Autobranchia;Heteroconchia;Euhe  
terodonta;Imparidentia;Venerida;Veneroidea;Veneridae;Mercenaria;Mercenari  
a mercenaria

|                 |      |       |                 |                |      |          |
|-----------------|------|-------|-----------------|----------------|------|----------|
| UdeM00000041336 | 6596 | 305.1 | UdeM00000041336 | XP_045208580.1 | 53.3 | 291      |
| 136             | 0    | 11    | 301             | 8              | 298  | 1.10E-79 |
|                 |      |       |                 |                |      | 305.1    |
|                 |      |       |                 |                |      | 6596     |
|                 |      |       |                 |                |      | cellular |

organisms;Eukaryota;Opisthokonta;Metazoa;Eumetazoa;Bilateria;Protostomia;  
Spiralia;Lophotrochozoa;Mollusca;Bivalvia;Autobranchia;Heteroconchia;Euhe  
terodonta;Imparidentia;Venerida;Veneroidea;Veneridae;Mercenaria;Mercenari  
a mercenaria

|                 |      |       |                 |                |      |          |
|-----------------|------|-------|-----------------|----------------|------|----------|
| UdeM00000041337 | 6596 | 316.6 | UdeM00000041337 | XP_045208580.1 | 55.8 | 285      |
| 125             | 1    | 68    | 352             | 3              | 286  | 4.10E-83 |
|                 |      |       |                 |                |      | 316.6    |
|                 |      |       |                 |                |      | 6596     |
|                 |      |       |                 |                |      | cellular |

organisms;Eukaryota;Opisthokonta;Metazoa;Eumetazoa;Bilateria;Protostomia;  
Spiralia;Lophotrochozoa;Mollusca;Bivalvia;Autobranchia;Heteroconchia;Euhe  
terodonta;Imparidentia;Venerida;Veneroidea;Veneridae;Mercenaria;Mercenari  
a mercenaria

|                 |      |       |                 |                |      |          |
|-----------------|------|-------|-----------------|----------------|------|----------|
| UdeM00000041338 | 6596 | 220.7 | UdeM00000041338 | XP_045193084.1 | 31.1 | 441      |
| 277             | 9    | 241   | 666             | 28             | 456  | 5.60E-54 |
|                 |      |       |                 |                |      | 220.7    |
|                 |      |       |                 |                |      | 6596     |
|                 |      |       |                 |                |      | cellular |

organisms;Eukaryota;Opisthokonta;Metazoa;Eumetazoa;Bilateria;Protostomia;  
Spiralia;Lophotrochozoa;Mollusca;Bivalvia;Autobranchia;Heteroconchia;Euhe  
terodonta;Imparidentia;Venerida;Veneroidea;Veneridae;Mercenaria;Mercenari  
a mercenaria

|                 |       |       |                 |                |      |          |
|-----------------|-------|-------|-----------------|----------------|------|----------|
| UdeM00000041339 | 29159 | 214.5 | UdeM00000041339 | XP_034312908.1 | 28.2 | 649      |
| 342             | 20    | 9     | 564             | 6              | 623  | 3.40E-52 |
|                 |       |       |                 |                |      | 214.5    |
|                 |       |       |                 |                |      | 29159    |
|                 |       |       |                 |                |      | cellular |

organisms;Eukaryota;Opisthokonta;Metazoa;Eumetazoa;Bilateria;Protostomia;  
Spiralia;Lophotrochozoa;Mollusca;Bivalvia;Autobranchia;Pteriormorphia;Ostr  
eida;Ostreoidea;Ostreidae;Crassostrea;Crassostrea gigas

|                 |       |      |                 |                |      |          |
|-----------------|-------|------|-----------------|----------------|------|----------|
| UdeM00000041340 | 29159 | 73.9 | UdeM00000041340 | XP_034307878.1 | 32.3 | 99       |
| 67              | 0     | 1    | 99              | 92             | 190  | 3.70E-10 |
|                 |       |      |                 |                |      | 73.9     |
|                 |       |      |                 |                |      | 29159    |
|                 |       |      |                 |                |      | cellular |

organisms;Eukaryota;Opisthokonta;Metazoa;Eumetazoa;Bilateria;Protostomia;  
Spiralia;Lophotrochozoa;Mollusca;Bivalvia;Autobranchia;Pteriormorphia;Ostr  
eida;Ostreoidea;Ostreidae;Crassostrea;Crassostrea gigas

|                 |      |       |                 |                |     |          |
|-----------------|------|-------|-----------------|----------------|-----|----------|
| UdeM00000041343 | 7574 | 104.8 | UdeM00000041343 | XP_013418747.1 | 34  | 153      |
| 90              | 2    | 227   | 372             | 42             | 190 | 2.50E-19 |
|                 |      |       |                 |                |     | 104.8    |
|                 |      |       |                 |                |     | 7574     |
|                 |      |       |                 |                |     | cellular |

organisms;Eukaryota;Opisthokonta;Metazoa;Eumetazoa;Bilateria;Protostomia;  
Spiralia;Lophotrochozoa;Brachiopoda;Linguliformea;Lingulata;Lingulida;Lin  
guloidea;Lingulidae;Lingula;Lingula anatina

|                 |      |       |                 |                |     |          |
|-----------------|------|-------|-----------------|----------------|-----|----------|
| UdeM00000041345 | 7604 | 303.5 | UdeM00000041345 | XP_033633146.1 | 41  | 390      |
| 212             | 3    | 262   | 633             | 29             | 418 | 8.30E-79 |
|                 |      |       |                 |                |     | 303.5    |
|                 |      |       |                 |                |     | 7604     |
|                 |      |       |                 |                |     | cellular |

organisms;Eukaryota;Opisthokonta;Metazoa;Eumetazoa;Bilateria;Deuterostomi  
a;Echinodermata;Eleutherozoa;Asterozoa;Asteroidea;Forcipulatacea;Forcipul  
atida;Asteroidea;Asteroidea;Asterias;Asterias rubens

|                 |        |      |                 |                |          |        |
|-----------------|--------|------|-----------------|----------------|----------|--------|
| UdeM00000041346 | 400727 | 92.8 | UdeM00000041346 | XP_025078952.1 | 24.1     |        |
| 493             | 340    | 13   | 40              | 512            | 66       |        |
|                 |        |      |                 | 544            | 1.40E-15 |        |
|                 |        |      |                 |                |          | 92.8   |
|                 |        |      |                 |                |          | 400727 |

cellular

organisms;Eukaryota;Opisthokonta;Metazoa;Eumetazoa;Bilateria;Protostomia;  
Spiralia;Lophotrochozoa;Mollusca;Gastropoda;Caenogastropoda;Architaeniogl  
ossa;Ampullarioidea;Ampullariidae;Pomacea;Pomacea canaliculata

UdeM00000041347 400727 92 UdeM00000041347 XP\_025078952.1 25.1  
 434 293 12 52 467 125 544 2.10E-15 92 400727  
 cellular  
 organisms;Eukaryota;Opisthokonta;Metazoa;Eumetazoa;Bilateria;Protostomia;  
 Spiralia;Lophotrochozoa;Mollusca;Gastropoda;Caenogastropoda;Architaenioglo  
 ssa;Ampullarioidea;Ampullariidae;Pomacea;Pomacea canaliculata  
 UdeM00000041349 6596 357.1 UdeM00000041349 XP\_045201596.1 39.2 546  
 300 9 4 533 8 537 4.00E-95 357.1 6596 cellular  
 organisms;Eukaryota;Opisthokonta;Metazoa;Eumetazoa;Bilateria;Protostomia;  
 Spiralia;Lophotrochozoa;Mollusca;Bivalvia;Autobranchia;Heteroconchia;Euhe  
 terodonta;Imparidentia;Venerida;Veneroidea;Veneridae;Mercenaria;Mercenari  
 a mercenaria  
 UdeM00000041350 6596 330.1 UdeM00000041350 XP\_045200182.1 64.1 231  
 83 0 1 231 16 246 2.40E-87 330.1 6596 cellular  
 organisms;Eukaryota;Opisthokonta;Metazoa;Eumetazoa;Bilateria;Protostomia;  
 Spiralia;Lophotrochozoa;Mollusca;Bivalvia;Autobranchia;Heteroconchia;Euhe  
 terodonta;Imparidentia;Venerida;Veneroidea;Veneridae;Mercenaria;Mercenari  
 a mercenaria  
 UdeM00000041351 6596 1094.7 UdeM00000041351 XP\_045200187.1 64.5  
 857 271 9 6 839 7 853 0.00E+00 1094.7 6596  
 cellular  
 organisms;Eukaryota;Opisthokonta;Metazoa;Eumetazoa;Bilateria;Protostomia;  
 Spiralia;Lophotrochozoa;Mollusca;Bivalvia;Autobranchia;Heteroconchia;Euhe  
 terodonta;Imparidentia;Venerida;Veneroidea;Veneridae;Mercenaria;Mercenari  
 a mercenaria  
 UdeM00000041352 6596 172.9 UdeM00000041352 XP\_045200185.1 62.2 156  
 51 4 1 155 733 881 3.10E-40 172.9 6596 cellular  
 organisms;Eukaryota;Opisthokonta;Metazoa;Eumetazoa;Bilateria;Protostomia;  
 Spiralia;Lophotrochozoa;Mollusca;Bivalvia;Autobranchia;Heteroconchia;Euhe  
 terodonta;Imparidentia;Venerida;Veneroidea;Veneridae;Mercenaria;Mercenari  
 a mercenaria  
 UdeM00000041353 6573 133.3 UdeM00000041353 XP\_021356128.1 79.1 86  
 16 2 95 178 349 434 6.10E-28 133.3 6573 cellular  
 organisms;Eukaryota;Opisthokonta;Metazoa;Eumetazoa;Bilateria;Protostomia;  
 Spiralia;Lophotrochozoa;Mollusca;Bivalvia;Autobranchia;Pteriomorphia;Pect  
 inida;Pectinoidea;Pectinidae;Mizuhopecten;Mizuhopecten yessoensis  
 UdeM00000041354 105023 261.9 UdeM00000041354 XP\_015828284.1 35.8  
 430 251 8 15 428 142 562 1.50E-66 261.9 105023  
 cellular  
 organisms;Eukaryota;Opisthokonta;Metazoa;Eumetazoa;Bilateria;Deuterostomi  
 a;Chordata;Craniata;Vertebrata;Gnathostomata;Teleostomi;Euteleostomi;Acti  
 nopterygii;Actinopteri;Neopterygii;Teleostei;Osteoglossocephalai;Clupeoce  
 phala;Euteleosteomorpha;Neoteleostei;Eurypterygia;Ctenosquamata;Acanthomo  
 rphata;Euacanthomorphacea;Percomorphaceae;Ovalentaria;Atherinomorphae;Cyp  
 rinodontiformes;Aplocheiloidei;Nothobranchiidae;Nothobranchius;Nothbranc  
 hius furzeri  
 UdeM00000041355 6565 250 UdeM00000041355 XP\_022286673.1 58.5 234  
 75 7 1 225 1 221 3.10E-63 250 6565 cellular  
 organisms;Eukaryota;Opisthokonta;Metazoa;Eumetazoa;Bilateria;Protostomia;  
 Spiralia;Lophotrochozoa;Mollusca;Bivalvia;Autobranchia;Pteriomorphia;Ostr  
 eida;Ostreoidea;Ostreidae;Crassostrea;Crassostrea virginica  
 UdeM00000041356 6596 594 UdeM00000041356 XP\_045200058.1 65.2 494  
 122 11 1 474 1 464 1.90E-166 594 6596 cellular  
 organisms;Eukaryota;Opisthokonta;Metazoa;Eumetazoa;Bilateria;Protostomia;



Spiralia;Lophotrochozoa;Mollusca;Bivalvia;Autobranchia;Heteroconchia;Euherodonta;Imparidentia;Venerida;Veneroidea;Veneridae;Mercenaria;Mercenaria mercenaria

UdeM00000041358 6573 175.3 UdeM00000041358 XP\_021376567.1 93.3 89  
6 0 1 89 476 564 4.20E-41 175.3 6573 cellular

organisms;Eukaryota;Opisthokonta;Metazoa;Eumetazoa;Bilateria;Protostomia;Spiralia;Lophotrochozoa;Mollusca;Bivalvia;Autobranchia;Pteriomorpha;Pectinida;Pectinoidea;Pectinidae;Mizuhopecten;Mizuhopecten yessoensis

UdeM00000041359 6565 316.6 UdeM00000041359 XP\_022286087.1 48.7 427  
190 8 1 423 557 958 4.70E-83 316.6 6565 cellular

organisms;Eukaryota;Opisthokonta;Metazoa;Eumetazoa;Bilateria;Protostomia;Spiralia;Lophotrochozoa;Mollusca;Bivalvia;Autobranchia;Pteriomorpha;Ostreida;Ostreoidea;Ostreidae;Crassostrea;Crassostrea virginica

UdeM00000041360 6573 140.6 UdeM00000041360 XP\_021340634.1 47.1 170  
74 3 4 157 2 171 1.70E-30 140.6 6573 cellular

organisms;Eukaryota;Opisthokonta;Metazoa;Eumetazoa;Bilateria;Protostomia;Spiralia;Lophotrochozoa;Mollusca;Bivalvia;Autobranchia;Pteriomorpha;Pectinida;Pectinoidea;Pectinidae;Mizuhopecten;Mizuhopecten yessoensis

UdeM00000041361 6596 682.9 UdeM00000041361 XP\_045201737.1 80.4 387  
62 2 6 378 10 396 2.20E-193 682.9 6596 cellular

organisms;Eukaryota;Opisthokonta;Metazoa;Eumetazoa;Bilateria;Protostomia;Spiralia;Lophotrochozoa;Mollusca;Bivalvia;Autobranchia;Heteroconchia;Euherodonta;Imparidentia;Venerida;Veneroidea;Veneridae;Mercenaria;Mercenaria mercenaria

UdeM00000041362 6573 261.9 UdeM00000041362 XP\_021365720.1 47.2 248  
129 1 36 281 25 272 9.60E-67 261.9 6573 cellular

organisms;Eukaryota;Opisthokonta;Metazoa;Eumetazoa;Bilateria;Protostomia;Spiralia;Lophotrochozoa;Mollusca;Bivalvia;Autobranchia;Pteriomorpha;Pectinida;Pectinoidea;Pectinidae;Mizuhopecten;Mizuhopecten yessoensis

UdeM00000041363 6596 570.1 UdeM00000041363 XP\_045199403.1 61.7 515  
156 7 12 493 111 617 2.80E-159 570.1 6596 cellular

organisms;Eukaryota;Opisthokonta;Metazoa;Eumetazoa;Bilateria;Protostomia;Spiralia;Lophotrochozoa;Mollusca;Bivalvia;Autobranchia;Heteroconchia;Euherodonta;Imparidentia;Venerida;Veneroidea;Veneridae;Mercenaria;Mercenaria mercenaria

UdeM00000041364 2607531 409.5 UdeM00000041364 XP\_029648101.2 66.7  
309 93 3 35 341 7 307 5.00E-111 409.5 2607531

cellular

organisms;Eukaryota;Opisthokonta;Metazoa;Eumetazoa;Bilateria;Protostomia;Spiralia;Lophotrochozoa;Mollusca;Cephalopoda;Coleoidea;Octopodiformes;Octopoda;Incirrata;Octopodidae;Octopus;Octopus sinensis

UdeM00000041365 6596 1860.5 UdeM00000041365 XP\_045201270.1 67.6  
1417 425 13 88 1488 91 1489 0.00E+00 1860.5 6596

cellular

organisms;Eukaryota;Opisthokonta;Metazoa;Eumetazoa;Bilateria;Protostomia;Spiralia;Lophotrochozoa;Mollusca;Bivalvia;Autobranchia;Heteroconchia;Euherodonta;Imparidentia;Venerida;Veneroidea;Veneridae;Mercenaria;Mercenaria mercenaria

UdeM00000041366 7654 904.8 UdeM00000041366 XP\_041454726.1 99.3 446  
3 0 1 446 1 446 4.30E-260 904.8 7654 cellular

organisms;Eukaryota;Opisthokonta;Metazoa;Eumetazoa;Bilateria;Deuterostomia;Echinodermata;Eleutherozoa;Echinozoa;Echinoidea;Euechinoidea;Echinacea;Temnopleuroidea;Toxopneustidae;Lytechinus;Lytechinus variegatus

UdeM00000041367 7668 906 UdeM00000041367 XP\_030840691.1 99.1 447  
 4 0 1 447 1 447 1.90E-260 906 7668 cellular  
 organisms;Eukaryota;Opisthokonta;Metazoa;Eumetazoa;Bilateria;Deuterostomi  
 a;Echinodermata;Eleutherozoa;Echinozoa;Echinoidea;Euechinoidea;Echinacea;  
 Camarodonta;Echinidea;Strongylocentrotidae;Strongylocentrotus;Strongyloce  
 ntrotus purpuratus  
 UdeM00000041368 400727 905.6 UdeM00000041368 XP\_025114802.1 99.3  
 445 3 0 1 445 1 445 2.50E-260 905.6 400727  
 cellular  
 organisms;Eukaryota;Opisthokonta;Metazoa;Eumetazoa;Bilateria;Protostomia;  
 Spiralia;Lophotrochozoa;Mollusca;Gastropoda;Caenogastropoda;Architaeniogl  
 ossa;Ampullarioidea;Ampullariidae;Pomacea;Pomacea canaliculata  
 UdeM00000041369 7654 904.4 UdeM00000041369 XP\_041454726.1 99.3 446  
 3 0 1 446 1 446 5.60E-260 904.4 7654 cellular  
 organisms;Eukaryota;Opisthokonta;Metazoa;Eumetazoa;Bilateria;Deuterostomi  
 a;Echinodermata;Eleutherozoa;Echinozoa;Echinoidea;Euechinoidea;Echinacea;  
 Temnopleuroidea;Toxopneustidae;Lytechinus;Lytechinus variegatus  
 UdeM00000041370 7654 904.4 UdeM00000041370 XP\_041454726.1 99.3 446  
 3 0 1 446 1 446 5.60E-260 904.4 7654 cellular  
 organisms;Eukaryota;Opisthokonta;Metazoa;Eumetazoa;Bilateria;Deuterostomi  
 a;Echinodermata;Eleutherozoa;Echinozoa;Echinoidea;Euechinoidea;Echinacea;  
 Temnopleuroidea;Toxopneustidae;Lytechinus;Lytechinus variegatus  
 UdeM00000041371 6579 199.9 UdeM00000041371 XP\_033761077.1 42.1 311  
 144 6 135 425 73 367 6.50E-48 199.9 6579 cellular  
 organisms;Eukaryota;Opisthokonta;Metazoa;Eumetazoa;Bilateria;Protostomia;  
 Spiralia;Lophotrochozoa;Mollusca;Bivalvia;Autobranchia;Pteriormorphia;Pect  
 inida;Pectinoidea;Pectinidae;Pecten;Pecten maximus  
 UdeM00000041374 33528 169.1 UdeM00000041374 XP\_043972167.1 52.9 157  
 69 1 1 152 1 157 4.60E-39 169.1 33528 cellular  
 organisms;Eukaryota;Opisthokonta;Metazoa;Eumetazoa;Bilateria;Deuterostomi  
 a;Chordata;Craniata;Vertebrata;Gnathostomata;Teleostomi;Euteleostomi;Acti  
 nopterygii;Actinopteri;Neopterygii;Teleostei;Osteoglossocephalai;Clupeoce  
 phala;Euteleosteomorpha;Neoteleostei;Eurypterygia;Ctenosquamata;Acanthomo  
 rphata;Euacanthomorphacea;Percomorphaceae;Ovalentaria;Atherinomorphae;Cyp  
 rinodontiformes;Cyprinodontoidei;Poeciliidae;Poeciliinae;Gambusia;Gambusi  
 a affinis  
 UdeM00000041373 6596 482.3 UdeM00000041373 XP\_045184035.1 48.3 476  
 233 4 1 464 1 475 7.20E-133 482.3 6596 cellular  
 organisms;Eukaryota;Opisthokonta;Metazoa;Eumetazoa;Bilateria;Protostomia;  
 Spiralia;Lophotrochozoa;Mollusca;Bivalvia;Autobranchia;Heteroconchia;Euhe  
 terodonta;Imparidentia;Venerida;Veneroidea;Veneridae;Mercenaria;Mercenari  
 a mercenaria  
 UdeM00000041375 6596 278.1 UdeM00000041375 XP\_045184035.1 50.6 253  
 120 2 2 250 224 475 1.10E-71 278.1 6596 cellular  
 organisms;Eukaryota;Opisthokonta;Metazoa;Eumetazoa;Bilateria;Protostomia;  
 Spiralia;Lophotrochozoa;Mollusca;Bivalvia;Autobranchia;Heteroconchia;Euhe  
 terodonta;Imparidentia;Venerida;Veneroidea;Veneridae;Mercenaria;Mercenari  
 a mercenaria  
 UdeM00000041376 6579 136.7 UdeM00000041376 XP\_033761231.1 54.2 107  
 48 1 14 119 515 621 2.00E-29 136.7 6579 cellular  
 organisms;Eukaryota;Opisthokonta;Metazoa;Eumetazoa;Bilateria;Protostomia;  
 Spiralia;Lophotrochozoa;Mollusca;Bivalvia;Autobranchia;Pteriormorphia;Pect  
 inida;Pectinoidea;Pectinidae;Pecten;Pecten maximus

UdeM00000041377 6596 720.3 UdeM00000041377 XP\_045201172.1 65.4 503  
 170 3 11 513 13 511 1.70E-204 720.3 6596 cellular  
 organisms;Eukaryota;Opisthokonta;Metazoa;Eumetazoa;Bilateria;Protostomia;  
 Spiralia;Lophotrochozoa;Mollusca;Bivalvia;Autobranchia;Heteroconchia;Euhe  
 terodonta;Imparidentia;Venerida;Veneroidea;Veneridae;Mercenaria;Mercenari  
 a mercenaria  
 UdeM00000041378 8090 235 UdeM00000041378 XP\_023809151.1 42.6 345  
 160 10 50 377 15 338 1.60E-58 235 8090 cellular  
 organisms;Eukaryota;Opisthokonta;Metazoa;Eumetazoa;Bilateria;Deuterostomi  
 a;Chordata;Craniata;Vertebrata;Gnathostomata;Teleostomi;Euteleostomi;Acti  
 nopterygii;Actinopteri;Neopterygii;Teleostei;Osteoglossocephalai;Clupeoce  
 phala;Euteleosteomorpha;Neoteleostei;Eurypterygia;Ctenosquamata;Acanthomo  
 rphata;Euacanthomorphacea;Percomorphaceae;Ovalentaria;Atherinomorphae;Bel  
 oniformes;Adrianichthyoidei;Adrianichthyidae;Oryziinae;Oryzias;Oryzias  
 latipes  
 UdeM00000041379 1735272 201.1 UdeM00000041379 XP\_041359434.1 89.7  
 136 10 1 1 132 1 136 9.10E-49 201.1 1735272  
 cellular  
 organisms;Eukaryota;Opisthokonta;Metazoa;Eumetazoa;Bilateria;Protostomia;  
 Spiralia;Lophotrochozoa;Mollusca;Gastropoda;Neomphalina;Neomphaloidea;Pel  
 tospiridae;Gigantopelta;Gigantopelta aegis  
 UdeM00000041380 6596 1053.1 UdeM00000041380 XP\_045201777.1 36.5  
 1816 989 43 468 2161 1 1773 4.70E-304 1053.1 6596  
 cellular  
 organisms;Eukaryota;Opisthokonta;Metazoa;Eumetazoa;Bilateria;Protostomia;  
 Spiralia;Lophotrochozoa;Mollusca;Bivalvia;Autobranchia;Heteroconchia;Euhe  
 terodonta;Imparidentia;Venerida;Veneroidea;Veneridae;Mercenaria;Mercenari  
 a mercenaria  
 UdeM00000041382 6596 862.8 UdeM00000041382 XP\_045202682.1 37 1386  
 791 22 6 1366 238 1566 5.70E-247 862.8 6596 cellular  
 organisms;Eukaryota;Opisthokonta;Metazoa;Eumetazoa;Bilateria;Protostomia;  
 Spiralia;Lophotrochozoa;Mollusca;Bivalvia;Autobranchia;Heteroconchia;Euhe  
 terodonta;Imparidentia;Venerida;Veneroidea;Veneridae;Mercenaria;Mercenari  
 a mercenaria  
 UdeM00000041383 6573 885.9 UdeM00000041383 XP\_021377155.1 64.8 648  
 226 2 1 648 1 646 3.00E-254 885.9 6573 cellular  
 organisms;Eukaryota;Opisthokonta;Metazoa;Eumetazoa;Bilateria;Protostomia;  
 Spiralia;Lophotrochozoa;Mollusca;Bivalvia;Autobranchia;Pteriomorphia;Pect  
 inida;Pectinoidea;Pectinidae;Mizuhopecten;Mizuhopecten yessoensis  
 UdeM00000041384 6565 134.4 UdeM00000041384 XP\_022344344.1 34.7 219  
 130 8 642 856 159 368 6.80E-28 134.4 6565 cellular  
 organisms;Eukaryota;Opisthokonta;Metazoa;Eumetazoa;Bilateria;Protostomia;  
 Spiralia;Lophotrochozoa;Mollusca;Bivalvia;Autobranchia;Pteriomorphia;Ostr  
 eida;Ostreoidea;Ostreidae;Crassostrea;Crassostrea virginica  
 UdeM00000041385 6579 788.5 UdeM00000041385 XP\_033759707.1 80.4 759  
 126 4 4 759 39 777 7.60E-225 788.5 6579 cellular  
 organisms;Eukaryota;Opisthokonta;Metazoa;Eumetazoa;Bilateria;Protostomia;  
 Spiralia;Lophotrochozoa;Mollusca;Bivalvia;Autobranchia;Pteriomorphia;Pect  
 inida;Pectinoidea;Pectinidae;Pecten;Pecten maximus  
 UdeM00000041386 6596 1294.6 UdeM00000041386 XP\_045201515.1 82.4  
 888 153 1 1 885 1 888 0.00E+00 1294.6 6596  
 cellular  
 organisms;Eukaryota;Opisthokonta;Metazoa;Eumetazoa;Bilateria;Protostomia;  
 Spiralia;Lophotrochozoa;Mollusca;Bivalvia;Autobranchia;Heteroconchia;Euhe

terodonta;Imparidentia;Venerida;Veneroidea;Veneridae;Mercenaria;Mercenari  
 a mercenaria  
 UdeM00000041387 6579 85.1 UdeM00000041387 XP\_033759354.1 32.8 122  
 72 1 10 131 7 118 1.60E-13 85.1 6579 cellular  
 organisms;Eukaryota;Opisthokonta;Metazoa;Eumetazoa;Bilateria;Protostomia;  
 Spiralia;Lophotrochozoa;Mollusca;Bivalvia;Autobranhia;Pteriormorphia;Pect  
 inida;Pectinoidea;Pectinidae;Pecten;Pecten maximus  
 UdeM00000041388 6596 291.6 UdeM00000041388 XP\_045199971.1 59.1 237  
 97 0 1 237 1 237 9.30E-76 291.6 6596 cellular  
 organisms;Eukaryota;Opisthokonta;Metazoa;Eumetazoa;Bilateria;Protostomia;  
 Spiralia;Lophotrochozoa;Mollusca;Bivalvia;Autobranhia;Heteroconchia;Euhe  
 terodonta;Imparidentia;Venerida;Veneroidea;Veneridae;Mercenaria;Mercenari  
 a mercenaria  
 UdeM00000041389 6579 419.5 UdeM00000041389 XP\_033760370.1 67.2 290  
 90 2 1 285 78 367 3.50E-114 419.5 6579 cellular  
 organisms;Eukaryota;Opisthokonta;Metazoa;Eumetazoa;Bilateria;Protostomia;  
 Spiralia;Lophotrochozoa;Mollusca;Bivalvia;Autobranhia;Pteriormorphia;Pect  
 inida;Pectinoidea;Pectinidae;Pecten;Pecten maximus  
 UdeM00000041390 6596 154.5 UdeM00000041390 XP\_045195108.1 48.8 160  
 76 2 1 155 231 389 3.20E-34 154.5 6596 cellular  
 organisms;Eukaryota;Opisthokonta;Metazoa;Eumetazoa;Bilateria;Protostomia;  
 Spiralia;Lophotrochozoa;Mollusca;Bivalvia;Autobranhia;Heteroconchia;Euhe  
 terodonta;Imparidentia;Venerida;Veneroidea;Veneridae;Mercenaria;Mercenari  
 a mercenaria  
 UdeM00000041392 6596 547.4 UdeM00000041392 XP\_045200407.1 68 394  
 125 1 1 394 2221 2613 1.50E-152 547.4 6596 cellular  
 organisms;Eukaryota;Opisthokonta;Metazoa;Eumetazoa;Bilateria;Protostomia;  
 Spiralia;Lophotrochozoa;Mollusca;Bivalvia;Autobranhia;Heteroconchia;Euhe  
 terodonta;Imparidentia;Venerida;Veneroidea;Veneridae;Mercenaria;Mercenari  
 a mercenaria  
 UdeM00000041393 6596 1749.2 UdeM00000041393 XP\_045200407.1 61.7  
 1472 475 11 1 1395 754 2213 0.00E+00 1749.2 6596  
 cellular  
 organisms;Eukaryota;Opisthokonta;Metazoa;Eumetazoa;Bilateria;Protostomia;  
 Spiralia;Lophotrochozoa;Mollusca;Bivalvia;Autobranhia;Heteroconchia;Euhe  
 terodonta;Imparidentia;Venerida;Veneroidea;Veneridae;Mercenaria;Mercenari  
 a mercenaria  
 UdeM00000041394 6579 272.3 UdeM00000041394 XP\_033730119.1 66.3 190  
 63 1 1 189 471 660 4.60E-70 272.3 6579 cellular  
 organisms;Eukaryota;Opisthokonta;Metazoa;Eumetazoa;Bilateria;Protostomia;  
 Spiralia;Lophotrochozoa;Mollusca;Bivalvia;Autobranhia;Pteriormorphia;Pect  
 inida;Pectinoidea;Pectinidae;Pecten;Pecten maximus  
 UdeM00000041395 114398 432.2 UdeM00000041395 XP\_042903861.1 39  
 605 358 6 5 605 5 602 1.10E-117 432.2 114398  
 cellular  
 organisms;Eukaryota;Opisthokonta;Metazoa;Eumetazoa;Bilateria;Protostomia;  
 Ecdysozoa;Panarthropoda;Arthropoda;Chelicerata;Arachnida;Araneae;Araneomo  
 rphae;Entelegynae;Orbiculariae;Araneoidea;Theridiidae;Parasteatoda;Parast  
 eatoda tepidariorum  
 UdeM00000041396 6596 767.3 UdeM00000041396 XP\_045200407.1 73 519  
 131 1 3 512 4 522 1.20E-218 767.3 6596 cellular  
 organisms;Eukaryota;Opisthokonta;Metazoa;Eumetazoa;Bilateria;Protostomia;  
 Spiralia;Lophotrochozoa;Mollusca;Bivalvia;Autobranhia;Heteroconchia;Euhe

terodonta;Imparidentia;Venerida;Veneroidea;Veneridae;Mercenaria;Mercenari  
 a mercenaria  
 UdeM00000041397 6596 79.7 UdeM00000041397 XP\_045199380.1 46.6 88  
 46 1 29 115 1108 1195 2.70E-12 79.7 6596 cellular  
 organisms;Eukaryota;Opisthokonta;Metazoa;Eumetazoa;Bilateria;Protostomia;  
 Spiralia;Lophotrochozoa;Mollusca;Bivalvia;Autobranhia;Heteroconchia;Euhe  
 terodonta;Imparidentia;Venerida;Veneroidea;Veneridae;Mercenaria;Mercenari  
 a mercenaria  
 UdeM00000041398 6596 74.7 UdeM00000041398 XP\_045199380.1 39.5 124  
 73 2 18 139 1072 1195 1.00E-10 74.7 6596 cellular  
 organisms;Eukaryota;Opisthokonta;Metazoa;Eumetazoa;Bilateria;Protostomia;  
 Spiralia;Lophotrochozoa;Mollusca;Bivalvia;Autobranhia;Heteroconchia;Euhe  
 terodonta;Imparidentia;Venerida;Veneroidea;Veneridae;Mercenaria;Mercenari  
 a mercenaria  
 UdeM00000041399 6596 74.7 UdeM00000041399 XP\_045199380.1 39.5 124  
 73 2 18 139 1072 1195 1.00E-10 74.7 6596 cellular  
 organisms;Eukaryota;Opisthokonta;Metazoa;Eumetazoa;Bilateria;Protostomia;  
 Spiralia;Lophotrochozoa;Mollusca;Bivalvia;Autobranhia;Heteroconchia;Euhe  
 terodonta;Imparidentia;Venerida;Veneroidea;Veneridae;Mercenaria;Mercenari  
 a mercenaria  
 UdeM00000041400 6596 74.7 UdeM00000041400 XP\_045199380.1 39.5 124  
 73 2 18 139 1072 1195 1.00E-10 74.7 6596 cellular  
 organisms;Eukaryota;Opisthokonta;Metazoa;Eumetazoa;Bilateria;Protostomia;  
 Spiralia;Lophotrochozoa;Mollusca;Bivalvia;Autobranhia;Heteroconchia;Euhe  
 terodonta;Imparidentia;Venerida;Veneroidea;Veneridae;Mercenaria;Mercenari  
 a mercenaria  
 UdeM00000041401 29159 274.6 UdeM00000041401 XP\_011438294.2 59.9 207  
 82 1 1 206 1 207 1.20E-69 274.6 29159 cellular  
 organisms;Eukaryota;Opisthokonta;Metazoa;Eumetazoa;Bilateria;Protostomia;  
 Spiralia;Lophotrochozoa;Mollusca;Bivalvia;Autobranhia;Pteriomorphia;Ostr  
 eida;Ostreoidea;Ostreidae;Crassostrea;Crassostrea gigas  
 UdeM00000041403 6573 209.1 UdeM00000041403 XP\_021340400.1 44.2 231  
 123 3 1 231 493 717 6.80E-51 209.1 6573 cellular  
 organisms;Eukaryota;Opisthokonta;Metazoa;Eumetazoa;Bilateria;Protostomia;  
 Spiralia;Lophotrochozoa;Mollusca;Bivalvia;Autobranhia;Pteriomorphia;Pect  
 inida;Pectinoidea;Pectinidae;Mizuhopecten;Mizuhopecten yessoensis  
 UdeM00000041405 6579 283.9 UdeM00000041405 XP\_033759954.1 39.8 405  
 230 7 2 400 77 473 3.40E-73 283.9 6579 cellular  
 organisms;Eukaryota;Opisthokonta;Metazoa;Eumetazoa;Bilateria;Protostomia;  
 Spiralia;Lophotrochozoa;Mollusca;Bivalvia;Autobranhia;Pteriomorphia;Pect  
 inida;Pectinoidea;Pectinidae;Pecten;Pecten maximus  
 UdeM00000041407 6573 600.5 UdeM00000041407 XP\_021340400.1 38.2 814  
 477 13 34 837 35 832 3.60E-168 600.5 6573 cellular  
 organisms;Eukaryota;Opisthokonta;Metazoa;Eumetazoa;Bilateria;Protostomia;  
 Spiralia;Lophotrochozoa;Mollusca;Bivalvia;Autobranhia;Pteriomorphia;Pect  
 inida;Pectinoidea;Pectinidae;Mizuhopecten;Mizuhopecten yessoensis  
 UdeM00000041408 6573 600.5 UdeM00000041408 XP\_021340400.1 38.2 814  
 477 13 34 837 35 832 3.60E-168 600.5 6573 cellular  
 organisms;Eukaryota;Opisthokonta;Metazoa;Eumetazoa;Bilateria;Protostomia;  
 Spiralia;Lophotrochozoa;Mollusca;Bivalvia;Autobranhia;Pteriomorphia;Pect  
 inida;Pectinoidea;Pectinidae;Mizuhopecten;Mizuhopecten yessoensis  
 UdeM00000041409 6573 608.2 UdeM00000041409 XP\_021340400.1 38.6 819  
 470 15 34 840 35 832 1.70E-170 608.2 6573 cellular  
 organisms;Eukaryota;Opisthokonta;Metazoa;Eumetazoa;Bilateria;Protostomia;

Spiralia;Lophotrochozoa;Mollusca;Bivalvia;Autobranchia;Pteriormorphia;Pect  
 inida;Pectinoidea;Pectinidae;Mizuhopecten;Mizuhopecten yessoensis  
 UdeM00000041410 6573 325.9 UdeM00000041410 XP\_021376733.1 40.9 484  
 266 11 1 475 466 938 1.10E-85 325.9 6573 cellular  
 organisms;Eukaryota;Opisthokonta;Metazoa;Eumetazoa;Bilateria;Protostomia;  
 Spiralia;Lophotrochozoa;Mollusca;Bivalvia;Autobranchia;Pteriormorphia;Pect  
 inida;Pectinoidea;Pectinidae;Mizuhopecten;Mizuhopecten yessoensis  
 UdeM00000041411 6573 149.4 UdeM00000041411 XP\_021340400.1 34.5 275  
 155 8 36 301 41 299 7.10E-33 149.4 6573 cellular  
 organisms;Eukaryota;Opisthokonta;Metazoa;Eumetazoa;Bilateria;Protostomia;  
 Spiralia;Lophotrochozoa;Mollusca;Bivalvia;Autobranchia;Pteriormorphia;Pect  
 inida;Pectinoidea;Pectinidae;Mizuhopecten;Mizuhopecten yessoensis  
 UdeM00000041412 6573 557.8 UdeM00000041412 XP\_021340400.1 38.7 856  
 448 21 30 837 36 862 3.00E-155 557.8 6573 cellular  
 organisms;Eukaryota;Opisthokonta;Metazoa;Eumetazoa;Bilateria;Protostomia;  
 Spiralia;Lophotrochozoa;Mollusca;Bivalvia;Autobranchia;Pteriormorphia;Pect  
 inida;Pectinoidea;Pectinidae;Mizuhopecten;Mizuhopecten yessoensis  
 UdeM00000041413 6573 614.8 UdeM00000041413 XP\_021340400.1 40.8 856  
 466 20 30 873 36 862 2.10E-172 614.8 6573 cellular  
 organisms;Eukaryota;Opisthokonta;Metazoa;Eumetazoa;Bilateria;Protostomia;  
 Spiralia;Lophotrochozoa;Mollusca;Bivalvia;Autobranchia;Pteriormorphia;Pect  
 inida;Pectinoidea;Pectinidae;Mizuhopecten;Mizuhopecten yessoensis  
 UdeM00000041414 6573 320.9 UdeM00000041414 XP\_021376735.1 43 395  
 194 8 18 396 553 932 4.30E-84 320.9 6573 cellular  
 organisms;Eukaryota;Opisthokonta;Metazoa;Eumetazoa;Bilateria;Protostomia;  
 Spiralia;Lophotrochozoa;Mollusca;Bivalvia;Autobranchia;Pteriormorphia;Pect  
 inida;Pectinoidea;Pectinidae;Mizuhopecten;Mizuhopecten yessoensis  
 UdeM00000041415 6573 371.3 UdeM00000041415 XP\_021340400.1 38.2 568  
 319 13 14 568 14 562 2.20E-99 371.3 6573 cellular  
 organisms;Eukaryota;Opisthokonta;Metazoa;Eumetazoa;Bilateria;Protostomia;  
 Spiralia;Lophotrochozoa;Mollusca;Bivalvia;Autobranchia;Pteriormorphia;Pect  
 inida;Pectinoidea;Pectinidae;Mizuhopecten;Mizuhopecten yessoensis  
 UdeM00000041416 6596 145.6 UdeM00000041416 XP\_045201682.1 68.4 98  
 27 1 12 105 4 101 3.80E-32 145.6 6596 cellular  
 organisms;Eukaryota;Opisthokonta;Metazoa;Eumetazoa;Bilateria;Protostomia;  
 Spiralia;Lophotrochozoa;Mollusca;Bivalvia;Autobranchia;Heteroconchia;Euhe  
 terodonta;Imparidentia;Venerida;Veneroidea;Veneridae;Mercenaria;Mercenari  
 a mercenaria  
 UdeM00000041417 6596 145.6 UdeM00000041417 XP\_045201682.1 68.4 98  
 27 1 11 104 4 101 3.80E-32 145.6 6596 cellular  
 organisms;Eukaryota;Opisthokonta;Metazoa;Eumetazoa;Bilateria;Protostomia;  
 Spiralia;Lophotrochozoa;Mollusca;Bivalvia;Autobranchia;Heteroconchia;Euhe  
 terodonta;Imparidentia;Venerida;Veneroidea;Veneridae;Mercenaria;Mercenari  
 a mercenaria  
 UdeM00000041418 45264 85.9 UdeM00000041418 XP\_044167111.1 57.9 57  
 24 0 5 61 6 62 3.70E-14 85.9 45264 cellular  
 organisms;Eukaryota;Opisthokonta;Metazoa;Eumetazoa;Cnidaria;Anthozoa;Hexa  
 corallia;Scleractinia;Astrocoeniina;Acroporidae;Acropora;Acropora  
 millepora  
 UdeM00000041419 6573 1049.3 UdeM00000041419 XP\_021351493.1 56.4  
 1060 375 22 1 1030 164 1166 3.20E-303 1049.3 6573  
 cellular  
 organisms;Eukaryota;Opisthokonta;Metazoa;Eumetazoa;Bilateria;Protostomia;

Spiralia; Lophotrochozoa; Mollusca; Bivalvia; Autobranchia; Pteriomorpha; Pectinida; Pectinoidea; Pectinidae; Mizuhopecten; Mizuhopecten yessoensis

UdeM00000041420 29159 723.8 UdeM00000041420 XP\_011422754.3 55.9 637  
152 4 1 632 70 582 1.90E-205 723.8 29159 cellular  
organisms; Eukaryota; Opisthokonta; Metazoa; Eumetazoa; Bilateria; Protostomia; Spiralia; Lophotrochozoa; Mollusca; Bivalvia; Autobranchia; Pteriomorpha; Ostr  
eida; Ostreidae; Crassostrea; Crassostrea gigas

UdeM00000041421 6596 209.1 UdeM00000041421 XP\_045201068.1 42.6 272  
133 9 1 262 1 259 6.60E-51 209.1 6596 cellular  
organisms; Eukaryota; Opisthokonta; Metazoa; Eumetazoa; Bilateria; Protostomia; Spiralia; Lophotrochozoa; Mollusca; Bivalvia; Autobranchia; Heteroconchia; Eue  
terodonta; Imparidentia; Venerida; Veneroidea; Veneridae; Mercenaria; Mercenari  
a mercenaria

UdeM00000041422 6565 134.4 UdeM00000041422 XP\_022299727.1 31 248  
128 4 1 207 460 705 1.60E-28 134.4 6565 cellular  
organisms; Eukaryota; Opisthokonta; Metazoa; Eumetazoa; Bilateria; Protostomia; Spiralia; Lophotrochozoa; Mollusca; Bivalvia; Autobranchia; Pteriomorpha; Ostr  
eida; Ostreidae; Crassostrea; Crassostrea virginica

UdeM00000041423 6579 157.5 UdeM00000041423 XP\_033726657.1 57.8 128  
53 1 1 127 270 397 1.10E-35 157.5 6579 cellular  
organisms; Eukaryota; Opisthokonta; Metazoa; Eumetazoa; Bilateria; Protostomia; Spiralia; Lophotrochozoa; Mollusca; Bivalvia; Autobranchia; Pteriomorpha; Pect  
inida; Pectinoidea; Pectinidae; Pecten; Pecten maximus

UdeM00000041424 6565 142.1 UdeM00000041424 XP\_022299727.1 44.9 147  
81 0 1 147 106 252 5.60E-31 142.1 6565 cellular  
organisms; Eukaryota; Opisthokonta; Metazoa; Eumetazoa; Bilateria; Protostomia; Spiralia; Lophotrochozoa; Mollusca; Bivalvia; Autobranchia; Pteriomorpha; Ostr  
eida; Ostreidae; Crassostrea; Crassostrea virginica

UdeM00000041425 6596 283.9 UdeM00000041425 XP\_045200285.1 28 703  
441 16 5 657 19 706 5.50E-73 283.9 6596 cellular  
organisms; Eukaryota; Opisthokonta; Metazoa; Eumetazoa; Bilateria; Protostomia; Spiralia; Lophotrochozoa; Mollusca; Bivalvia; Autobranchia; Heteroconchia; Eue  
terodonta; Imparidentia; Venerida; Veneroidea; Veneridae; Mercenaria; Mercenari  
a mercenaria

UdeM00000041426 6565 112.8 UdeM00000041426 XP\_022328252.1 37.9 211  
78 5 1 158 1105 1315 3.90E-22 112.8 6565 cellular  
organisms; Eukaryota; Opisthokonta; Metazoa; Eumetazoa; Bilateria; Protostomia; Spiralia; Lophotrochozoa; Mollusca; Bivalvia; Autobranchia; Pteriomorpha; Ostr  
eida; Ostreidae; Crassostrea; Crassostrea virginica

UdeM00000041427 6596 174.5 UdeM00000041427 XP\_045200267.1 38 274  
149 7 7 277 445 700 2.00E-40 174.5 6596 cellular  
organisms; Eukaryota; Opisthokonta; Metazoa; Eumetazoa; Bilateria; Protostomia; Spiralia; Lophotrochozoa; Mollusca; Bivalvia; Autobranchia; Heteroconchia; Eue  
terodonta; Imparidentia; Venerida; Veneroidea; Veneridae; Mercenaria; Mercenari  
a mercenaria

UdeM00000041428 6596 223.8 UdeM00000041428 XP\_045200267.1 36.4 341  
202 7 2 334 15 348 3.40E-55 223.8 6596 cellular  
organisms; Eukaryota; Opisthokonta; Metazoa; Eumetazoa; Bilateria; Protostomia; Spiralia; Lophotrochozoa; Mollusca; Bivalvia; Autobranchia; Heteroconchia; Eue  
terodonta; Imparidentia; Venerida; Veneroidea; Veneridae; Mercenaria; Mercenari  
a mercenaria

UdeM00000041429 6596 406 UdeM00000041429 XP\_045200267.1 35.5 713  
416 17 2 697 15 700 9.90E-110 406 6596 cellular  
organisms; Eukaryota; Opisthokonta; Metazoa; Eumetazoa; Bilateria; Protostomia;

Spiralia;Lophotrochozoa;Mollusca;Bivalvia;Autobranchia;Heteroconchia;Euherodonta;Imparidentia;Venerida;Veneroidea;Veneridae;Mercenaria;Mercenaria mercenaria

UdeM00000041430 7654 154.8 UdeM00000041430 XP\_041463467.1 34.4 308  
137 8 21 265 137 442 1.60E-34 154.8 7654 cellular

organisms;Eukaryota;Opisthokonta;Metazoa;Eumetazoa;Bilateria;Deuterostomia;Echinodermata;Eleutherozoa;Echinozoa;Echinoidea;Euechinoidea;Echinacea;Temnopleuroida;Toxopneustidae;Lytechinus;Lytechinus variegatus

UdeM00000041431 50429 76.3 UdeM00000041431 XP\_022790680.1 47.2 72  
37 1 3 74 40 110 4.30E-11 76.3 50429 cellular

organisms;Eukaryota;Opisthokonta;Metazoa;Eumetazoa;Cnidaria;Anthozoa;Hexacorallia;Scleractinia;Astrocoeniina;Pocilloporidae;Stylophora;Stylophora pistillata

UdeM00000041432 6596 378.6 UdeM00000041432 XP\_045200267.1 34 711  
424 18 9 701 22 705 1.70E-101 378.6 6596 cellular

organisms;Eukaryota;Opisthokonta;Metazoa;Eumetazoa;Bilateria;Protostomia;Spiralia;Lophotrochozoa;Mollusca;Bivalvia;Autobranchia;Heteroconchia;Euherodonta;Imparidentia;Venerida;Veneroidea;Veneridae;Mercenaria;Mercenaria mercenaria

UdeM00000041433 6596 291.6 UdeM00000041433 XP\_045200285.1 28.8 715  
435 21 9 675 19 707 2.70E-75 291.6 6596 cellular

organisms;Eukaryota;Opisthokonta;Metazoa;Eumetazoa;Bilateria;Protostomia;Spiralia;Lophotrochozoa;Mollusca;Bivalvia;Autobranchia;Heteroconchia;Euherodonta;Imparidentia;Venerida;Veneroidea;Veneridae;Mercenaria;Mercenaria mercenaria

UdeM00000041434 6596 77.4 UdeM00000041434 XP\_045200280.1 31.9 138  
90 3 7 143 539 673 1.90E-11 77.4 6596 cellular

organisms;Eukaryota;Opisthokonta;Metazoa;Eumetazoa;Bilateria;Protostomia;Spiralia;Lophotrochozoa;Mollusca;Bivalvia;Autobranchia;Heteroconchia;Euherodonta;Imparidentia;Venerida;Veneroidea;Veneridae;Mercenaria;Mercenaria mercenaria

UdeM00000041435 6596 376.7 UdeM00000041435 XP\_045200267.1 33.9 711  
425 18 9 701 22 705 6.40E-101 376.7 6596 cellular

organisms;Eukaryota;Opisthokonta;Metazoa;Eumetazoa;Bilateria;Protostomia;Spiralia;Lophotrochozoa;Mollusca;Bivalvia;Autobranchia;Heteroconchia;Euherodonta;Imparidentia;Venerida;Veneroidea;Veneridae;Mercenaria;Mercenaria mercenaria

UdeM00000041436 6596 289.7 UdeM00000041436 XP\_045200285.1 28.6 717  
436 21 9 677 19 707 1.00E-74 289.7 6596 cellular

organisms;Eukaryota;Opisthokonta;Metazoa;Eumetazoa;Bilateria;Protostomia;Spiralia;Lophotrochozoa;Mollusca;Bivalvia;Autobranchia;Heteroconchia;Euherodonta;Imparidentia;Venerida;Veneroidea;Veneridae;Mercenaria;Mercenaria mercenaria

UdeM00000041437 6596 77.4 UdeM00000041437 XP\_045200280.1 31.9 138  
90 3 7 143 539 673 1.90E-11 77.4 6596 cellular

organisms;Eukaryota;Opisthokonta;Metazoa;Eumetazoa;Bilateria;Protostomia;Spiralia;Lophotrochozoa;Mollusca;Bivalvia;Autobranchia;Heteroconchia;Euherodonta;Imparidentia;Venerida;Veneroidea;Veneridae;Mercenaria;Mercenaria mercenaria

UdeM00000041438 6596 375.9 UdeM00000041438 XP\_045200267.1 33.3 709  
432 17 9 701 22 705 1.10E-100 375.9 6596 cellular

organisms;Eukaryota;Opisthokonta;Metazoa;Eumetazoa;Bilateria;Protostomia;Spiralia;Lophotrochozoa;Mollusca;Bivalvia;Autobranchia;Heteroconchia;Euherodonta



terodonta;Imparidentia;Venerida;Veneroidea;Veneridae;Mercenaria;Mercenaria mercenaria

UdeM00000041440 6596 295 UdeM00000041440 XP\_045200285.1 27.7 725  
436 20 9 681 19 707 2.50E-76 295 6596 cellular

organisms;Eukaryota;Opisthokonta;Metazoa;Eumetazoa;Bilateria;Protostomia;Spiralia;Lophotrochozoa;Mollusca;Bivalvia;Autobranchia;Heteroconchia;Euherodonta;Imparidentia;Venerida;Veneroidea;Veneridae;Mercenaria;Mercenaria mercenaria

UdeM00000041441 6596 379.8 UdeM00000041441 XP\_045200267.1 35 703  
410 18 9 690 24 700 7.50E-102 379.8 6596 cellular

organisms;Eukaryota;Opisthokonta;Metazoa;Eumetazoa;Bilateria;Protostomia;Spiralia;Lophotrochozoa;Mollusca;Bivalvia;Autobranchia;Heteroconchia;Euherodonta;Imparidentia;Venerida;Veneroidea;Veneridae;Mercenaria;Mercenaria mercenaria

UdeM00000041442 6596 386.7 UdeM00000041442 XP\_045200267.1 34.9 702  
412 18 9 690 24 700 6.20E-104 386.7 6596 cellular

organisms;Eukaryota;Opisthokonta;Metazoa;Eumetazoa;Bilateria;Protostomia;Spiralia;Lophotrochozoa;Mollusca;Bivalvia;Autobranchia;Heteroconchia;Euherodonta;Imparidentia;Venerida;Veneroidea;Veneridae;Mercenaria;Mercenaria mercenaria

UdeM00000041444 6596 498.4 UdeM00000041444 XP\_045199728.1 63.1 366  
134 1 225 590 49 413 1.30E-137 498.4 6596 cellular

organisms;Eukaryota;Opisthokonta;Metazoa;Eumetazoa;Bilateria;Protostomia;Spiralia;Lophotrochozoa;Mollusca;Bivalvia;Autobranchia;Heteroconchia;Euherodonta;Imparidentia;Venerida;Veneroidea;Veneridae;Mercenaria;Mercenaria mercenaria

UdeM00000041445 29159 534.6 UdeM00000041445 XP\_034329719.1 74.1 347  
89 1 3 348 620 966 9.10E-149 534.6 29159 cellular

organisms;Eukaryota;Opisthokonta;Metazoa;Eumetazoa;Bilateria;Protostomia;Spiralia;Lophotrochozoa;Mollusca;Bivalvia;Autobranchia;Pteriomorphia;Ostreida;Ostreoidea;Ostreidae;Crassostrea;Crassostrea gigas

UdeM00000041446 6573 280 UdeM00000041446 XP\_021375565.1 68.2 201  
59 2 59 257 395 592 3.20E-72 280 6573 cellular

organisms;Eukaryota;Opisthokonta;Metazoa;Eumetazoa;Bilateria;Protostomia;Spiralia;Lophotrochozoa;Mollusca;Bivalvia;Autobranchia;Pteriomorphia;Pectinida;Pectinoidea;Pectinidae;Mizuhopecten;Mizuhopecten yessoensis

UdeM00000041447 6596 534.6 UdeM00000041447 XP\_045202556.1 76.5 340  
60 2 14 333 57 396 9.50E-149 534.6 6596 cellular

organisms;Eukaryota;Opisthokonta;Metazoa;Eumetazoa;Bilateria;Protostomia;Spiralia;Lophotrochozoa;Mollusca;Bivalvia;Autobranchia;Heteroconchia;Euherodonta;Imparidentia;Venerida;Veneroidea;Veneridae;Mercenaria;Mercenaria mercenaria

UdeM00000041448 59861 199.9 UdeM00000041448 XP\_045070405.1 50 208  
102 2 2 207 47 254 4.90E-48 199.9 59861 cellular

organisms;Eukaryota;Opisthokonta;Metazoa;Eumetazoa;Bilateria;Deuterostomia;Chordata;Craniata;Vertebrata;Gnathostomata;Teleostomi;Euteleostomi;Actinopterygii;Actinopteri;Neopterygii;Teleostei;Osteoglossocephalai;Clupeocephala;Euteleostei;Protacanthopterygii;Salmoniformes;Salmonidae;Coregoninae;Coregonus;Coregonus clupeaformis

UdeM00000041449 6596 1376.7 UdeM00000041449 XP\_045199869.1 42.9  
1687 942 14 34 1714 269 1940 0.00E+00 1376.7 6596 cellular

organisms;Eukaryota;Opisthokonta;Metazoa;Eumetazoa;Bilateria;Protostomia;Spiralia;Lophotrochozoa;Mollusca;Bivalvia;Autobranchia;Heteroconchia;Euherodonta

terodonta;Imparidentia;Venerida;Veneroidea;Veneridae;Mercenaria;Mercenari  
a mercenaria

UdeM00000041450 6596 185.7 UdeM00000041450 XP\_045199869.1 41.1 287  
168 1 32 317 269 555 9.90E-44 185.7 6596 cellular

organisms;Eukaryota;Opisthokonta;Metazoa;Eumetazoa;Bilateria;Protostomia;  
Spiralia;Lophotrochozoa;Mollusca;Bivalvia;Autobranhia;Heteroconchia;Euhe  
terodonta;Imparidentia;Venerida;Veneroidea;Veneridae;Mercenaria;Mercenari  
a mercenaria

UdeM00000041451 6596 1159.4 UdeM00000041451 XP\_045199869.1 42.8  
1373 764 11 1 1366 582 1940 0.00E+00 1159.4 6596  
cellular

organisms;Eukaryota;Opisthokonta;Metazoa;Eumetazoa;Bilateria;Protostomia;  
Spiralia;Lophotrochozoa;Mollusca;Bivalvia;Autobranhia;Heteroconchia;Euhe  
terodonta;Imparidentia;Venerida;Veneroidea;Veneridae;Mercenaria;Mercenari  
a mercenaria

UdeM00000041452 6596 1349.3 UdeM00000041452 XP\_045199869.1 42  
1686 956 12 32 1709 269 1940 0.00E+00 1349.3 6596  
cellular

organisms;Eukaryota;Opisthokonta;Metazoa;Eumetazoa;Bilateria;Protostomia;  
Spiralia;Lophotrochozoa;Mollusca;Bivalvia;Autobranhia;Heteroconchia;Euhe  
terodonta;Imparidentia;Venerida;Veneroidea;Veneridae;Mercenaria;Mercenari  
a mercenaria

UdeM00000041453 6596 1341.6 UdeM00000041453 XP\_045199869.1 42  
1686 956 12 34 1711 269 1940 0.00E+00 1341.6 6596  
cellular

organisms;Eukaryota;Opisthokonta;Metazoa;Eumetazoa;Bilateria;Protostomia;  
Spiralia;Lophotrochozoa;Mollusca;Bivalvia;Autobranhia;Heteroconchia;Euhe  
terodonta;Imparidentia;Venerida;Veneroidea;Veneridae;Mercenaria;Mercenari  
a mercenaria

UdeM00000041455 6596 1639 UdeM00000041455 XP\_045199760.1 51.6 1823  
830 21 103 1898 151 1947 0.00E+00 1639 6596 cellular

organisms;Eukaryota;Opisthokonta;Metazoa;Eumetazoa;Bilateria;Protostomia;  
Spiralia;Lophotrochozoa;Mollusca;Bivalvia;Autobranhia;Heteroconchia;Euhe  
terodonta;Imparidentia;Venerida;Veneroidea;Veneridae;Mercenaria;Mercenari  
a mercenaria

UdeM00000041456 6596 767.3 UdeM00000041456 XP\_045200553.1 67.6 521  
169 0 17 537 11 531 1.30E-218 767.3 6596 cellular

organisms;Eukaryota;Opisthokonta;Metazoa;Eumetazoa;Bilateria;Protostomia;  
Spiralia;Lophotrochozoa;Mollusca;Bivalvia;Autobranhia;Heteroconchia;Euhe  
terodonta;Imparidentia;Venerida;Veneroidea;Veneridae;Mercenaria;Mercenari  
a mercenaria

UdeM00000041457 6500 202.6 UdeM00000041457 XP\_035827795.1 77.5 120  
27 0 4 123 14 133 2.90E-49 202.6 6500 cellular

organisms;Eukaryota;Opisthokonta;Metazoa;Eumetazoa;Bilateria;Protostomia;  
Spiralia;Lophotrochozoa;Mollusca;Gastropoda;Heterobranhia;Euthyneura;Tec  
tipleura;Aplysiida;Aplysiioidea;Aplysiidae;Aplysia;Aplysia californica

UdeM00000041461 6596 117.9 UdeM00000041461 XP\_045158309.1 47.4 135  
69 2 16 150 76 208 1.30E-23 117.9 6596 cellular

organisms;Eukaryota;Opisthokonta;Metazoa;Eumetazoa;Bilateria;Protostomia;  
Spiralia;Lophotrochozoa;Mollusca;Bivalvia;Autobranhia;Heteroconchia;Euhe  
terodonta;Imparidentia;Venerida;Veneroidea;Veneridae;Mercenaria;Mercenari  
a mercenaria

UdeM00000041462 6596 223 UdeM00000041462 XP\_045197203.1 32.6 387  
241 7 1 372 81 462 6.40E-55 223 6596 cellular

organisms;Eukaryota;Opisthokonta;Metazoa;Eumetazoa;Bilateria;Protostomia;Spiralia;Lophotrochozoa;Mollusca;Bivalvia;Autobranchia;Heteroconchia;Euheterodonta;Imparidentia;Venerida;Veneroidea;Veneridae;Mercenaria;Mercenaria mercenaria

UdeM00000041463 6596 413.3 UdeM00000041463 XP\_045199078.1 39.4 594  
332 10 6 587 11 588 5.20E-112 413.3 6596 cellular

organisms;Eukaryota;Opisthokonta;Metazoa;Eumetazoa;Bilateria;Protostomia;Spiralia;Lophotrochozoa;Mollusca;Bivalvia;Autobranchia;Heteroconchia;Euheterodonta;Imparidentia;Venerida;Veneroidea;Veneridae;Mercenaria;Mercenaria mercenaria

UdeM00000041464 6573 610.1 UdeM00000041464 XP\_021375393.1 59.8 502  
200 1 1 502 36 535 2.50E-171 610.1 6573 cellular

organisms;Eukaryota;Opisthokonta;Metazoa;Eumetazoa;Bilateria;Protostomia;Spiralia;Lophotrochozoa;Mollusca;Bivalvia;Autobranchia;Pteriomorphia;Pectinida;Pectinoidea;Pectinidae;Mizuhopecten;Mizuhopecten yessoensis

UdeM00000041465 6579 280.4 UdeM00000041465 XP\_033735066.1 33.5 502  
295 10 73 542 65 559 4.90E-72 280.4 6579 cellular

organisms;Eukaryota;Opisthokonta;Metazoa;Eumetazoa;Bilateria;Protostomia;Spiralia;Lophotrochozoa;Mollusca;Bivalvia;Autobranchia;Pteriomorphia;Pectinida;Pectinoidea;Pectinidae;Pecten;Pecten maximus

UdeM00000041467 6579 288.1 UdeM00000041467 XP\_033735066.1 32.3 548  
328 12 29 544 23 559 2.40E-74 288.1 6579 cellular

organisms;Eukaryota;Opisthokonta;Metazoa;Eumetazoa;Bilateria;Protostomia;Spiralia;Lophotrochozoa;Mollusca;Bivalvia;Autobranchia;Pteriomorphia;Pectinida;Pectinoidea;Pectinidae;Pecten;Pecten maximus

UdeM00000041468 6573 733.4 UdeM00000041468 XP\_021373272.1 66.5 552  
182 1 1 549 1 552 2.10E-208 733.4 6573 cellular

organisms;Eukaryota;Opisthokonta;Metazoa;Eumetazoa;Bilateria;Protostomia;Spiralia;Lophotrochozoa;Mollusca;Bivalvia;Autobranchia;Pteriomorphia;Pectinida;Pectinoidea;Pectinidae;Mizuhopecten;Mizuhopecten yessoensis

UdeM00000041469 6596 339 UdeM00000041469 XP\_045201857.1 40.1 436  
250 2 6 432 5 438 9.50E-90 339 6596 cellular

organisms;Eukaryota;Opisthokonta;Metazoa;Eumetazoa;Bilateria;Protostomia;Spiralia;Lophotrochozoa;Mollusca;Bivalvia;Autobranchia;Heteroconchia;Euheterodonta;Imparidentia;Venerida;Veneroidea;Veneridae;Mercenaria;Mercenaria mercenaria

UdeM00000041470 6596 298.9 UdeM00000041470 XP\_045201949.1 46.2 372  
159 5 12 343 9 379 8.60E-78 298.9 6596 cellular

organisms;Eukaryota;Opisthokonta;Metazoa;Eumetazoa;Bilateria;Protostomia;Spiralia;Lophotrochozoa;Mollusca;Bivalvia;Autobranchia;Heteroconchia;Euheterodonta;Imparidentia;Venerida;Veneroidea;Veneridae;Mercenaria;Mercenaria mercenaria

UdeM00000041471 29159 603.6 UdeM00000041471 XP\_034318263.1 77 374  
86 0 3 376 4 377 1.70E-169 603.6 29159 cellular

organisms;Eukaryota;Opisthokonta;Metazoa;Eumetazoa;Bilateria;Protostomia;Spiralia;Lophotrochozoa;Mollusca;Bivalvia;Autobranchia;Pteriomorphia;Ostreida;Ostreoidea;Ostreidae;Crassostrea;Crassostrea gigas

UdeM00000041472 59729 142.5 UdeM00000041472 XP\_030144625.3 35.4 206  
125 4 305 505 123 325 1.50E-30 142.5 59729 cellular

organisms;Eukaryota;Opisthokonta;Metazoa;Eumetazoa;Bilateria;Deuterostomia;Chordata;Craniata;Vertebrata;Gnathostomata;Teleostomi;Euteleostomi;Sarcopterygii;Dipnotetrapodomorpha;Tetrapoda;Amniota;Sauropsida;Sauria;Archelosauria;Archosauria;Dinosauria;Saurischia;Theropoda;Coelurosauria;Aves;Ne

ognathae; Passeriformes; Passeroidea; Estrildidae; Estrildinae; Taeniopygia; Taeniopygia guttata  
 UdeM00000041475 6565 125.6 UdeM00000041475 XP\_022287303.1 29.8 228  
 128 7 2 198 522 748 7.30E-26 125.6 6565 cellular  
 organisms; Eukaryota; Opisthokonta; Metazoa; Eumetazoa; Bilateria; Protostomia; Spiralia; Lophotrochozoa; Mollusca; Bivalvia; Autobranchia; Pteriomorpha; Ostr  
 eida; Ostreidae; Crassostrea; Crassostrea virginica  
 UdeM00000041477 6565 92 UdeM00000041477 XP\_022287303.1 42.9 105  
 58 2 5 108 591 694 5.30E-16 92 6565 cellular  
 organisms; Eukaryota; Opisthokonta; Metazoa; Eumetazoa; Bilateria; Protostomia; Spiralia; Lophotrochozoa; Mollusca; Bivalvia; Autobranchia; Pteriomorpha; Ostr  
 eida; Ostreidae; Crassostrea; Crassostrea virginica  
 UdeM00000041476 6565 92.4 UdeM00000041476 XP\_022287303.1 42.9 105  
 58 2 5 108 591 694 4.00E-16 92.4 6565 cellular  
 organisms; Eukaryota; Opisthokonta; Metazoa; Eumetazoa; Bilateria; Protostomia; Spiralia; Lophotrochozoa; Mollusca; Bivalvia; Autobranchia; Pteriomorpha; Ostr  
 eida; Ostreidae; Crassostrea; Crassostrea virginica  
 UdeM00000041478 400727 478.8 UdeM00000041478 XP\_025080098.1 87.7  
 260 30 1 1 258 1 260 4.40E-132 478.8 400727  
 cellular  
 organisms; Eukaryota; Opisthokonta; Metazoa; Eumetazoa; Bilateria; Protostomia; Spiralia; Lophotrochozoa; Mollusca; Gastropoda; Caenogastropoda; Architaeniogl  
 ossa; Ampullarioidea; Ampullariidae; Pomacea; Pomacea canaliculata  
 UdeM00000041479 400727 448.4 UdeM00000041479 XP\_025080098.1 83.8  
 260 29 2 1 247 1 260 6.10E-123 448.4 400727  
 cellular  
 organisms; Eukaryota; Opisthokonta; Metazoa; Eumetazoa; Bilateria; Protostomia; Spiralia; Lophotrochozoa; Mollusca; Gastropoda; Caenogastropoda; Architaeniogl  
 ossa; Ampullarioidea; Ampullariidae; Pomacea; Pomacea canaliculata  
 UdeM00000041480 6579 821.2 UdeM00000041480 XP\_033759680.1 74.5 596  
 131 8 257 834 192 784 1.20E-234 821.2 6579 cellular  
 organisms; Eukaryota; Opisthokonta; Metazoa; Eumetazoa; Bilateria; Protostomia; Spiralia; Lophotrochozoa; Mollusca; Bivalvia; Autobranchia; Pteriomorpha; Pect  
 inida; Pectinoidea; Pectinidae; Pecten; Pecten maximus  
 UdeM00000041481 6573 285.8 UdeM00000041481 XP\_021368303.1 50.3 326  
 107 10 1 306 3 293 6.50E-74 285.8 6573 cellular  
 organisms; Eukaryota; Opisthokonta; Metazoa; Eumetazoa; Bilateria; Protostomia; Spiralia; Lophotrochozoa; Mollusca; Bivalvia; Autobranchia; Pteriomorpha; Pect  
 inida; Pectinoidea; Pectinidae; Mizuhopecten; Mizuhopecten yessoensis  
 UdeM00000041482 6596 63.9 UdeM00000041482 XP\_045199535.1 52.9 51  
 24 0 216 266 162 212 3.50E-07 63.9 6596 cellular  
 organisms; Eukaryota; Opisthokonta; Metazoa; Eumetazoa; Bilateria; Protostomia; Spiralia; Lophotrochozoa; Mollusca; Bivalvia; Autobranchia; Heteroconchia; Eue  
 terodonta; Imparidentia; Venerida; Veneroidea; Veneridae; Mercenaria; Mercenari  
 a mercenaria  
 UdeM00000041483 6596 851.3 UdeM00000041483 XP\_045199534.1 62.7 611  
 228 0 1 611 61 671 7.70E-244 851.3 6596 cellular  
 organisms; Eukaryota; Opisthokonta; Metazoa; Eumetazoa; Bilateria; Protostomia; Spiralia; Lophotrochozoa; Mollusca; Bivalvia; Autobranchia; Heteroconchia; Eue  
 terodonta; Imparidentia; Venerida; Veneroidea; Veneridae; Mercenaria; Mercenari  
 a mercenaria  
 UdeM00000041484 6579 75.1 UdeM00000041484 XP\_033760834.1 41.1 112  
 58 2 7 111 1 111 7.00E-11 75.1 6579 cellular  
 organisms; Eukaryota; Opisthokonta; Metazoa; Eumetazoa; Bilateria; Protostomia;

Spiralia; Lophotrochozoa; Mollusca; Bivalvia; Autobranchia; Pteriomorphia; Pectinida; Pectinoidea; Pectinidae; Pecten; Pecten maximus

UdeM00000041485 6596 232.3 UdeM00000041485 XP\_045202502.1 50.3 348  
167 4 1547 1892 1534 1877 5.20E-57 232.3 6596 cellular  
organisms; Eukaryota; Opisthokonta; Metazoa; Eumetazoa; Bilateria; Protostomia; Spiralia; Lophotrochozoa; Mollusca; Bivalvia; Autobranchia; Heteroconchia; Euheterodonta; Imparidentia; Venerida; Veneroidea; Veneridae; Mercenaria; Mercenaria mercenaria

UdeM00000041486 10224 85.9 UdeM00000041486 XP\_002740528.1 37.3 142  
59 4 2 121 106 239 4.30E-14 85.9 10224 cellular  
organisms; Eukaryota; Opisthokonta; Metazoa; Eumetazoa; Bilateria; Deuterostomia; Hemichordata; Enteropneusta; Harrimaniidae; Saccoglossus; Saccoglossus kowalevskii

UdeM00000041487 10224 184.1 UdeM00000041487 XP\_006814936.1 42 245  
134 4 111 350 64 305 3.10E-43 184.1 10224 cellular  
organisms; Eukaryota; Opisthokonta; Metazoa; Eumetazoa; Bilateria; Deuterostomia; Hemichordata; Enteropneusta; Harrimaniidae; Saccoglossus; Saccoglossus kowalevskii

UdeM00000041488 6596 157.1 UdeM00000041488 XP\_045202502.1 77.8 108  
23 1 1 108 1908 2014 1.20E-35 157.1 6596 cellular  
organisms; Eukaryota; Opisthokonta; Metazoa; Eumetazoa; Bilateria; Protostomia; Spiralia; Lophotrochozoa; Mollusca; Bivalvia; Autobranchia; Heteroconchia; Euheterodonta; Imparidentia; Venerida; Veneroidea; Veneridae; Mercenaria; Mercenaria mercenaria

UdeM00000041489 6596 320.1 UdeM00000041489 XP\_045201857.1 39.6 412  
241 2 6 409 7 418 4.70E-84 320.1 6596 cellular  
organisms; Eukaryota; Opisthokonta; Metazoa; Eumetazoa; Bilateria; Protostomia; Spiralia; Lophotrochozoa; Mollusca; Bivalvia; Autobranchia; Heteroconchia; Euheterodonta; Imparidentia; Venerida; Veneroidea; Veneridae; Mercenaria; Mercenaria mercenaria

UdeM00000041490 29159 141 UdeM00000041490 XP\_034335613.1 30.1 362  
183 9 9 366 498 793 3.10E-30 141 29159 cellular  
organisms; Eukaryota; Opisthokonta; Metazoa; Eumetazoa; Bilateria; Protostomia; Spiralia; Lophotrochozoa; Mollusca; Bivalvia; Autobranchia; Pteriomorphia; Ostreida; Ostreioidea; Ostreidae; Crassostrea; Crassostrea gigas

UdeM00000041491 6596 106.3 UdeM00000041491 XP\_045197109.1 26.3 369  
197 7 671 975 450 807 2.20E-19 106.3 6596 cellular  
organisms; Eukaryota; Opisthokonta; Metazoa; Eumetazoa; Bilateria; Protostomia; Spiralia; Lophotrochozoa; Mollusca; Bivalvia; Autobranchia; Heteroconchia; Euheterodonta; Imparidentia; Venerida; Veneroidea; Veneridae; Mercenaria; Mercenaria mercenaria

UdeM00000041494 6596 202.6 UdeM00000041494 XP\_045197408.1 30 497  
268 11 544 1009 952 1399 2.80E-48 202.6 6596 cellular  
organisms; Eukaryota; Opisthokonta; Metazoa; Eumetazoa; Bilateria; Protostomia; Spiralia; Lophotrochozoa; Mollusca; Bivalvia; Autobranchia; Heteroconchia; Euheterodonta; Imparidentia; Venerida; Veneroidea; Veneridae; Mercenaria; Mercenaria mercenaria

UdeM00000041495 6573 315.5 UdeM00000041495 XP\_021372035.1 36.4 530  
314 9 55 570 90 610 1.50E-82 315.5 6573 cellular  
organisms; Eukaryota; Opisthokonta; Metazoa; Eumetazoa; Bilateria; Protostomia; Spiralia; Lophotrochozoa; Mollusca; Bivalvia; Autobranchia; Pteriomorphia; Pectinida; Pectinoidea; Pectinidae; Mizuhopecten; Mizuhopecten yessoensis

UdeM00000041496 6579 114.4 UdeM00000041496 XP\_033732935.1 37.6 173  
101 4 21 188 35 205 1.60E-22 114.4 6579 cellular

organisms;Eukaryota;Opisthokonta;Metazoa;Eumetazoa;Bilateria;Protostomia;  
Spiralia;Lophotrochozoa;Mollusca;Bivalvia;Autobranchia;Pteriomorpha;Pect  
inida;Pectinoidea;Pectinidae;Pecten;Pecten maximus  
UdeM00000041497 6565 136.7 UdeM00000041497 XP\_022296914.1 31 287  
148 2 1 287 174 410 6.10E-29 136.7 6565 cellular  
organisms;Eukaryota;Opisthokonta;Metazoa;Eumetazoa;Bilateria;Protostomia;  
Spiralia;Lophotrochozoa;Mollusca;Bivalvia;Autobranchia;Pteriomorpha;Ostr  
eida;Ostreoidea;Ostreidae;Crassostrea;Crassostrea virginica  
UdeM00000041498 6565 317 UdeM00000041498 XP\_022298933.1 31 671  
397 13 207 834 89 736 7.30E-83 317 6565 cellular  
organisms;Eukaryota;Opisthokonta;Metazoa;Eumetazoa;Bilateria;Protostomia;  
Spiralia;Lophotrochozoa;Mollusca;Bivalvia;Autobranchia;Pteriomorpha;Ostr  
eida;Ostreoidea;Ostreidae;Crassostrea;Crassostrea virginica  
UdeM00000041499 6579 115.5 UdeM00000041499 XP\_033732935.1 38.2 173  
100 4 21 188 35 205 7.20E-23 115.5 6579 cellular  
organisms;Eukaryota;Opisthokonta;Metazoa;Eumetazoa;Bilateria;Protostomia;  
Spiralia;Lophotrochozoa;Mollusca;Bivalvia;Autobranchia;Pteriomorpha;Pect  
inida;Pectinoidea;Pectinidae;Pecten;Pecten maximus  
UdeM00000041500 6573 319.7 UdeM00000041500 XP\_021372035.1 36.8 527  
310 9 58 570 93 610 7.70E-84 319.7 6573 cellular  
organisms;Eukaryota;Opisthokonta;Metazoa;Eumetazoa;Bilateria;Protostomia;  
Spiralia;Lophotrochozoa;Mollusca;Bivalvia;Autobranchia;Pteriomorpha;Pect  
inida;Pectinoidea;Pectinidae;Mizuhopecten;Mizuhopecten yessoensis  
UdeM00000041501 6596 60.1 UdeM00000041501 XP\_045169188.1 44.8 67  
33 2 1 67 859 921 1.30E-06 60.1 6596 cellular  
organisms;Eukaryota;Opisthokonta;Metazoa;Eumetazoa;Bilateria;Protostomia;  
Spiralia;Lophotrochozoa;Mollusca;Bivalvia;Autobranchia;Heteroconchia;Euhe  
terodonta;Imparidentia;Venerida;Veneroidea;Veneridae;Mercenaria;Mercenari  
a mercenaria  
UdeM00000041502 6573 345.9 UdeM00000041502 XP\_021346851.1 29.8 801  
487 15 26 813 29 767 1.40E-91 345.9 6573 cellular  
organisms;Eukaryota;Opisthokonta;Metazoa;Eumetazoa;Bilateria;Protostomia;  
Spiralia;Lophotrochozoa;Mollusca;Bivalvia;Autobranchia;Pteriomorpha;Pect  
inida;Pectinoidea;Pectinidae;Mizuhopecten;Mizuhopecten yessoensis  
UdeM00000041503 6596 60.1 UdeM00000041503 XP\_045169188.1 44.8 67  
33 2 1 67 859 921 1.30E-06 60.1 6596 cellular  
organisms;Eukaryota;Opisthokonta;Metazoa;Eumetazoa;Bilateria;Protostomia;  
Spiralia;Lophotrochozoa;Mollusca;Bivalvia;Autobranchia;Heteroconchia;Euhe  
terodonta;Imparidentia;Venerida;Veneroidea;Veneridae;Mercenaria;Mercenari  
a mercenaria  
UdeM00000041504 6565 311.6 UdeM00000041504 XP\_022301129.1 38.3 418  
250 5 157 567 320 736 2.10E-81 311.6 6565 cellular  
organisms;Eukaryota;Opisthokonta;Metazoa;Eumetazoa;Bilateria;Protostomia;  
Spiralia;Lophotrochozoa;Mollusca;Bivalvia;Autobranchia;Pteriomorpha;Ostr  
eida;Ostreoidea;Ostreidae;Crassostrea;Crassostrea virginica  
UdeM00000041505 29159 169.5 UdeM00000041505 XP\_034331441.1 28.8 473  
238 12 10 388 61 528 8.60E-39 169.5 29159 cellular  
organisms;Eukaryota;Opisthokonta;Metazoa;Eumetazoa;Bilateria;Protostomia;  
Spiralia;Lophotrochozoa;Mollusca;Bivalvia;Autobranchia;Pteriomorpha;Ostr  
eida;Ostreoidea;Ostreidae;Crassostrea;Crassostrea gigas  
UdeM00000041506 6573 463.4 UdeM00000041506 XP\_021346851.1 33.4 874  
512 13 26 886 29 845 6.70E-127 463.4 6573 cellular  
organisms;Eukaryota;Opisthokonta;Metazoa;Eumetazoa;Bilateria;Protostomia;

Spiralia;Lophotrochozoa;Mollusca;Bivalvia;Autobranchia;Pteriomorpha;Pectinida;Pectinoidea;Pectinidae;Mizuhopecten;Mizuhopecten yessoensis  
UdeM00000041507 1735272 296.2 UdeM00000041507 XP\_041347002.1 60.8  
265 98 3 269 531 194 454 8.30E-77 296.2 1735272  
cellular  
organisms;Eukaryota;Opisthokonta;Metazoa;Eumetazoa;Bilateria;Protostomia;Spiralia;Lophotrochozoa;Mollusca;Gastropoda;Neomphalina;Neomphaloidea;Peltospiridae;Gigantopelta;Gigantopelta aegis  
UdeM00000041508 1735272 296.2 UdeM00000041508 XP\_041347002.1 60.8  
265 98 3 238 500 194 454 7.80E-77 296.2 1735272  
cellular  
organisms;Eukaryota;Opisthokonta;Metazoa;Eumetazoa;Bilateria;Protostomia;Spiralia;Lophotrochozoa;Mollusca;Gastropoda;Neomphalina;Neomphaloidea;Peltospiridae;Gigantopelta;Gigantopelta aegis  
UdeM00000041512 225164 196.1 UdeM00000041512 XP\_009062741.1 32.2  
307 197 5 54 352 55 358 8.00E-47 196.1 225164  
cellular  
organisms;Eukaryota;Opisthokonta;Metazoa;Eumetazoa;Bilateria;Protostomia;Spiralia;Lophotrochozoa;Mollusca;Gastropoda;Patellogastropoda;Lottiidae;Lottia;Lottia gigantea  
UdeM00000042378 6596 562.8 UdeM00000042378 XP\_045178786.1 32.8 2235  
983 52 50 1954 100 2144 1.80E-156 562.8 6596 cellular  
organisms;Eukaryota;Opisthokonta;Metazoa;Eumetazoa;Bilateria;Protostomia;Spiralia;Lophotrochozoa;Mollusca;Bivalvia;Autobranchia;Heteroconchia;Euheterodonta;Imparidentia;Venerida;Veneroidea;Veneridae;Mercenaria;Mercenaria mercenaria  
UdeM00000042379 45351 93.2 UdeM00000042379 XP\_001623471.2 31.3 211  
118 5 3 197 6 205 4.50E-16 93.2 45351 cellular  
organisms;Eukaryota;Opisthokonta;Metazoa;Eumetazoa;Cnidaria;Anthozoa;Hexacorallia;Actiniaria;Edwardsiidae;Nematostella;Nematostella vectensis  
UdeM00000042380 6596 193.4 UdeM00000042380 XP\_045177779.1 44.2 231  
125 4 56 285 398 625 4.60E-46 193.4 6596 cellular  
organisms;Eukaryota;Opisthokonta;Metazoa;Eumetazoa;Bilateria;Protostomia;Spiralia;Lophotrochozoa;Mollusca;Bivalvia;Autobranchia;Heteroconchia;Euheterodonta;Imparidentia;Venerida;Veneroidea;Veneridae;Mercenaria;Mercenaria mercenaria  
UdeM00000042381 6596 116.7 UdeM00000042381 XP\_045177779.1 44.3 122  
67 1 3 123 401 522 2.10E-23 116.7 6596 cellular  
organisms;Eukaryota;Opisthokonta;Metazoa;Eumetazoa;Bilateria;Protostomia;Spiralia;Lophotrochozoa;Mollusca;Bivalvia;Autobranchia;Heteroconchia;Euheterodonta;Imparidentia;Venerida;Veneroidea;Veneridae;Mercenaria;Mercenaria mercenaria  
UdeM00000042382 6596 189.9 UdeM00000042382 XP\_045177778.1 39.8 299  
162 6 1 289 405 695 8.50E-45 189.9 6596 cellular  
organisms;Eukaryota;Opisthokonta;Metazoa;Eumetazoa;Bilateria;Protostomia;Spiralia;Lophotrochozoa;Mollusca;Bivalvia;Autobranchia;Heteroconchia;Euheterodonta;Imparidentia;Venerida;Veneroidea;Veneridae;Mercenaria;Mercenaria mercenaria  
UdeM00000042384 72036 303.1 UdeM00000042384 XP\_040576246.1 45 349  
184 6 7 351 117 461 4.50E-79 303.1 72036 cellular  
organisms;Eukaryota;Opisthokonta;Metazoa;Eumetazoa;Bilateria;Protostomia;Ecdysozoa;Panarthropoda;Arthropoda;Mandibulata;Pancrustacea;Crustacea;Multicrustacea;Hexanauplia;Copepoda;Neocopepoda;Podoplea;Siphonostomatoida;Caligidae;Lepeophtheirus;Lepeophtheirus salmonis

UdeM00000042386 29159 241.9 UdeM00000042386 XP\_034302488.1 47 328  
 155 5 1463 1785 7 320 6.30E-60 241.9 29159 cellular  
 organisms;Eukaryota;Opisthokonta;Metazoa;Eumetazoa;Bilateria;Protostomia;  
 Spiralia;Lophotrochozoa;Mollusca;Bivalvia;Autobranchia;Pteriomorphia;Ostr  
 eida;Ostreoidea;Ostreidae;Crassostrea;Crassostrea gigas  
 UdeM00000042387 6596 324.3 UdeM00000042387 XP\_045199354.1 28.8 852  
 485 22 1 758 65 888 4.10E-85 324.3 6596 cellular  
 organisms;Eukaryota;Opisthokonta;Metazoa;Eumetazoa;Bilateria;Protostomia;  
 Spiralia;Lophotrochozoa;Mollusca;Bivalvia;Autobranchia;Heteroconchia;Euhe  
 terodonta;Imparidentia;Venerida;Veneroidea;Veneridae;Mercenaria;Mercenari  
 a mercenaria  
 UdeM00000042388 6565 167.9 UdeM00000042388 XP\_022297037.1 43.1 225  
 121 3 6 225 11 233 1.40E-38 167.9 6565 cellular  
 organisms;Eukaryota;Opisthokonta;Metazoa;Eumetazoa;Bilateria;Protostomia;  
 Spiralia;Lophotrochozoa;Mollusca;Bivalvia;Autobranchia;Pteriomorphia;Ostr  
 eida;Ostreoidea;Ostreidae;Crassostrea;Crassostrea virginica  
 UdeM00000042389 6596 395.2 UdeM00000042389 XP\_045199354.1 29.9 941  
 545 25 1 864 65 967 2.10E-106 395.2 6596 cellular  
 organisms;Eukaryota;Opisthokonta;Metazoa;Eumetazoa;Bilateria;Protostomia;  
 Spiralia;Lophotrochozoa;Mollusca;Bivalvia;Autobranchia;Heteroconchia;Euhe  
 terodonta;Imparidentia;Venerida;Veneroidea;Veneridae;Mercenaria;Mercenari  
 a mercenaria  
 UdeM00000042390 6565 79.7 UdeM00000042390 XP\_022297037.1 36 136  
 80 3 6 136 11 144 3.20E-12 79.7 6565 cellular  
 organisms;Eukaryota;Opisthokonta;Metazoa;Eumetazoa;Bilateria;Protostomia;  
 Spiralia;Lophotrochozoa;Mollusca;Bivalvia;Autobranchia;Pteriomorphia;Ostr  
 eida;Ostreoidea;Ostreidae;Crassostrea;Crassostrea virginica  
 UdeM00000042391 6565 72 UdeM00000042391 XP\_022297037.1 65.4 52  
 18 0 1 52 183 234 1.30E-09 72 6565 cellular  
 organisms;Eukaryota;Opisthokonta;Metazoa;Eumetazoa;Bilateria;Protostomia;  
 Spiralia;Lophotrochozoa;Mollusca;Bivalvia;Autobranchia;Pteriomorphia;Ostr  
 eida;Ostreoidea;Ostreidae;Crassostrea;Crassostrea virginica  
 UdeM00000042392 7574 63.5 UdeM00000042392 XP\_013389170.1 29.9 97  
 65 2 9 104 338 432 1.80E-07 63.5 7574 cellular  
 organisms;Eukaryota;Opisthokonta;Metazoa;Eumetazoa;Bilateria;Protostomia;  
 Spiralia;Lophotrochozoa;Brachiopoda;Linguliformea;Lingulata;Lingulida;Lin  
 guloidea;Lingulidae;Lingula;Lingula anatina  
 UdeM00000042394 6596 370.9 UdeM00000042394 XP\_045179669.1 53.2 391  
 163 4 6 394 29 401 2.00E-99 370.9 6596 cellular  
 organisms;Eukaryota;Opisthokonta;Metazoa;Eumetazoa;Bilateria;Protostomia;  
 Spiralia;Lophotrochozoa;Mollusca;Bivalvia;Autobranchia;Heteroconchia;Euhe  
 terodonta;Imparidentia;Venerida;Veneroidea;Veneridae;Mercenaria;Mercenari  
 a mercenaria  
 UdeM00000042395 6596 186.8 UdeM00000042395 XP\_045187052.1 50 188  
 89 3 2 188 145 328 3.40E-44 186.8 6596 cellular  
 organisms;Eukaryota;Opisthokonta;Metazoa;Eumetazoa;Bilateria;Protostomia;  
 Spiralia;Lophotrochozoa;Mollusca;Bivalvia;Autobranchia;Heteroconchia;Euhe  
 terodonta;Imparidentia;Venerida;Veneroidea;Veneridae;Mercenaria;Mercenari  
 a mercenaria  
 UdeM00000042396 6596 186 UdeM00000042396 XP\_045187052.1 49.7 187  
 89 3 2 187 145 327 4.40E-44 186 6596 cellular  
 organisms;Eukaryota;Opisthokonta;Metazoa;Eumetazoa;Bilateria;Protostomia;  
 Spiralia;Lophotrochozoa;Mollusca;Bivalvia;Autobranchia;Heteroconchia;Euhe



terodonta;Imparidentia;Venerida;Veneroidea;Veneridae;Mercenaria;Mercenaria mercenaria

UdeM00000042397 6596 99.8 UdeM00000042397 XP\_045202346.1 40.5 131  
74 2 6 135 16 143 2.90E-18 99.8 6596 cellular

organisms;Eukaryota;Opisthokonta;Metazoa;Eumetazoa;Bilateria;Protostomia;Spiralia;Lophotrochozoa;Mollusca;Bivalvia;Autobranchia;Heteroconchia;Euheterodonta;Imparidentia;Venerida;Veneroidea;Veneridae;Mercenaria;Mercenaria mercenaria

UdeM00000042398 6596 1781.1 UdeM00000042398 XP\_045179914.1 59  
1836 633 20 35 1814 1235 3006 0.00E+00 1781.1 6596  
cellular

organisms;Eukaryota;Opisthokonta;Metazoa;Eumetazoa;Bilateria;Protostomia;Spiralia;Lophotrochozoa;Mollusca;Bivalvia;Autobranchia;Heteroconchia;Euheterodonta;Imparidentia;Venerida;Veneroidea;Veneridae;Mercenaria;Mercenaria mercenaria

UdeM00000042399 6565 1232.6 UdeM00000042399 XP\_022322319.1 46  
1290 673 14 1 1275 192 1472 0.00E+00 1232.6 6565  
cellular

organisms;Eukaryota;Opisthokonta;Metazoa;Eumetazoa;Bilateria;Protostomia;Spiralia;Lophotrochozoa;Mollusca;Bivalvia;Autobranchia;Pteriormorphia;Ostreida;Ostreoidea;Ostreidae;Crassostrea;Crassostrea virginica

UdeM00000042400 29159 204.5 UdeM00000042400 XP\_034300594.1 54.2 177  
77 1 1 177 61 233 1.20E-49 204.5 29159 cellular

organisms;Eukaryota;Opisthokonta;Metazoa;Eumetazoa;Bilateria;Protostomia;Spiralia;Lophotrochozoa;Mollusca;Bivalvia;Autobranchia;Pteriormorphia;Ostreida;Ostreoidea;Ostreidae;Crassostrea;Crassostrea gigas

UdeM00000042402 6596 167.9 UdeM00000042402 XP\_045204388.1 35.4 347  
187 11 6 333 10 338 3.10E-38 167.9 6596 cellular

organisms;Eukaryota;Opisthokonta;Metazoa;Eumetazoa;Bilateria;Protostomia;Spiralia;Lophotrochozoa;Mollusca;Bivalvia;Autobranchia;Heteroconchia;Euheterodonta;Imparidentia;Venerida;Veneroidea;Veneridae;Mercenaria;Mercenaria mercenaria

UdeM00000042403 6579 216.1 UdeM00000042403 XP\_033731739.1 54.7 179  
79 1 1 179 202 378 3.70E-53 216.1 6579 cellular

organisms;Eukaryota;Opisthokonta;Metazoa;Eumetazoa;Bilateria;Protostomia;Spiralia;Lophotrochozoa;Mollusca;Bivalvia;Autobranchia;Pteriormorphia;Pectinida;Pectinoidea;Pectinidae;Pecten;Pecten maximus

UdeM00000042405 6573 252.7 UdeM00000042405 XP\_021350148.1 45.3 311  
161 5 2 306 33 340 6.50E-64 252.7 6573 cellular

organisms;Eukaryota;Opisthokonta;Metazoa;Eumetazoa;Bilateria;Protostomia;Spiralia;Lophotrochozoa;Mollusca;Bivalvia;Autobranchia;Pteriormorphia;Pectinida;Pectinoidea;Pectinidae;Mizuhopecten;Mizuhopecten yessoensis

UdeM00000042406 6565 371.7 UdeM00000042406 XP\_022320666.1 53.8 379  
165 7 3 377 3886 4258 1.30E-99 371.7 6565 cellular

organisms;Eukaryota;Opisthokonta;Metazoa;Eumetazoa;Bilateria;Protostomia;Spiralia;Lophotrochozoa;Mollusca;Bivalvia;Autobranchia;Pteriormorphia;Ostreida;Ostreoidea;Ostreidae;Crassostrea;Crassostrea virginica

UdeM00000042407 29159 1053.9 UdeM00000042407 XP\_034301274.1 59.1  
815 328 4 3 814 2823 3635 1.50E-304 1053.9  
29159 cellular

organisms;Eukaryota;Opisthokonta;Metazoa;Eumetazoa;Bilateria;Protostomia;Spiralia;Lophotrochozoa;Mollusca;Bivalvia;Autobranchia;Pteriormorphia;Ostreida;Ostreoidea;Ostreidae;Crassostrea;Crassostrea gigas

UdeM00000042408 6526 3037.7 UdeM00000042408 XP\_013077212.1 48.6  
2990 1485 15 1 2976 231 3181 0.00E+00 3037.7 6526  
cellular

organisms;Eukaryota;Opisthokonta;Metazoa;Eumetazoa;Bilateria;Protostomia;  
Spiralia;Lophotrochozoa;Mollusca;Gastropoda;Heterobranchia;Euthyneura;Pan  
pulmonata;Hygrophila;Lymnaeioidea;Planorbidae;Biophalaria;Biophalaria  
glabrata

UdeM00000042409 1735272 212.2 UdeM00000042409 XP\_041374759.1 45.9  
209 110 2 3 209 19 226 6.30E-52 212.2 1735272  
cellular

organisms;Eukaryota;Opisthokonta;Metazoa;Eumetazoa;Bilateria;Protostomia;  
Spiralia;Lophotrochozoa;Mollusca;Gastropoda;Neomphalina;Neomphaloidea;Pel  
topiridae;Gigantopelta;Gigantopelta aegis

UdeM00000042410 6596 261.9 UdeM00000042410 XP\_045178329.1 62.3 204  
77 0 1 204 1 204 6.80E-67 261.9 6596 cellular

organisms;Eukaryota;Opisthokonta;Metazoa;Eumetazoa;Bilateria;Protostomia;  
Spiralia;Lophotrochozoa;Mollusca;Bivalvia;Autobranchia;Heteroconchia;Euhe  
terodonta;Imparidentia;Venerida;Veneroidea;Veneridae;Mercenaria;Mercenari  
a mercenaria

UdeM00000042411 6565 841.6 UdeM00000042411 XP\_022344846.1 72.2 543  
137 2 1 543 2 530 5.40E-241 841.6 6565 cellular

organisms;Eukaryota;Opisthokonta;Metazoa;Eumetazoa;Bilateria;Protostomia;  
Spiralia;Lophotrochozoa;Mollusca;Bivalvia;Autobranchia;Pteriormorphia;Ostr  
eida;Ostreioidea;Ostreidae;Crassostrea;Crassostrea virginica

UdeM00000042412 7574 609.4 UdeM00000042412 XP\_013382110.1 49.2 589  
280 7 14 601 45 615 5.00E-171 609.4 7574 cellular

organisms;Eukaryota;Opisthokonta;Metazoa;Eumetazoa;Bilateria;Protostomia;  
Spiralia;Lophotrochozoa;Brachiopoda;Linguliformea;Lingulata;Lingulida;Lin  
guloidea;Lingulidae;Lingula;Lingula anatina

UdeM00000042413 7574 236.5 UdeM00000042413 XP\_013409676.1 50.7 268  
115 5 1 261 1 258 3.90E-59 236.5 7574 cellular

organisms;Eukaryota;Opisthokonta;Metazoa;Eumetazoa;Bilateria;Protostomia;  
Spiralia;Lophotrochozoa;Brachiopoda;Linguliformea;Lingulata;Lingulida;Lin  
guloidea;Lingulidae;Lingula;Lingula anatina

UdeM00000042414 6500 70.1 UdeM00000042414 XP\_005096263.1 42.8 152  
67 5 6 151 8 145 2.80E-09 70.1 6500 cellular

organisms;Eukaryota;Opisthokonta;Metazoa;Eumetazoa;Bilateria;Protostomia;  
Spiralia;Lophotrochozoa;Mollusca;Gastropoda;Heterobranchia;Euthyneura;Tec  
tipleura;Aplysiida;Aplysioidea;Aplysiidae;Aplysia;Aplysia californica

UdeM00000042415 6596 829.3 UdeM00000042415 XP\_045179606.1 81.5 492  
89 1 6 497 149 638 3.10E-237 829.3 6596 cellular

organisms;Eukaryota;Opisthokonta;Metazoa;Eumetazoa;Bilateria;Protostomia;  
Spiralia;Lophotrochozoa;Mollusca;Bivalvia;Autobranchia;Heteroconchia;Euhe  
terodonta;Imparidentia;Venerida;Veneroidea;Veneridae;Mercenaria;Mercenari  
a mercenaria

UdeM00000042416 451745 110.2 UdeM00000042416 XP\_037531102.1 28.2  
209 144 3 7 215 184 386 3.50E-21 110.2 451745  
cellular

organisms;Eukaryota;Opisthokonta;Metazoa;Eumetazoa;Bilateria;Deuterostomi  
a;Chordata;Craniata;Vertebrata;Gnathostomata;Teleostomi;Euteleostomi;Acti  
nopterygii;Actinopteri;Neopterygii;Teleostei;Osteoglossocephalai;Clupeoce  
phala;Euteleostei;Neoteleostei;Eurypterygia;Ctenosquamata;Acanthomo  
rphata;Euacanthomorphacea;Percomorphaceae;Ovalentaria;Atherinomorphae;Cyp  
rinodontiformes;Aplocheiloidei;Rivulidae;Nematolebias;Nematolebias whitei

UdeM00000039991 441366 326.6 UdeM00000039991 XP\_028296753.1 40.5  
459 258 8 6 463 32 476 5.30E-86 326.6 441366  
cellular

organisms;Eukaryota;Opisthokonta;Metazoa;Eumetazoa;Bilateria;Deuterostomi  
a;Chordata;Craniata;Vertebrata;Gnathostomata;Teleostomi;Euteleostomi;Acti  
nopterygii;Actinopteri;Neopterygii;Teleostei;Osteoglossocephalai;Clupeoce  
phala;Euteleosteomorpha;Neoteleostei;Eurypterygia;Ctenosquamata;Acanthomo  
rphata;Euacanthomorphacea;Percomorphaceae;Ovalentaria;Blenniimorphae;Blen  
niiformes;Gobiesocoidei;Gobiesocidae;Gobiesocinae;Gouania;Gouania  
willdenowi

UdeM00000039992 6573 104.4 UdeM00000039992 XP\_021369796.1 34.4 151  
98 1 165 315 4176 4325 2.90E-19 104.4 6573 cellular

organisms;Eukaryota;Opisthokonta;Metazoa;Eumetazoa;Bilateria;Protostomia;  
Spiralia;Lophotrochozoa;Mollusca;Bivalvia;Autobranchia;Pteriormorphia;Pect  
inida;Pectinoidea;Pectinidae;Mizuhopecten;Mizuhopecten yessoensis

UdeM00000039994 6596 412.5 UdeM00000039994 XP\_045190136.1 26.2 1179  
784 27 477 1600 10 1157 2.40E-111 412.5 6596 cellular

organisms;Eukaryota;Opisthokonta;Metazoa;Eumetazoa;Bilateria;Protostomia;  
Spiralia;Lophotrochozoa;Mollusca;Bivalvia;Autobranchia;Heteroconchia;Euhe  
terodonta;Imparidentia;Venerida;Veneroidea;Veneridae;Mercenaria;Mercenari  
a mercenaria

UdeM00000039995 6596 445.3 UdeM00000039995 XP\_045190136.1 27.1 1178  
792 26 477 1617 10 1157 3.40E-121 445.3 6596 cellular

organisms;Eukaryota;Opisthokonta;Metazoa;Eumetazoa;Bilateria;Protostomia;  
Spiralia;Lophotrochozoa;Mollusca;Bivalvia;Autobranchia;Heteroconchia;Euhe  
terodonta;Imparidentia;Venerida;Veneroidea;Veneridae;Mercenaria;Mercenari  
a mercenaria

UdeM00000021990 6596 191 UdeM00000021990 XP\_045191793.1 39 310  
160 7 1 307 258 541 2.40E-45 191 6596 cellular

organisms;Eukaryota;Opisthokonta;Metazoa;Eumetazoa;Bilateria;Protostomia;  
Spiralia;Lophotrochozoa;Mollusca;Bivalvia;Autobranchia;Heteroconchia;Euhe  
terodonta;Imparidentia;Venerida;Veneroidea;Veneridae;Mercenaria;Mercenari  
a mercenaria

UdeM00000021991 6596 153.7 UdeM00000021991 XP\_045177779.1 41.1 209  
117 5 38 244 372 576 3.20E-34 153.7 6596 cellular

organisms;Eukaryota;Opisthokonta;Metazoa;Eumetazoa;Bilateria;Protostomia;  
Spiralia;Lophotrochozoa;Mollusca;Bivalvia;Autobranchia;Heteroconchia;Euhe  
terodonta;Imparidentia;Venerida;Veneroidea;Veneridae;Mercenaria;Mercenari  
a mercenaria

UdeM00000021992 29159 106.3 UdeM00000021992 XP\_034305547.1 29.3 222  
137 6 79 284 21 238 6.60E-20 106.3 29159 cellular

organisms;Eukaryota;Opisthokonta;Metazoa;Eumetazoa;Bilateria;Protostomia;  
Spiralia;Lophotrochozoa;Mollusca;Bivalvia;Autobranchia;Pteriormorphia;Ostr  
eida;Ostreoidea;Ostreidae;Crassostrea;Crassostrea gigas

UdeM00000021993 8154 73.9 UdeM00000021993 XP\_026015163.1 52.1 73  
35 0 1 73 1 73 1.30E-10 73.9 8154 cellular

organisms;Eukaryota;Opisthokonta;Metazoa;Eumetazoa;Bilateria;Deuterostomi  
a;Chordata;Craniata;Vertebrata;Gnathostomata;Teleostomi;Euteleostomi;Acti  
nopterygii;Actinopteri;Neopterygii;Teleostei;Osteoglossocephalai;Clupeoce  
phala;Euteleosteomorpha;Neoteleostei;Eurypterygia;Ctenosquamata;Acanthomo  
rphata;Euacanthomorphacea;Percomorphaceae;Ovalentaria;Cichlomorphae;Cichl  
iformes;Cichlidae;African  
cichlids;Pseudocrenilabrinae;Haplochromini;Astatotilapia;Astatotilapia  
calliptera

UdeM00000021994 6596 174.5 UdeM00000021994 XP\_045182316.1 45.1 213  
 114 2 106 318 407 616 2.40E-40 174.5 6596 cellular  
 organisms;Eukaryota;Opisthokonta;Metazoa;Eumetazoa;Bilateria;Protostomia;  
 Spiralia;Lophotrochozoa;Mollusca;Bivalvia;Autobranchia;Heteroconchia;Euhe  
 terodonta;Imparidentia;Venerida;Veneroidea;Veneridae;Mercenaria;Mercenari  
 a mercenaria  
 UdeM00000021996 6596 109.4 UdeM00000021996 XP\_045162187.1 68.8 77  
 24 0 1 77 36 112 3.40E-21 109.4 6596 cellular  
 organisms;Eukaryota;Opisthokonta;Metazoa;Eumetazoa;Bilateria;Protostomia;  
 Spiralia;Lophotrochozoa;Mollusca;Bivalvia;Autobranchia;Heteroconchia;Euhe  
 terodonta;Imparidentia;Venerida;Veneroidea;Veneridae;Mercenaria;Mercenari  
 a mercenaria  
 UdeM00000021997 6596 303.5 UdeM00000021997 XP\_045177776.1 41.9 372  
 209 4 129 496 602 970 7.00E-79 303.5 6596 cellular  
 organisms;Eukaryota;Opisthokonta;Metazoa;Eumetazoa;Bilateria;Protostomia;  
 Spiralia;Lophotrochozoa;Mollusca;Bivalvia;Autobranchia;Heteroconchia;Euhe  
 terodonta;Imparidentia;Venerida;Veneroidea;Veneridae;Mercenaria;Mercenari  
 a mercenaria  
 UdeM00000021998 6596 394 UdeM00000021998 XP\_045177779.1 37.4 562  
 338 9 73 631 247 797 4.70E-106 394 6596 cellular  
 organisms;Eukaryota;Opisthokonta;Metazoa;Eumetazoa;Bilateria;Protostomia;  
 Spiralia;Lophotrochozoa;Mollusca;Bivalvia;Autobranchia;Heteroconchia;Euhe  
 terodonta;Imparidentia;Venerida;Veneroidea;Veneridae;Mercenaria;Mercenari  
 a mercenaria  
 UdeM00000021999 45351 80.9 UdeM00000021999 XP\_032226414.1 37.1 151  
 78 3 37 172 11 159 2.30E-12 80.9 45351 cellular  
 organisms;Eukaryota;Opisthokonta;Metazoa;Eumetazoa;Cnidaria;Anthozoa;Hexa  
 corallia;Actiniaria;Edwardsiidae;Nematostella;Nematostella vectensis  
 UdeM00000022000 6573 164.5 UdeM00000022000 XP\_021358159.1 38.1 260  
 148 7 3 251 394 651 3.10E-37 164.5 6573 cellular  
 organisms;Eukaryota;Opisthokonta;Metazoa;Eumetazoa;Bilateria;Protostomia;  
 Spiralia;Lophotrochozoa;Mollusca;Bivalvia;Autobranchia;Pteriomorphia;Pect  
 inida;Pectinoidea;Pectinidae;Mizuhopecten;Mizuhopecten yessoensis  
 UdeM00000022002 29159 95.5 UdeM00000022002 XP\_034330187.1 34.5 171  
 89 6 164 334 9 156 1.40E-16 95.5 29159 cellular  
 organisms;Eukaryota;Opisthokonta;Metazoa;Eumetazoa;Bilateria;Protostomia;  
 Spiralia;Lophotrochozoa;Mollusca;Bivalvia;Autobranchia;Pteriomorphia;Ostr  
 eida;Ostreoidea;Ostreidae;Crassostrea;Crassostrea gigas  
 UdeM00000022004 50429 92 UdeM00000022004 XP\_022799946.1 31.8 157  
 103 3 312 468 6 158 2.20E-15 92 50429 cellular  
 organisms;Eukaryota;Opisthokonta;Metazoa;Eumetazoa;Cnidaria;Anthozoa;Hexa  
 corallia;Scleractinia;Astrocoeniina;Pocilloporidae;Stylophora;Stylophora  
 pistillata  
 UdeM00000022006 6596 115.5 UdeM00000022006 XP\_045177776.1 29.5 244  
 157 5 133 365 803 1042 2.30E-22 115.5 6596 cellular  
 organisms;Eukaryota;Opisthokonta;Metazoa;Eumetazoa;Bilateria;Protostomia;  
 Spiralia;Lophotrochozoa;Mollusca;Bivalvia;Autobranchia;Heteroconchia;Euhe  
 terodonta;Imparidentia;Venerida;Veneroidea;Veneridae;Mercenaria;Mercenari  
 a mercenaria  
 UdeM00000022011 45351 91.3 UdeM00000022011 XP\_032236999.1 35.8 151  
 81 2 9 144 11 160 1.50E-15 91.3 45351 cellular  
 organisms;Eukaryota;Opisthokonta;Metazoa;Eumetazoa;Cnidaria;Anthozoa;Hexa  
 corallia;Actiniaria;Edwardsiidae;Nematostella;Nematostella vectensis

UdeM00000022012 6596 125.6 UdeM00000022012 XP\_045204184.1 41 166  
 92 3 2 164 60 222 6.30E-26 125.6 6596 cellular  
 organisms;Eukaryota;Opisthokonta;Metazoa;Eumetazoa;Bilateria;Protostomia;  
 Spiralia;Lophotrochozoa;Mollusca;Bivalvia;Autobranhia;Heteroconchia;Euhe  
 terodonta;Imparidentia;Venerida;Veneroidea;Veneridae;Mercenaria;Mercenari  
 a mercenaria  
 UdeM00000022015 29159 96.7 UdeM00000022015 XP\_034330187.1 33.7 172  
 97 5 240 409 9 165 7.70E-17 96.7 29159 cellular  
 organisms;Eukaryota;Opisthokonta;Metazoa;Eumetazoa;Bilateria;Protostomia;  
 Spiralia;Lophotrochozoa;Mollusca;Bivalvia;Autobranhia;Pteriormorphia;Ostr  
 eida;Ostreoidea;Ostreidae;Crassostrea;Crassostrea gigas  
 UdeM00000022017 6596 380.9 UdeM00000022017 XP\_045177776.1 40.5 568  
 310 11 1 561 405 951 3.80E-102 380.9 6596 cellular  
 organisms;Eukaryota;Opisthokonta;Metazoa;Eumetazoa;Bilateria;Protostomia;  
 Spiralia;Lophotrochozoa;Mollusca;Bivalvia;Autobranhia;Heteroconchia;Euhe  
 terodonta;Imparidentia;Venerida;Veneroidea;Veneridae;Mercenaria;Mercenari  
 a mercenaria  
 UdeM00000022018 6596 82.8 UdeM00000022018 XP\_045161680.1 34.1 138  
 81 2 131 258 97 234 1.20E-12 82.8 6596 cellular  
 organisms;Eukaryota;Opisthokonta;Metazoa;Eumetazoa;Bilateria;Protostomia;  
 Spiralia;Lophotrochozoa;Mollusca;Bivalvia;Autobranhia;Heteroconchia;Euhe  
 terodonta;Imparidentia;Venerida;Veneroidea;Veneridae;Mercenaria;Mercenari  
 a mercenaria  
 UdeM00000022019 6579 230.3 UdeM00000022019 XP\_033728503.1 89.1 119  
 13 0 1 119 716 834 1.30E-57 230.3 6579 cellular  
 organisms;Eukaryota;Opisthokonta;Metazoa;Eumetazoa;Bilateria;Protostomia;  
 Spiralia;Lophotrochozoa;Mollusca;Bivalvia;Autobranhia;Pteriormorphia;Pect  
 inida;Pectinoidea;Pectinidae;Pecten;Pecten maximus  
 UdeM00000022020 6573 201.4 UdeM00000022020 XP\_021368509.1 84.2 114  
 13 1 1 109 859 972 6.30E-49 201.4 6573 cellular  
 organisms;Eukaryota;Opisthokonta;Metazoa;Eumetazoa;Bilateria;Protostomia;  
 Spiralia;Lophotrochozoa;Mollusca;Bivalvia;Autobranhia;Pteriormorphia;Pect  
 inida;Pectinoidea;Pectinidae;Mizuhopecten;Mizuhopecten yessoensis  
 UdeM00000022021 6579 597.4 UdeM00000022021 XP\_033728503.1 57.3 562  
 65 2 16 402 1014 1575 1.30E-167 597.4 6579 cellular  
 organisms;Eukaryota;Opisthokonta;Metazoa;Eumetazoa;Bilateria;Protostomia;  
 Spiralia;Lophotrochozoa;Mollusca;Bivalvia;Autobranhia;Pteriormorphia;Pect  
 inida;Pectinoidea;Pectinidae;Pecten;Pecten maximus  
 UdeM00000022024 6596 60.5 UdeM00000022024 XP\_045180775.1 29.9 107  
 66 1 85 182 1448 1554 2.80E-06 60.5 6596 cellular  
 organisms;Eukaryota;Opisthokonta;Metazoa;Eumetazoa;Bilateria;Protostomia;  
 Spiralia;Lophotrochozoa;Mollusca;Bivalvia;Autobranhia;Heteroconchia;Euhe  
 terodonta;Imparidentia;Venerida;Veneroidea;Veneridae;Mercenaria;Mercenari  
 a mercenaria  
 UdeM00000022025 29159 99.4 UdeM00000022025 XP\_034330187.1 37.4 171  
 84 6 164 334 9 156 9.90E-18 99.4 29159 cellular  
 organisms;Eukaryota;Opisthokonta;Metazoa;Eumetazoa;Bilateria;Protostomia;  
 Spiralia;Lophotrochozoa;Mollusca;Bivalvia;Autobranhia;Pteriormorphia;Ostr  
 eida;Ostreoidea;Ostreidae;Crassostrea;Crassostrea gigas  
 UdeM00000022026 29159 99.4 UdeM00000022026 XP\_034330187.1 36.3 171  
 86 6 164 334 9 156 9.90E-18 99.4 29159 cellular  
 organisms;Eukaryota;Opisthokonta;Metazoa;Eumetazoa;Bilateria;Protostomia;  
 Spiralia;Lophotrochozoa;Mollusca;Bivalvia;Autobranhia;Pteriormorphia;Ostr  
 eida;Ostreoidea;Ostreidae;Crassostrea;Crassostrea gigas

UdeM00000022027 7574 79 UdeM00000022027 XP\_023932360.1 24.3 210  
 131 6 30 237 1652 1835 2.30E-11 79 7574 cellular  
 organisms;Eukaryota;Opisthokonta;Metazoa;Eumetazoa;Bilateria;Protostomia;  
 Spiralia;Lophotrochozoa;Brachiopoda;Linguliformea;Lingulata;Lingulida;Lin  
 guloidea;Lingulidae;Lingula;Lingula anatina  
 UdeM00000022028 7574 79 UdeM00000022028 XP\_023932360.1 24.3 210  
 131 6 30 237 1652 1835 2.50E-11 79 7574 cellular  
 organisms;Eukaryota;Opisthokonta;Metazoa;Eumetazoa;Bilateria;Protostomia;  
 Spiralia;Lophotrochozoa;Brachiopoda;Linguliformea;Lingulata;Lingulida;Lin  
 guloidea;Lingulidae;Lingula;Lingula anatina  
 UdeM00000022029 6596 318.5 UdeM00000022029 XP\_045178416.1 47 372  
 145 3 110 429 4 375 1.30E-83 318.5 6596 cellular  
 organisms;Eukaryota;Opisthokonta;Metazoa;Eumetazoa;Bilateria;Protostomia;  
 Spiralia;Lophotrochozoa;Mollusca;Bivalvia;Autobranchia;Heteroconchia;Euhe  
 terodonta;Imparidentia;Venerida;Veneroidea;Veneridae;Mercenaria;Mercenari  
 a mercenaria  
 UdeM00000022030 1735272 275.4 UdeM00000022030 XP\_041374011.1 58.3  
 206 84 1 1 204 512 717 5.90E-71 275.4 1735272  
 cellular  
 organisms;Eukaryota;Opisthokonta;Metazoa;Eumetazoa;Bilateria;Protostomia;  
 Spiralia;Lophotrochozoa;Mollusca;Gastropoda;Neomphalina;Neomphaloidea;Pel  
 tospiridae;Gigantopelta;Gigantopelta aegis  
 UdeM00000022031 1735272 292.7 UdeM00000022031 XP\_041374011.1 57.1  
 224 94 1 1 222 494 717 3.90E-76 292.7 1735272  
 cellular  
 organisms;Eukaryota;Opisthokonta;Metazoa;Eumetazoa;Bilateria;Protostomia;  
 Spiralia;Lophotrochozoa;Mollusca;Gastropoda;Neomphalina;Neomphaloidea;Pel  
 tospiridae;Gigantopelta;Gigantopelta aegis  
 UdeM00000022032 1735272 414.8 UdeM00000022032 XP\_041374011.1 43.2  
 486 270 4 12 494 10 492 1.50E-112 414.8 1735272  
 cellular  
 organisms;Eukaryota;Opisthokonta;Metazoa;Eumetazoa;Bilateria;Protostomia;  
 Spiralia;Lophotrochozoa;Mollusca;Gastropoda;Neomphalina;Neomphaloidea;Pel  
 tospiridae;Gigantopelta;Gigantopelta aegis  
 UdeM00000022033 6573 580.1 UdeM00000022033 XP\_021341356.1 76.4 365  
 82 1 5 369 103 463 2.00E-162 580.1 6573 cellular  
 organisms;Eukaryota;Opisthokonta;Metazoa;Eumetazoa;Bilateria;Protostomia;  
 Spiralia;Lophotrochozoa;Mollusca;Bivalvia;Autobranchia;Pteriomorphia;Pect  
 inida;Pectinoidea;Pectinidae;Mizuhopecten;Mizuhopecten yessoensis  
 UdeM00000022035 400727 427.9 UdeM00000022035 XP\_025104943.1 79.2  
 269 56 0 2 270 3 271 9.40E-117 427.9 400727  
 cellular  
 organisms;Eukaryota;Opisthokonta;Metazoa;Eumetazoa;Bilateria;Protostomia;  
 Spiralia;Lophotrochozoa;Mollusca;Gastropoda;Caenogastropoda;Architaeniogl  
 ossa;Ampullarioidea;Ampullariidae;Pomacea;Pomacea canaliculata  
 UdeM00000022036 6500 298.5 UdeM00000022036 XP\_012945148.1 60.5 309  
 117 5 829 1134 25 331 3.80E-77 298.5 6500 cellular  
 organisms;Eukaryota;Opisthokonta;Metazoa;Eumetazoa;Bilateria;Protostomia;  
 Spiralia;Lophotrochozoa;Mollusca;Gastropoda;Heterobranchia;Euthyneura;Tec  
 tipleura;Aplysiida;Aplysioidea;Aplysiidae;Aplysia;Aplysia californica  
 UdeM00000022037 6579 1048.5 UdeM00000022037 XP\_033728946.1 45.8  
 1236 600 16 1 1208 31 1224 1.30E-302 1048.5 6579  
 cellular  
 organisms;Eukaryota;Opisthokonta;Metazoa;Eumetazoa;Bilateria;Protostomia;

Spiralia; Lophotrochozoa; Mollusca; Bivalvia; Autobranchia; Pteriomorpha; Pectinida; Pectinoidea; Pectinidae; Pecten; Pecten maximus  
UdeM00000022037 6579 108.6 UdeM00000022037 XP\_033728946.1 34.3 178  
100 4 2184 2360 2596 2757 1.10E-19 108.6 6579 cellular  
organisms; Eukaryota; Opisthokonta; Metazoa; Eumetazoa; Bilateria; Protostomia; Spiralia; Lophotrochozoa; Mollusca; Bivalvia; Autobranchia; Pteriomorpha; Pectinida; Pectinoidea; Pectinidae; Pecten; Pecten maximus  
UdeM00000022039 6596 691.4 UdeM00000022039 XP\_045178671.1 64.6 495  
171 2 2 492 175 669 8.20E-196 691.4 6596 cellular  
organisms; Eukaryota; Opisthokonta; Metazoa; Eumetazoa; Bilateria; Protostomia; Spiralia; Lophotrochozoa; Mollusca; Bivalvia; Autobranchia; Heteroconchia; Euheterodonta; Imparidentia; Venerida; Veneroidea; Veneridae; Mercenaria; Mercenaria mercenaria  
UdeM00000022040 6596 310.5 UdeM00000022040 XP\_045178671.1 70 203  
61 0 2 204 467 669 1.60E-81 310.5 6596 cellular  
organisms; Eukaryota; Opisthokonta; Metazoa; Eumetazoa; Bilateria; Protostomia; Spiralia; Lophotrochozoa; Mollusca; Bivalvia; Autobranchia; Heteroconchia; Euheterodonta; Imparidentia; Venerida; Veneroidea; Veneridae; Mercenaria; Mercenaria mercenaria  
UdeM00000022041 6596 312.4 UdeM00000022041 XP\_045178671.1 70.4 203  
60 0 2 204 467 669 4.30E-82 312.4 6596 cellular  
organisms; Eukaryota; Opisthokonta; Metazoa; Eumetazoa; Bilateria; Protostomia; Spiralia; Lophotrochozoa; Mollusca; Bivalvia; Autobranchia; Heteroconchia; Euheterodonta; Imparidentia; Venerida; Veneroidea; Veneridae; Mercenaria; Mercenaria mercenaria  
UdeM00000022042 29159 389 UdeM00000022042 XP\_011428534.2 38.1 586  
340 11 23 596 296 870 1.10E-104 389 29159 cellular  
organisms; Eukaryota; Opisthokonta; Metazoa; Eumetazoa; Bilateria; Protostomia; Spiralia; Lophotrochozoa; Mollusca; Bivalvia; Autobranchia; Pteriomorpha; Ostreida; Ostreioidea; Ostreidae; Crassostrea; Crassostrea gigas  
UdeM00000007799 6573 76.6 UdeM00000007799 XP\_021347744.1 43.9 82  
46 0 6 87 7 88 2.20E-11 76.6 6573 cellular  
organisms; Eukaryota; Opisthokonta; Metazoa; Eumetazoa; Bilateria; Protostomia; Spiralia; Lophotrochozoa; Mollusca; Bivalvia; Autobranchia; Pteriomorpha; Pectinida; Pectinoidea; Pectinidae; Mizuhopecten; Mizuhopecten yessoensis  
UdeM00000007801 6579 122.1 UdeM00000007801 XP\_033739131.1 51.8 112  
53 1 3 114 1260 1370 4.70E-25 122.1 6579 cellular  
organisms; Eukaryota; Opisthokonta; Metazoa; Eumetazoa; Bilateria; Protostomia; Spiralia; Lophotrochozoa; Mollusca; Bivalvia; Autobranchia; Pteriomorpha; Pectinida; Pectinoidea; Pectinidae; Pecten; Pecten maximus  
UdeM00000007802 400727 493.4 UdeM00000007802 XP\_025103991.1 71.2  
479 119 4 2 471 3 471 3.10E-136 493.4 400727  
cellular  
organisms; Eukaryota; Opisthokonta; Metazoa; Eumetazoa; Bilateria; Protostomia; Spiralia; Lophotrochozoa; Mollusca; Gastropoda; Caenogastropoda; Architaenioglossa; Ampullarioidea; Ampullariidae; Pomacea; Pomacea canaliculata  
UdeM00000007803 7515 124.4 UdeM00000007803 XP\_026479132.1 43.4 143  
80 1 1 143 105 246 1.20E-25 124.4 7515 cellular  
organisms; Eukaryota; Opisthokonta; Metazoa; Eumetazoa; Bilateria; Protostomia; Ecdysozoa; Panarthropoda; Arthropoda; Mandibulata; Pancrustacea; Hexapoda; Insecta; Dicondylia; Pterygota; Neoptera; Endopterygota; Siphonaptera; Pulicomorpha; Pulicoidea; Pulicidae; Archaeopsyllinae; Ctenocephalides; Ctenocephalides felis

UdeM00000007804 7515 154.8 UdeM00000007804 XP\_026479132.1 38.9 198  
 119 2 37 233 50 246 1.30E-34 154.8 7515 cellular  
 organisms;Eukaryota;Opisthokonta;Metazoa;Eumetazoa;Bilateria;Protostomia;  
 Ecdysozoa;Panarthropoda;Arthropoda;Mandibulata;Pancrustacea;Hexapoda;Inse  
 cta;Dicondylia;Pterygota;Neoptera;Endopterygota;Siphonaptera;Pulicomorpha  
 ;Pulicoidea;Pulicidae;Archaeopsyllinae;Ctenocephalides;Ctenocephalides  
 felis

UdeM00000007805 6596 392.5 UdeM00000007805 XP\_045161160.1 59.9 324  
 125 2 1 319 1 324 5.70E-106 392.5 6596 cellular  
 organisms;Eukaryota;Opisthokonta;Metazoa;Eumetazoa;Bilateria;Protostomia;  
 Spiralia;Lophotrochozoa;Mollusca;Bivalvia;Autobranchia;Heteroconchia;Euhe  
 terodonta;Imparidentia;Venerida;Veneroidea;Veneridae;Mercenaria;Mercenari  
 a mercenaria

UdeM00000007806 6579 320.5 UdeM00000007806 XP\_033734733.1 32.5 1101  
 611 37 1 1067 1 1003 8.20E-84 320.5 6579 cellular  
 organisms;Eukaryota;Opisthokonta;Metazoa;Eumetazoa;Bilateria;Protostomia;  
 Spiralia;Lophotrochozoa;Mollusca;Bivalvia;Autobranchia;Pteriormorphia;Pect  
 inida;Pectinoidea;Pectinidae;Pecten;Pecten maximus

UdeM00000007807 6596 1614 UdeM00000007807 XP\_045187153.1 89.9 884  
 89 0 4 887 7 890 0.00E+00 1614 6596 cellular  
 organisms;Eukaryota;Opisthokonta;Metazoa;Eumetazoa;Bilateria;Protostomia;  
 Spiralia;Lophotrochozoa;Mollusca;Bivalvia;Autobranchia;Heteroconchia;Euhe  
 terodonta;Imparidentia;Venerida;Veneroidea;Veneridae;Mercenaria;Mercenari  
 a mercenaria

UdeM00000007808 6596 62 UdeM00000007808 XP\_045167285.1 36.8 87  
 53 1 7 91 159 245 5.00E-07 62 6596 cellular  
 organisms;Eukaryota;Opisthokonta;Metazoa;Eumetazoa;Bilateria;Protostomia;  
 Spiralia;Lophotrochozoa;Mollusca;Bivalvia;Autobranchia;Heteroconchia;Euhe  
 terodonta;Imparidentia;Venerida;Veneroidea;Veneridae;Mercenaria;Mercenari  
 a mercenaria

UdeM00000007809 36176 76.3 UdeM00000007809 XP\_043552272.1 59.4 64  
 26 0 1 64 1 64 2.10E-11 76.3 36176 cellular  
 organisms;Eukaryota;Opisthokonta;Metazoa;Eumetazoa;Bilateria;Deuterostomi  
 a;Chordata;Craniata;Vertebrata;Gnathostomata;Chondrichthyes;Elasmobranchi  
 i;Selachii;Galeomorphii;Galeoidea;Orectolobiformes;Hemiscylliidae;Chilosc  
 yllium;Chiloscyllium plagiolum

UdeM00000007810 1415580 87.4 UdeM00000007810 XP\_030075314.1 41.1  
 107 62 1 1 107 1 106 1.20E-14 87.4 1415580  
 cellular  
 organisms;Eukaryota;Opisthokonta;Metazoa;Eumetazoa;Bilateria;Deuterostomi  
 a;Chordata;Craniata;Vertebrata;Gnathostomata;Teleostomi;Euteleostomi;Sarc  
 opterygii;Dipnotetrapodomorpha;Tetrapoda;Amphibia;Gymnophiona;Siphonopida  
 e;Microcaecilia;Microcaecilia unicolor

UdeM00000007811 7757 488 UdeM00000007811 XP\_032835197.1 79.5 308  
 62 1 1 308 52 358 1.20E-134 488 7757 cellular  
 organisms;Eukaryota;Opisthokonta;Metazoa;Eumetazoa;Bilateria;Deuterostomi  
 a;Chordata;Craniata;Vertebrata;Cyclostomata;Hyperoartia;Petromyzontiforme  
 s;Petromyzontidae;Petromyzon;Petromyzon marinus

UdeM00000007812 1415580 109 UdeM00000007812 XP\_030075314.1 72.2  
 72 20 0 2 73 554 625 2.60E-21 109 1415580  
 cellular  
 organisms;Eukaryota;Opisthokonta;Metazoa;Eumetazoa;Bilateria;Deuterostomi  
 a;Chordata;Craniata;Vertebrata;Gnathostomata;Teleostomi;Euteleostomi;Sarc



opterygii;Dipnotetrapodomorpha;Tetrapoda;Amphibia;Gymnophiona;Siphonopida  
 e;Microcaecilia;Microcaecilia unicolor  
 UdeM00000007813 6596 400.6 UdeM00000007813 XP\_045167193.1 38.6 694  
 337 14 6 673 4 634 4.00E-108 400.6 6596 cellular  
 organisms;Eukaryota;Opisthokonta;Metazoa;Eumetazoa;Bilateria;Protostomia;  
 Spiralia;Lophotrochozoa;Mollusca;Bivalvia;Autobranchia;Heteroconchia;Euhe  
 terodonta;Imparidentia;Venerida;Veneroidea;Veneridae;Mercenaria;Mercenari  
 a mercenaria  
 UdeM00000007814 6596 736.9 UdeM00000007814 XP\_045167204.1 56.6 831  
 301 18 1 780 1 822 4.10E-209 736.9 6596 cellular  
 organisms;Eukaryota;Opisthokonta;Metazoa;Eumetazoa;Bilateria;Protostomia;  
 Spiralia;Lophotrochozoa;Mollusca;Bivalvia;Autobranchia;Heteroconchia;Euhe  
 terodonta;Imparidentia;Venerida;Veneroidea;Veneridae;Mercenaria;Mercenari  
 a mercenaria  
 UdeM00000007815 6565 528.9 UdeM00000007815 XP\_022332113.1 83.8 320  
 17 1 1 285 113 432 4.80E-147 528.9 6565 cellular  
 organisms;Eukaryota;Opisthokonta;Metazoa;Eumetazoa;Bilateria;Protostomia;  
 Spiralia;Lophotrochozoa;Mollusca;Bivalvia;Autobranchia;Pteriormorphia;Ostr  
 eida;Ostreoidea;Ostreidae;Crassostrea;Crassostrea virginica  
 UdeM00000007816 6500 179.1 UdeM00000007816 XP\_005102107.1 66.2 142  
 45 2 3 144 5 143 4.30E-42 179.1 6500 cellular  
 organisms;Eukaryota;Opisthokonta;Metazoa;Eumetazoa;Bilateria;Protostomia;  
 Spiralia;Lophotrochozoa;Mollusca;Gastropoda;Heterobranchia;Euthyneura;Tec  
 tipleura;Aplysiida;Aplysioidea;Aplysiidae;Aplysia;Aplysia californica  
 UdeM00000007817 1410327 151 UdeM00000007817 XP\_012759400.1 41.1  
 185 103 3 47 231 618 796 4.50E-33 151 1410327  
 cellular  
 organisms;Eukaryota;Amoebozoa;Evosea;Eumycetozoa;Dictyostelia;Acytostelia  
 les;Acytosteliaceae;Acytostelium;Acytostelium subglobosum;Acytostelium  
 subglobosum LB1  
 UdeM00000007818 6596 718.4 UdeM00000007818 XP\_045167260.1 57.2 671  
 197 5 6 673 4 587 8.60E-204 718.4 6596 cellular  
 organisms;Eukaryota;Opisthokonta;Metazoa;Eumetazoa;Bilateria;Protostomia;  
 Spiralia;Lophotrochozoa;Mollusca;Bivalvia;Autobranchia;Heteroconchia;Euhe  
 terodonta;Imparidentia;Venerida;Veneroidea;Veneridae;Mercenaria;Mercenari  
 a mercenaria  
 UdeM00000007819 6596 744.6 UdeM00000007819 XP\_045167260.1 63.8 602  
 197 5 6 604 4 587 1.00E-211 744.6 6596 cellular  
 organisms;Eukaryota;Opisthokonta;Metazoa;Eumetazoa;Bilateria;Protostomia;  
 Spiralia;Lophotrochozoa;Mollusca;Bivalvia;Autobranchia;Heteroconchia;Euhe  
 terodonta;Imparidentia;Venerida;Veneroidea;Veneridae;Mercenaria;Mercenari  
 a mercenaria  
 UdeM00000007820 6579 541.6 UdeM00000007820 XP\_033735477.1 58.9 462  
 177 6 27 476 37 497 1.00E-150 541.6 6579 cellular  
 organisms;Eukaryota;Opisthokonta;Metazoa;Eumetazoa;Bilateria;Protostomia;  
 Spiralia;Lophotrochozoa;Mollusca;Bivalvia;Autobranchia;Pteriormorphia;Pect  
 inida;Pectinoidea;Pectinidae;Pecten;Pecten maximus  
 UdeM00000007821 6579 548.1 UdeM00000007821 XP\_033735477.1 59.7 464  
 172 7 26 476 36 497 1.10E-152 548.1 6579 cellular  
 organisms;Eukaryota;Opisthokonta;Metazoa;Eumetazoa;Bilateria;Protostomia;  
 Spiralia;Lophotrochozoa;Mollusca;Bivalvia;Autobranchia;Pteriormorphia;Pect  
 inida;Pectinoidea;Pectinidae;Pecten;Pecten maximus  
 UdeM00000007822 6596 257.7 UdeM00000007822 XP\_045167298.1 49.1 273  
 123 2 109 368 119 388 2.50E-65 257.7 6596 cellular

organisms;Eukaryota;Opisthokonta;Metazoa;Eumetazoa;Bilateria;Protostomia;Spiralia;Lophotrochozoa;Mollusca;Bivalvia;Autobranchia;Heteroconchia;Euherodonta;Imparidentia;Venerida;Veneroidea;Veneridae;Mercenaria;Mercenaria mercenaria

UdeM00000007823 6596 340.1 UdeM00000007823 XP\_045191221.1 41.9 415  
225 4 13 426 12 411 4.10E-90 340.1 6596 cellular

organisms;Eukaryota;Opisthokonta;Metazoa;Eumetazoa;Bilateria;Protostomia;Spiralia;Lophotrochozoa;Mollusca;Bivalvia;Autobranchia;Heteroconchia;Euherodonta;Imparidentia;Venerida;Veneroidea;Veneridae;Mercenaria;Mercenaria mercenaria

UdeM00000007824 6596 369.4 UdeM00000007824 XP\_045191221.1 45.6 410  
218 5 9 416 7 413 6.10E-99 369.4 6596 cellular

organisms;Eukaryota;Opisthokonta;Metazoa;Eumetazoa;Bilateria;Protostomia;Spiralia;Lophotrochozoa;Mollusca;Bivalvia;Autobranchia;Heteroconchia;Euherodonta;Imparidentia;Venerida;Veneroidea;Veneridae;Mercenaria;Mercenaria mercenaria

UdeM00000007825 6596 369.4 UdeM00000007825 XP\_045191221.1 45.6 410  
218 5 9 416 7 413 6.10E-99 369.4 6596 cellular

organisms;Eukaryota;Opisthokonta;Metazoa;Eumetazoa;Bilateria;Protostomia;Spiralia;Lophotrochozoa;Mollusca;Bivalvia;Autobranchia;Heteroconchia;Euherodonta;Imparidentia;Venerida;Veneroidea;Veneridae;Mercenaria;Mercenaria mercenaria

UdeM00000007826 6596 369.4 UdeM00000007826 XP\_045191221.1 45.6 410  
218 5 9 416 7 413 6.10E-99 369.4 6596 cellular

organisms;Eukaryota;Opisthokonta;Metazoa;Eumetazoa;Bilateria;Protostomia;Spiralia;Lophotrochozoa;Mollusca;Bivalvia;Autobranchia;Heteroconchia;Euherodonta;Imparidentia;Venerida;Veneroidea;Veneridae;Mercenaria;Mercenaria mercenaria

UdeM00000007827 6573 307.8 UdeM00000007827 XP\_021347271.1 54 359  
135 10 1 342 1 346 1.90E-80 307.8 6573 cellular

organisms;Eukaryota;Opisthokonta;Metazoa;Eumetazoa;Bilateria;Protostomia;Spiralia;Lophotrochozoa;Mollusca;Bivalvia;Autobranchia;Pteriomorphia;Pectinida;Pectinoidea;Pectinidae;Mizuhopecten;Mizuhopecten yessoensis

UdeM00000007828 6579 351.7 UdeM00000007828 XP\_033735481.1 60.1 376  
121 11 1 364 1 359 1.10E-93 351.7 6579 cellular

organisms;Eukaryota;Opisthokonta;Metazoa;Eumetazoa;Bilateria;Protostomia;Spiralia;Lophotrochozoa;Mollusca;Bivalvia;Autobranchia;Pteriomorphia;Pectinida;Pectinoidea;Pectinidae;Pecten;Pecten maximus

UdeM00000007830 29159 401.4 UdeM00000007830 XP\_019926412.2 54.5 398  
165 6 1 393 1 387 1.40E-108 401.4 29159 cellular

organisms;Eukaryota;Opisthokonta;Metazoa;Eumetazoa;Bilateria;Protostomia;Spiralia;Lophotrochozoa;Mollusca;Bivalvia;Autobranchia;Pteriomorphia;Ostreida;Ostreoidea;Ostreidae;Crassostrea;Crassostrea gigas

UdeM00000007831 6579 371.3 UdeM00000007831 XP\_033735483.1 56.2 381  
143 10 2 367 9 380 1.40E-99 371.3 6579 cellular

organisms;Eukaryota;Opisthokonta;Metazoa;Eumetazoa;Bilateria;Protostomia;Spiralia;Lophotrochozoa;Mollusca;Bivalvia;Autobranchia;Pteriomorphia;Pectinida;Pectinoidea;Pectinidae;Pecten;Pecten maximus

UdeM00000007832 667725 178.7 UdeM00000007832 XP\_014153486.1 54.4  
149 67 1 1 148 1 149 5.40E-42 178.7 667725  
cellular

organisms;Eukaryota;Opisthokonta;Ichthyosporea;Ichthyophonida;Sphaeroforma;Sphaeroforma arctica;Sphaeroforma arctica JP610

UdeM00000007833 6573 171.8 UdeM00000007833 XP\_021360372.1 57.9 140  
 57 1 1101 1240 620 757 5.60E-39 171.8 6573 cellular  
 organisms;Eukaryota;Opisthokonta;Metazoa;Eumetazoa;Bilateria;Protostomia;  
 Spiralia;Lophotrochozoa;Mollusca;Bivalvia;Autobranhia;Pteriomorpha;Pect  
 inida;Pectinoidea;Pectinidae;Mizuhopecten;Mizuhopecten yessoensis  
 UdeM00000007835 6596 347.1 UdeM00000007835 XP\_045157154.1 40.7 450  
 262 3 26 472 113 560 4.50E-92 347.1 6596 cellular  
 organisms;Eukaryota;Opisthokonta;Metazoa;Eumetazoa;Bilateria;Protostomia;  
 Spiralia;Lophotrochozoa;Mollusca;Bivalvia;Autobranhia;Heteroconchia;Euhe  
 terodonta;Imparidentia;Venerida;Veneroidea;Veneridae;Mercenaria;Mercenari  
 a mercenaria  
 UdeM00000007836 6596 318.2 UdeM00000007836 XP\_045187665.1 60.3 252  
 98 2 8 259 11 260 1.10E-83 318.2 6596 cellular  
 organisms;Eukaryota;Opisthokonta;Metazoa;Eumetazoa;Bilateria;Protostomia;  
 Spiralia;Lophotrochozoa;Mollusca;Bivalvia;Autobranhia;Heteroconchia;Euhe  
 terodonta;Imparidentia;Venerida;Veneroidea;Veneridae;Mercenaria;Mercenari  
 a mercenaria  
 UdeM00000007837 6573 96.3 UdeM00000007837 XP\_021367970.1 31 155  
 107 0 126 280 82 236 7.00E-17 96.3 6573 cellular  
 organisms;Eukaryota;Opisthokonta;Metazoa;Eumetazoa;Bilateria;Protostomia;  
 Spiralia;Lophotrochozoa;Mollusca;Bivalvia;Autobranhia;Pteriomorpha;Pect  
 inida;Pectinoidea;Pectinidae;Mizuhopecten;Mizuhopecten yessoensis  
 UdeM00000007838 6579 473.8 UdeM00000007838 XP\_033735451.1 41.5 776  
 392 14 1 748 1 742 4.20E-130 473.8 6579 cellular  
 organisms;Eukaryota;Opisthokonta;Metazoa;Eumetazoa;Bilateria;Protostomia;  
 Spiralia;Lophotrochozoa;Mollusca;Bivalvia;Autobranhia;Pteriomorpha;Pect  
 inida;Pectinoidea;Pectinidae;Pecten;Pecten maximus  
 UdeM00000007839 6596 445.3 UdeM00000007839 XP\_045167688.1 59.6 364  
 145 2 7 368 8 371 9.80E-122 445.3 6596 cellular  
 organisms;Eukaryota;Opisthokonta;Metazoa;Eumetazoa;Bilateria;Protostomia;  
 Spiralia;Lophotrochozoa;Mollusca;Bivalvia;Autobranhia;Heteroconchia;Euhe  
 terodonta;Imparidentia;Venerida;Veneroidea;Veneridae;Mercenaria;Mercenari  
 a mercenaria  
 UdeM00000007840 10224 122.1 UdeM00000007840 XP\_006813844.1 41.5 147  
 86 0 2 148 126 272 6.40E-25 122.1 10224 cellular  
 organisms;Eukaryota;Opisthokonta;Metazoa;Eumetazoa;Bilateria;Deuterostomi  
 a;Hemichordata;Enteropneusta;Harrimaniidae;Saccoglossus;Saccoglossus  
 kowalevskii  
 UdeM00000007841 10224 120.2 UdeM00000007841 XP\_006813844.1 41.4 145  
 85 0 1 145 128 272 2.40E-24 120.2 10224 cellular  
 organisms;Eukaryota;Opisthokonta;Metazoa;Eumetazoa;Bilateria;Deuterostomi  
 a;Hemichordata;Enteropneusta;Harrimaniidae;Saccoglossus;Saccoglossus  
 kowalevskii  
 UdeM00000007842 6596 151 UdeM00000007842 XP\_045167688.1 72.5 102  
 28 0 252 353 371 472 2.90E-33 151 6596 cellular  
 organisms;Eukaryota;Opisthokonta;Metazoa;Eumetazoa;Bilateria;Protostomia;  
 Spiralia;Lophotrochozoa;Mollusca;Bivalvia;Autobranhia;Heteroconchia;Euhe  
 terodonta;Imparidentia;Venerida;Veneroidea;Veneridae;Mercenaria;Mercenari  
 a mercenaria  
 UdeM00000007845 29159 400.2 UdeM00000007845 XP\_034311318.1 36.3 681  
 348 16 157 768 1 664 6.50E-108 400.2 29159 cellular  
 organisms;Eukaryota;Opisthokonta;Metazoa;Eumetazoa;Bilateria;Protostomia;  
 Spiralia;Lophotrochozoa;Mollusca;Bivalvia;Autobranhia;Pteriomorpha;Ostr  
 eida;Ostreoidea;Ostreidae;Crassostrea;Crassostrea gigas

UdeM00000007846 6579 198.4 UdeM00000007846 XP\_033736448.1 39 272  
 155 5 5 267 10 279 2.20E-47 198.4 6579 cellular  
 organisms;Eukaryota;Opisthokonta;Metazoa;Eumetazoa;Bilateria;Protostomia;  
 Spiralia;Lophotrochozoa;Mollusca;Bivalvia;Autobranchia;Pteriomorphia;Pect  
 inida;Pectinoidea;Pectinidae;Pecten;Pecten maximus  
 UdeM00000007847 225164 320.1 UdeM00000007847 XP\_009061546.1 75.5  
 196 48 0 1 196 1 196 2.00E-84 320.1 225164  
 cellular  
 organisms;Eukaryota;Opisthokonta;Metazoa;Eumetazoa;Bilateria;Protostomia;  
 Spiralia;Lophotrochozoa;Mollusca;Gastropoda;Patellogastropoda;Lottioidea;  
 Lottiidae;Lottia;Lottia gigantea  
 UdeM00000007848 6573 914.1 UdeM00000007848 XP\_021343879.1 40.1 1305  
 711 20 4 1265 5 1281 2.00E-262 914.1 6573 cellular  
 organisms;Eukaryota;Opisthokonta;Metazoa;Eumetazoa;Bilateria;Protostomia;  
 Spiralia;Lophotrochozoa;Mollusca;Bivalvia;Autobranchia;Pteriomorphia;Pect  
 inida;Pectinoidea;Pectinidae;Mizuhopecten;Mizuhopecten yessoensis  
 UdeM00000007849 6526 68.9 UdeM00000007849 XP\_013069545.1 28.4 176  
 107 5 46 218 1099 1258 9.70E-09 68.9 6526 cellular  
 organisms;Eukaryota;Opisthokonta;Metazoa;Eumetazoa;Bilateria;Protostomia;  
 Spiralia;Lophotrochozoa;Mollusca;Gastropoda;Heterobranchia;Euthyneura;Pan  
 pulmonata;Hygrophila;Lymnaeioidea;Planorbidae;Biomphalaria;Biomphalaria  
 glabrata  
 UdeM00000007850 6596 837.4 UdeM00000007850 XP\_045167527.1 53.9 798  
 343 4 6 802 134 907 1.50E-239 837.4 6596 cellular  
 organisms;Eukaryota;Opisthokonta;Metazoa;Eumetazoa;Bilateria;Protostomia;  
 Spiralia;Lophotrochozoa;Mollusca;Bivalvia;Autobranchia;Heteroconchia;Euhe  
 terodonta;Imparidentia;Venerida;Veneroidea;Veneridae;Mercenaria;Mercenari  
 a mercenaria  
 UdeM00000007852 6565 731.9 UdeM00000007852 XP\_022334489.1 55 645  
 282 7 5 644 12 653 7.50E-208 731.9 6565 cellular  
 organisms;Eukaryota;Opisthokonta;Metazoa;Eumetazoa;Bilateria;Protostomia;  
 Spiralia;Lophotrochozoa;Mollusca;Bivalvia;Autobranchia;Pteriomorphia;Ostr  
 eida;Ostreioidea;Ostreidae;Crassostrea;Crassostrea virginica  
 UdeM00000007853 29159 454.5 UdeM00000007853 XP\_034332465.1 49.2 496  
 240 8 80 565 72 565 2.20E-124 454.5 29159 cellular  
 organisms;Eukaryota;Opisthokonta;Metazoa;Eumetazoa;Bilateria;Protostomia;  
 Spiralia;Lophotrochozoa;Mollusca;Bivalvia;Autobranchia;Pteriomorphia;Ostr  
 eida;Ostreioidea;Ostreidae;Crassostrea;Crassostrea gigas  
 UdeM00000007854 6596 121.3 UdeM00000007854 XP\_045182392.1 42.5 153  
 84 3 1 153 432 580 1.50E-24 121.3 6596 cellular  
 organisms;Eukaryota;Opisthokonta;Metazoa;Eumetazoa;Bilateria;Protostomia;  
 Spiralia;Lophotrochozoa;Mollusca;Bivalvia;Autobranchia;Heteroconchia;Euhe  
 terodonta;Imparidentia;Venerida;Veneroidea;Veneridae;Mercenaria;Mercenari  
 a mercenaria  
 UdeM00000007855 29159 448.4 UdeM00000007855 XP\_034332465.1 49.1 499  
 237 7 19 505 72 565 1.40E-122 448.4 29159 cellular  
 organisms;Eukaryota;Opisthokonta;Metazoa;Eumetazoa;Bilateria;Protostomia;  
 Spiralia;Lophotrochozoa;Mollusca;Bivalvia;Autobranchia;Pteriomorphia;Ostr  
 eida;Ostreioidea;Ostreidae;Crassostrea;Crassostrea gigas  
 UdeM00000007856 6565 416.4 UdeM00000007856 XP\_022333610.1 59.7 347  
 136 2 2 347 469 812 4.80E-113 416.4 6565 cellular  
 organisms;Eukaryota;Opisthokonta;Metazoa;Eumetazoa;Bilateria;Protostomia;  
 Spiralia;Lophotrochozoa;Mollusca;Bivalvia;Autobranchia;Pteriomorphia;Ostr  
 eida;Ostreioidea;Ostreidae;Crassostrea;Crassostrea virginica

UdeM00000007857 29159 421.4 UdeM00000007857 XP\_011442695.2 43.9 558  
 289 8 23 562 819 1370 1.90E-114 421.4 29159 cellular  
 organisms;Eukaryota;Opisthokonta;Metazoa;Eumetazoa;Bilateria;Protostomia;  
 Spiralia;Lophotrochozoa;Mollusca;Bivalvia;Autobranchia;Pteriormorphia;Ostr  
 eida;Ostreoidea;Ostreidae;Crassostrea;Crassostrea gigas  
 UdeM00000007858 6596 718.8 UdeM00000007858 XP\_045187532.1 42.5 1060  
 382 17 1 852 1 1041 8.30E-204 718.8 6596 cellular  
 organisms;Eukaryota;Opisthokonta;Metazoa;Eumetazoa;Bilateria;Protostomia;  
 Spiralia;Lophotrochozoa;Mollusca;Bivalvia;Autobranchia;Heteroconchia;Euhe  
 terodonta;Imparidentia;Venerida;Veneroidea;Veneridae;Mercenaria;Mercenari  
 a mercenaria  
 UdeM00000007859 6596 357.8 UdeM00000007859 XP\_045187532.1 46.6 455  
 186 10 1 413 1 440 1.80E-95 357.8 6596 cellular  
 organisms;Eukaryota;Opisthokonta;Metazoa;Eumetazoa;Bilateria;Protostomia;  
 Spiralia;Lophotrochozoa;Mollusca;Bivalvia;Autobranchia;Heteroconchia;Euhe  
 terodonta;Imparidentia;Venerida;Veneroidea;Veneridae;Mercenaria;Mercenari  
 a mercenaria  
 UdeM00000007860 6596 656.4 UdeM00000007860 XP\_045187532.1 39.7 1056  
 392 15 1 826 1 1041 4.90E-185 656.4 6596 cellular  
 organisms;Eukaryota;Opisthokonta;Metazoa;Eumetazoa;Bilateria;Protostomia;  
 Spiralia;Lophotrochozoa;Mollusca;Bivalvia;Autobranchia;Heteroconchia;Euhe  
 terodonta;Imparidentia;Venerida;Veneroidea;Veneridae;Mercenaria;Mercenari  
 a mercenaria  
 UdeM00000007862 6596 139 UdeM00000007862 XP\_045162402.1 45.3 148  
 81 0 50 197 412 559 6.30E-30 139 6596 cellular  
 organisms;Eukaryota;Opisthokonta;Metazoa;Eumetazoa;Bilateria;Protostomia;  
 Spiralia;Lophotrochozoa;Mollusca;Bivalvia;Autobranchia;Heteroconchia;Euhe  
 terodonta;Imparidentia;Venerida;Veneroidea;Veneridae;Mercenaria;Mercenari  
 a mercenaria  
 UdeM00000007863 7654 224.2 UdeM00000007863 XP\_041477967.1 60.5 177  
 70 0 2 178 6 182 1.70E-55 224.2 7654 cellular  
 organisms;Eukaryota;Opisthokonta;Metazoa;Eumetazoa;Bilateria;Deuterostomi  
 a;Echinodermata;Eleutherozoa;Echinozoa;Echinoidea;Euechinoidea;Echinacea;  
 Temnopleuroidea;Toxopneustidae;Lytechinus;Lytechinus variegatus  
 UdeM00000007864 6579 224.9 UdeM00000007864 XP\_033737260.1 50.2 221  
 101 2 1 221 1 212 1.00E-55 224.9 6579 cellular  
 organisms;Eukaryota;Opisthokonta;Metazoa;Eumetazoa;Bilateria;Protostomia;  
 Spiralia;Lophotrochozoa;Mollusca;Bivalvia;Autobranchia;Pteriormorphia;Pect  
 inida;Pectinoidea;Pectinidae;Pecten;Pecten maximus  
 UdeM00000007866 6596 133.7 UdeM00000007866 XP\_045161061.1 52 123  
 59 0 1 123 79 201 1.70E-28 133.7 6596 cellular  
 organisms;Eukaryota;Opisthokonta;Metazoa;Eumetazoa;Bilateria;Protostomia;  
 Spiralia;Lophotrochozoa;Mollusca;Bivalvia;Autobranchia;Heteroconchia;Euhe  
 terodonta;Imparidentia;Venerida;Veneroidea;Veneridae;Mercenaria;Mercenari  
 a mercenaria  
 UdeM00000007865 6596 237.7 UdeM00000007865 XP\_045161061.1 57.2 201  
 85 1 1 200 1 201 1.30E-59 237.7 6596 cellular  
 organisms;Eukaryota;Opisthokonta;Metazoa;Eumetazoa;Bilateria;Protostomia;  
 Spiralia;Lophotrochozoa;Mollusca;Bivalvia;Autobranchia;Heteroconchia;Euhe  
 terodonta;Imparidentia;Venerida;Veneroidea;Veneridae;Mercenaria;Mercenari  
 a mercenaria  
 UdeM00000007867 6573 383.6 UdeM00000007867 XP\_021340111.1 50.2 426  
 184 7 22 427 41 458 3.40E-103 383.6 6573 cellular  
 organisms;Eukaryota;Opisthokonta;Metazoa;Eumetazoa;Bilateria;Protostomia;

Spiralia;Lophotrochozoa;Mollusca;Bivalvia;Autobranchia;Pteriomorpha;Pectinida;Pectinoidea;Pectinidae;Mizuhopecten;Mizuhopecten yessoensis  
UdeM00000007868 6579 731.5 UdeM00000007868 XP\_033735883.1 47.9 771  
367 12 58 803 14 774 1.20E-207 731.5 6579 cellular  
organisms;Eukaryota;Opisthokonta;Metazoa;Eumetazoa;Bilateria;Protostomia;  
Spiralia;Lophotrochozoa;Mollusca;Bivalvia;Autobranchia;Pteriomorpha;Pectinida;Pectinoidea;Pectinidae;Pecten;Pecten maximus  
UdeM00000007869 6596 124.8 UdeM00000007869 XP\_045178837.1 44.6 139  
71 3 145 279 77 213 1.70E-25 124.8 6596 cellular  
organisms;Eukaryota;Opisthokonta;Metazoa;Eumetazoa;Bilateria;Protostomia;  
Spiralia;Lophotrochozoa;Mollusca;Bivalvia;Autobranchia;Heteroconchia;Euherodonta;Imparidentia;Venerida;Veneroidea;Veneridae;Mercenaria;Mercenaria mercenaria  
UdeM00000007870 7725 141.7 UdeM00000007870 XP\_039250069.1 70.2 104  
30 1 1 104 313 415 6.30E-31 141.7 7725 cellular  
organisms;Eukaryota;Opisthokonta;Metazoa;Eumetazoa;Bilateria;Deuterostomia;Chordata;Tunicata;Ascidiacea;Stolidobranchia;Styelidae;Styela;Styela clava  
UdeM00000007871 6596 149.1 UdeM00000007871 XP\_045173814.1 40.7 302  
142 14 89 359 29 324 1.10E-32 149.1 6596 cellular  
organisms;Eukaryota;Opisthokonta;Metazoa;Eumetazoa;Bilateria;Protostomia;  
Spiralia;Lophotrochozoa;Mollusca;Bivalvia;Autobranchia;Heteroconchia;Euherodonta;Imparidentia;Venerida;Veneroidea;Veneridae;Mercenaria;Mercenaria mercenaria  
UdeM00000007872 6596 495.7 UdeM00000007872 XP\_045173803.1 48.6 541  
248 7 5 544 3 514 2.10E-136 495.7 6596 cellular  
organisms;Eukaryota;Opisthokonta;Metazoa;Eumetazoa;Bilateria;Protostomia;  
Spiralia;Lophotrochozoa;Mollusca;Bivalvia;Autobranchia;Heteroconchia;Euherodonta;Imparidentia;Venerida;Veneroidea;Veneridae;Mercenaria;Mercenaria mercenaria  
UdeM00000007873 6596 501.9 UdeM00000007873 XP\_045188256.1 51.2 502  
218 8 3 496 122 604 1.20E-138 501.9 6596 cellular  
organisms;Eukaryota;Opisthokonta;Metazoa;Eumetazoa;Bilateria;Protostomia;  
Spiralia;Lophotrochozoa;Mollusca;Bivalvia;Autobranchia;Heteroconchia;Euherodonta;Imparidentia;Venerida;Veneroidea;Veneridae;Mercenaria;Mercenaria mercenaria  
UdeM00000007874 6596 184.5 UdeM00000007874 XP\_045202545.1 49 202  
77 5 10 186 10 210 1.20E-43 184.5 6596 cellular  
organisms;Eukaryota;Opisthokonta;Metazoa;Eumetazoa;Bilateria;Protostomia;  
Spiralia;Lophotrochozoa;Mollusca;Bivalvia;Autobranchia;Heteroconchia;Euherodonta;Imparidentia;Venerida;Veneroidea;Veneridae;Mercenaria;Mercenaria mercenaria  
UdeM00000007875 6579 198.7 UdeM00000007875 XP\_033741736.1 53.5 187  
85 1 1 185 671 857 6.80E-48 198.7 6579 cellular  
organisms;Eukaryota;Opisthokonta;Metazoa;Eumetazoa;Bilateria;Protostomia;  
Spiralia;Lophotrochozoa;Mollusca;Bivalvia;Autobranchia;Pteriomorpha;Pectinida;Pectinoidea;Pectinidae;Pecten;Pecten maximus  
UdeM00000007876 6596 340.1 UdeM00000007876 XP\_045162348.1 81.1 206  
36 2 115 318 54 258 3.80E-90 340.1 6596 cellular  
organisms;Eukaryota;Opisthokonta;Metazoa;Eumetazoa;Bilateria;Protostomia;  
Spiralia;Lophotrochozoa;Mollusca;Bivalvia;Autobranchia;Heteroconchia;Euherodonta;Imparidentia;Venerida;Veneroidea;Veneridae;Mercenaria;Mercenaria mercenaria

UdeM00000007877 6579 217.6 UdeM00000007877 XP\_033734184.1 37.3 373  
 206 9 3 356 20 383 2.60E-53 217.6 6579 cellular  
 organisms;Eukaryota;Opisthokonta;Metazoa;Eumetazoa;Bilateria;Protostomia;  
 Spiralia;Lophotrochozoa;Mollusca;Bivalvia;Autobranchia;Pteriomorpha;Pect  
 inida;Pectinoidea;Pectinidae;Pecten;Pecten maximus  
 UdeM00000007878 29159 223 UdeM00000007878 XP\_034326637.1 37.9 359  
 200 8 8 351 6 356 6.00E-55 223 29159 cellular  
 organisms;Eukaryota;Opisthokonta;Metazoa;Eumetazoa;Bilateria;Protostomia;  
 Spiralia;Lophotrochozoa;Mollusca;Bivalvia;Autobranchia;Pteriomorpha;Ostr  
 eida;Ostreoidea;Ostreidae;Crassostrea;Crassostrea gigas  
 UdeM00000007879 6565 253.1 UdeM00000007879 XP\_022334079.1 67.6 182  
 56 2 1 180 1 181 3.00E-64 253.1 6565 cellular  
 organisms;Eukaryota;Opisthokonta;Metazoa;Eumetazoa;Bilateria;Protostomia;  
 Spiralia;Lophotrochozoa;Mollusca;Bivalvia;Autobranchia;Pteriomorpha;Ostr  
 eida;Ostreoidea;Ostreidae;Crassostrea;Crassostrea virginica  
 UdeM00000007880 6579 496.5 UdeM00000007880 XP\_033734608.1 44.6 583  
 295 7 44 613 2 569 4.80E-137 496.5 6579 cellular  
 organisms;Eukaryota;Opisthokonta;Metazoa;Eumetazoa;Bilateria;Protostomia;  
 Spiralia;Lophotrochozoa;Mollusca;Bivalvia;Autobranchia;Pteriomorpha;Pect  
 inida;Pectinoidea;Pectinidae;Pecten;Pecten maximus  
 UdeM00000007881 6579 85.1 UdeM00000007881 XP\_033733680.1 30.9 220  
 127 5 17 214 11 227 1.20E-13 85.1 6579 cellular  
 organisms;Eukaryota;Opisthokonta;Metazoa;Eumetazoa;Bilateria;Protostomia;  
 Spiralia;Lophotrochozoa;Mollusca;Bivalvia;Autobranchia;Pteriomorpha;Pect  
 inida;Pectinoidea;Pectinidae;Pecten;Pecten maximus  
 UdeM00000007882 6565 158.7 UdeM00000007882 XP\_022328708.1 48.5 169  
 86 1 1 168 1 169 7.10E-36 158.7 6565 cellular  
 organisms;Eukaryota;Opisthokonta;Metazoa;Eumetazoa;Bilateria;Protostomia;  
 Spiralia;Lophotrochozoa;Mollusca;Bivalvia;Autobranchia;Pteriomorpha;Ostr  
 eida;Ostreoidea;Ostreidae;Crassostrea;Crassostrea virginica  
 UdeM00000007883 6596 3191.4 UdeM00000007883 XP\_045213071.1 47.8  
 3797 1696 61 1 3626 104 3785 0.00E+00 3191.4 6596  
 cellular  
 organisms;Eukaryota;Opisthokonta;Metazoa;Eumetazoa;Bilateria;Protostomia;  
 Spiralia;Lophotrochozoa;Mollusca;Bivalvia;Autobranchia;Heteroconchia;Euhe  
 terodonta;Imparidentia;Venerida;Veneroidea;Veneridae;Mercenaria;Mercenari  
 a mercenaria  
 UdeM00000007885 6596 694.5 UdeM00000007885 XP\_045175481.1 71.3 471  
 130 2 4 469 16 486 9.40E-197 694.5 6596 cellular  
 organisms;Eukaryota;Opisthokonta;Metazoa;Eumetazoa;Bilateria;Protostomia;  
 Spiralia;Lophotrochozoa;Mollusca;Bivalvia;Autobranchia;Heteroconchia;Euhe  
 terodonta;Imparidentia;Venerida;Veneroidea;Veneridae;Mercenaria;Mercenari  
 a mercenaria  
 UdeM00000007886 6596 360.1 UdeM00000007886 XP\_045187095.1 86.4 206  
 28 0 1 206 1 206 1.80E-96 360.1 6596 cellular  
 organisms;Eukaryota;Opisthokonta;Metazoa;Eumetazoa;Bilateria;Protostomia;  
 Spiralia;Lophotrochozoa;Mollusca;Bivalvia;Autobranchia;Heteroconchia;Euhe  
 terodonta;Imparidentia;Venerida;Veneroidea;Veneridae;Mercenaria;Mercenari  
 a mercenaria  
 UdeM00000007887 6579 349.4 UdeM00000007887 XP\_033733793.1 64.9 268  
 92 1 18 285 571 836 4.40E-93 349.4 6579 cellular  
 organisms;Eukaryota;Opisthokonta;Metazoa;Eumetazoa;Bilateria;Protostomia;  
 Spiralia;Lophotrochozoa;Mollusca;Bivalvia;Autobranchia;Pteriomorpha;Pect  
 inida;Pectinoidea;Pectinidae;Pecten;Pecten maximus

UdeM00000007888 151771 104.4 UdeM00000007888 XP\_028408207.1 38.9  
 157 95 1 84 240 138 293 2.10E-19 104.4 151771  
 cellular  
 organisms;Eukaryota;Opisthokonta;Metazoa;Eumetazoa;Cnidaria;Anthozoa;Octo  
 corallia;Alcyonacea;Alcyoniina;Nephtheidae;Dendronephthya;Dendronephthya  
 gigantea  
 UdeM00000007889 70779 102.4 UdeM00000007889 XP\_015764363.1 36 214  
 125 6 27 239 73 275 9.20E-19 102.4 70779 cellular  
 organisms;Eukaryota;Opisthokonta;Metazoa;Eumetazoa;Cnidaria;Anthozoa;Hexa  
 corallia;Scleractinia;Astrocoeniina;Acroporidae;Acropora;Acropora  
 digitifera  
 UdeM00000007890 6596 659.4 UdeM00000007890 XP\_045215580.1 66.1 528  
 166 5 41 557 141 666 3.90E-186 659.4 6596 cellular  
 organisms;Eukaryota;Opisthokonta;Metazoa;Eumetazoa;Bilateria;Protostomia;  
 Spiralia;Lophotrochozoa;Mollusca;Bivalvia;Autobranchia;Heteroconchia;Euhe  
 terodonta;Imparidentia;Venerida;Veneroidea;Veneridae;Mercenaria;Mercenari  
 a mercenaria  
 UdeM00000007891 6596 721.8 UdeM00000007891 XP\_045182724.1 54.4 1578  
 690 13 217 1791 1 1551 2.60E-204 721.8 6596 cellular  
 organisms;Eukaryota;Opisthokonta;Metazoa;Eumetazoa;Bilateria;Protostomia;  
 Spiralia;Lophotrochozoa;Mollusca;Bivalvia;Autobranchia;Heteroconchia;Euhe  
 terodonta;Imparidentia;Venerida;Veneroidea;Veneridae;Mercenaria;Mercenari  
 a mercenaria  
 UdeM00000007892 6596 721.8 UdeM00000007892 XP\_045182724.1 54.4 1578  
 690 13 546 2120 1 1551 3.00E-204 721.8 6596 cellular  
 organisms;Eukaryota;Opisthokonta;Metazoa;Eumetazoa;Bilateria;Protostomia;  
 Spiralia;Lophotrochozoa;Mollusca;Bivalvia;Autobranchia;Heteroconchia;Euhe  
 terodonta;Imparidentia;Venerida;Veneroidea;Veneridae;Mercenaria;Mercenari  
 a mercenaria  
 UdeM00000007893 6596 1094.7 UdeM00000007893 XP\_045182791.1 69.6  
 853 239 6 7 851 32 872 0.00E+00 1094.7 6596  
 cellular  
 organisms;Eukaryota;Opisthokonta;Metazoa;Eumetazoa;Bilateria;Protostomia;  
 Spiralia;Lophotrochozoa;Mollusca;Bivalvia;Autobranchia;Heteroconchia;Euhe  
 terodonta;Imparidentia;Venerida;Veneroidea;Veneridae;Mercenaria;Mercenari  
 a mercenaria  
 UdeM00000007894 6579 243.4 UdeM00000007894 XP\_033740907.1 68.7 163  
 51 0 9 171 11 173 2.10E-61 243.4 6579 cellular  
 organisms;Eukaryota;Opisthokonta;Metazoa;Eumetazoa;Bilateria;Protostomia;  
 Spiralia;Lophotrochozoa;Mollusca;Bivalvia;Autobranchia;Pteriomorphia;Pect  
 inida;Pectinoidea;Pectinidae;Pecten;Pecten maximus  
 UdeM00000007895 6596 332 UdeM00000007895 XP\_045183083.1 77.2 202  
 46 0 5 206 2 203 5.30E-88 332 6596 cellular  
 organisms;Eukaryota;Opisthokonta;Metazoa;Eumetazoa;Bilateria;Protostomia;  
 Spiralia;Lophotrochozoa;Mollusca;Bivalvia;Autobranchia;Heteroconchia;Euhe  
 terodonta;Imparidentia;Venerida;Veneroidea;Veneridae;Mercenaria;Mercenari  
 a mercenaria  
 UdeM00000007896 6596 217.2 UdeM00000007896 XP\_045168484.1 52.3 199  
 91 1 1 195 1 199 1.90E-53 217.2 6596 cellular  
 organisms;Eukaryota;Opisthokonta;Metazoa;Eumetazoa;Bilateria;Protostomia;  
 Spiralia;Lophotrochozoa;Mollusca;Bivalvia;Autobranchia;Heteroconchia;Euhe  
 terodonta;Imparidentia;Venerida;Veneroidea;Veneridae;Mercenaria;Mercenari  
 a mercenaria



UdeM00000007898 6596 225.3 UdeM00000007898 XP\_045168484.1 55.8 199  
 84 1 1 195 1 199 6.60E-56 225.3 6596 cellular  
 organisms;Eukaryota;Opisthokonta;Metazoa;Eumetazoa;Bilateria;Protostomia;  
 Spiralia;Lophotrochozoa;Mollusca;Bivalvia;Autobranhia;Heteroconchia;Euhe  
 terodonta;Imparidentia;Venerida;Veneroidea;Veneridae;Mercenaria;Mercenari  
 a mercenaria

UdeM00000007899 6596 170.6 UdeM00000007899 XP\_045168484.1 48.9 178  
 89 1 1 178 24 199 1.80E-39 170.6 6596 cellular  
 organisms;Eukaryota;Opisthokonta;Metazoa;Eumetazoa;Bilateria;Protostomia;  
 Spiralia;Lophotrochozoa;Mollusca;Bivalvia;Autobranhia;Heteroconchia;Euhe  
 terodonta;Imparidentia;Venerida;Veneroidea;Veneridae;Mercenaria;Mercenari  
 a mercenaria

UdeM00000007900 6596 184.9 UdeM00000007900 XP\_045168484.1 46.7 195  
 102 1 4 198 7 199 1.00E-43 184.9 6596 cellular  
 organisms;Eukaryota;Opisthokonta;Metazoa;Eumetazoa;Bilateria;Protostomia;  
 Spiralia;Lophotrochozoa;Mollusca;Bivalvia;Autobranhia;Heteroconchia;Euhe  
 terodonta;Imparidentia;Venerida;Veneroidea;Veneridae;Mercenaria;Mercenari  
 a mercenaria

UdeM00000007901 6596 193.7 UdeM00000007901 XP\_045168484.1 50.8 191  
 93 1 4 194 7 196 2.20E-46 193.7 6596 cellular  
 organisms;Eukaryota;Opisthokonta;Metazoa;Eumetazoa;Bilateria;Protostomia;  
 Spiralia;Lophotrochozoa;Mollusca;Bivalvia;Autobranhia;Heteroconchia;Euhe  
 terodonta;Imparidentia;Venerida;Veneroidea;Veneridae;Mercenaria;Mercenari  
 a mercenaria

UdeM00000007902 6596 216.9 UdeM00000007902 XP\_045157162.1 55.6 196  
 80 4 1 195 1 190 2.40E-53 216.9 6596 cellular  
 organisms;Eukaryota;Opisthokonta;Metazoa;Eumetazoa;Bilateria;Protostomia;  
 Spiralia;Lophotrochozoa;Mollusca;Bivalvia;Autobranhia;Heteroconchia;Euhe  
 terodonta;Imparidentia;Venerida;Veneroidea;Veneridae;Mercenaria;Mercenari  
 a mercenaria

UdeM00000007903 6596 251.9 UdeM00000007903 XP\_045168484.1 59.8 199  
 76 1 1 195 1 199 6.60E-64 251.9 6596 cellular  
 organisms;Eukaryota;Opisthokonta;Metazoa;Eumetazoa;Bilateria;Protostomia;  
 Spiralia;Lophotrochozoa;Mollusca;Bivalvia;Autobranhia;Heteroconchia;Euhe  
 terodonta;Imparidentia;Venerida;Veneroidea;Veneridae;Mercenaria;Mercenari  
 a mercenaria

UdeM00000007904 6596 196.4 UdeM00000007904 XP\_045168484.1 61.9 147  
 56 0 17 163 53 199 2.80E-47 196.4 6596 cellular  
 organisms;Eukaryota;Opisthokonta;Metazoa;Eumetazoa;Bilateria;Protostomia;  
 Spiralia;Lophotrochozoa;Mollusca;Bivalvia;Autobranhia;Heteroconchia;Euhe  
 terodonta;Imparidentia;Venerida;Veneroidea;Veneridae;Mercenaria;Mercenari  
 a mercenaria

UdeM00000007905 6596 159.8 UdeM00000007905 XP\_045168484.1 42.3 189  
 108 1 7 194 11 199 3.40E-36 159.8 6596 cellular  
 organisms;Eukaryota;Opisthokonta;Metazoa;Eumetazoa;Bilateria;Protostomia;  
 Spiralia;Lophotrochozoa;Mollusca;Bivalvia;Autobranhia;Heteroconchia;Euhe  
 terodonta;Imparidentia;Venerida;Veneroidea;Veneridae;Mercenaria;Mercenari  
 a mercenaria

UdeM00000007906 6596 218.8 UdeM00000007906 XP\_045168484.1 54 202  
 86 2 1 198 1 199 6.40E-54 218.8 6596 cellular  
 organisms;Eukaryota;Opisthokonta;Metazoa;Eumetazoa;Bilateria;Protostomia;  
 Spiralia;Lophotrochozoa;Mollusca;Bivalvia;Autobranhia;Heteroconchia;Euhe  
 terodonta;Imparidentia;Venerida;Veneroidea;Veneridae;Mercenaria;Mercenari  
 a mercenaria

UdeM00000007907 6500 107.8 UdeM00000007907 XP\_035825169.1 33.3 243  
 122 5 24 243 330 555 1.90E-20 107.8 6500 cellular  
 organisms;Eukaryota;Opisthokonta;Metazoa;Eumetazoa;Bilateria;Protostomia;  
 Spiralia;Lophotrochozoa;Mollusca;Gastropoda;Heterobranchia;Euthyneura;Tec  
 tipleura;Aplysiida;Aplysioidea;Aplysiidae;Aplysia;Aplysia californica  
 UdeM00000007908 6596 219.2 UdeM00000007908 XP\_045157162.1 58.2 196  
 75 4 1 195 1 190 4.70E-54 219.2 6596 cellular  
 organisms;Eukaryota;Opisthokonta;Metazoa;Eumetazoa;Bilateria;Protostomia;  
 Spiralia;Lophotrochozoa;Mollusca;Bivalvia;Autobranchia;Heteroconchia;Euhe  
 terodonta;Imparidentia;Venerida;Veneroidea;Veneridae;Mercenaria;Mercenari  
 a mercenaria  
 UdeM00000007909 6596 220.7 UdeM00000007909 XP\_045157162.1 58.7 196  
 74 4 1 195 1 190 1.60E-54 220.7 6596 cellular  
 organisms;Eukaryota;Opisthokonta;Metazoa;Eumetazoa;Bilateria;Protostomia;  
 Spiralia;Lophotrochozoa;Mollusca;Bivalvia;Autobranchia;Heteroconchia;Euhe  
 terodonta;Imparidentia;Venerida;Veneroidea;Veneridae;Mercenaria;Mercenari  
 a mercenaria  
 UdeM00000007910 6596 220.7 UdeM00000007910 XP\_045157162.1 58.7 196  
 74 4 1 195 1 190 1.60E-54 220.7 6596 cellular  
 organisms;Eukaryota;Opisthokonta;Metazoa;Eumetazoa;Bilateria;Protostomia;  
 Spiralia;Lophotrochozoa;Mollusca;Bivalvia;Autobranchia;Heteroconchia;Euhe  
 terodonta;Imparidentia;Venerida;Veneroidea;Veneridae;Mercenaria;Mercenari  
 a mercenaria  
 UdeM00000007911 6596 220.7 UdeM00000007911 XP\_045157162.1 58.7 196  
 74 4 1 195 1 190 1.60E-54 220.7 6596 cellular  
 organisms;Eukaryota;Opisthokonta;Metazoa;Eumetazoa;Bilateria;Protostomia;  
 Spiralia;Lophotrochozoa;Mollusca;Bivalvia;Autobranchia;Heteroconchia;Euhe  
 terodonta;Imparidentia;Venerida;Veneroidea;Veneridae;Mercenaria;Mercenari  
 a mercenaria  
 UdeM00000007912 6596 222.2 UdeM00000007912 XP\_045157162.1 58.7 196  
 74 4 1 195 1 190 5.60E-55 222.2 6596 cellular  
 organisms;Eukaryota;Opisthokonta;Metazoa;Eumetazoa;Bilateria;Protostomia;  
 Spiralia;Lophotrochozoa;Mollusca;Bivalvia;Autobranchia;Heteroconchia;Euhe  
 terodonta;Imparidentia;Venerida;Veneroidea;Veneridae;Mercenaria;Mercenari  
 a mercenaria  
 UdeM00000007913 6596 220.3 UdeM00000007913 XP\_045157162.1 58.2 196  
 75 4 1 195 1 190 2.10E-54 220.3 6596 cellular  
 organisms;Eukaryota;Opisthokonta;Metazoa;Eumetazoa;Bilateria;Protostomia;  
 Spiralia;Lophotrochozoa;Mollusca;Bivalvia;Autobranchia;Heteroconchia;Euhe  
 terodonta;Imparidentia;Venerida;Veneroidea;Veneridae;Mercenaria;Mercenari  
 a mercenaria  
 UdeM00000007914 6596 211.5 UdeM00000007914 XP\_045168484.1 54.7 190  
 84 1 4 193 9 196 1.00E-51 211.5 6596 cellular  
 organisms;Eukaryota;Opisthokonta;Metazoa;Eumetazoa;Bilateria;Protostomia;  
 Spiralia;Lophotrochozoa;Mollusca;Bivalvia;Autobranchia;Heteroconchia;Euhe  
 terodonta;Imparidentia;Venerida;Veneroidea;Veneridae;Mercenaria;Mercenari  
 a mercenaria  
 UdeM00000007915 27687 111.3 UdeM00000007915 XP\_028656852.1 41.5 135  
 76 3 4 136 316 449 9.80E-22 111.3 27687 cellular  
 organisms;Eukaryota;Opisthokonta;Metazoa;Eumetazoa;Bilateria;Deuterostomi  
 a;Chordata;Craniata;Vertebrata;Gnathostomata;Teleostomi;Euteleostomi;Acti  
 nopterygii;Cladistia;Polypteriformes;Polypteridae;Erpetoichthys;Erpetoich  
 thys calabaricus

UdeM00000007916 6596 176 UdeM00000007916 XP\_045168484.1 51.7 176  
 82 2 1 176 24 196 4.30E-41 176 6596 cellular  
 organisms;Eukaryota;Opisthokonta;Metazoa;Eumetazoa;Bilateria;Protostomia;  
 Spiralia;Lophotrochozoa;Mollusca;Bivalvia;Autobranchia;Heteroconchia;Euhe  
 terodonta;Imparidentia;Venerida;Veneroidea;Veneridae;Mercenaria;Mercenari  
 a mercenaria  
 UdeM00000007918 6596 201.4 UdeM00000007918 XP\_045168484.1 55.5 182  
 79 1 9 190 14 193 1.00E-48 201.4 6596 cellular  
 organisms;Eukaryota;Opisthokonta;Metazoa;Eumetazoa;Bilateria;Protostomia;  
 Spiralia;Lophotrochozoa;Mollusca;Bivalvia;Autobranchia;Heteroconchia;Euhe  
 terodonta;Imparidentia;Venerida;Veneroidea;Veneridae;Mercenaria;Mercenari  
 a mercenaria  
 UdeM00000007919 6596 199.1 UdeM00000007919 XP\_045168484.1 55.7 183  
 78 2 9 191 14 193 5.00E-48 199.1 6596 cellular  
 organisms;Eukaryota;Opisthokonta;Metazoa;Eumetazoa;Bilateria;Protostomia;  
 Spiralia;Lophotrochozoa;Mollusca;Bivalvia;Autobranchia;Heteroconchia;Euhe  
 terodonta;Imparidentia;Venerida;Veneroidea;Veneridae;Mercenaria;Mercenari  
 a mercenaria  
 UdeM00000007920 6579 218.8 UdeM00000007920 XP\_033734651.1 53.5 187  
 86 1 1 186 1 187 6.50E-54 218.8 6579 cellular  
 organisms;Eukaryota;Opisthokonta;Metazoa;Eumetazoa;Bilateria;Protostomia;  
 Spiralia;Lophotrochozoa;Mollusca;Bivalvia;Autobranchia;Pteriormorphia;Pect  
 inida;Pectinoidea;Pectinidae;Pecten;Pecten maximus  
 UdeM00000044298 400727 148.7 UdeM00000044298 XP\_025095647.1 51.2  
 127 58 1 42 168 5 127 7.00E-33 148.7 400727  
 cellular  
 organisms;Eukaryota;Opisthokonta;Metazoa;Eumetazoa;Bilateria;Protostomia;  
 Spiralia;Lophotrochozoa;Mollusca;Gastropoda;Caenogastropoda;Architaeniogl  
 ossa;Ampullarioidea;Ampullariidae;Pomacea;Pomacea canaliculata  
 UdeM00000044299 400727 108.6 UdeM00000044299 XP\_025093452.1 65.3  
 72 25 0 30 101 135 206 4.70E-21 108.6 400727  
 cellular  
 organisms;Eukaryota;Opisthokonta;Metazoa;Eumetazoa;Bilateria;Protostomia;  
 Spiralia;Lophotrochozoa;Mollusca;Gastropoda;Caenogastropoda;Architaeniogl  
 ossa;Ampullarioidea;Ampullariidae;Pomacea;Pomacea canaliculata  
 UdeM00000044300 6565 600.9 UdeM00000044300 XP\_022287481.1 50.5 622  
 295 8 2 620 1522 2133 1.80E-168 600.9 6565 cellular  
 organisms;Eukaryota;Opisthokonta;Metazoa;Eumetazoa;Bilateria;Protostomia;  
 Spiralia;Lophotrochozoa;Mollusca;Bivalvia;Autobranchia;Pteriormorphia;Ostr  
 eida;Ostreoidea;Ostreidae;Crassostrea;Crassostrea virginica  
 UdeM00000044301 6596 114.8 UdeM00000044301 XP\_045210599.1 43.7 151  
 70 3 87 224 160 308 1.50E-22 114.8 6596 cellular  
 organisms;Eukaryota;Opisthokonta;Metazoa;Eumetazoa;Bilateria;Protostomia;  
 Spiralia;Lophotrochozoa;Mollusca;Bivalvia;Autobranchia;Heteroconchia;Euhe  
 terodonta;Imparidentia;Venerida;Veneroidea;Veneridae;Mercenaria;Mercenari  
 a mercenaria  
 UdeM00000044302 7654 74.7 UdeM00000044302 XP\_041473734.1 42.4 92  
 49 2 8 97 652 741 7.20E-11 74.7 7654 cellular  
 organisms;Eukaryota;Opisthokonta;Metazoa;Eumetazoa;Bilateria;Deuterostomi  
 a;Echinodermata;Eleutherozoa;Echinozoa;Echinoidea;Euechinoidea;Echinacea;  
 Temnopleuroidea;Toxopneustidae;Lytechinus;Lytechinus variegatus  
 UdeM00000044352 7741 58.5 UdeM00000044352 XP\_019641549.1 32.8 119  
 75 4 10 127 57 171 7.10E-06 58.5 7741 cellular  
 organisms;Eukaryota;Opisthokonta;Metazoa;Eumetazoa;Bilateria;Deuterostomi

a;Chordata;Cephalochordata;Leptocardii;Amphioxiformes;Branchiostomidae;Branchiostoma;Branchiostoma belcheri

UdeM00000044351 45264 67.4 UdeM00000044351 XP\_044168285.1 25.4 169  
121 3 44 212 396 559 2.50E-08 67.4 45264 cellular  
organisms;Eukaryota;Opisthokonta;Metazoa;Eumetazoa;Cnidaria;Anthozoa;Hexacorallia;Scleractinia;Astrocoeniina;Acroporidae;Acropora;Acropora millepora

UdeM00000001818 6565 105.1 UdeM00000001818 XP\_022312780.1 63.5 74  
27 0 1 74 5 78 4.00E-20 105.1 6565 cellular  
organisms;Eukaryota;Opisthokonta;Metazoa;Eumetazoa;Bilateria;Protostomia;Spiralia;Lophotrochozoa;Mollusca;Bivalvia;Autobranchia;Pteriormorphia;Ostreida;Ostreioidea;Ostreidae;Crassostrea;Crassostrea virginica

UdeM00000001819 29159 474.2 UdeM00000001819 XP\_034303860.1 40 675  
263 15 42 590 35 693 2.50E-130 474.2 29159 cellular  
organisms;Eukaryota;Opisthokonta;Metazoa;Eumetazoa;Bilateria;Protostomia;Spiralia;Lophotrochozoa;Mollusca;Bivalvia;Autobranchia;Pteriormorphia;Ostreida;Ostreioidea;Ostreidae;Crassostrea;Crassostrea gigas

UdeM00000001820 6565 103.2 UdeM00000001820 XP\_022312780.1 62.2 74  
28 0 1 74 5 78 1.50E-19 103.2 6565 cellular  
organisms;Eukaryota;Opisthokonta;Metazoa;Eumetazoa;Bilateria;Protostomia;Spiralia;Lophotrochozoa;Mollusca;Bivalvia;Autobranchia;Pteriormorphia;Ostreida;Ostreioidea;Ostreidae;Crassostrea;Crassostrea virginica

UdeM00000001821 29159 93.2 UdeM00000001821 XP\_034310427.1 58 69  
29 0 1 69 602 670 1.40E-16 93.2 29159 cellular  
organisms;Eukaryota;Opisthokonta;Metazoa;Eumetazoa;Bilateria;Protostomia;Spiralia;Lophotrochozoa;Mollusca;Bivalvia;Autobranchia;Pteriormorphia;Ostreida;Ostreioidea;Ostreidae;Crassostrea;Crassostrea gigas

UdeM00000001822 29159 338.2 UdeM00000001822 XP\_034303860.1 34.4 596  
233 13 27 480 29 608 1.70E-89 338.2 29159 cellular  
organisms;Eukaryota;Opisthokonta;Metazoa;Eumetazoa;Bilateria;Protostomia;Spiralia;Lophotrochozoa;Mollusca;Bivalvia;Autobranchia;Pteriormorphia;Ostreida;Ostreioidea;Ostreidae;Crassostrea;Crassostrea gigas

UdeM00000001823 29159 188.7 UdeM00000001823 XP\_034303860.1 29.3 416  
92 5 9 222 278 693 7.90E-45 188.7 29159 cellular  
organisms;Eukaryota;Opisthokonta;Metazoa;Eumetazoa;Bilateria;Protostomia;Spiralia;Lophotrochozoa;Mollusca;Bivalvia;Autobranchia;Pteriormorphia;Ostreida;Ostreioidea;Ostreidae;Crassostrea;Crassostrea gigas

UdeM00000001824 29159 110.9 UdeM00000001824 XP\_034303860.1 39.2 189  
98 7 79 262 32 208 2.50E-21 110.9 29159 cellular  
organisms;Eukaryota;Opisthokonta;Metazoa;Eumetazoa;Bilateria;Protostomia;Spiralia;Lophotrochozoa;Mollusca;Bivalvia;Autobranchia;Pteriormorphia;Ostreida;Ostreioidea;Ostreidae;Crassostrea;Crassostrea gigas

UdeM00000001825 6579 357.5 UdeM00000001825 XP\_033752673.1 54.5 323  
108 1 28 311 328 650 1.80E-95 357.5 6579 cellular  
organisms;Eukaryota;Opisthokonta;Metazoa;Eumetazoa;Bilateria;Protostomia;Spiralia;Lophotrochozoa;Mollusca;Bivalvia;Autobranchia;Pteriormorphia;Pectinida;Pectinoidea;Pectinidae;Pecten;Pecten maximus

UdeM00000001826 6500 188 UdeM00000001826 XP\_012938994.2 46.3 188  
101 0 34 221 69 256 1.40E-44 188 6500 cellular  
organisms;Eukaryota;Opisthokonta;Metazoa;Eumetazoa;Bilateria;Protostomia;Spiralia;Lophotrochozoa;Mollusca;Gastropoda;Heterobranchia;Euthyneura;Teptipleura;Aplysiida;Aplysioidea;Aplysiidae;Aplysia;Aplysia californica

UdeM00000001827 6596 424.1 UdeM00000001827 XP\_045196634.1 54.8 343  
153 1 13 355 7 347 1.80E-115 424.1 6596 cellular

organisms;Eukaryota;Opisthokonta;Metazoa;Eumetazoa;Bilateria;Protostomia;Spiralia;Lophotrochozoa;Mollusca;Bivalvia;Autobranhia;Heteroconchia;Euheterodonta;Imparidentia;Venerida;Veneroidea;Veneridae;Mercenaria;Mercenaria mercenaria

UdeM00000001829 6579 586.3 UdeM00000001829 XP\_033741429.1 58.6 514  
190 5 1 510 1 495 4.00E-164 586.3 6579 cellular

organisms;Eukaryota;Opisthokonta;Metazoa;Eumetazoa;Bilateria;Protostomia;Spiralia;Lophotrochozoa;Mollusca;Bivalvia;Autobranhia;Pteriormorphia;Pectinida;Pectinoidea;Pectinidae;Pecten;Pecten maximus

UdeM00000001830 400727 97.4 UdeM00000001830 XP\_025097146.1 61.8  
68 26 0 1 68 1 68 8.00E-18 97.4 400727  
cellular

organisms;Eukaryota;Opisthokonta;Metazoa;Eumetazoa;Bilateria;Protostomia;Spiralia;Lophotrochozoa;Mollusca;Gastropoda;Caenogastropoda;Architaenioglossa;Ampullarioidea;Ampullariidae;Pomacea;Pomacea canaliculata

UdeM00000001831 6596 695.3 UdeM00000001831 XP\_045196582.1 33.9 2077  
1063 47 84 2108 62 1881 2.40E-196 695.3 6596 cellular

organisms;Eukaryota;Opisthokonta;Metazoa;Eumetazoa;Bilateria;Protostomia;Spiralia;Lophotrochozoa;Mollusca;Bivalvia;Autobranhia;Heteroconchia;Euheterodonta;Imparidentia;Venerida;Veneroidea;Veneridae;Mercenaria;Mercenaria mercenaria

UdeM00000001833 6579 90.1 UdeM00000001833 XP\_033758230.1 69.5 59  
18 0 23 81 582 640 1.40E-15 90.1 6579 cellular

organisms;Eukaryota;Opisthokonta;Metazoa;Eumetazoa;Bilateria;Protostomia;Spiralia;Lophotrochozoa;Mollusca;Bivalvia;Autobranhia;Pteriormorphia;Pectinida;Pectinoidea;Pectinidae;Pecten;Pecten maximus

UdeM00000001834 6579 183 UdeM00000001834 XP\_033759640.1 47.9 190  
92 2 22 204 117 306 3.90E-43 183 6579 cellular

organisms;Eukaryota;Opisthokonta;Metazoa;Eumetazoa;Bilateria;Protostomia;Spiralia;Lophotrochozoa;Mollusca;Bivalvia;Autobranhia;Pteriormorphia;Pectinida;Pectinoidea;Pectinidae;Pecten;Pecten maximus

UdeM00000001835 6573 138.3 UdeM00000001835 XP\_021362776.1 37.1 202  
97 3 33 234 35 206 1.30E-29 138.3 6573 cellular

organisms;Eukaryota;Opisthokonta;Metazoa;Eumetazoa;Bilateria;Protostomia;Spiralia;Lophotrochozoa;Mollusca;Bivalvia;Autobranhia;Pteriormorphia;Pectinida;Pectinoidea;Pectinidae;Mizuhopecten;Mizuhopecten yessoensis

UdeM00000001836 6596 361.7 UdeM00000001836 XP\_045196737.1 48.3 474  
185 18 1 422 1 466 1.30E-96 361.7 6596 cellular

organisms;Eukaryota;Opisthokonta;Metazoa;Eumetazoa;Bilateria;Protostomia;Spiralia;Lophotrochozoa;Mollusca;Bivalvia;Autobranhia;Heteroconchia;Euheterodonta;Imparidentia;Venerida;Veneroidea;Veneridae;Mercenaria;Mercenaria mercenaria

UdeM00000001837 6565 869 UdeM00000001837 XP\_022292411.1 72.4 566  
134 4 2 567 695 1238 3.30E-249 869 6565 cellular

organisms;Eukaryota;Opisthokonta;Metazoa;Eumetazoa;Bilateria;Protostomia;Spiralia;Lophotrochozoa;Mollusca;Bivalvia;Autobranhia;Pteriormorphia;Ostreida;Ostreioidea;Ostreidae;Crassostrea;Crassostrea virginica

UdeM00000001838 29159 1038.5 UdeM00000001838 XP\_011455128.2 79.6  
641 128 3 35 674 80 718 3.70E-300 1038.5  
29159 cellular

organisms;Eukaryota;Opisthokonta;Metazoa;Eumetazoa;Bilateria;Protostomia;Spiralia;Lophotrochozoa;Mollusca;Bivalvia;Autobranhia;Pteriormorphia;Ostreida;Ostreioidea;Ostreidae;Crassostrea;Crassostrea gigas

UdeM00000001839 2607531 127.1 UdeM00000001839 XP\_029646202.1 83.3  
 72 12 0 15 86 57 128 1.50E-26 127.1 2607531  
 cellular  
 organisms;Eukaryota;Opisthokonta;Metazoa;Eumetazoa;Bilateria;Protostomia;  
 Spiralia;Lophotrochozoa;Mollusca;Cephalopoda;Coleoidea;Octopodiformes;Oct  
 opoda;Incirrata;Octopodidae;Octopus;Octopus sinensis  
 UdeM00000001840 6596 151.4 UdeM00000001840 XP\_045199821.1 54.9 133  
 58 2 10 141 11 142 8.80E-34 151.4 6596 cellular  
 organisms;Eukaryota;Opisthokonta;Metazoa;Eumetazoa;Bilateria;Protostomia;  
 Spiralia;Lophotrochozoa;Mollusca;Bivalvia;Autobranchia;Heteroconchia;Euhe  
 terodonta;Imparidentia;Venerida;Veneroidea;Veneridae;Mercenaria;Mercenari  
 a mercenaria  
 UdeM00000001841 6596 135.6 UdeM00000001841 XP\_045199821.1 44.4 126  
 70 0 41 166 16 141 6.00E-29 135.6 6596 cellular  
 organisms;Eukaryota;Opisthokonta;Metazoa;Eumetazoa;Bilateria;Protostomia;  
 Spiralia;Lophotrochozoa;Mollusca;Bivalvia;Autobranchia;Heteroconchia;Euhe  
 terodonta;Imparidentia;Venerida;Veneroidea;Veneridae;Mercenaria;Mercenari  
 a mercenaria  
 UdeM00000001842 6596 314.3 UdeM00000001842 XP\_045196365.1 52.6 308  
 146 0 13 320 157 464 1.80E-82 314.3 6596 cellular  
 organisms;Eukaryota;Opisthokonta;Metazoa;Eumetazoa;Bilateria;Protostomia;  
 Spiralia;Lophotrochozoa;Mollusca;Bivalvia;Autobranchia;Heteroconchia;Euhe  
 terodonta;Imparidentia;Venerida;Veneroidea;Veneridae;Mercenaria;Mercenari  
 a mercenaria  
 UdeM00000001843 114398 63.5 UdeM00000001843 XP\_015918496.1 49.2  
 65 32 1 32 96 15 78 3.60E-06 63.5 114398  
 cellular  
 organisms;Eukaryota;Opisthokonta;Metazoa;Eumetazoa;Bilateria;Protostomia;  
 Ecdysozoa;Panarthropoda;Arthropoda;Chelicerata;Arachnida;Araneae;Araneomo  
 rphae;Entelegynae;Orbiculariae;Araneoidea;Theridiidae;Parasteatoda;Parast  
 eatoda tepidariorum  
 UdeM00000001844 1735272 491.9 UdeM00000001844 XP\_041354220.1 67.5  
 314 102 0 1 314 1 314 6.10E-136 491.9 1735272  
 cellular  
 organisms;Eukaryota;Opisthokonta;Metazoa;Eumetazoa;Bilateria;Protostomia;  
 Spiralia;Lophotrochozoa;Mollusca;Gastropoda;Neomphalina;Neomphaloidea;Pel  
 tospiridae;Gigantopelta;Gigantopelta aegis  
 UdeM00000001845 6596 583.9 UdeM00000001845 XP\_045196481.1 45 671  
 358 6 17 682 6 670 2.60E-163 583.9 6596 cellular  
 organisms;Eukaryota;Opisthokonta;Metazoa;Eumetazoa;Bilateria;Protostomia;  
 Spiralia;Lophotrochozoa;Mollusca;Bivalvia;Autobranchia;Heteroconchia;Euhe  
 terodonta;Imparidentia;Venerida;Veneroidea;Veneridae;Mercenaria;Mercenari  
 a mercenaria  
 UdeM00000001846 6596 325.5 UdeM00000001846 XP\_045195385.1 54.1 331  
 138 5 4 324 133 459 7.80E-86 325.5 6596 cellular  
 organisms;Eukaryota;Opisthokonta;Metazoa;Eumetazoa;Bilateria;Protostomia;  
 Spiralia;Lophotrochozoa;Mollusca;Bivalvia;Autobranchia;Heteroconchia;Euhe  
 terodonta;Imparidentia;Venerida;Veneroidea;Veneridae;Mercenaria;Mercenari  
 a mercenaria  
 UdeM00000001847 6596 527.3 UdeM00000001847 XP\_045198506.1 35.7 990  
 502 26 34 932 1783 2728 3.90E-146 527.3 6596 cellular  
 organisms;Eukaryota;Opisthokonta;Metazoa;Eumetazoa;Bilateria;Protostomia;  
 Spiralia;Lophotrochozoa;Mollusca;Bivalvia;Autobranchia;Heteroconchia;Euhe

terodonta;Imparidentia;Venerida;Veneroidea;Veneridae;Mercenaria;Mercenari  
a mercenaria

UdeM00000001849 6596 240.4 UdeM00000001849 XP\_045198695.1 34.9 499  
172 5 5 354 2452 2946 3.60E-60 240.4 6596 cellular

organisms;Eukaryota;Opisthokonta;Metazoa;Eumetazoa;Bilateria;Protostomia;  
Spiralia;Lophotrochozoa;Mollusca;Bivalvia;Autobranhia;Heteroconchia;Euhe  
terodonta;Imparidentia;Venerida;Veneroidea;Veneridae;Mercenaria;Mercenari  
a mercenaria

UdeM00000001850 6596 602.8 UdeM00000001850 XP\_045197975.1 36 1107  
570 24 281 1273 907 1989 1.10E-168 602.8 6596 cellular

organisms;Eukaryota;Opisthokonta;Metazoa;Eumetazoa;Bilateria;Protostomia;  
Spiralia;Lophotrochozoa;Mollusca;Bivalvia;Autobranhia;Heteroconchia;Euhe  
terodonta;Imparidentia;Venerida;Veneroidea;Veneridae;Mercenaria;Mercenari  
a mercenaria

UdeM00000001851 6596 441 UdeM00000001851 XP\_045198506.1 39.1 662  
370 14 3 640 2043 2695 2.60E-120 441 6596 cellular

organisms;Eukaryota;Opisthokonta;Metazoa;Eumetazoa;Bilateria;Protostomia;  
Spiralia;Lophotrochozoa;Mollusca;Bivalvia;Autobranhia;Heteroconchia;Euhe  
terodonta;Imparidentia;Venerida;Veneroidea;Veneridae;Mercenaria;Mercenari  
a mercenaria

UdeM00000001852 6596 495.7 UdeM00000001852 XP\_045198506.1 38.6 761  
432 15 34 770 1946 2695 1.10E-136 495.7 6596 cellular

organisms;Eukaryota;Opisthokonta;Metazoa;Eumetazoa;Bilateria;Protostomia;  
Spiralia;Lophotrochozoa;Mollusca;Bivalvia;Autobranhia;Heteroconchia;Euhe  
terodonta;Imparidentia;Venerida;Veneroidea;Veneridae;Mercenaria;Mercenari  
a mercenaria

UdeM00000001853 6596 86.7 UdeM00000001853 XP\_045198505.1 25.7 331  
203 13 56 367 219 525 8.10E-14 86.7 6596 cellular

organisms;Eukaryota;Opisthokonta;Metazoa;Eumetazoa;Bilateria;Protostomia;  
Spiralia;Lophotrochozoa;Mollusca;Bivalvia;Autobranhia;Heteroconchia;Euhe  
terodonta;Imparidentia;Venerida;Veneroidea;Veneridae;Mercenaria;Mercenari  
a mercenaria

UdeM00000001854 6596 575.5 UdeM00000001854 XP\_045198506.1 27.4 1962  
1110 60 157 1928 892 2728 2.60E-160 575.5 6596 cellular

organisms;Eukaryota;Opisthokonta;Metazoa;Eumetazoa;Bilateria;Protostomia;  
Spiralia;Lophotrochozoa;Mollusca;Bivalvia;Autobranhia;Heteroconchia;Euhe  
terodonta;Imparidentia;Venerida;Veneroidea;Veneridae;Mercenaria;Mercenari  
a mercenaria

UdeM00000001855 6596 632.1 UdeM00000001855 XP\_045198506.1 40.7 923  
464 20 194 1083 1856 2728 1.30E-177 632.1 6596 cellular

organisms;Eukaryota;Opisthokonta;Metazoa;Eumetazoa;Bilateria;Protostomia;  
Spiralia;Lophotrochozoa;Mollusca;Bivalvia;Autobranhia;Heteroconchia;Euhe  
terodonta;Imparidentia;Venerida;Veneroidea;Veneridae;Mercenaria;Mercenari  
a mercenaria

UdeM00000001856 390379 224.9 UdeM00000001856 XP\_034020940.1 24.7  
1006 628 37 75 1036 3319 4238 4.70E-55 224.9 390379  
cellular

organisms;Eukaryota;Opisthokonta;Metazoa;Eumetazoa;Bilateria;Deuterostomi  
a;Chordata;Craniata;Vertebrata;Gnathostomata;Teleostomi;Euteleostomi;Acti  
nopterygii;Actinopteri;Neopterygii;Teleostei;Osteoglossocephalai;Clupeoce  
phala;Euteleosteomorpha;Neoteleostei;Eurypterygia;Ctenosquamata;Acanthomo  
rphata;Euacanthomorphacea;Percomorphaceae;Batrachoidaria;Batrachoidiforme  
s;Batrachoididae;Thalassophyrinae;Thalassophryne;Thalassophryne  
amazonica

UdeM00000001858 260615 80.1 UdeM00000001858 XP\_039385216.1 34.4  
 180 8 2 1 70 347 526 1.20E-12 80.1 260615  
 cellular  
 organisms;Eukaryota;Opisthokonta;Metazoa;Eumetazoa;Bilateria;Deuterostomi  
 a;Chordata;Craniata;Vertebrata;Gnathostomata;Teleostomi;Euteleostomi;Sarc  
 opterygii;Dipnotetrapodomorpha;Tetrapoda;Amniota;Sauropsida;Sauria;Archel  
 osauria;Testudinata;Testudines;Cryptodira;Durocryptodira;Testudinoidea;Ge  
 oemydidae;Geoemydinae;Mauremys;Mauremys reevesii  
 UdeM00000001859 260615 205.7 UdeM00000001859 XP\_039386738.1 70.6  
 180 9 3 1 136 347 526 3.80E-50 205.7 260615  
 cellular  
 organisms;Eukaryota;Opisthokonta;Metazoa;Eumetazoa;Bilateria;Deuterostomi  
 a;Chordata;Craniata;Vertebrata;Gnathostomata;Teleostomi;Euteleostomi;Sarc  
 opterygii;Dipnotetrapodomorpha;Tetrapoda;Amniota;Sauropsida;Sauria;Archel  
 osauria;Testudinata;Testudines;Cryptodira;Durocryptodira;Testudinoidea;Ge  
 oemydidae;Geoemydinae;Mauremys;Mauremys reevesii  
 UdeM00000001860 29159 57.4 UdeM00000001860 XP\_034315725.1 55.3 47  
 18 1 1 47 502 545 6.60E-06 57.4 29159 cellular  
 organisms;Eukaryota;Opisthokonta;Metazoa;Eumetazoa;Bilateria;Protostomia;  
 Spiralia;Lophotrochozoa;Mollusca;Bivalvia;Autobranchia;Pteriomorpha;Ostr  
 eida;Ostreoidea;Ostreidae;Crassostrea;Crassostrea gigas  
 UdeM00000001861 29159 134 UdeM00000001861 XP\_034315725.1 55.6 117  
 50 1 1 117 559 673 1.30E-28 134 29159 cellular  
 organisms;Eukaryota;Opisthokonta;Metazoa;Eumetazoa;Bilateria;Protostomia;  
 Spiralia;Lophotrochozoa;Mollusca;Bivalvia;Autobranchia;Pteriomorpha;Ostr  
 eida;Ostreoidea;Ostreidae;Crassostrea;Crassostrea gigas  
 UdeM00000001866 6565 286.6 UdeM00000001866 XP\_022286598.1 46.1 360  
 170 7 2 361 135 470 4.70E-74 286.6 6565 cellular  
 organisms;Eukaryota;Opisthokonta;Metazoa;Eumetazoa;Bilateria;Protostomia;  
 Spiralia;Lophotrochozoa;Mollusca;Bivalvia;Autobranchia;Pteriomorpha;Ostr  
 eida;Ostreoidea;Ostreidae;Crassostrea;Crassostrea virginica  
 UdeM00000001867 6565 247.7 UdeM00000001867 XP\_022320668.1 68.8 160  
 50 0 1 160 527 686 1.00E-62 247.7 6565 cellular  
 organisms;Eukaryota;Opisthokonta;Metazoa;Eumetazoa;Bilateria;Protostomia;  
 Spiralia;Lophotrochozoa;Mollusca;Bivalvia;Autobranchia;Pteriomorpha;Ostr  
 eida;Ostreoidea;Ostreidae;Crassostrea;Crassostrea virginica  
 UdeM00000001870 6596 197.6 UdeM00000001870 XP\_045195979.1 36.4 316  
 181 5 88 403 282 577 3.40E-47 197.6 6596 cellular  
 organisms;Eukaryota;Opisthokonta;Metazoa;Eumetazoa;Bilateria;Protostomia;  
 Spiralia;Lophotrochozoa;Mollusca;Bivalvia;Autobranchia;Heteroconchia;Euhe  
 terodonta;Imparidentia;Venerida;Veneroidea;Veneridae;Mercenaria;Mercenari  
 a mercenaria  
 UdeM00000001875 6596 302 UdeM00000001875 XP\_045196404.1 37.9 467  
 238 10 256 707 360 789 2.00E-78 302 6596 cellular  
 organisms;Eukaryota;Opisthokonta;Metazoa;Eumetazoa;Bilateria;Protostomia;  
 Spiralia;Lophotrochozoa;Mollusca;Bivalvia;Autobranchia;Heteroconchia;Euhe  
 terodonta;Imparidentia;Venerida;Veneroidea;Veneridae;Mercenaria;Mercenari  
 a mercenaria  
 UdeM00000001878 6579 701 UdeM00000001878 XP\_033728194.1 50.9 693  
 327 5 1 684 282 970 1.50E-198 701 6579 cellular  
 organisms;Eukaryota;Opisthokonta;Metazoa;Eumetazoa;Bilateria;Protostomia;  
 Spiralia;Lophotrochozoa;Mollusca;Bivalvia;Autobranchia;Pteriomorpha;Pect  
 inida;Pectinoidea;Pectinidae;Pecten;Pecten maximus



UdeM00000001880 29159 219.9 UdeM00000001880 XP\_034339165.1 38.3 334  
 192 8 1 331 186 508 4.70E-54 219.9 29159 cellular  
 organisms;Eukaryota;Opisthokonta;Metazoa;Eumetazoa;Bilateria;Protostomia;  
 Spiralia;Lophotrochozoa;Mollusca;Bivalvia;Autobranchia;Pteriomorpha;Ostr  
 eida;Ostreoidea;Ostreidae;Crassostrea;Crassostrea gigas  
 UdeM00000001881 29159 496.5 UdeM00000001881 XP\_034299474.1 43.4 611  
 322 8 66 665 158 755 5.20E-137 496.5 29159 cellular  
 organisms;Eukaryota;Opisthokonta;Metazoa;Eumetazoa;Bilateria;Protostomia;  
 Spiralia;Lophotrochozoa;Mollusca;Bivalvia;Autobranchia;Pteriomorpha;Ostr  
 eida;Ostreoidea;Ostreidae;Crassostrea;Crassostrea gigas  
 UdeM00000001884 29159 424.5 UdeM00000001884 XP\_034299474.1 44.1 526  
 279 7 3 522 239 755 2.00E-115 424.5 29159 cellular  
 organisms;Eukaryota;Opisthokonta;Metazoa;Eumetazoa;Bilateria;Protostomia;  
 Spiralia;Lophotrochozoa;Mollusca;Bivalvia;Autobranchia;Pteriomorpha;Ostr  
 eida;Ostreoidea;Ostreidae;Crassostrea;Crassostrea gigas  
 UdeM00000001885 29159 317 UdeM00000001885 XP\_034330911.1 39.3 489  
 265 12 31 505 13 483 4.40E-83 317 29159 cellular  
 organisms;Eukaryota;Opisthokonta;Metazoa;Eumetazoa;Bilateria;Protostomia;  
 Spiralia;Lophotrochozoa;Mollusca;Bivalvia;Autobranchia;Pteriomorpha;Ostr  
 eida;Ostreoidea;Ostreidae;Crassostrea;Crassostrea gigas  
 UdeM00000001886 46731 101.7 UdeM00000001886 XP\_027046473.1 43.8 112  
 63 0 74 185 19 130 1.10E-18 101.7 46731 cellular  
 organisms;Eukaryota;Opisthokonta;Metazoa;Eumetazoa;Cnidaria;Anthozoa;Hexa  
 corallia;Scleractinia;Astrocoeniina;Pocilloporidae;Pocillopora;Pocillopor  
 a damicornis  
 UdeM00000001890 6596 537 UdeM00000001890 XP\_045178231.1 50.6 559  
 267 5 7 557 9 566 3.00E-149 537 6596 cellular  
 organisms;Eukaryota;Opisthokonta;Metazoa;Eumetazoa;Bilateria;Protostomia;  
 Spiralia;Lophotrochozoa;Mollusca;Bivalvia;Autobranchia;Heteroconchia;Euhe  
 terodonta;Imparidentia;Venerida;Veneroidea;Veneridae;Mercenaria;Mercenari  
 a mercenaria  
 UdeM00000001891 6596 125.9 UdeM00000001891 XP\_045180427.1 33.6 274  
 127 4 1 220 1 273 6.60E-26 125.9 6596 cellular  
 organisms;Eukaryota;Opisthokonta;Metazoa;Eumetazoa;Bilateria;Protostomia;  
 Spiralia;Lophotrochozoa;Mollusca;Bivalvia;Autobranchia;Heteroconchia;Euhe  
 terodonta;Imparidentia;Venerida;Veneroidea;Veneridae;Mercenaria;Mercenari  
 a mercenaria  
 UdeM00000001892 6596 1186 UdeM00000001892 XP\_045178231.1 64.1 957  
 329 5 1 952 602 1548 0.00E+00 1186 6596 cellular  
 organisms;Eukaryota;Opisthokonta;Metazoa;Eumetazoa;Bilateria;Protostomia;  
 Spiralia;Lophotrochozoa;Mollusca;Bivalvia;Autobranchia;Heteroconchia;Euhe  
 terodonta;Imparidentia;Venerida;Veneroidea;Veneridae;Mercenaria;Mercenari  
 a mercenaria  
 UdeM00000001894 6596 177.6 UdeM00000001894 XP\_045195643.1 41.1 248  
 119 10 3 237 66 299 2.30E-41 177.6 6596 cellular  
 organisms;Eukaryota;Opisthokonta;Metazoa;Eumetazoa;Bilateria;Protostomia;  
 Spiralia;Lophotrochozoa;Mollusca;Bivalvia;Autobranchia;Heteroconchia;Euhe  
 terodonta;Imparidentia;Venerida;Veneroidea;Veneridae;Mercenaria;Mercenari  
 a mercenaria  
 UdeM00000001895 6579 345.1 UdeM00000001895 XP\_033740923.1 36.6 558  
 314 15 5 552 7 534 1.60E-91 345.1 6579 cellular  
 organisms;Eukaryota;Opisthokonta;Metazoa;Eumetazoa;Bilateria;Protostomia;  
 Spiralia;Lophotrochozoa;Mollusca;Bivalvia;Autobranchia;Pteriomorpha;Pect  
 inida;Pectinoidea;Pectinidae;Pecten;Pecten maximus

UdeM00000001896 225164 407.5 UdeM00000001896 XP\_009064346.1 41.6  
538 272 12 21 544 16 525 2.60E-110 407.5 225164  
cellular

organisms;Eukaryota;Opisthokonta;Metazoa;Eumetazoa;Bilateria;Protostomia;  
Spiralia;Lophotrochozoa;Mollusca;Gastropoda;Patellogastropoda;Lottioidea;  
Lottiidae;Lottia;Lottia gigantea

UdeM00000001897 29159 433 UdeM00000001897 XP\_011420306.2 83.9 261  
38 2 12 272 1 257 2.90E-118 433 29159 cellular

organisms;Eukaryota;Opisthokonta;Metazoa;Eumetazoa;Bilateria;Protostomia;  
Spiralia;Lophotrochozoa;Mollusca;Bivalvia;Autobranchia;Pteriormorphia;Ostr  
eida;Ostreoidea;Ostreidae;Crassostrea;Crassostrea gigas

UdeM00000001898 6596 300.8 UdeM00000001898 XP\_045195631.1 51 298  
138 4 55 348 41 334 2.50E-78 300.8 6596 cellular

organisms;Eukaryota;Opisthokonta;Metazoa;Eumetazoa;Bilateria;Protostomia;  
Spiralia;Lophotrochozoa;Mollusca;Bivalvia;Autobranchia;Heteroconchia;Euhe  
terodonta;Imparidentia;Venerida;Veneroidea;Veneridae;Mercenaria;Mercenari  
a mercenaria

UdeM00000001899 8128 67 UdeM00000001899 XP\_019206542.2 32 125  
75 3 85 204 28 147 3.20E-08 67 8128 cellular

organisms;Eukaryota;Opisthokonta;Metazoa;Eumetazoa;Bilateria;Deuterostomi  
a;Chordata;Craniata;Vertebrata;Gnathostomata;Teleostomi;Euteleostomi;Acti  
nopterygii;Actinopteri;Neopterygii;Teleostei;Osteoglossocephalai;Clupeoce  
phala;Euteleosteomorpha;Neoteleostei;Eurypterygia;Ctenosquamata;Acanthomo  
rphata;Euacanthomorphacea;Percomorphaceae;Ovalentaria;Cichlomorphae;Cichl  
iformes;Cichlidae;African

cichlids;Pseudocrenilabrinae;Oreochromini;Oreochromis;Oreochromis  
niloticus

UdeM00000001900 7906 243.8 UdeM00000001900 XP\_034780548.1 63.6 184  
67 0 2 185 193 376 1.70E-61 243.8 7906 cellular

organisms;Eukaryota;Opisthokonta;Metazoa;Eumetazoa;Bilateria;Deuterostomi  
a;Chordata;Craniata;Vertebrata;Gnathostomata;Teleostomi;Euteleostomi;Acti  
nopterygii;Actinopteri;Chondrostei;Acipenseriformes;Acipenseroides;Acipen  
seridae;Acipenserinae;Acipenserini;Acipenser;Acipenser ruthenus

UdeM00000001901 50429 75.5 UdeM00000001901 XP\_022807755.1 44.9 89  
47 1 2 90 89 175 4.20E-11 75.5 50429 cellular

organisms;Eukaryota;Opisthokonta;Metazoa;Eumetazoa;Cnidaria;Anthozoa;Hexa  
corallia;Scleractinia;Astrocoeniina;Pocilloporidae;Stylophora;Stylophora  
pistillata

UdeM00000001902 481459 97.4 UdeM00000001902 XP\_040031014.1 41.7  
103 58 1 1 103 311 411 1.10E-17 97.4 481459

cellular

organisms;Eukaryota;Opisthokonta;Metazoa;Eumetazoa;Bilateria;Deuterostomi  
a;Chordata;Craniata;Vertebrata;Gnathostomata;Teleostomi;Euteleostomi;Acti  
nopterygii;Actinopteri;Neopterygii;Teleostei;Osteoglossocephalai;Clupeoce  
phala;Euteleosteomorpha;Neoteleostei;Eurypterygia;Ctenosquamata;Acanthomo  
rphata;Euacanthomorphacea;Percomorphaceae;Eupercaria;Perciformes;Cottioid  
ei;Gasterosteales;Gasterosteidae;Gasterosteus;Gasterosteus  
aculeatus;Gasterosteus aculeatus aculeatus

UdeM00000001903 29159 171 UdeM00000001903 XP\_034335595.1 37.8 286  
125 6 52 284 294 579 2.20E-39 171 29159 cellular

organisms;Eukaryota;Opisthokonta;Metazoa;Eumetazoa;Bilateria;Protostomia;  
Spiralia;Lophotrochozoa;Mollusca;Bivalvia;Autobranchia;Pteriormorphia;Ostr  
eida;Ostreoidea;Ostreidae;Crassostrea;Crassostrea gigas

UdeM00000001905 6565 492.7 UdeM00000001905 XP\_022297037.1 50 534  
 238 6 6 532 11 522 6.10E-136 492.7 6565 cellular  
 organisms;Eukaryota;Opisthokonta;Metazoa;Eumetazoa;Bilateria;Protostomia;  
 Spiralia;Lophotrochozoa;Mollusca;Bivalvia;Autobranhia;Pteriormorphia;Ostr  
 eida;Ostreoidea;Ostreidae;Crassostrea;Crassostrea virginica  
 UdeM00000001912 29159 164.1 UdeM00000001912 XP\_034335621.1 36.1 294  
 156 4 109 378 294 579 3.50E-37 164.1 29159 cellular  
 organisms;Eukaryota;Opisthokonta;Metazoa;Eumetazoa;Bilateria;Protostomia;  
 Spiralia;Lophotrochozoa;Mollusca;Bivalvia;Autobranhia;Pteriormorphia;Ostr  
 eida;Ostreoidea;Ostreidae;Crassostrea;Crassostrea gigas  
 UdeM00000001916 6573 155.6 UdeM00000001916 XP\_021348626.1 35.3 269  
 142 6 14 250 257 525 8.30E-35 155.6 6573 cellular  
 organisms;Eukaryota;Opisthokonta;Metazoa;Eumetazoa;Bilateria;Protostomia;  
 Spiralia;Lophotrochozoa;Mollusca;Bivalvia;Autobranhia;Pteriormorphia;Pect  
 inida;Pectinoidea;Pectinidae;Mizuhopecten;Mizuhopecten yessoensis  
 UdeM00000001917 6596 253.1 UdeM00000001917 XP\_045215628.1 48 246  
 123 3 25 268 86 328 4.10E-64 253.1 6596 cellular  
 organisms;Eukaryota;Opisthokonta;Metazoa;Eumetazoa;Bilateria;Protostomia;  
 Spiralia;Lophotrochozoa;Mollusca;Bivalvia;Autobranhia;Heteroconchia;Euhe  
 terodonta;Imparidentia;Venerida;Veneroidea;Veneridae;Mercenaria;Mercenari  
 a mercenaria  
 UdeM00000001918 6596 65.1 UdeM00000001918 XP\_045185858.1 33.3 126  
 75 3 26 148 42 161 2.20E-07 65.1 6596 cellular  
 organisms;Eukaryota;Opisthokonta;Metazoa;Eumetazoa;Bilateria;Protostomia;  
 Spiralia;Lophotrochozoa;Mollusca;Bivalvia;Autobranhia;Heteroconchia;Euhe  
 terodonta;Imparidentia;Venerida;Veneroidea;Veneridae;Mercenaria;Mercenari  
 a mercenaria  
 UdeM00000001919 6596 65.1 UdeM00000001919 XP\_045185858.1 33.3 126  
 75 3 26 148 42 161 2.30E-07 65.1 6596 cellular  
 organisms;Eukaryota;Opisthokonta;Metazoa;Eumetazoa;Bilateria;Protostomia;  
 Spiralia;Lophotrochozoa;Mollusca;Bivalvia;Autobranhia;Heteroconchia;Euhe  
 terodonta;Imparidentia;Venerida;Veneroidea;Veneridae;Mercenaria;Mercenari  
 a mercenaria  
 UdeM00000001920 6573 71.6 UdeM00000001920 XP\_021358586.1 30.6 134  
 89 2 225 357 116 246 2.20E-09 71.6 6573 cellular  
 organisms;Eukaryota;Opisthokonta;Metazoa;Eumetazoa;Bilateria;Protostomia;  
 Spiralia;Lophotrochozoa;Mollusca;Bivalvia;Autobranhia;Pteriormorphia;Pect  
 inida;Pectinoidea;Pectinidae;Mizuhopecten;Mizuhopecten yessoensis  
 UdeM00000001921 6573 71.6 UdeM00000001921 XP\_021358586.1 30.6 134  
 89 2 224 356 116 246 2.20E-09 71.6 6573 cellular  
 organisms;Eukaryota;Opisthokonta;Metazoa;Eumetazoa;Bilateria;Protostomia;  
 Spiralia;Lophotrochozoa;Mollusca;Bivalvia;Autobranhia;Pteriormorphia;Pect  
 inida;Pectinoidea;Pectinidae;Mizuhopecten;Mizuhopecten yessoensis  
 UdeM00000001922 6565 84.3 UdeM00000001922 XP\_022345219.1 40 100  
 58 1 2 99 284 383 9.70E-14 84.3 6565 cellular  
 organisms;Eukaryota;Opisthokonta;Metazoa;Eumetazoa;Bilateria;Protostomia;  
 Spiralia;Lophotrochozoa;Mollusca;Bivalvia;Autobranhia;Pteriormorphia;Ostr  
 eida;Ostreoidea;Ostreidae;Crassostrea;Crassostrea virginica  
 UdeM00000001923 6565 327 UdeM00000001923 XP\_022287686.1 56.1 262  
 114 1 1 262 1 261 2.20E-86 327 6565 cellular  
 organisms;Eukaryota;Opisthokonta;Metazoa;Eumetazoa;Bilateria;Protostomia;  
 Spiralia;Lophotrochozoa;Mollusca;Bivalvia;Autobranhia;Pteriormorphia;Ostr  
 eida;Ostreoidea;Ostreidae;Crassostrea;Crassostrea virginica

UdeM00000001924 6596 161.8 UdeM00000001924 XP\_045215643.1 28.1 416  
 171 8 1 288 1 416 1.30E-36 161.8 6596 cellular  
 organisms;Eukaryota;Opisthokonta;Metazoa;Eumetazoa;Bilateria;Protostomia;  
 Spiralia;Lophotrochozoa;Mollusca;Bivalvia;Autobranchia;Heteroconchia;Euhe  
 terodonta;Imparidentia;Venerida;Veneroidea;Veneridae;Mercenaria;Mercenari  
 a mercenaria  
 UdeM00000001925 6579 159.5 UdeM00000001925 XP\_033744154.1 33.1 314  
 174 8 60 363 808 1095 8.30E-36 159.5 6579 cellular  
 organisms;Eukaryota;Opisthokonta;Metazoa;Eumetazoa;Bilateria;Protostomia;  
 Spiralia;Lophotrochozoa;Mollusca;Bivalvia;Autobranchia;Pteriormorphia;Pect  
 inida;Pectinoidea;Pectinidae;Pecten;Pecten maximus  
 UdeM00000001926 29159 301.2 UdeM00000001926 XP\_034322046.1 49.7 322  
 77 5 3 242 333 651 1.20E-78 301.2 29159 cellular  
 organisms;Eukaryota;Opisthokonta;Metazoa;Eumetazoa;Bilateria;Protostomia;  
 Spiralia;Lophotrochozoa;Mollusca;Bivalvia;Autobranchia;Pteriormorphia;Ostr  
 eida;Ostreoidea;Ostreidae;Crassostrea;Crassostrea gigas  
 UdeM00000001927 29159 65.1 UdeM00000001927 XP\_034322639.1 43.5 92  
 48 2 77 164 18 109 9.80E-08 65.1 29159 cellular  
 organisms;Eukaryota;Opisthokonta;Metazoa;Eumetazoa;Bilateria;Protostomia;  
 Spiralia;Lophotrochozoa;Mollusca;Bivalvia;Autobranchia;Pteriormorphia;Ostr  
 eida;Ostreoidea;Ostreidae;Crassostrea;Crassostrea gigas  
 UdeM00000001928 6565 100.5 UdeM00000001928 XP\_022290906.1 38.1 139  
 83 1 63 201 329 464 2.60E-18 100.5 6565 cellular  
 organisms;Eukaryota;Opisthokonta;Metazoa;Eumetazoa;Bilateria;Protostomia;  
 Spiralia;Lophotrochozoa;Mollusca;Bivalvia;Autobranchia;Pteriormorphia;Ostr  
 eida;Ostreoidea;Ostreidae;Crassostrea;Crassostrea virginica  
 UdeM00000001929 6579 103.2 UdeM00000001929 XP\_033739518.1 35.4 181  
 90 4 50 203 522 702 4.20E-19 103.2 6579 cellular  
 organisms;Eukaryota;Opisthokonta;Metazoa;Eumetazoa;Bilateria;Protostomia;  
 Spiralia;Lophotrochozoa;Mollusca;Bivalvia;Autobranchia;Pteriormorphia;Pect  
 inida;Pectinoidea;Pectinidae;Pecten;Pecten maximus  
 UdeM00000001930 29159 162.2 UdeM00000001930 XP\_034334597.1 32.8 317  
 167 8 49 319 719 1035 1.10E-36 162.2 29159 cellular  
 organisms;Eukaryota;Opisthokonta;Metazoa;Eumetazoa;Bilateria;Protostomia;  
 Spiralia;Lophotrochozoa;Mollusca;Bivalvia;Autobranchia;Pteriormorphia;Ostr  
 eida;Ostreoidea;Ostreidae;Crassostrea;Crassostrea gigas  
 UdeM00000001931 6565 164.1 UdeM00000001931 XP\_022288933.1 32.7 297  
 176 5 73 346 293 588 3.20E-37 164.1 6565 cellular  
 organisms;Eukaryota;Opisthokonta;Metazoa;Eumetazoa;Bilateria;Protostomia;  
 Spiralia;Lophotrochozoa;Mollusca;Bivalvia;Autobranchia;Pteriormorphia;Ostr  
 eida;Ostreoidea;Ostreidae;Crassostrea;Crassostrea virginica  
 UdeM00000001933 6596 84 UdeM00000001933 XP\_045195973.1 36.8 152  
 76 4 16 164 308 442 2.10E-13 84 6596 cellular  
 organisms;Eukaryota;Opisthokonta;Metazoa;Eumetazoa;Bilateria;Protostomia;  
 Spiralia;Lophotrochozoa;Mollusca;Bivalvia;Autobranchia;Heteroconchia;Euhe  
 terodonta;Imparidentia;Venerida;Veneroidea;Veneridae;Mercenaria;Mercenari  
 a mercenaria  
 UdeM00000001934 6565 171.8 UdeM00000001934 XP\_022288931.1 34.1 305  
 172 5 41 318 290 592 1.40E-39 171.8 6565 cellular  
 organisms;Eukaryota;Opisthokonta;Metazoa;Eumetazoa;Bilateria;Protostomia;  
 Spiralia;Lophotrochozoa;Mollusca;Bivalvia;Autobranchia;Pteriormorphia;Ostr  
 eida;Ostreoidea;Ostreidae;Crassostrea;Crassostrea virginica  
 UdeM00000001939 6596 183.3 UdeM00000001939 XP\_045195891.1 28.7 679  
 399 19 46 664 19 672 9.80E-43 183.3 6596 cellular

organisms;Eukaryota;Opisthokonta;Metazoa;Eumetazoa;Bilateria;Protostomia; Spiralia;Lophotrochozoa;Mollusca;Bivalvia;Autobranhia;Heteroconchia;Euherodonta;Imparidentia;Venerida;Veneroidea;Veneridae;Mercenaria;Mercenaria mercenaria

UdeM00000001940 6596 151.8 UdeM00000001940 XP\_045195892.1 40.4 250  
132 6 529 776 623 857 3.70E-33 151.8 6596 cellular

organisms;Eukaryota;Opisthokonta;Metazoa;Eumetazoa;Bilateria;Protostomia; Spiralia;Lophotrochozoa;Mollusca;Bivalvia;Autobranhia;Heteroconchia;Euherodonta;Imparidentia;Venerida;Veneroidea;Veneridae;Mercenaria;Mercenaria mercenaria

UdeM00000001941 6579 470.7 UdeM00000001941 XP\_033739698.1 72.3 311  
86 0 11 321 11 321 1.50E-129 470.7 6579 cellular

organisms;Eukaryota;Opisthokonta;Metazoa;Eumetazoa;Bilateria;Protostomia; Spiralia;Lophotrochozoa;Mollusca;Bivalvia;Autobranhia;Pteriormorphia;Pectinida;Pectinoidea;Pectinidae;Pecten;Pecten maximus

UdeM00000001943 13164 73.6 UdeM00000001943 XP\_022167387.1 39.5 76  
46 0 6 81 94 169 1.40E-10 73.6 13164 cellular

organisms;Eukaryota;Opisthokonta;Metazoa;Eumetazoa;Bilateria;Protostomia; Ecdysozoa;Panarthropoda;Arthropoda;Mandibulata;Pancrustacea;Hexapoda;Insecta;Dicondylia;Pterygota;Neoptera;Paraneoptera;Hemiptera;Sternorrhyncha;Aphidomorpha;Aphidoidea;Aphididae;Aphidinae;Macrosiphini;Myzus;Myzus persicae

UdeM00000001944 48498 432.6 UdeM00000001944 XP\_020611075.1 63.5 315  
115 0 11 325 2 316 4.60E-118 432.6 48498 cellular

organisms;Eukaryota;Opisthokonta;Metazoa;Eumetazoa;Cnidaria;Anthozoa;Hexacorallia;Scleractinia;Faviina;Merulinidae;Orbicella;Orbicella faveolata

UdeM00000001945 7741 453.8 UdeM00000001945 XP\_019617300.1 65.9 320  
109 0 13 332 29 348 2.00E-124 453.8 7741 cellular

organisms;Eukaryota;Opisthokonta;Metazoa;Eumetazoa;Bilateria;Deuterostomia;Chordata;Cephalochordata;Leptocardii;Amphioxiformes;Branchiostomidae;Branchiostoma;Branchiostoma belcheri

UdeM00000001946 6579 186 UdeM00000001946 XP\_033743002.1 43.8 194  
109 0 115 308 10 203 7.60E-44 186 6579 cellular

organisms;Eukaryota;Opisthokonta;Metazoa;Eumetazoa;Bilateria;Protostomia; Spiralia;Lophotrochozoa;Mollusca;Bivalvia;Autobranhia;Pteriormorphia;Pectinida;Pectinoidea;Pectinidae;Pecten;Pecten maximus

UdeM00000001947 6579 370.5 UdeM00000001947 XP\_033740259.1 47.4 390  
198 5 6 392 4 389 2.60E-99 370.5 6579 cellular

organisms;Eukaryota;Opisthokonta;Metazoa;Eumetazoa;Bilateria;Protostomia; Spiralia;Lophotrochozoa;Mollusca;Bivalvia;Autobranhia;Pteriormorphia;Pectinida;Pectinoidea;Pectinidae;Pecten;Pecten maximus

UdeM00000001948 6596 106.7 UdeM00000001948 XP\_045196692.1 31.7 306  
174 11 30 310 27 322 6.70E-20 106.7 6596 cellular

organisms;Eukaryota;Opisthokonta;Metazoa;Eumetazoa;Bilateria;Protostomia; Spiralia;Lophotrochozoa;Mollusca;Bivalvia;Autobranhia;Heteroconchia;Euherodonta;Imparidentia;Venerida;Veneroidea;Veneridae;Mercenaria;Mercenaria mercenaria

UdeM00000001950 6105 646 UdeM00000001950 XP\_031557674.1 33.9 1062  
655 21 4 1032 5 1052 8.30E-182 646 6105 cellular

organisms;Eukaryota;Opisthokonta;Metazoa;Eumetazoa;Cnidaria;Anthozoa;Hexacorallia;Actiniaria;Actiniidae;Actinia;Actinia tenebrosa

UdeM00000001951 6596 89.4 UdeM00000001951 XP\_045197768.1 45 111  
39 2 1 89 180 290 4.10E-15 89.4 6596 cellular

organisms;Eukaryota;Opisthokonta;Metazoa;Eumetazoa;Bilateria;Protostomia;

Spiralia;Lophotrochozoa;Mollusca;Bivalvia;Autobranchia;Heteroconchia;Euherodonta;Imparidentia;Venerida;Veneroidea;Veneridae;Mercenaria;Mercenaria mercenaria

UdeM00000001952 6105 637.5 UdeM00000001952 XP\_031557674.1 34.2 1041  
653 16 7 1024 21 1052 2.90E-179 637.5 6105 cellular

organisms;Eukaryota;Opisthokonta;Metazoa;Eumetazoa;Cnidaria;Anthozoa;Hexacorallia;Actiniaria;Actiniidae;Actinia;Actinia tenebrosa

UdeM00000001953 6105 646.4 UdeM00000001953 XP\_031557674.1 34.2 1056  
658 17 2 1029 6 1052 6.30E-182 646.4 6105 cellular

organisms;Eukaryota;Opisthokonta;Metazoa;Eumetazoa;Cnidaria;Anthozoa;Hexacorallia;Actiniaria;Actiniidae;Actinia;Actinia tenebrosa

UdeM00000001954 6105 618.6 UdeM00000001954 XP\_031557674.1 33.8 1053  
660 16 5 1027 7 1052 1.40E-173 618.6 6105 cellular

organisms;Eukaryota;Opisthokonta;Metazoa;Eumetazoa;Cnidaria;Anthozoa;Hexacorallia;Actiniaria;Actiniidae;Actinia;Actinia tenebrosa

UdeM00000001955 6105 618.6 UdeM00000001955 XP\_031557674.1 33.8 1053  
660 16 10 1032 7 1052 1.40E-173 618.6 6105 cellular

organisms;Eukaryota;Opisthokonta;Metazoa;Eumetazoa;Cnidaria;Anthozoa;Hexacorallia;Actiniaria;Actiniidae;Actinia;Actinia tenebrosa

UdeM00000001956 6596 447.6 UdeM00000001956 XP\_045198784.1 49.7 431  
216 1 3 432 103 533 1.80E-122 447.6 6596 cellular

organisms;Eukaryota;Opisthokonta;Metazoa;Eumetazoa;Bilateria;Protostomia;Spiralia;Lophotrochozoa;Mollusca;Bivalvia;Autobranchia;Heteroconchia;Euherodonta;Imparidentia;Venerida;Veneroidea;Veneridae;Mercenaria;Mercenaria mercenaria

UdeM00000001957 6596 387.9 UdeM00000001957 XP\_045198127.1 46 448  
231 7 35 479 54 493 2.10E-104 387.9 6596 cellular

organisms;Eukaryota;Opisthokonta;Metazoa;Eumetazoa;Bilateria;Protostomia;Spiralia;Lophotrochozoa;Mollusca;Bivalvia;Autobranchia;Heteroconchia;Euherodonta;Imparidentia;Venerida;Veneroidea;Veneridae;Mercenaria;Mercenaria mercenaria

UdeM00000001958 6105 625.9 UdeM00000001958 XP\_031557674.1 33.9 1056  
655 18 5 1027 7 1052 8.80E-176 625.9 6105 cellular

organisms;Eukaryota;Opisthokonta;Metazoa;Eumetazoa;Cnidaria;Anthozoa;Hexacorallia;Actiniaria;Actiniidae;Actinia;Actinia tenebrosa

UdeM00000001959 6105 626.3 UdeM00000001959 XP\_031557674.1 34 1053  
658 17 5 1027 7 1052 6.80E-176 626.3 6105 cellular

organisms;Eukaryota;Opisthokonta;Metazoa;Eumetazoa;Cnidaria;Anthozoa;Hexacorallia;Actiniaria;Actiniidae;Actinia;Actinia tenebrosa

UdeM00000001960 6573 443 UdeM00000001960 XP\_021349183.1 68.1 383  
121 1 1 383 81 462 4.00E-121 443 6573 cellular

organisms;Eukaryota;Opisthokonta;Metazoa;Eumetazoa;Bilateria;Protostomia;Spiralia;Lophotrochozoa;Mollusca;Bivalvia;Autobranchia;Pteriomorpha;Pectinida;Pectinoidea;Pectinidae;Mizuhopecten;Mizuhopecten yessoensis

UdeM00000001961 6573 578.6 UdeM00000001961 XP\_021349183.1 70.8 463  
134 1 1 463 1 462 7.30E-162 578.6 6573 cellular

organisms;Eukaryota;Opisthokonta;Metazoa;Eumetazoa;Bilateria;Protostomia;Spiralia;Lophotrochozoa;Mollusca;Bivalvia;Autobranchia;Pteriomorpha;Pectinida;Pectinoidea;Pectinidae;Mizuhopecten;Mizuhopecten yessoensis

UdeM00000001962 218467 112.8 UdeM00000001962 XP\_023219748.1 53  
115 53 1 15 128 84 198 3.20E-22 112.8 218467

cellular

organisms;Eukaryota;Opisthokonta;Metazoa;Eumetazoa;Bilateria;Protostomia;

Ecdysozoa; Panarthropoda; Arthropoda; Chelicerata; Arachnida; Scorpiones; Buthida; Buthoidea; Buthidae; Centruroides; Centruroides sculpturatus

UdeM00000001963 1735272 228.8 UdeM00000001963 XP\_041354581.1 47.4  
230 117 3 24 250 91 319 9.80E-57 228.8 1735272  
cellular

organisms; Eukaryota; Opisthokonta; Metazoa; Eumetazoa; Bilateria; Protostomia; Spiralia; Lophotrochozoa; Mollusca; Gastropoda; Neomphalina; Neomphaloidea; Peltospiridae; Gigantopelta; Gigantopelta aegis

UdeM00000001964 1735272 211.1 UdeM00000001964 XP\_041354581.1 47.6  
210 106 3 48 253 121 330 1.70E-51 211.1 1735272  
cellular

organisms; Eukaryota; Opisthokonta; Metazoa; Eumetazoa; Bilateria; Protostomia; Spiralia; Lophotrochozoa; Mollusca; Gastropoda; Neomphalina; Neomphaloidea; Peltospiridae; Gigantopelta; Gigantopelta aegis

UdeM00000001965 6596 1946.4 UdeM00000001965 XP\_045198705.1 52  
1958 830 23 1 1869 407 2343 0.00E+00 1946.4 6596  
cellular

organisms; Eukaryota; Opisthokonta; Metazoa; Eumetazoa; Bilateria; Protostomia; Spiralia; Lophotrochozoa; Mollusca; Bivalvia; Autobranchia; Heteroconchia; Euheterodonta; Imparidentia; Venerida; Veneroidea; Veneridae; Mercenaria; Mercenaria mercenaria

UdeM00000001967 6596 629.4 UdeM00000001967 XP\_045198706.1 38.8 981  
550 15 1 969 760 1702 8.30E-177 629.4 6596 cellular

organisms; Eukaryota; Opisthokonta; Metazoa; Eumetazoa; Bilateria; Protostomia; Spiralia; Lophotrochozoa; Mollusca; Bivalvia; Autobranchia; Heteroconchia; Euheterodonta; Imparidentia; Venerida; Veneroidea; Veneridae; Mercenaria; Mercenaria mercenaria

UdeM00000001968 6596 593.2 UdeM00000001968 XP\_045198706.1 52.7 584  
271 5 20 601 178 758 4.00E-166 593.2 6596 cellular

organisms; Eukaryota; Opisthokonta; Metazoa; Eumetazoa; Bilateria; Protostomia; Spiralia; Lophotrochozoa; Mollusca; Bivalvia; Autobranchia; Heteroconchia; Euheterodonta; Imparidentia; Venerida; Veneroidea; Veneridae; Mercenaria; Mercenaria mercenaria

UdeM00000001969 1529436 60.1 UdeM00000001969 XP\_033124707.1 30.2  
106 62 2 27 120 503 608 2.30E-06 60.1 1529436  
cellular

organisms; Eukaryota; Opisthokonta; Metazoa; Eumetazoa; Bilateria; Deuterostomia; Echinodermata; Pelmatozoa; Crinoidea; Articulata; Comatulida; Comatulidae; Comatulinae; Anneissia; Anneissia japonica

UdeM00000001970 48498 151.4 UdeM00000001970 XP\_020611646.1 30 293  
197 4 4 288 1178 1470 1.80E-33 151.4 48498 cellular

organisms; Eukaryota; Opisthokonta; Metazoa; Eumetazoa; Cnidaria; Anthozoa; Hexacorallia; Scleractinia; Faviina; Merulinidae; Orbicella; Orbicella faveolata

UdeM00000001971 7741 559.7 UdeM00000001971 XP\_019618826.1 56.8 477  
205 1 1 476 47 523 3.60E-156 559.7 7741 cellular

organisms; Eukaryota; Opisthokonta; Metazoa; Eumetazoa; Bilateria; Deuterostomia; Chordata; Cephalochordata; Leptocardii; Amphioxiformes; Branchiostomidae; Branchiostoma; Branchiostoma belcheri

UdeM00000001972 1529436 117.5 UdeM00000001972 XP\_033124707.1 33.3  
231 136 6 2 224 388 608 2.30E-23 117.5 1529436  
cellular

organisms; Eukaryota; Opisthokonta; Metazoa; Eumetazoa; Bilateria; Deuterostomia; Echinodermata; Pelmatozoa; Crinoidea; Articulata; Comatulida; Comatulidae; Comatulinae; Anneissia; Anneissia japonica

UdeM00000001973 29159 132.1 UdeM00000001973 XP\_034319761.1 26.9 275  
 177 4 108 365 19 286 1.50E-27 132.1 29159 cellular  
 organisms;Eukaryota;Opisthokonta;Metazoa;Eumetazoa;Bilateria;Protostomia;  
 Spiralia;Lophotrochozoa;Mollusca;Bivalvia;Autobranchia;Pteriomorphia;Ostr  
 eida;Ostreoidea;Ostreidae;Crassostrea;Crassostrea gigas  
 UdeM00000001974 1529436 60.8 UdeM00000001974 XP\_033124707.1 28.8  
 111 70 2 5 107 499 608 1.20E-06 60.8 1529436  
 cellular  
 organisms;Eukaryota;Opisthokonta;Metazoa;Eumetazoa;Bilateria;Deuterostomi  
 a;Echinodermata;Pelmatozoa;Crinoidea;Articulata;Comatulida;Comatulidae;Co  
 matulinae;Anneissia;Anneissia japonica  
 UdeM00000001975 29159 362.5 UdeM00000001975 XP\_034319761.1 27.9 746  
 532 4 68 811 10 751 1.40E-96 362.5 29159 cellular  
 organisms;Eukaryota;Opisthokonta;Metazoa;Eumetazoa;Bilateria;Protostomia;  
 Spiralia;Lophotrochozoa;Mollusca;Bivalvia;Autobranchia;Pteriomorphia;Ostr  
 eida;Ostreoidea;Ostreidae;Crassostrea;Crassostrea gigas  
 UdeM00000001978 6596 137.9 UdeM00000001978 XP\_045198856.1 38.7 204  
 99 6 43 229 65 259 1.80E-29 137.9 6596 cellular  
 organisms;Eukaryota;Opisthokonta;Metazoa;Eumetazoa;Bilateria;Protostomia;  
 Spiralia;Lophotrochozoa;Mollusca;Bivalvia;Autobranchia;Heteroconchia;Euhe  
 terodonta;Imparidentia;Venerida;Veneroidea;Veneridae;Mercenaria;Mercenari  
 a mercenaria  
 UdeM00000001979 37653 215.7 UdeM00000001979 XP\_014776580.1 89.3 121  
 13 0 1 121 1 121 3.30E-53 215.7 37653 cellular  
 organisms;Eukaryota;Opisthokonta;Metazoa;Eumetazoa;Bilateria;Protostomia;  
 Spiralia;Lophotrochozoa;Mollusca;Cephalopoda;Coleoidea;Octopodiformes;Oct  
 opoda;Incirrata;Octopodidae;Octopus;Octopus bimaculoides  
 UdeM00000001980 6526 59.7 UdeM00000001980 XP\_013089460.1 37.5 128  
 64 6 7 134 5 116 3.50E-06 59.7 6526 cellular  
 organisms;Eukaryota;Opisthokonta;Metazoa;Eumetazoa;Bilateria;Protostomia;  
 Spiralia;Lophotrochozoa;Mollusca;Gastropoda;Heterobranchia;Euthyneura;Pan  
 pulmonata;Hygrophila;Lymnaeioidea;Planorbidae;Biomphalaria;Biomphalaria  
 glabrata  
 UdeM00000001982 6596 1251.1 UdeM00000001982 XP\_045198596.1 49.8  
 1358 545 20 28 1333 16 1288 0.00E+00 1251.1 6596  
 cellular  
 organisms;Eukaryota;Opisthokonta;Metazoa;Eumetazoa;Bilateria;Protostomia;  
 Spiralia;Lophotrochozoa;Mollusca;Bivalvia;Autobranchia;Heteroconchia;Euhe  
 terodonta;Imparidentia;Venerida;Veneroidea;Veneridae;Mercenaria;Mercenari  
 a mercenaria  
 UdeM00000001984 6596 145.2 UdeM00000001984 XP\_045195551.1 36.4 231  
 132 6 189 417 821 1038 2.20E-31 145.2 6596 cellular  
 organisms;Eukaryota;Opisthokonta;Metazoa;Eumetazoa;Bilateria;Protostomia;  
 Spiralia;Lophotrochozoa;Mollusca;Bivalvia;Autobranchia;Heteroconchia;Euhe  
 terodonta;Imparidentia;Venerida;Veneroidea;Veneridae;Mercenaria;Mercenari  
 a mercenaria  
 UdeM00000001986 6573 77.8 UdeM00000001986 XP\_021376553.1 47.4 76  
 38 1 1 76 3 76 7.80E-12 77.8 6573 cellular  
 organisms;Eukaryota;Opisthokonta;Metazoa;Eumetazoa;Bilateria;Protostomia;  
 Spiralia;Lophotrochozoa;Mollusca;Bivalvia;Autobranchia;Pteriomorphia;Pect  
 inida;Pectinoidea;Pectinidae;Mizuhopecten;Mizuhopecten yessoensis  
 UdeM00000001989 6596 131.3 UdeM00000001989 XP\_045195551.1 40.7 162  
 89 3 34 193 836 992 1.60E-27 131.3 6596 cellular  
 organisms;Eukaryota;Opisthokonta;Metazoa;Eumetazoa;Bilateria;Protostomia;



Spiralia; Lophotrochozoa; Mollusca; Bivalvia; Autobranchia; Heteroconchia; Euheterodonta; Imparidentia; Venerida; Veneroidea; Veneridae; Mercenaria; Mercenaria mercenaria

UdeM00000001990 6596 171.4 UdeM00000001990 XP\_045187536.1 52.2 161  
73 1 11 171 50 206 1.00E-39 171.4 6596 cellular  
organisms; Eukaryota; Opisthokonta; Metazoa; Eumetazoa; Bilateria; Protostomia; Spiralia; Lophotrochozoa; Mollusca; Bivalvia; Autobranchia; Heteroconchia; Euheterodonta; Imparidentia; Venerida; Veneroidea; Veneridae; Mercenaria; Mercenaria mercenaria

UdeM00000001991 6596 344.4 UdeM00000001991 XP\_045187536.1 74.1 232  
59 1 2 233 228 458 1.20E-91 344.4 6596 cellular  
organisms; Eukaryota; Opisthokonta; Metazoa; Eumetazoa; Bilateria; Protostomia; Spiralia; Lophotrochozoa; Mollusca; Bivalvia; Autobranchia; Heteroconchia; Euheterodonta; Imparidentia; Venerida; Veneroidea; Veneridae; Mercenaria; Mercenaria mercenaria

UdeM00000001992 6596 102.4 UdeM00000001992 XP\_045187536.1 74.6 63  
16 0 1 63 396 458 2.40E-19 102.4 6596 cellular  
organisms; Eukaryota; Opisthokonta; Metazoa; Eumetazoa; Bilateria; Protostomia; Spiralia; Lophotrochozoa; Mollusca; Bivalvia; Autobranchia; Heteroconchia; Euheterodonta; Imparidentia; Venerida; Veneroidea; Veneridae; Mercenaria; Mercenaria mercenaria

UdeM00000001993 6596 123.6 UdeM00000001993 XP\_045187536.1 54.1 111  
49 1 1 111 496 604 2.40E-25 123.6 6596 cellular  
organisms; Eukaryota; Opisthokonta; Metazoa; Eumetazoa; Bilateria; Protostomia; Spiralia; Lophotrochozoa; Mollusca; Bivalvia; Autobranchia; Heteroconchia; Euheterodonta; Imparidentia; Venerida; Veneroidea; Veneridae; Mercenaria; Mercenaria mercenaria

UdeM00000001994 6596 498 UdeM00000001994 XP\_045195551.1 34.7 1124  
577 23 336 1348 391 1468 3.70E-137 498 6596 cellular  
organisms; Eukaryota; Opisthokonta; Metazoa; Eumetazoa; Bilateria; Protostomia; Spiralia; Lophotrochozoa; Mollusca; Bivalvia; Autobranchia; Heteroconchia; Euheterodonta; Imparidentia; Venerida; Veneroidea; Veneridae; Mercenaria; Mercenaria mercenaria

UdeM00000001997 6579 146.7 UdeM00000001997 XP\_033741098.1 50.4 137  
67 1 2 137 4 140 2.10E-32 146.7 6579 cellular  
organisms; Eukaryota; Opisthokonta; Metazoa; Eumetazoa; Bilateria; Protostomia; Spiralia; Lophotrochozoa; Mollusca; Bivalvia; Autobranchia; Pteriomorpha; Pectinida; Pectinoidea; Pectinidae; Pecten; Pecten maximus

UdeM00000001998 6579 146.7 UdeM00000001998 XP\_033741098.1 50.4 137  
67 1 7 142 4 140 2.20E-32 146.7 6579 cellular  
organisms; Eukaryota; Opisthokonta; Metazoa; Eumetazoa; Bilateria; Protostomia; Spiralia; Lophotrochozoa; Mollusca; Bivalvia; Autobranchia; Pteriomorpha; Pectinida; Pectinoidea; Pectinidae; Pecten; Pecten maximus

UdeM00000001999 6596 748.4 UdeM00000001999 XP\_045195549.1 77.4 446  
97 2 1 445 1 443 5.20E-213 748.4 6596 cellular  
organisms; Eukaryota; Opisthokonta; Metazoa; Eumetazoa; Bilateria; Protostomia; Spiralia; Lophotrochozoa; Mollusca; Bivalvia; Autobranchia; Heteroconchia; Euheterodonta; Imparidentia; Venerida; Veneroidea; Veneridae; Mercenaria; Mercenaria mercenaria

UdeM00000002000 6596 840.1 UdeM00000002000 XP\_045195108.1 49.5 1187  
469 27 1 1149 1 1095 3.30E-240 840.1 6596 cellular  
organisms; Eukaryota; Opisthokonta; Metazoa; Eumetazoa; Bilateria; Protostomia; Spiralia; Lophotrochozoa; Mollusca; Bivalvia; Autobranchia; Heteroconchia; Euheterodonta; Imparidentia; Venerida; Veneroidea; Veneridae; Mercenaria; Mercenaria mercenaria

terodonta;Imparidentia;Venerida;Veneroidea;Veneridae;Mercenaria;Mercenari  
 a mercenaria  
 UdeM00000002001 6565 134 UdeM00000002001 XP\_022299727.1 50 134  
 66 1 29 162 145 277 1.90E-28 134 6565 cellular  
 organisms;Eukaryota;Opisthokonta;Metazoa;Eumetazoa;Bilateria;Protostomia;  
 Spiralia;Lophotrochozoa;Mollusca;Bivalvia;Autobranchia;Pteriormorphia;Ostr  
 eida;Ostreoidea;Ostreidae;Crassostrea;Crassostrea virginica  
 UdeM00000002002 6596 458.4 UdeM00000002002 XP\_045190515.1 32.6 973  
 534 28 281 1226 1100 1977 2.90E-125 458.4 6596 cellular  
 organisms;Eukaryota;Opisthokonta;Metazoa;Eumetazoa;Bilateria;Protostomia;  
 Spiralia;Lophotrochozoa;Mollusca;Bivalvia;Autobranchia;Heteroconchia;Euhe  
 terodonta;Imparidentia;Venerida;Veneroidea;Veneridae;Mercenaria;Mercenari  
 a mercenaria  
 UdeM00000002003 6596 602.4 UdeM00000002003 XP\_045190527.1 48.7 622  
 313 3 1 621 36 652 6.40E-169 602.4 6596 cellular  
 organisms;Eukaryota;Opisthokonta;Metazoa;Eumetazoa;Bilateria;Protostomia;  
 Spiralia;Lophotrochozoa;Mollusca;Bivalvia;Autobranchia;Heteroconchia;Euhe  
 terodonta;Imparidentia;Venerida;Veneroidea;Veneridae;Mercenaria;Mercenari  
 a mercenaria  
 UdeM00000002004 29159 243 UdeM00000002004 XP\_034322429.1 29 637  
 211 7 4 403 1 633 1.20E-60 243 29159 cellular  
 organisms;Eukaryota;Opisthokonta;Metazoa;Eumetazoa;Bilateria;Protostomia;  
 Spiralia;Lophotrochozoa;Mollusca;Bivalvia;Autobranchia;Pteriormorphia;Ostr  
 eida;Ostreoidea;Ostreidae;Crassostrea;Crassostrea gigas  
 UdeM00000002005 6596 226.9 UdeM00000002005 XP\_045204261.1 41.3 276  
 150 6 6 276 39 307 3.30E-56 226.9 6596 cellular  
 organisms;Eukaryota;Opisthokonta;Metazoa;Eumetazoa;Bilateria;Protostomia;  
 Spiralia;Lophotrochozoa;Mollusca;Bivalvia;Autobranchia;Heteroconchia;Euhe  
 terodonta;Imparidentia;Venerida;Veneroidea;Veneridae;Mercenaria;Mercenari  
 a mercenaria  
 UdeM00000002006 6596 232.3 UdeM00000002006 XP\_045202146.1 46.7 242  
 112 3 45 272 77 315 7.70E-58 232.3 6596 cellular  
 organisms;Eukaryota;Opisthokonta;Metazoa;Eumetazoa;Bilateria;Protostomia;  
 Spiralia;Lophotrochozoa;Mollusca;Bivalvia;Autobranchia;Heteroconchia;Euhe  
 terodonta;Imparidentia;Venerida;Veneroidea;Veneridae;Mercenaria;Mercenari  
 a mercenaria  
 UdeM00000002007 6596 232.3 UdeM00000002007 XP\_045202146.1 46.7 242  
 112 3 46 273 77 315 7.80E-58 232.3 6596 cellular  
 organisms;Eukaryota;Opisthokonta;Metazoa;Eumetazoa;Bilateria;Protostomia;  
 Spiralia;Lophotrochozoa;Mollusca;Bivalvia;Autobranchia;Heteroconchia;Euhe  
 terodonta;Imparidentia;Venerida;Veneroidea;Veneridae;Mercenaria;Mercenari  
 a mercenaria  
 UdeM00000002008 6579 856.3 UdeM00000002008 XP\_033756903.1 76.1 876  
 209 0 16 891 1 876 3.50E-245 856.3 6579 cellular  
 organisms;Eukaryota;Opisthokonta;Metazoa;Eumetazoa;Bilateria;Protostomia;  
 Spiralia;Lophotrochozoa;Mollusca;Bivalvia;Autobranchia;Pteriormorphia;Pect  
 inida;Pectinoidea;Pectinidae;Pecten;Pecten maximus  
 UdeM00000002009 400727 984.2 UdeM00000002009 XP\_025095839.1 78.5  
 873 188 0 6 878 3 875 1.10E-283 984.2 400727  
 cellular  
 organisms;Eukaryota;Opisthokonta;Metazoa;Eumetazoa;Bilateria;Protostomia;  
 Spiralia;Lophotrochozoa;Mollusca;Gastropoda;Caenogastropoda;Architaeniogl  
 ossa;Ampullarioidea;Ampullariidae;Pomacea;Pomacea canaliculata

UdeM00000002010 400727 986.5 UdeM00000002010 XP\_025095839.1 78.6  
 877 186 1 1 877 1 875 2.20E-284 986.5 400727  
 cellular  
 organisms;Eukaryota;Opisthokonta;Metazoa;Eumetazoa;Bilateria;Protostomia;  
 Spiralia;Lophotrochozoa;Mollusca;Gastropoda;Caenogastropoda;Architaenioglossa;  
 Ampullarioidea;Ampullariidae;Pomacea;Pomacea canaliculata  
 UdeM00000002012 6596 213.8 UdeM00000002012 XP\_045189306.1 66.4 152  
 51 0 5 156 6 157 1.70E-52 213.8 6596 cellular  
 organisms;Eukaryota;Opisthokonta;Metazoa;Eumetazoa;Bilateria;Protostomia;  
 Spiralia;Lophotrochozoa;Mollusca;Bivalvia;Autobranchia;Heteroconchia;Euheterodonta;  
 Imparidentia;Venerida;Veneroidea;Veneridae;Mercenaria;Mercenaria mercenaria  
 UdeM00000002013 6596 197.2 UdeM00000002013 XP\_045189304.1 53.8 169  
 76 2 1 167 1 169 1.70E-47 197.2 6596 cellular  
 organisms;Eukaryota;Opisthokonta;Metazoa;Eumetazoa;Bilateria;Protostomia;  
 Spiralia;Lophotrochozoa;Mollusca;Bivalvia;Autobranchia;Heteroconchia;Euheterodonta;  
 Imparidentia;Venerida;Veneroidea;Veneridae;Mercenaria;Mercenaria mercenaria  
 UdeM00000002014 6596 287.7 UdeM00000002014 XP\_045173426.1 51.1 266  
 120 4 7 264 6 269 1.50E-74 287.7 6596 cellular  
 organisms;Eukaryota;Opisthokonta;Metazoa;Eumetazoa;Bilateria;Protostomia;  
 Spiralia;Lophotrochozoa;Mollusca;Bivalvia;Autobranchia;Heteroconchia;Euheterodonta;  
 Imparidentia;Venerida;Veneroidea;Veneridae;Mercenaria;Mercenaria mercenaria  
 UdeM00000002015 6596 270.4 UdeM00000002015 XP\_045173426.1 48.4 248  
 122 3 19 260 22 269 2.40E-69 270.4 6596 cellular  
 organisms;Eukaryota;Opisthokonta;Metazoa;Eumetazoa;Bilateria;Protostomia;  
 Spiralia;Lophotrochozoa;Mollusca;Bivalvia;Autobranchia;Heteroconchia;Euheterodonta;  
 Imparidentia;Venerida;Veneroidea;Veneridae;Mercenaria;Mercenaria mercenaria  
 UdeM00000002016 6565 363.2 UdeM00000002016 XP\_022289852.1 43.1 501  
 256 11 11 497 8 493 5.30E-97 363.2 6565 cellular  
 organisms;Eukaryota;Opisthokonta;Metazoa;Eumetazoa;Bilateria;Protostomia;  
 Spiralia;Lophotrochozoa;Mollusca;Bivalvia;Autobranchia;Pteriomorphia;Ostreida;  
 Ostreidae;Crassostrea;Crassostrea virginica  
 UdeM00000002017 1735272 387.5 UdeM00000002017 XP\_041368165.1 48.1  
 1102 567 2 3 1099 2 1103 5.70E-104 387.5 1735272  
 cellular  
 organisms;Eukaryota;Opisthokonta;Metazoa;Eumetazoa;Bilateria;Protostomia;  
 Spiralia;Lophotrochozoa;Mollusca;Gastropoda;Neomphalina;Neomphaloidea;Pelto-  
 spiridae;Gigantopelta;Gigantopelta aegis  
 UdeM00000002018 6565 144.1 UdeM00000002018 XP\_022343804.1 53 217  
 101 1 14 229 25 241 2.30E-31 144.1 6565 cellular  
 organisms;Eukaryota;Opisthokonta;Metazoa;Eumetazoa;Bilateria;Protostomia;  
 Spiralia;Lophotrochozoa;Mollusca;Bivalvia;Autobranchia;Pteriomorphia;Ostreida;  
 Ostreidae;Crassostrea;Crassostrea virginica  
 UdeM00000002019 27405 75.1 UdeM00000002019 XP\_042874304.1 34.4 122  
 64 3 153 260 199 318 1.50E-10 75.1 27405 cellular  
 organisms;Eukaryota;Opisthokonta;Metazoa;Eumetazoa;Bilateria;Protostomia;  
 Ecdysozoa;Panarthropoda;Arthropoda;Mandibulata;Pancrustacea;Crustacea;Mul-  
 ticrustacea;Malacostraca;Eumalacostraca;Eucarida;Decapoda;Dendrobranchiat-  
 a;Penaeoidea;Penaeidae;Penaeus;Penaeus japonicus  
 UdeM00000002021 6596 687.2 UdeM00000002021 XP\_045177521.1 62.4 651  
 202 6 62 670 454 1103 2.10E-194 687.2 6596 cellular

organisms;Eukaryota;Opisthokonta;Metazoa;Eumetazoa;Bilateria;Protostomia;Spiralia;Lophotrochozoa;Mollusca;Bivalvia;Autobranhia;Heteroconchia;Euherodonta;Imparidentia;Venerida;Veneroidea;Veneridae;Mercenaria;Mercenaria mercenaria

UdeM00000002020 6596 1233 UdeM00000002020 XP\_045177521.1 61.4 1116  
369 11 1 1067 1 1103 0.00E+00 1233 6596 cellular

organisms;Eukaryota;Opisthokonta;Metazoa;Eumetazoa;Bilateria;Protostomia;Spiralia;Lophotrochozoa;Mollusca;Bivalvia;Autobranhia;Heteroconchia;Euherodonta;Imparidentia;Venerida;Veneroidea;Veneridae;Mercenaria;Mercenaria mercenaria

UdeM00000002022 6596 953.4 UdeM00000002022 XP\_045177521.1 60.7 898  
291 11 1 849 1 885 2.00E-274 953.4 6596 cellular

organisms;Eukaryota;Opisthokonta;Metazoa;Eumetazoa;Bilateria;Protostomia;Spiralia;Lophotrochozoa;Mollusca;Bivalvia;Autobranhia;Heteroconchia;Euherodonta;Imparidentia;Venerida;Veneroidea;Veneridae;Mercenaria;Mercenaria mercenaria

UdeM00000002023 6579 191.8 UdeM00000002023 XP\_033757264.1 34.7 430  
252 14 5 419 18 433 2.10E-45 191.8 6579 cellular

organisms;Eukaryota;Opisthokonta;Metazoa;Eumetazoa;Bilateria;Protostomia;Spiralia;Lophotrochozoa;Mollusca;Bivalvia;Autobranhia;Pteriormorphia;Pectinida;Pectinoidea;Pectinidae;Pecten;Pecten maximus

UdeM00000002024 6579 450.7 UdeM00000002024 XP\_033757412.1 53.3 448  
208 1 21 468 6 452 3.70E-123 450.7 6579 cellular

organisms;Eukaryota;Opisthokonta;Metazoa;Eumetazoa;Bilateria;Protostomia;Spiralia;Lophotrochozoa;Mollusca;Bivalvia;Autobranhia;Pteriormorphia;Pectinida;Pectinoidea;Pectinidae;Pecten;Pecten maximus

UdeM00000002025 6596 2055.8 UdeM00000002025 XP\_045188105.1 58.9  
1984 684 13 365 2232 1039 3007 0.00E+00 2055.8 6596  
cellular

organisms;Eukaryota;Opisthokonta;Metazoa;Eumetazoa;Bilateria;Protostomia;Spiralia;Lophotrochozoa;Mollusca;Bivalvia;Autobranhia;Heteroconchia;Euherodonta;Imparidentia;Venerida;Veneroidea;Veneridae;Mercenaria;Mercenaria mercenaria

UdeM00000002026 6596 957.2 UdeM00000002026 XP\_045188105.1 63.4 796  
197 8 1 716 256 1037 1.20E-275 957.2 6596 cellular

organisms;Eukaryota;Opisthokonta;Metazoa;Eumetazoa;Bilateria;Protostomia;Spiralia;Lophotrochozoa;Mollusca;Bivalvia;Autobranhia;Heteroconchia;Euherodonta;Imparidentia;Venerida;Veneroidea;Veneridae;Mercenaria;Mercenaria mercenaria

UdeM00000002027 6596 466.1 UdeM00000002027 XP\_045188105.1 74.5 310  
69 3 1 309 1 301 3.50E-128 466.1 6596 cellular

organisms;Eukaryota;Opisthokonta;Metazoa;Eumetazoa;Bilateria;Protostomia;Spiralia;Lophotrochozoa;Mollusca;Bivalvia;Autobranhia;Heteroconchia;Euherodonta;Imparidentia;Venerida;Veneroidea;Veneridae;Mercenaria;Mercenaria mercenaria

UdeM00000002028 6596 427.9 UdeM00000002028 XP\_045188105.1 80.4 255  
49 1 1 255 1 254 8.80E-117 427.9 6596 cellular

organisms;Eukaryota;Opisthokonta;Metazoa;Eumetazoa;Bilateria;Protostomia;Spiralia;Lophotrochozoa;Mollusca;Bivalvia;Autobranhia;Heteroconchia;Euherodonta;Imparidentia;Venerida;Veneroidea;Veneridae;Mercenaria;Mercenaria mercenaria

UdeM00000002029 6579 302.4 UdeM00000002029 XP\_033756003.1 61.3 248  
95 1 23 269 1 248 5.90E-79 302.4 6579 cellular

organisms;Eukaryota;Opisthokonta;Metazoa;Eumetazoa;Bilateria;Protostomia;

Spiralia; Lophotrochozoa; Mollusca; Bivalvia; Autobranchia; Pteriomorpha; Pectinida; Pectinoidea; Pectinidae; Pecten; Pecten maximus

UdeM00000002030 29159 258.8 UdeM00000002030 XP\_034328347.1 42 348  
184 5 1 346 1 332 1.10E-65 258.8 29159 cellular  
organisms; Eukaryota; Opisthokonta; Metazoa; Eumetazoa; Bilateria; Protostomia; Spiralia; Lophotrochozoa; Mollusca; Bivalvia; Autobranchia; Pteriomorpha; Ostracida; Ostreidae; Crassostrea; Crassostrea gigas

UdeM00000002031 29159 267.7 UdeM00000002031 XP\_034328346.1 41.1 336  
187 2 1 336 1 325 2.20E-68 267.7 29159 cellular  
organisms; Eukaryota; Opisthokonta; Metazoa; Eumetazoa; Bilateria; Protostomia; Spiralia; Lophotrochozoa; Mollusca; Bivalvia; Autobranchia; Pteriomorpha; Ostracida; Ostreidae; Crassostrea; Crassostrea gigas

UdeM00000002032 29159 515 UdeM00000002032 XP\_011426140.1 72.3 382  
93 5 1 379 1 372 8.40E-143 515 29159 cellular  
organisms; Eukaryota; Opisthokonta; Metazoa; Eumetazoa; Bilateria; Protostomia; Spiralia; Lophotrochozoa; Mollusca; Bivalvia; Autobranchia; Pteriomorpha; Ostracida; Ostreidae; Crassostrea; Crassostrea gigas

UdeM00000002033 1735272 257.3 UdeM00000002033 XP\_041369094.1 27.5  
724 421 15 1 719 1 625 6.00E-65 257.3 1735272  
cellular  
organisms; Eukaryota; Opisthokonta; Metazoa; Eumetazoa; Bilateria; Protostomia; Spiralia; Lophotrochozoa; Mollusca; Gastropoda; Neomphalina; Neomphaloidea; Peltopspiridae; Gigantopelta; Gigantopelta aegis

UdeM00000002034 6596 100.9 UdeM00000002034 XP\_045189611.1 44.7 114  
60 2 454 566 629 740 5.50E-18 100.9 6596 cellular  
organisms; Eukaryota; Opisthokonta; Metazoa; Eumetazoa; Bilateria; Protostomia; Spiralia; Lophotrochozoa; Mollusca; Bivalvia; Autobranchia; Heteroconchia; Euheterodonta; Imparidentia; Venerida; Veneroidea; Veneridae; Mercenaria; Mercenaria mercenaria

UdeM00000002035 6596 100.9 UdeM00000002035 XP\_045189611.1 44.7 114  
60 2 420 532 629 740 5.10E-18 100.9 6596 cellular  
organisms; Eukaryota; Opisthokonta; Metazoa; Eumetazoa; Bilateria; Protostomia; Spiralia; Lophotrochozoa; Mollusca; Bivalvia; Autobranchia; Heteroconchia; Euheterodonta; Imparidentia; Venerida; Veneroidea; Veneridae; Mercenaria; Mercenaria mercenaria

UdeM00000002038 6596 90.1 UdeM00000002038 XP\_045189611.1 49.4 77  
37 1 6 80 8 84 1.60E-15 90.1 6596 cellular  
organisms; Eukaryota; Opisthokonta; Metazoa; Eumetazoa; Bilateria; Protostomia; Spiralia; Lophotrochozoa; Mollusca; Bivalvia; Autobranchia; Heteroconchia; Euheterodonta; Imparidentia; Venerida; Veneroidea; Veneridae; Mercenaria; Mercenaria mercenaria

UdeM00000002039 6565 211.5 UdeM00000002039 XP\_022321940.1 22.9 686  
480 11 4 646 6 685 3.30E-51 211.5 6565 cellular  
organisms; Eukaryota; Opisthokonta; Metazoa; Eumetazoa; Bilateria; Protostomia; Spiralia; Lophotrochozoa; Mollusca; Bivalvia; Autobranchia; Pteriomorpha; Ostracida; Ostreidae; Crassostrea; Crassostrea virginica

UdeM00000002040 6596 65.9 UdeM00000002040 XP\_045206071.1 39.2 74  
44 1 52 125 689 761 4.80E-08 65.9 6596 cellular  
organisms; Eukaryota; Opisthokonta; Metazoa; Eumetazoa; Bilateria; Protostomia; Spiralia; Lophotrochozoa; Mollusca; Bivalvia; Autobranchia; Heteroconchia; Euheterodonta; Imparidentia; Venerida; Veneroidea; Veneridae; Mercenaria; Mercenaria mercenaria

UdeM00000002041 29159 143.7 UdeM00000002041 XP\_034317706.1 31.2 250  
160 4 12 261 18 255 6.20E-31 143.7 29159 cellular

organisms;Eukaryota;Opisthokonta;Metazoa;Eumetazoa;Bilateria;Protostomia;Spiralia;Lophotrochozoa;Mollusca;Bivalvia;Autobranchia;Pteriormorphia;Ostr  
eida;Ostreoidea;Ostreidae;Crassostrea;Crassostrea gigas  
UdeM00000002042 6565 232.6 UdeM00000002042 XP\_022343730.1 49.7 288  
121 10 2 272 38 318 6.10E-58 232.6 6565 cellular  
organisms;Eukaryota;Opisthokonta;Metazoa;Eumetazoa;Bilateria;Protostomia;Spiralia;Lophotrochozoa;Mollusca;Bivalvia;Autobranchia;Pteriormorphia;Ostr  
eida;Ostreoidea;Ostreidae;Crassostrea;Crassostrea virginica  
UdeM00000002043 7574 727.6 UdeM00000002043 XP\_013409497.1 42 1010  
566 8 1 995 791 1795 2.10E-206 727.6 7574 cellular  
organisms;Eukaryota;Opisthokonta;Metazoa;Eumetazoa;Bilateria;Protostomia;Spiralia;Lophotrochozoa;Brachiopoda;Linguliformea;Lingulata;Lingulida;Lin  
guloidea;Lingulidae;Lingula;Lingula anatina  
UdeM00000002044 7574 118.6 UdeM00000002044 XP\_013409495.1 40.8 142  
84 0 15 156 879 1020 7.00E-24 118.6 7574 cellular  
organisms;Eukaryota;Opisthokonta;Metazoa;Eumetazoa;Bilateria;Protostomia;Spiralia;Lophotrochozoa;Brachiopoda;Linguliformea;Lingulata;Lingulida;Lin  
guloidea;Lingulidae;Lingula;Lingula anatina  
UdeM00000002045 1735272 413.3 UdeM00000002045 XP\_041370390.1 61.7  
347 128 3 96 439 1465 1809 3.90E-112 413.3 1735272  
cellular  
organisms;Eukaryota;Opisthokonta;Metazoa;Eumetazoa;Bilateria;Protostomia;Spiralia;Lophotrochozoa;Mollusca;Gastropoda;Neomphalina;Neomphaloidea;Pel  
tospiridae;Gigantopelta;Gigantopelta aegis  
UdeM00000002046 70779 85.9 UdeM00000002046 XP\_015752579.1 45.8 83  
42 1 47 126 18 100 4.40E-14 85.9 70779 cellular  
organisms;Eukaryota;Opisthokonta;Metazoa;Eumetazoa;Cnidaria;Anthozoa;Hexa  
corallia;Scleractinia;Astrocoeniina;Acroporidae;Acropora;Acropora  
digitifera  
UdeM00000002047 29159 82 UdeM00000002047 XP\_011425447.2 48.6 72  
36 1 13 84 158 228 4.20E-13 82 29159 cellular  
organisms;Eukaryota;Opisthokonta;Metazoa;Eumetazoa;Bilateria;Protostomia;Spiralia;Lophotrochozoa;Mollusca;Bivalvia;Autobranchia;Pteriormorphia;Ostr  
eida;Ostreoidea;Ostreidae;Crassostrea;Crassostrea gigas  
UdeM00000002048 400682 201.1 UdeM00000002048 XP\_019849765.1 47.8  
184 83 3 71 243 533 714 1.70E-48 201.1 400682  
cellular  
organisms;Eukaryota;Opisthokonta;Metazoa;Porifera;Demospongiae;Heteroscle  
romorpha;Haplosclerida;Niphatidae;Amphimedon;Amphimedon queenslandica  
UdeM00000002049 400682 177.6 UdeM00000002049 XP\_019849765.1 44.4  
178 87 2 535 702 537 712 5.80E-41 177.6 400682  
cellular  
organisms;Eukaryota;Opisthokonta;Metazoa;Porifera;Demospongiae;Heteroscle  
romorpha;Haplosclerida;Niphatidae;Amphimedon;Amphimedon queenslandica  
UdeM00000002050 48498 153.7 UdeM00000002050 XP\_020611730.1 61.2 103  
40 0 48 150 31 133 2.00E-34 153.7 48498 cellular  
organisms;Eukaryota;Opisthokonta;Metazoa;Eumetazoa;Cnidaria;Anthozoa;Hexa  
corallia;Scleractinia;Faviina;Merulinidae;Orbicella;Orbicella faveolata  
UdeM00000002052 7725 149.4 UdeM00000002052 XP\_039258617.1 53.5 127  
55 2 6 128 174 300 3.10E-33 149.4 7725 cellular  
organisms;Eukaryota;Opisthokonta;Metazoa;Eumetazoa;Bilateria;Deuterostomi  
a;Chordata;Tunicata;Ascidiacea;Stolidobranchia;Styelidae;Styela;Styela  
clava

UdeM00000002051 146911 183.7 UdeM00000002051 XP\_015282965.1 36.4  
 297 146 11 12 279 7 289 3.30E-43 183.7 146911  
 cellular  
 organisms;Eukaryota;Opisthokonta;Metazoa;Eumetazoa;Bilateria;Deuterostomi  
 a;Chordata;Craniata;Vertebrata;Gnathostomata;Teleostomi;Euteleostomi;Sarc  
 opterygii;Dipnotetrapodomorpha;Tetrapoda;Amniota;Sauropsida;Sauria;Lepido  
 sauria;Squamata;Bifurcata;Gekkota;Gekkonidae;Gekkoninae;Gekko;Gekko  
 japonicus  
 UdeM00000002053 51298 90.5 UdeM00000002053 XP\_036178578.1 55.4 74  
 32 1 1 73 399 472 9.90E-16 90.5 51298 cellular  
 organisms;Eukaryota;Opisthokonta;Metazoa;Eumetazoa;Bilateria;Deuterostomi  
 a;Chordata;Craniata;Vertebrata;Gnathostomata;Teleostomi;Euteleostomi;Sarc  
 opterygii;Dipnotetrapodomorpha;Tetrapoda;Amniota;Mammalia;Theria;Eutheria  
 ;Boreoeutheria;Laurasiatheria;Chiroptera;Microchiroptera;Vespertilionidae  
 ;Myotis;Myotis myotis  
 UdeM00000002055 6573 456.8 UdeM00000002055 XP\_021358892.1 32.5 822  
 532 12 124 926 205 1022 7.20E-125 456.8 6573 cellular  
 organisms;Eukaryota;Opisthokonta;Metazoa;Eumetazoa;Bilateria;Protostomia;  
 Spiralia;Lophotrochozoa;Mollusca;Bivalvia;Autobranchia;Pteriomorphia;Pect  
 inida;Pectinoidea;Pectinidae;Mizuhopecten;Mizuhopecten yessoensis  
 UdeM00000002056 400727 267.7 UdeM00000002056 XP\_025094638.1 32.6  
 576 304 13 118 615 258 827 4.90E-68 267.7 400727  
 cellular  
 organisms;Eukaryota;Opisthokonta;Metazoa;Eumetazoa;Bilateria;Protostomia;  
 Spiralia;Lophotrochozoa;Mollusca;Gastropoda;Caenogastropoda;Architaeniogl  
 ossa;Ampullarioidea;Ampullariidae;Pomacea;Pomacea canaliculata  
 UdeM00000002056 400727 196.1 UdeM00000002056 XP\_025094638.1 50.5  
 200 94 3 623 820 2196 2392 1.80E-46 196.1 400727  
 cellular  
 organisms;Eukaryota;Opisthokonta;Metazoa;Eumetazoa;Bilateria;Protostomia;  
 Spiralia;Lophotrochozoa;Mollusca;Gastropoda;Caenogastropoda;Architaeniogl  
 ossa;Ampullarioidea;Ampullariidae;Pomacea;Pomacea canaliculata  
 UdeM00000002058 6565 771.9 UdeM00000002058 XP\_022335825.1 34 1367  
 851 23 395 1743 271 1604 1.70E-219 771.9 6565 cellular  
 organisms;Eukaryota;Opisthokonta;Metazoa;Eumetazoa;Bilateria;Protostomia;  
 Spiralia;Lophotrochozoa;Mollusca;Bivalvia;Autobranchia;Pteriomorphia;Ostr  
 eida;Ostreidae;Crassostrea;Crassostrea virginica  
 UdeM00000002059 6565 762.7 UdeM00000002059 XP\_022335825.1 34.1 1339  
 834 21 412 1733 298 1604 1.00E-216 762.7 6565 cellular  
 organisms;Eukaryota;Opisthokonta;Metazoa;Eumetazoa;Bilateria;Protostomia;  
 Spiralia;Lophotrochozoa;Mollusca;Bivalvia;Autobranchia;Pteriomorphia;Ostr  
 eida;Ostreidae;Crassostrea;Crassostrea virginica  
 UdeM00000002060 6573 216.9 UdeM00000002060 XP\_021358892.1 30.4 477  
 238 11 1 386 1301 1774 4.70E-53 216.9 6573 cellular  
 organisms;Eukaryota;Opisthokonta;Metazoa;Eumetazoa;Bilateria;Protostomia;  
 Spiralia;Lophotrochozoa;Mollusca;Bivalvia;Autobranchia;Pteriomorphia;Pect  
 inida;Pectinoidea;Pectinidae;Mizuhopecten;Mizuhopecten yessoensis  
 UdeM00000002061 6573 215.3 UdeM00000002061 XP\_021358892.1 30.5 472  
 234 11 1 381 1306 1774 1.40E-52 215.3 6573 cellular  
 organisms;Eukaryota;Opisthokonta;Metazoa;Eumetazoa;Bilateria;Protostomia;  
 Spiralia;Lophotrochozoa;Mollusca;Bivalvia;Autobranchia;Pteriomorphia;Pect  
 inida;Pectinoidea;Pectinidae;Mizuhopecten;Mizuhopecten yessoensis  
 UdeM00000002062 6596 103.6 UdeM00000002062 XP\_045190676.1 45.8 131  
 69 2 1 130 643 772 2.20E-19 103.6 6596 cellular

organisms;Eukaryota;Opisthokonta;Metazoa;Eumetazoa;Bilateria;Protostomia;Spiralia;Lophotrochozoa;Mollusca;Bivalvia;Autobranchia;Heteroconchia;Euherodonta;Imparidentia;Venerida;Veneroidea;Veneridae;Mercenaria;Mercenaria mercenaria

UdeM00000002063 6596 444.1 UdeM00000002063 XP\_045190678.1 43.4 539  
290 8 1 527 601 1136 2.40E-121 444.1 6596 cellular

organisms;Eukaryota;Opisthokonta;Metazoa;Eumetazoa;Bilateria;Protostomia;Spiralia;Lophotrochozoa;Mollusca;Bivalvia;Autobranchia;Heteroconchia;Euherodonta;Imparidentia;Venerida;Veneroidea;Veneridae;Mercenaria;Mercenaria mercenaria

UdeM00000002064 6596 184.5 UdeM00000002064 XP\_045202545.1 49 202  
77 5 10 186 10 210 1.20E-43 184.5 6596 cellular

organisms;Eukaryota;Opisthokonta;Metazoa;Eumetazoa;Bilateria;Protostomia;Spiralia;Lophotrochozoa;Mollusca;Bivalvia;Autobranchia;Heteroconchia;Euherodonta;Imparidentia;Venerida;Veneroidea;Veneridae;Mercenaria;Mercenaria mercenaria

UdeM00000002065 6596 225.3 UdeM00000002065 XP\_045188256.1 34.5 438  
178 9 8 355 122 540 1.60E-55 225.3 6596 cellular

organisms;Eukaryota;Opisthokonta;Metazoa;Eumetazoa;Bilateria;Protostomia;Spiralia;Lophotrochozoa;Mollusca;Bivalvia;Autobranchia;Heteroconchia;Euherodonta;Imparidentia;Venerida;Veneroidea;Veneridae;Mercenaria;Mercenaria mercenaria

UdeM00000002066 7897 100.5 UdeM00000002066 XP\_014349537.1 45.3 106  
57 1 7 112 32 136 1.40E-18 100.5 7897 cellular

organisms;Eukaryota;Opisthokonta;Metazoa;Eumetazoa;Bilateria;Deuterostomia;Chordata;Craniata;Vertebrata;Gnathostomata;Teleostomi;Euteleostomi;Sarcopterygii;Coelacanthimorpha;Coelacanthiformes;Coelacanthidae;Latimeria;Latimeria chalumnae

UdeM00000002067 6596 542.7 UdeM00000002067 XP\_045188256.1 51.3 546  
239 8 3 540 78 604 6.80E-151 542.7 6596 cellular

organisms;Eukaryota;Opisthokonta;Metazoa;Eumetazoa;Bilateria;Protostomia;Spiralia;Lophotrochozoa;Mollusca;Bivalvia;Autobranchia;Heteroconchia;Euherodonta;Imparidentia;Venerida;Veneroidea;Veneridae;Mercenaria;Mercenaria mercenaria

UdeM00000002070 6565 70.1 UdeM00000002070 XP\_022337731.1 47 83  
43 1 56 138 128 209 2.50E-09 70.1 6565 cellular

organisms;Eukaryota;Opisthokonta;Metazoa;Eumetazoa;Bilateria;Protostomia;Spiralia;Lophotrochozoa;Mollusca;Bivalvia;Autobranchia;Pteriomorpha;Ostreida;Ostreoidea;Ostreidae;Crassostrea;Crassostrea virginica

UdeM00000002072 6596 263.8 UdeM00000002072 XP\_045190673.1 40.9 413  
215 9 475 877 408 801 7.60E-67 263.8 6596 cellular

organisms;Eukaryota;Opisthokonta;Metazoa;Eumetazoa;Bilateria;Protostomia;Spiralia;Lophotrochozoa;Mollusca;Bivalvia;Autobranchia;Heteroconchia;Euherodonta;Imparidentia;Venerida;Veneroidea;Veneridae;Mercenaria;Mercenaria mercenaria

UdeM00000002073 6565 726.1 UdeM00000002073 XP\_022339595.1 33.2 1300  
771 21 14 1235 607 1886 7.70E-206 726.1 6565 cellular

organisms;Eukaryota;Opisthokonta;Metazoa;Eumetazoa;Bilateria;Protostomia;Spiralia;Lophotrochozoa;Mollusca;Bivalvia;Autobranchia;Pteriomorpha;Ostreida;Ostreoidea;Ostreidae;Crassostrea;Crassostrea virginica

UdeM00000002074 6596 510 UdeM00000002074 XP\_045190678.1 46.1 601  
306 9 18 610 546 1136 4.20E-141 510 6596 cellular

organisms;Eukaryota;Opisthokonta;Metazoa;Eumetazoa;Bilateria;Protostomia;Spiralia;Lophotrochozoa;Mollusca;Bivalvia;Autobranchia;Heteroconchia;Euherodonta



terodonta;Imparidentia;Venerida;Veneroidea;Veneridae;Mercenaria;Mercenaria mercenaria

UdeM00000002076 7668 95.5 UdeM00000002076 XP\_030845845.1 54.1 74  
34 0 1 74 168 241 4.00E-17 95.5 7668 cellular

organisms;Eukaryota;Opisthokonta;Metazoa;Eumetazoa;Bilateria;Deuterostomia;Echinodermata;Eleutherozoa;Echinozoa;Echinoidea;Euechinoidea;Echinacea;Camarodonta;Echinidea;Strongylocentrotidae;Strongylocentrotus;Strongylocentrotus purpuratus

UdeM00000002077 6596 520.8 UdeM00000002077 XP\_045190515.1 30.1 1420  
801 45 17 1382 690 1972 5.40E-144 520.8 6596 cellular

organisms;Eukaryota;Opisthokonta;Metazoa;Eumetazoa;Bilateria;Protostomia;Spiralia;Lophotrochozoa;Mollusca;Bivalvia;Autobranchia;Heteroconchia;Euheterodonta;Imparidentia;Venerida;Veneroidea;Veneridae;Mercenaria;Mercenaria mercenaria

UdeM00000002078 7574 116.3 UdeM00000002078 XP\_013388573.1 39.6 182  
92 6 82 262 349 513 6.60E-23 116.3 7574 cellular

organisms;Eukaryota;Opisthokonta;Metazoa;Eumetazoa;Bilateria;Protostomia;Spiralia;Lophotrochozoa;Brachiopoda;Linguliformea;Lingulata;Lingulida;Linguloidea;Lingulidae;Lingula;Lingula anatina

UdeM00000002079 7574 226.1 UdeM00000002079 XP\_013388573.1 40.4 314  
184 2 4 317 629 939 6.40E-56 226.1 7574 cellular

organisms;Eukaryota;Opisthokonta;Metazoa;Eumetazoa;Bilateria;Protostomia;Spiralia;Lophotrochozoa;Brachiopoda;Linguliformea;Lingulata;Lingulida;Linguloidea;Lingulidae;Lingula;Lingula anatina

UdeM00000002080 6596 436.8 UdeM00000002080 XP\_045188729.1 32.5 947  
534 26 245 1168 870 1734 8.70E-119 436.8 6596 cellular

organisms;Eukaryota;Opisthokonta;Metazoa;Eumetazoa;Bilateria;Protostomia;Spiralia;Lophotrochozoa;Mollusca;Bivalvia;Autobranchia;Heteroconchia;Euheterodonta;Imparidentia;Venerida;Veneroidea;Veneridae;Mercenaria;Mercenaria mercenaria

UdeM00000002083 1735272 87 UdeM00000002083 XP\_041347204.1 33.8  
160 89 7 1 157 346 491 2.40E-14 87 1735272

cellular

organisms;Eukaryota;Opisthokonta;Metazoa;Eumetazoa;Bilateria;Protostomia;Spiralia;Lophotrochozoa;Mollusca;Gastropoda;Neomphalina;Neomphaloidea;Peltospiridae;Gigantopelta;Gigantopelta aegis

UdeM00000002082 1735272 135.6 UdeM00000002082 XP\_041347204.1 31.7  
300 159 12 2 270 207 491 9.90E-29 135.6 1735272

cellular

organisms;Eukaryota;Opisthokonta;Metazoa;Eumetazoa;Bilateria;Protostomia;Spiralia;Lophotrochozoa;Mollusca;Gastropoda;Neomphalina;Neomphaloidea;Peltospiridae;Gigantopelta;Gigantopelta aegis

UdeM00000002084 6945 62.4 UdeM00000002084 XP\_040078187.1 28.7 122  
86 1 51 171 33 154 2.00E-06 62.4 6945 cellular

organisms;Eukaryota;Opisthokonta;Metazoa;Eumetazoa;Bilateria;Protostomia;Ecdysozoa;Panarthropoda;Arthropoda;Chelicerata;Arachnida;Acari;Parasitiformes;Ixodida;Ixodoidea;Ixodidae;Ixodinae;Ixodes;Ixodes scapularis

UdeM00000002085 6945 62.4 UdeM00000002085 XP\_040078187.1 28.7 122  
86 1 51 171 33 154 2.00E-06 62.4 6945 cellular

organisms;Eukaryota;Opisthokonta;Metazoa;Eumetazoa;Bilateria;Protostomia;Ecdysozoa;Panarthropoda;Arthropoda;Chelicerata;Arachnida;Acari;Parasitiformes;Ixodida;Ixodoidea;Ixodidae;Ixodinae;Ixodes;Ixodes scapularis

UdeM00000043667 6596 69.3 UdeM00000043667 XP\_045183837.1 39.4 104  
58 2 46 145 239 341 8.00E-09 69.3 6596 cellular

organisms;Eukaryota;Opisthokonta;Metazoa;Eumetazoa;Bilateria;Protostomia;Spiralia;Lophotrochozoa;Mollusca;Bivalvia;Autobranhia;Heteroconchia;Euherodonta;Imparidentia;Venerida;Veneroidea;Veneridae;Mercenaria;Mercenaria mercenaria

UdeM00000043670 6596 70.1 UdeM00000043670 XP\_045183837.1 38.5 104  
59 2 46 145 239 341 3.50E-09 70.1 6596 cellular

organisms;Eukaryota;Opisthokonta;Metazoa;Eumetazoa;Bilateria;Protostomia;Spiralia;Lophotrochozoa;Mollusca;Bivalvia;Autobranhia;Heteroconchia;Euherodonta;Imparidentia;Venerida;Veneroidea;Veneridae;Mercenaria;Mercenaria mercenaria

UdeM00000030989 6596 364.4 UdeM00000030989 XP\_045161155.1 49.4 336  
167 1 31 363 123 458 1.70E-97 364.4 6596 cellular

organisms;Eukaryota;Opisthokonta;Metazoa;Eumetazoa;Bilateria;Protostomia;Spiralia;Lophotrochozoa;Mollusca;Bivalvia;Autobranhia;Heteroconchia;Euherodonta;Imparidentia;Venerida;Veneroidea;Veneridae;Mercenaria;Mercenaria mercenaria

UdeM00000030990 6596 170.2 UdeM00000030990 XP\_045163223.1 72.6 113  
27 1 1 113 1 109 1.50E-39 170.2 6596 cellular

organisms;Eukaryota;Opisthokonta;Metazoa;Eumetazoa;Bilateria;Protostomia;Spiralia;Lophotrochozoa;Mollusca;Bivalvia;Autobranhia;Heteroconchia;Euherodonta;Imparidentia;Venerida;Veneroidea;Veneridae;Mercenaria;Mercenaria mercenaria

UdeM00000030991 6596 69.7 UdeM00000030991 XP\_045162944.1 47.6 82  
27 3 159 231 141 215 5.50E-09 69.7 6596 cellular

organisms;Eukaryota;Opisthokonta;Metazoa;Eumetazoa;Bilateria;Protostomia;Spiralia;Lophotrochozoa;Mollusca;Bivalvia;Autobranhia;Heteroconchia;Euherodonta;Imparidentia;Venerida;Veneroidea;Veneridae;Mercenaria;Mercenaria mercenaria

UdeM00000030992 6596 1066.2 UdeM00000030992 XP\_045163002.1 53  
972 439 10 17 983 17 975 2.40E-308 1066.2 6596  
cellular

organisms;Eukaryota;Opisthokonta;Metazoa;Eumetazoa;Bilateria;Protostomia;Spiralia;Lophotrochozoa;Mollusca;Bivalvia;Autobranhia;Heteroconchia;Euherodonta;Imparidentia;Venerida;Veneroidea;Veneridae;Mercenaria;Mercenaria mercenaria

UdeM00000030993 6579 135.6 UdeM00000030993 XP\_033763141.1 42.6 195  
108 2 14 205 10 203 7.50E-29 135.6 6579 cellular

organisms;Eukaryota;Opisthokonta;Metazoa;Eumetazoa;Bilateria;Protostomia;Spiralia;Lophotrochozoa;Mollusca;Bivalvia;Autobranhia;Pteriomorphia;Pectinida;Pectinoidea;Pectinidae;Pecten;Pecten maximus

UdeM00000030994 6596 204.1 UdeM00000030994 XP\_045173066.1 35.9 312  
189 7 44 348 46 353 2.80E-49 204.1 6596 cellular

organisms;Eukaryota;Opisthokonta;Metazoa;Eumetazoa;Bilateria;Protostomia;Spiralia;Lophotrochozoa;Mollusca;Bivalvia;Autobranhia;Heteroconchia;Euherodonta;Imparidentia;Venerida;Veneroidea;Veneridae;Mercenaria;Mercenaria mercenaria

UdeM00000030995 6579 1055.4 UdeM00000030995 XP\_033763055.1 51  
1224 493 28 1 1148 1 1193 5.00E-305 1055.4 6579  
cellular

organisms;Eukaryota;Opisthokonta;Metazoa;Eumetazoa;Bilateria;Protostomia;Spiralia;Lophotrochozoa;Mollusca;Bivalvia;Autobranhia;Pteriomorphia;Pectinida;Pectinoidea;Pectinidae;Pecten;Pecten maximus

UdeM00000030996 6573 318.5 UdeM00000030996 XP\_021366944.1 51.7 294  
137 4 8 297 7 299 8.80E-84 318.5 6573 cellular

organisms;Eukaryota;Opisthokonta;Metazoa;Eumetazoa;Bilateria;Protostomia;  
Spiralia;Lophotrochozoa;Mollusca;Bivalvia;Autobranchia;Pteriomorpha;Pect  
inida;Pectinoidea;Pectinidae;Mizuhopecten;Mizuhopecten yessoensis  
UdeM00000030997 6596 682.2 UdeM00000030997 XP\_045164027.1 53.8 613  
271 5 45 651 27 633 6.60E-193 682.2 6596 cellular  
organisms;Eukaryota;Opisthokonta;Metazoa;Eumetazoa;Bilateria;Protostomia;  
Spiralia;Lophotrochozoa;Mollusca;Bivalvia;Autobranchia;Heteroconchia;Euhe  
terodonta;Imparidentia;Venerida;Veneroidea;Veneridae;Mercenaria;Mercenari  
a mercenaria  
UdeM00000030999 7719 197.6 UdeM00000030999 XP\_004227365.1 52.8 161  
76 0 4 164 2 162 1.20E-47 197.6 7719 cellular  
organisms;Eukaryota;Opisthokonta;Metazoa;Eumetazoa;Bilateria;Deuterostomi  
a;Chordata;Tunicata;Ascidiacea;Phlebobranchia;Cionidae;Ciona;Ciona  
intestinalis  
UdeM00000031000 7719 197.6 UdeM00000031000 XP\_004227365.1 52.8 161  
76 0 6 166 2 162 1.30E-47 197.6 7719 cellular  
organisms;Eukaryota;Opisthokonta;Metazoa;Eumetazoa;Bilateria;Deuterostomi  
a;Chordata;Tunicata;Ascidiacea;Phlebobranchia;Cionidae;Ciona;Ciona  
intestinalis  
UdeM00000031001 6596 463.4 UdeM00000031001 XP\_045200982.1 70.2 299  
87 1 4 300 6 304 2.80E-127 463.4 6596 cellular  
organisms;Eukaryota;Opisthokonta;Metazoa;Eumetazoa;Bilateria;Protostomia;  
Spiralia;Lophotrochozoa;Mollusca;Bivalvia;Autobranchia;Heteroconchia;Euhe  
terodonta;Imparidentia;Venerida;Veneroidea;Veneridae;Mercenaria;Mercenari  
a mercenaria  
UdeM00000031002 6596 901.4 UdeM00000031002 XP\_045200982.1 49.6 932  
460 7 4 930 6 932 1.00E-258 901.4 6596 cellular  
organisms;Eukaryota;Opisthokonta;Metazoa;Eumetazoa;Bilateria;Protostomia;  
Spiralia;Lophotrochozoa;Mollusca;Bivalvia;Autobranchia;Heteroconchia;Euhe  
terodonta;Imparidentia;Venerida;Veneroidea;Veneridae;Mercenaria;Mercenari  
a mercenaria  
UdeM00000031003 6579 80.5 UdeM00000031003 XP\_033754238.1 63.2 57  
21 0 59 115 72 128 1.60E-12 80.5 6579 cellular  
organisms;Eukaryota;Opisthokonta;Metazoa;Eumetazoa;Bilateria;Protostomia;  
Spiralia;Lophotrochozoa;Mollusca;Bivalvia;Autobranchia;Pteriomorpha;Pect  
inida;Pectinoidea;Pectinidae;Pecten;Pecten maximus  
UdeM00000031004 29159 84 UdeM00000031004 XP\_034326245.1 25.8 236  
161 4 262 484 32 266 6.20E-13 84 29159 cellular  
organisms;Eukaryota;Opisthokonta;Metazoa;Eumetazoa;Bilateria;Protostomia;  
Spiralia;Lophotrochozoa;Mollusca;Bivalvia;Autobranchia;Pteriomorpha;Ostr  
eida;Ostreoidea;Ostreidae;Crassostrea;Crassostrea gigas  
UdeM00000031005 6565 123.6 UdeM00000031005 XP\_022329668.1 32 375  
208 8 14 347 7 375 5.00E-25 123.6 6565 cellular  
organisms;Eukaryota;Opisthokonta;Metazoa;Eumetazoa;Bilateria;Protostomia;  
Spiralia;Lophotrochozoa;Mollusca;Bivalvia;Autobranchia;Pteriomorpha;Ostr  
eida;Ostreoidea;Ostreidae;Crassostrea;Crassostrea virginica  
UdeM00000031006 6565 123.6 UdeM00000031006 XP\_022329668.1 32.5 375  
205 9 14 346 7 375 5.00E-25 123.6 6565 cellular  
organisms;Eukaryota;Opisthokonta;Metazoa;Eumetazoa;Bilateria;Protostomia;  
Spiralia;Lophotrochozoa;Mollusca;Bivalvia;Autobranchia;Pteriomorpha;Ostr  
eida;Ostreoidea;Ostreidae;Crassostrea;Crassostrea virginica  
UdeM00000031007 218467 103.2 UdeM00000031007 XP\_023212519.1 53.6  
97 44 1 1 97 1 96 1.90E-19 103.2 218467  
cellular

organisms;Eukaryota;Opisthokonta;Metazoa;Eumetazoa;Bilateria;Protostomia;  
Ecdysozoa;Panarthropoda;Arthropoda;Chelicerata;Arachnida;Scorpiones;Buthi  
da;Buthoidea;Buthidae;Centruroides;Centruroides sculpturatus

UdeM00000031008 1529436 442.6 UdeM00000031008 XP\_033120141.1 58.1  
389 152 5 41 427 1154 1533 5.80E-121 442.6 1529436

cellular

organisms;Eukaryota;Opisthokonta;Metazoa;Eumetazoa;Bilateria;Deuterostomi  
a;Echinodermata;Pelmatozoa;Crinoidea;Articulata;Comatulida;Comatulidae;Co  
matulinae;Anneissia;Anneissia japonica

UdeM00000031009 6573 102.1 UdeM00000031009 XP\_021365717.1 32.4 173  
111 6 28 198 182 350 8.80E-19 102.1 6573 cellular

organisms;Eukaryota;Opisthokonta;Metazoa;Eumetazoa;Bilateria;Protostomia;  
Spiralia;Lophotrochozoa;Mollusca;Bivalvia;Autobranchia;Pteriormorphia;Pect  
inida;Pectinoidea;Pectinidae;Mizuhopecten;Mizuhopecten yessoensis

UdeM00000031010 41139 126.3 UdeM00000031010 XP\_044759447.1 31.4 277  
180 6 92 361 13 286 8.00E-26 126.3 41139 cellular

organisms;Eukaryota;Opisthokonta;Metazoa;Eumetazoa;Bilateria;Protostomia;  
Ecdysozoa;Panarthropoda;Arthropoda;Mandibulata;Pancrustacea;Hexapoda;Inse  
cta;Dicondylia;Pterygota;Neoptera;Endopterygota;Coleoptera;Polyphaga;Cucu  
jiformia;Cucujoidea;Coccinellidae;Coccinellinae;Coccinellini;Coccinella;C  
occinella septempunctata

UdeM00000031014 6596 599.4 UdeM00000031014 XP\_045162694.1 85 346  
51 1 1 345 1 346 3.10E-168 599.4 6596 cellular

organisms;Eukaryota;Opisthokonta;Metazoa;Eumetazoa;Bilateria;Protostomia;  
Spiralia;Lophotrochozoa;Mollusca;Bivalvia;Autobranchia;Heteroconchia;Euhe  
terodonta;Imparidentia;Venerida;Veneroidea;Veneridae;Mercenaria;Mercenari  
a mercenaria

UdeM00000031015 6596 101.3 UdeM00000031015 XP\_045181277.1 30.9 207  
111 5 111 315 143 319 2.40E-18 101.3 6596 cellular

organisms;Eukaryota;Opisthokonta;Metazoa;Eumetazoa;Bilateria;Protostomia;  
Spiralia;Lophotrochozoa;Mollusca;Bivalvia;Autobranchia;Heteroconchia;Euhe  
terodonta;Imparidentia;Venerida;Veneroidea;Veneridae;Mercenaria;Mercenari  
a mercenaria

UdeM00000031016 6596 112.5 UdeM00000031016 XP\_045176094.1 40.9 154  
82 6 62 211 119 267 6.90E-22 112.5 6596 cellular

organisms;Eukaryota;Opisthokonta;Metazoa;Eumetazoa;Bilateria;Protostomia;  
Spiralia;Lophotrochozoa;Mollusca;Bivalvia;Autobranchia;Heteroconchia;Euhe  
terodonta;Imparidentia;Venerida;Veneroidea;Veneridae;Mercenaria;Mercenari  
a mercenaria

UdeM00000031017 6596 580.9 UdeM00000031017 XP\_045199719.1 42.2 733  
406 11 3 727 67 789 2.80E-162 580.9 6596 cellular

organisms;Eukaryota;Opisthokonta;Metazoa;Eumetazoa;Bilateria;Protostomia;  
Spiralia;Lophotrochozoa;Mollusca;Bivalvia;Autobranchia;Heteroconchia;Euhe  
terodonta;Imparidentia;Venerida;Veneroidea;Veneridae;Mercenaria;Mercenari  
a mercenaria

UdeM00000031018 6579 227.3 UdeM00000031018 XP\_033729693.1 54.4 193  
85 3 1 190 68 260 2.00E-56 227.3 6579 cellular

organisms;Eukaryota;Opisthokonta;Metazoa;Eumetazoa;Bilateria;Protostomia;  
Spiralia;Lophotrochozoa;Mollusca;Bivalvia;Autobranchia;Pteriormorphia;Pect  
inida;Pectinoidea;Pectinidae;Pecten;Pecten maximus

UdeM00000031019 6596 229.2 UdeM00000031019 XP\_045172944.1 49.8 263  
106 5 1 257 1 243 6.00E-57 229.2 6596 cellular

organisms;Eukaryota;Opisthokonta;Metazoa;Eumetazoa;Bilateria;Protostomia;  
Spiralia;Lophotrochozoa;Mollusca;Bivalvia;Autobranchia;Heteroconchia;Euhe

terodonta;Imparidentia;Venerida;Veneroidea;Veneridae;Mercenaria;Mercenari  
 a mercenaria  
 UdeM00000031020 50429 168.3 UdeM00000031020 XP\_022802642.1 75.8 99  
 24 0 1 99 1 99 8.10E-39 168.3 50429 cellular  
 organisms;Eukaryota;Opisthokonta;Metazoa;Eumetazoa;Cnidaria;Anthozoa;Hexa  
 corallia;Scleractinia;Astrocoeniina;Pocilloporidae;Stylophora;Stylophora  
 pistillata  
 UdeM00000031021 6596 627.1 UdeM00000031021 XP\_045199719.1 41.7 809  
 451 14 25 824 24 820 3.20E-176 627.1 6596 cellular  
 organisms;Eukaryota;Opisthokonta;Metazoa;Eumetazoa;Bilateria;Protostomia;  
 Spiralia;Lophotrochozoa;Mollusca;Bivalvia;Autobranchia;Heteroconchia;Euhe  
 terodonta;Imparidentia;Venerida;Veneroidea;Veneridae;Mercenaria;Mercenari  
 a mercenaria  
 UdeM00000031023 6596 543.5 UdeM00000031023 XP\_045199719.1 39.9 737  
 432 9 21 753 28 757 4.30E-151 543.5 6596 cellular  
 organisms;Eukaryota;Opisthokonta;Metazoa;Eumetazoa;Bilateria;Protostomia;  
 Spiralia;Lophotrochozoa;Mollusca;Bivalvia;Autobranchia;Heteroconchia;Euhe  
 terodonta;Imparidentia;Venerida;Veneroidea;Veneridae;Mercenaria;Mercenari  
 a mercenaria  
 UdeM00000031024 6596 668.3 UdeM00000031024 XP\_045199719.1 42 833  
 450 11 25 845 24 835 1.30E-188 668.3 6596 cellular  
 organisms;Eukaryota;Opisthokonta;Metazoa;Eumetazoa;Bilateria;Protostomia;  
 Spiralia;Lophotrochozoa;Mollusca;Bivalvia;Autobranchia;Heteroconchia;Euhe  
 terodonta;Imparidentia;Venerida;Veneroidea;Veneridae;Mercenaria;Mercenari  
 a mercenaria  
 UdeM00000031025 116150 114.4 UdeM00000031025 XP\_039753516.1 41.1  
 163 82 3 16 171 26 181 1.90E-22 114.4 116150  
 cellular  
 organisms;Eukaryota;Opisthokonta;Metazoa;Eumetazoa;Bilateria;Protostomia;  
 Ecdysozoa;Panarthropoda;Arthropoda;Mandibulata;Pancrustacea;Hexapoda;Inse  
 cta;Dicondylia;Pterygota;Neoptera;Endopterygota;Amphiesmenoptera;Lepidopt  
 era;Glossata;Neolepidoptera;Heteroneura;Ditrysia;Obtectomera;Papilionoide  
 a;Nymphalidae;Satyrinae;Satyrini;Parargina;Pararge;Pararge aegeria  
 UdeM00000031026 6579 117.9 UdeM00000031026 XP\_033764248.1 39 182  
 85 4 15 192 19 178 1.70E-23 117.9 6579 cellular  
 organisms;Eukaryota;Opisthokonta;Metazoa;Eumetazoa;Bilateria;Protostomia;  
 Spiralia;Lophotrochozoa;Mollusca;Bivalvia;Autobranchia;Pteriormorphia;Pect  
 inida;Pectinoidea;Pectinidae;Pecten;Pecten maximus  
 UdeM00000031027 6596 127.1 UdeM00000031027 XP\_045163831.1 34.7 268  
 150 8 3 259 20 273 3.30E-26 127.1 6596 cellular  
 organisms;Eukaryota;Opisthokonta;Metazoa;Eumetazoa;Bilateria;Protostomia;  
 Spiralia;Lophotrochozoa;Mollusca;Bivalvia;Autobranchia;Heteroconchia;Euhe  
 terodonta;Imparidentia;Venerida;Veneroidea;Veneridae;Mercenaria;Mercenari  
 a mercenaria  
 UdeM00000031028 6573 272.7 UdeM00000031028 XP\_021366482.1 63.6 217  
 79 0 1 217 1 217 4.20E-70 272.7 6573 cellular  
 organisms;Eukaryota;Opisthokonta;Metazoa;Eumetazoa;Bilateria;Protostomia;  
 Spiralia;Lophotrochozoa;Mollusca;Bivalvia;Autobranchia;Pteriormorphia;Pect  
 inida;Pectinoidea;Pectinidae;Mizuhopecten;Mizuhopecten yessoensis  
 UdeM00000031029 6500 180.6 UdeM00000031029 XP\_005103007.1 61.2 129  
 50 0 44 172 40 168 1.80E-42 180.6 6500 cellular  
 organisms;Eukaryota;Opisthokonta;Metazoa;Eumetazoa;Bilateria;Protostomia;  
 Spiralia;Lophotrochozoa;Mollusca;Gastropoda;Heterobranchia;Euthyneura;Tec  
 tipleura;Aplysiida;Aplysiioidea;Aplysiidae;Aplysia;Aplysia californica

UdeM00000031030 29159 177.6 UdeM00000031030 XP\_011427968.2 55.9 152  
 63 3 1 148 1 152 1.20E-41 177.6 29159 cellular  
 organisms;Eukaryota;Opisthokonta;Metazoa;Eumetazoa;Bilateria;Protostomia;  
 Spiralia;Lophotrochozoa;Mollusca;Bivalvia;Autobranchia;Pteriormorphia;Ostr  
 eida;Ostreoidea;Ostreidae;Crassostrea;Crassostrea gigas  
 UdeM00000031032 9371 59.7 UdeM00000031032 XP\_045155162.1 49 51  
 24 1 273 321 124 174 7.90E-06 59.7 9371 cellular  
 organisms;Eukaryota;Opisthokonta;Metazoa;Eumetazoa;Bilateria;Deuterostomi  
 a;Chordata;Craniata;Vertebrata;Gnathostomata;Teleostomi;Euteleostomi;Sarc  
 opterygii;Dipnotetrapodomorpha;Tetrapoda;Amniota;Mammalia;Theria;Eutheria  
 ;Afrotheria;Tenrecidae;Tenrecinae;Echinops;Echinops telfairi  
 UdeM00000031033 9371 59.7 UdeM00000031033 XP\_045155162.1 49 51  
 24 1 322 370 124 174 9.10E-06 59.7 9371 cellular  
 organisms;Eukaryota;Opisthokonta;Metazoa;Eumetazoa;Bilateria;Deuterostomi  
 a;Chordata;Craniata;Vertebrata;Gnathostomata;Teleostomi;Euteleostomi;Sarc  
 opterygii;Dipnotetrapodomorpha;Tetrapoda;Amniota;Mammalia;Theria;Eutheria  
 ;Afrotheria;Tenrecidae;Tenrecinae;Echinops;Echinops telfairi  
 UdeM00000031034 6596 893.3 UdeM00000031034 XP\_045161992.1 43.1 1147  
 576 20 18 1116 33 1150 3.30E-256 893.3 6596 cellular  
 organisms;Eukaryota;Opisthokonta;Metazoa;Eumetazoa;Bilateria;Protostomia;  
 Spiralia;Lophotrochozoa;Mollusca;Bivalvia;Autobranchia;Heteroconchia;Euhe  
 terodonta;Imparidentia;Venerida;Veneroidea;Veneridae;Mercenaria;Mercenari  
 a mercenaria  
 UdeM00000031035 6596 912.5 UdeM00000031035 XP\_045161992.1 43.8 1149  
 592 21 18 1143 33 1150 5.40E-262 912.5 6596 cellular  
 organisms;Eukaryota;Opisthokonta;Metazoa;Eumetazoa;Bilateria;Protostomia;  
 Spiralia;Lophotrochozoa;Mollusca;Bivalvia;Autobranchia;Heteroconchia;Euhe  
 terodonta;Imparidentia;Venerida;Veneroidea;Veneridae;Mercenaria;Mercenari  
 a mercenaria  
 UdeM00000031036 6596 1176.4 UdeM00000031036 XP\_045161096.1 52.9  
 1192 444 11 18 1106 1 1177 0.00E+00 1176.4 6596  
 cellular  
 organisms;Eukaryota;Opisthokonta;Metazoa;Eumetazoa;Bilateria;Protostomia;  
 Spiralia;Lophotrochozoa;Mollusca;Bivalvia;Autobranchia;Heteroconchia;Euhe  
 terodonta;Imparidentia;Venerida;Veneroidea;Veneridae;Mercenaria;Mercenari  
 a mercenaria  
 UdeM00000031037 6596 1170.2 UdeM00000031037 XP\_045161096.1 52.8  
 1192 444 12 18 1105 1 1177 0.00E+00 1170.2 6596  
 cellular  
 organisms;Eukaryota;Opisthokonta;Metazoa;Eumetazoa;Bilateria;Protostomia;  
 Spiralia;Lophotrochozoa;Mollusca;Bivalvia;Autobranchia;Heteroconchia;Euhe  
 terodonta;Imparidentia;Venerida;Veneroidea;Veneridae;Mercenaria;Mercenari  
 a mercenaria  
 UdeM00000031038 1735272 406.8 UdeM00000031038 XP\_041377672.1 48  
 508 205 9 76 577 77 531 4.80E-110 406.8 1735272  
 cellular  
 organisms;Eukaryota;Opisthokonta;Metazoa;Eumetazoa;Bilateria;Protostomia;  
 Spiralia;Lophotrochozoa;Mollusca;Gastropoda;Neomphalina;Neomphaloidea;Pel  
 tospiridae;Gigantopelta;Gigantopelta aegis  
 UdeM00000031039 1735272 715.7 UdeM00000031039 XP\_041377672.1 68.4  
 506 159 1 228 733 532 1036 6.20E-203 715.7 1735272  
 cellular  
 organisms;Eukaryota;Opisthokonta;Metazoa;Eumetazoa;Bilateria;Protostomia;

Spiralia; Lophotrochozoa; Mollusca; Gastropoda; Neomphalina; Neomphaloidea; Pelto-  
 tospiridae; Gigantopelta; Gigantopelta aegis  
 UdeM00000031040 94885 105.1 UdeM00000031040 XP\_034274523.1 62.1 87  
 30 1 6 89 61 147 4.60E-20 105.1 94885 cellular  
 organisms; Eukaryota; Opisthokonta; Metazoa; Eumetazoa; Bilateria; Deuterostomi-  
 a; Chordata; Craniata; Vertebrata; Gnathostomata; Teleostomi; Euteleostomi; Sarc-  
 opterygii; Dipnotetrapodomorpha; Tetrapoda; Amniota; Sauropsida; Sauria; Lepido-  
 sauria; Squamata; Bifurcata; Unidentata; Episquamata; Toxicofera; Serpentes; Col-  
 ubroidea; Colubridae; Colubrinae; Pantherophis; Pantherophis guttatus  
 UdeM00000031041 37653 439.5 UdeM00000031041 XP\_014789344.1 37.3 684  
 413 7 3 676 4 681 7.80E-120 439.5 37653 cellular  
 organisms; Eukaryota; Opisthokonta; Metazoa; Eumetazoa; Bilateria; Protostomia;  
 Spiralia; Lophotrochozoa; Mollusca; Cephalopoda; Coleoidea; Octopodiformes; Oct-  
 opoda; Incirrata; Octopodidae; Octopus; Octopus bimaculoides  
 UdeM00000033685 7574 131.3 UdeM00000033685 XP\_013418753.1 63.9 97  
 33 1 156 250 66 162 1.70E-27 131.3 7574 cellular  
 organisms; Eukaryota; Opisthokonta; Metazoa; Eumetazoa; Bilateria; Protostomia;  
 Spiralia; Lophotrochozoa; Brachiopoda; Linguliformea; Lingulata; Lingulida; Lin-  
 guloidea; Lingulidae; Lingula; Lingula anatina  
 UdeM00000033686 6579 1133.2 UdeM00000033686 XP\_033727362.1 60.7  
 937 364 2 1 934 1 936 0.00E+00 1133.2 6579  
 cellular  
 organisms; Eukaryota; Opisthokonta; Metazoa; Eumetazoa; Bilateria; Protostomia;  
 Spiralia; Lophotrochozoa; Mollusca; Bivalvia; Autobranchia; Pteriomorpha; Pect-  
 inida; Pectinoidea; Pectinidae; Pecten; Pecten maximus  
 UdeM00000033687 29159 626.7 UdeM00000033687 XP\_011446826.2 62.7 453  
 169 0 37 489 37 489 2.60E-176 626.7 29159 cellular  
 organisms; Eukaryota; Opisthokonta; Metazoa; Eumetazoa; Bilateria; Protostomia;  
 Spiralia; Lophotrochozoa; Mollusca; Bivalvia; Autobranchia; Pteriomorpha; Ostr-  
 eida; Ostreidae; Crassostrea; Crassostrea gigas  
 UdeM00000033688 6596 561.6 UdeM00000033688 XP\_045205741.1 52.8 631  
 270 4 2 631 29 632 1.30E-156 561.6 6596 cellular  
 organisms; Eukaryota; Opisthokonta; Metazoa; Eumetazoa; Bilateria; Protostomia;  
 Spiralia; Lophotrochozoa; Mollusca; Bivalvia; Autobranchia; Heteroconchia; Eue-  
 terodonta; Imparidentia; Venerida; Veneroidea; Veneridae; Mercenaria; Mercenari-  
 a mercenaria  
 UdeM00000033689 6565 341.3 UdeM00000033689 XP\_022306197.1 53.8 320  
 104 2 98 373 363 682 1.60E-90 341.3 6565 cellular  
 organisms; Eukaryota; Opisthokonta; Metazoa; Eumetazoa; Bilateria; Protostomia;  
 Spiralia; Lophotrochozoa; Mollusca; Bivalvia; Autobranchia; Pteriomorpha; Ostr-  
 eida; Ostreidae; Crassostrea; Crassostrea virginica  
 UdeM00000033690 6596 560.5 UdeM00000033690 XP\_045205741.1 53.3 615  
 275 4 2 615 29 632 2.70E-156 560.5 6596 cellular  
 organisms; Eukaryota; Opisthokonta; Metazoa; Eumetazoa; Bilateria; Protostomia;  
 Spiralia; Lophotrochozoa; Mollusca; Bivalvia; Autobranchia; Heteroconchia; Eue-  
 terodonta; Imparidentia; Venerida; Veneroidea; Veneridae; Mercenaria; Mercenari-  
 a mercenaria  
 UdeM00000033691 6596 568.2 UdeM00000033691 XP\_045205741.1 54.2 611  
 267 5 6 615 34 632 1.30E-158 568.2 6596 cellular  
 organisms; Eukaryota; Opisthokonta; Metazoa; Eumetazoa; Bilateria; Protostomia;  
 Spiralia; Lophotrochozoa; Mollusca; Bivalvia; Autobranchia; Heteroconchia; Eue-  
 terodonta; Imparidentia; Venerida; Veneroidea; Veneridae; Mercenaria; Mercenari-  
 a mercenaria

UdeM00000033692 6565 78.6 UdeM00000033692 XP\_022323426.1 32.3 161  
 101 3 19 177 19 173 9.10E-12 78.6 6565 cellular  
 organisms;Eukaryota;Opisthokonta;Metazoa;Eumetazoa;Bilateria;Protostomia;  
 Spiralia;Lophotrochozoa;Mollusca;Bivalvia;Autobranchia;Pteriormorphia;Ostr  
 eida;Ostreoidea;Ostreidae;Crassostrea;Crassostrea virginica  
 UdeM00000033693 6565 89 UdeM00000033693 XP\_022323426.1 31.8 173  
 116 2 1 171 1 173 6.50E-15 89 6565 cellular  
 organisms;Eukaryota;Opisthokonta;Metazoa;Eumetazoa;Bilateria;Protostomia;  
 Spiralia;Lophotrochozoa;Mollusca;Bivalvia;Autobranchia;Pteriormorphia;Ostr  
 eida;Ostreoidea;Ostreidae;Crassostrea;Crassostrea virginica  
 UdeM00000033694 6596 93.2 UdeM00000033694 XP\_045182675.1 29.8 168  
 116 2 6 171 5 172 3.40E-16 93.2 6596 cellular  
 organisms;Eukaryota;Opisthokonta;Metazoa;Eumetazoa;Bilateria;Protostomia;  
 Spiralia;Lophotrochozoa;Mollusca;Bivalvia;Autobranchia;Heteroconchia;Euhe  
 terodonta;Imparidentia;Venerida;Veneroidea;Veneridae;Mercenaria;Mercenari  
 a mercenaria  
 UdeM00000033695 6596 213.4 UdeM00000033695 XP\_045181502.1 96.4 112  
 4 0 1 112 1 112 1.60E-52 213.4 6596 cellular  
 organisms;Eukaryota;Opisthokonta;Metazoa;Eumetazoa;Bilateria;Protostomia;  
 Spiralia;Lophotrochozoa;Mollusca;Bivalvia;Autobranchia;Heteroconchia;Euhe  
 terodonta;Imparidentia;Venerida;Veneroidea;Veneridae;Mercenaria;Mercenari  
 a mercenaria  
 UdeM00000033696 29159 933.3 UdeM00000033696 XP\_034323329.1 67.2 725  
 220 8 1 715 1 717 1.80E-268 933.3 29159 cellular  
 organisms;Eukaryota;Opisthokonta;Metazoa;Eumetazoa;Bilateria;Protostomia;  
 Spiralia;Lophotrochozoa;Mollusca;Bivalvia;Autobranchia;Pteriormorphia;Ostr  
 eida;Ostreoidea;Ostreidae;Crassostrea;Crassostrea gigas  
 UdeM00000033697 400727 145.6 UdeM00000033697 XP\_025089755.1 41.4  
 181 102 1 15 195 17 193 7.00E-32 145.6 400727  
 cellular  
 organisms;Eukaryota;Opisthokonta;Metazoa;Eumetazoa;Bilateria;Protostomia;  
 Spiralia;Lophotrochozoa;Mollusca;Gastropoda;Caenogastropoda;Architaeniogl  
 ossa;Ampullarioidea;Ampullariidae;Pomacea;Pomacea canaliculata  
 UdeM00000033699 125878 156 UdeM00000033699 XP\_018411046.1 69.5  
 105 31 1 19 122 27 131 3.10E-35 156 125878  
 cellular  
 organisms;Eukaryota;Opisthokonta;Metazoa;Eumetazoa;Bilateria;Deuterostomi  
 a;Chordata;Craniata;Vertebrata;Gnathostomata;Teleostomi;Euteleostomi;Sarc  
 opterygii;Dipnotetrapodomorpha;Tetrapoda;Amphibia;Batrachia;Anura;Neobatr  
 achia;Ranoidea;Dicroglossidae;Dicroglossinae;Nanorana;Nanorana parkeri  
 UdeM00000033698 125878 156 UdeM00000033698 XP\_018411046.1 69.5  
 105 31 1 42 145 27 131 3.70E-35 156 125878  
 cellular  
 organisms;Eukaryota;Opisthokonta;Metazoa;Eumetazoa;Bilateria;Deuterostomi  
 a;Chordata;Craniata;Vertebrata;Gnathostomata;Teleostomi;Euteleostomi;Sarc  
 opterygii;Dipnotetrapodomorpha;Tetrapoda;Amphibia;Batrachia;Anura;Neobatr  
 achia;Ranoidea;Dicroglossidae;Dicroglossinae;Nanorana;Nanorana parkeri  
 UdeM00000033700 7739 845.9 UdeM00000033700 XP\_035659512.1 88.5 462  
 52 1 1 462 1 461 2.40E-242 845.9 7739 cellular  
 organisms;Eukaryota;Opisthokonta;Metazoa;Eumetazoa;Bilateria;Deuterostomi  
 a;Chordata;Cephalochordata;Leptocardii;Amphioxiformes;Branchiostomidae;Br  
 anchiostoma;Branchiostoma floridae  
 UdeM00000033702 6596 612.5 UdeM00000033702 XP\_045161437.1 76.1 377  
 90 0 43 419 43 419 4.80E-172 612.5 6596 cellular



organisms;Eukaryota;Opisthokonta;Metazoa;Eumetazoa;Bilateria;Protostomia;  
 Spiralia;Lophotrochozoa;Mollusca;Bivalvia;Autobranhia;Heteroconchia;Euhe  
 terodonta;Imparidentia;Venerida;Veneroidea;Veneridae;Mercenaria;Mercenari  
 a mercenaria  
 UdeM00000033704 6573 439.1 UdeM00000033704 XP\_021360119.1 43.1 552  
 297 7 14 550 3 552 8.20E-120 439.1 6573 cellular  
 organisms;Eukaryota;Opisthokonta;Metazoa;Eumetazoa;Bilateria;Protostomia;  
 Spiralia;Lophotrochozoa;Mollusca;Bivalvia;Autobranhia;Pteriormorphia;Pect  
 inida;Pectinoidea;Pectinidae;Mizuhopecten;Mizuhopecten yessoensis  
 UdeM00000033705 6596 212.2 UdeM00000033705 XP\_045181873.1 87.8 115  
 14 0 2 116 3 117 4.00E-52 212.2 6596 cellular  
 organisms;Eukaryota;Opisthokonta;Metazoa;Eumetazoa;Bilateria;Protostomia;  
 Spiralia;Lophotrochozoa;Mollusca;Bivalvia;Autobranhia;Heteroconchia;Euhe  
 terodonta;Imparidentia;Venerida;Veneroidea;Veneridae;Mercenaria;Mercenari  
 a mercenaria  
 UdeM00000033706 6573 233.8 UdeM00000033706 XP\_021365243.1 67.3 223  
 60 7 1 213 1 220 2.00E-58 233.8 6573 cellular  
 organisms;Eukaryota;Opisthokonta;Metazoa;Eumetazoa;Bilateria;Protostomia;  
 Spiralia;Lophotrochozoa;Mollusca;Bivalvia;Autobranhia;Pteriormorphia;Pect  
 inida;Pectinoidea;Pectinidae;Mizuhopecten;Mizuhopecten yessoensis  
 UdeM00000033707 46514 157.1 UdeM00000033707 XP\_038073561.1 51.5 134  
 65 0 2 135 17 150 1.50E-35 157.1 46514 cellular  
 organisms;Eukaryota;Opisthokonta;Metazoa;Eumetazoa;Bilateria;Deuterostomi  
 a;Echinodermata;Eleutherozoa;Asterozoa;Asteroidea;Valvatataceae;Valvatida;As  
 terinidae;Patiria;Patiria miniata  
 UdeM00000033708 6579 606.3 UdeM00000033708 XP\_033739131.1 57.3 508  
 197 4 1 489 864 1370 3.50E-170 606.3 6579 cellular  
 organisms;Eukaryota;Opisthokonta;Metazoa;Eumetazoa;Bilateria;Protostomia;  
 Spiralia;Lophotrochozoa;Mollusca;Bivalvia;Autobranhia;Pteriormorphia;Pect  
 inida;Pectinoidea;Pectinidae;Pecten;Pecten maximus  
 UdeM00000033710 6596 261.9 UdeM00000033710 XP\_045182024.1 61.3 212  
 78 2 2 210 3 213 7.50E-67 261.9 6596 cellular  
 organisms;Eukaryota;Opisthokonta;Metazoa;Eumetazoa;Bilateria;Protostomia;  
 Spiralia;Lophotrochozoa;Mollusca;Bivalvia;Autobranhia;Heteroconchia;Euhe  
 terodonta;Imparidentia;Venerida;Veneroidea;Veneridae;Mercenaria;Mercenari  
 a mercenaria  
 UdeM00000033711 6596 301.6 UdeM00000033711 XP\_045182024.1 64.3 235  
 72 2 48 271 257 490 1.00E-78 301.6 6596 cellular  
 organisms;Eukaryota;Opisthokonta;Metazoa;Eumetazoa;Bilateria;Protostomia;  
 Spiralia;Lophotrochozoa;Mollusca;Bivalvia;Autobranhia;Heteroconchia;Euhe  
 terodonta;Imparidentia;Venerida;Veneroidea;Veneridae;Mercenaria;Mercenari  
 a mercenaria  
 UdeM00000033712 202533 261.2 UdeM00000033712 XP\_035218957.1 48.9  
 276 140 1 179 454 107 381 2.50E-66 261.2 202533  
 cellular  
 organisms;Eukaryota;Opisthokonta;Metazoa;Eumetazoa;Bilateria;Protostomia;  
 Ecdysozoa;Panarthropoda;Arthropoda;Chelicerata;Arachnida;Araneae;Araneomo  
 rphae;Entelegynae;Eresoidea;Eresidae;Stegodyphus;Stegodyphus dumicola  
 UdeM00000033713 29159 244.2 UdeM00000033713 XP\_011447953.2 78 150  
 33 0 1 150 1 150 1.10E-61 244.2 29159 cellular  
 organisms;Eukaryota;Opisthokonta;Metazoa;Eumetazoa;Bilateria;Protostomia;  
 Spiralia;Lophotrochozoa;Mollusca;Bivalvia;Autobranhia;Pteriormorphia;Ostr  
 eida;Ostreoidea;Ostreidae;Crassostrea;Crassostrea gigas

UdeM00000033714 29159 115.5 UdeM00000033714 XP\_011447959.2 29 359  
 216 13 3 351 33 362 1.40E-22 115.5 29159 cellular  
 organisms;Eukaryota;Opisthokonta;Metazoa;Eumetazoa;Bilateria;Protostomia;  
 Spiralia;Lophotrochozoa;Mollusca;Bivalvia;Autobranhia;Pteriomorphia;Ostr  
 eida;Ostreoidea;Ostreidae;Crassostrea;Crassostrea gigas  
 UdeM00000033715 6596 753.8 UdeM00000033715 XP\_045182686.1 44.1 1123  
 424 37 102 1113 20 1049 3.00E-214 753.8 6596 cellular  
 organisms;Eukaryota;Opisthokonta;Metazoa;Eumetazoa;Bilateria;Protostomia;  
 Spiralia;Lophotrochozoa;Mollusca;Bivalvia;Autobranhia;Heteroconchia;Euhe  
 terodonta;Imparidentia;Venerida;Veneroidea;Veneridae;Mercenaria;Mercenari  
 a mercenaria  
 UdeM00000033717 6596 114.4 UdeM00000033717 XP\_045188183.1 35.1 174  
 94 2 42 215 89 243 3.50E-22 114.4 6596 cellular  
 organisms;Eukaryota;Opisthokonta;Metazoa;Eumetazoa;Bilateria;Protostomia;  
 Spiralia;Lophotrochozoa;Mollusca;Bivalvia;Autobranhia;Heteroconchia;Euhe  
 terodonta;Imparidentia;Venerida;Veneroidea;Veneridae;Mercenaria;Mercenari  
 a mercenaria  
 UdeM00000033718 6573 255 UdeM00000033718 XP\_021377872.1 27.9 681  
 439 21 1 665 1 645 2.70E-64 255 6573 cellular  
 organisms;Eukaryota;Opisthokonta;Metazoa;Eumetazoa;Bilateria;Protostomia;  
 Spiralia;Lophotrochozoa;Mollusca;Bivalvia;Autobranhia;Pteriomorphia;Pect  
 inida;Pectinoidea;Pectinidae;Mizuhopecten;Mizuhopecten yessoensis  
 UdeM00000033719 6573 140.2 UdeM00000033719 XP\_021354369.1 50 132  
 61 2 308 436 460 589 6.40E-30 140.2 6573 cellular  
 organisms;Eukaryota;Opisthokonta;Metazoa;Eumetazoa;Bilateria;Protostomia;  
 Spiralia;Lophotrochozoa;Mollusca;Bivalvia;Autobranhia;Pteriomorphia;Pect  
 inida;Pectinoidea;Pectinidae;Mizuhopecten;Mizuhopecten yessoensis  
 UdeM00000033720 6573 139.8 UdeM00000033720 XP\_021354369.1 50 132  
 61 2 308 436 460 589 8.30E-30 139.8 6573 cellular  
 organisms;Eukaryota;Opisthokonta;Metazoa;Eumetazoa;Bilateria;Protostomia;  
 Spiralia;Lophotrochozoa;Mollusca;Bivalvia;Autobranhia;Pteriomorphia;Pect  
 inida;Pectinoidea;Pectinidae;Mizuhopecten;Mizuhopecten yessoensis  
 UdeM00000033721 6565 204.1 UdeM00000033721 XP\_022287001.1 55.4 175  
 76 1 156 328 69 243 2.90E-49 204.1 6565 cellular  
 organisms;Eukaryota;Opisthokonta;Metazoa;Eumetazoa;Bilateria;Protostomia;  
 Spiralia;Lophotrochozoa;Mollusca;Bivalvia;Autobranhia;Pteriomorphia;Ostr  
 eida;Ostreoidea;Ostreidae;Crassostrea;Crassostrea virginica  
 UdeM00000033722 6565 222.6 UdeM00000033722 XP\_022287001.1 51 208  
 99 2 156 361 69 275 7.90E-55 222.6 6565 cellular  
 organisms;Eukaryota;Opisthokonta;Metazoa;Eumetazoa;Bilateria;Protostomia;  
 Spiralia;Lophotrochozoa;Mollusca;Bivalvia;Autobranhia;Pteriomorphia;Ostr  
 eida;Ostreoidea;Ostreidae;Crassostrea;Crassostrea virginica  
 UdeM00000033723 6596 290 UdeM00000033723 XP\_045177776.1 30.7 641  
 259 9 1 626 405 875 7.00E-75 290 6596 cellular  
 organisms;Eukaryota;Opisthokonta;Metazoa;Eumetazoa;Bilateria;Protostomia;  
 Spiralia;Lophotrochozoa;Mollusca;Bivalvia;Autobranhia;Heteroconchia;Euhe  
 terodonta;Imparidentia;Venerida;Veneroidea;Veneridae;Mercenaria;Mercenari  
 a mercenaria  
 UdeM00000033724 6596 90.5 UdeM00000033724 XP\_045191531.1 37.6 125  
 71 2 1 120 807 929 4.70E-15 90.5 6596 cellular  
 organisms;Eukaryota;Opisthokonta;Metazoa;Eumetazoa;Bilateria;Protostomia;  
 Spiralia;Lophotrochozoa;Mollusca;Bivalvia;Autobranhia;Heteroconchia;Euhe  
 terodonta;Imparidentia;Venerida;Veneroidea;Veneridae;Mercenaria;Mercenari  
 a mercenaria

UdeM00000033725 150288 210.7 UdeM00000033725 XP\_020788097.1 69.3  
 127 39 0 2 128 439 565 1.10E-51 210.7 150288  
 cellular  
 organisms;Eukaryota;Opisthokonta;Metazoa;Eumetazoa;Bilateria;Deuterostomi  
 a;Chordata;Craniata;Vertebrata;Gnathostomata;Teleostomi;Euteleostomi;Acti  
 nopterygii;Actinopteri;Neopterygii;Teleostei;Osteoglossocephalai;Clupeoce  
 phala;Euteleostei;Neoteleostei;Eurypterygia;Ctenosquamata;Acanthomo  
 rphata;Euacanthomorpha;Percomorphaceae;Gobiaria;Gobiiformes;Gobioidei;  
 Gobiidae;Oxudercinae;Boleophthalmus;Boleophthalmus pectinirostris  
 UdeM00000033726 6596 135.6 UdeM00000033726 XP\_045216906.1 30.5 282  
 103 5 4 192 175 456 7.00E-29 135.6 6596 cellular  
 organisms;Eukaryota;Opisthokonta;Metazoa;Eumetazoa;Bilateria;Protostomia;  
 Spiralia;Lophotrochozoa;Mollusca;Bivalvia;Autobranhia;Heteroconchia;Euhe  
 terodonta;Imparidentia;Venerida;Veneroidea;Veneridae;Mercenaria;Mercenari  
 a mercenaria  
 UdeM00000033727 29159 150.2 UdeM00000033727 XP\_034318217.1 55.8 120  
 52 1 1 119 755 874 1.70E-33 150.2 29159 cellular  
 organisms;Eukaryota;Opisthokonta;Metazoa;Eumetazoa;Bilateria;Protostomia;  
 Spiralia;Lophotrochozoa;Mollusca;Bivalvia;Autobranhia;Pteriormorphia;Ostr  
 eida;Ostreioidea;Ostreidae;Crassostrea;Crassostrea gigas  
 UdeM00000033728 6596 363.6 UdeM00000033728 XP\_045177776.1 36.3 571  
 286 8 1 532 405 936 6.10E-97 363.6 6596 cellular  
 organisms;Eukaryota;Opisthokonta;Metazoa;Eumetazoa;Bilateria;Protostomia;  
 Spiralia;Lophotrochozoa;Mollusca;Bivalvia;Autobranhia;Heteroconchia;Euhe  
 terodonta;Imparidentia;Venerida;Veneroidea;Veneridae;Mercenaria;Mercenari  
 a mercenaria  
 UdeM00000044422 3055 364 UdeM00000044422 XP\_001702748.1 56 323  
 141 1 1 323 29 350 2.00E-97 364 3055 cellular  
 organisms;Eukaryota;Viridiplantae;Chlorophyta;core  
 chlorophytes;Chlorophyceae;CS  
 clade;Chlamydomonadales;Chlamydomonadaceae;Chlamydomonas;Chlamydomonas  
 reinhardtii  
 UdeM00000044423 69820 615.9 UdeM00000044423 XP\_022836162.1 61.3 478  
 179 3 5 479 5 479 4.30E-173 615.9 69820 cellular  
 organisms;Eukaryota;Opisthokonta;Metazoa;Eumetazoa;Bilateria;Protostomia;  
 Ecdysozoa;Panarthropoda;Arthropoda;Mandibulata;Pancrustacea;Hexapoda;Inse  
 cta;Dicondylia;Pterygota;Neoptera;Endopterygota;Amphiesmenoptera;Lepidopt  
 era;Glossata;Neolepidoptera;Heteroneura;Ditrysia;Obtectomera;Noctuoidea;N  
 octuidae;Amphipyrrinae;Spodoptera;Spodoptera litura  
 UdeM00000044424 294128 331.6 UdeM00000044424 XP\_018027785.1 55.7  
 314 136 2 4 314 25 338 1.10E-87 331.6 294128  
 cellular  
 organisms;Eukaryota;Opisthokonta;Metazoa;Eumetazoa;Bilateria;Protostomia;  
 Ecdysozoa;Panarthropoda;Arthropoda;Mandibulata;Pancrustacea;Crustacea;Mul  
 ticrustacea;Malacostraca;Eumalacostraca;Peracarida;Amphipoda;Senticaudata  
 ;Talitrida;Talitroidea;Hyalellidae;Hyalella;Hyalella azteca  
 UdeM00000044343 6596 89.7 UdeM00000044343 XP\_045186357.1 65.1 63  
 22 0 17 79 523 585 1.80E-15 89.7 6596 cellular  
 organisms;Eukaryota;Opisthokonta;Metazoa;Eumetazoa;Bilateria;Protostomia;  
 Spiralia;Lophotrochozoa;Mollusca;Bivalvia;Autobranhia;Heteroconchia;Euhe  
 terodonta;Imparidentia;Venerida;Veneroidea;Veneridae;Mercenaria;Mercenari  
 a mercenaria  
 UdeM00000044344 6565 181.8 UdeM00000044344 XP\_022337131.1 44 250  
 113 5 28 277 2 224 1.20E-42 181.8 6565 cellular

organisms;Eukaryota;Opisthokonta;Metazoa;Eumetazoa;Bilateria;Protostomia;Spiralia;Lophotrochozoa;Mollusca;Bivalvia;Autobranhia;Pteriormorphia;Ostr eida;Ostreoidea;Ostreidae;Crassostrea;Crassostrea virginica  
UdeM00000043257 29159 63.2 UdeM00000043257 XP\_034305617.1 44.3 61  
32 1 3 63 97 155 1.90E-07 63.2 29159 cellular  
organisms;Eukaryota;Opisthokonta;Metazoa;Eumetazoa;Bilateria;Protostomia;Spiralia;Lophotrochozoa;Mollusca;Bivalvia;Autobranhia;Pteriormorphia;Ostr eida;Ostreoidea;Ostreidae;Crassostrea;Crassostrea gigas  
UdeM00000043258 6579 153.3 UdeM00000043258 XP\_033728059.1 52.3 149  
68 1 1 149 1066 1211 2.50E-34 153.3 6579 cellular  
organisms;Eukaryota;Opisthokonta;Metazoa;Eumetazoa;Bilateria;Protostomia;Spiralia;Lophotrochozoa;Mollusca;Bivalvia;Autobranhia;Pteriormorphia;Pect inida;Pectinoidea;Pectinidae;Pecten;Pecten maximus  
UdeM00000043259 6596 187.2 UdeM00000043259 XP\_045177776.1 36.6 333  
181 9 1 329 405 711 3.90E-44 187.2 6596 cellular  
organisms;Eukaryota;Opisthokonta;Metazoa;Eumetazoa;Bilateria;Protostomia;Spiralia;Lophotrochozoa;Mollusca;Bivalvia;Autobranhia;Heteroconchia;Euhe terodonta;Imparidentia;Venerida;Veneroidea;Veneridae;Mercenaria;Mercenari a mercenaria  
UdeM00000043260 6596 181.4 UdeM00000043260 XP\_045188183.1 41.3 235  
133 4 6 238 3 234 5.10E-42 181.4 6596 cellular  
organisms;Eukaryota;Opisthokonta;Metazoa;Eumetazoa;Bilateria;Protostomia;Spiralia;Lophotrochozoa;Mollusca;Bivalvia;Autobranhia;Heteroconchia;Euhe terodonta;Imparidentia;Venerida;Veneroidea;Veneridae;Mercenaria;Mercenari a mercenaria  
UdeM00000043261 6596 289.7 UdeM00000043261 XP\_045177779.1 36.3 416  
249 9 4 415 394 797 1.50E-74 289.7 6596 cellular  
organisms;Eukaryota;Opisthokonta;Metazoa;Eumetazoa;Bilateria;Protostomia;Spiralia;Lophotrochozoa;Mollusca;Bivalvia;Autobranhia;Heteroconchia;Euhe terodonta;Imparidentia;Venerida;Veneroidea;Veneridae;Mercenaria;Mercenari a mercenaria  
UdeM00000043262 7054 221.9 UdeM00000043262 XP\_031333698.1 37.8 336  
140 5 63 337 321 648 1.30E-54 221.9 7054 cellular  
organisms;Eukaryota;Opisthokonta;Metazoa;Eumetazoa;Bilateria;Protostomia;Ecdysozoa;Panarthropoda;Arthropoda;Mandibulata;Pancrustacea;Hexapoda;Inse cta;Dicondylia;Pterygota;Neoptera;Endopterygota;Coleoptera;Polyphaga;Elat eriformia;Elateroidea;Lampyridae;Lampyrinae;Photinus;Photinus pyralis  
UdeM00000043263 46514 67.4 UdeM00000043263 XP\_038065173.1 49.4 77  
35 2 5 77 8 84 9.20E-09 67.4 46514 cellular  
organisms;Eukaryota;Opisthokonta;Metazoa;Eumetazoa;Bilateria;Deuterostomi a;Echinodermata;Eleutherozoa;Asterozoa;Asteroidea;Valvatacea;Valvatida;As terinidae;Patiria;Patiria miniata  
UdeM00000043265 6596 190.7 UdeM00000043265 XP\_045182317.1 35.1 370  
178 6 16 326 261 627 3.40E-45 190.7 6596 cellular  
organisms;Eukaryota;Opisthokonta;Metazoa;Eumetazoa;Bilateria;Protostomia;Spiralia;Lophotrochozoa;Mollusca;Bivalvia;Autobranhia;Heteroconchia;Euhe terodonta;Imparidentia;Venerida;Veneroidea;Veneridae;Mercenaria;Mercenari a mercenaria  
UdeM00000043267 6596 188.7 UdeM00000043267 XP\_045191793.1 35 357  
198 8 1 349 258 588 1.50E-44 188.7 6596 cellular  
organisms;Eukaryota;Opisthokonta;Metazoa;Eumetazoa;Bilateria;Protostomia;Spiralia;Lophotrochozoa;Mollusca;Bivalvia;Autobranhia;Heteroconchia;Euhe terodonta;Imparidentia;Venerida;Veneroidea;Veneridae;Mercenaria;Mercenari a mercenaria

UdeM00000017129 189513 102.8 UdeM00000017129 XP\_044736929.1 29.7  
 249 136 11 414 659 135 347 1.90E-18 102.8 189513  
 cellular  
 organisms;Eukaryota;Opisthokonta;Metazoa;Eumetazoa;Bilateria;Protostomia;  
 Ecdysozoa;Panarthropoda;Arthropoda;Mandibulata;Pancrustacea;Hexapoda;Inse  
 cta;Dicondylia;Pterygota;Neoptera;Endopterygota;Neuropterida;Neuroptera;H  
 emerobiiiformia;Chrysopidae;Chrysopinae;Chrysoperla;Chrysoperla carnea  
 UdeM00000017130 6573 1508.8 UdeM00000017130 XP\_021341468.1 51.7  
 1544 712 12 5 1525 17 1550 0.00E+00 1508.8 6573  
 cellular  
 organisms;Eukaryota;Opisthokonta;Metazoa;Eumetazoa;Bilateria;Protostomia;  
 Spiralia;Lophotrochozoa;Mollusca;Bivalvia;Autobranchia;Pteriormorphia;Pect  
 inida;Pectinoidea;Pectinidae;Mizuhopecten;Mizuhopecten yessoensis  
 UdeM00000017131 6596 680.6 UdeM00000017131 XP\_045207510.1 60.2 583  
 228 2 5 584 639 1220 1.70E-192 680.6 6596 cellular  
 organisms;Eukaryota;Opisthokonta;Metazoa;Eumetazoa;Bilateria;Protostomia;  
 Spiralia;Lophotrochozoa;Mollusca;Bivalvia;Autobranchia;Heteroconchia;Euhe  
 terodonta;Imparidentia;Venerida;Veneroidea;Veneridae;Mercenaria;Mercenari  
 a mercenaria  
 UdeM00000017132 6573 797.3 UdeM00000017132 XP\_021341468.1 47.5 886  
 442 8 7 870 19 903 1.90E-227 797.3 6573 cellular  
 organisms;Eukaryota;Opisthokonta;Metazoa;Eumetazoa;Bilateria;Protostomia;  
 Spiralia;Lophotrochozoa;Mollusca;Bivalvia;Autobranchia;Pteriormorphia;Pect  
 inida;Pectinoidea;Pectinidae;Mizuhopecten;Mizuhopecten yessoensis  
 UdeM00000017133 6596 85.5 UdeM00000017133 XP\_045196953.1 21.8 774  
 483 33 19 717 20 746 3.00E-13 85.5 6596 cellular  
 organisms;Eukaryota;Opisthokonta;Metazoa;Eumetazoa;Bilateria;Protostomia;  
 Spiralia;Lophotrochozoa;Mollusca;Bivalvia;Autobranchia;Heteroconchia;Euhe  
 terodonta;Imparidentia;Venerida;Veneroidea;Veneridae;Mercenaria;Mercenari  
 a mercenaria  
 UdeM00000017134 6596 85.5 UdeM00000017134 XP\_045196953.1 21.8 774  
 483 33 30 728 20 746 3.10E-13 85.5 6596 cellular  
 organisms;Eukaryota;Opisthokonta;Metazoa;Eumetazoa;Bilateria;Protostomia;  
 Spiralia;Lophotrochozoa;Mollusca;Bivalvia;Autobranchia;Heteroconchia;Euhe  
 terodonta;Imparidentia;Venerida;Veneroidea;Veneridae;Mercenaria;Mercenari  
 a mercenaria  
 UdeM00000017136 6565 88.2 UdeM00000017136 XP\_022313678.1 25.3 379  
 227 16 335 683 145 497 4.70E-14 88.2 6565 cellular  
 organisms;Eukaryota;Opisthokonta;Metazoa;Eumetazoa;Bilateria;Protostomia;  
 Spiralia;Lophotrochozoa;Mollusca;Bivalvia;Autobranchia;Pteriormorphia;Ostr  
 eida;Ostreoidea;Ostreidae;Crassostrea;Crassostrea virginica  
 UdeM00000017135 6565 88.2 UdeM00000017135 XP\_022313678.1 25.3 379  
 227 16 338 686 145 497 4.70E-14 88.2 6565 cellular  
 organisms;Eukaryota;Opisthokonta;Metazoa;Eumetazoa;Bilateria;Protostomia;  
 Spiralia;Lophotrochozoa;Mollusca;Bivalvia;Autobranchia;Pteriormorphia;Ostr  
 eida;Ostreoidea;Ostreidae;Crassostrea;Crassostrea virginica  
 UdeM00000017137 6565 474.6 UdeM00000017137 XP\_022337291.1 39.9 711  
 401 13 2 701 58 753 2.40E-130 474.6 6565 cellular  
 organisms;Eukaryota;Opisthokonta;Metazoa;Eumetazoa;Bilateria;Protostomia;  
 Spiralia;Lophotrochozoa;Mollusca;Bivalvia;Autobranchia;Pteriormorphia;Ostr  
 eida;Ostreoidea;Ostreidae;Crassostrea;Crassostrea virginica  
 UdeM00000017139 6565 557.4 UdeM00000017139 XP\_022337291.1 41.1 791  
 438 13 34 814 58 830 3.40E-155 557.4 6565 cellular  
 organisms;Eukaryota;Opisthokonta;Metazoa;Eumetazoa;Bilateria;Protostomia;

Spiralia;Lophotrochozoa;Mollusca;Bivalvia;Autobranchia;Pteriormorphia;Ostr  
eida;Ostreoidea;Ostreidae;Crassostrea;Crassostrea virginica  
UdeM00000017140 6596 532.3 UdeM00000017140 XP\_045167151.1 44.5 721  
380 11 24 734 84 794 1.00E-147 532.3 6596 cellular  
organisms;Eukaryota;Opisthokonta;Metazoa;Eumetazoa;Bilateria;Protostomia;  
Spiralia;Lophotrochozoa;Mollusca;Bivalvia;Autobranchia;Heteroconchia;Euhe  
terodonta;Imparidentia;Venerida;Veneroidea;Veneridae;Mercenaria;Mercenari  
a mercenaria  
UdeM00000017141 6596 715.7 UdeM00000017141 XP\_045163747.1 64.4 564  
183 4 46 606 88 636 5.00E-203 715.7 6596 cellular  
organisms;Eukaryota;Opisthokonta;Metazoa;Eumetazoa;Bilateria;Protostomia;  
Spiralia;Lophotrochozoa;Mollusca;Bivalvia;Autobranchia;Heteroconchia;Euhe  
terodonta;Imparidentia;Venerida;Veneroidea;Veneridae;Mercenaria;Mercenari  
a mercenaria  
UdeM00000017142 6596 715.7 UdeM00000017142 XP\_045163747.1 64.4 564  
183 4 62 622 88 636 5.20E-203 715.7 6596 cellular  
organisms;Eukaryota;Opisthokonta;Metazoa;Eumetazoa;Bilateria;Protostomia;  
Spiralia;Lophotrochozoa;Mollusca;Bivalvia;Autobranchia;Heteroconchia;Euhe  
terodonta;Imparidentia;Venerida;Veneroidea;Veneridae;Mercenaria;Mercenari  
a mercenaria  
UdeM00000017143 6596 98.6 UdeM00000017143 XP\_045196953.1 20.9 791  
504 28 23 754 18 745 3.60E-17 98.6 6596 cellular  
organisms;Eukaryota;Opisthokonta;Metazoa;Eumetazoa;Bilateria;Protostomia;  
Spiralia;Lophotrochozoa;Mollusca;Bivalvia;Autobranchia;Heteroconchia;Euhe  
terodonta;Imparidentia;Venerida;Veneroidea;Veneridae;Mercenaria;Mercenari  
a mercenaria  
UdeM00000017144 6596 84 UdeM00000017144 XP\_045193866.1 23.2 725  
442 30 71 737 22 689 9.60E-13 84 6596 cellular  
organisms;Eukaryota;Opisthokonta;Metazoa;Eumetazoa;Bilateria;Protostomia;  
Spiralia;Lophotrochozoa;Mollusca;Bivalvia;Autobranchia;Heteroconchia;Euhe  
terodonta;Imparidentia;Venerida;Veneroidea;Veneridae;Mercenaria;Mercenari  
a mercenaria  
UdeM00000017145 6596 84 UdeM00000017145 XP\_045193866.1 32.1 262  
140 11 86 324 384 630 5.20E-13 84 6596 cellular  
organisms;Eukaryota;Opisthokonta;Metazoa;Eumetazoa;Bilateria;Protostomia;  
Spiralia;Lophotrochozoa;Mollusca;Bivalvia;Autobranchia;Heteroconchia;Euhe  
terodonta;Imparidentia;Venerida;Veneroidea;Veneridae;Mercenaria;Mercenari  
a mercenaria  
UdeM00000017148 225164 125.6 UdeM00000017148 XP\_009051919.1 58.6  
111 43 2 4 111 34 144 4.40E-26 125.6 225164  
cellular  
organisms;Eukaryota;Opisthokonta;Metazoa;Eumetazoa;Bilateria;Protostomia;  
Spiralia;Lophotrochozoa;Mollusca;Gastropoda;Patellogastropoda;Lottioidea;  
Lottiidae;Lottia;Lottia gigantea  
UdeM00000017147 225164 186 UdeM00000017147 XP\_009051919.1 61.8  
144 54 1 14 156 1 144 3.80E-44 186 225164  
cellular  
organisms;Eukaryota;Opisthokonta;Metazoa;Eumetazoa;Bilateria;Protostomia;  
Spiralia;Lophotrochozoa;Mollusca;Gastropoda;Patellogastropoda;Lottioidea;  
Lottiidae;Lottia;Lottia gigantea  
UdeM00000017149 6596 133.7 UdeM00000017149 XP\_045196953.1 23.7 807  
477 30 17 763 18 745 1.00E-27 133.7 6596 cellular  
organisms;Eukaryota;Opisthokonta;Metazoa;Eumetazoa;Bilateria;Protostomia;  
Spiralia;Lophotrochozoa;Mollusca;Bivalvia;Autobranchia;Heteroconchia;Euhe

terodonta;Imparidentia;Venerida;Veneroidea;Veneridae;Mercenaria;Mercenari  
 a mercenaria  
 UdeM00000017150 6573 171 UdeM00000017150 XP\_021368552.1 52.1 169  
 81 0 1 169 1 169 1.30E-39 171 6573 cellular  
 organisms;Eukaryota;Opisthokonta;Metazoa;Eumetazoa;Bilateria;Protostomia;  
 Spiralia;Lophotrochozoa;Mollusca;Bivalvia;Autobranhia;Pteriomorphia;Pect  
 inida;Pectinoidea;Pectinidae;Mizuhopecten;Mizuhopecten yessoensis  
 UdeM00000017151 6596 262.7 UdeM00000017151 XP\_045185723.1 43.7 325  
 167 4 7 331 455 763 6.30E-67 262.7 6596 cellular  
 organisms;Eukaryota;Opisthokonta;Metazoa;Eumetazoa;Bilateria;Protostomia;  
 Spiralia;Lophotrochozoa;Mollusca;Bivalvia;Autobranhia;Heteroconchia;Euhe  
 terodonta;Imparidentia;Venerida;Veneroidea;Veneridae;Mercenaria;Mercenari  
 a mercenaria  
 UdeM00000017154 6579 652.9 UdeM00000017154 XP\_033748227.1 73.7 419  
 109 1 22 439 55 473 2.90E-184 652.9 6579 cellular  
 organisms;Eukaryota;Opisthokonta;Metazoa;Eumetazoa;Bilateria;Protostomia;  
 Spiralia;Lophotrochozoa;Mollusca;Bivalvia;Autobranhia;Pteriomorphia;Pect  
 inida;Pectinoidea;Pectinidae;Pecten;Pecten maximus  
 UdeM00000017155 29159 251.5 UdeM00000017155 XP\_011418327.2 67.3 171  
 56 0 1 171 1 171 7.60E-64 251.5 29159 cellular  
 organisms;Eukaryota;Opisthokonta;Metazoa;Eumetazoa;Bilateria;Protostomia;  
 Spiralia;Lophotrochozoa;Mollusca;Bivalvia;Autobranhia;Pteriomorphia;Ostr  
 eida;Ostreoidea;Ostreidae;Crassostrea;Crassostrea gigas  
 UdeM00000017156 6565 335.9 UdeM00000017156 XP\_022342034.1 52.9 361  
 144 7 3 353 2 346 9.00E-89 335.9 6565 cellular  
 organisms;Eukaryota;Opisthokonta;Metazoa;Eumetazoa;Bilateria;Protostomia;  
 Spiralia;Lophotrochozoa;Mollusca;Bivalvia;Autobranhia;Pteriomorphia;Ostr  
 eida;Ostreoidea;Ostreidae;Crassostrea;Crassostrea virginica  
 UdeM00000017157 6596 194.1 UdeM00000017157 XP\_045172235.1 56.7 208  
 79 3 12 219 2 198 1.80E-46 194.1 6596 cellular  
 organisms;Eukaryota;Opisthokonta;Metazoa;Eumetazoa;Bilateria;Protostomia;  
 Spiralia;Lophotrochozoa;Mollusca;Bivalvia;Autobranhia;Heteroconchia;Euhe  
 terodonta;Imparidentia;Venerida;Veneroidea;Veneridae;Mercenaria;Mercenari  
 a mercenaria  
 UdeM00000017158 6596 173.7 UdeM00000017158 XP\_045172235.1 56.7 187  
 70 3 12 198 2 177 2.40E-40 173.7 6596 cellular  
 organisms;Eukaryota;Opisthokonta;Metazoa;Eumetazoa;Bilateria;Protostomia;  
 Spiralia;Lophotrochozoa;Mollusca;Bivalvia;Autobranhia;Heteroconchia;Euhe  
 terodonta;Imparidentia;Venerida;Veneroidea;Veneridae;Mercenaria;Mercenari  
 a mercenaria  
 UdeM00000017159 6596 344.7 UdeM00000017159 XP\_045172778.1 77.7 215  
 48 0 40 254 5 219 9.80E-92 344.7 6596 cellular  
 organisms;Eukaryota;Opisthokonta;Metazoa;Eumetazoa;Bilateria;Protostomia;  
 Spiralia;Lophotrochozoa;Mollusca;Bivalvia;Autobranhia;Heteroconchia;Euhe  
 terodonta;Imparidentia;Venerida;Veneroidea;Veneridae;Mercenaria;Mercenari  
 a mercenaria  
 UdeM00000017160 6596 344 UdeM00000017160 XP\_045172778.1 78 214  
 47 0 1 214 6 219 1.40E-91 344 6596 cellular  
 organisms;Eukaryota;Opisthokonta;Metazoa;Eumetazoa;Bilateria;Protostomia;  
 Spiralia;Lophotrochozoa;Mollusca;Bivalvia;Autobranhia;Heteroconchia;Euhe  
 terodonta;Imparidentia;Venerida;Veneroidea;Veneridae;Mercenaria;Mercenari  
 a mercenaria  
 UdeM00000017161 386614 201.1 UdeM00000017161 XP\_032906139.1 37.8  
 291 174 1 12 302 15 298 2.10E-48 201.1 386614

cellular  
organisms;Eukaryota;Opisthokonta;Metazoa;Eumetazoa;Bilateria;Deuterostomi  
a;Chordata;Craniata;Vertebrata;Gnathostomata;Chondrichthyes;Elasmobranchi  
i;Batoidea;Rajiformes;Rajidae;Amblyraja;Amblyraja radiata  
UdeM00000017162 29159 72.4 UdeM00000017162 XP\_034330259.1 47.9 71  
35 1 1 71 213 281 2.90E-10 72.4 29159 cellular  
organisms;Eukaryota;Opisthokonta;Metazoa;Eumetazoa;Bilateria;Protostomia;  
Spiralia;Lophotrochozoa;Mollusca;Bivalvia;Autobranchia;Pteriormorphia;Ostr  
eida;Ostreoidea;Ostreidae;Crassostrea;Crassostrea gigas  
UdeM00000017163 6596 270.4 UdeM00000017163 XP\_045159778.1 50.6 253  
123 2 11 262 4 255 2.50E-69 270.4 6596 cellular  
organisms;Eukaryota;Opisthokonta;Metazoa;Eumetazoa;Bilateria;Protostomia;  
Spiralia;Lophotrochozoa;Mollusca;Bivalvia;Autobranchia;Heteroconchia;Euhe  
terodonta;Imparidentia;Venerida;Veneroidea;Veneridae;Mercenaria;Mercenari  
a mercenaria  
UdeM00000017164 6596 444.9 UdeM00000017164 XP\_045159777.1 57.9 366  
147 2 1 366 52 410 1.00E-121 444.9 6596 cellular  
organisms;Eukaryota;Opisthokonta;Metazoa;Eumetazoa;Bilateria;Protostomia;  
Spiralia;Lophotrochozoa;Mollusca;Bivalvia;Autobranchia;Heteroconchia;Euhe  
terodonta;Imparidentia;Venerida;Veneroidea;Veneridae;Mercenaria;Mercenari  
a mercenaria  
UdeM00000017165 6596 133.7 UdeM00000017165 XP\_045159778.1 62.7 102  
38 0 43 144 266 367 2.00E-28 133.7 6596 cellular  
organisms;Eukaryota;Opisthokonta;Metazoa;Eumetazoa;Bilateria;Protostomia;  
Spiralia;Lophotrochozoa;Mollusca;Bivalvia;Autobranchia;Heteroconchia;Euhe  
terodonta;Imparidentia;Venerida;Veneroidea;Veneridae;Mercenaria;Mercenari  
a mercenaria  
UdeM00000017167 400727 146 UdeM00000017167 XP\_025115998.1 29.9  
364 233 8 8 357 505 860 9.40E-32 146 400727  
cellular  
organisms;Eukaryota;Opisthokonta;Metazoa;Eumetazoa;Bilateria;Protostomia;  
Spiralia;Lophotrochozoa;Mollusca;Gastropoda;Caenogastropoda;Architaeniogl  
ossa;Ampullarioidea;Ampullariidae;Pomacea;Pomacea canaliculata  
UdeM00000017173 6596 77.4 UdeM00000017173 XP\_045202427.1 28.4 190  
112 6 69 246 539 716 2.80E-11 77.4 6596 cellular  
organisms;Eukaryota;Opisthokonta;Metazoa;Eumetazoa;Bilateria;Protostomia;  
Spiralia;Lophotrochozoa;Mollusca;Bivalvia;Autobranchia;Heteroconchia;Euhe  
terodonta;Imparidentia;Venerida;Veneroidea;Veneridae;Mercenaria;Mercenari  
a mercenaria  
UdeM00000017174 6573 133.7 UdeM00000017174 XP\_021362994.1 29.5 332  
211 9 52 372 55 374 5.20E-28 133.7 6573 cellular  
organisms;Eukaryota;Opisthokonta;Metazoa;Eumetazoa;Bilateria;Protostomia;  
Spiralia;Lophotrochozoa;Mollusca;Bivalvia;Autobranchia;Pteriormorphia;Pect  
inida;Pectinoidea;Pectinidae;Mizuhopecten;Mizuhopecten yessoensis  
UdeM00000017175 6412 412.9 UdeM00000017175 XP\_009012646.1 56 348  
150 2 1 346 1 347 4.20E-112 412.9 6412 cellular  
organisms;Eukaryota;Opisthokonta;Metazoa;Eumetazoa;Bilateria;Protostomia;  
Spiralia;Lophotrochozoa;Annelida;Clitellata;Hirudinea;Rhynchobdellida;Glo  
ssisiphiidae;Helobdella;Helobdella robusta  
UdeM00000017178 10036 68.6 UdeM00000017178 XP\_040602731.1 61.5 52  
20 0 8 59 5 56 3.80E-09 68.6 10036 cellular  
organisms;Eukaryota;Opisthokonta;Metazoa;Eumetazoa;Bilateria;Deuterostomi  
a;Chordata;Craniata;Vertebrata;Gnathostomata;Teleostomi;Euteleostomi;Sarc  
opterygii;Dipnotetrapodomorpha;Tetrapoda;Amniota;Mammalia;Theria;Eutheria



;Boreoeutheria;Euarchontoglires;Glires;Rodentia;Myomorpha;Muroidea;Cricetidae;Cricetinae;Mesocricetus;Mesocricetus auratus

UdeM00000017179 6579 440.7 UdeM00000017179 XP\_033748232.1 33.1 1161  
606 30 1801 2895 1251 2306 1.50E-119 440.7 6579 cellular  
organisms;Eukaryota;Opisthokonta;Metazoa;Eumetazoa;Bilateria;Protostomia;  
Spiralia;Lophotrochozoa;Mollusca;Bivalvia;Autobranchia;Pteriomorpha;Pectinida;  
Pectinoidea;Pectinidae;Pecten;Pecten maximus

UdeM00000017179 6579 58.5 UdeM00000017179 XP\_033748232.1 60 45  
18 0 43 87 7 51 1.60E-04 58.5 6579 cellular  
organisms;Eukaryota;Opisthokonta;Metazoa;Eumetazoa;Bilateria;Protostomia;  
Spiralia;Lophotrochozoa;Mollusca;Bivalvia;Autobranchia;Pteriomorpha;Pectinida;  
Pectinoidea;Pectinidae;Pecten;Pecten maximus

UdeM00000017180 6596 374.8 UdeM00000017180 XP\_045207388.1 34.8 909  
513 28 326 1182 9 889 4.10E-100 374.8 6596 cellular  
organisms;Eukaryota;Opisthokonta;Metazoa;Eumetazoa;Bilateria;Protostomia;  
Spiralia;Lophotrochozoa;Mollusca;Bivalvia;Autobranchia;Heteroconchia;Euheterodonta;  
Imparidentia;Venerida;Veneroidea;Veneridae;Mercenaria;Mercenaria mercenaria

UdeM00000017181 6596 374.8 UdeM00000017181 XP\_045207388.1 34.8 909  
513 28 422 1278 9 889 4.50E-100 374.8 6596 cellular  
organisms;Eukaryota;Opisthokonta;Metazoa;Eumetazoa;Bilateria;Protostomia;  
Spiralia;Lophotrochozoa;Mollusca;Bivalvia;Autobranchia;Heteroconchia;Euheterodonta;  
Imparidentia;Venerida;Veneroidea;Veneridae;Mercenaria;Mercenaria mercenaria

UdeM00000017182 6596 130.6 UdeM00000017182 XP\_045207393.1 41.2 160  
87 4 38 192 21 178 2.20E-27 130.6 6596 cellular  
organisms;Eukaryota;Opisthokonta;Metazoa;Eumetazoa;Bilateria;Protostomia;  
Spiralia;Lophotrochozoa;Mollusca;Bivalvia;Autobranchia;Heteroconchia;Euheterodonta;  
Imparidentia;Venerida;Veneroidea;Veneridae;Mercenaria;Mercenaria mercenaria

UdeM00000017183 6596 276.9 UdeM00000017183 XP\_045171339.1 51.9 237  
112 2 1 236 117 352 2.40E-71 276.9 6596 cellular  
organisms;Eukaryota;Opisthokonta;Metazoa;Eumetazoa;Bilateria;Protostomia;  
Spiralia;Lophotrochozoa;Mollusca;Bivalvia;Autobranchia;Heteroconchia;Euheterodonta;  
Imparidentia;Venerida;Veneroidea;Veneridae;Mercenaria;Mercenaria mercenaria

UdeM00000017184 29159 282.3 UdeM00000017184 XP\_011422571.2 74.7 178  
45 0 1 178 282 459 4.20E-73 282.3 29159 cellular  
organisms;Eukaryota;Opisthokonta;Metazoa;Eumetazoa;Bilateria;Protostomia;  
Spiralia;Lophotrochozoa;Mollusca;Bivalvia;Autobranchia;Pteriomorpha;Ostreida;  
Ostreoidea;Ostreidae;Crassostrea;Crassostrea gigas

UdeM00000017186 42526 157.9 UdeM00000017186 XP\_036443704.1 68.2 107  
34 0 2 108 44 150 7.40E-36 157.9 42526 cellular  
organisms;Eukaryota;Opisthokonta;Metazoa;Eumetazoa;Bilateria;Deuterostomia;  
Chordata;Craniata;Vertebrata;Gnathostomata;Teleostomi;Euteleostomi;Actinopterygii;  
Actinopteri;Neopterygii;Teleostei;Osteoglossocephalai;Clupeocephala;Otomorpha;  
Ostariophysi;Otophysi;Characiphysae;Characiformes;Characidae;Serrasalminidae;  
Colossoma;Colossoma macropomum

UdeM00000021373 6596 574.7 UdeM00000021373 XP\_045216588.1 53 566  
231 6 1 549 2171 2718 1.70E-160 574.7 6596 cellular  
organisms;Eukaryota;Opisthokonta;Metazoa;Eumetazoa;Bilateria;Protostomia;  
Spiralia;Lophotrochozoa;Mollusca;Bivalvia;Autobranchia;Heteroconchia;Euheterodonta;  
Imparidentia;Venerida;Veneroidea;Veneridae;Mercenaria;Mercenaria mercenaria

UdeM00000021374 6596 1718.7 UdeM00000021374 XP\_045216588.1 48.1  
 1808 885 20 18 1802 348 2125 0.00E+00 1718.7 6596  
 cellular  
 organisms;Eukaryota;Opisthokonta;Metazoa;Eumetazoa;Bilateria;Protostomia;  
 Spiralia;Lophotrochozoa;Mollusca;Bivalvia;Autobranchia;Heteroconchia;Euhe  
 terodonta;Imparidentia;Venerida;Veneroidea;Veneridae;Mercenaria;Mercenari  
 a mercenaria  
 UdeM00000021375 6596 176.4 UdeM00000021375 XP\_045215148.1 30.1 342  
 207 9 119 438 1 332 7.90E-41 176.4 6596 cellular  
 organisms;Eukaryota;Opisthokonta;Metazoa;Eumetazoa;Bilateria;Protostomia;  
 Spiralia;Lophotrochozoa;Mollusca;Bivalvia;Autobranchia;Heteroconchia;Euhe  
 terodonta;Imparidentia;Venerida;Veneroidea;Veneridae;Mercenaria;Mercenari  
 a mercenaria  
 UdeM00000021376 6596 549.7 UdeM00000021376 XP\_045216685.1 67.3 425  
 135 1 118 538 112 536 4.20E-153 549.7 6596 cellular  
 organisms;Eukaryota;Opisthokonta;Metazoa;Eumetazoa;Bilateria;Protostomia;  
 Spiralia;Lophotrochozoa;Mollusca;Bivalvia;Autobranchia;Heteroconchia;Euhe  
 terodonta;Imparidentia;Venerida;Veneroidea;Veneridae;Mercenaria;Mercenari  
 a mercenaria  
 UdeM00000021378 6573 353.6 UdeM00000021378 XP\_021360512.1 74.8 234  
 59 0 1 234 3 236 2.00E-94 353.6 6573 cellular  
 organisms;Eukaryota;Opisthokonta;Metazoa;Eumetazoa;Bilateria;Protostomia;  
 Spiralia;Lophotrochozoa;Mollusca;Bivalvia;Autobranchia;Pteriormorphia;Pect  
 inida;Pectinoidea;Pectinidae;Mizuhopecten;Mizuhopecten yessoensis  
 UdeM00000021379 6579 375.6 UdeM00000021379 XP\_033749419.1 74.9 247  
 62 0 1 247 3 249 5.10E-101 375.6 6579 cellular  
 organisms;Eukaryota;Opisthokonta;Metazoa;Eumetazoa;Bilateria;Protostomia;  
 Spiralia;Lophotrochozoa;Mollusca;Bivalvia;Autobranchia;Pteriormorphia;Pect  
 inida;Pectinoidea;Pectinidae;Pecten;Pecten maximus  
 UdeM00000021380 6596 91.3 UdeM00000021380 XP\_045207772.1 40.2 132  
 72 5 33 158 11 141 1.80E-15 91.3 6596 cellular  
 organisms;Eukaryota;Opisthokonta;Metazoa;Eumetazoa;Bilateria;Protostomia;  
 Spiralia;Lophotrochozoa;Mollusca;Bivalvia;Autobranchia;Heteroconchia;Euhe  
 terodonta;Imparidentia;Venerida;Veneroidea;Veneridae;Mercenaria;Mercenari  
 a mercenaria  
 UdeM00000021381 6596 90.9 UdeM00000021381 XP\_045207772.1 40.2 132  
 72 5 7 132 11 141 2.00E-15 90.9 6596 cellular  
 organisms;Eukaryota;Opisthokonta;Metazoa;Eumetazoa;Bilateria;Protostomia;  
 Spiralia;Lophotrochozoa;Mollusca;Bivalvia;Autobranchia;Heteroconchia;Euhe  
 terodonta;Imparidentia;Venerida;Veneroidea;Veneridae;Mercenaria;Mercenari  
 a mercenaria  
 UdeM00000021382 6596 107.1 UdeM00000021382 XP\_045181980.1 53.6 97  
 42 2 303 399 285 378 5.60E-20 107.1 6596 cellular  
 organisms;Eukaryota;Opisthokonta;Metazoa;Eumetazoa;Bilateria;Protostomia;  
 Spiralia;Lophotrochozoa;Mollusca;Bivalvia;Autobranchia;Heteroconchia;Euhe  
 terodonta;Imparidentia;Venerida;Veneroidea;Veneridae;Mercenaria;Mercenari  
 a mercenaria  
 UdeM00000021383 6596 107.1 UdeM00000021383 XP\_045181980.1 53.6 97  
 42 2 297 393 285 378 5.50E-20 107.1 6596 cellular  
 organisms;Eukaryota;Opisthokonta;Metazoa;Eumetazoa;Bilateria;Protostomia;  
 Spiralia;Lophotrochozoa;Mollusca;Bivalvia;Autobranchia;Heteroconchia;Euhe  
 terodonta;Imparidentia;Venerida;Veneroidea;Veneridae;Mercenaria;Mercenari  
 a mercenaria

UdeM00000021384 6579 82 UdeM00000021384 XP\_033750328.1 27.3 422  
 232 14 23 427 2 365 2.00E-12 82 6579 cellular  
 organisms;Eukaryota;Opisthokonta;Metazoa;Eumetazoa;Bilateria;Protostomia;  
 Spiralia;Lophotrochozoa;Mollusca;Bivalvia;Autobranchia;Pteriomorpha;Pect  
 inida;Pectinoidea;Pectinidae;Pecten;Pecten maximus  
 UdeM00000021385 400727 275.8 UdeM00000021385 XP\_025077216.1 42.9  
 359 201 2 14 369 53 410 8.10E-71 275.8 400727  
 cellular  
 organisms;Eukaryota;Opisthokonta;Metazoa;Eumetazoa;Bilateria;Protostomia;  
 Spiralia;Lophotrochozoa;Mollusca;Gastropoda;Caenogastropoda;Architaeniogl  
 ossa;Ampullarioidea;Ampullariidae;Pomacea;Pomacea canaliculata  
 UdeM00000021386 6579 1639.8 UdeM00000021386 XP\_033749503.1 61.9  
 1348 497 9 1 1333 1 1347 0.00E+00 1639.8 6579  
 cellular  
 organisms;Eukaryota;Opisthokonta;Metazoa;Eumetazoa;Bilateria;Protostomia;  
 Spiralia;Lophotrochozoa;Mollusca;Bivalvia;Autobranchia;Pteriomorpha;Pect  
 inida;Pectinoidea;Pectinidae;Pecten;Pecten maximus  
 UdeM00000021388 6573 146.7 UdeM00000021388 XP\_021346093.1 40.5 215  
 77 1 10 224 13 176 3.70E-32 146.7 6573 cellular  
 organisms;Eukaryota;Opisthokonta;Metazoa;Eumetazoa;Bilateria;Protostomia;  
 Spiralia;Lophotrochozoa;Mollusca;Bivalvia;Autobranchia;Pteriomorpha;Pect  
 inida;Pectinoidea;Pectinidae;Mizuhopecten;Mizuhopecten yessoensis  
 UdeM00000021387 6573 146 UdeM00000021387 XP\_021346093.1 40.5 215  
 77 1 11 225 13 176 6.30E-32 146 6573 cellular  
 organisms;Eukaryota;Opisthokonta;Metazoa;Eumetazoa;Bilateria;Protostomia;  
 Spiralia;Lophotrochozoa;Mollusca;Bivalvia;Autobranchia;Pteriomorpha;Pect  
 inida;Pectinoidea;Pectinidae;Mizuhopecten;Mizuhopecten yessoensis  
 UdeM00000021389 37621 145.6 UdeM00000021389 XP\_014673981.1 46.8 171  
 57 3 114 250 48 218 9.10E-32 145.6 37621 cellular  
 organisms;Eukaryota;Opisthokonta;Metazoa;Eumetazoa;Bilateria;Protostomia;  
 Ecdysozoa;Scalidophora;Priapulida;Priapulimorpha;Priapulimorphida;Priapul  
 idae;Priapululus;Priapululus caudatus  
 UdeM00000021390 37621 211.8 UdeM00000021390 XP\_014672567.1 51.7 174  
 84 0 10 183 345 518 9.00E-52 211.8 37621 cellular  
 organisms;Eukaryota;Opisthokonta;Metazoa;Eumetazoa;Bilateria;Protostomia;  
 Ecdysozoa;Scalidophora;Priapulida;Priapulimorpha;Priapulimorphida;Priapul  
 idae;Priapululus;Priapululus caudatus  
 UdeM00000021391 6573 498.4 UdeM00000021391 XP\_021346091.1 45.3 656  
 223 9 3 627 84 634 1.30E-137 498.4 6573 cellular  
 organisms;Eukaryota;Opisthokonta;Metazoa;Eumetazoa;Bilateria;Protostomia;  
 Spiralia;Lophotrochozoa;Mollusca;Bivalvia;Autobranchia;Pteriomorpha;Pect  
 inida;Pectinoidea;Pectinidae;Mizuhopecten;Mizuhopecten yessoensis  
 UdeM00000021394 6565 62 UdeM00000021394 XP\_022287521.1 39.7 73  
 44 0 2 74 313 385 4.90E-07 62 6565 cellular  
 organisms;Eukaryota;Opisthokonta;Metazoa;Eumetazoa;Bilateria;Protostomia;  
 Spiralia;Lophotrochozoa;Mollusca;Bivalvia;Autobranchia;Pteriomorpha;Ostr  
 eida;Ostreoidea;Ostreidae;Crassostrea;Crassostrea virginica  
 UdeM00000021395 6579 242.7 UdeM00000021395 XP\_033751024.1 38.7 426  
 218 12 388 801 521 915 1.70E-60 242.7 6579 cellular  
 organisms;Eukaryota;Opisthokonta;Metazoa;Eumetazoa;Bilateria;Protostomia;  
 Spiralia;Lophotrochozoa;Mollusca;Bivalvia;Autobranchia;Pteriomorpha;Pect  
 inida;Pectinoidea;Pectinidae;Pecten;Pecten maximus  
 UdeM00000021396 6596 181 UdeM00000021396 XP\_045156271.1 45.8 201  
 99 2 23 213 25 225 1.60E-42 181 6596 cellular

organisms;Eukaryota;Opisthokonta;Metazoa;Eumetazoa;Bilateria;Protostomia;Spiralia;Lophotrochozoa;Mollusca;Bivalvia;Autobranhia;Heteroconchia;Euherodonta;Imparidentia;Venerida;Veneroidea;Veneridae;Mercenaria;Mercenaria mercenaria

UdeM00000021397 6596 295 UdeM00000021397 XP\_045157060.1 43.5 331  
177 3 65 389 46 372 1.50E-76 295 6596 cellular

organisms;Eukaryota;Opisthokonta;Metazoa;Eumetazoa;Bilateria;Protostomia;Spiralia;Lophotrochozoa;Mollusca;Bivalvia;Autobranhia;Heteroconchia;Euherodonta;Imparidentia;Venerida;Veneroidea;Veneridae;Mercenaria;Mercenaria mercenaria

UdeM00000021398 6596 215.7 UdeM00000021398 XP\_045156445.1 53.3 199  
92 1 4 201 70 268 6.30E-53 215.7 6596 cellular

organisms;Eukaryota;Opisthokonta;Metazoa;Eumetazoa;Bilateria;Protostomia;Spiralia;Lophotrochozoa;Mollusca;Bivalvia;Autobranhia;Heteroconchia;Euherodonta;Imparidentia;Venerida;Veneroidea;Veneridae;Mercenaria;Mercenaria mercenaria

UdeM00000021399 7574 105.9 UdeM00000021399 XP\_013401097.1 53.6 112  
51 1 6 117 544 654 3.60E-20 105.9 7574 cellular

organisms;Eukaryota;Opisthokonta;Metazoa;Eumetazoa;Bilateria;Protostomia;Spiralia;Lophotrochozoa;Brachiopoda;Linguliformea;Lingulata;Lingulida;Linguloidea;Lingulidae;Lingula;Lingula anatina

UdeM00000021400 6596 65.5 UdeM00000021400 XP\_045202346.1 33 109  
69 2 6 113 16 121 5.10E-08 65.5 6596 cellular

organisms;Eukaryota;Opisthokonta;Metazoa;Eumetazoa;Bilateria;Protostomia;Spiralia;Lophotrochozoa;Mollusca;Bivalvia;Autobranhia;Heteroconchia;Euherodonta;Imparidentia;Venerida;Veneroidea;Veneridae;Mercenaria;Mercenaria mercenaria

UdeM00000021401 6596 253.1 UdeM00000021401 XP\_045183440.1 52.9 240  
108 3 2 240 145 380 5.20E-64 253.1 6596 cellular

organisms;Eukaryota;Opisthokonta;Metazoa;Eumetazoa;Bilateria;Protostomia;Spiralia;Lophotrochozoa;Mollusca;Bivalvia;Autobranhia;Heteroconchia;Euherodonta;Imparidentia;Venerida;Veneroidea;Veneridae;Mercenaria;Mercenaria mercenaria

UdeM00000021402 114398 228.8 UdeM00000021402 XP\_042903861.1 27.7  
607 252 7 1 425 1 602 1.30E-56 228.8 114398  
cellular

organisms;Eukaryota;Opisthokonta;Metazoa;Eumetazoa;Bilateria;Protostomia;Ecdysozoa;Panarthropoda;Arthropoda;Chelicerata;Arachnida;Araneae;Araneomorphae;Entelegynae;Orbiculariae;Araneoidea;Theridiidae;Parasteatoda;Parasteatoda tepidariorum

UdeM00000021403 6596 231.9 UdeM00000021403 XP\_045195710.1 51.4 220  
107 0 43 262 36 255 1.10E-57 231.9 6596 cellular

organisms;Eukaryota;Opisthokonta;Metazoa;Eumetazoa;Bilateria;Protostomia;Spiralia;Lophotrochozoa;Mollusca;Bivalvia;Autobranhia;Heteroconchia;Euherodonta;Imparidentia;Venerida;Veneroidea;Veneridae;Mercenaria;Mercenaria mercenaria

UdeM00000021404 6579 282.3 UdeM00000021404 XP\_033748359.1 45.8 319  
170 2 13 328 378 696 1.10E-72 282.3 6579 cellular

organisms;Eukaryota;Opisthokonta;Metazoa;Eumetazoa;Bilateria;Protostomia;Spiralia;Lophotrochozoa;Mollusca;Bivalvia;Autobranhia;Pteriomorphia;Pectinida;Pectinoidea;Pectinidae;Pecten;Pecten maximus

UdeM00000021405 90988 171.4 UdeM00000021405 XP\_039535177.1 25 608  
393 16 43 600 28 622 3.50E-39 171.4 90988 cellular

organisms;Eukaryota;Opisthokonta;Metazoa;Eumetazoa;Bilateria;Deuterostomi

a;Chordata;Craniata;Vertebrata;Gnathostomata;Teleostomi;Euteleostomi;Acti  
 nopterygii;Actinopteri;Neopterygii;Teleostei;Osteoglossocephalai;Clupeocephala;  
 Otomorpha;Ostariophysi;Otophysi;Cypriniphysae;Cypriniiformes;Cyprinoides;  
 Leuciscidae;Pogonichthyinae;Pimephales;Pimephales promelas  
 UdeM00000021407 6573 783.1 UdeM00000021407 XP\_021364536.1 83.6 432  
 71 0 1 432 1 432 2.10E-223 783.1 6573 cellular  
 organisms;Eukaryota;Opisthokonta;Metazoa;Eumetazoa;Bilateria;Protostomia;  
 Spiralia;Lophotrochozoa;Mollusca;Bivalvia;Autobranchia;Pteriormorphia;Pect  
 inida;Pectinoidea;Pectinidae;Mizuhopecten;Mizuhopecten yessoensis  
 UdeM00000021409 6596 58.9 UdeM00000021409 XP\_045195711.1 43.3 67  
 36 1 15 81 1 65 3.50E-06 58.9 6596 cellular  
 organisms;Eukaryota;Opisthokonta;Metazoa;Eumetazoa;Bilateria;Protostomia;  
 Spiralia;Lophotrochozoa;Mollusca;Bivalvia;Autobranchia;Heteroconchia;Euhe  
 terodonta;Imparidentia;Venerida;Veneroidea;Veneridae;Mercenaria;Mercenari  
 a mercenaria  
 UdeM00000021408 6596 281.6 UdeM00000021408 XP\_045195711.1 51.1 278  
 134 1 15 292 1 276 1.20E-72 281.6 6596 cellular  
 organisms;Eukaryota;Opisthokonta;Metazoa;Eumetazoa;Bilateria;Protostomia;  
 Spiralia;Lophotrochozoa;Mollusca;Bivalvia;Autobranchia;Heteroconchia;Euhe  
 terodonta;Imparidentia;Venerida;Veneroidea;Veneridae;Mercenaria;Mercenari  
 a mercenaria  
 UdeM00000021411 6596 215.3 UdeM00000021411 XP\_045195710.1 50 214  
 107 0 3 216 71 284 7.80E-53 215.3 6596 cellular  
 organisms;Eukaryota;Opisthokonta;Metazoa;Eumetazoa;Bilateria;Protostomia;  
 Spiralia;Lophotrochozoa;Mollusca;Bivalvia;Autobranchia;Heteroconchia;Euhe  
 terodonta;Imparidentia;Venerida;Veneroidea;Veneridae;Mercenaria;Mercenari  
 a mercenaria  
 UdeM00000021410 6596 267.3 UdeM00000021410 XP\_045195711.1 48.9 272  
 131 1 104 367 7 278 2.90E-68 267.3 6596 cellular  
 organisms;Eukaryota;Opisthokonta;Metazoa;Eumetazoa;Bilateria;Protostomia;  
 Spiralia;Lophotrochozoa;Mollusca;Bivalvia;Autobranchia;Heteroconchia;Euhe  
 terodonta;Imparidentia;Venerida;Veneroidea;Veneridae;Mercenaria;Mercenari  
 a mercenaria  
 UdeM00000021412 6596 255.8 UdeM00000021412 XP\_045195710.1 55.1 225  
 94 1 15 232 35 259 6.20E-65 255.8 6596 cellular  
 organisms;Eukaryota;Opisthokonta;Metazoa;Eumetazoa;Bilateria;Protostomia;  
 Spiralia;Lophotrochozoa;Mollusca;Bivalvia;Autobranchia;Heteroconchia;Euhe  
 terodonta;Imparidentia;Venerida;Veneroidea;Veneridae;Mercenaria;Mercenari  
 a mercenaria  
 UdeM00000021413 6565 155.6 UdeM00000021413 XP\_022320952.1 47.3 186  
 72 3 12 171 321 506 7.30E-35 155.6 6565 cellular  
 organisms;Eukaryota;Opisthokonta;Metazoa;Eumetazoa;Bilateria;Protostomia;  
 Spiralia;Lophotrochozoa;Mollusca;Bivalvia;Autobranchia;Pteriormorphia;Ostr  
 eida;Ostreoidea;Ostreidae;Crassostrea;Crassostrea virginica  
 UdeM00000021414 37653 98.2 UdeM00000021414 XP\_014784355.1 60 80  
 31 1 34 112 429 508 9.60E-18 98.2 37653 cellular  
 organisms;Eukaryota;Opisthokonta;Metazoa;Eumetazoa;Bilateria;Protostomia;  
 Spiralia;Lophotrochozoa;Mollusca;Cephalopoda;Coleoidea;Octopodiformes;Oct  
 opoda;Incirrata;Octopodidae;Octopus;Octopus bimaculoides  
 UdeM00000021415 37653 97.8 UdeM00000021415 XP\_014784355.1 60 80  
 31 1 33 111 429 508 1.20E-17 97.8 37653 cellular  
 organisms;Eukaryota;Opisthokonta;Metazoa;Eumetazoa;Bilateria;Protostomia;  
 Spiralia;Lophotrochozoa;Mollusca;Cephalopoda;Coleoidea;Octopodiformes;Oct  
 opoda;Incirrata;Octopodidae;Octopus;Octopus bimaculoides

UdeM00000021416 29159 115.9 UdeM00000021416 XP\_034322541.1 25.6 433  
 242 19 58 453 203 592 1.40E-22 115.9 29159 cellular  
 organisms;Eukaryota;Opisthokonta;Metazoa;Eumetazoa;Bilateria;Protostomia;  
 Spiralia;Lophotrochozoa;Mollusca;Bivalvia;Autobranchia;Pteriormorphia;Ostr  
 eida;Ostreoidea;Ostreidae;Crassostrea;Crassostrea gigas  
 UdeM00000021419 225164 123.6 UdeM00000021419 XP\_009061770.1 40.6  
 155 38 1 23 123 99 253 1.70E-25 123.6 225164  
 cellular  
 organisms;Eukaryota;Opisthokonta;Metazoa;Eumetazoa;Bilateria;Protostomia;  
 Spiralia;Lophotrochozoa;Mollusca;Gastropoda;Patellogastropoda;Lottioidea;  
 Lottiidae;Lottia;Lottia gigantea  
 UdeM00000021420 7462 78.6 UdeM00000021420 XP\_031368538.1 31.2 144  
 97 1 14 155 468 611 8.00E-12 78.6 7462 cellular  
 organisms;Eukaryota;Opisthokonta;Metazoa;Eumetazoa;Bilateria;Protostomia;  
 Ecdysozoa;Panarthropoda;Arthropoda;Mandibulata;Pancrustacea;Hexapoda;Inse  
 cta;Dicondylia;Pterygota;Neoptera;Endopterygota;Hymenoptera;Apocrita;Acul  
 eata;Apoidea;Apidae;Apinae;Apini;Apis;Apis dorsata  
 UdeM00000021422 6596 412.9 UdeM00000021422 XP\_045180006.1 52.1 436  
 177 3 2 408 1 433 4.80E-112 412.9 6596 cellular  
 organisms;Eukaryota;Opisthokonta;Metazoa;Eumetazoa;Bilateria;Protostomia;  
 Spiralia;Lophotrochozoa;Mollusca;Bivalvia;Autobranchia;Heteroconchia;Euhe  
 terodonta;Imparidentia;Venerida;Veneroidea;Veneridae;Mercenaria;Mercenari  
 a mercenaria  
 UdeM00000021423 6596 362.5 UdeM00000021423 XP\_045156265.1 41.9 511  
 245 7 5 509 11 475 1.00E-96 362.5 6596 cellular  
 organisms;Eukaryota;Opisthokonta;Metazoa;Eumetazoa;Bilateria;Protostomia;  
 Spiralia;Lophotrochozoa;Mollusca;Bivalvia;Autobranchia;Heteroconchia;Euhe  
 terodonta;Imparidentia;Venerida;Veneroidea;Veneridae;Mercenaria;Mercenari  
 a mercenaria  
 UdeM00000021424 6596 89 UdeM00000021424 XP\_045156267.1 58 88  
 32 3 71 154 100 186 6.00E-15 89 6596 cellular  
 organisms;Eukaryota;Opisthokonta;Metazoa;Eumetazoa;Bilateria;Protostomia;  
 Spiralia;Lophotrochozoa;Mollusca;Bivalvia;Autobranchia;Heteroconchia;Euhe  
 terodonta;Imparidentia;Venerida;Veneroidea;Veneridae;Mercenaria;Mercenari  
 a mercenaria  
 UdeM00000021425 6596 511.1 UdeM00000021425 XP\_045216984.1 81.9 287  
 52 0 1 287 1 287 9.40E-142 511.1 6596 cellular  
 organisms;Eukaryota;Opisthokonta;Metazoa;Eumetazoa;Bilateria;Protostomia;  
 Spiralia;Lophotrochozoa;Mollusca;Bivalvia;Autobranchia;Heteroconchia;Euhe  
 terodonta;Imparidentia;Venerida;Veneroidea;Veneridae;Mercenaria;Mercenari  
 a mercenaria  
 UdeM00000021426 7936 71.2 UdeM00000021426 XP\_035277210.1 70.8 48  
 13 1 3 50 2 48 8.00E-10 71.2 7936 cellular  
 organisms;Eukaryota;Opisthokonta;Metazoa;Eumetazoa;Bilateria;Deuterostomi  
 a;Chordata;Craniata;Vertebrata;Gnathostomata;Teleostomi;Euteleostomi;Acti  
 nopterygii;Actinopteri;Neopterygii;Teleostei;Elopocephalai;Elopocephala;E  
 lopomorpha;Anguilliformes;Anguillidae;Anguilla;Anguilla anguilla  
 UdeM00000021427 45351 248.4 UdeM00000021427 XP\_001631596.1 57.8 192  
 81 0 18 209 64 255 7.80E-63 248.4 45351 cellular  
 organisms;Eukaryota;Opisthokonta;Metazoa;Eumetazoa;Cnidaria;Anthozoa;Hexa  
 corallia;Actiniaria;Edwardsiidae;Nematostella;Nematostella vectensis  
 UdeM00000021429 6596 119 UdeM00000021429 XP\_045216977.1 74.7 75  
 14 1 17 86 2 76 3.20E-24 119 6596 cellular  
 organisms;Eukaryota;Opisthokonta;Metazoa;Eumetazoa;Bilateria;Protostomia;

Spiralia;Lophotrochozoa;Mollusca;Bivalvia;Autobranchia;Heteroconchia;Euherodonta;Imparidentia;Venerida;Veneroidea;Veneridae;Mercenaria;Mercenaria mercenaria

UdeM00000021428 6596 148.3 UdeM00000021428 XP\_045216977.1 88.2 76  
9 0 1 76 1 76 4.40E-33 148.3 6596 cellular

organisms;Eukaryota;Opisthokonta;Metazoa;Eumetazoa;Bilateria;Protostomia;Spiralia;Lophotrochozoa;Mollusca;Bivalvia;Autobranchia;Heteroconchia;Euherodonta;Imparidentia;Venerida;Veneroidea;Veneridae;Mercenaria;Mercenaria mercenaria

UdeM00000021430 6596 562.4 UdeM00000021430 XP\_045215956.1 53.3 598  
152 12 1 589 1 480 6.90E-157 562.4 6596 cellular

organisms;Eukaryota;Opisthokonta;Metazoa;Eumetazoa;Bilateria;Protostomia;Spiralia;Lophotrochozoa;Mollusca;Bivalvia;Autobranchia;Heteroconchia;Euherodonta;Imparidentia;Venerida;Veneroidea;Veneridae;Mercenaria;Mercenaria mercenaria

UdeM00000021431 7574 235.3 UdeM00000021431 XP\_013415139.1 49.2 254  
116 4 1 241 1 254 7.90E-59 235.3 7574 cellular

organisms;Eukaryota;Opisthokonta;Metazoa;Eumetazoa;Bilateria;Protostomia;Spiralia;Lophotrochozoa;Brachiopoda;Linguliformea;Lingulata;Lingulida;Linguloidea;Lingulidae;Lingula;Lingula anatina

UdeM00000021432 130825 62.4 UdeM00000021432 XP\_040846503.1 52.3  
44 21 0 3 46 1 44 2.60E-07 62.4 130825

cellular

organisms;Eukaryota;Opisthokonta;Metazoa;Eumetazoa;Bilateria;Deuterostomia;Chordata;Craniata;Vertebrata;Gnathostomata;Teleostomi;Euteleostomi;Sarcopterygii;Dipnotetrapodomorpha;Tetrapoda;Amniota;Mammalia;Theria;Eutheria;Boreoeutheria;Euarchontoglires;Glires;Lagomorpha;Ochotonidae;Ochotona;Ochotona curzoniae

UdeM00000021433 6579 378.3 UdeM00000021433 XP\_033750909.1 43.5 451  
233 6 28 458 29 477 1.50E-101 378.3 6579 cellular

organisms;Eukaryota;Opisthokonta;Metazoa;Eumetazoa;Bilateria;Protostomia;Spiralia;Lophotrochozoa;Mollusca;Bivalvia;Autobranchia;Pteriomorpha;Pectinida;Pectinoidea;Pectinidae;Pecten;Pecten maximus

UdeM00000021434 6573 1753.4 UdeM00000021434 XP\_021340399.1 70.4  
1462 407 15 140 1577 130 1589 0.00E+00 1753.4 6573

cellular

organisms;Eukaryota;Opisthokonta;Metazoa;Eumetazoa;Bilateria;Protostomia;Spiralia;Lophotrochozoa;Mollusca;Bivalvia;Autobranchia;Pteriomorpha;Pectinida;Pectinoidea;Pectinidae;Mizuhopecten;Mizuhopecten yessoensis

UdeM00000021436 6500 222.6 UdeM00000021436 XP\_035824079.1 41.7 276  
149 4 1 264 106 381 8.20E-55 222.6 6500 cellular

organisms;Eukaryota;Opisthokonta;Metazoa;Eumetazoa;Bilateria;Protostomia;Spiralia;Lophotrochozoa;Mollusca;Gastropoda;Heterobranchia;Euthyneura;Teptipleura;Aplysiida;Aplysioidea;Aplysiidae;Aplysia;Aplysia californica

UdeM00000021439 6579 163.3 UdeM00000021439 XP\_033749843.1 30 526  
285 16 22 496 28 521 7.90E-37 163.3 6579 cellular

organisms;Eukaryota;Opisthokonta;Metazoa;Eumetazoa;Bilateria;Protostomia;Spiralia;Lophotrochozoa;Mollusca;Bivalvia;Autobranchia;Pteriomorpha;Pectinida;Pectinoidea;Pectinidae;Pecten;Pecten maximus

UdeM00000021440 6596 141.4 UdeM00000021440 XP\_045215567.1 61.6 99  
38 0 9 107 261 359 1.20E-30 141.4 6596 cellular

organisms;Eukaryota;Opisthokonta;Metazoa;Eumetazoa;Bilateria;Protostomia;Spiralia;Lophotrochozoa;Mollusca;Bivalvia;Autobranchia;Heteroconchia;Euherodonta

terodonta;Imparidentia;Venerida;Veneroidea;Veneridae;Mercenaria;Mercenari  
 a mercenaria  
 UdeM00000021441 6596 138.7 UdeM00000021441 XP\_045215434.1 34.1 211  
 139 0 73 283 15 225 1.30E-29 138.7 6596 cellular  
 organisms;Eukaryota;Opisthokonta;Metazoa;Eumetazoa;Bilateria;Protostomia;  
 Spiralia;Lophotrochozoa;Mollusca;Bivalvia;Autobranchia;Heteroconchia;Euhe  
 terodonta;Imparidentia;Venerida;Veneroidea;Veneridae;Mercenaria;Mercenari  
 a mercenaria  
 UdeM00000021442 6596 145.2 UdeM00000021442 XP\_045215567.1 52.7 131  
 60 1 5 135 136 264 8.70E-32 145.2 6596 cellular  
 organisms;Eukaryota;Opisthokonta;Metazoa;Eumetazoa;Bilateria;Protostomia;  
 Spiralia;Lophotrochozoa;Mollusca;Bivalvia;Autobranchia;Heteroconchia;Euhe  
 terodonta;Imparidentia;Venerida;Veneroidea;Veneridae;Mercenaria;Mercenari  
 a mercenaria  
 UdeM00000021443 6596 163.7 UdeM00000021443 XP\_045215567.1 54.1 135  
 62 0 3 137 1 135 1.70E-37 163.7 6596 cellular  
 organisms;Eukaryota;Opisthokonta;Metazoa;Eumetazoa;Bilateria;Protostomia;  
 Spiralia;Lophotrochozoa;Mollusca;Bivalvia;Autobranchia;Heteroconchia;Euhe  
 terodonta;Imparidentia;Venerida;Veneroidea;Veneridae;Mercenaria;Mercenari  
 a mercenaria  
 UdeM00000021444 6596 148.3 UdeM00000021444 XP\_045216867.1 39.1 235  
 120 6 11 232 35 259 1.20E-32 148.3 6596 cellular  
 organisms;Eukaryota;Opisthokonta;Metazoa;Eumetazoa;Bilateria;Protostomia;  
 Spiralia;Lophotrochozoa;Mollusca;Bivalvia;Autobranchia;Heteroconchia;Euhe  
 terodonta;Imparidentia;Venerida;Veneroidea;Veneridae;Mercenaria;Mercenari  
 a mercenaria  
 UdeM00000021448 6596 716.1 UdeM00000021448 XP\_045216892.1 68.7 504  
 157 1 3 506 415 917 3.20E-203 716.1 6596 cellular  
 organisms;Eukaryota;Opisthokonta;Metazoa;Eumetazoa;Bilateria;Protostomia;  
 Spiralia;Lophotrochozoa;Mollusca;Bivalvia;Autobranchia;Heteroconchia;Euhe  
 terodonta;Imparidentia;Venerida;Veneroidea;Veneridae;Mercenaria;Mercenari  
 a mercenaria  
 UdeM00000021447 6596 870.5 UdeM00000021447 XP\_045216892.1 65.3 660  
 198 3 79 737 288 917 1.50E-249 870.5 6596 cellular  
 organisms;Eukaryota;Opisthokonta;Metazoa;Eumetazoa;Bilateria;Protostomia;  
 Spiralia;Lophotrochozoa;Mollusca;Bivalvia;Autobranchia;Heteroconchia;Euhe  
 terodonta;Imparidentia;Venerida;Veneroidea;Veneridae;Mercenaria;Mercenari  
 a mercenaria  
 UdeM00000021449 6565 156.4 UdeM00000021449 XP\_022333402.1 80.9 94  
 18 0 2 95 773 866 2.10E-35 156.4 6565 cellular  
 organisms;Eukaryota;Opisthokonta;Metazoa;Eumetazoa;Bilateria;Protostomia;  
 Spiralia;Lophotrochozoa;Mollusca;Bivalvia;Autobranchia;Pteriomorphia;Ostr  
 eida;Ostreoidea;Ostreidae;Crassostrea;Crassostrea virginica  
 UdeM00000021450 6565 169.9 UdeM00000021450 XP\_022297037.1 43.6 218  
 116 3 6 218 11 226 3.70E-39 169.9 6565 cellular  
 organisms;Eukaryota;Opisthokonta;Metazoa;Eumetazoa;Bilateria;Protostomia;  
 Spiralia;Lophotrochozoa;Mollusca;Bivalvia;Autobranchia;Pteriomorphia;Ostr  
 eida;Ostreoidea;Ostreidae;Crassostrea;Crassostrea virginica  
 UdeM00000021451 6596 186.4 UdeM00000021451 XP\_045216892.1 52.4 185  
 25 1 36 157 103 287 2.70E-44 186.4 6596 cellular  
 organisms;Eukaryota;Opisthokonta;Metazoa;Eumetazoa;Bilateria;Protostomia;  
 Spiralia;Lophotrochozoa;Mollusca;Bivalvia;Autobranchia;Heteroconchia;Euhe  
 terodonta;Imparidentia;Venerida;Veneroidea;Veneridae;Mercenaria;Mercenari  
 a mercenaria



UdeM00000021452 6596 127.9 UdeM00000021452 XP\_045216209.1 43.6 179  
 99 2 1 179 1 177 2.20E-26 127.9 6596 cellular  
 organisms;Eukaryota;Opisthokonta;Metazoa;Eumetazoa;Bilateria;Protostomia;  
 Spiralia;Lophotrochozoa;Mollusca;Bivalvia;Autobranchia;Heteroconchia;Euhe  
 terodonta;Imparidentia;Venerida;Veneroidea;Veneridae;Mercenaria;Mercenari  
 a mercenaria  
 UdeM00000021454 6565 159.1 UdeM00000021454 XP\_022328252.1 44.5 211  
 99 5 1 193 1105 1315 5.80E-36 159.1 6565 cellular  
 organisms;Eukaryota;Opisthokonta;Metazoa;Eumetazoa;Bilateria;Protostomia;  
 Spiralia;Lophotrochozoa;Mollusca;Bivalvia;Autobranchia;Pteriormorphia;Ostr  
 eida;Ostreoidea;Ostreidae;Crassostrea;Crassostrea virginica  
 UdeM00000021455 29159 1224.9 UdeM00000021455 XP\_034322339.1 52.2  
 1183 519 15 1 1144 142 1316 0.00E+00 1224.9  
 29159 cellular  
 organisms;Eukaryota;Opisthokonta;Metazoa;Eumetazoa;Bilateria;Protostomia;  
 Spiralia;Lophotrochozoa;Mollusca;Bivalvia;Autobranchia;Pteriormorphia;Ostr  
 eida;Ostreoidea;Ostreidae;Crassostrea;Crassostrea gigas  
 UdeM00000021456 6596 120.6 UdeM00000021456 XP\_045216209.1 42.9 175  
 98 2 1 175 1 173 3.60E-24 120.6 6596 cellular  
 organisms;Eukaryota;Opisthokonta;Metazoa;Eumetazoa;Bilateria;Protostomia;  
 Spiralia;Lophotrochozoa;Mollusca;Bivalvia;Autobranchia;Heteroconchia;Euhe  
 terodonta;Imparidentia;Venerida;Veneroidea;Veneridae;Mercenaria;Mercenari  
 a mercenaria  
 UdeM00000021457 6596 118.2 UdeM00000021457 XP\_045216209.1 35.9 220  
 135 4 1 218 1 216 1.80E-23 118.2 6596 cellular  
 organisms;Eukaryota;Opisthokonta;Metazoa;Eumetazoa;Bilateria;Protostomia;  
 Spiralia;Lophotrochozoa;Mollusca;Bivalvia;Autobranchia;Heteroconchia;Euhe  
 terodonta;Imparidentia;Venerida;Veneroidea;Veneridae;Mercenaria;Mercenari  
 a mercenaria  
 UdeM00000021458 42526 71.6 UdeM00000021458 XP\_036431265.1 49.3 67  
 33 1 13 79 87 152 7.60E-10 71.6 42526 cellular  
 organisms;Eukaryota;Opisthokonta;Metazoa;Eumetazoa;Bilateria;Deuterostomi  
 a;Chordata;Craniata;Vertebrata;Gnathostomata;Teleostomi;Euteleostomi;Acti  
 nopterygii;Actinopteri;Neopterygii;Teleostei;Osteoglossocephalai;Clupeoce  
 phala;Otomorpha;Ostariophysi;Otophysi;Characiphysae;Characiiformes;Characo  
 idei;Serrasalminidae;Colossoma;Colossoma macropomum  
 UdeM00000021459 6573 157.5 UdeM00000021459 XP\_021368610.1 66.1 115  
 39 0 11 125 12 126 1.60E-35 157.5 6573 cellular  
 organisms;Eukaryota;Opisthokonta;Metazoa;Eumetazoa;Bilateria;Protostomia;  
 Spiralia;Lophotrochozoa;Mollusca;Bivalvia;Autobranchia;Pteriormorphia;Pect  
 inida;Pectinoidea;Pectinidae;Mizuhopecten;Mizuhopecten yessoensis  
 UdeM00000021460 6565 401.7 UdeM00000021460 XP\_022322482.1 47.5 438  
 206 4 37 463 12 436 1.40E-108 401.7 6565 cellular  
 organisms;Eukaryota;Opisthokonta;Metazoa;Eumetazoa;Bilateria;Protostomia;  
 Spiralia;Lophotrochozoa;Mollusca;Bivalvia;Autobranchia;Pteriormorphia;Ostr  
 eida;Ostreoidea;Ostreidae;Crassostrea;Crassostrea virginica  
 UdeM00000021461 6565 132.5 UdeM00000021461 XP\_022299727.1 49.6 133  
 66 1 4 136 140 271 4.20E-28 132.5 6565 cellular  
 organisms;Eukaryota;Opisthokonta;Metazoa;Eumetazoa;Bilateria;Protostomia;  
 Spiralia;Lophotrochozoa;Mollusca;Bivalvia;Autobranchia;Pteriormorphia;Ostr  
 eida;Ostreoidea;Ostreidae;Crassostrea;Crassostrea virginica  
 UdeM00000021462 133901 162.2 UdeM00000021462 XP\_026279040.1 59.8  
 127 51 0 29 155 448 574 5.50E-37 162.2 133901  
 cellular

organisms;Eukaryota;Opisthokonta;Metazoa;Eumetazoa;Bilateria;Protostomia;  
Ecdysozoa;Panarthropoda;Arthropoda;Mandibulata;Pancrustacea;Hexapoda;Inse  
cta;Dicondylia;Pterygota;Neoptera;Paraneoptera;Thysanoptera;Terebrantia;T  
hripoidea;Thripidae;Thripinae;Frankliniella;Frankliniella occidentalis  
UdeM00000021463 29159 888.3 UdeM00000021463 XP\_034300520.1 53.1 892  
397 5 34 922 443 1316 8.90E-255 888.3 29159 cellular  
organisms;Eukaryota;Opisthokonta;Metazoa;Eumetazoa;Bilateria;Protostomia;  
Spiralia;Lophotrochozoa;Mollusca;Bivalvia;Autobranchia;Pteriomorphia;Ostr  
eida;Ostreoidea;Ostreidae;Crassostrea;Crassostrea gigas  
UdeM00000021464 6573 287.7 UdeM00000021464 XP\_021362287.1 41.8 335  
185 5 25 356 30 357 2.00E-74 287.7 6573 cellular  
organisms;Eukaryota;Opisthokonta;Metazoa;Eumetazoa;Bilateria;Protostomia;  
Spiralia;Lophotrochozoa;Mollusca;Bivalvia;Autobranchia;Pteriomorphia;Pect  
inida;Pectinoidea;Pectinidae;Mizuhopecten;Mizuhopecten yessoensis  
UdeM00000021465 6573 139 UdeM00000021465 XP\_021345906.1 41.2 250  
122 5 101 343 113 344 1.10E-29 139 6573 cellular  
organisms;Eukaryota;Opisthokonta;Metazoa;Eumetazoa;Bilateria;Protostomia;  
Spiralia;Lophotrochozoa;Mollusca;Bivalvia;Autobranchia;Pteriomorphia;Pect  
inida;Pectinoidea;Pectinidae;Mizuhopecten;Mizuhopecten yessoensis  
UdeM00000021466 1735272 583.6 UdeM00000021466 XP\_041367912.1 57.9  
451 188 2 41 489 112 562 2.40E-163 583.6 1735272  
cellular  
organisms;Eukaryota;Opisthokonta;Metazoa;Eumetazoa;Bilateria;Protostomia;  
Spiralia;Lophotrochozoa;Mollusca;Gastropoda;Neomphalina;Neomphaloidea;Pel  
tospiridae;Gigantopelta;Gigantopelta aegis  
UdeM00000021468 6573 260.4 UdeM00000021468 XP\_021348468.1 64.3 199  
70 1 1 199 42 239 1.90E-66 260.4 6573 cellular  
organisms;Eukaryota;Opisthokonta;Metazoa;Eumetazoa;Bilateria;Protostomia;  
Spiralia;Lophotrochozoa;Mollusca;Bivalvia;Autobranchia;Pteriomorphia;Pect  
inida;Pectinoidea;Pectinidae;Mizuhopecten;Mizuhopecten yessoensis  
UdeM00000021469 6573 321.6 UdeM00000021469 XP\_021348468.1 65.4 240  
82 1 1 240 1 239 8.40E-85 321.6 6573 cellular  
organisms;Eukaryota;Opisthokonta;Metazoa;Eumetazoa;Bilateria;Protostomia;  
Spiralia;Lophotrochozoa;Mollusca;Bivalvia;Autobranchia;Pteriomorphia;Pect  
inida;Pectinoidea;Pectinidae;Mizuhopecten;Mizuhopecten yessoensis  
UdeM00000021470 6573 149.8 UdeM00000021470 XP\_021365617.1 49.1 173  
85 2 2 174 178 347 3.30E-33 149.8 6573 cellular  
organisms;Eukaryota;Opisthokonta;Metazoa;Eumetazoa;Bilateria;Protostomia;  
Spiralia;Lophotrochozoa;Mollusca;Bivalvia;Autobranchia;Pteriomorphia;Pect  
inida;Pectinoidea;Pectinidae;Mizuhopecten;Mizuhopecten yessoensis  
UdeM00000021471 8128 63.2 UdeM00000021471 XP\_019206542.2 41.5 82  
41 2 59 133 106 187 3.20E-07 63.2 8128 cellular  
organisms;Eukaryota;Opisthokonta;Metazoa;Eumetazoa;Bilateria;Deuterostomi  
a;Chordata;Craniata;Vertebrata;Gnathostomata;Teleostomi;Euteleostomi;Acti  
nopterygii;Actinopteri;Neopterygii;Teleostei;Osteoglossocephalai;Clupeoce  
phala;Euteleosteomorpha;Neoteleostei;Eurypterygia;Ctenosquamata;Acanthomo  
rphata;Euacanthomorphacea;Percomorphaceae;Ovalentaria;Cichlomorphae;Cichl  
iformes;Cichlidae;African  
cichlids;Pseudocrenilabrinae;Oreochromini;Oreochromis;Oreochromis  
niloticus  
UdeM00000021474 6579 275.8 UdeM00000021474 XP\_033741736.1 54.9 244  
108 1 1 242 614 857 5.60E-71 275.8 6579 cellular  
organisms;Eukaryota;Opisthokonta;Metazoa;Eumetazoa;Bilateria;Protostomia;

Spiralia; Lophotrochozoa; Mollusca; Bivalvia; Autobranchia; Pteriomorpha; Pectinida; Pectinoidea; Pectinidae; Pecten; Pecten maximus

UdeM00000021473 6579 562 UdeM00000021473 XP\_033741736.1 59.6 438  
175 1 2 437 420 857 6.90E-157 562 6579 cellular  
organisms; Eukaryota; Opisthokonta; Metazoa; Eumetazoa; Bilateria; Protostomia; Spiralia; Lophotrochozoa; Mollusca; Bivalvia; Autobranchia; Pteriomorpha; Pectinida; Pectinoidea; Pectinidae; Pecten; Pecten maximus

UdeM00000021475 29159 241.1 UdeM00000021475 XP\_019926412.2 53.4 238  
100 3 1 235 1 230 1.40E-60 241.1 29159 cellular  
organisms; Eukaryota; Opisthokonta; Metazoa; Eumetazoa; Bilateria; Protostomia; Spiralia; Lophotrochozoa; Mollusca; Bivalvia; Autobranchia; Pteriomorpha; Ostracoda; Ostreidae; Crassostrea; Crassostrea gigas

UdeM00000021476 6596 178.7 UdeM00000021476 XP\_045216225.1 46 409  
204 9 48 447 400 800 1.60E-41 178.7 6596 cellular  
organisms; Eukaryota; Opisthokonta; Metazoa; Eumetazoa; Bilateria; Protostomia; Spiralia; Lophotrochozoa; Mollusca; Bivalvia; Autobranchia; Heteroconchia; Euheterodonta; Imparidentia; Venerida; Veneroidea; Veneridae; Mercenaria; Mercenaria mercenaria

UdeM00000021477 6596 533.1 UdeM00000021477 XP\_045216224.1 68.3 391  
123 1 4 393 11 401 5.00E-148 533.1 6596 cellular  
organisms; Eukaryota; Opisthokonta; Metazoa; Eumetazoa; Bilateria; Protostomia; Spiralia; Lophotrochozoa; Mollusca; Bivalvia; Autobranchia; Heteroconchia; Euheterodonta; Imparidentia; Venerida; Veneroidea; Veneridae; Mercenaria; Mercenaria mercenaria

UdeM00000021478 6596 154.8 UdeM00000021478 XP\_045215732.1 64.2 134  
48 0 2 135 3 136 7.60E-35 154.8 6596 cellular  
organisms; Eukaryota; Opisthokonta; Metazoa; Eumetazoa; Bilateria; Protostomia; Spiralia; Lophotrochozoa; Mollusca; Bivalvia; Autobranchia; Heteroconchia; Euheterodonta; Imparidentia; Venerida; Veneroidea; Veneridae; Mercenaria; Mercenaria mercenaria

UdeM00000021479 6596 149.8 UdeM00000021479 XP\_045215732.1 65.3 118  
41 0 1 118 18 135 2.20E-33 149.8 6596 cellular  
organisms; Eukaryota; Opisthokonta; Metazoa; Eumetazoa; Bilateria; Protostomia; Spiralia; Lophotrochozoa; Mollusca; Bivalvia; Autobranchia; Heteroconchia; Euheterodonta; Imparidentia; Venerida; Veneroidea; Veneridae; Mercenaria; Mercenaria mercenaria

UdeM00000021481 6596 66.6 UdeM00000021481 XP\_045215732.1 55.6 72  
32 0 1 72 18 89 1.50E-08 66.6 6596 cellular  
organisms; Eukaryota; Opisthokonta; Metazoa; Eumetazoa; Bilateria; Protostomia; Spiralia; Lophotrochozoa; Mollusca; Bivalvia; Autobranchia; Heteroconchia; Euheterodonta; Imparidentia; Venerida; Veneroidea; Veneridae; Mercenaria; Mercenaria mercenaria

UdeM00000021482 6573 229.9 UdeM00000021482 XP\_021362280.1 56.6 221  
93 2 1 221 178 395 3.40E-57 229.9 6573 cellular  
organisms; Eukaryota; Opisthokonta; Metazoa; Eumetazoa; Bilateria; Protostomia; Spiralia; Lophotrochozoa; Mollusca; Bivalvia; Autobranchia; Pteriomorpha; Pectinida; Pectinoidea; Pectinidae; Mizuhopecten; Mizuhopecten yessoensis

UdeM00000021483 6596 189.1 UdeM00000021483 XP\_045215725.1 66.7 138  
45 1 31 167 24 161 4.50E-45 189.1 6596 cellular  
organisms; Eukaryota; Opisthokonta; Metazoa; Eumetazoa; Bilateria; Protostomia; Spiralia; Lophotrochozoa; Mollusca; Bivalvia; Autobranchia; Heteroconchia; Euheterodonta; Imparidentia; Venerida; Veneroidea; Veneridae; Mercenaria; Mercenaria mercenaria

UdeM00000021486 6596 3372.4 UdeM00000021486 XP\_045215836.1 58.7  
 3113 1117 47 103 3172 337 3323 0.00E+00 3372.4 6596  
 cellular  
 organisms;Eukaryota;Opisthokonta;Metazoa;Eumetazoa;Bilateria;Protostomia;  
 Spiralia;Lophotrochozoa;Mollusca;Bivalvia;Autobranchia;Heteroconchia;Euhe  
 terodonta;Imparidentia;Venerida;Veneroidea;Veneridae;Mercenaria;Mercenari  
 a mercenaria  
 UdeM00000021487 29159 519.2 UdeM00000021487 XP\_034325757.1 72.9 340  
 85 3 1 339 1 334 3.90E-144 519.2 29159 cellular  
 organisms;Eukaryota;Opisthokonta;Metazoa;Eumetazoa;Bilateria;Protostomia;  
 Spiralia;Lophotrochozoa;Mollusca;Bivalvia;Autobranchia;Pteriormorphia;Ostr  
 eida;Ostreoidea;Ostreidae;Crassostrea;Crassostrea gigas  
 UdeM00000021488 151771 485.7 UdeM00000021488 XP\_028419301.1 54  
 448 203 3 42 488 34 479 6.80E-134 485.7 151771  
 cellular  
 organisms;Eukaryota;Opisthokonta;Metazoa;Eumetazoa;Cnidaria;Anthozoa;Octo  
 corallia;Alcyonacea;Alcyoniina;Nephtheidae;Dendronephthya;Dendronephthya  
 gigantea  
 UdeM00000021489 151771 65.9 UdeM00000021489 XP\_028401094.1 37.5  
 88 50 1 47 134 88 170 4.60E-08 65.9 151771  
 cellular  
 organisms;Eukaryota;Opisthokonta;Metazoa;Eumetazoa;Cnidaria;Anthozoa;Octo  
 corallia;Alcyonacea;Alcyoniina;Nephtheidae;Dendronephthya;Dendronephthya  
 gigantea  
 UdeM00000021490 10224 111.3 UdeM00000021490 XP\_006814936.1 37.1 170  
 102 3 127 291 77 246 2.10E-21 111.3 10224 cellular  
 organisms;Eukaryota;Opisthokonta;Metazoa;Eumetazoa;Bilateria;Deuterostomi  
 a;Hemichordata;Enteropneusta;Harrimaniidae;Saccoglossus;Saccoglossus  
 kowalevskii  
 UdeM00000021492 1735272 253.4 UdeM00000021492 XP\_041362467.1 54.2  
 264 107 6 1 255 1 259 3.00E-64 253.4 1735272  
 cellular  
 organisms;Eukaryota;Opisthokonta;Metazoa;Eumetazoa;Bilateria;Protostomia;  
 Spiralia;Lophotrochozoa;Mollusca;Gastropoda;Neomphalina;Neomphaloidea;Pel  
 tospiridae;Gigantopelta;Gigantopelta aegis  
 UdeM00000021493 6596 259.6 UdeM00000021493 XP\_045156669.1 55.1 234  
 105 0 8 241 6 239 4.00E-66 259.6 6596 cellular  
 organisms;Eukaryota;Opisthokonta;Metazoa;Eumetazoa;Bilateria;Protostomia;  
 Spiralia;Lophotrochozoa;Mollusca;Bivalvia;Autobranchia;Heteroconchia;Euhe  
 terodonta;Imparidentia;Venerida;Veneroidea;Veneridae;Mercenaria;Mercenari  
 a mercenaria  
 UdeM00000021494 400727 119.8 UdeM00000021494 XP\_025076802.1 71.6  
 88 23 1 41 128 69 154 2.60E-24 119.8 400727  
 cellular  
 organisms;Eukaryota;Opisthokonta;Metazoa;Eumetazoa;Bilateria;Protostomia;  
 Spiralia;Lophotrochozoa;Mollusca;Gastropoda;Caenogastropoda;Architaeniogl  
 ossa;Ampullarioidea;Ampullariidae;Pomacea;Pomacea canaliculata  
 UdeM00000021495 1735272 585.5 UdeM00000021495 XP\_041368677.1 79.7  
 364 72 1 1 362 1 364 4.70E-164 585.5 1735272  
 cellular  
 organisms;Eukaryota;Opisthokonta;Metazoa;Eumetazoa;Bilateria;Protostomia;  
 Spiralia;Lophotrochozoa;Mollusca;Gastropoda;Neomphalina;Neomphaloidea;Pel  
 tospiridae;Gigantopelta;Gigantopelta aegis

UdeM00000021496 6573 158.3 UdeM00000021496 XP\_021358522.1 97.5 79  
 2 0 1 79 1 79 4.10E-36 158.3 6573 cellular  
 organisms;Eukaryota;Opisthokonta;Metazoa;Eumetazoa;Bilateria;Protostomia;  
 Spiralia;Lophotrochozoa;Mollusca;Bivalvia;Autobranchia;Pteriomorpha;Pect  
 inida;Pectinoidea;Pectinidae;Mizuhopecten;Mizuhopecten yessoensis  
 UdeM00000021497 6596 1375.5 UdeM00000021497 XP\_045156512.1 49.9  
 1518 621 31 7 1438 355 1818 0.00E+00 1375.5 6596  
 cellular  
 organisms;Eukaryota;Opisthokonta;Metazoa;Eumetazoa;Bilateria;Protostomia;  
 Spiralia;Lophotrochozoa;Mollusca;Bivalvia;Autobranchia;Heteroconchia;Euhe  
 terodonta;Imparidentia;Venerida;Veneroidea;Veneridae;Mercenaria;Mercenari  
 a mercenaria  
 UdeM00000021498 6596 219.5 UdeM00000021498 XP\_045216916.1 51.7 205  
 97 2 71 273 60 264 5.10E-54 219.5 6596 cellular  
 organisms;Eukaryota;Opisthokonta;Metazoa;Eumetazoa;Bilateria;Protostomia;  
 Spiralia;Lophotrochozoa;Mollusca;Bivalvia;Autobranchia;Heteroconchia;Euhe  
 terodonta;Imparidentia;Venerida;Veneroidea;Veneridae;Mercenaria;Mercenari  
 a mercenaria  
 UdeM00000021499 6596 119.8 UdeM00000021499 XP\_045204472.1 49.6 115  
 51 2 5 115 3 114 3.10E-24 119.8 6596 cellular  
 organisms;Eukaryota;Opisthokonta;Metazoa;Eumetazoa;Bilateria;Protostomia;  
 Spiralia;Lophotrochozoa;Mollusca;Bivalvia;Autobranchia;Heteroconchia;Euhe  
 terodonta;Imparidentia;Venerida;Veneroidea;Veneridae;Mercenaria;Mercenari  
 a mercenaria  
 UdeM00000021501 6526 198.4 UdeM00000021501 XP\_013096252.1 60 160  
 63 1 11 169 16 175 7.50E-48 198.4 6526 cellular  
 organisms;Eukaryota;Opisthokonta;Metazoa;Eumetazoa;Bilateria;Protostomia;  
 Spiralia;Lophotrochozoa;Mollusca;Gastropoda;Heterobranchia;Euthyneura;Pan  
 pulmonata;Hygrophila;Lymnaeioidea;Planorbidae;Biomphalaria;Biomphalaria  
 glabrata  
 UdeM00000021500 29159 198.4 UdeM00000021500 XP\_034322993.1 74 123  
 32 0 67 189 52 174 8.40E-48 198.4 29159 cellular  
 organisms;Eukaryota;Opisthokonta;Metazoa;Eumetazoa;Bilateria;Protostomia;  
 Spiralia;Lophotrochozoa;Mollusca;Bivalvia;Autobranchia;Pteriomorpha;Ostr  
 eida;Ostreioidea;Ostreidae;Crassostrea;Crassostrea gigas  
 UdeM00000021502 6596 510.4 UdeM00000021502 XP\_045215251.1 46.3 557  
 278 9 30 577 17 561 3.00E-141 510.4 6596 cellular  
 organisms;Eukaryota;Opisthokonta;Metazoa;Eumetazoa;Bilateria;Protostomia;  
 Spiralia;Lophotrochozoa;Mollusca;Bivalvia;Autobranchia;Heteroconchia;Euhe  
 terodonta;Imparidentia;Venerida;Veneroidea;Veneridae;Mercenaria;Mercenari  
 a mercenaria  
 UdeM00000021503 6573 929.5 UdeM00000021503 XP\_021377196.1 46.3 1090  
 561 12 5 1085 1 1075 4.00E-267 929.5 6573 cellular  
 organisms;Eukaryota;Opisthokonta;Metazoa;Eumetazoa;Bilateria;Protostomia;  
 Spiralia;Lophotrochozoa;Mollusca;Bivalvia;Autobranchia;Pteriomorpha;Pect  
 inida;Pectinoidea;Pectinidae;Mizuhopecten;Mizuhopecten yessoensis  
 UdeM00000021504 6596 970.7 UdeM00000021504 XP\_045216905.1 40.4 1380  
 782 23 65 1420 2 1365 2.20E-279 970.7 6596 cellular  
 organisms;Eukaryota;Opisthokonta;Metazoa;Eumetazoa;Bilateria;Protostomia;  
 Spiralia;Lophotrochozoa;Mollusca;Bivalvia;Autobranchia;Heteroconchia;Euhe  
 terodonta;Imparidentia;Venerida;Veneroidea;Veneridae;Mercenaria;Mercenari  
 a mercenaria  
 UdeM00000021505 6596 995 UdeM00000021505 XP\_045216905.1 40.8 1377  
 779 22 160 1517 2 1361 1.10E-286 995 6596 cellular

organisms;Eukaryota;Opisthokonta;Metazoa;Eumetazoa;Bilateria;Protostomia;Spiralia;Lophotrochozoa;Mollusca;Bivalvia;Autobranchia;Heteroconchia;Euherodonta;Imparidentia;Venerida;Veneroidea;Veneridae;Mercenaria;Mercenaria mercenaria

UdeM00000021507 6596 351.3 UdeM00000021507 XP\_045156624.1 48.1 372  
175 4 30 390 26 390 1.70E-93 351.3 6596 cellular

organisms;Eukaryota;Opisthokonta;Metazoa;Eumetazoa;Bilateria;Protostomia;Spiralia;Lophotrochozoa;Mollusca;Bivalvia;Autobranchia;Heteroconchia;Euherodonta;Imparidentia;Venerida;Veneroidea;Veneridae;Mercenaria;Mercenaria mercenaria

UdeM00000021508 6596 351.7 UdeM00000021508 XP\_045156624.1 55.1 301  
135 0 30 330 26 326 1.20E-93 351.7 6596 cellular

organisms;Eukaryota;Opisthokonta;Metazoa;Eumetazoa;Bilateria;Protostomia;Spiralia;Lophotrochozoa;Mollusca;Bivalvia;Autobranchia;Heteroconchia;Euherodonta;Imparidentia;Venerida;Veneroidea;Veneridae;Mercenaria;Mercenaria mercenaria

UdeM00000021509 6596 349 UdeM00000021509 XP\_045156624.1 49.2 366  
168 5 30 384 26 384 8.00E-93 349 6596 cellular

organisms;Eukaryota;Opisthokonta;Metazoa;Eumetazoa;Bilateria;Protostomia;Spiralia;Lophotrochozoa;Mollusca;Bivalvia;Autobranchia;Heteroconchia;Euherodonta;Imparidentia;Venerida;Veneroidea;Veneridae;Mercenaria;Mercenaria mercenaria

UdeM00000021510 6596 297.4 UdeM00000021510 XP\_045156624.1 54.8 263  
118 1 1 262 59 321 1.90E-77 297.4 6596 cellular

organisms;Eukaryota;Opisthokonta;Metazoa;Eumetazoa;Bilateria;Protostomia;Spiralia;Lophotrochozoa;Mollusca;Bivalvia;Autobranchia;Heteroconchia;Euherodonta;Imparidentia;Venerida;Veneroidea;Veneridae;Mercenaria;Mercenaria mercenaria

UdeM00000021513 6596 635.6 UdeM00000021513 XP\_045156574.1 67.5 477  
145 2 2 473 377 848 5.30E-179 635.6 6596 cellular

organisms;Eukaryota;Opisthokonta;Metazoa;Eumetazoa;Bilateria;Protostomia;Spiralia;Lophotrochozoa;Mollusca;Bivalvia;Autobranchia;Heteroconchia;Euherodonta;Imparidentia;Venerida;Veneroidea;Veneridae;Mercenaria;Mercenaria mercenaria

UdeM00000021514 6596 133.3 UdeM00000021514 XP\_045156574.1 56.6 106  
46 0 18 123 207 312 3.00E-28 133.3 6596 cellular

organisms;Eukaryota;Opisthokonta;Metazoa;Eumetazoa;Bilateria;Protostomia;Spiralia;Lophotrochozoa;Mollusca;Bivalvia;Autobranchia;Heteroconchia;Euherodonta;Imparidentia;Venerida;Veneroidea;Veneridae;Mercenaria;Mercenaria mercenaria

UdeM00000021515 29159 139.8 UdeM00000021515 XP\_034324132.1 62.4 101  
35 1 3 100 17 117 1.90E-30 139.8 29159 cellular

organisms;Eukaryota;Opisthokonta;Metazoa;Eumetazoa;Bilateria;Protostomia;Spiralia;Lophotrochozoa;Mollusca;Bivalvia;Autobranchia;Pteriomorphia;Ostreida;Ostreoidea;Ostreidae;Crassostrea;Crassostrea gigas

UdeM00000021516 6565 80.5 UdeM00000021516 XP\_022330412.1 49.5 97  
42 4 1 93 1 94 1.80E-12 80.5 6565 cellular

organisms;Eukaryota;Opisthokonta;Metazoa;Eumetazoa;Bilateria;Protostomia;Spiralia;Lophotrochozoa;Mollusca;Bivalvia;Autobranchia;Pteriomorphia;Ostreida;Ostreoidea;Ostreidae;Crassostrea;Crassostrea virginica

UdeM00000021517 6500 198.4 UdeM00000021517 XP\_005094757.1 64.2 137  
49 0 5 141 7 143 6.60E-48 198.4 6500 cellular

organisms;Eukaryota;Opisthokonta;Metazoa;Eumetazoa;Bilateria;Protostomia;

Spiralia; Lophotrochozoa; Mollusca; Gastropoda; Heterobranchia; Euthyneura; Tectipleura; Aplysiida; Aplysioidea; Aplysiidae; Aplysia; Aplysia californica  
UdeM00000021518 6573 656.8 UdeM00000021518 XP\_021360480.1 51.9 746  
307 12 190 901 436 1163 4.10E-185 656.8 6573 cellular  
organisms; Eukaryota; Opisthokonta; Metazoa; Eumetazoa; Bilateria; Protostomia;  
Spiralia; Lophotrochozoa; Mollusca; Bivalvia; Autobranchia; Pteriomorpha; Pectinida; Pectinoidea; Pectinidae; Mizuhopecten; Mizuhopecten yessoensis  
UdeM00000021519 6573 572 UdeM00000021519 XP\_021371985.1 36.4 989  
427 18 3 944 15 848 1.40E-159 572 6573 cellular  
organisms; Eukaryota; Opisthokonta; Metazoa; Eumetazoa; Bilateria; Protostomia;  
Spiralia; Lophotrochozoa; Mollusca; Bivalvia; Autobranchia; Pteriomorpha; Pectinida; Pectinoidea; Pectinidae; Mizuhopecten; Mizuhopecten yessoensis  
UdeM00000021520 6579 438 UdeM00000021520 XP\_033750349.1 44.1 555  
197 5 68 620 5 448 2.10E-119 438 6579 cellular  
organisms; Eukaryota; Opisthokonta; Metazoa; Eumetazoa; Bilateria; Protostomia;  
Spiralia; Lophotrochozoa; Mollusca; Bivalvia; Autobranchia; Pteriomorpha; Pectinida; Pectinoidea; Pectinidae; Pecten; Pecten maximus  
UdeM00000021521 6596 209.5 UdeM00000021521 XP\_045216209.1 51.3 197  
96 0 1 197 1 197 5.10E-51 209.5 6596 cellular  
organisms; Eukaryota; Opisthokonta; Metazoa; Eumetazoa; Bilateria; Protostomia;  
Spiralia; Lophotrochozoa; Mollusca; Bivalvia; Autobranchia; Heteroconchia; Euheterodonta; Imparidentia; Venerida; Veneroidea; Veneridae; Mercenaria; Mercenaria mercenaria  
UdeM00000021524 6573 96.7 UdeM00000021524 XP\_021371671.1 56 91  
38 2 39 128 62 151 2.40E-17 96.7 6573 cellular  
organisms; Eukaryota; Opisthokonta; Metazoa; Eumetazoa; Bilateria; Protostomia;  
Spiralia; Lophotrochozoa; Mollusca; Bivalvia; Autobranchia; Pteriomorpha; Pectinida; Pectinoidea; Pectinidae; Mizuhopecten; Mizuhopecten yessoensis  
UdeM00000021525 29159 1024.2 UdeM00000021525 XP\_011449960.1 78.1  
622 136 0 1 622 1 622 6.80E-296 1024.2  
29159 cellular  
organisms; Eukaryota; Opisthokonta; Metazoa; Eumetazoa; Bilateria; Protostomia;  
Spiralia; Lophotrochozoa; Mollusca; Bivalvia; Autobranchia; Pteriomorpha; Ostreida; Ostreioidea; Ostreidae; Crassostrea; Crassostrea gigas  
UdeM00000021526 6596 257.7 UdeM00000021526 XP\_045172628.1 34.6 445  
250 11 296 733 16 426 4.80E-65 257.7 6596 cellular  
organisms; Eukaryota; Opisthokonta; Metazoa; Eumetazoa; Bilateria; Protostomia;  
Spiralia; Lophotrochozoa; Mollusca; Bivalvia; Autobranchia; Heteroconchia; Euheterodonta; Imparidentia; Venerida; Veneroidea; Veneridae; Mercenaria; Mercenaria mercenaria  
UdeM00000021528 6565 168.3 UdeM00000021528 XP\_022294204.1 38 213  
127 3 8 217 600 810 1.10E-38 168.3 6565 cellular  
organisms; Eukaryota; Opisthokonta; Metazoa; Eumetazoa; Bilateria; Protostomia;  
Spiralia; Lophotrochozoa; Mollusca; Bivalvia; Autobranchia; Pteriomorpha; Ostreida; Ostreioidea; Ostreidae; Crassostrea; Crassostrea virginica  
UdeM00000021529 1735272 126.7 UdeM00000021529 XP\_041368228.1 31.7  
303 185 8 2 287 439 736 8.30E-26 126.7 1735272  
cellular  
organisms; Eukaryota; Opisthokonta; Metazoa; Eumetazoa; Bilateria; Protostomia;  
Spiralia; Lophotrochozoa; Mollusca; Gastropoda; Neomphalina; Neomphaloidea; Peltopiridae; Gigantopelta; Gigantopelta aegis  
UdeM00000021530 6579 735.3 UdeM00000021530 XP\_033749673.1 78.6 579  
104 3 167 745 151 709 8.10E-209 735.3 6579 cellular  
organisms; Eukaryota; Opisthokonta; Metazoa; Eumetazoa; Bilateria; Protostomia;

Spiralia;Lophotrochozoa;Mollusca;Bivalvia;Autobranchia;Pteriormorphia;Pectinida;Pectinoidea;Pectinidae;Pecten;Pecten maximus  
UdeM00000021531 6579 734.9 UdeM00000021531 XP\_033749673.1 78.4 580  
104 3 167 746 151 709 1.10E-208 734.9 6579 cellular  
organisms;Eukaryota;Opisthokonta;Metazoa;Eumetazoa;Bilateria;Protostomia;  
Spiralia;Lophotrochozoa;Mollusca;Bivalvia;Autobranchia;Pteriormorphia;Pectinida;Pectinoidea;Pectinidae;Pecten;Pecten maximus  
UdeM00000021532 6596 924.5 UdeM00000021532 XP\_045216318.1 56.4 904  
353 8 1 887 1 880 1.30E-265 924.5 6596 cellular  
organisms;Eukaryota;Opisthokonta;Metazoa;Eumetazoa;Bilateria;Protostomia;  
Spiralia;Lophotrochozoa;Mollusca;Bivalvia;Autobranchia;Heteroconchia;Euheterodonta;Imparidentia;Venerida;Veneroidea;Veneridae;Mercenaria;Mercenaria mercenaria  
UdeM00000021533 6579 263.1 UdeM00000021533 XP\_033749210.1 70.6 180  
48 1 2 176 1048 1227 2.70E-67 263.1 6579 cellular  
organisms;Eukaryota;Opisthokonta;Metazoa;Eumetazoa;Bilateria;Protostomia;  
Spiralia;Lophotrochozoa;Mollusca;Bivalvia;Autobranchia;Pteriormorphia;Pectinida;Pectinoidea;Pectinidae;Pecten;Pecten maximus  
UdeM00000021534 1735272 342.4 UdeM00000021534 XP\_041360632.1 41.4  
500 256 13 1 490 1 473 9.40E-91 342.4 1735272  
cellular  
organisms;Eukaryota;Opisthokonta;Metazoa;Eumetazoa;Bilateria;Protostomia;  
Spiralia;Lophotrochozoa;Mollusca;Gastropoda;Neomphalina;Neomphaloidea;Peltopspiridae;Gigantopelta;Gigantopelta aegis  
UdeM00000021535 6596 760.8 UdeM00000021535 XP\_045216565.1 84.6 455  
62 6 1 448 1 454 1.00E-216 760.8 6596 cellular  
organisms;Eukaryota;Opisthokonta;Metazoa;Eumetazoa;Bilateria;Protostomia;  
Spiralia;Lophotrochozoa;Mollusca;Bivalvia;Autobranchia;Heteroconchia;Euheterodonta;Imparidentia;Venerida;Veneroidea;Veneridae;Mercenaria;Mercenaria mercenaria  
UdeM00000021536 6596 746.5 UdeM00000021536 XP\_045216566.1 86 450  
56 5 1 443 1 450 1.90E-212 746.5 6596 cellular  
organisms;Eukaryota;Opisthokonta;Metazoa;Eumetazoa;Bilateria;Protostomia;  
Spiralia;Lophotrochozoa;Mollusca;Bivalvia;Autobranchia;Heteroconchia;Euheterodonta;Imparidentia;Venerida;Veneroidea;Veneridae;Mercenaria;Mercenaria mercenaria  
UdeM00000021537 6573 1137.5 UdeM00000021537 XP\_021346116.1 69.8  
1027 276 8 1 1001 1 1019 0.00E+00 1137.5 6573  
cellular  
organisms;Eukaryota;Opisthokonta;Metazoa;Eumetazoa;Bilateria;Protostomia;  
Spiralia;Lophotrochozoa;Mollusca;Bivalvia;Autobranchia;Pteriormorphia;Pectinida;Pectinoidea;Pectinidae;Mizuhopecten;Mizuhopecten yessoensis  
UdeM00000021539 6596 422.2 UdeM00000021539 XP\_045156650.1 63.2 351  
110 6 7 338 21 371 6.40E-115 422.2 6596 cellular  
organisms;Eukaryota;Opisthokonta;Metazoa;Eumetazoa;Bilateria;Protostomia;  
Spiralia;Lophotrochozoa;Mollusca;Bivalvia;Autobranchia;Heteroconchia;Euheterodonta;Imparidentia;Venerida;Veneroidea;Veneridae;Mercenaria;Mercenaria mercenaria  
UdeM00000021540 6596 542 UdeM00000021540 XP\_045156643.1 60 462  
174 5 6 457 14 474 7.50E-151 542 6596 cellular  
organisms;Eukaryota;Opisthokonta;Metazoa;Eumetazoa;Bilateria;Protostomia;  
Spiralia;Lophotrochozoa;Mollusca;Bivalvia;Autobranchia;Heteroconchia;Euheterodonta;Imparidentia;Venerida;Veneroidea;Veneridae;Mercenaria;Mercenaria mercenaria



UdeM00000021541 6596 224.6 UdeM00000021541 XP\_045156638.1 69.1 149  
 45 1 1 149 233 380 1.30E-55 224.6 6596 cellular  
 organisms;Eukaryota;Opisthokonta;Metazoa;Eumetazoa;Bilateria;Protostomia;  
 Spiralia;Lophotrochozoa;Mollusca;Bivalvia;Autobranhia;Heteroconchia;Euhe  
 terodonta;Imparidentia;Venerida;Veneroidea;Veneridae;Mercenaria;Mercenari  
 a mercenaria  
 UdeM00000021542 6596 530 UdeM00000021542 XP\_045156643.1 74.1 332  
 85 1 30 361 31 361 2.80E-147 530 6596 cellular  
 organisms;Eukaryota;Opisthokonta;Metazoa;Eumetazoa;Bilateria;Protostomia;  
 Spiralia;Lophotrochozoa;Mollusca;Bivalvia;Autobranhia;Heteroconchia;Euhe  
 terodonta;Imparidentia;Venerida;Veneroidea;Veneridae;Mercenaria;Mercenari  
 a mercenaria  
 UdeM00000021544 6596 221.9 UdeM00000021544 XP\_045177916.1 50.2 213  
 103 3 5 216 446 656 8.10E-55 221.9 6596 cellular  
 organisms;Eukaryota;Opisthokonta;Metazoa;Eumetazoa;Bilateria;Protostomia;  
 Spiralia;Lophotrochozoa;Mollusca;Bivalvia;Autobranhia;Heteroconchia;Euhe  
 terodonta;Imparidentia;Venerida;Veneroidea;Veneridae;Mercenaria;Mercenari  
 a mercenaria  
 UdeM00000040755 321614 217.2 UdeM00000040755 XP\_001806620.1 47.7  
 243 121 5 16 253 116 357 2.40E-53 217.2 321614  
 cellular  
 organisms;Eukaryota;Opisthokonta;Fungi;Dikarya;Ascomycota;saccharomyceta;  
 Pezizomycotina;leotiomyceta;dothideomyceta;Dothideomycetes;Pleosporomycet  
 idae;Pleosporales;Pleosporineae;Phaeosphaeriaceae;Parastagonospora;Parast  
 agonospora nodorum;Parastagonospora nodorum SN15  
 UdeM00000043487 6596 500 UdeM00000043487 XP\_045212781.1 61.9 436  
 144 7 1 416 18 451 3.00E-138 500 6596 cellular  
 organisms;Eukaryota;Opisthokonta;Metazoa;Eumetazoa;Bilateria;Protostomia;  
 Spiralia;Lophotrochozoa;Mollusca;Bivalvia;Autobranhia;Heteroconchia;Euhe  
 terodonta;Imparidentia;Venerida;Veneroidea;Veneridae;Mercenaria;Mercenari  
 a mercenaria  
 UdeM00000043488 6579 167.5 UdeM00000043488 XP\_033731739.1 44.4 196  
 72 1 4 162 183 378 1.40E-38 167.5 6579 cellular  
 organisms;Eukaryota;Opisthokonta;Metazoa;Eumetazoa;Bilateria;Protostomia;  
 Spiralia;Lophotrochozoa;Mollusca;Bivalvia;Autobranhia;Pteriomorphia;Pect  
 inida;Pectinoidea;Pectinidae;Pecten;Pecten maximus  
 UdeM00000043490 6596 639.4 UdeM00000043490 XP\_045203777.1 51.3 581  
 277 3 6 580 12 592 4.40E-180 639.4 6596 cellular  
 organisms;Eukaryota;Opisthokonta;Metazoa;Eumetazoa;Bilateria;Protostomia;  
 Spiralia;Lophotrochozoa;Mollusca;Bivalvia;Autobranhia;Heteroconchia;Euhe  
 terodonta;Imparidentia;Venerida;Veneroidea;Veneridae;Mercenaria;Mercenari  
 a mercenaria  
 UdeM00000043491 6573 110.5 UdeM00000043491 XP\_021352053.1 55.1 89  
 38 1 1 87 113 201 1.10E-21 110.5 6573 cellular  
 organisms;Eukaryota;Opisthokonta;Metazoa;Eumetazoa;Bilateria;Protostomia;  
 Spiralia;Lophotrochozoa;Mollusca;Bivalvia;Autobranhia;Pteriomorphia;Pect  
 inida;Pectinoidea;Pectinidae;Mizuhopecten;Mizuhopecten yessoensis  
 UdeM00000043492 6596 585.9 UdeM00000043492 XP\_045211712.1 77.2 369  
 80 1 1 369 1 365 3.80E-164 585.9 6596 cellular  
 organisms;Eukaryota;Opisthokonta;Metazoa;Eumetazoa;Bilateria;Protostomia;  
 Spiralia;Lophotrochozoa;Mollusca;Bivalvia;Autobranhia;Heteroconchia;Euhe  
 terodonta;Imparidentia;Venerida;Veneroidea;Veneridae;Mercenaria;Mercenari  
 a mercenaria

UdeM000000443495 6596 380.2 UdeM000000443495 XP\_045214167.1 76.3 236  
 56 0 1 236 1 236 2.00E-102 380.2 6596 cellular  
 organisms;Eukaryota;Opisthokonta;Metazoa;Eumetazoa;Bilateria;Protostomia;  
 Spiralia;Lophotrochozoa;Mollusca;Bivalvia;Autobranchia;Heteroconchia;Euhe  
 terodonta;Imparidentia;Venerida;Veneroidea;Veneridae;Mercenaria;Mercenari  
 a mercenaria  
 UdeM00000044366 6596 317.8 UdeM00000044366 XP\_045201815.1 31.5 759  
 443 18 77 795 64 785 4.00E-83 317.8 6596 cellular  
 organisms;Eukaryota;Opisthokonta;Metazoa;Eumetazoa;Bilateria;Protostomia;  
 Spiralia;Lophotrochozoa;Mollusca;Bivalvia;Autobranchia;Heteroconchia;Euhe  
 terodonta;Imparidentia;Venerida;Veneroidea;Veneridae;Mercenaria;Mercenari  
 a mercenaria  
 UdeM00000044367 6596 126.3 UdeM00000044367 XP\_045192805.1 42.2 147  
 61 1 42 188 37 159 4.00E-26 126.3 6596 cellular  
 organisms;Eukaryota;Opisthokonta;Metazoa;Eumetazoa;Bilateria;Protostomia;  
 Spiralia;Lophotrochozoa;Mollusca;Bivalvia;Autobranchia;Heteroconchia;Euhe  
 terodonta;Imparidentia;Venerida;Veneroidea;Veneridae;Mercenaria;Mercenari  
 a mercenaria  
 UdeM00000044368 6596 134 UdeM00000044368 XP\_045201815.1 31.5 327  
 180 8 1 314 4 299 3.20E-28 134 6596 cellular  
 organisms;Eukaryota;Opisthokonta;Metazoa;Eumetazoa;Bilateria;Protostomia;  
 Spiralia;Lophotrochozoa;Mollusca;Bivalvia;Autobranchia;Heteroconchia;Euhe  
 terodonta;Imparidentia;Venerida;Veneroidea;Veneridae;Mercenaria;Mercenari  
 a mercenaria  
 UdeM00000044211 1735272 431 UdeM00000044211 XP\_041351670.1 58.8  
 354 142 2 22 375 20 369 1.50E-117 431 1735272  
 cellular  
 organisms;Eukaryota;Opisthokonta;Metazoa;Eumetazoa;Bilateria;Protostomia;  
 Spiralia;Lophotrochozoa;Mollusca;Gastropoda;Neomphalina;Neomphaloidea;Pel  
 tospiridae;Gigantopelta;Gigantopelta aegis  
 UdeM00000044212 6596 167.9 UdeM00000044212 XP\_045196496.1 29.7 690  
 396 13 168 843 55 669 5.40E-38 167.9 6596 cellular  
 organisms;Eukaryota;Opisthokonta;Metazoa;Eumetazoa;Bilateria;Protostomia;  
 Spiralia;Lophotrochozoa;Mollusca;Bivalvia;Autobranchia;Heteroconchia;Euhe  
 terodonta;Imparidentia;Venerida;Veneroidea;Veneridae;Mercenaria;Mercenari  
 a mercenaria  
 UdeM00000040630 6596 530 UdeM00000040630 XP\_045158043.1 45.8 618  
 324 7 134 746 170 781 4.80E-147 530 6596 cellular  
 organisms;Eukaryota;Opisthokonta;Metazoa;Eumetazoa;Bilateria;Protostomia;  
 Spiralia;Lophotrochozoa;Mollusca;Bivalvia;Autobranchia;Heteroconchia;Euhe  
 terodonta;Imparidentia;Venerida;Veneroidea;Veneridae;Mercenaria;Mercenari  
 a mercenaria  
 UdeM00000040631 29159 67 UdeM00000040631 XP\_034315266.1 47.6 63  
 33 0 26 88 237 299 4.70E-08 67 29159 cellular  
 organisms;Eukaryota;Opisthokonta;Metazoa;Eumetazoa;Bilateria;Protostomia;  
 Spiralia;Lophotrochozoa;Mollusca;Bivalvia;Autobranchia;Pteriomorphia;Ostr  
 eida;Ostreoidea;Ostreidae;Crassostrea;Crassostrea gigas  
 UdeM00000040632 7906 203.4 UdeM00000040632 XP\_034783111.1 58.9 168  
 69 0 61 228 88 255 3.20E-49 203.4 7906 cellular  
 organisms;Eukaryota;Opisthokonta;Metazoa;Eumetazoa;Bilateria;Deuterostomi  
 a;Chordata;Craniata;Vertebrata;Gnathostomata;Teleostomi;Euteleostomi;Acti  
 nopterygii;Actinopteri;Chondrostei;Acipenseriformes;Acipenseroides;Acipen  
 seridae;Acipenserinae;Acipenserini;Acipenser;Acipenser ruthenus

UdeM00000040634 6596 208.8 UdeM00000040634 XP\_045170374.1 47.2 235  
 118 2 2 230 279 513 7.70E-51 208.8 6596 cellular  
 organisms;Eukaryota;Opisthokonta;Metazoa;Eumetazoa;Bilateria;Protostomia;  
 Spiralia;Lophotrochozoa;Mollusca;Bivalvia;Autobranchia;Heteroconchia;Euhe  
 terodonta;Imparidentia;Venerida;Veneroidea;Veneridae;Mercenaria;Mercenari  
 a mercenaria  
 UdeM00000040635 37621 156.8 UdeM00000040635 XP\_014677368.1 44.9 207  
 100 6 1 196 1 204 3.00E-35 156.8 37621 cellular  
 organisms;Eukaryota;Opisthokonta;Metazoa;Eumetazoa;Bilateria;Protostomia;  
 Ecdysozoa;Scalidophora;Priapulida;Priapulimorpha;Priapulimorphida;Priapul  
 idae;Priapululus;Priapululus caudatus  
 UdeM00000040636 7741 98.6 UdeM00000040636 XP\_019633208.1 31.3 182  
 101 8 195 374 2715 2874 1.90E-17 98.6 7741 cellular  
 organisms;Eukaryota;Opisthokonta;Metazoa;Eumetazoa;Bilateria;Deuterostomi  
 a;Chordata;Cephalochordata;Leptocardii;Amphioxiformes;Branchiostomidae;Br  
 anchiostoma;Branchiostoma belcheri  
 UdeM00000040637 6596 119.8 UdeM00000040637 XP\_045202346.1 38.8 152  
 89 2 6 156 16 164 3.20E-24 119.8 6596 cellular  
 organisms;Eukaryota;Opisthokonta;Metazoa;Eumetazoa;Bilateria;Protostomia;  
 Spiralia;Lophotrochozoa;Mollusca;Bivalvia;Autobranchia;Heteroconchia;Euhe  
 terodonta;Imparidentia;Venerida;Veneroidea;Veneridae;Mercenaria;Mercenari  
 a mercenaria  
 UdeM00000040638 6596 82 UdeM00000040638 XP\_045201969.1 39.5 157  
 75 5 1 146 19 166 8.00E-13 82 6596 cellular  
 organisms;Eukaryota;Opisthokonta;Metazoa;Eumetazoa;Bilateria;Protostomia;  
 Spiralia;Lophotrochozoa;Mollusca;Bivalvia;Autobranchia;Heteroconchia;Euhe  
 terodonta;Imparidentia;Venerida;Veneroidea;Veneridae;Mercenaria;Mercenari  
 a mercenaria  
 UdeM00000040639 6596 1434.5 UdeM00000040639 XP\_045160921.1 37.2  
 2089 1136 19 27 2099 114 2042 0.00E+00 1434.5 6596  
 cellular  
 organisms;Eukaryota;Opisthokonta;Metazoa;Eumetazoa;Bilateria;Protostomia;  
 Spiralia;Lophotrochozoa;Mollusca;Bivalvia;Autobranchia;Heteroconchia;Euhe  
 terodonta;Imparidentia;Venerida;Veneroidea;Veneridae;Mercenaria;Mercenari  
 a mercenaria  
 UdeM00000040640 6596 718 UdeM00000040640 XP\_045160921.1 31.8 1333  
 787 11 1 1225 2849 4167 2.10E-203 718 6596 cellular  
 organisms;Eukaryota;Opisthokonta;Metazoa;Eumetazoa;Bilateria;Protostomia;  
 Spiralia;Lophotrochozoa;Mollusca;Bivalvia;Autobranchia;Heteroconchia;Euhe  
 terodonta;Imparidentia;Venerida;Veneroidea;Veneridae;Mercenaria;Mercenari  
 a mercenaria  
 UdeM00000040642 6596 401.4 UdeM00000040642 XP\_045158043.1 49.4 419  
 208 3 4 421 366 781 1.50E-108 401.4 6596 cellular  
 organisms;Eukaryota;Opisthokonta;Metazoa;Eumetazoa;Bilateria;Protostomia;  
 Spiralia;Lophotrochozoa;Mollusca;Bivalvia;Autobranchia;Heteroconchia;Euhe  
 terodonta;Imparidentia;Venerida;Veneroidea;Veneridae;Mercenaria;Mercenari  
 a mercenaria  
 UdeM00000040641 6596 533.9 UdeM00000040641 XP\_045158043.1 46.1 618  
 322 7 112 724 170 781 3.20E-148 533.9 6596 cellular  
 organisms;Eukaryota;Opisthokonta;Metazoa;Eumetazoa;Bilateria;Protostomia;  
 Spiralia;Lophotrochozoa;Mollusca;Bivalvia;Autobranchia;Heteroconchia;Euhe  
 terodonta;Imparidentia;Venerida;Veneroidea;Veneridae;Mercenaria;Mercenari  
 a mercenaria

UdeM00000040643 29159 69.3 UdeM00000040643 XP\_019929678.1 36.2 105  
 58 2 48 152 200 295 9.40E-09 69.3 29159 cellular  
 organisms;Eukaryota;Opisthokonta;Metazoa;Eumetazoa;Bilateria;Protostomia;  
 Spiralia;Lophotrochozoa;Mollusca;Bivalvia;Autobranhia;Pteriomorphia;Ostr  
 eida;Ostreoidea;Ostreidae;Crassostrea;Crassostrea gigas  
 UdeM00000040644 29159 105.5 UdeM00000040644 XP\_034312519.1 71.4 77  
 21 1 172 248 236 311 1.20E-19 105.5 29159 cellular  
 organisms;Eukaryota;Opisthokonta;Metazoa;Eumetazoa;Bilateria;Protostomia;  
 Spiralia;Lophotrochozoa;Mollusca;Bivalvia;Autobranhia;Pteriomorphia;Ostr  
 eida;Ostreoidea;Ostreidae;Crassostrea;Crassostrea gigas  
 UdeM00000040646 6596 93.6 UdeM00000040646 XP\_045208792.1 45 131  
 64 4 1 125 1 129 2.30E-16 93.6 6596 cellular  
 organisms;Eukaryota;Opisthokonta;Metazoa;Eumetazoa;Bilateria;Protostomia;  
 Spiralia;Lophotrochozoa;Mollusca;Bivalvia;Autobranhia;Heteroconchia;Euhe  
 terodonta;Imparidentia;Venerida;Veneroidea;Veneridae;Mercenaria;Mercenari  
 a mercenaria  
 UdeM00000040647 6596 237.7 UdeM00000040647 XP\_045160921.1 27.7 563  
 401 4 1 562 3003 3560 3.70E-59 237.7 6596 cellular  
 organisms;Eukaryota;Opisthokonta;Metazoa;Eumetazoa;Bilateria;Protostomia;  
 Spiralia;Lophotrochozoa;Mollusca;Bivalvia;Autobranhia;Heteroconchia;Euhe  
 terodonta;Imparidentia;Venerida;Veneroidea;Veneridae;Mercenaria;Mercenari  
 a mercenaria  
 UdeM00000040648 6596 515.4 UdeM00000040648 XP\_045160921.1 36.3 780  
 369 12 4 675 3589 4348 1.10E-142 515.4 6596 cellular  
 organisms;Eukaryota;Opisthokonta;Metazoa;Eumetazoa;Bilateria;Protostomia;  
 Spiralia;Lophotrochozoa;Mollusca;Bivalvia;Autobranhia;Heteroconchia;Euhe  
 terodonta;Imparidentia;Venerida;Veneroidea;Veneridae;Mercenaria;Mercenari  
 a mercenaria  
 UdeM00000040649 6596 517.7 UdeM00000040649 XP\_045158018.1 37.5 829  
 466 16 131 942 465 1258 3.10E-143 517.7 6596 cellular  
 organisms;Eukaryota;Opisthokonta;Metazoa;Eumetazoa;Bilateria;Protostomia;  
 Spiralia;Lophotrochozoa;Mollusca;Bivalvia;Autobranhia;Heteroconchia;Euhe  
 terodonta;Imparidentia;Venerida;Veneroidea;Veneridae;Mercenaria;Mercenari  
 a mercenaria  
 UdeM00000040650 7668 128.3 UdeM00000040650 XP\_030851866.1 27.7 328  
 177 13 184 485 1959 2252 3.50E-26 128.3 7668 cellular  
 organisms;Eukaryota;Opisthokonta;Metazoa;Eumetazoa;Bilateria;Deuterostomi  
 a;Echinodermata;Eleutherozoa;Echinozoa;Echinoidea;Euechinoidea;Echinacea;  
 Camarodonta;Echinidea;Strongylocentrotidae;Strongylocentrotus;Strongyloce  
 ntrotus purpuratus  
 UdeM00000040651 7668 128.3 UdeM00000040651 XP\_030851866.1 27.7 328  
 177 13 184 485 1959 2252 3.40E-26 128.3 7668 cellular  
 organisms;Eukaryota;Opisthokonta;Metazoa;Eumetazoa;Bilateria;Deuterostomi  
 a;Echinodermata;Eleutherozoa;Echinozoa;Echinoidea;Euechinoidea;Echinacea;  
 Camarodonta;Echinidea;Strongylocentrotidae;Strongylocentrotus;Strongyloce  
 ntrotus purpuratus  
 UdeM00000040652 1735272 124.8 UdeM00000040652 XP\_041357850.1 50  
 118 58 1 1 118 158 274 8.40E-26 124.8 1735272  
 cellular  
 organisms;Eukaryota;Opisthokonta;Metazoa;Eumetazoa;Bilateria;Protostomia;  
 Spiralia;Lophotrochozoa;Mollusca;Gastropoda;Neomphalina;Neomphaloidea;Pel  
 tospiridae;Gigantopelta;Gigantopelta aegis  
 UdeM00000040653 6596 914.1 UdeM00000040653 XP\_045160921.1 40.2 1201  
 705 10 1 1193 348 1543 1.90E-262 914.1 6596 cellular

organisms;Eukaryota;Opisthokonta;Metazoa;Eumetazoa;Bilateria;Protostomia;Spiralia;Lophotrochozoa;Mollusca;Bivalvia;Autobranhia;Heteroconchia;Euherodonta;Imparidentia;Venerida;Veneroidea;Veneridae;Mercenaria;Mercenaria mercenaria

UdeM00000040654 6596 920.2 UdeM00000040654 XP\_045160921.1 32 1844  
1120 36 1 1807 1563 3309 4.00E-264 920.2 6596 cellular

organisms;Eukaryota;Opisthokonta;Metazoa;Eumetazoa;Bilateria;Protostomia;Spiralia;Lophotrochozoa;Mollusca;Bivalvia;Autobranhia;Heteroconchia;Euherodonta;Imparidentia;Venerida;Veneroidea;Veneridae;Mercenaria;Mercenaria mercenaria

UdeM00000040655 6596 608.6 UdeM00000040655 XP\_045160921.1 34.4 978  
516 11 12 881 3359 4318 1.30E-170 608.6 6596 cellular

organisms;Eukaryota;Opisthokonta;Metazoa;Eumetazoa;Bilateria;Protostomia;Spiralia;Lophotrochozoa;Mollusca;Bivalvia;Autobranhia;Heteroconchia;Euherodonta;Imparidentia;Venerida;Veneroidea;Veneridae;Mercenaria;Mercenaria mercenaria

UdeM00000040656 6596 613.2 UdeM00000040656 XP\_045158018.1 32 1264  
785 26 24 1244 27 1258 7.20E-172 613.2 6596 cellular

organisms;Eukaryota;Opisthokonta;Metazoa;Eumetazoa;Bilateria;Protostomia;Spiralia;Lophotrochozoa;Mollusca;Bivalvia;Autobranhia;Heteroconchia;Euherodonta;Imparidentia;Venerida;Veneroidea;Veneridae;Mercenaria;Mercenaria mercenaria

UdeM00000044452 151771 395.6 UdeM00000044452 XP\_028419301.1 57.3  
337 142 2 42 378 34 368 7.20E-107 395.6 151771  
cellular

organisms;Eukaryota;Opisthokonta;Metazoa;Eumetazoa;Cnidaria;Anthozoa;Octocorallia;Alcyonacea;Alcyoniina;Nephtheidae;Dendronephthya;Dendronephthya gigantea

UdeM00000035651 400727 500 UdeM00000035651 XP\_025093876.1 73.9  
318 83 0 1 318 6 323 2.30E-138 500 400727  
cellular

organisms;Eukaryota;Opisthokonta;Metazoa;Eumetazoa;Bilateria;Protostomia;Spiralia;Lophotrochozoa;Mollusca;Gastropoda;Caenogastropoda;Architaenioglossa;Ampullarioidea;Ampullariidae;Pomacea;Pomacea canaliculata

UdeM00000035652 6579 493.4 UdeM00000035652 XP\_033756773.1 74.3 315  
81 0 6 320 5 319 2.10E-136 493.4 6579 cellular

organisms;Eukaryota;Opisthokonta;Metazoa;Eumetazoa;Bilateria;Protostomia;Spiralia;Lophotrochozoa;Mollusca;Bivalvia;Autobranhia;Pteriomorphia;Pectinida;Pectinoidea;Pectinidae;Pecten;Pecten maximus

UdeM00000035654 7574 101.3 UdeM00000035654 XP\_013384015.1 49.2 120  
59 2 6 125 186 303 1.50E-18 101.3 7574 cellular

organisms;Eukaryota;Opisthokonta;Metazoa;Eumetazoa;Bilateria;Protostomia;Spiralia;Lophotrochozoa;Brachiopoda;Linguliformea;Lingulata;Lingulida;Linguloidea;Lingulidae;Lingula;Lingula anatina

UdeM00000035655 6596 77 UdeM00000035655 XP\_045173729.1 44 75  
42 0 52 126 101 175 2.10E-11 77 6596 cellular

organisms;Eukaryota;Opisthokonta;Metazoa;Eumetazoa;Bilateria;Protostomia;Spiralia;Lophotrochozoa;Mollusca;Bivalvia;Autobranhia;Heteroconchia;Euherodonta;Imparidentia;Venerida;Veneroidea;Veneridae;Mercenaria;Mercenaria mercenaria

UdeM00000035656 6596 80.9 UdeM00000035656 XP\_045173729.1 46.8 77  
40 1 52 128 101 176 1.40E-12 80.9 6596 cellular

organisms;Eukaryota;Opisthokonta;Metazoa;Eumetazoa;Bilateria;Protostomia;Spiralia;Lophotrochozoa;Mollusca;Bivalvia;Autobranhia;Heteroconchia;Euherodonta;Imparidentia;Venerida;Veneroidea;Veneridae;Mercenaria;Mercenaria mercenaria

terodonta;Imparidentia;Venerida;Veneroidea;Veneridae;Mercenaria;Mercenaria mercenaria

UdeM00000035657 225164 80.1 UdeM00000035657 XP\_009051888.1 30.9  
152 92 5 28 176 28 169 3.30E-12 80.1 225164  
cellular

organisms;Eukaryota;Opisthokonta;Metazoa;Eumetazoa;Bilateria;Protostomia;Spiralia;Lophotrochozoa;Mollusca;Gastropoda;Patellogastropoda;Lottioidea;Lottiidae;Lottia;Lottia gigantea

UdeM00000035658 6596 78.6 UdeM00000035658 XP\_045173729.1 44 84  
47 0 43 126 92 175 7.10E-12 78.6 6596 cellular

organisms;Eukaryota;Opisthokonta;Metazoa;Eumetazoa;Bilateria;Protostomia;Spiralia;Lophotrochozoa;Mollusca;Bivalvia;Autobranchia;Heteroconchia;Euheterodonta;Imparidentia;Venerida;Veneroidea;Veneridae;Mercenaria;Mercenaria mercenaria

UdeM00000035659 1735272 140.6 UdeM00000035659 XP\_041369037.1 64.7  
102 35 1 48 149 40 140 1.90E-30 140.6 1735272  
cellular

organisms;Eukaryota;Opisthokonta;Metazoa;Eumetazoa;Bilateria;Protostomia;Spiralia;Lophotrochozoa;Mollusca;Gastropoda;Neomphalina;Neomphaloidea;Peltospiridae;Gigantopelta;Gigantopelta aegis

UdeM00000035660 1735272 833.9 UdeM00000035660 XP\_041369037.1 68.8  
600 168 4 1 591 162 751 1.30E-238 833.9 1735272  
cellular

organisms;Eukaryota;Opisthokonta;Metazoa;Eumetazoa;Bilateria;Protostomia;Spiralia;Lophotrochozoa;Mollusca;Gastropoda;Neomphalina;Neomphaloidea;Peltospiridae;Gigantopelta;Gigantopelta aegis

UdeM00000035663 6573 232.3 UdeM00000035663 XP\_021378568.1 62.4 165  
58 2 634 794 490 654 2.50E-57 232.3 6573 cellular

organisms;Eukaryota;Opisthokonta;Metazoa;Eumetazoa;Bilateria;Protostomia;Spiralia;Lophotrochozoa;Mollusca;Bivalvia;Autobranchia;Pteriomorphia;Pectinida;Pectinoidea;Pectinidae;Mizuhopecten;Mizuhopecten yessoensis

UdeM00000035664 6596 464.5 UdeM00000035664 XP\_045191127.1 45.8 522  
256 5 1 497 5 524 1.70E-127 464.5 6596 cellular

organisms;Eukaryota;Opisthokonta;Metazoa;Eumetazoa;Bilateria;Protostomia;Spiralia;Lophotrochozoa;Mollusca;Bivalvia;Autobranchia;Heteroconchia;Euheterodonta;Imparidentia;Venerida;Veneroidea;Veneridae;Mercenaria;Mercenaria mercenaria

UdeM00000035665 6596 183.3 UdeM00000035665 XP\_045190001.1 56.6 143  
60 1 25 167 4 144 2.50E-43 183.3 6596 cellular

organisms;Eukaryota;Opisthokonta;Metazoa;Eumetazoa;Bilateria;Protostomia;Spiralia;Lophotrochozoa;Mollusca;Bivalvia;Autobranchia;Heteroconchia;Euheterodonta;Imparidentia;Venerida;Veneroidea;Veneridae;Mercenaria;Mercenaria mercenaria

UdeM00000035666 6579 151.4 UdeM00000035666 XP\_033757506.1 43.4 143  
80 1 14 155 14 156 1.00E-33 151.4 6579 cellular

organisms;Eukaryota;Opisthokonta;Metazoa;Eumetazoa;Bilateria;Protostomia;Spiralia;Lophotrochozoa;Mollusca;Bivalvia;Autobranchia;Pteriomorphia;Pectinida;Pectinoidea;Pectinidae;Pecten;Pecten maximus

UdeM00000035667 6596 364.8 UdeM00000035667 XP\_045191095.1 60.5 258  
101 1 24 280 50 307 1.00E-97 364.8 6596 cellular

organisms;Eukaryota;Opisthokonta;Metazoa;Eumetazoa;Bilateria;Protostomia;Spiralia;Lophotrochozoa;Mollusca;Bivalvia;Autobranchia;Heteroconchia;Euheterodonta;Imparidentia;Venerida;Veneroidea;Veneridae;Mercenaria;Mercenaria mercenaria

UdeM00000035668 6596 901.7 UdeM00000035668 XP\_045189275.1 60.6 690  
 270 2 3 691 2 690 5.80E-259 901.7 6596 cellular  
 organisms;Eukaryota;Opisthokonta;Metazoa;Eumetazoa;Bilateria;Protostomia;  
 Spiralia;Lophotrochozoa;Mollusca;Bivalvia;Autobranchia;Heteroconchia;Euhe  
 terodonta;Imparidentia;Venerida;Veneroidea;Veneridae;Mercenaria;Mercenari  
 a mercenaria  
 UdeM00000035669 225164 325.1 UdeM00000035669 XP\_009066648.1 32.2  
 652 383 12 4 648 28 627 2.00E-85 325.1 225164  
 cellular  
 organisms;Eukaryota;Opisthokonta;Metazoa;Eumetazoa;Bilateria;Protostomia;  
 Spiralia;Lophotrochozoa;Mollusca;Gastropoda;Patellogastropoda;Lottioidea;  
 Lottiidae;Lottia;Lottia gigantea  
 UdeM00000035670 6596 390.6 UdeM00000035670 XP\_045188197.1 38.1 616  
 188 8 1 476 3 565 2.90E-105 390.6 6596 cellular  
 organisms;Eukaryota;Opisthokonta;Metazoa;Eumetazoa;Bilateria;Protostomia;  
 Spiralia;Lophotrochozoa;Mollusca;Bivalvia;Autobranchia;Heteroconchia;Euhe  
 terodonta;Imparidentia;Venerida;Veneroidea;Veneridae;Mercenaria;Mercenari  
 a mercenaria  
 UdeM00000035671 6596 360.1 UdeM00000035671 XP\_045188197.1 36.3 615  
 167 7 1 442 3 565 3.90E-96 360.1 6596 cellular  
 organisms;Eukaryota;Opisthokonta;Metazoa;Eumetazoa;Bilateria;Protostomia;  
 Spiralia;Lophotrochozoa;Mollusca;Bivalvia;Autobranchia;Heteroconchia;Euhe  
 terodonta;Imparidentia;Venerida;Veneroidea;Veneridae;Mercenaria;Mercenari  
 a mercenaria  
 UdeM00000035673 6573 680.6 UdeM00000035673 XP\_021369118.1 75.4 435  
 99 3 15 444 50 481 1.30E-192 680.6 6573 cellular  
 organisms;Eukaryota;Opisthokonta;Metazoa;Eumetazoa;Bilateria;Protostomia;  
 Spiralia;Lophotrochozoa;Mollusca;Bivalvia;Autobranchia;Pteriomorphia;Pect  
 inida;Pectinoidea;Pectinidae;Mizuhopecten;Mizuhopecten yessoensis  
 UdeM00000035674 6596 736.5 UdeM00000035674 XP\_045188969.1 94.7 376  
 20 0 1 376 1 376 1.70E-209 736.5 6596 cellular  
 organisms;Eukaryota;Opisthokonta;Metazoa;Eumetazoa;Bilateria;Protostomia;  
 Spiralia;Lophotrochozoa;Mollusca;Bivalvia;Autobranchia;Heteroconchia;Euhe  
 terodonta;Imparidentia;Venerida;Veneroidea;Veneridae;Mercenaria;Mercenari  
 a mercenaria  
 UdeM00000035675 6596 1125.9 UdeM00000035675 XP\_045189303.1 63.3  
 828 296 4 1 822 1 826 0.00E+00 1125.9 6596  
 cellular  
 organisms;Eukaryota;Opisthokonta;Metazoa;Eumetazoa;Bilateria;Protostomia;  
 Spiralia;Lophotrochozoa;Mollusca;Bivalvia;Autobranchia;Heteroconchia;Euhe  
 terodonta;Imparidentia;Venerida;Veneroidea;Veneridae;Mercenaria;Mercenari  
 a mercenaria  
 UdeM00000035676 6596 391.7 UdeM00000035676 XP\_045189115.1 69.7 261  
 78 1 3 263 26 285 1.70E-105 391.7 6596 cellular  
 organisms;Eukaryota;Opisthokonta;Metazoa;Eumetazoa;Bilateria;Protostomia;  
 Spiralia;Lophotrochozoa;Mollusca;Bivalvia;Autobranchia;Heteroconchia;Euhe  
 terodonta;Imparidentia;Venerida;Veneroidea;Veneridae;Mercenaria;Mercenari  
 a mercenaria  
 UdeM00000035677 37621 141.7 UdeM00000035677 XP\_014677462.1 52.1 144  
 58 2 2 141 30 166 8.90E-31 141.7 37621 cellular  
 organisms;Eukaryota;Opisthokonta;Metazoa;Eumetazoa;Bilateria;Protostomia;  
 Ecdysozoa;Scalidophora;Priapulida;Priapulimorpha;Priapulimorphida;Priapul  
 idae;Priapulus;Priapulus caudatus

UdeM00000035678 6573 632.5 UdeM00000035678 XP\_021375729.1 49.8 626  
 289 6 1 601 1 626 5.70E-178 632.5 6573 cellular  
 organisms;Eukaryota;Opisthokonta;Metazoa;Eumetazoa;Bilateria;Protostomia;  
 Spiralia;Lophotrochozoa;Mollusca;Bivalvia;Autobranchia;Pteriormorphia;Pect  
 inida;Pectinoidea;Pectinidae;Mizuhopecten;Mizuhopecten yessoensis  
 UdeM00000035679 6596 503.8 UdeM00000035679 XP\_045189114.1 59.5 402  
 155 4 3 399 288 686 2.00E-139 503.8 6596 cellular  
 organisms;Eukaryota;Opisthokonta;Metazoa;Eumetazoa;Bilateria;Protostomia;  
 Spiralia;Lophotrochozoa;Mollusca;Bivalvia;Autobranchia;Heteroconchia;Euhe  
 terodonta;Imparidentia;Venerida;Veneroidea;Veneridae;Mercenaria;Mercenari  
 a mercenaria  
 UdeM00000035680 6596 457.2 UdeM00000035680 XP\_045189114.1 57.4 376  
 152 4 1 371 314 686 2.00E-125 457.2 6596 cellular  
 organisms;Eukaryota;Opisthokonta;Metazoa;Eumetazoa;Bilateria;Protostomia;  
 Spiralia;Lophotrochozoa;Mollusca;Bivalvia;Autobranchia;Heteroconchia;Euhe  
 terodonta;Imparidentia;Venerida;Veneroidea;Veneridae;Mercenaria;Mercenari  
 a mercenaria  
 UdeM00000035681 6596 316.2 UdeM00000035681 XP\_045190567.1 40.5 607  
 304 13 11 566 19 619 8.30E-83 316.2 6596 cellular  
 organisms;Eukaryota;Opisthokonta;Metazoa;Eumetazoa;Bilateria;Protostomia;  
 Spiralia;Lophotrochozoa;Mollusca;Bivalvia;Autobranchia;Heteroconchia;Euhe  
 terodonta;Imparidentia;Venerida;Veneroidea;Veneridae;Mercenaria;Mercenari  
 a mercenaria  
 UdeM00000035683 6579 93.2 UdeM00000035683 XP\_033725359.1 55.4 83  
 37 0 1 83 1 83 1.70E-16 93.2 6579 cellular  
 organisms;Eukaryota;Opisthokonta;Metazoa;Eumetazoa;Bilateria;Protostomia;  
 Spiralia;Lophotrochozoa;Mollusca;Bivalvia;Autobranchia;Pteriormorphia;Pect  
 inida;Pectinoidea;Pectinidae;Pecten;Pecten maximus  
 UdeM00000035684 6596 243.4 UdeM00000035684 XP\_045188426.1 31.8 538  
 275 12 2 531 29 482 6.60E-61 243.4 6596 cellular  
 organisms;Eukaryota;Opisthokonta;Metazoa;Eumetazoa;Bilateria;Protostomia;  
 Spiralia;Lophotrochozoa;Mollusca;Bivalvia;Autobranchia;Heteroconchia;Euhe  
 terodonta;Imparidentia;Venerida;Veneroidea;Veneridae;Mercenaria;Mercenari  
 a mercenaria  
 UdeM00000035685 6596 283.1 UdeM00000035685 XP\_045188426.1 37.4 478  
 293 3 49 523 10 484 7.30E-73 283.1 6596 cellular  
 organisms;Eukaryota;Opisthokonta;Metazoa;Eumetazoa;Bilateria;Protostomia;  
 Spiralia;Lophotrochozoa;Mollusca;Bivalvia;Autobranchia;Heteroconchia;Euhe  
 terodonta;Imparidentia;Venerida;Veneroidea;Veneridae;Mercenaria;Mercenari  
 a mercenaria  
 UdeM00000035686 6596 1513 UdeM00000035686 XP\_045190629.1 51.2 2403  
 888 38 360 2648 644 2876 0.00E+00 1513 6596 cellular  
 organisms;Eukaryota;Opisthokonta;Metazoa;Eumetazoa;Bilateria;Protostomia;  
 Spiralia;Lophotrochozoa;Mollusca;Bivalvia;Autobranchia;Heteroconchia;Euhe  
 terodonta;Imparidentia;Venerida;Veneroidea;Veneridae;Mercenaria;Mercenari  
 a mercenaria  
 UdeM00000035687 6596 368.2 UdeM00000035687 XP\_045190629.1 76.8 228  
 50 1 1 225 1 228 7.70E-99 368.2 6596 cellular  
 organisms;Eukaryota;Opisthokonta;Metazoa;Eumetazoa;Bilateria;Protostomia;  
 Spiralia;Lophotrochozoa;Mollusca;Bivalvia;Autobranchia;Heteroconchia;Euhe  
 terodonta;Imparidentia;Venerida;Veneroidea;Veneridae;Mercenaria;Mercenari  
 a mercenaria  
 UdeM00000035688 6573 320.9 UdeM00000035688 XP\_021363992.1 61.4 290  
 94 5 1 285 1 277 1.70E-84 320.9 6573 cellular



organisms;Eukaryota;Opisthokonta;Metazoa;Eumetazoa;Bilateria;Protostomia;  
Spiralia;Lophotrochozoa;Mollusca;Bivalvia;Autobranchia;Pteriomorpha;Pect  
inida;Pectinoidea;Pectinidae;Mizuhopecten;Mizuhopecten yessoensis  
UdeM00000035689 6573 393.3 UdeM00000035689 XP\_021369121.1 41 547  
295 7 3 541 609 1135 5.10E-106 393.3 6573 cellular  
organisms;Eukaryota;Opisthokonta;Metazoa;Eumetazoa;Bilateria;Protostomia;  
Spiralia;Lophotrochozoa;Mollusca;Bivalvia;Autobranchia;Pteriomorpha;Pect  
inida;Pectinoidea;Pectinidae;Mizuhopecten;Mizuhopecten yessoensis  
UdeM00000035690 6565 164.1 UdeM00000035690 XP\_022288784.1 45.5 220  
110 7 86 299 465 680 2.90E-37 164.1 6565 cellular  
organisms;Eukaryota;Opisthokonta;Metazoa;Eumetazoa;Bilateria;Protostomia;  
Spiralia;Lophotrochozoa;Mollusca;Bivalvia;Autobranchia;Pteriomorpha;Ostr  
eida;Ostreoidea;Ostreidae;Crassostrea;Crassostrea virginica  
UdeM00000035691 6565 164.5 UdeM00000035691 XP\_022288784.1 45.9 220  
107 8 86 297 465 680 2.20E-37 164.5 6565 cellular  
organisms;Eukaryota;Opisthokonta;Metazoa;Eumetazoa;Bilateria;Protostomia;  
Spiralia;Lophotrochozoa;Mollusca;Bivalvia;Autobranchia;Pteriomorpha;Ostr  
eida;Ostreoidea;Ostreidae;Crassostrea;Crassostrea virginica  
UdeM00000035693 6573 557.4 UdeM00000035693 XP\_021369121.1 34 1144  
671 26 12 1095 8 1127 4.10E-155 557.4 6573 cellular  
organisms;Eukaryota;Opisthokonta;Metazoa;Eumetazoa;Bilateria;Protostomia;  
Spiralia;Lophotrochozoa;Mollusca;Bivalvia;Autobranchia;Pteriomorpha;Pect  
inida;Pectinoidea;Pectinidae;Mizuhopecten;Mizuhopecten yessoensis  
UdeM00000035695 6573 572.4 UdeM00000035695 XP\_021369121.1 34.1 1186  
676 24 3 1137 5 1135 1.30E-159 572.4 6573 cellular  
organisms;Eukaryota;Opisthokonta;Metazoa;Eumetazoa;Bilateria;Protostomia;  
Spiralia;Lophotrochozoa;Mollusca;Bivalvia;Autobranchia;Pteriomorpha;Pect  
inida;Pectinoidea;Pectinidae;Mizuhopecten;Mizuhopecten yessoensis  
UdeM00000035696 6573 677.6 UdeM00000035696 XP\_021369121.1 39.3 1151  
605 28 14 1089 6 1137 2.70E-191 677.6 6573 cellular  
organisms;Eukaryota;Opisthokonta;Metazoa;Eumetazoa;Bilateria;Protostomia;  
Spiralia;Lophotrochozoa;Mollusca;Bivalvia;Autobranchia;Pteriomorpha;Pect  
inida;Pectinoidea;Pectinidae;Mizuhopecten;Mizuhopecten yessoensis  
UdeM00000035697 6573 670.2 UdeM00000035697 XP\_021369121.1 39 1160  
605 29 14 1098 6 1137 4.40E-189 670.2 6573 cellular  
organisms;Eukaryota;Opisthokonta;Metazoa;Eumetazoa;Bilateria;Protostomia;  
Spiralia;Lophotrochozoa;Mollusca;Bivalvia;Autobranchia;Pteriomorpha;Pect  
inida;Pectinoidea;Pectinidae;Mizuhopecten;Mizuhopecten yessoensis  
UdeM00000035700 400727 806.6 UdeM00000035700 XP\_025093999.1 51.3  
819 246 6 22 839 73 739 3.00E-230 806.6 400727  
cellular  
organisms;Eukaryota;Opisthokonta;Metazoa;Eumetazoa;Bilateria;Protostomia;  
Spiralia;Lophotrochozoa;Mollusca;Gastropoda;Caenogastropoda;Architaeniogl  
ossa;Ampullarioidea;Ampullariidae;Pomacea;Pomacea canaliculata  
UdeM00000035701 6565 301.6 UdeM00000035701 XP\_022338358.1 38 492  
265 11 37 526 12 465 2.00E-78 301.6 6565 cellular  
organisms;Eukaryota;Opisthokonta;Metazoa;Eumetazoa;Bilateria;Protostomia;  
Spiralia;Lophotrochozoa;Mollusca;Bivalvia;Autobranchia;Pteriomorpha;Ostr  
eida;Ostreoidea;Ostreidae;Crassostrea;Crassostrea virginica  
UdeM00000035702 6579 246.1 UdeM00000035702 XP\_033739209.1 49.2 258  
115 2 9 261 2 248 4.90E-62 246.1 6579 cellular  
organisms;Eukaryota;Opisthokonta;Metazoa;Eumetazoa;Bilateria;Protostomia;  
Spiralia;Lophotrochozoa;Mollusca;Bivalvia;Autobranchia;Pteriomorpha;Pect  
inida;Pectinoidea;Pectinidae;Pecten;Pecten maximus

UdeM00000035703 6565 265 UdeM00000035703 XP\_022305704.1 32.8 485  
 232 6 103 523 3 457 2.00E-67 265 6565 cellular  
 organisms;Eukaryota;Opisthokonta;Metazoa;Eumetazoa;Bilateria;Protostomia;  
 Spiralia;Lophotrochozoa;Mollusca;Bivalvia;Autobranchia;Pteriormorphia;Ostr  
 eida;Ostreoidea;Ostreidae;Crassostrea;Crassostrea virginica  
 UdeM00000035704 7574 148.3 UdeM00000035704 XP\_013405563.1 36.6 257  
 136 6 1 254 146 378 1.40E-32 148.3 7574 cellular  
 organisms;Eukaryota;Opisthokonta;Metazoa;Eumetazoa;Bilateria;Protostomia;  
 Spiralia;Lophotrochozoa;Brachiopoda;Linguliformea;Lingulata;Lingulida;Lin  
 guloidea;Lingulidae;Lingula;Lingula anatina  
 UdeM00000035705 6579 246.1 UdeM00000035705 XP\_033739209.1 49.2 258  
 115 2 9 261 2 248 4.90E-62 246.1 6579 cellular  
 organisms;Eukaryota;Opisthokonta;Metazoa;Eumetazoa;Bilateria;Protostomia;  
 Spiralia;Lophotrochozoa;Mollusca;Bivalvia;Autobranchia;Pteriormorphia;Pect  
 inida;Pectinoidea;Pectinidae;Pecten;Pecten maximus  
 UdeM00000035706 6565 265 UdeM00000035706 XP\_022305704.1 32.8 485  
 232 6 103 523 3 457 2.00E-67 265 6565 cellular  
 organisms;Eukaryota;Opisthokonta;Metazoa;Eumetazoa;Bilateria;Protostomia;  
 Spiralia;Lophotrochozoa;Mollusca;Bivalvia;Autobranchia;Pteriormorphia;Ostr  
 eida;Ostreoidea;Ostreidae;Crassostrea;Crassostrea virginica  
 UdeM00000035707 7574 148.3 UdeM00000035707 XP\_013405563.1 36.6 257  
 136 6 1 254 146 378 1.40E-32 148.3 7574 cellular  
 organisms;Eukaryota;Opisthokonta;Metazoa;Eumetazoa;Bilateria;Protostomia;  
 Spiralia;Lophotrochozoa;Brachiopoda;Linguliformea;Lingulata;Lingulida;Lin  
 guloidea;Lingulidae;Lingula;Lingula anatina  
 UdeM00000035708 6579 246.1 UdeM00000035708 XP\_033739209.1 49.2 258  
 115 2 9 261 2 248 4.90E-62 246.1 6579 cellular  
 organisms;Eukaryota;Opisthokonta;Metazoa;Eumetazoa;Bilateria;Protostomia;  
 Spiralia;Lophotrochozoa;Mollusca;Bivalvia;Autobranchia;Pteriormorphia;Pect  
 inida;Pectinoidea;Pectinidae;Pecten;Pecten maximus  
 UdeM00000035709 6565 265 UdeM00000035709 XP\_022305704.1 32.8 485  
 232 6 103 523 3 457 2.00E-67 265 6565 cellular  
 organisms;Eukaryota;Opisthokonta;Metazoa;Eumetazoa;Bilateria;Protostomia;  
 Spiralia;Lophotrochozoa;Mollusca;Bivalvia;Autobranchia;Pteriormorphia;Ostr  
 eida;Ostreoidea;Ostreidae;Crassostrea;Crassostrea virginica  
 UdeM00000035710 6596 122.5 UdeM00000035710 XP\_045215394.1 49.6 113  
 55 1 96 206 35 147 7.20E-25 122.5 6596 cellular  
 organisms;Eukaryota;Opisthokonta;Metazoa;Eumetazoa;Bilateria;Protostomia;  
 Spiralia;Lophotrochozoa;Mollusca;Bivalvia;Autobranchia;Heteroconchia;Euhe  
 terodonta;Imparidentia;Venerida;Veneroidea;Veneridae;Mercenaria;Mercenari  
 a mercenaria  
 UdeM00000035711 1735272 435.3 UdeM00000035711 XP\_041369772.1 59.5  
 380 145 2 21 392 13 391 9.30E-119 435.3 1735272  
 cellular  
 organisms;Eukaryota;Opisthokonta;Metazoa;Eumetazoa;Bilateria;Protostomia;  
 Spiralia;Lophotrochozoa;Mollusca;Gastropoda;Neomphalina;Neomphaloidea;Pel  
 tospiridae;Gigantopelta;Gigantopelta aegis  
 UdeM00000035712 6565 594.7 UdeM00000035712 XP\_022333349.1 64.8 466  
 120 2 6 427 43 508 9.10E-167 594.7 6565 cellular  
 organisms;Eukaryota;Opisthokonta;Metazoa;Eumetazoa;Bilateria;Protostomia;  
 Spiralia;Lophotrochozoa;Mollusca;Bivalvia;Autobranchia;Pteriormorphia;Ostr  
 eida;Ostreoidea;Ostreidae;Crassostrea;Crassostrea virginica  
 UdeM00000035713 7757 71.2 UdeM00000035713 XP\_032835784.1 60 60  
 24 0 3 62 4 63 7.80E-10 71.2 7757 cellular

organisms;Eukaryota;Opisthokonta;Metazoa;Eumetazoa;Bilateria;Deuterostomi  
a;Chordata;Craniata;Vertebrata;Cyclostomata;Hyperoartia;Petromyzontiforme  
s;Petromyzontidae;Petromyzon;Petromyzon marinus

UdeM00000035714 6579 250 UdeM00000035714 XP\_033733679.1 63.4 186  
68 0 3 188 2 187 2.50E-63 250 6579 cellular

organisms;Eukaryota;Opisthokonta;Metazoa;Eumetazoa;Bilateria;Protostomia;  
Spiralia;Lophotrochozoa;Mollusca;Bivalvia;Autobranchia;Pteriomorphia;Pect  
inida;Pectinoidea;Pectinidae;Pecten;Pecten maximus

UdeM00000035715 1529436 151 UdeM00000035715 XP\_033124485.1 83.3  
78 11 1 1 78 1 76 6.50E-34 151 1529436  
cellular

organisms;Eukaryota;Opisthokonta;Metazoa;Eumetazoa;Bilateria;Deuterostomi  
a;Echinodermata;Pelmatozoa;Crinoidea;Articulata;Comatulida;Comatulidae;Co  
matulinae;Anneissia;Anneissia japonica

UdeM00000035716 6573 130.6 UdeM00000035716 XP\_021355033.1 40.3 144  
85 1 2 144 4 147 2.70E-27 130.6 6573 cellular

organisms;Eukaryota;Opisthokonta;Metazoa;Eumetazoa;Bilateria;Protostomia;  
Spiralia;Lophotrochozoa;Mollusca;Bivalvia;Autobranchia;Pteriomorphia;Pect  
inida;Pectinoidea;Pectinidae;Mizuhopecten;Mizuhopecten yessoensis

UdeM00000035717 6596 164.5 UdeM00000035717 XP\_045207342.1 50.6 170  
81 2 2 168 3 172 1.20E-37 164.5 6596 cellular

organisms;Eukaryota;Opisthokonta;Metazoa;Eumetazoa;Bilateria;Protostomia;  
Spiralia;Lophotrochozoa;Mollusca;Bivalvia;Autobranchia;Heteroconchia;Euhe  
terodonta;Imparidentia;Venerida;Veneroidea;Veneridae;Mercenaria;Mercenari  
a mercenaria

UdeM00000035718 6565 133.7 UdeM00000035718 XP\_022321780.1 50.8 122  
57 2 1 119 30 151 2.10E-28 133.7 6565 cellular

organisms;Eukaryota;Opisthokonta;Metazoa;Eumetazoa;Bilateria;Protostomia;  
Spiralia;Lophotrochozoa;Mollusca;Bivalvia;Autobranchia;Pteriomorphia;Ostr  
eida;Ostreoidea;Ostreidae;Crassostrea;Crassostrea virginica

UdeM00000035719 6573 87 UdeM00000035719 XP\_021345893.1 30.3 152  
83 2 77 227 20 149 3.40E-14 87 6573 cellular

organisms;Eukaryota;Opisthokonta;Metazoa;Eumetazoa;Bilateria;Protostomia;  
Spiralia;Lophotrochozoa;Mollusca;Bivalvia;Autobranchia;Pteriomorphia;Pect  
inida;Pectinoidea;Pectinidae;Mizuhopecten;Mizuhopecten yessoensis

UdeM00000035721 6596 167.2 UdeM00000035721 XP\_045207342.1 57 142  
60 1 2 142 3 144 2.00E-38 167.2 6596 cellular

organisms;Eukaryota;Opisthokonta;Metazoa;Eumetazoa;Bilateria;Protostomia;  
Spiralia;Lophotrochozoa;Mollusca;Bivalvia;Autobranchia;Heteroconchia;Euhe  
terodonta;Imparidentia;Venerida;Veneroidea;Veneridae;Mercenaria;Mercenari  
a mercenaria

UdeM00000035722 6579 109 UdeM00000035722 XP\_033750443.1 33.1 172  
88 2 14 184 3 148 6.90E-21 109 6579 cellular

organisms;Eukaryota;Opisthokonta;Metazoa;Eumetazoa;Bilateria;Protostomia;  
Spiralia;Lophotrochozoa;Mollusca;Bivalvia;Autobranchia;Pteriomorphia;Pect  
inida;Pectinoidea;Pectinidae;Pecten;Pecten maximus

UdeM00000035723 6565 109 UdeM00000035723 XP\_022321782.1 39.8 176  
77 5 13 186 2 150 7.40E-21 109 6565 cellular

organisms;Eukaryota;Opisthokonta;Metazoa;Eumetazoa;Bilateria;Protostomia;  
Spiralia;Lophotrochozoa;Mollusca;Bivalvia;Autobranchia;Pteriomorphia;Ostr  
eida;Ostreoidea;Ostreidae;Crassostrea;Crassostrea virginica

UdeM00000035724 6565 111.3 UdeM00000035724 XP\_022321780.1 38.8 170  
76 4 19 186 7 150 1.40E-21 111.3 6565 cellular

organisms;Eukaryota;Opisthokonta;Metazoa;Eumetazoa;Bilateria;Protostomia;

Spiralia; Lophotrochozoa; Mollusca; Bivalvia; Autobranchia; Pteriomorpha; Ostr  
eida; Ostreoida; Ostreidae; Crassostrea; Crassostrea virginica  
UdeM00000035725 7574 151.8 UdeM00000035725 XP\_013421302.1 46.5 142  
75 1 2 143 3 143 8.10E-34 151.8 7574 cellular  
organisms; Eukaryota; Opisthokonta; Metazoa; Eumetazoa; Bilateria; Protostomia;  
Spiralia; Lophotrochozoa; Brachiopoda; Linguliformea; Lingulata; Lingulida; Lin  
guloidea; Lingulidae; Lingula; Lingula anatina  
UdeM00000035726 6579 370.2 UdeM00000035726 XP\_033728194.1 43.8 475  
254 5 1 466 282 752 4.00E-99 370.2 6579 cellular  
organisms; Eukaryota; Opisthokonta; Metazoa; Eumetazoa; Bilateria; Protostomia;  
Spiralia; Lophotrochozoa; Mollusca; Bivalvia; Autobranchia; Pteriomorpha; Pect  
inida; Pectinoidea; Pectinidae; Pecten; Pecten maximus  
UdeM00000035727 6565 112.8 UdeM00000035727 XP\_022321782.1 35 163  
95 3 8 161 9 169 4.90E-22 112.8 6565 cellular  
organisms; Eukaryota; Opisthokonta; Metazoa; Eumetazoa; Bilateria; Protostomia;  
Spiralia; Lophotrochozoa; Mollusca; Bivalvia; Autobranchia; Pteriomorpha; Ostr  
eida; Ostreoida; Ostreidae; Crassostrea; Crassostrea virginica  
UdeM00000035728 6565 507.3 UdeM00000035728 XP\_022338256.1 61.4 438  
155 6 16 445 56 487 2.00E-140 507.3 6565 cellular  
organisms; Eukaryota; Opisthokonta; Metazoa; Eumetazoa; Bilateria; Protostomia;  
Spiralia; Lophotrochozoa; Mollusca; Bivalvia; Autobranchia; Pteriomorpha; Ostr  
eida; Ostreoida; Ostreidae; Crassostrea; Crassostrea virginica  
UdeM00000035729 6565 502.7 UdeM00000035729 XP\_022338256.1 60.4 445  
162 6 10 446 49 487 4.90E-139 502.7 6565 cellular  
organisms; Eukaryota; Opisthokonta; Metazoa; Eumetazoa; Bilateria; Protostomia;  
Spiralia; Lophotrochozoa; Mollusca; Bivalvia; Autobranchia; Pteriomorpha; Ostr  
eida; Ostreoida; Ostreidae; Crassostrea; Crassostrea virginica  
UdeM00000035730 6565 502.3 UdeM00000035730 XP\_022338258.1 63.9 416  
135 7 7 413 72 481 5.90E-139 502.3 6565 cellular  
organisms; Eukaryota; Opisthokonta; Metazoa; Eumetazoa; Bilateria; Protostomia;  
Spiralia; Lophotrochozoa; Mollusca; Bivalvia; Autobranchia; Pteriomorpha; Ostr  
eida; Ostreoida; Ostreidae; Crassostrea; Crassostrea virginica  
UdeM00000035732 6573 299.7 UdeM00000035732 XP\_021374853.1 73.2 183  
49 0 1 183 404 586 2.60E-78 299.7 6573 cellular  
organisms; Eukaryota; Opisthokonta; Metazoa; Eumetazoa; Bilateria; Protostomia;  
Spiralia; Lophotrochozoa; Mollusca; Bivalvia; Autobranchia; Pteriomorpha; Pect  
inida; Pectinoidea; Pectinidae; Mizuhopecten; Mizuhopecten yessoensis  
UdeM00000035733 6526 166.4 UdeM00000035733 XP\_013091220.1 80.6 98  
19 0 3 100 131 228 2.20E-38 166.4 6526 cellular  
organisms; Eukaryota; Opisthokonta; Metazoa; Eumetazoa; Bilateria; Protostomia;  
Spiralia; Lophotrochozoa; Mollusca; Gastropoda; Heterobranchia; Euthyneura; Pan  
pulmonata; Hygrophila; Lymnaeoida; Planorbidae; Biomphalaria; Biomphalaria  
glabrata  
UdeM00000035734 6526 166.4 UdeM00000035734 XP\_013091220.1 80.6 98  
19 0 3 100 131 228 2.20E-38 166.4 6526 cellular  
organisms; Eukaryota; Opisthokonta; Metazoa; Eumetazoa; Bilateria; Protostomia;  
Spiralia; Lophotrochozoa; Mollusca; Gastropoda; Heterobranchia; Euthyneura; Pan  
pulmonata; Hygrophila; Lymnaeoida; Planorbidae; Biomphalaria; Biomphalaria  
glabrata  
UdeM00000035735 6573 187.2 UdeM00000035735 XP\_021358159.1 36 303  
181 6 1 293 361 660 4.70E-44 187.2 6573 cellular  
organisms; Eukaryota; Opisthokonta; Metazoa; Eumetazoa; Bilateria; Protostomia;  
Spiralia; Lophotrochozoa; Mollusca; Bivalvia; Autobranchia; Pteriomorpha; Pect  
inida; Pectinoidea; Pectinidae; Mizuhopecten; Mizuhopecten yessoensis

UdeM00000035736 6500 309.7 UdeM00000035736 XP\_012936360.1 68.9 219  
 68 0 740 958 42 260 1.30E-80 309.7 6500 cellular  
 organisms;Eukaryota;Opisthokonta;Metazoa;Eumetazoa;Bilateria;Protostomia;  
 Spiralia;Lophotrochozoa;Mollusca;Gastropoda;Heterobranchia;Euthyneura;Tec  
 tipleura;Aplysiida;Aplysioidea;Aplysiidae;Aplysia;Aplysia californica  
 UdeM00000035737 6565 121.3 UdeM00000035737 XP\_022344036.1 64.3 84  
 30 0 6 89 4 87 6.20E-25 121.3 6565 cellular  
 organisms;Eukaryota;Opisthokonta;Metazoa;Eumetazoa;Bilateria;Protostomia;  
 Spiralia;Lophotrochozoa;Mollusca;Bivalvia;Autobranchia;Pteriormorphia;Ostr  
 eida;Ostreoidea;Ostreidae;Crassostrea;Crassostrea virginica  
 UdeM00000035738 7574 860.1 UdeM00000035738 XP\_013413356.1 63.9 682  
 223 10 1084 1758 388 1053 4.80E-246 860.1 7574 cellular  
 organisms;Eukaryota;Opisthokonta;Metazoa;Eumetazoa;Bilateria;Protostomia;  
 Spiralia;Lophotrochozoa;Brachiopoda;Linguliformea;Lingulata;Lingulida;Lin  
 guloidea;Lingulidae;Lingula;Lingula anatina  
 UdeM00000042334 400727 215.7 UdeM00000042334 XP\_025089961.1 59.5  
 190 2 1 1 190 1 115 5.10E-53 215.7 400727  
 cellular  
 organisms;Eukaryota;Opisthokonta;Metazoa;Eumetazoa;Bilateria;Protostomia;  
 Spiralia;Lophotrochozoa;Mollusca;Gastropoda;Caenogastropoda;Architaeniogl  
 ossa;Ampullarioidea;Ampullariidae;Pomacea;Pomacea canaliculata  
 UdeM00000042335 1735272 301.2 UdeM00000042335 XP\_041349021.1 50  
 286 143 0 5 290 43 328 1.40E-78 301.2 1735272  
 cellular  
 organisms;Eukaryota;Opisthokonta;Metazoa;Eumetazoa;Bilateria;Protostomia;  
 Spiralia;Lophotrochozoa;Mollusca;Gastropoda;Neomphalina;Neomphaloidea;Pel  
 tospiridae;Gigantopelta;Gigantopelta aegis  
 UdeM00000042336 7574 174.9 UdeM00000042336 XP\_013416544.1 73.8 126  
 33 0 4 129 3 128 6.90E-41 174.9 7574 cellular  
 organisms;Eukaryota;Opisthokonta;Metazoa;Eumetazoa;Bilateria;Protostomia;  
 Spiralia;Lophotrochozoa;Brachiopoda;Linguliformea;Lingulata;Lingulida;Lin  
 guloidea;Lingulidae;Lingula;Lingula anatina  
 UdeM00000042337 6500 700.7 UdeM00000042337 XP\_005090939.1 78.2 496  
 108 0 1 496 1 496 1.40E-198 700.7 6500 cellular  
 organisms;Eukaryota;Opisthokonta;Metazoa;Eumetazoa;Bilateria;Protostomia;  
 Spiralia;Lophotrochozoa;Mollusca;Gastropoda;Heterobranchia;Euthyneura;Tec  
 tipleura;Aplysiida;Aplysioidea;Aplysiidae;Aplysia;Aplysia californica  
 UdeM00000042338 6500 517.3 UdeM00000042338 XP\_005090939.1 80.7 337  
 65 0 1 337 160 496 1.50E-143 517.3 6500 cellular  
 organisms;Eukaryota;Opisthokonta;Metazoa;Eumetazoa;Bilateria;Protostomia;  
 Spiralia;Lophotrochozoa;Mollusca;Gastropoda;Heterobranchia;Euthyneura;Tec  
 tipleura;Aplysiida;Aplysioidea;Aplysiidae;Aplysia;Aplysia californica  
 UdeM00000042340 29159 65.9 UdeM00000042340 XP\_034307878.1 30.5 95  
 66 0 5 99 96 190 4.80E-08 65.9 29159 cellular  
 organisms;Eukaryota;Opisthokonta;Metazoa;Eumetazoa;Bilateria;Protostomia;  
 Spiralia;Lophotrochozoa;Mollusca;Bivalvia;Autobranchia;Pteriormorphia;Ostr  
 eida;Ostreoidea;Ostreidae;Crassostrea;Crassostrea gigas  
 UdeM00000042341 6573 189.5 UdeM00000042341 XP\_021340815.1 47.9 188  
 86 2 2 187 3 180 4.00E-45 189.5 6573 cellular  
 organisms;Eukaryota;Opisthokonta;Metazoa;Eumetazoa;Bilateria;Protostomia;  
 Spiralia;Lophotrochozoa;Mollusca;Bivalvia;Autobranchia;Pteriormorphia;Pect  
 inida;Pectinoidea;Pectinidae;Mizuhopecten;Mizuhopecten yessoensis  
 UdeM00000042342 6596 468 UdeM00000042342 XP\_045172771.1 46.4 534  
 268 7 1 524 1 526 1.60E-128 468 6596 cellular

organisms;Eukaryota;Opisthokonta;Metazoa;Eumetazoa;Bilateria;Protostomia;Spiralia;Lophotrochozoa;Mollusca;Bivalvia;Autobranchia;Heteroconchia;Euherodonta;Imparidentia;Venerida;Veneroidea;Veneridae;Mercenaria;Mercenaria mercenaria

UdeM00000042343 6596 877.5 UdeM00000042343 XP\_045171607.1 65.3 1010  
336 5 1 1004 1 1002 1.60E-251 877.5 6596 cellular

organisms;Eukaryota;Opisthokonta;Metazoa;Eumetazoa;Bilateria;Protostomia;Spiralia;Lophotrochozoa;Mollusca;Bivalvia;Autobranchia;Heteroconchia;Euherodonta;Imparidentia;Venerida;Veneroidea;Veneridae;Mercenaria;Mercenaria mercenaria

UdeM00000042345 6596 1282.3 UdeM00000042345 XP\_045173271.1 73.5  
823 215 2 52 874 52 871 0.00E+00 1282.3 6596  
cellular

organisms;Eukaryota;Opisthokonta;Metazoa;Eumetazoa;Bilateria;Protostomia;Spiralia;Lophotrochozoa;Mollusca;Bivalvia;Autobranchia;Heteroconchia;Euherodonta;Imparidentia;Venerida;Veneroidea;Veneridae;Mercenaria;Mercenaria mercenaria

UdeM00000042346 6565 290.4 UdeM00000042346 XP\_022341463.1 67.1 207  
64 2 53 259 53 255 2.40E-75 290.4 6565 cellular

organisms;Eukaryota;Opisthokonta;Metazoa;Eumetazoa;Bilateria;Protostomia;Spiralia;Lophotrochozoa;Mollusca;Bivalvia;Autobranchia;Pteriormorphia;Ostreida;Ostreioidea;Ostreidae;Crassostrea;Crassostrea virginica

UdeM00000042347 6579 186.4 UdeM00000042347 XP\_033747281.1 59.7 139  
54 1 52 190 55 191 3.40E-44 186.4 6579 cellular

organisms;Eukaryota;Opisthokonta;Metazoa;Eumetazoa;Bilateria;Protostomia;Spiralia;Lophotrochozoa;Mollusca;Bivalvia;Autobranchia;Pteriormorphia;Pectinida;Pectinoidea;Pectinidae;Pecten;Pecten maximus

UdeM00000042348 29159 429.1 UdeM00000042348 XP\_034338151.1 53.4 416  
174 4 20 416 35 449 6.40E-117 429.1 29159 cellular

organisms;Eukaryota;Opisthokonta;Metazoa;Eumetazoa;Bilateria;Protostomia;Spiralia;Lophotrochozoa;Mollusca;Bivalvia;Autobranchia;Pteriormorphia;Ostreida;Ostreioidea;Ostreidae;Crassostrea;Crassostrea gigas

UdeM00000042349 6596 1330.9 UdeM00000042349 XP\_045173270.1 76.3  
823 192 2 52 874 52 871 0.00E+00 1330.9 6596  
cellular

organisms;Eukaryota;Opisthokonta;Metazoa;Eumetazoa;Bilateria;Protostomia;Spiralia;Lophotrochozoa;Mollusca;Bivalvia;Autobranchia;Heteroconchia;Euherodonta;Imparidentia;Venerida;Veneroidea;Veneridae;Mercenaria;Mercenaria mercenaria

UdeM00000042350 6596 66.6 UdeM00000042350 XP\_045172255.1 23.6 368  
209 13 15 334 40 383 7.20E-08 66.6 6596 cellular

organisms;Eukaryota;Opisthokonta;Metazoa;Eumetazoa;Bilateria;Protostomia;Spiralia;Lophotrochozoa;Mollusca;Bivalvia;Autobranchia;Heteroconchia;Euherodonta;Imparidentia;Venerida;Veneroidea;Veneridae;Mercenaria;Mercenaria mercenaria

UdeM00000042351 6573 280.8 UdeM00000042351 XP\_021371351.1 66.2 358  
117 3 2 356 350 706 2.40E-72 280.8 6573 cellular

organisms;Eukaryota;Opisthokonta;Metazoa;Eumetazoa;Bilateria;Protostomia;Spiralia;Lophotrochozoa;Mollusca;Bivalvia;Autobranchia;Pteriormorphia;Pectinida;Pectinoidea;Pectinidae;Mizuhopecten;Mizuhopecten yessoensis

UdeM00000042352 6579 735.3 UdeM00000042352 XP\_033747709.1 64.1 701  
248 3 6 703 7 706 7.10E-209 735.3 6579 cellular

organisms;Eukaryota;Opisthokonta;Metazoa;Eumetazoa;Bilateria;Protostomia;

Spiralia; Lophotrochozoa; Mollusca; Bivalvia; Autobranchia; Pteriomorpha; Pectinida; Pectinoidea; Pectinidae; Pecten; Pecten maximus

UdeM00000042353 6596 515 UdeM00000042353 XP\_045173758.1 52.5 465  
213 3 35 499 19 475 1.10E-142 515 6596 cellular  
organisms; Eukaryota; Opisthokonta; Metazoa; Eumetazoa; Bilateria; Protostomia; Spiralia; Lophotrochozoa; Mollusca; Bivalvia; Autobranchia; Heteroconchia; Euheterodonta; Imparidentia; Venerida; Veneroidea; Veneridae; Mercenaria; Mercenaria mercenaria

UdeM00000042355 6579 268.9 UdeM00000042355 XP\_033747711.1 64.9 211  
73 1 1 210 803 1013 5.70E-69 268.9 6579 cellular  
organisms; Eukaryota; Opisthokonta; Metazoa; Eumetazoa; Bilateria; Protostomia; Spiralia; Lophotrochozoa; Mollusca; Bivalvia; Autobranchia; Pteriomorpha; Pectinida; Pectinoidea; Pectinidae; Pecten; Pecten maximus

UdeM00000042354 6579 270.4 UdeM00000042354 XP\_033747711.1 65.1 212  
73 1 2 212 802 1013 2.00E-69 270.4 6579 cellular  
organisms; Eukaryota; Opisthokonta; Metazoa; Eumetazoa; Bilateria; Protostomia; Spiralia; Lophotrochozoa; Mollusca; Bivalvia; Autobranchia; Pteriomorpha; Pectinida; Pectinoidea; Pectinidae; Pecten; Pecten maximus

UdeM00000042356 6596 194.5 UdeM00000042356 XP\_045172776.1 40.2 358  
170 14 11 357 435 759 2.30E-46 194.5 6596 cellular  
organisms; Eukaryota; Opisthokonta; Metazoa; Eumetazoa; Bilateria; Protostomia; Spiralia; Lophotrochozoa; Mollusca; Bivalvia; Autobranchia; Heteroconchia; Euheterodonta; Imparidentia; Venerida; Veneroidea; Veneridae; Mercenaria; Mercenaria mercenaria

UdeM00000042357 6596 493 UdeM00000042357 XP\_045172777.1 67.5 421  
112 6 1 417 1 400 4.30E-136 493 6596 cellular  
organisms; Eukaryota; Opisthokonta; Metazoa; Eumetazoa; Bilateria; Protostomia; Spiralia; Lophotrochozoa; Mollusca; Bivalvia; Autobranchia; Heteroconchia; Euheterodonta; Imparidentia; Venerida; Veneroidea; Veneridae; Mercenaria; Mercenaria mercenaria

UdeM00000042358 7668 75.5 UdeM00000042358 XP\_030841875.1 50 64  
31 1 3 66 71 133 5.80E-11 75.5 7668 cellular  
organisms; Eukaryota; Opisthokonta; Metazoa; Eumetazoa; Bilateria; Deuterostomia; Echinodermata; Eleutherozoa; Echinozoa; Echinoidea; Euechinoidea; Echinacea; Camarodonta; Echinidea; Strongylocentrotidae; Strongylocentrotus; Strongylocentrotus purpuratus

UdeM00000042359 6596 699.1 UdeM00000042359 XP\_045172777.1 50.1 857  
347 19 5 818 121 939 6.70E-198 699.1 6596 cellular  
organisms; Eukaryota; Opisthokonta; Metazoa; Eumetazoa; Bilateria; Protostomia; Spiralia; Lophotrochozoa; Mollusca; Bivalvia; Autobranchia; Heteroconchia; Euheterodonta; Imparidentia; Venerida; Veneroidea; Veneridae; Mercenaria; Mercenaria mercenaria

UdeM00000042360 1735272 109 UdeM00000042360 XP\_041349948.1 70  
80 22 1 1 80 1 78 1.10E-20 109 1735272  
cellular  
organisms; Eukaryota; Opisthokonta; Metazoa; Eumetazoa; Bilateria; Protostomia; Spiralia; Lophotrochozoa; Mollusca; Gastropoda; Neomphalina; Neomphaloidea; Peltopiridae; Gigantopelta; Gigantopelta aegis

UdeM00000042361 6596 476.9 UdeM00000042361 XP\_045173648.1 38.9 769  
369 12 1 739 1 698 4.80E-131 476.9 6596 cellular  
organisms; Eukaryota; Opisthokonta; Metazoa; Eumetazoa; Bilateria; Protostomia; Spiralia; Lophotrochozoa; Mollusca; Bivalvia; Autobranchia; Heteroconchia; Euheterodonta; Imparidentia; Venerida; Veneroidea; Veneridae; Mercenaria; Mercenaria mercenaria

UdeM00000042362 6573 131.3 UdeM00000042362 XP\_021349751.1 30.5 321  
 198 4 1 315 2 303 2.30E-27 131.3 6573 cellular  
 organisms;Eukaryota;Opisthokonta;Metazoa;Eumetazoa;Bilateria;Protostomia;  
 Spiralia;Lophotrochozoa;Mollusca;Bivalvia;Autobranhia;Pteriomorpha;Pect  
 inida;Pectinoidea;Pectinidae;Mizuhopecten;Mizuhopecten yessoensis  
 UdeM00000042363 6579 589 UdeM00000042363 XP\_033748230.1 60.9 463  
 167 3 2 451 144 605 5.30E-165 589 6579 cellular  
 organisms;Eukaryota;Opisthokonta;Metazoa;Eumetazoa;Bilateria;Protostomia;  
 Spiralia;Lophotrochozoa;Mollusca;Bivalvia;Autobranhia;Pteriomorpha;Pect  
 inida;Pectinoidea;Pectinidae;Pecten;Pecten maximus  
 UdeM00000042364 2607531 193.4 UdeM00000042364 XP\_036359789.1 82.5  
 103 18 0 6 108 27 129 1.70E-46 193.4 2607531  
 cellular  
 organisms;Eukaryota;Opisthokonta;Metazoa;Eumetazoa;Bilateria;Protostomia;  
 Spiralia;Lophotrochozoa;Mollusca;Cephalopoda;Coleoidea;Octopodiformes;Oct  
 opoda;Incirrata;Octopodidae;Octopus;Octopus sinensis  
 UdeM00000042365 6596 259.2 UdeM00000042365 XP\_045171870.1 67.8 177  
 57 0 29 205 458 634 5.40E-66 259.2 6596 cellular  
 organisms;Eukaryota;Opisthokonta;Metazoa;Eumetazoa;Bilateria;Protostomia;  
 Spiralia;Lophotrochozoa;Mollusca;Bivalvia;Autobranhia;Heteroconchia;Euhe  
 terodonta;Imparidentia;Venerida;Veneroidea;Veneridae;Mercenaria;Mercenari  
 a mercenaria  
 UdeM00000042366 6579 433.3 UdeM00000042366 XP\_033747389.1 70.6 279  
 82 0 1 279 206 484 2.30E-118 433.3 6579 cellular  
 organisms;Eukaryota;Opisthokonta;Metazoa;Eumetazoa;Bilateria;Protostomia;  
 Spiralia;Lophotrochozoa;Mollusca;Bivalvia;Autobranhia;Pteriomorpha;Pect  
 inida;Pectinoidea;Pectinidae;Pecten;Pecten maximus  
 UdeM00000042367 6565 97.4 UdeM00000042367 XP\_022335714.1 49.1 110  
 39 4 47 154 96 190 1.70E-17 97.4 6565 cellular  
 organisms;Eukaryota;Opisthokonta;Metazoa;Eumetazoa;Bilateria;Protostomia;  
 Spiralia;Lophotrochozoa;Mollusca;Bivalvia;Autobranhia;Pteriomorpha;Ostr  
 eida;Ostreoidea;Ostreidae;Crassostrea;Crassostrea virginica  
 UdeM00000042368 6579 3042.3 UdeM00000042368 XP\_033748694.1 92.1  
 1641 130 0 147 1787 15 1655 0.00E+00 3042.3 6579  
 cellular  
 organisms;Eukaryota;Opisthokonta;Metazoa;Eumetazoa;Bilateria;Protostomia;  
 Spiralia;Lophotrochozoa;Mollusca;Bivalvia;Autobranhia;Pteriomorpha;Pect  
 inida;Pectinoidea;Pectinidae;Pecten;Pecten maximus  
 UdeM00000042369 37653 206.1 UdeM00000042369 XP\_014789336.1 78.8 137  
 29 0 1 137 1 137 3.10E-50 206.1 37653 cellular  
 organisms;Eukaryota;Opisthokonta;Metazoa;Eumetazoa;Bilateria;Protostomia;  
 Spiralia;Lophotrochozoa;Mollusca;Cephalopoda;Coleoidea;Octopodiformes;Oct  
 opoda;Incirrata;Octopodidae;Octopus;Octopus bimaculoides  
 UdeM00000042370 6526 110.2 UdeM00000042370 XP\_013067933.1 82.4 68  
 12 0 1 68 1 68 1.90E-21 110.2 6526 cellular  
 organisms;Eukaryota;Opisthokonta;Metazoa;Eumetazoa;Bilateria;Protostomia;  
 Spiralia;Lophotrochozoa;Mollusca;Gastropoda;Heterobranhia;Euthyneura;Pan  
 pulmonata;Hygrophila;Lymnaeidea;Planorbidae;Biomphalaria;Biomphalaria  
 glabrata  
 UdeM00000042371 6596 252.7 UdeM00000042371 XP\_045173333.1 43.5 306  
 123 3 5 261 7 311 5.20E-64 252.7 6596 cellular  
 organisms;Eukaryota;Opisthokonta;Metazoa;Eumetazoa;Bilateria;Protostomia;  
 Spiralia;Lophotrochozoa;Mollusca;Bivalvia;Autobranhia;Heteroconchia;Euhe



terodonta;Imparidentia;Venerida;Veneroidea;Veneridae;Mercenaria;Mercenari  
 a mercenaria  
 UdeM00000042372 6596 178.7 UdeM00000042372 XP\_045181277.1 33.7 306  
 187 8 41 338 132 429 1.20E-41 178.7 6596 cellular  
 organisms;Eukaryota;Opisthokonta;Metazoa;Eumetazoa;Bilateria;Protostomia;  
 Spiralia;Lophotrochozoa;Mollusca;Bivalvia;Autobranchia;Heteroconchia;Euhe  
 terodonta;Imparidentia;Venerida;Veneroidea;Veneridae;Mercenaria;Mercenari  
 a mercenaria  
 UdeM00000042373 6596 153.7 UdeM00000042373 XP\_045173647.1 38.2 207  
 126 2 1 205 226 432 2.60E-34 153.7 6596 cellular  
 organisms;Eukaryota;Opisthokonta;Metazoa;Eumetazoa;Bilateria;Protostomia;  
 Spiralia;Lophotrochozoa;Mollusca;Bivalvia;Autobranchia;Heteroconchia;Euhe  
 terodonta;Imparidentia;Venerida;Veneroidea;Veneridae;Mercenaria;Mercenari  
 a mercenaria  
 UdeM00000042374 6596 204.9 UdeM00000042374 XP\_045181277.1 35.7 322  
 189 10 17 327 108 422 1.60E-49 204.9 6596 cellular  
 organisms;Eukaryota;Opisthokonta;Metazoa;Eumetazoa;Bilateria;Protostomia;  
 Spiralia;Lophotrochozoa;Mollusca;Bivalvia;Autobranchia;Heteroconchia;Euhe  
 terodonta;Imparidentia;Venerida;Veneroidea;Veneridae;Mercenaria;Mercenari  
 a mercenaria  
 UdeM00000042375 6596 63.5 UdeM00000042375 XP\_045174485.1 31.5 127  
 82 4 30 155 651 773 3.90E-07 63.5 6596 cellular  
 organisms;Eukaryota;Opisthokonta;Metazoa;Eumetazoa;Bilateria;Protostomia;  
 Spiralia;Lophotrochozoa;Mollusca;Bivalvia;Autobranchia;Heteroconchia;Euhe  
 terodonta;Imparidentia;Venerida;Veneroidea;Veneridae;Mercenaria;Mercenari  
 a mercenaria  
 UdeM00000043537 29159 119 UdeM00000043537 XP\_011449152.1 66.3 92  
 29 2 15 106 61 150 3.70E-24 119 29159 cellular  
 organisms;Eukaryota;Opisthokonta;Metazoa;Eumetazoa;Bilateria;Protostomia;  
 Spiralia;Lophotrochozoa;Mollusca;Bivalvia;Autobranchia;Pteriormorphia;Ostr  
 eida;Ostreoidea;Ostreidae;Crassostrea;Crassostrea gigas  
 UdeM00000043538 6596 907.5 UdeM00000043538 XP\_045199690.1 51.9 930  
 388 12 8 918 2 891 1.40E-260 907.5 6596 cellular  
 organisms;Eukaryota;Opisthokonta;Metazoa;Eumetazoa;Bilateria;Protostomia;  
 Spiralia;Lophotrochozoa;Mollusca;Bivalvia;Autobranchia;Heteroconchia;Euhe  
 terodonta;Imparidentia;Venerida;Veneroidea;Veneridae;Mercenaria;Mercenari  
 a mercenaria  
 UdeM00000043539 6596 704.5 UdeM00000043539 XP\_045199690.1 50.6 769  
 322 13 1 748 160 891 1.40E-199 704.5 6596 cellular  
 organisms;Eukaryota;Opisthokonta;Metazoa;Eumetazoa;Bilateria;Protostomia;  
 Spiralia;Lophotrochozoa;Mollusca;Bivalvia;Autobranchia;Heteroconchia;Euhe  
 terodonta;Imparidentia;Venerida;Veneroidea;Veneridae;Mercenaria;Mercenari  
 a mercenaria  
 UdeM00000043540 6596 1349.7 UdeM00000043540 XP\_045199705.1 66.7  
 1080 320 7 5 1048 301 1376 0.00E+00 1349.7 6596  
 cellular  
 organisms;Eukaryota;Opisthokonta;Metazoa;Eumetazoa;Bilateria;Protostomia;  
 Spiralia;Lophotrochozoa;Mollusca;Bivalvia;Autobranchia;Heteroconchia;Euhe  
 terodonta;Imparidentia;Venerida;Veneroidea;Veneridae;Mercenaria;Mercenari  
 a mercenaria  
 UdeM00000043541 37621 98.2 UdeM00000043541 XP\_014678683.1 60 70  
 28 0 1 70 59 128 8.50E-18 98.2 37621 cellular  
 organisms;Eukaryota;Opisthokonta;Metazoa;Eumetazoa;Bilateria;Protostomia;

Ecdysozoa; Scalidophora; Priapulida; Priapulimorpha; Priapulimorphida; Priapulidae; Priapululus; Priapululus caudatus

UdeM00000043542 6596 461.8 UdeM00000043542 XP\_045199705.1 80.4 275  
54 0 1 275 27 301 5.90E-127 461.8 6596 cellular  
organisms; Eukaryota; Opisthokonta; Metazoa; Eumetazoa; Bilateria; Protostomia; Spiralia; Lophotrochozoa; Mollusca; Bivalvia; Autobranchia; Heteroconchia; Euheterodonta; Imparidentia; Venerida; Veneroidea; Veneridae; Mercenaria; Mercenaria mercenaria

UdeM00000043543 6573 715.3 UdeM00000043543 XP\_021372077.1 80 444  
76 4 1 440 1 435 5.50E-203 715.3 6573 cellular  
organisms; Eukaryota; Opisthokonta; Metazoa; Eumetazoa; Bilateria; Protostomia; Spiralia; Lophotrochozoa; Mollusca; Bivalvia; Autobranchia; Pteriormorphia; Pectinida; Pectinoidea; Pectinidae; Mizuhopecten; Mizuhopecten yessoensis

UdeM00000043544 6596 187.6 UdeM00000043544 XP\_045177580.1 33.1 359  
212 10 16 369 13 348 3.50E-44 187.6 6596 cellular  
organisms; Eukaryota; Opisthokonta; Metazoa; Eumetazoa; Bilateria; Protostomia; Spiralia; Lophotrochozoa; Mollusca; Bivalvia; Autobranchia; Heteroconchia; Euheterodonta; Imparidentia; Venerida; Veneroidea; Veneridae; Mercenaria; Mercenaria mercenaria

UdeM00000043545 7913 164.5 UdeM00000043545 XP\_041090681.1 23.2 626  
444 18 1 603 1809 2420 4.30E-37 164.5 7913 cellular  
organisms; Eukaryota; Opisthokonta; Metazoa; Eumetazoa; Bilateria; Deuterostomia; Chordata; Craniata; Vertebrata; Gnathostomata; Teleostomi; Euteleostomi; Actinopterygii; Actinopteri; Chondrostei; Acipenseriformes; Acipenseridae; Polyodontidae; Polyodontinae; Polyodontini; Polyodon; Polyodon spathula

UdeM00000043546 6596 286.2 UdeM00000043546 XP\_045200257.1 30.7 610  
378 13 7 580 124 724 9.40E-74 286.2 6596 cellular  
organisms; Eukaryota; Opisthokonta; Metazoa; Eumetazoa; Bilateria; Protostomia; Spiralia; Lophotrochozoa; Mollusca; Bivalvia; Autobranchia; Heteroconchia; Euheterodonta; Imparidentia; Venerida; Veneroidea; Veneridae; Mercenaria; Mercenaria mercenaria

UdeM00000043547 6596 298.1 UdeM00000043547 XP\_045200267.1 32.4 599  
367 16 2 583 123 700 2.40E-77 298.1 6596 cellular  
organisms; Eukaryota; Opisthokonta; Metazoa; Eumetazoa; Bilateria; Protostomia; Spiralia; Lophotrochozoa; Mollusca; Bivalvia; Autobranchia; Heteroconchia; Euheterodonta; Imparidentia; Venerida; Veneroidea; Veneridae; Mercenaria; Mercenaria mercenaria

UdeM00000043549 6596 361.7 UdeM00000043549 XP\_045202682.1 33.2 719  
429 11 57 760 884 1566 2.30E-96 361.7 6596 cellular  
organisms; Eukaryota; Opisthokonta; Metazoa; Eumetazoa; Bilateria; Protostomia; Spiralia; Lophotrochozoa; Mollusca; Bivalvia; Autobranchia; Heteroconchia; Euheterodonta; Imparidentia; Venerida; Veneroidea; Veneridae; Mercenaria; Mercenaria mercenaria

UdeM00000043550 6596 361.7 UdeM00000043550 XP\_045202682.1 33.2 719  
429 11 57 760 884 1566 2.30E-96 361.7 6596 cellular  
organisms; Eukaryota; Opisthokonta; Metazoa; Eumetazoa; Bilateria; Protostomia; Spiralia; Lophotrochozoa; Mollusca; Bivalvia; Autobranchia; Heteroconchia; Euheterodonta; Imparidentia; Venerida; Veneroidea; Veneridae; Mercenaria; Mercenaria mercenaria

UdeM00000043551 6596 361.7 UdeM00000043551 XP\_045202682.1 33.2 719  
429 11 57 760 884 1566 2.30E-96 361.7 6596 cellular  
organisms; Eukaryota; Opisthokonta; Metazoa; Eumetazoa; Bilateria; Protostomia; Spiralia; Lophotrochozoa; Mollusca; Bivalvia; Autobranchia; Heteroconchia; Euheterodonta; Imparidentia; Venerida; Veneroidea; Veneridae; Mercenaria; Mercenaria mercenaria

terodonta;Imparidentia;Venerida;Veneroidea;Veneridae;Mercenaria;Mercenaria mercenaria  
 UdeM00000043552 6596 361.7 UdeM00000043552 XP\_045202682.1 33.2 719  
 429 11 57 760 884 1566 2.30E-96 361.7 6596 cellular  
 organisms;Eukaryota;Opisthokonta;Metazoa;Eumetazoa;Bilateria;Protostomia;  
 Spiralia;Lophotrochozoa;Mollusca;Bivalvia;Autobranchia;Heteroconchia;Euhe  
 terodonta;Imparidentia;Venerida;Veneroidea;Veneridae;Mercenaria;Mercenari  
 a mercenaria  
 UdeM00000043553 6596 363.2 UdeM00000043553 XP\_045202682.1 33.4 719  
 428 12 57 760 884 1566 7.90E-97 363.2 6596 cellular  
 organisms;Eukaryota;Opisthokonta;Metazoa;Eumetazoa;Bilateria;Protostomia;  
 Spiralia;Lophotrochozoa;Mollusca;Bivalvia;Autobranchia;Heteroconchia;Euhe  
 terodonta;Imparidentia;Venerida;Veneroidea;Veneridae;Mercenaria;Mercenari  
 a mercenaria  
 UdeM00000043554 6596 221.1 UdeM00000043554 XP\_045181277.1 40.4 285  
 157 7 189 466 127 405 3.10E-54 221.1 6596 cellular  
 organisms;Eukaryota;Opisthokonta;Metazoa;Eumetazoa;Bilateria;Protostomia;  
 Spiralia;Lophotrochozoa;Mollusca;Bivalvia;Autobranchia;Heteroconchia;Euhe  
 terodonta;Imparidentia;Venerida;Veneroidea;Veneridae;Mercenaria;Mercenari  
 a mercenaria  
 UdeM00000043555 27687 562 UdeM00000043555 XP\_028648107.1 26.5 1655  
 1060 44 163 1728 342 1929 2.60E-156 562 27687 cellular  
 organisms;Eukaryota;Opisthokonta;Metazoa;Eumetazoa;Bilateria;Deuterostomi  
 a;Chordata;Craniata;Vertebrata;Gnathostomata;Teleostomi;Euteleostomi;Acti  
 nopterygii;Cladistia;Polypteriformes;Polypteridae;Erpetoichthys;Erpetoich  
 thys calabaricus  
 UdeM00000043556 8384 156.8 UdeM00000043556 XP\_040263820.1 30.6 372  
 234 12 12 375 47 402 5.60E-35 156.8 8384 cellular  
 organisms;Eukaryota;Opisthokonta;Metazoa;Eumetazoa;Bilateria;Deuterostomi  
 a;Chordata;Craniata;Vertebrata;Gnathostomata;Teleostomi;Euteleostomi;Sarc  
 opterygii;Dipnotetrapodomorpha;Tetrapoda;Amphibia;Batrachia;Anura;Neobatr  
 achia;Hyloidea;Bufonidae;Bufo;Bufo bufo  
 UdeM00000043557 6850 147.9 UdeM00000043557 XP\_013775720.2 29.4 320  
 209 8 109 425 171 476 3.00E-32 147.9 6850 cellular  
 organisms;Eukaryota;Opisthokonta;Metazoa;Eumetazoa;Bilateria;Protostomia;  
 Ecdysozoa;Panarthropoda;Arthropoda;Chelicerata;Merostomata;Xiphosura;Limu  
 lidae;Limulus;Limulus polyphemus  
 UdeM00000043558 6412 115.5 UdeM00000043558 XP\_009031446.1 27.6 257  
 170 8 1 248 244 493 9.40E-23 115.5 6412 cellular  
 organisms;Eukaryota;Opisthokonta;Metazoa;Eumetazoa;Bilateria;Protostomia;  
 Spiralia;Lophotrochozoa;Annelida;Clitellata;Hirudinea;Rhynchobdellida;Glo  
 ssisiphiidae;Helobdella;Helobdella robusta  
 UdeM00000043559 6412 164.1 UdeM00000043559 XP\_009031446.1 28.2 365  
 241 11 83 433 136 493 4.00E-37 164.1 6412 cellular  
 organisms;Eukaryota;Opisthokonta;Metazoa;Eumetazoa;Bilateria;Protostomia;  
 Spiralia;Lophotrochozoa;Annelida;Clitellata;Hirudinea;Rhynchobdellida;Glo  
 ssisiphiidae;Helobdella;Helobdella robusta  
 UdeM00000040657 6573 729.6 UdeM00000040657 XP\_021345467.1 66.3 812  
 273 1 10 821 124 934 4.50E-207 729.6 6573 cellular  
 organisms;Eukaryota;Opisthokonta;Metazoa;Eumetazoa;Bilateria;Protostomia;  
 Spiralia;Lophotrochozoa;Mollusca;Bivalvia;Autobranchia;Pteriormorphia;Pect  
 inida;Pectinoidea;Pectinidae;Mizuhopecten;Mizuhopecten yessoensis  
 UdeM00000040659 29159 99.8 UdeM00000040659 XP\_011445731.2 39.8 123  
 72 2 17 139 227 347 3.40E-18 99.8 29159 cellular

organisms;Eukaryota;Opisthokonta;Metazoa;Eumetazoa;Bilateria;Protostomia;Spiralia;Lophotrochozoa;Mollusca;Bivalvia;Autobranhia;Pteriormorphia;Ostreida;Ostreioidea;Ostreidae;Crassostrea;Crassostrea gigas  
UdeM00000040658 29159 102.8 UdeM00000040658 XP\_011445731.2 36.8 144  
87 3 245 388 208 347 1.00E-18 102.8 29159 cellular  
organisms;Eukaryota;Opisthokonta;Metazoa;Eumetazoa;Bilateria;Protostomia;Spiralia;Lophotrochozoa;Mollusca;Bivalvia;Autobranhia;Pteriormorphia;Ostreida;Ostreioidea;Ostreidae;Crassostrea;Crassostrea gigas  
UdeM00000040660 29159 434.1 UdeM00000040660 XP\_034307109.1 42.8 579  
317 7 10 577 29 604 2.90E-118 434.1 29159 cellular  
organisms;Eukaryota;Opisthokonta;Metazoa;Eumetazoa;Bilateria;Protostomia;Spiralia;Lophotrochozoa;Mollusca;Bivalvia;Autobranhia;Pteriormorphia;Ostreida;Ostreioidea;Ostreidae;Crassostrea;Crassostrea gigas  
UdeM00000040661 2652724 442.6 UdeM00000040661 XP\_020903819.1 48.2  
461 223 6 5 449 9 469 6.10E-121 442.6 2652724  
cellular  
organisms;Eukaryota;Opisthokonta;Metazoa;Eumetazoa;Cnidaria;Anthozoa;Hexacorallia;Actiniaria;Aiptasiidae;Exaiptasia;Exaiptasia diaphana  
UdeM00000040662 6596 252.7 UdeM00000040662 XP\_045204432.1 48 248  
126 2 10 254 105 352 5.00E-64 252.7 6596 cellular  
organisms;Eukaryota;Opisthokonta;Metazoa;Eumetazoa;Bilateria;Protostomia;Spiralia;Lophotrochozoa;Mollusca;Bivalvia;Autobranhia;Heteroconchia;Euheterodonta;Imparidentia;Venerida;Veneroidea;Veneridae;Mercenaria;Mercenaria mercenaria  
UdeM00000040663 6573 491.1 UdeM00000040663 XP\_021353682.1 44.8 585  
311 5 12 584 39 623 1.90E-135 491.1 6573 cellular  
organisms;Eukaryota;Opisthokonta;Metazoa;Eumetazoa;Bilateria;Protostomia;Spiralia;Lophotrochozoa;Mollusca;Bivalvia;Autobranhia;Pteriormorphia;Pectinida;Pectinoidea;Pectinidae;Mizuhopecten;Mizuhopecten yessoensis  
UdeM00000040664 6596 326.6 UdeM00000040664 XP\_045204432.1 43.2 352  
197 2 1 349 1 352 3.80E-86 326.6 6596 cellular  
organisms;Eukaryota;Opisthokonta;Metazoa;Eumetazoa;Bilateria;Protostomia;Spiralia;Lophotrochozoa;Mollusca;Bivalvia;Autobranhia;Heteroconchia;Euheterodonta;Imparidentia;Venerida;Veneroidea;Veneridae;Mercenaria;Mercenaria mercenaria  
UdeM00000040666 6596 102.4 UdeM00000040666 XP\_045204432.1 50 90  
43 1 1 88 263 352 2.90E-19 102.4 6596 cellular  
organisms;Eukaryota;Opisthokonta;Metazoa;Eumetazoa;Bilateria;Protostomia;Spiralia;Lophotrochozoa;Mollusca;Bivalvia;Autobranhia;Heteroconchia;Euheterodonta;Imparidentia;Venerida;Veneroidea;Veneridae;Mercenaria;Mercenaria mercenaria  
UdeM00000040665 6596 139.8 UdeM00000040665 XP\_045204432.1 50.9 116  
55 1 2 115 237 352 2.20E-30 139.8 6596 cellular  
organisms;Eukaryota;Opisthokonta;Metazoa;Eumetazoa;Bilateria;Protostomia;Spiralia;Lophotrochozoa;Mollusca;Bivalvia;Autobranhia;Heteroconchia;Euheterodonta;Imparidentia;Venerida;Veneroidea;Veneridae;Mercenaria;Mercenaria mercenaria  
UdeM00000040667 6596 205.7 UdeM00000040667 XP\_045204432.1 43.8 226  
124 2 7 229 6 231 6.40E-50 205.7 6596 cellular  
organisms;Eukaryota;Opisthokonta;Metazoa;Eumetazoa;Bilateria;Protostomia;Spiralia;Lophotrochozoa;Mollusca;Bivalvia;Autobranhia;Heteroconchia;Euheterodonta;Imparidentia;Venerida;Veneroidea;Veneridae;Mercenaria;Mercenaria mercenaria

UdeM00000044439 83332 238 UdeM00000044439 NP\_217959.1 93.1 130 9  
 0 393 522 22 151 2.60E-59 238 83332 cellular  
 organisms;Bacteria;Terrabacteria  
 group;Actinobacteria;Actinomycetia;Corynebacteriales;Mycobacteriaceae;Mycobacterium;Mycobacterium tuberculosis complex;Mycobacterium tuberculosis;Mycobacterium tuberculosis H37Rv

UdeM00000043682 6596 436 UdeM00000043682 XP\_045187536.1 63.7 331  
 118 1 1 331 396 724 4.20E-119 436 6596 cellular  
 organisms;Eukaryota;Opisthokonta;Metazoa;Eumetazoa;Bilateria;Protostomia;Spiralia;Lophotrochozoa;Mollusca;Bivalvia;Autobranchia;Heteroconchia;Euheterodonta;Imparidentia;Venerida;Veneroidea;Veneridae;Mercenaria;Mercenaria mercenaria

UdeM00000043683 6596 671 UdeM00000043683 XP\_045187536.1 66.6 500  
 164 2 2 501 228 724 1.20E-189 671 6596 cellular  
 organisms;Eukaryota;Opisthokonta;Metazoa;Eumetazoa;Bilateria;Protostomia;Spiralia;Lophotrochozoa;Mollusca;Bivalvia;Autobranchia;Heteroconchia;Euheterodonta;Imparidentia;Venerida;Veneroidea;Veneridae;Mercenaria;Mercenaria mercenaria

UdeM00000043685 1735272 88.2 UdeM00000043685 XP\_041362151.1 38.9  
 113 68 1 9 120 563 675 8.50E-15 88.2 1735272  
 cellular  
 organisms;Eukaryota;Opisthokonta;Metazoa;Eumetazoa;Bilateria;Protostomia;Spiralia;Lophotrochozoa;Mollusca;Gastropoda;Neomphalina;Neomphaloidea;Peltopspiridae;Gigantopelta;Gigantopelta aegis

UdeM00000043687 6579 262.7 UdeM00000043687 XP\_033761495.1 66.3 184  
 59 1 36 219 24 204 4.20E-67 262.7 6579 cellular  
 organisms;Eukaryota;Opisthokonta;Metazoa;Eumetazoa;Bilateria;Protostomia;Spiralia;Lophotrochozoa;Mollusca;Bivalvia;Autobranchia;Pteriormorphia;Pectinida;Pectinoidea;Pectinidae;Pecten;Pecten maximus

UdeM00000043690 7574 258.8 UdeM00000043690 XP\_013382110.1 59.1 208  
 79 1 1 208 37 238 5.80E-66 258.8 7574 cellular  
 organisms;Eukaryota;Opisthokonta;Metazoa;Eumetazoa;Bilateria;Protostomia;Spiralia;Lophotrochozoa;Brachiopoda;Linguliformea;Lingulata;Lingulida;Linguloidea;Lingulidae;Lingula;Lingula anatina

UdeM00000043691 7574 259.2 UdeM00000043691 XP\_013382110.1 61.3 194  
 75 0 14 207 45 238 4.40E-66 259.2 7574 cellular  
 organisms;Eukaryota;Opisthokonta;Metazoa;Eumetazoa;Bilateria;Protostomia;Spiralia;Lophotrochozoa;Brachiopoda;Linguliformea;Lingulata;Lingulida;Linguloidea;Lingulidae;Lingula;Lingula anatina

UdeM00000043692 7574 255.8 UdeM00000043692 XP\_013382110.1 47.4 234  
 119 2 3 236 386 615 5.50E-65 255.8 7574 cellular  
 organisms;Eukaryota;Opisthokonta;Metazoa;Eumetazoa;Bilateria;Protostomia;Spiralia;Lophotrochozoa;Brachiopoda;Linguliformea;Lingulata;Lingulida;Linguloidea;Lingulidae;Lingula;Lingula anatina

UdeM00000043693 7574 188.7 UdeM00000043693 XP\_013384628.1 58.3 163  
 59 2 1 163 33 186 6.50E-45 188.7 7574 cellular  
 organisms;Eukaryota;Opisthokonta;Metazoa;Eumetazoa;Bilateria;Protostomia;Spiralia;Lophotrochozoa;Brachiopoda;Linguliformea;Lingulata;Lingulida;Linguloidea;Lingulidae;Lingula;Lingula anatina

UdeM00000043694 7574 221.9 UdeM00000043694 XP\_013399039.1 48.2 247  
 116 4 3 243 4 244 9.10E-55 221.9 7574 cellular  
 organisms;Eukaryota;Opisthokonta;Metazoa;Eumetazoa;Bilateria;Protostomia;Spiralia;Lophotrochozoa;Brachiopoda;Linguliformea;Lingulata;Lingulida;Linguloidea;Lingulidae;Lingula;Lingula anatina

UdeM00000043697 6596 276.9 UdeM00000043697 XP\_045182316.1 40.9 399  
 192 6 1 398 392 747 7.30E-71 276.9 6596 cellular  
 organisms;Eukaryota;Opisthokonta;Metazoa;Eumetazoa;Bilateria;Protostomia;  
 Spiralia;Lophotrochozoa;Mollusca;Bivalvia;Autobranchia;Heteroconchia;Euhe  
 terodonta;Imparidentia;Venerida;Veneroidea;Veneridae;Mercenaria;Mercenari  
 a mercenaria  
 UdeM00000043698 6596 230.7 UdeM00000043698 XP\_045182313.1 38.7 475  
 210 18 16 442 772 1213 3.60E-57 230.7 6596 cellular  
 organisms;Eukaryota;Opisthokonta;Metazoa;Eumetazoa;Bilateria;Protostomia;  
 Spiralia;Lophotrochozoa;Mollusca;Bivalvia;Autobranchia;Heteroconchia;Euhe  
 terodonta;Imparidentia;Venerida;Veneroidea;Veneridae;Mercenaria;Mercenari  
 a mercenaria  
 UdeM00000033322 6526 131.7 UdeM00000033322 XP\_013095404.1 49.1 163  
 78 4 1 158 1 163 8.20E-28 131.7 6526 cellular  
 organisms;Eukaryota;Opisthokonta;Metazoa;Eumetazoa;Bilateria;Protostomia;  
 Spiralia;Lophotrochozoa;Mollusca;Gastropoda;Heterobranchia;Euthyneura;Pan  
 pulmonata;Hygrophila;Lymnaeioidea;Planorbidae;Biomphalaria;Biomphalaria  
 glabrata  
 UdeM00000033323 6596 102.4 UdeM00000033323 XP\_045173241.1 30.5 311  
 131 11 17 257 554 849 1.20E-18 102.4 6596 cellular  
 organisms;Eukaryota;Opisthokonta;Metazoa;Eumetazoa;Bilateria;Protostomia;  
 Spiralia;Lophotrochozoa;Mollusca;Bivalvia;Autobranchia;Heteroconchia;Euhe  
 terodonta;Imparidentia;Venerida;Veneroidea;Veneridae;Mercenaria;Mercenari  
 a mercenaria  
 UdeM00000033324 46514 120.2 UdeM00000033324 XP\_038073135.1 42.6 148  
 78 2 1 148 393 533 2.40E-24 120.2 46514 cellular  
 organisms;Eukaryota;Opisthokonta;Metazoa;Eumetazoa;Bilateria;Deuterostomi  
 a;Echinodermata;Eleutherozoa;Asterozoa;Asteroidea;Valvatacea;Valvatida;As  
 terinidae;Patiria;Patiria miniata  
 UdeM00000033326 46514 112.1 UdeM00000033326 XP\_038073135.1 52.6 95  
 45 0 81 175 12 106 7.30E-22 112.1 46514 cellular  
 organisms;Eukaryota;Opisthokonta;Metazoa;Eumetazoa;Bilateria;Deuterostomi  
 a;Echinodermata;Eleutherozoa;Asterozoa;Asteroidea;Valvatacea;Valvatida;As  
 terinidae;Patiria;Patiria miniata  
 UdeM00000033327 6573 181 UdeM00000033327 XP\_021359687.1 31.2 433  
 229 12 120 533 299 681 4.00E-42 181 6573 cellular  
 organisms;Eukaryota;Opisthokonta;Metazoa;Eumetazoa;Bilateria;Protostomia;  
 Spiralia;Lophotrochozoa;Mollusca;Bivalvia;Autobranchia;Pteriomorphia;Pect  
 inida;Pectinoidea;Pectinidae;Mizuhopecten;Mizuhopecten yessoensis  
 UdeM00000033328 6596 90.9 UdeM00000033328 XP\_045214422.1 35.3 184  
 99 8 16 185 330 507 1.90E-15 90.9 6596 cellular  
 organisms;Eukaryota;Opisthokonta;Metazoa;Eumetazoa;Bilateria;Protostomia;  
 Spiralia;Lophotrochozoa;Mollusca;Bivalvia;Autobranchia;Heteroconchia;Euhe  
 terodonta;Imparidentia;Venerida;Veneroidea;Veneridae;Mercenaria;Mercenari  
 a mercenaria  
 UdeM00000033329 6596 90.9 UdeM00000033329 XP\_045214422.1 35.3 184  
 99 8 20 189 330 507 2.00E-15 90.9 6596 cellular  
 organisms;Eukaryota;Opisthokonta;Metazoa;Eumetazoa;Bilateria;Protostomia;  
 Spiralia;Lophotrochozoa;Mollusca;Bivalvia;Autobranchia;Heteroconchia;Euhe  
 terodonta;Imparidentia;Venerida;Veneroidea;Veneridae;Mercenaria;Mercenari  
 a mercenaria  
 UdeM00000033330 6596 117.5 UdeM00000033330 XP\_045214422.1 34.3 277  
 147 13 1 258 247 507 2.70E-23 117.5 6596 cellular  
 organisms;Eukaryota;Opisthokonta;Metazoa;Eumetazoa;Bilateria;Protostomia;

Spiralia;Lophotrochozoa;Mollusca;Bivalvia;Autobranchia;Heteroconchia;Euherodonta;Imparidentia;Venerida;Veneroidea;Veneridae;Mercenaria;Mercenaria mercenaria

UdeM00000033331 6596 92.8 UdeM00000033331 XP\_045158080.1 37.6 157  
93 3 45 198 676 830 5.40E-16 92.8 6596 cellular

organisms;Eukaryota;Opisthokonta;Metazoa;Eumetazoa;Bilateria;Protostomia;Spiralia;Lophotrochozoa;Mollusca;Bivalvia;Autobranchia;Heteroconchia;Euherodonta;Imparidentia;Venerida;Veneroidea;Veneridae;Mercenaria;Mercenaria mercenaria

UdeM00000033332 6596 197.2 UdeM00000033332 XP\_045214422.1 35.9 390  
203 16 158 535 153 507 5.30E-47 197.2 6596 cellular

organisms;Eukaryota;Opisthokonta;Metazoa;Eumetazoa;Bilateria;Protostomia;Spiralia;Lophotrochozoa;Mollusca;Bivalvia;Autobranchia;Heteroconchia;Euherodonta;Imparidentia;Venerida;Veneroidea;Veneridae;Mercenaria;Mercenaria mercenaria

UdeM00000033333 29159 88.6 UdeM00000033333 XP\_034320029.1 62.9 70  
25 1 1 70 418 486 3.70E-15 88.6 29159 cellular

organisms;Eukaryota;Opisthokonta;Metazoa;Eumetazoa;Bilateria;Protostomia;Spiralia;Lophotrochozoa;Mollusca;Bivalvia;Autobranchia;Pteriormorphia;Ostreida;Ostreoidea;Ostreidae;Crassostrea;Crassostrea gigas

UdeM00000033334 6596 195.7 UdeM00000033334 XP\_045173241.1 30.2 507  
316 15 28 530 377 849 1.50E-46 195.7 6596 cellular

organisms;Eukaryota;Opisthokonta;Metazoa;Eumetazoa;Bilateria;Protostomia;Spiralia;Lophotrochozoa;Mollusca;Bivalvia;Autobranchia;Heteroconchia;Euherodonta;Imparidentia;Venerida;Veneroidea;Veneridae;Mercenaria;Mercenaria mercenaria

UdeM00000033335 6596 345.5 UdeM00000033335 XP\_045177776.1 35.8 559  
327 8 23 573 393 927 2.80E-91 345.5 6596 cellular

organisms;Eukaryota;Opisthokonta;Metazoa;Eumetazoa;Bilateria;Protostomia;Spiralia;Lophotrochozoa;Mollusca;Bivalvia;Autobranchia;Heteroconchia;Euherodonta;Imparidentia;Venerida;Veneroidea;Veneridae;Mercenaria;Mercenaria mercenaria

UdeM00000033337 72036 90.1 UdeM00000033337 XP\_040576246.1 42.2 90  
52 0 3 92 253 342 1.80E-15 90.1 72036 cellular

organisms;Eukaryota;Opisthokonta;Metazoa;Eumetazoa;Bilateria;Protostomia;Ecdysozoa;Panarthropoda;Arthropoda;Mandibulata;Pancrustacea;Crustacea;Multicrustacea;Hexanauplia;Copepoda;Neocopepoda;Podoplea;Siphonostomatoida;Caligidae;Lepeophtheirus;Lepeophtheirus salmonis

UdeM00000033340 6596 205.3 UdeM00000033340 XP\_045173275.1 30.9 570  
335 18 4 546 328 865 2.00E-49 205.3 6596 cellular

organisms;Eukaryota;Opisthokonta;Metazoa;Eumetazoa;Bilateria;Protostomia;Spiralia;Lophotrochozoa;Mollusca;Bivalvia;Autobranchia;Heteroconchia;Euherodonta;Imparidentia;Venerida;Veneroidea;Veneridae;Mercenaria;Mercenaria mercenaria

UdeM00000033341 6596 127.9 UdeM00000033341 XP\_045177648.1 47.4 135  
64 2 25 152 24 158 1.20E-26 127.9 6596 cellular

organisms;Eukaryota;Opisthokonta;Metazoa;Eumetazoa;Bilateria;Protostomia;Spiralia;Lophotrochozoa;Mollusca;Bivalvia;Autobranchia;Heteroconchia;Euherodonta;Imparidentia;Venerida;Veneroidea;Veneridae;Mercenaria;Mercenaria mercenaria

UdeM00000033343 6526 108.2 UdeM00000033343 XP\_013089974.1 28.9 308  
196 8 98 394 69 364 2.80E-20 108.2 6526 cellular

organisms;Eukaryota;Opisthokonta;Metazoa;Eumetazoa;Bilateria;Protostomia;Spiralia;Lophotrochozoa;Mollusca;Gastropoda;Heterobranchia;Euthyneura;Pan

pulmonata;Hygrophila;Lymnaeidae;Planorbidae;Biomphalaria;Biomphalaria glabrata

|                 |      |       |                 |                |       |          |
|-----------------|------|-------|-----------------|----------------|-------|----------|
| UdeM00000033344 | 6526 | 109.8 | UdeM00000033344 | XP_013089974.1 | 28.9  | 311      |
| 198             | 8    | 98    | 397             | 69             | 367   | 9.10E-21 |
|                 |      |       |                 |                | 109.8 | 6526     |

cellular organisms;Eukaryota;Opisthokonta;Metazoa;Eumetazoa;Bilateria;Protostomia;Spiralia;Lophotrochozoa;Mollusca;Gastropoda;Heterobranchia;Euthyneura;Pan pulmonata;Hygrophila;Lymnaeidae;Planorbidae;Biomphalaria;Biomphalaria glabrata

|                 |      |       |                 |                |       |          |
|-----------------|------|-------|-----------------|----------------|-------|----------|
| UdeM00000033345 | 6596 | 172.2 | UdeM00000033345 | XP_045182203.1 | 54.2  | 144      |
| 66              | 0    | 33    | 176             | 504            | 647   | 8.00E-40 |
|                 |      |       |                 |                | 172.2 | 6596     |

cellular organisms;Eukaryota;Opisthokonta;Metazoa;Eumetazoa;Bilateria;Protostomia;Spiralia;Lophotrochozoa;Mollusca;Bivalvia;Autobranchia;Heteroconchia;Euherodonta;Imparidentia;Venerida;Veneroidea;Veneridae;Mercenaria;Mercenaria mercenaria

|                 |        |       |                 |                |          |       |
|-----------------|--------|-------|-----------------|----------------|----------|-------|
| UdeM00000033347 | 400727 | 348.6 | UdeM00000033347 | XP_025089898.1 | 36.3     |       |
| 597             | 340    | 11    | 184             | 749            | 251      | 838   |
|                 |        |       |                 |                | 2.00E-92 | 348.6 |

400727 cellular organisms;Eukaryota;Opisthokonta;Metazoa;Eumetazoa;Bilateria;Protostomia;Spiralia;Lophotrochozoa;Mollusca;Gastropoda;Caenogastropoda;Architaenioglossa;Ampullarioidea;Ampullariidae;Pomacea;Pomacea canaliculata

|                 |        |       |                 |                |          |       |
|-----------------|--------|-------|-----------------|----------------|----------|-------|
| UdeM00000033348 | 400727 | 348.6 | UdeM00000033348 | XP_025089898.1 | 36.3     |       |
| 597             | 340    | 11    | 149             | 714            | 251      | 838   |
|                 |        |       |                 |                | 1.90E-92 | 348.6 |

400727 cellular organisms;Eukaryota;Opisthokonta;Metazoa;Eumetazoa;Bilateria;Protostomia;Spiralia;Lophotrochozoa;Mollusca;Gastropoda;Caenogastropoda;Architaenioglossa;Ampullarioidea;Ampullariidae;Pomacea;Pomacea canaliculata

|                 |       |       |                 |                |       |           |
|-----------------|-------|-------|-----------------|----------------|-------|-----------|
| UdeM00000033349 | 29159 | 390.6 | UdeM00000033349 | XP_011414121.1 | 45.5  | 420       |
| 220             | 3     | 11    | 429             | 5              | 416   | 2.60E-105 |
|                 |       |       |                 |                | 390.6 | 29159     |

cellular organisms;Eukaryota;Opisthokonta;Metazoa;Eumetazoa;Bilateria;Protostomia;Spiralia;Lophotrochozoa;Mollusca;Bivalvia;Autobranchia;Pteriomorphia;Ostreida;Ostreidae;Crassostrea;Crassostrea gigas

|                 |      |       |                 |                |       |           |
|-----------------|------|-------|-----------------|----------------|-------|-----------|
| UdeM00000033350 | 6579 | 396.4 | UdeM00000033350 | XP_033738649.1 | 45.7  | 431       |
| 225             | 4    | 12    | 438             | 5              | 430   | 4.90E-107 |
|                 |      |       |                 |                | 396.4 | 6579      |

cellular organisms;Eukaryota;Opisthokonta;Metazoa;Eumetazoa;Bilateria;Protostomia;Spiralia;Lophotrochozoa;Mollusca;Bivalvia;Autobranchia;Pteriomorphia;Pectinida;Pectinoidea;Pectinidae;Pecten;Pecten maximus

|                 |        |       |                 |                |          |       |
|-----------------|--------|-------|-----------------|----------------|----------|-------|
| UdeM00000033351 | 218467 | 153.3 | UdeM00000033351 | XP_023213948.1 | 46.4     |       |
| 179             | 95     | 1     | 4               | 182            | 1458     | 1635  |
|                 |        |       |                 |                | 3.30E-34 | 153.3 |

218467 cellular organisms;Eukaryota;Opisthokonta;Metazoa;Eumetazoa;Bilateria;Protostomia;Ecdysozoa;Panarthropoda;Arthropoda;Chelicerata;Arachnida;Scorpiones;Buthida;Buthoidea;Buthidae;Centruroides;Centruroides sculpturatus

|                 |       |      |                 |                |      |          |
|-----------------|-------|------|-----------------|----------------|------|----------|
| UdeM00000033352 | 50429 | 70.1 | UdeM00000033352 | XP_022804186.1 | 43.1 | 72       |
| 41              | 0     | 1    | 72              | 430            | 501  | 2.30E-09 |
|                 |       |      |                 |                | 70.1 | 50429    |

cellular organisms;Eukaryota;Opisthokonta;Metazoa;Eumetazoa;Cnidaria;Anthozoa;Hexacorallia;Scleractinia;Astrocoeniina;Pocilloporidae;Stylophora;Stylophora pistillata

|                 |      |      |                 |                |      |          |
|-----------------|------|------|-----------------|----------------|------|----------|
| UdeM00000033354 | 6565 | 63.2 | UdeM00000033354 | XP_022294688.1 | 46   | 63       |
| 33              | 1    | 51   | 112             | 43             | 105  | 3.20E-07 |
|                 |      |      |                 |                | 63.2 | 6565     |

cellular organisms;Eukaryota;Opisthokonta;Metazoa;Eumetazoa;Bilateria;Protostomia;Spiralia;Lophotrochozoa;Mollusca;Bivalvia;Autobranchia;Pteriomorphia;Ostreida;Ostreidae;Crassostrea;Crassostrea virginica

|                 |      |      |                 |                |      |          |
|-----------------|------|------|-----------------|----------------|------|----------|
| UdeM00000033355 | 6596 | 95.9 | UdeM00000033355 | XP_045157166.1 | 46.9 | 96       |
| 50              | 1    | 22   | 117             | 31             | 125  | 3.70E-17 |
|                 |      |      |                 |                | 95.9 | 6596     |

cellular organisms;Eukaryota;Opisthokonta;Metazoa;Eumetazoa;Bilateria;Protostomia;Spiralia;Lophotrochozoa;Mollusca;Bivalvia;Autobranchia;Pteriomorphia;Ostreida;Ostreidae;Crassostrea;Crassostrea virginica



organisms;Eukaryota;Opisthokonta;Metazoa;Eumetazoa;Bilateria;Protostomia;Spiralia;Lophotrochozoa;Mollusca;Bivalvia;Autobranchia;Heteroconchia;Euherodonta;Imparidentia;Venerida;Veneroidea;Veneridae;Mercenaria;Mercenaria mercenaria

UdeM00000033357 6596 105.1 UdeM00000033357 XP\_045157166.1 50 96  
47 1 18 113 31 125 6.00E-20 105.1 6596 cellular

organisms;Eukaryota;Opisthokonta;Metazoa;Eumetazoa;Bilateria;Protostomia;Spiralia;Lophotrochozoa;Mollusca;Bivalvia;Autobranchia;Heteroconchia;Euherodonta;Imparidentia;Venerida;Veneroidea;Veneridae;Mercenaria;Mercenaria mercenaria

UdeM00000033358 6596 103.2 UdeM00000033358 XP\_045157166.1 52.1 96  
45 1 18 113 31 125 2.30E-19 103.2 6596 cellular

organisms;Eukaryota;Opisthokonta;Metazoa;Eumetazoa;Bilateria;Protostomia;Spiralia;Lophotrochozoa;Mollusca;Bivalvia;Autobranchia;Heteroconchia;Euherodonta;Imparidentia;Venerida;Veneroidea;Veneridae;Mercenaria;Mercenaria mercenaria

UdeM00000033359 6596 78.6 UdeM00000033359 XP\_045157188.1 35.2 122  
78 1 1 121 2 123 6.20E-12 78.6 6596 cellular

organisms;Eukaryota;Opisthokonta;Metazoa;Eumetazoa;Bilateria;Protostomia;Spiralia;Lophotrochozoa;Mollusca;Bivalvia;Autobranchia;Heteroconchia;Euherodonta;Imparidentia;Venerida;Veneroidea;Veneridae;Mercenaria;Mercenaria mercenaria

UdeM00000033360 6596 72.8 UdeM00000033360 XP\_045157166.1 30.2 126  
77 2 1 117 2 125 3.40E-10 72.8 6596 cellular

organisms;Eukaryota;Opisthokonta;Metazoa;Eumetazoa;Bilateria;Protostomia;Spiralia;Lophotrochozoa;Mollusca;Bivalvia;Autobranchia;Heteroconchia;Euherodonta;Imparidentia;Venerida;Veneroidea;Veneridae;Mercenaria;Mercenaria mercenaria

UdeM00000033361 6596 67 UdeM00000033361 XP\_045157166.1 41.6 77  
44 1 47 123 50 125 2.00E-08 67 6596 cellular

organisms;Eukaryota;Opisthokonta;Metazoa;Eumetazoa;Bilateria;Protostomia;Spiralia;Lophotrochozoa;Mollusca;Bivalvia;Autobranchia;Heteroconchia;Euherodonta;Imparidentia;Venerida;Veneroidea;Veneridae;Mercenaria;Mercenaria mercenaria

UdeM00000033362 6596 63.2 UdeM00000033362 XP\_045157188.1 42.9 84  
46 1 1 82 2 85 2.20E-07 63.2 6596 cellular

organisms;Eukaryota;Opisthokonta;Metazoa;Eumetazoa;Bilateria;Protostomia;Spiralia;Lophotrochozoa;Mollusca;Bivalvia;Autobranchia;Heteroconchia;Euherodonta;Imparidentia;Venerida;Veneroidea;Veneridae;Mercenaria;Mercenaria mercenaria

UdeM00000033363 7741 93.2 UdeM00000033363 XP\_019647702.1 41.5 130  
65 5 13 138 199 321 3.00E-16 93.2 7741 cellular

organisms;Eukaryota;Opisthokonta;Metazoa;Eumetazoa;Bilateria;Deuterostomia;Chordata;Cephalochordata;Leptocardii;Amphioxiformes;Branchiostomidae;Branchiostoma;Branchiostoma belcheri

UdeM00000033364 6596 75.1 UdeM00000033364 XP\_045157188.1 39.8 108  
63 1 1 106 13 120 6.20E-11 75.1 6596 cellular

organisms;Eukaryota;Opisthokonta;Metazoa;Eumetazoa;Bilateria;Protostomia;Spiralia;Lophotrochozoa;Mollusca;Bivalvia;Autobranchia;Heteroconchia;Euherodonta;Imparidentia;Venerida;Veneroidea;Veneridae;Mercenaria;Mercenaria mercenaria

UdeM00000033365 6596 77.4 UdeM00000033365 XP\_045157188.1 38.7 119  
71 1 1 117 2 120 1.40E-11 77.4 6596 cellular

organisms;Eukaryota;Opisthokonta;Metazoa;Eumetazoa;Bilateria;Protostomia;

Spiralia;Lophotrochozoa;Mollusca;Bivalvia;Autobranchia;Heteroconchia;Euherodonta;Imparidentia;Venerida;Veneroidea;Veneridae;Mercenaria;Mercenaria mercenaria

UdeM00000033366 6596 62.8 UdeM00000033366 XP\_045157187.1 37.8 82  
51 0 67 148 43 124 4.40E-07 62.8 6596 cellular

organisms;Eukaryota;Opisthokonta;Metazoa;Eumetazoa;Bilateria;Protostomia;Spiralia;Lophotrochozoa;Mollusca;Bivalvia;Autobranchia;Heteroconchia;Euherodonta;Imparidentia;Venerida;Veneroidea;Veneridae;Mercenaria;Mercenaria mercenaria

UdeM00000033367 6596 84.3 UdeM00000033367 XP\_045157166.1 42.6 122  
63 4 6 121 5 125 1.20E-13 84.3 6596 cellular

organisms;Eukaryota;Opisthokonta;Metazoa;Eumetazoa;Bilateria;Protostomia;Spiralia;Lophotrochozoa;Mollusca;Bivalvia;Autobranchia;Heteroconchia;Euherodonta;Imparidentia;Venerida;Veneroidea;Veneridae;Mercenaria;Mercenaria mercenaria

UdeM00000033368 6596 69.3 UdeM00000033368 XP\_045157189.1 43.6 78  
44 0 37 114 45 122 3.80E-09 69.3 6596 cellular

organisms;Eukaryota;Opisthokonta;Metazoa;Eumetazoa;Bilateria;Protostomia;Spiralia;Lophotrochozoa;Mollusca;Bivalvia;Autobranchia;Heteroconchia;Euherodonta;Imparidentia;Venerida;Veneroidea;Veneridae;Mercenaria;Mercenaria mercenaria

UdeM00000033369 6579 438.3 UdeM00000033369 XP\_033728856.1 79.6 270  
47 2 1 268 1 264 1.10E-119 438.3 6579 cellular

organisms;Eukaryota;Opisthokonta;Metazoa;Eumetazoa;Bilateria;Protostomia;Spiralia;Lophotrochozoa;Mollusca;Bivalvia;Autobranchia;Pteriomorphia;Pectinida;Pectinoidea;Pectinidae;Pecten;Pecten maximus

UdeM00000033370 6596 658.3 UdeM00000033370 XP\_045177717.1 53.3 732  
249 19 37 696 59 769 1.20E-185 658.3 6596 cellular

organisms;Eukaryota;Opisthokonta;Metazoa;Eumetazoa;Bilateria;Protostomia;Spiralia;Lophotrochozoa;Mollusca;Bivalvia;Autobranchia;Heteroconchia;Euherodonta;Imparidentia;Venerida;Veneroidea;Veneridae;Mercenaria;Mercenaria mercenaria

UdeM00000033371 6573 265.4 UdeM00000033371 XP\_021342561.1 57.9 233  
93 2 1 233 1 228 6.90E-68 265.4 6573 cellular

organisms;Eukaryota;Opisthokonta;Metazoa;Eumetazoa;Bilateria;Protostomia;Spiralia;Lophotrochozoa;Mollusca;Bivalvia;Autobranchia;Pteriomorphia;Pectinida;Pectinoidea;Pectinidae;Mizuhopecten;Mizuhopecten yessoensis

UdeM00000033372 6596 1523.5 UdeM00000033372 XP\_045179823.1 77.5  
1084 222 6 1 1072 1 1074 0.00E+00 1523.5 6596  
cellular

organisms;Eukaryota;Opisthokonta;Metazoa;Eumetazoa;Bilateria;Protostomia;Spiralia;Lophotrochozoa;Mollusca;Bivalvia;Autobranchia;Heteroconchia;Euherodonta;Imparidentia;Venerida;Veneroidea;Veneridae;Mercenaria;Mercenaria mercenaria

UdeM00000033373 29159 612.8 UdeM00000033373 XP\_011430931.2 61.9 438  
162 2 1 436 9 443 3.30E-172 612.8 29159 cellular

organisms;Eukaryota;Opisthokonta;Metazoa;Eumetazoa;Bilateria;Protostomia;Spiralia;Lophotrochozoa;Mollusca;Bivalvia;Autobranchia;Pteriomorphia;Ostreida;Ostreoidea;Ostreidae;Crassostrea;Crassostrea gigas

UdeM00000033374 6596 211.8 UdeM00000033374 XP\_045206316.1 50 212  
105 1 32 242 84 295 1.20E-51 211.8 6596 cellular

organisms;Eukaryota;Opisthokonta;Metazoa;Eumetazoa;Bilateria;Protostomia;Spiralia;Lophotrochozoa;Mollusca;Bivalvia;Autobranchia;Heteroconchia;Euherodonta

terodonta;Imparidentia;Venerida;Veneroidea;Veneridae;Mercenaria;Mercenaria mercenaria

UdeM00000033376 37621 93.6 UdeM00000033376 XP\_014663462.1 52.5 80  
37 1 5 84 45 123 1.70E-16 93.6 37621 cellular

organisms;Eukaryota;Opisthokonta;Metazoa;Eumetazoa;Bilateria;Protostomia;Ecdysozoa;Scalidophora;Priapulida;Priapulimorpha;Priapulimorphida;Priapulidae;Priapulus;Priapulus caudatus

UdeM00000033377 6412 533.9 UdeM00000033377 XP\_009012507.1 66 359  
121 1 2 360 4 361 1.60E-148 533.9 6412 cellular

organisms;Eukaryota;Opisthokonta;Metazoa;Eumetazoa;Bilateria;Protostomia;Spiralia;Lophotrochozoa;Annelida;Clitellata;Hirudinea;Rhynchobdellida;Glossiphoniidae;Helobdella;Helobdella robusta

UdeM00000033378 6412 486.5 UdeM00000033378 XP\_009012507.1 65.7 332  
113 1 1 332 31 361 2.70E-134 486.5 6412 cellular

organisms;Eukaryota;Opisthokonta;Metazoa;Eumetazoa;Bilateria;Protostomia;Spiralia;Lophotrochozoa;Annelida;Clitellata;Hirudinea;Rhynchobdellida;Glossiphoniidae;Helobdella;Helobdella robusta

UdeM00000033379 6565 283.1 UdeM00000033379 XP\_022292556.1 50.4 268  
132 1 94 361 141 407 6.00E-73 283.1 6565 cellular

organisms;Eukaryota;Opisthokonta;Metazoa;Eumetazoa;Bilateria;Protostomia;Spiralia;Lophotrochozoa;Mollusca;Bivalvia;Autobranchia;Pteriormorpha;Ostreida;Ostreoidea;Ostreidae;Crassostrea;Crassostrea virginica

UdeM00000033380 6565 203.8 UdeM00000033380 XP\_022336169.1 35.9 337  
182 8 2 324 154 470 3.50E-49 203.8 6565 cellular

organisms;Eukaryota;Opisthokonta;Metazoa;Eumetazoa;Bilateria;Protostomia;Spiralia;Lophotrochozoa;Mollusca;Bivalvia;Autobranchia;Pteriormorpha;Ostreida;Ostreoidea;Ostreidae;Crassostrea;Crassostrea virginica

UdeM00000033381 37621 81.6 UdeM00000033381 XP\_014670827.1 45.1 102  
52 2 7 107 120 218 6.60E-13 81.6 37621 cellular

organisms;Eukaryota;Opisthokonta;Metazoa;Eumetazoa;Bilateria;Protostomia;Ecdysozoa;Scalidophora;Priapulida;Priapulimorpha;Priapulimorphida;Priapulidae;Priapulus;Priapulus caudatus

UdeM00000033382 37621 114.8 UdeM00000033382 XP\_014677368.1 50.9 114  
50 3 1 108 1 114 7.10E-23 114.8 37621 cellular

organisms;Eukaryota;Opisthokonta;Metazoa;Eumetazoa;Bilateria;Protostomia;Ecdysozoa;Scalidophora;Priapulida;Priapulimorpha;Priapulimorphida;Priapulidae;Priapulus;Priapulus caudatus

UdeM00000033383 10228 66.6 UdeM00000033383 XP\_002118406.1 40.7 86  
49 2 19 104 182 265 2.60E-08 66.6 10228 cellular

organisms;Eukaryota;Opisthokonta;Metazoa;Eumetazoa;Placozoa;Trichoplacidae;Trichoplax;Trichoplax adhaerens

UdeM00000033385 6573 919.1 UdeM00000033385 XP\_021341648.1 67.8 721  
199 11 21 722 26 732 3.60E-264 919.1 6573 cellular

organisms;Eukaryota;Opisthokonta;Metazoa;Eumetazoa;Bilateria;Protostomia;Spiralia;Lophotrochozoa;Mollusca;Bivalvia;Autobranchia;Pteriormorpha;Pectinida;Pectinoidea;Pectinidae;Mizuhopecten;Mizuhopecten yessoensis

UdeM00000033386 1735272 343.6 UdeM00000033386 XP\_041356281.1 58.1  
322 122 7 13 331 18 329 3.00E-91 343.6 1735272

cellular organisms;Eukaryota;Opisthokonta;Metazoa;Eumetazoa;Bilateria;Protostomia;Spiralia;Lophotrochozoa;Mollusca;Gastropoda;Neomphalina;Neomphaloidea;Peltospiridae;Gigantopelta;Gigantopelta aegis

UdeM00000033389 7668 448.7 UdeM00000033389 XP\_003729577.2 41 608  
295 12 85 638 319 916 1.20E-122 448.7 7668 cellular

organisms;Eukaryota;Opisthokonta;Metazoa;Eumetazoa;Bilateria;Deuterostomi  
a;Echinodermata;Eleutherozoa;Echinozoa;Echinoidea;Euechinoidea;Echinacea;  
Camarodonta;Echinidea;Strongylocentrotidae;Strongylocentrotus;Strongyloce  
ntrotus purpuratus

UdeM00000033391 7668 59.7 UdeM00000033391 XP\_011673985.1 56.7 60  
24 2 49 106 642 701 5.20E-06 59.7 7668 cellular

organisms;Eukaryota;Opisthokonta;Metazoa;Eumetazoa;Bilateria;Deuterostomi  
a;Echinodermata;Eleutherozoa;Echinozoa;Echinoidea;Euechinoidea;Echinacea;  
Camarodonta;Echinidea;Strongylocentrotidae;Strongylocentrotus;Strongyloce  
ntrotus purpuratus

UdeM00000033392 6565 161 UdeM00000033392 XP\_022297037.1 66.7 114  
38 0 5 118 125 238 9.60E-37 161 6565 cellular

organisms;Eukaryota;Opisthokonta;Metazoa;Eumetazoa;Bilateria;Protostomia;  
Spiralia;Lophotrochozoa;Mollusca;Bivalvia;Autobranchia;Pteriormorphia;Ostr  
eida;Ostreoidea;Ostreidae;Crassostrea;Crassostrea virginica

UdeM00000033394 6596 455.3 UdeM00000033394 XP\_045177776.1 36.5 823  
449 15 288 1068 398 1188 2.20E-124 455.3 6596 cellular

organisms;Eukaryota;Opisthokonta;Metazoa;Eumetazoa;Bilateria;Protostomia;  
Spiralia;Lophotrochozoa;Mollusca;Bivalvia;Autobranchia;Heteroconchia;Euhe  
terodonta;Imparidentia;Venerida;Veneroidea;Veneridae;Mercenaria;Mercenari  
a mercenaria

UdeM00000033395 8030 59.3 UdeM00000033395 XP\_014027910.1 43.1 58  
33 0 45 102 1131 1188 3.70E-06 59.3 8030 cellular

organisms;Eukaryota;Opisthokonta;Metazoa;Eumetazoa;Bilateria;Deuterostomi  
a;Chordata;Craniata;Vertebrata;Gnathostomata;Teleostomi;Euteleostomi;Acti  
nopterygii;Actinopteri;Neopterygii;Teleostei;Osteoglossocephalai;Clupeoce  
phala;Euteleosteomorpha;Protacanthopterygii;Salmoniformes;Salmonidae;Salm  
oninae;Salmo;Salmo salar

UdeM00000033396 6596 348.2 UdeM00000033396 XP\_045177822.1 73.1 238  
61 2 1 237 1 236 8.20E-93 348.2 6596 cellular

organisms;Eukaryota;Opisthokonta;Metazoa;Eumetazoa;Bilateria;Protostomia;  
Spiralia;Lophotrochozoa;Mollusca;Bivalvia;Autobranchia;Heteroconchia;Euhe  
terodonta;Imparidentia;Venerida;Veneroidea;Veneridae;Mercenaria;Mercenari  
a mercenaria

UdeM00000033397 6596 217.2 UdeM00000033397 XP\_045216638.1 40.4 230  
136 1 37 265 126 355 2.60E-53 217.2 6596 cellular

organisms;Eukaryota;Opisthokonta;Metazoa;Eumetazoa;Bilateria;Protostomia;  
Spiralia;Lophotrochozoa;Mollusca;Bivalvia;Autobranchia;Heteroconchia;Euhe  
terodonta;Imparidentia;Venerida;Veneroidea;Veneridae;Mercenaria;Mercenari  
a mercenaria

UdeM00000033398 6596 473.4 UdeM00000033398 XP\_045190222.1 74.4 273  
70 0 12 284 11 283 2.00E-130 473.4 6596 cellular

organisms;Eukaryota;Opisthokonta;Metazoa;Eumetazoa;Bilateria;Protostomia;  
Spiralia;Lophotrochozoa;Mollusca;Bivalvia;Autobranchia;Heteroconchia;Euhe  
terodonta;Imparidentia;Venerida;Veneroidea;Veneridae;Mercenaria;Mercenari  
a mercenaria

UdeM00000033399 2607531 116.3 UdeM00000033399 XP\_029633614.1 52.5  
99 46 1 1 98 1 99 4.80E-23 116.3 2607531  
cellular

organisms;Eukaryota;Opisthokonta;Metazoa;Eumetazoa;Bilateria;Protostomia;  
Spiralia;Lophotrochozoa;Mollusca;Cephalopoda;Coleoidea;Octopodiformes;Oct  
opoda;Incirrata;Octopodidae;Octopus;Octopus sinensis

UdeM00000033400 6596 282.3 UdeM00000033400 XP\_045199387.1 29.2 713  
460 13 5 693 4 695 1.60E-72 282.3 6596 cellular

organisms;Eukaryota;Opisthokonta;Metazoa;Eumetazoa;Bilateria;Protostomia;Spiralia;Lophotrochozoa;Mollusca;Bivalvia;Autobranchia;Heteroconchia;Euheterodonta;Imparidentia;Venerida;Veneroidea;Veneridae;Mercenaria;Mercenaria mercenaria

UdeM00000033401 6596 139 UdeM00000033401 XP\_045176094.1 47.9 140  
72 1 4 143 81 219 5.00E-30 139 6596 cellular

organisms;Eukaryota;Opisthokonta;Metazoa;Eumetazoa;Bilateria;Protostomia;Spiralia;Lophotrochozoa;Mollusca;Bivalvia;Autobranchia;Heteroconchia;Euheterodonta;Imparidentia;Venerida;Veneroidea;Veneridae;Mercenaria;Mercenaria mercenaria

UdeM00000033403 150288 332.4 UdeM00000033403 XP\_020788097.1 64.8  
219 75 1 2 220 355 571 4.40E-88 332.4 150288  
cellular

organisms;Eukaryota;Opisthokonta;Metazoa;Eumetazoa;Bilateria;Deuterostomia;Chordata;Craniata;Vertebrata;Gnathostomata;Teleostomi;Euteleostomi;Actinopterygii;Actinopteri;Neopterygii;Teleostei;Osteoglossocephalai;Clupeocephala;Euteleostei;Neoteleostei;Eurypterygia;Ctenosquamata;Acanthomorpha;Euacanthomorpha;Percomorphaceae;Gobiaria;Gobiiformes;Gobioidei;Gobiidae;Oxudercinae;Boleophthalmus;Boleophthalmus pectinirostris

UdeM00000033405 6565 59.7 UdeM00000033405 XP\_022301639.1 43.2 81  
44 1 12 92 115 193 3.10E-06 59.7 6565 cellular

organisms;Eukaryota;Opisthokonta;Metazoa;Eumetazoa;Bilateria;Protostomia;Spiralia;Lophotrochozoa;Mollusca;Bivalvia;Autobranchia;Pteriormorphia;Ostreida;Ostreoidea;Ostreidae;Crassostrea;Crassostrea virginica

UdeM00000033406 6579 93.6 UdeM00000033406 XP\_033744347.1 35.1 171  
100 4 3 166 111 277 3.00E-16 93.6 6579 cellular

organisms;Eukaryota;Opisthokonta;Metazoa;Eumetazoa;Bilateria;Protostomia;Spiralia;Lophotrochozoa;Mollusca;Bivalvia;Autobranchia;Pteriormorphia;Pectinida;Pectinoidea;Pectinidae;Pecten;Pecten maximus

UdeM00000033407 29159 73.2 UdeM00000033407 XP\_019926412.2 51.3 78  
35 1 1 75 1 78 3.80E-10 73.2 29159 cellular

organisms;Eukaryota;Opisthokonta;Metazoa;Eumetazoa;Bilateria;Protostomia;Spiralia;Lophotrochozoa;Mollusca;Bivalvia;Autobranchia;Pteriormorphia;Ostreida;Ostreoidea;Ostreidae;Crassostrea;Crassostrea gigas

UdeM00000033407 29159 59.7 UdeM00000033407 XP\_019926412.2 36.1 72  
45 1 87 158 415 485 4.40E-06 59.7 29159 cellular

organisms;Eukaryota;Opisthokonta;Metazoa;Eumetazoa;Bilateria;Protostomia;Spiralia;Lophotrochozoa;Mollusca;Bivalvia;Autobranchia;Pteriormorphia;Ostreida;Ostreoidea;Ostreidae;Crassostrea;Crassostrea gigas

UdeM00000033408 6565 67 UdeM00000033408 XP\_022304481.1 33.1 118  
77 2 35 151 584 700 3.00E-08 67 6565 cellular

organisms;Eukaryota;Opisthokonta;Metazoa;Eumetazoa;Bilateria;Protostomia;Spiralia;Lophotrochozoa;Mollusca;Bivalvia;Autobranchia;Pteriormorphia;Ostreida;Ostreoidea;Ostreidae;Crassostrea;Crassostrea virginica

UdeM00000033410 7054 92 UdeM00000033410 XP\_031334632.1 54.4 90  
38 2 2 89 33 121 5.00E-16 92 7054 cellular

organisms;Eukaryota;Opisthokonta;Metazoa;Eumetazoa;Bilateria;Protostomia;Ecdysozoa;Panarthropoda;Arthropoda;Mandibulata;Pancrustacea;Hexapoda;Insecta;Dicondylia;Pterygota;Neoptera;Endopterygota;Coleoptera;Polyphaga;Elateriformia;Elateroidea;Lampyridae;Lampyrinae;Photinus;Photinus pyralis

UdeM00000033411 7962 109.4 UdeM00000033411 XP\_042620674.1 41.6 154  
86 4 1 153 1 151 1.10E-20 109.4 7962 cellular

organisms;Eukaryota;Opisthokonta;Metazoa;Eumetazoa;Bilateria;Deuterostomia;Chordata;Craniata;Vertebrata;Gnathostomata;Teleostomi;Euteleostomi;Acti

nopterygii;Actinopteri;Neopterygii;Teleostei;Osteoglossocephalai;Clupeocephala;Otomorpha;Ostariophysii;Otophysi;Cypriniphysae;Cypriniformes;Cyprinoidae;Cyprinidae;Cyprininae;Cyprinus;Cyprinus carpio

UdeM00000033412 34773 583.9 UdeM00000033412 XP\_041926911.1 47.7 648  
305 8 1 637 1 625 3.20E-163 583.9 34773 cellular

organisms;Eukaryota;Opisthokonta;Metazoa;Eumetazoa;Bilateria;Deuterostomia;Chordata;Craniata;Vertebrata;Gnathostomata;Teleostomi;Euteleostomi;Actinopterygii;Actinopteri;Neopterygii;Teleostei;Osteoglossocephalai;Clupeocephala;Otomorpha;Clupeii;Clupeiformes;Clupeoidei;Clupeidae;Alosinae;Alosa;Alosa sapidissima

UdeM00000033413 46514 117.5 UdeM00000033413 XP\_038073135.1 41.9 148  
79 2 1 148 393 533 1.50E-23 117.5 46514 cellular

organisms;Eukaryota;Opisthokonta;Metazoa;Eumetazoa;Bilateria;Deuterostomia;Echinodermata;Eleutherozoa;Asterozoa;Asterozoa;Asterozoa;Asterozoa;Asterozoa;Valvatataceae;Valvatataceae;Valvatataceae;Valvatataceae;Valvatataceae;Valvatataceae;Valvatataceae;Valvatataceae;Valvatataceae;Valvatataceae;Patiria;Patiria miniata

UdeM00000033414 50390 359.4 UdeM00000033414 XP\_028147518.1 55.6 257  
113 1 1 256 74 330 3.90E-96 359.4 50390 cellular

organisms;Eukaryota;Opisthokonta;Metazoa;Eumetazoa;Bilateria;Protostomia;Ecdysozoa;Panarthropoda;Arthropoda;Mandibulata;Pancrustacea;Hexapoda;Insecta;Dicondylia;Pterygota;Neoptera;Endopterygota;Coleoptera;Polyphaga;Cucujiformia;Chrysomeloidea;Chrysomelidae;Galerucinae;Luperini;Diabroticina;Diabroticites;Diabrotica;Diabrotica virgifera;Diabrotica virgifera virgifera

UdeM00000033415 50390 498 UdeM00000033415 XP\_028142380.1 57.4 345  
147 0 1 345 33 377 9.30E-138 498 50390 cellular

organisms;Eukaryota;Opisthokonta;Metazoa;Eumetazoa;Bilateria;Protostomia;Ecdysozoa;Panarthropoda;Arthropoda;Mandibulata;Pancrustacea;Hexapoda;Insecta;Dicondylia;Pterygota;Neoptera;Endopterygota;Coleoptera;Polyphaga;Cucujiformia;Chrysomeloidea;Chrysomelidae;Galerucinae;Luperini;Diabroticina;Diabroticites;Diabrotica;Diabrotica virgifera;Diabrotica virgifera virgifera

UdeM00000033416 150288 357.5 UdeM00000033416 XP\_020788097.1 61.9  
244 93 0 1 244 311 554 1.40E-95 357.5 150288  
cellular

organisms;Eukaryota;Opisthokonta;Metazoa;Eumetazoa;Bilateria;Deuterostomia;Chordata;Craniata;Vertebrata;Gnathostomata;Teleostomi;Euteleostomi;Actinopterygii;Actinopteri;Neopterygii;Teleostei;Osteoglossocephalai;Clupeocephala;Euteleosteomorpha;Neoteleostei;Eurypterygia;Ctenosquamata;Acanthomorphata;Euacanthomorphacea;Percomorphaceae;Gobiaria;Gobiiformes;Gobioidei;Gobiidae;Oxudercinae;Boleophthalmus;Boleophthalmus pectinirostris

UdeM00000033417 150288 637.5 UdeM00000033417 XP\_020788097.1 58.4  
483 176 1 1 458 87 569 1.30E-179 637.5 150288  
cellular

organisms;Eukaryota;Opisthokonta;Metazoa;Eumetazoa;Bilateria;Deuterostomia;Chordata;Craniata;Vertebrata;Gnathostomata;Teleostomi;Euteleostomi;Actinopterygii;Actinopteri;Neopterygii;Teleostei;Osteoglossocephalai;Clupeocephala;Euteleosteomorpha;Neoteleostei;Eurypterygia;Ctenosquamata;Acanthomorphata;Euacanthomorphacea;Percomorphaceae;Gobiaria;Gobiiformes;Gobioidei;Gobiidae;Oxudercinae;Boleophthalmus;Boleophthalmus pectinirostris

UdeM00000033419 50390 513.8 UdeM00000033419 XP\_028142380.1 58.4 363  
149 2 1 362 44 405 1.70E-142 513.8 50390 cellular

organisms;Eukaryota;Opisthokonta;Metazoa;Eumetazoa;Bilateria;Protostomia;Ecdysozoa;Panarthropoda;Arthropoda;Mandibulata;Pancrustacea;Hexapoda;Insecta;Dicondylia;Pterygota;Neoptera;Endopterygota;Coleoptera;Polyphaga;Cucujiformia

jiiformia;Chrysmeloidea;Chrysmelidae;Galerucinae;Luperini;Diabroticina;Diabroticites;Diabrotica;Diabrotica virgifera;Diabrotica virgifera virgifera

UdeM00000033418 50390 468 UdeM00000033418 XP\_028142380.1 54.8 367  
154 4 69 424 40 405 1.30E-128 468 50390 cellular

organisms;Eukaryota;Opisthokonta;Metazoa;Eumetazoa;Bilateria;Protostomia;Ecdysozoa;Panarthropoda;Arthropoda;Mandibulata;Pancrustacea;Hexapoda;Insecta;Dicondylia;Pterygota;Neoptera;Endopterygota;Coleoptera;Polyphaga;Cucujiformia;Chrysmeloidea;Chrysmelidae;Galerucinae;Luperini;Diabroticina;Diabroticites;Diabrotica;Diabrotica virgifera;Diabrotica virgifera virgifera

UdeM00000033421 50390 419.9 UdeM00000033421 XP\_028142380.1 58.2 294  
122 1 1 294 44 336 2.80E-114 419.9 50390 cellular

organisms;Eukaryota;Opisthokonta;Metazoa;Eumetazoa;Bilateria;Protostomia;Ecdysozoa;Panarthropoda;Arthropoda;Mandibulata;Pancrustacea;Hexapoda;Insecta;Dicondylia;Pterygota;Neoptera;Endopterygota;Coleoptera;Polyphaga;Cucujiformia;Chrysmeloidea;Chrysmelidae;Galerucinae;Luperini;Diabroticina;Diabroticites;Diabrotica;Diabrotica virgifera;Diabrotica virgifera virgifera

UdeM00000033422 50390 364.8 UdeM00000033422 XP\_028142380.1 58.6 251  
103 1 1 251 87 336 9.10E-98 364.8 50390 cellular

organisms;Eukaryota;Opisthokonta;Metazoa;Eumetazoa;Bilateria;Protostomia;Ecdysozoa;Panarthropoda;Arthropoda;Mandibulata;Pancrustacea;Hexapoda;Insecta;Dicondylia;Pterygota;Neoptera;Endopterygota;Coleoptera;Polyphaga;Cucujiformia;Chrysmeloidea;Chrysmelidae;Galerucinae;Luperini;Diabroticina;Diabroticites;Diabrotica;Diabrotica virgifera;Diabrotica virgifera virgifera

UdeM00000033423 50390 690.3 UdeM00000033423 XP\_028154228.1 56.8 505  
218 0 3 507 89 593 1.90E-195 690.3 50390 cellular

organisms;Eukaryota;Opisthokonta;Metazoa;Eumetazoa;Bilateria;Protostomia;Ecdysozoa;Panarthropoda;Arthropoda;Mandibulata;Pancrustacea;Hexapoda;Insecta;Dicondylia;Pterygota;Neoptera;Endopterygota;Coleoptera;Polyphaga;Cucujiformia;Chrysmeloidea;Chrysmelidae;Galerucinae;Luperini;Diabroticina;Diabroticites;Diabrotica;Diabrotica virgifera;Diabrotica virgifera virgifera

UdeM00000033424 6596 101.7 UdeM00000033424 XP\_045171063.1 35.3 170  
94 2 1 166 178 335 1.10E-18 101.7 6596 cellular

organisms;Eukaryota;Opisthokonta;Metazoa;Eumetazoa;Bilateria;Protostomia;Spiralia;Lophotrochozoa;Mollusca;Bivalvia;Autobranchia;Heteroconchia;Euheterodonta;Imparidentia;Venerida;Veneroidea;Veneridae;Mercenaria;Mercenaria mercenaria

UdeM00000033425 7668 74.3 UdeM00000033425 XP\_030841875.1 50 64  
31 1 3 66 71 133 1.30E-10 74.3 7668 cellular

organisms;Eukaryota;Opisthokonta;Metazoa;Eumetazoa;Bilateria;Deuterostomia;Echinodermata;Eleutherozoa;Echinozoa;Echinoidea;Euechinoidea;Echinacea;Camarodonta;Echinidea;Strongylocentrotidae;Strongylocentrotus;Strongylocentrotus purpuratus

UdeM00000033426 150288 338.2 UdeM00000033426 XP\_020788097.1 58.8  
240 99 0 5 244 330 569 8.80E-90 338.2 150288

cellular

organisms;Eukaryota;Opisthokonta;Metazoa;Eumetazoa;Bilateria;Deuterostomia;Chordata;Craniata;Vertebrata;Gnathostomata;Teleostomi;Euteleostomi;Actinopterygii;Actinopteri;Neopterygii;Teleostei;Osteoglossocephalai;Clupeocephala;Euteleostei;Neoteleostei;Eurypterygia;Ctenosquamata;Acanthomo

rphata;Euacanthomorpha;Percomorphaceae;Gobiaria;Gobiiformes;Gobioidei;Gobiidae;Oxudercinae;Boleophthalmus;Boleophthalmus pectinirostris  
UdeM00000033427 150288 127.1 UdeM00000033427 XP\_020788097.1 73.3  
75 19 1 2 76 411 484 9.60E-27 127.1 150288  
cellular

organisms;Eukaryota;Opisthokonta;Metazoa;Eumetazoa;Bilateria;Deuterostomi  
a;Chordata;Craniata;Vertebrata;Gnathostomata;Teleostomi;Euteleostomi;Acti  
nopterygii;Actinopteri;Neopterygii;Teleostei;Osteoglossocephalai;Clupeoce  
phala;Euteleosteomorpha;Neoteleostei;Eurypterygia;Ctenosquamata;Acanthomo  
rphata;Euacanthomorpha;Percomorphaceae;Gobiaria;Gobiiformes;Gobioidei;  
Gobiidae;Oxudercinae;Boleophthalmus;Boleophthalmus pectinirostris  
UdeM00000033428 6596 86.7 UdeM00000033428 XP\_045171063.1 36.7 139  
72 2 1 135 209 335 3.00E-14 86.7 6596 cellular

organisms;Eukaryota;Opisthokonta;Metazoa;Eumetazoa;Bilateria;Protostomia;  
Spiralia;Lophotrochozoa;Mollusca;Bivalvia;Autobranchia;Heteroconchia;Euhe  
terodonta;Imparidentia;Venerida;Veneroidea;Veneridae;Mercenaria;Mercenari  
a mercenaria

UdeM00000033429 150288 226.5 UdeM00000033429 XP\_020788097.1 62.3  
154 50 1 1 146 393 546 2.20E-56 226.5 150288  
cellular

organisms;Eukaryota;Opisthokonta;Metazoa;Eumetazoa;Bilateria;Deuterostomi  
a;Chordata;Craniata;Vertebrata;Gnathostomata;Teleostomi;Euteleostomi;Acti  
nopterygii;Actinopteri;Neopterygii;Teleostei;Osteoglossocephalai;Clupeoce  
phala;Euteleosteomorpha;Neoteleostei;Eurypterygia;Ctenosquamata;Acanthomo  
rphata;Euacanthomorpha;Percomorphaceae;Gobiaria;Gobiiformes;Gobioidei;  
Gobiidae;Oxudercinae;Boleophthalmus;Boleophthalmus pectinirostris

UdeM00000033430 150288 145.6 UdeM00000033430 XP\_020788097.1 66.3  
89 29 1 2 89 423 511 3.10E-32 145.6 150288  
cellular

organisms;Eukaryota;Opisthokonta;Metazoa;Eumetazoa;Bilateria;Deuterostomi  
a;Chordata;Craniata;Vertebrata;Gnathostomata;Teleostomi;Euteleostomi;Acti  
nopterygii;Actinopteri;Neopterygii;Teleostei;Osteoglossocephalai;Clupeoce  
phala;Euteleosteomorpha;Neoteleostei;Eurypterygia;Ctenosquamata;Acanthomo  
rphata;Euacanthomorpha;Percomorphaceae;Gobiaria;Gobiiformes;Gobioidei;  
Gobiidae;Oxudercinae;Boleophthalmus;Boleophthalmus pectinirostris

UdeM00000033431 150288 163.3 UdeM00000033431 XP\_020788097.1 63.3  
120 34 1 1 110 421 540 1.80E-37 163.3 150288  
cellular

organisms;Eukaryota;Opisthokonta;Metazoa;Eumetazoa;Bilateria;Deuterostomi  
a;Chordata;Craniata;Vertebrata;Gnathostomata;Teleostomi;Euteleostomi;Acti  
nopterygii;Actinopteri;Neopterygii;Teleostei;Osteoglossocephalai;Clupeoce  
phala;Euteleosteomorpha;Neoteleostei;Eurypterygia;Ctenosquamata;Acanthomo  
rphata;Euacanthomorpha;Percomorphaceae;Gobiaria;Gobiiformes;Gobioidei;  
Gobiidae;Oxudercinae;Boleophthalmus;Boleophthalmus pectinirostris

UdeM00000033432 6596 57.8 UdeM00000033432 XP\_045171063.1 40.8 71  
42 0 1 71 178 248 6.70E-06 57.8 6596 cellular

organisms;Eukaryota;Opisthokonta;Metazoa;Eumetazoa;Bilateria;Protostomia;  
Spiralia;Lophotrochozoa;Mollusca;Bivalvia;Autobranchia;Heteroconchia;Euhe  
terodonta;Imparidentia;Venerida;Veneroidea;Veneridae;Mercenaria;Mercenari  
a mercenaria

UdeM00000033433 6596 75.5 UdeM00000033433 XP\_045171063.1 49.3 73  
37 0 23 95 86 158 4.20E-11 75.5 6596 cellular

organisms;Eukaryota;Opisthokonta;Metazoa;Eumetazoa;Bilateria;Protostomia;  
Spiralia;Lophotrochozoa;Mollusca;Bivalvia;Autobranchia;Heteroconchia;Euhe



terodonta;Imparidentia;Venerida;Veneroidea;Veneridae;Mercenaria;Mercenaria mercenaria  
 UdeM00000033434 6596 245.7 UdeM00000033434 XP\_045160375.1 57.3 206  
 84 4 1 203 1 205 6.50E-62 245.7 6596 cellular  
 organisms;Eukaryota;Opisthokonta;Metazoa;Eumetazoa;Bilateria;Protostomia;Spiralia;Lophotrochozoa;Mollusca;Bivalvia;Autobranchia;Heteroconchia;Euheterodonta;Imparidentia;Venerida;Veneroidea;Veneridae;Mercenaria;Mercenaria mercenaria  
 UdeM00000033435 6596 106.3 UdeM00000033435 XP\_045160375.1 63.8 69  
 25 0 18 86 518 586 2.00E-20 106.3 6596 cellular  
 organisms;Eukaryota;Opisthokonta;Metazoa;Eumetazoa;Bilateria;Protostomia;Spiralia;Lophotrochozoa;Mollusca;Bivalvia;Autobranchia;Heteroconchia;Euheterodonta;Imparidentia;Venerida;Veneroidea;Veneridae;Mercenaria;Mercenaria mercenaria  
 UdeM00000033436 6596 622.1 UdeM00000033436 XP\_045160376.1 61.9 520  
 161 5 18 508 5 516 6.30E-175 622.1 6596 cellular  
 organisms;Eukaryota;Opisthokonta;Metazoa;Eumetazoa;Bilateria;Protostomia;Spiralia;Lophotrochozoa;Mollusca;Bivalvia;Autobranchia;Heteroconchia;Euheterodonta;Imparidentia;Venerida;Veneroidea;Veneridae;Mercenaria;Mercenaria mercenaria  
 UdeM00000033438 50390 723 UdeM00000033438 XP\_028154228.1 55.8 538  
 238 0 1 538 72 609 2.80E-205 723 50390 cellular  
 organisms;Eukaryota;Opisthokonta;Metazoa;Eumetazoa;Bilateria;Protostomia;Ecdysozoa;Panarthropoda;Arthropoda;Mandibulata;Pancrustacea;Hexapoda;Insecta;Dicondylia;Pterygota;Neoptera;Endopterygota;Coleoptera;Polyphaga;Cucujiformia;Chrysomeloidea;Chrysomelidae;Galerucinae;Luperini;Diabroticina;Diabroticites;Diabrotica;Diabrotica virgifera;Diabrotica virgifera virgifera  
 UdeM00000033439 50390 543.5 UdeM00000033439 XP\_028142380.1 59.2 375  
 153 0 1 375 59 433 2.10E-151 543.5 50390 cellular  
 organisms;Eukaryota;Opisthokonta;Metazoa;Eumetazoa;Bilateria;Protostomia;Ecdysozoa;Panarthropoda;Arthropoda;Mandibulata;Pancrustacea;Hexapoda;Insecta;Dicondylia;Pterygota;Neoptera;Endopterygota;Coleoptera;Polyphaga;Cucujiformia;Chrysomeloidea;Chrysomelidae;Galerucinae;Luperini;Diabroticina;Diabroticites;Diabrotica;Diabrotica virgifera;Diabrotica virgifera virgifera  
 UdeM00000033443 150288 290.4 UdeM00000033443 XP\_020788097.1 65.1  
 186 65 0 2 187 383 568 1.60E-75 290.4 150288  
 cellular  
 organisms;Eukaryota;Opisthokonta;Metazoa;Eumetazoa;Bilateria;Deuterostomia;Chordata;Craniata;Vertebrata;Gnathostomata;Teleostomi;Euteleostomi;Actinopterygii;Actinopteri;Neopterygii;Teleostei;Osteoglossocephalai;Clupeocephala;Euteleostei;Neoteleostei;Eurypterygia;Ctenosquamata;Acanthopterygii;Euacanthopterygii;Percomorphaceae;Gobiaria;Gobiiformes;Gobioidei;Gobiidae;Oxudercinae;Boleophthalmus;Boleophthalmus pectinirostris  
 UdeM00000033444 50390 484.6 UdeM00000033444 XP\_028142380.1 56.3 343  
 150 0 1 343 115 457 1.10E-133 484.6 50390 cellular  
 organisms;Eukaryota;Opisthokonta;Metazoa;Eumetazoa;Bilateria;Protostomia;Ecdysozoa;Panarthropoda;Arthropoda;Mandibulata;Pancrustacea;Hexapoda;Insecta;Dicondylia;Pterygota;Neoptera;Endopterygota;Coleoptera;Polyphaga;Cucujiformia;Chrysomeloidea;Chrysomelidae;Galerucinae;Luperini;Diabroticina;Diabroticites;Diabrotica;Diabrotica virgifera;Diabrotica virgifera virgifera

UdeM00000033445 10224 295.4 UdeM00000033445 XP\_006820181.1 45.6 342  
 181 2 2 339 92 432 1.20E-76 295.4 10224 cellular  
 organisms;Eukaryota;Opisthokonta;Metazoa;Eumetazoa;Bilateria;Deuterostomi  
 a;Hemichordata;Enteropneusta;Harrimaniidae;Saccoglossus;Saccoglossus  
 kowalevskii  
 UdeM00000033446 45264 389.8 UdeM00000033446 XP\_044165535.1 49.3 367  
 182 1 1 363 158 524 3.90E-105 389.8 45264 cellular  
 organisms;Eukaryota;Opisthokonta;Metazoa;Eumetazoa;Cnidaria;Anthozoa;Hexa  
 corallia;Scleractinia;Astrocoeniina;Acroporidae;Acropora;Acropora  
 millepora  
 UdeM00000033447 50390 379.8 UdeM00000033447 XP\_028142380.1 59.8 259  
 104 0 1 259 31 289 2.80E-102 379.8 50390 cellular  
 organisms;Eukaryota;Opisthokonta;Metazoa;Eumetazoa;Bilateria;Protostomia;  
 Ecdysozoa;Panarthropoda;Arthropoda;Mandibulata;Pancrustacea;Hexapoda;Inse  
 cta;Dicondylia;Pterygota;Neoptera;Endopterygota;Coleoptera;Polyphaga;Cucu  
 jiformia;Chrysomeloidea;Chrysomelidae;Galerucinae;Luperini;Diabroticina;D  
 iabroticites;Diabrotica;Diabrotica virgifera;Diabrotica virgifera  
 virgifera  
 UdeM00000033448 50390 567.8 UdeM00000033448 XP\_028154228.1 54.4 425  
 189 1 1 420 72 496 1.20E-158 567.8 50390 cellular  
 organisms;Eukaryota;Opisthokonta;Metazoa;Eumetazoa;Bilateria;Protostomia;  
 Ecdysozoa;Panarthropoda;Arthropoda;Mandibulata;Pancrustacea;Hexapoda;Inse  
 cta;Dicondylia;Pterygota;Neoptera;Endopterygota;Coleoptera;Polyphaga;Cucu  
 jiformia;Chrysomeloidea;Chrysomelidae;Galerucinae;Luperini;Diabroticina;D  
 iabroticites;Diabrotica;Diabrotica virgifera;Diabrotica virgifera  
 virgifera  
 UdeM00000033449 150288 308.1 UdeM00000033449 XP\_020788097.1 63.3  
 199 73 0 1 199 367 565 8.80E-81 308.1 150288  
 cellular  
 organisms;Eukaryota;Opisthokonta;Metazoa;Eumetazoa;Bilateria;Deuterostomi  
 a;Chordata;Craniata;Vertebrata;Gnathostomata;Teleostomi;Euteleostomi;Acti  
 nopterygii;Actinopteri;Neopterygii;Teleostei;Osteoglossocephalai;Clupeoce  
 phala;Euteleosteomorpha;Neoteleostei;Eurypterygia;Ctenosquamata;Acanthomo  
 rphata;Euacanthomorphacea;Percomorphaceae;Gobiaria;Gobiiformes;Gobioidei;  
 Gobiidae;Oxudercinae;Boleophthalmus;Boleophthalmus pectinirostris  
 UdeM00000033451 225164 67.4 UdeM00000033451 XP\_009062376.1 43.8  
 80 25 2 1 80 426 485 1.90E-08 67.4 225164  
 cellular  
 organisms;Eukaryota;Opisthokonta;Metazoa;Eumetazoa;Bilateria;Protostomia;  
 Spiralia;Lophotrochozoa;Mollusca;Gastropoda;Patellogastropoda;Lottioidea;  
 Lottiidae;Lottia;Lottia gigantea  
 UdeM00000033450 150288 157.5 UdeM00000033450 XP\_020788097.1 52  
 148 55 3 1 136 421 564 1.90E-35 157.5 150288  
 cellular  
 organisms;Eukaryota;Opisthokonta;Metazoa;Eumetazoa;Bilateria;Deuterostomi  
 a;Chordata;Craniata;Vertebrata;Gnathostomata;Teleostomi;Euteleostomi;Acti  
 nopterygii;Actinopteri;Neopterygii;Teleostei;Osteoglossocephalai;Clupeoce  
 phala;Euteleosteomorpha;Neoteleostei;Eurypterygia;Ctenosquamata;Acanthomo  
 rphata;Euacanthomorphacea;Percomorphaceae;Gobiaria;Gobiiformes;Gobioidei;  
 Gobiidae;Oxudercinae;Boleophthalmus;Boleophthalmus pectinirostris  
 UdeM00000033452 6565 315.5 UdeM00000033452 XP\_022321094.1 58.5 260  
 107 1 17 276 22 280 1.20E-82 315.5 6565 cellular  
 organisms;Eukaryota;Opisthokonta;Metazoa;Eumetazoa;Bilateria;Protostomia;

Spiralia;Lophotrochozoa;Mollusca;Bivalvia;Autobranchia;Pteriomorpha;Ostr  
eida;Ostreoidea;Ostreidae;Crassostrea;Crassostrea virginica  
UdeM00000033454 6596 255 UdeM00000033454 XP\_045177809.1 69.1 217  
61 3 29 244 57 268 1.00E-64 255 6596 cellular  
organisms;Eukaryota;Opisthokonta;Metazoa;Eumetazoa;Bilateria;Protostomia;  
Spiralia;Lophotrochozoa;Mollusca;Bivalvia;Autobranchia;Heteroconchia;Euhe  
terodonta;Imparidentia;Venerida;Veneroidea;Veneridae;Mercenaria;Mercenari  
a mercenaria  
UdeM00000033455 6579 2322.7 UdeM00000033455 XP\_033728509.1 86  
1302 177 4 421 1720 269 1567 0.00E+00 2322.7 6579  
cellular  
organisms;Eukaryota;Opisthokonta;Metazoa;Eumetazoa;Bilateria;Protostomia;  
Spiralia;Lophotrochozoa;Mollusca;Bivalvia;Autobranchia;Pteriomorpha;Pect  
inida;Pectinoidea;Pectinidae;Pecten;Pecten maximus  
UdeM00000033456 6573 763.8 UdeM00000033456 XP\_021368509.1 90.6 405  
38 0 1 405 1163 1567 1.10E-217 763.8 6573 cellular  
organisms;Eukaryota;Opisthokonta;Metazoa;Eumetazoa;Bilateria;Protostomia;  
Spiralia;Lophotrochozoa;Mollusca;Bivalvia;Autobranchia;Pteriomorpha;Pect  
inida;Pectinoidea;Pectinidae;Mizuhopecten;Mizuhopecten yessoensis  
UdeM00000033457 6579 213.4 UdeM00000033457 XP\_033745805.1 46.9 256  
126 5 68 314 48 302 7.00E-52 213.4 6579 cellular  
organisms;Eukaryota;Opisthokonta;Metazoa;Eumetazoa;Bilateria;Protostomia;  
Spiralia;Lophotrochozoa;Mollusca;Bivalvia;Autobranchia;Pteriomorpha;Pect  
inida;Pectinoidea;Pectinidae;Pecten;Pecten maximus  
UdeM00000033458 29159 101.3 UdeM00000033458 XP\_034330187.1 35.7 171  
93 5 341 509 10 165 3.80E-18 101.3 29159 cellular  
organisms;Eukaryota;Opisthokonta;Metazoa;Eumetazoa;Bilateria;Protostomia;  
Spiralia;Lophotrochozoa;Mollusca;Bivalvia;Autobranchia;Pteriomorpha;Ostr  
eida;Ostreoidea;Ostreidae;Crassostrea;Crassostrea gigas  
UdeM00000033460 6579 110.9 UdeM00000033460 XP\_033731337.1 35.4 158  
94 3 141 298 174 323 3.00E-21 110.9 6579 cellular  
organisms;Eukaryota;Opisthokonta;Metazoa;Eumetazoa;Bilateria;Protostomia;  
Spiralia;Lophotrochozoa;Mollusca;Bivalvia;Autobranchia;Pteriomorpha;Pect  
inida;Pectinoidea;Pectinidae;Pecten;Pecten maximus  
UdeM00000033461 6579 80.5 UdeM00000033461 XP\_033728164.1 46.5 86  
40 3 53 133 566 650 1.40E-11 80.5 6579 cellular  
organisms;Eukaryota;Opisthokonta;Metazoa;Eumetazoa;Bilateria;Protostomia;  
Spiralia;Lophotrochozoa;Mollusca;Bivalvia;Autobranchia;Pteriomorpha;Pect  
inida;Pectinoidea;Pectinidae;Pecten;Pecten maximus  
UdeM00000033462 6573 71.6 UdeM00000033462 XP\_021365807.1 45.3 75  
36 2 67 136 558 632 1.80E-09 71.6 6573 cellular  
organisms;Eukaryota;Opisthokonta;Metazoa;Eumetazoa;Bilateria;Protostomia;  
Spiralia;Lophotrochozoa;Mollusca;Bivalvia;Autobranchia;Pteriomorpha;Pect  
inida;Pectinoidea;Pectinidae;Mizuhopecten;Mizuhopecten yessoensis  
UdeM00000033464 6573 73.9 UdeM00000033464 XP\_021365807.1 49.4 77  
34 2 29 100 558 634 1.20E-09 73.9 6573 cellular  
organisms;Eukaryota;Opisthokonta;Metazoa;Eumetazoa;Bilateria;Protostomia;  
Spiralia;Lophotrochozoa;Mollusca;Bivalvia;Autobranchia;Pteriomorpha;Pect  
inida;Pectinoidea;Pectinidae;Mizuhopecten;Mizuhopecten yessoensis  
UdeM00000033465 6596 436.4 UdeM00000033465 XP\_045207516.1 31.2 996  
571 31 242 1193 49 974 1.20E-118 436.4 6596 cellular  
organisms;Eukaryota;Opisthokonta;Metazoa;Eumetazoa;Bilateria;Protostomia;  
Spiralia;Lophotrochozoa;Mollusca;Bivalvia;Autobranchia;Heteroconchia;Euhe

terodonta;Imparidentia;Venerida;Veneroidea;Veneridae;Mercenaria;Mercenari  
 a mercenaria  
 UdeM00000033466 6596 419.1 UdeM00000033466 XP\_045178031.1 50.6 453  
 122 4 54 404 1 453 6.50E-114 419.1 6596 cellular  
 organisms;Eukaryota;Opisthokonta;Metazoa;Eumetazoa;Bilateria;Protostomia;  
 Spiralia;Lophotrochozoa;Mollusca;Bivalvia;Autobranhia;Heteroconchia;Euhe  
 terodonta;Imparidentia;Venerida;Veneroidea;Veneridae;Mercenaria;Mercenari  
 a mercenaria  
 UdeM00000033467 1735272 157.1 UdeM00000033467 XP\_041376200.1 40.2  
 209 74 2 1 158 1 209 1.90E-35 157.1 1735272  
 cellular  
 organisms;Eukaryota;Opisthokonta;Metazoa;Eumetazoa;Bilateria;Protostomia;  
 Spiralia;Lophotrochozoa;Mollusca;Gastropoda;Neomphalina;Neomphaloidea;Pel  
 tospiridae;Gigantopelta;Gigantopelta aegis  
 UdeM00000033468 6596 208.8 UdeM00000033468 XP\_045178031.1 61.7 149  
 57 0 1 149 477 625 4.90E-51 208.8 6596 cellular  
 organisms;Eukaryota;Opisthokonta;Metazoa;Eumetazoa;Bilateria;Protostomia;  
 Spiralia;Lophotrochozoa;Mollusca;Bivalvia;Autobranhia;Heteroconchia;Euhe  
 terodonta;Imparidentia;Venerida;Veneroidea;Veneridae;Mercenaria;Mercenari  
 a mercenaria  
 UdeM00000033469 6596 1015.4 UdeM00000033469 XP\_045179123.1 64.2  
 877 277 18 20 868 17 884 4.40E-293 1015.4 6596  
 cellular  
 organisms;Eukaryota;Opisthokonta;Metazoa;Eumetazoa;Bilateria;Protostomia;  
 Spiralia;Lophotrochozoa;Mollusca;Bivalvia;Autobranhia;Heteroconchia;Euhe  
 terodonta;Imparidentia;Venerida;Veneroidea;Veneridae;Mercenaria;Mercenari  
 a mercenaria  
 UdeM00000033470 6596 141.4 UdeM00000033470 XP\_045174908.1 38.1 223  
 134 2 148 370 337 555 2.40E-30 141.4 6596 cellular  
 organisms;Eukaryota;Opisthokonta;Metazoa;Eumetazoa;Bilateria;Protostomia;  
 Spiralia;Lophotrochozoa;Mollusca;Bivalvia;Autobranhia;Heteroconchia;Euhe  
 terodonta;Imparidentia;Venerida;Veneroidea;Veneridae;Mercenaria;Mercenari  
 a mercenaria  
 UdeM00000033471 6596 145.6 UdeM00000033471 XP\_045174908.1 39.8 221  
 126 4 152 371 340 554 1.30E-31 145.6 6596 cellular  
 organisms;Eukaryota;Opisthokonta;Metazoa;Eumetazoa;Bilateria;Protostomia;  
 Spiralia;Lophotrochozoa;Mollusca;Bivalvia;Autobranhia;Heteroconchia;Euhe  
 terodonta;Imparidentia;Venerida;Veneroidea;Veneridae;Mercenaria;Mercenari  
 a mercenaria  
 UdeM00000033472 6596 124.4 UdeM00000033472 XP\_045174908.1 43.7 158  
 87 1 2 159 400 555 1.30E-25 124.4 6596 cellular  
 organisms;Eukaryota;Opisthokonta;Metazoa;Eumetazoa;Bilateria;Protostomia;  
 Spiralia;Lophotrochozoa;Mollusca;Bivalvia;Autobranhia;Heteroconchia;Euhe  
 terodonta;Imparidentia;Venerida;Veneroidea;Veneridae;Mercenaria;Mercenari  
 a mercenaria  
 UdeM00000033475 6596 143.7 UdeM00000033475 XP\_045174908.1 38.1 223  
 134 2 145 367 337 555 4.80E-31 143.7 6596 cellular  
 organisms;Eukaryota;Opisthokonta;Metazoa;Eumetazoa;Bilateria;Protostomia;  
 Spiralia;Lophotrochozoa;Mollusca;Bivalvia;Autobranhia;Heteroconchia;Euhe  
 terodonta;Imparidentia;Venerida;Veneroidea;Veneridae;Mercenaria;Mercenari  
 a mercenaria  
 UdeM00000033476 6596 82.8 UdeM00000033476 XP\_045180748.1 55.4 65  
 28 1 42 106 25 88 6.50E-13 82.8 6596 cellular  
 organisms;Eukaryota;Opisthokonta;Metazoa;Eumetazoa;Bilateria;Protostomia;

Spiralia;Lophotrochozoa;Mollusca;Bivalvia;Autobranhia;Heteroconchia;Euherodonta;Imparidentia;Venerida;Veneroidea;Veneridae;Mercenaria;Mercenaria mercenaria

UdeM00000033477 6596 79 UdeM00000033477 XP\_045180748.1 52.3 65  
30 1 28 92 25 88 1.20E-11 79 6596 cellular  
organisms;Eukaryota;Opisthokonta;Metazoa;Eumetazoa;Bilateria;Protostomia;Spiralia;Lophotrochozoa;Mollusca;Bivalvia;Autobranhia;Heteroconchia;Euherodonta;Imparidentia;Venerida;Veneroidea;Veneridae;Mercenaria;Mercenaria mercenaria

UdeM00000033479 6579 79.7 UdeM00000033479 XP\_033728164.1 42 88  
49 1 25 110 561 648 4.60E-12 79.7 6579 cellular  
organisms;Eukaryota;Opisthokonta;Metazoa;Eumetazoa;Bilateria;Protostomia;Spiralia;Lophotrochozoa;Mollusca;Bivalvia;Autobranhia;Pteriormorphia;Pectinida;Pectinoidea;Pectinidae;Pecten;Pecten maximus

UdeM00000033478 6579 79.3 UdeM00000033478 XP\_033728164.1 42 88  
49 1 27 112 561 648 6.10E-12 79.3 6579 cellular  
organisms;Eukaryota;Opisthokonta;Metazoa;Eumetazoa;Bilateria;Protostomia;Spiralia;Lophotrochozoa;Mollusca;Bivalvia;Autobranhia;Pteriormorphia;Pectinida;Pectinoidea;Pectinidae;Pecten;Pecten maximus

UdeM00000033481 6596 297 UdeM00000033481 XP\_045164960.1 45 400  
187 10 1 387 114 493 3.80E-77 297 6596 cellular  
organisms;Eukaryota;Opisthokonta;Metazoa;Eumetazoa;Bilateria;Protostomia;Spiralia;Lophotrochozoa;Mollusca;Bivalvia;Autobranhia;Heteroconchia;Euherodonta;Imparidentia;Venerida;Veneroidea;Veneridae;Mercenaria;Mercenaria mercenaria

UdeM00000033482 6596 294.7 UdeM00000033482 XP\_045164960.1 44.1 399  
192 9 1 387 114 493 1.90E-76 294.7 6596 cellular  
organisms;Eukaryota;Opisthokonta;Metazoa;Eumetazoa;Bilateria;Protostomia;Spiralia;Lophotrochozoa;Mollusca;Bivalvia;Autobranhia;Heteroconchia;Euherodonta;Imparidentia;Venerida;Veneroidea;Veneridae;Mercenaria;Mercenaria mercenaria

UdeM00000033483 6596 279.3 UdeM00000033483 XP\_045164960.1 43.7 389  
188 9 1 377 114 483 7.60E-72 279.3 6596 cellular  
organisms;Eukaryota;Opisthokonta;Metazoa;Eumetazoa;Bilateria;Protostomia;Spiralia;Lophotrochozoa;Mollusca;Bivalvia;Autobranhia;Heteroconchia;Euherodonta;Imparidentia;Venerida;Veneroidea;Veneridae;Mercenaria;Mercenaria mercenaria

UdeM00000033484 6596 276.9 UdeM00000033484 XP\_045178416.1 63.6 206  
73 1 1 204 283 488 2.40E-71 276.9 6596 cellular  
organisms;Eukaryota;Opisthokonta;Metazoa;Eumetazoa;Bilateria;Protostomia;Spiralia;Lophotrochozoa;Mollusca;Bivalvia;Autobranhia;Heteroconchia;Euherodonta;Imparidentia;Venerida;Veneroidea;Veneridae;Mercenaria;Mercenaria mercenaria

UdeM00000033485 7054 225.3 UdeM00000033485 XP\_031350480.1 43.6 236  
91 2 2 195 232 467 6.60E-56 225.3 7054 cellular  
organisms;Eukaryota;Opisthokonta;Metazoa;Eumetazoa;Bilateria;Protostomia;Ecdysozoa;Panarthropoda;Arthropoda;Mandibulata;Pancrustacea;Hexapoda;Insecta;Dicondylia;Pterygota;Neoptera;Endopterygota;Coleoptera;Polyphaga;Elaterriformia;Elateroidea;Lampyridae;Lampyrinae;Photinus;Photinus pyralis

UdeM00000033486 7054 214.2 UdeM00000033486 XP\_031350480.1 44.7 219  
79 2 1 177 249 467 1.40E-52 214.2 7054 cellular  
organisms;Eukaryota;Opisthokonta;Metazoa;Eumetazoa;Bilateria;Protostomia;Ecdysozoa;Panarthropoda;Arthropoda;Mandibulata;Pancrustacea;Hexapoda;Insecta

cta;Dicondylia;Pterygota;Neoptera;Endopterygota;Coleoptera;Polyphaga;Elat  
eriformia;Elateroidea;Lampyridae;Lampyrinae;Photinus;Photinus pyralis  
UdeM00000033487 29159 101.7 UdeM00000033487 XP\_034330187.1 37.7 167  
88 6 2 167 14 165 1.00E-18 101.7 29159 cellular  
organisms;Eukaryota;Opisthokonta;Metazoa;Eumetazoa;Bilateria;Protostomia;  
Spiralia;Lophotrochozoa;Mollusca;Bivalvia;Autobranchia;Pteriomorpha;Ostr  
eida;Ostreoidea;Ostreidae;Crassostrea;Crassostrea gigas  
UdeM00000033489 6596 290.4 UdeM00000033489 XP\_045164960.1 43.9 399  
193 9 1 387 114 493 3.60E-75 290.4 6596 cellular  
organisms;Eukaryota;Opisthokonta;Metazoa;Eumetazoa;Bilateria;Protostomia;  
Spiralia;Lophotrochozoa;Mollusca;Bivalvia;Autobranchia;Heteroconchia;Euhe  
terodonta;Imparidentia;Venerida;Veneroidea;Veneridae;Mercenaria;Mercenari  
a mercenaria  
UdeM00000033492 10224 315.1 UdeM00000033492 XP\_002736880.1 53.7 283  
108 1 32 291 35 317 1.20E-82 315.1 10224 cellular  
organisms;Eukaryota;Opisthokonta;Metazoa;Eumetazoa;Bilateria;Deuterostomi  
a;Hemichordata;Enteropneusta;Harrimaniidae;Saccoglossus;Saccoglossus  
kowalevskii  
UdeM00000033493 6596 214.2 UdeM00000033493 XP\_045178416.1 43.4 256  
140 4 1 252 11 265 2.00E-52 214.2 6596 cellular  
organisms;Eukaryota;Opisthokonta;Metazoa;Eumetazoa;Bilateria;Protostomia;  
Spiralia;Lophotrochozoa;Mollusca;Bivalvia;Autobranchia;Heteroconchia;Euhe  
terodonta;Imparidentia;Venerida;Veneroidea;Veneridae;Mercenaria;Mercenari  
a mercenaria  
UdeM00000033494 6596 107.5 UdeM00000033494 XP\_045178416.1 36 164  
102 2 1 161 11 174 1.70E-20 107.5 6596 cellular  
organisms;Eukaryota;Opisthokonta;Metazoa;Eumetazoa;Bilateria;Protostomia;  
Spiralia;Lophotrochozoa;Mollusca;Bivalvia;Autobranchia;Heteroconchia;Euhe  
terodonta;Imparidentia;Venerida;Veneroidea;Veneridae;Mercenaria;Mercenari  
a mercenaria  
UdeM00000033495 50429 94.7 UdeM00000033495 XP\_022799946.1 32.5 157  
102 3 165 321 6 158 2.40E-16 94.7 50429 cellular  
organisms;Eukaryota;Opisthokonta;Metazoa;Eumetazoa;Cnidaria;Anthozoa;Hexa  
corallia;Scleractinia;Astrocoeniina;Pocilloporidae;Stylophora;Stylophora  
pistillata  
UdeM00000033497 158441 124.4 UdeM00000033497 XP\_021948043.1 39.2  
153 93 0 3 155 168 320 1.70E-25 124.4 158441  
cellular  
organisms;Eukaryota;Opisthokonta;Metazoa;Eumetazoa;Bilateria;Protostomia;  
Ecdysozoa;Panarthropoda;Arthropoda;Mandibulata;Pancrustacea;Hexapoda;Coll  
embola;Entomobryomorpha;Isotomoidea;Isotomidae;Proisotominae;Folsomia;Fol  
somia candida  
UdeM00000033499 7668 324.7 UdeM00000033499 XP\_003724302.3 47.1 348  
178 4 1 348 1 342 1.40E-85 324.7 7668 cellular  
organisms;Eukaryota;Opisthokonta;Metazoa;Eumetazoa;Bilateria;Deuterostomi  
a;Echinodermata;Eleutherozoa;Echinozoa;Echinoidea;Euechinoidea;Echinacea;  
Camarodonta;Echinidea;Strongylocentrotidae;Strongylocentrotus;Strongyloce  
ntrotus purpuratus  
UdeM00000033500 6596 383.6 UdeM00000033500 XP\_045177776.1 39.4 566  
318 9 1 560 405 951 6.10E-103 383.6 6596 cellular  
organisms;Eukaryota;Opisthokonta;Metazoa;Eumetazoa;Bilateria;Protostomia;  
Spiralia;Lophotrochozoa;Mollusca;Bivalvia;Autobranchia;Heteroconchia;Euhe  
terodonta;Imparidentia;Venerida;Veneroidea;Veneridae;Mercenaria;Mercenari  
a mercenaria

UdeM00000033502 6596 162.2 UdeM00000033502 XP\_045182317.1 36.3 311  
 135 10 23 278 243 545 1.10E-36 162.2 6596 cellular  
 organisms;Eukaryota;Opisthokonta;Metazoa;Eumetazoa;Bilateria;Protostomia;  
 Spiralia;Lophotrochozoa;Mollusca;Bivalvia;Autobranchia;Heteroconchia;Euhe  
 terodonta;Imparidentia;Venerida;Veneroidea;Veneridae;Mercenaria;Mercenari  
 a mercenaria

UdeM00000033504 46514 66.2 UdeM00000033504 XP\_038065173.1 48.1 77  
 36 2 5 77 8 84 2.00E-08 66.2 46514 cellular  
 organisms;Eukaryota;Opisthokonta;Metazoa;Eumetazoa;Bilateria;Deuterostomi  
 a;Echinodermata;Eleutherozoa;Asterozoa;Asteroidea;Valvatacea;Valvatida;As  
 terinidae;Patiria;Patiria miniata

UdeM00000033505 1735272 198.4 UdeM00000033505 XP\_041373683.1 42.4  
 245 136 4 49 292 254 494 1.30E-47 198.4 1735272  
 cellular  
 organisms;Eukaryota;Opisthokonta;Metazoa;Eumetazoa;Bilateria;Protostomia;  
 Spiralia;Lophotrochozoa;Mollusca;Gastropoda;Neomphalina;Neomphaloidea;Pel  
 tospiridae;Gigantopelta;Gigantopelta aegis

UdeM00000033506 1250792 95.5 UdeM00000033506 XP\_041861569.1 56.2  
 73 32 0 2 74 595 667 3.00E-17 95.5 1250792  
 cellular  
 organisms;Eukaryota;Opisthokonta;Metazoa;Eumetazoa;Bilateria;Deuterostomi  
 a;Chordata;Craniata;Vertebrata;Gnathostomata;Teleostomi;Euteleostomi;Acti  
 nopterygii;Actinopteri;Neopterygii;Teleostei;Osteoglossocephalai;Clupeoce  
 phala;Euteleosteomorpha;Neoteleostei;Eurypterygia;Ctenosquamata;Acanthomo  
 rphata;Euacanthomorphacea;Percomorphaceae;Ovalentaria;Atherinomorphae;Ath  
 eriniformes;Melanotaeniidae;Melanotaenia;Melanotaenia boesemani

UdeM00000033507 6596 80.1 UdeM00000033507 XP\_045186033.1 27.4 175  
 121 3 234 404 23 195 7.50E-12 80.1 6596 cellular  
 organisms;Eukaryota;Opisthokonta;Metazoa;Eumetazoa;Bilateria;Protostomia;  
 Spiralia;Lophotrochozoa;Mollusca;Bivalvia;Autobranchia;Heteroconchia;Euhe  
 terodonta;Imparidentia;Venerida;Veneroidea;Veneridae;Mercenaria;Mercenari  
 a mercenaria

UdeM00000033508 151771 106.3 UdeM00000033508 XP\_028414844.1 36.9  
 149 92 1 2 150 22 168 2.00E-19 106.3 151771  
 cellular  
 organisms;Eukaryota;Opisthokonta;Metazoa;Eumetazoa;Cnidaria;Anthozoa;Octo  
 corallia;Alcyonacea;Alcyoniina;Nephtheidae;Dendronephthya;Dendronephthya  
 gigantea

UdeM00000033509 151771 106.3 UdeM00000033509 XP\_028414844.1 36.9  
 149 92 1 2 150 22 168 2.00E-19 106.3 151771  
 cellular  
 organisms;Eukaryota;Opisthokonta;Metazoa;Eumetazoa;Cnidaria;Anthozoa;Octo  
 corallia;Alcyonacea;Alcyoniina;Nephtheidae;Dendronephthya;Dendronephthya  
 gigantea

UdeM00000033510 151771 106.3 UdeM00000033510 XP\_028414844.1 36.9  
 149 92 1 2 150 22 168 1.20E-19 106.3 151771  
 cellular  
 organisms;Eukaryota;Opisthokonta;Metazoa;Eumetazoa;Cnidaria;Anthozoa;Octo  
 corallia;Alcyonacea;Alcyoniina;Nephtheidae;Dendronephthya;Dendronephthya  
 gigantea

UdeM00000033511 6579 100.9 UdeM00000033511 XP\_033731337.1 34.4 160  
 93 3 152 309 174 323 3.20E-18 100.9 6579 cellular  
 organisms;Eukaryota;Opisthokonta;Metazoa;Eumetazoa;Bilateria;Protostomia;

Spiralia; Lophotrochozoa; Mollusca; Bivalvia; Autobranchia; Pteriomorpha; Pectinida; Pectinoidea; Pectinidae; Pecten; Pecten maximus  
UdeM00000034166 6596 463 UdeM00000034166 XP\_045182316.1 38.7 813  
380 20 2 786 370 1092 7.80E-127 463 6596 cellular  
organisms; Eukaryota; Opisthokonta; Metazoa; Eumetazoa; Bilateria; Protostomia; Spiralia; Lophotrochozoa; Mollusca; Bivalvia; Autobranchia; Heteroconchia; Euheterodonta; Imparidentia; Venerida; Veneroidea; Veneridae; Mercenaria; Mercenaria mercenaria

UdeM00000034170 6565 176 UdeM00000034170 XP\_022305704.1 34.5 290  
150 3 1 290 208 457 6.90E-41 176 6565 cellular  
organisms; Eukaryota; Opisthokonta; Metazoa; Eumetazoa; Bilateria; Protostomia; Spiralia; Lophotrochozoa; Mollusca; Bivalvia; Autobranchia; Pteriomorpha; Ostreida; Ostreoidea; Ostreidae; Crassostrea; Crassostrea virginica

UdeM00000034171 48498 504.6 UdeM00000034171 XP\_020629946.1 37.7 772  
393 12 2 769 1050 1737 2.30E-139 504.6 48498 cellular  
organisms; Eukaryota; Opisthokonta; Metazoa; Eumetazoa; Cnidaria; Anthozoa; Hexacorallia; Scleractinia; Faviina; Merulinidae; Orbicella; Orbicella faveolata

UdeM00000034172 6579 249.6 UdeM00000034172 XP\_033739209.1 49.6 258  
114 2 9 261 2 248 4.40E-63 249.6 6579 cellular  
organisms; Eukaryota; Opisthokonta; Metazoa; Eumetazoa; Bilateria; Protostomia; Spiralia; Lophotrochozoa; Mollusca; Bivalvia; Autobranchia; Pteriomorpha; Pectinida; Pectinoidea; Pectinidae; Pecten; Pecten maximus

UdeM00000034173 70779 125.6 UdeM00000034173 XP\_015764363.1 33.3 276  
143 6 4 247 6 272 1.00E-25 125.6 70779 cellular  
organisms; Eukaryota; Opisthokonta; Metazoa; Eumetazoa; Cnidaria; Anthozoa; Hexacorallia; Scleractinia; Astrocoeniina; Acroporidae; Acropora; Acropora digitifera

UdeM00000034174 6596 68.9 UdeM00000034174 XP\_045201969.1 58.9 56  
22 1 27 82 20 74 4.90E-09 68.9 6596 cellular  
organisms; Eukaryota; Opisthokonta; Metazoa; Eumetazoa; Bilateria; Protostomia; Spiralia; Lophotrochozoa; Mollusca; Bivalvia; Autobranchia; Heteroconchia; Euheterodonta; Imparidentia; Venerida; Veneroidea; Veneridae; Mercenaria; Mercenaria mercenaria

UdeM00000044201 69820 388.7 UdeM00000044201 XP\_022836638.1 60.6 320  
124 2 3 320 2 321 7.50E-105 388.7 69820 cellular  
organisms; Eukaryota; Opisthokonta; Metazoa; Eumetazoa; Bilateria; Protostomia; Ecdysozoa; Panarthropoda; Arthropoda; Mandibulata; Pancrustacea; Hexapoda; Insecta; Dicondylia; Pterygota; Neoptera; Endopterygota; Amphiesmenoptera; Lepidoptera; Glossata; Neolepidoptera; Heteroneura; Ditrysia; Obtectomera; Noctuoidea; Noctuidae; Amphipyrrinae; Spodoptera; Spodoptera litura

UdeM00000043246 400727 238.4 UdeM00000043246 XP\_025083450.1 68.8  
154 45 1 3 156 181 331 6.10E-60 238.4 400727  
cellular  
organisms; Eukaryota; Opisthokonta; Metazoa; Eumetazoa; Bilateria; Protostomia; Spiralia; Lophotrochozoa; Mollusca; Gastropoda; Caenogastropoda; Architaenioglossa; Ampullarioidea; Ampullariidae; Pomacea; Pomacea canaliculata

UdeM00000043247 400727 409.8 UdeM00000043247 XP\_025083450.1 59.6  
319 124 3 28 345 17 331 3.30E-111 409.8 400727  
cellular  
organisms; Eukaryota; Opisthokonta; Metazoa; Eumetazoa; Bilateria; Protostomia; Spiralia; Lophotrochozoa; Mollusca; Gastropoda; Caenogastropoda; Architaenioglossa; Ampullarioidea; Ampullariidae; Pomacea; Pomacea canaliculata

UdeM00000043248 1529436 69.7 UdeM00000043248 XP\_033121705.1 46.5  
71 36 1 24 92 49 119 7.70E-09 69.7 1529436



cellular  
organisms;Eukaryota;Opisthokonta;Metazoa;Eumetazoa;Bilateria;Deuterostomi  
a;Echinodermata;Pelmatozoa;Crinoidea;Articulata;Comatulida;Comatulidae;Co  
matulinae;Anneissia;Anneissia japonica  
UdeM00000043249 6526 226.5 UdeM00000043249 XP\_013061472.1 98.2 109  
2 0 144 252 53 161 3.80E-56 226.5 6526 cellular  
organisms;Eukaryota;Opisthokonta;Metazoa;Eumetazoa;Bilateria;Protostomia;  
Spiralia;Lophotrochozoa;Mollusca;Gastropoda;Heterobranchia;Euthyneura;Pan  
pulmonata;Hygrophila;Lymnaeidae;Planorbidae;Biomphalaria;Biomphalaria  
glabrata  
UdeM00000043250 6573 145.6 UdeM00000043250 XP\_021376808.1 85.9 78  
11 0 97 174 50 127 6.00E-32 145.6 6573 cellular  
organisms;Eukaryota;Opisthokonta;Metazoa;Eumetazoa;Bilateria;Protostomia;  
Spiralia;Lophotrochozoa;Mollusca;Bivalvia;Autobranchia;Pteriomorphia;Pect  
inida;Pectinoidea;Pectinidae;Mizuhopecten;Mizuhopecten yessoensis  
UdeM00000043251 6596 503.4 UdeM00000043251 XP\_045197975.1 36.9 869  
490 21 24 851 1081 1932 5.80E-139 503.4 6596 cellular  
organisms;Eukaryota;Opisthokonta;Metazoa;Eumetazoa;Bilateria;Protostomia;  
Spiralia;Lophotrochozoa;Mollusca;Bivalvia;Autobranchia;Heteroconchia;Euhe  
terodonta;Imparidentia;Venerida;Veneroidea;Veneridae;Mercenaria;Mercenari  
a mercenaria  
UdeM00000043252 7725 73.9 UdeM00000043252 XP\_039259573.1 27.6 246  
135 11 18 242 395 618 3.20E-10 73.9 7725 cellular  
organisms;Eukaryota;Opisthokonta;Metazoa;Eumetazoa;Bilateria;Deuterostomi  
a;Chordata;Tunicata;Ascidiacea;Stolidobranchia;Styelidae;Styela;Styela  
clava  
UdeM00000043254 29159 178.7 UdeM00000043254 XP\_011451271.1 50 170  
80 2 7 176 2 166 6.60E-42 178.7 29159 cellular  
organisms;Eukaryota;Opisthokonta;Metazoa;Eumetazoa;Bilateria;Protostomia;  
Spiralia;Lophotrochozoa;Mollusca;Bivalvia;Autobranchia;Pteriomorphia;Ostr  
eida;Ostreoidea;Ostreidae;Crassostrea;Crassostrea gigas  
UdeM00000015653 6945 64.7 UdeM00000015653 XP\_042146206.1 29.1 151  
91 2 37 171 88 238 1.70E-07 64.7 6945 cellular  
organisms;Eukaryota;Opisthokonta;Metazoa;Eumetazoa;Bilateria;Protostomia;  
Ecdysozoa;Panarthropoda;Arthropoda;Chelicerata;Arachnida;Acari;Parasitifo  
rmes;Ixodida;Ixodoidea;Ixodidae;Ixodinae;Ixodes;Ixodes scapularis  
UdeM00000015654 6596 200.7 UdeM00000015654 XP\_045182316.1 41.6 281  
122 4 337 577 362 640 5.40E-48 200.7 6596 cellular  
organisms;Eukaryota;Opisthokonta;Metazoa;Eumetazoa;Bilateria;Protostomia;  
Spiralia;Lophotrochozoa;Mollusca;Bivalvia;Autobranchia;Heteroconchia;Euhe  
terodonta;Imparidentia;Venerida;Veneroidea;Veneridae;Mercenaria;Mercenari  
a mercenaria  
UdeM00000015655 6565 295.8 UdeM00000015655 XP\_022334993.1 59.2 240  
95 3 1 238 574 812 5.00E-77 295.8 6565 cellular  
organisms;Eukaryota;Opisthokonta;Metazoa;Eumetazoa;Bilateria;Protostomia;  
Spiralia;Lophotrochozoa;Mollusca;Bivalvia;Autobranchia;Pteriomorphia;Ostr  
eida;Ostreoidea;Ostreidae;Crassostrea;Crassostrea virginica  
UdeM00000015657 29159 85.1 UdeM00000015657 XP\_034299474.1 39.6 91  
53 1 1 91 415 503 5.10E-14 85.1 29159 cellular  
organisms;Eukaryota;Opisthokonta;Metazoa;Eumetazoa;Bilateria;Protostomia;  
Spiralia;Lophotrochozoa;Mollusca;Bivalvia;Autobranchia;Pteriomorphia;Ostr  
eida;Ostreoidea;Ostreidae;Crassostrea;Crassostrea gigas  
UdeM00000015658 90988 249.2 UdeM00000015658 XP\_039535825.1 54.6 216  
98 0 1 216 111 326 4.70E-63 249.2 90988 cellular

organisms;Eukaryota;Opisthokonta;Metazoa;Eumetazoa;Bilateria;Deuterostomia;Chordata;Craniata;Vertebrata;Gnathostomata;Teleostomi;Euteleostomi;Actinopterygii;Actinopteri;Neopterygii;Teleostei;Osteoglossocephalai;Clupeocephala;Otomorpha;Ostariophysi;Otophysi;Cypriniphysae;Cypriniiformes;Cyprinidae;Leuciscidae;Pogonichthyinae;Pimephales;Pimephales promelas

UdeM00000015659 50429 69.7 UdeM00000015659 XP\_022785721.1 40.9 93  
52 1 1 90 365 457 4.20E-09 69.7 50429 cellular

organisms;Eukaryota;Opisthokonta;Metazoa;Eumetazoa;Cnidaria;Anthozoa;Hexacorallia;Scleractinia;Astrocoeniina;Pocilloporidae;Stylophora;Stylophora pistillata

UdeM00000015660 50429 69.7 UdeM00000015660 XP\_022785721.1 40.9 93  
52 1 1 90 365 457 4.10E-09 69.7 50429 cellular

organisms;Eukaryota;Opisthokonta;Metazoa;Eumetazoa;Cnidaria;Anthozoa;Hexacorallia;Scleractinia;Astrocoeniina;Pocilloporidae;Stylophora;Stylophora pistillata

UdeM00000015661 50429 67.4 UdeM00000015661 XP\_022804186.1 41.7 72  
42 0 1 72 430 501 1.50E-08 67.4 50429 cellular

organisms;Eukaryota;Opisthokonta;Metazoa;Eumetazoa;Cnidaria;Anthozoa;Hexacorallia;Scleractinia;Astrocoeniina;Pocilloporidae;Stylophora;Stylophora pistillata

UdeM00000015665 6565 179.5 UdeM00000015665 XP\_022299727.1 43.1 232  
103 2 1 203 46 277 4.90E-42 179.5 6565 cellular

organisms;Eukaryota;Opisthokonta;Metazoa;Eumetazoa;Bilateria;Protostomia;Spiralia;Lophotrochozoa;Mollusca;Bivalvia;Autobranchia;Pteriomorphia;Ostreida;Ostreioidea;Ostreidae;Crassostrea;Crassostrea virginica

UdeM00000015667 6565 138.7 UdeM00000015667 XP\_022334994.1 32.5 268  
107 4 3 197 188 454 8.20E-30 138.7 6565 cellular

organisms;Eukaryota;Opisthokonta;Metazoa;Eumetazoa;Bilateria;Protostomia;Spiralia;Lophotrochozoa;Mollusca;Bivalvia;Autobranchia;Pteriomorphia;Ostreida;Ostreioidea;Ostreidae;Crassostrea;Crassostrea virginica

UdeM00000015668 6565 203.8 UdeM00000015668 XP\_022334993.1 73.2 127  
33 1 68 193 686 812 2.10E-49 203.8 6565 cellular

organisms;Eukaryota;Opisthokonta;Metazoa;Eumetazoa;Bilateria;Protostomia;Spiralia;Lophotrochozoa;Mollusca;Bivalvia;Autobranchia;Pteriomorphia;Ostreida;Ostreioidea;Ostreidae;Crassostrea;Crassostrea virginica

UdeM00000015668 6565 59.3 UdeM00000015668 XP\_022334993.1 47.8 69  
34 1 1 67 481 549 6.40E-06 59.3 6565 cellular

organisms;Eukaryota;Opisthokonta;Metazoa;Eumetazoa;Bilateria;Protostomia;Spiralia;Lophotrochozoa;Mollusca;Bivalvia;Autobranchia;Heteroconchia;Euherodonta;Imparidentia;Venerida;Veneroidea;Veneridae;Mercenaria;Mercenaria mercenaria

UdeM00000015671 6596 89 UdeM00000015671 XP\_045206084.1 32.5 166  
104 6 49 208 266 429 8.00E-15 89 6596 cellular

organisms;Eukaryota;Opisthokonta;Metazoa;Eumetazoa;Bilateria;Protostomia;Spiralia;Lophotrochozoa;Mollusca;Bivalvia;Autobranchia;Heteroconchia;Euherodonta;Imparidentia;Venerida;Veneroidea;Veneridae;Mercenaria;Mercenaria mercenaria

UdeM00000015672 6596 138.3 UdeM00000015672 XP\_045206055.1 40.4 183  
104 3 129 310 61 239 1.70E-29 138.3 6596 cellular

organisms;Eukaryota;Opisthokonta;Metazoa;Eumetazoa;Bilateria;Protostomia;Spiralia;Lophotrochozoa;Mollusca;Bivalvia;Autobranchia;Heteroconchia;Euherodonta;Imparidentia;Venerida;Veneroidea;Veneridae;Mercenaria;Mercenaria mercenaria

UdeM00000015673 6596 243.8 UdeM00000015673 XP\_045206084.1 28.9 602  
347 14 10 550 157 738 5.10E-61 243.8 6596 cellular

organisms;Eukaryota;Opisthokonta;Metazoa;Eumetazoa;Bilateria;Protostomia; Spiralia;Lophotrochozoa;Mollusca;Bivalvia;Autobranchia;Heteroconchia;Euherodonta;Imparidentia;Venerida;Veneroidea;Veneridae;Mercenaria;Mercenaria mercenaria

UdeM00000015674 6573 214.5 UdeM00000015674 XP\_021380249.1 28.8 473  
309 13 31 489 270 728 3.00E-52 214.5 6573 cellular

organisms;Eukaryota;Opisthokonta;Metazoa;Eumetazoa;Bilateria;Protostomia; Spiralia;Lophotrochozoa;Mollusca;Bivalvia;Autobranchia;Pteriomorphia;Pectinida;Pectinoidea;Pectinidae;Mizuhopecten;Mizuhopecten yessoensis

UdeM00000015676 6596 272.3 UdeM00000015676 XP\_045206055.1 33.4 503  
317 12 27 520 41 534 1.30E-69 272.3 6596 cellular

organisms;Eukaryota;Opisthokonta;Metazoa;Eumetazoa;Bilateria;Protostomia; Spiralia;Lophotrochozoa;Mollusca;Bivalvia;Autobranchia;Heteroconchia;Euherodonta;Imparidentia;Venerida;Veneroidea;Veneridae;Mercenaria;Mercenaria mercenaria

UdeM00000015675 6596 272.3 UdeM00000015675 XP\_045206055.1 33.4 503  
317 12 40 533 41 534 1.30E-69 272.3 6596 cellular

organisms;Eukaryota;Opisthokonta;Metazoa;Eumetazoa;Bilateria;Protostomia; Spiralia;Lophotrochozoa;Mollusca;Bivalvia;Autobranchia;Heteroconchia;Euherodonta;Imparidentia;Venerida;Veneroidea;Veneridae;Mercenaria;Mercenaria mercenaria

UdeM00000015677 6596 95.5 UdeM00000015677 XP\_045206084.1 36.5 178  
104 5 6 175 296 472 8.10E-17 95.5 6596 cellular

organisms;Eukaryota;Opisthokonta;Metazoa;Eumetazoa;Bilateria;Protostomia; Spiralia;Lophotrochozoa;Mollusca;Bivalvia;Autobranchia;Heteroconchia;Euherodonta;Imparidentia;Venerida;Veneroidea;Veneridae;Mercenaria;Mercenaria mercenaria

UdeM00000015678 6573 96.3 UdeM00000015678 XP\_021380249.1 32.3 161  
88 3 8 148 215 374 4.40E-17 96.3 6573 cellular

organisms;Eukaryota;Opisthokonta;Metazoa;Eumetazoa;Bilateria;Protostomia; Spiralia;Lophotrochozoa;Mollusca;Bivalvia;Autobranchia;Pteriomorphia;Pectinida;Pectinoidea;Pectinidae;Mizuhopecten;Mizuhopecten yessoensis

UdeM00000015679 6565 104.8 UdeM00000015679 XP\_022325254.1 26.9 279  
184 8 21 294 494 757 2.00E-19 104.8 6565 cellular

organisms;Eukaryota;Opisthokonta;Metazoa;Eumetazoa;Bilateria;Protostomia; Spiralia;Lophotrochozoa;Mollusca;Bivalvia;Autobranchia;Pteriomorphia;Ostreida;Ostreoidea;Ostreidae;Crassostrea;Crassostrea virginica

UdeM00000015680 6596 212.2 UdeM00000015680 XP\_045206055.1 37.7 297  
181 3 84 379 77 370 1.30E-51 212.2 6596 cellular

organisms;Eukaryota;Opisthokonta;Metazoa;Eumetazoa;Bilateria;Protostomia; Spiralia;Lophotrochozoa;Mollusca;Bivalvia;Autobranchia;Heteroconchia;Euherodonta;Imparidentia;Venerida;Veneroidea;Veneridae;Mercenaria;Mercenaria mercenaria

UdeM00000015681 6596 177.6 UdeM00000015681 XP\_045177112.1 29.2 407  
195 11 37 357 77 476 2.90E-41 177.6 6596 cellular

organisms;Eukaryota;Opisthokonta;Metazoa;Eumetazoa;Bilateria;Protostomia; Spiralia;Lophotrochozoa;Mollusca;Bivalvia;Autobranchia;Heteroconchia;Euherodonta;Imparidentia;Venerida;Veneroidea;Veneridae;Mercenaria;Mercenaria mercenaria

UdeM00000015682 6596 120.2 UdeM00000015682 XP\_045177112.1 27.1 317  
155 7 9 249 160 476 3.90E-24 120.2 6596 cellular

organisms;Eukaryota;Opisthokonta;Metazoa;Eumetazoa;Bilateria;Protostomia; Spiralia;Lophotrochozoa;Mollusca;Bivalvia;Autobranchia;Heteroconchia;Euherodonta;Imparidentia;Venerida;Veneroidea;Veneridae;Mercenaria;Mercenaria mercenaria

terodonta;Imparidentia;Venerida;Veneroidea;Veneridae;Mercenaria;Mercenari  
 a mercenaria  
 UdeM00000015685 6596 453.4 UdeM00000015685 XP\_045206065.1 31.2 960  
 602 26 77 1005 49 981 7.70E-124 453.4 6596 cellular  
 organisms;Eukaryota;Opisthokonta;Metazoa;Eumetazoa;Bilateria;Protostomia;  
 Spiralia;Lophotrochozoa;Mollusca;Bivalvia;Autobranhia;Heteroconchia;Euhe  
 terodonta;Imparidentia;Venerida;Veneroidea;Veneridae;Mercenaria;Mercenari  
 a mercenaria  
 UdeM00000015686 6596 266.9 UdeM00000015686 XP\_045206084.1 30.6 529  
 351 10 10 529 157 678 6.10E-68 266.9 6596 cellular  
 organisms;Eukaryota;Opisthokonta;Metazoa;Eumetazoa;Bilateria;Protostomia;  
 Spiralia;Lophotrochozoa;Mollusca;Bivalvia;Autobranhia;Heteroconchia;Euhe  
 terodonta;Imparidentia;Venerida;Veneroidea;Veneridae;Mercenaria;Mercenari  
 a mercenaria  
 UdeM00000015687 6596 342.8 UdeM00000015687 XP\_045206084.1 29.6 766  
 473 17 54 775 50 793 1.20E-90 342.8 6596 cellular  
 organisms;Eukaryota;Opisthokonta;Metazoa;Eumetazoa;Bilateria;Protostomia;  
 Spiralia;Lophotrochozoa;Mollusca;Bivalvia;Autobranhia;Heteroconchia;Euhe  
 terodonta;Imparidentia;Venerida;Veneroidea;Veneridae;Mercenaria;Mercenari  
 a mercenaria  
 UdeM00000015688 6565 184.9 UdeM00000015688 XP\_022326775.1 28.7 414  
 246 11 30 417 307 697 2.30E-43 184.9 6565 cellular  
 organisms;Eukaryota;Opisthokonta;Metazoa;Eumetazoa;Bilateria;Protostomia;  
 Spiralia;Lophotrochozoa;Mollusca;Bivalvia;Autobranhia;Pteriormorphia;Ostr  
 eida;Ostreoidea;Ostreidae;Crassostrea;Crassostrea virginica  
 UdeM00000015689 6596 219.2 UdeM00000015689 XP\_045206084.1 34.9 367  
 231 6 202 563 78 441 1.50E-53 219.2 6596 cellular  
 organisms;Eukaryota;Opisthokonta;Metazoa;Eumetazoa;Bilateria;Protostomia;  
 Spiralia;Lophotrochozoa;Mollusca;Bivalvia;Autobranhia;Heteroconchia;Euhe  
 terodonta;Imparidentia;Venerida;Veneroidea;Veneridae;Mercenaria;Mercenari  
 a mercenaria  
 UdeM00000015690 6596 219.2 UdeM00000015690 XP\_045206084.1 34.9 367  
 231 6 292 653 78 441 1.70E-53 219.2 6596 cellular  
 organisms;Eukaryota;Opisthokonta;Metazoa;Eumetazoa;Bilateria;Protostomia;  
 Spiralia;Lophotrochozoa;Mollusca;Bivalvia;Autobranhia;Heteroconchia;Euhe  
 terodonta;Imparidentia;Venerida;Veneroidea;Veneridae;Mercenaria;Mercenari  
 a mercenaria  
 UdeM00000015692 6596 246.5 UdeM00000015692 XP\_045177112.1 30.1 528  
 307 13 9 492 160 669 7.20E-62 246.5 6596 cellular  
 organisms;Eukaryota;Opisthokonta;Metazoa;Eumetazoa;Bilateria;Protostomia;  
 Spiralia;Lophotrochozoa;Mollusca;Bivalvia;Autobranhia;Heteroconchia;Euhe  
 terodonta;Imparidentia;Venerida;Veneroidea;Veneridae;Mercenaria;Mercenari  
 a mercenaria  
 UdeM00000015691 6596 298.1 UdeM00000015691 XP\_045177112.1 30.1 655  
 375 19 77 669 36 669 2.80E-77 298.1 6596 cellular  
 organisms;Eukaryota;Opisthokonta;Metazoa;Eumetazoa;Bilateria;Protostomia;  
 Spiralia;Lophotrochozoa;Mollusca;Bivalvia;Autobranhia;Heteroconchia;Euhe  
 terodonta;Imparidentia;Venerida;Veneroidea;Veneridae;Mercenaria;Mercenari  
 a mercenaria  
 UdeM00000015693 37621 202.2 UdeM00000015693 XP\_014672567.1 50 174  
 87 0 10 183 345 518 7.10E-49 202.2 37621 cellular  
 organisms;Eukaryota;Opisthokonta;Metazoa;Eumetazoa;Bilateria;Protostomia;  
 Ecdysozoa;Scalidophora;Priapulida;Priapulimorpha;Priapulimorphida;Priapul  
 idae;Priapululus;Priapululus caudatus

UdeM00000015694 29159 255.8 UdeM00000015694 XP\_019926412.2 57 223  
 95 1 178 399 37 259 9.80E-65 255.8 29159 cellular  
 organisms;Eukaryota;Opisthokonta;Metazoa;Eumetazoa;Bilateria;Protostomia;  
 Spiralia;Lophotrochozoa;Mollusca;Bivalvia;Autobranchia;Pteriomorphia;Ostr  
 eida;Ostreoidea;Ostreidae;Crassostrea;Crassostrea gigas  
 UdeM00000015695 6596 990.7 UdeM00000015695 XP\_045181000.1 66.3 982  
 240 17 6 937 676 1616 1.30E-285 990.7 6596 cellular  
 organisms;Eukaryota;Opisthokonta;Metazoa;Eumetazoa;Bilateria;Protostomia;  
 Spiralia;Lophotrochozoa;Mollusca;Bivalvia;Autobranchia;Heteroconchia;Euhe  
 terodonta;Imparidentia;Venerida;Veneroidea;Veneridae;Mercenaria;Mercenari  
 a mercenaria  
 UdeM00000015696 6596 951.8 UdeM00000015696 XP\_045181000.1 63.7 1016  
 244 19 6 971 676 1616 6.70E-274 951.8 6596 cellular  
 organisms;Eukaryota;Opisthokonta;Metazoa;Eumetazoa;Bilateria;Protostomia;  
 Spiralia;Lophotrochozoa;Mollusca;Bivalvia;Autobranchia;Heteroconchia;Euhe  
 terodonta;Imparidentia;Venerida;Veneroidea;Veneridae;Mercenaria;Mercenari  
 a mercenaria  
 UdeM00000015697 1735272 119.8 UdeM00000015697 XP\_041361298.1 37  
 492 238 18 1 455 157 613 9.10E-24 119.8 1735272  
 cellular  
 organisms;Eukaryota;Opisthokonta;Metazoa;Eumetazoa;Bilateria;Protostomia;  
 Spiralia;Lophotrochozoa;Mollusca;Gastropoda;Neomphalina;Neomphaloidea;Pel  
 tospiridae;Gigantopelta;Gigantopelta aegis  
 UdeM00000015698 6596 3424.4 UdeM00000015698 XP\_045180677.1 63  
 3358 972 51 1 3278 1 3169 0.00E+00 3424.4 6596  
 cellular  
 organisms;Eukaryota;Opisthokonta;Metazoa;Eumetazoa;Bilateria;Protostomia;  
 Spiralia;Lophotrochozoa;Mollusca;Bivalvia;Autobranchia;Heteroconchia;Euhe  
 terodonta;Imparidentia;Venerida;Veneroidea;Veneridae;Mercenaria;Mercenari  
 a mercenaria  
 UdeM00000015699 6573 666.8 UdeM00000015699 XP\_021377534.1 79.4 471  
 78 4 4 459 2562 3028 2.00E-188 666.8 6573 cellular  
 organisms;Eukaryota;Opisthokonta;Metazoa;Eumetazoa;Bilateria;Protostomia;  
 Spiralia;Lophotrochozoa;Mollusca;Bivalvia;Autobranchia;Pteriomorphia;Pect  
 inida;Pectinoidea;Pectinidae;Mizuhopecten;Mizuhopecten yessoensis  
 UdeM00000015700 6573 705.3 UdeM00000015700 XP\_021377534.1 76.7 524  
 100 6 14 520 2530 3048 5.80E-200 705.3 6573 cellular  
 organisms;Eukaryota;Opisthokonta;Metazoa;Eumetazoa;Bilateria;Protostomia;  
 Spiralia;Lophotrochozoa;Mollusca;Bivalvia;Autobranchia;Pteriomorphia;Pect  
 inida;Pectinoidea;Pectinidae;Mizuhopecten;Mizuhopecten yessoensis  
 UdeM00000015701 6573 574.7 UdeM00000015701 XP\_021377534.1 66.3 523  
 105 7 14 469 2530 3048 1.10E-160 574.7 6573 cellular  
 organisms;Eukaryota;Opisthokonta;Metazoa;Eumetazoa;Bilateria;Protostomia;  
 Spiralia;Lophotrochozoa;Mollusca;Bivalvia;Autobranchia;Pteriomorphia;Pect  
 inida;Pectinoidea;Pectinidae;Mizuhopecten;Mizuhopecten yessoensis  
 UdeM00000015702 6573 169.5 UdeM00000015702 XP\_021377534.1 80.8 99  
 19 0 18 116 2950 3048 2.60E-39 169.5 6573 cellular  
 organisms;Eukaryota;Opisthokonta;Metazoa;Eumetazoa;Bilateria;Protostomia;  
 Spiralia;Lophotrochozoa;Mollusca;Bivalvia;Autobranchia;Pteriomorphia;Pect  
 inida;Pectinoidea;Pectinidae;Mizuhopecten;Mizuhopecten yessoensis  
 UdeM00000015703 6565 721.1 UdeM00000015703 XP\_022311347.1 64.1 566  
 185 6 1 566 148 695 1.20E-204 721.1 6565 cellular  
 organisms;Eukaryota;Opisthokonta;Metazoa;Eumetazoa;Bilateria;Protostomia;

Spiralia;Lophotrochozoa;Mollusca;Bivalvia;Autobranchia;Pteriormorphia;Ostr  
eida;Ostreoidea;Ostreidae;Crassostrea;Crassostrea virginica  
UdeM00000015704 6105 97.1 UdeM00000015704 XP\_031568563.1 51.2 86  
42 0 5 90 56 141 1.30E-17 97.1 6105 cellular  
organisms;Eukaryota;Opisthokonta;Metazoa;Eumetazoa;Cnidaria;Anthozoa;Hexa  
corallia;Actiniaria;Actiniidae;Actinia;Actinia tenebrosa  
UdeM00000015705 6596 93.2 UdeM00000015705 XP\_045201969.1 61.2 80  
30 1 1 79 10 89 3.20E-16 93.2 6596 cellular  
organisms;Eukaryota;Opisthokonta;Metazoa;Eumetazoa;Bilateria;Protostomia;  
Spiralia;Lophotrochozoa;Mollusca;Bivalvia;Autobranchia;Heteroconchia;Euhe  
terodonta;Imparidentia;Venerida;Veneroidea;Veneridae;Mercenaria;Mercenari  
a mercenaria  
UdeM00000015707 6573 722.2 UdeM00000015707 XP\_021377534.1 80.5 498  
78 4 1 483 2555 3048 4.30E-205 722.2 6573 cellular  
organisms;Eukaryota;Opisthokonta;Metazoa;Eumetazoa;Bilateria;Protostomia;  
Spiralia;Lophotrochozoa;Mollusca;Bivalvia;Autobranchia;Pteriormorphia;Pect  
inida;Pectinoidea;Pectinidae;Mizuhopecten;Mizuhopecten yessoensis  
UdeM00000015708 6573 738.4 UdeM00000015708 XP\_021377534.1 78 518  
94 5 105 607 2536 3048 7.20E-210 738.4 6573 cellular  
organisms;Eukaryota;Opisthokonta;Metazoa;Eumetazoa;Bilateria;Protostomia;  
Spiralia;Lophotrochozoa;Mollusca;Bivalvia;Autobranchia;Pteriormorphia;Pect  
inida;Pectinoidea;Pectinidae;Mizuhopecten;Mizuhopecten yessoensis  
UdeM00000015708 6573 161.4 UdeM00000015708 XP\_021377534.1 72 107  
29 1 3 109 1077 1182 3.60E-36 161.4 6573 cellular  
organisms;Eukaryota;Opisthokonta;Metazoa;Eumetazoa;Bilateria;Protostomia;  
Spiralia;Lophotrochozoa;Mollusca;Bivalvia;Autobranchia;Pteriormorphia;Pect  
inida;Pectinoidea;Pectinidae;Mizuhopecten;Mizuhopecten yessoensis  
UdeM00000044380 29159 95.9 UdeM00000044380 XP\_034304086.1 49.4 87  
44 0 173 259 226 312 8.20E-17 95.9 29159 cellular  
organisms;Eukaryota;Opisthokonta;Metazoa;Eumetazoa;Bilateria;Protostomia;  
Spiralia;Lophotrochozoa;Mollusca;Bivalvia;Autobranchia;Pteriormorphia;Ostr  
eida;Ostreoidea;Ostreidae;Crassostrea;Crassostrea gigas  
UdeM00000038773 6596 102.4 UdeM00000038773 XP\_045184054.1 30.8 227  
150 3 77 299 78 301 9.90E-19 102.4 6596 cellular  
organisms;Eukaryota;Opisthokonta;Metazoa;Eumetazoa;Bilateria;Protostomia;  
Spiralia;Lophotrochozoa;Mollusca;Bivalvia;Autobranchia;Heteroconchia;Euhe  
terodonta;Imparidentia;Venerida;Veneroidea;Veneridae;Mercenaria;Mercenari  
a mercenaria  
UdeM00000038774 6565 103.6 UdeM00000038774 XP\_022334875.1 44.3 115  
61 2 3 115 603 716 1.70E-19 103.6 6565 cellular  
organisms;Eukaryota;Opisthokonta;Metazoa;Eumetazoa;Bilateria;Protostomia;  
Spiralia;Lophotrochozoa;Mollusca;Bivalvia;Autobranchia;Pteriormorphia;Ostr  
eida;Ostreoidea;Ostreidae;Crassostrea;Crassostrea virginica  
UdeM00000038775 6573 392.5 UdeM00000038775 XP\_021352792.1 30.7 812  
500 17 66 855 104 874 1.40E-105 392.5 6573 cellular  
organisms;Eukaryota;Opisthokonta;Metazoa;Eumetazoa;Bilateria;Protostomia;  
Spiralia;Lophotrochozoa;Mollusca;Bivalvia;Autobranchia;Pteriormorphia;Pect  
inida;Pectinoidea;Pectinidae;Mizuhopecten;Mizuhopecten yessoensis  
UdeM00000038776 6596 107.8 UdeM00000038776 XP\_045184054.1 31.1 228  
148 5 77 299 78 301 2.40E-20 107.8 6596 cellular  
organisms;Eukaryota;Opisthokonta;Metazoa;Eumetazoa;Bilateria;Protostomia;  
Spiralia;Lophotrochozoa;Mollusca;Bivalvia;Autobranchia;Heteroconchia;Euhe  
terodonta;Imparidentia;Venerida;Veneroidea;Veneridae;Mercenaria;Mercenari  
a mercenaria

UdeM00000038777 6579 225.3 UdeM00000038777 XP\_033746771.1 38.6 311  
 169 6 1 295 561 865 1.00E-55 225.3 6579 cellular  
 organisms;Eukaryota;Opisthokonta;Metazoa;Eumetazoa;Bilateria;Protostomia;  
 Spiralia;Lophotrochozoa;Mollusca;Bivalvia;Autobranchia;Pteriomorphia;Pect  
 inida;Pectinoidea;Pectinidae;Pecten;Pecten maximus  
 UdeM00000038778 6573 392.9 UdeM00000038778 XP\_021352792.1 30.3 809  
 511 14 64 855 102 874 1.00E-105 392.9 6573 cellular  
 organisms;Eukaryota;Opisthokonta;Metazoa;Eumetazoa;Bilateria;Protostomia;  
 Spiralia;Lophotrochozoa;Mollusca;Bivalvia;Autobranchia;Pteriomorphia;Pect  
 inida;Pectinoidea;Pectinidae;Mizuhopecten;Mizuhopecten yessoensis  
 UdeM00000038779 1735272 146.7 UdeM00000038779 XP\_041362996.1 31.5  
 355 216 11 17 362 27 363 9.50E-32 146.7 1735272  
 cellular  
 organisms;Eukaryota;Opisthokonta;Metazoa;Eumetazoa;Bilateria;Protostomia;  
 Spiralia;Lophotrochozoa;Mollusca;Gastropoda;Neomphalina;Neomphaloidea;Pel  
 tospiridae;Gigantopelta;Gigantopelta aegis  
 UdeM00000038780 77115 70.1 UdeM00000038780 XP\_038144245.1 44.4 72  
 40 0 1 72 315 386 1.30E-09 70.1 77115 cellular  
 organisms;Eukaryota;Opisthokonta;Metazoa;Eumetazoa;Bilateria;Deuterostomi  
 a;Chordata;Craniata;Vertebrata;Gnathostomata;Teleostomi;Euteleostomi;Acti  
 nopterygii;Actinopteri;Neopterygii;Teleostei;Osteoglossocephalai;Clupeoce  
 phala;Euteleosteomorpha;Neoteleostei;Eurypterygia;Ctenosquamata;Acanthomo  
 rphata;Euacanthomorphacea;Percomorphaceae;Ovalentaria;Atherinomorphae;Cyp  
 rinodontiformes;Cyprinodontoidei;Cyprinodontidae;Cyprinodontinae;Cyprinod  
 ontini;Cyprinodon;Cyprinodon tularosa  
 UdeM00000038781 29159 182.6 UdeM00000038781 XP\_034334268.1 60.7 135  
 50 1 59 193 129 260 4.90E-43 182.6 29159 cellular  
 organisms;Eukaryota;Opisthokonta;Metazoa;Eumetazoa;Bilateria;Protostomia;  
 Spiralia;Lophotrochozoa;Mollusca;Bivalvia;Autobranchia;Pteriomorphia;Ostr  
 eida;Ostreoidea;Ostreidae;Crassostrea;Crassostrea gigas  
 UdeM00000038782 6573 167.2 UdeM00000038782 XP\_021352792.1 33.3 258  
 144 5 19 248 617 874 2.70E-38 167.2 6573 cellular  
 organisms;Eukaryota;Opisthokonta;Metazoa;Eumetazoa;Bilateria;Protostomia;  
 Spiralia;Lophotrochozoa;Mollusca;Bivalvia;Autobranchia;Pteriomorphia;Pect  
 inida;Pectinoidea;Pectinidae;Mizuhopecten;Mizuhopecten yessoensis  
 UdeM00000038783 6573 394.8 UdeM00000038783 XP\_021352792.1 31.1 794  
 503 16 84 855 103 874 2.80E-106 394.8 6573 cellular  
 organisms;Eukaryota;Opisthokonta;Metazoa;Eumetazoa;Bilateria;Protostomia;  
 Spiralia;Lophotrochozoa;Mollusca;Bivalvia;Autobranchia;Pteriomorphia;Pect  
 inida;Pectinoidea;Pectinidae;Mizuhopecten;Mizuhopecten yessoensis  
 UdeM00000015602 29159 81.6 UdeM00000015602 XP\_034302429.1 30.5 151  
 97 3 20 166 307 453 1.00E-12 81.6 29159 cellular  
 organisms;Eukaryota;Opisthokonta;Metazoa;Eumetazoa;Bilateria;Protostomia;  
 Spiralia;Lophotrochozoa;Mollusca;Bivalvia;Autobranchia;Pteriomorphia;Ostr  
 eida;Ostreoidea;Ostreidae;Crassostrea;Crassostrea gigas  
 UdeM00000015601 6596 83.2 UdeM00000015601 XP\_045177112.1 27.5 222  
 130 7 21 211 268 489 4.40E-13 83.2 6596 cellular  
 organisms;Eukaryota;Opisthokonta;Metazoa;Eumetazoa;Bilateria;Protostomia;  
 Spiralia;Lophotrochozoa;Mollusca;Bivalvia;Autobranchia;Heteroconchia;Euhe  
 terodonta;Imparidentia;Venerida;Veneroidea;Veneridae;Mercenaria;Mercenari  
 a mercenaria  
 UdeM00000015603 6596 276.6 UdeM00000015603 XP\_045206084.1 34 509  
 313 14 70 569 49 543 1.10E-70 276.6 6596 cellular  
 organisms;Eukaryota;Opisthokonta;Metazoa;Eumetazoa;Bilateria;Protostomia;

Spiralia;Lophotrochozoa;Mollusca;Bivalvia;Autobranchia;Heteroconchia;Euherodonta;Imparidentia;Venerida;Veneroidea;Veneridae;Mercenaria;Mercenaria mercenaria

UdeM00000015604 6596 279.3 UdeM00000015604 XP\_045206084.1 35.2 460  
285 10 106 555 78 534 1.10E-71 279.3 6596 cellular

organisms;Eukaryota;Opisthokonta;Metazoa;Eumetazoa;Bilateria;Protostomia;Spiralia;Lophotrochozoa;Mollusca;Bivalvia;Autobranchia;Heteroconchia;Euherodonta;Imparidentia;Venerida;Veneroidea;Veneridae;Mercenaria;Mercenaria mercenaria

UdeM00000015606 6596 75.9 UdeM00000015606 XP\_045208571.1 33.1 169  
103 5 1 166 1 162 5.70E-11 75.9 6596 cellular

organisms;Eukaryota;Opisthokonta;Metazoa;Eumetazoa;Bilateria;Protostomia;Spiralia;Lophotrochozoa;Mollusca;Bivalvia;Autobranchia;Heteroconchia;Euherodonta;Imparidentia;Venerida;Veneroidea;Veneridae;Mercenaria;Mercenaria mercenaria

UdeM00000015607 6596 107.8 UdeM00000015607 XP\_045177032.1 41.2 153  
84 3 3 153 1 149 1.30E-20 107.8 6596 cellular

organisms;Eukaryota;Opisthokonta;Metazoa;Eumetazoa;Bilateria;Protostomia;Spiralia;Lophotrochozoa;Mollusca;Bivalvia;Autobranchia;Heteroconchia;Euherodonta;Imparidentia;Venerida;Veneroidea;Veneridae;Mercenaria;Mercenaria mercenaria

UdeM00000015608 29159 71.6 UdeM00000015608 XP\_034325686.1 31.9 160  
101 3 8 160 10 168 1.10E-09 71.6 29159 cellular

organisms;Eukaryota;Opisthokonta;Metazoa;Eumetazoa;Bilateria;Protostomia;Spiralia;Lophotrochozoa;Mollusca;Bivalvia;Autobranchia;Pteriormorphia;Ostreida;Ostreioidea;Ostreidae;Crassostrea;Crassostrea gigas

UdeM00000015609 219594 595.9 UdeM00000015609 XP\_032040424.1 27.5  
1664 1048 47 16 1611 861 2433 1.50E-166 595.9 219594  
cellular

organisms;Eukaryota;Opisthokonta;Metazoa;Eumetazoa;Bilateria;Deuterostomia;Chordata;Craniata;Vertebrata;Gnathostomata;Teleostomi;Euteleostomi;Sarcopterygii;Dipnotetrapodomorpha;Tetrapoda;Amniota;Sauropsida;Sauria;Archelosauria;Archosauria;Dinosauria;Saurischia;Theropoda;Coelurosauria;Aves;Neognathae;Galloanserae;Anseriformes;Anatidae;Aythyinae;Aythya;Aythya fuligula

UdeM00000015610 6596 124.4 UdeM00000015610 XP\_045177580.1 29.1 258  
146 4 19 275 4 225 2.20E-25 124.4 6596 cellular

organisms;Eukaryota;Opisthokonta;Metazoa;Eumetazoa;Bilateria;Protostomia;Spiralia;Lophotrochozoa;Mollusca;Bivalvia;Autobranchia;Heteroconchia;Euherodonta;Imparidentia;Venerida;Veneroidea;Veneridae;Mercenaria;Mercenaria mercenaria

UdeM00000015611 50402 488 UdeM00000015611 XP\_009888669.1 26 1360  
914 30 6 1327 1121 2426 3.70E-134 488 50402 cellular

organisms;Eukaryota;Opisthokonta;Metazoa;Eumetazoa;Bilateria;Deuterostomia;Chordata;Craniata;Vertebrata;Gnathostomata;Teleostomi;Euteleostomi;Sarcopterygii;Dipnotetrapodomorpha;Tetrapoda;Amniota;Sauropsida;Sauria;Archelosauria;Archosauria;Dinosauria;Saurischia;Theropoda;Coelurosauria;Aves;Neognathae;Charadriiformes;Charadriidae;Charadrius;Charadrius vociferus

UdeM00000015613 219594 593.2 UdeM00000015613 XP\_032040424.1 27.2  
1663 1056 45 16 1613 861 2433 1.00E-165 593.2 219594  
cellular

organisms;Eukaryota;Opisthokonta;Metazoa;Eumetazoa;Bilateria;Deuterostomia;Chordata;Craniata;Vertebrata;Gnathostomata;Teleostomi;Euteleostomi;Sarcopterygii;Dipnotetrapodomorpha;Tetrapoda;Amniota;Sauropsida;Sauria;Archel



osauria;Archosauria;Dinosauria;Saurischia;Theropoda;Coelurosauria;Aves;Neognathae;Galloanserae;Anseriformes;Anatidae;Aythyinae;Aythya;Aythya fuligula

UdeM00000015614 441366 392.1 UdeM00000015614 XP\_028318209.1 57.4  
284 121 0 1 284 671 954 6.00E-106 392.1 441366

cellular

organisms;Eukaryota;Opisthokonta;Metazoa;Eumetazoa;Bilateria;Deuterostomia;Chordata;Craniata;Vertebrata;Gnathostomata;Teleostomi;Euteleostomi;Actinopterygii;Actinopteri;Neopterygii;Teleostei;Osteoglossocephalai;Clupeocephala;Euteleosteomorpha;Neoteleostei;Eurypterygia;Ctenosquamata;Acanthomorphata;Euacanthomorphacea;Percomorphaceae;Ovalentaria;Blenniimorphae;Blenniiformes;Gobiesocoidei;Gobiesocidae;Gobiesocinae;Gouania;Gouania willdenowi

UdeM00000015615 6573 115.9 UdeM00000015615 XP\_021374984.1 63 81  
29 1 441 521 216 295 1.50E-22 115.9 6573 cellular

organisms;Eukaryota;Opisthokonta;Metazoa;Eumetazoa;Bilateria;Protostomia;Spiralia;Lophotrochozoa;Mollusca;Bivalvia;Autobranchia;Pteriormorphia;Pectinida;Pectinoidea;Pectinidae;Mizuhopecten;Mizuhopecten yessoensis

UdeM00000015616 6596 80.1 UdeM00000015616 XP\_045161982.1 52.9 70  
33 0 1 70 1 70 1.30E-12 80.1 6596 cellular

organisms;Eukaryota;Opisthokonta;Metazoa;Eumetazoa;Bilateria;Protostomia;Spiralia;Lophotrochozoa;Mollusca;Bivalvia;Autobranchia;Heteroconchia;Euheterodonta;Imparidentia;Venerida;Veneroidea;Veneridae;Mercenaria;Mercenaria mercenaria

UdeM00000015618 7604 187.2 UdeM00000015618 XP\_033641610.1 35.6 270  
166 4 5 268 42 309 2.70E-44 187.2 7604 cellular

organisms;Eukaryota;Opisthokonta;Metazoa;Eumetazoa;Bilateria;Deuterostomia;Echinodermata;Eleutherozoa;Asterozoa;Asteroidea;Forcipulatacea;Forcipulatacida;Asteroidea;Asteroidea;Asterias;Asterias rubens

UdeM00000015619 1250792 171.4 UdeM00000015619 XP\_041861569.1 36.6  
254 146 8 17 263 368 613 1.60E-39 171.4 1250792

cellular

organisms;Eukaryota;Opisthokonta;Metazoa;Eumetazoa;Bilateria;Deuterostomia;Chordata;Craniata;Vertebrata;Gnathostomata;Teleostomi;Euteleostomi;Actinopterygii;Actinopteri;Neopterygii;Teleostei;Osteoglossocephalai;Clupeocephala;Euteleosteomorpha;Neoteleostei;Eurypterygia;Ctenosquamata;Acanthomorphata;Euacanthomorphacea;Percomorphaceae;Ovalentaria;Atherinomorphae;Atheriniformes;Melanotaeniidae;Melanotaenia;Melanotaenia boesemani

UdeM00000015621 1250792 72 UdeM00000015621 XP\_041861567.1 50  
68 34 0 66 133 601 668 6.40E-10 72 1250792

cellular

organisms;Eukaryota;Opisthokonta;Metazoa;Eumetazoa;Bilateria;Deuterostomia;Chordata;Craniata;Vertebrata;Gnathostomata;Teleostomi;Euteleostomi;Actinopterygii;Actinopteri;Neopterygii;Teleostei;Osteoglossocephalai;Clupeocephala;Euteleosteomorpha;Neoteleostei;Eurypterygia;Ctenosquamata;Acanthomorphata;Euacanthomorphacea;Percomorphaceae;Ovalentaria;Atherinomorphae;Atheriniformes;Melanotaeniidae;Melanotaenia;Melanotaenia boesemani

UdeM00000015622 6565 173.3 UdeM00000015622 XP\_022333382.1 50.7 148  
72 1 1 148 219 365 2.30E-40 173.3 6565 cellular

organisms;Eukaryota;Opisthokonta;Metazoa;Eumetazoa;Bilateria;Protostomia;Spiralia;Lophotrochozoa;Mollusca;Bivalvia;Autobranchia;Pteriormorphia;Ostreida;Ostreoidea;Ostreidae;Crassostrea;Crassostrea virginica

UdeM00000015623 6565 102.8 UdeM00000015623 XP\_022333382.1 50.6 89  
43 1 1 89 253 340 2.40E-19 102.8 6565 cellular

organisms;Eukaryota;Opisthokonta;Metazoa;Eumetazoa;Bilateria;Protostomia;Spiralia;Lophotrochozoa;Mollusca;Bivalvia;Autobranchia;Pteriomorpha;Ostreida;Ostreioidea;Ostreidae;Crassostrea;Crassostrea virginica  
UdeM00000015624 6565 162.5 UdeM00000015624 XP\_022333382.1 56.1 123  
53 1 1 123 219 340 3.50E-37 162.5 6565 cellular

organisms;Eukaryota;Opisthokonta;Metazoa;Eumetazoa;Bilateria;Protostomia;Spiralia;Lophotrochozoa;Mollusca;Bivalvia;Autobranchia;Pteriomorpha;Ostreida;Ostreioidea;Ostreidae;Crassostrea;Crassostrea virginica  
UdeM00000015625 6565 242.7 UdeM00000015625 XP\_022333382.1 56.3 197  
81 1 13 204 1 197 4.30E-61 242.7 6565 cellular

organisms;Eukaryota;Opisthokonta;Metazoa;Eumetazoa;Bilateria;Protostomia;Spiralia;Lophotrochozoa;Mollusca;Bivalvia;Autobranchia;Pteriomorpha;Ostreida;Ostreioidea;Ostreidae;Crassostrea;Crassostrea virginica  
UdeM00000015626 6579 204.9 UdeM00000015626 XP\_033728194.1 35.2 366  
224 5 1 357 282 643 1.70E-49 204.9 6579 cellular

organisms;Eukaryota;Opisthokonta;Metazoa;Eumetazoa;Bilateria;Protostomia;Spiralia;Lophotrochozoa;Mollusca;Bivalvia;Autobranchia;Pteriomorpha;Pectinida;Pectinoidea;Pectinidae;Pecten;Pecten maximus  
UdeM00000015627 1735272 338.2 UdeM00000015627 XP\_041372570.1 62.7  
241 90 0 2 242 140 380 8.70E-90 338.2 1735272  
cellular

organisms;Eukaryota;Opisthokonta;Metazoa;Eumetazoa;Bilateria;Protostomia;Spiralia;Lophotrochozoa;Mollusca;Gastropoda;Neomphalina;Neomphaloidea;Peltospiridae;Gigantopelta;Gigantopelta aegis  
UdeM00000015628 6596 69.7 UdeM00000015628 XP\_045202117.1 47.1 68  
36 0 43 110 7 74 3.10E-09 69.7 6596 cellular

organisms;Eukaryota;Opisthokonta;Metazoa;Eumetazoa;Bilateria;Protostomia;Spiralia;Lophotrochozoa;Mollusca;Bivalvia;Autobranchia;Heteroconchia;Euheterodonta;Imparidentia;Venerida;Veneroidea;Veneridae;Mercenaria;Mercenaria mercenaria  
UdeM00000015630 37621 71.6 UdeM00000015630 XP\_014676916.1 36 111  
71 0 6 116 140 250 1.10E-09 71.6 37621 cellular

organisms;Eukaryota;Opisthokonta;Metazoa;Eumetazoa;Bilateria;Protostomia;Ecdysozoa;Scalidophora;Priapulida;Priapulimorpha;Priapulimorphida;Priapulidae;Priapululus;Priapululus caudatus  
UdeM00000015631 441366 439.1 UdeM00000015631 XP\_028318232.1 57.9  
323 136 0 2 324 71 393 4.80E-120 439.1 441366  
cellular

organisms;Eukaryota;Opisthokonta;Metazoa;Eumetazoa;Bilateria;Deuterostomia;Chordata;Craniata;Vertebrata;Gnathostomata;Teleostomi;Euteleostomi;Actinopterygii;Actinopteri;Neopterygii;Teleostei;Osteoglossocephalai;Clupeocephala;Euteleostei;Neoteleostei;Eurypterygia;Ctenosquamata;Acanthopterygii;Euacanthopterygii;Percomorphaceae;Ovalentaria;Blenniiformes;Blenniiformes;Gobiesocidae;Gobiesocinae;Gouania;Gouania willdenowi  
UdeM00000015632 6596 466.5 UdeM00000015632 XP\_045156247.1 42.9 597  
306 9 8 602 192 755 5.30E-128 466.5 6596 cellular

organisms;Eukaryota;Opisthokonta;Metazoa;Eumetazoa;Bilateria;Protostomia;Spiralia;Lophotrochozoa;Mollusca;Bivalvia;Autobranchia;Heteroconchia;Euheterodonta;Imparidentia;Venerida;Veneroidea;Veneridae;Mercenaria;Mercenaria mercenaria  
UdeM00000015633 151771 94 UdeM00000015633 XP\_028417120.1 27.9  
269 166 6 6 247 6 273 3.50E-16 94 151771  
cellular

organisms;Eukaryota;Opisthokonta;Metazoa;Eumetazoa;Cnidaria;Anthozoa;Octo  
corallia;Alcyonacea;Alcyoniina;Nephtheidae;Dendronephthya;Dendronephthya  
gigantea

|                 |        |       |                 |                |      |     |          |       |        |
|-----------------|--------|-------|-----------------|----------------|------|-----|----------|-------|--------|
| UdeM00000015634 | 210409 | 123.6 | UdeM00000015634 | XP_045107160.1 | 43.3 |     |          |       |        |
| 134             | 74     | 1     | 1               | 132            | 171  | 304 | 1.80E-25 | 123.6 | 210409 |

cellular

organisms;Eukaryota;Opisthokonta;Metazoa;Eumetazoa;Bilateria;Protostomia;  
Ecdysozoa;Panarthropoda;Arthropoda;Mandibulata;Pancrustacea;Crustacea;Mul  
ticrustacea;Malacostraca;Eumalacostraca;Eucarida;Decapoda;Pleocyemata;Bra  
chyura;Eubrachyura;Heterotremata;Portunoidea;Portunidae;Portunus;Portunus  
trituberculatus

|                 |       |       |                 |                |      |          |       |       |          |
|-----------------|-------|-------|-----------------|----------------|------|----------|-------|-------|----------|
| UdeM00000015635 | 90988 | 362.1 | UdeM00000015635 | XP_039537529.1 | 52.8 | 326      |       |       |          |
| 150             | 1     | 75    | 400             | 103            | 424  | 9.30E-97 | 362.1 | 90988 | cellular |

organisms;Eukaryota;Opisthokonta;Metazoa;Eumetazoa;Bilateria;Deuterostomi  
a;Chordata;Craniata;Vertebrata;Gnathostomata;Teleostomi;Euteleostomi;Acti  
nopterygii;Actinopteri;Neopterygii;Teleostei;Osteoglossocephalai;Clupeoce  
phala;Otomorpha;Ostariophysi;Otophysi;Cypriniphysae;Cypriniiformes;Cyprino  
idei;Leuciscidae;Pogonichthyinae;Pimephales;Pimephales promelas

|                 |        |       |                 |                |      |     |          |       |        |
|-----------------|--------|-------|-----------------|----------------|------|-----|----------|-------|--------|
| UdeM00000015636 | 441366 | 308.9 | UdeM00000015636 | XP_028318232.1 | 62.4 |     |          |       |        |
| 210             | 79     | 0     | 1               | 210            | 165  | 374 | 5.00E-81 | 308.9 | 441366 |

cellular

organisms;Eukaryota;Opisthokonta;Metazoa;Eumetazoa;Bilateria;Deuterostomi  
a;Chordata;Craniata;Vertebrata;Gnathostomata;Teleostomi;Euteleostomi;Acti  
nopterygii;Actinopteri;Neopterygii;Teleostei;Osteoglossocephalai;Clupeoce  
phala;Euteleosteomorpha;Neoteleostei;Eurypterygia;Ctenosquamata;Acanthomo  
rphata;Euacanthomorphacea;Percomorphaceae;Ovalentaria;Blenniimorphae;Blen  
niiformes;Gobiesocoidei;Gobiesocidae;Gobiesocinae;Gouania;Gouania  
willdenowi

|                 |        |     |                 |                |      |     |          |     |        |
|-----------------|--------|-----|-----------------|----------------|------|-----|----------|-----|--------|
| UdeM00000015637 | 151771 | 280 | UdeM00000015637 | XP_028408207.1 | 42.6 |     |          |     |        |
| 329             | 149    | 5   | 2               | 292            | 280  | 606 | 3.40E-72 | 280 | 151771 |

cellular

organisms;Eukaryota;Opisthokonta;Metazoa;Eumetazoa;Cnidaria;Anthozoa;Octo  
corallia;Alcyonacea;Alcyoniina;Nephtheidae;Dendronephthya;Dendronephthya  
gigantea

|                 |      |       |                 |                |      |          |       |      |          |
|-----------------|------|-------|-----------------|----------------|------|----------|-------|------|----------|
| UdeM00000015638 | 7741 | 229.2 | UdeM00000015638 | XP_019622111.1 | 45.8 | 251      |       |      |          |
| 133             | 3    | 2     | 251             | 30             | 278  | 5.90E-57 | 229.2 | 7741 | cellular |

organisms;Eukaryota;Opisthokonta;Metazoa;Eumetazoa;Bilateria;Deuterostomi  
a;Chordata;Cephalochordata;Leptocardii;Amphioxiformes;Branchiostomidae;Br  
anchiostoma;Branchiostoma belcheri

|                 |        |      |                 |                |      |    |          |      |        |
|-----------------|--------|------|-----------------|----------------|------|----|----------|------|--------|
| UdeM00000015642 | 210409 | 56.6 | UdeM00000015642 | XP_045105039.1 | 64.7 |    |          |      |        |
| 34              | 12     | 0    | 4               | 37             | 10   | 43 | 9.40E-06 | 56.6 | 210409 |

cellular

organisms;Eukaryota;Opisthokonta;Metazoa;Eumetazoa;Bilateria;Protostomia;  
Ecdysozoa;Panarthropoda;Arthropoda;Mandibulata;Pancrustacea;Crustacea;Mul  
ticrustacea;Malacostraca;Eumalacostraca;Eucarida;Decapoda;Pleocyemata;Bra  
chyura;Eubrachyura;Heterotremata;Portunoidea;Portunidae;Portunus;Portunus  
trituberculatus

|                 |        |       |                 |                |      |     |          |       |        |
|-----------------|--------|-------|-----------------|----------------|------|-----|----------|-------|--------|
| UdeM00000015643 | 210409 | 127.5 | UdeM00000015643 | XP_045107160.1 | 44.8 |     |          |       |        |
| 134             | 72     | 1     | 1               | 132            | 171  | 304 | 1.30E-26 | 127.5 | 210409 |

cellular

organisms;Eukaryota;Opisthokonta;Metazoa;Eumetazoa;Bilateria;Protostomia;  
Ecdysozoa;Panarthropoda;Arthropoda;Mandibulata;Pancrustacea;Crustacea;Mul  
ticrustacea;Malacostraca;Eumalacostraca;Eucarida;Decapoda;Pleocyemata;Bra

chyura;Eubrachyura;Heterotremata;Portunoidea;Portunidae;Portunus;Portunus trituberculatus

|                 |         |       |                 |                |     |     |          |       |         |
|-----------------|---------|-------|-----------------|----------------|-----|-----|----------|-------|---------|
| UdeM00000015644 | 1735272 | 171.4 | UdeM00000015644 | XP_041372570.1 | 65  |     |          |       |         |
| 120             | 42      | 0     | 1               | 120            | 202 | 321 | 7.10E-40 | 171.4 | 1735272 |

cellular

organisms;Eukaryota;Opisthokonta;Metazoa;Eumetazoa;Bilateria;Protostomia;Spiralia;Lophotrochozoa;Mollusca;Gastropoda;Neomphalina;Neomphaloidea;Pel tospiridae;Gigantopelta;Gigantopelta aegis

|                 |         |       |                 |                |      |     |          |       |         |
|-----------------|---------|-------|-----------------|----------------|------|-----|----------|-------|---------|
| UdeM00000015645 | 1735272 | 278.1 | UdeM00000015645 | XP_041372570.1 | 62.6 |     |          |       |         |
| 203             | 76      | 0     | 1               | 203            | 178  | 380 | 9.00E-72 | 278.1 | 1735272 |

cellular

organisms;Eukaryota;Opisthokonta;Metazoa;Eumetazoa;Bilateria;Protostomia;Spiralia;Lophotrochozoa;Mollusca;Gastropoda;Neomphalina;Neomphaloidea;Pel tospiridae;Gigantopelta;Gigantopelta aegis

|                 |         |       |                 |                |      |     |          |       |         |
|-----------------|---------|-------|-----------------|----------------|------|-----|----------|-------|---------|
| UdeM00000015646 | 1735272 | 266.5 | UdeM00000015646 | XP_041372570.1 | 63.6 |     |          |       |         |
| 187             | 68      | 0     | 1               | 187            | 178  | 364 | 2.70E-68 | 266.5 | 1735272 |

cellular

organisms;Eukaryota;Opisthokonta;Metazoa;Eumetazoa;Bilateria;Protostomia;Spiralia;Lophotrochozoa;Mollusca;Gastropoda;Neomphalina;Neomphaloidea;Pel tospiridae;Gigantopelta;Gigantopelta aegis

|                 |       |     |                 |                |      |          |     |       |          |
|-----------------|-------|-----|-----------------|----------------|------|----------|-----|-------|----------|
| UdeM00000015647 | 50390 | 151 | UdeM00000015647 | XP_028140040.1 | 56.2 | 112      |     |       |          |
| 49              | 0     | 2   | 113             | 186            | 297  | 1.00E-33 | 151 | 50390 | cellular |

organisms;Eukaryota;Opisthokonta;Metazoa;Eumetazoa;Bilateria;Protostomia;Ecdysozoa;Panarthropoda;Arthropoda;Mandibulata;Pancrustacea;Hexapoda;Insecta;Dicondylia;Pterygota;Neoptera;Endopterygota;Coleoptera;Polyphaga;Cucujiformia;Chrysomeloidea;Chrysomelidae;Galerucinae;Luperini;Diabroticina;Diabroticites;Diabrotica;Diabrotica virgifera;Diabrotica virgifera virgifera

|                 |         |       |                 |                |      |     |          |       |         |
|-----------------|---------|-------|-----------------|----------------|------|-----|----------|-------|---------|
| UdeM00000015648 | 1735272 | 170.2 | UdeM00000015648 | XP_041372570.1 | 64.2 |     |          |       |         |
| 120             | 43      | 0     | 1               | 120            | 202  | 321 | 1.60E-39 | 170.2 | 1735272 |

cellular

organisms;Eukaryota;Opisthokonta;Metazoa;Eumetazoa;Bilateria;Protostomia;Spiralia;Lophotrochozoa;Mollusca;Gastropoda;Neomphalina;Neomphaloidea;Pel tospiridae;Gigantopelta;Gigantopelta aegis

|                 |        |       |                 |                |      |     |           |       |        |
|-----------------|--------|-------|-----------------|----------------|------|-----|-----------|-------|--------|
| UdeM00000015649 | 441366 | 465.7 | UdeM00000015649 | XP_028318215.1 | 56.7 |     |           |       |        |
| 358             | 150    | 2     | 2               | 355            | 372  | 728 | 5.30E-128 | 465.7 | 441366 |

cellular

organisms;Eukaryota;Opisthokonta;Metazoa;Eumetazoa;Bilateria;Deuterostomia;Chordata;Craniata;Vertebrata;Gnathostomata;Teleostomi;Euteleostomi;Actinopterygii;Actinopteri;Neopterygii;Teleostei;Osteoglossocephalai;Clupeocephala;Euteleosteoromorpha;Neoteleostei;Eurypterygia;Ctenosquamata;Acanthomorpha;Euacanthomorpha;Percomorphaceae;Ovalentaria;Blenniiformes;Blenniiformes;Gobiesocoidei;Gobiesocidae;Gobiesocinae;Gouania;Gouania willdenowi

|                 |        |       |                 |                |      |     |           |       |        |
|-----------------|--------|-------|-----------------|----------------|------|-----|-----------|-------|--------|
| UdeM00000015650 | 150288 | 480.3 | UdeM00000015650 | XP_020788097.1 | 56.1 |     |           |       |        |
| 358             | 155    | 1     | 2               | 357            | 215  | 572 | 2.10E-132 | 480.3 | 150288 |

cellular

organisms;Eukaryota;Opisthokonta;Metazoa;Eumetazoa;Bilateria;Deuterostomia;Chordata;Craniata;Vertebrata;Gnathostomata;Teleostomi;Euteleostomi;Actinopterygii;Actinopteri;Neopterygii;Teleostei;Osteoglossocephalai;Clupeocephala;Euteleosteoromorpha;Neoteleostei;Eurypterygia;Ctenosquamata;Acanthomorpha;Euacanthomorpha;Percomorphaceae;Gobiaria;Gobiiformes;Gobioidei;Gobiidae;Oxudercinae;Boleophthalmus;Boleophthalmus pectinirostris

UdeM00000015651 70779 83.6 UdeM00000015651 XP\_015777172.1 38.7 93  
 57 0 6 98 45 137 1.70E-13 83.6 70779 cellular  
 organisms;Eukaryota;Opisthokonta;Metazoa;Eumetazoa;Cnidaria;Anthozoa;Hexa  
 corallia;Scleractinia;Astrocoeniina;Acroporidae;Acropora;Acropora  
 digitifera

UdeM00000015652 50390 578.9 UdeM00000015652 XP\_028154228.1 53.6 403  
 187 0 1 403 126 528 5.00E-162 578.9 50390 cellular  
 organisms;Eukaryota;Opisthokonta;Metazoa;Eumetazoa;Bilateria;Protostomia;  
 Ecdysozoa;Panarthropoda;Arthropoda;Mandibulata;Pancrustacea;Hexapoda;Inse  
 cta;Dicondylia;Pterygota;Neoptera;Endopterygota;Coleoptera;Polyphaga;Cucu  
 jiformia;Chrysomeloidea;Chrysomelidae;Galerucinae;Luperini;Diabroticina;D  
 iabroticites;Diabrotica;Diabrotica virgifera;Diabrotica virgifera  
 virgifera

UdeM00000044436 6596 114.8 UdeM00000044436 XP\_045180427.1 39 177  
 105 2 76 250 98 273 1.70E-22 114.8 6596 cellular  
 organisms;Eukaryota;Opisthokonta;Metazoa;Eumetazoa;Bilateria;Protostomia;  
 Spiralia;Lophotrochozoa;Mollusca;Bivalvia;Autobranchia;Heteroconchia;Euhe  
 terodonta;Imparidentia;Venerida;Veneroidea;Veneridae;Mercenaria;Mercenari  
 a mercenaria

UdeM00000044437 6526 72.4 UdeM00000044437 XP\_013065713.1 26.6 222  
 120 7 40 254 1085 1270 1.50E-09 72.4 6526 cellular  
 organisms;Eukaryota;Opisthokonta;Metazoa;Eumetazoa;Bilateria;Protostomia;  
 Spiralia;Lophotrochozoa;Mollusca;Gastropoda;Heterobranchia;Euthyneura;Pan  
 pulmonata;Hygrophila;Lymnaeoida;Planorbidae;Biomphalaria;Biomphalaria  
 glabrata

UdeM00000029148 6565 211.1 UdeM00000029148 XP\_022327987.1 44.5 218  
 119 1 2 217 34 251 2.00E-51 211.1 6565 cellular  
 organisms;Eukaryota;Opisthokonta;Metazoa;Eumetazoa;Bilateria;Protostomia;  
 Spiralia;Lophotrochozoa;Mollusca;Bivalvia;Autobranchia;Pteriormorphia;Ostr  
 eida;Ostreoida;Ostreidae;Crassostrea;Crassostrea virginica

UdeM00000029149 6596 213 UdeM00000029149 XP\_045210908.1 43.3 238  
 127 4 21 251 38 274 4.40E-52 213 6596 cellular  
 organisms;Eukaryota;Opisthokonta;Metazoa;Eumetazoa;Bilateria;Protostomia;  
 Spiralia;Lophotrochozoa;Mollusca;Bivalvia;Autobranchia;Heteroconchia;Euhe  
 terodonta;Imparidentia;Venerida;Veneroidea;Veneridae;Mercenaria;Mercenari  
 a mercenaria

UdeM00000029151 6565 215.3 UdeM00000029151 XP\_022327987.1 45.4 218  
 115 1 2 215 34 251 1.50E-52 215.3 6565 cellular  
 organisms;Eukaryota;Opisthokonta;Metazoa;Eumetazoa;Bilateria;Protostomia;  
 Spiralia;Lophotrochozoa;Mollusca;Bivalvia;Autobranchia;Pteriormorphia;Ostr  
 eida;Ostreoida;Ostreidae;Crassostrea;Crassostrea virginica

UdeM00000029152 6596 555.8 UdeM00000029152 XP\_045190076.1 52.7 573  
 221 4 108 642 51 611 7.10E-155 555.8 6596 cellular  
 organisms;Eukaryota;Opisthokonta;Metazoa;Eumetazoa;Bilateria;Protostomia;  
 Spiralia;Lophotrochozoa;Mollusca;Bivalvia;Autobranchia;Heteroconchia;Euhe  
 terodonta;Imparidentia;Venerida;Veneroidea;Veneridae;Mercenaria;Mercenari  
 a mercenaria

UdeM00000029153 7167 137.1 UdeM00000029153 XP\_035787911.1 24.1 507  
 224 11 12 365 49 547 4.70E-29 137.1 7167 cellular  
 organisms;Eukaryota;Opisthokonta;Metazoa;Eumetazoa;Bilateria;Protostomia;  
 Ecdysozoa;Panarthropoda;Arthropoda;Mandibulata;Pancrustacea;Hexapoda;Inse  
 cta;Dicondylia;Pterygota;Neoptera;Endopterygota;Diptera;Nematocera;Culico  
 morpha;Culicoidea;Culicidae;Anophelinae;Anopheles;Nyssorhynchus;albimanus  
 section;albimanus series;Anopheles albimanus

UdeM00000029154 6565 219.9 UdeM00000029154 XP\_022327987.1 46.3 218  
 115 1 2 217 34 251 3.60E-54 219.9 6565 cellular  
 organisms;Eukaryota;Opisthokonta;Metazoa;Eumetazoa;Bilateria;Protostomia;  
 Spiralia;Lophotrochozoa;Mollusca;Bivalvia;Autobranchia;Pteriormorphia;Ostr  
 eida;Ostreoidea;Ostreidae;Crassostrea;Crassostrea virginica  
 UdeM00000029155 6596 219.2 UdeM00000029155 XP\_045210908.1 45.7 232  
 117 3 27 249 43 274 9.80E-54 219.2 6596 cellular  
 organisms;Eukaryota;Opisthokonta;Metazoa;Eumetazoa;Bilateria;Protostomia;  
 Spiralia;Lophotrochozoa;Mollusca;Bivalvia;Autobranchia;Heteroconchia;Euhe  
 terodonta;Imparidentia;Venerida;Veneroidea;Veneridae;Mercenaria;Mercenari  
 a mercenaria  
 UdeM00000029157 7739 87 UdeM00000029157 XP\_035698725.1 31.5 168  
 102 3 1 167 168 323 3.50E-14 87 7739 cellular  
 organisms;Eukaryota;Opisthokonta;Metazoa;Eumetazoa;Bilateria;Deuterostomi  
 a;Chordata;Cephalochordata;Leptocardii;Amphioxiformes;Branchiostomidae;Br  
 anchiostoma;Branchiostoma floridae  
 UdeM00000029158 6596 556.2 UdeM00000029158 XP\_045190076.1 52.7 573  
 221 4 108 642 51 611 5.50E-155 556.2 6596 cellular  
 organisms;Eukaryota;Opisthokonta;Metazoa;Eumetazoa;Bilateria;Protostomia;  
 Spiralia;Lophotrochozoa;Mollusca;Bivalvia;Autobranchia;Heteroconchia;Euhe  
 terodonta;Imparidentia;Venerida;Veneroidea;Veneridae;Mercenaria;Mercenari  
 a mercenaria  
 UdeM00000029161 6579 86.7 UdeM00000029161 XP\_033757657.1 27.6 250  
 165 5 34 280 425 661 5.30E-14 86.7 6579 cellular  
 organisms;Eukaryota;Opisthokonta;Metazoa;Eumetazoa;Bilateria;Protostomia;  
 Spiralia;Lophotrochozoa;Mollusca;Bivalvia;Autobranchia;Pteriormorphia;Pect  
 inida;Pectinoidea;Pectinidae;Pecten;Pecten maximus  
 UdeM00000029162 6526 80.1 UdeM00000029162 XP\_013089956.1 34.2 146  
 81 4 16 160 10 141 3.00E-12 80.1 6526 cellular  
 organisms;Eukaryota;Opisthokonta;Metazoa;Eumetazoa;Bilateria;Protostomia;  
 Spiralia;Lophotrochozoa;Mollusca;Gastropoda;Heterobranchia;Euthyneura;Pan  
 pulmonata;Hygrophila;Lymnaeioidea;Planorbidae;Biomphalaria;Biomphalaria  
 glabrata  
 UdeM00000029164 6565 179.9 UdeM00000029164 XP\_022327987.1 41.7 218  
 96 2 2 188 34 251 3.60E-42 179.9 6565 cellular  
 organisms;Eukaryota;Opisthokonta;Metazoa;Eumetazoa;Bilateria;Protostomia;  
 Spiralia;Lophotrochozoa;Mollusca;Bivalvia;Autobranchia;Pteriormorphia;Ostr  
 eida;Ostreoidea;Ostreidae;Crassostrea;Crassostrea virginica  
 UdeM00000029166 151771 342.8 UdeM00000029166 XP\_028417042.1 46.9  
 426 191 12 1 407 745 1154 6.00E-91 342.8 151771  
 cellular  
 organisms;Eukaryota;Opisthokonta;Metazoa;Eumetazoa;Cnidaria;Anthozoa;Octo  
 corallia;Alcyonacea;Alcyoniina;Nephtheidae;Dendronephthya;Dendronephthya  
 gigantea  
 UdeM00000029167 6565 105.5 UdeM00000029167 XP\_022305631.1 48.2 110  
 57 0 1 110 18 127 4.90E-20 105.5 6565 cellular  
 organisms;Eukaryota;Opisthokonta;Metazoa;Eumetazoa;Bilateria;Protostomia;  
 Spiralia;Lophotrochozoa;Mollusca;Bivalvia;Autobranchia;Pteriormorphia;Ostr  
 eida;Ostreoidea;Ostreidae;Crassostrea;Crassostrea virginica  
 UdeM00000029168 6596 196.1 UdeM00000029168 XP\_045172484.1 24 667  
 457 15 8 650 70 710 1.50E-46 196.1 6596 cellular  
 organisms;Eukaryota;Opisthokonta;Metazoa;Eumetazoa;Bilateria;Protostomia;  
 Spiralia;Lophotrochozoa;Mollusca;Bivalvia;Autobranchia;Heteroconchia;Euhe

terodonta;Imparidentia;Venerida;Veneroidea;Veneridae;Mercenaria;Mercenari  
 a mercenaria  
 UdeM00000029170 6596 419.9 UdeM00000029170 XP\_045198998.1 44.4 513  
 273 5 88 593 137 644 5.60E-114 419.9 6596 cellular  
 organisms;Eukaryota;Opisthokonta;Metazoa;Eumetazoa;Bilateria;Protostomia;  
 Spiralia;Lophotrochozoa;Mollusca;Bivalvia;Autobranchia;Heteroconchia;Euhe  
 terodonta;Imparidentia;Venerida;Veneroidea;Veneridae;Mercenaria;Mercenari  
 a mercenaria  
 UdeM00000029171 6596 76.6 UdeM00000029171 XP\_045166996.1 55 60  
 27 0 103 162 395 454 3.20E-11 76.6 6596 cellular  
 organisms;Eukaryota;Opisthokonta;Metazoa;Eumetazoa;Bilateria;Protostomia;  
 Spiralia;Lophotrochozoa;Mollusca;Bivalvia;Autobranchia;Heteroconchia;Euhe  
 terodonta;Imparidentia;Venerida;Veneroidea;Veneridae;Mercenaria;Mercenari  
 a mercenaria  
 UdeM00000029172 6596 632.1 UdeM00000029172 XP\_045169182.1 57.1 560  
 211 5 1 536 1 555 6.70E-178 632.1 6596 cellular  
 organisms;Eukaryota;Opisthokonta;Metazoa;Eumetazoa;Bilateria;Protostomia;  
 Spiralia;Lophotrochozoa;Mollusca;Bivalvia;Autobranchia;Heteroconchia;Euhe  
 terodonta;Imparidentia;Venerida;Veneroidea;Veneridae;Mercenaria;Mercenari  
 a mercenaria  
 UdeM00000029173 6573 114.8 UdeM00000029173 XP\_021368347.1 23.9 489  
 331 12 31 502 169 633 3.40E-22 114.8 6573 cellular  
 organisms;Eukaryota;Opisthokonta;Metazoa;Eumetazoa;Bilateria;Protostomia;  
 Spiralia;Lophotrochozoa;Mollusca;Bivalvia;Autobranchia;Pteriormorphia;Pect  
 inida;Pectinoidea;Pectinidae;Mizuhopecten;Mizuhopecten yessoensis  
 UdeM00000029174 6596 159.1 UdeM00000029174 XP\_045193365.1 54.6 130  
 59 0 1 130 106 235 4.00E-36 159.1 6596 cellular  
 organisms;Eukaryota;Opisthokonta;Metazoa;Eumetazoa;Bilateria;Protostomia;  
 Spiralia;Lophotrochozoa;Mollusca;Bivalvia;Autobranchia;Heteroconchia;Euhe  
 terodonta;Imparidentia;Venerida;Veneroidea;Veneridae;Mercenaria;Mercenari  
 a mercenaria  
 UdeM00000029175 6596 206.8 UdeM00000029175 XP\_045193365.1 56.6 166  
 72 0 169 334 70 235 4.20E-50 206.8 6596 cellular  
 organisms;Eukaryota;Opisthokonta;Metazoa;Eumetazoa;Bilateria;Protostomia;  
 Spiralia;Lophotrochozoa;Mollusca;Bivalvia;Autobranchia;Heteroconchia;Euhe  
 terodonta;Imparidentia;Venerida;Veneroidea;Veneridae;Mercenaria;Mercenari  
 a mercenaria  
 UdeM00000029176 1735272 61.6 UdeM00000029176 XP\_041374757.1 53.8  
 65 30 0 2 66 280 344 5.60E-07 61.6 1735272  
 cellular  
 organisms;Eukaryota;Opisthokonta;Metazoa;Eumetazoa;Bilateria;Protostomia;  
 Spiralia;Lophotrochozoa;Mollusca;Gastropoda;Neomphalina;Neomphaloidea;Pel  
 tospiridae;Gigantopelta;Gigantopelta aegis  
 UdeM00000029178 6596 184.9 UdeM00000029178 XP\_045193365.1 49.2 181  
 77 1 17 197 70 235 1.00E-43 184.9 6596 cellular  
 organisms;Eukaryota;Opisthokonta;Metazoa;Eumetazoa;Bilateria;Protostomia;  
 Spiralia;Lophotrochozoa;Mollusca;Bivalvia;Autobranchia;Heteroconchia;Euhe  
 terodonta;Imparidentia;Venerida;Veneroidea;Veneridae;Mercenaria;Mercenari  
 a mercenaria  
 UdeM00000029179 6596 186.4 UdeM00000029179 XP\_045193365.1 54.2 166  
 76 0 202 367 70 235 6.50E-44 186.4 6596 cellular  
 organisms;Eukaryota;Opisthokonta;Metazoa;Eumetazoa;Bilateria;Protostomia;  
 Spiralia;Lophotrochozoa;Mollusca;Bivalvia;Autobranchia;Heteroconchia;Euhe

terodonta;Imparidentia;Venerida;Veneroidea;Veneridae;Mercenaria;Mercenari  
 a mercenaria  
 UdeM00000029181 6596 206.5 UdeM00000029181 XP\_045193365.1 55.4 166  
 74 0 171 336 72 237 5.60E-50 206.5 6596 cellular  
 organisms;Eukaryota;Opisthokonta;Metazoa;Eumetazoa;Bilateria;Protostomia;  
 Spiralia;Lophotrochozoa;Mollusca;Bivalvia;Autobranchia;Heteroconchia;Euhe  
 terodonta;Imparidentia;Venerida;Veneroidea;Veneridae;Mercenaria;Mercenari  
 a mercenaria  
 UdeM00000029182 6596 225.3 UdeM00000029182 XP\_045193365.1 59 178  
 72 1 244 420 68 245 1.40E-55 225.3 6596 cellular  
 organisms;Eukaryota;Opisthokonta;Metazoa;Eumetazoa;Bilateria;Protostomia;  
 Spiralia;Lophotrochozoa;Mollusca;Bivalvia;Autobranchia;Heteroconchia;Euhe  
 terodonta;Imparidentia;Venerida;Veneroidea;Veneridae;Mercenaria;Mercenari  
 a mercenaria  
 UdeM00000029183 6596 225.7 UdeM00000029183 XP\_045193365.1 56.5 186  
 79 2 59 242 58 243 6.40E-56 225.7 6596 cellular  
 organisms;Eukaryota;Opisthokonta;Metazoa;Eumetazoa;Bilateria;Protostomia;  
 Spiralia;Lophotrochozoa;Mollusca;Bivalvia;Autobranchia;Heteroconchia;Euhe  
 terodonta;Imparidentia;Venerida;Veneroidea;Veneridae;Mercenaria;Mercenari  
 a mercenaria  
 UdeM00000029185 6596 201.1 UdeM00000029185 XP\_045193365.1 54.2 166  
 76 0 186 351 72 237 2.40E-48 201.1 6596 cellular  
 organisms;Eukaryota;Opisthokonta;Metazoa;Eumetazoa;Bilateria;Protostomia;  
 Spiralia;Lophotrochozoa;Mollusca;Bivalvia;Autobranchia;Heteroconchia;Euhe  
 terodonta;Imparidentia;Venerida;Veneroidea;Veneridae;Mercenaria;Mercenari  
 a mercenaria  
 UdeM00000029186 6596 218.8 UdeM00000029186 XP\_045193365.1 57.3 178  
 75 1 221 397 68 245 1.30E-53 218.8 6596 cellular  
 organisms;Eukaryota;Opisthokonta;Metazoa;Eumetazoa;Bilateria;Protostomia;  
 Spiralia;Lophotrochozoa;Mollusca;Bivalvia;Autobranchia;Heteroconchia;Euhe  
 terodonta;Imparidentia;Venerida;Veneroidea;Veneridae;Mercenaria;Mercenari  
 a mercenaria  
 UdeM00000029187 6596 171.8 UdeM00000029187 XP\_045193365.1 62.4 125  
 46 1 1 124 119 243 5.80E-40 171.8 6596 cellular  
 organisms;Eukaryota;Opisthokonta;Metazoa;Eumetazoa;Bilateria;Protostomia;  
 Spiralia;Lophotrochozoa;Mollusca;Bivalvia;Autobranchia;Heteroconchia;Euhe  
 terodonta;Imparidentia;Venerida;Veneroidea;Veneridae;Mercenaria;Mercenari  
 a mercenaria  
 UdeM00000029188 6596 141 UdeM00000029188 XP\_045193365.1 60.4 106  
 42 0 6 111 130 235 1.00E-30 141 6596 cellular  
 organisms;Eukaryota;Opisthokonta;Metazoa;Eumetazoa;Bilateria;Protostomia;  
 Spiralia;Lophotrochozoa;Mollusca;Bivalvia;Autobranchia;Heteroconchia;Euhe  
 terodonta;Imparidentia;Venerida;Veneroidea;Veneridae;Mercenaria;Mercenari  
 a mercenaria  
 UdeM00000029189 6596 124 UdeM00000029189 XP\_045202346.1 40 160  
 92 2 6 164 16 172 2.00E-25 124 6596 cellular  
 organisms;Eukaryota;Opisthokonta;Metazoa;Eumetazoa;Bilateria;Protostomia;  
 Spiralia;Lophotrochozoa;Mollusca;Bivalvia;Autobranchia;Heteroconchia;Euhe  
 terodonta;Imparidentia;Venerida;Veneroidea;Veneridae;Mercenaria;Mercenari  
 a mercenaria  
 UdeM00000029190 6596 140.2 UdeM00000029190 XP\_045183440.1 43.7 183  
 52 2 1 132 198 380 3.40E-30 140.2 6596 cellular  
 organisms;Eukaryota;Opisthokonta;Metazoa;Eumetazoa;Bilateria;Protostomia;  
 Spiralia;Lophotrochozoa;Mollusca;Bivalvia;Autobranchia;Heteroconchia;Euhe



terodonta;Imparidentia;Venerida;Veneroidea;Veneridae;Mercenaria;Mercenari  
 a mercenaria  
 UdeM00000029191 7574 95.1 UdeM00000029191 XP\_013396733.1 34.3 198  
 87 4 74 228 51 248 1.20E-16 95.1 7574 cellular  
 organisms;Eukaryota;Opisthokonta;Metazoa;Eumetazoa;Bilateria;Protostomia;  
 Spiralia;Lophotrochozoa;Brachiopoda;Linguliformea;Lingulata;Lingulida;Lin  
 guloidea;Lingulidae;Lingula;Lingula anatina  
 UdeM00000029193 29159 203 UdeM00000029193 XP\_034302502.1 45 240  
 130 2 12 250 103 341 5.20E-49 203 29159 cellular  
 organisms;Eukaryota;Opisthokonta;Metazoa;Eumetazoa;Bilateria;Protostomia;  
 Spiralia;Lophotrochozoa;Mollusca;Bivalvia;Autobranchia;Pteriormorphia;Ostr  
 eida;Ostreoidea;Ostreidae;Crassostrea;Crassostrea gigas  
 UdeM00000029194 6565 260.8 UdeM00000029194 XP\_022326632.1 52.7 222  
 104 1 8 229 78 298 1.70E-66 260.8 6565 cellular  
 organisms;Eukaryota;Opisthokonta;Metazoa;Eumetazoa;Bilateria;Protostomia;  
 Spiralia;Lophotrochozoa;Mollusca;Bivalvia;Autobranchia;Pteriormorphia;Ostr  
 eida;Ostreoidea;Ostreidae;Crassostrea;Crassostrea virginica  
 UdeM00000029196 6579 93.6 UdeM00000029196 XP\_033726575.1 30.5 190  
 121 3 84 267 180 364 4.50E-16 93.6 6579 cellular  
 organisms;Eukaryota;Opisthokonta;Metazoa;Eumetazoa;Bilateria;Protostomia;  
 Spiralia;Lophotrochozoa;Mollusca;Bivalvia;Autobranchia;Pteriormorphia;Pect  
 inida;Pectinoidea;Pectinidae;Pecten;Pecten maximus  
 UdeM00000029197 6579 104.8 UdeM00000029197 XP\_033726576.1 79.4 63  
 9 2 25 83 13 75 5.60E-20 104.8 6579 cellular  
 organisms;Eukaryota;Opisthokonta;Metazoa;Eumetazoa;Bilateria;Protostomia;  
 Spiralia;Lophotrochozoa;Mollusca;Bivalvia;Autobranchia;Pteriormorphia;Pect  
 inida;Pectinoidea;Pectinidae;Pecten;Pecten maximus  
 UdeM00000029198 6596 146.7 UdeM00000029198 XP\_045187141.1 89.2 74  
 8 0 5 78 734 807 3.20E-32 146.7 6596 cellular  
 organisms;Eukaryota;Opisthokonta;Metazoa;Eumetazoa;Bilateria;Protostomia;  
 Spiralia;Lophotrochozoa;Mollusca;Bivalvia;Autobranchia;Heteroconchia;Euhe  
 terodonta;Imparidentia;Venerida;Veneroidea;Veneridae;Mercenaria;Mercenari  
 a mercenaria  
 UdeM00000029199 6596 146.7 UdeM00000029199 XP\_045187141.1 89.2 74  
 8 0 5 78 734 807 3.20E-32 146.7 6596 cellular  
 organisms;Eukaryota;Opisthokonta;Metazoa;Eumetazoa;Bilateria;Protostomia;  
 Spiralia;Lophotrochozoa;Mollusca;Bivalvia;Autobranchia;Heteroconchia;Euhe  
 terodonta;Imparidentia;Venerida;Veneroidea;Veneridae;Mercenaria;Mercenari  
 a mercenaria  
 UdeM00000029200 6579 261.9 UdeM00000029200 XP\_033727722.1 74.5 165  
 39 1 34 198 480 641 6.70E-67 261.9 6579 cellular  
 organisms;Eukaryota;Opisthokonta;Metazoa;Eumetazoa;Bilateria;Protostomia;  
 Spiralia;Lophotrochozoa;Mollusca;Bivalvia;Autobranchia;Pteriormorphia;Pect  
 inida;Pectinoidea;Pectinidae;Pecten;Pecten maximus  
 UdeM00000029201 6596 241.9 UdeM00000029201 XP\_045164592.1 59.9 182  
 73 0 1 182 1 182 6.90E-61 241.9 6596 cellular  
 organisms;Eukaryota;Opisthokonta;Metazoa;Eumetazoa;Bilateria;Protostomia;  
 Spiralia;Lophotrochozoa;Mollusca;Bivalvia;Autobranchia;Heteroconchia;Euhe  
 terodonta;Imparidentia;Venerida;Veneroidea;Veneridae;Mercenaria;Mercenari  
 a mercenaria  
 UdeM00000029202 6579 5529.9 UdeM00000029202 XP\_033735276.1 82.1  
 3360 593 7 6 3361 3 3356 0.00E+00 5529.9 6579  
 cellular  
 organisms;Eukaryota;Opisthokonta;Metazoa;Eumetazoa;Bilateria;Protostomia;

Spiralia;Lophotrochozoa;Mollusca;Bivalvia;Autobranchia;Pteriormorphia;Pectinida;Pectinoidea;Pectinidae;Pecten;Pecten maximus

UdeM00000029203 6579 7630.4 UdeM00000029203 XP\_033735278.1 81.7  
4654 839 10 6 4652 3 4649 0.00E+00 7630.4 6579  
cellular

organisms;Eukaryota;Opisthokonta;Metazoa;Eumetazoa;Bilateria;Protostomia;Spiralia;Lophotrochozoa;Mollusca;Bivalvia;Autobranchia;Pteriormorphia;Pectinida;Pectinoidea;Pectinidae;Pecten;Pecten maximus

UdeM00000029204 6596 2207.9 UdeM00000029204 XP\_045213463.1 80.3  
1346 264 1 1 1346 3060 4404 0.00E+00 2207.9 6596  
cellular

organisms;Eukaryota;Opisthokonta;Metazoa;Eumetazoa;Bilateria;Protostomia;Spiralia;Lophotrochozoa;Mollusca;Bivalvia;Autobranchia;Heteroconchia;Euheterodonta;Imparidentia;Venerida;Veneroidea;Veneridae;Mercenaria;Mercenaria mercenaria

UdeM00000029205 6596 2200.6 UdeM00000029205 XP\_045213463.1 80.3  
1346 259 2 1 1341 3060 4404 0.00E+00 2200.6 6596  
cellular

organisms;Eukaryota;Opisthokonta;Metazoa;Eumetazoa;Bilateria;Protostomia;Spiralia;Lophotrochozoa;Mollusca;Bivalvia;Autobranchia;Heteroconchia;Euheterodonta;Imparidentia;Venerida;Veneroidea;Veneridae;Mercenaria;Mercenaria mercenaria

UdeM00000029206 6596 780.8 UdeM00000029206 XP\_045172841.1 94.8 440  
23 0 13 452 1 440 9.50E-223 780.8 6596 cellular

organisms;Eukaryota;Opisthokonta;Metazoa;Eumetazoa;Bilateria;Protostomia;Spiralia;Lophotrochozoa;Mollusca;Bivalvia;Autobranchia;Heteroconchia;Euheterodonta;Imparidentia;Venerida;Veneroidea;Veneridae;Mercenaria;Mercenaria mercenaria

UdeM00000029207 6596 780 UdeM00000029207 XP\_045172841.1 94.8 440  
23 0 1 440 1 440 1.60E-222 780 6596 cellular

organisms;Eukaryota;Opisthokonta;Metazoa;Eumetazoa;Bilateria;Protostomia;Spiralia;Lophotrochozoa;Mollusca;Bivalvia;Autobranchia;Heteroconchia;Euheterodonta;Imparidentia;Venerida;Veneroidea;Veneridae;Mercenaria;Mercenaria mercenaria

UdeM00000029209 6573 248.8 UdeM00000029209 XP\_021378476.1 78.3 152  
31 1 1 152 1 150 4.50E-63 248.8 6573 cellular

organisms;Eukaryota;Opisthokonta;Metazoa;Eumetazoa;Bilateria;Protostomia;Spiralia;Lophotrochozoa;Mollusca;Bivalvia;Autobranchia;Pteriormorphia;Pectinida;Pectinoidea;Pectinidae;Mizuhopecten;Mizuhopecten yessoensis

UdeM00000029210 6573 217.6 UdeM00000029210 XP\_021378476.1 76.9 134  
29 1 3 136 19 150 9.90E-54 217.6 6573 cellular

organisms;Eukaryota;Opisthokonta;Metazoa;Eumetazoa;Bilateria;Protostomia;Spiralia;Lophotrochozoa;Mollusca;Bivalvia;Autobranchia;Pteriormorphia;Pectinida;Pectinoidea;Pectinidae;Mizuhopecten;Mizuhopecten yessoensis

UdeM00000029208 6596 1164.4 UdeM00000029208 XP\_045187418.1 57.2  
1087 382 12 1 1076 1 1015 0.00E+00 1164.4 6596  
cellular

organisms;Eukaryota;Opisthokonta;Metazoa;Eumetazoa;Bilateria;Protostomia;Spiralia;Lophotrochozoa;Mollusca;Bivalvia;Autobranchia;Heteroconchia;Euheterodonta;Imparidentia;Venerida;Veneroidea;Veneridae;Mercenaria;Mercenaria mercenaria

UdeM00000029211 6596 652.9 UdeM00000029211 XP\_045187418.1 49.9 700  
324 11 6 694 332 1015 4.60E-184 652.9 6596 cellular

organisms;Eukaryota;Opisthokonta;Metazoa;Eumetazoa;Bilateria;Protostomia;

Spiralia;Lophotrochozoa;Mollusca;Bivalvia;Autobranchia;Heteroconchia;Euherodonta;Imparidentia;Venerida;Veneroidea;Veneridae;Mercenaria;Mercenaria mercenaria

UdeM00000029212 8932 139 UdeM00000029212 XP\_005500038.2 57.3 110  
47 0 1 110 77 186 3.60E-30 139 8932 cellular

organisms;Eukaryota;Opisthokonta;Metazoa;Eumetazoa;Bilateria;Deuterostomia;Chordata;Craniata;Vertebrata;Gnathostomata;Teleostomi;Euteleostomi;Sarcopterygii;Dipnotetrapodomorpha;Tetrapoda;Amniota;Sauropsida;Sauria;Archelosauria;Archosauria;Dinosauria;Saurischia;Theropoda;Coelurosauria;Aves;Neognathae;Columbiformes;Columbidae;Columba;Columba livia

UdeM00000029213 1735272 154.8 UdeM00000029213 XP\_041352716.1 60.3  
121 47 1 1 120 1 121 7.00E-35 154.8 1735272  
cellular

organisms;Eukaryota;Opisthokonta;Metazoa;Eumetazoa;Bilateria;Protostomia;Spiralia;Lophotrochozoa;Mollusca;Gastropoda;Neomphalina;Neomphaloidea;Peltospiridae;Gigantopelta;Gigantopelta aegis

UdeM00000029214 6596 1275.8 UdeM00000029214 XP\_045159161.1 54.2  
1501 470 26 2 1407 3 1380 0.00E+00 1275.8 6596  
cellular

organisms;Eukaryota;Opisthokonta;Metazoa;Eumetazoa;Bilateria;Protostomia;Spiralia;Lophotrochozoa;Mollusca;Bivalvia;Autobranchia;Heteroconchia;Euherodonta;Imparidentia;Venerida;Veneroidea;Veneridae;Mercenaria;Mercenaria mercenaria

UdeM00000029215 1735272 189.1 UdeM00000029215 XP\_041352715.1 45.6  
252 112 7 44 282 699 938 7.60E-45 189.1 1735272  
cellular

organisms;Eukaryota;Opisthokonta;Metazoa;Eumetazoa;Bilateria;Protostomia;Spiralia;Lophotrochozoa;Mollusca;Gastropoda;Neomphalina;Neomphaloidea;Peltospiridae;Gigantopelta;Gigantopelta aegis

UdeM00000029216 29159 411.8 UdeM00000029216 XP\_011448802.2 56 339  
147 2 3 341 17 353 8.80E-112 411.8 29159 cellular

organisms;Eukaryota;Opisthokonta;Metazoa;Eumetazoa;Bilateria;Protostomia;Spiralia;Lophotrochozoa;Mollusca;Bivalvia;Autobranchia;Pteriomorpha;Ostreida;Ostreoidea;Ostreidae;Crassostrea;Crassostrea gigas

UdeM00000029217 6565 451.8 UdeM00000029217 XP\_022329309.1 57.2 388  
159 4 7 390 12 396 8.70E-124 451.8 6565 cellular

organisms;Eukaryota;Opisthokonta;Metazoa;Eumetazoa;Bilateria;Protostomia;Spiralia;Lophotrochozoa;Mollusca;Bivalvia;Autobranchia;Pteriomorpha;Ostreida;Ostreoidea;Ostreidae;Crassostrea;Crassostrea virginica

UdeM00000029218 6573 641.7 UdeM00000029218 XP\_021355259.1 61.7 577  
158 11 2 541 5 555 8.20E-181 641.7 6573 cellular

organisms;Eukaryota;Opisthokonta;Metazoa;Eumetazoa;Bilateria;Protostomia;Spiralia;Lophotrochozoa;Mollusca;Bivalvia;Autobranchia;Pteriomorpha;Pectinida;Pectinoidea;Pectinidae;Mizuhopecten;Mizuhopecten yessoensis

UdeM00000029219 6579 657.5 UdeM00000029219 XP\_033729129.1 64 566  
160 9 2 539 5 554 1.40E-185 657.5 6579 cellular

organisms;Eukaryota;Opisthokonta;Metazoa;Eumetazoa;Bilateria;Protostomia;Spiralia;Lophotrochozoa;Mollusca;Bivalvia;Autobranchia;Pteriomorpha;Pectinida;Pectinoidea;Pectinidae;Pecten;Pecten maximus

UdeM00000029220 6596 849.4 UdeM00000029220 XP\_045164957.1 68.6 633  
196 3 1 631 1 632 3.00E-243 849.4 6596 cellular

organisms;Eukaryota;Opisthokonta;Metazoa;Eumetazoa;Bilateria;Protostomia;Spiralia;Lophotrochozoa;Mollusca;Bivalvia;Autobranchia;Heteroconchia;Euherodonta

terodonta;Imparidentia;Venerida;Veneroidea;Veneridae;Mercenaria;Mercenaria mercenaria

|                 |      |        |    |                 |                |      |                           |
|-----------------|------|--------|----|-----------------|----------------|------|---------------------------|
| UdeM00000029221 | 6579 | 1400.6 |    | UdeM00000029221 | XP_033735266.1 | 56.2 |                           |
|                 | 1275 | 534    | 12 | 1               | 1266           | 1    | 1259 0.00E+00 1400.6 6579 |

cellular

organisms;Eukaryota;Opisthokonta;Metazoa;Eumetazoa;Bilateria;Protostomia;Spiralia;Lophotrochozoa;Mollusca;Bivalvia;Autobranhia;Pteriomorphia;Pectinida;Pectinoidea;Pectinidae;Pecten;Pecten maximus

|                 |      |       |   |                 |                |      |                               |
|-----------------|------|-------|---|-----------------|----------------|------|-------------------------------|
| UdeM00000029222 | 6596 | 708.8 |   | UdeM00000029222 | XP_045165002.1 | 79.7 | 408                           |
|                 | 83   | 0     | 2 | 409             | 207            | 614  | 4.20E-201 708.8 6596 cellular |

organisms;Eukaryota;Opisthokonta;Metazoa;Eumetazoa;Bilateria;Protostomia;Spiralia;Lophotrochozoa;Mollusca;Bivalvia;Autobranhia;Heteroconchia;Euheterodonta;Imparidentia;Venerida;Veneroidea;Veneridae;Mercenaria;Mercenaria mercenaria

|                 |      |       |   |                 |                |      |                              |
|-----------------|------|-------|---|-----------------|----------------|------|------------------------------|
| UdeM00000029223 | 6573 | 353.6 |   | UdeM00000029223 | XP_021359974.1 | 49.1 | 446                          |
|                 | 195  | 8     | 5 | 432             | 3              | 434  | 3.60E-94 353.6 6573 cellular |

organisms;Eukaryota;Opisthokonta;Metazoa;Eumetazoa;Bilateria;Protostomia;Spiralia;Lophotrochozoa;Mollusca;Bivalvia;Autobranhia;Pteriomorphia;Pectinida;Pectinoidea;Pectinidae;Mizuhopecten;Mizuhopecten yessoensis

|                 |      |       |   |                 |                |      |                              |
|-----------------|------|-------|---|-----------------|----------------|------|------------------------------|
| UdeM00000029224 | 6573 | 204.5 |   | UdeM00000029224 | XP_021359974.1 | 45.2 | 314                          |
|                 | 153  | 5     | 5 | 310             | 132            | 434  | 1.90E-49 204.5 6573 cellular |

organisms;Eukaryota;Opisthokonta;Metazoa;Eumetazoa;Bilateria;Protostomia;Spiralia;Lophotrochozoa;Mollusca;Bivalvia;Autobranhia;Pteriomorphia;Pectinida;Pectinoidea;Pectinidae;Mizuhopecten;Mizuhopecten yessoensis

|                 |      |       |    |                 |                |      |                               |
|-----------------|------|-------|----|-----------------|----------------|------|-------------------------------|
| UdeM00000029226 | 6596 | 589.3 |    | UdeM00000029226 | XP_045172533.1 | 61.8 | 448                           |
|                 | 165  | 4     | 61 | 505             | 66             | 510  | 4.50E-165 589.3 6596 cellular |

organisms;Eukaryota;Opisthokonta;Metazoa;Eumetazoa;Bilateria;Protostomia;Spiralia;Lophotrochozoa;Mollusca;Bivalvia;Autobranhia;Heteroconchia;Euheterodonta;Imparidentia;Venerida;Veneroidea;Veneridae;Mercenaria;Mercenaria mercenaria

|                 |      |       |    |                 |                |      |                               |
|-----------------|------|-------|----|-----------------|----------------|------|-------------------------------|
| UdeM00000029227 | 6596 | 589.3 |    | UdeM00000029227 | XP_045172533.1 | 61.8 | 448                           |
|                 | 165  | 4     | 83 | 527             | 66             | 510  | 4.70E-165 589.3 6596 cellular |

organisms;Eukaryota;Opisthokonta;Metazoa;Eumetazoa;Bilateria;Protostomia;Spiralia;Lophotrochozoa;Mollusca;Bivalvia;Autobranhia;Heteroconchia;Euheterodonta;Imparidentia;Venerida;Veneroidea;Veneridae;Mercenaria;Mercenaria mercenaria

|                 |      |       |   |                 |                |      |                               |
|-----------------|------|-------|---|-----------------|----------------|------|-------------------------------|
| UdeM00000029228 | 6596 | 585.9 |   | UdeM00000029228 | XP_045172533.1 | 63.7 | 421                           |
|                 | 150  | 2     | 5 | 423             | 91             | 510  | 4.20E-164 585.9 6596 cellular |

organisms;Eukaryota;Opisthokonta;Metazoa;Eumetazoa;Bilateria;Protostomia;Spiralia;Lophotrochozoa;Mollusca;Bivalvia;Autobranhia;Heteroconchia;Euheterodonta;Imparidentia;Venerida;Veneroidea;Veneridae;Mercenaria;Mercenaria mercenaria

|                 |         |    |       |                 |                |      |                            |
|-----------------|---------|----|-------|-----------------|----------------|------|----------------------------|
| UdeM00000029229 | 1735272 |    | 370.5 | UdeM00000029229 | XP_041354179.1 | 69.1 |                            |
|                 | 256     | 79 | 0     | 52              | 307            | 37   | 292 2.00E-99 370.5 1735272 |

cellular

organisms;Eukaryota;Opisthokonta;Metazoa;Eumetazoa;Bilateria;Protostomia;Spiralia;Lophotrochozoa;Mollusca;Gastropoda;Neomphalina;Neomphaloidea;Peltospiridae;Gigantopelta;Gigantopelta aegis

|                 |      |       |   |                 |                |      |                              |
|-----------------|------|-------|---|-----------------|----------------|------|------------------------------|
| UdeM00000029230 | 6596 | 266.5 |   | UdeM00000029230 | XP_045166702.1 | 40.9 | 403                          |
|                 | 211  | 8     | 1 | 386             | 1              | 393  | 5.10E-68 266.5 6596 cellular |

organisms;Eukaryota;Opisthokonta;Metazoa;Eumetazoa;Bilateria;Protostomia;Spiralia;Lophotrochozoa;Mollusca;Bivalvia;Autobranhia;Heteroconchia;Euheterodonta;Imparidentia;Venerida;Veneroidea;Veneridae;Mercenaria;Mercenaria mercenaria

UdeM00000029231 6596 414.1 UdeM00000029231 XP\_045166690.1 68.2 296  
 91 1 1 293 1 296 1.50E-112 414.1 6596 cellular  
 organisms;Eukaryota;Opisthokonta;Metazoa;Eumetazoa;Bilateria;Protostomia;  
 Spiralia;Lophotrochozoa;Mollusca;Bivalvia;Autobranchia;Heteroconchia;Euhe  
 terodonta;Imparidentia;Venerida;Veneroidea;Veneridae;Mercenaria;Mercenari  
 a mercenaria  
 UdeM00000029232 6596 1627.1 UdeM00000029232 XP\_045166679.1 72.4  
 1261 331 12 17 1265 34 1289 0.00E+00 1627.1 6596  
 cellular  
 organisms;Eukaryota;Opisthokonta;Metazoa;Eumetazoa;Bilateria;Protostomia;  
 Spiralia;Lophotrochozoa;Mollusca;Bivalvia;Autobranchia;Heteroconchia;Euhe  
 terodonta;Imparidentia;Venerida;Veneroidea;Veneridae;Mercenaria;Mercenari  
 a mercenaria  
 UdeM00000029233 6596 275.4 UdeM00000029233 XP\_045187326.1 51.8 280  
 124 3 8 286 67 336 8.70E-71 275.4 6596 cellular  
 organisms;Eukaryota;Opisthokonta;Metazoa;Eumetazoa;Bilateria;Protostomia;  
 Spiralia;Lophotrochozoa;Mollusca;Bivalvia;Autobranchia;Heteroconchia;Euhe  
 terodonta;Imparidentia;Venerida;Veneroidea;Veneridae;Mercenaria;Mercenari  
 a mercenaria  
 UdeM00000029234 6596 272.7 UdeM00000029234 XP\_045161066.1 52.2 255  
 120 1 11 265 5 257 5.20E-70 272.7 6596 cellular  
 organisms;Eukaryota;Opisthokonta;Metazoa;Eumetazoa;Bilateria;Protostomia;  
 Spiralia;Lophotrochozoa;Mollusca;Bivalvia;Autobranchia;Heteroconchia;Euhe  
 terodonta;Imparidentia;Venerida;Veneroidea;Veneridae;Mercenaria;Mercenari  
 a mercenaria  
 UdeM00000029235 6596 144.1 UdeM00000029235 XP\_045187324.1 39.9 158  
 94 1 3 160 327 483 1.70E-31 144.1 6596 cellular  
 organisms;Eukaryota;Opisthokonta;Metazoa;Eumetazoa;Bilateria;Protostomia;  
 Spiralia;Lophotrochozoa;Mollusca;Bivalvia;Autobranchia;Heteroconchia;Euhe  
 terodonta;Imparidentia;Venerida;Veneroidea;Veneridae;Mercenaria;Mercenari  
 a mercenaria  
 UdeM00000029236 6579 154.8 UdeM00000029236 XP\_033733873.1 50 172  
 76 2 12 180 10 174 3.80E-34 154.8 6579 cellular  
 organisms;Eukaryota;Opisthokonta;Metazoa;Eumetazoa;Bilateria;Protostomia;  
 Spiralia;Lophotrochozoa;Mollusca;Bivalvia;Autobranchia;Pteriomorphia;Pect  
 inida;Pectinoidea;Pectinidae;Pecten;Pecten maximus  
 UdeM00000029237 6596 967.2 UdeM00000029237 XP\_045169951.1 80.7 579  
 112 0 11 589 10 588 9.30E-279 967.2 6596 cellular  
 organisms;Eukaryota;Opisthokonta;Metazoa;Eumetazoa;Bilateria;Protostomia;  
 Spiralia;Lophotrochozoa;Mollusca;Bivalvia;Autobranchia;Heteroconchia;Euhe  
 terodonta;Imparidentia;Venerida;Veneroidea;Veneridae;Mercenaria;Mercenari  
 a mercenaria  
 UdeM00000029238 29159 376.3 UdeM00000029238 XP\_011441045.2 47.1 586  
 267 14 217 788 166 722 9.50E-101 376.3 29159 cellular  
 organisms;Eukaryota;Opisthokonta;Metazoa;Eumetazoa;Bilateria;Protostomia;  
 Spiralia;Lophotrochozoa;Mollusca;Bivalvia;Autobranchia;Pteriomorphia;Ostr  
 eida;Ostreoidea;Ostreidae;Crassostrea;Crassostrea gigas  
 UdeM00000029239 29159 376.3 UdeM00000029239 XP\_011441045.2 47.1 586  
 267 14 179 750 166 722 9.00E-101 376.3 29159 cellular  
 organisms;Eukaryota;Opisthokonta;Metazoa;Eumetazoa;Bilateria;Protostomia;  
 Spiralia;Lophotrochozoa;Mollusca;Bivalvia;Autobranchia;Pteriomorphia;Ostr  
 eida;Ostreoidea;Ostreidae;Crassostrea;Crassostrea gigas  
 UdeM00000029240 6596 719.5 UdeM00000029240 XP\_045170735.1 56.4 724  
 267 7 1 679 1 720 3.90E-204 719.5 6596 cellular

organisms;Eukaryota;Opisthokonta;Metazoa;Eumetazoa;Bilateria;Protostomia;Spiralia;Lophotrochozoa;Mollusca;Bivalvia;Autobranchia;Heteroconchia;Euherodonta;Imparidentia;Venerida;Veneroidea;Veneridae;Mercenaria;Mercenaria mercenaria

UdeM00000029241 6596 458.8 UdeM00000029241 XP\_045170735.1 56.9 499  
168 6 1 456 1 495 9.20E-126 458.8 6596 cellular

organisms;Eukaryota;Opisthokonta;Metazoa;Eumetazoa;Bilateria;Protostomia;Spiralia;Lophotrochozoa;Mollusca;Bivalvia;Autobranchia;Heteroconchia;Euherodonta;Imparidentia;Venerida;Veneroidea;Veneridae;Mercenaria;Mercenaria mercenaria

UdeM00000029242 6573 621.3 UdeM00000029242 XP\_021353706.1 65.8 421  
144 0 1 421 6 426 8.90E-175 621.3 6573 cellular

organisms;Eukaryota;Opisthokonta;Metazoa;Eumetazoa;Bilateria;Protostomia;Spiralia;Lophotrochozoa;Mollusca;Bivalvia;Autobranchia;Pteriomorphia;Pectinida;Pectinoidea;Pectinidae;Mizuhopecten;Mizuhopecten yessoensis

UdeM00000029243 6596 1785.8 UdeM00000029243 XP\_045162147.1 60.7  
1425 542 5 1 1419 429 1841 0.00E+00 1785.8 6596  
cellular

organisms;Eukaryota;Opisthokonta;Metazoa;Eumetazoa;Bilateria;Protostomia;Spiralia;Lophotrochozoa;Mollusca;Bivalvia;Autobranchia;Heteroconchia;Euherodonta;Imparidentia;Venerida;Veneroidea;Veneridae;Mercenaria;Mercenaria mercenaria

UdeM00000029244 6596 75.1 UdeM00000029244 XP\_045162224.1 30.6 235  
131 7 3 207 5 237 1.20E-10 75.1 6596 cellular

organisms;Eukaryota;Opisthokonta;Metazoa;Eumetazoa;Bilateria;Protostomia;Spiralia;Lophotrochozoa;Mollusca;Bivalvia;Autobranchia;Heteroconchia;Euherodonta;Imparidentia;Venerida;Veneroidea;Veneridae;Mercenaria;Mercenaria mercenaria

UdeM00000029246 6565 714.5 UdeM00000029246 XP\_022331834.1 42.2 813  
391 9 120 862 15 818 1.60E-202 714.5 6565 cellular

organisms;Eukaryota;Opisthokonta;Metazoa;Eumetazoa;Bilateria;Protostomia;Spiralia;Lophotrochozoa;Mollusca;Bivalvia;Autobranchia;Pteriomorphia;Ostreida;Ostreoidea;Ostreidae;Crassostrea;Crassostrea virginica

UdeM00000029247 29159 154.8 UdeM00000029247 XP\_034324507.1 41.8 208  
120 1 7 214 585 791 1.20E-34 154.8 29159 cellular

organisms;Eukaryota;Opisthokonta;Metazoa;Eumetazoa;Bilateria;Protostomia;Spiralia;Lophotrochozoa;Mollusca;Bivalvia;Autobranchia;Pteriomorphia;Ostreida;Ostreoidea;Ostreidae;Crassostrea;Crassostrea gigas

UdeM00000029248 1735272 1874.4 UdeM00000029248 XP\_041351068.1  
36.5 2940 1793 28 2 2916 1013 3902 0.00E+00 1874.4  
1735272 cellular

organisms;Eukaryota;Opisthokonta;Metazoa;Eumetazoa;Bilateria;Protostomia;Spiralia;Lophotrochozoa;Mollusca;Gastropoda;Neomphalina;Neomphaloidea;Peltospiridae;Gigantopelta;Gigantopelta aegis

UdeM00000029249 1735272 1877.1 UdeM00000029249 XP\_041351068.1  
36.5 2940 1789 29 2 2914 1013 3902 0.00E+00 1877.1  
1735272 cellular

organisms;Eukaryota;Opisthokonta;Metazoa;Eumetazoa;Bilateria;Protostomia;Spiralia;Lophotrochozoa;Mollusca;Gastropoda;Neomphalina;Neomphaloidea;Peltospiridae;Gigantopelta;Gigantopelta aegis

UdeM00000029251 7574 310.8 UdeM00000029251 XP\_013381563.1 45.4 326  
158 7 9 322 68 385 2.10E-81 310.8 7574 cellular

organisms;Eukaryota;Opisthokonta;Metazoa;Eumetazoa;Bilateria;Protostomia;

Spiralia;Lophotrochozoa;Brachiopoda;Linguliformea;Lingulata;Lingulida;Linguloidea;Lingulidae;Lingula;Lingula anatina  
UdeM00000029252 7574 330.1 UdeM00000029252 XP\_013381563.1 44.7 347  
172 7 69 403 50 388 4.20E-87 330.1 7574 cellular  
organisms;Eukaryota;Opisthokonta;Metazoa;Eumetazoa;Bilateria;Protostomia;  
Spiralia;Lophotrochozoa;Brachiopoda;Linguliformea;Lingulata;Lingulida;Linguloidea;Lingulidae;Lingula;Lingula anatina  
UdeM00000029253 6565 520 UdeM00000029253 XP\_022334993.1 38.1 830  
308 13 1 648 1 806 4.30E-144 520 6565 cellular  
organisms;Eukaryota;Opisthokonta;Metazoa;Eumetazoa;Bilateria;Protostomia;  
Spiralia;Lophotrochozoa;Mollusca;Bivalvia;Autobranchia;Pteriormorphia;Ostreida;Ostreoidea;Ostreidae;Crassostrea;Crassostrea virginica  
UdeM00000029254 6565 212.6 UdeM00000029254 XP\_022287303.1 34.2 310  
190 7 6 303 443 750 6.90E-52 212.6 6565 cellular  
organisms;Eukaryota;Opisthokonta;Metazoa;Eumetazoa;Bilateria;Protostomia;  
Spiralia;Lophotrochozoa;Mollusca;Bivalvia;Autobranchia;Pteriormorphia;Ostreida;Ostreoidea;Ostreidae;Crassostrea;Crassostrea virginica  
UdeM00000029255 6565 125.9 UdeM00000029255 XP\_022334997.1 42.6 155  
84 3 3 154 28 180 4.40E-26 125.9 6565 cellular  
organisms;Eukaryota;Opisthokonta;Metazoa;Eumetazoa;Bilateria;Protostomia;  
Spiralia;Lophotrochozoa;Mollusca;Bivalvia;Autobranchia;Pteriormorphia;Ostreida;Ostreoidea;Ostreidae;Crassostrea;Crassostrea virginica  
UdeM00000029256 6596 427.2 UdeM00000029256 XP\_045160382.1 57.6 363  
152 2 1 362 1 362 2.10E-116 427.2 6596 cellular  
organisms;Eukaryota;Opisthokonta;Metazoa;Eumetazoa;Bilateria;Protostomia;  
Spiralia;Lophotrochozoa;Mollusca;Bivalvia;Autobranchia;Heteroconchia;Euheterodonta;Imparidentia;Venerida;Veneroidea;Veneridae;Mercenaria;Mercenaria mercenaria  
UdeM00000029257 6596 493.4 UdeM00000029257 XP\_045160402.1 62.9 372  
137 1 7 377 5 376 2.50E-136 493.4 6596 cellular  
organisms;Eukaryota;Opisthokonta;Metazoa;Eumetazoa;Bilateria;Protostomia;  
Spiralia;Lophotrochozoa;Mollusca;Bivalvia;Autobranchia;Heteroconchia;Euheterodonta;Imparidentia;Venerida;Veneroidea;Veneridae;Mercenaria;Mercenaria mercenaria  
UdeM00000029258 1735272 503.8 UdeM00000029258 XP\_041353805.1 48.2  
523 266 5 22 543 18 536 2.70E-139 503.8 1735272  
cellular  
organisms;Eukaryota;Opisthokonta;Metazoa;Eumetazoa;Bilateria;Protostomia;  
Spiralia;Lophotrochozoa;Mollusca;Gastropoda;Neomphalina;Neomphaloidea;Peltospiridae;Gigantopelta;Gigantopelta aegis  
UdeM00000029259 1735272 92 UdeM00000029259 XP\_041353807.1 41.7  
127 72 1 95 221 90 214 1.10E-15 92 1735272  
cellular  
organisms;Eukaryota;Opisthokonta;Metazoa;Eumetazoa;Bilateria;Protostomia;  
Spiralia;Lophotrochozoa;Mollusca;Gastropoda;Neomphalina;Neomphaloidea;Peltospiridae;Gigantopelta;Gigantopelta aegis  
UdeM00000029260 6596 136 UdeM00000029260 XP\_045167114.1 47.4 154  
76 2 7 159 8 157 4.30E-29 136 6596 cellular  
organisms;Eukaryota;Opisthokonta;Metazoa;Eumetazoa;Bilateria;Protostomia;  
Spiralia;Lophotrochozoa;Mollusca;Bivalvia;Autobranchia;Heteroconchia;Euheterodonta;Imparidentia;Venerida;Veneroidea;Veneridae;Mercenaria;Mercenaria mercenaria  
UdeM00000029261 6596 186 UdeM00000029261 XP\_045167114.1 66.4 119  
40 0 2 120 179 297 2.80E-44 186 6596 cellular

organisms;Eukaryota;Opisthokonta;Metazoa;Eumetazoa;Bilateria;Protostomia;Spiralia;Lophotrochozoa;Mollusca;Bivalvia;Autobranchia;Heteroconchia;Euheterodonta;Imparidentia;Venerida;Veneroidea;Veneridae;Mercenaria;Mercenaria mercenaria

UdeM00000029262 400727 300.1 UdeM00000029262 XP\_025104663.1 51.1  
278 129 4 4 277 3 277 3.10E-78 300.1 400727  
cellular

organisms;Eukaryota;Opisthokonta;Metazoa;Eumetazoa;Bilateria;Protostomia;Spiralia;Lophotrochozoa;Mollusca;Gastropoda;Caenogastropoda;Architaenioglossa;Ampullarioidea;Ampullariidae;Pomacea;Pomacea canaliculata

UdeM00000029263 6596 177.6 UdeM00000029263 XP\_045184682.1 36.3 300  
173 10 5 294 9 300 2.40E-41 177.6 6596 cellular

organisms;Eukaryota;Opisthokonta;Metazoa;Eumetazoa;Bilateria;Protostomia;Spiralia;Lophotrochozoa;Mollusca;Bivalvia;Autobranchia;Heteroconchia;Euheterodonta;Imparidentia;Venerida;Veneroidea;Veneridae;Mercenaria;Mercenaria mercenaria

UdeM00000029264 400727 299.7 UdeM00000029264 XP\_025104663.1 49.8  
277 133 4 2 274 1 275 3.90E-78 299.7 400727  
cellular

organisms;Eukaryota;Opisthokonta;Metazoa;Eumetazoa;Bilateria;Protostomia;Spiralia;Lophotrochozoa;Mollusca;Gastropoda;Caenogastropoda;Architaenioglossa;Ampullarioidea;Ampullariidae;Pomacea;Pomacea canaliculata

UdeM00000029265 400727 416.4 UdeM00000029265 XP\_025104046.1 64.2  
318 113 1 8 324 3 320 3.40E-113 416.4 400727  
cellular

organisms;Eukaryota;Opisthokonta;Metazoa;Eumetazoa;Bilateria;Protostomia;Spiralia;Lophotrochozoa;Mollusca;Gastropoda;Caenogastropoda;Architaenioglossa;Ampullarioidea;Ampullariidae;Pomacea;Pomacea canaliculata

UdeM00000029267 218467 282.7 UdeM00000029267 XP\_023220322.1 47.2  
305 157 3 1 303 303 605 5.40E-73 282.7 218467  
cellular

organisms;Eukaryota;Opisthokonta;Metazoa;Eumetazoa;Bilateria;Protostomia;Ecdysozoa;Panarthropoda;Arthropoda;Chelicerata;Arachnida;Scorpiones;Buthida;Buthoidea;Buthidae;Centruroides;Centruroides sculpturatus

UdeM00000029266 114398 223 UdeM00000029266 XP\_042913023.1 30.8  
490 145 4 1 296 104 593 5.00E-55 223 114398  
cellular

organisms;Eukaryota;Opisthokonta;Metazoa;Eumetazoa;Bilateria;Protostomia;Ecdysozoa;Panarthropoda;Arthropoda;Chelicerata;Arachnida;Araneae;Araneomorphae;Entelegynae;Orbiculariae;Araneoidea;Theridiidae;Parasteatoda;Parasteatoda tepidariorum

UdeM00000029268 6596 397.9 UdeM00000029268 XP\_045187911.1 55.9 331  
142 2 5 333 13 341 1.30E-107 397.9 6596 cellular

organisms;Eukaryota;Opisthokonta;Metazoa;Eumetazoa;Bilateria;Protostomia;Spiralia;Lophotrochozoa;Mollusca;Bivalvia;Autobranchia;Heteroconchia;Euheterodonta;Imparidentia;Venerida;Veneroidea;Veneridae;Mercenaria;Mercenaria mercenaria

UdeM00000029269 6596 388.7 UdeM00000029269 XP\_045170432.1 61.6 359  
125 5 1 351 1 354 8.20E-105 388.7 6596 cellular

organisms;Eukaryota;Opisthokonta;Metazoa;Eumetazoa;Bilateria;Protostomia;Spiralia;Lophotrochozoa;Mollusca;Bivalvia;Autobranchia;Heteroconchia;Euheterodonta;Imparidentia;Venerida;Veneroidea;Veneridae;Mercenaria;Mercenaria mercenaria



UdeM00000029270 6573 575.1 UdeM00000029270 XP\_021361734.1 65 468  
 156 5 28 489 391 856 8.70E-161 575.1 6573 cellular  
 organisms;Eukaryota;Opisthokonta;Metazoa;Eumetazoa;Bilateria;Protostomia;  
 Spiralia;Lophotrochozoa;Mollusca;Bivalvia;Autobranchia;Pteriormorphia;Pect  
 inida;Pectinoidea;Pectinidae;Mizuhopecten;Mizuhopecten yessoensis  
 UdeM00000029271 37653 473 UdeM00000029271 XP\_014790445.1 70.9 350  
 92 2 1 348 1 342 3.20E-130 473 37653 cellular  
 organisms;Eukaryota;Opisthokonta;Metazoa;Eumetazoa;Bilateria;Protostomia;  
 Spiralia;Lophotrochozoa;Mollusca;Cephalopoda;Coleoidea;Octopodiformes;Oct  
 opoda;Incirrata;Octopodidae;Octopus;Octopus bimaculoides  
 UdeM00000029272 6596 595.9 UdeM00000029272 XP\_045175141.1 44.7 788  
 372 18 5 765 9 759 7.30E-167 595.9 6596 cellular  
 organisms;Eukaryota;Opisthokonta;Metazoa;Eumetazoa;Bilateria;Protostomia;  
 Spiralia;Lophotrochozoa;Mollusca;Bivalvia;Autobranchia;Heteroconchia;Euhe  
 terodonta;Imparidentia;Venerida;Veneroidea;Veneridae;Mercenaria;Mercenari  
 a mercenaria  
 UdeM00000029273 6596 442.6 UdeM00000029273 XP\_045175121.1 72.8 364  
 83 5 1 357 1 355 4.80E-121 442.6 6596 cellular  
 organisms;Eukaryota;Opisthokonta;Metazoa;Eumetazoa;Bilateria;Protostomia;  
 Spiralia;Lophotrochozoa;Mollusca;Bivalvia;Autobranchia;Heteroconchia;Euhe  
 terodonta;Imparidentia;Venerida;Veneroidea;Veneridae;Mercenaria;Mercenari  
 a mercenaria  
 UdeM00000029274 6579 902.1 UdeM00000029274 XP\_033734273.1 77.6 563  
 124 1 1 561 1 563 3.50E-259 902.1 6579 cellular  
 organisms;Eukaryota;Opisthokonta;Metazoa;Eumetazoa;Bilateria;Protostomia;  
 Spiralia;Lophotrochozoa;Mollusca;Bivalvia;Autobranchia;Pteriormorphia;Pect  
 inida;Pectinoidea;Pectinidae;Pecten;Pecten maximus  
 UdeM00000029275 29159 1956 UdeM00000029275 XP\_034325685.1 75.2 1255  
 309 2 1 1254 1 1254 0.00E+00 1956 29159 cellular  
 organisms;Eukaryota;Opisthokonta;Metazoa;Eumetazoa;Bilateria;Protostomia;  
 Spiralia;Lophotrochozoa;Mollusca;Bivalvia;Autobranchia;Pteriormorphia;Ostr  
 eida;Ostreoidea;Ostreidae;Crassostrea;Crassostrea gigas  
 UdeM00000029276 6596 778.9 UdeM00000029276 XP\_045216006.1 79.9 473  
 94 1 18 489 338 810 4.00E-222 778.9 6596 cellular  
 organisms;Eukaryota;Opisthokonta;Metazoa;Eumetazoa;Bilateria;Protostomia;  
 Spiralia;Lophotrochozoa;Mollusca;Bivalvia;Autobranchia;Heteroconchia;Euhe  
 terodonta;Imparidentia;Venerida;Veneroidea;Veneridae;Mercenaria;Mercenari  
 a mercenaria  
 UdeM00000029278 225164 193.7 UdeM00000029278 XP\_009053113.1 75.9  
 112 27 0 1 112 1 112 1.30E-46 193.7 225164  
 cellular  
 organisms;Eukaryota;Opisthokonta;Metazoa;Eumetazoa;Bilateria;Protostomia;  
 Spiralia;Lophotrochozoa;Mollusca;Gastropoda;Patellogastropoda;Lottioida;  
 Lottiidae;Lottia;Lottia gigantea  
 UdeM00000029279 6596 322 UdeM00000029279 XP\_045187052.1 47.9 334  
 169 3 45 377 32 361 1.20E-84 322 6596 cellular  
 organisms;Eukaryota;Opisthokonta;Metazoa;Eumetazoa;Bilateria;Protostomia;  
 Spiralia;Lophotrochozoa;Mollusca;Bivalvia;Autobranchia;Heteroconchia;Euhe  
 terodonta;Imparidentia;Venerida;Veneroidea;Veneridae;Mercenaria;Mercenari  
 a mercenaria  
 UdeM00000029280 7604 298.1 UdeM00000029280 XP\_033633146.1 40.8 390  
 213 3 296 667 29 418 3.40E-77 298.1 7604 cellular  
 organisms;Eukaryota;Opisthokonta;Metazoa;Eumetazoa;Bilateria;Deuterostomi

a;Echinodermata;Eleutherozoa;Asterozoa;Asteroidea;Forcipulatacea;Forcipul  
 atida;Asteriidae;Asterias;Asterias rubens  
 UdeM00000029281 6526 156.4 UdeM00000029281 XP\_013069506.1 60.2 118  
 43 2 8 125 47 160 2.70E-35 156.4 6526 cellular  
 organisms;Eukaryota;Opisthokonta;Metazoa;Eumetazoa;Bilateria;Protostomia;  
 Spiralia;Lophotrochozoa;Mollusca;Gastropoda;Heterobranchia;Euthyneura;Pan  
 pulmonata;Hygrophila;Lymnaeioidea;Planorbidae;Biomphalaria;Biomphalaria  
 glabrata  
 UdeM00000029282 6596 138.7 UdeM00000029282 XP\_045172952.1 39.2 194  
 37 1 88 200 8 201 8.40E-30 138.7 6596 cellular  
 organisms;Eukaryota;Opisthokonta;Metazoa;Eumetazoa;Bilateria;Protostomia;  
 Spiralia;Lophotrochozoa;Mollusca;Bivalvia;Autobranchia;Heteroconchia;Euhe  
 terodonta;Imparidentia;Venerida;Veneroidea;Veneridae;Mercenaria;Mercenari  
 a mercenaria  
 UdeM00000029283 37653 80.9 UdeM00000029283 XP\_014774932.1 38.2 102  
 58 3 113 211 1990 2089 2.20E-12 80.9 37653 cellular  
 organisms;Eukaryota;Opisthokonta;Metazoa;Eumetazoa;Bilateria;Protostomia;  
 Spiralia;Lophotrochozoa;Mollusca;Cephalopoda;Coleoidea;Octopodiformes;Oct  
 opoda;Incirrata;Octopodidae;Octopus;Octopus bimaculoides  
 UdeM00000029284 114398 348.6 UdeM00000029284 XP\_042903861.1 34.2  
 605 324 5 1 534 1 602 1.40E-92 348.6 114398  
 cellular  
 organisms;Eukaryota;Opisthokonta;Metazoa;Eumetazoa;Bilateria;Protostomia;  
 Ecdysozoa;Panarthropoda;Arthropoda;Chelicerata;Arachnida;Araneae;Araneomo  
 rphae;Entelegynae;Orbiculariae;Araneoidea;Theridiidae;Parasteatoda;Parast  
 eatoda tepidariorum  
 UdeM00000029285 6596 685.3 UdeM00000029285 XP\_045186907.1 48.5 1173  
 492 33 23 1173 973 2055 1.40E-193 685.3 6596 cellular  
 organisms;Eukaryota;Opisthokonta;Metazoa;Eumetazoa;Bilateria;Protostomia;  
 Spiralia;Lophotrochozoa;Mollusca;Bivalvia;Autobranchia;Heteroconchia;Euhe  
 terodonta;Imparidentia;Venerida;Veneroidea;Veneridae;Mercenaria;Mercenari  
 a mercenaria  
 UdeM00000029286 6579 431.4 UdeM00000029286 XP\_033736355.1 74.7 281  
 69 1 149 427 731 1011 1.40E-117 431.4 6579 cellular  
 organisms;Eukaryota;Opisthokonta;Metazoa;Eumetazoa;Bilateria;Protostomia;  
 Spiralia;Lophotrochozoa;Mollusca;Bivalvia;Autobranchia;Pteriomorphia;Pect  
 inida;Pectinoidea;Pectinidae;Pecten;Pecten maximus  
 UdeM00000029287 6596 112.1 UdeM00000029287 XP\_045186907.1 30.7 306  
 132 11 1 229 55 357 1.00E-21 112.1 6596 cellular  
 organisms;Eukaryota;Opisthokonta;Metazoa;Eumetazoa;Bilateria;Protostomia;  
 Spiralia;Lophotrochozoa;Mollusca;Bivalvia;Autobranchia;Heteroconchia;Euhe  
 terodonta;Imparidentia;Venerida;Veneroidea;Veneridae;Mercenaria;Mercenari  
 a mercenaria  
 UdeM00000029288 7574 313.9 UdeM00000029288 XP\_013381563.1 41.1 377  
 210 3 19 385 11 385 3.00E-82 313.9 7574 cellular  
 organisms;Eukaryota;Opisthokonta;Metazoa;Eumetazoa;Bilateria;Protostomia;  
 Spiralia;Lophotrochozoa;Brachiopoda;Linguliformea;Lingulata;Lingulida;Lin  
 guloidea;Lingulidae;Lingula;Lingula anatina  
 UdeM00000029289 7574 69.3 UdeM00000029289 XP\_013381563.1 47.5 61  
 32 0 68 128 55 115 4.00E-09 69.3 7574 cellular  
 organisms;Eukaryota;Opisthokonta;Metazoa;Eumetazoa;Bilateria;Protostomia;  
 Spiralia;Lophotrochozoa;Brachiopoda;Linguliformea;Lingulata;Lingulida;Lin  
 guloidea;Lingulidae;Lingula;Lingula anatina

UdeM00000029290 7574 208.8 UdeM00000029290 XP\_013381563.1 42.3 234  
 126 1 1 225 154 387 8.30E-51 208.8 7574 cellular  
 organisms;Eukaryota;Opisthokonta;Metazoa;Eumetazoa;Bilateria;Protostomia;  
 Spiralia;Lophotrochozoa;Brachiopoda;Linguliformea;Lingulata;Lingulida;Lin  
 guloidea;Lingulidae;Lingula;Lingula anatina  
 UdeM00000029291 7574 314.7 UdeM00000029291 XP\_013381563.1 45.1 335  
 173 2 68 393 55 387 1.80E-82 314.7 7574 cellular  
 organisms;Eukaryota;Opisthokonta;Metazoa;Eumetazoa;Bilateria;Protostomia;  
 Spiralia;Lophotrochozoa;Brachiopoda;Linguliformea;Lingulata;Lingulida;Lin  
 guloidea;Lingulidae;Lingula;Lingula anatina  
 UdeM00000029292 7574 320.9 UdeM00000029292 XP\_013381563.1 45 333  
 172 2 68 391 55 385 2.50E-84 320.9 7574 cellular  
 organisms;Eukaryota;Opisthokonta;Metazoa;Eumetazoa;Bilateria;Protostomia;  
 Spiralia;Lophotrochozoa;Brachiopoda;Linguliformea;Lingulata;Lingulida;Lin  
 guloidea;Lingulidae;Lingula;Lingula anatina  
 UdeM00000029293 6596 710.3 UdeM00000029293 XP\_045183449.1 56.7 645  
 174 6 228 776 225 860 2.70E-201 710.3 6596 cellular  
 organisms;Eukaryota;Opisthokonta;Metazoa;Eumetazoa;Bilateria;Protostomia;  
 Spiralia;Lophotrochozoa;Mollusca;Bivalvia;Autobranchia;Heteroconchia;Euhe  
 terodonta;Imparidentia;Venerida;Veneroidea;Veneridae;Mercenaria;Mercenari  
 a mercenaria  
 UdeM00000029294 6579 362.5 UdeM00000029294 XP\_033734265.1 86.9 175  
 23 0 1 175 1 175 3.10E-97 362.5 6579 cellular  
 organisms;Eukaryota;Opisthokonta;Metazoa;Eumetazoa;Bilateria;Protostomia;  
 Spiralia;Lophotrochozoa;Mollusca;Bivalvia;Autobranchia;Pteriomorphia;Pect  
 inida;Pectinoidea;Pectinidae;Pecten;Pecten maximus  
 UdeM00000029301 6596 215.7 UdeM00000029301 XP\_045173449.1 33.6 324  
 203 5 8 330 17 329 1.60E-52 215.7 6596 cellular  
 organisms;Eukaryota;Opisthokonta;Metazoa;Eumetazoa;Bilateria;Protostomia;  
 Spiralia;Lophotrochozoa;Mollusca;Bivalvia;Autobranchia;Heteroconchia;Euhe  
 terodonta;Imparidentia;Venerida;Veneroidea;Veneridae;Mercenaria;Mercenari  
 a mercenaria  
 UdeM00000029302 6573 125.2 UdeM00000029302 XP\_021353616.1 33.7 249  
 134 9 12 231 1251 1497 1.20E-25 125.2 6573 cellular  
 organisms;Eukaryota;Opisthokonta;Metazoa;Eumetazoa;Bilateria;Protostomia;  
 Spiralia;Lophotrochozoa;Mollusca;Bivalvia;Autobranchia;Pteriomorphia;Pect  
 inida;Pectinoidea;Pectinidae;Mizuhopecten;Mizuhopecten yessoensis  
 UdeM00000029303 6565 443.7 UdeM00000029303 XP\_022330944.1 72.2 291  
 81 0 1 291 1 291 1.80E-121 443.7 6565 cellular  
 organisms;Eukaryota;Opisthokonta;Metazoa;Eumetazoa;Bilateria;Protostomia;  
 Spiralia;Lophotrochozoa;Mollusca;Bivalvia;Autobranchia;Pteriomorphia;Ostr  
 eida;Ostreoidea;Ostreidae;Crassostrea;Crassostrea virginica  
 UdeM00000029304 6573 526.2 UdeM00000029304 XP\_021366974.1 45.5 793  
 365 9 1 759 1 760 7.10E-146 526.2 6573 cellular  
 organisms;Eukaryota;Opisthokonta;Metazoa;Eumetazoa;Bilateria;Protostomia;  
 Spiralia;Lophotrochozoa;Mollusca;Bivalvia;Autobranchia;Pteriomorphia;Pect  
 inida;Pectinoidea;Pectinidae;Mizuhopecten;Mizuhopecten yessoensis  
 UdeM00000029305 6579 641.3 UdeM00000029305 XP\_033734747.1 49.5 679  
 325 8 28 695 8 679 1.40E-180 641.3 6579 cellular  
 organisms;Eukaryota;Opisthokonta;Metazoa;Eumetazoa;Bilateria;Protostomia;  
 Spiralia;Lophotrochozoa;Mollusca;Bivalvia;Autobranchia;Pteriomorphia;Pect  
 inida;Pectinoidea;Pectinidae;Pecten;Pecten maximus  
 UdeM00000029306 6579 511.5 UdeM00000029306 XP\_033734749.1 63.5 469  
 137 13 8 455 32 487 1.10E-141 511.5 6579 cellular

organisms;Eukaryota;Opisthokonta;Metazoa;Eumetazoa;Bilateria;Protostomia;Spiralia;Lophotrochozoa;Mollusca;Bivalvia;Autobranchia;Pteriormorphia;Pectinida;Pectinoidea;Pectinidae;Pecten;Pecten maximus

UdeM00000029307 29159 486.1 UdeM00000029307 XP\_034324250.1 75.4 317  
78 0 6 322 265 581 3.40E-134 486.1 29159 cellular

organisms;Eukaryota;Opisthokonta;Metazoa;Eumetazoa;Bilateria;Protostomia;Spiralia;Lophotrochozoa;Mollusca;Bivalvia;Autobranchia;Pteriormorphia;Ostreida;Ostreoidea;Ostreidae;Crassostrea;Crassostrea gigas

UdeM00000029309 6596 68.9 UdeM00000029309 XP\_045159213.1 62.7 51  
19 0 1 51 12 62 3.20E-09 68.9 6596 cellular

organisms;Eukaryota;Opisthokonta;Metazoa;Eumetazoa;Bilateria;Protostomia;Spiralia;Lophotrochozoa;Mollusca;Bivalvia;Autobranchia;Heteroconchia;Euheterodonta;Imparidentia;Venerida;Veneroidea;Veneridae;Mercenaria;Mercenaria mercenaria

UdeM00000029310 6579 399.8 UdeM00000029310 XP\_033735461.1 71.2 299  
74 4 1 297 124 412 3.00E-108 399.8 6579 cellular

organisms;Eukaryota;Opisthokonta;Metazoa;Eumetazoa;Bilateria;Protostomia;Spiralia;Lophotrochozoa;Mollusca;Bivalvia;Autobranchia;Pteriormorphia;Pectinida;Pectinoidea;Pectinidae;Pecten;Pecten maximus

UdeM00000029311 7054 203 UdeM00000029311 XP\_031350480.1 53.3 167  
77 1 1 166 301 467 3.00E-49 203 7054 cellular

organisms;Eukaryota;Opisthokonta;Metazoa;Eumetazoa;Bilateria;Protostomia;Ecdysozoa;Panarthropoda;Arthropoda;Mandibulata;Pancrustacea;Hexapoda;Insecta;Dicondylia;Pterygota;Neoptera;Endopterygota;Coleoptera;Polyphaga;Elateriformia;Elateroidea;Lampyridae;Lampyrinae;Photinus;Photinus pyralis

UdeM00000029312 2607531 60.1 UdeM00000029312 XP\_029638196.1 38.7  
111 53 2 1 111 1 96 2.60E-06 60.1 2607531  
cellular

organisms;Eukaryota;Opisthokonta;Metazoa;Eumetazoa;Bilateria;Protostomia;Spiralia;Lophotrochozoa;Mollusca;Cephalopoda;Coleoidea;Octopodiformes;Octopoda;Incirrata;Octopodidae;Octopus;Octopus sinensis

UdeM00000029313 6565 879.8 UdeM00000029313 XP\_022332635.1 58.3 841  
343 4 2 836 3 841 2.80E-252 879.8 6565 cellular

organisms;Eukaryota;Opisthokonta;Metazoa;Eumetazoa;Bilateria;Protostomia;Spiralia;Lophotrochozoa;Mollusca;Bivalvia;Autobranchia;Pteriormorphia;Ostreida;Ostreoidea;Ostreidae;Crassostrea;Crassostrea virginica

UdeM00000029316 6596 695.7 UdeM00000029316 XP\_045185658.1 59.9 611  
226 8 3 597 12 619 5.30E-197 695.7 6596 cellular

organisms;Eukaryota;Opisthokonta;Metazoa;Eumetazoa;Bilateria;Protostomia;Spiralia;Lophotrochozoa;Mollusca;Bivalvia;Autobranchia;Heteroconchia;Euheterodonta;Imparidentia;Venerida;Veneroidea;Veneridae;Mercenaria;Mercenaria mercenaria

UdeM00000029317 6596 240 UdeM00000029317 XP\_045187444.1 53.5 260  
111 4 1 259 1 251 4.40E-60 240 6596 cellular

organisms;Eukaryota;Opisthokonta;Metazoa;Eumetazoa;Bilateria;Protostomia;Spiralia;Lophotrochozoa;Mollusca;Bivalvia;Autobranchia;Heteroconchia;Euheterodonta;Imparidentia;Venerida;Veneroidea;Veneridae;Mercenaria;Mercenaria mercenaria

UdeM00000029318 1735272 240.7 UdeM00000029318 XP\_041351861.1 36.9  
388 184 6 25 356 9 391 2.80E-60 240.7 1735272  
cellular

organisms;Eukaryota;Opisthokonta;Metazoa;Eumetazoa;Bilateria;Protostomia;Spiralia;Lophotrochozoa;Mollusca;Gastropoda;Neomphalina;Neomphaloidea;Peltopiridae;Gigantopelta;Gigantopelta aegis

UdeM00000029319 6596 211.5 UdeM00000029319 XP\_045163837.1 54 211  
 83 3 13 222 1 198 1.10E-51 211.5 6596 cellular  
 organisms;Eukaryota;Opisthokonta;Metazoa;Eumetazoa;Bilateria;Protostomia;  
 Spiralia;Lophotrochozoa;Mollusca;Bivalvia;Autobranchia;Heteroconchia;Euhe  
 terodonta;Imparidentia;Venerida;Veneroidea;Veneridae;Mercenaria;Mercenari  
 a mercenaria  
 UdeM00000029320 29159 106.3 UdeM00000029320 XP\_034325540.1 34.6 159  
 101 3 5 162 18 174 3.80E-20 106.3 29159 cellular  
 organisms;Eukaryota;Opisthokonta;Metazoa;Eumetazoa;Bilateria;Protostomia;  
 Spiralia;Lophotrochozoa;Mollusca;Bivalvia;Autobranchia;Pteriormorphia;Ostr  
 eida;Ostreoidea;Ostreidae;Crassostrea;Crassostrea gigas  
 UdeM00000029321 29159 561.2 UdeM00000029321 XP\_034325551.1 61.1 427  
 166 0 3 429 281 707 2.10E-156 561.2 29159 cellular  
 organisms;Eukaryota;Opisthokonta;Metazoa;Eumetazoa;Bilateria;Protostomia;  
 Spiralia;Lophotrochozoa;Mollusca;Bivalvia;Autobranchia;Pteriormorphia;Ostr  
 eida;Ostreoidea;Ostreidae;Crassostrea;Crassostrea gigas  
 UdeM00000029321 29159 80.1 UdeM00000029321 XP\_034325551.1 51.1 90  
 35 4 653 737 1787 1872 1.40E-11 80.1 29159 cellular  
 organisms;Eukaryota;Opisthokonta;Metazoa;Eumetazoa;Bilateria;Protostomia;  
 Spiralia;Lophotrochozoa;Mollusca;Bivalvia;Autobranchia;Pteriormorphia;Ostr  
 eida;Ostreoidea;Ostreidae;Crassostrea;Crassostrea gigas  
 UdeM00000029322 29159 462.6 UdeM00000029322 XP\_019926413.2 71.6 334  
 81 4 1 326 239 566 8.10E-127 462.6 29159 cellular  
 organisms;Eukaryota;Opisthokonta;Metazoa;Eumetazoa;Bilateria;Protostomia;  
 Spiralia;Lophotrochozoa;Mollusca;Bivalvia;Autobranchia;Pteriormorphia;Ostr  
 eida;Ostreoidea;Ostreidae;Crassostrea;Crassostrea gigas  
 UdeM00000029323 6596 132.1 UdeM00000029323 XP\_045163898.1 33.7 288  
 160 4 2 261 1119 1403 1.10E-27 132.1 6596 cellular  
 organisms;Eukaryota;Opisthokonta;Metazoa;Eumetazoa;Bilateria;Protostomia;  
 Spiralia;Lophotrochozoa;Mollusca;Bivalvia;Autobranchia;Heteroconchia;Euhe  
 terodonta;Imparidentia;Venerida;Veneroidea;Veneridae;Mercenaria;Mercenari  
 a mercenaria  
 UdeM00000029324 6579 209.5 UdeM00000029324 XP\_033734412.1 37.6 386  
 205 7 1 361 49 423 7.50E-51 209.5 6579 cellular  
 organisms;Eukaryota;Opisthokonta;Metazoa;Eumetazoa;Bilateria;Protostomia;  
 Spiralia;Lophotrochozoa;Mollusca;Bivalvia;Autobranchia;Pteriormorphia;Pect  
 inida;Pectinoidea;Pectinidae;Pecten;Pecten maximus  
 UdeM00000029325 6596 459.9 UdeM00000029325 XP\_045187294.1 51.2 471  
 196 7 24 490 27 467 5.80E-126 459.9 6596 cellular  
 organisms;Eukaryota;Opisthokonta;Metazoa;Eumetazoa;Bilateria;Protostomia;  
 Spiralia;Lophotrochozoa;Mollusca;Bivalvia;Autobranchia;Heteroconchia;Euhe  
 terodonta;Imparidentia;Venerida;Veneroidea;Veneridae;Mercenaria;Mercenari  
 a mercenaria  
 UdeM00000029326 29159 851.3 UdeM00000029326 XP\_034325827.1 84.6 521  
 74 1 7 521 13 533 6.60E-244 851.3 29159 cellular  
 organisms;Eukaryota;Opisthokonta;Metazoa;Eumetazoa;Bilateria;Protostomia;  
 Spiralia;Lophotrochozoa;Mollusca;Bivalvia;Autobranchia;Pteriormorphia;Ostr  
 eida;Ostreoidea;Ostreidae;Crassostrea;Crassostrea gigas  
 UdeM00000029327 6596 201.1 UdeM00000029327 XP\_045187296.1 47.6 210  
 110 0 1 210 209 418 1.40E-48 201.1 6596 cellular  
 organisms;Eukaryota;Opisthokonta;Metazoa;Eumetazoa;Bilateria;Protostomia;  
 Spiralia;Lophotrochozoa;Mollusca;Bivalvia;Autobranchia;Heteroconchia;Euhe  
 terodonta;Imparidentia;Venerida;Veneroidea;Veneridae;Mercenaria;Mercenari  
 a mercenaria

UdeM00000029328 6596 171.8 UdeM00000029328 XP\_045187296.1 39 254  
 100 7 1 250 1 203 1.40E-39 171.8 6596 cellular  
 organisms;Eukaryota;Opisthokonta;Metazoa;Eumetazoa;Bilateria;Protostomia;  
 Spiralia;Lophotrochozoa;Mollusca;Bivalvia;Autobranchia;Heteroconchia;Euhe  
 terodonta;Imparidentia;Venerida;Veneroidea;Veneridae;Mercenaria;Mercenari  
 a mercenaria  
 UdeM00000029329 6596 191 UdeM00000029329 XP\_045187297.1 72.7 128  
 33 1 1 128 69 194 9.10E-46 191 6596 cellular  
 organisms;Eukaryota;Opisthokonta;Metazoa;Eumetazoa;Bilateria;Protostomia;  
 Spiralia;Lophotrochozoa;Mollusca;Bivalvia;Autobranchia;Heteroconchia;Euhe  
 terodonta;Imparidentia;Venerida;Veneroidea;Veneridae;Mercenaria;Mercenari  
 a mercenaria  
 UdeM00000029330 6596 272.3 UdeM00000029330 XP\_045187297.1 68.4 190  
 58 1 1 190 7 194 4.60E-70 272.3 6596 cellular  
 organisms;Eukaryota;Opisthokonta;Metazoa;Eumetazoa;Bilateria;Protostomia;  
 Spiralia;Lophotrochozoa;Mollusca;Bivalvia;Autobranchia;Heteroconchia;Euhe  
 terodonta;Imparidentia;Venerida;Veneroidea;Veneridae;Mercenaria;Mercenari  
 a mercenaria  
 UdeM00000029331 6596 971.1 UdeM00000029331 XP\_045187298.1 56.3 891  
 375 6 1 891 1 877 1.10E-279 971.1 6596 cellular  
 organisms;Eukaryota;Opisthokonta;Metazoa;Eumetazoa;Bilateria;Protostomia;  
 Spiralia;Lophotrochozoa;Mollusca;Bivalvia;Autobranchia;Heteroconchia;Euhe  
 terodonta;Imparidentia;Venerida;Veneroidea;Veneridae;Mercenaria;Mercenari  
 a mercenaria  
 UdeM00000029332 37621 91.7 UdeM00000029332 XP\_014666210.1 36.3 204  
 108 4 104 299 223 412 1.90E-15 91.7 37621 cellular  
 organisms;Eukaryota;Opisthokonta;Metazoa;Eumetazoa;Bilateria;Protostomia;  
 Ecdysozoa;Scalidophora;Priapulida;Priapulimorpha;Priapulimorphida;Priapul  
 idae;Priapululus;Priapululus caudatus  
 UdeM00000029335 6596 157.5 UdeM00000029335 XP\_045182338.1 39.1 312  
 171 9 3 307 8 307 3.60E-35 157.5 6596 cellular  
 organisms;Eukaryota;Opisthokonta;Metazoa;Eumetazoa;Bilateria;Protostomia;  
 Spiralia;Lophotrochozoa;Mollusca;Bivalvia;Autobranchia;Heteroconchia;Euhe  
 terodonta;Imparidentia;Venerida;Veneroidea;Veneridae;Mercenaria;Mercenari  
 a mercenaria  
 UdeM00000029339 6596 630.2 UdeM00000029339 XP\_045187479.1 82.5 485  
 69 9 1 473 20 500 2.20E-177 630.2 6596 cellular  
 organisms;Eukaryota;Opisthokonta;Metazoa;Eumetazoa;Bilateria;Protostomia;  
 Spiralia;Lophotrochozoa;Mollusca;Bivalvia;Autobranchia;Heteroconchia;Euhe  
 terodonta;Imparidentia;Venerida;Veneroidea;Veneridae;Mercenaria;Mercenari  
 a mercenaria  
 UdeM00000029340 6596 333.6 UdeM00000029340 XP\_045187479.1 87 192  
 21 4 1 188 20 211 1.90E-88 333.6 6596 cellular  
 organisms;Eukaryota;Opisthokonta;Metazoa;Eumetazoa;Bilateria;Protostomia;  
 Spiralia;Lophotrochozoa;Mollusca;Bivalvia;Autobranchia;Heteroconchia;Euhe  
 terodonta;Imparidentia;Venerida;Veneroidea;Veneridae;Mercenaria;Mercenari  
 a mercenaria  
 UdeM00000043508 6565 201.4 UdeM00000043508 XP\_022297447.1 51 196  
 80 2 1 180 71 266 1.80E-48 201.4 6565 cellular  
 organisms;Eukaryota;Opisthokonta;Metazoa;Eumetazoa;Bilateria;Protostomia;  
 Spiralia;Lophotrochozoa;Mollusca;Bivalvia;Autobranchia;Pteriomorpha;Ostr  
 eida;Ostreoidea;Ostreidae;Crassostrea;Crassostrea virginica  
 UdeM00000043510 70779 111.3 UdeM00000043510 XP\_015764363.1 33.2 184  
 104 3 5 170 6 188 1.20E-21 111.3 70779 cellular

organisms;Eukaryota;Opisthokonta;Metazoa;Eumetazoa;Cnidaria;Anthozoa;Hexa  
corallia;Scleractinia;Astrocoeniina;Acroporidae;Acropora;Acropora  
digitifera

UdeM00000043512 48498 152.9 UdeM00000043512 XP\_020608168.1 26.8 497  
280 20 32 494 100 546 1.40E-33 152.9 48498 cellular

organisms;Eukaryota;Opisthokonta;Metazoa;Eumetazoa;Cnidaria;Anthozoa;Hexa  
corallia;Scleractinia;Faviina;Merulinidae;Orbicella;Orbicella faveolata

UdeM00000043515 6596 132.1 UdeM00000043515 XP\_045208720.1 25.1 545  
305 10 5 455 754 1289 1.80E-27 132.1 6596 cellular

organisms;Eukaryota;Opisthokonta;Metazoa;Eumetazoa;Bilateria;Protostomia;  
Spiralia;Lophotrochozoa;Mollusca;Bivalvia;Autobranchia;Heteroconchia;Euhe  
terodonta;Imparidentia;Venerida;Veneroidea;Veneridae;Mercenaria;Mercenari  
a mercenaria

UdeM00000043516 6596 132.5 UdeM00000043516 XP\_045209416.1 30.7 348  
214 12 33 369 679 1010 1.20E-27 132.5 6596 cellular

organisms;Eukaryota;Opisthokonta;Metazoa;Eumetazoa;Bilateria;Protostomia;  
Spiralia;Lophotrochozoa;Mollusca;Bivalvia;Autobranchia;Heteroconchia;Euhe  
terodonta;Imparidentia;Venerida;Veneroidea;Veneridae;Mercenaria;Mercenari  
a mercenaria

UdeM00000043517 6596 105.1 UdeM00000043517 XP\_045208721.1 34.4 186  
115 4 7 190 719 899 1.10E-19 105.1 6596 cellular

organisms;Eukaryota;Opisthokonta;Metazoa;Eumetazoa;Bilateria;Protostomia;  
Spiralia;Lophotrochozoa;Mollusca;Bivalvia;Autobranchia;Heteroconchia;Euhe  
terodonta;Imparidentia;Venerida;Veneroidea;Veneridae;Mercenaria;Mercenari  
a mercenaria

UdeM00000043518 6596 66.6 UdeM00000043518 XP\_045209522.1 31 145  
92 4 27 166 203 344 4.00E-08 66.6 6596 cellular

organisms;Eukaryota;Opisthokonta;Metazoa;Eumetazoa;Bilateria;Protostomia;  
Spiralia;Lophotrochozoa;Mollusca;Bivalvia;Autobranchia;Heteroconchia;Euhe  
terodonta;Imparidentia;Venerida;Veneroidea;Veneridae;Mercenaria;Mercenari  
a mercenaria

UdeM00000043519 6596 117.5 UdeM00000043519 XP\_045208721.1 34.6 234  
142 7 103 332 679 905 3.90E-23 117.5 6596 cellular

organisms;Eukaryota;Opisthokonta;Metazoa;Eumetazoa;Bilateria;Protostomia;  
Spiralia;Lophotrochozoa;Mollusca;Bivalvia;Autobranchia;Heteroconchia;Euhe  
terodonta;Imparidentia;Venerida;Veneroidea;Veneridae;Mercenaria;Mercenari  
a mercenaria

UdeM00000043521 29159 144.8 UdeM00000043521 XP\_034305965.1 37.3 212  
116 5 6 216 6 201 1.30E-31 144.8 29159 cellular

organisms;Eukaryota;Opisthokonta;Metazoa;Eumetazoa;Bilateria;Protostomia;  
Spiralia;Lophotrochozoa;Mollusca;Bivalvia;Autobranchia;Pteriomorphia;Ostr  
eida;Ostreoidea;Ostreidae;Crassostrea;Crassostrea gigas

UdeM00000043522 29159 335.9 UdeM00000043522 XP\_034311318.1 42.6 465  
230 12 1 435 167 624 8.80E-89 335.9 29159 cellular

organisms;Eukaryota;Opisthokonta;Metazoa;Eumetazoa;Bilateria;Protostomia;  
Spiralia;Lophotrochozoa;Mollusca;Bivalvia;Autobranchia;Pteriomorphia;Ostr  
eida;Ostreoidea;Ostreidae;Crassostrea;Crassostrea gigas

UdeM00000043524 6596 109.8 UdeM00000043524 XP\_045209522.1 39.4 175  
101 3 7 176 179 353 4.30E-21 109.8 6596 cellular

organisms;Eukaryota;Opisthokonta;Metazoa;Eumetazoa;Bilateria;Protostomia;  
Spiralia;Lophotrochozoa;Mollusca;Bivalvia;Autobranchia;Heteroconchia;Euhe  
terodonta;Imparidentia;Venerida;Veneroidea;Veneridae;Mercenaria;Mercenari  
a mercenaria

UdeM000000043523 6596 109.4 UdeM000000043523 XP\_045209522.1 43.1 153  
 82 3 90 237 201 353 7.30E-21 109.4 6596 cellular  
 organisms;Eukaryota;Opisthokonta;Metazoa;Eumetazoa;Bilateria;Protostomia;  
 Spiralia;Lophotrochozoa;Mollusca;Bivalvia;Autobranchia;Heteroconchia;Euhe  
 terodonta;Imparidentia;Venerida;Veneroidea;Veneridae;Mercenaria;Mercenari  
 a mercenaria  
 UdeM000000005455 29159 111.3 UdeM000000005455 XP\_011439204.2 28.9 253  
 174 3 5 255 114 362 1.80E-21 111.3 29159 cellular  
 organisms;Eukaryota;Opisthokonta;Metazoa;Eumetazoa;Bilateria;Protostomia;  
 Spiralia;Lophotrochozoa;Mollusca;Bivalvia;Autobranchia;Pteriormorphia;Ostr  
 eida;Ostreoidea;Ostreidae;Crassostrea;Crassostrea gigas  
 UdeM000000005456 6596 73.9 UdeM000000005456 XP\_045176656.1 30.8 130  
 87 1 111 240 368 494 3.00E-10 73.9 6596 cellular  
 organisms;Eukaryota;Opisthokonta;Metazoa;Eumetazoa;Bilateria;Protostomia;  
 Spiralia;Lophotrochozoa;Mollusca;Bivalvia;Autobranchia;Heteroconchia;Euhe  
 terodonta;Imparidentia;Venerida;Veneroidea;Veneridae;Mercenaria;Mercenari  
 a mercenaria  
 UdeM000000005457 6573 149.1 UdeM000000005457 XP\_021340030.1 28.2 380  
 258 2 3 370 9 385 1.20E-32 149.1 6573 cellular  
 organisms;Eukaryota;Opisthokonta;Metazoa;Eumetazoa;Bilateria;Protostomia;  
 Spiralia;Lophotrochozoa;Mollusca;Bivalvia;Autobranchia;Pteriormorphia;Pect  
 inida;Pectinoidea;Pectinidae;Mizuhopecten;Mizuhopecten yessoensis  
 UdeM000000005458 6573 61.6 UdeM000000005458 XP\_021354431.1 37.2 78  
 49 0 1 78 663 740 6.50E-07 61.6 6573 cellular  
 organisms;Eukaryota;Opisthokonta;Metazoa;Eumetazoa;Bilateria;Protostomia;  
 Spiralia;Lophotrochozoa;Mollusca;Bivalvia;Autobranchia;Pteriormorphia;Pect  
 inida;Pectinoidea;Pectinidae;Mizuhopecten;Mizuhopecten yessoensis  
 UdeM000000005459 6596 86.3 UdeM000000005459 XP\_045175479.1 31 142  
 98 0 4 145 21 162 6.00E-14 86.3 6596 cellular  
 organisms;Eukaryota;Opisthokonta;Metazoa;Eumetazoa;Bilateria;Protostomia;  
 Spiralia;Lophotrochozoa;Mollusca;Bivalvia;Autobranchia;Heteroconchia;Euhe  
 terodonta;Imparidentia;Venerida;Veneroidea;Veneridae;Mercenaria;Mercenari  
 a mercenaria  
 UdeM000000005460 6573 172.9 UdeM000000005460 XP\_021340030.1 31.1 412  
 272 5 5 405 11 421 8.50E-40 172.9 6573 cellular  
 organisms;Eukaryota;Opisthokonta;Metazoa;Eumetazoa;Bilateria;Protostomia;  
 Spiralia;Lophotrochozoa;Mollusca;Bivalvia;Autobranchia;Pteriormorphia;Pect  
 inida;Pectinoidea;Pectinidae;Mizuhopecten;Mizuhopecten yessoensis  
 UdeM000000005461 7574 86.7 UdeM000000005461 XP\_023931762.1 77.3 44  
 10 0 26 69 254 297 1.40E-14 86.7 7574 cellular  
 organisms;Eukaryota;Opisthokonta;Metazoa;Eumetazoa;Bilateria;Protostomia;  
 Spiralia;Lophotrochozoa;Brachiopoda;Linguliformea;Lingulata;Lingulida;Lin  
 guloidea;Lingulidae;Lingula;Lingula anatina  
 UdeM000000005462 29159 629.8 UdeM000000005462 XP\_011425180.2 68.4 751  
 202 7 1 727 1 740 4.50E-177 629.8 29159 cellular  
 organisms;Eukaryota;Opisthokonta;Metazoa;Eumetazoa;Bilateria;Protostomia;  
 Spiralia;Lophotrochozoa;Mollusca;Bivalvia;Autobranchia;Pteriormorphia;Ostr  
 eida;Ostreoidea;Ostreidae;Crassostrea;Crassostrea gigas  
 UdeM000000005463 2607531 164.9 UdeM000000005463 XP\_029634756.1 52.6  
 173 75 1 15 180 806 978 9.90E-38 164.9 2607531  
 cellular  
 organisms;Eukaryota;Opisthokonta;Metazoa;Eumetazoa;Bilateria;Protostomia;  
 Spiralia;Lophotrochozoa;Mollusca;Cephalopoda;Coleoidea;Octopodiformes;Oct  
 opoda;Incirrata;Octopodidae;Octopus;Octopus sinensis



UdeM00000005464 6579 93.6 UdeM00000005464 XP\_033726575.1 33.1 154  
 99 1 114 267 215 364 4.50E-16 93.6 6579 cellular  
 organisms;Eukaryota;Opisthokonta;Metazoa;Eumetazoa;Bilateria;Protostomia;  
 Spiralia;Lophotrochozoa;Mollusca;Bivalvia;Autobranchia;Pteriormorphia;Pect  
 inida;Pectinoidea;Pectinidae;Pecten;Pecten maximus  
 UdeM00000005465 6596 155.6 UdeM00000005465 XP\_045187141.1 63.8 127  
 36 2 23 146 527 646 5.70E-35 155.6 6596 cellular  
 organisms;Eukaryota;Opisthokonta;Metazoa;Eumetazoa;Bilateria;Protostomia;  
 Spiralia;Lophotrochozoa;Mollusca;Bivalvia;Autobranchia;Heteroconchia;Euhe  
 terodonta;Imparidentia;Venerida;Veneroidea;Veneridae;Mercenaria;Mercenari  
 a mercenaria  
 UdeM00000005466 6596 158.3 UdeM00000005466 XP\_045187141.1 62.6 131  
 39 2 21 148 523 646 8.90E-36 158.3 6596 cellular  
 organisms;Eukaryota;Opisthokonta;Metazoa;Eumetazoa;Bilateria;Protostomia;  
 Spiralia;Lophotrochozoa;Mollusca;Bivalvia;Autobranchia;Heteroconchia;Euhe  
 terodonta;Imparidentia;Venerida;Veneroidea;Veneridae;Mercenaria;Mercenari  
 a mercenaria  
 UdeM00000011684 400727 471.5 UdeM00000011684 XP\_025097195.1 71.1  
 329 78 3 10 326 18 341 8.90E-130 471.5 400727  
 cellular  
 organisms;Eukaryota;Opisthokonta;Metazoa;Eumetazoa;Bilateria;Protostomia;  
 Spiralia;Lophotrochozoa;Mollusca;Gastropoda;Caenogastropoda;Architaeniogl  
 ossa;Ampullarioidea;Ampullariidae;Pomacea;Pomacea canaliculata  
 UdeM00000011686 6579 288.9 UdeM00000011686 XP\_033740715.1 77.8 171  
 37 1 1 171 1 170 4.80E-75 288.9 6579 cellular  
 organisms;Eukaryota;Opisthokonta;Metazoa;Eumetazoa;Bilateria;Protostomia;  
 Spiralia;Lophotrochozoa;Mollusca;Bivalvia;Autobranchia;Pteriormorphia;Pect  
 inida;Pectinoidea;Pectinidae;Pecten;Pecten maximus  
 UdeM00000011685 6579 347.4 UdeM00000011685 XP\_033740715.1 72.9 229  
 57 3 1 225 1 228 1.30E-92 347.4 6579 cellular  
 organisms;Eukaryota;Opisthokonta;Metazoa;Eumetazoa;Bilateria;Protostomia;  
 Spiralia;Lophotrochozoa;Mollusca;Bivalvia;Autobranchia;Pteriormorphia;Pect  
 inida;Pectinoidea;Pectinidae;Pecten;Pecten maximus  
 UdeM00000011687 6579 213.8 UdeM00000011687 XP\_033744301.1 53.9 191  
 79 2 1 189 59 242 1.90E-52 213.8 6579 cellular  
 organisms;Eukaryota;Opisthokonta;Metazoa;Eumetazoa;Bilateria;Protostomia;  
 Spiralia;Lophotrochozoa;Mollusca;Bivalvia;Autobranchia;Pteriormorphia;Pect  
 inida;Pectinoidea;Pectinidae;Pecten;Pecten maximus  
 UdeM00000011688 6573 168.7 UdeM00000011688 XP\_021378265.1 47.4 196  
 93 2 1 196 1 186 7.70E-39 168.7 6573 cellular  
 organisms;Eukaryota;Opisthokonta;Metazoa;Eumetazoa;Bilateria;Protostomia;  
 Spiralia;Lophotrochozoa;Mollusca;Bivalvia;Autobranchia;Pteriormorphia;Pect  
 inida;Pectinoidea;Pectinidae;Mizuhopecten;Mizuhopecten yessoensis  
 UdeM00000011693 6596 236.9 UdeM00000011693 XP\_045161741.1 41.1 309  
 168 4 5 299 113 421 3.50E-59 236.9 6596 cellular  
 organisms;Eukaryota;Opisthokonta;Metazoa;Eumetazoa;Bilateria;Protostomia;  
 Spiralia;Lophotrochozoa;Mollusca;Bivalvia;Autobranchia;Heteroconchia;Euhe  
 terodonta;Imparidentia;Venerida;Veneroidea;Veneridae;Mercenaria;Mercenari  
 a mercenaria  
 UdeM00000011694 6596 120.9 UdeM00000011694 XP\_045161739.1 47.1 119  
 63 0 5 123 110 228 1.40E-24 120.9 6596 cellular  
 organisms;Eukaryota;Opisthokonta;Metazoa;Eumetazoa;Bilateria;Protostomia;  
 Spiralia;Lophotrochozoa;Mollusca;Bivalvia;Autobranchia;Heteroconchia;Euhe

terodonta;Imparidentia;Venerida;Veneroidea;Veneridae;Mercenaria;Mercenari  
 a mercenaria  
 UdeM00000011696 6596 238.8 UdeM00000011696 XP\_045161741.1 44.1 272  
 145 3 5 269 113 384 9.20E-60 238.8 6596 cellular  
 organisms;Eukaryota;Opisthokonta;Metazoa;Eumetazoa;Bilateria;Protostomia;  
 Spiralia;Lophotrochozoa;Mollusca;Bivalvia;Autobranhia;Heteroconchia;Euhe  
 terodonta;Imparidentia;Venerida;Veneroidea;Veneridae;Mercenaria;Mercenari  
 a mercenaria  
 UdeM00000011697 6596 112.8 UdeM00000011697 XP\_045161741.1 39.4 188  
 101 4 4 180 235 420 4.70E-22 112.8 6596 cellular  
 organisms;Eukaryota;Opisthokonta;Metazoa;Eumetazoa;Bilateria;Protostomia;  
 Spiralia;Lophotrochozoa;Mollusca;Bivalvia;Autobranhia;Heteroconchia;Euhe  
 terodonta;Imparidentia;Venerida;Veneroidea;Veneridae;Mercenaria;Mercenari  
 a mercenaria  
 UdeM00000011698 6596 169.1 UdeM00000011698 XP\_045163028.1 33.7 350  
 143 5 18 288 25 364 9.60E-39 169.1 6596 cellular  
 organisms;Eukaryota;Opisthokonta;Metazoa;Eumetazoa;Bilateria;Protostomia;  
 Spiralia;Lophotrochozoa;Mollusca;Bivalvia;Autobranhia;Heteroconchia;Euhe  
 terodonta;Imparidentia;Venerida;Veneroidea;Veneridae;Mercenaria;Mercenari  
 a mercenaria  
 UdeM00000011702 6596 704.1 UdeM00000011702 XP\_045196696.1 68 500  
 154 4 7 501 11 509 1.30E-199 704.1 6596 cellular  
 organisms;Eukaryota;Opisthokonta;Metazoa;Eumetazoa;Bilateria;Protostomia;  
 Spiralia;Lophotrochozoa;Mollusca;Bivalvia;Autobranhia;Heteroconchia;Euhe  
 terodonta;Imparidentia;Venerida;Veneroidea;Veneridae;Mercenaria;Mercenari  
 a mercenaria  
 UdeM00000011704 29159 132.5 UdeM00000011704 XP\_034316161.1 51.7 118  
 57 0 1 118 718 835 4.20E-28 132.5 29159 cellular  
 organisms;Eukaryota;Opisthokonta;Metazoa;Eumetazoa;Bilateria;Protostomia;  
 Spiralia;Lophotrochozoa;Mollusca;Bivalvia;Autobranhia;Pteriormorphia;Ostr  
 eida;Ostreoidea;Ostreidae;Crassostrea;Crassostrea gigas  
 UdeM00000011705 6596 246.1 UdeM00000011705 XP\_045197796.1 60.2 186  
 74 0 3 188 30 215 3.50E-62 246.1 6596 cellular  
 organisms;Eukaryota;Opisthokonta;Metazoa;Eumetazoa;Bilateria;Protostomia;  
 Spiralia;Lophotrochozoa;Mollusca;Bivalvia;Autobranhia;Heteroconchia;Euhe  
 terodonta;Imparidentia;Venerida;Veneroidea;Veneridae;Mercenaria;Mercenari  
 a mercenaria  
 UdeM00000011706 6596 465.3 UdeM00000011706 XP\_045198580.1 64.9 333  
 117 0 22 354 1 333 6.90E-128 465.3 6596 cellular  
 organisms;Eukaryota;Opisthokonta;Metazoa;Eumetazoa;Bilateria;Protostomia;  
 Spiralia;Lophotrochozoa;Mollusca;Bivalvia;Autobranhia;Heteroconchia;Euhe  
 terodonta;Imparidentia;Venerida;Veneroidea;Veneridae;Mercenaria;Mercenari  
 a mercenaria  
 UdeM00000011707 6573 530 UdeM00000011707 XP\_021366754.1 41 1178  
 340 20 5 832 36 1208 5.80E-147 530 6573 cellular  
 organisms;Eukaryota;Opisthokonta;Metazoa;Eumetazoa;Bilateria;Protostomia;  
 Spiralia;Lophotrochozoa;Mollusca;Bivalvia;Autobranhia;Pteriormorphia;Pect  
 inida;Pectinoidea;Pectinidae;Mizuhopecten;Mizuhopecten yessoensis  
 UdeM00000011708 6596 719.5 UdeM00000011708 XP\_045196933.1 69.1 521  
 150 5 20 533 1139 1655 3.10E-204 719.5 6596 cellular  
 organisms;Eukaryota;Opisthokonta;Metazoa;Eumetazoa;Bilateria;Protostomia;  
 Spiralia;Lophotrochozoa;Mollusca;Bivalvia;Autobranhia;Heteroconchia;Euhe  
 terodonta;Imparidentia;Venerida;Veneroidea;Veneridae;Mercenaria;Mercenari  
 a mercenaria

UdeM00000011709 29159 215.3 UdeM00000011709 XP\_034322594.1 42.2 322  
 145 11 17 306 99 411 1.80E-52 215.3 29159 cellular  
 organisms;Eukaryota;Opisthokonta;Metazoa;Eumetazoa;Bilateria;Protostomia;  
 Spiralia;Lophotrochozoa;Mollusca;Bivalvia;Autobranchia;Pteriomorpha;Ostr  
 eida;Ostreoidea;Ostreidae;Crassostrea;Crassostrea gigas  
 UdeM00000011709 29159 98.2 UdeM00000011709 XP\_034322594.1 36.7 196  
 107 4 268 448 1127 1320 3.20E-17 98.2 29159 cellular  
 organisms;Eukaryota;Opisthokonta;Metazoa;Eumetazoa;Bilateria;Protostomia;  
 Spiralia;Lophotrochozoa;Mollusca;Bivalvia;Autobranchia;Pteriomorpha;Ostr  
 eida;Ostreoidea;Ostreidae;Crassostrea;Crassostrea gigas  
 UdeM00000011710 6579 1391.3 UdeM00000011710 XP\_033747009.1 51.9  
 1363 608 9 197 1525 112 1460 0.00E+00 1391.3 6579  
 cellular  
 organisms;Eukaryota;Opisthokonta;Metazoa;Eumetazoa;Bilateria;Protostomia;  
 Spiralia;Lophotrochozoa;Mollusca;Bivalvia;Autobranchia;Pteriomorpha;Pect  
 inida;Pectinoidea;Pectinidae;Pecten;Pecten maximus  
 UdeM00000011711 6565 473 UdeM00000011711 XP\_022288182.1 70.7 304  
 89 0 1 304 388 691 2.90E-130 473 6565 cellular  
 organisms;Eukaryota;Opisthokonta;Metazoa;Eumetazoa;Bilateria;Protostomia;  
 Spiralia;Lophotrochozoa;Mollusca;Bivalvia;Autobranchia;Pteriomorpha;Ostr  
 eida;Ostreoidea;Ostreidae;Crassostrea;Crassostrea virginica  
 UdeM00000011712 6565 515.8 UdeM00000011712 XP\_022288182.1 70.6 347  
 101 1 4 350 390 735 4.40E-143 515.8 6565 cellular  
 organisms;Eukaryota;Opisthokonta;Metazoa;Eumetazoa;Bilateria;Protostomia;  
 Spiralia;Lophotrochozoa;Mollusca;Bivalvia;Autobranchia;Pteriomorpha;Ostr  
 eida;Ostreoidea;Ostreidae;Crassostrea;Crassostrea virginica  
 UdeM00000011713 29159 500.7 UdeM00000011713 XP\_034334413.1 65.7 382  
 123 3 1 381 1 375 1.60E-138 500.7 29159 cellular  
 organisms;Eukaryota;Opisthokonta;Metazoa;Eumetazoa;Bilateria;Protostomia;  
 Spiralia;Lophotrochozoa;Mollusca;Bivalvia;Autobranchia;Pteriomorpha;Ostr  
 eida;Ostreoidea;Ostreidae;Crassostrea;Crassostrea gigas  
 UdeM00000011714 6573 158.7 UdeM00000011714 XP\_021380033.1 48.6 177  
 89 2 1 177 1 175 6.90E-36 158.7 6573 cellular  
 organisms;Eukaryota;Opisthokonta;Metazoa;Eumetazoa;Bilateria;Protostomia;  
 Spiralia;Lophotrochozoa;Mollusca;Bivalvia;Autobranchia;Pteriomorpha;Pect  
 inida;Pectinoidea;Pectinidae;Mizuhopecten;Mizuhopecten yessoensis  
 UdeM00000011715 6573 162.5 UdeM00000011715 XP\_021380033.1 48.9 176  
 89 1 1 176 1 175 4.80E-37 162.5 6573 cellular  
 organisms;Eukaryota;Opisthokonta;Metazoa;Eumetazoa;Bilateria;Protostomia;  
 Spiralia;Lophotrochozoa;Mollusca;Bivalvia;Autobranchia;Pteriomorpha;Pect  
 inida;Pectinoidea;Pectinidae;Mizuhopecten;Mizuhopecten yessoensis  
 UdeM00000011716 6596 136 UdeM00000011716 XP\_045182943.1 43.7 158  
 79 5 1 153 1 153 4.20E-29 136 6596 cellular  
 organisms;Eukaryota;Opisthokonta;Metazoa;Eumetazoa;Bilateria;Protostomia;  
 Spiralia;Lophotrochozoa;Mollusca;Bivalvia;Autobranchia;Heteroconchia;Euhe  
 terodonta;Imparidentia;Venerida;Veneroidea;Veneridae;Mercenaria;Mercenari  
 a mercenaria  
 UdeM00000011718 6596 139.4 UdeM00000011718 XP\_045197826.1 48.9 188  
 85 3 1 181 14 197 4.50E-30 139.4 6596 cellular  
 organisms;Eukaryota;Opisthokonta;Metazoa;Eumetazoa;Bilateria;Protostomia;  
 Spiralia;Lophotrochozoa;Mollusca;Bivalvia;Autobranchia;Heteroconchia;Euhe  
 terodonta;Imparidentia;Venerida;Veneroidea;Veneridae;Mercenaria;Mercenari  
 a mercenaria

UdeM00000011719 6596 139.8 UdeM00000011719 XP\_045197826.1 51.8 164  
 70 3 11 169 42 201 3.30E-30 139.8 6596 cellular  
 organisms;Eukaryota;Opisthokonta;Metazoa;Eumetazoa;Bilateria;Protostomia;  
 Spiralia;Lophotrochozoa;Mollusca;Bivalvia;Autobranchia;Heteroconchia;Euhe  
 terodonta;Imparidentia;Venerida;Veneroidea;Veneridae;Mercenaria;Mercenari  
 a mercenaria  
 UdeM00000011720 6596 89.4 UdeM00000011720 XP\_045199201.1 33.2 187  
 115 4 78 255 97 282 8.50E-15 89.4 6596 cellular  
 organisms;Eukaryota;Opisthokonta;Metazoa;Eumetazoa;Bilateria;Protostomia;  
 Spiralia;Lophotrochozoa;Mollusca;Bivalvia;Autobranchia;Heteroconchia;Euhe  
 terodonta;Imparidentia;Venerida;Veneroidea;Veneridae;Mercenaria;Mercenari  
 a mercenaria  
 UdeM00000011721 6500 691.8 UdeM00000011721 XP\_005107019.1 52.1 687  
 307 9 33 701 33 715 1.10E-195 691.8 6500 cellular  
 organisms;Eukaryota;Opisthokonta;Metazoa;Eumetazoa;Bilateria;Protostomia;  
 Spiralia;Lophotrochozoa;Mollusca;Gastropoda;Heterobranchia;Euthyneura;Tec  
 tipleura;Aplysiida;Aplysioidea;Aplysiidae;Aplysia;Aplysia californica  
 UdeM00000011722 6500 647.1 UdeM00000011722 XP\_005107019.1 49.5 703  
 317 13 33 704 33 728 2.70E-182 647.1 6500 cellular  
 organisms;Eukaryota;Opisthokonta;Metazoa;Eumetazoa;Bilateria;Protostomia;  
 Spiralia;Lophotrochozoa;Mollusca;Gastropoda;Heterobranchia;Euthyneura;Tec  
 tipleura;Aplysiida;Aplysioidea;Aplysiidae;Aplysia;Aplysia californica  
 UdeM00000011724 6579 103.2 UdeM00000011724 XP\_033729790.1 46.2 104  
 56 0 10 113 17 120 2.20E-19 103.2 6579 cellular  
 organisms;Eukaryota;Opisthokonta;Metazoa;Eumetazoa;Bilateria;Protostomia;  
 Spiralia;Lophotrochozoa;Mollusca;Bivalvia;Autobranchia;Pteriormorphia;Pect  
 inida;Pectinoidea;Pectinidae;Pecten;Pecten maximus  
 UdeM00000011725 6596 261.2 UdeM00000011725 XP\_045196022.1 60.7 211  
 81 1 1 209 1 211 1.20E-66 261.2 6596 cellular  
 organisms;Eukaryota;Opisthokonta;Metazoa;Eumetazoa;Bilateria;Protostomia;  
 Spiralia;Lophotrochozoa;Mollusca;Bivalvia;Autobranchia;Heteroconchia;Euhe  
 terodonta;Imparidentia;Venerida;Veneroidea;Veneridae;Mercenaria;Mercenari  
 a mercenaria  
 UdeM00000011727 6565 223 UdeM00000011727 XP\_022344558.1 57.1 184  
 77 1 1 184 3 184 3.10E-55 223 6565 cellular  
 organisms;Eukaryota;Opisthokonta;Metazoa;Eumetazoa;Bilateria;Protostomia;  
 Spiralia;Lophotrochozoa;Mollusca;Bivalvia;Autobranchia;Pteriormorphia;Ostr  
 eida;Ostreoidea;Ostreidae;Crassostrea;Crassostrea virginica  
 UdeM00000011728 6565 223 UdeM00000011728 XP\_022344558.1 57.1 184  
 77 1 1 184 3 184 3.10E-55 223 6565 cellular  
 organisms;Eukaryota;Opisthokonta;Metazoa;Eumetazoa;Bilateria;Protostomia;  
 Spiralia;Lophotrochozoa;Mollusca;Bivalvia;Autobranchia;Pteriormorphia;Ostr  
 eida;Ostreoidea;Ostreidae;Crassostrea;Crassostrea virginica  
 UdeM00000011730 6565 217.2 UdeM00000011730 XP\_022344558.1 56 184  
 79 1 1 184 3 184 1.70E-53 217.2 6565 cellular  
 organisms;Eukaryota;Opisthokonta;Metazoa;Eumetazoa;Bilateria;Protostomia;  
 Spiralia;Lophotrochozoa;Mollusca;Bivalvia;Autobranchia;Pteriormorphia;Ostr  
 eida;Ostreoidea;Ostreidae;Crassostrea;Crassostrea virginica  
 UdeM00000011731 1735272 109.4 UdeM00000011731 XP\_041379021.1 41.1  
 124 70 1 348 468 36 159 1.30E-20 109.4 1735272  
 cellular  
 organisms;Eukaryota;Opisthokonta;Metazoa;Eumetazoa;Bilateria;Protostomia;  
 Spiralia;Lophotrochozoa;Mollusca;Gastropoda;Neomphalina;Neomphaloidea;Pel  
 tospiridae;Gigantopelta;Gigantopelta aegis

UdeM00000011733 6596 226.1 UdeM00000011733 XP\_045195330.1 43.7 252  
 140 2 1 251 242 492 5.00E-56 226.1 6596 cellular  
 organisms;Eukaryota;Opisthokonta;Metazoa;Eumetazoa;Bilateria;Protostomia;  
 Spiralia;Lophotrochozoa;Mollusca;Bivalvia;Autobranhia;Heteroconchia;Euhe  
 terodonta;Imparidentia;Venerida;Veneroidea;Veneridae;Mercenaria;Mercenari  
 a mercenaria  
 UdeM00000011732 6596 364.8 UdeM00000011732 XP\_045195330.1 44.3 420  
 223 6 57 471 79 492 1.70E-97 364.8 6596 cellular  
 organisms;Eukaryota;Opisthokonta;Metazoa;Eumetazoa;Bilateria;Protostomia;  
 Spiralia;Lophotrochozoa;Mollusca;Bivalvia;Autobranhia;Heteroconchia;Euhe  
 terodonta;Imparidentia;Venerida;Veneroidea;Veneridae;Mercenaria;Mercenari  
 a mercenaria  
 UdeM00000011734 6596 137.1 UdeM00000011734 XP\_045195300.1 42.2 187  
 97 5 35 215 19 200 2.80E-29 137.1 6596 cellular  
 organisms;Eukaryota;Opisthokonta;Metazoa;Eumetazoa;Bilateria;Protostomia;  
 Spiralia;Lophotrochozoa;Mollusca;Bivalvia;Autobranhia;Heteroconchia;Euhe  
 terodonta;Imparidentia;Venerida;Veneroidea;Veneridae;Mercenaria;Mercenari  
 a mercenaria  
 UdeM00000011735 6596 365.2 UdeM00000011735 XP\_045195330.1 43.7 421  
 224 7 57 471 79 492 1.30E-97 365.2 6596 cellular  
 organisms;Eukaryota;Opisthokonta;Metazoa;Eumetazoa;Bilateria;Protostomia;  
 Spiralia;Lophotrochozoa;Mollusca;Bivalvia;Autobranhia;Heteroconchia;Euhe  
 terodonta;Imparidentia;Venerida;Veneroidea;Veneridae;Mercenaria;Mercenari  
 a mercenaria  
 UdeM00000011737 6596 307.8 UdeM00000011737 XP\_045198124.1 26.8 620  
 399 4 1 566 684 1302 3.00E-80 307.8 6596 cellular  
 organisms;Eukaryota;Opisthokonta;Metazoa;Eumetazoa;Bilateria;Protostomia;  
 Spiralia;Lophotrochozoa;Mollusca;Bivalvia;Autobranhia;Heteroconchia;Euhe  
 terodonta;Imparidentia;Venerida;Veneroidea;Veneridae;Mercenaria;Mercenari  
 a mercenaria  
 UdeM00000011738 6565 90.1 UdeM00000011738 XP\_022303012.1 37 100  
 63 0 2 101 1062 1161 1.70E-15 90.1 6565 cellular  
 organisms;Eukaryota;Opisthokonta;Metazoa;Eumetazoa;Bilateria;Protostomia;  
 Spiralia;Lophotrochozoa;Mollusca;Bivalvia;Autobranhia;Pteriomorphia;Ostr  
 eida;Ostreoidea;Ostreidae;Crassostrea;Crassostrea virginica  
 UdeM00000011739 6596 197.2 UdeM00000011739 XP\_045198124.1 28.1 449  
 272 8 1 402 885 1329 4.00E-47 197.2 6596 cellular  
 organisms;Eukaryota;Opisthokonta;Metazoa;Eumetazoa;Bilateria;Protostomia;  
 Spiralia;Lophotrochozoa;Mollusca;Bivalvia;Autobranhia;Heteroconchia;Euhe  
 terodonta;Imparidentia;Venerida;Veneroidea;Veneridae;Mercenaria;Mercenari  
 a mercenaria  
 UdeM00000011740 6565 184.9 UdeM00000011740 XP\_022303012.1 28.9 380  
 227 5 6 343 788 1166 1.80E-43 184.9 6565 cellular  
 organisms;Eukaryota;Opisthokonta;Metazoa;Eumetazoa;Bilateria;Protostomia;  
 Spiralia;Lophotrochozoa;Mollusca;Bivalvia;Autobranhia;Pteriomorphia;Ostr  
 eida;Ostreoidea;Ostreidae;Crassostrea;Crassostrea virginica  
 UdeM00000011741 6596 156.4 UdeM00000011741 XP\_045198124.1 32.8 241  
 160 2 5 244 949 1188 4.70E-35 156.4 6596 cellular  
 organisms;Eukaryota;Opisthokonta;Metazoa;Eumetazoa;Bilateria;Protostomia;  
 Spiralia;Lophotrochozoa;Mollusca;Bivalvia;Autobranhia;Heteroconchia;Euhe  
 terodonta;Imparidentia;Venerida;Veneroidea;Veneridae;Mercenaria;Mercenari  
 a mercenaria  
 UdeM00000011742 6596 202.2 UdeM00000011742 XP\_045186644.1 39.8 249  
 149 1 8 255 287 535 7.90E-49 202.2 6596 cellular

organisms;Eukaryota;Opisthokonta;Metazoa;Eumetazoa;Bilateria;Protostomia;Spiralia;Lophotrochozoa;Mollusca;Bivalvia;Autobranchia;Heteroconchia;Euherodonta;Imparidentia;Venerida;Veneroidea;Veneridae;Mercenaria;Mercenaria mercenaria

UdeM00000011743 6573 100.9 UdeM00000011743 XP\_021379506.1 52.8 89  
41 1 122 209 170 258 2.00E-18 100.9 6573 cellular

organisms;Eukaryota;Opisthokonta;Metazoa;Eumetazoa;Bilateria;Protostomia;Spiralia;Lophotrochozoa;Mollusca;Bivalvia;Autobranchia;Pteriormorphia;Pectinida;Pectinoidea;Pectinidae;Mizuhopecten;Mizuhopecten yessoensis

UdeM00000011744 6596 534.3 UdeM00000011744 XP\_045186644.1 33.9 984  
558 28 170 1121 108 1031 3.80E-148 534.3 6596 cellular

organisms;Eukaryota;Opisthokonta;Metazoa;Eumetazoa;Bilateria;Protostomia;Spiralia;Lophotrochozoa;Mollusca;Bivalvia;Autobranchia;Heteroconchia;Euherodonta;Imparidentia;Venerida;Veneroidea;Veneridae;Mercenaria;Mercenaria mercenaria

UdeM00000011745 34773 72.8 UdeM00000011745 XP\_041963929.1 29.9 154  
95 3 2 149 101 247 4.70E-10 72.8 34773 cellular

organisms;Eukaryota;Opisthokonta;Metazoa;Eumetazoa;Bilateria;Deuterostomia;Chordata;Craniata;Vertebrata;Gnathostomata;Teleostomi;Euteleostomi;Actinopterygii;Actinopteri;Neopterygii;Teleostei;Osteoglossocephalai;Clupeocephala;Otomorpha;Clupei;Clupeiformes;Clupeoidei;Clupeidae;Alosinae;Alosa;Alosa sapidissima

UdeM00000011746 6596 1565.1 UdeM00000011746 XP\_045198491.1 60.7  
1354 482 15 45 1375 20 1346 0.00E+00 1565.1 6596  
cellular

organisms;Eukaryota;Opisthokonta;Metazoa;Eumetazoa;Bilateria;Protostomia;Spiralia;Lophotrochozoa;Mollusca;Bivalvia;Autobranchia;Heteroconchia;Euherodonta;Imparidentia;Venerida;Veneroidea;Veneridae;Mercenaria;Mercenaria mercenaria

UdeM00000011748 6596 470.7 UdeM00000011748 XP\_045197538.1 56.7 448  
168 7 17 449 10 446 2.20E-129 470.7 6596 cellular

organisms;Eukaryota;Opisthokonta;Metazoa;Eumetazoa;Bilateria;Protostomia;Spiralia;Lophotrochozoa;Mollusca;Bivalvia;Autobranchia;Heteroconchia;Euherodonta;Imparidentia;Venerida;Veneroidea;Veneridae;Mercenaria;Mercenaria mercenaria

UdeM00000011749 6596 332.8 UdeM00000011749 XP\_045197537.1 63.5 266  
92 3 1 263 87 350 5.60E-88 332.8 6596 cellular

organisms;Eukaryota;Opisthokonta;Metazoa;Eumetazoa;Bilateria;Protostomia;Spiralia;Lophotrochozoa;Mollusca;Bivalvia;Autobranchia;Heteroconchia;Euherodonta;Imparidentia;Venerida;Veneroidea;Veneridae;Mercenaria;Mercenaria mercenaria

UdeM00000011750 6596 372.5 UdeM00000011750 XP\_045197538.1 63.9 288  
101 2 1 286 69 355 4.90E-100 372.5 6596 cellular

organisms;Eukaryota;Opisthokonta;Metazoa;Eumetazoa;Bilateria;Protostomia;Spiralia;Lophotrochozoa;Mollusca;Bivalvia;Autobranchia;Heteroconchia;Euherodonta;Imparidentia;Venerida;Veneroidea;Veneridae;Mercenaria;Mercenaria mercenaria

UdeM00000011751 7739 161 UdeM00000011751 XP\_035666883.1 27.6 402  
252 12 126 504 9 394 4.00E-36 161 7739 cellular

organisms;Eukaryota;Opisthokonta;Metazoa;Eumetazoa;Bilateria;Deuterostomia;Chordata;Cephalochordata;Leptocardii;Amphioxiformes;Branchiostomidae;Branchiostoma;Branchiostoma floridae

UdeM00000011753 7741 84.7 UdeM00000011753 XP\_019620827.1 41.7 103  
55 2 3 103 180 279 8.30E-14 84.7 7741 cellular

organisms;Eukaryota;Opisthokonta;Metazoa;Eumetazoa;Bilateria;Deuterostomi  
a;Chordata;Cephalochordata;Leptocardii;Amphioxiformes;Branchiostomidae;Br  
anchiostoma;Branchiostoma belcheri  
UdeM00000011755 10224 107.8 UdeM00000011755 XP\_006813734.1 35.8 159  
99 2 54 211 186 342 1.80E-20 107.8 10224 cellular  
organisms;Eukaryota;Opisthokonta;Metazoa;Eumetazoa;Bilateria;Deuterostomi  
a;Hemichordata;Enteropneusta;Harrimaniidae;Saccoglossus;Saccoglossus  
kowalevskii  
UdeM00000011757 7741 160.2 UdeM00000011757 XP\_019640989.1 30.1 316  
206 8 199 506 85 393 6.80E-36 160.2 7741 cellular  
organisms;Eukaryota;Opisthokonta;Metazoa;Eumetazoa;Bilateria;Deuterostomi  
a;Chordata;Cephalochordata;Leptocardii;Amphioxiformes;Branchiostomidae;Br  
anchiostoma;Branchiostoma belcheri  
UdeM00000011758 6579 158.7 UdeM00000011758 XP\_033759182.1 33.4 293  
180 8 218 500 110 397 2.40E-35 158.7 6579 cellular  
organisms;Eukaryota;Opisthokonta;Metazoa;Eumetazoa;Bilateria;Protostomia;  
Spiralia;Lophotrochozoa;Mollusca;Bivalvia;Autobranchia;Pteriormorphia;Pect  
inida;Pectinoidea;Pectinidae;Pecten;Pecten maximus  
UdeM00000011759 6596 75.1 UdeM00000011759 XP\_045191365.1 33.6 137  
83 3 58 188 17 151 1.10E-10 75.1 6596 cellular  
organisms;Eukaryota;Opisthokonta;Metazoa;Eumetazoa;Bilateria;Protostomia;  
Spiralia;Lophotrochozoa;Mollusca;Bivalvia;Autobranchia;Heteroconchia;Euhe  
terodonta;Imparidentia;Venerida;Veneroidea;Veneridae;Mercenaria;Mercenari  
a mercenaria  
UdeM00000011760 6596 61.2 UdeM00000011760 XP\_045166452.1 33.3 108  
69 2 26 133 292 396 1.40E-06 61.2 6596 cellular  
organisms;Eukaryota;Opisthokonta;Metazoa;Eumetazoa;Bilateria;Protostomia;  
Spiralia;Lophotrochozoa;Mollusca;Bivalvia;Autobranchia;Heteroconchia;Euhe  
terodonta;Imparidentia;Venerida;Veneroidea;Veneridae;Mercenaria;Mercenari  
a mercenaria  
UdeM00000011761 7668 119.8 UdeM00000011761 XP\_030832292.1 34.3 204  
115 5 2 204 257 442 4.10E-24 119.8 7668 cellular  
organisms;Eukaryota;Opisthokonta;Metazoa;Eumetazoa;Bilateria;Deuterostomi  
a;Echinodermata;Eleutherozoa;Echinozoa;Echinoidea;Euechinoidea;Echinacea;  
Camarodonta;Echinidea;Strongylocentrotidae;Strongylocentrotus;Strongyloce  
ntrotus purpuratus  
UdeM00000011762 7741 79.7 UdeM00000011762 XP\_019636110.1 27.5 182  
128 2 26 206 285 463 5.90E-12 79.7 7741 cellular  
organisms;Eukaryota;Opisthokonta;Metazoa;Eumetazoa;Bilateria;Deuterostomi  
a;Chordata;Cephalochordata;Leptocardii;Amphioxiformes;Branchiostomidae;Br  
anchiostoma;Branchiostoma belcheri  
UdeM00000011763 7741 82 UdeM00000011763 XP\_019636110.1 27.7 184  
129 2 28 210 283 463 1.20E-12 82 7741 cellular  
organisms;Eukaryota;Opisthokonta;Metazoa;Eumetazoa;Bilateria;Deuterostomi  
a;Chordata;Cephalochordata;Leptocardii;Amphioxiformes;Branchiostomidae;Br  
anchiostoma;Branchiostoma belcheri  
UdeM00000011764 45264 141.7 UdeM00000011764 XP\_044180685.1 23 469  
342 8 287 742 235 697 3.70E-30 141.7 45264 cellular  
organisms;Eukaryota;Opisthokonta;Metazoa;Eumetazoa;Cnidaria;Anthozoa;Hexa  
corallia;Scleractinia;Astrocoeniina;Acroporidae;Acropora;Acropora  
millepora  
UdeM00000011765 45264 142.5 UdeM00000011765 XP\_044180685.1 22.9 472  
343 8 275 734 235 697 2.10E-30 142.5 45264 cellular  
organisms;Eukaryota;Opisthokonta;Metazoa;Eumetazoa;Cnidaria;Anthozoa;Hexa

corallia;Scleractinia;Astrocoeniina;Acroporidae;Acropora;Acropora  
millepora  
UdeM00000011766 6596 164.1 UdeM00000011766 XP\_045191364.1 29.1 347  
234 5 200 537 88 431 5.10E-37 164.1 6596 cellular  
organisms;Eukaryota;Opisthokonta;Metazoa;Eumetazoa;Bilateria;Protostomia;  
Spiralia;Lophotrochozoa;Mollusca;Bivalvia;Autobranhia;Heteroconchia;Euhe  
terodonta;Imparidentia;Venerida;Veneroidea;Veneridae;Mercenaria;Mercenari  
a mercenaria  
UdeM00000011768 6565 111.7 UdeM00000011768 XP\_022330142.1 36.7 196  
101 4 1 178 1 191 9.90E-22 111.7 6565 cellular  
organisms;Eukaryota;Opisthokonta;Metazoa;Eumetazoa;Bilateria;Protostomia;  
Spiralia;Lophotrochozoa;Mollusca;Bivalvia;Autobranhia;Pteriormorphia;Ostr  
eida;Ostreoidea;Ostreidae;Crassostrea;Crassostrea virginica  
UdeM00000011769 6573 1166 UdeM00000011769 XP\_021362822.1 60.5 928  
346 6 1 916 147 1065 0.00E+00 1166 6573 cellular  
organisms;Eukaryota;Opisthokonta;Metazoa;Eumetazoa;Bilateria;Protostomia;  
Spiralia;Lophotrochozoa;Mollusca;Bivalvia;Autobranhia;Pteriormorphia;Pect  
inida;Pectinoidea;Pectinidae;Mizuhopecten;Mizuhopecten yessoensis  
UdeM00000011770 6573 1134.4 UdeM00000011770 XP\_021362822.1 56.2  
1000 345 7 1 988 147 1065 0.00E+00 1134.4 6573  
cellular  
organisms;Eukaryota;Opisthokonta;Metazoa;Eumetazoa;Bilateria;Protostomia;  
Spiralia;Lophotrochozoa;Mollusca;Bivalvia;Autobranhia;Pteriormorphia;Pect  
inida;Pectinoidea;Pectinidae;Mizuhopecten;Mizuhopecten yessoensis  
UdeM00000011771 6105 195.3 UdeM00000011771 XP\_031572230.1 62.3 138  
49 1 3 137 5 142 5.20E-47 195.3 6105 cellular  
organisms;Eukaryota;Opisthokonta;Metazoa;Eumetazoa;Cnidaria;Anthozoa;Hexa  
corallia;Actiniaria;Actiniidae;Actinia;Actinia tenebrosa  
UdeM00000011772 6596 483.4 UdeM00000011772 XP\_045195153.1 45.3 601  
289 13 1 582 74 653 4.10E-133 483.4 6596 cellular  
organisms;Eukaryota;Opisthokonta;Metazoa;Eumetazoa;Bilateria;Protostomia;  
Spiralia;Lophotrochozoa;Mollusca;Bivalvia;Autobranhia;Heteroconchia;Euhe  
terodonta;Imparidentia;Venerida;Veneroidea;Veneridae;Mercenaria;Mercenari  
a mercenaria  
UdeM00000011773 45264 97.8 UdeM00000011773 XP\_044184709.1 51.7 87  
42 0 38 124 55 141 2.20E-17 97.8 45264 cellular  
organisms;Eukaryota;Opisthokonta;Metazoa;Eumetazoa;Cnidaria;Anthozoa;Hexa  
corallia;Scleractinia;Astrocoeniina;Acroporidae;Acropora;Acropora  
millepora  
UdeM00000011774 45264 201.8 UdeM00000011774 XP\_044184031.1 42.7 281  
130 8 1 257 213 486 1.00E-48 201.8 45264 cellular  
organisms;Eukaryota;Opisthokonta;Metazoa;Eumetazoa;Cnidaria;Anthozoa;Hexa  
corallia;Scleractinia;Astrocoeniina;Acroporidae;Acropora;Acropora  
millepora  
UdeM00000011775 45264 86.7 UdeM00000011775 XP\_044165143.1 44.9 107  
57 2 2 106 367 473 2.20E-14 86.7 45264 cellular  
organisms;Eukaryota;Opisthokonta;Metazoa;Eumetazoa;Cnidaria;Anthozoa;Hexa  
corallia;Scleractinia;Astrocoeniina;Acroporidae;Acropora;Acropora  
millepora  
UdeM00000011776 45264 141.4 UdeM00000011776 XP\_044184028.1 48.2 168  
82 3 27 193 68 231 1.50E-30 141.4 45264 cellular  
organisms;Eukaryota;Opisthokonta;Metazoa;Eumetazoa;Cnidaria;Anthozoa;Hexa  
corallia;Scleractinia;Astrocoeniina;Acroporidae;Acropora;Acropora  
millepora



UdeM00000011777 6596 199.9 UdeM00000011777 XP\_045195792.1 74 131  
 32 1 1 131 1 129 2.00E-48 199.9 6596 cellular  
 organisms;Eukaryota;Opisthokonta;Metazoa;Eumetazoa;Bilateria;Protostomia;  
 Spiralia;Lophotrochozoa;Mollusca;Bivalvia;Autobranchia;Heteroconchia;Euhe  
 terodonta;Imparidentia;Venerida;Veneroidea;Veneridae;Mercenaria;Mercenari  
 a mercenaria  
 UdeM00000011778 6596 159.1 UdeM00000011778 XP\_045198836.1 31.2 449  
 254 15 6 438 7 416 1.30E-35 159.1 6596 cellular  
 organisms;Eukaryota;Opisthokonta;Metazoa;Eumetazoa;Bilateria;Protostomia;  
 Spiralia;Lophotrochozoa;Mollusca;Bivalvia;Autobranchia;Heteroconchia;Euhe  
 terodonta;Imparidentia;Venerida;Veneroidea;Veneridae;Mercenaria;Mercenari  
 a mercenaria  
 UdeM00000011779 6573 204.1 UdeM00000011779 XP\_021359370.1 67.6 210  
 60 2 1 202 1 210 1.70E-49 204.1 6573 cellular  
 organisms;Eukaryota;Opisthokonta;Metazoa;Eumetazoa;Bilateria;Protostomia;  
 Spiralia;Lophotrochozoa;Mollusca;Bivalvia;Autobranchia;Pteriomorphia;Pect  
 inida;Pectinoidea;Pectinidae;Mizuhopecten;Mizuhopecten yessoensis  
 UdeM00000011780 1735272 401 UdeM00000011780 XP\_041351282.1 70.2  
 289 86 0 4 292 3 291 1.30E-108 401 1735272  
 cellular  
 organisms;Eukaryota;Opisthokonta;Metazoa;Eumetazoa;Bilateria;Protostomia;  
 Spiralia;Lophotrochozoa;Mollusca;Gastropoda;Neomphalina;Neomphaloidea;Pel  
 tospiridae;Gigantopelta;Gigantopelta aegis  
 UdeM00000011781 6573 1306.2 UdeM00000011781 XP\_021359375.1 67.8  
 929 296 2 1 927 1 928 0.00E+00 1306.2 6573  
 cellular  
 organisms;Eukaryota;Opisthokonta;Metazoa;Eumetazoa;Bilateria;Protostomia;  
 Spiralia;Lophotrochozoa;Mollusca;Bivalvia;Autobranchia;Pteriomorphia;Pect  
 inida;Pectinoidea;Pectinidae;Mizuhopecten;Mizuhopecten yessoensis  
 UdeM00000011782 7739 236.5 UdeM00000011782 XP\_035677734.1 43.7 286  
 154 4 104 384 708 991 6.30E-59 236.5 7739 cellular  
 organisms;Eukaryota;Opisthokonta;Metazoa;Eumetazoa;Bilateria;Deuterostomi  
 a;Chordata;Cephalochordata;Leptocardii;Amphioxiformes;Branchiostomidae;Br  
 anchiostoma;Branchiostoma floridae  
 UdeM00000011783 7574 183.3 UdeM00000011783 XP\_013401572.1 36 405  
 223 13 83 471 32 416 9.90E-43 183.3 7574 cellular  
 organisms;Eukaryota;Opisthokonta;Metazoa;Eumetazoa;Bilateria;Protostomia;  
 Spiralia;Lophotrochozoa;Brachiopoda;Linguliformea;Lingulata;Lingulida;Lin  
 guloidea;Lingulidae;Lingula;Lingula anatina  
 UdeM00000011784 7574 183.3 UdeM00000011784 XP\_013401572.1 36 405  
 223 13 82 470 32 416 9.90E-43 183.3 7574 cellular  
 organisms;Eukaryota;Opisthokonta;Metazoa;Eumetazoa;Bilateria;Protostomia;  
 Spiralia;Lophotrochozoa;Brachiopoda;Linguliformea;Lingulata;Lingulida;Lin  
 guloidea;Lingulidae;Lingula;Lingula anatina  
 UdeM00000011785 9135 67.8 UdeM00000011785 XP\_030088303.1 31.5 130  
 77 4 82 201 27 154 2.40E-08 67.8 9135 cellular  
 organisms;Eukaryota;Opisthokonta;Metazoa;Eumetazoa;Bilateria;Deuterostomi  
 a;Chordata;Craniata;Vertebrata;Gnathostomata;Teleostomi;Euteleostomi;Sarc  
 opterygii;Dipnotetrapodomorpha;Tetrapoda;Amniota;Sauropsida;Sauria;Archel  
 osauria;Archosauria;Dinosauria;Saurischia;Theropoda;Coelurosauria;Aves;Ne  
 ognathae;Passeriformes;Passeroidea;Fringillidae;Carduelinae;Serinus;Serin  
 us canaria  
 UdeM00000011786 6596 323.9 UdeM00000011786 XP\_045192577.1 30.6 898  
 495 43 88 913 97 938 6.40E-85 323.9 6596 cellular

organisms;Eukaryota;Opisthokonta;Metazoa;Eumetazoa;Bilateria;Protostomia;Spiralia;Lophotrochozoa;Mollusca;Bivalvia;Autobranhia;Heteroconchia;Euherodonta;Imparidentia;Venerida;Veneroidea;Veneridae;Mercenaria;Mercenaria mercenaria

UdeM00000011788 6596 63.2 UdeM00000011788 XP\_045185049.1 59.6 47  
19 0 5 51 190 236 1.60E-07 63.2 6596 cellular

organisms;Eukaryota;Opisthokonta;Metazoa;Eumetazoa;Bilateria;Protostomia;Spiralia;Lophotrochozoa;Mollusca;Bivalvia;Autobranhia;Heteroconchia;Euherodonta;Imparidentia;Venerida;Veneroidea;Veneridae;Mercenaria;Mercenaria mercenaria

UdeM00000011789 41895 132.1 UdeM00000011789 XP\_044262289.1 34.6 243  
137 6 1 234 306 535 2.30E-27 132.1 41895 cellular

organisms;Eukaryota;Opisthokonta;Metazoa;Eumetazoa;Bilateria;Protostomia;Ecdysozoa;Panarthropoda;Arthropoda;Mandibulata;Pancrustacea;Hexapoda;Insecta;Dicondylia;Pterygota;Neoptera;Endopterygota;Coleoptera;Polyphaga;Cucujiformia;Tenebrionoidea;Tenebrionidae;Tenebrionidae incertae sedis;Tribolium;Tribolium madens

UdeM00000011790 6596 273.9 UdeM00000011790 XP\_045170511.1 31.6 553  
324 16 10 525 394 929 5.80E-70 273.9 6596 cellular

organisms;Eukaryota;Opisthokonta;Metazoa;Eumetazoa;Bilateria;Protostomia;Spiralia;Lophotrochozoa;Mollusca;Bivalvia;Autobranhia;Heteroconchia;Euherodonta;Imparidentia;Venerida;Veneroidea;Veneridae;Mercenaria;Mercenaria mercenaria

UdeM00000011791 6596 388.7 UdeM00000011791 XP\_045170511.1 30.4 865  
502 28 234 1028 95 929 2.80E-104 388.7 6596 cellular

organisms;Eukaryota;Opisthokonta;Metazoa;Eumetazoa;Bilateria;Protostomia;Spiralia;Lophotrochozoa;Mollusca;Bivalvia;Autobranhia;Heteroconchia;Euherodonta;Imparidentia;Venerida;Veneroidea;Veneridae;Mercenaria;Mercenaria mercenaria

UdeM00000011793 6573 287 UdeM00000011793 XP\_021350250.1 28.2 1181  
696 36 96 1207 99 1196 1.10E-73 287 6573 cellular

organisms;Eukaryota;Opisthokonta;Metazoa;Eumetazoa;Bilateria;Protostomia;Spiralia;Lophotrochozoa;Mollusca;Bivalvia;Autobranhia;Pteriomorphia;Pectinida;Pectinoidea;Pectinidae;Mizuhopecten;Mizuhopecten yessoensis

UdeM00000011794 6573 83.6 UdeM00000011794 XP\_021350281.1 69.4 49  
15 0 497 545 1845 1893 8.70E-13 83.6 6573 cellular

organisms;Eukaryota;Opisthokonta;Metazoa;Eumetazoa;Bilateria;Protostomia;Spiralia;Lophotrochozoa;Mollusca;Bivalvia;Autobranhia;Pteriomorphia;Pectinida;Pectinoidea;Pectinidae;Mizuhopecten;Mizuhopecten yessoensis

UdeM00000011795 6596 725.7 UdeM00000011795 XP\_045195382.1 46.9 785  
401 9 7 787 25 797 7.10E-206 725.7 6596 cellular

organisms;Eukaryota;Opisthokonta;Metazoa;Eumetazoa;Bilateria;Protostomia;Spiralia;Lophotrochozoa;Mollusca;Bivalvia;Autobranhia;Heteroconchia;Euherodonta;Imparidentia;Venerida;Veneroidea;Veneridae;Mercenaria;Mercenaria mercenaria

UdeM00000011796 6596 321.6 UdeM00000011796 XP\_045174253.1 39.1 427  
229 6 14 425 11 421 1.60E-84 321.6 6596 cellular

organisms;Eukaryota;Opisthokonta;Metazoa;Eumetazoa;Bilateria;Protostomia;Spiralia;Lophotrochozoa;Mollusca;Bivalvia;Autobranhia;Heteroconchia;Euherodonta;Imparidentia;Venerida;Veneroidea;Veneridae;Mercenaria;Mercenaria mercenaria

UdeM00000011797 6596 268.5 UdeM00000011797 XP\_045174253.1 38.2 374  
199 7 4 361 64 421 1.30E-68 268.5 6596 cellular

organisms;Eukaryota;Opisthokonta;Metazoa;Eumetazoa;Bilateria;Protostomia;

Spiralia;Lophotrochozoa;Mollusca;Bivalvia;Autobranchia;Heteroconchia;Euherodonta;Imparidentia;Venerida;Veneroidea;Veneridae;Mercenaria;Mercenaria mercenaria

UdeM00000011798 6596 239.2 UdeM00000011798 XP\_045177916.1 48.6 245  
121 4 187 428 414 656 9.70E-60 239.2 6596 cellular

organisms;Eukaryota;Opisthokonta;Metazoa;Eumetazoa;Bilateria;Protostomia;Spiralia;Lophotrochozoa;Mollusca;Bivalvia;Autobranchia;Heteroconchia;Euherodonta;Imparidentia;Venerida;Veneroidea;Veneridae;Mercenaria;Mercenaria mercenaria

UdeM00000011799 29159 68.9 UdeM00000011799 XP\_034315886.1 48.8 82  
38 2 88 167 9 88 7.70E-09 68.9 29159 cellular

organisms;Eukaryota;Opisthokonta;Metazoa;Eumetazoa;Bilateria;Protostomia;Spiralia;Lophotrochozoa;Mollusca;Bivalvia;Autobranchia;Pteriomorpha;Ostreida;Ostreoidea;Ostreidae;Crassostrea;Crassostrea gigas

UdeM00000011800 29159 79.7 UdeM00000011800 XP\_034336062.1 29.7 209  
137 4 12 211 15 222 5.10E-12 79.7 29159 cellular

organisms;Eukaryota;Opisthokonta;Metazoa;Eumetazoa;Bilateria;Protostomia;Spiralia;Lophotrochozoa;Mollusca;Bivalvia;Autobranchia;Pteriomorpha;Ostreida;Ostreoidea;Ostreidae;Crassostrea;Crassostrea gigas

UdeM00000011801 7574 260.8 UdeM00000011801 XP\_013381304.1 28.9 532  
328 11 9 530 6 497 3.90E-66 260.8 7574 cellular

organisms;Eukaryota;Opisthokonta;Metazoa;Eumetazoa;Bilateria;Protostomia;Spiralia;Lophotrochozoa;Brachiopoda;Linguliformea;Lingulata;Lingulida;Linguloidea;Lingulidae;Lingula;Lingula anatina

UdeM00000011802 1735272 179.5 UdeM00000011802 XP\_041352553.1 63  
154 53 3 67 220 81 230 4.70E-42 179.5 1735272

cellular organisms;Eukaryota;Opisthokonta;Metazoa;Eumetazoa;Bilateria;Protostomia;Spiralia;Lophotrochozoa;Mollusca;Gastropoda;Neomphalina;Neomphaloidea;Peltospiridae;Gigantopelta;Gigantopelta aegis

UdeM00000011803 6596 147.9 UdeM00000011803 XP\_045166258.1 47.5 160  
79 2 2 161 103 257 1.10E-32 147.9 6596 cellular

organisms;Eukaryota;Opisthokonta;Metazoa;Eumetazoa;Bilateria;Protostomia;Spiralia;Lophotrochozoa;Mollusca;Bivalvia;Autobranchia;Heteroconchia;Euherodonta;Imparidentia;Venerida;Veneroidea;Veneridae;Mercenaria;Mercenaria mercenaria

UdeM00000011804 6596 609.4 UdeM00000011804 XP\_045197193.1 42.9 827  
419 17 2248 3043 533 1337 2.50E-170 609.4 6596 cellular

organisms;Eukaryota;Opisthokonta;Metazoa;Eumetazoa;Bilateria;Protostomia;Spiralia;Lophotrochozoa;Mollusca;Bivalvia;Autobranchia;Heteroconchia;Euherodonta;Imparidentia;Venerida;Veneroidea;Veneridae;Mercenaria;Mercenaria mercenaria

UdeM00000011805 1735272 172.6 UdeM00000011805 XP\_041347213.1 44.2  
217 106 6 5 212 58 268 5.60E-40 172.6 1735272

cellular organisms;Eukaryota;Opisthokonta;Metazoa;Eumetazoa;Bilateria;Protostomia;Spiralia;Lophotrochozoa;Mollusca;Gastropoda;Neomphalina;Neomphaloidea;Peltospiridae;Gigantopelta;Gigantopelta aegis

UdeM00000011806 6596 289.7 UdeM00000011806 XP\_045198704.1 49.8 307  
150 2 108 410 18 324 6.00E-75 289.7 6596 cellular

organisms;Eukaryota;Opisthokonta;Metazoa;Eumetazoa;Bilateria;Protostomia;Spiralia;Lophotrochozoa;Mollusca;Bivalvia;Autobranchia;Heteroconchia;Euherodonta;Imparidentia;Venerida;Veneroidea;Veneridae;Mercenaria;Mercenaria mercenaria

UdeM00000011807 1735272 201.4 UdeM00000011807 XP\_041352058.1 64.6  
 147 52 0 1 147 679 825 1.10E-48 201.4 1735272  
 cellular  
 organisms;Eukaryota;Opisthokonta;Metazoa;Eumetazoa;Bilateria;Protostomia;  
 Spiralia;Lophotrochozoa;Mollusca;Gastropoda;Neomphalina;Neomphaloidea;Pel  
 tospiridae;Gigantopelta;Gigantopelta aegis  
 UdeM00000011808 29159 158.3 UdeM00000011808 XP\_011422055.1 59.4 106  
 43 0 6 111 15 120 5.70E-36 158.3 29159 cellular  
 organisms;Eukaryota;Opisthokonta;Metazoa;Eumetazoa;Bilateria;Protostomia;  
 Spiralia;Lophotrochozoa;Mollusca;Bivalvia;Autobranchia;Pteriormorphia;Ostr  
 eida;Ostreoidea;Ostreidae;Crassostrea;Crassostrea gigas  
 UdeM00000011810 1735272 402.9 UdeM00000011810 XP\_041354939.1 62  
 305 115 1 184 488 232 535 5.80E-109 402.9 1735272  
 cellular  
 organisms;Eukaryota;Opisthokonta;Metazoa;Eumetazoa;Bilateria;Protostomia;  
 Spiralia;Lophotrochozoa;Mollusca;Gastropoda;Neomphalina;Neomphaloidea;Pel  
 tospiridae;Gigantopelta;Gigantopelta aegis  
 UdeM00000003845 7739 267.3 UdeM00000003845 XP\_035696678.1 49.3 268  
 131 2 28 290 587 854 2.50E-68 267.3 7739 cellular  
 organisms;Eukaryota;Opisthokonta;Metazoa;Eumetazoa;Bilateria;Deuterostomi  
 a;Chordata;Cephalochordata;Leptocardii;Amphioxiformes;Branchiostomidae;Br  
 anchiostoma;Branchiostoma floridae  
 UdeM00000003846 6596 131.3 UdeM00000003846 XP\_045173349.1 32.2 270  
 142 7 28 292 78 311 2.10E-27 131.3 6596 cellular  
 organisms;Eukaryota;Opisthokonta;Metazoa;Eumetazoa;Bilateria;Protostomia;  
 Spiralia;Lophotrochozoa;Mollusca;Bivalvia;Autobranchia;Heteroconchia;Euhe  
 terodonta;Imparidentia;Venerida;Veneroidea;Veneridae;Mercenaria;Mercenari  
 a mercenaria  
 UdeM00000003847 6565 103.2 UdeM00000003847 XP\_022293466.1 52.7 93  
 44 0 1 93 419 511 1.80E-19 103.2 6565 cellular  
 organisms;Eukaryota;Opisthokonta;Metazoa;Eumetazoa;Bilateria;Protostomia;  
 Spiralia;Lophotrochozoa;Mollusca;Bivalvia;Autobranchia;Pteriormorphia;Ostr  
 eida;Ostreoidea;Ostreidae;Crassostrea;Crassostrea virginica  
 UdeM00000003848 6565 138.3 UdeM00000003848 XP\_022298001.1 54.9 122  
 48 3 1 118 1 119 6.80E-30 138.3 6565 cellular  
 organisms;Eukaryota;Opisthokonta;Metazoa;Eumetazoa;Bilateria;Protostomia;  
 Spiralia;Lophotrochozoa;Mollusca;Bivalvia;Autobranchia;Pteriormorphia;Ostr  
 eida;Ostreoidea;Ostreidae;Crassostrea;Crassostrea virginica  
 UdeM00000003849 6596 77 UdeM00000003849 XP\_045208716.1 44.1 102  
 51 3 39 135 43 143 2.30E-11 77 6596 cellular  
 organisms;Eukaryota;Opisthokonta;Metazoa;Eumetazoa;Bilateria;Protostomia;  
 Spiralia;Lophotrochozoa;Mollusca;Bivalvia;Autobranchia;Heteroconchia;Euhe  
 terodonta;Imparidentia;Venerida;Veneroidea;Veneridae;Mercenaria;Mercenari  
 a mercenaria  
 UdeM00000003850 1735272 72.8 UdeM00000003850 XP\_041378949.1 37.5  
 104 62 2 2 103 27 129 3.20E-10 72.8 1735272  
 cellular  
 organisms;Eukaryota;Opisthokonta;Metazoa;Eumetazoa;Bilateria;Protostomia;  
 Spiralia;Lophotrochozoa;Mollusca;Gastropoda;Neomphalina;Neomphaloidea;Pel  
 tospiridae;Gigantopelta;Gigantopelta aegis  
 UdeM00000003852 29159 250.8 UdeM00000003852 XP\_011428326.2 76.6 154  
 36 0 3 156 509 662 1.30E-63 250.8 29159 cellular  
 organisms;Eukaryota;Opisthokonta;Metazoa;Eumetazoa;Bilateria;Protostomia;

Spiralia;Lophotrochozoa;Mollusca;Bivalvia;Autobranchia;Pteriormorphia;Ostr  
eida;Ostreoidea;Ostreidae;Crassostrea;Crassostrea gigas  
UdeM00000003851 6565 960.3 UdeM00000003851 XP\_022301267.1 73.1 635  
154 3 1 633 1 620 1.20E-276 960.3 6565 cellular  
organisms;Eukaryota;Opisthokonta;Metazoa;Eumetazoa;Bilateria;Protostomia;  
Spiralia;Lophotrochozoa;Mollusca;Bivalvia;Autobranchia;Pteriormorphia;Ostr  
eida;Ostreoidea;Ostreidae;Crassostrea;Crassostrea virginica  
UdeM00000003853 6596 991.5 UdeM00000003853 XP\_045171880.1 44.9 1287  
478 28 1 1098 48 1292 8.60E-286 991.5 6596 cellular  
organisms;Eukaryota;Opisthokonta;Metazoa;Eumetazoa;Bilateria;Protostomia;  
Spiralia;Lophotrochozoa;Mollusca;Bivalvia;Autobranchia;Heteroconchia;Euhe  
terodonta;Imparidentia;Venerida;Veneroidea;Veneridae;Mercenaria;Mercenari  
a mercenaria  
UdeM00000003854 6526 790 UdeM00000003854 XP\_013085300.1 59.5 1016  
312 9 1 1008 1 925 3.50E-225 790 6526 cellular  
organisms;Eukaryota;Opisthokonta;Metazoa;Eumetazoa;Bilateria;Protostomia;  
Spiralia;Lophotrochozoa;Mollusca;Gastropoda;Heterobranchia;Euthyneura;Pan  
pulmonata;Hygrophila;Lymnaeoidea;Planorbidae;Biomphalaria;Biomphalaria  
glabrata  
UdeM00000003857 6596 594.3 UdeM00000003857 XP\_045172484.1 42.8 663  
377 2 150 810 61 723 2.20E-166 594.3 6596 cellular  
organisms;Eukaryota;Opisthokonta;Metazoa;Eumetazoa;Bilateria;Protostomia;  
Spiralia;Lophotrochozoa;Mollusca;Bivalvia;Autobranchia;Heteroconchia;Euhe  
terodonta;Imparidentia;Venerida;Veneroidea;Veneridae;Mercenaria;Mercenari  
a mercenaria  
UdeM00000003858 6596 684.1 UdeM00000003858 XP\_045171315.1 98.5 329  
4 1 1 329 1 328 8.80E-194 684.1 6596 cellular  
organisms;Eukaryota;Opisthokonta;Metazoa;Eumetazoa;Bilateria;Protostomia;  
Spiralia;Lophotrochozoa;Mollusca;Bivalvia;Autobranchia;Heteroconchia;Euhe  
terodonta;Imparidentia;Venerida;Veneroidea;Veneridae;Mercenaria;Mercenari  
a mercenaria  
UdeM00000003859 6596 768.5 UdeM00000003859 XP\_045171310.1 59.1 1137  
331 18 1 1117 1 1023 1.20E-218 768.5 6596 cellular  
organisms;Eukaryota;Opisthokonta;Metazoa;Eumetazoa;Bilateria;Protostomia;  
Spiralia;Lophotrochozoa;Mollusca;Bivalvia;Autobranchia;Heteroconchia;Euhe  
terodonta;Imparidentia;Venerida;Veneroidea;Veneridae;Mercenaria;Mercenari  
a mercenaria  
UdeM00000003860 6579 427.2 UdeM00000003860 XP\_033748950.1 59.4 360  
134 8 11 364 37 390 2.20E-116 427.2 6579 cellular  
organisms;Eukaryota;Opisthokonta;Metazoa;Eumetazoa;Bilateria;Protostomia;  
Spiralia;Lophotrochozoa;Mollusca;Bivalvia;Autobranchia;Pteriormorphia;Pect  
inida;Pectinoidea;Pectinidae;Pecten;Pecten maximus  
UdeM00000003861 400727 471.9 UdeM00000003861 XP\_025091165.1 52  
475 150 4 3 475 4 402 1.00E-129 471.9 400727  
cellular  
organisms;Eukaryota;Opisthokonta;Metazoa;Eumetazoa;Bilateria;Protostomia;  
Spiralia;Lophotrochozoa;Mollusca;Gastropoda;Caenogastropoda;Architaeniogl  
ossa;Ampullarioidea;Ampullariidae;Pomacea;Pomacea canaliculata  
UdeM00000003862 400727 229.6 UdeM00000003862 XP\_025091163.1 62.6  
174 62 2 3 175 4 175 3.20E-57 229.6 400727  
cellular  
organisms;Eukaryota;Opisthokonta;Metazoa;Eumetazoa;Bilateria;Protostomia;  
Spiralia;Lophotrochozoa;Mollusca;Gastropoda;Caenogastropoda;Architaeniogl  
ossa;Ampullarioidea;Ampullariidae;Pomacea;Pomacea canaliculata

UdeM00000003863 6596 173.7 UdeM00000003863 XP\_045173530.1 46.7 182  
 87 3 4 185 6 177 2.30E-40 173.7 6596 cellular  
 organisms;Eukaryota;Opisthokonta;Metazoa;Eumetazoa;Bilateria;Protostomia;  
 Spiralia;Lophotrochozoa;Mollusca;Bivalvia;Autobranchia;Heteroconchia;Euhe  
 terodonta;Imparidentia;Venerida;Veneroidea;Veneridae;Mercenaria;Mercenari  
 a mercenaria  
 UdeM00000003864 6596 369.8 UdeM00000003864 XP\_045173658.1 45.3 393  
 215 0 20 412 25 417 4.60E-99 369.8 6596 cellular  
 organisms;Eukaryota;Opisthokonta;Metazoa;Eumetazoa;Bilateria;Protostomia;  
 Spiralia;Lophotrochozoa;Mollusca;Bivalvia;Autobranchia;Heteroconchia;Euhe  
 terodonta;Imparidentia;Venerida;Veneroidea;Veneridae;Mercenaria;Mercenari  
 a mercenaria  
 UdeM00000003865 6579 347.4 UdeM00000003865 XP\_033748966.1 47.3 351  
 182 2 4 351 6 356 2.10E-92 347.4 6579 cellular  
 organisms;Eukaryota;Opisthokonta;Metazoa;Eumetazoa;Bilateria;Protostomia;  
 Spiralia;Lophotrochozoa;Mollusca;Bivalvia;Autobranchia;Pteriormorphia;Pect  
 inida;Pectinoidea;Pectinidae;Pecten;Pecten maximus  
 UdeM00000003866 6565 743 UdeM00000003866 XP\_022344930.1 69.1 628  
 182 3 1 617 8 634 3.60E-211 743 6565 cellular  
 organisms;Eukaryota;Opisthokonta;Metazoa;Eumetazoa;Bilateria;Protostomia;  
 Spiralia;Lophotrochozoa;Mollusca;Bivalvia;Autobranchia;Pteriormorphia;Ostr  
 eida;Ostreoidea;Ostreidae;Crassostrea;Crassostrea virginica  
 UdeM00000003867 6596 459.1 UdeM00000003867 XP\_045171049.1 65.5 385  
 104 4 1 362 1 379 5.10E-126 459.1 6596 cellular  
 organisms;Eukaryota;Opisthokonta;Metazoa;Eumetazoa;Bilateria;Protostomia;  
 Spiralia;Lophotrochozoa;Mollusca;Bivalvia;Autobranchia;Heteroconchia;Euhe  
 terodonta;Imparidentia;Venerida;Veneroidea;Veneridae;Mercenaria;Mercenari  
 a mercenaria  
 UdeM00000003868 6596 319.7 UdeM00000003868 XP\_045171521.1 85.4 178  
 26 0 9 186 171 348 2.50E-84 319.7 6596 cellular  
 organisms;Eukaryota;Opisthokonta;Metazoa;Eumetazoa;Bilateria;Protostomia;  
 Spiralia;Lophotrochozoa;Mollusca;Bivalvia;Autobranchia;Heteroconchia;Euhe  
 terodonta;Imparidentia;Venerida;Veneroidea;Veneridae;Mercenaria;Mercenari  
 a mercenaria  
 UdeM00000003869 6579 266.2 UdeM00000003869 XP\_033747925.1 95 140  
 7 0 11 150 34 173 2.90E-68 266.2 6579 cellular  
 organisms;Eukaryota;Opisthokonta;Metazoa;Eumetazoa;Bilateria;Protostomia;  
 Spiralia;Lophotrochozoa;Mollusca;Bivalvia;Autobranchia;Pteriormorphia;Pect  
 inida;Pectinoidea;Pectinidae;Pecten;Pecten maximus  
 UdeM00000003870 7574 284.3 UdeM00000003870 XP\_013421860.1 48.8 322  
 131 4 3 306 4 309 2.10E-73 284.3 7574 cellular  
 organisms;Eukaryota;Opisthokonta;Metazoa;Eumetazoa;Bilateria;Protostomia;  
 Spiralia;Lophotrochozoa;Brachiopoda;Linguliformea;Lingulata;Lingulida;Lin  
 guloidea;Lingulidae;Lingula;Lingula anatina  
 UdeM00000003871 7574 411.4 UdeM00000003871 XP\_013382110.1 47.7 419  
 203 4 1 419 38 440 1.50E-111 411.4 7574 cellular  
 organisms;Eukaryota;Opisthokonta;Metazoa;Eumetazoa;Bilateria;Protostomia;  
 Spiralia;Lophotrochozoa;Brachiopoda;Linguliformea;Lingulata;Lingulida;Lin  
 guloidea;Lingulidae;Lingula;Lingula anatina  
 UdeM00000003872 10224 99 UdeM00000003872 XP\_002735215.1 35.9 145  
 84 1 4 148 3 138 5.50E-18 99 10224 cellular  
 organisms;Eukaryota;Opisthokonta;Metazoa;Eumetazoa;Bilateria;Deuterostomi  
 a;Hemichordata;Enteropneusta;Harrimaniidae;Saccoglossus;Saccoglossus  
 kowalevskii

UdeM00000003873 6579 149.8 UdeM00000003873 XP\_033749026.1 59 105  
 43 0 1 105 82 186 1.90E-33 149.8 6579 cellular  
 organisms;Eukaryota;Opisthokonta;Metazoa;Eumetazoa;Bilateria;Protostomia;  
 Spiralia;Lophotrochozoa;Mollusca;Bivalvia;Autobranchia;Pteriomorpha;Pect  
 inida;Pectinoidea;Pectinidae;Pecten;Pecten maximus  
 UdeM00000003874 6579 7336.9 UdeM00000003874 XP\_033747926.1 79.9  
 4719 912 8 1 4704 1 4698 0.00E+00 7336.9 6579  
 cellular  
 organisms;Eukaryota;Opisthokonta;Metazoa;Eumetazoa;Bilateria;Protostomia;  
 Spiralia;Lophotrochozoa;Mollusca;Bivalvia;Autobranchia;Pteriomorpha;Pect  
 inida;Pectinoidea;Pectinidae;Pecten;Pecten maximus  
 UdeM00000003875 6596 123.6 UdeM00000003875 XP\_045174440.1 25.3 419  
 272 16 31 437 1303 1692 6.20E-25 123.6 6596 cellular  
 organisms;Eukaryota;Opisthokonta;Metazoa;Eumetazoa;Bilateria;Protostomia;  
 Spiralia;Lophotrochozoa;Mollusca;Bivalvia;Autobranchia;Heteroconchia;Euhe  
 terodonta;Imparidentia;Venerida;Veneroidea;Veneridae;Mercenaria;Mercenari  
 a mercenaria  
 UdeM00000003876 29159 111.7 UdeM00000003876 XP\_011428534.2 36.4 165  
 104 1 109 273 36 199 3.10E-21 111.7 29159 cellular  
 organisms;Eukaryota;Opisthokonta;Metazoa;Eumetazoa;Bilateria;Protostomia;  
 Spiralia;Lophotrochozoa;Mollusca;Bivalvia;Autobranchia;Pteriomorpha;Ostr  
 eida;Ostreoidea;Ostreidae;Crassostrea;Crassostrea gigas  
 UdeM00000003877 29159 198.7 UdeM00000003877 XP\_011440479.2 29.7 677  
 407 21 13 682 24 638 2.30E-47 198.7 29159 cellular  
 organisms;Eukaryota;Opisthokonta;Metazoa;Eumetazoa;Bilateria;Protostomia;  
 Spiralia;Lophotrochozoa;Mollusca;Bivalvia;Autobranchia;Pteriomorpha;Ostr  
 eida;Ostreoidea;Ostreidae;Crassostrea;Crassostrea gigas  
 UdeM00000003878 29159 200.7 UdeM00000003878 XP\_011440479.2 29.8 672  
 405 21 13 674 24 638 6.10E-48 200.7 29159 cellular  
 organisms;Eukaryota;Opisthokonta;Metazoa;Eumetazoa;Bilateria;Protostomia;  
 Spiralia;Lophotrochozoa;Mollusca;Bivalvia;Autobranchia;Pteriomorpha;Ostr  
 eida;Ostreoidea;Ostreidae;Crassostrea;Crassostrea gigas  
 UdeM00000003881 6573 319.3 UdeM00000003881 XP\_021364733.1 58.7 242  
 99 1 40 281 135 375 5.30E-84 319.3 6573 cellular  
 organisms;Eukaryota;Opisthokonta;Metazoa;Eumetazoa;Bilateria;Protostomia;  
 Spiralia;Lophotrochozoa;Mollusca;Bivalvia;Autobranchia;Pteriomorpha;Pect  
 inida;Pectinoidea;Pectinidae;Mizuhopecten;Mizuhopecten yessoensis  
 UdeM00000003880 6573 350.9 UdeM00000003880 XP\_021364733.1 51 335  
 154 5 15 340 42 375 2.00E-93 350.9 6573 cellular  
 organisms;Eukaryota;Opisthokonta;Metazoa;Eumetazoa;Bilateria;Protostomia;  
 Spiralia;Lophotrochozoa;Mollusca;Bivalvia;Autobranchia;Pteriomorpha;Pect  
 inida;Pectinoidea;Pectinidae;Mizuhopecten;Mizuhopecten yessoensis  
 UdeM00000003882 6596 389.4 UdeM00000003882 XP\_045171360.1 44.2 443  
 228 7 1168 1602 1294 1725 2.20E-104 389.4 6596 cellular  
 organisms;Eukaryota;Opisthokonta;Metazoa;Eumetazoa;Bilateria;Protostomia;  
 Spiralia;Lophotrochozoa;Mollusca;Bivalvia;Autobranchia;Heteroconchia;Euhe  
 terodonta;Imparidentia;Venerida;Veneroidea;Veneridae;Mercenaria;Mercenari  
 a mercenaria  
 UdeM00000003883 29159 180.3 UdeM00000003883 XP\_034339065.1 37.8 238  
 146 2 1422 1659 834 1069 2.10E-41 180.3 29159 cellular  
 organisms;Eukaryota;Opisthokonta;Metazoa;Eumetazoa;Bilateria;Protostomia;  
 Spiralia;Lophotrochozoa;Mollusca;Bivalvia;Autobranchia;Pteriomorpha;Ostr  
 eida;Ostreoidea;Ostreidae;Crassostrea;Crassostrea gigas

UdeM00000003884 6706 145.2 UdeM00000003884 XP\_042235765.1 47.6 145  
 75 1 18 162 13 156 7.40E-32 145.2 6706 cellular  
 organisms;Eukaryota;Opisthokonta;Metazoa;Eumetazoa;Bilateria;Protostomia;  
 Ecdysozoa;Panarthropoda;Arthropoda;Mandibulata;Pancrustacea;Crustacea;Mul  
 ticrustacea;Malacostraca;Eumalacostraca;Eucarida;Decapoda;Pleocyemata;Ast  
 acidea;Nephropoidea;Nephropidae;Homarus;Homarus americanus  
 UdeM00000003885 6596 284.6 UdeM00000003885 XP\_045170965.1 38.5 382  
 222 7 21 397 20 393 2.00E-73 284.6 6596 cellular  
 organisms;Eukaryota;Opisthokonta;Metazoa;Eumetazoa;Bilateria;Protostomia;  
 Spiralia;Lophotrochozoa;Mollusca;Bivalvia;Autobranchia;Heteroconchia;Euhe  
 terodonta;Imparidentia;Venerida;Veneroidea;Veneridae;Mercenaria;Mercenari  
 a mercenaria  
 UdeM00000003886 6596 276.2 UdeM00000003886 XP\_045170965.1 43.6 307  
 164 5 3 304 91 393 5.60E-71 276.2 6596 cellular  
 organisms;Eukaryota;Opisthokonta;Metazoa;Eumetazoa;Bilateria;Protostomia;  
 Spiralia;Lophotrochozoa;Mollusca;Bivalvia;Autobranchia;Heteroconchia;Euhe  
 terodonta;Imparidentia;Venerida;Veneroidea;Veneridae;Mercenaria;Mercenari  
 a mercenaria  
 UdeM00000003887 225164 91.7 UdeM00000003887 XP\_009051992.1 29  
 238 159 5 219 450 157 390 2.70E-15 91.7 225164  
 cellular  
 organisms;Eukaryota;Opisthokonta;Metazoa;Eumetazoa;Bilateria;Protostomia;  
 Spiralia;Lophotrochozoa;Mollusca;Gastropoda;Patellogastropoda;Lottioidea;  
 Lottiidae;Lottia;Lottia gigantea  
 UdeM00000003888 6565 344.7 UdeM00000003888 XP\_022343297.1 63.7 256  
 92 1 12 266 8 263 1.00E-91 344.7 6565 cellular  
 organisms;Eukaryota;Opisthokonta;Metazoa;Eumetazoa;Bilateria;Protostomia;  
 Spiralia;Lophotrochozoa;Mollusca;Bivalvia;Autobranchia;Pteriomorphia;Ostr  
 eida;Ostreoidea;Ostreidae;Crassostrea;Crassostrea virginica  
 UdeM00000003889 6596 284.6 UdeM00000003889 XP\_045170965.1 42.2 329  
 183 5 55 378 68 394 1.90E-73 284.6 6596 cellular  
 organisms;Eukaryota;Opisthokonta;Metazoa;Eumetazoa;Bilateria;Protostomia;  
 Spiralia;Lophotrochozoa;Mollusca;Bivalvia;Autobranchia;Heteroconchia;Euhe  
 terodonta;Imparidentia;Venerida;Veneroidea;Veneridae;Mercenaria;Mercenari  
 a mercenaria  
 UdeM00000003890 6573 335.1 UdeM00000003890 XP\_021370400.1 43.3 462  
 253 5 11 464 2 462 1.40E-88 335.1 6573 cellular  
 organisms;Eukaryota;Opisthokonta;Metazoa;Eumetazoa;Bilateria;Protostomia;  
 Spiralia;Lophotrochozoa;Mollusca;Bivalvia;Autobranchia;Pteriomorphia;Pect  
 inida;Pectinoidea;Pectinidae;Mizuhopecten;Mizuhopecten yessoensis  
 UdeM00000003891 6579 494.6 UdeM00000003891 XP\_033749048.1 80.2 313  
 33 1 2 314 42 325 9.40E-137 494.6 6579 cellular  
 organisms;Eukaryota;Opisthokonta;Metazoa;Eumetazoa;Bilateria;Protostomia;  
 Spiralia;Lophotrochozoa;Mollusca;Bivalvia;Autobranchia;Pteriomorphia;Pect  
 inida;Pectinoidea;Pectinidae;Pecten;Pecten maximus  
 UdeM00000003892 6579 517.3 UdeM00000003892 XP\_033748741.1 47.4 718  
 321 17 1 676 1 703 2.90E-143 517.3 6579 cellular  
 organisms;Eukaryota;Opisthokonta;Metazoa;Eumetazoa;Bilateria;Protostomia;  
 Spiralia;Lophotrochozoa;Mollusca;Bivalvia;Autobranchia;Pteriomorphia;Pect  
 inida;Pectinoidea;Pectinidae;Pecten;Pecten maximus  
 UdeM00000003893 6596 288.5 UdeM00000003893 XP\_045171150.1 32.3 963  
 484 36 5 909 96 948 7.50E-74 288.5 6596 cellular  
 organisms;Eukaryota;Opisthokonta;Metazoa;Eumetazoa;Bilateria;Protostomia;  
 Spiralia;Lophotrochozoa;Mollusca;Bivalvia;Autobranchia;Heteroconchia;Euhe



terodonta;Imparidentia;Venerida;Veneroidea;Veneridae;Mercenaria;Mercenari  
 a mercenaria  
 UdeM00000003894 6596 306.2 UdeM00000003894 XP\_045173278.1 67 215  
 67 1 11 225 5 215 3.40E-80 306.2 6596 cellular  
 organisms;Eukaryota;Opisthokonta;Metazoa;Eumetazoa;Bilateria;Protostomia;  
 Spiralia;Lophotrochozoa;Mollusca;Bivalvia;Autobranhia;Heteroconchia;Euhe  
 terodonta;Imparidentia;Venerida;Veneroidea;Veneridae;Mercenaria;Mercenari  
 a mercenaria  
 UdeM00000003895 6596 280.4 UdeM00000003895 XP\_045171150.1 45.8 421  
 172 12 1 393 1 393 3.80E-72 280.4 6596 cellular  
 organisms;Eukaryota;Opisthokonta;Metazoa;Eumetazoa;Bilateria;Protostomia;  
 Spiralia;Lophotrochozoa;Mollusca;Bivalvia;Autobranhia;Heteroconchia;Euhe  
 terodonta;Imparidentia;Venerida;Veneroidea;Veneridae;Mercenaria;Mercenari  
 a mercenaria  
 UdeM00000003896 6596 194.9 UdeM00000003896 XP\_045171150.1 27.1 1055  
 593 40 34 1014 413 1365 5.00E-46 194.9 6596 cellular  
 organisms;Eukaryota;Opisthokonta;Metazoa;Eumetazoa;Bilateria;Protostomia;  
 Spiralia;Lophotrochozoa;Mollusca;Bivalvia;Autobranhia;Heteroconchia;Euhe  
 terodonta;Imparidentia;Venerida;Veneroidea;Veneridae;Mercenaria;Mercenari  
 a mercenaria  
 UdeM00000003897 29159 618.6 UdeM00000003897 XP\_011441791.2 53.2 616  
 253 11 1 607 45 634 8.90E-174 618.6 29159 cellular  
 organisms;Eukaryota;Opisthokonta;Metazoa;Eumetazoa;Bilateria;Protostomia;  
 Spiralia;Lophotrochozoa;Mollusca;Bivalvia;Autobranhia;Pteriormorphia;Ostr  
 eida;Ostreoidea;Ostreidae;Crassostrea;Crassostrea gigas  
 UdeM00000003898 29159 953.7 UdeM00000003898 XP\_011441791.2 55.8 941  
 372 16 1 927 45 955 1.70E-274 953.7 29159 cellular  
 organisms;Eukaryota;Opisthokonta;Metazoa;Eumetazoa;Bilateria;Protostomia;  
 Spiralia;Lophotrochozoa;Mollusca;Bivalvia;Autobranhia;Pteriormorphia;Ostr  
 eida;Ostreoidea;Ostreidae;Crassostrea;Crassostrea gigas  
 UdeM00000003899 6573 824.3 UdeM00000003899 XP\_021343874.1 31 1868  
 1139 43 1 1789 1 1798 3.00E-235 824.3 6573 cellular  
 organisms;Eukaryota;Opisthokonta;Metazoa;Eumetazoa;Bilateria;Protostomia;  
 Spiralia;Lophotrochozoa;Mollusca;Bivalvia;Autobranhia;Pteriormorphia;Pect  
 inida;Pectinoidea;Pectinidae;Mizuhopecten;Mizuhopecten yessoensis  
 UdeM00000003901 6573 395.6 UdeM00000003901 XP\_021349885.1 92.9 211  
 15 0 1 211 175 385 4.00E-107 395.6 6573 cellular  
 organisms;Eukaryota;Opisthokonta;Metazoa;Eumetazoa;Bilateria;Protostomia;  
 Spiralia;Lophotrochozoa;Mollusca;Bivalvia;Autobranhia;Pteriormorphia;Pect  
 inida;Pectinoidea;Pectinidae;Mizuhopecten;Mizuhopecten yessoensis  
 UdeM00000003900 29159 649 UdeM00000003900 XP\_034317960.1 87.6 380  
 47 0 32 411 13 392 3.90E-183 649 29159 cellular  
 organisms;Eukaryota;Opisthokonta;Metazoa;Eumetazoa;Bilateria;Protostomia;  
 Spiralia;Lophotrochozoa;Mollusca;Bivalvia;Autobranhia;Pteriormorphia;Ostr  
 eida;Ostreoidea;Ostreidae;Crassostrea;Crassostrea gigas  
 UdeM00000003902 6596 416 UdeM00000003902 XP\_045170918.1 39.4 1330  
 578 27 47 1186 49 1340 2.20E-112 416 6596 cellular  
 organisms;Eukaryota;Opisthokonta;Metazoa;Eumetazoa;Bilateria;Protostomia;  
 Spiralia;Lophotrochozoa;Mollusca;Bivalvia;Autobranhia;Heteroconchia;Euhe  
 terodonta;Imparidentia;Venerida;Veneroidea;Veneridae;Mercenaria;Mercenari  
 a mercenaria  
 UdeM00000003903 6579 597 UdeM00000003903 XP\_033747838.1 67.5 507  
 153 6 13 512 1386 1887 2.20E-167 597 6579 cellular  
 organisms;Eukaryota;Opisthokonta;Metazoa;Eumetazoa;Bilateria;Protostomia;

Spiralia;Lophotrochozoa;Mollusca;Bivalvia;Autobranchia;Pteriormorphia;Pectinida;Pectinoidea;Pectinidae;Pecten;Pecten maximus  
 UdeM00000003905 6579 448.7 UdeM00000003905 XP\_033748539.1 29.4 1362  
 750 30 1 1328 24 1207 2.50E-122 448.7 6579 cellular  
 organisms;Eukaryota;Opisthokonta;Metazoa;Eumetazoa;Bilateria;Protostomia;Spiralia;Lophotrochozoa;Mollusca;Bivalvia;Autobranchia;Pteriormorphia;Pectinida;Pectinoidea;Pectinidae;Pecten;Pecten maximus  
 UdeM00000003906 37653 287 UdeM00000003906 XP\_014774593.1 80 160  
 32 0 1 160 1971 2130 1.50E-74 287 37653 cellular  
 organisms;Eukaryota;Opisthokonta;Metazoa;Eumetazoa;Bilateria;Protostomia;Spiralia;Lophotrochozoa;Mollusca;Cephalopoda;Coleoidea;Octopodiformes;Octopoda;Incirrata;Octopodidae;Octopus;Octopus bimaculoides  
 UdeM00000003907 6573 850.1 UdeM00000003907 XP\_021377623.1 76.4 550  
 126 1 3 552 1579 2124 1.50E-243 850.1 6573 cellular  
 organisms;Eukaryota;Opisthokonta;Metazoa;Eumetazoa;Bilateria;Protostomia;Spiralia;Lophotrochozoa;Mollusca;Bivalvia;Autobranchia;Pteriormorphia;Pectinida;Pectinoidea;Pectinidae;Mizuhopecten;Mizuhopecten yessoensis  
 UdeM00000003908 6573 1279.2 UdeM00000003908 XP\_021377626.1 66.5  
 947 315 2 9 953 630 1576 0.00E+00 1279.2 6573  
 cellular  
 organisms;Eukaryota;Opisthokonta;Metazoa;Eumetazoa;Bilateria;Protostomia;Spiralia;Lophotrochozoa;Mollusca;Bivalvia;Autobranchia;Pteriormorphia;Pectinida;Pectinoidea;Pectinidae;Mizuhopecten;Mizuhopecten yessoensis  
 UdeM00000003909 400727 667.2 UdeM00000003909 XP\_025090939.1 56.8  
 639 248 8 2 626 3 627 2.10E-188 667.2 400727  
 cellular  
 organisms;Eukaryota;Opisthokonta;Metazoa;Eumetazoa;Bilateria;Protostomia;Spiralia;Lophotrochozoa;Mollusca;Gastropoda;Caenogastropoda;Architaenioglossa;Ampullarioidea;Ampullariidae;Pomacea;Pomacea canaliculata  
 UdeM00000003916 6596 139 UdeM00000003916 XP\_045209817.1 47.4 137  
 59 1 54 190 18 141 6.10E-30 139 6596 cellular  
 organisms;Eukaryota;Opisthokonta;Metazoa;Eumetazoa;Bilateria;Protostomia;Spiralia;Lophotrochozoa;Mollusca;Bivalvia;Autobranchia;Heteroconchia;Euheterodonta;Imparidentia;Venerida;Veneroidea;Veneridae;Mercenaria;Mercenaria mercenaria  
 UdeM00000003917 29159 129.8 UdeM00000003917 XP\_011413255.2 38 163  
 93 3 1 156 1 162 3.00E-27 129.8 29159 cellular  
 organisms;Eukaryota;Opisthokonta;Metazoa;Eumetazoa;Bilateria;Protostomia;Spiralia;Lophotrochozoa;Mollusca;Bivalvia;Autobranchia;Pteriormorphia;Ostreida;Ostreoidea;Ostreidae;Crassostrea;Crassostrea gigas  
 UdeM00000003918 6596 139.8 UdeM00000003918 XP\_045209817.1 45.9 148  
 73 2 48 195 1 141 3.70E-30 139.8 6596 cellular  
 organisms;Eukaryota;Opisthokonta;Metazoa;Eumetazoa;Bilateria;Protostomia;Spiralia;Lophotrochozoa;Mollusca;Bivalvia;Autobranchia;Heteroconchia;Euheterodonta;Imparidentia;Venerida;Veneroidea;Veneridae;Mercenaria;Mercenaria mercenaria  
 UdeM00000003919 29159 131.3 UdeM00000003919 XP\_011413255.2 41.2 153  
 70 2 9 142 11 162 9.60E-28 131.3 29159 cellular  
 organisms;Eukaryota;Opisthokonta;Metazoa;Eumetazoa;Bilateria;Protostomia;Spiralia;Lophotrochozoa;Mollusca;Bivalvia;Autobranchia;Pteriormorphia;Ostreida;Ostreoidea;Ostreidae;Crassostrea;Crassostrea gigas  
 UdeM00000003920 1735272 110.9 UdeM00000003920 XP\_041378994.1 46.2  
 106 48 2 21 125 32 129 1.30E-21 110.9 1735272  
 cellular

organisms;Eukaryota;Opisthokonta;Metazoa;Eumetazoa;Bilateria;Protostomia;Spiralia;Lophotrochozoa;Mollusca;Gastropoda;Neomphalina;Neomphaloidea;Peltospiridae;Gigantopelta;Gigantopelta aegis

UdeM00000003921 6596 105.1 UdeM00000003921 XP\_045209817.1 43.5 124  
63 3 58 181 3 119 9.30E-20 105.1 6596 cellular

organisms;Eukaryota;Opisthokonta;Metazoa;Eumetazoa;Bilateria;Protostomia;Spiralia;Lophotrochozoa;Mollusca;Bivalvia;Autobranchia;Heteroconchia;Euheterodonta;Imparidentia;Venerida;Veneroidea;Veneridae;Mercenaria;Mercenaria mercenaria

UdeM00000003922 6596 105.1 UdeM00000003922 XP\_045209817.1 43.5 124  
63 3 4 127 3 119 6.60E-20 105.1 6596 cellular

organisms;Eukaryota;Opisthokonta;Metazoa;Eumetazoa;Bilateria;Protostomia;Spiralia;Lophotrochozoa;Mollusca;Bivalvia;Autobranchia;Heteroconchia;Euheterodonta;Imparidentia;Venerida;Veneroidea;Veneridae;Mercenaria;Mercenaria mercenaria

UdeM00000003923 6596 750 UdeM00000003923 XP\_045171515.1 57.3 621  
245 6 7 608 6 625 2.50E-213 750 6596 cellular

organisms;Eukaryota;Opisthokonta;Metazoa;Eumetazoa;Bilateria;Protostomia;Spiralia;Lophotrochozoa;Mollusca;Bivalvia;Autobranchia;Heteroconchia;Euheterodonta;Imparidentia;Venerida;Veneroidea;Veneridae;Mercenaria;Mercenaria mercenaria

UdeM00000003924 1735272 247.7 UdeM00000003924 XP\_041379415.1 57.1  
205 80 4 5 203 193 395 1.40E-62 247.7 1735272  
cellular

organisms;Eukaryota;Opisthokonta;Metazoa;Eumetazoa;Bilateria;Protostomia;Spiralia;Lophotrochozoa;Mollusca;Gastropoda;Neomphalina;Neomphaloidea;Peltospiridae;Gigantopelta;Gigantopelta aegis

UdeM00000003926 6579 166.8 UdeM00000003926 XP\_033748609.1 67.9 112  
33 1 6 117 1 109 1.70E-38 166.8 6579 cellular

organisms;Eukaryota;Opisthokonta;Metazoa;Eumetazoa;Bilateria;Protostomia;Spiralia;Lophotrochozoa;Mollusca;Bivalvia;Autobranchia;Pteriomorphia;Pectinida;Pectinoidea;Pectinidae;Pecten;Pecten maximus

UdeM00000003925 6579 166.8 UdeM00000003925 XP\_033748609.1 67.9 112  
33 1 6 117 1 109 1.80E-38 166.8 6579 cellular

organisms;Eukaryota;Opisthokonta;Metazoa;Eumetazoa;Bilateria;Protostomia;Spiralia;Lophotrochozoa;Mollusca;Bivalvia;Autobranchia;Pteriomorphia;Pectinida;Pectinoidea;Pectinidae;Pecten;Pecten maximus

UdeM00000003927 6596 1000 UdeM00000003927 XP\_045174151.1 71.6 756  
199 5 13 760 114 861 1.70E-288 1000 6596 cellular

organisms;Eukaryota;Opisthokonta;Metazoa;Eumetazoa;Bilateria;Protostomia;Spiralia;Lophotrochozoa;Mollusca;Bivalvia;Autobranchia;Heteroconchia;Euheterodonta;Imparidentia;Venerida;Veneroidea;Veneridae;Mercenaria;Mercenaria mercenaria

UdeM00000003928 6596 521.2 UdeM00000003928 XP\_045174154.1 60.8 403  
158 0 1 403 49 451 1.20E-144 521.2 6596 cellular

organisms;Eukaryota;Opisthokonta;Metazoa;Eumetazoa;Bilateria;Protostomia;Spiralia;Lophotrochozoa;Mollusca;Bivalvia;Autobranchia;Heteroconchia;Euheterodonta;Imparidentia;Venerida;Veneroidea;Veneridae;Mercenaria;Mercenaria mercenaria

UdeM00000003929 6596 530.4 UdeM00000003929 XP\_045174154.1 60.1 416  
166 0 6 421 36 451 2.10E-147 530.4 6596 cellular

organisms;Eukaryota;Opisthokonta;Metazoa;Eumetazoa;Bilateria;Protostomia;Spiralia;Lophotrochozoa;Mollusca;Bivalvia;Autobranchia;Heteroconchia;Euheterodonta;Imparidentia;Venerida;Veneroidea;Veneridae;Mercenaria;Mercenaria mercenaria

terodonta;Imparidentia;Venerida;Veneroidea;Veneridae;Mercenaria;Mercenaria mercenaria  
 UdeM00000003930 6573 1245 UdeM00000003930 XP\_021342152.1 66.3 923  
 303 6 2 916 5 927 0.00E+00 1245 6573 cellular  
 organisms;Eukaryota;Opisthokonta;Metazoa;Eumetazoa;Bilateria;Protostomia;  
 Spiralia;Lophotrochozoa;Mollusca;Bivalvia;Autobranhia;Pteriomorpha;Pectinida;  
 Pectinoidea;Pectinidae;Mizuhopecten;Mizuhopecten yessoensis  
 UdeM00000003931 29159 376.3 UdeM00000003931 XP\_034318124.1 56.4 314  
 135 2 1 313 10 322 3.70E-101 376.3 29159 cellular  
 organisms;Eukaryota;Opisthokonta;Metazoa;Eumetazoa;Bilateria;Protostomia;  
 Spiralia;Lophotrochozoa;Mollusca;Bivalvia;Autobranhia;Pteriomorpha;Ostreida;  
 Ostreidae;Crassostrea;Crassostrea gigas  
 UdeM00000003932 29159 176 UdeM00000003932 XP\_034318124.1 59.7 134  
 53 1 4 137 190 322 3.20E-41 176 29159 cellular  
 organisms;Eukaryota;Opisthokonta;Metazoa;Eumetazoa;Bilateria;Protostomia;  
 Spiralia;Lophotrochozoa;Mollusca;Bivalvia;Autobranhia;Pteriomorpha;Ostreida;  
 Ostreidae;Crassostrea;Crassostrea gigas  
 UdeM00000003933 6596 910.2 UdeM00000003933 XP\_045171631.1 89.2 509  
 54 1 1 509 1 508 1.20E-261 910.2 6596 cellular  
 organisms;Eukaryota;Opisthokonta;Metazoa;Eumetazoa;Bilateria;Protostomia;  
 Spiralia;Lophotrochozoa;Mollusca;Bivalvia;Autobranhia;Heteroconchia;Euheterodonta;  
 Imparidentia;Venerida;Veneroidea;Veneridae;Mercenaria;Mercenaria mercenaria  
 UdeM00000003934 37653 68.9 UdeM00000003934 XP\_014771794.1 51.7 89  
 30 4 14 98 301 380 1.20E-08 68.9 37653 cellular  
 organisms;Eukaryota;Opisthokonta;Metazoa;Eumetazoa;Bilateria;Protostomia;  
 Spiralia;Lophotrochozoa;Mollusca;Cephalopoda;Coleoidea;Octopodiformes;Octopoda;  
 Incirrata;Octopodidae;Octopus;Octopus bimaculoides  
 UdeM00000003935 6596 634.8 UdeM00000003935 XP\_045171511.1 62.5 483  
 167 4 1 473 1 479 8.80E-179 634.8 6596 cellular  
 organisms;Eukaryota;Opisthokonta;Metazoa;Eumetazoa;Bilateria;Protostomia;  
 Spiralia;Lophotrochozoa;Mollusca;Bivalvia;Autobranhia;Heteroconchia;Euheterodonta;  
 Imparidentia;Venerida;Veneroidea;Veneridae;Mercenaria;Mercenaria mercenaria  
 UdeM00000003936 6573 576.2 UdeM00000003936 XP\_021371702.1 52.8 544  
 236 3 1 534 1 533 4.30E-161 576.2 6573 cellular  
 organisms;Eukaryota;Opisthokonta;Metazoa;Eumetazoa;Bilateria;Protostomia;  
 Spiralia;Lophotrochozoa;Mollusca;Bivalvia;Autobranhia;Pteriomorpha;Pectinida;  
 Pectinoidea;Pectinidae;Mizuhopecten;Mizuhopecten yessoensis  
 UdeM00000003937 6573 446.4 UdeM00000003937 XP\_021371702.1 56.2 384  
 167 1 1 383 150 533 3.70E-122 446.4 6573 cellular  
 organisms;Eukaryota;Opisthokonta;Metazoa;Eumetazoa;Bilateria;Protostomia;  
 Spiralia;Lophotrochozoa;Mollusca;Bivalvia;Autobranhia;Pteriomorpha;Pectinida;  
 Pectinoidea;Pectinidae;Mizuhopecten;Mizuhopecten yessoensis  
 UdeM00000003938 6573 569.7 UdeM00000003938 XP\_021371702.1 52.4 540  
 254 2 1 539 1 538 4.10E-159 569.7 6573 cellular  
 organisms;Eukaryota;Opisthokonta;Metazoa;Eumetazoa;Bilateria;Protostomia;  
 Spiralia;Lophotrochozoa;Mollusca;Bivalvia;Autobranhia;Pteriomorpha;Pectinida;  
 Pectinoidea;Pectinidae;Mizuhopecten;Mizuhopecten yessoensis  
 UdeM00000003939 6596 179.5 UdeM00000003939 XP\_045171008.1 69.4 121  
 37 0 1 121 222 342 2.60E-42 179.5 6596 cellular  
 organisms;Eukaryota;Opisthokonta;Metazoa;Eumetazoa;Bilateria;Protostomia;  
 Spiralia;Lophotrochozoa;Mollusca;Bivalvia;Autobranhia;Heteroconchia;Euheterodonta

terodonta;Imparidentia;Venerida;Veneroidea;Veneridae;Mercenaria;Mercenaria mercenaria

UdeM00000003940 6596 401.4 UdeM00000003940 XP\_045172626.1 69.7 277  
83 1 1 277 1 276 9.60E-109 401.4 6596 cellular

organisms;Eukaryota;Opisthokonta;Metazoa;Eumetazoa;Bilateria;Protostomia;Spiralia;Lophotrochozoa;Mollusca;Bivalvia;Autobranhia;Heteroconchia;Euheterodonta;Imparidentia;Venerida;Veneroidea;Veneridae;Mercenaria;Mercenaria mercenaria

UdeM00000003941 6596 229.9 UdeM00000003941 XP\_045172626.1 64.6 175  
61 1 1 175 1 174 2.50E-57 229.9 6596 cellular

organisms;Eukaryota;Opisthokonta;Metazoa;Eumetazoa;Bilateria;Protostomia;Spiralia;Lophotrochozoa;Mollusca;Bivalvia;Autobranhia;Heteroconchia;Euheterodonta;Imparidentia;Venerida;Veneroidea;Veneridae;Mercenaria;Mercenaria mercenaria

UdeM00000003943 1735272 688.3 UdeM00000003943 XP\_041349025.1 42.4  
994 485 22 460 1400 586 1544 2.00E-194 688.3 1735272  
cellular

organisms;Eukaryota;Opisthokonta;Metazoa;Eumetazoa;Bilateria;Protostomia;Spiralia;Lophotrochozoa;Mollusca;Gastropoda;Neomphalina;Neomphaloidea;Peltospiridae;Gigantopelta;Gigantopelta aegis

UdeM00000003944 7574 91.7 UdeM00000003944 XP\_013413186.1 67.3 107  
35 0 8 114 16 122 6.70E-16 91.7 7574 cellular

organisms;Eukaryota;Opisthokonta;Metazoa;Eumetazoa;Bilateria;Protostomia;Spiralia;Lophotrochozoa;Brachiopoda;Linguliformea;Lingulata;Lingulida;Linguloidea;Lingulidae;Lingula;Lingula anatina

UdeM00000003946 400727 213 UdeM00000003946 XP\_025092204.1 86.7  
128 13 1 1 128 1 124 2.20E-52 213 400727  
cellular

organisms;Eukaryota;Opisthokonta;Metazoa;Eumetazoa;Bilateria;Protostomia;Spiralia;Lophotrochozoa;Mollusca;Gastropoda;Caenogastropoda;Architaenioglossa;Ampullarioidea;Ampullariidae;Pomacea;Pomacea canaliculata

UdeM00000003947 7574 104.4 UdeM00000003947 XP\_013396733.1 51.9 104  
48 2 39 140 144 247 1.30E-19 104.4 7574 cellular

organisms;Eukaryota;Opisthokonta;Metazoa;Eumetazoa;Bilateria;Protostomia;Spiralia;Lophotrochozoa;Brachiopoda;Linguliformea;Lingulata;Lingulida;Linguloidea;Lingulidae;Lingula;Lingula anatina

UdeM00000003948 6596 205.7 UdeM00000003948 XP\_045170857.1 88.9 117  
13 0 2 118 1967 2083 3.30E-50 205.7 6596 cellular

organisms;Eukaryota;Opisthokonta;Metazoa;Eumetazoa;Bilateria;Protostomia;Spiralia;Lophotrochozoa;Mollusca;Bivalvia;Autobranhia;Heteroconchia;Euheterodonta;Imparidentia;Venerida;Veneroidea;Veneridae;Mercenaria;Mercenaria mercenaria

UdeM00000003949 6573 1976.8 UdeM00000003949 XP\_021357180.1 53.4  
1887 821 18 54 1922 194 2039 0.00E+00 1976.8 6573  
cellular

organisms;Eukaryota;Opisthokonta;Metazoa;Eumetazoa;Bilateria;Protostomia;Spiralia;Lophotrochozoa;Mollusca;Bivalvia;Autobranhia;Pteriomorphia;Pectinida;Pectinoidea;Pectinidae;Mizuhopecten;Mizuhopecten yessoensis

UdeM00000003950 6596 1002.7 UdeM00000003950 XP\_045170857.1 50.9  
1030 446 12 23 1022 44 1043 3.50E-289 1002.7 6596  
cellular

organisms;Eukaryota;Opisthokonta;Metazoa;Eumetazoa;Bilateria;Protostomia;Spiralia;Lophotrochozoa;Mollusca;Bivalvia;Autobranhia;Heteroconchia;Euheterodonta

terodonta;Imparidentia;Venerida;Veneroidea;Veneridae;Mercenaria;Mercenaria mercenaria

UdeM00000003951 6596 224.9 UdeM00000003951 XP\_045170857.1 65.1 169  
56 1 23 191 44 209 9.20E-56 224.9 6596 cellular

organisms;Eukaryota;Opisthokonta;Metazoa;Eumetazoa;Bilateria;Protostomia;Spiralia;Lophotrochozoa;Mollusca;Bivalvia;Autobranchia;Heteroconchia;Euherodonta;Imparidentia;Venerida;Veneroidea;Veneridae;Mercenaria;Mercenaria mercenaria

UdeM00000003952 6596 2287.7 UdeM00000003952 XP\_045172914.1 57.5  
2113 784 40 1 2062 1 2050 0.00E+00 2287.7 6596  
cellular

organisms;Eukaryota;Opisthokonta;Metazoa;Eumetazoa;Bilateria;Protostomia;Spiralia;Lophotrochozoa;Mollusca;Bivalvia;Autobranchia;Heteroconchia;Euherodonta;Imparidentia;Venerida;Veneroidea;Veneridae;Mercenaria;Mercenaria mercenaria

UdeM00000003953 6565 125.2 UdeM00000003953 XP\_022336594.1 74.7 79  
20 0 154 232 164 242 1.10E-25 125.2 6565 cellular

organisms;Eukaryota;Opisthokonta;Metazoa;Eumetazoa;Bilateria;Protostomia;Spiralia;Lophotrochozoa;Mollusca;Bivalvia;Autobranchia;Pteriomorphia;Ostreida;Ostreoidea;Ostreidae;Crassostrea;Crassostrea virginica

UdeM00000003955 6565 643.7 UdeM00000003955 XP\_022341229.1 67.2 488  
151 3 10 488 6 493 2.00E-181 643.7 6565 cellular

organisms;Eukaryota;Opisthokonta;Metazoa;Eumetazoa;Bilateria;Protostomia;Spiralia;Lophotrochozoa;Mollusca;Bivalvia;Autobranchia;Pteriomorphia;Ostreida;Ostreoidea;Ostreidae;Crassostrea;Crassostrea virginica

UdeM00000003954 6565 645.6 UdeM00000003954 XP\_022341229.1 66.6 494  
156 3 10 494 6 499 5.90E-182 645.6 6565 cellular

organisms;Eukaryota;Opisthokonta;Metazoa;Eumetazoa;Bilateria;Protostomia;Spiralia;Lophotrochozoa;Mollusca;Bivalvia;Autobranchia;Pteriomorphia;Ostreida;Ostreoidea;Ostreidae;Crassostrea;Crassostrea virginica

UdeM00000003956 6596 100.1 UdeM00000003956 XP\_045174064.1 64 86  
29 1 3 86 506 591 3.30E-18 100.1 6596 cellular

organisms;Eukaryota;Opisthokonta;Metazoa;Eumetazoa;Bilateria;Protostomia;Spiralia;Lophotrochozoa;Mollusca;Bivalvia;Autobranchia;Heteroconchia;Euherodonta;Imparidentia;Venerida;Veneroidea;Veneridae;Mercenaria;Mercenaria mercenaria

UdeM00000003957 6596 256.9 UdeM00000003957 XP\_045171726.1 65.9 185  
60 1 3 187 252 433 2.00E-65 256.9 6596 cellular

organisms;Eukaryota;Opisthokonta;Metazoa;Eumetazoa;Bilateria;Protostomia;Spiralia;Lophotrochozoa;Mollusca;Bivalvia;Autobranchia;Heteroconchia;Euherodonta;Imparidentia;Venerida;Veneroidea;Veneridae;Mercenaria;Mercenaria mercenaria

UdeM00000003958 6579 2480.7 UdeM00000003958 XP\_033747128.1 65.1  
1969 605 14 1 1940 166 2081 0.00E+00 2480.7 6579  
cellular

organisms;Eukaryota;Opisthokonta;Metazoa;Eumetazoa;Bilateria;Protostomia;Spiralia;Lophotrochozoa;Mollusca;Bivalvia;Autobranchia;Pteriomorphia;Pectinida;Pectinoidea;Pectinidae;Pecten;Pecten maximus

UdeM00000003959 6596 615.5 UdeM00000003959 XP\_045171726.1 70.3 421  
122 1 35 455 16 433 5.30E-173 615.5 6596 cellular

organisms;Eukaryota;Opisthokonta;Metazoa;Eumetazoa;Bilateria;Protostomia;Spiralia;Lophotrochozoa;Mollusca;Bivalvia;Autobranchia;Heteroconchia;Euherodonta;Imparidentia;Venerida;Veneroidea;Veneridae;Mercenaria;Mercenaria mercenaria

UdeM00000003960 6565 497.3 UdeM00000003960 XP\_022345395.1 67.1 337  
 107 2 133 469 26 358 2.20E-137 497.3 6565 cellular  
 organisms;Eukaryota;Opisthokonta;Metazoa;Eumetazoa;Bilateria;Protostomia;  
 Spiralia;Lophotrochozoa;Mollusca;Bivalvia;Autobranchia;Pteriomorpha;Ostr  
 eida;Ostreoidea;Ostreidae;Crassostrea;Crassostrea virginica  
 UdeM00000003961 6573 570.9 UdeM00000003961 XP\_021346657.1 56.9 531  
 204 8 131 644 159 681 2.10E-159 570.9 6573 cellular  
 organisms;Eukaryota;Opisthokonta;Metazoa;Eumetazoa;Bilateria;Protostomia;  
 Spiralia;Lophotrochozoa;Mollusca;Bivalvia;Autobranchia;Pteriomorpha;Pect  
 inida;Pectinoidea;Pectinidae;Mizuhopecten;Mizuhopecten yessoensis  
 UdeM00000003962 6596 811.2 UdeM00000003962 XP\_045172461.1 57 926  
 338 16 1 903 1 889 1.30E-231 811.2 6596 cellular  
 organisms;Eukaryota;Opisthokonta;Metazoa;Eumetazoa;Bilateria;Protostomia;  
 Spiralia;Lophotrochozoa;Mollusca;Bivalvia;Autobranchia;Heteroconchia;Euhe  
 terodonta;Imparidentia;Venerida;Veneroidea;Veneridae;Mercenaria;Mercenari  
 a mercenaria  
 UdeM00000003963 6573 89 UdeM00000003963 XP\_021364748.1 45 120  
 55 3 2 110 5 124 4.80E-15 89 6573 cellular  
 organisms;Eukaryota;Opisthokonta;Metazoa;Eumetazoa;Bilateria;Protostomia;  
 Spiralia;Lophotrochozoa;Mollusca;Bivalvia;Autobranchia;Pteriomorpha;Pect  
 inida;Pectinoidea;Pectinidae;Mizuhopecten;Mizuhopecten yessoensis  
 UdeM00000003964 6579 569.7 UdeM00000003964 XP\_033747551.1 82.2 332  
 59 0 1 332 1 332 2.40E-159 569.7 6579 cellular  
 organisms;Eukaryota;Opisthokonta;Metazoa;Eumetazoa;Bilateria;Protostomia;  
 Spiralia;Lophotrochozoa;Mollusca;Bivalvia;Autobranchia;Pteriomorpha;Pect  
 inida;Pectinoidea;Pectinidae;Pecten;Pecten maximus  
 UdeM00000003965 29159 211.8 UdeM00000003965 XP\_034317111.1 56.7 180  
 78 0 2 181 171 350 7.10E-52 211.8 29159 cellular  
 organisms;Eukaryota;Opisthokonta;Metazoa;Eumetazoa;Bilateria;Protostomia;  
 Spiralia;Lophotrochozoa;Mollusca;Bivalvia;Autobranchia;Pteriomorpha;Ostr  
 eida;Ostreoidea;Ostreidae;Crassostrea;Crassostrea gigas  
 UdeM00000003966 29159 97.1 UdeM00000003966 XP\_034336638.1 39.8 123  
 74 0 15 137 17 139 2.00E-17 97.1 29159 cellular  
 organisms;Eukaryota;Opisthokonta;Metazoa;Eumetazoa;Bilateria;Protostomia;  
 Spiralia;Lophotrochozoa;Mollusca;Bivalvia;Autobranchia;Pteriomorpha;Ostr  
 eida;Ostreoidea;Ostreidae;Crassostrea;Crassostrea gigas  
 UdeM00000003967 6596 103.2 UdeM00000003967 XP\_045188684.1 39.4 142  
 84 2 2 142 8 148 2.90E-19 103.2 6596 cellular  
 organisms;Eukaryota;Opisthokonta;Metazoa;Eumetazoa;Bilateria;Protostomia;  
 Spiralia;Lophotrochozoa;Mollusca;Bivalvia;Autobranchia;Heteroconchia;Euhe  
 terodonta;Imparidentia;Venerida;Veneroidea;Veneridae;Mercenaria;Mercenari  
 a mercenaria  
 UdeM00000003970 6579 161.8 UdeM00000003970 XP\_033748058.1 61.2 129  
 50 0 3 131 2 130 6.10E-37 161.8 6579 cellular  
 organisms;Eukaryota;Opisthokonta;Metazoa;Eumetazoa;Bilateria;Protostomia;  
 Spiralia;Lophotrochozoa;Mollusca;Bivalvia;Autobranchia;Pteriomorpha;Pect  
 inida;Pectinoidea;Pectinidae;Pecten;Pecten maximus  
 UdeM00000003971 6596 165.2 UdeM00000003971 XP\_045172196.1 47 183  
 88 3 10 191 15 189 8.00E-38 165.2 6596 cellular  
 organisms;Eukaryota;Opisthokonta;Metazoa;Eumetazoa;Bilateria;Protostomia;  
 Spiralia;Lophotrochozoa;Mollusca;Bivalvia;Autobranchia;Heteroconchia;Euhe  
 terodonta;Imparidentia;Venerida;Veneroidea;Veneridae;Mercenaria;Mercenari  
 a mercenaria

UdeM00000003972 6596 165.2 UdeM00000003972 XP\_045172196.1 47 183  
 88 3 9 190 15 189 7.90E-38 165.2 6596 cellular  
 organisms;Eukaryota;Opisthokonta;Metazoa;Eumetazoa;Bilateria;Protostomia;  
 Spiralia;Lophotrochozoa;Mollusca;Bivalvia;Autobranchia;Heteroconchia;Euhe  
 terodonta;Imparidentia;Venerida;Veneroidea;Veneridae;Mercenaria;Mercenari  
 a mercenaria  
 UdeM00000003973 1735272 179.1 UdeM00000003973 XP\_041377040.1 66.7  
 123 40 1 1 122 1 123 3.40E-42 179.1 1735272  
 cellular  
 organisms;Eukaryota;Opisthokonta;Metazoa;Eumetazoa;Bilateria;Protostomia;  
 Spiralia;Lophotrochozoa;Mollusca;Gastropoda;Neomphalina;Neomphaloidea;Pel  
 tospiridae;Gigantopelta;Gigantopelta aegis  
 UdeM00000003978 6596 168.3 UdeM00000003978 XP\_045176664.1 26.3 499  
 282 15 44 460 32 526 2.30E-38 168.3 6596 cellular  
 organisms;Eukaryota;Opisthokonta;Metazoa;Eumetazoa;Bilateria;Protostomia;  
 Spiralia;Lophotrochozoa;Mollusca;Bivalvia;Autobranchia;Heteroconchia;Euhe  
 terodonta;Imparidentia;Venerida;Veneroidea;Veneridae;Mercenaria;Mercenari  
 a mercenaria  
 UdeM00000003979 6573 125.9 UdeM00000003979 XP\_021352044.1 62.6 91  
 34 0 1 91 98 188 2.60E-26 125.9 6573 cellular  
 organisms;Eukaryota;Opisthokonta;Metazoa;Eumetazoa;Bilateria;Protostomia;  
 Spiralia;Lophotrochozoa;Mollusca;Bivalvia;Autobranchia;Pteriomorphia;Pect  
 inida;Pectinoidea;Pectinidae;Mizuhopecten;Mizuhopecten yessoensis  
 UdeM00000003980 6596 194.5 UdeM00000003980 XP\_045176094.1 41.4 256  
 142 6 1 252 1 252 1.80E-46 194.5 6596 cellular  
 organisms;Eukaryota;Opisthokonta;Metazoa;Eumetazoa;Bilateria;Protostomia;  
 Spiralia;Lophotrochozoa;Mollusca;Bivalvia;Autobranchia;Heteroconchia;Euhe  
 terodonta;Imparidentia;Venerida;Veneroidea;Veneridae;Mercenaria;Mercenari  
 a mercenaria  
 UdeM00000003981 6596 253.1 UdeM00000003981 XP\_045176664.1 30.6 576  
 347 17 25 568 13 567 8.80E-64 253.1 6596 cellular  
 organisms;Eukaryota;Opisthokonta;Metazoa;Eumetazoa;Bilateria;Protostomia;  
 Spiralia;Lophotrochozoa;Mollusca;Bivalvia;Autobranchia;Heteroconchia;Euhe  
 terodonta;Imparidentia;Venerida;Veneroidea;Veneridae;Mercenaria;Mercenari  
 a mercenaria  
 UdeM00000003982 6573 132.5 UdeM00000003982 XP\_021352044.1 63.7 91  
 33 0 1 91 98 188 2.70E-28 132.5 6573 cellular  
 organisms;Eukaryota;Opisthokonta;Metazoa;Eumetazoa;Bilateria;Protostomia;  
 Spiralia;Lophotrochozoa;Mollusca;Bivalvia;Autobranchia;Pteriomorphia;Pect  
 inida;Pectinoidea;Pectinidae;Mizuhopecten;Mizuhopecten yessoensis  
 UdeM00000003983 6596 238.8 UdeM00000003983 XP\_045176664.1 31.1 511  
 326 13 20 517 17 514 1.60E-59 238.8 6596 cellular  
 organisms;Eukaryota;Opisthokonta;Metazoa;Eumetazoa;Bilateria;Protostomia;  
 Spiralia;Lophotrochozoa;Mollusca;Bivalvia;Autobranchia;Heteroconchia;Euhe  
 terodonta;Imparidentia;Venerida;Veneroidea;Veneridae;Mercenaria;Mercenari  
 a mercenaria  
 UdeM00000003984 6565 68.9 UdeM00000003984 XP\_022297037.1 74.4 43  
 11 0 1 43 400 442 4.10E-09 68.9 6565 cellular  
 organisms;Eukaryota;Opisthokonta;Metazoa;Eumetazoa;Bilateria;Protostomia;  
 Spiralia;Lophotrochozoa;Mollusca;Bivalvia;Autobranchia;Pteriomorphia;Ostr  
 eida;Ostreoidea;Ostreidae;Crassostrea;Crassostrea virginica  
 UdeM00000003986 6596 234.6 UdeM00000003986 XP\_045176664.1 38.4 333  
 192 9 25 349 240 567 2.00E-58 234.6 6596 cellular  
 organisms;Eukaryota;Opisthokonta;Metazoa;Eumetazoa;Bilateria;Protostomia;



Spiralia;Lophotrochozoa;Mollusca;Bivalvia;Autobranchia;Heteroconchia;Euherodonta;Imparidentia;Venerida;Veneroidea;Veneridae;Mercenaria;Mercenaria mercenaria

UdeM00000003987 6596 239.2 UdeM00000003987 XP\_045176664.1 31 506  
294 14 44 517 32 514 1.20E-59 239.2 6596 cellular

organisms;Eukaryota;Opisthokonta;Metazoa;Eumetazoa;Bilateria;Protostomia;Spiralia;Lophotrochozoa;Mollusca;Bivalvia;Autobranchia;Heteroconchia;Euherodonta;Imparidentia;Venerida;Veneroidea;Veneridae;Mercenaria;Mercenaria mercenaria

UdeM00000003990 1735272 119.8 UdeM00000003990 XP\_041379275.1 33.2  
187 115 3 1 181 1 183 3.90E-24 119.8 1735272  
cellular

organisms;Eukaryota;Opisthokonta;Metazoa;Eumetazoa;Bilateria;Protostomia;Spiralia;Lophotrochozoa;Mollusca;Gastropoda;Neomphalina;Neomphaloidea;Peltopspiridae;Gigantopelta;Gigantopelta aegis

UdeM00000001261 6596 299.3 UdeM00000001261 XP\_045158722.1 57.8 249  
94 5 1 244 29 271 5.00E-78 299.3 6596 cellular

organisms;Eukaryota;Opisthokonta;Metazoa;Eumetazoa;Bilateria;Protostomia;Spiralia;Lophotrochozoa;Mollusca;Bivalvia;Autobranchia;Heteroconchia;Euherodonta;Imparidentia;Venerida;Veneroidea;Veneridae;Mercenaria;Mercenaria mercenaria

UdeM00000001263 6596 126.7 UdeM00000001263 XP\_045159727.1 68.7 99  
31 0 26 124 742 840 2.00E-26 126.7 6596 cellular

organisms;Eukaryota;Opisthokonta;Metazoa;Eumetazoa;Bilateria;Protostomia;Spiralia;Lophotrochozoa;Mollusca;Bivalvia;Autobranchia;Heteroconchia;Euherodonta;Imparidentia;Venerida;Veneroidea;Veneridae;Mercenaria;Mercenaria mercenaria

UdeM00000001264 6596 399.4 UdeM00000001264 XP\_045160493.1 51.3 388  
176 6 25 404 27 409 5.30E-108 399.4 6596 cellular

organisms;Eukaryota;Opisthokonta;Metazoa;Eumetazoa;Bilateria;Protostomia;Spiralia;Lophotrochozoa;Mollusca;Bivalvia;Autobranchia;Heteroconchia;Euherodonta;Imparidentia;Venerida;Veneroidea;Veneridae;Mercenaria;Mercenaria mercenaria

UdeM00000001265 6596 946 UdeM00000001265 XP\_045157986.1 62.9 855  
312 4 373 1226 373 1223 4.70E-272 946 6596 cellular

organisms;Eukaryota;Opisthokonta;Metazoa;Eumetazoa;Bilateria;Protostomia;Spiralia;Lophotrochozoa;Mollusca;Bivalvia;Autobranchia;Heteroconchia;Euherodonta;Imparidentia;Venerida;Veneroidea;Veneridae;Mercenaria;Mercenaria mercenaria

UdeM00000001266 6596 615.5 UdeM00000001266 XP\_045157986.1 66.4 426  
138 3 1 421 1324 1749 4.90E-173 615.5 6596 cellular

organisms;Eukaryota;Opisthokonta;Metazoa;Eumetazoa;Bilateria;Protostomia;Spiralia;Lophotrochozoa;Mollusca;Bivalvia;Autobranchia;Heteroconchia;Euherodonta;Imparidentia;Venerida;Veneroidea;Veneridae;Mercenaria;Mercenaria mercenaria

UdeM00000001267 46514 67.8 UdeM00000001267 XP\_038053029.1 40.2 92  
50 3 76 166 300 387 1.70E-08 67.8 46514 cellular

organisms;Eukaryota;Opisthokonta;Metazoa;Eumetazoa;Bilateria;Deuterostomia;Echinodermata;Eleutherozoa;Asterozoa;Asteroidea;Valvatacea;Valvatida;Asterinidae;Patiria;Patiria miniata

UdeM00000001268 6596 488.4 UdeM00000001268 XP\_045158727.1 42.1 783  
372 20 1 754 1 731 1.60E-134 488.4 6596 cellular

organisms;Eukaryota;Opisthokonta;Metazoa;Eumetazoa;Bilateria;Protostomia;Spiralia;Lophotrochozoa;Mollusca;Bivalvia;Autobranchia;Heteroconchia;Euherodonta

terodonta;Imparidentia;Venerida;Veneroidea;Veneridae;Mercenaria;Mercenaria mercenaria

UdeM00000001269 6596 483.4 UdeM00000001269 XP\_045158727.1 42.1 784  
372 21 1 755 1 731 5.30E-133 483.4 6596 cellular

organisms;Eukaryota;Opisthokonta;Metazoa;Eumetazoa;Bilateria;Protostomia;Spiralia;Lophotrochozoa;Mollusca;Bivalvia;Autobranchia;Heteroconchia;Euherodonta;Imparidentia;Venerida;Veneroidea;Veneridae;Mercenaria;Mercenaria mercenaria

UdeM00000001270 6596 1382.1 UdeM00000001270 XP\_045158733.1 50.9  
1624 629 31 22 1630 26 1496 0.00E+00 1382.1 6596  
cellular

organisms;Eukaryota;Opisthokonta;Metazoa;Eumetazoa;Bilateria;Protostomia;Spiralia;Lophotrochozoa;Mollusca;Bivalvia;Autobranchia;Heteroconchia;Euherodonta;Imparidentia;Venerida;Veneroidea;Veneridae;Mercenaria;Mercenaria mercenaria

UdeM00000001271 6596 370.9 UdeM00000001271 XP\_045160869.1 60.6 320  
110 3 1 306 1 318 2.20E-99 370.9 6596 cellular

organisms;Eukaryota;Opisthokonta;Metazoa;Eumetazoa;Bilateria;Protostomia;Spiralia;Lophotrochozoa;Mollusca;Bivalvia;Autobranchia;Heteroconchia;Euherodonta;Imparidentia;Venerida;Veneroidea;Veneridae;Mercenaria;Mercenaria mercenaria

UdeM00000001272 6573 177.9 UdeM00000001272 XP\_021343710.1 42.2 320  
165 10 49 362 128 433 2.30E-41 177.9 6573 cellular

organisms;Eukaryota;Opisthokonta;Metazoa;Eumetazoa;Bilateria;Protostomia;Spiralia;Lophotrochozoa;Mollusca;Bivalvia;Autobranchia;Pteriomorphia;Pectinida;Pectinoidea;Pectinidae;Mizuhopecten;Mizuhopecten yessoensis

UdeM00000001273 29159 149.4 UdeM00000001273 XP\_011444591.1 47.2 163  
85 1 6 167 13 175 4.10E-33 149.4 29159 cellular

organisms;Eukaryota;Opisthokonta;Metazoa;Eumetazoa;Bilateria;Protostomia;Spiralia;Lophotrochozoa;Mollusca;Bivalvia;Autobranchia;Pteriomorphia;Ostreida;Ostreoidea;Ostreidae;Crassostrea;Crassostrea gigas

UdeM00000001274 225164 746.9 UdeM00000001274 XP\_009043729.1 73.4  
497 122 3 1 495 1 489 1.70E-212 746.9 225164

cellular  
organisms;Eukaryota;Opisthokonta;Metazoa;Eumetazoa;Bilateria;Protostomia;Spiralia;Lophotrochozoa;Mollusca;Gastropoda;Patellogastropoda;Lottioidea;Lottiidae;Lottia;Lottia gigantea

UdeM00000001275 225164 746.9 UdeM00000001275 XP\_009043729.1 73.4  
497 122 3 1 495 1 489 1.70E-212 746.9 225164

cellular  
organisms;Eukaryota;Opisthokonta;Metazoa;Eumetazoa;Bilateria;Protostomia;Spiralia;Lophotrochozoa;Mollusca;Gastropoda;Patellogastropoda;Lottioidea;Lottiidae;Lottia;Lottia gigantea

UdeM00000001276 8078 95.9 UdeM00000001276 XP\_035983910.1 42.6 108  
61 1 3 109 44 151 5.80E-17 95.9 8078 cellular

organisms;Eukaryota;Opisthokonta;Metazoa;Eumetazoa;Bilateria;Deuterostomia;Chordata;Craniata;Vertebrata;Gnathostomata;Teleostomi;Euteleostomi;Actinopterygii;Actinopteri;Neopterygii;Teleostei;Osteoglossocephalai;Clupeocephala;Euteleostei;Neoteleostei;Eurypterygia;Ctenosquamata;Acanthopterygii;Euacanthopterygii;Percomorphaceae;Ovalentaria;Atherinomorpha;Cyprinodontiformes;Cyprinodontoides;Fundulidae;Fundulus;Fundulus heteroclitus

UdeM00000001277 400727 342.4 UdeM00000001277 XP\_025109363.1 73  
244 56 2 1 244 4 237 4.60E-91 342.4 400727

cellular  
organisms;Eukaryota;Opisthokonta;Metazoa;Eumetazoa;Bilateria;Protostomia;  
Spiralia;Lophotrochozoa;Mollusca;Gastropoda;Caenogastropoda;Architaenioglossa;  
Ampullarioidea;Ampullariidae;Pomacea;Pomacea canaliculata  
UdeM00000001278 45264 167.9 UdeM00000001278 XP\_044164507.1 43.5 214  
115 3 28 240 80 288 1.50E-38 167.9 45264 cellular  
organisms;Eukaryota;Opisthokonta;Metazoa;Eumetazoa;Cnidaria;Anthozoa;Hexacorallia;  
Scleractinia;Astrocoeniina;Acroporidae;Acropora;Acropora millepora  
UdeM00000001279 6596 1092 UdeM00000001279 XP\_045160410.1 37.1 2179  
1091 49 1 1956 1 2122 0.00E+00 1092 6596 cellular  
organisms;Eukaryota;Opisthokonta;Metazoa;Eumetazoa;Bilateria;Protostomia;  
Spiralia;Lophotrochozoa;Mollusca;Bivalvia;Autobranchia;Heteroconchia;Euheterodonta;  
Imparidentia;Venerida;Veneroidea;Veneridae;Mercenaria;Mercenaria mercenaria  
UdeM00000001280 6596 780.8 UdeM00000001280 XP\_045159132.1 78.6 462  
99 0 1 462 1 462 9.70E-223 780.8 6596 cellular  
organisms;Eukaryota;Opisthokonta;Metazoa;Eumetazoa;Bilateria;Protostomia;  
Spiralia;Lophotrochozoa;Mollusca;Bivalvia;Autobranchia;Heteroconchia;Euheterodonta;  
Imparidentia;Venerida;Veneroidea;Veneridae;Mercenaria;Mercenaria mercenaria  
UdeM00000001281 29159 370.5 UdeM00000001281 XP\_034338246.1 28.2 1248  
772 44 28 1216 189 1371 9.60E-99 370.5 29159 cellular  
organisms;Eukaryota;Opisthokonta;Metazoa;Eumetazoa;Bilateria;Protostomia;  
Spiralia;Lophotrochozoa;Mollusca;Bivalvia;Autobranchia;Pteriormorphia;Ostreida;  
Ostreoidea;Ostreidae;Crassostrea;Crassostrea gigas  
UdeM00000001283 29159 366.3 UdeM00000001283 XP\_034338246.1 28.8 1082  
664 33 78 1107 256 1283 1.60E-97 366.3 29159 cellular  
organisms;Eukaryota;Opisthokonta;Metazoa;Eumetazoa;Bilateria;Protostomia;  
Spiralia;Lophotrochozoa;Mollusca;Bivalvia;Autobranchia;Pteriormorphia;Ostreida;  
Ostreoidea;Ostreidae;Crassostrea;Crassostrea gigas  
UdeM00000001284 6596 76.6 UdeM00000001284 XP\_045160955.1 32.7 107  
63 1 34 140 1196 1293 3.20E-11 76.6 6596 cellular  
organisms;Eukaryota;Opisthokonta;Metazoa;Eumetazoa;Bilateria;Protostomia;  
Spiralia;Lophotrochozoa;Mollusca;Bivalvia;Autobranchia;Heteroconchia;Euheterodonta;  
Imparidentia;Venerida;Veneroidea;Veneridae;Mercenaria;Mercenaria mercenaria  
UdeM00000001285 29159 366.3 UdeM00000001285 XP\_034338246.1 28.3 1206  
735 42 28 1173 189 1324 1.70E-97 366.3 29159 cellular  
organisms;Eukaryota;Opisthokonta;Metazoa;Eumetazoa;Bilateria;Protostomia;  
Spiralia;Lophotrochozoa;Mollusca;Bivalvia;Autobranchia;Pteriormorphia;Ostreida;  
Ostreoidea;Ostreidae;Crassostrea;Crassostrea gigas  
UdeM00000001286 6596 660.6 UdeM00000001286 XP\_045160955.1 40.8 1298  
495 9 5 1029 7 1303 3.40E-186 660.6 6596 cellular  
organisms;Eukaryota;Opisthokonta;Metazoa;Eumetazoa;Bilateria;Protostomia;  
Spiralia;Lophotrochozoa;Mollusca;Bivalvia;Autobranchia;Heteroconchia;Euheterodonta;  
Imparidentia;Venerida;Veneroidea;Veneridae;Mercenaria;Mercenaria mercenaria  
UdeM00000001287 6565 191.8 UdeM00000001287 XP\_022318096.1 63.2 152  
56 0 5 156 1 152 6.50E-46 191.8 6565 cellular  
organisms;Eukaryota;Opisthokonta;Metazoa;Eumetazoa;Bilateria;Protostomia;  
Spiralia;Lophotrochozoa;Mollusca;Bivalvia;Autobranchia;Pteriormorphia;Ostreida;  
Ostreoidea;Ostreidae;Crassostrea;Crassostrea virginica

UdeM00000001288 6596 582.4 UdeM00000001288 XP\_045157797.1 45.9 658  
 346 7 49 701 94 746 7.80E-163 582.4 6596 cellular  
 organisms;Eukaryota;Opisthokonta;Metazoa;Eumetazoa;Bilateria;Protostomia;  
 Spiralia;Lophotrochozoa;Mollusca;Bivalvia;Autobranhia;Heteroconchia;Euhe  
 terodonta;Imparidentia;Venerida;Veneroidea;Veneridae;Mercenaria;Mercenari  
 a mercenaria  
 UdeM00000001289 29159 505 UdeM00000001289 XP\_011419218.2 60.3 413  
 157 2 1 409 1 410 9.20E-140 505 29159 cellular  
 organisms;Eukaryota;Opisthokonta;Metazoa;Eumetazoa;Bilateria;Protostomia;  
 Spiralia;Lophotrochozoa;Mollusca;Bivalvia;Autobranhia;Pteriormorphia;Ostr  
 eida;Ostreoidea;Ostreidae;Crassostrea;Crassostrea gigas  
 UdeM00000001290 6596 659.1 UdeM00000001290 XP\_045157797.1 48.2 683  
 339 8 93 769 84 757 7.10E-186 659.1 6596 cellular  
 organisms;Eukaryota;Opisthokonta;Metazoa;Eumetazoa;Bilateria;Protostomia;  
 Spiralia;Lophotrochozoa;Mollusca;Bivalvia;Autobranhia;Heteroconchia;Euhe  
 terodonta;Imparidentia;Venerida;Veneroidea;Veneridae;Mercenaria;Mercenari  
 a mercenaria  
 UdeM00000001291 6573 315.5 UdeM00000001291 XP\_021348223.1 30.6 689  
 243 7 39 497 14 697 1.20E-82 315.5 6573 cellular  
 organisms;Eukaryota;Opisthokonta;Metazoa;Eumetazoa;Bilateria;Protostomia;  
 Spiralia;Lophotrochozoa;Mollusca;Bivalvia;Autobranhia;Pteriormorphia;Pect  
 inida;Pectinoidea;Pectinidae;Mizuhopecten;Mizuhopecten yessoensis  
 UdeM00000001292 6573 164.9 UdeM00000001292 XP\_021347253.1 27.2 677  
 396 22 5 605 1 656 6.20E-37 164.9 6573 cellular  
 organisms;Eukaryota;Opisthokonta;Metazoa;Eumetazoa;Bilateria;Protostomia;  
 Spiralia;Lophotrochozoa;Mollusca;Bivalvia;Autobranhia;Pteriormorphia;Pect  
 inida;Pectinoidea;Pectinidae;Mizuhopecten;Mizuhopecten yessoensis  
 UdeM00000001294 114398 80.9 UdeM00000001294 XP\_015924831.2 27.3  
 209 121 8 29 219 20 215 2.80E-12 80.9 114398  
 cellular  
 organisms;Eukaryota;Opisthokonta;Metazoa;Eumetazoa;Bilateria;Protostomia;  
 Ecdysozoa;Panarthropoda;Arthropoda;Chelicerata;Arachnida;Araneae;Araneomo  
 rphae;Entelegynae;Orbiculariae;Araneoidea;Theridiidae;Parasteatoda;Parast  
 eatoda tepidariorum  
 UdeM00000001295 29159 80.1 UdeM00000001295 XP\_034314412.1 23.4 475  
 301 18 17 481 278 699 1.30E-11 80.1 29159 cellular  
 organisms;Eukaryota;Opisthokonta;Metazoa;Eumetazoa;Bilateria;Protostomia;  
 Spiralia;Lophotrochozoa;Mollusca;Bivalvia;Autobranhia;Pteriormorphia;Ostr  
 eida;Ostreoidea;Ostreidae;Crassostrea;Crassostrea gigas  
 UdeM00000001296 6596 294.3 UdeM00000001296 XP\_045157355.1 46.6 352  
 162 5 11 350 82 419 2.10E-76 294.3 6596 cellular  
 organisms;Eukaryota;Opisthokonta;Metazoa;Eumetazoa;Bilateria;Protostomia;  
 Spiralia;Lophotrochozoa;Mollusca;Bivalvia;Autobranhia;Heteroconchia;Euhe  
 terodonta;Imparidentia;Venerida;Veneroidea;Veneridae;Mercenaria;Mercenari  
 a mercenaria  
 UdeM00000001297 6596 131.7 UdeM00000001297 XP\_045158033.1 37.4 187  
 111 3 8 188 9 195 1.00E-27 131.7 6596 cellular  
 organisms;Eukaryota;Opisthokonta;Metazoa;Eumetazoa;Bilateria;Protostomia;  
 Spiralia;Lophotrochozoa;Mollusca;Bivalvia;Autobranhia;Heteroconchia;Euhe  
 terodonta;Imparidentia;Venerida;Veneroidea;Veneridae;Mercenaria;Mercenari  
 a mercenaria  
 UdeM00000001299 400727 713.4 UdeM00000001299 XP\_025111169.1 76.9  
 471 107 2 1 470 11 480 1.90E-202 713.4 400727  
 cellular

organisms;Eukaryota;Opisthokonta;Metazoa;Eumetazoa;Bilateria;Protostomia;Spiralia;Lophotrochozoa;Mollusca;Gastropoda;Caenogastropoda;Architaenioglossa;Ampullarioidea;Ampullariidae;Pomacea;Pomacea canaliculata

UdeM00000039051 1735272 195.7 UdeM00000039051 XP\_041378840.1 52.4  
191 89 2 1 190 10 199 6.10E-47 195.7 1735272

cellular

organisms;Eukaryota;Opisthokonta;Metazoa;Eumetazoa;Bilateria;Protostomia;Spiralia;Lophotrochozoa;Mollusca;Gastropoda;Neomphalina;Neomphaloidea;Peltospiridae;Gigantopelta;Gigantopelta aegis

UdeM00000039057 160734 114.8 UdeM00000039057 XP\_042354838.1 51.5  
103 50 0 20 122 1 103 8.20E-23 114.8 160734

cellular

organisms;Eukaryota;Opisthokonta;Metazoa;Eumetazoa;Bilateria;Deuterostomia;Chordata;Craniata;Vertebrata;Gnathostomata;Teleostomi;Euteleostomi;Actinopterygii;Actinopteri;Neopterygii;Teleostei;Osteoglossocephalai;Clupeocephala;Euteleostomorpha;Neoteleostei;Eurypterygia;Ctenosquamata;Acanthomorphata;Euacanthomorphacea;Percomorphaceae;Eupercaria;Perciformes;Serranoidi;Serranidae;Epinephelinae;Epinephelini;Plectropomus;Plectropomus leopardus

UdeM00000039059 400727 173.3 UdeM00000039059 XP\_025101378.1 49.2  
185 82 2 265 438 235 418 6.80E-40 173.3 400727

cellular

organisms;Eukaryota;Opisthokonta;Metazoa;Eumetazoa;Bilateria;Protostomia;Spiralia;Lophotrochozoa;Mollusca;Gastropoda;Caenogastropoda;Architaenioglossa;Ampullarioidea;Ampullariidae;Pomacea;Pomacea canaliculata

UdeM00000039060 6596 74.3 UdeM00000039060 XP\_045209336.1 33.1 130  
79 4 17 139 150 278 1.80E-10 74.3 6596 cellular

organisms;Eukaryota;Opisthokonta;Metazoa;Eumetazoa;Bilateria;Protostomia;Spiralia;Lophotrochozoa;Mollusca;Bivalvia;Autobranchia;Heteroconchia;Euheterodonta;Imparidentia;Venerida;Veneroidea;Veneridae;Mercenaria;Mercenaria mercenaria

UdeM00000039061 6596 173.3 UdeM00000039061 XP\_045174904.1 61.7 115  
43 1 42 155 66 180 2.40E-40 173.3 6596 cellular

organisms;Eukaryota;Opisthokonta;Metazoa;Eumetazoa;Bilateria;Protostomia;Spiralia;Lophotrochozoa;Mollusca;Bivalvia;Autobranchia;Heteroconchia;Euheterodonta;Imparidentia;Venerida;Veneroidea;Veneridae;Mercenaria;Mercenaria mercenaria

UdeM00000039062 6596 77 UdeM00000039062 XP\_045209336.1 33.6 128  
80 2 11 133 145 272 2.80E-11 77 6596 cellular

organisms;Eukaryota;Opisthokonta;Metazoa;Eumetazoa;Bilateria;Protostomia;Spiralia;Lophotrochozoa;Mollusca;Bivalvia;Autobranchia;Heteroconchia;Euheterodonta;Imparidentia;Venerida;Veneroidea;Veneridae;Mercenaria;Mercenaria mercenaria

UdeM00000039063 6596 105.1 UdeM00000039063 XP\_045208608.1 31.2 304  
176 15 11 295 33 322 1.50E-19 105.1 6596 cellular

organisms;Eukaryota;Opisthokonta;Metazoa;Eumetazoa;Bilateria;Protostomia;Spiralia;Lophotrochozoa;Mollusca;Bivalvia;Autobranchia;Heteroconchia;Euheterodonta;Imparidentia;Venerida;Veneroidea;Veneridae;Mercenaria;Mercenaria mercenaria

UdeM00000039064 6579 283.5 UdeM00000039064 XP\_033752673.1 41.3 385  
132 5 21 317 273 651 3.30E-73 283.5 6579 cellular

organisms;Eukaryota;Opisthokonta;Metazoa;Eumetazoa;Bilateria;Protostomia;Spiralia;Lophotrochozoa;Mollusca;Bivalvia;Autobranchia;Pteriomorphia;Pectinida;Pectinoidea;Pectinidae;Pecten;Pecten maximus

UdeM00000039065 205130 144.8 UdeM00000039065 XP\_026180020.1 47.8  
138 70 1 3 138 167 304 8.20E-32 144.8 205130  
cellular

organisms;Eukaryota;Opisthokonta;Metazoa;Eumetazoa;Bilateria;Deuterostomi  
a;Chordata;Craniata;Vertebrata;Gnathostomata;Teleostomi;Euteleostomi;Acti  
nopterygii;Actinopteri;Neopterygii;Teleostei;Osteoglossocephalai;Clupeoce  
phala;Euteleostomorpha;Neoteleostei;Eurypterygia;Ctenosquamata;Acanthomo  
rphata;Euacanthomorpha;Percomorphaceae;Anabantaria;Synbranchiformes;Ma  
stacembeloidei;Mastacembelidae;Mastacembelus;Mastacembelus armatus

UdeM00000039066 225164 99.8 UdeM00000039066 XP\_009058200.1 52.4  
105 49 1 1 104 1 105 2.20E-18 99.8 225164  
cellular

organisms;Eukaryota;Opisthokonta;Metazoa;Eumetazoa;Bilateria;Protostomia;  
Spiralia;Lophotrochozoa;Mollusca;Gastropoda;Patellogastropoda;Lottioidea;  
Lottiidae;Lottia;Lottia gigantea

UdeM00000039067 29159 179.1 UdeM00000039067 XP\_034320563.1 61.6 125  
48 0 36 160 9 133 4.50E-42 179.1 29159 cellular

organisms;Eukaryota;Opisthokonta;Metazoa;Eumetazoa;Bilateria;Protostomia;  
Spiralia;Lophotrochozoa;Mollusca;Bivalvia;Autobranchia;Pteriormorphia;Ostr  
eida;Ostreioidea;Ostreidae;Crassostrea;Crassostrea gigas

UdeM00000039069 6565 180.6 UdeM00000039069 XP\_022310560.1 60.8 120  
47 0 16 135 64 183 1.30E-42 180.6 6565 cellular

organisms;Eukaryota;Opisthokonta;Metazoa;Eumetazoa;Bilateria;Protostomia;  
Spiralia;Lophotrochozoa;Mollusca;Bivalvia;Autobranchia;Pteriormorphia;Ostr  
eida;Ostreioidea;Ostreidae;Crassostrea;Crassostrea virginica

UdeM00000039070 6565 171.8 UdeM00000039070 XP\_022306813.1 61.4 114  
44 0 47 160 86 199 7.10E-40 171.8 6565 cellular

organisms;Eukaryota;Opisthokonta;Metazoa;Eumetazoa;Bilateria;Protostomia;  
Spiralia;Lophotrochozoa;Mollusca;Bivalvia;Autobranchia;Pteriormorphia;Ostr  
eida;Ostreioidea;Ostreidae;Crassostrea;Crassostrea virginica

UdeM00000039073 260995 80.1 UdeM00000039073 XP\_033812940.1 51.4  
74 35 1 1 74 1 73 1.70E-12 80.1 260995  
cellular

organisms;Eukaryota;Opisthokonta;Metazoa;Eumetazoa;Bilateria;Deuterostomi  
a;Chordata;Craniata;Vertebrata;Gnathostomata;Teleostomi;Euteleostomi;Sarc  
opterygii;Dipnotetrapodomorpha;Tetrapoda;Amphibia;Gymnophiona;Dermophiida  
e;Geotrypetes;Geotrypetes seraphini

UdeM00000039074 1415580 372.9 UdeM00000039074 XP\_030075314.1 42.4  
517 161 4 1 396 125 625 5.20E-100 372.9 1415580  
cellular

organisms;Eukaryota;Opisthokonta;Metazoa;Eumetazoa;Bilateria;Deuterostomi  
a;Chordata;Craniata;Vertebrata;Gnathostomata;Teleostomi;Euteleostomi;Sarc  
opterygii;Dipnotetrapodomorpha;Tetrapoda;Amphibia;Gymnophiona;Siphonopida  
e;Microcaecilia;Microcaecilia unicolor

UdeM00000039076 6579 249.2 UdeM00000039076 XP\_033758546.1 53.2 282  
114 4 46 317 40 313 7.00E-63 249.2 6579 cellular

organisms;Eukaryota;Opisthokonta;Metazoa;Eumetazoa;Bilateria;Protostomia;  
Spiralia;Lophotrochozoa;Mollusca;Bivalvia;Autobranchia;Pteriormorphia;Pect  
inida;Pectinoidea;Pectinidae;Pecten;Pecten maximus

UdeM00000039077 6579 189.9 UdeM00000039077 XP\_033758546.1 50.8 242  
102 3 46 278 40 273 8.30E-45 189.9 6579 cellular

organisms;Eukaryota;Opisthokonta;Metazoa;Eumetazoa;Bilateria;Protostomia;  
Spiralia;Lophotrochozoa;Mollusca;Bivalvia;Autobranchia;Pteriormorphia;Pect  
inida;Pectinoidea;Pectinidae;Pecten;Pecten maximus

UdeM00000039078 6573 568.9 UdeM00000039078 XP\_021372017.1 47.1 688  
 219 5 3 547 5 690 7.20E-159 568.9 6573 cellular  
 organisms;Eukaryota;Opisthokonta;Metazoa;Eumetazoa;Bilateria;Protostomia;  
 Spiralia;Lophotrochozoa;Mollusca;Bivalvia;Autobranchia;Pteriomorpha;Pect  
 inida;Pectinoidea;Pectinidae;Mizuhopecten;Mizuhopecten yessoensis  
 UdeM00000039079 1735272 446 UdeM00000039079 XP\_041373796.1 65.5  
 351 119 2 6 355 5 354 4.30E-122 446 1735272  
 cellular  
 organisms;Eukaryota;Opisthokonta;Metazoa;Eumetazoa;Bilateria;Protostomia;  
 Spiralia;Lophotrochozoa;Mollusca;Gastropoda;Neomphalina;Neomphaloidea;Pel  
 tospiridae;Gigantopelta;Gigantopelta aegis  
 UdeM00000039080 1735272 226.9 UdeM00000039080 XP\_041373796.1 72.8  
 151 39 2 1 150 205 354 1.80E-56 226.9 1735272  
 cellular  
 organisms;Eukaryota;Opisthokonta;Metazoa;Eumetazoa;Bilateria;Protostomia;  
 Spiralia;Lophotrochozoa;Mollusca;Gastropoda;Neomphalina;Neomphaloidea;Pel  
 tospiridae;Gigantopelta;Gigantopelta aegis  
 UdeM00000039081 400727 632.5 UdeM00000039081 XP\_025102511.1 57.9  
 622 60 3 1 618 1 424 5.70E-178 632.5 400727  
 cellular  
 organisms;Eukaryota;Opisthokonta;Metazoa;Eumetazoa;Bilateria;Protostomia;  
 Spiralia;Lophotrochozoa;Mollusca;Gastropoda;Caenogastropoda;Architaeniogl  
 ossa;Ampullarioidea;Ampullariidae;Pomacea;Pomacea canaliculata  
 UdeM00000039082 29159 161 UdeM00000039082 XP\_011452761.2 46.4 192  
 97 3 26 214 67 255 3.60E-36 161 29159 cellular  
 organisms;Eukaryota;Opisthokonta;Metazoa;Eumetazoa;Bilateria;Protostomia;  
 Spiralia;Lophotrochozoa;Mollusca;Bivalvia;Autobranchia;Pteriomorpha;Ostr  
 eida;Ostreoidea;Ostreidae;Crassostrea;Crassostrea gigas  
 UdeM00000039084 6579 165.6 UdeM00000039084 XP\_033763728.1 35.7 252  
 146 7 7 243 4 254 7.80E-38 165.6 6579 cellular  
 organisms;Eukaryota;Opisthokonta;Metazoa;Eumetazoa;Bilateria;Protostomia;  
 Spiralia;Lophotrochozoa;Mollusca;Bivalvia;Autobranchia;Pteriomorpha;Pect  
 inida;Pectinoidea;Pectinidae;Pecten;Pecten maximus  
 UdeM00000039085 6573 174.9 UdeM00000039085 XP\_021366565.1 42.7 192  
 102 4 81 265 57 247 1.40E-40 174.9 6573 cellular  
 organisms;Eukaryota;Opisthokonta;Metazoa;Eumetazoa;Bilateria;Protostomia;  
 Spiralia;Lophotrochozoa;Mollusca;Bivalvia;Autobranchia;Pteriomorpha;Pect  
 inida;Pectinoidea;Pectinidae;Mizuhopecten;Mizuhopecten yessoensis  
 UdeM00000039086 37293 83.6 UdeM00000039086 XP\_021526080.1 29.4 245  
 143 7 55 279 251 485 7.90E-13 83.6 37293 cellular  
 organisms;Eukaryota;Opisthokonta;Metazoa;Eumetazoa;Bilateria;Deuterostomi  
 a;Chordata;Craniata;Vertebrata;Gnathostomata;Teleostomi;Euteleostomi;Sarc  
 opterygii;Dipnotetrapodomorpha;Tetrapoda;Amniota;Mammalia;Theria;Eutheria  
 ;Boreoeutheria;Euarchontoglires;Primates;Haplorrhini;Simiiformes;Platyrrh  
 ini;Aotidae;Aotus;Aotus nancymaae  
 UdeM00000039087 6573 92 UdeM00000039087 XP\_021366565.1 41.2 114  
 63 2 52 161 57 170 7.70E-16 92 6573 cellular  
 organisms;Eukaryota;Opisthokonta;Metazoa;Eumetazoa;Bilateria;Protostomia;  
 Spiralia;Lophotrochozoa;Mollusca;Bivalvia;Autobranchia;Pteriomorpha;Pect  
 inida;Pectinoidea;Pectinidae;Mizuhopecten;Mizuhopecten yessoensis  
 UdeM00000044399 6596 80.1 UdeM00000044399 XP\_045161982.1 52.9 70  
 33 0 1 70 1 70 1.30E-12 80.1 6596 cellular  
 organisms;Eukaryota;Opisthokonta;Metazoa;Eumetazoa;Bilateria;Protostomia;  
 Spiralia;Lophotrochozoa;Mollusca;Bivalvia;Autobranchia;Heteroconchia;Euhe

terodonta;Imparidentia;Venerida;Veneroidea;Veneridae;Mercenaria;Mercenari  
 a mercenaria  
 UdeM00000035487 6596 184.1 UdeM00000035487 XP\_045191793.1 34.5 330  
 160 5 1 322 258 539 3.40E-43 184.1 6596 cellular  
 organisms;Eukaryota;Opisthokonta;Metazoa;Eumetazoa;Bilateria;Protostomia;  
 Spiralia;Lophotrochozoa;Mollusca;Bivalvia;Autobranchia;Heteroconchia;Euhe  
 terodonta;Imparidentia;Venerida;Veneroidea;Veneridae;Mercenaria;Mercenari  
 a mercenaria  
 UdeM00000035489 72036 250.4 UdeM00000035489 XP\_040576246.1 43.6 282  
 156 3 4 283 103 383 3.20E-63 250.4 72036 cellular  
 organisms;Eukaryota;Opisthokonta;Metazoa;Eumetazoa;Bilateria;Protostomia;  
 Ecdysozoa;Panarthropoda;Arthropoda;Mandibulata;Pancrustacea;Crustacea;Mul  
 ticrustacea;Hexanauplia;Copepoda;Neocopepoda;Podoplea;Siphonostomatoida;C  
 aligidae;Lepeophtheirus;Lepeophtheirus salmonis  
 UdeM00000035488 72036 269.6 UdeM00000035488 XP\_040576246.1 43 314  
 176 3 3 314 71 383 5.50E-69 269.6 72036 cellular  
 organisms;Eukaryota;Opisthokonta;Metazoa;Eumetazoa;Bilateria;Protostomia;  
 Ecdysozoa;Panarthropoda;Arthropoda;Mandibulata;Pancrustacea;Crustacea;Mul  
 ticrustacea;Hexanauplia;Copepoda;Neocopepoda;Podoplea;Siphonostomatoida;C  
 aligidae;Lepeophtheirus;Lepeophtheirus salmonis  
 UdeM00000035490 6596 197.2 UdeM00000035490 XP\_045177779.1 39.3 272  
 157 3 100 367 398 665 5.70E-47 197.2 6596 cellular  
 organisms;Eukaryota;Opisthokonta;Metazoa;Eumetazoa;Bilateria;Protostomia;  
 Spiralia;Lophotrochozoa;Mollusca;Bivalvia;Autobranchia;Heteroconchia;Euhe  
 terodonta;Imparidentia;Venerida;Veneroidea;Veneridae;Mercenaria;Mercenari  
 a mercenaria  
 UdeM00000014218 6596 300.4 UdeM00000014218 XP\_045192283.1 85 160  
 24 0 1 160 1 160 1.30E-78 300.4 6596 cellular  
 organisms;Eukaryota;Opisthokonta;Metazoa;Eumetazoa;Bilateria;Protostomia;  
 Spiralia;Lophotrochozoa;Mollusca;Bivalvia;Autobranchia;Heteroconchia;Euhe  
 terodonta;Imparidentia;Venerida;Veneroidea;Veneridae;Mercenaria;Mercenari  
 a mercenaria  
 UdeM00000014219 400727 86.3 UdeM00000014219 XP\_025076300.1 35.2  
 193 84 9 663 819 214 401 2.00E-13 86.3 400727  
 cellular  
 organisms;Eukaryota;Opisthokonta;Metazoa;Eumetazoa;Bilateria;Protostomia;  
 Spiralia;Lophotrochozoa;Mollusca;Gastropoda;Caenogastropoda;Architaeniogl  
 ossa;Ampullarioidea;Ampullariidae;Pomacea;Pomacea canaliculata  
 UdeM00000014221 1735272 309.3 UdeM00000014221 XP\_041375166.1 47.1  
 410 184 7 4 387 6 408 7.40E-81 309.3 1735272  
 cellular  
 organisms;Eukaryota;Opisthokonta;Metazoa;Eumetazoa;Bilateria;Protostomia;  
 Spiralia;Lophotrochozoa;Mollusca;Gastropoda;Neomphalina;Neomphaloidea;Pel  
 tospiridae;Gigantopelta;Gigantopelta aegis  
 UdeM00000014222 6596 449.1 UdeM00000014222 XP\_045191732.1 63.2 378  
 129 4 1 372 1 374 5.40E-123 449.1 6596 cellular  
 organisms;Eukaryota;Opisthokonta;Metazoa;Eumetazoa;Bilateria;Protostomia;  
 Spiralia;Lophotrochozoa;Mollusca;Bivalvia;Autobranchia;Heteroconchia;Euhe  
 terodonta;Imparidentia;Venerida;Veneroidea;Veneridae;Mercenaria;Mercenari  
 a mercenaria  
 UdeM00000014223 6565 221.9 UdeM00000014223 XP\_022339725.1 59 234  
 94 2 6 239 384 615 9.00E-55 221.9 6565 cellular  
 organisms;Eukaryota;Opisthokonta;Metazoa;Eumetazoa;Bilateria;Protostomia;



Spiralia;Lophotrochozoa;Mollusca;Bivalvia;Autobranchia;Pteriormorphia;Ostr  
eida;Ostreoidea;Ostreidae;Crassostrea;Crassostrea virginica

UdeM00000014224 1437191 139.8 UdeM00000014224 XP\_029054816.1 43.2  
162 89 2 1 159 302 463 3.00E-30 139.8 1437191  
cellular

organisms;Eukaryota;Opisthokonta;Metazoa;Eumetazoa;Bilateria;Protostomia;  
Ecdysozoa;Panarthropoda;Arthropoda;Mandibulata;Pancrustacea;Hexapoda;Inse  
cta;Dicondylia;Pterygota;Neoptera;Endopterygota;Hymenoptera;Apocrita;Acul  
eata;Apoidea;Megachilidae;Megachilinae;Osmiini;Osmia;Osmia bicornis;Osmia  
bicornis bicornis

UdeM00000014225 29159 392.5 UdeM00000014225 XP\_019921828.2 74.7 407  
103 0 5 411 610 1016 6.60E-106 392.5 29159 cellular

organisms;Eukaryota;Opisthokonta;Metazoa;Eumetazoa;Bilateria;Protostomia;  
Spiralia;Lophotrochozoa;Mollusca;Bivalvia;Autobranchia;Pteriormorphia;Ostr  
eida;Ostreoidea;Ostreidae;Crassostrea;Crassostrea gigas

UdeM00000014227 6596 836.6 UdeM00000014227 XP\_045194764.1 55.3 707  
279 4 29 734 30 700 2.40E-239 836.6 6596 cellular

organisms;Eukaryota;Opisthokonta;Metazoa;Eumetazoa;Bilateria;Protostomia;  
Spiralia;Lophotrochozoa;Mollusca;Bivalvia;Autobranchia;Heteroconchia;Euhe  
terodonta;Imparidentia;Venerida;Veneroidea;Veneridae;Mercenaria;Mercenari  
a mercenaria

UdeM00000014228 1735272 427.6 UdeM00000014228 XP\_041375783.1 82  
250 42 2 1 247 989 1238 1.10E-116 427.6 1735272  
cellular

organisms;Eukaryota;Opisthokonta;Metazoa;Eumetazoa;Bilateria;Protostomia;  
Spiralia;Lophotrochozoa;Mollusca;Gastropoda;Neomphalina;Neomphaloidea;Pel  
tospiridae;Gigantopelta;Gigantopelta aegis

UdeM00000014229 1735272 123.6 UdeM00000014229 XP\_041375784.1 33.1  
266 159 9 3 262 313 565 5.20E-25 123.6 1735272  
cellular

organisms;Eukaryota;Opisthokonta;Metazoa;Eumetazoa;Bilateria;Protostomia;  
Spiralia;Lophotrochozoa;Mollusca;Gastropoda;Neomphalina;Neomphaloidea;Pel  
tospiridae;Gigantopelta;Gigantopelta aegis

UdeM00000014230 1735272 123.2 UdeM00000014230 XP\_041375784.1 32.1  
265 163 7 3 262 313 565 6.80E-25 123.2 1735272  
cellular

organisms;Eukaryota;Opisthokonta;Metazoa;Eumetazoa;Bilateria;Protostomia;  
Spiralia;Lophotrochozoa;Mollusca;Gastropoda;Neomphalina;Neomphaloidea;Pel  
tospiridae;Gigantopelta;Gigantopelta aegis

UdeM00000014231 6596 1169.1 UdeM00000014231 XP\_045194150.1 78.9  
1012 179 5 1 985 1 1004 0.00E+00 1169.1 6596  
cellular

organisms;Eukaryota;Opisthokonta;Metazoa;Eumetazoa;Bilateria;Protostomia;  
Spiralia;Lophotrochozoa;Mollusca;Bivalvia;Autobranchia;Heteroconchia;Euhe  
terodonta;Imparidentia;Venerida;Veneroidea;Veneridae;Mercenaria;Mercenari  
a mercenaria

UdeM00000014232 6596 404.1 UdeM00000014232 XP\_045194154.1 80.7 249  
48 0 1 249 1 249 1.50E-109 404.1 6596 cellular

organisms;Eukaryota;Opisthokonta;Metazoa;Eumetazoa;Bilateria;Protostomia;  
Spiralia;Lophotrochozoa;Mollusca;Bivalvia;Autobranchia;Heteroconchia;Euhe  
terodonta;Imparidentia;Venerida;Veneroidea;Veneridae;Mercenaria;Mercenari  
a mercenaria

UdeM00000014233 6596 438 UdeM00000014233 XP\_045195003.1 37.3 757  
379 17 516 1224 377 1085 4.30E-119 438 6596 cellular

organisms;Eukaryota;Opisthokonta;Metazoa;Eumetazoa;Bilateria;Protostomia; Spiralia;Lophotrochozoa;Mollusca;Bivalvia;Autobranchia;Heteroconchia;Euherodonta;Imparidentia;Venerida;Veneroidea;Veneridae;Mercenaria;Mercenaria mercenaria

UdeM00000014234 1735272 810.1 UdeM00000014234 XP\_041347431.1 57.9  
825 321 10 1 804 1 820 2.60E-231 810.1 1735272  
cellular

organisms;Eukaryota;Opisthokonta;Metazoa;Eumetazoa;Bilateria;Protostomia; Spiralia;Lophotrochozoa;Mollusca;Gastropoda;Neomphalina;Neomphaloidea;Peltospiridae;Gigantopelta;Gigantopelta aegis

UdeM00000014235 6596 117.1 UdeM00000014235 XP\_045192448.1 32.9 219  
142 2 1 218 45 259 5.50E-23 117.1 6596 cellular

organisms;Eukaryota;Opisthokonta;Metazoa;Eumetazoa;Bilateria;Protostomia; Spiralia;Lophotrochozoa;Mollusca;Bivalvia;Autobranchia;Heteroconchia;Euherodonta;Imparidentia;Venerida;Veneroidea;Veneridae;Mercenaria;Mercenaria mercenaria

UdeM00000014236 6596 141 UdeM00000014236 XP\_045192448.1 25.6 511  
257 9 1 510 45 433 4.50E-30 141 6596 cellular

organisms;Eukaryota;Opisthokonta;Metazoa;Eumetazoa;Bilateria;Protostomia; Spiralia;Lophotrochozoa;Mollusca;Bivalvia;Autobranchia;Heteroconchia;Euherodonta;Imparidentia;Venerida;Veneroidea;Veneridae;Mercenaria;Mercenaria mercenaria

UdeM00000014237 6579 89.7 UdeM00000014237 XP\_033754917.1 47.7 128  
59 3 7 133 4 124 3.10E-15 89.7 6579 cellular

organisms;Eukaryota;Opisthokonta;Metazoa;Eumetazoa;Bilateria;Protostomia; Spiralia;Lophotrochozoa;Mollusca;Bivalvia;Autobranchia;Pteriomorphia;Pectinida;Pectinoidea;Pectinidae;Pecten;Pecten maximus

UdeM00000014238 6596 646 UdeM00000014238 XP\_045191805.1 89.9 346  
35 0 1 346 1 346 3.40E-182 646 6596 cellular

organisms;Eukaryota;Opisthokonta;Metazoa;Eumetazoa;Bilateria;Protostomia; Spiralia;Lophotrochozoa;Mollusca;Bivalvia;Autobranchia;Heteroconchia;Euherodonta;Imparidentia;Venerida;Veneroidea;Veneridae;Mercenaria;Mercenaria mercenaria

UdeM00000014239 6596 576.2 UdeM00000014239 XP\_045192611.1 62.5 451  
165 1 1 451 4 450 3.60E-161 576.2 6596 cellular

organisms;Eukaryota;Opisthokonta;Metazoa;Eumetazoa;Bilateria;Protostomia; Spiralia;Lophotrochozoa;Mollusca;Bivalvia;Autobranchia;Heteroconchia;Euherodonta;Imparidentia;Venerida;Veneroidea;Veneridae;Mercenaria;Mercenaria mercenaria

UdeM00000014240 6500 150.6 UdeM00000014240 XP\_005091282.1 47 183  
97 0 88 270 114 296 2.90E-33 150.6 6500 cellular

organisms;Eukaryota;Opisthokonta;Metazoa;Eumetazoa;Bilateria;Protostomia; Spiralia;Lophotrochozoa;Mollusca;Gastropoda;Heterobranchia;Euthyneura;Tectipleura;Aplysiida;Aplysioidea;Aplysiidae;Aplysia;Aplysia californica

UdeM00000014241 6596 906.7 UdeM00000014241 XP\_045193364.1 62.5 801  
256 9 1 772 1 786 2.00E-260 906.7 6596 cellular

organisms;Eukaryota;Opisthokonta;Metazoa;Eumetazoa;Bilateria;Protostomia; Spiralia;Lophotrochozoa;Mollusca;Bivalvia;Autobranchia;Heteroconchia;Euherodonta;Imparidentia;Venerida;Veneroidea;Veneridae;Mercenaria;Mercenaria mercenaria

UdeM00000014242 6596 598.6 UdeM00000014242 XP\_045191635.1 67.4 426  
138 1 31 456 37 461 6.70E-168 598.6 6596 cellular

organisms;Eukaryota;Opisthokonta;Metazoa;Eumetazoa;Bilateria;Protostomia; Spiralia;Lophotrochozoa;Mollusca;Bivalvia;Autobranchia;Heteroconchia;Euherodonta;Imparidentia;Venerida;Veneroidea;Veneridae;Mercenaria;Mercenaria mercenaria

terodonta;Imparidentia;Venerida;Veneroidea;Veneridae;Mercenaria;Mercenaria mercenaria  
 UdeM00000014243 6596 221.1 UdeM00000014243 XP\_045191636.1 58.7 201  
 63 5 1 190 1 192 1.20E-54 221.1 6596 cellular  
 organisms;Eukaryota;Opisthokonta;Metazoa;Eumetazoa;Bilateria;Protostomia;  
 Spiralia;Lophotrochozoa;Mollusca;Bivalvia;Autobranhia;Heteroconchia;Euheterodonta;Imparidentia;Venerida;Veneroidea;Veneridae;Mercenaria;Mercenaria mercenaria  
 UdeM00000014245 6573 654.8 UdeM00000014245 XP\_021365183.1 79.3 411  
 75 2 199 601 137 545 1.00E-184 654.8 6573 cellular  
 organisms;Eukaryota;Opisthokonta;Metazoa;Eumetazoa;Bilateria;Protostomia;  
 Spiralia;Lophotrochozoa;Mollusca;Bivalvia;Autobranhia;Pteriormorphia;Pectinida;Pectinoidea;Pectinidae;Mizuhopecten;Mizuhopecten yessoensis  
 UdeM00000014246 6573 649.4 UdeM00000014246 XP\_021365183.1 78.7 414  
 75 3 199 604 137 545 4.40E-183 649.4 6573 cellular  
 organisms;Eukaryota;Opisthokonta;Metazoa;Eumetazoa;Bilateria;Protostomia;  
 Spiralia;Lophotrochozoa;Mollusca;Bivalvia;Autobranhia;Pteriormorphia;Pectinida;Pectinoidea;Pectinidae;Mizuhopecten;Mizuhopecten yessoensis  
 UdeM00000014247 29159 364 UdeM00000014247 XP\_019918674.2 41.7 607  
 311 11 167 754 84 666 4.70E-97 364 29159 cellular  
 organisms;Eukaryota;Opisthokonta;Metazoa;Eumetazoa;Bilateria;Protostomia;  
 Spiralia;Lophotrochozoa;Mollusca;Bivalvia;Autobranhia;Pteriormorphia;Ostreida;Ostreoidea;Ostreidae;Crassostrea;Crassostrea gigas  
 UdeM00000014248 6596 606.3 UdeM00000014248 XP\_045193948.1 58.9 530  
 150 6 1 462 1 530 3.30E-170 606.3 6596 cellular  
 organisms;Eukaryota;Opisthokonta;Metazoa;Eumetazoa;Bilateria;Protostomia;  
 Spiralia;Lophotrochozoa;Mollusca;Bivalvia;Autobranhia;Heteroconchia;Euheterodonta;Imparidentia;Venerida;Veneroidea;Veneridae;Mercenaria;Mercenaria mercenaria  
 UdeM00000014249 6565 196.1 UdeM00000014249 XP\_022340630.1 64.7 139  
 49 0 3 141 274 412 3.40E-47 196.1 6565 cellular  
 organisms;Eukaryota;Opisthokonta;Metazoa;Eumetazoa;Bilateria;Protostomia;  
 Spiralia;Lophotrochozoa;Mollusca;Bivalvia;Autobranhia;Pteriormorphia;Ostreida;Ostreoidea;Ostreidae;Crassostrea;Crassostrea virginica  
 UdeM00000014251 6706 149.1 UdeM00000014251 XP\_042235765.1 43.9 157  
 88 0 1 157 1 157 4.90E-33 149.1 6706 cellular  
 organisms;Eukaryota;Opisthokonta;Metazoa;Eumetazoa;Bilateria;Protostomia;  
 Ecdysozoa;Panarthropoda;Arthropoda;Mandibulata;Pancrustacea;Crustacea;Multicrustacea;Malacostraca;Eumalacostraca;Eucarida;Decapoda;Pleocyemata;Astacidea;Nephropoidea;Nephropidae;Homarus;Homarus americanus  
 UdeM00000014250 202533 236.1 UdeM00000014250 XP\_035218899.1 46.8  
 250 127 2 1 244 214 463 4.70E-59 236.1 202533  
 cellular  
 organisms;Eukaryota;Opisthokonta;Metazoa;Eumetazoa;Bilateria;Protostomia;  
 Ecdysozoa;Panarthropoda;Arthropoda;Chelicerata;Arachnida;Araneae;Araneomorphae;Entelegynae;Eresoidea;Eresidae;Stegodyphus;Stegodyphus dumicola  
 UdeM00000014252 400727 397.5 UdeM00000014252 XP\_025114867.1 60.3  
 317 113 2 5 309 38 353 1.60E-107 397.5 400727  
 cellular  
 organisms;Eukaryota;Opisthokonta;Metazoa;Eumetazoa;Bilateria;Protostomia;  
 Spiralia;Lophotrochozoa;Mollusca;Gastropoda;Caenogastropoda;Architaenioglossa;Ampullarioidea;Ampullariidae;Pomacea;Pomacea canaliculata  
 UdeM00000014253 6579 161.8 UdeM00000014253 XP\_033753769.1 64.8 128  
 42 2 4 131 9 133 6.10E-37 161.8 6579 cellular

organisms;Eukaryota;Opisthokonta;Metazoa;Eumetazoa;Bilateria;Protostomia;Spiralia;Lophotrochozoa;Mollusca;Bivalvia;Autobranchia;Pteriomorpha;Pectinida;Pectinoidea;Pectinidae;Pecten;Pecten maximus  
UdeM00000014255 6596 627.5 UdeM00000014255 XP\_045194301.1 85.2 358  
52 1 55 411 122 479 1.20E-176 627.5 6596 cellular  
organisms;Eukaryota;Opisthokonta;Metazoa;Eumetazoa;Bilateria;Protostomia;Spiralia;Lophotrochozoa;Mollusca;Bivalvia;Autobranchia;Heteroconchia;Euherodonta;Imparidentia;Venerida;Veneroidea;Veneridae;Mercenaria;Mercenaria mercenaria  
UdeM00000014256 6596 3207.9 UdeM00000014256 XP\_045194301.1 71  
2378 577 17 1 2328 485 2799 0.00E+00 3207.9 6596  
cellular  
organisms;Eukaryota;Opisthokonta;Metazoa;Eumetazoa;Bilateria;Protostomia;Spiralia;Lophotrochozoa;Mollusca;Bivalvia;Autobranchia;Heteroconchia;Euherodonta;Imparidentia;Venerida;Veneroidea;Veneridae;Mercenaria;Mercenaria mercenaria  
UdeM00000014257 6596 808.1 UdeM00000014257 XP\_045194172.1 82.4 472  
66 3 51 522 9 463 6.40E-231 808.1 6596 cellular  
organisms;Eukaryota;Opisthokonta;Metazoa;Eumetazoa;Bilateria;Protostomia;Spiralia;Lophotrochozoa;Mollusca;Bivalvia;Autobranchia;Heteroconchia;Euherodonta;Imparidentia;Venerida;Veneroidea;Veneridae;Mercenaria;Mercenaria mercenaria  
UdeM00000014258 6579 251.9 UdeM00000014258 XP\_033754414.1 63.7 190  
67 2 1 190 1 188 9.40E-64 251.9 6579 cellular  
organisms;Eukaryota;Opisthokonta;Metazoa;Eumetazoa;Bilateria;Protostomia;Spiralia;Lophotrochozoa;Mollusca;Bivalvia;Autobranchia;Pteriomorpha;Pectinida;Pectinoidea;Pectinidae;Pecten;Pecten maximus  
UdeM00000014259 29159 394.8 UdeM00000014259 XP\_019924711.1 100 193  
0 0 1 193 1 193 6.30E-107 394.8 29159 cellular  
organisms;Eukaryota;Opisthokonta;Metazoa;Eumetazoa;Bilateria;Protostomia;Spiralia;Lophotrochozoa;Mollusca;Bivalvia;Autobranchia;Pteriomorpha;Ostreida;Ostreoidea;Ostreidae;Crassostrea;Crassostrea gigas  
UdeM00000014260 6596 555.4 UdeM00000014260 XP\_045192925.1 59 458  
183 4 15 468 9 465 6.70E-155 555.4 6596 cellular  
organisms;Eukaryota;Opisthokonta;Metazoa;Eumetazoa;Bilateria;Protostomia;Spiralia;Lophotrochozoa;Mollusca;Bivalvia;Autobranchia;Heteroconchia;Euherodonta;Imparidentia;Venerida;Veneroidea;Veneridae;Mercenaria;Mercenaria mercenaria  
UdeM00000014261 29159 519.2 UdeM00000014261 XP\_011433876.2 90.8 282  
26 0 20 301 6 287 3.90E-144 519.2 29159 cellular  
organisms;Eukaryota;Opisthokonta;Metazoa;Eumetazoa;Bilateria;Protostomia;Spiralia;Lophotrochozoa;Mollusca;Bivalvia;Autobranchia;Pteriomorpha;Ostreida;Ostreoidea;Ostreidae;Crassostrea;Crassostrea gigas  
UdeM00000014262 6573 194.9 UdeM00000014262 XP\_021358246.1 36 350  
208 2 3 344 5 346 1.90E-46 194.9 6573 cellular  
organisms;Eukaryota;Opisthokonta;Metazoa;Eumetazoa;Bilateria;Protostomia;Spiralia;Lophotrochozoa;Mollusca;Bivalvia;Autobranchia;Pteriomorpha;Pectinida;Pectinoidea;Pectinidae;Mizuhopecten;Mizuhopecten yessoensis  
UdeM00000014263 6565 208.4 UdeM00000014263 XP\_022344863.1 63.4 145  
52 1 1 144 1 145 6.20E-51 208.4 6565 cellular  
organisms;Eukaryota;Opisthokonta;Metazoa;Eumetazoa;Bilateria;Protostomia;Spiralia;Lophotrochozoa;Mollusca;Bivalvia;Autobranchia;Pteriomorpha;Ostreida;Ostreoidea;Ostreidae;Crassostrea;Crassostrea virginica

UdeM00000014264 6596 1011.9 UdeM00000014264 XP\_045193836.1 50.6  
 1107 500 13 4 1085 6 1090 6.60E-292 1011.9 6596  
 cellular  
 organisms;Eukaryota;Opisthokonta;Metazoa;Eumetazoa;Bilateria;Protostomia;  
 Spiralia;Lophotrochozoa;Mollusca;Bivalvia;Autobranchia;Heteroconchia;Euhe  
 terodonta;Imparidentia;Venerida;Veneroidea;Veneridae;Mercenaria;Mercenari  
 a mercenaria  
 UdeM00000014265 6596 463 UdeM00000014265 XP\_045193481.1 47.9 610  
 269 13 4 579 19 613 5.60E-127 463 6596 cellular  
 organisms;Eukaryota;Opisthokonta;Metazoa;Eumetazoa;Bilateria;Protostomia;  
 Spiralia;Lophotrochozoa;Mollusca;Bivalvia;Autobranchia;Heteroconchia;Euhe  
 terodonta;Imparidentia;Venerida;Veneroidea;Veneridae;Mercenaria;Mercenari  
 a mercenaria  
 UdeM00000014266 1735272 402.5 UdeM00000014266 XP\_041377031.1 68.1  
 285 91 0 95 379 17 301 5.90E-109 402.5 1735272  
 cellular  
 organisms;Eukaryota;Opisthokonta;Metazoa;Eumetazoa;Bilateria;Protostomia;  
 Spiralia;Lophotrochozoa;Mollusca;Gastropoda;Neomphalina;Neomphaloidea;Pel  
 tospiridae;Gigantopelta;Gigantopelta aegis  
 UdeM00000014267 1735272 414.5 UdeM00000014267 XP\_041377031.1 70  
 280 84 0 22 301 22 301 1.20E-112 414.5 1735272  
 cellular  
 organisms;Eukaryota;Opisthokonta;Metazoa;Eumetazoa;Bilateria;Protostomia;  
 Spiralia;Lophotrochozoa;Mollusca;Gastropoda;Neomphalina;Neomphaloidea;Pel  
 tospiridae;Gigantopelta;Gigantopelta aegis  
 UdeM00000014268 29159 336.7 UdeM00000014268 XP\_011413410.3 36.1 537  
 321 9 47 571 641 1167 7.20E-89 336.7 29159 cellular  
 organisms;Eukaryota;Opisthokonta;Metazoa;Eumetazoa;Bilateria;Protostomia;  
 Spiralia;Lophotrochozoa;Mollusca;Bivalvia;Autobranchia;Pteriomorphia;Ostr  
 eida;Ostreoidea;Ostreidae;Crassostrea;Crassostrea gigas  
 UdeM00000014269 29159 248.4 UdeM00000014269 XP\_011413410.3 31 542  
 346 10 206 733 16 543 2.80E-62 248.4 29159 cellular  
 organisms;Eukaryota;Opisthokonta;Metazoa;Eumetazoa;Bilateria;Protostomia;  
 Spiralia;Lophotrochozoa;Mollusca;Bivalvia;Autobranchia;Pteriomorphia;Ostr  
 eida;Ostreoidea;Ostreidae;Crassostrea;Crassostrea gigas  
 UdeM00000014270 6565 277.3 UdeM00000014270 XP\_022338655.1 37.3 440  
 258 7 84 507 568 1005 4.00E-71 277.3 6565 cellular  
 organisms;Eukaryota;Opisthokonta;Metazoa;Eumetazoa;Bilateria;Protostomia;  
 Spiralia;Lophotrochozoa;Mollusca;Bivalvia;Autobranchia;Pteriomorphia;Ostr  
 eida;Ostreoidea;Ostreidae;Crassostrea;Crassostrea virginica  
 UdeM00000014272 6579 397.9 UdeM00000014272 XP\_033745282.1 55 327  
 140 5 16 341 11 331 1.40E-107 397.9 6579 cellular  
 organisms;Eukaryota;Opisthokonta;Metazoa;Eumetazoa;Bilateria;Protostomia;  
 Spiralia;Lophotrochozoa;Mollusca;Bivalvia;Autobranchia;Pteriomorphia;Pect  
 inida;Pectinoidea;Pectinidae;Pecten;Pecten maximus  
 UdeM00000014273 6596 216.5 UdeM00000014273 XP\_045193824.1 48.1 208  
 107 1 57 263 11 218 4.30E-53 216.5 6596 cellular  
 organisms;Eukaryota;Opisthokonta;Metazoa;Eumetazoa;Bilateria;Protostomia;  
 Spiralia;Lophotrochozoa;Mollusca;Bivalvia;Autobranchia;Heteroconchia;Euhe  
 terodonta;Imparidentia;Venerida;Veneroidea;Veneridae;Mercenaria;Mercenari  
 a mercenaria  
 UdeM00000014274 6596 226.5 UdeM00000014274 XP\_045191448.1 49.3 217  
 110 0 2 218 3 219 3.40E-56 226.5 6596 cellular  
 organisms;Eukaryota;Opisthokonta;Metazoa;Eumetazoa;Bilateria;Protostomia;

Spiralia;Lophotrochozoa;Mollusca;Bivalvia;Autobranchia;Heteroconchia;Euherodonta;Imparidentia;Venerida;Veneroidea;Veneridae;Mercenaria;Mercenaria mercenaria

UdeM00000014275 6579 198.7 UdeM00000014275 XP\_033755176.1 60.2 166  
61 2 78 238 74 239 1.00E-47 198.7 6579 cellular

organisms;Eukaryota;Opisthokonta;Metazoa;Eumetazoa;Bilateria;Protostomia;Spiralia;Lophotrochozoa;Mollusca;Bivalvia;Autobranchia;Pteriomorpha;Pectinida;Pectinoidea;Pectinidae;Pecten;Pecten maximus

UdeM00000014276 1735272 1268.1 UdeM00000014276 XP\_041376750.1  
50.4 1307 487 24 1 1229 243 1466 0.00E+00 1268.1  
1735272 cellular

organisms;Eukaryota;Opisthokonta;Metazoa;Eumetazoa;Bilateria;Protostomia;Spiralia;Lophotrochozoa;Mollusca;Gastropoda;Neomphalina;Neomphaloidea;Peltospiridae;Gigantopelta;Gigantopelta aegis

UdeM00000014277 6500 613.6 UdeM00000014277 XP\_005096659.1 78.9 464  
98 0 52 515 23 486 2.30E-172 613.6 6500 cellular

organisms;Eukaryota;Opisthokonta;Metazoa;Eumetazoa;Bilateria;Protostomia;Spiralia;Lophotrochozoa;Mollusca;Gastropoda;Heterobranchia;Euthyneura;Tectipleura;Aplysiida;Aplysioida;Aplysiidae;Aplysia;Aplysia californica

UdeM00000014278 45264 71.2 UdeM00000014278 XP\_044167082.1 41.6 89  
49 1 1 86 103 191 8.20E-10 71.2 45264 cellular

organisms;Eukaryota;Opisthokonta;Metazoa;Eumetazoa;Cnidaria;Anthozoa;Hexacorallia;Scleractinia;Astrocoeniina;Acroporidae;Acropora;Acropora millepora

UdeM00000014279 6596 223 UdeM00000014279 XP\_045191608.1 28.4 623  
340 15 22 541 36 655 9.10E-55 223 6596 cellular

organisms;Eukaryota;Opisthokonta;Metazoa;Eumetazoa;Bilateria;Protostomia;Spiralia;Lophotrochozoa;Mollusca;Bivalvia;Autobranchia;Heteroconchia;Euherodonta;Imparidentia;Venerida;Veneroidea;Veneridae;Mercenaria;Mercenaria mercenaria

UdeM00000014281 6596 558.9 UdeM00000014281 XP\_045191616.1 56.9 480  
184 6 19 492 32 494 6.40E-156 558.9 6596 cellular

organisms;Eukaryota;Opisthokonta;Metazoa;Eumetazoa;Bilateria;Protostomia;Spiralia;Lophotrochozoa;Mollusca;Bivalvia;Autobranchia;Heteroconchia;Euherodonta;Imparidentia;Venerida;Veneroidea;Veneridae;Mercenaria;Mercenaria mercenaria

UdeM00000014280 6596 568.2 UdeM00000014280 XP\_045191616.1 55.7 499  
208 6 1 491 1 494 1.10E-158 568.2 6596 cellular

organisms;Eukaryota;Opisthokonta;Metazoa;Eumetazoa;Bilateria;Protostomia;Spiralia;Lophotrochozoa;Mollusca;Bivalvia;Autobranchia;Heteroconchia;Euherodonta;Imparidentia;Venerida;Veneroidea;Veneridae;Mercenaria;Mercenaria mercenaria

UdeM00000014284 1735272 80.5 UdeM00000014284 XP\_041379274.1 34.4  
122 78 2 2 122 245 365 1.70E-12 80.5 1735272  
cellular

organisms;Eukaryota;Opisthokonta;Metazoa;Eumetazoa;Bilateria;Protostomia;Spiralia;Lophotrochozoa;Mollusca;Gastropoda;Neomphalina;Neomphaloidea;Peltospiridae;Gigantopelta;Gigantopelta aegis

UdeM00000014285 6087 176 UdeM00000014285 XP\_012565456.1 62.2 127  
48 0 4 130 890 1016 3.20E-41 176 6087 cellular

organisms;Eukaryota;Opisthokonta;Metazoa;Eumetazoa;Cnidaria;Hydrozoa;Hydrozoa;Anthoathecata;Aplanulata;Hydridae;Hydra;Hydra vulgaris

UdeM00000014286 6596 339 UdeM00000014286 XP\_045192248.1 44.9 365  
192 6 1 363 6 363 7.70E-90 339 6596 cellular

organisms;Eukaryota;Opisthokonta;Metazoa;Eumetazoa;Bilateria;Protostomia;Spiralia;Lophotrochozoa;Mollusca;Bivalvia;Autobranchia;Heteroconchia;Euherodonta;Imparidentia;Venerida;Veneroidea;Veneridae;Mercenaria;Mercenaria mercenaria

UdeM00000014287 6596 796.6 UdeM00000014287 XP\_045191377.1 63.4 604  
205 3 73 676 45 632 2.50E-227 796.6 6596 cellular

organisms;Eukaryota;Opisthokonta;Metazoa;Eumetazoa;Bilateria;Protostomia;Spiralia;Lophotrochozoa;Mollusca;Bivalvia;Autobranchia;Heteroconchia;Euherodonta;Imparidentia;Venerida;Veneroidea;Veneridae;Mercenaria;Mercenaria mercenaria

UdeM00000014288 6596 598.6 UdeM00000014288 XP\_045191631.1 86.1 332  
46 0 1 332 1 332 6.10E-168 598.6 6596 cellular

organisms;Eukaryota;Opisthokonta;Metazoa;Eumetazoa;Bilateria;Protostomia;Spiralia;Lophotrochozoa;Mollusca;Bivalvia;Autobranchia;Heteroconchia;Euherodonta;Imparidentia;Venerida;Veneroidea;Veneridae;Mercenaria;Mercenaria mercenaria

UdeM00000014289 1735272 555.8 UdeM00000014289 XP\_041375452.1 46.3  
650 318 6 1 622 1 647 6.80E-155 555.8 1735272  
cellular

organisms;Eukaryota;Opisthokonta;Metazoa;Eumetazoa;Bilateria;Protostomia;Spiralia;Lophotrochozoa;Mollusca;Gastropoda;Neomphalina;Neomphaloidea;Peltospiridae;Gigantopelta;Gigantopelta aegis

UdeM00000014290 1735272 172.9 UdeM00000014290 XP\_041377053.1 75  
128 31 1 1 128 29 155 2.60E-40 172.9 1735272  
cellular

organisms;Eukaryota;Opisthokonta;Metazoa;Eumetazoa;Bilateria;Protostomia;Spiralia;Lophotrochozoa;Mollusca;Gastropoda;Neomphalina;Neomphaloidea;Peltospiridae;Gigantopelta;Gigantopelta aegis

UdeM00000014291 6596 316.6 UdeM00000014291 XP\_045191743.1 48 327  
169 1 11 337 10 335 3.80E-83 316.6 6596 cellular

organisms;Eukaryota;Opisthokonta;Metazoa;Eumetazoa;Bilateria;Protostomia;Spiralia;Lophotrochozoa;Mollusca;Bivalvia;Autobranchia;Heteroconchia;Euherodonta;Imparidentia;Venerida;Veneroidea;Veneridae;Mercenaria;Mercenaria mercenaria

UdeM00000014292 6596 1402.1 UdeM00000014292 XP\_045194736.1 58.4  
1415 499 14 1 1339 1 1402 0.00E+00 1402.1 6596  
cellular

organisms;Eukaryota;Opisthokonta;Metazoa;Eumetazoa;Bilateria;Protostomia;Spiralia;Lophotrochozoa;Mollusca;Bivalvia;Autobranchia;Heteroconchia;Euherodonta;Imparidentia;Venerida;Veneroidea;Veneridae;Mercenaria;Mercenaria mercenaria

UdeM00000014293 6596 200.3 UdeM00000014293 XP\_045193066.1 40.1 302  
169 5 1 297 1 295 1.10E-47 200.3 6596 cellular

organisms;Eukaryota;Opisthokonta;Metazoa;Eumetazoa;Bilateria;Protostomia;Spiralia;Lophotrochozoa;Mollusca;Bivalvia;Autobranchia;Heteroconchia;Euherodonta;Imparidentia;Venerida;Veneroidea;Veneridae;Mercenaria;Mercenaria mercenaria

UdeM00000014294 7957 591.7 UdeM00000014294 XP\_026115228.1 47.7 631  
303 8 5 623 1 616 1.20E-165 591.7 7957 cellular

organisms;Eukaryota;Opisthokonta;Metazoa;Eumetazoa;Bilateria;Deuterostomia;Chordata;Craniata;Vertebrata;Gnathostomata;Teleostomi;Euteleostomi;Actinopterygii;Actinopteri;Neopterygii;Teleostei;Osteoglossocephalai;Clupeocephala;Otomorpha;Ostariophysi;Otophysi;Cypriniphysae;Cypriniformes;Cyprinidae;Cyprininae;Carassius;Carassius auratus

UdeM00000014295 151771 167.2 UdeM00000014295 XP\_028417120.1 35.2  
 349 208 8 6 338 6 352 4.00E-38 167.2 151771  
 cellular  
 organisms;Eukaryota;Opisthokonta;Metazoa;Eumetazoa;Cnidaria;Anthozoa;Octo  
 corallia;Alcyonacea;Alcyoniina;Nephtheidae;Dendronephthya;Dendronephthya  
 gigantea  
 UdeM00000014296 6596 179.1 UdeM00000014296 XP\_045193064.1 47 183  
 86 1 43 225 41 212 6.30E-42 179.1 6596 cellular  
 organisms;Eukaryota;Opisthokonta;Metazoa;Eumetazoa;Bilateria;Protostomia;  
 Spiralia;Lophotrochozoa;Mollusca;Bivalvia;Autobranhia;Heteroconchia;Euhe  
 terodonta;Imparidentia;Venerida;Veneroidea;Veneridae;Mercenaria;Mercenari  
 a mercenaria  
 UdeM00000014298 6579 627.9 UdeM00000014298 XP\_033754869.1 56.9 591  
 220 9 16 592 14 583 1.30E-176 627.9 6579 cellular  
 organisms;Eukaryota;Opisthokonta;Metazoa;Eumetazoa;Bilateria;Protostomia;  
 Spiralia;Lophotrochozoa;Mollusca;Bivalvia;Autobranhia;Pteriormorphia;Pect  
 inida;Pectinoidea;Pectinidae;Pecten;Pecten maximus  
 UdeM00000014297 6579 630.6 UdeM00000014297 XP\_033754869.1 59.8 547  
 192 7 71 607 55 583 2.10E-177 630.6 6579 cellular  
 organisms;Eukaryota;Opisthokonta;Metazoa;Eumetazoa;Bilateria;Protostomia;  
 Spiralia;Lophotrochozoa;Mollusca;Bivalvia;Autobranhia;Pteriormorphia;Pect  
 inida;Pectinoidea;Pectinidae;Pecten;Pecten maximus  
 UdeM00000014299 6596 301.6 UdeM00000014299 XP\_045192888.1 73.9 188  
 49 0 34 221 24 211 8.30E-79 301.6 6596 cellular  
 organisms;Eukaryota;Opisthokonta;Metazoa;Eumetazoa;Bilateria;Protostomia;  
 Spiralia;Lophotrochozoa;Mollusca;Bivalvia;Autobranhia;Heteroconchia;Euhe  
 terodonta;Imparidentia;Venerida;Veneroidea;Veneridae;Mercenaria;Mercenari  
 a mercenaria  
 UdeM00000014300 6596 520 UdeM00000014300 XP\_045192888.1 69.5 361  
 108 2 34 393 24 383 2.60E-144 520 6596 cellular  
 organisms;Eukaryota;Opisthokonta;Metazoa;Eumetazoa;Bilateria;Protostomia;  
 Spiralia;Lophotrochozoa;Mollusca;Bivalvia;Autobranhia;Heteroconchia;Euhe  
 terodonta;Imparidentia;Venerida;Veneroidea;Veneridae;Mercenaria;Mercenari  
 a mercenaria  
 UdeM00000014301 6596 112.8 UdeM00000014301 XP\_045199086.1 43 135  
 73 3 1 134 66 197 3.30E-22 112.8 6596 cellular  
 organisms;Eukaryota;Opisthokonta;Metazoa;Eumetazoa;Bilateria;Protostomia;  
 Spiralia;Lophotrochozoa;Mollusca;Bivalvia;Autobranhia;Heteroconchia;Euhe  
 terodonta;Imparidentia;Venerida;Veneroidea;Veneridae;Mercenaria;Mercenari  
 a mercenaria  
 UdeM00000014302 6596 129.8 UdeM00000014302 XP\_045178837.1 45.2 135  
 70 2 1 132 80 213 2.60E-27 129.8 6596 cellular  
 organisms;Eukaryota;Opisthokonta;Metazoa;Eumetazoa;Bilateria;Protostomia;  
 Spiralia;Lophotrochozoa;Mollusca;Bivalvia;Autobranhia;Heteroconchia;Euhe  
 terodonta;Imparidentia;Venerida;Veneroidea;Veneridae;Mercenaria;Mercenari  
 a mercenaria  
 UdeM00000014303 6596 133.7 UdeM00000014303 XP\_045178837.1 47.5 139  
 67 3 95 229 77 213 3.10E-28 133.7 6596 cellular  
 organisms;Eukaryota;Opisthokonta;Metazoa;Eumetazoa;Bilateria;Protostomia;  
 Spiralia;Lophotrochozoa;Mollusca;Bivalvia;Autobranhia;Heteroconchia;Euhe  
 terodonta;Imparidentia;Venerida;Veneroidea;Veneridae;Mercenaria;Mercenari  
 a mercenaria  
 UdeM00000014305 6596 235 UdeM00000014305 XP\_045191486.1 48.5 237  
 114 3 8 239 129 362 1.00E-58 235 6596 cellular



organisms;Eukaryota;Opisthokonta;Metazoa;Eumetazoa;Bilateria;Protostomia;Spiralia;Lophotrochozoa;Mollusca;Bivalvia;Autobranchia;Heteroconchia;Euherodonta;Imparidentia;Venerida;Veneroidea;Veneridae;Mercenaria;Mercenaria mercenaria

UdeM00000014306 6596 870.9 UdeM00000014306 XP\_045191482.1 76.4 551  
129 1 43 593 64 613 9.30E-250 870.9 6596 cellular

organisms;Eukaryota;Opisthokonta;Metazoa;Eumetazoa;Bilateria;Protostomia;Spiralia;Lophotrochozoa;Mollusca;Bivalvia;Autobranchia;Heteroconchia;Euherodonta;Imparidentia;Venerida;Veneroidea;Veneridae;Mercenaria;Mercenaria mercenaria

UdeM00000014307 6596 800.8 UdeM00000014307 XP\_045191473.1 47.4 1157  
473 27 6 1074 8 1116 2.10E-228 800.8 6596 cellular

organisms;Eukaryota;Opisthokonta;Metazoa;Eumetazoa;Bilateria;Protostomia;Spiralia;Lophotrochozoa;Mollusca;Bivalvia;Autobranchia;Heteroconchia;Euherodonta;Imparidentia;Venerida;Veneroidea;Veneridae;Mercenaria;Mercenaria mercenaria

UdeM00000014309 6596 165.2 UdeM00000014309 XP\_045206071.1 26.8 366  
261 6 6 367 22 384 1.60E-37 165.2 6596 cellular

organisms;Eukaryota;Opisthokonta;Metazoa;Eumetazoa;Bilateria;Protostomia;Spiralia;Lophotrochozoa;Mollusca;Bivalvia;Autobranchia;Heteroconchia;Euherodonta;Imparidentia;Venerida;Veneroidea;Veneridae;Mercenaria;Mercenaria mercenaria

UdeM00000014310 6596 446.4 UdeM00000014310 XP\_045192731.1 52.2 412  
187 4 31 433 22 432 4.00E-122 446.4 6596 cellular

organisms;Eukaryota;Opisthokonta;Metazoa;Eumetazoa;Bilateria;Protostomia;Spiralia;Lophotrochozoa;Mollusca;Bivalvia;Autobranchia;Heteroconchia;Euherodonta;Imparidentia;Venerida;Veneroidea;Veneridae;Mercenaria;Mercenaria mercenaria

UdeM00000014311 29159 651.7 UdeM00000014311 XP\_011432175.1 83.5 442  
72 1 2 442 3 444 6.50E-184 651.7 29159 cellular

organisms;Eukaryota;Opisthokonta;Metazoa;Eumetazoa;Bilateria;Protostomia;Spiralia;Lophotrochozoa;Mollusca;Bivalvia;Autobranchia;Pteriomorpha;Ostreida;Ostreoidea;Ostreidae;Crassostrea;Crassostrea gigas

UdeM00000014312 6596 124.8 UdeM00000014312 XP\_045209337.1 33.7 267  
161 9 8 265 8 267 2.00E-25 124.8 6596 cellular

organisms;Eukaryota;Opisthokonta;Metazoa;Eumetazoa;Bilateria;Protostomia;Spiralia;Lophotrochozoa;Mollusca;Bivalvia;Autobranchia;Heteroconchia;Euherodonta;Imparidentia;Venerida;Veneroidea;Veneridae;Mercenaria;Mercenaria mercenaria

UdeM00000014313 6596 166.8 UdeM00000014313 XP\_045193117.1 41.2 311  
156 15 8 311 284 574 4.80E-38 166.8 6596 cellular

organisms;Eukaryota;Opisthokonta;Metazoa;Eumetazoa;Bilateria;Protostomia;Spiralia;Lophotrochozoa;Mollusca;Bivalvia;Autobranchia;Heteroconchia;Euherodonta;Imparidentia;Venerida;Veneroidea;Veneridae;Mercenaria;Mercenaria mercenaria

UdeM00000014314 6596 119.4 UdeM00000014314 XP\_045193117.1 34.3 265  
150 8 42 293 25 278 8.30E-24 119.4 6596 cellular

organisms;Eukaryota;Opisthokonta;Metazoa;Eumetazoa;Bilateria;Protostomia;Spiralia;Lophotrochozoa;Mollusca;Bivalvia;Autobranchia;Heteroconchia;Euherodonta;Imparidentia;Venerida;Veneroidea;Veneridae;Mercenaria;Mercenaria mercenaria

UdeM00000014315 6573 316.2 UdeM00000014315 XP\_021342124.1 31.1 776  
465 18 7 738 4 753 1.10E-82 316.2 6573 cellular

organisms;Eukaryota;Opisthokonta;Metazoa;Eumetazoa;Bilateria;Protostomia;

Spiralia;Lophotrochozoa;Mollusca;Bivalvia;Autobranchia;Pteriomorpha;Pectinida;Pectinoidea;Pectinidae;Mizuhopecten;Mizuhopecten yessoensis  
UdeM00000014316 6579 191.4 UdeM00000014316 XP\_033731328.1 46.5 215  
106 3 131 344 97 303 1.90E-45 191.4 6579 cellular  
organisms;Eukaryota;Opisthokonta;Metazoa;Eumetazoa;Bilateria;Protostomia;Spiralia;Lophotrochozoa;Mollusca;Bivalvia;Autobranchia;Pteriomorpha;Pectinida;Pectinoidea;Pectinidae;Pecten;Pecten maximus  
UdeM00000014317 6596 1965.3 UdeM00000014317 XP\_045192947.1 45.8  
2338 1143 27 124 2408 1080 3346 0.00E+00 1965.3 6596  
cellular  
organisms;Eukaryota;Opisthokonta;Metazoa;Eumetazoa;Bilateria;Protostomia;Spiralia;Lophotrochozoa;Mollusca;Bivalvia;Autobranchia;Heteroconchia;Euherodonta;Imparidentia;Venerida;Veneroidea;Veneridae;Mercenaria;Mercenaria mercenaria  
UdeM00000014318 6573 235.7 UdeM00000014318 XP\_021358375.1 47.5 257  
131 1 1 253 1 257 6.40E-59 235.7 6573 cellular  
organisms;Eukaryota;Opisthokonta;Metazoa;Eumetazoa;Bilateria;Protostomia;Spiralia;Lophotrochozoa;Mollusca;Bivalvia;Autobranchia;Pteriomorpha;Pectinida;Pectinoidea;Pectinidae;Mizuhopecten;Mizuhopecten yessoensis  
UdeM00000014319 6573 1363.6 UdeM00000014319 XP\_021358295.1 85.3  
798 117 0 1 798 1 798 0.00E+00 1363.6 6573  
cellular  
organisms;Eukaryota;Opisthokonta;Metazoa;Eumetazoa;Bilateria;Protostomia;Spiralia;Lophotrochozoa;Mollusca;Bivalvia;Autobranchia;Pteriomorpha;Pectinida;Pectinoidea;Pectinidae;Mizuhopecten;Mizuhopecten yessoensis  
UdeM00000014320 6573 1363.6 UdeM00000014320 XP\_021358295.1 85.3  
798 117 0 1 798 1 798 0.00E+00 1363.6 6573  
cellular  
organisms;Eukaryota;Opisthokonta;Metazoa;Eumetazoa;Bilateria;Protostomia;Spiralia;Lophotrochozoa;Mollusca;Bivalvia;Autobranchia;Pteriomorpha;Pectinida;Pectinoidea;Pectinidae;Mizuhopecten;Mizuhopecten yessoensis  
UdeM00000014321 6573 87.8 UdeM00000014321 XP\_021380372.1 40.9 93  
52 2 24 113 235 327 1.00E-14 87.8 6573 cellular  
organisms;Eukaryota;Opisthokonta;Metazoa;Eumetazoa;Bilateria;Protostomia;Spiralia;Lophotrochozoa;Mollusca;Bivalvia;Autobranchia;Pteriomorpha;Pectinida;Pectinoidea;Pectinidae;Mizuhopecten;Mizuhopecten yessoensis  
UdeM00000014322 6596 553.9 UdeM00000014322 XP\_045192401.1 60.7 463  
173 1 82 535 73 535 2.20E-154 553.9 6596 cellular  
organisms;Eukaryota;Opisthokonta;Metazoa;Eumetazoa;Bilateria;Protostomia;Spiralia;Lophotrochozoa;Mollusca;Bivalvia;Autobranchia;Heteroconchia;Euherodonta;Imparidentia;Venerida;Veneroidea;Veneridae;Mercenaria;Mercenaria mercenaria  
UdeM00000014323 6596 446.8 UdeM00000014323 XP\_045191724.1 59.8 405  
145 3 25 411 34 438 3.00E-122 446.8 6596 cellular  
organisms;Eukaryota;Opisthokonta;Metazoa;Eumetazoa;Bilateria;Protostomia;Spiralia;Lophotrochozoa;Mollusca;Bivalvia;Autobranchia;Heteroconchia;Euherodonta;Imparidentia;Venerida;Veneroidea;Veneridae;Mercenaria;Mercenaria mercenaria  
UdeM00000014324 6596 819.3 UdeM00000014324 XP\_045191884.1 35.4 1680  
866 39 69 1636 434 2006 8.70E-234 819.3 6596 cellular  
organisms;Eukaryota;Opisthokonta;Metazoa;Eumetazoa;Bilateria;Protostomia;Spiralia;Lophotrochozoa;Mollusca;Bivalvia;Autobranchia;Heteroconchia;Euherodonta;Imparidentia;Venerida;Veneroidea;Veneridae;Mercenaria;Mercenaria mercenaria

UdeM00000014325 29159 153.3 UdeM00000014325 XP\_011454492.2 46.8 158  
 82 1 11 166 14 171 2.80E-34 153.3 29159 cellular  
 organisms;Eukaryota;Opisthokonta;Metazoa;Eumetazoa;Bilateria;Protostomia;  
 Spiralia;Lophotrochozoa;Mollusca;Bivalvia;Autobranchia;Pteriomorphia;Ostr  
 eida;Ostreoidea;Ostreidae;Crassostrea;Crassostrea gigas  
 UdeM00000014326 6596 206.8 UdeM00000014326 XP\_045194203.1 27.3 557  
 385 9 3 552 5 548 7.20E-50 206.8 6596 cellular  
 organisms;Eukaryota;Opisthokonta;Metazoa;Eumetazoa;Bilateria;Protostomia;  
 Spiralia;Lophotrochozoa;Mollusca;Bivalvia;Autobranchia;Heteroconchia;Euhe  
 terodonta;Imparidentia;Venerida;Veneroidea;Veneridae;Mercenaria;Mercenari  
 a mercenaria  
 UdeM00000014327 6579 65.5 UdeM00000014327 XP\_033758492.1 46.8 77  
 36 3 50 125 510 582 5.70E-08 65.5 6579 cellular  
 organisms;Eukaryota;Opisthokonta;Metazoa;Eumetazoa;Bilateria;Protostomia;  
 Spiralia;Lophotrochozoa;Mollusca;Bivalvia;Autobranchia;Pteriomorphia;Pect  
 inida;Pectinoidea;Pectinidae;Pecten;Pecten maximus  
 UdeM00000014328 1735272 469.5 UdeM00000014328 XP\_041375469.1 70.6  
 330 77 3 4 330 7 319 3.50E-129 469.5 1735272  
 cellular  
 organisms;Eukaryota;Opisthokonta;Metazoa;Eumetazoa;Bilateria;Protostomia;  
 Spiralia;Lophotrochozoa;Mollusca;Gastropoda;Neomphalina;Neomphaloidea;Pel  
 tospiridae;Gigantopelta;Gigantopelta aegis  
 UdeM00000014329 6573 1526.9 UdeM00000014329 XP\_021347883.1 80.9  
 936 178 1 1 936 1 935 0.00E+00 1526.9 6573  
 cellular  
 organisms;Eukaryota;Opisthokonta;Metazoa;Eumetazoa;Bilateria;Protostomia;  
 Spiralia;Lophotrochozoa;Mollusca;Bivalvia;Autobranchia;Pteriomorphia;Pect  
 inida;Pectinoidea;Pectinidae;Mizuhopecten;Mizuhopecten yessoensis  
 UdeM00000014330 37653 256.1 UdeM00000014330 XP\_014781961.1 91.1 135  
 12 0 1 135 1 135 2.40E-65 256.1 37653 cellular  
 organisms;Eukaryota;Opisthokonta;Metazoa;Eumetazoa;Bilateria;Protostomia;  
 Spiralia;Lophotrochozoa;Mollusca;Cephalopoda;Coleoidea;Octopodiformes;Oct  
 opoda;Incirrata;Octopodidae;Octopus;Octopus bimaculoides  
 UdeM00000014331 6500 616.3 UdeM00000014331 XP\_005105611.1 82.5 377  
 64 2 1 376 1 376 2.60E-173 616.3 6500 cellular  
 organisms;Eukaryota;Opisthokonta;Metazoa;Eumetazoa;Bilateria;Protostomia;  
 Spiralia;Lophotrochozoa;Mollusca;Gastropoda;Heterobranchia;Euthyneura;Tec  
 tipleura;Aplysiida;Aplysioidea;Aplysiidae;Aplysia;Aplysia californica  
 UdeM00000014332 6596 334.3 UdeM00000014332 XP\_045193654.1 60.5 256  
 101 0 8 263 167 422 1.40E-88 334.3 6596 cellular  
 organisms;Eukaryota;Opisthokonta;Metazoa;Eumetazoa;Bilateria;Protostomia;  
 Spiralia;Lophotrochozoa;Mollusca;Bivalvia;Autobranchia;Heteroconchia;Euhe  
 terodonta;Imparidentia;Venerida;Veneroidea;Veneridae;Mercenaria;Mercenari  
 a mercenaria  
 UdeM00000014333 6596 526.9 UdeM00000014333 XP\_045193654.1 60.8 408  
 160 0 1 408 15 422 2.20E-146 526.9 6596 cellular  
 organisms;Eukaryota;Opisthokonta;Metazoa;Eumetazoa;Bilateria;Protostomia;  
 Spiralia;Lophotrochozoa;Mollusca;Bivalvia;Autobranchia;Heteroconchia;Euhe  
 terodonta;Imparidentia;Venerida;Veneroidea;Veneridae;Mercenaria;Mercenari  
 a mercenaria  
 UdeM00000014334 6579 198 UdeM00000014334 XP\_033741736.1 50.7 203  
 97 2 1 200 671 873 1.30E-47 198 6579 cellular  
 organisms;Eukaryota;Opisthokonta;Metazoa;Eumetazoa;Bilateria;Protostomia;

Spiralia; Lophotrochozoa; Mollusca; Bivalvia; Autobranchia; Pteriomorphia; Pectinida; Pectinoidea; Pectinidae; Pecten; Pecten maximus  
UdeM00000014335 6706 80.9 UdeM00000014335 XP\_042235765.1 44.7 76  
42 0 1 76 82 157 8.10E-13 80.9 6706 cellular  
organisms; Eukaryota; Opisthokonta; Metazoa; Eumetazoa; Bilateria; Protostomia; Ecdysozoa; Panarthropoda; Arthropoda; Mandibulata; Pancrustacea; Crustacea; Multicrustacea; Malacostraca; Eumalacostraca; Eucarida; Decapoda; Pleocyemata; Astacidea; Nephropoidea; Nephropidae; Homarus; Homarus americanus  
UdeM00000014336 1735272 60.5 UdeM00000014336 XP\_041371610.1 31.9  
135 86 2 1 130 76 209 1.90E-06 60.5 1735272  
cellular  
organisms; Eukaryota; Opisthokonta; Metazoa; Eumetazoa; Bilateria; Protostomia; Spiralia; Lophotrochozoa; Mollusca; Gastropoda; Neomphalina; Neomphaloidea; Peltospiridae; Gigantopelta; Gigantopelta aegis  
UdeM00000014337 6596 160.2 UdeM00000014337 XP\_045194991.1 50.2 209  
88 7 18 219 357 556 3.00E-36 160.2 6596 cellular  
organisms; Eukaryota; Opisthokonta; Metazoa; Eumetazoa; Bilateria; Protostomia; Spiralia; Lophotrochozoa; Mollusca; Bivalvia; Autobranchia; Heteroconchia; Euheterodonta; Imparidentia; Venerida; Veneroidea; Veneridae; Mercenaria; Mercenaria mercenaria  
UdeM00000014339 202533 121.7 UdeM00000014339 XP\_035231949.1 43.3  
141 68 3 3 131 303 443 7.10E-25 121.7 202533  
cellular  
organisms; Eukaryota; Opisthokonta; Metazoa; Eumetazoa; Bilateria; Protostomia; Ecdysozoa; Panarthropoda; Arthropoda; Chelicerata; Arachnida; Araneae; Araneomorphae; Entelegynae; Eresoidea; Eresidae; Stegodyphus; Stegodyphus dumicola  
UdeM00000014340 6596 200.7 UdeM00000014340 XP\_045193489.1 69.1 139  
38 2 1 138 1 135 1.20E-48 200.7 6596 cellular  
organisms; Eukaryota; Opisthokonta; Metazoa; Eumetazoa; Bilateria; Protostomia; Spiralia; Lophotrochozoa; Mollusca; Bivalvia; Autobranchia; Heteroconchia; Euheterodonta; Imparidentia; Venerida; Veneroidea; Veneridae; Mercenaria; Mercenaria mercenaria  
UdeM00000014341 6596 116.3 UdeM00000014341 XP\_045193352.1 28.4 299  
184 11 1 275 36 328 6.60E-23 116.3 6596 cellular  
organisms; Eukaryota; Opisthokonta; Metazoa; Eumetazoa; Bilateria; Protostomia; Spiralia; Lophotrochozoa; Mollusca; Bivalvia; Autobranchia; Heteroconchia; Euheterodonta; Imparidentia; Venerida; Veneroidea; Veneridae; Mercenaria; Mercenaria mercenaria  
UdeM00000014342 225164 186.8 UdeM00000014342 XP\_009058215.1 76.3  
118 28 0 99 216 16 133 2.90E-44 186.8 225164  
cellular  
organisms; Eukaryota; Opisthokonta; Metazoa; Eumetazoa; Bilateria; Protostomia; Spiralia; Lophotrochozoa; Mollusca; Gastropoda; Patellogastropoda; Lottiidae; Lottia; Lottia gigantea  
UdeM00000014343 6565 113.6 UdeM00000014343 XP\_022319350.1 76.5 68  
16 0 1 68 52 119 1.00E-22 113.6 6565 cellular  
organisms; Eukaryota; Opisthokonta; Metazoa; Eumetazoa; Bilateria; Protostomia; Spiralia; Lophotrochozoa; Mollusca; Bivalvia; Autobranchia; Pteriomorphia; Ostreida; Ostreidae; Crassostrea; Crassostrea virginica  
UdeM00000014344 400727 1186.8 UdeM00000014344 XP\_025115130.1  
60.2 987 367 13 1 970 1 978 0.00E+00 1186.8  
400727 cellular  
organisms; Eukaryota; Opisthokonta; Metazoa; Eumetazoa; Bilateria; Protostomia;

Spiralia;Lophotrochozoa;Mollusca;Gastropoda;Caenogastropoda;Architaenioglossa;Ampullarioidea;Ampullariidae;Pomacea;Pomacea canaliculata  
UdeM00000014345 6596 348.2 UdeM00000014345 XP\_045194879.1 63.1 249  
91 1 1 248 1031 1279 8.60E-93 348.2 6596 cellular  
organisms;Eukaryota;Opisthokonta;Metazoa;Eumetazoa;Bilateria;Protostomia;  
Spiralia;Lophotrochozoa;Mollusca;Bivalvia;Autobranhia;Heteroconchia;Euherodonta;Imparidentia;Venerida;Veneroidea;Veneridae;Mercenaria;Mercenaria mercenaria  
UdeM00000014346 6596 442.6 UdeM00000014346 XP\_045194964.1 36.5 819  
449 15 1 796 1 771 1.10E-120 442.6 6596 cellular  
organisms;Eukaryota;Opisthokonta;Metazoa;Eumetazoa;Bilateria;Protostomia;  
Spiralia;Lophotrochozoa;Mollusca;Bivalvia;Autobranhia;Heteroconchia;Euherodonta;Imparidentia;Venerida;Veneroidea;Veneridae;Mercenaria;Mercenaria mercenaria  
UdeM00000014347 225164 234.2 UdeM00000014347 XP\_009058511.1 33.1  
514 302 9 4 513 191 666 3.80E-58 234.2 225164  
cellular  
organisms;Eukaryota;Opisthokonta;Metazoa;Eumetazoa;Bilateria;Protostomia;  
Spiralia;Lophotrochozoa;Mollusca;Gastropoda;Patellogastropoda;Lottioidae;  
Lottiidae;Lottia;Lottia gigantea  
UdeM00000014348 6579 1743.8 UdeM00000014348 XP\_033754221.1 55.8  
1809 647 30 126 1818 4 1775 0.00E+00 1743.8 6579  
cellular  
organisms;Eukaryota;Opisthokonta;Metazoa;Eumetazoa;Bilateria;Protostomia;  
Spiralia;Lophotrochozoa;Mollusca;Bivalvia;Autobranhia;Pteriomorphia;Pectinida;Pectinoidea;Pectinidae;Pecten;Pecten maximus  
UdeM00000014349 6596 170.6 UdeM00000014349 XP\_045192398.1 34.2 316  
188 7 438 739 1872 2181 7.30E-39 170.6 6596 cellular  
organisms;Eukaryota;Opisthokonta;Metazoa;Eumetazoa;Bilateria;Protostomia;  
Spiralia;Lophotrochozoa;Mollusca;Bivalvia;Autobranhia;Heteroconchia;Euherodonta;Imparidentia;Venerida;Veneroidea;Veneridae;Mercenaria;Mercenaria mercenaria  
UdeM00000014350 6596 170.6 UdeM00000014350 XP\_045192398.1 34.2 316  
188 7 383 684 1872 2181 6.80E-39 170.6 6596 cellular  
organisms;Eukaryota;Opisthokonta;Metazoa;Eumetazoa;Bilateria;Protostomia;  
Spiralia;Lophotrochozoa;Mollusca;Bivalvia;Autobranhia;Heteroconchia;Euherodonta;Imparidentia;Venerida;Veneroidea;Veneridae;Mercenaria;Mercenaria mercenaria  
UdeM00000014351 6565 118.2 UdeM00000014351 XP\_022337743.1 35.9 459  
233 16 1 450 1 407 2.60E-23 118.2 6565 cellular  
organisms;Eukaryota;Opisthokonta;Metazoa;Eumetazoa;Bilateria;Protostomia;  
Spiralia;Lophotrochozoa;Mollusca;Bivalvia;Autobranhia;Pteriomorphia;Ostreida;Ostreoidae;Ostreidae;Crassostrea;Crassostrea virginica  
UdeM00000014352 400727 507.7 UdeM00000014352 XP\_025115970.1 70.2  
352 105 0 1 352 48 399 1.30E-140 507.7 400727  
cellular  
organisms;Eukaryota;Opisthokonta;Metazoa;Eumetazoa;Bilateria;Protostomia;  
Spiralia;Lophotrochozoa;Mollusca;Gastropoda;Caenogastropoda;Architaenioglossa;Ampullarioidea;Ampullariidae;Pomacea;Pomacea canaliculata  
UdeM00000014353 6596 755 UdeM00000014353 XP\_045193968.1 75.5 478  
113 1 1 478 7 480 6.30E-215 755 6596 cellular  
organisms;Eukaryota;Opisthokonta;Metazoa;Eumetazoa;Bilateria;Protostomia;  
Spiralia;Lophotrochozoa;Mollusca;Bivalvia;Autobranhia;Heteroconchia;Euherodonta;Imparidentia;Venerida;Veneroidea;Veneridae;Mercenaria;Mercenaria mercenaria

terodonta;Imparidentia;Venerida;Veneroidea;Veneridae;Mercenaria;Mercenaria mercenaria

UdeM00000014354 6565 176.4 UdeM00000014354 XP\_022341904.1 86.5 96  
13 0 29 124 532 627 2.60E-41 176.4 6565 cellular

organisms;Eukaryota;Opisthokonta;Metazoa;Eumetazoa;Bilateria;Protostomia;Spiralia;Lophotrochozoa;Mollusca;Bivalvia;Autobranchia;Pteriormorphia;Ostreida;Ostreoidea;Ostreidae;Crassostrea;Crassostrea virginica

UdeM00000014355 6565 61.2 UdeM00000014355 XP\_022287645.1 38.9 90  
38 2 1 89 36 109 1.20E-06 61.2 6565 cellular

organisms;Eukaryota;Opisthokonta;Metazoa;Eumetazoa;Bilateria;Protostomia;Spiralia;Lophotrochozoa;Mollusca;Bivalvia;Autobranchia;Pteriormorphia;Ostreida;Ostreoidea;Ostreidae;Crassostrea;Crassostrea virginica

UdeM00000014356 6596 148.3 UdeM00000014356 XP\_045193968.1 83.3 72  
12 0 6 77 616 687 6.10E-33 148.3 6596 cellular

organisms;Eukaryota;Opisthokonta;Metazoa;Eumetazoa;Bilateria;Protostomia;Spiralia;Lophotrochozoa;Mollusca;Bivalvia;Autobranchia;Heteroconchia;Euheterodonta;Imparidentia;Venerida;Veneroidea;Veneridae;Mercenaria;Mercenaria mercenaria

UdeM00000014357 6596 62 UdeM00000014357 XP\_045193968.1 75 40  
10 0 156 195 691 730 9.70E-07 62 6596 cellular

organisms;Eukaryota;Opisthokonta;Metazoa;Eumetazoa;Bilateria;Protostomia;Spiralia;Lophotrochozoa;Mollusca;Bivalvia;Autobranchia;Heteroconchia;Euheterodonta;Imparidentia;Venerida;Veneroidea;Veneridae;Mercenaria;Mercenaria mercenaria

UdeM00000014358 6579 226.1 UdeM00000014358 XP\_033755517.1 51.8 197  
93 2 1 197 86 280 5.00E-56 226.1 6579 cellular

organisms;Eukaryota;Opisthokonta;Metazoa;Eumetazoa;Bilateria;Protostomia;Spiralia;Lophotrochozoa;Mollusca;Bivalvia;Autobranchia;Pteriormorphia;Pectinida;Pectinoidea;Pectinidae;Pecten;Pecten maximus

UdeM00000014359 29159 342.8 UdeM00000014359 XP\_011442127.1 73.2 228  
53 2 47 266 2 229 3.90E-91 342.8 29159 cellular

organisms;Eukaryota;Opisthokonta;Metazoa;Eumetazoa;Bilateria;Protostomia;Spiralia;Lophotrochozoa;Mollusca;Bivalvia;Autobranchia;Pteriormorphia;Ostreida;Ostreoidea;Ostreidae;Crassostrea;Crassostrea gigas

UdeM00000014360 6596 618.2 UdeM00000014360 XP\_045193995.1 66.5 492  
148 6 1 487 14 493 8.80E-174 618.2 6596 cellular

organisms;Eukaryota;Opisthokonta;Metazoa;Eumetazoa;Bilateria;Protostomia;Spiralia;Lophotrochozoa;Mollusca;Bivalvia;Autobranchia;Heteroconchia;Euheterodonta;Imparidentia;Venerida;Veneroidea;Veneridae;Mercenaria;Mercenaria mercenaria

UdeM00000014361 6579 371.7 UdeM00000014361 XP\_033755625.1 40.8 473  
264 6 1 465 1 465 1.40E-99 371.7 6579 cellular

organisms;Eukaryota;Opisthokonta;Metazoa;Eumetazoa;Bilateria;Protostomia;Spiralia;Lophotrochozoa;Mollusca;Bivalvia;Autobranchia;Pteriormorphia;Pectinida;Pectinoidea;Pectinidae;Pecten;Pecten maximus

UdeM00000014362 6596 2661.7 UdeM00000014362 XP\_045193997.1 60.1  
2285 851 22 1 2259 1 2251 0.00E+00 2661.7 6596  
cellular

organisms;Eukaryota;Opisthokonta;Metazoa;Eumetazoa;Bilateria;Protostomia;Spiralia;Lophotrochozoa;Mollusca;Bivalvia;Autobranchia;Heteroconchia;Euheterodonta;Imparidentia;Venerida;Veneroidea;Veneridae;Mercenaria;Mercenaria mercenaria

UdeM00000014363 29159 164.1 UdeM00000014363 XP\_011422459.1 77 100  
23 0 2 101 152 251 9.50E-38 164.1 29159 cellular

organisms;Eukaryota;Opisthokonta;Metazoa;Eumetazoa;Bilateria;Protostomia;Spiralia;Lophotrochozoa;Mollusca;Bivalvia;Autobranchia;Pteriomorpha;Ostr  
eida;Ostreoidea;Ostreidae;Crassostrea;Crassostrea gigas  
UdeM00000014364 29159 422.5 UdeM00000014364 XP\_011422459.1 76.9 251  
58 0 1 251 1 251 3.70E-115 422.5 29159 cellular  
organisms;Eukaryota;Opisthokonta;Metazoa;Eumetazoa;Bilateria;Protostomia;Spiralia;Lophotrochozoa;Mollusca;Bivalvia;Autobranchia;Pteriomorpha;Ostr  
eida;Ostreoidea;Ostreidae;Crassostrea;Crassostrea gigas  
UdeM00000014365 29159 1471.8 UdeM00000014365 XP\_034336620.1 75.4  
1062 256 3 1 1062 1 1057 0.00E+00 1471.8  
29159 cellular  
organisms;Eukaryota;Opisthokonta;Metazoa;Eumetazoa;Bilateria;Protostomia;Spiralia;Lophotrochozoa;Mollusca;Bivalvia;Autobranchia;Pteriomorpha;Ostr  
eida;Ostreoidea;Ostreidae;Crassostrea;Crassostrea gigas  
UdeM00000014366 6596 478.8 UdeM00000014366 XP\_045192776.1 53.2 464  
209 5 1 460 1 460 8.00E-132 478.8 6596 cellular  
organisms;Eukaryota;Opisthokonta;Metazoa;Eumetazoa;Bilateria;Protostomia;Spiralia;Lophotrochozoa;Mollusca;Bivalvia;Autobranchia;Heteroconchia;Euhe  
terodonta;Imparidentia;Venerida;Veneroidea;Veneridae;Mercenaria;Mercenari  
a mercenaria  
UdeM00000014369 6565 500.4 UdeM00000014369 XP\_022340973.1 68 359  
113 1 1 359 33 389 2.00E-138 500.4 6565 cellular  
organisms;Eukaryota;Opisthokonta;Metazoa;Eumetazoa;Bilateria;Protostomia;Spiralia;Lophotrochozoa;Mollusca;Bivalvia;Autobranchia;Pteriomorpha;Ostr  
eida;Ostreoidea;Ostreidae;Crassostrea;Crassostrea virginica  
UdeM00000014368 6565 508.1 UdeM00000014368 XP\_022340973.1 64.1 393  
135 2 2 394 3 389 1.00E-140 508.1 6565 cellular  
organisms;Eukaryota;Opisthokonta;Metazoa;Eumetazoa;Bilateria;Protostomia;Spiralia;Lophotrochozoa;Mollusca;Bivalvia;Autobranchia;Pteriomorpha;Ostr  
eida;Ostreoidea;Ostreidae;Crassostrea;Crassostrea virginica  
UdeM00000014370 6565 523.9 UdeM00000014370 XP\_022340973.1 65.6 393  
129 2 2 394 3 389 1.80E-145 523.9 6565 cellular  
organisms;Eukaryota;Opisthokonta;Metazoa;Eumetazoa;Bilateria;Protostomia;Spiralia;Lophotrochozoa;Mollusca;Bivalvia;Autobranchia;Pteriomorpha;Ostr  
eida;Ostreoidea;Ostreidae;Crassostrea;Crassostrea virginica  
UdeM00000014371 6573 508.1 UdeM00000014371 XP\_021343784.1 64.8 432  
125 8 432 844 477 900 2.20E-140 508.1 6573 cellular  
organisms;Eukaryota;Opisthokonta;Metazoa;Eumetazoa;Bilateria;Protostomia;Spiralia;Lophotrochozoa;Mollusca;Bivalvia;Autobranchia;Pteriomorpha;Pect  
inida;Pectinoidea;Pectinidae;Mizuhopecten;Mizuhopecten yessoensis  
UdeM00000014372 6579 761.1 UdeM00000014372 XP\_033754300.1 54 680  
280 6 5 682 28 676 1.20E-216 761.1 6579 cellular  
organisms;Eukaryota;Opisthokonta;Metazoa;Eumetazoa;Bilateria;Protostomia;Spiralia;Lophotrochozoa;Mollusca;Bivalvia;Autobranchia;Pteriomorpha;Pect  
inida;Pectinoidea;Pectinidae;Pecten;Pecten maximus  
UdeM00000014373 6573 378.6 UdeM00000014373 XP\_021343805.1 66.4 256  
86 0 13 268 317 572 6.50E-102 378.6 6573 cellular  
organisms;Eukaryota;Opisthokonta;Metazoa;Eumetazoa;Bilateria;Protostomia;Spiralia;Lophotrochozoa;Mollusca;Bivalvia;Autobranchia;Pteriomorpha;Pect  
inida;Pectinoidea;Pectinidae;Mizuhopecten;Mizuhopecten yessoensis  
UdeM00000014374 6596 699.1 UdeM00000014374 XP\_045191729.1 37.7 1050  
283 5 1 1050 23 701 8.50E-198 699.1 6596 cellular  
organisms;Eukaryota;Opisthokonta;Metazoa;Eumetazoa;Bilateria;Protostomia;Spiralia;Lophotrochozoa;Mollusca;Bivalvia;Autobranchia;Heteroconchia;Euhe

terodonta;Imparidentia;Venerida;Veneroidea;Veneridae;Mercenaria;Mercenari  
 a mercenaria  
 UdeM00000014375 6596 263.1 UdeM00000014375 XP\_045191638.1 52.3 260  
 113 5 5 256 4 260 3.80E-67 263.1 6596 cellular  
 organisms;Eukaryota;Opisthokonta;Metazoa;Eumetazoa;Bilateria;Protostomia;  
 Spiralia;Lophotrochozoa;Mollusca;Bivalvia;Autobranchia;Heteroconchia;Euhe  
 terodonta;Imparidentia;Venerida;Veneroidea;Veneridae;Mercenaria;Mercenari  
 a mercenaria  
 UdeM00000014376 6596 127.1 UdeM00000014376 XP\_045191729.1 42.6 136  
 78 0 6 141 566 701 1.90E-26 127.1 6596 cellular  
 organisms;Eukaryota;Opisthokonta;Metazoa;Eumetazoa;Bilateria;Protostomia;  
 Spiralia;Lophotrochozoa;Mollusca;Bivalvia;Autobranchia;Heteroconchia;Euhe  
 terodonta;Imparidentia;Venerida;Veneroidea;Veneridae;Mercenaria;Mercenari  
 a mercenaria  
 UdeM00000014377 6596 136 UdeM00000014377 XP\_045191729.1 38.5 174  
 101 1 3 170 528 701 4.80E-29 136 6596 cellular  
 organisms;Eukaryota;Opisthokonta;Metazoa;Eumetazoa;Bilateria;Protostomia;  
 Spiralia;Lophotrochozoa;Mollusca;Bivalvia;Autobranchia;Heteroconchia;Euhe  
 terodonta;Imparidentia;Venerida;Veneroidea;Veneridae;Mercenaria;Mercenari  
 a mercenaria  
 UdeM00000014378 6596 263.1 UdeM00000014378 XP\_045191638.1 52.3 260  
 113 5 5 256 4 260 3.80E-67 263.1 6596 cellular  
 organisms;Eukaryota;Opisthokonta;Metazoa;Eumetazoa;Bilateria;Protostomia;  
 Spiralia;Lophotrochozoa;Mollusca;Bivalvia;Autobranchia;Heteroconchia;Euhe  
 terodonta;Imparidentia;Venerida;Veneroidea;Veneridae;Mercenaria;Mercenari  
 a mercenaria  
 UdeM00000014379 6596 91.3 UdeM00000014379 XP\_045191729.1 45.3 86  
 47 0 1 86 616 701 7.20E-16 91.3 6596 cellular  
 organisms;Eukaryota;Opisthokonta;Metazoa;Eumetazoa;Bilateria;Protostomia;  
 Spiralia;Lophotrochozoa;Mollusca;Bivalvia;Autobranchia;Heteroconchia;Euhe  
 terodonta;Imparidentia;Venerida;Veneroidea;Veneridae;Mercenaria;Mercenari  
 a mercenaria  
 UdeM00000014380 6596 263.1 UdeM00000014380 XP\_045191638.1 52.3 260  
 113 5 5 256 4 260 3.80E-67 263.1 6596 cellular  
 organisms;Eukaryota;Opisthokonta;Metazoa;Eumetazoa;Bilateria;Protostomia;  
 Spiralia;Lophotrochozoa;Mollusca;Bivalvia;Autobranchia;Heteroconchia;Euhe  
 terodonta;Imparidentia;Venerida;Veneroidea;Veneridae;Mercenaria;Mercenari  
 a mercenaria  
 UdeM00000014381 6596 271.6 UdeM00000014381 XP\_045191638.1 54.5 246  
 103 4 17 256 18 260 1.10E-69 271.6 6596 cellular  
 organisms;Eukaryota;Opisthokonta;Metazoa;Eumetazoa;Bilateria;Protostomia;  
 Spiralia;Lophotrochozoa;Mollusca;Bivalvia;Autobranchia;Heteroconchia;Euhe  
 terodonta;Imparidentia;Venerida;Veneroidea;Veneridae;Mercenaria;Mercenari  
 a mercenaria  
 UdeM00000014382 6596 391 UdeM00000014382 XP\_045192021.1 55.5 566  
 167 17 1 495 2 553 2.40E-105 391 6596 cellular  
 organisms;Eukaryota;Opisthokonta;Metazoa;Eumetazoa;Bilateria;Protostomia;  
 Spiralia;Lophotrochozoa;Mollusca;Bivalvia;Autobranchia;Heteroconchia;Euhe  
 terodonta;Imparidentia;Venerida;Veneroidea;Veneridae;Mercenaria;Mercenari  
 a mercenaria  
 UdeM00000014383 29159 441 UdeM00000014383 XP\_034313077.1 63.8 323  
 117 0 1 323 1 323 1.30E-120 441 29159 cellular  
 organisms;Eukaryota;Opisthokonta;Metazoa;Eumetazoa;Bilateria;Protostomia;



Spiralia;Lophotrochozoa;Mollusca;Bivalvia;Autobranchia;Pteriormorphia;Ostr  
eida;Ostreoidea;Ostreidae;Crassostrea;Crassostrea gigas

UdeM00000014385 300111 184.5 UdeM00000014385 XP\_024870039.1 37  
281 157 7 1 262 1 280 1.70E-43 184.5 300111  
cellular

organisms;Eukaryota;Opisthokonta;Metazoa;Eumetazoa;Bilateria;Protostomia;  
Ecdysozoa;Panarthropoda;Arthropoda;Mandibulata;Pancrustacea;Hexapoda;Inse  
cta;Dicondylia;Pterygota;Neoptera;Endopterygota;Hymenoptera;Apocrita;Acul  
eata;Formicoidea;Formicidae;Myrmicinae;Crematogastrini;Temnothorax;Temnot  
horax curvispinosus

UdeM00000014386 202533 151 UdeM00000014386 XP\_035218899.1 45.1  
164 85 2 2 160 303 466 1.30E-33 151 202533  
cellular

organisms;Eukaryota;Opisthokonta;Metazoa;Eumetazoa;Bilateria;Protostomia;  
Ecdysozoa;Panarthropoda;Arthropoda;Chelicerata;Arachnida;Araneae;Araneomo  
rphae;Entelegynae;Eresoidea;Eresidae;Stegodyphus;Stegodyphus dumicola

UdeM00000014387 6596 216.9 UdeM00000014387 XP\_045191890.1 29.9 568  
327 8 125 681 311 818 8.40E-53 216.9 6596 cellular

organisms;Eukaryota;Opisthokonta;Metazoa;Eumetazoa;Bilateria;Protostomia;  
Spiralia;Lophotrochozoa;Mollusca;Bivalvia;Autobranchia;Heteroconchia;Euhe  
terodonta;Imparidentia;Venerida;Veneroidea;Veneridae;Mercenaria;Mercenari  
a mercenaria

UdeM00000014388 6565 65.9 UdeM00000014388 XP\_022337397.1 24 150  
91 1 83 209 103 252 8.10E-08 65.9 6565 cellular

organisms;Eukaryota;Opisthokonta;Metazoa;Eumetazoa;Bilateria;Protostomia;  
Spiralia;Lophotrochozoa;Mollusca;Bivalvia;Autobranchia;Pteriormorphia;Ostr  
eida;Ostreoidea;Ostreidae;Crassostrea;Crassostrea virginica

UdeM00000014389 29159 160.2 UdeM00000014389 XP\_034316161.1 48.3 149  
77 0 1 149 645 793 2.00E-36 160.2 29159 cellular

organisms;Eukaryota;Opisthokonta;Metazoa;Eumetazoa;Bilateria;Protostomia;  
Spiralia;Lophotrochozoa;Mollusca;Bivalvia;Autobranchia;Pteriormorphia;Ostr  
eida;Ostreoidea;Ostreidae;Crassostrea;Crassostrea gigas

UdeM00000014390 29159 115.5 UdeM00000014390 XP\_011455806.1 46.1 165  
71 5 48 209 13 162 8.30E-23 115.5 29159 cellular

organisms;Eukaryota;Opisthokonta;Metazoa;Eumetazoa;Bilateria;Protostomia;  
Spiralia;Lophotrochozoa;Mollusca;Bivalvia;Autobranchia;Pteriormorphia;Ostr  
eida;Ostreoidea;Ostreidae;Crassostrea;Crassostrea gigas

UdeM00000014391 6596 268.9 UdeM00000014391 XP\_045192092.1 46.2 383  
186 10 24 396 29 401 1.10E-68 268.9 6596 cellular

organisms;Eukaryota;Opisthokonta;Metazoa;Eumetazoa;Bilateria;Protostomia;  
Spiralia;Lophotrochozoa;Mollusca;Bivalvia;Autobranchia;Heteroconchia;Euhe  
terodonta;Imparidentia;Venerida;Veneroidea;Veneridae;Mercenaria;Mercenari  
a mercenaria

UdeM00000014393 6596 557.4 UdeM00000014393 XP\_045195045.1 52.1 532  
245 5 6 529 5 534 2.00E-155 557.4 6596 cellular

organisms;Eukaryota;Opisthokonta;Metazoa;Eumetazoa;Bilateria;Protostomia;  
Spiralia;Lophotrochozoa;Mollusca;Bivalvia;Autobranchia;Heteroconchia;Euhe  
terodonta;Imparidentia;Venerida;Veneroidea;Veneridae;Mercenaria;Mercenari  
a mercenaria

UdeM00000014394 260995 80.9 UdeM00000014394 XP\_033812940.1 51.4  
74 35 1 1 74 1 73 7.90E-13 80.9 260995

cellular

organisms;Eukaryota;Opisthokonta;Metazoa;Eumetazoa;Bilateria;Deuterostomi  
a;Chordata;Craniata;Vertebrata;Gnathostomata;Teleostomi;Euteleostomi;Sarc

opterygii;Dipnotetrapodomorpha;Tetrapoda;Amphibia;Gymnophiona;Dermophiida  
e;Geotrypetes;Geotrypetes seraphini

UdeM00000014395 1415580 532.3 UdeM00000014395 XP\_030075314.1 53.4  
517 222 3 1 514 125 625 6.70E-148 532.3 1415580  
cellular

organisms;Eukaryota;Opisthokonta;Metazoa;Eumetazoa;Bilateria;Deuterostomi  
a;Chordata;Craniata;Vertebrata;Gnathostomata;Teleostomi;Euteleostomi;Sarc  
opterygii;Dipnotetrapodomorpha;Tetrapoda;Amphibia;Gymnophiona;Siphonopida  
e;Microcaecilia;Microcaecilia unicolor

UdeM00000014396 1735272 493.8 UdeM00000014396 XP\_041376768.1 33.7  
889 560 10 1 871 62 939 4.60E-136 493.8 1735272  
cellular

organisms;Eukaryota;Opisthokonta;Metazoa;Eumetazoa;Bilateria;Protostomia;  
Spiralia;Lophotrochozoa;Mollusca;Gastropoda;Neomphalina;Neomphaloidea;Pel  
tospiridae;Gigantopelta;Gigantopelta aegis

UdeM00000014397 133434 150.6 UdeM00000014397 XP\_022102547.1 54.4  
136 55 3 25 159 24 153 1.80E-33 150.6 133434  
cellular

organisms;Eukaryota;Opisthokonta;Metazoa;Eumetazoa;Bilateria;Deuterostomi  
a;Echinodermata;Eleutherozoa;Asterozoa;Asteroidea;Valvatata;Valvatida;Ac  
anthasteridae;Acanthaster;Acanthaster planci

UdeM00000014398 133434 145.2 UdeM00000014398 XP\_022102547.1 52.2  
136 59 2 25 160 24 153 7.50E-32 145.2 133434  
cellular

organisms;Eukaryota;Opisthokonta;Metazoa;Eumetazoa;Bilateria;Deuterostomi  
a;Echinodermata;Eleutherozoa;Asterozoa;Asteroidea;Valvatata;Valvatida;Ac  
anthasteridae;Acanthaster;Acanthaster planci

UdeM00000014399 6579 311.2 UdeM00000014399 XP\_033754550.1 51.5 291  
138 3 50 338 3 292 1.60E-81 311.2 6579 cellular

organisms;Eukaryota;Opisthokonta;Metazoa;Eumetazoa;Bilateria;Protostomia;  
Spiralia;Lophotrochozoa;Mollusca;Bivalvia;Autobranchia;Pteriomorphia;Pect  
inida;Pectinoidea;Pectinidae;Pecten;Pecten maximus

UdeM00000014400 6573 343.2 UdeM00000014400 XP\_021375826.1 64.8 253  
82 3 19 266 5 255 3.00E-91 343.2 6573 cellular

organisms;Eukaryota;Opisthokonta;Metazoa;Eumetazoa;Bilateria;Protostomia;  
Spiralia;Lophotrochozoa;Mollusca;Bivalvia;Autobranchia;Pteriomorphia;Pect  
inida;Pectinoidea;Pectinidae;Mizuhopecten;Mizuhopecten yessoensis

UdeM00000014401 6596 1482.2 UdeM00000014401 XP\_045191424.1 62.9  
1142 408 6 63 1194 59 1194 0.00E+00 1482.2 6596  
cellular

organisms;Eukaryota;Opisthokonta;Metazoa;Eumetazoa;Bilateria;Protostomia;  
Spiralia;Lophotrochozoa;Mollusca;Bivalvia;Autobranchia;Heteroconchia;Euhe  
terodonta;Imparidentia;Venerida;Veneroidea;Veneridae;Mercenaria;Mercenari  
a mercenaria

UdeM00000014402 6596 581.6 UdeM00000014402 XP\_045192730.1 41.7 701  
380 10 1 699 1 674 1.30E-162 581.6 6596 cellular

organisms;Eukaryota;Opisthokonta;Metazoa;Eumetazoa;Bilateria;Protostomia;  
Spiralia;Lophotrochozoa;Mollusca;Bivalvia;Autobranchia;Heteroconchia;Euhe  
terodonta;Imparidentia;Venerida;Veneroidea;Veneridae;Mercenaria;Mercenari  
a mercenaria

UdeM00000014403 6565 455.3 UdeM00000014403 XP\_022342767.1 66.9 308  
96 2 8 309 469 776 6.30E-125 455.3 6565 cellular

organisms;Eukaryota;Opisthokonta;Metazoa;Eumetazoa;Bilateria;Protostomia;

Spiralia;Lophotrochozoa;Mollusca;Bivalvia;Autobranchia;Pteriormorphia;Ostr  
eida;Ostreoidea;Ostreidae;Crassostrea;Crassostrea virginica

UdeM00000014404 225164 441.8 UdeM00000014404 XP\_009062755.1 63.7  
344 125 0 3 346 2 345 8.80E-121 441.8 225164  
cellular

organisms;Eukaryota;Opisthokonta;Metazoa;Eumetazoa;Bilateria;Protostomia;  
Spiralia;Lophotrochozoa;Mollusca;Gastropoda;Patellogastropoda;Lottioidea;  
Lottiidae;Lottia;Lottia gigantea

UdeM00000014405 6596 3241.8 UdeM00000014405 XP\_045191945.1 74.5  
2100 522 10 1 2095 3334 5424 0.00E+00 3241.8 6596  
cellular

organisms;Eukaryota;Opisthokonta;Metazoa;Eumetazoa;Bilateria;Protostomia;  
Spiralia;Lophotrochozoa;Mollusca;Bivalvia;Autobranchia;Heteroconchia;Euhe  
terodonta;Imparidentia;Venerida;Veneroidea;Veneridae;Mercenaria;Mercenari  
a mercenaria

UdeM00000014406 6596 3994.5 UdeM00000014406 XP\_045191949.1 73.7  
3260 714 21 1 3166 20 3229 0.00E+00 3994.5 6596  
cellular

organisms;Eukaryota;Opisthokonta;Metazoa;Eumetazoa;Bilateria;Protostomia;  
Spiralia;Lophotrochozoa;Mollusca;Bivalvia;Autobranchia;Heteroconchia;Euhe  
terodonta;Imparidentia;Venerida;Veneroidea;Veneridae;Mercenaria;Mercenari  
a mercenaria

UdeM00000014407 6596 3964.8 UdeM00000014407 XP\_045191949.1 73.7  
3237 709 21 1 3121 20 3229 0.00E+00 3964.8 6596  
cellular

organisms;Eukaryota;Opisthokonta;Metazoa;Eumetazoa;Bilateria;Protostomia;  
Spiralia;Lophotrochozoa;Mollusca;Bivalvia;Autobranchia;Heteroconchia;Euhe  
terodonta;Imparidentia;Venerida;Veneroidea;Veneridae;Mercenaria;Mercenari  
a mercenaria

UdeM00000014408 6596 3181.7 UdeM00000014408 XP\_045191949.1 73.1  
2322 537 16 1 2253 20 2322 0.00E+00 3181.7 6596  
cellular

organisms;Eukaryota;Opisthokonta;Metazoa;Eumetazoa;Bilateria;Protostomia;  
Spiralia;Lophotrochozoa;Mollusca;Bivalvia;Autobranchia;Heteroconchia;Euhe  
terodonta;Imparidentia;Venerida;Veneroidea;Veneridae;Mercenaria;Mercenari  
a mercenaria

UdeM00000014409 1735272 270 UdeM00000014409 XP\_041375118.1 56.7  
217 65 1 1 217 1 188 2.70E-69 270 1735272  
cellular

organisms;Eukaryota;Opisthokonta;Metazoa;Eumetazoa;Bilateria;Protostomia;  
Spiralia;Lophotrochozoa;Mollusca;Gastropoda;Neomphalina;Neomphaloidea;Pel  
tospiridae;Gigantopelta;Gigantopelta aegis

UdeM00000014410 6573 90.1 UdeM00000014410 XP\_021347123.1 34.1 135  
88 1 38 171 49 183 3.10E-15 90.1 6573 cellular

organisms;Eukaryota;Opisthokonta;Metazoa;Eumetazoa;Bilateria;Protostomia;  
Spiralia;Lophotrochozoa;Mollusca;Bivalvia;Autobranchia;Pteriormorphia;Pect  
inida;Pectinoidea;Pectinidae;Mizuhopecten;Mizuhopecten yessoensis

UdeM00000014411 6500 72.8 UdeM00000014411 XP\_005096779.1 29.6 125  
78 3 45 164 49 168 4.90E-10 72.8 6500 cellular

organisms;Eukaryota;Opisthokonta;Metazoa;Eumetazoa;Bilateria;Protostomia;  
Spiralia;Lophotrochozoa;Mollusca;Gastropoda;Heterobranchia;Euthyneura;Tec  
tipleura;Aplysiida;Aplysioidea;Aplysiidae;Aplysia;Aplysia californica

UdeM00000014416 7668 388.3 UdeM00000014416 XP\_003729577.2 46.3 443  
214 9 4 425 330 769 1.50E-104 388.3 7668 cellular

organisms;Eukaryota;Opisthokonta;Metazoa;Eumetazoa;Bilateria;Deuterostomia;Echinodermata;Eleutherozoa;Echinozoa;Echinoidea;Euechinoidea;Echinacea;Camarodonta;Echinidea;Strongylocentrotidae;Strongylocentrotus;Strongylocentrotus purpuratus

UdeM00000014417 37621 162.5 UdeM00000014417 XP\_014672571.1 44.8 203  
105 3 103 298 1 203 9.40E-37 162.5 37621 cellular

organisms;Eukaryota;Opisthokonta;Metazoa;Eumetazoa;Bilateria;Protostomia;Ecdysozoa;Scalidophora;Priapulida;Priapulimorpha;Priapulimorphida;Priapulidae;Priapulus;Priapulus caudatus

UdeM00000014418 400727 155.2 UdeM00000014418 XP\_025080579.1 68.5  
108 32 1 8 115 137 242 5.00E-35 155.2 400727  
cellular

organisms;Eukaryota;Opisthokonta;Metazoa;Eumetazoa;Bilateria;Protostomia;Spiralia;Lophotrochozoa;Mollusca;Gastropoda;Caenogastropoda;Architaenioglossa;Ampullarioidea;Ampullariidae;Pomacea;Pomacea canaliculata

UdeM00000014420 400727 171.8 UdeM00000014420 XP\_025080579.1 62.6  
131 47 1 13 143 125 253 6.40E-40 171.8 400727  
cellular

organisms;Eukaryota;Opisthokonta;Metazoa;Eumetazoa;Bilateria;Protostomia;Spiralia;Lophotrochozoa;Mollusca;Gastropoda;Caenogastropoda;Architaenioglossa;Ampullarioidea;Ampullariidae;Pomacea;Pomacea canaliculata

UdeM00000014423 109461 130.6 UdeM00000014423 XP\_022667192.1 68.6  
86 25 1 1 86 179 262 9.90E-28 130.6 109461  
cellular

organisms;Eukaryota;Opisthokonta;Metazoa;Eumetazoa;Bilateria;Protostomia;Ecdysozoa;Panarthropoda;Arthropoda;Chelicerata;Arachnida;Acari;Parasitiformes;Mesostigmata;Monogynaspida;Gamasina;Dermanyssoidea;Varroidae;Varroa;Varroa destructor

UdeM00000014424 6596 412.1 UdeM00000014424 XP\_045192988.1 59 378  
136 10 1 370 1 367 8.00E-112 412.1 6596 cellular

organisms;Eukaryota;Opisthokonta;Metazoa;Eumetazoa;Bilateria;Protostomia;Spiralia;Lophotrochozoa;Mollusca;Bivalvia;Autobranchia;Heteroconchia;Euheterodonta;Imparidentia;Venerida;Veneroidea;Veneridae;Mercenaria;Mercenaria mercenaria

UdeM00000014427 6596 395.2 UdeM00000014427 XP\_045192988.1 57.4 378  
142 11 1 370 1 367 1.00E-106 395.2 6596 cellular

organisms;Eukaryota;Opisthokonta;Metazoa;Eumetazoa;Bilateria;Protostomia;Spiralia;Lophotrochozoa;Mollusca;Bivalvia;Autobranchia;Heteroconchia;Euheterodonta;Imparidentia;Venerida;Veneroidea;Veneridae;Mercenaria;Mercenaria mercenaria

UdeM00000014429 400727 255.8 UdeM00000014429 XP\_025115911.1 60  
215 70 3 19 217 12 226 5.50E-65 255.8 400727  
cellular

organisms;Eukaryota;Opisthokonta;Metazoa;Eumetazoa;Bilateria;Protostomia;Spiralia;Lophotrochozoa;Mollusca;Gastropoda;Caenogastropoda;Architaenioglossa;Ampullarioidea;Ampullariidae;Pomacea;Pomacea canaliculata

UdeM00000014430 6596 287.7 UdeM00000014430 XP\_045194579.1 41.1 358  
195 7 1 350 24 373 2.00E-74 287.7 6596 cellular

organisms;Eukaryota;Opisthokonta;Metazoa;Eumetazoa;Bilateria;Protostomia;Spiralia;Lophotrochozoa;Mollusca;Bivalvia;Autobranchia;Heteroconchia;Euheterodonta;Imparidentia;Venerida;Veneroidea;Veneridae;Mercenaria;Mercenaria mercenaria

UdeM00000014431 6573 696.4 UdeM00000014431 XP\_021357061.1 43.5 793  
436 7 1 790 451 1234 4.20E-197 696.4 6573 cellular

organisms;Eukaryota;Opisthokonta;Metazoa;Eumetazoa;Bilateria;Protostomia; Spiralia;Lophotrochozoa;Mollusca;Bivalvia;Autobranchia;Pteriomorphia;Pectinida;Pectinoidea;Pectinidae;Mizuhopecten;Mizuhopecten yessoensis

UdeM00000014432 1735272 306.2 UdeM00000014432 XP\_041371563.1 43.6  
337 179 3 4 334 99 430 5.00E-80 306.2 1735272  
cellular

organisms;Eukaryota;Opisthokonta;Metazoa;Eumetazoa;Bilateria;Protostomia; Spiralia;Lophotrochozoa;Mollusca;Gastropoda;Neomphalina;Neomphaloidea;Peltospiridae;Gigantopelta;Gigantopelta aegis

UdeM00000014433 6596 73.9 UdeM00000014433 XP\_045162639.1 39.7 73  
44 0 10 82 9 81 1.10E-10 73.9 6596 cellular

organisms;Eukaryota;Opisthokonta;Metazoa;Eumetazoa;Bilateria;Protostomia; Spiralia;Lophotrochozoa;Mollusca;Bivalvia;Autobranchia;Heteroconchia;Euheterodonta;Imparidentia;Venerida;Veneroidea;Veneridae;Mercenaria;Mercenaria mercenaria

UdeM00000014434 1735272 995.7 UdeM00000014434 XP\_041371563.1 43  
1201 650 13 23 1203 22 1207 5.10E-287 995.7 1735272  
cellular

organisms;Eukaryota;Opisthokonta;Metazoa;Eumetazoa;Bilateria;Protostomia; Spiralia;Lophotrochozoa;Mollusca;Gastropoda;Neomphalina;Neomphaloidea;Peltospiridae;Gigantopelta;Gigantopelta aegis

UdeM00000014435 1735272 1018.8 UdeM00000014435 XP\_041371563.1  
45 1194 620 15 11 1183 24 1201 5.40E-294 1018.8  
1735272 cellular

organisms;Eukaryota;Opisthokonta;Metazoa;Eumetazoa;Bilateria;Protostomia; Spiralia;Lophotrochozoa;Mollusca;Gastropoda;Neomphalina;Neomphaloidea;Peltospiridae;Gigantopelta;Gigantopelta aegis

UdeM00000014437 6596 469.2 UdeM00000014437 XP\_045192419.1 77.4 301  
68 0 6 306 31 331 4.20E-129 469.2 6596 cellular

organisms;Eukaryota;Opisthokonta;Metazoa;Eumetazoa;Bilateria;Protostomia; Spiralia;Lophotrochozoa;Mollusca;Bivalvia;Autobranchia;Heteroconchia;Euheterodonta;Imparidentia;Venerida;Veneroidea;Veneridae;Mercenaria;Mercenaria mercenaria

UdeM00000014436 6596 471.5 UdeM00000014436 XP\_045192419.1 72.2 331  
87 1 50 375 1 331 1.00E-129 471.5 6596 cellular

organisms;Eukaryota;Opisthokonta;Metazoa;Eumetazoa;Bilateria;Protostomia; Spiralia;Lophotrochozoa;Mollusca;Bivalvia;Autobranchia;Heteroconchia;Euheterodonta;Imparidentia;Venerida;Veneroidea;Veneridae;Mercenaria;Mercenaria mercenaria

UdeM00000014438 6565 101.3 UdeM00000014438 XP\_022322655.1 26.1 352  
117 8 5 215 19 368 1.70E-18 101.3 6565 cellular

organisms;Eukaryota;Opisthokonta;Metazoa;Eumetazoa;Bilateria;Protostomia; Spiralia;Lophotrochozoa;Mollusca;Bivalvia;Autobranchia;Pteriomorphia;Ostreida;Ostreoidea;Ostreidae;Crassostrea;Crassostrea virginica

UdeM00000014439 6565 95.1 UdeM00000014439 XP\_022322655.1 54.3 81  
37 0 1 81 417 497 4.30E-17 95.1 6565 cellular

organisms;Eukaryota;Opisthokonta;Metazoa;Eumetazoa;Bilateria;Protostomia; Spiralia;Lophotrochozoa;Mollusca;Bivalvia;Autobranchia;Pteriomorphia;Ostreida;Ostreoidea;Ostreidae;Crassostrea;Crassostrea virginica

UdeM00000014440 29159 107.8 UdeM00000014440 XP\_034299474.1 45.9 98  
51 1 1 98 400 495 1.00E-20 107.8 29159 cellular

organisms;Eukaryota;Opisthokonta;Metazoa;Eumetazoa;Bilateria;Protostomia; Spiralia;Lophotrochozoa;Mollusca;Bivalvia;Autobranchia;Pteriomorphia;Ostreida;Ostreoidea;Ostreidae;Crassostrea;Crassostrea gigas

UdeM00000014441 29159 222.6 UdeM00000014441 XP\_034299474.1 45.7 247  
 132 1 1 245 509 755 5.40E-55 222.6 29159 cellular  
 organisms;Eukaryota;Opisthokonta;Metazoa;Eumetazoa;Bilateria;Protostomia;  
 Spiralia;Lophotrochozoa;Mollusca;Bivalvia;Autobranhia;Pteriomorphia;Ostr  
 eida;Ostreoidea;Ostreidae;Crassostrea;Crassostrea gigas  
 UdeM00000014442 45264 162.2 UdeM00000014442 XP\_044165535.1 43.3 180  
 98 1 4 179 345 524 6.90E-37 162.2 45264 cellular  
 organisms;Eukaryota;Opisthokonta;Metazoa;Eumetazoa;Cnidaria;Anthozoa;Hexa  
 corallia;Scleractinia;Astrocoeniina;Acroporidae;Acropora;Acropora  
 millepora  
 UdeM00000014443 29159 232.3 UdeM00000014443 XP\_034330911.1 42.6 284  
 84 2 23 227 95 378 6.50E-58 232.3 29159 cellular  
 organisms;Eukaryota;Opisthokonta;Metazoa;Eumetazoa;Bilateria;Protostomia;  
 Spiralia;Lophotrochozoa;Mollusca;Bivalvia;Autobranhia;Pteriomorphia;Ostr  
 eida;Ostreoidea;Ostreidae;Crassostrea;Crassostrea gigas  
 UdeM00000014444 6579 199.1 UdeM00000014444 XP\_033729790.1 38 274  
 165 2 10 283 17 285 1.70E-47 199.1 6579 cellular  
 organisms;Eukaryota;Opisthokonta;Metazoa;Eumetazoa;Bilateria;Protostomia;  
 Spiralia;Lophotrochozoa;Mollusca;Bivalvia;Autobranhia;Pteriomorphia;Pect  
 inida;Pectinoidea;Pectinidae;Pecten;Pecten maximus  
 UdeM00000014447 29159 136.3 UdeM00000014447 XP\_034310977.1 61.1 113  
 44 0 166 278 61 173 5.80E-29 136.3 29159 cellular  
 organisms;Eukaryota;Opisthokonta;Metazoa;Eumetazoa;Bilateria;Protostomia;  
 Spiralia;Lophotrochozoa;Mollusca;Bivalvia;Autobranhia;Pteriomorphia;Ostr  
 eida;Ostreoidea;Ostreidae;Crassostrea;Crassostrea gigas  
 UdeM00000014448 6596 647.1 UdeM00000014448 XP\_045191875.1 51.7 580  
 275 4 2 578 52 629 2.40E-182 647.1 6596 cellular  
 organisms;Eukaryota;Opisthokonta;Metazoa;Eumetazoa;Bilateria;Protostomia;  
 Spiralia;Lophotrochozoa;Mollusca;Bivalvia;Autobranhia;Heteroconchia;Euhe  
 terodonta;Imparidentia;Venerida;Veneroidea;Veneridae;Mercenaria;Mercenari  
 a mercenaria  
 UdeM00000014449 6596 393.7 UdeM00000014449 XP\_045204266.1 59.3 327  
 131 1 11 335 32 358 2.40E-106 393.7 6596 cellular  
 organisms;Eukaryota;Opisthokonta;Metazoa;Eumetazoa;Bilateria;Protostomia;  
 Spiralia;Lophotrochozoa;Mollusca;Bivalvia;Autobranhia;Heteroconchia;Euhe  
 terodonta;Imparidentia;Venerida;Veneroidea;Veneridae;Mercenaria;Mercenari  
 a mercenaria  
 UdeM00000014452 10228 58.9 UdeM00000014452 XP\_002118406.1 41.5 82  
 43 3 6 86 169 246 3.90E-06 58.9 10228 cellular  
 organisms;Eukaryota;Opisthokonta;Metazoa;Eumetazoa;Placozoa;Trichoplacida  
 e;Trichoplax;Trichoplax adhaerens  
 UdeM00000014454 6596 126.3 UdeM00000014454 XP\_045191419.1 38.3 180  
 104 4 32 206 43 220 5.30E-26 126.3 6596 cellular  
 organisms;Eukaryota;Opisthokonta;Metazoa;Eumetazoa;Bilateria;Protostomia;  
 Spiralia;Lophotrochozoa;Mollusca;Bivalvia;Autobranhia;Heteroconchia;Euhe  
 terodonta;Imparidentia;Venerida;Veneroidea;Veneridae;Mercenaria;Mercenari  
 a mercenaria  
 UdeM00000014455 6596 101.3 UdeM00000014455 XP\_045191421.1 40.5 116  
 64 2 8 120 106 219 1.20E-18 101.3 6596 cellular  
 organisms;Eukaryota;Opisthokonta;Metazoa;Eumetazoa;Bilateria;Protostomia;  
 Spiralia;Lophotrochozoa;Mollusca;Bivalvia;Autobranhia;Heteroconchia;Euhe  
 terodonta;Imparidentia;Venerida;Veneroidea;Veneridae;Mercenaria;Mercenari  
 a mercenaria

UdeM00000014456 6596 276.9 UdeM00000014456 XP\_045192811.1 45.4 348  
 172 8 22 363 92 427 3.60E-71 276.9 6596 cellular  
 organisms;Eukaryota;Opisthokonta;Metazoa;Eumetazoa;Bilateria;Protostomia;  
 Spiralia;Lophotrochozoa;Mollusca;Bivalvia;Autobranhia;Heteroconchia;Euhe  
 terodonta;Imparidentia;Venerida;Veneroidea;Veneridae;Mercenaria;Mercenari  
 a mercenaria

UdeM00000014457 6596 172.6 UdeM00000014457 XP\_045192447.1 39.9 263  
 135 9 107 358 1 251 9.30E-40 172.6 6596 cellular  
 organisms;Eukaryota;Opisthokonta;Metazoa;Eumetazoa;Bilateria;Protostomia;  
 Spiralia;Lophotrochozoa;Mollusca;Bivalvia;Autobranhia;Heteroconchia;Euhe  
 terodonta;Imparidentia;Venerida;Veneroidea;Veneridae;Mercenaria;Mercenari  
 a mercenaria

UdeM00000014458 1735272 461.1 UdeM00000014458 XP\_041375381.1 41  
 627 295 4 13 568 50 672 2.10E-126 461.1 1735272  
 cellular  
 organisms;Eukaryota;Opisthokonta;Metazoa;Eumetazoa;Bilateria;Protostomia;  
 Spiralia;Lophotrochozoa;Mollusca;Gastropoda;Neomphalina;Neomphaloidea;Pel  
 tospiridae;Gigantopelta;Gigantopelta aegis

UdeM00000014459 7574 105.5 UdeM00000014459 XP\_013410728.1 44.1 127  
 68 1 500 623 215 341 2.40E-19 105.5 7574 cellular  
 organisms;Eukaryota;Opisthokonta;Metazoa;Eumetazoa;Bilateria;Protostomia;  
 Spiralia;Lophotrochozoa;Brachiopoda;Linguliformea;Lingulata;Lingulida;Lin  
 guloidea;Lingulidae;Lingula;Lingula anatina

UdeM00000014461 6596 744.6 UdeM00000014461 XP\_045194090.1 66.2 580  
 177 6 1 578 1 563 9.60E-212 744.6 6596 cellular  
 organisms;Eukaryota;Opisthokonta;Metazoa;Eumetazoa;Bilateria;Protostomia;  
 Spiralia;Lophotrochozoa;Mollusca;Bivalvia;Autobranhia;Heteroconchia;Euhe  
 terodonta;Imparidentia;Venerida;Veneroidea;Veneridae;Mercenaria;Mercenari  
 a mercenaria

UdeM00000014462 6579 209.5 UdeM00000014462 XP\_033755355.1 50.7 205  
 92 2 17 220 11 207 4.30E-51 209.5 6579 cellular  
 organisms;Eukaryota;Opisthokonta;Metazoa;Eumetazoa;Bilateria;Protostomia;  
 Spiralia;Lophotrochozoa;Mollusca;Bivalvia;Autobranhia;Pteriomorphia;Pect  
 inida;Pectinoidea;Pectinidae;Pecten;Pecten maximus

UdeM00000014463 29159 205.7 UdeM00000014463 XP\_011425085.1 49 202  
 91 2 19 220 2 191 6.20E-50 205.7 29159 cellular  
 organisms;Eukaryota;Opisthokonta;Metazoa;Eumetazoa;Bilateria;Protostomia;  
 Spiralia;Lophotrochozoa;Mollusca;Bivalvia;Autobranhia;Pteriomorphia;Ostr  
 eida;Ostreoidea;Ostreidae;Crassostrea;Crassostrea gigas

UdeM00000014464 6579 204.1 UdeM00000014464 XP\_033755355.1 49 204  
 96 2 17 219 11 207 1.80E-49 204.1 6579 cellular  
 organisms;Eukaryota;Opisthokonta;Metazoa;Eumetazoa;Bilateria;Protostomia;  
 Spiralia;Lophotrochozoa;Mollusca;Bivalvia;Autobranhia;Pteriomorphia;Pect  
 inida;Pectinoidea;Pectinidae;Pecten;Pecten maximus

UdeM00000014465 6579 208 UdeM00000014465 XP\_033755355.1 50.2 205  
 93 2 17 220 11 207 1.20E-50 208 6579 cellular  
 organisms;Eukaryota;Opisthokonta;Metazoa;Eumetazoa;Bilateria;Protostomia;  
 Spiralia;Lophotrochozoa;Mollusca;Bivalvia;Autobranhia;Pteriomorphia;Pect  
 inida;Pectinoidea;Pectinidae;Pecten;Pecten maximus

UdeM00000014466 6579 205.7 UdeM00000014466 XP\_033755355.1 49.8 205  
 94 2 17 220 11 207 6.20E-50 205.7 6579 cellular  
 organisms;Eukaryota;Opisthokonta;Metazoa;Eumetazoa;Bilateria;Protostomia;  
 Spiralia;Lophotrochozoa;Mollusca;Bivalvia;Autobranhia;Pteriomorphia;Pect  
 inida;Pectinoidea;Pectinidae;Pecten;Pecten maximus

UdeM00000014467 6596 412.1 UdeM00000014467 XP\_045193786.1 36.6 752  
 409 15 30 750 30 744 1.50E-111 412.1 6596 cellular  
 organisms;Eukaryota;Opisthokonta;Metazoa;Eumetazoa;Bilateria;Protostomia;  
 Spiralia;Lophotrochozoa;Mollusca;Bivalvia;Autobranhia;Heteroconchia;Euhe  
 terodonta;Imparidentia;Venerida;Veneroidea;Veneridae;Mercenaria;Mercenari  
 a mercenaria

UdeM00000014472 6596 220.3 UdeM00000014472 XP\_045193788.1 61.2 196  
 59 5 32 219 40 226 4.40E-54 220.3 6596 cellular  
 organisms;Eukaryota;Opisthokonta;Metazoa;Eumetazoa;Bilateria;Protostomia;  
 Spiralia;Lophotrochozoa;Mollusca;Bivalvia;Autobranhia;Heteroconchia;Euhe  
 terodonta;Imparidentia;Venerida;Veneroidea;Veneridae;Mercenaria;Mercenari  
 a mercenaria

UdeM00000014473 6596 193 UdeM00000014473 XP\_045193788.1 51.8 218  
 80 7 18 228 28 227 7.90E-46 193 6596 cellular  
 organisms;Eukaryota;Opisthokonta;Metazoa;Eumetazoa;Bilateria;Protostomia;  
 Spiralia;Lophotrochozoa;Mollusca;Bivalvia;Autobranhia;Heteroconchia;Euhe  
 terodonta;Imparidentia;Venerida;Veneroidea;Veneridae;Mercenaria;Mercenari  
 a mercenaria

UdeM00000014474 6596 189.9 UdeM00000014474 XP\_045193788.1 54.1 196  
 73 5 34 222 42 227 6.60E-45 189.9 6596 cellular  
 organisms;Eukaryota;Opisthokonta;Metazoa;Eumetazoa;Bilateria;Protostomia;  
 Spiralia;Lophotrochozoa;Mollusca;Bivalvia;Autobranhia;Heteroconchia;Euhe  
 terodonta;Imparidentia;Venerida;Veneroidea;Veneridae;Mercenaria;Mercenari  
 a mercenaria

UdeM00000014475 6596 228.8 UdeM00000014475 XP\_045193788.1 60.2 201  
 69 5 14 206 24 221 1.30E-56 228.8 6596 cellular  
 organisms;Eukaryota;Opisthokonta;Metazoa;Eumetazoa;Bilateria;Protostomia;  
 Spiralia;Lophotrochozoa;Mollusca;Bivalvia;Autobranhia;Heteroconchia;Euhe  
 terodonta;Imparidentia;Venerida;Veneroidea;Veneridae;Mercenaria;Mercenari  
 a mercenaria

UdeM00000014476 6596 1441 UdeM00000014476 XP\_045194882.1 47.7 1687  
 605 24 41 1637 4922 6421 0.00E+00 1441 6596 cellular  
 organisms;Eukaryota;Opisthokonta;Metazoa;Eumetazoa;Bilateria;Protostomia;  
 Spiralia;Lophotrochozoa;Mollusca;Bivalvia;Autobranhia;Heteroconchia;Euhe  
 terodonta;Imparidentia;Venerida;Veneroidea;Veneridae;Mercenaria;Mercenari  
 a mercenaria

UdeM00000014477 6573 2075.8 UdeM00000014477 XP\_021371320.1 52.5  
 2625 992 43 11 2548 515 2970 0.00E+00 2075.8 6573  
 cellular  
 organisms;Eukaryota;Opisthokonta;Metazoa;Eumetazoa;Bilateria;Protostomia;  
 Spiralia;Lophotrochozoa;Mollusca;Bivalvia;Autobranhia;Pteriomorphia;Pect  
 inida;Pectinoidea;Pectinidae;Mizuhopecten;Mizuhopecten yessoensis

UdeM00000014478 6596 587.4 UdeM00000014478 XP\_045194882.1 60.4 452  
 175 1 1 452 57 504 1.60E-164 587.4 6596 cellular  
 organisms;Eukaryota;Opisthokonta;Metazoa;Eumetazoa;Bilateria;Protostomia;  
 Spiralia;Lophotrochozoa;Mollusca;Bivalvia;Autobranhia;Heteroconchia;Euhe  
 terodonta;Imparidentia;Venerida;Veneroidea;Veneridae;Mercenaria;Mercenari  
 a mercenaria

UdeM00000014479 6596 301.6 UdeM00000014479 XP\_045192449.1 56.4 287  
 123 2 24 308 2 288 1.20E-78 301.6 6596 cellular  
 organisms;Eukaryota;Opisthokonta;Metazoa;Eumetazoa;Bilateria;Protostomia;  
 Spiralia;Lophotrochozoa;Mollusca;Bivalvia;Autobranhia;Heteroconchia;Euhe  
 terodonta;Imparidentia;Venerida;Veneroidea;Veneridae;Mercenaria;Mercenari  
 a mercenaria



UdeM00000014480 1735272 436 UdeM00000014480 XP\_041375668.1 50.5  
 434 211 3 1 432 176 607 7.40E-119 436 1735272  
 cellular  
 organisms;Eukaryota;Opisthokonta;Metazoa;Eumetazoa;Bilateria;Protostomia;  
 Spiralia;Lophotrochozoa;Mollusca;Gastropoda;Neomphalina;Neomphaloidea;Pel  
 tospiridae;Gigantopelta;Gigantopelta aegis  
 UdeM00000014481 6596 470.3 UdeM00000014481 XP\_045192452.1 83.6 274  
 42 2 1 271 1 274 1.70E-129 470.3 6596 cellular  
 organisms;Eukaryota;Opisthokonta;Metazoa;Eumetazoa;Bilateria;Protostomia;  
 Spiralia;Lophotrochozoa;Mollusca;Bivalvia;Autobranchia;Heteroconchia;Euhe  
 terodonta;Imparidentia;Venerida;Veneroidea;Veneridae;Mercenaria;Mercenari  
 a mercenaria  
 UdeM00000014482 6596 73.6 UdeM00000014482 XP\_045192823.1 28.8 236  
 147 8 5 231 6 229 3.80E-10 73.6 6596 cellular  
 organisms;Eukaryota;Opisthokonta;Metazoa;Eumetazoa;Bilateria;Protostomia;  
 Spiralia;Lophotrochozoa;Mollusca;Bivalvia;Autobranchia;Heteroconchia;Euhe  
 terodonta;Imparidentia;Venerida;Veneroidea;Veneridae;Mercenaria;Mercenari  
 a mercenaria  
 UdeM00000014483 6596 118.6 UdeM00000014483 XP\_045192823.1 29.2 390  
 228 15 5 360 6 381 1.80E-23 118.6 6596 cellular  
 organisms;Eukaryota;Opisthokonta;Metazoa;Eumetazoa;Bilateria;Protostomia;  
 Spiralia;Lophotrochozoa;Mollusca;Bivalvia;Autobranchia;Heteroconchia;Euhe  
 terodonta;Imparidentia;Venerida;Veneroidea;Veneridae;Mercenaria;Mercenari  
 a mercenaria  
 UdeM00000014484 6596 657.5 UdeM00000014484 XP\_045192826.1 41.4 1253  
 608 33 1 1226 214 1367 3.30E-185 657.5 6596 cellular  
 organisms;Eukaryota;Opisthokonta;Metazoa;Eumetazoa;Bilateria;Protostomia;  
 Spiralia;Lophotrochozoa;Mollusca;Bivalvia;Autobranchia;Heteroconchia;Euhe  
 terodonta;Imparidentia;Venerida;Veneroidea;Veneridae;Mercenaria;Mercenari  
 a mercenaria  
 UdeM00000014485 6596 149.4 UdeM00000014485 XP\_045192826.1 53.2 141  
 59 2 97 236 73 207 5.90E-33 149.4 6596 cellular  
 organisms;Eukaryota;Opisthokonta;Metazoa;Eumetazoa;Bilateria;Protostomia;  
 Spiralia;Lophotrochozoa;Mollusca;Bivalvia;Autobranchia;Heteroconchia;Euhe  
 terodonta;Imparidentia;Venerida;Veneroidea;Veneridae;Mercenaria;Mercenari  
 a mercenaria  
 UdeM00000014486 6596 255 UdeM00000014486 XP\_045192227.1 49 263  
 134 0 96 358 169 431 1.50E-64 255 6596 cellular  
 organisms;Eukaryota;Opisthokonta;Metazoa;Eumetazoa;Bilateria;Protostomia;  
 Spiralia;Lophotrochozoa;Mollusca;Bivalvia;Autobranchia;Heteroconchia;Euhe  
 terodonta;Imparidentia;Venerida;Veneroidea;Veneridae;Mercenaria;Mercenari  
 a mercenaria  
 UdeM00000014488 6596 865.1 UdeM00000014488 XP\_045193272.1 65 711  
 238 7 83 788 176 880 9.40E-248 865.1 6596 cellular  
 organisms;Eukaryota;Opisthokonta;Metazoa;Eumetazoa;Bilateria;Protostomia;  
 Spiralia;Lophotrochozoa;Mollusca;Bivalvia;Autobranchia;Heteroconchia;Euhe  
 terodonta;Imparidentia;Venerida;Veneroidea;Veneridae;Mercenaria;Mercenari  
 a mercenaria  
 UdeM00000014490 29159 309.3 UdeM00000014490 XP\_011413487.2 51 357  
 157 7 16 364 11 357 6.50E-81 309.3 29159 cellular  
 organisms;Eukaryota;Opisthokonta;Metazoa;Eumetazoa;Bilateria;Protostomia;  
 Spiralia;Lophotrochozoa;Mollusca;Bivalvia;Autobranchia;Pteriomorphia;Ostr  
 eida;Ostreoidea;Ostreidae;Crassostrea;Crassostrea gigas

UdeM00000014491 6596 738.4 UdeM00000014491 XP\_045191957.1 93 384  
 27 0 1 384 3 386 4.60E-210 738.4 6596 cellular  
 organisms;Eukaryota;Opisthokonta;Metazoa;Eumetazoa;Bilateria;Protostomia;  
 Spiralia;Lophotrochozoa;Mollusca;Bivalvia;Autobranchia;Heteroconchia;Euhe  
 terodonta;Imparidentia;Venerida;Veneroidea;Veneridae;Mercenaria;Mercenari  
 a mercenaria  
 UdeM00000014492 6596 564.3 UdeM00000014492 XP\_045191810.1 82.2 383  
 67 1 4 386 2 383 1.20E-157 564.3 6596 cellular  
 organisms;Eukaryota;Opisthokonta;Metazoa;Eumetazoa;Bilateria;Protostomia;  
 Spiralia;Lophotrochozoa;Mollusca;Bivalvia;Autobranchia;Heteroconchia;Euhe  
 terodonta;Imparidentia;Venerida;Veneroidea;Veneridae;Mercenaria;Mercenari  
 a mercenaria  
 UdeM00000014493 6596 879.8 UdeM00000014493 XP\_045191812.1 65.8 653  
 210 5 1 643 15 664 2.20E-252 879.8 6596 cellular  
 organisms;Eukaryota;Opisthokonta;Metazoa;Eumetazoa;Bilateria;Protostomia;  
 Spiralia;Lophotrochozoa;Mollusca;Bivalvia;Autobranchia;Heteroconchia;Euhe  
 terodonta;Imparidentia;Venerida;Veneroidea;Veneridae;Mercenaria;Mercenari  
 a mercenaria  
 UdeM00000014495 29159 179.5 UdeM00000014495 XP\_034336742.1 50 168  
 80 1 3 170 6 169 3.70E-42 179.5 29159 cellular  
 organisms;Eukaryota;Opisthokonta;Metazoa;Eumetazoa;Bilateria;Protostomia;  
 Spiralia;Lophotrochozoa;Mollusca;Bivalvia;Autobranchia;Pteriormorphia;Ostr  
 eida;Ostreoidea;Ostreidae;Crassostrea;Crassostrea gigas  
 UdeM00000014496 29159 217.6 UdeM00000014496 XP\_011433871.1 74.1 147  
 38 0 1 147 1 147 1.10E-53 217.6 29159 cellular  
 organisms;Eukaryota;Opisthokonta;Metazoa;Eumetazoa;Bilateria;Protostomia;  
 Spiralia;Lophotrochozoa;Mollusca;Bivalvia;Autobranchia;Pteriormorphia;Ostr  
 eida;Ostreoidea;Ostreidae;Crassostrea;Crassostrea gigas  
 UdeM00000014497 29159 218 UdeM00000014497 XP\_011433871.1 74.1 147  
 38 0 26 172 1 147 9.90E-54 218 29159 cellular  
 organisms;Eukaryota;Opisthokonta;Metazoa;Eumetazoa;Bilateria;Protostomia;  
 Spiralia;Lophotrochozoa;Mollusca;Bivalvia;Autobranchia;Pteriormorphia;Ostr  
 eida;Ostreoidea;Ostreidae;Crassostrea;Crassostrea gigas  
 UdeM00000014498 6596 541.6 UdeM00000014498 XP\_045193765.1 72.3 365  
 94 2 8 372 14 371 8.30E-151 541.6 6596 cellular  
 organisms;Eukaryota;Opisthokonta;Metazoa;Eumetazoa;Bilateria;Protostomia;  
 Spiralia;Lophotrochozoa;Mollusca;Bivalvia;Autobranchia;Heteroconchia;Euhe  
 terodonta;Imparidentia;Venerida;Veneroidea;Veneridae;Mercenaria;Mercenari  
 a mercenaria  
 UdeM00000014499 6596 764.2 UdeM00000014499 XP\_045193766.1 75.4 488  
 113 2 8 495 14 494 1.00E-217 764.2 6596 cellular  
 organisms;Eukaryota;Opisthokonta;Metazoa;Eumetazoa;Bilateria;Protostomia;  
 Spiralia;Lophotrochozoa;Mollusca;Bivalvia;Autobranchia;Heteroconchia;Euhe  
 terodonta;Imparidentia;Venerida;Veneroidea;Veneridae;Mercenaria;Mercenari  
 a mercenaria  
 UdeM00000014500 6596 219.5 UdeM00000014500 XP\_045193769.1 59 183  
 73 2 32 214 44 224 4.00E-54 219.5 6596 cellular  
 organisms;Eukaryota;Opisthokonta;Metazoa;Eumetazoa;Bilateria;Protostomia;  
 Spiralia;Lophotrochozoa;Mollusca;Bivalvia;Autobranchia;Heteroconchia;Euhe  
 terodonta;Imparidentia;Venerida;Veneroidea;Veneridae;Mercenaria;Mercenari  
 a mercenaria  
 UdeM00000014501 6596 362.1 UdeM00000014501 XP\_045193782.1 57.5 318  
 126 4 1 318 1 309 7.40E-97 362.1 6596 cellular  
 organisms;Eukaryota;Opisthokonta;Metazoa;Eumetazoa;Bilateria;Protostomia;

Spiralia;Lophotrochozoa;Mollusca;Bivalvia;Autobranchia;Heteroconchia;Euherodonta;Imparidentia;Venerida;Veneroidea;Veneridae;Mercenaria;Mercenaria mercenaria

UdeM00000014502 6596 452.6 UdeM00000014502 XP\_045193778.1 37.2 907  
456 20 3 826 4 879 1.10E-123 452.6 6596 cellular

organisms;Eukaryota;Opisthokonta;Metazoa;Eumetazoa;Bilateria;Protostomia;Spiralia;Lophotrochozoa;Mollusca;Bivalvia;Autobranchia;Heteroconchia;Euherodonta;Imparidentia;Venerida;Veneroidea;Veneridae;Mercenaria;Mercenaria mercenaria

UdeM00000014504 6596 322.4 UdeM00000014504 XP\_045193783.1 59.5 259  
102 2 3 259 21 278 5.30E-85 322.4 6596 cellular

organisms;Eukaryota;Opisthokonta;Metazoa;Eumetazoa;Bilateria;Protostomia;Spiralia;Lophotrochozoa;Mollusca;Bivalvia;Autobranchia;Heteroconchia;Euherodonta;Imparidentia;Venerida;Veneroidea;Veneridae;Mercenaria;Mercenaria mercenaria

UdeM00000014503 6596 327.4 UdeM00000014503 XP\_045193783.1 56.6 279  
118 2 1 277 1 278 1.80E-86 327.4 6596 cellular

organisms;Eukaryota;Opisthokonta;Metazoa;Eumetazoa;Bilateria;Protostomia;Spiralia;Lophotrochozoa;Mollusca;Bivalvia;Autobranchia;Heteroconchia;Euherodonta;Imparidentia;Venerida;Veneroidea;Veneridae;Mercenaria;Mercenaria mercenaria

UdeM00000014505 6500 410.2 UdeM00000014505 XP\_005101961.1 95.3 212  
10 0 1 212 1 212 1.60E-111 410.2 6500 cellular

organisms;Eukaryota;Opisthokonta;Metazoa;Eumetazoa;Bilateria;Protostomia;Spiralia;Lophotrochozoa;Mollusca;Gastropoda;Heterobranchia;Euthyneura;Tectipleura;Aplysiida;Aplysioidea;Aplysiidae;Aplysia;Aplysia californica

UdeM00000014506 6596 1083.9 UdeM00000014506 XP\_045193504.1 68.7  
750 231 2 1 749 1 747 0.00E+00 1083.9 6596  
cellular

organisms;Eukaryota;Opisthokonta;Metazoa;Eumetazoa;Bilateria;Protostomia;Spiralia;Lophotrochozoa;Mollusca;Bivalvia;Autobranchia;Heteroconchia;Euherodonta;Imparidentia;Venerida;Veneroidea;Veneridae;Mercenaria;Mercenaria mercenaria

UdeM00000014507 6596 147.1 UdeM00000014507 XP\_045193504.1 55.8 156  
61 3 1 154 772 921 1.80E-32 147.1 6596 cellular

organisms;Eukaryota;Opisthokonta;Metazoa;Eumetazoa;Bilateria;Protostomia;Spiralia;Lophotrochozoa;Mollusca;Bivalvia;Autobranchia;Heteroconchia;Euherodonta;Imparidentia;Venerida;Veneroidea;Veneridae;Mercenaria;Mercenaria mercenaria

UdeM00000014508 225164 260.8 UdeM00000014508 XP\_009050867.1 55.7  
203 90 0 10 212 1 203 1.60E-66 260.8 225164  
cellular

organisms;Eukaryota;Opisthokonta;Metazoa;Eumetazoa;Bilateria;Protostomia;Spiralia;Lophotrochozoa;Mollusca;Gastropoda;Patellogastropoda;Lottiidae;Lottia;Lottia gigantea

UdeM00000014509 6573 203 UdeM00000014509 XP\_021373514.1 44.2 251  
120 6 529 771 484 722 1.40E-48 203 6573 cellular

organisms;Eukaryota;Opisthokonta;Metazoa;Eumetazoa;Bilateria;Protostomia;Spiralia;Lophotrochozoa;Mollusca;Bivalvia;Autobranchia;Pteriomorpha;Pectinida;Pectinoidea;Pectinidae;Mizuhopecten;Mizuhopecten yessoensis

UdeM00000014510 29159 132.1 UdeM00000014510 XP\_011421193.2 62.6 246  
78 3 1 238 1 240 9.50E-28 132.1 29159 cellular

organisms;Eukaryota;Opisthokonta;Metazoa;Eumetazoa;Bilateria;Protostomia;

Spiralia;Lophotrochozoa;Mollusca;Bivalvia;Autobranchia;Pteriomorpha;Ostr  
eida;Ostreoidea;Ostreidae;Crassostrea;Crassostrea gigas

UdeM00000014511 6573 2159.8 UdeM00000014511 XP\_021372446.1 59.4  
2098 758 27 950 2971 1083 3163 0.00E+00 2159.8 6573  
cellular

organisms;Eukaryota;Opisthokonta;Metazoa;Eumetazoa;Bilateria;Protostomia;  
Spiralia;Lophotrochozoa;Mollusca;Bivalvia;Autobranchia;Pteriomorpha;Pect  
inida;Pectinoidea;Pectinidae;Mizuhopecten;Mizuhopecten yessoensis

UdeM00000014512 400727 583.6 UdeM00000014512 XP\_025115550.1 75.4  
382 85 3 3 381 9 384 1.90E-163 583.6 400727  
cellular

organisms;Eukaryota;Opisthokonta;Metazoa;Eumetazoa;Bilateria;Protostomia;  
Spiralia;Lophotrochozoa;Mollusca;Gastropoda;Caenogastropoda;Architaeniogl  
ossa;Ampullarioidea;Ampullariidae;Pomacea;Pomacea canaliculata

UdeM00000014513 400727 374.8 UdeM00000014513 XP\_025115455.1 65.6  
270 85 3 1 269 1 263 9.30E-101 374.8 400727  
cellular

organisms;Eukaryota;Opisthokonta;Metazoa;Eumetazoa;Bilateria;Protostomia;  
Spiralia;Lophotrochozoa;Mollusca;Gastropoda;Caenogastropoda;Architaeniogl  
ossa;Ampullarioidea;Ampullariidae;Pomacea;Pomacea canaliculata

UdeM00000014514 6579 181.4 UdeM00000014514 XP\_033753775.1 38.7 238  
140 3 9 245 47 279 1.40E-42 181.4 6579 cellular

organisms;Eukaryota;Opisthokonta;Metazoa;Eumetazoa;Bilateria;Protostomia;  
Spiralia;Lophotrochozoa;Mollusca;Bivalvia;Autobranchia;Pteriomorpha;Pect  
inida;Pectinoidea;Pectinidae;Pecten;Pecten maximus

UdeM00000014515 6596 511.9 UdeM00000014515 XP\_045193580.1 78.1 292  
62 1 20 311 15 304 2.30E-141 511.9 6596 cellular

organisms;Eukaryota;Opisthokonta;Metazoa;Eumetazoa;Bilateria;Protostomia;  
Spiralia;Lophotrochozoa;Mollusca;Bivalvia;Autobranchia;Heteroconchia;Euhe  
terodonta;Imparidentia;Venerida;Veneroidea;Veneridae;Mercenaria;Mercenari  
a mercenaria

UdeM00000014515 6596 276.6 UdeM00000014515 XP\_045193580.1 70.5 176  
52 0 1088 1263 312 487 1.60E-70 276.6 6596 cellular

organisms;Eukaryota;Opisthokonta;Metazoa;Eumetazoa;Bilateria;Protostomia;  
Spiralia;Lophotrochozoa;Mollusca;Bivalvia;Autobranchia;Heteroconchia;Euhe  
terodonta;Imparidentia;Venerida;Veneroidea;Veneridae;Mercenaria;Mercenari  
a mercenaria

UdeM00000014516 6579 375.2 UdeM00000014516 XP\_033746355.1 34 652  
386 15 17 642 20 653 1.80E-100 375.2 6579 cellular

organisms;Eukaryota;Opisthokonta;Metazoa;Eumetazoa;Bilateria;Protostomia;  
Spiralia;Lophotrochozoa;Mollusca;Bivalvia;Autobranchia;Pteriomorpha;Pect  
inida;Pectinoidea;Pectinidae;Pecten;Pecten maximus

UdeM00000014518 6596 454.9 UdeM00000014518 XP\_045194325.1 33.6 760  
339 11 28 641 1 740 1.70E-124 454.9 6596 cellular

organisms;Eukaryota;Opisthokonta;Metazoa;Eumetazoa;Bilateria;Protostomia;  
Spiralia;Lophotrochozoa;Mollusca;Bivalvia;Autobranchia;Heteroconchia;Euhe  
terodonta;Imparidentia;Venerida;Veneroidea;Veneridae;Mercenaria;Mercenari  
a mercenaria

UdeM00000014519 6596 402.5 UdeM00000014519 XP\_045194325.1 34.5 635  
269 7 11 514 122 740 8.00E-109 402.5 6596 cellular

organisms;Eukaryota;Opisthokonta;Metazoa;Eumetazoa;Bilateria;Protostomia;  
Spiralia;Lophotrochozoa;Mollusca;Bivalvia;Autobranchia;Heteroconchia;Euhe  
terodonta;Imparidentia;Venerida;Veneroidea;Veneridae;Mercenaria;Mercenari  
a mercenaria

UdeM00000014520 6596 653.7 UdeM00000014520 XP\_045194325.1 45.4 756  
 337 17 24 719 1 740 2.80E-184 653.7 6596 cellular  
 organisms;Eukaryota;Opisthokonta;Metazoa;Eumetazoa;Bilateria;Protostomia;  
 Spiralia;Lophotrochozoa;Mollusca;Bivalvia;Autobranchia;Heteroconchia;Euhe  
 terodonta;Imparidentia;Venerida;Veneroidea;Veneridae;Mercenaria;Mercenari  
 a mercenaria  
 UdeM00000014521 6596 552.7 UdeM00000014521 XP\_045194325.1 39.3 774  
 365 17 27 729 1 740 6.80E-154 552.7 6596 cellular  
 organisms;Eukaryota;Opisthokonta;Metazoa;Eumetazoa;Bilateria;Protostomia;  
 Spiralia;Lophotrochozoa;Mollusca;Bivalvia;Autobranchia;Heteroconchia;Euhe  
 terodonta;Imparidentia;Venerida;Veneroidea;Veneridae;Mercenaria;Mercenari  
 a mercenaria  
 UdeM00000014522 6596 571.6 UdeM00000014522 XP\_045194325.1 40 758  
 365 18 28 713 1 740 1.40E-159 571.6 6596 cellular  
 organisms;Eukaryota;Opisthokonta;Metazoa;Eumetazoa;Bilateria;Protostomia;  
 Spiralia;Lophotrochozoa;Mollusca;Bivalvia;Autobranchia;Heteroconchia;Euhe  
 terodonta;Imparidentia;Venerida;Veneroidea;Veneridae;Mercenaria;Mercenari  
 a mercenaria  
 UdeM00000014523 6565 578.2 UdeM00000014523 XP\_022286092.1 71.4 412  
 117 1 15 426 124 534 8.80E-162 578.2 6565 cellular  
 organisms;Eukaryota;Opisthokonta;Metazoa;Eumetazoa;Bilateria;Protostomia;  
 Spiralia;Lophotrochozoa;Mollusca;Bivalvia;Autobranchia;Pteriormorphia;Ostr  
 eida;Ostreoidea;Ostreidae;Crassostrea;Crassostrea virginica  
 UdeM00000014524 6565 298.5 UdeM00000014524 XP\_022286092.1 74.2 198  
 50 1 15 212 124 320 7.40E-78 298.5 6565 cellular  
 organisms;Eukaryota;Opisthokonta;Metazoa;Eumetazoa;Bilateria;Protostomia;  
 Spiralia;Lophotrochozoa;Mollusca;Bivalvia;Autobranchia;Pteriormorphia;Ostr  
 eida;Ostreoidea;Ostreidae;Crassostrea;Crassostrea virginica  
 UdeM00000014525 225164 83.2 UdeM00000014525 XP\_009061450.1 68.4  
 57 18 0 7 63 56 112 4.80E-13 83.2 225164  
 cellular  
 organisms;Eukaryota;Opisthokonta;Metazoa;Eumetazoa;Bilateria;Protostomia;  
 Spiralia;Lophotrochozoa;Mollusca;Gastropoda;Patellogastropoda;Lottioidea;  
 Lottiidae;Lottia;Lottia gigantea  
 UdeM00000014526 225164 140.2 UdeM00000014526 XP\_009051015.1 30.3  
 330 202 6 1 326 1 306 4.70E-30 140.2 225164  
 cellular  
 organisms;Eukaryota;Opisthokonta;Metazoa;Eumetazoa;Bilateria;Protostomia;  
 Spiralia;Lophotrochozoa;Mollusca;Gastropoda;Patellogastropoda;Lottioidea;  
 Lottiidae;Lottia;Lottia gigantea  
 UdeM00000014527 6579 142.1 UdeM00000014527 XP\_033753722.1 39.9 203  
 117 3 6 205 13 213 7.80E-31 142.1 6579 cellular  
 organisms;Eukaryota;Opisthokonta;Metazoa;Eumetazoa;Bilateria;Protostomia;  
 Spiralia;Lophotrochozoa;Mollusca;Bivalvia;Autobranchia;Pteriormorphia;Pect  
 inida;Pectinoidea;Pectinidae;Pecten;Pecten maximus  
 UdeM00000014528 6596 282.3 UdeM00000014528 XP\_045193040.1 46.6 320  
 135 5 1 306 1 298 7.20E-73 282.3 6596 cellular  
 organisms;Eukaryota;Opisthokonta;Metazoa;Eumetazoa;Bilateria;Protostomia;  
 Spiralia;Lophotrochozoa;Mollusca;Bivalvia;Autobranchia;Heteroconchia;Euhe  
 terodonta;Imparidentia;Venerida;Veneroidea;Veneridae;Mercenaria;Mercenari  
 a mercenaria  
 UdeM00000014529 6596 1472.2 UdeM00000014529 XP\_045193033.1 77.5  
 953 211 3 1 953 1 950 0.00E+00 1472.2 6596  
 cellular

organisms;Eukaryota;Opisthokonta;Metazoa;Eumetazoa;Bilateria;Protostomia;Spiralia;Lophotrochozoa;Mollusca;Bivalvia;Autobranchia;Heteroconchia;Euherodonta;Imparidentia;Venerida;Veneroidea;Veneridae;Mercenaria;Mercenaria mercenaria

UdeM00000014531 1735272 104.4 UdeM00000014531 XP\_041376923.1 48.5  
101 51 1 71 171 91 190 1.50E-19 104.4 1735272  
cellular

organisms;Eukaryota;Opisthokonta;Metazoa;Eumetazoa;Bilateria;Protostomia;Spiralia;Lophotrochozoa;Mollusca;Gastropoda;Neomphalina;Neomphaloidea;Peltospiridae;Gigantopelta;Gigantopelta aegis

UdeM00000014533 6596 184.9 UdeM00000014533 XP\_045192645.1 61.3 137  
53 0 1 137 1 137 7.70E-44 184.9 6596 cellular

organisms;Eukaryota;Opisthokonta;Metazoa;Eumetazoa;Bilateria;Protostomia;Spiralia;Lophotrochozoa;Mollusca;Bivalvia;Autobranchia;Heteroconchia;Euherodonta;Imparidentia;Venerida;Veneroidea;Veneridae;Mercenaria;Mercenaria mercenaria

UdeM00000014534 6596 475.7 UdeM00000014534 XP\_045192638.1 53.9 519  
214 11 53 553 191 702 8.00E-131 475.7 6596 cellular

organisms;Eukaryota;Opisthokonta;Metazoa;Eumetazoa;Bilateria;Protostomia;Spiralia;Lophotrochozoa;Mollusca;Bivalvia;Autobranchia;Heteroconchia;Euherodonta;Imparidentia;Venerida;Veneroidea;Veneridae;Mercenaria;Mercenaria mercenaria

UdeM00000014535 6565 632.1 UdeM00000014535 XP\_022343976.1 28.3 2034  
1159 61 66 2007 43 1868 2.40E-177 632.1 6565 cellular

organisms;Eukaryota;Opisthokonta;Metazoa;Eumetazoa;Bilateria;Protostomia;Spiralia;Lophotrochozoa;Mollusca;Bivalvia;Autobranchia;Pteriomorphia;Ostreida;Ostreoidea;Ostreidae;Crassostrea;Crassostrea virginica

UdeM00000014536 6596 531.2 UdeM00000014536 XP\_045194127.1 63.8 376  
136 0 34 409 30 405 1.20E-147 531.2 6596 cellular

organisms;Eukaryota;Opisthokonta;Metazoa;Eumetazoa;Bilateria;Protostomia;Spiralia;Lophotrochozoa;Mollusca;Bivalvia;Autobranchia;Heteroconchia;Euherodonta;Imparidentia;Venerida;Veneroidea;Veneridae;Mercenaria;Mercenaria mercenaria

UdeM00000014537 6579 260.4 UdeM00000014537 XP\_033741736.1 52.4 248  
116 1 1 246 647 894 2.50E-66 260.4 6579 cellular

organisms;Eukaryota;Opisthokonta;Metazoa;Eumetazoa;Bilateria;Protostomia;Spiralia;Lophotrochozoa;Mollusca;Bivalvia;Autobranchia;Pteriomorphia;Pectinida;Pectinoidea;Pectinidae;Pecten;Pecten maximus

UdeM00000014538 6579 1120.1 UdeM00000014538 XP\_033744278.1 56.2  
967 413 6 2 965 337 1295 0.00E+00 1120.1 6579  
cellular

organisms;Eukaryota;Opisthokonta;Metazoa;Eumetazoa;Bilateria;Protostomia;Spiralia;Lophotrochozoa;Mollusca;Bivalvia;Autobranchia;Pteriomorphia;Pectinida;Pectinoidea;Pectinidae;Pecten;Pecten maximus

UdeM00000014539 400727 519.6 UdeM00000014539 XP\_025115462.1 64.9  
524 147 13 1 499 10 521 4.70E-144 519.6 400727  
cellular

organisms;Eukaryota;Opisthokonta;Metazoa;Eumetazoa;Bilateria;Protostomia;Spiralia;Lophotrochozoa;Mollusca;Gastropoda;Caenogastropoda;Architaenioglossa;Ampullarioidea;Ampullariidae;Pomacea;Pomacea canaliculata

UdeM00000014540 6596 736.1 UdeM00000014540 XP\_045191621.1 76.4 466  
103 2 1 465 2 461 2.70E-209 736.1 6596 cellular

organisms;Eukaryota;Opisthokonta;Metazoa;Eumetazoa;Bilateria;Protostomia;Spiralia;Lophotrochozoa;Mollusca;Bivalvia;Autobranchia;Heteroconchia;Euherodonta

terodonta;Imparidentia;Venerida;Veneroidea;Veneridae;Mercenaria;Mercenari  
 a mercenaria  
 UdeM00000014541 6596 426.8 UdeM00000014541 XP\_045193253.1 44.3 524  
 256 5 11 534 1 488 4.10E-116 426.8 6596 cellular  
 organisms;Eukaryota;Opisthokonta;Metazoa;Eumetazoa;Bilateria;Protostomia;  
 Spiralia;Lophotrochozoa;Mollusca;Bivalvia;Autobranhia;Heteroconchia;Euhe  
 terodonta;Imparidentia;Venerida;Veneroidea;Veneridae;Mercenaria;Mercenari  
 a mercenaria  
 UdeM00000014542 6579 557 UdeM00000014542 XP\_033753878.1 44.2 633  
 319 6 3 629 6 610 3.40E-155 557 6579 cellular  
 organisms;Eukaryota;Opisthokonta;Metazoa;Eumetazoa;Bilateria;Protostomia;  
 Spiralia;Lophotrochozoa;Mollusca;Bivalvia;Autobranhia;Pteriormorphia;Pect  
 inida;Pectinoidea;Pectinidae;Pecten;Pecten maximus  
 UdeM00000014543 6573 156 UdeM00000014543 XP\_021343891.1 42.4 210  
 101 5 3 212 6 195 5.50E-35 156 6573 cellular  
 organisms;Eukaryota;Opisthokonta;Metazoa;Eumetazoa;Bilateria;Protostomia;  
 Spiralia;Lophotrochozoa;Mollusca;Bivalvia;Autobranhia;Pteriormorphia;Pect  
 inida;Pectinoidea;Pectinidae;Mizuhopecten;Mizuhopecten yessoensis  
 UdeM00000014544 6596 166.4 UdeM00000014544 XP\_045191841.1 58.2 177  
 71 2 3 178 4 178 3.30E-38 166.4 6596 cellular  
 organisms;Eukaryota;Opisthokonta;Metazoa;Eumetazoa;Bilateria;Protostomia;  
 Spiralia;Lophotrochozoa;Mollusca;Bivalvia;Autobranhia;Heteroconchia;Euhe  
 terodonta;Imparidentia;Venerida;Veneroidea;Veneridae;Mercenaria;Mercenari  
 a mercenaria  
 UdeM00000014545 6596 119.8 UdeM00000014545 XP\_045191845.1 47.5 162  
 70 3 2 163 3 149 6.20E-24 119.8 6596 cellular  
 organisms;Eukaryota;Opisthokonta;Metazoa;Eumetazoa;Bilateria;Protostomia;  
 Spiralia;Lophotrochozoa;Mollusca;Bivalvia;Autobranhia;Heteroconchia;Euhe  
 terodonta;Imparidentia;Venerida;Veneroidea;Veneridae;Mercenaria;Mercenari  
 a mercenaria  
 UdeM00000014546 6596 119.8 UdeM00000014546 XP\_045191845.1 43.2 190  
 94 4 2 191 3 178 3.80E-24 119.8 6596 cellular  
 organisms;Eukaryota;Opisthokonta;Metazoa;Eumetazoa;Bilateria;Protostomia;  
 Spiralia;Lophotrochozoa;Mollusca;Bivalvia;Autobranhia;Heteroconchia;Euhe  
 terodonta;Imparidentia;Venerida;Veneroidea;Veneridae;Mercenaria;Mercenari  
 a mercenaria  
 UdeM00000014547 6596 478.4 UdeM00000014547 XP\_045193583.1 71.7 307  
 87 0 1 307 1 307 6.90E-132 478.4 6596 cellular  
 organisms;Eukaryota;Opisthokonta;Metazoa;Eumetazoa;Bilateria;Protostomia;  
 Spiralia;Lophotrochozoa;Mollusca;Bivalvia;Autobranhia;Heteroconchia;Euhe  
 terodonta;Imparidentia;Venerida;Veneroidea;Veneridae;Mercenaria;Mercenari  
 a mercenaria  
 UdeM00000014548 7574 188 UdeM00000014548 XP\_013384628.1 66 141  
 45 2 1 140 33 171 1.10E-44 188 7574 cellular  
 organisms;Eukaryota;Opisthokonta;Metazoa;Eumetazoa;Bilateria;Protostomia;  
 Spiralia;Lophotrochozoa;Brachiopoda;Linguliformea;Lingulata;Lingulida;Lin  
 guloidea;Lingulidae;Lingula;Lingula anatina  
 UdeM00000014548 7574 73.9 UdeM00000014548 XP\_013384628.1 43.1 116  
 49 4 79 178 446 560 2.30E-10 73.9 7574 cellular  
 organisms;Eukaryota;Opisthokonta;Metazoa;Eumetazoa;Bilateria;Protostomia;  
 Spiralia;Lophotrochozoa;Brachiopoda;Linguliformea;Lingulata;Lingulida;Lin  
 guloidea;Lingulidae;Lingula;Lingula anatina  
 UdeM00000014549 29159 541.2 UdeM00000014549 XP\_011435747.2 29.6 1146  
 573 23 52 996 172 1284 2.90E-150 541.2 29159 cellular

organisms;Eukaryota;Opisthokonta;Metazoa;Eumetazoa;Bilateria;Protostomia;Spiralia;Lophotrochozoa;Mollusca;Bivalvia;Autobranhia;Pteriomorphia;Ostreida;Ostreoidea;Ostreidae;Crassostrea;Crassostrea gigas

UdeM00000014550 29159 515.8 UdeM00000014550 XP\_011435747.2 28.2 1204  
573 24 52 1054 172 1284 1.40E-142 515.8 29159 cellular

organisms;Eukaryota;Opisthokonta;Metazoa;Eumetazoa;Bilateria;Protostomia;Spiralia;Lophotrochozoa;Mollusca;Bivalvia;Autobranhia;Pteriomorphia;Ostreida;Ostreoidea;Ostreidae;Crassostrea;Crassostrea gigas

UdeM00000014551 6596 119.8 UdeM00000014551 XP\_045171682.1 35 206  
128 4 5 208 3 204 5.30E-24 119.8 6596 cellular

organisms;Eukaryota;Opisthokonta;Metazoa;Eumetazoa;Bilateria;Protostomia;Spiralia;Lophotrochozoa;Mollusca;Bivalvia;Autobranhia;Heteroconchia;Euherodonta;Imparidentia;Venerida;Veneroidea;Veneridae;Mercenaria;Mercenaria mercenaria

UdeM00000014552 6596 114.4 UdeM00000014552 XP\_045193352.1 35.7 230  
122 7 23 236 39 258 2.20E-22 114.4 6596 cellular

organisms;Eukaryota;Opisthokonta;Metazoa;Eumetazoa;Bilateria;Protostomia;Spiralia;Lophotrochozoa;Mollusca;Bivalvia;Autobranhia;Heteroconchia;Euherodonta;Imparidentia;Venerida;Veneroidea;Veneridae;Mercenaria;Mercenaria mercenaria

UdeM00000014554 6573 1680.2 UdeM00000014554 XP\_021343237.1 67  
1294 384 14 18 1288 234 1507 0.00E+00 1680.2 6573  
cellular

organisms;Eukaryota;Opisthokonta;Metazoa;Eumetazoa;Bilateria;Protostomia;Spiralia;Lophotrochozoa;Mollusca;Bivalvia;Autobranhia;Pteriomorphia;Pectinida;Pectinoidea;Pectinidae;Mizuhopecten;Mizuhopecten yessoensis

UdeM00000014555 6596 422.2 UdeM00000014555 XP\_045192299.1 58.2 400  
147 6 1 396 40 423 7.50E-115 422.2 6596 cellular

organisms;Eukaryota;Opisthokonta;Metazoa;Eumetazoa;Bilateria;Protostomia;Spiralia;Lophotrochozoa;Mollusca;Bivalvia;Autobranhia;Heteroconchia;Euherodonta;Imparidentia;Venerida;Veneroidea;Veneridae;Mercenaria;Mercenaria mercenaria

UdeM00000014556 6565 643.7 UdeM00000014556 XP\_022343422.1 49.2 715  
315 10 8 693 3 698 3.90E-181 643.7 6565 cellular

organisms;Eukaryota;Opisthokonta;Metazoa;Eumetazoa;Bilateria;Protostomia;Spiralia;Lophotrochozoa;Mollusca;Bivalvia;Autobranhia;Pteriomorphia;Ostreida;Ostreoidea;Ostreidae;Crassostrea;Crassostrea virginica

UdeM00000014557 1735272 168.3 UdeM00000014557 XP\_041376984.1 95.4  
87 4 0 1 87 1 87 6.00E-39 168.3 1735272  
cellular

organisms;Eukaryota;Opisthokonta;Metazoa;Eumetazoa;Bilateria;Protostomia;Spiralia;Lophotrochozoa;Mollusca;Gastropoda;Neomphalina;Neomphaloidea;Peltospiridae;Gigantopelta;Gigantopelta aegis

UdeM00000014560 6596 278.1 UdeM00000014560 XP\_045193279.1 33.2 635  
358 13 34 632 21 625 2.80E-71 278.1 6596 cellular

organisms;Eukaryota;Opisthokonta;Metazoa;Eumetazoa;Bilateria;Protostomia;Spiralia;Lophotrochozoa;Mollusca;Bivalvia;Autobranhia;Heteroconchia;Euherodonta;Imparidentia;Venerida;Veneroidea;Veneridae;Mercenaria;Mercenaria mercenaria

UdeM00000014561 6596 900.6 UdeM00000014561 XP\_045193278.1 68.6 633  
196 1 26 655 15 647 1.30E-258 900.6 6596 cellular

organisms;Eukaryota;Opisthokonta;Metazoa;Eumetazoa;Bilateria;Protostomia;Spiralia;Lophotrochozoa;Mollusca;Bivalvia;Autobranhia;Heteroconchia;Euherodonta



terodonta;Imparidentia;Venerida;Veneroidea;Veneridae;Mercenaria;Mercenari  
 a mercenaria  
 UdeM00000014562 6596 338.2 UdeM00000014562 XP\_045194120.1 49.9 355  
 156 4 1 337 24 374 1.20E-89 338.2 6596 cellular  
 organisms;Eukaryota;Opisthokonta;Metazoa;Eumetazoa;Bilateria;Protostomia;  
 Spiralia;Lophotrochozoa;Mollusca;Bivalvia;Autobranchia;Heteroconchia;Euhe  
 terodonta;Imparidentia;Venerida;Veneroidea;Veneridae;Mercenaria;Mercenari  
 a mercenaria  
 UdeM00000014563 29159 1050.4 UdeM00000014563 NP\_001292222.1 74.5  
 631 160 1 14 644 2 631 9.10E-304 1050.4  
 29159 cellular  
 organisms;Eukaryota;Opisthokonta;Metazoa;Eumetazoa;Bilateria;Protostomia;  
 Spiralia;Lophotrochozoa;Mollusca;Bivalvia;Autobranchia;Pteriormorphia;Ostr  
 eida;Ostreoidea;Ostreidae;Crassostrea;Crassostrea gigas  
 UdeM00000014564 6596 1040.8 UdeM00000014564 XP\_045191735.1 74.2  
 651 160 4 9 656 10 655 7.40E-301 1040.8 6596  
 cellular  
 organisms;Eukaryota;Opisthokonta;Metazoa;Eumetazoa;Bilateria;Protostomia;  
 Spiralia;Lophotrochozoa;Mollusca;Bivalvia;Autobranchia;Heteroconchia;Euhe  
 terodonta;Imparidentia;Venerida;Veneroidea;Veneridae;Mercenaria;Mercenari  
 a mercenaria  
 UdeM00000014565 6596 1113.6 UdeM00000014565 XP\_045192723.1 53.4  
 1065 483 8 1 1063 1 1054 0.00E+00 1113.6 6596  
 cellular  
 organisms;Eukaryota;Opisthokonta;Metazoa;Eumetazoa;Bilateria;Protostomia;  
 Spiralia;Lophotrochozoa;Mollusca;Bivalvia;Autobranchia;Heteroconchia;Euhe  
 terodonta;Imparidentia;Venerida;Veneroidea;Veneridae;Mercenaria;Mercenari  
 a mercenaria  
 UdeM00000014566 1735272 401.7 UdeM00000014566 XP\_041375682.1 53.2  
 344 158 2 1 341 1 344 9.10E-109 401.7 1735272  
 cellular  
 organisms;Eukaryota;Opisthokonta;Metazoa;Eumetazoa;Bilateria;Protostomia;  
 Spiralia;Lophotrochozoa;Mollusca;Gastropoda;Neomphalina;Neomphaloidea;Pel  
 tospiridae;Gigantopelta;Gigantopelta aegis  
 UdeM00000014567 6596 158.7 UdeM00000014567 XP\_045192522.1 39.6 202  
 109 4 160 356 344 537 1.40E-35 158.7 6596 cellular  
 organisms;Eukaryota;Opisthokonta;Metazoa;Eumetazoa;Bilateria;Protostomia;  
 Spiralia;Lophotrochozoa;Mollusca;Bivalvia;Autobranchia;Heteroconchia;Euhe  
 terodonta;Imparidentia;Venerida;Veneroidea;Veneridae;Mercenaria;Mercenari  
 a mercenaria  
 UdeM00000014568 6579 468.8 UdeM00000014568 XP\_033755136.1 62.8 331  
 122 1 12 342 77 406 6.00E-129 468.8 6579 cellular  
 organisms;Eukaryota;Opisthokonta;Metazoa;Eumetazoa;Bilateria;Protostomia;  
 Spiralia;Lophotrochozoa;Mollusca;Bivalvia;Autobranchia;Pteriormorphia;Pect  
 inida;Pectinoidea;Pectinidae;Pecten;Pecten maximus  
 UdeM00000014569 6573 171.4 UdeM00000014569 XP\_021354656.1 29.4 521  
 150 10 17 325 16 530 2.50E-39 171.4 6573 cellular  
 organisms;Eukaryota;Opisthokonta;Metazoa;Eumetazoa;Bilateria;Protostomia;  
 Spiralia;Lophotrochozoa;Mollusca;Bivalvia;Autobranchia;Pteriormorphia;Pect  
 inida;Pectinoidea;Pectinidae;Mizuhopecten;Mizuhopecten yessoensis  
 UdeM00000014570 6565 246.1 UdeM00000014570 XP\_022327158.1 48.9 268  
 129 4 2 266 4 266 5.10E-62 246.1 6565 cellular  
 organisms;Eukaryota;Opisthokonta;Metazoa;Eumetazoa;Bilateria;Protostomia;

Spiralia;Lophotrochozoa;Mollusca;Bivalvia;Autobranchia;Pteriormorphia;Ostr  
eida;Ostreoidea;Ostreidae;Crassostrea;Crassostrea virginica  
UdeM00000014571 6596 109 UdeM00000014571 XP\_045194521.1 42.2 147  
64 5 28 163 29 165 1.30E-20 109 6596 cellular  
organisms;Eukaryota;Opisthokonta;Metazoa;Eumetazoa;Bilateria;Protostomia;  
Spiralia;Lophotrochozoa;Mollusca;Bivalvia;Autobranchia;Heteroconchia;Euhe  
terodonta;Imparidentia;Venerida;Veneroidea;Veneridae;Mercenaria;Mercenari  
a mercenaria  
UdeM00000014572 6596 208.4 UdeM00000014572 XP\_045192652.1 40.8 265  
155 2 42 305 32 295 1.70E-50 208.4 6596 cellular  
organisms;Eukaryota;Opisthokonta;Metazoa;Eumetazoa;Bilateria;Protostomia;  
Spiralia;Lophotrochozoa;Mollusca;Bivalvia;Autobranchia;Heteroconchia;Euhe  
terodonta;Imparidentia;Venerida;Veneroidea;Veneridae;Mercenaria;Mercenari  
a mercenaria  
UdeM00000014573 6596 962.2 UdeM00000014573 XP\_045194959.1 45.8 1263  
433 19 1 1098 338 1514 5.80E-277 962.2 6596 cellular  
organisms;Eukaryota;Opisthokonta;Metazoa;Eumetazoa;Bilateria;Protostomia;  
Spiralia;Lophotrochozoa;Mollusca;Bivalvia;Autobranchia;Heteroconchia;Euhe  
terodonta;Imparidentia;Venerida;Veneroidea;Veneridae;Mercenaria;Mercenari  
a mercenaria  
UdeM00000014574 6596 471.1 UdeM00000014574 XP\_045194959.1 67.9 361  
93 4 1 344 1520 1874 1.20E-129 471.1 6596 cellular  
organisms;Eukaryota;Opisthokonta;Metazoa;Eumetazoa;Bilateria;Protostomia;  
Spiralia;Lophotrochozoa;Mollusca;Bivalvia;Autobranchia;Heteroconchia;Euhe  
terodonta;Imparidentia;Venerida;Veneroidea;Veneridae;Mercenaria;Mercenari  
a mercenaria  
UdeM00000014575 6579 417.9 UdeM00000014575 XP\_033755409.1 57.2 346  
134 5 204 546 308 642 2.00E-113 417.9 6579 cellular  
organisms;Eukaryota;Opisthokonta;Metazoa;Eumetazoa;Bilateria;Protostomia;  
Spiralia;Lophotrochozoa;Mollusca;Bivalvia;Autobranchia;Pteriormorphia;Pect  
inida;Pectinoidea;Pectinidae;Pecten;Pecten maximus  
UdeM00000014576 6573 177.6 UdeM00000014576 XP\_021379305.1 65.4 133  
46 0 1 133 1 133 1.20E-41 177.6 6573 cellular  
organisms;Eukaryota;Opisthokonta;Metazoa;Eumetazoa;Bilateria;Protostomia;  
Spiralia;Lophotrochozoa;Mollusca;Bivalvia;Autobranchia;Pteriormorphia;Pect  
inida;Pectinoidea;Pectinidae;Mizuhopecten;Mizuhopecten yessoensis  
UdeM00000014577 2607531 164.1 UdeM00000014577 XP\_029647783.1 40.5  
262 105 4 269 482 153 411 4.50E-37 164.1 2607531  
cellular  
organisms;Eukaryota;Opisthokonta;Metazoa;Eumetazoa;Bilateria;Protostomia;  
Spiralia;Lophotrochozoa;Mollusca;Cephalopoda;Coleoidea;Octopodiformes;Oct  
opoda;Incirrata;Octopodidae;Octopus;Octopus sinensis  
UdeM00000014578 6596 74.7 UdeM00000014578 XP\_045192936.1 46.6 116  
42 4 265 365 652 762 2.70E-10 74.7 6596 cellular  
organisms;Eukaryota;Opisthokonta;Metazoa;Eumetazoa;Bilateria;Protostomia;  
Spiralia;Lophotrochozoa;Mollusca;Bivalvia;Autobranchia;Heteroconchia;Euhe  
terodonta;Imparidentia;Venerida;Veneroidea;Veneridae;Mercenaria;Mercenari  
a mercenaria  
UdeM00000014579 6596 518.1 UdeM00000014579 XP\_045192936.1 76.7 344  
78 1 1 344 1 342 8.80E-144 518.1 6596 cellular  
organisms;Eukaryota;Opisthokonta;Metazoa;Eumetazoa;Bilateria;Protostomia;  
Spiralia;Lophotrochozoa;Mollusca;Bivalvia;Autobranchia;Heteroconchia;Euhe  
terodonta;Imparidentia;Venerida;Veneroidea;Veneridae;Mercenaria;Mercenari  
a mercenaria

UdeM00000014580 6596 234.2 UdeM00000014580 XP\_045192936.1 80.7 161  
 29 1 1 161 1 159 1.20E-58 234.2 6596 cellular  
 organisms;Eukaryota;Opisthokonta;Metazoa;Eumetazoa;Bilateria;Protostomia;  
 Spiralia;Lophotrochozoa;Mollusca;Bivalvia;Autobranchia;Heteroconchia;Euhe  
 terodonta;Imparidentia;Venerida;Veneroidea;Veneridae;Mercenaria;Mercenari  
 a mercenaria  
 UdeM00000014581 6596 360.1 UdeM00000014581 XP\_045192907.1 65.8 257  
 88 0 10 266 182 438 2.30E-96 360.1 6596 cellular  
 organisms;Eukaryota;Opisthokonta;Metazoa;Eumetazoa;Bilateria;Protostomia;  
 Spiralia;Lophotrochozoa;Mollusca;Bivalvia;Autobranchia;Heteroconchia;Euhe  
 terodonta;Imparidentia;Venerida;Veneroidea;Veneridae;Mercenaria;Mercenari  
 a mercenaria  
 UdeM00000014582 1735272 234.6 UdeM00000014582 XP\_041375601.1 65  
 177 62 0 42 218 19 195 1.30E-58 234.6 1735272  
 cellular  
 organisms;Eukaryota;Opisthokonta;Metazoa;Eumetazoa;Bilateria;Protostomia;  
 Spiralia;Lophotrochozoa;Mollusca;Gastropoda;Neomphalina;Neomphaloidea;Pel  
 tospiridae;Gigantopelta;Gigantopelta aegis  
 UdeM00000014583 6596 415.6 UdeM00000014583 XP\_045194905.1 36.7 773  
 329 16 179 903 113 773 2.70E-112 415.6 6596 cellular  
 organisms;Eukaryota;Opisthokonta;Metazoa;Eumetazoa;Bilateria;Protostomia;  
 Spiralia;Lophotrochozoa;Mollusca;Bivalvia;Autobranchia;Heteroconchia;Euhe  
 terodonta;Imparidentia;Venerida;Veneroidea;Veneridae;Mercenaria;Mercenari  
 a mercenaria  
 UdeM00000014584 6596 397.5 UdeM00000014584 XP\_045194905.1 36.1 773  
 323 17 179 892 113 773 7.50E-107 397.5 6596 cellular  
 organisms;Eukaryota;Opisthokonta;Metazoa;Eumetazoa;Bilateria;Protostomia;  
 Spiralia;Lophotrochozoa;Mollusca;Bivalvia;Autobranchia;Heteroconchia;Euhe  
 terodonta;Imparidentia;Venerida;Veneroidea;Veneridae;Mercenaria;Mercenari  
 a mercenaria  
 UdeM00000014585 6573 595.9 UdeM00000014585 XP\_021376780.1 52 685  
 266 16 2 666 5 646 6.40E-167 595.9 6573 cellular  
 organisms;Eukaryota;Opisthokonta;Metazoa;Eumetazoa;Bilateria;Protostomia;  
 Spiralia;Lophotrochozoa;Mollusca;Bivalvia;Autobranchia;Pteriomorphia;Pect  
 inida;Pectinoidea;Pectinidae;Mizuhopecten;Mizuhopecten yessoensis  
 UdeM00000014586 6573 577.8 UdeM00000014586 XP\_021347065.1 42.2 810  
 390 19 18 764 18 812 2.30E-161 577.8 6573 cellular  
 organisms;Eukaryota;Opisthokonta;Metazoa;Eumetazoa;Bilateria;Protostomia;  
 Spiralia;Lophotrochozoa;Mollusca;Bivalvia;Autobranchia;Pteriomorphia;Pect  
 inida;Pectinoidea;Pectinidae;Mizuhopecten;Mizuhopecten yessoensis  
 UdeM00000014587 6579 707.2 UdeM00000014587 XP\_033755716.1 46.4 854  
 450 4 50 901 30 877 2.70E-200 707.2 6579 cellular  
 organisms;Eukaryota;Opisthokonta;Metazoa;Eumetazoa;Bilateria;Protostomia;  
 Spiralia;Lophotrochozoa;Mollusca;Bivalvia;Autobranchia;Pteriomorphia;Pect  
 inida;Pectinoidea;Pectinidae;Pecten;Pecten maximus  
 UdeM00000014588 6573 493.4 UdeM00000014588 XP\_021375890.1 47.9 562  
 291 1 4 565 142 701 3.80E-136 493.4 6573 cellular  
 organisms;Eukaryota;Opisthokonta;Metazoa;Eumetazoa;Bilateria;Protostomia;  
 Spiralia;Lophotrochozoa;Mollusca;Bivalvia;Autobranchia;Pteriomorphia;Pect  
 inida;Pectinoidea;Pectinidae;Mizuhopecten;Mizuhopecten yessoensis  
 UdeM00000014589 6579 123.2 UdeM00000014589 XP\_033755716.1 39.3 163  
 97 1 9 171 717 877 3.20E-25 123.2 6579 cellular  
 organisms;Eukaryota;Opisthokonta;Metazoa;Eumetazoa;Bilateria;Protostomia;

Spiralia; Lophotrochozoa; Mollusca; Bivalvia; Autobranchia; Pteriomorpha; Pectinida; Pectinoidea; Pectinidae; Pecten; Pecten maximus  
UdeM00000014591 6579 333.6 UdeM00000014591 XP\_033754965.1 88.1 185  
22 0 18 202 733 917 1.80E-88 333.6 6579 cellular  
organisms; Eukaryota; Opisthokonta; Metazoa; Eumetazoa; Bilateria; Protostomia; Spiralia; Lophotrochozoa; Mollusca; Bivalvia; Autobranchia; Pteriomorpha; Pectinida; Pectinoidea; Pectinidae; Pecten; Pecten maximus  
UdeM00000014592 6579 684.5 UdeM00000014592 XP\_033755716.1 45.8 850  
453 3 78 925 34 877 1.90E-193 684.5 6579 cellular  
organisms; Eukaryota; Opisthokonta; Metazoa; Eumetazoa; Bilateria; Protostomia; Spiralia; Lophotrochozoa; Mollusca; Bivalvia; Autobranchia; Pteriomorpha; Pectinida; Pectinoidea; Pectinidae; Pecten; Pecten maximus  
UdeM00000014593 6573 248.8 UdeM00000014593 XP\_021375890.1 50.2 269  
134 0 4 272 142 410 7.80E-63 248.8 6573 cellular  
organisms; Eukaryota; Opisthokonta; Metazoa; Eumetazoa; Bilateria; Protostomia; Spiralia; Lophotrochozoa; Mollusca; Bivalvia; Autobranchia; Pteriomorpha; Pectinida; Pectinoidea; Pectinidae; Mizuhopecten; Mizuhopecten yessoensis  
UdeM00000014594 29159 382.5 UdeM00000014594 XP\_019924334.2 42.9 468  
260 4 4 469 416 878 7.80E-103 382.5 29159 cellular  
organisms; Eukaryota; Opisthokonta; Metazoa; Eumetazoa; Bilateria; Protostomia; Spiralia; Lophotrochozoa; Mollusca; Bivalvia; Autobranchia; Pteriomorpha; Ostracida; Ostreidae; Crassostrea; Crassostrea gigas  
UdeM00000014595 29159 360.5 UdeM00000014595 XP\_019924334.2 42.6 444  
248 4 2 443 440 878 3.00E-96 360.5 29159 cellular  
organisms; Eukaryota; Opisthokonta; Metazoa; Eumetazoa; Bilateria; Protostomia; Spiralia; Lophotrochozoa; Mollusca; Bivalvia; Autobranchia; Pteriomorpha; Ostracida; Ostreidae; Crassostrea; Crassostrea gigas  
UdeM00000014597 400727 647.1 UdeM00000014597 XP\_025115158.1 77.1  
419 88 3 739 1156 636 1047 4.20E-182 647.1 400727  
cellular  
organisms; Eukaryota; Opisthokonta; Metazoa; Eumetazoa; Bilateria; Protostomia; Spiralia; Lophotrochozoa; Mollusca; Gastropoda; Caenogastropoda; Architaenioglossa; Ampullarioidea; Ampullariidae; Pomacea; Pomacea canaliculata  
UdeM00000014599 6596 162.2 UdeM00000014599 XP\_045191792.1 93.1 87  
6 0 3 89 1 87 3.20E-37 162.2 6596 cellular  
organisms; Eukaryota; Opisthokonta; Metazoa; Eumetazoa; Bilateria; Protostomia; Spiralia; Lophotrochozoa; Mollusca; Bivalvia; Autobranchia; Heteroconchia; Euheterodonta; Imparidentia; Venerida; Veneroidea; Veneridae; Mercenaria; Mercenaria mercenaria  
UdeM00000014598 6596 221.1 UdeM00000014598 XP\_045191792.1 94 116  
7 0 3 118 1 116 7.70E-55 221.1 6596 cellular  
organisms; Eukaryota; Opisthokonta; Metazoa; Eumetazoa; Bilateria; Protostomia; Spiralia; Lophotrochozoa; Mollusca; Bivalvia; Autobranchia; Heteroconchia; Euheterodonta; Imparidentia; Venerida; Veneroidea; Veneridae; Mercenaria; Mercenaria mercenaria  
UdeM00000014601 1735272 318.9 UdeM00000014601 XP\_041375095.1 39  
549 251 15 2 537 4 481 1.20E-83 318.9 1735272  
cellular  
organisms; Eukaryota; Opisthokonta; Metazoa; Eumetazoa; Bilateria; Protostomia; Spiralia; Lophotrochozoa; Mollusca; Gastropoda; Neomphalina; Neomphaloidea; Peltopiridae; Gigantopelta; Gigantopelta aegis  
UdeM00000014600 7574 399.8 UdeM00000014600 XP\_013410521.1 38.8 662  
323 13 2 645 26 623 6.50E-108 399.8 7574 cellular  
organisms; Eukaryota; Opisthokonta; Metazoa; Eumetazoa; Bilateria; Protostomia;

Spiralia;Lophotrochozoa;Brachiopoda;Linguliformea;Lingulata;Lingulida;Linguloidea;Lingulidae;Lingula;Lingula anatina

UdeM00000014602 6565 1094.7 UdeM00000014602 XP\_022343253.1 56.9  
1206 423 19 122 1254 1289 2470 0.00E+00 1094.7 6565  
cellular

organisms;Eukaryota;Opisthokonta;Metazoa;Eumetazoa;Bilateria;Protostomia;Spiralia;Lophotrochozoa;Mollusca;Bivalvia;Autobranchia;Pteriomorpha;Ostreida;Ostreoidea;Ostreidae;Crassostrea;Crassostrea virginica

UdeM00000014603 6565 1084.7 UdeM00000014603 XP\_022343259.1 57  
1194 415 20 122 1242 1289 2457 0.00E+00 1084.7 6565  
cellular

organisms;Eukaryota;Opisthokonta;Metazoa;Eumetazoa;Bilateria;Protostomia;Spiralia;Lophotrochozoa;Mollusca;Bivalvia;Autobranchia;Pteriomorpha;Ostreida;Ostreoidea;Ostreidae;Crassostrea;Crassostrea virginica

UdeM00000014604 6596 184.9 UdeM00000014604 XP\_045194995.1 93.7 95  
6 0 26 120 1210 1304 6.60E-44 184.9 6596 cellular

organisms;Eukaryota;Opisthokonta;Metazoa;Eumetazoa;Bilateria;Protostomia;Spiralia;Lophotrochozoa;Mollusca;Bivalvia;Autobranchia;Heteroconchia;Euheterodonta;Imparidentia;Venerida;Veneroidea;Veneridae;Mercenaria;Mercenaria mercenaria

UdeM00000014605 400727 163.3 UdeM00000014605 XP\_025115921.1 52.2  
159 55 3 1 146 1 151 2.40E-37 163.3 400727  
cellular

organisms;Eukaryota;Opisthokonta;Metazoa;Eumetazoa;Bilateria;Protostomia;Spiralia;Lophotrochozoa;Mollusca;Gastropoda;Caenogastropoda;Architaenioglossa;Ampullarioidea;Ampullariidae;Pomacea;Pomacea canaliculata

UdeM00000014606 6596 340.9 UdeM00000014606 XP\_045194995.1 36.3 1141  
578 33 30 1098 78 1141 6.10E-90 340.9 6596 cellular

organisms;Eukaryota;Opisthokonta;Metazoa;Eumetazoa;Bilateria;Protostomia;Spiralia;Lophotrochozoa;Mollusca;Bivalvia;Autobranchia;Heteroconchia;Euheterodonta;Imparidentia;Venerida;Veneroidea;Veneridae;Mercenaria;Mercenaria mercenaria

UdeM00000014607 6596 1783.8 UdeM00000014607 XP\_045193533.1 59.4  
1580 560 17 21 1558 19 1558 0.00E+00 1783.8 6596  
cellular

organisms;Eukaryota;Opisthokonta;Metazoa;Eumetazoa;Bilateria;Protostomia;Spiralia;Lophotrochozoa;Mollusca;Bivalvia;Autobranchia;Heteroconchia;Euheterodonta;Imparidentia;Venerida;Veneroidea;Veneridae;Mercenaria;Mercenaria mercenaria

UdeM00000014608 6596 148.7 UdeM00000014608 XP\_045193676.1 52.6 152  
55 1 1 152 18 152 6.20E-33 148.7 6596 cellular

organisms;Eukaryota;Opisthokonta;Metazoa;Eumetazoa;Bilateria;Protostomia;Spiralia;Lophotrochozoa;Mollusca;Bivalvia;Autobranchia;Heteroconchia;Euheterodonta;Imparidentia;Venerida;Veneroidea;Veneridae;Mercenaria;Mercenaria mercenaria

UdeM00000014609 225164 489.2 UdeM00000014609 XP\_009056330.1 64.5  
397 130 5 13 401 2 395 5.10E-135 489.2 225164  
cellular

organisms;Eukaryota;Opisthokonta;Metazoa;Eumetazoa;Bilateria;Protostomia;Spiralia;Lophotrochozoa;Mollusca;Gastropoda;Patellogastropoda;Lottiidae;Lottia;Lottia gigantea

UdeM00000014610 6573 190.3 UdeM00000014610 XP\_021356908.1 29.3 560  
339 9 16 567 408 918 1.10E-44 190.3 6573 cellular

organisms;Eukaryota;Opisthokonta;Metazoa;Eumetazoa;Bilateria;Protostomia;

Spiralia;Lophotrochozoa;Mollusca;Bivalvia;Autobranchia;Pteriormorphia;Pectinida;Pectinoidea;Pectinidae;Mizuhopecten;Mizuhopecten yessoensis  
UdeM00000014611 6596 561.6 UdeM00000014611 XP\_045193137.1 57.4 453  
190 1 25 474 8 460 1.10E-156 561.6 6596 cellular  
organisms;Eukaryota;Opisthokonta;Metazoa;Eumetazoa;Bilateria;Protostomia;  
Spiralia;Lophotrochozoa;Mollusca;Bivalvia;Autobranchia;Heteroconchia;Euherodonta;Imparidentia;Venerida;Veneroidea;Veneridae;Mercenaria;Mercenaria mercenaria  
UdeM00000014612 6596 706.8 UdeM00000014612 XP\_045193132.1 49.8 723  
344 6 61 781 37 742 3.00E-200 706.8 6596 cellular  
organisms;Eukaryota;Opisthokonta;Metazoa;Eumetazoa;Bilateria;Protostomia;  
Spiralia;Lophotrochozoa;Mollusca;Bivalvia;Autobranchia;Heteroconchia;Euherodonta;Imparidentia;Venerida;Veneroidea;Veneridae;Mercenaria;Mercenaria mercenaria  
UdeM00000014615 6596 268.5 UdeM00000014615 XP\_045191438.1 72.7 165  
45 0 1 165 413 577 5.80E-69 268.5 6596 cellular  
organisms;Eukaryota;Opisthokonta;Metazoa;Eumetazoa;Bilateria;Protostomia;  
Spiralia;Lophotrochozoa;Mollusca;Bivalvia;Autobranchia;Heteroconchia;Euherodonta;Imparidentia;Venerida;Veneroidea;Veneridae;Mercenaria;Mercenaria mercenaria  
UdeM00000014616 6596 551.6 UdeM00000014616 XP\_045191440.1 67.8 388  
106 1 4 391 6 374 8.20E-154 551.6 6596 cellular  
organisms;Eukaryota;Opisthokonta;Metazoa;Eumetazoa;Bilateria;Protostomia;  
Spiralia;Lophotrochozoa;Mollusca;Bivalvia;Autobranchia;Heteroconchia;Euherodonta;Imparidentia;Venerida;Veneroidea;Veneridae;Mercenaria;Mercenaria mercenaria  
UdeM00000014618 6596 481.5 UdeM00000014618 XP\_045170131.1 65.5 357  
120 2 1 357 1 354 9.50E-133 481.5 6596 cellular  
organisms;Eukaryota;Opisthokonta;Metazoa;Eumetazoa;Bilateria;Protostomia;  
Spiralia;Lophotrochozoa;Mollusca;Bivalvia;Autobranchia;Heteroconchia;Euherodonta;Imparidentia;Venerida;Veneroidea;Veneridae;Mercenaria;Mercenaria mercenaria  
UdeM00000014619 6596 563.1 UdeM00000014619 XP\_045192867.1 73.4 353  
93 1 85 436 29 381 3.00E-157 563.1 6596 cellular  
organisms;Eukaryota;Opisthokonta;Metazoa;Eumetazoa;Bilateria;Protostomia;  
Spiralia;Lophotrochozoa;Mollusca;Bivalvia;Autobranchia;Heteroconchia;Euherodonta;Imparidentia;Venerida;Veneroidea;Veneridae;Mercenaria;Mercenaria mercenaria  
UdeM00000044120 6596 830.5 UdeM00000044120 XP\_045200330.1 49.7 837  
384 4 288 1089 49 883 2.50E-237 830.5 6596 cellular  
organisms;Eukaryota;Opisthokonta;Metazoa;Eumetazoa;Bilateria;Protostomia;  
Spiralia;Lophotrochozoa;Mollusca;Bivalvia;Autobranchia;Heteroconchia;Euherodonta;Imparidentia;Venerida;Veneroidea;Veneridae;Mercenaria;Mercenaria mercenaria  
UdeM00000044121 6573 211.1 UdeM00000044121 XP\_021362990.1 35.3 337  
210 5 9 339 12 346 2.30E-51 211.1 6573 cellular  
organisms;Eukaryota;Opisthokonta;Metazoa;Eumetazoa;Bilateria;Protostomia;  
Spiralia;Lophotrochozoa;Mollusca;Bivalvia;Autobranchia;Pteriormorphia;Pectinida;Pectinoidea;Pectinidae;Mizuhopecten;Mizuhopecten yessoensis  
UdeM00000044122 29159 87.4 UdeM00000044122 XP\_034308960.1 29.1 179  
122 2 19 192 35 213 2.10E-14 87.4 29159 cellular  
organisms;Eukaryota;Opisthokonta;Metazoa;Eumetazoa;Bilateria;Protostomia;  
Spiralia;Lophotrochozoa;Mollusca;Bivalvia;Autobranchia;Pteriormorphia;Ostreida;Ostreoidea;Ostreidae;Crassostrea;Crassostrea gigas

UdeM00000044123 29159 76.6 UdeM00000044123 XP\_034308960.1 31.4 140  
 91 2 12 146 77 216 3.10E-11 76.6 29159 cellular  
 organisms;Eukaryota;Opisthokonta;Metazoa;Eumetazoa;Bilateria;Protostomia;  
 Spiralia;Lophotrochozoa;Mollusca;Bivalvia;Autobranhia;Pteriomorphia;Ostr  
 eida;Ostreoidea;Ostreidae;Crassostrea;Crassostrea gigas  
 UdeM00000044124 6573 99.8 UdeM00000044124 XP\_021378781.1 28.8 236  
 147 6 43 271 223 444 5.90E-18 99.8 6573 cellular  
 organisms;Eukaryota;Opisthokonta;Metazoa;Eumetazoa;Bilateria;Protostomia;  
 Spiralia;Lophotrochozoa;Mollusca;Bivalvia;Autobranhia;Pteriomorphia;Pect  
 inida;Pectinoidea;Pectinidae;Mizuhopecten;Mizuhopecten yessoensis  
 UdeM00000044125 6596 237.7 UdeM00000044125 XP\_045201849.1 30 580  
 368 20 1 568 478 1031 3.80E-59 237.7 6596 cellular  
 organisms;Eukaryota;Opisthokonta;Metazoa;Eumetazoa;Bilateria;Protostomia;  
 Spiralia;Lophotrochozoa;Mollusca;Bivalvia;Autobranhia;Heteroconchia;Euhe  
 terodonta;Imparidentia;Venerida;Veneroidea;Veneridae;Mercenaria;Mercenari  
 a mercenaria  
 UdeM00000044126 29159 76.6 UdeM00000044126 XP\_034308958.1 33.3 120  
 74 3 12 128 15 131 4.10E-11 76.6 29159 cellular  
 organisms;Eukaryota;Opisthokonta;Metazoa;Eumetazoa;Bilateria;Protostomia;  
 Spiralia;Lophotrochozoa;Mollusca;Bivalvia;Autobranhia;Pteriomorphia;Ostr  
 eida;Ostreoidea;Ostreidae;Crassostrea;Crassostrea gigas  
 UdeM00000044127 6596 286.6 UdeM00000044127 XP\_045201849.1 30.3 693  
 432 23 2 673 384 1046 8.80E-74 286.6 6596 cellular  
 organisms;Eukaryota;Opisthokonta;Metazoa;Eumetazoa;Bilateria;Protostomia;  
 Spiralia;Lophotrochozoa;Mollusca;Bivalvia;Autobranhia;Heteroconchia;Euhe  
 terodonta;Imparidentia;Venerida;Veneroidea;Veneridae;Mercenaria;Mercenari  
 a mercenaria  
 UdeM00000044128 6565 269.2 UdeM00000044128 XP\_022312094.1 29.2 763  
 456 26 2 716 256 982 1.50E-68 269.2 6565 cellular  
 organisms;Eukaryota;Opisthokonta;Metazoa;Eumetazoa;Bilateria;Protostomia;  
 Spiralia;Lophotrochozoa;Mollusca;Bivalvia;Autobranhia;Pteriomorphia;Ostr  
 eida;Ostreoidea;Ostreidae;Crassostrea;Crassostrea virginica  
 UdeM00000012141 6596 137.5 UdeM00000012141 XP\_045211352.1 34.2 196  
 120 3 4 190 51 246 2.00E-29 137.5 6596 cellular  
 organisms;Eukaryota;Opisthokonta;Metazoa;Eumetazoa;Bilateria;Protostomia;  
 Spiralia;Lophotrochozoa;Mollusca;Bivalvia;Autobranhia;Heteroconchia;Euhe  
 terodonta;Imparidentia;Venerida;Veneroidea;Veneridae;Mercenaria;Mercenari  
 a mercenaria  
 UdeM00000012142 7574 152.5 UdeM00000012142 XP\_013396733.1 43.2 206  
 115 2 67 270 43 248 7.50E-34 152.5 7574 cellular  
 organisms;Eukaryota;Opisthokonta;Metazoa;Eumetazoa;Bilateria;Protostomia;  
 Spiralia;Lophotrochozoa;Brachiopoda;Linguliformea;Lingulata;Lingulida;Lin  
 guloidea;Lingulidae;Lingula;Lingula anatina  
 UdeM00000012143 400727 365.2 UdeM00000012143 XP\_025109728.1 48.9  
 376 181 4 26 396 302 671 1.10E-97 365.2 400727  
 cellular  
 organisms;Eukaryota;Opisthokonta;Metazoa;Eumetazoa;Bilateria;Protostomia;  
 Spiralia;Lophotrochozoa;Mollusca;Gastropoda;Caenogastropoda;Architaeniogl  
 ossa;Ampullarioidea;Ampullariidae;Pomacea;Pomacea canaliculata  
 UdeM00000012144 400727 364 UdeM00000012144 XP\_025109728.1 54.2  
 323 139 3 2 319 353 671 1.90E-97 364 400727  
 cellular  
 organisms;Eukaryota;Opisthokonta;Metazoa;Eumetazoa;Bilateria;Protostomia;

Spiralia;Lophotrochozoa;Mollusca;Gastropoda;Caenogastropoda;Architaenioglossa;Ampullarioidea;Ampullariidae;Pomacea;Pomacea canaliculata

UdeM00000012145 6596 94.4 UdeM00000012145 XP\_045211353.1 29.4 211  
132 4 9 207 7 212 1.90E-16 94.4 6596 cellular  
organisms;Eukaryota;Opisthokonta;Metazoa;Eumetazoa;Bilateria;Protostomia;  
Spiralia;Lophotrochozoa;Mollusca;Bivalvia;Autobranhia;Heteroconchia;Euherodonta;Imparidentia;Venerida;Veneroidea;Veneridae;Mercenaria;Mercenaria mercenaria

UdeM00000012147 225164 133.7 UdeM00000012147 XP\_009062103.1 32.6  
193 128 2 1 192 1 192 2.90E-28 133.7 225164  
cellular  
organisms;Eukaryota;Opisthokonta;Metazoa;Eumetazoa;Bilateria;Protostomia;  
Spiralia;Lophotrochozoa;Mollusca;Gastropoda;Patellogastropoda;Lottioidea;  
Lottiidae;Lottia;Lottia gigantea

UdeM00000012146 225164 133.7 UdeM00000012146 XP\_009062103.1 32.6  
193 128 2 39 230 1 192 3.40E-28 133.7 225164  
cellular  
organisms;Eukaryota;Opisthokonta;Metazoa;Eumetazoa;Bilateria;Protostomia;  
Spiralia;Lophotrochozoa;Mollusca;Gastropoda;Patellogastropoda;Lottioidea;  
Lottiidae;Lottia;Lottia gigantea

UdeM00000012149 225164 123.6 UdeM00000012149 XP\_009062103.1 33  
179 118 2 1 178 15 192 2.80E-25 123.6 225164  
cellular  
organisms;Eukaryota;Opisthokonta;Metazoa;Eumetazoa;Bilateria;Protostomia;  
Spiralia;Lophotrochozoa;Mollusca;Gastropoda;Patellogastropoda;Lottioidea;  
Lottiidae;Lottia;Lottia gigantea

UdeM00000012150 6573 101.3 UdeM00000012150 XP\_021345878.1 32.1 196  
123 5 2 191 1 192 1.60E-18 101.3 6573 cellular  
organisms;Eukaryota;Opisthokonta;Metazoa;Eumetazoa;Bilateria;Protostomia;  
Spiralia;Lophotrochozoa;Mollusca;Bivalvia;Autobranhia;Pteriomorphia;Pectinida;  
Pectinoidea;Pectinidae;Mizuhopecten;Mizuhopecten yessoensis

UdeM00000012151 6573 97.1 UdeM00000012151 XP\_021345878.1 31.6 177  
113 4 19 191 20 192 3.00E-17 97.1 6573 cellular  
organisms;Eukaryota;Opisthokonta;Metazoa;Eumetazoa;Bilateria;Protostomia;  
Spiralia;Lophotrochozoa;Mollusca;Bivalvia;Autobranhia;Pteriomorphia;Pectinida;  
Pectinoidea;Pectinidae;Mizuhopecten;Mizuhopecten yessoensis

UdeM00000012153 6596 110.2 UdeM00000012153 XP\_045214139.1 32.1 184  
122 2 19 200 23 205 3.40E-21 110.2 6596 cellular  
organisms;Eukaryota;Opisthokonta;Metazoa;Eumetazoa;Bilateria;Protostomia;  
Spiralia;Lophotrochozoa;Mollusca;Bivalvia;Autobranhia;Heteroconchia;Euherodonta;  
Imparidentia;Venerida;Veneroidea;Veneridae;Mercenaria;Mercenaria mercenaria

UdeM00000012154 225164 62.8 UdeM00000012154 XP\_009062103.1 26.9  
193 75 5 1 128 1 192 4.30E-07 62.8 225164  
cellular  
organisms;Eukaryota;Opisthokonta;Metazoa;Eumetazoa;Bilateria;Protostomia;  
Spiralia;Lophotrochozoa;Mollusca;Gastropoda;Patellogastropoda;Lottioidea;  
Lottiidae;Lottia;Lottia gigantea

UdeM00000012155 225164 119 UdeM00000012155 XP\_009062103.1 32.6  
193 128 2 1 192 1 192 7.30E-24 119 225164  
cellular  
organisms;Eukaryota;Opisthokonta;Metazoa;Eumetazoa;Bilateria;Protostomia;  
Spiralia;Lophotrochozoa;Mollusca;Gastropoda;Patellogastropoda;Lottioidea;  
Lottiidae;Lottia;Lottia gigantea



UdeM00000012156 6596 136.7 UdeM00000012156 XP\_045211352.1 38.1 202  
 112 7 1 193 49 246 4.60E-29 136.7 6596 cellular  
 organisms;Eukaryota;Opisthokonta;Metazoa;Eumetazoa;Bilateria;Protostomia;  
 Spiralia;Lophotrochozoa;Mollusca;Bivalvia;Autobranhia;Heteroconchia;Euhe  
 terodonta;Imparidentia;Venerida;Veneroidea;Veneridae;Mercenaria;Mercenari  
 a mercenaria  
 UdeM00000012157 6596 114.4 UdeM00000012157 XP\_045211352.1 35.4 175  
 107 2 5 179 51 219 1.80E-22 114.4 6596 cellular  
 organisms;Eukaryota;Opisthokonta;Metazoa;Eumetazoa;Bilateria;Protostomia;  
 Spiralia;Lophotrochozoa;Mollusca;Bivalvia;Autobranhia;Heteroconchia;Euhe  
 terodonta;Imparidentia;Venerida;Veneroidea;Veneridae;Mercenaria;Mercenari  
 a mercenaria  
 UdeM00000012158 6596 155.2 UdeM00000012158 XP\_045204471.1 59.8 122  
 49 0 4 125 11 132 9.20E-35 155.2 6596 cellular  
 organisms;Eukaryota;Opisthokonta;Metazoa;Eumetazoa;Bilateria;Protostomia;  
 Spiralia;Lophotrochozoa;Mollusca;Bivalvia;Autobranhia;Heteroconchia;Euhe  
 terodonta;Imparidentia;Venerida;Veneroidea;Veneridae;Mercenaria;Mercenari  
 a mercenaria  
 UdeM00000012159 6596 150.2 UdeM00000012159 XP\_045204471.1 53.7 134  
 62 0 4 137 11 144 3.80E-33 150.2 6596 cellular  
 organisms;Eukaryota;Opisthokonta;Metazoa;Eumetazoa;Bilateria;Protostomia;  
 Spiralia;Lophotrochozoa;Mollusca;Bivalvia;Autobranhia;Heteroconchia;Euhe  
 terodonta;Imparidentia;Venerida;Veneroidea;Veneridae;Mercenaria;Mercenari  
 a mercenaria  
 UdeM00000012160 6596 162.2 UdeM00000012160 XP\_045204471.1 52.1 163  
 66 2 2 154 9 169 2.40E-36 162.2 6596 cellular  
 organisms;Eukaryota;Opisthokonta;Metazoa;Eumetazoa;Bilateria;Protostomia;  
 Spiralia;Lophotrochozoa;Mollusca;Bivalvia;Autobranhia;Heteroconchia;Euhe  
 terodonta;Imparidentia;Venerida;Veneroidea;Veneridae;Mercenaria;Mercenari  
 a mercenaria  
 UdeM00000012161 6596 164.1 UdeM00000012161 XP\_045204471.1 52.8 163  
 65 2 2 154 9 169 4.10E-37 164.1 6596 cellular  
 organisms;Eukaryota;Opisthokonta;Metazoa;Eumetazoa;Bilateria;Protostomia;  
 Spiralia;Lophotrochozoa;Mollusca;Bivalvia;Autobranhia;Heteroconchia;Euhe  
 terodonta;Imparidentia;Venerida;Veneroidea;Veneridae;Mercenaria;Mercenari  
 a mercenaria  
 UdeM00000012162 6596 149.8 UdeM00000012162 XP\_045204471.1 59.8 122  
 49 0 1 122 11 132 3.50E-33 149.8 6596 cellular  
 organisms;Eukaryota;Opisthokonta;Metazoa;Eumetazoa;Bilateria;Protostomia;  
 Spiralia;Lophotrochozoa;Mollusca;Bivalvia;Autobranhia;Heteroconchia;Euhe  
 terodonta;Imparidentia;Venerida;Veneroidea;Veneridae;Mercenaria;Mercenari  
 a mercenaria  
 UdeM00000012163 6596 157.5 UdeM00000012163 XP\_045170381.1 63.3 120  
 43 1 4 122 1 120 2.40E-35 157.5 6596 cellular  
 organisms;Eukaryota;Opisthokonta;Metazoa;Eumetazoa;Bilateria;Protostomia;  
 Spiralia;Lophotrochozoa;Mollusca;Bivalvia;Autobranhia;Heteroconchia;Euhe  
 terodonta;Imparidentia;Venerida;Veneroidea;Veneridae;Mercenaria;Mercenari  
 a mercenaria  
 UdeM00000012164 6596 157.1 UdeM00000012164 XP\_045170381.1 64.2 120  
 42 1 4 122 1 120 3.20E-35 157.1 6596 cellular  
 organisms;Eukaryota;Opisthokonta;Metazoa;Eumetazoa;Bilateria;Protostomia;  
 Spiralia;Lophotrochozoa;Mollusca;Bivalvia;Autobranhia;Heteroconchia;Euhe  
 terodonta;Imparidentia;Venerida;Veneroidea;Veneridae;Mercenaria;Mercenari  
 a mercenaria

UdeM00000012165 6596 150.2 UdeM00000012165 XP\_045170381.1 60 120  
 47 1 4 122 1 120 3.60E-33 150.2 6596 cellular  
 organisms;Eukaryota;Opisthokonta;Metazoa;Eumetazoa;Bilateria;Protostomia;  
 Spiralia;Lophotrochozoa;Mollusca;Bivalvia;Autobranchia;Heteroconchia;Euhe  
 terodonta;Imparidentia;Venerida;Veneroidea;Veneridae;Mercenaria;Mercenari  
 a mercenaria  
 UdeM00000012166 6596 83.2 UdeM00000012166 XP\_045170381.1 47.4 97  
 46 2 4 95 56 152 7.80E-13 83.2 6596 cellular  
 organisms;Eukaryota;Opisthokonta;Metazoa;Eumetazoa;Bilateria;Protostomia;  
 Spiralia;Lophotrochozoa;Mollusca;Bivalvia;Autobranchia;Heteroconchia;Euhe  
 terodonta;Imparidentia;Venerida;Veneroidea;Veneridae;Mercenaria;Mercenari  
 a mercenaria  
 UdeM00000012167 6573 131.3 UdeM00000012167 XP\_021374431.1 93 71  
 5 0 15 85 5 75 5.70E-28 131.3 6573 cellular  
 organisms;Eukaryota;Opisthokonta;Metazoa;Eumetazoa;Bilateria;Protostomia;  
 Spiralia;Lophotrochozoa;Mollusca;Bivalvia;Autobranchia;Pteriormorphia;Pect  
 inida;Pectinoidea;Pectinidae;Mizuhopecten;Mizuhopecten yessoensis  
 UdeM00000012169 6596 155.6 UdeM00000012169 XP\_045211274.1 32 356  
 193 7 1 311 1 352 1.10E-34 155.6 6596 cellular  
 organisms;Eukaryota;Opisthokonta;Metazoa;Eumetazoa;Bilateria;Protostomia;  
 Spiralia;Lophotrochozoa;Mollusca;Bivalvia;Autobranchia;Heteroconchia;Euhe  
 terodonta;Imparidentia;Venerida;Veneroidea;Veneridae;Mercenaria;Mercenari  
 a mercenaria  
 UdeM00000012170 6565 73.2 UdeM00000012170 XP\_022317062.1 41.2 119  
 55 3 8 113 142 258 2.60E-10 73.2 6565 cellular  
 organisms;Eukaryota;Opisthokonta;Metazoa;Eumetazoa;Bilateria;Protostomia;  
 Spiralia;Lophotrochozoa;Mollusca;Bivalvia;Autobranchia;Pteriormorphia;Ostr  
 eida;Ostreoidea;Ostreidae;Crassostrea;Crassostrea virginica  
 UdeM00000012171 6565 162.9 UdeM00000012171 XP\_022305631.1 51.2 170  
 82 1 1 169 18 187 6.20E-37 162.9 6565 cellular  
 organisms;Eukaryota;Opisthokonta;Metazoa;Eumetazoa;Bilateria;Protostomia;  
 Spiralia;Lophotrochozoa;Mollusca;Bivalvia;Autobranchia;Pteriormorphia;Ostr  
 eida;Ostreoidea;Ostreidae;Crassostrea;Crassostrea virginica  
 UdeM00000012172 6573 181 UdeM00000012172 XP\_021347594.1 62.4 141  
 48 2 8 144 5 144 1.10E-42 181 6573 cellular  
 organisms;Eukaryota;Opisthokonta;Metazoa;Eumetazoa;Bilateria;Protostomia;  
 Spiralia;Lophotrochozoa;Mollusca;Bivalvia;Autobranchia;Pteriormorphia;Pect  
 inida;Pectinoidea;Pectinidae;Mizuhopecten;Mizuhopecten yessoensis  
 UdeM00000012173 6596 201.1 UdeM00000012173 XP\_045212697.1 61.9 147  
 56 0 8 154 72 218 1.10E-48 201.1 6596 cellular  
 organisms;Eukaryota;Opisthokonta;Metazoa;Eumetazoa;Bilateria;Protostomia;  
 Spiralia;Lophotrochozoa;Mollusca;Bivalvia;Autobranchia;Heteroconchia;Euhe  
 terodonta;Imparidentia;Venerida;Veneroidea;Veneridae;Mercenaria;Mercenari  
 a mercenaria  
 UdeM00000012174 6850 168.7 UdeM00000012174 XP\_013772703.1 40.5 210  
 85 2 9 178 8 217 6.80E-39 168.7 6850 cellular  
 organisms;Eukaryota;Opisthokonta;Metazoa;Eumetazoa;Bilateria;Protostomia;  
 Ecdysozoa;Panarthropoda;Arthropoda;Chelicerata;Merostomata;Xiphosura;Limu  
 lidae;Limulus;Limulus polyphemus  
 UdeM00000012175 6579 766.5 UdeM00000012175 XP\_033753894.1 48.5 781  
 397 2 7 787 6 781 3.60E-218 766.5 6579 cellular  
 organisms;Eukaryota;Opisthokonta;Metazoa;Eumetazoa;Bilateria;Protostomia;  
 Spiralia;Lophotrochozoa;Mollusca;Bivalvia;Autobranchia;Pteriormorphia;Pect  
 inida;Pectinoidea;Pectinidae;Pecten;Pecten maximus

UdeM00000012176 105785 163.7 UdeM00000012176 XP\_023714940.1 57.9  
 121 49 1 6 124 10 130 2.00E-37 163.7 105785  
 cellular  
 organisms;Eukaryota;Opisthokonta;Metazoa;Eumetazoa;Bilateria;Protostomia;  
 Ecdysozoa;Panarthropoda;Arthropoda;Mandibulata;Pancrustacea;Hexapoda;Inse  
 cta;Dicondylia;Pterygota;Neoptera;Polyneoptera;Dictyoptera;Blattodea;Blat  
 toidea;Termitoidea;Kalotermitidae;Cryptotermitinae;Cryptotermes;Cryptoter  
 mes secundus  
 UdeM00000012177 225164 546.6 UdeM00000012177 XP\_009059514.1 41  
 671 392 1 5 671 53 723 4.50E-152 546.6 225164  
 cellular  
 organisms;Eukaryota;Opisthokonta;Metazoa;Eumetazoa;Bilateria;Protostomia;  
 Spiralia;Lophotrochozoa;Mollusca;Gastropoda;Patellogastropoda;Lottioidea;  
 Lottiidae;Lottia;Lottia gigantea  
 UdeM00000012178 6579 142.9 UdeM00000012178 XP\_033724951.1 31.6 269  
 160 5 1 249 554 818 1.60E-30 142.9 6579 cellular  
 organisms;Eukaryota;Opisthokonta;Metazoa;Eumetazoa;Bilateria;Protostomia;  
 Spiralia;Lophotrochozoa;Mollusca;Bivalvia;Autobranchia;Pteriormorphia;Pect  
 inida;Pectinoidea;Pectinidae;Pecten;Pecten maximus  
 UdeM00000012179 6579 142.9 UdeM00000012179 XP\_033724951.1 31.6 269  
 160 5 1 249 554 818 7.50E-31 142.9 6579 cellular  
 organisms;Eukaryota;Opisthokonta;Metazoa;Eumetazoa;Bilateria;Protostomia;  
 Spiralia;Lophotrochozoa;Mollusca;Bivalvia;Autobranchia;Pteriormorphia;Pect  
 inida;Pectinoidea;Pectinidae;Pecten;Pecten maximus  
 UdeM00000012180 6579 104.4 UdeM00000012180 XP\_033729967.1 30.8 208  
 137 3 9 210 128 334 2.00E-19 104.4 6579 cellular  
 organisms;Eukaryota;Opisthokonta;Metazoa;Eumetazoa;Bilateria;Protostomia;  
 Spiralia;Lophotrochozoa;Mollusca;Bivalvia;Autobranchia;Pteriormorphia;Pect  
 inida;Pectinoidea;Pectinidae;Pecten;Pecten maximus  
 UdeM00000012181 6579 104 UdeM00000012181 XP\_033724951.1 26.7 258  
 180 6 1 257 72 321 2.90E-19 104 6579 cellular  
 organisms;Eukaryota;Opisthokonta;Metazoa;Eumetazoa;Bilateria;Protostomia;  
 Spiralia;Lophotrochozoa;Mollusca;Bivalvia;Autobranchia;Pteriormorphia;Pect  
 inida;Pectinoidea;Pectinidae;Pecten;Pecten maximus  
 UdeM00000012182 6596 682.6 UdeM00000012182 XP\_045212796.1 55.7 575  
 252 3 35 607 34 607 4.70E-193 682.6 6596 cellular  
 organisms;Eukaryota;Opisthokonta;Metazoa;Eumetazoa;Bilateria;Protostomia;  
 Spiralia;Lophotrochozoa;Mollusca;Bivalvia;Autobranchia;Heteroconchia;Euhe  
 terodonta;Imparidentia;Venerida;Veneroidea;Veneridae;Mercenaria;Mercenari  
 a mercenaria  
 UdeM00000012183 6579 263.1 UdeM00000012183 XP\_033746710.1 51.3 298  
 114 10 17 306 10 284 4.60E-67 263.1 6579 cellular  
 organisms;Eukaryota;Opisthokonta;Metazoa;Eumetazoa;Bilateria;Protostomia;  
 Spiralia;Lophotrochozoa;Mollusca;Bivalvia;Autobranchia;Pteriormorphia;Pect  
 inida;Pectinoidea;Pectinidae;Pecten;Pecten maximus  
 UdeM00000012184 6596 406.4 UdeM00000012184 XP\_045211381.1 42 514  
 289 7 1 509 29 538 5.50E-110 406.4 6596 cellular  
 organisms;Eukaryota;Opisthokonta;Metazoa;Eumetazoa;Bilateria;Protostomia;  
 Spiralia;Lophotrochozoa;Mollusca;Bivalvia;Autobranchia;Heteroconchia;Euhe  
 terodonta;Imparidentia;Venerida;Veneroidea;Veneridae;Mercenaria;Mercenari  
 a mercenaria  
 UdeM00000012185 6596 366.3 UdeM00000012185 XP\_045211381.1 40.3 529  
 268 10 30 554 60 544 6.80E-98 366.3 6596 cellular  
 organisms;Eukaryota;Opisthokonta;Metazoa;Eumetazoa;Bilateria;Protostomia;

Spiralia; Lophotrochozoa; Mollusca; Bivalvia; Autobranchia; Heteroconchia; Euheterodonta; Imparidentia; Venerida; Veneroidea; Veneridae; Mercenaria; Mercenaria mercenaria

UdeM00000012186 6596 256.1 UdeM00000012186 XP\_045211381.1 33.1 484  
283 9 23 503 21 466 9.20E-65 256.1 6596 cellular  
organisms; Eukaryota; Opisthokonta; Metazoa; Eumetazoa; Bilateria; Protostomia; Spiralia; Lophotrochozoa; Mollusca; Bivalvia; Autobranchia; Heteroconchia; Euheterodonta; Imparidentia; Venerida; Veneroidea; Veneridae; Mercenaria; Mercenaria mercenaria

UdeM00000012187 6596 142.1 UdeM00000012187 XP\_045211381.1 78.8 80  
17 0 3 82 465 544 3.20E-31 142.1 6596 cellular  
organisms; Eukaryota; Opisthokonta; Metazoa; Eumetazoa; Bilateria; Protostomia; Spiralia; Lophotrochozoa; Mollusca; Bivalvia; Autobranchia; Heteroconchia; Euheterodonta; Imparidentia; Venerida; Veneroidea; Veneridae; Mercenaria; Mercenaria mercenaria

UdeM00000012188 6596 244.2 UdeM00000012188 XP\_045211382.1 34.4 407  
157 5 4 305 126 527 2.20E-61 244.2 6596 cellular  
organisms; Eukaryota; Opisthokonta; Metazoa; Eumetazoa; Bilateria; Protostomia; Spiralia; Lophotrochozoa; Mollusca; Bivalvia; Autobranchia; Heteroconchia; Euheterodonta; Imparidentia; Venerida; Veneroidea; Veneridae; Mercenaria; Mercenaria mercenaria

UdeM00000012189 6596 115.9 UdeM00000012189 XP\_045211381.1 27.1 266  
159 5 13 278 10 240 8.60E-23 115.9 6596 cellular  
organisms; Eukaryota; Opisthokonta; Metazoa; Eumetazoa; Bilateria; Protostomia; Spiralia; Lophotrochozoa; Mollusca; Bivalvia; Autobranchia; Heteroconchia; Euheterodonta; Imparidentia; Venerida; Veneroidea; Veneridae; Mercenaria; Mercenaria mercenaria

UdeM00000012190 6596 310.5 UdeM00000012190 XP\_045211381.1 50.9 289  
140 2 13 300 257 544 2.40E-81 310.5 6596 cellular  
organisms; Eukaryota; Opisthokonta; Metazoa; Eumetazoa; Bilateria; Protostomia; Spiralia; Lophotrochozoa; Mollusca; Bivalvia; Autobranchia; Heteroconchia; Euheterodonta; Imparidentia; Venerida; Veneroidea; Veneridae; Mercenaria; Mercenaria mercenaria

UdeM00000012191 6573 193.7 UdeM00000012191 XP\_021346619.1 27.8 518  
336 9 5 501 11 511 5.70E-46 193.7 6573 cellular  
organisms; Eukaryota; Opisthokonta; Metazoa; Eumetazoa; Bilateria; Protostomia; Spiralia; Lophotrochozoa; Mollusca; Bivalvia; Autobranchia; Pteriomorpha; Pectinida; Pectinoidea; Pectinidae; Mizuhopecten; Mizuhopecten yessoensis

UdeM00000012192 6573 199.1 UdeM00000012192 XP\_021346619.1 28 514  
336 8 5 497 11 511 1.30E-47 199.1 6573 cellular  
organisms; Eukaryota; Opisthokonta; Metazoa; Eumetazoa; Bilateria; Protostomia; Spiralia; Lophotrochozoa; Mollusca; Bivalvia; Autobranchia; Pteriomorpha; Pectinida; Pectinoidea; Pectinidae; Mizuhopecten; Mizuhopecten yessoensis

UdeM00000012193 7574 239.6 UdeM00000012193 XP\_013408505.1 69.9 156  
47 0 1 156 1 156 2.80E-60 239.6 7574 cellular  
organisms; Eukaryota; Opisthokonta; Metazoa; Eumetazoa; Bilateria; Protostomia; Spiralia; Lophotrochozoa; Brachiopoda; Linguliformea; Lingulata; Lingulida; Linguloidea; Lingulidae; Lingula; Lingula anatina

UdeM00000012194 6565 70.1 UdeM00000012194 XP\_022319531.1 29.2 144  
78 3 3 122 191 334 2.20E-09 70.1 6565 cellular  
organisms; Eukaryota; Opisthokonta; Metazoa; Eumetazoa; Bilateria; Protostomia; Spiralia; Lophotrochozoa; Mollusca; Bivalvia; Autobranchia; Pteriomorpha; Ostreida; Ostreoidea; Ostreidae; Crassostrea; Crassostrea virginica

UdeM00000012195 6596 149.1 UdeM00000012195 XP\_045214037.1 59.3 108  
 44 0 1 108 1 108 4.40E-33 149.1 6596 cellular  
 organisms;Eukaryota;Opisthokonta;Metazoa;Eumetazoa;Bilateria;Protostomia;  
 Spiralia;Lophotrochozoa;Mollusca;Bivalvia;Autobranhia;Heteroconchia;Euhe  
 terodonta;Imparidentia;Venerida;Veneroidea;Veneridae;Mercenaria;Mercenari  
 a mercenaria  
 UdeM00000012196 6596 392.5 UdeM00000012196 XP\_045214036.1 67.8 283  
 89 1 9 289 7 289 5.90E-106 392.5 6596 cellular  
 organisms;Eukaryota;Opisthokonta;Metazoa;Eumetazoa;Bilateria;Protostomia;  
 Spiralia;Lophotrochozoa;Mollusca;Bivalvia;Autobranhia;Heteroconchia;Euhe  
 terodonta;Imparidentia;Venerida;Veneroidea;Veneridae;Mercenaria;Mercenari  
 a mercenaria  
 UdeM00000012197 400727 575.5 UdeM00000012197 XP\_025082558.1 55.1  
 512 211 6 1 501 1 504 6.70E-161 575.5 400727  
 cellular  
 organisms;Eukaryota;Opisthokonta;Metazoa;Eumetazoa;Bilateria;Protostomia;  
 Spiralia;Lophotrochozoa;Mollusca;Gastropoda;Caenogastropoda;Architaeniogl  
 ossa;Ampullarioidea;Ampullariidae;Pomacea;Pomacea canaliculata  
 UdeM00000012198 400727 318.9 UdeM00000012198 XP\_025098589.1 72.2  
 205 52 2 104 308 92 291 7.00E-84 318.9 400727  
 cellular  
 organisms;Eukaryota;Opisthokonta;Metazoa;Eumetazoa;Bilateria;Protostomia;  
 Spiralia;Lophotrochozoa;Mollusca;Gastropoda;Caenogastropoda;Architaeniogl  
 ossa;Ampullarioidea;Ampullariidae;Pomacea;Pomacea canaliculata  
 UdeM00000012199 6596 637.9 UdeM00000012199 XP\_045213437.1 85.2 364  
 54 0 1 364 1 364 8.00E-180 637.9 6596 cellular  
 organisms;Eukaryota;Opisthokonta;Metazoa;Eumetazoa;Bilateria;Protostomia;  
 Spiralia;Lophotrochozoa;Mollusca;Bivalvia;Autobranhia;Heteroconchia;Euhe  
 terodonta;Imparidentia;Venerida;Veneroidea;Veneridae;Mercenaria;Mercenari  
 a mercenaria  
 UdeM00000012200 6596 216.9 UdeM00000012200 XP\_045158043.1 43.8 251  
 137 2 278 525 173 422 6.30E-53 216.9 6596 cellular  
 organisms;Eukaryota;Opisthokonta;Metazoa;Eumetazoa;Bilateria;Protostomia;  
 Spiralia;Lophotrochozoa;Mollusca;Bivalvia;Autobranhia;Heteroconchia;Euhe  
 terodonta;Imparidentia;Venerida;Veneroidea;Veneridae;Mercenaria;Mercenari  
 a mercenaria  
 UdeM00000012201 6596 216.9 UdeM00000012201 XP\_045158043.1 43.8 251  
 137 2 113 360 173 422 4.40E-53 216.9 6596 cellular  
 organisms;Eukaryota;Opisthokonta;Metazoa;Eumetazoa;Bilateria;Protostomia;  
 Spiralia;Lophotrochozoa;Mollusca;Bivalvia;Autobranhia;Heteroconchia;Euhe  
 terodonta;Imparidentia;Venerida;Veneroidea;Veneridae;Mercenaria;Mercenari  
 a mercenaria  
 UdeM00000012202 6565 307.8 UdeM00000012202 XP\_022313078.1 43.7 389  
 187 5 113 495 1136 1498 2.60E-80 307.8 6565 cellular  
 organisms;Eukaryota;Opisthokonta;Metazoa;Eumetazoa;Bilateria;Protostomia;  
 Spiralia;Lophotrochozoa;Mollusca;Bivalvia;Autobranhia;Pteriomorphia;Ostr  
 eida;Ostreoidea;Ostreidae;Crassostrea;Crassostrea virginica  
 UdeM00000012203 6596 278.9 UdeM00000012203 XP\_045206316.1 48.4 322  
 139 6 1 314 222 524 8.20E-72 278.9 6596 cellular  
 organisms;Eukaryota;Opisthokonta;Metazoa;Eumetazoa;Bilateria;Protostomia;  
 Spiralia;Lophotrochozoa;Mollusca;Bivalvia;Autobranhia;Heteroconchia;Euhe  
 terodonta;Imparidentia;Venerida;Veneroidea;Veneridae;Mercenaria;Mercenari  
 a mercenaria

UdeM00000012206 6596 487.6 UdeM00000012206 XP\_045206611.1 40.4 649  
 329 12 771 1391 483 1101 5.10E-134 487.6 6596 cellular  
 organisms;Eukaryota;Opisthokonta;Metazoa;Eumetazoa;Bilateria;Protostomia;  
 Spiralia;Lophotrochozoa;Mollusca;Bivalvia;Autobranchia;Heteroconchia;Euhe  
 terodonta;Imparidentia;Venerida;Veneroidea;Veneridae;Mercenaria;Mercenari  
 a mercenaria  
 UdeM00000012207 6500 169.9 UdeM00000012207 XP\_005094781.1 74.1 108  
 24 2 42 149 33 136 3.70E-39 169.9 6500 cellular  
 organisms;Eukaryota;Opisthokonta;Metazoa;Eumetazoa;Bilateria;Protostomia;  
 Spiralia;Lophotrochozoa;Mollusca;Gastropoda;Heterobranchia;Euthyneura;Tec  
 tipleura;Aplysiida;Aplysioidea;Aplysiidae;Aplysia;Aplysia californica  
 UdeM00000012208 1735272 1385.9 UdeM00000012208 XP\_041363035.1  
 62.2 1223 433 13 1 1219 1 1198 0.00E+00 1385.9  
 1735272 cellular  
 organisms;Eukaryota;Opisthokonta;Metazoa;Eumetazoa;Bilateria;Protostomia;  
 Spiralia;Lophotrochozoa;Mollusca;Gastropoda;Neomphalina;Neomphaloidea;Pel  
 tospiridae;Gigantopelta;Gigantopelta aegis  
 UdeM00000012209 6596 209.9 UdeM00000012209 XP\_045214433.1 58.5 183  
 73 2 1 180 17 199 3.50E-51 209.9 6596 cellular  
 organisms;Eukaryota;Opisthokonta;Metazoa;Eumetazoa;Bilateria;Protostomia;  
 Spiralia;Lophotrochozoa;Mollusca;Bivalvia;Autobranchia;Heteroconchia;Euhe  
 terodonta;Imparidentia;Venerida;Veneroidea;Veneridae;Mercenaria;Mercenari  
 a mercenaria  
 UdeM00000012211 6573 105.9 UdeM00000012211 XP\_021351071.1 72.7 66  
 18 0 39 104 7 72 3.30E-20 105.9 6573 cellular  
 organisms;Eukaryota;Opisthokonta;Metazoa;Eumetazoa;Bilateria;Protostomia;  
 Spiralia;Lophotrochozoa;Mollusca;Bivalvia;Autobranchia;Pteriormorphia;Pect  
 inida;Pectinoidea;Pectinidae;Mizuhopecten;Mizuhopecten yessoensis  
 UdeM00000012213 400727 65.5 UdeM00000012213 XP\_025089679.1 59.6  
 52 21 0 70 121 56 107 6.20E-08 65.5 400727  
 cellular  
 organisms;Eukaryota;Opisthokonta;Metazoa;Eumetazoa;Bilateria;Protostomia;  
 Spiralia;Lophotrochozoa;Mollusca;Gastropoda;Caenogastropoda;Architaeniogl  
 ossa;Ampullarioidea;Ampullariidae;Pomacea;Pomacea canaliculata  
 UdeM00000012215 6579 602.8 UdeM00000012215 XP\_033742903.1 88.7 326  
 34 2 398 720 507 832 7.20E-169 602.8 6579 cellular  
 organisms;Eukaryota;Opisthokonta;Metazoa;Eumetazoa;Bilateria;Protostomia;  
 Spiralia;Lophotrochozoa;Mollusca;Bivalvia;Autobranchia;Pteriormorphia;Pect  
 inida;Pectinoidea;Pectinidae;Pecten;Pecten maximus  
 UdeM00000012217 6579 691 UdeM00000012217 XP\_033743898.1 40.1 1044  
 443 17 1 1036 2129 2998 2.30E-195 691 6579 cellular  
 organisms;Eukaryota;Opisthokonta;Metazoa;Eumetazoa;Bilateria;Protostomia;  
 Spiralia;Lophotrochozoa;Mollusca;Bivalvia;Autobranchia;Pteriormorphia;Pect  
 inida;Pectinoidea;Pectinidae;Pecten;Pecten maximus  
 UdeM00000012216 29159 889 UdeM00000012216 XP\_034312289.1 43.1 1166  
 477 17 1 1159 4944 5930 6.40E-255 889 29159 cellular  
 organisms;Eukaryota;Opisthokonta;Metazoa;Eumetazoa;Bilateria;Protostomia;  
 Spiralia;Lophotrochozoa;Mollusca;Bivalvia;Autobranchia;Pteriormorphia;Ostr  
 eida;Ostreoidea;Ostreidae;Crassostrea;Crassostrea gigas  
 UdeM00000012218 6596 428.3 UdeM00000012218 XP\_045211001.1 41.5 537  
 287 10 3 531 2502 3019 1.40E-116 428.3 6596 cellular  
 organisms;Eukaryota;Opisthokonta;Metazoa;Eumetazoa;Bilateria;Protostomia;  
 Spiralia;Lophotrochozoa;Mollusca;Bivalvia;Autobranchia;Heteroconchia;Euhe

terodonta;Imparidentia;Venerida;Veneroidea;Veneridae;Mercenaria;Mercenari  
 a mercenaria  
 UdeM00000012219 29159 880.2 UdeM00000012219 XP\_034312289.1 41.1 1116  
 635 11 3 1112 3131 4230 3.00E-252 880.2 29159 cellular  
 organisms;Eukaryota;Opisthokonta;Metazoa;Eumetazoa;Bilateria;Protostomia;  
 Spiralia;Lophotrochozoa;Mollusca;Bivalvia;Autobranhia;Pteriormorphia;Ostr  
 eida;Ostreoidea;Ostreidae;Crassostrea;Crassostrea gigas  
 UdeM00000012220 6573 65.5 UdeM00000012220 XP\_021359195.1 41.7 72  
 42 0 30 101 519 590 4.60E-08 65.5 6573 cellular  
 organisms;Eukaryota;Opisthokonta;Metazoa;Eumetazoa;Bilateria;Protostomia;  
 Spiralia;Lophotrochozoa;Mollusca;Bivalvia;Autobranhia;Pteriormorphia;Pect  
 inida;Pectinoidea;Pectinidae;Mizuhopecten;Mizuhopecten yessoensis  
 UdeM00000012221 29159 113.2 UdeM00000012221 XP\_034312289.1 33.9 168  
 105 2 13 178 2870 3033 3.80E-22 113.2 29159 cellular  
 organisms;Eukaryota;Opisthokonta;Metazoa;Eumetazoa;Bilateria;Protostomia;  
 Spiralia;Lophotrochozoa;Mollusca;Bivalvia;Autobranhia;Pteriormorphia;Ostr  
 eida;Ostreoidea;Ostreidae;Crassostrea;Crassostrea gigas  
 UdeM00000012222 70779 317.4 UdeM00000012222 XP\_015772611.1 39.3 468  
 242 15 5899 6331 108 568 4.10E-82 317.4 70779 cellular  
 organisms;Eukaryota;Opisthokonta;Metazoa;Eumetazoa;Cnidaria;Anthozoa;Hexa  
 corallia;Scleractinia;Astrocoeniina;Acroporidae;Acropora;Acropora  
 digitifera  
 UdeM00000012223 6596 300.4 UdeM00000012223 XP\_045215021.1 54.6 282  
 123 3 1 279 1 280 2.90E-78 300.4 6596 cellular  
 organisms;Eukaryota;Opisthokonta;Metazoa;Eumetazoa;Bilateria;Protostomia;  
 Spiralia;Lophotrochozoa;Mollusca;Bivalvia;Autobranhia;Heteroconchia;Euhe  
 terodonta;Imparidentia;Venerida;Veneroidea;Veneridae;Mercenaria;Mercenari  
 a mercenaria  
 UdeM00000012225 6596 409.8 UdeM00000012225 XP\_045213528.1 45.7 420  
 218 6 539 950 222 639 9.20E-111 409.8 6596 cellular  
 organisms;Eukaryota;Opisthokonta;Metazoa;Eumetazoa;Bilateria;Protostomia;  
 Spiralia;Lophotrochozoa;Mollusca;Bivalvia;Autobranhia;Heteroconchia;Euhe  
 terodonta;Imparidentia;Venerida;Veneroidea;Veneridae;Mercenaria;Mercenari  
 a mercenaria  
 UdeM00000012226 6596 66.2 UdeM00000012226 XP\_045213610.1 27.1 207  
 131 7 5 208 17 206 7.80E-08 66.2 6596 cellular  
 organisms;Eukaryota;Opisthokonta;Metazoa;Eumetazoa;Bilateria;Protostomia;  
 Spiralia;Lophotrochozoa;Mollusca;Bivalvia;Autobranhia;Heteroconchia;Euhe  
 terodonta;Imparidentia;Venerida;Veneroidea;Veneridae;Mercenaria;Mercenari  
 a mercenaria  
 UdeM00000012227 6596 318.5 UdeM00000012227 XP\_045213483.1 62.2 283  
 102 3 10 289 11 291 8.50E-84 318.5 6596 cellular  
 organisms;Eukaryota;Opisthokonta;Metazoa;Eumetazoa;Bilateria;Protostomia;  
 Spiralia;Lophotrochozoa;Mollusca;Bivalvia;Autobranhia;Heteroconchia;Euhe  
 terodonta;Imparidentia;Venerida;Veneroidea;Veneridae;Mercenaria;Mercenari  
 a mercenaria  
 UdeM00000012228 6573 862.8 UdeM00000012228 XP\_021358765.1 47.1 1154  
 517 27 1 1130 1 1085 5.00E-247 862.8 6573 cellular  
 organisms;Eukaryota;Opisthokonta;Metazoa;Eumetazoa;Bilateria;Protostomia;  
 Spiralia;Lophotrochozoa;Mollusca;Bivalvia;Autobranhia;Pteriormorphia;Pect  
 inida;Pectinoidea;Pectinidae;Mizuhopecten;Mizuhopecten yessoensis  
 UdeM00000012229 7054 394.4 UdeM00000012229 XP\_031350480.1 54 337  
 155 0 21 357 109 445 1.60E-106 394.4 7054 cellular  
 organisms;Eukaryota;Opisthokonta;Metazoa;Eumetazoa;Bilateria;Protostomia;

Ecdysozoa; Panarthropoda; Arthropoda; Mandibulata; Pancrustacea; Hexapoda; Insecta; Dicondylia; Pterygota; Neoptera; Endopterygota; Coleoptera; Polyphaga; Elateriformia; Elateroidea; Lampyridae; Lampyrinae; Photinus; Photinus pyralis  
UdeM00000012230 225164 253.1 UdeM00000012230 XP\_009048025.1 80.9  
141 27 0 1 141 1 141 2.10E-64 253.1 225164  
cellular  
organisms; Eukaryota; Opisthokonta; Metazoa; Eumetazoa; Bilateria; Protostomia; Spiralia; Lophotrochozoa; Mollusca; Gastropoda; Patellogastropoda; Lottioidea; Lottiidae; Lottia; Lottia gigantea  
UdeM00000012231 6573 478.8 UdeM00000012231 XP\_021344743.1 41.1 601  
333 9 7 594 30 622 1.00E-131 478.8 6573 cellular  
organisms; Eukaryota; Opisthokonta; Metazoa; Eumetazoa; Bilateria; Protostomia; Spiralia; Lophotrochozoa; Mollusca; Bivalvia; Autobranchia; Pteriomorpha; Pectinida; Pectinoidea; Pectinidae; Mizuhopecten; Mizuhopecten yessoensis  
UdeM00000012232 6596 422.5 UdeM00000012232 XP\_045212509.1 52 381  
181 2 10 388 72 452 5.60E-115 422.5 6596 cellular  
organisms; Eukaryota; Opisthokonta; Metazoa; Eumetazoa; Bilateria; Protostomia; Spiralia; Lophotrochozoa; Mollusca; Bivalvia; Autobranchia; Heteroconchia; Euheterodonta; Imparidentia; Venerida; Veneroidea; Veneridae; Mercenaria; Mercenaria mercenaria  
UdeM00000012233 6579 966.5 UdeM00000012233 XP\_033743097.1 59.6 826  
315 5 2 817 4 820 2.20E-278 966.5 6579 cellular  
organisms; Eukaryota; Opisthokonta; Metazoa; Eumetazoa; Bilateria; Protostomia; Spiralia; Lophotrochozoa; Mollusca; Bivalvia; Autobranchia; Pteriomorpha; Pectinida; Pectinoidea; Pectinidae; Pecten; Pecten maximus  
UdeM00000012234 6596 431 UdeM00000012234 XP\_045212129.1 71.6 289  
82 0 72 360 654 942 1.50E-117 431 6596 cellular  
organisms; Eukaryota; Opisthokonta; Metazoa; Eumetazoa; Bilateria; Protostomia; Spiralia; Lophotrochozoa; Mollusca; Bivalvia; Autobranchia; Heteroconchia; Euheterodonta; Imparidentia; Venerida; Veneroidea; Veneridae; Mercenaria; Mercenaria mercenaria  
UdeM00000012235 7739 461.8 UdeM00000012235 XP\_035672096.1 60.4 394  
95 1 1 394 484 816 8.60E-127 461.8 7739 cellular  
organisms; Eukaryota; Opisthokonta; Metazoa; Eumetazoa; Bilateria; Deuterostomia; Chordata; Cephalochordata; Leptocardii; Amphioxiformes; Branchiostomidae; Branchiostoma; Branchiostoma floridae  
UdeM00000012236 7668 77.8 UdeM00000012236 XP\_030841875.1 51.6 64  
30 1 3 66 71 133 9.10E-12 77.8 7668 cellular  
organisms; Eukaryota; Opisthokonta; Metazoa; Eumetazoa; Bilateria; Deuterostomia; Echinodermata; Eleutherozoa; Echinozoa; Echinoidea; Euechinoidea; Echinacea; Camarodonta; Echinidea; Strongylocentrotidae; Strongylocentrotus; Strongylocentrotus purpuratus  
UdeM00000012237 1735272 322.4 UdeM00000012237 XP\_041374858.1 67.4  
230 75 0 7 236 310 539 4.80E-85 322.4 1735272  
cellular  
organisms; Eukaryota; Opisthokonta; Metazoa; Eumetazoa; Bilateria; Protostomia; Spiralia; Lophotrochozoa; Mollusca; Gastropoda; Neomphalina; Neomphaloidea; Peltospiridae; Gigantopelta; Gigantopelta aegis  
UdeM00000012239 6579 118.2 UdeM00000012239 XP\_033739317.1 35 203  
127 3 3 205 288 485 1.20E-23 118.2 6579 cellular  
organisms; Eukaryota; Opisthokonta; Metazoa; Eumetazoa; Bilateria; Protostomia; Spiralia; Lophotrochozoa; Mollusca; Bivalvia; Autobranchia; Pteriomorpha; Pectinida; Pectinoidea; Pectinidae; Pecten; Pecten maximus



UdeM00000012240 6573 59.7 UdeM00000012240 XP\_021353127.1 37 138  
 76 6 4 137 214 344 4.80E-06 59.7 6573 cellular  
 organisms;Eukaryota;Opisthokonta;Metazoa;Eumetazoa;Bilateria;Protostomia;  
 Spiralia;Lophotrochozoa;Mollusca;Bivalvia;Autobranchia;Pteriomorpha;Pect  
 inida;Pectinoidea;Pectinidae;Mizuhopecten;Mizuhopecten yessoensis  
 UdeM00000012242 7574 73.2 UdeM00000012242 XP\_013410728.1 29.2 260  
 134 7 230 449 56 305 9.70E-10 73.2 7574 cellular  
 organisms;Eukaryota;Opisthokonta;Metazoa;Eumetazoa;Bilateria;Protostomia;  
 Spiralia;Lophotrochozoa;Brachiopoda;Linguliformea;Lingulata;Lingulida;Lin  
 guloidea;Lingulidae;Lingula;Lingula anatina  
 UdeM00000012243 7574 73.2 UdeM00000012243 XP\_013410728.1 29.2 260  
 134 7 202 421 56 305 9.10E-10 73.2 7574 cellular  
 organisms;Eukaryota;Opisthokonta;Metazoa;Eumetazoa;Bilateria;Protostomia;  
 Spiralia;Lophotrochozoa;Brachiopoda;Linguliformea;Lingulata;Lingulida;Lin  
 guloidea;Lingulidae;Lingula;Lingula anatina  
 UdeM00000012245 6596 314.3 UdeM00000012245 XP\_045178672.1 33.8 551  
 330 15 23 555 123 656 4.70E-82 314.3 6596 cellular  
 organisms;Eukaryota;Opisthokonta;Metazoa;Eumetazoa;Bilateria;Protostomia;  
 Spiralia;Lophotrochozoa;Mollusca;Bivalvia;Autobranchia;Heteroconchia;Euhe  
 terodonta;Imparidentia;Venerida;Veneroidea;Veneridae;Mercenaria;Mercenari  
 a mercenaria  
 UdeM00000012244 6596 311.6 UdeM00000012244 XP\_045178672.1 31.3 680  
 397 21 40 681 9 656 3.50E-81 311.6 6596 cellular  
 organisms;Eukaryota;Opisthokonta;Metazoa;Eumetazoa;Bilateria;Protostomia;  
 Spiralia;Lophotrochozoa;Mollusca;Bivalvia;Autobranchia;Heteroconchia;Euhe  
 terodonta;Imparidentia;Venerida;Veneroidea;Veneridae;Mercenaria;Mercenari  
 a mercenaria  
 UdeM00000012246 6565 426 UdeM00000012246 XP\_022312958.1 91.3 231  
 20 0 17 247 111 341 3.20E-116 426 6565 cellular  
 organisms;Eukaryota;Opisthokonta;Metazoa;Eumetazoa;Bilateria;Protostomia;  
 Spiralia;Lophotrochozoa;Mollusca;Bivalvia;Autobranchia;Pteriomorpha;Ostr  
 eida;Ostreoidea;Ostreidae;Crassostrea;Crassostrea virginica  
 UdeM00000012247 6596 147.5 UdeM00000012247 XP\_045213526.1 74.8 111  
 28 0 1 111 1 111 1.00E-32 147.5 6596 cellular  
 organisms;Eukaryota;Opisthokonta;Metazoa;Eumetazoa;Bilateria;Protostomia;  
 Spiralia;Lophotrochozoa;Mollusca;Bivalvia;Autobranchia;Heteroconchia;Euhe  
 terodonta;Imparidentia;Venerida;Veneroidea;Veneridae;Mercenaria;Mercenari  
 a mercenaria  
 UdeM00000012248 10224 223 UdeM00000012248 XP\_002741224.1 88 125  
 15 0 3 127 5 129 2.10E-55 223 10224 cellular  
 organisms;Eukaryota;Opisthokonta;Metazoa;Eumetazoa;Bilateria;Deuterostomi  
 a;Hemichordata;Enteropneusta;Harrimaniidae;Saccoglossus;Saccoglossus  
 kowalevskii  
 UdeM00000012251 6565 1132.9 UdeM00000012251 XP\_022315354.1 64.1  
 976 298 13 1 956 4 947 0.00E+00 1132.9 6565  
 cellular  
 organisms;Eukaryota;Opisthokonta;Metazoa;Eumetazoa;Bilateria;Protostomia;  
 Spiralia;Lophotrochozoa;Mollusca;Bivalvia;Autobranchia;Pteriomorpha;Ostr  
 eida;Ostreoidea;Ostreidae;Crassostrea;Crassostrea virginica  
 UdeM00000012252 6565 1129.4 UdeM00000012252 XP\_022315354.1 63.6  
 986 297 14 1 966 4 947 0.00E+00 1129.4 6565  
 cellular  
 organisms;Eukaryota;Opisthokonta;Metazoa;Eumetazoa;Bilateria;Protostomia;

Spiralia;Lophotrochozoa;Mollusca;Bivalvia;Autobranchia;Pteriormorphia;Ostr  
eida;Ostreoidea;Ostreidae;Crassostrea;Crassostrea virginica  
UdeM00000012253 6579 1167.5 UdeM00000012253 XP\_033756207.1 69.9  
860 246 9 2 855 917 1769 0.00E+00 1167.5 6579  
cellular

organisms;Eukaryota;Opisthokonta;Metazoa;Eumetazoa;Bilateria;Protostomia;  
Spiralia;Lophotrochozoa;Mollusca;Bivalvia;Autobranchia;Pteriormorphia;Pect  
inida;Pectinoidea;Pectinidae;Pecten;Pecten maximus  
UdeM00000012254 299321 153.3 UdeM00000012254 XP\_028856899.1 38.7  
362 169 11 42 369 37 379 6.10E-34 153.3 299321  
cellular

organisms;Eukaryota;Opisthokonta;Metazoa;Eumetazoa;Bilateria;Deuterostomi  
a;Chordata;Craniata;Vertebrata;Gnathostomata;Teleostomi;Euteleostomi;Acti  
nopterygii;Actinopteri;Neopterygii;Teleostei;Osteoglossocephalai;Clupeoce  
phala;Otomorpha;Clupei;Clupeiformes;Denticipitoidei;Denticipitidae;Dentic  
eps;Denticeps clupeoides

UdeM00000012255 6565 120.6 UdeM00000012255 XP\_022310266.1 49 143  
64 2 149 287 187 324 3.50E-24 120.6 6565 cellular

organisms;Eukaryota;Opisthokonta;Metazoa;Eumetazoa;Bilateria;Protostomia;  
Spiralia;Lophotrochozoa;Mollusca;Bivalvia;Autobranchia;Pteriormorphia;Ostr  
eida;Ostreoidea;Ostreidae;Crassostrea;Crassostrea virginica

UdeM00000012256 6579 238.8 UdeM00000012256 XP\_033758968.1 25.2 678  
454 17 29 664 11 677 2.00E-59 238.8 6579 cellular

organisms;Eukaryota;Opisthokonta;Metazoa;Eumetazoa;Bilateria;Protostomia;  
Spiralia;Lophotrochozoa;Mollusca;Bivalvia;Autobranchia;Pteriormorphia;Pect  
inida;Pectinoidea;Pectinidae;Pecten;Pecten maximus

UdeM00000012257 6565 375.6 UdeM00000012257 XP\_022318283.1 72.3 318  
70 4 1 307 1 311 6.20E-101 375.6 6565 cellular

organisms;Eukaryota;Opisthokonta;Metazoa;Eumetazoa;Bilateria;Protostomia;  
Spiralia;Lophotrochozoa;Mollusca;Bivalvia;Autobranchia;Pteriormorphia;Ostr  
eida;Ostreoidea;Ostreidae;Crassostrea;Crassostrea virginica

UdeM00000012260 6596 1216.1 UdeM00000012260 XP\_045213687.1 61  
955 360 6 4 948 5 957 0.00E+00 1216.1 6596  
cellular

organisms;Eukaryota;Opisthokonta;Metazoa;Eumetazoa;Bilateria;Protostomia;  
Spiralia;Lophotrochozoa;Mollusca;Bivalvia;Autobranchia;Heteroconchia;Euhe  
terodonta;Imparidentia;Venerida;Veneroidea;Veneridae;Mercenaria;Mercenari  
a mercenaria

UdeM00000012261 6596 94.7 UdeM00000012261 XP\_045179940.1 31.8 198  
81 4 12 156 147 343 1.10E-16 94.7 6596 cellular

organisms;Eukaryota;Opisthokonta;Metazoa;Eumetazoa;Bilateria;Protostomia;  
Spiralia;Lophotrochozoa;Mollusca;Bivalvia;Autobranchia;Heteroconchia;Euhe  
terodonta;Imparidentia;Venerida;Veneroidea;Veneridae;Mercenaria;Mercenari  
a mercenaria

UdeM00000012262 6565 151.8 UdeM00000012262 XP\_022310266.1 33.4 353  
192 10 1 337 1 326 1.60E-33 151.8 6565 cellular

organisms;Eukaryota;Opisthokonta;Metazoa;Eumetazoa;Bilateria;Protostomia;  
Spiralia;Lophotrochozoa;Mollusca;Bivalvia;Autobranchia;Pteriormorphia;Ostr  
eida;Ostreoidea;Ostreidae;Crassostrea;Crassostrea virginica

UdeM00000012263 7574 378.6 UdeM00000012263 XP\_013421848.1 51.2 363  
166 4 48 404 193 550 1.10E-101 378.6 7574 cellular

organisms;Eukaryota;Opisthokonta;Metazoa;Eumetazoa;Bilateria;Protostomia;  
Spiralia;Lophotrochozoa;Brachiopoda;Linguliformea;Lingulata;Lingulida;Lin  
guloidea;Lingulidae;Lingula;Lingula anatina

UdeM00000012264 7574 339.3 UdeM00000012264 XP\_013402385.1 52.8 301  
 139 2 7 306 42 340 5.00E-90 339.3 7574 cellular  
 organisms;Eukaryota;Opisthokonta;Metazoa;Eumetazoa;Bilateria;Protostomia;  
 Spiralia;Lophotrochozoa;Brachiopoda;Linguliformea;Lingulata;Lingulida;Lin  
 guloidea;Lingulidae;Lingula;Lingula anatina  
 UdeM00000012265 6596 831.2 UdeM00000012265 XP\_045213690.1 62.2 717  
 233 13 1 703 566 1258 9.50E-238 831.2 6596 cellular  
 organisms;Eukaryota;Opisthokonta;Metazoa;Eumetazoa;Bilateria;Protostomia;  
 Spiralia;Lophotrochozoa;Mollusca;Bivalvia;Autobranchia;Heteroconchia;Euhe  
 terodonta;Imparidentia;Venerida;Veneroidea;Veneridae;Mercenaria;Mercenari  
 a mercenaria  
 UdeM00000012266 6596 358.2 UdeM00000012266 XP\_045213693.1 61.8 309  
 117 1 6 313 205 513 1.00E-95 358.2 6596 cellular  
 organisms;Eukaryota;Opisthokonta;Metazoa;Eumetazoa;Bilateria;Protostomia;  
 Spiralia;Lophotrochozoa;Mollusca;Bivalvia;Autobranchia;Heteroconchia;Euhe  
 terodonta;Imparidentia;Venerida;Veneroidea;Veneridae;Mercenaria;Mercenari  
 a mercenaria  
 UdeM00000012267 6596 209.5 UdeM00000012267 XP\_045213690.1 50.5 212  
 87 3 1 194 2 213 3.90E-51 209.5 6596 cellular  
 organisms;Eukaryota;Opisthokonta;Metazoa;Eumetazoa;Bilateria;Protostomia;  
 Spiralia;Lophotrochozoa;Mollusca;Bivalvia;Autobranchia;Heteroconchia;Euhe  
 terodonta;Imparidentia;Venerida;Veneroidea;Veneridae;Mercenaria;Mercenari  
 a mercenaria  
 UdeM00000012268 6579 108.6 UdeM00000012268 XP\_033743193.1 34.2 196  
 128 1 2 196 31 226 9.10E-21 108.6 6579 cellular  
 organisms;Eukaryota;Opisthokonta;Metazoa;Eumetazoa;Bilateria;Protostomia;  
 Spiralia;Lophotrochozoa;Mollusca;Bivalvia;Autobranchia;Pteriormorphia;Pect  
 inida;Pectinoidea;Pectinidae;Pecten;Pecten maximus  
 UdeM00000012272 1735272 138.7 UdeM00000012272 XP\_041346684.1 38.4  
 211 94 4 21 195 616 826 8.20E-30 138.7 1735272  
 cellular  
 organisms;Eukaryota;Opisthokonta;Metazoa;Eumetazoa;Bilateria;Protostomia;  
 Spiralia;Lophotrochozoa;Mollusca;Gastropoda;Neomphalina;Neomphaloidea;Pel  
 tospiridae;Gigantopelta;Gigantopelta aegis  
 UdeM00000012271 1735272 296.6 UdeM00000012271 XP\_041347279.1 30.7  
 667 183 10 21 411 219 882 4.90E-77 296.6 1735272  
 cellular  
 organisms;Eukaryota;Opisthokonta;Metazoa;Eumetazoa;Bilateria;Protostomia;  
 Spiralia;Lophotrochozoa;Mollusca;Gastropoda;Neomphalina;Neomphaloidea;Pel  
 tospiridae;Gigantopelta;Gigantopelta aegis  
 UdeM00000012273 45264 97.8 UdeM00000012273 XP\_044184709.1 51.7 87  
 42 0 38 124 55 141 2.10E-17 97.8 45264 cellular  
 organisms;Eukaryota;Opisthokonta;Metazoa;Eumetazoa;Cnidaria;Anthozoa;Hexa  
 corallia;Scleractinia;Astrocoeniina;Acroporidae;Acropora;Acropora  
 millepora  
 UdeM00000012274 45264 97.8 UdeM00000012274 XP\_044184709.1 51.7 87  
 42 0 38 124 55 141 2.20E-17 97.8 45264 cellular  
 organisms;Eukaryota;Opisthokonta;Metazoa;Eumetazoa;Cnidaria;Anthozoa;Hexa  
 corallia;Scleractinia;Astrocoeniina;Acroporidae;Acropora;Acropora  
 millepora  
 UdeM00000012275 45264 187.6 UdeM00000012275 XP\_044184031.1 39.4 277  
 125 6 1 237 213 486 1.90E-44 187.6 45264 cellular  
 organisms;Eukaryota;Opisthokonta;Metazoa;Eumetazoa;Cnidaria;Anthozoa;Hexa

corallia;Scleractinia;Astrocoeniina;Acroporidae;Acropora;Acropora  
millepora  
UdeM00000012276 45264 260.4 UdeM00000012276 XP\_044165143.1 54.4 241  
105 2 27 266 35 271 3.20E-66 260.4 45264 cellular  
organisms;Eukaryota;Opisthokonta;Metazoa;Eumetazoa;Cnidaria;Anthozoa;Hexa  
corallia;Scleractinia;Astrocoeniina;Acroporidae;Acropora;Acropora  
millepora  
UdeM00000012277 6565 86.7 UdeM00000012277 XP\_022316284.1 30.3 201  
137 3 30 229 1 199 5.40E-14 86.7 6565 cellular  
organisms;Eukaryota;Opisthokonta;Metazoa;Eumetazoa;Bilateria;Protostomia;  
Spiralia;Lophotrochozoa;Mollusca;Bivalvia;Autobranhia;Pteriormorphia;Ostr  
eida;Ostreoidea;Ostreidae;Crassostrea;Crassostrea virginica  
UdeM00000012278 6565 88.2 UdeM00000012278 XP\_022316839.1 30.5 210  
143 3 30 238 1 208 1.50E-14 88.2 6565 cellular  
organisms;Eukaryota;Opisthokonta;Metazoa;Eumetazoa;Bilateria;Protostomia;  
Spiralia;Lophotrochozoa;Mollusca;Bivalvia;Autobranhia;Pteriormorphia;Ostr  
eida;Ostreoidea;Ostreidae;Crassostrea;Crassostrea virginica  
UdeM00000012279 6573 486.9 UdeM00000012279 XP\_021369020.1 43.6 693  
357 9 25 711 32 696 4.50E-134 486.9 6573 cellular  
organisms;Eukaryota;Opisthokonta;Metazoa;Eumetazoa;Bilateria;Protostomia;  
Spiralia;Lophotrochozoa;Mollusca;Bivalvia;Autobranhia;Pteriormorphia;Pect  
inida;Pectinoidea;Pectinidae;Mizuhopecten;Mizuhopecten yessoensis  
UdeM00000012280 6573 535 UdeM00000012280 XP\_021369020.1 45 682  
348 5 44 720 33 692 1.50E-148 535 6573 cellular  
organisms;Eukaryota;Opisthokonta;Metazoa;Eumetazoa;Bilateria;Protostomia;  
Spiralia;Lophotrochozoa;Mollusca;Bivalvia;Autobranhia;Pteriormorphia;Pect  
inida;Pectinoidea;Pectinidae;Mizuhopecten;Mizuhopecten yessoensis  
UdeM00000012281 29159 253.4 UdeM00000012281 XP\_011444850.1 45.9 307  
154 4 1 304 131 428 3.60E-64 253.4 29159 cellular  
organisms;Eukaryota;Opisthokonta;Metazoa;Eumetazoa;Bilateria;Protostomia;  
Spiralia;Lophotrochozoa;Mollusca;Bivalvia;Autobranhia;Pteriormorphia;Ostr  
eida;Ostreoidea;Ostreidae;Crassostrea;Crassostrea gigas  
UdeM00000012282 6596 62.4 UdeM00000012282 XP\_045211229.1 35.8 67  
43 0 1 67 648 714 2.80E-07 62.4 6596 cellular  
organisms;Eukaryota;Opisthokonta;Metazoa;Eumetazoa;Bilateria;Protostomia;  
Spiralia;Lophotrochozoa;Mollusca;Bivalvia;Autobranhia;Heteroconchia;Euhe  
terodonta;Imparidentia;Venerida;Veneroidea;Veneridae;Mercenaria;Mercenari  
a mercenaria  
UdeM00000012283 7574 105.5 UdeM00000012283 XP\_013408344.1 30.2 199  
130 3 19 211 27 222 8.90E-20 105.5 7574 cellular  
organisms;Eukaryota;Opisthokonta;Metazoa;Eumetazoa;Bilateria;Protostomia;  
Spiralia;Lophotrochozoa;Brachiopoda;Linguliformea;Lingulata;Lingulida;Lin  
guloidea;Lingulidae;Lingula;Lingula anatina  
UdeM00000012284 6565 103.6 UdeM00000012284 XP\_022316839.1 30.9 207  
137 4 4 207 5 208 3.40E-19 103.6 6565 cellular  
organisms;Eukaryota;Opisthokonta;Metazoa;Eumetazoa;Bilateria;Protostomia;  
Spiralia;Lophotrochozoa;Mollusca;Bivalvia;Autobranhia;Pteriormorphia;Ostr  
eida;Ostreoidea;Ostreidae;Crassostrea;Crassostrea virginica  
UdeM00000012286 6573 379.4 UdeM00000012286 XP\_021348045.1 72.7 253  
66 1 3 252 2 254 3.50E-102 379.4 6573 cellular  
organisms;Eukaryota;Opisthokonta;Metazoa;Eumetazoa;Bilateria;Protostomia;  
Spiralia;Lophotrochozoa;Mollusca;Bivalvia;Autobranhia;Pteriormorphia;Pect  
inida;Pectinoidea;Pectinidae;Mizuhopecten;Mizuhopecten yessoensis

UdeM00000012287 6596 821.6 UdeM00000012287 XP\_045214983.1 75.9 551  
 131 2 1 551 1 549 6.30E-235 821.6 6596 cellular  
 organisms;Eukaryota;Opisthokonta;Metazoa;Eumetazoa;Bilateria;Protostomia;  
 Spiralia;Lophotrochozoa;Mollusca;Bivalvia;Autobranchia;Heteroconchia;Euhe  
 terodonta;Imparidentia;Venerida;Veneroidea;Veneridae;Mercenaria;Mercenari  
 a mercenaria

UdeM00000012288 37621 115.9 UdeM00000012288 XP\_014676916.1 45.2 126  
 69 0 160 285 173 298 8.60E-23 115.9 37621 cellular  
 organisms;Eukaryota;Opisthokonta;Metazoa;Eumetazoa;Bilateria;Protostomia;  
 Ecdysozoa;Scalidophora;Priapulida;Priapulimorpha;Priapulimorphida;Priapul  
 idae;Priapulus;Priapulus caudatus

UdeM00000012289 29159 211.5 UdeM00000012289 XP\_011439000.1 46.7 242  
 121 4 18 258 7 241 1.30E-51 211.5 29159 cellular  
 organisms;Eukaryota;Opisthokonta;Metazoa;Eumetazoa;Bilateria;Protostomia;  
 Spiralia;Lophotrochozoa;Mollusca;Bivalvia;Autobranchia;Pteriormorpha;Ostr  
 eida;Ostreoidea;Ostreidae;Crassostrea;Crassostrea gigas

UdeM00000012292 6573 562 UdeM00000012292 XP\_021367419.1 62.4 468  
 161 4 1 467 46 499 7.30E-157 562 6573 cellular  
 organisms;Eukaryota;Opisthokonta;Metazoa;Eumetazoa;Bilateria;Protostomia;  
 Spiralia;Lophotrochozoa;Mollusca;Bivalvia;Autobranchia;Pteriormorpha;Pect  
 inida;Pectinoidea;Pectinidae;Mizuhopecten;Mizuhopecten yessoensis

UdeM00000012293 6596 802.7 UdeM00000012293 XP\_045210553.1 34.7 2009  
 931 46 22 1770 957 2845 9.10E-229 802.7 6596 cellular  
 organisms;Eukaryota;Opisthokonta;Metazoa;Eumetazoa;Bilateria;Protostomia;  
 Spiralia;Lophotrochozoa;Mollusca;Bivalvia;Autobranchia;Heteroconchia;Euhe  
 terodonta;Imparidentia;Venerida;Veneroidea;Veneridae;Mercenaria;Mercenari  
 a mercenaria

UdeM00000012294 6596 669.5 UdeM00000012294 XP\_045210553.1 47.6 870  
 391 13 29 865 43 880 6.20E-189 669.5 6596 cellular  
 organisms;Eukaryota;Opisthokonta;Metazoa;Eumetazoa;Bilateria;Protostomia;  
 Spiralia;Lophotrochozoa;Mollusca;Bivalvia;Autobranchia;Heteroconchia;Euhe  
 terodonta;Imparidentia;Venerida;Veneroidea;Veneridae;Mercenaria;Mercenari  
 a mercenaria

UdeM00000012295 37653 370.5 UdeM00000012295 XP\_014789662.1 35.1 746  
 375 20 6 660 17 744 4.40E-99 370.5 37653 cellular  
 organisms;Eukaryota;Opisthokonta;Metazoa;Eumetazoa;Bilateria;Protostomia;  
 Spiralia;Lophotrochozoa;Mollusca;Cephalopoda;Coleoidea;Octopodiformes;Oct  
 opoda;Incirrata;Octopodidae;Octopus;Octopus bimaculoides

UdeM00000012296 6596 367.9 UdeM00000012296 XP\_045214834.1 36.5 646  
 393 13 49 680 59 701 2.90E-98 367.9 6596 cellular  
 organisms;Eukaryota;Opisthokonta;Metazoa;Eumetazoa;Bilateria;Protostomia;  
 Spiralia;Lophotrochozoa;Mollusca;Bivalvia;Autobranchia;Heteroconchia;Euhe  
 terodonta;Imparidentia;Venerida;Veneroidea;Veneridae;Mercenaria;Mercenari  
 a mercenaria

UdeM00000012297 6596 366.3 UdeM00000012297 XP\_045214844.1 33.6 649  
 417 10 43 679 53 699 8.40E-98 366.3 6596 cellular  
 organisms;Eukaryota;Opisthokonta;Metazoa;Eumetazoa;Bilateria;Protostomia;  
 Spiralia;Lophotrochozoa;Mollusca;Bivalvia;Autobranchia;Heteroconchia;Euhe  
 terodonta;Imparidentia;Venerida;Veneroidea;Veneridae;Mercenaria;Mercenari  
 a mercenaria

UdeM00000012298 6596 540.8 UdeM00000012298 XP\_045214686.1 69.2 377  
 115 1 35 410 38 414 1.50E-150 540.8 6596 cellular  
 organisms;Eukaryota;Opisthokonta;Metazoa;Eumetazoa;Bilateria;Protostomia;  
 Spiralia;Lophotrochozoa;Mollusca;Bivalvia;Autobranchia;Heteroconchia;Euhe

terodonta;Imparidentia;Venerida;Veneroidea;Veneridae;Mercenaria;Mercenaria mercenaria

UdeM00000012299 6565 181 UdeM00000012299 XP\_022313065.1 59 161  
60 3 6 160 7 167 7.20E-42 181 6565 cellular

organisms;Eukaryota;Opisthokonta;Metazoa;Eumetazoa;Bilateria;Protostomia;Spiralia;Lophotrochozoa;Mollusca;Bivalvia;Autobranchia;Pteriormorphia;Ostreida;Ostreoidea;Ostreidae;Crassostrea;Crassostrea virginica

UdeM00000012300 1735272 121.7 UdeM00000012300 XP\_041364464.1 63.2  
87 32 0 7 93 26 112 5.40E-25 121.7 1735272  
cellular

organisms;Eukaryota;Opisthokonta;Metazoa;Eumetazoa;Bilateria;Protostomia;Spiralia;Lophotrochozoa;Mollusca;Gastropoda;Neomphalina;Neomphaloidea;Peltospiridae;Gigantopelta;Gigantopelta aegis

UdeM00000012302 6579 948.7 UdeM00000012302 XP\_033735925.1 62 769  
264 14 3 754 21 778 4.40E-273 948.7 6579 cellular

organisms;Eukaryota;Opisthokonta;Metazoa;Eumetazoa;Bilateria;Protostomia;Spiralia;Lophotrochozoa;Mollusca;Bivalvia;Autobranchia;Pteriormorphia;Pectinida;Pectinoidea;Pectinidae;Pecten;Pecten maximus

UdeM00000012303 7574 188 UdeM00000012303 XP\_013411082.1 42.7 185  
102 3 233 416 277 458 4.60E-44 188 7574 cellular

organisms;Eukaryota;Opisthokonta;Metazoa;Eumetazoa;Bilateria;Protostomia;Spiralia;Lophotrochozoa;Brachiopoda;Linguliformea;Lingulata;Lingulida;Linguloidea;Lingulidae;Lingula;Lingula anatina

UdeM00000012304 29159 871.7 UdeM00000012304 XP\_019926413.2 71 617  
170 5 1 616 1 609 6.00E-250 871.7 29159 cellular

organisms;Eukaryota;Opisthokonta;Metazoa;Eumetazoa;Bilateria;Protostomia;Spiralia;Lophotrochozoa;Mollusca;Bivalvia;Autobranchia;Pteriormorphia;Ostreida;Ostreoidea;Ostreidae;Crassostrea;Crassostrea gigas

UdeM00000012305 6596 61.6 UdeM00000012305 XP\_045214504.1 44.4 72  
40 0 1 72 8 79 8.30E-07 61.6 6596 cellular

organisms;Eukaryota;Opisthokonta;Metazoa;Eumetazoa;Bilateria;Protostomia;Spiralia;Lophotrochozoa;Mollusca;Bivalvia;Autobranchia;Heteroconchia;Euheterodonta;Imparidentia;Venerida;Veneroidea;Veneridae;Mercenaria;Mercenaria mercenaria

UdeM00000012306 6687 73.2 UdeM00000012306 XP\_037797777.1 50.7 73  
36 0 2 74 83 155 1.90E-10 73.2 6687 cellular

organisms;Eukaryota;Opisthokonta;Metazoa;Eumetazoa;Bilateria;Protostomia;Ecdysozoa;Panarthropoda;Arthropoda;Mandibulata;Pancrustacea;Crustacea;Multicrustacea;Malacostraca;Eumalacostraca;Eucarida;Decapoda;Dendrobranchiata;Penaeoidea;Penaeidae;Penaeus;Penaeus monodon

UdeM00000012307 6596 614.8 UdeM00000012307 XP\_045214504.1 77 352  
81 0 1 352 197 548 7.00E-173 614.8 6596 cellular

organisms;Eukaryota;Opisthokonta;Metazoa;Eumetazoa;Bilateria;Protostomia;Spiralia;Lophotrochozoa;Mollusca;Bivalvia;Autobranchia;Heteroconchia;Euheterodonta;Imparidentia;Venerida;Veneroidea;Veneridae;Mercenaria;Mercenaria mercenaria

UdeM00000012308 6573 109 UdeM00000012308 XP\_021377235.1 45.1 133  
66 3 1 127 270 401 5.50E-21 109 6573 cellular

organisms;Eukaryota;Opisthokonta;Metazoa;Eumetazoa;Bilateria;Protostomia;Spiralia;Lophotrochozoa;Mollusca;Bivalvia;Autobranchia;Pteriormorphia;Pectinida;Pectinoidea;Pectinidae;Mizuhopecten;Mizuhopecten yessoensis

UdeM00000012309 6573 1254.6 UdeM00000012309 XP\_021363351.1 76.5  
831 116 6 1 816 1 767 0.00E+00 1254.6 6573  
cellular

organisms;Eukaryota;Opisthokonta;Metazoa;Eumetazoa;Bilateria;Protostomia;Spiralia;Lophotrochozoa;Mollusca;Bivalvia;Autobranhia;Pteriormorphia;Pectinida;Pectinoidea;Pectinidae;Mizuhopecten;Mizuhopecten yessoensis  
UdeM00000012310 6579 278.9 UdeM00000012310 XP\_033746745.1 51.7 294  
130 5 1 288 1 288 9.40E-72 278.9 6579 cellular

organisms;Eukaryota;Opisthokonta;Metazoa;Eumetazoa;Bilateria;Protostomia;Spiralia;Lophotrochozoa;Mollusca;Bivalvia;Autobranhia;Pteriormorphia;Pectinida;Pectinoidea;Pectinidae;Pecten;Pecten maximus  
UdeM00000012311 6596 171.8 UdeM00000012311 XP\_045213491.1 47.5 238  
102 8 371 588 455 689 2.60E-39 171.8 6596 cellular

organisms;Eukaryota;Opisthokonta;Metazoa;Eumetazoa;Bilateria;Protostomia;Spiralia;Lophotrochozoa;Mollusca;Bivalvia;Autobranhia;Heteroconchia;Euheterodonta;Imparidentia;Venerida;Veneroidea;Veneridae;Mercenaria;Mercenaria mercenaria  
UdeM00000012312 6596 277.3 UdeM00000012312 XP\_045210609.1 39.1 486  
219 10 750 1184 1037 1496 8.90E-71 277.3 6596 cellular

organisms;Eukaryota;Opisthokonta;Metazoa;Eumetazoa;Bilateria;Protostomia;Spiralia;Lophotrochozoa;Mollusca;Bivalvia;Autobranhia;Heteroconchia;Euheterodonta;Imparidentia;Venerida;Veneroidea;Veneridae;Mercenaria;Mercenaria mercenaria  
UdeM00000012313 2607531 222.2 UdeM00000012313 XP\_036361770.1 71.1  
173 39 3 3 166 53 223 5.70E-55 222.2 2607531  
cellular

organisms;Eukaryota;Opisthokonta;Metazoa;Eumetazoa;Bilateria;Protostomia;Spiralia;Lophotrochozoa;Mollusca;Cephalopoda;Coleoidea;Octopodiformes;Octopoda;Incirrata;Octopodidae;Octopus;Octopus sinensis  
UdeM00000012314 6565 278.5 UdeM00000012314 XP\_022297447.1 47.2 303  
114 5 14 272 67 367 9.30E-72 278.5 6565 cellular

organisms;Eukaryota;Opisthokonta;Metazoa;Eumetazoa;Bilateria;Protostomia;Spiralia;Lophotrochozoa;Mollusca;Bivalvia;Autobranhia;Pteriormorphia;Ostreida;Ostreoidea;Ostreidae;Crassostrea;Crassostrea virginica  
UdeM00000012315 451745 104.8 UdeM00000012315 XP\_037553707.1 42  
112 65 0 22 133 548 659 9.50E-20 104.8 451745  
cellular

organisms;Eukaryota;Opisthokonta;Metazoa;Eumetazoa;Bilateria;Deuterostomia;Chordata;Craniata;Vertebrata;Gnathostomata;Teleostomi;Euteleostomi;Actinopterygii;Actinopteri;Neopterygii;Teleostei;Osteoglossocephalai;Clupeocephala;Euteleostei;Neoteleostei;Eurypterygia;Ctenosquamata;Acanthomorphata;Euacanthomorphacea;Percomorphaceae;Ovalentaria;Atherinomorphae;Cypriodontiformes;Aplocheiloidei;Rivulidae;Nematolebias;Nematolebias whitei  
UdeM00000012316 6596 721.8 UdeM00000012316 XP\_045212231.1 76.5 447  
105 0 8 454 13 459 5.30E-205 721.8 6596 cellular

organisms;Eukaryota;Opisthokonta;Metazoa;Eumetazoa;Bilateria;Protostomia;Spiralia;Lophotrochozoa;Mollusca;Bivalvia;Autobranhia;Heteroconchia;Euheterodonta;Imparidentia;Venerida;Veneroidea;Veneridae;Mercenaria;Mercenaria mercenaria  
UdeM00000012318 6579 304.3 UdeM00000012318 XP\_033755452.1 64.9 225  
77 2 9 233 9 231 1.30E-79 304.3 6579 cellular

organisms;Eukaryota;Opisthokonta;Metazoa;Eumetazoa;Bilateria;Protostomia;Spiralia;Lophotrochozoa;Mollusca;Bivalvia;Autobranhia;Pteriormorphia;Pectinida;Pectinoidea;Pectinidae;Pecten;Pecten maximus  
UdeM00000012319 29159 342.4 UdeM00000012319 XP\_034322771.1 37.1 571  
307 14 20 581 55 582 1.10E-90 342.4 29159 cellular

organisms;Eukaryota;Opisthokonta;Metazoa;Eumetazoa;Bilateria;Protostomia;

Spiralia;Lophotrochozoa;Mollusca;Bivalvia;Autobranchia;Pteriormorphia;Ostr  
eida;Ostreoidea;Ostreidae;Crassostrea;Crassostrea gigas

UdeM00000012320 6596 1242.3 UdeM00000012320 XP\_045210622.1 59  
1042 383 8 6 1042 5 1007 0.00E+00 1242.3 6596  
cellular

organisms;Eukaryota;Opisthokonta;Metazoa;Eumetazoa;Bilateria;Protostomia;  
Spiralia;Lophotrochozoa;Mollusca;Bivalvia;Autobranchia;Heteroconchia;Euhe  
terodonta;Imparidentia;Venerida;Veneroidea;Veneridae;Mercenaria;Mercenari  
a mercenaria

UdeM00000012321 7668 275.4 UdeM00000012321 XP\_011666894.1 40 402  
215 8 7 391 5 397 1.10E-70 275.4 7668 cellular

organisms;Eukaryota;Opisthokonta;Metazoa;Eumetazoa;Bilateria;Deuterostomi  
a;Echinodermata;Eleutherozoa;Echinozoa;Echinoidea;Euechinoidea;Echinacea;  
Camarodonta;Echinidea;Strongylocentrotidae;Strongylocentrotus;Strongyloce  
ntrotus purpuratus

UdeM00000012322 225164 234.6 UdeM00000012322 XP\_009064523.1 53.3  
212 97 1 2 213 7 216 1.30E-58 234.6 225164  
cellular

organisms;Eukaryota;Opisthokonta;Metazoa;Eumetazoa;Bilateria;Protostomia;  
Spiralia;Lophotrochozoa;Mollusca;Gastropoda;Patellogastropoda;Lottioidea;  
Lottiidae;Lottia;Lottia gigantea

UdeM00000012323 225164 544.3 UdeM00000012323 XP\_009064523.1 69.7  
370 109 2 4 372 158 525 1.20E-151 544.3 225164  
cellular

organisms;Eukaryota;Opisthokonta;Metazoa;Eumetazoa;Bilateria;Protostomia;  
Spiralia;Lophotrochozoa;Mollusca;Gastropoda;Patellogastropoda;Lottioidea;  
Lottiidae;Lottia;Lottia gigantea

UdeM00000012324 29159 1071.2 UdeM00000012324 XP\_011454678.1 61.9  
975 329 17 1 958 1 950 7.6e-310 1071.2  
29159 cellular

organisms;Eukaryota;Opisthokonta;Metazoa;Eumetazoa;Bilateria;Protostomia;  
Spiralia;Lophotrochozoa;Mollusca;Bivalvia;Autobranchia;Pteriormorphia;Ostr  
eida;Ostreoidea;Ostreidae;Crassostrea;Crassostrea gigas

UdeM00000012325 1735272 961.1 UdeM00000012325 XP\_041363110.1 63.9  
866 313 0 248 1113 139 1004 1.30E-276 961.1 1735272  
cellular

organisms;Eukaryota;Opisthokonta;Metazoa;Eumetazoa;Bilateria;Protostomia;  
Spiralia;Lophotrochozoa;Mollusca;Gastropoda;Neomphalina;Neomphaloidea;Pel  
tospiridae;Gigantopelta;Gigantopelta aegis

UdeM00000012326 6596 828.9 UdeM00000012326 XP\_045213461.1 63 683  
238 5 1 671 1 680 5.30E-237 828.9 6596 cellular

organisms;Eukaryota;Opisthokonta;Metazoa;Eumetazoa;Bilateria;Protostomia;  
Spiralia;Lophotrochozoa;Mollusca;Bivalvia;Autobranchia;Heteroconchia;Euhe  
terodonta;Imparidentia;Venerida;Veneroidea;Veneridae;Mercenaria;Mercenari  
a mercenaria

UdeM00000012327 6573 926.8 UdeM00000012327 XP\_021370666.1 99.3 451  
3 0 1 451 1 451 1.10E-266 926.8 6573 cellular

organisms;Eukaryota;Opisthokonta;Metazoa;Eumetazoa;Bilateria;Protostomia;  
Spiralia;Lophotrochozoa;Mollusca;Bivalvia;Autobranchia;Pteriormorphia;Pect  
inida;Pectinoidea;Pectinidae;Mizuhopecten;Mizuhopecten yessoensis

UdeM00000012328 7668 77.8 UdeM00000012328 XP\_030841875.1 51.6 64  
30 1 3 66 71 133 9.10E-12 77.8 7668 cellular

organisms;Eukaryota;Opisthokonta;Metazoa;Eumetazoa;Bilateria;Deuterostomi  
a;Echinodermata;Eleutherozoa;Echinozoa;Echinoidea;Euechinoidea;Echinacea;



Camarodonta;Echinidea;Strongylocentrotidae;Strongylocentrotus;Strongylocentrotus purpuratus

UdeM00000012329 6596 1186.4 UdeM00000012329 XP\_045212044.1 44.5  
2176 955 65 1 2048 1 2052 0.00E+00 1186.4 6596  
cellular

organisms;Eukaryota;Opisthokonta;Metazoa;Eumetazoa;Bilateria;Protostomia;Spiralia;Lophotrochozoa;Mollusca;Bivalvia;Autobranchia;Heteroconchia;Euherodonta;Imparidentia;Venerida;Veneroidea;Veneridae;Mercenaria;Mercenaria mercenaria

UdeM00000012330 6596 1143.6 UdeM00000012330 XP\_045212044.1 44.7  
2080 906 62 1 1955 1 1961 0.00E+00 1143.6 6596  
cellular

organisms;Eukaryota;Opisthokonta;Metazoa;Eumetazoa;Bilateria;Protostomia;Spiralia;Lophotrochozoa;Mollusca;Bivalvia;Autobranchia;Heteroconchia;Euherodonta;Imparidentia;Venerida;Veneroidea;Veneridae;Mercenaria;Mercenaria mercenaria

UdeM00000012331 6596 704.1 UdeM00000012331 XP\_045212044.1 43.4 1394  
620 38 12 1313 736 2052 3.30E-199 704.1 6596 cellular

organisms;Eukaryota;Opisthokonta;Metazoa;Eumetazoa;Bilateria;Protostomia;Spiralia;Lophotrochozoa;Mollusca;Bivalvia;Autobranchia;Heteroconchia;Euherodonta;Imparidentia;Venerida;Veneroidea;Veneridae;Mercenaria;Mercenaria mercenaria

UdeM00000012332 6596 399.1 UdeM00000012332 XP\_045212058.1 66.1 298  
101 0 8 305 4 301 5.30E-108 399.1 6596 cellular

organisms;Eukaryota;Opisthokonta;Metazoa;Eumetazoa;Bilateria;Protostomia;Spiralia;Lophotrochozoa;Mollusca;Bivalvia;Autobranchia;Heteroconchia;Euherodonta;Imparidentia;Venerida;Veneroidea;Veneridae;Mercenaria;Mercenaria mercenaria

UdeM00000012333 6579 782.3 UdeM00000012333 XP\_033746678.1 57.9 651  
265 2 1 651 1 642 4.70E-223 782.3 6579 cellular

organisms;Eukaryota;Opisthokonta;Metazoa;Eumetazoa;Bilateria;Protostomia;Spiralia;Lophotrochozoa;Mollusca;Bivalvia;Autobranchia;Pteriormorphia;Pectinida;Pectinoidea;Pectinidae;Pecten;Pecten maximus

UdeM00000012335 6596 941.8 UdeM00000012335 XP\_045210592.1 35.7 2510  
1197 69 1 2260 5 2348 1.60E-270 941.8 6596 cellular

organisms;Eukaryota;Opisthokonta;Metazoa;Eumetazoa;Bilateria;Protostomia;Spiralia;Lophotrochozoa;Mollusca;Bivalvia;Autobranchia;Heteroconchia;Euherodonta;Imparidentia;Venerida;Veneroidea;Veneridae;Mercenaria;Mercenaria mercenaria

UdeM00000012336 6596 925.6 UdeM00000012336 XP\_045210592.1 35.5 2510  
1196 69 1 2252 5 2348 1.20E-265 925.6 6596 cellular

organisms;Eukaryota;Opisthokonta;Metazoa;Eumetazoa;Bilateria;Protostomia;Spiralia;Lophotrochozoa;Mollusca;Bivalvia;Autobranchia;Heteroconchia;Euherodonta;Imparidentia;Venerida;Veneroidea;Veneridae;Mercenaria;Mercenaria mercenaria

UdeM00000012338 400727 58.9 UdeM00000012338 XP\_025105873.1 51.6  
64 27 2 1 60 1 64 4.50E-06 58.9 400727  
cellular

organisms;Eukaryota;Opisthokonta;Metazoa;Eumetazoa;Bilateria;Protostomia;Spiralia;Lophotrochozoa;Mollusca;Gastropoda;Caenogastropoda;Architaenioglossa;Ampullarioidea;Ampullariidae;Pomacea;Pomacea canaliculata

UdeM00000012339 6596 526.9 UdeM00000012339 XP\_045211089.1 35.9 835  
507 13 7 827 10 830 4.50E-146 526.9 6596 cellular

organisms;Eukaryota;Opisthokonta;Metazoa;Eumetazoa;Bilateria;Protostomia;

Spiralia;Lophotrochozoa;Mollusca;Bivalvia;Autobranchia;Heteroconchia;Euherodonta;Imparidentia;Venerida;Veneroidea;Veneridae;Mercenaria;Mercenaria mercenaria

UdeM00000012340 6596 460.3 UdeM00000012340 XP\_045213177.1 66.8 319  
105 1 2 319 21 339 2.40E-126 460.3 6596 cellular

organisms;Eukaryota;Opisthokonta;Metazoa;Eumetazoa;Bilateria;Protostomia;Spiralia;Lophotrochozoa;Mollusca;Bivalvia;Autobranchia;Heteroconchia;Euherodonta;Imparidentia;Venerida;Veneroidea;Veneridae;Mercenaria;Mercenaria mercenaria

UdeM00000012341 6596 1483.4 UdeM00000012341 XP\_045213178.1 67.3  
1058 318 5 2 1031 21 1078 0.00E+00 1483.4 6596  
cellular

organisms;Eukaryota;Opisthokonta;Metazoa;Eumetazoa;Bilateria;Protostomia;Spiralia;Lophotrochozoa;Mollusca;Bivalvia;Autobranchia;Heteroconchia;Euherodonta;Imparidentia;Venerida;Veneroidea;Veneridae;Mercenaria;Mercenaria mercenaria

UdeM00000012343 6573 162.5 UdeM00000012343 XP\_021380141.1 51.9 162  
76 2 33 192 35 196 5.20E-37 162.5 6573 cellular

organisms;Eukaryota;Opisthokonta;Metazoa;Eumetazoa;Bilateria;Protostomia;Spiralia;Lophotrochozoa;Mollusca;Bivalvia;Autobranchia;Pteriomorphia;Pectinida;Pectinoidea;Pectinidae;Mizuhopecten;Mizuhopecten yessoensis

UdeM00000012342 6573 162.5 UdeM00000012342 XP\_021380141.1 51.9 162  
76 2 62 221 35 196 6.00E-37 162.5 6573 cellular

organisms;Eukaryota;Opisthokonta;Metazoa;Eumetazoa;Bilateria;Protostomia;Spiralia;Lophotrochozoa;Mollusca;Bivalvia;Autobranchia;Pteriomorphia;Pectinida;Pectinoidea;Pectinidae;Mizuhopecten;Mizuhopecten yessoensis

UdeM00000012346 6579 743.8 UdeM00000012346 XP\_033736667.1 53 693  
307 4 46 736 5 680 2.10E-211 743.8 6579 cellular

organisms;Eukaryota;Opisthokonta;Metazoa;Eumetazoa;Bilateria;Protostomia;Spiralia;Lophotrochozoa;Mollusca;Bivalvia;Autobranchia;Pteriomorphia;Pectinida;Pectinoidea;Pectinidae;Pecten;Pecten maximus

UdeM00000012347 6596 707.2 UdeM00000012347 XP\_045214295.1 57.1 681  
259 10 1 666 707 1369 2.00E-200 707.2 6596 cellular

organisms;Eukaryota;Opisthokonta;Metazoa;Eumetazoa;Bilateria;Protostomia;Spiralia;Lophotrochozoa;Mollusca;Bivalvia;Autobranchia;Heteroconchia;Euherodonta;Imparidentia;Venerida;Veneroidea;Veneridae;Mercenaria;Mercenaria mercenaria

UdeM00000012348 6596 382.5 UdeM00000012348 XP\_045214295.1 58.6 314  
128 1 5 316 1056 1369 5.20E-103 382.5 6596 cellular

organisms;Eukaryota;Opisthokonta;Metazoa;Eumetazoa;Bilateria;Protostomia;Spiralia;Lophotrochozoa;Mollusca;Bivalvia;Autobranchia;Heteroconchia;Euherodonta;Imparidentia;Venerida;Veneroidea;Veneridae;Mercenaria;Mercenaria mercenaria

UdeM00000012350 400727 208.4 UdeM00000012350 XP\_025093061.1 50.7  
203 98 2 27 228 30 231 9.80E-51 208.4 400727  
cellular

organisms;Eukaryota;Opisthokonta;Metazoa;Eumetazoa;Bilateria;Protostomia;Spiralia;Lophotrochozoa;Mollusca;Gastropoda;Caenogastropoda;Architaenioglossa;Ampullarioidea;Ampullariidae;Pomacea;Pomacea canaliculata

UdeM00000012351 6579 394 UdeM00000012351 XP\_033748217.1 69.4 252  
77 0 1 252 1 252 1.40E-106 394 6579 cellular

organisms;Eukaryota;Opisthokonta;Metazoa;Eumetazoa;Bilateria;Protostomia;Spiralia;Lophotrochozoa;Mollusca;Bivalvia;Autobranchia;Pteriomorphia;Pectinida;Pectinoidea;Pectinidae;Pecten;Pecten maximus

UdeM00000012352 6596 1583.5 UdeM00000012352 XP\_045214772.1 67.3  
1169 377 3 10 1175 9 1175 0.00E+00 1583.5 6596  
cellular

organisms;Eukaryota;Opisthokonta;Metazoa;Eumetazoa;Bilateria;Protostomia;  
Spiralia;Lophotrochozoa;Mollusca;Bivalvia;Autobranhia;Heteroconchia;Euhe  
terodonta;Imparidentia;Venerida;Veneroidea;Veneridae;Mercenaria;Mercenari  
a mercenaria

UdeM00000012353 6596 1239.6 UdeM00000012353 XP\_045214772.1 67.4  
917 295 2 10 923 9 924 0.00E+00 1239.6 6596  
cellular

organisms;Eukaryota;Opisthokonta;Metazoa;Eumetazoa;Bilateria;Protostomia;  
Spiralia;Lophotrochozoa;Mollusca;Bivalvia;Autobranhia;Heteroconchia;Euhe  
terodonta;Imparidentia;Venerida;Veneroidea;Veneridae;Mercenaria;Mercenari  
a mercenaria

UdeM00000012354 6596 454.5 UdeM00000012354 XP\_045174747.1 46.5 531  
279 2 1 531 12 537 1.80E-124 454.5 6596 cellular

organisms;Eukaryota;Opisthokonta;Metazoa;Eumetazoa;Bilateria;Protostomia;  
Spiralia;Lophotrochozoa;Mollusca;Bivalvia;Autobranhia;Heteroconchia;Euhe  
terodonta;Imparidentia;Venerida;Veneroidea;Veneridae;Mercenaria;Mercenari  
a mercenaria

UdeM00000012355 6596 457.2 UdeM00000012355 XP\_045212100.1 71.3 499  
110 9 1 479 1034 1519 2.50E-125 457.2 6596 cellular

organisms;Eukaryota;Opisthokonta;Metazoa;Eumetazoa;Bilateria;Protostomia;  
Spiralia;Lophotrochozoa;Mollusca;Bivalvia;Autobranhia;Heteroconchia;Euhe  
terodonta;Imparidentia;Venerida;Veneroidea;Veneridae;Mercenaria;Mercenari  
a mercenaria

UdeM00000012356 6596 1412.1 UdeM00000012356 XP\_045212118.1 72.6  
1205 268 13 1 1157 304 1494 0.00E+00 1412.1 6596  
cellular

organisms;Eukaryota;Opisthokonta;Metazoa;Eumetazoa;Bilateria;Protostomia;  
Spiralia;Lophotrochozoa;Mollusca;Bivalvia;Autobranhia;Heteroconchia;Euhe  
terodonta;Imparidentia;Venerida;Veneroidea;Veneridae;Mercenaria;Mercenari  
a mercenaria

UdeM00000012357 6596 1403.3 UdeM00000012357 XP\_045212118.1 71.9  
1217 268 14 1 1169 304 1494 0.00E+00 1403.3 6596  
cellular

organisms;Eukaryota;Opisthokonta;Metazoa;Eumetazoa;Bilateria;Protostomia;  
Spiralia;Lophotrochozoa;Mollusca;Bivalvia;Autobranhia;Heteroconchia;Euhe  
terodonta;Imparidentia;Venerida;Veneroidea;Veneridae;Mercenaria;Mercenari  
a mercenaria

UdeM00000012358 225164 168.3 UdeM00000012358 XP\_009062074.1 77.1  
109 25 0 1 109 674 782 6.30E-39 168.3 225164  
cellular

organisms;Eukaryota;Opisthokonta;Metazoa;Eumetazoa;Bilateria;Protostomia;  
Spiralia;Lophotrochozoa;Mollusca;Gastropoda;Patellogastropoda;Lottioidea;  
Lottiidae;Lottia;Lottia gigantea

UdeM00000012359 6596 451.1 UdeM00000012359 XP\_045212099.1 74.5 310  
62 5 1 304 1 299 1.20E-123 451.1 6596 cellular

organisms;Eukaryota;Opisthokonta;Metazoa;Eumetazoa;Bilateria;Protostomia;  
Spiralia;Lophotrochozoa;Mollusca;Bivalvia;Autobranhia;Heteroconchia;Euhe  
terodonta;Imparidentia;Venerida;Veneroidea;Veneridae;Mercenaria;Mercenari  
a mercenaria

UdeM00000012360 6596 219.2 UdeM00000012360 XP\_045214448.1 66.7 144  
48 0 1 144 1 144 3.70E-54 219.2 6596 cellular

organisms;Eukaryota;Opisthokonta;Metazoa;Eumetazoa;Bilateria;Protostomia;Spiralia;Lophotrochozoa;Mollusca;Bivalvia;Autobranchia;Heteroconchia;Euherodonta;Imparidentia;Venerida;Veneroidea;Veneridae;Mercenaria;Mercenaria mercenaria

UdeM00000012361 6526 77.8 UdeM00000012361 XP\_013068665.1 45.5 145  
77 1 1 145 1 143 1.70E-11 77.8 6526 cellular

organisms;Eukaryota;Opisthokonta;Metazoa;Eumetazoa;Bilateria;Protostomia;Spiralia;Lophotrochozoa;Mollusca;Gastropoda;Heterobranchia;Euthyneura;Pantpulmonata;Hygrophila;Lymnaeoidea;Planorbidae;Biomphalaria;Biomphalaria glabrata

UdeM00000012362 6596 290 UdeM00000012362 XP\_045213977.1 60.2 226  
81 2 1 226 1 217 2.60E-75 290 6596 cellular

organisms;Eukaryota;Opisthokonta;Metazoa;Eumetazoa;Bilateria;Protostomia;Spiralia;Lophotrochozoa;Mollusca;Bivalvia;Autobranchia;Heteroconchia;Euherodonta;Imparidentia;Venerida;Veneroidea;Veneridae;Mercenaria;Mercenaria mercenaria

UdeM00000012363 6596 222.2 UdeM00000012363 XP\_045210620.1 77.5 120  
27 0 10 129 36 155 5.00E-55 222.2 6596 cellular

organisms;Eukaryota;Opisthokonta;Metazoa;Eumetazoa;Bilateria;Protostomia;Spiralia;Lophotrochozoa;Mollusca;Bivalvia;Autobranchia;Heteroconchia;Euherodonta;Imparidentia;Venerida;Veneroidea;Veneridae;Mercenaria;Mercenaria mercenaria

UdeM00000012364 6596 3677.9 UdeM00000012364 XP\_045210620.1 55.5  
3571 1513 21 9 3545 157 3684 0.00E+00 3677.9 6596  
cellular

organisms;Eukaryota;Opisthokonta;Metazoa;Eumetazoa;Bilateria;Protostomia;Spiralia;Lophotrochozoa;Mollusca;Bivalvia;Autobranchia;Heteroconchia;Euherodonta;Imparidentia;Venerida;Veneroidea;Veneridae;Mercenaria;Mercenaria mercenaria

UdeM00000012365 37653 249.6 UdeM00000012365 XP\_014783177.1 31.5 677  
382 11 8 678 9 609 1.20E-62 249.6 37653 cellular

organisms;Eukaryota;Opisthokonta;Metazoa;Eumetazoa;Bilateria;Protostomia;Spiralia;Lophotrochozoa;Mollusca;Cephalopoda;Coleoidea;Octopodiformes;Octopoda;Incirrata;Octopodidae;Octopus;Octopus bimaculoides

UdeM00000012367 6596 351.7 UdeM00000012367 XP\_045212250.1 49.8 333  
159 3 5 332 9 338 1.10E-93 351.7 6596 cellular

organisms;Eukaryota;Opisthokonta;Metazoa;Eumetazoa;Bilateria;Protostomia;Spiralia;Lophotrochozoa;Mollusca;Bivalvia;Autobranchia;Heteroconchia;Euherodonta;Imparidentia;Venerida;Veneroidea;Veneridae;Mercenaria;Mercenaria mercenaria

UdeM00000012366 6596 541.6 UdeM00000012366 XP\_045212250.1 46.9 550  
283 4 5 548 9 555 1.20E-150 541.6 6596 cellular

organisms;Eukaryota;Opisthokonta;Metazoa;Eumetazoa;Bilateria;Protostomia;Spiralia;Lophotrochozoa;Mollusca;Bivalvia;Autobranchia;Heteroconchia;Euherodonta;Imparidentia;Venerida;Veneroidea;Veneridae;Mercenaria;Mercenaria mercenaria

UdeM00000012368 6596 685.3 UdeM00000012368 XP\_045159289.1 59.9 583  
202 3 6 556 9 591 7.70E-194 685.3 6596 cellular

organisms;Eukaryota;Opisthokonta;Metazoa;Eumetazoa;Bilateria;Protostomia;Spiralia;Lophotrochozoa;Mollusca;Bivalvia;Autobranchia;Heteroconchia;Euherodonta;Imparidentia;Venerida;Veneroidea;Veneridae;Mercenaria;Mercenaria mercenaria

UdeM00000012369 6573 931.4 UdeM00000012369 XP\_021340317.1 66.3 682  
224 4 1 679 1 679 6.70E-268 931.4 6573 cellular

organisms;Eukaryota;Opisthokonta;Metazoa;Eumetazoa;Bilateria;Protostomia;  
Spiralia;Lophotrochozoa;Mollusca;Bivalvia;Autobranchia;Pteriomorpha;Pect  
inida;Pectinoidea;Pectinidae;Mizuhopecten;Mizuhopecten yessoensis  
UdeM00000012370 6596 711.1 UdeM00000012370 XP\_045214044.1 67.4 555  
169 6 1 547 1 551 1.10E-201 711.1 6596 cellular  
organisms;Eukaryota;Opisthokonta;Metazoa;Eumetazoa;Bilateria;Protostomia;  
Spiralia;Lophotrochozoa;Mollusca;Bivalvia;Autobranchia;Heteroconchia;Euhe  
terodonta;Imparidentia;Venerida;Veneroidea;Veneridae;Mercenaria;Mercenari  
a mercenaria  
UdeM00000012371 6596 380.6 UdeM00000012371 XP\_045214046.1 36.2 1120  
496 29 1 966 1 1055 6.10E-102 380.6 6596 cellular  
organisms;Eukaryota;Opisthokonta;Metazoa;Eumetazoa;Bilateria;Protostomia;  
Spiralia;Lophotrochozoa;Mollusca;Bivalvia;Autobranchia;Heteroconchia;Euhe  
terodonta;Imparidentia;Venerida;Veneroidea;Veneridae;Mercenaria;Mercenari  
a mercenaria  
UdeM00000012372 6596 426 UdeM00000012372 XP\_045214046.1 38.3 1124  
524 31 1 1023 1 1055 1.30E-115 426 6596 cellular  
organisms;Eukaryota;Opisthokonta;Metazoa;Eumetazoa;Bilateria;Protostomia;  
Spiralia;Lophotrochozoa;Mollusca;Bivalvia;Autobranchia;Heteroconchia;Euhe  
terodonta;Imparidentia;Venerida;Veneroidea;Veneridae;Mercenaria;Mercenari  
a mercenaria  
UdeM00000012373 6596 215.3 UdeM00000012373 XP\_045212359.1 34.6 641  
284 14 1 524 1 623 1.80E-52 215.3 6596 cellular  
organisms;Eukaryota;Opisthokonta;Metazoa;Eumetazoa;Bilateria;Protostomia;  
Spiralia;Lophotrochozoa;Mollusca;Bivalvia;Autobranchia;Heteroconchia;Euhe  
terodonta;Imparidentia;Venerida;Veneroidea;Veneridae;Mercenaria;Mercenari  
a mercenaria  
UdeM00000012374 6596 253.4 UdeM00000012374 XP\_045212359.1 38.6 666  
304 16 1 604 1 623 7.00E-64 253.4 6596 cellular  
organisms;Eukaryota;Opisthokonta;Metazoa;Eumetazoa;Bilateria;Protostomia;  
Spiralia;Lophotrochozoa;Mollusca;Bivalvia;Autobranchia;Heteroconchia;Euhe  
terodonta;Imparidentia;Venerida;Veneroidea;Veneridae;Mercenaria;Mercenari  
a mercenaria  
UdeM00000012375 6596 124.8 UdeM00000012375 XP\_045212359.1 34.5 403  
210 12 16 406 263 623 2.50E-25 124.8 6596 cellular  
organisms;Eukaryota;Opisthokonta;Metazoa;Eumetazoa;Bilateria;Protostomia;  
Spiralia;Lophotrochozoa;Mollusca;Bivalvia;Autobranchia;Heteroconchia;Euhe  
terodonta;Imparidentia;Venerida;Veneroidea;Veneridae;Mercenaria;Mercenari  
a mercenaria  
UdeM00000012376 6596 135.2 UdeM00000012376 XP\_045210644.1 55.8 120  
52 1 29 147 790 909 7.00E-29 135.2 6596 cellular  
organisms;Eukaryota;Opisthokonta;Metazoa;Eumetazoa;Bilateria;Protostomia;  
Spiralia;Lophotrochozoa;Mollusca;Bivalvia;Autobranchia;Heteroconchia;Euhe  
terodonta;Imparidentia;Venerida;Veneroidea;Veneridae;Mercenaria;Mercenari  
a mercenaria  
UdeM00000012377 6596 188 UdeM00000012377 XP\_045212360.1 45.6 217  
109 5 19 233 135 344 1.40E-44 188 6596 cellular  
organisms;Eukaryota;Opisthokonta;Metazoa;Eumetazoa;Bilateria;Protostomia;  
Spiralia;Lophotrochozoa;Mollusca;Bivalvia;Autobranchia;Heteroconchia;Euhe  
terodonta;Imparidentia;Venerida;Veneroidea;Veneridae;Mercenaria;Mercenari  
a mercenaria  
UdeM00000012379 6596 750.7 UdeM00000012379 XP\_045210644.1 45.4 925  
466 20 4 912 54 955 2.10E-213 750.7 6596 cellular  
organisms;Eukaryota;Opisthokonta;Metazoa;Eumetazoa;Bilateria;Protostomia;

Spiralia;Lophotrochozoa;Mollusca;Bivalvia;Autobranchia;Heteroconchia;Euherodonta;Imparidentia;Venerida;Veneroidea;Veneridae;Mercenaria;Mercenaria mercenaria

UdeM00000012380 6596 184.5 UdeM00000012380 XP\_045212360.1 45.6 217  
109 5 19 233 135 344 1.60E-43 184.5 6596 cellular

organisms;Eukaryota;Opisthokonta;Metazoa;Eumetazoa;Bilateria;Protostomia;Spiralia;Lophotrochozoa;Mollusca;Bivalvia;Autobranchia;Heteroconchia;Euherodonta;Imparidentia;Venerida;Veneroidea;Veneridae;Mercenaria;Mercenaria mercenaria

UdeM00000012382 6565 492.7 UdeM00000012382 XP\_022318241.1 63.6 382  
133 1 5 380 3 384 1.00E-135 492.7 6565 cellular

organisms;Eukaryota;Opisthokonta;Metazoa;Eumetazoa;Bilateria;Protostomia;Spiralia;Lophotrochozoa;Mollusca;Bivalvia;Autobranchia;Pteriormorphia;Ostreida;Ostreoidea;Ostreidae;Crassostrea;Crassostrea virginica

UdeM00000012383 400727 241.5 UdeM00000012383 XP\_025084843.1 58  
193 79 2 3 193 4 196 9.00E-61 241.5 400727

cellular

organisms;Eukaryota;Opisthokonta;Metazoa;Eumetazoa;Bilateria;Protostomia;Spiralia;Lophotrochozoa;Mollusca;Gastropoda;Caenogastropoda;Architaenioglossa;Ampullarioidea;Ampullariidae;Pomacea;Pomacea canaliculata

UdeM00000012384 7574 106.7 UdeM00000012384 XP\_013399038.1 43.1 102  
56 1 5 106 348 447 1.90E-20 106.7 7574 cellular

organisms;Eukaryota;Opisthokonta;Metazoa;Eumetazoa;Bilateria;Protostomia;Spiralia;Lophotrochozoa;Brachiopoda;Linguliformea;Lingulata;Lingulida;Linguloidea;Lingulidae;Lingula;Lingula anatina

UdeM00000012385 7574 183.3 UdeM00000012385 XP\_013384628.1 57.8 161  
59 2 1 161 33 184 2.70E-43 183.3 7574 cellular

organisms;Eukaryota;Opisthokonta;Metazoa;Eumetazoa;Bilateria;Protostomia;Spiralia;Lophotrochozoa;Brachiopoda;Linguliformea;Lingulata;Lingulida;Linguloidea;Lingulidae;Lingula;Lingula anatina

UdeM00000012386 1735272 113.2 UdeM00000012386 XP\_041363650.1 57.7  
78 33 0 1 78 211 288 1.50E-22 113.2 1735272

cellular

organisms;Eukaryota;Opisthokonta;Metazoa;Eumetazoa;Bilateria;Protostomia;Spiralia;Lophotrochozoa;Mollusca;Gastropoda;Neomphalina;Neomphaloidea;Peltospiridae;Gigantopelta;Gigantopelta aegis

UdeM00000012387 6596 418.7 UdeM00000012387 XP\_045211186.1 45.3 475  
247 8 4 469 5 475 9.80E-114 418.7 6596 cellular

organisms;Eukaryota;Opisthokonta;Metazoa;Eumetazoa;Bilateria;Protostomia;Spiralia;Lophotrochozoa;Mollusca;Bivalvia;Autobranchia;Heteroconchia;Euherodonta;Imparidentia;Venerida;Veneroidea;Veneridae;Mercenaria;Mercenaria mercenaria

UdeM00000012388 400727 450.3 UdeM00000012388 XP\_025112701.1 62.3  
324 118 1 117 440 1 320 2.90E-123 450.3 400727

cellular

organisms;Eukaryota;Opisthokonta;Metazoa;Eumetazoa;Bilateria;Protostomia;Spiralia;Lophotrochozoa;Mollusca;Gastropoda;Caenogastropoda;Architaenioglossa;Ampullarioidea;Ampullariidae;Pomacea;Pomacea canaliculata

UdeM00000012389 37653 440.3 UdeM00000012389 XP\_014788510.1 60.1 326  
123 2 1 322 14 336 2.20E-120 440.3 37653 cellular

organisms;Eukaryota;Opisthokonta;Metazoa;Eumetazoa;Bilateria;Protostomia;Spiralia;Lophotrochozoa;Mollusca;Cephalopoda;Coleoidea;Octopodiformes;Octopoda;Incirrata;Octopodidae;Octopus;Octopus bimaculoides

UdeM00000012391 6596 199.9 UdeM00000012391 XP\_045213577.1 31.3 390  
 251 10 8 391 59 437 6.10E-48 199.9 6596 cellular  
 organisms;Eukaryota;Opisthokonta;Metazoa;Eumetazoa;Bilateria;Protostomia;  
 Spiralia;Lophotrochozoa;Mollusca;Bivalvia;Autobranchia;Heteroconchia;Euhe  
 terodonta;Imparidentia;Venerida;Veneroidea;Veneridae;Mercenaria;Mercenari  
 a mercenaria

UdeM00000012390 6596 206.8 UdeM00000012390 XP\_045213577.1 31.3 402  
 258 11 75 470 48 437 6.00E-50 206.8 6596 cellular  
 organisms;Eukaryota;Opisthokonta;Metazoa;Eumetazoa;Bilateria;Protostomia;  
 Spiralia;Lophotrochozoa;Mollusca;Bivalvia;Autobranchia;Heteroconchia;Euhe  
 terodonta;Imparidentia;Venerida;Veneroidea;Veneridae;Mercenaria;Mercenari  
 a mercenaria

UdeM00000012392 29159 100.1 UdeM00000012392 XP\_034317111.1 56 75  
 33 0 1 75 1 75 1.30E-18 100.1 29159 cellular  
 organisms;Eukaryota;Opisthokonta;Metazoa;Eumetazoa;Bilateria;Protostomia;  
 Spiralia;Lophotrochozoa;Mollusca;Bivalvia;Autobranchia;Pteriormorphia;Ostr  
 eida;Ostreoidea;Ostreidae;Crassostrea;Crassostrea gigas

UdeM00000012394 29159 340.1 UdeM00000012394 XP\_034317111.1 48.3 383  
 187 5 2 376 171 550 3.60E-90 340.1 29159 cellular  
 organisms;Eukaryota;Opisthokonta;Metazoa;Eumetazoa;Bilateria;Protostomia;  
 Spiralia;Lophotrochozoa;Mollusca;Bivalvia;Autobranchia;Pteriormorphia;Ostr  
 eida;Ostreoidea;Ostreidae;Crassostrea;Crassostrea gigas

UdeM00000012393 29159 615.9 UdeM00000012393 XP\_034317111.1 42.2 867  
 483 12 2 858 171 1029 7.60E-173 615.9 29159 cellular  
 organisms;Eukaryota;Opisthokonta;Metazoa;Eumetazoa;Bilateria;Protostomia;  
 Spiralia;Lophotrochozoa;Mollusca;Bivalvia;Autobranchia;Pteriormorphia;Ostr  
 eida;Ostreoidea;Ostreidae;Crassostrea;Crassostrea gigas

UdeM00000012395 29159 180.6 UdeM00000012395 XP\_034317111.1 36.5 359  
 220 6 1 355 675 1029 3.40E-42 180.6 29159 cellular  
 organisms;Eukaryota;Opisthokonta;Metazoa;Eumetazoa;Bilateria;Protostomia;  
 Spiralia;Lophotrochozoa;Mollusca;Bivalvia;Autobranchia;Pteriormorphia;Ostr  
 eida;Ostreoidea;Ostreidae;Crassostrea;Crassostrea gigas

UdeM00000012396 151771 435.6 UdeM00000012396 XP\_028419301.1 50.2  
 448 192 5 23 441 34 479 7.30E-119 435.6 151771  
 cellular  
 organisms;Eukaryota;Opisthokonta;Metazoa;Eumetazoa;Cnidaria;Anthozoa;Octo  
 corallia;Alcyonacea;Alcyoniina;Nephtheidae;Dendronephthya;Dendronephthya  
 gigantea

UdeM00000012397 6596 562.8 UdeM00000012397 XP\_045213255.1 44.8 687  
 318 9 1 634 6 684 5.70E-157 562.8 6596 cellular  
 organisms;Eukaryota;Opisthokonta;Metazoa;Eumetazoa;Bilateria;Protostomia;  
 Spiralia;Lophotrochozoa;Mollusca;Bivalvia;Autobranchia;Heteroconchia;Euhe  
 terodonta;Imparidentia;Venerida;Veneroidea;Veneridae;Mercenaria;Mercenari  
 a mercenaria

UdeM00000012399 7574 272.7 UdeM00000012399 XP\_013415605.1 55.2 259  
 109 5 7 264 612 864 5.30E-70 272.7 7574 cellular  
 organisms;Eukaryota;Opisthokonta;Metazoa;Eumetazoa;Bilateria;Protostomia;  
 Spiralia;Lophotrochozoa;Brachiopoda;Linguliformea;Lingulata;Lingulida;Lin  
 guloidea;Lingulidae;Lingula;Lingula anatina

UdeM00000012398 7574 272.7 UdeM00000012398 XP\_013415605.1 55.2 259  
 109 5 7 264 612 864 5.50E-70 272.7 7574 cellular  
 organisms;Eukaryota;Opisthokonta;Metazoa;Eumetazoa;Bilateria;Protostomia;  
 Spiralia;Lophotrochozoa;Brachiopoda;Linguliformea;Lingulata;Lingulida;Lin  
 guloidea;Lingulidae;Lingula;Lingula anatina

UdeM00000012401 6596 145.6 UdeM00000012401 XP\_045210952.1 48.3 151  
 68 2 24 165 555 704 6.00E-32 145.6 6596 cellular  
 organisms;Eukaryota;Opisthokonta;Metazoa;Eumetazoa;Bilateria;Protostomia;  
 Spiralia;Lophotrochozoa;Mollusca;Bivalvia;Autobranchia;Heteroconchia;Euhe  
 terodonta;Imparidentia;Venerida;Veneroidea;Veneridae;Mercenaria;Mercenari  
 a mercenaria  
 UdeM00000012400 6596 434.5 UdeM00000012400 XP\_045210952.1 52.5 413  
 143 5 10 413 336 704 1.60E-118 434.5 6596 cellular  
 organisms;Eukaryota;Opisthokonta;Metazoa;Eumetazoa;Bilateria;Protostomia;  
 Spiralia;Lophotrochozoa;Mollusca;Bivalvia;Autobranchia;Heteroconchia;Euhe  
 terodonta;Imparidentia;Venerida;Veneroidea;Veneridae;Mercenaria;Mercenari  
 a mercenaria  
 UdeM00000012402 6579 468 UdeM00000012402 XP\_033734525.1 50.1 495  
 214 7 1 479 98 575 1.40E-128 468 6579 cellular  
 organisms;Eukaryota;Opisthokonta;Metazoa;Eumetazoa;Bilateria;Protostomia;  
 Spiralia;Lophotrochozoa;Mollusca;Bivalvia;Autobranchia;Pteriormorphia;Pect  
 inida;Pectinoidea;Pectinidae;Pecten;Pecten maximus  
 UdeM00000012403 1735272 211.1 UdeM00000012403 XP\_041362690.1 42.2  
 287 151 6 15 289 115 398 1.90E-51 211.1 1735272  
 cellular  
 organisms;Eukaryota;Opisthokonta;Metazoa;Eumetazoa;Bilateria;Protostomia;  
 Spiralia;Lophotrochozoa;Mollusca;Gastropoda;Neomphalina;Neomphaloidea;Pel  
 tospiridae;Gigantopelta;Gigantopelta aegis  
 UdeM00000012404 1735272 206.8 UdeM00000012404 XP\_041362690.1 43.7  
 261 134 5 15 265 141 398 3.40E-50 206.8 1735272  
 cellular  
 organisms;Eukaryota;Opisthokonta;Metazoa;Eumetazoa;Bilateria;Protostomia;  
 Spiralia;Lophotrochozoa;Mollusca;Gastropoda;Neomphalina;Neomphaloidea;Pel  
 tospiridae;Gigantopelta;Gigantopelta aegis  
 UdeM00000012405 400727 260 UdeM00000012405 XP\_025107714.1 69.9  
 183 55 0 1 183 1 183 2.30E-66 260 400727  
 cellular  
 organisms;Eukaryota;Opisthokonta;Metazoa;Eumetazoa;Bilateria;Protostomia;  
 Spiralia;Lophotrochozoa;Mollusca;Gastropoda;Caenogastropoda;Architaeniogl  
 ossa;Ampullarioidea;Ampullariidae;Pomacea;Pomacea canaliculata  
 UdeM00000012406 7741 200.7 UdeM00000012406 XP\_019634563.1 46.3 216  
 110 4 227 439 188 400 4.00E-48 200.7 7741 cellular  
 organisms;Eukaryota;Opisthokonta;Metazoa;Eumetazoa;Bilateria;Deuterostomi  
 a;Chordata;Cephalochordata;Leptocardii;Amphioxiformes;Branchiostomidae;Br  
 anchiostoma;Branchiostoma belcheri  
 UdeM00000012407 6565 243.8 UdeM00000012407 XP\_022314738.1 60.6 203  
 76 2 1 203 1 199 1.90E-61 243.8 6565 cellular  
 organisms;Eukaryota;Opisthokonta;Metazoa;Eumetazoa;Bilateria;Protostomia;  
 Spiralia;Lophotrochozoa;Mollusca;Bivalvia;Autobranchia;Pteriormorphia;Ostr  
 eida;Ostreoidea;Ostreidae;Crassostrea;Crassostrea virginica  
 UdeM00000012408 6596 638.6 UdeM00000012408 XP\_045212536.1 62.9 483  
 166 3 29 510 6 476 6.60E-180 638.6 6596 cellular  
 organisms;Eukaryota;Opisthokonta;Metazoa;Eumetazoa;Bilateria;Protostomia;  
 Spiralia;Lophotrochozoa;Mollusca;Bivalvia;Autobranchia;Heteroconchia;Euhe  
 terodonta;Imparidentia;Venerida;Veneroidea;Veneridae;Mercenaria;Mercenari  
 a mercenaria  
 UdeM00000012409 6596 444.1 UdeM00000012409 XP\_045212526.1 34.8 995  
 480 18 16 846 16 1005 3.90E-121 444.1 6596 cellular  
 organisms;Eukaryota;Opisthokonta;Metazoa;Eumetazoa;Bilateria;Protostomia;



Spiralia;Lophotrochozoa;Mollusca;Bivalvia;Autobranchia;Heteroconchia;Euherodonta;Imparidentia;Venerida;Veneroidea;Veneridae;Mercenaria;Mercenaria mercenaria

UdeM00000012410 6596 1129.4 UdeM00000012410 XP\_045213202.1 66.7  
832 274 1 1 829 1 832 0.00E+00 1129.4 6596  
cellular

organisms;Eukaryota;Opisthokonta;Metazoa;Eumetazoa;Bilateria;Protostomia;Spiralia;Lophotrochozoa;Mollusca;Bivalvia;Autobranchia;Heteroconchia;Euherodonta;Imparidentia;Venerida;Veneroidea;Veneridae;Mercenaria;Mercenaria mercenaria

UdeM00000012411 29159 161 UdeM00000012411 XP\_011442838.1 48.3 180  
77 4 135 298 610 789 2.70E-36 161 29159 cellular

organisms;Eukaryota;Opisthokonta;Metazoa;Eumetazoa;Bilateria;Protostomia;Spiralia;Lophotrochozoa;Mollusca;Bivalvia;Autobranchia;Pteriomorpha;Ostreida;Ostreoidea;Ostreidae;Crassostrea;Crassostrea gigas

UdeM00000012412 6596 123.2 UdeM00000012412 XP\_045179939.1 47.3 129  
64 3 75 200 252 379 3.70E-25 123.2 6596 cellular

organisms;Eukaryota;Opisthokonta;Metazoa;Eumetazoa;Bilateria;Protostomia;Spiralia;Lophotrochozoa;Mollusca;Bivalvia;Autobranchia;Heteroconchia;Euherodonta;Imparidentia;Venerida;Veneroidea;Veneridae;Mercenaria;Mercenaria mercenaria

UdeM00000012413 6596 177.2 UdeM00000012413 XP\_045213202.1 68.9 119  
37 0 2 120 714 832 1.30E-41 177.2 6596 cellular

organisms;Eukaryota;Opisthokonta;Metazoa;Eumetazoa;Bilateria;Protostomia;Spiralia;Lophotrochozoa;Mollusca;Bivalvia;Autobranchia;Heteroconchia;Euherodonta;Imparidentia;Venerida;Veneroidea;Veneridae;Mercenaria;Mercenaria mercenaria

UdeM00000012414 6596 1798.1 UdeM00000012414 XP\_045213175.1 74.2  
1174 290 4 84 1246 79 1250 0.00E+00 1798.1 6596  
cellular

organisms;Eukaryota;Opisthokonta;Metazoa;Eumetazoa;Bilateria;Protostomia;Spiralia;Lophotrochozoa;Mollusca;Bivalvia;Autobranchia;Heteroconchia;Euherodonta;Imparidentia;Venerida;Veneroidea;Veneridae;Mercenaria;Mercenaria mercenaria

UdeM00000012415 6596 360.9 UdeM00000012415 XP\_045157354.1 43.2 403  
225 3 26 426 5 405 2.20E-96 360.9 6596 cellular

organisms;Eukaryota;Opisthokonta;Metazoa;Eumetazoa;Bilateria;Protostomia;Spiralia;Lophotrochozoa;Mollusca;Bivalvia;Autobranchia;Heteroconchia;Euherodonta;Imparidentia;Venerida;Veneroidea;Veneridae;Mercenaria;Mercenaria mercenaria

UdeM00000012416 6596 222.2 UdeM00000012416 XP\_045211181.1 56.5 191  
81 1 3 191 2 192 5.60E-55 222.2 6596 cellular

organisms;Eukaryota;Opisthokonta;Metazoa;Eumetazoa;Bilateria;Protostomia;Spiralia;Lophotrochozoa;Mollusca;Bivalvia;Autobranchia;Heteroconchia;Euherodonta;Imparidentia;Venerida;Veneroidea;Veneridae;Mercenaria;Mercenaria mercenaria

UdeM00000012417 29159 217.2 UdeM00000012417 XP\_034339165.1 37.7 334  
194 8 1 331 186 508 3.10E-53 217.2 29159 cellular

organisms;Eukaryota;Opisthokonta;Metazoa;Eumetazoa;Bilateria;Protostomia;Spiralia;Lophotrochozoa;Mollusca;Bivalvia;Autobranchia;Pteriomorpha;Ostreida;Ostreoidea;Ostreidae;Crassostrea;Crassostrea gigas

UdeM00000012418 29159 428.7 UdeM00000012418 XP\_034299474.1 44.5 526  
277 7 3 522 239 755 1.10E-116 428.7 29159 cellular

organisms;Eukaryota;Opisthokonta;Metazoa;Eumetazoa;Bilateria;Protostomia;

Spiralia; Lophotrochozoa; Mollusca; Bivalvia; Autobranchia; Pteriomorpha; Ostr  
 eida; Ostreoidea; Ostreidae; Crassostrea; Crassostrea gigas  
 UdeM00000012419 6596 449.5 UdeM00000012419 XP\_045212345.1 63.9 321  
 114 2 1 321 18 336 4.40E-123 449.5 6596 cellular  
 organisms; Eukaryota; Opisthokonta; Metazoa; Eumetazoa; Bilateria; Protostomia;  
 Spiralia; Lophotrochozoa; Mollusca; Bivalvia; Autobranchia; Heteroconchia; Eue  
 terodonta; Imparidentia; Venerida; Veneroidea; Veneridae; Mercenaria; Mercenari  
 a mercenaria  
 UdeM00000012420 6596 169.5 UdeM00000012420 XP\_045212345.1 72.2 115  
 29 2 10 124 374 485 2.80E-39 169.5 6596 cellular  
 organisms; Eukaryota; Opisthokonta; Metazoa; Eumetazoa; Bilateria; Protostomia;  
 Spiralia; Lophotrochozoa; Mollusca; Bivalvia; Autobranchia; Heteroconchia; Eue  
 terodonta; Imparidentia; Venerida; Veneroidea; Veneridae; Mercenaria; Mercenari  
 a mercenaria  
 UdeM00000044449 83332 277.3 UdeM00000044449 NP\_216518.1 59.9 237 94  
 1 4 240 2 237 1.90E-71 277.3 83332 cellular  
 organisms; Bacteria; Terrabacteria  
 group; Actinobacteria; Actinomycetia; Corynebacteriales; Mycobacteriaceae; Myc  
 obacterium; Mycobacterium tuberculosis complex; Mycobacterium  
 tuberculosis; Mycobacterium tuberculosis H37Rv  
 UdeM00000044474 7668 115.2 UdeM00000044474 XP\_030847080.1 40.9 149  
 81 3 1 147 1 144 8.30E-23 115.2 7668 cellular  
 organisms; Eukaryota; Opisthokonta; Metazoa; Eumetazoa; Bilateria; Deuterostomi  
 a; Echinodermata; Eleutherozoa; Echinozoa; Echinoidea; Euechinoidea; Echinacea;  
 Camarodonta; Echinidea; Strongylocentrotidae; Strongylocentrotus; Strongyloce  
 ntrotus purpuratus  
 UdeM00000044257 105984 316.2 UdeM00000044257 XP\_028477281.1 61.6  
 255 98 0 5 259 3 257 3.80E-83 316.2 105984  
 cellular  
 organisms; Eukaryota; Opisthokonta; Fungi; Dikarya; Basidiomycota; Agaricomycot  
 ina; Tremellomycetes; Trichosporonales; Trichosporonaceae; Apiotrichum; Apiotr  
 ichum porosum  
 UdeM00000044483 6596 198 UdeM00000044483 XP\_045184161.1 40.9 252  
 124 8 18 252 358 601 1.50E-47 198 6596 cellular  
 organisms; Eukaryota; Opisthokonta; Metazoa; Eumetazoa; Bilateria; Protostomia;  
 Spiralia; Lophotrochozoa; Mollusca; Bivalvia; Autobranchia; Heteroconchia; Eue  
 terodonta; Imparidentia; Venerida; Veneroidea; Veneridae; Mercenaria; Mercenari  
 a mercenaria  
 UdeM00000039270 6596 159.8 UdeM00000039270 XP\_045198458.1 73.7 99  
 26 0 1 99 1 99 1.80E-36 159.8 6596 cellular  
 organisms; Eukaryota; Opisthokonta; Metazoa; Eumetazoa; Bilateria; Protostomia;  
 Spiralia; Lophotrochozoa; Mollusca; Bivalvia; Autobranchia; Heteroconchia; Eue  
 terodonta; Imparidentia; Venerida; Veneroidea; Veneridae; Mercenaria; Mercenari  
 a mercenaria  
 UdeM00000039271 225164 123.6 UdeM00000039271 XP\_009062162.1 63.8  
 127 34 2 8 127 102 223 1.80E-25 123.6 225164  
 cellular  
 organisms; Eukaryota; Opisthokonta; Metazoa; Eumetazoa; Bilateria; Protostomia;  
 Spiralia; Lophotrochozoa; Mollusca; Gastropoda; Patellogastropoda; Lottioidae;  
 Lottiidae; Lottia; Lottia gigantea  
 UdeM00000039272 6596 1532.7 UdeM00000039272 XP\_045198458.1 50.8  
 2529 819 54 1 2437 128 2322 0.00E+00 1532.7 6596  
 cellular  
 organisms; Eukaryota; Opisthokonta; Metazoa; Eumetazoa; Bilateria; Protostomia;

Spiralia;Lophotrochozoa;Mollusca;Bivalvia;Autobranchia;Heteroconchia;Euherodonta;Imparidentia;Venerida;Veneroidea;Veneridae;Mercenaria;Mercenaria mercenaria

UdeM00000039273 6596 265 UdeM00000039273 XP\_045167863.1 61.3 199  
74 2 169 367 106 301 1.40E-67 265 6596 cellular

organisms;Eukaryota;Opisthokonta;Metazoa;Eumetazoa;Bilateria;Protostomia;Spiralia;Lophotrochozoa;Mollusca;Bivalvia;Autobranchia;Heteroconchia;Euherodonta;Imparidentia;Venerida;Veneroidea;Veneridae;Mercenaria;Mercenaria mercenaria

UdeM00000039274 6596 1275.8 UdeM00000039274 XP\_045196090.1 85.2  
843 117 4 1 838 1 840 0.00E+00 1275.8 6596  
cellular

organisms;Eukaryota;Opisthokonta;Metazoa;Eumetazoa;Bilateria;Protostomia;Spiralia;Lophotrochozoa;Mollusca;Bivalvia;Autobranchia;Heteroconchia;Euherodonta;Imparidentia;Venerida;Veneroidea;Veneridae;Mercenaria;Mercenaria mercenaria

UdeM00000039275 6579 315.5 UdeM00000039275 XP\_033740054.1 41.5 446  
249 7 9 446 6 447 1.10E-82 315.5 6579 cellular

organisms;Eukaryota;Opisthokonta;Metazoa;Eumetazoa;Bilateria;Protostomia;Spiralia;Lophotrochozoa;Mollusca;Bivalvia;Autobranchia;Pteriomorphia;Pectinida;Pectinoidea;Pectinidae;Pecten;Pecten maximus

UdeM00000039276 6573 193.4 UdeM00000039276 XP\_021377366.1 75.8 128  
27 2 1 127 1 125 1.90E-46 193.4 6573 cellular

organisms;Eukaryota;Opisthokonta;Metazoa;Eumetazoa;Bilateria;Protostomia;Spiralia;Lophotrochozoa;Mollusca;Bivalvia;Autobranchia;Pteriomorphia;Pectinida;Pectinoidea;Pectinidae;Mizuhopecten;Mizuhopecten yessoensis

UdeM00000039277 37621 112.5 UdeM00000039277 XP\_014672134.1 41.6 137  
77 1 2 135 139 275 4.70E-22 112.5 37621 cellular

organisms;Eukaryota;Opisthokonta;Metazoa;Eumetazoa;Bilateria;Protostomia;Ecdysozoa;Scalidophora;Priapulida;Priapulimorpha;Priapulimorphida;Priapulidae;Priapululus;Priapululus caudatus

UdeM00000039280 6579 263.1 UdeM00000039280 XP\_033740844.1 45 556  
229 22 1 507 130 657 7.40E-67 263.1 6579 cellular

organisms;Eukaryota;Opisthokonta;Metazoa;Eumetazoa;Bilateria;Protostomia;Spiralia;Lophotrochozoa;Mollusca;Bivalvia;Autobranchia;Pteriomorphia;Pectinida;Pectinoidea;Pectinidae;Pecten;Pecten maximus

UdeM00000039281 6596 68.2 UdeM00000039281 XP\_045181585.1 37 92  
56 2 1 91 1 91 3.70E-08 68.2 6596 cellular

organisms;Eukaryota;Opisthokonta;Metazoa;Eumetazoa;Bilateria;Protostomia;Spiralia;Lophotrochozoa;Mollusca;Bivalvia;Autobranchia;Heteroconchia;Euherodonta;Imparidentia;Venerida;Veneroidea;Veneridae;Mercenaria;Mercenaria mercenaria

UdeM00000039282 6565 81.3 UdeM00000039282 XP\_022329491.1 39.8 98  
58 1 1 97 1 98 5.80E-12 81.3 6565 cellular

organisms;Eukaryota;Opisthokonta;Metazoa;Eumetazoa;Bilateria;Protostomia;Spiralia;Lophotrochozoa;Mollusca;Bivalvia;Autobranchia;Pteriomorphia;Ostreida;Ostreoidea;Ostreidae;Crassostrea;Crassostrea virginica

UdeM00000039283 29159 170.6 UdeM00000039283 XP\_034323800.1 23.6 750  
450 22 15 737 27 680 7.30E-39 170.6 29159 cellular

organisms;Eukaryota;Opisthokonta;Metazoa;Eumetazoa;Bilateria;Protostomia;Spiralia;Lophotrochozoa;Mollusca;Bivalvia;Autobranchia;Pteriomorphia;Ostreida;Ostreoidea;Ostreidae;Crassostrea;Crassostrea gigas

UdeM00000039284 6596 3273.8 UdeM00000039284 XP\_045198334.1 54.2  
3154 1327 42 5 3089 2508 5612 0.00E+00 3273.8 6596

cellular  
organisms;Eukaryota;Opisthokonta;Metazoa;Eumetazoa;Bilateria;Protostomia;  
Spiralia;Lophotrochozoa;Mollusca;Bivalvia;Autobranchia;Heteroconchia;Euhe  
terodonta;Imparidentia;Venerida;Veneroidea;Veneridae;Mercenaria;Mercenari  
a mercenaria

|                 |      |        |   |                 |                |      |          |        |      |
|-----------------|------|--------|---|-----------------|----------------|------|----------|--------|------|
| UdeM00000039285 | 6596 | 1807.7 |   | UdeM00000039285 | XP_045198334.1 | 67.4 |          |        |      |
| 1338            | 401  | 13     | 5 | 1331            | 2508           | 3821 | 0.00E+00 | 1807.7 | 6596 |

cellular  
organisms;Eukaryota;Opisthokonta;Metazoa;Eumetazoa;Bilateria;Protostomia;  
Spiralia;Lophotrochozoa;Mollusca;Bivalvia;Autobranchia;Heteroconchia;Euhe  
terodonta;Imparidentia;Venerida;Veneroidea;Veneridae;Mercenaria;Mercenari  
a mercenaria

|                 |      |        |   |                 |                |      |          |        |      |
|-----------------|------|--------|---|-----------------|----------------|------|----------|--------|------|
| UdeM00000039286 | 6596 | 1359.4 |   | UdeM00000039286 | XP_045195413.1 | 34.5 |          |        |      |
| 2654            | 1476 | 58     | 1 | 2501            | 1              | 2545 | 0.00E+00 | 1359.4 | 6596 |

cellular  
organisms;Eukaryota;Opisthokonta;Metazoa;Eumetazoa;Bilateria;Protostomia;  
Spiralia;Lophotrochozoa;Mollusca;Bivalvia;Autobranchia;Heteroconchia;Euhe  
terodonta;Imparidentia;Venerida;Veneroidea;Veneridae;Mercenaria;Mercenari  
a mercenaria

|                 |      |       |     |                 |                |          |       |      |          |
|-----------------|------|-------|-----|-----------------|----------------|----------|-------|------|----------|
| UdeM00000039287 | 6596 | 114.8 |     | UdeM00000039287 | XP_045198336.1 | 42.6     | 122   |      |          |
| 69              | 1    | 5     | 125 | 579             | 700            | 8.70E-23 | 114.8 | 6596 | cellular |

organisms;Eukaryota;Opisthokonta;Metazoa;Eumetazoa;Bilateria;Protostomia;  
Spiralia;Lophotrochozoa;Mollusca;Bivalvia;Autobranchia;Heteroconchia;Euhe  
terodonta;Imparidentia;Venerida;Veneroidea;Veneridae;Mercenaria;Mercenari  
a mercenaria

|                 |      |        |    |                 |                |      |          |        |      |
|-----------------|------|--------|----|-----------------|----------------|------|----------|--------|------|
| UdeM00000039288 | 6596 | 4535.7 |    | UdeM00000039288 | XP_045198334.1 | 49.4 |          |        |      |
| 4887            | 2241 | 64     | 24 | 4761            | 809            | 5612 | 0.00E+00 | 4535.7 | 6596 |

cellular  
organisms;Eukaryota;Opisthokonta;Metazoa;Eumetazoa;Bilateria;Protostomia;  
Spiralia;Lophotrochozoa;Mollusca;Bivalvia;Autobranchia;Heteroconchia;Euhe  
terodonta;Imparidentia;Venerida;Veneroidea;Veneridae;Mercenaria;Mercenari  
a mercenaria

|                 |      |       |     |                 |                |          |       |      |          |
|-----------------|------|-------|-----|-----------------|----------------|----------|-------|------|----------|
| UdeM00000039289 | 6596 | 105.1 |     | UdeM00000039289 | XP_045195418.1 | 30.2     | 232   |      |          |
| 149             | 5    | 529   | 754 | 732             | 956            | 3.90E-19 | 105.1 | 6596 | cellular |

organisms;Eukaryota;Opisthokonta;Metazoa;Eumetazoa;Bilateria;Protostomia;  
Spiralia;Lophotrochozoa;Mollusca;Bivalvia;Autobranchia;Heteroconchia;Euhe  
terodonta;Imparidentia;Venerida;Veneroidea;Veneridae;Mercenaria;Mercenari  
a mercenaria

|                 |      |        |   |                 |                |      |          |        |      |
|-----------------|------|--------|---|-----------------|----------------|------|----------|--------|------|
| UdeM00000039290 | 6596 | 4703.3 |   | UdeM00000039290 | XP_045195413.1 | 48.9 |          |        |      |
| 5143            | 2436 | 73     | 8 | 5035            | 599            | 5665 | 0.00E+00 | 4703.3 | 6596 |

cellular  
organisms;Eukaryota;Opisthokonta;Metazoa;Eumetazoa;Bilateria;Protostomia;  
Spiralia;Lophotrochozoa;Mollusca;Bivalvia;Autobranchia;Heteroconchia;Euhe  
terodonta;Imparidentia;Venerida;Veneroidea;Veneridae;Mercenaria;Mercenari  
a mercenaria

|                 |        |      |    |                 |                |     |          |      |        |
|-----------------|--------|------|----|-----------------|----------------|-----|----------|------|--------|
| UdeM00000039291 | 400727 | 60.8 |    | UdeM00000039291 | XP_025098957.1 | 37  |          |      |        |
| 81              | 49     | 1    | 21 | 99              | 28             | 108 | 6.50E-06 | 60.8 | 400727 |

cellular  
organisms;Eukaryota;Opisthokonta;Metazoa;Eumetazoa;Bilateria;Protostomia;  
Spiralia;Lophotrochozoa;Mollusca;Gastropoda;Caenogastropoda;Architaeniogl  
ossa;Ampullarioidea;Ampullariidae;Pomacea;Pomacea canaliculata

|                 |      |      |     |                 |                |          |      |      |          |
|-----------------|------|------|-----|-----------------|----------------|----------|------|------|----------|
| UdeM00000039292 | 6596 | 80.5 |     | UdeM00000039292 | XP_045195419.1 | 23.3     | 223  |      |          |
| 153             | 4    | 367  | 575 | 805             | 1023           | 7.90E-12 | 80.5 | 6596 | cellular |

organisms;Eukaryota;Opisthokonta;Metazoa;Eumetazoa;Bilateria;Protostomia;

Spiralia;Lophotrochozoa;Mollusca;Bivalvia;Autobranchia;Heteroconchia;Euherodonta;Imparidentia;Venerida;Veneroidea;Veneridae;Mercenaria;Mercenaria mercenaria

UdeM00000039293 6596 565.8 UdeM00000039293 XP\_045198333.1 36 920  
543 17 17 906 840 1743 9.60E-158 565.8 6596 cellular

organisms;Eukaryota;Opisthokonta;Metazoa;Eumetazoa;Bilateria;Protostomia;Spiralia;Lophotrochozoa;Mollusca;Bivalvia;Autobranchia;Heteroconchia;Euherodonta;Imparidentia;Venerida;Veneroidea;Veneridae;Mercenaria;Mercenaria mercenaria

UdeM00000039294 6596 3865.5 UdeM00000039294 XP\_045198334.1 52.2  
3957 1692 57 21 3883 1759 5608 0.00E+00 3865.5 6596  
cellular

organisms;Eukaryota;Opisthokonta;Metazoa;Eumetazoa;Bilateria;Protostomia;Spiralia;Lophotrochozoa;Mollusca;Bivalvia;Autobranchia;Heteroconchia;Euherodonta;Imparidentia;Venerida;Veneroidea;Veneridae;Mercenaria;Mercenaria mercenaria

UdeM00000039295 6596 932.9 UdeM00000039295 XP\_045195413.1 48.3 1025  
491 14 2 996 4650 5665 3.30E-268 932.9 6596 cellular

organisms;Eukaryota;Opisthokonta;Metazoa;Eumetazoa;Bilateria;Protostomia;Spiralia;Lophotrochozoa;Mollusca;Bivalvia;Autobranchia;Heteroconchia;Euherodonta;Imparidentia;Venerida;Veneroidea;Veneridae;Mercenaria;Mercenaria mercenaria

UdeM00000039296 1735272 1110.9 UdeM00000039296 XP\_041373141.1  
50.2 1115 529 9 7 1105 12 1116 0.00E+00 1110.9  
1735272 cellular

organisms;Eukaryota;Opisthokonta;Metazoa;Eumetazoa;Bilateria;Protostomia;Spiralia;Lophotrochozoa;Mollusca;Gastropoda;Neomphalina;Neomphaloidea;Peltospiridae;Gigantopelta;Gigantopelta aegis

UdeM00000039297 6596 588.2 UdeM00000039297 XP\_045195413.1 45.8 679  
337 11 34 695 3950 4614 1.40E-164 588.2 6596 cellular

organisms;Eukaryota;Opisthokonta;Metazoa;Eumetazoa;Bilateria;Protostomia;Spiralia;Lophotrochozoa;Mollusca;Bivalvia;Autobranchia;Heteroconchia;Euherodonta;Imparidentia;Venerida;Veneroidea;Veneridae;Mercenaria;Mercenaria mercenaria

UdeM00000039298 6596 634.4 UdeM00000039298 XP\_045198334.1 58.2 550  
213 9 1 540 3300 3842 1.40E-178 634.4 6596 cellular

organisms;Eukaryota;Opisthokonta;Metazoa;Eumetazoa;Bilateria;Protostomia;Spiralia;Lophotrochozoa;Mollusca;Bivalvia;Autobranchia;Heteroconchia;Euherodonta;Imparidentia;Venerida;Veneroidea;Veneridae;Mercenaria;Mercenaria mercenaria

UdeM00000035739 6596 1180.2 UdeM00000035739 XP\_045192074.1 77.5  
848 172 11 1 842 1 835 0.00E+00 1180.2 6596  
cellular

organisms;Eukaryota;Opisthokonta;Metazoa;Eumetazoa;Bilateria;Protostomia;Spiralia;Lophotrochozoa;Mollusca;Bivalvia;Autobranchia;Heteroconchia;Euherodonta;Imparidentia;Venerida;Veneroidea;Veneridae;Mercenaria;Mercenaria mercenaria

UdeM00000035740 6596 1434.9 UdeM00000035740 XP\_045192074.1 77.8  
1011 201 13 1 1001 1 998 0.00E+00 1434.9 6596  
cellular

organisms;Eukaryota;Opisthokonta;Metazoa;Eumetazoa;Bilateria;Protostomia;Spiralia;Lophotrochozoa;Mollusca;Bivalvia;Autobranchia;Heteroconchia;Euherodonta;Imparidentia;Venerida;Veneroidea;Veneridae;Mercenaria;Mercenaria mercenaria

UdeM00000035741 6596 1431.8 UdeM00000035741 XP\_045192074.1 77.8  
 1011 200 14 1 1000 1 998 0.00E+00 1431.8 6596  
 cellular  
 organisms;Eukaryota;Opisthokonta;Metazoa;Eumetazoa;Bilateria;Protostomia;  
 Spiralia;Lophotrochozoa;Mollusca;Bivalvia;Autobranhia;Heteroconchia;Euhe  
 terodonta;Imparidentia;Venerida;Veneroidea;Veneridae;Mercenaria;Mercenari  
 a mercenaria  
 UdeM00000035742 7604 89.7 UdeM00000035742 XP\_033647944.1 50.6 77  
 38 0 7 83 10 86 1.90E-15 89.7 7604 cellular  
 organisms;Eukaryota;Opisthokonta;Metazoa;Eumetazoa;Bilateria;Deuterostomi  
 a;Echinodermata;Eleutherozoa;Asterozoa;Asteroidea;Forcipulatacea;Forcipul  
 atida;Asteroidea;Asterias;Asterias rubens  
 UdeM00000035743 29159 126.3 UdeM00000035743 XP\_034334268.1 51.6 122  
 53 2 1 119 160 278 3.00E-26 126.3 29159 cellular  
 organisms;Eukaryota;Opisthokonta;Metazoa;Eumetazoa;Bilateria;Protostomia;  
 Spiralia;Lophotrochozoa;Mollusca;Bivalvia;Autobranhia;Pteriormorphia;Ostr  
 eida;Ostreidae;Crassostrea;Crassostrea gigas  
 UdeM00000035744 6565 198.7 UdeM00000035744 XP\_022329914.1 67.6 139  
 45 0 15 153 150 288 5.40E-48 198.7 6565 cellular  
 organisms;Eukaryota;Opisthokonta;Metazoa;Eumetazoa;Bilateria;Protostomia;  
 Spiralia;Lophotrochozoa;Mollusca;Bivalvia;Autobranhia;Pteriormorphia;Ostr  
 eida;Ostreidae;Crassostrea;Crassostrea virginica  
 UdeM00000035745 29159 362.8 UdeM00000035745 XP\_011453191.2 47.9 390  
 186 2 19 408 115 487 5.60E-97 362.8 29159 cellular  
 organisms;Eukaryota;Opisthokonta;Metazoa;Eumetazoa;Bilateria;Protostomia;  
 Spiralia;Lophotrochozoa;Mollusca;Bivalvia;Autobranhia;Pteriormorphia;Ostr  
 eida;Ostreidae;Crassostrea;Crassostrea gigas  
 UdeM00000035748 6573 79 UdeM00000035748 XP\_021362634.1 37.7 138  
 73 4 6 139 5 133 8.40E-12 79 6573 cellular  
 organisms;Eukaryota;Opisthokonta;Metazoa;Eumetazoa;Bilateria;Protostomia;  
 Spiralia;Lophotrochozoa;Mollusca;Bivalvia;Autobranhia;Pteriormorphia;Pect  
 inida;Pectinoidea;Pectinidae;Mizuhopecten;Mizuhopecten yessoensis  
 UdeM00000035749 6573 81.3 UdeM00000035749 XP\_021379779.1 46 100  
 50 2 81 180 704 799 1.50E-12 81.3 6573 cellular  
 organisms;Eukaryota;Opisthokonta;Metazoa;Eumetazoa;Bilateria;Protostomia;  
 Spiralia;Lophotrochozoa;Mollusca;Bivalvia;Autobranhia;Pteriormorphia;Pect  
 inida;Pectinoidea;Pectinidae;Mizuhopecten;Mizuhopecten yessoensis  
 UdeM00000035750 6596 161 UdeM00000035750 XP\_045198374.1 33.4 368  
 97 6 1 230 1 358 1.80E-36 161 6596 cellular  
 organisms;Eukaryota;Opisthokonta;Metazoa;Eumetazoa;Bilateria;Protostomia;  
 Spiralia;Lophotrochozoa;Mollusca;Bivalvia;Autobranhia;Heteroconchia;Euhe  
 terodonta;Imparidentia;Venerida;Veneroidea;Veneridae;Mercenaria;Mercenari  
 a mercenaria  
 UdeM00000035752 6565 108.6 UdeM00000035752 XP\_022340194.1 31.9 182  
 120 2 66 243 1741 1922 2.00E-20 108.6 6565 cellular  
 organisms;Eukaryota;Opisthokonta;Metazoa;Eumetazoa;Bilateria;Protostomia;  
 Spiralia;Lophotrochozoa;Mollusca;Bivalvia;Autobranhia;Pteriormorphia;Ostr  
 eida;Ostreidae;Crassostrea;Crassostrea virginica  
 UdeM00000035753 9337 62.8 UdeM00000035753 XP\_036613770.1 32.5 126  
 83 2 4 129 1857 1980 6.40E-07 62.8 9337 cellular  
 organisms;Eukaryota;Opisthokonta;Metazoa;Eumetazoa;Bilateria;Deuterostomi  
 a;Chordata;Craniata;Vertebrata;Gnathostomata;Teleostomi;Euteleostomi;Sarc  
 opterygii;Dipnotetrapodomorpha;Tetrapoda;Amniota;Mammalia;Theria;Metather  
 ia;Diprotodontia;Phalangeridae;Trichosurus;Trichosurus vulpecula

UdeM00000035754 6596 3618.2 UdeM00000035754 XP\_045192074.1 77.2  
2471 490 23 1 2420 1 2448 0.00E+00 3618.2 6596  
cellular

organisms;Eukaryota;Opisthokonta;Metazoa;Eumetazoa;Bilateria;Protostomia;  
Spiralia;Lophotrochozoa;Mollusca;Bivalvia;Autobranhia;Heteroconchia;Euhe  
terodonta;Imparidentia;Venerida;Veneroidea;Veneridae;Mercenaria;Mercenari  
a mercenaria

UdeM00000035755 6596 473.4 UdeM00000035755 XP\_045191451.1 71.1 311  
88 1 6 314 7 317 2.20E-130 473.4 6596 cellular

organisms;Eukaryota;Opisthokonta;Metazoa;Eumetazoa;Bilateria;Protostomia;  
Spiralia;Lophotrochozoa;Mollusca;Bivalvia;Autobranhia;Heteroconchia;Euhe  
terodonta;Imparidentia;Venerida;Veneroidea;Veneridae;Mercenaria;Mercenari  
a mercenaria

UdeM00000035756 6596 144.8 UdeM00000035756 XP\_045191451.1 65.7 99  
34 0 6 104 7 105 6.10E-32 144.8 6596 cellular

organisms;Eukaryota;Opisthokonta;Metazoa;Eumetazoa;Bilateria;Protostomia;  
Spiralia;Lophotrochozoa;Mollusca;Bivalvia;Autobranhia;Heteroconchia;Euhe  
terodonta;Imparidentia;Venerida;Veneroidea;Veneridae;Mercenaria;Mercenari  
a mercenaria

UdeM00000035757 6573 145.6 UdeM00000035757 XP\_021352394.1 48.5 169  
74 3 2 165 115 275 7.50E-32 145.6 6573 cellular

organisms;Eukaryota;Opisthokonta;Metazoa;Eumetazoa;Bilateria;Protostomia;  
Spiralia;Lophotrochozoa;Mollusca;Bivalvia;Autobranhia;Pteriormorphia;Pect  
inida;Pectinoidea;Pectinidae;Mizuhopecten;Mizuhopecten yessoensis

UdeM00000044460 7739 240.4 UdeM00000044460 XP\_035674784.1 75.5 139  
34 0 1 139 367 505 1.40E-60 240.4 7739 cellular

organisms;Eukaryota;Opisthokonta;Metazoa;Eumetazoa;Bilateria;Deuterostomi  
a;Chordata;Cephalochordata;Leptocardii;Amphioxiformes;Branchiostomidae;Br  
anchiostoma;Branchiostoma floridae

UdeM00000040248 6596 79.7 UdeM00000040248 XP\_045190331.1 39.3 89  
54 0 39 127 94 182 3.00E-12 79.7 6596 cellular

organisms;Eukaryota;Opisthokonta;Metazoa;Eumetazoa;Bilateria;Protostomia;  
Spiralia;Lophotrochozoa;Mollusca;Bivalvia;Autobranhia;Heteroconchia;Euhe  
terodonta;Imparidentia;Venerida;Veneroidea;Veneridae;Mercenaria;Mercenari  
a mercenaria

UdeM00000040249 114398 430.3 UdeM00000040249 XP\_042903861.1 38.8  
609 362 6 1 605 1 602 4.20E-117 430.3 114398

cellular

organisms;Eukaryota;Opisthokonta;Metazoa;Eumetazoa;Bilateria;Protostomia;  
Ecdysozoa;Panarthropoda;Arthropoda;Chelicerata;Arachnida;Araneae;Araneomo  
rphae;Entelegynae;Orbiculariae;Araneoidea;Theridiidae;Parasteatoda;Parast  
eatoda tepidariorum

UdeM00000040250 6596 131.3 UdeM00000040250 XP\_045173066.1 41.1 175  
95 4 34 201 153 326 1.50E-27 131.3 6596 cellular

organisms;Eukaryota;Opisthokonta;Metazoa;Eumetazoa;Bilateria;Protostomia;  
Spiralia;Lophotrochozoa;Mollusca;Bivalvia;Autobranhia;Heteroconchia;Euhe  
terodonta;Imparidentia;Venerida;Veneroidea;Veneridae;Mercenaria;Mercenari  
a mercenaria

UdeM00000040251 6596 219.9 UdeM00000040251 XP\_045173066.1 38.8 307  
178 7 83 383 24 326 5.70E-54 219.9 6596 cellular

organisms;Eukaryota;Opisthokonta;Metazoa;Eumetazoa;Bilateria;Protostomia;  
Spiralia;Lophotrochozoa;Mollusca;Bivalvia;Autobranhia;Heteroconchia;Euhe  
terodonta;Imparidentia;Venerida;Veneroidea;Veneridae;Mercenaria;Mercenari  
a mercenaria

UdeM00000040252 9785 110.5 UdeM00000040252 XP\_023411769.1 42.3 123  
 70 1 3 124 324 446 2.10E-21 110.5 9785 cellular  
 organisms;Eukaryota;Opisthokonta;Metazoa;Eumetazoa;Bilateria;Deuterostomi  
 a;Chordata;Craniata;Vertebrata;Gnathostomata;Teleostomi;Euteleostomi;Sarc  
 opterygii;Dipnotetrapodomorpha;Tetrapoda;Amniota;Mammalia;Theria;Eutheria  
 ;Afrotheria;Proboscidea;Elephantidae;Loxodonta;Loxodonta africana  
 UdeM00000040253 6565 228.8 UdeM00000040253 XP\_022294078.1 41.6 296  
 160 6 39 324 147 439 1.00E-56 228.8 6565 cellular  
 organisms;Eukaryota;Opisthokonta;Metazoa;Eumetazoa;Bilateria;Protostomia;  
 Spiralia;Lophotrochozoa;Mollusca;Bivalvia;Autobranchia;Pteriormorphia;Ostr  
 eida;Ostreoidea;Ostreidae;Crassostrea;Crassostrea virginica  
 UdeM00000040254 7757 94.4 UdeM00000040254 XP\_032835784.1 61.1 72  
 28 0 2 73 3 74 7.90E-17 94.4 7757 cellular  
 organisms;Eukaryota;Opisthokonta;Metazoa;Eumetazoa;Bilateria;Deuterostomi  
 a;Chordata;Craniata;Vertebrata;Cyclostomata;Hyperoartia;Petromyzontiforme  
 s;Petromyzontidae;Petromyzon;Petromyzon marinus  
 UdeM00000040255 6565 221.1 UdeM00000040255 XP\_022294078.1 39 300  
 168 6 126 413 143 439 2.70E-54 221.1 6565 cellular  
 organisms;Eukaryota;Opisthokonta;Metazoa;Eumetazoa;Bilateria;Protostomia;  
 Spiralia;Lophotrochozoa;Mollusca;Bivalvia;Autobranchia;Pteriormorphia;Ostr  
 eida;Ostreoidea;Ostreidae;Crassostrea;Crassostrea virginica  
 UdeM00000040256 6596 132.1 UdeM00000040256 XP\_045169945.1 43.6 133  
 75 0 1 133 37 169 5.20E-28 132.1 6596 cellular  
 organisms;Eukaryota;Opisthokonta;Metazoa;Eumetazoa;Bilateria;Protostomia;  
 Spiralia;Lophotrochozoa;Mollusca;Bivalvia;Autobranchia;Heteroconchia;Euhe  
 terodonta;Imparidentia;Venerida;Veneroidea;Veneridae;Mercenaria;Mercenari  
 a mercenaria  
 UdeM00000040257 6596 571.6 UdeM00000040257 XP\_045197406.1 75.2 367  
 88 2 1 367 1 364 1.10E-159 571.6 6596 cellular  
 organisms;Eukaryota;Opisthokonta;Metazoa;Eumetazoa;Bilateria;Protostomia;  
 Spiralia;Lophotrochozoa;Mollusca;Bivalvia;Autobranchia;Heteroconchia;Euhe  
 terodonta;Imparidentia;Venerida;Veneroidea;Veneridae;Mercenaria;Mercenari  
 a mercenaria  
 UdeM00000040258 29159 232.6 UdeM00000040258 XP\_034332822.1 40.6 308  
 169 7 98 396 109 411 8.60E-58 232.6 29159 cellular  
 organisms;Eukaryota;Opisthokonta;Metazoa;Eumetazoa;Bilateria;Protostomia;  
 Spiralia;Lophotrochozoa;Mollusca;Bivalvia;Autobranchia;Pteriormorphia;Ostr  
 eida;Ostreoidea;Ostreidae;Crassostrea;Crassostrea gigas  
 UdeM00000040260 6596 121.7 UdeM00000040260 XP\_045206982.1 47.1 136  
 59 4 1 128 1 131 7.10E-25 121.7 6596 cellular  
 organisms;Eukaryota;Opisthokonta;Metazoa;Eumetazoa;Bilateria;Protostomia;  
 Spiralia;Lophotrochozoa;Mollusca;Bivalvia;Autobranchia;Heteroconchia;Euhe  
 terodonta;Imparidentia;Venerida;Veneroidea;Veneridae;Mercenaria;Mercenari  
 a mercenaria  
 UdeM00000040262 37653 259.6 UdeM00000040262 XP\_014788370.1 43.7 295  
 160 4 14 306 32 322 5.00E-66 259.6 37653 cellular  
 organisms;Eukaryota;Opisthokonta;Metazoa;Eumetazoa;Bilateria;Protostomia;  
 Spiralia;Lophotrochozoa;Mollusca;Cephalopoda;Coleoidea;Octopodiformes;Oct  
 opoda;Incirrata;Octopodidae;Octopus;Octopus bimaculoides  
 UdeM00000040261 37653 265 UdeM00000040261 XP\_014788370.1 41.9 327  
 183 5 44 368 1 322 1.40E-67 265 37653 cellular  
 organisms;Eukaryota;Opisthokonta;Metazoa;Eumetazoa;Bilateria;Protostomia;  
 Spiralia;Lophotrochozoa;Mollusca;Cephalopoda;Coleoidea;Octopodiformes;Oct  
 opoda;Incirrata;Octopodidae;Octopus;Octopus bimaculoides



UdeM00000040263 6596 493 UdeM00000040263 XP\_045197748.1 53.5 441  
 195 3 24 464 21 451 4.10E-136 493 6596 cellular  
 organisms;Eukaryota;Opisthokonta;Metazoa;Eumetazoa;Bilateria;Protostomia;  
 Spiralia;Lophotrochozoa;Mollusca;Bivalvia;Autobranchia;Heteroconchia;Euhe  
 terodonta;Imparidentia;Venerida;Veneroidea;Veneridae;Mercenaria;Mercenari  
 a mercenaria  
 UdeM00000044469 29159 423.7 UdeM00000044469 XP\_034316358.1 42.9 508  
 274 10 1 504 5 500 3.30E-115 423.7 29159 cellular  
 organisms;Eukaryota;Opisthokonta;Metazoa;Eumetazoa;Bilateria;Protostomia;  
 Spiralia;Lophotrochozoa;Mollusca;Bivalvia;Autobranchia;Pteriormorphia;Ostr  
 eida;Ostreoidea;Ostreidae;Crassostrea;Crassostrea gigas  
 UdeM00000044468 29159 423.7 UdeM00000044468 XP\_034316358.1 42.8 509  
 275 10 62 566 4 500 3.70E-115 423.7 29159 cellular  
 organisms;Eukaryota;Opisthokonta;Metazoa;Eumetazoa;Bilateria;Protostomia;  
 Spiralia;Lophotrochozoa;Mollusca;Bivalvia;Autobranchia;Pteriormorphia;Ostr  
 eida;Ostreoidea;Ostreidae;Crassostrea;Crassostrea gigas  
 UdeM00000000720 29159 515 UdeM00000000720 XP\_011414145.3 35.6 795  
 471 21 1 782 681 1447 1.70E-142 515 29159 cellular  
 organisms;Eukaryota;Opisthokonta;Metazoa;Eumetazoa;Bilateria;Protostomia;  
 Spiralia;Lophotrochozoa;Mollusca;Bivalvia;Autobranchia;Pteriormorphia;Ostr  
 eida;Ostreoidea;Ostreidae;Crassostrea;Crassostrea gigas  
 UdeM00000000721 6596 299.3 UdeM00000000721 XP\_045170965.1 43.9 330  
 172 8 52 379 70 388 8.70E-78 299.3 6596 cellular  
 organisms;Eukaryota;Opisthokonta;Metazoa;Eumetazoa;Bilateria;Protostomia;  
 Spiralia;Lophotrochozoa;Mollusca;Bivalvia;Autobranchia;Heteroconchia;Euhe  
 terodonta;Imparidentia;Venerida;Veneroidea;Veneridae;Mercenaria;Mercenari  
 a mercenaria  
 UdeM00000000722 45264 400.2 UdeM00000000722 XP\_044165143.1 48.5 443  
 184 4 42 444 35 473 5.10E-108 400.2 45264 cellular  
 organisms;Eukaryota;Opisthokonta;Metazoa;Eumetazoa;Cnidaria;Anthozoa;Hexa  
 corallia;Scleractinia;Astrocoeniina;Acroporidae;Acropora;Acropora  
 millepora  
 UdeM00000000723 29159 865.9 UdeM00000000723 XP\_011432044.2 83.4 535  
 87 2 1 534 1 534 2.70E-248 865.9 29159 cellular  
 organisms;Eukaryota;Opisthokonta;Metazoa;Eumetazoa;Bilateria;Protostomia;  
 Spiralia;Lophotrochozoa;Mollusca;Bivalvia;Autobranchia;Pteriormorphia;Ostr  
 eida;Ostreoidea;Ostreidae;Crassostrea;Crassostrea gigas  
 UdeM00000000724 6579 205.7 UdeM00000000724 XP\_033742122.1 51.5 206  
 77 1 8 190 1 206 6.10E-50 205.7 6579 cellular  
 organisms;Eukaryota;Opisthokonta;Metazoa;Eumetazoa;Bilateria;Protostomia;  
 Spiralia;Lophotrochozoa;Mollusca;Bivalvia;Autobranchia;Pteriormorphia;Pect  
 inida;Pectinoidea;Pectinidae;Pecten;Pecten maximus  
 UdeM00000000725 6596 451.4 UdeM00000000725 XP\_045213159.1 81.6 277  
 48 2 1 275 1 276 8.70E-124 451.4 6596 cellular  
 organisms;Eukaryota;Opisthokonta;Metazoa;Eumetazoa;Bilateria;Protostomia;  
 Spiralia;Lophotrochozoa;Mollusca;Bivalvia;Autobranchia;Heteroconchia;Euhe  
 terodonta;Imparidentia;Venerida;Veneroidea;Veneridae;Mercenaria;Mercenari  
 a mercenaria  
 UdeM00000000726 6565 409.1 UdeM00000000726 XP\_022313765.1 60.1 306  
 122 0 1 306 1 306 5.10E-111 409.1 6565 cellular  
 organisms;Eukaryota;Opisthokonta;Metazoa;Eumetazoa;Bilateria;Protostomia;  
 Spiralia;Lophotrochozoa;Mollusca;Bivalvia;Autobranchia;Pteriormorphia;Ostr  
 eida;Ostreoidea;Ostreidae;Crassostrea;Crassostrea virginica

UdeM00000000727 6596 350.5 UdeM00000000727 XP\_045212061.1 50.6 320  
 158 0 8 327 34 353 2.30E-93 350.5 6596 cellular  
 organisms;Eukaryota;Opisthokonta;Metazoa;Eumetazoa;Bilateria;Protostomia;  
 Spiralia;Lophotrochozoa;Mollusca;Bivalvia;Autobranhia;Heteroconchia;Euhe  
 terodonta;Imparidentia;Venerida;Veneroidea;Veneridae;Mercenaria;Mercenari  
 a mercenaria  
 UdeM00000000728 6596 325.5 UdeM00000000728 XP\_045212061.1 48 321  
 166 1 9 328 34 354 7.90E-86 325.5 6596 cellular  
 organisms;Eukaryota;Opisthokonta;Metazoa;Eumetazoa;Bilateria;Protostomia;  
 Spiralia;Lophotrochozoa;Mollusca;Bivalvia;Autobranhia;Heteroconchia;Euhe  
 terodonta;Imparidentia;Venerida;Veneroidea;Veneridae;Mercenaria;Mercenari  
 a mercenaria  
 UdeM00000000729 6596 325.1 UdeM00000000729 XP\_045212061.1 48 321  
 166 1 16 335 34 354 1.10E-85 325.1 6596 cellular  
 organisms;Eukaryota;Opisthokonta;Metazoa;Eumetazoa;Bilateria;Protostomia;  
 Spiralia;Lophotrochozoa;Mollusca;Bivalvia;Autobranhia;Heteroconchia;Euhe  
 terodonta;Imparidentia;Venerida;Veneroidea;Veneridae;Mercenaria;Mercenari  
 a mercenaria  
 UdeM00000000730 6573 1208.4 UdeM00000000730 XP\_021350487.1 63.8  
 865 303 4 24 885 28 885 0.00E+00 1208.4 6573  
 cellular  
 organisms;Eukaryota;Opisthokonta;Metazoa;Eumetazoa;Bilateria;Protostomia;  
 Spiralia;Lophotrochozoa;Mollusca;Bivalvia;Autobranhia;Pteriomorphia;Pect  
 inida;Pectinoidea;Pectinidae;Mizuhopecten;Mizuhopecten yessoensis  
 UdeM00000000732 6573 911.8 UdeM00000000732 XP\_021350486.1 68 656  
 206 2 1 654 1 654 5.10E-262 911.8 6573 cellular  
 organisms;Eukaryota;Opisthokonta;Metazoa;Eumetazoa;Bilateria;Protostomia;  
 Spiralia;Lophotrochozoa;Mollusca;Bivalvia;Autobranhia;Pteriomorphia;Pect  
 inida;Pectinoidea;Pectinidae;Mizuhopecten;Mizuhopecten yessoensis  
 UdeM00000000731 6573 940.6 UdeM00000000731 XP\_021350485.1 66.9 679  
 223 1 2 678 3 681 1.10E-270 940.6 6573 cellular  
 organisms;Eukaryota;Opisthokonta;Metazoa;Eumetazoa;Bilateria;Protostomia;  
 Spiralia;Lophotrochozoa;Mollusca;Bivalvia;Autobranhia;Pteriomorphia;Pect  
 inida;Pectinoidea;Pectinidae;Mizuhopecten;Mizuhopecten yessoensis  
 UdeM00000000733 46514 72.4 UdeM00000000733 XP\_038075930.1 42.7 89  
 45 3 12 98 128 212 4.10E-10 72.4 46514 cellular  
 organisms;Eukaryota;Opisthokonta;Metazoa;Eumetazoa;Bilateria;Deuterostomi  
 a;Echinodermata;Eleutherozoa;Asterozoa;Asteroidea;Valvatacea;Valvatida;As  
 terinidae;Patiria;Patiria miniata  
 UdeM00000000736 6596 1021.5 UdeM00000000736 XP\_045210703.1 59.7  
 893 322 8 17 873 1029 1919 6.20E-295 1021.5 6596  
 cellular  
 organisms;Eukaryota;Opisthokonta;Metazoa;Eumetazoa;Bilateria;Protostomia;  
 Spiralia;Lophotrochozoa;Mollusca;Bivalvia;Autobranhia;Heteroconchia;Euhe  
 terodonta;Imparidentia;Venerida;Veneroidea;Veneridae;Mercenaria;Mercenari  
 a mercenaria  
 UdeM00000000737 6579 1085.9 UdeM00000000737 XP\_033738816.1 65.1  
 835 275 8 7 829 6 836 0.00E+00 1085.9 6579  
 cellular  
 organisms;Eukaryota;Opisthokonta;Metazoa;Eumetazoa;Bilateria;Protostomia;  
 Spiralia;Lophotrochozoa;Mollusca;Bivalvia;Autobranhia;Pteriomorphia;Pect  
 inida;Pectinoidea;Pectinidae;Pecten;Pecten maximus  
 UdeM00000000738 6596 723.8 UdeM00000000738 XP\_045213627.1 82.3 423  
 75 0 1 423 1 423 1.30E-205 723.8 6596 cellular

organisms;Eukaryota;Opisthokonta;Metazoa;Eumetazoa;Bilateria;Protostomia;Spiralia;Lophotrochozoa;Mollusca;Bivalvia;Autobranhia;Heteroconchia;Euherodonta;Imparidentia;Venerida;Veneroidea;Veneridae;Mercenaria;Mercenaria mercenaria

UdeM00000000739 6596 261.9 UdeM00000000739 XP\_045213626.1 61.1 198  
74 1 15 212 34 228 6.90E-67 261.9 6596 cellular

organisms;Eukaryota;Opisthokonta;Metazoa;Eumetazoa;Bilateria;Protostomia;Spiralia;Lophotrochozoa;Mollusca;Bivalvia;Autobranhia;Heteroconchia;Euherodonta;Imparidentia;Venerida;Veneroidea;Veneridae;Mercenaria;Mercenaria mercenaria

UdeM00000000740 6596 749.2 UdeM00000000740 XP\_045213262.1 55.8 715  
302 8 66 771 143 852 5.20E-213 749.2 6596 cellular

organisms;Eukaryota;Opisthokonta;Metazoa;Eumetazoa;Bilateria;Protostomia;Spiralia;Lophotrochozoa;Mollusca;Bivalvia;Autobranhia;Heteroconchia;Euherodonta;Imparidentia;Venerida;Veneroidea;Veneridae;Mercenaria;Mercenaria mercenaria

UdeM00000000741 7574 145.2 UdeM00000000741 XP\_013405563.1 35.2 267  
136 6 32 295 146 378 1.30E-31 145.2 7574 cellular

organisms;Eukaryota;Opisthokonta;Metazoa;Eumetazoa;Bilateria;Protostomia;Spiralia;Lophotrochozoa;Brachiopoda;Linguliformea;Lingulata;Lingulida;Linguloidea;Lingulidae;Lingula;Lingula anatina

UdeM00000000742 6596 153.3 UdeM00000000742 XP\_045213260.1 57.2 138  
58 1 20 157 799 935 2.90E-34 153.3 6596 cellular

organisms;Eukaryota;Opisthokonta;Metazoa;Eumetazoa;Bilateria;Protostomia;Spiralia;Lophotrochozoa;Mollusca;Bivalvia;Autobranhia;Heteroconchia;Euherodonta;Imparidentia;Venerida;Veneroidea;Veneridae;Mercenaria;Mercenaria mercenaria

UdeM00000000743 6596 396 UdeM00000000743 XP\_045213260.1 41.6 652  
316 11 162 763 100 736 1.20E-106 396 6596 cellular

organisms;Eukaryota;Opisthokonta;Metazoa;Eumetazoa;Bilateria;Protostomia;Spiralia;Lophotrochozoa;Mollusca;Bivalvia;Autobranhia;Heteroconchia;Euherodonta;Imparidentia;Venerida;Veneroidea;Veneridae;Mercenaria;Mercenaria mercenaria

UdeM00000000744 7741 192.6 UdeM00000000744 XP\_019615122.1 58.9 146  
57 1 2 144 3 148 3.50E-46 192.6 7741 cellular

organisms;Eukaryota;Opisthokonta;Metazoa;Eumetazoa;Bilateria;Deuterostomia;Chordata;Cephalochordata;Leptocardii;Amphioxiformes;Branchiostomidae;Branchiostoma;Branchiostoma belcheri

UdeM00000000745 7741 186.8 UdeM00000000745 XP\_019615122.1 58.9 146  
57 1 2 144 3 148 1.90E-44 186.8 7741 cellular

organisms;Eukaryota;Opisthokonta;Metazoa;Eumetazoa;Bilateria;Deuterostomia;Chordata;Cephalochordata;Leptocardii;Amphioxiformes;Branchiostomidae;Branchiostoma;Branchiostoma belcheri

UdeM00000000748 6573 199.5 UdeM00000000748 XP\_021348174.1 29.1 554  
339 12 2 548 21 527 1.10E-47 199.5 6573 cellular

organisms;Eukaryota;Opisthokonta;Metazoa;Eumetazoa;Bilateria;Protostomia;Spiralia;Lophotrochozoa;Mollusca;Bivalvia;Autobranhia;Pteriomorphia;Pectinida;Pectinoidea;Pectinidae;Mizuhopecten;Mizuhopecten yessoensis

UdeM00000000750 6596 223.4 UdeM00000000750 XP\_045169077.1 28.3 715  
430 25 330 1017 233 891 1.40E-54 223.4 6596 cellular

organisms;Eukaryota;Opisthokonta;Metazoa;Eumetazoa;Bilateria;Protostomia;Spiralia;Lophotrochozoa;Mollusca;Bivalvia;Autobranhia;Heteroconchia;Euherodonta;Imparidentia;Venerida;Veneroidea;Veneridae;Mercenaria;Mercenaria mercenaria

UdeM00000000751 29159 334 UdeM00000000751 XP\_034311213.1 63.2 250  
 92 0 1 250 42 291 1.70E-88 334 29159 cellular  
 organisms;Eukaryota;Opisthokonta;Metazoa;Eumetazoa;Bilateria;Protostomia;  
 Spiralia;Lophotrochozoa;Mollusca;Bivalvia;Autobranchia;Pteriormorphia;Ostr  
 eida;Ostreoidea;Ostreidae;Crassostrea;Crassostrea gigas  
 UdeM00000000752 29159 337.8 UdeM00000000752 XP\_034311213.1 61.6 263  
 101 0 29 291 29 291 1.40E-89 337.8 29159 cellular  
 organisms;Eukaryota;Opisthokonta;Metazoa;Eumetazoa;Bilateria;Protostomia;  
 Spiralia;Lophotrochozoa;Mollusca;Bivalvia;Autobranchia;Pteriormorphia;Ostr  
 eida;Ostreoidea;Ostreidae;Crassostrea;Crassostrea gigas  
 UdeM00000000753 6596 258.1 UdeM00000000753 XP\_045214897.1 62 192  
 71 2 10 200 10 200 1.20E-65 258.1 6596 cellular  
 organisms;Eukaryota;Opisthokonta;Metazoa;Eumetazoa;Bilateria;Protostomia;  
 Spiralia;Lophotrochozoa;Mollusca;Bivalvia;Autobranchia;Heteroconchia;Euhe  
 terodonta;Imparidentia;Venerida;Veneroidea;Veneridae;Mercenaria;Mercenari  
 a mercenaria  
 UdeM00000000754 400727 245.7 UdeM00000000754 XP\_025096313.1 77.4  
 146 32 1 4 148 3 148 3.60E-62 245.7 400727  
 cellular  
 organisms;Eukaryota;Opisthokonta;Metazoa;Eumetazoa;Bilateria;Protostomia;  
 Spiralia;Lophotrochozoa;Mollusca;Gastropoda;Caenogastropoda;Architaeniogl  
 ossa;Ampullarioidea;Ampullariidae;Pomacea;Pomacea canaliculata  
 UdeM00000000755 6500 548.9 UdeM00000000755 XP\_005093836.1 68.1 367  
 117 0 3 369 2 368 5.00E-153 548.9 6500 cellular  
 organisms;Eukaryota;Opisthokonta;Metazoa;Eumetazoa;Bilateria;Protostomia;  
 Spiralia;Lophotrochozoa;Mollusca;Gastropoda;Heterobranchia;Euthyneura;Tec  
 tipleura;Aplysiida;Aplysioidea;Aplysiidae;Aplysia;Aplysia californica  
 UdeM00000000756 6565 125.9 UdeM00000000756 XP\_022299727.1 44.9 156  
 84 1 1 154 46 201 4.90E-26 125.9 6565 cellular  
 organisms;Eukaryota;Opisthokonta;Metazoa;Eumetazoa;Bilateria;Protostomia;  
 Spiralia;Lophotrochozoa;Mollusca;Bivalvia;Autobranchia;Pteriormorphia;Ostr  
 eida;Ostreoidea;Ostreidae;Crassostrea;Crassostrea virginica  
 UdeM00000000757 6596 824.7 UdeM00000000757 XP\_045211047.1 58.7 722  
 235 10 2 686 3 698 8.70E-236 824.7 6596 cellular  
 organisms;Eukaryota;Opisthokonta;Metazoa;Eumetazoa;Bilateria;Protostomia;  
 Spiralia;Lophotrochozoa;Mollusca;Bivalvia;Autobranchia;Heteroconchia;Euhe  
 terodonta;Imparidentia;Venerida;Veneroidea;Veneridae;Mercenaria;Mercenari  
 a mercenaria  
 UdeM00000000760 6573 110.5 UdeM00000000760 XP\_021351920.1 62.7 75  
 28 0 2 76 186 260 9.30E-22 110.5 6573 cellular  
 organisms;Eukaryota;Opisthokonta;Metazoa;Eumetazoa;Bilateria;Protostomia;  
 Spiralia;Lophotrochozoa;Mollusca;Bivalvia;Autobranchia;Pteriormorphia;Pect  
 inida;Pectinoidea;Pectinidae;Mizuhopecten;Mizuhopecten yessoensis  
 UdeM00000000759 6579 193.7 UdeM00000000759 XP\_033739930.1 57 149  
 64 0 2 150 183 331 2.00E-46 193.7 6579 cellular  
 organisms;Eukaryota;Opisthokonta;Metazoa;Eumetazoa;Bilateria;Protostomia;  
 Spiralia;Lophotrochozoa;Mollusca;Bivalvia;Autobranchia;Pteriormorphia;Pect  
 inida;Pectinoidea;Pectinidae;Pecten;Pecten maximus  
 UdeM00000000762 6565 850.9 UdeM00000000762 XP\_022316357.1 25.5 2745  
 1374 52 59 2709 346 2514 4.50E-243 850.9 6565 cellular  
 organisms;Eukaryota;Opisthokonta;Metazoa;Eumetazoa;Bilateria;Protostomia;  
 Spiralia;Lophotrochozoa;Mollusca;Bivalvia;Autobranchia;Pteriormorphia;Ostr  
 eida;Ostreoidea;Ostreidae;Crassostrea;Crassostrea virginica

UdeM00000000763 6596 1532.3 UdeM00000000763 XP\_045212515.1 51.5  
1675 753 21 17 1683 77 1699 0.00E+00 1532.3 6596  
cellular

organisms;Eukaryota;Opisthokonta;Metazoa;Eumetazoa;Bilateria;Protostomia;  
Spiralia;Lophotrochozoa;Mollusca;Bivalvia;Autobranchia;Heteroconchia;Euhe  
terodonta;Imparidentia;Venerida;Veneroidea;Veneridae;Mercenaria;Mercenari  
a mercenaria

UdeM00000000764 6579 610.5 UdeM00000000764 XP\_033735647.1 60.6 472  
185 1 13 484 24 494 1.80E-171 610.5 6579 cellular

organisms;Eukaryota;Opisthokonta;Metazoa;Eumetazoa;Bilateria;Protostomia;  
Spiralia;Lophotrochozoa;Mollusca;Bivalvia;Autobranchia;Pteriormorphia;Pect  
inida;Pectinoidea;Pectinidae;Pecten;Pecten maximus

UdeM00000000765 6596 849.4 UdeM00000000765 XP\_045213589.1 63.8 654  
202 2 3 656 621 1239 3.10E-243 849.4 6596 cellular

organisms;Eukaryota;Opisthokonta;Metazoa;Eumetazoa;Bilateria;Protostomia;  
Spiralia;Lophotrochozoa;Mollusca;Bivalvia;Autobranchia;Heteroconchia;Euhe  
terodonta;Imparidentia;Venerida;Veneroidea;Veneridae;Mercenaria;Mercenari  
a mercenaria

UdeM00000000767 6596 259.6 UdeM00000000767 XP\_045214814.1 58.3 218  
90 1 5 222 3 219 3.80E-66 259.6 6596 cellular

organisms;Eukaryota;Opisthokonta;Metazoa;Eumetazoa;Bilateria;Protostomia;  
Spiralia;Lophotrochozoa;Mollusca;Bivalvia;Autobranchia;Heteroconchia;Euhe  
terodonta;Imparidentia;Venerida;Veneroidea;Veneridae;Mercenaria;Mercenari  
a mercenaria

UdeM00000000768 6596 472.6 UdeM00000000768 XP\_045214990.1 52.9 435  
200 2 29 458 5 439 5.60E-130 472.6 6596 cellular

organisms;Eukaryota;Opisthokonta;Metazoa;Eumetazoa;Bilateria;Protostomia;  
Spiralia;Lophotrochozoa;Mollusca;Bivalvia;Autobranchia;Heteroconchia;Euhe  
terodonta;Imparidentia;Venerida;Veneroidea;Veneridae;Mercenaria;Mercenari  
a mercenaria

UdeM00000000769 6579 165.2 UdeM00000000769 XP\_033739320.1 61.1 126  
49 0 40 165 74 199 7.30E-38 165.2 6579 cellular

organisms;Eukaryota;Opisthokonta;Metazoa;Eumetazoa;Bilateria;Protostomia;  
Spiralia;Lophotrochozoa;Mollusca;Bivalvia;Autobranchia;Pteriormorphia;Pect  
inida;Pectinoidea;Pectinidae;Pecten;Pecten maximus

UdeM00000000770 6596 1266.9 UdeM00000000770 XP\_045211050.1 33  
2558 1521 59 96 2536 92 2572 0.00E+00 1266.9 6596

cellular

organisms;Eukaryota;Opisthokonta;Metazoa;Eumetazoa;Bilateria;Protostomia;  
Spiralia;Lophotrochozoa;Mollusca;Bivalvia;Autobranchia;Heteroconchia;Euhe  
terodonta;Imparidentia;Venerida;Veneroidea;Veneridae;Mercenaria;Mercenari  
a mercenaria

UdeM00000000771 6596 1273.5 UdeM00000000771 XP\_045211050.1 33  
2558 1537 58 96 2553 92 2572 0.00E+00 1273.5 6596

cellular

organisms;Eukaryota;Opisthokonta;Metazoa;Eumetazoa;Bilateria;Protostomia;  
Spiralia;Lophotrochozoa;Mollusca;Bivalvia;Autobranchia;Heteroconchia;Euhe  
terodonta;Imparidentia;Venerida;Veneroidea;Veneridae;Mercenaria;Mercenari  
a mercenaria

UdeM00000000772 6596 1086.2 UdeM00000000772 XP\_045214928.1 36  
1815 1062 29 4 1759 95 1869 0.00E+00 1086.2 6596

cellular

organisms;Eukaryota;Opisthokonta;Metazoa;Eumetazoa;Bilateria;Protostomia;  
Spiralia;Lophotrochozoa;Mollusca;Bivalvia;Autobranchia;Heteroconchia;Euhe

terodonta;Imparidentia;Venerida;Veneroidea;Veneridae;Mercenaria;Mercenari  
 a mercenaria  
 UdeM000000000774 6596 222.2 UdeM000000000774 XP\_045212092.1 67.3 156  
 50 1 3 158 2 156 4.60E-55 222.2 6596 cellular  
 organisms;Eukaryota;Opisthokonta;Metazoa;Eumetazoa;Bilateria;Protostomia;  
 Spiralia;Lophotrochozoa;Mollusca;Bivalvia;Autobranchia;Heteroconchia;Euhe  
 terodonta;Imparidentia;Venerida;Veneroidea;Veneridae;Mercenaria;Mercenari  
 a mercenaria  
 UdeM000000000775 6596 290.8 UdeM000000000775 XP\_045213110.1 84.4 167  
 26 0 1 167 1 167 1.10E-75 290.8 6596 cellular  
 organisms;Eukaryota;Opisthokonta;Metazoa;Eumetazoa;Bilateria;Protostomia;  
 Spiralia;Lophotrochozoa;Mollusca;Bivalvia;Autobranchia;Heteroconchia;Euhe  
 terodonta;Imparidentia;Venerida;Veneroidea;Veneridae;Mercenaria;Mercenari  
 a mercenaria  
 UdeM000000000776 6573 425.6 UdeM000000000776 XP\_021342927.1 66.8 322  
 102 2 22 342 6 323 5.90E-116 425.6 6573 cellular  
 organisms;Eukaryota;Opisthokonta;Metazoa;Eumetazoa;Bilateria;Protostomia;  
 Spiralia;Lophotrochozoa;Mollusca;Bivalvia;Autobranchia;Pteriormorphia;Pect  
 inida;Pectinoidea;Pectinidae;Mizuhopecten;Mizuhopecten yessoensis  
 UdeM000000000778 29159 353.6 UdeM000000000778 XP\_011423551.1 55 411  
 158 5 1 409 1 386 3.40E-94 353.6 29159 cellular  
 organisms;Eukaryota;Opisthokonta;Metazoa;Eumetazoa;Bilateria;Protostomia;  
 Spiralia;Lophotrochozoa;Mollusca;Bivalvia;Autobranchia;Pteriormorphia;Ostr  
 eida;Ostreoidea;Ostreidae;Crassostrea;Crassostrea gigas  
 UdeM000000000779 1415580 146 UdeM000000000779 XP\_030075314.1 44.4  
 214 96 5 1 206 427 625 5.40E-32 146 1415580  
 cellular  
 organisms;Eukaryota;Opisthokonta;Metazoa;Eumetazoa;Bilateria;Deuterostomi  
 a;Chordata;Craniata;Vertebrata;Gnathostomata;Teleostomi;Euteleostomi;Sarc  
 opterygii;Dipnotetrapodomorpha;Tetrapoda;Amphibia;Gymnophiona;Siphonopida  
 e;Microcaecilia;Microcaecilia unicolor  
 UdeM000000000780 7757 288.1 UdeM000000000780 XP\_032835197.1 78.7 183  
 39 0 2 184 149 331 8.10E-75 288.1 7757 cellular  
 organisms;Eukaryota;Opisthokonta;Metazoa;Eumetazoa;Bilateria;Deuterostomi  
 a;Chordata;Craniata;Vertebrata;Cyclostomata;Hyperoartia;Petromyzontiforme  
 s;Petromyzontidae;Petromyzon;Petromyzon marinus  
 UdeM000000000782 6596 1112.1 UdeM000000000782 XP\_045212547.1 82.2  
 656 114 1 21 673 383 1038 0.00E+00 1112.1 6596  
 cellular  
 organisms;Eukaryota;Opisthokonta;Metazoa;Eumetazoa;Bilateria;Protostomia;  
 Spiralia;Lophotrochozoa;Mollusca;Bivalvia;Autobranchia;Heteroconchia;Euhe  
 terodonta;Imparidentia;Venerida;Veneroidea;Veneridae;Mercenaria;Mercenari  
 a mercenaria  
 UdeM000000000783 6596 181 UdeM000000000783 XP\_045212548.1 65.6 128  
 44 0 133 260 130 257 1.90E-42 181 6596 cellular  
 organisms;Eukaryota;Opisthokonta;Metazoa;Eumetazoa;Bilateria;Protostomia;  
 Spiralia;Lophotrochozoa;Mollusca;Bivalvia;Autobranchia;Heteroconchia;Euhe  
 terodonta;Imparidentia;Venerida;Veneroidea;Veneridae;Mercenaria;Mercenari  
 a mercenaria  
 UdeM000000000784 6596 597.4 UdeM000000000784 XP\_045212546.1 70 453  
 85 4 24 472 4 409 1.70E-167 597.4 6596 cellular  
 organisms;Eukaryota;Opisthokonta;Metazoa;Eumetazoa;Bilateria;Protostomia;  
 Spiralia;Lophotrochozoa;Mollusca;Bivalvia;Autobranchia;Heteroconchia;Euhe

terodonta;Imparidentia;Venerida;Veneroidea;Veneridae;Mercenaria;Mercenari  
 a mercenaria  
 UdeM000000000785 6596 359.8 UdeM000000000785 XP\_045214000.1 89.5 200  
 16 1 1 195 1 200 2.30E-96 359.8 6596 cellular  
 organisms;Eukaryota;Opisthokonta;Metazoa;Eumetazoa;Bilateria;Protostomia;  
 Spiralia;Lophotrochozoa;Mollusca;Bivalvia;Autobranchia;Heteroconchia;Euhe  
 terodonta;Imparidentia;Venerida;Veneroidea;Veneridae;Mercenaria;Mercenari  
 a mercenaria  
 UdeM000000000786 6596 1030.4 UdeM000000000786 XP\_045213999.1 40.3  
 1918 842 46 38 1785 14 1797 2.70E-297 1030.4 6596  
 cellular  
 organisms;Eukaryota;Opisthokonta;Metazoa;Eumetazoa;Bilateria;Protostomia;  
 Spiralia;Lophotrochozoa;Mollusca;Bivalvia;Autobranchia;Heteroconchia;Euhe  
 terodonta;Imparidentia;Venerida;Veneroidea;Veneridae;Mercenaria;Mercenari  
 a mercenaria  
 UdeM000000000787 6596 1068.5 UdeM000000000787 XP\_045213999.1 41.2  
 1938 940 48 38 1929 14 1797 0.00E+00 1068.5 6596  
 cellular  
 organisms;Eukaryota;Opisthokonta;Metazoa;Eumetazoa;Bilateria;Protostomia;  
 Spiralia;Lophotrochozoa;Mollusca;Bivalvia;Autobranchia;Heteroconchia;Euhe  
 terodonta;Imparidentia;Venerida;Veneroidea;Veneridae;Mercenaria;Mercenari  
 a mercenaria  
 UdeM000000000788 6596 119.4 UdeM000000000788 XP\_045211760.1 45.6 136  
 74 0 1 136 285 420 5.10E-24 119.4 6596 cellular  
 organisms;Eukaryota;Opisthokonta;Metazoa;Eumetazoa;Bilateria;Protostomia;  
 Spiralia;Lophotrochozoa;Mollusca;Bivalvia;Autobranchia;Heteroconchia;Euhe  
 terodonta;Imparidentia;Venerida;Veneroidea;Veneridae;Mercenaria;Mercenari  
 a mercenaria  
 UdeM000000000789 6596 513.1 UdeM000000000789 XP\_045211757.1 32.1 982  
 605 17 57 1006 304 1255 8.50E-142 513.1 6596 cellular  
 organisms;Eukaryota;Opisthokonta;Metazoa;Eumetazoa;Bilateria;Protostomia;  
 Spiralia;Lophotrochozoa;Mollusca;Bivalvia;Autobranchia;Heteroconchia;Euhe  
 terodonta;Imparidentia;Venerida;Veneroidea;Veneridae;Mercenaria;Mercenari  
 a mercenaria  
 UdeM000000000790 225164 78.2 UdeM000000000790 XP\_009060253.1 38.2  
 102 62 1 1 102 904 1004 6.90E-12 78.2 225164  
 cellular  
 organisms;Eukaryota;Opisthokonta;Metazoa;Eumetazoa;Bilateria;Protostomia;  
 Spiralia;Lophotrochozoa;Mollusca;Gastropoda;Patellogastropoda;Lottioidea;  
 Lottiidae;Lottia;Lottia gigantea  
 UdeM000000000791 6596 183 UdeM000000000791 XP\_045211757.1 33.9 274  
 171 4 4 269 495 766 5.20E-43 183 6596 cellular  
 organisms;Eukaryota;Opisthokonta;Metazoa;Eumetazoa;Bilateria;Protostomia;  
 Spiralia;Lophotrochozoa;Mollusca;Bivalvia;Autobranchia;Heteroconchia;Euhe  
 terodonta;Imparidentia;Venerida;Veneroidea;Veneridae;Mercenaria;Mercenari  
 a mercenaria  
 UdeM000000000792 29159 70.5 UdeM000000000792 XP\_034322594.1 50 56  
 28 0 16 71 55 110 1.00E-09 70.5 29159 cellular  
 organisms;Eukaryota;Opisthokonta;Metazoa;Eumetazoa;Bilateria;Protostomia;  
 Spiralia;Lophotrochozoa;Mollusca;Bivalvia;Autobranchia;Pteriomorphia;Ostr  
 eida;Ostreoidea;Ostreidae;Crassostrea;Crassostrea gigas  
 UdeM000000000793 80966 179.1 UdeM000000000793 XP\_022077561.1 54.5 156  
 71 0 1 156 116 271 4.40E-42 179.1 80966 cellular  
 organisms;Eukaryota;Opisthokonta;Metazoa;Eumetazoa;Bilateria;Deuterostomi

a;Chordata;Craniata;Vertebrata;Gnathostomata;Teleostomi;Euteleostomi;Acti  
 nopterygii;Actinopteri;Neopterygii;Teleostei;Osteoglossocephalai;Clupeoce  
 phala;Euteleostomorpha;Neoteleostei;Eurypterygia;Ctenosquamata;Acanthomo  
 rphata;Euacanthomorpha;Percomorphaceae;Ovalentaria;Ovalentaria  
 incertae sedis;Pomacentridae;Acanthochromis;Acanthochromis polyacanthus  
 UdeM00000000795 151771 354.8 UdeM00000000795 XP\_028419301.1 65.1  
 249 87 0 116 364 162 410 1.40E-94 354.8 151771  
 cellular  
 organisms;Eukaryota;Opisthokonta;Metazoa;Eumetazoa;Cnidaria;Anthozoa;Octo  
 corallia;Alcyonacea;Alcyoniina;Nephtheidae;Dendronephthya;Dendronephthya  
 gigantea  
 UdeM00000000796 45264 164.1 UdeM00000000796 XP\_044184031.1 47.1 191  
 91 4 160 344 300 486 3.30E-37 164.1 45264 cellular  
 organisms;Eukaryota;Opisthokonta;Metazoa;Eumetazoa;Cnidaria;Anthozoa;Hexa  
 corallia;Scleractinia;Astrocoeniina;Acroporidae;Acropora;Acropora  
 millepora  
 UdeM00000000798 6596 460.3 UdeM00000000798 XP\_045212322.1 69.3 326  
 92 4 7 324 34 359 2.00E-126 460.3 6596 cellular  
 organisms;Eukaryota;Opisthokonta;Metazoa;Eumetazoa;Bilateria;Protostomia;  
 Spiralia;Lophotrochozoa;Mollusca;Bivalvia;Autobranchia;Heteroconchia;Euhe  
 terodonta;Imparidentia;Venerida;Veneroidea;Veneridae;Mercenaria;Mercenari  
 a mercenaria  
 UdeM00000000799 37653 126.3 UdeM00000000799 XP\_014781892.1 55.7 131  
 38 2 1 130 42 153 2.80E-26 126.3 37653 cellular  
 organisms;Eukaryota;Opisthokonta;Metazoa;Eumetazoa;Bilateria;Protostomia;  
 Spiralia;Lophotrochozoa;Mollusca;Cephalopoda;Coleoidea;Octopodiformes;Oct  
 opoda;Incirrata;Octopodidae;Octopus;Octopus bimaculoides  
 UdeM00000000800 6596 409.1 UdeM00000000800 XP\_045212316.1 48 394  
 162 8 11 401 5 358 6.70E-111 409.1 6596 cellular  
 organisms;Eukaryota;Opisthokonta;Metazoa;Eumetazoa;Bilateria;Protostomia;  
 Spiralia;Lophotrochozoa;Mollusca;Bivalvia;Autobranchia;Heteroconchia;Euhe  
 terodonta;Imparidentia;Venerida;Veneroidea;Veneridae;Mercenaria;Mercenari  
 a mercenaria  
 UdeM00000000801 6579 1258 UdeM00000000801 XP\_033733751.1 75.9 900  
 204 2 140 1039 129 1015 0.00E+00 1258 6579 cellular  
 organisms;Eukaryota;Opisthokonta;Metazoa;Eumetazoa;Bilateria;Protostomia;  
 Spiralia;Lophotrochozoa;Mollusca;Bivalvia;Autobranchia;Pteriomorphia;Pect  
 inida;Pectinoidea;Pectinidae;Pecten;Pecten maximus  
 UdeM00000000804 6596 873.6 UdeM00000000804 XP\_045211683.1 77.7 560  
 119 4 1 557 1 557 1.30E-250 873.6 6596 cellular  
 organisms;Eukaryota;Opisthokonta;Metazoa;Eumetazoa;Bilateria;Protostomia;  
 Spiralia;Lophotrochozoa;Mollusca;Bivalvia;Autobranchia;Heteroconchia;Euhe  
 terodonta;Imparidentia;Venerida;Veneroidea;Veneridae;Mercenaria;Mercenari  
 a mercenaria  
 UdeM00000000803 6596 1205.3 UdeM00000000803 XP\_045211683.1 68.1  
 906 268 8 1 897 1 894 0.00E+00 1205.3 6596  
 cellular  
 organisms;Eukaryota;Opisthokonta;Metazoa;Eumetazoa;Bilateria;Protostomia;  
 Spiralia;Lophotrochozoa;Mollusca;Bivalvia;Autobranchia;Heteroconchia;Euhe  
 terodonta;Imparidentia;Venerida;Veneroidea;Veneridae;Mercenaria;Mercenari  
 a mercenaria  
 UdeM00000000805 6596 836.3 UdeM00000000805 XP\_045211954.1 86.6 484  
 64 1 1 484 1 483 2.00E-239 836.3 6596 cellular  
 organisms;Eukaryota;Opisthokonta;Metazoa;Eumetazoa;Bilateria;Protostomia;



Spiralia;Lophotrochozoa;Mollusca;Bivalvia;Autobranchia;Heteroconchia;Euherodonta;Imparidentia;Venerida;Veneroidea;Veneridae;Mercenaria;Mercenaria mercenaria

UdeM00000000807 6596 162.9 UdeM00000000807 XP\_045211891.1 38 213  
129 2 26 236 103 314 6.30E-36 162.9 6596 cellular

organisms;Eukaryota;Opisthokonta;Metazoa;Eumetazoa;Bilateria;Protostomia;Spiralia;Lophotrochozoa;Mollusca;Bivalvia;Autobranchia;Heteroconchia;Euherodonta;Imparidentia;Venerida;Veneroidea;Veneridae;Mercenaria;Mercenaria mercenaria

UdeM00000000809 6596 268.5 UdeM00000000809 XP\_045211847.1 37.7 329  
204 1 1 328 1 329 1.20E-68 268.5 6596 cellular

organisms;Eukaryota;Opisthokonta;Metazoa;Eumetazoa;Bilateria;Protostomia;Spiralia;Lophotrochozoa;Mollusca;Bivalvia;Autobranchia;Heteroconchia;Euherodonta;Imparidentia;Venerida;Veneroidea;Veneridae;Mercenaria;Mercenaria mercenaria

UdeM00000000810 6596 1657.5 UdeM00000000810 XP\_045212835.1 73.7  
1124 238 6 8 1080 7 1123 0.00E+00 1657.5 6596  
cellular

organisms;Eukaryota;Opisthokonta;Metazoa;Eumetazoa;Bilateria;Protostomia;Spiralia;Lophotrochozoa;Mollusca;Bivalvia;Autobranchia;Heteroconchia;Euherodonta;Imparidentia;Venerida;Veneroidea;Veneridae;Mercenaria;Mercenaria mercenaria

UdeM00000000811 6596 1203.7 UdeM00000000811 XP\_045212835.1 79.9  
686 128 2 22 697 438 1123 0.00E+00 1203.7 6596  
cellular

organisms;Eukaryota;Opisthokonta;Metazoa;Eumetazoa;Bilateria;Protostomia;Spiralia;Lophotrochozoa;Mollusca;Bivalvia;Autobranchia;Heteroconchia;Euherodonta;Imparidentia;Venerida;Veneroidea;Veneridae;Mercenaria;Mercenaria mercenaria

UdeM00000000813 37653 939.5 UdeM00000000813 XP\_014788958.1 86.7 556  
74 0 13 568 27 582 2.00E-270 939.5 37653 cellular

organisms;Eukaryota;Opisthokonta;Metazoa;Eumetazoa;Bilateria;Protostomia;Spiralia;Lophotrochozoa;Mollusca;Cephalopoda;Coleoidea;Octopodiformes;Octopoda;Incirrata;Octopodidae;Octopus;Octopus bimaculoides

UdeM00000000812 37653 954.9 UdeM00000000812 XP\_014788958.1 85.4 574  
84 0 9 582 9 582 4.70E-275 954.9 37653 cellular

organisms;Eukaryota;Opisthokonta;Metazoa;Eumetazoa;Bilateria;Protostomia;Spiralia;Lophotrochozoa;Mollusca;Cephalopoda;Coleoidea;Octopodiformes;Octopoda;Incirrata;Octopodidae;Octopus;Octopus bimaculoides

UdeM00000000814 6596 627.9 UdeM00000000814 XP\_045211887.1 50.9 627  
297 3 19 643 42 659 1.50E-176 627.9 6596 cellular

organisms;Eukaryota;Opisthokonta;Metazoa;Eumetazoa;Bilateria;Protostomia;Spiralia;Lophotrochozoa;Mollusca;Bivalvia;Autobranchia;Heteroconchia;Euherodonta;Imparidentia;Venerida;Veneroidea;Veneridae;Mercenaria;Mercenaria mercenaria

UdeM00000000815 400727 347.1 UdeM00000000815 XP\_025086018.1 61.5  
262 100 1 4 265 10 270 2.10E-92 347.1 400727  
cellular

organisms;Eukaryota;Opisthokonta;Metazoa;Eumetazoa;Bilateria;Protostomia;Spiralia;Lophotrochozoa;Mollusca;Gastropoda;Caenogastropoda;Architaenioglossa;Ampullarioidea;Ampullariidae;Pomacea;Pomacea canaliculata

UdeM00000000816 400727 345.1 UdeM00000000816 XP\_025086018.1 59.2  
262 106 1 4 265 10 270 7.80E-92 345.1 400727  
cellular

organisms;Eukaryota;Opisthokonta;Metazoa;Eumetazoa;Bilateria;Protostomia;Spiralia;Lophotrochozoa;Mollusca;Gastropoda;Caenogastropoda;Architaenioglossa;Ampullarioidea;Ampullariidae;Pomacea;Pomacea canaliculata

UdeM00000000817 6579 292 UdeM00000000817 XP\_033738674.1 45.1 395  
172 9 89 449 47 430 1.30E-75 292 6579 cellular

organisms;Eukaryota;Opisthokonta;Metazoa;Eumetazoa;Bilateria;Protostomia;Spiralia;Lophotrochozoa;Mollusca;Bivalvia;Autobranchia;Pteriormorphia;Pectinida;Pectinoidea;Pectinidae;Pecten;Pecten maximus

UdeM00000000818 105023 360.5 UdeM00000000818 XP\_015828284.1 36  
578 342 11 4 566 25 589 3.90E-96 360.5 105023  
cellular

organisms;Eukaryota;Opisthokonta;Metazoa;Eumetazoa;Bilateria;Deuterostomia;Chordata;Craniata;Vertebrata;Gnathostomata;Teleostomi;Euteleostomi;Actinopterygii;Actinopteri;Neopterygii;Teleostei;Osteoglossocephalai;Clupeocephala;Euteleostei;Neoteleostei;Eurypterygia;Ctenosquamata;Acanthomorphata;Euacanthomorphacea;Percomorphaceae;Ovalentaria;Atherinomorphae;Cypriodontiformes;Aplocheiloidei;Nothobranchiidae;Nothobranchius;Nothobranchius furzeri

UdeM00000000819 6596 517.7 UdeM00000000819 XP\_045212343.1 68.4 342  
108 0 4 345 5 346 1.10E-143 517.7 6596 cellular

organisms;Eukaryota;Opisthokonta;Metazoa;Eumetazoa;Bilateria;Protostomia;Spiralia;Lophotrochozoa;Mollusca;Bivalvia;Autobranchia;Heteroconchia;Euheterodonta;Imparidentia;Venerida;Veneroidea;Veneridae;Mercenaria;Mercenaria mercenaria

UdeM00000000820 6596 517.7 UdeM00000000820 XP\_045212343.1 67.6 346  
112 0 3 348 1 346 1.20E-143 517.7 6596 cellular

organisms;Eukaryota;Opisthokonta;Metazoa;Eumetazoa;Bilateria;Protostomia;Spiralia;Lophotrochozoa;Mollusca;Bivalvia;Autobranchia;Heteroconchia;Euheterodonta;Imparidentia;Venerida;Veneroidea;Veneridae;Mercenaria;Mercenaria mercenaria

UdeM00000000821 6596 1001.1 UdeM00000000821 XP\_045212341.1 48.5  
1226 480 25 184 1370 303 1416 1.50E-288 1001.1 6596  
cellular

organisms;Eukaryota;Opisthokonta;Metazoa;Eumetazoa;Bilateria;Protostomia;Spiralia;Lophotrochozoa;Mollusca;Bivalvia;Autobranchia;Heteroconchia;Euheterodonta;Imparidentia;Venerida;Veneroidea;Veneridae;Mercenaria;Mercenaria mercenaria

UdeM00000000823 6596 207.2 UdeM00000000823 XP\_045216530.1 38.6 347  
197 10 19 358 622 959 5.30E-50 207.2 6596 cellular

organisms;Eukaryota;Opisthokonta;Metazoa;Eumetazoa;Bilateria;Protostomia;Spiralia;Lophotrochozoa;Mollusca;Bivalvia;Autobranchia;Heteroconchia;Euheterodonta;Imparidentia;Venerida;Veneroidea;Veneridae;Mercenaria;Mercenaria mercenaria

UdeM00000000826 6573 201.1 UdeM00000000826 XP\_021346881.1 33.1 362  
224 9 15 366 1 354 2.60E-48 201.1 6573 cellular

organisms;Eukaryota;Opisthokonta;Metazoa;Eumetazoa;Bilateria;Protostomia;Spiralia;Lophotrochozoa;Mollusca;Bivalvia;Autobranchia;Pteriormorphia;Pectinida;Pectinoidea;Pectinidae;Mizuhopecten;Mizuhopecten yessoensis

UdeM00000000828 6596 142.1 UdeM00000000828 XP\_045168100.1 62.6 99  
37 0 1 99 301 399 4.90E-31 142.1 6596 cellular

organisms;Eukaryota;Opisthokonta;Metazoa;Eumetazoa;Bilateria;Protostomia;Spiralia;Lophotrochozoa;Mollusca;Bivalvia;Autobranchia;Heteroconchia;Euheterodonta;Imparidentia;Venerida;Veneroidea;Veneridae;Mercenaria;Mercenaria mercenaria

UdeM00000000829 6596 65.9 UdeM00000000829 XP\_045173143.1 41.7 108  
 57 4 31 135 204 308 5.00E-08 65.9 6596 cellular  
 organisms;Eukaryota;Opisthokonta;Metazoa;Eumetazoa;Bilateria;Protostomia;  
 Spiralia;Lophotrochozoa;Mollusca;Bivalvia;Autobranchia;Heteroconchia;Euhe  
 terodonta;Imparidentia;Venerida;Veneroidea;Veneridae;Mercenaria;Mercenari  
 a mercenaria  
 UdeM00000000834 6596 778.1 UdeM00000000834 XP\_045213094.1 77.8 487  
 106 2 2 487 189 674 6.60E-22 778.1 6596 cellular  
 organisms;Eukaryota;Opisthokonta;Metazoa;Eumetazoa;Bilateria;Protostomia;  
 Spiralia;Lophotrochozoa;Mollusca;Bivalvia;Autobranchia;Heteroconchia;Euhe  
 terodonta;Imparidentia;Venerida;Veneroidea;Veneridae;Mercenaria;Mercenari  
 a mercenaria  
 UdeM00000000835 6596 769.6 UdeM00000000835 XP\_045213094.1 76.1 498  
 106 3 2 498 189 674 2.40E-21 769.6 6596 cellular  
 organisms;Eukaryota;Opisthokonta;Metazoa;Eumetazoa;Bilateria;Protostomia;  
 Spiralia;Lophotrochozoa;Mollusca;Bivalvia;Autobranchia;Heteroconchia;Euhe  
 terodonta;Imparidentia;Venerida;Veneroidea;Veneridae;Mercenaria;Mercenari  
 a mercenaria  
 UdeM00000000836 1735272 76.3 UdeM00000000836 XP\_041362279.1 60.8  
 79 30 1 269 347 27 104 9.30E-11 76.3 1735272  
 cellular  
 organisms;Eukaryota;Opisthokonta;Metazoa;Eumetazoa;Bilateria;Protostomia;  
 Spiralia;Lophotrochozoa;Mollusca;Gastropoda;Neomphalina;Neomphaloidea;Pel  
 tospiridae;Gigantopelta;Gigantopelta aegis  
 UdeM00000000837 6579 363.6 UdeM00000000837 XP\_033733288.1 59 315  
 121 2 1 307 1 315 2.40E-97 363.6 6579 cellular  
 organisms;Eukaryota;Opisthokonta;Metazoa;Eumetazoa;Bilateria;Protostomia;  
 Spiralia;Lophotrochozoa;Mollusca;Bivalvia;Autobranchia;Pteriormorphia;Pect  
 inida;Pectinoidea;Pectinidae;Pecten;Pecten maximus  
 UdeM00000000838 6579 124.8 UdeM00000000838 XP\_033733301.1 40.5 190  
 92 3 1 190 1 169 1.80E-25 124.8 6579 cellular  
 organisms;Eukaryota;Opisthokonta;Metazoa;Eumetazoa;Bilateria;Protostomia;  
 Spiralia;Lophotrochozoa;Mollusca;Bivalvia;Autobranchia;Pteriormorphia;Pect  
 inida;Pectinoidea;Pectinidae;Pecten;Pecten maximus  
 UdeM00000000839 6596 251.1 UdeM00000000839 XP\_045211690.1 49.1 271  
 138 0 7 277 314 584 1.60E-63 251.1 6596 cellular  
 organisms;Eukaryota;Opisthokonta;Metazoa;Eumetazoa;Bilateria;Protostomia;  
 Spiralia;Lophotrochozoa;Mollusca;Bivalvia;Autobranchia;Heteroconchia;Euhe  
 terodonta;Imparidentia;Venerida;Veneroidea;Veneridae;Mercenaria;Mercenari  
 a mercenaria  
 UdeM00000000841 6596 546.6 UdeM00000000841 XP\_045214051.1 80.1 307  
 59 2 1 306 325 630 2.00E-15 546.6 6596 cellular  
 organisms;Eukaryota;Opisthokonta;Metazoa;Eumetazoa;Bilateria;Protostomia;  
 Spiralia;Lophotrochozoa;Mollusca;Bivalvia;Autobranchia;Heteroconchia;Euhe  
 terodonta;Imparidentia;Venerida;Veneroidea;Veneridae;Mercenaria;Mercenari  
 a mercenaria  
 UdeM00000000840 6596 955.7 UdeM00000000840 XP\_045214051.1 71.9 629  
 162 3 13 627 3 630 3.00E-27 955.7 6596 cellular  
 organisms;Eukaryota;Opisthokonta;Metazoa;Eumetazoa;Bilateria;Protostomia;  
 Spiralia;Lophotrochozoa;Mollusca;Bivalvia;Autobranchia;Heteroconchia;Euhe  
 terodonta;Imparidentia;Venerida;Veneroidea;Veneridae;Mercenaria;Mercenari  
 a mercenaria  
 UdeM00000000842 70779 151 UdeM00000000842 XP\_015747237.1 39.8 206  
 119 2 48 249 3 207 2.10E-33 151 70779 cellular

organisms;Eukaryota;Opisthokonta;Metazoa;Eumetazoa;Cnidaria;Anthozoa;Hexa  
corallia;Scleractinia;Astrocoeniina;Acroporidae;Acropora;Acropora  
digitifera

UdeM00000000843 89399 140.6 UdeM00000000843 XP\_019572540.1 34.8 244  
142 5 6 236 222 461 3.10E-30 140.6 89399 cellular

organisms;Eukaryota;Opisthokonta;Metazoa;Eumetazoa;Bilateria;Deuterostomi  
a;Chordata;Craniata;Vertebrata;Gnathostomata;Teleostomi;Euteleostomi;Sarc  
opterygii;Dipnotetrapodomorpha;Tetrapoda;Amniota;Mammalia;Theria;Eutheria  
;Boreoeutheria;Laurasiatheria;Chiroptera;Microchiroptera;Rhinolophidae;Rh  
inolophinae;Rhinolophus;Rhinolophus sinicus

UdeM00000000844 37621 151.4 UdeM00000000844 XP\_014675863.1 35 243  
144 5 5 236 179 418 1.70E-33 151.4 37621 cellular

organisms;Eukaryota;Opisthokonta;Metazoa;Eumetazoa;Bilateria;Protostomia;  
Ecdysozoa;Scalidophora;Priapulida;Priapulimorpha;Priapulimorphida;Priapul  
idae;Priapulus;Priapulus caudatus

UdeM00000000845 6579 570.9 UdeM00000000845 XP\_033744367.1 83.2 345  
53 3 7 347 5 348 2.20E-159 570.9 6579 cellular

organisms;Eukaryota;Opisthokonta;Metazoa;Eumetazoa;Bilateria;Protostomia;  
Spiralia;Lophotrochozoa;Mollusca;Bivalvia;Autobranchia;Pteriomorpha;Pect  
inida;Pectinoidea;Pectinidae;Pecten;Pecten maximus

UdeM00000000846 6565 2286.1 UdeM00000000846 XP\_022316192.1 80.3  
1391 272 1 1 1389 1 1391 0.00E+00 2286.1 6565  
cellular

organisms;Eukaryota;Opisthokonta;Metazoa;Eumetazoa;Bilateria;Protostomia;  
Spiralia;Lophotrochozoa;Mollusca;Bivalvia;Autobranchia;Pteriomorpha;Ostr  
eida;Ostreoidea;Ostreidae;Crassostrea;Crassostrea virginica

UdeM00000000847 6596 431.4 UdeM00000000847 XP\_045213700.1 53 406  
174 5 17 417 13 406 1.30E-117 431.4 6596 cellular

organisms;Eukaryota;Opisthokonta;Metazoa;Eumetazoa;Bilateria;Protostomia;  
Spiralia;Lophotrochozoa;Mollusca;Bivalvia;Autobranchia;Heteroconchia;Euhe  
terodonta;Imparidentia;Venerida;Veneroidea;Veneridae;Mercenaria;Mercenari  
a mercenaria

UdeM00000000848 6596 176.4 UdeM00000000848 XP\_045213700.1 54.7 148  
66 1 5 151 259 406 2.80E-41 176.4 6596 cellular

organisms;Eukaryota;Opisthokonta;Metazoa;Eumetazoa;Bilateria;Protostomia;  
Spiralia;Lophotrochozoa;Mollusca;Bivalvia;Autobranchia;Heteroconchia;Euhe  
terodonta;Imparidentia;Venerida;Veneroidea;Veneridae;Mercenaria;Mercenari  
a mercenaria

UdeM00000000849 225164 221.5 UdeM00000000849 XP\_009045245.1 56  
191 79 2 13 202 167 353 1.00E-54 221.5 225164  
cellular

organisms;Eukaryota;Opisthokonta;Metazoa;Eumetazoa;Bilateria;Protostomia;  
Spiralia;Lophotrochozoa;Mollusca;Gastropoda;Patellogastropoda;Lottioidea;  
Lottiidae;Lottia;Lottia gigantea

UdeM00000000850 225164 227.3 UdeM00000000850 XP\_009045245.1 53.9  
206 90 2 12 216 152 353 2.00E-56 227.3 225164  
cellular

organisms;Eukaryota;Opisthokonta;Metazoa;Eumetazoa;Bilateria;Protostomia;  
Spiralia;Lophotrochozoa;Mollusca;Gastropoda;Patellogastropoda;Lottioidea;  
Lottiidae;Lottia;Lottia gigantea

UdeM00000000851 6596 449.9 UdeM00000000851 XP\_045213700.1 54.5 402  
171 4 8 405 13 406 3.50E-123 449.9 6596 cellular

organisms;Eukaryota;Opisthokonta;Metazoa;Eumetazoa;Bilateria;Protostomia;  
Spiralia;Lophotrochozoa;Mollusca;Bivalvia;Autobranchia;Heteroconchia;Euhe

terodonta;Imparidentia;Venerida;Veneroidea;Veneridae;Mercenaria;Mercenari  
 a mercenaria  
 UdeM00000000852 6565 411.8 UdeM00000000852 XP\_022315909.1 89.2 213  
 23 0 27 239 1 213 6.30E-112 411.8 6565 cellular  
 organisms;Eukaryota;Opisthokonta;Metazoa;Eumetazoa;Bilateria;Protostomia;  
 Spiralia;Lophotrochozoa;Mollusca;Bivalvia;Autobranchia;Pteriormorphia;Ostr  
 eida;Ostreoidea;Ostreidae;Crassostrea;Crassostrea virginica  
 UdeM00000000853 6596 765.4 UdeM00000000853 XP\_045213534.1 53 859  
 314 13 4 800 2 832 7.30E-218 765.4 6596 cellular  
 organisms;Eukaryota;Opisthokonta;Metazoa;Eumetazoa;Bilateria;Protostomia;  
 Spiralia;Lophotrochozoa;Mollusca;Bivalvia;Autobranchia;Heteroconchia;Euhe  
 terodonta;Imparidentia;Venerida;Veneroidea;Veneridae;Mercenaria;Mercenari  
 a mercenaria  
 UdeM00000000854 6596 201.4 UdeM00000000854 XP\_045213534.1 62.2 180  
 66 2 1 179 440 618 1.00E-48 201.4 6596 cellular  
 organisms;Eukaryota;Opisthokonta;Metazoa;Eumetazoa;Bilateria;Protostomia;  
 Spiralia;Lophotrochozoa;Mollusca;Bivalvia;Autobranchia;Heteroconchia;Euhe  
 terodonta;Imparidentia;Venerida;Veneroidea;Veneridae;Mercenaria;Mercenari  
 a mercenaria  
 UdeM00000000855 6579 529.3 UdeM00000000855 XP\_033734909.1 56.8 507  
 164 6 10 478 9 498 5.20E-147 529.3 6579 cellular  
 organisms;Eukaryota;Opisthokonta;Metazoa;Eumetazoa;Bilateria;Protostomia;  
 Spiralia;Lophotrochozoa;Mollusca;Bivalvia;Autobranchia;Pteriormorphia;Pect  
 inida;Pectinoidea;Pectinidae;Pecten;Pecten maximus  
 UdeM00000000856 400727 84 UdeM00000000856 XP\_025100531.1 37.4  
 107 65 2 1 106 1 106 1.40E-13 84 400727  
 cellular  
 organisms;Eukaryota;Opisthokonta;Metazoa;Eumetazoa;Bilateria;Protostomia;  
 Spiralia;Lophotrochozoa;Mollusca;Gastropoda;Caenogastropoda;Architaeniogl  
 ossa;Ampullarioidea;Ampullariidae;Pomacea;Pomacea canaliculata  
 UdeM00000000857 6596 271.2 UdeM00000000857 XP\_045156247.1 33.7 501  
 258 9 10 441 260 755 2.40E-69 271.2 6596 cellular  
 organisms;Eukaryota;Opisthokonta;Metazoa;Eumetazoa;Bilateria;Protostomia;  
 Spiralia;Lophotrochozoa;Mollusca;Bivalvia;Autobranchia;Heteroconchia;Euhe  
 terodonta;Imparidentia;Venerida;Veneroidea;Veneridae;Mercenaria;Mercenari  
 a mercenaria  
 UdeM00000000858 6596 871.3 UdeM00000000858 XP\_045210666.1 59.4 724  
 248 8 1 706 1 696 8.30E-250 871.3 6596 cellular  
 organisms;Eukaryota;Opisthokonta;Metazoa;Eumetazoa;Bilateria;Protostomia;  
 Spiralia;Lophotrochozoa;Mollusca;Bivalvia;Autobranchia;Heteroconchia;Euhe  
 terodonta;Imparidentia;Venerida;Veneroidea;Veneridae;Mercenaria;Mercenari  
 a mercenaria  
 UdeM00000000859 6596 459.5 UdeM00000000859 XP\_045211827.1 57.4 394  
 156 7 59 441 90 482 4.70E-126 459.5 6596 cellular  
 organisms;Eukaryota;Opisthokonta;Metazoa;Eumetazoa;Bilateria;Protostomia;  
 Spiralia;Lophotrochozoa;Mollusca;Bivalvia;Autobranchia;Heteroconchia;Euhe  
 terodonta;Imparidentia;Venerida;Veneroidea;Veneridae;Mercenaria;Mercenari  
 a mercenaria  
 UdeM00000000860 6596 480.7 UdeM00000000860 XP\_045211832.1 52.3 455  
 196 9 3 446 4 448 2.00E-132 480.7 6596 cellular  
 organisms;Eukaryota;Opisthokonta;Metazoa;Eumetazoa;Bilateria;Protostomia;  
 Spiralia;Lophotrochozoa;Mollusca;Bivalvia;Autobranchia;Heteroconchia;Euhe  
 terodonta;Imparidentia;Venerida;Veneroidea;Veneridae;Mercenaria;Mercenari  
 a mercenaria

UdeM00000000861 6596 473.4 UdeM00000000861 XP\_045211832.1 52.1 453  
 200 9 3 446 4 448 3.20E-130 473.4 6596 cellular  
 organisms;Eukaryota;Opisthokonta;Metazoa;Eumetazoa;Bilateria;Protostomia;  
 Spiralia;Lophotrochozoa;Mollusca;Bivalvia;Autobranhia;Heteroconchia;Euhe  
 terodonta;Imparidentia;Venerida;Veneroidea;Veneridae;Mercenaria;Mercenari  
 a mercenaria  
 UdeM00000000864 6565 122.9 UdeM00000000864 XP\_022312990.1 55.6 108  
 48 0 1 108 1 108 4.20E-25 122.9 6565 cellular  
 organisms;Eukaryota;Opisthokonta;Metazoa;Eumetazoa;Bilateria;Protostomia;  
 Spiralia;Lophotrochozoa;Mollusca;Bivalvia;Autobranhia;Pteriormorphia;Ostr  
 eida;Ostreoidea;Ostreidae;Crassostrea;Crassostrea virginica  
 UdeM00000000865 6596 707.6 UdeM00000000865 XP\_045213089.1 68 540  
 169 3 1 536 1 540 1.20E-200 707.6 6596 cellular  
 organisms;Eukaryota;Opisthokonta;Metazoa;Eumetazoa;Bilateria;Protostomia;  
 Spiralia;Lophotrochozoa;Mollusca;Bivalvia;Autobranhia;Heteroconchia;Euhe  
 terodonta;Imparidentia;Venerida;Veneroidea;Veneridae;Mercenaria;Mercenari  
 a mercenaria  
 UdeM00000000866 2607531 102.8 UdeM00000000866 XP\_036369419.1 53.9  
 102 32 1 14 100 11 112 3.40E-19 102.8 2607531  
 cellular  
 organisms;Eukaryota;Opisthokonta;Metazoa;Eumetazoa;Bilateria;Protostomia;  
 Spiralia;Lophotrochozoa;Mollusca;Cephalopoda;Coleoidea;Octopodiformes;Oct  
 opoda;Incirrata;Octopodidae;Octopus;Octopus sinensis  
 UdeM00000000867 6573 300.8 UdeM00000000867 XP\_021360091.1 53.2 280  
 129 2 3 281 113 391 1.80E-78 300.8 6573 cellular  
 organisms;Eukaryota;Opisthokonta;Metazoa;Eumetazoa;Bilateria;Protostomia;  
 Spiralia;Lophotrochozoa;Mollusca;Bivalvia;Autobranhia;Pteriormorphia;Pect  
 inida;Pectinoidea;Pectinidae;Mizuhopecten;Mizuhopecten yessoensis  
 UdeM00000000868 7739 119 UdeM00000000868 XP\_035698548.1 32.2 233  
 140 8 4 230 7 227 8.00E-24 119 7739 cellular  
 organisms;Eukaryota;Opisthokonta;Metazoa;Eumetazoa;Bilateria;Deuterostomi  
 a;Chordata;Cephalochordata;Leptocardii;Amphioxiformes;Branchiostomidae;Br  
 anchiostoma;Branchiostoma floridae  
 UdeM00000000869 6596 95.1 UdeM00000000869 XP\_045198974.1 44.6 92  
 48 1 12 100 22 113 6.80E-17 95.1 6596 cellular  
 organisms;Eukaryota;Opisthokonta;Metazoa;Eumetazoa;Bilateria;Protostomia;  
 Spiralia;Lophotrochozoa;Mollusca;Bivalvia;Autobranhia;Heteroconchia;Euhe  
 terodonta;Imparidentia;Venerida;Veneroidea;Veneridae;Mercenaria;Mercenari  
 a mercenaria  
 UdeM00000000870 7739 118.6 UdeM00000000870 XP\_035698548.1 32.2 233  
 140 8 4 230 7 227 1.00E-23 118.6 7739 cellular  
 organisms;Eukaryota;Opisthokonta;Metazoa;Eumetazoa;Bilateria;Deuterostomi  
 a;Chordata;Cephalochordata;Leptocardii;Amphioxiformes;Branchiostomidae;Br  
 anchiostoma;Branchiostoma floridae  
 UdeM00000000871 6596 112.1 UdeM00000000871 XP\_045183704.1 26.8 336  
 191 10 151 473 182 475 2.20E-21 112.1 6596 cellular  
 organisms;Eukaryota;Opisthokonta;Metazoa;Eumetazoa;Bilateria;Protostomia;  
 Spiralia;Lophotrochozoa;Mollusca;Bivalvia;Autobranhia;Heteroconchia;Euhe  
 terodonta;Imparidentia;Venerida;Veneroidea;Veneridae;Mercenaria;Mercenari  
 a mercenaria  
 UdeM00000000872 6579 748.8 UdeM00000000872 XP\_033744346.1 83.3 438  
 69 3 14 447 21 458 3.90E-213 748.8 6579 cellular  
 organisms;Eukaryota;Opisthokonta;Metazoa;Eumetazoa;Bilateria;Protostomia;

Spiralia;Lophotrochozoa;Mollusca;Bivalvia;Autobranchia;Pteriormorphia;Pectinida;Pectinoidea;Pectinidae;Pecten;Pecten maximus  
UdeM00000000873 6579 166.4 UdeM00000000873 XP\_033744346.1 65.9 135  
42 3 14 144 21 155 2.90E-38 166.4 6579 cellular  
organisms;Eukaryota;Opisthokonta;Metazoa;Eumetazoa;Bilateria;Protostomia;  
Spiralia;Lophotrochozoa;Mollusca;Bivalvia;Autobranchia;Pteriormorphia;Pectinida;Pectinoidea;Pectinidae;Pecten;Pecten maximus  
UdeM00000000874 29159 273.5 UdeM00000000874 XP\_019924565.2 59.1 203  
81 1 10 212 5 205 2.40E-70 273.5 29159 cellular  
organisms;Eukaryota;Opisthokonta;Metazoa;Eumetazoa;Bilateria;Protostomia;  
Spiralia;Lophotrochozoa;Mollusca;Bivalvia;Autobranchia;Pteriormorphia;Ostreida;Ostreioidea;Ostreidae;Crassostrea;Crassostrea gigas  
UdeM00000000875 29159 313.9 UdeM00000000875 XP\_011433409.1 58.6 232  
94 1 10 241 5 234 1.80E-82 313.9 29159 cellular  
organisms;Eukaryota;Opisthokonta;Metazoa;Eumetazoa;Bilateria;Protostomia;  
Spiralia;Lophotrochozoa;Mollusca;Bivalvia;Autobranchia;Pteriormorphia;Ostreida;Ostreioidea;Ostreidae;Crassostrea;Crassostrea gigas  
UdeM00000000876 6596 411 UdeM00000000876 XP\_045213561.1 62.8 323  
112 3 1 316 30 351 1.40E-111 411 6596 cellular  
organisms;Eukaryota;Opisthokonta;Metazoa;Eumetazoa;Bilateria;Protostomia;  
Spiralia;Lophotrochozoa;Mollusca;Bivalvia;Autobranchia;Heteroconchia;Euheterodonta;Imparidentia;Venerida;Veneroidea;Veneridae;Mercenaria;Mercenaria mercenaria  
UdeM00000000878 29159 249.6 UdeM00000000878 XP\_034311609.1 45.3 276  
137 6 133 398 134 405 6.90E-63 249.6 29159 cellular  
organisms;Eukaryota;Opisthokonta;Metazoa;Eumetazoa;Bilateria;Protostomia;  
Spiralia;Lophotrochozoa;Mollusca;Bivalvia;Autobranchia;Pteriormorphia;Ostreida;Ostreioidea;Ostreidae;Crassostrea;Crassostrea gigas  
UdeM00000000879 6596 419.9 UdeM00000000879 XP\_045205492.1 53.5 372  
164 3 276 642 96 463 6.00E-114 419.9 6596 cellular  
organisms;Eukaryota;Opisthokonta;Metazoa;Eumetazoa;Bilateria;Protostomia;  
Spiralia;Lophotrochozoa;Mollusca;Bivalvia;Autobranchia;Heteroconchia;Euheterodonta;Imparidentia;Venerida;Veneroidea;Veneridae;Mercenaria;Mercenaria mercenaria  
UdeM00000000880 6596 356.7 UdeM00000000880 XP\_045212394.1 85.4 206  
30 0 17 222 153 358 2.20E-95 356.7 6596 cellular  
organisms;Eukaryota;Opisthokonta;Metazoa;Eumetazoa;Bilateria;Protostomia;  
Spiralia;Lophotrochozoa;Mollusca;Bivalvia;Autobranchia;Heteroconchia;Euheterodonta;Imparidentia;Venerida;Veneroidea;Veneridae;Mercenaria;Mercenaria mercenaria  
UdeM00000000881 6596 234.6 UdeM00000000881 XP\_045212394.1 73 152  
41 0 1 152 1 152 8.90E-59 234.6 6596 cellular  
organisms;Eukaryota;Opisthokonta;Metazoa;Eumetazoa;Bilateria;Protostomia;  
Spiralia;Lophotrochozoa;Mollusca;Bivalvia;Autobranchia;Heteroconchia;Euheterodonta;Imparidentia;Venerida;Veneroidea;Veneridae;Mercenaria;Mercenaria mercenaria  
UdeM00000000882 1735272 691 UdeM00000000882 XP\_041362646.1 46.6  
712 374 3 14 723 17 724 1.60E-195 691 1735272  
cellular  
organisms;Eukaryota;Opisthokonta;Metazoa;Eumetazoa;Bilateria;Protostomia;  
Spiralia;Lophotrochozoa;Mollusca;Gastropoda;Neomphalina;Neomphaloidea;Peltospiridae;Gigantopelta;Gigantopelta aegis  
UdeM00000000883 1735272 461.5 UdeM00000000883 XP\_041362646.1 51.6  
407 197 0 1 407 318 724 1.10E-126 461.5 1735272

cellular  
organisms;Eukaryota;Opisthokonta;Metazoa;Eumetazoa;Bilateria;Protostomia;  
Spiralia;Lophotrochozoa;Mollusca;Gastropoda;Neomphalina;Neomphaloidea;Pel  
tospiridae;Gigantopelta;Gigantopelta aegis

UdeM000000000884 6596 1756.5 UdeM000000000884 XP\_045212396.1 50.5  
2756 1123 47 12 2633 87 2736 0.00E+00 1756.5 6596

cellular  
organisms;Eukaryota;Opisthokonta;Metazoa;Eumetazoa;Bilateria;Protostomia;  
Spiralia;Lophotrochozoa;Mollusca;Bivalvia;Autobranchia;Heteroconchia;Euhe  
terodonta;Imparidentia;Venerida;Veneroidea;Veneridae;Mercenaria;Mercenari  
a mercenaria

UdeM000000000888 225164 202.6 UdeM000000000888 XP\_009060114.1 35  
363 196 11 4 330 9 367 9.20E-49 202.6 225164

cellular  
organisms;Eukaryota;Opisthokonta;Metazoa;Eumetazoa;Bilateria;Protostomia;  
Spiralia;Lophotrochozoa;Mollusca;Gastropoda;Patellogastropoda;Lottioidea;  
Lottiidae;Lottia;Lottia gigantea

UdeM000000000889 6596 332.8 UdeM000000000889 XP\_045211425.1 51.7 344  
149 5 1 328 1 343 5.90E-88 332.8 6596 cellular

organisms;Eukaryota;Opisthokonta;Metazoa;Eumetazoa;Bilateria;Protostomia;  
Spiralia;Lophotrochozoa;Mollusca;Bivalvia;Autobranchia;Heteroconchia;Euhe  
terodonta;Imparidentia;Venerida;Veneroidea;Veneridae;Mercenaria;Mercenari  
a mercenaria

UdeM000000000890 6596 470.3 UdeM000000000890 XP\_045214213.1 67.5 335  
94 3 6 330 2 331 2.20E-129 470.3 6596 cellular

organisms;Eukaryota;Opisthokonta;Metazoa;Eumetazoa;Bilateria;Protostomia;  
Spiralia;Lophotrochozoa;Mollusca;Bivalvia;Autobranchia;Heteroconchia;Euhe  
terodonta;Imparidentia;Venerida;Veneroidea;Veneridae;Mercenaria;Mercenari  
a mercenaria

UdeM000000000891 6579 1199.5 UdeM000000000891 XP\_033735963.1 90.7  
647 60 0 1 647 1 647 0.00E+00 1199.5 6579

cellular  
organisms;Eukaryota;Opisthokonta;Metazoa;Eumetazoa;Bilateria;Protostomia;  
Spiralia;Lophotrochozoa;Mollusca;Bivalvia;Autobranchia;Pteriomorphia;Pect  
inida;Pectinoidea;Pectinidae;Pecten;Pecten maximus

UdeM000000000892 6596 655.2 UdeM000000000892 XP\_045211022.1 55.8 751  
268 16 26 762 549 1249 1.30E-184 655.2 6596 cellular

organisms;Eukaryota;Opisthokonta;Metazoa;Eumetazoa;Bilateria;Protostomia;  
Spiralia;Lophotrochozoa;Mollusca;Bivalvia;Autobranchia;Heteroconchia;Euhe  
terodonta;Imparidentia;Venerida;Veneroidea;Veneridae;Mercenaria;Mercenari  
a mercenaria

UdeM000000000893 6596 159.8 UdeM000000000893 XP\_045211022.1 57.1 147  
51 4 19 156 352 495 3.20E-36 159.8 6596 cellular

organisms;Eukaryota;Opisthokonta;Metazoa;Eumetazoa;Bilateria;Protostomia;  
Spiralia;Lophotrochozoa;Mollusca;Bivalvia;Autobranchia;Heteroconchia;Euhe  
terodonta;Imparidentia;Venerida;Veneroidea;Veneridae;Mercenaria;Mercenari  
a mercenaria

UdeM000000000894 1735272 194.1 UdeM000000000894 XP\_041363793.1 70.1  
137 40 1 1 136 14 150 1.20E-46 194.1 1735272

cellular  
organisms;Eukaryota;Opisthokonta;Metazoa;Eumetazoa;Bilateria;Protostomia;  
Spiralia;Lophotrochozoa;Mollusca;Gastropoda;Neomphalina;Neomphaloidea;Pel  
tospiridae;Gigantopelta;Gigantopelta aegis



UdeM00000000895 6596 743 UdeM00000000895 XP\_045213085.1 74.2 484  
 115 3 5 480 4 485 2.30E-211 743 6596 cellular  
 organisms;Eukaryota;Opisthokonta;Metazoa;Eumetazoa;Bilateria;Protostomia;  
 Spiralia;Lophotrochozoa;Mollusca;Bivalvia;Autobranchia;Heteroconchia;Euhe-  
 terodonta;Imparidentia;Venerida;Veneroidea;Veneridae;Mercenaria;Mercenari-  
 a mercenaria

UdeM00000000896 90988 271.6 UdeM00000000896 XP\_039509182.1 68.2 192  
 61 0 1 192 1 192 7.90E-70 271.6 90988 cellular  
 organisms;Eukaryota;Opisthokonta;Metazoa;Eumetazoa;Bilateria;Deuterostomi-  
 a;Chordata;Craniata;Vertebrata;Gnathostomata;Teleostomi;Euteleostomi;Acti-  
 nopterygii;Actinopteri;Neopterygii;Teleostei;Osteoglossocephalai;Clupeoce-  
 phala;Otomorpha;Ostariophysi;Otophysi;Cypriniphysae;Cypriniiformes;Cyprino-  
 idei;Leuciscidae;Pogonichthyinae;Pimephales;Pimephales promelas

UdeM00000000897 90988 211.5 UdeM00000000897 XP\_039509182.1 66.7 150  
 50 0 6 155 43 192 7.90E-52 211.5 90988 cellular  
 organisms;Eukaryota;Opisthokonta;Metazoa;Eumetazoa;Bilateria;Deuterostomi-  
 a;Chordata;Craniata;Vertebrata;Gnathostomata;Teleostomi;Euteleostomi;Acti-  
 nopterygii;Actinopteri;Neopterygii;Teleostei;Osteoglossocephalai;Clupeoce-  
 phala;Otomorpha;Ostariophysi;Otophysi;Cypriniphysae;Cypriniiformes;Cyprino-  
 idei;Leuciscidae;Pogonichthyinae;Pimephales;Pimephales promelas

UdeM00000000898 109905 295 UdeM00000000898 XP\_041819117.1 58.8  
 250 85 2 1 250 1 232 8.80E-77 295 109905  
 cellular  
 organisms;Eukaryota;Opisthokonta;Metazoa;Eumetazoa;Bilateria;Deuterostomi-  
 a;Chordata;Craniata;Vertebrata;Gnathostomata;Teleostomi;Euteleostomi;Acti-  
 nopterygii;Actinopteri;Neopterygii;Teleostei;Osteoglossocephalai;Clupeoce-  
 phala;Euteleosteomorpha;Neoteleostei;Eurypterygia;Ctenosquamata;Acanthomo-  
 rphata;Euacanthomorphacea;Percomorphaceae;Eupercaria;Chaetodontiformes;Ch-  
 aetodontidae;Chelmon;Chelmon rostratus

UdeM00000000899 6579 327.8 UdeM00000000899 XP\_033735063.1 80.2 192  
 38 0 1 192 1 192 9.30E-87 327.8 6579 cellular  
 organisms;Eukaryota;Opisthokonta;Metazoa;Eumetazoa;Bilateria;Protostomia;  
 Spiralia;Lophotrochozoa;Mollusca;Bivalvia;Autobranchia;Pteriormorphia;Pect-  
 inida;Pectinoidea;Pectinidae;Pecten;Pecten maximus

UdeM00000000900 400727 257.3 UdeM00000000900 XP\_025098320.1 75.6  
 156 38 0 6 161 37 192 1.30E-65 257.3 400727  
 cellular  
 organisms;Eukaryota;Opisthokonta;Metazoa;Eumetazoa;Bilateria;Protostomia;  
 Spiralia;Lophotrochozoa;Mollusca;Gastropoda;Caenogastropoda;Architaeniogl-  
 ossa;Ampullarioidea;Ampullariidae;Pomacea;Pomacea canaliculata

UdeM00000000901 400727 358.2 UdeM00000000901 XP\_025098320.1 89.1  
 192 21 0 1 192 1 192 6.40E-96 358.2 400727  
 cellular  
 organisms;Eukaryota;Opisthokonta;Metazoa;Eumetazoa;Bilateria;Protostomia;  
 Spiralia;Lophotrochozoa;Mollusca;Gastropoda;Caenogastropoda;Architaeniogl-  
 ossa;Ampullarioidea;Ampullariidae;Pomacea;Pomacea canaliculata

UdeM00000000902 6573 223.4 UdeM00000000902 XP\_021358761.1 89.9 119  
 12 0 4 122 74 192 1.60E-55 223.4 6573 cellular  
 organisms;Eukaryota;Opisthokonta;Metazoa;Eumetazoa;Bilateria;Protostomia;  
 Spiralia;Lophotrochozoa;Mollusca;Bivalvia;Autobranchia;Pteriormorphia;Pect-  
 inida;Pectinoidea;Pectinidae;Mizuhopecten;Mizuhopecten yessoensis

UdeM00000000903 6596 169.9 UdeM00000000903 XP\_045214102.1 55.3 152  
 66 1 2 153 3 152 2.60E-39 169.9 6596 cellular  
 organisms;Eukaryota;Opisthokonta;Metazoa;Eumetazoa;Bilateria;Protostomia;

Spiralia;Lophotrochozoa;Mollusca;Bivalvia;Autobranchia;Heteroconchia;Euherodonta;Imparidentia;Venerida;Veneroidea;Veneridae;Mercenaria;Mercenaria mercenaria

UdeM00000000904 6596 151 UdeM00000000904 XP\_045214103.1 50.3 151  
73 1 2 152 3 151 1.20E-33 151 6596 cellular

organisms;Eukaryota;Opisthokonta;Metazoa;Eumetazoa;Bilateria;Protostomia;Spiralia;Lophotrochozoa;Mollusca;Bivalvia;Autobranchia;Heteroconchia;Euherodonta;Imparidentia;Venerida;Veneroidea;Veneridae;Mercenaria;Mercenaria mercenaria

UdeM00000000905 6565 451.1 UdeM00000000905 XP\_022318108.1 56.2 404  
172 3 141 541 70 471 2.10E-123 451.1 6565 cellular

organisms;Eukaryota;Opisthokonta;Metazoa;Eumetazoa;Bilateria;Protostomia;Spiralia;Lophotrochozoa;Mollusca;Bivalvia;Autobranchia;Pteriomorpha;Ostreida;Ostreoidea;Ostreidae;Crassostrea;Crassostrea virginica

UdeM00000000906 6500 494.2 UdeM00000000906 XP\_005109235.1 58.8 403  
165 1 204 605 154 556 2.40E-136 494.2 6500 cellular

organisms;Eukaryota;Opisthokonta;Metazoa;Eumetazoa;Bilateria;Protostomia;Spiralia;Lophotrochozoa;Mollusca;Gastropoda;Heterobranchia;Euthyneura;Tectipleura;Aplysiida;Aplysioidea;Aplysiidae;Aplysia;Aplysia californica

UdeM00000000907 6596 1286.2 UdeM00000000907 XP\_045169084.1 53.4  
1257 544 12 1 1227 28 1272 0.00E+00 1286.2 6596

cellular

organisms;Eukaryota;Opisthokonta;Metazoa;Eumetazoa;Bilateria;Protostomia;Spiralia;Lophotrochozoa;Mollusca;Bivalvia;Autobranchia;Heteroconchia;Euherodonta;Imparidentia;Venerida;Veneroidea;Veneridae;Mercenaria;Mercenaria mercenaria

UdeM00000000908 6500 127.5 UdeM00000000908 XP\_005109235.1 50 110  
55 0 61 170 154 263 1.70E-26 127.5 6500 cellular

organisms;Eukaryota;Opisthokonta;Metazoa;Eumetazoa;Bilateria;Protostomia;Spiralia;Lophotrochozoa;Mollusca;Gastropoda;Heterobranchia;Euthyneura;Tectipleura;Aplysiida;Aplysioidea;Aplysiidae;Aplysia;Aplysia californica

UdeM00000000909 29159 372.1 UdeM00000000909 XP\_034314463.1 67.1 277  
90 1 8 284 301 576 6.40E-100 372.1 29159 cellular

organisms;Eukaryota;Opisthokonta;Metazoa;Eumetazoa;Bilateria;Protostomia;Spiralia;Lophotrochozoa;Mollusca;Bivalvia;Autobranchia;Pteriomorpha;Ostreida;Ostreoidea;Ostreidae;Crassostrea;Crassostrea gigas

UdeM00000000910 6596 1281.9 UdeM00000000910 XP\_045169084.1 52.5  
1257 556 12 1 1228 28 1272 0.00E+00 1281.9 6596

cellular

organisms;Eukaryota;Opisthokonta;Metazoa;Eumetazoa;Bilateria;Protostomia;Spiralia;Lophotrochozoa;Mollusca;Bivalvia;Autobranchia;Heteroconchia;Euherodonta;Imparidentia;Venerida;Veneroidea;Veneridae;Mercenaria;Mercenaria mercenaria

UdeM00000000911 6573 167.5 UdeM00000000911 XP\_021358159.1 37 270  
157 7 3 262 394 660 3.60E-38 167.5 6573 cellular

organisms;Eukaryota;Opisthokonta;Metazoa;Eumetazoa;Bilateria;Protostomia;Spiralia;Lophotrochozoa;Mollusca;Bivalvia;Autobranchia;Pteriomorpha;Pectinida;Pectinoidea;Pectinidae;Mizuhopecten;Mizuhopecten yessoensis

UdeM00000000912 6596 231.5 UdeM00000000912 XP\_045212817.1 60.7 214  
78 3 13 221 8 220 1.10E-57 231.5 6596 cellular

organisms;Eukaryota;Opisthokonta;Metazoa;Eumetazoa;Bilateria;Protostomia;Spiralia;Lophotrochozoa;Mollusca;Bivalvia;Autobranchia;Heteroconchia;Euherodonta;Imparidentia;Venerida;Veneroidea;Veneridae;Mercenaria;Mercenaria mercenaria

UdeM00000000913 6596 215.3 UdeM00000000913 XP\_045212819.1 64.5 166  
 53 2 1 166 1 160 8.20E-53 215.3 6596 cellular  
 organisms;Eukaryota;Opisthokonta;Metazoa;Eumetazoa;Bilateria;Protostomia;  
 Spiralia;Lophotrochozoa;Mollusca;Bivalvia;Autobranchia;Heteroconchia;Euhe  
 terodonta;Imparidentia;Venerida;Veneroidea;Veneridae;Mercenaria;Mercenari  
 a mercenaria  
 UdeM00000000914 6573 934.9 UdeM00000000914 XP\_021348847.1 70.2 631  
 183 3 1 627 1 630 5.60E-269 934.9 6573 cellular  
 organisms;Eukaryota;Opisthokonta;Metazoa;Eumetazoa;Bilateria;Protostomia;  
 Spiralia;Lophotrochozoa;Mollusca;Bivalvia;Autobranchia;Pteriormorphia;Pect  
 inida;Pectinoidea;Pectinidae;Mizuhopecten;Mizuhopecten yessoensis  
 UdeM00000000915 6596 1299.3 UdeM00000000915 XP\_045211593.1 69.2  
 915 256 8 2032 2924 982 1892 0.00E+00 1299.3 6596  
 cellular  
 organisms;Eukaryota;Opisthokonta;Metazoa;Eumetazoa;Bilateria;Protostomia;  
 Spiralia;Lophotrochozoa;Mollusca;Bivalvia;Autobranchia;Heteroconchia;Euhe  
 terodonta;Imparidentia;Venerida;Veneroidea;Veneridae;Mercenaria;Mercenari  
 a mercenaria  
 UdeM00000000915 6596 548.5 UdeM00000000915 XP\_045211593.1 74.6 338  
 84 1 2 339 647 982 5.10E-152 548.5 6596 cellular  
 organisms;Eukaryota;Opisthokonta;Metazoa;Eumetazoa;Bilateria;Protostomia;  
 Spiralia;Lophotrochozoa;Mollusca;Bivalvia;Autobranchia;Heteroconchia;Euhe  
 terodonta;Imparidentia;Venerida;Veneroidea;Veneridae;Mercenaria;Mercenari  
 a mercenaria  
 UdeM00000000916 6565 140.2 UdeM00000000916 XP\_022328252.1 49 149  
 70 2 1 143 1105 1253 2.20E-30 140.2 6565 cellular  
 organisms;Eukaryota;Opisthokonta;Metazoa;Eumetazoa;Bilateria;Protostomia;  
 Spiralia;Lophotrochozoa;Mollusca;Bivalvia;Autobranchia;Pteriormorphia;Ostr  
 eida;Ostreoidea;Ostreidae;Crassostrea;Crassostrea virginica  
 UdeM00000000917 225164 289.3 UdeM00000000917 XP\_009064572.1 71.9  
 196 48 1 18 206 8 203 4.20E-75 289.3 225164  
 cellular  
 organisms;Eukaryota;Opisthokonta;Metazoa;Eumetazoa;Bilateria;Protostomia;  
 Spiralia;Lophotrochozoa;Mollusca;Gastropoda;Patellogastropoda;Lottioidea;  
 Lottiidae;Lottia;Lottia gigantea  
 UdeM00000000918 6596 293.1 UdeM00000000918 XP\_045215019.1 47.8 312  
 153 2 6 317 2 303 4.20E-76 293.1 6596 cellular  
 organisms;Eukaryota;Opisthokonta;Metazoa;Eumetazoa;Bilateria;Protostomia;  
 Spiralia;Lophotrochozoa;Mollusca;Bivalvia;Autobranchia;Heteroconchia;Euhe  
 terodonta;Imparidentia;Venerida;Veneroidea;Veneridae;Mercenaria;Mercenari  
 a mercenaria  
 UdeM00000000919 6579 271.6 UdeM00000000919 XP\_033744348.1 53.3 259  
 109 3 1 247 1 259 1.00E-69 271.6 6579 cellular  
 organisms;Eukaryota;Opisthokonta;Metazoa;Eumetazoa;Bilateria;Protostomia;  
 Spiralia;Lophotrochozoa;Mollusca;Bivalvia;Autobranchia;Pteriormorphia;Pect  
 inida;Pectinoidea;Pectinidae;Pecten;Pecten maximus  
 UdeM00000000920 6565 666.8 UdeM00000000920 XP\_022313761.1 86.5 371  
 50 0 69 439 76 446 1.90E-188 666.8 6565 cellular  
 organisms;Eukaryota;Opisthokonta;Metazoa;Eumetazoa;Bilateria;Protostomia;  
 Spiralia;Lophotrochozoa;Mollusca;Bivalvia;Autobranchia;Pteriormorphia;Ostr  
 eida;Ostreoidea;Ostreidae;Crassostrea;Crassostrea virginica  
 UdeM00000000921 6596 141.7 UdeM00000000921 XP\_045214251.1 71.1 90  
 25 1 35 123 17 106 7.30E-31 141.7 6596 cellular  
 organisms;Eukaryota;Opisthokonta;Metazoa;Eumetazoa;Bilateria;Protostomia;

Spiralia;Lophotrochozoa;Mollusca;Bivalvia;Autobranchia;Heteroconchia;Euherodonta;Imparidentia;Venerida;Veneroidea;Veneridae;Mercenaria;Mercenaria mercenaria

UdeM00000000922 6579 300.8 UdeM00000000922 XP\_033730215.1 52.3 266  
125 1 4 267 91 356 1.70E-78 300.8 6579 cellular

organisms;Eukaryota;Opisthokonta;Metazoa;Eumetazoa;Bilateria;Protostomia;Spiralia;Lophotrochozoa;Mollusca;Bivalvia;Autobranchia;Pteriomorpha;Pectinida;Pectinoidea;Pectinidae;Pecten;Pecten maximus

UdeM00000000925 6596 219.2 UdeM00000000925 XP\_045214251.1 60.5 157  
62 0 2 158 134 290 3.90E-54 219.2 6596 cellular

organisms;Eukaryota;Opisthokonta;Metazoa;Eumetazoa;Bilateria;Protostomia;Spiralia;Lophotrochozoa;Mollusca;Bivalvia;Autobranchia;Heteroconchia;Euherodonta;Imparidentia;Venerida;Veneroidea;Veneridae;Mercenaria;Mercenaria mercenaria

UdeM00000000923 29159 304.7 UdeM00000000923 XP\_034314376.1 57.9 240  
98 1 1 237 131 370 1.10E-79 304.7 29159 cellular

organisms;Eukaryota;Opisthokonta;Metazoa;Eumetazoa;Bilateria;Protostomia;Spiralia;Lophotrochozoa;Mollusca;Bivalvia;Autobranchia;Pteriomorpha;Ostreida;Ostreoidea;Ostreidae;Crassostrea;Crassostrea gigas

UdeM00000000924 29159 301.2 UdeM00000000924 XP\_034314376.1 58.3 235  
95 1 1 232 131 365 1.40E-78 301.2 29159 cellular

organisms;Eukaryota;Opisthokonta;Metazoa;Eumetazoa;Bilateria;Protostomia;Spiralia;Lophotrochozoa;Mollusca;Bivalvia;Autobranchia;Pteriomorpha;Ostreida;Ostreoidea;Ostreidae;Crassostrea;Crassostrea gigas

UdeM00000000927 6596 60.1 UdeM00000000927 XP\_045214255.1 21.1 341  
188 9 29 315 456 769 6.20E-06 60.1 6596 cellular

organisms;Eukaryota;Opisthokonta;Metazoa;Eumetazoa;Bilateria;Protostomia;Spiralia;Lophotrochozoa;Mollusca;Bivalvia;Autobranchia;Heteroconchia;Euherodonta;Imparidentia;Venerida;Veneroidea;Veneridae;Mercenaria;Mercenaria mercenaria

UdeM00000000926 6596 534.3 UdeM00000000926 XP\_045214255.1 38.4 794  
386 14 19 739 6 769 2.60E-148 534.3 6596 cellular

organisms;Eukaryota;Opisthokonta;Metazoa;Eumetazoa;Bilateria;Protostomia;Spiralia;Lophotrochozoa;Mollusca;Bivalvia;Autobranchia;Heteroconchia;Euherodonta;Imparidentia;Venerida;Veneroidea;Veneridae;Mercenaria;Mercenaria mercenaria

UdeM00000000929 441366 386 UdeM00000000929 XP\_028296753.1 39.8  
596 329 13 6 593 32 605 9.00E-104 386 441366  
cellular

organisms;Eukaryota;Opisthokonta;Metazoa;Eumetazoa;Bilateria;Deuterostomia;Chordata;Craniata;Vertebrata;Gnathostomata;Teleostomi;Euteleostomi;Actinopterygii;Actinopteri;Neopterygii;Teleostei;Osteoglossocephalai;Clupeocephala;Euteleostei;Neoteleostei;Eurypterygia;Ctenosquamata;Acanthopterygii;Euacanthopterygii;Percomorphaceae;Ovalentaria;Blenniiformes;Blenniiformes;Gobiesocidae;Gobiesocinae;Gouania;Gouania willdenowi

UdeM00000000930 6596 366.7 UdeM00000000930 XP\_045211704.1 75.3 231  
57 0 1 231 1 231 3.60E-98 366.7 6596 cellular

organisms;Eukaryota;Opisthokonta;Metazoa;Eumetazoa;Bilateria;Protostomia;Spiralia;Lophotrochozoa;Mollusca;Bivalvia;Autobranchia;Heteroconchia;Euherodonta;Imparidentia;Venerida;Veneroidea;Veneridae;Mercenaria;Mercenaria mercenaria

UdeM00000000931 6579 77.8 UdeM00000000931 XP\_033746809.1 46.6 103  
48 2 1 96 1 103 8.90E-12 77.8 6579 cellular

organisms;Eukaryota;Opisthokonta;Metazoa;Eumetazoa;Bilateria;Protostomia;Spiralia;Lophotrochozoa;Mollusca;Bivalvia;Autobranchia;Pteriormorphia;Pectinida;Pectinoidea;Pectinidae;Pecten;Pecten maximus  
UdeM00000000932 37653 768.8 UdeM00000000932 XP\_014771649.1 78.4 449  
96 1 41 488 102 550 4.00E-219 768.8 37653 cellular  
organisms;Eukaryota;Opisthokonta;Metazoa;Eumetazoa;Bilateria;Protostomia;Spiralia;Lophotrochozoa;Mollusca;Cephalopoda;Coleoidea;Octopodiformes;Octopoda;Incirrata;Octopodidae;Octopus;Octopus bimaculoides  
UdeM00000000933 29159 316.6 UdeM00000000933 XP\_034317111.1 55.8 283  
124 1 2 283 171 453 3.20E-83 316.6 29159 cellular  
organisms;Eukaryota;Opisthokonta;Metazoa;Eumetazoa;Bilateria;Protostomia;Spiralia;Lophotrochozoa;Mollusca;Bivalvia;Autobranchia;Pteriormorphia;Ostreida;Ostreoidea;Ostreidae;Crassostrea;Crassostrea gigas  
UdeM00000000934 6565 215.7 UdeM00000000934 XP\_022313768.1 68.1 163  
43 3 1 163 1 154 4.40E-53 215.7 6565 cellular  
organisms;Eukaryota;Opisthokonta;Metazoa;Eumetazoa;Bilateria;Protostomia;Spiralia;Lophotrochozoa;Mollusca;Bivalvia;Autobranchia;Pteriormorphia;Ostreida;Ostreoidea;Ostreidae;Crassostrea;Crassostrea virginica  
UdeM00000000935 6596 180.3 UdeM00000000935 XP\_045214921.1 41.9 203  
101 2 1 186 245 447 2.70E-42 180.3 6596 cellular  
organisms;Eukaryota;Opisthokonta;Metazoa;Eumetazoa;Bilateria;Protostomia;Spiralia;Lophotrochozoa;Mollusca;Bivalvia;Autobranchia;Heteroconchia;Euheterodonta;Imparidentia;Venerida;Veneroidea;Veneridae;Mercenaria;Mercenaria mercenaria  
UdeM00000000936 6596 300.8 UdeM00000000936 XP\_045211715.1 34.4 419  
263 5 21 431 32 446 2.90E-78 300.8 6596 cellular  
organisms;Eukaryota;Opisthokonta;Metazoa;Eumetazoa;Bilateria;Protostomia;Spiralia;Lophotrochozoa;Mollusca;Bivalvia;Autobranchia;Heteroconchia;Euheterodonta;Imparidentia;Venerida;Veneroidea;Veneridae;Mercenaria;Mercenaria mercenaria  
UdeM00000000937 6596 233 UdeM00000000937 XP\_045213008.1 77.1 144  
33 0 7 150 4 147 3.20E-58 233 6596 cellular  
organisms;Eukaryota;Opisthokonta;Metazoa;Eumetazoa;Bilateria;Protostomia;Spiralia;Lophotrochozoa;Mollusca;Bivalvia;Autobranchia;Heteroconchia;Euheterodonta;Imparidentia;Venerida;Veneroidea;Veneridae;Mercenaria;Mercenaria mercenaria  
UdeM00000000938 6596 753.1 UdeM00000000938 XP\_045213008.1 59.9 694  
203 6 7 651 4 671 3.10E-214 753.1 6596 cellular  
organisms;Eukaryota;Opisthokonta;Metazoa;Eumetazoa;Bilateria;Protostomia;Spiralia;Lophotrochozoa;Mollusca;Bivalvia;Autobranchia;Heteroconchia;Euheterodonta;Imparidentia;Venerida;Veneroidea;Veneridae;Mercenaria;Mercenaria mercenaria  
UdeM00000000939 6500 636 UdeM00000000939 XP\_005112284.1 72.4 410  
96 3 1 401 1 402 4.00E-179 636 6500 cellular  
organisms;Eukaryota;Opisthokonta;Metazoa;Eumetazoa;Bilateria;Protostomia;Spiralia;Lophotrochozoa;Mollusca;Gastropoda;Heterobranchia;Euthyneura;Teptipleura;Aplysiida;Aplysioidea;Aplysiidae;Aplysia;Aplysia californica  
UdeM00000000940 6596 141.7 UdeM00000000940 XP\_045214300.1 51.9 133  
64 0 51 183 322 454 9.00E-31 141.7 6596 cellular  
organisms;Eukaryota;Opisthokonta;Metazoa;Eumetazoa;Bilateria;Protostomia;Spiralia;Lophotrochozoa;Mollusca;Bivalvia;Autobranchia;Heteroconchia;Euheterodonta;Imparidentia;Venerida;Veneroidea;Veneridae;Mercenaria;Mercenaria mercenaria

UdeM00000000941 400727 452.6 UdeM00000000941 XP\_025095969.1 50.3  
 465 219 2 1 456 1 462 6.00E-124 452.6 400727  
 cellular  
 organisms;Eukaryota;Opisthokonta;Metazoa;Eumetazoa;Bilateria;Protostomia;  
 Spiralia;Lophotrochozoa;Mollusca;Gastropoda;Caenogastropoda;Architaenioglossa;  
 Ampullarioidea;Ampullariidae;Pomacea;Pomacea canaliculata  
 UdeM00000000942 6596 640.2 UdeM00000000942 XP\_045212702.1 61.9 512  
 190 4 1 509 1 510 2.20E-180 640.2 6596 cellular  
 organisms;Eukaryota;Opisthokonta;Metazoa;Eumetazoa;Bilateria;Protostomia;  
 Spiralia;Lophotrochozoa;Mollusca;Bivalvia;Autobranchia;Heteroconchia;Euheterodonta;  
 Imparidentia;Venerida;Veneroidea;Veneridae;Mercenaria;Mercenaria mercenaria  
 UdeM00000000943 6596 64.7 UdeM00000000943 XP\_045213389.1 27.7 285  
 178 8 83 361 280 542 4.60E-07 64.7 6596 cellular  
 organisms;Eukaryota;Opisthokonta;Metazoa;Eumetazoa;Bilateria;Protostomia;  
 Spiralia;Lophotrochozoa;Mollusca;Bivalvia;Autobranchia;Heteroconchia;Euheterodonta;  
 Imparidentia;Venerida;Veneroidea;Veneridae;Mercenaria;Mercenaria mercenaria  
 UdeM00000000944 6596 64.7 UdeM00000000944 XP\_045213389.1 27.7 285  
 178 8 83 361 280 542 4.90E-07 64.7 6596 cellular  
 organisms;Eukaryota;Opisthokonta;Metazoa;Eumetazoa;Bilateria;Protostomia;  
 Spiralia;Lophotrochozoa;Mollusca;Bivalvia;Autobranchia;Heteroconchia;Euheterodonta;  
 Imparidentia;Venerida;Veneroidea;Veneridae;Mercenaria;Mercenaria mercenaria  
 UdeM00000000945 6596 137.1 UdeM00000000945 XP\_045213389.1 38.5 213  
 117 5 30 235 280 485 1.10E-28 137.1 6596 cellular  
 organisms;Eukaryota;Opisthokonta;Metazoa;Eumetazoa;Bilateria;Protostomia;  
 Spiralia;Lophotrochozoa;Mollusca;Bivalvia;Autobranchia;Heteroconchia;Euheterodonta;  
 Imparidentia;Venerida;Veneroidea;Veneridae;Mercenaria;Mercenaria mercenaria  
 UdeM00000000946 45264 393.7 UdeM00000000946 XP\_044165535.1 49.6 367  
 181 1 1 363 158 524 2.60E-106 393.7 45264 cellular  
 organisms;Eukaryota;Opisthokonta;Metazoa;Eumetazoa;Cnidaria;Anthozoa;Hexacorallia;  
 Scleractinia;Astrocoeniina;Acroporidae;Acropora;Acropora millepora  
 UdeM00000000947 8496 84.3 UdeM00000000947 XP\_014461102.1 37.8 119  
 70 3 4 119 228 345 1.10E-13 84.3 8496 cellular  
 organisms;Eukaryota;Opisthokonta;Metazoa;Eumetazoa;Bilateria;Deuterostomia;  
 Chordata;Craniata;Vertebrata;Gnathostomata;Teleostomi;Euteleostomi;Sarcopterygii;  
 Dipnotetrapodomorpha;Tetrapoda;Amniota;Sauropsida;Sauria;Archelosauria;  
 Archosauria;Crocodylia;Alligatoridae;Alligatorinae;Alligator;Alligator mississippiensis  
 UdeM00000000948 6596 81.3 UdeM00000000948 XP\_045213389.1 28.4 197  
 125 4 140 333 280 463 4.80E-12 81.3 6596 cellular  
 organisms;Eukaryota;Opisthokonta;Metazoa;Eumetazoa;Bilateria;Protostomia;  
 Spiralia;Lophotrochozoa;Mollusca;Bivalvia;Autobranchia;Heteroconchia;Euheterodonta;  
 Imparidentia;Venerida;Veneroidea;Veneridae;Mercenaria;Mercenaria mercenaria  
 UdeM00000000950 7574 277.3 UdeM00000000950 XP\_013384375.1 61.9 202  
 76 1 4 204 26 227 1.60E-71 277.3 7574 cellular  
 organisms;Eukaryota;Opisthokonta;Metazoa;Eumetazoa;Bilateria;Protostomia;  
 Spiralia;Lophotrochozoa;Brachiopoda;Linguliformea;Lingulata;Lingulida;Linguloidea;  
 Lingulidae;Lingula;Lingula anatina

UdeM00000000951 6596 521.5 UdeM00000000951 XP\_045212398.1 79.4 316  
 65 0 1 316 1 316 7.20E-145 521.5 6596 cellular  
 organisms;Eukaryota;Opisthokonta;Metazoa;Eumetazoa;Bilateria;Protostomia;  
 Spiralia;Lophotrochozoa;Mollusca;Bivalvia;Autobranhia;Heteroconchia;Euhe  
 terodonta;Imparidentia;Venerida;Veneroidea;Veneridae;Mercenaria;Mercenari  
 a mercenaria  
 UdeM00000000952 6596 553.5 UdeM00000000952 XP\_045212400.1 59.5 437  
 176 1 33 469 31 466 2.60E-154 553.5 6596 cellular  
 organisms;Eukaryota;Opisthokonta;Metazoa;Eumetazoa;Bilateria;Protostomia;  
 Spiralia;Lophotrochozoa;Mollusca;Bivalvia;Autobranhia;Heteroconchia;Euhe  
 terodonta;Imparidentia;Venerida;Veneroidea;Veneridae;Mercenaria;Mercenari  
 a mercenaria  
 UdeM00000000953 6565 2551.9 UdeM00000000953 XP\_022317026.1 42.3  
 3549 1872 62 4 3448 20 3496 0.00E+00 2551.9 6565  
 cellular  
 organisms;Eukaryota;Opisthokonta;Metazoa;Eumetazoa;Bilateria;Protostomia;  
 Spiralia;Lophotrochozoa;Mollusca;Bivalvia;Autobranhia;Pteriormorphia;Ostr  
 eida;Ostreoidea;Ostreidae;Crassostrea;Crassostrea virginica  
 UdeM00000000954 6565 2560.8 UdeM00000000954 XP\_022317025.1 42.3  
 3552 1876 61 4 3454 20 3499 0.00E+00 2560.8 6565  
 cellular  
 organisms;Eukaryota;Opisthokonta;Metazoa;Eumetazoa;Bilateria;Protostomia;  
 Spiralia;Lophotrochozoa;Mollusca;Bivalvia;Autobranhia;Pteriormorphia;Ostr  
 eida;Ostreoidea;Ostreidae;Crassostrea;Crassostrea virginica  
 UdeM00000000955 6596 168.3 UdeM00000000955 XP\_045212484.1 51 194  
 82 5 1 191 1 184 9.50E-39 168.3 6596 cellular  
 organisms;Eukaryota;Opisthokonta;Metazoa;Eumetazoa;Bilateria;Protostomia;  
 Spiralia;Lophotrochozoa;Mollusca;Bivalvia;Autobranhia;Heteroconchia;Euhe  
 terodonta;Imparidentia;Venerida;Veneroidea;Veneridae;Mercenaria;Mercenari  
 a mercenaria  
 UdeM00000000956 7574 478.4 UdeM00000000956 XP\_013383353.1 66.9 332  
 106 1 10 341 24 351 7.70E-132 478.4 7574 cellular  
 organisms;Eukaryota;Opisthokonta;Metazoa;Eumetazoa;Bilateria;Protostomia;  
 Spiralia;Lophotrochozoa;Brachiopoda;Linguliformea;Lingulata;Lingulida;Lin  
 guloidea;Lingulidae;Lingula;Lingula anatina  
 UdeM00000000957 6596 372.5 UdeM00000000957 XP\_045169782.1 53.6 332  
 152 2 1 331 56 386 5.80E-100 372.5 6596 cellular  
 organisms;Eukaryota;Opisthokonta;Metazoa;Eumetazoa;Bilateria;Protostomia;  
 Spiralia;Lophotrochozoa;Mollusca;Bivalvia;Autobranhia;Heteroconchia;Euhe  
 terodonta;Imparidentia;Venerida;Veneroidea;Veneridae;Mercenaria;Mercenari  
 a mercenaria  
 UdeM00000000958 6596 1117.1 UdeM00000000958 XP\_045213359.1 56.4  
 1160 426 20 1 1133 1 1107 0.00E+00 1117.1 6596  
 cellular  
 organisms;Eukaryota;Opisthokonta;Metazoa;Eumetazoa;Bilateria;Protostomia;  
 Spiralia;Lophotrochozoa;Mollusca;Bivalvia;Autobranhia;Heteroconchia;Euhe  
 terodonta;Imparidentia;Venerida;Veneroidea;Veneridae;Mercenaria;Mercenari  
 a mercenaria  
 UdeM00000000959 6579 147.1 UdeM00000000959 XP\_033756505.1 60.4 106  
 42 0 71 176 140 245 2.10E-32 147.1 6579 cellular  
 organisms;Eukaryota;Opisthokonta;Metazoa;Eumetazoa;Bilateria;Protostomia;  
 Spiralia;Lophotrochozoa;Mollusca;Bivalvia;Autobranhia;Pteriormorphia;Pect  
 inida;Pectinoidea;Pectinidae;Pecten;Pecten maximus

UdeM00000000960 1529436 230.7 UdeM00000000960 XP\_033105495.1 34.4  
 419 217 11 1 409 12 382 3.30E-57 230.7 1529436  
 cellular  
 organisms;Eukaryota;Opisthokonta;Metazoa;Eumetazoa;Bilateria;Deuterostomi  
 a;Echinodermata;Pelmatozoa;Crinoidea;Articulata;Comatulida;Comatulidae;Co  
 matulinae;Anneissia;Anneissia japonica  
 UdeM00000000961 6579 309.7 UdeM00000000961 XP\_033748801.1 42.6 418  
 223 6 5 420 10 412 6.70E-81 309.7 6579 cellular  
 organisms;Eukaryota;Opisthokonta;Metazoa;Eumetazoa;Bilateria;Protostomia;  
 Spiralia;Lophotrochozoa;Mollusca;Bivalvia;Autobranchia;Pteriormorphia;Pect  
 inida;Pectinoidea;Pectinidae;Pecten;Pecten maximus  
 UdeM00000000962 6596 282 UdeM00000000962 XP\_045214795.1 70.9 172  
 50 0 1 172 1 172 3.60E-72 282 6596 cellular  
 organisms;Eukaryota;Opisthokonta;Metazoa;Eumetazoa;Bilateria;Protostomia;  
 Spiralia;Lophotrochozoa;Mollusca;Bivalvia;Autobranchia;Heteroconchia;Euhe  
 terodonta;Imparidentia;Venerida;Veneroidea;Veneridae;Mercenaria;Mercenari  
 a mercenaria  
 UdeM00000000963 6500 391.7 UdeM00000000963 XP\_005108643.1 67.9 277  
 84 2 1 274 1 275 7.50E-106 391.7 6500 cellular  
 organisms;Eukaryota;Opisthokonta;Metazoa;Eumetazoa;Bilateria;Protostomia;  
 Spiralia;Lophotrochozoa;Mollusca;Gastropoda;Heterobranchia;Euthyneura;Tec  
 tipleura;Aplysiida;Aplysioidea;Aplysiidae;Aplysia;Aplysia californica  
 UdeM00000000964 6596 258.5 UdeM00000000964 XP\_045214538.1 71.2 156  
 44 1 1 155 1 156 5.60E-66 258.5 6596 cellular  
 organisms;Eukaryota;Opisthokonta;Metazoa;Eumetazoa;Bilateria;Protostomia;  
 Spiralia;Lophotrochozoa;Mollusca;Bivalvia;Autobranchia;Heteroconchia;Euhe  
 terodonta;Imparidentia;Venerida;Veneroidea;Veneridae;Mercenaria;Mercenari  
 a mercenaria  
 UdeM00000000965 6596 179.1 UdeM00000000965 XP\_045214539.1 68.3 123  
 39 0 26 148 17 139 4.20E-42 179.1 6596 cellular  
 organisms;Eukaryota;Opisthokonta;Metazoa;Eumetazoa;Bilateria;Protostomia;  
 Spiralia;Lophotrochozoa;Mollusca;Bivalvia;Autobranchia;Heteroconchia;Euhe  
 terodonta;Imparidentia;Venerida;Veneroidea;Veneridae;Mercenaria;Mercenari  
 a mercenaria  
 UdeM00000000967 6573 195.7 UdeM00000000967 XP\_021374533.1 83 112  
 19 0 7 118 279 390 3.40E-47 195.7 6573 cellular  
 organisms;Eukaryota;Opisthokonta;Metazoa;Eumetazoa;Bilateria;Protostomia;  
 Spiralia;Lophotrochozoa;Mollusca;Bivalvia;Autobranchia;Pteriormorphia;Pect  
 inida;Pectinoidea;Pectinidae;Mizuhopecten;Mizuhopecten yessoensis  
 UdeM00000000966 6596 503.8 UdeM00000000966 XP\_045214536.1 77.3 384  
 76 2 1 375 1 382 1.90E-139 503.8 6596 cellular  
 organisms;Eukaryota;Opisthokonta;Metazoa;Eumetazoa;Bilateria;Protostomia;  
 Spiralia;Lophotrochozoa;Mollusca;Bivalvia;Autobranchia;Heteroconchia;Euhe  
 terodonta;Imparidentia;Venerida;Veneroidea;Veneridae;Mercenaria;Mercenari  
 a mercenaria  
 UdeM00000000968 6596 496.9 UdeM00000000968 XP\_045214537.1 75.3 384  
 84 2 1 375 1 382 2.30E-137 496.9 6596 cellular  
 organisms;Eukaryota;Opisthokonta;Metazoa;Eumetazoa;Bilateria;Protostomia;  
 Spiralia;Lophotrochozoa;Mollusca;Bivalvia;Autobranchia;Heteroconchia;Euhe  
 terodonta;Imparidentia;Venerida;Veneroidea;Veneridae;Mercenaria;Mercenari  
 a mercenaria  
 UdeM00000000969 29159 59.7 UdeM00000000969 XP\_019930444.2 52.2 46  
 22 0 96 141 79 124 3.70E-06 59.7 29159 cellular  
 organisms;Eukaryota;Opisthokonta;Metazoa;Eumetazoa;Bilateria;Protostomia;



Spiralia;Lophotrochozoa;Mollusca;Bivalvia;Autobranchia;Pteriormorphia;Ostr  
eida;Ostreoidea;Ostreidae;Crassostrea;Crassostrea gigas  
UdeM00000000970 45264 97.8 UdeM00000000970 XP\_044184709.1 51.7 87  
42 0 38 124 55 141 2.20E-17 97.8 45264 cellular  
organisms;Eukaryota;Opisthokonta;Metazoa;Eumetazoa;Cnidaria;Anthozoa;Hexa  
corallia;Scleractinia;Astrocoeniina;Acroporidae;Acropora;Acropora  
millepora  
UdeM00000000971 45264 237.3 UdeM00000000971 XP\_044184031.1 45.7 282  
137 6 2 274 212 486 2.40E-59 237.3 45264 cellular  
organisms;Eukaryota;Opisthokonta;Metazoa;Eumetazoa;Cnidaria;Anthozoa;Hexa  
corallia;Scleractinia;Astrocoeniina;Acroporidae;Acropora;Acropora  
millepora  
UdeM00000000972 45264 236.9 UdeM00000000972 XP\_044184031.1 45.9 281  
136 6 1 272 213 486 3.10E-59 236.9 45264 cellular  
organisms;Eukaryota;Opisthokonta;Metazoa;Eumetazoa;Cnidaria;Anthozoa;Hexa  
corallia;Scleractinia;Astrocoeniina;Acroporidae;Acropora;Acropora  
millepora  
UdeM00000000974 45264 92 UdeM00000000974 XP\_044165143.1 45.8 107  
56 2 2 106 367 473 5.20E-16 92 45264 cellular  
organisms;Eukaryota;Opisthokonta;Metazoa;Eumetazoa;Cnidaria;Anthozoa;Hexa  
corallia;Scleractinia;Astrocoeniina;Acroporidae;Acropora;Acropora  
millepora  
UdeM00000000973 45264 252.7 UdeM00000000973 XP\_044184028.1 37.2 444  
161 6 27 356 68 507 7.20E-64 252.7 45264 cellular  
organisms;Eukaryota;Opisthokonta;Metazoa;Eumetazoa;Cnidaria;Anthozoa;Hexa  
corallia;Scleractinia;Astrocoeniina;Acroporidae;Acropora;Acropora  
millepora  
UdeM00000000975 45264 359.4 UdeM00000000975 XP\_044165143.1 45.4 443  
176 6 27 407 35 473 6.30E-96 359.4 45264 cellular  
organisms;Eukaryota;Opisthokonta;Metazoa;Eumetazoa;Cnidaria;Anthozoa;Hexa  
corallia;Scleractinia;Astrocoeniina;Acroporidae;Acropora;Acropora  
millepora  
UdeM00000000976 151771 312.4 UdeM00000000976 XP\_028419301.1 52.3  
306 139 3 9 314 6 304 6.70E-82 312.4 151771  
cellular  
organisms;Eukaryota;Opisthokonta;Metazoa;Eumetazoa;Cnidaria;Anthozoa;Octo  
corallia;Alcyonacea;Alcyoniina;Nephtheidae;Dendronephthya;Dendronephthya  
gigantea  
UdeM00000000977 400727 432.6 UdeM00000000977 XP\_025097823.1 87.1  
233 30 0 1 233 1 233 3.30E-118 432.6 400727  
cellular  
organisms;Eukaryota;Opisthokonta;Metazoa;Eumetazoa;Bilateria;Protostomia;  
Spiralia;Lophotrochozoa;Mollusca;Gastropoda;Caenogastropoda;Architaeniogl  
ossa;Ampullarioidea;Ampullariidae;Pomacea;Pomacea canaliculata  
UdeM00000000978 2607531 183.7 UdeM00000000978 XP\_029634863.1 56.5  
161 61 3 14 173 41 193 2.00E-43 183.7 2607531  
cellular  
organisms;Eukaryota;Opisthokonta;Metazoa;Eumetazoa;Bilateria;Protostomia;  
Spiralia;Lophotrochozoa;Mollusca;Cephalopoda;Coleoidea;Octopodiformes;Oct  
opoda;Incirrata;Octopodidae;Octopus;Octopus sinensis  
UdeM00000000979 6579 233.4 UdeM00000000979 XP\_033747132.1 34.9 447  
251 13 101 517 146 582 7.40E-58 233.4 6579 cellular  
organisms;Eukaryota;Opisthokonta;Metazoa;Eumetazoa;Bilateria;Protostomia;

Spiralia;Lophotrochozoa;Mollusca;Bivalvia;Autobranchia;Pteriomorpha;Pectinida;Pectinoidea;Pectinidae;Pecten;Pecten maximus

UdeM00000000980 6596 939.1 UdeM00000000980 XP\_045213315.1 72.9 628  
151 6 1 618 1 619 2.80E-270 939.1 6596 cellular  
organisms;Eukaryota;Opisthokonta;Metazoa;Eumetazoa;Bilateria;Protostomia;Spiralia;Lophotrochozoa;Mollusca;Bivalvia;Autobranchia;Heteroconchia;Euherodonta;Imparidentia;Venerida;Veneroidea;Veneridae;Mercenaria;Mercenaria mercenaria

UdeM00000000981 7719 294.3 UdeM00000000981 XP\_026693397.1 43 377  
168 6 6 351 6 366 2.20E-76 294.3 7719 cellular  
organisms;Eukaryota;Opisthokonta;Metazoa;Eumetazoa;Bilateria;Deuterostomia;Chordata;Tunicata;Ascidiacea;Phlebobranchia;Cionidae;Ciona;Ciona intestinalis

UdeM00000000982 6596 208.8 UdeM00000000982 XP\_045211133.1 40.3 298  
153 9 30 315 9 293 1.00E-50 208.8 6596 cellular  
organisms;Eukaryota;Opisthokonta;Metazoa;Eumetazoa;Bilateria;Protostomia;Spiralia;Lophotrochozoa;Mollusca;Bivalvia;Autobranchia;Heteroconchia;Euherodonta;Imparidentia;Venerida;Veneroidea;Veneridae;Mercenaria;Mercenaria mercenaria

UdeM00000000984 6596 171.4 UdeM00000000984 XP\_045214368.1 81.8 99  
18 0 2 100 31 129 6.00E-40 171.4 6596 cellular  
organisms;Eukaryota;Opisthokonta;Metazoa;Eumetazoa;Bilateria;Protostomia;Spiralia;Lophotrochozoa;Mollusca;Bivalvia;Autobranchia;Heteroconchia;Euherodonta;Imparidentia;Venerida;Veneroidea;Veneridae;Mercenaria;Mercenaria mercenaria

UdeM00000000983 6596 209.5 UdeM00000000983 XP\_045214368.1 75.2 129  
32 0 17 145 1 129 2.90E-51 209.5 6596 cellular  
organisms;Eukaryota;Opisthokonta;Metazoa;Eumetazoa;Bilateria;Protostomia;Spiralia;Lophotrochozoa;Mollusca;Bivalvia;Autobranchia;Heteroconchia;Euherodonta;Imparidentia;Venerida;Veneroidea;Veneridae;Mercenaria;Mercenaria mercenaria

UdeM00000000985 6579 302.8 UdeM00000000985 XP\_033754084.1 52.8 462  
202 4 1 451 1 457 7.50E-79 302.8 6579 cellular  
organisms;Eukaryota;Opisthokonta;Metazoa;Eumetazoa;Bilateria;Protostomia;Spiralia;Lophotrochozoa;Mollusca;Bivalvia;Autobranchia;Pteriomorpha;Pectinida;Pectinoidea;Pectinidae;Pecten;Pecten maximus

UdeM00000000986 6579 145.2 UdeM00000000986 XP\_033737894.1 48.5 266  
135 2 1 265 1 265 1.20E-31 145.2 6579 cellular  
organisms;Eukaryota;Opisthokonta;Metazoa;Eumetazoa;Bilateria;Protostomia;Spiralia;Lophotrochozoa;Mollusca;Bivalvia;Autobranchia;Pteriomorpha;Pectinida;Pectinoidea;Pectinidae;Pecten;Pecten maximus

UdeM00000000987 2607531 197.2 UdeM00000000987 XP\_029639946.1 64  
278 83 4 3 269 5 276 2.70E-47 197.2 2607531  
cellular  
organisms;Eukaryota;Opisthokonta;Metazoa;Eumetazoa;Bilateria;Protostomia;Spiralia;Lophotrochozoa;Mollusca;Cephalopoda;Coleoidea;Octopodiformes;Octopoda;Incirrata;Octopodidae;Octopus;Octopus sinensis

UdeM00000000988 6596 487.6 UdeM00000000988 XP\_045213274.1 50.9 485  
223 3 1 473 20 501 1.70E-134 487.6 6596 cellular  
organisms;Eukaryota;Opisthokonta;Metazoa;Eumetazoa;Bilateria;Protostomia;Spiralia;Lophotrochozoa;Mollusca;Bivalvia;Autobranchia;Heteroconchia;Euherodonta;Imparidentia;Venerida;Veneroidea;Veneridae;Mercenaria;Mercenaria mercenaria

UdeM00000000989 6596 506.9 UdeM00000000989 XP\_045213274.1 48.6 572  
 258 8 1 539 20 588 3.20E-140 506.9 6596 cellular  
 organisms;Eukaryota;Opisthokonta;Metazoa;Eumetazoa;Bilateria;Protostomia;  
 Spiralia;Lophotrochozoa;Mollusca;Bivalvia;Autobranhia;Heteroconchia;Euhe  
 terodonta;Imparidentia;Venerida;Veneroidea;Veneridae;Mercenaria;Mercenari  
 a mercenaria  
 UdeM00000000990 6579 377.9 UdeM00000000990 XP\_033751606.1 48 435  
 202 7 1 416 1 430 1.70E-101 377.9 6579 cellular  
 organisms;Eukaryota;Opisthokonta;Metazoa;Eumetazoa;Bilateria;Protostomia;  
 Spiralia;Lophotrochozoa;Mollusca;Bivalvia;Autobranhia;Pteriormorphia;Pect  
 inida;Pectinoidea;Pectinidae;Pecten;Pecten maximus  
 UdeM00000000991 400727 156 UdeM00000000991 XP\_025106083.1 76.3  
 93 22 0 126 218 114 206 7.10E-35 156 400727  
 cellular  
 organisms;Eukaryota;Opisthokonta;Metazoa;Eumetazoa;Bilateria;Protostomia;  
 Spiralia;Lophotrochozoa;Mollusca;Gastropoda;Caenogastropoda;Architaeniogl  
 ossa;Ampullarioidea;Ampullariidae;Pomacea;Pomacea canaliculata  
 UdeM00000000993 45264 420.6 UdeM00000000993 XP\_044171434.1 31.8 948  
 591 17 18 943 11 924 5.80E-114 420.6 45264 cellular  
 organisms;Eukaryota;Opisthokonta;Metazoa;Eumetazoa;Cnidaria;Anthozoa;Hexa  
 corallia;Scleractinia;Astrocoeniina;Acroporidae;Acropora;Acropora  
 millepora  
 UdeM00000000994 6565 340.9 UdeM00000000994 XP\_022314619.1 80.8 208  
 35 1 1 203 1 208 1.10E-90 340.9 6565 cellular  
 organisms;Eukaryota;Opisthokonta;Metazoa;Eumetazoa;Bilateria;Protostomia;  
 Spiralia;Lophotrochozoa;Mollusca;Bivalvia;Autobranhia;Pteriormorphia;Ostr  
 eida;Ostreoidea;Ostreidae;Crassostrea;Crassostrea virginica  
 UdeM00000000995 6573 522.7 UdeM00000000995 XP\_021346606.1 65.9 405  
 110 5 2 402 3 383 4.10E-145 522.7 6573 cellular  
 organisms;Eukaryota;Opisthokonta;Metazoa;Eumetazoa;Bilateria;Protostomia;  
 Spiralia;Lophotrochozoa;Mollusca;Bivalvia;Autobranhia;Pteriormorphia;Pect  
 inida;Pectinoidea;Pectinidae;Mizuhopecten;Mizuhopecten yessoensis  
 UdeM00000000996 6573 514.2 UdeM00000000996 XP\_021346606.1 63.9 418  
 110 6 2 415 3 383 1.50E-142 514.2 6573 cellular  
 organisms;Eukaryota;Opisthokonta;Metazoa;Eumetazoa;Bilateria;Protostomia;  
 Spiralia;Lophotrochozoa;Mollusca;Bivalvia;Autobranhia;Pteriormorphia;Pect  
 inida;Pectinoidea;Pectinidae;Mizuhopecten;Mizuhopecten yessoensis  
 UdeM00000000997 151771 321.6 UdeM00000000997 XP\_028406951.1 34.8  
 551 310 8 1 543 119 628 1.90E-84 321.6 151771  
 cellular  
 organisms;Eukaryota;Opisthokonta;Metazoa;Eumetazoa;Cnidaria;Anthozoa;Octo  
 corallia;Alcyonacea;Alcyoniina;Nephtheidae;Dendronephthya;Dendronephthya  
 gigantea  
 UdeM00000000998 45264 94 UdeM00000000998 XP\_044165143.1 45.8 107  
 56 2 2 106 367 473 1.40E-16 94 45264 cellular  
 organisms;Eukaryota;Opisthokonta;Metazoa;Eumetazoa;Cnidaria;Anthozoa;Hexa  
 corallia;Scleractinia;Astrocoeniina;Acroporidae;Acropora;Acropora  
 millepora  
 UdeM00000000999 151771 265 UdeM00000000999 XP\_028419301.1 64.2  
 193 69 0 1 193 112 304 7.60E-68 265 151771  
 cellular  
 organisms;Eukaryota;Opisthokonta;Metazoa;Eumetazoa;Cnidaria;Anthozoa;Octo  
 corallia;Alcyonacea;Alcyoniina;Nephtheidae;Dendronephthya;Dendronephthya  
 gigantea

UdeM00000001001 6596 252.7 UdeM00000001001 XP\_045213482.1 55.7 201  
 87 1 5 203 8 208 4.10E-64 252.7 6596 cellular  
 organisms;Eukaryota;Opisthokonta;Metazoa;Eumetazoa;Bilateria;Protostomia;  
 Spiralia;Lophotrochozoa;Mollusca;Bivalvia;Autobranhia;Heteroconchia;Euhe  
 terodonta;Imparidentia;Venerida;Veneroidea;Veneridae;Mercenaria;Mercenari  
 a mercenaria  
 UdeM00000001003 6596 422.9 UdeM00000001003 XP\_045211868.1 70.4 297  
 85 3 1 296 1 295 3.30E-115 422.9 6596 cellular  
 organisms;Eukaryota;Opisthokonta;Metazoa;Eumetazoa;Bilateria;Protostomia;  
 Spiralia;Lophotrochozoa;Mollusca;Bivalvia;Autobranhia;Heteroconchia;Euhe  
 terodonta;Imparidentia;Venerida;Veneroidea;Veneridae;Mercenaria;Mercenari  
 a mercenaria  
 UdeM00000001004 6596 656 UdeM00000001004 XP\_045211871.1 89.8 344  
 35 0 2 345 1 344 2.70E-185 656 6596 cellular  
 organisms;Eukaryota;Opisthokonta;Metazoa;Eumetazoa;Bilateria;Protostomia;  
 Spiralia;Lophotrochozoa;Mollusca;Bivalvia;Autobranhia;Heteroconchia;Euhe  
 terodonta;Imparidentia;Venerida;Veneroidea;Veneridae;Mercenaria;Mercenari  
 a mercenaria  
 UdeM00000001005 6596 494.2 UdeM00000001005 XP\_045211871.1 90.1 262  
 26 0 1 262 83 344 1.00E-136 494.2 6596 cellular  
 organisms;Eukaryota;Opisthokonta;Metazoa;Eumetazoa;Bilateria;Protostomia;  
 Spiralia;Lophotrochozoa;Mollusca;Bivalvia;Autobranhia;Heteroconchia;Euhe  
 terodonta;Imparidentia;Venerida;Veneroidea;Veneridae;Mercenaria;Mercenari  
 a mercenaria  
 UdeM00000001006 6596 58.5 UdeM00000001006 XP\_045211872.1 46.4 138  
 73 1 12 149 24 160 8.50E-06 58.5 6596 cellular  
 organisms;Eukaryota;Opisthokonta;Metazoa;Eumetazoa;Bilateria;Protostomia;  
 Spiralia;Lophotrochozoa;Mollusca;Bivalvia;Autobranhia;Heteroconchia;Euhe  
 terodonta;Imparidentia;Venerida;Veneroidea;Veneridae;Mercenaria;Mercenari  
 a mercenaria  
 UdeM00000001007 6596 392.9 UdeM00000001007 XP\_045211874.1 75.2 258  
 64 0 1 258 1 258 3.20E-106 392.9 6596 cellular  
 organisms;Eukaryota;Opisthokonta;Metazoa;Eumetazoa;Bilateria;Protostomia;  
 Spiralia;Lophotrochozoa;Mollusca;Bivalvia;Autobranhia;Heteroconchia;Euhe  
 terodonta;Imparidentia;Venerida;Veneroidea;Veneridae;Mercenaria;Mercenari  
 a mercenaria  
 UdeM00000001008 6596 322.8 UdeM00000001008 XP\_045213875.1 54.4 309  
 128 7 7 308 11 313 4.90E-85 322.8 6596 cellular  
 organisms;Eukaryota;Opisthokonta;Metazoa;Eumetazoa;Bilateria;Protostomia;  
 Spiralia;Lophotrochozoa;Mollusca;Bivalvia;Autobranhia;Heteroconchia;Euhe  
 terodonta;Imparidentia;Venerida;Veneroidea;Veneridae;Mercenaria;Mercenari  
 a mercenaria  
 UdeM00000001009 6596 342.4 UdeM00000001009 XP\_045214182.1 61.4 264  
 100 1 34 295 47 310 5.70E-91 342.4 6596 cellular  
 organisms;Eukaryota;Opisthokonta;Metazoa;Eumetazoa;Bilateria;Protostomia;  
 Spiralia;Lophotrochozoa;Mollusca;Bivalvia;Autobranhia;Heteroconchia;Euhe  
 terodonta;Imparidentia;Venerida;Veneroidea;Veneridae;Mercenaria;Mercenari  
 a mercenaria  
 UdeM00000001010 6596 143.3 UdeM00000001010 XP\_045214182.1 60.5 129  
 45 3 3 127 183 309 2.20E-31 143.3 6596 cellular  
 organisms;Eukaryota;Opisthokonta;Metazoa;Eumetazoa;Bilateria;Protostomia;  
 Spiralia;Lophotrochozoa;Mollusca;Bivalvia;Autobranhia;Heteroconchia;Euhe  
 terodonta;Imparidentia;Venerida;Veneroidea;Veneridae;Mercenaria;Mercenari  
 a mercenaria

UdeM00000001011 6596 171.4 UdeM00000001011 XP\_045214182.1 55.6 142  
 63 0 34 175 44 185 1.10E-39 171.4 6596 cellular  
 organisms;Eukaryota;Opisthokonta;Metazoa;Eumetazoa;Bilateria;Protostomia;  
 Spiralia;Lophotrochozoa;Mollusca;Bivalvia;Autobranchia;Heteroconchia;Euhe  
 terodonta;Imparidentia;Venerida;Veneroidea;Veneridae;Mercenaria;Mercenari  
 a mercenaria  
 UdeM00000001012 6596 309.7 UdeM00000001012 XP\_045214182.1 53.9 293  
 131 2 11 299 18 310 4.10E-81 309.7 6596 cellular  
 organisms;Eukaryota;Opisthokonta;Metazoa;Eumetazoa;Bilateria;Protostomia;  
 Spiralia;Lophotrochozoa;Mollusca;Bivalvia;Autobranchia;Heteroconchia;Euhe  
 terodonta;Imparidentia;Venerida;Veneroidea;Veneridae;Mercenaria;Mercenari  
 a mercenaria  
 UdeM00000001013 6596 167.5 UdeM00000001013 XP\_045210764.1 29.9 518  
 305 15 44 527 183 676 4.60E-38 167.5 6596 cellular  
 organisms;Eukaryota;Opisthokonta;Metazoa;Eumetazoa;Bilateria;Protostomia;  
 Spiralia;Lophotrochozoa;Mollusca;Bivalvia;Autobranchia;Heteroconchia;Euhe  
 terodonta;Imparidentia;Venerida;Veneroidea;Veneridae;Mercenaria;Mercenari  
 a mercenaria  
 UdeM00000001014 6596 163.3 UdeM00000001014 XP\_045161152.1 36.2 235  
 147 2 22 254 113 346 6.10E-37 163.3 6596 cellular  
 organisms;Eukaryota;Opisthokonta;Metazoa;Eumetazoa;Bilateria;Protostomia;  
 Spiralia;Lophotrochozoa;Mollusca;Bivalvia;Autobranchia;Heteroconchia;Euhe  
 terodonta;Imparidentia;Venerida;Veneroidea;Veneridae;Mercenaria;Mercenari  
 a mercenaria  
 UdeM00000001015 1735272 121.3 UdeM00000001015 XP\_041364792.1 42.1  
 178 82 5 539 714 442 600 4.90E-24 121.3 1735272  
 cellular  
 organisms;Eukaryota;Opisthokonta;Metazoa;Eumetazoa;Bilateria;Protostomia;  
 Spiralia;Lophotrochozoa;Mollusca;Gastropoda;Neomphalina;Neomphaloidea;Pel  
 tospiridae;Gigantopelta;Gigantopelta aegis  
 UdeM00000001015 1735272 64.7 UdeM00000001015 XP\_041364792.1 39.3  
 84 51 0 1 84 1 84 5.50E-07 64.7 1735272  
 cellular  
 organisms;Eukaryota;Opisthokonta;Metazoa;Eumetazoa;Bilateria;Protostomia;  
 Spiralia;Lophotrochozoa;Mollusca;Gastropoda;Neomphalina;Neomphaloidea;Pel  
 tospiridae;Gigantopelta;Gigantopelta aegis  
 UdeM00000001016 6573 610.9 UdeM00000001016 XP\_021374424.1 57.2 526  
 208 7 1 523 5 516 1.50E-171 610.9 6573 cellular  
 organisms;Eukaryota;Opisthokonta;Metazoa;Eumetazoa;Bilateria;Protostomia;  
 Spiralia;Lophotrochozoa;Mollusca;Bivalvia;Autobranchia;Pteriomorphia;Pect  
 inida;Pectinoidea;Pectinidae;Mizuhopecten;Mizuhopecten yessoensis  
 UdeM00000001017 6573 661 UdeM00000001017 XP\_021374424.1 55.8 595  
 241 10 1 592 5 580 1.40E-186 661 6573 cellular  
 organisms;Eukaryota;Opisthokonta;Metazoa;Eumetazoa;Bilateria;Protostomia;  
 Spiralia;Lophotrochozoa;Mollusca;Bivalvia;Autobranchia;Pteriomorphia;Pect  
 inida;Pectinoidea;Pectinidae;Mizuhopecten;Mizuhopecten yessoensis  
 UdeM00000001018 6596 253.1 UdeM00000001018 XP\_045214182.1 45 307  
 154 4 29 321 5 310 4.90E-64 253.1 6596 cellular  
 organisms;Eukaryota;Opisthokonta;Metazoa;Eumetazoa;Bilateria;Protostomia;  
 Spiralia;Lophotrochozoa;Mollusca;Bivalvia;Autobranchia;Heteroconchia;Euhe  
 terodonta;Imparidentia;Venerida;Veneroidea;Veneridae;Mercenaria;Mercenari  
 a mercenaria  
 UdeM00000001019 6500 292.4 UdeM00000001019 XP\_035826907.1 42.6 385  
 212 5 1 383 300 677 1.10E-75 292.4 6500 cellular

organisms;Eukaryota;Opisthokonta;Metazoa;Eumetazoa;Bilateria;Protostomia;  
Spiralia;Lophotrochozoa;Mollusca;Gastropoda;Heterobranchia;Euthyneura;Tec  
tipleura;Aplysiida;Aplysiioidea;Aplysiidae;Aplysia;Aplysia californica  
UdeM00000001020 6573 355.5 UdeM00000001020 XP\_021354782.1 82 217  
39 0 7 223 18 234 4.90E-95 355.5 6573 cellular  
organisms;Eukaryota;Opisthokonta;Metazoa;Eumetazoa;Bilateria;Protostomia;  
Spiralia;Lophotrochozoa;Mollusca;Bivalvia;Autobranchia;Pteriormorphia;Pect  
inida;Pectinoidea;Pectinidae;Mizuhopecten;Mizuhopecten yessoensis  
UdeM00000001021 6573 345.1 UdeM00000001021 XP\_021354781.1 74.3 241  
38 1 7 247 18 234 7.30E-92 345.1 6573 cellular  
organisms;Eukaryota;Opisthokonta;Metazoa;Eumetazoa;Bilateria;Protostomia;  
Spiralia;Lophotrochozoa;Mollusca;Bivalvia;Autobranchia;Pteriormorphia;Pect  
inida;Pectinoidea;Pectinidae;Mizuhopecten;Mizuhopecten yessoensis  
UdeM00000001022 29159 209.1 UdeM00000001022 XP\_034312787.1 81.5 130  
24 0 1 130 361 490 3.30E-51 209.1 29159 cellular  
organisms;Eukaryota;Opisthokonta;Metazoa;Eumetazoa;Bilateria;Protostomia;  
Spiralia;Lophotrochozoa;Mollusca;Bivalvia;Autobranchia;Pteriormorphia;Ostr  
eida;Ostreioidea;Ostreidae;Crassostrea;Crassostrea gigas  
UdeM00000001023 1735272 731.5 UdeM00000001023 XP\_041362481.1 95.2  
357 17 0 1 357 1 357 5.40E-208 731.5 1735272  
cellular  
organisms;Eukaryota;Opisthokonta;Metazoa;Eumetazoa;Bilateria;Protostomia;  
Spiralia;Lophotrochozoa;Mollusca;Gastropoda;Neomphalina;Neomphaloidea;Pel  
tospiridae;Gigantopelta;Gigantopelta aegis  
UdeM00000001024 6596 390.6 UdeM00000001024 XP\_045190792.1 40.2 487  
285 5 6 490 16 498 3.10E-105 390.6 6596 cellular  
organisms;Eukaryota;Opisthokonta;Metazoa;Eumetazoa;Bilateria;Protostomia;  
Spiralia;Lophotrochozoa;Mollusca;Bivalvia;Autobranchia;Heteroconchia;Euhe  
terodonta;Imparidentia;Venerida;Veneroidea;Veneridae;Mercenaria;Mercenari  
a mercenaria  
UdeM000000028137 6596 138.7 UdeM000000028137 XP\_045161410.1 72.9 85  
23 0 1 85 1 85 4.20E-30 138.7 6596 cellular  
organisms;Eukaryota;Opisthokonta;Metazoa;Eumetazoa;Bilateria;Protostomia;  
Spiralia;Lophotrochozoa;Mollusca;Bivalvia;Autobranchia;Heteroconchia;Euhe  
terodonta;Imparidentia;Venerida;Veneroidea;Veneridae;Mercenaria;Mercenari  
a mercenaria  
UdeM000000028138 29159 186 UdeM000000028138 XP\_011454339.2 72 132  
36 1 1 132 1 131 3.00E-44 186 29159 cellular  
organisms;Eukaryota;Opisthokonta;Metazoa;Eumetazoa;Bilateria;Protostomia;  
Spiralia;Lophotrochozoa;Mollusca;Bivalvia;Autobranchia;Pteriormorphia;Ostr  
eida;Ostreioidea;Ostreidae;Crassostrea;Crassostrea gigas  
UdeM000000028139 6579 182.6 UdeM000000028139 XP\_033735012.1 54.9 645  
174 8 6 584 8 601 1.50E-42 182.6 6579 cellular  
organisms;Eukaryota;Opisthokonta;Metazoa;Eumetazoa;Bilateria;Protostomia;  
Spiralia;Lophotrochozoa;Mollusca;Bivalvia;Autobranchia;Pteriormorphia;Pect  
inida;Pectinoidea;Pectinidae;Pecten;Pecten maximus  
UdeM000000028140 7574 240 UdeM000000028140 XP\_013411753.1 49.8 205  
96 2 10 214 5 202 2.90E-60 240 7574 cellular  
organisms;Eukaryota;Opisthokonta;Metazoa;Eumetazoa;Bilateria;Protostomia;  
Spiralia;Lophotrochozoa;Brachiopoda;Linguliformea;Lingulata;Lingulida;Lin  
guloidea;Lingulidae;Lingula;Lingula anatina  
UdeM000000028141 6596 339 UdeM000000028141 XP\_045161383.1 38.6 497  
264 8 1 497 1 456 1.00E-89 339 6596 cellular  
organisms;Eukaryota;Opisthokonta;Metazoa;Eumetazoa;Bilateria;Protostomia;

Spiralia;Lophotrochozoa;Mollusca;Bivalvia;Autobranchia;Heteroconchia;Euherodonta;Imparidentia;Venerida;Veneroidea;Veneridae;Mercenaria;Mercenaria mercenaria

UdeM00000028143 6596 166.4 UdeM00000028143 XP\_045185651.1 68.2 110  
32 1 51 160 45 151 3.10E-38 166.4 6596 cellular

organisms;Eukaryota;Opisthokonta;Metazoa;Eumetazoa;Bilateria;Protostomia;Spiralia;Lophotrochozoa;Mollusca;Bivalvia;Autobranchia;Heteroconchia;Euherodonta;Imparidentia;Venerida;Veneroidea;Veneridae;Mercenaria;Mercenaria mercenaria

UdeM00000028142 6596 1030.8 UdeM00000028142 XP\_045185651.1 75.2  
648 155 3 51 697 45 687 8.10E-298 1030.8 6596  
cellular

organisms;Eukaryota;Opisthokonta;Metazoa;Eumetazoa;Bilateria;Protostomia;Spiralia;Lophotrochozoa;Mollusca;Bivalvia;Autobranchia;Heteroconchia;Euherodonta;Imparidentia;Venerida;Veneroidea;Veneridae;Mercenaria;Mercenaria mercenaria

UdeM00000028144 6596 291.2 UdeM00000028144 XP\_045184448.1 54.9 237  
107 0 38 274 381 617 1.40E-75 291.2 6596 cellular

organisms;Eukaryota;Opisthokonta;Metazoa;Eumetazoa;Bilateria;Protostomia;Spiralia;Lophotrochozoa;Mollusca;Bivalvia;Autobranchia;Heteroconchia;Euherodonta;Imparidentia;Venerida;Veneroidea;Veneridae;Mercenaria;Mercenaria mercenaria

UdeM00000028145 6596 500.7 UdeM00000028145 XP\_045184448.1 65.9 372  
126 1 7 377 4 375 1.60E-138 500.7 6596 cellular

organisms;Eukaryota;Opisthokonta;Metazoa;Eumetazoa;Bilateria;Protostomia;Spiralia;Lophotrochozoa;Mollusca;Bivalvia;Autobranchia;Heteroconchia;Euherodonta;Imparidentia;Venerida;Veneroidea;Veneridae;Mercenaria;Mercenaria mercenaria

UdeM00000028146 6573 522.7 UdeM00000028146 XP\_021346594.1 59.7 402  
161 1 20 420 6 407 4.40E-145 522.7 6573 cellular

organisms;Eukaryota;Opisthokonta;Metazoa;Eumetazoa;Bilateria;Protostomia;Spiralia;Lophotrochozoa;Mollusca;Bivalvia;Autobranchia;Pteriomorphia;Pectinida;Pectinoidea;Pectinidae;Mizuhopecten;Mizuhopecten yessoensis

UdeM00000028147 6573 549.7 UdeM00000028147 XP\_021346594.1 61.7 405  
154 1 4 407 6 410 3.20E-153 549.7 6573 cellular

organisms;Eukaryota;Opisthokonta;Metazoa;Eumetazoa;Bilateria;Protostomia;Spiralia;Lophotrochozoa;Mollusca;Bivalvia;Autobranchia;Pteriomorphia;Pectinida;Pectinoidea;Pectinidae;Mizuhopecten;Mizuhopecten yessoensis

UdeM00000028148 6573 347.4 UdeM00000028148 XP\_021346594.1 65.4 237  
82 0 4 240 174 410 1.40E-92 347.4 6573 cellular

organisms;Eukaryota;Opisthokonta;Metazoa;Eumetazoa;Bilateria;Protostomia;Spiralia;Lophotrochozoa;Mollusca;Bivalvia;Autobranchia;Pteriomorphia;Pectinida;Pectinoidea;Pectinidae;Mizuhopecten;Mizuhopecten yessoensis

UdeM00000028149 7539 95.9 UdeM00000028149 XP\_023028017.1 57 79  
34 0 1 79 304 382 3.40E-17 95.9 7539 cellular

organisms;Eukaryota;Opisthokonta;Metazoa;Eumetazoa;Bilateria;Protostomia;Ecdysozoa;Panarthropoda;Arthropoda;Mandibulata;Pancrustacea;Hexapoda;Insecta;Dicondylia;Pterygota;Neoptera;Endopterygota;Coleoptera;Polyphaga;Cucujiformia;Chrysomeloidea;Chrysomelidae;Chrysomelinae;Doryphorini;Leptinotarsa;Leptinotarsa decemlineata

UdeM00000028150 6565 119.4 UdeM00000028150 XP\_022324430.1 65.1 83  
29 0 3 85 4 86 2.20E-24 119.4 6565 cellular

organisms;Eukaryota;Opisthokonta;Metazoa;Eumetazoa;Bilateria;Protostomia;

Spiralia;Lophotrochozoa;Mollusca;Bivalvia;Autobranchia;Pteriomorpha;Ostr  
 eida;Ostreoidea;Ostreidae;Crassostrea;Crassostrea virginica  
 UdeM00000028151 6596 2606.2 UdeM00000028151 XP\_045167390.1 69.8  
 1963 523 16 33 1962 115 2040 0.00E+00 2606.2 6596  
 cellular

organisms;Eukaryota;Opisthokonta;Metazoa;Eumetazoa;Bilateria;Protostomia;  
 Spiralia;Lophotrochozoa;Mollusca;Bivalvia;Autobranchia;Heteroconchia;Euhe  
 terodonta;Imparidentia;Venerida;Veneroidea;Veneridae;Mercenaria;Mercenari  
 a mercenaria

UdeM00000028152 7574 422.2 UdeM00000028152 XP\_023932112.1 46.3 454  
 235 5 163 610 1 451 1.40E-114 422.2 7574 cellular

organisms;Eukaryota;Opisthokonta;Metazoa;Eumetazoa;Bilateria;Protostomia;  
 Spiralia;Lophotrochozoa;Brachiopoda;Linguliformea;Lingulata;Lingulida;Lin  
 guloidea;Lingulidae;Lingula;Lingula anatina

UdeM00000028153 6565 338.6 UdeM00000028153 XP\_022332822.1 48.7 316  
 162 0 6 321 4 319 8.90E-90 338.6 6565 cellular

organisms;Eukaryota;Opisthokonta;Metazoa;Eumetazoa;Bilateria;Protostomia;  
 Spiralia;Lophotrochozoa;Mollusca;Bivalvia;Autobranchia;Pteriomorpha;Ostr  
 eida;Ostreoidea;Ostreidae;Crassostrea;Crassostrea virginica

UdeM00000028154 6573 409.8 UdeM00000028154 XP\_021340121.1 51.6 376  
 177 3 75 446 328 702 4.40E-111 409.8 6573 cellular

organisms;Eukaryota;Opisthokonta;Metazoa;Eumetazoa;Bilateria;Protostomia;  
 Spiralia;Lophotrochozoa;Mollusca;Bivalvia;Autobranchia;Pteriomorpha;Pect  
 inida;Pectinoidea;Pectinidae;Mizuhopecten;Mizuhopecten yessoensis

UdeM00000028156 6596 296.2 UdeM00000028156 XP\_045170965.1 44.3 325  
 171 6 56 379 73 388 6.40E-77 296.2 6596 cellular

organisms;Eukaryota;Opisthokonta;Metazoa;Eumetazoa;Bilateria;Protostomia;  
 Spiralia;Lophotrochozoa;Mollusca;Bivalvia;Autobranchia;Heteroconchia;Euhe  
 terodonta;Imparidentia;Venerida;Veneroidea;Veneridae;Mercenaria;Mercenari  
 a mercenaria

UdeM00000028157 7574 173.3 UdeM00000028157 XP\_013408419.1 34.8 270  
 171 3 58 324 133 400 5.30E-40 173.3 7574 cellular

organisms;Eukaryota;Opisthokonta;Metazoa;Eumetazoa;Bilateria;Protostomia;  
 Spiralia;Lophotrochozoa;Brachiopoda;Linguliformea;Lingulata;Lingulida;Lin  
 guloidea;Lingulidae;Lingula;Lingula anatina

UdeM00000028158 7574 174.5 UdeM00000028158 XP\_013408419.1 35.6 270  
 169 3 90 356 133 400 2.50E-40 174.5 7574 cellular

organisms;Eukaryota;Opisthokonta;Metazoa;Eumetazoa;Bilateria;Protostomia;  
 Spiralia;Lophotrochozoa;Brachiopoda;Linguliformea;Lingulata;Lingulida;Lin  
 guloidea;Lingulidae;Lingula;Lingula anatina

UdeM00000028159 6596 282.3 UdeM00000028159 XP\_045182180.1 49 253  
 129 0 41 293 87 339 7.20E-73 282.3 6596 cellular

organisms;Eukaryota;Opisthokonta;Metazoa;Eumetazoa;Bilateria;Protostomia;  
 Spiralia;Lophotrochozoa;Mollusca;Bivalvia;Autobranchia;Heteroconchia;Euhe  
 terodonta;Imparidentia;Venerida;Veneroidea;Veneridae;Mercenaria;Mercenari  
 a mercenaria

UdeM00000028160 6596 299.3 UdeM00000028160 XP\_045181224.1 48.5 270  
 139 0 52 321 34 303 6.30E-78 299.3 6596 cellular

organisms;Eukaryota;Opisthokonta;Metazoa;Eumetazoa;Bilateria;Protostomia;  
 Spiralia;Lophotrochozoa;Mollusca;Bivalvia;Autobranchia;Heteroconchia;Euhe  
 terodonta;Imparidentia;Venerida;Veneroidea;Veneridae;Mercenaria;Mercenari  
 a mercenaria

UdeM00000028161 29159 85.9 UdeM00000028161 XP\_034331441.1 34.8 132  
 71 3 1 124 722 846 4.80E-14 85.9 29159 cellular



organisms;Eukaryota;Opisthokonta;Metazoa;Eumetazoa;Bilateria;Protostomia;Spiralia;Lophotrochozoa;Mollusca;Bivalvia;Autobranchia;Pteriormorphia;Ostreida;Ostreoidea;Ostreidae;Crassostrea;Crassostrea gigas  
UdeM00000028162 6596 289.7 UdeM00000028162 XP\_045181219.1 50.6 249  
123 0 68 316 77 325 5.20E-75 289.7 6596 cellular  
organisms;Eukaryota;Opisthokonta;Metazoa;Eumetazoa;Bilateria;Protostomia;Spiralia;Lophotrochozoa;Mollusca;Bivalvia;Autobranchia;Heteroconchia;Euherodonta;Imparidentia;Venerida;Veneroidea;Veneridae;Mercenaria;Mercenaria mercenaria  
UdeM00000028163 6596 308.1 UdeM00000028163 XP\_045179490.1 50.8 327  
144 3 1 325 1 312 1.30E-80 308.1 6596 cellular  
organisms;Eukaryota;Opisthokonta;Metazoa;Eumetazoa;Bilateria;Protostomia;Spiralia;Lophotrochozoa;Mollusca;Bivalvia;Autobranchia;Heteroconchia;Euherodonta;Imparidentia;Venerida;Veneroidea;Veneridae;Mercenaria;Mercenaria mercenaria  
UdeM00000028164 6596 61.2 UdeM00000028164 XP\_045179468.1 71.1 38  
11 0 31 68 309 346 5.80E-07 61.2 6596 cellular  
organisms;Eukaryota;Opisthokonta;Metazoa;Eumetazoa;Bilateria;Protostomia;Spiralia;Lophotrochozoa;Mollusca;Bivalvia;Autobranchia;Heteroconchia;Euherodonta;Imparidentia;Venerida;Veneroidea;Veneridae;Mercenaria;Mercenaria mercenaria  
UdeM00000028165 6596 201.4 UdeM00000028165 XP\_045179468.1 63.2 144  
51 2 54 197 206 347 1.00E-48 201.4 6596 cellular  
organisms;Eukaryota;Opisthokonta;Metazoa;Eumetazoa;Bilateria;Protostomia;Spiralia;Lophotrochozoa;Mollusca;Bivalvia;Autobranchia;Heteroconchia;Euherodonta;Imparidentia;Venerida;Veneroidea;Veneridae;Mercenaria;Mercenaria mercenaria  
UdeM00000028166 6596 364.8 UdeM00000028166 XP\_045179490.1 58.3 314  
125 4 1 310 1 312 1.10E-97 364.8 6596 cellular  
organisms;Eukaryota;Opisthokonta;Metazoa;Eumetazoa;Bilateria;Protostomia;Spiralia;Lophotrochozoa;Mollusca;Bivalvia;Autobranchia;Heteroconchia;Euherodonta;Imparidentia;Venerida;Veneroidea;Veneridae;Mercenaria;Mercenaria mercenaria  
UdeM00000028167 6596 320.9 UdeM00000028167 XP\_045179490.1 52.2 322  
123 3 4 308 5 312 1.80E-84 320.9 6596 cellular  
organisms;Eukaryota;Opisthokonta;Metazoa;Eumetazoa;Bilateria;Protostomia;Spiralia;Lophotrochozoa;Mollusca;Bivalvia;Autobranchia;Heteroconchia;Euherodonta;Imparidentia;Venerida;Veneroidea;Veneridae;Mercenaria;Mercenaria mercenaria  
UdeM00000028168 29159 120.9 UdeM00000028168 XP\_011414066.2 58.3 96  
40 0 1 96 1 96 9.10E-25 120.9 29159 cellular  
organisms;Eukaryota;Opisthokonta;Metazoa;Eumetazoa;Bilateria;Protostomia;Spiralia;Lophotrochozoa;Mollusca;Bivalvia;Autobranchia;Pteriormorphia;Ostreida;Ostreoidea;Ostreidae;Crassostrea;Crassostrea gigas  
UdeM00000028169 48498 58.2 UdeM00000028169 XP\_020613056.1 53.7 54  
21 1 26 79 162 211 6.40E-06 58.2 48498 cellular  
organisms;Eukaryota;Opisthokonta;Metazoa;Eumetazoa;Cnidaria;Anthozoa;Hexacorallia;Scleractinia;Faviina;Merulinidae;Orbicella;Orbicella faveolata  
UdeM00000028170 29159 75.9 UdeM00000028170 XP\_019922986.1 37.9 87  
54 0 81 167 26 112 5.60E-11 75.9 29159 cellular  
organisms;Eukaryota;Opisthokonta;Metazoa;Eumetazoa;Bilateria;Protostomia;Spiralia;Lophotrochozoa;Mollusca;Bivalvia;Autobranchia;Pteriormorphia;Ostreida;Ostreoidea;Ostreidae;Crassostrea;Crassostrea gigas

UdeM00000028171 6596 194.1 UdeM00000028171 XP\_045187793.1 48 179  
 93 0 6 184 6 184 1.60E-46 194.1 6596 cellular  
 organisms;Eukaryota;Opisthokonta;Metazoa;Eumetazoa;Bilateria;Protostomia;  
 Spiralia;Lophotrochozoa;Mollusca;Bivalvia;Autobranhia;Heteroconchia;Euhe  
 terodonta;Imparidentia;Venerida;Veneroidea;Veneridae;Mercenaria;Mercenari  
 a mercenaria

UdeM00000028172 6596 479.6 UdeM00000028172 XP\_045175723.1 66 335  
 114 0 3 337 2 336 3.40E-132 479.6 6596 cellular  
 organisms;Eukaryota;Opisthokonta;Metazoa;Eumetazoa;Bilateria;Protostomia;  
 Spiralia;Lophotrochozoa;Mollusca;Bivalvia;Autobranhia;Heteroconchia;Euhe  
 terodonta;Imparidentia;Venerida;Veneroidea;Veneridae;Mercenaria;Mercenari  
 a mercenaria

UdeM00000028173 6596 298.5 UdeM00000028173 XP\_045175799.1 39.7 418  
 104 2 10 281 12 427 8.90E-78 298.5 6596 cellular  
 organisms;Eukaryota;Opisthokonta;Metazoa;Eumetazoa;Bilateria;Protostomia;  
 Spiralia;Lophotrochozoa;Mollusca;Bivalvia;Autobranhia;Heteroconchia;Euhe  
 terodonta;Imparidentia;Venerida;Veneroidea;Veneridae;Mercenaria;Mercenari  
 a mercenaria

UdeM00000028174 6596 575.9 UdeM00000028174 XP\_045175799.1 56.3 519  
 213 5 10 525 12 519 5.40E-161 575.9 6596 cellular  
 organisms;Eukaryota;Opisthokonta;Metazoa;Eumetazoa;Bilateria;Protostomia;  
 Spiralia;Lophotrochozoa;Mollusca;Bivalvia;Autobranhia;Heteroconchia;Euhe  
 terodonta;Imparidentia;Venerida;Veneroidea;Veneridae;Mercenaria;Mercenari  
 a mercenaria

UdeM00000028175 6596 436.8 UdeM00000028175 XP\_045175799.1 47.2 519  
 171 6 10 436 12 519 3.20E-119 436.8 6596 cellular  
 organisms;Eukaryota;Opisthokonta;Metazoa;Eumetazoa;Bilateria;Protostomia;  
 Spiralia;Lophotrochozoa;Mollusca;Bivalvia;Autobranhia;Heteroconchia;Euhe  
 terodonta;Imparidentia;Venerida;Veneroidea;Veneridae;Mercenaria;Mercenari  
 a mercenaria

UdeM00000028176 6596 428.7 UdeM00000028176 XP\_045175799.1 46.2 519  
 150 6 10 410 12 519 8.30E-117 428.7 6596 cellular  
 organisms;Eukaryota;Opisthokonta;Metazoa;Eumetazoa;Bilateria;Protostomia;  
 Spiralia;Lophotrochozoa;Mollusca;Bivalvia;Autobranhia;Heteroconchia;Euhe  
 terodonta;Imparidentia;Venerida;Veneroidea;Veneridae;Mercenaria;Mercenari  
 a mercenaria

UdeM00000028177 6596 312 UdeM00000028177 XP\_045175809.1 45.9 567  
 264 14 1 545 205 750 1.50E-81 312 6596 cellular  
 organisms;Eukaryota;Opisthokonta;Metazoa;Eumetazoa;Bilateria;Protostomia;  
 Spiralia;Lophotrochozoa;Mollusca;Bivalvia;Autobranhia;Heteroconchia;Euhe  
 terodonta;Imparidentia;Venerida;Veneroidea;Veneridae;Mercenaria;Mercenari  
 a mercenaria

UdeM00000028178 6596 733.8 UdeM00000028178 XP\_045175823.1 73.2 500  
 119 6 1 490 7 501 1.40E-208 733.8 6596 cellular  
 organisms;Eukaryota;Opisthokonta;Metazoa;Eumetazoa;Bilateria;Protostomia;  
 Spiralia;Lophotrochozoa;Mollusca;Bivalvia;Autobranhia;Heteroconchia;Euhe  
 terodonta;Imparidentia;Venerida;Veneroidea;Veneridae;Mercenaria;Mercenari  
 a mercenaria

UdeM00000028179 6596 307.4 UdeM00000028179 XP\_045175809.1 83.4 181  
 29 1 1 180 1 181 1.60E-80 307.4 6596 cellular  
 organisms;Eukaryota;Opisthokonta;Metazoa;Eumetazoa;Bilateria;Protostomia;  
 Spiralia;Lophotrochozoa;Mollusca;Bivalvia;Autobranhia;Heteroconchia;Euhe  
 terodonta;Imparidentia;Venerida;Veneroidea;Veneridae;Mercenaria;Mercenari  
 a mercenaria

UdeM00000028180 6573 1078.2 UdeM00000028180 XP\_021378425.1 87.3  
 589 75 0 27 615 13 601 0.00E+00 1078.2 6573  
 cellular  
 organisms;Eukaryota;Opisthokonta;Metazoa;Eumetazoa;Bilateria;Protostomia;  
 Spiralia;Lophotrochozoa;Mollusca;Bivalvia;Autobranchia;Pteriormorphia;Pect  
 inida;Pectinoidea;Pectinidae;Mizuhopecten;Mizuhopecten yessoensis  
 UdeM00000028181 6579 817.8 UdeM00000028181 XP\_033735641.1 68.6 598  
 188 0 29 626 127 724 9.70E-234 817.8 6579 cellular  
 organisms;Eukaryota;Opisthokonta;Metazoa;Eumetazoa;Bilateria;Protostomia;  
 Spiralia;Lophotrochozoa;Mollusca;Bivalvia;Autobranchia;Pteriormorphia;Pect  
 inida;Pectinoidea;Pectinidae;Pecten;Pecten maximus  
 UdeM00000028182 6573 431 UdeM00000028182 XP\_021347262.1 78.9 247  
 52 0 1 247 1 247 2.20E-117 431 6573 cellular  
 organisms;Eukaryota;Opisthokonta;Metazoa;Eumetazoa;Bilateria;Protostomia;  
 Spiralia;Lophotrochozoa;Mollusca;Bivalvia;Autobranchia;Pteriormorphia;Pect  
 inida;Pectinoidea;Pectinidae;Mizuhopecten;Mizuhopecten yessoensis  
 UdeM00000028183 6573 144.8 UdeM00000028183 XP\_021347275.1 39 195  
 106 3 1 182 1 195 1.10E-31 144.8 6573 cellular  
 organisms;Eukaryota;Opisthokonta;Metazoa;Eumetazoa;Bilateria;Protostomia;  
 Spiralia;Lophotrochozoa;Mollusca;Bivalvia;Autobranchia;Pteriormorphia;Pect  
 inida;Pectinoidea;Pectinidae;Mizuhopecten;Mizuhopecten yessoensis  
 UdeM00000028184 6596 187.6 UdeM00000028184 XP\_045190584.1 40.5 242  
 139 1 7 248 5 241 2.00E-44 187.6 6596 cellular  
 organisms;Eukaryota;Opisthokonta;Metazoa;Eumetazoa;Bilateria;Protostomia;  
 Spiralia;Lophotrochozoa;Mollusca;Bivalvia;Autobranchia;Heteroconchia;Euhe  
 terodonta;Imparidentia;Venerida;Veneroidea;Veneridae;Mercenaria;Mercenari  
 a mercenaria  
 UdeM00000028185 6596 449.5 UdeM00000028185 XP\_045187054.1 74.8 310  
 61 3 1 297 44 349 3.30E-123 449.5 6596 cellular  
 organisms;Eukaryota;Opisthokonta;Metazoa;Eumetazoa;Bilateria;Protostomia;  
 Spiralia;Lophotrochozoa;Mollusca;Bivalvia;Autobranchia;Heteroconchia;Euhe  
 terodonta;Imparidentia;Venerida;Veneroidea;Veneridae;Mercenaria;Mercenari  
 a mercenaria  
 UdeM00000028186 6573 935.6 UdeM00000028186 XP\_021347838.1 50.4 1395  
 584 18 1 1357 1 1325 6.90E-269 935.6 6573 cellular  
 organisms;Eukaryota;Opisthokonta;Metazoa;Eumetazoa;Bilateria;Protostomia;  
 Spiralia;Lophotrochozoa;Mollusca;Bivalvia;Autobranchia;Pteriormorphia;Pect  
 inida;Pectinoidea;Pectinidae;Mizuhopecten;Mizuhopecten yessoensis  
 UdeM00000028187 6596 167.2 UdeM00000028187 XP\_045187065.1 38.5 218  
 129 2 10 223 12 228 2.50E-38 167.2 6596 cellular  
 organisms;Eukaryota;Opisthokonta;Metazoa;Eumetazoa;Bilateria;Protostomia;  
 Spiralia;Lophotrochozoa;Mollusca;Bivalvia;Autobranchia;Heteroconchia;Euhe  
 terodonta;Imparidentia;Venerida;Veneroidea;Veneridae;Mercenaria;Mercenari  
 a mercenaria  
 UdeM00000028188 1735272 135.2 UdeM00000028188 XP\_041354580.1 50  
 122 59 1 37 156 26 147 7.30E-29 135.2 1735272  
 cellular  
 organisms;Eukaryota;Opisthokonta;Metazoa;Eumetazoa;Bilateria;Protostomia;  
 Spiralia;Lophotrochozoa;Mollusca;Gastropoda;Neomphalina;Neomphaloidea;Pel  
 tospiridae;Gigantopelta;Gigantopelta aegis  
 UdeM00000028189 6565 566.2 UdeM00000028189 XP\_022313246.1 63.2 429  
 152 4 17 444 10 433 3.60E-158 566.2 6565 cellular  
 organisms;Eukaryota;Opisthokonta;Metazoa;Eumetazoa;Bilateria;Protostomia;

Spiralia;Lophotrochozoa;Mollusca;Bivalvia;Autobranchia;Pteriormorphia;Ostr  
eida;Ostreoidea;Ostreidae;Crassostrea;Crassostrea virginica  
UdeM00000028190 6596 478.8 UdeM00000028190 XP\_045161993.1 61.2 361  
139 1 3 362 2 362 6.20E-132 478.8 6596 cellular  
organisms;Eukaryota;Opisthokonta;Metazoa;Eumetazoa;Bilateria;Protostomia;  
Spiralia;Lophotrochozoa;Mollusca;Bivalvia;Autobranchia;Heteroconchia;Euhe  
terodonta;Imparidentia;Venerida;Veneroidea;Veneridae;Mercenaria;Mercenari  
a mercenaria  
UdeM00000028191 6579 190.3 UdeM00000028191 XP\_033734860.1 53.2 186  
80 2 1 186 1 179 2.30E-45 190.3 6579 cellular  
organisms;Eukaryota;Opisthokonta;Metazoa;Eumetazoa;Bilateria;Protostomia;  
Spiralia;Lophotrochozoa;Mollusca;Bivalvia;Autobranchia;Pteriormorphia;Pect  
inida;Pectinoidea;Pectinidae;Pecten;Pecten maximus  
UdeM00000028192 1735272 200.3 UdeM00000028192 XP\_041352419.1 80  
120 24 0 1 120 37 156 2.40E-48 200.3 1735272  
cellular  
organisms;Eukaryota;Opisthokonta;Metazoa;Eumetazoa;Bilateria;Protostomia;  
Spiralia;Lophotrochozoa;Mollusca;Gastropoda;Neomphalina;Neomphaloidea;Pel  
tospiridae;Gigantopelta;Gigantopelta aegis  
UdeM00000028193 6596 137.1 UdeM00000028193 XP\_045187190.1 45.9 146  
79 0 1 146 1 146 1.80E-29 137.1 6596 cellular  
organisms;Eukaryota;Opisthokonta;Metazoa;Eumetazoa;Bilateria;Protostomia;  
Spiralia;Lophotrochozoa;Mollusca;Bivalvia;Autobranchia;Heteroconchia;Euhe  
terodonta;Imparidentia;Venerida;Veneroidea;Veneridae;Mercenaria;Mercenari  
a mercenaria  
UdeM00000028194 6596 738.4 UdeM00000028194 XP\_045171973.1 55.8 638  
266 5 1 635 1 625 7.70E-210 738.4 6596 cellular  
organisms;Eukaryota;Opisthokonta;Metazoa;Eumetazoa;Bilateria;Protostomia;  
Spiralia;Lophotrochozoa;Mollusca;Bivalvia;Autobranchia;Heteroconchia;Euhe  
terodonta;Imparidentia;Venerida;Veneroidea;Veneridae;Mercenaria;Mercenari  
a mercenaria  
UdeM00000028195 6579 437.6 UdeM00000028195 XP\_033734377.1 68.6 312  
96 2 6 317 17 326 1.40E-119 437.6 6579 cellular  
organisms;Eukaryota;Opisthokonta;Metazoa;Eumetazoa;Bilateria;Protostomia;  
Spiralia;Lophotrochozoa;Mollusca;Bivalvia;Autobranchia;Pteriormorphia;Pect  
inida;Pectinoidea;Pectinidae;Pecten;Pecten maximus  
UdeM00000028196 6596 1980.3 UdeM00000028196 XP\_045172990.1 64.9  
1539 502 17 52 1576 26 1540 0.00E+00 1980.3 6596  
cellular  
organisms;Eukaryota;Opisthokonta;Metazoa;Eumetazoa;Bilateria;Protostomia;  
Spiralia;Lophotrochozoa;Mollusca;Bivalvia;Autobranchia;Heteroconchia;Euhe  
terodonta;Imparidentia;Venerida;Veneroidea;Veneridae;Mercenaria;Mercenari  
a mercenaria  
UdeM00000028197 6596 270.8 UdeM00000028197 XP\_045181219.1 55.4 213  
95 0 17 229 77 289 1.70E-69 270.8 6596 cellular  
organisms;Eukaryota;Opisthokonta;Metazoa;Eumetazoa;Bilateria;Protostomia;  
Spiralia;Lophotrochozoa;Mollusca;Bivalvia;Autobranchia;Heteroconchia;Euhe  
terodonta;Imparidentia;Venerida;Veneroidea;Veneridae;Mercenaria;Mercenari  
a mercenaria  
UdeM00000028198 6596 268.5 UdeM00000028198 XP\_045182180.1 49.2 238  
121 0 5 242 102 339 9.00E-69 268.5 6596 cellular  
organisms;Eukaryota;Opisthokonta;Metazoa;Eumetazoa;Bilateria;Protostomia;  
Spiralia;Lophotrochozoa;Mollusca;Bivalvia;Autobranchia;Heteroconchia;Euhe

terodonta;Imparidentia;Venerida;Veneroidea;Veneridae;Mercenaria;Mercenari  
a mercenaria

UdeM00000028199 6596 281.6 UdeM00000028199 XP\_045182180.1 49.4 251  
127 0 65 315 89 339 1.30E-72 281.6 6596 cellular

organisms;Eukaryota;Opisthokonta;Metazoa;Eumetazoa;Bilateria;Protostomia;  
Spiralia;Lophotrochozoa;Mollusca;Bivalvia;Autobranhia;Heteroconchia;Euhe  
terodonta;Imparidentia;Venerida;Veneroidea;Veneridae;Mercenaria;Mercenari  
a mercenaria

UdeM00000028200 6596 676 UdeM00000028200 XP\_045187188.1 62 555  
177 5 9 555 645 1173 4.00E-191 676 6596 cellular

organisms;Eukaryota;Opisthokonta;Metazoa;Eumetazoa;Bilateria;Protostomia;  
Spiralia;Lophotrochozoa;Mollusca;Bivalvia;Autobranhia;Heteroconchia;Euhe  
terodonta;Imparidentia;Venerida;Veneroidea;Veneridae;Mercenaria;Mercenari  
a mercenaria

UdeM00000028201 6573 1089.7 UdeM00000028201 XP\_021379976.1 44.3  
1446 708 21 9 1418 9 1392 0.00E+00 1089.7 6573  
cellular

organisms;Eukaryota;Opisthokonta;Metazoa;Eumetazoa;Bilateria;Protostomia;  
Spiralia;Lophotrochozoa;Mollusca;Bivalvia;Autobranhia;Pteriormorphia;Pect  
inida;Pectinoidea;Pectinidae;Mizuhopecten;Mizuhopecten yessoensis

UdeM00000028202 6596 373.2 UdeM00000028202 XP\_045168084.1 44.1 492  
196 7 195 672 140 566 6.80E-100 373.2 6596 cellular

organisms;Eukaryota;Opisthokonta;Metazoa;Eumetazoa;Bilateria;Protostomia;  
Spiralia;Lophotrochozoa;Mollusca;Bivalvia;Autobranhia;Heteroconchia;Euhe  
terodonta;Imparidentia;Venerida;Veneroidea;Veneridae;Mercenaria;Mercenari  
a mercenaria

UdeM00000028203 6596 434.9 UdeM00000028203 XP\_045197719.1 58.2 354  
146 2 1 353 2 354 9.90E-119 434.9 6596 cellular

organisms;Eukaryota;Opisthokonta;Metazoa;Eumetazoa;Bilateria;Protostomia;  
Spiralia;Lophotrochozoa;Mollusca;Bivalvia;Autobranhia;Heteroconchia;Euhe  
terodonta;Imparidentia;Venerida;Veneroidea;Veneridae;Mercenaria;Mercenari  
a mercenaria

UdeM00000028204 6596 365.9 UdeM00000028204 XP\_045197719.1 58.7 310  
124 3 3 311 53 359 5.00E-98 365.9 6596 cellular

organisms;Eukaryota;Opisthokonta;Metazoa;Eumetazoa;Bilateria;Protostomia;  
Spiralia;Lophotrochozoa;Mollusca;Bivalvia;Autobranhia;Heteroconchia;Euhe  
terodonta;Imparidentia;Venerida;Veneroidea;Veneridae;Mercenaria;Mercenari  
a mercenaria

UdeM00000028205 6596 198.7 UdeM00000028205 XP\_045186891.1 64.8 145  
51 0 6 150 78 222 5.20E-48 198.7 6596 cellular

organisms;Eukaryota;Opisthokonta;Metazoa;Eumetazoa;Bilateria;Protostomia;  
Spiralia;Lophotrochozoa;Mollusca;Bivalvia;Autobranhia;Heteroconchia;Euhe  
terodonta;Imparidentia;Venerida;Veneroidea;Veneridae;Mercenaria;Mercenari  
a mercenaria

UdeM00000028206 6579 235.7 UdeM00000028206 XP\_033736461.1 81.2 138  
26 0 71 208 34 171 5.40E-59 235.7 6579 cellular

organisms;Eukaryota;Opisthokonta;Metazoa;Eumetazoa;Bilateria;Protostomia;  
Spiralia;Lophotrochozoa;Mollusca;Bivalvia;Autobranhia;Pteriormorphia;Pect  
inida;Pectinoidea;Pectinidae;Pecten;Pecten maximus

UdeM00000028207 595528 191.8 UdeM00000028207 XP\_004349444.1 63.9  
144 52 0 2 145 3 146 6.20E-46 191.8 595528

cellular

organisms;Eukaryota;Opisthokonta;Filasterea;Capsaspora;Capsaspora  
owczarzaki;Capsaspora owczarzaki ATCC 30864

UdeM00000028208 595528 221.1 UdeM00000028208 XP\_004349444.1 71.2  
 146 42 0 32 177 3 148 1.10E-54 221.1 595528  
 cellular  
 organisms;Eukaryota;Opisthokonta;Filasterea;Capsaspora;Capsaspora  
 owczarzaki;Capsaspora owczarzaki ATCC 30864  
 UdeM00000028209 133434 172.9 UdeM00000028209 XP\_022083902.1 70.2  
 114 34 0 1 114 242 355 2.30E-40 172.9 133434  
 cellular  
 organisms;Eukaryota;Opisthokonta;Metazoa;Eumetazoa;Bilateria;Deuterostomi  
 a;Echinodermata;Eleutherozoa;Asterozoa;Asterozoa;Asterozoa;Asterozoa;Asterozoa;Asterozoa;Valvataceae;Valvatida;Aca  
 nthasteridae;Acanthaster;Acanthaster planci  
 UdeM00000028210 1437191 215.7 UdeM00000028210 XP\_029049447.1 67.3  
 150 49 0 30 179 6 155 4.90E-53 215.7 1437191  
 cellular  
 organisms;Eukaryota;Opisthokonta;Metazoa;Eumetazoa;Bilateria;Protostomia;  
 Ecdysozoa;Panarthropoda;Arthropoda;Mandibulata;Pancrustacea;Hexapoda;Inse  
 cta;Dicondylia;Pterygota;Neoptera;Endopterygota;Hymenoptera;Apocrita;Acul  
 eata;Apoidea;Megachilidae;Megachilinae;Osmiini;Osmia;Osmia bicornis;Osmia  
 bicornis bicornis  
 UdeM00000028211 6412 292.7 UdeM00000028211 XP\_009031530.1 99.3 149  
 1 0 1 149 2 150 2.60E-76 292.7 6412 cellular  
 organisms;Eukaryota;Opisthokonta;Metazoa;Eumetazoa;Bilateria;Protostomia;  
 Spiralia;Lophotrochozoa;Annelida;Clitellata;Hirudinea;Rhynchobdellida;Glo  
 ssiphoniidae;Helobdella;Helobdella robusta  
 UdeM00000028212 7668 204.5 UdeM00000028212 XP\_011675926.1 65.5 148  
 51 0 1 148 1 148 9.30E-50 204.5 7668 cellular  
 organisms;Eukaryota;Opisthokonta;Metazoa;Eumetazoa;Bilateria;Deuterostomi  
 a;Echinodermata;Eleutherozoa;Echinozoa;Echinozoa;Echinozoa;Euechinozoa;Echinacea;  
 Camarodonta;Echinidea;Strongylocentrotidae;Strongylocentrotus;Strongyloce  
 ntrotus purpuratus  
 UdeM00000028213 48498 200.7 UdeM00000028213 XP\_020613090.1 68.1 144  
 46 0 1 144 1 144 1.30E-48 200.7 48498 cellular  
 organisms;Eukaryota;Opisthokonta;Metazoa;Eumetazoa;Cnidaria;Anthozoa;Hexa  
 corallia;Scleractinia;Faviina;Merulinidae;Orbicella;Orbicella faveolata  
 UdeM00000028214 390379 221.9 UdeM00000028214 XP\_034015211.1 75.3  
 146 36 0 1 146 1 146 5.60E-55 221.9 390379  
 cellular  
 organisms;Eukaryota;Opisthokonta;Metazoa;Eumetazoa;Bilateria;Deuterostomi  
 a;Chordata;Craniata;Vertebrata;Gnathostomata;Teleostomi;Euteleostomi;Acti  
 nopterygii;Actinopteri;Neopterygii;Teleostei;Osteoglossocephalai;Clupeoce  
 phala;Euteleosteomorpha;Neoteleostei;Eurypterygia;Ctenosquamata;Acanthomo  
 rphata;Euacanthomorphacea;Percomorphaceae;Batrachoidaria;Batrachoidiforme  
 s;Batrachoididae;Thalassophyrinae;Thalassophryne;Thalassophryne  
 amazonica  
 UdeM00000028216 645134 194.5 UdeM00000028216 XP\_016611050.1 66.7  
 150 49 1 1 150 1 149 9.70E-47 194.5 645134  
 cellular organisms;Eukaryota;Opisthokonta;Fungi;Fungi incertae  
 sedis;Chytridiomycota;Chytridiomycota incertae  
 sedis;Chytridiomycetes;Spizellomyces;Spizellomyces;Spizellomyces  
 punctatus;Spizellomyces punctatus DAOM BR117  
 UdeM00000028217 667725 184.9 UdeM00000028217 XP\_014153486.1 58.4  
 149 62 0 1 149 1 149 7.60E-44 184.9 667725  
 cellular

organisms;Eukaryota;Opisthokonta;Ichthyosporea;Ichthyophonida;Sphaeroforma;Sphaeroforma arctica;Sphaeroforma arctica JP610

UdeM00000028218 423536 246.5 UdeM00000028218 XP\_002767178.1 81  
147 28 0 1 147 1 147 2.10E-62 246.5 423536  
cellular

organisms;Eukaryota;Sar;Alveolata;Perkinsozoa;Perkinsea;Perkinsida;Perkinsidae;Perkinsus;Perkinsus marinus;Perkinsus marinus ATCC 50983

UdeM00000028219 45351 203.4 UdeM00000028219 XP\_032219228.1 75.6 131  
32 0 1 131 38 168 1.80E-49 203.4 45351 cellular

organisms;Eukaryota;Opisthokonta;Metazoa;Eumetazoa;Cnidaria;Anthozoa;Hexacorallia;Actiniaria;Edwardsiidae;Nematostella;Nematostella vectensis

UdeM00000028220 50429 221.5 UdeM00000028220 XP\_022785402.1 70.1 157  
47 0 11 167 141 297 8.20E-55 221.5 50429 cellular

organisms;Eukaryota;Opisthokonta;Metazoa;Eumetazoa;Cnidaria;Anthozoa;Hexacorallia;Scleractinia;Astrocoeniina;Pocilloporidae;Stylophora;Stylophora pistillata

UdeM00000028221 6596 93.2 UdeM00000028221 XP\_045210831.1 39.3 150  
74 3 1 134 1 149 2.70E-16 93.2 6596 cellular

organisms;Eukaryota;Opisthokonta;Metazoa;Eumetazoa;Bilateria;Protostomia;Spiralia;Lophotrochozoa;Mollusca;Bivalvia;Autobranchia;Heteroconchia;Euheterodonta;Imparidentia;Venerida;Veneroidea;Veneridae;Mercenaria;Mercenaria mercenaria

UdeM00000028222 6596 466.8 UdeM00000028222 XP\_045187150.1 49.6 484  
233 3 1 474 135 617 3.20E-128 466.8 6596 cellular

organisms;Eukaryota;Opisthokonta;Metazoa;Eumetazoa;Bilateria;Protostomia;Spiralia;Lophotrochozoa;Mollusca;Bivalvia;Autobranchia;Heteroconchia;Euheterodonta;Imparidentia;Venerida;Veneroidea;Veneridae;Mercenaria;Mercenaria mercenaria

UdeM00000028223 1735272 114.8 UdeM00000028223 XP\_041352439.1 64.7  
85 30 0 4 88 110 194 6.10E-23 114.8 1735272  
cellular

organisms;Eukaryota;Opisthokonta;Metazoa;Eumetazoa;Bilateria;Protostomia;Spiralia;Lophotrochozoa;Mollusca;Gastropoda;Neomphalina;Neomphaloidea;Peltospiridae;Gigantopelta;Gigantopelta aegis

UdeM00000028224 1735272 132.1 UdeM00000028224 XP\_041352439.1 64.4  
101 35 1 3 103 4 103 4.20E-28 132.1 1735272  
cellular

organisms;Eukaryota;Opisthokonta;Metazoa;Eumetazoa;Bilateria;Protostomia;Spiralia;Lophotrochozoa;Mollusca;Gastropoda;Neomphalina;Neomphaloidea;Peltospiridae;Gigantopelta;Gigantopelta aegis

UdeM00000028225 6565 328.2 UdeM00000028225 XP\_022343048.1 58.2 282  
118 0 1 282 132 413 1.00E-86 328.2 6565 cellular

organisms;Eukaryota;Opisthokonta;Metazoa;Eumetazoa;Bilateria;Protostomia;Spiralia;Lophotrochozoa;Mollusca;Bivalvia;Autobranchia;Pteriormorphia;Ostreida;Ostreoidea;Ostreidae;Crassostrea;Crassostrea virginica

UdeM00000028226 6596 3620.9 UdeM00000028226 XP\_045187350.1 77.8  
2463 436 13 1 2449 1 2365 0.00E+00 3620.9 6596  
cellular

organisms;Eukaryota;Opisthokonta;Metazoa;Eumetazoa;Bilateria;Protostomia;Spiralia;Lophotrochozoa;Mollusca;Bivalvia;Autobranchia;Heteroconchia;Euheterodonta;Imparidentia;Venerida;Veneroidea;Veneridae;Mercenaria;Mercenaria mercenaria

UdeM00000028227 1735272 600.9 UdeM00000028227 XP\_041351520.1 42.3  
1134 526 18 10 1091 7 1064 3.30E-168 600.9 1735272

cellular  
organisms;Eukaryota;Opisthokonta;Metazoa;Eumetazoa;Bilateria;Protostomia;  
Spiralia;Lophotrochozoa;Mollusca;Gastropoda;Neomphalina;Neomphaloidea;Pel  
tospiridae;Gigantopelta;Gigantopelta aegis

UdeM00000028228 6596 1131.3 UdeM00000028228 XP\_045175037.1 39.6  
1920 914 36 1 1768 1 1827 0.00E+00 1131.3 6596

cellular  
organisms;Eukaryota;Opisthokonta;Metazoa;Eumetazoa;Bilateria;Protostomia;  
Spiralia;Lophotrochozoa;Mollusca;Bivalvia;Autobranchia;Heteroconchia;Euhe  
terodonta;Imparidentia;Venerida;Veneroidea;Veneridae;Mercenaria;Mercenari  
a mercenaria

UdeM00000028229 6579 62.8 UdeM00000028229 XP\_033732492.1 23 317  
194 10 87 363 6 312 1.10E-06 62.8 6579 cellular

organisms;Eukaryota;Opisthokonta;Metazoa;Eumetazoa;Bilateria;Protostomia;  
Spiralia;Lophotrochozoa;Mollusca;Bivalvia;Autobranchia;Pteriormorphia;Pect  
inida;Pectinoidea;Pectinidae;Pecten;Pecten maximus

UdeM00000028230 6565 60.8 UdeM00000028230 XP\_022299013.1 41.8 67  
39 0 232 298 146 212 3.50E-06 60.8 6565 cellular

organisms;Eukaryota;Opisthokonta;Metazoa;Eumetazoa;Bilateria;Protostomia;  
Spiralia;Lophotrochozoa;Mollusca;Bivalvia;Autobranchia;Pteriormorphia;Ostr  
eida;Ostreoidea;Ostreidae;Crassostrea;Crassostrea virginica

UdeM00000028231 6579 66.2 UdeM00000028231 XP\_033732492.1 23.2 315  
191 10 92 364 7 312 1.00E-07 66.2 6579 cellular

organisms;Eukaryota;Opisthokonta;Metazoa;Eumetazoa;Bilateria;Protostomia;  
Spiralia;Lophotrochozoa;Mollusca;Bivalvia;Autobranchia;Pteriormorphia;Pect  
inida;Pectinoidea;Pectinidae;Pecten;Pecten maximus

UdeM00000028232 6579 65.5 UdeM00000028232 XP\_033732492.1 23 318  
194 10 87 364 6 312 1.70E-07 65.5 6579 cellular

organisms;Eukaryota;Opisthokonta;Metazoa;Eumetazoa;Bilateria;Protostomia;  
Spiralia;Lophotrochozoa;Mollusca;Bivalvia;Autobranchia;Pteriormorphia;Pect  
inida;Pectinoidea;Pectinidae;Pecten;Pecten maximus

UdeM00000028233 6596 283.9 UdeM00000028233 XP\_045168888.1 39.9 313  
178 3 29 331 181 493 2.70E-73 283.9 6596 cellular

organisms;Eukaryota;Opisthokonta;Metazoa;Eumetazoa;Bilateria;Protostomia;  
Spiralia;Lophotrochozoa;Mollusca;Bivalvia;Autobranchia;Heteroconchia;Euhe  
terodonta;Imparidentia;Venerida;Veneroidea;Veneridae;Mercenaria;Mercenari  
a mercenaria

UdeM00000028234 6596 124 UdeM00000028234 XP\_045187633.1 34.5 229  
130 3 2 211 9 236 2.20E-25 124 6596 cellular

organisms;Eukaryota;Opisthokonta;Metazoa;Eumetazoa;Bilateria;Protostomia;  
Spiralia;Lophotrochozoa;Mollusca;Bivalvia;Autobranchia;Heteroconchia;Euhe  
terodonta;Imparidentia;Venerida;Veneroidea;Veneridae;Mercenaria;Mercenari  
a mercenaria

UdeM00000028235 37621 550.4 UdeM00000028235 XP\_014675321.1 59.3 435  
175 1 31 463 1 435 2.40E-153 550.4 37621 cellular

organisms;Eukaryota;Opisthokonta;Metazoa;Eumetazoa;Bilateria;Protostomia;  
Ecdysozoa;Scalidophora;Priapulida;Priapulimorpha;Priapulimorphida;Priapul  
idae;Priapululus;Priapululus caudatus

UdeM00000028236 29159 72.4 UdeM00000028236 XP\_011412758.3 30.6 144  
90 4 12 150 63 201 6.40E-10 72.4 29159 cellular

organisms;Eukaryota;Opisthokonta;Metazoa;Eumetazoa;Bilateria;Protostomia;  
Spiralia;Lophotrochozoa;Mollusca;Bivalvia;Autobranchia;Pteriormorphia;Ostr  
eida;Ostreoidea;Ostreidae;Crassostrea;Crassostrea gigas



UdeM00000028237 6579 66.2 UdeM00000028237 XP\_033732492.1 23.2 315  
 191 10 92 364 7 312 1.00E-07 66.2 6579 cellular  
 organisms;Eukaryota;Opisthokonta;Metazoa;Eumetazoa;Bilateria;Protostomia;  
 Spiralia;Lophotrochozoa;Mollusca;Bivalvia;Autobranhia;Pteriormorphia;Pect  
 inida;Pectinoidea;Pectinidae;Pecten;Pecten maximus  
 UdeM00000028239 6596 211.1 UdeM00000028239 XP\_045164107.1 32.5 495  
 110 7 26 319 2223 2694 2.10E-51 211.1 6596 cellular  
 organisms;Eukaryota;Opisthokonta;Metazoa;Eumetazoa;Bilateria;Protostomia;  
 Spiralia;Lophotrochozoa;Mollusca;Bivalvia;Autobranhia;Heteroconchia;Euhe  
 terodonta;Imparidentia;Venerida;Veneroidea;Veneridae;Mercenaria;Mercenari  
 a mercenaria  
 UdeM00000028240 6596 137.9 UdeM00000028240 XP\_045164107.1 38 213  
 89 1 1 170 2707 2919 1.60E-29 137.9 6596 cellular  
 organisms;Eukaryota;Opisthokonta;Metazoa;Eumetazoa;Bilateria;Protostomia;  
 Spiralia;Lophotrochozoa;Mollusca;Bivalvia;Autobranhia;Heteroconchia;Euhe  
 terodonta;Imparidentia;Venerida;Veneroidea;Veneridae;Mercenaria;Mercenari  
 a mercenaria  
 UdeM00000028242 6579 70.5 UdeM00000028242 XP\_033732492.1 23.1 321  
 196 10 92 370 7 318 5.40E-09 70.5 6579 cellular  
 organisms;Eukaryota;Opisthokonta;Metazoa;Eumetazoa;Bilateria;Protostomia;  
 Spiralia;Lophotrochozoa;Mollusca;Bivalvia;Autobranhia;Pteriormorphia;Pect  
 inida;Pectinoidea;Pectinidae;Pecten;Pecten maximus  
 UdeM00000028243 6579 72.8 UdeM00000028243 XP\_033761099.1 20.7 300  
 189 6 113 372 30 320 1.10E-09 72.8 6579 cellular  
 organisms;Eukaryota;Opisthokonta;Metazoa;Eumetazoa;Bilateria;Protostomia;  
 Spiralia;Lophotrochozoa;Mollusca;Bivalvia;Autobranhia;Pteriormorphia;Pect  
 inida;Pectinoidea;Pectinidae;Pecten;Pecten maximus  
 UdeM00000028244 6579 62 UdeM00000028244 XP\_033761099.1 21.3 254  
 164 5 84 301 67 320 1.60E-06 62 6579 cellular  
 organisms;Eukaryota;Opisthokonta;Metazoa;Eumetazoa;Bilateria;Protostomia;  
 Spiralia;Lophotrochozoa;Mollusca;Bivalvia;Autobranhia;Pteriormorphia;Pect  
 inida;Pectinoidea;Pectinidae;Pecten;Pecten maximus  
 UdeM00000028245 29159 72.4 UdeM00000028245 XP\_011412758.3 30.6 144  
 90 4 12 150 63 201 6.40E-10 72.4 29159 cellular  
 organisms;Eukaryota;Opisthokonta;Metazoa;Eumetazoa;Bilateria;Protostomia;  
 Spiralia;Lophotrochozoa;Mollusca;Bivalvia;Autobranhia;Pteriormorphia;Ostr  
 eida;Ostreoidea;Ostreidae;Crassostrea;Crassostrea gigas  
 UdeM00000028246 37621 547 UdeM00000028246 XP\_014675321.1 59.5 435  
 168 2 31 457 1 435 2.40E-152 547 37621 cellular  
 organisms;Eukaryota;Opisthokonta;Metazoa;Eumetazoa;Bilateria;Protostomia;  
 Ecdysozoa;Scalidophora;Priapulida;Priapulimorpha;Priapulimorphida;Priapul  
 idae;Priapululus;Priapululus caudatus  
 UdeM00000028247 6596 125.9 UdeM00000028247 XP\_045187633.1 34.9 229  
 129 3 2 211 9 236 5.90E-26 125.9 6596 cellular  
 organisms;Eukaryota;Opisthokonta;Metazoa;Eumetazoa;Bilateria;Protostomia;  
 Spiralia;Lophotrochozoa;Mollusca;Bivalvia;Autobranhia;Heteroconchia;Euhe  
 terodonta;Imparidentia;Venerida;Veneroidea;Veneridae;Mercenaria;Mercenari  
 a mercenaria  
 UdeM00000028248 6596 289.3 UdeM00000028248 XP\_045168888.1 40.3 313  
 177 3 29 331 181 493 6.50E-75 289.3 6596 cellular  
 organisms;Eukaryota;Opisthokonta;Metazoa;Eumetazoa;Bilateria;Protostomia;  
 Spiralia;Lophotrochozoa;Mollusca;Bivalvia;Autobranhia;Heteroconchia;Euhe  
 terodonta;Imparidentia;Venerida;Veneroidea;Veneridae;Mercenaria;Mercenari  
 a mercenaria

UdeM00000028249 6596 297.4 UdeM00000028249 XP\_045164107.1 56.8 273  
 100 3 53 319 2223 2483 2.20E-77 297.4 6596 cellular  
 organisms;Eukaryota;Opisthokonta;Metazoa;Eumetazoa;Bilateria;Protostomia;  
 Spiralia;Lophotrochozoa;Mollusca;Bivalvia;Autobranchia;Heteroconchia;Euhe  
 terodonta;Imparidentia;Venerida;Veneroidea;Veneridae;Mercenaria;Mercenari  
 a mercenaria  
 UdeM00000028250 6565 111.7 UdeM00000028250 XP\_022327940.1 59.8 97  
 34 1 2 93 2377 2473 5.10E-22 111.7 6565 cellular  
 organisms;Eukaryota;Opisthokonta;Metazoa;Eumetazoa;Bilateria;Protostomia;  
 Spiralia;Lophotrochozoa;Mollusca;Bivalvia;Autobranchia;Pteriormorphia;Ostr  
 eida;Ostreoidea;Ostreidae;Crassostrea;Crassostrea virginica  
 UdeM00000028251 6596 125.2 UdeM00000028251 XP\_045164107.1 35.6 219  
 97 2 1 175 2752 2970 8.50E-26 125.2 6596 cellular  
 organisms;Eukaryota;Opisthokonta;Metazoa;Eumetazoa;Bilateria;Protostomia;  
 Spiralia;Lophotrochozoa;Mollusca;Bivalvia;Autobranchia;Heteroconchia;Euhe  
 terodonta;Imparidentia;Venerida;Veneroidea;Veneridae;Mercenaria;Mercenari  
 a mercenaria  
 UdeM00000028252 6596 92.8 UdeM00000028252 XP\_045164107.1 34.5 168  
 67 1 1 125 2752 2919 4.80E-16 92.8 6596 cellular  
 organisms;Eukaryota;Opisthokonta;Metazoa;Eumetazoa;Bilateria;Protostomia;  
 Spiralia;Lophotrochozoa;Mollusca;Bivalvia;Autobranchia;Heteroconchia;Euhe  
 terodonta;Imparidentia;Venerida;Veneroidea;Veneridae;Mercenaria;Mercenari  
 a mercenaria  
 UdeM00000028255 6596 236.9 UdeM00000028255 XP\_045168888.1 41.6 255  
 126 5 3 241 246 493 2.80E-59 236.9 6596 cellular  
 organisms;Eukaryota;Opisthokonta;Metazoa;Eumetazoa;Bilateria;Protostomia;  
 Spiralia;Lophotrochozoa;Mollusca;Bivalvia;Autobranchia;Heteroconchia;Euhe  
 terodonta;Imparidentia;Venerida;Veneroidea;Veneridae;Mercenaria;Mercenari  
 a mercenaria  
 UdeM00000028256 6596 240.4 UdeM00000028256 XP\_045164107.1 26.4 803  
 192 8 6 466 2223 2968 5.20E-60 240.4 6596 cellular  
 organisms;Eukaryota;Opisthokonta;Metazoa;Eumetazoa;Bilateria;Protostomia;  
 Spiralia;Lophotrochozoa;Mollusca;Bivalvia;Autobranchia;Heteroconchia;Euhe  
 terodonta;Imparidentia;Venerida;Veneroidea;Veneridae;Mercenaria;Mercenari  
 a mercenaria  
 UdeM00000028257 6596 416.8 UdeM00000028257 XP\_045169189.1 67.4 298  
 94 1 12 309 17 311 2.50E-113 416.8 6596 cellular  
 organisms;Eukaryota;Opisthokonta;Metazoa;Eumetazoa;Bilateria;Protostomia;  
 Spiralia;Lophotrochozoa;Mollusca;Bivalvia;Autobranchia;Heteroconchia;Euhe  
 terodonta;Imparidentia;Venerida;Veneroidea;Veneridae;Mercenaria;Mercenari  
 a mercenaria  
 UdeM00000028258 225164 362.5 UdeM00000028258 XP\_009063618.1 61.1  
 298 116 0 20 317 1 298 5.70E-97 362.5 225164  
 cellular  
 organisms;Eukaryota;Opisthokonta;Metazoa;Eumetazoa;Bilateria;Protostomia;  
 Spiralia;Lophotrochozoa;Mollusca;Gastropoda;Patellogastropoda;Lottioida;  
 Lottiidae;Lottia;Lottia gigantea  
 UdeM00000028260 6573 415.2 UdeM00000028260 XP\_021378461.1 44.9 486  
 241 8 3 485 15 476 1.10E-112 415.2 6573 cellular  
 organisms;Eukaryota;Opisthokonta;Metazoa;Eumetazoa;Bilateria;Protostomia;  
 Spiralia;Lophotrochozoa;Mollusca;Bivalvia;Autobranchia;Pteriormorphia;Pect  
 inida;Pectinoidea;Pectinidae;Mizuhopecten;Mizuhopecten yessoensis  
 UdeM00000028261 29159 204.1 UdeM00000028261 XP\_011416189.2 71.9 135  
 35 2 3 136 6 138 3.60E-49 204.1 29159 cellular

organisms;Eukaryota;Opisthokonta;Metazoa;Eumetazoa;Bilateria;Protostomia;Spiralia;Lophotrochozoa;Mollusca;Bivalvia;Autobranchia;Pteriomorpha;Ostr

eida;Ostreoidea;Ostreidae;Crassostrea;Crassostrea gigas  
UdeM00000028262 29159 146.7 UdeM00000028262 XP\_011416186.1 85.9 78  
11 0 1 78 1 78 1.20E-32 146.7 29159 cellular

organisms;Eukaryota;Opisthokonta;Metazoa;Eumetazoa;Bilateria;Protostomia;Spiralia;Lophotrochozoa;Mollusca;Bivalvia;Autobranchia;Pteriomorpha;Ostr

eida;Ostreoidea;Ostreidae;Crassostrea;Crassostrea gigas  
UdeM00000028263 7574 104.4 UdeM00000028263 XP\_013404567.1 41.3 126  
70 2 188 310 9 133 3.80E-19 104.4 7574 cellular

organisms;Eukaryota;Opisthokonta;Metazoa;Eumetazoa;Bilateria;Protostomia;Spiralia;Lophotrochozoa;Brachiopoda;Linguliformea;Lingulata;Lingulida;Lin

guloidea;Lingulidae;Lingula;Lingula anatina  
UdeM00000028264 6596 379.8 UdeM00000028264 XP\_045165749.1 81.4 247  
46 0 1 247 1 247 2.70E-102 379.8 6596 cellular

organisms;Eukaryota;Opisthokonta;Metazoa;Eumetazoa;Bilateria;Protostomia;Spiralia;Lophotrochozoa;Mollusca;Bivalvia;Autobranchia;Heteroconchia;Euhe

terodonta;Imparidentia;Venerida;Veneroidea;Veneridae;Mercenaria;Mercenari  
a mercenaria  
UdeM00000028265 6579 742.7 UdeM00000028265 XP\_033736025.1 77.7 461  
101 1 6 464 547 1007 2.90E-211 742.7 6579 cellular

organisms;Eukaryota;Opisthokonta;Metazoa;Eumetazoa;Bilateria;Protostomia;Spiralia;Lophotrochozoa;Mollusca;Bivalvia;Autobranchia;Pteriomorpha;Pect

inida;Pectinoidea;Pectinidae;Pecten;Pecten maximus  
UdeM00000028266 6579 343.6 UdeM00000028266 XP\_033736025.1 78.6 210  
45 0 135 344 798 1007 2.90E-91 343.6 6579 cellular

organisms;Eukaryota;Opisthokonta;Metazoa;Eumetazoa;Bilateria;Protostomia;Spiralia;Lophotrochozoa;Mollusca;Bivalvia;Autobranchia;Pteriomorpha;Pect

inida;Pectinoidea;Pectinidae;Pecten;Pecten maximus  
UdeM00000028268 6579 205.7 UdeM00000028268 XP\_033729790.1 39.4 274  
161 2 10 283 17 285 1.90E-49 205.7 6579 cellular

organisms;Eukaryota;Opisthokonta;Metazoa;Eumetazoa;Bilateria;Protostomia;Spiralia;Lophotrochozoa;Mollusca;Bivalvia;Autobranchia;Pteriomorpha;Pect

inida;Pectinoidea;Pectinidae;Pecten;Pecten maximus  
UdeM00000028270 2652724 179.1 UdeM00000028270 XP\_020913146.1 41.5  
272 137 5 154 424 166 416 1.20E-41 179.1 2652724  
cellular

organisms;Eukaryota;Opisthokonta;Metazoa;Eumetazoa;Cnidaria;Anthozoa;Hexa

corallia;Actiniaria;Aiptasiidae;Exaiptasia;Exaiptasia diaphana  
UdeM00000028271 6579 196.4 UdeM00000028271 XP\_033729790.1 44.9 214  
118 0 10 223 17 230 4.00E-47 196.4 6579 cellular

organisms;Eukaryota;Opisthokonta;Metazoa;Eumetazoa;Bilateria;Protostomia;Spiralia;Lophotrochozoa;Mollusca;Bivalvia;Autobranchia;Pteriomorpha;Pect

inida;Pectinoidea;Pectinidae;Pecten;Pecten maximus  
UdeM00000028273 2652724 179.1 UdeM00000028273 XP\_020913146.1 41.5  
272 137 5 154 424 166 416 1.20E-41 179.1 2652724  
cellular

organisms;Eukaryota;Opisthokonta;Metazoa;Eumetazoa;Cnidaria;Anthozoa;Hexa

corallia;Actiniaria;Aiptasiidae;Exaiptasia;Exaiptasia diaphana  
UdeM00000028274 6579 196.8 UdeM00000028274 XP\_033729790.1 44.9 214  
118 0 10 223 17 230 3.10E-47 196.8 6579 cellular

organisms;Eukaryota;Opisthokonta;Metazoa;Eumetazoa;Bilateria;Protostomia;Spiralia;Lophotrochozoa;Mollusca;Bivalvia;Autobranchia;Pteriomorpha;Pect

inida;Pectinoidea;Pectinidae;Pecten;Pecten maximus

UdeM00000028275 29159 166.4 UdeM00000028275 XP\_034339171.1 39.5 210  
 121 4 1 208 653 858 4.10E-38 166.4 29159 cellular  
 organisms;Eukaryota;Opisthokonta;Metazoa;Eumetazoa;Bilateria;Protostomia;  
 Spiralia;Lophotrochozoa;Mollusca;Bivalvia;Autobranchia;Pteriormorphia;Ostr  
 eida;Ostreoidea;Ostreidae;Crassostrea;Crassostrea gigas  
 UdeM00000028276 6579 745 UdeM00000028276 XP\_033736024.1 45.6 956  
 399 18 14 910 11 904 1.20E-211 745 6579 cellular  
 organisms;Eukaryota;Opisthokonta;Metazoa;Eumetazoa;Bilateria;Protostomia;  
 Spiralia;Lophotrochozoa;Mollusca;Bivalvia;Autobranchia;Pteriormorphia;Pect  
 inida;Pectinoidea;Pectinidae;Pecten;Pecten maximus  
 UdeM00000028277 6596 605.9 UdeM00000028277 XP\_045162889.1 57 589  
 223 11 2 570 3 581 5.40E-170 605.9 6596 cellular  
 organisms;Eukaryota;Opisthokonta;Metazoa;Eumetazoa;Bilateria;Protostomia;  
 Spiralia;Lophotrochozoa;Mollusca;Bivalvia;Autobranchia;Heteroconchia;Euhe  
 terodonta;Imparidentia;Venerida;Veneroidea;Veneridae;Mercenaria;Mercenari  
 a mercenaria  
 UdeM00000028278 6596 194.1 UdeM00000028278 XP\_045175322.1 49 202  
 103 0 3 204 415 616 1.80E-46 194.1 6596 cellular  
 organisms;Eukaryota;Opisthokonta;Metazoa;Eumetazoa;Bilateria;Protostomia;  
 Spiralia;Lophotrochozoa;Mollusca;Bivalvia;Autobranchia;Heteroconchia;Euhe  
 terodonta;Imparidentia;Venerida;Veneroidea;Veneridae;Mercenaria;Mercenari  
 a mercenaria  
 UdeM00000028279 6596 409.5 UdeM00000028279 XP\_045175322.1 50.6 411  
 197 3 7 415 10 416 5.40E-111 409.5 6596 cellular  
 organisms;Eukaryota;Opisthokonta;Metazoa;Eumetazoa;Bilateria;Protostomia;  
 Spiralia;Lophotrochozoa;Mollusca;Bivalvia;Autobranchia;Heteroconchia;Euhe  
 terodonta;Imparidentia;Venerida;Veneroidea;Veneridae;Mercenaria;Mercenari  
 a mercenaria  
 UdeM00000028280 6596 2228.8 UdeM00000028280 XP\_045181146.1 65.6  
 1866 576 15 29 1864 404 2234 0.00E+00 2228.8 6596  
 cellular  
 organisms;Eukaryota;Opisthokonta;Metazoa;Eumetazoa;Bilateria;Protostomia;  
 Spiralia;Lophotrochozoa;Mollusca;Bivalvia;Autobranchia;Heteroconchia;Euhe  
 terodonta;Imparidentia;Venerida;Veneroidea;Veneridae;Mercenaria;Mercenari  
 a mercenaria  
 UdeM00000028281 6596 534.3 UdeM00000028281 XP\_045181124.1 79.3 329  
 62 1 43 365 75 403 1.30E-148 534.3 6596 cellular  
 organisms;Eukaryota;Opisthokonta;Metazoa;Eumetazoa;Bilateria;Protostomia;  
 Spiralia;Lophotrochozoa;Mollusca;Bivalvia;Autobranchia;Heteroconchia;Euhe  
 terodonta;Imparidentia;Venerida;Veneroidea;Veneridae;Mercenaria;Mercenari  
 a mercenaria  
 UdeM00000028282 6573 156.4 UdeM00000028282 XP\_021367980.1 33 569  
 318 12 1355 1894 910 1444 4.60E-34 156.4 6573 cellular  
 organisms;Eukaryota;Opisthokonta;Metazoa;Eumetazoa;Bilateria;Protostomia;  
 Spiralia;Lophotrochozoa;Mollusca;Bivalvia;Autobranchia;Pteriormorphia;Pect  
 inida;Pectinoidea;Pectinidae;Mizuhopecten;Mizuhopecten yessoensis  
 UdeM00000028282 6573 79 UdeM00000028282 XP\_021367980.1 54.7 75  
 32 1 552 626 386 458 9.30E-11 79 6573 cellular  
 organisms;Eukaryota;Opisthokonta;Metazoa;Eumetazoa;Bilateria;Protostomia;  
 Spiralia;Lophotrochozoa;Mollusca;Bivalvia;Autobranchia;Pteriormorphia;Pect  
 inida;Pectinoidea;Pectinidae;Mizuhopecten;Mizuhopecten yessoensis  
 UdeM00000018932 6596 332.4 UdeM00000018932 XP\_045182203.1 40.3 459  
 265 4 35 488 137 591 1.10E-87 332.4 6596 cellular  
 organisms;Eukaryota;Opisthokonta;Metazoa;Eumetazoa;Bilateria;Protostomia;

Spiralia;Lophotrochozoa;Mollusca;Bivalvia;Autobranchia;Heteroconchia;Euherodonta;Imparidentia;Venerida;Veneroidea;Veneridae;Mercenaria;Mercenaria mercenaria

UdeM00000018933 1735272 286.6 UdeM00000018933 XP\_041361800.1 35.3  
499 234 7 63 481 235 724 6.00E-74 286.6 1735272

cellular

organisms;Eukaryota;Opisthokonta;Metazoa;Eumetazoa;Bilateria;Protostomia;Spiralia;Lophotrochozoa;Mollusca;Gastropoda;Neomphalina;Neomphaloidea;Peltospiridae;Gigantopelta;Gigantopelta aegis

UdeM00000018934 77115 377.5 UdeM00000018934 XP\_038133904.1 61.3 282  
107 1 9 290 11 290 1.50E-101 377.5 77115 cellular

organisms;Eukaryota;Opisthokonta;Metazoa;Eumetazoa;Bilateria;Deuterostomia;Chordata;Craniata;Vertebrata;Gnathostomata;Teleostomi;Euteleostomi;Actinopterygii;Actinopteri;Neopterygii;Teleostei;Osteoglossocephalai;Clupeocephala;Euteleosteomorpha;Neoteleostei;Eurypterygia;Ctenosquamata;Acanthomorphata;Euacanthomorphacea;Percomorphaceae;Ovalentaria;Atherinomorphae;Cyprinodontiformes;Cyprinodontoidei;Cyprinodontidae;Cyprinodontinae;Cyprinodontini;Cyprinodon;Cyprinodon tularosa

UdeM00000018935 30732 184.9 UdeM00000018935 XP\_024118320.1 44.2 208  
114 2 14 221 409 614 1.10E-43 184.9 30732 cellular

organisms;Eukaryota;Opisthokonta;Metazoa;Eumetazoa;Bilateria;Deuterostomia;Chordata;Craniata;Vertebrata;Gnathostomata;Teleostomi;Euteleostomi;Actinopterygii;Actinopteri;Neopterygii;Teleostei;Osteoglossocephalai;Clupeocephala;Euteleosteomorpha;Neoteleostei;Eurypterygia;Ctenosquamata;Acanthomorphata;Euacanthomorphacea;Percomorphaceae;Ovalentaria;Atherinomorphae;Beloniformes;Adrianichthyoidei;Adrianichthyidae;Oryziinae;Oryzias;Oryzias melastigma

UdeM00000018936 1250792 280 UdeM00000018936 XP\_041861569.1 44  
336 178 6 25 359 341 667 4.20E-72 280 1250792

cellular

organisms;Eukaryota;Opisthokonta;Metazoa;Eumetazoa;Bilateria;Deuterostomia;Chordata;Craniata;Vertebrata;Gnathostomata;Teleostomi;Euteleostomi;Actinopterygii;Actinopteri;Neopterygii;Teleostei;Osteoglossocephalai;Clupeocephala;Euteleosteomorpha;Neoteleostei;Eurypterygia;Ctenosquamata;Acanthomorphata;Euacanthomorphacea;Percomorphaceae;Ovalentaria;Atherinomorphae;Atheriniformes;Melanotaeniidae;Melanotaenia;Melanotaenia boesemani

UdeM00000018937 8236 121.3 UdeM00000018937 XP\_044216249.1 39 177  
102 2 31 207 100 270 1.50E-24 121.3 8236 cellular

organisms;Eukaryota;Opisthokonta;Metazoa;Eumetazoa;Bilateria;Deuterostomia;Chordata;Craniata;Vertebrata;Gnathostomata;Teleostomi;Euteleostomi;Actinopterygii;Actinopteri;Neopterygii;Teleostei;Osteoglossocephalai;Clupeocephala;Euteleosteomorpha;Neoteleostei;Eurypterygia;Ctenosquamata;Acanthomorphata;Euacanthomorphacea;Percomorphaceae;Pelagiaria;Scombriformes;Scombridae;Scombrinae;Thunnini;Thunnus;Thunnus albacares

UdeM00000018938 32473 64.7 UdeM00000018938 XP\_027860025.1 52.7 55  
23 1 25 76 40 94 5.90E-08 64.7 32473 cellular

organisms;Eukaryota;Opisthokonta;Metazoa;Eumetazoa;Bilateria;Deuterostomia;Chordata;Craniata;Vertebrata;Gnathostomata;Teleostomi;Euteleostomi;Actinopterygii;Actinopteri;Neopterygii;Teleostei;Osteoglossocephalai;Clupeocephala;Euteleosteomorpha;Neoteleostei;Eurypterygia;Ctenosquamata;Acanthomorphata;Euacanthomorphacea;Percomorphaceae;Ovalentaria;Atherinomorphae;Cyprinodontiformes;Cyprinodontoidei;Poeciliidae;Poeciliinae;Xiphophorus;Xiphophorus couchianus

UdeM00000018939 6579 176.4 UdeM00000018939 XP\_033727094.1 58.7 138  
 57 0 123 260 514 651 4.80E-41 176.4 6579 cellular  
 organisms;Eukaryota;Opisthokonta;Metazoa;Eumetazoa;Bilateria;Protostomia;  
 Spiralia;Lophotrochozoa;Mollusca;Bivalvia;Autobranchia;Pteriomorpha;Pecti  
 nida;Pectinoidea;Pectinidae;Pecten;Pecten maximus  
 UdeM00000018940 6596 319.3 UdeM00000018940 XP\_045182203.1 38 521  
 280 9 22 504 131 646 8.80E-84 319.3 6596 cellular  
 organisms;Eukaryota;Opisthokonta;Metazoa;Eumetazoa;Bilateria;Protostomia;  
 Spiralia;Lophotrochozoa;Mollusca;Bivalvia;Autobranchia;Heteroconchia;Euhe  
 terodonta;Imparidentia;Venerida;Veneroidea;Veneridae;Mercenaria;Mercenari  
 a mercenaria  
 UdeM00000018941 1735272 279.6 UdeM00000018941 XP\_041361800.1 45  
 358 168 7 5 339 373 724 5.20E-72 279.6 1735272  
 cellular  
 organisms;Eukaryota;Opisthokonta;Metazoa;Eumetazoa;Bilateria;Protostomia;  
 Spiralia;Lophotrochozoa;Mollusca;Gastropoda;Neomphalina;Neomphaloidea;Pel  
 tospiridae;Gigantopelta;Gigantopelta aegis  
 UdeM00000018942 1735272 279.6 UdeM00000018942 XP\_041361800.1 45  
 358 168 7 37 371 373 724 5.70E-72 279.6 1735272  
 cellular  
 organisms;Eukaryota;Opisthokonta;Metazoa;Eumetazoa;Bilateria;Protostomia;  
 Spiralia;Lophotrochozoa;Mollusca;Gastropoda;Neomphalina;Neomphaloidea;Pel  
 tospiridae;Gigantopelta;Gigantopelta aegis  
 UdeM00000018943 45264 66.2 UdeM00000018943 XP\_044167082.1 37.9 95  
 56 1 1 92 103 197 2.70E-08 66.2 45264 cellular  
 organisms;Eukaryota;Opisthokonta;Metazoa;Eumetazoa;Cnidaria;Anthozoa;Hexa  
 corallia;Scleractinia;Astrocoeniina;Acroporidae;Acropora;Acropora  
 millepora  
 UdeM00000018944 400727 213.8 UdeM00000018944 XP\_025108466.1 50.7  
 205 100 1 1 205 140 343 2.20E-52 213.8 400727  
 cellular  
 organisms;Eukaryota;Opisthokonta;Metazoa;Eumetazoa;Bilateria;Protostomia;  
 Spiralia;Lophotrochozoa;Mollusca;Gastropoda;Caenogastropoda;Architaeniogl  
 ossa;Ampullarioidea;Ampullariidae;Pomacea;Pomacea canaliculata  
 UdeM00000018945 6596 124.4 UdeM00000018945 XP\_045180427.1 49.6 115  
 56 1 47 159 159 273 1.40E-25 124.4 6596 cellular  
 organisms;Eukaryota;Opisthokonta;Metazoa;Eumetazoa;Bilateria;Protostomia;  
 Spiralia;Lophotrochozoa;Mollusca;Bivalvia;Autobranchia;Heteroconchia;Euhe  
 terodonta;Imparidentia;Venerida;Veneroidea;Veneridae;Mercenaria;Mercenari  
 a mercenaria  
 UdeM00000018947 6596 380.2 UdeM00000018947 XP\_045170207.1 73.3 240  
 64 0 50 289 8 247 3.00E-102 380.2 6596 cellular  
 organisms;Eukaryota;Opisthokonta;Metazoa;Eumetazoa;Bilateria;Protostomia;  
 Spiralia;Lophotrochozoa;Mollusca;Bivalvia;Autobranchia;Heteroconchia;Euhe  
 terodonta;Imparidentia;Venerida;Veneroidea;Veneridae;Mercenaria;Mercenari  
 a mercenaria  
 UdeM00000018948 1250792 158.3 UdeM00000018948 XP\_041832618.1 56.4  
 133 58 0 5 137 6 138 7.50E-36 158.3 1250792  
 cellular  
 organisms;Eukaryota;Opisthokonta;Metazoa;Eumetazoa;Bilateria;Deuterostomi  
 a;Chordata;Craniata;Vertebrata;Gnathostomata;Teleostomi;Euteleostomi;Acti  
 nopterygii;Actinopteri;Neopterygii;Teleostei;Osteoglossocephalai;Clupeoce  
 phala;Euteleosteomorpha;Neoteleostei;Eurypterygia;Ctenosquamata;Acanthomo

rphata;Euacanthomorphae;Percomorphaceae;Ovalentaria;Atherinomorphae;Atheriniformes;Melanotaeniidae;Melanotaenia;Melanotaenia boesemani  
UdeM00000018949 6412 503.4 UdeM00000018949 XP\_009009748.1 53.2 436  
186 2 25 449 2 430 3.00E-139 503.4 6412 cellular  
organisms;Eukaryota;Opisthokonta;Metazoa;Eumetazoa;Bilateria;Protostomia;  
Spiralia;Lophotrochozoa;Annelida;Clitellata;Hirudinea;Rhynchobdellida;Glossiphoniidae;Helobdella;Helobdella robusta  
UdeM00000018950 6565 627.5 UdeM00000018950 XP\_022310623.1 70.4 426  
121 1 12 437 19 439 1.30E-176 627.5 6565 cellular  
organisms;Eukaryota;Opisthokonta;Metazoa;Eumetazoa;Bilateria;Protostomia;  
Spiralia;Lophotrochozoa;Mollusca;Bivalvia;Autobranchia;Pteriormorphia;Ostreida;  
Ostreoidea;Ostreidae;Crassostrea;Crassostrea virginica  
UdeM00000018951 6596 536.2 UdeM00000018951 XP\_045180331.1 72.9 373  
98 3 1 373 1 370 3.40E-149 536.2 6596 cellular  
organisms;Eukaryota;Opisthokonta;Metazoa;Eumetazoa;Bilateria;Protostomia;  
Spiralia;Lophotrochozoa;Mollusca;Bivalvia;Autobranchia;Heteroconchia;Euheterodonta;  
Imparidentia;Venerida;Veneroidea;Veneridae;Mercenaria;Mercenaria mercenaria  
UdeM00000018953 29159 693.7 UdeM00000018953 XP\_019921604.2 45 1239  
508 26 44 1147 42 1241 4.70E-196 693.7 29159 cellular  
organisms;Eukaryota;Opisthokonta;Metazoa;Eumetazoa;Bilateria;Protostomia;  
Spiralia;Lophotrochozoa;Mollusca;Bivalvia;Autobranchia;Pteriormorphia;Ostreida;  
Ostreoidea;Ostreidae;Crassostrea;Crassostrea gigas  
UdeM00000018954 6596 148.7 UdeM00000018954 XP\_045180252.1 35.5 228  
138 1 2 229 3 221 1.10E-32 148.7 6596 cellular  
organisms;Eukaryota;Opisthokonta;Metazoa;Eumetazoa;Bilateria;Protostomia;  
Spiralia;Lophotrochozoa;Mollusca;Bivalvia;Autobranchia;Heteroconchia;Euheterodonta;  
Imparidentia;Venerida;Veneroidea;Veneridae;Mercenaria;Mercenaria mercenaria  
UdeM00000018955 29159 130.2 UdeM00000018955 XP\_011417891.2 67.7 93  
28 2 6 97 160 251 1.60E-27 130.2 29159 cellular  
organisms;Eukaryota;Opisthokonta;Metazoa;Eumetazoa;Bilateria;Protostomia;  
Spiralia;Lophotrochozoa;Mollusca;Bivalvia;Autobranchia;Pteriormorphia;Ostreida;  
Ostreoidea;Ostreidae;Crassostrea;Crassostrea gigas  
UdeM00000018956 1735272 308.5 UdeM00000018956 XP\_041360999.1 57.9  
240 99 2 6 245 6 243 7.70E-81 308.5 1735272  
cellular  
organisms;Eukaryota;Opisthokonta;Metazoa;Eumetazoa;Bilateria;Protostomia;  
Spiralia;Lophotrochozoa;Mollusca;Gastropoda;Neomphalina;Neomphaloidea;Peltospiridae;  
Gigantopelta;Gigantopelta aegis  
UdeM00000018957 29159 99.4 UdeM00000018957 XP\_011417890.3 42.5 106  
60 1 19 124 41 145 4.80E-18 99.4 29159 cellular  
organisms;Eukaryota;Opisthokonta;Metazoa;Eumetazoa;Bilateria;Protostomia;  
Spiralia;Lophotrochozoa;Mollusca;Bivalvia;Autobranchia;Pteriormorphia;Ostreida;  
Ostreoidea;Ostreidae;Crassostrea;Crassostrea gigas  
UdeM00000018958 1735272 194.5 UdeM00000018958 XP\_041360999.1 39  
246 147 3 1 246 1 243 1.60E-46 194.5 1735272  
cellular  
organisms;Eukaryota;Opisthokonta;Metazoa;Eumetazoa;Bilateria;Protostomia;  
Spiralia;Lophotrochozoa;Mollusca;Gastropoda;Neomphalina;Neomphaloidea;Peltospiridae;  
Gigantopelta;Gigantopelta aegis  
UdeM00000018959 1735272 199.9 UdeM00000018959 XP\_041360999.1 40.2  
246 144 3 1 246 1 243 3.90E-48 199.9 1735272  
cellular

organisms;Eukaryota;Opisthokonta;Metazoa;Eumetazoa;Bilateria;Protostomia;Spiralia;Lophotrochozoa;Mollusca;Gastropoda;Neomphalina;Neomphaloidea;Pel tospiridae;Gigantopelta;Gigantopelta aegis

UdeM00000018960 1735272 162.5 UdeM00000018960 XP\_041360999.1 37.4  
246 126 4 1 221 1 243 6.20E-37 162.5 1735272  
cellular

organisms;Eukaryota;Opisthokonta;Metazoa;Eumetazoa;Bilateria;Protostomia;Spiralia;Lophotrochozoa;Mollusca;Gastropoda;Neomphalina;Neomphaloidea;Pel tospiridae;Gigantopelta;Gigantopelta aegis

UdeM00000018961 1735272 139.8 UdeM00000018961 XP\_041360999.1 37.7  
212 104 4 1 187 1 209 3.70E-30 139.8 1735272  
cellular

organisms;Eukaryota;Opisthokonta;Metazoa;Eumetazoa;Bilateria;Protostomia;Spiralia;Lophotrochozoa;Mollusca;Gastropoda;Neomphalina;Neomphaloidea;Pel tospiridae;Gigantopelta;Gigantopelta aegis

UdeM00000018962 1735272 164.9 UdeM00000018962 XP\_041360999.1 35.4  
246 131 4 1 221 1 243 1.30E-37 164.9 1735272  
cellular

organisms;Eukaryota;Opisthokonta;Metazoa;Eumetazoa;Bilateria;Protostomia;Spiralia;Lophotrochozoa;Mollusca;Gastropoda;Neomphalina;Neomphaloidea;Pel tospiridae;Gigantopelta;Gigantopelta aegis

UdeM00000018963 1735272 291.6 UdeM00000018963 XP\_041360999.1 57.9  
235 94 3 5 239 9 238 9.30E-76 291.6 1735272  
cellular

organisms;Eukaryota;Opisthokonta;Metazoa;Eumetazoa;Bilateria;Protostomia;Spiralia;Lophotrochozoa;Mollusca;Gastropoda;Neomphalina;Neomphaloidea;Pel tospiridae;Gigantopelta;Gigantopelta aegis

UdeM00000018964 7574 154.8 UdeM00000018964 XP\_013417145.1 59.3 118  
44 2 9 126 11 124 7.20E-35 154.8 7574 cellular

organisms;Eukaryota;Opisthokonta;Metazoa;Eumetazoa;Bilateria;Protostomia;Spiralia;Lophotrochozoa;Brachiopoda;Linguliformea;Lingulata;Lingulida;Linguloidea;Lingulidae;Lingula;Lingula anatina

UdeM00000018965 6596 209.5 UdeM00000018965 XP\_045181324.1 50.2 211  
89 6 1 207 1 199 4.70E-51 209.5 6596 cellular

organisms;Eukaryota;Opisthokonta;Metazoa;Eumetazoa;Bilateria;Protostomia;Spiralia;Lophotrochozoa;Mollusca;Bivalvia;Autobranchia;Heteroconchia;Euheterodonta;Imparidentia;Venerida;Veneroidea;Veneridae;Mercenaria;Mercenaria mercenaria

UdeM00000018966 6596 209.5 UdeM00000018966 XP\_045181324.1 50.2 211  
89 6 1 207 1 199 5.40E-51 209.5 6596 cellular

organisms;Eukaryota;Opisthokonta;Metazoa;Eumetazoa;Bilateria;Protostomia;Spiralia;Lophotrochozoa;Mollusca;Bivalvia;Autobranchia;Heteroconchia;Euheterodonta;Imparidentia;Venerida;Veneroidea;Veneridae;Mercenaria;Mercenaria mercenaria

UdeM00000018967 6579 121.3 UdeM00000018967 XP\_033761142.1 23 538  
367 16 6 515 2 520 3.70E-24 121.3 6579 cellular

organisms;Eukaryota;Opisthokonta;Metazoa;Eumetazoa;Bilateria;Protostomia;Spiralia;Lophotrochozoa;Mollusca;Bivalvia;Autobranchia;Pteriomorphia;Pectinida;Pectinoidea;Pectinidae;Pecten;Pecten maximus

UdeM00000018968 6579 458.4 UdeM00000018968 XP\_033727232.1 53 541  
226 7 93 612 122 655 1.50E-125 458.4 6579 cellular

organisms;Eukaryota;Opisthokonta;Metazoa;Eumetazoa;Bilateria;Protostomia;Spiralia;Lophotrochozoa;Mollusca;Bivalvia;Autobranchia;Pteriomorphia;Pectinida;Pectinoidea;Pectinidae;Pecten;Pecten maximus



UdeM00000018969 8868 69.7 UdeM00000018969 XP\_035423088.1 31.9 182  
 78 12 56 217 79 234 5.30E-09 69.7 8868 cellular  
 organisms;Eukaryota;Opisthokonta;Metazoa;Eumetazoa;Bilateria;Deuterostomi  
 a;Chordata;Craniata;Vertebrata;Gnathostomata;Teleostomi;Euteleostomi;Sarc  
 opterygii;Dipnotetrapodomorpha;Tetrapoda;Amniota;Sauropsida;Sauria;Archel  
 osauria;Archosauria;Dinosauria;Saurischia;Theropoda;Coelurosauria;Aves;Ne  
 ognathae;Galloanserae;Anseriformes;Anatidae;Anserinae;Cygnus;Cygnus  
 atratus

UdeM00000018970 221976 59.3 UdeM00000018970 XP\_041334617.1 31.2  
 189 82 8 34 216 413 559 7.10E-06 59.3 221976  
 cellular  
 organisms;Eukaryota;Opisthokonta;Metazoa;Eumetazoa;Bilateria;Deuterostomi  
 a;Chordata;Craniata;Vertebrata;Gnathostomata;Teleostomi;Euteleostomi;Sarc  
 opterygii;Dipnotetrapodomorpha;Tetrapoda;Amniota;Sauropsida;Sauria;Archel  
 osauria;Archosauria;Dinosauria;Saurischia;Theropoda;Coelurosauria;Aves;Ne  
 ognathae;Passeriformes;Passeroidea;Passeridae;Pyrgilauda;Pyrgilauda  
 ruficollis

UdeM00000018972 6334 67.4 UdeM00000018972 XP\_003376901.1 35.1 131  
 58 7 25 154 468 572 1.80E-08 67.4 6334 cellular  
 organisms;Eukaryota;Opisthokonta;Metazoa;Eumetazoa;Bilateria;Protostomia;  
 Ecdysozoa;Nematoda;Enoplea;Dorylaimia;Trichinellida;Trichinellidae;Trichi  
 nella;Trichinella spiralis

UdeM00000018973 2652724 74.3 UdeM00000018973 XP\_020912735.1 45.4  
 97 50 2 29 125 2659 2752 1.20E-10 74.3 2652724  
 cellular  
 organisms;Eukaryota;Opisthokonta;Metazoa;Eumetazoa;Cnidaria;Anthozoa;Hexa  
 corallia;Actiniaria;Aiptasiidae;Exaiptasia;Exaiptasia diaphana

UdeM00000018974 37621 111.3 UdeM00000018974 XP\_014679849.1 60.6 99  
 38 1 48 145 164 262 1.30E-21 111.3 37621 cellular  
 organisms;Eukaryota;Opisthokonta;Metazoa;Eumetazoa;Bilateria;Protostomia;  
 Ecdysozoa;Scalidophora;Priapulida;Priapulimorpha;Priapulimorphida;Priapul  
 idae;Priapulid;Priapulid caudatus

UdeM00000018974 37621 75.5 UdeM00000018974 XP\_014679849.1 74.3 35  
 9 0 146 180 589 623 7.90E-11 75.5 37621 cellular  
 organisms;Eukaryota;Opisthokonta;Metazoa;Eumetazoa;Bilateria;Protostomia;  
 Ecdysozoa;Scalidophora;Priapulida;Priapulimorpha;Priapulimorphida;Priapul  
 idae;Priapulid;Priapulid caudatus

UdeM00000018975 6596 2545.8 UdeM00000018975 XP\_045193558.1 35.6  
 4404 2624 93 28 4332 15 4307 0.00E+00 2545.8 6596  
 cellular  
 organisms;Eukaryota;Opisthokonta;Metazoa;Eumetazoa;Bilateria;Protostomia;  
 Spiralia;Lophotrochozoa;Mollusca;Bivalvia;Autobranchia;Heteroconchia;Euhe  
 terodonta;Imparidentia;Venerida;Veneroidea;Veneridae;Mercenaria;Mercenari  
 a mercenaria

UdeM00000018976 6596 372.9 UdeM00000018976 XP\_045167481.1 51.4 356  
 163 7 11 360 75 426 4.80E-10 372.9 6596 cellular  
 organisms;Eukaryota;Opisthokonta;Metazoa;Eumetazoa;Bilateria;Protostomia;  
 Spiralia;Lophotrochozoa;Mollusca;Bivalvia;Autobranchia;Heteroconchia;Euhe  
 terodonta;Imparidentia;Venerida;Veneroidea;Veneridae;Mercenaria;Mercenari  
 a mercenaria

UdeM00000018977 6596 2575.8 UdeM00000018977 XP\_045193558.1 35.3  
 4516 2684 92 13 4422 15 4399 0.00E+00 2575.8 6596  
 cellular  
 organisms;Eukaryota;Opisthokonta;Metazoa;Eumetazoa;Bilateria;Protostomia;

Spiralia;Lophotrochozoa;Mollusca;Bivalvia;Autobranchia;Heteroconchia;Euherodonta;Imparidentia;Venerida;Veneroidea;Veneridae;Mercenaria;Mercenaria mercenaria

UdeM00000018978 6596 2564.6 UdeM00000018978 XP\_045193558.1 35.3  
4479 2679 86 1134 5516 42 4399 0.00E+00 2564.6 6596  
cellular

organisms;Eukaryota;Opisthokonta;Metazoa;Eumetazoa;Bilateria;Protostomia;Spiralia;Lophotrochozoa;Mollusca;Bivalvia;Autobranchia;Heteroconchia;Euherodonta;Imparidentia;Venerida;Veneroidea;Veneridae;Mercenaria;Mercenaria mercenaria

UdeM00000018979 6573 178.7 UdeM00000018979 XP\_021351749.1 71.1 128  
33 3 4 127 7 134 5.00E-42 178.7 6573 cellular

organisms;Eukaryota;Opisthokonta;Metazoa;Eumetazoa;Bilateria;Protostomia;Spiralia;Lophotrochozoa;Mollusca;Bivalvia;Autobranchia;Pteriormorphia;Pectinida;Pectinoidea;Pectinidae;Mizuhopecten;Mizuhopecten yessoensis

UdeM00000018981 6573 181.4 UdeM00000018981 XP\_021351749.1 69 129  
37 2 2 127 6 134 1.10E-42 181.4 6573 cellular

organisms;Eukaryota;Opisthokonta;Metazoa;Eumetazoa;Bilateria;Protostomia;Spiralia;Lophotrochozoa;Mollusca;Bivalvia;Autobranchia;Pteriormorphia;Pectinida;Pectinoidea;Pectinidae;Mizuhopecten;Mizuhopecten yessoensis

UdeM00000018982 6596 2394.8 UdeM00000018982 XP\_045193558.1 34.3  
4346 2653 90 25 4286 172 4399 0.00E+00 2394.8 6596  
cellular

organisms;Eukaryota;Opisthokonta;Metazoa;Eumetazoa;Bilateria;Protostomia;Spiralia;Lophotrochozoa;Mollusca;Bivalvia;Autobranchia;Heteroconchia;Euherodonta;Imparidentia;Venerida;Veneroidea;Veneridae;Mercenaria;Mercenaria mercenaria

UdeM00000018985 6596 2177.5 UdeM00000018985 XP\_045193558.1 34  
4068 2475 82 10 3984 445 4396 0.00E+00 2177.5 6596  
cellular

organisms;Eukaryota;Opisthokonta;Metazoa;Eumetazoa;Bilateria;Protostomia;Spiralia;Lophotrochozoa;Mollusca;Bivalvia;Autobranchia;Heteroconchia;Euherodonta;Imparidentia;Venerida;Veneroidea;Veneridae;Mercenaria;Mercenaria mercenaria

UdeM00000018986 6596 408.7 UdeM00000018986 XP\_045193558.1 50.4 417  
191 6 21 430 15 422 9.30E-111 408.7 6596 cellular

organisms;Eukaryota;Opisthokonta;Metazoa;Eumetazoa;Bilateria;Protostomia;Spiralia;Lophotrochozoa;Mollusca;Bivalvia;Autobranchia;Heteroconchia;Euherodonta;Imparidentia;Venerida;Veneroidea;Veneridae;Mercenaria;Mercenaria mercenaria

UdeM00000018987 29159 536.6 UdeM00000018987 XP\_034317111.1 51.9 539  
251 5 1 535 1 535 3.70E-149 536.6 29159 cellular

organisms;Eukaryota;Opisthokonta;Metazoa;Eumetazoa;Bilateria;Protostomia;Spiralia;Lophotrochozoa;Mollusca;Bivalvia;Autobranchia;Pteriormorphia;Ostreida;Ostreoidea;Ostreidae;Crassostrea;Crassostrea gigas

UdeM00000018988 29159 349.4 UdeM00000018988 XP\_019926412.2 58.6 290  
119 1 131 419 2 291 6.60E-93 349.4 29159 cellular

organisms;Eukaryota;Opisthokonta;Metazoa;Eumetazoa;Bilateria;Protostomia;Spiralia;Lophotrochozoa;Mollusca;Bivalvia;Autobranchia;Pteriormorphia;Ostreida;Ostreoidea;Ostreidae;Crassostrea;Crassostrea gigas

UdeM00000018992 6596 212.2 UdeM00000018992 XP\_045185723.1 39.1 320  
171 6 4 319 456 755 1.20E-51 212.2 6596 cellular

organisms;Eukaryota;Opisthokonta;Metazoa;Eumetazoa;Bilateria;Protostomia;Spiralia;Lophotrochozoa;Mollusca;Bivalvia;Autobranchia;Heteroconchia;Euherodonta

terodonta;Imparidentia;Venerida;Veneroidea;Veneridae;Mercenaria;Mercenari  
 a mercenaria  
 UdeM00000018993 6596 579.7 UdeM00000018993 XP\_045215263.1 33.4 1165  
 328 11 59 789 4 1154 5.70E-162 579.7 6596 cellular  
 organisms;Eukaryota;Opisthokonta;Metazoa;Eumetazoa;Bilateria;Protostomia;  
 Spiralia;Lophotrochozoa;Mollusca;Bivalvia;Autobranchia;Heteroconchia;Euhe  
 terodonta;Imparidentia;Venerida;Veneroidea;Veneridae;Mercenaria;Mercenari  
 a mercenaria  
 UdeM00000018994 1735272 96.7 UdeM00000018994 XP\_041379412.1 40.8  
 120 67 2 15 133 11 127 3.70E-17 96.7 1735272  
 cellular  
 organisms;Eukaryota;Opisthokonta;Metazoa;Eumetazoa;Bilateria;Protostomia;  
 Spiralia;Lophotrochozoa;Mollusca;Gastropoda;Neomphalina;Neomphaloidea;Pel  
 tospiridae;Gigantopelta;Gigantopelta aegis  
 UdeM00000018995 6596 2535.8 UdeM00000018995 XP\_045193558.1 35  
 4477 2701 95 150 4535 42 4399 0.00E+00 2535.8 6596  
 cellular  
 organisms;Eukaryota;Opisthokonta;Metazoa;Eumetazoa;Bilateria;Protostomia;  
 Spiralia;Lophotrochozoa;Mollusca;Bivalvia;Autobranchia;Heteroconchia;Euhe  
 terodonta;Imparidentia;Venerida;Veneroidea;Veneridae;Mercenaria;Mercenari  
 a mercenaria  
 UdeM00000018997 6596 458.8 UdeM00000018997 XP\_045180256.1 46 530  
 235 9 159 647 97 616 1.20E-125 458.8 6596 cellular  
 organisms;Eukaryota;Opisthokonta;Metazoa;Eumetazoa;Bilateria;Protostomia;  
 Spiralia;Lophotrochozoa;Mollusca;Bivalvia;Autobranchia;Heteroconchia;Euhe  
 terodonta;Imparidentia;Venerida;Veneroidea;Veneridae;Mercenaria;Mercenari  
 a mercenaria  
 UdeM00000018998 6596 132.1 UdeM00000018998 XP\_045180899.1 35.8 201  
 126 1 31 231 35 232 1.10E-27 132.1 6596 cellular  
 organisms;Eukaryota;Opisthokonta;Metazoa;Eumetazoa;Bilateria;Protostomia;  
 Spiralia;Lophotrochozoa;Mollusca;Bivalvia;Autobranchia;Heteroconchia;Euhe  
 terodonta;Imparidentia;Venerida;Veneroidea;Veneridae;Mercenaria;Mercenari  
 a mercenaria  
 UdeM00000018999 6596 220.7 UdeM00000018999 XP\_045181959.1 43.2 410  
 181 15 1 381 1 387 3.20E-54 220.7 6596 cellular  
 organisms;Eukaryota;Opisthokonta;Metazoa;Eumetazoa;Bilateria;Protostomia;  
 Spiralia;Lophotrochozoa;Mollusca;Bivalvia;Autobranchia;Heteroconchia;Euhe  
 terodonta;Imparidentia;Venerida;Veneroidea;Veneridae;Mercenaria;Mercenari  
 a mercenaria  
 UdeM00000019000 1735272 76.6 UdeM00000019000 XP\_041371610.1 36.3  
 135 67 3 1 117 76 209 2.30E-11 76.6 1735272  
 cellular  
 organisms;Eukaryota;Opisthokonta;Metazoa;Eumetazoa;Bilateria;Protostomia;  
 Spiralia;Lophotrochozoa;Mollusca;Gastropoda;Neomphalina;Neomphaloidea;Pel  
 tospiridae;Gigantopelta;Gigantopelta aegis  
 UdeM00000019001 6596 299.3 UdeM00000019001 XP\_045206316.1 41.9 442  
 207 9 45 465 84 496 8.80E-78 299.3 6596 cellular  
 organisms;Eukaryota;Opisthokonta;Metazoa;Eumetazoa;Bilateria;Protostomia;  
 Spiralia;Lophotrochozoa;Mollusca;Bivalvia;Autobranchia;Heteroconchia;Euhe  
 terodonta;Imparidentia;Venerida;Veneroidea;Veneridae;Mercenaria;Mercenari  
 a mercenaria  
 UdeM00000019004 6596 236.1 UdeM00000019004 XP\_045182203.1 38.3 373  
 188 8 1 338 404 769 6.70E-59 236.1 6596 cellular  
 organisms;Eukaryota;Opisthokonta;Metazoa;Eumetazoa;Bilateria;Protostomia;

Spiralia;Lophotrochozoa;Mollusca;Bivalvia;Autobranchia;Heteroconchia;Euherodonta;Imparidentia;Venerida;Veneroidea;Veneridae;Mercenaria;Mercenaria mercenaria

UdeM00000019018 400727 111.7 UdeM00000019018 XP\_025089898.1 33.7  
190 95 4 44 204 652 839 1.20E-21 111.7 400727

cellular

organisms;Eukaryota;Opisthokonta;Metazoa;Eumetazoa;Bilateria;Protostomia;Spiralia;Lophotrochozoa;Mollusca;Gastropoda;Caenogastropoda;Architaenioglossa;Ampullarioidea;Ampullariidae;Pomacea;Pomacea canaliculata

UdeM00000019020 76193 99.4 UdeM00000019020 XP\_014367806.1 54.1 85  
39 0 1 85 732 816 4.00E-18 99.4 76193 cellular

organisms;Eukaryota;Opisthokonta;Metazoa;Eumetazoa;Bilateria;Protostomia;Ecdysozoa;Panarthropoda;Arthropoda;Mandibulata;Pancrustacea;Hexapoda;Insecta;Dicondylia;Pterygota;Neoptera;Endopterygota;Amphiesmenoptera;Lepidoptera;Glossata;Neolepidoptera;Heteroneura;Ditrysia;Obtectomera;Papilionoidea;Papilionidae;Papilioninae;Papilionini;Papilio;Papilio machaon

UdeM00000019021 218467 235.7 UdeM00000019021 XP\_023213948.1 46  
278 149 1 94 371 1346 1622 1.30E-58 235.7 218467

cellular

organisms;Eukaryota;Opisthokonta;Metazoa;Eumetazoa;Bilateria;Protostomia;Ecdysozoa;Panarthropoda;Arthropoda;Chelicerata;Arachnida;Scorpiones;Buthida;Buthoidea;Buthidae;Centruroides;Centruroides sculpturatus

UdeM00000019022 6573 87 UdeM00000019022 XP\_021346189.1 53.8 78  
36 0 30 107 1 78 1.60E-14 87 6573 cellular

organisms;Eukaryota;Opisthokonta;Metazoa;Eumetazoa;Bilateria;Protostomia;Spiralia;Lophotrochozoa;Mollusca;Bivalvia;Autobranchia;Pteriormorphia;Pectinida;Pectinoidea;Pectinidae;Mizuhopecten;Mizuhopecten yessoensis

UdeM00000019026 6573 228.8 UdeM00000019026 XP\_021355924.1 58 212  
81 3 25 232 9 216 8.00E-57 228.8 6573 cellular

organisms;Eukaryota;Opisthokonta;Metazoa;Eumetazoa;Bilateria;Protostomia;Spiralia;Lophotrochozoa;Mollusca;Bivalvia;Autobranchia;Pteriormorphia;Pectinida;Pectinoidea;Pectinidae;Mizuhopecten;Mizuhopecten yessoensis

UdeM00000019027 6596 235.3 UdeM00000019027 XP\_045181941.1 74.2 151  
39 0 9 159 54 204 5.30E-59 235.3 6596 cellular

organisms;Eukaryota;Opisthokonta;Metazoa;Eumetazoa;Bilateria;Protostomia;Spiralia;Lophotrochozoa;Mollusca;Bivalvia;Autobranchia;Heteroconchia;Euherodonta;Imparidentia;Venerida;Veneroidea;Veneridae;Mercenaria;Mercenaria mercenaria

UdeM00000019028 6596 233.8 UdeM00000019028 XP\_045181941.1 66.5 176  
55 1 2 177 33 204 1.70E-58 233.8 6596 cellular

organisms;Eukaryota;Opisthokonta;Metazoa;Eumetazoa;Bilateria;Protostomia;Spiralia;Lophotrochozoa;Mollusca;Bivalvia;Autobranchia;Heteroconchia;Euherodonta;Imparidentia;Venerida;Veneroidea;Veneridae;Mercenaria;Mercenaria mercenaria

UdeM00000019029 6596 436.4 UdeM00000019029 XP\_045191724.1 58.5 402  
149 3 28 411 37 438 4.00E-119 436.4 6596 cellular

organisms;Eukaryota;Opisthokonta;Metazoa;Eumetazoa;Bilateria;Protostomia;Spiralia;Lophotrochozoa;Mollusca;Bivalvia;Autobranchia;Heteroconchia;Euherodonta;Imparidentia;Venerida;Veneroidea;Veneridae;Mercenaria;Mercenaria mercenaria

UdeM00000019030 6596 557.8 UdeM00000019030 XP\_045181557.1 78.4 365  
70 4 1 364 1 357 1.20E-155 557.8 6596 cellular

organisms;Eukaryota;Opisthokonta;Metazoa;Eumetazoa;Bilateria;Protostomia;Spiralia;Lophotrochozoa;Mollusca;Bivalvia;Autobranchia;Heteroconchia;Euherodonta;Imparidentia;Venerida;Veneroidea;Veneridae;Mercenaria;Mercenaria mercenaria

terodonta;Imparidentia;Venerida;Veneroidea;Veneridae;Mercenaria;Mercenaria mercenaria

UdeM00000019031 6596 582.4 UdeM00000019031 XP\_045181554.1 47.4 658  
324 9 1 639 2 656 7.00E-163 582.4 6596 cellular

organisms;Eukaryota;Opisthokonta;Metazoa;Eumetazoa;Bilateria;Protostomia;Spiralia;Lophotrochozoa;Mollusca;Bivalvia;Autobranhia;Heteroconchia;Euheterodonta;Imparidentia;Venerida;Veneroidea;Veneridae;Mercenaria;Mercenaria mercenaria

UdeM00000019032 6579 508.4 UdeM00000019032 XP\_033726991.1 64.6 381  
43 1 29 409 665 953 8.20E-141 508.4 6579 cellular

organisms;Eukaryota;Opisthokonta;Metazoa;Eumetazoa;Bilateria;Protostomia;Spiralia;Lophotrochozoa;Mollusca;Bivalvia;Autobranhia;Pteriomorphia;Pectinida;Pectinoidea;Pectinidae;Pecten;Pecten maximus

UdeM00000019034 1073090 71.2 UdeM00000019034 XP\_022578436.1 35.2  
145 88 4 7 147 4 146 1.40E-09 71.2 1073090

cellular

organisms;Eukaryota;Opisthokonta;Fungi;Dikarya;Ascomycota;saccharomyceta;Pezizomycotina;leotiomyceta;Eurotiomycetes;Eurotiomycetidae;Eurotiales;Aspergillaceae;Penicillium;Penicillium zonata;Penicillium zonata CBS 506.65

UdeM00000019035 7668 127.9 UdeM00000019035 XP\_789104.5 46.2 156 75  
2 2 153 52 202 1.10E-26 127.9 7668 cellular

organisms;Eukaryota;Opisthokonta;Metazoa;Eumetazoa;Bilateria;Deuterostomia;Echinodermata;Eleutherozoa;Echinozoa;Echinoidea;Euechinoidea;Echinacea;Camarodonta;Echinidea;Strongylocentrotidae;Strongylocentrotus;Strongylocentrotus purpuratus

UdeM00000019037 6596 397.1 UdeM00000019037 XP\_045169063.1 36.8 638  
376 11 18 637 14 642 4.30E-107 397.1 6596 cellular

organisms;Eukaryota;Opisthokonta;Metazoa;Eumetazoa;Bilateria;Protostomia;Spiralia;Lophotrochozoa;Mollusca;Bivalvia;Autobranhia;Heteroconchia;Euheterodonta;Imparidentia;Venerida;Veneroidea;Veneridae;Mercenaria;Mercenaria mercenaria

UdeM00000019038 6596 275 UdeM00000019038 XP\_045169075.1 33.5 498  
304 11 3 482 154 642 1.90E-70 275 6596 cellular

organisms;Eukaryota;Opisthokonta;Metazoa;Eumetazoa;Bilateria;Protostomia;Spiralia;Lophotrochozoa;Mollusca;Bivalvia;Autobranhia;Heteroconchia;Euheterodonta;Imparidentia;Venerida;Veneroidea;Veneridae;Mercenaria;Mercenaria mercenaria

UdeM00000019039 6565 172.2 UdeM00000019039 XP\_022342298.1 35.3 343  
123 5 16 275 200 526 9.40E-40 172.2 6565 cellular

organisms;Eukaryota;Opisthokonta;Metazoa;Eumetazoa;Bilateria;Protostomia;Spiralia;Lophotrochozoa;Mollusca;Bivalvia;Autobranhia;Pteriomorphia;Ostreida;Ostreoidea;Ostreidae;Crassostrea;Crassostrea virginica

UdeM00000019040 6565 172.2 UdeM00000019040 XP\_022342298.1 35.3 343  
123 5 18 277 200 526 9.50E-40 172.2 6565 cellular

organisms;Eukaryota;Opisthokonta;Metazoa;Eumetazoa;Bilateria;Protostomia;Spiralia;Lophotrochozoa;Mollusca;Bivalvia;Autobranhia;Pteriomorphia;Ostreida;Ostreoidea;Ostreidae;Crassostrea;Crassostrea virginica

UdeM00000019041 6596 731.1 UdeM00000019041 XP\_045182690.1 52.5 714  
317 6 43 753 38 732 1.40E-207 731.1 6596 cellular

organisms;Eukaryota;Opisthokonta;Metazoa;Eumetazoa;Bilateria;Protostomia;Spiralia;Lophotrochozoa;Mollusca;Bivalvia;Autobranhia;Heteroconchia;Euheterodonta;Imparidentia;Venerida;Veneroidea;Veneridae;Mercenaria;Mercenaria mercenaria

UdeM00000019042 6596 90.9 UdeM00000019042 XP\_045182551.1 48.4 91  
 47 0 1 91 2 92 9.50E-16 90.9 6596 cellular  
 organisms;Eukaryota;Opisthokonta;Metazoa;Eumetazoa;Bilateria;Protostomia;  
 Spiralia;Lophotrochozoa;Mollusca;Bivalvia;Autobranhia;Heteroconchia;Euhe  
 terodonta;Imparidentia;Venerida;Veneroidea;Veneridae;Mercenaria;Mercenari  
 a mercenaria

UdeM00000019043 6596 209.9 UdeM00000019043 XP\_045196479.1 44.3 230  
 127 1 13 242 3 231 3.60E-51 209.9 6596 cellular  
 organisms;Eukaryota;Opisthokonta;Metazoa;Eumetazoa;Bilateria;Protostomia;  
 Spiralia;Lophotrochozoa;Mollusca;Bivalvia;Autobranhia;Heteroconchia;Euhe  
 terodonta;Imparidentia;Venerida;Veneroidea;Veneridae;Mercenaria;Mercenari  
 a mercenaria

UdeM00000019044 6596 226.1 UdeM00000019044 XP\_045182096.1 36.1 382  
 218 3 15 373 78 456 7.60E-56 226.1 6596 cellular  
 organisms;Eukaryota;Opisthokonta;Metazoa;Eumetazoa;Bilateria;Protostomia;  
 Spiralia;Lophotrochozoa;Mollusca;Bivalvia;Autobranhia;Heteroconchia;Euhe  
 terodonta;Imparidentia;Venerida;Veneroidea;Veneridae;Mercenaria;Mercenari  
 a mercenaria

UdeM00000019045 6596 325.1 UdeM00000019045 XP\_045180892.1 67.1 237  
 72 4 5 240 8 239 7.60E-86 325.1 6596 cellular  
 organisms;Eukaryota;Opisthokonta;Metazoa;Eumetazoa;Bilateria;Protostomia;  
 Spiralia;Lophotrochozoa;Mollusca;Bivalvia;Autobranhia;Heteroconchia;Euhe  
 terodonta;Imparidentia;Venerida;Veneroidea;Veneridae;Mercenaria;Mercenari  
 a mercenaria

UdeM00000019046 6596 240.4 UdeM00000019046 XP\_045180893.1 56.5 214  
 92 1 1 214 1 213 3.70E-60 240.4 6596 cellular  
 organisms;Eukaryota;Opisthokonta;Metazoa;Eumetazoa;Bilateria;Protostomia;  
 Spiralia;Lophotrochozoa;Mollusca;Bivalvia;Autobranhia;Heteroconchia;Euhe  
 terodonta;Imparidentia;Venerida;Veneroidea;Veneridae;Mercenaria;Mercenari  
 a mercenaria

UdeM00000019047 6596 198.7 UdeM00000019047 XP\_045182096.1 30.5 479  
 231 8 15 491 78 456 1.70E-47 198.7 6596 cellular  
 organisms;Eukaryota;Opisthokonta;Metazoa;Eumetazoa;Bilateria;Protostomia;  
 Spiralia;Lophotrochozoa;Mollusca;Bivalvia;Autobranhia;Heteroconchia;Euhe  
 terodonta;Imparidentia;Venerida;Veneroidea;Veneridae;Mercenaria;Mercenari  
 a mercenaria

UdeM00000019048 6596 196.1 UdeM00000019048 XP\_045182096.1 30.9 482  
 228 8 15 495 78 455 1.10E-46 196.1 6596 cellular  
 organisms;Eukaryota;Opisthokonta;Metazoa;Eumetazoa;Bilateria;Protostomia;  
 Spiralia;Lophotrochozoa;Mollusca;Bivalvia;Autobranhia;Heteroconchia;Euhe  
 terodonta;Imparidentia;Venerida;Veneroidea;Veneridae;Mercenaria;Mercenari  
 a mercenaria

UdeM00000019049 6596 207.2 UdeM00000019049 XP\_045180342.1 30.7 424  
 253 3 13 432 36 422 4.20E-50 207.2 6596 cellular  
 organisms;Eukaryota;Opisthokonta;Metazoa;Eumetazoa;Bilateria;Protostomia;  
 Spiralia;Lophotrochozoa;Mollusca;Bivalvia;Autobranhia;Heteroconchia;Euhe  
 terodonta;Imparidentia;Venerida;Veneroidea;Veneridae;Mercenaria;Mercenari  
 a mercenaria

UdeM00000019050 6573 527.7 UdeM00000019050 XP\_021357519.1 36.8 920  
 508 23 6 879 5 897 2.90E-146 527.7 6573 cellular  
 organisms;Eukaryota;Opisthokonta;Metazoa;Eumetazoa;Bilateria;Protostomia;  
 Spiralia;Lophotrochozoa;Mollusca;Bivalvia;Autobranhia;Pteriomorphia;Pect  
 inida;Pectinoidea;Pectinidae;Mizuhopecten;Mizuhopecten yessoensis

UdeM00000019051 6579 270.8 UdeM00000019051 XP\_033726671.1 51.8 282  
 121 6 992 1273 708 974 9.00E-69 270.8 6579 cellular  
 organisms;Eukaryota;Opisthokonta;Metazoa;Eumetazoa;Bilateria;Protostomia;  
 Spiralia;Lophotrochozoa;Mollusca;Bivalvia;Autobranchia;Pteriormorphia;Pect  
 inida;Pectinoidea;Pectinidae;Pecten;Pecten maximus  
 UdeM00000019051 6579 72 UdeM00000019051 XP\_033726671.1 50.7 73  
 33 1 17 89 35 104 6.10E-09 72 6579 cellular  
 organisms;Eukaryota;Opisthokonta;Metazoa;Eumetazoa;Bilateria;Protostomia;  
 Spiralia;Lophotrochozoa;Mollusca;Bivalvia;Autobranchia;Pteriormorphia;Pect  
 inida;Pectinoidea;Pectinidae;Pecten;Pecten maximus  
 UdeM00000019052 6596 194.9 UdeM00000019052 XP\_045182493.1 74.8 119  
 30 0 1 119 1 119 5.90E-47 194.9 6596 cellular  
 organisms;Eukaryota;Opisthokonta;Metazoa;Eumetazoa;Bilateria;Protostomia;  
 Spiralia;Lophotrochozoa;Mollusca;Bivalvia;Autobranchia;Heteroconchia;Euhe  
 terodonta;Imparidentia;Venerida;Veneroidea;Veneridae;Mercenaria;Mercenari  
 a mercenaria  
 UdeM00000019053 6596 1031.6 UdeM00000019053 XP\_045183076.1 51.7  
 1085 438 17 8 1080 54 1064 7.30E-298 1031.6 6596  
 cellular  
 organisms;Eukaryota;Opisthokonta;Metazoa;Eumetazoa;Bilateria;Protostomia;  
 Spiralia;Lophotrochozoa;Mollusca;Bivalvia;Autobranchia;Heteroconchia;Euhe  
 terodonta;Imparidentia;Venerida;Veneroidea;Veneridae;Mercenaria;Mercenari  
 a mercenaria  
 UdeM00000019055 6596 288.1 UdeM00000019055 XP\_045180964.1 40.3 464  
 236 8 15 469 3 434 2.00E-74 288.1 6596 cellular  
 organisms;Eukaryota;Opisthokonta;Metazoa;Eumetazoa;Bilateria;Protostomia;  
 Spiralia;Lophotrochozoa;Mollusca;Bivalvia;Autobranchia;Heteroconchia;Euhe  
 terodonta;Imparidentia;Venerida;Veneroidea;Veneridae;Mercenaria;Mercenari  
 a mercenaria  
 UdeM00000019056 6579 391 UdeM00000019056 XP\_033727099.1 59.4 335  
 132 3 131 464 18 349 2.20E-105 391 6579 cellular  
 organisms;Eukaryota;Opisthokonta;Metazoa;Eumetazoa;Bilateria;Protostomia;  
 Spiralia;Lophotrochozoa;Mollusca;Bivalvia;Autobranchia;Pteriormorphia;Pect  
 inida;Pectinoidea;Pectinidae;Pecten;Pecten maximus  
 UdeM00000019057 6579 385.6 UdeM00000019057 XP\_033727099.1 59.1 337  
 132 4 131 466 18 349 9.10E-104 385.6 6579 cellular  
 organisms;Eukaryota;Opisthokonta;Metazoa;Eumetazoa;Bilateria;Protostomia;  
 Spiralia;Lophotrochozoa;Mollusca;Bivalvia;Autobranchia;Pteriormorphia;Pect  
 inida;Pectinoidea;Pectinidae;Pecten;Pecten maximus  
 UdeM00000019058 29159 67.8 UdeM00000019058 XP\_034329456.1 49.3 71  
 31 1 82 152 451 516 1.50E-08 67.8 29159 cellular  
 organisms;Eukaryota;Opisthokonta;Metazoa;Eumetazoa;Bilateria;Protostomia;  
 Spiralia;Lophotrochozoa;Mollusca;Bivalvia;Autobranchia;Pteriormorphia;Ostr  
 eida;Ostreoidea;Ostreidae;Crassostrea;Crassostrea gigas  
 UdeM00000019059 7574 70.1 UdeM00000019059 XP\_013389723.1 29.9 177  
 101 4 54 213 55 225 4.30E-09 70.1 7574 cellular  
 organisms;Eukaryota;Opisthokonta;Metazoa;Eumetazoa;Bilateria;Protostomia;  
 Spiralia;Lophotrochozoa;Brachiopoda;Linguliformea;Lingulata;Lingulida;Lin  
 guloidea;Lingulidae;Lingula;Lingula anatina  
 UdeM00000019061 7574 67.8 UdeM00000019061 XP\_013380638.1 27.9 172  
 102 4 58 213 59 224 2.10E-08 67.8 7574 cellular  
 organisms;Eukaryota;Opisthokonta;Metazoa;Eumetazoa;Bilateria;Protostomia;  
 Spiralia;Lophotrochozoa;Brachiopoda;Linguliformea;Lingulata;Lingulida;Lin  
 guloidea;Lingulidae;Lingula;Lingula anatina

UdeM00000019062 7574 65.1 UdeM00000019062 XP\_013389723.1 28.6 182  
 103 5 54 215 55 229 1.40E-07 65.1 7574 cellular  
 organisms;Eukaryota;Opisthokonta;Metazoa;Eumetazoa;Bilateria;Protostomia;  
 Spiralia;Lophotrochozoa;Brachiopoda;Linguliformea;Lingulata;Lingulida;Lin  
 guloidea;Lingulidae;Lingula;Lingula anatina  
 UdeM00000019063 7574 70.9 UdeM00000019063 XP\_013389723.1 30.6 222  
 130 5 6 210 11 225 2.50E-09 70.9 7574 cellular  
 organisms;Eukaryota;Opisthokonta;Metazoa;Eumetazoa;Bilateria;Protostomia;  
 Spiralia;Lophotrochozoa;Brachiopoda;Linguliformea;Lingulata;Lingulida;Lin  
 guloidea;Lingulidae;Lingula;Lingula anatina  
 UdeM00000019064 7574 63.5 UdeM00000019064 XP\_013414043.1 26.4 178  
 104 5 58 215 59 229 4.00E-07 63.5 7574 cellular  
 organisms;Eukaryota;Opisthokonta;Metazoa;Eumetazoa;Bilateria;Protostomia;  
 Spiralia;Lophotrochozoa;Brachiopoda;Linguliformea;Lingulata;Lingulida;Lin  
 guloidea;Lingulidae;Lingula;Lingula anatina  
 UdeM00000019066 7574 60.8 UdeM00000019066 XP\_013389723.1 28.5 151  
 92 3 59 199 60 204 2.40E-06 60.8 7574 cellular  
 organisms;Eukaryota;Opisthokonta;Metazoa;Eumetazoa;Bilateria;Protostomia;  
 Spiralia;Lophotrochozoa;Brachiopoda;Linguliformea;Lingulata;Lingulida;Lin  
 guloidea;Lingulidae;Lingula;Lingula anatina  
 UdeM00000019068 7574 70.5 UdeM00000019068 XP\_013389723.1 30.2 182  
 98 5 58 219 59 231 3.30E-09 70.5 7574 cellular  
 organisms;Eukaryota;Opisthokonta;Metazoa;Eumetazoa;Bilateria;Protostomia;  
 Spiralia;Lophotrochozoa;Brachiopoda;Linguliformea;Lingulata;Lingulida;Lin  
 guloidea;Lingulidae;Lingula;Lingula anatina  
 UdeM00000019069 7574 67.4 UdeM00000019069 XP\_013414043.1 25.9 224  
 143 5 9 215 11 228 2.80E-08 67.4 7574 cellular  
 organisms;Eukaryota;Opisthokonta;Metazoa;Eumetazoa;Bilateria;Protostomia;  
 Spiralia;Lophotrochozoa;Brachiopoda;Linguliformea;Lingulata;Lingulida;Lin  
 guloidea;Lingulidae;Lingula;Lingula anatina  
 UdeM00000019070 7574 65.9 UdeM00000019070 XP\_013380638.1 30 210  
 125 4 14 207 15 218 8.20E-08 65.9 7574 cellular  
 organisms;Eukaryota;Opisthokonta;Metazoa;Eumetazoa;Bilateria;Protostomia;  
 Spiralia;Lophotrochozoa;Brachiopoda;Linguliformea;Lingulata;Lingulida;Lin  
 guloidea;Lingulidae;Lingula;Lingula anatina  
 UdeM00000019071 7574 69.3 UdeM00000019071 XP\_013414043.1 29.6 179  
 94 5 58 213 59 228 7.40E-09 69.3 7574 cellular  
 organisms;Eukaryota;Opisthokonta;Metazoa;Eumetazoa;Bilateria;Protostomia;  
 Spiralia;Lophotrochozoa;Brachiopoda;Linguliformea;Lingulata;Lingulida;Lin  
 guloidea;Lingulidae;Lingula;Lingula anatina  
 UdeM00000019072 6596 366.7 UdeM00000019072 XP\_045183006.1 52.4 355  
 163 5 38 389 848 1199 3.80E-98 366.7 6596 cellular  
 organisms;Eukaryota;Opisthokonta;Metazoa;Eumetazoa;Bilateria;Protostomia;  
 Spiralia;Lophotrochozoa;Mollusca;Bivalvia;Autobranchia;Heteroconchia;Euhe  
 terodonta;Imparidentia;Venerida;Veneroidea;Veneridae;Mercenaria;Mercenari  
 a mercenaria  
 UdeM00000019073 7574 67 UdeM00000019073 XP\_013414043.1 26.7 176  
 103 4 58 213 59 228 3.70E-08 67 7574 cellular  
 organisms;Eukaryota;Opisthokonta;Metazoa;Eumetazoa;Bilateria;Protostomia;  
 Spiralia;Lophotrochozoa;Brachiopoda;Linguliformea;Lingulata;Lingulida;Lin  
 guloidea;Lingulidae;Lingula;Lingula anatina  
 UdeM00000019074 6596 1247.3 UdeM00000019074 XP\_045183006.1 54.4  
 1169 500 13 3 1165 58 1199 0.00E+00 1247.3 6596  
 cellular



organisms;Eukaryota;Opisthokonta;Metazoa;Eumetazoa;Bilateria;Protostomia;Spiralia;Lophotrochozoa;Mollusca;Bivalvia;Autobranchia;Heteroconchia;Euherodonta;Imparidentia;Venerida;Veneroidea;Veneridae;Mercenaria;Mercenaria mercenaria

UdeM00000019075 8005 80.1 UdeM00000019075 XP\_035388140.1 31.8 132  
84 4 101 232 26 151 4.20E-12 80.1 8005 cellular

organisms;Eukaryota;Opisthokonta;Metazoa;Eumetazoa;Bilateria;Deuterostomia;Chordata;Craniata;Vertebrata;Gnathostomata;Teleostomi;Euteleostomi;Actinopterygii;Actinopteri;Neopterygii;Teleostei;Osteoglossocephalai;Clupeocephala;Otomorpha;Ostariophysi;Otophysi;Characiphysae;Gymnotiformes;Gymnotoidei;Gymnotidae;Electrophorus;Electrophorus electricus

UdeM00000019077 225164 137.1 UdeM00000019077 XP\_009049302.1 48.1  
133 69 0 29 161 6 138 2.10E-29 137.1 225164  
cellular

organisms;Eukaryota;Opisthokonta;Metazoa;Eumetazoa;Bilateria;Protostomia;Spiralia;Lophotrochozoa;Mollusca;Gastropoda;Patellogastropoda;Lottioidea;Lottiidae;Lottia;Lottia gigantea

UdeM00000019078 225164 152.1 UdeM00000019078 XP\_009049302.1 48.6  
142 73 0 20 161 9 150 6.10E-34 152.1 225164  
cellular

organisms;Eukaryota;Opisthokonta;Metazoa;Eumetazoa;Bilateria;Protostomia;Spiralia;Lophotrochozoa;Mollusca;Gastropoda;Patellogastropoda;Lottioidea;Lottiidae;Lottia;Lottia gigantea

UdeM00000019079 225164 156.4 UdeM00000019079 XP\_009049302.1 48.3  
145 75 0 10 154 6 150 3.10E-35 156.4 225164  
cellular

organisms;Eukaryota;Opisthokonta;Metazoa;Eumetazoa;Bilateria;Protostomia;Spiralia;Lophotrochozoa;Mollusca;Gastropoda;Patellogastropoda;Lottioidea;Lottiidae;Lottia;Lottia gigantea

UdeM00000019080 225164 150.2 UdeM00000019080 XP\_009049302.1 47.2  
144 76 0 33 176 6 149 2.60E-33 150.2 225164  
cellular

organisms;Eukaryota;Opisthokonta;Metazoa;Eumetazoa;Bilateria;Protostomia;Spiralia;Lophotrochozoa;Mollusca;Gastropoda;Patellogastropoda;Lottioidea;Lottiidae;Lottia;Lottia gigantea

UdeM00000019081 225164 146 UdeM00000019081 XP\_009049302.1 48.2  
137 71 0 50 186 13 149 5.10E-32 146 225164  
cellular

organisms;Eukaryota;Opisthokonta;Metazoa;Eumetazoa;Bilateria;Protostomia;Spiralia;Lophotrochozoa;Mollusca;Gastropoda;Patellogastropoda;Lottioidea;Lottiidae;Lottia;Lottia gigantea

UdeM00000019082 400727 257.7 UdeM00000019082 XP\_025093899.1 40.2  
326 174 5 142 461 83 393 2.90E-65 257.7 400727  
cellular

organisms;Eukaryota;Opisthokonta;Metazoa;Eumetazoa;Bilateria;Protostomia;Spiralia;Lophotrochozoa;Mollusca;Gastropoda;Caenogastropoda;Architaenioglossa;Ampullarioidea;Ampullariidae;Pomacea;Pomacea canaliculata

UdeM00000019084 29159 143.7 UdeM00000019084 XP\_034334268.1 41.3 167  
71 1 18 157 184 350 2.00E-31 143.7 29159 cellular

organisms;Eukaryota;Opisthokonta;Metazoa;Eumetazoa;Bilateria;Protostomia;Spiralia;Lophotrochozoa;Mollusca;Bivalvia;Autobranchia;Pteriomorpha;Ostreida;Ostreoidea;Ostreidae;Crassostrea;Crassostrea gigas

UdeM00000019083 29159 201.8 UdeM00000019083 XP\_034334268.1 47.9 194  
98 1 1 194 160 350 7.80E-49 201.8 29159 cellular

organisms;Eukaryota;Opisthokonta;Metazoa;Eumetazoa;Bilateria;Protostomia;Spiralia;Lophotrochozoa;Mollusca;Bivalvia;Autobranhia;Pteriormorphia;Ostr

eida;Ostreoidea;Ostreidae;Crassostrea;Crassostrea gigas  
UdeM00000019085 6565 756.1 UdeM00000019085 XP\_022308715.1 68.3 520  
165 0 3 522 1 520 2.90E-215 756.1 6565 cellular

organisms;Eukaryota;Opisthokonta;Metazoa;Eumetazoa;Bilateria;Protostomia;Spiralia;Lophotrochozoa;Mollusca;Bivalvia;Autobranhia;Pteriormorphia;Ostr

eida;Ostreoidea;Ostreidae;Crassostrea;Crassostrea virginica  
UdeM00000019086 29159 354 UdeM00000019086 XP\_034313418.1 32.7 765  
424 26 480 1220 4709 5406 7.80E-94 354 29159 cellular

organisms;Eukaryota;Opisthokonta;Metazoa;Eumetazoa;Bilateria;Protostomia;Spiralia;Lophotrochozoa;Mollusca;Bivalvia;Autobranhia;Pteriormorphia;Ostr

eida;Ostreoidea;Ostreidae;Crassostrea;Crassostrea gigas  
UdeM00000019087 6573 377.1 UdeM00000019087 XP\_021340778.1 57 321  
138 0 10 330 30 350 2.40E-101 377.1 6573 cellular

organisms;Eukaryota;Opisthokonta;Metazoa;Eumetazoa;Bilateria;Protostomia;Spiralia;Lophotrochozoa;Mollusca;Bivalvia;Autobranhia;Pteriormorphia;Pect

inida;Pectinoidea;Pectinidae;Mizuhopecten;Mizuhopecten yessoensis  
UdeM00000019088 6596 73.6 UdeM00000019088 XP\_045180327.1 42.3 104  
46 2 18 112 20 118 1.90E-10 73.6 6596 cellular

organisms;Eukaryota;Opisthokonta;Metazoa;Eumetazoa;Bilateria;Protostomia;Spiralia;Lophotrochozoa;Mollusca;Bivalvia;Autobranhia;Heteroconchia;Euhe

terodonta;Imparidentia;Venerida;Veneroidea;Veneridae;Mercenaria;Mercenari  
a mercenaria  
UdeM00000019089 6596 825.1 UdeM00000019089 XP\_045180323.1 76.5 519  
122 0 1 519 31 549 5.00E-236 825.1 6596 cellular

organisms;Eukaryota;Opisthokonta;Metazoa;Eumetazoa;Bilateria;Protostomia;Spiralia;Lophotrochozoa;Mollusca;Bivalvia;Autobranhia;Heteroconchia;Euhe

terodonta;Imparidentia;Venerida;Veneroidea;Veneridae;Mercenaria;Mercenari  
a mercenaria  
UdeM00000019090 6596 130.2 UdeM00000019090 XP\_045181586.1 29.5 264  
150 4 1 230 4 265 5.70E-27 130.2 6596 cellular

organisms;Eukaryota;Opisthokonta;Metazoa;Eumetazoa;Bilateria;Protostomia;Spiralia;Lophotrochozoa;Mollusca;Bivalvia;Autobranhia;Heteroconchia;Euhe

terodonta;Imparidentia;Venerida;Veneroidea;Veneridae;Mercenaria;Mercenari  
a mercenaria  
UdeM00000019091 1735272 71.2 UdeM00000019091 XP\_041360471.1 32.8  
125 79 1 1 120 1 125 3.60E-09 71.2 1735272

cellular

organisms;Eukaryota;Opisthokonta;Metazoa;Eumetazoa;Bilateria;Protostomia;Spiralia;Lophotrochozoa;Mollusca;Gastropoda;Neomphalina;Neomphaloidea;Pel

tospiridae;Gigantopelta;Gigantopelta aegis  
UdeM00000019092 6596 124.8 UdeM00000019092 XP\_045181586.1 29.8 265  
150 4 1 231 4 266 2.40E-25 124.8 6596 cellular

organisms;Eukaryota;Opisthokonta;Metazoa;Eumetazoa;Bilateria;Protostomia;Spiralia;Lophotrochozoa;Mollusca;Bivalvia;Autobranhia;Heteroconchia;Euhe

terodonta;Imparidentia;Venerida;Veneroidea;Veneridae;Mercenaria;Mercenari  
a mercenaria  
UdeM00000019093 6573 1454.1 UdeM00000019093 XP\_021365348.1 71.7  
975 266 8 2 972 400 1368 0.00E+00 1454.1 6573

cellular

organisms;Eukaryota;Opisthokonta;Metazoa;Eumetazoa;Bilateria;Protostomia;Spiralia;Lophotrochozoa;Mollusca;Bivalvia;Autobranhia;Pteriormorphia;Pect

inida;Pectinoidea;Pectinidae;Mizuhopecten;Mizuhopecten yessoensis

UdeM00000019094 6573 1661.7 UdeM00000019094 XP\_021365349.1 70.1  
 1376 379 11 1 1353 1 1367 0.00E+00 1661.7 6573  
 cellular  
 organisms;Eukaryota;Opisthokonta;Metazoa;Eumetazoa;Bilateria;Protostomia;  
 Spiralia;Lophotrochozoa;Mollusca;Bivalvia;Autobranhia;Pteriormorphia;Pect  
 inida;Pectinoidea;Pectinidae;Mizuhopecten;Mizuhopecten yessoensis  
 UdeM00000019095 29159 1500.7 UdeM00000019095 XP\_034317487.1 82.9  
 933 153 3 2 933 22 948 0.00E+00 1500.7  
 29159 cellular  
 organisms;Eukaryota;Opisthokonta;Metazoa;Eumetazoa;Bilateria;Protostomia;  
 Spiralia;Lophotrochozoa;Mollusca;Bivalvia;Autobranhia;Pteriormorphia;Ostr  
 eida;Ostreoidea;Ostreidae;Crassostrea;Crassostrea gigas  
 UdeM00000019096 6579 368.6 UdeM00000019096 XP\_033727315.1 76.1 226  
 53 1 1 226 242 466 5.60E-99 368.6 6579 cellular  
 organisms;Eukaryota;Opisthokonta;Metazoa;Eumetazoa;Bilateria;Protostomia;  
 Spiralia;Lophotrochozoa;Mollusca;Bivalvia;Autobranhia;Pteriormorphia;Pect  
 inida;Pectinoidea;Pectinidae;Pecten;Pecten maximus  
 UdeM00000019097 6596 297 UdeM00000019097 XP\_045180521.1 59.2 267  
 93 5 1 251 1 267 2.30E-77 297 6596 cellular  
 organisms;Eukaryota;Opisthokonta;Metazoa;Eumetazoa;Bilateria;Protostomia;  
 Spiralia;Lophotrochozoa;Mollusca;Bivalvia;Autobranhia;Heteroconchia;Euhe  
 terodonta;Imparidentia;Venerida;Veneroidea;Veneridae;Mercenaria;Mercenari  
 a mercenaria  
 UdeM00000019098 6596 1147.9 UdeM00000019098 XP\_045180520.1 83.6  
 641 105 0 1 641 1 641 0.00E+00 1147.9 6596  
 cellular  
 organisms;Eukaryota;Opisthokonta;Metazoa;Eumetazoa;Bilateria;Protostomia;  
 Spiralia;Lophotrochozoa;Mollusca;Bivalvia;Autobranhia;Heteroconchia;Euhe  
 terodonta;Imparidentia;Venerida;Veneroidea;Veneridae;Mercenaria;Mercenari  
 a mercenaria  
 UdeM00000019099 225164 196.1 UdeM00000019099 XP\_009050136.1 88.2  
 110 12 1 1 109 278 387 2.40E-47 196.1 225164  
 cellular  
 organisms;Eukaryota;Opisthokonta;Metazoa;Eumetazoa;Bilateria;Protostomia;  
 Spiralia;Lophotrochozoa;Mollusca;Gastropoda;Patellogastropoda;Lottioidea;  
 Lottiidae;Lottia;Lottia gigantea  
 UdeM00000019100 6412 139.8 UdeM00000019100 XP\_009012561.1 81.7 82  
 13 1 15 94 1 82 1.80E-30 139.8 6412 cellular  
 organisms;Eukaryota;Opisthokonta;Metazoa;Eumetazoa;Bilateria;Protostomia;  
 Spiralia;Lophotrochozoa;Annelida;Clitellata;Hirudinea;Rhynchobdellida;Glo  
 ssisphoniidae;Helobdella;Helobdella robusta  
 UdeM00000019101 6573 436 UdeM00000019101 XP\_021347927.1 72.7 275  
 75 0 1 275 1 275 3.70E-119 436 6573 cellular  
 organisms;Eukaryota;Opisthokonta;Metazoa;Eumetazoa;Bilateria;Protostomia;  
 Spiralia;Lophotrochozoa;Mollusca;Bivalvia;Autobranhia;Pteriormorphia;Pect  
 inida;Pectinoidea;Pectinidae;Mizuhopecten;Mizuhopecten yessoensis  
 UdeM00000019103 6596 192.2 UdeM00000019103 XP\_045201917.1 36.8 269  
 159 3 9 266 13 281 1.10E-45 192.2 6596 cellular  
 organisms;Eukaryota;Opisthokonta;Metazoa;Eumetazoa;Bilateria;Protostomia;  
 Spiralia;Lophotrochozoa;Mollusca;Bivalvia;Autobranhia;Heteroconchia;Euhe  
 terodonta;Imparidentia;Venerida;Veneroidea;Veneridae;Mercenaria;Mercenari  
 a mercenaria  
 UdeM00000019108 6596 216.5 UdeM00000019108 XP\_045185723.1 37.9 346  
 192 6 7 345 455 784 7.90E-53 216.5 6596 cellular

organisms;Eukaryota;Opisthokonta;Metazoa;Eumetazoa;Bilateria;Protostomia;Spiralia;Lophotrochozoa;Mollusca;Bivalvia;Autobranchia;Heteroconchia;Euherodonta;Imparidentia;Venerida;Veneroidea;Veneridae;Mercenaria;Mercenaria mercenaria

UdeM00000019109 6565 75.1 UdeM00000019109 XP\_022322655.1 41.4 87  
50 1 1 86 662 748 4.90E-11 75.1 6565 cellular

organisms;Eukaryota;Opisthokonta;Metazoa;Eumetazoa;Bilateria;Protostomia;Spiralia;Lophotrochozoa;Mollusca;Bivalvia;Autobranchia;Pteriormorphia;Ostreida;Ostreoidea;Ostreidae;Crassostrea;Crassostrea virginica

UdeM00000019110 29159 207.2 UdeM00000019110 XP\_034299474.1 43.7 261  
141 3 1 261 394 648 2.50E-50 207.2 29159 cellular

organisms;Eukaryota;Opisthokonta;Metazoa;Eumetazoa;Bilateria;Protostomia;Spiralia;Lophotrochozoa;Mollusca;Bivalvia;Autobranchia;Pteriormorphia;Ostreida;Ostreoidea;Ostreidae;Crassostrea;Crassostrea gigas

UdeM00000019111 6565 83.6 UdeM00000019111 XP\_022322655.1 45 100  
55 0 2 101 413 512 1.60E-13 83.6 6565 cellular

organisms;Eukaryota;Opisthokonta;Metazoa;Eumetazoa;Bilateria;Protostomia;Spiralia;Lophotrochozoa;Mollusca;Bivalvia;Autobranchia;Pteriormorphia;Ostreida;Ostreoidea;Ostreidae;Crassostrea;Crassostrea virginica

UdeM00000019116 6565 88.2 UdeM00000019116 XP\_022322655.1 38.2 110  
67 1 1 109 639 748 7.10E-15 88.2 6565 cellular

organisms;Eukaryota;Opisthokonta;Metazoa;Eumetazoa;Bilateria;Protostomia;Spiralia;Lophotrochozoa;Mollusca;Bivalvia;Autobranchia;Pteriormorphia;Ostreida;Ostreoidea;Ostreidae;Crassostrea;Crassostrea virginica

UdeM00000019117 29159 187.6 UdeM00000019117 XP\_034299474.1 42.8 243  
132 3 1 241 394 631 2.40E-44 187.6 29159 cellular

organisms;Eukaryota;Opisthokonta;Metazoa;Eumetazoa;Bilateria;Protostomia;Spiralia;Lophotrochozoa;Mollusca;Bivalvia;Autobranchia;Pteriormorphia;Ostreida;Ostreoidea;Ostreidae;Crassostrea;Crassostrea gigas

UdeM00000019118 6565 84 UdeM00000019118 XP\_022322655.1 45 100  
55 0 2 101 413 512 1.30E-13 84 6565 cellular

organisms;Eukaryota;Opisthokonta;Metazoa;Eumetazoa;Bilateria;Protostomia;Spiralia;Lophotrochozoa;Mollusca;Bivalvia;Autobranchia;Pteriormorphia;Ostreida;Ostreoidea;Ostreidae;Crassostrea;Crassostrea virginica

UdeM00000019121 6596 476.5 UdeM00000019121 XP\_045182512.1 41.9 666  
348 14 1 642 12 662 5.40E-131 476.5 6596 cellular

organisms;Eukaryota;Opisthokonta;Metazoa;Eumetazoa;Bilateria;Protostomia;Spiralia;Lophotrochozoa;Mollusca;Bivalvia;Autobranchia;Heteroconchia;Euherodonta;Imparidentia;Venerida;Veneroidea;Veneridae;Mercenaria;Mercenaria mercenaria

UdeM00000019124 6596 359 UdeM00000019124 XP\_045182062.1 54.6 359  
120 8 2 317 123 481 2.10E-95 359 6596 cellular

organisms;Eukaryota;Opisthokonta;Metazoa;Eumetazoa;Bilateria;Protostomia;Spiralia;Lophotrochozoa;Mollusca;Bivalvia;Autobranchia;Heteroconchia;Euherodonta;Imparidentia;Venerida;Veneroidea;Veneridae;Mercenaria;Mercenaria mercenaria

UdeM00000019125 6596 281.2 UdeM00000019125 XP\_045181359.1 58.4 233  
97 0 1 233 1 233 1.20E-72 281.2 6596 cellular

organisms;Eukaryota;Opisthokonta;Metazoa;Eumetazoa;Bilateria;Protostomia;Spiralia;Lophotrochozoa;Mollusca;Bivalvia;Autobranchia;Heteroconchia;Euherodonta;Imparidentia;Venerida;Veneroidea;Veneridae;Mercenaria;Mercenaria mercenaria

UdeM00000019126 6573 879 UdeM00000019126 XP\_021359728.1 60.3 754  
221 11 2 686 3 747 4.10E-252 879 6573 cellular

organisms;Eukaryota;Opisthokonta;Metazoa;Eumetazoa;Bilateria;Protostomia;Spiralia;Lophotrochozoa;Mollusca;Bivalvia;Autobranchia;Pteriormorphia;Pectinida;Pectinoidea;Pectinidae;Mizuhopecten;Mizuhopecten yessoensis

UdeM00000019127 400727 149.1 UdeM00000019127 XP\_025091637.1 64.5  
110 37 1 10 119 4 111 3.70E-33 149.1 400727

cellular

organisms;Eukaryota;Opisthokonta;Metazoa;Eumetazoa;Bilateria;Protostomia;Spiralia;Lophotrochozoa;Mollusca;Gastropoda;Caenogastropoda;Architaenioglossa;Ampullarioidea;Ampullariidae;Pomacea;Pomacea canaliculata

UdeM00000019128 8078 197.6 UdeM00000019128 XP\_035991581.1 44.3 210  
112 3 750 959 1622 1826 7.90E-47 197.6 8078 cellular

organisms;Eukaryota;Opisthokonta;Metazoa;Eumetazoa;Bilateria;Deuterostomia;Chordata;Craniata;Vertebrata;Gnathostomata;Teleostomi;Euteleostomi;Actinopterygii;Actinopteri;Neopterygii;Teleostei;Osteoglossocephalai;Clupeocephala;Euteleostei;Neoteleostei;Eurypterygia;Ctenosquamata;Acanthomorphata;Euacanthomorphacea;Percomorphaceae;Ovalentaria;Atherinomorphae;Cypriodontiformes;Cyprinodontoidei;Fundulidae;Fundulus;Fundulus

heteroclitus

UdeM00000019129 6596 166.4 UdeM00000019129 XP\_045176664.1 31.7 319  
206 5 20 333 227 538 6.90E-38 166.4 6596 cellular

organisms;Eukaryota;Opisthokonta;Metazoa;Eumetazoa;Bilateria;Protostomia;Spiralia;Lophotrochozoa;Mollusca;Bivalvia;Autobranchia;Heteroconchia;Euheterodonta;Imparidentia;Venerida;Veneroidea;Veneridae;Mercenaria;Mercenaria mercenaria

UdeM00000019130 6596 167.2 UdeM00000019130 XP\_045176094.1 37.9 269  
147 8 7 261 9 271 3.20E-38 167.2 6596 cellular

organisms;Eukaryota;Opisthokonta;Metazoa;Eumetazoa;Bilateria;Protostomia;Spiralia;Lophotrochozoa;Mollusca;Bivalvia;Autobranchia;Heteroconchia;Euheterodonta;Imparidentia;Venerida;Veneroidea;Veneridae;Mercenaria;Mercenaria mercenaria

UdeM00000019131 6596 180.3 UdeM00000019131 XP\_045176664.1 37.4 286  
167 8 131 409 287 567 5.20E-42 180.3 6596 cellular

organisms;Eukaryota;Opisthokonta;Metazoa;Eumetazoa;Bilateria;Protostomia;Spiralia;Lophotrochozoa;Mollusca;Bivalvia;Autobranchia;Heteroconchia;Euheterodonta;Imparidentia;Venerida;Veneroidea;Veneridae;Mercenaria;Mercenaria mercenaria

UdeM00000019132 8078 229.6 UdeM00000019132 XP\_035996634.1 43.2 292  
103 4 10 238 100 391 4.40E-57 229.6 8078 cellular

organisms;Eukaryota;Opisthokonta;Metazoa;Eumetazoa;Bilateria;Deuterostomia;Chordata;Craniata;Vertebrata;Gnathostomata;Teleostomi;Euteleostomi;Actinopterygii;Actinopteri;Neopterygii;Teleostei;Osteoglossocephalai;Clupeocephala;Euteleostei;Neoteleostei;Eurypterygia;Ctenosquamata;Acanthomorphata;Euacanthomorphacea;Percomorphaceae;Ovalentaria;Atherinomorphae;Cypriodontiformes;Cyprinodontoidei;Fundulidae;Fundulus;Fundulus

heteroclitus

UdeM00000019133 6596 120.2 UdeM00000019133 XP\_045214418.1 36.1 194  
111 6 24 208 118 307 3.20E-24 120.2 6596 cellular

organisms;Eukaryota;Opisthokonta;Metazoa;Eumetazoa;Bilateria;Protostomia;Spiralia;Lophotrochozoa;Mollusca;Bivalvia;Autobranchia;Heteroconchia;Euheterodonta;Imparidentia;Venerida;Veneroidea;Veneridae;Mercenaria;Mercenaria mercenaria

UdeM00000019134 6596 109 UdeM00000019134 XP\_045175693.1 28.1 306  
166 11 82 381 854 1111 1.50E-20 109 6596 cellular

organisms;Eukaryota;Opisthokonta;Metazoa;Eumetazoa;Bilateria;Protostomia;

Spiralia;Lophotrochozoa;Mollusca;Bivalvia;Autobranchia;Heteroconchia;Euherodonta;Imparidentia;Venerida;Veneroidea;Veneridae;Mercenaria;Mercenaria mercenaria

UdeM00000019135 29159 260.4 UdeM00000019135 XP\_034318948.1 47 268  
140 1 1 266 686 953 2.50E-66 260.4 29159 cellular

organisms;Eukaryota;Opisthokonta;Metazoa;Eumetazoa;Bilateria;Protostomia;Spiralia;Lophotrochozoa;Mollusca;Bivalvia;Autobranchia;Pteriormorphia;Ostreida;Ostreoidea;Ostreidae;Crassostrea;Crassostrea gigas

UdeM00000019136 6565 226.5 UdeM00000019136 XP\_022306954.1 40.3 303  
144 6 174 444 651 948 6.80E-56 226.5 6565 cellular

organisms;Eukaryota;Opisthokonta;Metazoa;Eumetazoa;Bilateria;Protostomia;Spiralia;Lophotrochozoa;Mollusca;Bivalvia;Autobranchia;Pteriormorphia;Ostreida;Ostreoidea;Ostreidae;Crassostrea;Crassostrea virginica

UdeM00000019136 6565 120.6 UdeM00000019136 XP\_022306954.1 33.8 225  
116 4 12 223 6 210 5.20E-24 120.6 6565 cellular

organisms;Eukaryota;Opisthokonta;Metazoa;Eumetazoa;Bilateria;Protostomia;Spiralia;Lophotrochozoa;Mollusca;Bivalvia;Autobranchia;Pteriormorphia;Ostreida;Ostreoidea;Ostreidae;Crassostrea;Crassostrea virginica

UdeM00000019137 29159 194.9 UdeM00000019137 XP\_034315421.1 51.9 206  
93 3 135 336 271 474 1.70E-46 194.9 29159 cellular

organisms;Eukaryota;Opisthokonta;Metazoa;Eumetazoa;Bilateria;Protostomia;Spiralia;Lophotrochozoa;Mollusca;Bivalvia;Autobranchia;Pteriormorphia;Ostreida;Ostreoidea;Ostreidae;Crassostrea;Crassostrea gigas

UdeM00000019138 6596 133.7 UdeM00000019138 XP\_045176664.1 40 190  
107 5 153 338 381 567 4.60E-28 133.7 6596 cellular

organisms;Eukaryota;Opisthokonta;Metazoa;Eumetazoa;Bilateria;Protostomia;Spiralia;Lophotrochozoa;Mollusca;Bivalvia;Autobranchia;Heteroconchia;Euherodonta;Imparidentia;Venerida;Veneroidea;Veneridae;Mercenaria;Mercenaria mercenaria

UdeM00000019139 6565 183 UdeM00000019139 XP\_022287574.1 81.6 103  
19 0 30 132 72 174 2.70E-43 183 6565 cellular

organisms;Eukaryota;Opisthokonta;Metazoa;Eumetazoa;Bilateria;Protostomia;Spiralia;Lophotrochozoa;Mollusca;Bivalvia;Autobranchia;Pteriormorphia;Ostreida;Ostreoidea;Ostreidae;Crassostrea;Crassostrea virginica

UdeM00000019141 6565 134 UdeM00000019141 XP\_022306758.1 46 161  
81 2 7 164 3 160 2.50E-28 134 6565 cellular

organisms;Eukaryota;Opisthokonta;Metazoa;Eumetazoa;Bilateria;Protostomia;Spiralia;Lophotrochozoa;Mollusca;Bivalvia;Autobranchia;Pteriormorphia;Ostreida;Ostreoidea;Ostreidae;Crassostrea;Crassostrea virginica

UdeM00000019142 6596 230.7 UdeM00000019142 XP\_045176664.1 29.7 555  
334 16 38 558 35 567 4.50E-57 230.7 6596 cellular

organisms;Eukaryota;Opisthokonta;Metazoa;Eumetazoa;Bilateria;Protostomia;Spiralia;Lophotrochozoa;Mollusca;Bivalvia;Autobranchia;Heteroconchia;Euherodonta;Imparidentia;Venerida;Veneroidea;Veneridae;Mercenaria;Mercenaria mercenaria

UdeM00000019143 6573 402.9 UdeM00000019143 XP\_021356047.1 48.4 434  
218 2 73 505 21 449 6.00E-109 402.9 6573 cellular

organisms;Eukaryota;Opisthokonta;Metazoa;Eumetazoa;Bilateria;Protostomia;Spiralia;Lophotrochozoa;Mollusca;Bivalvia;Autobranchia;Pteriormorphia;Pectinida;Pectinoidea;Pectinidae;Mizuhopecten;Mizuhopecten yessoensis

UdeM00000019145 6596 71.6 UdeM00000019145 XP\_045177053.1 29.5 156  
94 6 63 209 80 228 2.80E-09 71.6 6596 cellular

organisms;Eukaryota;Opisthokonta;Metazoa;Eumetazoa;Bilateria;Protostomia;Spiralia;Lophotrochozoa;Mollusca;Bivalvia;Autobranchia;Heteroconchia;Euherodonta

terodonta;Imparidentia;Venerida;Veneroidea;Veneridae;Mercenaria;Mercenari  
 a mercenaria  
 UdeM00000019146 6596 70.1 UdeM00000019146 XP\_045177053.1 31.2 138  
 82 5 19 147 95 228 7.00E-09 70.1 6596 cellular  
 organisms;Eukaryota;Opisthokonta;Metazoa;Eumetazoa;Bilateria;Protostomia;  
 Spiralia;Lophotrochozoa;Mollusca;Bivalvia;Autobranchia;Heteroconchia;Euhe  
 terodonta;Imparidentia;Venerida;Veneroidea;Veneridae;Mercenaria;Mercenari  
 a mercenaria  
 UdeM00000019147 27687 60.1 UdeM00000019147 XP\_028657207.1 37.1 89  
 48 1 9 97 48 128 4.00E-06 60.1 27687 cellular  
 organisms;Eukaryota;Opisthokonta;Metazoa;Eumetazoa;Bilateria;Deuterostomi  
 a;Chordata;Craniata;Vertebrata;Gnathostomata;Teleostomi;Euteleostomi;Acti  
 nopterygii;Cladistia;Polypteriformes;Polypteridae;Erpetoichthys;Erpetoich  
 thys calabaricus  
 UdeM00000019148 27687 91.3 UdeM00000019148 XP\_028657207.1 61.3 62  
 24 0 17 78 663 724 6.00E-16 91.3 27687 cellular  
 organisms;Eukaryota;Opisthokonta;Metazoa;Eumetazoa;Bilateria;Deuterostomi  
 a;Chordata;Craniata;Vertebrata;Gnathostomata;Teleostomi;Euteleostomi;Acti  
 nopterygii;Cladistia;Polypteriformes;Polypteridae;Erpetoichthys;Erpetoich  
 thys calabaricus  
 UdeM00000019149 29159 201.1 UdeM00000019149 XP\_019926413.2 82 128  
 21 2 1 127 292 418 9.10E-49 201.1 29159 cellular  
 organisms;Eukaryota;Opisthokonta;Metazoa;Eumetazoa;Bilateria;Protostomia;  
 Spiralia;Lophotrochozoa;Mollusca;Bivalvia;Autobranchia;Pteriormorphia;Ostr  
 eida;Ostreoidea;Ostreidae;Crassostrea;Crassostrea gigas  
 UdeM00000019153 6596 302.4 UdeM00000019153 XP\_045182035.1 67.5 240  
 71 4 2 236 4 241 5.20E-79 302.4 6596 cellular  
 organisms;Eukaryota;Opisthokonta;Metazoa;Eumetazoa;Bilateria;Protostomia;  
 Spiralia;Lophotrochozoa;Mollusca;Bivalvia;Autobranchia;Heteroconchia;Euhe  
 terodonta;Imparidentia;Venerida;Veneroidea;Veneridae;Mercenaria;Mercenari  
 a mercenaria  
 UdeM00000019155 6596 162.2 UdeM00000019155 XP\_045176664.1 34.6 286  
 175 7 131 409 287 567 1.50E-36 162.2 6596 cellular  
 organisms;Eukaryota;Opisthokonta;Metazoa;Eumetazoa;Bilateria;Protostomia;  
 Spiralia;Lophotrochozoa;Mollusca;Bivalvia;Autobranchia;Heteroconchia;Euhe  
 terodonta;Imparidentia;Venerida;Veneroidea;Veneridae;Mercenaria;Mercenari  
 a mercenaria  
 UdeM00000019156 6596 199.1 UdeM00000019156 XP\_045177053.1 32.8 344  
 210 9 5 335 95 430 8.80E-48 199.1 6596 cellular  
 organisms;Eukaryota;Opisthokonta;Metazoa;Eumetazoa;Bilateria;Protostomia;  
 Spiralia;Lophotrochozoa;Mollusca;Bivalvia;Autobranchia;Heteroconchia;Euhe  
 terodonta;Imparidentia;Venerida;Veneroidea;Veneridae;Mercenaria;Mercenari  
 a mercenaria  
 UdeM00000019157 6596 141 UdeM00000019157 XP\_045176094.1 39.2 212  
 120 6 4 210 63 270 1.80E-30 141 6596 cellular  
 organisms;Eukaryota;Opisthokonta;Metazoa;Eumetazoa;Bilateria;Protostomia;  
 Spiralia;Lophotrochozoa;Mollusca;Bivalvia;Autobranchia;Heteroconchia;Euhe  
 terodonta;Imparidentia;Venerida;Veneroidea;Veneridae;Mercenaria;Mercenari  
 a mercenaria  
 UdeM00000019159 6596 124.4 UdeM00000019159 XP\_045177053.1 30.7 251  
 147 5 16 251 159 397 2.20E-25 124.4 6596 cellular  
 organisms;Eukaryota;Opisthokonta;Metazoa;Eumetazoa;Bilateria;Protostomia;  
 Spiralia;Lophotrochozoa;Mollusca;Bivalvia;Autobranchia;Heteroconchia;Euhe

terodonta;Imparidentia;Venerida;Veneroidea;Veneridae;Mercenaria;Mercenari  
 a mercenaria  
 UdeM00000019160 6596 152.9 UdeM00000019160 XP\_045181277.1 33.7 246  
 149 7 6 243 182 421 5.30E-34 152.9 6596 cellular  
 organisms;Eukaryota;Opisthokonta;Metazoa;Eumetazoa;Bilateria;Protostomia;  
 Spiralia;Lophotrochozoa;Mollusca;Bivalvia;Autobranchia;Heteroconchia;Euhe  
 terodonta;Imparidentia;Venerida;Veneroidea;Veneridae;Mercenaria;Mercenari  
 a mercenaria  
 UdeM00000019161 6596 60.1 UdeM00000019161 XP\_045181277.1 23.6 127  
 85 2 15 131 93 217 3.20E-06 60.1 6596 cellular  
 organisms;Eukaryota;Opisthokonta;Metazoa;Eumetazoa;Bilateria;Protostomia;  
 Spiralia;Lophotrochozoa;Mollusca;Bivalvia;Autobranchia;Heteroconchia;Euhe  
 terodonta;Imparidentia;Venerida;Veneroidea;Veneridae;Mercenaria;Mercenari  
 a mercenaria  
 UdeM00000019163 6596 131.3 UdeM00000019163 XP\_045176094.1 39.7 194  
 109 5 10 199 81 270 1.30E-27 131.3 6596 cellular  
 organisms;Eukaryota;Opisthokonta;Metazoa;Eumetazoa;Bilateria;Protostomia;  
 Spiralia;Lophotrochozoa;Mollusca;Bivalvia;Autobranchia;Heteroconchia;Euhe  
 terodonta;Imparidentia;Venerida;Veneroidea;Veneridae;Mercenaria;Mercenari  
 a mercenaria  
 UdeM00000019164 6596 183 UdeM00000019164 XP\_045176664.1 36.7 311  
 171 10 451 746 268 567 1.40E-42 183 6596 cellular  
 organisms;Eukaryota;Opisthokonta;Metazoa;Eumetazoa;Bilateria;Protostomia;  
 Spiralia;Lophotrochozoa;Mollusca;Bivalvia;Autobranchia;Heteroconchia;Euhe  
 terodonta;Imparidentia;Venerida;Veneroidea;Veneridae;Mercenaria;Mercenari  
 a mercenaria  
 UdeM00000019165 6596 109.4 UdeM00000019165 XP\_045174482.1 27.6 352  
 221 13 15 338 21 366 9.70E-21 109.4 6596 cellular  
 organisms;Eukaryota;Opisthokonta;Metazoa;Eumetazoa;Bilateria;Protostomia;  
 Spiralia;Lophotrochozoa;Mollusca;Bivalvia;Autobranchia;Heteroconchia;Euhe  
 terodonta;Imparidentia;Venerida;Veneroidea;Veneridae;Mercenaria;Mercenari  
 a mercenaria  
 UdeM00000019166 6596 92.8 UdeM00000019166 XP\_045176094.1 38.1 134  
 80 2 1 132 84 216 5.60E-16 92.8 6596 cellular  
 organisms;Eukaryota;Opisthokonta;Metazoa;Eumetazoa;Bilateria;Protostomia;  
 Spiralia;Lophotrochozoa;Mollusca;Bivalvia;Autobranchia;Heteroconchia;Euhe  
 terodonta;Imparidentia;Venerida;Veneroidea;Veneridae;Mercenaria;Mercenari  
 a mercenaria  
 UdeM00000019167 6596 86.7 UdeM00000019167 XP\_045174482.1 24.2 368  
 230 10 15 349 21 372 6.80E-14 86.7 6596 cellular  
 organisms;Eukaryota;Opisthokonta;Metazoa;Eumetazoa;Bilateria;Protostomia;  
 Spiralia;Lophotrochozoa;Mollusca;Bivalvia;Autobranchia;Heteroconchia;Euhe  
 terodonta;Imparidentia;Venerida;Veneroidea;Veneridae;Mercenaria;Mercenari  
 a mercenaria  
 UdeM00000019168 6596 103.2 UdeM00000019168 XP\_045176094.1 35.5 172  
 105 3 114 283 64 231 6.30E-19 103.2 6596 cellular  
 organisms;Eukaryota;Opisthokonta;Metazoa;Eumetazoa;Bilateria;Protostomia;  
 Spiralia;Lophotrochozoa;Mollusca;Bivalvia;Autobranchia;Heteroconchia;Euhe  
 terodonta;Imparidentia;Venerida;Veneroidea;Veneridae;Mercenaria;Mercenari  
 a mercenaria  
 UdeM00000019169 6596 97.8 UdeM00000019169 XP\_045176094.1 36.8 152  
 90 3 6 155 84 231 1.60E-17 97.8 6596 cellular  
 organisms;Eukaryota;Opisthokonta;Metazoa;Eumetazoa;Bilateria;Protostomia;  
 Spiralia;Lophotrochozoa;Mollusca;Bivalvia;Autobranchia;Heteroconchia;Euhe



terodonta;Imparidentia;Venerida;Veneroidea;Veneridae;Mercenaria;Mercenari  
 a mercenaria  
 UdeM00000019170 6596 199.1 UdeM00000019170 XP\_045176664.1 28 536  
 318 14 12 512 9 511 1.40E-47 199.1 6596 cellular  
 organisms;Eukaryota;Opisthokonta;Metazoa;Eumetazoa;Bilateria;Protostomia;  
 Spiralia;Lophotrochozoa;Mollusca;Bivalvia;Autobranhia;Heteroconchia;Euhe  
 terodonta;Imparidentia;Venerida;Veneroidea;Veneridae;Mercenaria;Mercenari  
 a mercenaria  
 UdeM00000019171 6596 108.6 UdeM00000019171 XP\_045214418.1 32.6 187  
 119 4 13 195 66 249 9.40E-21 108.6 6596 cellular  
 organisms;Eukaryota;Opisthokonta;Metazoa;Eumetazoa;Bilateria;Protostomia;  
 Spiralia;Lophotrochozoa;Mollusca;Bivalvia;Autobranhia;Heteroconchia;Euhe  
 terodonta;Imparidentia;Venerida;Veneroidea;Veneridae;Mercenaria;Mercenari  
 a mercenaria  
 UdeM00000019172 10224 194.5 UdeM00000019172 XP\_006819375.1 55 191  
 73 1 13 203 113 290 2.10E-46 194.5 10224 cellular  
 organisms;Eukaryota;Opisthokonta;Metazoa;Eumetazoa;Bilateria;Deuterostomi  
 a;Hemichordata;Enteropneusta;Harrimaniidae;Saccoglossus;Saccoglossus  
 kowalevskii  
 UdeM00000019173 6596 126.3 UdeM00000019173 XP\_045176664.1 32.2 239  
 151 5 26 258 234 467 5.70E-26 126.3 6596 cellular  
 organisms;Eukaryota;Opisthokonta;Metazoa;Eumetazoa;Bilateria;Protostomia;  
 Spiralia;Lophotrochozoa;Mollusca;Bivalvia;Autobranhia;Heteroconchia;Euhe  
 terodonta;Imparidentia;Venerida;Veneroidea;Veneridae;Mercenaria;Mercenari  
 a mercenaria  
 UdeM00000019174 7741 251.5 UdeM00000019174 XP\_019622111.1 47.1 280  
 116 3 5 254 1 278 1.10E-63 251.5 7741 cellular  
 organisms;Eukaryota;Opisthokonta;Metazoa;Eumetazoa;Bilateria;Deuterostomi  
 a;Chordata;Cephalochordata;Leptocardii;Amphioxiformes;Branchiostomidae;Br  
 anchiostoma;Branchiostoma belcheri  
 UdeM00000019175 6596 211.1 UdeM00000019175 XP\_045176664.1 29.7 488  
 300 13 19 473 90 567 3.10E-51 211.1 6596 cellular  
 organisms;Eukaryota;Opisthokonta;Metazoa;Eumetazoa;Bilateria;Protostomia;  
 Spiralia;Lophotrochozoa;Mollusca;Bivalvia;Autobranhia;Heteroconchia;Euhe  
 terodonta;Imparidentia;Venerida;Veneroidea;Veneridae;Mercenaria;Mercenari  
 a mercenaria  
 UdeM00000019176 6596 208.4 UdeM00000019176 XP\_045176664.1 29.5 499  
 299 14 19 485 90 567 2.10E-50 208.4 6596 cellular  
 organisms;Eukaryota;Opisthokonta;Metazoa;Eumetazoa;Bilateria;Protostomia;  
 Spiralia;Lophotrochozoa;Mollusca;Bivalvia;Autobranhia;Heteroconchia;Euhe  
 terodonta;Imparidentia;Venerida;Veneroidea;Veneridae;Mercenaria;Mercenari  
 a mercenaria  
 UdeM00000019177 6596 68.9 UdeM00000019177 XP\_045177372.1 25.6 281  
 148 8 4 233 21 291 1.00E-08 68.9 6596 cellular  
 organisms;Eukaryota;Opisthokonta;Metazoa;Eumetazoa;Bilateria;Protostomia;  
 Spiralia;Lophotrochozoa;Mollusca;Bivalvia;Autobranhia;Heteroconchia;Euhe  
 terodonta;Imparidentia;Venerida;Veneroidea;Veneridae;Mercenaria;Mercenari  
 a mercenaria  
 UdeM00000019178 6596 143.3 UdeM00000019178 XP\_045177053.1 34.3 251  
 149 8 11 252 191 434 4.30E-31 143.3 6596 cellular  
 organisms;Eukaryota;Opisthokonta;Metazoa;Eumetazoa;Bilateria;Protostomia;  
 Spiralia;Lophotrochozoa;Mollusca;Bivalvia;Autobranhia;Heteroconchia;Euhe  
 terodonta;Imparidentia;Venerida;Veneroidea;Veneridae;Mercenaria;Mercenari  
 a mercenaria

UdeM00000019180 6596 222.2 UdeM00000019180 XP\_045176664.1 29.3 557  
 352 15 18 548 27 567 1.60E-54 222.2 6596 cellular  
 organisms;Eukaryota;Opisthokonta;Metazoa;Eumetazoa;Bilateria;Protostomia;  
 Spiralia;Lophotrochozoa;Mollusca;Bivalvia;Autobranhia;Heteroconchia;Euhe  
 terodonta;Imparidentia;Venerida;Veneroidea;Veneridae;Mercenaria;Mercenari  
 a mercenaria

UdeM00000019181 6596 163.3 UdeM00000019181 XP\_045176664.1 28.1 480  
 265 14 7 419 1 467 6.80E-37 163.3 6596 cellular  
 organisms;Eukaryota;Opisthokonta;Metazoa;Eumetazoa;Bilateria;Protostomia;  
 Spiralia;Lophotrochozoa;Mollusca;Bivalvia;Autobranhia;Heteroconchia;Euhe  
 terodonta;Imparidentia;Venerida;Veneroidea;Veneridae;Mercenaria;Mercenari  
 a mercenaria

UdeM00000019182 7574 97.1 UdeM00000019182 XP\_023931762.1 66.2 65  
 22 0 389 453 250 314 6.70E-17 97.1 7574 cellular  
 organisms;Eukaryota;Opisthokonta;Metazoa;Eumetazoa;Bilateria;Protostomia;  
 Spiralia;Lophotrochozoa;Brachiopoda;Linguliformea;Lingulata;Lingulida;Lin  
 guloidea;Lingulidae;Lingula;Lingula anatina

UdeM00000019184 46514 368.2 UdeM00000019184 XP\_038061741.1 32.3 915  
 473 34 134 961 865 1720 3.40E-98 368.2 46514 cellular  
 organisms;Eukaryota;Opisthokonta;Metazoa;Eumetazoa;Bilateria;Deuterostomi  
 a;Echinodermata;Eleutherozoa;Asterozoa;Asteroidea;Valvatacea;Valvatida;As  
 terinidae;Patiria;Patiria miniata

UdeM00000019185 29159 212.2 UdeM00000019185 XP\_034313418.1 35.6 371  
 207 10 5 362 5087 5438 1.10E-51 212.2 29159 cellular  
 organisms;Eukaryota;Opisthokonta;Metazoa;Eumetazoa;Bilateria;Protostomia;  
 Spiralia;Lophotrochozoa;Mollusca;Bivalvia;Autobranhia;Pteriormorphia;Ostr  
 eida;Ostreoidea;Ostreidae;Crassostrea;Crassostrea gigas

UdeM00000019186 29159 203 UdeM00000019186 XP\_034313418.1 37.1 334  
 179 9 6 327 5124 5438 6.00E-49 203 29159 cellular  
 organisms;Eukaryota;Opisthokonta;Metazoa;Eumetazoa;Bilateria;Protostomia;  
 Spiralia;Lophotrochozoa;Mollusca;Bivalvia;Autobranhia;Pteriormorphia;Ostr  
 eida;Ostreoidea;Ostreidae;Crassostrea;Crassostrea gigas

UdeM00000019187 6596 91.3 UdeM00000019187 XP\_045176094.1 36.8 144  
 80 2 8 151 84 216 1.20E-15 91.3 6596 cellular  
 organisms;Eukaryota;Opisthokonta;Metazoa;Eumetazoa;Bilateria;Protostomia;  
 Spiralia;Lophotrochozoa;Mollusca;Bivalvia;Autobranhia;Heteroconchia;Euhe  
 terodonta;Imparidentia;Venerida;Veneroidea;Veneridae;Mercenaria;Mercenari  
 a mercenaria

UdeM00000019188 29159 973.4 UdeM00000019188 XP\_034313457.1 26.8 3964  
 2205 132 1341 5060 1847 5357 1.10E-279 973.4 29159 cellular  
 organisms;Eukaryota;Opisthokonta;Metazoa;Eumetazoa;Bilateria;Protostomia;  
 Spiralia;Lophotrochozoa;Mollusca;Bivalvia;Autobranhia;Pteriormorphia;Ostr  
 eida;Ostreoidea;Ostreidae;Crassostrea;Crassostrea gigas

UdeM00000019188 29159 147.9 UdeM00000019188 XP\_034313457.1 28 461  
 293 15 1227 1667 1222 1663 3.50E-31 147.9 29159 cellular  
 organisms;Eukaryota;Opisthokonta;Metazoa;Eumetazoa;Bilateria;Protostomia;  
 Spiralia;Lophotrochozoa;Mollusca;Bivalvia;Autobranhia;Pteriormorphia;Ostr  
 eida;Ostreoidea;Ostreidae;Crassostrea;Crassostrea gigas

UdeM00000019189 29159 775.8 UdeM00000019189 XP\_034313418.1 34.5 1628  
 920 61 514 2059 3875 5438 1.40E-220 775.8 29159 cellular  
 organisms;Eukaryota;Opisthokonta;Metazoa;Eumetazoa;Bilateria;Protostomia;  
 Spiralia;Lophotrochozoa;Mollusca;Bivalvia;Autobranhia;Pteriormorphia;Ostr  
 eida;Ostreoidea;Ostreidae;Crassostrea;Crassostrea gigas

UdeM00000019190 6596 415.6 UdeM00000019190 XP\_045193407.1 29.6 1095  
 625 32 142 1167 1120 2137 5.10E-112 415.6 6596 cellular  
 organisms;Eukaryota;Opisthokonta;Metazoa;Eumetazoa;Bilateria;Protostomia;  
 Spiralia;Lophotrochozoa;Mollusca;Bivalvia;Autobranchia;Heteroconchia;Euhe  
 terodonta;Imparidentia;Venerida;Veneroidea;Veneridae;Mercenaria;Mercenari  
 a mercenaria  
 UdeM00000019191 29159 317.4 UdeM00000019191 XP\_011432590.1 49 351  
 155 5 1 328 1 350 2.20E-83 317.4 29159 cellular  
 organisms;Eukaryota;Opisthokonta;Metazoa;Eumetazoa;Bilateria;Protostomia;  
 Spiralia;Lophotrochozoa;Mollusca;Bivalvia;Autobranchia;Pteriormorphia;Ostr  
 eida;Ostreoidea;Ostreidae;Crassostrea;Crassostrea gigas  
 UdeM00000019192 29159 342.4 UdeM00000019192 XP\_011432590.1 51.3 351  
 159 4 1 340 1 350 6.50E-91 342.4 29159 cellular  
 organisms;Eukaryota;Opisthokonta;Metazoa;Eumetazoa;Bilateria;Protostomia;  
 Spiralia;Lophotrochozoa;Mollusca;Bivalvia;Autobranchia;Pteriormorphia;Ostr  
 eida;Ostreoidea;Ostreidae;Crassostrea;Crassostrea gigas  
 UdeM00000019193 6596 122.9 UdeM00000019193 XP\_045164042.1 43.9 148  
 80 2 171 317 88 233 7.60E-25 122.9 6596 cellular  
 organisms;Eukaryota;Opisthokonta;Metazoa;Eumetazoa;Bilateria;Protostomia;  
 Spiralia;Lophotrochozoa;Mollusca;Bivalvia;Autobranchia;Heteroconchia;Euhe  
 terodonta;Imparidentia;Venerida;Veneroidea;Veneridae;Mercenaria;Mercenari  
 a mercenaria  
 UdeM00000019194 6596 253.4 UdeM00000019194 XP\_045172484.1 25.2 656  
 469 8 8 655 66 707 7.80E-64 253.4 6596 cellular  
 organisms;Eukaryota;Opisthokonta;Metazoa;Eumetazoa;Bilateria;Protostomia;  
 Spiralia;Lophotrochozoa;Mollusca;Bivalvia;Autobranchia;Heteroconchia;Euhe  
 terodonta;Imparidentia;Venerida;Veneroidea;Veneridae;Mercenaria;Mercenari  
 a mercenaria  
 UdeM00000019195 6596 182.6 UdeM00000019195 XP\_045172484.1 29.1 382  
 251 7 5 378 70 439 1.20E-42 182.6 6596 cellular  
 organisms;Eukaryota;Opisthokonta;Metazoa;Eumetazoa;Bilateria;Protostomia;  
 Spiralia;Lophotrochozoa;Mollusca;Bivalvia;Autobranchia;Heteroconchia;Euhe  
 terodonta;Imparidentia;Venerida;Veneroidea;Veneridae;Mercenaria;Mercenari  
 a mercenaria  
 UdeM00000019196 6596 264.6 UdeM00000019196 XP\_045206071.1 25.9 754  
 433 10 15 662 28 761 3.40E-67 264.6 6596 cellular  
 organisms;Eukaryota;Opisthokonta;Metazoa;Eumetazoa;Bilateria;Protostomia;  
 Spiralia;Lophotrochozoa;Mollusca;Bivalvia;Autobranchia;Heteroconchia;Euhe  
 terodonta;Imparidentia;Venerida;Veneroidea;Veneridae;Mercenaria;Mercenari  
 a mercenaria  
 UdeM00000019197 6596 77 UdeM00000019197 XP\_045168144.1 27.4 208  
 123 4 149 339 619 815 5.10E-11 77 6596 cellular  
 organisms;Eukaryota;Opisthokonta;Metazoa;Eumetazoa;Bilateria;Protostomia;  
 Spiralia;Lophotrochozoa;Mollusca;Bivalvia;Autobranchia;Heteroconchia;Euhe  
 terodonta;Imparidentia;Venerida;Veneroidea;Veneridae;Mercenaria;Mercenari  
 a mercenaria  
 UdeM00000019198 6596 93.2 UdeM00000019198 XP\_045181640.1 57.3 96  
 39 1 1 94 264 359 2.50E-16 93.2 6596 cellular  
 organisms;Eukaryota;Opisthokonta;Metazoa;Eumetazoa;Bilateria;Protostomia;  
 Spiralia;Lophotrochozoa;Mollusca;Bivalvia;Autobranchia;Heteroconchia;Euhe  
 terodonta;Imparidentia;Venerida;Veneroidea;Veneridae;Mercenaria;Mercenari  
 a mercenaria  
 UdeM00000019199 29159 273.5 UdeM00000019199 XP\_011449844.1 24.7 675  
 484 9 13 666 14 685 7.30E-70 273.5 29159 cellular

organisms;Eukaryota;Opisthokonta;Metazoa;Eumetazoa;Bilateria;Protostomia;Spiralia;Lophotrochozoa;Mollusca;Bivalvia;Autobranchia;Pteriormorphia;Ostreida;Ostreoidea;Ostreidae;Crassostrea;Crassostrea gigas  
UdeM00000019201 6565 175.3 UdeM00000019201 XP\_022321940.1 21.4 555  
393 7 1 522 138 682 2.10E-40 175.3 6565 cellular

organisms;Eukaryota;Opisthokonta;Metazoa;Eumetazoa;Bilateria;Protostomia;Spiralia;Lophotrochozoa;Mollusca;Bivalvia;Autobranchia;Pteriormorphia;Ostreida;Ostreoidea;Ostreidae;Crassostrea;Crassostrea virginica  
UdeM00000019202 6596 648.7 UdeM00000019202 XP\_045181640.1 58.5 629  
228 10 131 751 86 689 9.50E-183 648.7 6596 cellular

organisms;Eukaryota;Opisthokonta;Metazoa;Eumetazoa;Bilateria;Protostomia;Spiralia;Lophotrochozoa;Mollusca;Bivalvia;Autobranchia;Heteroconchia;Euheterodonta;Imparidentia;Venerida;Veneroidea;Veneridae;Mercenaria;Mercenaria mercenaria  
UdeM00000019203 6579 339.3 UdeM00000019203 XP\_033741403.1 68.4 237  
75 0 1 237 1 237 3.90E-90 339.3 6579 cellular

organisms;Eukaryota;Opisthokonta;Metazoa;Eumetazoa;Bilateria;Protostomia;Spiralia;Lophotrochozoa;Mollusca;Bivalvia;Autobranchia;Pteriormorphia;Pectinida;Pectinoidea;Pectinidae;Pecten;Pecten maximus  
UdeM00000019204 6596 250.8 UdeM00000019204 XP\_045182963.1 41.6 368  
190 6 37 385 78 439 3.70E-63 250.8 6596 cellular

organisms;Eukaryota;Opisthokonta;Metazoa;Eumetazoa;Bilateria;Protostomia;Spiralia;Lophotrochozoa;Mollusca;Bivalvia;Autobranchia;Heteroconchia;Euheterodonta;Imparidentia;Venerida;Veneroidea;Veneridae;Mercenaria;Mercenaria mercenaria  
UdeM00000019205 6596 666.8 UdeM00000019205 XP\_045182420.1 45.5 863  
406 17 125 974 1452 2263 4.30E-188 666.8 6596 cellular

organisms;Eukaryota;Opisthokonta;Metazoa;Eumetazoa;Bilateria;Protostomia;Spiralia;Lophotrochozoa;Mollusca;Bivalvia;Autobranchia;Heteroconchia;Euheterodonta;Imparidentia;Venerida;Veneroidea;Veneridae;Mercenaria;Mercenaria mercenaria  
UdeM00000019206 6596 1227.2 UdeM00000019206 XP\_045182420.1 47.5  
1569 660 35 1 1524 1 1451 0.00E+00 1227.2 6596  
cellular

organisms;Eukaryota;Opisthokonta;Metazoa;Eumetazoa;Bilateria;Protostomia;Spiralia;Lophotrochozoa;Mollusca;Bivalvia;Autobranchia;Heteroconchia;Euheterodonta;Imparidentia;Venerida;Veneroidea;Veneridae;Mercenaria;Mercenaria mercenaria  
UdeM00000019207 47969 101.7 UdeM00000019207 XP\_039470406.1 33.1 148  
91 3 96 241 13 154 1.40E-18 101.7 47969 cellular

organisms;Eukaryota;Opisthokonta;Metazoa;Eumetazoa;Bilateria;Deuterostomia;Chordata;Craniata;Vertebrata;Gnathostomata;Teleostomi;Euteleostomi;Actinopterygii;Actinopteri;Neopterygii;Teleostei;Osteoglossocephalai;Clupeocephala;Euteleostei;Neoteleostei;Eurypterygia;Ctenosquamata;Acanthopterygii;Euacanthopterygii;Percomorphaceae;Ovalentaria;Cichlomorphae;Cichliformes;Cichlidae;African  
cichlids;Pseudocrenilabrinae;Oreochromini;Oreochromis;Oreochromis aureus  
UdeM00000019208 6565 323.6 UdeM00000019208 XP\_022322717.1 63.6 247  
84 4 58 302 69 311 2.80E-85 323.6 6565 cellular

organisms;Eukaryota;Opisthokonta;Metazoa;Eumetazoa;Bilateria;Protostomia;Spiralia;Lophotrochozoa;Mollusca;Bivalvia;Autobranchia;Pteriormorphia;Ostreida;Ostreoidea;Ostreidae;Crassostrea;Crassostrea virginica  
UdeM00000019209 6573 327 UdeM00000019209 XP\_021356482.1 62.9 248  
86 4 74 319 70 313 2.70E-86 327 6573 cellular

organisms;Eukaryota;Opisthokonta;Metazoa;Eumetazoa;Bilateria;Protostomia;Spiralia;Lophotrochozoa;Mollusca;Bivalvia;Autobranchia;Pteriomorpha;Pectinida;Pectinoidea;Pectinidae;Mizuhopecten;Mizuhopecten yessoensis  
UdeM00000019210 6565 304.3 UdeM00000019210 XP\_022322717.1 60.5 253  
94 4 54 304 67 315 1.80E-79 304.3 6565 cellular

organisms;Eukaryota;Opisthokonta;Metazoa;Eumetazoa;Bilateria;Protostomia;Spiralia;Lophotrochozoa;Mollusca;Bivalvia;Autobranchia;Pteriomorpha;Ostreida;Ostreioidea;Ostreidae;Crassostrea;Crassostrea virginica  
UdeM00000019212 6565 96.7 UdeM00000019212 XP\_022322655.1 41.8 110  
63 1 1 109 639 748 2.00E-17 96.7 6565 cellular

organisms;Eukaryota;Opisthokonta;Metazoa;Eumetazoa;Bilateria;Protostomia;Spiralia;Lophotrochozoa;Mollusca;Bivalvia;Autobranchia;Pteriomorpha;Ostreida;Ostreioidea;Ostreidae;Crassostrea;Crassostrea virginica  
UdeM00000019211 29159 179.1 UdeM00000019211 XP\_034299474.1 50.6 178  
87 1 1 177 578 755 4.90E-42 179.1 29159 cellular

organisms;Eukaryota;Opisthokonta;Metazoa;Eumetazoa;Bilateria;Protostomia;Spiralia;Lophotrochozoa;Mollusca;Bivalvia;Autobranchia;Pteriomorpha;Ostreida;Ostreioidea;Ostreidae;Crassostrea;Crassostrea gigas  
UdeM00000019213 29159 213 UdeM00000019213 XP\_034299474.1 42.9 261  
142 3 3 259 239 496 5.40E-52 213 29159 cellular

organisms;Eukaryota;Opisthokonta;Metazoa;Eumetazoa;Bilateria;Protostomia;Spiralia;Lophotrochozoa;Mollusca;Bivalvia;Autobranchia;Pteriomorpha;Ostreida;Ostreioidea;Ostreidae;Crassostrea;Crassostrea gigas  
UdeM00000019214 400727 322 UdeM00000019214 XP\_025083302.1 62.7  
255 89 4 65 317 62 312 8.50E-85 322 400727  
cellular

organisms;Eukaryota;Opisthokonta;Metazoa;Eumetazoa;Bilateria;Protostomia;Spiralia;Lophotrochozoa;Mollusca;Gastropoda;Caenogastropoda;Architaenioglossa;Ampullarioidea;Ampullariidae;Pomacea;Pomacea canaliculata  
UdeM00000019215 6565 239.2 UdeM00000019215 XP\_022322717.1 63 189  
66 3 34 222 131 315 5.10E-60 239.2 6565 cellular

organisms;Eukaryota;Opisthokonta;Metazoa;Eumetazoa;Bilateria;Protostomia;Spiralia;Lophotrochozoa;Mollusca;Bivalvia;Autobranchia;Pteriomorpha;Ostreida;Ostreioidea;Ostreidae;Crassostrea;Crassostrea virginica  
UdeM00000019216 29159 85.1 UdeM00000019216 XP\_011437187.2 34.2 114  
72 1 2 115 210 320 6.50E-14 85.1 29159 cellular

organisms;Eukaryota;Opisthokonta;Metazoa;Eumetazoa;Bilateria;Protostomia;Spiralia;Lophotrochozoa;Mollusca;Bivalvia;Autobranchia;Pteriomorpha;Ostreida;Ostreioidea;Ostreidae;Crassostrea;Crassostrea gigas  
UdeM00000019217 6573 549.7 UdeM00000019217 XP\_021378217.1 76.3 363  
81 2 1 359 1 362 2.80E-153 549.7 6573 cellular

organisms;Eukaryota;Opisthokonta;Metazoa;Eumetazoa;Bilateria;Protostomia;Spiralia;Lophotrochozoa;Mollusca;Bivalvia;Autobranchia;Pteriomorpha;Pectinida;Pectinoidea;Pectinidae;Mizuhopecten;Mizuhopecten yessoensis  
UdeM00000019219 6573 195.7 UdeM00000019219 XP\_021340030.1 33.2 419  
271 3 4 413 10 428 1.20E-46 195.7 6573 cellular

organisms;Eukaryota;Opisthokonta;Metazoa;Eumetazoa;Bilateria;Protostomia;Spiralia;Lophotrochozoa;Mollusca;Bivalvia;Autobranchia;Pteriomorpha;Pectinida;Pectinoidea;Pectinidae;Mizuhopecten;Mizuhopecten yessoensis  
UdeM00000019220 6573 145.6 UdeM00000019220 XP\_021340030.1 31.1 325  
205 2 13 323 65 384 1.10E-31 145.6 6573 cellular

organisms;Eukaryota;Opisthokonta;Metazoa;Eumetazoa;Bilateria;Protostomia;Spiralia;Lophotrochozoa;Mollusca;Bivalvia;Autobranchia;Pteriomorpha;Pectinida;Pectinoidea;Pectinidae;Mizuhopecten;Mizuhopecten yessoensis

UdeM00000019222 6573 189.1 UdeM00000019222 XP\_021340030.1 29.6 425  
 276 3 5 413 11 428 1.10E-44 189.1 6573 cellular  
 organisms;Eukaryota;Opisthokonta;Metazoa;Eumetazoa;Bilateria;Protostomia;  
 Spiralia;Lophotrochozoa;Mollusca;Bivalvia;Autobranhia;Pteriomorpha;Pect  
 inida;Pectinoidea;Pectinidae;Mizuhopecten;Mizuhopecten yessoensis  
 UdeM00000019223 6573 178.3 UdeM00000019223 XP\_021340030.1 29.2 421  
 283 2 5 413 11 428 2.00E-41 178.3 6573 cellular  
 organisms;Eukaryota;Opisthokonta;Metazoa;Eumetazoa;Bilateria;Protostomia;  
 Spiralia;Lophotrochozoa;Mollusca;Bivalvia;Autobranhia;Pteriomorpha;Pect  
 inida;Pectinoidea;Pectinidae;Mizuhopecten;Mizuhopecten yessoensis  
 UdeM00000019224 6573 173.7 UdeM00000019224 XP\_021340030.1 28.7 421  
 285 2 5 413 11 428 5.00E-40 173.7 6573 cellular  
 organisms;Eukaryota;Opisthokonta;Metazoa;Eumetazoa;Bilateria;Protostomia;  
 Spiralia;Lophotrochozoa;Mollusca;Bivalvia;Autobranhia;Pteriomorpha;Pect  
 inida;Pectinoidea;Pectinidae;Mizuhopecten;Mizuhopecten yessoensis  
 UdeM00000019225 6573 61.6 UdeM00000019225 XP\_021354431.1 37.2 78  
 49 0 1 78 663 740 6.50E-07 61.6 6573 cellular  
 organisms;Eukaryota;Opisthokonta;Metazoa;Eumetazoa;Bilateria;Protostomia;  
 Spiralia;Lophotrochozoa;Mollusca;Bivalvia;Autobranhia;Pteriomorpha;Pect  
 inida;Pectinoidea;Pectinidae;Mizuhopecten;Mizuhopecten yessoensis  
 UdeM00000019226 29159 656.8 UdeM00000019226 XP\_034303860.1 46.5 753  
 312 14 5 691 21 748 3.20E-185 656.8 29159 cellular  
 organisms;Eukaryota;Opisthokonta;Metazoa;Eumetazoa;Bilateria;Protostomia;  
 Spiralia;Lophotrochozoa;Mollusca;Bivalvia;Autobranhia;Pteriomorpha;Ostr  
 eida;Ostreoidea;Ostreidae;Crassostrea;Crassostrea gigas  
 UdeM00000019227 6565 102.1 UdeM00000019227 XP\_022312527.1 46.1 102  
 54 1 86 186 70 171 8.80E-19 102.1 6565 cellular  
 organisms;Eukaryota;Opisthokonta;Metazoa;Eumetazoa;Bilateria;Protostomia;  
 Spiralia;Lophotrochozoa;Mollusca;Bivalvia;Autobranhia;Pteriomorpha;Ostr  
 eida;Ostreoidea;Ostreidae;Crassostrea;Crassostrea virginica  
 UdeM00000019228 6596 63.9 UdeM00000019228 XP\_045175479.1 28.2 142  
 83 2 4 126 21 162 2.90E-07 63.9 6596 cellular  
 organisms;Eukaryota;Opisthokonta;Metazoa;Eumetazoa;Bilateria;Protostomia;  
 Spiralia;Lophotrochozoa;Mollusca;Bivalvia;Autobranhia;Heteroconchia;Euhe  
 terodonta;Imparidentia;Venerida;Veneroidea;Veneridae;Mercenaria;Mercenari  
 a mercenaria  
 UdeM00000019229 6596 88.6 UdeM00000019229 XP\_045175479.1 31.7 142  
 97 0 4 145 21 162 1.20E-14 88.6 6596 cellular  
 organisms;Eukaryota;Opisthokonta;Metazoa;Eumetazoa;Bilateria;Protostomia;  
 Spiralia;Lophotrochozoa;Mollusca;Bivalvia;Autobranhia;Heteroconchia;Euhe  
 terodonta;Imparidentia;Venerida;Veneroidea;Veneridae;Mercenaria;Mercenari  
 a mercenaria  
 UdeM00000019230 6573 171.8 UdeM00000019230 XP\_021340030.1 30.8 412  
 273 5 5 405 11 421 1.90E-39 171.8 6573 cellular  
 organisms;Eukaryota;Opisthokonta;Metazoa;Eumetazoa;Bilateria;Protostomia;  
 Spiralia;Lophotrochozoa;Mollusca;Bivalvia;Autobranhia;Pteriomorpha;Pect  
 inida;Pectinoidea;Pectinidae;Mizuhopecten;Mizuhopecten yessoensis  
 UdeM00000019231 7574 133.7 UdeM00000019231 XP\_023933510.1 57.8 102  
 42 1 28 129 248 348 1.80E-28 133.7 7574 cellular  
 organisms;Eukaryota;Opisthokonta;Metazoa;Eumetazoa;Bilateria;Protostomia;  
 Spiralia;Lophotrochozoa;Brachiopoda;Linguliformea;Lingulata;Lingulida;Lin  
 guloidea;Lingulidae;Lingula;Lingula anatina  
 UdeM00000019232 29159 758.8 UdeM00000019232 XP\_011425180.2 69.4 828  
 218 7 1 804 1 817 7.60E-216 758.8 29159 cellular

organisms;Eukaryota;Opisthokonta;Metazoa;Eumetazoa;Bilateria;Protostomia;Spiralia;Lophotrochozoa;Mollusca;Bivalvia;Autobranchia;Pteriormorphia;Ostr

UdeM00000019233 2607531 164.9 UdeM00000019233 XP\_029634756.1 52.6  
173 75 1 15 180 806 978 9.90E-38 164.9 2607531

cellular

organisms;Eukaryota;Opisthokonta;Metazoa;Eumetazoa;Bilateria;Protostomia;Spiralia;Lophotrochozoa;Mollusca;Cephalopoda;Coleoidea;Octopodiformes;Oct

UdeM00000019234 6579 107.1 UdeM00000019234 XP\_033726576.1 74.3 74  
15 2 4 73 2 75 9.90E-21 107.1 6579 cellular

organisms;Eukaryota;Opisthokonta;Metazoa;Eumetazoa;Bilateria;Protostomia;Spiralia;Lophotrochozoa;Mollusca;Bivalvia;Autobranchia;Pteriormorphia;Pect

UdeM00000019235 6573 162.9 UdeM00000019235 XP\_021374919.1 37.4 273  
147 7 109 370 211 470 7.60E-37 162.9 6573 cellular

organisms;Eukaryota;Opisthokonta;Metazoa;Eumetazoa;Bilateria;Protostomia;Spiralia;Lophotrochozoa;Mollusca;Bivalvia;Autobranchia;Pteriormorphia;Pect

UdeM00000019236 6573 162.9 UdeM00000019236 XP\_021374919.1 37.4 273  
147 7 107 368 211 470 7.60E-37 162.9 6573 cellular

organisms;Eukaryota;Opisthokonta;Metazoa;Eumetazoa;Bilateria;Protostomia;Spiralia;Lophotrochozoa;Mollusca;Bivalvia;Autobranchia;Pteriormorphia;Pect

UdeM00000019238 6565 276.6 UdeM00000019238 XP\_022326632.1 51.4 247  
117 2 8 254 78 321 3.30E-71 276.6 6565 cellular

organisms;Eukaryota;Opisthokonta;Metazoa;Eumetazoa;Bilateria;Protostomia;Spiralia;Lophotrochozoa;Mollusca;Bivalvia;Autobranchia;Pteriormorphia;Ostr

UdeM00000019239 6596 1600.5 UdeM00000019239 XP\_045174685.1 55.6  
1505 641 9 18 1505 430 1924 0.00E+00 1600.5 6596

cellular

organisms;Eukaryota;Opisthokonta;Metazoa;Eumetazoa;Bilateria;Protostomia;Spiralia;Lophotrochozoa;Mollusca;Bivalvia;Autobranchia;Heteroconchia;Euhe

UdeM00000019240 6596 363.2 UdeM00000019240 XP\_045174685.1 63.8 290  
100 1 1 285 154 443 5.50E-97 363.2 6596 cellular

organisms;Eukaryota;Opisthokonta;Metazoa;Eumetazoa;Bilateria;Protostomia;Spiralia;Lophotrochozoa;Mollusca;Bivalvia;Autobranchia;Heteroconchia;Euhe

UdeM00000019241 6596 105.5 UdeM00000019241 XP\_045210831.1 41.4 152  
72 3 1 136 1 151 5.40E-20 105.5 6596 cellular

organisms;Eukaryota;Opisthokonta;Metazoa;Eumetazoa;Bilateria;Protostomia;Spiralia;Lophotrochozoa;Mollusca;Bivalvia;Autobranchia;Heteroconchia;Euhe

UdeM00000019242 6596 380.9 UdeM00000019242 XP\_045187150.1 50 394  
192 2 1 394 229 617 1.90E-102 380.9 6596 cellular

organisms;Eukaryota;Opisthokonta;Metazoa;Eumetazoa;Bilateria;Protostomia;Spiralia;Lophotrochozoa;Mollusca;Bivalvia;Autobranchia;Heteroconchia;Euhe

a mercenaria

UdeM00000019243 6579 322 UdeM00000019243 XP\_033752232.1 61.5 262  
 85 3 3 251 2 260 7.00E-85 322 6579 cellular  
 organisms;Eukaryota;Opisthokonta;Metazoa;Eumetazoa;Bilateria;Protostomia;  
 Spiralia;Lophotrochozoa;Mollusca;Bivalvia;Autobranchia;Pteriomorpha;Pect  
 inida;Pectinoidea;Pectinidae;Pecten;Pecten maximus  
 UdeM00000019245 6573 152.1 UdeM00000019245 XP\_021368212.1 66.4 113  
 32 1 13 125 2 108 4.60E-34 152.1 6573 cellular  
 organisms;Eukaryota;Opisthokonta;Metazoa;Eumetazoa;Bilateria;Protostomia;  
 Spiralia;Lophotrochozoa;Mollusca;Bivalvia;Autobranchia;Pteriomorpha;Pect  
 inida;Pectinoidea;Pectinidae;Mizuhopecten;Mizuhopecten yessoensis  
 UdeM00000019244 6579 442.6 UdeM00000019244 XP\_033752403.1 51.2 490  
 213 9 13 493 2 474 6.70E-121 442.6 6579 cellular  
 organisms;Eukaryota;Opisthokonta;Metazoa;Eumetazoa;Bilateria;Protostomia;  
 Spiralia;Lophotrochozoa;Mollusca;Bivalvia;Autobranchia;Pteriomorpha;Pect  
 inida;Pectinoidea;Pectinidae;Pecten;Pecten maximus  
 UdeM00000019246 6579 299.7 UdeM00000019246 XP\_033752403.1 46.8 378  
 181 8 2 370 108 474 5.20E-78 299.7 6579 cellular  
 organisms;Eukaryota;Opisthokonta;Metazoa;Eumetazoa;Bilateria;Protostomia;  
 Spiralia;Lophotrochozoa;Mollusca;Bivalvia;Autobranchia;Pteriomorpha;Pect  
 inida;Pectinoidea;Pectinidae;Pecten;Pecten maximus  
 UdeM00000019247 6565 459.1 UdeM00000019247 XP\_022335152.1 64.9 402  
 140 1 1 402 1 401 5.60E-126 459.1 6565 cellular  
 organisms;Eukaryota;Opisthokonta;Metazoa;Eumetazoa;Bilateria;Protostomia;  
 Spiralia;Lophotrochozoa;Mollusca;Bivalvia;Autobranchia;Pteriomorpha;Ostr  
 eida;Ostreoidea;Ostreidae;Crassostrea;Crassostrea virginica  
 UdeM00000019248 29159 276.2 UdeM00000019248 XP\_034330259.1 45.3 296  
 149 5 23 316 414 698 6.10E-71 276.2 29159 cellular  
 organisms;Eukaryota;Opisthokonta;Metazoa;Eumetazoa;Bilateria;Protostomia;  
 Spiralia;Lophotrochozoa;Mollusca;Bivalvia;Autobranchia;Pteriomorpha;Ostr  
 eida;Ostreoidea;Ostreidae;Crassostrea;Crassostrea gigas  
 UdeM00000019249 6596 236.9 UdeM00000019249 XP\_045201011.1 49.2 260  
 121 4 16 274 7 256 3.10E-59 236.9 6596 cellular  
 organisms;Eukaryota;Opisthokonta;Metazoa;Eumetazoa;Bilateria;Protostomia;  
 Spiralia;Lophotrochozoa;Mollusca;Bivalvia;Autobranchia;Heteroconchia;Euhe  
 terodonta;Imparidentia;Venerida;Veneroidea;Veneridae;Mercenaria;Mercenari  
 a mercenaria  
 UdeM00000019250 29159 109 UdeM00000019250 XP\_034307341.1 25.9 344  
 203 10 3 304 5 338 1.10E-20 109 29159 cellular  
 organisms;Eukaryota;Opisthokonta;Metazoa;Eumetazoa;Bilateria;Protostomia;  
 Spiralia;Lophotrochozoa;Mollusca;Bivalvia;Autobranchia;Pteriomorpha;Ostr  
 eida;Ostreoidea;Ostreidae;Crassostrea;Crassostrea gigas  
 UdeM00000019251 1735272 238 UdeM00000019251 XP\_041374187.1 35.6  
 486 155 13 1 346 1 468 1.70E-59 238 1735272  
 cellular  
 organisms;Eukaryota;Opisthokonta;Metazoa;Eumetazoa;Bilateria;Protostomia;  
 Spiralia;Lophotrochozoa;Mollusca;Gastropoda;Neomphalina;Neomphaloidea;Pel  
 tospiridae;Gigantopelta;Gigantopelta aegis  
 UdeM00000019252 6579 294.3 UdeM00000019252 XP\_033764274.1 40.8 346  
 170 4 6 319 252 594 1.90E-76 294.3 6579 cellular  
 organisms;Eukaryota;Opisthokonta;Metazoa;Eumetazoa;Bilateria;Protostomia;  
 Spiralia;Lophotrochozoa;Mollusca;Bivalvia;Autobranchia;Pteriomorpha;Pect  
 inida;Pectinoidea;Pectinidae;Pecten;Pecten maximus  
 UdeM00000019253 6579 127.1 UdeM00000019253 XP\_033747958.1 60.5 86  
 34 0 1 86 87 172 1.10E-26 127.1 6579 cellular



organisms;Eukaryota;Opisthokonta;Metazoa;Eumetazoa;Bilateria;Protostomia;  
Spiralia;Lophotrochozoa;Mollusca;Bivalvia;Autobranchia;Pteriomorpha;Pect  
inida;Pectinoidea;Pectinidae;Pecten;Pecten maximus  
UdeM00000019254 6596 103.6 UdeM00000019254 XP\_045208720.1 33.5 182  
115 2 5 185 754 930 5.00E-19 103.6 6596 cellular  
organisms;Eukaryota;Opisthokonta;Metazoa;Eumetazoa;Bilateria;Protostomia;  
Spiralia;Lophotrochozoa;Mollusca;Bivalvia;Autobranchia;Heteroconchia;Euhe  
terodonta;Imparidentia;Venerida;Veneroidea;Veneridae;Mercenaria;Mercenari  
a mercenaria  
UdeM00000019255 6596 104 UdeM00000019255 XP\_045208720.1 33.5 182  
115 2 5 185 754 930 2.30E-19 104 6596 cellular  
organisms;Eukaryota;Opisthokonta;Metazoa;Eumetazoa;Bilateria;Protostomia;  
Spiralia;Lophotrochozoa;Mollusca;Bivalvia;Autobranchia;Heteroconchia;Euhe  
terodonta;Imparidentia;Venerida;Veneroidea;Veneridae;Mercenaria;Mercenari  
a mercenaria  
UdeM00000019256 37653 85.1 UdeM00000019256 XP\_014782792.1 30.7 176  
109 3 7 171 646 819 1.00E-13 85.1 37653 cellular  
organisms;Eukaryota;Opisthokonta;Metazoa;Eumetazoa;Bilateria;Protostomia;  
Spiralia;Lophotrochozoa;Mollusca;Cephalopoda;Coleoidea;Octopodiformes;Oct  
opoda;Incirrata;Octopodidae;Octopus;Octopus bimaculoides  
UdeM00000040806 7574 239.2 UdeM00000040806 XP\_013409676.1 50.7 268  
115 5 1 261 1 258 6.00E-60 239.2 7574 cellular  
organisms;Eukaryota;Opisthokonta;Metazoa;Eumetazoa;Bilateria;Protostomia;  
Spiralia;Lophotrochozoa;Brachiopoda;Linguliformea;Lingulata;Lingulida;Lin  
guloidea;Lingulidae;Lingula;Lingula anatina  
UdeM00000040808 7574 260.8 UdeM00000040808 XP\_013382110.1 61.9 194  
74 0 14 207 45 238 1.50E-66 260.8 7574 cellular  
organisms;Eukaryota;Opisthokonta;Metazoa;Eumetazoa;Bilateria;Protostomia;  
Spiralia;Lophotrochozoa;Brachiopoda;Linguliformea;Lingulata;Lingulida;Lin  
guloidea;Lingulidae;Lingula;Lingula anatina  
UdeM00000040807 7574 260.8 UdeM00000040807 XP\_013382110.1 59.6 208  
78 1 1 208 37 238 1.50E-66 260.8 7574 cellular  
organisms;Eukaryota;Opisthokonta;Metazoa;Eumetazoa;Bilateria;Protostomia;  
Spiralia;Lophotrochozoa;Brachiopoda;Linguliformea;Lingulata;Lingulida;Lin  
guloidea;Lingulidae;Lingula;Lingula anatina  
UdeM00000040810 6579 110.5 UdeM00000040810 XP\_033740904.1 53.8 91  
42 0 231 321 27 117 4.20E-21 110.5 6579 cellular  
organisms;Eukaryota;Opisthokonta;Metazoa;Eumetazoa;Bilateria;Protostomia;  
Spiralia;Lophotrochozoa;Mollusca;Bivalvia;Autobranchia;Pteriomorpha;Pect  
inida;Pectinoidea;Pectinidae;Pecten;Pecten maximus  
UdeM00000040811 6596 98.6 UdeM00000040811 XP\_045208792.1 43.3 134  
72 3 1 132 1 132 9.70E-18 98.6 6596 cellular  
organisms;Eukaryota;Opisthokonta;Metazoa;Eumetazoa;Bilateria;Protostomia;  
Spiralia;Lophotrochozoa;Mollusca;Bivalvia;Autobranchia;Heteroconchia;Euhe  
terodonta;Imparidentia;Venerida;Veneroidea;Veneridae;Mercenaria;Mercenari  
a mercenaria  
UdeM00000040812 6565 162.9 UdeM00000040812 XP\_022337267.1 38 305  
109 9 11 237 264 566 5.10E-37 162.9 6565 cellular  
organisms;Eukaryota;Opisthokonta;Metazoa;Eumetazoa;Bilateria;Protostomia;  
Spiralia;Lophotrochozoa;Mollusca;Bivalvia;Autobranchia;Pteriomorpha;Ostr  
eida;Ostreoidea;Ostreidae;Crassostrea;Crassostrea virginica  
UdeM00000040814 7719 194.9 UdeM00000040814 XP\_004227365.1 52.2 161  
77 0 6 166 2 162 8.20E-47 194.9 7719 cellular  
organisms;Eukaryota;Opisthokonta;Metazoa;Eumetazoa;Bilateria;Deuterostomi

a;Chordata;Tunicata;Ascidiacea;Phlebobranchia;Cionidae;Ciona;Ciona intestinalis

UdeM00000040813 7054 264.2 UdeM00000040813 XP\_031350480.1 52.5 219  
103 1 1 218 249 467 1.40E-67 264.2 7054 cellular  
organisms;Eukaryota;Opisthokonta;Metazoa;Eumetazoa;Bilateria;Protostomia;  
Ecdysozoa;Panarthropoda;Arthropoda;Mandibulata;Pancrustacea;Hexapoda;Inse  
cta;Dicondylia;Pterygota;Neoptera;Endopterygota;Coleoptera;Polyphaga;Elat  
eriformia;Elateroidea;Lampyridae;Lampyrinae;Photinus;Photinus pyralis

UdeM00000040815 7054 77.4 UdeM00000040815 XP\_031346849.1 59.7 67  
27 0 1 67 101 167 1.00E-11 77.4 7054 cellular  
organisms;Eukaryota;Opisthokonta;Metazoa;Eumetazoa;Bilateria;Protostomia;  
Ecdysozoa;Panarthropoda;Arthropoda;Mandibulata;Pancrustacea;Hexapoda;Inse  
cta;Dicondylia;Pterygota;Neoptera;Endopterygota;Coleoptera;Polyphaga;Elat  
eriformia;Elateroidea;Lampyridae;Lampyrinae;Photinus;Photinus pyralis

UdeM00000040816 13164 127.1 UdeM00000040816 XP\_022160646.1 50.9 108  
53 0 1 108 7 114 1.40E-26 127.1 13164 cellular  
organisms;Eukaryota;Opisthokonta;Metazoa;Eumetazoa;Bilateria;Protostomia;  
Ecdysozoa;Panarthropoda;Arthropoda;Mandibulata;Pancrustacea;Hexapoda;Inse  
cta;Dicondylia;Pterygota;Neoptera;Paraneoptera;Hemiptera;Sternorrhyncha;A  
phidomorpha;Aphidoidea;Aphididae;Aphidinae;Macrosiphini;Myzus;Myzus  
persicae

UdeM00000040820 6596 360.9 UdeM00000040820 XP\_045187536.1 74.1 247  
63 1 2 248 228 473 1.30E-96 360.9 6596 cellular  
organisms;Eukaryota;Opisthokonta;Metazoa;Eumetazoa;Bilateria;Protostomia;  
Spiralia;Lophotrochozoa;Mollusca;Bivalvia;Autobranchia;Heteroconchia;Euhe  
terodonta;Imparidentia;Venerida;Veneroidea;Veneridae;Mercenaria;Mercenari  
a mercenaria

UdeM00000040821 6596 289.3 UdeM00000040821 XP\_045187536.1 60.4 225  
87 1 1 225 502 724 4.30E-75 289.3 6596 cellular  
organisms;Eukaryota;Opisthokonta;Metazoa;Eumetazoa;Bilateria;Protostomia;  
Spiralia;Lophotrochozoa;Mollusca;Bivalvia;Autobranchia;Heteroconchia;Euhe  
terodonta;Imparidentia;Venerida;Veneroidea;Veneridae;Mercenaria;Mercenari  
a mercenaria

UdeM00000040826 37653 170.2 UdeM00000040826 XP\_014789722.1 46 302  
55 3 77 273 1331 1629 3.70E-39 170.2 37653 cellular  
organisms;Eukaryota;Opisthokonta;Metazoa;Eumetazoa;Bilateria;Protostomia;  
Spiralia;Lophotrochozoa;Mollusca;Cephalopoda;Coleoidea;Octopodiformes;Oct  
opoda;Incirrata;Octopodidae;Octopus;Octopus bimaculoides

UdeM00000040827 29159 134 UdeM00000040827 XP\_034315421.1 35.3 258  
108 5 40 242 221 474 2.50E-28 134 29159 cellular  
organisms;Eukaryota;Opisthokonta;Metazoa;Eumetazoa;Bilateria;Protostomia;  
Spiralia;Lophotrochozoa;Mollusca;Bivalvia;Autobranchia;Pteriormorphia;Ostr  
eida;Ostreoidea;Ostreidae;Crassostrea;Crassostrea gigas

UdeM00000040829 29159 485.3 UdeM00000040829 XP\_034322147.1 68.1 326  
104 0 1 326 374 699 5.90E-134 485.3 29159 cellular  
organisms;Eukaryota;Opisthokonta;Metazoa;Eumetazoa;Bilateria;Protostomia;  
Spiralia;Lophotrochozoa;Mollusca;Bivalvia;Autobranchia;Pteriormorphia;Ostr  
eida;Ostreoidea;Ostreidae;Crassostrea;Crassostrea gigas

UdeM00000040830 6565 199.5 UdeM00000040830 XP\_022306954.1 44.3 212  
116 1 1 210 737 948 4.20E-48 199.5 6565 cellular  
organisms;Eukaryota;Opisthokonta;Metazoa;Eumetazoa;Bilateria;Protostomia;  
Spiralia;Lophotrochozoa;Mollusca;Bivalvia;Autobranchia;Pteriormorphia;Ostr  
eida;Ostreoidea;Ostreidae;Crassostrea;Crassostrea virginica

UdeM00000040833 6596 401.7 UdeM00000040833 XP\_045182313.1 37.3 770  
 329 18 13 756 572 1213 2.00E-108 401.7 6596 cellular  
 organisms;Eukaryota;Opisthokonta;Metazoa;Eumetazoa;Bilateria;Protostomia;  
 Spiralia;Lophotrochozoa;Mollusca;Bivalvia;Autobranchia;Heteroconchia;Euhe  
 terodonta;Imparidentia;Venerida;Veneroidea;Veneridae;Mercenaria;Mercenari  
 a mercenaria  
 UdeM00000040834 6596 58.5 UdeM00000040834 XP\_045182316.1 34.8 115  
 44 3 17 130 408 492 7.20E-06 58.5 6596 cellular  
 organisms;Eukaryota;Opisthokonta;Metazoa;Eumetazoa;Bilateria;Protostomia;  
 Spiralia;Lophotrochozoa;Mollusca;Bivalvia;Autobranchia;Heteroconchia;Euhe  
 terodonta;Imparidentia;Venerida;Veneroidea;Veneridae;Mercenaria;Mercenari  
 a mercenaria  
 UdeM00000040835 7739 470.3 UdeM00000040835 XP\_035696678.1 38.2 702  
 266 4 103 636 202 903 4.00E-129 470.3 7739 cellular  
 organisms;Eukaryota;Opisthokonta;Metazoa;Eumetazoa;Bilateria;Deuterostomi  
 a;Chordata;Cephalochordata;Leptocardii;Amphioxiformes;Branchiostomidae;Br  
 anchiostoma;Branchiostoma floridae  
 UdeM00000044129 6596 122.5 UdeM00000044129 XP\_045171947.1 39.8 161  
 91 2 179 339 181 335 1.10E-24 122.5 6596 cellular  
 organisms;Eukaryota;Opisthokonta;Metazoa;Eumetazoa;Bilateria;Protostomia;  
 Spiralia;Lophotrochozoa;Mollusca;Bivalvia;Autobranchia;Heteroconchia;Euhe  
 terodonta;Imparidentia;Venerida;Veneroidea;Veneridae;Mercenaria;Mercenari  
 a mercenaria  
 UdeM00000026039 7741 120.6 UdeM00000026039 XP\_019628258.1 51.4 105  
 51 0 2 106 931 1035 1.30E-24 120.6 7741 cellular  
 organisms;Eukaryota;Opisthokonta;Metazoa;Eumetazoa;Bilateria;Deuterostomi  
 a;Chordata;Cephalochordata;Leptocardii;Amphioxiformes;Branchiostomidae;Br  
 anchiostoma;Branchiostoma belcheri  
 UdeM00000026040 6565 272.7 UdeM00000026040 XP\_022325115.1 32.3 616  
 310 12 4 610 3 520 1.10E-69 272.7 6565 cellular  
 organisms;Eukaryota;Opisthokonta;Metazoa;Eumetazoa;Bilateria;Protostomia;  
 Spiralia;Lophotrochozoa;Mollusca;Bivalvia;Autobranchia;Pteriomorphia;Ostr  
 eida;Ostreoidea;Ostreidae;Crassostrea;Crassostrea virginica  
 UdeM00000026041 6596 277.3 UdeM00000026041 XP\_045203637.1 48.6 290  
 106 3 1 290 609 855 2.20E-71 277.3 6596 cellular  
 organisms;Eukaryota;Opisthokonta;Metazoa;Eumetazoa;Bilateria;Protostomia;  
 Spiralia;Lophotrochozoa;Mollusca;Bivalvia;Autobranchia;Heteroconchia;Euhe  
 terodonta;Imparidentia;Venerida;Veneroidea;Veneridae;Mercenaria;Mercenari  
 a mercenaria  
 UdeM00000026042 29159 688 UdeM00000026042 XP\_011434317.2 69 503  
 150 4 2 500 70 570 9.20E-195 688 29159 cellular  
 organisms;Eukaryota;Opisthokonta;Metazoa;Eumetazoa;Bilateria;Protostomia;  
 Spiralia;Lophotrochozoa;Mollusca;Bivalvia;Autobranchia;Pteriomorphia;Ostr  
 eida;Ostreoidea;Ostreidae;Crassostrea;Crassostrea gigas  
 UdeM00000026045 6596 704.5 UdeM00000026045 XP\_045204956.1 59.5 587  
 232 3 13 599 196 776 1.10E-199 704.5 6596 cellular  
 organisms;Eukaryota;Opisthokonta;Metazoa;Eumetazoa;Bilateria;Protostomia;  
 Spiralia;Lophotrochozoa;Mollusca;Bivalvia;Autobranchia;Heteroconchia;Euhe  
 terodonta;Imparidentia;Venerida;Veneroidea;Veneridae;Mercenaria;Mercenari  
 a mercenaria  
 UdeM00000026046 6573 674.9 UdeM00000026046 XP\_021350367.1 65.3 499  
 158 3 37 522 18 514 8.60E-191 674.9 6573 cellular  
 organisms;Eukaryota;Opisthokonta;Metazoa;Eumetazoa;Bilateria;Protostomia;

Spiralia;Lophotrochozoa;Mollusca;Bivalvia;Autobranchia;Pteriormorphia;Pectinida;Pectinoidea;Pectinidae;Mizuhopecten;Mizuhopecten yessoensis  
 UdeM00000026047 6573 672.2 UdeM00000026047 XP\_021350367.1 65.8 494  
 154 3 49 529 23 514 5.60E-190 672.2 6573 cellular  
 organisms;Eukaryota;Opisthokonta;Metazoa;Eumetazoa;Bilateria;Protostomia;Spiralia;Lophotrochozoa;Mollusca;Bivalvia;Autobranchia;Pteriormorphia;Pectinida;Pectinoidea;Pectinidae;Mizuhopecten;Mizuhopecten yessoensis  
 UdeM00000026048 6579 615.5 UdeM00000026048 XP\_033742168.1 39.9 915  
 466 19 1 870 20 895 1.00E-172 615.5 6579 cellular  
 organisms;Eukaryota;Opisthokonta;Metazoa;Eumetazoa;Bilateria;Protostomia;Spiralia;Lophotrochozoa;Mollusca;Bivalvia;Autobranchia;Pteriormorphia;Pectinida;Pectinoidea;Pectinidae;Pecten;Pecten maximus  
 UdeM00000026049 6596 311.2 UdeM00000026049 XP\_045204605.1 54.2 284  
 106 3 24 294 28 300 1.40E-81 311.2 6596 cellular  
 organisms;Eukaryota;Opisthokonta;Metazoa;Eumetazoa;Bilateria;Protostomia;Spiralia;Lophotrochozoa;Mollusca;Bivalvia;Autobranchia;Heteroconchia;Euheterodonta;Imparidentia;Venerida;Veneroidea;Veneridae;Mercenaria;Mercenaria mercenaria  
 UdeM00000026050 6596 226.5 UdeM00000026050 XP\_045204594.1 34.5 833  
 428 34 16 808 22 776 1.40E-55 226.5 6596 cellular  
 organisms;Eukaryota;Opisthokonta;Metazoa;Eumetazoa;Bilateria;Protostomia;Spiralia;Lophotrochozoa;Mollusca;Bivalvia;Autobranchia;Heteroconchia;Euheterodonta;Imparidentia;Venerida;Veneroidea;Veneridae;Mercenaria;Mercenaria mercenaria  
 UdeM00000026051 6565 251.5 UdeM00000026051 XP\_022320680.1 58.3 187  
 77 1 72 258 31 216 1.10E-63 251.5 6565 cellular  
 organisms;Eukaryota;Opisthokonta;Metazoa;Eumetazoa;Bilateria;Protostomia;Spiralia;Lophotrochozoa;Mollusca;Bivalvia;Autobranchia;Pteriormorphia;Ostreida;Ostreoidea;Ostreidae;Crassostrea;Crassostrea virginica  
 UdeM00000026052 2607531 306.6 UdeM00000026052 XP\_029657462.1 56  
 277 122 0 92 368 7 283 4.40E-80 306.6 2607531  
 cellular  
 organisms;Eukaryota;Opisthokonta;Metazoa;Eumetazoa;Bilateria;Protostomia;Spiralia;Lophotrochozoa;Mollusca;Cephalopoda;Coleoidea;Octopodiformes;Octopoda;Incirrata;Octopodidae;Octopus;Octopus sinensis  
 UdeM00000026053 29159 734.9 UdeM00000026053 XP\_034301342.1 64.2 547  
 190 3 34 574 30 576 7.60E-209 734.9 29159 cellular  
 organisms;Eukaryota;Opisthokonta;Metazoa;Eumetazoa;Bilateria;Protostomia;Spiralia;Lophotrochozoa;Mollusca;Bivalvia;Autobranchia;Pteriormorphia;Ostreida;Ostreoidea;Ostreidae;Crassostrea;Crassostrea gigas  
 UdeM00000026054 6579 1249.2 UdeM00000026054 XP\_033743782.1 74.2  
 855 220 1 1 855 1 854 0.00E+00 1249.2 6579  
 cellular  
 organisms;Eukaryota;Opisthokonta;Metazoa;Eumetazoa;Bilateria;Protostomia;Spiralia;Lophotrochozoa;Mollusca;Bivalvia;Autobranchia;Pteriormorphia;Pectinida;Pectinoidea;Pectinidae;Pecten;Pecten maximus  
 UdeM00000026055 29159 375.2 UdeM00000026055 XP\_011442206.1 73.6 242  
 54 1 7 238 2 243 6.30E-101 375.2 29159 cellular  
 organisms;Eukaryota;Opisthokonta;Metazoa;Eumetazoa;Bilateria;Protostomia;Spiralia;Lophotrochozoa;Mollusca;Bivalvia;Autobranchia;Pteriormorphia;Ostreida;Ostreoidea;Ostreidae;Crassostrea;Crassostrea gigas  
 UdeM00000026056 6596 506.1 UdeM00000026056 XP\_045206047.1 55.4 708  
 255 8 1269 1967 1385 2040 2.10E-139 506.1 6596 cellular  
 organisms;Eukaryota;Opisthokonta;Metazoa;Eumetazoa;Bilateria;Protostomia;

Spiralia;Lophotrochozoa;Mollusca;Bivalvia;Autobranchia;Heteroconchia;Euherodonta;Imparidentia;Venerida;Veneroidea;Veneridae;Mercenaria;Mercenaria mercenaria

UdeM00000026056 6596 129 UdeM00000026056 XP\_045206047.1 52.7 131  
48 1 1 131 1 117 6.80E-26 129 6596 cellular

organisms;Eukaryota;Opisthokonta;Metazoa;Eumetazoa;Bilateria;Protostomia;Spiralia;Lophotrochozoa;Mollusca;Bivalvia;Autobranchia;Heteroconchia;Euherodonta;Imparidentia;Venerida;Veneroidea;Veneridae;Mercenaria;Mercenaria mercenaria

UdeM00000026056 6596 114 UdeM00000026056 XP\_045206047.1 45.9 146  
69 3 745 890 597 732 2.30E-21 114 6596 cellular

organisms;Eukaryota;Opisthokonta;Metazoa;Eumetazoa;Bilateria;Protostomia;Spiralia;Lophotrochozoa;Mollusca;Bivalvia;Autobranchia;Heteroconchia;Euherodonta;Imparidentia;Venerida;Veneroidea;Veneridae;Mercenaria;Mercenaria mercenaria

UdeM00000026057 6596 328.9 UdeM00000026057 XP\_045203554.1 76.4 203  
48 0 1 203 1 203 4.40E-87 328.9 6596 cellular

organisms;Eukaryota;Opisthokonta;Metazoa;Eumetazoa;Bilateria;Protostomia;Spiralia;Lophotrochozoa;Mollusca;Bivalvia;Autobranchia;Heteroconchia;Euherodonta;Imparidentia;Venerida;Veneroidea;Veneridae;Mercenaria;Mercenaria mercenaria

UdeM00000026058 29159 105.1 UdeM00000026058 XP\_011431267.2 50.5 101  
50 0 1 101 19 119 5.70E-20 105.1 29159 cellular

organisms;Eukaryota;Opisthokonta;Metazoa;Eumetazoa;Bilateria;Protostomia;Spiralia;Lophotrochozoa;Mollusca;Bivalvia;Autobranchia;Pteriomorphia;Ostreida;Ostreoidea;Ostreidae;Crassostrea;Crassostrea gigas

UdeM00000026059 210409 81.6 UdeM00000026059 XP\_045105039.1 52.6  
78 36 1 10 86 310 387 5.40E-13 81.6 210409  
cellular

organisms;Eukaryota;Opisthokonta;Metazoa;Eumetazoa;Bilateria;Protostomia;Ecdysozoa;Panarthropoda;Arthropoda;Mandibulata;Pancrustacea;Crustacea;Multicrustacea;Malacostraca;Eumalacostraca;Eucarida;Decapoda;Pleocyemata;Brachyura;Eubrachyura;Heterotremata;Portunoidea;Portunidae;Portunus;Portunus trituberculatus

UdeM00000026060 6579 351.3 UdeM00000026060 XP\_033743198.1 60.6 277  
109 0 1 277 16 292 1.10E-93 351.3 6579 cellular

organisms;Eukaryota;Opisthokonta;Metazoa;Eumetazoa;Bilateria;Protostomia;Spiralia;Lophotrochozoa;Mollusca;Bivalvia;Autobranchia;Pteriomorphia;Pectinida;Pectinoidea;Pectinidae;Pecten;Pecten maximus

UdeM00000026061 1735272 325.5 UdeM00000026061 XP\_041359639.1 55.7  
287 116 3 1 287 1 276 7.00E-86 325.5 1735272

cellular  
organisms;Eukaryota;Opisthokonta;Metazoa;Eumetazoa;Bilateria;Protostomia;Spiralia;Lophotrochozoa;Mollusca;Gastropoda;Neomphalina;Neomphaloidea;Peltopspiridae;Gigantopelta;Gigantopelta aegis

UdeM00000026062 6596 69.7 UdeM00000026062 XP\_045204937.1 88.9 36  
4 0 17 52 2 37 1.60E-09 69.7 6596 cellular

organisms;Eukaryota;Opisthokonta;Metazoa;Eumetazoa;Bilateria;Protostomia;Spiralia;Lophotrochozoa;Mollusca;Bivalvia;Autobranchia;Heteroconchia;Euherodonta;Imparidentia;Venerida;Veneroidea;Veneridae;Mercenaria;Mercenaria mercenaria

UdeM00000026063 6500 146 UdeM00000026063 XP\_005106266.1 50 162  
69 3 17 177 35 185 4.70E-32 146 6500 cellular

organisms;Eukaryota;Opisthokonta;Metazoa;Eumetazoa;Bilateria;Protostomia;

Spiralia; Lophotrochozoa; Mollusca; Gastropoda; Heterobranchia; Euthyneura; Tectipleura; Aplysiida; Aplysioidea; Aplysiidae; Aplysia; Aplysia californica

UdeM00000026064 6579 109 UdeM00000026064 XP\_033743198.1 58.1 74  
31 0 1 74 219 292 2.70E-21 109 6579 cellular  
organisms; Eukaryota; Opisthokonta; Metazoa; Eumetazoa; Bilateria; Protostomia; Spiralia; Lophotrochozoa; Mollusca; Bivalvia; Autobranchia; Pteriomorpha; Pectinida; Pectinoidea; Pectinidae; Pecten; Pecten maximus

UdeM00000026065 6579 365.2 UdeM00000026065 XP\_033743198.1 62.9 278  
103 0 1 278 16 293 7.60E-98 365.2 6579 cellular  
organisms; Eukaryota; Opisthokonta; Metazoa; Eumetazoa; Bilateria; Protostomia; Spiralia; Lophotrochozoa; Mollusca; Bivalvia; Autobranchia; Pteriomorpha; Pectinida; Pectinoidea; Pectinidae; Pecten; Pecten maximus

UdeM00000026068 6579 354.8 UdeM00000026068 XP\_033743198.1 63.4 268  
98 0 1 268 16 283 5.20E-94 354.8 6579 cellular  
organisms; Eukaryota; Opisthokonta; Metazoa; Eumetazoa; Bilateria; Protostomia; Spiralia; Lophotrochozoa; Mollusca; Bivalvia; Autobranchia; Pteriomorpha; Pectinida; Pectinoidea; Pectinidae; Pecten; Pecten maximus

UdeM00000026069 6579 362.1 UdeM00000026069 XP\_033743198.1 61.9 278  
106 0 1 278 16 293 6.50E-97 362.1 6579 cellular  
organisms; Eukaryota; Opisthokonta; Metazoa; Eumetazoa; Bilateria; Protostomia; Spiralia; Lophotrochozoa; Mollusca; Bivalvia; Autobranchia; Pteriomorpha; Pectinida; Pectinoidea; Pectinidae; Pecten; Pecten maximus

UdeM00000026070 6579 167.5 UdeM00000026070 XP\_033743198.1 55.6 133  
59 0 2 134 161 293 1.10E-38 167.5 6579 cellular  
organisms; Eukaryota; Opisthokonta; Metazoa; Eumetazoa; Bilateria; Protostomia; Spiralia; Lophotrochozoa; Mollusca; Bivalvia; Autobranchia; Pteriomorpha; Pectinida; Pectinoidea; Pectinidae; Pecten; Pecten maximus

UdeM00000026071 6579 349.4 UdeM00000026071 XP\_033743091.1 48 344  
168 4 1 338 15 353 5.30E-93 349.4 6579 cellular  
organisms; Eukaryota; Opisthokonta; Metazoa; Eumetazoa; Bilateria; Protostomia; Spiralia; Lophotrochozoa; Mollusca; Bivalvia; Autobranchia; Pteriomorpha; Pectinida; Pectinoidea; Pectinidae; Pecten; Pecten maximus

UdeM00000026072 260615 193.7 UdeM00000026072 XP\_039385216.1 87  
115 15 0 17 131 412 526 1.40E-46 193.7 260615  
cellular  
organisms; Eukaryota; Opisthokonta; Metazoa; Eumetazoa; Bilateria; Deuterostomia; Chordata; Craniata; Vertebrata; Gnathostomata; Teleostomi; Euteleostomi; Sarcopterygii; Dipnotetrapodomorpha; Tetrapoda; Amniota; Sauropsida; Sauria; Archelosauria; Testudinata; Testudines; Cryptodira; Durocryptodira; Testudinoidea; Geoemydidae; Geoemydinae; Mauremys; Mauremys reevesii

UdeM00000026073 1735272 92 UdeM00000026073 XP\_041358575.1 57.5  
73 31 0 1 73 12 84 5.60E-16 92 1735272  
cellular  
organisms; Eukaryota; Opisthokonta; Metazoa; Eumetazoa; Bilateria; Protostomia; Spiralia; Lophotrochozoa; Mollusca; Gastropoda; Neomphalina; Neomphaloidea; Peltospiridae; Gigantopelta; Gigantopelta aegis

UdeM00000026074 6579 461.8 UdeM00000026074 XP\_033743094.1 67.7 359  
102 4 4 356 7 357 7.70E-127 461.8 6579 cellular  
organisms; Eukaryota; Opisthokonta; Metazoa; Eumetazoa; Bilateria; Protostomia; Spiralia; Lophotrochozoa; Mollusca; Bivalvia; Autobranchia; Pteriomorpha; Pectinida; Pectinoidea; Pectinidae; Pecten; Pecten maximus

UdeM00000026075 6573 329.3 UdeM00000026075 XP\_021361328.1 79 205  
43 0 1 205 153 357 3.40E-87 329.3 6573 cellular  
organisms; Eukaryota; Opisthokonta; Metazoa; Eumetazoa; Bilateria; Protostomia;

Spiralia;Lophotrochozoa;Mollusca;Bivalvia;Autobranchia;Pteriomorpha;Pectinida;Pectinoidea;Pectinidae;Mizuhopecten;Mizuhopecten yessoensis  
 UdeM00000026076 6596 385.6 UdeM00000026076 XP\_045204381.1 56.6 357  
 147 5 1 351 1 355 7.30E-104 385.6 6596 cellular  
 organisms;Eukaryota;Opisthokonta;Metazoa;Eumetazoa;Bilateria;Protostomia;Spiralia;Lophotrochozoa;Mollusca;Bivalvia;Autobranchia;Heteroconchia;Euherodonta;Imparidentia;Venerida;Veneroidea;Veneridae;Mercenaria;Mercenaria mercenaria  
 UdeM00000026077 6500 500.7 UdeM00000026077 XP\_012945462.1 74.8 313  
 79 0 82 394 79 391 1.70E-138 500.7 6500 cellular  
 organisms;Eukaryota;Opisthokonta;Metazoa;Eumetazoa;Bilateria;Protostomia;Spiralia;Lophotrochozoa;Mollusca;Gastropoda;Heterobranchia;Euthyneura;Tectipleura;Aplysiida;Aplysioidae;Aplysiidae;Aplysia;Aplysia californica  
 UdeM00000026078 6579 972.2 UdeM00000026078 XP\_033742457.1 69.1 725  
 206 5 8 727 10 721 3.60E-280 972.2 6579 cellular  
 organisms;Eukaryota;Opisthokonta;Metazoa;Eumetazoa;Bilateria;Protostomia;Spiralia;Lophotrochozoa;Mollusca;Bivalvia;Autobranchia;Pteriomorpha;Pectinida;Pectinoidea;Pectinidae;Pecten;Pecten maximus  
 UdeM00000026081 2652724 89 UdeM00000026081 XP\_020900102.1 29.2  
 264 113 10 23 281 61 255 1.50E-14 89 2652724  
 cellular  
 organisms;Eukaryota;Opisthokonta;Metazoa;Eumetazoa;Cnidaria;Anthozoa;Hexacorallia;Actiniaria;Aiptasiidae;Exaiptasia;Exaiptasia diaphana  
 UdeM00000026082 2652724 84.7 UdeM00000026082 XP\_020900102.1 32.7  
 171 101 6 56 222 33 193 1.60E-13 84.7 2652724  
 cellular  
 organisms;Eukaryota;Opisthokonta;Metazoa;Eumetazoa;Cnidaria;Anthozoa;Hexacorallia;Actiniaria;Aiptasiidae;Exaiptasia;Exaiptasia diaphana  
 UdeM00000026089 6105 102.1 UdeM00000026089 XP\_031570619.1 35.4 175  
 107 5 49 221 22 192 1.60E-18 102.1 6105 cellular  
 organisms;Eukaryota;Opisthokonta;Metazoa;Eumetazoa;Cnidaria;Anthozoa;Hexacorallia;Actiniaria;Actiniidae;Actinia;Actinia tenebrosa  
 UdeM00000026090 6105 77.4 UdeM00000026090 XP\_031566938.1 41.4 116  
 56 5 3 110 506 617 1.70E-11 77.4 6105 cellular  
 organisms;Eukaryota;Opisthokonta;Metazoa;Eumetazoa;Cnidaria;Anthozoa;Hexacorallia;Actiniaria;Actiniidae;Actinia;Actinia tenebrosa  
 UdeM00000026093 6105 106.3 UdeM00000026093 XP\_031570619.1 36 175  
 106 5 49 221 22 192 5.40E-20 106.3 6105 cellular  
 organisms;Eukaryota;Opisthokonta;Metazoa;Eumetazoa;Cnidaria;Anthozoa;Hexacorallia;Actiniaria;Actiniidae;Actinia;Actinia tenebrosa  
 UdeM00000026098 6105 101.7 UdeM00000026098 XP\_031570619.1 35.4 175  
 107 5 49 221 22 192 1.30E-18 101.7 6105 cellular  
 organisms;Eukaryota;Opisthokonta;Metazoa;Eumetazoa;Cnidaria;Anthozoa;Hexacorallia;Actiniaria;Actiniidae;Actinia;Actinia tenebrosa  
 UdeM00000026103 6105 101.7 UdeM00000026103 XP\_031570619.1 35.5 172  
 105 5 52 221 25 192 1.30E-18 101.7 6105 cellular  
 organisms;Eukaryota;Opisthokonta;Metazoa;Eumetazoa;Cnidaria;Anthozoa;Hexacorallia;Actiniaria;Actiniidae;Actinia;Actinia tenebrosa  
 UdeM00000026113 6596 352.1 UdeM00000026113 XP\_045203580.1 56.6 302  
 131 0 1 302 1 302 7.30E-94 352.1 6596 cellular  
 organisms;Eukaryota;Opisthokonta;Metazoa;Eumetazoa;Bilateria;Protostomia;Spiralia;Lophotrochozoa;Mollusca;Bivalvia;Autobranchia;Heteroconchia;Euherodonta;Imparidentia;Venerida;Veneroidea;Veneridae;Mercenaria;Mercenaria mercenaria

UdeM00000026114 1735272 1638.2 UdeM00000026114 XP\_041357021.1  
 57.5 1483 598 17 87 1555 75 1538 0.00E+00 1638.2  
 1735272 cellular  
 organisms;Eukaryota;Opisthokonta;Metazoa;Eumetazoa;Bilateria;Protostomia;  
 Spiralia;Lophotrochozoa;Mollusca;Gastropoda;Neomphalina;Neomphaloidea;Pel  
 tospiridae;Gigantopelta;Gigantopelta aegis  
 UdeM00000026115 6596 210.7 UdeM00000026115 XP\_045206053.1 47.6 349  
 148 12 104 432 1486 1819 3.70E-51 210.7 6596 cellular  
 organisms;Eukaryota;Opisthokonta;Metazoa;Eumetazoa;Bilateria;Protostomia;  
 Spiralia;Lophotrochozoa;Mollusca;Bivalvia;Autobranchia;Heteroconchia;Euhe  
 terodonta;Imparidentia;Venerida;Veneroidea;Veneridae;Mercenaria;Mercenari  
 a mercenaria  
 UdeM00000026116 6579 199.5 UdeM00000026116 XP\_033748267.1 42.7 260  
 134 7 4 255 10 262 5.10E-48 199.5 6579 cellular  
 organisms;Eukaryota;Opisthokonta;Metazoa;Eumetazoa;Bilateria;Protostomia;  
 Spiralia;Lophotrochozoa;Mollusca;Bivalvia;Autobranchia;Pteriormorphia;Pect  
 inida;Pectinoidea;Pectinidae;Pecten;Pecten maximus  
 UdeM00000026117 6596 409.8 UdeM00000026117 XP\_045204037.1 71.2 278  
 80 0 1 278 1 278 2.80E-111 409.8 6596 cellular  
 organisms;Eukaryota;Opisthokonta;Metazoa;Eumetazoa;Bilateria;Protostomia;  
 Spiralia;Lophotrochozoa;Mollusca;Bivalvia;Autobranchia;Heteroconchia;Euhe  
 terodonta;Imparidentia;Venerida;Veneroidea;Veneridae;Mercenaria;Mercenari  
 a mercenaria  
 UdeM00000026118 6596 415.6 UdeM00000026118 XP\_045204037.1 60.2 374  
 124 4 75 423 274 647 7.50E-113 415.6 6596 cellular  
 organisms;Eukaryota;Opisthokonta;Metazoa;Eumetazoa;Bilateria;Protostomia;  
 Spiralia;Lophotrochozoa;Mollusca;Bivalvia;Autobranchia;Heteroconchia;Euhe  
 terodonta;Imparidentia;Venerida;Veneroidea;Veneridae;Mercenaria;Mercenari  
 a mercenaria  
 UdeM00000026119 6573 213.8 UdeM00000026119 XP\_021369519.1 46.9 243  
 116 5 19 255 27 262 2.60E-52 213.8 6573 cellular  
 organisms;Eukaryota;Opisthokonta;Metazoa;Eumetazoa;Bilateria;Protostomia;  
 Spiralia;Lophotrochozoa;Mollusca;Bivalvia;Autobranchia;Pteriormorphia;Pect  
 inida;Pectinoidea;Pectinidae;Mizuhopecten;Mizuhopecten yessoensis  
 UdeM00000026120 6573 211.5 UdeM00000026120 XP\_021369519.1 46.5 243  
 117 5 19 255 27 262 1.30E-51 211.5 6573 cellular  
 organisms;Eukaryota;Opisthokonta;Metazoa;Eumetazoa;Bilateria;Protostomia;  
 Spiralia;Lophotrochozoa;Mollusca;Bivalvia;Autobranchia;Pteriormorphia;Pect  
 inida;Pectinoidea;Pectinidae;Mizuhopecten;Mizuhopecten yessoensis  
 UdeM00000026123 6596 793.9 UdeM00000026123 XP\_045205234.1 62.9 618  
 221 3 29 646 404 1013 1.50E-226 793.9 6596 cellular  
 organisms;Eukaryota;Opisthokonta;Metazoa;Eumetazoa;Bilateria;Protostomia;  
 Spiralia;Lophotrochozoa;Mollusca;Bivalvia;Autobranchia;Heteroconchia;Euhe  
 terodonta;Imparidentia;Venerida;Veneroidea;Veneridae;Mercenaria;Mercenari  
 a mercenaria  
 UdeM00000026122 6596 1037.3 UdeM00000026122 XP\_045205234.1 60.3  
 857 320 6 1 851 171 1013 1.10E-299 1037.3 6596  
 cellular  
 organisms;Eukaryota;Opisthokonta;Metazoa;Eumetazoa;Bilateria;Protostomia;  
 Spiralia;Lophotrochozoa;Mollusca;Bivalvia;Autobranchia;Heteroconchia;Euhe  
 terodonta;Imparidentia;Venerida;Veneroidea;Veneridae;Mercenaria;Mercenari  
 a mercenaria  
 UdeM00000026124 29159 260 UdeM00000026124 XP\_011418163.2 49.8 269  
 126 4 3 267 174 437 3.50E-66 260 29159 cellular



organisms;Eukaryota;Opisthokonta;Metazoa;Eumetazoa;Bilateria;Protostomia;  
Spiralia;Lophotrochozoa;Mollusca;Bivalvia;Autobranhia;Pteriormorphia;Ostr  
eida;Ostreoidea;Ostreidae;Crassostrea;Crassostrea gigas  
UdeM00000026125 6596 221.9 UdeM00000026125 XP\_045205234.1 68.1 163  
49 2 1 163 1 160 6.30E-55 221.9 6596 cellular  
organisms;Eukaryota;Opisthokonta;Metazoa;Eumetazoa;Bilateria;Protostomia;  
Spiralia;Lophotrochozoa;Mollusca;Bivalvia;Autobranhia;Heteroconchia;Euhe  
terodonta;Imparidentia;Venerida;Veneroidea;Veneridae;Mercenaria;Mercenari  
a mercenaria  
UdeM00000026126 6565 704.1 UdeM00000026126 XP\_022327372.1 58.3 576  
236 3 1 574 8 581 1.40E-199 704.1 6565 cellular  
organisms;Eukaryota;Opisthokonta;Metazoa;Eumetazoa;Bilateria;Protostomia;  
Spiralia;Lophotrochozoa;Mollusca;Bivalvia;Autobranhia;Pteriormorphia;Ostr  
eida;Ostreoidea;Ostreidae;Crassostrea;Crassostrea virginica  
UdeM00000026127 6565 137.1 UdeM00000026127 XP\_022326035.1 28.9 346  
172 7 172 513 117 392 6.30E-29 137.1 6565 cellular  
organisms;Eukaryota;Opisthokonta;Metazoa;Eumetazoa;Bilateria;Protostomia;  
Spiralia;Lophotrochozoa;Mollusca;Bivalvia;Autobranhia;Pteriormorphia;Ostr  
eida;Ostreoidea;Ostreidae;Crassostrea;Crassostrea virginica  
UdeM00000026129 6565 69.7 UdeM00000026129 XP\_022290110.1 48.4 62  
31 1 122 182 51 112 5.10E-09 69.7 6565 cellular  
organisms;Eukaryota;Opisthokonta;Metazoa;Eumetazoa;Bilateria;Protostomia;  
Spiralia;Lophotrochozoa;Mollusca;Bivalvia;Autobranhia;Pteriormorphia;Ostr  
eida;Ostreoidea;Ostreidae;Crassostrea;Crassostrea virginica  
UdeM00000026130 6565 344.4 UdeM00000026130 XP\_022327372.1 45.1 399  
159 3 23 363 185 581 1.80E-91 344.4 6565 cellular  
organisms;Eukaryota;Opisthokonta;Metazoa;Eumetazoa;Bilateria;Protostomia;  
Spiralia;Lophotrochozoa;Mollusca;Bivalvia;Autobranhia;Pteriormorphia;Ostr  
eida;Ostreoidea;Ostreidae;Crassostrea;Crassostrea virginica  
UdeM00000026131 6596 122.9 UdeM00000026131 XP\_045205252.1 25.9 402  
238 11 179 550 80 451 1.30E-24 122.9 6596 cellular  
organisms;Eukaryota;Opisthokonta;Metazoa;Eumetazoa;Bilateria;Protostomia;  
Spiralia;Lophotrochozoa;Mollusca;Bivalvia;Autobranhia;Heteroconchia;Euhe  
terodonta;Imparidentia;Venerida;Veneroidea;Veneridae;Mercenaria;Mercenari  
a mercenaria  
UdeM00000026132 6565 689.5 UdeM00000026132 XP\_022327372.1 56.8 583  
248 3 1 581 1 581 3.70E-195 689.5 6565 cellular  
organisms;Eukaryota;Opisthokonta;Metazoa;Eumetazoa;Bilateria;Protostomia;  
Spiralia;Lophotrochozoa;Mollusca;Bivalvia;Autobranhia;Pteriormorphia;Ostr  
eida;Ostreoidea;Ostreidae;Crassostrea;Crassostrea virginica  
UdeM00000026136 6596 226.1 UdeM00000026136 XP\_045204839.1 41.1 309  
169 6 291 592 320 622 1.20E-55 226.1 6596 cellular  
organisms;Eukaryota;Opisthokonta;Metazoa;Eumetazoa;Bilateria;Protostomia;  
Spiralia;Lophotrochozoa;Mollusca;Bivalvia;Autobranhia;Heteroconchia;Euhe  
terodonta;Imparidentia;Venerida;Veneroidea;Veneridae;Mercenaria;Mercenari  
a mercenaria  
UdeM00000026137 6596 226.1 UdeM00000026137 XP\_045204839.1 41.1 309  
169 6 294 595 320 622 1.20E-55 226.1 6596 cellular  
organisms;Eukaryota;Opisthokonta;Metazoa;Eumetazoa;Bilateria;Protostomia;  
Spiralia;Lophotrochozoa;Mollusca;Bivalvia;Autobranhia;Heteroconchia;Euhe  
terodonta;Imparidentia;Venerida;Veneroidea;Veneridae;Mercenaria;Mercenari  
a mercenaria  
UdeM00000026139 7054 230.7 UdeM00000026139 XP\_031350379.1 38.9 347  
192 7 1 327 1 347 2.60E-57 230.7 7054 cellular

organisms;Eukaryota;Opisthokonta;Metazoa;Eumetazoa;Bilateria;Protostomia;  
Ecdysozoa;Panarthropoda;Arthropoda;Mandibulata;Pancrustacea;Hexapoda;Inse  
cta;Dicondylia;Pterygota;Neoptera;Endopterygota;Coleoptera;Polyphaga;Elat  
eriformia;Elateroidea;Lampyridae;Lampyrinae;Photinus;Photinus pyralis  
UdeM00000026140 6596 62.4 UdeM00000026140 XP\_045205343.1 64.1 39  
14 0 66 104 128 166 6.10E-07 62.4 6596 cellular  
organisms;Eukaryota;Opisthokonta;Metazoa;Eumetazoa;Bilateria;Protostomia;  
Spiralia;Lophotrochozoa;Mollusca;Bivalvia;Autobranchia;Heteroconchia;Euhe  
terodonta;Imparidentia;Venerida;Veneroidea;Veneridae;Mercenaria;Mercenari  
a mercenaria  
UdeM00000026141 6596 62.4 UdeM00000026141 XP\_045205343.1 64.1 39  
14 0 66 104 128 166 6.10E-07 62.4 6596 cellular  
organisms;Eukaryota;Opisthokonta;Metazoa;Eumetazoa;Bilateria;Protostomia;  
Spiralia;Lophotrochozoa;Mollusca;Bivalvia;Autobranchia;Heteroconchia;Euhe  
terodonta;Imparidentia;Venerida;Veneroidea;Veneridae;Mercenaria;Mercenari  
a mercenaria  
UdeM00000026144 6565 139.4 UdeM00000026144 XP\_022305631.1 41.6 197  
102 4 1 185 18 213 4.60E-30 139.4 6565 cellular  
organisms;Eukaryota;Opisthokonta;Metazoa;Eumetazoa;Bilateria;Protostomia;  
Spiralia;Lophotrochozoa;Mollusca;Bivalvia;Autobranchia;Pteriormorphia;Ostr  
eida;Ostreoidea;Ostreidae;Crassostrea;Crassostrea virginica  
UdeM00000026147 6596 67.4 UdeM00000026147 XP\_045205361.1 41.8 91  
48 2 57 144 73 161 1.80E-08 67.4 6596 cellular  
organisms;Eukaryota;Opisthokonta;Metazoa;Eumetazoa;Bilateria;Protostomia;  
Spiralia;Lophotrochozoa;Mollusca;Bivalvia;Autobranchia;Heteroconchia;Euhe  
terodonta;Imparidentia;Venerida;Veneroidea;Veneridae;Mercenaria;Mercenari  
a mercenaria  
UdeM00000026149 225164 67 UdeM00000026149 XP\_009059819.1 43.5  
85 43 2 47 128 71 153 2.10E-08 67 225164  
cellular  
organisms;Eukaryota;Opisthokonta;Metazoa;Eumetazoa;Bilateria;Protostomia;  
Spiralia;Lophotrochozoa;Mollusca;Gastropoda;Patellogastropoda;Lottioidea;  
Lottiidae;Lottia;Lottia gigantea  
UdeM00000026151 6596 58.9 UdeM00000026151 XP\_045205365.1 75 32  
8 0 66 97 83 114 6.00E-06 58.9 6596 cellular  
organisms;Eukaryota;Opisthokonta;Metazoa;Eumetazoa;Bilateria;Protostomia;  
Spiralia;Lophotrochozoa;Mollusca;Bivalvia;Autobranchia;Heteroconchia;Euhe  
terodonta;Imparidentia;Venerida;Veneroidea;Veneridae;Mercenaria;Mercenari  
a mercenaria  
UdeM00000026154 225164 68.6 UdeM00000026154 XP\_009059819.1 42.7  
110 49 5 43 147 71 171 7.80E-09 68.6 225164  
cellular  
organisms;Eukaryota;Opisthokonta;Metazoa;Eumetazoa;Bilateria;Protostomia;  
Spiralia;Lophotrochozoa;Mollusca;Gastropoda;Patellogastropoda;Lottioidea;  
Lottiidae;Lottia;Lottia gigantea  
UdeM00000026155 225164 74.3 UdeM00000026155 XP\_009059819.1 40.6  
106 52 4 69 163 66 171 1.60E-10 74.3 225164  
cellular  
organisms;Eukaryota;Opisthokonta;Metazoa;Eumetazoa;Bilateria;Protostomia;  
Spiralia;Lophotrochozoa;Mollusca;Gastropoda;Patellogastropoda;Lottioidea;  
Lottiidae;Lottia;Lottia gigantea  
UdeM00000026156 6596 385.2 UdeM00000026156 XP\_045187606.1 44 520  
258 10 9 512 17 519 1.30E-103 385.2 6596 cellular  
organisms;Eukaryota;Opisthokonta;Metazoa;Eumetazoa;Bilateria;Protostomia;

Spiralia;Lophotrochozoa;Mollusca;Bivalvia;Autobranchia;Heteroconchia;Euherodonta;Imparidentia;Venerida;Veneroidea;Veneridae;Mercenaria;Mercenaria mercenaria

UdeM00000026157 6596 835.9 UdeM00000026157 XP\_045205778.1 46.2 1014  
514 13 31 1028 36 1033 6.40E-239 835.9 6596 cellular

organisms;Eukaryota;Opisthokonta;Metazoa;Eumetazoa;Bilateria;Protostomia;Spiralia;Lophotrochozoa;Mollusca;Bivalvia;Autobranchia;Heteroconchia;Euherodonta;Imparidentia;Venerida;Veneroidea;Veneridae;Mercenaria;Mercenaria mercenaria

UdeM00000026160 6596 802.7 UdeM00000026160 XP\_045205778.1 42.9 1155  
570 22 4 1135 36 1123 5.90E-229 802.7 6596 cellular

organisms;Eukaryota;Opisthokonta;Metazoa;Eumetazoa;Bilateria;Protostomia;Spiralia;Lophotrochozoa;Mollusca;Bivalvia;Autobranchia;Heteroconchia;Euherodonta;Imparidentia;Venerida;Veneroidea;Veneridae;Mercenaria;Mercenaria mercenaria

UdeM00000026161 6596 682.9 UdeM00000026161 XP\_045205778.1 41.7 992  
497 13 15 934 22 1004 5.70E-193 682.9 6596 cellular

organisms;Eukaryota;Opisthokonta;Metazoa;Eumetazoa;Bilateria;Protostomia;Spiralia;Lophotrochozoa;Mollusca;Bivalvia;Autobranchia;Heteroconchia;Euherodonta;Imparidentia;Venerida;Veneroidea;Veneridae;Mercenaria;Mercenaria mercenaria

UdeM00000026162 7574 148.7 UdeM00000026162 XP\_013390258.1 31.2 321  
206 7 5 313 5 322 1.50E-32 148.7 7574 cellular

organisms;Eukaryota;Opisthokonta;Metazoa;Eumetazoa;Bilateria;Protostomia;Spiralia;Lophotrochozoa;Brachiopoda;Linguliformea;Lingulata;Lingulida;Linguloidea;Lingulidae;Lingula;Lingula anatina

UdeM00000026163 6596 284.6 UdeM00000026163 XP\_045181541.1 24.6 1212  
741 40 87 1200 93 1229 5.70E-73 284.6 6596 cellular

organisms;Eukaryota;Opisthokonta;Metazoa;Eumetazoa;Bilateria;Protostomia;Spiralia;Lophotrochozoa;Mollusca;Bivalvia;Autobranchia;Heteroconchia;Euherodonta;Imparidentia;Venerida;Veneroidea;Veneridae;Mercenaria;Mercenaria mercenaria

UdeM00000026165 6596 341.3 UdeM00000026165 XP\_045205716.1 53.8 316  
129 3 1 310 13 317 1.30E-90 341.3 6596 cellular

organisms;Eukaryota;Opisthokonta;Metazoa;Eumetazoa;Bilateria;Protostomia;Spiralia;Lophotrochozoa;Mollusca;Bivalvia;Autobranchia;Heteroconchia;Euherodonta;Imparidentia;Venerida;Veneroidea;Veneridae;Mercenaria;Mercenaria mercenaria

UdeM00000026164 6596 357.5 UdeM00000026164 XP\_045205716.1 54.3 328  
133 3 1 322 1 317 1.90E-95 357.5 6596 cellular

organisms;Eukaryota;Opisthokonta;Metazoa;Eumetazoa;Bilateria;Protostomia;Spiralia;Lophotrochozoa;Mollusca;Bivalvia;Autobranchia;Heteroconchia;Euherodonta;Imparidentia;Venerida;Veneroidea;Veneridae;Mercenaria;Mercenaria mercenaria

UdeM00000026166 6579 62.8 UdeM00000026166 XP\_033743177.1 43.5 62  
35 0 79 140 65 126 4.10E-07 62.8 6579 cellular

organisms;Eukaryota;Opisthokonta;Metazoa;Eumetazoa;Bilateria;Protostomia;Spiralia;Lophotrochozoa;Mollusca;Bivalvia;Autobranchia;Pteriomorphia;Pectinida;Pectinoidea;Pectinidae;Pecten;Pecten maximus

UdeM00000026167 6596 209.9 UdeM00000026167 XP\_045206975.1 39.5 243  
138 6 9 244 6 246 5.20E-51 209.9 6596 cellular

organisms;Eukaryota;Opisthokonta;Metazoa;Eumetazoa;Bilateria;Protostomia;Spiralia;Lophotrochozoa;Mollusca;Bivalvia;Autobranchia;Heteroconchia;Euherodonta

terodonta;Imparidentia;Venerida;Veneroidea;Veneridae;Mercenaria;Mercenari  
a mercenaria

UdeM00000026168 29159 61.2 UdeM00000026168 XP\_011418168.2 31 113  
78 0 21 133 25 137 5.40E-06 61.2 29159 cellular

organisms;Eukaryota;Opisthokonta;Metazoa;Eumetazoa;Bilateria;Protostomia;  
Spiralia;Lophotrochozoa;Mollusca;Bivalvia;Autobranchia;Pteriormorphia;Ostr  
eida;Ostreoidea;Ostreidae;Crassostrea;Crassostrea gigas

UdeM00000026169 29159 61.2 UdeM00000026169 XP\_011418168.2 31 113  
78 0 21 133 25 137 5.20E-06 61.2 29159 cellular

organisms;Eukaryota;Opisthokonta;Metazoa;Eumetazoa;Bilateria;Protostomia;  
Spiralia;Lophotrochozoa;Mollusca;Bivalvia;Autobranchia;Pteriormorphia;Ostr  
eida;Ostreoidea;Ostreidae;Crassostrea;Crassostrea gigas

UdeM00000026170 6596 187.2 UdeM00000026170 XP\_045203187.1 64.4 146  
45 2 1 146 1 139 1.50E-44 187.2 6596 cellular

organisms;Eukaryota;Opisthokonta;Metazoa;Eumetazoa;Bilateria;Protostomia;  
Spiralia;Lophotrochozoa;Mollusca;Bivalvia;Autobranchia;Heteroconchia;Euhe  
terodonta;Imparidentia;Venerida;Veneroidea;Veneridae;Mercenaria;Mercenari  
a mercenaria

UdeM00000026171 6596 758.1 UdeM00000026171 XP\_045203183.1 47.2 1054  
461 24 29 1017 30 1053 1.50E-215 758.1 6596 cellular

organisms;Eukaryota;Opisthokonta;Metazoa;Eumetazoa;Bilateria;Protostomia;  
Spiralia;Lophotrochozoa;Mollusca;Bivalvia;Autobranchia;Heteroconchia;Euhe  
terodonta;Imparidentia;Venerida;Veneroidea;Veneridae;Mercenaria;Mercenari  
a mercenaria

UdeM00000026172 6596 138.3 UdeM00000026172 XP\_045203172.1 54.7 159  
58 7 70 224 43 191 1.20E-29 138.3 6596 cellular

organisms;Eukaryota;Opisthokonta;Metazoa;Eumetazoa;Bilateria;Protostomia;  
Spiralia;Lophotrochozoa;Mollusca;Bivalvia;Autobranchia;Heteroconchia;Euhe  
terodonta;Imparidentia;Venerida;Veneroidea;Veneridae;Mercenaria;Mercenari  
a mercenaria

UdeM00000026173 6596 1543.1 UdeM00000026173 XP\_045203182.1 70.8  
1021 258 5 13 999 171 1185 0.00E+00 1543.1 6596  
cellular

organisms;Eukaryota;Opisthokonta;Metazoa;Eumetazoa;Bilateria;Protostomia;  
Spiralia;Lophotrochozoa;Mollusca;Bivalvia;Autobranchia;Heteroconchia;Euhe  
terodonta;Imparidentia;Venerida;Veneroidea;Veneridae;Mercenaria;Mercenari  
a mercenaria

UdeM00000026174 6596 321.6 UdeM00000026174 XP\_045203172.1 64.2 229  
79 1 1 226 1022 1250 8.00E-85 321.6 6596 cellular

organisms;Eukaryota;Opisthokonta;Metazoa;Eumetazoa;Bilateria;Protostomia;  
Spiralia;Lophotrochozoa;Mollusca;Bivalvia;Autobranchia;Heteroconchia;Euhe  
terodonta;Imparidentia;Venerida;Veneroidea;Veneridae;Mercenaria;Mercenari  
a mercenaria

UdeM00000026175 6596 1174.5 UdeM00000026175 XP\_045203166.1 39.2  
1530 445 10 104 1193 89 1573 0.00E+00 1174.5 6596  
cellular

organisms;Eukaryota;Opisthokonta;Metazoa;Eumetazoa;Bilateria;Protostomia;  
Spiralia;Lophotrochozoa;Mollusca;Bivalvia;Autobranchia;Heteroconchia;Euhe  
terodonta;Imparidentia;Venerida;Veneroidea;Veneridae;Mercenaria;Mercenari  
a mercenaria

UdeM00000044329 7574 444.1 UdeM00000044329 XP\_013381964.1 87.9 223  
27 0 9 231 16 238 1.10E-121 444.1 7574 cellular

organisms;Eukaryota;Opisthokonta;Metazoa;Eumetazoa;Bilateria;Protostomia;

Spiralia; Lophotrochozoa; Brachiopoda; Linguliformea; Lingulata; Lingulida; Linguloidea; Lingulidae; Lingula; Lingula anatina

UdeM00000043211 6573 102.8 UdeM00000043211 XP\_021352394.1 50 116  
51 2 5 115 162 275 4.30E-19 102.8 6573 cellular  
organisms; Eukaryota; Opisthokonta; Metazoa; Eumetazoa; Bilateria; Protostomia; Spiralia; Lophotrochozoa; Mollusca; Bivalvia; Autobranchia; Pteriomorpha; Pectinida; Pectinoidea; Pectinidae; Mizuhopecten; Mizuhopecten yessoensis

UdeM00000043212 6579 176.8 UdeM00000043212 XP\_033754505.1 56.6 145  
63 0 1 145 16 160 2.30E-41 176.8 6579 cellular  
organisms; Eukaryota; Opisthokonta; Metazoa; Eumetazoa; Bilateria; Protostomia; Spiralia; Lophotrochozoa; Mollusca; Bivalvia; Autobranchia; Pteriomorpha; Pectinida; Pectinoidea; Pectinidae; Pecten; Pecten maximus

UdeM00000043213 6579 154.5 UdeM00000043213 XP\_033754505.1 57.7 123  
52 0 3 125 38 160 1.00E-34 154.5 6579 cellular  
organisms; Eukaryota; Opisthokonta; Metazoa; Eumetazoa; Bilateria; Protostomia; Spiralia; Lophotrochozoa; Mollusca; Bivalvia; Autobranchia; Pteriomorpha; Pectinida; Pectinoidea; Pectinidae; Pecten; Pecten maximus

UdeM00000043214 6596 326.2 UdeM00000043214 XP\_045192847.1 67.2 262  
84 2 9 270 11 270 4.70E-86 326.2 6596 cellular  
organisms; Eukaryota; Opisthokonta; Metazoa; Eumetazoa; Bilateria; Protostomia; Spiralia; Lophotrochozoa; Mollusca; Bivalvia; Autobranchia; Heteroconchia; Euheterodonta; Imparidentia; Venerida; Veneroidea; Veneridae; Mercenaria; Mercenaria mercenaria

UdeM00000044382 871585 139 UdeM00000044382 YP\_004995567.1 35.2  
247 157 3 11 256 7 251 8.20E-30 139 871585  
cellular  
organisms; Bacteria; Proteobacteria; Gammaproteobacteria; Pseudomonadales; Moraxellaceae; Acinetobacter; Acinetobacter calcoaceticus/baumannii complex; Acinetobacter pittii; Acinetobacter pittii PHEA-2

UdeM00000013763 6573 153.7 UdeM00000013763 XP\_021350017.1 61 123  
46 1 24 144 4 126 1.80E-34 153.7 6573 cellular  
organisms; Eukaryota; Opisthokonta; Metazoa; Eumetazoa; Bilateria; Protostomia; Spiralia; Lophotrochozoa; Mollusca; Bivalvia; Autobranchia; Pteriomorpha; Pectinida; Pectinoidea; Pectinidae; Mizuhopecten; Mizuhopecten yessoensis

UdeM00000013764 6596 196.1 UdeM00000013764 XP\_045212202.1 59.9 172  
68 1 1 171 226 397 4.20E-47 196.1 6596 cellular  
organisms; Eukaryota; Opisthokonta; Metazoa; Eumetazoa; Bilateria; Protostomia; Spiralia; Lophotrochozoa; Mollusca; Bivalvia; Autobranchia; Heteroconchia; Euheterodonta; Imparidentia; Venerida; Veneroidea; Veneridae; Mercenaria; Mercenaria mercenaria

UdeM00000013765 110193 61.2 UdeM00000013765 XP\_017777214.1 43.8  
64 35 1 10 73 11 73 1.20E-06 61.2 110193  
cellular  
organisms; Eukaryota; Opisthokonta; Metazoa; Eumetazoa; Bilateria; Protostomia; Ecdysozoa; Panarthropoda; Arthropoda; Mandibulata; Pancrustacea; Hexapoda; Insecta; Dicondylia; Pterygota; Neoptera; Endopterygota; Coleoptera; Polyphaga; Staphyliniformia; Staphylinioida; Silphidae; Nicrophorinae; Nicrophorus; Nicrophorus vespilloides

UdeM00000013766 400727 213.4 UdeM00000013766 XP\_025080377.1 54.7  
179 81 0 1 179 50 228 2.40E-52 213.4 400727  
cellular  
organisms; Eukaryota; Opisthokonta; Metazoa; Eumetazoa; Bilateria; Protostomia; Spiralia; Lophotrochozoa; Mollusca; Gastropoda; Caenogastropoda; Architaenioglossa; Ampullarioidea; Ampullariidae; Pomacea; Pomacea canaliculata

UdeM00000013767 6596 1055.8 UdeM00000013767 XP\_045214928.1 48.1  
 1096 541 11 2 1085 846 1925 3.70E-305 1055.8 6596  
 cellular  
 organisms;Eukaryota;Opisthokonta;Metazoa;Eumetazoa;Bilateria;Protostomia;  
 Spiralia;Lophotrochozoa;Mollusca;Bivalvia;Autobranhia;Heteroconchia;Euhe  
 terodonta;Imparidentia;Venerida;Veneroidea;Veneridae;Mercenaria;Mercenari  
 a mercenaria  
 UdeM00000013769 29159 241.9 UdeM00000013769 XP\_034313809.1 24.3 980  
 648 26 56 1014 53 959 4.30E-60 241.9 29159 cellular  
 organisms;Eukaryota;Opisthokonta;Metazoa;Eumetazoa;Bilateria;Protostomia;  
 Spiralia;Lophotrochozoa;Mollusca;Bivalvia;Autobranhia;Pteriormorphia;Ostr  
 eida;Ostreoidea;Ostreidae;Crassostrea;Crassostrea gigas  
 UdeM00000013770 6579 138.3 UdeM00000013770 XP\_033754748.1 42.8 145  
 79 2 8 149 35 178 8.90E-30 138.3 6579 cellular  
 organisms;Eukaryota;Opisthokonta;Metazoa;Eumetazoa;Bilateria;Protostomia;  
 Spiralia;Lophotrochozoa;Mollusca;Bivalvia;Autobranhia;Pteriormorphia;Pect  
 inida;Pectinoidea;Pectinidae;Pecten;Pecten maximus  
 UdeM00000013771 6579 127.9 UdeM00000013771 XP\_033754748.1 44.8 116  
 61 1 1 113 63 178 9.30E-27 127.9 6579 cellular  
 organisms;Eukaryota;Opisthokonta;Metazoa;Eumetazoa;Bilateria;Protostomia;  
 Spiralia;Lophotrochozoa;Mollusca;Bivalvia;Autobranhia;Pteriormorphia;Pect  
 inida;Pectinoidea;Pectinidae;Pecten;Pecten maximus  
 UdeM00000013772 6573 221.1 UdeM00000013772 XP\_021351855.1 49.8 269  
 121 6 1 260 620 883 2.00E-54 221.1 6573 cellular  
 organisms;Eukaryota;Opisthokonta;Metazoa;Eumetazoa;Bilateria;Protostomia;  
 Spiralia;Lophotrochozoa;Mollusca;Bivalvia;Autobranhia;Pteriormorphia;Pect  
 inida;Pectinoidea;Pectinidae;Mizuhopecten;Mizuhopecten yessoensis  
 UdeM00000013773 6596 511.5 UdeM00000013773 XP\_045213754.1 78 309  
 67 1 1 309 674 981 1.10E-141 511.5 6596 cellular  
 organisms;Eukaryota;Opisthokonta;Metazoa;Eumetazoa;Bilateria;Protostomia;  
 Spiralia;Lophotrochozoa;Mollusca;Bivalvia;Autobranhia;Heteroconchia;Euhe  
 terodonta;Imparidentia;Venerida;Veneroidea;Veneridae;Mercenaria;Mercenari  
 a mercenaria  
 UdeM00000013774 6596 308.9 UdeM00000013774 XP\_045213754.1 82.3 175  
 31 0 1 175 674 848 4.20E-81 308.9 6596 cellular  
 organisms;Eukaryota;Opisthokonta;Metazoa;Eumetazoa;Bilateria;Protostomia;  
 Spiralia;Lophotrochozoa;Mollusca;Bivalvia;Autobranhia;Heteroconchia;Euhe  
 terodonta;Imparidentia;Venerida;Veneroidea;Veneridae;Mercenaria;Mercenari  
 a mercenaria  
 UdeM00000013775 6596 361.3 UdeM00000013775 XP\_045213754.1 46.7 392  
 188 10 1 382 283 663 1.60E-96 361.3 6596 cellular  
 organisms;Eukaryota;Opisthokonta;Metazoa;Eumetazoa;Bilateria;Protostomia;  
 Spiralia;Lophotrochozoa;Mollusca;Bivalvia;Autobranhia;Heteroconchia;Euhe  
 terodonta;Imparidentia;Venerida;Veneroidea;Veneridae;Mercenaria;Mercenari  
 a mercenaria  
 UdeM00000013776 6596 405.6 UdeM00000013776 XP\_045213754.1 52 383  
 167 9 1 373 283 658 7.00E-110 405.6 6596 cellular  
 organisms;Eukaryota;Opisthokonta;Metazoa;Eumetazoa;Bilateria;Protostomia;  
 Spiralia;Lophotrochozoa;Mollusca;Bivalvia;Autobranhia;Heteroconchia;Euhe  
 terodonta;Imparidentia;Venerida;Veneroidea;Veneridae;Mercenaria;Mercenari  
 a mercenaria  
 UdeM00000013777 6596 119 UdeM00000013777 XP\_045213754.1 50.9 112  
 48 1 3 107 157 268 1.40E-23 119 6596 cellular  
 organisms;Eukaryota;Opisthokonta;Metazoa;Eumetazoa;Bilateria;Protostomia;

Spiralia;Lophotrochozoa;Mollusca;Bivalvia;Autobranchia;Heteroconchia;Euherodonta;Imparidentia;Venerida;Veneroidea;Veneridae;Mercenaria;Mercenaria mercenaria

UdeM00000013779 29159 306.6 UdeM00000013779 XP\_034317111.1 54.8 283  
127 1 2 283 171 453 3.30E-80 306.6 29159 cellular

organisms;Eukaryota;Opisthokonta;Metazoa;Eumetazoa;Bilateria;Protostomia;Spiralia;Lophotrochozoa;Mollusca;Bivalvia;Autobranchia;Pteriomorphia;Ostreida;Ostreoidea;Ostreidae;Crassostrea;Crassostrea gigas

UdeM00000013781 6573 112.8 UdeM00000013781 XP\_021347433.1 52.9 102  
48 0 1 102 640 741 4.30E-22 112.8 6573 cellular

organisms;Eukaryota;Opisthokonta;Metazoa;Eumetazoa;Bilateria;Protostomia;Spiralia;Lophotrochozoa;Mollusca;Bivalvia;Autobranchia;Pteriomorphia;Pectinida;Pectinoidea;Pectinidae;Mizuhopecten;Mizuhopecten yessoensis

UdeM00000013782 260615 248.4 UdeM00000013782 XP\_039386738.1 80.5  
169 15 1 1 151 347 515 5.70E-63 248.4 260615

cellular

organisms;Eukaryota;Opisthokonta;Metazoa;Eumetazoa;Bilateria;Deuterostomia;Chordata;Craniata;Vertebrata;Gnathostomata;Teleostomi;Euteleostomi;Sarcopterygii;Dipnotetrapodomorpha;Tetrapoda;Amniota;Sauropsida;Sauria;Archelosauria;Testudinata;Testudines;Cryptodira;Durocryptodira;Testudinoidea;Geoemydidae;Geoemydinae;Mauremys;Mauremys reevesii

UdeM00000013783 1735272 515.8 UdeM00000013783 XP\_041365008.1 40.2  
681 389 12 24 696 16 686 8.70E-143 515.8 1735272

cellular

organisms;Eukaryota;Opisthokonta;Metazoa;Eumetazoa;Bilateria;Protostomia;Spiralia;Lophotrochozoa;Mollusca;Gastropoda;Neomphalina;Neomphaloidea;Peltospiridae;Gigantopelta;Gigantopelta aegis

UdeM00000013784 6579 3114.3 UdeM00000013784 XP\_033763482.1 45.7  
3770 1836 45 45 3764 171 3779 0.00E+00 3114.3 6579

cellular

organisms;Eukaryota;Opisthokonta;Metazoa;Eumetazoa;Bilateria;Protostomia;Spiralia;Lophotrochozoa;Mollusca;Bivalvia;Autobranchia;Pteriomorphia;Pectinida;Pectinoidea;Pectinidae;Pecten;Pecten maximus

UdeM00000013785 6565 168.7 UdeM00000013785 XP\_022318171.1 70.5 112  
33 0 1 112 55 166 4.40E-39 168.7 6565 cellular

organisms;Eukaryota;Opisthokonta;Metazoa;Eumetazoa;Bilateria;Protostomia;Spiralia;Lophotrochozoa;Mollusca;Bivalvia;Autobranchia;Pteriomorphia;Ostreida;Ostreoidea;Ostreidae;Crassostrea;Crassostrea virginica

UdeM00000013786 29159 806.2 UdeM00000013786 XP\_011455290.1 67.6 590  
185 2 17 600 9 598 2.80E-230 806.2 29159 cellular

organisms;Eukaryota;Opisthokonta;Metazoa;Eumetazoa;Bilateria;Protostomia;Spiralia;Lophotrochozoa;Mollusca;Bivalvia;Autobranchia;Pteriomorphia;Ostreida;Ostreoidea;Ostreidae;Crassostrea;Crassostrea gigas

UdeM00000013787 6596 626.7 UdeM00000013787 XP\_045214061.1 64 653  
163 8 1 584 1 650 2.90E-176 626.7 6596 cellular

organisms;Eukaryota;Opisthokonta;Metazoa;Eumetazoa;Bilateria;Protostomia;Spiralia;Lophotrochozoa;Mollusca;Bivalvia;Autobranchia;Heteroconchia;Euherodonta;Imparidentia;Venerida;Veneroidea;Veneridae;Mercenaria;Mercenaria mercenaria

UdeM00000013789 6596 635.2 UdeM00000013789 XP\_045214062.1 62.7 517  
183 2 45 560 40 547 8.00E-179 635.2 6596 cellular

organisms;Eukaryota;Opisthokonta;Metazoa;Eumetazoa;Bilateria;Protostomia;Spiralia;Lophotrochozoa;Mollusca;Bivalvia;Autobranchia;Heteroconchia;Euherodonta

terodonta;Imparidentia;Venerida;Veneroidea;Veneridae;Mercenaria;Mercenari  
 a mercenaria  
 UdeM00000013788 6596 635.2 UdeM00000013788 XP\_045214062.1 62.1 523  
 188 2 45 566 40 553 8.80E-179 635.2 6596 cellular  
 organisms;Eukaryota;Opisthokonta;Metazoa;Eumetazoa;Bilateria;Protostomia;  
 Spiralia;Lophotrochozoa;Mollusca;Bivalvia;Autobranhia;Heteroconchia;Euhe  
 terodonta;Imparidentia;Venerida;Veneroidea;Veneridae;Mercenaria;Mercenari  
 a mercenaria  
 UdeM00000013790 6596 382.9 UdeM00000013790 XP\_045214059.1 61.7 303  
 113 2 14 316 35 334 4.00E-103 382.9 6596 cellular  
 organisms;Eukaryota;Opisthokonta;Metazoa;Eumetazoa;Bilateria;Protostomia;  
 Spiralia;Lophotrochozoa;Mollusca;Bivalvia;Autobranhia;Heteroconchia;Euhe  
 terodonta;Imparidentia;Venerida;Veneroidea;Veneridae;Mercenaria;Mercenari  
 a mercenaria  
 UdeM00000013791 6596 298.9 UdeM00000013791 XP\_045214060.1 73.1 186  
 50 0 1 186 1 186 4.50E-78 298.9 6596 cellular  
 organisms;Eukaryota;Opisthokonta;Metazoa;Eumetazoa;Bilateria;Protostomia;  
 Spiralia;Lophotrochozoa;Mollusca;Bivalvia;Autobranhia;Heteroconchia;Euhe  
 terodonta;Imparidentia;Venerida;Veneroidea;Veneridae;Mercenaria;Mercenari  
 a mercenaria  
 UdeM00000013792 6579 513.8 UdeM00000013792 XP\_033754031.1 51.9 495  
 207 11 7 487 4 481 2.30E-142 513.8 6579 cellular  
 organisms;Eukaryota;Opisthokonta;Metazoa;Eumetazoa;Bilateria;Protostomia;  
 Spiralia;Lophotrochozoa;Mollusca;Bivalvia;Autobranhia;Pteriormorphia;Pect  
 inida;Pectinoidea;Pectinidae;Pecten;Pecten maximus  
 UdeM00000013793 6579 513.8 UdeM00000013793 XP\_033754031.1 56.9 432  
 162 9 46 466 63 481 2.20E-142 513.8 6579 cellular  
 organisms;Eukaryota;Opisthokonta;Metazoa;Eumetazoa;Bilateria;Protostomia;  
 Spiralia;Lophotrochozoa;Mollusca;Bivalvia;Autobranhia;Pteriormorphia;Pect  
 inida;Pectinoidea;Pectinidae;Pecten;Pecten maximus  
 UdeM00000013794 7574 704.5 UdeM00000013794 XP\_013385952.1 83.5 436  
 69 2 17 452 13 445 8.60E-200 704.5 7574 cellular  
 organisms;Eukaryota;Opisthokonta;Metazoa;Eumetazoa;Bilateria;Protostomia;  
 Spiralia;Lophotrochozoa;Brachiopoda;Linguliformea;Lingulata;Lingulida;Lin  
 guloidea;Lingulidae;Lingula;Lingula anatina  
 UdeM00000013795 6573 381.7 UdeM00000013795 XP\_021351087.1 54.7 338  
 149 2 23 359 19 353 1.00E-102 381.7 6573 cellular  
 organisms;Eukaryota;Opisthokonta;Metazoa;Eumetazoa;Bilateria;Protostomia;  
 Spiralia;Lophotrochozoa;Mollusca;Bivalvia;Autobranhia;Pteriormorphia;Pect  
 inida;Pectinoidea;Pectinidae;Mizuhopecten;Mizuhopecten yessoensis  
 UdeM00000013796 6579 157.9 UdeM00000013796 XP\_033743026.1 54.3 138  
 60 1 1 138 219 353 9.50E-36 157.9 6579 cellular  
 organisms;Eukaryota;Opisthokonta;Metazoa;Eumetazoa;Bilateria;Protostomia;  
 Spiralia;Lophotrochozoa;Mollusca;Bivalvia;Autobranhia;Pteriormorphia;Pect  
 inida;Pectinoidea;Pectinidae;Pecten;Pecten maximus  
 UdeM00000013798 400727 120.2 UdeM00000013798 XP\_025103888.1 59.1  
 88 36 0 1 88 1 88 1.40E-24 120.2 400727  
 cellular  
 organisms;Eukaryota;Opisthokonta;Metazoa;Eumetazoa;Bilateria;Protostomia;  
 Spiralia;Lophotrochozoa;Mollusca;Gastropoda;Caenogastropoda;Architaeniogl  
 ossa;Ampullarioidea;Ampullariidae;Pomacea;Pomacea canaliculata  
 UdeM00000013799 6596 90.9 UdeM00000013799 XP\_045212005.1 51.5 103  
 44 3 20 121 1045 1142 1.30E-15 90.9 6596 cellular  
 organisms;Eukaryota;Opisthokonta;Metazoa;Eumetazoa;Bilateria;Protostomia;



Spiralia;Lophotrochozoa;Mollusca;Bivalvia;Autobranchia;Heteroconchia;Euherodonta;Imparidentia;Venerida;Veneroidea;Veneridae;Mercenaria;Mercenaria mercenaria

UdeM00000013800 29159 216.1 UdeM00000013800 XP\_034312908.1 28.2 649  
342 20 9 564 6 623 1.20E-52 216.1 29159 cellular

organisms;Eukaryota;Opisthokonta;Metazoa;Eumetazoa;Bilateria;Protostomia;Spiralia;Lophotrochozoa;Mollusca;Bivalvia;Autobranchia;Pteriormorphia;Ostreida;Ostreoidea;Ostreidae;Crassostrea;Crassostrea gigas

UdeM00000013801 29159 1978 UdeM00000013801 XP\_034311750.1 29.3 4721  
2653 96 1 4176 703 5281 0.00E+00 1978 29159 cellular

organisms;Eukaryota;Opisthokonta;Metazoa;Eumetazoa;Bilateria;Protostomia;Spiralia;Lophotrochozoa;Mollusca;Bivalvia;Autobranchia;Pteriormorphia;Ostreida;Ostreoidea;Ostreidae;Crassostrea;Crassostrea gigas

UdeM00000013802 6596 248.4 UdeM00000013802 XP\_045212003.1 28 669  
444 17 1 654 1 646 2.50E-62 248.4 6596 cellular

organisms;Eukaryota;Opisthokonta;Metazoa;Eumetazoa;Bilateria;Protostomia;Spiralia;Lophotrochozoa;Mollusca;Bivalvia;Autobranchia;Heteroconchia;Euherodonta;Imparidentia;Venerida;Veneroidea;Veneridae;Mercenaria;Mercenaria mercenaria

UdeM00000013803 1735272 238.8 UdeM00000013803 XP\_041359638.1 39.1  
335 190 5 64 391 82 409 1.20E-59 238.8 1735272

cellular

organisms;Eukaryota;Opisthokonta;Metazoa;Eumetazoa;Bilateria;Protostomia;Spiralia;Lophotrochozoa;Mollusca;Gastropoda;Neomphalina;Neomphaloidea;Peltospiridae;Gigantopelta;Gigantopelta aegis

UdeM00000013804 1735272 230.3 UdeM00000013804 XP\_041359638.1 38.9  
324 184 5 3 319 93 409 3.40E-57 230.3 1735272

cellular

organisms;Eukaryota;Opisthokonta;Metazoa;Eumetazoa;Bilateria;Protostomia;Spiralia;Lophotrochozoa;Mollusca;Gastropoda;Neomphalina;Neomphaloidea;Peltospiridae;Gigantopelta;Gigantopelta aegis

UdeM00000013805 1735272 233 UdeM00000013805 XP\_041379319.1 40.2  
301 135 3 1 258 624 922 4.20E-58 233 1735272

cellular

organisms;Eukaryota;Opisthokonta;Metazoa;Eumetazoa;Bilateria;Protostomia;Spiralia;Lophotrochozoa;Mollusca;Gastropoda;Neomphalina;Neomphaloidea;Peltospiridae;Gigantopelta;Gigantopelta aegis

UdeM00000013806 1735272 142.1 UdeM00000013806 XP\_041363347.1 26.6  
305 217 3 67 371 30 327 1.40E-30 142.1 1735272

cellular

organisms;Eukaryota;Opisthokonta;Metazoa;Eumetazoa;Bilateria;Protostomia;Spiralia;Lophotrochozoa;Mollusca;Gastropoda;Neomphalina;Neomphaloidea;Peltospiridae;Gigantopelta;Gigantopelta aegis

UdeM00000013807 1735272 613.2 UdeM00000013807 XP\_041364383.1 20.4  
3152 1737 51 1 2433 1 3100 1.40E-171 613.2 1735272

cellular

organisms;Eukaryota;Opisthokonta;Metazoa;Eumetazoa;Bilateria;Protostomia;Spiralia;Lophotrochozoa;Mollusca;Gastropoda;Neomphalina;Neomphaloidea;Peltospiridae;Gigantopelta;Gigantopelta aegis

UdeM00000013808 29159 2493.4 UdeM00000013808 XP\_034311750.1 30.2  
5579 3313 111 1 5197 1 5380 0.00E+00 2493.4

29159 cellular

organisms;Eukaryota;Opisthokonta;Metazoa;Eumetazoa;Bilateria;Protostomia;

Spiralia;Lophotrochozoa;Mollusca;Bivalvia;Autobranchia;Pteriormorphia;Ostr  
eida;Ostreoidea;Ostreidae;Crassostrea;Crassostrea gigas  
UdeM00000013809 6596 1006.9 UdeM00000013809 XP\_045210790.1 49.8  
1311 523 27 1 1248 65 1303 2.20E-290 1006.9 6596  
cellular

organisms;Eukaryota;Opisthokonta;Metazoa;Eumetazoa;Bilateria;Protostomia;  
Spiralia;Lophotrochozoa;Mollusca;Bivalvia;Autobranchia;Heteroconchia;Euhe  
terodonta;Imparidentia;Venerida;Veneroidea;Veneridae;Mercenaria;Mercenari  
a mercenaria

UdeM00000013810 6596 978.4 UdeM00000013810 XP\_045210790.1 50.1 1272  
499 27 1 1209 105 1303 8.30E-282 978.4 6596 cellular

organisms;Eukaryota;Opisthokonta;Metazoa;Eumetazoa;Bilateria;Protostomia;  
Spiralia;Lophotrochozoa;Mollusca;Bivalvia;Autobranchia;Heteroconchia;Euhe  
terodonta;Imparidentia;Venerida;Veneroidea;Veneridae;Mercenaria;Mercenari  
a mercenaria

UdeM00000013813 6596 352.4 UdeM00000013813 XP\_045213170.1 56.6 535  
202 9 1 506 11 544 9.30E-94 352.4 6596 cellular

organisms;Eukaryota;Opisthokonta;Metazoa;Eumetazoa;Bilateria;Protostomia;  
Spiralia;Lophotrochozoa;Mollusca;Bivalvia;Autobranchia;Heteroconchia;Euhe  
terodonta;Imparidentia;Venerida;Veneroidea;Veneridae;Mercenaria;Mercenari  
a mercenaria

UdeM00000013815 6596 346.3 UdeM00000013815 XP\_045213172.1 45.4 527  
247 21 1 510 12 514 6.70E-92 346.3 6596 cellular

organisms;Eukaryota;Opisthokonta;Metazoa;Eumetazoa;Bilateria;Protostomia;  
Spiralia;Lophotrochozoa;Mollusca;Bivalvia;Autobranchia;Heteroconchia;Euhe  
terodonta;Imparidentia;Venerida;Veneroidea;Veneridae;Mercenaria;Mercenari  
a mercenaria

UdeM00000013816 114398 344 UdeM00000013816 XP\_042903861.1 38.7  
489 289 6 1 485 1 482 3.20E-91 344 114398  
cellular

organisms;Eukaryota;Opisthokonta;Metazoa;Eumetazoa;Bilateria;Protostomia;  
Ecdysozoa;Panarthropoda;Arthropoda;Chelicerata;Arachnida;Araneae;Araneomo  
rphae;Entelegynae;Orbiculariae;Araneoidea;Theridiidae;Parasteatoda;Parast  
eatoda tepidariorum

UdeM00000013817 7739 58.5 UdeM00000013817 XP\_035677667.1 43.1 72  
40 1 21 92 298 368 5.30E-06 58.5 7739 cellular

organisms;Eukaryota;Opisthokonta;Metazoa;Eumetazoa;Bilateria;Deuterostomi  
a;Chordata;Cephalochordata;Leptocardii;Amphioxiformes;Branchiostomidae;Br  
anchiostoma;Branchiostoma floridae

UdeM00000013818 7739 58.2 UdeM00000013818 XP\_035677667.1 44.3 70  
38 1 21 90 298 366 7.40E-06 58.2 7739 cellular

organisms;Eukaryota;Opisthokonta;Metazoa;Eumetazoa;Bilateria;Deuterostomi  
a;Chordata;Cephalochordata;Leptocardii;Amphioxiformes;Branchiostomidae;Br  
anchiostoma;Branchiostoma floridae

UdeM00000013820 586833 193.4 UdeM00000013820 XP\_029920931.1 30.7  
381 211 5 567 947 117 444 1.30E-45 193.4 586833  
cellular

organisms;Eukaryota;Opisthokonta;Metazoa;Eumetazoa;Bilateria;Deuterostomi  
a;Chordata;Craniata;Vertebrata;Gnathostomata;Teleostomi;Euteleostomi;Acti  
nopterygii;Actinopteri;Neopterygii;Teleostei;Osteoglossocephalai;Clupeoce  
phala;Euteleosteomorpha;Neoteleostei;Eurypterygia;Ctenosquamata;Acanthomo  
rphata;Euacanthomorpha;Holocentrimorphaceae;Holocentriformes;Holocentr  
idae;Myripristinae;Myripristis;Myripristis murdjan

UdeM00000013821 6596 800 UdeM00000013821 XP\_045213613.1 81.8 462  
 84 0 8 469 6 467 1.60E-228 800 6596 cellular  
 organisms;Eukaryota;Opisthokonta;Metazoa;Eumetazoa;Bilateria;Protostomia;  
 Spiralia;Lophotrochozoa;Mollusca;Bivalvia;Autobranchia;Heteroconchia;Euhe  
 terodonta;Imparidentia;Venerida;Veneroidea;Veneridae;Mercenaria;Mercenari  
 a mercenaria

UdeM00000013823 6596 467.6 UdeM00000013823 XP\_045213378.1 67.8 466  
 135 6 1 462 1 455 1.80E-128 467.6 6596 cellular  
 organisms;Eukaryota;Opisthokonta;Metazoa;Eumetazoa;Bilateria;Protostomia;  
 Spiralia;Lophotrochozoa;Mollusca;Bivalvia;Autobranchia;Heteroconchia;Euhe  
 terodonta;Imparidentia;Venerida;Veneroidea;Veneridae;Mercenaria;Mercenari  
 a mercenaria

UdeM00000013824 1735272 330.1 UdeM00000013824 XP\_041363880.1 62  
 276 100 3 1 273 1 274 2.70E-87 330.1 1735272  
 cellular  
 organisms;Eukaryota;Opisthokonta;Metazoa;Eumetazoa;Bilateria;Protostomia;  
 Spiralia;Lophotrochozoa;Mollusca;Gastropoda;Neomphalina;Neomphaloidea;Pel  
 tospiridae;Gigantopelta;Gigantopelta aegis

UdeM00000013825 400727 329.7 UdeM00000013825 XP\_025087959.1 65.9  
 252 83 2 19 268 1 251 3.40E-87 329.7 400727  
 cellular  
 organisms;Eukaryota;Opisthokonta;Metazoa;Eumetazoa;Bilateria;Protostomia;  
 Spiralia;Lophotrochozoa;Mollusca;Gastropoda;Caenogastropoda;Architaeniogl  
 ossa;Ampullarioidea;Ampullariidae;Pomacea;Pomacea canaliculata

UdeM00000013826 7054 468.8 UdeM00000013826 XP\_031328250.1 49.4 470  
 233 4 1 468 1 467 8.20E-129 468.8 7054 cellular  
 organisms;Eukaryota;Opisthokonta;Metazoa;Eumetazoa;Bilateria;Protostomia;  
 Ecdysozoa;Panarthropoda;Arthropoda;Mandibulata;Pancrustacea;Hexapoda;Inse  
 cta;Dicondylia;Pterygota;Neoptera;Endopterygota;Coleoptera;Polyphaga;Elat  
 eriformia;Elateroidea;Lampyridae;Lampyrinae;Photinus;Photinus pyralis

UdeM00000013827 6596 325.9 UdeM00000013827 XP\_045211318.1 46.3 441  
 190 8 1 427 1 408 7.90E-86 325.9 6596 cellular  
 organisms;Eukaryota;Opisthokonta;Metazoa;Eumetazoa;Bilateria;Protostomia;  
 Spiralia;Lophotrochozoa;Mollusca;Bivalvia;Autobranchia;Heteroconchia;Euhe  
 terodonta;Imparidentia;Venerida;Veneroidea;Veneridae;Mercenaria;Mercenari  
 a mercenaria

UdeM00000013828 6596 649.8 UdeM00000013828 XP\_045171349.1 83.2 380  
 62 1 1 380 1 378 2.10E-183 649.8 6596 cellular  
 organisms;Eukaryota;Opisthokonta;Metazoa;Eumetazoa;Bilateria;Protostomia;  
 Spiralia;Lophotrochozoa;Mollusca;Bivalvia;Autobranchia;Heteroconchia;Euhe  
 terodonta;Imparidentia;Venerida;Veneroidea;Veneridae;Mercenaria;Mercenari  
 a mercenaria

UdeM00000013829 6596 1004.6 UdeM00000013829 XP\_045213377.1 54.5  
 972 405 12 3 952 2 958 8.50E-290 1004.6 6596  
 cellular  
 organisms;Eukaryota;Opisthokonta;Metazoa;Eumetazoa;Bilateria;Protostomia;  
 Spiralia;Lophotrochozoa;Mollusca;Bivalvia;Autobranchia;Heteroconchia;Euhe  
 terodonta;Imparidentia;Venerida;Veneroidea;Veneridae;Mercenaria;Mercenari  
 a mercenaria

UdeM00000013830 6596 229.2 UdeM00000013830 XP\_045213374.1 86.2 116  
 16 0 24 139 660 775 3.30E-57 229.2 6596 cellular  
 organisms;Eukaryota;Opisthokonta;Metazoa;Eumetazoa;Bilateria;Protostomia;  
 Spiralia;Lophotrochozoa;Mollusca;Bivalvia;Autobranchia;Heteroconchia;Euhe

terodonta;Imparidentia;Venerida;Veneroidea;Veneridae;Mercenaria;Mercenari  
 a mercenaria  
 UdeM00000013831 6596 844 UdeM00000013831 XP\_045213368.1 84.3 483  
 76 0 18 500 177 659 1.00E-241 844 6596 cellular  
 organisms;Eukaryota;Opisthokonta;Metazoa;Eumetazoa;Bilateria;Protostomia;  
 Spiralia;Lophotrochozoa;Mollusca;Bivalvia;Autobranhia;Heteroconchia;Euhe  
 terodonta;Imparidentia;Venerida;Veneroidea;Veneridae;Mercenaria;Mercenari  
 a mercenaria  
 UdeM00000013832 6596 198.7 UdeM00000013832 XP\_045213368.1 65.9 182  
 56 5 1 180 1 178 6.10E-48 198.7 6596 cellular  
 organisms;Eukaryota;Opisthokonta;Metazoa;Eumetazoa;Bilateria;Protostomia;  
 Spiralia;Lophotrochozoa;Mollusca;Bivalvia;Autobranhia;Heteroconchia;Euhe  
 terodonta;Imparidentia;Venerida;Veneroidea;Veneridae;Mercenaria;Mercenari  
 a mercenaria  
 UdeM00000013833 6579 124.4 UdeM00000013833 XP\_033756770.1 74.4 86  
 21 1 81 166 18 102 1.70E-25 124.4 6579 cellular  
 organisms;Eukaryota;Opisthokonta;Metazoa;Eumetazoa;Bilateria;Protostomia;  
 Spiralia;Lophotrochozoa;Mollusca;Bivalvia;Autobranhia;Pteriormorphia;Pect  
 inida;Pectinoidea;Pectinidae;Pecten;Pecten maximus  
 UdeM00000013837 6596 131.3 UdeM00000013837 XP\_045212334.1 26.9 584  
 336 19 38 581 32 564 4.00E-27 131.3 6596 cellular  
 organisms;Eukaryota;Opisthokonta;Metazoa;Eumetazoa;Bilateria;Protostomia;  
 Spiralia;Lophotrochozoa;Mollusca;Bivalvia;Autobranhia;Heteroconchia;Euhe  
 terodonta;Imparidentia;Venerida;Veneroidea;Veneridae;Mercenaria;Mercenari  
 a mercenaria  
 UdeM00000013836 6596 147.9 UdeM00000013836 XP\_045212334.1 26.2 781  
 471 23 38 775 32 750 5.60E-32 147.9 6596 cellular  
 organisms;Eukaryota;Opisthokonta;Metazoa;Eumetazoa;Bilateria;Protostomia;  
 Spiralia;Lophotrochozoa;Mollusca;Bivalvia;Autobranhia;Heteroconchia;Euhe  
 terodonta;Imparidentia;Venerida;Veneroidea;Veneridae;Mercenaria;Mercenari  
 a mercenaria  
 UdeM00000013838 6596 648.3 UdeM00000013838 XP\_045213557.1 49.9 605  
 297 3 30 628 28 632 1.00E-182 648.3 6596 cellular  
 organisms;Eukaryota;Opisthokonta;Metazoa;Eumetazoa;Bilateria;Protostomia;  
 Spiralia;Lophotrochozoa;Mollusca;Bivalvia;Autobranhia;Heteroconchia;Euhe  
 terodonta;Imparidentia;Venerida;Veneroidea;Veneridae;Mercenaria;Mercenari  
 a mercenaria  
 UdeM00000013839 6596 562.4 UdeM00000013839 XP\_045213560.1 57.3 450  
 191 1 42 491 44 492 5.80E-157 562.4 6596 cellular  
 organisms;Eukaryota;Opisthokonta;Metazoa;Eumetazoa;Bilateria;Protostomia;  
 Spiralia;Lophotrochozoa;Mollusca;Bivalvia;Autobranhia;Heteroconchia;Euhe  
 terodonta;Imparidentia;Venerida;Veneroidea;Veneridae;Mercenaria;Mercenari  
 a mercenaria  
 UdeM00000013840 6596 1172.1 UdeM00000013840 XP\_045213557.1 51.5  
 1056 505 4 5 1054 28 1082 0.00E+00 1172.1 6596  
 cellular  
 organisms;Eukaryota;Opisthokonta;Metazoa;Eumetazoa;Bilateria;Protostomia;  
 Spiralia;Lophotrochozoa;Mollusca;Bivalvia;Autobranhia;Heteroconchia;Euhe  
 terodonta;Imparidentia;Venerida;Veneroidea;Veneridae;Mercenaria;Mercenari  
 a mercenaria  
 UdeM00000013841 6596 1141.7 UdeM00000013841 XP\_045213557.1 51.7  
 1021 486 4 47 1061 63 1082 0.00E+00 1141.7 6596  
 cellular  
 organisms;Eukaryota;Opisthokonta;Metazoa;Eumetazoa;Bilateria;Protostomia;

Spiralia;Lophotrochozoa;Mollusca;Bivalvia;Autobranchia;Heteroconchia;Euherodonta;Imparidentia;Venerida;Veneroidea;Veneridae;Mercenaria;Mercenaria mercenaria

UdeM00000013842 6596 1142.1 UdeM00000013842 XP\_045213557.1 51.7  
1021 486 4 23 1037 63 1082 0.00E+00 1142.1 6596  
cellular

organisms;Eukaryota;Opisthokonta;Metazoa;Eumetazoa;Bilateria;Protostomia;Spiralia;Lophotrochozoa;Mollusca;Bivalvia;Autobranchia;Heteroconchia;Euherodonta;Imparidentia;Venerida;Veneroidea;Veneridae;Mercenaria;Mercenaria mercenaria

UdeM00000013843 6573 150.6 UdeM00000013843 XP\_021379569.1 61.8 110  
42 0 8 117 2 111 1.60E-33 150.6 6573 cellular

organisms;Eukaryota;Opisthokonta;Metazoa;Eumetazoa;Bilateria;Protostomia;Spiralia;Lophotrochozoa;Mollusca;Bivalvia;Autobranchia;Pteriomorphia;Pectinida;Pectinoidea;Pectinidae;Mizuhopecten;Mizuhopecten yessoensis

UdeM00000013844 6573 144.4 UdeM00000013844 XP\_021379570.1 59.2 120  
46 1 4 120 2 121 9.30E-32 144.4 6573 cellular

organisms;Eukaryota;Opisthokonta;Metazoa;Eumetazoa;Bilateria;Protostomia;Spiralia;Lophotrochozoa;Mollusca;Bivalvia;Autobranchia;Pteriomorphia;Pectinida;Pectinoidea;Pectinidae;Mizuhopecten;Mizuhopecten yessoensis

UdeM00000013845 29159 127.9 UdeM00000013845 XP\_011447088.2 67.8 90  
29 0 23 112 28 117 8.30E-27 127.9 29159 cellular

organisms;Eukaryota;Opisthokonta;Metazoa;Eumetazoa;Bilateria;Protostomia;Spiralia;Lophotrochozoa;Mollusca;Bivalvia;Autobranchia;Pteriomorphia;Ostreida;Ostreoidea;Ostreidae;Crassostrea;Crassostrea gigas

UdeM00000013846 6573 89 UdeM00000013846 XP\_021362152.1 56.2 64  
28 0 4 67 53 116 2.70E-15 89 6573 cellular

organisms;Eukaryota;Opisthokonta;Metazoa;Eumetazoa;Bilateria;Protostomia;Spiralia;Lophotrochozoa;Mollusca;Bivalvia;Autobranchia;Pteriomorphia;Pectinida;Pectinoidea;Pectinidae;Mizuhopecten;Mizuhopecten yessoensis

UdeM00000013847 6565 60.1 UdeM00000013847 XP\_022327049.1 40 70  
40 1 57 124 3 72 2.50E-06 60.1 6565 cellular

organisms;Eukaryota;Opisthokonta;Metazoa;Eumetazoa;Bilateria;Protostomia;Spiralia;Lophotrochozoa;Mollusca;Bivalvia;Autobranchia;Pteriomorphia;Ostreida;Ostreoidea;Ostreidae;Crassostrea;Crassostrea virginica

UdeM00000013849 6596 263.1 UdeM00000013849 XP\_045212339.1 42.4 342  
165 7 2 330 98 420 4.80E-67 263.1 6596 cellular

organisms;Eukaryota;Opisthokonta;Metazoa;Eumetazoa;Bilateria;Protostomia;Spiralia;Lophotrochozoa;Mollusca;Bivalvia;Autobranchia;Heteroconchia;Euherodonta;Imparidentia;Venerida;Veneroidea;Veneridae;Mercenaria;Mercenaria mercenaria

UdeM00000013850 6579 666.8 UdeM00000013850 XP\_033755568.1 84.1 409  
65 0 1 409 1 409 1.80E-188 666.8 6579 cellular

organisms;Eukaryota;Opisthokonta;Metazoa;Eumetazoa;Bilateria;Protostomia;Spiralia;Lophotrochozoa;Mollusca;Bivalvia;Autobranchia;Pteriomorphia;Pectinida;Pectinoidea;Pectinidae;Pecten;Pecten maximus

UdeM00000013851 6579 184.9 UdeM00000013851 XP\_033736448.1 39.5 253  
142 5 1 244 29 279 2.40E-43 184.9 6579 cellular

organisms;Eukaryota;Opisthokonta;Metazoa;Eumetazoa;Bilateria;Protostomia;Spiralia;Lophotrochozoa;Mollusca;Bivalvia;Autobranchia;Pteriomorphia;Pectinida;Pectinoidea;Pectinidae;Pecten;Pecten maximus

UdeM00000013852 29159 470.7 UdeM00000013852 XP\_034311318.1 39.9 684  
374 17 157 823 1 664 4.20E-129 470.7 29159 cellular

organisms;Eukaryota;Opisthokonta;Metazoa;Eumetazoa;Bilateria;Protostomia;

Spiralia;Lophotrochozoa;Mollusca;Bivalvia;Autobranchia;Pteriormorphia;Ostr  
eida;Ostreoidea;Ostreidae;Crassostrea;Crassostrea gigas

UdeM00000013853 400727 454.9 UdeM00000013853 XP\_025078538.1 76.6  
282 66 0 1 282 1 282 7.40E-125 454.9 400727  
cellular

organisms;Eukaryota;Opisthokonta;Metazoa;Eumetazoa;Bilateria;Protostomia;  
Spiralia;Lophotrochozoa;Mollusca;Gastropoda;Caenogastropoda;Architaeniogl  
ossa;Ampullarioidea;Ampullariidae;Pomacea;Pomacea canaliculata

UdeM00000013854 6596 178.3 UdeM00000013854 XP\_045164125.1 69.9 123  
37 0 1 123 169 291 6.00E-42 178.3 6596 cellular

organisms;Eukaryota;Opisthokonta;Metazoa;Eumetazoa;Bilateria;Protostomia;  
Spiralia;Lophotrochozoa;Mollusca;Bivalvia;Autobranchia;Heteroconchia;Euhe  
terodonta;Imparidentia;Venerida;Veneroidea;Veneridae;Mercenaria;Mercenari  
a mercenaria

UdeM00000013856 6596 548.9 UdeM00000013856 XP\_045212981.1 63.7 421  
148 3 3 421 5 422 5.60E-153 548.9 6596 cellular

organisms;Eukaryota;Opisthokonta;Metazoa;Eumetazoa;Bilateria;Protostomia;  
Spiralia;Lophotrochozoa;Mollusca;Bivalvia;Autobranchia;Heteroconchia;Euhe  
terodonta;Imparidentia;Venerida;Veneroidea;Veneridae;Mercenaria;Mercenari  
a mercenaria

UdeM00000013857 6579 79 UdeM00000013857 XP\_033752672.1 34.3 198  
100 9 406 590 610 790 5.60E-11 79 6579 cellular

organisms;Eukaryota;Opisthokonta;Metazoa;Eumetazoa;Bilateria;Protostomia;  
Spiralia;Lophotrochozoa;Mollusca;Bivalvia;Autobranchia;Pteriormorphia;Pect  
inida;Pectinoidea;Pectinidae;Pecten;Pecten maximus

UdeM00000013858 6596 1080.5 UdeM00000013858 XP\_045212918.1 83.9  
602 95 1 3 602 14 615 0.00E+00 1080.5 6596  
cellular

organisms;Eukaryota;Opisthokonta;Metazoa;Eumetazoa;Bilateria;Protostomia;  
Spiralia;Lophotrochozoa;Mollusca;Bivalvia;Autobranchia;Heteroconchia;Euhe  
terodonta;Imparidentia;Venerida;Veneroidea;Veneridae;Mercenaria;Mercenari  
a mercenaria

UdeM00000013859 400727 273.1 UdeM00000013859 XP\_025087756.1 63.8  
301 82 4 6 297 28 310 4.20E-70 273.1 400727  
cellular

organisms;Eukaryota;Opisthokonta;Metazoa;Eumetazoa;Bilateria;Protostomia;  
Spiralia;Lophotrochozoa;Mollusca;Gastropoda;Caenogastropoda;Architaeniogl  
ossa;Ampullarioidea;Ampullariidae;Pomacea;Pomacea canaliculata

UdeM00000013860 225164 185.3 UdeM00000013860 XP\_009060252.1 60.9  
133 51 1 11 143 8 139 5.60E-44 185.3 225164  
cellular

organisms;Eukaryota;Opisthokonta;Metazoa;Eumetazoa;Bilateria;Protostomia;  
Spiralia;Lophotrochozoa;Mollusca;Gastropoda;Patellogastropoda;Lottioida;  
Lottiidae;Lottia;Lottia gigantea

UdeM00000013861 6596 160.2 UdeM00000013861 XP\_045212809.1 75.8 95  
22 1 103 196 57 151 2.60E-36 160.2 6596 cellular

organisms;Eukaryota;Opisthokonta;Metazoa;Eumetazoa;Bilateria;Protostomia;  
Spiralia;Lophotrochozoa;Mollusca;Bivalvia;Autobranchia;Heteroconchia;Euhe  
terodonta;Imparidentia;Venerida;Veneroidea;Veneridae;Mercenaria;Mercenari  
a mercenaria

UdeM00000013862 1735272 158.7 UdeM00000013862 XP\_041363010.1 75.6  
90 22 0 64 153 77 166 6.00E-36 158.7 1735272  
cellular

organisms;Eukaryota;Opisthokonta;Metazoa;Eumetazoa;Bilateria;Protostomia;

Spiralia;Lophotrochozoa;Mollusca;Gastropoda;Neomphalina;Neomphaloidea;Pel  
tospiridae;Gigantopelta;Gigantopelta aegis  
UdeM00000013863 6573 389 UdeM00000013863 XP\_021374435.1 64.4 419  
143 3 183 596 212 629 1.10E-104 389 6573 cellular  
organisms;Eukaryota;Opisthokonta;Metazoa;Eumetazoa;Bilateria;Protostomia;  
Spiralia;Lophotrochozoa;Mollusca;Bivalvia;Autobranhia;Pteriormorphia;Pect  
inida;Pectinoidea;Pectinidae;Mizuhopecten;Mizuhopecten yessoensis  
UdeM00000013864 6596 270 UdeM00000013864 XP\_045212799.1 74.5 322  
80 2 184 503 202 523 6.40E-69 270 6596 cellular  
organisms;Eukaryota;Opisthokonta;Metazoa;Eumetazoa;Bilateria;Protostomia;  
Spiralia;Lophotrochozoa;Mollusca;Bivalvia;Autobranhia;Heteroconchia;Euhe  
terodonta;Imparidentia;Venerida;Veneroidea;Veneridae;Mercenaria;Mercenari  
a mercenaria  
UdeM00000013865 6573 87 UdeM00000013865 XP\_021339362.1 47.6 82  
43 0 110 191 270 351 2.90E-14 87 6573 cellular  
organisms;Eukaryota;Opisthokonta;Metazoa;Eumetazoa;Bilateria;Protostomia;  
Spiralia;Lophotrochozoa;Mollusca;Bivalvia;Autobranhia;Pteriormorphia;Pect  
inida;Pectinoidea;Pectinidae;Mizuhopecten;Mizuhopecten yessoensis  
UdeM00000013866 29159 320.1 UdeM00000013866 XP\_011444637.2 70.4 223  
63 2 1 221 1 222 2.30E-84 320.1 29159 cellular  
organisms;Eukaryota;Opisthokonta;Metazoa;Eumetazoa;Bilateria;Protostomia;  
Spiralia;Lophotrochozoa;Mollusca;Bivalvia;Autobranhia;Pteriormorphia;Ostr  
eida;Ostreioidea;Ostreidae;Crassostrea;Crassostrea gigas  
UdeM00000013867 6573 455.7 UdeM00000013867 XP\_021374436.1 61 364  
142 0 56 419 53 416 6.70E-125 455.7 6573 cellular  
organisms;Eukaryota;Opisthokonta;Metazoa;Eumetazoa;Bilateria;Protostomia;  
Spiralia;Lophotrochozoa;Mollusca;Bivalvia;Autobranhia;Pteriormorphia;Pect  
inida;Pectinoidea;Pectinidae;Mizuhopecten;Mizuhopecten yessoensis  
UdeM00000013868 29159 932.2 UdeM00000013868 XP\_034313437.1 71.2 712  
166 9 3 692 4 698 4.00E-268 932.2 29159 cellular  
organisms;Eukaryota;Opisthokonta;Metazoa;Eumetazoa;Bilateria;Protostomia;  
Spiralia;Lophotrochozoa;Mollusca;Bivalvia;Autobranhia;Pteriormorphia;Ostr  
eida;Ostreioidea;Ostreidae;Crassostrea;Crassostrea gigas  
UdeM00000013869 29159 896.3 UdeM00000013869 XP\_034313437.1 71 690  
161 9 12 679 26 698 2.40E-257 896.3 29159 cellular  
organisms;Eukaryota;Opisthokonta;Metazoa;Eumetazoa;Bilateria;Protostomia;  
Spiralia;Lophotrochozoa;Mollusca;Bivalvia;Autobranhia;Pteriormorphia;Ostr  
eida;Ostreioidea;Ostreidae;Crassostrea;Crassostrea gigas  
UdeM00000013870 6565 282.3 UdeM00000013870 XP\_022315961.1 39 587  
256 18 1 574 671 1168 1.40E-72 282.3 6565 cellular  
organisms;Eukaryota;Opisthokonta;Metazoa;Eumetazoa;Bilateria;Protostomia;  
Spiralia;Lophotrochozoa;Mollusca;Bivalvia;Autobranhia;Pteriormorphia;Ostr  
eida;Ostreioidea;Ostreidae;Crassostrea;Crassostrea virginica  
UdeM00000013871 1232801 86.3 UdeM00000013871 XP\_043215282.1 48.9  
92 44 2 30 119 86 176 3.00E-14 86.3 1232801  
cellular  
organisms;Eukaryota;Opisthokonta;Metazoa;Eumetazoa;Bilateria;Protostomia;  
Ecdysozoa;Panarthropoda;Arthropoda;Mandibulata;Pancrustacea;Crustacea;Mul  
ticrustacea;Hexanauplia;Thecostraca;Cirripedia;Thoracica;Sessilia;Balanid  
ae;Amphibalanus;Amphibalanus amphitrite  
UdeM00000013872 29159 189.1 UdeM00000013872 XP\_011435569.2 46.9 211  
108 3 31 240 68 275 6.50E-45 189.1 29159 cellular  
organisms;Eukaryota;Opisthokonta;Metazoa;Eumetazoa;Bilateria;Protostomia;

Spiralia;Lophotrochozoa;Mollusca;Bivalvia;Autobranchia;Pteriormorphia;Ostr  
eida;Ostreoidea;Ostreidae;Crassostrea;Crassostrea gigas  
UdeM00000013873 8022 73.9 UdeM00000013873 XP\_036795370.1 43.5 85  
48 0 7 91 351 435 2.10E-10 73.9 8022 cellular  
organisms;Eukaryota;Opisthokonta;Metazoa;Eumetazoa;Bilateria;Deuterostomi  
a;Chordata;Craniata;Vertebrata;Gnathostomata;Teleostomi;Euteleostomi;Acti  
nopterygii;Actinopteri;Neopterygii;Teleostei;Osteoglossocephalai;Clupeoce  
phala;Euteleosteomorpha;Protacanthopterygii;Salmoniformes;Salmonidae;Salm  
oninae;Oncorhynchus;Oncorhynchus mykiss  
UdeM00000013874 6596 1061.6 UdeM00000013874 XP\_045213792.1 43.8  
1742 768 55 28 1704 35 1630 1.00E-306 1061.6 6596  
cellular  
organisms;Eukaryota;Opisthokonta;Metazoa;Eumetazoa;Bilateria;Protostomia;  
Spiralia;Lophotrochozoa;Mollusca;Bivalvia;Autobranchia;Heteroconchia;Euhe  
terodonta;Imparidentia;Venerida;Veneroidea;Veneridae;Mercenaria;Mercenari  
a mercenaria  
UdeM00000013876 6596 654.4 UdeM00000013876 XP\_045211300.1 64.6 497  
171 4 1 496 1 493 1.10E-184 654.4 6596 cellular  
organisms;Eukaryota;Opisthokonta;Metazoa;Eumetazoa;Bilateria;Protostomia;  
Spiralia;Lophotrochozoa;Mollusca;Bivalvia;Autobranchia;Heteroconchia;Euhe  
terodonta;Imparidentia;Venerida;Veneroidea;Veneridae;Mercenaria;Mercenari  
a mercenaria  
UdeM00000013877 6596 2329.3 UdeM00000013877 XP\_045211558.1 57.5  
2136 859 24 1 2119 1 2104 0.00E+00 2329.3 6596  
cellular  
organisms;Eukaryota;Opisthokonta;Metazoa;Eumetazoa;Bilateria;Protostomia;  
Spiralia;Lophotrochozoa;Mollusca;Bivalvia;Autobranchia;Heteroconchia;Euhe  
terodonta;Imparidentia;Venerida;Veneroidea;Veneridae;Mercenaria;Mercenari  
a mercenaria  
UdeM00000013878 6596 439.9 UdeM00000013878 XP\_045213184.1 82.4 255  
45 0 46 300 17 271 2.60E-120 439.9 6596 cellular  
organisms;Eukaryota;Opisthokonta;Metazoa;Eumetazoa;Bilateria;Protostomia;  
Spiralia;Lophotrochozoa;Mollusca;Bivalvia;Autobranchia;Heteroconchia;Euhe  
terodonta;Imparidentia;Venerida;Veneroidea;Veneridae;Mercenaria;Mercenari  
a mercenaria  
UdeM00000013879 1735272 186.4 UdeM00000013879 XP\_041362289.1 44.1  
204 109 2 1 199 1 204 3.50E-44 186.4 1735272  
cellular  
organisms;Eukaryota;Opisthokonta;Metazoa;Eumetazoa;Bilateria;Protostomia;  
Spiralia;Lophotrochozoa;Mollusca;Gastropoda;Neomphalina;Neomphaloidea;Pel  
tospiridae;Gigantopelta;Gigantopelta aegis  
UdeM00000013880 6596 372.1 UdeM00000013880 XP\_045213184.1 83.2 220  
37 0 2 221 270 489 5.00E-100 372.1 6596 cellular  
organisms;Eukaryota;Opisthokonta;Metazoa;Eumetazoa;Bilateria;Protostomia;  
Spiralia;Lophotrochozoa;Mollusca;Bivalvia;Autobranchia;Heteroconchia;Euhe  
terodonta;Imparidentia;Venerida;Veneroidea;Veneridae;Mercenaria;Mercenari  
a mercenaria  
UdeM00000013881 6596 337.4 UdeM00000013881 XP\_045213186.1 47.6 357  
183 2 1 354 1 356 2.20E-89 337.4 6596 cellular  
organisms;Eukaryota;Opisthokonta;Metazoa;Eumetazoa;Bilateria;Protostomia;  
Spiralia;Lophotrochozoa;Mollusca;Bivalvia;Autobranchia;Heteroconchia;Euhe  
terodonta;Imparidentia;Venerida;Veneroidea;Veneridae;Mercenaria;Mercenari  
a mercenaria



UdeM00000013882 6596 413.3 UdeM00000013882 XP\_045213189.1 42.4 582  
 254 13 1 508 1 575 4.70E-112 413.3 6596 cellular  
 organisms;Eukaryota;Opisthokonta;Metazoa;Eumetazoa;Bilateria;Protostomia;  
 Spiralia;Lophotrochozoa;Mollusca;Bivalvia;Autobranchia;Heteroconchia;Euhe  
 terodonta;Imparidentia;Venerida;Veneroidea;Veneridae;Mercenaria;Mercenari  
 a mercenaria

UdeM00000013883 6596 225.3 UdeM00000013883 XP\_045213187.1 51 243  
 118 1 2 244 619 860 8.40E-56 225.3 6596 cellular  
 organisms;Eukaryota;Opisthokonta;Metazoa;Eumetazoa;Bilateria;Protostomia;  
 Spiralia;Lophotrochozoa;Mollusca;Bivalvia;Autobranchia;Heteroconchia;Euhe  
 terodonta;Imparidentia;Venerida;Veneroidea;Veneridae;Mercenaria;Mercenari  
 a mercenaria

UdeM00000013884 6596 156.4 UdeM00000013884 XP\_045213187.1 40.2 204  
 116 3 1 204 860 1057 9.40E-35 156.4 6596 cellular  
 organisms;Eukaryota;Opisthokonta;Metazoa;Eumetazoa;Bilateria;Protostomia;  
 Spiralia;Lophotrochozoa;Mollusca;Bivalvia;Autobranchia;Heteroconchia;Euhe  
 terodonta;Imparidentia;Venerida;Veneroidea;Veneridae;Mercenaria;Mercenari  
 a mercenaria

UdeM00000013885 29159 127.1 UdeM00000013885 XP\_034314214.1 27.7 423  
 254 14 1 384 1 410 5.20E-26 127.1 29159 cellular  
 organisms;Eukaryota;Opisthokonta;Metazoa;Eumetazoa;Bilateria;Protostomia;  
 Spiralia;Lophotrochozoa;Mollusca;Bivalvia;Autobranchia;Pteriormorphia;Ostr  
 eida;Ostreoidea;Ostreidae;Crassostrea;Crassostrea gigas

UdeM00000013886 6596 259.2 UdeM00000013886 XP\_045211538.1 26.3 767  
 456 18 5 708 48 768 1.60E-65 259.2 6596 cellular  
 organisms;Eukaryota;Opisthokonta;Metazoa;Eumetazoa;Bilateria;Protostomia;  
 Spiralia;Lophotrochozoa;Mollusca;Bivalvia;Autobranchia;Heteroconchia;Euhe  
 terodonta;Imparidentia;Venerida;Veneroidea;Veneridae;Mercenaria;Mercenari  
 a mercenaria

UdeM00000013888 6596 181.8 UdeM00000013888 XP\_045193383.1 40.9 230  
 134 1 6 233 50 279 1.00E-42 181.8 6596 cellular  
 organisms;Eukaryota;Opisthokonta;Metazoa;Eumetazoa;Bilateria;Protostomia;  
 Spiralia;Lophotrochozoa;Mollusca;Bivalvia;Autobranchia;Heteroconchia;Euhe  
 terodonta;Imparidentia;Venerida;Veneroidea;Veneridae;Mercenaria;Mercenari  
 a mercenaria

UdeM00000013889 6596 129.8 UdeM00000013889 XP\_045193383.1 32 231  
 142 3 4 224 53 278 4.50E-27 129.8 6596 cellular  
 organisms;Eukaryota;Opisthokonta;Metazoa;Eumetazoa;Bilateria;Protostomia;  
 Spiralia;Lophotrochozoa;Mollusca;Bivalvia;Autobranchia;Heteroconchia;Euhe  
 terodonta;Imparidentia;Venerida;Veneroidea;Veneridae;Mercenaria;Mercenari  
 a mercenaria

UdeM00000013890 6596 213.4 UdeM00000013890 XP\_045211538.1 29.2 415  
 250 7 22 403 321 724 6.30E-52 213.4 6596 cellular  
 organisms;Eukaryota;Opisthokonta;Metazoa;Eumetazoa;Bilateria;Protostomia;  
 Spiralia;Lophotrochozoa;Mollusca;Bivalvia;Autobranchia;Heteroconchia;Euhe  
 terodonta;Imparidentia;Venerida;Veneroidea;Veneridae;Mercenaria;Mercenari  
 a mercenaria

UdeM00000013891 6596 186.8 UdeM00000013891 XP\_045193383.1 41.3 230  
 133 1 6 233 50 279 3.20E-44 186.8 6596 cellular  
 organisms;Eukaryota;Opisthokonta;Metazoa;Eumetazoa;Bilateria;Protostomia;  
 Spiralia;Lophotrochozoa;Mollusca;Bivalvia;Autobranchia;Heteroconchia;Euhe  
 terodonta;Imparidentia;Venerida;Veneroidea;Veneridae;Mercenaria;Mercenari  
 a mercenaria

UdeM00000013892 6596 74.3 UdeM00000013892 XP\_045193380.1 33.3 159  
 51 4 21 132 66 216 1.40E-10 74.3 6596 cellular  
 organisms;Eukaryota;Opisthokonta;Metazoa;Eumetazoa;Bilateria;Protostomia;  
 Spiralia;Lophotrochozoa;Mollusca;Bivalvia;Autobranchia;Heteroconchia;Euhe  
 terodonta;Imparidentia;Venerida;Veneroidea;Veneridae;Mercenaria;Mercenari  
 a mercenaria  
 UdeM00000013893 6596 184.1 UdeM00000013893 XP\_045211538.1 34.1 290  
 178 4 1 284 513 795 2.60E-43 184.1 6596 cellular  
 organisms;Eukaryota;Opisthokonta;Metazoa;Eumetazoa;Bilateria;Protostomia;  
 Spiralia;Lophotrochozoa;Mollusca;Bivalvia;Autobranchia;Heteroconchia;Euhe  
 terodonta;Imparidentia;Venerida;Veneroidea;Veneridae;Mercenaria;Mercenari  
 a mercenaria  
 UdeM00000013894 6596 134.8 UdeM00000013894 XP\_045193383.1 41 178  
 103 1 3 178 102 279 1.10E-28 134.8 6596 cellular  
 organisms;Eukaryota;Opisthokonta;Metazoa;Eumetazoa;Bilateria;Protostomia;  
 Spiralia;Lophotrochozoa;Mollusca;Bivalvia;Autobranchia;Heteroconchia;Euhe  
 terodonta;Imparidentia;Venerida;Veneroidea;Veneridae;Mercenaria;Mercenari  
 a mercenaria  
 UdeM00000013895 6596 129.8 UdeM00000013895 XP\_045193383.1 32 231  
 142 3 4 224 53 278 5.00E-27 129.8 6596 cellular  
 organisms;Eukaryota;Opisthokonta;Metazoa;Eumetazoa;Bilateria;Protostomia;  
 Spiralia;Lophotrochozoa;Mollusca;Bivalvia;Autobranchia;Heteroconchia;Euhe  
 terodonta;Imparidentia;Venerida;Veneroidea;Veneridae;Mercenaria;Mercenari  
 a mercenaria  
 UdeM00000013896 6596 162.9 UdeM00000013896 XP\_045193383.1 37.6 237  
 141 4 6 238 50 283 5.10E-37 162.9 6596 cellular  
 organisms;Eukaryota;Opisthokonta;Metazoa;Eumetazoa;Bilateria;Protostomia;  
 Spiralia;Lophotrochozoa;Mollusca;Bivalvia;Autobranchia;Heteroconchia;Euhe  
 terodonta;Imparidentia;Venerida;Veneroidea;Veneridae;Mercenaria;Mercenari  
 a mercenaria  
 UdeM00000013897 29159 84.3 UdeM00000013897 XP\_011440881.2 37 135  
 85 0 12 146 25 159 1.90E-13 84.3 29159 cellular  
 organisms;Eukaryota;Opisthokonta;Metazoa;Eumetazoa;Bilateria;Protostomia;  
 Spiralia;Lophotrochozoa;Mollusca;Bivalvia;Autobranchia;Pteriomorphia;Ostr  
 eida;Ostreoidea;Ostreidae;Crassostrea;Crassostrea gigas  
 UdeM00000013900 7668 66.2 UdeM00000013900 XP\_030855118.1 41.8 91  
 53 0 2 92 152 242 3.70E-08 66.2 7668 cellular  
 organisms;Eukaryota;Opisthokonta;Metazoa;Eumetazoa;Bilateria;Deuterostomi  
 a;Echinodermata;Eleutherozoa;Echinozoa;Echinoidea;Euechinoidea;Echinacea;  
 Camarodonta;Echinidea;Strongylocentrotidae;Strongylocentrotus;Strongyloce  
 ntrotus purpuratus  
 UdeM00000013901 6573 78.6 UdeM00000013901 XP\_021353820.1 41.5 123  
 72 0 27 149 25 147 9.10E-12 78.6 6573 cellular  
 organisms;Eukaryota;Opisthokonta;Metazoa;Eumetazoa;Bilateria;Protostomia;  
 Spiralia;Lophotrochozoa;Mollusca;Bivalvia;Autobranchia;Pteriomorphia;Pect  
 inida;Pectinoidea;Pectinidae;Mizuhopecten;Mizuhopecten yessoensis  
 UdeM00000013902 29159 76.3 UdeM00000013902 XP\_034313026.1 47.8 90  
 46 1 30 119 8 96 3.10E-11 76.3 29159 cellular  
 organisms;Eukaryota;Opisthokonta;Metazoa;Eumetazoa;Bilateria;Protostomia;  
 Spiralia;Lophotrochozoa;Mollusca;Bivalvia;Autobranchia;Pteriomorphia;Ostr  
 eida;Ostreoidea;Ostreidae;Crassostrea;Crassostrea gigas  
 UdeM00000013903 6579 77 UdeM00000013903 XP\_033736138.1 37.5 144  
 88 1 8 151 4 145 2.80E-11 77 6579 cellular  
 organisms;Eukaryota;Opisthokonta;Metazoa;Eumetazoa;Bilateria;Protostomia;

Spiralia;Lophotrochozoa;Mollusca;Bivalvia;Autobranchia;Pteriormorphia;Pectinida;Pectinoidea;Pectinidae;Pecten;Pecten maximus

|                 |         |      |                 |                |      |     |          |      |         |
|-----------------|---------|------|-----------------|----------------|------|-----|----------|------|---------|
| UdeM00000013904 | 1250792 | 60.8 | UdeM00000013904 | XP_041830825.1 | 57.1 |     |          |      |         |
| 49              | 21      | 0    | 2               | 50             | 173  | 221 | 9.90E-07 | 60.8 | 1250792 |

cellular

organisms;Eukaryota;Opisthokonta;Metazoa;Eumetazoa;Bilateria;Deuterostomia;Chordata;Craniata;Vertebrata;Gnathostomata;Teleostomi;Euteleostomi;Actinopterygii;Actinopteri;Neopterygii;Teleostei;Osteoglossocephalai;Clupeocephala;Euteleostei;Neoteleostei;Eurypterygia;Ctenosquamata;Acanthomorphata;Euacanthomorphacea;Percomorphaceae;Ovalentaria;Atherinomorphae;Atheriniformes;Melanotaeniidae;Melanotaenia;Melanotaenia boesemani

|                 |        |       |                 |                |      |     |          |       |        |
|-----------------|--------|-------|-----------------|----------------|------|-----|----------|-------|--------|
| UdeM00000013905 | 225164 | 306.6 | UdeM00000013905 | XP_009062152.1 | 75.7 |     |          |       |        |
| 239             | 50     | 2     | 8               | 244            | 1    | 233 | 3.10E-80 | 306.6 | 225164 |

cellular

organisms;Eukaryota;Opisthokonta;Metazoa;Eumetazoa;Bilateria;Protostomia;Spiralia;Lophotrochozoa;Mollusca;Gastropoda;Patellogastropoda;Lottioidea;Lottiidae;Lottia;Lottia gigantea

|                 |       |        |                 |                |    |     |          |        |       |
|-----------------|-------|--------|-----------------|----------------|----|-----|----------|--------|-------|
| UdeM00000013906 | 29159 | 1106.7 | UdeM00000013906 | XP_011438173.1 | 83 |     |          |        |       |
| 693             | 106   | 3      | 7               | 696            | 6  | 689 | 0.00E+00 | 1106.7 | 29159 |

cellular

organisms;Eukaryota;Opisthokonta;Metazoa;Eumetazoa;Bilateria;Protostomia;Spiralia;Lophotrochozoa;Mollusca;Bivalvia;Autobranchia;Pteriormorphia;Ostreida;Ostreioidea;Ostreidae;Crassostrea;Crassostrea gigas

|                 |       |       |                 |                |      |           |       |       |          |
|-----------------|-------|-------|-----------------|----------------|------|-----------|-------|-------|----------|
| UdeM00000013907 | 29159 | 806.2 | UdeM00000013907 | XP_011438172.1 | 86.5 | 452       |       |       |          |
| 61              | 0     | 18    | 469             | 263            | 714  | 2.20E-230 | 806.2 | 29159 | cellular |

organisms;Eukaryota;Opisthokonta;Metazoa;Eumetazoa;Bilateria;Protostomia;Spiralia;Lophotrochozoa;Mollusca;Bivalvia;Autobranchia;Pteriormorphia;Ostreida;Ostreioidea;Ostreidae;Crassostrea;Crassostrea gigas

|                 |      |      |                 |                |      |          |      |      |          |
|-----------------|------|------|-----------------|----------------|------|----------|------|------|----------|
| UdeM00000013908 | 6565 | 84.7 | UdeM00000013908 | XP_022318500.1 | 76.1 | 46       |      |      |          |
| 11              | 0    | 1    | 46              | 1              | 46   | 1.30E-13 | 84.7 | 6565 | cellular |

organisms;Eukaryota;Opisthokonta;Metazoa;Eumetazoa;Bilateria;Protostomia;Spiralia;Lophotrochozoa;Mollusca;Bivalvia;Autobranchia;Pteriormorphia;Ostreida;Ostreioidea;Ostreidae;Crassostrea;Crassostrea virginica

|                 |      |       |                 |                |      |          |       |      |          |
|-----------------|------|-------|-----------------|----------------|------|----------|-------|------|----------|
| UdeM00000013909 | 6565 | 217.2 | UdeM00000013909 | XP_022318499.1 | 69.4 | 134      |       |      |          |
| 41              | 0    | 15    | 148             | 21             | 154  | 1.70E-53 | 217.2 | 6565 | cellular |

organisms;Eukaryota;Opisthokonta;Metazoa;Eumetazoa;Bilateria;Protostomia;Spiralia;Lophotrochozoa;Mollusca;Bivalvia;Autobranchia;Pteriormorphia;Ostreida;Ostreioidea;Ostreidae;Crassostrea;Crassostrea virginica

|                 |      |       |                 |                |      |           |       |      |          |
|-----------------|------|-------|-----------------|----------------|------|-----------|-------|------|----------|
| UdeM00000013910 | 6596 | 488.4 | UdeM00000013910 | XP_045211591.1 | 74.3 | 327       |       |      |          |
| 77              | 1    | 220   | 539             | 243            | 569  | 1.20E-134 | 488.4 | 6596 | cellular |

organisms;Eukaryota;Opisthokonta;Metazoa;Eumetazoa;Bilateria;Protostomia;Spiralia;Lophotrochozoa;Mollusca;Bivalvia;Autobranchia;Heteroconchia;Euheterodonta;Imparidentia;Venerida;Veneroidea;Veneridae;Mercenaria;Mercenaria mercenaria

|                 |      |     |                 |                |      |           |     |      |          |
|-----------------|------|-----|-----------------|----------------|------|-----------|-----|------|----------|
| UdeM00000013911 | 6596 | 500 | UdeM00000013911 | XP_045211591.1 | 75.8 | 327       |     |      |          |
| 72              | 1    | 220 | 539             | 243            | 569  | 3.80E-138 | 500 | 6596 | cellular |

organisms;Eukaryota;Opisthokonta;Metazoa;Eumetazoa;Bilateria;Protostomia;Spiralia;Lophotrochozoa;Mollusca;Bivalvia;Autobranchia;Heteroconchia;Euheterodonta;Imparidentia;Venerida;Veneroidea;Veneridae;Mercenaria;Mercenaria mercenaria

|                 |      |       |                 |                |      |           |       |      |          |
|-----------------|------|-------|-----------------|----------------|------|-----------|-------|------|----------|
| UdeM00000013912 | 6596 | 553.5 | UdeM00000013912 | XP_045211651.1 | 74.2 | 360       |       |      |          |
| 93              | 0    | 11    | 370             | 161            | 520  | 2.10E-154 | 553.5 | 6596 | cellular |

organisms;Eukaryota;Opisthokonta;Metazoa;Eumetazoa;Bilateria;Protostomia;Spiralia;Lophotrochozoa;Mollusca;Bivalvia;Autobranchia;Heteroconchia;Euheterodonta

terodonta;Imparidentia;Venerida;Veneroidea;Veneridae;Mercenaria;Mercenari  
 a mercenaria  
 UdeM00000013913 6596 547 UdeM00000013913 XP\_045211651.1 73.9 360  
 93 1 11 369 161 520 1.90E-152 547 6596 cellular  
 organisms;Eukaryota;Opisthokonta;Metazoa;Eumetazoa;Bilateria;Protostomia;  
 Spiralia;Lophotrochozoa;Mollusca;Bivalvia;Autobranchia;Heteroconchia;Euhe  
 terodonta;Imparidentia;Venerida;Veneroidea;Veneridae;Mercenaria;Mercenari  
 a mercenaria  
 UdeM00000013914 6596 272.3 UdeM00000013914 XP\_045211651.1 83.5 158  
 26 0 1 158 1 158 3.90E-70 272.3 6596 cellular  
 organisms;Eukaryota;Opisthokonta;Metazoa;Eumetazoa;Bilateria;Protostomia;  
 Spiralia;Lophotrochozoa;Mollusca;Bivalvia;Autobranchia;Heteroconchia;Euhe  
 terodonta;Imparidentia;Venerida;Veneroidea;Veneridae;Mercenaria;Mercenari  
 a mercenaria  
 UdeM00000013915 6596 480.7 UdeM00000013915 XP\_045211648.1 49.3 621  
 287 8 31 626 65 682 3.10E-132 480.7 6596 cellular  
 organisms;Eukaryota;Opisthokonta;Metazoa;Eumetazoa;Bilateria;Protostomia;  
 Spiralia;Lophotrochozoa;Mollusca;Bivalvia;Autobranchia;Heteroconchia;Euhe  
 terodonta;Imparidentia;Venerida;Veneroidea;Veneridae;Mercenaria;Mercenari  
 a mercenaria  
 UdeM00000013916 6596 211.1 UdeM00000013916 XP\_045211108.1 59.5 205  
 81 1 103 307 103 305 2.10E-51 211.1 6596 cellular  
 organisms;Eukaryota;Opisthokonta;Metazoa;Eumetazoa;Bilateria;Protostomia;  
 Spiralia;Lophotrochozoa;Mollusca;Bivalvia;Autobranchia;Heteroconchia;Euhe  
 terodonta;Imparidentia;Venerida;Veneroidea;Veneridae;Mercenaria;Mercenari  
 a mercenaria  
 UdeM00000013917 6596 161 UdeM00000013917 XP\_045211644.1 46.4 194  
 96 3 1 188 1 192 2.60E-36 161 6596 cellular  
 organisms;Eukaryota;Opisthokonta;Metazoa;Eumetazoa;Bilateria;Protostomia;  
 Spiralia;Lophotrochozoa;Mollusca;Bivalvia;Autobranchia;Heteroconchia;Euhe  
 terodonta;Imparidentia;Venerida;Veneroidea;Veneridae;Mercenaria;Mercenari  
 a mercenaria  
 UdeM00000013918 6596 596.3 UdeM00000013918 XP\_045214442.1 48.8 559  
 284 1 1 557 3 561 4.20E-167 596.3 6596 cellular  
 organisms;Eukaryota;Opisthokonta;Metazoa;Eumetazoa;Bilateria;Protostomia;  
 Spiralia;Lophotrochozoa;Mollusca;Bivalvia;Autobranchia;Heteroconchia;Euhe  
 terodonta;Imparidentia;Venerida;Veneroidea;Veneridae;Mercenaria;Mercenari  
 a mercenaria  
 UdeM00000013919 400727 365.5 UdeM00000013919 XP\_025089656.1 58.3  
 300 113 1 11 310 322 609 6.70E-98 365.5 400727  
 cellular  
 organisms;Eukaryota;Opisthokonta;Metazoa;Eumetazoa;Bilateria;Protostomia;  
 Spiralia;Lophotrochozoa;Mollusca;Gastropoda;Caenogastropoda;Architaeniogl  
 ossa;Ampullarioidea;Ampullariidae;Pomacea;Pomacea canaliculata  
 UdeM00000013920 6596 555.4 UdeM00000013920 XP\_045214857.1 53.1 531  
 226 7 26 549 13 527 7.90E-155 555.4 6596 cellular  
 organisms;Eukaryota;Opisthokonta;Metazoa;Eumetazoa;Bilateria;Protostomia;  
 Spiralia;Lophotrochozoa;Mollusca;Bivalvia;Autobranchia;Heteroconchia;Euhe  
 terodonta;Imparidentia;Venerida;Veneroidea;Veneridae;Mercenaria;Mercenari  
 a mercenaria  
 UdeM00000013921 6596 817.8 UdeM00000013921 XP\_045212843.1 45.6 950  
 355 7 1 796 1 942 1.20E-233 817.8 6596 cellular  
 organisms;Eukaryota;Opisthokonta;Metazoa;Eumetazoa;Bilateria;Protostomia;  
 Spiralia;Lophotrochozoa;Mollusca;Bivalvia;Autobranchia;Heteroconchia;Euhe

terodonta;Imparidentia;Venerida;Veneroidea;Veneridae;Mercenaria;Mercenari  
 a mercenaria  
 UdeM00000013922 6579 655.2 UdeM00000013922 XP\_033755626.1 53.4 734  
 302 14 5 729 4 706 9.70E-185 655.2 6579 cellular  
 organisms;Eukaryota;Opisthokonta;Metazoa;Eumetazoa;Bilateria;Protostomia;  
 Spiralia;Lophotrochozoa;Mollusca;Bivalvia;Autobranchia;Pteriomorpha;Pect  
 inida;Pectinoidea;Pectinidae;Pecten;Pecten maximus  
 UdeM00000013923 6596 129.8 UdeM00000013923 XP\_045212838.1 45.4 174  
 82 4 1 172 234 396 4.90E-27 129.8 6596 cellular  
 organisms;Eukaryota;Opisthokonta;Metazoa;Eumetazoa;Bilateria;Protostomia;  
 Spiralia;Lophotrochozoa;Mollusca;Bivalvia;Autobranchia;Heteroconchia;Euhe  
 terodonta;Imparidentia;Venerida;Veneroidea;Veneridae;Mercenaria;Mercenari  
 a mercenaria  
 UdeM00000013924 6596 1310 UdeM00000013924 XP\_045212836.1 53.6 1165  
 515 9 83 1243 91 1234 0.00E+00 1310 6596 cellular  
 organisms;Eukaryota;Opisthokonta;Metazoa;Eumetazoa;Bilateria;Protostomia;  
 Spiralia;Lophotrochozoa;Mollusca;Bivalvia;Autobranchia;Heteroconchia;Euhe  
 terodonta;Imparidentia;Venerida;Veneroidea;Veneridae;Mercenaria;Mercenari  
 a mercenaria  
 UdeM00000013929 6596 326.6 UdeM00000013929 XP\_045212391.1 34.2 719  
 388 16 28 731 77 725 8.40E-86 326.6 6596 cellular  
 organisms;Eukaryota;Opisthokonta;Metazoa;Eumetazoa;Bilateria;Protostomia;  
 Spiralia;Lophotrochozoa;Mollusca;Bivalvia;Autobranchia;Heteroconchia;Euhe  
 terodonta;Imparidentia;Venerida;Veneroidea;Veneridae;Mercenaria;Mercenari  
 a mercenaria  
 UdeM00000013930 1735272 495 UdeM00000013930 XP\_041364156.1 53.2  
 472 213 3 1 469 54 520 1.10E-136 495 1735272  
 cellular  
 organisms;Eukaryota;Opisthokonta;Metazoa;Eumetazoa;Bilateria;Protostomia;  
 Spiralia;Lophotrochozoa;Mollusca;Gastropoda;Neomphalina;Neomphaloidea;Pel  
 tospiridae;Gigantopelta;Gigantopelta aegis  
 UdeM00000013931 6579 649 UdeM00000013931 XP\_033742145.1 61.8 453  
 171 2 9 461 8 458 4.40E-183 649 6579 cellular  
 organisms;Eukaryota;Opisthokonta;Metazoa;Eumetazoa;Bilateria;Protostomia;  
 Spiralia;Lophotrochozoa;Mollusca;Bivalvia;Autobranchia;Pteriomorpha;Pect  
 inida;Pectinoidea;Pectinidae;Pecten;Pecten maximus  
 UdeM00000013932 6579 581.3 UdeM00000013932 XP\_033742145.1 57 453  
 157 3 9 425 8 458 1.00E-162 581.3 6579 cellular  
 organisms;Eukaryota;Opisthokonta;Metazoa;Eumetazoa;Bilateria;Protostomia;  
 Spiralia;Lophotrochozoa;Mollusca;Bivalvia;Autobranchia;Pteriomorpha;Pect  
 inida;Pectinoidea;Pectinidae;Pecten;Pecten maximus  
 UdeM00000013933 6579 654.8 UdeM00000013933 XP\_033742145.1 62.5 453  
 168 2 9 461 8 458 8.00E-185 654.8 6579 cellular  
 organisms;Eukaryota;Opisthokonta;Metazoa;Eumetazoa;Bilateria;Protostomia;  
 Spiralia;Lophotrochozoa;Mollusca;Bivalvia;Autobranchia;Pteriomorpha;Pect  
 inida;Pectinoidea;Pectinidae;Pecten;Pecten maximus  
 UdeM00000013934 6579 637.1 UdeM00000013934 XP\_033742145.1 59.9 454  
 180 2 8 461 7 458 1.70E-179 637.1 6579 cellular  
 organisms;Eukaryota;Opisthokonta;Metazoa;Eumetazoa;Bilateria;Protostomia;  
 Spiralia;Lophotrochozoa;Mollusca;Bivalvia;Autobranchia;Pteriomorpha;Pect  
 inida;Pectinoidea;Pectinidae;Pecten;Pecten maximus  
 UdeM00000013935 6579 223 UdeM00000013935 XP\_033742172.1 55.7 174  
 76 1 1 174 286 458 3.00E-55 223 6579 cellular  
 organisms;Eukaryota;Opisthokonta;Metazoa;Eumetazoa;Bilateria;Protostomia;

Spiralia;Lophotrochozoa;Mollusca;Bivalvia;Autobranchia;Pteriormorphia;Pectinida;Pectinoidea;Pectinidae;Pecten;Pecten maximus  
UdeM00000013936 6596 1042.7 UdeM00000013936 XP\_045212850.1 86.4  
597 79 2 1 595 1 597 1.80E-301 1042.7 6596  
cellular

organisms;Eukaryota;Opisthokonta;Metazoa;Eumetazoa;Bilateria;Protostomia;Spiralia;Lophotrochozoa;Mollusca;Bivalvia;Autobranchia;Heteroconchia;Euheterodonta;Imparidentia;Venerida;Veneroidea;Veneridae;Mercenaria;Mercenaria mercenaria

UdeM00000013937 6596 855.9 UdeM00000013937 XP\_045211045.1 60.2 861  
285 16 1 827 177 1013 4.20E-245 855.9 6596 cellular

organisms;Eukaryota;Opisthokonta;Metazoa;Eumetazoa;Bilateria;Protostomia;Spiralia;Lophotrochozoa;Mollusca;Bivalvia;Autobranchia;Heteroconchia;Euheterodonta;Imparidentia;Venerida;Veneroidea;Veneridae;Mercenaria;Mercenaria mercenaria

UdeM00000013938 6596 804.7 UdeM00000013938 XP\_045214415.1 34.7 1451  
745 32 1 1303 1 1396 1.90E-229 804.7 6596 cellular

organisms;Eukaryota;Opisthokonta;Metazoa;Eumetazoa;Bilateria;Protostomia;Spiralia;Lophotrochozoa;Mollusca;Bivalvia;Autobranchia;Heteroconchia;Euheterodonta;Imparidentia;Venerida;Veneroidea;Veneridae;Mercenaria;Mercenaria mercenaria

UdeM00000013939 6579 675.2 UdeM00000013939 XP\_033742145.1 65 451  
151 3 8 451 8 458 5.60E-191 675.2 6579 cellular

organisms;Eukaryota;Opisthokonta;Metazoa;Eumetazoa;Bilateria;Protostomia;Spiralia;Lophotrochozoa;Mollusca;Bivalvia;Autobranchia;Pteriormorphia;Pectinida;Pectinoidea;Pectinidae;Pecten;Pecten maximus

UdeM00000013940 6573 810.4 UdeM00000013940 XP\_021348679.1 71.8 515  
142 2 1 514 1 513 1.30E-231 810.4 6573 cellular

organisms;Eukaryota;Opisthokonta;Metazoa;Eumetazoa;Bilateria;Protostomia;Spiralia;Lophotrochozoa;Mollusca;Bivalvia;Autobranchia;Pteriormorphia;Pectinida;Pectinoidea;Pectinidae;Mizuhopecten;Mizuhopecten yessoensis

UdeM00000013941 6596 154.1 UdeM00000013941 XP\_045213601.1 51 157  
73 1 1 157 1 153 1.60E-34 154.1 6596 cellular

organisms;Eukaryota;Opisthokonta;Metazoa;Eumetazoa;Bilateria;Protostomia;Spiralia;Lophotrochozoa;Mollusca;Bivalvia;Autobranchia;Heteroconchia;Euheterodonta;Imparidentia;Venerida;Veneroidea;Veneridae;Mercenaria;Mercenaria mercenaria

UdeM00000013942 29159 189.5 UdeM00000013942 XP\_011436622.2 63.1 141  
52 0 5 145 165 305 3.00E-45 189.5 29159 cellular

organisms;Eukaryota;Opisthokonta;Metazoa;Eumetazoa;Bilateria;Protostomia;Spiralia;Lophotrochozoa;Mollusca;Bivalvia;Autobranchia;Pteriormorphia;Ostreida;Ostreoidea;Ostreidae;Crassostrea;Crassostrea gigas

UdeM00000013943 6596 2325.1 UdeM00000013943 XP\_045213473.1 60.4  
1941 700 12 35 1931 2262 4177 0.00E+00 2325.1 6596

cellular

organisms;Eukaryota;Opisthokonta;Metazoa;Eumetazoa;Bilateria;Protostomia;Spiralia;Lophotrochozoa;Mollusca;Bivalvia;Autobranchia;Heteroconchia;Euheterodonta;Imparidentia;Venerida;Veneroidea;Veneridae;Mercenaria;Mercenaria mercenaria

UdeM00000013944 6596 639 UdeM00000013944 XP\_045213473.1 63.6 506  
178 4 35 537 2262 2764 5.30E-180 639 6596 cellular

organisms;Eukaryota;Opisthokonta;Metazoa;Eumetazoa;Bilateria;Protostomia;Spiralia;Lophotrochozoa;Mollusca;Bivalvia;Autobranchia;Heteroconchia;Euheterodonta

terodonta;Imparidentia;Venerida;Veneroidea;Veneridae;Mercenaria;Mercenaria mercenaria

UdeM00000013945 6596 249.2 UdeM00000013945 XP\_045213473.1 64.7 170  
60 0 1 170 2098 2267 3.70E-63 249.2 6596 cellular

organisms;Eukaryota;Opisthokonta;Metazoa;Eumetazoa;Bilateria;Protostomia;Spiralia;Lophotrochozoa;Mollusca;Bivalvia;Autobranhia;Heteroconchia;Euherodonta;Imparidentia;Venerida;Veneroidea;Veneridae;Mercenaria;Mercenaria mercenaria

UdeM00000013946 6596 586.6 UdeM00000013946 XP\_045213473.1 53.1 565  
258 4 8 570 1362 1921 3.30E-164 586.6 6596 cellular

organisms;Eukaryota;Opisthokonta;Metazoa;Eumetazoa;Bilateria;Protostomia;Spiralia;Lophotrochozoa;Mollusca;Bivalvia;Autobranhia;Heteroconchia;Euherodonta;Imparidentia;Venerida;Veneroidea;Veneridae;Mercenaria;Mercenaria mercenaria

UdeM00000013947 6596 1710.7 UdeM00000013947 XP\_045213473.1 62.9  
1361 479 9 1 1351 1 1345 0.00E+00 1710.7 6596  
cellular

organisms;Eukaryota;Opisthokonta;Metazoa;Eumetazoa;Bilateria;Protostomia;Spiralia;Lophotrochozoa;Mollusca;Bivalvia;Autobranhia;Heteroconchia;Euherodonta;Imparidentia;Venerida;Veneroidea;Veneridae;Mercenaria;Mercenaria mercenaria

UdeM00000013948 1735272 510 UdeM00000013948 XP\_041363826.1 51.4  
543 223 11 1 538 1 507 3.80E-141 510 1735272  
cellular

organisms;Eukaryota;Opisthokonta;Metazoa;Eumetazoa;Bilateria;Protostomia;Spiralia;Lophotrochozoa;Mollusca;Gastropoda;Neomphalina;Neomphaloidea;Peltospiridae;Gigantopelta;Gigantopelta aegis

UdeM00000013949 7739 331.6 UdeM00000013949 XP\_035695457.1 68 244  
78 0 1 244 1 244 8.20E-88 331.6 7739 cellular

organisms;Eukaryota;Opisthokonta;Metazoa;Eumetazoa;Bilateria;Deuterostomia;Chordata;Cephalochordata;Leptocardii;Amphioxiformes;Branchiostomidae;Branchiostoma;Branchiostoma floridae

UdeM00000013951 6596 439.9 UdeM00000013951 XP\_045176367.1 37.1 682  
352 11 4 615 34 708 5.40E-120 439.9 6596 cellular

organisms;Eukaryota;Opisthokonta;Metazoa;Eumetazoa;Bilateria;Protostomia;Spiralia;Lophotrochozoa;Mollusca;Bivalvia;Autobranhia;Heteroconchia;Euherodonta;Imparidentia;Venerida;Veneroidea;Veneridae;Mercenaria;Mercenaria mercenaria

UdeM00000013953 225164 125.2 UdeM00000013953 XP\_009062094.1 65.3  
101 31 1 3 103 231 327 5.40E-26 125.2 225164  
cellular

organisms;Eukaryota;Opisthokonta;Metazoa;Eumetazoa;Bilateria;Protostomia;Spiralia;Lophotrochozoa;Mollusca;Gastropoda;Patellogastropoda;Lottiidae;Lottia;Lottia gigantea

UdeM00000013954 6596 615.9 UdeM00000013954 XP\_045211858.1 90.3 318  
31 0 1 318 1 318 2.80E-173 615.9 6596 cellular

organisms;Eukaryota;Opisthokonta;Metazoa;Eumetazoa;Bilateria;Protostomia;Spiralia;Lophotrochozoa;Mollusca;Bivalvia;Autobranhia;Heteroconchia;Euherodonta;Imparidentia;Venerida;Veneroidea;Veneridae;Mercenaria;Mercenaria mercenaria

UdeM00000013955 400727 646.7 UdeM00000013955 XP\_025095840.1 97.1  
308 9 0 3 310 2 309 1.50E-182 646.7 400727  
cellular

organisms;Eukaryota;Opisthokonta;Metazoa;Eumetazoa;Bilateria;Protostomia;

Spiralia; Lophotrochozoa; Mollusca; Gastropoda; Caenogastropoda; Architaenioglossa; Ampullarioidea; Ampullariidae; Pomacea; Pomacea canaliculata

UdeM00000013956 6565 89.4 UdeM00000013956 XP\_022334997.1 44.7 103  
54 2 7 106 76 178 5.80E-15 89.4 6565 cellular  
organisms; Eukaryota; Opisthokonta; Metazoa; Eumetazoa; Bilateria; Protostomia; Spiralia; Lophotrochozoa; Mollusca; Bivalvia; Autobranchia; Pteriomorpha; Ostreida; Ostreioidea; Ostreidae; Crassostrea; Crassostrea virginica

UdeM00000013957 6596 392.9 UdeM00000013957 XP\_045213917.1 43.9 503  
253 9 1 487 1 490 6.00E-106 392.9 6596 cellular  
organisms; Eukaryota; Opisthokonta; Metazoa; Eumetazoa; Bilateria; Protostomia; Spiralia; Lophotrochozoa; Mollusca; Bivalvia; Autobranchia; Heteroconchia; Euheterodonta; Imparidentia; Venerida; Veneroidea; Veneridae; Mercenaria; Mercenaria mercenaria

UdeM00000013958 6579 61.2 UdeM00000013958 XP\_033744278.1 43.5 62  
35 0 1 62 759 820 8.50E-07 61.2 6579 cellular  
organisms; Eukaryota; Opisthokonta; Metazoa; Eumetazoa; Bilateria; Protostomia; Spiralia; Lophotrochozoa; Mollusca; Bivalvia; Autobranchia; Pteriomorpha; Pectinida; Pectinoidea; Pectinidae; Pecten; Pecten maximus

UdeM00000013959 6596 426 UdeM00000013959 XP\_045213917.1 46.2 500  
243 8 26 510 25 513 6.70E-116 426 6596 cellular  
organisms; Eukaryota; Opisthokonta; Metazoa; Eumetazoa; Bilateria; Protostomia; Spiralia; Lophotrochozoa; Mollusca; Bivalvia; Autobranchia; Heteroconchia; Euheterodonta; Imparidentia; Venerida; Veneroidea; Veneridae; Mercenaria; Mercenaria mercenaria

UdeM00000013960 6596 427.9 UdeM00000013960 XP\_045213917.1 46.5 499  
241 8 26 508 25 513 1.80E-116 427.9 6596 cellular  
organisms; Eukaryota; Opisthokonta; Metazoa; Eumetazoa; Bilateria; Protostomia; Spiralia; Lophotrochozoa; Mollusca; Bivalvia; Autobranchia; Heteroconchia; Euheterodonta; Imparidentia; Venerida; Veneroidea; Veneridae; Mercenaria; Mercenaria mercenaria

UdeM00000013961 6596 298.1 UdeM00000013961 XP\_045212466.1 51.7 354  
148 4 1 342 1 343 1.60E-77 298.1 6596 cellular  
organisms; Eukaryota; Opisthokonta; Metazoa; Eumetazoa; Bilateria; Protostomia; Spiralia; Lophotrochozoa; Mollusca; Bivalvia; Autobranchia; Heteroconchia; Euheterodonta; Imparidentia; Venerida; Veneroidea; Veneridae; Mercenaria; Mercenaria mercenaria

UdeM00000013963 6579 268.5 UdeM00000013963 XP\_033755373.1 51 367  
149 9 1 351 16 367 1.30E-68 268.5 6579 cellular  
organisms; Eukaryota; Opisthokonta; Metazoa; Eumetazoa; Bilateria; Protostomia; Spiralia; Lophotrochozoa; Mollusca; Bivalvia; Autobranchia; Pteriomorpha; Pectinida; Pectinoidea; Pectinidae; Pecten; Pecten maximus

UdeM00000013964 6579 224.2 UdeM00000013964 XP\_033755373.1 46 367  
148 10 1 332 16 367 2.60E-55 224.2 6579 cellular  
organisms; Eukaryota; Opisthokonta; Metazoa; Eumetazoa; Bilateria; Protostomia; Spiralia; Lophotrochozoa; Mollusca; Bivalvia; Autobranchia; Pteriomorpha; Pectinida; Pectinoidea; Pectinidae; Pecten; Pecten maximus

UdeM00000013965 6596 105.9 UdeM00000013965 XP\_045213389.1 32.7 202  
124 5 142 340 280 472 2.10E-19 105.9 6596 cellular  
organisms; Eukaryota; Opisthokonta; Metazoa; Eumetazoa; Bilateria; Protostomia; Spiralia; Lophotrochozoa; Mollusca; Bivalvia; Autobranchia; Heteroconchia; Euheterodonta; Imparidentia; Venerida; Veneroidea; Veneridae; Mercenaria; Mercenaria mercenaria

UdeM00000013966 6596 105.9 UdeM00000013966 XP\_045213389.1 32.7 202  
124 5 142 340 280 472 2.20E-19 105.9 6596 cellular



organisms;Eukaryota;Opisthokonta;Metazoa;Eumetazoa;Bilateria;Protostomia;Spiralia;Lophotrochozoa;Mollusca;Bivalvia;Autobranhia;Heteroconchia;Euherodonta;Imparidentia;Venerida;Veneroidea;Veneridae;Mercenaria;Mercenaria mercenaria

UdeM00000013967 6596 106.3 UdeM00000013967 XP\_045213389.1 31.6 206  
123 5 172 371 280 473 1.70E-19 106.3 6596 cellular

organisms;Eukaryota;Opisthokonta;Metazoa;Eumetazoa;Bilateria;Protostomia;Spiralia;Lophotrochozoa;Mollusca;Bivalvia;Autobranhia;Heteroconchia;Euherodonta;Imparidentia;Venerida;Veneroidea;Veneridae;Mercenaria;Mercenaria mercenaria

UdeM00000013968 6596 114.8 UdeM00000013968 XP\_045213389.1 33.7 205  
118 5 176 374 280 472 4.70E-22 114.8 6596 cellular

organisms;Eukaryota;Opisthokonta;Metazoa;Eumetazoa;Bilateria;Protostomia;Spiralia;Lophotrochozoa;Mollusca;Bivalvia;Autobranhia;Heteroconchia;Euherodonta;Imparidentia;Venerida;Veneroidea;Veneridae;Mercenaria;Mercenaria mercenaria

UdeM00000013969 6579 487.6 UdeM00000013969 XP\_033737399.1 47.6 542  
224 3 1 490 4 537 1.80E-134 487.6 6579 cellular

organisms;Eukaryota;Opisthokonta;Metazoa;Eumetazoa;Bilateria;Protostomia;Spiralia;Lophotrochozoa;Mollusca;Bivalvia;Autobranhia;Pteriomorphia;Pectinida;Pectinoidea;Pectinidae;Pecten;Pecten maximus

UdeM00000013970 6596 88.2 UdeM00000013970 XP\_045213901.1 61.5 65  
25 0 7 71 376 440 5.20E-15 88.2 6596 cellular

organisms;Eukaryota;Opisthokonta;Metazoa;Eumetazoa;Bilateria;Protostomia;Spiralia;Lophotrochozoa;Mollusca;Bivalvia;Autobranhia;Heteroconchia;Euherodonta;Imparidentia;Venerida;Veneroidea;Veneridae;Mercenaria;Mercenaria mercenaria

UdeM00000013971 225164 75.9 UdeM00000013971 XP\_009063534.1 71.4  
49 13 1 7 55 329 376 2.20E-11 75.9 225164  
cellular

organisms;Eukaryota;Opisthokonta;Metazoa;Eumetazoa;Bilateria;Protostomia;Spiralia;Lophotrochozoa;Mollusca;Gastropoda;Patellogastropoda;Lottioidae;Lottiidae;Lottia;Lottia gigantea

UdeM00000013972 29159 80.9 UdeM00000013972 XP\_034307341.1 35 143  
67 2 2 124 48 184 1.30E-12 80.9 29159 cellular

organisms;Eukaryota;Opisthokonta;Metazoa;Eumetazoa;Bilateria;Protostomia;Spiralia;Lophotrochozoa;Mollusca;Bivalvia;Autobranhia;Pteriomorphia;Ostreida;Ostreoidae;Ostreidae;Crassostrea;Crassostrea gigas

UdeM00000013973 29159 93.6 UdeM00000013973 XP\_034307341.1 40.9 110  
55 1 9 108 230 339 3.40E-16 93.6 29159 cellular

organisms;Eukaryota;Opisthokonta;Metazoa;Eumetazoa;Bilateria;Protostomia;Spiralia;Lophotrochozoa;Mollusca;Bivalvia;Autobranhia;Pteriomorphia;Ostreida;Ostreoidae;Ostreidae;Crassostrea;Crassostrea gigas

UdeM00000013974 6596 636.7 UdeM00000013974 XP\_045213901.1 93.1 335  
19 2 1 331 44 378 1.70E-179 636.7 6596 cellular

organisms;Eukaryota;Opisthokonta;Metazoa;Eumetazoa;Bilateria;Protostomia;Spiralia;Lophotrochozoa;Mollusca;Bivalvia;Autobranhia;Heteroconchia;Euherodonta;Imparidentia;Venerida;Veneroidea;Veneridae;Mercenaria;Mercenaria mercenaria

UdeM00000013975 6573 102.1 UdeM00000013975 XP\_021346744.1 55.4 83  
35 1 54 136 1 81 6.00E-19 102.1 6573 cellular

organisms;Eukaryota;Opisthokonta;Metazoa;Eumetazoa;Bilateria;Protostomia;Spiralia;Lophotrochozoa;Mollusca;Bivalvia;Autobranhia;Pteriomorphia;Pectinida;Pectinoidea;Pectinidae;Mizuhopecten;Mizuhopecten yessoensis

UdeM00000013976 6596 393.7 UdeM00000013976 XP\_045213908.1 37.7 660  
 324 8 67 704 50 644 5.10E-106 393.7 6596 cellular  
 organisms;Eukaryota;Opisthokonta;Metazoa;Eumetazoa;Bilateria;Protostomia;  
 Spiralia;Lophotrochozoa;Mollusca;Bivalvia;Autobranchia;Heteroconchia;Euhe  
 terodonta;Imparidentia;Venerida;Veneroidea;Veneridae;Mercenaria;Mercenari  
 a mercenaria

UdeM00000013977 6596 263.1 UdeM00000013977 XP\_045213903.1 34.8 541  
 268 7 1 519 202 679 7.70E-67 263.1 6596 cellular  
 organisms;Eukaryota;Opisthokonta;Metazoa;Eumetazoa;Bilateria;Protostomia;  
 Spiralia;Lophotrochozoa;Mollusca;Bivalvia;Autobranchia;Heteroconchia;Euhe  
 terodonta;Imparidentia;Venerida;Veneroidea;Veneridae;Mercenaria;Mercenari  
 a mercenaria

UdeM00000013978 6596 711.4 UdeM00000013978 XP\_045213910.1 72.7 455  
 123 1 273 726 3 457 1.10E-201 711.4 6596 cellular  
 organisms;Eukaryota;Opisthokonta;Metazoa;Eumetazoa;Bilateria;Protostomia;  
 Spiralia;Lophotrochozoa;Mollusca;Bivalvia;Autobranchia;Heteroconchia;Euhe  
 terodonta;Imparidentia;Venerida;Veneroidea;Veneridae;Mercenaria;Mercenari  
 a mercenaria

UdeM00000013979 6596 270 UdeM00000013979 XP\_045213911.1 39.4 612  
 268 20 1 570 1 551 6.80E-69 270 6596 cellular  
 organisms;Eukaryota;Opisthokonta;Metazoa;Eumetazoa;Bilateria;Protostomia;  
 Spiralia;Lophotrochozoa;Mollusca;Bivalvia;Autobranchia;Heteroconchia;Euhe  
 terodonta;Imparidentia;Venerida;Veneroidea;Veneridae;Mercenaria;Mercenari  
 a mercenaria

UdeM00000013980 6596 619.8 UdeM00000013980 XP\_045213912.1 69.8 443  
 116 4 8 433 552 993 2.70E-174 619.8 6596 cellular  
 organisms;Eukaryota;Opisthokonta;Metazoa;Eumetazoa;Bilateria;Protostomia;  
 Spiralia;Lophotrochozoa;Mollusca;Bivalvia;Autobranchia;Heteroconchia;Euhe  
 terodonta;Imparidentia;Venerida;Veneroidea;Veneridae;Mercenaria;Mercenari  
 a mercenaria

UdeM00000013981 6596 485.7 UdeM00000013981 XP\_045213912.1 66.1 369  
 107 4 1 352 626 993 5.00E-134 485.7 6596 cellular  
 organisms;Eukaryota;Opisthokonta;Metazoa;Eumetazoa;Bilateria;Protostomia;  
 Spiralia;Lophotrochozoa;Mollusca;Bivalvia;Autobranchia;Heteroconchia;Euhe  
 terodonta;Imparidentia;Venerida;Veneroidea;Veneridae;Mercenaria;Mercenari  
 a mercenaria

UdeM00000013985 7574 140.6 UdeM00000013985 XP\_013380173.1 77.4 84  
 19 0 3 86 433 516 3.80E-30 140.6 7574 cellular  
 organisms;Eukaryota;Opisthokonta;Metazoa;Eumetazoa;Bilateria;Protostomia;  
 Spiralia;Lophotrochozoa;Brachiopoda;Linguliformea;Lingulata;Lingulida;Lin  
 guloidea;Lingulidae;Lingula;Lingula anatina

UdeM00000013982 6596 765.4 UdeM00000013982 XP\_045214081.1 76 526  
 106 2 1 515 1 517 7.50E-218 765.4 6596 cellular  
 organisms;Eukaryota;Opisthokonta;Metazoa;Eumetazoa;Bilateria;Protostomia;  
 Spiralia;Lophotrochozoa;Mollusca;Bivalvia;Autobranchia;Heteroconchia;Euhe  
 terodonta;Imparidentia;Venerida;Veneroidea;Veneridae;Mercenaria;Mercenari  
 a mercenaria

UdeM00000013983 6596 765.4 UdeM00000013983 XP\_045214081.1 76 526  
 106 2 1 515 1 517 7.20E-218 765.4 6596 cellular  
 organisms;Eukaryota;Opisthokonta;Metazoa;Eumetazoa;Bilateria;Protostomia;  
 Spiralia;Lophotrochozoa;Mollusca;Bivalvia;Autobranchia;Heteroconchia;Euhe  
 terodonta;Imparidentia;Venerida;Veneroidea;Veneridae;Mercenaria;Mercenari  
 a mercenaria

UdeM00000013984 6596 703 UdeM00000013984 XP\_045214081.1 59.3 675  
 106 3 1 664 1 517 5.10E-199 703 6596 cellular  
 organisms;Eukaryota;Opisthokonta;Metazoa;Eumetazoa;Bilateria;Protostomia;  
 Spiralia;Lophotrochozoa;Mollusca;Bivalvia;Autobranchia;Heteroconchia;Euhe  
 terodonta;Imparidentia;Venerida;Veneroidea;Veneridae;Mercenaria;Mercenari  
 a mercenaria  
 UdeM00000013986 6596 269.2 UdeM00000013986 XP\_045214082.1 59.1 208  
 85 0 62 269 24 231 5.50E-69 269.2 6596 cellular  
 organisms;Eukaryota;Opisthokonta;Metazoa;Eumetazoa;Bilateria;Protostomia;  
 Spiralia;Lophotrochozoa;Mollusca;Bivalvia;Autobranchia;Heteroconchia;Euhe  
 terodonta;Imparidentia;Venerida;Veneroidea;Veneridae;Mercenaria;Mercenari  
 a mercenaria  
 UdeM00000013987 6596 752.3 UdeM00000013987 XP\_045214081.1 75 523  
 114 2 1 512 1 517 5.70E-214 752.3 6596 cellular  
 organisms;Eukaryota;Opisthokonta;Metazoa;Eumetazoa;Bilateria;Protostomia;  
 Spiralia;Lophotrochozoa;Mollusca;Bivalvia;Autobranchia;Heteroconchia;Euhe  
 terodonta;Imparidentia;Venerida;Veneroidea;Veneridae;Mercenaria;Mercenari  
 a mercenaria  
 UdeM00000013988 29159 607.1 UdeM00000013988 XP\_034312670.1 59.2 547  
 212 5 1 542 1 541 3.60E-170 607.1 29159 cellular  
 organisms;Eukaryota;Opisthokonta;Metazoa;Eumetazoa;Bilateria;Protostomia;  
 Spiralia;Lophotrochozoa;Mollusca;Bivalvia;Autobranchia;Pteriormorphia;Ostr  
 eida;Ostreoidea;Ostreidae;Crassostrea;Crassostrea gigas  
 UdeM00000013989 8355 110.9 UdeM00000013989 XP\_018105792.1 51.7 116  
 55 1 5 120 508 622 1.10E-21 110.9 8355 cellular  
 organisms;Eukaryota;Opisthokonta;Metazoa;Eumetazoa;Bilateria;Deuterostomi  
 a;Chordata;Craniata;Vertebrata;Gnathostomata;Teleostomi;Euteleostomi;Sarc  
 opterygii;Dipnotetrapodomorpha;Tetrapoda;Amphibia;Batrachia;Anura;Pipoide  
 a;Pipidae;Xenopodinae;Xenopus;Xenopus;Xenopus laevis  
 UdeM00000013990 6596 399.1 UdeM00000013990 XP\_045214086.1 64.2 318  
 112 1 1 316 4 321 5.90E-108 399.1 6596 cellular  
 organisms;Eukaryota;Opisthokonta;Metazoa;Eumetazoa;Bilateria;Protostomia;  
 Spiralia;Lophotrochozoa;Mollusca;Bivalvia;Autobranchia;Heteroconchia;Euhe  
 terodonta;Imparidentia;Venerida;Veneroidea;Veneridae;Mercenaria;Mercenari  
 a mercenaria  
 UdeM00000013991 6565 688.7 UdeM00000013991 XP\_022317112.1 69.3 475  
 143 3 1 474 1 473 5.40E-195 688.7 6565 cellular  
 organisms;Eukaryota;Opisthokonta;Metazoa;Eumetazoa;Bilateria;Protostomia;  
 Spiralia;Lophotrochozoa;Mollusca;Bivalvia;Autobranchia;Pteriormorphia;Ostr  
 eida;Ostreoidea;Ostreidae;Crassostrea;Crassostrea virginica  
 UdeM00000013993 6596 429.5 UdeM00000013993 XP\_045212218.1 74.6 284  
 69 2 1 283 265 546 3.40E-117 429.5 6596 cellular  
 organisms;Eukaryota;Opisthokonta;Metazoa;Eumetazoa;Bilateria;Protostomia;  
 Spiralia;Lophotrochozoa;Mollusca;Bivalvia;Autobranchia;Heteroconchia;Euhe  
 terodonta;Imparidentia;Venerida;Veneroidea;Veneridae;Mercenaria;Mercenari  
 a mercenaria  
 UdeM00000013992 6596 763.5 UdeM00000013992 XP\_045212222.1 69.7 545  
 161 3 1 544 1 542 1.90E-217 763.5 6596 cellular  
 organisms;Eukaryota;Opisthokonta;Metazoa;Eumetazoa;Bilateria;Protostomia;  
 Spiralia;Lophotrochozoa;Mollusca;Bivalvia;Autobranchia;Heteroconchia;Euhe  
 terodonta;Imparidentia;Venerida;Veneroidea;Veneridae;Mercenaria;Mercenari  
 a mercenaria  
 UdeM00000013994 6596 315.8 UdeM00000013994 XP\_045212222.1 64.6 237  
 84 0 1 237 1 237 4.50E-83 315.8 6596 cellular

organisms;Eukaryota;Opisthokonta;Metazoa;Eumetazoa;Bilateria;Protostomia;Spiralia;Lophotrochozoa;Mollusca;Bivalvia;Autobranchia;Heteroconchia;Euherodonta;Imparidentia;Venerida;Veneroidea;Veneridae;Mercenaria;Mercenaria mercenaria

UdeM00000013995 6596 802.4 UdeM00000013995 XP\_045212214.1 56.5 830  
226 15 8 719 82 894 4.80E-229 802.4 6596 cellular

organisms;Eukaryota;Opisthokonta;Metazoa;Eumetazoa;Bilateria;Protostomia;Spiralia;Lophotrochozoa;Mollusca;Bivalvia;Autobranchia;Heteroconchia;Euherodonta;Imparidentia;Venerida;Veneroidea;Veneridae;Mercenaria;Mercenaria mercenaria

UdeM00000013997 6596 495 UdeM00000013997 XP\_045211668.1 53.5 1120  
389 35 498 1535 279 1348 3.70E-136 495 6596 cellular

organisms;Eukaryota;Opisthokonta;Metazoa;Eumetazoa;Bilateria;Protostomia;Spiralia;Lophotrochozoa;Mollusca;Bivalvia;Autobranchia;Heteroconchia;Euherodonta;Imparidentia;Venerida;Veneroidea;Veneridae;Mercenaria;Mercenaria mercenaria

UdeM00000013998 6500 302.8 UdeM00000013998 XP\_005104344.1 62.1 219  
83 0 18 236 11 229 4.00E-79 302.8 6500 cellular

organisms;Eukaryota;Opisthokonta;Metazoa;Eumetazoa;Bilateria;Protostomia;Spiralia;Lophotrochozoa;Mollusca;Gastropoda;Heterobranchia;Euthyneura;Tectipleura;Aplysiida;Aplysioidea;Aplysiidae;Aplysia;Aplysia californica

UdeM00000014000 6596 191 UdeM00000014000 XP\_045211673.1 80.3 117  
21 1 1 115 1 117 8.30E-46 191 6596 cellular

organisms;Eukaryota;Opisthokonta;Metazoa;Eumetazoa;Bilateria;Protostomia;Spiralia;Lophotrochozoa;Mollusca;Bivalvia;Autobranchia;Heteroconchia;Euherodonta;Imparidentia;Venerida;Veneroidea;Veneridae;Mercenaria;Mercenaria mercenaria

UdeM00000013999 6596 715.7 UdeM00000013999 XP\_045211673.1 84.7 426  
62 2 1 424 1 425 3.50E-203 715.7 6596 cellular

organisms;Eukaryota;Opisthokonta;Metazoa;Eumetazoa;Bilateria;Protostomia;Spiralia;Lophotrochozoa;Mollusca;Bivalvia;Autobranchia;Heteroconchia;Euherodonta;Imparidentia;Venerida;Veneroidea;Veneridae;Mercenaria;Mercenaria mercenaria

UdeM00000014001 1735272 1622.4 UdeM00000014001 XP\_041363356.1  
45.3 1896 988 25 25 1894 33 1905 0.00E+00 1622.4  
1735272 cellular

organisms;Eukaryota;Opisthokonta;Metazoa;Eumetazoa;Bilateria;Protostomia;Spiralia;Lophotrochozoa;Mollusca;Gastropoda;Neomphalina;Neomphaloidea;Peltospiridae;Gigantopelta;Gigantopelta aegis

UdeM00000036460 6565 152.9 UdeM00000036460 XP\_022339895.1 21.3 723  
464 27 551 1198 832 1524 2.90E-33 152.9 6565 cellular

organisms;Eukaryota;Opisthokonta;Metazoa;Eumetazoa;Bilateria;Protostomia;Spiralia;Lophotrochozoa;Mollusca;Bivalvia;Autobranchia;Pteriomorphia;Ostreida;Ostreoidea;Ostreidae;Crassostrea;Crassostrea virginica

UdeM00000036461 6596 521.5 UdeM00000036461 XP\_045188897.1 79.6 319  
64 1 1 319 1 318 7.50E-145 521.5 6596 cellular

organisms;Eukaryota;Opisthokonta;Metazoa;Eumetazoa;Bilateria;Protostomia;Spiralia;Lophotrochozoa;Mollusca;Bivalvia;Autobranchia;Heteroconchia;Euherodonta;Imparidentia;Venerida;Veneroidea;Veneridae;Mercenaria;Mercenaria mercenaria

UdeM00000036480 6596 183.7 UdeM00000036480 XP\_045190309.1 27.6 573  
264 12 53 619 3 430 7.00E-43 183.7 6596 cellular

organisms;Eukaryota;Opisthokonta;Metazoa;Eumetazoa;Bilateria;Protostomia;Spiralia;Lophotrochozoa;Mollusca;Bivalvia;Autobranchia;Heteroconchia;Euherodonta

terodonta;Imparidentia;Venerida;Veneroidea;Veneridae;Mercenaria;Mercenaria mercenaria

UdeM00000036481 6573 353.6 UdeM00000036481 XP\_021340995.1 42.3 513  
236 15 236 715 195 680 5.90E-94 353.6 6573 cellular

organisms;Eukaryota;Opisthokonta;Metazoa;Eumetazoa;Bilateria;Protostomia;Spiralia;Lophotrochozoa;Mollusca;Bivalvia;Autobranhia;Pteriomorpha;Pectinida;Pectinoidea;Pectinidae;Mizuhopecten;Mizuhopecten yessoensis

UdeM00000036482 6596 1488.4 UdeM00000036482 XP\_045190399.1 62  
1322 456 14 1 1305 1 1293 0.00E+00 1488.4 6596  
cellular

organisms;Eukaryota;Opisthokonta;Metazoa;Eumetazoa;Bilateria;Protostomia;Spiralia;Lophotrochozoa;Mollusca;Bivalvia;Autobranhia;Heteroconchia;Euheterodonta;Imparidentia;Venerida;Veneroidea;Veneridae;Mercenaria;Mercenaria mercenaria

UdeM00000036483 6565 146.4 UdeM00000036483 XP\_022326943.1 33.8 305  
133 10 13 277 8 283 6.10E-32 146.4 6565 cellular

organisms;Eukaryota;Opisthokonta;Metazoa;Eumetazoa;Bilateria;Protostomia;Spiralia;Lophotrochozoa;Mollusca;Bivalvia;Autobranhia;Pteriomorpha;Ostreida;Ostreoidea;Ostreidae;Crassostrea;Crassostrea virginica

UdeM00000036484 225164 665.6 UdeM00000036484 XP\_009051112.1 64.2  
481 163 2 4 479 6 482 4.80E-188 665.6 225164  
cellular

organisms;Eukaryota;Opisthokonta;Metazoa;Eumetazoa;Bilateria;Protostomia;Spiralia;Lophotrochozoa;Mollusca;Gastropoda;Patellogastropoda;Lottioidae;Lottiidae;Lottia;Lottia gigantea

UdeM00000036485 13686 483.8 UdeM00000036485 XP\_011170408.3 37.8 765  
424 14 79 801 122 876 4.20E-133 483.8 13686 cellular

organisms;Eukaryota;Opisthokonta;Metazoa;Eumetazoa;Bilateria;Protostomia;Ecdysozoa;Panarthropoda;Arthropoda;Mandibulata;Pancrustacea;Hexapoda;Insecta;Dicondylia;Pterygota;Neoptera;Endopterygota;Hymenoptera;Apocrita;Aculeata;Formicoidea;Formicidae;Myrmicinae;Solenopsidini;Solenopsis;Solenopsis invicta

UdeM00000036486 6596 167.5 UdeM00000036486 XP\_045189629.1 38.2 233  
119 7 1 218 1 223 1.80E-38 167.5 6596 cellular

organisms;Eukaryota;Opisthokonta;Metazoa;Eumetazoa;Bilateria;Protostomia;Spiralia;Lophotrochozoa;Mollusca;Bivalvia;Autobranhia;Heteroconchia;Euheterodonta;Imparidentia;Venerida;Veneroidea;Veneridae;Mercenaria;Mercenaria mercenaria

UdeM00000036487 1735272 144.4 UdeM00000036487 XP\_041369137.1 47.6  
170 74 4 2 171 985 1139 5.20E-31 144.4 1735272  
cellular

organisms;Eukaryota;Opisthokonta;Metazoa;Eumetazoa;Bilateria;Protostomia;Spiralia;Lophotrochozoa;Mollusca;Gastropoda;Neomphalina;Neomphaloidea;Peltospiridae;Gigantopelta;Gigantopelta aegis

UdeM00000036489 29159 416.4 UdeM00000036489 XP\_011415861.2 62.9 321  
105 2 1 307 13 333 3.20E-113 416.4 29159 cellular

organisms;Eukaryota;Opisthokonta;Metazoa;Eumetazoa;Bilateria;Protostomia;Spiralia;Lophotrochozoa;Mollusca;Bivalvia;Autobranhia;Pteriomorpha;Ostreida;Ostreoidea;Ostreidae;Crassostrea;Crassostrea gigas

UdeM00000036490 29159 77.4 UdeM00000036490 XP\_011415861.2 40.8 125  
60 2 1 111 13 137 1.30E-11 77.4 29159 cellular

organisms;Eukaryota;Opisthokonta;Metazoa;Eumetazoa;Bilateria;Protostomia;Spiralia;Lophotrochozoa;Mollusca;Bivalvia;Autobranhia;Pteriomorpha;Ostreida;Ostreoidea;Ostreidae;Crassostrea;Crassostrea gigas

UdeM00000036491 6596 762.7 UdeM00000036491 XP\_045189095.1 66.8 590  
 191 4 6 590 2 591 3.90E-217 762.7 6596 cellular  
 organisms;Eukaryota;Opisthokonta;Metazoa;Eumetazoa;Bilateria;Protostomia;  
 Spiralia;Lophotrochozoa;Mollusca;Bivalvia;Autobranchia;Heteroconchia;Euhe  
 terodonta;Imparidentia;Venerida;Veneroidea;Veneridae;Mercenaria;Mercenari  
 a mercenaria  
 UdeM00000036492 6596 357.1 UdeM00000036492 XP\_045189095.1 69.7 251  
 73 2 6 253 2 252 1.90E-95 357.1 6596 cellular  
 organisms;Eukaryota;Opisthokonta;Metazoa;Eumetazoa;Bilateria;Protostomia;  
 Spiralia;Lophotrochozoa;Mollusca;Bivalvia;Autobranchia;Heteroconchia;Euhe  
 terodonta;Imparidentia;Venerida;Veneroidea;Veneridae;Mercenaria;Mercenari  
 a mercenaria  
 UdeM00000036493 1735272 359.8 UdeM00000036493 XP\_041369969.1 76.8  
 224 50 2 1 222 1 224 2.60E-96 359.8 1735272  
 cellular  
 organisms;Eukaryota;Opisthokonta;Metazoa;Eumetazoa;Bilateria;Protostomia;  
 Spiralia;Lophotrochozoa;Mollusca;Gastropoda;Neomphalina;Neomphaloidea;Pel  
 tospiridae;Gigantopelta;Gigantopelta aegis  
 UdeM00000036494 6500 398.3 UdeM00000036494 XP\_005099446.1 68.8 276  
 84 1 2 275 43 318 8.10E-108 398.3 6500 cellular  
 organisms;Eukaryota;Opisthokonta;Metazoa;Eumetazoa;Bilateria;Protostomia;  
 Spiralia;Lophotrochozoa;Mollusca;Gastropoda;Heterobranchia;Euthyneura;Tec  
 tipleura;Aplysiida;Aplysioidea;Aplysiidae;Aplysia;Aplysia californica  
 UdeM00000036497 37653 116.3 UdeM00000036497 XP\_014769340.1 67.8 87  
 28 0 2 88 13 99 2.00E-23 116.3 37653 cellular  
 organisms;Eukaryota;Opisthokonta;Metazoa;Eumetazoa;Bilateria;Protostomia;  
 Spiralia;Lophotrochozoa;Mollusca;Cephalopoda;Coleoidea;Octopodiformes;Oct  
 opoda;Incirrata;Octopodidae;Octopus;Octopus bimaculoides  
 UdeM00000036498 6596 375.2 UdeM00000036498 XP\_045190639.1 28.6 920  
 580 22 66 953 74 948 2.60E-100 375.2 6596 cellular  
 organisms;Eukaryota;Opisthokonta;Metazoa;Eumetazoa;Bilateria;Protostomia;  
 Spiralia;Lophotrochozoa;Mollusca;Bivalvia;Autobranchia;Heteroconchia;Euhe  
 terodonta;Imparidentia;Venerida;Veneroidea;Veneridae;Mercenaria;Mercenari  
 a mercenaria  
 UdeM00000036499 6596 385.6 UdeM00000036499 XP\_045190639.1 29.6 927  
 576 22 71 965 74 955 2.00E-103 385.6 6596 cellular  
 organisms;Eukaryota;Opisthokonta;Metazoa;Eumetazoa;Bilateria;Protostomia;  
 Spiralia;Lophotrochozoa;Mollusca;Bivalvia;Autobranchia;Heteroconchia;Euhe  
 terodonta;Imparidentia;Venerida;Veneroidea;Veneridae;Mercenaria;Mercenari  
 a mercenaria  
 UdeM00000036500 6596 385.6 UdeM00000036500 XP\_045190639.1 29.6 927  
 576 22 66 960 74 955 1.90E-103 385.6 6596 cellular  
 organisms;Eukaryota;Opisthokonta;Metazoa;Eumetazoa;Bilateria;Protostomia;  
 Spiralia;Lophotrochozoa;Mollusca;Bivalvia;Autobranchia;Heteroconchia;Euhe  
 terodonta;Imparidentia;Venerida;Veneroidea;Veneridae;Mercenaria;Mercenari  
 a mercenaria  
 UdeM00000036501 6596 136.7 UdeM00000036501 XP\_045156460.1 27.2 312  
 203 11 90 387 31 332 6.60E-29 136.7 6596 cellular  
 organisms;Eukaryota;Opisthokonta;Metazoa;Eumetazoa;Bilateria;Protostomia;  
 Spiralia;Lophotrochozoa;Mollusca;Bivalvia;Autobranchia;Heteroconchia;Euhe  
 terodonta;Imparidentia;Venerida;Veneroidea;Veneridae;Mercenaria;Mercenari  
 a mercenaria  
 UdeM00000036503 6596 308.1 UdeM00000036503 XP\_045190639.1 28.8 777  
 493 20 4 761 213 948 3.30E-80 308.1 6596 cellular

organisms;Eukaryota;Opisthokonta;Metazoa;Eumetazoa;Bilateria;Protostomia;Spiralia;Lophotrochozoa;Mollusca;Bivalvia;Autobranhia;Heteroconchia;Euherodonta;Imparidentia;Venerida;Veneroidea;Veneridae;Mercenaria;Mercenaria mercenaria

UdeM00000036504 6596 453 UdeM00000036504 XP\_045189313.1 71.9 288  
81 0 1 288 1 288 2.90E-124 453 6596 cellular

organisms;Eukaryota;Opisthokonta;Metazoa;Eumetazoa;Bilateria;Protostomia;Spiralia;Lophotrochozoa;Mollusca;Bivalvia;Autobranhia;Heteroconchia;Euherodonta;Imparidentia;Venerida;Veneroidea;Veneridae;Mercenaria;Mercenaria mercenaria

UdeM00000036505 6596 287.3 UdeM00000036505 XP\_045189020.1 43.2 400  
164 7 11 349 41 438 2.60E-74 287.3 6596 cellular

organisms;Eukaryota;Opisthokonta;Metazoa;Eumetazoa;Bilateria;Protostomia;Spiralia;Lophotrochozoa;Mollusca;Bivalvia;Autobranhia;Heteroconchia;Euherodonta;Imparidentia;Venerida;Veneroidea;Veneridae;Mercenaria;Mercenaria mercenaria

UdeM00000036506 6596 805.8 UdeM00000036506 XP\_045189309.1 76.6 516  
119 1 2 517 19 532 3.10E-230 805.8 6596 cellular

organisms;Eukaryota;Opisthokonta;Metazoa;Eumetazoa;Bilateria;Protostomia;Spiralia;Lophotrochozoa;Mollusca;Bivalvia;Autobranhia;Heteroconchia;Euherodonta;Imparidentia;Venerida;Veneroidea;Veneridae;Mercenaria;Mercenaria mercenaria

UdeM00000036507 6596 307.8 UdeM00000036507 XP\_045189020.1 43.5 444  
209 7 7 450 37 438 2.40E-80 307.8 6596 cellular

organisms;Eukaryota;Opisthokonta;Metazoa;Eumetazoa;Bilateria;Protostomia;Spiralia;Lophotrochozoa;Mollusca;Bivalvia;Autobranhia;Heteroconchia;Euherodonta;Imparidentia;Venerida;Veneroidea;Veneridae;Mercenaria;Mercenaria mercenaria

UdeM00000036508 6596 285 UdeM00000036508 XP\_045189020.1 39.7 459  
225 6 10 468 40 446 1.70E-73 285 6596 cellular

organisms;Eukaryota;Opisthokonta;Metazoa;Eumetazoa;Bilateria;Protostomia;Spiralia;Lophotrochozoa;Mollusca;Bivalvia;Autobranhia;Heteroconchia;Euherodonta;Imparidentia;Venerida;Veneroidea;Veneridae;Mercenaria;Mercenaria mercenaria

UdeM00000036509 6596 213 UdeM00000036509 XP\_045189020.1 36.3 416  
229 7 11 400 41 446 7.10E-52 213 6596 cellular

organisms;Eukaryota;Opisthokonta;Metazoa;Eumetazoa;Bilateria;Protostomia;Spiralia;Lophotrochozoa;Mollusca;Bivalvia;Autobranhia;Heteroconchia;Euherodonta;Imparidentia;Venerida;Veneroidea;Veneridae;Mercenaria;Mercenaria mercenaria

UdeM00000036510 6596 314.7 UdeM00000036510 XP\_045189020.1 45.5 400  
209 4 8 400 38 435 1.70E-82 314.7 6596 cellular

organisms;Eukaryota;Opisthokonta;Metazoa;Eumetazoa;Bilateria;Protostomia;Spiralia;Lophotrochozoa;Mollusca;Bivalvia;Autobranhia;Heteroconchia;Euherodonta;Imparidentia;Venerida;Veneroidea;Veneridae;Mercenaria;Mercenaria mercenaria

UdeM00000036511 6596 268.5 UdeM00000036511 XP\_045191091.1 39.5 418  
226 6 15 407 2 417 1.50E-68 268.5 6596 cellular

organisms;Eukaryota;Opisthokonta;Metazoa;Eumetazoa;Bilateria;Protostomia;Spiralia;Lophotrochozoa;Mollusca;Bivalvia;Autobranhia;Heteroconchia;Euherodonta;Imparidentia;Venerida;Veneroidea;Veneridae;Mercenaria;Mercenaria mercenaria

UdeM00000036512 6596 256.9 UdeM00000036512 XP\_045191091.1 39.1 422  
220 8 6 401 3 413 4.40E-65 256.9 6596 cellular

organisms;Eukaryota;Opisthokonta;Metazoa;Eumetazoa;Bilateria;Protostomia;Spiralia;Lophotrochozoa;Mollusca;Bivalvia;Autobranchia;Heteroconchia;Euheterodonta;Imparidentia;Venerida;Veneroidea;Veneridae;Mercenaria;Mercenaria mercenaria

UdeM00000036513 6573 356.7 UdeM00000036513 XP\_021348618.1 43.9 715  
318 16 1 645 1 702 6.30E-95 356.7 6573 cellular

organisms;Eukaryota;Opisthokonta;Metazoa;Eumetazoa;Bilateria;Protostomia;Spiralia;Lophotrochozoa;Mollusca;Bivalvia;Autobranchia;Pteriormorphia;Pectinida;Pectinoidea;Pectinidae;Mizuhopecten;Mizuhopecten yessoensis

UdeM00000036515 6579 117.1 UdeM00000036515 XP\_033757678.1 45.4 141  
67 4 56 187 434 573 2.40E-23 117.1 6579 cellular

organisms;Eukaryota;Opisthokonta;Metazoa;Eumetazoa;Bilateria;Protostomia;Spiralia;Lophotrochozoa;Mollusca;Bivalvia;Autobranchia;Pteriormorphia;Pectinida;Pectinoidea;Pectinidae;Pecten;Pecten maximus

UdeM00000036517 6565 158.7 UdeM00000036517 XP\_022328252.1 45.5 211  
95 6 1 191 1105 1315 7.50E-36 158.7 6565 cellular

organisms;Eukaryota;Opisthokonta;Metazoa;Eumetazoa;Bilateria;Protostomia;Spiralia;Lophotrochozoa;Mollusca;Bivalvia;Autobranchia;Pteriormorphia;Ostreida;Ostreoidea;Ostreidae;Crassostrea;Crassostrea virginica

UdeM00000036518 6579 266.9 UdeM00000036518 XP\_033744278.1 46.3 283  
106 2 1 237 726 1008 3.00E-68 266.9 6579 cellular

organisms;Eukaryota;Opisthokonta;Metazoa;Eumetazoa;Bilateria;Protostomia;Spiralia;Lophotrochozoa;Mollusca;Bivalvia;Autobranchia;Pteriormorphia;Pectinida;Pectinoidea;Pectinidae;Pecten;Pecten maximus

UdeM00000036519 6596 100.9 UdeM00000036519 XP\_045190064.1 41.6 125  
70 1 26 147 28 152 1.40E-18 100.9 6596 cellular

organisms;Eukaryota;Opisthokonta;Metazoa;Eumetazoa;Bilateria;Protostomia;Spiralia;Lophotrochozoa;Mollusca;Bivalvia;Autobranchia;Heteroconchia;Euheterodonta;Imparidentia;Venerida;Veneroidea;Veneridae;Mercenaria;Mercenaria mercenaria

UdeM00000036520 6573 152.5 UdeM00000036520 XP\_021355607.1 39.9 228  
107 7 7 218 11 224 1.70E-33 152.5 6573 cellular

organisms;Eukaryota;Opisthokonta;Metazoa;Eumetazoa;Bilateria;Protostomia;Spiralia;Lophotrochozoa;Mollusca;Bivalvia;Autobranchia;Pteriormorphia;Pectinida;Pectinoidea;Pectinidae;Mizuhopecten;Mizuhopecten yessoensis

UdeM00000036521 6573 156 UdeM00000036521 XP\_021355607.1 50.7 152  
63 3 7 146 11 162 1.70E-34 156 6573 cellular

organisms;Eukaryota;Opisthokonta;Metazoa;Eumetazoa;Bilateria;Protostomia;Spiralia;Lophotrochozoa;Mollusca;Bivalvia;Autobranchia;Pteriormorphia;Pectinida;Pectinoidea;Pectinidae;Mizuhopecten;Mizuhopecten yessoensis

UdeM00000036522 6596 473.4 UdeM00000036522 XP\_045188675.1 52.7 548  
204 9 2 518 10 533 3.70E-130 473.4 6596 cellular

organisms;Eukaryota;Opisthokonta;Metazoa;Eumetazoa;Bilateria;Protostomia;Spiralia;Lophotrochozoa;Mollusca;Bivalvia;Autobranchia;Heteroconchia;Euheterodonta;Imparidentia;Venerida;Veneroidea;Veneridae;Mercenaria;Mercenaria mercenaria

UdeM00000036526 6596 575.1 UdeM00000036526 XP\_045188637.1 43.1 788  
350 17 2 765 174 887 1.60E-160 575.1 6596 cellular

organisms;Eukaryota;Opisthokonta;Metazoa;Eumetazoa;Bilateria;Protostomia;Spiralia;Lophotrochozoa;Mollusca;Bivalvia;Autobranchia;Heteroconchia;Euheterodonta;Imparidentia;Venerida;Veneroidea;Veneridae;Mercenaria;Mercenaria mercenaria

UdeM00000036527 6596 516.5 UdeM00000036527 XP\_045190324.1 60.6 442  
168 5 13 451 56 494 3.30E-143 516.5 6596 cellular



organisms;Eukaryota;Opisthokonta;Metazoa;Eumetazoa;Bilateria;Protostomia; Spiralia;Lophotrochozoa;Mollusca;Bivalvia;Autobranchia;Heteroconchia;Euherodonta;Imparidentia;Venerida;Veneroidea;Veneridae;Mercenaria;Mercenaria mercenaria

UdeM00000036528 6596 362.5 UdeM00000036528 XP\_045190322.1 44.4 480  
188 7 33 454 1110 1568 1.80E-96 362.5 6596 cellular

organisms;Eukaryota;Opisthokonta;Metazoa;Eumetazoa;Bilateria;Protostomia; Spiralia;Lophotrochozoa;Mollusca;Bivalvia;Autobranchia;Heteroconchia;Euherodonta;Imparidentia;Venerida;Veneroidea;Veneridae;Mercenaria;Mercenaria mercenaria

UdeM00000036528 6596 84 UdeM00000036528 XP\_045190322.1 36 114  
67 2 916 1026 1687 1797 1.30E-12 84 6596 cellular

organisms;Eukaryota;Opisthokonta;Metazoa;Eumetazoa;Bilateria;Protostomia; Spiralia;Lophotrochozoa;Mollusca;Bivalvia;Autobranchia;Heteroconchia;Euherodonta;Imparidentia;Venerida;Veneroidea;Veneridae;Mercenaria;Mercenaria mercenaria

UdeM00000036529 6596 109.8 UdeM00000036529 XP\_045190322.1 27.7 506  
271 15 1 440 605 1081 1.10E-20 109.8 6596 cellular

organisms;Eukaryota;Opisthokonta;Metazoa;Eumetazoa;Bilateria;Protostomia; Spiralia;Lophotrochozoa;Mollusca;Bivalvia;Autobranchia;Heteroconchia;Euherodonta;Imparidentia;Venerida;Veneroidea;Veneridae;Mercenaria;Mercenaria mercenaria

UdeM00000036530 6596 536.2 UdeM00000036530 XP\_045190322.1 59.4 488  
193 3 7 492 120 604 4.40E-149 536.2 6596 cellular

organisms;Eukaryota;Opisthokonta;Metazoa;Eumetazoa;Bilateria;Protostomia; Spiralia;Lophotrochozoa;Mollusca;Bivalvia;Autobranchia;Heteroconchia;Euherodonta;Imparidentia;Venerida;Veneroidea;Veneridae;Mercenaria;Mercenaria mercenaria

UdeM00000036531 6579 394.4 UdeM00000036531 XP\_033731739.1 61.8 280  
107 0 1 280 99 378 1.20E-106 394.4 6579 cellular

organisms;Eukaryota;Opisthokonta;Metazoa;Eumetazoa;Bilateria;Protostomia; Spiralia;Lophotrochozoa;Mollusca;Bivalvia;Autobranchia;Pteriomorphia;Pectinida;Pectinoidea;Pectinidae;Pecten;Pecten maximus

UdeM00000036532 6596 254.2 UdeM00000036532 XP\_045188280.1 28.8 1324  
683 52 16 1223 5 1184 8.60E-64 254.2 6596 cellular

organisms;Eukaryota;Opisthokonta;Metazoa;Eumetazoa;Bilateria;Protostomia; Spiralia;Lophotrochozoa;Mollusca;Bivalvia;Autobranchia;Heteroconchia;Euherodonta;Imparidentia;Venerida;Veneroidea;Veneridae;Mercenaria;Mercenaria mercenaria

UdeM00000036533 6573 337 UdeM00000036533 XP\_021376241.1 36.8 693  
356 13 193 832 1379 2042 6.60E-89 337 6573 cellular

organisms;Eukaryota;Opisthokonta;Metazoa;Eumetazoa;Bilateria;Protostomia; Spiralia;Lophotrochozoa;Mollusca;Bivalvia;Autobranchia;Pteriomorphia;Pectinida;Pectinoidea;Pectinidae;Mizuhopecten;Mizuhopecten yessoensis

UdeM00000036534 6596 250.8 UdeM00000036534 XP\_045190910.1 40.7 354  
198 10 45 392 21 368 3.00E-63 250.8 6596 cellular

organisms;Eukaryota;Opisthokonta;Metazoa;Eumetazoa;Bilateria;Protostomia; Spiralia;Lophotrochozoa;Mollusca;Bivalvia;Autobranchia;Heteroconchia;Euherodonta;Imparidentia;Venerida;Veneroidea;Veneridae;Mercenaria;Mercenaria mercenaria

UdeM00000036535 400727 202.2 UdeM00000036535 XP\_025094113.1 48.1  
210 94 5 298 493 81 289 1.60E-48 202.2 400727  
cellular

organisms;Eukaryota;Opisthokonta;Metazoa;Eumetazoa;Bilateria;Protostomia;

Spiralia;Lophotrochozoa;Mollusca;Gastropoda;Caenogastropoda;Architaenioglossa;Ampullarioidea;Ampullariidae;Pomacea;Pomacea canaliculata  
UdeM00000036536 6596 721.5 UdeM00000036536 XP\_045189687.1 81.4 440  
82 0 1 440 1 440 8.50E-205 721.5 6596 cellular  
organisms;Eukaryota;Opisthokonta;Metazoa;Eumetazoa;Bilateria;Protostomia;  
Spiralia;Lophotrochozoa;Mollusca;Bivalvia;Autobranchia;Heteroconchia;Euheterodonta;Imparidentia;Venerida;Veneroidea;Veneridae;Mercenaria;Mercenaria mercenaria  
UdeM00000036537 70779 82.8 UdeM00000036537 XP\_015777172.1 38.7 93  
57 0 25 117 45 137 3.50E-13 82.8 70779 cellular  
organisms;Eukaryota;Opisthokonta;Metazoa;Eumetazoa;Cnidaria;Anthozoa;Hexacorallia;Scleractinia;Astrocoeniina;Acroporidae;Acropora;Acropora digitifera  
UdeM00000036538 29159 114.8 UdeM00000036538 XP\_011435523.1 25.9 424  
222 12 1 402 1 354 2.60E-22 114.8 29159 cellular  
organisms;Eukaryota;Opisthokonta;Metazoa;Eumetazoa;Bilateria;Protostomia;  
Spiralia;Lophotrochozoa;Mollusca;Bivalvia;Autobranchia;Pteriormorphia;Ostreida;Ostreoidea;Ostreidae;Crassostrea;Crassostrea gigas  
UdeM00000036539 6596 119.4 UdeM00000036539 XP\_045190845.1 34.3 210  
131 4 15 221 27 232 5.90E-24 119.4 6596 cellular  
organisms;Eukaryota;Opisthokonta;Metazoa;Eumetazoa;Bilateria;Protostomia;  
Spiralia;Lophotrochozoa;Mollusca;Bivalvia;Autobranchia;Heteroconchia;Euheterodonta;Imparidentia;Venerida;Veneroidea;Veneridae;Mercenaria;Mercenaria mercenaria  
UdeM00000036540 6579 664.8 UdeM00000036540 XP\_033756632.1 56.5 582  
245 3 4 577 298 879 1.00E-187 664.8 6579 cellular  
organisms;Eukaryota;Opisthokonta;Metazoa;Eumetazoa;Bilateria;Protostomia;  
Spiralia;Lophotrochozoa;Mollusca;Bivalvia;Autobranchia;Pteriormorphia;Pectinida;Pectinoidea;Pectinidae;Pecten;Pecten maximus  
UdeM00000036542 6573 178.7 UdeM00000036542 XP\_021376286.1 54.8 146  
66 0 1 146 273 418 5.50E-42 178.7 6573 cellular  
organisms;Eukaryota;Opisthokonta;Metazoa;Eumetazoa;Bilateria;Protostomia;  
Spiralia;Lophotrochozoa;Mollusca;Bivalvia;Autobranchia;Pteriormorphia;Pectinida;Pectinoidea;Pectinidae;Mizuhopecten;Mizuhopecten yessoensis  
UdeM00000036541 6573 224.6 UdeM00000036541 XP\_021376286.1 52.1 190  
91 0 1 190 229 418 1.10E-55 224.6 6573 cellular  
organisms;Eukaryota;Opisthokonta;Metazoa;Eumetazoa;Bilateria;Protostomia;  
Spiralia;Lophotrochozoa;Mollusca;Bivalvia;Autobranchia;Pteriormorphia;Pectinida;Pectinoidea;Pectinidae;Mizuhopecten;Mizuhopecten yessoensis  
UdeM00000036544 29159 208.4 UdeM00000036544 XP\_011443521.2 52.1 167  
78 2 4 170 57 221 7.40E-51 208.4 29159 cellular  
organisms;Eukaryota;Opisthokonta;Metazoa;Eumetazoa;Bilateria;Protostomia;  
Spiralia;Lophotrochozoa;Mollusca;Bivalvia;Autobranchia;Pteriormorphia;Ostreida;Ostreoidea;Ostreidae;Crassostrea;Crassostrea gigas  
UdeM00000036546 2652724 95.9 UdeM00000036546 XP\_020896433.1 29.7  
192 121 3 18 196 73 263 6.40E-17 95.9 2652724  
cellular  
organisms;Eukaryota;Opisthokonta;Metazoa;Eumetazoa;Cnidaria;Anthozoa;Hexacorallia;Actiniaria;Aiptasiidae;Exaiptasia;Exaiptasia diaphana  
UdeM00000036547 6565 603.6 UdeM00000036547 XP\_022341509.1 41.1 975  
415 13 3 963 5 834 4.40E-169 603.6 6565 cellular  
organisms;Eukaryota;Opisthokonta;Metazoa;Eumetazoa;Bilateria;Protostomia;  
Spiralia;Lophotrochozoa;Mollusca;Bivalvia;Autobranchia;Pteriormorphia;Ostreida;Ostreoidea;Ostreidae;Crassostrea;Crassostrea virginica

UdeM00000036548 6565 313.5 UdeM00000036548 XP\_022341509.1 35.9 579  
 259 7 3 578 5 474 5.60E-82 313.5 6565 cellular  
 organisms;Eukaryota;Opisthokonta;Metazoa;Eumetazoa;Bilateria;Protostomia;  
 Spiralia;Lophotrochozoa;Mollusca;Bivalvia;Autobranchia;Pteriomorphia;Ostr  
 eida;Ostreoidea;Ostreidae;Crassostrea;Crassostrea virginica  
 UdeM00000036549 6596 264.2 UdeM00000036549 XP\_045189776.1 38.6 396  
 221 8 13 405 8 384 3.00E-67 264.2 6596 cellular  
 organisms;Eukaryota;Opisthokonta;Metazoa;Eumetazoa;Bilateria;Protostomia;  
 Spiralia;Lophotrochozoa;Mollusca;Bivalvia;Autobranchia;Heteroconchia;Euhe  
 terodonta;Imparidentia;Venerida;Veneroidea;Veneridae;Mercenaria;Mercenari  
 a mercenaria  
 UdeM00000036563 1735272 526.6 UdeM00000036563 XP\_041371151.1 51.3  
 857 264 12 1 854 1 707 6.40E-146 526.6 1735272  
 cellular  
 organisms;Eukaryota;Opisthokonta;Metazoa;Eumetazoa;Bilateria;Protostomia;  
 Spiralia;Lophotrochozoa;Mollusca;Gastropoda;Neomphalina;Neomphaloidea;Pel  
 tospiridae;Gigantopelta;Gigantopelta aegis  
 UdeM00000036564 225164 64.3 UdeM00000036564 XP\_009066276.1 39.6  
 96 50 4 87 178 678 769 1.80E-07 64.3 225164  
 cellular  
 organisms;Eukaryota;Opisthokonta;Metazoa;Eumetazoa;Bilateria;Protostomia;  
 Spiralia;Lophotrochozoa;Mollusca;Gastropoda;Patellogastropoda;Lottioidea;  
 Lottiidae;Lottia;Lottia gigantea  
 UdeM00000036565 225164 231.5 UdeM00000036565 XP\_009066276.1 68.3  
 417 126 3 37 453 813 1223 2.10E-57 231.5 225164  
 cellular  
 organisms;Eukaryota;Opisthokonta;Metazoa;Eumetazoa;Bilateria;Protostomia;  
 Spiralia;Lophotrochozoa;Mollusca;Gastropoda;Patellogastropoda;Lottioidea;  
 Lottiidae;Lottia;Lottia gigantea  
 UdeM00000036567 6596 233 UdeM00000036567 XP\_045190087.1 40.8 392  
 205 9 26 405 25 401 6.60E-58 233 6596 cellular  
 organisms;Eukaryota;Opisthokonta;Metazoa;Eumetazoa;Bilateria;Protostomia;  
 Spiralia;Lophotrochozoa;Mollusca;Bivalvia;Autobranchia;Heteroconchia;Euhe  
 terodonta;Imparidentia;Venerida;Veneroidea;Veneridae;Mercenaria;Mercenari  
 a mercenaria  
 UdeM00000036568 6573 617.8 UdeM00000036568 XP\_021375984.1 72.2 449  
 116 3 15 459 383 826 1.10E-173 617.8 6573 cellular  
 organisms;Eukaryota;Opisthokonta;Metazoa;Eumetazoa;Bilateria;Protostomia;  
 Spiralia;Lophotrochozoa;Mollusca;Bivalvia;Autobranchia;Pteriomorphia;Pect  
 inida;Pectinoidea;Pectinidae;Mizuhopecten;Mizuhopecten yessoensis  
 UdeM00000036569 6573 375.9 UdeM00000036569 XP\_021374995.1 39.7 587  
 279 14 1 558 1 541 8.70E-101 375.9 6573 cellular  
 organisms;Eukaryota;Opisthokonta;Metazoa;Eumetazoa;Bilateria;Protostomia;  
 Spiralia;Lophotrochozoa;Mollusca;Bivalvia;Autobranchia;Pteriomorphia;Pect  
 inida;Pectinoidea;Pectinidae;Mizuhopecten;Mizuhopecten yessoensis  
 UdeM00000036570 6596 117.9 UdeM00000036570 XP\_045187536.1 69.6 79  
 24 0 24 102 646 724 7.80E-24 117.9 6596 cellular  
 organisms;Eukaryota;Opisthokonta;Metazoa;Eumetazoa;Bilateria;Protostomia;  
 Spiralia;Lophotrochozoa;Mollusca;Bivalvia;Autobranchia;Heteroconchia;Euhe  
 terodonta;Imparidentia;Venerida;Veneroidea;Veneridae;Mercenaria;Mercenari  
 a mercenaria  
 UdeM00000036571 6596 524.6 UdeM00000036571 XP\_045190375.1 74.6 323  
 78 2 1 320 1 322 8.90E-146 524.6 6596 cellular  
 organisms;Eukaryota;Opisthokonta;Metazoa;Eumetazoa;Bilateria;Protostomia;

Spiralia;Lophotrochozoa;Mollusca;Bivalvia;Autobranchia;Heteroconchia;Euherodonta;Imparidentia;Venerida;Veneroidea;Veneridae;Mercenaria;Mercenaria mercenaria

UdeM00000036572 6596 376.7 UdeM00000036572 XP\_045188843.1 38.7 702  
333 18 1 698 1 609 6.30E-101 376.7 6596 cellular

organisms;Eukaryota;Opisthokonta;Metazoa;Eumetazoa;Bilateria;Protostomia;Spiralia;Lophotrochozoa;Mollusca;Bivalvia;Autobranchia;Heteroconchia;Euherodonta;Imparidentia;Venerida;Veneroidea;Veneridae;Mercenaria;Mercenaria mercenaria

UdeM00000036573 6596 111.3 UdeM00000036573 XP\_045189847.1 46.8 156  
62 7 13 157 14 159 1.90E-21 111.3 6596 cellular

organisms;Eukaryota;Opisthokonta;Metazoa;Eumetazoa;Bilateria;Protostomia;Spiralia;Lophotrochozoa;Mollusca;Bivalvia;Autobranchia;Heteroconchia;Euherodonta;Imparidentia;Venerida;Veneroidea;Veneridae;Mercenaria;Mercenaria mercenaria

UdeM00000036574 6596 359 UdeM00000036574 XP\_045188665.1 47.7 417  
202 6 163 572 53 460 1.10E-95 359 6596 cellular

organisms;Eukaryota;Opisthokonta;Metazoa;Eumetazoa;Bilateria;Protostomia;Spiralia;Lophotrochozoa;Mollusca;Bivalvia;Autobranchia;Heteroconchia;Euherodonta;Imparidentia;Venerida;Veneroidea;Veneridae;Mercenaria;Mercenaria mercenaria

UdeM00000036575 6596 300.1 UdeM00000036575 XP\_045188430.1 40.6 384  
217 8 16 392 40 419 5.40E-78 300.1 6596 cellular

organisms;Eukaryota;Opisthokonta;Metazoa;Eumetazoa;Bilateria;Protostomia;Spiralia;Lophotrochozoa;Mollusca;Bivalvia;Autobranchia;Heteroconchia;Euherodonta;Imparidentia;Venerida;Veneroidea;Veneridae;Mercenaria;Mercenaria mercenaria

UdeM00000036576 6596 476.5 UdeM00000036576 XP\_045188548.1 33.6 1107  
545 26 2 972 13 1065 8.20E-131 476.5 6596 cellular

organisms;Eukaryota;Opisthokonta;Metazoa;Eumetazoa;Bilateria;Protostomia;Spiralia;Lophotrochozoa;Mollusca;Bivalvia;Autobranchia;Heteroconchia;Euherodonta;Imparidentia;Venerida;Veneroidea;Veneridae;Mercenaria;Mercenaria mercenaria

UdeM00000036578 6596 292 UdeM00000036578 XP\_045182027.1 40.2 368  
204 6 14 373 98 457 1.20E-75 292 6596 cellular

organisms;Eukaryota;Opisthokonta;Metazoa;Eumetazoa;Bilateria;Protostomia;Spiralia;Lophotrochozoa;Mollusca;Bivalvia;Autobranchia;Heteroconchia;Euherodonta;Imparidentia;Venerida;Veneroidea;Veneridae;Mercenaria;Mercenaria mercenaria

UdeM00000036579 6596 1263.4 UdeM00000036579 XP\_045189353.1 78.3  
824 176 3 1 823 1 822 0.00E+00 1263.4 6596  
cellular

organisms;Eukaryota;Opisthokonta;Metazoa;Eumetazoa;Bilateria;Protostomia;Spiralia;Lophotrochozoa;Mollusca;Bivalvia;Autobranchia;Heteroconchia;Euherodonta;Imparidentia;Venerida;Veneroidea;Veneridae;Mercenaria;Mercenaria mercenaria

UdeM00000036580 6579 570.9 UdeM00000036580 XP\_033757697.1 50.4 566  
250 6 60 598 20 581 2.00E-159 570.9 6579 cellular

organisms;Eukaryota;Opisthokonta;Metazoa;Eumetazoa;Bilateria;Protostomia;Spiralia;Lophotrochozoa;Mollusca;Bivalvia;Autobranchia;Pteriomorphia;Pectinida;Pectinoidea;Pectinidae;Pecten;Pecten maximus

UdeM00000036581 400727 83.6 UdeM00000036581 XP\_025093833.1 56  
159 60 2 1 159 1 149 2.50E-13 83.6 400727  
cellular

organisms;Eukaryota;Opisthokonta;Metazoa;Eumetazoa;Bilateria;Protostomia;Spiralia;Lophotrochozoa;Mollusca;Gastropoda;Caenogastropoda;Architaenioglossa;Ampullarioidea;Ampullariidae;Pomacea;Pomacea canaliculata

UdeM00000036582 6596 181 UdeM00000036582 XP\_045189393.1 42.9 205  
115 2 1 205 23 225 1.80E-42 181 6596 cellular

organisms;Eukaryota;Opisthokonta;Metazoa;Eumetazoa;Bilateria;Protostomia;Spiralia;Lophotrochozoa;Mollusca;Bivalvia;Autobranchia;Heteroconchia;Euheterodonta;Imparidentia;Venerida;Veneroidea;Veneridae;Mercenaria;Mercenaria mercenaria

UdeM00000036583 6596 409.8 UdeM00000036583 XP\_045189391.1 56.7 402  
78 2 1 308 17 416 4.90E-111 409.8 6596 cellular

organisms;Eukaryota;Opisthokonta;Metazoa;Eumetazoa;Bilateria;Protostomia;Spiralia;Lophotrochozoa;Mollusca;Bivalvia;Autobranchia;Heteroconchia;Euheterodonta;Imparidentia;Venerida;Veneroidea;Veneridae;Mercenaria;Mercenaria mercenaria

UdeM00000036584 6596 750.4 UdeM00000036584 XP\_045189792.1 84.1 428  
66 1 1 426 32 459 1.30E-213 750.4 6596 cellular

organisms;Eukaryota;Opisthokonta;Metazoa;Eumetazoa;Bilateria;Protostomia;Spiralia;Lophotrochozoa;Mollusca;Bivalvia;Autobranchia;Heteroconchia;Euheterodonta;Imparidentia;Venerida;Veneroidea;Veneridae;Mercenaria;Mercenaria mercenaria

UdeM00000044354 157072 611.3 UdeM00000044354 XP\_008878993.1 70.8  
448 129 1 4 451 33 478 1.00E-171 611.3 157072  
cellular

organisms;Eukaryota;Sar;Stramenopiles;Oomycota;Saprolegniales;Saprolegniaceae;Aphanomyces;Aphanomyces invadans

UdeM00000044355 69820 261.5 UdeM00000044355 XP\_022836958.1 39.7 375  
214 8 137 503 5 375 2.40E-66 261.5 69820 cellular

organisms;Eukaryota;Opisthokonta;Metazoa;Eumetazoa;Bilateria;Protostomia;Ecdysozoa;Panarthropoda;Arthropoda;Mandibulata;Pancrustacea;Hexapoda;Insecta;Dicondylia;Pterygota;Neoptera;Endopterygota;Amphiesmenoptera;Lepidoptera;Glossata;Neolepidoptera;Heteroneura;Ditrysia;Obtectomera;Noctuoidea;Noctuidae;Amphipyridae;Spodoptera;Spodoptera litura

UdeM00000044356 1125630 546.6 UdeM00000044356 YP\_005228207.1 54.2  
496 217 3 1 486 30 525 3.20E-152 546.6 1125630  
cellular

organisms;Bacteria;Proteobacteria;Gammaproteobacteria;Enterobacteriales;Enterobacteriaceae;Klebsiella;Klebsiella pneumoniae;Klebsiella pneumoniae subsp. pneumoniae;Klebsiella pneumoniae subsp. pneumoniae HS11286

UdeM00000044353 225164 172.6 UdeM00000044353 XP\_009054793.1 32.4  
339 203 7 21 352 126 445 9.60E-40 172.6 225164  
cellular

organisms;Eukaryota;Opisthokonta;Metazoa;Eumetazoa;Bilateria;Protostomia;Spiralia;Lophotrochozoa;Mollusca;Gastropoda;Patellogastropoda;Lottiidae;Lottia;Lottia gigantea

UdeM00000037759 37621 428.3 UdeM00000037759 XP\_014679849.1 39.5 621  
153 3 1 398 3 623 1.10E-116 428.3 37621 cellular

organisms;Eukaryota;Opisthokonta;Metazoa;Eumetazoa;Bilateria;Protostomia;Ecdysozoa;Scalidophora;Priapulida;Priapulimorpha;Priapulimorphida;Priapulidae;Priapululus;Priapululus caudatus

UdeM00000037760 37621 268.5 UdeM00000037760 XP\_014679850.1 54.3 256  
107 3 1 248 1 254 8.80E-69 268.5 37621 cellular

organisms;Eukaryota;Opisthokonta;Metazoa;Eumetazoa;Bilateria;Protostomia;

Ecdysozoa; Scalidophora; Priapulida; Priapulimorpha; Priapulimorphida; Priapulidae; Priapululus; Priapululus caudatus

UdeM00000037762 6596 479.2 UdeM00000037762 XP\_045164298.1 71.5 326  
81 5 1 318 1 322 4.10E-132 479.2 6596 cellular  
organisms; Eukaryota; Opisthokonta; Metazoa; Eumetazoa; Bilateria; Protostomia; Spiralia; Lophotrochozoa; Mollusca; Bivalvia; Autobranchia; Heteroconchia; Euheterodonta; Imparidentia; Venerida; Veneroidea; Veneridae; Mercenaria; Mercenaria mercenaria

UdeM00000037763 6596 530.8 UdeM00000037763 XP\_045165400.1 45.9 706  
307 18 1 689 1 648 2.60E-147 530.8 6596 cellular  
organisms; Eukaryota; Opisthokonta; Metazoa; Eumetazoa; Bilateria; Protostomia; Spiralia; Lophotrochozoa; Mollusca; Bivalvia; Autobranchia; Heteroconchia; Euheterodonta; Imparidentia; Venerida; Veneroidea; Veneridae; Mercenaria; Mercenaria mercenaria

UdeM00000037764 6565 584.3 UdeM00000037764 XP\_022298098.1 80 350  
69 1 1 350 1 349 1.00E-163 584.3 6565 cellular  
organisms; Eukaryota; Opisthokonta; Metazoa; Eumetazoa; Bilateria; Protostomia; Spiralia; Lophotrochozoa; Mollusca; Bivalvia; Autobranchia; Pteriomorpha; Ostreida; Ostreoidea; Ostreidae; Crassostrea; Crassostrea virginica

UdeM00000037765 6596 573.9 UdeM00000037765 XP\_045164448.1 77.8 360  
79 1 1 359 1 360 1.40E-160 573.9 6596 cellular  
organisms; Eukaryota; Opisthokonta; Metazoa; Eumetazoa; Bilateria; Protostomia; Spiralia; Lophotrochozoa; Mollusca; Bivalvia; Autobranchia; Heteroconchia; Euheterodonta; Imparidentia; Venerida; Veneroidea; Veneridae; Mercenaria; Mercenaria mercenaria

UdeM00000037766 1735272 62.8 UdeM00000037766 XP\_041360711.1 32.7  
98 65 1 1 97 1 98 6.20E-07 62.8 1735272  
cellular  
organisms; Eukaryota; Opisthokonta; Metazoa; Eumetazoa; Bilateria; Protostomia; Spiralia; Lophotrochozoa; Mollusca; Gastropoda; Neomphalina; Neomphaloidea; Peltospiridae; Gigantopelta; Gigantopelta aegis

UdeM00000037768 6596 232.6 UdeM00000037768 XP\_045166184.1 34.3 656  
357 22 1 612 35 660 2.10E-57 232.6 6596 cellular  
organisms; Eukaryota; Opisthokonta; Metazoa; Eumetazoa; Bilateria; Protostomia; Spiralia; Lophotrochozoa; Mollusca; Bivalvia; Autobranchia; Heteroconchia; Euheterodonta; Imparidentia; Venerida; Veneroidea; Veneridae; Mercenaria; Mercenaria mercenaria

UdeM00000037767 6596 239.2 UdeM00000037767 XP\_045166184.1 34.1 687  
377 23 2 642 4 660 2.40E-59 239.2 6596 cellular  
organisms; Eukaryota; Opisthokonta; Metazoa; Eumetazoa; Bilateria; Protostomia; Spiralia; Lophotrochozoa; Mollusca; Bivalvia; Autobranchia; Heteroconchia; Euheterodonta; Imparidentia; Venerida; Veneroidea; Veneridae; Mercenaria; Mercenaria mercenaria

UdeM00000037769 29159 299.7 UdeM00000037769 XP\_034322429.1 40.9 399  
199 4 4 371 1 393 5.50E-78 299.7 29159 cellular  
organisms; Eukaryota; Opisthokonta; Metazoa; Eumetazoa; Bilateria; Protostomia; Spiralia; Lophotrochozoa; Mollusca; Bivalvia; Autobranchia; Pteriomorpha; Ostreida; Ostreoidea; Ostreidae; Crassostrea; Crassostrea gigas

UdeM00000037770 29159 282.3 UdeM00000037770 XP\_034322429.1 38.9 409  
202 4 4 380 1 393 9.30E-73 282.3 29159 cellular  
organisms; Eukaryota; Opisthokonta; Metazoa; Eumetazoa; Bilateria; Protostomia; Spiralia; Lophotrochozoa; Mollusca; Bivalvia; Autobranchia; Pteriomorpha; Ostreida; Ostreoidea; Ostreidae; Crassostrea; Crassostrea gigas

UdeM00000037772 46731 105.9 UdeM00000037772 XP\_027036472.1 30.8 198  
 126 5 16 205 125 319 2.00E-19 105.9 46731 cellular  
 organisms;Eukaryota;Opisthokonta;Metazoa;Eumetazoa;Cnidaria;Anthozoa;Hexa  
 corallia;Scleractinia;Astrocoeniina;Pocilloporidae;Pocillopora;Pocillopor  
 a damicornis  
 UdeM00000037773 6105 226.9 UdeM00000037773 XP\_031572248.1 30.5 502  
 307 12 24 496 18 506 9.50E-56 226.9 6105 cellular  
 organisms;Eukaryota;Opisthokonta;Metazoa;Eumetazoa;Cnidaria;Anthozoa;Hexa  
 corallia;Actiniaria;Actiniidae;Actinia;Actinia tenebrosa  
 UdeM00000037774 6105 142.9 UdeM00000037774 XP\_031572248.1 33 264  
 152 6 24 270 18 273 6.10E-31 142.9 6105 cellular  
 organisms;Eukaryota;Opisthokonta;Metazoa;Eumetazoa;Cnidaria;Anthozoa;Hexa  
 corallia;Actiniaria;Actiniidae;Actinia;Actinia tenebrosa  
 UdeM00000037775 6596 391.3 UdeM00000037775 XP\_045166622.1 58.9 333  
 128 3 1 332 1 325 1.40E-105 391.3 6596 cellular  
 organisms;Eukaryota;Opisthokonta;Metazoa;Eumetazoa;Bilateria;Protostomia;  
 Spiralia;Lophotrochozoa;Mollusca;Bivalvia;Autobranchia;Heteroconchia;Euhe  
 terodonta;Imparidentia;Venerida;Veneroidea;Veneridae;Mercenaria;Mercenari  
 a mercenaria  
 UdeM00000037776 6596 397.9 UdeM00000037776 XP\_045166622.1 60.1 326  
 128 2 1 325 1 325 1.50E-107 397.9 6596 cellular  
 organisms;Eukaryota;Opisthokonta;Metazoa;Eumetazoa;Bilateria;Protostomia;  
 Spiralia;Lophotrochozoa;Mollusca;Bivalvia;Autobranchia;Heteroconchia;Euhe  
 terodonta;Imparidentia;Venerida;Veneroidea;Veneridae;Mercenaria;Mercenari  
 a mercenaria  
 UdeM00000037777 29159 164.5 UdeM00000037777 XP\_034308606.1 37.7 236  
 136 2 6 230 623 858 1.60E-37 164.5 29159 cellular  
 organisms;Eukaryota;Opisthokonta;Metazoa;Eumetazoa;Bilateria;Protostomia;  
 Spiralia;Lophotrochozoa;Mollusca;Bivalvia;Autobranchia;Pteriomorphia;Ostr  
 eida;Ostreoidea;Ostreidae;Crassostrea;Crassostrea gigas  
 UdeM00000037779 6573 646 UdeM00000037779 XP\_021346977.1 40.7 926  
 503 22 4 908 79 979 9.20E-182 646 6573 cellular  
 organisms;Eukaryota;Opisthokonta;Metazoa;Eumetazoa;Bilateria;Protostomia;  
 Spiralia;Lophotrochozoa;Mollusca;Bivalvia;Autobranchia;Pteriomorphia;Pect  
 inida;Pectinoidea;Pectinidae;Mizuhopecten;Mizuhopecten yessoensis  
 UdeM00000037780 6579 685.6 UdeM00000037780 XP\_033746774.1 38.5 1041  
 589 22 8 1027 8 1018 1.10E-193 685.6 6579 cellular  
 organisms;Eukaryota;Opisthokonta;Metazoa;Eumetazoa;Bilateria;Protostomia;  
 Spiralia;Lophotrochozoa;Mollusca;Bivalvia;Autobranchia;Pteriomorphia;Pect  
 inida;Pectinoidea;Pectinidae;Pecten;Pecten maximus  
 UdeM00000037781 6596 663.3 UdeM00000037781 XP\_045166890.1 34.7 1284  
 732 35 5 1242 256 1479 6.00E-187 663.3 6596 cellular  
 organisms;Eukaryota;Opisthokonta;Metazoa;Eumetazoa;Bilateria;Protostomia;  
 Spiralia;Lophotrochozoa;Mollusca;Bivalvia;Autobranchia;Heteroconchia;Euhe  
 terodonta;Imparidentia;Venerida;Veneroidea;Veneridae;Mercenaria;Mercenari  
 a mercenaria  
 UdeM00000037784 6596 662.5 UdeM00000037784 XP\_045166535.1 42.5 856  
 440 11 502 1319 184 1025 1.10E-186 662.5 6596 cellular  
 organisms;Eukaryota;Opisthokonta;Metazoa;Eumetazoa;Bilateria;Protostomia;  
 Spiralia;Lophotrochozoa;Mollusca;Bivalvia;Autobranchia;Heteroconchia;Euhe  
 terodonta;Imparidentia;Venerida;Veneroidea;Veneridae;Mercenaria;Mercenari  
 a mercenaria  
 UdeM00000037785 6596 416 UdeM00000037785 XP\_045166538.1 57.7 350  
 148 0 8 357 10 359 4.90E-113 416 6596 cellular

organisms;Eukaryota;Opisthokonta;Metazoa;Eumetazoa;Bilateria;Protostomia; Spiralia;Lophotrochozoa;Mollusca;Bivalvia;Autobranchia;Heteroconchia;Euherodonta;Imparidentia;Venerida;Veneroidea;Veneridae;Mercenaria;Mercenaria mercenaria

UdeM00000037786 400727 313.5 UdeM00000037786 XP\_025108563.1 55.3  
253 112 1 5 257 10 261 2.50E-82 313.5 400727  
cellular

organisms;Eukaryota;Opisthokonta;Metazoa;Eumetazoa;Bilateria;Protostomia; Spiralia;Lophotrochozoa;Mollusca;Gastropoda;Caenogastropoda;Architaenioglossa;Ampullarioidea;Ampullariidae;Pomacea;Pomacea canaliculata

UdeM00000037787 6596 114 UdeM00000037787 XP\_045166236.1 37.2 339  
165 13 29 352 28 333 5.10E-22 114 6596 cellular

organisms;Eukaryota;Opisthokonta;Metazoa;Eumetazoa;Bilateria;Protostomia; Spiralia;Lophotrochozoa;Mollusca;Bivalvia;Autobranchia;Heteroconchia;Euherodonta;Imparidentia;Venerida;Veneroidea;Veneridae;Mercenaria;Mercenaria mercenaria

UdeM00000037788 6596 366.7 UdeM00000037788 XP\_045166647.1 66.8 241  
78 1 623 861 1 241 8.10E-98 366.7 6596 cellular

organisms;Eukaryota;Opisthokonta;Metazoa;Eumetazoa;Bilateria;Protostomia; Spiralia;Lophotrochozoa;Mollusca;Bivalvia;Autobranchia;Heteroconchia;Euherodonta;Imparidentia;Venerida;Veneroidea;Veneridae;Mercenaria;Mercenaria mercenaria

UdeM00000037789 6596 468.8 UdeM00000037789 XP\_045166647.1 53 549  
202 27 667 1186 891 1412 2.10E-128 468.8 6596 cellular

organisms;Eukaryota;Opisthokonta;Metazoa;Eumetazoa;Bilateria;Protostomia; Spiralia;Lophotrochozoa;Mollusca;Bivalvia;Autobranchia;Heteroconchia;Euherodonta;Imparidentia;Venerida;Veneroidea;Veneridae;Mercenaria;Mercenaria mercenaria

UdeM00000037789 6596 86.7 UdeM00000037789 XP\_045166647.1 52 75  
32 1 53 127 242 312 2.20E-13 86.7 6596 cellular

organisms;Eukaryota;Opisthokonta;Metazoa;Eumetazoa;Bilateria;Protostomia; Spiralia;Lophotrochozoa;Mollusca;Bivalvia;Autobranchia;Heteroconchia;Euherodonta;Imparidentia;Venerida;Veneroidea;Veneridae;Mercenaria;Mercenaria mercenaria

UdeM00000037790 1735272 196.1 UdeM00000037790 XP\_041349776.1 56.7  
164 69 1 4 165 5 168 5.20E-47 196.1 1735272  
cellular

organisms;Eukaryota;Opisthokonta;Metazoa;Eumetazoa;Bilateria;Protostomia; Spiralia;Lophotrochozoa;Mollusca;Gastropoda;Neomphalina;Neomphaloidea;Peltospiridae;Gigantopelta;Gigantopelta aegis

UdeM00000037791 6596 137.5 UdeM00000037791 XP\_045165493.1 51.1 133  
61 2 14 145 126 255 1.40E-29 137.5 6596 cellular

organisms;Eukaryota;Opisthokonta;Metazoa;Eumetazoa;Bilateria;Protostomia; Spiralia;Lophotrochozoa;Mollusca;Bivalvia;Autobranchia;Heteroconchia;Euherodonta;Imparidentia;Venerida;Veneroidea;Veneridae;Mercenaria;Mercenaria mercenaria

UdeM00000037792 6596 89.4 UdeM00000037792 XP\_045211864.1 33.9 115  
76 0 32 146 33 147 5.50E-15 89.4 6596 cellular

organisms;Eukaryota;Opisthokonta;Metazoa;Eumetazoa;Bilateria;Protostomia; Spiralia;Lophotrochozoa;Mollusca;Bivalvia;Autobranchia;Heteroconchia;Euherodonta;Imparidentia;Venerida;Veneroidea;Veneridae;Mercenaria;Mercenaria mercenaria

UdeM00000037793 29159 359.8 UdeM00000037793 XP\_011434531.2 55.7 327  
138 5 4 324 5 330 3.70E-96 359.8 29159 cellular



organisms;Eukaryota;Opisthokonta;Metazoa;Eumetazoa;Bilateria;Protostomia; Spiralia;Lophotrochozoa;Mollusca;Bivalvia;Autobranchia;Pteriormorphia;Ostr eida;Ostreoidea;Ostreidae;Crassostrea;Crassostrea gigas

UdeM00000037794 6565 358.6 UdeM00000037794 XP\_022296552.1 55 327  
140 5 4 324 5 330 8.30E-96 358.6 6565 cellular

organisms;Eukaryota;Opisthokonta;Metazoa;Eumetazoa;Bilateria;Protostomia; Spiralia;Lophotrochozoa;Mollusca;Bivalvia;Autobranchia;Pteriormorphia;Ostr eida;Ostreoidea;Ostreidae;Crassostrea;Crassostrea virginica

UdeM00000037795 29159 363.6 UdeM00000037795 XP\_011439669.2 53.9 323  
147 2 4 324 5 327 2.60E-97 363.6 29159 cellular

organisms;Eukaryota;Opisthokonta;Metazoa;Eumetazoa;Bilateria;Protostomia; Spiralia;Lophotrochozoa;Mollusca;Bivalvia;Autobranchia;Pteriormorphia;Ostr eida;Ostreoidea;Ostreidae;Crassostrea;Crassostrea gigas

UdeM00000037796 6596 171 UdeM00000037796 XP\_045164207.1 86.5 96  
13 0 1 96 1 96 7.30E-40 171 6596 cellular

organisms;Eukaryota;Opisthokonta;Metazoa;Eumetazoa;Bilateria;Protostomia; Spiralia;Lophotrochozoa;Mollusca;Bivalvia;Autobranchia;Heteroconchia;Euhe terodonta;Imparidentia;Venerida;Veneroidea;Veneridae;Mercenaria;Mercenari a mercenaria

UdeM00000037797 1735272 367.1 UdeM00000037797 XP\_041347548.1 68.2  
258 81 1 26 282 33 290 2.00E-98 367.1 1735272  
cellular

organisms;Eukaryota;Opisthokonta;Metazoa;Eumetazoa;Bilateria;Protostomia; Spiralia;Lophotrochozoa;Mollusca;Gastropoda;Neomphalina;Neomphaloidea;Pel tospiridae;Gigantopelta;Gigantopelta aegis

UdeM00000037798 1735272 70.9 UdeM00000037798 XP\_041371188.1 37.5  
104 57 4 9 107 5 105 1.20E-09 70.9 1735272  
cellular

organisms;Eukaryota;Opisthokonta;Metazoa;Eumetazoa;Bilateria;Protostomia; Spiralia;Lophotrochozoa;Mollusca;Gastropoda;Neomphalina;Neomphaloidea;Pel tospiridae;Gigantopelta;Gigantopelta aegis

UdeM00000037799 6573 70.1 UdeM00000037799 XP\_021347926.1 32.7 107  
66 2 6 108 5 109 2.10E-09 70.1 6573 cellular

organisms;Eukaryota;Opisthokonta;Metazoa;Eumetazoa;Bilateria;Protostomia; Spiralia;Lophotrochozoa;Mollusca;Bivalvia;Autobranchia;Pteriormorphia;Pect inida;Pectinoidea;Pectinidae;Mizuhopecten;Mizuhopecten yessoensis

UdeM00000037800 6596 304.3 UdeM00000037800 XP\_045165186.1 58.1 270  
81 6 1 241 1 267 1.40E-79 304.3 6596 cellular

organisms;Eukaryota;Opisthokonta;Metazoa;Eumetazoa;Bilateria;Protostomia; Spiralia;Lophotrochozoa;Mollusca;Bivalvia;Autobranchia;Heteroconchia;Euhe terodonta;Imparidentia;Venerida;Veneroidea;Veneridae;Mercenaria;Mercenari a mercenaria

UdeM00000037801 6596 247.3 UdeM00000037801 XP\_045165186.1 46 265  
108 5 1 230 1 265 2.00E-62 247.3 6596 cellular

organisms;Eukaryota;Opisthokonta;Metazoa;Eumetazoa;Bilateria;Protostomia; Spiralia;Lophotrochozoa;Mollusca;Bivalvia;Autobranchia;Heteroconchia;Euhe terodonta;Imparidentia;Venerida;Veneroidea;Veneridae;Mercenaria;Mercenari a mercenaria

UdeM00000037802 6596 432.6 UdeM00000037802 XP\_045171158.1 59.7 345  
130 4 1 336 1 345 4.90E-118 432.6 6596 cellular

organisms;Eukaryota;Opisthokonta;Metazoa;Eumetazoa;Bilateria;Protostomia; Spiralia;Lophotrochozoa;Mollusca;Bivalvia;Autobranchia;Heteroconchia;Euhe terodonta;Imparidentia;Venerida;Veneroidea;Veneridae;Mercenaria;Mercenari a mercenaria

UdeM00000037803 8078 381.7 UdeM00000037803 XP\_035996634.1 48.3 377  
 192 3 6 379 15 391 1.10E-102 381.7 8078 cellular  
 organisms;Eukaryota;Opisthokonta;Metazoa;Eumetazoa;Bilateria;Deuterostomi  
 a;Chordata;Craniata;Vertebrata;Gnathostomata;Teleostomi;Euteleostomi;Acti  
 nopterygii;Actinopteri;Neopterygii;Teleostei;Osteoglossocephalai;Clupeoce  
 phala;Euteleostomorpha;Neoteleostei;Eurypterygia;Ctenosquamata;Acanthomo  
 rphata;Euacanthomorphacea;Percomorphaceae;Ovalentaria;Atherinomorphae;Cyp  
 rinodontiformes;Cyprinodontoidei;Fundulidae;Fundulus;Fundulus  
 heteroclitus

UdeM00000037804 6596 513.8 UdeM00000037804 XP\_045166762.1 79.1 297  
 62 0 1 297 1 297 1.40E-142 513.8 6596 cellular  
 organisms;Eukaryota;Opisthokonta;Metazoa;Eumetazoa;Bilateria;Protostomia;  
 Spiralia;Lophotrochozoa;Mollusca;Bivalvia;Autobranchia;Heteroconchia;Euhe  
 terodonta;Imparidentia;Venerida;Veneroidea;Veneridae;Mercenaria;Mercenari  
 a mercenaria

UdeM00000037805 37653 302.4 UdeM00000037805 XP\_014789676.1 91.1 168  
 15 0 1 168 1 168 3.70E-79 302.4 37653 cellular  
 organisms;Eukaryota;Opisthokonta;Metazoa;Eumetazoa;Bilateria;Protostomia;  
 Spiralia;Lophotrochozoa;Mollusca;Cephalopoda;Coleoidea;Octopodiformes;Oct  
 opoda;Incirrata;Octopodidae;Octopus;Octopus bimaculoides

UdeM00000037806 6596 674.9 UdeM00000037806 XP\_045164554.1 49.3 691  
 342 3 17 699 19 709 1.30E-190 674.9 6596 cellular  
 organisms;Eukaryota;Opisthokonta;Metazoa;Eumetazoa;Bilateria;Protostomia;  
 Spiralia;Lophotrochozoa;Mollusca;Bivalvia;Autobranchia;Heteroconchia;Euhe  
 terodonta;Imparidentia;Venerida;Veneroidea;Veneridae;Mercenaria;Mercenari  
 a mercenaria

UdeM00000037807 6579 490 UdeM00000037807 XP\_033746759.1 65.6 343  
 115 2 1 340 1 343 2.50E-135 490 6579 cellular  
 organisms;Eukaryota;Opisthokonta;Metazoa;Eumetazoa;Bilateria;Protostomia;  
 Spiralia;Lophotrochozoa;Mollusca;Bivalvia;Autobranchia;Pteriormorphia;Pect  
 inida;Pectinoidea;Pectinidae;Pecten;Pecten maximus

UdeM00000037808 29159 164.1 UdeM00000037808 XP\_011439460.2 27.4 475  
 293 14 24 481 12 451 4.50E-37 164.1 29159 cellular  
 organisms;Eukaryota;Opisthokonta;Metazoa;Eumetazoa;Bilateria;Protostomia;  
 Spiralia;Lophotrochozoa;Mollusca;Bivalvia;Autobranchia;Pteriormorphia;Ostr  
 eida;Ostreoidea;Ostreidae;Crassostrea;Crassostrea gigas

UdeM00000037809 6596 451.4 UdeM00000037809 XP\_045164554.1 42 526  
 300 2 51 575 21 542 1.70E-123 451.4 6596 cellular  
 organisms;Eukaryota;Opisthokonta;Metazoa;Eumetazoa;Bilateria;Protostomia;  
 Spiralia;Lophotrochozoa;Mollusca;Bivalvia;Autobranchia;Heteroconchia;Euhe  
 terodonta;Imparidentia;Venerida;Veneroidea;Veneridae;Mercenaria;Mercenari  
 a mercenaria

UdeM00000037811 29159 79 UdeM00000037811 XP\_034299474.1 38.5 91  
 54 1 1 91 415 503 5.40E-12 79 29159 cellular  
 organisms;Eukaryota;Opisthokonta;Metazoa;Eumetazoa;Bilateria;Protostomia;  
 Spiralia;Lophotrochozoa;Mollusca;Bivalvia;Autobranchia;Pteriormorphia;Ostr  
 eida;Ostreoidea;Ostreidae;Crassostrea;Crassostrea gigas

UdeM00000037812 6565 82.4 UdeM00000037812 XP\_022322655.1 53.4 73  
 33 1 8 79 339 411 3.90E-13 82.4 6565 cellular  
 organisms;Eukaryota;Opisthokonta;Metazoa;Eumetazoa;Bilateria;Protostomia;  
 Spiralia;Lophotrochozoa;Mollusca;Bivalvia;Autobranchia;Pteriormorphia;Ostr  
 eida;Ostreoidea;Ostreidae;Crassostrea;Crassostrea virginica

UdeM00000037813 6565 67 UdeM00000037813 XP\_022322655.1 40.6 106  
 49 5 7 108 1 96 1.90E-08 67 6565 cellular

organisms;Eukaryota;Opisthokonta;Metazoa;Eumetazoa;Bilateria;Protostomia;Spiralia;Lophotrochozoa;Mollusca;Bivalvia;Autobranchia;Pteriormorphia;Ostreida;Ostreoidea;Ostreidae;Crassostrea;Crassostrea virginica  
UdeM00000037814 6596 462.6 UdeM00000037814 XP\_045164554.1 36.7 723  
441 6 35 746 19 735 1.00E-126 462.6 6596 cellular  
organisms;Eukaryota;Opisthokonta;Metazoa;Eumetazoa;Bilateria;Protostomia;Spiralia;Lophotrochozoa;Mollusca;Bivalvia;Autobranchia;Heteroconchia;Euheterodonta;Imparidentia;Venerida;Veneroidea;Veneridae;Mercenaria;Mercenaria mercenaria  
UdeM00000037815 6596 996.5 UdeM00000037815 XP\_045165558.1 59.5 982  
298 22 6 953 432 1347 2.60E-287 996.5 6596 cellular  
organisms;Eukaryota;Opisthokonta;Metazoa;Eumetazoa;Bilateria;Protostomia;Spiralia;Lophotrochozoa;Mollusca;Bivalvia;Autobranchia;Heteroconchia;Euheterodonta;Imparidentia;Venerida;Veneroidea;Veneridae;Mercenaria;Mercenaria mercenaria  
UdeM00000037817 6596 287.3 UdeM00000037817 XP\_045165551.1 67.6 207  
62 2 1 203 1 206 1.50E-74 287.3 6596 cellular  
organisms;Eukaryota;Opisthokonta;Metazoa;Eumetazoa;Bilateria;Protostomia;Spiralia;Lophotrochozoa;Mollusca;Bivalvia;Autobranchia;Heteroconchia;Euheterodonta;Imparidentia;Venerida;Veneroidea;Veneridae;Mercenaria;Mercenaria mercenaria  
UdeM00000037819 6573 998 UdeM00000037819 XP\_021356928.1 57.8 839  
346 7 9 842 291 1126 7.00E-288 998 6573 cellular  
organisms;Eukaryota;Opisthokonta;Metazoa;Eumetazoa;Bilateria;Protostomia;Spiralia;Lophotrochozoa;Mollusca;Bivalvia;Autobranchia;Pteriormorphia;Pectinida;Pectinoidea;Pectinidae;Mizuhopecten;Mizuhopecten yessoensis  
UdeM00000037820 6579 208.4 UdeM00000037820 XP\_033744976.1 40.8 265  
142 5 1 251 1 264 1.10E-50 208.4 6579 cellular  
organisms;Eukaryota;Opisthokonta;Metazoa;Eumetazoa;Bilateria;Protostomia;Spiralia;Lophotrochozoa;Mollusca;Bivalvia;Autobranchia;Pteriormorphia;Pectinida;Pectinoidea;Pectinidae;Pecten;Pecten maximus  
UdeM00000037821 8496 95.1 UdeM00000037821 XP\_014461102.1 39 123  
71 3 7 126 231 352 7.30E-17 95.1 8496 cellular  
organisms;Eukaryota;Opisthokonta;Metazoa;Eumetazoa;Bilateria;Deuterostomia;Chordata;Craniata;Vertebrata;Gnathostomata;Teleostomi;Euteleostomi;Sarcopterygii;Dipnotetrapodomorpha;Tetrapoda;Amniota;Sauropsida;Sauria;Archelosauria;Archosauria;Crocodylia;Alligatoridae;Alligatorinae;Alligator;Alligator mississippiensis  
UdeM00000037822 6596 695.7 UdeM00000037822 XP\_045166672.1 75.8 487  
74 1 1 443 1 487 3.90E-197 695.7 6596 cellular  
organisms;Eukaryota;Opisthokonta;Metazoa;Eumetazoa;Bilateria;Protostomia;Spiralia;Lophotrochozoa;Mollusca;Bivalvia;Autobranchia;Heteroconchia;Euheterodonta;Imparidentia;Venerida;Veneroidea;Veneridae;Mercenaria;Mercenaria mercenaria  
UdeM00000037824 6579 162.9 UdeM00000037824 XP\_033745670.1 59.1 154  
62 1 1 154 1 153 3.30E-37 162.9 6579 cellular  
organisms;Eukaryota;Opisthokonta;Metazoa;Eumetazoa;Bilateria;Protostomia;Spiralia;Lophotrochozoa;Mollusca;Bivalvia;Autobranchia;Pteriormorphia;Pectinida;Pectinoidea;Pectinidae;Pecten;Pecten maximus  
UdeM00000037823 2607531 403.7 UdeM00000037823 XP\_029635246.1 44.9  
857 436 9 1 853 1 825 6.60E-109 403.7 2607531  
cellular  
organisms;Eukaryota;Opisthokonta;Metazoa;Eumetazoa;Bilateria;Protostomia;

Spiralia;Lophotrochozoa;Mollusca;Cephalopoda;Coleoidea;Octopodiformes;Octopoda;Incirrata;Octopodidae;Octopus;Octopus sinensis  
UdeM00000037825 6579 249.6 UdeM00000037825 XP\_033739209.1 49.6 258  
114 2 9 261 2 248 4.40E-63 249.6 6579 cellular  
organisms;Eukaryota;Opisthokonta;Metazoa;Eumetazoa;Bilateria;Protostomia;  
Spiralia;Lophotrochozoa;Mollusca;Bivalvia;Autobranchia;Pteriormorphia;Pectinida;  
Pectinoidea;Pectinidae;Pecten;Pecten maximus  
UdeM00000037826 6596 101.3 UdeM00000037826 XP\_045188277.1 29.7 202  
130 4 2 201 79 270 3.10E-18 101.3 6596 cellular  
organisms;Eukaryota;Opisthokonta;Metazoa;Eumetazoa;Bilateria;Protostomia;  
Spiralia;Lophotrochozoa;Mollusca;Bivalvia;Autobranchia;Heteroconchia;Euheterodonta;  
Imparidentia;Venerida;Veneroidea;Veneridae;Mercenaria;Mercenaria mercenaria  
UdeM00000037827 6573 344 UdeM00000037827 XP\_021346496.1 40.8 458  
248 7 203 657 27 464 4.90E-91 344 6573 cellular  
organisms;Eukaryota;Opisthokonta;Metazoa;Eumetazoa;Bilateria;Protostomia;  
Spiralia;Lophotrochozoa;Mollusca;Bivalvia;Autobranchia;Pteriormorphia;Pectinida;  
Pectinoidea;Pectinidae;Mizuhopecten;Mizuhopecten yessoensis  
UdeM00000037827 6573 57.4 UdeM00000037827 XP\_021346496.1 35.8 67  
43 0 673 739 625 691 9.10E-05 57.4 6573 cellular  
organisms;Eukaryota;Opisthokonta;Metazoa;Eumetazoa;Bilateria;Protostomia;  
Spiralia;Lophotrochozoa;Mollusca;Bivalvia;Autobranchia;Pteriormorphia;Pectinida;  
Pectinoidea;Pectinidae;Mizuhopecten;Mizuhopecten yessoensis  
UdeM00000037829 400727 642.5 UdeM00000037829 XP\_025106656.1 83.5  
369 61 0 1 369 1 369 3.30E-181 642.5 400727  
cellular  
organisms;Eukaryota;Opisthokonta;Metazoa;Eumetazoa;Bilateria;Protostomia;  
Spiralia;Lophotrochozoa;Mollusca;Gastropoda;Caenogastropoda;Architaenioglossa;  
Ampullarioidea;Ampullariidae;Pomacea;Pomacea canaliculata  
UdeM00000037830 6565 318.9 UdeM00000037830 XP\_022299292.1 66.7 273  
78 4 1 263 373 642 5.90E-84 318.9 6565 cellular  
organisms;Eukaryota;Opisthokonta;Metazoa;Eumetazoa;Bilateria;Protostomia;  
Spiralia;Lophotrochozoa;Mollusca;Bivalvia;Autobranchia;Pteriormorphia;Ostreida;  
Ostreoidea;Ostreidae;Crassostrea;Crassostrea virginica  
UdeM00000037832 29159 90.1 UdeM00000037832 XP\_034318858.1 42.6 94  
52 2 1 93 255 347 1.60E-15 90.1 29159 cellular  
organisms;Eukaryota;Opisthokonta;Metazoa;Eumetazoa;Bilateria;Protostomia;  
Spiralia;Lophotrochozoa;Mollusca;Bivalvia;Autobranchia;Pteriormorphia;Ostreida;  
Ostreoidea;Ostreidae;Crassostrea;Crassostrea gigas  
UdeM00000037833 6596 1325.8 UdeM00000037833 XP\_045167023.1 40.6  
1568 855 13 76 1574 167 1726 0.00E+00 1325.8 6596  
cellular  
organisms;Eukaryota;Opisthokonta;Metazoa;Eumetazoa;Bilateria;Protostomia;  
Spiralia;Lophotrochozoa;Mollusca;Bivalvia;Autobranchia;Heteroconchia;Euheterodonta;  
Imparidentia;Venerida;Veneroidea;Veneridae;Mercenaria;Mercenaria mercenaria  
UdeM00000037834 6596 1320.8 UdeM00000037834 XP\_045167023.1 40.8  
1568 852 13 76 1574 167 1726 0.00E+00 1320.8 6596  
cellular  
organisms;Eukaryota;Opisthokonta;Metazoa;Eumetazoa;Bilateria;Protostomia;  
Spiralia;Lophotrochozoa;Mollusca;Bivalvia;Autobranchia;Heteroconchia;Euheterodonta;  
Imparidentia;Venerida;Veneroidea;Veneridae;Mercenaria;Mercenaria mercenaria

UdeM00000037835 6596 725.3 UdeM00000037835 XP\_045167019.1 39.6 895  
 492 11 75 948 207 1073 1.00E-205 725.3 6596 cellular  
 organisms;Eukaryota;Opisthokonta;Metazoa;Eumetazoa;Bilateria;Protostomia;  
 Spiralia;Lophotrochozoa;Mollusca;Bivalvia;Autobranchia;Heteroconchia;Euhe  
 terodonta;Imparidentia;Venerida;Veneroidea;Veneridae;Mercenaria;Mercenari  
 a mercenaria

UdeM00000037837 6596 224.2 UdeM00000037837 XP\_045166921.1 35.5 304  
 165 3 26 299 37 339 2.30E-55 224.2 6596 cellular  
 organisms;Eukaryota;Opisthokonta;Metazoa;Eumetazoa;Bilateria;Protostomia;  
 Spiralia;Lophotrochozoa;Mollusca;Bivalvia;Autobranchia;Heteroconchia;Euhe  
 terodonta;Imparidentia;Venerida;Veneroidea;Veneridae;Mercenaria;Mercenari  
 a mercenaria

UdeM00000037838 6596 224.6 UdeM00000037838 XP\_045166921.1 35.5 304  
 166 3 26 300 37 339 1.80E-55 224.6 6596 cellular  
 organisms;Eukaryota;Opisthokonta;Metazoa;Eumetazoa;Bilateria;Protostomia;  
 Spiralia;Lophotrochozoa;Mollusca;Bivalvia;Autobranchia;Heteroconchia;Euhe  
 terodonta;Imparidentia;Venerida;Veneroidea;Veneridae;Mercenaria;Mercenari  
 a mercenaria

UdeM00000037839 6596 189.9 UdeM00000037839 XP\_045167019.1 47.4 173  
 90 1 42 214 673 844 3.40E-45 189.9 6596 cellular  
 organisms;Eukaryota;Opisthokonta;Metazoa;Eumetazoa;Bilateria;Protostomia;  
 Spiralia;Lophotrochozoa;Mollusca;Bivalvia;Autobranchia;Heteroconchia;Euhe  
 terodonta;Imparidentia;Venerida;Veneroidea;Veneridae;Mercenaria;Mercenari  
 a mercenaria

UdeM00000037840 8364 65.9 UdeM00000037840 XP\_031759770.1 50 56  
 25 1 7 59 1808 1863 5.60E-08 65.9 8364 cellular  
 organisms;Eukaryota;Opisthokonta;Metazoa;Eumetazoa;Bilateria;Deuterostomi  
 a;Chordata;Craniata;Vertebrata;Gnathostomata;Teleostomi;Euteleostomi;Sarc  
 opterygii;Dipnotetrapodomorpha;Tetrapoda;Amphibia;Batrachia;Anura;Pipoide  
 a;Pipidae;Xenopodinae;Xenopus;Silurana;Xenopus tropicalis

UdeM00000037841 7574 107.8 UdeM00000037841 XP\_023932361.1 41.9 136  
 75 3 42 173 908 1043 2.20E-20 107.8 7574 cellular  
 organisms;Eukaryota;Opisthokonta;Metazoa;Eumetazoa;Bilateria;Protostomia;  
 Spiralia;Lophotrochozoa;Brachiopoda;Linguliformea;Lingulata;Lingulida;Lin  
 guloidea;Lingulidae;Lingula;Lingula anatina

UdeM00000037842 6596 285.8 UdeM00000037842 XP\_045171816.1 42.9 333  
 186 4 44 375 107 436 7.90E-74 285.8 6596 cellular  
 organisms;Eukaryota;Opisthokonta;Metazoa;Eumetazoa;Bilateria;Protostomia;  
 Spiralia;Lophotrochozoa;Mollusca;Bivalvia;Autobranchia;Heteroconchia;Euhe  
 terodonta;Imparidentia;Venerida;Veneroidea;Veneridae;Mercenaria;Mercenari  
 a mercenaria

UdeM00000037843 6596 283.1 UdeM00000037843 XP\_045212093.1 44.3 323  
 166 6 4 320 106 420 4.40E-73 283.1 6596 cellular  
 organisms;Eukaryota;Opisthokonta;Metazoa;Eumetazoa;Bilateria;Protostomia;  
 Spiralia;Lophotrochozoa;Mollusca;Bivalvia;Autobranchia;Heteroconchia;Euhe  
 terodonta;Imparidentia;Venerida;Veneroidea;Veneridae;Mercenaria;Mercenari  
 a mercenaria

UdeM00000037844 6596 283.1 UdeM00000037844 XP\_045212093.1 44.3 323  
 166 6 4 320 106 420 4.40E-73 283.1 6596 cellular  
 organisms;Eukaryota;Opisthokonta;Metazoa;Eumetazoa;Bilateria;Protostomia;  
 Spiralia;Lophotrochozoa;Mollusca;Bivalvia;Autobranchia;Heteroconchia;Euhe  
 terodonta;Imparidentia;Venerida;Veneroidea;Veneridae;Mercenaria;Mercenari  
 a mercenaria

UdeM00000037845 6596 282 UdeM00000037845 XP\_045171816.1 42.3 333  
 188 4 44 375 107 436 1.10E-72 282 6596 cellular  
 organisms;Eukaryota;Opisthokonta;Metazoa;Eumetazoa;Bilateria;Protostomia;  
 Spiralia;Lophotrochozoa;Mollusca;Bivalvia;Autobranchia;Heteroconchia;Euhe  
 terodonta;Imparidentia;Venerida;Veneroidea;Veneridae;Mercenaria;Mercenari  
 a mercenaria

UdeM00000037846 6596 284.6 UdeM00000037846 XP\_045171816.1 42.6 333  
 187 4 44 375 107 436 1.80E-73 284.6 6596 cellular  
 organisms;Eukaryota;Opisthokonta;Metazoa;Eumetazoa;Bilateria;Protostomia;  
 Spiralia;Lophotrochozoa;Mollusca;Bivalvia;Autobranchia;Heteroconchia;Euhe  
 terodonta;Imparidentia;Venerida;Veneroidea;Veneridae;Mercenaria;Mercenari  
 a mercenaria

UdeM00000037847 6596 284.6 UdeM00000037847 XP\_045171816.1 42.6 333  
 187 4 44 375 107 436 1.80E-73 284.6 6596 cellular  
 organisms;Eukaryota;Opisthokonta;Metazoa;Eumetazoa;Bilateria;Protostomia;  
 Spiralia;Lophotrochozoa;Mollusca;Bivalvia;Autobranchia;Heteroconchia;Euhe  
 terodonta;Imparidentia;Venerida;Veneroidea;Veneridae;Mercenaria;Mercenari  
 a mercenaria

UdeM00000037848 6596 282 UdeM00000037848 XP\_045212093.1 44.3 323  
 166 6 59 375 106 420 1.10E-72 282 6596 cellular  
 organisms;Eukaryota;Opisthokonta;Metazoa;Eumetazoa;Bilateria;Protostomia;  
 Spiralia;Lophotrochozoa;Mollusca;Bivalvia;Autobranchia;Heteroconchia;Euhe  
 terodonta;Imparidentia;Venerida;Veneroidea;Veneridae;Mercenaria;Mercenari  
 a mercenaria

UdeM00000037852 29159 939.1 UdeM00000037852 XP\_019919313.2 49.9 1056  
 480 20 3 1033 8 1039 4.90E-270 939.1 29159 cellular  
 organisms;Eukaryota;Opisthokonta;Metazoa;Eumetazoa;Bilateria;Protostomia;  
 Spiralia;Lophotrochozoa;Mollusca;Bivalvia;Autobranchia;Pteriormorphia;Ostr  
 eida;Ostreoidea;Ostreidae;Crassostrea;Crassostrea gigas

UdeM00000037853 6500 616.3 UdeM00000037853 XP\_005112685.1 63.8 461  
 167 0 1 461 1 461 3.20E-173 616.3 6500 cellular  
 organisms;Eukaryota;Opisthokonta;Metazoa;Eumetazoa;Bilateria;Protostomia;  
 Spiralia;Lophotrochozoa;Mollusca;Gastropoda;Heterobranchia;Euthyneura;Tec  
 tipleura;Aplysiida;Aplysioidea;Aplysiidae;Aplysia;Aplysia californica

UdeM00000037854 6596 1069.7 UdeM00000037854 XP\_045164397.1 69  
 810 223 7 15 810 11 806 0.00E+00 1069.7 6596  
 cellular  
 organisms;Eukaryota;Opisthokonta;Metazoa;Eumetazoa;Bilateria;Protostomia;  
 Spiralia;Lophotrochozoa;Mollusca;Bivalvia;Autobranchia;Heteroconchia;Euhe  
 terodonta;Imparidentia;Venerida;Veneroidea;Veneridae;Mercenaria;Mercenari  
 a mercenaria

UdeM00000037855 6596 128.6 UdeM00000037855 XP\_045165082.1 60.7 107  
 41 1 1 107 1 106 4.70E-27 128.6 6596 cellular  
 organisms;Eukaryota;Opisthokonta;Metazoa;Eumetazoa;Bilateria;Protostomia;  
 Spiralia;Lophotrochozoa;Mollusca;Bivalvia;Autobranchia;Heteroconchia;Euhe  
 terodonta;Imparidentia;Venerida;Veneroidea;Veneridae;Mercenaria;Mercenari  
 a mercenaria

UdeM00000037857 6596 219.9 UdeM00000037857 XP\_045166559.1 75.4 142  
 34 1 1 142 88 228 2.00E-54 219.9 6596 cellular  
 organisms;Eukaryota;Opisthokonta;Metazoa;Eumetazoa;Bilateria;Protostomia;  
 Spiralia;Lophotrochozoa;Mollusca;Bivalvia;Autobranchia;Heteroconchia;Euhe  
 terodonta;Imparidentia;Venerida;Veneroidea;Veneridae;Mercenaria;Mercenari  
 a mercenaria

UdeM00000037858 6596 736.5 UdeM00000037858 XP\_045166561.1 50.6 904  
 337 19 6 812 229 1119 4.40E-209 736.5 6596 cellular  
 organisms;Eukaryota;Opisthokonta;Metazoa;Eumetazoa;Bilateria;Protostomia;  
 Spiralia;Lophotrochozoa;Mollusca;Bivalvia;Autobranchia;Heteroconchia;Euhe  
 terodonta;Imparidentia;Venerida;Veneroidea;Veneridae;Mercenaria;Mercenari  
 a mercenaria  
 UdeM00000037859 6596 736.5 UdeM00000037859 XP\_045166561.1 50.6 904  
 337 19 6 812 229 1119 5.30E-209 736.5 6596 cellular  
 organisms;Eukaryota;Opisthokonta;Metazoa;Eumetazoa;Bilateria;Protostomia;  
 Spiralia;Lophotrochozoa;Mollusca;Bivalvia;Autobranchia;Heteroconchia;Euhe  
 terodonta;Imparidentia;Venerida;Veneroidea;Veneridae;Mercenaria;Mercenari  
 a mercenaria  
 UdeM00000037860 6596 369.8 UdeM00000037860 XP\_045166561.1 43.2 646  
 265 18 1 557 487 1119 1.00E-98 369.8 6596 cellular  
 organisms;Eukaryota;Opisthokonta;Metazoa;Eumetazoa;Bilateria;Protostomia;  
 Spiralia;Lophotrochozoa;Mollusca;Bivalvia;Autobranchia;Heteroconchia;Euhe  
 terodonta;Imparidentia;Venerida;Veneroidea;Veneridae;Mercenaria;Mercenari  
 a mercenaria  
 UdeM00000037861 29159 164.5 UdeM00000037861 XP\_034313081.1 50.3 161  
 78 2 52 211 135 294 1.60E-37 164.5 29159 cellular  
 organisms;Eukaryota;Opisthokonta;Metazoa;Eumetazoa;Bilateria;Protostomia;  
 Spiralia;Lophotrochozoa;Mollusca;Bivalvia;Autobranchia;Pteriormorphia;Ostr  
 eida;Ostreoidea;Ostreidae;Crassostrea;Crassostrea gigas  
 UdeM00000037862 6565 158.3 UdeM00000037862 XP\_022293464.1 46.1 154  
 81 1 1 154 339 490 8.60E-36 158.3 6565 cellular  
 organisms;Eukaryota;Opisthokonta;Metazoa;Eumetazoa;Bilateria;Protostomia;  
 Spiralia;Lophotrochozoa;Mollusca;Bivalvia;Autobranchia;Pteriormorphia;Ostr  
 eida;Ostreoidea;Ostreidae;Crassostrea;Crassostrea virginica  
 UdeM00000037863 6596 169.9 UdeM00000037863 XP\_045166555.1 41.5 205  
 118 1 15 219 3 205 4.20E-39 169.9 6596 cellular  
 organisms;Eukaryota;Opisthokonta;Metazoa;Eumetazoa;Bilateria;Protostomia;  
 Spiralia;Lophotrochozoa;Mollusca;Bivalvia;Autobranchia;Heteroconchia;Euhe  
 terodonta;Imparidentia;Venerida;Veneroidea;Veneridae;Mercenaria;Mercenari  
 a mercenaria  
 UdeM00000037864 6565 426 UdeM00000037864 XP\_022296857.1 52.4 393  
 172 4 3 389 1 384 1.60E-115 426 6565 cellular  
 organisms;Eukaryota;Opisthokonta;Metazoa;Eumetazoa;Bilateria;Protostomia;  
 Spiralia;Lophotrochozoa;Mollusca;Bivalvia;Autobranchia;Pteriormorphia;Ostr  
 eida;Ostreoidea;Ostreidae;Crassostrea;Crassostrea virginica  
 UdeM00000044318 6596 485.3 UdeM00000044318 XP\_045185394.1 57.8 410  
 161 5 24 428 17 419 8.80E-134 485.3 6596 cellular  
 organisms;Eukaryota;Opisthokonta;Metazoa;Eumetazoa;Bilateria;Protostomia;  
 Spiralia;Lophotrochozoa;Mollusca;Bivalvia;Autobranchia;Heteroconchia;Euhe  
 terodonta;Imparidentia;Venerida;Veneroidea;Veneridae;Mercenaria;Mercenari  
 a mercenaria  
 UdeM00000044320 6596 176.4 UdeM00000044320 XP\_045164928.1 59.4 138  
 50 1 3 134 124 261 2.40E-41 176.4 6596 cellular  
 organisms;Eukaryota;Opisthokonta;Metazoa;Eumetazoa;Bilateria;Protostomia;  
 Spiralia;Lophotrochozoa;Mollusca;Bivalvia;Autobranchia;Heteroconchia;Euhe  
 terodonta;Imparidentia;Venerida;Veneroidea;Veneridae;Mercenaria;Mercenari  
 a mercenaria  
 UdeM00000044319 6596 173.7 UdeM00000044319 XP\_045164928.1 66.7 117  
 39 0 34 150 145 261 1.80E-40 173.7 6596 cellular  
 organisms;Eukaryota;Opisthokonta;Metazoa;Eumetazoa;Bilateria;Protostomia;

Spiralia;Lophotrochozoa;Mollusca;Bivalvia;Autobranchia;Heteroconchia;Euherodonta;Imparidentia;Venerida;Veneroidea;Veneridae;Mercenaria;Mercenaria mercenaria

UdeM00000002088 29159 580.9 UdeM00000002088 XP\_011429969.1 49.1 532  
268 2 1 529 1 532 1.70E-162 580.9 29159 cellular

organisms;Eukaryota;Opisthokonta;Metazoa;Eumetazoa;Bilateria;Protostomia;Spiralia;Lophotrochozoa;Mollusca;Bivalvia;Autobranchia;Pteriomorpha;Ostreida;Ostreoidea;Ostreidae;Crassostrea;Crassostrea gigas

UdeM00000002089 29159 580.5 UdeM00000002089 XP\_011429969.1 49.1 532  
268 2 27 555 1 532 2.30E-162 580.5 29159 cellular

organisms;Eukaryota;Opisthokonta;Metazoa;Eumetazoa;Bilateria;Protostomia;Spiralia;Lophotrochozoa;Mollusca;Bivalvia;Autobranchia;Pteriomorpha;Ostreida;Ostreoidea;Ostreidae;Crassostrea;Crassostrea gigas

UdeM00000002090 6565 471.9 UdeM00000002090 XP\_022346107.1 55.8 398  
176 0 1 398 1 398 8.30E-130 471.9 6565 cellular

organisms;Eukaryota;Opisthokonta;Metazoa;Eumetazoa;Bilateria;Protostomia;Spiralia;Lophotrochozoa;Mollusca;Bivalvia;Autobranchia;Pteriomorpha;Ostreida;Ostreoidea;Ostreidae;Crassostrea;Crassostrea virginica

UdeM00000002091 6573 547.7 UdeM00000002091 XP\_021363389.1 62.1 427  
160 1 29 453 29 455 1.40E-152 547.7 6573 cellular

organisms;Eukaryota;Opisthokonta;Metazoa;Eumetazoa;Bilateria;Protostomia;Spiralia;Lophotrochozoa;Mollusca;Bivalvia;Autobranchia;Pteriomorpha;Pectinida;Pectinoidea;Pectinidae;Mizuhopecten;Mizuhopecten yessoensis

UdeM00000002092 6596 1808.1 UdeM00000002092 XP\_045163829.1 54.5  
1651 686 15 4 1639 6 1606 0.00E+00 1808.1 6596

cellular

organisms;Eukaryota;Opisthokonta;Metazoa;Eumetazoa;Bilateria;Protostomia;Spiralia;Lophotrochozoa;Mollusca;Bivalvia;Autobranchia;Heteroconchia;Euherodonta;Imparidentia;Venerida;Veneroidea;Veneridae;Mercenaria;Mercenaria mercenaria

UdeM00000002093 6596 1748.4 UdeM00000002093 XP\_045163829.1 53.4  
1650 706 17 4 1637 6 1608 0.00E+00 1748.4 6596

cellular

organisms;Eukaryota;Opisthokonta;Metazoa;Eumetazoa;Bilateria;Protostomia;Spiralia;Lophotrochozoa;Mollusca;Bivalvia;Autobranchia;Heteroconchia;Euherodonta;Imparidentia;Venerida;Veneroidea;Veneridae;Mercenaria;Mercenaria mercenaria

UdeM00000002094 6596 337 UdeM00000002094 XP\_045179239.1 64 250  
88 1 1 248 1 250 2.00E-89 337 6596 cellular

organisms;Eukaryota;Opisthokonta;Metazoa;Eumetazoa;Bilateria;Protostomia;Spiralia;Lophotrochozoa;Mollusca;Bivalvia;Autobranchia;Heteroconchia;Euherodonta;Imparidentia;Venerida;Veneroidea;Veneridae;Mercenaria;Mercenaria mercenaria

UdeM00000002095 6596 592.4 UdeM00000002095 XP\_045161075.1 79.6 367  
72 2 2 366 3 368 3.90E-166 592.4 6596 cellular

organisms;Eukaryota;Opisthokonta;Metazoa;Eumetazoa;Bilateria;Protostomia;Spiralia;Lophotrochozoa;Mollusca;Bivalvia;Autobranchia;Heteroconchia;Euherodonta;Imparidentia;Venerida;Veneroidea;Veneridae;Mercenaria;Mercenaria mercenaria

UdeM00000002096 6596 823.2 UdeM00000002096 XP\_045161087.1 54.4 871  
355 19 1 835 1 865 3.10E-235 823.2 6596 cellular

organisms;Eukaryota;Opisthokonta;Metazoa;Eumetazoa;Bilateria;Protostomia;Spiralia;Lophotrochozoa;Mollusca;Bivalvia;Autobranchia;Heteroconchia;Euherodonta;Imparidentia;Venerida;Veneroidea;Veneridae;Mercenaria;Mercenaria mercenaria



terodonta;Imparidentia;Venerida;Veneroidea;Veneridae;Mercenaria;Mercenaria mercenaria

UdeM00000002097 6573 389 UdeM00000002097 XP\_021357267.1 47.3 385  
188 6 1 379 10 385 7.20E-105 389 6573 cellular

organisms;Eukaryota;Opisthokonta;Metazoa;Eumetazoa;Bilateria;Protostomia;Spiralia;Lophotrochozoa;Mollusca;Bivalvia;Autobranchia;Pteriormorphia;Pectinida;Pectinoidea;Pectinidae;Mizuhopecten;Mizuhopecten yessoensis

UdeM00000002098 1735272 75.5 UdeM00000002098 XP\_041354181.1 29.9  
177 119 2 19 191 17 192 1.10E-10 75.5 1735272  
cellular

organisms;Eukaryota;Opisthokonta;Metazoa;Eumetazoa;Bilateria;Protostomia;Spiralia;Lophotrochozoa;Mollusca;Gastropoda;Neomphalina;Neomphaloidea;Peltospiridae;Gigantopelta;Gigantopelta aegis

UdeM00000002099 6565 308.9 UdeM00000002099 XP\_022332440.1 62 250  
91 2 35 282 90 337 1.20E-80 308.9 6565 cellular

organisms;Eukaryota;Opisthokonta;Metazoa;Eumetazoa;Bilateria;Protostomia;Spiralia;Lophotrochozoa;Mollusca;Bivalvia;Autobranchia;Pteriormorphia;Ostreida;Ostreoidea;Ostreidae;Crassostrea;Crassostrea virginica

UdeM00000002100 6579 537.3 UdeM00000002100 XP\_033735148.1 61.7 465  
155 8 1 458 1 449 1.80E-149 537.3 6579 cellular

organisms;Eukaryota;Opisthokonta;Metazoa;Eumetazoa;Bilateria;Protostomia;Spiralia;Lophotrochozoa;Mollusca;Bivalvia;Autobranchia;Pteriormorphia;Pectinida;Pectinoidea;Pectinidae;Pecten;Pecten maximus

UdeM00000002102 1735272 998 UdeM00000002102 XP\_041353787.1 84  
630 95 4 1 626 21 648 5.20E-288 998 1735272  
cellular

organisms;Eukaryota;Opisthokonta;Metazoa;Eumetazoa;Bilateria;Protostomia;Spiralia;Lophotrochozoa;Mollusca;Gastropoda;Neomphalina;Neomphaloidea;Peltospiridae;Gigantopelta;Gigantopelta aegis

UdeM00000002104 1735272 992.3 UdeM00000002104 XP\_041353787.1 83.3  
630 99 4 1 626 21 648 2.90E-286 992.3 1735272  
cellular

organisms;Eukaryota;Opisthokonta;Metazoa;Eumetazoa;Bilateria;Protostomia;Spiralia;Lophotrochozoa;Mollusca;Gastropoda;Neomphalina;Neomphaloidea;Peltospiridae;Gigantopelta;Gigantopelta aegis

UdeM00000002103 1735272 972.6 UdeM00000002103 XP\_041353787.1 85  
605 85 4 1 601 21 623 3.20E-280 972.6 1735272  
cellular

organisms;Eukaryota;Opisthokonta;Metazoa;Eumetazoa;Bilateria;Protostomia;Spiralia;Lophotrochozoa;Mollusca;Gastropoda;Neomphalina;Neomphaloidea;Peltospiridae;Gigantopelta;Gigantopelta aegis

UdeM00000002105 6596 122.1 UdeM00000002105 XP\_045186262.1 40.8 147  
77 5 1 139 1 145 1.50E-24 122.1 6596 cellular

organisms;Eukaryota;Opisthokonta;Metazoa;Eumetazoa;Bilateria;Protostomia;Spiralia;Lophotrochozoa;Mollusca;Bivalvia;Autobranchia;Heteroconchia;Euheterodonta;Imparidentia;Venerida;Veneroidea;Veneridae;Mercenaria;Mercenaria mercenaria

UdeM00000002106 6596 1064.7 UdeM00000002106 XP\_045186232.1 65.3  
776 267 2 62 836 71 845 6.10E-308 1064.7 6596  
cellular

organisms;Eukaryota;Opisthokonta;Metazoa;Eumetazoa;Bilateria;Protostomia;Spiralia;Lophotrochozoa;Mollusca;Bivalvia;Autobranchia;Heteroconchia;Euheterodonta;Imparidentia;Venerida;Veneroidea;Veneridae;Mercenaria;Mercenaria mercenaria

UdeM00000002107 6596 314.3 UdeM00000002107 XP\_045163821.1 42.6 338  
 188 2 60 391 97 434 2.20E-82 314.3 6596 cellular  
 organisms;Eukaryota;Opisthokonta;Metazoa;Eumetazoa;Bilateria;Protostomia;  
 Spiralia;Lophotrochozoa;Mollusca;Bivalvia;Autobranchia;Heteroconchia;Euhe  
 terodonta;Imparidentia;Venerida;Veneroidea;Veneridae;Mercenaria;Mercenari  
 a mercenaria  
 UdeM00000002109 30213 390.6 UdeM00000002109 XP\_043676064.1 41 722  
 379 15 4 715 5 689 4.80E-105 390.6 30213 cellular  
 organisms;Eukaryota;Opisthokonta;Metazoa;Eumetazoa;Bilateria;Protostomia;  
 Ecdysozoa;Panarthropoda;Arthropoda;Mandibulata;Pancrustacea;Hexapoda;Inse  
 cta;Dicondylia;Pterygota;Neoptera;Endopterygota;Hymenoptera;Apocrita;Acul  
 eata;Vespoidea;Vespidae;Vespinae;Vespula;Vespula pensylvanica  
 UdeM00000002110 6596 543.9 UdeM00000002110 XP\_045159966.1 50.5 733  
 334 7 1 716 4 724 3.10E-151 543.9 6596 cellular  
 organisms;Eukaryota;Opisthokonta;Metazoa;Eumetazoa;Bilateria;Protostomia;  
 Spiralia;Lophotrochozoa;Mollusca;Bivalvia;Autobranchia;Heteroconchia;Euhe  
 terodonta;Imparidentia;Venerida;Veneroidea;Veneridae;Mercenaria;Mercenari  
 a mercenaria  
 UdeM00000002111 6579 84.3 UdeM00000002111 XP\_033735982.1 35.4 113  
 66 2 116 225 254 362 2.10E-13 84.3 6579 cellular  
 organisms;Eukaryota;Opisthokonta;Metazoa;Eumetazoa;Bilateria;Protostomia;  
 Spiralia;Lophotrochozoa;Mollusca;Bivalvia;Autobranchia;Pteriormorphia;Pect  
 inida;Pectinoidea;Pectinidae;Pecten;Pecten maximus  
 UdeM00000002113 1735272 569.7 UdeM00000002113 XP\_041353635.1 64.8  
 406 143 0 1 406 33 438 3.00E-159 569.7 1735272  
 cellular  
 organisms;Eukaryota;Opisthokonta;Metazoa;Eumetazoa;Bilateria;Protostomia;  
 Spiralia;Lophotrochozoa;Mollusca;Gastropoda;Neomphalina;Neomphaloidea;Pel  
 tospiridae;Gigantopelta;Gigantopelta aegis  
 UdeM00000002114 6596 136.3 UdeM00000002114 XP\_045161056.1 47.3 207  
 91 5 22 215 14 215 4.50E-29 136.3 6596 cellular  
 organisms;Eukaryota;Opisthokonta;Metazoa;Eumetazoa;Bilateria;Protostomia;  
 Spiralia;Lophotrochozoa;Mollusca;Bivalvia;Autobranchia;Heteroconchia;Euhe  
 terodonta;Imparidentia;Venerida;Veneroidea;Veneridae;Mercenaria;Mercenari  
 a mercenaria  
 UdeM00000002115 400727 302.4 UdeM00000002115 XP\_025108466.1 52.1  
 288 135 2 31 318 59 343 8.00E-79 302.4 400727  
 cellular  
 organisms;Eukaryota;Opisthokonta;Metazoa;Eumetazoa;Bilateria;Protostomia;  
 Spiralia;Lophotrochozoa;Mollusca;Gastropoda;Caenogastropoda;Architaeniogl  
 ossa;Ampullarioidea;Ampullariidae;Pomacea;Pomacea canaliculata  
 UdeM00000002116 6596 86.3 UdeM00000002116 XP\_045190867.1 43.5 108  
 60 1 51 158 646 752 4.30E-14 86.3 6596 cellular  
 organisms;Eukaryota;Opisthokonta;Metazoa;Eumetazoa;Bilateria;Protostomia;  
 Spiralia;Lophotrochozoa;Mollusca;Bivalvia;Autobranchia;Heteroconchia;Euhe  
 terodonta;Imparidentia;Venerida;Veneroidea;Veneridae;Mercenaria;Mercenari  
 a mercenaria  
 UdeM00000002117 6579 219.9 UdeM00000002117 XP\_033739209.1 49.6 232  
 101 2 17 243 29 249 3.50E-54 219.9 6579 cellular  
 organisms;Eukaryota;Opisthokonta;Metazoa;Eumetazoa;Bilateria;Protostomia;  
 Spiralia;Lophotrochozoa;Mollusca;Bivalvia;Autobranchia;Pteriormorphia;Pect  
 inida;Pectinoidea;Pectinidae;Pecten;Pecten maximus  
 UdeM00000002119 29159 857.4 UdeM00000002119 XP\_034305523.1 51.6 913  
 421 11 16 924 9 904 1.60E-245 857.4 29159 cellular

organisms;Eukaryota;Opisthokonta;Metazoa;Eumetazoa;Bilateria;Protostomia;Spiralia;Lophotrochozoa;Mollusca;Bivalvia;Autobranchia;Pteriormorphia;Ostreida;Ostreoidea;Ostreidae;Crassostrea;Crassostrea gigas

UdeM00000002120 29159 156.8 UdeM00000002120 XP\_034305523.1 50.7 134  
65 1 2 134 771 904 2.20E-35 156.8 29159 cellular

organisms;Eukaryota;Opisthokonta;Metazoa;Eumetazoa;Bilateria;Protostomia;Spiralia;Lophotrochozoa;Mollusca;Bivalvia;Autobranchia;Pteriormorphia;Ostreida;Ostreoidea;Ostreidae;Crassostrea;Crassostrea gigas

UdeM00000002121 6596 137.1 UdeM00000002121 XP\_045161056.1 61.2 121  
45 1 39 157 28 148 3.90E-29 137.1 6596 cellular

organisms;Eukaryota;Opisthokonta;Metazoa;Eumetazoa;Bilateria;Protostomia;Spiralia;Lophotrochozoa;Mollusca;Bivalvia;Autobranchia;Heteroconchia;Euheterodonta;Imparidentia;Venerida;Veneroidea;Veneridae;Mercenaria;Mercenaria mercenaria

UdeM00000002122 1735272 613.6 UdeM00000002122 XP\_041351996.1 70.5  
641 178 3 1 631 1 640 2.90E-172 613.6 1735272  
cellular

organisms;Eukaryota;Opisthokonta;Metazoa;Eumetazoa;Bilateria;Protostomia;Spiralia;Lophotrochozoa;Mollusca;Gastropoda;Neomphalina;Neomphaloidea;Peltospiridae;Gigantopelta;Gigantopelta aegis

UdeM00000002123 6596 313.2 UdeM00000002123 XP\_045157071.1 72.2 212  
56 2 165 375 4 213 4.70E-82 313.2 6596 cellular

organisms;Eukaryota;Opisthokonta;Metazoa;Eumetazoa;Bilateria;Protostomia;Spiralia;Lophotrochozoa;Mollusca;Bivalvia;Autobranchia;Heteroconchia;Euheterodonta;Imparidentia;Venerida;Veneroidea;Veneridae;Mercenaria;Mercenaria mercenaria

UdeM00000002127 6579 384.4 UdeM00000002127 XP\_033736332.1 45.6 452  
196 7 1 449 27 431 2.00E-103 384.4 6579 cellular

organisms;Eukaryota;Opisthokonta;Metazoa;Eumetazoa;Bilateria;Protostomia;Spiralia;Lophotrochozoa;Mollusca;Bivalvia;Autobranchia;Pteriormorphia;Pectinida;Pectinoidea;Pectinidae;Pecten;Pecten maximus

UdeM00000002129 7574 224.2 UdeM00000002129 XP\_013397718.1 97.4 115  
3 0 1 115 5 119 8.70E-56 224.2 7574 cellular

organisms;Eukaryota;Opisthokonta;Metazoa;Eumetazoa;Bilateria;Protostomia;Spiralia;Lophotrochozoa;Brachiopoda;Linguliformea;Lingulata;Lingulida;Linguloidea;Lingulidae;Lingula;Lingula anatina

UdeM00000002128 6596 230.7 UdeM00000002128 XP\_045161891.1 97.5 119  
3 0 1 119 1 119 9.70E-58 230.7 6596 cellular

organisms;Eukaryota;Opisthokonta;Metazoa;Eumetazoa;Bilateria;Protostomia;Spiralia;Lophotrochozoa;Mollusca;Bivalvia;Autobranchia;Heteroconchia;Euheterodonta;Imparidentia;Venerida;Veneroidea;Veneridae;Mercenaria;Mercenaria mercenaria

UdeM00000002130 151771 239.6 UdeM00000002130 XP\_028415423.1 26.6  
624 300 8 4 471 7 628 8.20E-60 239.6 151771  
cellular

organisms;Eukaryota;Opisthokonta;Metazoa;Eumetazoa;Cnidaria;Anthozoa;Octocorallia;Alcyonacea;Alcyoniina;Nephtheidae;Dendronephthya;Dendronephthya gigantea

UdeM00000002131 6526 225.7 UdeM00000002131 XP\_013084353.1 78.1 137  
30 0 8 144 10 146 3.80E-56 225.7 6526 cellular

organisms;Eukaryota;Opisthokonta;Metazoa;Eumetazoa;Bilateria;Protostomia;Spiralia;Lophotrochozoa;Mollusca;Gastropoda;Heterobranchia;Euthyneura;Pulmonata;Hygrophila;Lymnaeidae;Planorbidae;Biomphalaria;Biomphalaria glabrata

UdeM00000002132 6526 223.4 UdeM00000002132 XP\_013084353.1 80.8 130  
 25 0 3 132 17 146 1.70E-55 223.4 6526 cellular  
 organisms;Eukaryota;Opisthokonta;Metazoa;Eumetazoa;Bilateria;Protostomia;  
 Spiralia;Lophotrochozoa;Mollusca;Gastropoda;Heterobranchia;Euthyneura;Pan  
 pulmonata;Hygrophila;Lymnaeidae;Planorbidae;Biomphalaria;Biomphalaria  
 glabrata  
 UdeM00000002133 6573 174.1 UdeM00000002133 XP\_021378491.1 24.1 918  
 565 27 325 1148 473 1352 1.00E-39 174.1 6573 cellular  
 organisms;Eukaryota;Opisthokonta;Metazoa;Eumetazoa;Bilateria;Protostomia;  
 Spiralia;Lophotrochozoa;Mollusca;Bivalvia;Autobranchia;Pteriormorphia;Pect  
 inida;Pectinoidea;Pectinidae;Mizuhopecten;Mizuhopecten yessoensis  
 UdeM00000002134 6596 284.3 UdeM00000002134 XP\_045187452.1 74.4 172  
 44 0 3 174 6 177 1.10E-73 284.3 6596 cellular  
 organisms;Eukaryota;Opisthokonta;Metazoa;Eumetazoa;Bilateria;Protostomia;  
 Spiralia;Lophotrochozoa;Mollusca;Bivalvia;Autobranchia;Heteroconchia;Euhe  
 terodonta;Imparidentia;Venerida;Veneroidea;Veneridae;Mercenaria;Mercenari  
 a mercenaria  
 UdeM00000002135 6596 501.9 UdeM00000002135 XP\_045182621.1 71.2 323  
 93 0 29 351 31 353 6.60E-139 501.9 6596 cellular  
 organisms;Eukaryota;Opisthokonta;Metazoa;Eumetazoa;Bilateria;Protostomia;  
 Spiralia;Lophotrochozoa;Mollusca;Bivalvia;Autobranchia;Heteroconchia;Euhe  
 terodonta;Imparidentia;Venerida;Veneroidea;Veneridae;Mercenaria;Mercenari  
 a mercenaria  
 UdeM00000002137 6596 334 UdeM00000002137 XP\_045187126.1 50.6 356  
 159 3 1 356 67 405 2.40E-88 334 6596 cellular  
 organisms;Eukaryota;Opisthokonta;Metazoa;Eumetazoa;Bilateria;Protostomia;  
 Spiralia;Lophotrochozoa;Mollusca;Bivalvia;Autobranchia;Heteroconchia;Euhe  
 terodonta;Imparidentia;Venerida;Veneroidea;Veneridae;Mercenaria;Mercenari  
 a mercenaria  
 UdeM00000002136 6596 376.3 UdeM00000002136 XP\_045187127.1 51.8 386  
 169 3 7 392 9 377 4.70E-101 376.3 6596 cellular  
 organisms;Eukaryota;Opisthokonta;Metazoa;Eumetazoa;Bilateria;Protostomia;  
 Spiralia;Lophotrochozoa;Mollusca;Bivalvia;Autobranchia;Heteroconchia;Euhe  
 terodonta;Imparidentia;Venerida;Veneroidea;Veneridae;Mercenaria;Mercenari  
 a mercenaria  
 UdeM00000002138 6596 1444.9 UdeM00000002138 XP\_045187123.1 88.9  
 783 84 2 1 783 1 780 0.00E+00 1444.9 6596  
 cellular  
 organisms;Eukaryota;Opisthokonta;Metazoa;Eumetazoa;Bilateria;Protostomia;  
 Spiralia;Lophotrochozoa;Mollusca;Bivalvia;Autobranchia;Heteroconchia;Euhe  
 terodonta;Imparidentia;Venerida;Veneroidea;Veneridae;Mercenaria;Mercenari  
 a mercenaria  
 UdeM00000002139 6596 325.1 UdeM00000002139 XP\_045187122.1 87.9 190  
 23 0 1 190 1 190 6.00E-86 325.1 6596 cellular  
 organisms;Eukaryota;Opisthokonta;Metazoa;Eumetazoa;Bilateria;Protostomia;  
 Spiralia;Lophotrochozoa;Mollusca;Bivalvia;Autobranchia;Heteroconchia;Euhe  
 terodonta;Imparidentia;Venerida;Veneroidea;Veneridae;Mercenaria;Mercenari  
 a mercenaria  
 UdeM00000002140 6596 301.2 UdeM00000002140 XP\_045187122.1 87.9 174  
 21 0 1 174 1 174 8.60E-79 301.2 6596 cellular  
 organisms;Eukaryota;Opisthokonta;Metazoa;Eumetazoa;Bilateria;Protostomia;  
 Spiralia;Lophotrochozoa;Mollusca;Bivalvia;Autobranchia;Heteroconchia;Euhe  
 terodonta;Imparidentia;Venerida;Veneroidea;Veneridae;Mercenaria;Mercenari  
 a mercenaria

UdeM00000002141 1735272 323.2 UdeM00000002141 XP\_041353254.1 54.4  
 272 123 1 29 300 25 295 3.60E-85 323.2 1735272  
 cellular  
 organisms;Eukaryota;Opisthokonta;Metazoa;Eumetazoa;Bilateria;Protostomia;  
 Spiralia;Lophotrochozoa;Mollusca;Gastropoda;Neomphalina;Neomphaloidea;Pel  
 tospiridae;Gigantopelta;Gigantopelta aegis  
 UdeM00000002142 6579 243.8 UdeM00000002142 XP\_033734537.1 61.7 188  
 70 2 5 190 13 200 1.80E-61 243.8 6579 cellular  
 organisms;Eukaryota;Opisthokonta;Metazoa;Eumetazoa;Bilateria;Protostomia;  
 Spiralia;Lophotrochozoa;Mollusca;Bivalvia;Autobranchia;Pteriormorphia;Pect  
 inida;Pectinoidea;Pectinidae;Pecten;Pecten maximus  
 UdeM00000002143 6579 263.1 UdeM00000002143 XP\_033734537.1 64.9 188  
 65 1 5 191 13 200 2.80E-67 263.1 6579 cellular  
 organisms;Eukaryota;Opisthokonta;Metazoa;Eumetazoa;Bilateria;Protostomia;  
 Spiralia;Lophotrochozoa;Mollusca;Bivalvia;Autobranchia;Pteriormorphia;Pect  
 inida;Pectinoidea;Pectinidae;Pecten;Pecten maximus  
 UdeM00000002144 6573 267.7 UdeM00000002144 XP\_021379956.1 44.4 351  
 178 4 22 367 13 351 2.20E-68 267.7 6573 cellular  
 organisms;Eukaryota;Opisthokonta;Metazoa;Eumetazoa;Bilateria;Protostomia;  
 Spiralia;Lophotrochozoa;Mollusca;Bivalvia;Autobranchia;Pteriormorphia;Pect  
 inida;Pectinoidea;Pectinidae;Mizuhopecten;Mizuhopecten yessoensis  
 UdeM00000002145 6596 354.4 UdeM00000002145 XP\_045184795.1 36.7 569  
 348 7 41 601 21 585 2.90E-94 354.4 6596 cellular  
 organisms;Eukaryota;Opisthokonta;Metazoa;Eumetazoa;Bilateria;Protostomia;  
 Spiralia;Lophotrochozoa;Mollusca;Bivalvia;Autobranchia;Heteroconchia;Euhe  
 terodonta;Imparidentia;Venerida;Veneroidea;Veneridae;Mercenaria;Mercenari  
 a mercenaria  
 UdeM00000002146 6596 444.5 UdeM00000002146 XP\_045184795.1 40.9 575  
 327 9 9 578 16 582 2.10E-121 444.5 6596 cellular  
 organisms;Eukaryota;Opisthokonta;Metazoa;Eumetazoa;Bilateria;Protostomia;  
 Spiralia;Lophotrochozoa;Mollusca;Bivalvia;Autobranchia;Heteroconchia;Euhe  
 terodonta;Imparidentia;Venerida;Veneroidea;Veneridae;Mercenaria;Mercenari  
 a mercenaria  
 UdeM00000002147 6500 164.5 UdeM00000002147 XP\_005090674.1 52.6 156  
 72 2 1 154 5 160 1.10E-37 164.5 6500 cellular  
 organisms;Eukaryota;Opisthokonta;Metazoa;Eumetazoa;Bilateria;Protostomia;  
 Spiralia;Lophotrochozoa;Mollusca;Gastropoda;Heterobranchia;Euthyneura;Tec  
 tipleura;Aplysiida;Aplysioidea;Aplysiidae;Aplysia;Aplysia californica  
 UdeM00000002148 6596 397.1 UdeM00000002148 XP\_045170479.1 64 303  
 108 1 1 302 1 303 2.00E-107 397.1 6596 cellular  
 organisms;Eukaryota;Opisthokonta;Metazoa;Eumetazoa;Bilateria;Protostomia;  
 Spiralia;Lophotrochozoa;Mollusca;Bivalvia;Autobranchia;Heteroconchia;Euhe  
 terodonta;Imparidentia;Venerida;Veneroidea;Veneridae;Mercenaria;Mercenari  
 a mercenaria  
 UdeM00000002149 6596 178.7 UdeM00000002149 XP\_045170479.1 69.6 125  
 37 1 1 124 179 303 4.60E-42 178.7 6596 cellular  
 organisms;Eukaryota;Opisthokonta;Metazoa;Eumetazoa;Bilateria;Protostomia;  
 Spiralia;Lophotrochozoa;Mollusca;Bivalvia;Autobranchia;Heteroconchia;Euhe  
 terodonta;Imparidentia;Venerida;Veneroidea;Veneridae;Mercenaria;Mercenari  
 a mercenaria  
 UdeM00000002150 151771 219.5 UdeM00000002150 XP\_028415423.1 34.2  
 398 178 7 3 321 5 397 6.00E-54 219.5 151771  
 cellular  
 organisms;Eukaryota;Opisthokonta;Metazoa;Eumetazoa;Cnidaria;Anthozoa;Octo

corallia;Alcyonacea;Alcyoniina;Nephtheidae;Dendronephthya;Dendronephthya gigantea  
 UdeM00000002151 6573 312.8 UdeM00000002151 XP\_021378012.1 51.9 312  
 145 3 151 458 1 311 7.50E-82 312.8 6573 cellular  
 organisms;Eukaryota;Opisthokonta;Metazoa;Eumetazoa;Bilateria;Protostomia;  
 Spiralia;Lophotrochozoa;Mollusca;Bivalvia;Autobranchia;Pteriormorphia;Pect  
 inida;Pectinoidea;Pectinidae;Mizuhopecten;Mizuhopecten yessoensis  
 UdeM00000002152 28377 85.1 UdeM00000002152 XP\_016852536.1 61.8 55  
 21 0 41 95 27 81 5.30E-14 85.1 28377 cellular  
 organisms;Eukaryota;Opisthokonta;Metazoa;Eumetazoa;Bilateria;Deuterostomi  
 a;Chordata;Craniata;Vertebrata;Gnathostomata;Teleostomi;Euteleostomi;Sarc  
 opterygii;Dipnotetrapodomorpha;Tetrapoda;Amniota;Sauropsida;Sauria;Lepido  
 sauria;Squamata;Bifurcata;Unidentata;Episquamata;Toxicofera;Iguania;Dacty  
 loidae;Anolis;Anolis carolinensis  
 UdeM00000002153 202533 86.7 UdeM00000002153 XP\_035229803.1 63  
 54 20 0 71 124 157 210 2.40E-14 86.7 202533  
 cellular  
 organisms;Eukaryota;Opisthokonta;Metazoa;Eumetazoa;Bilateria;Protostomia;  
 Ecdysozoa;Panarthropoda;Arthropoda;Chelicerata;Arachnida;Araneae;Araneomo  
 rphae;Entelegynae;Eresoidea;Eresidae;Stegodyphus;Stegodyphus dumicola  
 UdeM00000002154 6941 86.3 UdeM00000002154 XP\_037274979.1 64.2 53  
 19 0 20 72 105 157 1.90E-14 86.3 6941 cellular  
 organisms;Eukaryota;Opisthokonta;Metazoa;Eumetazoa;Bilateria;Protostomia;  
 Ecdysozoa;Panarthropoda;Arthropoda;Chelicerata;Arachnida;Acari;Parasitifo  
 rmes;Ixodida;Ixodoidea;Ixodidae;Rhipicephalinae;Rhipicephalus;Boophilus;R  
 hipicephalus microplus  
 UdeM00000002155 6565 566.6 UdeM00000002155 XP\_022330967.1 59.7 551  
 198 8 1 544 5 538 3.40E-158 566.6 6565 cellular  
 organisms;Eukaryota;Opisthokonta;Metazoa;Eumetazoa;Bilateria;Protostomia;  
 Spiralia;Lophotrochozoa;Mollusca;Bivalvia;Autobranchia;Pteriormorphia;Ostr  
 eida;Ostreoidea;Ostreidae;Crassostrea;Crassostrea virginica  
 UdeM00000002156 6573 524.2 UdeM00000002156 XP\_021378154.1 73 352  
 91 3 1 348 1 352 1.30E-145 524.2 6573 cellular  
 organisms;Eukaryota;Opisthokonta;Metazoa;Eumetazoa;Bilateria;Protostomia;  
 Spiralia;Lophotrochozoa;Mollusca;Bivalvia;Autobranchia;Pteriormorphia;Pect  
 inida;Pectinoidea;Pectinidae;Mizuhopecten;Mizuhopecten yessoensis  
 UdeM00000002157 7574 604.4 UdeM00000002157 XP\_013396332.1 48.8 652  
 279 7 1 619 1 630 1.70E-169 604.4 7574 cellular  
 organisms;Eukaryota;Opisthokonta;Metazoa;Eumetazoa;Bilateria;Protostomia;  
 Spiralia;Lophotrochozoa;Brachiopoda;Linguliformea;Lingulata;Lingulida;Lin  
 guloidea;Lingulidae;Lingula;Lingula anatina  
 UdeM00000002158 6565 229.9 UdeM00000002158 XP\_022330950.1 39.8 508  
 249 15 17 501 1272 1745 6.90E-57 229.9 6565 cellular  
 organisms;Eukaryota;Opisthokonta;Metazoa;Eumetazoa;Bilateria;Protostomia;  
 Spiralia;Lophotrochozoa;Mollusca;Bivalvia;Autobranchia;Pteriormorphia;Ostr  
 eida;Ostreoidea;Ostreidae;Crassostrea;Crassostrea virginica  
 UdeM00000002159 6579 1121.3 UdeM00000002159 XP\_033736072.1 56.4  
 1091 410 12 10 1046 4 1082 0.00E+00 1121.3 6579  
 cellular  
 organisms;Eukaryota;Opisthokonta;Metazoa;Eumetazoa;Bilateria;Protostomia;  
 Spiralia;Lophotrochozoa;Mollusca;Bivalvia;Autobranchia;Pteriormorphia;Pect  
 inida;Pectinoidea;Pectinidae;Pecten;Pecten maximus  
 UdeM00000002160 6596 164.9 UdeM00000002160 XP\_045158716.1 35 349  
 183 8 103 426 1370 1699 2.30E-37 164.9 6596 cellular

organisms;Eukaryota;Opisthokonta;Metazoa;Eumetazoa;Bilateria;Protostomia;Spiralia;Lophotrochozoa;Mollusca;Bivalvia;Autobranchia;Heteroconchia;Euherodonta;Imparidentia;Venerida;Veneroidea;Veneridae;Mercenaria;Mercenaria mercenaria

UdeM00000002161 6596 1132.5 UdeM00000002161 XP\_045158716.1 41.7  
1508 759 24 20 1481 266 1699 0.00E+00 1132.5 6596  
cellular

organisms;Eukaryota;Opisthokonta;Metazoa;Eumetazoa;Bilateria;Protostomia;Spiralia;Lophotrochozoa;Mollusca;Bivalvia;Autobranchia;Heteroconchia;Euherodonta;Imparidentia;Venerida;Veneroidea;Veneridae;Mercenaria;Mercenaria mercenaria

UdeM00000002162 29159 144.8 UdeM00000002162 XP\_034326827.1 51.9 154  
68 2 1 153 1 149 9.10E-32 144.8 29159 cellular

organisms;Eukaryota;Opisthokonta;Metazoa;Eumetazoa;Bilateria;Protostomia;Spiralia;Lophotrochozoa;Mollusca;Bivalvia;Autobranchia;Pteriomorpha;Ostreida;Ostreoidea;Ostreidae;Crassostrea;Crassostrea gigas

UdeM00000002163 1735272 965.3 UdeM00000002163 XP\_041353446.1 62.9  
765 275 4 1 760 1 761 4.60E-278 965.3 1735272  
cellular

organisms;Eukaryota;Opisthokonta;Metazoa;Eumetazoa;Bilateria;Protostomia;Spiralia;Lophotrochozoa;Mollusca;Gastropoda;Neomphalina;Neomphaloidea;Peltopspiridae;Gigantopelta;Gigantopelta aegis

UdeM00000002164 6596 357.8 UdeM00000002164 XP\_045181007.1 50.3 354  
174 2 1 353 1 353 1.60E-95 357.8 6596 cellular

organisms;Eukaryota;Opisthokonta;Metazoa;Eumetazoa;Bilateria;Protostomia;Spiralia;Lophotrochozoa;Mollusca;Bivalvia;Autobranchia;Heteroconchia;Euherodonta;Imparidentia;Venerida;Veneroidea;Veneridae;Mercenaria;Mercenaria mercenaria

UdeM00000002165 6596 1477.2 UdeM00000002165 XP\_045181004.1 49.9  
1568 738 17 1 1540 394 1942 0.00E+00 1477.2 6596  
cellular

organisms;Eukaryota;Opisthokonta;Metazoa;Eumetazoa;Bilateria;Protostomia;Spiralia;Lophotrochozoa;Mollusca;Bivalvia;Autobranchia;Heteroconchia;Euherodonta;Imparidentia;Venerida;Veneroidea;Veneridae;Mercenaria;Mercenaria mercenaria

UdeM00000002166 6596 193.4 UdeM00000002166 XP\_045181004.1 41.9 236  
133 2 1 235 1975 2207 3.40E-46 193.4 6596 cellular

organisms;Eukaryota;Opisthokonta;Metazoa;Eumetazoa;Bilateria;Protostomia;Spiralia;Lophotrochozoa;Mollusca;Bivalvia;Autobranchia;Heteroconchia;Euherodonta;Imparidentia;Venerida;Veneroidea;Veneridae;Mercenaria;Mercenaria mercenaria

UdeM00000002167 6579 75.1 UdeM00000002167 XP\_033734713.1 44.6 92  
51 0 59 150 292 383 1.60E-10 75.1 6579 cellular

organisms;Eukaryota;Opisthokonta;Metazoa;Eumetazoa;Bilateria;Protostomia;Spiralia;Lophotrochozoa;Mollusca;Bivalvia;Autobranchia;Pteriomorpha;Pectinida;Pectinoidea;Pectinidae;Pecten;Pecten maximus

UdeM00000002169 6579 288.9 UdeM00000002169 XP\_033734182.1 55.7 264  
105 3 52 315 16 267 7.90E-75 288.9 6579 cellular

organisms;Eukaryota;Opisthokonta;Metazoa;Eumetazoa;Bilateria;Protostomia;Spiralia;Lophotrochozoa;Mollusca;Bivalvia;Autobranchia;Pteriomorpha;Pectinida;Pectinoidea;Pectinidae;Pecten;Pecten maximus

UdeM00000002168 6573 666.4 UdeM00000002168 XP\_021361758.1 49.3 682  
319 8 44 721 11 669 4.20E-188 666.4 6573 cellular

organisms;Eukaryota;Opisthokonta;Metazoa;Eumetazoa;Bilateria;Protostomia;

Spiralia; Lophotrochozoa; Mollusca; Bivalvia; Autobranchia; Pteriomorpha; Pectinida; Pectinoidea; Pectinidae; Mizuhopecten; Mizuhopecten yessoensis  
 UdeM00000002170 6573 681.4 UdeM00000002170 XP\_021361758.1 50.4 679  
 316 6 18 693 4 664 1.40E-192 681.4 6573 cellular  
 organisms; Eukaryota; Opisthokonta; Metazoa; Eumetazoa; Bilateria; Protostomia; Spiralia; Lophotrochozoa; Mollusca; Bivalvia; Autobranchia; Pteriomorpha; Pectinida; Pectinoidea; Pectinidae; Mizuhopecten; Mizuhopecten yessoensis  
 UdeM00000002171 1735272 149.8 UdeM00000002171 XP\_041352779.1 41.7  
 187 100 5 180 364 25 204 7.10E-33 149.8 1735272  
 cellular  
 organisms; Eukaryota; Opisthokonta; Metazoa; Eumetazoa; Bilateria; Protostomia; Spiralia; Lophotrochozoa; Mollusca; Gastropoda; Neomphalina; Neomphaloidea; Peltospiridae; Gigantopelta; Gigantopelta aegis  
 UdeM00000002172 1735272 148.7 UdeM00000002172 XP\_041352779.1 42.7  
 185 99 6 88 270 25 204 1.20E-32 148.7 1735272  
 cellular  
 organisms; Eukaryota; Opisthokonta; Metazoa; Eumetazoa; Bilateria; Protostomia; Spiralia; Lophotrochozoa; Mollusca; Gastropoda; Neomphalina; Neomphaloidea; Peltospiridae; Gigantopelta; Gigantopelta aegis  
 UdeM00000002173 29159 96.3 UdeM00000002173 XP\_019918637.2 31.6 190  
 122 4 1 185 3 189 5.20E-17 96.3 29159 cellular  
 organisms; Eukaryota; Opisthokonta; Metazoa; Eumetazoa; Bilateria; Protostomia; Spiralia; Lophotrochozoa; Mollusca; Bivalvia; Autobranchia; Pteriomorpha; Ostreida; Ostreidae; Crassostrea; Crassostrea gigas  
 UdeM00000002174 1735272 408.7 UdeM00000002174 XP\_041353596.1 62.8  
 323 116 4 20 340 18 338 7.50E-111 408.7 1735272  
 cellular  
 organisms; Eukaryota; Opisthokonta; Metazoa; Eumetazoa; Bilateria; Protostomia; Spiralia; Lophotrochozoa; Mollusca; Gastropoda; Neomphalina; Neomphaloidea; Peltospiridae; Gigantopelta; Gigantopelta aegis  
 UdeM00000002175 6596 310.5 UdeM00000002175 XP\_045182166.1 44.9 457  
 235 6 18 464 1 450 3.70E-81 310.5 6596 cellular  
 organisms; Eukaryota; Opisthokonta; Metazoa; Eumetazoa; Bilateria; Protostomia; Spiralia; Lophotrochozoa; Mollusca; Bivalvia; Autobranchia; Heteroconchia; Euheterodonta; Imparidentia; Venerida; Veneroidea; Veneridae; Mercenaria; Mercenaria mercenaria  
 UdeM00000002177 6596 196.4 UdeM00000002177 XP\_045161586.1 48.1 385  
 165 5 1 361 3 376 8.60E-47 196.4 6596 cellular  
 organisms; Eukaryota; Opisthokonta; Metazoa; Eumetazoa; Bilateria; Protostomia; Spiralia; Lophotrochozoa; Mollusca; Bivalvia; Autobranchia; Heteroconchia; Euheterodonta; Imparidentia; Venerida; Veneroidea; Veneridae; Mercenaria; Mercenaria mercenaria  
 UdeM00000002176 6596 196.1 UdeM00000002176 XP\_045161586.1 48.1 385  
 165 5 6 366 3 376 1.10E-46 196.1 6596 cellular  
 organisms; Eukaryota; Opisthokonta; Metazoa; Eumetazoa; Bilateria; Protostomia; Spiralia; Lophotrochozoa; Mollusca; Bivalvia; Autobranchia; Heteroconchia; Euheterodonta; Imparidentia; Venerida; Veneroidea; Veneridae; Mercenaria; Mercenaria mercenaria  
 UdeM00000002178 6573 934.9 UdeM00000002178 XP\_021361303.1 57.4 938  
 336 12 1 906 1 906 7.90E-269 934.9 6573 cellular  
 organisms; Eukaryota; Opisthokonta; Metazoa; Eumetazoa; Bilateria; Protostomia; Spiralia; Lophotrochozoa; Mollusca; Bivalvia; Autobranchia; Pteriomorpha; Pectinida; Pectinoidea; Pectinidae; Mizuhopecten; Mizuhopecten yessoensis



UdeM00000002179 6596 157.9 UdeM00000002179 XP\_045182156.1 43.1 209  
 109 6 33 233 17 223 1.60E-35 157.9 6596 cellular  
 organisms;Eukaryota;Opisthokonta;Metazoa;Eumetazoa;Bilateria;Protostomia;  
 Spiralia;Lophotrochozoa;Mollusca;Bivalvia;Autobranhia;Heteroconchia;Euhe  
 terodonta;Imparidentia;Venerida;Veneroidea;Veneridae;Mercenaria;Mercenari  
 a mercenaria  
 UdeM00000002181 6596 2469.1 UdeM00000002181 XP\_045187226.1 71.1  
 1847 482 20 5 1830 650 2465 0.00E+00 2469.1 6596  
 cellular  
 organisms;Eukaryota;Opisthokonta;Metazoa;Eumetazoa;Bilateria;Protostomia;  
 Spiralia;Lophotrochozoa;Mollusca;Bivalvia;Autobranhia;Heteroconchia;Euhe  
 terodonta;Imparidentia;Venerida;Veneroidea;Veneridae;Mercenaria;Mercenari  
 a mercenaria  
 UdeM00000002182 6596 2456.4 UdeM00000002182 XP\_045187226.1 70.8  
 1849 482 20 5 1828 650 2465 0.00E+00 2456.4 6596  
 cellular  
 organisms;Eukaryota;Opisthokonta;Metazoa;Eumetazoa;Bilateria;Protostomia;  
 Spiralia;Lophotrochozoa;Mollusca;Bivalvia;Autobranhia;Heteroconchia;Euhe  
 terodonta;Imparidentia;Venerida;Veneroidea;Veneridae;Mercenaria;Mercenari  
 a mercenaria  
 UdeM00000002183 6596 1008.8 UdeM00000002183 XP\_045187226.1 78.5  
 651 129 3 1 641 1 650 3.10E-291 1008.8 6596  
 cellular  
 organisms;Eukaryota;Opisthokonta;Metazoa;Eumetazoa;Bilateria;Protostomia;  
 Spiralia;Lophotrochozoa;Mollusca;Bivalvia;Autobranhia;Heteroconchia;Euhe  
 terodonta;Imparidentia;Venerida;Veneroidea;Veneridae;Mercenaria;Mercenari  
 a mercenaria  
 UdeM00000002184 6596 626.7 UdeM00000002184 XP\_045187226.1 82.7 381  
 58 1 1 373 1 381 1.90E-176 626.7 6596 cellular  
 organisms;Eukaryota;Opisthokonta;Metazoa;Eumetazoa;Bilateria;Protostomia;  
 Spiralia;Lophotrochozoa;Mollusca;Bivalvia;Autobranhia;Heteroconchia;Euhe  
 terodonta;Imparidentia;Venerida;Veneroidea;Veneridae;Mercenaria;Mercenari  
 a mercenaria  
 UdeM00000002185 6596 69.7 UdeM00000002185 XP\_045177091.1 60.7 61  
 24 0 3 63 5 65 3.00E-09 69.7 6596 cellular  
 organisms;Eukaryota;Opisthokonta;Metazoa;Eumetazoa;Bilateria;Protostomia;  
 Spiralia;Lophotrochozoa;Mollusca;Bivalvia;Autobranhia;Heteroconchia;Euhe  
 terodonta;Imparidentia;Venerida;Veneroidea;Veneridae;Mercenaria;Mercenari  
 a mercenaria  
 UdeM00000002186 6573 605.5 UdeM00000002186 XP\_021359930.1 60.8 500  
 183 3 11 499 2 499 6.20E-170 605.5 6573 cellular  
 organisms;Eukaryota;Opisthokonta;Metazoa;Eumetazoa;Bilateria;Protostomia;  
 Spiralia;Lophotrochozoa;Mollusca;Bivalvia;Autobranhia;Pteriomorphia;Pect  
 inida;Pectinoidea;Pectinidae;Mizuhopecten;Mizuhopecten yessoensis  
 UdeM00000002187 29159 139.4 UdeM00000002187 XP\_034323163.1 53.6 125  
 54 2 25 146 14 137 3.80E-30 139.4 29159 cellular  
 organisms;Eukaryota;Opisthokonta;Metazoa;Eumetazoa;Bilateria;Protostomia;  
 Spiralia;Lophotrochozoa;Mollusca;Bivalvia;Autobranhia;Pteriomorphia;Ostr  
 eida;Ostreoidea;Ostreidae;Crassostrea;Crassostrea gigas  
 UdeM00000002189 6565 411.8 UdeM00000002189 XP\_022332697.1 52.2 356  
 162 2 8 363 8 355 9.30E-112 411.8 6565 cellular  
 organisms;Eukaryota;Opisthokonta;Metazoa;Eumetazoa;Bilateria;Protostomia;  
 Spiralia;Lophotrochozoa;Mollusca;Bivalvia;Autobranhia;Pteriomorphia;Ostr  
 eida;Ostreoidea;Ostreidae;Crassostrea;Crassostrea virginica

UdeM00000002188 6579 737.3 UdeM00000002188 XP\_033735616.1 56.3 604  
 239 6 8 601 16 604 1.90E-209 737.3 6579 cellular  
 organisms;Eukaryota;Opisthokonta;Metazoa;Eumetazoa;Bilateria;Protostomia;  
 Spiralia;Lophotrochozoa;Mollusca;Bivalvia;Autobranchia;Pteriomorpha;Pect  
 inida;Pectinoidea;Pectinidae;Pecten;Pecten maximus  
 UdeM00000002190 6596 122.1 UdeM00000002190 XP\_045180427.1 32.8 274  
 129 4 1 220 1 273 9.50E-25 122.1 6596 cellular  
 organisms;Eukaryota;Opisthokonta;Metazoa;Eumetazoa;Bilateria;Protostomia;  
 Spiralia;Lophotrochozoa;Mollusca;Bivalvia;Autobranchia;Heteroconchia;Euhe  
 terodonta;Imparidentia;Venerida;Veneroidea;Veneridae;Mercenaria;Mercenari  
 a mercenaria  
 UdeM00000002191 225164 469.2 UdeM00000002191 XP\_009064850.1 54.3  
 422 163 3 2 395 5 424 5.40E-129 469.2 225164  
 cellular  
 organisms;Eukaryota;Opisthokonta;Metazoa;Eumetazoa;Bilateria;Protostomia;  
 Spiralia;Lophotrochozoa;Mollusca;Gastropoda;Patellogastropoda;Lottioidea;  
 Lottiidae;Lottia;Lottia gigantea  
 UdeM00000002192 6596 265.8 UdeM00000002192 XP\_045165556.1 90.6 127  
 12 0 1 127 1 127 2.90E-68 265.8 6596 cellular  
 organisms;Eukaryota;Opisthokonta;Metazoa;Eumetazoa;Bilateria;Protostomia;  
 Spiralia;Lophotrochozoa;Mollusca;Bivalvia;Autobranchia;Heteroconchia;Euhe  
 terodonta;Imparidentia;Venerida;Veneroidea;Veneridae;Mercenaria;Mercenari  
 a mercenaria  
 UdeM00000002193 6596 288.1 UdeM00000002193 XP\_045213325.1 44.8 1124  
 498 14 1 1079 1 1046 4.60E-74 288.1 6596 cellular  
 organisms;Eukaryota;Opisthokonta;Metazoa;Eumetazoa;Bilateria;Protostomia;  
 Spiralia;Lophotrochozoa;Mollusca;Bivalvia;Autobranchia;Heteroconchia;Euhe  
 terodonta;Imparidentia;Venerida;Veneroidea;Veneridae;Mercenaria;Mercenari  
 a mercenaria  
 UdeM00000002194 29159 309.7 UdeM00000002194 XP\_011428851.1 60.7 267  
 102 2 1 266 1 265 4.40E-81 309.7 29159 cellular  
 organisms;Eukaryota;Opisthokonta;Metazoa;Eumetazoa;Bilateria;Protostomia;  
 Spiralia;Lophotrochozoa;Mollusca;Bivalvia;Autobranchia;Pteriomorpha;Ostr  
 eida;Ostreoidea;Ostreidae;Crassostrea;Crassostrea gigas  
 UdeM00000002195 6565 157.9 UdeM00000002195 XP\_022329353.1 53.4 148  
 66 1 10 157 1 145 1.10E-35 157.9 6565 cellular  
 organisms;Eukaryota;Opisthokonta;Metazoa;Eumetazoa;Bilateria;Protostomia;  
 Spiralia;Lophotrochozoa;Mollusca;Bivalvia;Autobranchia;Pteriomorpha;Ostr  
 eida;Ostreoidea;Ostreidae;Crassostrea;Crassostrea virginica  
 UdeM00000002196 6565 141.7 UdeM00000002196 XP\_022329353.1 47.3 146  
 74 1 1 146 1 143 8.10E-31 141.7 6565 cellular  
 organisms;Eukaryota;Opisthokonta;Metazoa;Eumetazoa;Bilateria;Protostomia;  
 Spiralia;Lophotrochozoa;Mollusca;Bivalvia;Autobranchia;Pteriomorpha;Ostr  
 eida;Ostreoidea;Ostreidae;Crassostrea;Crassostrea virginica  
 UdeM00000002197 6565 151 UdeM00000002197 XP\_022329353.1 50.7 146  
 69 1 1 146 1 143 1.30E-33 151 6565 cellular  
 organisms;Eukaryota;Opisthokonta;Metazoa;Eumetazoa;Bilateria;Protostomia;  
 Spiralia;Lophotrochozoa;Mollusca;Bivalvia;Autobranchia;Pteriomorpha;Ostr  
 eida;Ostreoidea;Ostreidae;Crassostrea;Crassostrea virginica  
 UdeM00000002198 6565 169.5 UdeM00000002198 XP\_022329353.1 54.1 148  
 65 1 10 157 1 145 3.80E-39 169.5 6565 cellular  
 organisms;Eukaryota;Opisthokonta;Metazoa;Eumetazoa;Bilateria;Protostomia;  
 Spiralia;Lophotrochozoa;Mollusca;Bivalvia;Autobranchia;Pteriomorpha;Ostr  
 eida;Ostreoidea;Ostreidae;Crassostrea;Crassostrea virginica

UdeM00000002199 29159 158.3 UdeM00000002199 XP\_011452630.2 51.7 143  
 66 1 115 257 7 146 1.40E-35 158.3 29159 cellular  
 organisms;Eukaryota;Opisthokonta;Metazoa;Eumetazoa;Bilateria;Protostomia;  
 Spiralia;Lophotrochozoa;Mollusca;Bivalvia;Autobranchia;Pteriormorphia;Ostr  
 eida;Ostreoidea;Ostreidae;Crassostrea;Crassostrea gigas  
 UdeM00000002200 1735272 446 UdeM00000002200 XP\_041354569.1 63.6  
 349 119 5 26 372 50 392 4.60E-122 446 1735272  
 cellular  
 organisms;Eukaryota;Opisthokonta;Metazoa;Eumetazoa;Bilateria;Protostomia;  
 Spiralia;Lophotrochozoa;Mollusca;Gastropoda;Neomphalina;Neomphaloidea;Pel  
 tospiridae;Gigantopelta;Gigantopelta aegis  
 UdeM00000002201 29159 649 UdeM00000002201 XP\_011423718.2 70.9 443  
 124 4 16 456 11 450 4.40E-183 649 29159 cellular  
 organisms;Eukaryota;Opisthokonta;Metazoa;Eumetazoa;Bilateria;Protostomia;  
 Spiralia;Lophotrochozoa;Mollusca;Bivalvia;Autobranchia;Pteriormorphia;Ostr  
 eida;Ostreoidea;Ostreidae;Crassostrea;Crassostrea gigas  
 UdeM00000002202 6596 421.8 UdeM00000002202 XP\_045157233.1 61.3 357  
 128 4 48 396 65 419 1.10E-114 421.8 6596 cellular  
 organisms;Eukaryota;Opisthokonta;Metazoa;Eumetazoa;Bilateria;Protostomia;  
 Spiralia;Lophotrochozoa;Mollusca;Bivalvia;Autobranchia;Heteroconchia;Euhe  
 terodonta;Imparidentia;Venerida;Veneroidea;Veneridae;Mercenaria;Mercenari  
 a mercenaria  
 UdeM00000002203 6573 648.7 UdeM00000002203 XP\_021339361.1 49.4 644  
 315 5 1 641 100 735 8.00E-183 648.7 6573 cellular  
 organisms;Eukaryota;Opisthokonta;Metazoa;Eumetazoa;Bilateria;Protostomia;  
 Spiralia;Lophotrochozoa;Mollusca;Bivalvia;Autobranchia;Pteriormorphia;Pect  
 inida;Pectinoidea;Pectinidae;Mizuhopecten;Mizuhopecten yessoensis  
 UdeM00000002204 46731 142.5 UdeM00000002204 XP\_027055174.1 27.1 336  
 221 7 29 360 35 350 1.10E-30 142.5 46731 cellular  
 organisms;Eukaryota;Opisthokonta;Metazoa;Eumetazoa;Cnidaria;Anthozoa;Hexa  
 corallia;Scleractinia;Astrocoeniina;Pocilloporidae;Pocillopora;Pocillopor  
 a damicornis  
 UdeM00000002205 6596 258.8 UdeM00000002205 XP\_045166150.1 63.5 208  
 75 1 1 208 1 207 7.20E-66 258.8 6596 cellular  
 organisms;Eukaryota;Opisthokonta;Metazoa;Eumetazoa;Bilateria;Protostomia;  
 Spiralia;Lophotrochozoa;Mollusca;Bivalvia;Autobranchia;Heteroconchia;Euhe  
 terodonta;Imparidentia;Venerida;Veneroidea;Veneridae;Mercenaria;Mercenari  
 a mercenaria  
 UdeM00000002206 6596 530.8 UdeM00000002206 XP\_045166158.1 72.4 384  
 101 3 4 385 183 563 1.50E-147 530.8 6596 cellular  
 organisms;Eukaryota;Opisthokonta;Metazoa;Eumetazoa;Bilateria;Protostomia;  
 Spiralia;Lophotrochozoa;Mollusca;Bivalvia;Autobranchia;Heteroconchia;Euhe  
 terodonta;Imparidentia;Venerida;Veneroidea;Veneridae;Mercenaria;Mercenari  
 a mercenaria  
 UdeM00000002207 6596 523.5 UdeM00000002207 XP\_045166169.1 51.5 495  
 228 5 1 489 2 490 3.00E-145 523.5 6596 cellular  
 organisms;Eukaryota;Opisthokonta;Metazoa;Eumetazoa;Bilateria;Protostomia;  
 Spiralia;Lophotrochozoa;Mollusca;Bivalvia;Autobranchia;Heteroconchia;Euhe  
 terodonta;Imparidentia;Venerida;Veneroidea;Veneridae;Mercenaria;Mercenari  
 a mercenaria  
 UdeM00000002208 7574 118.6 UdeM00000002208 XP\_013388573.1 44.2 156  
 85 1 12 167 786 939 7.60E-24 118.6 7574 cellular  
 organisms;Eukaryota;Opisthokonta;Metazoa;Eumetazoa;Bilateria;Protostomia;

Spiralia;Lophotrochozoa;Brachiopoda;Linguliformea;Lingulata;Lingulida;Linguloidea;Lingulidae;Lingula;Lingula anatina  
UdeM00000002209 7574 73.9 UdeM00000002209 XP\_013388573.1 42.4 99  
50 3 93 190 346 438 2.40E-10 73.9 7574 cellular  
organisms;Eukaryota;Opisthokonta;Metazoa;Eumetazoa;Bilateria;Protostomia;  
Spiralia;Lophotrochozoa;Brachiopoda;Linguliformea;Lingulata;Lingulida;Linguloidea;Lingulidae;Lingula;Lingula anatina  
UdeM00000002210 29159 218 UdeM00000002210 XP\_034339171.1 45 240  
127 2 25 259 13 252 1.60E-53 218 29159 cellular  
organisms;Eukaryota;Opisthokonta;Metazoa;Eumetazoa;Bilateria;Protostomia;  
Spiralia;Lophotrochozoa;Mollusca;Bivalvia;Autobranchia;Pteriormorphia;Ostreida;Ostreoidea;Ostreidae;Crassostrea;Crassostrea gigas  
UdeM00000002211 6596 427.6 UdeM00000002211 XP\_045178562.1 49.7 443  
190 5 2 439 121 535 2.00E-116 427.6 6596 cellular  
organisms;Eukaryota;Opisthokonta;Metazoa;Eumetazoa;Bilateria;Protostomia;  
Spiralia;Lophotrochozoa;Mollusca;Bivalvia;Autobranchia;Heteroconchia;Euheterodonta;Imparidentia;Venerida;Veneroidea;Veneridae;Mercenaria;Mercenaria mercenaria  
UdeM00000002212 6596 156.4 UdeM00000002212 XP\_045178574.1 34.2 371  
208 13 138 492 121 471 9.70E-35 156.4 6596 cellular  
organisms;Eukaryota;Opisthokonta;Metazoa;Eumetazoa;Bilateria;Protostomia;  
Spiralia;Lophotrochozoa;Mollusca;Bivalvia;Autobranchia;Heteroconchia;Euheterodonta;Imparidentia;Venerida;Veneroidea;Veneridae;Mercenaria;Mercenaria mercenaria  
UdeM00000002213 6412 134.8 UdeM00000002213 XP\_009012646.1 36.5 211  
85 3 1 163 1 210 1.00E-28 134.8 6412 cellular  
organisms;Eukaryota;Opisthokonta;Metazoa;Eumetazoa;Bilateria;Protostomia;  
Spiralia;Lophotrochozoa;Annelida;Clitellata;Hirudinea;Rhynchobdellida;Glossiphoniidae;Helobdella;Helobdella robusta  
UdeM00000002214 6596 582.8 UdeM00000002214 XP\_045178464.1 50 610  
266 10 9 584 7 611 4.90E-163 582.8 6596 cellular  
organisms;Eukaryota;Opisthokonta;Metazoa;Eumetazoa;Bilateria;Protostomia;  
Spiralia;Lophotrochozoa;Mollusca;Bivalvia;Autobranchia;Heteroconchia;Euheterodonta;Imparidentia;Venerida;Veneroidea;Veneridae;Mercenaria;Mercenaria mercenaria  
UdeM00000002215 6596 607.8 UdeM00000002215 XP\_045178455.1 51 616  
268 9 9 595 7 617 1.40E-170 607.8 6596 cellular  
organisms;Eukaryota;Opisthokonta;Metazoa;Eumetazoa;Bilateria;Protostomia;  
Spiralia;Lophotrochozoa;Mollusca;Bivalvia;Autobranchia;Heteroconchia;Euheterodonta;Imparidentia;Venerida;Veneroidea;Veneridae;Mercenaria;Mercenaria mercenaria  
UdeM00000002216 6596 579.3 UdeM00000002216 XP\_045178500.1 51.5 584  
236 11 9 564 7 571 5.20E-162 579.3 6596 cellular  
organisms;Eukaryota;Opisthokonta;Metazoa;Eumetazoa;Bilateria;Protostomia;  
Spiralia;Lophotrochozoa;Mollusca;Bivalvia;Autobranchia;Heteroconchia;Euheterodonta;Imparidentia;Venerida;Veneroidea;Veneridae;Mercenaria;Mercenaria mercenaria  
UdeM00000002217 1735272 101.3 UdeM00000002217 XP\_041353139.1 41.1  
129 65 4 22 150 23 140 1.80E-18 101.3 1735272  
cellular  
organisms;Eukaryota;Opisthokonta;Metazoa;Eumetazoa;Bilateria;Protostomia;  
Spiralia;Lophotrochozoa;Mollusca;Gastropoda;Neomphalina;Neomphaloidea;Peltopiridae;Gigantopelta;Gigantopelta aegis

UdeM00000002218 6500 98.6 UdeM00000002218 XP\_005104922.1 37.8 156  
 86 2 31 183 99 246 1.10E-17 98.6 6500 cellular  
 organisms;Eukaryota;Opisthokonta;Metazoa;Eumetazoa;Bilateria;Protostomia;  
 Spiralia;Lophotrochozoa;Mollusca;Gastropoda;Heterobranchia;Euthyneura;Tec  
 tipleura;Aplysiida;Aplysioidea;Aplysiidae;Aplysia;Aplysia californica  
 UdeM00000002219 6596 147.1 UdeM00000002219 XP\_045170978.1 60.7 112  
 43 1 15 125 18 129 1.50E-32 147.1 6596 cellular  
 organisms;Eukaryota;Opisthokonta;Metazoa;Eumetazoa;Bilateria;Protostomia;  
 Spiralia;Lophotrochozoa;Mollusca;Bivalvia;Autobranchia;Heteroconchia;Euhe  
 terodonta;Imparidentia;Venerida;Veneroidea;Veneridae;Mercenaria;Mercenari  
 a mercenaria  
 UdeM00000002220 6087 142.1 UdeM00000002220 XP\_012558222.1 37.7 223  
 125 3 4 214 13 233 8.20E-31 142.1 6087 cellular  
 organisms;Eukaryota;Opisthokonta;Metazoa;Eumetazoa;Cnidaria;Hydrozoa;Hydr  
 oidolina;Anthoathecata;Aplanulata;Hydridae;Hydra;Hydra vulgaris  
 UdeM00000002221 400682 120.9 UdeM00000002221 XP\_003390251.1 35.7  
 213 123 5 12 221 432 633 2.00E-24 120.9 400682  
 cellular  
 organisms;Eukaryota;Opisthokonta;Metazoa;Porifera;Demospongiae;Heteroscle  
 romorpha;Haplosclerida;Niphatidae;Amphimedon;Amphimedon queenslandica  
 UdeM00000002222 6596 397.5 UdeM00000002222 XP\_045171039.1 66.7 306  
 60 5 1 303 1 267 1.50E-107 397.5 6596 cellular  
 organisms;Eukaryota;Opisthokonta;Metazoa;Eumetazoa;Bilateria;Protostomia;  
 Spiralia;Lophotrochozoa;Mollusca;Bivalvia;Autobranchia;Heteroconchia;Euhe  
 terodonta;Imparidentia;Venerida;Veneroidea;Veneridae;Mercenaria;Mercenari  
 a mercenaria  
 UdeM00000002223 6596 133.7 UdeM00000002223 XP\_045171006.1 68.7 99  
 28 3 1 96 1 99 1.30E-28 133.7 6596 cellular  
 organisms;Eukaryota;Opisthokonta;Metazoa;Eumetazoa;Bilateria;Protostomia;  
 Spiralia;Lophotrochozoa;Mollusca;Bivalvia;Autobranchia;Heteroconchia;Euhe  
 terodonta;Imparidentia;Venerida;Veneroidea;Veneridae;Mercenaria;Mercenari  
 a mercenaria  
 UdeM00000002224 6596 420.2 UdeM00000002224 XP\_045186138.1 66.8 295  
 98 0 1 295 1 295 2.10E-114 420.2 6596 cellular  
 organisms;Eukaryota;Opisthokonta;Metazoa;Eumetazoa;Bilateria;Protostomia;  
 Spiralia;Lophotrochozoa;Mollusca;Bivalvia;Autobranchia;Heteroconchia;Euhe  
 terodonta;Imparidentia;Venerida;Veneroidea;Veneridae;Mercenaria;Mercenari  
 a mercenaria  
 UdeM00000002225 6573 431.8 UdeM00000002225 XP\_021374786.1 44.3 499  
 248 8 3 476 42 535 1.10E-117 431.8 6573 cellular  
 organisms;Eukaryota;Opisthokonta;Metazoa;Eumetazoa;Bilateria;Protostomia;  
 Spiralia;Lophotrochozoa;Mollusca;Bivalvia;Autobranchia;Pteriomorphia;Pect  
 inida;Pectinoidea;Pectinidae;Mizuhopecten;Mizuhopecten yessoensis  
 UdeM00000002226 6596 603.6 UdeM00000002226 XP\_045161534.1 68.7 434  
 130 4 50 479 370 801 2.20E-169 603.6 6596 cellular  
 organisms;Eukaryota;Opisthokonta;Metazoa;Eumetazoa;Bilateria;Protostomia;  
 Spiralia;Lophotrochozoa;Mollusca;Bivalvia;Autobranchia;Heteroconchia;Euhe  
 terodonta;Imparidentia;Venerida;Veneroidea;Veneridae;Mercenaria;Mercenari  
 a mercenaria  
 UdeM00000002228 6579 172.2 UdeM00000002228 XP\_033733860.1 59.2 157  
 54 4 16 163 14 169 5.60E-40 172.2 6579 cellular  
 organisms;Eukaryota;Opisthokonta;Metazoa;Eumetazoa;Bilateria;Protostomia;  
 Spiralia;Lophotrochozoa;Mollusca;Bivalvia;Autobranchia;Pteriomorphia;Pect  
 inida;Pectinoidea;Pectinidae;Pecten;Pecten maximus

UdeM00000002229 6573 220.7 UdeM00000002229 XP\_021374792.1 74.3 148  
 35 1 1 148 1 145 1.50E-54 220.7 6573 cellular  
 organisms;Eukaryota;Opisthokonta;Metazoa;Eumetazoa;Bilateria;Protostomia;  
 Spiralia;Lophotrochozoa;Mollusca;Bivalvia;Autobranhia;Pteriomorphia;Pect  
 inida;Pectinoidea;Pectinidae;Mizuhopecten;Mizuhopecten yessoensis  
 UdeM00000002230 6579 249.6 UdeM00000002230 XP\_033734616.1 57.6 210  
 84 2 14 220 10 217 3.70E-63 249.6 6579 cellular  
 organisms;Eukaryota;Opisthokonta;Metazoa;Eumetazoa;Bilateria;Protostomia;  
 Spiralia;Lophotrochozoa;Mollusca;Bivalvia;Autobranhia;Pteriomorphia;Pect  
 inida;Pectinoidea;Pectinidae;Pecten;Pecten maximus  
 UdeM00000002231 6596 709.5 UdeM00000002231 XP\_045164531.1 65.4 624  
 207 4 6 621 9 631 3.70E-201 709.5 6596 cellular  
 organisms;Eukaryota;Opisthokonta;Metazoa;Eumetazoa;Bilateria;Protostomia;  
 Spiralia;Lophotrochozoa;Mollusca;Bivalvia;Autobranhia;Heteroconchia;Euhe  
 terodonta;Imparidentia;Venerida;Veneroidea;Veneridae;Mercenaria;Mercenari  
 a mercenaria  
 UdeM00000002232 6596 235 UdeM00000002232 XP\_045164495.1 74.3 167  
 43 0 6 172 9 175 7.40E-59 235 6596 cellular  
 organisms;Eukaryota;Opisthokonta;Metazoa;Eumetazoa;Bilateria;Protostomia;  
 Spiralia;Lophotrochozoa;Mollusca;Bivalvia;Autobranhia;Heteroconchia;Euhe  
 terodonta;Imparidentia;Venerida;Veneroidea;Veneridae;Mercenaria;Mercenari  
 a mercenaria  
 UdeM00000002233 6565 777.3 UdeM00000002233 XP\_022332899.1 95 419  
 20 1 1 419 1 418 9.70E-222 777.3 6565 cellular  
 organisms;Eukaryota;Opisthokonta;Metazoa;Eumetazoa;Bilateria;Protostomia;  
 Spiralia;Lophotrochozoa;Mollusca;Bivalvia;Autobranhia;Pteriomorphia;Ostr  
 eida;Ostreoidea;Ostreidae;Crassostrea;Crassostrea virginica  
 UdeM00000002234 6596 647.1 UdeM00000002234 XP\_045165854.1 43.2 773  
 416 9 14 773 9 771 3.30E-182 647.1 6596 cellular  
 organisms;Eukaryota;Opisthokonta;Metazoa;Eumetazoa;Bilateria;Protostomia;  
 Spiralia;Lophotrochozoa;Mollusca;Bivalvia;Autobranhia;Heteroconchia;Euhe  
 terodonta;Imparidentia;Venerida;Veneroidea;Veneridae;Mercenaria;Mercenari  
 a mercenaria  
 UdeM00000002236 6565 449.9 UdeM00000002236 XP\_022345479.1 38.4 765  
 441 18 23 773 22 770 6.50E-123 449.9 6565 cellular  
 organisms;Eukaryota;Opisthokonta;Metazoa;Eumetazoa;Bilateria;Protostomia;  
 Spiralia;Lophotrochozoa;Mollusca;Bivalvia;Autobranhia;Pteriomorphia;Ostr  
 eida;Ostreoidea;Ostreidae;Crassostrea;Crassostrea virginica  
 UdeM00000002238 6573 171.8 UdeM00000002238 XP\_021364860.1 23.6 1267  
 742 49 15 1172 18 1167 9.90E-39 171.8 6573 cellular  
 organisms;Eukaryota;Opisthokonta;Metazoa;Eumetazoa;Bilateria;Protostomia;  
 Spiralia;Lophotrochozoa;Mollusca;Bivalvia;Autobranhia;Pteriomorphia;Pect  
 inida;Pectinoidea;Pectinidae;Mizuhopecten;Mizuhopecten yessoensis  
 UdeM00000002240 6579 75.1 UdeM00000002240 XP\_033736127.1 25.8 306  
 163 9 1 255 1 293 1.50E-10 75.1 6579 cellular  
 organisms;Eukaryota;Opisthokonta;Metazoa;Eumetazoa;Bilateria;Protostomia;  
 Spiralia;Lophotrochozoa;Mollusca;Bivalvia;Autobranhia;Pteriomorphia;Pect  
 inida;Pectinoidea;Pectinidae;Pecten;Pecten maximus  
 UdeM00000002241 400727 192.2 UdeM00000002241 XP\_025106005.1 70.9  
 127 37 0 25 151 18 144 4.80E-46 192.2 400727  
 cellular  
 organisms;Eukaryota;Opisthokonta;Metazoa;Eumetazoa;Bilateria;Protostomia;  
 Spiralia;Lophotrochozoa;Mollusca;Gastropoda;Caenogastropoda;Architaeniogl  
 ossa;Ampullarioidea;Ampullariidae;Pomacea;Pomacea canaliculata

UdeM00000002242 72036 77.4 UdeM00000002242 XP\_040571364.1 32.4 170  
 100 2 621 784 126 286 1.00E-10 77.4 72036 cellular  
 organisms;Eukaryota;Opisthokonta;Metazoa;Eumetazoa;Bilateria;Protostomia;  
 Ecdysozoa;Panarthropoda;Arthropoda;Mandibulata;Pancrustacea;Crustacea;Mul  
 ticrustacea;Hexanauplia;Copepoda;Neocopepoda;Podoplea;Siphonostomatoida;C  
 aligidae;Lepeophtheirus;Lepeophtheirus salmonis  
 UdeM00000002243 6596 705.7 UdeM00000002243 XP\_045167801.1 48.3 822  
 366 15 11 808 1 787 7.40E-200 705.7 6596 cellular  
 organisms;Eukaryota;Opisthokonta;Metazoa;Eumetazoa;Bilateria;Protostomia;  
 Spiralia;Lophotrochozoa;Mollusca;Bivalvia;Autobranchia;Heteroconchia;Euhe  
 terodonta;Imparidentia;Venerida;Veneroidea;Veneridae;Mercenaria;Mercenari  
 a mercenaria  
 UdeM00000002244 6596 705.7 UdeM00000002244 XP\_045167801.1 48.3 822  
 366 15 1 798 1 787 7.30E-200 705.7 6596 cellular  
 organisms;Eukaryota;Opisthokonta;Metazoa;Eumetazoa;Bilateria;Protostomia;  
 Spiralia;Lophotrochozoa;Mollusca;Bivalvia;Autobranchia;Heteroconchia;Euhe  
 terodonta;Imparidentia;Venerida;Veneroidea;Veneridae;Mercenaria;Mercenari  
 a mercenaria  
 UdeM00000002245 6579 174.5 UdeM00000002245 XP\_033736012.1 43.1 267  
 124 7 1 257 1 249 1.80E-40 174.5 6579 cellular  
 organisms;Eukaryota;Opisthokonta;Metazoa;Eumetazoa;Bilateria;Protostomia;  
 Spiralia;Lophotrochozoa;Mollusca;Bivalvia;Autobranchia;Pteriormorphia;Pect  
 inida;Pectinoidea;Pectinidae;Pecten;Pecten maximus  
 UdeM00000002247 6596 238.4 UdeM00000002247 XP\_045187806.1 60.9 202  
 76 2 1 199 1 202 8.30E-60 238.4 6596 cellular  
 organisms;Eukaryota;Opisthokonta;Metazoa;Eumetazoa;Bilateria;Protostomia;  
 Spiralia;Lophotrochozoa;Mollusca;Bivalvia;Autobranchia;Heteroconchia;Euhe  
 terodonta;Imparidentia;Venerida;Veneroidea;Veneridae;Mercenaria;Mercenari  
 a mercenaria  
 UdeM00000002248 6565 417.9 UdeM00000002248 XP\_022345479.1 33.6 867  
 521 22 31 869 27 866 3.40E-113 417.9 6565 cellular  
 organisms;Eukaryota;Opisthokonta;Metazoa;Eumetazoa;Bilateria;Protostomia;  
 Spiralia;Lophotrochozoa;Mollusca;Bivalvia;Autobranchia;Pteriormorphia;Ostr  
 eida;Ostreoidea;Ostreidae;Crassostrea;Crassostrea virginica  
 UdeM00000002249 29159 443.4 UdeM00000002249 XP\_034310115.1 34.1 877  
 543 19 1 859 1 860 7.50E-121 443.4 29159 cellular  
 organisms;Eukaryota;Opisthokonta;Metazoa;Eumetazoa;Bilateria;Protostomia;  
 Spiralia;Lophotrochozoa;Mollusca;Bivalvia;Autobranchia;Pteriormorphia;Ostr  
 eida;Ostreoidea;Ostreidae;Crassostrea;Crassostrea gigas  
 UdeM00000002250 6573 214.5 UdeM00000002250 XP\_021348097.1 60 185  
 70 2 1 185 1 181 1.10E-52 214.5 6573 cellular  
 organisms;Eukaryota;Opisthokonta;Metazoa;Eumetazoa;Bilateria;Protostomia;  
 Spiralia;Lophotrochozoa;Mollusca;Bivalvia;Autobranchia;Pteriormorphia;Pect  
 inida;Pectinoidea;Pectinidae;Mizuhopecten;Mizuhopecten yessoensis  
 UdeM00000002252 6573 204.9 UdeM00000002252 XP\_021348136.1 33.6 339  
 213 5 6 338 168 500 1.60E-49 204.9 6573 cellular  
 organisms;Eukaryota;Opisthokonta;Metazoa;Eumetazoa;Bilateria;Protostomia;  
 Spiralia;Lophotrochozoa;Mollusca;Bivalvia;Autobranchia;Pteriormorphia;Pect  
 inida;Pectinoidea;Pectinidae;Mizuhopecten;Mizuhopecten yessoensis  
 UdeM00000002253 6573 686.8 UdeM00000002253 XP\_021376661.1 43.2 797  
 423 13 9 795 188 964 3.30E-194 686.8 6573 cellular  
 organisms;Eukaryota;Opisthokonta;Metazoa;Eumetazoa;Bilateria;Protostomia;  
 Spiralia;Lophotrochozoa;Mollusca;Bivalvia;Autobranchia;Pteriormorphia;Pect  
 inida;Pectinoidea;Pectinidae;Mizuhopecten;Mizuhopecten yessoensis

UdeM00000002254 6573 137.5 UdeM00000002254 XP\_021376661.1 42 157  
 90 1 7 162 7 163 1.50E-29 137.5 6573 cellular  
 organisms;Eukaryota;Opisthokonta;Metazoa;Eumetazoa;Bilateria;Protostomia;  
 Spiralia;Lophotrochozoa;Mollusca;Bivalvia;Autobranchia;Pteriormorphia;Pect  
 inida;Pectinoidea;Pectinidae;Mizuhopecten;Mizuhopecten yessoensis  
 UdeM00000002255 29159 853.2 UdeM00000002255 XP\_011439505.1 82.7 521  
 89 1 4 523 5 525 1.70E-244 853.2 29159 cellular  
 organisms;Eukaryota;Opisthokonta;Metazoa;Eumetazoa;Bilateria;Protostomia;  
 Spiralia;Lophotrochozoa;Mollusca;Bivalvia;Autobranchia;Pteriormorphia;Ostr  
 eida;Ostreoidea;Ostreidae;Crassostrea;Crassostrea gigas  
 UdeM00000002256 6596 174.1 UdeM00000002256 XP\_045173793.1 81 105  
 19 1 12 115 23 127 1.10E-40 174.1 6596 cellular  
 organisms;Eukaryota;Opisthokonta;Metazoa;Eumetazoa;Bilateria;Protostomia;  
 Spiralia;Lophotrochozoa;Mollusca;Bivalvia;Autobranchia;Heteroconchia;Euhe  
 terodonta;Imparidentia;Venerida;Veneroidea;Veneridae;Mercenaria;Mercenari  
 a mercenaria  
 UdeM00000002257 6596 131.3 UdeM00000002257 XP\_045180696.1 78.3 83  
 18 0 10 92 256 338 6.20E-28 131.3 6596 cellular  
 organisms;Eukaryota;Opisthokonta;Metazoa;Eumetazoa;Bilateria;Protostomia;  
 Spiralia;Lophotrochozoa;Mollusca;Bivalvia;Autobranchia;Heteroconchia;Euhe  
 terodonta;Imparidentia;Venerida;Veneroidea;Veneridae;Mercenaria;Mercenari  
 a mercenaria  
 UdeM00000002258 6596 103.2 UdeM00000002258 XP\_045187815.1 61.9 118  
 29 6 1 107 1 113 2.40E-19 103.2 6596 cellular  
 organisms;Eukaryota;Opisthokonta;Metazoa;Eumetazoa;Bilateria;Protostomia;  
 Spiralia;Lophotrochozoa;Mollusca;Bivalvia;Autobranchia;Heteroconchia;Euhe  
 terodonta;Imparidentia;Venerida;Veneroidea;Veneridae;Mercenaria;Mercenari  
 a mercenaria  
 UdeM00000002260 6565 353.2 UdeM00000002260 XP\_022333579.1 63.2 253  
 92 1 15 267 12 263 2.90E-94 353.2 6565 cellular  
 organisms;Eukaryota;Opisthokonta;Metazoa;Eumetazoa;Bilateria;Protostomia;  
 Spiralia;Lophotrochozoa;Mollusca;Bivalvia;Autobranchia;Pteriormorphia;Ostr  
 eida;Ostreoidea;Ostreidae;Crassostrea;Crassostrea virginica  
 UdeM00000002261 6573 289.3 UdeM00000002261 XP\_021362951.1 57.3 225  
 95 1 15 239 47 270 4.60E-75 289.3 6573 cellular  
 organisms;Eukaryota;Opisthokonta;Metazoa;Eumetazoa;Bilateria;Protostomia;  
 Spiralia;Lophotrochozoa;Mollusca;Bivalvia;Autobranchia;Pteriormorphia;Pect  
 inida;Pectinoidea;Pectinidae;Mizuhopecten;Mizuhopecten yessoensis  
 UdeM00000002262 6565 268.5 UdeM00000002262 XP\_022330460.1 71.7 187  
 53 0 1 187 15 201 1.20E-68 268.5 6565 cellular  
 organisms;Eukaryota;Opisthokonta;Metazoa;Eumetazoa;Bilateria;Protostomia;  
 Spiralia;Lophotrochozoa;Mollusca;Bivalvia;Autobranchia;Pteriormorphia;Ostr  
 eida;Ostreoidea;Ostreidae;Crassostrea;Crassostrea virginica  
 UdeM00000002263 6500 747.3 UdeM00000002263 NP\_001191401.1 82.2 455  
 74 5 1 450 283 735 1.20E-212 747.3 6500 cellular  
 organisms;Eukaryota;Opisthokonta;Metazoa;Eumetazoa;Bilateria;Protostomia;  
 Spiralia;Lophotrochozoa;Mollusca;Gastropoda;Heterobranchia;Euthyneura;Tec  
 tipleura;Aplysiida;Aplysioidea;Aplysiidae;Aplysia;Aplysia californica  
 UdeM00000002264 6596 324.3 UdeM00000002264 XP\_045163814.1 72.5 218  
 43 4 1 201 1 218 1.10E-85 324.3 6596 cellular  
 organisms;Eukaryota;Opisthokonta;Metazoa;Eumetazoa;Bilateria;Protostomia;  
 Spiralia;Lophotrochozoa;Mollusca;Bivalvia;Autobranchia;Heteroconchia;Euhe  
 terodonta;Imparidentia;Venerida;Veneroidea;Veneridae;Mercenaria;Mercenari  
 a mercenaria



UdeM00000002265 6596 324.7 UdeM00000002265 XP\_045163814.1 80.5 190  
 32 3 1 185 1 190 7.60E-86 324.7 6596 cellular  
 organisms;Eukaryota;Opisthokonta;Metazoa;Eumetazoa;Bilateria;Protostomia;  
 Spiralia;Lophotrochozoa;Mollusca;Bivalvia;Autobranhia;Heteroconchia;Euhe  
 terodonta;Imparidentia;Venerida;Veneroidea;Veneridae;Mercenaria;Mercenari  
 a mercenaria

UdeM00000002266 6596 171.4 UdeM00000002266 XP\_045163848.1 55.5 146  
 56 2 12 157 14 150 9.20E-40 171.4 6596 cellular  
 organisms;Eukaryota;Opisthokonta;Metazoa;Eumetazoa;Bilateria;Protostomia;  
 Spiralia;Lophotrochozoa;Mollusca;Bivalvia;Autobranhia;Heteroconchia;Euhe  
 terodonta;Imparidentia;Venerida;Veneroidea;Veneridae;Mercenaria;Mercenari  
 a mercenaria

UdeM00000002267 6596 317.4 UdeM00000002267 XP\_045180732.1 47.9 489  
 201 12 207 662 446 913 5.70E-83 317.4 6596 cellular  
 organisms;Eukaryota;Opisthokonta;Metazoa;Eumetazoa;Bilateria;Protostomia;  
 Spiralia;Lophotrochozoa;Mollusca;Bivalvia;Autobranhia;Heteroconchia;Euhe  
 terodonta;Imparidentia;Venerida;Veneroidea;Veneridae;Mercenaria;Mercenari  
 a mercenaria

UdeM00000002270 6596 172.6 UdeM00000002270 XP\_045176457.1 46.8 231  
 101 3 1 225 806 1020 6.00E-40 172.6 6596 cellular  
 organisms;Eukaryota;Opisthokonta;Metazoa;Eumetazoa;Bilateria;Protostomia;  
 Spiralia;Lophotrochozoa;Mollusca;Bivalvia;Autobranhia;Heteroconchia;Euhe  
 terodonta;Imparidentia;Venerida;Veneroidea;Veneridae;Mercenaria;Mercenari  
 a mercenaria

UdeM00000002271 6596 907.9 UdeM00000002271 XP\_045176451.1 65.4 824  
 265 5 1 820 3 810 1.20E-260 907.9 6596 cellular  
 organisms;Eukaryota;Opisthokonta;Metazoa;Eumetazoa;Bilateria;Protostomia;  
 Spiralia;Lophotrochozoa;Mollusca;Bivalvia;Autobranhia;Heteroconchia;Euhe  
 terodonta;Imparidentia;Venerida;Veneroidea;Veneridae;Mercenaria;Mercenari  
 a mercenaria

UdeM00000002272 6596 651 UdeM00000002272 XP\_045176451.1 65.8 605  
 189 4 1 601 3 593 1.50E-183 651 6596 cellular  
 organisms;Eukaryota;Opisthokonta;Metazoa;Eumetazoa;Bilateria;Protostomia;  
 Spiralia;Lophotrochozoa;Mollusca;Bivalvia;Autobranhia;Heteroconchia;Euhe  
 terodonta;Imparidentia;Venerida;Veneroidea;Veneridae;Mercenaria;Mercenari  
 a mercenaria

UdeM00000002273 6596 332 UdeM00000002273 XP\_045186895.1 69.7 238  
 72 0 1 238 1 238 6.10E-88 332 6596 cellular  
 organisms;Eukaryota;Opisthokonta;Metazoa;Eumetazoa;Bilateria;Protostomia;  
 Spiralia;Lophotrochozoa;Mollusca;Bivalvia;Autobranhia;Heteroconchia;Euhe  
 terodonta;Imparidentia;Venerida;Veneroidea;Veneridae;Mercenaria;Mercenari  
 a mercenaria

UdeM00000002274 6596 310.8 UdeM00000002274 XP\_045186897.1 62.8 261  
 45 1 2 262 8 216 1.60E-81 310.8 6596 cellular  
 organisms;Eukaryota;Opisthokonta;Metazoa;Eumetazoa;Bilateria;Protostomia;  
 Spiralia;Lophotrochozoa;Mollusca;Bivalvia;Autobranhia;Heteroconchia;Euhe  
 terodonta;Imparidentia;Venerida;Veneroidea;Veneridae;Mercenaria;Mercenari  
 a mercenaria

UdeM00000002275 6596 308.5 UdeM00000002275 XP\_045186899.1 62.5 259  
 45 1 2 260 8 214 8.00E-81 308.5 6596 cellular  
 organisms;Eukaryota;Opisthokonta;Metazoa;Eumetazoa;Bilateria;Protostomia;  
 Spiralia;Lophotrochozoa;Mollusca;Bivalvia;Autobranhia;Heteroconchia;Euhe  
 terodonta;Imparidentia;Venerida;Veneroidea;Veneridae;Mercenaria;Mercenari  
 a mercenaria

UdeM00000002276 37621 221.5 UdeM00000002276 XP\_014676995.1 64.9 154  
 53 1 1 154 1 153 7.60E-55 221.5 37621 cellular  
 organisms;Eukaryota;Opisthokonta;Metazoa;Eumetazoa;Bilateria;Protostomia;  
 Ecdysozoa;Scalidophora;Priapulida;Priapulimorpha;Priapulimorphida;Priapul  
 idae;Priapululus;Priapululus caudatus  
 UdeM00000002277 34632 82.8 UdeM00000002277 XP\_037515180.1 43.2 95  
 54 0 6 100 269 363 3.30E-13 82.8 34632 cellular  
 organisms;Eukaryota;Opisthokonta;Metazoa;Eumetazoa;Bilateria;Protostomia;  
 Ecdysozoa;Panarthropoda;Arthropoda;Chelicerata;Arachnida;Acari;Parasitifo  
 rmes;Ixodida;Ixodoidea;Ixodidae;Rhipicephalinae;Rhipicephalus;Rhipicephal  
 us;Rhipicephalus sanguineus group;Rhipicephalus sanguineus  
 UdeM00000002278 7654 169.5 UdeM00000002278 XP\_041472362.1 41.8 196  
 106 4 2 192 255 447 4.40E-39 169.5 7654 cellular  
 organisms;Eukaryota;Opisthokonta;Metazoa;Eumetazoa;Bilateria;Deuterostomi  
 a;Echinodermata;Eleutherozoa;Echinozoa;Echinoidea;Euechinoidea;Echinacea;  
 Temnopleuroida;Toxopneustidae;Lytechinus;Lytechinus variegatus  
 UdeM00000002279 45351 112.8 UdeM00000002279 XP\_032227349.1 32.3 217  
 115 4 1 217 15 199 5.70E-22 112.8 45351 cellular  
 organisms;Eukaryota;Opisthokonta;Metazoa;Eumetazoa;Cnidaria;Anthozoa;Hexa  
 corallia;Actiniaria;Edwardsiidae;Nematostella;Nematostella vectensis  
 UdeM00000002280 29159 114.8 UdeM00000002280 XP\_034323387.1 63.2 76  
 28 0 2 77 17 92 8.60E-23 114.8 29159 cellular  
 organisms;Eukaryota;Opisthokonta;Metazoa;Eumetazoa;Bilateria;Protostomia;  
 Spiralia;Lophotrochozoa;Mollusca;Bivalvia;Autobranchia;Pteriormorphia;Ostr  
 eida;Ostreoidea;Ostreidae;Crassostrea;Crassostrea gigas  
 UdeM00000002281 6596 517.3 UdeM00000002281 XP\_045158275.1 31.1 1738  
 835 51 417 1980 490 2038 8.60E-143 517.3 6596 cellular  
 organisms;Eukaryota;Opisthokonta;Metazoa;Eumetazoa;Bilateria;Protostomia;  
 Spiralia;Lophotrochozoa;Mollusca;Bivalvia;Autobranchia;Heteroconchia;Euhe  
 terodonta;Imparidentia;Venerida;Veneroidea;Veneridae;Mercenaria;Mercenari  
 a mercenaria  
 UdeM00000002283 6596 406.8 UdeM00000002283 XP\_045192999.1 53.5 368  
 165 4 12 378 6 368 3.20E-110 406.8 6596 cellular  
 organisms;Eukaryota;Opisthokonta;Metazoa;Eumetazoa;Bilateria;Protostomia;  
 Spiralia;Lophotrochozoa;Mollusca;Bivalvia;Autobranchia;Heteroconchia;Euhe  
 terodonta;Imparidentia;Venerida;Veneroidea;Veneridae;Mercenaria;Mercenari  
 a mercenaria  
 UdeM00000002284 6596 268.9 UdeM00000002284 XP\_045192999.1 54.7 232  
 99 4 38 268 55 281 7.20E-69 268.9 6596 cellular  
 organisms;Eukaryota;Opisthokonta;Metazoa;Eumetazoa;Bilateria;Protostomia;  
 Spiralia;Lophotrochozoa;Mollusca;Bivalvia;Autobranchia;Heteroconchia;Euhe  
 terodonta;Imparidentia;Venerida;Veneroidea;Veneridae;Mercenaria;Mercenari  
 a mercenaria  
 UdeM00000002286 6573 231.1 UdeM00000002286 XP\_021353785.1 45.5 321  
 136 6 6 292 2 317 1.80E-57 231.1 6573 cellular  
 organisms;Eukaryota;Opisthokonta;Metazoa;Eumetazoa;Bilateria;Protostomia;  
 Spiralia;Lophotrochozoa;Mollusca;Bivalvia;Autobranchia;Pteriormorphia;Pect  
 inida;Pectinoidea;Pectinidae;Mizuhopecten;Mizuhopecten yessoensis  
 UdeM00000002287 6596 587 UdeM00000002287 XP\_045158332.1 43.9 781  
 191 14 18 596 129 864 2.70E-164 587 6596 cellular  
 organisms;Eukaryota;Opisthokonta;Metazoa;Eumetazoa;Bilateria;Protostomia;  
 Spiralia;Lophotrochozoa;Mollusca;Bivalvia;Autobranchia;Heteroconchia;Euhe  
 terodonta;Imparidentia;Venerida;Veneroidea;Veneridae;Mercenaria;Mercenari  
 a mercenaria

UdeM00000002289 6596 173.3 UdeM00000002289 XP\_045182678.1 59.9 147  
 55 2 2 144 104 250 2.20E-40 173.3 6596 cellular  
 organisms;Eukaryota;Opisthokonta;Metazoa;Eumetazoa;Bilateria;Protostomia;  
 Spiralia;Lophotrochozoa;Mollusca;Bivalvia;Autobranchia;Heteroconchia;Euhe  
 terodonta;Imparidentia;Venerida;Veneroidea;Veneridae;Mercenaria;Mercenari  
 a mercenaria  
 UdeM00000002288 2607531 268.1 UdeM00000002288 XP\_029643017.1 52.9  
 274 79 2 1 273 1 225 1.30E-68 268.1 2607531  
 cellular  
 organisms;Eukaryota;Opisthokonta;Metazoa;Eumetazoa;Bilateria;Protostomia;  
 Spiralia;Lophotrochozoa;Mollusca;Cephalopoda;Coleoidea;Octopodiformes;Oct  
 opoda;Incirrata;Octopodidae;Octopus;Octopus sinensis  
 UdeM00000002290 6596 1194.5 UdeM00000002290 XP\_045156990.1 79.8  
 759 140 4 1 754 152 902 0.00E+00 1194.5 6596  
 cellular  
 organisms;Eukaryota;Opisthokonta;Metazoa;Eumetazoa;Bilateria;Protostomia;  
 Spiralia;Lophotrochozoa;Mollusca;Bivalvia;Autobranchia;Heteroconchia;Euhe  
 terodonta;Imparidentia;Venerida;Veneroidea;Veneridae;Mercenaria;Mercenari  
 a mercenaria  
 UdeM00000002291 6596 368.2 UdeM00000002291 XP\_045156990.1 87.1 202  
 26 0 1 202 157 358 6.60E-99 368.2 6596 cellular  
 organisms;Eukaryota;Opisthokonta;Metazoa;Eumetazoa;Bilateria;Protostomia;  
 Spiralia;Lophotrochozoa;Mollusca;Bivalvia;Autobranchia;Heteroconchia;Euhe  
 terodonta;Imparidentia;Venerida;Veneroidea;Veneridae;Mercenaria;Mercenari  
 a mercenaria  
 UdeM00000002292 6573 745.7 UdeM00000002292 XP\_021353642.1 63.2 593  
 202 5 24 603 56 645 4.70E-212 745.7 6573 cellular  
 organisms;Eukaryota;Opisthokonta;Metazoa;Eumetazoa;Bilateria;Protostomia;  
 Spiralia;Lophotrochozoa;Mollusca;Bivalvia;Autobranchia;Pteriomorphia;Pect  
 inida;Pectinoidea;Pectinidae;Mizuhopecten;Mizuhopecten yessoensis  
 UdeM00000002293 6573 265.8 UdeM00000002293 XP\_021353644.1 55.5 227  
 98 2 1 226 1 225 5.20E-68 265.8 6573 cellular  
 organisms;Eukaryota;Opisthokonta;Metazoa;Eumetazoa;Bilateria;Protostomia;  
 Spiralia;Lophotrochozoa;Mollusca;Bivalvia;Autobranchia;Pteriomorphia;Pect  
 inida;Pectinoidea;Pectinidae;Mizuhopecten;Mizuhopecten yessoensis  
 UdeM00000002294 6573 120.9 UdeM00000002294 XP\_021353644.1 51.9 108  
 51 1 2 108 118 225 1.00E-24 120.9 6573 cellular  
 organisms;Eukaryota;Opisthokonta;Metazoa;Eumetazoa;Bilateria;Protostomia;  
 Spiralia;Lophotrochozoa;Mollusca;Bivalvia;Autobranchia;Pteriomorphia;Pect  
 inida;Pectinoidea;Pectinidae;Mizuhopecten;Mizuhopecten yessoensis  
 UdeM00000002295 400727 385.2 UdeM00000002295 XP\_025103728.1 93.6  
 202 13 0 1 202 4 205 5.20E-104 385.2 400727  
 cellular  
 organisms;Eukaryota;Opisthokonta;Metazoa;Eumetazoa;Bilateria;Protostomia;  
 Spiralia;Lophotrochozoa;Mollusca;Gastropoda;Caenogastropoda;Architaeniogl  
 ossa;Ampullarioidea;Ampullariidae;Pomacea;Pomacea canaliculata  
 UdeM00000002296 409849 322.8 UdeM00000002296 XP\_033836177.1 91.3  
 172 15 0 1 172 1 172 2.70E-85 322.8 409849  
 cellular  
 organisms;Eukaryota;Opisthokonta;Metazoa;Eumetazoa;Bilateria;Deuterostomi  
 a;Chordata;Craniata;Vertebrata;Gnathostomata;Teleostomi;Euteleostomi;Acti  
 nopterygii;Actinopteri;Neopterygii;Teleostei;Osteoglossocephalai;Clupeoce  
 phala;Euteleosteomorpha;Neoteleostei;Eurypterygia;Ctenosquamata;Acanthomo

rphata;Euacanthomorpha;Percomorphaceae;Gobiaria;Gobiiformes;Gobioidei;
 Gobiidae;Oxudercinae;Periophthalmus;Periophthalmus magnuspinnatus

|                 |      |     |                 |                |      |           |
|-----------------|------|-----|-----------------|----------------|------|-----------|
| UdeM00000002297 | 6596 | 619 | UdeM00000002297 | XP_045161058.1 | 58.3 | 496       |
| 203             | 3    | 1   | 495             | 1              | 493  | 5.30E-174 |

619 6596 cellular organisms;Eukaryota;Opisthokonta;Metazoa;Eumetazoa;Bilateria;Protostomia;Spiralia;Lophotrochozoa;Mollusca;Bivalvia;Autobranchia;Heteroconchia;Euherodonta;Imparidentia;Venerida;Veneroidea;Veneridae;Mercenaria;Mercenaria mercenaria

|                 |      |       |                 |                |      |           |
|-----------------|------|-------|-----------------|----------------|------|-----------|
| UdeM00000002298 | 6573 | 503.8 | UdeM00000002298 | XP_021372699.1 | 47.1 | 548       |
| 236             | 9    | 24    | 524             | 84             | 624  | 2.60E-139 |

503.8 6573 cellular organisms;Eukaryota;Opisthokonta;Metazoa;Eumetazoa;Bilateria;Protostomia;Spiralia;Lophotrochozoa;Mollusca;Bivalvia;Autobranchia;Pteriormorphia;Pectinida;Pectinoidea;Pectinidae;Mizuhopecten;Mizuhopecten yessoensis

|                 |      |       |                 |                |     |           |
|-----------------|------|-------|-----------------|----------------|-----|-----------|
| UdeM00000002299 | 6573 | 449.1 | UdeM00000002299 | XP_021372699.1 | 44  | 548       |
| 230             | 10   | 24    | 501             | 84             | 624 | 7.30E-123 |

449.1 6573 cellular organisms;Eukaryota;Opisthokonta;Metazoa;Eumetazoa;Bilateria;Protostomia;Spiralia;Lophotrochozoa;Mollusca;Bivalvia;Autobranchia;Pteriormorphia;Pectinida;Pectinoidea;Pectinidae;Mizuhopecten;Mizuhopecten yessoensis

|                 |      |      |                 |                |      |          |
|-----------------|------|------|-----------------|----------------|------|----------|
| UdeM00000002300 | 6579 | 95.5 | UdeM00000002300 | XP_033735570.1 | 63.1 | 65       |
| 24              | 0    | 1    | 65              | 315            | 379  | 5.50E-17 |

95.5 6579 cellular organisms;Eukaryota;Opisthokonta;Metazoa;Eumetazoa;Bilateria;Protostomia;Spiralia;Lophotrochozoa;Mollusca;Bivalvia;Autobranchia;Pteriormorphia;Pectinida;Pectinoidea;Pectinidae;Pecten;Pecten maximus

|                 |        |       |                 |                |      |     |
|-----------------|--------|-------|-----------------|----------------|------|-----|
| UdeM00000002301 | 400727 | 267.3 | UdeM00000002301 | XP_025104112.1 | 65.4 |     |
| 191             | 64     | 1     | 75              | 263            | 10   | 200 |

267.3 400727 cellular organisms;Eukaryota;Opisthokonta;Metazoa;Eumetazoa;Bilateria;Protostomia;Spiralia;Lophotrochozoa;Mollusca;Gastropoda;Caenogastropoda;Architaenioglossa;Ampullarioidea;Ampullariidae;Pomacea;Pomacea canaliculata

|                 |      |       |                 |                |      |           |
|-----------------|------|-------|-----------------|----------------|------|-----------|
| UdeM00000002302 | 6596 | 750.7 | UdeM00000002302 | XP_045159980.1 | 58.7 | 624       |
| 257             | 1    | 7     | 629             | 36             | 659  | 1.50E-213 |

750.7 6596 cellular organisms;Eukaryota;Opisthokonta;Metazoa;Eumetazoa;Bilateria;Protostomia;Spiralia;Lophotrochozoa;Mollusca;Bivalvia;Autobranchia;Heteroconchia;Euherodonta;Imparidentia;Venerida;Veneroidea;Veneridae;Mercenaria;Mercenaria mercenaria

|                 |      |       |                 |                |      |           |
|-----------------|------|-------|-----------------|----------------|------|-----------|
| UdeM00000002303 | 6596 | 743.8 | UdeM00000002303 | XP_045159980.1 | 59.1 | 624       |
| 254             | 1    | 7     | 629             | 36             | 659  | 1.80E-211 |

743.8 6596 cellular organisms;Eukaryota;Opisthokonta;Metazoa;Eumetazoa;Bilateria;Protostomia;Spiralia;Lophotrochozoa;Mollusca;Bivalvia;Autobranchia;Heteroconchia;Euherodonta;Imparidentia;Venerida;Veneroidea;Veneridae;Mercenaria;Mercenaria mercenaria

|                 |      |       |                 |                |      |           |
|-----------------|------|-------|-----------------|----------------|------|-----------|
| UdeM00000002304 | 6596 | 407.1 | UdeM00000002304 | XP_045159914.1 | 61.5 | 338       |
| 128             | 2    | 23    | 358             | 38             | 375  | 2.30E-110 |

407.1 6596 cellular organisms;Eukaryota;Opisthokonta;Metazoa;Eumetazoa;Bilateria;Protostomia;Spiralia;Lophotrochozoa;Mollusca;Bivalvia;Autobranchia;Heteroconchia;Euherodonta;Imparidentia;Venerida;Veneroidea;Veneridae;Mercenaria;Mercenaria mercenaria

|                 |      |       |                 |                |     |           |
|-----------------|------|-------|-----------------|----------------|-----|-----------|
| UdeM00000002305 | 6596 | 902.5 | UdeM00000002305 | XP_045159914.1 | 68  | 641       |
| 204             | 1    | 3     | 642             | 8              | 648 | 3.10E-259 |

902.5 6596 cellular organisms;Eukaryota;Opisthokonta;Metazoa;Eumetazoa;Bilateria;Protostomia;Spiralia;Lophotrochozoa;Mollusca;Bivalvia;Autobranchia;Heteroconchia;Euherodonta;Imparidentia;Venerida;Veneroidea;Veneridae;Mercenaria;Mercenaria mercenaria

UdeM00000002306 6596 988.8 UdeM00000002306 XP\_045159875.1 76.1 639  
 152 1 39 676 91 729 3.40E-285 988.8 6596 cellular  
 organisms;Eukaryota;Opisthokonta;Metazoa;Eumetazoa;Bilateria;Protostomia;  
 Spiralia;Lophotrochozoa;Mollusca;Bivalvia;Autobranhia;Heteroconchia;Euhe  
 terodonta;Imparidentia;Venerida;Veneroidea;Veneridae;Mercenaria;Mercenari  
 a mercenaria

UdeM00000002308 29159 310.1 UdeM00000002308 XP\_011425562.1 78.3 189  
 34 1 1 182 1 189 3.10E-81 310.1 29159 cellular  
 organisms;Eukaryota;Opisthokonta;Metazoa;Eumetazoa;Bilateria;Protostomia;  
 Spiralia;Lophotrochozoa;Mollusca;Bivalvia;Autobranhia;Pteriormorphia;Ostr  
 eida;Ostreoidea;Ostreidae;Crassostrea;Crassostrea gigas

UdeM00000002309 1735272 288.9 UdeM00000002309 XP\_041352381.1 71.9  
 199 41 2 22 220 1 184 7.90E-75 288.9 1735272  
 cellular  
 organisms;Eukaryota;Opisthokonta;Metazoa;Eumetazoa;Bilateria;Protostomia;  
 Spiralia;Lophotrochozoa;Mollusca;Gastropoda;Neomphalina;Neomphaloidea;Pel  
 tospiridae;Gigantopelta;Gigantopelta aegis

UdeM00000002311 1735272 253.1 UdeM00000002311 XP\_041352377.1 57.8  
 287 116 3 8 294 6 287 4.60E-64 253.1 1735272  
 cellular  
 organisms;Eukaryota;Opisthokonta;Metazoa;Eumetazoa;Bilateria;Protostomia;  
 Spiralia;Lophotrochozoa;Mollusca;Gastropoda;Neomphalina;Neomphaloidea;Pel  
 tospiridae;Gigantopelta;Gigantopelta aegis

UdeM00000002310 1735272 1149 UdeM00000002310 XP\_041352377.1 57.8  
 1172 367 13 8 1143 6 1086 0.00E+00 1149 1735272  
 cellular  
 organisms;Eukaryota;Opisthokonta;Metazoa;Eumetazoa;Bilateria;Protostomia;  
 Spiralia;Lophotrochozoa;Mollusca;Gastropoda;Neomphalina;Neomphaloidea;Pel  
 tospiridae;Gigantopelta;Gigantopelta aegis

UdeM00000002313 6573 418.3 UdeM00000002313 XP\_021351552.1 69.9 376  
 107 3 36 410 1099 1469 1.10E-113 418.3 6573 cellular  
 organisms;Eukaryota;Opisthokonta;Metazoa;Eumetazoa;Bilateria;Protostomia;  
 Spiralia;Lophotrochozoa;Mollusca;Bivalvia;Autobranhia;Pteriormorphia;Pect  
 inida;Pectinoidea;Pectinidae;Mizuhopecten;Mizuhopecten yessoensis

UdeM00000002314 1735272 226.5 UdeM00000002314 XP\_041352384.1 56.5  
 191 81 1 7 197 8 196 3.30E-56 226.5 1735272  
 cellular  
 organisms;Eukaryota;Opisthokonta;Metazoa;Eumetazoa;Bilateria;Protostomia;  
 Spiralia;Lophotrochozoa;Mollusca;Gastropoda;Neomphalina;Neomphaloidea;Pel  
 tospiridae;Gigantopelta;Gigantopelta aegis

UdeM00000002316 225164 842 UdeM00000002316 XP\_009061666.1 65.1  
 536 181 2 24 557 1 532 6.00E-241 842 225164  
 cellular  
 organisms;Eukaryota;Opisthokonta;Metazoa;Eumetazoa;Bilateria;Protostomia;  
 Spiralia;Lophotrochozoa;Mollusca;Gastropoda;Patellogastropoda;Lottioidea;  
 Lottiidae;Lottia;Lottia gigantea

UdeM00000002317 225164 842 UdeM00000002317 XP\_009061666.1 65.1  
 536 181 2 25 558 1 532 6.00E-241 842 225164  
 cellular  
 organisms;Eukaryota;Opisthokonta;Metazoa;Eumetazoa;Bilateria;Protostomia;  
 Spiralia;Lophotrochozoa;Mollusca;Gastropoda;Patellogastropoda;Lottioidea;  
 Lottiidae;Lottia;Lottia gigantea

UdeM00000002318 2607531 385.2 UdeM00000002318 XP\_029637912.1 62.5  
 296 111 0 102 397 118 413 1.00E-103 385.2 2607531

cellular  
organisms;Eukaryota;Opisthokonta;Metazoa;Eumetazoa;Bilateria;Protostomia;  
Spiralia;Lophotrochozoa;Mollusca;Cephalopoda;Coleoidea;Octopodiformes;Oct  
opoda;Incirrata;Octopodidae;Octopus;Octopus sinensis  
UdeM00000002319 6596 481.1 UdeM00000002319 XP\_045161383.1 50.2 476  
230 4 1 476 1 469 1.60E-132 481.1 6596 cellular  
organisms;Eukaryota;Opisthokonta;Metazoa;Eumetazoa;Bilateria;Protostomia;  
Spiralia;Lophotrochozoa;Mollusca;Bivalvia;Autobranchia;Heteroconchia;Euhe  
terodonta;Imparidentia;Venerida;Veneroidea;Veneridae;Mercenaria;Mercenari  
a mercenaria  
UdeM00000002320 7741 218.8 UdeM00000002320 XP\_019622111.1 53.3 199  
91 2 106 304 82 278 9.70E-54 218.8 7741 cellular  
organisms;Eukaryota;Opisthokonta;Metazoa;Eumetazoa;Bilateria;Deuterostomi  
a;Chordata;Cephalochordata;Leptocardii;Amphioxiformes;Branchiostomidae;Br  
anchiostoma;Branchiostoma belcheri  
UdeM00000002321 6500 110.9 UdeM00000002321 XP\_035824558.1 70.7 75  
22 0 1 75 30 104 8.40E-22 110.9 6500 cellular  
organisms;Eukaryota;Opisthokonta;Metazoa;Eumetazoa;Bilateria;Protostomia;  
Spiralia;Lophotrochozoa;Mollusca;Gastropoda;Heterobranchia;Euthyneura;Tec  
tipleura;Aplysiida;Aplysioidea;Aplysiidae;Aplysia;Aplysia californica  
UdeM00000002322 6573 128.3 UdeM00000002322 XP\_021353616.1 34.8 250  
135 8 12 236 1251 1497 1.40E-26 128.3 6573 cellular  
organisms;Eukaryota;Opisthokonta;Metazoa;Eumetazoa;Bilateria;Protostomia;  
Spiralia;Lophotrochozoa;Mollusca;Bivalvia;Autobranchia;Pteriormorphia;Pect  
inida;Pectinoidea;Pectinidae;Mizuhopecten;Mizuhopecten yessoensis  
UdeM00000002323 6596 486.9 UdeM00000002323 XP\_045161383.1 51.7 462  
218 3 1 462 1 457 3.00E-134 486.9 6596 cellular  
organisms;Eukaryota;Opisthokonta;Metazoa;Eumetazoa;Bilateria;Protostomia;  
Spiralia;Lophotrochozoa;Mollusca;Bivalvia;Autobranchia;Heteroconchia;Euhe  
terodonta;Imparidentia;Venerida;Veneroidea;Veneridae;Mercenaria;Mercenari  
a mercenaria  
UdeM00000002326 6596 733.4 UdeM00000002326 XP\_045187433.1 54.5 657  
286 8 8 657 25 675 2.60E-208 733.4 6596 cellular  
organisms;Eukaryota;Opisthokonta;Metazoa;Eumetazoa;Bilateria;Protostomia;  
Spiralia;Lophotrochozoa;Mollusca;Bivalvia;Autobranchia;Heteroconchia;Euhe  
terodonta;Imparidentia;Venerida;Veneroidea;Veneridae;Mercenaria;Mercenari  
a mercenaria  
UdeM00000002327 6596 551.6 UdeM00000002327 XP\_045187433.1 53.6 502  
227 5 40 539 52 549 1.10E-153 551.6 6596 cellular  
organisms;Eukaryota;Opisthokonta;Metazoa;Eumetazoa;Bilateria;Protostomia;  
Spiralia;Lophotrochozoa;Mollusca;Bivalvia;Autobranchia;Heteroconchia;Euhe  
terodonta;Imparidentia;Venerida;Veneroidea;Veneridae;Mercenaria;Mercenari  
a mercenaria  
UdeM00000002328 6596 109 UdeM00000002328 XP\_045187433.1 66.7 75  
24 1 1 75 563 636 2.90E-21 109 6596 cellular  
organisms;Eukaryota;Opisthokonta;Metazoa;Eumetazoa;Bilateria;Protostomia;  
Spiralia;Lophotrochozoa;Mollusca;Bivalvia;Autobranchia;Heteroconchia;Euhe  
terodonta;Imparidentia;Venerida;Veneroidea;Veneridae;Mercenaria;Mercenari  
a mercenaria  
UdeM00000002329 6596 98.2 UdeM00000002329 XP\_045187433.1 64.7 68  
23 1 1 68 570 636 4.60E-18 98.2 6596 cellular  
organisms;Eukaryota;Opisthokonta;Metazoa;Eumetazoa;Bilateria;Protostomia;  
Spiralia;Lophotrochozoa;Mollusca;Bivalvia;Autobranchia;Heteroconchia;Euhe

terodonta;Imparidentia;Venerida;Veneroidea;Veneridae;Mercenaria;Mercenari  
 a mercenaria  
 UdeM00000002330 6596 707.2 UdeM00000002330 XP\_045187433.1 53.3 630  
 287 5 29 656 51 675 2.00E-200 707.2 6596 cellular  
 organisms;Eukaryota;Opisthokonta;Metazoa;Eumetazoa;Bilateria;Protostomia;  
 Spiralia;Lophotrochozoa;Mollusca;Bivalvia;Autobranhia;Heteroconchia;Euhe  
 terodonta;Imparidentia;Venerida;Veneroidea;Veneridae;Mercenaria;Mercenari  
 a mercenaria  
 UdeM00000002331 6596 707.2 UdeM00000002331 XP\_045187433.1 53.3 630  
 287 5 35 662 51 675 2.00E-200 707.2 6596 cellular  
 organisms;Eukaryota;Opisthokonta;Metazoa;Eumetazoa;Bilateria;Protostomia;  
 Spiralia;Lophotrochozoa;Mollusca;Bivalvia;Autobranhia;Heteroconchia;Euhe  
 terodonta;Imparidentia;Venerida;Veneroidea;Veneridae;Mercenaria;Mercenari  
 a mercenaria  
 UdeM00000002332 6579 454.9 UdeM00000002332 XP\_033741736.1 58.5 364  
 149 1 1 362 494 857 9.90E-125 454.9 6579 cellular  
 organisms;Eukaryota;Opisthokonta;Metazoa;Eumetazoa;Bilateria;Protostomia;  
 Spiralia;Lophotrochozoa;Mollusca;Bivalvia;Autobranhia;Pteriormorphia;Pect  
 inida;Pectinoidea;Pectinidae;Pecten;Pecten maximus  
 UdeM00000002333 6579 279.3 UdeM00000002333 XP\_033741736.1 54.9 244  
 108 1 1 242 614 857 5.10E-72 279.3 6579 cellular  
 organisms;Eukaryota;Opisthokonta;Metazoa;Eumetazoa;Bilateria;Protostomia;  
 Spiralia;Lophotrochozoa;Mollusca;Bivalvia;Autobranhia;Pteriormorphia;Pect  
 inida;Pectinoidea;Pectinidae;Pecten;Pecten maximus  
 UdeM00000002334 680683 100.1 UdeM00000002334 XP\_013184004.1 23.8  
 323 132 8 61 380 14 225 6.20E-18 100.1 680683  
 cellular  
 organisms;Eukaryota;Opisthokonta;Metazoa;Eumetazoa;Bilateria;Protostomia;  
 Ecdysozoa;Panarthropoda;Arthropoda;Mandibulata;Pancrustacea;Hexapoda;Inse  
 cta;Dicondylia;Pterygota;Neoptera;Endopterygota;Amphiesmenoptera;Lepidopt  
 era;Glossata;Neolepidoptera;Heteroneura;Ditrysia;Obtectomera;Pyraloidea;P  
 yralidae;Phycitinae;Amyelois;Amyelois transitella  
 UdeM00000002335 105785 87 UdeM00000002335 XP\_023716734.1 32.8  
 134 76 3 47 175 62 186 2.50E-14 87 105785  
 cellular  
 organisms;Eukaryota;Opisthokonta;Metazoa;Eumetazoa;Bilateria;Protostomia;  
 Ecdysozoa;Panarthropoda;Arthropoda;Mandibulata;Pancrustacea;Hexapoda;Inse  
 cta;Dicondylia;Pterygota;Neoptera;Polyneoptera;Dictyoptera;Blattodea;Blat  
 toidea;Termitoidea;Kalotermitidae;Cryptotermitinae;Cryptotermes;Cryptoter  
 mes secundus  
 UdeM00000002336 6500 113.2 UdeM00000002336 XP\_012944388.1 54.8 93  
 41 1 14 106 548 639 2.40E-22 113.2 6500 cellular  
 organisms;Eukaryota;Opisthokonta;Metazoa;Eumetazoa;Bilateria;Protostomia;  
 Spiralia;Lophotrochozoa;Mollusca;Gastropoda;Heterobranhia;Euthyneura;Tec  
 tipleura;Aplysiida;Aplysioidea;Aplysiidae;Aplysia;Aplysia californica  
 UdeM00000002337 6596 547.7 UdeM00000002337 XP\_045187433.1 51.3 519  
 247 4 38 554 161 675 1.70E-152 547.7 6596 cellular  
 organisms;Eukaryota;Opisthokonta;Metazoa;Eumetazoa;Bilateria;Protostomia;  
 Spiralia;Lophotrochozoa;Mollusca;Bivalvia;Autobranhia;Heteroconchia;Euhe  
 terodonta;Imparidentia;Venerida;Veneroidea;Veneridae;Mercenaria;Mercenari  
 a mercenaria  
 UdeM00000002338 6500 115.2 UdeM00000002338 XP\_012944388.1 55.7 88  
 38 1 1 88 563 649 5.80E-23 115.2 6500 cellular  
 organisms;Eukaryota;Opisthokonta;Metazoa;Eumetazoa;Bilateria;Protostomia;

Spiralia;Lophotrochozoa;Mollusca;Gastropoda;Heterobranchia;Euthyneura;Te-  
 tipleura;Aplysiida;Aplysioidea;Aplysiidae;Aplysia;Aplysia californica  
 UdeM00000002339 6596 406 UdeM00000002339 XP\_045161100.1 40.2 801  
 414 24 1 764 186 958 1.10E-109 406 6596 cellular  
 organisms;Eukaryota;Opisthokonta;Metazoa;Eumetazoa;Bilateria;Protostomia;  
 Spiralia;Lophotrochozoa;Mollusca;Bivalvia;Autobranchia;Heteroconchia;Euhe-  
 terodonta;Imparidentia;Venerida;Veneroidea;Veneridae;Mercenaria;Mercenari  
 a mercenaria  
 UdeM00000002340 6596 322.4 UdeM00000002340 XP\_045161100.1 83.5 182  
 30 0 1 182 1 182 3.80E-85 322.4 6596 cellular  
 organisms;Eukaryota;Opisthokonta;Metazoa;Eumetazoa;Bilateria;Protostomia;  
 Spiralia;Lophotrochozoa;Mollusca;Bivalvia;Autobranchia;Heteroconchia;Euhe-  
 terodonta;Imparidentia;Venerida;Veneroidea;Veneridae;Mercenaria;Mercenari  
 a mercenaria  
 UdeM00000002341 6596 385.6 UdeM00000002341 XP\_045161113.1 72.2 273  
 70 3 8 280 7 273 5.50E-104 385.6 6596 cellular  
 organisms;Eukaryota;Opisthokonta;Metazoa;Eumetazoa;Bilateria;Protostomia;  
 Spiralia;Lophotrochozoa;Mollusca;Bivalvia;Autobranchia;Heteroconchia;Euhe-  
 terodonta;Imparidentia;Venerida;Veneroidea;Veneridae;Mercenaria;Mercenari  
 a mercenaria  
 UdeM00000002343 29159 255.8 UdeM00000002343 XP\_034326762.1 53.5 241  
 104 3 118 358 230 462 1.20E-64 255.8 29159 cellular  
 organisms;Eukaryota;Opisthokonta;Metazoa;Eumetazoa;Bilateria;Protostomia;  
 Spiralia;Lophotrochozoa;Mollusca;Bivalvia;Autobranchia;Pteriormorphia;Ostr-  
 eida;Ostreoidea;Ostreidae;Crassostrea;Crassostrea gigas  
 UdeM00000002344 6596 291.6 UdeM00000002344 XP\_045214054.1 66.5 209  
 68 1 395 603 289 495 4.10E-75 291.6 6596 cellular  
 organisms;Eukaryota;Opisthokonta;Metazoa;Eumetazoa;Bilateria;Protostomia;  
 Spiralia;Lophotrochozoa;Mollusca;Bivalvia;Autobranchia;Heteroconchia;Euhe-  
 terodonta;Imparidentia;Venerida;Veneroidea;Veneridae;Mercenaria;Mercenari  
 a mercenaria  
 UdeM00000002345 6596 289.3 UdeM00000002345 XP\_045214054.1 66.5 209  
 68 1 531 739 289 495 2.10E-74 289.3 6596 cellular  
 organisms;Eukaryota;Opisthokonta;Metazoa;Eumetazoa;Bilateria;Protostomia;  
 Spiralia;Lophotrochozoa;Mollusca;Bivalvia;Autobranchia;Heteroconchia;Euhe-  
 terodonta;Imparidentia;Venerida;Veneroidea;Veneridae;Mercenaria;Mercenari  
 a mercenaria  
 UdeM00000002346 7574 116.3 UdeM00000002346 XP\_023932869.1 51.9 108  
 52 0 12 119 79 186 2.80E-23 116.3 7574 cellular  
 organisms;Eukaryota;Opisthokonta;Metazoa;Eumetazoa;Bilateria;Protostomia;  
 Spiralia;Lophotrochozoa;Brachiopoda;Linguliformea;Lingulata;Lingulida;Lin-  
 guloidea;Lingulidae;Lingula;Lingula anatina  
 UdeM00000002347 6579 78.2 UdeM00000002347 XP\_033734582.1 29.8 228  
 142 8 145 367 513 727 2.70E-11 78.2 6579 cellular  
 organisms;Eukaryota;Opisthokonta;Metazoa;Eumetazoa;Bilateria;Protostomia;  
 Spiralia;Lophotrochozoa;Mollusca;Bivalvia;Autobranchia;Pteriormorphia;Pect-  
 inida;Pectinoidea;Pectinidae;Pecten;Pecten maximus  
 UdeM00000002348 6579 78.2 UdeM00000002348 XP\_033734582.1 29.8 228  
 142 8 128 350 513 727 2.50E-11 78.2 6579 cellular  
 organisms;Eukaryota;Opisthokonta;Metazoa;Eumetazoa;Bilateria;Protostomia;  
 Spiralia;Lophotrochozoa;Mollusca;Bivalvia;Autobranchia;Pteriormorphia;Pect-  
 inida;Pectinoidea;Pectinidae;Pecten;Pecten maximus  
 UdeM00000002349 6596 1922.1 UdeM00000002349 XP\_045187264.1 78.3  
 1226 233 7 1 1219 1 1200 0.00E+00 1922.1 6596



cellular  
organisms;Eukaryota;Opisthokonta;Metazoa;Eumetazoa;Bilateria;Protostomia;  
Spiralia;Lophotrochozoa;Mollusca;Bivalvia;Autobranchia;Heteroconchia;Euhe  
terodonta;Imparidentia;Venerida;Veneroidea;Veneridae;Mercenaria;Mercenari  
a mercenaria  
UdeM00000002350 6596 520 UdeM00000002350 XP\_045187265.1 53.5 735  
272 13 10 738 7 677 5.00E-144 520 6596 cellular  
organisms;Eukaryota;Opisthokonta;Metazoa;Eumetazoa;Bilateria;Protostomia;  
Spiralia;Lophotrochozoa;Mollusca;Bivalvia;Autobranchia;Heteroconchia;Euhe  
terodonta;Imparidentia;Venerida;Veneroidea;Veneridae;Mercenaria;Mercenari  
a mercenaria  
UdeM00000002351 6596 527.3 UdeM00000002351 XP\_045183662.1 64.3 406  
138 3 1 405 2799 3198 1.70E-146 527.3 6596 cellular  
organisms;Eukaryota;Opisthokonta;Metazoa;Eumetazoa;Bilateria;Protostomia;  
Spiralia;Lophotrochozoa;Mollusca;Bivalvia;Autobranchia;Heteroconchia;Euhe  
terodonta;Imparidentia;Venerida;Veneroidea;Veneridae;Mercenaria;Mercenari  
a mercenaria  
UdeM00000002352 6596 1524.6 UdeM00000002352 XP\_045183662.1 49.1  
1704 614 22 5 1634 1674 3198 0.00E+00 1524.6 6596  
cellular  
organisms;Eukaryota;Opisthokonta;Metazoa;Eumetazoa;Bilateria;Protostomia;  
Spiralia;Lophotrochozoa;Mollusca;Bivalvia;Autobranchia;Heteroconchia;Euhe  
terodonta;Imparidentia;Venerida;Veneroidea;Veneridae;Mercenaria;Mercenari  
a mercenaria  
UdeM00000002353 6596 1060.1 UdeM00000002353 XP\_045183662.1 43.2  
1462 766 29 34 1462 117 1547 2.60E-306 1060.1 6596  
cellular  
organisms;Eukaryota;Opisthokonta;Metazoa;Eumetazoa;Bilateria;Protostomia;  
Spiralia;Lophotrochozoa;Mollusca;Bivalvia;Autobranchia;Heteroconchia;Euhe  
terodonta;Imparidentia;Venerida;Veneroidea;Veneridae;Mercenaria;Mercenari  
a mercenaria  
UdeM00000002354 6565 537.3 UdeM00000002354 XP\_022335046.1 59.5 543  
162 7 10 537 48 547 2.20E-149 537.3 6565 cellular  
organisms;Eukaryota;Opisthokonta;Metazoa;Eumetazoa;Bilateria;Protostomia;  
Spiralia;Lophotrochozoa;Mollusca;Bivalvia;Autobranchia;Pteriormorphia;Ostr  
eida;Ostreoidea;Ostreidae;Crassostrea;Crassostrea virginica  
UdeM00000002355 6579 111.7 UdeM00000002355 XP\_033735356.1 45.2 146  
55 4 482 618 410 539 3.40E-21 111.7 6579 cellular  
organisms;Eukaryota;Opisthokonta;Metazoa;Eumetazoa;Bilateria;Protostomia;  
Spiralia;Lophotrochozoa;Mollusca;Bivalvia;Autobranchia;Pteriormorphia;Pect  
inida;Pectinoidea;Pectinidae;Pecten;Pecten maximus  
UdeM00000002358 6573 299.3 UdeM00000002358 XP\_021353636.1 72.7 264  
60 7 64 320 95 353 5.90E-78 299.3 6573 cellular  
organisms;Eukaryota;Opisthokonta;Metazoa;Eumetazoa;Bilateria;Protostomia;  
Spiralia;Lophotrochozoa;Mollusca;Bivalvia;Autobranchia;Pteriormorphia;Pect  
inida;Pectinoidea;Pectinidae;Mizuhopecten;Mizuhopecten yessoensis  
UdeM00000002357 6573 299.3 UdeM00000002357 XP\_021353636.1 72.7 264  
60 7 47 303 95 353 5.60E-78 299.3 6573 cellular  
organisms;Eukaryota;Opisthokonta;Metazoa;Eumetazoa;Bilateria;Protostomia;  
Spiralia;Lophotrochozoa;Mollusca;Bivalvia;Autobranchia;Pteriormorphia;Pect  
inida;Pectinoidea;Pectinidae;Mizuhopecten;Mizuhopecten yessoensis  
UdeM00000002359 6596 748.4 UdeM00000002359 XP\_045163118.1 43.1 1333  
567 22 1 1311 1 1164 1.50E-212 748.4 6596 cellular  
organisms;Eukaryota;Opisthokonta;Metazoa;Eumetazoa;Bilateria;Protostomia;

Spiralia;Lophotrochozoa;Mollusca;Bivalvia;Autobranchia;Heteroconchia;Euherodonta;Imparidentia;Venerida;Veneroidea;Veneridae;Mercenaria;Mercenaria mercenaria

UdeM00000002360 6573 555.8 UdeM00000002360 XP\_021353626.1 44.7 792  
349 14 1 754 1 741 9.80E-155 555.8 6573 cellular

organisms;Eukaryota;Opisthokonta;Metazoa;Eumetazoa;Bilateria;Protostomia;Spiralia;Lophotrochozoa;Mollusca;Bivalvia;Autobranchia;Pteriomorphia;Pectinida;Pectinoidea;Pectinidae;Mizuhopecten;Mizuhopecten yessoensis

UdeM00000002361 6596 271.2 UdeM00000002361 XP\_045163118.1 74.7 178  
31 1 1 178 1 164 9.60E-70 271.2 6596 cellular

organisms;Eukaryota;Opisthokonta;Metazoa;Eumetazoa;Bilateria;Protostomia;Spiralia;Lophotrochozoa;Mollusca;Bivalvia;Autobranchia;Heteroconchia;Euherodonta;Imparidentia;Venerida;Veneroidea;Veneridae;Mercenaria;Mercenaria mercenaria

UdeM00000002362 1735272 506.5 UdeM00000002362 XP\_041351883.1 50.8  
610 246 13 52 622 39 633 5.60E-140 506.5 1735272  
cellular

organisms;Eukaryota;Opisthokonta;Metazoa;Eumetazoa;Bilateria;Protostomia;Spiralia;Lophotrochozoa;Mollusca;Gastropoda;Neomphalina;Neomphaloidea;Peltospiridae;Gigantopelta;Gigantopelta aegis

UdeM00000002363 6596 320.9 UdeM00000002363 XP\_045212833.1 74.5 208  
49 2 1 208 258 461 1.90E-84 320.9 6596 cellular

organisms;Eukaryota;Opisthokonta;Metazoa;Eumetazoa;Bilateria;Protostomia;Spiralia;Lophotrochozoa;Mollusca;Bivalvia;Autobranchia;Heteroconchia;Euherodonta;Imparidentia;Venerida;Veneroidea;Veneridae;Mercenaria;Mercenaria mercenaria

UdeM00000002364 1735272 496.9 UdeM00000002364 XP\_041352393.1 56.3  
426 178 4 61 484 42 461 2.90E-137 496.9 1735272  
cellular

organisms;Eukaryota;Opisthokonta;Metazoa;Eumetazoa;Bilateria;Protostomia;Spiralia;Lophotrochozoa;Mollusca;Gastropoda;Neomphalina;Neomphaloidea;Peltospiridae;Gigantopelta;Gigantopelta aegis

UdeM00000002365 6579 531.2 UdeM00000002365 XP\_033733842.1 49.3 570  
272 8 1 567 1 556 1.60E-147 531.2 6579 cellular

organisms;Eukaryota;Opisthokonta;Metazoa;Eumetazoa;Bilateria;Protostomia;Spiralia;Lophotrochozoa;Mollusca;Bivalvia;Autobranchia;Pteriomorphia;Pectinida;Pectinoidea;Pectinidae;Pecten;Pecten maximus

UdeM00000002366 6596 79 UdeM00000002366 XP\_045165132.1 43.6 117  
53 2 13 116 585 701 2.00E-11 79 6596 cellular

organisms;Eukaryota;Opisthokonta;Metazoa;Eumetazoa;Bilateria;Protostomia;Spiralia;Lophotrochozoa;Mollusca;Bivalvia;Autobranchia;Heteroconchia;Euherodonta;Imparidentia;Venerida;Veneroidea;Veneridae;Mercenaria;Mercenaria mercenaria

UdeM00000002367 6596 79 UdeM00000002367 XP\_045187574.1 45.2 84  
46 0 118 201 86 169 8.10E-12 79 6596 cellular

organisms;Eukaryota;Opisthokonta;Metazoa;Eumetazoa;Bilateria;Protostomia;Spiralia;Lophotrochozoa;Mollusca;Bivalvia;Autobranchia;Heteroconchia;Euherodonta;Imparidentia;Venerida;Veneroidea;Veneridae;Mercenaria;Mercenaria mercenaria

UdeM00000002369 6596 971.1 UdeM00000002369 XP\_045170121.1 65.2 747  
249 6 1 745 1 738 8.20E-280 971.1 6596 cellular

organisms;Eukaryota;Opisthokonta;Metazoa;Eumetazoa;Bilateria;Protostomia;Spiralia;Lophotrochozoa;Mollusca;Bivalvia;Autobranchia;Heteroconchia;Euherodonta;Imparidentia;Venerida;Veneroidea;Veneridae;Mercenaria;Mercenaria mercenaria

terodonta;Imparidentia;Venerida;Veneroidea;Veneridae;Mercenaria;Mercenari  
 a mercenaria  
 UdeM00000002370 6596 437.6 UdeM00000002370 XP\_045170132.1 46 478  
 243 7 7 474 10 482 2.20E-119 437.6 6596 cellular  
 organisms;Eukaryota;Opisthokonta;Metazoa;Eumetazoa;Bilateria;Protostomia;  
 Spiralia;Lophotrochozoa;Mollusca;Bivalvia;Autobranchia;Heteroconchia;Euhe  
 terodonta;Imparidentia;Venerida;Veneroidea;Veneridae;Mercenaria;Mercenari  
 a mercenaria  
 UdeM00000002371 6596 114.8 UdeM00000002371 XP\_045170178.1 45.3 170  
 78 4 1 158 1 167 1.00E-22 114.8 6596 cellular  
 organisms;Eukaryota;Opisthokonta;Metazoa;Eumetazoa;Bilateria;Protostomia;  
 Spiralia;Lophotrochozoa;Mollusca;Bivalvia;Autobranchia;Heteroconchia;Euhe  
 terodonta;Imparidentia;Venerida;Veneroidea;Veneridae;Mercenaria;Mercenari  
 a mercenaria  
 UdeM00000002372 29159 176 UdeM00000002372 XP\_011451435.2 35.6 494  
 229 18 23 513 24 431 1.20E-40 176 29159 cellular  
 organisms;Eukaryota;Opisthokonta;Metazoa;Eumetazoa;Bilateria;Protostomia;  
 Spiralia;Lophotrochozoa;Mollusca;Bivalvia;Autobranchia;Pteriormorphia;Ostr  
 eida;Ostreoidea;Ostreidae;Crassostrea;Crassostrea gigas  
 UdeM00000002374 6596 163.7 UdeM00000002374 XP\_045187696.1 46.5 215  
 106 6 12 220 26 237 2.70E-37 163.7 6596 cellular  
 organisms;Eukaryota;Opisthokonta;Metazoa;Eumetazoa;Bilateria;Protostomia;  
 Spiralia;Lophotrochozoa;Mollusca;Bivalvia;Autobranchia;Heteroconchia;Euhe  
 terodonta;Imparidentia;Venerida;Veneroidea;Veneridae;Mercenaria;Mercenari  
 a mercenaria  
 UdeM00000002375 6596 67 UdeM00000002375 XP\_045187700.1 36.8 95  
 60 0 12 106 12 106 4.60E-08 67 6596 cellular  
 organisms;Eukaryota;Opisthokonta;Metazoa;Eumetazoa;Bilateria;Protostomia;  
 Spiralia;Lophotrochozoa;Mollusca;Bivalvia;Autobranchia;Heteroconchia;Euhe  
 terodonta;Imparidentia;Venerida;Veneroidea;Veneridae;Mercenaria;Mercenari  
 a mercenaria  
 UdeM00000002376 6596 778.5 UdeM00000002376 XP\_045175491.1 70.6 555  
 157 3 32 584 16 566 6.10E-222 778.5 6596 cellular  
 organisms;Eukaryota;Opisthokonta;Metazoa;Eumetazoa;Bilateria;Protostomia;  
 Spiralia;Lophotrochozoa;Mollusca;Bivalvia;Autobranchia;Heteroconchia;Euhe  
 terodonta;Imparidentia;Venerida;Veneroidea;Veneridae;Mercenaria;Mercenari  
 a mercenaria  
 UdeM00000002377 6596 463.4 UdeM00000002377 XP\_045216089.1 78.7 296  
 60 2 13 307 60 353 2.30E-127 463.4 6596 cellular  
 organisms;Eukaryota;Opisthokonta;Metazoa;Eumetazoa;Bilateria;Protostomia;  
 Spiralia;Lophotrochozoa;Mollusca;Bivalvia;Autobranchia;Heteroconchia;Euhe  
 terodonta;Imparidentia;Venerida;Veneroidea;Veneridae;Mercenaria;Mercenari  
 a mercenaria  
 UdeM00000002378 6596 154.8 UdeM00000002378 XP\_045162359.1 27.3 330  
 219 8 1 318 1 321 2.30E-34 154.8 6596 cellular  
 organisms;Eukaryota;Opisthokonta;Metazoa;Eumetazoa;Bilateria;Protostomia;  
 Spiralia;Lophotrochozoa;Mollusca;Bivalvia;Autobranchia;Heteroconchia;Euhe  
 terodonta;Imparidentia;Venerida;Veneroidea;Veneridae;Mercenaria;Mercenari  
 a mercenaria  
 UdeM00000002379 6596 167.2 UdeM00000002379 XP\_045203959.1 26.4 697  
 415 25 103 765 100 732 8.70E-38 167.2 6596 cellular  
 organisms;Eukaryota;Opisthokonta;Metazoa;Eumetazoa;Bilateria;Protostomia;  
 Spiralia;Lophotrochozoa;Mollusca;Bivalvia;Autobranchia;Heteroconchia;Euhe

terodonta;Imparidentia;Venerida;Veneroidea;Veneridae;Mercenaria;Mercenari  
 a mercenaria  
 UdeM00000002381 6596 625.5 UdeM00000002381 XP\_045165450.1 75.7 436  
 94 2 1 433 1 427 4.90E-176 625.5 6596 cellular  
 organisms;Eukaryota;Opisthokonta;Metazoa;Eumetazoa;Bilateria;Protostomia;  
 Spiralia;Lophotrochozoa;Mollusca;Bivalvia;Autobranchia;Heteroconchia;Euhe  
 terodonta;Imparidentia;Venerida;Veneroidea;Veneridae;Mercenaria;Mercenari  
 a mercenaria  
 UdeM00000002382 6565 327 UdeM00000002382 XP\_022332142.1 95.3 170  
 8 0 1 170 1 170 1.40E-86 327 6565 cellular  
 organisms;Eukaryota;Opisthokonta;Metazoa;Eumetazoa;Bilateria;Protostomia;  
 Spiralia;Lophotrochozoa;Mollusca;Bivalvia;Autobranchia;Pteriormorphia;Ostr  
 eida;Ostreoidea;Ostreidae;Crassostrea;Crassostrea virginica  
 UdeM00000002383 6565 312 UdeM00000002383 XP\_022332142.1 95.7 162  
 7 0 1 162 9 170 4.50E-82 312 6565 cellular  
 organisms;Eukaryota;Opisthokonta;Metazoa;Eumetazoa;Bilateria;Protostomia;  
 Spiralia;Lophotrochozoa;Mollusca;Bivalvia;Autobranchia;Pteriormorphia;Ostr  
 eida;Ostreoidea;Ostreidae;Crassostrea;Crassostrea virginica  
 UdeM00000002384 6596 346.3 UdeM00000002384 XP\_045187575.1 39.1 458  
 271 3 5 457 27 481 6.00E-92 346.3 6596 cellular  
 organisms;Eukaryota;Opisthokonta;Metazoa;Eumetazoa;Bilateria;Protostomia;  
 Spiralia;Lophotrochozoa;Mollusca;Bivalvia;Autobranchia;Heteroconchia;Euhe  
 terodonta;Imparidentia;Venerida;Veneroidea;Veneridae;Mercenaria;Mercenari  
 a mercenaria  
 UdeM00000002385 6105 256.9 UdeM00000002385 XP\_031566938.1 35.1 456  
 235 12 72 523 38 436 7.50E-65 256.9 6105 cellular  
 organisms;Eukaryota;Opisthokonta;Metazoa;Eumetazoa;Cnidaria;Anthozoa;Hexa  
 corallia;Actiniaria;Actiniidae;Actinia;Actinia tenebrosa  
 UdeM00000002386 6596 342.4 UdeM00000002386 XP\_045187575.1 38.6 448  
 271 2 24 467 49 496 9.10E-91 342.4 6596 cellular  
 organisms;Eukaryota;Opisthokonta;Metazoa;Eumetazoa;Bilateria;Protostomia;  
 Spiralia;Lophotrochozoa;Mollusca;Bivalvia;Autobranchia;Heteroconchia;Euhe  
 terodonta;Imparidentia;Venerida;Veneroidea;Veneridae;Mercenaria;Mercenari  
 a mercenaria  
 UdeM00000002387 6596 324.3 UdeM00000002387 XP\_045187575.1 37.5 440  
 268 3 19 451 42 481 2.40E-85 324.3 6596 cellular  
 organisms;Eukaryota;Opisthokonta;Metazoa;Eumetazoa;Bilateria;Protostomia;  
 Spiralia;Lophotrochozoa;Mollusca;Bivalvia;Autobranchia;Heteroconchia;Euhe  
 terodonta;Imparidentia;Venerida;Veneroidea;Veneridae;Mercenaria;Mercenari  
 a mercenaria  
 UdeM00000002388 6596 335.1 UdeM00000002388 XP\_045187575.1 39 446  
 267 3 17 457 43 488 1.40E-88 335.1 6596 cellular  
 organisms;Eukaryota;Opisthokonta;Metazoa;Eumetazoa;Bilateria;Protostomia;  
 Spiralia;Lophotrochozoa;Mollusca;Bivalvia;Autobranchia;Heteroconchia;Euhe  
 terodonta;Imparidentia;Venerida;Veneroidea;Veneridae;Mercenaria;Mercenari  
 a mercenaria  
 UdeM00000002389 1735272 290 UdeM00000002389 XP\_041353073.1 57.8  
 289 113 5 1 283 159 444 3.20E-75 290 1735272  
 cellular  
 organisms;Eukaryota;Opisthokonta;Metazoa;Eumetazoa;Bilateria;Protostomia;  
 Spiralia;Lophotrochozoa;Mollusca;Gastropoda;Neomphalina;Neomphaloidea;Pel  
 tospiridae;Gigantopelta;Gigantopelta aegis  
 UdeM00000002390 29159 199.1 UdeM00000002390 XP\_034325963.1 36.1 327  
 194 8 10 325 9 331 1.00E-47 199.1 29159 cellular

organisms;Eukaryota;Opisthokonta;Metazoa;Eumetazoa;Bilateria;Protostomia;  
Spiralia;Lophotrochozoa;Mollusca;Bivalvia;Autobranchia;Pteriormorphia;Ostr  
eida;Ostreoidea;Ostreidae;Crassostrea;Crassostrea gigas  
UdeM00000002391 6579 132.5 UdeM00000002391 XP\_033735131.1 54.4 147  
58 6 13 155 15 156 4.70E-28 132.5 6579 cellular  
organisms;Eukaryota;Opisthokonta;Metazoa;Eumetazoa;Bilateria;Protostomia;  
Spiralia;Lophotrochozoa;Mollusca;Bivalvia;Autobranchia;Pteriormorphia;Pect  
inida;Pectinoidea;Pectinidae;Pecten;Pecten maximus  
UdeM00000002393 1735272 476.5 UdeM00000002393 XP\_041351450.1 28.2  
1261 812 27 139 1358 81 1288 1.20E-130 476.5 1735272  
cellular  
organisms;Eukaryota;Opisthokonta;Metazoa;Eumetazoa;Bilateria;Protostomia;  
Spiralia;Lophotrochozoa;Mollusca;Gastropoda;Neomphalina;Neomphaloidea;Pel  
tospiridae;Gigantopelta;Gigantopelta aegis  
UdeM00000002395 400727 351.3 UdeM00000002395 XP\_025105551.1 31.3  
827 514 18 28 819 195 1002 4.00E-93 351.3 400727  
cellular  
organisms;Eukaryota;Opisthokonta;Metazoa;Eumetazoa;Bilateria;Protostomia;  
Spiralia;Lophotrochozoa;Mollusca;Gastropoda;Caenogastropoda;Architaeniogl  
ossa;Ampullarioidea;Ampullariidae;Pomacea;Pomacea canaliculata  
UdeM00000002394 1735272 379.4 UdeM00000002394 XP\_041351450.1 26.8  
1144 745 25 28 1131 197 1288 1.60E-101 379.4 1735272  
cellular  
organisms;Eukaryota;Opisthokonta;Metazoa;Eumetazoa;Bilateria;Protostomia;  
Spiralia;Lophotrochozoa;Mollusca;Gastropoda;Neomphalina;Neomphaloidea;Pel  
tospiridae;Gigantopelta;Gigantopelta aegis  
UdeM00000002397 6596 570.9 UdeM00000002397 XP\_045171070.1 89.3 299  
32 0 8 306 5 303 1.00E-159 570.9 6596 cellular  
organisms;Eukaryota;Opisthokonta;Metazoa;Eumetazoa;Bilateria;Protostomia;  
Spiralia;Lophotrochozoa;Mollusca;Bivalvia;Autobranchia;Heteroconchia;Euhe  
terodonta;Imparidentia;Venerida;Veneroidea;Veneridae;Mercenaria;Mercenari  
a mercenaria  
UdeM00000002398 29159 590.1 UdeM00000002398 XP\_011446411.1 81.5 357  
63 3 1 354 1 357 1.90E-165 590.1 29159 cellular  
organisms;Eukaryota;Opisthokonta;Metazoa;Eumetazoa;Bilateria;Protostomia;  
Spiralia;Lophotrochozoa;Mollusca;Bivalvia;Autobranchia;Pteriormorphia;Ostr  
eida;Ostreoidea;Ostreidae;Crassostrea;Crassostrea gigas  
UdeM00000002399 6596 656.8 UdeM00000002399 XP\_045165363.1 74.5 423  
107 1 1 423 1 422 1.90E-185 656.8 6596 cellular  
organisms;Eukaryota;Opisthokonta;Metazoa;Eumetazoa;Bilateria;Protostomia;  
Spiralia;Lophotrochozoa;Mollusca;Bivalvia;Autobranchia;Heteroconchia;Euhe  
terodonta;Imparidentia;Venerida;Veneroidea;Veneridae;Mercenaria;Mercenari  
a mercenaria  
UdeM00000002400 6596 173.3 UdeM00000002400 XP\_045165363.1 74.5 102  
26 0 1 102 1 102 1.60E-40 173.3 6596 cellular  
organisms;Eukaryota;Opisthokonta;Metazoa;Eumetazoa;Bilateria;Protostomia;  
Spiralia;Lophotrochozoa;Mollusca;Bivalvia;Autobranchia;Heteroconchia;Euhe  
terodonta;Imparidentia;Venerida;Veneroidea;Veneridae;Mercenaria;Mercenari  
a mercenaria  
UdeM00000002401 6596 156.4 UdeM00000002401 XP\_045165373.1 40.6 234  
111 8 25 249 25 239 4.90E-35 156.4 6596 cellular  
organisms;Eukaryota;Opisthokonta;Metazoa;Eumetazoa;Bilateria;Protostomia;  
Spiralia;Lophotrochozoa;Mollusca;Bivalvia;Autobranchia;Heteroconchia;Euhe

terodonta;Imparidentia;Venerida;Veneroidea;Veneridae;Mercenaria;Mercenari  
 a mercenaria  
 UdeM00000002402 6596 134 UdeM00000002402 XP\_045165373.1 45.8 168  
 81 5 40 198 73 239 2.10E-28 134 6596 cellular  
 organisms;Eukaryota;Opisthokonta;Metazoa;Eumetazoa;Bilateria;Protostomia;  
 Spiralia;Lophotrochozoa;Mollusca;Bivalvia;Autobranhia;Heteroconchia;Euhe  
 terodonta;Imparidentia;Venerida;Veneroidea;Veneridae;Mercenaria;Mercenari  
 a mercenaria  
 UdeM00000002403 29159 63.2 UdeM00000002403 XP\_034307851.1 51.9 52  
 25 0 1 52 145 196 6.10E-07 63.2 29159 cellular  
 organisms;Eukaryota;Opisthokonta;Metazoa;Eumetazoa;Bilateria;Protostomia;  
 Spiralia;Lophotrochozoa;Mollusca;Bivalvia;Autobranhia;Pteriormorphia;Ostr  
 eida;Ostreoidea;Ostreidae;Crassostrea;Crassostrea gigas  
 UdeM00000002404 6596 85.5 UdeM00000002404 XP\_045185793.1 21.1 502  
 331 17 2 464 387 862 3.90E-13 85.5 6596 cellular  
 organisms;Eukaryota;Opisthokonta;Metazoa;Eumetazoa;Bilateria;Protostomia;  
 Spiralia;Lophotrochozoa;Mollusca;Bivalvia;Autobranhia;Heteroconchia;Euhe  
 terodonta;Imparidentia;Venerida;Veneroidea;Veneridae;Mercenaria;Mercenari  
 a mercenaria  
 UdeM00000002406 46514 139.8 UdeM00000002406 XP\_038075930.1 44.1 170  
 87 4 2 168 58 222 3.20E-30 139.8 46514 cellular  
 organisms;Eukaryota;Opisthokonta;Metazoa;Eumetazoa;Bilateria;Deuterostomi  
 a;Echinodermata;Eleutherozoa;Asterozoa;Asteroidea;Valvatacea;Valvatida;As  
 terinidae;Patiria;Patiria miniata  
 UdeM00000002407 46514 136.7 UdeM00000002407 XP\_038075930.1 24 517  
 290 15 176 668 369 806 1.10E-28 136.7 46514 cellular  
 organisms;Eukaryota;Opisthokonta;Metazoa;Eumetazoa;Bilateria;Deuterostomi  
 a;Echinodermata;Eleutherozoa;Asterozoa;Asteroidea;Valvatacea;Valvatida;As  
 terinidae;Patiria;Patiria miniata  
 UdeM00000002409 6596 85.5 UdeM00000002409 XP\_045173202.1 22 518  
 344 18 271 750 369 864 5.10E-13 85.5 6596 cellular  
 organisms;Eukaryota;Opisthokonta;Metazoa;Eumetazoa;Bilateria;Protostomia;  
 Spiralia;Lophotrochozoa;Mollusca;Bivalvia;Autobranhia;Heteroconchia;Euhe  
 terodonta;Imparidentia;Venerida;Veneroidea;Veneridae;Mercenaria;Mercenari  
 a mercenaria  
 UdeM00000002411 6596 100.9 UdeM00000002411 XP\_045156361.1 23.3 516  
 349 19 285 770 319 817 1.20E-17 100.9 6596 cellular  
 organisms;Eukaryota;Opisthokonta;Metazoa;Eumetazoa;Bilateria;Protostomia;  
 Spiralia;Lophotrochozoa;Mollusca;Bivalvia;Autobranhia;Heteroconchia;Euhe  
 terodonta;Imparidentia;Venerida;Veneroidea;Veneridae;Mercenaria;Mercenari  
 a mercenaria  
 UdeM00000002412 6596 100.9 UdeM00000002412 XP\_045156361.1 23.3 516  
 349 19 288 773 319 817 1.20E-17 100.9 6596 cellular  
 organisms;Eukaryota;Opisthokonta;Metazoa;Eumetazoa;Bilateria;Protostomia;  
 Spiralia;Lophotrochozoa;Mollusca;Bivalvia;Autobranhia;Heteroconchia;Euhe  
 terodonta;Imparidentia;Venerida;Veneroidea;Veneridae;Mercenaria;Mercenari  
 a mercenaria  
 UdeM00000002414 6596 95.9 UdeM00000002414 XP\_045156361.1 23.2 492  
 331 18 259 721 319 792 3.70E-16 95.9 6596 cellular  
 organisms;Eukaryota;Opisthokonta;Metazoa;Eumetazoa;Bilateria;Protostomia;  
 Spiralia;Lophotrochozoa;Mollusca;Bivalvia;Autobranhia;Heteroconchia;Euhe  
 terodonta;Imparidentia;Venerida;Veneroidea;Veneridae;Mercenaria;Mercenari  
 a mercenaria

UdeM00000002415 6596 95.9 UdeM00000002415 XP\_045156361.1 23.2 492  
 331 18 277 739 319 792 3.80E-16 95.9 6596 cellular  
 organisms;Eukaryota;Opisthokonta;Metazoa;Eumetazoa;Bilateria;Protostomia;  
 Spiralia;Lophotrochozoa;Mollusca;Bivalvia;Autobranchia;Heteroconchia;Euhe  
 terodonta;Imparidentia;Venerida;Veneroidea;Veneridae;Mercenaria;Mercenari  
 a mercenaria  
 UdeM00000002416 6596 107.1 UdeM00000002416 XP\_045185797.1 20.8 518  
 361 15 338 822 383 884 1.70E-19 107.1 6596 cellular  
 organisms;Eukaryota;Opisthokonta;Metazoa;Eumetazoa;Bilateria;Protostomia;  
 Spiralia;Lophotrochozoa;Mollusca;Bivalvia;Autobranchia;Heteroconchia;Euhe  
 terodonta;Imparidentia;Venerida;Veneroidea;Veneridae;Mercenaria;Mercenari  
 a mercenaria  
 UdeM00000002417 6573 319.3 UdeM00000002417 XP\_021367843.1 35 665  
 225 15 1 459 1 664 7.90E-84 319.3 6573 cellular  
 organisms;Eukaryota;Opisthokonta;Metazoa;Eumetazoa;Bilateria;Protostomia;  
 Spiralia;Lophotrochozoa;Mollusca;Bivalvia;Autobranchia;Pteriormorphia;Pect  
 inida;Pectinoidea;Pectinidae;Mizuhopecten;Mizuhopecten yessoensis  
 UdeM00000002418 7604 326.6 UdeM00000002418 XP\_033641066.1 58.5 270  
 111 1 4 272 3 272 3.00E-86 326.6 7604 cellular  
 organisms;Eukaryota;Opisthokonta;Metazoa;Eumetazoa;Bilateria;Deuterostomi  
 a;Echinodermata;Eleutherozoa;Asterozoa;Asteroidea;Forcipulatacea;Forcipul  
 atida;Asteroidea;Asterias;Asterias rubens  
 UdeM00000002419 6596 242.7 UdeM00000002419 XP\_045187109.1 53.1 228  
 100 2 1 221 1 228 4.60E-61 242.7 6596 cellular  
 organisms;Eukaryota;Opisthokonta;Metazoa;Eumetazoa;Bilateria;Protostomia;  
 Spiralia;Lophotrochozoa;Mollusca;Bivalvia;Autobranchia;Heteroconchia;Euhe  
 terodonta;Imparidentia;Venerida;Veneroidea;Veneridae;Mercenaria;Mercenari  
 a mercenaria  
 UdeM00000002420 10224 342.4 UdeM00000002420 XP\_002736880.1 57.4 282  
 118 2 144 423 36 317 9.30E-91 342.4 10224 cellular  
 organisms;Eukaryota;Opisthokonta;Metazoa;Eumetazoa;Bilateria;Deuterostomi  
 a;Hemichordata;Enteropneusta;Harrimaniidae;Saccoglossus;Saccoglossus  
 kowalevskii  
 UdeM00000002423 6596 77 UdeM00000002423 XP\_045187109.1 47.1 85  
 39 1 13 91 144 228 1.40E-11 77 6596 cellular  
 organisms;Eukaryota;Opisthokonta;Metazoa;Eumetazoa;Bilateria;Protostomia;  
 Spiralia;Lophotrochozoa;Mollusca;Bivalvia;Autobranchia;Heteroconchia;Euhe  
 terodonta;Imparidentia;Venerida;Veneroidea;Veneridae;Mercenaria;Mercenari  
 a mercenaria  
 UdeM00000002424 6596 1025.8 UdeM00000002424 XP\_045212469.1 65.9  
 806 240 6 137 938 80 854 3.50E-296 1025.8 6596  
 cellular  
 organisms;Eukaryota;Opisthokonta;Metazoa;Eumetazoa;Bilateria;Protostomia;  
 Spiralia;Lophotrochozoa;Mollusca;Bivalvia;Autobranchia;Heteroconchia;Euhe  
 terodonta;Imparidentia;Venerida;Veneroidea;Veneridae;Mercenaria;Mercenari  
 a mercenaria  
 UdeM00000002425 6573 2223.4 UdeM00000002425 XP\_021351544.1 59.8  
 1964 738 20 1 1943 1 1934 0.00E+00 2223.4 6573  
 cellular  
 organisms;Eukaryota;Opisthokonta;Metazoa;Eumetazoa;Bilateria;Protostomia;  
 Spiralia;Lophotrochozoa;Mollusca;Bivalvia;Autobranchia;Pteriormorphia;Pect  
 inida;Pectinoidea;Pectinidae;Mizuhopecten;Mizuhopecten yessoensis  
 UdeM00000002426 1735272 186.4 UdeM00000002426 XP\_041350611.1 49.7  
 199 88 3 9 201 11 203 3.50E-44 186.4 1735272

cellular

organisms;Eukaryota;Opisthokonta;Metazoa;Eumetazoa;Bilateria;Protostomia;Spiralia;Lophotrochozoa;Mollusca;Gastropoda;Neomphalina;Neomphaloidea;Peltospiridae;Gigantopelta;Gigantopelta aegis

UdeM00000002427 6596 361.7 UdeM00000002427 XP\_045161807.1 80.1 216  
43 0 1 216 5 220 6.60E-97 361.7 6596 cellular

organisms;Eukaryota;Opisthokonta;Metazoa;Eumetazoa;Bilateria;Protostomia;Spiralia;Lophotrochozoa;Mollusca;Bivalvia;Autobranchia;Heteroconchia;Euheterodonta;Imparidentia;Venerida;Veneroidea;Veneridae;Mercenaria;Mercenaria mercenaria

UdeM00000002428 6412 159.5 UdeM00000002428 XP\_009031446.1 29.7 364  
229 10 38 383 138 492 8.70E-36 159.5 6412 cellular

organisms;Eukaryota;Opisthokonta;Metazoa;Eumetazoa;Bilateria;Protostomia;Spiralia;Lophotrochozoa;Annelida;Clitellata;Hirudinea;Rhynchobdellida;Glossiphoniidae;Helobdella;Helobdella robusta

UdeM00000002430 6596 299.7 UdeM00000002430 XP\_045170508.1 38.9 429  
245 7 44 461 21 443 6.70E-78 299.7 6596 cellular

organisms;Eukaryota;Opisthokonta;Metazoa;Eumetazoa;Bilateria;Protostomia;Spiralia;Lophotrochozoa;Mollusca;Bivalvia;Autobranchia;Heteroconchia;Euheterodonta;Imparidentia;Venerida;Veneroidea;Veneridae;Mercenaria;Mercenaria mercenaria

UdeM00000002429 6596 299.7 UdeM00000002429 XP\_045170508.1 38.9 429  
245 7 46 463 21 443 6.80E-78 299.7 6596 cellular

organisms;Eukaryota;Opisthokonta;Metazoa;Eumetazoa;Bilateria;Protostomia;Spiralia;Lophotrochozoa;Mollusca;Bivalvia;Autobranchia;Heteroconchia;Euheterodonta;Imparidentia;Venerida;Veneroidea;Veneridae;Mercenaria;Mercenaria mercenaria

UdeM00000002431 6596 136.3 UdeM00000002431 XP\_045171296.1 69 100  
28 1 96 195 79 175 4.00E-29 136.3 6596 cellular

organisms;Eukaryota;Opisthokonta;Metazoa;Eumetazoa;Bilateria;Protostomia;Spiralia;Lophotrochozoa;Mollusca;Bivalvia;Autobranchia;Heteroconchia;Euheterodonta;Imparidentia;Venerida;Veneroidea;Veneridae;Mercenaria;Mercenaria mercenaria

UdeM00000002432 6579 374.8 UdeM00000002432 XP\_033733929.1 75.3 267  
59 6 1 265 1 262 9.20E-101 374.8 6579 cellular

organisms;Eukaryota;Opisthokonta;Metazoa;Eumetazoa;Bilateria;Protostomia;Spiralia;Lophotrochozoa;Mollusca;Bivalvia;Autobranchia;Pteriomorphia;Pectinida;Pectinoidea;Pectinidae;Pecten;Pecten maximus

UdeM00000002433 6596 98.6 UdeM00000002433 XP\_045187959.1 27.1 247  
162 6 8 244 8 246 1.20E-17 98.6 6596 cellular

organisms;Eukaryota;Opisthokonta;Metazoa;Eumetazoa;Bilateria;Protostomia;Spiralia;Lophotrochozoa;Mollusca;Bivalvia;Autobranchia;Heteroconchia;Euheterodonta;Imparidentia;Venerida;Veneroidea;Veneridae;Mercenaria;Mercenaria mercenaria

UdeM00000002434 29159 593.2 UdeM00000002434 XP\_034325680.1 69.3 384  
111 2 1 384 1 377 2.40E-166 593.2 29159 cellular

organisms;Eukaryota;Opisthokonta;Metazoa;Eumetazoa;Bilateria;Protostomia;Spiralia;Lophotrochozoa;Mollusca;Bivalvia;Autobranchia;Pteriomorphia;Ostreida;Ostreoidea;Ostreidae;Crassostrea;Crassostrea gigas

UdeM00000002435 35525 164.1 UdeM00000002435 XP\_032798050.1 49.3 142  
72 0 11 152 9 150 1.40E-37 164.1 35525 cellular

organisms;Eukaryota;Opisthokonta;Metazoa;Eumetazoa;Bilateria;Protostomia;Ecdysozoa;Panarthropoda;Arthropoda;Mandibulata;Pancrustacea;Crustacea;Bra



nchiopoda; Phyllopora; Diplostraca; Cladocera; Anomopoda; Daphniidae; Daphnia; Daphnia magna

UdeM00000002436 7574 93.2 UdeM00000002436 XP\_013385473.1 51.1 90  
44 0 22 111 117 206 5.20E-16 93.2 7574 cellular

organisms; Eukaryota; Opisthokonta; Metazoa; Eumetazoa; Bilateria; Protostomia; Spiralia; Lophotrochozoa; Brachiopoda; Linguliformea; Lingulata; Lingulida; Linguloidea; Lingulidae; Lingula; Lingula anatina

UdeM000000044358 225164 81.3 UdeM000000044358 XP\_009046376.1 47.7  
88 45 1 15 102 127 213 9.30E-13 81.3 225164  
cellular

organisms; Eukaryota; Opisthokonta; Metazoa; Eumetazoa; Bilateria; Protostomia; Spiralia; Lophotrochozoa; Mollusca; Gastropoda; Patellogastropoda; Lottioidea; Lottiidae; Lottia; Lottia gigantea

UdeM000000017459 6596 346.3 UdeM000000017459 XP\_045183440.1 50.4 353  
169 4 45 395 32 380 6.50E-92 346.3 6596 cellular

organisms; Eukaryota; Opisthokonta; Metazoa; Eumetazoa; Bilateria; Protostomia; Spiralia; Lophotrochozoa; Mollusca; Bivalvia; Autobranchia; Heteroconchia; Euheterodonta; Imparidentia; Venerida; Veneroidea; Veneridae; Mercenaria; Mercenaria mercenaria

UdeM000000017460 6579 635.2 UdeM000000017460 XP\_033736936.1 54.3 619  
75 2 3 602 2 431 8.50E-179 635.2 6579 cellular

organisms; Eukaryota; Opisthokonta; Metazoa; Eumetazoa; Bilateria; Protostomia; Spiralia; Lophotrochozoa; Mollusca; Bivalvia; Autobranchia; Pteriomorphia; Pectinida; Pectinoidea; Pectinidae; Pecten; Pecten maximus

UdeM000000017461 6596 270.4 UdeM000000017461 XP\_045156936.1 59.4 224  
85 2 11 234 8 225 2.50E-69 270.4 6596 cellular

organisms; Eukaryota; Opisthokonta; Metazoa; Eumetazoa; Bilateria; Protostomia; Spiralia; Lophotrochozoa; Mollusca; Bivalvia; Autobranchia; Heteroconchia; Euheterodonta; Imparidentia; Venerida; Veneroidea; Veneridae; Mercenaria; Mercenaria mercenaria

UdeM000000017462 1735272 1451.8 UdeM000000017462 XP\_041357930.1  
71.3 975 276 4 20 992 39 1011 0.00E+00 1451.8  
1735272 cellular

organisms; Eukaryota; Opisthokonta; Metazoa; Eumetazoa; Bilateria; Protostomia; Spiralia; Lophotrochozoa; Mollusca; Gastropoda; Neomphalina; Neomphaloidea; Peltospiridae; Gigantopelta; Gigantopelta aegis

UdeM000000017463 6579 337.4 UdeM000000017463 XP\_033736872.1 61.7 261  
88 3 1 255 1 255 1.60E-89 337.4 6579 cellular

organisms; Eukaryota; Opisthokonta; Metazoa; Eumetazoa; Bilateria; Protostomia; Spiralia; Lophotrochozoa; Mollusca; Bivalvia; Autobranchia; Pteriomorphia; Pectinida; Pectinoidea; Pectinidae; Pecten; Pecten maximus

UdeM000000017464 6579 335.9 UdeM000000017464 XP\_033736872.1 62.3 257  
89 3 1 251 1 255 4.50E-89 335.9 6579 cellular

organisms; Eukaryota; Opisthokonta; Metazoa; Eumetazoa; Bilateria; Protostomia; Spiralia; Lophotrochozoa; Mollusca; Bivalvia; Autobranchia; Pteriomorphia; Pectinida; Pectinoidea; Pectinidae; Mizuhopecten; Mizuhopecten yessoensis

UdeM000000017465 6573 187.2 UdeM000000017465 XP\_021342315.1 63.8 279  
83 5 11 274 249 524 2.80E-44 187.2 6573 cellular

organisms; Eukaryota; Opisthokonta; Metazoa; Eumetazoa; Bilateria; Protostomia; Spiralia; Lophotrochozoa; Mollusca; Bivalvia; Autobranchia; Pteriomorphia; Pectinida; Pectinoidea; Pectinidae; Mizuhopecten; Mizuhopecten yessoensis

UdeM000000017466 6596 280.8 UdeM000000017466 XP\_045156937.1 68.4 190  
58 1 137 324 113 302 3.10E-72 280.8 6596 cellular

organisms; Eukaryota; Opisthokonta; Metazoa; Eumetazoa; Bilateria; Protostomia;

Spiralia;Lophotrochozoa;Mollusca;Bivalvia;Autobranchia;Heteroconchia;Euherodonta;Imparidentia;Venerida;Veneroidea;Veneridae;Mercenaria;Mercenaria mercenaria

|                 |        |       |                 |                |      |     |           |       |        |
|-----------------|--------|-------|-----------------|----------------|------|-----|-----------|-------|--------|
| UdeM00000017467 | 225164 | 619.8 | UdeM00000017467 | XP_009056744.1 | 79.1 |     |           |       |        |
| 402             | 83     | 1     | 1               | 402            | 1    | 401 | 2.50E-174 | 619.8 | 225164 |

cellular

organisms;Eukaryota;Opisthokonta;Metazoa;Eumetazoa;Bilateria;Protostomia;Spiralia;Lophotrochozoa;Mollusca;Gastropoda;Patellogastropoda;Lottioidea;Lottiidae;Lottia;Lottia gigantea

|                 |      |      |                 |                |      |          |      |      |          |
|-----------------|------|------|-----------------|----------------|------|----------|------|------|----------|
| UdeM00000017468 | 6596 | 3793 | UdeM00000017468 | XP_045157325.1 | 49.3 | 3643     |      |      |          |
| 1652            | 33   | 24   | 3564            | 28             | 3578 | 0.00E+00 | 3793 | 6596 | cellular |

organisms;Eukaryota;Opisthokonta;Metazoa;Eumetazoa;Bilateria;Protostomia;Spiralia;Lophotrochozoa;Mollusca;Bivalvia;Autobranchia;Heteroconchia;Euherodonta;Imparidentia;Venerida;Veneroidea;Veneridae;Mercenaria;Mercenaria mercenaria

|                 |      |      |                 |                |      |          |      |      |          |
|-----------------|------|------|-----------------|----------------|------|----------|------|------|----------|
| UdeM00000017469 | 6596 | 2045 | UdeM00000017469 | XP_045157325.1 | 44.5 | 2124     |      |      |          |
| 1033            | 15   | 7    | 2048            | 1518           | 3578 | 0.00E+00 | 2045 | 6596 | cellular |

organisms;Eukaryota;Opisthokonta;Metazoa;Eumetazoa;Bilateria;Protostomia;Spiralia;Lophotrochozoa;Mollusca;Bivalvia;Autobranchia;Heteroconchia;Euherodonta;Imparidentia;Venerida;Veneroidea;Veneridae;Mercenaria;Mercenaria mercenaria

|                 |      |     |                 |                |      |          |     |      |          |
|-----------------|------|-----|-----------------|----------------|------|----------|-----|------|----------|
| UdeM00000017470 | 6596 | 124 | UdeM00000017470 | XP_045159299.1 | 31.2 | 218      |     |      |          |
| 131             | 7    | 1   | 210             | 36             | 242  | 2.30E-25 | 124 | 6596 | cellular |

organisms;Eukaryota;Opisthokonta;Metazoa;Eumetazoa;Bilateria;Protostomia;Spiralia;Lophotrochozoa;Mollusca;Bivalvia;Autobranchia;Heteroconchia;Euherodonta;Imparidentia;Venerida;Veneroidea;Veneridae;Mercenaria;Mercenaria mercenaria

|                 |      |        |                 |                |      |     |          |        |      |
|-----------------|------|--------|-----------------|----------------|------|-----|----------|--------|------|
| UdeM00000017471 | 6596 | 1261.5 | UdeM00000017471 | XP_045159913.1 | 68.4 |     |          |        |      |
| 922             | 283  | 7      | 1               | 918            | 1    | 918 | 0.00E+00 | 1261.5 | 6596 |

cellular

organisms;Eukaryota;Opisthokonta;Metazoa;Eumetazoa;Bilateria;Protostomia;Spiralia;Lophotrochozoa;Mollusca;Bivalvia;Autobranchia;Heteroconchia;Euherodonta;Imparidentia;Venerida;Veneroidea;Veneridae;Mercenaria;Mercenaria mercenaria

|                 |      |       |                 |                |      |           |       |      |          |
|-----------------|------|-------|-----------------|----------------|------|-----------|-------|------|----------|
| UdeM00000017472 | 6596 | 417.5 | UdeM00000017472 | XP_045159910.1 | 69.9 | 296       |       |      |          |
| 86              | 2    | 1     | 295             | 633            | 926  | 1.40E-113 | 417.5 | 6596 | cellular |

organisms;Eukaryota;Opisthokonta;Metazoa;Eumetazoa;Bilateria;Protostomia;Spiralia;Lophotrochozoa;Mollusca;Bivalvia;Autobranchia;Heteroconchia;Euherodonta;Imparidentia;Venerida;Veneroidea;Veneridae;Mercenaria;Mercenaria mercenaria

|                 |      |       |                 |                |      |          |       |      |          |
|-----------------|------|-------|-----------------|----------------|------|----------|-------|------|----------|
| UdeM00000017473 | 6596 | 221.1 | UdeM00000017473 | XP_045159888.1 | 35.3 | 380      |       |      |          |
| 224             | 8    | 37    | 401             | 62             | 434  | 2.80E-54 | 221.1 | 6596 | cellular |

organisms;Eukaryota;Opisthokonta;Metazoa;Eumetazoa;Bilateria;Protostomia;Spiralia;Lophotrochozoa;Mollusca;Bivalvia;Autobranchia;Heteroconchia;Euherodonta;Imparidentia;Venerida;Veneroidea;Veneridae;Mercenaria;Mercenaria mercenaria

|                 |      |       |                 |                |      |          |       |      |          |
|-----------------|------|-------|-----------------|----------------|------|----------|-------|------|----------|
| UdeM00000017474 | 6596 | 209.5 | UdeM00000017474 | XP_045159888.1 | 35.3 | 351      |       |      |          |
| 206             | 7    | 4     | 339             | 90             | 434  | 7.30E-51 | 209.5 | 6596 | cellular |

organisms;Eukaryota;Opisthokonta;Metazoa;Eumetazoa;Bilateria;Protostomia;Spiralia;Lophotrochozoa;Mollusca;Bivalvia;Autobranchia;Heteroconchia;Euherodonta;Imparidentia;Venerida;Veneroidea;Veneridae;Mercenaria;Mercenaria mercenaria

|                 |      |        |                 |                |      |      |          |        |      |
|-----------------|------|--------|-----------------|----------------|------|------|----------|--------|------|
| UdeM00000017475 | 6596 | 1386.7 | UdeM00000017475 | XP_045160514.1 | 63.5 |      |          |        |      |
| 1089            | 377  | 6      | 1               | 1083           | 1    | 1074 | 0.00E+00 | 1386.7 | 6596 |

cellular  
organisms;Eukaryota;Opisthokonta;Metazoa;Eumetazoa;Bilateria;Protostomia;  
Spiralia;Lophotrochozoa;Mollusca;Bivalvia;Autobranchia;Heteroconchia;Euhe  
terodonta;Imparidentia;Venerida;Veneroidea;Veneridae;Mercenaria;Mercenari  
a mercenaria  
UdeM00000017476 50429 177.2 UdeM00000017476 XP\_022790694.1 79 105  
22 0 1 105 1 105 1.10E-41 177.2 50429 cellular  
organisms;Eukaryota;Opisthokonta;Metazoa;Eumetazoa;Cnidaria;Anthozoa;Hexa  
corallia;Scleractinia;Astrocoeniina;Pocilloporidae;Stylophora;Stylophora  
pistillata  
UdeM00000017477 6596 188 UdeM00000017477 XP\_045157762.1 63.4 131  
48 0 1 131 13 143 9.40E-45 188 6596 cellular  
organisms;Eukaryota;Opisthokonta;Metazoa;Eumetazoa;Bilateria;Protostomia;  
Spiralia;Lophotrochozoa;Mollusca;Bivalvia;Autobranchia;Heteroconchia;Euhe  
terodonta;Imparidentia;Venerida;Veneroidea;Veneridae;Mercenaria;Mercenari  
a mercenaria  
UdeM00000017478 6596 124.4 UdeM00000017478 XP\_045157763.1 55.7 106  
46 1 4 109 7 111 9.20E-26 124.4 6596 cellular  
organisms;Eukaryota;Opisthokonta;Metazoa;Eumetazoa;Bilateria;Protostomia;  
Spiralia;Lophotrochozoa;Mollusca;Bivalvia;Autobranchia;Heteroconchia;Euhe  
terodonta;Imparidentia;Venerida;Veneroidea;Veneridae;Mercenaria;Mercenari  
a mercenaria  
UdeM00000017479 6596 185.7 UdeM00000017479 XP\_045196479.1 48.1 185  
95 1 105 289 31 214 8.60E-44 185.7 6596 cellular  
organisms;Eukaryota;Opisthokonta;Metazoa;Eumetazoa;Bilateria;Protostomia;  
Spiralia;Lophotrochozoa;Mollusca;Bivalvia;Autobranchia;Heteroconchia;Euhe  
terodonta;Imparidentia;Venerida;Veneroidea;Veneridae;Mercenaria;Mercenari  
a mercenaria  
UdeM00000017480 6596 289.3 UdeM00000017480 XP\_045156554.1 34.8 492  
260 11 5 440 1259 1745 8.40E-75 289.3 6596 cellular  
organisms;Eukaryota;Opisthokonta;Metazoa;Eumetazoa;Bilateria;Protostomia;  
Spiralia;Lophotrochozoa;Mollusca;Bivalvia;Autobranchia;Heteroconchia;Euhe  
terodonta;Imparidentia;Venerida;Veneroidea;Veneridae;Mercenaria;Mercenari  
a mercenaria  
UdeM00000017481 6596 247.7 UdeM00000017481 XP\_045161023.1 47.8 270  
137 2 11 280 12 277 2.40E-62 247.7 6596 cellular  
organisms;Eukaryota;Opisthokonta;Metazoa;Eumetazoa;Bilateria;Protostomia;  
Spiralia;Lophotrochozoa;Mollusca;Bivalvia;Autobranchia;Heteroconchia;Euhe  
terodonta;Imparidentia;Venerida;Veneroidea;Veneridae;Mercenaria;Mercenari  
a mercenaria  
UdeM00000017482 6596 358.2 UdeM00000017482 XP\_045161023.1 30.9 794  
398 16 7 789 372 1025 2.90E-95 358.2 6596 cellular  
organisms;Eukaryota;Opisthokonta;Metazoa;Eumetazoa;Bilateria;Protostomia;  
Spiralia;Lophotrochozoa;Mollusca;Bivalvia;Autobranchia;Heteroconchia;Euhe  
terodonta;Imparidentia;Venerida;Veneroidea;Veneridae;Mercenaria;Mercenari  
a mercenaria  
UdeM00000017483 6412 80.1 UdeM00000017483 XP\_009009863.1 43.5 92  
52 0 3 94 17 108 1.80E-12 80.1 6412 cellular  
organisms;Eukaryota;Opisthokonta;Metazoa;Eumetazoa;Bilateria;Protostomia;  
Spiralia;Lophotrochozoa;Annelida;Clitellata;Hirudinea;Rhynchobdellida;Glo  
ssiphoniidae;Helobdella;Helobdella robusta  
UdeM00000017484 6412 80.1 UdeM00000017484 XP\_009009863.1 43.5 92  
52 0 35 126 17 108 2.30E-12 80.1 6412 cellular  
organisms;Eukaryota;Opisthokonta;Metazoa;Eumetazoa;Bilateria;Protostomia;



organisms;Eukaryota;Opisthokonta;Metazoa;Eumetazoa;Bilateria;Protostomia;Ecdysozoa;Panarthropoda;Arthropoda;Mandibulata;Pancrustacea;Hexapoda;Insecta;Dicondylia;Pterygota;Neoptera;Endopterygota;Coleoptera;Polyphaga;Cucujiformia;Chrysomeloidea;Chrysomelidae;Galerucinae;Luperini;Diabroticina;Diabroticites;Diabrotica;Diabrotica virgifera;Diabrotica virgifera virgifera

UdeM00000017494 50390 365.5 UdeM00000017494 XP\_028142380.1 61 241  
94 0 2 242 77 317 5.10E-98 365.5 50390 cellular

organisms;Eukaryota;Opisthokonta;Metazoa;Eumetazoa;Bilateria;Protostomia;Ecdysozoa;Panarthropoda;Arthropoda;Mandibulata;Pancrustacea;Hexapoda;Insecta;Dicondylia;Pterygota;Neoptera;Endopterygota;Coleoptera;Polyphaga;Cucujiformia;Chrysomeloidea;Chrysomelidae;Galerucinae;Luperini;Diabroticina;Diabroticites;Diabrotica;Diabrotica virgifera;Diabrotica virgifera virgifera

UdeM00000017495 50390 341.7 UdeM00000017495 XP\_028142380.1 59.7 236  
95 0 7 242 82 317 8.00E-91 341.7 50390 cellular

organisms;Eukaryota;Opisthokonta;Metazoa;Eumetazoa;Bilateria;Protostomia;Ecdysozoa;Panarthropoda;Arthropoda;Mandibulata;Pancrustacea;Hexapoda;Insecta;Dicondylia;Pterygota;Neoptera;Endopterygota;Coleoptera;Polyphaga;Cucujiformia;Chrysomeloidea;Chrysomelidae;Galerucinae;Luperini;Diabroticina;Diabroticites;Diabrotica;Diabrotica virgifera;Diabrotica virgifera virgifera

UdeM00000017496 6579 92.4 UdeM00000017496 XP\_033729303.1 67.8 59  
19 0 1 59 1 59 2.30E-16 92.4 6579 cellular

organisms;Eukaryota;Opisthokonta;Metazoa;Eumetazoa;Bilateria;Protostomia;Spiralia;Lophotrochozoa;Mollusca;Bivalvia;Autobranchia;Pteriormorphia;Pectinida;Pectinoidea;Pectinidae;Pecten;Pecten maximus

UdeM00000017497 6573 290 UdeM00000017497 XP\_021362623.1 43 351  
152 1 2 304 4 354 3.60E-75 290 6573 cellular

organisms;Eukaryota;Opisthokonta;Metazoa;Eumetazoa;Bilateria;Protostomia;Spiralia;Lophotrochozoa;Mollusca;Bivalvia;Autobranchia;Pteriormorphia;Pectinida;Pectinoidea;Pectinidae;Mizuhopecten;Mizuhopecten yessoensis

UdeM00000017498 225164 104.8 UdeM00000017498 XP\_009043758.1 40.5  
116 68 1 6 121 25 139 8.80E-20 104.8 225164  
cellular

organisms;Eukaryota;Opisthokonta;Metazoa;Eumetazoa;Bilateria;Protostomia;Spiralia;Lophotrochozoa;Mollusca;Gastropoda;Patellogastropoda;Lottiioidea;Lottiidae;Lottia;Lottia gigantea

UdeM00000017499 6596 396.4 UdeM00000017499 XP\_045167892.1 50.9 385  
187 2 24 407 5 388 6.00E-107 396.4 6596 cellular

organisms;Eukaryota;Opisthokonta;Metazoa;Eumetazoa;Bilateria;Protostomia;Spiralia;Lophotrochozoa;Mollusca;Bivalvia;Autobranchia;Heteroconchia;Euheterodonta;Imparidentia;Venerida;Veneroidea;Veneridae;Mercenaria;Mercenaria mercenaria

UdeM00000017501 6412 88.6 UdeM00000017501 XP\_009017867.1 38.6 132  
51 2 1 102 302 433 6.70E-15 88.6 6412 cellular

organisms;Eukaryota;Opisthokonta;Metazoa;Eumetazoa;Bilateria;Protostomia;Spiralia;Lophotrochozoa;Annelida;Clitellata;Hirudinea;Rhynchobdellida;Glossiphoniidae;Helobdella;Helobdella robusta

UdeM00000017503 6596 189.9 UdeM00000017503 XP\_045158593.1 61.6 151  
58 0 186 336 301 451 5.40E-45 189.9 6596 cellular

organisms;Eukaryota;Opisthokonta;Metazoa;Eumetazoa;Bilateria;Protostomia;Spiralia;Lophotrochozoa;Mollusca;Bivalvia;Autobranchia;Heteroconchia;Euheterodonta

terodonta;Imparidentia;Venerida;Veneroidea;Veneridae;Mercenaria;Mercenari  
a mercenaria

UdeM00000017502 6596 679.9 UdeM00000017502 XP\_045158593.1 73 452  
121 1 1 452 1 451 2.30E-192 679.9 6596 cellular

organisms;Eukaryota;Opisthokonta;Metazoa;Eumetazoa;Bilateria;Protostomia;  
Spiralia;Lophotrochozoa;Mollusca;Bivalvia;Autobranhia;Heteroconchia;Euhe  
terodonta;Imparidentia;Venerida;Veneroidea;Veneridae;Mercenaria;Mercenari  
a mercenaria

UdeM00000017505 6596 1156.4 UdeM00000017505 XP\_045160921.1 43.8  
1334 730 14 1 1323 1 1325 0.00E+00 1156.4 6596  
cellular

organisms;Eukaryota;Opisthokonta;Metazoa;Eumetazoa;Bilateria;Protostomia;  
Spiralia;Lophotrochozoa;Mollusca;Bivalvia;Autobranhia;Heteroconchia;Euhe  
terodonta;Imparidentia;Venerida;Veneroidea;Veneridae;Mercenaria;Mercenari  
a mercenaria

UdeM00000017504 6596 2770.7 UdeM00000017504 XP\_045160921.1 35.4  
4464 2606 62 1 4308 1 4343 0.00E+00 2770.7 6596  
cellular

organisms;Eukaryota;Opisthokonta;Metazoa;Eumetazoa;Bilateria;Protostomia;  
Spiralia;Lophotrochozoa;Mollusca;Bivalvia;Autobranhia;Heteroconchia;Euhe  
terodonta;Imparidentia;Venerida;Veneroidea;Veneridae;Mercenaria;Mercenari  
a mercenaria

UdeM00000017506 6596 528.1 UdeM00000017506 XP\_045158043.1 45.6 618  
325 7 386 998 170 781 2.40E-146 528.1 6596 cellular

organisms;Eukaryota;Opisthokonta;Metazoa;Eumetazoa;Bilateria;Protostomia;  
Spiralia;Lophotrochozoa;Mollusca;Bivalvia;Autobranhia;Heteroconchia;Euhe  
terodonta;Imparidentia;Venerida;Veneroidea;Veneridae;Mercenaria;Mercenari  
a mercenaria

UdeM00000017507 6596 397.5 UdeM00000017507 XP\_045160921.1 33.9 670  
310 10 11 561 3688 4343 2.80E-107 397.5 6596 cellular

organisms;Eukaryota;Opisthokonta;Metazoa;Eumetazoa;Bilateria;Protostomia;  
Spiralia;Lophotrochozoa;Mollusca;Bivalvia;Autobranhia;Heteroconchia;Euhe  
terodonta;Imparidentia;Venerida;Veneroidea;Veneridae;Mercenaria;Mercenari  
a mercenaria

UdeM00000017508 6596 438.3 UdeM00000017508 XP\_045158018.1 33 903  
499 25 68 894 386 1258 2.30E-119 438.3 6596 cellular

organisms;Eukaryota;Opisthokonta;Metazoa;Eumetazoa;Bilateria;Protostomia;  
Spiralia;Lophotrochozoa;Mollusca;Bivalvia;Autobranhia;Heteroconchia;Euhe  
terodonta;Imparidentia;Venerida;Veneroidea;Veneridae;Mercenaria;Mercenari  
a mercenaria

UdeM00000017509 6596 483.4 UdeM00000017509 XP\_045160921.1 33.9 823  
528 8 1 814 1227 2042 5.70E-133 483.4 6596 cellular

organisms;Eukaryota;Opisthokonta;Metazoa;Eumetazoa;Bilateria;Protostomia;  
Spiralia;Lophotrochozoa;Mollusca;Bivalvia;Autobranhia;Heteroconchia;Euhe  
terodonta;Imparidentia;Venerida;Veneroidea;Veneridae;Mercenaria;Mercenari  
a mercenaria

UdeM00000017510 6596 781.6 UdeM00000017510 XP\_045160921.1 32.7 1387  
800 16 2 1279 2971 4332 1.60E-222 781.6 6596 cellular

organisms;Eukaryota;Opisthokonta;Metazoa;Eumetazoa;Bilateria;Protostomia;  
Spiralia;Lophotrochozoa;Mollusca;Bivalvia;Autobranhia;Heteroconchia;Euhe  
terodonta;Imparidentia;Venerida;Veneroidea;Veneridae;Mercenaria;Mercenari  
a mercenaria

UdeM00000017511 6596 398.7 UdeM00000017511 XP\_045158043.1 49.2 419  
209 3 4 421 366 781 9.40E-108 398.7 6596 cellular

organisms;Eukaryota;Opisthokonta;Metazoa;Eumetazoa;Bilateria;Protostomia;Spiralia;Lophotrochozoa;Mollusca;Bivalvia;Autobranchia;Heteroconchia;Euheterodonta;Imparidentia;Venerida;Veneroidea;Veneridae;Mercenaria;Mercenaria mercenaria

UdeM00000017512 6596 545 UdeM00000017512 XP\_045158018.1 36.7 878  
516 14 21 879 402 1258 1.70E-151 545 6596 cellular

organisms;Eukaryota;Opisthokonta;Metazoa;Eumetazoa;Bilateria;Protostomia;Spiralia;Lophotrochozoa;Mollusca;Bivalvia;Autobranchia;Heteroconchia;Euheterodonta;Imparidentia;Venerida;Veneroidea;Veneridae;Mercenaria;Mercenaria mercenaria

UdeM00000017513 29159 67 UdeM00000017513 XP\_034315266.1 47.6 63  
33 0 26 88 237 299 4.70E-08 67 29159 cellular

organisms;Eukaryota;Opisthokonta;Metazoa;Eumetazoa;Bilateria;Protostomia;Spiralia;Lophotrochozoa;Mollusca;Bivalvia;Autobranchia;Pteriormorphia;Ostreida;Ostreoidea;Ostreidae;Crassostrea;Crassostrea gigas

UdeM00000017514 7955 204.5 UdeM00000017514 XP\_021326643.1 58.5 164  
68 0 9 172 314 477 1.10E-49 204.5 7955 cellular

organisms;Eukaryota;Opisthokonta;Metazoa;Eumetazoa;Bilateria;Deuterostomia;Chordata;Craniata;Vertebrata;Gnathostomata;Teleostomi;Euteleostomi;Actinopterygii;Actinopteri;Neopterygii;Teleostei;Osteoglossocephalai;Clupeocephala;Otomorpha;Ostariophysi;Otophysi;Cypriniphysae;Cypriniiformes;Cyprinidae;Danionidae;Danioninae;Danio;Danio rerio

UdeM00000017515 8040 110.5 UdeM00000017515 XP\_038831415.1 37.7 231  
113 11 10 234 28 233 8.60E-21 110.5 8040 cellular

organisms;Eukaryota;Opisthokonta;Metazoa;Eumetazoa;Bilateria;Deuterostomia;Chordata;Craniata;Vertebrata;Gnathostomata;Teleostomi;Euteleostomi;Actinopterygii;Actinopteri;Neopterygii;Teleostei;Osteoglossocephalai;Clupeocephala;Euteleostei;Protacanthopterygii;Salmoniformes;Salmonidae;Salmoninae;Salvelinus;Salvelinus namaycush

UdeM00000017516 6565 574.7 UdeM00000017516 XP\_022315266.1 46.9 635  
310 7 6 624 516 1139 1.40E-160 574.7 6565 cellular

organisms;Eukaryota;Opisthokonta;Metazoa;Eumetazoa;Bilateria;Protostomia;Spiralia;Lophotrochozoa;Mollusca;Bivalvia;Autobranchia;Pteriormorphia;Ostreida;Ostreoidea;Ostreidae;Crassostrea;Crassostrea virginica

UdeM00000017517 6596 117.9 UdeM00000017517 XP\_045158017.1 54.8 104  
46 1 71 174 707 809 1.30E-23 117.9 6596 cellular

organisms;Eukaryota;Opisthokonta;Metazoa;Eumetazoa;Bilateria;Protostomia;Spiralia;Lophotrochozoa;Mollusca;Bivalvia;Autobranchia;Heteroconchia;Euheterodonta;Imparidentia;Venerida;Veneroidea;Veneridae;Mercenaria;Mercenaria mercenaria

UdeM00000017518 29159 161.4 UdeM00000017518 XP\_034311971.1 43.3 215  
91 5 11 218 1227 1417 1.50E-36 161.4 29159 cellular

organisms;Eukaryota;Opisthokonta;Metazoa;Eumetazoa;Bilateria;Protostomia;Spiralia;Lophotrochozoa;Mollusca;Bivalvia;Autobranchia;Pteriormorphia;Ostreida;Ostreoidea;Ostreidae;Crassostrea;Crassostrea gigas

UdeM00000017519 6596 65.5 UdeM00000017519 XP\_045198771.1 30.1 136  
71 6 137 272 4964 5075 1.20E-07 65.5 6596 cellular

organisms;Eukaryota;Opisthokonta;Metazoa;Eumetazoa;Bilateria;Protostomia;Spiralia;Lophotrochozoa;Mollusca;Bivalvia;Autobranchia;Heteroconchia;Euheterodonta;Imparidentia;Venerida;Veneroidea;Veneridae;Mercenaria;Mercenaria mercenaria

UdeM00000017520 6565 487.3 UdeM00000017520 XP\_022315266.1 51 496  
226 8 71 559 654 1139 2.70E-134 487.3 6565 cellular

organisms;Eukaryota;Opisthokonta;Metazoa;Eumetazoa;Bilateria;Protostomia;

Spiralia; Lophotrochozoa; Mollusca; Bivalvia; Autobranchia; Pteriomorpha; Ostr  
eida; Ostreoida; Ostreidae; Crassostrea; Crassostrea virginica  
UdeM00000017522 10224 98.6 UdeM00000017522 XP\_006823355.1 34.6 240  
121 8 33 260 84 299 1.30E-17 98.6 10224 cellular  
organisms; Eukaryota; Opisthokonta; Metazoa; Eumetazoa; Bilateria; Deuterostomi  
a; Hemichordata; Enteropneusta; Harrimaniidae; Saccoglossus; Saccoglossus  
kowalevskii  
UdeM00000017523 6565 574.7 UdeM00000017523 XP\_022315266.1 45.1 685  
338 10 6 671 474 1139 1.50E-160 574.7 6565 cellular  
organisms; Eukaryota; Opisthokonta; Metazoa; Eumetazoa; Bilateria; Protostomia;  
Spiralia; Lophotrochozoa; Mollusca; Bivalvia; Autobranchia; Pteriomorpha; Ostr  
eida; Ostreoida; Ostreidae; Crassostrea; Crassostrea virginica  
UdeM00000017525 29159 72 UdeM00000017525 XP\_034337190.1 27.8 306  
164 12 1 280 1 275 2.10E-09 72 29159 cellular  
organisms; Eukaryota; Opisthokonta; Metazoa; Eumetazoa; Bilateria; Protostomia;  
Spiralia; Lophotrochozoa; Mollusca; Bivalvia; Autobranchia; Pteriomorpha; Ostr  
eida; Ostreoida; Ostreidae; Crassostrea; Crassostrea gigas  
UdeM00000017526 6596 128.6 UdeM00000017526 XP\_045185859.1 56.7 104  
33 1 73 164 83 186 7.10E-27 128.6 6596 cellular  
organisms; Eukaryota; Opisthokonta; Metazoa; Eumetazoa; Bilateria; Protostomia;  
Spiralia; Lophotrochozoa; Mollusca; Bivalvia; Autobranchia; Heteroconchia; Eueh  
terodonta; Imparidentia; Venerida; Veneroidea; Veneridae; Mercenaria; Mercenari  
a mercenaria  
UdeM00000017527 6596 121.7 UdeM00000017527 XP\_045215628.1 31.4 258  
115 7 3 249 122 328 1.30E-24 121.7 6596 cellular  
organisms; Eukaryota; Opisthokonta; Metazoa; Eumetazoa; Bilateria; Protostomia;  
Spiralia; Lophotrochozoa; Mollusca; Bivalvia; Autobranchia; Heteroconchia; Eueh  
terodonta; Imparidentia; Venerida; Veneroidea; Veneridae; Mercenaria; Mercenari  
a mercenaria  
UdeM00000017529 6596 170.6 UdeM00000017529 XP\_045158040.1 47.1 189  
96 3 126 311 747 934 3.20E-39 170.6 6596 cellular  
organisms; Eukaryota; Opisthokonta; Metazoa; Eumetazoa; Bilateria; Protostomia;  
Spiralia; Lophotrochozoa; Mollusca; Bivalvia; Autobranchia; Heteroconchia; Eueh  
terodonta; Imparidentia; Venerida; Veneroidea; Veneridae; Mercenaria; Mercenari  
a mercenaria  
UdeM00000017530 1232801 109.8 UdeM00000017530 XP\_043216604.1 39.2  
166 95 2 101 261 439 603 7.40E-21 109.8 1232801  
cellular  
organisms; Eukaryota; Opisthokonta; Metazoa; Eumetazoa; Bilateria; Protostomia;  
Ecdysozoa; Panarthropoda; Arthropoda; Mandibulata; Pancrustacea; Crustacea; Mul  
ticrustacea; Hexanauplia; Thecostraca; Cirripedia; Thoracica; Sessilia; Balanid  
ae; Amphibalanus; Amphibalanus amphitrite  
UdeM00000017531 29139 172.2 UdeM00000017531 XP\_027722928.1 36.2 279  
124 4 440 673 831 1100 2.40E-39 172.2 29139 cellular  
organisms; Eukaryota; Opisthokonta; Metazoa; Eumetazoa; Bilateria; Deuterostomi  
a; Chordata; Craniata; Vertebrata; Gnathostomata; Teleostomi; Euteleostomi; Sarc  
opterygii; Dipnotetrapodomorpha; Tetrapoda; Amniota; Mammalia; Theria; Metather  
ia; Diprotodontia; Vombatidae; Vombatus; Vombatus ursinus  
UdeM00000017532 7654 136.3 UdeM00000017532 XP\_041475001.1 28.8 299  
188 10 22 318 1975 2250 6.70E-29 136.3 7654 cellular  
organisms; Eukaryota; Opisthokonta; Metazoa; Eumetazoa; Bilateria; Deuterostomi  
a; Echinodermata; Eleutherozoa; Echinozoa; Echinoidea; Euechinoidea; Echinacea;  
Temnopleuroidea; Toxopneustidae; Lytechinus; Lytechinus variegatus



UdeM00000017533 7957 72.4 UdeM00000017533 XP\_026107689.1 36.4 143  
 68 6 2 131 138 270 6.30E-10 72.4 7957 cellular  
 organisms;Eukaryota;Opisthokonta;Metazoa;Eumetazoa;Bilateria;Deuterostomi  
 a;Chordata;Craniata;Vertebrata;Gnathostomata;Teleostomi;Euteleostomi;Acti  
 nopterygii;Actinopteri;Neopterygii;Teleostei;Osteoglossocephalai;Clupeoce  
 phala;Otomorpha;Ostariophysi;Otophysi;Cypriniphysae;Cypriniiformes;Cyprino  
 ideii;Cyprinidae;Cyprininae;Carassius;Carassius auratus  
 UdeM00000017535 1735272 100.1 UdeM00000017535 XP\_041379412.1 34.2  
 161 98 2 88 247 16 169 7.10E-18 100.1 1735272  
 cellular  
 organisms;Eukaryota;Opisthokonta;Metazoa;Eumetazoa;Bilateria;Protostomia;  
 Spiralia;Lophotrochozoa;Mollusca;Gastropoda;Neomphalina;Neomphaloidea;Pel  
 tospiridae;Gigantopelta;Gigantopelta aegis  
 UdeM00000017536 7539 172.2 UdeM00000017536 XP\_023028017.1 46.5 187  
 87 4 1 175 195 380 9.50E-40 172.2 7539 cellular  
 organisms;Eukaryota;Opisthokonta;Metazoa;Eumetazoa;Bilateria;Protostomia;  
 Ecdysozoa;Panarthropoda;Arthropoda;Mandibulata;Pancrustacea;Hexapoda;Inse  
 cta;Dicondylia;Pterygota;Neoptera;Endopterygota;Coleoptera;Polyphaga;Cucu  
 jiformia;Chrysomeloidea;Chrysomelidae;Chrysomelinae;Doryphorini;Leptinota  
 rsa;Leptinotarsa decemlineata  
 UdeM00000017537 7668 233.4 UdeM00000017537 XP\_030852255.1 28.5 691  
 317 19 877 1413 62 729 1.80E-57 233.4 7668 cellular  
 organisms;Eukaryota;Opisthokonta;Metazoa;Eumetazoa;Bilateria;Deuterostomi  
 a;Echinodermata;Eleutherozoa;Echinozoa;Echinoidea;Euechinoidea;Echinacea;  
 Camarodonta;Echinidea;Strongylocentrotidae;Strongylocentrotus;Strongyloce  
 ntrotus purpuratus  
 UdeM00000017538 7668 238.4 UdeM00000017538 XP\_030852255.1 29.3 693  
 357 21 877 1461 62 729 5.70E-59 238.4 7668 cellular  
 organisms;Eukaryota;Opisthokonta;Metazoa;Eumetazoa;Bilateria;Deuterostomi  
 a;Echinodermata;Eleutherozoa;Echinozoa;Echinoidea;Euechinoidea;Echinacea;  
 Camarodonta;Echinidea;Strongylocentrotidae;Strongylocentrotus;Strongyloce  
 ntrotus purpuratus  
 UdeM00000017539 29159 730.7 UdeM00000017539 XP\_034311971.1 32.5 1593  
 916 44 78 1622 79 1559 4.00E-207 730.7 29159 cellular  
 organisms;Eukaryota;Opisthokonta;Metazoa;Eumetazoa;Bilateria;Protostomia;  
 Spiralia;Lophotrochozoa;Mollusca;Bivalvia;Autobranchia;Pteriomorphia;Ostr  
 eida;Ostreoidea;Ostreidae;Crassostrea;Crassostrea gigas  
 UdeM00000017540 6596 171.8 UdeM00000017540 XP\_045158017.1 42.5 181  
 104 0 1 181 1093 1273 8.20E-40 171.8 6596 cellular  
 organisms;Eukaryota;Opisthokonta;Metazoa;Eumetazoa;Bilateria;Protostomia;  
 Spiralia;Lophotrochozoa;Mollusca;Bivalvia;Autobranchia;Heteroconchia;Euhe  
 terodonta;Imparidentia;Venerida;Veneroidea;Veneridae;Mercenaria;Mercenari  
 a mercenaria  
 UdeM00000017541 29159 60.1 UdeM00000017541 XP\_034320912.1 42.1 57  
 33 0 74 130 446 502 2.60E-06 60.1 29159 cellular  
 organisms;Eukaryota;Opisthokonta;Metazoa;Eumetazoa;Bilateria;Protostomia;  
 Spiralia;Lophotrochozoa;Mollusca;Bivalvia;Autobranchia;Pteriomorphia;Ostr  
 eida;Ostreoidea;Ostreidae;Crassostrea;Crassostrea gigas  
 UdeM00000017543 8040 120.6 UdeM00000017543 XP\_038831799.1 31.9 317  
 171 13 12 311 5 293 9.00E-24 120.6 8040 cellular  
 organisms;Eukaryota;Opisthokonta;Metazoa;Eumetazoa;Bilateria;Deuterostomi  
 a;Chordata;Craniata;Vertebrata;Gnathostomata;Teleostomi;Euteleostomi;Acti  
 nopterygii;Actinopteri;Neopterygii;Teleostei;Osteoglossocephalai;Clupeoce

phala;Euteleosteomorpha;Protacanthopterygii;Salmoniformes;Salmonidae;Salmoninae;Salvelinus;Salvelinus namaycush

UdeM00000017544 7741 184.1 UdeM00000017544 XP\_019626709.1 28.1 441  
277 19 331 766 1909 2314 7.70E-43 184.1 7741 cellular  
organisms;Eukaryota;Opisthokonta;Metazoa;Eumetazoa;Bilateria;Deuterostomia;Chordata;Cephalochordata;Leptocardii;Amphioxiformes;Branchiostomidae;Branchiostoma;Branchiostoma belcheri

UdeM00000017545 6579 92.8 UdeM00000017545 XP\_033738099.1 43.5 124  
35 1 1 89 167 290 2.50E-16 92.8 6579 cellular  
organisms;Eukaryota;Opisthokonta;Metazoa;Eumetazoa;Bilateria;Protostomia;Spiralia;Lophotrochozoa;Mollusca;Bivalvia;Autobranchia;Pteriomorpha;Pectinida;Pectinoidea;Pectinidae;Pecten;Pecten maximus

UdeM00000017546 37621 73.9 UdeM00000017546 XP\_014675482.1 40.6 96  
57 0 3 98 11 106 1.20E-10 73.9 37621 cellular  
organisms;Eukaryota;Opisthokonta;Metazoa;Eumetazoa;Bilateria;Protostomia;Ecdysozoa;Scalidophora;Priapulida;Priapulimorpha;Priapulimorphida;Priapulidae;Priapululus;Priapululus caudatus

UdeM00000017547 29159 63.5 UdeM00000017547 XP\_034320912.1 52.6 57  
24 1 59 112 9 65 2.20E-07 63.5 29159 cellular  
organisms;Eukaryota;Opisthokonta;Metazoa;Eumetazoa;Bilateria;Protostomia;Spiralia;Lophotrochozoa;Mollusca;Bivalvia;Autobranchia;Pteriomorpha;Ostreida;Ostreioidea;Ostreidae;Crassostrea;Crassostrea gigas

UdeM00000017548 29159 83.2 UdeM00000017548 XP\_034317031.1 34 153  
85 4 25 169 90 234 3.70E-13 83.2 29159 cellular  
organisms;Eukaryota;Opisthokonta;Metazoa;Eumetazoa;Bilateria;Protostomia;Spiralia;Lophotrochozoa;Mollusca;Bivalvia;Autobranchia;Pteriomorpha;Ostreida;Ostreioidea;Ostreidae;Crassostrea;Crassostrea gigas

UdeM00000017551 6565 577.8 UdeM00000017551 XP\_022315266.1 45.8 671  
329 9 182 828 480 1139 2.20E-161 577.8 6565 cellular  
organisms;Eukaryota;Opisthokonta;Metazoa;Eumetazoa;Bilateria;Protostomia;Spiralia;Lophotrochozoa;Mollusca;Bivalvia;Autobranchia;Pteriomorpha;Ostreida;Ostreioidea;Ostreidae;Crassostrea;Crassostrea virginica

UdeM00000017552 6565 451.8 UdeM00000017552 XP\_022315266.1 48.9 474  
224 6 1 467 677 1139 1.00E-123 451.8 6565 cellular  
organisms;Eukaryota;Opisthokonta;Metazoa;Eumetazoa;Bilateria;Protostomia;Spiralia;Lophotrochozoa;Mollusca;Bivalvia;Autobranchia;Pteriomorpha;Ostreida;Ostreioidea;Ostreidae;Crassostrea;Crassostrea virginica

UdeM00000017553 37621 69.3 UdeM00000017553 XP\_014675482.1 43.4 76  
43 0 5 80 24 99 2.50E-09 69.3 37621 cellular  
organisms;Eukaryota;Opisthokonta;Metazoa;Eumetazoa;Bilateria;Protostomia;Ecdysozoa;Scalidophora;Priapulida;Priapulimorpha;Priapulimorphida;Priapulidae;Priapululus;Priapululus caudatus

UdeM00000017554 7741 119 UdeM00000017554 XP\_019616118.1 33.2 310  
169 13 32 327 31 316 1.40E-23 119 7741 cellular  
organisms;Eukaryota;Opisthokonta;Metazoa;Eumetazoa;Bilateria;Deuterostomia;Chordata;Cephalochordata;Leptocardii;Amphioxiformes;Branchiostomidae;Branchiostoma;Branchiostoma belcheri

UdeM00000017555 6596 195.3 UdeM00000017555 XP\_045158040.1 53 183  
85 1 90 272 752 933 1.00E-46 195.3 6596 cellular  
organisms;Eukaryota;Opisthokonta;Metazoa;Eumetazoa;Bilateria;Protostomia;Spiralia;Lophotrochozoa;Mollusca;Bivalvia;Autobranchia;Heteroconchia;Euherterodonta;Imparidentia;Venerida;Veneroidea;Veneridae;Mercenaria;Mercenaria mercenaria

UdeM00000017556 6565 351.3 UdeM00000017556 XP\_022315266.1 49.7 370  
 178 4 1 363 771 1139 1.50E-93 351.3 6565 cellular  
 organisms;Eukaryota;Opisthokonta;Metazoa;Eumetazoa;Bilateria;Protostomia;  
 Spiralia;Lophotrochozoa;Mollusca;Bivalvia;Autobranhia;Pteriomorphia;Ostr  
 eida;Ostreoidea;Ostreidae;Crassostrea;Crassostrea virginica  
 UdeM00000017557 6565 98.2 UdeM00000017557 XP\_022314153.1 27.9 287  
 184 11 92 377 112 376 2.40E-17 98.2 6565 cellular  
 organisms;Eukaryota;Opisthokonta;Metazoa;Eumetazoa;Bilateria;Protostomia;  
 Spiralia;Lophotrochozoa;Mollusca;Bivalvia;Autobranhia;Pteriomorphia;Ostr  
 eida;Ostreoidea;Ostreidae;Crassostrea;Crassostrea virginica  
 UdeM00000017559 6565 550.8 UdeM00000017559 XP\_022315266.1 45.7 656  
 333 8 10 653 475 1119 2.40E-153 550.8 6565 cellular  
 organisms;Eukaryota;Opisthokonta;Metazoa;Eumetazoa;Bilateria;Protostomia;  
 Spiralia;Lophotrochozoa;Mollusca;Bivalvia;Autobranhia;Pteriomorphia;Ostr  
 eida;Ostreoidea;Ostreidae;Crassostrea;Crassostrea virginica  
 UdeM00000017558 6565 580.1 UdeM00000017558 XP\_022315266.1 46.2 676  
 341 8 10 673 475 1139 3.70E-162 580.1 6565 cellular  
 organisms;Eukaryota;Opisthokonta;Metazoa;Eumetazoa;Bilateria;Protostomia;  
 Spiralia;Lophotrochozoa;Mollusca;Bivalvia;Autobranhia;Pteriomorphia;Ostr  
 eida;Ostreoidea;Ostreidae;Crassostrea;Crassostrea virginica  
 UdeM00000017560 6596 242.3 UdeM00000017560 XP\_045159715.1 39.5 324  
 112 2 5 283 56 340 7.60E-61 242.3 6596 cellular  
 organisms;Eukaryota;Opisthokonta;Metazoa;Eumetazoa;Bilateria;Protostomia;  
 Spiralia;Lophotrochozoa;Mollusca;Bivalvia;Autobranhia;Heteroconchia;Euhe  
 terodonta;Imparidentia;Venerida;Veneroidea;Veneridae;Mercenaria;Mercenari  
 a mercenaria  
 UdeM00000017561 6596 105.1 UdeM00000017561 XP\_045159715.1 49 102  
 51 1 1 102 334 434 6.50E-20 105.1 6596 cellular  
 organisms;Eukaryota;Opisthokonta;Metazoa;Eumetazoa;Bilateria;Protostomia;  
 Spiralia;Lophotrochozoa;Mollusca;Bivalvia;Autobranhia;Heteroconchia;Euhe  
 terodonta;Imparidentia;Venerida;Veneroidea;Veneridae;Mercenaria;Mercenari  
 a mercenaria  
 UdeM00000017562 7111 102.4 UdeM00000017562 XP\_026739920.1 68.4 76  
 23 1 21 96 192 266 3.30E-19 102.4 7111 cellular  
 organisms;Eukaryota;Opisthokonta;Metazoa;Eumetazoa;Bilateria;Protostomia;  
 Ecdysozoa;Panarthropoda;Arthropoda;Mandibulata;Pancrustacea;Hexapoda;Inse  
 cta;Dicondylia;Pterygota;Neoptera;Endopterygota;Amphiesmenoptera;Lepidopt  
 era;Glossata;Neolepidoptera;Heteroneura;Ditrysia;Obtectomera;Noctuoidea;N  
 octuidae;Plusiinae;Trichoplusia;Trichoplusia ni  
 UdeM00000017563 6596 440.3 UdeM00000017563 XP\_045159715.1 48.6 455  
 197 7 12 431 27 479 3.00E-120 440.3 6596 cellular  
 organisms;Eukaryota;Opisthokonta;Metazoa;Eumetazoa;Bilateria;Protostomia;  
 Spiralia;Lophotrochozoa;Mollusca;Bivalvia;Autobranhia;Heteroconchia;Euhe  
 terodonta;Imparidentia;Venerida;Veneroidea;Veneridae;Mercenaria;Mercenari  
 a mercenaria  
 UdeM00000017564 6596 439.1 UdeM00000017564 XP\_045159715.1 49.9 441  
 183 7 33 438 27 464 6.60E-120 439.1 6596 cellular  
 organisms;Eukaryota;Opisthokonta;Metazoa;Eumetazoa;Bilateria;Protostomia;  
 Spiralia;Lophotrochozoa;Mollusca;Bivalvia;Autobranhia;Heteroconchia;Euhe  
 terodonta;Imparidentia;Venerida;Veneroidea;Veneridae;Mercenaria;Mercenari  
 a mercenaria  
 UdeM00000017565 6596 259.6 UdeM00000017565 XP\_045159715.1 42.1 323  
 126 4 4 266 158 479 4.50E-66 259.6 6596 cellular  
 organisms;Eukaryota;Opisthokonta;Metazoa;Eumetazoa;Bilateria;Protostomia;

Spiralia;Lophotrochozoa;Mollusca;Bivalvia;Autobranchia;Heteroconchia;Euherodonta;Imparidentia;Venerida;Veneroidea;Veneridae;Mercenaria;Mercenaria mercenaria

UdeM00000017566 6596 193.4 UdeM00000017566 XP\_045159715.1 34.8 362  
150 7 33 339 27 357 5.00E-46 193.4 6596 cellular

organisms;Eukaryota;Opisthokonta;Metazoa;Eumetazoa;Bilateria;Protostomia;Spiralia;Lophotrochozoa;Mollusca;Bivalvia;Autobranchia;Heteroconchia;Euherodonta;Imparidentia;Venerida;Veneroidea;Veneridae;Mercenaria;Mercenaria mercenaria

UdeM00000017567 6596 625.9 UdeM00000017567 XP\_045159715.1 57.3 494  
204 3 12 505 5 491 4.40E-176 625.9 6596 cellular

organisms;Eukaryota;Opisthokonta;Metazoa;Eumetazoa;Bilateria;Protostomia;Spiralia;Lophotrochozoa;Mollusca;Bivalvia;Autobranchia;Heteroconchia;Euherodonta;Imparidentia;Venerida;Veneroidea;Veneridae;Mercenaria;Mercenaria mercenaria

UdeM00000017568 6565 199.5 UdeM00000017568 XP\_022313159.1 60 165  
61 2 34 198 33 192 4.50E-48 199.5 6565 cellular

organisms;Eukaryota;Opisthokonta;Metazoa;Eumetazoa;Bilateria;Protostomia;Spiralia;Lophotrochozoa;Mollusca;Bivalvia;Autobranchia;Pteriomorphia;Ostreida;Ostreoidea;Ostreidae;Crassostrea;Crassostrea virginica

UdeM00000017569 6565 125.2 UdeM00000017569 XP\_022313159.1 60.2 93  
35 1 34 126 33 123 7.30E-26 125.2 6565 cellular

organisms;Eukaryota;Opisthokonta;Metazoa;Eumetazoa;Bilateria;Protostomia;Spiralia;Lophotrochozoa;Mollusca;Bivalvia;Autobranchia;Pteriomorphia;Ostreida;Ostreoidea;Ostreidae;Crassostrea;Crassostrea virginica

UdeM00000017570 6579 1067.4 UdeM00000017570 XP\_033738010.1 43.5  
1628 731 45 44 1611 31 1529 0.00E+00 1067.4 6579  
cellular

organisms;Eukaryota;Opisthokonta;Metazoa;Eumetazoa;Bilateria;Protostomia;Spiralia;Lophotrochozoa;Mollusca;Bivalvia;Autobranchia;Pteriomorphia;Pectinida;Pectinoidea;Pectinidae;Pecten;Pecten maximus

UdeM00000017571 6596 302 UdeM00000017571 XP\_045157851.1 68.5 197  
62 0 13 209 75 271 6.00E-79 302 6596 cellular

organisms;Eukaryota;Opisthokonta;Metazoa;Eumetazoa;Bilateria;Protostomia;Spiralia;Lophotrochozoa;Mollusca;Bivalvia;Autobranchia;Heteroconchia;Euherodonta;Imparidentia;Venerida;Veneroidea;Veneridae;Mercenaria;Mercenaria mercenaria

UdeM00000017572 1735272 355.9 UdeM00000017572 XP\_041359881.1 49  
339 170 2 38 376 43 378 6.30E-95 355.9 1735272  
cellular

organisms;Eukaryota;Opisthokonta;Metazoa;Eumetazoa;Bilateria;Protostomia;Spiralia;Lophotrochozoa;Mollusca;Gastropoda;Neomphalina;Neomphaloidea;Peltospiridae;Gigantopelta;Gigantopelta aegis

UdeM00000017573 6596 577.4 UdeM00000017573 XP\_045159955.1 47.7 894  
376 26 1 839 1 857 2.90E-161 577.4 6596 cellular

organisms;Eukaryota;Opisthokonta;Metazoa;Eumetazoa;Bilateria;Protostomia;Spiralia;Lophotrochozoa;Mollusca;Bivalvia;Autobranchia;Heteroconchia;Euherodonta;Imparidentia;Venerida;Veneroidea;Veneridae;Mercenaria;Mercenaria mercenaria

UdeM00000017574 6596 676 UdeM00000017574 XP\_045157288.1 39.8 1162  
509 20 109 1202 488 1526 8.80E-191 676 6596 cellular

organisms;Eukaryota;Opisthokonta;Metazoa;Eumetazoa;Bilateria;Protostomia;Spiralia;Lophotrochozoa;Mollusca;Bivalvia;Autobranchia;Heteroconchia;Euherodonta;Imparidentia;Venerida;Veneroidea;Veneridae;Mercenaria;Mercenaria mercenaria

terodonta;Imparidentia;Venerida;Veneroidea;Veneridae;Mercenaria;Mercenari  
 a mercenaria  
 UdeM00000017574 6596 72.8 UdeM00000017574 XP\_045157288.1 39 105  
 61 2 8 110 6 109 3.40E-09 72.8 6596 cellular  
 organisms;Eukaryota;Opisthokonta;Metazoa;Eumetazoa;Bilateria;Protostomia;  
 Spiralia;Lophotrochozoa;Mollusca;Bivalvia;Autobranhia;Heteroconchia;Euhe  
 terodonta;Imparidentia;Venerida;Veneroidea;Veneridae;Mercenaria;Mercenari  
 a mercenaria  
 UdeM00000017575 6565 60.1 UdeM00000017575 XP\_022299727.1 43.8 73  
 41 0 1 73 261 333 1.40E-06 60.1 6565 cellular  
 organisms;Eukaryota;Opisthokonta;Metazoa;Eumetazoa;Bilateria;Protostomia;  
 Spiralia;Lophotrochozoa;Mollusca;Bivalvia;Autobranhia;Pteriormorphia;Ostr  
 eida;Ostreoidea;Ostreidae;Crassostrea;Crassostrea virginica  
 UdeM00000017576 6565 170.6 UdeM00000017576 XP\_022299727.1 46.5 187  
 98 1 1 185 46 232 1.80E-39 170.6 6565 cellular  
 organisms;Eukaryota;Opisthokonta;Metazoa;Eumetazoa;Bilateria;Protostomia;  
 Spiralia;Lophotrochozoa;Mollusca;Bivalvia;Autobranhia;Pteriormorphia;Ostr  
 eida;Ostreoidea;Ostreidae;Crassostrea;Crassostrea virginica  
 UdeM00000017582 6596 357.8 UdeM00000017582 XP\_045159209.1 34.1 648  
 371 14 2 639 9 610 3.00E-95 357.8 6596 cellular  
 organisms;Eukaryota;Opisthokonta;Metazoa;Eumetazoa;Bilateria;Protostomia;  
 Spiralia;Lophotrochozoa;Mollusca;Bivalvia;Autobranhia;Heteroconchia;Euhe  
 terodonta;Imparidentia;Venerida;Veneroidea;Veneridae;Mercenaria;Mercenari  
 a mercenaria  
 UdeM00000017583 6596 348.6 UdeM00000017583 XP\_045159209.1 34.8 584  
 338 11 66 635 39 593 1.80E-92 348.6 6596 cellular  
 organisms;Eukaryota;Opisthokonta;Metazoa;Eumetazoa;Bilateria;Protostomia;  
 Spiralia;Lophotrochozoa;Mollusca;Bivalvia;Autobranhia;Heteroconchia;Euhe  
 terodonta;Imparidentia;Venerida;Veneroidea;Veneridae;Mercenaria;Mercenari  
 a mercenaria  
 UdeM00000017584 6596 257.3 UdeM00000017584 XP\_045157350.1 37.2 355  
 205 3 28 377 208 549 3.50E-65 257.3 6596 cellular  
 organisms;Eukaryota;Opisthokonta;Metazoa;Eumetazoa;Bilateria;Protostomia;  
 Spiralia;Lophotrochozoa;Mollusca;Bivalvia;Autobranhia;Heteroconchia;Euhe  
 terodonta;Imparidentia;Venerida;Veneroidea;Veneridae;Mercenaria;Mercenari  
 a mercenaria  
 UdeM00000017585 6596 334 UdeM00000017585 XP\_045159209.1 33.1 634  
 362 16 8 628 9 593 4.60E-88 334 6596 cellular  
 organisms;Eukaryota;Opisthokonta;Metazoa;Eumetazoa;Bilateria;Protostomia;  
 Spiralia;Lophotrochozoa;Mollusca;Bivalvia;Autobranhia;Heteroconchia;Euhe  
 terodonta;Imparidentia;Venerida;Veneroidea;Veneridae;Mercenaria;Mercenari  
 a mercenaria  
 UdeM00000017586 6596 141.7 UdeM00000017586 XP\_045157350.1 44.3 167  
 88 2 3 165 402 567 1.10E-30 141.7 6596 cellular  
 organisms;Eukaryota;Opisthokonta;Metazoa;Eumetazoa;Bilateria;Protostomia;  
 Spiralia;Lophotrochozoa;Mollusca;Bivalvia;Autobranhia;Heteroconchia;Euhe  
 terodonta;Imparidentia;Venerida;Veneroidea;Veneridae;Mercenaria;Mercenari  
 a mercenaria  
 UdeM00000017590 6596 668.7 UdeM00000017590 XP\_045160747.1 60.5 622  
 203 10 1 607 1 594 9.90E-189 668.7 6596 cellular  
 organisms;Eukaryota;Opisthokonta;Metazoa;Eumetazoa;Bilateria;Protostomia;  
 Spiralia;Lophotrochozoa;Mollusca;Bivalvia;Autobranhia;Heteroconchia;Euhe  
 terodonta;Imparidentia;Venerida;Veneroidea;Veneridae;Mercenaria;Mercenari  
 a mercenaria

UdeM00000017591 1735272 120.6 UdeM00000017591 XP\_041378637.1 52.4  
 105 46 3 1 103 1 103 1.80E-24 120.6 1735272  
 cellular  
 organisms;Eukaryota;Opisthokonta;Metazoa;Eumetazoa;Bilateria;Protostomia;  
 Spiralia;Lophotrochozoa;Mollusca;Gastropoda;Neomphalina;Neomphaloidea;Pel  
 tospiridae;Gigantopelta;Gigantopelta aegis  
 UdeM00000017592 6573 570.1 UdeM00000017592 XP\_021341588.1 67.6 414  
 130 4 1 410 1 414 2.30E-159 570.1 6573 cellular  
 organisms;Eukaryota;Opisthokonta;Metazoa;Eumetazoa;Bilateria;Protostomia;  
 Spiralia;Lophotrochozoa;Mollusca;Bivalvia;Autobranchia;Pteriomorpha;Pect  
 inida;Pectinoidea;Pectinidae;Mizuhopecten;Mizuhopecten yessoensis  
 UdeM00000017593 1735272 174.9 UdeM00000017593 XP\_041357338.1 88.2  
 85 10 0 1 85 1 85 4.50E-41 174.9 1735272  
 cellular  
 organisms;Eukaryota;Opisthokonta;Metazoa;Eumetazoa;Bilateria;Protostomia;  
 Spiralia;Lophotrochozoa;Mollusca;Gastropoda;Neomphalina;Neomphaloidea;Pel  
 tospiridae;Gigantopelta;Gigantopelta aegis  
 UdeM00000017594 6579 284.3 UdeM00000017594 XP\_033738196.1 58 262  
 97 5 14 262 11 272 1.70E-73 284.3 6579 cellular  
 organisms;Eukaryota;Opisthokonta;Metazoa;Eumetazoa;Bilateria;Protostomia;  
 Spiralia;Lophotrochozoa;Mollusca;Bivalvia;Autobranchia;Pteriomorpha;Pect  
 inida;Pectinoidea;Pectinidae;Pecten;Pecten maximus  
 UdeM00000017595 6565 278.5 UdeM00000017595 XP\_022317859.1 54.3 278  
 123 3 1 277 1 275 9.40E-72 278.5 6565 cellular  
 organisms;Eukaryota;Opisthokonta;Metazoa;Eumetazoa;Bilateria;Protostomia;  
 Spiralia;Lophotrochozoa;Mollusca;Bivalvia;Autobranchia;Pteriomorpha;Ostr  
 eida;Ostreoidea;Ostreidae;Crassostrea;Crassostrea virginica  
 UdeM00000017596 6596 237.3 UdeM00000017596 XP\_045161039.1 47.2 409  
 161 13 1 374 1 389 3.20E-59 237.3 6596 cellular  
 organisms;Eukaryota;Opisthokonta;Metazoa;Eumetazoa;Bilateria;Protostomia;  
 Spiralia;Lophotrochozoa;Mollusca;Bivalvia;Autobranchia;Heteroconchia;Euhe  
 terodonta;Imparidentia;Venerida;Veneroidea;Veneridae;Mercenaria;Mercenari  
 a mercenaria  
 UdeM00000017597 6596 210.3 UdeM00000017597 XP\_045160237.1 42.5 322  
 140 10 1 282 1 317 3.30E-51 210.3 6596 cellular  
 organisms;Eukaryota;Opisthokonta;Metazoa;Eumetazoa;Bilateria;Protostomia;  
 Spiralia;Lophotrochozoa;Mollusca;Bivalvia;Autobranchia;Heteroconchia;Euhe  
 terodonta;Imparidentia;Venerida;Veneroidea;Veneridae;Mercenaria;Mercenari  
 a mercenaria  
 UdeM00000017598 6579 305.1 UdeM00000017598 XP\_033737565.1 88.8 169  
 19 0 1 169 1 169 5.80E-80 305.1 6579 cellular  
 organisms;Eukaryota;Opisthokonta;Metazoa;Eumetazoa;Bilateria;Protostomia;  
 Spiralia;Lophotrochozoa;Mollusca;Bivalvia;Autobranchia;Pteriomorpha;Pect  
 inida;Pectinoidea;Pectinidae;Pecten;Pecten maximus  
 UdeM00000017599 6596 1956.4 UdeM00000017599 XP\_045158607.1 67.4  
 1445 365 6 3 1445 5 1345 0.00E+00 1956.4 6596  
 cellular  
 organisms;Eukaryota;Opisthokonta;Metazoa;Eumetazoa;Bilateria;Protostomia;  
 Spiralia;Lophotrochozoa;Mollusca;Bivalvia;Autobranchia;Heteroconchia;Euhe  
 terodonta;Imparidentia;Venerida;Veneroidea;Veneridae;Mercenaria;Mercenari  
 a mercenaria  
 UdeM00000017600 6596 68.2 UdeM00000017600 XP\_045159484.1 33.6 119  
 74 1 12 125 22 140 1.00E-08 68.2 6596 cellular  
 organisms;Eukaryota;Opisthokonta;Metazoa;Eumetazoa;Bilateria;Protostomia;

Spiralia;Lophotrochozoa;Mollusca;Bivalvia;Autobranchia;Heteroconchia;Euherodonta;Imparidentia;Venerida;Veneroidea;Veneridae;Mercenaria;Mercenaria mercenaria

UdeM00000017601 6596 68.9 UdeM00000017601 XP\_045159484.1 31 142  
92 2 12 147 22 163 6.90E-09 68.9 6596 cellular

organisms;Eukaryota;Opisthokonta;Metazoa;Eumetazoa;Bilateria;Protostomia;Spiralia;Lophotrochozoa;Mollusca;Bivalvia;Autobranchia;Heteroconchia;Euherodonta;Imparidentia;Venerida;Veneroidea;Veneridae;Mercenaria;Mercenaria mercenaria

UdeM00000017602 6596 274.6 UdeM00000017602 XP\_045159135.1 73 174  
46 1 1 174 121 293 8.70E-71 274.6 6596 cellular

organisms;Eukaryota;Opisthokonta;Metazoa;Eumetazoa;Bilateria;Protostomia;Spiralia;Lophotrochozoa;Mollusca;Bivalvia;Autobranchia;Heteroconchia;Euherodonta;Imparidentia;Venerida;Veneroidea;Veneridae;Mercenaria;Mercenaria mercenaria

UdeM00000017603 6596 1448.7 UdeM00000017603 XP\_045159134.1 83.2  
1207 199 2 1 1206 1 1204 0.00E+00 1448.7 6596  
cellular

organisms;Eukaryota;Opisthokonta;Metazoa;Eumetazoa;Bilateria;Protostomia;Spiralia;Lophotrochozoa;Mollusca;Bivalvia;Autobranchia;Heteroconchia;Euherodonta;Imparidentia;Venerida;Veneroidea;Veneridae;Mercenaria;Mercenaria mercenaria

UdeM00000017604 6596 1325.1 UdeM00000017604 XP\_045159134.1 73.7  
1211 307 6 1 1207 1 1204 0.00E+00 1325.1 6596  
cellular

organisms;Eukaryota;Opisthokonta;Metazoa;Eumetazoa;Bilateria;Protostomia;Spiralia;Lophotrochozoa;Mollusca;Bivalvia;Autobranchia;Heteroconchia;Euherodonta;Imparidentia;Venerida;Veneroidea;Veneridae;Mercenaria;Mercenaria mercenaria

UdeM00000017605 400727 462.6 UdeM00000017605 XP\_025110127.1 72.7  
304 81 2 1 303 13 315 3.80E-127 462.6 400727  
cellular

organisms;Eukaryota;Opisthokonta;Metazoa;Eumetazoa;Bilateria;Protostomia;Spiralia;Lophotrochozoa;Mollusca;Gastropoda;Caenogastropoda;Architaenioglossa;Ampullarioidea;Ampullariidae;Pomacea;Pomacea canaliculata

UdeM00000017607 6579 302.8 UdeM00000017607 XP\_033754779.1 31.8 625  
387 17 583 1176 618 1234 3.00E-78 302.8 6579 cellular

organisms;Eukaryota;Opisthokonta;Metazoa;Eumetazoa;Bilateria;Protostomia;Spiralia;Lophotrochozoa;Mollusca;Bivalvia;Autobranchia;Pteriomorphia;Pectinida;Pectinoidea;Pectinidae;Pecten;Pecten maximus

UdeM00000017608 6579 302.8 UdeM00000017608 XP\_033754779.1 31.8 625  
387 17 73 666 618 1234 2.10E-78 302.8 6579 cellular

organisms;Eukaryota;Opisthokonta;Metazoa;Eumetazoa;Bilateria;Protostomia;Spiralia;Lophotrochozoa;Mollusca;Bivalvia;Autobranchia;Pteriomorphia;Pectinida;Pectinoidea;Pectinidae;Pecten;Pecten maximus

UdeM00000017610 29159 282.7 UdeM00000017610 XP\_011424167.2 25.8 1069  
679 38 28 1033 229 1246 2.60E-72 282.7 29159 cellular

organisms;Eukaryota;Opisthokonta;Metazoa;Eumetazoa;Bilateria;Protostomia;Spiralia;Lophotrochozoa;Mollusca;Bivalvia;Autobranchia;Pteriomorphia;Ostreida;Ostreoidea;Ostreidae;Crassostrea;Crassostrea gigas

UdeM00000017611 29159 273.5 UdeM00000017611 XP\_011424167.2 25.7 1081  
677 40 210 1227 229 1246 1.90E-69 273.5 29159 cellular

organisms;Eukaryota;Opisthokonta;Metazoa;Eumetazoa;Bilateria;Protostomia;

Spiralia;Lophotrochozoa;Mollusca;Bivalvia;Autobranchia;Pteriormorphia;Ostr  
eida;Ostreoidea;Ostreidae;Crassostrea;Crassostrea gigas  
UdeM00000017612 29159 280 UdeM00000017612 XP\_011424167.2 26.1 1070  
675 40 210 1215 229 1246 2.00E-71 280 29159 cellular  
organisms;Eukaryota;Opisthokonta;Metazoa;Eumetazoa;Bilateria;Protostomia;  
Spiralia;Lophotrochozoa;Mollusca;Bivalvia;Autobranchia;Pteriormorphia;Ostr  
eida;Ostreoidea;Ostreidae;Crassostrea;Crassostrea gigas  
UdeM00000017625 6596 103.2 UdeM00000017625 XP\_045160009.1 35.9 251  
84 8 78 282 216 435 5.50E-19 103.2 6596 cellular  
organisms;Eukaryota;Opisthokonta;Metazoa;Eumetazoa;Bilateria;Protostomia;  
Spiralia;Lophotrochozoa;Mollusca;Bivalvia;Autobranchia;Heteroconchia;Euhe  
terodonta;Imparidentia;Venerida;Veneroidea;Veneridae;Mercenaria;Mercenari  
a mercenaria  
UdeM00000017626 6596 104.8 UdeM00000017626 XP\_045160009.1 39.1 243  
87 9 100 304 216 435 2.00E-19 104.8 6596 cellular  
organisms;Eukaryota;Opisthokonta;Metazoa;Eumetazoa;Bilateria;Protostomia;  
Spiralia;Lophotrochozoa;Mollusca;Bivalvia;Autobranchia;Heteroconchia;Euhe  
terodonta;Imparidentia;Venerida;Veneroidea;Veneridae;Mercenaria;Mercenari  
a mercenaria  
UdeM00000017627 6596 104 UdeM00000017627 XP\_045160009.1 37.5 224  
58 6 113 258 216 435 3.00E-19 104 6596 cellular  
organisms;Eukaryota;Opisthokonta;Metazoa;Eumetazoa;Bilateria;Protostomia;  
Spiralia;Lophotrochozoa;Mollusca;Bivalvia;Autobranchia;Heteroconchia;Euhe  
terodonta;Imparidentia;Venerida;Veneroidea;Veneridae;Mercenaria;Mercenari  
a mercenaria  
UdeM00000017628 6596 103.6 UdeM00000017628 XP\_045160009.1 37.5 224  
58 6 113 258 216 435 3.90E-19 103.6 6596 cellular  
organisms;Eukaryota;Opisthokonta;Metazoa;Eumetazoa;Bilateria;Protostomia;  
Spiralia;Lophotrochozoa;Mollusca;Bivalvia;Autobranchia;Heteroconchia;Euhe  
terodonta;Imparidentia;Venerida;Veneroidea;Veneridae;Mercenaria;Mercenari  
a mercenaria  
UdeM00000017629 6596 103.6 UdeM00000017629 XP\_045160009.1 37.5 224  
58 6 100 245 216 435 3.70E-19 103.6 6596 cellular  
organisms;Eukaryota;Opisthokonta;Metazoa;Eumetazoa;Bilateria;Protostomia;  
Spiralia;Lophotrochozoa;Mollusca;Bivalvia;Autobranchia;Heteroconchia;Euhe  
terodonta;Imparidentia;Venerida;Veneroidea;Veneridae;Mercenaria;Mercenari  
a mercenaria  
UdeM00000017630 6596 103.6 UdeM00000017630 XP\_045160007.1 36.4 264  
106 8 100 304 216 476 4.50E-19 103.6 6596 cellular  
organisms;Eukaryota;Opisthokonta;Metazoa;Eumetazoa;Bilateria;Protostomia;  
Spiralia;Lophotrochozoa;Mollusca;Bivalvia;Autobranchia;Heteroconchia;Euhe  
terodonta;Imparidentia;Venerida;Veneroidea;Veneridae;Mercenaria;Mercenari  
a mercenaria  
UdeM00000017631 6596 114.4 UdeM00000017631 XP\_045166601.1 38.4 138  
84 1 22 158 606 743 1.70E-22 114.4 6596 cellular  
organisms;Eukaryota;Opisthokonta;Metazoa;Eumetazoa;Bilateria;Protostomia;  
Spiralia;Lophotrochozoa;Mollusca;Bivalvia;Autobranchia;Heteroconchia;Euhe  
terodonta;Imparidentia;Venerida;Veneroidea;Veneridae;Mercenaria;Mercenari  
a mercenaria  
UdeM00000017633 6596 118.6 UdeM00000017633 XP\_045166601.1 39.9 138  
82 1 22 158 606 743 9.00E-24 118.6 6596 cellular  
organisms;Eukaryota;Opisthokonta;Metazoa;Eumetazoa;Bilateria;Protostomia;  
Spiralia;Lophotrochozoa;Mollusca;Bivalvia;Autobranchia;Heteroconchia;Euhe



terodonta;Imparidentia;Venerida;Veneroidea;Veneridae;Mercenaria;Mercenaria mercenaria

UdeM00000017635 6596 145.2 UdeM00000017635 XP\_045166601.1 32.9 298  
186 5 14 306 455 743 1.40E-31 145.2 6596 cellular

organisms;Eukaryota;Opisthokonta;Metazoa;Eumetazoa;Bilateria;Protostomia;Spiralia;Lophotrochozoa;Mollusca;Bivalvia;Autobranhia;Heteroconchia;Euheterodonta;Imparidentia;Venerida;Veneroidea;Veneridae;Mercenaria;Mercenaria mercenaria

UdeM00000017639 6596 102.1 UdeM00000017639 XP\_045160926.1 38.2 123  
69 2 1 118 88 208 5.40E-19 102.1 6596 cellular

organisms;Eukaryota;Opisthokonta;Metazoa;Eumetazoa;Bilateria;Protostomia;Spiralia;Lophotrochozoa;Mollusca;Bivalvia;Autobranhia;Heteroconchia;Euheterodonta;Imparidentia;Venerida;Veneroidea;Veneridae;Mercenaria;Mercenaria mercenaria

UdeM00000017641 211228 109.4 UdeM00000017641 XP\_015592873.1 47.4  
137 53 2 5 122 402 538 4.20E-21 109.4 211228  
cellular

organisms;Eukaryota;Opisthokonta;Metazoa;Eumetazoa;Bilateria;Protostomia;Ecdysozoa;Panarthropoda;Arthropoda;Mandibulata;Pancrustacea;Hexapoda;Insecta;Dicondylia;Pterygota;Neoptera;Endopterygota;Hymenoptera;Cephoidea;Cephalidae;Cephus;Cephus cinctus

UdeM00000017640 7574 351.7 UdeM00000017640 XP\_013384168.1 57.2 332  
130 2 9 328 172 503 1.10E-93 351.7 7574 cellular

organisms;Eukaryota;Opisthokonta;Metazoa;Eumetazoa;Bilateria;Protostomia;Spiralia;Lophotrochozoa;Brachiopoda;Linguliformea;Lingulata;Lingulida;Linguloidea;Lingulidae;Lingula;Lingula anatina

UdeM00000017642 6596 84.3 UdeM00000017642 XP\_045158358.1 52.6 97  
23 3 1 97 1 74 1.10E-13 84.3 6596 cellular

organisms;Eukaryota;Opisthokonta;Metazoa;Eumetazoa;Bilateria;Protostomia;Spiralia;Lophotrochozoa;Mollusca;Bivalvia;Autobranhia;Heteroconchia;Euheterodonta;Imparidentia;Venerida;Veneroidea;Veneridae;Mercenaria;Mercenaria mercenaria

UdeM00000017643 6579 3758 UdeM00000017643 XP\_033738042.1 42.1 5106  
2508 54 24 4870 163 5078 0.00E+00 3758 6579 cellular

organisms;Eukaryota;Opisthokonta;Metazoa;Eumetazoa;Bilateria;Protostomia;Spiralia;Lophotrochozoa;Mollusca;Bivalvia;Autobranhia;Pteriormorphia;Pectinida;Pectinoidea;Pectinidae;Pecten;Pecten maximus

UdeM00000017644 6573 4539.2 UdeM00000017644 XP\_021343547.1 46.4  
5586 2720 57 213 5704 11665 17068 0.00E+00 4539.2 6573  
cellular

organisms;Eukaryota;Opisthokonta;Metazoa;Eumetazoa;Bilateria;Protostomia;Spiralia;Lophotrochozoa;Mollusca;Bivalvia;Autobranhia;Pteriormorphia;Pectinida;Pectinoidea;Pectinidae;Mizuhopecten;Mizuhopecten yessoensis

UdeM00000017645 1735272 243.8 UdeM00000017645 XP\_041367293.1 52.4  
252 109 3 1 252 140 380 2.30E-61 243.8 1735272  
cellular

organisms;Eukaryota;Opisthokonta;Metazoa;Eumetazoa;Bilateria;Protostomia;Spiralia;Lophotrochozoa;Mollusca;Gastropoda;Neomphalina;Neomphaloidea;Peltospiridae;Gigantopelta;Gigantopelta aegis

UdeM00000017646 1735272 389.8 UdeM00000017646 XP\_041367293.1 54  
391 166 4 1 388 1 380 4.00E-105 389.8 1735272  
cellular

organisms;Eukaryota;Opisthokonta;Metazoa;Eumetazoa;Bilateria;Protostomia;

Spiralia;Lophotrochozoa;Mollusca;Gastropoda;Neomphalina;Neomphaloidea;Pel  
tospiridae;Gigantopelta;Gigantopelta aegis

UdeM00000017647 1735272 288.9 UdeM00000017647 XP\_041359971.1 54.5  
264 113 2 23 285 49 306 1.10E-74 288.9 1735272  
cellular

organisms;Eukaryota;Opisthokonta;Metazoa;Eumetazoa;Bilateria;Protostomia;  
Spiralia;Lophotrochozoa;Mollusca;Gastropoda;Neomphalina;Neomphaloidea;Pel  
tospiridae;Gigantopelta;Gigantopelta aegis

UdeM00000017648 1735272 162.5 UdeM00000017648 XP\_041359971.1 43.3  
194 103 2 1 193 119 306 9.80E-37 162.5 1735272  
cellular

organisms;Eukaryota;Opisthokonta;Metazoa;Eumetazoa;Bilateria;Protostomia;  
Spiralia;Lophotrochozoa;Mollusca;Gastropoda;Neomphalina;Neomphaloidea;Pel  
tospiridae;Gigantopelta;Gigantopelta aegis

UdeM00000017649 6596 148.3 UdeM00000017649 XP\_045159583.1 83.7 86  
13 1 1 86 1 85 4.70E-33 148.3 6596 cellular

organisms;Eukaryota;Opisthokonta;Metazoa;Eumetazoa;Bilateria;Protostomia;  
Spiralia;Lophotrochozoa;Mollusca;Bivalvia;Autobranchia;Heteroconchia;Euhe  
terodonta;Imparidentia;Venerida;Veneroidea;Veneridae;Mercenaria;Mercenari  
a mercenaria

UdeM00000017650 6596 189.9 UdeM00000017650 XP\_045159583.1 87.6 105  
12 1 1 105 1 104 1.70E-45 189.9 6596 cellular

organisms;Eukaryota;Opisthokonta;Metazoa;Eumetazoa;Bilateria;Protostomia;  
Spiralia;Lophotrochozoa;Mollusca;Bivalvia;Autobranchia;Heteroconchia;Euhe  
terodonta;Imparidentia;Venerida;Veneroidea;Veneridae;Mercenaria;Mercenari  
a mercenaria

UdeM00000017651 1735272 631.7 UdeM00000017651 XP\_041357151.1 61.2  
513 135 2 1 453 65 573 8.00E-178 631.7 1735272  
cellular

organisms;Eukaryota;Opisthokonta;Metazoa;Eumetazoa;Bilateria;Protostomia;  
Spiralia;Lophotrochozoa;Mollusca;Gastropoda;Neomphalina;Neomphaloidea;Pel  
tospiridae;Gigantopelta;Gigantopelta aegis

UdeM00000017652 6526 484.2 UdeM00000017652 XP\_013072407.1 67.9 361  
110 2 31 389 27 383 1.60E-133 484.2 6526 cellular

organisms;Eukaryota;Opisthokonta;Metazoa;Eumetazoa;Bilateria;Protostomia;  
Spiralia;Lophotrochozoa;Mollusca;Gastropoda;Heterobranchia;Euthyneura;Pan  
pulmonata;Hygrophila;Lymnaeioidea;Planorbidae;Biomphalaria;Biomphalaria  
glabrata

UdeM00000017653 6565 753.8 UdeM00000017653 XP\_022317800.1 54.5 701  
272 5 1 694 1 661 1.90E-214 753.8 6565 cellular

organisms;Eukaryota;Opisthokonta;Metazoa;Eumetazoa;Bilateria;Protostomia;  
Spiralia;Lophotrochozoa;Mollusca;Bivalvia;Autobranchia;Pteriomorphia;Ostr  
eida;Ostreioidea;Ostreidae;Crassostrea;Crassostrea virginica

UdeM00000017655 6596 540.4 UdeM00000017655 XP\_045159570.1 73.4 372  
98 1 51 421 63 434 2.50E-150 540.4 6596 cellular

organisms;Eukaryota;Opisthokonta;Metazoa;Eumetazoa;Bilateria;Protostomia;  
Spiralia;Lophotrochozoa;Mollusca;Bivalvia;Autobranchia;Heteroconchia;Euhe  
terodonta;Imparidentia;Venerida;Veneroidea;Veneridae;Mercenaria;Mercenari  
a mercenaria

UdeM00000017657 6579 195.3 UdeM00000017657 XP\_033741736.1 52.4 187  
87 1 1 185 671 857 7.60E-47 195.3 6579 cellular

organisms;Eukaryota;Opisthokonta;Metazoa;Eumetazoa;Bilateria;Protostomia;  
Spiralia;Lophotrochozoa;Mollusca;Bivalvia;Autobranchia;Pteriomorphia;Pect  
inida;Pectinoidea;Pectinidae;Pecten;Pecten maximus

UdeM00000017656 6579 617.5 UdeM00000017656 XP\_033741736.1 57.2 516  
 219 1 55 568 342 857 1.80E-173 617.5 6579 cellular  
 organisms;Eukaryota;Opisthokonta;Metazoa;Eumetazoa;Bilateria;Protostomia;  
 Spiralia;Lophotrochozoa;Mollusca;Bivalvia;Autobranhia;Pteriomorphia;Pect  
 inida;Pectinoidea;Pectinidae;Pecten;Pecten maximus  
 UdeM00000017658 6596 406.8 UdeM00000017658 XP\_045157994.1 59.7 325  
 127 2 7 327 31 355 2.70E-110 406.8 6596 cellular  
 organisms;Eukaryota;Opisthokonta;Metazoa;Eumetazoa;Bilateria;Protostomia;  
 Spiralia;Lophotrochozoa;Mollusca;Bivalvia;Autobranhia;Heteroconchia;Euhe  
 terodonta;Imparidentia;Venerida;Veneroidea;Veneridae;Mercenaria;Mercenari  
 a mercenaria  
 UdeM00000017661 2607531 288.9 UdeM00000017661 XP\_029657406.1 57.2  
 250 107 0 1 250 1 250 7.80E-75 288.9 2607531  
 cellular  
 organisms;Eukaryota;Opisthokonta;Metazoa;Eumetazoa;Bilateria;Protostomia;  
 Spiralia;Lophotrochozoa;Mollusca;Cephalopoda;Coleoidea;Octopodiformes;Oct  
 opoda;Incirrata;Octopodidae;Octopus;Octopus sinensis  
 UdeM00000017662 29159 261.9 UdeM00000017662 XP\_011456257.1 88.8 143  
 9 1 4 146 2 137 4.80E-67 261.9 29159 cellular  
 organisms;Eukaryota;Opisthokonta;Metazoa;Eumetazoa;Bilateria;Protostomia;  
 Spiralia;Lophotrochozoa;Mollusca;Bivalvia;Autobranhia;Pteriomorphia;Ostr  
 eida;Ostreoidea;Ostreidae;Crassostrea;Crassostrea gigas  
 UdeM00000017663 6579 422.9 UdeM00000017663 XP\_033736893.1 38.7 710  
 387 15 11 680 10 711 7.50E-115 422.9 6579 cellular  
 organisms;Eukaryota;Opisthokonta;Metazoa;Eumetazoa;Bilateria;Protostomia;  
 Spiralia;Lophotrochozoa;Mollusca;Bivalvia;Autobranhia;Pteriomorphia;Pect  
 inida;Pectinoidea;Pectinidae;Pecten;Pecten maximus  
 UdeM00000017664 6565 341.7 UdeM00000017664 XP\_022328252.1 49.7 364  
 164 5 1 346 953 1315 1.10E-90 341.7 6565 cellular  
 organisms;Eukaryota;Opisthokonta;Metazoa;Eumetazoa;Bilateria;Protostomia;  
 Spiralia;Lophotrochozoa;Mollusca;Bivalvia;Autobranhia;Pteriomorphia;Ostr  
 eida;Ostreoidea;Ostreidae;Crassostrea;Crassostrea virginica  
 UdeM00000017665 6565 156.4 UdeM00000017665 XP\_022328252.1 43.1 211  
 102 4 1 193 1105 1315 3.70E-35 156.4 6565 cellular  
 organisms;Eukaryota;Opisthokonta;Metazoa;Eumetazoa;Bilateria;Protostomia;  
 Spiralia;Lophotrochozoa;Mollusca;Bivalvia;Autobranhia;Pteriomorphia;Ostr  
 eida;Ostreoidea;Ostreidae;Crassostrea;Crassostrea virginica  
 UdeM00000017666 6596 372.9 UdeM00000017666 XP\_045157484.1 47.3 490  
 222 14 13 485 9 479 6.40E-100 372.9 6596 cellular  
 organisms;Eukaryota;Opisthokonta;Metazoa;Eumetazoa;Bilateria;Protostomia;  
 Spiralia;Lophotrochozoa;Mollusca;Bivalvia;Autobranhia;Heteroconchia;Euhe  
 terodonta;Imparidentia;Venerida;Veneroidea;Veneridae;Mercenaria;Mercenari  
 a mercenaria  
 UdeM00000017667 6596 423.3 UdeM00000017667 XP\_045159715.1 52.5 402  
 168 4 2 381 64 464 3.20E-115 423.3 6596 cellular  
 organisms;Eukaryota;Opisthokonta;Metazoa;Eumetazoa;Bilateria;Protostomia;  
 Spiralia;Lophotrochozoa;Mollusca;Bivalvia;Autobranhia;Heteroconchia;Euhe  
 terodonta;Imparidentia;Venerida;Veneroidea;Veneridae;Mercenaria;Mercenari  
 a mercenaria  
 UdeM00000017668 6596 443.4 UdeM00000017668 XP\_045159715.1 49.9 439  
 194 4 77 490 27 464 3.90E-121 443.4 6596 cellular  
 organisms;Eukaryota;Opisthokonta;Metazoa;Eumetazoa;Bilateria;Protostomia;  
 Spiralia;Lophotrochozoa;Mollusca;Bivalvia;Autobranhia;Heteroconchia;Euhe

terodonta;Imparidentia;Venerida;Veneroidea;Veneridae;Mercenaria;Mercenari  
 a mercenaria  
 UdeM00000017669 6596 419.9 UdeM00000017669 XP\_045159715.1 51.5 402  
 172 4 2 381 64 464 3.60E-114 419.9 6596 cellular  
 organisms;Eukaryota;Opisthokonta;Metazoa;Eumetazoa;Bilateria;Protostomia;  
 Spiralia;Lophotrochozoa;Mollusca;Bivalvia;Autobranhia;Heteroconchia;Euhe  
 terodonta;Imparidentia;Venerida;Veneroidea;Veneridae;Mercenaria;Mercenari  
 a mercenaria  
 UdeM00000017670 6596 364 UdeM00000017670 XP\_045159715.1 55.6 313  
 127 2 2 302 64 376 1.90E-97 364 6596 cellular  
 organisms;Eukaryota;Opisthokonta;Metazoa;Eumetazoa;Bilateria;Protostomia;  
 Spiralia;Lophotrochozoa;Mollusca;Bivalvia;Autobranhia;Heteroconchia;Euhe  
 terodonta;Imparidentia;Venerida;Veneroidea;Veneridae;Mercenaria;Mercenari  
 a mercenaria  
 UdeM00000017671 6596 288.5 UdeM00000017671 XP\_045160010.1 57 474  
 149 17 1 460 1 433 1.50E-74 288.5 6596 cellular  
 organisms;Eukaryota;Opisthokonta;Metazoa;Eumetazoa;Bilateria;Protostomia;  
 Spiralia;Lophotrochozoa;Mollusca;Bivalvia;Autobranhia;Heteroconchia;Euhe  
 terodonta;Imparidentia;Venerida;Veneroidea;Veneridae;Mercenaria;Mercenari  
 a mercenaria  
 UdeM00000017672 7739 70.9 UdeM00000017672 XP\_035660271.1 38.2 76  
 47 0 319 394 169 244 6.20E-09 70.9 7739 cellular  
 organisms;Eukaryota;Opisthokonta;Metazoa;Eumetazoa;Bilateria;Deuterostomi  
 a;Chordata;Cephalochordata;Leptocardii;Amphioxiformes;Branchiostomidae;Br  
 anchiostoma;Branchiostoma floridae  
 UdeM00000017673 6596 344 UdeM00000017673 XP\_045158477.1 53.3 349  
 148 5 22 365 74 412 3.00E-91 344 6596 cellular  
 organisms;Eukaryota;Opisthokonta;Metazoa;Eumetazoa;Bilateria;Protostomia;  
 Spiralia;Lophotrochozoa;Mollusca;Bivalvia;Autobranhia;Heteroconchia;Euhe  
 terodonta;Imparidentia;Venerida;Veneroidea;Veneridae;Mercenaria;Mercenari  
 a mercenaria  
 UdeM00000017675 6565 460.3 UdeM00000017675 XP\_022306197.1 42.3 685  
 276 12 9 592 16 682 3.70E-126 460.3 6565 cellular  
 organisms;Eukaryota;Opisthokonta;Metazoa;Eumetazoa;Bilateria;Protostomia;  
 Spiralia;Lophotrochozoa;Mollusca;Bivalvia;Autobranhia;Pteriomorphia;Ostr  
 eida;Ostreoidea;Ostreidae;Crassostrea;Crassostrea virginica  
 UdeM00000017676 6573 610.5 UdeM00000017676 XP\_021343621.1 38.8 876  
 499 14 1 866 1 849 4.60E-171 610.5 6573 cellular  
 organisms;Eukaryota;Opisthokonta;Metazoa;Eumetazoa;Bilateria;Protostomia;  
 Spiralia;Lophotrochozoa;Mollusca;Bivalvia;Autobranhia;Pteriomorphia;Pect  
 inida;Pectinoidea;Pectinidae;Mizuhopecten;Mizuhopecten yessoensis  
 UdeM00000017677 6565 194.1 UdeM00000017677 XP\_022315817.1 49.7 187  
 88 2 17 203 3 183 1.70E-46 194.1 6565 cellular  
 organisms;Eukaryota;Opisthokonta;Metazoa;Eumetazoa;Bilateria;Protostomia;  
 Spiralia;Lophotrochozoa;Mollusca;Bivalvia;Autobranhia;Pteriomorphia;Ostr  
 eida;Ostreoidea;Ostreidae;Crassostrea;Crassostrea virginica  
 UdeM00000017678 6573 914.4 UdeM00000017678 XP\_021343545.1 23 4241  
 2599 111 2 3979 203 4039 4.80E-262 914.4 6573 cellular  
 organisms;Eukaryota;Opisthokonta;Metazoa;Eumetazoa;Bilateria;Protostomia;  
 Spiralia;Lophotrochozoa;Mollusca;Bivalvia;Autobranhia;Pteriomorphia;Pect  
 inida;Pectinoidea;Pectinidae;Mizuhopecten;Mizuhopecten yessoensis  
 UdeM00000017679 6573 1061.2 UdeM00000017679 XP\_021343545.1 24.1  
 4406 2685 111 46 4162 2 4039 3.30E-306 1061.2 6573  
 cellular

organisms;Eukaryota;Opisthokonta;Metazoa;Eumetazoa;Bilateria;Protostomia;Spiralia;Lophotrochozoa;Mollusca;Bivalvia;Autobranchia;Pteriormorphia;Pectinida;Pectinoidea;Pectinidae;Mizuhopecten;Mizuhopecten yessoensis

UdeM00000017680 6596 621.3 UdeM00000017680 XP\_045157820.1 47.8 768  
349 15 19 764 124 861 1.60E-174 621.3 6596 cellular

organisms;Eukaryota;Opisthokonta;Metazoa;Eumetazoa;Bilateria;Protostomia;Spiralia;Lophotrochozoa;Mollusca;Bivalvia;Autobranchia;Heteroconchia;Euherodonta;Imparidentia;Venerida;Veneroidea;Veneridae;Mercenaria;Mercenaria mercenaria

UdeM00000017681 6596 1004.2 UdeM00000017681 XP\_045159291.1 75.1  
702 158 8 13 708 20 710 8.30E-290 1004.2 6596  
cellular

organisms;Eukaryota;Opisthokonta;Metazoa;Eumetazoa;Bilateria;Protostomia;Spiralia;Lophotrochozoa;Mollusca;Bivalvia;Autobranchia;Heteroconchia;Euherodonta;Imparidentia;Venerida;Veneroidea;Veneridae;Mercenaria;Mercenaria mercenaria

UdeM00000017682 6596 318.5 UdeM00000017682 XP\_045191221.1 41.2 422  
232 4 10 430 9 415 1.30E-83 318.5 6596 cellular

organisms;Eukaryota;Opisthokonta;Metazoa;Eumetazoa;Bilateria;Protostomia;Spiralia;Lophotrochozoa;Mollusca;Bivalvia;Autobranchia;Heteroconchia;Euherodonta;Imparidentia;Venerida;Veneroidea;Veneridae;Mercenaria;Mercenaria mercenaria

UdeM00000017684 6596 266.5 UdeM00000017684 XP\_045191221.1 36.9 420  
209 5 11 388 10 415 5.20E-68 266.5 6596 cellular

organisms;Eukaryota;Opisthokonta;Metazoa;Eumetazoa;Bilateria;Protostomia;Spiralia;Lophotrochozoa;Mollusca;Bivalvia;Autobranchia;Heteroconchia;Euherodonta;Imparidentia;Venerida;Veneroidea;Veneridae;Mercenaria;Mercenaria mercenaria

UdeM00000017685 6596 342.8 UdeM00000017685 XP\_045191221.1 42.6 423  
228 4 8 429 7 415 6.30E-91 342.8 6596 cellular

organisms;Eukaryota;Opisthokonta;Metazoa;Eumetazoa;Bilateria;Protostomia;Spiralia;Lophotrochozoa;Mollusca;Bivalvia;Autobranchia;Heteroconchia;Euherodonta;Imparidentia;Venerida;Veneroidea;Veneridae;Mercenaria;Mercenaria mercenaria

UdeM00000017686 6596 351.7 UdeM00000017686 XP\_045191221.1 42.7 424  
226 4 8 429 7 415 1.40E-93 351.7 6596 cellular

organisms;Eukaryota;Opisthokonta;Metazoa;Eumetazoa;Bilateria;Protostomia;Spiralia;Lophotrochozoa;Mollusca;Bivalvia;Autobranchia;Heteroconchia;Euherodonta;Imparidentia;Venerida;Veneroidea;Veneridae;Mercenaria;Mercenaria mercenaria

UdeM00000017687 72036 405.6 UdeM00000017687 XP\_040576246.1 45.6 463  
240 7 12 470 8 462 8.60E-110 405.6 72036 cellular

organisms;Eukaryota;Opisthokonta;Metazoa;Eumetazoa;Bilateria;Protostomia;Ecdysozoa;Panarthropoda;Arthropoda;Mandibulata;Pancrustacea;Crustacea;Multicrustacea;Hexanauplia;Copepoda;Neocopepoda;Podoplea;Siphonostomatoida;Caligidae;Lepeophtheirus;Lepeophtheirus salmonis

UdeM00000017688 6596 286.2 UdeM00000017688 XP\_045158718.1 30.6 843  
544 23 125 948 75 895 1.50E-73 286.2 6596 cellular

organisms;Eukaryota;Opisthokonta;Metazoa;Eumetazoa;Bilateria;Protostomia;Spiralia;Lophotrochozoa;Mollusca;Bivalvia;Autobranchia;Heteroconchia;Euherodonta;Imparidentia;Venerida;Veneroidea;Veneridae;Mercenaria;Mercenaria mercenaria

UdeM00000017689 29159 622.9 UdeM00000017689 XP\_011445222.2 44.5 868  
468 3 76 929 45 912 6.90E-175 622.9 29159 cellular

organisms;Eukaryota;Opisthokonta;Metazoa;Eumetazoa;Bilateria;Protostomia;Spiralia;Lophotrochozoa;Mollusca;Bivalvia;Autobranchia;Pteriormorphia;Ostr

UdeM00000017690 6596 417.2 UdeM00000017690 XP\_045159294.1 35.1 1103  
555 37 12 1052 125 1128 6.40E-113 417.2 6596 cellular

organisms;Eukaryota;Opisthokonta;Metazoa;Eumetazoa;Bilateria;Protostomia;Spiralia;Lophotrochozoa;Mollusca;Bivalvia;Autobranchia;Heteroconchia;Euhe

UdeM00000017691 400727 602.1 UdeM00000017691 XP\_025110485.1 75.3  
385 94 1 4 388 59 442 5.20E-169 602.1 400727  
cellular

organisms;Eukaryota;Opisthokonta;Metazoa;Eumetazoa;Bilateria;Protostomia;Spiralia;Lophotrochozoa;Mollusca;Gastropoda;Caenogastropoda;Architaeniogl

UdeM00000017692 29159 515.4 UdeM00000017692 XP\_011426851.2 63 384  
142 0 4 387 43 426 6.40E-143 515.4 29159 cellular

organisms;Eukaryota;Opisthokonta;Metazoa;Eumetazoa;Bilateria;Protostomia;Spiralia;Lophotrochozoa;Mollusca;Bivalvia;Autobranchia;Pteriormorphia;Ostr

UdeM00000017693 6596 60.5 UdeM00000017693 XP\_045160107.1 27.8 187  
116 6 231 399 240 425 5.80E-06 60.5 6596 cellular

organisms;Eukaryota;Opisthokonta;Metazoa;Eumetazoa;Bilateria;Protostomia;Spiralia;Lophotrochozoa;Mollusca;Bivalvia;Autobranchia;Heteroconchia;Euhe

UdeM00000017694 6596 191.8 UdeM00000017694 XP\_045158316.1 56.5 138  
58 2 579 715 175 311 3.00E-45 191.8 6596 cellular

organisms;Eukaryota;Opisthokonta;Metazoa;Eumetazoa;Bilateria;Protostomia;Spiralia;Lophotrochozoa;Mollusca;Bivalvia;Autobranchia;Heteroconchia;Euhe

UdeM00000017695 6596 70.1 UdeM00000017695 XP\_045195103.1 35.4 96  
57 1 24 119 41 131 5.90E-09 70.1 6596 cellular

organisms;Eukaryota;Opisthokonta;Metazoa;Eumetazoa;Bilateria;Protostomia;Spiralia;Lophotrochozoa;Mollusca;Bivalvia;Autobranchia;Heteroconchia;Euhe

UdeM00000017696 6579 60.8 UdeM00000017696 XP\_033745075.1 38.2 76  
47 0 3 78 41 116 3.10E-06 60.8 6579 cellular

organisms;Eukaryota;Opisthokonta;Metazoa;Eumetazoa;Bilateria;Protostomia;Spiralia;Lophotrochozoa;Mollusca;Bivalvia;Autobranchia;Pteriormorphia;Pect

UdeM00000017697 6596 168.3 UdeM00000017697 XP\_045160724.1 40.9 230  
132 2 1 226 82 311 2.00E-38 168.3 6596 cellular

organisms;Eukaryota;Opisthokonta;Metazoa;Eumetazoa;Bilateria;Protostomia;Spiralia;Lophotrochozoa;Mollusca;Bivalvia;Autobranchia;Heteroconchia;Euhe

UdeM00000017698 6596 191.8 UdeM00000017698 XP\_045160724.1 37.4 289  
171 3 21 299 23 311 2.00E-45 191.8 6596 cellular

organisms;Eukaryota;Opisthokonta;Metazoa;Eumetazoa;Bilateria;Protostomia;Spiralia;Lophotrochozoa;Mollusca;Bivalvia;Autobranchia;Heteroconchia;Euhe

terodonta;Imparidentia;Venerida;Veneroidea;Veneridae;Mercenaria;Mercenaria mercenaria

|                 |        |      |                 |                |     |     |            |      |        |
|-----------------|--------|------|-----------------|----------------|-----|-----|------------|------|--------|
| UdeM00000017699 | 205130 | 84.3 | UdeM00000017699 | XP_026180020.1 | 44  |     |            |      |        |
| 84              | 47     | 0    | 2               | 85             | 200 | 283 | $8.40E-14$ | 84.3 | 205130 |

cellular

organisms;Eukaryota;Opisthokonta;Metazoa;Eumetazoa;Bilateria;Deuterostomia;Chordata;Craniata;Vertebrata;Gnathostomata;Teleostomi;Euteleostomi;Actinopterygii;Actinopteri;Neopterygii;Teleostei;Osteoglossocephalai;Clupeocephala;Euteleostei;Neoteleostei;Eurypterygia;Ctenosquamata;Acanthomorpha;Euacanthomorpha;Percomorphaceae;Anabantaria;Synbranchiformes;Mastacembeloidei;Mastacembelidae;Mastacembelus;Mastacembelus armatus

|                 |      |       |                 |                |      |            |       |      |          |
|-----------------|------|-------|-----------------|----------------|------|------------|-------|------|----------|
| UdeM00000017700 | 6596 | 170.6 | UdeM00000017700 | XP_045160724.1 | 39.3 | 242        |       |      |          |
| 143             | 2    | 2     | 239             | 68             | 309  | $3.90E-39$ | 170.6 | 6596 | cellular |

organisms;Eukaryota;Opisthokonta;Metazoa;Eumetazoa;Bilateria;Protostomia;Spiralia;Lophotrochozoa;Mollusca;Bivalvia;Autobranchia;Heteroconchia;Euheterodonta;Imparidentia;Venerida;Veneroidea;Veneridae;Mercenaria;Mercenaria mercenaria

|                 |      |       |                 |                |      |            |       |      |          |
|-----------------|------|-------|-----------------|----------------|------|------------|-------|------|----------|
| UdeM00000017701 | 6596 | 190.3 | UdeM00000017701 | XP_045160724.1 | 37.3 | 284        |       |      |          |
| 168             | 3    | 23    | 296             | 23             | 306  | $5.70E-45$ | 190.3 | 6596 | cellular |

organisms;Eukaryota;Opisthokonta;Metazoa;Eumetazoa;Bilateria;Protostomia;Spiralia;Lophotrochozoa;Mollusca;Bivalvia;Autobranchia;Heteroconchia;Euheterodonta;Imparidentia;Venerida;Veneroidea;Veneridae;Mercenaria;Mercenaria mercenaria

|                 |      |       |                 |                |      |            |       |      |          |
|-----------------|------|-------|-----------------|----------------|------|------------|-------|------|----------|
| UdeM00000017702 | 6596 | 170.2 | UdeM00000017702 | XP_045160724.1 | 39.7 | 242        |       |      |          |
| 142             | 2    | 2     | 239             | 68             | 309  | $5.10E-39$ | 170.2 | 6596 | cellular |

organisms;Eukaryota;Opisthokonta;Metazoa;Eumetazoa;Bilateria;Protostomia;Spiralia;Lophotrochozoa;Mollusca;Bivalvia;Autobranchia;Heteroconchia;Euheterodonta;Imparidentia;Venerida;Veneroidea;Veneridae;Mercenaria;Mercenaria mercenaria

|                 |      |     |                 |                |      |            |     |      |          |
|-----------------|------|-----|-----------------|----------------|------|------------|-----|------|----------|
| UdeM00000017704 | 6596 | 191 | UdeM00000017704 | XP_045160724.1 | 38.9 | 303        |     |      |          |
| 168             | 5    | 7   | 299             | 14             | 309  | $3.20E-45$ | 191 | 6596 | cellular |

organisms;Eukaryota;Opisthokonta;Metazoa;Eumetazoa;Bilateria;Protostomia;Spiralia;Lophotrochozoa;Mollusca;Bivalvia;Autobranchia;Heteroconchia;Euheterodonta;Imparidentia;Venerida;Veneroidea;Veneridae;Mercenaria;Mercenaria mercenaria

|                 |      |     |                 |                |      |            |     |      |          |
|-----------------|------|-----|-----------------|----------------|------|------------|-----|------|----------|
| UdeM00000017706 | 6596 | 156 | UdeM00000017706 | XP_045195103.1 | 33.2 | 250        |     |      |          |
| 159             | 3    | 27  | 273             | 41             | 285  | $7.70E-35$ | 156 | 6596 | cellular |

organisms;Eukaryota;Opisthokonta;Metazoa;Eumetazoa;Bilateria;Protostomia;Spiralia;Lophotrochozoa;Mollusca;Bivalvia;Autobranchia;Heteroconchia;Euheterodonta;Imparidentia;Venerida;Veneroidea;Veneridae;Mercenaria;Mercenaria mercenaria

|                 |      |       |                 |                |      |            |       |      |          |
|-----------------|------|-------|-----------------|----------------|------|------------|-------|------|----------|
| UdeM00000017708 | 6596 | 189.1 | UdeM00000017708 | XP_045195103.1 | 35.9 | 287        |       |      |          |
| 176             | 3    | 26    | 309             | 41             | 322  | $1.20E-44$ | 189.1 | 6596 | cellular |

organisms;Eukaryota;Opisthokonta;Metazoa;Eumetazoa;Bilateria;Protostomia;Spiralia;Lophotrochozoa;Mollusca;Bivalvia;Autobranchia;Heteroconchia;Euheterodonta;Imparidentia;Venerida;Veneroidea;Veneridae;Mercenaria;Mercenaria mercenaria

|                 |      |     |                 |                |      |            |     |      |          |
|-----------------|------|-----|-----------------|----------------|------|------------|-----|------|----------|
| UdeM00000017709 | 6596 | 183 | UdeM00000017709 | XP_045215023.1 | 34.5 | 307        |     |      |          |
| 193             | 3    | 3   | 301             | 1              | 307  | $8.80E-43$ | 183 | 6596 | cellular |

organisms;Eukaryota;Opisthokonta;Metazoa;Eumetazoa;Bilateria;Protostomia;Spiralia;Lophotrochozoa;Mollusca;Bivalvia;Autobranchia;Heteroconchia;Euheterodonta;Imparidentia;Venerida;Veneroidea;Veneridae;Mercenaria;Mercenaria mercenaria

UdeM00000017710 6573 172.2 UdeM00000017710 XP\_021378843.1 63.3 128  
 47 0 38 165 343 470 5.60E-40 172.2 6573 cellular  
 organisms;Eukaryota;Opisthokonta;Metazoa;Eumetazoa;Bilateria;Protostomia;  
 Spiralia;Lophotrochozoa;Mollusca;Bivalvia;Autobranchia;Pteriormorphia;Pect  
 inida;Pectinoidea;Pectinidae;Mizuhopecten;Mizuhopecten yessoensis  
 UdeM00000017711 45264 99.8 UdeM00000017711 XP\_044168061.1 32.3 192  
 109 5 1 172 1 191 4.20E-18 99.8 45264 cellular  
 organisms;Eukaryota;Opisthokonta;Metazoa;Eumetazoa;Cnidaria;Anthozoa;Hexa  
 corallia;Scleractinia;Astrocoeniina;Acroporidae;Acropora;Acropora  
 millepora  
 UdeM00000017712 37621 95.9 UdeM00000017712 XP\_014675882.1 54.5 88  
 39 1 10 97 165 251 3.50E-17 95.9 37621 cellular  
 organisms;Eukaryota;Opisthokonta;Metazoa;Eumetazoa;Bilateria;Protostomia;  
 Ecdysozoa;Scalidophora;Priapulida;Priapulimorpha;Priapulimorphida;Priapul  
 idae;Priapulus;Priapulus caudatus  
 UdeM00000017713 283035 118.2 UdeM00000017713 XP\_031143187.1 34.3  
 201 103 4 1 172 326 526 1.00E-23 118.2 283035  
 cellular  
 organisms;Eukaryota;Opisthokonta;Metazoa;Eumetazoa;Bilateria;Deuterostomi  
 a;Chordata;Craniata;Vertebrata;Gnathostomata;Teleostomi;Euteleostomi;Acti  
 nopterygii;Actinopteri;Neopterygii;Teleostei;Osteoglossocephalai;Clupeoce  
 phala;Euteleosteomorpha;Neoteleostei;Eurypterygia;Ctenosquamata;Acanthomo  
 rphata;Euacanthomorphacea;Percomorphaceae;Eupercaria;Perciformes;Percoide  
 i;Percidae;Luciopercinae;Sander;Sander lucioperca  
 UdeM00000017714 6596 187.6 UdeM00000017714 XP\_045158401.1 53 200  
 88 5 2 196 43 241 1.60E-44 187.6 6596 cellular  
 organisms;Eukaryota;Opisthokonta;Metazoa;Eumetazoa;Bilateria;Protostomia;  
 Spiralia;Lophotrochozoa;Mollusca;Bivalvia;Autobranchia;Heteroconchia;Euhe  
 terodonta;Imparidentia;Venerida;Veneroidea;Veneridae;Mercenaria;Mercenari  
 a mercenaria  
 UdeM00000017715 1735272 107.1 UdeM00000017715 XP\_041378840.1 67.6  
 74 24 0 1 74 10 83 1.10E-20 107.1 1735272  
 cellular  
 organisms;Eukaryota;Opisthokonta;Metazoa;Eumetazoa;Bilateria;Protostomia;  
 Spiralia;Lophotrochozoa;Mollusca;Gastropoda;Neomphalina;Neomphaloidea;Pel  
 tospiridae;Gigantopelta;Gigantopelta aegis  
 UdeM00000017716 1735272 121.7 UdeM00000017716 XP\_041347065.1 44.1  
 143 49 2 1 112 1 143 6.90E-25 121.7 1735272  
 cellular  
 organisms;Eukaryota;Opisthokonta;Metazoa;Eumetazoa;Bilateria;Protostomia;  
 Spiralia;Lophotrochozoa;Mollusca;Gastropoda;Neomphalina;Neomphaloidea;Pel  
 tospiridae;Gigantopelta;Gigantopelta aegis  
 UdeM00000017717 586833 195.7 UdeM00000017717 XP\_029935345.1 51.8  
 197 74 3 1 187 1 186 5.40E-47 195.7 586833  
 cellular  
 organisms;Eukaryota;Opisthokonta;Metazoa;Eumetazoa;Bilateria;Deuterostomi  
 a;Chordata;Craniata;Vertebrata;Gnathostomata;Teleostomi;Euteleostomi;Acti  
 nopterygii;Actinopteri;Neopterygii;Teleostei;Osteoglossocephalai;Clupeoce  
 phala;Euteleosteomorpha;Neoteleostei;Eurypterygia;Ctenosquamata;Acanthomo  
 rphata;Euacanthomorphacea;Holocentrimorphaceae;Holocentriformes;Holocentr  
 idae;Myripristinae;Myripristis;Myripristis murdjan  
 UdeM00000017718 586833 357.8 UdeM00000017718 XP\_029935345.1 59.5  
 291 95 5 1 280 1 279 1.40E-95 357.8 586833  
 cellular



organisms;Eukaryota;Opisthokonta;Metazoa;Eumetazoa;Bilateria;Deuterostomi  
a;Chordata;Craniata;Vertebrata;Gnathostomata;Teleostomi;Euteleostomi;Acti  
nopterygii;Actinopteri;Neopterygii;Teleostei;Osteoglossocephalai;Clupeoce  
phala;Euteleostomorpha;Neoteleostei;Eurypterygia;Ctenosquamata;Acanthomo  
rphata;Euacanthomorphacea;Holocentrimorphaceae;Holocentriformes;Holocentr  
idae;Myripristinae;Myripristis;Myripristis murdjan

UdeM00000017719 6596 180.6 UdeM00000017719 XP\_045158429.1 71.1 114  
29 1 7 120 44 153 1.20E-42 180.6 6596 cellular

organisms;Eukaryota;Opisthokonta;Metazoa;Eumetazoa;Bilateria;Protostomia;  
Spiralia;Lophotrochozoa;Mollusca;Bivalvia;Autobranchia;Heteroconchia;Euhe  
terodonta;Imparidentia;Venerida;Veneroidea;Veneridae;Mercenaria;Mercenari  
a mercenaria

UdeM00000017720 6596 216.5 UdeM00000017720 XP\_045158428.1 49.8 319  
147 3 36 354 419 724 5.80E-53 216.5 6596 cellular

organisms;Eukaryota;Opisthokonta;Metazoa;Eumetazoa;Bilateria;Protostomia;  
Spiralia;Lophotrochozoa;Mollusca;Bivalvia;Autobranchia;Heteroconchia;Euhe  
terodonta;Imparidentia;Venerida;Veneroidea;Veneridae;Mercenaria;Mercenari  
a mercenaria

UdeM00000017721 6596 375.2 UdeM00000017721 XP\_045158428.1 34.6 687  
330 13 36 614 49 724 1.70E-100 375.2 6596 cellular

organisms;Eukaryota;Opisthokonta;Metazoa;Eumetazoa;Bilateria;Protostomia;  
Spiralia;Lophotrochozoa;Mollusca;Bivalvia;Autobranchia;Heteroconchia;Euhe  
terodonta;Imparidentia;Venerida;Veneroidea;Veneridae;Mercenaria;Mercenari  
a mercenaria

UdeM00000017722 6596 421.4 UdeM00000017722 XP\_045158428.1 40.1 684  
337 12 36 654 49 724 2.10E-114 421.4 6596 cellular

organisms;Eukaryota;Opisthokonta;Metazoa;Eumetazoa;Bilateria;Protostomia;  
Spiralia;Lophotrochozoa;Mollusca;Bivalvia;Autobranchia;Heteroconchia;Euhe  
terodonta;Imparidentia;Venerida;Veneroidea;Veneridae;Mercenaria;Mercenari  
a mercenaria

UdeM00000017723 6565 365.9 UdeM00000017723 XP\_022313293.1 56.9 371  
134 5 16 364 20 386 6.10E-98 365.9 6565 cellular

organisms;Eukaryota;Opisthokonta;Metazoa;Eumetazoa;Bilateria;Protostomia;  
Spiralia;Lophotrochozoa;Mollusca;Bivalvia;Autobranchia;Pteriomorphia;Ostr  
eida;Ostreoidea;Ostreidae;Crassostrea;Crassostrea virginica

UdeM00000017724 6596 139.8 UdeM00000017724 XP\_045159621.1 50.4 137  
64 2 17 153 47 179 2.90E-30 139.8 6596 cellular

organisms;Eukaryota;Opisthokonta;Metazoa;Eumetazoa;Bilateria;Protostomia;  
Spiralia;Lophotrochozoa;Mollusca;Bivalvia;Autobranchia;Heteroconchia;Euhe  
terodonta;Imparidentia;Venerida;Veneroidea;Veneridae;Mercenaria;Mercenari  
a mercenaria

UdeM00000017725 6596 71.2 UdeM00000017725 XP\_045215232.1 50 56  
27 1 4 59 7 61 2.10E-09 71.2 6596 cellular

organisms;Eukaryota;Opisthokonta;Metazoa;Eumetazoa;Bilateria;Protostomia;  
Spiralia;Lophotrochozoa;Mollusca;Bivalvia;Autobranchia;Heteroconchia;Euhe  
terodonta;Imparidentia;Venerida;Veneroidea;Veneridae;Mercenaria;Mercenari  
a mercenaria

UdeM00000017726 37653 787.3 UdeM00000017726 XP\_014786406.1 90.5 422  
40 0 1 422 1 422 9.40E-225 787.3 37653 cellular

organisms;Eukaryota;Opisthokonta;Metazoa;Eumetazoa;Bilateria;Protostomia;  
Spiralia;Lophotrochozoa;Mollusca;Cephalopoda;Coleoidea;Octopodiformes;Oct  
opoda;Incirrata;Octopodidae;Octopus;Octopus bimaculoides

UdeM00000017731 6579 959.1 UdeM00000017731 XP\_033739671.1 73.6 656  
166 5 1 654 1 651 2.80E-276 959.1 6579 cellular

organisms;Eukaryota;Opisthokonta;Metazoa;Eumetazoa;Bilateria;Protostomia;Spiralia;Lophotrochozoa;Mollusca;Bivalvia;Autobranhia;Pteriomorphia;Pectinida;Pectinoidea;Pectinidae;Pecten;Pecten maximus

UdeM00000017732 6596 892.9 UdeM00000017732 XP\_045158360.1 62.7 699  
228 6 1 694 1 671 2.60E-256 892.9 6596 cellular

organisms;Eukaryota;Opisthokonta;Metazoa;Eumetazoa;Bilateria;Protostomia;Spiralia;Lophotrochozoa;Mollusca;Bivalvia;Autobranhia;Heteroconchia;Euheterodonta;Imparidentia;Venerida;Veneroidea;Veneridae;Mercenaria;Mercenaria mercenaria

UdeM00000017733 6573 710.7 UdeM00000017733 XP\_021343536.1 66 694  
177 20 3 658 9 681 1.90E-201 710.7 6573 cellular

organisms;Eukaryota;Opisthokonta;Metazoa;Eumetazoa;Bilateria;Protostomia;Spiralia;Lophotrochozoa;Mollusca;Bivalvia;Autobranhia;Pteriomorphia;Pectinida;Pectinoidea;Pectinidae;Mizuhopecten;Mizuhopecten yessoensis

UdeM00000017734 6579 57.8 UdeM00000017734 XP\_033738040.1 80.8 26  
5 0 1 26 3 28 9.00E-06 57.8 6579 cellular

organisms;Eukaryota;Opisthokonta;Metazoa;Eumetazoa;Bilateria;Protostomia;Spiralia;Lophotrochozoa;Mollusca;Bivalvia;Autobranhia;Pteriomorphia;Pectinida;Pectinoidea;Pectinidae;Pecten;Pecten maximus

UdeM00000017738 6596 294.7 UdeM00000017738 XP\_045200312.1 32.2 656  
382 19 1 618 1 631 2.80E-76 294.7 6596 cellular

organisms;Eukaryota;Opisthokonta;Metazoa;Eumetazoa;Bilateria;Protostomia;Spiralia;Lophotrochozoa;Mollusca;Bivalvia;Autobranhia;Heteroconchia;Euheterodonta;Imparidentia;Venerida;Veneroidea;Veneridae;Mercenaria;Mercenaria mercenaria

UdeM00000017740 225164 274.2 UdeM00000017740 XP\_009043971.1 37.5  
429 229 5 132 529 133 553 3.50E-70 274.2 225164  
cellular

organisms;Eukaryota;Opisthokonta;Metazoa;Eumetazoa;Bilateria;Protostomia;Spiralia;Lophotrochozoa;Mollusca;Gastropoda;Patellogastropoda;Lottiidae;Lottia;Lottia gigantea

UdeM00000017741 6596 820.8 UdeM00000017741 XP\_045209202.1 35.9 1371  
810 39 385 1718 639 1977 3.10E-234 820.8 6596 cellular

organisms;Eukaryota;Opisthokonta;Metazoa;Eumetazoa;Bilateria;Protostomia;Spiralia;Lophotrochozoa;Mollusca;Bivalvia;Autobranhia;Heteroconchia;Euheterodonta;Imparidentia;Venerida;Veneroidea;Veneridae;Mercenaria;Mercenaria mercenaria

UdeM00000017742 6596 231.5 UdeM00000017742 XP\_045184507.1 31.4 487  
275 9 2 432 823 1306 2.80E-57 231.5 6596 cellular

organisms;Eukaryota;Opisthokonta;Metazoa;Eumetazoa;Bilateria;Protostomia;Spiralia;Lophotrochozoa;Mollusca;Bivalvia;Autobranhia;Heteroconchia;Euheterodonta;Imparidentia;Venerida;Veneroidea;Veneridae;Mercenaria;Mercenaria mercenaria

UdeM00000017743 6596 1123.6 UdeM00000017743 XP\_045189898.1 34.4  
1916 1084 42 409 2272 316 2110 0.00E+00 1123.6 6596  
cellular

organisms;Eukaryota;Opisthokonta;Metazoa;Eumetazoa;Bilateria;Protostomia;Spiralia;Lophotrochozoa;Mollusca;Bivalvia;Autobranhia;Heteroconchia;Euheterodonta;Imparidentia;Venerida;Veneroidea;Veneridae;Mercenaria;Mercenaria mercenaria

UdeM00000017745 6573 219.5 UdeM00000017745 XP\_021360451.1 43.4 256  
140 3 2 256 52 303 5.20E-54 219.5 6573 cellular

organisms;Eukaryota;Opisthokonta;Metazoa;Eumetazoa;Bilateria;Protostomia;

Spiralia;Lophotrochozoa;Mollusca;Bivalvia;Autobranchia;Pteriormorphia;Pectinida;Pectinoidea;Pectinidae;Mizuhopecten;Mizuhopecten yessoensis  
 UdeM00000017746 6596 581.3 UdeM00000017746 XP\_045160659.1 51 577  
 280 2 11 585 10 585 1.40E-162 581.3 6596 cellular  
 organisms;Eukaryota;Opisthokonta;Metazoa;Eumetazoa;Bilateria;Protostomia;Spiralia;Lophotrochozoa;Mollusca;Bivalvia;Autobranchia;Heteroconchia;Euherodonta;Imparidentia;Venerida;Veneroidea;Veneridae;Mercenaria;Mercenaria mercenaria  
 UdeM00000017747 6573 89.4 UdeM00000017747 XP\_021379819.1 69.1 55  
 17 0 1 55 129 183 3.10E-15 89.4 6573 cellular  
 organisms;Eukaryota;Opisthokonta;Metazoa;Eumetazoa;Bilateria;Protostomia;Spiralia;Lophotrochozoa;Mollusca;Bivalvia;Autobranchia;Pteriormorphia;Pectinida;Pectinoidea;Pectinidae;Mizuhopecten;Mizuhopecten yessoensis  
 UdeM00000017748 6579 99.4 UdeM00000017748 XP\_033741063.1 62 71  
 27 0 1 71 129 199 2.10E-18 99.4 6579 cellular  
 organisms;Eukaryota;Opisthokonta;Metazoa;Eumetazoa;Bilateria;Protostomia;Spiralia;Lophotrochozoa;Mollusca;Bivalvia;Autobranchia;Pteriormorphia;Pectinida;Pectinoidea;Pectinidae;Pecten;Pecten maximus  
 UdeM00000017749 6573 240 UdeM00000017749 XP\_021360451.1 43.5 283  
 157 2 129 410 29 309 5.70E-60 240 6573 cellular  
 organisms;Eukaryota;Opisthokonta;Metazoa;Eumetazoa;Bilateria;Protostomia;Spiralia;Lophotrochozoa;Mollusca;Bivalvia;Autobranchia;Pteriormorphia;Pectinida;Pectinoidea;Pectinidae;Mizuhopecten;Mizuhopecten yessoensis  
 UdeM00000017750 29159 72.4 UdeM00000017750 XP\_034331441.1 38.5 117  
 69 3 1 117 1 114 6.00E-10 72.4 29159 cellular  
 organisms;Eukaryota;Opisthokonta;Metazoa;Eumetazoa;Bilateria;Protostomia;Spiralia;Lophotrochozoa;Mollusca;Bivalvia;Autobranchia;Pteriormorphia;Ostreida;Ostreoidea;Ostreidae;Crassostrea;Crassostrea gigas  
 UdeM00000017751 6573 229.6 UdeM00000017751 XP\_021360451.1 40.9 291  
 169 3 23 310 41 331 5.60E-57 229.6 6573 cellular  
 organisms;Eukaryota;Opisthokonta;Metazoa;Eumetazoa;Bilateria;Protostomia;Spiralia;Lophotrochozoa;Mollusca;Bivalvia;Autobranchia;Pteriormorphia;Pectinida;Pectinoidea;Pectinidae;Mizuhopecten;Mizuhopecten yessoensis  
 UdeM00000017752 37653 261.9 UdeM00000017752 XP\_014767739.1 51.7 269  
 119 3 38 301 42 304 9.80E-67 261.9 37653 cellular  
 organisms;Eukaryota;Opisthokonta;Metazoa;Eumetazoa;Bilateria;Protostomia;Spiralia;Lophotrochozoa;Mollusca;Cephalopoda;Coleoidea;Octopodiformes;Octopoda;Incirrata;Octopodidae;Octopus;Octopus bimaculoides  
 UdeM00000017753 6579 245.4 UdeM00000017753 XP\_033737257.1 99.2 119  
 1 0 1 119 1 119 3.80E-62 245.4 6579 cellular  
 organisms;Eukaryota;Opisthokonta;Metazoa;Eumetazoa;Bilateria;Protostomia;Spiralia;Lophotrochozoa;Mollusca;Bivalvia;Autobranchia;Pteriormorphia;Pectinida;Pectinoidea;Pectinidae;Pecten;Pecten maximus  
 UdeM00000017754 6596 1442.6 UdeM00000017754 XP\_045158536.1 66.2  
 1080 257 5 1 1051 1 1001 0.00E+00 1442.6 6596  
 cellular  
 organisms;Eukaryota;Opisthokonta;Metazoa;Eumetazoa;Bilateria;Protostomia;Spiralia;Lophotrochozoa;Mollusca;Bivalvia;Autobranchia;Heteroconchia;Euherodonta;Imparidentia;Venerida;Veneroidea;Veneridae;Mercenaria;Mercenaria mercenaria  
 UdeM00000017755 6596 307.4 UdeM00000017755 XP\_045158346.1 41 512  
 228 12 8 490 2 468 3.30E-80 307.4 6596 cellular  
 organisms;Eukaryota;Opisthokonta;Metazoa;Eumetazoa;Bilateria;Protostomia;Spiralia;Lophotrochozoa;Mollusca;Bivalvia;Autobranchia;Heteroconchia;Euherodonta;Imparidentia;Venerida;Veneroidea;Veneridae;Mercenaria;Mercenaria mercenaria

terodonta;Imparidentia;Venerida;Veneroidea;Veneridae;Mercenaria;Mercenaria mercenaria

UdeM00000017756 1735272 424.1 UdeM00000017756 XP\_041358878.1 57.1  
333 142 1 1 332 1 333 1.70E-115 424.1 1735272  
cellular

organisms;Eukaryota;Opisthokonta;Metazoa;Eumetazoa;Bilateria;Protostomia;Spiralia;Lophotrochozoa;Mollusca;Gastropoda;Neomphalina;Neomphaloidea;Peltospiridae;Gigantopelta;Gigantopelta aegis

UdeM00000017757 6573 1067 UdeM00000017757 XP\_021343628.1 40 1409  
802 19 1 1397 44 1420 0.00E+00 1067 6573 cellular

organisms;Eukaryota;Opisthokonta;Metazoa;Eumetazoa;Bilateria;Protostomia;Spiralia;Lophotrochozoa;Mollusca;Bivalvia;Autobranchia;Pteriormorphia;Pectinida;Pectinoidea;Pectinidae;Mizuhopecten;Mizuhopecten yessoensis

UdeM00000017758 6573 264.2 UdeM00000017758 XP\_021378853.1 74.1 158  
41 0 1 158 1 158 1.10E-67 264.2 6573 cellular

organisms;Eukaryota;Opisthokonta;Metazoa;Eumetazoa;Bilateria;Protostomia;Spiralia;Lophotrochozoa;Mollusca;Bivalvia;Autobranchia;Pteriormorphia;Pectinida;Pectinoidea;Pectinidae;Mizuhopecten;Mizuhopecten yessoensis

UdeM00000034223 6596 248.4 UdeM00000034223 XP\_045177916.1 49.6 242  
117 4 101 339 417 656 1.30E-62 248.4 6596 cellular

organisms;Eukaryota;Opisthokonta;Metazoa;Eumetazoa;Bilateria;Protostomia;Spiralia;Lophotrochozoa;Mollusca;Bivalvia;Autobranchia;Heteroconchia;Euheterodonta;Imparidentia;Venerida;Veneroidea;Veneridae;Mercenaria;Mercenaria mercenaria

UdeM00000034226 6596 182.2 UdeM00000034226 XP\_045192683.1 44.5 245  
101 6 19 240 49 281 7.90E-43 182.2 6596 cellular

organisms;Eukaryota;Opisthokonta;Metazoa;Eumetazoa;Bilateria;Protostomia;Spiralia;Lophotrochozoa;Mollusca;Bivalvia;Autobranchia;Heteroconchia;Euheterodonta;Imparidentia;Venerida;Veneroidea;Veneridae;Mercenaria;Mercenaria mercenaria

UdeM00000034227 6596 350.1 UdeM00000034227 XP\_045212389.1 45.5 365  
189 6 54 415 61 418 3.80E-93 350.1 6596 cellular

organisms;Eukaryota;Opisthokonta;Metazoa;Eumetazoa;Bilateria;Protostomia;Spiralia;Lophotrochozoa;Mollusca;Bivalvia;Autobranchia;Heteroconchia;Euheterodonta;Imparidentia;Venerida;Veneroidea;Veneridae;Mercenaria;Mercenaria mercenaria

UdeM00000034229 6573 221.1 UdeM00000034229 XP\_021377528.1 65.6 157  
54 0 1 157 18 174 1.00E-54 221.1 6573 cellular

organisms;Eukaryota;Opisthokonta;Metazoa;Eumetazoa;Bilateria;Protostomia;Spiralia;Lophotrochozoa;Mollusca;Bivalvia;Autobranchia;Pteriormorphia;Pectinida;Pectinoidea;Pectinidae;Mizuhopecten;Mizuhopecten yessoensis

UdeM00000034230 6565 629 UdeM00000034230 XP\_022328027.1 84.1 383  
59 1 1 381 174 556 3.90E-177 629 6565 cellular

organisms;Eukaryota;Opisthokonta;Metazoa;Eumetazoa;Bilateria;Protostomia;Spiralia;Lophotrochozoa;Mollusca;Bivalvia;Autobranchia;Pteriormorphia;Ostreida;Ostreoidea;Ostreidae;Crassostrea;Crassostrea virginica

UdeM00000034231 6565 927.5 UdeM00000034231 XP\_022328027.1 85.4 556  
79 1 1 554 1 556 7.70E-267 927.5 6565 cellular

organisms;Eukaryota;Opisthokonta;Metazoa;Eumetazoa;Bilateria;Protostomia;Spiralia;Lophotrochozoa;Mollusca;Bivalvia;Autobranchia;Pteriormorphia;Ostreida;Ostreoidea;Ostreidae;Crassostrea;Crassostrea virginica

UdeM00000034232 6579 295.4 UdeM00000034232 XP\_033727093.1 89.8 166  
17 0 1 166 1 166 4.50E-77 295.4 6579 cellular

organisms;Eukaryota;Opisthokonta;Metazoa;Eumetazoa;Bilateria;Protostomia;

Spiralia; Lophotrochozoa; Mollusca; Bivalvia; Autobranchia; Pteriomorpha; Pectinida; Pectinoidea; Pectinidae; Pecten; Pecten maximus

UdeM00000034233 29159 330.9 UdeM00000034233 XP\_034333743.1 52.6 331  
97 1 2 332 24 294 1.90E-87 330.9 29159 cellular  
organisms; Eukaryota; Opisthokonta; Metazoa; Eumetazoa; Bilateria; Protostomia; Spiralia; Lophotrochozoa; Mollusca; Bivalvia; Autobranchia; Pteriomorpha; Ostreida; Ostreidae; Crassostrea; Crassostrea gigas

UdeM00000034235 6565 115.2 UdeM00000034235 XP\_022299727.1 42.2 147  
83 1 1 145 46 192 9.30E-23 115.2 6565 cellular  
organisms; Eukaryota; Opisthokonta; Metazoa; Eumetazoa; Bilateria; Protostomia; Spiralia; Lophotrochozoa; Mollusca; Bivalvia; Autobranchia; Pteriomorpha; Ostreida; Ostreidae; Crassostrea; Crassostrea virginica

UdeM00000034242 6565 281.2 UdeM00000034242 XP\_022303385.1 44.9 303  
155 7 29 322 547 846 1.70E-72 281.2 6565 cellular  
organisms; Eukaryota; Opisthokonta; Metazoa; Eumetazoa; Bilateria; Protostomia; Spiralia; Lophotrochozoa; Mollusca; Bivalvia; Autobranchia; Pteriomorpha; Ostreida; Ostreidae; Crassostrea; Crassostrea virginica

UdeM00000034243 6565 108.2 UdeM00000034243 XP\_022321940.1 26 292  
199 7 31 312 399 683 1.90E-20 108.2 6565 cellular  
organisms; Eukaryota; Opisthokonta; Metazoa; Eumetazoa; Bilateria; Protostomia; Spiralia; Lophotrochozoa; Mollusca; Bivalvia; Autobranchia; Pteriomorpha; Ostreida; Ostreidae; Crassostrea; Crassostrea virginica

UdeM00000027256 6596 409.8 UdeM00000027256 XP\_045177776.1 39.4 589  
319 10 1 577 405 967 9.90E-111 409.8 6596 cellular  
organisms; Eukaryota; Opisthokonta; Metazoa; Eumetazoa; Bilateria; Protostomia; Spiralia; Lophotrochozoa; Mollusca; Bivalvia; Autobranchia; Heteroconchia; Euheterodonta; Imparidentia; Venerida; Veneroidea; Veneridae; Mercenaria; Mercenaria mercenaria

UdeM00000027257 50390 464.5 UdeM00000027257 XP\_028148951.1 59.3 327  
132 1 1 326 466 792 1.10E-127 464.5 50390 cellular  
organisms; Eukaryota; Opisthokonta; Metazoa; Eumetazoa; Bilateria; Protostomia; Ecdysozoa; Panarthropoda; Arthropoda; Mandibulata; Pancrustacea; Hexapoda; Insecta; Dicondylia; Pterygota; Neoptera; Endopterygota; Coleoptera; Polyphaga; Cucujiformia; Chrysomeloidea; Chrysomelidae; Galerucinae; Luperini; Diabroticina; Diabroticites; Diabrotica; Diabrotica virgifera; Diabrotica virgifera virgifera

UdeM00000027258 6596 421.4 UdeM00000027258 XP\_045177776.1 41 564  
317 10 60 615 396 951 2.70E-114 421.4 6596 cellular  
organisms; Eukaryota; Opisthokonta; Metazoa; Eumetazoa; Bilateria; Protostomia; Spiralia; Lophotrochozoa; Mollusca; Bivalvia; Autobranchia; Heteroconchia; Euheterodonta; Imparidentia; Venerida; Veneroidea; Veneridae; Mercenaria; Mercenaria mercenaria

UdeM00000027260 400727 199.9 UdeM00000027260 XP\_025089735.1 81.9  
127 23 0 61 187 287 413 3.40E-48 199.9 400727  
cellular  
organisms; Eukaryota; Opisthokonta; Metazoa; Eumetazoa; Bilateria; Protostomia; Spiralia; Lophotrochozoa; Mollusca; Gastropoda; Caenogastropoda; Architaenioglossa; Ampullarioidea; Ampullariidae; Pomacea; Pomacea canaliculata

UdeM00000027261 400727 416 UdeM00000027261 XP\_025089735.1 71.8  
411 76 3 5 376 4 413 5.60E-113 416 400727  
cellular  
organisms; Eukaryota; Opisthokonta; Metazoa; Eumetazoa; Bilateria; Protostomia; Spiralia; Lophotrochozoa; Mollusca; Gastropoda; Caenogastropoda; Architaenioglossa; Ampullarioidea; Ampullariidae; Pomacea; Pomacea canaliculata

UdeM00000027262 6573 267.3 UdeM00000027262 XP\_021376048.1 82.7 150  
 25 1 1 150 1 149 1.50E-68 267.3 6573 cellular  
 organisms;Eukaryota;Opisthokonta;Metazoa;Eumetazoa;Bilateria;Protostomia;  
 Spiralia;Lophotrochozoa;Mollusca;Bivalvia;Autobranchia;Pteriomorphia;Pectinida;  
 Pectinoidea;Pectinidae;Mizuhopecten;Mizuhopecten yessoensis  
 UdeM00000027263 1415580 163.7 UdeM00000027263 XP\_030075314.1 44.9  
 214 100 2 1 211 427 625 2.60E-37 163.7 1415580  
 cellular  
 organisms;Eukaryota;Opisthokonta;Metazoa;Eumetazoa;Bilateria;Deuterostomia;  
 Chordata;Craniata;Vertebrata;Gnathostomata;Teleostomi;Euteleostomi;Sarcopterygii;  
 Dipnotetrapodomorpha;Tetrapoda;Amphibia;Gymnophiona;Siphonopidae;Microcaecilia;  
 Microcaecilia unicolor  
 UdeM00000027264 7757 451.1 UdeM00000027264 XP\_032835197.1 79.3 280  
 58 0 1 280 52 331 1.10E-123 451.1 7757 cellular  
 organisms;Eukaryota;Opisthokonta;Metazoa;Eumetazoa;Bilateria;Deuterostomia;  
 Chordata;Craniata;Vertebrata;Cyclostomata;Hyperoartia;Petromyzontiformes;  
 Petromyzontidae;Petromyzon;Petromyzon marinus  
 UdeM00000027265 260995 77.8 UdeM00000027265 XP\_033812940.1 50  
 74 36 1 1 74 1 73 8.60E-12 77.8 260995  
 cellular  
 organisms;Eukaryota;Opisthokonta;Metazoa;Eumetazoa;Bilateria;Deuterostomia;  
 Chordata;Craniata;Vertebrata;Gnathostomata;Teleostomi;Euteleostomi;Sarcopterygii;  
 Dipnotetrapodomorpha;Tetrapoda;Amphibia;Gymnophiona;Dermophiidae;Geotrypetes;  
 Geotrypetes seraphini  
 UdeM00000027266 6565 534.6 UdeM00000027266 XP\_022338038.1 61.4 396  
 152 1 1 396 1 395 1.00E-148 534.6 6565 cellular  
 organisms;Eukaryota;Opisthokonta;Metazoa;Eumetazoa;Bilateria;Protostomia;  
 Spiralia;Lophotrochozoa;Mollusca;Bivalvia;Autobranchia;Pteriomorphia;Ostreida;  
 Ostreioidea;Ostreidae;Crassostrea;Crassostrea virginica  
 UdeM00000027267 400727 196.1 UdeM00000027267 XP\_025091055.1 59.2  
 147 58 1 1 145 1 147 3.20E-47 196.1 400727  
 cellular  
 organisms;Eukaryota;Opisthokonta;Metazoa;Eumetazoa;Bilateria;Protostomia;  
 Spiralia;Lophotrochozoa;Mollusca;Gastropoda;Caenogastropoda;Architaenioglossa;  
 Ampullarioidea;Ampullariidae;Pomacea;Pomacea canaliculata  
 UdeM00000027268 29159 98.2 UdeM00000027268 XP\_034305547.1 35.9 153  
 91 4 23 175 21 166 1.20E-17 98.2 29159 cellular  
 organisms;Eukaryota;Opisthokonta;Metazoa;Eumetazoa;Bilateria;Protostomia;  
 Spiralia;Lophotrochozoa;Mollusca;Bivalvia;Autobranchia;Pteriomorphia;Ostreida;  
 Ostreioidea;Ostreidae;Crassostrea;Crassostrea gigas  
 UdeM00000027269 29159 98.2 UdeM00000027269 XP\_034305547.1 35.9 153  
 91 4 176 328 21 166 2.20E-17 98.2 29159 cellular  
 organisms;Eukaryota;Opisthokonta;Metazoa;Eumetazoa;Bilateria;Protostomia;  
 Spiralia;Lophotrochozoa;Mollusca;Bivalvia;Autobranchia;Pteriomorphia;Ostreida;  
 Ostreioidea;Ostreidae;Crassostrea;Crassostrea gigas  
 UdeM00000027270 45264 353.2 UdeM00000027270 XP\_044174360.1 39.4 490  
 244 4 275 714 112 598 8.00E-94 353.2 45264 cellular  
 organisms;Eukaryota;Opisthokonta;Metazoa;Eumetazoa;Cnidaria;Anthozoa;Hexacorallia;  
 Scleractinia;Astrocoeniina;Acroporidae;Acropora;Acropora millepora  
 UdeM00000027271 6596 148.3 UdeM00000027271 XP\_045189228.1 33.3 312  
 162 6 1 310 75 342 4.50E-32 148.3 6596 cellular  
 organisms;Eukaryota;Opisthokonta;Metazoa;Eumetazoa;Bilateria;Protostomia;  
 Spiralia;Lophotrochozoa;Mollusca;Bivalvia;Autobranchia;Heteroconchia;Euhe

terodonta;Imparidentia;Venerida;Veneroidea;Veneridae;Mercenaria;Mercenari  
 a mercenaria  
 UdeM00000027273 6596 148.3 UdeM00000027273 XP\_045189228.1 33.3 312  
 162 6 1 310 75 342 3.40E-32 148.3 6596 cellular  
 organisms;Eukaryota;Opisthokonta;Metazoa;Eumetazoa;Bilateria;Protostomia;  
 Spiralia;Lophotrochozoa;Mollusca;Bivalvia;Autobranchia;Heteroconchia;Euhe  
 terodonta;Imparidentia;Venerida;Veneroidea;Veneridae;Mercenaria;Mercenari  
 a mercenaria  
 UdeM00000027275 29159 332 UdeM00000027275 XP\_011424619.1 62.2 283  
 100 4 724 1005 129 405 2.90E-87 332 29159 cellular  
 organisms;Eukaryota;Opisthokonta;Metazoa;Eumetazoa;Bilateria;Protostomia;  
 Spiralia;Lophotrochozoa;Mollusca;Bivalvia;Autobranchia;Pteriormorphia;Ostr  
 eida;Ostreoidea;Ostreidae;Crassostrea;Crassostrea gigas  
 UdeM00000027275 29159 217.2 UdeM00000027275 XP\_011424619.1 78.3 129  
 27 1 1 129 1 128 1.00E-52 217.2 29159 cellular  
 organisms;Eukaryota;Opisthokonta;Metazoa;Eumetazoa;Bilateria;Protostomia;  
 Spiralia;Lophotrochozoa;Mollusca;Bivalvia;Autobranchia;Pteriormorphia;Ostr  
 eida;Ostreoidea;Ostreidae;Crassostrea;Crassostrea gigas  
 UdeM00000027276 6596 411.4 UdeM00000027276 XP\_045182654.1 52.3 421  
 181 10 1 415 11 417 1.40E-111 411.4 6596 cellular  
 organisms;Eukaryota;Opisthokonta;Metazoa;Eumetazoa;Bilateria;Protostomia;  
 Spiralia;Lophotrochozoa;Mollusca;Bivalvia;Autobranchia;Heteroconchia;Euhe  
 terodonta;Imparidentia;Venerida;Veneroidea;Veneridae;Mercenaria;Mercenari  
 a mercenaria  
 UdeM00000027277 6596 422.2 UdeM00000027277 XP\_045182654.1 52.6 420  
 180 9 1 414 11 417 8.00E-115 422.2 6596 cellular  
 organisms;Eukaryota;Opisthokonta;Metazoa;Eumetazoa;Bilateria;Protostomia;  
 Spiralia;Lophotrochozoa;Mollusca;Bivalvia;Autobranchia;Heteroconchia;Euhe  
 terodonta;Imparidentia;Venerida;Veneroidea;Veneridae;Mercenaria;Mercenari  
 a mercenaria  
 UdeM00000027278 6579 79 UdeM00000027278 XP\_033726824.1 76.4 55  
 12 1 216 270 267 320 1.10E-11 79 6579 cellular  
 organisms;Eukaryota;Opisthokonta;Metazoa;Eumetazoa;Bilateria;Protostomia;  
 Spiralia;Lophotrochozoa;Mollusca;Bivalvia;Autobranchia;Pteriormorphia;Pect  
 inida;Pectinoidea;Pectinidae;Pecten;Pecten maximus  
 UdeM00000027279 6596 1056.2 UdeM00000027279 XP\_045182923.1 78  
 695 130 9 1 679 251 938 1.80E-305 1056.2 6596  
 cellular  
 organisms;Eukaryota;Opisthokonta;Metazoa;Eumetazoa;Bilateria;Protostomia;  
 Spiralia;Lophotrochozoa;Mollusca;Bivalvia;Autobranchia;Heteroconchia;Euhe  
 terodonta;Imparidentia;Venerida;Veneroidea;Veneridae;Mercenaria;Mercenari  
 a mercenaria  
 UdeM00000027280 6596 178.3 UdeM00000027280 XP\_045182922.1 86 100  
 14 0 1 100 848 947 4.80E-42 178.3 6596 cellular  
 organisms;Eukaryota;Opisthokonta;Metazoa;Eumetazoa;Bilateria;Protostomia;  
 Spiralia;Lophotrochozoa;Mollusca;Bivalvia;Autobranchia;Heteroconchia;Euhe  
 terodonta;Imparidentia;Venerida;Veneroidea;Veneridae;Mercenaria;Mercenari  
 a mercenaria  
 UdeM00000027281 6596 552.7 UdeM00000027281 XP\_045181173.1 70.8 397  
 114 1 42 438 51 445 4.10E-154 552.7 6596 cellular  
 organisms;Eukaryota;Opisthokonta;Metazoa;Eumetazoa;Bilateria;Protostomia;  
 Spiralia;Lophotrochozoa;Mollusca;Bivalvia;Autobranchia;Heteroconchia;Euhe  
 terodonta;Imparidentia;Venerida;Veneroidea;Veneridae;Mercenaria;Mercenari  
 a mercenaria

UdeM00000027282 400727 259.2 UdeM00000027282 XP\_025092884.1 91.8  
 134 11 0 1 134 1 134 3.30E-66 259.2 400727  
 cellular  
 organisms;Eukaryota;Opisthokonta;Metazoa;Eumetazoa;Bilateria;Protostomia;  
 Spiralia;Lophotrochozoa;Mollusca;Gastropoda;Caenogastropoda;Architaenioglossa;  
 Ampullarioidea;Ampullariidae;Pomacea;Pomacea canaliculata  
 UdeM00000027283 7574 171.4 UdeM00000027283 XP\_013405563.1 36.8 291  
 147 6 1 288 122 378 1.70E-39 171.4 7574 cellular  
 organisms;Eukaryota;Opisthokonta;Metazoa;Eumetazoa;Bilateria;Protostomia;  
 Spiralia;Lophotrochozoa;Brachiopoda;Linguliformea;Lingulata;Lingulida;Linguloidea;  
 Lingulidae;Lingula;Lingula anatina  
 UdeM00000027284 48498 587 UdeM00000027284 XP\_020629946.1 38.1 885  
 450 13 2 879 1050 1843 3.90E-164 587 48498 cellular  
 organisms;Eukaryota;Opisthokonta;Metazoa;Eumetazoa;Cnidaria;Anthozoa;Hexacorallia;  
 Scleractinia;Faviina;Merulinidae;Orbicella;Orbicella faveolata  
 UdeM00000027285 6579 201.8 UdeM00000027285 XP\_033739209.1 48.6 214  
 99 1 9 222 2 204 9.40E-49 201.8 6579 cellular  
 organisms;Eukaryota;Opisthokonta;Metazoa;Eumetazoa;Bilateria;Protostomia;  
 Spiralia;Lophotrochozoa;Mollusca;Bivalvia;Autobranchia;Pteriormorphia;Pectinida;  
 Pectinoidea;Pectinidae;Pecten;Pecten maximus  
 UdeM00000027286 6596 101.3 UdeM00000027286 XP\_045183029.1 65.3 72  
 23 1 1 72 149 218 5.40E-19 101.3 6596 cellular  
 organisms;Eukaryota;Opisthokonta;Metazoa;Eumetazoa;Bilateria;Protostomia;  
 Spiralia;Lophotrochozoa;Mollusca;Bivalvia;Autobranchia;Heteroconchia;Euheterodonta;  
 Imparidentia;Venerida;Veneroidea;Veneridae;Mercenaria;Mercenaria mercenaria  
 UdeM00000027287 29159 449.5 UdeM00000027287 XP\_019926413.2 71.3 324  
 85 4 1 324 292 607 4.10E-123 449.5 29159 cellular  
 organisms;Eukaryota;Opisthokonta;Metazoa;Eumetazoa;Bilateria;Protostomia;  
 Spiralia;Lophotrochozoa;Mollusca;Bivalvia;Autobranchia;Pteriormorphia;Ostreida;  
 Ostreoidea;Ostreidae;Crassostrea;Crassostrea gigas  
 UdeM00000027288 10224 142.9 UdeM00000027288 XP\_006813844.1 43.9 164  
 92 0 1 164 128 291 4.30E-31 142.9 10224 cellular  
 organisms;Eukaryota;Opisthokonta;Metazoa;Eumetazoa;Bilateria;Deuterostomia;  
 Hemichordata;Enteropneusta;Harrimaniidae;Saccoglossus;Saccoglossus kowalevskii  
 UdeM00000027289 7668 116.3 UdeM00000027289 XP\_030832292.1 36.1 191  
 103 5 2 182 257 438 4.10E-23 116.3 7668 cellular  
 organisms;Eukaryota;Opisthokonta;Metazoa;Eumetazoa;Bilateria;Deuterostomia;  
 Echinodermata;Eleutherozoa;Echinozoa;Echinoidea;Euechinoidea;Echinacea;  
 Camarodonta;Echinidea;Strongylocentrotidae;Strongylocentrotus;Strongylocentrotus  
 purpuratus  
 UdeM00000027290 7668 137.5 UdeM00000027290 XP\_030839940.1 31 310  
 178 10 2 307 90 367 3.30E-29 137.5 7668 cellular  
 organisms;Eukaryota;Opisthokonta;Metazoa;Eumetazoa;Bilateria;Deuterostomia;  
 Echinodermata;Eleutherozoa;Echinozoa;Echinoidea;Euechinoidea;Echinacea;  
 Camarodonta;Echinidea;Strongylocentrotidae;Strongylocentrotus;Strongylocentrotus  
 purpuratus  
 UdeM00000027292 50390 558.9 UdeM00000027292 XP\_028142380.1 57.1 413  
 177 0 2 414 21 433 5.40E-156 558.9 50390 cellular  
 organisms;Eukaryota;Opisthokonta;Metazoa;Eumetazoa;Bilateria;Protostomia;  
 Ecdysozoa;Panarthropoda;Arthropoda;Mandibulata;Pancrustacea;Hexapoda;Insecta;  
 Dicondylia;Pterygota;Neoptera;Endopterygota;Coleoptera;Polyphaga;Cucujiformia;  
 Chrysomeloidea;Chrysomelidae;Galerucinae;Luperini;Diabroticina;D



iabroticites;Diabrotica;Diabrotica virgifera;Diabrotica virgifera  
 virgifera  
 UdeM00000027293 7757 93.2 UdeM00000027293 XP\_032835301.1 66.7 60  
 20 0 2 61 1345 1404 1.70E-16 93.2 7757 cellular  
 organisms;Eukaryota;Opisthokonta;Metazoa;Eumetazoa;Bilateria;Deuterostomi  
 a;Chordata;Craniata;Vertebrata;Cyclostomata;Hyperoartia;Petromyzontiforme  
 s;Petromyzontidae;Petromyzon;Petromyzon marinus  
 UdeM00000027294 7574 260.8 UdeM00000027294 XP\_013382110.1 62.2 193  
 73 0 14 206 45 237 1.50E-66 260.8 7574 cellular  
 organisms;Eukaryota;Opisthokonta;Metazoa;Eumetazoa;Bilateria;Protostomia;  
 Spiralia;Lophotrochozoa;Brachiopoda;Linguliformea;Lingulata;Lingulida;Lin  
 guloidea;Lingulidae;Lingula;Lingula anatina  
 UdeM00000027295 7574 260.8 UdeM00000027295 XP\_013382110.1 59.9 207  
 77 1 1 207 37 237 1.50E-66 260.8 7574 cellular  
 organisms;Eukaryota;Opisthokonta;Metazoa;Eumetazoa;Bilateria;Protostomia;  
 Spiralia;Lophotrochozoa;Brachiopoda;Linguliformea;Lingulata;Lingulida;Lin  
 guloidea;Lingulidae;Lingula;Lingula anatina  
 UdeM00000027296 150288 245 UdeM00000027296 XP\_020788097.1 60.1  
 168 67 0 2 169 392 559 8.30E-62 245 150288  
 cellular  
 organisms;Eukaryota;Opisthokonta;Metazoa;Eumetazoa;Bilateria;Deuterostomi  
 a;Chordata;Craniata;Vertebrata;Gnathostomata;Teleostomi;Euteleostomi;Acti  
 nopterygii;Actinopteri;Neopterygii;Teleostei;Osteoglossocephalai;Clupeoce  
 phala;Euteleosteomorpha;Neoteleostei;Eurypterygia;Ctenosquamata;Acanthomo  
 rphata;Euacanthomorphacea;Percomorphaceae;Gobiaria;Gobiiformes;Gobioidei;  
 Gobiidae;Oxudercinae;Boleophthalmus;Boleophthalmus pectinirostris  
 UdeM00000027297 400727 111.7 UdeM00000027297 XP\_025108466.1 42.9  
 170 85 3 2 171 305 462 9.50E-22 111.7 400727  
 cellular  
 organisms;Eukaryota;Opisthokonta;Metazoa;Eumetazoa;Bilateria;Protostomia;  
 Spiralia;Lophotrochozoa;Mollusca;Gastropoda;Caenogastropoda;Architaeniogl  
 ossa;Ampullarioidea;Ampullariidae;Pomacea;Pomacea canaliculata  
 UdeM00000027298 10224 142.9 UdeM00000027298 XP\_006813844.1 43.9 164  
 92 0 1 164 128 291 4.30E-31 142.9 10224 cellular  
 organisms;Eukaryota;Opisthokonta;Metazoa;Eumetazoa;Bilateria;Deuterostomi  
 a;Hemichordata;Enteropneusta;Harrimaniidae;Saccoglossus;Saccoglossus  
 kowalevskii  
 UdeM00000027299 50390 171.8 UdeM00000027299 XP\_028148853.1 51.7 149  
 60 1 1 137 243 391 6.70E-40 171.8 50390 cellular  
 organisms;Eukaryota;Opisthokonta;Metazoa;Eumetazoa;Bilateria;Protostomia;  
 Ecdysozoa;Panarthropoda;Arthropoda;Mandibulata;Pancrustacea;Hexapoda;Inse  
 cta;Dicondylia;Pterygota;Neoptera;Endopterygota;Coleoptera;Polyphaga;Cucu  
 jiformia;Chrysomeloidea;Chrysomelidae;Galerucinae;Luperini;Diabroticina;D  
 iabroticites;Diabrotica;Diabrotica virgifera;Diabrotica virgifera  
 virgifera  
 UdeM00000027300 150288 261.9 UdeM00000027300 XP\_020788097.1 56  
 200 88 0 2 201 383 582 6.60E-67 261.9 150288  
 cellular  
 organisms;Eukaryota;Opisthokonta;Metazoa;Eumetazoa;Bilateria;Deuterostomi  
 a;Chordata;Craniata;Vertebrata;Gnathostomata;Teleostomi;Euteleostomi;Acti  
 nopterygii;Actinopteri;Neopterygii;Teleostei;Osteoglossocephalai;Clupeoce  
 phala;Euteleosteomorpha;Neoteleostei;Eurypterygia;Ctenosquamata;Acanthomo  
 rphata;Euacanthomorphacea;Percomorphaceae;Gobiaria;Gobiiformes;Gobioidei;  
 Gobiidae;Oxudercinae;Boleophthalmus;Boleophthalmus pectinirostris

UdeM00000027302 13397 146.4 UdeM00000027302 XP\_041069197.1 68.1 91  
 29 0 2 92 166 256 1.90E-32 146.4 13397 cellular  
 organisms;Eukaryota;Opisthokonta;Metazoa;Eumetazoa;Bilateria;Deuterostomi  
 a;Chordata;Craniata;Vertebrata;Gnathostomata;Chondrichthyes;Elasmobranchi  
 i;Selachii;Galeomorphii;Galeoidea;Lamniformes;Alopiidae;Lamninae;Carcharo  
 don;Carcharodon carcharias

UdeM00000027303 13397 146.4 UdeM00000027303 XP\_041069197.1 68.1 91  
 29 0 2 92 166 256 1.90E-32 146.4 13397 cellular  
 organisms;Eukaryota;Opisthokonta;Metazoa;Eumetazoa;Bilateria;Deuterostomi  
 a;Chordata;Craniata;Vertebrata;Gnathostomata;Chondrichthyes;Elasmobranchi  
 i;Selachii;Galeomorphii;Galeoidea;Lamniformes;Alopiidae;Lamninae;Carcharo  
 don;Carcharodon carcharias

UdeM00000027304 6596 369.8 UdeM00000027304 XP\_045156248.1 35 625  
 288 9 4 541 7 600 6.00E-99 369.8 6596 cellular  
 organisms;Eukaryota;Opisthokonta;Metazoa;Eumetazoa;Bilateria;Protostomia;  
 Spiralia;Lophotrochozoa;Mollusca;Bivalvia;Autobranchia;Heteroconchia;Euhe  
 terodonta;Imparidentia;Venerida;Veneroidea;Veneridae;Mercenaria;Mercenari  
 a mercenaria

UdeM00000027305 50390 579.7 UdeM00000027305 XP\_028148951.1 58.8 430  
 177 0 1 430 408 837 3.10E-162 579.7 50390 cellular  
 organisms;Eukaryota;Opisthokonta;Metazoa;Eumetazoa;Bilateria;Protostomia;  
 Ecdysozoa;Panarthropoda;Arthropoda;Mandibulata;Pancrustacea;Hexapoda;Inse  
 cta;Dicondylia;Pterygota;Neoptera;Endopterygota;Coleoptera;Polyphaga;Cucu  
 jiformia;Chrysomeloidea;Chrysomelidae;Galerucinae;Luperini;Diabroticina;D  
 iabroticites;Diabrotica;Diabrotica virgifera;Diabrotica virgifera  
 virgifera

UdeM00000027306 50390 567.8 UdeM00000027306 XP\_028152723.1 59.1 411  
 166 2 2 410 19 429 1.10E-158 567.8 50390 cellular  
 organisms;Eukaryota;Opisthokonta;Metazoa;Eumetazoa;Bilateria;Protostomia;  
 Ecdysozoa;Panarthropoda;Arthropoda;Mandibulata;Pancrustacea;Hexapoda;Inse  
 cta;Dicondylia;Pterygota;Neoptera;Endopterygota;Coleoptera;Polyphaga;Cucu  
 jiformia;Chrysomeloidea;Chrysomelidae;Galerucinae;Luperini;Diabroticina;D  
 iabroticites;Diabrotica;Diabrotica virgifera;Diabrotica virgifera  
 virgifera

UdeM00000027307 7739 71.2 UdeM00000027307 XP\_035692545.1 27.5 222  
 150 6 9 223 192 409 1.90E-09 71.2 7739 cellular  
 organisms;Eukaryota;Opisthokonta;Metazoa;Eumetazoa;Bilateria;Deuterostomi  
 a;Chordata;Cephalochordata;Leptocardii;Amphioxiformes;Branchiostomidae;Br  
 anchiostoma;Branchiostoma floridae

UdeM00000027308 7668 119 UdeM00000027308 XP\_030839940.1 32.2 258  
 148 7 2 256 90 323 8.80E-24 119 7668 cellular  
 organisms;Eukaryota;Opisthokonta;Metazoa;Eumetazoa;Bilateria;Deuterostomi  
 a;Echinodermata;Eleutherozoa;Echinozoa;Echinoidea;Euechinoidea;Echinacea;  
 Camarodonta;Echinidea;Strongylocentrotidae;Strongylocentrotus;Strongyloce  
 ntrotus purpuratus

UdeM00000027309 225164 139.4 UdeM00000027309 XP\_009064447.1 57.8  
 102 43 0 2 103 829 930 2.60E-30 139.4 225164  
 cellular  
 organisms;Eukaryota;Opisthokonta;Metazoa;Eumetazoa;Bilateria;Protostomia;  
 Spiralia;Lophotrochozoa;Mollusca;Gastropoda;Patellogastropoda;Lottioidae;  
 Lottiidae;Lottia;Lottia gigantea

UdeM00000027310 29159 662.5 UdeM00000027310 XP\_019926413.2 72.4 457  
 118 4 1 457 153 601 4.00E-187 662.5 29159 cellular  
 organisms;Eukaryota;Opisthokonta;Metazoa;Eumetazoa;Bilateria;Protostomia;

Spiralia; Lophotrochozoa; Mollusca; Bivalvia; Autobranchia; Pteriomorphia; Ostr  
 eida; Ostreoidae; Ostreidae; Crassostrea; Crassostrea gigas  
 UdeM00000027311 50390 385.6 UdeM00000027311 XP\_028148951.1 58.7 288  
 119 0 1 288 522 809 5.70E-104 385.6 50390 cellular  
 organisms; Eukaryota; Opisthokonta; Metazoa; Eumetazoa; Bilateria; Protostomia;  
 Ecdysozoa; Panarthropoda; Arthropoda; Mandibulata; Pancrustacea; Hexapoda; Inse  
 cta; Dicondylia; Pterygota; Neoptera; Endopterygota; Coleoptera; Polyphaga; Cucu  
 jiformia; Chrysomeloidea; Chrysomelidae; Galerucinae; Luperini; Diabroticina; D  
 iabroticites; Diabrotica; Diabrotica virgifera; Diabrotica virgifera  
 virgifera  
 UdeM00000027312 6596 137.1 UdeM00000027312 XP\_045182680.1 59.3 118  
 46 2 2 117 101 218 1.50E-29 137.1 6596 cellular  
 organisms; Eukaryota; Opisthokonta; Metazoa; Eumetazoa; Bilateria; Protostomia;  
 Spiralia; Lophotrochozoa; Mollusca; Bivalvia; Autobranchia; Heteroconchia; Eue  
 terodonta; Imparidentia; Venerida; Veneroidea; Veneridae; Mercenaria; Mercenari  
 a mercenaria  
 UdeM00000027313 6596 137.1 UdeM00000027313 XP\_045182680.1 59.3 118  
 46 2 2 117 101 218 1.50E-29 137.1 6596 cellular  
 organisms; Eukaryota; Opisthokonta; Metazoa; Eumetazoa; Bilateria; Protostomia;  
 Spiralia; Lophotrochozoa; Mollusca; Bivalvia; Autobranchia; Heteroconchia; Eue  
 terodonta; Imparidentia; Venerida; Veneroidea; Veneridae; Mercenaria; Mercenari  
 a mercenaria  
 UdeM00000027314 6596 96.3 UdeM00000027314 XP\_045182680.1 60 85  
 32 2 2 84 134 218 2.20E-17 96.3 6596 cellular  
 organisms; Eukaryota; Opisthokonta; Metazoa; Eumetazoa; Bilateria; Protostomia;  
 Spiralia; Lophotrochozoa; Mollusca; Bivalvia; Autobranchia; Heteroconchia; Eue  
 terodonta; Imparidentia; Venerida; Veneroidea; Veneridae; Mercenaria; Mercenari  
 a mercenaria  
 UdeM00000027315 6596 137.1 UdeM00000027315 XP\_045182680.1 59.3 118  
 46 2 2 117 101 218 1.50E-29 137.1 6596 cellular  
 organisms; Eukaryota; Opisthokonta; Metazoa; Eumetazoa; Bilateria; Protostomia;  
 Spiralia; Lophotrochozoa; Mollusca; Bivalvia; Autobranchia; Heteroconchia; Eue  
 terodonta; Imparidentia; Venerida; Veneroidea; Veneridae; Mercenaria; Mercenari  
 a mercenaria  
 UdeM00000027316 6596 137.1 UdeM00000027316 XP\_045182680.1 59.3 118  
 46 2 2 117 101 218 1.50E-29 137.1 6596 cellular  
 organisms; Eukaryota; Opisthokonta; Metazoa; Eumetazoa; Bilateria; Protostomia;  
 Spiralia; Lophotrochozoa; Mollusca; Bivalvia; Autobranchia; Heteroconchia; Eue  
 terodonta; Imparidentia; Venerida; Veneroidea; Veneridae; Mercenaria; Mercenari  
 a mercenaria  
 UdeM00000027317 6596 96.3 UdeM00000027317 XP\_045182680.1 60 85  
 32 2 2 84 134 218 2.20E-17 96.3 6596 cellular  
 organisms; Eukaryota; Opisthokonta; Metazoa; Eumetazoa; Bilateria; Protostomia;  
 Spiralia; Lophotrochozoa; Mollusca; Bivalvia; Autobranchia; Heteroconchia; Eue  
 terodonta; Imparidentia; Venerida; Veneroidea; Veneridae; Mercenaria; Mercenari  
 a mercenaria  
 UdeM00000027318 6596 136 UdeM00000027318 XP\_045182680.1 59.3 118  
 46 2 2 117 101 218 3.40E-29 136 6596 cellular  
 organisms; Eukaryota; Opisthokonta; Metazoa; Eumetazoa; Bilateria; Protostomia;  
 Spiralia; Lophotrochozoa; Mollusca; Bivalvia; Autobranchia; Heteroconchia; Eue  
 terodonta; Imparidentia; Venerida; Veneroidea; Veneridae; Mercenaria; Mercenari  
 a mercenaria  
 UdeM00000027320 50390 464.5 UdeM00000027320 XP\_028148951.1 58 355  
 148 1 1 355 483 836 1.20E-127 464.5 50390 cellular

organisms;Eukaryota;Opisthokonta;Metazoa;Eumetazoa;Bilateria;Protostomia;Ecdysozoa;Panarthropoda;Arthropoda;Mandibulata;Pancrustacea;Hexapoda;Insecta;Dicondylia;Pterygota;Neoptera;Endopterygota;Coleoptera;Polyphaga;Cucujiformia;Chrysomeloidea;Chrysomelidae;Galerucinae;Luperini;Diabroticina;Diabroticites;Diabrotica;Diabrotica virgifera;Diabrotica virgifera virgifera

UdeM00000027321 50390 567.8 UdeM00000027321 XP\_028152723.1 59.1 411  
166 2 2 410 19 429 1.10E-158 567.8 50390 cellular

organisms;Eukaryota;Opisthokonta;Metazoa;Eumetazoa;Bilateria;Protostomia;Ecdysozoa;Panarthropoda;Arthropoda;Mandibulata;Pancrustacea;Hexapoda;Insecta;Dicondylia;Pterygota;Neoptera;Endopterygota;Coleoptera;Polyphaga;Cucujiformia;Chrysomeloidea;Chrysomelidae;Galerucinae;Luperini;Diabroticina;Diabroticites;Diabrotica;Diabrotica virgifera;Diabrotica virgifera virgifera

UdeM00000027322 7739 71.2 UdeM00000027322 XP\_035692545.1 27.5 222  
150 6 9 223 192 409 1.90E-09 71.2 7739 cellular

organisms;Eukaryota;Opisthokonta;Metazoa;Eumetazoa;Bilateria;Deuterostomia;Chordata;Cephalochordata;Leptocardii;Amphioxiformes;Branchiostomidae;Branchiostoma;Branchiostoma floridae

UdeM00000027323 7668 119 UdeM00000027323 XP\_030839940.1 32.2 258  
148 7 2 256 90 323 8.80E-24 119 7668 cellular

organisms;Eukaryota;Opisthokonta;Metazoa;Eumetazoa;Bilateria;Deuterostomia;Echinodermata;Eleutherozoa;Echinozoa;Echinoidea;Euechinoidea;Echinacea;Camarodonta;Echinidea;Strongylocentrotidae;Strongylocentrotus;Strongylocentrotus purpuratus

UdeM00000027324 225164 139.4 UdeM00000027324 XP\_009064447.1 57.8  
102 43 0 2 103 829 930 2.60E-30 139.4 225164  
cellular

organisms;Eukaryota;Opisthokonta;Metazoa;Eumetazoa;Bilateria;Protostomia;Spiralia;Lophotrochozoa;Mollusca;Gastropoda;Patellogastropoda;Lottioidea;Lottiidae;Lottia;Lottia gigantea

UdeM00000027325 37621 305.1 UdeM00000027325 XP\_014672567.1 37.7 424  
192 8 1 358 101 518 1.40E-79 305.1 37621 cellular

organisms;Eukaryota;Opisthokonta;Metazoa;Eumetazoa;Bilateria;Protostomia;Ecdysozoa;Scalidophora;Priapulida;Priapulimorpha;Priapulimorphida;Priapulidae;Priapululus;Priapululus caudatus

UdeM00000027326 6596 288.9 UdeM00000027326 XP\_045182680.1 67.6 213  
67 2 7 217 8 220 5.60E-75 288.9 6596 cellular

organisms;Eukaryota;Opisthokonta;Metazoa;Eumetazoa;Bilateria;Protostomia;Spiralia;Lophotrochozoa;Mollusca;Bivalvia;Autobranchia;Heteroconchia;Euheterodonta;Imparidentia;Venerida;Veneroidea;Veneridae;Mercenaria;Mercenaria mercenaria

UdeM00000027327 1735272 165.2 UdeM00000027327 XP\_041361273.1 61.9  
134 46 2 59 188 73 205 9.20E-38 165.2 1735272  
cellular

organisms;Eukaryota;Opisthokonta;Metazoa;Eumetazoa;Bilateria;Protostomia;Spiralia;Lophotrochozoa;Mollusca;Gastropoda;Neomphalina;Neomphaloidea;Peltospiridae;Gigantopelta;Gigantopelta aegis

UdeM00000027328 6573 300.4 UdeM00000027328 XP\_021356185.1 56.1 310  
122 7 1 308 1 298 2.60E-78 300.4 6573 cellular

organisms;Eukaryota;Opisthokonta;Metazoa;Eumetazoa;Bilateria;Protostomia;Spiralia;Lophotrochozoa;Mollusca;Bivalvia;Autobranchia;Pteriormorpha;Pectinida;Pectinoidea;Pectinidae;Mizuhopecten;Mizuhopecten yessoensis

UdeM00000027330 6579 274.6 UdeM00000027330 XP\_033727462.1 57.1 303  
 120 6 1 300 1 296 1.50E-70 274.6 6579 cellular  
 organisms;Eukaryota;Opisthokonta;Metazoa;Eumetazoa;Bilateria;Protostomia;  
 Spiralia;Lophotrochozoa;Mollusca;Bivalvia;Autobranchia;Pteriomorphia;Pect  
 inida;Pectinoidea;Pectinidae;Pecten;Pecten maximus  
 UdeM00000027331 6596 322 UdeM00000027331 XP\_045177776.1 42 386  
 213 7 146 525 568 948 1.90E-84 322 6596 cellular  
 organisms;Eukaryota;Opisthokonta;Metazoa;Eumetazoa;Bilateria;Protostomia;  
 Spiralia;Lophotrochozoa;Mollusca;Bivalvia;Autobranchia;Heteroconchia;Euhe  
 terodonta;Imparidentia;Venerida;Veneroidea;Veneridae;Mercenaria;Mercenari  
 a mercenaria  
 UdeM00000027332 6596 102.1 UdeM00000027332 XP\_045177776.1 59.5 79  
 32 0 1 79 405 483 5.90E-19 102.1 6596 cellular  
 organisms;Eukaryota;Opisthokonta;Metazoa;Eumetazoa;Bilateria;Protostomia;  
 Spiralia;Lophotrochozoa;Mollusca;Bivalvia;Autobranchia;Heteroconchia;Euhe  
 terodonta;Imparidentia;Venerida;Veneroidea;Veneridae;Mercenaria;Mercenari  
 a mercenaria  
 UdeM00000027333 6596 313.5 UdeM00000027333 XP\_045177776.1 42.5 372  
 203 8 247 613 568 933 7.10E-82 313.5 6596 cellular  
 organisms;Eukaryota;Opisthokonta;Metazoa;Eumetazoa;Bilateria;Protostomia;  
 Spiralia;Lophotrochozoa;Mollusca;Bivalvia;Autobranchia;Heteroconchia;Euhe  
 terodonta;Imparidentia;Venerida;Veneroidea;Veneridae;Mercenaria;Mercenari  
 a mercenaria  
 UdeM00000027334 6596 139.4 UdeM00000027334 XP\_045188277.1 32.3 254  
 158 4 2 253 79 320 6.20E-30 139.4 6596 cellular  
 organisms;Eukaryota;Opisthokonta;Metazoa;Eumetazoa;Bilateria;Protostomia;  
 Spiralia;Lophotrochozoa;Mollusca;Bivalvia;Autobranchia;Heteroconchia;Euhe  
 terodonta;Imparidentia;Venerida;Veneroidea;Veneridae;Mercenaria;Mercenari  
 a mercenaria  
 UdeM00000027335 7668 61.2 UdeM00000027335 XP\_030834722.1 41.5 65  
 33 1 41 100 199 263 8.50E-07 61.2 7668 cellular  
 organisms;Eukaryota;Opisthokonta;Metazoa;Eumetazoa;Bilateria;Deuterostomi  
 a;Echinodermata;Eleutherozoa;Echinozoa;Echinoidea;Euechinoidea;Echinacea;  
 Camarodonta;Echinidea;Strongylocentrotidae;Strongylocentrotus;Strongyloce  
 ntrotus purpuratus  
 UdeM00000027336 6596 112.8 UdeM00000027336 XP\_045177674.1 45.5 123  
 64 2 46 166 298 419 4.80E-22 112.8 6596 cellular  
 organisms;Eukaryota;Opisthokonta;Metazoa;Eumetazoa;Bilateria;Protostomia;  
 Spiralia;Lophotrochozoa;Mollusca;Bivalvia;Autobranchia;Heteroconchia;Euhe  
 terodonta;Imparidentia;Venerida;Veneroidea;Veneridae;Mercenaria;Mercenari  
 a mercenaria  
 UdeM00000027337 6596 350.1 UdeM00000027337 XP\_045198179.1 33.1 652  
 402 12 28 659 429 1066 7.00E-93 350.1 6596 cellular  
 organisms;Eukaryota;Opisthokonta;Metazoa;Eumetazoa;Bilateria;Protostomia;  
 Spiralia;Lophotrochozoa;Mollusca;Bivalvia;Autobranchia;Heteroconchia;Euhe  
 terodonta;Imparidentia;Venerida;Veneroidea;Veneridae;Mercenaria;Mercenari  
 a mercenaria  
 UdeM00000027338 6596 427.9 UdeM00000027338 XP\_045156280.1 52.7 425  
 194 6 1 421 389 810 1.40E-116 427.9 6596 cellular  
 organisms;Eukaryota;Opisthokonta;Metazoa;Eumetazoa;Bilateria;Protostomia;  
 Spiralia;Lophotrochozoa;Mollusca;Bivalvia;Autobranchia;Heteroconchia;Euhe  
 terodonta;Imparidentia;Venerida;Veneroidea;Veneridae;Mercenaria;Mercenari  
 a mercenaria

UdeM00000027339 6573 228.4 UdeM00000027339 XP\_021349151.1 51.9 214  
 102 1 1 214 147 359 8.90E-57 228.4 6573 cellular  
 organisms;Eukaryota;Opisthokonta;Metazoa;Eumetazoa;Bilateria;Protostomia;  
 Spiralia;Lophotrochozoa;Mollusca;Bivalvia;Autobranhia;Pteriomorpha;Pect  
 inida;Pectinoidea;Pectinidae;Mizuhopecten;Mizuhopecten yessoensis  
 UdeM00000027340 6596 157.9 UdeM00000027340 XP\_045177792.1 45.3 161  
 87 1 2 161 19 179 2.60E-35 157.9 6596 cellular  
 organisms;Eukaryota;Opisthokonta;Metazoa;Eumetazoa;Bilateria;Protostomia;  
 Spiralia;Lophotrochozoa;Mollusca;Bivalvia;Autobranhia;Heteroconchia;Euhe  
 terodonta;Imparidentia;Venerida;Veneroidea;Veneridae;Mercenaria;Mercenari  
 a mercenaria  
 UdeM00000027341 29159 173.3 UdeM00000027341 XP\_034312908.1 25.6 649  
 321 16 5 524 6 621 8.10E-40 173.3 29159 cellular  
 organisms;Eukaryota;Opisthokonta;Metazoa;Eumetazoa;Bilateria;Protostomia;  
 Spiralia;Lophotrochozoa;Mollusca;Bivalvia;Autobranhia;Pteriomorpha;Ostr  
 eida;Ostreoidea;Ostreidae;Crassostrea;Crassostrea gigas  
 UdeM00000027342 6596 200.7 UdeM00000027342 XP\_045177776.1 39.5 306  
 172 7 1 299 405 704 2.70E-48 200.7 6596 cellular  
 organisms;Eukaryota;Opisthokonta;Metazoa;Eumetazoa;Bilateria;Protostomia;  
 Spiralia;Lophotrochozoa;Mollusca;Bivalvia;Autobranhia;Heteroconchia;Euhe  
 terodonta;Imparidentia;Venerida;Veneroidea;Veneridae;Mercenaria;Mercenari  
 a mercenaria  
 UdeM00000027343 37621 59.3 UdeM00000027343 XP\_014679850.1 39 82  
 45 1 30 106 62 143 5.40E-06 59.3 37621 cellular  
 organisms;Eukaryota;Opisthokonta;Metazoa;Eumetazoa;Bilateria;Protostomia;  
 Ecdysozoa;Scalidophora;Priapulida;Priapulimorpha;Priapulimorphida;Priapul  
 idae;Priapulul;Priapulul caudatus  
 UdeM00000027344 6565 81.3 UdeM00000027344 XP\_022299602.1 51.5 68  
 32 1 1 68 65 131 2.20E-12 81.3 6565 cellular  
 organisms;Eukaryota;Opisthokonta;Metazoa;Eumetazoa;Bilateria;Protostomia;  
 Spiralia;Lophotrochozoa;Mollusca;Bivalvia;Autobranhia;Pteriomorpha;Ostr  
 eida;Ostreoidea;Ostreidae;Crassostrea;Crassostrea virginica  
 UdeM00000027345 6573 96.3 UdeM00000027345 XP\_021380144.1 25.8 244  
 166 7 4 241 3 237 5.70E-17 96.3 6573 cellular  
 organisms;Eukaryota;Opisthokonta;Metazoa;Eumetazoa;Bilateria;Protostomia;  
 Spiralia;Lophotrochozoa;Mollusca;Bivalvia;Autobranhia;Pteriomorpha;Pect  
 inida;Pectinoidea;Pectinidae;Mizuhopecten;Mizuhopecten yessoensis  
 UdeM00000027346 6573 97.8 UdeM00000027346 XP\_021380144.1 25.8 213  
 151 6 28 239 31 237 2.00E-17 97.8 6573 cellular  
 organisms;Eukaryota;Opisthokonta;Metazoa;Eumetazoa;Bilateria;Protostomia;  
 Spiralia;Lophotrochozoa;Mollusca;Bivalvia;Autobranhia;Pteriomorpha;Pect  
 inida;Pectinoidea;Pectinidae;Mizuhopecten;Mizuhopecten yessoensis  
 UdeM00000027347 6573 64.7 UdeM00000027347 XP\_021380144.1 27.4 124  
 87 3 19 141 31 152 1.20E-07 64.7 6573 cellular  
 organisms;Eukaryota;Opisthokonta;Metazoa;Eumetazoa;Bilateria;Protostomia;  
 Spiralia;Lophotrochozoa;Mollusca;Bivalvia;Autobranhia;Pteriomorpha;Pect  
 inida;Pectinoidea;Pectinidae;Mizuhopecten;Mizuhopecten yessoensis  
 UdeM00000027348 6573 59.7 UdeM00000027348 XP\_021380144.1 29.3 99  
 68 2 7 104 55 152 2.90E-06 59.7 6573 cellular  
 organisms;Eukaryota;Opisthokonta;Metazoa;Eumetazoa;Bilateria;Protostomia;  
 Spiralia;Lophotrochozoa;Mollusca;Bivalvia;Autobranhia;Pteriomorpha;Pect  
 inida;Pectinoidea;Pectinidae;Mizuhopecten;Mizuhopecten yessoensis  
 UdeM00000027349 7994 79.7 UdeM00000027349 XP\_022517750.1 37.1 124  
 71 3 116 235 16 136 5.50E-12 79.7 7994 cellular

organisms;Eukaryota;Opisthokonta;Metazoa;Eumetazoa;Bilateria;Deuterostomi  
a;Chordata;Craniata;Vertebrata;Gnathostomata;Teleostomi;Euteleostomi;Acti  
nopterygii;Actinopteri;Neopterygii;Teleostei;Osteoglossocephalai;Clupeoce  
phala;Otomorpha;Ostariophysi;Otophysi;Characiphysae;Characiformes;Characo  
idei;Characidae;Stethaprioninae;Astyanax;Astyanax mexicanus

UdeM00000027350 400727 76.6 UdeM00000027350 XP\_025084083.1 24.2  
198 132 4 22 208 31 221 4.10E-11 76.6 400727  
cellular

organisms;Eukaryota;Opisthokonta;Metazoa;Eumetazoa;Bilateria;Protostomia;  
Spiralia;Lophotrochozoa;Mollusca;Gastropoda;Caenogastropoda;Architaeniogl  
ossa;Ampullarioidea;Ampullariidae;Pomacea;Pomacea canaliculata

UdeM00000027351 241271 70.1 UdeM00000027351 XP\_041653182.1 33.3  
105 60 3 2 106 428 522 2.00E-09 70.1 241271  
cellular

organisms;Eukaryota;Opisthokonta;Metazoa;Eumetazoa;Bilateria;Deuterostomi  
a;Chordata;Craniata;Vertebrata;Gnathostomata;Teleostomi;Euteleostomi;Acti  
nopterygii;Actinopteri;Neopterygii;Teleostei;Osteoglossocephalai;Clupeoce  
phala;Euteleosteomorpha;Neoteleostei;Eurypterygia;Ctenosquamata;Acanthomo  
rphata;Euacanthomorphacea;Percomorphaceae;Eupercaria;Labriiformes;Labridae  
;Cheilinus;Cheilinus undulatus

UdeM00000027352 1735272 94.4 UdeM00000027352 XP\_041375600.1 27  
230 155 4 5 226 18 242 2.10E-16 94.4 1735272  
cellular

organisms;Eukaryota;Opisthokonta;Metazoa;Eumetazoa;Bilateria;Protostomia;  
Spiralia;Lophotrochozoa;Mollusca;Gastropoda;Neomphalina;Neomphaloidea;Pel  
tospiridae;Gigantopelta;Gigantopelta aegis

UdeM00000027353 6573 92 UdeM00000027353 XP\_021380144.1 25.5 216  
144 6 35 249 38 237 1.10E-15 92 6573 cellular

organisms;Eukaryota;Opisthokonta;Metazoa;Eumetazoa;Bilateria;Protostomia;  
Spiralia;Lophotrochozoa;Mollusca;Bivalvia;Autobranchia;Pteriomorphia;Pect  
inida;Pectinoidea;Pectinidae;Mizuhopecten;Mizuhopecten yessoensis

UdeM00000027354 6596 623.2 UdeM00000027354 XP\_045182254.1 59.5 587  
171 8 1 585 2 523 3.30E-175 623.2 6596 cellular

organisms;Eukaryota;Opisthokonta;Metazoa;Eumetazoa;Bilateria;Protostomia;  
Spiralia;Lophotrochozoa;Mollusca;Bivalvia;Autobranchia;Heteroconchia;Euhe  
terodonta;Imparidentia;Venerida;Veneroidea;Veneridae;Mercenaria;Mercenari  
a mercenaria

UdeM00000027355 6596 591.7 UdeM00000027355 XP\_045182254.1 56.9 594  
185 9 1 589 1 528 1.10E-165 591.7 6596 cellular

organisms;Eukaryota;Opisthokonta;Metazoa;Eumetazoa;Bilateria;Protostomia;  
Spiralia;Lophotrochozoa;Mollusca;Bivalvia;Autobranchia;Heteroconchia;Euhe  
terodonta;Imparidentia;Venerida;Veneroidea;Veneridae;Mercenaria;Mercenari  
a mercenaria

UdeM00000027356 89462 453.4 UdeM00000027356 XP\_025125963.3 53.3 347  
162 0 5 351 235 581 2.70E-124 453.4 89462 cellular

organisms;Eukaryota;Opisthokonta;Metazoa;Eumetazoa;Bilateria;Deuterostomi  
a;Chordata;Craniata;Vertebrata;Gnathostomata;Teleostomi;Euteleostomi;Sarc  
opterygii;Dipnotetrapodomorpha;Tetrapoda;Amniota;Mammalia;Theria;Eutheria  
;Boreoeutheria;Laurasiatheria;Artiodactyla;Ruminantia;Pecora;Bovidae;Bovi  
nae;Bubalus;Bubalus bubalis

UdeM00000027357 6565 306.2 UdeM00000027357 XP\_022309566.1 56.6 221  
96 0 55 275 843 1063 4.30E-80 306.2 6565 cellular

organisms;Eukaryota;Opisthokonta;Metazoa;Eumetazoa;Bilateria;Protostomia;

Spiralia; Lophotrochozoa; Mollusca; Bivalvia; Autobranchia; Pteriomorphia; Ostreida; Ostreioidea; Ostreidae; Crassostrea; Crassostrea virginica  
UdeM00000027358 7741 303.5 UdeM00000027358 XP\_019627830.1 57 237  
100 1 55 289 71 307 3.20E-79 303.5 7741 cellular  
organisms; Eukaryota; Opisthokonta; Metazoa; Eumetazoa; Bilateria; Deuterostomia; Chordata; Cephalochordata; Leptocardii; Amphioxiformes; Branchiostomidae; Branchiostoma; Branchiostoma belcheri  
UdeM00000027359 2607531 74.7 UdeM00000027359 XP\_029651995.2 66.7  
48 16 0 29 76 107 154 9.20E-11 74.7 2607531  
cellular  
organisms; Eukaryota; Opisthokonta; Metazoa; Eumetazoa; Bilateria; Protostomia; Spiralia; Lophotrochozoa; Mollusca; Cephalopoda; Coleoidea; Octopodiformes; Octopoda; Incirrata; Octopodidae; Octopus; Octopus sinensis  
UdeM00000027360 6565 285 UdeM00000027360 XP\_022309566.1 51.3 224  
109 0 42 265 843 1066 1.00E-73 285 6565 cellular  
organisms; Eukaryota; Opisthokonta; Metazoa; Eumetazoa; Bilateria; Protostomia; Spiralia; Lophotrochozoa; Mollusca; Bivalvia; Autobranchia; Pteriomorphia; Ostreida; Ostreioidea; Ostreidae; Crassostrea; Crassostrea virginica  
UdeM00000027361 50390 286.2 UdeM00000027361 XP\_028154228.1 55.3 219  
98 0 31 249 161 379 4.30E-74 286.2 50390 cellular  
organisms; Eukaryota; Opisthokonta; Metazoa; Eumetazoa; Bilateria; Protostomia; Ecdysozoa; Panarthropoda; Arthropoda; Mandibulata; Pancrustacea; Hexapoda; Insecta; Dicondylia; Pterygota; Neoptera; Endopterygota; Coleoptera; Polyphaga; Cucujiformia; Chrysomeloidea; Chrysomelidae; Galerucinae; Luperini; Diabroticina; Diabroticites; Diabrotica; Diabrotica virgifera; Diabrotica virgifera  
virgifera  
UdeM00000027362 6596 208.4 UdeM00000027362 XP\_045192158.1 48.6 210  
94 2 1 202 129 332 9.80E-51 208.4 6596 cellular  
organisms; Eukaryota; Opisthokonta; Metazoa; Eumetazoa; Bilateria; Protostomia; Spiralia; Lophotrochozoa; Mollusca; Bivalvia; Autobranchia; Heteroconchia; Euheterodonta; Imparidentia; Venerida; Veneroidea; Veneridae; Mercenaria; Mercenaria mercenaria  
UdeM00000027364 48498 61.2 UdeM00000027364 XP\_020624041.1 26.7 150  
87 5 351 494 320 452 7.50E-06 61.2 48498 cellular  
organisms; Eukaryota; Opisthokonta; Metazoa; Eumetazoa; Cnidaria; Anthozoa; Hexacorallia; Scleractinia; Faviina; Merulinidae; Orbicella; Orbicella faveolata  
UdeM00000027367 29159 1217.2 UdeM00000027367 XP\_011446824.2 63.9  
990 331 7 2 971 82 1065 0.00E+00 1217.2  
29159 cellular  
organisms; Eukaryota; Opisthokonta; Metazoa; Eumetazoa; Bilateria; Protostomia; Spiralia; Lophotrochozoa; Mollusca; Bivalvia; Autobranchia; Pteriomorphia; Ostreida; Ostreioidea; Ostreidae; Crassostrea; Crassostrea gigas  
UdeM00000027368 1606681 116.3 UdeM00000027368 XP\_043084860.1 29.6  
226 156 3 1 225 1 224 5.20E-23 116.3 1606681  
cellular  
organisms; Eukaryota; Opisthokonta; Metazoa; Eumetazoa; Bilateria; Deuterostomia; Chordata; Craniata; Vertebrata; Gnathostomata; Teleostomi; Euteleostomi; Actinopterygii; Actinopteri; Neopterygii; Teleostei; Osteoglossocephalai; Clupeocephala; Otomorpha; Ostariophysi; Otophysi; Cypriniphysae; Cypriniformes; Cyprinidae; Cyprinidae; Smiliogastrinae; Puntigrus; Puntigrus tetrazona  
UdeM00000027369 47969 71.6 UdeM00000027369 XP\_039460666.1 30.8 107  
70 1 118 224 454 556 2.30E-09 71.6 47969 cellular  
organisms; Eukaryota; Opisthokonta; Metazoa; Eumetazoa; Bilateria; Deuterostomia; Chordata; Craniata; Vertebrata; Gnathostomata; Teleostomi; Euteleostomi; Acti



nopterygii;Actinopteri;Neopterygii;Teleostei;Osteoglossocephalai;Clupeocephala;Euteleostei;Neoteleostei;Eurypterygia;Ctenosquamata;Acanthomorphata;Euacanthomorphacea;Percomorphaceae;Ovalentaria;Cichlomorphae;Cichliformes;Cichlidae;African

cichlids;Pseudocrenilabrinae;Oreochromini;Oreochromis;Oreochromis aureus  
UdeM00000027370 6573 88.2 UdeM00000027370 XP\_021380144.1 24.6 207  
148 5 7 212 38 237 1.40E-14 88.2 6573 cellular

organisms;Eukaryota;Opisthokonta;Metazoa;Eumetazoa;Bilateria;Protostomia;Spiralia;Lophotrochozoa;Mollusca;Bivalvia;Autobranchia;Pteriormorphia;Pectinida;Pectinoidea;Pectinidae;Mizuhopecten;Mizuhopecten yessoensis

UdeM00000027371 6573 88.2 UdeM00000027371 XP\_021380144.1 25 228  
162 6 15 241 18 237 1.60E-14 88.2 6573 cellular

organisms;Eukaryota;Opisthokonta;Metazoa;Eumetazoa;Bilateria;Protostomia;Spiralia;Lophotrochozoa;Mollusca;Bivalvia;Autobranchia;Pteriormorphia;Pectinida;Pectinoidea;Pectinidae;Mizuhopecten;Mizuhopecten yessoensis

UdeM00000027372 241271 63.5 UdeM00000027372 XP\_041653182.1 32.7  
107 62 3 2 108 428 524 1.90E-07 63.5 241271  
cellular

organisms;Eukaryota;Opisthokonta;Metazoa;Eumetazoa;Bilateria;Deuterostomia;Chordata;Craniata;Vertebrata;Gnathostomata;Teleostomi;Euteleostomi;Actinopterygii;Actinopteri;Neopterygii;Teleostei;Osteoglossocephalai;Clupeocephala;Euteleostei;Neoteleostei;Eurypterygia;Ctenosquamata;Acanthomorphata;Euacanthomorphacea;Percomorphaceae;Eupercaria;Labriformes;Labridae;Cheilinus;Cheilinus undulatus

UdeM00000027373 6596 354.8 UdeM00000027373 XP\_045177776.1 35.4 622  
285 9 4 612 396 913 2.50E-94 354.8 6596 cellular

organisms;Eukaryota;Opisthokonta;Metazoa;Eumetazoa;Bilateria;Protostomia;Spiralia;Lophotrochozoa;Mollusca;Bivalvia;Autobranchia;Heteroconchia;Euheterodonta;Imparidentia;Venerida;Veneroidea;Veneridae;Mercenaria;Mercenaria mercenaria

UdeM00000027374 6596 79.3 UdeM00000027374 XP\_045186033.1 30.4 158  
108 2 331 488 23 178 1.60E-11 79.3 6596 cellular

organisms;Eukaryota;Opisthokonta;Metazoa;Eumetazoa;Bilateria;Protostomia;Spiralia;Lophotrochozoa;Mollusca;Bivalvia;Autobranchia;Heteroconchia;Euheterodonta;Imparidentia;Venerida;Veneroidea;Veneridae;Mercenaria;Mercenaria mercenaria

UdeM00000027375 6596 69.7 UdeM00000027375 XP\_045180697.1 37.9 95  
58 1 124 217 325 419 5.20E-09 69.7 6596 cellular

organisms;Eukaryota;Opisthokonta;Metazoa;Eumetazoa;Bilateria;Protostomia;Spiralia;Lophotrochozoa;Mollusca;Bivalvia;Autobranchia;Heteroconchia;Euheterodonta;Imparidentia;Venerida;Veneroidea;Veneridae;Mercenaria;Mercenaria mercenaria

UdeM00000027376 6596 158.3 UdeM00000027376 XP\_045180657.1 35.6 216  
137 2 2 215 13 228 1.20E-35 158.3 6596 cellular

organisms;Eukaryota;Opisthokonta;Metazoa;Eumetazoa;Bilateria;Protostomia;Spiralia;Lophotrochozoa;Mollusca;Bivalvia;Autobranchia;Heteroconchia;Euheterodonta;Imparidentia;Venerida;Veneroidea;Veneridae;Mercenaria;Mercenaria mercenaria

UdeM00000027377 6596 195.7 UdeM00000027377 XP\_045180657.1 27 541  
305 10 2 453 13 552 1.30E-46 195.7 6596 cellular

organisms;Eukaryota;Opisthokonta;Metazoa;Eumetazoa;Bilateria;Protostomia;Spiralia;Lophotrochozoa;Mollusca;Bivalvia;Autobranchia;Heteroconchia;Euheterodonta;Imparidentia;Venerida;Veneroidea;Veneridae;Mercenaria;Mercenaria mercenaria

UdeM00000027378 6565 83.2 UdeM00000027378 XP\_022299602.1 42.1 107  
 61 1 9 115 3 108 2.50E-13 83.2 6565 cellular  
 organisms;Eukaryota;Opisthokonta;Metazoa;Eumetazoa;Bilateria;Protostomia;  
 Spiralia;Lophotrochozoa;Mollusca;Bivalvia;Autobranchia;Pteriormorphia;Ostr  
 eida;Ostreoidea;Ostreidae;Crassostrea;Crassostrea virginica  
 UdeM00000027379 6596 196.4 UdeM00000027379 XP\_045180657.1 26.8 542  
 305 13 2 453 13 552 7.60E-47 196.4 6596 cellular  
 organisms;Eukaryota;Opisthokonta;Metazoa;Eumetazoa;Bilateria;Protostomia;  
 Spiralia;Lophotrochozoa;Mollusca;Bivalvia;Autobranchia;Heteroconchia;Euhe  
 terodonta;Imparidentia;Venerida;Veneroidea;Veneridae;Mercenaria;Mercenari  
 a mercenaria  
 UdeM00000027381 6596 193.4 UdeM00000027381 XP\_045180657.1 26.7 544  
 303 12 2 453 13 552 6.50E-46 193.4 6596 cellular  
 organisms;Eukaryota;Opisthokonta;Metazoa;Eumetazoa;Bilateria;Protostomia;  
 Spiralia;Lophotrochozoa;Mollusca;Bivalvia;Autobranchia;Heteroconchia;Euhe  
 terodonta;Imparidentia;Venerida;Veneroidea;Veneridae;Mercenaria;Mercenari  
 a mercenaria  
 UdeM00000027382 6565 113.2 UdeM00000027382 XP\_022299602.1 44.4 126  
 68 2 25 150 8 131 3.00E-22 113.2 6565 cellular  
 organisms;Eukaryota;Opisthokonta;Metazoa;Eumetazoa;Bilateria;Protostomia;  
 Spiralia;Lophotrochozoa;Mollusca;Bivalvia;Autobranchia;Pteriormorphia;Ostr  
 eida;Ostreoidea;Ostreidae;Crassostrea;Crassostrea virginica  
 UdeM00000027383 6596 176 UdeM00000027383 XP\_045180657.1 25.5 541  
 261 11 2 402 13 551 9.50E-41 176 6596 cellular  
 organisms;Eukaryota;Opisthokonta;Metazoa;Eumetazoa;Bilateria;Protostomia;  
 Spiralia;Lophotrochozoa;Mollusca;Bivalvia;Autobranchia;Heteroconchia;Euhe  
 terodonta;Imparidentia;Venerida;Veneroidea;Veneridae;Mercenaria;Mercenari  
 a mercenaria  
 UdeM00000027384 6596 193 UdeM00000027384 XP\_045180657.1 26.8 541  
 306 10 2 453 13 552 8.40E-46 193 6596 cellular  
 organisms;Eukaryota;Opisthokonta;Metazoa;Eumetazoa;Bilateria;Protostomia;  
 Spiralia;Lophotrochozoa;Mollusca;Bivalvia;Autobranchia;Heteroconchia;Euhe  
 terodonta;Imparidentia;Venerida;Veneroidea;Veneridae;Mercenaria;Mercenari  
 a mercenaria  
 UdeM00000027385 6596 307.8 UdeM00000027385 XP\_045208806.1 50 316  
 143 5 1 309 1 308 1.60E-80 307.8 6596 cellular  
 organisms;Eukaryota;Opisthokonta;Metazoa;Eumetazoa;Bilateria;Protostomia;  
 Spiralia;Lophotrochozoa;Mollusca;Bivalvia;Autobranchia;Heteroconchia;Euhe  
 terodonta;Imparidentia;Venerida;Veneroidea;Veneridae;Mercenaria;Mercenari  
 a mercenaria  
 UdeM00000027387 29159 94 UdeM00000027387 XP\_011428043.2 46.2 104  
 56 0 13 116 33 136 2.00E-16 94 29159 cellular  
 organisms;Eukaryota;Opisthokonta;Metazoa;Eumetazoa;Bilateria;Protostomia;  
 Spiralia;Lophotrochozoa;Mollusca;Bivalvia;Autobranchia;Pteriormorphia;Ostr  
 eida;Ostreoidea;Ostreidae;Crassostrea;Crassostrea gigas  
 UdeM00000027388 6565 75.1 UdeM00000027388 XP\_022333812.1 47.1 70  
 37 0 141 210 728 797 1.20E-10 75.1 6565 cellular  
 organisms;Eukaryota;Opisthokonta;Metazoa;Eumetazoa;Bilateria;Protostomia;  
 Spiralia;Lophotrochozoa;Mollusca;Bivalvia;Autobranchia;Pteriormorphia;Ostr  
 eida;Ostreoidea;Ostreidae;Crassostrea;Crassostrea virginica  
 UdeM00000027389 6596 768.8 UdeM00000027389 XP\_045165226.1 75.6 476  
 116 0 44 519 6 481 4.30E-219 768.8 6596 cellular  
 organisms;Eukaryota;Opisthokonta;Metazoa;Eumetazoa;Bilateria;Protostomia;  
 Spiralia;Lophotrochozoa;Mollusca;Bivalvia;Autobranchia;Heteroconchia;Euhe

terodonta;Imparidentia;Venerida;Veneroidea;Veneridae;Mercenaria;Mercenaria mercenaria

UdeM00000027390 6573 159.5 UdeM00000027390 XP\_021365376.1 46.6 161  
84 2 11 169 3 163 4.00E-36 159.5 6573 cellular

organisms;Eukaryota;Opisthokonta;Metazoa;Eumetazoa;Bilateria;Protostomia;Spiralia;Lophotrochozoa;Mollusca;Bivalvia;Autobranchia;Pteriormorphia;Pectinida;Pectinoidea;Pectinidae;Mizuhopecten;Mizuhopecten yessoensis

UdeM00000027391 6573 159.8 UdeM00000027391 XP\_021365376.1 47 164  
82 3 8 169 3 163 3.10E-36 159.8 6573 cellular

organisms;Eukaryota;Opisthokonta;Metazoa;Eumetazoa;Bilateria;Protostomia;Spiralia;Lophotrochozoa;Mollusca;Bivalvia;Autobranchia;Pteriormorphia;Pectinida;Pectinoidea;Pectinidae;Mizuhopecten;Mizuhopecten yessoensis

UdeM00000027392 29159 257.3 UdeM00000027392 XP\_034318948.1 47 268  
140 1 1 266 686 953 2.20E-65 257.3 29159 cellular

organisms;Eukaryota;Opisthokonta;Metazoa;Eumetazoa;Bilateria;Protostomia;Spiralia;Lophotrochozoa;Mollusca;Bivalvia;Autobranchia;Pteriormorphia;Ostreida;Ostreoidea;Ostreidae;Crassostrea;Crassostrea gigas

UdeM00000027393 29159 188.3 UdeM00000027393 XP\_034315421.1 51.5 206  
94 3 122 323 271 474 1.50E-44 188.3 29159 cellular

organisms;Eukaryota;Opisthokonta;Metazoa;Eumetazoa;Bilateria;Protostomia;Spiralia;Lophotrochozoa;Mollusca;Bivalvia;Autobranchia;Pteriormorphia;Ostreida;Ostreoidea;Ostreidae;Crassostrea;Crassostrea gigas

UdeM00000027394 7741 64.3 UdeM00000027394 XP\_019641549.1 30.6 134  
87 4 21 153 43 171 1.60E-07 64.3 7741 cellular

organisms;Eukaryota;Opisthokonta;Metazoa;Eumetazoa;Bilateria;Deuterostomia;Chordata;Cephalochordata;Leptocardii;Amphioxiformes;Branchiostomidae;Branchiostoma;Branchiostoma belcheri

UdeM00000027395 7739 67.8 UdeM00000027395 XP\_035673027.1 27.7 137  
86 4 5 136 1058 1186 1.30E-08 67.8 7739 cellular

organisms;Eukaryota;Opisthokonta;Metazoa;Eumetazoa;Bilateria;Deuterostomia;Chordata;Cephalochordata;Leptocardii;Amphioxiformes;Branchiostomidae;Branchiostoma;Branchiostoma floridae

UdeM00000027396 7739 67.8 UdeM00000027396 XP\_035673027.1 27.7 137  
86 4 5 136 1058 1186 1.30E-08 67.8 7739 cellular

organisms;Eukaryota;Opisthokonta;Metazoa;Eumetazoa;Bilateria;Deuterostomia;Chordata;Cephalochordata;Leptocardii;Amphioxiformes;Branchiostomidae;Branchiostoma;Branchiostoma floridae

UdeM00000027398 6579 675.6 UdeM00000027398 XP\_033728194.1 49.9 693  
334 5 1 684 282 970 6.50E-191 675.6 6579 cellular

organisms;Eukaryota;Opisthokonta;Metazoa;Eumetazoa;Bilateria;Protostomia;Spiralia;Lophotrochozoa;Mollusca;Bivalvia;Autobranchia;Pteriormorphia;Pectinida;Pectinoidea;Pectinidae;Pecten;Pecten maximus

UdeM00000027401 390379 60.1 UdeM00000027401 XP\_034045841.1 26.6  
124 87 2 3 126 248 367 2.40E-06 60.1 390379

cellular

organisms;Eukaryota;Opisthokonta;Metazoa;Eumetazoa;Bilateria;Deuterostomia;Chordata;Craniata;Vertebrata;Gnathostomata;Teleostomi;Euteleostomi;Actinopterygii;Actinopteri;Neopterygii;Teleostei;Osteoglossocephalai;Clupeocephala;Euteleostei;Neoteleostei;Eurypterygia;Ctenosquamata;Acanthopterygii;Euacanthopterygii;Percomorphaceae;Batrachoidaria;Batrachoidiformes;Batrachoididae;Thalassophyrinae;Thalassophryne;Thalassophryne amazonica

UdeM00000027402 52670 200.3 UdeM00000027402 XP\_013879842.1 47.2 176  
87 1 1 170 245 420 2.00E-48 200.3 52670 cellular

organisms;Eukaryota;Opisthokonta;Metazoa;Eumetazoa;Bilateria;Deuterostomi  
a;Chordata;Craniata;Vertebrata;Gnathostomata;Teleostomi;Euteleostomi;Acti  
nopterygii;Actinopteri;Neopterygii;Teleostei;Osteoglossocephalai;Clupeoce  
phala;Euteleosteomorpha;Neoteleostei;Eurypterygia;Ctenosquamata;Acanthomo  
rphata;Euacanthomorphacea;Percomorphaceae;Ovalentaria;Atherinomorphae;Cyp  
rinodontiformes;Aplocheiloidei;Rivulidae;Austrofundulus;Austrofundulus  
limnaeus

UdeM00000027403 400727 63.9 UdeM00000027403 XP\_025089336.1 25  
164 108 5 38 193 41 197 2.50E-07 63.9 400727  
cellular

organisms;Eukaryota;Opisthokonta;Metazoa;Eumetazoa;Bilateria;Protostomia;  
Spiralia;Lophotrochozoa;Mollusca;Gastropoda;Caenogastropoda;Architaeniogl  
ossa;Ampullarioidea;Ampullariidae;Pomacea;Pomacea canaliculata

UdeM00000027404 160734 197.6 UdeM00000027404 XP\_042337771.1 47.5  
177 87 1 1 171 241 417 1.30E-47 197.6 160734  
cellular

organisms;Eukaryota;Opisthokonta;Metazoa;Eumetazoa;Bilateria;Deuterostomi  
a;Chordata;Craniata;Vertebrata;Gnathostomata;Teleostomi;Euteleostomi;Acti  
nopterygii;Actinopteri;Neopterygii;Teleostei;Osteoglossocephalai;Clupeoce  
phala;Euteleosteomorpha;Neoteleostei;Eurypterygia;Ctenosquamata;Acanthomo  
rphata;Euacanthomorphacea;Percomorphaceae;Eupercaria;Perciformes;Serranoi  
dei;Serranidae;Epinephelinae;Epinephelini;Plectropomus;Plectropomus  
leopardus

UdeM00000027405 27405 65.5 UdeM00000027405 XP\_042879563.1 31.2 128  
80 4 71 190 109 236 8.70E-08 65.5 27405 cellular

organisms;Eukaryota;Opisthokonta;Metazoa;Eumetazoa;Bilateria;Protostomia;  
Ecdysozoa;Panarthropoda;Arthropoda;Mandibulata;Pancrustacea;Crustacea;Mul  
ticrustacea;Malacostraca;Eumalacostraca;Eucarida;Decapoda;Dendrobranchiat  
a;Penaeoidea;Penaeidae;Penaeus;Penaeus japonicus

UdeM00000027406 52670 326.6 UdeM00000027406 XP\_013860411.1 52 254  
122 0 9 262 147 400 2.90E-86 326.6 52670 cellular

organisms;Eukaryota;Opisthokonta;Metazoa;Eumetazoa;Bilateria;Deuterostomi  
a;Chordata;Craniata;Vertebrata;Gnathostomata;Teleostomi;Euteleostomi;Acti  
nopterygii;Actinopteri;Neopterygii;Teleostei;Osteoglossocephalai;Clupeoce  
phala;Euteleosteomorpha;Neoteleostei;Eurypterygia;Ctenosquamata;Acanthomo  
rphata;Euacanthomorphacea;Percomorphaceae;Ovalentaria;Atherinomorphae;Cyp  
rinodontiformes;Aplocheiloidei;Rivulidae;Austrofundulus;Austrofundulus  
limnaeus

UdeM00000027407 400727 191.4 UdeM00000027407 XP\_025092108.1 61.6  
146 56 0 18 163 72 217 9.20E-46 191.4 400727  
cellular

organisms;Eukaryota;Opisthokonta;Metazoa;Eumetazoa;Bilateria;Protostomia;  
Spiralia;Lophotrochozoa;Mollusca;Gastropoda;Caenogastropoda;Architaeniogl  
ossa;Ampullarioidea;Ampullariidae;Pomacea;Pomacea canaliculata

UdeM00000027409 1735272 466.1 UdeM00000027409 XP\_041372570.1 56.9  
360 152 1 9 365 46 405 4.20E-128 466.1 1735272  
cellular

organisms;Eukaryota;Opisthokonta;Metazoa;Eumetazoa;Bilateria;Protostomia;  
Spiralia;Lophotrochozoa;Mollusca;Gastropoda;Neomphalina;Neomphaloidea;Pel  
tospiridae;Gigantopelta;Gigantopelta aegis

UdeM00000027410 8103 434.5 UdeM00000027410 XP\_034385613.1 56.6 309  
134 0 7 315 260 568 1.20E-118 434.5 8103 cellular

organisms;Eukaryota;Opisthokonta;Metazoa;Eumetazoa;Bilateria;Deuterostomi  
a;Chordata;Craniata;Vertebrata;Gnathostomata;Teleostomi;Euteleostomi;Acti

nopterygii;Actinopteri;Neopterygii;Teleostei;Osteoglossocephalai;Clupeocephala;Euteleostei;Neoteleostei;Eurypterygia;Ctenosquamata;Acanthomorphata;Euacanthomorphacea;Percomorphaceae;Eupercaria;Perciformes;Cottioidei;Cottales;Cyclopteridae;Cyclopterinae;Cyclopterus;Cyclopterus lumpus  
 UdeM00000027411 6565 263.8 UdeM00000027411 XP\_022327962.1 54.4 250  
 112 2 1 249 445 693 2.30E-67 263.8 6565 cellular  
 organisms;Eukaryota;Opisthokonta;Metazoa;Eumetazoa;Bilateria;Protostomia;Spiralia;Lophotrochozoa;Mollusca;Bivalvia;Autobranchia;Pteriormorphia;Ostreida;Ostreioidea;Ostreidae;Crassostrea;Crassostrea virginica  
 UdeM00000027412 6596 178.3 UdeM00000027412 XP\_045164125.1 71.7 120  
 34 0 1 120 169 288 5.80E-42 178.3 6596 cellular  
 organisms;Eukaryota;Opisthokonta;Metazoa;Eumetazoa;Bilateria;Protostomia;Spiralia;Lophotrochozoa;Mollusca;Bivalvia;Autobranchia;Heteroconchia;Euheterodonta;Imparidentia;Venerida;Veneroidea;Veneridae;Mercenaria;Mercenaria mercenaria  
 UdeM00000027413 6565 246.9 UdeM00000027413 XP\_022297447.1 53.2 220  
 102 1 18 236 145 364 2.60E-62 246.9 6565 cellular  
 organisms;Eukaryota;Opisthokonta;Metazoa;Eumetazoa;Bilateria;Protostomia;Spiralia;Lophotrochozoa;Mollusca;Bivalvia;Autobranchia;Pteriormorphia;Ostreida;Ostreioidea;Ostreidae;Crassostrea;Crassostrea virginica  
 UdeM00000027414 1735272 337.4 UdeM00000027414 XP\_041372566.1 55.4  
 267 119 0 2 268 46 312 1.60E-89 337.4 1735272  
 cellular  
 organisms;Eukaryota;Opisthokonta;Metazoa;Eumetazoa;Bilateria;Protostomia;Spiralia;Lophotrochozoa;Mollusca;Gastropoda;Neomphalina;Neomphaloidea;Peltospiridae;Gigantopelta;Gigantopelta aegis  
 UdeM00000027416 6596 498.8 UdeM00000027416 XP\_045177776.1 37.8 720  
 429 10 1 712 405 1113 1.50E-137 498.8 6596 cellular  
 organisms;Eukaryota;Opisthokonta;Metazoa;Eumetazoa;Bilateria;Protostomia;Spiralia;Lophotrochozoa;Mollusca;Bivalvia;Autobranchia;Heteroconchia;Euheterodonta;Imparidentia;Venerida;Veneroidea;Veneridae;Mercenaria;Mercenaria mercenaria  
 UdeM00000027417 6596 401 UdeM00000027417 XP\_045177776.1 39.5 555  
 320 9 1 547 405 951 3.50E-108 401 6596 cellular  
 organisms;Eukaryota;Opisthokonta;Metazoa;Eumetazoa;Bilateria;Protostomia;Spiralia;Lophotrochozoa;Mollusca;Bivalvia;Autobranchia;Heteroconchia;Euheterodonta;Imparidentia;Venerida;Veneroidea;Veneridae;Mercenaria;Mercenaria mercenaria  
 UdeM00000027418 6596 344.4 UdeM00000027418 XP\_045177778.1 40.4 480  
 274 7 258 733 391 862 7.10E-91 344.4 6596 cellular  
 organisms;Eukaryota;Opisthokonta;Metazoa;Eumetazoa;Bilateria;Protostomia;Spiralia;Lophotrochozoa;Mollusca;Bivalvia;Autobranchia;Heteroconchia;Euheterodonta;Imparidentia;Venerida;Veneroidea;Veneridae;Mercenaria;Mercenaria mercenaria  
 UdeM00000027419 6596 457.2 UdeM00000027419 XP\_045175052.1 51.2 445  
 210 2 1 440 1 443 2.50E-125 457.2 6596 cellular  
 organisms;Eukaryota;Opisthokonta;Metazoa;Eumetazoa;Bilateria;Protostomia;Spiralia;Lophotrochozoa;Mollusca;Bivalvia;Autobranchia;Heteroconchia;Euheterodonta;Imparidentia;Venerida;Veneroidea;Veneridae;Mercenaria;Mercenaria mercenaria  
 UdeM00000027420 6596 270.4 UdeM00000027420 XP\_045165301.1 52 279  
 111 3 11 287 55 312 2.70E-69 270.4 6596 cellular  
 organisms;Eukaryota;Opisthokonta;Metazoa;Eumetazoa;Bilateria;Protostomia;Spiralia;Lophotrochozoa;Mollusca;Bivalvia;Autobranchia;Heteroconchia;Euheterodonta;Imparidentia;Venerida;Veneroidea;Veneridae;Mercenaria;Mercenaria mercenaria

terodonta;Imparidentia;Venerida;Veneroidea;Veneridae;Mercenaria;Mercenaria mercenaria  
 UdeM00000027422 6596 160.2 UdeM00000027422 XP\_045180624.1 35.1 276  
 169 3 141 413 142 410 5.80E-36 160.2 6596 cellular  
 organisms;Eukaryota;Opisthokonta;Metazoa;Eumetazoa;Bilateria;Protostomia;  
 Spiralia;Lophotrochozoa;Mollusca;Bivalvia;Autobranhia;Heteroconchia;Euhe  
 terodonta;Imparidentia;Venerida;Veneroidea;Veneridae;Mercenaria;Mercenari  
 a mercenaria  
 UdeM00000027421 6596 160.6 UdeM00000027421 XP\_045180624.1 35.1 276  
 169 3 141 413 142 410 4.40E-36 160.6 6596 cellular  
 organisms;Eukaryota;Opisthokonta;Metazoa;Eumetazoa;Bilateria;Protostomia;  
 Spiralia;Lophotrochozoa;Mollusca;Bivalvia;Autobranhia;Heteroconchia;Euhe  
 terodonta;Imparidentia;Venerida;Veneroidea;Veneridae;Mercenaria;Mercenari  
 a mercenaria  
 UdeM00000027423 37621 122.9 UdeM00000027423 XP\_014679849.1 35.4 198  
 54 1 44 167 27 224 4.30E-25 122.9 37621 cellular  
 organisms;Eukaryota;Opisthokonta;Metazoa;Eumetazoa;Bilateria;Protostomia;  
 Ecdysozoa;Scalidophora;Priapulida;Priapulimorpha;Priapulimorphida;Priapul  
 idae;Priapululus;Priapululus caudatus  
 UdeM00000027424 6573 141.7 UdeM00000027424 XP\_021371061.1 36.6 257  
 124 8 1 244 1 231 1.40E-30 141.7 6573 cellular  
 organisms;Eukaryota;Opisthokonta;Metazoa;Eumetazoa;Bilateria;Protostomia;  
 Spiralia;Lophotrochozoa;Mollusca;Bivalvia;Autobranhia;Pteriormorpha;Pect  
 inida;Pectinoidea;Pectinidae;Mizuhopecten;Mizuhopecten yessoensis  
 UdeM00000027425 6105 285.4 UdeM00000027425 XP\_031549116.1 54.5 275  
 116 6 161 428 45 317 1.20E-73 285.4 6105 cellular  
 organisms;Eukaryota;Opisthokonta;Metazoa;Eumetazoa;Cnidaria;Anthozoa;Hexa  
 corallia;Actiniaria;Actiniidae;Actinia;Actinia tenebrosa  
 UdeM00000027426 6596 473.8 UdeM00000027426 XP\_045180850.1 70.9 333  
 96 1 1 332 735 1067 1.80E-130 473.8 6596 cellular  
 organisms;Eukaryota;Opisthokonta;Metazoa;Eumetazoa;Bilateria;Protostomia;  
 Spiralia;Lophotrochozoa;Mollusca;Bivalvia;Autobranhia;Heteroconchia;Euhe  
 terodonta;Imparidentia;Venerida;Veneroidea;Veneridae;Mercenaria;Mercenari  
 a mercenaria  
 UdeM00000027427 6596 1167.1 UdeM00000027427 XP\_045180850.1 57.3  
 1075 413 9 95 1134 4 1067 0.00E+00 1167.1 6596  
 cellular  
 organisms;Eukaryota;Opisthokonta;Metazoa;Eumetazoa;Bilateria;Protostomia;  
 Spiralia;Lophotrochozoa;Mollusca;Bivalvia;Autobranhia;Heteroconchia;Euhe  
 terodonta;Imparidentia;Venerida;Veneroidea;Veneridae;Mercenaria;Mercenari  
 a mercenaria  
 UdeM00000027428 6573 69.7 UdeM00000027428 XP\_021362121.1 29.1 292  
 163 10 263 521 333 613 1.30E-08 69.7 6573 cellular  
 organisms;Eukaryota;Opisthokonta;Metazoa;Eumetazoa;Bilateria;Protostomia;  
 Spiralia;Lophotrochozoa;Mollusca;Bivalvia;Autobranhia;Pteriormorpha;Pect  
 inida;Pectinoidea;Pectinidae;Mizuhopecten;Mizuhopecten yessoensis  
 UdeM00000027429 6500 341.3 UdeM00000027429 XP\_005099746.1 71.6 232  
 66 0 3 234 2 233 1.00E-90 341.3 6500 cellular  
 organisms;Eukaryota;Opisthokonta;Metazoa;Eumetazoa;Bilateria;Protostomia;  
 Spiralia;Lophotrochozoa;Mollusca;Gastropoda;Heterobranhia;Euthyneura;Tec  
 tipleura;Aplysiida;Aplysiioidea;Aplysiidae;Aplysia;Aplysia californica  
 UdeM00000027430 6596 549.3 UdeM00000027430 XP\_045180371.1 68.3 404  
 119 2 96 493 46 446 5.00E-153 549.3 6596 cellular  
 organisms;Eukaryota;Opisthokonta;Metazoa;Eumetazoa;Bilateria;Protostomia;

Spiralia;Lophotrochozoa;Mollusca;Bivalvia;Autobranchia;Heteroconchia;Euherodonta;Imparidentia;Venerida;Veneroidea;Veneridae;Mercenaria;Mercenaria mercenaria

UdeM00000027432 6596 260 UdeM00000027432 XP\_045180341.1 83.1 154  
26 0 2 155 358 511 1.90E-66 260 6596 cellular

organisms;Eukaryota;Opisthokonta;Metazoa;Eumetazoa;Bilateria;Protostomia;Spiralia;Lophotrochozoa;Mollusca;Bivalvia;Autobranchia;Heteroconchia;Euherodonta;Imparidentia;Venerida;Veneroidea;Veneridae;Mercenaria;Mercenaria mercenaria

UdeM00000027431 6596 602.1 UdeM00000027431 XP\_045180341.1 78.6 383  
82 0 105 487 129 511 6.50E-169 602.1 6596 cellular

organisms;Eukaryota;Opisthokonta;Metazoa;Eumetazoa;Bilateria;Protostomia;Spiralia;Lophotrochozoa;Mollusca;Bivalvia;Autobranchia;Heteroconchia;Euherodonta;Imparidentia;Venerida;Veneroidea;Veneridae;Mercenaria;Mercenaria mercenaria

UdeM00000027433 6596 172.2 UdeM00000027433 XP\_045181474.1 61.4 145  
52 2 151 292 81 224 1.00E-39 172.2 6596 cellular

organisms;Eukaryota;Opisthokonta;Metazoa;Eumetazoa;Bilateria;Protostomia;Spiralia;Lophotrochozoa;Mollusca;Bivalvia;Autobranchia;Heteroconchia;Euherodonta;Imparidentia;Venerida;Veneroidea;Veneridae;Mercenaria;Mercenaria mercenaria

UdeM00000027434 6596 172.2 UdeM00000027434 XP\_045181474.1 61.4 145  
52 2 101 242 81 224 8.50E-40 172.2 6596 cellular

organisms;Eukaryota;Opisthokonta;Metazoa;Eumetazoa;Bilateria;Protostomia;Spiralia;Lophotrochozoa;Mollusca;Bivalvia;Autobranchia;Heteroconchia;Euherodonta;Imparidentia;Venerida;Veneroidea;Veneridae;Mercenaria;Mercenaria mercenaria

UdeM00000027435 6596 131.7 UdeM00000027435 XP\_045181371.1 39.5 243  
109 7 1 222 20 245 1.10E-27 131.7 6596 cellular

organisms;Eukaryota;Opisthokonta;Metazoa;Eumetazoa;Bilateria;Protostomia;Spiralia;Lophotrochozoa;Mollusca;Bivalvia;Autobranchia;Heteroconchia;Euherodonta;Imparidentia;Venerida;Veneroidea;Veneridae;Mercenaria;Mercenaria mercenaria

UdeM00000027438 6579 1006.9 UdeM00000027438 XP\_033727239.1 50.2  
1032 489 10 1 1016 1 1023 1.80E-290 1006.9 6579  
cellular

organisms;Eukaryota;Opisthokonta;Metazoa;Eumetazoa;Bilateria;Protostomia;Spiralia;Lophotrochozoa;Mollusca;Bivalvia;Autobranchia;Pteriomorphia;Pectinida;Pectinoidea;Pectinidae;Pecten;Pecten maximus

UdeM00000027439 6596 2619.3 UdeM00000027439 XP\_045215313.1 43.5  
3293 1693 49 1 3234 811 3995 0.00E+00 2619.3 6596  
cellular

organisms;Eukaryota;Opisthokonta;Metazoa;Eumetazoa;Bilateria;Protostomia;Spiralia;Lophotrochozoa;Mollusca;Bivalvia;Autobranchia;Heteroconchia;Euherodonta;Imparidentia;Venerida;Veneroidea;Veneridae;Mercenaria;Mercenaria mercenaria

UdeM00000027440 6596 840.9 UdeM00000027440 XP\_045215313.1 59.8 722  
267 7 1 719 1 702 1.30E-240 840.9 6596 cellular

organisms;Eukaryota;Opisthokonta;Metazoa;Eumetazoa;Bilateria;Protostomia;Spiralia;Lophotrochozoa;Mollusca;Bivalvia;Autobranchia;Heteroconchia;Euherodonta;Imparidentia;Venerida;Veneroidea;Veneridae;Mercenaria;Mercenaria mercenaria

UdeM00000031309 6579 657.9 UdeM00000031309 XP\_033734127.1 48.1 630  
319 5 1 626 1 626 1.40E-185 657.9 6579 cellular

organisms;Eukaryota;Opisthokonta;Metazoa;Eumetazoa;Bilateria;Protostomia; Spiralia;Lophotrochozoa;Mollusca;Bivalvia;Autobranchia;Pteriormorphia;Pect inida;Pectinoidea;Pectinidae;Pecten;Pecten maximus

UdeM00000031310 1735272 328.2 UdeM00000031310 XP\_041354476.1 52.9  
308 140 4 35 341 26 329 1.30E-86 328.2 1735272  
cellular

organisms;Eukaryota;Opisthokonta;Metazoa;Eumetazoa;Bilateria;Protostomia; Spiralia;Lophotrochozoa;Mollusca;Gastropoda;Neomphalina;Neomphaloidea;Pel tospiridae;Gigantopelta;Gigantopelta aegis

UdeM00000031311 1735272 328.9 UdeM00000031311 XP\_041354477.1 51.1  
327 153 5 12 337 3 323 7.40E-87 328.9 1735272  
cellular

organisms;Eukaryota;Opisthokonta;Metazoa;Eumetazoa;Bilateria;Protostomia; Spiralia;Lophotrochozoa;Mollusca;Gastropoda;Neomphalina;Neomphaloidea;Pel tospiridae;Gigantopelta;Gigantopelta aegis

UdeM00000031312 6596 284.3 UdeM00000031312 XP\_045156531.1 53.1 256  
117 2 9 261 190 445 1.60E-73 284.3 6596 cellular

organisms;Eukaryota;Opisthokonta;Metazoa;Eumetazoa;Bilateria;Protostomia; Spiralia;Lophotrochozoa;Mollusca;Bivalvia;Autobranchia;Heteroconchia;Euhe terodonta;Imparidentia;Venerida;Veneroidea;Veneridae;Mercenaria;Mercenari a mercenaria

UdeM00000031313 6596 372.5 UdeM00000031313 XP\_045180855.1 61 346  
111 7 4 339 15 346 5.80E-100 372.5 6596 cellular

organisms;Eukaryota;Opisthokonta;Metazoa;Eumetazoa;Bilateria;Protostomia; Spiralia;Lophotrochozoa;Mollusca;Bivalvia;Autobranchia;Heteroconchia;Euhe terodonta;Imparidentia;Venerida;Veneroidea;Veneridae;Mercenaria;Mercenari a mercenaria

UdeM00000031314 6579 122.5 UdeM00000031314 XP\_033732319.1 70.9 86  
25 0 1 86 1 86 3.00E-25 122.5 6579 cellular

organisms;Eukaryota;Opisthokonta;Metazoa;Eumetazoa;Bilateria;Protostomia; Spiralia;Lophotrochozoa;Mollusca;Bivalvia;Autobranchia;Pteriormorphia;Pect inida;Pectinoidea;Pectinidae;Pecten;Pecten maximus

UdeM00000031315 6579 460.3 UdeM00000031315 XP\_033734118.1 71.2 281  
79 1 1 281 96 374 1.80E-126 460.3 6579 cellular

organisms;Eukaryota;Opisthokonta;Metazoa;Eumetazoa;Bilateria;Protostomia; Spiralia;Lophotrochozoa;Mollusca;Bivalvia;Autobranchia;Pteriormorphia;Pect inida;Pectinoidea;Pectinidae;Pecten;Pecten maximus

UdeM00000031316 6579 493 UdeM00000031316 XP\_033735968.1 62.6 358  
130 1 8 365 14 367 3.20E-136 493 6579 cellular

organisms;Eukaryota;Opisthokonta;Metazoa;Eumetazoa;Bilateria;Protostomia; Spiralia;Lophotrochozoa;Mollusca;Bivalvia;Autobranchia;Pteriormorphia;Pect inida;Pectinoidea;Pectinidae;Pecten;Pecten maximus

UdeM00000031317 6596 2805 UdeM00000031317 XP\_045163820.1 62.7 2176  
781 10 50 2206 376 2539 0.00E+00 2805 6596 cellular

organisms;Eukaryota;Opisthokonta;Metazoa;Eumetazoa;Bilateria;Protostomia; Spiralia;Lophotrochozoa;Mollusca;Bivalvia;Autobranchia;Heteroconchia;Euhe terodonta;Imparidentia;Venerida;Veneroidea;Veneridae;Mercenaria;Mercenari a mercenaria

UdeM00000031318 6596 575.5 UdeM00000031318 XP\_045163820.1 45 696  
150 4 1 463 1844 2539 8.60E-161 575.5 6596 cellular

organisms;Eukaryota;Opisthokonta;Metazoa;Eumetazoa;Bilateria;Protostomia; Spiralia;Lophotrochozoa;Mollusca;Bivalvia;Autobranchia;Heteroconchia;Euhe terodonta;Imparidentia;Venerida;Veneroidea;Veneridae;Mercenaria;Mercenari a mercenaria



UdeM00000031319 6596 1194.1 UdeM00000031319 XP\_045163820.1 62.8  
 920 335 5 73 989 376 1291 0.00E+00 1194.1 6596  
 cellular  
 organisms;Eukaryota;Opisthokonta;Metazoa;Eumetazoa;Bilateria;Protostomia;  
 Spiralia;Lophotrochozoa;Mollusca;Bivalvia;Autobranchia;Heteroconchia;Euhe  
 terodonta;Imparidentia;Venerida;Veneroidea;Veneridae;Mercenaria;Mercenari  
 a mercenaria  
 UdeM00000031320 6579 486.9 UdeM00000031320 XP\_033735968.1 61.7 358  
 133 1 17 374 14 367 2.30E-134 486.9 6579 cellular  
 organisms;Eukaryota;Opisthokonta;Metazoa;Eumetazoa;Bilateria;Protostomia;  
 Spiralia;Lophotrochozoa;Mollusca;Bivalvia;Autobranchia;Pteriormorphia;Pect  
 inida;Pectinoidea;Pectinidae;Pecten;Pecten maximus  
 UdeM00000031321 6596 154.1 UdeM00000031321 XP\_045188075.1 51.2 166  
 80 1 6 171 4 168 2.10E-34 154.1 6596 cellular  
 organisms;Eukaryota;Opisthokonta;Metazoa;Eumetazoa;Bilateria;Protostomia;  
 Spiralia;Lophotrochozoa;Mollusca;Bivalvia;Autobranchia;Heteroconchia;Euhe  
 terodonta;Imparidentia;Venerida;Veneroidea;Veneridae;Mercenaria;Mercenari  
 a mercenaria  
 UdeM00000031322 747089 180.3 UdeM00000031322 XP\_025171917.1 34.6  
 327 183 11 33 348 39 345 4.40E-42 180.3 747089  
 cellular organisms;Eukaryota;Opisthokonta;Fungi;Fungi incertae  
 sedis;Mucoromycota;Glomeromycotina;Glomeromycetes;Glomerales;Glomeraceae;  
 Rhizophagus;Rhizophagus irregularis;Rhizophagus irregularis DAOM  
 181602=DAOM 197198  
 UdeM00000031323 747089 183.3 UdeM00000031323 XP\_025171917.1 35.2  
 327 186 10 30 347 36 345 5.20E-43 183.3 747089  
 cellular organisms;Eukaryota;Opisthokonta;Fungi;Fungi incertae  
 sedis;Mucoromycota;Glomeromycotina;Glomeromycetes;Glomerales;Glomeraceae;  
 Rhizophagus;Rhizophagus irregularis;Rhizophagus irregularis DAOM  
 181602=DAOM 197198  
 UdeM00000031324 747089 176 UdeM00000031324 XP\_025171917.1 33.8  
 331 193 10 30 351 36 349 8.30E-41 176 747089  
 cellular organisms;Eukaryota;Opisthokonta;Fungi;Fungi incertae  
 sedis;Mucoromycota;Glomeromycotina;Glomeromycetes;Glomerales;Glomeraceae;  
 Rhizophagus;Rhizophagus irregularis;Rhizophagus irregularis DAOM  
 181602=DAOM 197198  
 UdeM00000031325 747089 63.9 UdeM00000031325 XP\_025183680.1 36.2  
 80 51 0 11 90 17 96 1.40E-07 63.9 747089  
 cellular organisms;Eukaryota;Opisthokonta;Fungi;Fungi incertae  
 sedis;Mucoromycota;Glomeromycotina;Glomeromycetes;Glomerales;Glomeraceae;  
 Rhizophagus;Rhizophagus irregularis;Rhizophagus irregularis DAOM  
 181602=DAOM 197198  
 UdeM00000031326 747089 107.8 UdeM00000031326 XP\_025183672.1 34.3  
 178 104 4 7 180 173 341 1.50E-20 107.8 747089  
 cellular organisms;Eukaryota;Opisthokonta;Fungi;Fungi incertae  
 sedis;Mucoromycota;Glomeromycotina;Glomeromycetes;Glomerales;Glomeraceae;  
 Rhizophagus;Rhizophagus irregularis;Rhizophagus irregularis DAOM  
 181602=DAOM 197198  
 UdeM00000031327 29159 337.4 UdeM00000031327 XP\_011419833.1 71.1 249  
 65 3 1 246 168 412 1.50E-89 337.4 29159 cellular  
 organisms;Eukaryota;Opisthokonta;Metazoa;Eumetazoa;Bilateria;Protostomia;  
 Spiralia;Lophotrochozoa;Mollusca;Bivalvia;Autobranchia;Pteriormorphia;Ostr  
 eida;Ostreoidea;Ostreidae;Crassostrea;Crassostrea gigas

UdeM00000031328 6565 120.2 UdeM00000031328 XP\_022328739.1 67 91  
 26 2 1 91 11 97 1.40E-24 120.2 6565 cellular  
 organisms;Eukaryota;Opisthokonta;Metazoa;Eumetazoa;Bilateria;Protostomia;  
 Spiralia;Lophotrochozoa;Mollusca;Bivalvia;Autobranchia;Pteriormorphia;Ostr  
 eida;Ostreoidea;Ostreidae;Crassostrea;Crassostrea virginica  
 UdeM00000031330 6565 157.1 UdeM00000031330 XP\_022334742.1 81.1 90  
 17 0 2 91 1 90 1.00E-35 157.1 6565 cellular  
 organisms;Eukaryota;Opisthokonta;Metazoa;Eumetazoa;Bilateria;Protostomia;  
 Spiralia;Lophotrochozoa;Mollusca;Bivalvia;Autobranchia;Pteriormorphia;Ostr  
 eida;Ostreoidea;Ostreidae;Crassostrea;Crassostrea virginica  
 UdeM00000031329 6565 157.9 UdeM00000031329 XP\_022334742.1 81.1 90  
 17 0 47 136 1 90 9.10E-36 157.9 6565 cellular  
 organisms;Eukaryota;Opisthokonta;Metazoa;Eumetazoa;Bilateria;Protostomia;  
 Spiralia;Lophotrochozoa;Mollusca;Bivalvia;Autobranchia;Pteriormorphia;Ostr  
 eida;Ostreoidea;Ostreidae;Crassostrea;Crassostrea virginica  
 UdeM00000031331 45264 109 UdeM00000031331 XP\_029180364.1 60.5 86  
 34 0 1 86 36 121 3.20E-21 109 45264 cellular  
 organisms;Eukaryota;Opisthokonta;Metazoa;Eumetazoa;Cnidaria;Anthozoa;Hexa  
 corallia;Scleractinia;Astrocoeniina;Acroporidae;Acropora;Acropora  
 millepora  
 UdeM00000031332 6565 319.7 UdeM00000031332 XP\_022342533.1 35.6 523  
 313 10 34 541 57 570 7.50E-84 319.7 6565 cellular  
 organisms;Eukaryota;Opisthokonta;Metazoa;Eumetazoa;Bilateria;Protostomia;  
 Spiralia;Lophotrochozoa;Mollusca;Bivalvia;Autobranchia;Pteriormorphia;Ostr  
 eida;Ostreoidea;Ostreidae;Crassostrea;Crassostrea virginica  
 UdeM00000031333 6596 393.7 UdeM00000031333 XP\_045166426.1 33.4 671  
 404 11 34 669 79 741 5.00E-106 393.7 6596 cellular  
 organisms;Eukaryota;Opisthokonta;Metazoa;Eumetazoa;Bilateria;Protostomia;  
 Spiralia;Lophotrochozoa;Mollusca;Bivalvia;Autobranchia;Heteroconchia;Euhe  
 terodonta;Imparidentia;Venerida;Veneroidea;Veneridae;Mercenaria;Mercenari  
 a mercenaria  
 UdeM00000031334 6596 392.1 UdeM00000031334 XP\_045166426.1 33.1 671  
 406 11 34 669 79 741 1.50E-105 392.1 6596 cellular  
 organisms;Eukaryota;Opisthokonta;Metazoa;Eumetazoa;Bilateria;Protostomia;  
 Spiralia;Lophotrochozoa;Mollusca;Bivalvia;Autobranchia;Heteroconchia;Euhe  
 terodonta;Imparidentia;Venerida;Veneroidea;Veneridae;Mercenaria;Mercenari  
 a mercenaria  
 UdeM00000031335 6565 455.3 UdeM00000031335 XP\_022303697.1 63.8 376  
 127 3 337 703 317 692 1.40E-124 455.3 6565 cellular  
 organisms;Eukaryota;Opisthokonta;Metazoa;Eumetazoa;Bilateria;Protostomia;  
 Spiralia;Lophotrochozoa;Mollusca;Bivalvia;Autobranchia;Pteriormorphia;Ostr  
 eida;Ostreoidea;Ostreidae;Crassostrea;Crassostrea virginica  
 UdeM00000031336 6596 1016.5 UdeM00000031336 XP\_045162040.1 62  
 832 305 6 7 837 10 831 1.90E-293 1016.5 6596  
 cellular  
 organisms;Eukaryota;Opisthokonta;Metazoa;Eumetazoa;Bilateria;Protostomia;  
 Spiralia;Lophotrochozoa;Mollusca;Bivalvia;Autobranchia;Heteroconchia;Euhe  
 terodonta;Imparidentia;Venerida;Veneroidea;Veneridae;Mercenaria;Mercenari  
 a mercenaria  
 UdeM00000031337 6565 169.9 UdeM00000031337 XP\_022287303.1 33.6 235  
 144 4 6 229 517 750 3.90E-39 169.9 6565 cellular  
 organisms;Eukaryota;Opisthokonta;Metazoa;Eumetazoa;Bilateria;Protostomia;  
 Spiralia;Lophotrochozoa;Mollusca;Bivalvia;Autobranchia;Pteriormorphia;Ostr  
 eida;Ostreoidea;Ostreidae;Crassostrea;Crassostrea virginica

UdeM00000031338 6596 264.6 UdeM00000031338 XP\_045162032.1 65.6 218  
 72 2 1 216 1 217 1.10E-67 264.6 6596 cellular  
 organisms;Eukaryota;Opisthokonta;Metazoa;Eumetazoa;Bilateria;Protostomia;  
 Spiralia;Lophotrochozoa;Mollusca;Bivalvia;Autobranchia;Heteroconchia;Euhe  
 terodonta;Imparidentia;Venerida;Veneroidea;Veneridae;Mercenaria;Mercenari  
 a mercenaria  
 UdeM00000031339 1735272 615.9 UdeM00000031339 XP\_041353617.1 62.4  
 439 162 1 1 436 1 439 3.90E-173 615.9 1735272  
 cellular  
 organisms;Eukaryota;Opisthokonta;Metazoa;Eumetazoa;Bilateria;Protostomia;  
 Spiralia;Lophotrochozoa;Mollusca;Gastropoda;Neomphalina;Neomphaloidea;Pel  
 tospiridae;Gigantopelta;Gigantopelta aegis  
 UdeM00000031340 6596 573.5 UdeM00000031340 XP\_045185783.1 58.4 485  
 197 3 4 488 7 486 2.50E-160 573.5 6596 cellular  
 organisms;Eukaryota;Opisthokonta;Metazoa;Eumetazoa;Bilateria;Protostomia;  
 Spiralia;Lophotrochozoa;Mollusca;Bivalvia;Autobranchia;Heteroconchia;Euhe  
 terodonta;Imparidentia;Venerida;Veneroidea;Veneridae;Mercenaria;Mercenari  
 a mercenaria  
 UdeM00000031341 6596 319.7 UdeM00000031341 XP\_045182485.1 51.2 295  
 144 0 8 302 14 308 4.20E-84 319.7 6596 cellular  
 organisms;Eukaryota;Opisthokonta;Metazoa;Eumetazoa;Bilateria;Protostomia;  
 Spiralia;Lophotrochozoa;Mollusca;Bivalvia;Autobranchia;Heteroconchia;Euhe  
 terodonta;Imparidentia;Venerida;Veneroidea;Veneridae;Mercenaria;Mercenari  
 a mercenaria  
 UdeM00000031342 1735272 330.1 UdeM00000031342 XP\_041353379.1 45.4  
 324 176 1 4 326 6 329 3.30E-87 330.1 1735272  
 cellular  
 organisms;Eukaryota;Opisthokonta;Metazoa;Eumetazoa;Bilateria;Protostomia;  
 Spiralia;Lophotrochozoa;Mollusca;Gastropoda;Neomphalina;Neomphaloidea;Pel  
 tospiridae;Gigantopelta;Gigantopelta aegis  
 UdeM00000031343 6565 323.2 UdeM00000031343 XP\_022333986.1 49.7 302  
 150 1 26 325 23 324 3.90E-85 323.2 6565 cellular  
 organisms;Eukaryota;Opisthokonta;Metazoa;Eumetazoa;Bilateria;Protostomia;  
 Spiralia;Lophotrochozoa;Mollusca;Bivalvia;Autobranchia;Pteriomorphia;Ostr  
 eida;Ostreoidea;Ostreidae;Crassostrea;Crassostrea virginica  
 UdeM00000031344 6573 196.1 UdeM00000031344 XP\_021354498.1 78 109  
 24 0 2 110 4 112 5.20E-47 196.1 6573 cellular  
 organisms;Eukaryota;Opisthokonta;Metazoa;Eumetazoa;Bilateria;Protostomia;  
 Spiralia;Lophotrochozoa;Mollusca;Bivalvia;Autobranchia;Pteriomorphia;Pect  
 inida;Pectinoidea;Pectinidae;Mizuhopecten;Mizuhopecten yessoensis  
 UdeM00000031345 6573 196.1 UdeM00000031345 XP\_021354498.1 78 109  
 24 0 2 110 4 112 4.70E-47 196.1 6573 cellular  
 organisms;Eukaryota;Opisthokonta;Metazoa;Eumetazoa;Bilateria;Protostomia;  
 Spiralia;Lophotrochozoa;Mollusca;Bivalvia;Autobranchia;Pteriomorphia;Pect  
 inida;Pectinoidea;Pectinidae;Mizuhopecten;Mizuhopecten yessoensis  
 UdeM00000031346 2607531 175.3 UdeM00000031346 XP\_029646709.1 58.3  
 163 62 2 71 232 45 202 9.90E-41 175.3 2607531  
 cellular  
 organisms;Eukaryota;Opisthokonta;Metazoa;Eumetazoa;Bilateria;Protostomia;  
 Spiralia;Lophotrochozoa;Mollusca;Cephalopoda;Coleoidea;Octopodiformes;Oct  
 opoda;Incirrata;Octopodidae;Octopus;Octopus sinensis  
 UdeM00000031347 225164 299.7 UdeM00000031347 XP\_009063169.1 78.9  
 190 40 0 1 190 1 190 2.70E-78 299.7 225164  
 cellular

organisms;Eukaryota;Opisthokonta;Metazoa;Eumetazoa;Bilateria;Protostomia;Spiralia;Lophotrochozoa;Mollusca;Gastropoda;Patellogastropoda;Lottioidea;Lottiidae;Lottia;Lottia gigantea  
UdeM00000031348 6573 617.8 UdeM00000031348 XP\_021343053.1 42.9 1827  
823 50 102 1841 111 1804 4.40E-173 617.8 6573 cellular  
organisms;Eukaryota;Opisthokonta;Metazoa;Eumetazoa;Bilateria;Protostomia;Spiralia;Lophotrochozoa;Mollusca;Bivalvia;Autobranchia;Pteriormorphia;Pectinida;Pectinoidea;Pectinidae;Mizuhopecten;Mizuhopecten yessoensis  
UdeM00000031349 6596 795.4 UdeM00000031349 XP\_045174527.1 74.1 536  
135 2 1 533 1 535 4.40E-227 795.4 6596 cellular  
organisms;Eukaryota;Opisthokonta;Metazoa;Eumetazoa;Bilateria;Protostomia;Spiralia;Lophotrochozoa;Mollusca;Bivalvia;Autobranchia;Heteroconchia;Euheterodonta;Imparidentia;Venerida;Veneroidea;Veneridae;Mercenaria;Mercenaria mercenaria  
UdeM00000031350 6579 909.4 UdeM00000031350 XP\_033734986.1 83.2 548  
89 3 1 546 1 547 2.30E-261 909.4 6579 cellular  
organisms;Eukaryota;Opisthokonta;Metazoa;Eumetazoa;Bilateria;Protostomia;Spiralia;Lophotrochozoa;Mollusca;Bivalvia;Autobranchia;Pteriormorphia;Pectinida;Pectinoidea;Pectinidae;Pecten;Pecten maximus  
UdeM00000031351 6579 907.9 UdeM00000031351 XP\_033734986.1 83.4 548  
88 3 1 546 1 547 6.70E-261 907.9 6579 cellular  
organisms;Eukaryota;Opisthokonta;Metazoa;Eumetazoa;Bilateria;Protostomia;Spiralia;Lophotrochozoa;Mollusca;Bivalvia;Autobranchia;Pteriormorphia;Pectinida;Pectinoidea;Pectinidae;Pecten;Pecten maximus  
UdeM00000031353 6596 157.1 UdeM00000031353 XP\_045171374.1 32 309  
188 11 8 303 15 314 4.50E-35 157.1 6596 cellular  
organisms;Eukaryota;Opisthokonta;Metazoa;Eumetazoa;Bilateria;Protostomia;Spiralia;Lophotrochozoa;Mollusca;Bivalvia;Autobranchia;Heteroconchia;Euheterodonta;Imparidentia;Venerida;Veneroidea;Veneridae;Mercenaria;Mercenaria mercenaria  
UdeM00000031354 6596 109 UdeM00000031354 XP\_045171992.1 29.4 231  
147 8 2 222 86 310 1.20E-20 109 6596 cellular  
organisms;Eukaryota;Opisthokonta;Metazoa;Eumetazoa;Bilateria;Protostomia;Spiralia;Lophotrochozoa;Mollusca;Bivalvia;Autobranchia;Heteroconchia;Euheterodonta;Imparidentia;Venerida;Veneroidea;Veneridae;Mercenaria;Mercenaria mercenaria  
UdeM00000031355 6596 131.3 UdeM00000031355 XP\_045187703.1 32.3 248  
150 6 5 240 43 284 1.60E-27 131.3 6596 cellular  
organisms;Eukaryota;Opisthokonta;Metazoa;Eumetazoa;Bilateria;Protostomia;Spiralia;Lophotrochozoa;Mollusca;Bivalvia;Autobranchia;Heteroconchia;Euheterodonta;Imparidentia;Venerida;Veneroidea;Veneridae;Mercenaria;Mercenaria mercenaria  
UdeM00000031356 6596 101.3 UdeM00000031356 XP\_045187611.1 50 84  
41 1 10 92 43 126 7.20E-19 101.3 6596 cellular  
organisms;Eukaryota;Opisthokonta;Metazoa;Eumetazoa;Bilateria;Protostomia;Spiralia;Lophotrochozoa;Mollusca;Bivalvia;Autobranchia;Heteroconchia;Euheterodonta;Imparidentia;Venerida;Veneroidea;Veneridae;Mercenaria;Mercenaria mercenaria  
UdeM00000031357 29159 80.5 UdeM00000031357 XP\_034307341.1 35 143  
67 2 2 124 48 184 1.70E-12 80.5 29159 cellular  
organisms;Eukaryota;Opisthokonta;Metazoa;Eumetazoa;Bilateria;Protostomia;Spiralia;Lophotrochozoa;Mollusca;Bivalvia;Autobranchia;Pteriormorphia;Ostreida;Ostreioidea;Ostreidae;Crassostrea;Crassostrea gigas

UdeM00000031358 29159 93.2 UdeM00000031358 XP\_034307341.1 40.9 110  
 55 1 9 108 230 339 4.00E-16 93.2 29159 cellular  
 organisms;Eukaryota;Opisthokonta;Metazoa;Eumetazoa;Bilateria;Protostomia;  
 Spiralia;Lophotrochozoa;Mollusca;Bivalvia;Autobranchia;Pteriomorpha;Ostr  
 eida;Ostreoidea;Ostreidae;Crassostrea;Crassostrea gigas  
 UdeM00000031359 6596 188 UdeM00000031359 XP\_045185049.1 55 180  
 79 1 9 186 11 190 1.30E-44 188 6596 cellular  
 organisms;Eukaryota;Opisthokonta;Metazoa;Eumetazoa;Bilateria;Protostomia;  
 Spiralia;Lophotrochozoa;Mollusca;Bivalvia;Autobranchia;Heteroconchia;Euhe  
 terodonta;Imparidentia;Venerida;Veneroidea;Veneridae;Mercenaria;Mercenari  
 a mercenaria  
 UdeM00000031360 7739 108.2 UdeM00000031360 XP\_035675655.1 32.9 213  
 127 8 2 213 370 567 2.50E-20 108.2 7739 cellular  
 organisms;Eukaryota;Opisthokonta;Metazoa;Eumetazoa;Bilateria;Deuterostomi  
 a;Chordata;Cephalochordata;Leptocardii;Amphioxiformes;Branchiostomidae;Br  
 anchiostoma;Branchiostoma floridae  
 UdeM00000031361 29159 472.6 UdeM00000031361 XP\_034323999.1 59.9 566  
 185 8 4 552 5 545 6.80E-130 472.6 29159 cellular  
 organisms;Eukaryota;Opisthokonta;Metazoa;Eumetazoa;Bilateria;Protostomia;  
 Spiralia;Lophotrochozoa;Mollusca;Bivalvia;Autobranchia;Pteriomorpha;Ostr  
 eida;Ostreoidea;Ostreidae;Crassostrea;Crassostrea gigas  
 UdeM00000031362 6579 120.9 UdeM00000031362 XP\_033757956.1 48.1 131  
 65 1 31 158 31 161 1.50E-24 120.9 6579 cellular  
 organisms;Eukaryota;Opisthokonta;Metazoa;Eumetazoa;Bilateria;Protostomia;  
 Spiralia;Lophotrochozoa;Mollusca;Bivalvia;Autobranchia;Pteriomorpha;Pect  
 inida;Pectinoidea;Pectinidae;Pecten;Pecten maximus  
 UdeM00000031363 6579 106.3 UdeM00000031363 XP\_033757956.1 49.5 107  
 51 1 20 123 55 161 2.90E-20 106.3 6579 cellular  
 organisms;Eukaryota;Opisthokonta;Metazoa;Eumetazoa;Bilateria;Protostomia;  
 Spiralia;Lophotrochozoa;Mollusca;Bivalvia;Autobranchia;Pteriomorpha;Pect  
 inida;Pectinoidea;Pectinidae;Pecten;Pecten maximus  
 UdeM00000031364 6579 478 UdeM00000031364 XP\_033735415.1 82.2 276  
 49 0 1 276 1 276 8.00E-132 478 6579 cellular  
 organisms;Eukaryota;Opisthokonta;Metazoa;Eumetazoa;Bilateria;Protostomia;  
 Spiralia;Lophotrochozoa;Mollusca;Bivalvia;Autobranchia;Pteriomorpha;Pect  
 inida;Pectinoidea;Pectinidae;Pecten;Pecten maximus  
 UdeM00000031365 6596 300.8 UdeM00000031365 XP\_045174436.1 52.2 291  
 136 2 9 299 7 294 1.90E-78 300.8 6596 cellular  
 organisms;Eukaryota;Opisthokonta;Metazoa;Eumetazoa;Bilateria;Protostomia;  
 Spiralia;Lophotrochozoa;Mollusca;Bivalvia;Autobranchia;Heteroconchia;Euhe  
 terodonta;Imparidentia;Venerida;Veneroidea;Veneridae;Mercenaria;Mercenari  
 a mercenaria  
 UdeM00000031366 6596 820.8 UdeM00000031366 XP\_045174377.1 79.8 491  
 92 2 3 486 2 492 8.90E-235 820.8 6596 cellular  
 organisms;Eukaryota;Opisthokonta;Metazoa;Eumetazoa;Bilateria;Protostomia;  
 Spiralia;Lophotrochozoa;Mollusca;Bivalvia;Autobranchia;Heteroconchia;Euhe  
 terodonta;Imparidentia;Venerida;Veneroidea;Veneridae;Mercenaria;Mercenari  
 a mercenaria  
 UdeM00000031367 6596 841.6 UdeM00000031367 XP\_045174383.1 83.4 483  
 75 3 3 480 2 484 4.80E-241 841.6 6596 cellular  
 organisms;Eukaryota;Opisthokonta;Metazoa;Eumetazoa;Bilateria;Protostomia;  
 Spiralia;Lophotrochozoa;Mollusca;Bivalvia;Autobranchia;Heteroconchia;Euhe  
 terodonta;Imparidentia;Venerida;Veneroidea;Veneridae;Mercenaria;Mercenari  
 a mercenaria

UdeM00000031368 6596 458.4 UdeM00000031368 XP\_045174401.1 53.5 419  
 191 3 1 419 1 415 1.10E-125 458.4 6596 cellular  
 organisms;Eukaryota;Opisthokonta;Metazoa;Eumetazoa;Bilateria;Protostomia;  
 Spiralia;Lophotrochozoa;Mollusca;Bivalvia;Autobranchia;Heteroconchia;Euhe  
 terodonta;Imparidentia;Venerida;Veneroidea;Veneridae;Mercenaria;Mercenari  
 a mercenaria

UdeM00000031369 6573 432.6 UdeM00000031369 XP\_021378422.1 62.6 326  
 118 2 3 324 1 326 4.60E-118 432.6 6573 cellular  
 organisms;Eukaryota;Opisthokonta;Metazoa;Eumetazoa;Bilateria;Protostomia;  
 Spiralia;Lophotrochozoa;Mollusca;Bivalvia;Autobranchia;Pteriormorphia;Pect  
 inida;Pectinoidea;Pectinidae;Mizuhopecten;Mizuhopecten yessoensis

UdeM00000031370 6579 469.2 UdeM00000031370 XP\_033735374.1 55.4 424  
 166 6 4 419 2 410 5.70E-129 469.2 6579 cellular  
 organisms;Eukaryota;Opisthokonta;Metazoa;Eumetazoa;Bilateria;Protostomia;  
 Spiralia;Lophotrochozoa;Mollusca;Bivalvia;Autobranchia;Pteriormorphia;Pect  
 inida;Pectinoidea;Pectinidae;Pecten;Pecten maximus

UdeM00000031371 400727 176.8 UdeM00000031371 XP\_025090816.1 67.7  
 133 42 1 3 134 2 134 1.90E-41 176.8 400727  
 cellular  
 organisms;Eukaryota;Opisthokonta;Metazoa;Eumetazoa;Bilateria;Protostomia;  
 Spiralia;Lophotrochozoa;Mollusca;Gastropoda;Caenogastropoda;Architaeniogl  
 ossa;Ampullarioidea;Ampullariidae;Pomacea;Pomacea canaliculata

UdeM00000031372 1735272 241.5 UdeM00000031372 XP\_041376276.1 24.7  
 949 573 33 301 1151 46 950 5.40E-60 241.5 1735272  
 cellular  
 organisms;Eukaryota;Opisthokonta;Metazoa;Eumetazoa;Bilateria;Protostomia;  
 Spiralia;Lophotrochozoa;Mollusca;Gastropoda;Neomphalina;Neomphaloidea;Pel  
 tospiridae;Gigantopelta;Gigantopelta aegis

UdeM00000031373 6565 250.8 UdeM00000031373 XP\_022330234.1 44.2 339  
 176 4 15 348 3 333 2.60E-63 250.8 6565 cellular  
 organisms;Eukaryota;Opisthokonta;Metazoa;Eumetazoa;Bilateria;Protostomia;  
 Spiralia;Lophotrochozoa;Mollusca;Bivalvia;Autobranchia;Pteriormorphia;Ostr  
 eida;Ostreoidea;Ostreidae;Crassostrea;Crassostrea virginica

UdeM00000031374 29159 146.4 UdeM00000031374 XP\_034326047.1 33.3 493  
 259 17 16 488 7 449 9.80E-32 146.4 29159 cellular  
 organisms;Eukaryota;Opisthokonta;Metazoa;Eumetazoa;Bilateria;Protostomia;  
 Spiralia;Lophotrochozoa;Mollusca;Bivalvia;Autobranchia;Pteriormorphia;Ostr  
 eida;Ostreoidea;Ostreidae;Crassostrea;Crassostrea gigas

UdeM00000031375 6596 832.4 UdeM00000031375 XP\_045182547.1 44.3 1344  
 591 34 115 1351 136 1428 8.40E-238 832.4 6596 cellular  
 organisms;Eukaryota;Opisthokonta;Metazoa;Eumetazoa;Bilateria;Protostomia;  
 Spiralia;Lophotrochozoa;Mollusca;Bivalvia;Autobranchia;Heteroconchia;Euhe  
 terodonta;Imparidentia;Venerida;Veneroidea;Veneridae;Mercenaria;Mercenari  
 a mercenaria

UdeM00000031376 6565 65.1 UdeM00000031376 XP\_022299727.1 56.1 57  
 25 0 36 92 160 216 5.40E-08 65.1 6565 cellular  
 organisms;Eukaryota;Opisthokonta;Metazoa;Eumetazoa;Bilateria;Protostomia;  
 Spiralia;Lophotrochozoa;Mollusca;Bivalvia;Autobranchia;Pteriormorphia;Ostr  
 eida;Ostreoidea;Ostreidae;Crassostrea;Crassostrea virginica

UdeM00000031377 6579 161.4 UdeM00000031377 XP\_033726657.1 34.2 316  
 112 3 1 220 223 538 1.40E-36 161.4 6579 cellular  
 organisms;Eukaryota;Opisthokonta;Metazoa;Eumetazoa;Bilateria;Protostomia;  
 Spiralia;Lophotrochozoa;Mollusca;Bivalvia;Autobranchia;Pteriormorphia;Pect  
 inida;Pectinoidea;Pectinidae;Pecten;Pecten maximus

UdeM00000031378 6565 84.3 UdeM00000031378 XP\_022299727.1 44.9 78  
 43 0 3 80 657 734 1.10E-13 84.3 6565 cellular  
 organisms;Eukaryota;Opisthokonta;Metazoa;Eumetazoa;Bilateria;Protostomia;  
 Spiralia;Lophotrochozoa;Mollusca;Bivalvia;Autobranchia;Pteriormorphia;Ostr  
 eida;Ostreoidea;Ostreidae;Crassostrea;Crassostrea virginica  
 UdeM00000031380 6579 188 UdeM00000031380 XP\_033733984.1 46.3 246  
 94 7 7 251 20 228 1.60E-44 188 6579 cellular  
 organisms;Eukaryota;Opisthokonta;Metazoa;Eumetazoa;Bilateria;Protostomia;  
 Spiralia;Lophotrochozoa;Mollusca;Bivalvia;Autobranchia;Pteriormorphia;Pect  
 inida;Pectinoidea;Pectinidae;Pecten;Pecten maximus  
 UdeM00000031381 73337 102.4 UdeM00000031381 XP\_014644422.1 56.2 80  
 34 1 1 80 1 79 2.80E-19 102.4 73337 cellular  
 organisms;Eukaryota;Opisthokonta;Metazoa;Eumetazoa;Bilateria;Deuterostomi  
 a;Chordata;Craniata;Vertebrata;Gnathostomata;Teleostomi;Euteleostomi;Sarc  
 opterygii;Dipnotetrapodomorpha;Tetrapoda;Amniota;Mammalia;Theria;Eutheria  
 ;Boreoeutheria;Laurasiatheria;Perissodactyla;Rhinocerotidae;Ceratotherium  
 ;Ceratotherium simum;Ceratotherium simum simum  
 UdeM00000031382 6596 271.9 UdeM00000031382 XP\_045173409.1 70.9 196  
 52 1 55 245 50 245 7.80E-70 271.9 6596 cellular  
 organisms;Eukaryota;Opisthokonta;Metazoa;Eumetazoa;Bilateria;Protostomia;  
 Spiralia;Lophotrochozoa;Mollusca;Bivalvia;Autobranchia;Heteroconchia;Euhe  
 terodonta;Imparidentia;Venerida;Veneroidea;Veneridae;Mercenaria;Mercenari  
 a mercenaria  
 UdeM00000031383 260995 236.9 UdeM00000031383 XP\_033812940.1 37.6  
 417 144 6 1 314 221 624 3.50E-59 236.9 260995  
 cellular  
 organisms;Eukaryota;Opisthokonta;Metazoa;Eumetazoa;Bilateria;Deuterostomi  
 a;Chordata;Craniata;Vertebrata;Gnathostomata;Teleostomi;Euteleostomi;Sarc  
 opterygii;Dipnotetrapodomorpha;Tetrapoda;Amphibia;Gymnophiona;Dermophiida  
 e;Geotrypetes;Geotrypetes seraphini  
 UdeM00000031384 7757 186.4 UdeM00000031384 XP\_032835197.1 78.1 114  
 25 0 43 156 3 116 2.70E-44 186.4 7757 cellular  
 organisms;Eukaryota;Opisthokonta;Metazoa;Eumetazoa;Bilateria;Deuterostomi  
 a;Chordata;Craniata;Vertebrata;Cyclostomata;Hyperoartia;Petromyzontiforme  
 s;Petromyzontidae;Petromyzon;Petromyzon marinus  
 UdeM00000031385 29159 377.1 UdeM00000031385 XP\_011425206.2 28.6 1145  
 515 28 321 1423 348 1232 9.90E-101 377.1 29159 cellular  
 organisms;Eukaryota;Opisthokonta;Metazoa;Eumetazoa;Bilateria;Protostomia;  
 Spiralia;Lophotrochozoa;Mollusca;Bivalvia;Autobranchia;Pteriormorphia;Ostr  
 eida;Ostreoidea;Ostreidae;Crassostrea;Crassostrea gigas  
 UdeM00000031386 29159 377.1 UdeM00000031386 XP\_011425206.2 28.6 1145  
 515 28 319 1421 348 1232 9.90E-101 377.1 29159 cellular  
 organisms;Eukaryota;Opisthokonta;Metazoa;Eumetazoa;Bilateria;Protostomia;  
 Spiralia;Lophotrochozoa;Mollusca;Bivalvia;Autobranchia;Pteriormorphia;Ostr  
 eida;Ostreoidea;Ostreidae;Crassostrea;Crassostrea gigas  
 UdeM00000031387 6596 330.9 UdeM00000031387 XP\_045173604.1 69.3 225  
 68 1 3 227 12 235 1.30E-87 330.9 6596 cellular  
 organisms;Eukaryota;Opisthokonta;Metazoa;Eumetazoa;Bilateria;Protostomia;  
 Spiralia;Lophotrochozoa;Mollusca;Bivalvia;Autobranchia;Heteroconchia;Euhe  
 terodonta;Imparidentia;Venerida;Veneroidea;Veneridae;Mercenaria;Mercenari  
 a mercenaria  
 UdeM00000031388 6596 330.5 UdeM00000031388 XP\_045173604.1 68.3 227  
 71 1 12 238 10 235 1.80E-87 330.5 6596 cellular  
 organisms;Eukaryota;Opisthokonta;Metazoa;Eumetazoa;Bilateria;Protostomia;

Spiralia;Lophotrochozoa;Mollusca;Bivalvia;Autobranchia;Heteroconchia;Euherodonta;Imparidentia;Venerida;Veneroidea;Veneridae;Mercenaria;Mercenaria mercenaria

UdeM00000031389 6596 1920.2 UdeM00000031389 XP\_045173593.1 49.5  
2282 865 29 11 2289 14 2011 0.00E+00 1920.2 6596  
cellular

organisms;Eukaryota;Opisthokonta;Metazoa;Eumetazoa;Bilateria;Protostomia;Spiralia;Lophotrochozoa;Mollusca;Bivalvia;Autobranchia;Heteroconchia;Euherodonta;Imparidentia;Venerida;Veneroidea;Veneridae;Mercenaria;Mercenaria mercenaria

UdeM00000031390 6596 707.2 UdeM00000031390 XP\_045170552.1 71.9 466  
126 2 1 464 1 463 1.40E-200 707.2 6596 cellular

organisms;Eukaryota;Opisthokonta;Metazoa;Eumetazoa;Bilateria;Protostomia;Spiralia;Lophotrochozoa;Mollusca;Bivalvia;Autobranchia;Heteroconchia;Euherodonta;Imparidentia;Venerida;Veneroidea;Veneridae;Mercenaria;Mercenaria mercenaria

UdeM00000031391 7574 105.9 UdeM00000031391 XP\_013409897.1 79 62  
13 0 1 62 476 537 2.00E-20 105.9 7574 cellular

organisms;Eukaryota;Opisthokonta;Metazoa;Eumetazoa;Bilateria;Protostomia;Spiralia;Lophotrochozoa;Brachiopoda;Linguliformea;Lingulata;Lingulida;Linguloidea;Lingulidae;Lingula;Lingula anatina

UdeM00000031392 6596 834.3 UdeM00000031392 XP\_045170543.1 73.9 537  
139 1 1 537 1 536 8.60E-239 834.3 6596 cellular

organisms;Eukaryota;Opisthokonta;Metazoa;Eumetazoa;Bilateria;Protostomia;Spiralia;Lophotrochozoa;Mollusca;Bivalvia;Autobranchia;Heteroconchia;Euherodonta;Imparidentia;Venerida;Veneroidea;Veneridae;Mercenaria;Mercenaria mercenaria

UdeM00000031393 225164 239.2 UdeM00000031393 XP\_009046346.1 62.6  
190 71 0 548 737 38 227 1.70E-59 239.2 225164  
cellular

organisms;Eukaryota;Opisthokonta;Metazoa;Eumetazoa;Bilateria;Protostomia;Spiralia;Lophotrochozoa;Mollusca;Gastropoda;Patellogastropoda;Lottioidae;Lottiidae;Lottia;Lottia gigantea

UdeM00000031394 7757 290 UdeM00000031394 XP\_032835197.1 77.8 189  
42 0 2 190 149 337 2.20E-75 290 7757 cellular

organisms;Eukaryota;Opisthokonta;Metazoa;Eumetazoa;Bilateria;Deuterostomia;Chordata;Craniata;Vertebrata;Cyclostomata;Hyperoartia;Petromyzontiformes;Petromyzontidae;Petromyzon;Petromyzon marinus

UdeM00000031396 6596 229.2 UdeM00000031396 XP\_045170618.1 57.4 188  
79 1 1 188 24 210 4.60E-57 229.2 6596 cellular

organisms;Eukaryota;Opisthokonta;Metazoa;Eumetazoa;Bilateria;Protostomia;Spiralia;Lophotrochozoa;Mollusca;Bivalvia;Autobranchia;Heteroconchia;Euherodonta;Imparidentia;Venerida;Veneroidea;Veneridae;Mercenaria;Mercenaria mercenaria

UdeM00000031395 6596 337.4 UdeM00000031395 XP\_045170607.1 57 279  
118 2 1 279 1 277 1.80E-89 337.4 6596 cellular

organisms;Eukaryota;Opisthokonta;Metazoa;Eumetazoa;Bilateria;Protostomia;Spiralia;Lophotrochozoa;Mollusca;Bivalvia;Autobranchia;Heteroconchia;Euherodonta;Imparidentia;Venerida;Veneroidea;Veneridae;Mercenaria;Mercenaria mercenaria

UdeM00000031398 6596 574.3 UdeM00000031398 XP\_045170109.1 59.6 525  
188 6 2 523 486 989 1.80E-160 574.3 6596 cellular

organisms;Eukaryota;Opisthokonta;Metazoa;Eumetazoa;Bilateria;Protostomia;Spiralia;Lophotrochozoa;Mollusca;Bivalvia;Autobranchia;Heteroconchia;Euherodonta;Imparidentia;Venerida;Veneroidea;Veneridae;Mercenaria;Mercenaria mercenaria



terodonta;Imparidentia;Venerida;Veneroidea;Veneridae;Mercenaria;Mercenaria mercenaria

UdeM00000031397 6596 840.9 UdeM00000031397 XP\_045170109.1 58.1 785  
297 9 2 780 231 989 1.40E-240 840.9 6596 cellular

organisms;Eukaryota;Opisthokonta;Metazoa;Eumetazoa;Bilateria;Protostomia;Spiralia;Lophotrochozoa;Mollusca;Bivalvia;Autobranhia;Heteroconchia;Euheterodonta;Imparidentia;Venerida;Veneroidea;Veneridae;Mercenaria;Mercenaria mercenaria

UdeM00000031399 6596 190.3 UdeM00000031399 XP\_045170109.1 73.3 120  
32 0 5 124 61 180 1.50E-45 190.3 6596 cellular

organisms;Eukaryota;Opisthokonta;Metazoa;Eumetazoa;Bilateria;Protostomia;Spiralia;Lophotrochozoa;Mollusca;Bivalvia;Autobranhia;Heteroconchia;Euheterodonta;Imparidentia;Venerida;Veneroidea;Veneridae;Mercenaria;Mercenaria mercenaria

UdeM00000031400 1735272 126.3 UdeM00000031400 XP\_041360711.1 32.1  
196 122 2 5 200 6 190 4.80E-26 126.3 1735272  
cellular

organisms;Eukaryota;Opisthokonta;Metazoa;Eumetazoa;Bilateria;Protostomia;Spiralia;Lophotrochozoa;Mollusca;Gastropoda;Neomphalina;Neomphaloidea;Peltospiridae;Gigantopelta;Gigantopelta aegis

UdeM00000031401 29159 309.7 UdeM00000031401 NP\_001306898.1 43 421  
146 9 88 507 121 448 7.10E-81 309.7 29159 cellular

organisms;Eukaryota;Opisthokonta;Metazoa;Eumetazoa;Bilateria;Protostomia;Spiralia;Lophotrochozoa;Mollusca;Bivalvia;Autobranhia;Pteriormorphia;Ostreida;Ostreioidea;Ostreidae;Crassostrea;Crassostrea gigas

UdeM00000031402 6596 283.1 UdeM00000031402 XP\_045187369.1 51 298  
123 4 4 279 3 299 4.00E-73 283.1 6596 cellular

organisms;Eukaryota;Opisthokonta;Metazoa;Eumetazoa;Bilateria;Protostomia;Spiralia;Lophotrochozoa;Mollusca;Bivalvia;Autobranhia;Heteroconchia;Euheterodonta;Imparidentia;Venerida;Veneroidea;Veneridae;Mercenaria;Mercenaria mercenaria

UdeM00000031403 7574 281.6 UdeM00000031403 XP\_013420189.1 49.5 293  
135 3 19 300 19 309 1.20E-72 281.6 7574 cellular

organisms;Eukaryota;Opisthokonta;Metazoa;Eumetazoa;Bilateria;Protostomia;Spiralia;Lophotrochozoa;Brachiopoda;Linguliformea;Lingulata;Lingulida;Linguloidea;Lingulidae;Lingula;Lingula anatina

UdeM00000031404 6596 283.5 UdeM00000031404 XP\_045181481.1 70.9 189  
55 0 1 189 1 189 2.00E-73 283.5 6596 cellular

organisms;Eukaryota;Opisthokonta;Metazoa;Eumetazoa;Bilateria;Protostomia;Spiralia;Lophotrochozoa;Mollusca;Bivalvia;Autobranhia;Heteroconchia;Euheterodonta;Imparidentia;Venerida;Veneroidea;Veneridae;Mercenaria;Mercenaria mercenaria

UdeM00000031405 225164 156 UdeM00000031405 XP\_009067077.1 49.6  
137 69 0 1 137 51 187 3.50E-35 156 225164  
cellular

organisms;Eukaryota;Opisthokonta;Metazoa;Eumetazoa;Bilateria;Protostomia;Spiralia;Lophotrochozoa;Mollusca;Gastropoda;Patellogastropoda;Lottioidae;Lottiidae;Lottia;Lottia gigantea

UdeM00000031406 225164 213 UdeM00000031406 XP\_009067077.1 59.8  
164 66 0 4 167 21 184 3.10E-52 213 225164

cellular

organisms;Eukaryota;Opisthokonta;Metazoa;Eumetazoa;Bilateria;Protostomia;Spiralia;Lophotrochozoa;Mollusca;Gastropoda;Patellogastropoda;Lottioidae;Lottiidae;Lottia;Lottia gigantea

UdeM00000031407 225164 289.3 UdeM00000031407 XP\_009067077.1 71.9  
 185 52 0 1 185 1 185 3.60E-75 289.3 225164  
 cellular  
 organisms;Eukaryota;Opisthokonta;Metazoa;Eumetazoa;Bilateria;Protostomia;  
 Spiralia;Lophotrochozoa;Mollusca;Gastropoda;Patellogastropoda;Lottioidea;  
 Lottiidae;Lottia;Lottia gigantea  
 UdeM00000031408 225164 113.6 UdeM00000031408 XP\_009051992.1 24.6  
 346 254 4 65 408 53 393 6.20E-22 113.6 225164  
 cellular  
 organisms;Eukaryota;Opisthokonta;Metazoa;Eumetazoa;Bilateria;Protostomia;  
 Spiralia;Lophotrochozoa;Mollusca;Gastropoda;Patellogastropoda;Lottioidea;  
 Lottiidae;Lottia;Lottia gigantea  
 UdeM00000031409 225164 288.5 UdeM00000031409 XP\_009067077.1 73.5  
 185 49 0 1 185 1 185 6.10E-75 288.5 225164  
 cellular  
 organisms;Eukaryota;Opisthokonta;Metazoa;Eumetazoa;Bilateria;Protostomia;  
 Spiralia;Lophotrochozoa;Mollusca;Gastropoda;Patellogastropoda;Lottioidea;  
 Lottiidae;Lottia;Lottia gigantea  
 UdeM00000031410 225164 103.2 UdeM00000031410 XP\_009051992.1 24.7  
 384 274 8 49 427 36 409 8.30E-19 103.2 225164  
 cellular  
 organisms;Eukaryota;Opisthokonta;Metazoa;Eumetazoa;Bilateria;Protostomia;  
 Spiralia;Lophotrochozoa;Mollusca;Gastropoda;Patellogastropoda;Lottioidea;  
 Lottiidae;Lottia;Lottia gigantea  
 UdeM00000031411 6596 494.6 UdeM00000031411 XP\_045176193.1 57.7 442  
 181 3 10 445 1 442 1.40E-136 494.6 6596 cellular  
 organisms;Eukaryota;Opisthokonta;Metazoa;Eumetazoa;Bilateria;Protostomia;  
 Spiralia;Lophotrochozoa;Mollusca;Bivalvia;Autobranchia;Heteroconchia;Euhe  
 terodonta;Imparidentia;Venerida;Veneroidea;Veneridae;Mercenaria;Mercenari  
 a mercenaria  
 UdeM00000031412 6596 500.7 UdeM00000031412 XP\_045176198.1 57.8 446  
 182 3 10 449 1 446 1.90E-138 500.7 6596 cellular  
 organisms;Eukaryota;Opisthokonta;Metazoa;Eumetazoa;Bilateria;Protostomia;  
 Spiralia;Lophotrochozoa;Mollusca;Bivalvia;Autobranchia;Heteroconchia;Euhe  
 terodonta;Imparidentia;Venerida;Veneroidea;Veneridae;Mercenaria;Mercenari  
 a mercenaria  
 UdeM00000031413 6579 258.1 UdeM00000031413 XP\_033735995.1 43.6 330  
 172 8 6 324 8 334 1.60E-65 258.1 6579 cellular  
 organisms;Eukaryota;Opisthokonta;Metazoa;Eumetazoa;Bilateria;Protostomia;  
 Spiralia;Lophotrochozoa;Mollusca;Bivalvia;Autobranchia;Pteriomorphia;Pect  
 inida;Pectinoidea;Pectinidae;Pecten;Pecten maximus  
 UdeM00000031414 6579 456.1 UdeM00000031414 XP\_033734862.1 53.4 461  
 200 5 1 459 1 448 5.40E-125 456.1 6579 cellular  
 organisms;Eukaryota;Opisthokonta;Metazoa;Eumetazoa;Bilateria;Protostomia;  
 Spiralia;Lophotrochozoa;Mollusca;Bivalvia;Autobranchia;Pteriomorphia;Pect  
 inida;Pectinoidea;Pectinidae;Pecten;Pecten maximus  
 UdeM00000031415 6579 367.1 UdeM00000031415 XP\_033736199.1 41.6 478  
 267 9 14 485 114 585 3.60E-98 367.1 6579 cellular  
 organisms;Eukaryota;Opisthokonta;Metazoa;Eumetazoa;Bilateria;Protostomia;  
 Spiralia;Lophotrochozoa;Mollusca;Bivalvia;Autobranchia;Pteriomorphia;Pect  
 inida;Pectinoidea;Pectinidae;Pecten;Pecten maximus  
 UdeM00000031416 6596 122.9 UdeM00000031416 XP\_045159185.1 41.1 151  
 85 3 541 690 420 567 1.70E-24 122.9 6596 cellular  
 organisms;Eukaryota;Opisthokonta;Metazoa;Eumetazoa;Bilateria;Protostomia;

Spiralia;Lophotrochozoa;Mollusca;Bivalvia;Autobranchia;Heteroconchia;Euherodonta;Imparidentia;Venerida;Veneroidea;Veneridae;Mercenaria;Mercenaria mercenaria

UdeM00000031417 6565 121.7 UdeM00000031417 XP\_022302274.1 47.9 119  
60 2 154 272 186 302 1.40E-24 121.7 6565 cellular

organisms;Eukaryota;Opisthokonta;Metazoa;Eumetazoa;Bilateria;Protostomia;Spiralia;Lophotrochozoa;Mollusca;Bivalvia;Autobranchia;Pteriomorphia;Ostreida;Ostreoidea;Ostreidae;Crassostrea;Crassostrea virginica

UdeM00000031418 6596 252.7 UdeM00000031418 XP\_045159185.1 35.4 429  
248 9 57 468 6 422 9.60E-64 252.7 6596 cellular

organisms;Eukaryota;Opisthokonta;Metazoa;Eumetazoa;Bilateria;Protostomia;Spiralia;Lophotrochozoa;Mollusca;Bivalvia;Autobranchia;Heteroconchia;Euherodonta;Imparidentia;Venerida;Veneroidea;Veneridae;Mercenaria;Mercenaria mercenaria

UdeM00000031419 6596 307.4 UdeM00000031419 XP\_045174563.1 61.3 256  
71 4 5 234 1256 1509 1.60E-80 307.4 6596 cellular

organisms;Eukaryota;Opisthokonta;Metazoa;Eumetazoa;Bilateria;Protostomia;Spiralia;Lophotrochozoa;Mollusca;Bivalvia;Autobranchia;Heteroconchia;Euherodonta;Imparidentia;Venerida;Veneroidea;Veneridae;Mercenaria;Mercenaria mercenaria

UdeM00000031420 6596 344.4 UdeM00000031420 XP\_045174563.1 68.5 260  
73 5 5 261 1256 1509 1.30E-91 344.4 6596 cellular

organisms;Eukaryota;Opisthokonta;Metazoa;Eumetazoa;Bilateria;Protostomia;Spiralia;Lophotrochozoa;Mollusca;Bivalvia;Autobranchia;Heteroconchia;Euherodonta;Imparidentia;Venerida;Veneroidea;Veneridae;Mercenaria;Mercenaria mercenaria

UdeM00000031421 6596 601.3 UdeM00000031421 XP\_045174563.1 79.3 362  
73 2 52 412 896 1256 1.00E-168 601.3 6596 cellular

organisms;Eukaryota;Opisthokonta;Metazoa;Eumetazoa;Bilateria;Protostomia;Spiralia;Lophotrochozoa;Mollusca;Bivalvia;Autobranchia;Heteroconchia;Euherodonta;Imparidentia;Venerida;Veneroidea;Veneridae;Mercenaria;Mercenaria mercenaria

UdeM00000031422 6596 1094 UdeM00000031422 XP\_045174601.1 66 879  
200 12 1 791 3 870 0.00E+00 1094 6596 cellular

organisms;Eukaryota;Opisthokonta;Metazoa;Eumetazoa;Bilateria;Protostomia;Spiralia;Lophotrochozoa;Mollusca;Bivalvia;Autobranchia;Heteroconchia;Euherodonta;Imparidentia;Venerida;Veneroidea;Veneridae;Mercenaria;Mercenaria mercenaria

UdeM00000031423 6565 476.9 UdeM00000031423 XP\_022334222.1 64.3 345  
120 1 1 345 1 342 2.20E-131 476.9 6565 cellular

organisms;Eukaryota;Opisthokonta;Metazoa;Eumetazoa;Bilateria;Protostomia;Spiralia;Lophotrochozoa;Mollusca;Bivalvia;Autobranchia;Pteriomorphia;Ostreida;Ostreoidea;Ostreidae;Crassostrea;Crassostrea virginica

UdeM00000031424 6596 4571.9 UdeM00000031424 XP\_045174712.1 71.6  
3500 899 24 1 3481 1 3423 0.00E+00 4571.9 6596

cellular  
organisms;Eukaryota;Opisthokonta;Metazoa;Eumetazoa;Bilateria;Protostomia;Spiralia;Lophotrochozoa;Mollusca;Bivalvia;Autobranchia;Heteroconchia;Euherodonta;Imparidentia;Venerida;Veneroidea;Veneridae;Mercenaria;Mercenaria mercenaria

UdeM00000031425 6565 227.3 UdeM00000031425 XP\_022288548.1 56.5 177  
75 1 16 192 83 257 1.70E-56 227.3 6565 cellular

organisms;Eukaryota;Opisthokonta;Metazoa;Eumetazoa;Bilateria;Protostomia;

Spiralia;Lophotrochozoa;Mollusca;Bivalvia;Autobranchia;Pteriormorphia;Ostr  
eida;Ostreoidea;Ostreidae;Crassostrea;Crassostrea virginica  
UdeM00000031426 29159 313.5 UdeM00000031426 XP\_034337046.1 58.8 255  
100 2 12 264 489 740 2.50E-82 313.5 29159 cellular  
organisms;Eukaryota;Opisthokonta;Metazoa;Eumetazoa;Bilateria;Protostomia;  
Spiralia;Lophotrochozoa;Mollusca;Bivalvia;Autobranchia;Pteriormorphia;Ostr  
eida;Ostreoidea;Ostreidae;Crassostrea;Crassostrea gigas  
UdeM00000031428 6579 569.7 UdeM00000031428 XP\_033735558.1 66.5 448  
145 3 69 515 322 765 3.80E-159 569.7 6579 cellular  
organisms;Eukaryota;Opisthokonta;Metazoa;Eumetazoa;Bilateria;Protostomia;  
Spiralia;Lophotrochozoa;Mollusca;Bivalvia;Autobranchia;Pteriormorphia;Pect  
inida;Pectinoidea;Pectinidae;Pecten;Pecten maximus  
UdeM00000031429 225164 589 UdeM00000031429 XP\_009061636.1 84.4  
326 51 0 25 350 1 326 4.40E-165 589 225164  
cellular  
organisms;Eukaryota;Opisthokonta;Metazoa;Eumetazoa;Bilateria;Protostomia;  
Spiralia;Lophotrochozoa;Mollusca;Gastropoda;Patellogastropoda;Lottioidea;  
Lottiidae;Lottia;Lottia gigantea  
UdeM00000031430 225164 399.4 UdeM00000031430 XP\_009061636.1 82.4  
221 39 0 1 221 1 221 3.00E-108 399.4 225164  
cellular  
organisms;Eukaryota;Opisthokonta;Metazoa;Eumetazoa;Bilateria;Protostomia;  
Spiralia;Lophotrochozoa;Mollusca;Gastropoda;Patellogastropoda;Lottioidea;  
Lottiidae;Lottia;Lottia gigantea  
UdeM00000031432 6596 332 UdeM00000031432 XP\_045184560.1 41.4 498  
264 10 1 482 29 514 1.20E-87 332 6596 cellular  
organisms;Eukaryota;Opisthokonta;Metazoa;Eumetazoa;Bilateria;Protostomia;  
Spiralia;Lophotrochozoa;Mollusca;Bivalvia;Autobranchia;Heteroconchia;Euhe  
terodonta;Imparidentia;Venerida;Veneroidea;Veneridae;Mercenaria;Mercenari  
a mercenaria  
UdeM00000031431 6596 550.8 UdeM00000031431 XP\_045184560.1 46 680  
334 13 1 660 29 695 2.40E-153 550.8 6596 cellular  
organisms;Eukaryota;Opisthokonta;Metazoa;Eumetazoa;Bilateria;Protostomia;  
Spiralia;Lophotrochozoa;Mollusca;Bivalvia;Autobranchia;Heteroconchia;Euhe  
terodonta;Imparidentia;Venerida;Veneroidea;Veneridae;Mercenaria;Mercenari  
a mercenaria  
UdeM00000031433 6596 512.3 UdeM00000031433 XP\_045184560.1 45.1 647  
325 12 1 630 29 662 8.80E-142 512.3 6596 cellular  
organisms;Eukaryota;Opisthokonta;Metazoa;Eumetazoa;Bilateria;Protostomia;  
Spiralia;Lophotrochozoa;Mollusca;Bivalvia;Autobranchia;Heteroconchia;Euhe  
terodonta;Imparidentia;Venerida;Veneroidea;Veneridae;Mercenaria;Mercenari  
a mercenaria  
UdeM00000031434 6596 797.3 UdeM00000031434 XP\_045185733.1 79.7 531  
108 0 1 531 1 531 1.10E-227 797.3 6596 cellular  
organisms;Eukaryota;Opisthokonta;Metazoa;Eumetazoa;Bilateria;Protostomia;  
Spiralia;Lophotrochozoa;Mollusca;Bivalvia;Autobranchia;Heteroconchia;Euhe  
terodonta;Imparidentia;Venerida;Veneroidea;Veneridae;Mercenaria;Mercenari  
a mercenaria  
UdeM00000031436 6596 374 UdeM00000031436 XP\_045185744.1 70.2 245  
73 0 4 248 5 249 1.60E-100 374 6596 cellular  
organisms;Eukaryota;Opisthokonta;Metazoa;Eumetazoa;Bilateria;Protostomia;  
Spiralia;Lophotrochozoa;Mollusca;Bivalvia;Autobranchia;Heteroconchia;Euhe  
terodonta;Imparidentia;Venerida;Veneroidea;Veneridae;Mercenaria;Mercenari  
a mercenaria

UdeM00000031437 6596 403.3 UdeM00000031437 XP\_045185744.1 69.7 267  
 81 0 29 295 249 515 2.70E-109 403.3 6596 cellular  
 organisms;Eukaryota;Opisthokonta;Metazoa;Eumetazoa;Bilateria;Protostomia;  
 Spiralia;Lophotrochozoa;Mollusca;Bivalvia;Autobranhia;Heteroconchia;Euhe  
 terodonta;Imparidentia;Venerida;Veneroidea;Veneridae;Mercenaria;Mercenari  
 a mercenaria

UdeM00000031438 6596 485 UdeM00000031438 XP\_045185394.1 57.8 410  
 161 5 24 428 17 419 1.20E-133 485 6596 cellular  
 organisms;Eukaryota;Opisthokonta;Metazoa;Eumetazoa;Bilateria;Protostomia;  
 Spiralia;Lophotrochozoa;Mollusca;Bivalvia;Autobranhia;Heteroconchia;Euhe  
 terodonta;Imparidentia;Venerida;Veneroidea;Veneridae;Mercenaria;Mercenari  
 a mercenaria

UdeM00000031439 6596 173.3 UdeM00000031439 XP\_045164928.1 66.7 117  
 39 0 25 141 145 261 2.20E-40 173.3 6596 cellular  
 organisms;Eukaryota;Opisthokonta;Metazoa;Eumetazoa;Bilateria;Protostomia;  
 Spiralia;Lophotrochozoa;Mollusca;Bivalvia;Autobranhia;Heteroconchia;Euhe  
 terodonta;Imparidentia;Venerida;Veneroidea;Veneridae;Mercenaria;Mercenari  
 a mercenaria

UdeM00000031440 6596 90.5 UdeM00000031440 XP\_045185394.1 60.8 74  
 28 1 3 75 95 168 1.00E-15 90.5 6596 cellular  
 organisms;Eukaryota;Opisthokonta;Metazoa;Eumetazoa;Bilateria;Protostomia;  
 Spiralia;Lophotrochozoa;Mollusca;Bivalvia;Autobranhia;Heteroconchia;Euhe  
 terodonta;Imparidentia;Venerida;Veneroidea;Veneridae;Mercenaria;Mercenari  
 a mercenaria

UdeM00000031441 6596 173.7 UdeM00000031441 XP\_045164928.1 66.7 117  
 39 0 34 150 145 261 1.80E-40 173.7 6596 cellular  
 organisms;Eukaryota;Opisthokonta;Metazoa;Eumetazoa;Bilateria;Protostomia;  
 Spiralia;Lophotrochozoa;Mollusca;Bivalvia;Autobranhia;Heteroconchia;Euhe  
 terodonta;Imparidentia;Venerida;Veneroidea;Veneridae;Mercenaria;Mercenari  
 a mercenaria

UdeM00000031442 6596 176.4 UdeM00000031442 XP\_045164928.1 59.4 138  
 50 1 3 134 124 261 2.40E-41 176.4 6596 cellular  
 organisms;Eukaryota;Opisthokonta;Metazoa;Eumetazoa;Bilateria;Protostomia;  
 Spiralia;Lophotrochozoa;Mollusca;Bivalvia;Autobranhia;Heteroconchia;Euhe  
 terodonta;Imparidentia;Venerida;Veneroidea;Veneridae;Mercenaria;Mercenari  
 a mercenaria

UdeM00000031443 6596 485.3 UdeM00000031443 XP\_045185394.1 57.8 410  
 161 5 24 428 17 419 8.80E-134 485.3 6596 cellular  
 organisms;Eukaryota;Opisthokonta;Metazoa;Eumetazoa;Bilateria;Protostomia;  
 Spiralia;Lophotrochozoa;Mollusca;Bivalvia;Autobranhia;Heteroconchia;Euhe  
 terodonta;Imparidentia;Venerida;Veneroidea;Veneridae;Mercenaria;Mercenari  
 a mercenaria

UdeM00000031444 6596 401.7 UdeM00000031444 XP\_045185744.1 69.5 266  
 81 0 11 276 250 515 7.40E-109 401.7 6596 cellular  
 organisms;Eukaryota;Opisthokonta;Metazoa;Eumetazoa;Bilateria;Protostomia;  
 Spiralia;Lophotrochozoa;Mollusca;Bivalvia;Autobranhia;Heteroconchia;Euhe  
 terodonta;Imparidentia;Venerida;Veneroidea;Veneridae;Mercenaria;Mercenari  
 a mercenaria

UdeM00000031445 6596 330.1 UdeM00000031445 XP\_045185744.1 73.2 209  
 56 0 12 220 42 250 2.70E-87 330.1 6596 cellular  
 organisms;Eukaryota;Opisthokonta;Metazoa;Eumetazoa;Bilateria;Protostomia;  
 Spiralia;Lophotrochozoa;Mollusca;Bivalvia;Autobranhia;Heteroconchia;Euhe  
 terodonta;Imparidentia;Venerida;Veneroidea;Veneridae;Mercenaria;Mercenari  
 a mercenaria

UdeM00000031446 6596 496.1 UdeM00000031446 XP\_045185394.1 59.1 408  
 155 5 24 426 17 417 4.70E-137 496.1 6596 cellular  
 organisms;Eukaryota;Opisthokonta;Metazoa;Eumetazoa;Bilateria;Protostomia;  
 Spiralia;Lophotrochozoa;Mollusca;Bivalvia;Autobranchia;Heteroconchia;Euhe  
 terodonta;Imparidentia;Venerida;Veneroidea;Veneridae;Mercenaria;Mercenari  
 a mercenaria  
 UdeM00000031447 6596 112.5 UdeM00000031447 XP\_045164928.1 52.7 110  
 37 1 7 101 155 264 3.60E-22 112.5 6596 cellular  
 organisms;Eukaryota;Opisthokonta;Metazoa;Eumetazoa;Bilateria;Protostomia;  
 Spiralia;Lophotrochozoa;Mollusca;Bivalvia;Autobranchia;Heteroconchia;Euhe  
 terodonta;Imparidentia;Venerida;Veneroidea;Veneridae;Mercenaria;Mercenari  
 a mercenaria  
 UdeM00000031448 6596 493.8 UdeM00000031448 XP\_045185394.1 59.1 408  
 155 5 24 426 17 417 2.50E-136 493.8 6596 cellular  
 organisms;Eukaryota;Opisthokonta;Metazoa;Eumetazoa;Bilateria;Protostomia;  
 Spiralia;Lophotrochozoa;Mollusca;Bivalvia;Autobranchia;Heteroconchia;Euhe  
 terodonta;Imparidentia;Venerida;Veneroidea;Veneridae;Mercenaria;Mercenari  
 a mercenaria  
 UdeM00000031449 29159 347.4 UdeM00000031449 XP\_011428660.2 64 264  
 85 2 1 254 1 264 1.50E-92 347.4 29159 cellular  
 organisms;Eukaryota;Opisthokonta;Metazoa;Eumetazoa;Bilateria;Protostomia;  
 Spiralia;Lophotrochozoa;Mollusca;Bivalvia;Autobranchia;Pteriormorphia;Ostr  
 eida;Ostreoidea;Ostreidae;Crassostrea;Crassostrea gigas  
 UdeM00000031450 6596 702.2 UdeM00000031450 XP\_045214618.1 43.4 1179  
 472 39 2 1101 292 1354 1.00E-198 702.2 6596 cellular  
 organisms;Eukaryota;Opisthokonta;Metazoa;Eumetazoa;Bilateria;Protostomia;  
 Spiralia;Lophotrochozoa;Mollusca;Bivalvia;Autobranchia;Heteroconchia;Euhe  
 terodonta;Imparidentia;Venerida;Veneroidea;Veneridae;Mercenaria;Mercenari  
 a mercenaria  
 UdeM00000031451 6596 254.2 UdeM00000031451 XP\_045214618.1 48.9 305  
 141 6 6 305 4 298 2.30E-64 254.2 6596 cellular  
 organisms;Eukaryota;Opisthokonta;Metazoa;Eumetazoa;Bilateria;Protostomia;  
 Spiralia;Lophotrochozoa;Mollusca;Bivalvia;Autobranchia;Heteroconchia;Euhe  
 terodonta;Imparidentia;Venerida;Veneroidea;Veneridae;Mercenaria;Mercenari  
 a mercenaria  
 UdeM00000031452 6579 704.5 UdeM00000031452 XP\_033734670.1 69.3 584  
 161 6 1 584 1 566 1.30E-199 704.5 6579 cellular  
 organisms;Eukaryota;Opisthokonta;Metazoa;Eumetazoa;Bilateria;Protostomia;  
 Spiralia;Lophotrochozoa;Mollusca;Bivalvia;Autobranchia;Pteriormorphia;Pect  
 inida;Pectinoidea;Pectinidae;Pecten;Pecten maximus  
 UdeM00000031453 6596 716.5 UdeM00000031453 XP\_045169864.1 52.4 760  
 196 11 1 596 1 758 2.90E-203 716.5 6596 cellular  
 organisms;Eukaryota;Opisthokonta;Metazoa;Eumetazoa;Bilateria;Protostomia;  
 Spiralia;Lophotrochozoa;Mollusca;Bivalvia;Autobranchia;Heteroconchia;Euhe  
 terodonta;Imparidentia;Venerida;Veneroidea;Veneridae;Mercenaria;Mercenari  
 a mercenaria  
 UdeM00000031454 6596 734.9 UdeM00000031454 XP\_045169864.1 53 762  
 211 10 1 619 1 758 8.20E-209 734.9 6596 cellular  
 organisms;Eukaryota;Opisthokonta;Metazoa;Eumetazoa;Bilateria;Protostomia;  
 Spiralia;Lophotrochozoa;Mollusca;Bivalvia;Autobranchia;Heteroconchia;Euhe  
 terodonta;Imparidentia;Venerida;Veneroidea;Veneridae;Mercenaria;Mercenari  
 a mercenaria  
 UdeM00000031455 6500 68.9 UdeM00000031455 XP\_005102894.1 48.6 74  
 36 1 16 89 577 648 3.70E-09 68.9 6500 cellular

organisms;Eukaryota;Opisthokonta;Metazoa;Eumetazoa;Bilateria;Protostomia;  
Spiralia;Lophotrochozoa;Mollusca;Gastropoda;Heterobranchia;Euthyneura;Tec  
tipleura;Aplysiida;Aplysioidea;Aplysiidae;Aplysia;Aplysia californica  
UdeM00000031456 6596 689.1 UdeM00000031456 XP\_045167178.1 53.7 618  
274 5 19 629 25 637 5.40E-195 689.1 6596 cellular  
organisms;Eukaryota;Opisthokonta;Metazoa;Eumetazoa;Bilateria;Protostomia;  
Spiralia;Lophotrochozoa;Mollusca;Bivalvia;Autobranchia;Heteroconchia;Euhe  
terodonta;Imparidentia;Venerida;Veneroidea;Veneridae;Mercenaria;Mercenari  
a mercenaria  
UdeM00000031457 6596 674.9 UdeM00000031457 XP\_045167178.1 50.7 621  
290 6 35 647 25 637 1.10E-190 674.9 6596 cellular  
organisms;Eukaryota;Opisthokonta;Metazoa;Eumetazoa;Bilateria;Protostomia;  
Spiralia;Lophotrochozoa;Mollusca;Bivalvia;Autobranchia;Heteroconchia;Euhe  
terodonta;Imparidentia;Venerida;Veneroidea;Veneridae;Mercenaria;Mercenari  
a mercenaria  
UdeM00000031458 6596 597.4 UdeM00000031458 XP\_045167178.1 47 630  
273 9 19 594 26 648 2.00E-167 597.4 6596 cellular  
organisms;Eukaryota;Opisthokonta;Metazoa;Eumetazoa;Bilateria;Protostomia;  
Spiralia;Lophotrochozoa;Mollusca;Bivalvia;Autobranchia;Heteroconchia;Euhe  
terodonta;Imparidentia;Venerida;Veneroidea;Veneridae;Mercenaria;Mercenari  
a mercenaria  
UdeM00000031459 6596 596.3 UdeM00000031459 XP\_045167178.1 49.1 586  
286 6 5 587 21 597 4.90E-167 596.3 6596 cellular  
organisms;Eukaryota;Opisthokonta;Metazoa;Eumetazoa;Bilateria;Protostomia;  
Spiralia;Lophotrochozoa;Mollusca;Bivalvia;Autobranchia;Heteroconchia;Euhe  
terodonta;Imparidentia;Venerida;Veneroidea;Veneridae;Mercenaria;Mercenari  
a mercenaria  
UdeM00000031461 79782 424.1 UdeM00000031461 XP\_014251961.1 71.7 276  
78 0 1 276 1 276 1.40E-115 424.1 79782 cellular  
organisms;Eukaryota;Opisthokonta;Metazoa;Eumetazoa;Bilateria;Protostomia;  
Ecdysozoa;Panarthropoda;Arthropoda;Mandibulata;Pancrustacea;Hexapoda;Inse  
cta;Dicondylia;Pterygota;Neoptera;Paraneoptera;Hemiptera;Prosorrhyncha;He  
teroptera;Euheteroptera;Neoheteroptera;Panheteroptera;Cimicomorpha;Cimico  
idea;Cimicidae;Cimex;Cimex lectularius  
UdeM00000031462 6596 545.8 UdeM00000031462 XP\_045187218.1 80.3 385  
36 7 1 384 1 346 4.40E-152 545.8 6596 cellular  
organisms;Eukaryota;Opisthokonta;Metazoa;Eumetazoa;Bilateria;Protostomia;  
Spiralia;Lophotrochozoa;Mollusca;Bivalvia;Autobranchia;Heteroconchia;Euhe  
terodonta;Imparidentia;Venerida;Veneroidea;Veneridae;Mercenaria;Mercenari  
a mercenaria  
UdeM00000031463 6596 362.5 UdeM00000031463 XP\_045187221.1 49 357  
178 2 1 354 32 387 6.60E-97 362.5 6596 cellular  
organisms;Eukaryota;Opisthokonta;Metazoa;Eumetazoa;Bilateria;Protostomia;  
Spiralia;Lophotrochozoa;Mollusca;Bivalvia;Autobranchia;Heteroconchia;Euhe  
terodonta;Imparidentia;Venerida;Veneroidea;Veneridae;Mercenaria;Mercenari  
a mercenaria  
UdeM00000031465 431895 228.4 UdeM00000031465 XP\_001749022.1 78.1  
146 32 0 5 150 4 149 6.00E-57 228.4 431895  
cellular  
organisms;Eukaryota;Opisthokonta;Choanoflagellata;Craspedida;Salpingoecid  
ae;Monosiga;Monosiga brevicollis;Monosiga brevicollis MX1  
UdeM00000031466 225164 121.3 UdeM00000031466 XP\_009056061.1 75.3  
77 19 0 1 77 73 149 5.40E-25 121.3 225164  
cellular

organisms;Eukaryota;Opisthokonta;Metazoa;Eumetazoa;Bilateria;Protostomia;Spiralia;Lophotrochozoa;Mollusca;Gastropoda;Patellogastropoda;Lottioidea;Lottiidae;Lottia;Lottia gigantea

UdeM00000031467 6565 256.5 UdeM00000031467 XP\_022332068.1 44.8 384  
176 9 4 379 532 887 5.20E-65 256.5 6565 cellular

organisms;Eukaryota;Opisthokonta;Metazoa;Eumetazoa;Bilateria;Protostomia;Spiralia;Lophotrochozoa;Mollusca;Bivalvia;Autobranchia;Pteriomorpha;Ostreida;Ostreoidea;Ostreidae;Crassostrea;Crassostrea virginica

UdeM00000031468 6573 303.1 UdeM00000031468 XP\_021361716.1 42.4 479  
201 13 3 429 17 472 5.80E-79 303.1 6573 cellular

organisms;Eukaryota;Opisthokonta;Metazoa;Eumetazoa;Bilateria;Protostomia;Spiralia;Lophotrochozoa;Mollusca;Bivalvia;Autobranchia;Pteriomorpha;Pectinida;Pectinoidea;Pectinidae;Mizuhopecten;Mizuhopecten yessoensis

UdeM00000031470 6596 869 UdeM00000031470 XP\_045182016.1 70.8 662  
172 6 1 660 1 643 3.90E-249 869 6596 cellular

organisms;Eukaryota;Opisthokonta;Metazoa;Eumetazoa;Bilateria;Protostomia;Spiralia;Lophotrochozoa;Mollusca;Bivalvia;Autobranchia;Heteroconchia;Euheterodonta;Imparidentia;Venerida;Veneroidea;Veneridae;Mercenaria;Mercenaria mercenaria

UdeM00000031471 6596 956.4 UdeM00000031471 XP\_045182016.1 59.6 970  
354 11 36 986 781 1731 2.70E-275 956.4 6596 cellular

organisms;Eukaryota;Opisthokonta;Metazoa;Eumetazoa;Bilateria;Protostomia;Spiralia;Lophotrochozoa;Mollusca;Bivalvia;Autobranchia;Heteroconchia;Euheterodonta;Imparidentia;Venerida;Veneroidea;Veneridae;Mercenaria;Mercenaria mercenaria

UdeM00000031472 6573 246.9 UdeM00000031472 XP\_021373841.1 34.9 487  
265 13 10 463 12 479 5.00E-62 246.9 6573 cellular

organisms;Eukaryota;Opisthokonta;Metazoa;Eumetazoa;Bilateria;Protostomia;Spiralia;Lophotrochozoa;Mollusca;Bivalvia;Autobranchia;Pteriomorpha;Pectinida;Pectinoidea;Pectinidae;Mizuhopecten;Mizuhopecten yessoensis

UdeM00000031474 29159 246.5 UdeM00000031474 XP\_034323987.1 73.7 156  
41 0 1 156 1 156 2.70E-62 246.5 29159 cellular

organisms;Eukaryota;Opisthokonta;Metazoa;Eumetazoa;Bilateria;Protostomia;Spiralia;Lophotrochozoa;Mollusca;Bivalvia;Autobranchia;Pteriomorpha;Ostreida;Ostreoidea;Ostreidae;Crassostrea;Crassostrea gigas

UdeM00000031475 6579 1591.2 UdeM00000031475 XP\_033734261.1 71  
1164 281 6 3 1138 2 1136 0.00E+00 1591.2 6579  
cellular

organisms;Eukaryota;Opisthokonta;Metazoa;Eumetazoa;Bilateria;Protostomia;Spiralia;Lophotrochozoa;Mollusca;Bivalvia;Autobranchia;Pteriomorpha;Pectinida;Pectinoidea;Pectinidae;Pecten;Pecten maximus

UdeM00000031476 6596 442.6 UdeM00000031476 XP\_045182041.1 59.5 400  
128 3 1 369 812 1208 5.00E-121 442.6 6596 cellular

organisms;Eukaryota;Opisthokonta;Metazoa;Eumetazoa;Bilateria;Protostomia;Spiralia;Lophotrochozoa;Mollusca;Bivalvia;Autobranchia;Heteroconchia;Euheterodonta;Imparidentia;Venerida;Veneroidea;Veneridae;Mercenaria;Mercenaria mercenaria

UdeM00000031477 6579 478.8 UdeM00000031477 XP\_033736165.1 63.4 434  
140 5 587 1013 417 838 1.80E-131 478.8 6579 cellular

organisms;Eukaryota;Opisthokonta;Metazoa;Eumetazoa;Bilateria;Protostomia;Spiralia;Lophotrochozoa;Mollusca;Bivalvia;Autobranchia;Pteriomorpha;Pectinida;Pectinoidea;Pectinidae;Pecten;Pecten maximus

UdeM00000031478 6596 274.2 UdeM00000031478 XP\_045182088.1 61.1 216  
74 4 17 230 13 220 1.50E-70 274.2 6596 cellular



organisms;Eukaryota;Opisthokonta;Metazoa;Eumetazoa;Bilateria;Protostomia;Spiralia;Lophotrochozoa;Mollusca;Bivalvia;Autobranhia;Heteroconchia;Euherodonta;Imparidentia;Venerida;Veneroidea;Veneridae;Mercenaria;Mercenaria mercenaria

UdeM00000031479 6596 1011.9 UdeM00000031479 XP\_045182088.1 73.4  
700 185 1 228 926 264 963 5.20E-292 1011.9 6596  
cellular

organisms;Eukaryota;Opisthokonta;Metazoa;Eumetazoa;Bilateria;Protostomia;Spiralia;Lophotrochozoa;Mollusca;Bivalvia;Autobranhia;Heteroconchia;Euherodonta;Imparidentia;Venerida;Veneroidea;Veneridae;Mercenaria;Mercenaria mercenaria

UdeM00000031479 6596 71.6 UdeM00000031479 XP\_045182088.1 76.7 43  
10 0 3 45 224 266 5.80E-09 71.6 6596 cellular

organisms;Eukaryota;Opisthokonta;Metazoa;Eumetazoa;Bilateria;Protostomia;Spiralia;Lophotrochozoa;Mollusca;Bivalvia;Autobranhia;Heteroconchia;Euherodonta;Imparidentia;Venerida;Veneroidea;Veneridae;Mercenaria;Mercenaria mercenaria

UdeM00000031480 6565 414.8 UdeM00000031480 XP\_022333349.1 87.3 229  
29 0 1 229 280 508 6.90E-113 414.8 6565 cellular

organisms;Eukaryota;Opisthokonta;Metazoa;Eumetazoa;Bilateria;Protostomia;Spiralia;Lophotrochozoa;Mollusca;Bivalvia;Autobranhia;Pteriormorphia;Ostreida;Ostreioidea;Ostreidae;Crassostrea;Crassostrea virginica

UdeM00000031481 225164 376.7 UdeM00000031481 XP\_009066935.1 68.9  
257 80 0 31 287 8 264 2.90E-101 376.7 225164  
cellular

organisms;Eukaryota;Opisthokonta;Metazoa;Eumetazoa;Bilateria;Protostomia;Spiralia;Lophotrochozoa;Mollusca;Gastropoda;Patellogastropoda;Lottiioidea;Lottiidae;Lottia;Lottia gigantea

UdeM00000031484 6596 1333.5 UdeM00000031484 XP\_045164789.1 80.4  
811 154 4 1 809 1607 2414 0.00E+00 1333.5 6596  
cellular

organisms;Eukaryota;Opisthokonta;Metazoa;Eumetazoa;Bilateria;Protostomia;Spiralia;Lophotrochozoa;Mollusca;Bivalvia;Autobranhia;Heteroconchia;Euherodonta;Imparidentia;Venerida;Veneroidea;Veneridae;Mercenaria;Mercenaria mercenaria

UdeM00000031483 6596 2336.6 UdeM00000031483 XP\_045164789.1 57  
2384 688 48 1 2101 84 2414 0.00E+00 2336.6 6596  
cellular

organisms;Eukaryota;Opisthokonta;Metazoa;Eumetazoa;Bilateria;Protostomia;Spiralia;Lophotrochozoa;Mollusca;Bivalvia;Autobranhia;Heteroconchia;Euherodonta;Imparidentia;Venerida;Veneroidea;Veneridae;Mercenaria;Mercenaria mercenaria

UdeM00000031485 1735272 71.2 UdeM00000031485 XP\_041352832.1 56.6  
76 26 4 1 73 1 72 1.00E-09 71.2 1735272  
cellular

organisms;Eukaryota;Opisthokonta;Metazoa;Eumetazoa;Bilateria;Protostomia;Spiralia;Lophotrochozoa;Mollusca;Gastropoda;Neomphalina;Neomphaloidea;Peltospiridae;Gigantopelta;Gigantopelta aegis

UdeM00000031486 29159 306.2 UdeM00000031486 XP\_011439507.2 51.7 267  
127 1 103 367 132 398 5.70E-80 306.2 29159 cellular

organisms;Eukaryota;Opisthokonta;Metazoa;Eumetazoa;Bilateria;Protostomia;Spiralia;Lophotrochozoa;Mollusca;Bivalvia;Autobranhia;Pteriormorphia;Ostreida;Ostreioidea;Ostreidae;Crassostrea;Crassostrea gigas

UdeM00000031487 6526 132.5 UdeM00000031487 XP\_013064827.1 50.8 122  
 56 2 4 123 5 124 3.80E-28 132.5 6526 cellular  
 organisms;Eukaryota;Opisthokonta;Metazoa;Eumetazoa;Bilateria;Protostomia;  
 Spiralia;Lophotrochozoa;Mollusca;Gastropoda;Heterobranchia;Euthyneura;Pan  
 pulmonata;Hygrophila;Lymnaeidae;Planorbidae;Biomphalaria;Biomphalaria  
 glabrata  
 UdeM00000031488 6596 222.2 UdeM00000031488 XP\_045187580.1 40.6 480  
 239 14 1 441 1 473 1.30E-54 222.2 6596 cellular  
 organisms;Eukaryota;Opisthokonta;Metazoa;Eumetazoa;Bilateria;Protostomia;  
 Spiralia;Lophotrochozoa;Mollusca;Bivalvia;Autobranchia;Heteroconchia;Euhe  
 terodonta;Imparidentia;Venerida;Veneroidea;Veneridae;Mercenaria;Mercenari  
 a mercenaria  
 UdeM00000031490 6596 245 UdeM00000031490 XP\_045161967.1 61.9 181  
 67 1 1 181 284 462 7.50E-62 245 6596 cellular  
 organisms;Eukaryota;Opisthokonta;Metazoa;Eumetazoa;Bilateria;Protostomia;  
 Spiralia;Lophotrochozoa;Mollusca;Bivalvia;Autobranchia;Heteroconchia;Euhe  
 terodonta;Imparidentia;Venerida;Veneroidea;Veneridae;Mercenaria;Mercenari  
 a mercenaria  
 UdeM00000031489 6579 587 UdeM00000031489 XP\_033734374.1 65.9 457  
 144 5 4 457 1 448 2.00E-164 587 6579 cellular  
 organisms;Eukaryota;Opisthokonta;Metazoa;Eumetazoa;Bilateria;Protostomia;  
 Spiralia;Lophotrochozoa;Mollusca;Bivalvia;Autobranchia;Pteriormorphia;Pect  
 inida;Pectinoidea;Pectinidae;Pecten;Pecten maximus  
 UdeM00000031492 6596 1195.6 UdeM00000031492 XP\_045165437.1 52.7  
 1621 652 19 1 1554 1 1574 0.00E+00 1195.6 6596  
 cellular  
 organisms;Eukaryota;Opisthokonta;Metazoa;Eumetazoa;Bilateria;Protostomia;  
 Spiralia;Lophotrochozoa;Mollusca;Bivalvia;Autobranchia;Heteroconchia;Euhe  
 terodonta;Imparidentia;Venerida;Veneroidea;Veneridae;Mercenaria;Mercenari  
 a mercenaria  
 UdeM00000043327 29159 147.9 UdeM00000043327 XP\_034313081.1 59.3 113  
 45 1 76 188 102 213 1.30E-32 147.9 29159 cellular  
 organisms;Eukaryota;Opisthokonta;Metazoa;Eumetazoa;Bilateria;Protostomia;  
 Spiralia;Lophotrochozoa;Mollusca;Bivalvia;Autobranchia;Pteriormorphia;Ostr  
 eida;Ostreidae;Crassostrea;Crassostrea gigas  
 UdeM00000043328 13164 62.8 UdeM00000043328 XP\_022183200.1 44.6 56  
 31 0 11 66 220 275 2.80E-07 62.8 13164 cellular  
 organisms;Eukaryota;Opisthokonta;Metazoa;Eumetazoa;Bilateria;Protostomia;  
 Ecdysozoa;Panarthropoda;Arthropoda;Mandibulata;Pancrustacea;Hexapoda;Inse  
 cta;Dicondylia;Pterygota;Neoptera;Paraneoptera;Hemiptera;Sternorrhyncha;A  
 phidomorpha;Aphidoidea;Aphididae;Aphidinae;Macrosiphini;Myzus;Myzus  
 persicae  
 UdeM00000043329 6579 97.1 UdeM00000043329 XP\_033759130.1 61.8 68  
 26 0 1 68 1 68 1.50E-17 97.1 6579 cellular  
 organisms;Eukaryota;Opisthokonta;Metazoa;Eumetazoa;Bilateria;Protostomia;  
 Spiralia;Lophotrochozoa;Mollusca;Bivalvia;Autobranchia;Pteriormorphia;Pect  
 inida;Pectinoidea;Pectinidae;Pecten;Pecten maximus  
 UdeM00000043330 6565 137.5 UdeM00000043330 XP\_022337267.1 58.4 113  
 47 0 68 180 452 564 1.80E-29 137.5 6565 cellular  
 organisms;Eukaryota;Opisthokonta;Metazoa;Eumetazoa;Bilateria;Protostomia;  
 Spiralia;Lophotrochozoa;Mollusca;Bivalvia;Autobranchia;Pteriormorphia;Ostr  
 eida;Ostreidae;Crassostrea;Crassostrea virginica  
 UdeM00000043331 59472 73.2 UdeM00000043331 XP\_045426894.1 29.2 219  
 135 7 94 305 107 312 1.30E-09 73.2 59472 cellular

organisms;Eukaryota;Opisthokonta;Metazoa;Eumetazoa;Bilateria;Deuterostomi  
a;Chordata;Craniata;Vertebrata;Gnathostomata;Teleostomi;Euteleostomi;Sarc  
opterygii;Dipnotetrapodomorpha;Tetrapoda;Amniota;Mammalia;Theria;Eutheria  
;Boreoeutheria;Laurasiatheria;Chiroptera;Microchiroptera;Vespertilionidae  
;Pipistrellus;Pipistrellus kuhlii

UdeM00000043334 114398 184.1 UdeM00000043334 XP\_042899054.1 32.5  
391 218 8 1 360 358 733 3.40E-43 184.1 114398  
cellular

organisms;Eukaryota;Opisthokonta;Metazoa;Eumetazoa;Bilateria;Protostomia;  
Ecdysozoa;Panarthropoda;Arthropoda;Chelicerata;Arachnida;Araneae;Araneomo  
rphae;Entelegynae;Orbiculariae;Araneoidea;Theridiidae;Parasteatoda;Parast  
eatoda tepidariorum

UdeM00000043336 1735272 203.8 UdeM00000043336 XP\_041356488.1 51.5  
202 97 1 418 619 133 333 6.70E-49 203.8 1735272  
cellular

organisms;Eukaryota;Opisthokonta;Metazoa;Eumetazoa;Bilateria;Protostomia;  
Spiralia;Lophotrochozoa;Mollusca;Gastropoda;Neomphalina;Neomphaloidea;Pel  
tospiridae;Gigantopelta;Gigantopelta aegis

UdeM00000043335 1735272 203.8 UdeM00000043335 XP\_041356488.1 51.5  
202 97 1 346 547 133 333 5.90E-49 203.8 1735272  
cellular

organisms;Eukaryota;Opisthokonta;Metazoa;Eumetazoa;Bilateria;Protostomia;  
Spiralia;Lophotrochozoa;Mollusca;Gastropoda;Neomphalina;Neomphaloidea;Pel  
tospiridae;Gigantopelta;Gigantopelta aegis

UdeM00000043339 143302 80.1 UdeM00000043339 XP\_012589114.1 27.2  
239 157 7 94 319 107 341 9.50E-12 80.1 143302  
cellular

organisms;Eukaryota;Opisthokonta;Metazoa;Eumetazoa;Bilateria;Deuterostomi  
a;Chordata;Craniata;Vertebrata;Gnathostomata;Teleostomi;Euteleostomi;Sarc  
opterygii;Dipnotetrapodomorpha;Tetrapoda;Amniota;Mammalia;Theria;Eutheria  
;Boreoeutheria;Laurasiatheria;Eulipotyphla;Talpidae;Condylura;Condylura  
cristata

UdeM00000043340 79684 59.7 UdeM00000043340 XP\_005347269.1 43.3 60  
34 0 16 75 15 74 2.00E-06 59.7 79684 cellular

organisms;Eukaryota;Opisthokonta;Metazoa;Eumetazoa;Bilateria;Deuterostomi  
a;Chordata;Craniata;Vertebrata;Gnathostomata;Teleostomi;Euteleostomi;Sarc  
opterygii;Dipnotetrapodomorpha;Tetrapoda;Amniota;Mammalia;Theria;Eutheria  
;Boreoeutheria;Euarchontoglires;Glires;Rodentia;Myomorpha;Muroidea;Cricet  
idae;Arvicolinae;Microtus;Microtus ochrogaster

UdeM00000043344 6579 394.4 UdeM00000043344 XP\_033752673.1 58 324  
109 1 28 324 328 651 1.40E-106 394.4 6579 cellular

organisms;Eukaryota;Opisthokonta;Metazoa;Eumetazoa;Bilateria;Protostomia;  
Spiralia;Lophotrochozoa;Mollusca;Bivalvia;Autobranchia;Pteriomorpha;Pect  
inida;Pectinoidea;Pectinidae;Pecten;Pecten maximus

UdeM00000043345 205130 85.9 UdeM00000043345 XP\_026180020.1 49.3  
71 36 0 1 71 197 267 2.70E-14 85.9 205130  
cellular

organisms;Eukaryota;Opisthokonta;Metazoa;Eumetazoa;Bilateria;Deuterostomi  
a;Chordata;Craniata;Vertebrata;Gnathostomata;Teleostomi;Euteleostomi;Acti  
nopterygii;Actinopteri;Neopterygii;Teleostei;Osteoglossocephalai;Clupeoce  
phala;Euteleosteomorpha;Neoteleostei;Eurypterygia;Ctenosquamata;Acanthomo  
rphata;Euacanthomorphacea;Percomorphaceae;Anabantaria;Synbranchiformes;Ma  
stacembeloidei;Mastacembelidae;Mastacembelus;Mastacembelus armatus

UdeM00000043346 7604 159.8 UdeM00000043346 XP\_033641066.1 65.1 109  
 38 0 1 109 155 263 1.90E-36 159.8 7604 cellular  
 organisms;Eukaryota;Opisthokonta;Metazoa;Eumetazoa;Bilateria;Deuterostomi  
 a;Echinodermata;Eleutherozoa;Asterozoa;Asteroidea;Forcipulatacea;Forcipul  
 atida;Asteroidea;Asterias;Asterias rubens  
 UdeM00000043347 225164 63.2 UdeM00000043347 XP\_009058200.1 46.8  
 77 41 0 1 77 1 77 2.10E-07 63.2 225164  
 cellular  
 organisms;Eukaryota;Opisthokonta;Metazoa;Eumetazoa;Bilateria;Protostomia;  
 Spiralia;Lophotrochozoa;Mollusca;Gastropoda;Patellogastropoda;Lottioidea;  
 Lottiidae;Lottia;Lottia gigantea  
 UdeM00000043349 1868482 70.5 UdeM00000043349 XP\_021568579.1 27.8  
 209 138 6 94 297 107 307 7.30E-09 70.5 1868482  
 cellular  
 organisms;Eukaryota;Opisthokonta;Metazoa;Eumetazoa;Bilateria;Deuterostomi  
 a;Chordata;Craniata;Vertebrata;Gnathostomata;Teleostomi;Euteleostomi;Sarc  
 opterygii;Dipnotetrapodomorpha;Tetrapoda;Amniota;Mammalia;Theria;Eutheria  
 ;Boreoeutheria;Euarchontoglires;Primates;Haplorrhini;Tarsiiformes;Tarsiid  
 ae;Carlito;Carlito syricta  
 UdeM00000043350 7739 62.4 UdeM00000043350 XP\_035687810.1 34.9 129  
 74 6 37 157 105 231 1.30E-06 62.4 7739 cellular  
 organisms;Eukaryota;Opisthokonta;Metazoa;Eumetazoa;Bilateria;Deuterostomi  
 a;Chordata;Cephalochordata;Leptocardii;Amphioxiformes;Branchiostomidae;Br  
 anchiostoma;Branchiostoma floridae  
 UdeM00000043351 29159 86.3 UdeM00000043351 XP\_034307341.1 48.1 79  
 41 0 8 86 230 308 2.10E-14 86.3 29159 cellular  
 organisms;Eukaryota;Opisthokonta;Metazoa;Eumetazoa;Bilateria;Protostomia;  
 Spiralia;Lophotrochozoa;Mollusca;Bivalvia;Autobranchia;Pteriormorphia;Ostr  
 eida;Ostreoidea;Ostreidae;Crassostrea;Crassostrea gigas  
 UdeM00000043352 6596 282 UdeM00000043352 XP\_045156248.1 32.6 601  
 255 12 4 461 7 600 1.40E-72 282 6596 cellular  
 organisms;Eukaryota;Opisthokonta;Metazoa;Eumetazoa;Bilateria;Protostomia;  
 Spiralia;Lophotrochozoa;Mollusca;Bivalvia;Autobranchia;Heteroconchia;Euhe  
 terodonta;Imparidentia;Venerida;Veneroidea;Veneridae;Mercenaria;Mercenari  
 a mercenaria  
 UdeM00000043353 6596 245.4 UdeM00000043353 XP\_045215936.1 42.4 321  
 117 5 115 371 122 438 1.20E-61 245.4 6596 cellular  
 organisms;Eukaryota;Opisthokonta;Metazoa;Eumetazoa;Bilateria;Protostomia;  
 Spiralia;Lophotrochozoa;Mollusca;Bivalvia;Autobranchia;Heteroconchia;Euhe  
 terodonta;Imparidentia;Venerida;Veneroidea;Veneridae;Mercenaria;Mercenari  
 a mercenaria  
 UdeM00000043355 6596 531.6 UdeM00000043355 XP\_045188256.1 47.1 628  
 250 9 1 577 1 597 1.30E-147 531.6 6596 cellular  
 organisms;Eukaryota;Opisthokonta;Metazoa;Eumetazoa;Bilateria;Protostomia;  
 Spiralia;Lophotrochozoa;Mollusca;Bivalvia;Autobranchia;Heteroconchia;Euhe  
 terodonta;Imparidentia;Venerida;Veneroidea;Veneridae;Mercenaria;Mercenari  
 a mercenaria  
 UdeM00000043356 6596 238.8 UdeM00000043356 XP\_045201099.1 59.5 200  
 71 1 1 190 101 300 5.90E-60 238.8 6596 cellular  
 organisms;Eukaryota;Opisthokonta;Metazoa;Eumetazoa;Bilateria;Protostomia;  
 Spiralia;Lophotrochozoa;Mollusca;Bivalvia;Autobranchia;Heteroconchia;Euhe  
 terodonta;Imparidentia;Venerida;Veneroidea;Veneridae;Mercenaria;Mercenari  
 a mercenaria

UdeM00000043357 6596 209.5 UdeM00000043357 XP\_045201099.1 62.7 166  
 62 0 3 168 135 300 3.40E-51 209.5 6596 cellular  
 organisms;Eukaryota;Opisthokonta;Metazoa;Eumetazoa;Bilateria;Protostomia;  
 Spiralia;Lophotrochozoa;Mollusca;Bivalvia;Autobranchia;Heteroconchia;Euhe  
 terodonta;Imparidentia;Venerida;Veneroidea;Veneridae;Mercenaria;Mercenari  
 a mercenaria

UdeM00000043358 29144 69.7 UdeM00000043358 XP\_030641492.1 27.1 214  
 136 6 76 279 247 450 1.30E-08 69.7 29144 cellular  
 organisms;Eukaryota;Opisthokonta;Metazoa;Eumetazoa;Bilateria;Deuterostomi  
 a;Chordata;Craniata;Vertebrata;Gnathostomata;Teleostomi;Euteleostomi;Acti  
 nopterygii;Actinopteri;Neopterygii;Teleostei;Osteoglossocephalai;Clupeoce  
 phala;Otomorpha;Ostariophysi;Anotophysii;Gonorynchiformes;Chanoidei;Chanid  
 ae;Chanos;Chanos chanos

UdeM00000043361 6596 111.7 UdeM00000043361 XP\_045180427.1 32.3 279  
 146 4 1 242 1 273 1.40E-21 111.7 6596 cellular  
 organisms;Eukaryota;Opisthokonta;Metazoa;Eumetazoa;Bilateria;Protostomia;  
 Spiralia;Lophotrochozoa;Mollusca;Bivalvia;Autobranchia;Heteroconchia;Euhe  
 terodonta;Imparidentia;Venerida;Veneroidea;Veneridae;Mercenaria;Mercenari  
 a mercenaria

UdeM00000043362 29159 142.5 UdeM00000043362 XP\_034318677.1 41.9 217  
 103 7 5 212 13 215 6.10E-31 142.5 29159 cellular  
 organisms;Eukaryota;Opisthokonta;Metazoa;Eumetazoa;Bilateria;Protostomia;  
 Spiralia;Lophotrochozoa;Mollusca;Bivalvia;Autobranchia;Pteriormorphia;Ostr  
 eida;Ostreoidea;Ostreidae;Crassostrea;Crassostrea gigas

UdeM00000043363 29159 65.5 UdeM00000043363 XP\_019923784.2 35.2 122  
 74 2 1 122 57 173 7.70E-08 65.5 29159 cellular  
 organisms;Eukaryota;Opisthokonta;Metazoa;Eumetazoa;Bilateria;Protostomia;  
 Spiralia;Lophotrochozoa;Mollusca;Bivalvia;Autobranchia;Pteriormorphia;Ostr  
 eida;Ostreoidea;Ostreidae;Crassostrea;Crassostrea gigas

UdeM00000043364 6573 169.5 UdeM00000043364 XP\_021373558.1 62.5 128  
 45 1 2 126 110 237 3.00E-39 169.5 6573 cellular  
 organisms;Eukaryota;Opisthokonta;Metazoa;Eumetazoa;Bilateria;Protostomia;  
 Spiralia;Lophotrochozoa;Mollusca;Bivalvia;Autobranchia;Pteriormorphia;Pect  
 inida;Pectinoidea;Pectinidae;Mizuhopecten;Mizuhopecten yessoensis

UdeM00000043365 6579 73.9 UdeM00000043365 XP\_033753599.1 44.7 94  
 33 2 3 77 9 102 1.00E-10 73.9 6579 cellular  
 organisms;Eukaryota;Opisthokonta;Metazoa;Eumetazoa;Bilateria;Protostomia;  
 Spiralia;Lophotrochozoa;Mollusca;Bivalvia;Autobranchia;Pteriormorphia;Pect  
 inida;Pectinoidea;Pectinidae;Pecten;Pecten maximus

UdeM00000043367 6596 226.5 UdeM00000043367 XP\_045180324.1 38.6 334  
 168 5 1 334 1 297 5.60E-56 226.5 6596 cellular  
 organisms;Eukaryota;Opisthokonta;Metazoa;Eumetazoa;Bilateria;Protostomia;  
 Spiralia;Lophotrochozoa;Mollusca;Bivalvia;Autobranchia;Heteroconchia;Euhe  
 terodonta;Imparidentia;Venerida;Veneroidea;Veneridae;Mercenaria;Mercenari  
 a mercenaria

UdeM00000043368 1735272 266.9 UdeM00000043368 XP\_041371313.1 38.5  
 369 143 4 16 301 215 582 3.10E-68 266.9 1735272  
 cellular  
 organisms;Eukaryota;Opisthokonta;Metazoa;Eumetazoa;Bilateria;Protostomia;  
 Spiralia;Lophotrochozoa;Mollusca;Gastropoda;Neomphalina;Neomphaloidea;Pel  
 tospiridae;Gigantopelta;Gigantopelta aegis

UdeM00000043369 1735272 282 UdeM00000043369 XP\_041371313.1 68  
 175 56 0 1 175 1 175 5.40E-73 282 1735272  
 cellular

organisms;Eukaryota;Opisthokonta;Metazoa;Eumetazoa;Bilateria;Protostomia;Spiralia;Lophotrochozoa;Mollusca;Gastropoda;Neomphalina;Neomphaloidea;Peltospiridae;Gigantopelta;Gigantopelta aegis

UdeM00000043370 6579 359 UdeM00000043370 XP\_033761495.1 63.7 278  
76 3 35 312 24 276 9.20E-96 359 6579 cellular

organisms;Eukaryota;Opisthokonta;Metazoa;Eumetazoa;Bilateria;Protostomia;Spiralia;Lophotrochozoa;Mollusca;Bivalvia;Autobranchia;Pteriormorphia;Pectinida;Pectinoidea;Pectinidae;Pecten;Pecten maximus

UdeM00000043372 1868482 71.6 UdeM00000043372 XP\_021568579.1 28.3  
205 134 6 98 297 111 307 3.30E-09 71.6 1868482  
cellular

organisms;Eukaryota;Opisthokonta;Metazoa;Eumetazoa;Bilateria;Deuterostomia;Chordata;Craniata;Vertebrata;Gnathostomata;Teleostomi;Euteleostomi;Sarcopterygii;Dipnotetrapodomorpha;Tetrapoda;Amniota;Mammalia;Theria;Eutheria;Boreoeutheria;Euarchontoglires;Primates;Haplorrhini;Tarsiiformes;Tarsiidae;Carlito;Carlito syricta

UdeM00000043373 1868482 71.6 UdeM00000043373 XP\_021568579.1 28.3  
205 134 6 98 297 111 307 3.30E-09 71.6 1868482  
cellular

organisms;Eukaryota;Opisthokonta;Metazoa;Eumetazoa;Bilateria;Deuterostomia;Chordata;Craniata;Vertebrata;Gnathostomata;Teleostomi;Euteleostomi;Sarcopterygii;Dipnotetrapodomorpha;Tetrapoda;Amniota;Mammalia;Theria;Eutheria;Boreoeutheria;Euarchontoglires;Primates;Haplorrhini;Tarsiiformes;Tarsiidae;Carlito;Carlito syricta

UdeM00000043374 1529436 82.4 UdeM00000043374 XP\_033114794.1 48.1  
77 40 0 1 77 795 871 4.70E-13 82.4 1529436  
cellular

organisms;Eukaryota;Opisthokonta;Metazoa;Eumetazoa;Bilateria;Deuterostomia;Echinodermata;Pelmatozoa;Crinoidea;Articulata;Comatulida;Comatulidae;Comatulinae;Anneissia;Anneissia japonica

UdeM00000043381 6579 382.1 UdeM00000043381 XP\_033752673.1 64.6 277  
98 0 13 289 376 652 6.30E-103 382.1 6579 cellular

organisms;Eukaryota;Opisthokonta;Metazoa;Eumetazoa;Bilateria;Protostomia;Spiralia;Lophotrochozoa;Mollusca;Bivalvia;Autobranchia;Pteriormorphia;Pectinida;Pectinoidea;Pectinidae;Pecten;Pecten maximus

UdeM00000043382 69319 129.4 UdeM00000043382 XP\_014297673.1 39.5 200  
96 3 3 177 95 294 4.60E-27 129.4 69319 cellular

organisms;Eukaryota;Opisthokonta;Metazoa;Eumetazoa;Bilateria;Protostomia;Ecdysozoa;Panarthropoda;Arthropoda;Mandibulata;Pancrustacea;Hexapoda;Insecta;Dicondylia;Pterygota;Neoptera;Endopterygota;Hymenoptera;Apocrita;Parasitoida;Ichneumonoidea;Braconidae;Microgastrinae;Microplitis;Microplitis demolitor

UdeM00000043386 6596 84.7 UdeM00000043386 XP\_045162193.1 39 118  
65 3 82 194 456 571 1.60E-13 84.7 6596 cellular

organisms;Eukaryota;Opisthokonta;Metazoa;Eumetazoa;Bilateria;Protostomia;Spiralia;Lophotrochozoa;Mollusca;Bivalvia;Autobranchia;Heteroconchia;Euheterodonta;Imparidentia;Venerida;Veneroidea;Veneridae;Mercenaria;Mercenaria mercenaria

UdeM00000043387 6596 86.3 UdeM00000043387 XP\_045162193.1 39.7 116  
63 3 82 192 456 569 5.10E-14 86.3 6596 cellular

organisms;Eukaryota;Opisthokonta;Metazoa;Eumetazoa;Bilateria;Protostomia;Spiralia;Lophotrochozoa;Mollusca;Bivalvia;Autobranchia;Heteroconchia;Euheterodonta;Imparidentia;Venerida;Veneroidea;Veneridae;Mercenaria;Mercenaria mercenaria

UdeM00000043390 6579 96.7 UdeM00000043390 XP\_033729770.1 47.3 110  
 51 3 1 103 1 110 2.30E-17 96.7 6579 cellular  
 organisms;Eukaryota;Opisthokonta;Metazoa;Eumetazoa;Bilateria;Protostomia;  
 Spiralia;Lophotrochozoa;Mollusca;Bivalvia;Autobranchia;Pteriomorpha;Pect  
 inida;Pectinoidea;Pectinidae;Pecten;Pecten maximus  
 UdeM00000043392 1735272 113.2 UdeM00000043392 XP\_041361861.1 31.2  
 215 53 2 1 120 1 215 2.40E-22 113.2 1735272  
 cellular  
 organisms;Eukaryota;Opisthokonta;Metazoa;Eumetazoa;Bilateria;Protostomia;  
 Spiralia;Lophotrochozoa;Mollusca;Gastropoda;Neomphalina;Neomphaloidea;Pel  
 tospiridae;Gigantopelta;Gigantopelta aegis  
 UdeM00000043391 6579 146.7 UdeM00000043391 XP\_033747958.1 58.4 101  
 42 0 1 101 57 157 2.40E-32 146.7 6579 cellular  
 organisms;Eukaryota;Opisthokonta;Metazoa;Eumetazoa;Bilateria;Protostomia;  
 Spiralia;Lophotrochozoa;Mollusca;Bivalvia;Autobranchia;Pteriomorpha;Pect  
 inida;Pectinoidea;Pectinidae;Pecten;Pecten maximus  
 UdeM00000043393 6565 172.6 UdeM00000043393 XP\_022334994.1 34.6 306  
 191 7 17 317 81 382 9.10E-40 172.6 6565 cellular  
 organisms;Eukaryota;Opisthokonta;Metazoa;Eumetazoa;Bilateria;Protostomia;  
 Spiralia;Lophotrochozoa;Mollusca;Bivalvia;Autobranchia;Pteriomorpha;Ostr  
 eida;Ostreoidea;Ostreidae;Crassostrea;Crassostrea virginica  
 UdeM00000043394 6565 210.7 UdeM00000043394 XP\_022334993.1 60 175  
 45 4 37 188 647 819 1.80E-51 210.7 6565 cellular  
 organisms;Eukaryota;Opisthokonta;Metazoa;Eumetazoa;Bilateria;Protostomia;  
 Spiralia;Lophotrochozoa;Mollusca;Bivalvia;Autobranchia;Pteriomorpha;Ostr  
 eida;Ostreoidea;Ostreidae;Crassostrea;Crassostrea virginica  
 UdeM00000043395 6565 110.5 UdeM00000043395 XP\_022287303.1 31.6 206  
 106 4 47 218 489 693 3.10E-21 110.5 6565 cellular  
 organisms;Eukaryota;Opisthokonta;Metazoa;Eumetazoa;Bilateria;Protostomia;  
 Spiralia;Lophotrochozoa;Mollusca;Bivalvia;Autobranchia;Pteriomorpha;Ostr  
 eida;Ostreoidea;Ostreidae;Crassostrea;Crassostrea virginica  
 UdeM00000043396 6565 107.5 UdeM00000043396 XP\_022287303.1 30.6 206  
 99 4 47 209 489 693 2.50E-20 107.5 6565 cellular  
 organisms;Eukaryota;Opisthokonta;Metazoa;Eumetazoa;Bilateria;Protostomia;  
 Spiralia;Lophotrochozoa;Mollusca;Bivalvia;Autobranchia;Pteriomorpha;Ostr  
 eida;Ostreoidea;Ostreidae;Crassostrea;Crassostrea virginica  
 UdeM00000043397 1735272 144.1 UdeM00000043397 XP\_041366048.1 48  
 150 72 3 1 146 1 148 1.50E-31 144.1 1735272  
 cellular  
 organisms;Eukaryota;Opisthokonta;Metazoa;Eumetazoa;Bilateria;Protostomia;  
 Spiralia;Lophotrochozoa;Mollusca;Gastropoda;Neomphalina;Neomphaloidea;Pel  
 tospiridae;Gigantopelta;Gigantopelta aegis  
 UdeM00000043398 1735272 216.5 UdeM00000043398 XP\_041366048.1 48.9  
 227 113 2 11 235 260 485 3.70E-53 216.5 1735272  
 cellular  
 organisms;Eukaryota;Opisthokonta;Metazoa;Eumetazoa;Bilateria;Protostomia;  
 Spiralia;Lophotrochozoa;Mollusca;Gastropoda;Neomphalina;Neomphaloidea;Pel  
 tospiridae;Gigantopelta;Gigantopelta aegis  
 UdeM00000043399 37621 70.5 UdeM00000043399 XP\_014670827.1 40.2 97  
 54 2 19 114 118 211 1.70E-09 70.5 37621 cellular  
 organisms;Eukaryota;Opisthokonta;Metazoa;Eumetazoa;Bilateria;Protostomia;  
 Ecdysozoa;Scalidophora;Priapulida;Priapulimorpha;Priapulimorphida;Priapul  
 idae;Priapulus;Priapulus caudatus

UdeM00000043401 1047088 71.6 UdeM00000043401 XP\_038194410.1 26.9  
212 143 6 98 301 111 318 3.50E-09 71.6 1047088  
cellular

organisms;Eukaryota;Opisthokonta;Metazoa;Eumetazoa;Bilateria;Deuterostomi  
a;Chordata;Craniata;Vertebrata;Gnathostomata;Teleostomi;Euteleostomi;Sarc  
opterygii;Dipnotetrapodomorpha;Tetrapoda;Amniota;Mammalia;Theria;Eutheria  
;Boreoeutheria;Euarchontoglires;Glires;Rodentia;Myomorpha;Muroidea;Cricet  
idae;Arvicolinae;Arvicola;Arvicola amphibius

UdeM00000043402 181472 71.2 UdeM00000043402 XP\_029975096.1 41.1  
73 43 0 77 149 312 384 1.20E-09 71.2 181472  
cellular

organisms;Eukaryota;Opisthokonta;Metazoa;Eumetazoa;Bilateria;Deuterostomi  
a;Chordata;Craniata;Vertebrata;Gnathostomata;Teleostomi;Euteleostomi;Acti  
nopterygii;Actinopteri;Neopterygii;Teleostei;Osteoglossocephalai;Clupeoce  
phala;Euteleosteomorpha;Neoteleostei;Eurypterygia;Ctenosquamata;Acanthomo  
rphata;Euacanthomorphacea;Percomorphaceae;Ovalentaria;Blenniimorphae;Blen  
niiformes;Blennioidei;Blenniidae;Salariae;Salariae;Salariae fasciatus

UdeM00000043405 29159 288.9 UdeM00000043405 XP\_034322429.1 50.2 295  
144 2 1 292 148 442 7.30E-75 288.9 29159 cellular

organisms;Eukaryota;Opisthokonta;Metazoa;Eumetazoa;Bilateria;Protostomia;  
Spiralia;Lophotrochozoa;Mollusca;Bivalvia;Autobranchia;Pteriormorphia;Ostr  
eida;Ostreioidea;Ostreidae;Crassostrea;Crassostrea gigas

UdeM00000043406 29159 130.6 UdeM00000043406 XP\_034309968.1 43.5 170  
84 4 5 167 322 486 5.50E-27 130.6 29159 cellular

organisms;Eukaryota;Opisthokonta;Metazoa;Eumetazoa;Bilateria;Protostomia;  
Spiralia;Lophotrochozoa;Mollusca;Bivalvia;Autobranchia;Pteriormorphia;Ostr  
eida;Ostreioidea;Ostreidae;Crassostrea;Crassostrea gigas

UdeM00000043406 29159 89.7 UdeM00000043406 XP\_034309968.1 42.7 96  
51 2 392 487 947 1038 1.10E-14 89.7 29159 cellular

organisms;Eukaryota;Opisthokonta;Metazoa;Eumetazoa;Bilateria;Protostomia;  
Spiralia;Lophotrochozoa;Mollusca;Bivalvia;Autobranchia;Pteriormorphia;Ostr  
eida;Ostreioidea;Ostreidae;Crassostrea;Crassostrea gigas

UdeM00000043408 8005 70.1 UdeM00000043408 XP\_026872277.2 36.5 104  
44 3 15 117 376 458 2.20E-09 70.1 8005 cellular

organisms;Eukaryota;Opisthokonta;Metazoa;Eumetazoa;Bilateria;Deuterostomi  
a;Chordata;Craniata;Vertebrata;Gnathostomata;Teleostomi;Euteleostomi;Acti  
nopterygii;Actinopteri;Neopterygii;Teleostei;Osteoglossocephalai;Clupeoce  
phala;Otomorpha;Ostariophysi;Otophysi;Characiphysae;Gymnotiformes;Gymnoto  
idei;Gymnotidae;Electrophorus;Electrophorus electricus

UdeM00000043409 6596 112.5 UdeM00000043409 XP\_045180427.1 48.9 180  
85 4 76 252 98 273 8.60E-22 112.5 6596 cellular

organisms;Eukaryota;Opisthokonta;Metazoa;Eumetazoa;Bilateria;Protostomia;  
Spiralia;Lophotrochozoa;Mollusca;Bivalvia;Autobranchia;Heteroconchia;Euhe  
terodonta;Imparidentia;Venerida;Veneroidea;Veneridae;Mercenaria;Mercenari  
a mercenaria

UdeM00000043411 941984 63.9 UdeM00000043411 XP\_040899707.1 27.4  
226 130 8 97 306 908 1115 8.20E-07 63.9 941984

cellular

organisms;Eukaryota;Opisthokonta;Metazoa;Eumetazoa;Bilateria;Deuterostomi  
a;Chordata;Craniata;Vertebrata;Gnathostomata;Teleostomi;Euteleostomi;Acti  
nopterygii;Actinopteri;Neopterygii;Teleostei;Osteoglossocephalai;Clupeoce  
phala;Euteleosteomorpha;Neoteleostei;Eurypterygia;Ctenosquamata;Acanthomo  
rphata;Euacanthomorphacea;Percomorphaceae;Carangaria;Carangaria incertae

sedis;Toxotidae;Toxotes;Toxotes jaculatrix



UdeM00000043412 70779 156 UdeM00000043412 XP\_015749890.1 35.1 268  
 141 8 130 380 170 421 1.40E-34 156 70779 cellular  
 organisms;Eukaryota;Opisthokonta;Metazoa;Eumetazoa;Cnidaria;Anthozoa;Hexa  
 corallia;Scleractinia;Astrocoeniina;Acroporidae;Acropora;Acropora  
 digitifera  
 UdeM00000043413 2652724 338.6 UdeM00000043413 XP\_028512668.1 43.3  
 393 205 11 6 380 88 480 1.60E-89 338.6 2652724  
 cellular  
 organisms;Eukaryota;Opisthokonta;Metazoa;Eumetazoa;Cnidaria;Anthozoa;Hexa  
 corallia;Actiniaria;Aiptasiidae;Exaiptasia;Exaiptasia diaphana  
 UdeM00000043414 7739 342.8 UdeM00000043414 XP\_035688793.1 45.3 395  
 193 12 6 378 4 397 8.30E-91 342.8 7739 cellular  
 organisms;Eukaryota;Opisthokonta;Metazoa;Eumetazoa;Bilateria;Deuterostomi  
 a;Chordata;Cephalochordata;Leptocardii;Amphioxiformes;Branchiostomidae;Br  
 anchiostoma;Branchiostoma floridae  
 UdeM00000043415 72036 321.6 UdeM00000043415 XP\_040563514.1 39.5 382  
 231 0 2 383 894 1275 1.30E-84 321.6 72036 cellular  
 organisms;Eukaryota;Opisthokonta;Metazoa;Eumetazoa;Bilateria;Protostomia;  
 Ecdysozoa;Panarthropoda;Arthropoda;Mandibulata;Pancrustacea;Crustacea;Mul  
 ticrustacea;Hexanauplia;Copepoda;Neocopepoda;Podoplea;Siphonostomatoida;C  
 aligidae;Lepeophtheirus;Lepeophtheirus salmonis  
 UdeM00000043416 2652724 256.9 UdeM00000043416 XP\_028512668.1 39.8  
 369 192 9 4 368 91 433 4.50E-65 256.9 2652724  
 cellular  
 organisms;Eukaryota;Opisthokonta;Metazoa;Eumetazoa;Cnidaria;Anthozoa;Hexa  
 corallia;Actiniaria;Aiptasiidae;Exaiptasia;Exaiptasia diaphana  
 UdeM00000043418 6596 550.4 UdeM00000043418 XP\_045183249.1 83.7 306  
 50 0 1 306 1 306 1.40E-153 550.4 6596 cellular  
 organisms;Eukaryota;Opisthokonta;Metazoa;Eumetazoa;Bilateria;Protostomia;  
 Spiralia;Lophotrochozoa;Mollusca;Bivalvia;Autobranchia;Heteroconchia;Euhe  
 terodonta;Imparidentia;Venerida;Veneroidea;Veneridae;Mercenaria;Mercenari  
 a mercenaria  
 UdeM00000043419 6596 266.5 UdeM00000043419 XP\_045184048.1 64.4 202  
 72 0 96 297 135 336 4.20E-68 266.5 6596 cellular  
 organisms;Eukaryota;Opisthokonta;Metazoa;Eumetazoa;Bilateria;Protostomia;  
 Spiralia;Lophotrochozoa;Mollusca;Bivalvia;Autobranchia;Heteroconchia;Euhe  
 terodonta;Imparidentia;Venerida;Veneroidea;Veneridae;Mercenaria;Mercenari  
 a mercenaria  
 UdeM00000043420 6596 563.5 UdeM00000043420 XP\_045184048.1 70.8 401  
 116 1 96 495 135 535 2.70E-157 563.5 6596 cellular  
 organisms;Eukaryota;Opisthokonta;Metazoa;Eumetazoa;Bilateria;Protostomia;  
 Spiralia;Lophotrochozoa;Mollusca;Bivalvia;Autobranchia;Heteroconchia;Euhe  
 terodonta;Imparidentia;Venerida;Veneroidea;Veneridae;Mercenaria;Mercenari  
 a mercenaria  
 UdeM00000043421 6596 302 UdeM00000043421 XP\_045184048.1 77 200  
 45 1 10 208 336 535 6.40E-79 302 6596 cellular  
 organisms;Eukaryota;Opisthokonta;Metazoa;Eumetazoa;Bilateria;Protostomia;  
 Spiralia;Lophotrochozoa;Mollusca;Bivalvia;Autobranchia;Heteroconchia;Euhe  
 terodonta;Imparidentia;Venerida;Veneroidea;Veneridae;Mercenaria;Mercenari  
 a mercenaria  
 UdeM00000043422 6596 243 UdeM00000043422 XP\_045202248.1 32.4 420  
 265 4 14 423 7 417 1.00E-60 243 6596 cellular  
 organisms;Eukaryota;Opisthokonta;Metazoa;Eumetazoa;Bilateria;Protostomia;  
 Spiralia;Lophotrochozoa;Mollusca;Bivalvia;Autobranchia;Heteroconchia;Euhe

terodonta;Imparidentia;Venerida;Veneroidea;Veneridae;Mercenaria;Mercenaria mercenaria

UdeM00000043423 6596 256.1 UdeM00000043423 XP\_045199854.1 30.7 463  
318 3 14 474 333 794 1.20E-64 256.1 6596 cellular

organisms;Eukaryota;Opisthokonta;Metazoa;Eumetazoa;Bilateria;Protostomia;Spiralia;Lophotrochozoa;Mollusca;Bivalvia;Autobranchia;Heteroconchia;Euheterodonta;Imparidentia;Venerida;Veneroidea;Veneridae;Mercenaria;Mercenaria mercenaria

UdeM00000043424 29159 70.1 UdeM00000043424 XP\_034309926.1 22 414  
279 9 23 400 3 408 8.40E-09 70.1 29159 cellular

organisms;Eukaryota;Opisthokonta;Metazoa;Eumetazoa;Bilateria;Protostomia;Spiralia;Lophotrochozoa;Mollusca;Bivalvia;Autobranchia;Pteriormorphia;Ostreida;Ostreoidea;Ostreidae;Crassostrea;Crassostrea gigas

UdeM00000043425 6596 200.3 UdeM00000043425 XP\_045199854.1 28.7 494  
309 6 17 469 335 826 7.20E-48 200.3 6596 cellular

organisms;Eukaryota;Opisthokonta;Metazoa;Eumetazoa;Bilateria;Protostomia;Spiralia;Lophotrochozoa;Mollusca;Bivalvia;Autobranchia;Heteroconchia;Euheterodonta;Imparidentia;Venerida;Veneroidea;Veneridae;Mercenaria;Mercenaria mercenaria

UdeM00000043426 80427 173.3 UdeM00000043426 XP\_033019252.1 44.7 197  
105 3 291 484 565 760 7.60E-40 173.3 80427 cellular

organisms;Eukaryota;Opisthokonta;Metazoa;Eumetazoa;Bilateria;Deuterostomia;Chordata;Craniata;Vertebrata;Gnathostomata;Teleostomi;Euteleostomi;Sarcopterygii;Dipnotetrapodomorpha;Tetrapoda;Amniota;Sauropsida;Sauria;Lepidosauria;Squamata;Bifurcata;Unidentata;Episquamata;Laterata;Lacertibaenia;Lacertidae;Lacertinae;Lacerta;Lacerta agilis

UdeM00000043427 7574 135.6 UdeM00000043427 XP\_013404488.1 49.3 142  
70 1 37 178 28 167 6.30E-29 135.6 7574 cellular

organisms;Eukaryota;Opisthokonta;Metazoa;Eumetazoa;Bilateria;Protostomia;Spiralia;Lophotrochozoa;Brachiopoda;Linguliformea;Lingulata;Lingulida;Linguloidea;Lingulidae;Lingula;Lingula anatina

UdeM00000043428 400682 167.2 UdeM00000043428 XP\_019854696.1 47.3  
182 90 3 10 189 110 287 2.10E-38 167.2 400682

cellular

organisms;Eukaryota;Opisthokonta;Metazoa;Porifera;Demospongiae;Heteroscleromorpha;Haplosclerida;Niphatidae;Amphimedon;Amphimedon queenslandica

UdeM00000043430 6565 136.7 UdeM00000043430 XP\_022342305.1 53.4 116  
54 0 10 125 1099 1214 2.20E-29 136.7 6565 cellular

organisms;Eukaryota;Opisthokonta;Metazoa;Eumetazoa;Bilateria;Protostomia;Spiralia;Lophotrochozoa;Mollusca;Bivalvia;Autobranchia;Pteriormorphia;Ostreida;Ostreoidea;Ostreidae;Crassostrea;Crassostrea virginica

UdeM00000043431 6565 146.7 UdeM00000043431 XP\_022306835.1 54.3 138  
61 1 20 157 23 158 2.50E-32 146.7 6565 cellular

organisms;Eukaryota;Opisthokonta;Metazoa;Eumetazoa;Bilateria;Protostomia;Spiralia;Lophotrochozoa;Mollusca;Bivalvia;Autobranchia;Pteriormorphia;Ostreida;Ostreoidea;Ostreidae;Crassostrea;Crassostrea virginica

UdeM00000043432 400682 164.5 UdeM00000043432 XP\_019854696.1 46  
187 87 6 67 248 93 270 1.90E-37 164.5 400682

cellular

organisms;Eukaryota;Opisthokonta;Metazoa;Porifera;Demospongiae;Heteroscleromorpha;Haplosclerida;Niphatidae;Amphimedon;Amphimedon queenslandica

UdeM00000043433 400682 167.2 UdeM00000043433 XP\_019854696.1 47.3  
182 90 3 10 189 110 287 2.10E-38 167.2 400682

cellular

organisms;Eukaryota;Opisthokonta;Metazoa;Porifera;Demospongiae;Heteroscleromorpha;Haplosclerida;Niphatidae;Amphimedon;Amphimedon queenslandica  
UdeM00000043434 6596 83.6 UdeM00000043434 XP\_045159615.1 31.8 170  
87 4 1 144 188 354 2.40E-13 83.6 6596 cellular

organisms;Eukaryota;Opisthokonta;Metazoa;Eumetazoa;Bilateria;Protostomia;Spiralia;Lophotrochozoa;Mollusca;Bivalvia;Autobranchia;Heteroconchia;Euherodonta;Imparidentia;Venerida;Veneroidea;Veneridae;Mercenaria;Mercenaria mercenaria  
UdeM00000043435 6596 220.7 UdeM00000043435 XP\_045161346.1 41.4 292  
136 6 4 266 71 356 2.30E-54 220.7 6596 cellular

organisms;Eukaryota;Opisthokonta;Metazoa;Eumetazoa;Bilateria;Protostomia;Spiralia;Lophotrochozoa;Mollusca;Bivalvia;Autobranchia;Heteroconchia;Euherodonta;Imparidentia;Venerida;Veneroidea;Veneridae;Mercenaria;Mercenaria mercenaria  
UdeM00000043437 34773 68.9 UdeM00000043437 XP\_041950605.1 57.1 56  
24 0 12 67 770 825 4.00E-09 68.9 34773 cellular

organisms;Eukaryota;Opisthokonta;Metazoa;Eumetazoa;Bilateria;Deuterostomia;Chordata;Craniata;Vertebrata;Gnathostomata;Teleostomi;Euteleostomi;Actinopterygii;Actinopteri;Neopterygii;Teleostei;Osteoglossocephalai;Clupeocephala;Otomorpha;Clupei;Clupeiformes;Clupeoidei;Clupeidae;Alosinae;Alosa;Alosa sapidissima  
UdeM00000043438 6105 257.7 UdeM00000043438 XP\_031566938.1 36 456  
231 14 72 523 38 436 4.50E-65 257.7 6105 cellular

organisms;Eukaryota;Opisthokonta;Metazoa;Eumetazoa;Cnidaria;Anthozoa;Hexacorallia;Actiniaria;Actiniidae;Actinia;Actinia tenebrosa  
UdeM00000043442 2607531 429.9 UdeM00000043442 XP\_036365414.1 58  
405 129 7 85 477 75 450 4.30E-117 429.9 2607531  
cellular

organisms;Eukaryota;Opisthokonta;Metazoa;Eumetazoa;Bilateria;Protostomia;Spiralia;Lophotrochozoa;Mollusca;Cephalopoda;Coleoidea;Octopodiformes;Octopoda;Incirrata;Octopodidae;Octopus;Octopus sinensis  
UdeM00000043443 6596 1417.5 UdeM00000043443 XP\_045183410.1 58.5  
1376 488 22 72 1402 60 1397 0.00E+00 1417.5 6596  
cellular

organisms;Eukaryota;Opisthokonta;Metazoa;Eumetazoa;Bilateria;Protostomia;Spiralia;Lophotrochozoa;Mollusca;Bivalvia;Autobranchia;Heteroconchia;Euherodonta;Imparidentia;Venerida;Veneroidea;Veneridae;Mercenaria;Mercenaria mercenaria  
UdeM00000043445 6596 347.1 UdeM00000043445 XP\_045183587.1 29.4 1774  
802 56 53 1609 166 1705 1.40E-91 347.1 6596 cellular

organisms;Eukaryota;Opisthokonta;Metazoa;Eumetazoa;Bilateria;Protostomia;Spiralia;Lophotrochozoa;Mollusca;Bivalvia;Autobranchia;Heteroconchia;Euherodonta;Imparidentia;Venerida;Veneroidea;Veneridae;Mercenaria;Mercenaria mercenaria  
UdeM00000043446 6596 109.8 UdeM00000043446 XP\_045183538.1 39.2 553  
287 14 419 951 591 1114 2.00E-20 109.8 6596 cellular

organisms;Eukaryota;Opisthokonta;Metazoa;Eumetazoa;Bilateria;Protostomia;Spiralia;Lophotrochozoa;Mollusca;Bivalvia;Autobranchia;Heteroconchia;Euherodonta;Imparidentia;Venerida;Veneroidea;Veneridae;Mercenaria;Mercenaria mercenaria  
UdeM00000043447 6596 113.2 UdeM00000043447 XP\_045174611.1 34.5 165  
103 3 52 212 458 621 4.00E-22 113.2 6596 cellular

organisms;Eukaryota;Opisthokonta;Metazoa;Eumetazoa;Bilateria;Protostomia;Spiralia;Lophotrochozoa;Mollusca;Bivalvia;Autobranchia;Heteroconchia;Euherodonta;Imparidentia;Venerida;Veneroidea;Veneridae;Mercenaria;Mercenaria mercenaria

terodonta;Imparidentia;Venerida;Veneroidea;Veneridae;Mercenaria;Mercenaria mercenaria

UdeM00000043450 7054 480.7 UdeM00000043450 XP\_031328250.1 49.7 467  
233 2 1 465 1 467 2.10E-132 480.7 7054 cellular

organisms;Eukaryota;Opisthokonta;Metazoa;Eumetazoa;Bilateria;Protostomia;Ecdysozoa;Panarthropoda;Arthropoda;Mandibulata;Pancrustacea;Hexapoda;Insecta;Dicondylia;Pterygota;Neoptera;Endopterygota;Coleoptera;Polyphaga;Elat eriformia;Elateroidea;Lampyridae;Lampyrinae;Photinus;Photinus pyralis

UdeM00000043451 6565 93.6 UdeM00000043451 XP\_022312527.1 44.8 96  
52 1 69 163 70 165 2.70E-16 93.6 6565 cellular

organisms;Eukaryota;Opisthokonta;Metazoa;Eumetazoa;Bilateria;Protostomia;Spiralia;Lophotrochozoa;Mollusca;Bivalvia;Autobranchia;Pteriormorphia;Ostr eida;Ostreoidea;Ostreidae;Crassostrea;Crassostrea virginica

UdeM00000043452 6579 160.6 UdeM00000043452 XP\_033752778.1 41.3 264  
127 7 2 255 15 260 2.60E-36 160.6 6579 cellular

organisms;Eukaryota;Opisthokonta;Metazoa;Eumetazoa;Bilateria;Protostomia;Spiralia;Lophotrochozoa;Mollusca;Bivalvia;Autobranchia;Pteriormorphia;Pect inida;Pectinoidea;Pectinidae;Pecten;Pecten maximus

UdeM00000043453 6579 130.2 UdeM00000043453 XP\_033748130.1 41.5 195  
102 4 20 203 67 260 3.00E-27 130.2 6579 cellular

organisms;Eukaryota;Opisthokonta;Metazoa;Eumetazoa;Bilateria;Protostomia;Spiralia;Lophotrochozoa;Mollusca;Bivalvia;Autobranchia;Pteriormorphia;Pect inida;Pectinoidea;Pectinidae;Pecten;Pecten maximus

UdeM00000043454 6596 355.9 UdeM00000043454 XP\_045182316.1 40.6 571  
277 13 5 561 361 883 1.30E-94 355.9 6596 cellular

organisms;Eukaryota;Opisthokonta;Metazoa;Eumetazoa;Bilateria;Protostomia;Spiralia;Lophotrochozoa;Mollusca;Bivalvia;Autobranchia;Heteroconchia;Euhe terodonta;Imparidentia;Venerida;Veneroidea;Veneridae;Mercenaria;Mercenari a mercenaria

UdeM00000043455 1735272 61.2 UdeM00000043455 XP\_041359548.1 27.3  
143 91 4 548 682 1031 1168 7.40E-06 61.2 1735272

cellular

organisms;Eukaryota;Opisthokonta;Metazoa;Eumetazoa;Bilateria;Protostomia;Spiralia;Lophotrochozoa;Mollusca;Gastropoda;Neomphalina;Neomphaloidea;Pel tospiridae;Gigantopelta;Gigantopelta aegis

UdeM00000043457 6596 136 UdeM00000043457 XP\_045182313.1 50 146  
71 2 18 161 1068 1213 4.50E-29 136 6596 cellular

organisms;Eukaryota;Opisthokonta;Metazoa;Eumetazoa;Bilateria;Protostomia;Spiralia;Lophotrochozoa;Mollusca;Bivalvia;Autobranchia;Heteroconchia;Euhe terodonta;Imparidentia;Venerida;Veneroidea;Veneridae;Mercenaria;Mercenari a mercenaria

UdeM00000043623 6565 158.7 UdeM00000043623 XP\_022313168.1 55.6 124  
55 0 374 497 230 353 1.90E-35 158.7 6565 cellular

organisms;Eukaryota;Opisthokonta;Metazoa;Eumetazoa;Bilateria;Protostomia;Spiralia;Lophotrochozoa;Mollusca;Bivalvia;Autobranchia;Pteriormorphia;Ostr eida;Ostreoidea;Ostreidae;Crassostrea;Crassostrea virginica

UdeM00000043624 2607531 253.8 UdeM00000043624 XP\_029637007.1 74  
169 42 1 40 206 36 204 1.80E-64 253.8 2607531

cellular

organisms;Eukaryota;Opisthokonta;Metazoa;Eumetazoa;Bilateria;Protostomia;Spiralia;Lophotrochozoa;Mollusca;Cephalopoda;Coleoidea;Octopodiformes;Oct opoda;Incirrata;Octopodidae;Octopus;Octopus sinensis

UdeM00000043625 6579 292.4 UdeM00000043625 XP\_033734454.1 71.7 191  
50 2 63 251 154 342 5.70E-76 292.4 6579 cellular

organisms;Eukaryota;Opisthokonta;Metazoa;Eumetazoa;Bilateria;Protostomia;Spiralia;Lophotrochozoa;Mollusca;Bivalvia;Autobranchia;Pteriomorpha;Pectinida;Pectinoidea;Pectinidae;Pecten;Pecten maximus  
UdeM00000043627 6565 282 UdeM00000043627 XP\_022317067.1 95.3 150  
7 0 1 150 1 150 4.60E-73 282 6565 cellular  
organisms;Eukaryota;Opisthokonta;Metazoa;Eumetazoa;Bilateria;Protostomia;Spiralia;Lophotrochozoa;Mollusca;Bivalvia;Autobranchia;Pteriomorpha;Ostreida;Ostreoidea;Ostreidae;Crassostrea;Crassostrea virginica  
UdeM00000043628 1735272 100.1 UdeM00000043628 XP\_041362775.1 60  
75 29 1 1 74 1 75 1.80E-18 100.1 1735272  
cellular  
organisms;Eukaryota;Opisthokonta;Metazoa;Eumetazoa;Bilateria;Protostomia;Spiralia;Lophotrochozoa;Mollusca;Gastropoda;Neomphalina;Neomphaloidea;Peltospiridae;Gigantopelta;Gigantopelta aegis  
UdeM00000043629 6579 2158.6 UdeM00000043629 XP\_033737463.1 67.7  
1815 527 30 16 1796 65 1853 0.00E+00 2158.6 6579  
cellular  
organisms;Eukaryota;Opisthokonta;Metazoa;Eumetazoa;Bilateria;Protostomia;Spiralia;Lophotrochozoa;Mollusca;Bivalvia;Autobranchia;Pteriomorpha;Pectinida;Pectinoidea;Pectinidae;Pecten;Pecten maximus  
UdeM00000043630 29159 199.5 UdeM00000043630 XP\_034334268.1 46.4 194  
101 1 1 194 160 350 3.90E-48 199.5 29159 cellular  
organisms;Eukaryota;Opisthokonta;Metazoa;Eumetazoa;Bilateria;Protostomia;Spiralia;Lophotrochozoa;Mollusca;Bivalvia;Autobranchia;Pteriomorpha;Ostreida;Ostreoidea;Ostreidae;Crassostrea;Crassostrea gigas  
UdeM00000043631 6596 60.1 UdeM00000043631 XP\_045180427.1 51.2 43  
21 0 1 43 231 273 6.00E-06 60.1 6596 cellular  
organisms;Eukaryota;Opisthokonta;Metazoa;Eumetazoa;Bilateria;Protostomia;Spiralia;Lophotrochozoa;Mollusca;Bivalvia;Autobranchia;Heteroconchia;Euheterodonta;Imparidentia;Venerida;Veneroidea;Veneridae;Mercenaria;Mercenaria mercenaria  
UdeM00000043632 29159 62.4 UdeM00000043632 XP\_034315424.1 36.1 108  
60 3 12 116 213 314 4.70E-07 62.4 29159 cellular  
organisms;Eukaryota;Opisthokonta;Metazoa;Eumetazoa;Bilateria;Protostomia;Spiralia;Lophotrochozoa;Mollusca;Bivalvia;Autobranchia;Pteriomorpha;Ostreida;Ostreoidea;Ostreidae;Crassostrea;Crassostrea gigas  
UdeM00000043637 6596 705.7 UdeM00000043637 XP\_045213104.1 82 410  
74 0 11 420 15 424 3.60E-200 705.7 6596 cellular  
organisms;Eukaryota;Opisthokonta;Metazoa;Eumetazoa;Bilateria;Protostomia;Spiralia;Lophotrochozoa;Mollusca;Bivalvia;Autobranchia;Heteroconchia;Euheterodonta;Imparidentia;Venerida;Veneroidea;Veneridae;Mercenaria;Mercenaria mercenaria  
UdeM00000043640 6596 334.7 UdeM00000043640 XP\_045213479.1 72.2 227  
62 1 6 231 18 244 9.30E-89 334.7 6596 cellular  
organisms;Eukaryota;Opisthokonta;Metazoa;Eumetazoa;Bilateria;Protostomia;Spiralia;Lophotrochozoa;Mollusca;Bivalvia;Autobranchia;Heteroconchia;Euheterodonta;Imparidentia;Venerida;Veneroidea;Veneridae;Mercenaria;Mercenaria mercenaria  
UdeM00000043641 45264 242.7 UdeM00000043641 XP\_044165535.1 47.6 231  
117 1 1 227 294 524 4.70E-61 242.7 45264 cellular  
organisms;Eukaryota;Opisthokonta;Metazoa;Eumetazoa;Cnidaria;Anthozoa;Hexacorallia;Scleractinia;Astrocoeniina;Acroporidae;Acropora;Acropora millepora

UdeM00000043642 1735272 152.1 UdeM00000043642 XP\_041366822.1 39.4  
 231 133 3 354 578 4 233 4.10E-33 152.1 1735272  
 cellular  
 organisms;Eukaryota;Opisthokonta;Metazoa;Eumetazoa;Bilateria;Protostomia;  
 Spiralia;Lophotrochozoa;Mollusca;Gastropoda;Neomphalina;Neomphaloidea;Pel  
 tospiridae;Gigantopelta;Gigantopelta aegis  
 UdeM00000043643 29159 309.7 UdeM00000043643 XP\_034317111.1 47.8 362  
 180 4 2 356 171 530 9.60E-81 309.7 29159 cellular  
 organisms;Eukaryota;Opisthokonta;Metazoa;Eumetazoa;Bilateria;Protostomia;  
 Spiralia;Lophotrochozoa;Mollusca;Bivalvia;Autobranchia;Pteriormorphia;Ostr  
 eida;Ostreoidea;Ostreidae;Crassostrea;Crassostrea gigas  
 UdeM00000043645 6579 88.2 UdeM00000043645 XP\_033727551.1 25.9 212  
 135 4 180 375 36 241 3.00E-14 88.2 6579 cellular  
 organisms;Eukaryota;Opisthokonta;Metazoa;Eumetazoa;Bilateria;Protostomia;  
 Spiralia;Lophotrochozoa;Mollusca;Bivalvia;Autobranchia;Pteriormorphia;Pect  
 inida;Pectinoidea;Pectinidae;Pecten;Pecten maximus  
 UdeM00000043648 6579 96.3 UdeM00000043648 XP\_033727573.1 30.6 216  
 130 5 8 204 39 253 7.50E-17 96.3 6579 cellular  
 organisms;Eukaryota;Opisthokonta;Metazoa;Eumetazoa;Bilateria;Protostomia;  
 Spiralia;Lophotrochozoa;Mollusca;Bivalvia;Autobranchia;Pteriormorphia;Pect  
 inida;Pectinoidea;Pectinidae;Pecten;Pecten maximus  
 UdeM00000043649 8128 96.7 UdeM00000043649 XP\_025765397.1 43.9 107  
 59 1 2 107 162 268 2.40E-17 96.7 8128 cellular  
 organisms;Eukaryota;Opisthokonta;Metazoa;Eumetazoa;Bilateria;Deuterostomi  
 a;Chordata;Craniata;Vertebrata;Gnathostomata;Teleostomi;Euteleostomi;Acti  
 nopterygii;Actinopteri;Neopterygii;Teleostei;Osteoglossocephalai;Clupeoce  
 phala;Euteleosteomorpha;Neoteleostei;Eurypterygia;Ctenosquamata;Acanthomo  
 rphata;Euacanthomorphacea;Percomorphaceae;Ovalentaria;Cichlomorphae;Cichl  
 iformes;Cichlidae;African  
 cichlids;Pseudocrenilabrinae;Oreochromini;Oreochromis;Oreochromis  
 niloticus  
 UdeM00000043650 10224 107.8 UdeM00000043650 XP\_006820181.1 52.3 107  
 50 1 3 109 373 478 8.70E-21 107.8 10224 cellular  
 organisms;Eukaryota;Opisthokonta;Metazoa;Eumetazoa;Bilateria;Deuterostomi  
 a;Hemichordata;Enteropneusta;Harrimaniidae;Saccoglossus;Saccoglossus  
 kowalevskii  
 UdeM00000043653 6579 97.1 UdeM00000043653 XP\_033727573.1 31.1 225  
 136 5 8 214 39 262 4.30E-17 97.1 6579 cellular  
 organisms;Eukaryota;Opisthokonta;Metazoa;Eumetazoa;Bilateria;Protostomia;  
 Spiralia;Lophotrochozoa;Mollusca;Bivalvia;Autobranchia;Pteriormorphia;Pect  
 inida;Pectinoidea;Pectinidae;Pecten;Pecten maximus  
 UdeM00000043654 543639 80.1 UdeM00000043654 XP\_037568308.1 27.1  
 192 125 4 5 181 27 218 5.50E-12 80.1 543639  
 cellular  
 organisms;Eukaryota;Opisthokonta;Metazoa;Eumetazoa;Bilateria;Protostomia;  
 Ecdysozoa;Panarthropoda;Arthropoda;Chelicerata;Arachnida;Acari;Parasitifo  
 rmes;Ixodida;Ixodoidea;Ixodidae;Rhipicephalinae;Dermacentor;Dermacentor  
 silvarum  
 UdeM00000043655 6579 87 UdeM00000043655 XP\_033727573.1 29.2 219  
 133 6 13 214 44 257 4.10E-14 87 6579 cellular  
 organisms;Eukaryota;Opisthokonta;Metazoa;Eumetazoa;Bilateria;Protostomia;  
 Spiralia;Lophotrochozoa;Mollusca;Bivalvia;Autobranchia;Pteriormorphia;Pect  
 inida;Pectinoidea;Pectinidae;Pecten;Pecten maximus

UdeM00000043656 6579 84 UdeM00000043656 XP\_033727573.1 28.3 219  
 134 6 13 209 45 262 3.70E-13 84 6579 cellular  
 organisms;Eukaryota;Opisthokonta;Metazoa;Eumetazoa;Bilateria;Protostomia;  
 Spiralia;Lophotrochozoa;Mollusca;Bivalvia;Autobranchia;Pteriomorphia;Pect  
 inida;Pectinoidea;Pectinidae;Pecten;Pecten maximus  
 UdeM00000043657 218467 69.3 UdeM00000043657 XP\_023232316.1 28.9  
 149 95 2 512 649 37 185 2.40E-08 69.3 218467  
 cellular  
 organisms;Eukaryota;Opisthokonta;Metazoa;Eumetazoa;Bilateria;Protostomia;  
 Ecdysozoa;Panarthropoda;Arthropoda;Chelicerata;Arachnida;Scorpiones;Buthi  
 da;Buthoidea;Buthidae;Centruroides;Centruroides sculpturatus  
 UdeM00000043658 1735272 339.3 UdeM00000043658 XP\_041356266.1 52.5  
 343 148 5 12 348 35 368 5.60E-90 339.3 1735272  
 cellular  
 organisms;Eukaryota;Opisthokonta;Metazoa;Eumetazoa;Bilateria;Protostomia;  
 Spiralia;Lophotrochozoa;Mollusca;Gastropoda;Neomphalina;Neomphaloidea;Pel  
 tospiridae;Gigantopelta;Gigantopelta aegis  
 UdeM00000043659 1735272 128.6 UdeM00000043659 XP\_041356266.1 36.1  
 180 69 2 1 134 429 608 5.90E-27 128.6 1735272  
 cellular  
 organisms;Eukaryota;Opisthokonta;Metazoa;Eumetazoa;Bilateria;Protostomia;  
 Spiralia;Lophotrochozoa;Mollusca;Gastropoda;Neomphalina;Neomphaloidea;Pel  
 tospiridae;Gigantopelta;Gigantopelta aegis  
 UdeM00000043660 7897 100.9 UdeM00000043660 XP\_014353137.1 32.3 186  
 99 3 7 165 351 536 1.70E-18 100.9 7897 cellular  
 organisms;Eukaryota;Opisthokonta;Metazoa;Eumetazoa;Bilateria;Deuterostomi  
 a;Chordata;Craniata;Vertebrata;Gnathostomata;Teleostomi;Euteleostomi;Sarc  
 opterygii;Coelacanthimorpha;Coelacanthiformes;Coelacanthidae;Latimeria;La  
 timeria chalumnae  
 UdeM00000043663 29159 258.8 UdeM00000043663 XP\_034311318.1 38.5 436  
 205 13 1 378 194 624 1.40E-65 258.8 29159 cellular  
 organisms;Eukaryota;Opisthokonta;Metazoa;Eumetazoa;Bilateria;Protostomia;  
 Spiralia;Lophotrochozoa;Mollusca;Bivalvia;Autobranchia;Pteriomorphia;Ostr  
 eida;Ostreoidea;Ostreidae;Crassostrea;Crassostrea gigas  
 UdeM00000043664 29159 94 UdeM00000043664 XP\_034305965.1 30.8 201  
 117 6 6 200 6 190 2.80E-16 94 29159 cellular  
 organisms;Eukaryota;Opisthokonta;Metazoa;Eumetazoa;Bilateria;Protostomia;  
 Spiralia;Lophotrochozoa;Mollusca;Bivalvia;Autobranchia;Pteriomorphia;Ostr  
 eida;Ostreoidea;Ostreidae;Crassostrea;Crassostrea gigas  
 UdeM00000043665 6579 95.5 UdeM00000043665 XP\_033734341.1 36.5 156  
 84 4 3 152 4 150 8.30E-17 95.5 6579 cellular  
 organisms;Eukaryota;Opisthokonta;Metazoa;Eumetazoa;Bilateria;Protostomia;  
 Spiralia;Lophotrochozoa;Mollusca;Bivalvia;Autobranchia;Pteriomorphia;Pect  
 inida;Pectinoidea;Pectinidae;Pecten;Pecten maximus  
 UdeM00000044381 6596 187.6 UdeM00000044381 XP\_045199556.1 31.9 354  
 236 4 45 395 787 1138 5.00E-44 187.6 6596 cellular  
 organisms;Eukaryota;Opisthokonta;Metazoa;Eumetazoa;Bilateria;Protostomia;  
 Spiralia;Lophotrochozoa;Mollusca;Bivalvia;Autobranchia;Heteroconchia;Euhe  
 terodonta;Imparidentia;Venerida;Veneroidea;Veneridae;Mercenaria;Mercenari  
 a mercenaria  
 UdeM00000034176 1735272 100.9 UdeM00000034176 XP\_041353563.1 24.7  
 356 241 7 25 369 7 346 3.60E-18 100.9 1735272  
 cellular  
 organisms;Eukaryota;Opisthokonta;Metazoa;Eumetazoa;Bilateria;Protostomia;

Spiralia;Lophotrochozoa;Mollusca;Gastropoda;Neomphalina;Neomphaloidea;Pel  
tospiridae;Gigantopelta;Gigantopelta aegis  
UdeM00000034177 6579 78.2 UdeM00000034177 XP\_033735137.1 55.8 77  
34 0 40 116 77 153 7.90E-12 78.2 6579 cellular  
organisms;Eukaryota;Opisthokonta;Metazoa;Eumetazoa;Bilateria;Protostomia;  
Spiralia;Lophotrochozoa;Mollusca;Bivalvia;Autobranchia;Pteriormorphia;Pect  
inida;Pectinoidea;Pectinidae;Pecten;Pecten maximus  
UdeM00000034178 29159 238 UdeM00000034178 XP\_034304882.1 43.4 279  
153 2 30 303 89 367 1.60E-59 238 29159 cellular  
organisms;Eukaryota;Opisthokonta;Metazoa;Eumetazoa;Bilateria;Protostomia;  
Spiralia;Lophotrochozoa;Mollusca;Bivalvia;Autobranchia;Pteriormorphia;Ostr  
eida;Ostreoidea;Ostreidae;Crassostrea;Crassostrea gigas  
UdeM00000034179 6596 145.6 UdeM00000034179 XP\_045187895.1 29.9 375  
245 4 38 412 32 388 1.40E-31 145.6 6596 cellular  
organisms;Eukaryota;Opisthokonta;Metazoa;Eumetazoa;Bilateria;Protostomia;  
Spiralia;Lophotrochozoa;Mollusca;Bivalvia;Autobranchia;Heteroconchia;Euhe  
terodonta;Imparidentia;Venerida;Veneroidea;Veneridae;Mercenaria;Mercenari  
a mercenaria  
UdeM00000034180 6596 154.8 UdeM00000034180 XP\_045187895.1 30.2 387  
252 4 38 424 32 400 2.40E-34 154.8 6596 cellular  
organisms;Eukaryota;Opisthokonta;Metazoa;Eumetazoa;Bilateria;Protostomia;  
Spiralia;Lophotrochozoa;Mollusca;Bivalvia;Autobranchia;Heteroconchia;Euhe  
terodonta;Imparidentia;Venerida;Veneroidea;Veneridae;Mercenaria;Mercenari  
a mercenaria  
UdeM00000034182 6573 711.1 UdeM00000034182 XP\_021369663.1 66.2 523  
175 2 6 526 191 713 1.10E-201 711.1 6573 cellular  
organisms;Eukaryota;Opisthokonta;Metazoa;Eumetazoa;Bilateria;Protostomia;  
Spiralia;Lophotrochozoa;Mollusca;Bivalvia;Autobranchia;Pteriormorphia;Pect  
inida;Pectinoidea;Pectinidae;Mizuhopecten;Mizuhopecten yessoensis  
UdeM00000034181 6579 985.3 UdeM00000034181 XP\_033749370.1 67.3 712  
232 1 23 733 2 713 4.10E-284 985.3 6579 cellular  
organisms;Eukaryota;Opisthokonta;Metazoa;Eumetazoa;Bilateria;Protostomia;  
Spiralia;Lophotrochozoa;Mollusca;Bivalvia;Autobranchia;Pteriormorphia;Pect  
inida;Pectinoidea;Pectinidae;Pecten;Pecten maximus  
UdeM00000034183 6596 218 UdeM00000034183 XP\_045216188.1 59.7 191  
74 2 15 202 153 343 1.50E-53 218 6596 cellular  
organisms;Eukaryota;Opisthokonta;Metazoa;Eumetazoa;Bilateria;Protostomia;  
Spiralia;Lophotrochozoa;Mollusca;Bivalvia;Autobranchia;Heteroconchia;Euhe  
terodonta;Imparidentia;Venerida;Veneroidea;Veneridae;Mercenaria;Mercenari  
a mercenaria  
UdeM00000034184 6596 206.5 UdeM00000034184 XP\_045216188.1 62 158  
60 0 2 159 4 161 3.50E-50 206.5 6596 cellular  
organisms;Eukaryota;Opisthokonta;Metazoa;Eumetazoa;Bilateria;Protostomia;  
Spiralia;Lophotrochozoa;Mollusca;Bivalvia;Autobranchia;Heteroconchia;Euhe  
terodonta;Imparidentia;Venerida;Veneroidea;Veneridae;Mercenaria;Mercenari  
a mercenaria  
UdeM00000034185 6596 919.1 UdeM00000034185 XP\_045156735.1 55 804  
352 4 20 816 33 833 4.00E-264 919.1 6596 cellular  
organisms;Eukaryota;Opisthokonta;Metazoa;Eumetazoa;Bilateria;Protostomia;  
Spiralia;Lophotrochozoa;Mollusca;Bivalvia;Autobranchia;Heteroconchia;Euhe  
terodonta;Imparidentia;Venerida;Veneroidea;Veneridae;Mercenaria;Mercenari  
a mercenaria  
UdeM00000034186 6596 389 UdeM00000034186 XP\_045156753.1 56.8 359  
144 6 15 366 18 372 6.50E-105 389 6596 cellular



organisms;Eukaryota;Opisthokonta;Metazoa;Eumetazoa;Bilateria;Protostomia;Spiralia;Lophotrochozoa;Mollusca;Bivalvia;Autobranchia;Heteroconchia;Euheterodonta;Imparidentia;Venerida;Veneroidea;Veneridae;Mercenaria;Mercenaria mercenaria

UdeM00000034187 6579 126.3 UdeM00000034187 XP\_033750197.1 52.1 119  
57 0 1 119 287 405 2.70E-26 126.3 6579 cellular

organisms;Eukaryota;Opisthokonta;Metazoa;Eumetazoa;Bilateria;Protostomia;Spiralia;Lophotrochozoa;Mollusca;Bivalvia;Autobranchia;Pteriomorpha;Pectinida;Pectinoidea;Pectinidae;Pecten;Pecten maximus

UdeM00000034188 6565 157.9 UdeM00000034188 XP\_022335990.1 70.3 101  
30 0 1 101 420 520 8.20E-36 157.9 6565 cellular

organisms;Eukaryota;Opisthokonta;Metazoa;Eumetazoa;Bilateria;Protostomia;Spiralia;Lophotrochozoa;Mollusca;Bivalvia;Autobranchia;Pteriomorpha;Ostreida;Ostreoidea;Ostreidae;Crassostrea;Crassostrea virginica

UdeM00000034189 6565 104.4 UdeM00000034189 XP\_022345797.1 71.9 64  
18 0 1 64 9 72 6.20E-20 104.4 6565 cellular

organisms;Eukaryota;Opisthokonta;Metazoa;Eumetazoa;Bilateria;Protostomia;Spiralia;Lophotrochozoa;Mollusca;Bivalvia;Autobranchia;Pteriomorpha;Ostreida;Ostreoidea;Ostreidae;Crassostrea;Crassostrea virginica

UdeM00000034190 6573 92.4 UdeM00000034190 XP\_021365625.1 51.7 87  
42 0 24 110 40 126 4.60E-16 92.4 6573 cellular

organisms;Eukaryota;Opisthokonta;Metazoa;Eumetazoa;Bilateria;Protostomia;Spiralia;Lophotrochozoa;Mollusca;Bivalvia;Autobranchia;Pteriomorpha;Pectinida;Pectinoidea;Pectinidae;Mizuhopecten;Mizuhopecten yessoensis

UdeM00000034191 6596 297 UdeM00000034191 XP\_045215575.1 44.7 365  
195 5 34 394 44 405 3.70E-77 297 6596 cellular

organisms;Eukaryota;Opisthokonta;Metazoa;Eumetazoa;Bilateria;Protostomia;Spiralia;Lophotrochozoa;Mollusca;Bivalvia;Autobranchia;Heteroconchia;Euheterodonta;Imparidentia;Venerida;Veneroidea;Veneridae;Mercenaria;Mercenaria mercenaria

UdeM00000034192 6596 299.7 UdeM00000034192 XP\_045215575.1 45.7 328  
174 3 38 361 44 371 5.10E-78 299.7 6596 cellular

organisms;Eukaryota;Opisthokonta;Metazoa;Eumetazoa;Bilateria;Protostomia;Spiralia;Lophotrochozoa;Mollusca;Bivalvia;Autobranchia;Heteroconchia;Euheterodonta;Imparidentia;Venerida;Veneroidea;Veneridae;Mercenaria;Mercenaria mercenaria

UdeM00000034193 225164 212.2 UdeM00000034193 XP\_009061694.1 62.7  
150 54 1 1 150 1 148 4.50E-52 212.2 225164  
cellular

organisms;Eukaryota;Opisthokonta;Metazoa;Eumetazoa;Bilateria;Protostomia;Spiralia;Lophotrochozoa;Mollusca;Gastropoda;Patellogastropoda;Lottioidae;Lottiidae;Lottia;Lottia gigantea

UdeM00000034194 6596 388.3 UdeM00000034194 XP\_045189912.1 43.8 482  
248 9 24 482 27 508 1.50E-104 388.3 6596 cellular

organisms;Eukaryota;Opisthokonta;Metazoa;Eumetazoa;Bilateria;Protostomia;Spiralia;Lophotrochozoa;Mollusca;Bivalvia;Autobranchia;Heteroconchia;Euheterodonta;Imparidentia;Venerida;Veneroidea;Veneridae;Mercenaria;Mercenaria mercenaria

UdeM00000034195 6596 124.8 UdeM00000034195 XP\_045189912.1 46.4 151  
73 3 2 151 538 681 9.70E-26 124.8 6596 cellular

organisms;Eukaryota;Opisthokonta;Metazoa;Eumetazoa;Bilateria;Protostomia;Spiralia;Lophotrochozoa;Mollusca;Bivalvia;Autobranchia;Heteroconchia;Euheterodonta;Imparidentia;Venerida;Veneroidea;Veneridae;Mercenaria;Mercenaria mercenaria

UdeM00000034196 6565 94.4 UdeM00000034196 XP\_022299727.1 50.6 77  
 38 0 18 94 658 734 2.00E-16 94.4 6565 cellular  
 organisms;Eukaryota;Opisthokonta;Metazoa;Eumetazoa;Bilateria;Protostomia;  
 Spiralia;Lophotrochozoa;Mollusca;Bivalvia;Autobranhia;Pteriormorphia;Ostr  
 eida;Ostreoidea;Ostreidae;Crassostrea;Crassostrea virginica  
 UdeM00000034197 6579 263.5 UdeM00000034197 XP\_033726657.1 50.7 284  
 106 3 1 250 223 506 2.80E-67 263.5 6579 cellular  
 organisms;Eukaryota;Opisthokonta;Metazoa;Eumetazoa;Bilateria;Protostomia;  
 Spiralia;Lophotrochozoa;Mollusca;Bivalvia;Autobranhia;Pteriormorphia;Pect  
 inida;Pectinoidea;Pectinidae;Pecten;Pecten maximus  
 UdeM00000034198 6596 840.1 UdeM00000034198 XP\_045189916.1 36.7 1461  
 793 34 23 1449 824 2186 4.20E-240 840.1 6596 cellular  
 organisms;Eukaryota;Opisthokonta;Metazoa;Eumetazoa;Bilateria;Protostomia;  
 Spiralia;Lophotrochozoa;Mollusca;Bivalvia;Autobranhia;Heteroconchia;Euhe  
 terodonta;Imparidentia;Venerida;Veneroidea;Veneridae;Mercenaria;Mercenari  
 a mercenaria  
 UdeM00000034199 1735272 365.9 UdeM00000034199 XP\_041373795.1 52.2  
 356 160 2 5 360 17 362 5.80E-98 365.9 1735272  
 cellular  
 organisms;Eukaryota;Opisthokonta;Metazoa;Eumetazoa;Bilateria;Protostomia;  
 Spiralia;Lophotrochozoa;Mollusca;Gastropoda;Neomphalina;Neomphaloidea;Pel  
 tospiridae;Gigantopelta;Gigantopelta aegis  
 UdeM00000034200 6573 333.6 UdeM00000034200 XP\_021355857.1 32.2 734  
 451 17 9 706 11 733 6.20E-88 333.6 6573 cellular  
 organisms;Eukaryota;Opisthokonta;Metazoa;Eumetazoa;Bilateria;Protostomia;  
 Spiralia;Lophotrochozoa;Mollusca;Bivalvia;Autobranhia;Pteriormorphia;Pect  
 inida;Pectinoidea;Pectinidae;Mizuhopecten;Mizuhopecten yessoensis  
 UdeM00000034201 6596 450.7 UdeM00000034201 XP\_045156781.1 65.7 335  
 110 3 5 336 4 336 1.70E-123 450.7 6596 cellular  
 organisms;Eukaryota;Opisthokonta;Metazoa;Eumetazoa;Bilateria;Protostomia;  
 Spiralia;Lophotrochozoa;Mollusca;Bivalvia;Autobranhia;Heteroconchia;Euhe  
 terodonta;Imparidentia;Venerida;Veneroidea;Veneridae;Mercenaria;Mercenari  
 a mercenaria  
 UdeM00000034202 6596 273.9 UdeM00000034202 XP\_045156781.1 47.8 289  
 151 0 15 303 10 298 2.60E-70 273.9 6596 cellular  
 organisms;Eukaryota;Opisthokonta;Metazoa;Eumetazoa;Bilateria;Protostomia;  
 Spiralia;Lophotrochozoa;Mollusca;Bivalvia;Autobranhia;Heteroconchia;Euhe  
 terodonta;Imparidentia;Venerida;Veneroidea;Veneridae;Mercenaria;Mercenari  
 a mercenaria  
 UdeM00000034203 6579 362.5 UdeM00000034203 XP\_033751003.1 47.3 465  
 203 12 1 430 1 458 7.90E-97 362.5 6579 cellular  
 organisms;Eukaryota;Opisthokonta;Metazoa;Eumetazoa;Bilateria;Protostomia;  
 Spiralia;Lophotrochozoa;Mollusca;Bivalvia;Autobranhia;Pteriormorphia;Pect  
 inida;Pectinoidea;Pectinidae;Pecten;Pecten maximus  
 UdeM00000034204 6596 73.6 UdeM00000034204 XP\_045211164.1 28.8 132  
 90 2 28 157 21 150 4.30E-10 73.6 6596 cellular  
 organisms;Eukaryota;Opisthokonta;Metazoa;Eumetazoa;Bilateria;Protostomia;  
 Spiralia;Lophotrochozoa;Mollusca;Bivalvia;Autobranhia;Heteroconchia;Euhe  
 terodonta;Imparidentia;Venerida;Veneroidea;Veneridae;Mercenaria;Mercenari  
 a mercenaria  
 UdeM00000034205 29159 132.9 UdeM00000034205 XP\_011434225.2 48.8 168  
 86 0 2 169 397 564 4.00E-28 132.9 29159 cellular  
 organisms;Eukaryota;Opisthokonta;Metazoa;Eumetazoa;Bilateria;Protostomia;

Spiralia;Lophotrochozoa;Mollusca;Bivalvia;Autobranchia;Pteriormorphia;Ostr  
eida;Ostreoidea;Ostreidae;Crassostrea;Crassostrea gigas  
UdeM00000034206 1735272 129.4 UdeM00000034206 XP\_041372210.1 34.6  
217 142 0 54 270 415 631 6.90E-27 129.4 1735272  
cellular  
organisms;Eukaryota;Opisthokonta;Metazoa;Eumetazoa;Bilateria;Protostomia;  
Spiralia;Lophotrochozoa;Mollusca;Gastropoda;Neomphalina;Neomphaloidea;Pel  
tospiridae;Gigantopelta;Gigantopelta aegis  
UdeM00000034208 400727 132.1 UdeM00000034208 XP\_025078313.1 52.3  
132 61 2 115 244 80 211 9.50E-28 132.1 400727  
cellular  
organisms;Eukaryota;Opisthokonta;Metazoa;Eumetazoa;Bilateria;Protostomia;  
Spiralia;Lophotrochozoa;Mollusca;Gastropoda;Caenogastropoda;Architaeniogl  
ossa;Ampullarioidea;Ampullariidae;Pomacea;Pomacea canaliculata  
UdeM00000034209 6579 242.3 UdeM00000034209 XP\_033749711.1 49.5 277  
106 6 1 248 1 272 1.00E-60 242.3 6579 cellular  
organisms;Eukaryota;Opisthokonta;Metazoa;Eumetazoa;Bilateria;Protostomia;  
Spiralia;Lophotrochozoa;Mollusca;Bivalvia;Autobranchia;Pteriormorphia;Pect  
inida;Pectinoidea;Pectinidae;Pecten;Pecten maximus  
UdeM00000034210 1735272 299.3 UdeM00000034210 XP\_041366953.1 76.8  
198 46 0 1 198 1 198 3.70E-78 299.3 1735272  
cellular  
organisms;Eukaryota;Opisthokonta;Metazoa;Eumetazoa;Bilateria;Protostomia;  
Spiralia;Lophotrochozoa;Mollusca;Gastropoda;Neomphalina;Neomphaloidea;Pel  
tospiridae;Gigantopelta;Gigantopelta aegis  
UdeM00000034211 6579 395.6 UdeM00000034211 XP\_033750685.1 80.4 235  
46 0 1 235 1 235 6.30E-107 395.6 6579 cellular  
organisms;Eukaryota;Opisthokonta;Metazoa;Eumetazoa;Bilateria;Protostomia;  
Spiralia;Lophotrochozoa;Mollusca;Bivalvia;Autobranchia;Pteriormorphia;Pect  
inida;Pectinoidea;Pectinidae;Pecten;Pecten maximus  
UdeM00000034213 50390 104 UdeM00000034213 XP\_028149250.1 37.8 196  
108 8 1 190 34 221 2.20E-19 104 50390 cellular  
organisms;Eukaryota;Opisthokonta;Metazoa;Eumetazoa;Bilateria;Protostomia;  
Ecdysozoa;Panarthropoda;Arthropoda;Mandibulata;Pancrustacea;Hexapoda;Inse  
cta;Dicondylia;Pterygota;Neoptera;Endopterygota;Coleoptera;Polyphaga;Cucu  
jiformia;Chrysomeloidea;Chrysomelidae;Galerucinae;Luperini;Diabroticina;D  
iabroticites;Diabrotica;Diabrotica virgifera;Diabrotica virgifera  
virgifera  
UdeM00000034212 6573 112.1 UdeM00000034212 XP\_021345950.1 40.1 177  
89 4 17 177 118 293 7.80E-22 112.1 6573 cellular  
organisms;Eukaryota;Opisthokonta;Metazoa;Eumetazoa;Bilateria;Protostomia;  
Spiralia;Lophotrochozoa;Mollusca;Bivalvia;Autobranchia;Pteriormorphia;Pect  
inida;Pectinoidea;Pectinidae;Mizuhopecten;Mizuhopecten yessoensis  
UdeM00000034214 6596 637.9 UdeM00000034214 XP\_045156550.1 63 495  
179 2 22 512 31 525 1.10E-179 637.9 6596 cellular  
organisms;Eukaryota;Opisthokonta;Metazoa;Eumetazoa;Bilateria;Protostomia;  
Spiralia;Lophotrochozoa;Mollusca;Bivalvia;Autobranchia;Heteroconchia;Euhe  
terodonta;Imparidentia;Venerida;Veneroidea;Veneridae;Mercenaria;Mercenari  
a mercenaria  
UdeM00000034215 6596 454.9 UdeM00000034215 XP\_045156551.1 71.3 366  
93 5 121 477 146 508 1.30E-124 454.9 6596 cellular  
organisms;Eukaryota;Opisthokonta;Metazoa;Eumetazoa;Bilateria;Protostomia;  
Spiralia;Lophotrochozoa;Mollusca;Bivalvia;Autobranchia;Heteroconchia;Euhe

terodonta;Imparidentia;Venerida;Veneroidea;Veneridae;Mercenaria;Mercenari  
a mercenaria

UdeM00000034216 6596 1947.9 UdeM00000034216 XP\_045216816.1 43.9  
2450 1274 27 87 2499 79 2464 0.00E+00 1947.9 6596  
cellular

organisms;Eukaryota;Opisthokonta;Metazoa;Eumetazoa;Bilateria;Protostomia;  
Spiralia;Lophotrochozoa;Mollusca;Bivalvia;Autobranhia;Heteroconchia;Euhe  
terodonta;Imparidentia;Venerida;Veneroidea;Veneridae;Mercenaria;Mercenari  
a mercenaria

UdeM00000034217 6579 125.9 UdeM00000034217 XP\_033750133.1 59.6 94  
37 1 529 622 728 820 1.80E-25 125.9 6579 cellular

organisms;Eukaryota;Opisthokonta;Metazoa;Eumetazoa;Bilateria;Protostomia;  
Spiralia;Lophotrochozoa;Mollusca;Bivalvia;Autobranhia;Pteriormorphia;Pect  
inida;Pectinoidea;Pectinidae;Pecten;Pecten maximus

UdeM00000034218 6596 233.4 UdeM00000034218 XP\_045215756.1 53.5 228  
102 3 26 253 866 1089 3.30E-58 233.4 6596 cellular

organisms;Eukaryota;Opisthokonta;Metazoa;Eumetazoa;Bilateria;Protostomia;  
Spiralia;Lophotrochozoa;Mollusca;Bivalvia;Autobranhia;Heteroconchia;Euhe  
terodonta;Imparidentia;Venerida;Veneroidea;Veneridae;Mercenaria;Mercenari  
a mercenaria

UdeM00000034220 6596 342.8 UdeM00000034220 XP\_045215762.1 45.5 352  
172 6 16 363 15 350 5.80E-91 342.8 6596 cellular

organisms;Eukaryota;Opisthokonta;Metazoa;Eumetazoa;Bilateria;Protostomia;  
Spiralia;Lophotrochozoa;Mollusca;Bivalvia;Autobranhia;Heteroconchia;Euhe  
terodonta;Imparidentia;Venerida;Veneroidea;Veneridae;Mercenaria;Mercenari  
a mercenaria

UdeM00000034219 6596 270.4 UdeM00000034219 XP\_045215761.1 47.4 266  
123 4 129 391 181 432 3.90E-69 270.4 6596 cellular

organisms;Eukaryota;Opisthokonta;Metazoa;Eumetazoa;Bilateria;Protostomia;  
Spiralia;Lophotrochozoa;Mollusca;Bivalvia;Autobranhia;Heteroconchia;Euhe  
terodonta;Imparidentia;Venerida;Veneroidea;Veneridae;Mercenaria;Mercenari  
a mercenaria

UdeM00000034221 2607531 226.9 UdeM00000034221 XP\_029635195.1 48.6  
222 111 1 10 228 101 322 4.40E-56 226.9 2607531  
cellular

organisms;Eukaryota;Opisthokonta;Metazoa;Eumetazoa;Bilateria;Protostomia;  
Spiralia;Lophotrochozoa;Mollusca;Cephalopoda;Coleoidea;Octopodiformes;Oct  
opoda;Incirrata;Octopodidae;Octopus;Octopus sinensis

UdeM00000034222 6573 323.2 UdeM00000034222 XP\_021368462.1 61.6 245  
94 0 1 245 107 351 3.70E-85 323.2 6573 cellular

organisms;Eukaryota;Opisthokonta;Metazoa;Eumetazoa;Bilateria;Protostomia;  
Spiralia;Lophotrochozoa;Mollusca;Bivalvia;Autobranhia;Pteriormorphia;Pect  
inida;Pectinoidea;Pectinidae;Mizuhopecten;Mizuhopecten yessoensis

UdeM00000043699 6596 204.9 UdeM00000043699 XP\_045174881.1 62.5 144  
54 0 9 152 9 152 7.60E-50 204.9 6596 cellular

organisms;Eukaryota;Opisthokonta;Metazoa;Eumetazoa;Bilateria;Protostomia;  
Spiralia;Lophotrochozoa;Mollusca;Bivalvia;Autobranhia;Heteroconchia;Euhe  
terodonta;Imparidentia;Venerida;Veneroidea;Veneridae;Mercenaria;Mercenari  
a mercenaria

UdeM00000043700 6596 264.6 UdeM00000043700 XP\_045174881.1 64 189  
68 0 9 197 9 197 1.10E-67 264.6 6596 cellular

organisms;Eukaryota;Opisthokonta;Metazoa;Eumetazoa;Bilateria;Protostomia;  
Spiralia;Lophotrochozoa;Mollusca;Bivalvia;Autobranhia;Heteroconchia;Euhe

terodonta;Imparidentia;Venerida;Veneroidea;Veneridae;Mercenaria;Mercenaria mercenaria  
 UdeM00000038923 6596 184.1 UdeM00000038923 XP\_045182316.1 41.7 266  
 117 6 1 245 392 640 2.40E-43 184.1 6596 cellular  
 organisms;Eukaryota;Opisthokonta;Metazoa;Eumetazoa;Bilateria;Protostomia;  
 Spiralia;Lophotrochozoa;Mollusca;Bivalvia;Autobranchia;Heteroconchia;Euhe  
 terodonta;Imparidentia;Venerida;Veneroidea;Veneridae;Mercenaria;Mercenari  
 a mercenaria  
 UdeM00000038924 6565 184.9 UdeM00000038924 XP\_022334993.1 52 177  
 83 1 42 216 374 550 1.10E-43 184.9 6565 cellular  
 organisms;Eukaryota;Opisthokonta;Metazoa;Eumetazoa;Bilateria;Protostomia;  
 Spiralia;Lophotrochozoa;Mollusca;Bivalvia;Autobranchia;Pteriormorphia;Ostr  
 eida;Ostreoidea;Ostreidae;Crassostrea;Crassostrea virginica  
 UdeM00000038925 6565 301.6 UdeM00000038925 XP\_022334993.1 60 240  
 93 3 1 238 574 812 9.10E-79 301.6 6565 cellular  
 organisms;Eukaryota;Opisthokonta;Metazoa;Eumetazoa;Bilateria;Protostomia;  
 Spiralia;Lophotrochozoa;Mollusca;Bivalvia;Autobranchia;Pteriormorphia;Ostr  
 eida;Ostreoidea;Ostreidae;Crassostrea;Crassostrea virginica  
 UdeM00000038927 6596 671 UdeM00000038927 XP\_045187536.1 66.6 500  
 164 2 2 501 228 724 1.20E-189 671 6596 cellular  
 organisms;Eukaryota;Opisthokonta;Metazoa;Eumetazoa;Bilateria;Protostomia;  
 Spiralia;Lophotrochozoa;Mollusca;Bivalvia;Autobranchia;Heteroconchia;Euhe  
 terodonta;Imparidentia;Venerida;Veneroidea;Veneridae;Mercenaria;Mercenari  
 a mercenaria  
 UdeM00000038928 6596 436 UdeM00000038928 XP\_045187536.1 63.7 331  
 118 1 1 331 396 724 4.20E-119 436 6596 cellular  
 organisms;Eukaryota;Opisthokonta;Metazoa;Eumetazoa;Bilateria;Protostomia;  
 Spiralia;Lophotrochozoa;Mollusca;Bivalvia;Autobranchia;Heteroconchia;Euhe  
 terodonta;Imparidentia;Venerida;Veneroidea;Veneridae;Mercenaria;Mercenari  
 a mercenaria  
 UdeM00000038932 37653 149.1 UdeM00000038932 XP\_014789722.1 41.1 246  
 38 2 19 160 1387 1629 5.20E-33 149.1 37653 cellular  
 organisms;Eukaryota;Opisthokonta;Metazoa;Eumetazoa;Bilateria;Protostomia;  
 Spiralia;Lophotrochozoa;Mollusca;Cephalopoda;Coleoidea;Octopodiformes;Oct  
 opoda;Incirrata;Octopodidae;Octopus;Octopus bimaculoides  
 UdeM00000038933 6596 186.8 UdeM00000038933 XP\_045181000.1 49.2 244  
 44 2 24 188 1302 1544 2.60E-44 186.8 6596 cellular  
 organisms;Eukaryota;Opisthokonta;Metazoa;Eumetazoa;Bilateria;Protostomia;  
 Spiralia;Lophotrochozoa;Mollusca;Bivalvia;Autobranchia;Heteroconchia;Euhe  
 terodonta;Imparidentia;Venerida;Veneroidea;Veneridae;Mercenaria;Mercenari  
 a mercenaria  
 UdeM00000038934 400727 62.4 UdeM00000038934 XP\_025090830.1 81.6  
 38 7 0 85 122 1146 1183 4.70E-07 62.4 400727  
 cellular  
 organisms;Eukaryota;Opisthokonta;Metazoa;Eumetazoa;Bilateria;Protostomia;  
 Spiralia;Lophotrochozoa;Mollusca;Gastropoda;Caenogastropoda;Architaeniogl  
 ossa;Ampullarioidea;Ampullariidae;Pomacea;Pomacea canaliculata  
 UdeM00000038935 1735272 257.7 UdeM00000038935 XP\_041347279.1 35.6  
 438 243 11 1 407 1 430 2.50E-65 257.7 1735272  
 cellular  
 organisms;Eukaryota;Opisthokonta;Metazoa;Eumetazoa;Bilateria;Protostomia;  
 Spiralia;Lophotrochozoa;Mollusca;Gastropoda;Neomphalina;Neomphaloidea;Pel  
 tospiridae;Gigantopelta;Gigantopelta aegis

UdeM00000038937 7054 274.2 UdeM00000038937 XP\_031350480.1 54.3 219  
 99 1 1 218 249 467 1.40E-70 274.2 7054 cellular  
 organisms;Eukaryota;Opisthokonta;Metazoa;Eumetazoa;Bilateria;Protostomia;  
 Ecdysozoa;Panarthropoda;Arthropoda;Mandibulata;Pancrustacea;Hexapoda;Inse  
 cta;Dicondylia;Pterygota;Neoptera;Endopterygota;Coleoptera;Polyphaga;Elat  
 eriformia;Elateroidea;Lampyridae;Lampyrinae;Photinus;Photinus pyralis  
 UdeM00000038938 7054 203.8 UdeM00000038938 XP\_031328250.1 49.1 224  
 113 1 1 223 1 224 2.40E-49 203.8 7054 cellular  
 organisms;Eukaryota;Opisthokonta;Metazoa;Eumetazoa;Bilateria;Protostomia;  
 Ecdysozoa;Panarthropoda;Arthropoda;Mandibulata;Pancrustacea;Hexapoda;Inse  
 cta;Dicondylia;Pterygota;Neoptera;Endopterygota;Coleoptera;Polyphaga;Elat  
 eriformia;Elateroidea;Lampyridae;Lampyrinae;Photinus;Photinus pyralis  
 UdeM00000038939 29159 143.7 UdeM00000038939 XP\_034307860.1 53 149  
 46 1 1 125 1 149 1.60E-31 143.7 29159 cellular  
 organisms;Eukaryota;Opisthokonta;Metazoa;Eumetazoa;Bilateria;Protostomia;  
 Spiralia;Lophotrochozoa;Mollusca;Bivalvia;Autobranchia;Pteriormorphia;Ostr  
 eida;Ostreoidea;Ostreidae;Crassostrea;Crassostrea gigas  
 UdeM00000038940 29159 94.7 UdeM00000038940 XP\_034307860.1 54.2 83  
 38 0 1 83 1 83 5.80E-17 94.7 29159 cellular  
 organisms;Eukaryota;Opisthokonta;Metazoa;Eumetazoa;Bilateria;Protostomia;  
 Spiralia;Lophotrochozoa;Mollusca;Bivalvia;Autobranchia;Pteriormorphia;Ostr  
 eida;Ostreoidea;Ostreidae;Crassostrea;Crassostrea gigas  
 UdeM00000038942 6596 436 UdeM00000038942 XP\_045187536.1 63.7 331  
 118 1 1 331 396 724 4.20E-119 436 6596 cellular  
 organisms;Eukaryota;Opisthokonta;Metazoa;Eumetazoa;Bilateria;Protostomia;  
 Spiralia;Lophotrochozoa;Mollusca;Bivalvia;Autobranchia;Heteroconchia;Euhe  
 terodonta;Imparidentia;Venerida;Veneroidea;Veneridae;Mercenaria;Mercenari  
 a mercenaria  
 UdeM00000044426 6596 172.6 UdeM00000044426 XP\_045208226.1 64.7 133  
 46 1 17 148 8 140 3.90E-40 172.6 6596 cellular  
 organisms;Eukaryota;Opisthokonta;Metazoa;Eumetazoa;Bilateria;Protostomia;  
 Spiralia;Lophotrochozoa;Mollusca;Bivalvia;Autobranchia;Heteroconchia;Euhe  
 terodonta;Imparidentia;Venerida;Veneroidea;Veneridae;Mercenaria;Mercenari  
 a mercenaria  
 UdeM00000043827 6579 100.9 UdeM00000043827 XP\_033731337.1 33.1 160  
 95 3 649 806 174 323 8.00E-18 100.9 6579 cellular  
 organisms;Eukaryota;Opisthokonta;Metazoa;Eumetazoa;Bilateria;Protostomia;  
 Spiralia;Lophotrochozoa;Mollusca;Bivalvia;Autobranchia;Pteriormorphia;Pect  
 inida;Pectinoidea;Pectinidae;Pecten;Pecten maximus  
 UdeM00000043828 6579 101.3 UdeM00000043828 XP\_033731337.1 33.1 160  
 95 3 351 508 174 323 3.90E-18 101.3 6579 cellular  
 organisms;Eukaryota;Opisthokonta;Metazoa;Eumetazoa;Bilateria;Protostomia;  
 Spiralia;Lophotrochozoa;Mollusca;Bivalvia;Autobranchia;Pteriormorphia;Pect  
 inida;Pectinoidea;Pectinidae;Pecten;Pecten maximus  
 UdeM00000043840 208964 135.2 UdeM00000043840 NP\_250340.1 42.1 261  
 125 5 1 247 5 253 1.10E-28 135.2 208964  
 cellular  
 organisms;Bacteria;Proteobacteria;Gammaproteobacteria;Pseudomonadales;Pse  
 udomonadaceae;Pseudomonas;Pseudomonas aeruginosa group;Pseudomonas  
 aeruginosa;Pseudomonas aeruginosa PA01  
 UdeM00000043841 51031 268.9 UdeM00000043841 XP\_013306300.1 52.6 272  
 129 0 4 275 24 295 7.40E-69 268.9 51031 cellular  
 organisms;Eukaryota;Opisthokonta;Metazoa;Eumetazoa;Bilateria;Protostomia;

Ecdysozoa;Nematoda;Chromadorea;Strongylida;Ancylostomatoidea;Ancylostomatidae;Bunostominae;Necator;Necator americanus

UdeM00000043842 208964 402.5 UdeM00000043842 NP\_253797.1 58 333  
135 2 7 335 5 336 5.50E-109 402.5 208964

cellular

organisms;Bacteria;Proteobacteria;Gammaproteobacteria;Pseudomonadales;Pseudomonadaceae;Pseudomonas;Pseudomonas aeruginosa group;Pseudomonas aeruginosa;Pseudomonas aeruginosa PA01

UdeM00000024600 6596 250 UdeM00000024600 XP\_045177112.1 28.8 570  
354 12 74 602 90 648 7.90E-63 250 6596 cellular

organisms;Eukaryota;Opisthokonta;Metazoa;Eumetazoa;Bilateria;Protostomia;Spiralia;Lophotrochozoa;Mollusca;Bivalvia;Autobranhia;Heteroconchia;Euheterodonta;Imparidentia;Venerida;Veneroidea;Veneridae;Mercenaria;Mercenaria mercenaria

UdeM00000024601 6565 103.2 UdeM00000024601 XP\_022325441.1 26.3 373  
230 11 2 354 137 484 7.00E-19 103.2 6565 cellular

organisms;Eukaryota;Opisthokonta;Metazoa;Eumetazoa;Bilateria;Protostomia;Spiralia;Lophotrochozoa;Mollusca;Bivalvia;Autobranhia;Pteriormorphia;Ostreida;Ostreioidea;Ostreidae;Crassostrea;Crassostrea virginica

UdeM00000024602 6565 107.8 UdeM00000024602 XP\_022326448.1 34.7 173  
80 3 31 170 772 944 1.50E-20 107.8 6565 cellular

organisms;Eukaryota;Opisthokonta;Metazoa;Eumetazoa;Bilateria;Protostomia;Spiralia;Lophotrochozoa;Mollusca;Bivalvia;Autobranhia;Pteriormorphia;Ostreida;Ostreioidea;Ostreidae;Crassostrea;Crassostrea virginica

UdeM00000024603 6596 130.2 UdeM00000024603 XP\_045206055.1 28 325  
145 6 1 238 118 440 3.70E-27 130.2 6596 cellular

organisms;Eukaryota;Opisthokonta;Metazoa;Eumetazoa;Bilateria;Protostomia;Spiralia;Lophotrochozoa;Mollusca;Bivalvia;Autobranhia;Heteroconchia;Euheterodonta;Imparidentia;Venerida;Veneroidea;Veneridae;Mercenaria;Mercenaria mercenaria

UdeM00000024604 6573 104 UdeM00000024604 XP\_021369020.1 28 239  
136 3 3 241 494 696 3.30E-19 104 6573 cellular

organisms;Eukaryota;Opisthokonta;Metazoa;Eumetazoa;Bilateria;Protostomia;Spiralia;Lophotrochozoa;Mollusca;Bivalvia;Autobranhia;Pteriormorphia;Pectinida;Pectinoidea;Pectinidae;Mizuhopecten;Mizuhopecten yessoensis

UdeM00000024605 1735272 231.1 UdeM00000024605 XP\_041365824.1 42.6  
303 166 3 32 333 35 330 2.10E-57 231.1 1735272

cellular

organisms;Eukaryota;Opisthokonta;Metazoa;Eumetazoa;Bilateria;Protostomia;Spiralia;Lophotrochozoa;Mollusca;Gastropoda;Neomphalina;Neomphaloidea;Peltopspiridae;Gigantopelta;Gigantopelta aegis

UdeM00000024606 6573 495.7 UdeM00000024606 XP\_021369020.1 39.5 722  
395 6 12 732 16 696 1.00E-136 495.7 6573 cellular

organisms;Eukaryota;Opisthokonta;Metazoa;Eumetazoa;Bilateria;Protostomia;Spiralia;Lophotrochozoa;Mollusca;Bivalvia;Autobranhia;Pteriormorphia;Pectinida;Pectinoidea;Pectinidae;Mizuhopecten;Mizuhopecten yessoensis

UdeM00000024607 400727 86.3 UdeM00000024607 XP\_025088218.1 38  
100 60 1 8 107 11 108 3.90E-14 86.3 400727

cellular

organisms;Eukaryota;Opisthokonta;Metazoa;Eumetazoa;Bilateria;Protostomia;Spiralia;Lophotrochozoa;Mollusca;Gastropoda;Caenogastropoda;Architaenioglossa;Ampullarioidea;Ampullariidae;Pomacea;Pomacea canaliculata

UdeM00000024608 6596 246.1 UdeM00000024608 XP\_045176016.1 64.6 189  
63 3 30 216 202 388 4.00E-62 246.1 6596 cellular

organisms;Eukaryota;Opisthokonta;Metazoa;Eumetazoa;Bilateria;Protostomia;Spiralia;Lophotrochozoa;Mollusca;Bivalvia;Autobranchia;Heteroconchia;Euherodonta;Imparidentia;Venerida;Veneroidea;Veneridae;Mercenaria;Mercenaria mercenaria

UdeM00000024609 6573 81.3 UdeM00000024609 XP\_021353383.1 87.8 49  
6 0 13 61 9 57 5.80E-13 81.3 6573 cellular

organisms;Eukaryota;Opisthokonta;Metazoa;Eumetazoa;Bilateria;Protostomia;Spiralia;Lophotrochozoa;Mollusca;Bivalvia;Autobranchia;Pteriormorphia;Pectinida;Pectinoidea;Pectinidae;Mizuhopecten;Mizuhopecten yessoensis

UdeM00000024610 29159 147.1 UdeM00000024610 XP\_034310118.1 25 597  
330 17 24 536 5 567 6.40E-32 147.1 29159 cellular

organisms;Eukaryota;Opisthokonta;Metazoa;Eumetazoa;Bilateria;Protostomia;Spiralia;Lophotrochozoa;Mollusca;Bivalvia;Autobranchia;Pteriormorphia;Ostreida;Ostreoidea;Ostreidae;Crassostrea;Crassostrea gigas

UdeM00000024611 326594 82.8 UdeM00000024611 XP\_011501916.1 77.6  
49 11 0 119 167 261 309 4.70E-13 82.8 326594  
cellular

organisms;Eukaryota;Opisthokonta;Metazoa;Eumetazoa;Bilateria;Protostomia;Ecdysozoa;Panarthropoda;Arthropoda;Mandibulata;Pancrustacea;Hexapoda;Insecta;Dicondylia;Pterygota;Neoptera;Endopterygota;Hymenoptera;Apocrita;Parasitoida;Chalcidoidea;Agaonidae;Agaoninae;Ceratosolen;Ceratosolen solmsi;Ceratosolen solmsi marchali

UdeM00000024612 6579 135.6 UdeM00000024612 XP\_033752833.1 35.5 217  
101 6 94 309 140 318 1.10E-28 135.6 6579 cellular

organisms;Eukaryota;Opisthokonta;Metazoa;Eumetazoa;Bilateria;Protostomia;Spiralia;Lophotrochozoa;Mollusca;Bivalvia;Autobranchia;Pteriormorphia;Pectinida;Pectinoidea;Pectinidae;Pecten;Pecten maximus

UdeM00000024614 6579 135.6 UdeM00000024614 XP\_033752833.1 35.6 219  
98 5 15 230 140 318 1.30E-28 135.6 6579 cellular

organisms;Eukaryota;Opisthokonta;Metazoa;Eumetazoa;Bilateria;Protostomia;Spiralia;Lophotrochozoa;Mollusca;Bivalvia;Autobranchia;Pteriormorphia;Pectinida;Pectinoidea;Pectinidae;Pecten;Pecten maximus

UdeM00000024615 6579 136.3 UdeM00000024615 XP\_033752833.1 34.6 228  
112 4 47 274 131 321 5.80E-29 136.3 6579 cellular

organisms;Eukaryota;Opisthokonta;Metazoa;Eumetazoa;Bilateria;Protostomia;Spiralia;Lophotrochozoa;Mollusca;Bivalvia;Autobranchia;Pteriormorphia;Pectinida;Pectinoidea;Pectinidae;Pecten;Pecten maximus

UdeM00000024616 1232801 123.2 UdeM00000024616 XP\_043215542.1 48.8  
129 56 2 1 121 1 127 3.60E-25 123.2 1232801  
cellular

organisms;Eukaryota;Opisthokonta;Metazoa;Eumetazoa;Bilateria;Protostomia;Ecdysozoa;Panarthropoda;Arthropoda;Mandibulata;Pancrustacea;Crustacea;Multicrustacea;Hexanauplia;Thecostraca;Cirripedia;Thoracica;Sessilia;Balanidae;Amphibalanus;Amphibalanus amphitrite

UdeM00000024617 13686 313.2 UdeM00000024617 XP\_011170408.3 41.1 411  
217 9 95 488 125 527 6.10E-82 313.2 13686 cellular

organisms;Eukaryota;Opisthokonta;Metazoa;Eumetazoa;Bilateria;Protostomia;Ecdysozoa;Panarthropoda;Arthropoda;Mandibulata;Pancrustacea;Hexapoda;Insecta;Dicondylia;Pterygota;Neoptera;Endopterygota;Hymenoptera;Apocrita;Aculeata;Formicoidea;Formicidae;Myrmicinae;Solenopsidini;Solenopsis;Solenopsis invicta

UdeM00000024618 29053 129.4 UdeM00000024618 XP\_014216996.1 58.8 102  
42 0 152 253 65 166 6.50E-27 129.4 29053 cellular

organisms;Eukaryota;Opisthokonta;Metazoa;Eumetazoa;Bilateria;Protostomia;



Ecdysozoa; Panarthropoda; Arthropoda; Mandibulata; Pancrustacea; Hexapoda; Insecta; Dicondylia; Pterygota; Neoptera; Endopterygota; Hymenoptera; Apocrita; Parasitoida; Chalcidoidea; Encyrtidae; Encyrtinae; Copidosoma; Copidosoma floridanum

UdeM00000024619 6573 281.2 UdeM00000024619 XP\_021353303.1 56.8 315  
116 9 1 303 11 317 1.60E-72 281.2 6573 cellular  
organisms; Eukaryota; Opisthokonta; Metazoa; Eumetazoa; Bilateria; Protostomia; Spiralia; Lophotrochozoa; Mollusca; Bivalvia; Autobranchia; Pteriomorpha; Pectinida; Pectinoidea; Pectinidae; Mizuhopecten; Mizuhopecten yessoensis

UdeM00000024620 6596 169.1 UdeM00000024620 XP\_045176167.1 36.6 246  
150 3 5 245 4 248 7.10E-39 169.1 6596 cellular  
organisms; Eukaryota; Opisthokonta; Metazoa; Eumetazoa; Bilateria; Protostomia; Spiralia; Lophotrochozoa; Mollusca; Bivalvia; Autobranchia; Heteroconchia; Euheterodonta; Imparidentia; Venerida; Veneroidea; Veneridae; Mercenaria; Mercenaria mercenaria

UdeM00000024621 6596 172.9 UdeM00000024621 XP\_045176167.1 38.2 246  
146 3 5 245 4 248 4.90E-40 172.9 6596 cellular  
organisms; Eukaryota; Opisthokonta; Metazoa; Eumetazoa; Bilateria; Protostomia; Spiralia; Lophotrochozoa; Mollusca; Bivalvia; Autobranchia; Heteroconchia; Euheterodonta; Imparidentia; Venerida; Veneroidea; Veneridae; Mercenaria; Mercenaria mercenaria

UdeM00000024622 6596 345.5 UdeM00000024622 XP\_045176167.1 65.5 252  
85 1 1 252 1 250 5.70E-92 345.5 6596 cellular  
organisms; Eukaryota; Opisthokonta; Metazoa; Eumetazoa; Bilateria; Protostomia; Spiralia; Lophotrochozoa; Mollusca; Bivalvia; Autobranchia; Heteroconchia; Euheterodonta; Imparidentia; Venerida; Veneroidea; Veneridae; Mercenaria; Mercenaria mercenaria

UdeM00000024623 29159 114.4 UdeM00000024623 XP\_011420572.1 48.4 128  
60 3 1 128 1 122 1.10E-22 114.4 29159 cellular  
organisms; Eukaryota; Opisthokonta; Metazoa; Eumetazoa; Bilateria; Protostomia; Spiralia; Lophotrochozoa; Mollusca; Bivalvia; Autobranchia; Pteriomorpha; Ostracoda; Ostreidae; Crassostrea; Crassostrea gigas

UdeM00000024624 6596 365.2 UdeM00000024624 XP\_045177362.1 45.2 427  
209 7 5 416 7 423 1.20E-97 365.2 6596 cellular  
organisms; Eukaryota; Opisthokonta; Metazoa; Eumetazoa; Bilateria; Protostomia; Spiralia; Lophotrochozoa; Mollusca; Bivalvia; Autobranchia; Heteroconchia; Euheterodonta; Imparidentia; Venerida; Veneroidea; Veneridae; Mercenaria; Mercenaria mercenaria

UdeM00000024625 6596 347.4 UdeM00000024625 XP\_045177362.1 42.9 431  
216 6 5 418 8 425 2.50E-92 347.4 6596 cellular  
organisms; Eukaryota; Opisthokonta; Metazoa; Eumetazoa; Bilateria; Protostomia; Spiralia; Lophotrochozoa; Mollusca; Bivalvia; Autobranchia; Heteroconchia; Euheterodonta; Imparidentia; Venerida; Veneroidea; Veneridae; Mercenaria; Mercenaria mercenaria

UdeM00000024626 6596 344 UdeM00000024626 XP\_045177362.1 42.6 420  
228 6 5 415 7 422 2.80E-91 344 6596 cellular  
organisms; Eukaryota; Opisthokonta; Metazoa; Eumetazoa; Bilateria; Protostomia; Spiralia; Lophotrochozoa; Mollusca; Bivalvia; Autobranchia; Heteroconchia; Euheterodonta; Imparidentia; Venerida; Veneroidea; Veneridae; Mercenaria; Mercenaria mercenaria

UdeM00000024627 6596 844 UdeM00000024627 XP\_045175570.1 95.7 463  
19 1 1 462 1 463 9.30E-242 844 6596 cellular  
organisms; Eukaryota; Opisthokonta; Metazoa; Eumetazoa; Bilateria; Protostomia; Spiralia; Lophotrochozoa; Mollusca; Bivalvia; Autobranchia; Heteroconchia; Euheterodonta; Imparidentia; Venerida; Veneroidea; Veneridae; Mercenaria; Mercenaria mercenaria

terodonta;Imparidentia;Venerida;Veneroidea;Veneridae;Mercenaria;Mercenaria mercenaria

UdeM00000024628 29159 370.5 UdeM00000024628 XP\_034332164.1 56.2 299  
129 1 3 301 2 298 2.00E-99 370.5 29159 cellular

organisms;Eukaryota;Opisthokonta;Metazoa;Eumetazoa;Bilateria;Protostomia;Spiralia;Lophotrochozoa;Mollusca;Bivalvia;Autobranhia;Pteriomorphia;Ostreida;Ostreoidea;Ostreidae;Crassostrea;Crassostrea gigas

UdeM00000024629 6596 194.5 UdeM00000024629 XP\_045176237.1 34.3 423  
183 14 6 356 4 403 2.30E-46 194.5 6596 cellular

organisms;Eukaryota;Opisthokonta;Metazoa;Eumetazoa;Bilateria;Protostomia;Spiralia;Lophotrochozoa;Mollusca;Bivalvia;Autobranhia;Heteroconchia;Euheterodonta;Imparidentia;Venerida;Veneroidea;Veneridae;Mercenaria;Mercenaria mercenaria

UdeM00000024630 1735272 253.4 UdeM00000024630 XP\_041367001.1 53.1  
224 103 2 222 444 28 250 5.20E-64 253.4 1735272  
cellular

organisms;Eukaryota;Opisthokonta;Metazoa;Eumetazoa;Bilateria;Protostomia;Spiralia;Lophotrochozoa;Mollusca;Gastropoda;Neomphalina;Neomphaloidea;Peltospiridae;Gigantopelta;Gigantopelta aegis

UdeM00000024631 7741 241.5 UdeM00000024631 XP\_019622111.1 50.8 244  
115 4 1 242 38 278 1.10E-60 241.5 7741 cellular

organisms;Eukaryota;Opisthokonta;Metazoa;Eumetazoa;Bilateria;Deuterostomia;Chordata;Cephalochordata;Leptocardii;Amphioxiformes;Branchiostomidae;Branchiostoma;Branchiostoma belcheri

UdeM00000024632 1735272 211.1 UdeM00000024632 XP\_041366306.1 26.6  
624 387 11 85 683 131 708 7.90E-51 211.1 1735272  
cellular

organisms;Eukaryota;Opisthokonta;Metazoa;Eumetazoa;Bilateria;Protostomia;Spiralia;Lophotrochozoa;Mollusca;Gastropoda;Neomphalina;Neomphaloidea;Peltospiridae;Gigantopelta;Gigantopelta aegis

UdeM00000024633 6573 229.9 UdeM00000024633 XP\_021360909.1 35 426  
222 8 27 448 5 379 6.30E-57 229.9 6573 cellular

organisms;Eukaryota;Opisthokonta;Metazoa;Eumetazoa;Bilateria;Protostomia;Spiralia;Lophotrochozoa;Mollusca;Bivalvia;Autobranhia;Pteriomorphia;Pectinida;Pectinoidea;Pectinidae;Mizuhopecten;Mizuhopecten yessoensis

UdeM00000024634 1735272 560.1 UdeM00000024634 XP\_041365198.1 59.4  
488 187 4 10 487 183 669 2.80E-156 560.1 1735272

cellular

organisms;Eukaryota;Opisthokonta;Metazoa;Eumetazoa;Bilateria;Protostomia;Spiralia;Lophotrochozoa;Mollusca;Gastropoda;Neomphalina;Neomphaloidea;Peltospiridae;Gigantopelta;Gigantopelta aegis

UdeM00000024635 37621 103.2 UdeM00000024635 XP\_014674238.1 41.2 131  
71 2 94 220 10 138 5.10E-19 103.2 37621 cellular

organisms;Eukaryota;Opisthokonta;Metazoa;Eumetazoa;Bilateria;Protostomia;Ecdysozoa;Scalidophora;Priapulida;Priapulimorpha;Priapulimorphida;Priapulidae;Priapululus;Priapululus caudatus

UdeM00000024636 6596 276.9 UdeM00000024636 XP\_045176593.1 92.7 151  
11 0 1 151 1 151 1.50E-71 276.9 6596 cellular

organisms;Eukaryota;Opisthokonta;Metazoa;Eumetazoa;Bilateria;Protostomia;Spiralia;Lophotrochozoa;Mollusca;Bivalvia;Autobranhia;Heteroconchia;Euheterodonta;Imparidentia;Venerida;Veneroidea;Veneridae;Mercenaria;Mercenaria mercenaria

UdeM00000024637 225164 166.4 UdeM00000024637 XP\_009048365.1 64.7  
119 42 0 7 125 5 123 2.30E-38 166.4 225164

cellular  
organisms;Eukaryota;Opisthokonta;Metazoa;Eumetazoa;Bilateria;Protostomia;  
Spiralia;Lophotrochozoa;Mollusca;Gastropoda;Patellogastropoda;Lottioidea;  
Lottiidae;Lottia;Lottia gigantea

UdeM00000024638 1735272 366.3 UdeM00000024638 XP\_041367682.1 53.2  
325 142 3 27 351 169 483 4.30E-98 366.3 1735272

cellular  
organisms;Eukaryota;Opisthokonta;Metazoa;Eumetazoa;Bilateria;Protostomia;  
Spiralia;Lophotrochozoa;Mollusca;Gastropoda;Neomphalina;Neomphaloidea;Pel  
tospiridae;Gigantopelta;Gigantopelta aegis

UdeM00000024639 1735272 567 UdeM00000024639 XP\_041367682.1 55.7  
485 201 4 7 487 9 483 2.30E-158 567 1735272

cellular  
organisms;Eukaryota;Opisthokonta;Metazoa;Eumetazoa;Bilateria;Protostomia;  
Spiralia;Lophotrochozoa;Mollusca;Gastropoda;Neomphalina;Neomphaloidea;Pel  
tospiridae;Gigantopelta;Gigantopelta aegis

UdeM00000024640 400727 547.4 UdeM00000024640 XP\_025086971.1 56.7  
448 182 4 43 489 50 486 1.90E-152 547.4 400727

cellular  
organisms;Eukaryota;Opisthokonta;Metazoa;Eumetazoa;Bilateria;Protostomia;  
Spiralia;Lophotrochozoa;Mollusca;Gastropoda;Caenogastropoda;Architaeniogl  
ossa;Ampullarioidea;Ampullariidae;Pomacea;Pomacea canaliculata

UdeM00000024641 225164 597 UdeM00000024641 XP\_009048365.1 61.2  
469 166 5 21 484 19 476 2.10E-167 597 225164

cellular  
organisms;Eukaryota;Opisthokonta;Metazoa;Eumetazoa;Bilateria;Protostomia;  
Spiralia;Lophotrochozoa;Mollusca;Gastropoda;Patellogastropoda;Lottioidea;  
Lottiidae;Lottia;Lottia gigantea

UdeM00000024642 225164 553.9 UdeM00000024642 XP\_009048365.1 59.9  
439 172 4 43 480 41 476 2.00E-154 553.9 225164

cellular  
organisms;Eukaryota;Opisthokonta;Metazoa;Eumetazoa;Bilateria;Protostomia;  
Spiralia;Lophotrochozoa;Mollusca;Gastropoda;Patellogastropoda;Lottioidea;  
Lottiidae;Lottia;Lottia gigantea

UdeM00000024643 225164 588.6 UdeM00000024643 XP\_009048365.1 59.1  
484 185 5 5 487 5 476 7.40E-165 588.6 225164

cellular  
organisms;Eukaryota;Opisthokonta;Metazoa;Eumetazoa;Bilateria;Protostomia;  
Spiralia;Lophotrochozoa;Mollusca;Gastropoda;Patellogastropoda;Lottioidea;  
Lottiidae;Lottia;Lottia gigantea

UdeM00000024644 6579 193.4 UdeM00000024644 XP\_033752989.1 30.4 517  
324 9 8 502 11 513 7.20E-46 193.4 6579 cellular

organisms;Eukaryota;Opisthokonta;Metazoa;Eumetazoa;Bilateria;Protostomia;  
Spiralia;Lophotrochozoa;Mollusca;Bivalvia;Autobranchia;Pteriomorphia;Pect  
inida;Pectinoidea;Pectinidae;Pecten;Pecten maximus

UdeM00000024645 29159 93.6 UdeM00000024645 XP\_011422797.2 44.4 90  
50 0 17 106 14 103 2.30E-16 93.6 29159 cellular

organisms;Eukaryota;Opisthokonta;Metazoa;Eumetazoa;Bilateria;Protostomia;  
Spiralia;Lophotrochozoa;Mollusca;Bivalvia;Autobranchia;Pteriomorphia;Ostr  
eida;Ostreoidea;Ostreidae;Crassostrea;Crassostrea gigas

UdeM00000024646 6596 529.3 UdeM00000024646 XP\_045175384.1 75.5 327  
75 2 3 327 4 327 3.60E-147 529.3 6596 cellular

organisms;Eukaryota;Opisthokonta;Metazoa;Eumetazoa;Bilateria;Protostomia;  
Spiralia;Lophotrochozoa;Mollusca;Bivalvia;Autobranchia;Heteroconchia;Euhe

terodonta;Imparidentia;Venerida;Veneroidea;Veneridae;Mercenaria;Mercenari  
 a mercenaria  
 UdeM00000024647 6596 232.6 UdeM00000024647 XP\_045175564.1 45.4 269  
 142 4 106 373 36 300 7.90E-58 232.6 6596 cellular  
 organisms;Eukaryota;Opisthokonta;Metazoa;Eumetazoa;Bilateria;Protostomia;  
 Spiralia;Lophotrochozoa;Mollusca;Bivalvia;Autobranchia;Heteroconchia;Euhe  
 terodonta;Imparidentia;Venerida;Veneroidea;Veneridae;Mercenaria;Mercenari  
 a mercenaria  
 UdeM00000024648 1735272 175.3 UdeM00000024648 XP\_041366062.1 30.4  
 760 402 29 2480 3144 2339 3066 1.30E-39 175.3 1735272  
 cellular  
 organisms;Eukaryota;Opisthokonta;Metazoa;Eumetazoa;Bilateria;Protostomia;  
 Spiralia;Lophotrochozoa;Mollusca;Gastropoda;Neomphalina;Neomphaloidea;Pel  
 tospiridae;Gigantopelta;Gigantopelta aegis  
 UdeM00000024650 29159 141.4 UdeM00000024650 XP\_034331441.1 45.8 153  
 81 1 1 153 1 151 1.00E-30 141.4 29159 cellular  
 organisms;Eukaryota;Opisthokonta;Metazoa;Eumetazoa;Bilateria;Protostomia;  
 Spiralia;Lophotrochozoa;Mollusca;Bivalvia;Autobranchia;Pteriormorphia;Ostr  
 eida;Ostreoidea;Ostreidae;Crassostrea;Crassostrea gigas  
 UdeM00000024651 6596 464.5 UdeM00000024651 XP\_045176796.1 64.7 371  
 110 7 1 354 1 367 1.20E-127 464.5 6596 cellular  
 organisms;Eukaryota;Opisthokonta;Metazoa;Eumetazoa;Bilateria;Protostomia;  
 Spiralia;Lophotrochozoa;Mollusca;Bivalvia;Autobranchia;Heteroconchia;Euhe  
 terodonta;Imparidentia;Venerida;Veneroidea;Veneridae;Mercenaria;Mercenari  
 a mercenaria  
 UdeM00000024652 6596 449.1 UdeM00000024652 XP\_045176796.1 63.6 379  
 109 9 1 362 1 367 5.20E-123 449.1 6596 cellular  
 organisms;Eukaryota;Opisthokonta;Metazoa;Eumetazoa;Bilateria;Protostomia;  
 Spiralia;Lophotrochozoa;Mollusca;Bivalvia;Autobranchia;Heteroconchia;Euhe  
 terodonta;Imparidentia;Venerida;Veneroidea;Veneridae;Mercenaria;Mercenari  
 a mercenaria  
 UdeM00000024653 6596 140.6 UdeM00000024653 XP\_045175847.1 69 100  
 31 0 6 105 5 104 1.20E-30 140.6 6596 cellular  
 organisms;Eukaryota;Opisthokonta;Metazoa;Eumetazoa;Bilateria;Protostomia;  
 Spiralia;Lophotrochozoa;Mollusca;Bivalvia;Autobranchia;Heteroconchia;Euhe  
 terodonta;Imparidentia;Venerida;Veneroidea;Veneridae;Mercenaria;Mercenari  
 a mercenaria  
 UdeM00000024654 6596 609 UdeM00000024654 XP\_045175842.1 56 763  
 293 13 6 748 27 766 8.20E-171 609 6596 cellular  
 organisms;Eukaryota;Opisthokonta;Metazoa;Eumetazoa;Bilateria;Protostomia;  
 Spiralia;Lophotrochozoa;Mollusca;Bivalvia;Autobranchia;Heteroconchia;Euhe  
 terodonta;Imparidentia;Venerida;Veneroidea;Veneridae;Mercenaria;Mercenari  
 a mercenaria  
 UdeM00000024655 6596 1109.7 UdeM00000024655 XP\_045176927.1 66.8  
 879 269 14 9 874 15 883 0.00E+00 1109.7 6596  
 cellular  
 organisms;Eukaryota;Opisthokonta;Metazoa;Eumetazoa;Bilateria;Protostomia;  
 Spiralia;Lophotrochozoa;Mollusca;Bivalvia;Autobranchia;Heteroconchia;Euhe  
 terodonta;Imparidentia;Venerida;Veneroidea;Veneridae;Mercenaria;Mercenari  
 a mercenaria  
 UdeM00000024656 114398 406.8 UdeM00000024656 XP\_042903861.1 39.7  
 574 335 6 1 570 1 567 4.70E-110 406.8 114398  
 cellular  
 organisms;Eukaryota;Opisthokonta;Metazoa;Eumetazoa;Bilateria;Protostomia;

Ecdysozoa; Panarthropoda; Arthropoda; Chelicerata; Arachnida; Araneae; Araneomorphae; Entelegynae; Orbiculariae; Araneoidea; Theridiidae; Parasteatoda; Parasteatoda tepidariorum

UdeM00000024657 260995 81.3 UdeM00000024657 XP\_033812940.1 51.4  
74 35 1 1 74 1 73 7.70E-13 81.3 260995

cellular

organisms; Eukaryota; Opisthokonta; Metazoa; Eumetazoa; Bilateria; Deuterostomia; Chordata; Craniata; Vertebrata; Gnathostomata; Teleostomi; Euteleostomi; Sarcopterygii; Dipnotetrapodomorpha; Tetrapoda; Amphibia; Gymnophiona; Dermophiidae; Geotrypetes; Geotrypetes seraphini

UdeM00000024658 1415580 532.7 UdeM00000024658 XP\_030075314.1 55.3  
510 191 6 1 482 125 625 4.80E-148 532.7 1415580

cellular

organisms; Eukaryota; Opisthokonta; Metazoa; Eumetazoa; Bilateria; Deuterostomia; Chordata; Craniata; Vertebrata; Gnathostomata; Teleostomi; Euteleostomi; Sarcopterygii; Dipnotetrapodomorpha; Tetrapoda; Amphibia; Gymnophiona; Siphonopidae; Microcaecilia; Microcaecilia unicolor

UdeM00000024659 6565 302.4 UdeM00000024659 XP\_022312737.1 60.6 231  
89 2 85 314 86 315 7.00E-79 302.4 6565 cellular

organisms; Eukaryota; Opisthokonta; Metazoa; Eumetazoa; Bilateria; Protostomia; Spiralia; Lophotrochozoa; Mollusca; Bivalvia; Autobranchia; Pteriomorpha; Ostreida; Ostreidae; Crassostrea; Crassostrea virginica

UdeM00000024660 6573 473.8 UdeM00000024660 XP\_021356047.1 50.1 489  
238 2 73 560 21 504 3.30E-130 473.8 6573 cellular

organisms; Eukaryota; Opisthokonta; Metazoa; Eumetazoa; Bilateria; Protostomia; Spiralia; Lophotrochozoa; Mollusca; Bivalvia; Autobranchia; Pteriomorpha; Pectinida; Pectinoidea; Pectinidae; Mizuhopecten; Mizuhopecten yessoensis

UdeM00000024662 6573 611.3 UdeM00000024662 XP\_021374492.1 55.7 603  
178 8 8 541 4 586 1.30E-171 611.3 6573 cellular

organisms; Eukaryota; Opisthokonta; Metazoa; Eumetazoa; Bilateria; Protostomia; Spiralia; Lophotrochozoa; Mollusca; Bivalvia; Autobranchia; Pteriomorpha; Pectinida; Pectinoidea; Pectinidae; Mizuhopecten; Mizuhopecten yessoensis

UdeM00000024664 7091 316.2 UdeM00000024664 XP\_037872913.1 36 569  
330 10 1 563 252 792 8.50E-83 316.2 7091 cellular

organisms; Eukaryota; Opisthokonta; Metazoa; Eumetazoa; Bilateria; Protostomia; Ecdysozoa; Panarthropoda; Arthropoda; Mandibulata; Pancrustacea; Hexapoda; Insecta; Dicondylia; Pterygota; Neoptera; Endopterygota; Amphiesmenoptera; Lepidoptera; Glossata; Neolepidoptera; Heteroneura; Ditrysia; Obtectomera; Bombycoidea; Bombycidae; Bombycinae; Bombyx; Bombyx mori

UdeM00000024665 6565 482.3 UdeM00000024665 XP\_022306197.1 44.4 657  
250 13 2 557 40 682 8.60E-133 482.3 6565 cellular

organisms; Eukaryota; Opisthokonta; Metazoa; Eumetazoa; Bilateria; Protostomia; Spiralia; Lophotrochozoa; Mollusca; Bivalvia; Autobranchia; Pteriomorpha; Ostreida; Ostreidae; Crassostrea; Crassostrea virginica

UdeM00000024666 6596 135.6 UdeM00000024666 XP\_045176115.1 36.9 260  
135 7 3 254 4 242 9.00E-29 135.6 6596 cellular

organisms; Eukaryota; Opisthokonta; Metazoa; Eumetazoa; Bilateria; Protostomia; Spiralia; Lophotrochozoa; Mollusca; Bivalvia; Autobranchia; Heteroconchia; Euheterodonta; Imparidentia; Venerida; Veneroidea; Veneridae; Mercenaria; Mercenaria mercenaria

UdeM00000024667 6596 212.6 UdeM00000024667 XP\_045194650.1 34.7 392  
222 8 12 376 21 405 9.70E-52 212.6 6596 cellular

organisms; Eukaryota; Opisthokonta; Metazoa; Eumetazoa; Bilateria; Protostomia; Spiralia; Lophotrochozoa; Mollusca; Bivalvia; Autobranchia; Heteroconchia; Euheterodonta; Imparidentia; Venerida; Veneroidea; Veneridae; Mercenaria; Mercenaria mercenaria

terodonta;Imparidentia;Venerida;Veneroidea;Veneridae;Mercenaria;Mercenari  
 a mercenaria  
 UdeM00000024668 6596 199.1 UdeM00000024668 XP\_045193707.1 32.4 392  
 236 6 12 381 22 406 1.10E-47 199.1 6596 cellular  
 organisms;Eukaryota;Opisthokonta;Metazoa;Eumetazoa;Bilateria;Protostomia;  
 Spiralia;Lophotrochozoa;Mollusca;Bivalvia;Autobranhia;Heteroconchia;Euhe  
 terodonta;Imparidentia;Venerida;Veneroidea;Veneridae;Mercenaria;Mercenari  
 a mercenaria  
 UdeM00000024669 6596 204.1 UdeM00000024669 XP\_045193707.1 32.3 387  
 238 6 12 376 22 406 3.40E-49 204.1 6596 cellular  
 organisms;Eukaryota;Opisthokonta;Metazoa;Eumetazoa;Bilateria;Protostomia;  
 Spiralia;Lophotrochozoa;Mollusca;Bivalvia;Autobranhia;Heteroconchia;Euhe  
 terodonta;Imparidentia;Venerida;Veneroidea;Veneridae;Mercenaria;Mercenari  
 a mercenaria  
 UdeM00000024670 6573 154.1 UdeM00000024670 XP\_021347744.1 45.3 172  
 92 2 3 173 4 174 1.80E-34 154.1 6573 cellular  
 organisms;Eukaryota;Opisthokonta;Metazoa;Eumetazoa;Bilateria;Protostomia;  
 Spiralia;Lophotrochozoa;Mollusca;Bivalvia;Autobranhia;Pteriormorphia;Pect  
 inida;Pectinoidea;Pectinidae;Mizuhopecten;Mizuhopecten yessoensis  
 UdeM00000024671 6596 415.2 UdeM00000024671 XP\_045175466.1 45.2 564  
 223 14 8 511 52 589 1.20E-112 415.2 6596 cellular  
 organisms;Eukaryota;Opisthokonta;Metazoa;Eumetazoa;Bilateria;Protostomia;  
 Spiralia;Lophotrochozoa;Mollusca;Bivalvia;Autobranhia;Heteroconchia;Euhe  
 terodonta;Imparidentia;Venerida;Veneroidea;Veneridae;Mercenaria;Mercenari  
 a mercenaria  
 UdeM00000024672 6596 117.1 UdeM00000024672 XP\_045176939.1 76.5 81  
 18 1 278 358 299 378 5.10E-23 117.1 6596 cellular  
 organisms;Eukaryota;Opisthokonta;Metazoa;Eumetazoa;Bilateria;Protostomia;  
 Spiralia;Lophotrochozoa;Mollusca;Bivalvia;Autobranhia;Heteroconchia;Euhe  
 terodonta;Imparidentia;Venerida;Veneroidea;Veneridae;Mercenaria;Mercenari  
 a mercenaria  
 UdeM00000024673 6573 373.2 UdeM00000024673 XP\_021350357.1 50.4 371  
 174 5 18 387 18 379 4.10E-100 373.2 6573 cellular  
 organisms;Eukaryota;Opisthokonta;Metazoa;Eumetazoa;Bilateria;Protostomia;  
 Spiralia;Lophotrochozoa;Mollusca;Bivalvia;Autobranhia;Pteriormorphia;Pect  
 inida;Pectinoidea;Pectinidae;Mizuhopecten;Mizuhopecten yessoensis  
 UdeM00000024674 6573 313.2 UdeM00000024674 XP\_021350357.1 45.8 371  
 176 7 18 372 18 379 4.90E-82 313.2 6573 cellular  
 organisms;Eukaryota;Opisthokonta;Metazoa;Eumetazoa;Bilateria;Protostomia;  
 Spiralia;Lophotrochozoa;Mollusca;Bivalvia;Autobranhia;Pteriormorphia;Pect  
 inida;Pectinoidea;Pectinidae;Mizuhopecten;Mizuhopecten yessoensis  
 UdeM00000024675 6596 77.8 UdeM00000024675 XP\_045175576.1 28.3 159  
 102 4 33 184 29 182 1.60E-11 77.8 6596 cellular  
 organisms;Eukaryota;Opisthokonta;Metazoa;Eumetazoa;Bilateria;Protostomia;  
 Spiralia;Lophotrochozoa;Mollusca;Bivalvia;Autobranhia;Heteroconchia;Euhe  
 terodonta;Imparidentia;Venerida;Veneroidea;Veneridae;Mercenaria;Mercenari  
 a mercenaria  
 UdeM00000024676 6596 77.8 UdeM00000024676 XP\_045175576.1 28.3 159  
 102 4 25 176 29 182 1.60E-11 77.8 6596 cellular  
 organisms;Eukaryota;Opisthokonta;Metazoa;Eumetazoa;Bilateria;Protostomia;  
 Spiralia;Lophotrochozoa;Mollusca;Bivalvia;Autobranhia;Heteroconchia;Euhe  
 terodonta;Imparidentia;Venerida;Veneroidea;Veneridae;Mercenaria;Mercenari  
 a mercenaria

UdeM00000024677 6573 62.4 UdeM00000024677 XP\_021350341.1 27.5 138  
 90 2 2 131 1 136 6.50E-07 62.4 6573 cellular  
 organisms;Eukaryota;Opisthokonta;Metazoa;Eumetazoa;Bilateria;Protostomia;  
 Spiralia;Lophotrochozoa;Mollusca;Bivalvia;Autobranhia;Pteriormorphia;Pect  
 inida;Pectinoidea;Pectinidae;Mizuhopecten;Mizuhopecten yessoensis  
 UdeM00000024678 29159 69.3 UdeM00000024678 XP\_011456356.2 26.4 265  
 147 10 13 251 5 247 8.20E-09 69.3 29159 cellular  
 organisms;Eukaryota;Opisthokonta;Metazoa;Eumetazoa;Bilateria;Protostomia;  
 Spiralia;Lophotrochozoa;Mollusca;Bivalvia;Autobranhia;Pteriormorphia;Ostr  
 eida;Ostreoidea;Ostreidae;Crassostrea;Crassostrea gigas  
 UdeM00000024679 400727 144.4 UdeM00000024679 XP\_025086352.1 57.8  
 135 54 2 132 264 181 314 2.10E-31 144.4 400727  
 cellular  
 organisms;Eukaryota;Opisthokonta;Metazoa;Eumetazoa;Bilateria;Protostomia;  
 Spiralia;Lophotrochozoa;Mollusca;Gastropoda;Caenogastropoda;Architaeniogl  
 ossa;Ampullarioidea;Ampullariidae;Pomacea;Pomacea canaliculata  
 UdeM00000024680 400727 141.7 UdeM00000024680 XP\_025086352.1 58.4  
 125 50 1 132 254 181 305 1.30E-30 141.7 400727  
 cellular  
 organisms;Eukaryota;Opisthokonta;Metazoa;Eumetazoa;Bilateria;Protostomia;  
 Spiralia;Lophotrochozoa;Mollusca;Gastropoda;Caenogastropoda;Architaeniogl  
 ossa;Ampullarioidea;Ampullariidae;Pomacea;Pomacea canaliculata  
 UdeM00000024682 6579 119.8 UdeM00000024682 XP\_033751337.1 60.4 91  
 17 1 74 164 680 751 1.10E-23 119.8 6579 cellular  
 organisms;Eukaryota;Opisthokonta;Metazoa;Eumetazoa;Bilateria;Protostomia;  
 Spiralia;Lophotrochozoa;Mollusca;Bivalvia;Autobranhia;Pteriormorphia;Pect  
 inida;Pectinoidea;Pectinidae;Pecten;Pecten maximus  
 UdeM00000024683 29159 84.3 UdeM00000024683 XP\_011439963.2 53 83  
 37 1 38 120 128 208 5.10E-13 84.3 29159 cellular  
 organisms;Eukaryota;Opisthokonta;Metazoa;Eumetazoa;Bilateria;Protostomia;  
 Spiralia;Lophotrochozoa;Mollusca;Bivalvia;Autobranhia;Pteriormorphia;Ostr  
 eida;Ostreoidea;Ostreidae;Crassostrea;Crassostrea gigas  
 UdeM00000024685 6565 105.1 UdeM00000024685 XP\_022332875.1 55.1 89  
 40 0 2 90 28 116 1.10E-19 105.1 6565 cellular  
 organisms;Eukaryota;Opisthokonta;Metazoa;Eumetazoa;Bilateria;Protostomia;  
 Spiralia;Lophotrochozoa;Mollusca;Bivalvia;Autobranhia;Pteriormorphia;Ostr  
 eida;Ostreoidea;Ostreidae;Crassostrea;Crassostrea virginica  
 UdeM00000024686 6579 132.9 UdeM00000024686 XP\_033739209.1 52 127  
 58 1 9 132 2 128 3.40E-28 132.9 6579 cellular  
 organisms;Eukaryota;Opisthokonta;Metazoa;Eumetazoa;Bilateria;Protostomia;  
 Spiralia;Lophotrochozoa;Mollusca;Bivalvia;Autobranhia;Pteriormorphia;Pect  
 inida;Pectinoidea;Pectinidae;Pecten;Pecten maximus  
 UdeM00000024687 6596 644.8 UdeM00000024687 XP\_045174792.1 79.4 393  
 79 1 52 442 61 453 8.20E-182 644.8 6596 cellular  
 organisms;Eukaryota;Opisthokonta;Metazoa;Eumetazoa;Bilateria;Protostomia;  
 Spiralia;Lophotrochozoa;Mollusca;Bivalvia;Autobranhia;Heteroconchia;Euhe  
 terodonta;Imparidentia;Venerida;Veneroidea;Veneridae;Mercenaria;Mercenari  
 a mercenaria  
 UdeM00000024688 6596 587.4 UdeM00000024688 XP\_045174792.1 72.1 405  
 99 2 52 454 61 453 1.60E-164 587.4 6596 cellular  
 organisms;Eukaryota;Opisthokonta;Metazoa;Eumetazoa;Bilateria;Protostomia;  
 Spiralia;Lophotrochozoa;Mollusca;Bivalvia;Autobranhia;Heteroconchia;Euhe  
 terodonta;Imparidentia;Venerida;Veneroidea;Veneridae;Mercenaria;Mercenari  
 a mercenaria

UdeM00000024689 6596 306.6 UdeM00000024689 XP\_045174792.1 81.3 182  
 32 1 1 180 205 386 2.10E-80 306.6 6596 cellular  
 organisms;Eukaryota;Opisthokonta;Metazoa;Eumetazoa;Bilateria;Protostomia;  
 Spiralia;Lophotrochozoa;Mollusca;Bivalvia;Autobranchia;Heteroconchia;Euhe  
 terodonta;Imparidentia;Venerida;Veneroidea;Veneridae;Mercenaria;Mercenari  
 a mercenaria  
 UdeM00000024690 6579 515 UdeM00000024690 XP\_033740429.1 32 1075  
 619 32 235 1297 594 1568 2.80E-142 515 6579 cellular  
 organisms;Eukaryota;Opisthokonta;Metazoa;Eumetazoa;Bilateria;Protostomia;  
 Spiralia;Lophotrochozoa;Mollusca;Bivalvia;Autobranchia;Pteriormorphia;Pect  
 inida;Pectinoidea;Pectinidae;Pecten;Pecten maximus  
 UdeM00000024691 6596 700.7 UdeM00000024691 XP\_045176276.1 47.1 889  
 395 21 161 993 36 905 2.80E-198 700.7 6596 cellular  
 organisms;Eukaryota;Opisthokonta;Metazoa;Eumetazoa;Bilateria;Protostomia;  
 Spiralia;Lophotrochozoa;Mollusca;Bivalvia;Autobranchia;Heteroconchia;Euhe  
 terodonta;Imparidentia;Venerida;Veneroidea;Veneridae;Mercenaria;Mercenari  
 a mercenaria  
 UdeM00000024692 29159 1142.1 UdeM00000024692 XP\_034313562.1 67.1  
 832 270 4 9 837 972 1802 0.00E+00 1142.1  
 29159 cellular  
 organisms;Eukaryota;Opisthokonta;Metazoa;Eumetazoa;Bilateria;Protostomia;  
 Spiralia;Lophotrochozoa;Mollusca;Bivalvia;Autobranchia;Pteriormorphia;Ostr  
 eida;Ostreoidea;Ostreidae;Crassostrea;Crassostrea gigas  
 UdeM00000024693 6596 374.8 UdeM00000024693 XP\_045175850.1 70.7 280  
 76 2 13 286 13 292 9.90E-101 374.8 6596 cellular  
 organisms;Eukaryota;Opisthokonta;Metazoa;Eumetazoa;Bilateria;Protostomia;  
 Spiralia;Lophotrochozoa;Mollusca;Bivalvia;Autobranchia;Heteroconchia;Euhe  
 terodonta;Imparidentia;Venerida;Veneroidea;Veneridae;Mercenaria;Mercenari  
 a mercenaria  
 UdeM00000024695 6596 701 UdeM00000024695 XP\_045175992.1 88.3 366  
 43 0 1 366 1 366 7.70E-199 701 6596 cellular  
 organisms;Eukaryota;Opisthokonta;Metazoa;Eumetazoa;Bilateria;Protostomia;  
 Spiralia;Lophotrochozoa;Mollusca;Bivalvia;Autobranchia;Heteroconchia;Euhe  
 terodonta;Imparidentia;Venerida;Veneroidea;Veneridae;Mercenaria;Mercenari  
 a mercenaria  
 UdeM00000024694 6596 793.1 UdeM00000024694 XP\_045175992.1 86.2 426  
 58 1 1 425 1 426 1.70E-226 793.1 6596 cellular  
 organisms;Eukaryota;Opisthokonta;Metazoa;Eumetazoa;Bilateria;Protostomia;  
 Spiralia;Lophotrochozoa;Mollusca;Bivalvia;Autobranchia;Heteroconchia;Euhe  
 terodonta;Imparidentia;Venerida;Veneroidea;Veneridae;Mercenaria;Mercenari  
 a mercenaria  
 UdeM00000024696 6565 244.2 UdeM00000024696 XP\_022338168.1 58.7 206  
 85 0 16 221 1076 1281 1.60E-61 244.2 6565 cellular  
 organisms;Eukaryota;Opisthokonta;Metazoa;Eumetazoa;Bilateria;Protostomia;  
 Spiralia;Lophotrochozoa;Mollusca;Bivalvia;Autobranchia;Pteriormorphia;Ostr  
 eida;Ostreoidea;Ostreidae;Crassostrea;Crassostrea virginica  
 UdeM00000024697 6579 82.8 UdeM00000024697 XP\_033752791.1 43.8 105  
 54 1 30 129 975 1079 3.50E-13 82.8 6579 cellular  
 organisms;Eukaryota;Opisthokonta;Metazoa;Eumetazoa;Bilateria;Protostomia;  
 Spiralia;Lophotrochozoa;Mollusca;Bivalvia;Autobranchia;Pteriormorphia;Pect  
 inida;Pectinoidea;Pectinidae;Pecten;Pecten maximus  
 UdeM00000024698 6573 632.1 UdeM00000024698 XP\_021342588.1 57.1 553  
 198 10 1 538 403 931 8.10E-178 632.1 6573 cellular  
 organisms;Eukaryota;Opisthokonta;Metazoa;Eumetazoa;Bilateria;Protostomia;



Spiralia;Lophotrochozoa;Mollusca;Bivalvia;Autobranhia;Pteriormorphia;Pectinida;Pectinoidea;Pectinidae;Mizuhopecten;Mizuhopecten yessoensis  
UdeM00000024699 6596 583.6 UdeM00000024699 XP\_045176202.1 79.2 365  
75 1 25 389 28 391 2.00E-163 583.6 6596 cellular  
organisms;Eukaryota;Opisthokonta;Metazoa;Eumetazoa;Bilateria;Protostomia;Spiralia;Lophotrochozoa;Mollusca;Bivalvia;Autobranhia;Heteroconchia;Euheterodonta;Imparidentia;Venerida;Veneroidea;Veneridae;Mercenaria;Mercenaria mercenaria  
UdeM00000024700 6596 615.9 UdeM00000024700 XP\_045176202.1 77 392  
89 1 1 392 1 391 3.60E-173 615.9 6596 cellular  
organisms;Eukaryota;Opisthokonta;Metazoa;Eumetazoa;Bilateria;Protostomia;Spiralia;Lophotrochozoa;Mollusca;Bivalvia;Autobranhia;Heteroconchia;Euheterodonta;Imparidentia;Venerida;Veneroidea;Veneridae;Mercenaria;Mercenaria mercenaria  
UdeM00000024701 6565 125.9 UdeM00000024701 XP\_022286451.1 39.3 219  
113 6 6 207 7 222 7.50E-26 125.9 6565 cellular  
organisms;Eukaryota;Opisthokonta;Metazoa;Eumetazoa;Bilateria;Protostomia;Spiralia;Lophotrochozoa;Mollusca;Bivalvia;Autobranhia;Pteriormorphia;Ostreida;Ostreoidea;Ostreidae;Crassostrea;Crassostrea virginica  
UdeM00000024702 6596 205.3 UdeM00000024702 XP\_045175821.1 60.2 181  
36 4 1 155 15 185 6.10E-50 205.3 6596 cellular  
organisms;Eukaryota;Opisthokonta;Metazoa;Eumetazoa;Bilateria;Protostomia;Spiralia;Lophotrochozoa;Mollusca;Bivalvia;Autobranhia;Heteroconchia;Euheterodonta;Imparidentia;Venerida;Veneroidea;Veneridae;Mercenaria;Mercenaria mercenaria  
UdeM00000024704 6596 449.5 UdeM00000024704 XP\_045175821.1 73.3 292  
78 0 27 318 186 477 3.50E-123 449.5 6596 cellular  
organisms;Eukaryota;Opisthokonta;Metazoa;Eumetazoa;Bilateria;Protostomia;Spiralia;Lophotrochozoa;Mollusca;Bivalvia;Autobranhia;Heteroconchia;Euheterodonta;Imparidentia;Venerida;Veneroidea;Veneridae;Mercenaria;Mercenaria mercenaria  
UdeM00000024705 133434 740.7 UdeM00000024705 XP\_022094946.1 55.2  
648 262 9 33 657 38 680 1.70E-210 740.7 133434  
cellular  
organisms;Eukaryota;Opisthokonta;Metazoa;Eumetazoa;Bilateria;Deuterostomia;Echinodermata;Eleutherozoa;Asterozoa;Asteroidea;Valvatacea;Valvatida;Acanthasteridae;Acanthaster;Acanthaster planci  
UdeM00000024706 133434 108.6 UdeM00000024706 XP\_022094946.1 69.8  
63 19 0 2 64 569 631 7.30E-21 108.6 133434  
cellular  
organisms;Eukaryota;Opisthokonta;Metazoa;Eumetazoa;Bilateria;Deuterostomia;Echinodermata;Eleutherozoa;Asterozoa;Asteroidea;Valvatacea;Valvatida;Acanthasteridae;Acanthaster;Acanthaster planci  
UdeM00000024707 6596 454.5 UdeM00000024707 XP\_045211962.1 61.4 350  
135 0 33 382 36 385 1.40E-124 454.5 6596 cellular  
organisms;Eukaryota;Opisthokonta;Metazoa;Eumetazoa;Bilateria;Protostomia;Spiralia;Lophotrochozoa;Mollusca;Bivalvia;Autobranhia;Heteroconchia;Euheterodonta;Imparidentia;Venerida;Veneroidea;Veneridae;Mercenaria;Mercenaria mercenaria  
UdeM00000024709 7604 118.6 UdeM00000024709 XP\_033638875.1 57.6 85  
31 1 39 118 379 463 5.30E-24 118.6 7604 cellular  
organisms;Eukaryota;Opisthokonta;Metazoa;Eumetazoa;Bilateria;Deuterostomia;Echinodermata;Eleutherozoa;Asterozoa;Asteroidea;Forcipulatacea;Forcipulatacida;Asteroidea;Asteroidea;Asterias;Asterias rubens

UdeM00000024711 6596 89.4 UdeM00000024711 XP\_045211962.1 40.9 93  
 53 1 42 134 9 99 4.30E-15 89.4 6596 cellular  
 organisms;Eukaryota;Opisthokonta;Metazoa;Eumetazoa;Bilateria;Protostomia;  
 Spiralia;Lophotrochozoa;Mollusca;Bivalvia;Autobranchia;Heteroconchia;Euhe  
 terodonta;Imparidentia;Venerida;Veneroidea;Veneridae;Mercenaria;Mercenari  
 a mercenaria

UdeM00000024712 6596 157.9 UdeM00000024712 XP\_045211962.1 49.3 136  
 67 1 4 139 9 142 9.30E-36 157.9 6596 cellular  
 organisms;Eukaryota;Opisthokonta;Metazoa;Eumetazoa;Bilateria;Protostomia;  
 Spiralia;Lophotrochozoa;Mollusca;Bivalvia;Autobranchia;Heteroconchia;Euhe  
 terodonta;Imparidentia;Venerida;Veneroidea;Veneridae;Mercenaria;Mercenari  
 a mercenaria

UdeM00000024713 46514 796.2 UdeM00000024713 XP\_038053214.1 60.6 614  
 236 4 33 640 38 651 3.60E-227 796.2 46514 cellular  
 organisms;Eukaryota;Opisthokonta;Metazoa;Eumetazoa;Bilateria;Deuterostomi  
 a;Echinodermata;Eleutherozoa;Asterozoa;Asteroidea;Valvatacea;Valvatida;As  
 terinidae;Patiria;Patiria miniata

UdeM00000024714 6596 376.7 UdeM00000024714 XP\_045211962.1 55.4 316  
 141 0 33 348 36 351 3.20E-101 376.7 6596 cellular  
 organisms;Eukaryota;Opisthokonta;Metazoa;Eumetazoa;Bilateria;Protostomia;  
 Spiralia;Lophotrochozoa;Mollusca;Bivalvia;Autobranchia;Heteroconchia;Euhe  
 terodonta;Imparidentia;Venerida;Veneroidea;Veneridae;Mercenaria;Mercenari  
 a mercenaria

UdeM00000024715 46514 812 UdeM00000024715 XP\_038053214.1 60.4 623  
 241 4 33 649 38 660 6.30E-232 812 46514 cellular  
 organisms;Eukaryota;Opisthokonta;Metazoa;Eumetazoa;Bilateria;Deuterostomi  
 a;Echinodermata;Eleutherozoa;Asterozoa;Asteroidea;Valvatacea;Valvatida;As  
 terinidae;Patiria;Patiria miniata

UdeM00000024716 46514 793.9 UdeM00000024716 XP\_038053214.1 59.5 615  
 243 4 33 641 38 652 1.80E-226 793.9 46514 cellular  
 organisms;Eukaryota;Opisthokonta;Metazoa;Eumetazoa;Bilateria;Deuterostomi  
 a;Echinodermata;Eleutherozoa;Asterozoa;Asteroidea;Valvatacea;Valvatida;As  
 terinidae;Patiria;Patiria miniata

UdeM00000024717 46514 822 UdeM00000024717 XP\_038053214.1 60.6 649  
 248 6 33 674 38 685 6.10E-235 822 46514 cellular  
 organisms;Eukaryota;Opisthokonta;Metazoa;Eumetazoa;Bilateria;Deuterostomi  
 a;Echinodermata;Eleutherozoa;Asterozoa;Asteroidea;Valvatacea;Valvatida;As  
 terinidae;Patiria;Patiria miniata

UdeM00000024718 46514 828.2 UdeM00000024718 XP\_038053214.1 60.2 649  
 250 6 33 674 38 685 8.50E-237 828.2 46514 cellular  
 organisms;Eukaryota;Opisthokonta;Metazoa;Eumetazoa;Bilateria;Deuterostomi  
 a;Echinodermata;Eleutherozoa;Asterozoa;Asteroidea;Valvatacea;Valvatida;As  
 terinidae;Patiria;Patiria miniata

UdeM00000024721 1735272 106.3 UdeM00000024721 XP\_041367593.1 52.1  
 140 67 0 21 160 19 158 3.70E-20 106.3 1735272  
 cellular  
 organisms;Eukaryota;Opisthokonta;Metazoa;Eumetazoa;Bilateria;Protostomia;  
 Spiralia;Lophotrochozoa;Mollusca;Gastropoda;Neomphalina;Neomphaloidea;Pel  
 tospiridae;Gigantopelta;Gigantopelta aegis

UdeM00000024722 7741 162.9 UdeM00000024722 XP\_019641287.1 60.7 112  
 41 2 1 109 1 112 2.70E-36 162.9 7741 cellular  
 organisms;Eukaryota;Opisthokonta;Metazoa;Eumetazoa;Bilateria;Deuterostomi  
 a;Chordata;Cephalochordata;Leptocardii;Amphioxiformes;Branchiostomidae;Br  
 anchiostoma;Branchiostoma belcheri

UdeM00000024728 6579 116.3 UdeM00000024728 XP\_033751571.1 31.9 207  
 134 4 11 210 153 359 5.00E-23 116.3 6579 cellular  
 organisms;Eukaryota;Opisthokonta;Metazoa;Eumetazoa;Bilateria;Protostomia;  
 Spiralia;Lophotrochozoa;Mollusca;Bivalvia;Autobranchia;Pteriormorphia;Pect  
 inida;Pectinoidea;Pectinidae;Pecten;Pecten maximus  
 UdeM00000024729 6579 110.5 UdeM00000024729 XP\_033751571.1 40.7 135  
 78 2 50 182 195 329 2.40E-21 110.5 6579 cellular  
 organisms;Eukaryota;Opisthokonta;Metazoa;Eumetazoa;Bilateria;Protostomia;  
 Spiralia;Lophotrochozoa;Mollusca;Bivalvia;Autobranchia;Pteriormorphia;Pect  
 inida;Pectinoidea;Pectinidae;Pecten;Pecten maximus  
 UdeM00000024730 6579 132.1 UdeM00000024730 XP\_033751571.1 44.1 152  
 83 2 50 199 195 346 8.80E-28 132.1 6579 cellular  
 organisms;Eukaryota;Opisthokonta;Metazoa;Eumetazoa;Bilateria;Protostomia;  
 Spiralia;Lophotrochozoa;Mollusca;Bivalvia;Autobranchia;Pteriormorphia;Pect  
 inida;Pectinoidea;Pectinidae;Pecten;Pecten maximus  
 UdeM00000024731 6526 62.4 UdeM00000024731 XP\_013073559.1 36.2 94  
 58 2 50 141 154 247 5.40E-07 62.4 6526 cellular  
 organisms;Eukaryota;Opisthokonta;Metazoa;Eumetazoa;Bilateria;Protostomia;  
 Spiralia;Lophotrochozoa;Mollusca;Gastropoda;Heterobranchia;Euthyneura;Pan  
 pulmonata;Hygrophila;Lymnaeoidea;Planorbidae;Biomphalaria;Biomphalaria  
 glabrata  
 UdeM00000024732 6579 132.5 UdeM00000024732 XP\_033751571.1 44.7 152  
 82 2 50 199 195 346 6.50E-28 132.5 6579 cellular  
 organisms;Eukaryota;Opisthokonta;Metazoa;Eumetazoa;Bilateria;Protostomia;  
 Spiralia;Lophotrochozoa;Mollusca;Bivalvia;Autobranchia;Pteriormorphia;Pect  
 inida;Pectinoidea;Pectinidae;Pecten;Pecten maximus  
 UdeM00000024733 6579 141 UdeM00000024733 XP\_033751571.1 40.7 167  
 98 1 36 201 180 346 1.90E-30 141 6579 cellular  
 organisms;Eukaryota;Opisthokonta;Metazoa;Eumetazoa;Bilateria;Protostomia;  
 Spiralia;Lophotrochozoa;Mollusca;Bivalvia;Autobranchia;Pteriormorphia;Pect  
 inida;Pectinoidea;Pectinidae;Pecten;Pecten maximus  
 UdeM00000024734 6573 489.2 UdeM00000024734 XP\_021368350.1 64.1 368  
 131 1 29 396 32 398 5.00E-135 489.2 6573 cellular  
 organisms;Eukaryota;Opisthokonta;Metazoa;Eumetazoa;Bilateria;Protostomia;  
 Spiralia;Lophotrochozoa;Mollusca;Bivalvia;Autobranchia;Pteriormorphia;Pect  
 inida;Pectinoidea;Pectinidae;Mizuhopecten;Mizuhopecten yessoensis  
 UdeM00000024735 6573 474.9 UdeM00000024735 XP\_021368351.1 64.1 359  
 128 1 29 387 32 389 9.50E-131 474.9 6573 cellular  
 organisms;Eukaryota;Opisthokonta;Metazoa;Eumetazoa;Bilateria;Protostomia;  
 Spiralia;Lophotrochozoa;Mollusca;Bivalvia;Autobranchia;Pteriormorphia;Pect  
 inida;Pectinoidea;Pectinidae;Mizuhopecten;Mizuhopecten yessoensis  
 UdeM00000024736 6573 448 UdeM00000024736 XP\_021368350.1 61.8 351  
 133 1 1 351 34 383 1.20E-122 448 6573 cellular  
 organisms;Eukaryota;Opisthokonta;Metazoa;Eumetazoa;Bilateria;Protostomia;  
 Spiralia;Lophotrochozoa;Mollusca;Bivalvia;Autobranchia;Pteriormorphia;Pect  
 inida;Pectinoidea;Pectinidae;Mizuhopecten;Mizuhopecten yessoensis  
 UdeM00000024737 6573 436.4 UdeM00000024737 XP\_021368351.1 62 342  
 129 1 1 342 34 374 3.50E-119 436.4 6573 cellular  
 organisms;Eukaryota;Opisthokonta;Metazoa;Eumetazoa;Bilateria;Protostomia;  
 Spiralia;Lophotrochozoa;Mollusca;Bivalvia;Autobranchia;Pteriormorphia;Pect  
 inida;Pectinoidea;Pectinidae;Mizuhopecten;Mizuhopecten yessoensis  
 UdeM00000024738 6579 124.4 UdeM00000024738 XP\_033729770.1 43.8 178  
 74 7 1 171 1 159 1.40E-25 124.4 6579 cellular  
 organisms;Eukaryota;Opisthokonta;Metazoa;Eumetazoa;Bilateria;Protostomia;

Spiralia; Lophotrochozoa; Mollusca; Bivalvia; Autobranchia; Pteriomorpha; Pectinida; Pectinoidea; Pectinidae; Pecten; Pecten maximus

UdeM00000024739 6579 104 UdeM00000024739 XP\_033729770.1 46 137  
56 5 1 130 1 126 1.70E-19 104 6579 cellular  
organisms; Eukaryota; Opisthokonta; Metazoa; Eumetazoa; Bilateria; Protostomia; Spiralia; Lophotrochozoa; Mollusca; Bivalvia; Autobranchia; Pteriomorpha; Pectinida; Pectinoidea; Pectinidae; Pecten; Pecten maximus

UdeM00000024741 6565 255.8 UdeM00000024741 XP\_022321940.1 23.7 670  
498 9 15 674 16 682 1.60E-64 255.8 6565 cellular  
organisms; Eukaryota; Opisthokonta; Metazoa; Eumetazoa; Bilateria; Protostomia; Spiralia; Lophotrochozoa; Mollusca; Bivalvia; Autobranchia; Pteriomorpha; Ostracida; Ostreidae; Crassostrea; Crassostrea virginica

UdeM00000024742 6565 263.1 UdeM00000024742 XP\_022321940.1 23.9 670  
497 9 15 674 16 682 9.90E-67 263.1 6565 cellular  
organisms; Eukaryota; Opisthokonta; Metazoa; Eumetazoa; Bilateria; Protostomia; Spiralia; Lophotrochozoa; Mollusca; Bivalvia; Autobranchia; Pteriomorpha; Ostracida; Ostreidae; Crassostrea; Crassostrea virginica

UdeM00000024743 6565 266.5 UdeM00000024743 XP\_022321940.1 24 670  
496 9 15 674 16 682 9.00E-68 266.5 6565 cellular  
organisms; Eukaryota; Opisthokonta; Metazoa; Eumetazoa; Bilateria; Protostomia; Spiralia; Lophotrochozoa; Mollusca; Bivalvia; Autobranchia; Pteriomorpha; Ostracida; Ostreidae; Crassostrea; Crassostrea virginica

UdeM00000024746 6573 98.6 UdeM00000024746 XP\_021353442.1 42.6 115  
62 2 17 127 13 127 6.40E-18 98.6 6573 cellular  
organisms; Eukaryota; Opisthokonta; Metazoa; Eumetazoa; Bilateria; Protostomia; Spiralia; Lophotrochozoa; Mollusca; Bivalvia; Autobranchia; Pteriomorpha; Pectinida; Pectinoidea; Pectinidae; Mizuhopecten; Mizuhopecten yessoensis

UdeM00000024747 6596 204.5 UdeM00000024747 XP\_045169960.1 23.7 498  
369 6 3 494 118 610 3.10E-49 204.5 6596 cellular  
organisms; Eukaryota; Opisthokonta; Metazoa; Eumetazoa; Bilateria; Protostomia; Spiralia; Lophotrochozoa; Mollusca; Bivalvia; Autobranchia; Heteroconchia; Euheterodonta; Imparidentia; Venerida; Veneroidea; Veneridae; Mercenaria; Mercenaria mercenaria

UdeM00000024749 6596 108.2 UdeM00000024749 XP\_045169960.1 27.6 199  
138 3 1 193 412 610 1.20E-20 108.2 6596 cellular  
organisms; Eukaryota; Opisthokonta; Metazoa; Eumetazoa; Bilateria; Protostomia; Spiralia; Lophotrochozoa; Mollusca; Bivalvia; Autobranchia; Heteroconchia; Euheterodonta; Imparidentia; Venerida; Veneroidea; Veneridae; Mercenaria; Mercenaria mercenaria

UdeM00000024750 6565 263.8 UdeM00000024750 XP\_022321940.1 25.2 671  
487 8 15 674 16 682 5.80E-67 263.8 6565 cellular  
organisms; Eukaryota; Opisthokonta; Metazoa; Eumetazoa; Bilateria; Protostomia; Spiralia; Lophotrochozoa; Mollusca; Bivalvia; Autobranchia; Pteriomorpha; Ostracida; Ostreidae; Crassostrea; Crassostrea virginica

UdeM00000024751 6579 478.8 UdeM00000024751 XP\_033751476.1 75.2 307  
65 1 8 314 4 299 6.60E-132 478.8 6579 cellular  
organisms; Eukaryota; Opisthokonta; Metazoa; Eumetazoa; Bilateria; Protostomia; Spiralia; Lophotrochozoa; Mollusca; Bivalvia; Autobranchia; Pteriomorpha; Pectinida; Pectinoidea; Pectinidae; Pecten; Pecten maximus

UdeM00000024752 6596 2167.1 UdeM00000024752 XP\_045175137.1 63.9  
1783 605 17 24 1793 19 1776 0.00E+00 2167.1 6596  
cellular  
organisms; Eukaryota; Opisthokonta; Metazoa; Eumetazoa; Bilateria; Protostomia; Spiralia; Lophotrochozoa; Mollusca; Bivalvia; Autobranchia; Heteroconchia; Euheterodonta

terodonta;Imparidentia;Venerida;Veneroidea;Veneridae;Mercenaria;Mercenaria mercenaria

UdeM00000024753 29159 1363.2 UdeM00000024753 XP\_019918054.2 67.5  
992 312 7 1 987 1 987 0.00E+00 1363.2  
29159 cellular

organisms;Eukaryota;Opisthokonta;Metazoa;Eumetazoa;Bilateria;Protostomia;Spiralia;Lophotrochozoa;Mollusca;Bivalvia;Autobranchia;Pteriomorpha;Ostreida;Ostreoidea;Ostreidae;Crassostrea;Crassostrea gigas

UdeM00000024756 6573 484.6 UdeM00000024756 XP\_021371381.1 61.7 379  
138 4 1 375 1 376 1.20E-133 484.6 6573 cellular

organisms;Eukaryota;Opisthokonta;Metazoa;Eumetazoa;Bilateria;Protostomia;Spiralia;Lophotrochozoa;Mollusca;Bivalvia;Autobranchia;Pteriomorpha;Pectinida;Pectinoidea;Pectinidae;Mizuhopecten;Mizuhopecten yessoensis

UdeM00000024754 225164 206.1 UdeM00000024754 XP\_009051889.1 87.3  
110 14 0 1 110 790 899 2.40E-50 206.1 225164

cellular

organisms;Eukaryota;Opisthokonta;Metazoa;Eumetazoa;Bilateria;Protostomia;Spiralia;Lophotrochozoa;Mollusca;Gastropoda;Patellogastropoda;Lottioidae;Lottiidae;Lottia;Lottia gigantea

UdeM00000024755 6565 506.5 UdeM00000024755 XP\_022303010.1 69.1 363  
112 0 1 363 408 770 2.80E-140 506.5 6565 cellular

organisms;Eukaryota;Opisthokonta;Metazoa;Eumetazoa;Bilateria;Protostomia;Spiralia;Lophotrochozoa;Mollusca;Bivalvia;Autobranchia;Pteriomorpha;Ostreida;Ostreoidea;Ostreidae;Crassostrea;Crassostrea virginica

UdeM00000024757 1250792 110.9 UdeM00000024757 XP\_041844020.1 38.4  
151 92 1 117 267 56 205 3.10E-21 110.9 1250792

cellular

organisms;Eukaryota;Opisthokonta;Metazoa;Eumetazoa;Bilateria;Deuterostomia;Chordata;Craniata;Vertebrata;Gnathostomata;Teleostomi;Euteleostomi;Actinopterygii;Actinopteri;Neopterygii;Teleostei;Osteoglossocephalai;Clupeocephala;Euteleostei;Neoteleostei;Eurypterygia;Ctenosquamata;Acanthomorpha;Euacanthomorpha;Percomorphaceae;Ovalentaria;Atherinomorpha;Atheriniformes;Melanotaeniidae;Melanotaenia;Melanotaenia boesemani

UdeM00000024758 400682 67.4 UdeM00000024758 XP\_003390251.1 27.7  
202 62 2 12 129 432 633 1.50E-08 67.4 400682

cellular

organisms;Eukaryota;Opisthokonta;Metazoa;Porifera;Demospongiae;Heteroscleromorpha;Haplosclerida;Niphatidae;Amphimedon;Amphimedon queenslandica

UdeM00000024759 6596 122.1 UdeM00000024759 XP\_045158584.1 54.9 113  
46 3 34 144 67 176 5.80E-25 122.1 6596 cellular

organisms;Eukaryota;Opisthokonta;Metazoa;Eumetazoa;Bilateria;Protostomia;Spiralia;Lophotrochozoa;Mollusca;Bivalvia;Autobranchia;Heteroconchia;Euterodonta;Imparidentia;Venerida;Veneroidea;Veneridae;Mercenaria;Mercenaria mercenaria

UdeM00000024760 37621 139 UdeM00000024760 XP\_014675321.1 49.6 127  
64 0 1 127 276 402 4.10E-30 139 37621 cellular

organisms;Eukaryota;Opisthokonta;Metazoa;Eumetazoa;Bilateria;Protostomia;Ecdysozoa;Scalidophora;Priapulida;Priapulimorpha;Priapulimorphida;Priapulidae;Priapulid;Priapulid caudatus

UdeM00000024761 37621 173.3 UdeM00000024761 XP\_014675321.1 66.7 114  
38 0 1 114 1 114 1.90E-40 173.3 37621 cellular

organisms;Eukaryota;Opisthokonta;Metazoa;Eumetazoa;Bilateria;Protostomia;Ecdysozoa;Scalidophora;Priapulida;Priapulimorpha;Priapulimorphida;Priapulidae;Priapulid;Priapulid caudatus

UdeM00000024766 6579 305.4 UdeM00000024766 XP\_033743002.1 49.2 309  
 127 3 1 285 90 392 7.40E-80 305.4 6579 cellular  
 organisms;Eukaryota;Opisthokonta;Metazoa;Eumetazoa;Bilateria;Protostomia;  
 Spiralia;Lophotrochozoa;Mollusca;Bivalvia;Autobranchia;Pteriomorphia;Pect  
 inida;Pectinoidea;Pectinidae;Pecten;Pecten maximus  
 UdeM00000024767 6596 64.7 UdeM00000024767 XP\_045191827.1 30 120  
 77 3 312 429 49 163 3.30E-07 64.7 6596 cellular  
 organisms;Eukaryota;Opisthokonta;Metazoa;Eumetazoa;Bilateria;Protostomia;  
 Spiralia;Lophotrochozoa;Mollusca;Bivalvia;Autobranchia;Heteroconchia;Euhe  
 terodonta;Imparidentia;Venerida;Veneroidea;Veneridae;Mercenaria;Mercenari  
 a mercenaria  
 UdeM00000024769 225164 211.5 UdeM00000024769 XP\_009065707.1 36.9  
 355 193 5 7 336 46 394 1.80E-51 211.5 225164  
 cellular  
 organisms;Eukaryota;Opisthokonta;Metazoa;Eumetazoa;Bilateria;Protostomia;  
 Spiralia;Lophotrochozoa;Mollusca;Gastropoda;Patellogastropoda;Lottioidea;  
 Lottiidae;Lottia;Lottia gigantea  
 UdeM00000024770 6596 120.6 UdeM00000024770 XP\_045169960.1 28.2 216  
 149 3 1 210 395 610 2.50E-24 120.6 6596 cellular  
 organisms;Eukaryota;Opisthokonta;Metazoa;Eumetazoa;Bilateria;Protostomia;  
 Spiralia;Lophotrochozoa;Mollusca;Bivalvia;Autobranchia;Heteroconchia;Euhe  
 terodonta;Imparidentia;Venerida;Veneroidea;Veneridae;Mercenaria;Mercenari  
 a mercenaria  
 UdeM00000024771 6573 72.4 UdeM00000024771 XP\_021365449.1 38 129  
 69 1 1 129 433 550 4.80E-10 72.4 6573 cellular  
 organisms;Eukaryota;Opisthokonta;Metazoa;Eumetazoa;Bilateria;Protostomia;  
 Spiralia;Lophotrochozoa;Mollusca;Bivalvia;Autobranchia;Pteriomorphia;Pect  
 inida;Pectinoidea;Pectinidae;Mizuhopecten;Mizuhopecten yessoensis  
 UdeM00000024772 6565 254.6 UdeM00000024772 XP\_022321940.1 23.6 670  
 499 9 15 674 16 682 3.50E-64 254.6 6565 cellular  
 organisms;Eukaryota;Opisthokonta;Metazoa;Eumetazoa;Bilateria;Protostomia;  
 Spiralia;Lophotrochozoa;Mollusca;Bivalvia;Autobranchia;Pteriomorphia;Ostr  
 eida;Ostreoidea;Ostreidae;Crassostrea;Crassostrea virginica  
 UdeM00000024773 7741 61.2 UdeM00000024773 XP\_019620661.1 36.5 104  
 64 2 65 166 27 130 1.70E-06 61.2 7741 cellular  
 organisms;Eukaryota;Opisthokonta;Metazoa;Eumetazoa;Bilateria;Deuterostomi  
 a;Chordata;Cephalochordata;Leptocardii;Amphioxiformes;Branchiostomidae;Br  
 anchiostoma;Branchiostoma belcheri  
 UdeM00000024775 225164 205.7 UdeM00000024775 XP\_009065707.1 36.4  
 354 194 5 7 335 46 393 9.60E-50 205.7 225164  
 cellular  
 organisms;Eukaryota;Opisthokonta;Metazoa;Eumetazoa;Bilateria;Protostomia;  
 Spiralia;Lophotrochozoa;Mollusca;Gastropoda;Patellogastropoda;Lottioidea;  
 Lottiidae;Lottia;Lottia gigantea  
 UdeM00000024776 6565 266.9 UdeM00000024776 XP\_022321940.1 24.5 670  
 493 9 15 674 16 682 6.90E-68 266.9 6565 cellular  
 organisms;Eukaryota;Opisthokonta;Metazoa;Eumetazoa;Bilateria;Protostomia;  
 Spiralia;Lophotrochozoa;Mollusca;Bivalvia;Autobranchia;Pteriomorphia;Ostr  
 eida;Ostreoidea;Ostreidae;Crassostrea;Crassostrea virginica  
 UdeM00000024777 6573 71.2 UdeM00000024777 XP\_021365449.1 35.7 129  
 72 1 1 129 433 550 1.10E-09 71.2 6573 cellular  
 organisms;Eukaryota;Opisthokonta;Metazoa;Eumetazoa;Bilateria;Protostomia;  
 Spiralia;Lophotrochozoa;Mollusca;Bivalvia;Autobranchia;Pteriomorphia;Pect  
 inida;Pectinoidea;Pectinidae;Mizuhopecten;Mizuhopecten yessoensis

UdeM00000024778 6596 106.3 UdeM00000024778 XP\_045169960.1 28.1 199  
 137 3 1 193 412 610 4.50E-20 106.3 6596 cellular  
 organisms;Eukaryota;Opisthokonta;Metazoa;Eumetazoa;Bilateria;Protostomia;  
 Spiralia;Lophotrochozoa;Mollusca;Bivalvia;Autobranchia;Heteroconchia;Euhe  
 terodonta;Imparidentia;Venerida;Veneroidea;Veneridae;Mercenaria;Mercenari  
 a mercenaria  
 UdeM00000024779 6573 95.9 UdeM00000024779 XP\_021353442.1 41.7 115  
 63 2 17 127 13 127 4.10E-17 95.9 6573 cellular  
 organisms;Eukaryota;Opisthokonta;Metazoa;Eumetazoa;Bilateria;Protostomia;  
 Spiralia;Lophotrochozoa;Mollusca;Bivalvia;Autobranchia;Pteriormorphia;Pect  
 inida;Pectinoidea;Pectinidae;Mizuhopecten;Mizuhopecten yessoensis  
 UdeM00000024782 225164 100.1 UdeM00000024782 XP\_009065707.1 36.2  
 174 89 2 6 157 45 218 2.70E-18 100.1 225164  
 cellular  
 organisms;Eukaryota;Opisthokonta;Metazoa;Eumetazoa;Bilateria;Protostomia;  
 Spiralia;Lophotrochozoa;Mollusca;Gastropoda;Patellogastropoda;Lottioidea;  
 Lottiidae;Lottia;Lottia gigantea  
 UdeM00000024783 6565 266.5 UdeM00000024783 XP\_022321940.1 25.2 662  
 478 11 15 664 16 672 9.00E-68 266.5 6565 cellular  
 organisms;Eukaryota;Opisthokonta;Metazoa;Eumetazoa;Bilateria;Protostomia;  
 Spiralia;Lophotrochozoa;Mollusca;Bivalvia;Autobranchia;Pteriormorphia;Ostr  
 eida;Ostreoidea;Ostreidae;Crassostrea;Crassostrea virginica  
 UdeM00000024784 6565 90.1 UdeM00000024784 XP\_022333999.1 44.9 98  
 51 2 14 109 112 208 1.90E-15 90.1 6565 cellular  
 organisms;Eukaryota;Opisthokonta;Metazoa;Eumetazoa;Bilateria;Protostomia;  
 Spiralia;Lophotrochozoa;Mollusca;Bivalvia;Autobranchia;Pteriormorphia;Ostr  
 eida;Ostreoidea;Ostreidae;Crassostrea;Crassostrea virginica  
 UdeM00000024785 29159 63.9 UdeM00000024785 XP\_011420009.2 23 270  
 180 4 18 278 226 476 3.80E-07 63.9 29159 cellular  
 organisms;Eukaryota;Opisthokonta;Metazoa;Eumetazoa;Bilateria;Protostomia;  
 Spiralia;Lophotrochozoa;Mollusca;Bivalvia;Autobranchia;Pteriormorphia;Ostr  
 eida;Ostreoidea;Ostreidae;Crassostrea;Crassostrea gigas  
 UdeM00000024786 6573 78.2 UdeM00000024786 XP\_021366217.1 42.2 83  
 48 0 11 93 558 640 6.40E-12 78.2 6573 cellular  
 organisms;Eukaryota;Opisthokonta;Metazoa;Eumetazoa;Bilateria;Protostomia;  
 Spiralia;Lophotrochozoa;Mollusca;Bivalvia;Autobranchia;Pteriormorphia;Pect  
 inida;Pectinoidea;Pectinidae;Mizuhopecten;Mizuhopecten yessoensis  
 UdeM00000024787 6573 77.4 UdeM00000024787 XP\_021365449.1 39.5 129  
 67 1 1 129 433 550 1.50E-11 77.4 6573 cellular  
 organisms;Eukaryota;Opisthokonta;Metazoa;Eumetazoa;Bilateria;Protostomia;  
 Spiralia;Lophotrochozoa;Mollusca;Bivalvia;Autobranchia;Pteriormorphia;Pect  
 inida;Pectinoidea;Pectinidae;Mizuhopecten;Mizuhopecten yessoensis  
 UdeM00000024788 6573 195.7 UdeM00000024788 XP\_021365449.1 28.8 535  
 351 10 21 541 32 550 1.60E-46 195.7 6573 cellular  
 organisms;Eukaryota;Opisthokonta;Metazoa;Eumetazoa;Bilateria;Protostomia;  
 Spiralia;Lophotrochozoa;Mollusca;Bivalvia;Autobranchia;Pteriormorphia;Pect  
 inida;Pectinoidea;Pectinidae;Mizuhopecten;Mizuhopecten yessoensis  
 UdeM00000024789 29159 501.9 UdeM00000024789 XP\_011434753.1 81.8 296  
 45 1 1 296 3 289 5.60E-139 501.9 29159 cellular  
 organisms;Eukaryota;Opisthokonta;Metazoa;Eumetazoa;Bilateria;Protostomia;  
 Spiralia;Lophotrochozoa;Mollusca;Bivalvia;Autobranchia;Pteriormorphia;Ostr  
 eida;Ostreoidea;Ostreidae;Crassostrea;Crassostrea gigas  
 UdeM00000024790 400727 229.2 UdeM00000024790 XP\_025087470.1 80.2  
 162 32 0 1 162 1 162 3.80E-57 229.2 400727

cellular  
organisms;Eukaryota;Opisthokonta;Metazoa;Eumetazoa;Bilateria;Protostomia;  
Spiralia;Lophotrochozoa;Mollusca;Gastropoda;Caenogastropoda;Architaenioglossa;  
Ampullarioidea;Ampullariidae;Pomacea;Pomacea canaliculata  
UdeM00000024791 6596 674.1 UdeM00000024791 XP\_045175533.1 28.7 2000  
1290 55 327 2257 6 1938 6.20E-190 674.1 6596 cellular  
organisms;Eukaryota;Opisthokonta;Metazoa;Eumetazoa;Bilateria;Protostomia;  
Spiralia;Lophotrochozoa;Mollusca;Bivalvia;Autobranchia;Heteroconchia;Euherodonta;  
Imparidentia;Venerida;Veneroidea;Veneridae;Mercenaria;Mercenaria mercenaria  
UdeM00000024792 6596 776.9 UdeM00000024792 XP\_045175533.1 30.3 2009  
1211 57 374 2301 39 1938 6.90E-221 776.9 6596 cellular  
organisms;Eukaryota;Opisthokonta;Metazoa;Eumetazoa;Bilateria;Protostomia;  
Spiralia;Lophotrochozoa;Mollusca;Bivalvia;Autobranchia;Heteroconchia;Euherodonta;  
Imparidentia;Venerida;Veneroidea;Veneridae;Mercenaria;Mercenaria mercenaria  
UdeM00000024793 6596 761.5 UdeM00000024793 XP\_045175533.1 30.9 1880  
1122 52 451 2258 164 1938 3.00E-216 761.5 6596 cellular  
organisms;Eukaryota;Opisthokonta;Metazoa;Eumetazoa;Bilateria;Protostomia;  
Spiralia;Lophotrochozoa;Mollusca;Bivalvia;Autobranchia;Heteroconchia;Euherodonta;  
Imparidentia;Venerida;Veneroidea;Veneridae;Mercenaria;Mercenaria mercenaria  
UdeM00000024794 6596 773.9 UdeM00000024794 XP\_045175533.1 30.3 2011  
1210 58 374 2303 39 1938 5.90E-220 773.9 6596 cellular  
organisms;Eukaryota;Opisthokonta;Metazoa;Eumetazoa;Bilateria;Protostomia;  
Spiralia;Lophotrochozoa;Mollusca;Bivalvia;Autobranchia;Heteroconchia;Euherodonta;  
Imparidentia;Venerida;Veneroidea;Veneridae;Mercenaria;Mercenaria mercenaria  
UdeM00000024795 37653 197.6 UdeM00000024795 XP\_014776876.1 52.7 222  
85 5 23 235 4 214 1.80E-47 197.6 37653 cellular  
organisms;Eukaryota;Opisthokonta;Metazoa;Eumetazoa;Bilateria;Protostomia;  
Spiralia;Lophotrochozoa;Mollusca;Cephalopoda;Coleoidea;Octopodiformes;Octopoda;  
Incirrata;Octopodidae;Octopus;Octopus bimaculoides  
UdeM00000024796 37653 197.2 UdeM00000024796 XP\_014776876.1 54.5 211  
87 4 23 224 4 214 2.20E-47 197.2 37653 cellular  
organisms;Eukaryota;Opisthokonta;Metazoa;Eumetazoa;Bilateria;Protostomia;  
Spiralia;Lophotrochozoa;Mollusca;Cephalopoda;Coleoidea;Octopodiformes;Octopoda;  
Incirrata;Octopodidae;Octopus;Octopus bimaculoides  
UdeM00000024797 6573 65.5 UdeM00000024797 XP\_021340041.1 36.8 136  
80 4 10 142 2 134 6.40E-08 65.5 6573 cellular  
organisms;Eukaryota;Opisthokonta;Metazoa;Eumetazoa;Bilateria;Protostomia;  
Spiralia;Lophotrochozoa;Mollusca;Bivalvia;Autobranchia;Pteriomorpha;Pectinida;  
Pectinoidea;Pectinidae;Mizuhopecten;Mizuhopecten yessoensis  
UdeM00000024798 6579 91.3 UdeM00000024798 XP\_033760709.1 56.1 66  
29 0 16 81 280 345 6.20E-16 91.3 6579 cellular  
organisms;Eukaryota;Opisthokonta;Metazoa;Eumetazoa;Bilateria;Protostomia;  
Spiralia;Lophotrochozoa;Mollusca;Bivalvia;Autobranchia;Pteriomorpha;Pectinida;  
Pectinoidea;Pectinidae;Pecten;Pecten maximus  
UdeM00000024799 6596 422.5 UdeM00000024799 XP\_045175533.1 32.8 933  
535 24 2 884 1048 1938 1.30E-114 422.5 6596 cellular  
organisms;Eukaryota;Opisthokonta;Metazoa;Eumetazoa;Bilateria;Protostomia;  
Spiralia;Lophotrochozoa;Mollusca;Bivalvia;Autobranchia;Heteroconchia;Euherodonta;  
Imparidentia;Venerida;Veneroidea;Veneridae;Mercenaria;Mercenaria mercenaria



UdeM00000024800 6596 323.6 UdeM00000024800 XP\_045175533.1 27 1052  
 671 36 36 1042 23 1022 9.50E-85 323.6 6596 cellular  
 organisms;Eukaryota;Opisthokonta;Metazoa;Eumetazoa;Bilateria;Protostomia;  
 Spiralia;Lophotrochozoa;Mollusca;Bivalvia;Autobranchia;Heteroconchia;Euhe  
 terodonta;Imparidentia;Venerida;Veneroidea;Veneridae;Mercenaria;Mercenari  
 a mercenaria  
 UdeM00000024801 6596 305.4 UdeM00000024801 XP\_045175533.1 28.3 902  
 564 30 131 997 169 1022 2.60E-79 305.4 6596 cellular  
 organisms;Eukaryota;Opisthokonta;Metazoa;Eumetazoa;Bilateria;Protostomia;  
 Spiralia;Lophotrochozoa;Mollusca;Bivalvia;Autobranchia;Heteroconchia;Euhe  
 terodonta;Imparidentia;Venerida;Veneroidea;Veneridae;Mercenaria;Mercenari  
 a mercenaria  
 UdeM00000024802 6565 61.6 UdeM00000024802 XP\_022326780.1 37.1 89  
 53 2 1 88 111 197 7.80E-07 61.6 6565 cellular  
 organisms;Eukaryota;Opisthokonta;Metazoa;Eumetazoa;Bilateria;Protostomia;  
 Spiralia;Lophotrochozoa;Mollusca;Bivalvia;Autobranchia;Pteriormorphia;Ostr  
 eida;Ostreoidea;Ostreidae;Crassostrea;Crassostrea virginica  
 UdeM00000024803 6579 91.3 UdeM00000024803 XP\_033760709.1 56.9 65  
 28 0 14 78 281 345 6.00E-16 91.3 6579 cellular  
 organisms;Eukaryota;Opisthokonta;Metazoa;Eumetazoa;Bilateria;Protostomia;  
 Spiralia;Lophotrochozoa;Mollusca;Bivalvia;Autobranchia;Pteriormorphia;Pect  
 inida;Pectinoidea;Pectinidae;Pecten;Pecten maximus  
 UdeM00000024804 6596 142.9 UdeM00000024804 XP\_045175533.1 49.1 161  
 74 5 21 174 1779 1938 3.90E-31 142.9 6596 cellular  
 organisms;Eukaryota;Opisthokonta;Metazoa;Eumetazoa;Bilateria;Protostomia;  
 Spiralia;Lophotrochozoa;Mollusca;Bivalvia;Autobranchia;Heteroconchia;Euhe  
 terodonta;Imparidentia;Venerida;Veneroidea;Veneridae;Mercenaria;Mercenari  
 a mercenaria  
 UdeM00000024806 6579 87.8 UdeM00000024806 XP\_033760709.1 53.2 77  
 33 2 6 79 269 345 6.70E-15 87.8 6579 cellular  
 organisms;Eukaryota;Opisthokonta;Metazoa;Eumetazoa;Bilateria;Protostomia;  
 Spiralia;Lophotrochozoa;Mollusca;Bivalvia;Autobranchia;Pteriormorphia;Pect  
 inida;Pectinoidea;Pectinidae;Pecten;Pecten maximus  
 UdeM00000024807 6596 802.7 UdeM00000024807 XP\_045175533.1 30.8 2028  
 1230 54 36 2001 23 1938 1.00E-228 802.7 6596 cellular  
 organisms;Eukaryota;Opisthokonta;Metazoa;Eumetazoa;Bilateria;Protostomia;  
 Spiralia;Lophotrochozoa;Mollusca;Bivalvia;Autobranchia;Heteroconchia;Euhe  
 terodonta;Imparidentia;Venerida;Veneroidea;Veneridae;Mercenaria;Mercenari  
 a mercenaria  
 UdeM00000024808 6596 805.4 UdeM00000024808 XP\_045175533.1 30.8 2026  
 1231 53 36 1999 23 1938 1.60E-229 805.4 6596 cellular  
 organisms;Eukaryota;Opisthokonta;Metazoa;Eumetazoa;Bilateria;Protostomia;  
 Spiralia;Lophotrochozoa;Mollusca;Bivalvia;Autobranchia;Heteroconchia;Euhe  
 terodonta;Imparidentia;Venerida;Veneroidea;Veneridae;Mercenaria;Mercenari  
 a mercenaria  
 UdeM00000024817 6596 800.8 UdeM00000024817 XP\_045174866.1 86.2 480  
 62 2 32 507 75 554 9.90E-229 800.8 6596 cellular  
 organisms;Eukaryota;Opisthokonta;Metazoa;Eumetazoa;Bilateria;Protostomia;  
 Spiralia;Lophotrochozoa;Mollusca;Bivalvia;Autobranchia;Heteroconchia;Euhe  
 terodonta;Imparidentia;Venerida;Veneroidea;Veneridae;Mercenaria;Mercenari  
 a mercenaria  
 UdeM00000024818 6596 81.6 UdeM00000024818 XP\_045174866.1 51.9 79  
 33 2 1 78 1 75 4.80E-13 81.6 6596 cellular  
 organisms;Eukaryota;Opisthokonta;Metazoa;Eumetazoa;Bilateria;Protostomia;

Spiralia;Lophotrochozoa;Mollusca;Bivalvia;Autobranchia;Heteroconchia;Euherodonta;Imparidentia;Venerida;Veneroidea;Veneridae;Mercenaria;Mercenaria mercenaria

UdeM00000024819 6573 184.1 UdeM00000024819 XP\_021353396.1 85.5 110  
16 0 4 113 48 157 9.90E-44 184.1 6573 cellular

organisms;Eukaryota;Opisthokonta;Metazoa;Eumetazoa;Bilateria;Protostomia;Spiralia;Lophotrochozoa;Mollusca;Bivalvia;Autobranchia;Pteriomorpha;Pectinida;Pectinoidea;Pectinidae;Mizuhopecten;Mizuhopecten yessoensis

UdeM00000024820 6573 267.7 UdeM00000024820 XP\_021353396.1 88.9 153  
17 0 4 156 48 200 1.90E-68 267.7 6573 cellular

organisms;Eukaryota;Opisthokonta;Metazoa;Eumetazoa;Bilateria;Protostomia;Spiralia;Lophotrochozoa;Mollusca;Bivalvia;Autobranchia;Pteriomorpha;Pectinida;Pectinoidea;Pectinidae;Mizuhopecten;Mizuhopecten yessoensis

UdeM00000024821 225164 99 UdeM00000024821 XP\_009066015.1 95.8  
48 2 0 7 54 38 85 7.90E-18 99 225164

cellular

organisms;Eukaryota;Opisthokonta;Metazoa;Eumetazoa;Bilateria;Protostomia;Spiralia;Lophotrochozoa;Mollusca;Gastropoda;Patellogastropoda;Lottiidae;Lottia;Lottia gigantea

UdeM00000024822 6596 3902.8 UdeM00000024822 XP\_045156859.1 41.9  
4802 2593 58 1 4768 7002 11641 0.00E+00 3902.8 6596

cellular

organisms;Eukaryota;Opisthokonta;Metazoa;Eumetazoa;Bilateria;Protostomia;Spiralia;Lophotrochozoa;Mollusca;Bivalvia;Autobranchia;Heteroconchia;Euherodonta;Imparidentia;Venerida;Veneroidea;Veneridae;Mercenaria;Mercenaria mercenaria

UdeM00000024823 6596 4219.1 UdeM00000024823 XP\_045156859.1 33.8  
6349 3931 88 14 6210 378 6603 0.00E+00 4219.1 6596

cellular

organisms;Eukaryota;Opisthokonta;Metazoa;Eumetazoa;Bilateria;Protostomia;Spiralia;Lophotrochozoa;Mollusca;Bivalvia;Autobranchia;Heteroconchia;Euherodonta;Imparidentia;Venerida;Veneroidea;Veneridae;Mercenaria;Mercenaria mercenaria

UdeM00000024824 6573 335.1 UdeM00000024824 XP\_021353372.1 49.3 343  
168 4 18 360 19 355 1.10E-88 335.1 6573 cellular

organisms;Eukaryota;Opisthokonta;Metazoa;Eumetazoa;Bilateria;Protostomia;Spiralia;Lophotrochozoa;Mollusca;Bivalvia;Autobranchia;Pteriomorpha;Pectinida;Pectinoidea;Pectinidae;Mizuhopecten;Mizuhopecten yessoensis

UdeM00000024825 6573 282 UdeM00000024825 XP\_021353372.1 45.1 346  
165 8 18 347 19 355 1.10E-72 282 6573 cellular

organisms;Eukaryota;Opisthokonta;Metazoa;Eumetazoa;Bilateria;Protostomia;Spiralia;Lophotrochozoa;Mollusca;Bivalvia;Autobranchia;Pteriomorpha;Pectinida;Pectinoidea;Pectinidae;Mizuhopecten;Mizuhopecten yessoensis

UdeM00000024826 29159 2596.6 UdeM00000024826 XP\_034301655.1 40  
3448 1884 51 44 3347 27 3433 0.00E+00 2596.6

29159 cellular

organisms;Eukaryota;Opisthokonta;Metazoa;Eumetazoa;Bilateria;Protostomia;Spiralia;Lophotrochozoa;Mollusca;Bivalvia;Autobranchia;Pteriomorpha;Ostreida;Ostreidae;Crassostrea;Crassostrea gigas

UdeM00000024827 6596 6892 UdeM00000024827 XP\_045156859.1 36.6 9671  
5694 134 1 9456 2098 11548 0.00E+00 6892 6596 cellular

organisms;Eukaryota;Opisthokonta;Metazoa;Eumetazoa;Bilateria;Protostomia;Spiralia;Lophotrochozoa;Mollusca;Bivalvia;Autobranchia;Heteroconchia;Euherodonta

terodonta;Imparidentia;Venerida;Veneroidea;Veneridae;Mercenaria;Mercenaria mercenaria

UdeM00000024828 6596 6887.4 UdeM00000024828 XP\_045156859.1 36.6  
9673 5695 134 1 9458 2098 11548 0.00E+00 6887.4 6596  
cellular

organisms;Eukaryota;Opisthokonta;Metazoa;Eumetazoa;Bilateria;Protostomia;Spiralia;Lophotrochozoa;Mollusca;Bivalvia;Autobranchia;Heteroconchia;Euheterodonta;Imparidentia;Venerida;Veneroidea;Veneridae;Mercenaria;Mercenaria mercenaria

UdeM00000024829 6573 1495.7 UdeM00000024829 XP\_021353372.1 43.8  
1770 932 24 1 1719 368 2125 0.00E+00 1495.7 6573  
cellular

organisms;Eukaryota;Opisthokonta;Metazoa;Eumetazoa;Bilateria;Protostomia;Spiralia;Lophotrochozoa;Mollusca;Bivalvia;Autobranchia;Pteriormorphia;Pectinida;Pectinoidea;Pectinidae;Mizuhopecten;Mizuhopecten yessoensis

UdeM00000024830 29159 2735.3 UdeM00000024830 XP\_034301655.1 41.7  
3445 1905 55 45 3427 29 3433 0.00E+00 2735.3  
29159 cellular

organisms;Eukaryota;Opisthokonta;Metazoa;Eumetazoa;Bilateria;Protostomia;Spiralia;Lophotrochozoa;Mollusca;Bivalvia;Autobranchia;Pteriormorphia;Ostreida;Ostreoidea;Ostreidae;Crassostrea;Crassostrea gigas

UdeM00000024831 29159 484.6 UdeM00000024831 XP\_034314164.1 34.2 801  
463 15 21 769 32 820 2.40E-133 484.6 29159 cellular

organisms;Eukaryota;Opisthokonta;Metazoa;Eumetazoa;Bilateria;Protostomia;Spiralia;Lophotrochozoa;Mollusca;Bivalvia;Autobranchia;Pteriormorphia;Ostreida;Ostreoidea;Ostreidae;Crassostrea;Crassostrea gigas

UdeM00000024832 6596 130.2 UdeM00000024832 XP\_045156859.1 50 116  
58 0 3 118 10897 11012 1.80E-27 130.2 6596 cellular

organisms;Eukaryota;Opisthokonta;Metazoa;Eumetazoa;Bilateria;Protostomia;Spiralia;Lophotrochozoa;Mollusca;Bivalvia;Autobranchia;Heteroconchia;Euheterodonta;Imparidentia;Venerida;Veneroidea;Veneridae;Mercenaria;Mercenaria mercenaria

UdeM00000024833 29159 254.2 UdeM00000024833 XP\_034331879.1 36.6 443  
196 10 5 372 3114 3546 2.80E-64 254.2 29159 cellular

organisms;Eukaryota;Opisthokonta;Metazoa;Eumetazoa;Bilateria;Protostomia;Spiralia;Lophotrochozoa;Mollusca;Bivalvia;Autobranchia;Pteriormorphia;Ostreida;Ostreoidea;Ostreidae;Crassostrea;Crassostrea gigas

UdeM00000024835 6573 69.7 UdeM00000024835 XP\_021356985.1 46.8 62  
33 0 16 77 1643 1704 1.90E-09 69.7 6573 cellular

organisms;Eukaryota;Opisthokonta;Metazoa;Eumetazoa;Bilateria;Protostomia;Spiralia;Lophotrochozoa;Mollusca;Bivalvia;Autobranchia;Pteriormorphia;Pectinida;Pectinoidea;Pectinidae;Mizuhopecten;Mizuhopecten yessoensis

UdeM00000024836 6565 171 UdeM00000024836 XP\_022293358.1 41.7 204  
92 3 1 178 1785 1987 1.50E-39 171 6565 cellular

organisms;Eukaryota;Opisthokonta;Metazoa;Eumetazoa;Bilateria;Protostomia;Spiralia;Lophotrochozoa;Mollusca;Bivalvia;Autobranchia;Pteriormorphia;Ostreida;Ostreoidea;Ostreidae;Crassostrea;Crassostrea virginica

UdeM00000024837 6596 190.3 UdeM00000024837 XP\_045156787.1 47.1 204  
95 1 24 227 1939 2129 2.80E-45 190.3 6596 cellular

organisms;Eukaryota;Opisthokonta;Metazoa;Eumetazoa;Bilateria;Protostomia;Spiralia;Lophotrochozoa;Mollusca;Bivalvia;Autobranchia;Heteroconchia;Euheterodonta;Imparidentia;Venerida;Veneroidea;Veneridae;Mercenaria;Mercenaria mercenaria

UdeM00000024838 6565 135.6 UdeM00000024838 XP\_022293986.1 28.2 358  
 164 5 12 276 2475 2832 1.00E-28 135.6 6565 cellular  
 organisms;Eukaryota;Opisthokonta;Metazoa;Eumetazoa;Bilateria;Protostomia;  
 Spiralia;Lophotrochozoa;Mollusca;Bivalvia;Autobranchia;Pteriormorphia;Ostr  
 eida;Ostreoidea;Ostreidae;Crassostrea;Crassostrea virginica  
 UdeM00000024839 6596 287.3 UdeM00000024839 XP\_045156787.1 40.4 354  
 207 2 3 354 2898 3249 2.80E-74 287.3 6596 cellular  
 organisms;Eukaryota;Opisthokonta;Metazoa;Eumetazoa;Bilateria;Protostomia;  
 Spiralia;Lophotrochozoa;Mollusca;Bivalvia;Autobranchia;Heteroconchia;Euhe  
 terodonta;Imparidentia;Venerida;Veneroidea;Veneridae;Mercenaria;Mercenari  
 a mercenaria  
 UdeM00000024840 29159 116.7 UdeM00000024840 XP\_034301655.1 36.8 163  
 102 1 54 215 3271 3433 3.70E-23 116.7 29159 cellular  
 organisms;Eukaryota;Opisthokonta;Metazoa;Eumetazoa;Bilateria;Protostomia;  
 Spiralia;Lophotrochozoa;Mollusca;Bivalvia;Autobranchia;Pteriormorphia;Ostr  
 eida;Ostreoidea;Ostreidae;Crassostrea;Crassostrea gigas  
 UdeM00000024841 29159 2714.5 UdeM00000024841 XP\_034301655.1 41  
 3454 1928 50 50 3441 27 3433 0.00E+00 2714.5  
 29159 cellular  
 organisms;Eukaryota;Opisthokonta;Metazoa;Eumetazoa;Bilateria;Protostomia;  
 Spiralia;Lophotrochozoa;Mollusca;Bivalvia;Autobranchia;Pteriormorphia;Ostr  
 eida;Ostreoidea;Ostreidae;Crassostrea;Crassostrea gigas  
 UdeM00000024842 6579 538.5 UdeM00000024842 XP\_033751849.1 66.8 380  
 126 0 140 519 80 459 9.40E-150 538.5 6579 cellular  
 organisms;Eukaryota;Opisthokonta;Metazoa;Eumetazoa;Bilateria;Protostomia;  
 Spiralia;Lophotrochozoa;Mollusca;Bivalvia;Autobranchia;Pteriormorphia;Pect  
 inida;Pectinoidea;Pectinidae;Pecten;Pecten maximus  
 UdeM00000024844 6596 273.5 UdeM00000024844 XP\_045175583.1 83.3 156  
 26 0 1 156 1 156 1.70E-70 273.5 6596 cellular  
 organisms;Eukaryota;Opisthokonta;Metazoa;Eumetazoa;Bilateria;Protostomia;  
 Spiralia;Lophotrochozoa;Mollusca;Bivalvia;Autobranchia;Heteroconchia;Euhe  
 terodonta;Imparidentia;Venerida;Veneroidea;Veneridae;Mercenaria;Mercenari  
 a mercenaria  
 UdeM00000024845 1735272 68.6 UdeM00000024845 XP\_041367811.1 53.3  
 60 24 1 261 316 242 301 1.70E-08 68.6 1735272  
 cellular  
 organisms;Eukaryota;Opisthokonta;Metazoa;Eumetazoa;Bilateria;Protostomia;  
 Spiralia;Lophotrochozoa;Mollusca;Gastropoda;Neomphalina;Neomphaloidea;Pel  
 tospiridae;Gigantopelta;Gigantopelta aegis  
 UdeM00000024846 1735272 93.6 UdeM00000024846 XP\_041366607.1 46.8  
 111 56 2 84 191 65 175 3.10E-16 93.6 1735272  
 cellular  
 organisms;Eukaryota;Opisthokonta;Metazoa;Eumetazoa;Bilateria;Protostomia;  
 Spiralia;Lophotrochozoa;Mollusca;Gastropoda;Neomphalina;Neomphaloidea;Pel  
 tospiridae;Gigantopelta;Gigantopelta aegis  
 UdeM00000024847 1735272 93.6 UdeM00000024847 XP\_041366607.1 46.8  
 111 56 2 70 177 65 175 2.90E-16 93.6 1735272  
 cellular  
 organisms;Eukaryota;Opisthokonta;Metazoa;Eumetazoa;Bilateria;Protostomia;  
 Spiralia;Lophotrochozoa;Mollusca;Gastropoda;Neomphalina;Neomphaloidea;Pel  
 tospiridae;Gigantopelta;Gigantopelta aegis  
 UdeM00000024848 1735272 91.7 UdeM00000024848 XP\_041366607.1 60.3  
 73 29 0 98 170 92 164 1.00E-15 91.7 1735272  
 cellular

organisms;Eukaryota;Opisthokonta;Metazoa;Eumetazoa;Bilateria;Protostomia;Spiralia;Lophotrochozoa;Mollusca;Gastropoda;Neomphalina;Neomphaloidea;Peltospiridae;Gigantopelta;Gigantopelta aegis

UdeM00000024849 6596 643.7 UdeM00000024849 XP\_045175681.1 57.7 596  
234 8 19 609 15 597 2.40E-181 643.7 6596 cellular

organisms;Eukaryota;Opisthokonta;Metazoa;Eumetazoa;Bilateria;Protostomia;Spiralia;Lophotrochozoa;Mollusca;Bivalvia;Autobranchia;Heteroconchia;Euheterodonta;Imparidentia;Venerida;Veneroidea;Veneridae;Mercenaria;Mercenaria mercenaria

UdeM00000024850 6579 318.5 UdeM00000024850 XP\_033753643.1 42.7 473  
220 9 1 440 1 455 1.30E-83 318.5 6579 cellular

organisms;Eukaryota;Opisthokonta;Metazoa;Eumetazoa;Bilateria;Protostomia;Spiralia;Lophotrochozoa;Mollusca;Bivalvia;Autobranchia;Pteriormorphia;Pectinida;Pectinoidea;Pectinidae;Pecten;Pecten maximus

UdeM00000024851 6596 273.9 UdeM00000024851 XP\_045175405.1 41.7 444  
189 10 1 408 1 410 3.40E-70 273.9 6596 cellular

organisms;Eukaryota;Opisthokonta;Metazoa;Eumetazoa;Bilateria;Protostomia;Spiralia;Lophotrochozoa;Mollusca;Bivalvia;Autobranchia;Heteroconchia;Euheterodonta;Imparidentia;Venerida;Veneroidea;Veneridae;Mercenaria;Mercenaria mercenaria

UdeM00000024852 79782 190.7 UdeM00000024852 XP\_014251564.1 60 150  
59 1 6 155 5 153 1.50E-45 190.7 79782 cellular

organisms;Eukaryota;Opisthokonta;Metazoa;Eumetazoa;Bilateria;Protostomia;Ecdysozoa;Panarthropoda;Arthropoda;Mandibulata;Pancrustacea;Hexapoda;Insecta;Dicondylia;Pterygota;Neoptera;Paraneoptera;Hemiptera;Prosorrhyncha;Heteroptera;Euheteroptera;Neoheteroptera;Panheteroptera;Cimicomorpha;Cimicoidea;Cimicidae;Cimex;Cimex lectularius

UdeM00000024853 6596 723.8 UdeM00000024853 XP\_045175056.1 66.4 512  
168 1 19 526 16 527 1.60E-205 723.8 6596 cellular

organisms;Eukaryota;Opisthokonta;Metazoa;Eumetazoa;Bilateria;Protostomia;Spiralia;Lophotrochozoa;Mollusca;Bivalvia;Autobranchia;Heteroconchia;Euheterodonta;Imparidentia;Venerida;Veneroidea;Veneridae;Mercenaria;Mercenaria mercenaria

UdeM00000024854 6596 1089.7 UdeM00000024854 XP\_045204827.1 41.3  
1507 812 22 1 1447 3 1496 0.00E+00 1089.7 6596  
cellular

organisms;Eukaryota;Opisthokonta;Metazoa;Eumetazoa;Bilateria;Protostomia;Spiralia;Lophotrochozoa;Mollusca;Bivalvia;Autobranchia;Heteroconchia;Euheterodonta;Imparidentia;Venerida;Veneroidea;Veneridae;Mercenaria;Mercenaria mercenaria

UdeM00000024855 6596 187.2 UdeM00000024855 XP\_045204827.1 40.1 289  
157 9 26 300 28 314 3.10E-44 187.2 6596 cellular

organisms;Eukaryota;Opisthokonta;Metazoa;Eumetazoa;Bilateria;Protostomia;Spiralia;Lophotrochozoa;Mollusca;Bivalvia;Autobranchia;Heteroconchia;Euheterodonta;Imparidentia;Venerida;Veneroidea;Veneridae;Mercenaria;Mercenaria mercenaria

UdeM00000024856 6596 782.7 UdeM00000024856 XP\_045204827.1 39.7 1166  
624 16 11 1115 318 1465 6.20E-223 782.7 6596 cellular

organisms;Eukaryota;Opisthokonta;Metazoa;Eumetazoa;Bilateria;Protostomia;Spiralia;Lophotrochozoa;Mollusca;Bivalvia;Autobranchia;Heteroconchia;Euheterodonta;Imparidentia;Venerida;Veneroidea;Veneridae;Mercenaria;Mercenaria mercenaria

UdeM00000024857 6596 186 UdeM00000024857 XP\_045204827.1 40.1 289  
157 9 21 295 28 314 6.80E-44 186 6596 cellular

organisms;Eukaryota;Opisthokonta;Metazoa;Eumetazoa;Bilateria;Protostomia;Spiralia;Lophotrochozoa;Mollusca;Bivalvia;Autobranhia;Heteroconchia;Euherodonta;Imparidentia;Venerida;Veneroidea;Veneridae;Mercenaria;Mercenaria mercenaria

UdeM00000024858 6596 764.2 UdeM00000024858 XP\_045204827.1 39.3 1164  
615 17 11 1101 318 1463 2.90E-217 764.2 6596 cellular

organisms;Eukaryota;Opisthokonta;Metazoa;Eumetazoa;Bilateria;Protostomia;Spiralia;Lophotrochozoa;Mollusca;Bivalvia;Autobranhia;Heteroconchia;Euherodonta;Imparidentia;Venerida;Veneroidea;Veneridae;Mercenaria;Mercenaria mercenaria

UdeM00000024859 6596 785.4 UdeM00000024859 XP\_045204827.1 39.8 1166  
623 16 11 1115 318 1465 9.60E-224 785.4 6596 cellular

organisms;Eukaryota;Opisthokonta;Metazoa;Eumetazoa;Bilateria;Protostomia;Spiralia;Lophotrochozoa;Mollusca;Bivalvia;Autobranhia;Heteroconchia;Euherodonta;Imparidentia;Venerida;Veneroidea;Veneridae;Mercenaria;Mercenaria mercenaria

UdeM00000024860 6596 188.3 UdeM00000024860 XP\_045204827.1 40.5 289  
156 9 21 295 28 314 1.40E-44 188.3 6596 cellular

organisms;Eukaryota;Opisthokonta;Metazoa;Eumetazoa;Bilateria;Protostomia;Spiralia;Lophotrochozoa;Mollusca;Bivalvia;Autobranhia;Heteroconchia;Euherodonta;Imparidentia;Venerida;Veneroidea;Veneridae;Mercenaria;Mercenaria mercenaria

UdeM00000024861 6596 784.6 UdeM00000024861 XP\_045204827.1 39.7 1166  
624 16 11 1115 318 1465 1.60E-223 784.6 6596 cellular

organisms;Eukaryota;Opisthokonta;Metazoa;Eumetazoa;Bilateria;Protostomia;Spiralia;Lophotrochozoa;Mollusca;Bivalvia;Autobranhia;Heteroconchia;Euherodonta;Imparidentia;Venerida;Veneroidea;Veneridae;Mercenaria;Mercenaria mercenaria

UdeM00000024862 6596 997.3 UdeM00000024862 XP\_045204827.1 40.6 1459  
798 25 21 1431 28 1465 2.10E-287 997.3 6596 cellular

organisms;Eukaryota;Opisthokonta;Metazoa;Eumetazoa;Bilateria;Protostomia;Spiralia;Lophotrochozoa;Mollusca;Bivalvia;Autobranhia;Heteroconchia;Euherodonta;Imparidentia;Venerida;Veneroidea;Veneridae;Mercenaria;Mercenaria mercenaria

UdeM00000024863 6596 722.6 UdeM00000024863 XP\_045204827.1 38.8 1172  
617 23 21 1113 28 1178 7.60E-205 722.6 6596 cellular

organisms;Eukaryota;Opisthokonta;Metazoa;Eumetazoa;Bilateria;Protostomia;Spiralia;Lophotrochozoa;Mollusca;Bivalvia;Autobranhia;Heteroconchia;Euherodonta;Imparidentia;Venerida;Veneroidea;Veneridae;Mercenaria;Mercenaria mercenaria

UdeM00000024864 6596 218.4 UdeM00000024864 XP\_045204827.1 41.4 280  
154 2 11 280 1186 1465 1.20E-53 218.4 6596 cellular

organisms;Eukaryota;Opisthokonta;Metazoa;Eumetazoa;Bilateria;Protostomia;Spiralia;Lophotrochozoa;Mollusca;Bivalvia;Autobranhia;Heteroconchia;Euherodonta;Imparidentia;Venerida;Veneroidea;Veneridae;Mercenaria;Mercenaria mercenaria

UdeM00000024865 6596 997.3 UdeM00000024865 XP\_045204827.1 40.6 1459  
798 25 21 1431 28 1465 2.10E-287 997.3 6596 cellular

organisms;Eukaryota;Opisthokonta;Metazoa;Eumetazoa;Bilateria;Protostomia;Spiralia;Lophotrochozoa;Mollusca;Bivalvia;Autobranhia;Heteroconchia;Euherodonta;Imparidentia;Venerida;Veneroidea;Veneridae;Mercenaria;Mercenaria mercenaria

UdeM00000024866 6596 166.4 UdeM00000024866 XP\_045204827.1 35.5 327  
171 9 21 309 28 352 5.80E-38 166.4 6596 cellular

organisms;Eukaryota;Opisthokonta;Metazoa;Eumetazoa;Bilateria;Protostomia;Spiralia;Lophotrochozoa;Mollusca;Bivalvia;Autobranchia;Heteroconchia;Euherodonta;Imparidentia;Venerida;Veneroidea;Veneridae;Mercenaria;Mercenaria mercenaria

UdeM00000024867 6596 768.1 UdeM00000024867 XP\_045204827.1 40.4 1115  
591 16 5 1057 363 1465 1.50E-218 768.1 6596 cellular

organisms;Eukaryota;Opisthokonta;Metazoa;Eumetazoa;Bilateria;Protostomia;Spiralia;Lophotrochozoa;Mollusca;Bivalvia;Autobranchia;Heteroconchia;Euherodonta;Imparidentia;Venerida;Veneroidea;Veneridae;Mercenaria;Mercenaria mercenaria

UdeM00000024868 6596 141 UdeM00000024868 XP\_045204827.1 43.3 171  
96 1 66 235 182 352 2.50E-30 141 6596 cellular

organisms;Eukaryota;Opisthokonta;Metazoa;Eumetazoa;Bilateria;Protostomia;Spiralia;Lophotrochozoa;Mollusca;Bivalvia;Autobranchia;Heteroconchia;Euherodonta;Imparidentia;Venerida;Veneroidea;Veneridae;Mercenaria;Mercenaria mercenaria

UdeM00000024870 6596 1017.3 UdeM00000024870 XP\_045204827.1 39.8  
1496 838 22 22 1476 6 1480 2.00E-293 1017.3 6596  
cellular

organisms;Eukaryota;Opisthokonta;Metazoa;Eumetazoa;Bilateria;Protostomia;Spiralia;Lophotrochozoa;Mollusca;Bivalvia;Autobranchia;Heteroconchia;Euherodonta;Imparidentia;Venerida;Veneroidea;Veneridae;Mercenaria;Mercenaria mercenaria

UdeM00000024871 6596 200.3 UdeM00000024871 XP\_045204827.1 33 376  
226 7 13 370 28 395 4.30E-48 200.3 6596 cellular

organisms;Eukaryota;Opisthokonta;Metazoa;Eumetazoa;Bilateria;Protostomia;Spiralia;Lophotrochozoa;Mollusca;Bivalvia;Autobranchia;Heteroconchia;Euherodonta;Imparidentia;Venerida;Veneroidea;Veneridae;Mercenaria;Mercenaria mercenaria

UdeM00000024872 6596 140.6 UdeM00000024872 XP\_045204827.1 33.1 257  
122 2 3 209 139 395 2.30E-30 140.6 6596 cellular

organisms;Eukaryota;Opisthokonta;Metazoa;Eumetazoa;Bilateria;Protostomia;Spiralia;Lophotrochozoa;Mollusca;Bivalvia;Autobranchia;Heteroconchia;Euherodonta;Imparidentia;Venerida;Veneroidea;Veneridae;Mercenaria;Mercenaria mercenaria

UdeM00000024873 6596 77.4 UdeM00000024873 XP\_045204827.1 42.4 99  
56 1 4 101 420 518 2.60E-11 77.4 6596 cellular

organisms;Eukaryota;Opisthokonta;Metazoa;Eumetazoa;Bilateria;Protostomia;Spiralia;Lophotrochozoa;Mollusca;Bivalvia;Autobranchia;Heteroconchia;Euherodonta;Imparidentia;Venerida;Veneroidea;Veneridae;Mercenaria;Mercenaria mercenaria

UdeM00000024874 29159 206.8 UdeM00000024874 XP\_011449844.1 23.4 662  
467 11 14 640 16 672 8.20E-50 206.8 29159 cellular

organisms;Eukaryota;Opisthokonta;Metazoa;Eumetazoa;Bilateria;Protostomia;Spiralia;Lophotrochozoa;Mollusca;Bivalvia;Autobranchia;Pteriomorpha;Ostreida;Ostreoidea;Ostreidae;Crassostrea;Crassostrea gigas

UdeM00000024875 6596 574.7 UdeM00000024875 XP\_045175533.1 28.6 1657  
869 37 59 1438 319 1938 3.30E-160 574.7 6596 cellular

organisms;Eukaryota;Opisthokonta;Metazoa;Eumetazoa;Bilateria;Protostomia;Spiralia;Lophotrochozoa;Mollusca;Bivalvia;Autobranchia;Heteroconchia;Euherodonta;Imparidentia;Venerida;Veneroidea;Veneridae;Mercenaria;Mercenaria mercenaria

UdeM00000024877 6596 297.7 UdeM00000024877 XP\_045211888.1 60.9 248  
94 3 15 261 16 261 1.40E-77 297.7 6596 cellular

organisms;Eukaryota;Opisthokonta;Metazoa;Eumetazoa;Bilateria;Protostomia;Spiralia;Lophotrochozoa;Mollusca;Bivalvia;Autobranhia;Heteroconchia;Euherodonta;Imparidentia;Venerida;Veneroidea;Veneridae;Mercenaria;Mercenaria mercenaria

UdeM00000024878 6596 918.3 UdeM00000024878 XP\_045175424.1 59.7 844  
314 11 73 904 45 874 7.60E-264 918.3 6596 cellular

organisms;Eukaryota;Opisthokonta;Metazoa;Eumetazoa;Bilateria;Protostomia;Spiralia;Lophotrochozoa;Mollusca;Bivalvia;Autobranhia;Heteroconchia;Euherodonta;Imparidentia;Venerida;Veneroidea;Veneridae;Mercenaria;Mercenaria mercenaria

UdeM00000024879 6579 322.4 UdeM00000024879 XP\_033751847.1 58.1 253  
101 1 1 253 35 282 5.30E-85 322.4 6579 cellular

organisms;Eukaryota;Opisthokonta;Metazoa;Eumetazoa;Bilateria;Protostomia;Spiralia;Lophotrochozoa;Mollusca;Bivalvia;Autobranhia;Pteriormorphia;Pectinida;Pectinoidea;Pectinidae;Pecten;Pecten maximus

UdeM00000024882 6596 66.2 UdeM00000024882 XP\_045174283.1 38.6 132  
67 6 11 132 6 133 2.00E-07 66.2 6596 cellular

organisms;Eukaryota;Opisthokonta;Metazoa;Eumetazoa;Bilateria;Protostomia;Spiralia;Lophotrochozoa;Mollusca;Bivalvia;Autobranhia;Heteroconchia;Euherodonta;Imparidentia;Venerida;Veneroidea;Veneridae;Mercenaria;Mercenaria mercenaria

UdeM00000024883 6596 159.8 UdeM00000024883 XP\_045175245.1 71.3 101  
29 0 2 102 1130 1230 2.00E-36 159.8 6596 cellular

organisms;Eukaryota;Opisthokonta;Metazoa;Eumetazoa;Bilateria;Protostomia;Spiralia;Lophotrochozoa;Mollusca;Bivalvia;Autobranhia;Heteroconchia;Euherodonta;Imparidentia;Venerida;Veneroidea;Veneridae;Mercenaria;Mercenaria mercenaria

UdeM00000024885 6596 565.8 UdeM00000024885 XP\_045175245.1 52.7 630  
274 14 52 673 512 1125 8.40E-158 565.8 6596 cellular

organisms;Eukaryota;Opisthokonta;Metazoa;Eumetazoa;Bilateria;Protostomia;Spiralia;Lophotrochozoa;Mollusca;Bivalvia;Autobranhia;Heteroconchia;Euherodonta;Imparidentia;Venerida;Veneroidea;Veneridae;Mercenaria;Mercenaria mercenaria

UdeM00000024884 6596 565.8 UdeM00000024884 XP\_045175245.1 52.7 630  
274 14 474 1095 512 1125 1.30E-157 565.8 6596 cellular

organisms;Eukaryota;Opisthokonta;Metazoa;Eumetazoa;Bilateria;Protostomia;Spiralia;Lophotrochozoa;Mollusca;Bivalvia;Autobranhia;Heteroconchia;Euherodonta;Imparidentia;Venerida;Veneroidea;Veneridae;Mercenaria;Mercenaria mercenaria

UdeM00000024886 6596 565.8 UdeM00000024886 XP\_045175245.1 52.7 630  
274 14 523 1144 512 1125 1.30E-157 565.8 6596 cellular

organisms;Eukaryota;Opisthokonta;Metazoa;Eumetazoa;Bilateria;Protostomia;Spiralia;Lophotrochozoa;Mollusca;Bivalvia;Autobranhia;Heteroconchia;Euherodonta;Imparidentia;Venerida;Veneroidea;Veneridae;Mercenaria;Mercenaria mercenaria

UdeM00000024887 6573 1139 UdeM00000024887 XP\_021355023.1 34.6 3075  
1286 62 17 2553 3 2889 0.00E+00 1139 6573 cellular

organisms;Eukaryota;Opisthokonta;Metazoa;Eumetazoa;Bilateria;Protostomia;Spiralia;Lophotrochozoa;Mollusca;Bivalvia;Autobranhia;Pteriormorphia;Pectinida;Pectinoidea;Pectinidae;Mizuhopecten;Mizuhopecten yessoensis

UdeM00000024888 6573 369.4 UdeM00000024888 XP\_021350360.1 34.2 669  
414 8 8 661 7 664 9.60E-99 369.4 6573 cellular

organisms;Eukaryota;Opisthokonta;Metazoa;Eumetazoa;Bilateria;Protostomia;



Spiralia; Lophotrochozoa; Mollusca; Bivalvia; Autobranchia; Pteriomorpha; Pectinida; Pectinoidea; Pectinidae; Mizuhopecten; Mizuhopecten yessoensis

UdeM00000024889 29159 99.8 UdeM00000024889 XP\_034339171.1 44.7 114  
63 0 1 114 61 174 2.60E-18 99.8 29159 cellular  
organisms; Eukaryota; Opisthokonta; Metazoa; Eumetazoa; Bilateria; Protostomia; Spiralia; Lophotrochozoa; Mollusca; Bivalvia; Autobranchia; Pteriomorpha; Ostracida; Ostreidae; Crassostrea; Crassostrea gigas

UdeM00000024890 50390 458 UdeM00000024890 XP\_028142380.1 53 345  
161 1 1 345 3 346 1.10E-125 458 50390 cellular  
organisms; Eukaryota; Opisthokonta; Metazoa; Eumetazoa; Bilateria; Protostomia; Ecdysozoa; Panarthropoda; Arthropoda; Mandibulata; Pancrustacea; Hexapoda; Insecta; Dicondylia; Pterygota; Neoptera; Endopterygota; Coleoptera; Polyphaga; Cucujiformia; Chrysomeloidea; Chrysomelidae; Galerucinae; Luperini; Diabroticina; Diabroticites; Diabrotica; Diabrotica virgifera; Diabrotica virgifera virgifera

UdeM00000024891 1735272 65.1 UdeM00000024891 XP\_041378228.1 41.2  
68 40 0 4 71 81 148 4.30E-08 65.1 1735272  
cellular  
organisms; Eukaryota; Opisthokonta; Metazoa; Eumetazoa; Bilateria; Protostomia; Spiralia; Lophotrochozoa; Mollusca; Gastropoda; Neomphalina; Neomphaloidea; Peltopspiridae; Gigantopelta; Gigantopelta aegis

UdeM00000024893 161584 649.4 UdeM00000024893 XP\_037123484.1 58.8  
485 199 1 1 485 200 683 3.50E-183 649.4 161584  
cellular  
organisms; Eukaryota; Opisthokonta; Metazoa; Eumetazoa; Bilateria; Deuterostomia; Chordata; Craniata; Vertebrata; Gnathostomata; Teleostomi; Euteleostomi; Actinopterygii; Actinopteri; Neopterygii; Teleostei; Osteoglossocephalai; Clupeocephala; Euteleostei; Neoteleostei; Eurypterygia; Ctenosquamata; Acanthomorpha; Euacanthomorpha; Percomorphaceae; Syngnatharia; Syngnathiformes; Syngnathoidei; Syngnathidae; Syngnathinae; Syngnathus; Syngnathus acus

UdeM00000024894 6596 71.6 UdeM00000024894 XP\_045201969.1 70 50  
15 0 119 168 40 89 1.70E-09 71.6 6596 cellular  
organisms; Eukaryota; Opisthokonta; Metazoa; Eumetazoa; Bilateria; Protostomia; Spiralia; Lophotrochozoa; Mollusca; Bivalvia; Autobranchia; Heteroconchia; Euheterodonta; Imparidentia; Venerida; Veneroidea; Veneridae; Mercenaria; Mercenaria mercenaria

UdeM00000024895 6565 144.4 UdeM00000024895 XP\_022297447.1 36 250  
81 3 1 171 117 366 1.30E-31 144.4 6565 cellular  
organisms; Eukaryota; Opisthokonta; Metazoa; Eumetazoa; Bilateria; Protostomia; Spiralia; Lophotrochozoa; Mollusca; Bivalvia; Autobranchia; Pteriomorpha; Ostracida; Ostreidae; Crassostrea; Crassostrea virginica

UdeM00000024896 45264 171.4 UdeM00000024896 XP\_044164508.1 30.8 347  
155 4 4 265 55 401 1.50E-39 171.4 45264 cellular  
organisms; Eukaryota; Opisthokonta; Metazoa; Eumetazoa; Cnidaria; Anthozoa; Hexacorallia; Scleractinia; Astrocoeniina; Acroporidae; Acropora; Acropora millepora

UdeM00000024897 6565 67 UdeM00000024897 XP\_022287303.1 29.7 101  
65 3 100 194 648 748 3.00E-08 67 6565 cellular  
organisms; Eukaryota; Opisthokonta; Metazoa; Eumetazoa; Bilateria; Protostomia; Spiralia; Lophotrochozoa; Mollusca; Bivalvia; Autobranchia; Pteriomorpha; Ostracida; Ostreidae; Crassostrea; Crassostrea virginica

UdeM00000024898 29159 117.1 UdeM00000024898 XP\_019926413.2 68.7 83  
26 0 1 83 1 83 1.20E-23 117.1 29159 cellular  
organisms; Eukaryota; Opisthokonta; Metazoa; Eumetazoa; Bilateria; Protostomia;

Spiralia; Lophotrochozoa; Mollusca; Bivalvia; Autobranchia; Pteriomorpha; Ostr  
eida; Ostreidae; Crassostrea; Crassostrea gigas  
UdeM00000024899 29159 354 UdeM00000024899 XP\_019926413.2 45.9 455  
102 6 1 318 153 600 2.40E-94 354 29159 cellular  
organisms; Eukaryota; Opisthokonta; Metazoa; Eumetazoa; Bilateria; Protostomia;  
Spiralia; Lophotrochozoa; Mollusca; Bivalvia; Autobranchia; Pteriomorpha; Ostr  
eida; Ostreidae; Crassostrea; Crassostrea gigas  
UdeM00000024900 1735272 89.7 UdeM00000024900 XP\_041353177.1 41.3  
92 54 0 8 99 134 225 3.30E-15 89.7 1735272  
cellular  
organisms; Eukaryota; Opisthokonta; Metazoa; Eumetazoa; Bilateria; Protostomia;  
Spiralia; Lophotrochozoa; Mollusca; Gastropoda; Neomphalina; Neomphaloidea; Pel  
tospiridae; Gigantopelta; Gigantopelta aegis  
UdeM00000024901 150288 250.4 UdeM00000024901 XP\_020788097.1 58.1  
186 72 2 80 260 385 569 2.60E-63 250.4 150288  
cellular  
organisms; Eukaryota; Opisthokonta; Metazoa; Eumetazoa; Bilateria; Deuterostomi  
a; Chordata; Craniata; Vertebrata; Gnathostomata; Teleostomi; Euteleostomi; Acti  
nopterygii; Actinopteri; Neopterygii; Teleostei; Osteoglossocephalai; Clupeoce  
phala; Euteleostei; Neoteleostei; Eurypterygia; Ctenosquamata; Acanthomo  
rphata; Euacanthomorpha; Percomorphaceae; Gobiaria; Gobiiformes; Gobioidi  
Gobiidae; Oxudercinae; Boleophthalmus; Boleophthalmus pectinirostris  
UdeM00000024902 151771 74.3 UdeM00000024902 XP\_028408197.1 44.4  
72 39 1 3 73 5 76 7.40E-11 74.3 151771  
cellular  
organisms; Eukaryota; Opisthokonta; Metazoa; Eumetazoa; Cnidaria; Anthozoa; Octo  
corallia; Alcyonacea; Alcyoniina; Nephtheidae; Dendronephthya; Dendronephthya  
gigantea  
UdeM00000024903 6565 263.8 UdeM00000024903 XP\_022341836.1 61.4 215  
78 3 4 217 3 213 1.90E-67 263.8 6565 cellular  
organisms; Eukaryota; Opisthokonta; Metazoa; Eumetazoa; Bilateria; Protostomia;  
Spiralia; Lophotrochozoa; Mollusca; Bivalvia; Autobranchia; Pteriomorpha; Ostr  
eida; Ostreidae; Crassostrea; Crassostrea virginica  
UdeM00000024904 6565 87 UdeM00000024904 XP\_022327962.1 46.2 91  
49 0 9 99 197 287 1.50E-14 87 6565 cellular  
organisms; Eukaryota; Opisthokonta; Metazoa; Eumetazoa; Bilateria; Protostomia;  
Spiralia; Lophotrochozoa; Mollusca; Bivalvia; Autobranchia; Pteriomorpha; Ostr  
eida; Ostreidae; Crassostrea; Crassostrea virginica  
UdeM00000024905 6596 126.7 UdeM00000024905 XP\_045164125.1 49.6 123  
62 0 1 123 320 442 2.00E-26 126.7 6596 cellular  
organisms; Eukaryota; Opisthokonta; Metazoa; Eumetazoa; Bilateria; Protostomia;  
Spiralia; Lophotrochozoa; Mollusca; Bivalvia; Autobranchia; Heteroconchia; Eue  
terodonta; Imparidentia; Venerida; Veneroidea; Veneridae; Mercenaria; Mercenari  
a mercenaria  
UdeM00000024906 6565 111.7 UdeM00000024906 XP\_022327962.1 58.1 93  
37 1 3 93 626 718 5.10E-22 111.7 6565 cellular  
organisms; Eukaryota; Opisthokonta; Metazoa; Eumetazoa; Bilateria; Protostomia;  
Spiralia; Lophotrochozoa; Mollusca; Bivalvia; Autobranchia; Pteriomorpha; Ostr  
eida; Ostreidae; Crassostrea; Crassostrea virginica  
UdeM00000024907 6579 218 UdeM00000024907 XP\_033752612.1 63.9 169  
61 0 1 169 1 169 9.40E-54 218 6579 cellular  
organisms; Eukaryota; Opisthokonta; Metazoa; Eumetazoa; Bilateria; Protostomia;  
Spiralia; Lophotrochozoa; Mollusca; Bivalvia; Autobranchia; Pteriomorpha; Pect  
inida; Pectinoidea; Pectinidae; Pecten; Pecten maximus

UdeM00000024908 6579 127.5 UdeM00000024908 XP\_033751706.1 60.4 106  
 36 2 3 108 4 103 1.50E-26 127.5 6579 cellular  
 organisms;Eukaryota;Opisthokonta;Metazoa;Eumetazoa;Bilateria;Protostomia;  
 Spiralia;Lophotrochozoa;Mollusca;Bivalvia;Autobranchia;Pteriomorpha;Pect  
 inida;Pectinoidea;Pectinidae;Pecten;Pecten maximus  
 UdeM00000024909 6596 376.7 UdeM00000024909 XP\_045175176.1 34.1 980  
 438 26 11 947 143 957 8.80E-101 376.7 6596 cellular  
 organisms;Eukaryota;Opisthokonta;Metazoa;Eumetazoa;Bilateria;Protostomia;  
 Spiralia;Lophotrochozoa;Mollusca;Bivalvia;Autobranchia;Heteroconchia;Euhe  
 terodonta;Imparidentia;Venerida;Veneroidea;Veneridae;Mercenaria;Mercenari  
 a mercenaria  
 UdeM00000024910 6596 429.5 UdeM00000024910 XP\_045187150.1 45.9 488  
 222 3 1 451 135 617 5.40E-117 429.5 6596 cellular  
 organisms;Eukaryota;Opisthokonta;Metazoa;Eumetazoa;Bilateria;Protostomia;  
 Spiralia;Lophotrochozoa;Mollusca;Bivalvia;Autobranchia;Heteroconchia;Euhe  
 terodonta;Imparidentia;Venerida;Veneroidea;Veneridae;Mercenaria;Mercenari  
 a mercenaria  
 UdeM00000024911 6596 89.7 UdeM00000024911 XP\_045210831.1 39.2 148  
 73 3 1 132 1 147 2.90E-15 89.7 6596 cellular  
 organisms;Eukaryota;Opisthokonta;Metazoa;Eumetazoa;Bilateria;Protostomia;  
 Spiralia;Lophotrochozoa;Mollusca;Bivalvia;Autobranchia;Heteroconchia;Euhe  
 terodonta;Imparidentia;Venerida;Veneroidea;Veneridae;Mercenaria;Mercenari  
 a mercenaria  
 UdeM00000024912 1735272 228.4 UdeM00000024912 XP\_041367457.1 39.1  
 404 183 8 2 404 41 382 2.10E-56 228.4 1735272  
 cellular  
 organisms;Eukaryota;Opisthokonta;Metazoa;Eumetazoa;Bilateria;Protostomia;  
 Spiralia;Lophotrochozoa;Mollusca;Gastropoda;Neomphalina;Neomphaloidea;Pel  
 tospiridae;Gigantopelta;Gigantopelta aegis  
 UdeM00000024913 6579 99.8 UdeM00000024913 XP\_033752117.1 28.9 301  
 158 10 15 307 11 263 7.30E-18 99.8 6579 cellular  
 organisms;Eukaryota;Opisthokonta;Metazoa;Eumetazoa;Bilateria;Protostomia;  
 Spiralia;Lophotrochozoa;Mollusca;Bivalvia;Autobranchia;Pteriomorpha;Pect  
 inida;Pectinoidea;Pectinidae;Pecten;Pecten maximus  
 UdeM00000024914 6596 126.7 UdeM00000024914 XP\_045176316.1 45.1 144  
 74 1 16 159 6 144 4.40E-26 126.7 6596 cellular  
 organisms;Eukaryota;Opisthokonta;Metazoa;Eumetazoa;Bilateria;Protostomia;  
 Spiralia;Lophotrochozoa;Mollusca;Bivalvia;Autobranchia;Heteroconchia;Euhe  
 terodonta;Imparidentia;Venerida;Veneroidea;Veneridae;Mercenaria;Mercenari  
 a mercenaria  
 UdeM00000024915 6573 218 UdeM00000024915 XP\_021368037.1 32.4 432  
 229 8 25 453 31 402 3.00E-53 218 6573 cellular  
 organisms;Eukaryota;Opisthokonta;Metazoa;Eumetazoa;Bilateria;Protostomia;  
 Spiralia;Lophotrochozoa;Mollusca;Bivalvia;Autobranchia;Pteriomorpha;Pect  
 inida;Pectinoidea;Pectinidae;Mizuhopecten;Mizuhopecten yessoensis  
 UdeM00000024916 6573 218 UdeM00000024916 XP\_021368037.1 32.4 432  
 229 8 78 506 31 402 3.30E-53 218 6573 cellular  
 organisms;Eukaryota;Opisthokonta;Metazoa;Eumetazoa;Bilateria;Protostomia;  
 Spiralia;Lophotrochozoa;Mollusca;Bivalvia;Autobranchia;Pteriomorpha;Pect  
 inida;Pectinoidea;Pectinidae;Mizuhopecten;Mizuhopecten yessoensis  
 UdeM00000024917 6596 301.2 UdeM00000024917 XP\_045192616.1 51.9 283  
 131 3 1 282 1 279 1.40E-78 301.2 6596 cellular  
 organisms;Eukaryota;Opisthokonta;Metazoa;Eumetazoa;Bilateria;Protostomia;  
 Spiralia;Lophotrochozoa;Mollusca;Bivalvia;Autobranchia;Heteroconchia;Euhe

terodonta;Imparidentia;Venerida;Veneroidea;Veneridae;Mercenaria;Mercenari  
 a mercenaria  
 UdeM00000024918 6596 313.9 UdeM00000024918 XP\_045192616.1 52.8 286  
 130 3 1 285 1 282 2.10E-82 313.9 6596 cellular  
 organisms;Eukaryota;Opisthokonta;Metazoa;Eumetazoa;Bilateria;Protostomia;  
 Spiralia;Lophotrochozoa;Mollusca;Bivalvia;Autobranhia;Heteroconchia;Euhe  
 terodonta;Imparidentia;Venerida;Veneroidea;Veneridae;Mercenaria;Mercenari  
 a mercenaria  
 UdeM00000024919 6596 263.5 UdeM00000024919 XP\_045192616.1 44.3 282  
 155 1 1 280 1 282 3.20E-67 263.5 6596 cellular  
 organisms;Eukaryota;Opisthokonta;Metazoa;Eumetazoa;Bilateria;Protostomia;  
 Spiralia;Lophotrochozoa;Mollusca;Bivalvia;Autobranhia;Heteroconchia;Euhe  
 terodonta;Imparidentia;Venerida;Veneroidea;Veneridae;Mercenaria;Mercenari  
 a mercenaria  
 UdeM00000024920 6596 201.4 UdeM00000024920 XP\_045192616.1 52.7 169  
 78 1 1 169 116 282 9.20E-49 201.4 6596 cellular  
 organisms;Eukaryota;Opisthokonta;Metazoa;Eumetazoa;Bilateria;Protostomia;  
 Spiralia;Lophotrochozoa;Mollusca;Bivalvia;Autobranhia;Heteroconchia;Euhe  
 terodonta;Imparidentia;Venerida;Veneroidea;Veneridae;Mercenaria;Mercenari  
 a mercenaria  
 UdeM00000024921 6596 1682.2 UdeM00000024921 XP\_045174453.1 58.1  
 1396 470 6 1 1396 1 1281 0.00E+00 1682.2 6596  
 cellular  
 organisms;Eukaryota;Opisthokonta;Metazoa;Eumetazoa;Bilateria;Protostomia;  
 Spiralia;Lophotrochozoa;Mollusca;Bivalvia;Autobranhia;Heteroconchia;Euhe  
 terodonta;Imparidentia;Venerida;Veneroidea;Veneridae;Mercenaria;Mercenari  
 a mercenaria  
 UdeM00000024922 6596 625.2 UdeM00000024922 XP\_045175180.1 61.7 561  
 164 8 1 535 1 536 8.70E-176 625.2 6596 cellular  
 organisms;Eukaryota;Opisthokonta;Metazoa;Eumetazoa;Bilateria;Protostomia;  
 Spiralia;Lophotrochozoa;Mollusca;Bivalvia;Autobranhia;Heteroconchia;Euhe  
 terodonta;Imparidentia;Venerida;Veneroidea;Veneridae;Mercenaria;Mercenari  
 a mercenaria  
 UdeM00000024923 6573 97.4 UdeM00000024923 XP\_021346237.1 39.3 150  
 67 3 1 126 328 477 1.40E-17 97.4 6573 cellular  
 organisms;Eukaryota;Opisthokonta;Metazoa;Eumetazoa;Bilateria;Protostomia;  
 Spiralia;Lophotrochozoa;Mollusca;Bivalvia;Autobranhia;Pteriomorphia;Pect  
 inida;Pectinoidea;Pectinidae;Mizuhopecten;Mizuhopecten yessoensis  
 UdeM00000024924 6596 523.1 UdeM00000024924 XP\_045175180.1 37.8 1050  
 497 31 31 1056 537 1454 8.80E-145 523.1 6596 cellular  
 organisms;Eukaryota;Opisthokonta;Metazoa;Eumetazoa;Bilateria;Protostomia;  
 Spiralia;Lophotrochozoa;Mollusca;Bivalvia;Autobranhia;Heteroconchia;Euhe  
 terodonta;Imparidentia;Venerida;Veneroidea;Veneridae;Mercenaria;Mercenari  
 a mercenaria  
 UdeM00000024925 6596 93.6 UdeM00000024925 XP\_045176117.1 52.5 99  
 41 4 6 98 14 112 1.70E-16 93.6 6596 cellular  
 organisms;Eukaryota;Opisthokonta;Metazoa;Eumetazoa;Bilateria;Protostomia;  
 Spiralia;Lophotrochozoa;Mollusca;Bivalvia;Autobranhia;Heteroconchia;Euhe  
 terodonta;Imparidentia;Venerida;Veneroidea;Veneridae;Mercenaria;Mercenari  
 a mercenaria  
 UdeM00000024926 1735272 77.8 UdeM00000024926 XP\_041366130.1 62.1  
 66 24 1 38 103 96 160 1.20E-11 77.8 1735272  
 cellular  
 organisms;Eukaryota;Opisthokonta;Metazoa;Eumetazoa;Bilateria;Protostomia;

Spiralia;Lophotrochozoa;Mollusca;Gastropoda;Neomphalina;Neomphaloidea;Pel  
tospiridae;Gigantopelta;Gigantopelta aegis  
UdeM00000024927 6596 115.2 UdeM00000024927 XP\_045176127.1 80.3 76  
15 0 2 77 5 80 4.30E-23 115.2 6596 cellular  
organisms;Eukaryota;Opisthokonta;Metazoa;Eumetazoa;Bilateria;Protostomia;  
Spiralia;Lophotrochozoa;Mollusca;Bivalvia;Autobranchia;Heteroconchia;Euhe  
terodonta;Imparidentia;Venerida;Veneroidea;Veneridae;Mercenaria;Mercenari  
a mercenaria  
UdeM00000024928 6596 199.9 UdeM00000024928 XP\_045176120.1 59 217  
79 5 18 230 255 465 3.60E-48 199.9 6596 cellular  
organisms;Eukaryota;Opisthokonta;Metazoa;Eumetazoa;Bilateria;Protostomia;  
Spiralia;Lophotrochozoa;Mollusca;Bivalvia;Autobranchia;Heteroconchia;Euhe  
terodonta;Imparidentia;Venerida;Veneroidea;Veneridae;Mercenaria;Mercenari  
a mercenaria  
UdeM00000024929 1735272 253.1 UdeM00000024929 XP\_041375983.1 43  
323 155 4 3 319 2385 2684 5.50E-64 253.1 1735272  
cellular  
organisms;Eukaryota;Opisthokonta;Metazoa;Eumetazoa;Bilateria;Protostomia;  
Spiralia;Lophotrochozoa;Mollusca;Gastropoda;Neomphalina;Neomphaloidea;Pel  
tospiridae;Gigantopelta;Gigantopelta aegis  
UdeM00000024930 1735272 231.5 UdeM00000024930 XP\_041375983.1 46.4  
261 128 2 3 258 2385 2638 2.40E-57 231.5 1735272  
cellular  
organisms;Eukaryota;Opisthokonta;Metazoa;Eumetazoa;Bilateria;Protostomia;  
Spiralia;Lophotrochozoa;Mollusca;Gastropoda;Neomphalina;Neomphaloidea;Pel  
tospiridae;Gigantopelta;Gigantopelta aegis  
UdeM00000024931 1735272 265.8 UdeM00000024931 XP\_041375983.1 45  
309 157 3 1 303 2383 2684 7.90E-68 265.8 1735272  
cellular  
organisms;Eukaryota;Opisthokonta;Metazoa;Eumetazoa;Bilateria;Protostomia;  
Spiralia;Lophotrochozoa;Mollusca;Gastropoda;Neomphalina;Neomphaloidea;Pel  
tospiridae;Gigantopelta;Gigantopelta aegis  
UdeM00000024932 6596 267.3 UdeM00000024932 XP\_045192074.1 49.3 292  
139 4 1 286 2132 2420 2.20E-68 267.3 6596 cellular  
organisms;Eukaryota;Opisthokonta;Metazoa;Eumetazoa;Bilateria;Protostomia;  
Spiralia;Lophotrochozoa;Mollusca;Bivalvia;Autobranchia;Heteroconchia;Euhe  
terodonta;Imparidentia;Venerida;Veneroidea;Veneridae;Mercenaria;Mercenari  
a mercenaria  
UdeM00000024933 29159 2742.2 UdeM00000024933 XP\_034301655.1 41.5  
3450 1911 48 45 3431 29 3435 0.00E+00 2742.2  
29159 cellular  
organisms;Eukaryota;Opisthokonta;Metazoa;Eumetazoa;Bilateria;Protostomia;  
Spiralia;Lophotrochozoa;Mollusca;Bivalvia;Autobranchia;Pteriomorphia;Ostr  
eida;Ostreoidea;Ostreidae;Crassostrea;Crassostrea gigas  
UdeM00000024934 6573 1394 UdeM00000024934 XP\_021353372.1 45.5 1628  
817 17 18 1587 19 1633 0.00E+00 1394 6573 cellular  
organisms;Eukaryota;Opisthokonta;Metazoa;Eumetazoa;Bilateria;Protostomia;  
Spiralia;Lophotrochozoa;Mollusca;Bivalvia;Autobranchia;Pteriomorphia;Pect  
inida;Pectinoidea;Pectinidae;Mizuhopecten;Mizuhopecten yessoensis  
UdeM00000024935 6596 7313.4 UdeM00000024935 XP\_045156859.1 36.9  
10191 5933 136 6 9919 1581 11549 0.00E+00 7313.4 6596  
cellular  
organisms;Eukaryota;Opisthokonta;Metazoa;Eumetazoa;Bilateria;Protostomia;  
Spiralia;Lophotrochozoa;Mollusca;Bivalvia;Autobranchia;Heteroconchia;Euhe

terodonta;Imparidentia;Venerida;Veneroidea;Veneridae;Mercenaria;Mercenari  
a mercenaria

UdeM00000024936 6596 7318 UdeM00000024936 XP\_045156859.1 36.9  
10189 5932 136 6 9917 1581 11549 0.00E+00 7318 6596  
cellular

organisms;Eukaryota;Opisthokonta;Metazoa;Eumetazoa;Bilateria;Protostomia;  
Spiralia;Lophotrochozoa;Mollusca;Bivalvia;Autobranchia;Heteroconchia;Euhe  
terodonta;Imparidentia;Venerida;Veneroidea;Veneridae;Mercenaria;Mercenari  
a mercenaria

UdeM00000024937 6596 7212.8 UdeM00000024937 XP\_045156859.1 36.7  
10136 5896 136 1 9832 1632 11549 0.00E+00 7212.8 6596  
cellular

organisms;Eukaryota;Opisthokonta;Metazoa;Eumetazoa;Bilateria;Protostomia;  
Spiralia;Lophotrochozoa;Mollusca;Bivalvia;Autobranchia;Heteroconchia;Euhe  
terodonta;Imparidentia;Venerida;Veneroidea;Veneridae;Mercenaria;Mercenari  
a mercenaria

UdeM00000024938 6596 7266.8 UdeM00000024938 XP\_045156859.1 36.8  
10136 5907 135 1 9859 1632 11549 0.00E+00 7266.8 6596  
cellular

organisms;Eukaryota;Opisthokonta;Metazoa;Eumetazoa;Bilateria;Protostomia;  
Spiralia;Lophotrochozoa;Mollusca;Bivalvia;Autobranchia;Heteroconchia;Euhe  
terodonta;Imparidentia;Venerida;Veneroidea;Veneridae;Mercenaria;Mercenari  
a mercenaria

UdeM00000024939 6579 98.6 UdeM00000024939 XP\_033732676.1 28.4 271  
166 6 50 313 154 403 1.50E-17 98.6 6579 cellular

organisms;Eukaryota;Opisthokonta;Metazoa;Eumetazoa;Bilateria;Protostomia;  
Spiralia;Lophotrochozoa;Mollusca;Bivalvia;Autobranchia;Pteriormorphia;Pect  
inida;Pectinoidea;Pectinidae;Pecten;Pecten maximus

UdeM00000024940 45264 189.9 UdeM00000024940 XP\_044165535.1 42.7 234  
125 4 19 247 351 580 4.00E-45 189.9 45264 cellular

organisms;Eukaryota;Opisthokonta;Metazoa;Eumetazoa;Cnidaria;Anthozoa;Hexa  
corallia;Scleractinia;Astrocoeniina;Acroporidae;Acropora;Acropora  
millepora

UdeM00000024941 29159 89.7 UdeM00000024941 XP\_034329660.1 28.6 259  
161 8 335 589 213 451 1.40E-14 89.7 29159 cellular

organisms;Eukaryota;Opisthokonta;Metazoa;Eumetazoa;Bilateria;Protostomia;  
Spiralia;Lophotrochozoa;Mollusca;Bivalvia;Autobranchia;Pteriormorphia;Ostr  
eida;Ostreoidea;Ostreidae;Crassostrea;Crassostrea gigas

UdeM00000024943 6596 282 UdeM00000024943 XP\_045175091.1 42.9 368  
176 5 202 562 1 341 1.70E-72 282 6596 cellular

organisms;Eukaryota;Opisthokonta;Metazoa;Eumetazoa;Bilateria;Protostomia;  
Spiralia;Lophotrochozoa;Mollusca;Bivalvia;Autobranchia;Heteroconchia;Euhe  
terodonta;Imparidentia;Venerida;Veneroidea;Veneridae;Mercenaria;Mercenari  
a mercenaria

UdeM00000024945 6579 2059.3 UdeM00000024945 XP\_033752319.1 67  
1636 447 22 1 1605 1 1574 0.00E+00 2059.3 6579  
cellular

organisms;Eukaryota;Opisthokonta;Metazoa;Eumetazoa;Bilateria;Protostomia;  
Spiralia;Lophotrochozoa;Mollusca;Bivalvia;Autobranchia;Pteriormorphia;Pect  
inida;Pectinoidea;Pectinidae;Pecten;Pecten maximus

UdeM00000024946 6573 312.4 UdeM00000024946 XP\_021345795.1 62.6 246  
92 0 1 246 50 295 6.20E-82 312.4 6573 cellular

organisms;Eukaryota;Opisthokonta;Metazoa;Eumetazoa;Bilateria;Protostomia;

Spiralia;Lophotrochozoa;Mollusca;Bivalvia;Autobranchia;Pteriormorphia;Pectinida;Pectinoidea;Pectinidae;Mizuhopecten;Mizuhopecten yessoensis

UdeM00000024947 6596 77.4 UdeM00000024947 XP\_045174437.1 51.2 82  
39 1 2 83 284 364 9.60E-12 77.4 6596 cellular  
organisms;Eukaryota;Opisthokonta;Metazoa;Eumetazoa;Bilateria;Protostomia;  
Spiralia;Lophotrochozoa;Mollusca;Bivalvia;Autobranchia;Heteroconchia;Euhe  
terodonta;Imparidentia;Venerida;Veneroidea;Veneridae;Mercenaria;Mercenari  
a mercenaria

UdeM00000024948 6596 115.5 UdeM00000024948 XP\_045174437.1 61.6 112  
39 4 145 253 400 510 1.20E-22 115.5 6596 cellular  
organisms;Eukaryota;Opisthokonta;Metazoa;Eumetazoa;Bilateria;Protostomia;  
Spiralia;Lophotrochozoa;Mollusca;Bivalvia;Autobranchia;Heteroconchia;Euhe  
terodonta;Imparidentia;Venerida;Veneroidea;Veneridae;Mercenaria;Mercenari  
a mercenaria

UdeM00000024949 6596 304.3 UdeM00000024949 XP\_045174437.1 79.9 194  
36 3 49 240 529 721 1.70E-79 304.3 6596 cellular  
organisms;Eukaryota;Opisthokonta;Metazoa;Eumetazoa;Bilateria;Protostomia;  
Spiralia;Lophotrochozoa;Mollusca;Bivalvia;Autobranchia;Heteroconchia;Euhe  
terodonta;Imparidentia;Venerida;Veneroidea;Veneridae;Mercenaria;Mercenari  
a mercenaria

UdeM00000024950 6596 391.7 UdeM00000024950 XP\_045177339.1 51.1 523  
214 17 1 510 2 495 1.40E-105 391.7 6596 cellular  
organisms;Eukaryota;Opisthokonta;Metazoa;Eumetazoa;Bilateria;Protostomia;  
Spiralia;Lophotrochozoa;Mollusca;Bivalvia;Autobranchia;Heteroconchia;Euhe  
terodonta;Imparidentia;Venerida;Veneroidea;Veneridae;Mercenaria;Mercenari  
a mercenaria

UdeM00000024951 6596 392.9 UdeM00000024951 XP\_045175458.1 56.9 332  
141 2 1 332 21 350 4.10E-106 392.9 6596 cellular  
organisms;Eukaryota;Opisthokonta;Metazoa;Eumetazoa;Bilateria;Protostomia;  
Spiralia;Lophotrochozoa;Mollusca;Bivalvia;Autobranchia;Heteroconchia;Euhe  
terodonta;Imparidentia;Venerida;Veneroidea;Veneridae;Mercenaria;Mercenari  
a mercenaria

UdeM00000024952 6596 60.8 UdeM00000024952 XP\_045174487.1 49.3 69  
32 1 26 91 848 916 1.00E-06 60.8 6596 cellular  
organisms;Eukaryota;Opisthokonta;Metazoa;Eumetazoa;Bilateria;Protostomia;  
Spiralia;Lophotrochozoa;Mollusca;Bivalvia;Autobranchia;Heteroconchia;Euhe  
terodonta;Imparidentia;Venerida;Veneroidea;Veneridae;Mercenaria;Mercenari  
a mercenaria

UdeM00000024953 6596 298.9 UdeM00000024953 XP\_045174323.1 58 250  
102 2 5 252 1 249 6.10E-78 298.9 6596 cellular  
organisms;Eukaryota;Opisthokonta;Metazoa;Eumetazoa;Bilateria;Protostomia;  
Spiralia;Lophotrochozoa;Mollusca;Bivalvia;Autobranchia;Heteroconchia;Euhe  
terodonta;Imparidentia;Venerida;Veneroidea;Veneridae;Mercenaria;Mercenari  
a mercenaria

UdeM00000024954 6579 314.3 UdeM00000024954 XP\_033751759.1 62.9 224  
80 2 8 228 11 234 1.30E-82 314.3 6579 cellular  
organisms;Eukaryota;Opisthokonta;Metazoa;Eumetazoa;Bilateria;Protostomia;  
Spiralia;Lophotrochozoa;Mollusca;Bivalvia;Autobranchia;Pteriormorphia;Pect  
inida;Pectinoidea;Pectinidae;Pecten;Pecten maximus

UdeM00000024955 6565 276.2 UdeM00000024955 XP\_022321940.1 24.6 671  
491 10 15 674 16 682 1.10E-70 276.2 6565 cellular  
organisms;Eukaryota;Opisthokonta;Metazoa;Eumetazoa;Bilateria;Protostomia;  
Spiralia;Lophotrochozoa;Mollusca;Bivalvia;Autobranchia;Pteriormorphia;Ostr  
eida;Ostreoidea;Ostreidae;Crassostrea;Crassostrea virginica

UdeM00000024956 6573 65.1 UdeM00000024956 XP\_021365449.1 37.8 111  
 58 1 1 111 433 532 7.10E-08 65.1 6573 cellular  
 organisms;Eukaryota;Opisthokonta;Metazoa;Eumetazoa;Bilateria;Protostomia;  
 Spiralia;Lophotrochozoa;Mollusca;Bivalvia;Autobranhia;Pteriormorphia;Pect  
 inida;Pectinoidea;Pectinidae;Mizuhopecten;Mizuhopecten yessoensis  
 UdeM00000024958 400727 387.9 UdeM00000024958 XP\_025086127.1 47  
 432 220 7 2 429 82 508 1.70E-104 387.9 400727  
 cellular  
 organisms;Eukaryota;Opisthokonta;Metazoa;Eumetazoa;Bilateria;Protostomia;  
 Spiralia;Lophotrochozoa;Mollusca;Gastropoda;Caenogastropoda;Architaeniogl  
 ossa;Ampullarioidea;Ampullariidae;Pomacea;Pomacea canaliculata  
 UdeM00000024959 6565 291.2 UdeM00000024959 XP\_022304770.1 49.1 320  
 151 5 3 315 176 490 1.70E-75 291.2 6565 cellular  
 organisms;Eukaryota;Opisthokonta;Metazoa;Eumetazoa;Bilateria;Protostomia;  
 Spiralia;Lophotrochozoa;Mollusca;Bivalvia;Autobranhia;Pteriormorphia;Ostr  
 eida;Ostreoida;Ostreidae;Crassostrea;Crassostrea virginica  
 UdeM00000024960 6596 83.2 UdeM00000024960 XP\_045182173.1 53.7 67  
 31 0 1 67 81 147 1.50E-13 83.2 6596 cellular  
 organisms;Eukaryota;Opisthokonta;Metazoa;Eumetazoa;Bilateria;Protostomia;  
 Spiralia;Lophotrochozoa;Mollusca;Bivalvia;Autobranhia;Heteroconchia;Euhe  
 terodonta;Imparidentia;Venerida;Veneroidea;Veneridae;Mercenaria;Mercenari  
 a mercenaria  
 UdeM00000024962 29159 316.6 UdeM00000024962 XP\_034318418.1 48.8 346  
 172 4 5 347 210 553 3.90E-83 316.6 29159 cellular  
 organisms;Eukaryota;Opisthokonta;Metazoa;Eumetazoa;Bilateria;Protostomia;  
 Spiralia;Lophotrochozoa;Mollusca;Bivalvia;Autobranhia;Pteriormorphia;Ostr  
 eida;Ostreoida;Ostreidae;Crassostrea;Crassostrea gigas  
 UdeM00000024961 6565 374.8 UdeM00000024961 XP\_022304770.1 41.7 515  
 237 8 1 458 1 509 1.60E-100 374.8 6565 cellular  
 organisms;Eukaryota;Opisthokonta;Metazoa;Eumetazoa;Bilateria;Protostomia;  
 Spiralia;Lophotrochozoa;Mollusca;Bivalvia;Autobranhia;Pteriormorphia;Ostr  
 eida;Ostreoida;Ostreidae;Crassostrea;Crassostrea virginica  
 UdeM00000024963 400727 326.6 UdeM00000024963 XP\_025086127.1 46.9  
 367 186 7 1 363 147 508 3.90E-86 326.6 400727  
 cellular  
 organisms;Eukaryota;Opisthokonta;Metazoa;Eumetazoa;Bilateria;Protostomia;  
 Spiralia;Lophotrochozoa;Mollusca;Gastropoda;Caenogastropoda;Architaeniogl  
 ossa;Ampullarioidea;Ampullariidae;Pomacea;Pomacea canaliculata  
 UdeM00000024964 6596 429.1 UdeM00000024964 XP\_045182173.1 42.3 513  
 288 6 1 508 1 510 7.90E-117 429.1 6596 cellular  
 organisms;Eukaryota;Opisthokonta;Metazoa;Eumetazoa;Bilateria;Protostomia;  
 Spiralia;Lophotrochozoa;Mollusca;Bivalvia;Autobranhia;Heteroconchia;Euhe  
 terodonta;Imparidentia;Venerida;Veneroidea;Veneridae;Mercenaria;Mercenari  
 a mercenaria  
 UdeM00000024966 6596 103.2 UdeM00000024966 XP\_045182173.1 50 86  
 43 0 1 86 62 147 1.90E-19 103.2 6596 cellular  
 organisms;Eukaryota;Opisthokonta;Metazoa;Eumetazoa;Bilateria;Protostomia;  
 Spiralia;Lophotrochozoa;Mollusca;Bivalvia;Autobranhia;Heteroconchia;Euhe  
 terodonta;Imparidentia;Venerida;Veneroidea;Veneridae;Mercenaria;Mercenari  
 a mercenaria  
 UdeM00000024967 6579 493 UdeM00000024967 XP\_033751397.1 77 344  
 77 2 7 349 1 343 3.10E-136 493 6579 cellular  
 organisms;Eukaryota;Opisthokonta;Metazoa;Eumetazoa;Bilateria;Protostomia;



Spiralia; Lophotrochozoa; Mollusca; Bivalvia; Autobranchia; Pteriomorpha; Pectinida; Pectinoidea; Pectinidae; Pecten; Pecten maximus  
UdeM00000024968 6579 491.1 UdeM00000024968 XP\_033751397.1 77 343  
77 2 9 350 2 343 1.20E-135 491.1 6579 cellular  
organisms; Eukaryota; Opisthokonta; Metazoa; Eumetazoa; Bilateria; Protostomia; Spiralia; Lophotrochozoa; Mollusca; Bivalvia; Autobranchia; Pteriomorpha; Pectinida; Pectinoidea; Pectinidae; Pecten; Pecten maximus  
UdeM00000024969 6565 582.4 UdeM00000024969 XP\_022329072.1 62.7 467  
158 4 2 454 5 469 5.00E-163 582.4 6565 cellular  
organisms; Eukaryota; Opisthokonta; Metazoa; Eumetazoa; Bilateria; Protostomia; Spiralia; Lophotrochozoa; Mollusca; Bivalvia; Autobranchia; Pteriomorpha; Ostracoda; Ostreidae; Crassostrea; Crassostrea virginica  
UdeM00000024970 6596 146 UdeM00000024970 XP\_045176517.1 32 409  
228 11 636 1018 126 510 2.70E-31 146 6596 cellular  
organisms; Eukaryota; Opisthokonta; Metazoa; Eumetazoa; Bilateria; Protostomia; Spiralia; Lophotrochozoa; Mollusca; Bivalvia; Autobranchia; Heteroconchia; Euheterodonta; Imparidentia; Venerida; Veneroidea; Veneridae; Mercenaria; Mercenaria mercenaria  
UdeM00000024971 6596 299.7 UdeM00000024971 XP\_045206981.1 35.2 512  
252 6 79 525 1 497 7.50E-78 299.7 6596 cellular  
organisms; Eukaryota; Opisthokonta; Metazoa; Eumetazoa; Bilateria; Protostomia; Spiralia; Lophotrochozoa; Mollusca; Bivalvia; Autobranchia; Heteroconchia; Euheterodonta; Imparidentia; Venerida; Veneroidea; Veneridae; Mercenaria; Mercenaria mercenaria  
UdeM00000024972 6596 946.4 UdeM00000024972 XP\_045175327.1 54.1 1312  
453 25 1 1243 1 1232 3.60E-272 946.4 6596 cellular  
organisms; Eukaryota; Opisthokonta; Metazoa; Eumetazoa; Bilateria; Protostomia; Spiralia; Lophotrochozoa; Mollusca; Bivalvia; Autobranchia; Heteroconchia; Euheterodonta; Imparidentia; Venerida; Veneroidea; Veneridae; Mercenaria; Mercenaria mercenaria  
UdeM00000024974 6573 396.4 UdeM00000024974 XP\_021370782.1 37.2 627  
348 15 55 655 82 688 2.40E-106 396.4 6573 cellular  
organisms; Eukaryota; Opisthokonta; Metazoa; Eumetazoa; Bilateria; Protostomia; Spiralia; Lophotrochozoa; Mollusca; Bivalvia; Autobranchia; Pteriomorpha; Pectinida; Pectinoidea; Pectinidae; Mizuhopecten; Mizuhopecten yessoensis  
UdeM00000024977 6596 147.1 UdeM00000024977 XP\_045157887.1 31.8 302  
186 7 27 312 111 408 3.90E-32 147.1 6596 cellular  
organisms; Eukaryota; Opisthokonta; Metazoa; Eumetazoa; Bilateria; Protostomia; Spiralia; Lophotrochozoa; Mollusca; Bivalvia; Autobranchia; Heteroconchia; Euheterodonta; Imparidentia; Venerida; Veneroidea; Veneridae; Mercenaria; Mercenaria mercenaria  
UdeM00000024979 7741 105.5 UdeM00000024979 XP\_019630366.1 31.8 195  
124 4 174 367 78 264 2.90E-19 105.5 7741 cellular  
organisms; Eukaryota; Opisthokonta; Metazoa; Eumetazoa; Bilateria; Deuterostomia; Chordata; Cephalochordata; Leptocardii; Amphioxiformes; Branchiostomidae; Branchiostoma; Branchiostoma belcheri  
UdeM00000024980 7741 111.3 UdeM00000024980 XP\_019630366.1 26 497  
302 18 34 506 78 532 3.90E-21 111.3 7741 cellular  
organisms; Eukaryota; Opisthokonta; Metazoa; Eumetazoa; Bilateria; Deuterostomia; Chordata; Cephalochordata; Leptocardii; Amphioxiformes; Branchiostomidae; Branchiostoma; Branchiostoma belcheri  
UdeM00000024982 29159 558.9 UdeM00000024982 XP\_011447099.2 50.4 554  
256 5 2 544 8 553 7.40E-156 558.9 29159 cellular  
organisms; Eukaryota; Opisthokonta; Metazoa; Eumetazoa; Bilateria; Protostomia;

Spiralia;Lophotrochozoa;Mollusca;Bivalvia;Autobranchia;Pteriormorphia;Ostr  
 eida;Ostreoidea;Ostreidae;Crassostrea;Crassostrea gigas  
 UdeM00000024983 260995 79.3 UdeM00000024983 XP\_033812940.1 51.4  
 74 35 1 1 74 1 73 2.90E-12 79.3 260995  
 cellular

organisms;Eukaryota;Opisthokonta;Metazoa;Eumetazoa;Bilateria;Deuterostomi  
 a;Chordata;Craniata;Vertebrata;Gnathostomata;Teleostomi;Euteleostomi;Sarc  
 opterygii;Dipnotetrapodomorpha;Tetrapoda;Amphibia;Gymnophiona;Dermophiida  
 e;Geotrypetes;Geotrypetes seraphini

UdeM00000024984 7757 480.3 UdeM00000024984 XP\_032835197.1 77.6 308  
 68 1 1 308 52 358 2.70E-132 480.3 7757 cellular

organisms;Eukaryota;Opisthokonta;Metazoa;Eumetazoa;Bilateria;Deuterostomi  
 a;Chordata;Craniata;Vertebrata;Cyclostomata;Hyperoartia;Petromyzontiforme  
 s;Petromyzontidae;Petromyzon;Petromyzon marinus

UdeM00000024985 6565 80.5 UdeM00000024985 XP\_022308159.1 37.4 115  
 69 1 36 147 30 144 2.30E-12 80.5 6565 cellular

organisms;Eukaryota;Opisthokonta;Metazoa;Eumetazoa;Bilateria;Protostomia;  
 Spiralia;Lophotrochozoa;Mollusca;Bivalvia;Autobranchia;Pteriormorphia;Ostr  
 eida;Ostreoidea;Ostreidae;Crassostrea;Crassostrea virginica

UdeM00000024986 6565 80.5 UdeM00000024986 XP\_022308159.1 37.4 115  
 69 1 48 159 30 144 2.50E-12 80.5 6565 cellular

organisms;Eukaryota;Opisthokonta;Metazoa;Eumetazoa;Bilateria;Protostomia;  
 Spiralia;Lophotrochozoa;Mollusca;Bivalvia;Autobranchia;Pteriormorphia;Ostr  
 eida;Ostreoidea;Ostreidae;Crassostrea;Crassostrea virginica

UdeM00000024987 6596 246.5 UdeM00000024987 XP\_045213288.1 28.6 718  
 466 19 43 741 39 728 1.10E-61 246.5 6596 cellular

organisms;Eukaryota;Opisthokonta;Metazoa;Eumetazoa;Bilateria;Protostomia;  
 Spiralia;Lophotrochozoa;Mollusca;Bivalvia;Autobranchia;Heteroconchia;Euhe  
 terodonta;Imparidentia;Venerida;Veneroidea;Veneridae;Mercenaria;Mercenari  
 a mercenaria

UdeM00000024988 6596 231.9 UdeM00000024988 XP\_045193560.1 26.5 732  
 505 13 14 727 8 724 2.70E-57 231.9 6596 cellular

organisms;Eukaryota;Opisthokonta;Metazoa;Eumetazoa;Bilateria;Protostomia;  
 Spiralia;Lophotrochozoa;Mollusca;Bivalvia;Autobranchia;Heteroconchia;Euhe  
 terodonta;Imparidentia;Venerida;Veneroidea;Veneridae;Mercenaria;Mercenari  
 a mercenaria

UdeM00000024989 6596 77.8 UdeM00000024989 XP\_045159101.1 38 121  
 70 1 15 130 155 275 1.40E-11 77.8 6596 cellular

organisms;Eukaryota;Opisthokonta;Metazoa;Eumetazoa;Bilateria;Protostomia;  
 Spiralia;Lophotrochozoa;Mollusca;Bivalvia;Autobranchia;Heteroconchia;Euhe  
 terodonta;Imparidentia;Venerida;Veneroidea;Veneridae;Mercenaria;Mercenari  
 a mercenaria

UdeM00000024990 6596 232.3 UdeM00000024990 XP\_045170933.1 27.9 725  
 486 17 35 731 25 740 2.10E-57 232.3 6596 cellular

organisms;Eukaryota;Opisthokonta;Metazoa;Eumetazoa;Bilateria;Protostomia;  
 Spiralia;Lophotrochozoa;Mollusca;Bivalvia;Autobranchia;Heteroconchia;Euhe  
 terodonta;Imparidentia;Venerida;Veneroidea;Veneridae;Mercenaria;Mercenari  
 a mercenaria

UdeM00000024993 6596 229.6 UdeM00000024993 XP\_045170933.1 27.9 725  
 486 18 35 731 25 740 1.30E-56 229.6 6596 cellular

organisms;Eukaryota;Opisthokonta;Metazoa;Eumetazoa;Bilateria;Protostomia;  
 Spiralia;Lophotrochozoa;Mollusca;Bivalvia;Autobranchia;Heteroconchia;Euhe  
 terodonta;Imparidentia;Venerida;Veneroidea;Veneridae;Mercenaria;Mercenari  
 a mercenaria

UdeM00000024994 6596 125.9 UdeM00000024994 XP\_045208881.1 31.8 211  
 143 1 8 218 236 445 6.80E-26 125.9 6596 cellular  
 organisms;Eukaryota;Opisthokonta;Metazoa;Eumetazoa;Bilateria;Protostomia;  
 Spiralia;Lophotrochozoa;Mollusca;Bivalvia;Autobranchia;Heteroconchia;Euhe  
 terodonta;Imparidentia;Venerida;Veneroidea;Veneridae;Mercenaria;Mercenari  
 a mercenaria  
 UdeM00000024996 29159 62.4 UdeM00000024996 XP\_034315421.1 30.5 154  
 76 3 79 203 217 368 7.70E-07 62.4 29159 cellular  
 organisms;Eukaryota;Opisthokonta;Metazoa;Eumetazoa;Bilateria;Protostomia;  
 Spiralia;Lophotrochozoa;Mollusca;Bivalvia;Autobranchia;Pteriormorphia;Ostr  
 eida;Ostreoidea;Ostreidae;Crassostrea;Crassostrea gigas  
 UdeM00000024998 29159 77 UdeM00000024998 XP\_034318948.1 32.1 140  
 78 4 1 129 686 819 1.90E-11 77 29159 cellular  
 organisms;Eukaryota;Opisthokonta;Metazoa;Eumetazoa;Bilateria;Protostomia;  
 Spiralia;Lophotrochozoa;Mollusca;Bivalvia;Autobranchia;Pteriormorphia;Ostr  
 eida;Ostreoidea;Ostreidae;Crassostrea;Crassostrea gigas  
 UdeM00000024999 6596 237.7 UdeM00000024999 XP\_045193560.1 26.7 707  
 483 13 39 727 35 724 4.90E-59 237.7 6596 cellular  
 organisms;Eukaryota;Opisthokonta;Metazoa;Eumetazoa;Bilateria;Protostomia;  
 Spiralia;Lophotrochozoa;Mollusca;Bivalvia;Autobranchia;Heteroconchia;Euhe  
 terodonta;Imparidentia;Venerida;Veneroidea;Veneridae;Mercenaria;Mercenari  
 a mercenaria  
 UdeM00000025001 6596 124.4 UdeM00000025001 XP\_045194994.1 33.3 219  
 141 2 4 218 686 903 2.00E-25 124.4 6596 cellular  
 organisms;Eukaryota;Opisthokonta;Metazoa;Eumetazoa;Bilateria;Protostomia;  
 Spiralia;Lophotrochozoa;Mollusca;Bivalvia;Autobranchia;Heteroconchia;Euhe  
 terodonta;Imparidentia;Venerida;Veneroidea;Veneridae;Mercenaria;Mercenari  
 a mercenaria  
 UdeM00000025002 6596 63.2 UdeM00000025002 XP\_045206120.1 30.3 178  
 114 4 45 214 6 181 6.50E-07 63.2 6596 cellular  
 organisms;Eukaryota;Opisthokonta;Metazoa;Eumetazoa;Bilateria;Protostomia;  
 Spiralia;Lophotrochozoa;Mollusca;Bivalvia;Autobranchia;Heteroconchia;Euhe  
 terodonta;Imparidentia;Venerida;Veneroidea;Veneridae;Mercenaria;Mercenari  
 a mercenaria  
 UdeM00000025003 6596 110.2 UdeM00000025003 XP\_045186885.1 32.6 184  
 112 2 25 208 114 285 3.60E-21 110.2 6596 cellular  
 organisms;Eukaryota;Opisthokonta;Metazoa;Eumetazoa;Bilateria;Protostomia;  
 Spiralia;Lophotrochozoa;Mollusca;Bivalvia;Autobranchia;Heteroconchia;Euhe  
 terodonta;Imparidentia;Venerida;Veneroidea;Veneridae;Mercenaria;Mercenari  
 a mercenaria  
 UdeM00000025006 6596 240 UdeM00000025006 XP\_045193560.1 26.5 729  
 509 12 13 729 11 724 1.00E-59 240 6596 cellular  
 organisms;Eukaryota;Opisthokonta;Metazoa;Eumetazoa;Bilateria;Protostomia;  
 Spiralia;Lophotrochozoa;Mollusca;Bivalvia;Autobranchia;Heteroconchia;Euhe  
 terodonta;Imparidentia;Venerida;Veneroidea;Veneridae;Mercenaria;Mercenari  
 a mercenaria  
 UdeM00000025007 6579 130.6 UdeM00000025007 XP\_033751401.1 38.2 283  
 152 11 67 340 61 329 3.90E-27 130.6 6579 cellular  
 organisms;Eukaryota;Opisthokonta;Metazoa;Eumetazoa;Bilateria;Protostomia;  
 Spiralia;Lophotrochozoa;Mollusca;Bivalvia;Autobranchia;Pteriormorphia;Pect  
 inida;Pectinoidea;Pectinidae;Pecten;Pecten maximus  
 UdeM00000025008 7574 82.8 UdeM00000025008 XP\_023932112.1 43.4 99  
 53 2 1 99 356 451 4.60E-13 82.8 7574 cellular  
 organisms;Eukaryota;Opisthokonta;Metazoa;Eumetazoa;Bilateria;Protostomia;

Spiralia; Lophotrochozoa; Brachiopoda; Linguliformea; Lingulata; Lingulida; Linguloidea; Lingulidae; Lingula; Lingula anatina

UdeM00000025011 6579 302.4 UdeM00000025011 XP\_033751259.1 53.9 323  
132 4 114 420 119 440 9.20E-79 302.4 6579 cellular  
organisms; Eukaryota; Opisthokonta; Metazoa; Eumetazoa; Bilateria; Protostomia; Spiralia; Lophotrochozoa; Mollusca; Bivalvia; Autobranchia; Pteriomorpha; Pectinida; Pectinoidea; Pectinidae; Pecten; Pecten maximus

UdeM00000025023 29159 168.3 UdeM00000025023 XP\_034317111.1 35.2 358  
226 5 1 355 675 1029 1.80E-38 168.3 29159 cellular  
organisms; Eukaryota; Opisthokonta; Metazoa; Eumetazoa; Bilateria; Protostomia; Spiralia; Lophotrochozoa; Mollusca; Bivalvia; Autobranchia; Pteriomorpha; Ostreida; Ostreoidea; Ostreidae; Crassostrea; Crassostrea gigas

UdeM00000025024 400727 331.6 UdeM00000025024 XP\_025086167.1 76.5  
187 44 0 1 187 1 187 6.40E-88 331.6 400727  
cellular  
organisms; Eukaryota; Opisthokonta; Metazoa; Eumetazoa; Bilateria; Protostomia; Spiralia; Lophotrochozoa; Mollusca; Gastropoda; Caenogastropoda; Architaenioglossa; Ampullarioidea; Ampullariidae; Pomacea; Pomacea canaliculata

UdeM00000016461 6596 76.6 UdeM00000016461 XP\_045181277.1 37.1 105  
61 2 149 249 216 319 5.00E-11 76.6 6596 cellular  
organisms; Eukaryota; Opisthokonta; Metazoa; Eumetazoa; Bilateria; Protostomia; Spiralia; Lophotrochozoa; Mollusca; Bivalvia; Autobranchia; Heteroconchia; Euheterodonta; Imparidentia; Venerida; Veneroidea; Veneridae; Mercenaria; Mercenaria mercenaria

UdeM00000016462 1735272 181.8 UdeM00000016462 XP\_041349428.1 43.8  
210 117 1 3 212 22 230 9.30E-43 181.8 1735272  
cellular  
organisms; Eukaryota; Opisthokonta; Metazoa; Eumetazoa; Bilateria; Protostomia; Spiralia; Lophotrochozoa; Mollusca; Gastropoda; Neomphalina; Neomphaloidea; Peltospiridae; Gigantopelta; Gigantopelta aegis

UdeM00000016464 6596 88.2 UdeM00000016464 XP\_045181277.1 36.9 160  
85 6 84 234 268 420 1.60E-14 88.2 6596 cellular  
organisms; Eukaryota; Opisthokonta; Metazoa; Eumetazoa; Bilateria; Protostomia; Spiralia; Lophotrochozoa; Mollusca; Bivalvia; Autobranchia; Heteroconchia; Euheterodonta; Imparidentia; Venerida; Veneroidea; Veneridae; Mercenaria; Mercenaria mercenaria

UdeM00000016465 29159 58.2 UdeM00000016465 XP\_034315421.1 34.7 95  
59 2 26 120 221 312 9.50E-06 58.2 29159 cellular  
organisms; Eukaryota; Opisthokonta; Metazoa; Eumetazoa; Bilateria; Protostomia; Spiralia; Lophotrochozoa; Mollusca; Bivalvia; Autobranchia; Pteriomorpha; Ostreida; Ostreoidea; Ostreidae; Crassostrea; Crassostrea gigas

UdeM00000016467 1232801 59.7 UdeM00000016467 XP\_043214649.1 42.4  
66 31 1 35 93 2516 2581 2.90E-06 59.7 1232801  
cellular  
organisms; Eukaryota; Opisthokonta; Metazoa; Eumetazoa; Bilateria; Protostomia; Ecdysozoa; Panarthropoda; Arthropoda; Mandibulata; Pancrustacea; Crustacea; Multicrustacea; Hexanauplia; Thecostraca; Cirripedia; Thoracica; Sessilia; Balanidae; Amphibalanus; Amphibalanus amphitrite

UdeM00000016468 1232801 59.7 UdeM00000016468 XP\_043214649.1 42.4  
66 31 1 35 93 2516 2581 2.90E-06 59.7 1232801  
cellular  
organisms; Eukaryota; Opisthokonta; Metazoa; Eumetazoa; Bilateria; Protostomia; Ecdysozoa; Panarthropoda; Arthropoda; Mandibulata; Pancrustacea; Crustacea; Mul

ticrustacea;Hexanauplia;Thecostraca;Cirripedia;Thoracica;Sessilia;Balanidae;Amphibalanus;Amphibalanus amphitrite  
 UdeM00000016469 6573 68.9 UdeM00000016469 XP\_021341707.1 21.3 314  
 212 10 56 352 45 340 1.40E-08 68.9 6573 cellular  
 organisms;Eukaryota;Opisthokonta;Metazoa;Eumetazoa;Bilateria;Protostomia;Spiralia;Lophotrochozoa;Mollusca;Bivalvia;Autobranchia;Pteriormorphia;Pectinida;Pectinoidea;Pectinidae;Mizuhopecten;Mizuhopecten yessoensis  
 UdeM00000016470 6579 72 UdeM00000016470 XP\_033752062.1 23.1 363  
 244 12 32 365 44 400 1.80E-09 72 6579 cellular  
 organisms;Eukaryota;Opisthokonta;Metazoa;Eumetazoa;Bilateria;Protostomia;Spiralia;Lophotrochozoa;Mollusca;Bivalvia;Autobranchia;Pteriormorphia;Pectinida;Pectinoidea;Pectinidae;Pecten;Pecten maximus  
 UdeM00000016471 6596 85.9 UdeM00000016471 XP\_045181277.1 26 273  
 141 9 105 326 143 405 1.10E-13 85.9 6596 cellular  
 organisms;Eukaryota;Opisthokonta;Metazoa;Eumetazoa;Bilateria;Protostomia;Spiralia;Lophotrochozoa;Mollusca;Bivalvia;Autobranchia;Heteroconchia;Euheterodonta;Imparidentia;Venerida;Veneroidea;Veneridae;Mercenaria;Mercenaria mercenaria  
 UdeM00000016475 6565 214.5 UdeM00000016475 XP\_022297037.1 43.8 290  
 77 2 1 204 183 472 1.30E-52 214.5 6565 cellular  
 organisms;Eukaryota;Opisthokonta;Metazoa;Eumetazoa;Bilateria;Protostomia;Spiralia;Lophotrochozoa;Mollusca;Bivalvia;Autobranchia;Pteriormorphia;Ostreida;Ostreoidea;Ostreidae;Crassostrea;Crassostrea virginica  
 UdeM00000016476 6706 128.6 UdeM00000016476 XP\_042235765.1 39.9 158  
 86 2 1 150 1 157 6.60E-27 128.6 6706 cellular  
 organisms;Eukaryota;Opisthokonta;Metazoa;Eumetazoa;Bilateria;Protostomia;Ecdysozoa;Panarthropoda;Arthropoda;Mandibulata;Pancrustacea;Crustacea;Multicrustacea;Malacostraca;Eumalacostraca;Eucarida;Decapoda;Pleocyemata;Astacidea;Nephropoidea;Nephropidae;Homarus;Homarus americanus  
 UdeM00000016478 441921 59.3 UdeM00000016478 XP\_015517572.1 57.5  
 40 16 1 34 73 841 879 3.10E-06 59.3 441921  
 cellular  
 organisms;Eukaryota;Opisthokonta;Metazoa;Eumetazoa;Bilateria;Protostomia;Ecdysozoa;Panarthropoda;Arthropoda;Mandibulata;Pancrustacea;Hexapoda;Insecta;Dicondylia;Pterygota;Neoptera;Endopterygota;Hymenoptera;Tenthredinoidea;Diprionidae;Diprioninae;Neodiprion;Neodiprion lecontei  
 UdeM00000016479 6596 159.8 UdeM00000016479 XP\_045181277.1 30.7 352  
 221 11 79 418 80 420 7.50E-36 159.8 6596 cellular  
 organisms;Eukaryota;Opisthokonta;Metazoa;Eumetazoa;Bilateria;Protostomia;Spiralia;Lophotrochozoa;Mollusca;Bivalvia;Autobranchia;Heteroconchia;Euheterodonta;Imparidentia;Venerida;Veneroidea;Veneridae;Mercenaria;Mercenaria mercenaria  
 UdeM00000023921 2607531 409.5 UdeM00000023921 XP\_029648101.2 66.7  
 309 93 3 35 341 7 307 5.00E-111 409.5 2607531  
 cellular  
 organisms;Eukaryota;Opisthokonta;Metazoa;Eumetazoa;Bilateria;Protostomia;Spiralia;Lophotrochozoa;Mollusca;Cephalopoda;Coleoidea;Octopodiformes;Octopoda;Incirrata;Octopodidae;Octopus;Octopus sinensis  
 UdeM00000023922 6596 569.3 UdeM00000023922 XP\_045199403.1 61.2 520  
 161 7 12 498 106 617 4.90E-159 569.3 6596 cellular  
 organisms;Eukaryota;Opisthokonta;Metazoa;Eumetazoa;Bilateria;Protostomia;Spiralia;Lophotrochozoa;Mollusca;Bivalvia;Autobranchia;Heteroconchia;Euheterodonta;Imparidentia;Venerida;Veneroidea;Veneridae;Mercenaria;Mercenaria mercenaria

UdeM00000023923 6596 559.3 UdeM00000023923 XP\_045199403.1 61.3 509  
 156 7 1 476 117 617 4.80E-156 559.3 6596 cellular  
 organisms;Eukaryota;Opisthokonta;Metazoa;Eumetazoa;Bilateria;Protostomia;  
 Spiralia;Lophotrochozoa;Mollusca;Bivalvia;Autobranhia;Heteroconchia;Euhe  
 terodonta;Imparidentia;Venerida;Veneroidea;Veneridae;Mercenaria;Mercenari  
 a mercenaria  
 UdeM00000023924 6573 261.9 UdeM00000023924 XP\_021365720.1 47.2 248  
 129 1 36 281 25 272 9.60E-67 261.9 6573 cellular  
 organisms;Eukaryota;Opisthokonta;Metazoa;Eumetazoa;Bilateria;Protostomia;  
 Spiralia;Lophotrochozoa;Mollusca;Bivalvia;Autobranhia;Pteriormorphia;Pect  
 inida;Pectinoidea;Pectinidae;Mizuhopecten;Mizuhopecten yessoensis  
 UdeM00000023925 6596 682.9 UdeM00000023925 XP\_045201737.1 80.4 387  
 62 2 6 378 10 396 2.20E-193 682.9 6596 cellular  
 organisms;Eukaryota;Opisthokonta;Metazoa;Eumetazoa;Bilateria;Protostomia;  
 Spiralia;Lophotrochozoa;Mollusca;Bivalvia;Autobranhia;Heteroconchia;Euhe  
 terodonta;Imparidentia;Venerida;Veneroidea;Veneridae;Mercenaria;Mercenari  
 a mercenaria  
 UdeM00000023926 6573 139 UdeM00000023926 XP\_021340634.1 46.5 170  
 75 3 4 157 2 171 5.00E-30 139 6573 cellular  
 organisms;Eukaryota;Opisthokonta;Metazoa;Eumetazoa;Bilateria;Protostomia;  
 Spiralia;Lophotrochozoa;Mollusca;Bivalvia;Autobranhia;Pteriormorphia;Pect  
 inida;Pectinoidea;Pectinidae;Mizuhopecten;Mizuhopecten yessoensis  
 UdeM00000023927 6596 1100.5 UdeM00000023927 XP\_045200058.1 60.3  
 1038 334 19 1 999 1 999 0.00E+00 1100.5 6596  
 cellular  
 organisms;Eukaryota;Opisthokonta;Metazoa;Eumetazoa;Bilateria;Protostomia;  
 Spiralia;Lophotrochozoa;Mollusca;Bivalvia;Autobranhia;Heteroconchia;Euhe  
 terodonta;Imparidentia;Venerida;Veneroidea;Veneridae;Mercenaria;Mercenari  
 a mercenaria  
 UdeM00000023929 6579 324.3 UdeM00000023929 XP\_033759400.1 60.3 426  
 132 13 1 399 1 416 3.10E-85 324.3 6579 cellular  
 organisms;Eukaryota;Opisthokonta;Metazoa;Eumetazoa;Bilateria;Protostomia;  
 Spiralia;Lophotrochozoa;Mollusca;Bivalvia;Autobranhia;Pteriormorphia;Pect  
 inida;Pectinoidea;Pectinidae;Pecten;Pecten maximus  
 UdeM00000023930 6579 164.9 UdeM00000023930 XP\_033759400.1 62.7 252  
 80 6 37 282 173 416 2.60E-37 164.9 6579 cellular  
 organisms;Eukaryota;Opisthokonta;Metazoa;Eumetazoa;Bilateria;Protostomia;  
 Spiralia;Lophotrochozoa;Mollusca;Bivalvia;Autobranhia;Pteriormorphia;Pect  
 inida;Pectinoidea;Pectinidae;Pecten;Pecten maximus  
 UdeM00000023931 7668 149.1 UdeM00000023931 XP\_011666894.1 39.5 215  
 114 4 2 205 95 304 6.50E-33 149.1 7668 cellular  
 organisms;Eukaryota;Opisthokonta;Metazoa;Eumetazoa;Bilateria;Deuterostomi  
 a;Echinodermata;Eleutherozoa;Echinozoa;Echinoidea;Euechinoidea;Echinacea;  
 Camarodonta;Echinidea;Strongylocentrotidae;Strongylocentrotus;Strongyloce  
 ntrotus purpuratus  
 UdeM00000023932 6596 172.9 UdeM00000023932 XP\_045200185.1 62.2 156  
 51 4 1 155 733 881 3.10E-40 172.9 6596 cellular  
 organisms;Eukaryota;Opisthokonta;Metazoa;Eumetazoa;Bilateria;Protostomia;  
 Spiralia;Lophotrochozoa;Mollusca;Bivalvia;Autobranhia;Heteroconchia;Euhe  
 terodonta;Imparidentia;Venerida;Veneroidea;Veneridae;Mercenaria;Mercenari  
 a mercenaria  
 UdeM00000023933 6596 775.4 UdeM00000023933 XP\_045200187.1 62.4 622  
 200 6 6 605 7 616 5.40E-221 775.4 6596 cellular  
 organisms;Eukaryota;Opisthokonta;Metazoa;Eumetazoa;Bilateria;Protostomia;

Spiralia;Lophotrochozoa;Mollusca;Bivalvia;Autobranchia;Heteroconchia;Euherodonta;Imparidentia;Venerida;Veneroidea;Veneridae;Mercenaria;Mercenaria mercenaria

UdeM00000023934 6596 330.1 UdeM00000023934 XP\_045200182.1 64.1 231  
83 0 1 231 16 246 2.40E-87 330.1 6596 cellular

organisms;Eukaryota;Opisthokonta;Metazoa;Eumetazoa;Bilateria;Protostomia;Spiralia;Lophotrochozoa;Mollusca;Bivalvia;Autobranchia;Heteroconchia;Euherodonta;Imparidentia;Venerida;Veneroidea;Veneridae;Mercenaria;Mercenaria mercenaria

UdeM00000023935 6596 357.1 UdeM00000023935 XP\_045201596.1 39.2 546  
300 9 4 533 8 537 4.00E-95 357.1 6596 cellular

organisms;Eukaryota;Opisthokonta;Metazoa;Eumetazoa;Bilateria;Protostomia;Spiralia;Lophotrochozoa;Mollusca;Bivalvia;Autobranchia;Heteroconchia;Euherodonta;Imparidentia;Venerida;Veneroidea;Veneridae;Mercenaria;Mercenaria mercenaria

UdeM00000023936 10228 62 UdeM00000023936 XP\_002118408.1 50 56  
28 0 48 103 12 67 5.20E-07 62 10228 cellular  
organisms;Eukaryota;Opisthokonta;Metazoa;Eumetazoa;Placozoa;Trichoplax;Trichoplax adhaerens

UdeM00000023937 400727 92 UdeM00000023937 XP\_025078952.1 25.1  
434 293 12 52 467 125 544 2.10E-15 92 400727  
cellular

organisms;Eukaryota;Opisthokonta;Metazoa;Eumetazoa;Bilateria;Protostomia;Spiralia;Lophotrochozoa;Mollusca;Gastropoda;Caenogastropoda;Architaenioglossa;Ampullarioidea;Ampullariidae;Pomacea;Pomacea canaliculata

UdeM00000023938 400727 92.8 UdeM00000023938 XP\_025078952.1 24.1  
493 340 13 40 512 66 544 1.40E-15 92.8 400727  
cellular

organisms;Eukaryota;Opisthokonta;Metazoa;Eumetazoa;Bilateria;Protostomia;Spiralia;Lophotrochozoa;Mollusca;Gastropoda;Caenogastropoda;Architaenioglossa;Ampullarioidea;Ampullariidae;Pomacea;Pomacea canaliculata

UdeM00000023939 50429 191.4 UdeM00000023939 XP\_022796414.1 48.9 180  
91 1 2 181 6 184 1.00E-45 191.4 50429 cellular

organisms;Eukaryota;Opisthokonta;Metazoa;Eumetazoa;Cnidaria;Anthozoa;Hexacorallia;Scleractinia;Astrocoeniina;Pocilloporidae;Stylophora;Stylophora pistillata

UdeM00000023940 6596 368.2 UdeM00000023940 XP\_045201953.1 48.9 409  
189 6 1 396 21 422 1.30E-98 368.2 6596 cellular

organisms;Eukaryota;Opisthokonta;Metazoa;Eumetazoa;Bilateria;Protostomia;Spiralia;Lophotrochozoa;Mollusca;Bivalvia;Autobranchia;Heteroconchia;Euherodonta;Imparidentia;Venerida;Veneroidea;Veneridae;Mercenaria;Mercenaria mercenaria

UdeM00000023941 6596 445.3 UdeM00000023941 XP\_045201699.1 49.7 429  
188 6 26 453 17 418 9.50E-122 445.3 6596 cellular

organisms;Eukaryota;Opisthokonta;Metazoa;Eumetazoa;Bilateria;Protostomia;Spiralia;Lophotrochozoa;Mollusca;Bivalvia;Autobranchia;Heteroconchia;Euherodonta;Imparidentia;Venerida;Veneroidea;Veneridae;Mercenaria;Mercenaria mercenaria

UdeM00000023942 6596 416 UdeM00000023942 XP\_045200610.1 79.9 229  
46 0 50 278 48 276 3.80E-113 416 6596 cellular

organisms;Eukaryota;Opisthokonta;Metazoa;Eumetazoa;Bilateria;Protostomia;Spiralia;Lophotrochozoa;Mollusca;Bivalvia;Autobranchia;Heteroconchia;Euherodonta;Imparidentia;Venerida;Veneroidea;Veneridae;Mercenaria;Mercenaria mercenaria

UdeM00000023945 6565 433.7 UdeM00000023945 XP\_022325507.1 49.5 457  
 217 8 102 547 92 545 3.50E-118 433.7 6565 cellular  
 organisms;Eukaryota;Opisthokonta;Metazoa;Eumetazoa;Bilateria;Protostomia;  
 Spiralia;Lophotrochozoa;Mollusca;Bivalvia;Autobranchia;Pteriormorphia;Ostr  
 eida;Ostreoidea;Ostreidae;Crassostrea;Crassostrea virginica  
 UdeM00000023947 6579 891.3 UdeM00000023947 XP\_033760068.1 71.6 584  
 164 1 2 585 3 584 6.40E-256 891.3 6579 cellular  
 organisms;Eukaryota;Opisthokonta;Metazoa;Eumetazoa;Bilateria;Protostomia;  
 Spiralia;Lophotrochozoa;Mollusca;Bivalvia;Autobranchia;Pteriormorphia;Pect  
 inida;Pectinoidea;Pectinidae;Pecten;Pecten maximus  
 UdeM00000023948 6596 281.6 UdeM00000023948 XP\_045201290.1 83.9 155  
 25 0 1 155 1 155 6.20E-73 281.6 6596 cellular  
 organisms;Eukaryota;Opisthokonta;Metazoa;Eumetazoa;Bilateria;Protostomia;  
 Spiralia;Lophotrochozoa;Mollusca;Bivalvia;Autobranchia;Heteroconchia;Euhe  
 terodonta;Imparidentia;Venerida;Veneroidea;Veneridae;Mercenaria;Mercenari  
 a mercenaria  
 UdeM00000023949 6500 776.9 UdeM00000023949 XP\_005100330.1 88.1 430  
 50 1 1 429 1088 1517 2.60E-221 776.9 6500 cellular  
 organisms;Eukaryota;Opisthokonta;Metazoa;Eumetazoa;Bilateria;Protostomia;  
 Spiralia;Lophotrochozoa;Mollusca;Gastropoda;Heterobranchia;Euthyneura;Tec  
 tipleura;Aplysiida;Aplysioidea;Aplysiidae;Aplysia;Aplysia californica  
 UdeM00000023950 6579 1944.1 UdeM00000023950 XP\_033759438.1 86.3  
 1077 146 1 1 1077 1 1075 0.00E+00 1944.1 6579  
 cellular  
 organisms;Eukaryota;Opisthokonta;Metazoa;Eumetazoa;Bilateria;Protostomia;  
 Spiralia;Lophotrochozoa;Mollusca;Bivalvia;Autobranchia;Pteriormorphia;Pect  
 inida;Pectinoidea;Pectinidae;Pecten;Pecten maximus  
 UdeM00000023951 6596 478.4 UdeM00000023951 XP\_045200407.1 65.7 361  
 114 2 2 352 3 363 8.00E-132 478.4 6596 cellular  
 organisms;Eukaryota;Opisthokonta;Metazoa;Eumetazoa;Bilateria;Protostomia;  
 Spiralia;Lophotrochozoa;Mollusca;Bivalvia;Autobranchia;Heteroconchia;Euhe  
 terodonta;Imparidentia;Venerida;Veneroidea;Veneridae;Mercenaria;Mercenari  
 a mercenaria  
 UdeM00000023952 6596 346.3 UdeM00000023952 XP\_045200407.1 60.6 284  
 104 3 2 278 471 753 3.90E-92 346.3 6596 cellular  
 organisms;Eukaryota;Opisthokonta;Metazoa;Eumetazoa;Bilateria;Protostomia;  
 Spiralia;Lophotrochozoa;Mollusca;Bivalvia;Autobranchia;Heteroconchia;Euhe  
 terodonta;Imparidentia;Venerida;Veneroidea;Veneridae;Mercenaria;Mercenari  
 a mercenaria  
 UdeM00000023953 6596 1785 UdeM00000023953 XP\_045200407.1 51.7 1869  
 725 20 1 1721 754 2592 0.00E+00 1785 6596 cellular  
 organisms;Eukaryota;Opisthokonta;Metazoa;Eumetazoa;Bilateria;Protostomia;  
 Spiralia;Lophotrochozoa;Mollusca;Bivalvia;Autobranchia;Heteroconchia;Euhe  
 terodonta;Imparidentia;Venerida;Veneroidea;Veneridae;Mercenaria;Mercenari  
 a mercenaria  
 UdeM00000023954 225164 90.5 UdeM00000023954 XP\_009044481.1 40.9  
 110 63 2 46 154 3 111 3.00E-15 90.5 225164  
 cellular  
 organisms;Eukaryota;Opisthokonta;Metazoa;Eumetazoa;Bilateria;Protostomia;  
 Spiralia;Lophotrochozoa;Mollusca;Gastropoda;Patellogastropoda;Lottioida;  
 Lottiidae;Lottia;Lottia gigantea  
 UdeM00000023955 6579 289.3 UdeM00000023955 XP\_033760032.1 40 365  
 174 9 1 321 260 623 1.00E-74 289.3 6579 cellular  
 organisms;Eukaryota;Opisthokonta;Metazoa;Eumetazoa;Bilateria;Protostomia;



Spiralia;Lophotrochozoa;Mollusca;Bivalvia;Autobranchia;Pteriormorphia;Pectinida;Pectinoidea;Pectinidae;Pecten;Pecten maximus

UdeM00000023956 6596 374.4 UdeM00000023956 XP\_045159477.1 28.1 1031  
636 27 20 1000 450 1425 4.80E-100 374.4 6596 cellular  
organisms;Eukaryota;Opisthokonta;Metazoa;Eumetazoa;Bilateria;Protostomia;  
Spiralia;Lophotrochozoa;Mollusca;Bivalvia;Autobranchia;Heteroconchia;Euhe  
terodonta;Imparidentia;Venerida;Veneroidea;Veneridae;Mercenaria;Mercenari  
a mercenaria

UdeM00000023957 6596 130.6 UdeM00000023957 XP\_045157132.1 44.1 145  
73 3 8 146 20 162 3.50E-27 130.6 6596 cellular  
organisms;Eukaryota;Opisthokonta;Metazoa;Eumetazoa;Bilateria;Protostomia;  
Spiralia;Lophotrochozoa;Mollusca;Bivalvia;Autobranchia;Heteroconchia;Euhe  
terodonta;Imparidentia;Venerida;Veneroidea;Veneridae;Mercenaria;Mercenari  
a mercenaria

UdeM00000023958 6596 112.8 UdeM00000023958 XP\_045157132.1 49.5 105  
52 1 13 117 59 162 5.40E-22 112.8 6596 cellular  
organisms;Eukaryota;Opisthokonta;Metazoa;Eumetazoa;Bilateria;Protostomia;  
Spiralia;Lophotrochozoa;Mollusca;Bivalvia;Autobranchia;Heteroconchia;Euhe  
terodonta;Imparidentia;Venerida;Veneroidea;Veneridae;Mercenaria;Mercenari  
a mercenaria

UdeM00000023959 6596 105.9 UdeM00000023959 XP\_045157132.1 38 137  
79 2 26 157 22 157 7.80E-20 105.9 6596 cellular  
organisms;Eukaryota;Opisthokonta;Metazoa;Eumetazoa;Bilateria;Protostomia;  
Spiralia;Lophotrochozoa;Mollusca;Bivalvia;Autobranchia;Heteroconchia;Euhe  
terodonta;Imparidentia;Venerida;Veneroidea;Veneridae;Mercenaria;Mercenari  
a mercenaria

UdeM00000023960 6596 500.4 UdeM00000023960 XP\_045199753.1 39.3 754  
337 17 3 674 6 720 3.70E-138 500.4 6596 cellular  
organisms;Eukaryota;Opisthokonta;Metazoa;Eumetazoa;Bilateria;Protostomia;  
Spiralia;Lophotrochozoa;Mollusca;Bivalvia;Autobranchia;Heteroconchia;Euhe  
terodonta;Imparidentia;Venerida;Veneroidea;Veneridae;Mercenaria;Mercenari  
a mercenaria

UdeM00000023962 6596 340.9 UdeM00000023962 XP\_045199753.1 39.4 515  
193 13 1 400 165 675 2.30E-90 340.9 6596 cellular  
organisms;Eukaryota;Opisthokonta;Metazoa;Eumetazoa;Bilateria;Protostomia;  
Spiralia;Lophotrochozoa;Mollusca;Bivalvia;Autobranchia;Heteroconchia;Euhe  
terodonta;Imparidentia;Venerida;Veneroidea;Veneridae;Mercenaria;Mercenari  
a mercenaria

UdeM00000023963 6596 533.9 UdeM00000023963 XP\_045199753.1 41.1 742  
307 18 3 641 6 720 2.90E-148 533.9 6596 cellular  
organisms;Eukaryota;Opisthokonta;Metazoa;Eumetazoa;Bilateria;Protostomia;  
Spiralia;Lophotrochozoa;Mollusca;Bivalvia;Autobranchia;Heteroconchia;Euhe  
terodonta;Imparidentia;Venerida;Veneroidea;Veneridae;Mercenaria;Mercenari  
a mercenaria

UdeM00000023964 6596 586.6 UdeM00000023964 XP\_045199753.1 40.7 805  
391 15 3 771 6 760 4.50E-164 586.6 6596 cellular  
organisms;Eukaryota;Opisthokonta;Metazoa;Eumetazoa;Bilateria;Protostomia;  
Spiralia;Lophotrochozoa;Mollusca;Bivalvia;Autobranchia;Heteroconchia;Euhe  
terodonta;Imparidentia;Venerida;Veneroidea;Veneridae;Mercenaria;Mercenari  
a mercenaria

UdeM00000023965 6596 387.9 UdeM00000023965 XP\_045199753.1 34.8 705  
272 14 3 545 42 720 2.20E-104 387.9 6596 cellular  
organisms;Eukaryota;Opisthokonta;Metazoa;Eumetazoa;Bilateria;Protostomia;  
Spiralia;Lophotrochozoa;Mollusca;Bivalvia;Autobranchia;Heteroconchia;Euhe

terodonta;Imparidentia;Venerida;Veneroidea;Veneridae;Mercenaria;Mercenari  
 a mercenaria  
 UdeM00000023966 6596 583.9 UdeM00000023966 XP\_045199753.1 40.5 805  
 393 15 3 771 6 760 2.90E-163 583.9 6596 cellular  
 organisms;Eukaryota;Opisthokonta;Metazoa;Eumetazoa;Bilateria;Protostomia;  
 Spiralia;Lophotrochozoa;Mollusca;Bivalvia;Autobranhia;Heteroconchia;Euhe  
 terodonta;Imparidentia;Venerida;Veneroidea;Veneridae;Mercenaria;Mercenari  
 a mercenaria  
 UdeM00000023967 6596 586.3 UdeM00000023967 XP\_045199753.1 40.5 805  
 393 15 3 771 6 760 5.90E-164 586.3 6596 cellular  
 organisms;Eukaryota;Opisthokonta;Metazoa;Eumetazoa;Bilateria;Protostomia;  
 Spiralia;Lophotrochozoa;Mollusca;Bivalvia;Autobranhia;Heteroconchia;Euhe  
 terodonta;Imparidentia;Venerida;Veneroidea;Veneridae;Mercenaria;Mercenari  
 a mercenaria  
 UdeM00000023968 6596 1332 UdeM00000023968 XP\_045200405.1 56.2 1118  
 484 2 1 1116 1 1114 0.00E+00 1332 6596 cellular  
 organisms;Eukaryota;Opisthokonta;Metazoa;Eumetazoa;Bilateria;Protostomia;  
 Spiralia;Lophotrochozoa;Mollusca;Bivalvia;Autobranhia;Heteroconchia;Euhe  
 terodonta;Imparidentia;Venerida;Veneroidea;Veneridae;Mercenaria;Mercenari  
 a mercenaria  
 UdeM00000023981 400727 142.1 UdeM00000023981 XP\_025079558.1 52  
 148 61 4 10 156 14 152 5.90E-31 142.1 400727  
 cellular  
 organisms;Eukaryota;Opisthokonta;Metazoa;Eumetazoa;Bilateria;Protostomia;  
 Spiralia;Lophotrochozoa;Mollusca;Gastropoda;Caenogastropoda;Architaeniogl  
 ossa;Ampullarioidea;Ampullariidae;Pomacea;Pomacea canaliculata  
 UdeM00000023982 1735272 136 UdeM00000023982 XP\_041351795.1 62.8  
 94 35 0 2 95 6 99 2.80E-29 136 1735272  
 cellular  
 organisms;Eukaryota;Opisthokonta;Metazoa;Eumetazoa;Bilateria;Protostomia;  
 Spiralia;Lophotrochozoa;Mollusca;Gastropoda;Neomphalina;Neomphaloidea;Pel  
 tospiridae;Gigantopelta;Gigantopelta aegis  
 UdeM00000023983 6573 185.3 UdeM00000023983 XP\_021372152.1 33.6 906  
 422 36 7 808 101 930 3.10E-43 185.3 6573 cellular  
 organisms;Eukaryota;Opisthokonta;Metazoa;Eumetazoa;Bilateria;Protostomia;  
 Spiralia;Lophotrochozoa;Mollusca;Bivalvia;Autobranhia;Pteriomorphia;Pect  
 inida;Pectinoidea;Pectinidae;Mizuhopecten;Mizuhopecten yessoensis  
 UdeM00000023984 6573 568.2 UdeM00000023984 XP\_021372170.1 41.4 659  
 362 8 8 655 492 1137 1.40E-158 568.2 6573 cellular  
 organisms;Eukaryota;Opisthokonta;Metazoa;Eumetazoa;Bilateria;Protostomia;  
 Spiralia;Lophotrochozoa;Mollusca;Bivalvia;Autobranhia;Pteriomorphia;Pect  
 inida;Pectinoidea;Pectinidae;Mizuhopecten;Mizuhopecten yessoensis  
 UdeM00000023985 6579 64.3 UdeM00000023985 XP\_033760565.1 33.1 163  
 90 5 204 348 131 292 3.50E-07 64.3 6579 cellular  
 organisms;Eukaryota;Opisthokonta;Metazoa;Eumetazoa;Bilateria;Protostomia;  
 Spiralia;Lophotrochozoa;Mollusca;Bivalvia;Autobranhia;Pteriomorphia;Pect  
 inida;Pectinoidea;Pectinidae;Pecten;Pecten maximus  
 UdeM00000023986 6579 503.4 UdeM00000023986 XP\_033760830.1 56.6 419  
 163 5 284 689 16 428 4.50E-139 503.4 6579 cellular  
 organisms;Eukaryota;Opisthokonta;Metazoa;Eumetazoa;Bilateria;Protostomia;  
 Spiralia;Lophotrochozoa;Mollusca;Bivalvia;Autobranhia;Pteriomorphia;Pect  
 inida;Pectinoidea;Pectinidae;Pecten;Pecten maximus  
 UdeM00000023987 6596 559.3 UdeM00000023987 XP\_045200309.1 55.9 485  
 184 7 13 473 18 496 4.70E-156 559.3 6596 cellular

organisms;Eukaryota;Opisthokonta;Metazoa;Eumetazoa;Bilateria;Protostomia; Spiralia;Lophotrochozoa;Mollusca;Bivalvia;Autobranchia;Heteroconchia;Euherodonta;Imparidentia;Venerida;Veneroidea;Veneridae;Mercenaria;Mercenaria mercenaria

UdeM00000023999 6596 324.7 UdeM00000023999 XP\_045200222.1 89.4 179  
19 0 1 179 1 179 7.40E-86 324.7 6596 cellular

organisms;Eukaryota;Opisthokonta;Metazoa;Eumetazoa;Bilateria;Protostomia; Spiralia;Lophotrochozoa;Mollusca;Bivalvia;Autobranchia;Heteroconchia;Euherodonta;Imparidentia;Venerida;Veneroidea;Veneridae;Mercenaria;Mercenaria mercenaria

UdeM00000024000 6596 331.3 UdeM00000024000 XP\_045200221.1 31.9 718  
429 19 7 685 8 704 3.00E-87 331.3 6596 cellular

organisms;Eukaryota;Opisthokonta;Metazoa;Eumetazoa;Bilateria;Protostomia; Spiralia;Lophotrochozoa;Mollusca;Bivalvia;Autobranchia;Heteroconchia;Euherodonta;Imparidentia;Venerida;Veneroidea;Veneridae;Mercenaria;Mercenaria mercenaria

UdeM00000024001 6596 330.5 UdeM00000024001 XP\_045200221.1 31.9 718  
429 19 6 684 8 704 5.10E-87 330.5 6596 cellular

organisms;Eukaryota;Opisthokonta;Metazoa;Eumetazoa;Bilateria;Protostomia; Spiralia;Lophotrochozoa;Mollusca;Bivalvia;Autobranchia;Heteroconchia;Euherodonta;Imparidentia;Venerida;Veneroidea;Veneridae;Mercenaria;Mercenaria mercenaria

UdeM00000024002 6596 332.8 UdeM00000024002 XP\_045200221.1 32.1 716  
440 17 9 692 3 704 1.00E-87 332.8 6596 cellular

organisms;Eukaryota;Opisthokonta;Metazoa;Eumetazoa;Bilateria;Protostomia; Spiralia;Lophotrochozoa;Mollusca;Bivalvia;Autobranchia;Heteroconchia;Euherodonta;Imparidentia;Venerida;Veneroidea;Veneridae;Mercenaria;Mercenaria mercenaria

UdeM00000024003 6579 3357.8 UdeM00000024003 XP\_033760554.1 77.2  
2180 478 11 2 2174 6 2173 0.00E+00 3357.8 6579  
cellular

organisms;Eukaryota;Opisthokonta;Metazoa;Eumetazoa;Bilateria;Protostomia; Spiralia;Lophotrochozoa;Mollusca;Bivalvia;Autobranchia;Pteriomorphia;Pectinida;Pectinoidea;Pectinidae;Pecten;Pecten maximus

UdeM00000024004 7574 746.5 UdeM00000024004 XP\_023931684.1 81.3 434  
79 1 1 434 1747 2178 1.90E-212 746.5 7574 cellular

organisms;Eukaryota;Opisthokonta;Metazoa;Eumetazoa;Bilateria;Protostomia; Spiralia;Lophotrochozoa;Brachiopoda;Linguliformea;Lingulata;Lingulida;Linguloidea;Lingulidae;Lingula;Lingula anatina

UdeM00000024005 6573 174.1 UdeM00000024005 XP\_021340138.1 37.1 229  
129 4 186 412 57 272 3.70E-40 174.1 6573 cellular

organisms;Eukaryota;Opisthokonta;Metazoa;Eumetazoa;Bilateria;Protostomia; Spiralia;Lophotrochozoa;Mollusca;Bivalvia;Autobranchia;Pteriomorphia;Pectinida;Pectinoidea;Pectinidae;Mizuhopecten;Mizuhopecten yessoensis

UdeM00000024006 6573 282.7 UdeM00000024006 XP\_021372109.1 39.8 382  
213 5 14 382 51 428 7.30E-73 282.7 6573 cellular

organisms;Eukaryota;Opisthokonta;Metazoa;Eumetazoa;Bilateria;Protostomia; Spiralia;Lophotrochozoa;Mollusca;Bivalvia;Autobranchia;Pteriomorphia;Pectinida;Pectinoidea;Pectinidae;Mizuhopecten;Mizuhopecten yessoensis

UdeM00000024007 37621 283.5 UdeM00000024007 XP\_014670792.1 53.4 251  
117 0 1 251 55 305 2.70E-73 283.5 37621 cellular

organisms;Eukaryota;Opisthokonta;Metazoa;Eumetazoa;Bilateria;Protostomia; Ecdysozoa;Scalidophora;Priapulida;Priapulimorpha;Priapulimorphida;Priapulidae;Priapululus;Priapululus caudatus

UdeM00000024008 6579 197.2 UdeM00000024008 XP\_033760088.1 42.4 236  
 127 3 1 229 206 439 2.50E-47 197.2 6579 cellular  
 organisms;Eukaryota;Opisthokonta;Metazoa;Eumetazoa;Bilateria;Protostomia;  
 Spiralia;Lophotrochozoa;Mollusca;Bivalvia;Autobranchia;Pteriormorphia;Pect  
 inida;Pectinoidea;Pectinidae;Pecten;Pecten maximus  
 UdeM00000024009 400727 67.4 UdeM00000024009 XP\_025077830.1 46.9  
 64 32 1 45 108 87 148 1.30E-08 67.4 400727  
 cellular  
 organisms;Eukaryota;Opisthokonta;Metazoa;Eumetazoa;Bilateria;Protostomia;  
 Spiralia;Lophotrochozoa;Mollusca;Gastropoda;Caenogastropoda;Architaeniogl  
 ossa;Ampullarioidea;Ampullariidae;Pomacea;Pomacea canaliculata  
 UdeM00000024010 27687 89.4 UdeM00000024010 XP\_028656944.1 63 73  
 26 1 1 73 1 72 2.20E-15 89.4 27687 cellular  
 organisms;Eukaryota;Opisthokonta;Metazoa;Eumetazoa;Bilateria;Deuterostomi  
 a;Chordata;Craniata;Vertebrata;Gnathostomata;Teleostomi;Euteleostomi;Acti  
 nopterygii;Cladistia;Polypteriformes;Polypteridae;Erpetoichthys;Erpetoich  
 thys calabaricus  
 UdeM00000024011 6573 65.1 UdeM00000024011 XP\_021372109.1 37.2 86  
 54 0 7 92 48 133 5.60E-08 65.1 6573 cellular  
 organisms;Eukaryota;Opisthokonta;Metazoa;Eumetazoa;Bilateria;Protostomia;  
 Spiralia;Lophotrochozoa;Mollusca;Bivalvia;Autobranchia;Pteriormorphia;Pect  
 inida;Pectinoidea;Pectinidae;Mizuhopecten;Mizuhopecten yessoensis  
 UdeM00000024012 6573 373.6 UdeM00000024012 XP\_021373840.1 42.4 441  
 168 2 19 373 27 467 3.00E-100 373.6 6573 cellular  
 organisms;Eukaryota;Opisthokonta;Metazoa;Eumetazoa;Bilateria;Protostomia;  
 Spiralia;Lophotrochozoa;Mollusca;Bivalvia;Autobranchia;Pteriormorphia;Pect  
 inida;Pectinoidea;Pectinidae;Mizuhopecten;Mizuhopecten yessoensis  
 UdeM00000024013 6596 166.4 UdeM00000024013 XP\_045200629.1 41.2 245  
 139 4 1 244 1 241 5.80E-38 166.4 6596 cellular  
 organisms;Eukaryota;Opisthokonta;Metazoa;Eumetazoa;Bilateria;Protostomia;  
 Spiralia;Lophotrochozoa;Mollusca;Bivalvia;Autobranchia;Heteroconchia;Euhe  
 terodonta;Imparidentia;Venerida;Veneroidea;Veneridae;Mercenaria;Mercenari  
 a mercenaria  
 UdeM00000024014 6573 111.3 UdeM00000024014 XP\_021372121.1 39.4 180  
 92 6 72 249 63 227 2.90E-21 111.3 6573 cellular  
 organisms;Eukaryota;Opisthokonta;Metazoa;Eumetazoa;Bilateria;Protostomia;  
 Spiralia;Lophotrochozoa;Mollusca;Bivalvia;Autobranchia;Pteriormorphia;Pect  
 inida;Pectinoidea;Pectinidae;Mizuhopecten;Mizuhopecten yessoensis  
 UdeM00000024015 6596 162.5 UdeM00000024015 XP\_045200345.1 38 234  
 133 4 1 233 1 223 8.20E-37 162.5 6596 cellular  
 organisms;Eukaryota;Opisthokonta;Metazoa;Eumetazoa;Bilateria;Protostomia;  
 Spiralia;Lophotrochozoa;Mollusca;Bivalvia;Autobranchia;Heteroconchia;Euhe  
 terodonta;Imparidentia;Venerida;Veneroidea;Veneridae;Mercenaria;Mercenari  
 a mercenaria  
 UdeM00000024019 37653 146 UdeM00000024019 XP\_014788941.1 60.5 124  
 45 1 214 333 115 238 8.70E-32 146 37653 cellular  
 organisms;Eukaryota;Opisthokonta;Metazoa;Eumetazoa;Bilateria;Protostomia;  
 Spiralia;Lophotrochozoa;Mollusca;Cephalopoda;Coleoidea;Octopodiformes;Oct  
 opoda;Incirrata;Octopodidae;Octopus;Octopus bimaculoides  
 UdeM00000024020 113540 99 UdeM00000024020 XP\_029112334.1 98  
 51 1 0 99 149 103 153 5.90E-18 99 113540  
 cellular  
 organisms;Eukaryota;Opisthokonta;Metazoa;Eumetazoa;Bilateria;Deuterostomi  
 a;Chordata;Craniata;Vertebrata;Gnathostomata;Teleostomi;Euteleostomi;Acti

nopterygii;Actinopteri;Neopterygii;Teleostei;Osteoglossocephalai;Osteoglo  
 ssocephala;Osteoglossomorpha;Osteoglossiformes;Osteoglossidae;Scleropages  
 ;Scleropages formosus  
 UdeM00000024022 6579 71.6 UdeM00000024022 XP\_033744278.1 54.2 59  
 25 1 61 119 989 1045 8.30E-10 71.6 6579 cellular  
 organisms;Eukaryota;Opisthokonta;Metazoa;Eumetazoa;Bilateria;Protostomia;  
 Spiralia;Lophotrochozoa;Mollusca;Bivalvia;Autobranchia;Pteriormorphia;Pect  
 inida;Pectinoidea;Pectinidae;Pecten;Pecten maximus  
 UdeM00000024023 45264 322.4 UdeM00000024023 XP\_044165535.1 47.6 307  
 157 1 1 303 218 524 7.40E-85 322.4 45264 cellular  
 organisms;Eukaryota;Opisthokonta;Metazoa;Eumetazoa;Cnidaria;Anthozoa;Hexa  
 corallia;Scleractinia;Astrocoeniina;Acroporidae;Acropora;Acropora  
 millepora  
 UdeM00000024025 6573 439.5 UdeM00000024025 XP\_021377756.1 40 660  
 225 9 1 649 784 1283 7.70E-120 439.5 6573 cellular  
 organisms;Eukaryota;Opisthokonta;Metazoa;Eumetazoa;Bilateria;Protostomia;  
 Spiralia;Lophotrochozoa;Mollusca;Bivalvia;Autobranchia;Pteriormorphia;Pect  
 inida;Pectinoidea;Pectinidae;Mizuhopecten;Mizuhopecten yessoensis  
 UdeM00000024026 6596 345.5 UdeM00000024026 XP\_045202592.1 64.6 268  
 92 1 1 268 110 374 6.30E-92 345.5 6596 cellular  
 organisms;Eukaryota;Opisthokonta;Metazoa;Eumetazoa;Bilateria;Protostomia;  
 Spiralia;Lophotrochozoa;Mollusca;Bivalvia;Autobranchia;Heteroconchia;Euhe  
 terodonta;Imparidentia;Venerida;Veneroidea;Veneridae;Mercenaria;Mercenari  
 a mercenaria  
 UdeM00000024027 6579 151.4 UdeM00000024027 XP\_033760363.1 36.6 262  
 130 5 60 286 230 490 2.30E-33 151.4 6579 cellular  
 organisms;Eukaryota;Opisthokonta;Metazoa;Eumetazoa;Bilateria;Protostomia;  
 Spiralia;Lophotrochozoa;Mollusca;Bivalvia;Autobranchia;Pteriormorphia;Pect  
 inida;Pectinoidea;Pectinidae;Pecten;Pecten maximus  
 UdeM00000024028 6565 220.7 UdeM00000024028 XP\_022343393.1 47.1 227  
 114 1 3 229 1 221 2.00E-54 220.7 6565 cellular  
 organisms;Eukaryota;Opisthokonta;Metazoa;Eumetazoa;Bilateria;Protostomia;  
 Spiralia;Lophotrochozoa;Mollusca;Bivalvia;Autobranchia;Pteriormorphia;Ostr  
 eida;Ostreoidea;Ostreidae;Crassostrea;Crassostrea virginica  
 UdeM00000024029 10228 87 UdeM00000024029 XP\_002107667.1 40.3 129  
 70 4 1 123 1 128 1.80E-14 87 10228 cellular  
 organisms;Eukaryota;Opisthokonta;Metazoa;Eumetazoa;Placozoa;Trichoplacida  
 e;Trichoplax;Trichoplax adhaerens  
 UdeM00000024031 10224 67.8 UdeM00000024031 XP\_002731044.1 45.6 68  
 37 0 8 75 60 127 6.90E-09 67.8 10224 cellular  
 organisms;Eukaryota;Opisthokonta;Metazoa;Eumetazoa;Bilateria;Deuterostomi  
 a;Hemichordata;Enteropneusta;Harrimaniidae;Saccoglossus;Saccoglossus  
 kowalevskii  
 UdeM00000024032 6579 309.7 UdeM00000024032 XP\_033759931.1 58.4 262  
 92 2 8 252 5 266 3.40E-81 309.7 6579 cellular  
 organisms;Eukaryota;Opisthokonta;Metazoa;Eumetazoa;Bilateria;Protostomia;  
 Spiralia;Lophotrochozoa;Mollusca;Bivalvia;Autobranchia;Pteriormorphia;Pect  
 inida;Pectinoidea;Pectinidae;Pecten;Pecten maximus  
 UdeM00000024033 6596 537.7 UdeM00000024033 XP\_045200092.1 74.7 364  
 87 3 1 364 1 359 1.10E-149 537.7 6596 cellular  
 organisms;Eukaryota;Opisthokonta;Metazoa;Eumetazoa;Bilateria;Protostomia;  
 Spiralia;Lophotrochozoa;Mollusca;Bivalvia;Autobranchia;Heteroconchia;Euhe  
 terodonta;Imparidentia;Venerida;Veneroidea;Veneridae;Mercenaria;Mercenari  
 a mercenaria

UdeM00000024034 218467 85.9 UdeM00000024034 XP\_023217047.1 25.8  
 453 285 17 2 428 11 438 1.50E-13 85.9 218467  
 cellular  
 organisms;Eukaryota;Opisthokonta;Metazoa;Eumetazoa;Bilateria;Protostomia;  
 Ecdysozoa;Panarthropoda;Arthropoda;Chelicerata;Arachnida;Scorpiones;Buthi  
 da;Buthoidea;Buthidae;Centruroides;Centruroides sculpturatus  
 UdeM00000024035 225164 136.7 UdeM00000024035 XP\_009053205.1 54.7  
 128 53 1 42 169 1 123 2.70E-29 136.7 225164  
 cellular  
 organisms;Eukaryota;Opisthokonta;Metazoa;Eumetazoa;Bilateria;Protostomia;  
 Spiralia;Lophotrochozoa;Mollusca;Gastropoda;Patellogastropoda;Lottioidea;  
 Lottiidae;Lottia;Lottia gigantea  
 UdeM00000024037 1735272 119.8 UdeM00000024037 XP\_041367923.1 30  
 273 95 4 5 181 123 395 3.70E-24 119.8 1735272  
 cellular  
 organisms;Eukaryota;Opisthokonta;Metazoa;Eumetazoa;Bilateria;Protostomia;  
 Spiralia;Lophotrochozoa;Mollusca;Gastropoda;Neomphalina;Neomphaloidea;Pel  
 tospiridae;Gigantopelta;Gigantopelta aegis  
 UdeM00000024038 6596 1086.6 UdeM00000024038 XP\_045202317.1 38.8  
 1498 749 23 79 1499 2572 3978 0.00E+00 1086.6 6596  
 cellular  
 organisms;Eukaryota;Opisthokonta;Metazoa;Eumetazoa;Bilateria;Protostomia;  
 Spiralia;Lophotrochozoa;Mollusca;Bivalvia;Autobranchia;Heteroconchia;Euhe  
 terodonta;Imparidentia;Venerida;Veneroidea;Veneridae;Mercenaria;Mercenari  
 a mercenaria  
 UdeM00000024039 6596 1092.8 UdeM00000024039 XP\_045202317.1 40.2  
 1441 787 24 79 1479 2572 3978 0.00E+00 1092.8 6596  
 cellular  
 organisms;Eukaryota;Opisthokonta;Metazoa;Eumetazoa;Bilateria;Protostomia;  
 Spiralia;Lophotrochozoa;Mollusca;Bivalvia;Autobranchia;Heteroconchia;Euhe  
 terodonta;Imparidentia;Venerida;Veneroidea;Veneridae;Mercenaria;Mercenari  
 a mercenaria  
 UdeM00000024040 6596 1164.8 UdeM00000024040 XP\_045202317.1 42.1  
 1431 765 24 79 1469 2572 3978 0.00E+00 1164.8 6596  
 cellular  
 organisms;Eukaryota;Opisthokonta;Metazoa;Eumetazoa;Bilateria;Protostomia;  
 Spiralia;Lophotrochozoa;Mollusca;Bivalvia;Autobranchia;Heteroconchia;Euhe  
 terodonta;Imparidentia;Venerida;Veneroidea;Veneridae;Mercenaria;Mercenari  
 a mercenaria  
 UdeM00000024041 6579 459.9 UdeM00000024041 XP\_033759314.1 40.3 747  
 327 19 185 893 68 733 7.30E-126 459.9 6579 cellular  
 organisms;Eukaryota;Opisthokonta;Metazoa;Eumetazoa;Bilateria;Protostomia;  
 Spiralia;Lophotrochozoa;Mollusca;Bivalvia;Autobranchia;Pteriomorphia;Pect  
 inida;Pectinoidea;Pectinidae;Pecten;Pecten maximus  
 UdeM00000024042 6596 378.6 UdeM00000024042 XP\_045199327.1 64.7 289  
 101 1 6 294 7 294 7.50E-102 378.6 6596 cellular  
 organisms;Eukaryota;Opisthokonta;Metazoa;Eumetazoa;Bilateria;Protostomia;  
 Spiralia;Lophotrochozoa;Mollusca;Bivalvia;Autobranchia;Heteroconchia;Euhe  
 terodonta;Imparidentia;Venerida;Veneroidea;Veneridae;Mercenaria;Mercenari  
 a mercenaria  
 UdeM00000024046 6596 384.8 UdeM00000024046 XP\_045199337.1 60.5 294  
 114 2 1 293 489 781 9.80E-104 384.8 6596 cellular  
 organisms;Eukaryota;Opisthokonta;Metazoa;Eumetazoa;Bilateria;Protostomia;  
 Spiralia;Lophotrochozoa;Mollusca;Bivalvia;Autobranchia;Heteroconchia;Euhe

terodonta;Imparidentia;Venerida;Veneroidea;Veneridae;Mercenaria;Mercenari  
 a mercenaria  
 UdeM00000024044 6596 606.7 UdeM00000024044 XP\_045199345.1 48 713  
 311 16 28 706 1 687 3.80E-170 606.7 6596 cellular  
 organisms;Eukaryota;Opisthokonta;Metazoa;Eumetazoa;Bilateria;Protostomia;  
 Spiralia;Lophotrochozoa;Mollusca;Bivalvia;Autobranchia;Heteroconchia;Euhe  
 terodonta;Imparidentia;Venerida;Veneroidea;Veneridae;Mercenaria;Mercenari  
 a mercenaria  
 UdeM00000024045 6596 605.1 UdeM00000024045 XP\_045199345.1 48 714  
 310 17 28 707 1 687 1.10E-169 605.1 6596 cellular  
 organisms;Eukaryota;Opisthokonta;Metazoa;Eumetazoa;Bilateria;Protostomia;  
 Spiralia;Lophotrochozoa;Mollusca;Bivalvia;Autobranchia;Heteroconchia;Euhe  
 terodonta;Imparidentia;Venerida;Veneroidea;Veneridae;Mercenaria;Mercenari  
 a mercenaria  
 UdeM00000024048 6596 264.2 UdeM00000024048 XP\_045199348.1 85.8 141  
 20 0 1 141 1 141 2.70E-67 264.2 6596 cellular  
 organisms;Eukaryota;Opisthokonta;Metazoa;Eumetazoa;Bilateria;Protostomia;  
 Spiralia;Lophotrochozoa;Mollusca;Bivalvia;Autobranchia;Heteroconchia;Euhe  
 terodonta;Imparidentia;Venerida;Veneroidea;Veneridae;Mercenaria;Mercenari  
 a mercenaria  
 UdeM00000024049 7574 160.6 UdeM00000024049 XP\_023932810.1 45.4 163  
 83 3 22 180 159 319 1.90E-36 160.6 7574 cellular  
 organisms;Eukaryota;Opisthokonta;Metazoa;Eumetazoa;Bilateria;Protostomia;  
 Spiralia;Lophotrochozoa;Brachiopoda;Linguliformea;Lingulata;Lingulida;Lin  
 guloidea;Lingulidae;Lingula;Lingula anatina  
 UdeM00000024050 400727 1225.7 UdeM00000024050 XP\_025116054.1  
 39.4 1761 940 23 424 2133 139 1823 0.00E+00 1225.7  
 400727 cellular  
 organisms;Eukaryota;Opisthokonta;Metazoa;Eumetazoa;Bilateria;Protostomia;  
 Spiralia;Lophotrochozoa;Mollusca;Gastropoda;Caenogastropoda;Architaeniogl  
 ossa;Ampullarioidea;Ampullariidae;Pomacea;Pomacea canaliculata  
 UdeM00000024051 6596 859 UdeM00000024051 XP\_045157300.1 37.5 1253  
 726 26 52 1285 155 1369 8.60E-246 859 6596 cellular  
 organisms;Eukaryota;Opisthokonta;Metazoa;Eumetazoa;Bilateria;Protostomia;  
 Spiralia;Lophotrochozoa;Mollusca;Bivalvia;Autobranchia;Heteroconchia;Euhe  
 terodonta;Imparidentia;Venerida;Veneroidea;Veneridae;Mercenaria;Mercenari  
 a mercenaria  
 UdeM00000024052 1735272 173.3 UdeM00000024052 XP\_041356772.1 30.2  
 401 256 10 13 403 21 407 6.40E-40 173.3 1735272  
 cellular  
 organisms;Eukaryota;Opisthokonta;Metazoa;Eumetazoa;Bilateria;Protostomia;  
 Spiralia;Lophotrochozoa;Mollusca;Gastropoda;Neomphalina;Neomphaloidea;Pel  
 tospiridae;Gigantopelta;Gigantopelta aegis  
 UdeM00000024053 6596 304.3 UdeM00000024053 XP\_045200072.1 74.9 207  
 47 2 7 208 2 208 1.20E-79 304.3 6596 cellular  
 organisms;Eukaryota;Opisthokonta;Metazoa;Eumetazoa;Bilateria;Protostomia;  
 Spiralia;Lophotrochozoa;Mollusca;Bivalvia;Autobranchia;Heteroconchia;Euhe  
 terodonta;Imparidentia;Venerida;Veneroidea;Veneridae;Mercenaria;Mercenari  
 a mercenaria  
 UdeM00000024054 6573 943.7 UdeM00000024054 XP\_021349540.1 71.7 679  
 191 1 1 679 1 678 1.30E-271 943.7 6573 cellular  
 organisms;Eukaryota;Opisthokonta;Metazoa;Eumetazoa;Bilateria;Protostomia;  
 Spiralia;Lophotrochozoa;Mollusca;Bivalvia;Autobranchia;Pteriomorphia;Pect  
 inida;Pectinoidea;Pectinidae;Mizuhopecten;Mizuhopecten yessoensis

UdeM00000024055 1735272 160.2 UdeM00000024055 XP\_041361785.1 59.4  
 101 41 0 2 102 62 162 1.40E-36 160.2 1735272  
 cellular  
 organisms;Eukaryota;Opisthokonta;Metazoa;Eumetazoa;Bilateria;Protostomia;  
 Spiralia;Lophotrochozoa;Mollusca;Gastropoda;Neomphalina;Neomphaloidea;Pel  
 tospiridae;Gigantopelta;Gigantopelta aegis  
 UdeM00000024056 6579 63.9 UdeM00000024056 XP\_033760949.1 46.8 79  
 36 3 9 82 8 85 1.10E-07 63.9 6579 cellular  
 organisms;Eukaryota;Opisthokonta;Metazoa;Eumetazoa;Bilateria;Protostomia;  
 Spiralia;Lophotrochozoa;Mollusca;Bivalvia;Autobranchia;Pteriormorphia;Pect  
 inida;Pectinoidea;Pectinidae;Pecten;Pecten maximus  
 UdeM00000024057 29159 75.5 UdeM00000024057 XP\_034328475.1 41.3 104  
 50 4 22 119 89 187 5.20E-11 75.5 29159 cellular  
 organisms;Eukaryota;Opisthokonta;Metazoa;Eumetazoa;Bilateria;Protostomia;  
 Spiralia;Lophotrochozoa;Mollusca;Bivalvia;Autobranchia;Pteriormorphia;Ostr  
 eida;Ostreoidea;Ostreidae;Crassostrea;Crassostrea gigas  
 UdeM00000024058 6596 168.7 UdeM00000024058 XP\_045210174.1 46.9 162  
 86 0 35 196 327 488 7.40E-39 168.7 6596 cellular  
 organisms;Eukaryota;Opisthokonta;Metazoa;Eumetazoa;Bilateria;Protostomia;  
 Spiralia;Lophotrochozoa;Mollusca;Bivalvia;Autobranchia;Heteroconchia;Euhe  
 terodonta;Imparidentia;Venerida;Veneroidea;Veneridae;Mercenaria;Mercenari  
 a mercenaria  
 UdeM00000024059 6596 183 UdeM00000024059 XP\_045201987.1 38 308  
 183 4 2 304 35 339 9.10E-43 183 6596 cellular  
 organisms;Eukaryota;Opisthokonta;Metazoa;Eumetazoa;Bilateria;Protostomia;  
 Spiralia;Lophotrochozoa;Mollusca;Bivalvia;Autobranchia;Heteroconchia;Euhe  
 terodonta;Imparidentia;Venerida;Veneroidea;Veneridae;Mercenaria;Mercenari  
 a mercenaria  
 UdeM00000024060 6596 72.8 UdeM00000024060 XP\_045200103.1 31.6 177  
 93 7 33 198 1 160 5.70E-10 72.8 6596 cellular  
 organisms;Eukaryota;Opisthokonta;Metazoa;Eumetazoa;Bilateria;Protostomia;  
 Spiralia;Lophotrochozoa;Mollusca;Bivalvia;Autobranchia;Heteroconchia;Euhe  
 terodonta;Imparidentia;Venerida;Veneroidea;Veneridae;Mercenaria;Mercenari  
 a mercenaria  
 UdeM00000024062 6579 121.3 UdeM00000024062 XP\_033760038.1 26.4 337  
 230 4 11 341 111 435 2.40E-24 121.3 6579 cellular  
 organisms;Eukaryota;Opisthokonta;Metazoa;Eumetazoa;Bilateria;Protostomia;  
 Spiralia;Lophotrochozoa;Mollusca;Bivalvia;Autobranchia;Pteriormorphia;Pect  
 inida;Pectinoidea;Pectinidae;Pecten;Pecten maximus  
 UdeM00000024063 6596 132.9 UdeM00000024063 XP\_045164125.1 52.2 134  
 60 2 704 833 272 405 1.90E-27 132.9 6596 cellular  
 organisms;Eukaryota;Opisthokonta;Metazoa;Eumetazoa;Bilateria;Protostomia;  
 Spiralia;Lophotrochozoa;Mollusca;Bivalvia;Autobranchia;Heteroconchia;Euhe  
 terodonta;Imparidentia;Venerida;Veneroidea;Veneridae;Mercenaria;Mercenari  
 a mercenaria  
 UdeM00000024064 6596 300.8 UdeM00000024064 XP\_045199722.1 40.3 414  
 201 8 19 424 30 405 2.70E-78 300.8 6596 cellular  
 organisms;Eukaryota;Opisthokonta;Metazoa;Eumetazoa;Bilateria;Protostomia;  
 Spiralia;Lophotrochozoa;Mollusca;Bivalvia;Autobranchia;Heteroconchia;Euhe  
 terodonta;Imparidentia;Venerida;Veneroidea;Veneridae;Mercenaria;Mercenari  
 a mercenaria  
 UdeM00000024067 6579 368.2 UdeM00000024067 XP\_033759540.1 50 408  
 186 6 4 400 6 406 1.70E-98 368.2 6579 cellular  
 organisms;Eukaryota;Opisthokonta;Metazoa;Eumetazoa;Bilateria;Protostomia;



Spiralia; Lophotrochozoa; Mollusca; Bivalvia; Autobranchia; Pteriomorpha; Pectinida; Pectinoidea; Pectinidae; Pecten; Pecten maximus  
UdeM00000024066 6573 547.7 UdeM00000024066 XP\_021374288.1 52.7 573  
255 7 10 572 10 576 2.00E-152 547.7 6573 cellular  
organisms; Eukaryota; Opisthokonta; Metazoa; Eumetazoa; Bilateria; Protostomia; Spiralia; Lophotrochozoa; Mollusca; Bivalvia; Autobranchia; Pteriomorpha; Pectinida; Pectinoidea; Pectinidae; Mizuhopecten; Mizuhopecten yessoensis  
UdeM00000024068 6596 137.1 UdeM00000024068 XP\_045199307.1 64.3 98  
35 0 1 98 1 98 1.20E-29 137.1 6596 cellular  
organisms; Eukaryota; Opisthokonta; Metazoa; Eumetazoa; Bilateria; Protostomia; Spiralia; Lophotrochozoa; Mollusca; Bivalvia; Autobranchia; Heteroconchia; Euheterodonta; Imparidentia; Venerida; Veneroidea; Veneridae; Mercenaria; Mercenaria mercenaria  
UdeM00000024069 6573 126.7 UdeM00000024069 XP\_021374289.1 60.4 96  
38 0 1 96 1 96 1.60E-26 126.7 6573 cellular  
organisms; Eukaryota; Opisthokonta; Metazoa; Eumetazoa; Bilateria; Protostomia; Spiralia; Lophotrochozoa; Mollusca; Bivalvia; Autobranchia; Pteriomorpha; Pectinida; Pectinoidea; Pectinidae; Mizuhopecten; Mizuhopecten yessoensis  
UdeM00000024070 7574 79.7 UdeM00000024070 XP\_013410728.1 50.5 91  
40 1 353 438 215 305 1.10E-11 79.7 7574 cellular  
organisms; Eukaryota; Opisthokonta; Metazoa; Eumetazoa; Bilateria; Protostomia; Spiralia; Lophotrochozoa; Brachiopoda; Linguliformea; Lingulata; Lingulida; Linguloidea; Lingulidae; Lingula; Lingula anatina  
UdeM00000024071 7574 79.7 UdeM00000024071 XP\_013410728.1 50.5 91  
40 1 355 440 215 305 1.10E-11 79.7 7574 cellular  
organisms; Eukaryota; Opisthokonta; Metazoa; Eumetazoa; Bilateria; Protostomia; Spiralia; Lophotrochozoa; Brachiopoda; Linguliformea; Lingulata; Lingulida; Linguloidea; Lingulidae; Lingula; Lingula anatina  
UdeM00000024072 6573 580.1 UdeM00000024072 XP\_021344066.1 60.5 440  
172 1 140 579 150 587 3.50E-162 580.1 6573 cellular  
organisms; Eukaryota; Opisthokonta; Metazoa; Eumetazoa; Bilateria; Protostomia; Spiralia; Lophotrochozoa; Mollusca; Bivalvia; Autobranchia; Pteriomorpha; Pectinida; Pectinoidea; Pectinidae; Mizuhopecten; Mizuhopecten yessoensis  
UdeM00000024073 6596 861.7 UdeM00000024073 XP\_045200038.1 76.9 515  
113 3 1 510 168 681 4.80E-247 861.7 6596 cellular  
organisms; Eukaryota; Opisthokonta; Metazoa; Eumetazoa; Bilateria; Protostomia; Spiralia; Lophotrochozoa; Mollusca; Bivalvia; Autobranchia; Heteroconchia; Euheterodonta; Imparidentia; Venerida; Veneroidea; Veneridae; Mercenaria; Mercenaria mercenaria  
UdeM00000024074 6573 300.4 UdeM00000024074 XP\_021343306.1 32.1 557  
362 8 6 552 140 690 4.70E-78 300.4 6573 cellular  
organisms; Eukaryota; Opisthokonta; Metazoa; Eumetazoa; Bilateria; Protostomia; Spiralia; Lophotrochozoa; Mollusca; Bivalvia; Autobranchia; Pteriomorpha; Pectinida; Pectinoidea; Pectinidae; Mizuhopecten; Mizuhopecten yessoensis  
UdeM00000024075 6573 332 UdeM00000024075 XP\_021343306.1 31.6 705  
449 14 12 699 1 689 1.80E-87 332 6573 cellular  
organisms; Eukaryota; Opisthokonta; Metazoa; Eumetazoa; Bilateria; Protostomia; Spiralia; Lophotrochozoa; Mollusca; Bivalvia; Autobranchia; Pteriomorpha; Pectinida; Pectinoidea; Pectinidae; Mizuhopecten; Mizuhopecten yessoensis  
UdeM00000024076 29159 364 UdeM00000024076 XP\_034301421.1 32.4 726  
453 17 21 718 32 747 4.50E-97 364 29159 cellular  
organisms; Eukaryota; Opisthokonta; Metazoa; Eumetazoa; Bilateria; Protostomia; Spiralia; Lophotrochozoa; Mollusca; Bivalvia; Autobranchia; Pteriomorpha; Ostreida; Ostreoidea; Ostreidae; Crassostrea; Crassostrea gigas

UdeM00000024078 29159 188.3 UdeM00000024078 XP\_034328616.1 36.6 292  
 167 5 48 338 2 276 1.60E-44 188.3 29159 cellular  
 organisms;Eukaryota;Opisthokonta;Metazoa;Eumetazoa;Bilateria;Protostomia;  
 Spiralia;Lophotrochozoa;Mollusca;Bivalvia;Autobranchia;Pteriormorphia;Ostr  
 eida;Ostreoidea;Ostreidae;Crassostrea;Crassostrea gigas  
 UdeM00000024080 6596 82 UdeM00000024080 XP\_045200531.1 27 248  
 172 7 126 367 264 508 1.80E-12 82 6596 cellular  
 organisms;Eukaryota;Opisthokonta;Metazoa;Eumetazoa;Bilateria;Protostomia;  
 Spiralia;Lophotrochozoa;Mollusca;Bivalvia;Autobranchia;Heteroconchia;Euhe  
 terodonta;Imparidentia;Venerida;Veneroidea;Veneridae;Mercenaria;Mercenari  
 a mercenaria  
 UdeM00000024081 29159 186 UdeM00000024081 XP\_011437085.1 48.7 193  
 89 3 1 193 1 183 4.50E-44 186 29159 cellular  
 organisms;Eukaryota;Opisthokonta;Metazoa;Eumetazoa;Bilateria;Protostomia;  
 Spiralia;Lophotrochozoa;Mollusca;Bivalvia;Autobranchia;Pteriormorphia;Ostr  
 eida;Ostreoidea;Ostreidae;Crassostrea;Crassostrea gigas  
 UdeM00000024084 6596 119.8 UdeM00000024084 XP\_045200540.1 29.5 264  
 171 4 125 382 155 409 8.40E-24 119.8 6596 cellular  
 organisms;Eukaryota;Opisthokonta;Metazoa;Eumetazoa;Bilateria;Protostomia;  
 Spiralia;Lophotrochozoa;Mollusca;Bivalvia;Autobranchia;Heteroconchia;Euhe  
 terodonta;Imparidentia;Venerida;Veneroidea;Veneridae;Mercenaria;Mercenari  
 a mercenaria  
 UdeM00000024085 6596 227.6 UdeM00000024085 XP\_045200866.1 57.8 206  
 87 0 33 238 35 240 1.60E-56 227.6 6596 cellular  
 organisms;Eukaryota;Opisthokonta;Metazoa;Eumetazoa;Bilateria;Protostomia;  
 Spiralia;Lophotrochozoa;Mollusca;Bivalvia;Autobranchia;Heteroconchia;Euhe  
 terodonta;Imparidentia;Venerida;Veneroidea;Veneridae;Mercenaria;Mercenari  
 a mercenaria  
 UdeM00000024086 6596 1182.2 UdeM00000024086 XP\_045202607.1 70.5  
 871 201 6 4 865 3 826 0.00E+00 1182.2 6596  
 cellular  
 organisms;Eukaryota;Opisthokonta;Metazoa;Eumetazoa;Bilateria;Protostomia;  
 Spiralia;Lophotrochozoa;Mollusca;Bivalvia;Autobranchia;Heteroconchia;Euhe  
 terodonta;Imparidentia;Venerida;Veneroidea;Veneridae;Mercenaria;Mercenari  
 a mercenaria  
 UdeM00000024087 1735272 246.9 UdeM00000024087 XP\_041350581.1 42.6  
 303 168 4 20 321 73 370 3.60E-62 246.9 1735272  
 cellular  
 organisms;Eukaryota;Opisthokonta;Metazoa;Eumetazoa;Bilateria;Protostomia;  
 Spiralia;Lophotrochozoa;Mollusca;Gastropoda;Neomphalina;Neomphaloidea;Pel  
 tospiridae;Gigantopelta;Gigantopelta aegis  
 UdeM00000024089 6596 169.9 UdeM00000024089 XP\_045199652.1 31.7 319  
 191 8 9 315 23 326 6.20E-39 169.9 6596 cellular  
 organisms;Eukaryota;Opisthokonta;Metazoa;Eumetazoa;Bilateria;Protostomia;  
 Spiralia;Lophotrochozoa;Mollusca;Bivalvia;Autobranchia;Heteroconchia;Euhe  
 terodonta;Imparidentia;Venerida;Veneroidea;Veneridae;Mercenaria;Mercenari  
 a mercenaria  
 UdeM00000024090 6596 168.3 UdeM00000024090 XP\_045199652.1 33.4 290  
 170 8 9 293 23 294 1.80E-38 168.3 6596 cellular  
 organisms;Eukaryota;Opisthokonta;Metazoa;Eumetazoa;Bilateria;Protostomia;  
 Spiralia;Lophotrochozoa;Mollusca;Bivalvia;Autobranchia;Heteroconchia;Euhe  
 terodonta;Imparidentia;Venerida;Veneroidea;Veneridae;Mercenaria;Mercenari  
 a mercenaria

UdeM00000024093 6596 171 UdeM00000024093 XP\_045164901.1 34.2 292  
 165 10 27 310 5 277 2.60E-39 171 6596 cellular  
 organisms;Eukaryota;Opisthokonta;Metazoa;Eumetazoa;Bilateria;Protostomia;  
 Spiralia;Lophotrochozoa;Mollusca;Bivalvia;Autobranchia;Heteroconchia;Euhe  
 terodonta;Imparidentia;Venerida;Veneroidea;Veneridae;Mercenaria;Mercenari  
 a mercenaria  
 UdeM00000024097 6596 79 UdeM00000024097 XP\_045164901.1 33.6 131  
 76 4 10 137 5 127 5.60E-12 79 6596 cellular  
 organisms;Eukaryota;Opisthokonta;Metazoa;Eumetazoa;Bilateria;Protostomia;  
 Spiralia;Lophotrochozoa;Mollusca;Bivalvia;Autobranchia;Heteroconchia;Euhe  
 terodonta;Imparidentia;Venerida;Veneroidea;Veneridae;Mercenaria;Mercenari  
 a mercenaria  
 UdeM00000024098 6596 92 UdeM00000024098 XP\_045199652.1 37.4 123  
 73 3 41 160 140 261 7.40E-16 92 6596 cellular  
 organisms;Eukaryota;Opisthokonta;Metazoa;Eumetazoa;Bilateria;Protostomia;  
 Spiralia;Lophotrochozoa;Mollusca;Bivalvia;Autobranchia;Heteroconchia;Euhe  
 terodonta;Imparidentia;Venerida;Veneroidea;Veneridae;Mercenaria;Mercenari  
 a mercenaria  
 UdeM00000024100 10224 275 UdeM00000024100 XP\_002736731.1 45.6 298  
 159 3 5 301 3 298 1.10E-70 275 10224 cellular  
 organisms;Eukaryota;Opisthokonta;Metazoa;Eumetazoa;Bilateria;Deuterostomi  
 a;Hemichordata;Enteropneusta;Harrimaniidae;Saccoglossus;Saccoglossus  
 kowalevskii  
 UdeM00000024101 1415580 72 UdeM00000024101 XP\_030075314.1 41.1  
 124 68 1 60 183 390 508 9.00E-10 72 1415580  
 cellular  
 organisms;Eukaryota;Opisthokonta;Metazoa;Eumetazoa;Bilateria;Deuterostomi  
 a;Chordata;Craniata;Vertebrata;Gnathostomata;Teleostomi;Euteleostomi;Sarc  
 opterygii;Dipnotetrapodomorpha;Tetrapoda;Amphibia;Gymnophiona;Siphonopida  
 e;Microcaecilia;Microcaecilia unicolor  
 UdeM00000024102 10224 275.4 UdeM00000024102 XP\_002736731.1 46 298  
 158 3 5 301 3 298 8.60E-71 275.4 10224 cellular  
 organisms;Eukaryota;Opisthokonta;Metazoa;Eumetazoa;Bilateria;Deuterostomi  
 a;Hemichordata;Enteropneusta;Harrimaniidae;Saccoglossus;Saccoglossus  
 kowalevskii  
 UdeM00000024103 10224 279.3 UdeM00000024103 XP\_002736731.1 47 298  
 156 2 5 302 3 298 6.00E-72 279.3 10224 cellular  
 organisms;Eukaryota;Opisthokonta;Metazoa;Eumetazoa;Bilateria;Deuterostomi  
 a;Hemichordata;Enteropneusta;Harrimaniidae;Saccoglossus;Saccoglossus  
 kowalevskii  
 UdeM00000024104 194408 278.1 UdeM00000024104 XP\_029432322.1 50.7  
 298 140 5 1 295 1 294 1.30E-71 278.1 194408  
 cellular  
 organisms;Eukaryota;Opisthokonta;Metazoa;Eumetazoa;Bilateria;Deuterostomi  
 a;Chordata;Craniata;Vertebrata;Gnathostomata;Teleostomi;Euteleostomi;Sarc  
 opterygii;Dipnotetrapodomorpha;Tetrapoda;Amphibia;Gymnophiona;Rhinatremat  
 idae;Rhinatrema;Rhinatrema bivittatum  
 UdeM00000024106 194408 263.5 UdeM00000024106 XP\_029432322.1 45.9  
 296 155 4 19 312 4 296 3.60E-67 263.5 194408  
 cellular  
 organisms;Eukaryota;Opisthokonta;Metazoa;Eumetazoa;Bilateria;Deuterostomi  
 a;Chordata;Craniata;Vertebrata;Gnathostomata;Teleostomi;Euteleostomi;Sarc  
 opterygii;Dipnotetrapodomorpha;Tetrapoda;Amphibia;Gymnophiona;Rhinatremat  
 idae;Rhinatrema;Rhinatrema bivittatum

UdeM00000024107 10224 283.9 UdeM00000024107 XP\_002736730.1 47 296  
 157 0 5 300 3 298 2.40E-73 283.9 10224 cellular  
 organisms;Eukaryota;Opisthokonta;Metazoa;Eumetazoa;Bilateria;Deuterostomi  
 a;Hemichordata;Enteropneusta;Harrimaniidae;Saccoglossus;Saccoglossus  
 kowalevskii  
 UdeM00000024108 10224 293.5 UdeM00000024108 XP\_002736731.1 48.5 297  
 152 1 5 301 3 298 3.10E-76 293.5 10224 cellular  
 organisms;Eukaryota;Opisthokonta;Metazoa;Eumetazoa;Bilateria;Deuterostomi  
 a;Hemichordata;Enteropneusta;Harrimaniidae;Saccoglossus;Saccoglossus  
 kowalevskii  
 UdeM00000024109 10224 297 UdeM00000024109 XP\_002736731.1 48.8 297  
 151 1 5 301 3 298 2.80E-77 297 10224 cellular  
 organisms;Eukaryota;Opisthokonta;Metazoa;Eumetazoa;Bilateria;Deuterostomi  
 a;Hemichordata;Enteropneusta;Harrimaniidae;Saccoglossus;Saccoglossus  
 kowalevskii  
 UdeM00000024110 10224 296.2 UdeM00000024110 XP\_002736731.1 48.8 297  
 151 1 5 301 3 298 4.70E-77 296.2 10224 cellular  
 organisms;Eukaryota;Opisthokonta;Metazoa;Eumetazoa;Bilateria;Deuterostomi  
 a;Hemichordata;Enteropneusta;Harrimaniidae;Saccoglossus;Saccoglossus  
 kowalevskii  
 UdeM00000024111 6596 451.8 UdeM00000024111 XP\_045199572.1 66.6 311  
 104 0 12 322 324 634 7.20E-124 451.8 6596 cellular  
 organisms;Eukaryota;Opisthokonta;Metazoa;Eumetazoa;Bilateria;Protostomia;  
 Spiralia;Lophotrochozoa;Mollusca;Bivalvia;Autobranchia;Heteroconchia;Euhe  
 terodonta;Imparidentia;Venerida;Veneroidea;Veneridae;Mercenaria;Mercenari  
 a mercenaria  
 UdeM00000024112 6579 520.8 UdeM00000024112 XP\_033761025.1 75.2 323  
 80 0 6 328 8 330 1.40E-144 520.8 6579 cellular  
 organisms;Eukaryota;Opisthokonta;Metazoa;Eumetazoa;Bilateria;Protostomia;  
 Spiralia;Lophotrochozoa;Mollusca;Bivalvia;Autobranchia;Pteriomorphia;Pect  
 inida;Pectinoidea;Pectinidae;Pecten;Pecten maximus  
 UdeM00000024113 6596 167.2 UdeM00000024113 XP\_045165299.1 36.9 260  
 151 9 13 268 16 266 3.00E-38 167.2 6596 cellular  
 organisms;Eukaryota;Opisthokonta;Metazoa;Eumetazoa;Bilateria;Protostomia;  
 Spiralia;Lophotrochozoa;Mollusca;Bivalvia;Autobranchia;Heteroconchia;Euhe  
 terodonta;Imparidentia;Venerida;Veneroidea;Veneridae;Mercenaria;Mercenari  
 a mercenaria  
 UdeM00000024114 29159 126.7 UdeM00000024114 XP\_034330911.1 37.6 181  
 102 3 1 175 308 483 3.00E-26 126.7 29159 cellular  
 organisms;Eukaryota;Opisthokonta;Metazoa;Eumetazoa;Bilateria;Protostomia;  
 Spiralia;Lophotrochozoa;Mollusca;Bivalvia;Autobranchia;Pteriomorphia;Ostr  
 eida;Ostreoidea;Ostreidae;Crassostrea;Crassostrea gigas  
 UdeM00000024115 29159 425.6 UdeM00000024115 XP\_034299474.1 44.1 526  
 279 7 3 522 239 755 8.90E-116 425.6 29159 cellular  
 organisms;Eukaryota;Opisthokonta;Metazoa;Eumetazoa;Bilateria;Protostomia;  
 Spiralia;Lophotrochozoa;Mollusca;Bivalvia;Autobranchia;Pteriomorphia;Ostr  
 eida;Ostreoidea;Ostreidae;Crassostrea;Crassostrea gigas  
 UdeM00000024116 7668 587.4 UdeM00000024116 XP\_003729577.2 39.3 860  
 467 15 65 877 65 916 3.00E-164 587.4 7668 cellular  
 organisms;Eukaryota;Opisthokonta;Metazoa;Eumetazoa;Bilateria;Deuterostomi  
 a;Echinodermata;Eleutherozoa;Echinozoa;Echinoidea;Euechinoidea;Echinacea;  
 Camarodonta;Echinidea;Strongylocentrotidae;Strongylocentrotus;Strongyloce  
 ntrotus purpuratus

UdeM00000024117 37621 379.8 UdeM00000024117 XP\_014672567.1 46.7 383  
 188 5 1 370 101 480 4.00E-102 379.8 37621 cellular  
 organisms;Eukaryota;Opisthokonta;Metazoa;Eumetazoa;Bilateria;Protostomia;  
 Ecdysozoa;Scalidophora;Priapulida;Priapulimorpha;Priapulimorphida;Priapul  
 idae;Priapululus;Priapululus caudatus  
 UdeM00000024121 6565 291.6 UdeM00000024121 XP\_022341262.1 50 296  
 143 4 6 296 28 323 1.20E-75 291.6 6565 cellular  
 organisms;Eukaryota;Opisthokonta;Metazoa;Eumetazoa;Bilateria;Protostomia;  
 Spiralia;Lophotrochozoa;Mollusca;Bivalvia;Autobranhia;Pteriomorpha;Ostr  
 eida;Ostreoidea;Ostreidae;Crassostrea;Crassostrea virginica  
 UdeM00000024122 6565 433 UdeM00000024122 XP\_022341262.1 59.9 349  
 129 5 1 343 1 344 4.50E-118 433 6565 cellular  
 organisms;Eukaryota;Opisthokonta;Metazoa;Eumetazoa;Bilateria;Protostomia;  
 Spiralia;Lophotrochozoa;Mollusca;Bivalvia;Autobranhia;Pteriomorpha;Ostr  
 eida;Ostreoidea;Ostreidae;Crassostrea;Crassostrea virginica  
 UdeM00000024123 6596 213 UdeM00000024123 XP\_045201076.1 48.5 196  
 96 2 19 210 2 196 4.00E-52 213 6596 cellular  
 organisms;Eukaryota;Opisthokonta;Metazoa;Eumetazoa;Bilateria;Protostomia;  
 Spiralia;Lophotrochozoa;Mollusca;Bivalvia;Autobranhia;Heteroconchia;Euhe  
 terodonta;Imparidentia;Venerida;Veneroidea;Veneridae;Mercenaria;Mercenari  
 a mercenaria  
 UdeM00000024124 6596 334 UdeM00000024124 XP\_045201116.1 63.6 343  
 111 7 3 337 6 342 2.80E-88 334 6596 cellular  
 organisms;Eukaryota;Opisthokonta;Metazoa;Eumetazoa;Bilateria;Protostomia;  
 Spiralia;Lophotrochozoa;Mollusca;Bivalvia;Autobranhia;Heteroconchia;Euhe  
 terodonta;Imparidentia;Venerida;Veneroidea;Veneridae;Mercenaria;Mercenari  
 a mercenaria  
 UdeM00000024125 6596 136.3 UdeM00000024125 XP\_045201116.1 25.9 614  
 190 12 461 1074 639 987 2.20E-28 136.3 6596 cellular  
 organisms;Eukaryota;Opisthokonta;Metazoa;Eumetazoa;Bilateria;Protostomia;  
 Spiralia;Lophotrochozoa;Mollusca;Bivalvia;Autobranhia;Heteroconchia;Euhe  
 terodonta;Imparidentia;Venerida;Veneroidea;Veneridae;Mercenaria;Mercenari  
 a mercenaria  
 UdeM00000024126 6596 142.9 UdeM00000024126 XP\_045201116.1 62.2 127  
 42 3 148 274 867 987 6.10E-31 142.9 6596 cellular  
 organisms;Eukaryota;Opisthokonta;Metazoa;Eumetazoa;Bilateria;Protostomia;  
 Spiralia;Lophotrochozoa;Mollusca;Bivalvia;Autobranhia;Heteroconchia;Euhe  
 terodonta;Imparidentia;Venerida;Veneroidea;Veneridae;Mercenaria;Mercenari  
 a mercenaria  
 UdeM00000024127 6596 69.3 UdeM00000024127 XP\_045192154.1 30.5 128  
 82 3 20 140 17 144 6.80E-09 69.3 6596 cellular  
 organisms;Eukaryota;Opisthokonta;Metazoa;Eumetazoa;Bilateria;Protostomia;  
 Spiralia;Lophotrochozoa;Mollusca;Bivalvia;Autobranhia;Heteroconchia;Euhe  
 terodonta;Imparidentia;Venerida;Veneroidea;Veneridae;Mercenaria;Mercenari  
 a mercenaria  
 UdeM00000024128 6500 174.9 UdeM00000024128 XP\_012946305.1 33.4 398  
 213 16 8 364 9 395 2.10E-40 174.9 6500 cellular  
 organisms;Eukaryota;Opisthokonta;Metazoa;Eumetazoa;Bilateria;Protostomia;  
 Spiralia;Lophotrochozoa;Mollusca;Gastropoda;Heterobranhia;Euthyneura;Tec  
 tipleura;Aplysiida;Aplysioidea;Aplysiidae;Aplysia;Aplysia californica  
 UdeM00000024129 6500 175.3 UdeM00000024129 XP\_012946305.1 33.4 401  
 215 16 5 364 6 395 1.60E-40 175.3 6500 cellular  
 organisms;Eukaryota;Opisthokonta;Metazoa;Eumetazoa;Bilateria;Protostomia;

Spiralia;Lophotrochozoa;Mollusca;Gastropoda;Heterobranchia;Euthyneura;Tectipleura;Aplysiida;Aplysioidea;Aplysiidae;Aplysia;Aplysia californica  
 UdeM00000024130 6500 177.6 UdeM00000024130 XP\_012946305.1 33.7 398  
 212 16 8 364 9 395 3.20E-41 177.6 6500 cellular  
 organisms;Eukaryota;Opisthokonta;Metazoa;Eumetazoa;Bilateria;Protostomia;  
 Spiralia;Lophotrochozoa;Mollusca;Gastropoda;Heterobranchia;Euthyneura;Tectipleura;Aplysiida;Aplysioidea;Aplysiidae;Aplysia;Aplysia californica  
 UdeM00000024131 6500 174.1 UdeM00000024131 XP\_012946305.1 33.4 398  
 213 16 8 364 9 395 3.50E-40 174.1 6500 cellular  
 organisms;Eukaryota;Opisthokonta;Metazoa;Eumetazoa;Bilateria;Protostomia;  
 Spiralia;Lophotrochozoa;Mollusca;Gastropoda;Heterobranchia;Euthyneura;Tectipleura;Aplysiida;Aplysioidea;Aplysiidae;Aplysia;Aplysia californica  
 UdeM00000024132 6500 162.9 UdeM00000024132 XP\_012946305.1 32.6 402  
 215 17 8 368 9 395 7.70E-37 162.9 6500 cellular  
 organisms;Eukaryota;Opisthokonta;Metazoa;Eumetazoa;Bilateria;Protostomia;  
 Spiralia;Lophotrochozoa;Mollusca;Gastropoda;Heterobranchia;Euthyneura;Tectipleura;Aplysiida;Aplysioidea;Aplysiidae;Aplysia;Aplysia californica  
 UdeM00000024135 6500 136 UdeM00000024135 XP\_012946305.1 29.8 396  
 213 14 8 347 9 395 1.10E-28 136 6500 cellular  
 organisms;Eukaryota;Opisthokonta;Metazoa;Eumetazoa;Bilateria;Protostomia;  
 Spiralia;Lophotrochozoa;Mollusca;Gastropoda;Heterobranchia;Euthyneura;Tectipleura;Aplysiida;Aplysioidea;Aplysiidae;Aplysia;Aplysia californica  
 UdeM00000024136 6500 171.4 UdeM00000024136 XP\_012946305.1 34 377  
 200 15 7 345 30 395 2.20E-39 171.4 6500 cellular  
 organisms;Eukaryota;Opisthokonta;Metazoa;Eumetazoa;Bilateria;Protostomia;  
 Spiralia;Lophotrochozoa;Mollusca;Gastropoda;Heterobranchia;Euthyneura;Tectipleura;Aplysiida;Aplysioidea;Aplysiidae;Aplysia;Aplysia californica  
 UdeM00000024137 29159 149.4 UdeM00000024137 XP\_034304660.1 39.7 189  
 107 5 168 352 294 479 1.80E-32 149.4 29159 cellular  
 organisms;Eukaryota;Opisthokonta;Metazoa;Eumetazoa;Bilateria;Protostomia;  
 Spiralia;Lophotrochozoa;Mollusca;Bivalvia;Autobranchia;Pteriomorphia;Ostreida;Ostreoidea;Ostreidae;Crassostrea;Crassostrea gigas  
 UdeM00000024138 6573 171.8 UdeM00000024138 XP\_021374113.1 43.5 214  
 97 5 20 231 2 193 1.00E-39 171.8 6573 cellular  
 organisms;Eukaryota;Opisthokonta;Metazoa;Eumetazoa;Bilateria;Protostomia;  
 Spiralia;Lophotrochozoa;Mollusca;Bivalvia;Autobranchia;Pteriomorphia;Pectinida;Pectinoidea;Pectinidae;Mizuhopecten;Mizuhopecten yessoensis  
 UdeM00000024139 6596 60.1 UdeM00000024139 XP\_045198344.1 29.4 136  
 92 2 20 155 30 161 3.80E-06 60.1 6596 cellular  
 organisms;Eukaryota;Opisthokonta;Metazoa;Eumetazoa;Bilateria;Protostomia;  
 Spiralia;Lophotrochozoa;Mollusca;Bivalvia;Autobranchia;Heteroconchia;Euheterodonta;Imparidentia;Venerida;Veneroidea;Veneridae;Mercenaria;Mercenaria mercenaria  
 UdeM00000024141 29159 430.3 UdeM00000024141 XP\_034327845.1 65.5 310  
 105 1 14 321 45 354 2.50E-117 430.3 29159 cellular  
 organisms;Eukaryota;Opisthokonta;Metazoa;Eumetazoa;Bilateria;Protostomia;  
 Spiralia;Lophotrochozoa;Mollusca;Bivalvia;Autobranchia;Pteriomorphia;Ostreida;Ostreoidea;Ostreidae;Crassostrea;Crassostrea gigas  
 UdeM00000024140 29159 431 UdeM00000024140 XP\_034327845.1 60.4 346  
 133 2 12 353 9 354 1.60E-117 431 29159 cellular  
 organisms;Eukaryota;Opisthokonta;Metazoa;Eumetazoa;Bilateria;Protostomia;  
 Spiralia;Lophotrochozoa;Mollusca;Bivalvia;Autobranchia;Pteriomorphia;Ostreida;Ostreoidea;Ostreidae;Crassostrea;Crassostrea gigas

UdeM00000024142 29159 544.3 UdeM00000024142 XP\_011448612.1 84.3 312  
 49 0 1 312 1 312 1.00E-151 544.3 29159 cellular  
 organisms;Eukaryota;Opisthokonta;Metazoa;Eumetazoa;Bilateria;Protostomia;  
 Spiralia;Lophotrochozoa;Mollusca;Bivalvia;Autobranchia;Pteriormorphia;Ostr  
 eida;Ostreoidea;Ostreidae;Crassostrea;Crassostrea gigas  
 UdeM00000024143 29159 154.8 UdeM00000024143 XP\_034304660.1 34.4 221  
 138 4 21 236 229 447 4.30E-34 154.8 29159 cellular  
 organisms;Eukaryota;Opisthokonta;Metazoa;Eumetazoa;Bilateria;Protostomia;  
 Spiralia;Lophotrochozoa;Mollusca;Bivalvia;Autobranchia;Pteriormorphia;Ostr  
 eida;Ostreoidea;Ostreidae;Crassostrea;Crassostrea gigas  
 UdeM00000024144 29159 151 UdeM00000024144 XP\_034304660.1 33.9 221  
 139 4 32 247 229 447 6.20E-33 151 29159 cellular  
 organisms;Eukaryota;Opisthokonta;Metazoa;Eumetazoa;Bilateria;Protostomia;  
 Spiralia;Lophotrochozoa;Mollusca;Bivalvia;Autobranchia;Pteriormorphia;Ostr  
 eida;Ostreoidea;Ostreidae;Crassostrea;Crassostrea gigas  
 UdeM00000024145 6596 80.1 UdeM00000024145 XP\_045196439.1 21.5 424  
 285 12 354 741 483 894 1.30E-11 80.1 6596 cellular  
 organisms;Eukaryota;Opisthokonta;Metazoa;Eumetazoa;Bilateria;Protostomia;  
 Spiralia;Lophotrochozoa;Mollusca;Bivalvia;Autobranchia;Heteroconchia;Euhe  
 terodonta;Imparidentia;Venerida;Veneroidea;Veneridae;Mercenaria;Mercenari  
 a mercenaria  
 UdeM00000024147 6596 639 UdeM00000024147 XP\_045201549.1 73.6 436  
 107 2 36 470 24 452 4.60E-180 639 6596 cellular  
 organisms;Eukaryota;Opisthokonta;Metazoa;Eumetazoa;Bilateria;Protostomia;  
 Spiralia;Lophotrochozoa;Mollusca;Bivalvia;Autobranchia;Heteroconchia;Euhe  
 terodonta;Imparidentia;Venerida;Veneroidea;Veneridae;Mercenaria;Mercenari  
 a mercenaria  
 UdeM00000024148 29159 370.2 UdeM00000024148 XP\_034330668.1 36.2 588  
 99 1 78 665 6 317 5.70E-99 370.2 29159 cellular  
 organisms;Eukaryota;Opisthokonta;Metazoa;Eumetazoa;Bilateria;Protostomia;  
 Spiralia;Lophotrochozoa;Mollusca;Bivalvia;Autobranchia;Pteriormorphia;Ostr  
 eida;Ostreoidea;Ostreidae;Crassostrea;Crassostrea gigas  
 UdeM00000024149 6596 404.4 UdeM00000024149 XP\_045202147.1 57.1 319  
 128 3 1 319 319 628 1.30E-109 404.4 6596 cellular  
 organisms;Eukaryota;Opisthokonta;Metazoa;Eumetazoa;Bilateria;Protostomia;  
 Spiralia;Lophotrochozoa;Mollusca;Bivalvia;Autobranchia;Heteroconchia;Euhe  
 terodonta;Imparidentia;Venerida;Veneroidea;Veneridae;Mercenaria;Mercenari  
 a mercenaria  
 UdeM00000024150 6596 839.3 UdeM00000024150 XP\_045201212.1 60.7 639  
 240 4 1 639 1 628 3.20E-240 839.3 6596 cellular  
 organisms;Eukaryota;Opisthokonta;Metazoa;Eumetazoa;Bilateria;Protostomia;  
 Spiralia;Lophotrochozoa;Mollusca;Bivalvia;Autobranchia;Heteroconchia;Euhe  
 terodonta;Imparidentia;Venerida;Veneroidea;Veneridae;Mercenaria;Mercenari  
 a mercenaria  
 UdeM00000024151 6573 431 UdeM00000024151 XP\_021349775.1 65.5 296  
 98 3 3 294 6 301 1.20E-117 431 6573 cellular  
 organisms;Eukaryota;Opisthokonta;Metazoa;Eumetazoa;Bilateria;Protostomia;  
 Spiralia;Lophotrochozoa;Mollusca;Bivalvia;Autobranchia;Pteriormorphia;Pect  
 inida;Pectinoidea;Pectinidae;Mizuhopecten;Mizuhopecten yessoensis  
 UdeM00000024152 6573 996.1 UdeM00000024152 XP\_021374026.1 77.4 611  
 137 1 12 622 8 617 2.00E-287 996.1 6573 cellular  
 organisms;Eukaryota;Opisthokonta;Metazoa;Eumetazoa;Bilateria;Protostomia;  
 Spiralia;Lophotrochozoa;Mollusca;Bivalvia;Autobranchia;Pteriormorphia;Pect  
 inida;Pectinoidea;Pectinidae;Mizuhopecten;Mizuhopecten yessoensis

UdeM00000024153 400727 115.5 UdeM00000024153 XP\_025079032.1 41.1  
 158 87 4 52 207 241 394 7.80E-23 115.5 400727  
 cellular  
 organisms;Eukaryota;Opisthokonta;Metazoa;Eumetazoa;Bilateria;Protostomia;  
 Spiralia;Lophotrochozoa;Mollusca;Gastropoda;Caenogastropoda;Architaeniogl  
 ossa;Ampullarioidea;Ampullariidae;Pomacea;Pomacea canaliculata  
 UdeM00000024154 400727 125.9 UdeM00000024154 XP\_025079032.1 33.5  
 257 128 8 115 364 177 397 1.00E-25 125.9 400727  
 cellular  
 organisms;Eukaryota;Opisthokonta;Metazoa;Eumetazoa;Bilateria;Protostomia;  
 Spiralia;Lophotrochozoa;Mollusca;Gastropoda;Caenogastropoda;Architaeniogl  
 ossa;Ampullarioidea;Ampullariidae;Pomacea;Pomacea canaliculata  
 UdeM00000024155 400727 105.1 UdeM00000024155 XP\_025079032.1 35  
 197 111 6 148 327 199 395 1.70E-19 105.1 400727  
 cellular  
 organisms;Eukaryota;Opisthokonta;Metazoa;Eumetazoa;Bilateria;Protostomia;  
 Spiralia;Lophotrochozoa;Mollusca;Gastropoda;Caenogastropoda;Architaeniogl  
 ossa;Ampullarioidea;Ampullariidae;Pomacea;Pomacea canaliculata  
 UdeM00000024156 400727 102.8 UdeM00000024156 XP\_025079032.1 34.5  
 197 111 6 148 326 199 395 8.40E-19 102.8 400727  
 cellular  
 organisms;Eukaryota;Opisthokonta;Metazoa;Eumetazoa;Bilateria;Protostomia;  
 Spiralia;Lophotrochozoa;Mollusca;Gastropoda;Caenogastropoda;Architaeniogl  
 ossa;Ampullarioidea;Ampullariidae;Pomacea;Pomacea canaliculata  
 UdeM00000024157 6565 59.3 UdeM00000024157 XP\_022342906.1 30.3 185  
 91 11 53 210 55 228 6.80E-06 59.3 6565 cellular  
 organisms;Eukaryota;Opisthokonta;Metazoa;Eumetazoa;Bilateria;Protostomia;  
 Spiralia;Lophotrochozoa;Mollusca;Bivalvia;Autobranchia;Pteriomorphia;Ostr  
 eida;Ostreoidea;Ostreidae;Crassostrea;Crassostrea virginica  
 UdeM00000024159 6596 68.2 UdeM00000024159 XP\_045199469.1 29.1 189  
 108 7 108 284 30 204 2.00E-08 68.2 6596 cellular  
 organisms;Eukaryota;Opisthokonta;Metazoa;Eumetazoa;Bilateria;Protostomia;  
 Spiralia;Lophotrochozoa;Mollusca;Bivalvia;Autobranchia;Heteroconchia;Euhe  
 terodonta;Imparidentia;Venerida;Veneroidea;Veneridae;Mercenaria;Mercenari  
 a mercenaria  
 UdeM00000024160 6596 70.9 UdeM00000024160 XP\_045199469.1 29.1 189  
 111 6 108 287 30 204 3.10E-09 70.9 6596 cellular  
 organisms;Eukaryota;Opisthokonta;Metazoa;Eumetazoa;Bilateria;Protostomia;  
 Spiralia;Lophotrochozoa;Mollusca;Bivalvia;Autobranchia;Heteroconchia;Euhe  
 terodonta;Imparidentia;Venerida;Veneroidea;Veneridae;Mercenaria;Mercenari  
 a mercenaria  
 UdeM00000024163 6596 174.9 UdeM00000024163 XP\_045199477.1 39.2 306  
 152 12 30 319 37 324 1.90E-40 174.9 6596 cellular  
 organisms;Eukaryota;Opisthokonta;Metazoa;Eumetazoa;Bilateria;Protostomia;  
 Spiralia;Lophotrochozoa;Mollusca;Bivalvia;Autobranchia;Heteroconchia;Euhe  
 terodonta;Imparidentia;Venerida;Veneroidea;Veneridae;Mercenaria;Mercenari  
 a mercenaria  
 UdeM00000024164 6596 313.9 UdeM00000024164 XP\_045199479.1 42 455  
 237 7 33 466 33 481 3.40E-82 313.9 6596 cellular  
 organisms;Eukaryota;Opisthokonta;Metazoa;Eumetazoa;Bilateria;Protostomia;  
 Spiralia;Lophotrochozoa;Mollusca;Bivalvia;Autobranchia;Heteroconchia;Euhe  
 terodonta;Imparidentia;Venerida;Veneroidea;Veneridae;Mercenaria;Mercenari  
 a mercenaria



UdeM00000024165 6596 390.2 UdeM00000024165 XP\_045199480.1 45 464  
 237 6 7 463 22 474 3.70E-105 390.2 6596 cellular  
 organisms;Eukaryota;Opisthokonta;Metazoa;Eumetazoa;Bilateria;Protostomia;  
 Spiralia;Lophotrochozoa;Mollusca;Bivalvia;Autobranchia;Heteroconchia;Euhe  
 terodonta;Imparidentia;Venerida;Veneroidea;Veneridae;Mercenaria;Mercenari  
 a mercenaria  
 UdeM00000024166 6596 389 UdeM00000024166 XP\_045199480.1 44.8 453  
 232 6 18 463 33 474 8.30E-105 389 6596 cellular  
 organisms;Eukaryota;Opisthokonta;Metazoa;Eumetazoa;Bilateria;Protostomia;  
 Spiralia;Lophotrochozoa;Mollusca;Bivalvia;Autobranchia;Heteroconchia;Euhe  
 terodonta;Imparidentia;Venerida;Veneroidea;Veneridae;Mercenaria;Mercenari  
 a mercenaria  
 UdeM00000024167 6596 407.1 UdeM00000024167 XP\_045199480.1 46.4 433  
 225 4 27 457 47 474 2.90E-110 407.1 6596 cellular  
 organisms;Eukaryota;Opisthokonta;Metazoa;Eumetazoa;Bilateria;Protostomia;  
 Spiralia;Lophotrochozoa;Mollusca;Bivalvia;Autobranchia;Heteroconchia;Euhe  
 terodonta;Imparidentia;Venerida;Veneroidea;Veneridae;Mercenaria;Mercenari  
 a mercenaria  
 UdeM00000024168 6596 317 UdeM00000024168 XP\_045199479.1 40.8 448  
 238 6 22 445 33 477 3.90E-83 317 6596 cellular  
 organisms;Eukaryota;Opisthokonta;Metazoa;Eumetazoa;Bilateria;Protostomia;  
 Spiralia;Lophotrochozoa;Mollusca;Bivalvia;Autobranchia;Heteroconchia;Euhe  
 terodonta;Imparidentia;Venerida;Veneroidea;Veneridae;Mercenaria;Mercenari  
 a mercenaria  
 UdeM00000024170 6596 291.2 UdeM00000024170 XP\_045199479.1 44.4 387  
 189 6 25 390 100 481 2.00E-75 291.2 6596 cellular  
 organisms;Eukaryota;Opisthokonta;Metazoa;Eumetazoa;Bilateria;Protostomia;  
 Spiralia;Lophotrochozoa;Mollusca;Bivalvia;Autobranchia;Heteroconchia;Euhe  
 terodonta;Imparidentia;Venerida;Veneroidea;Veneridae;Mercenaria;Mercenari  
 a mercenaria  
 UdeM00000024171 6596 290.8 UdeM00000024171 XP\_045199479.1 44.6 388  
 189 6 24 390 99 481 2.60E-75 290.8 6596 cellular  
 organisms;Eukaryota;Opisthokonta;Metazoa;Eumetazoa;Bilateria;Protostomia;  
 Spiralia;Lophotrochozoa;Mollusca;Bivalvia;Autobranchia;Heteroconchia;Euhe  
 terodonta;Imparidentia;Venerida;Veneroidea;Veneridae;Mercenaria;Mercenari  
 a mercenaria  
 UdeM00000024173 6596 283.5 UdeM00000024173 XP\_045199482.1 50.2 313  
 146 6 1 311 157 461 3.30E-73 283.5 6596 cellular  
 organisms;Eukaryota;Opisthokonta;Metazoa;Eumetazoa;Bilateria;Protostomia;  
 Spiralia;Lophotrochozoa;Mollusca;Bivalvia;Autobranchia;Heteroconchia;Euhe  
 terodonta;Imparidentia;Venerida;Veneroidea;Veneridae;Mercenaria;Mercenari  
 a mercenaria  
 UdeM00000024174 6579 1208 UdeM00000024174 XP\_033759887.1 74.6 743  
 188 1 1 742 1 743 0.00E+00 1208 6579 cellular  
 organisms;Eukaryota;Opisthokonta;Metazoa;Eumetazoa;Bilateria;Protostomia;  
 Spiralia;Lophotrochozoa;Mollusca;Bivalvia;Autobranchia;Pteriomorphia;Pect  
 inida;Pectinoidea;Pectinidae;Pecten;Pecten maximus  
 UdeM00000024175 6596 134.4 UdeM00000024175 XP\_045199509.1 48.7 150  
 73 3 19 164 10 159 1.90E-28 134.4 6596 cellular  
 organisms;Eukaryota;Opisthokonta;Metazoa;Eumetazoa;Bilateria;Protostomia;  
 Spiralia;Lophotrochozoa;Mollusca;Bivalvia;Autobranchia;Heteroconchia;Euhe  
 terodonta;Imparidentia;Venerida;Veneroidea;Veneridae;Mercenaria;Mercenari  
 a mercenaria

UdeM00000024176 6573 389.8 UdeM00000024176 XP\_021356105.1 56.9 355  
 146 4 12 364 9 358 3.80E-105 389.8 6573 cellular  
 organisms;Eukaryota;Opisthokonta;Metazoa;Eumetazoa;Bilateria;Protostomia;  
 Spiralia;Lophotrochozoa;Mollusca;Bivalvia;Autobranchia;Pteriomorpha;Pect  
 inida;Pectinoidea;Pectinidae;Mizuhopecten;Mizuhopecten yessoensis  
 UdeM00000024177 6596 804.3 UdeM00000024177 XP\_045199544.1 65.1 621  
 200 5 16 624 28 643 1.20E-229 804.3 6596 cellular  
 organisms;Eukaryota;Opisthokonta;Metazoa;Eumetazoa;Bilateria;Protostomia;  
 Spiralia;Lophotrochozoa;Mollusca;Bivalvia;Autobranchia;Heteroconchia;Euhe  
 terodonta;Imparidentia;Venerida;Veneroidea;Veneridae;Mercenaria;Mercenari  
 a mercenaria  
 UdeM00000024178 6565 114 UdeM00000024178 XP\_022328486.1 25.4 469  
 289 12 2 417 9 469 4.60E-22 114 6565 cellular  
 organisms;Eukaryota;Opisthokonta;Metazoa;Eumetazoa;Bilateria;Protostomia;  
 Spiralia;Lophotrochozoa;Mollusca;Bivalvia;Autobranchia;Pteriomorpha;Ostr  
 eida;Ostreoidea;Ostreidae;Crassostrea;Crassostrea virginica  
 UdeM00000024179 6565 74.7 UdeM00000024179 XP\_022328486.1 24.8 351  
 199 11 13 300 121 469 2.20E-10 74.7 6565 cellular  
 organisms;Eukaryota;Opisthokonta;Metazoa;Eumetazoa;Bilateria;Protostomia;  
 Spiralia;Lophotrochozoa;Mollusca;Bivalvia;Autobranchia;Pteriomorpha;Ostr  
 eida;Ostreoidea;Ostreidae;Crassostrea;Crassostrea virginica  
 UdeM00000024180 6596 134.4 UdeM00000024180 XP\_045181975.1 24.6 549  
 331 19 1 521 1 494 4.10E-28 134.4 6596 cellular  
 organisms;Eukaryota;Opisthokonta;Metazoa;Eumetazoa;Bilateria;Protostomia;  
 Spiralia;Lophotrochozoa;Mollusca;Bivalvia;Autobranchia;Heteroconchia;Euhe  
 terodonta;Imparidentia;Venerida;Veneroidea;Veneridae;Mercenaria;Mercenari  
 a mercenaria  
 UdeM00000024181 6596 327 UdeM00000024181 XP\_045199697.1 49.4 354  
 156 8 7 347 8 351 3.40E-86 327 6596 cellular  
 organisms;Eukaryota;Opisthokonta;Metazoa;Eumetazoa;Bilateria;Protostomia;  
 Spiralia;Lophotrochozoa;Mollusca;Bivalvia;Autobranchia;Heteroconchia;Euhe  
 terodonta;Imparidentia;Venerida;Veneroidea;Veneridae;Mercenaria;Mercenari  
 a mercenaria  
 UdeM00000024182 37653 906.7 UdeM00000024182 XP\_014776380.1 91.7 471  
 38 1 11 481 20 489 1.20E-260 906.7 37653 cellular  
 organisms;Eukaryota;Opisthokonta;Metazoa;Eumetazoa;Bilateria;Protostomia;  
 Spiralia;Lophotrochozoa;Mollusca;Cephalopoda;Coleoidea;Octopodiformes;Oct  
 opoda;Incirrata;Octopodidae;Octopus;Octopus bimaculoides  
 UdeM00000024183 1735272 812.4 UdeM00000024183 XP\_041351105.1 77.1  
 489 112 0 3 491 6 494 3.20E-232 812.4 1735272  
 cellular  
 organisms;Eukaryota;Opisthokonta;Metazoa;Eumetazoa;Bilateria;Protostomia;  
 Spiralia;Lophotrochozoa;Mollusca;Gastropoda;Neomphalina;Neomphaloidea;Pel  
 tospiridae;Gigantopelta;Gigantopelta aegis  
 UdeM00000024184 6596 575.9 UdeM00000024184 XP\_045199719.1 43.9 708  
 369 10 69 764 137 828 7.90E-161 575.9 6596 cellular  
 organisms;Eukaryota;Opisthokonta;Metazoa;Eumetazoa;Bilateria;Protostomia;  
 Spiralia;Lophotrochozoa;Mollusca;Bivalvia;Autobranchia;Heteroconchia;Euhe  
 terodonta;Imparidentia;Venerida;Veneroidea;Veneridae;Mercenaria;Mercenari  
 a mercenaria  
 UdeM00000024185 6596 380.2 UdeM00000024185 XP\_045157916.1 35.2 691  
 423 11 1 672 150 834 5.60E-102 380.2 6596 cellular  
 organisms;Eukaryota;Opisthokonta;Metazoa;Eumetazoa;Bilateria;Protostomia;  
 Spiralia;Lophotrochozoa;Mollusca;Bivalvia;Autobranchia;Heteroconchia;Euhe

terodonta;Imparidentia;Venerida;Veneroidea;Veneridae;Mercenaria;Mercenari  
 a mercenaria  
 UdeM00000024186 6565 92.4 UdeM00000024186 XP\_022312385.1 70.5 61  
 18 0 52 112 231 291 3.90E-16 92.4 6565 cellular  
 organisms;Eukaryota;Opisthokonta;Metazoa;Eumetazoa;Bilateria;Protostomia;  
 Spiralia;Lophotrochozoa;Mollusca;Bivalvia;Autobranchia;Pteriormorphia;Ostr  
 eida;Ostreoidea;Ostreidae;Crassostrea;Crassostrea virginica  
 UdeM00000024187 6596 500.4 UdeM00000024187 XP\_045171694.1 64.9 370  
 124 3 3 372 2 365 2.00E-138 500.4 6596 cellular  
 organisms;Eukaryota;Opisthokonta;Metazoa;Eumetazoa;Bilateria;Protostomia;  
 Spiralia;Lophotrochozoa;Mollusca;Bivalvia;Autobranchia;Heteroconchia;Euhe  
 terodonta;Imparidentia;Venerida;Veneroidea;Veneridae;Mercenaria;Mercenari  
 a mercenaria  
 UdeM00000024188 6596 500.7 UdeM00000024188 XP\_045171694.1 65.4 370  
 122 3 3 372 2 365 1.60E-138 500.7 6596 cellular  
 organisms;Eukaryota;Opisthokonta;Metazoa;Eumetazoa;Bilateria;Protostomia;  
 Spiralia;Lophotrochozoa;Mollusca;Bivalvia;Autobranchia;Heteroconchia;Euhe  
 terodonta;Imparidentia;Venerida;Veneroidea;Veneridae;Mercenaria;Mercenari  
 a mercenaria  
 UdeM00000024189 6596 417.9 UdeM00000024189 XP\_045157916.1 32 796  
 497 12 41 811 52 828 2.90E-113 417.9 6596 cellular  
 organisms;Eukaryota;Opisthokonta;Metazoa;Eumetazoa;Bilateria;Protostomia;  
 Spiralia;Lophotrochozoa;Mollusca;Bivalvia;Autobranchia;Heteroconchia;Euhe  
 terodonta;Imparidentia;Venerida;Veneroidea;Veneridae;Mercenaria;Mercenari  
 a mercenaria  
 UdeM00000024190 6596 422.9 UdeM00000024190 XP\_045157916.1 32 804  
 503 12 41 820 52 835 9.20E-115 422.9 6596 cellular  
 organisms;Eukaryota;Opisthokonta;Metazoa;Eumetazoa;Bilateria;Protostomia;  
 Spiralia;Lophotrochozoa;Mollusca;Bivalvia;Autobranchia;Heteroconchia;Euhe  
 terodonta;Imparidentia;Venerida;Veneroidea;Veneridae;Mercenaria;Mercenari  
 a mercenaria  
 UdeM00000024191 6596 414.8 UdeM00000024191 XP\_045157916.1 32.6 797  
 505 11 44 821 52 835 2.50E-112 414.8 6596 cellular  
 organisms;Eukaryota;Opisthokonta;Metazoa;Eumetazoa;Bilateria;Protostomia;  
 Spiralia;Lophotrochozoa;Mollusca;Bivalvia;Autobranchia;Heteroconchia;Euhe  
 terodonta;Imparidentia;Venerida;Veneroidea;Veneridae;Mercenaria;Mercenari  
 a mercenaria  
 UdeM00000024192 6596 481.9 UdeM00000024192 XP\_045171694.1 62.4 372  
 132 4 3 374 2 365 7.50E-133 481.9 6596 cellular  
 organisms;Eukaryota;Opisthokonta;Metazoa;Eumetazoa;Bilateria;Protostomia;  
 Spiralia;Lophotrochozoa;Mollusca;Bivalvia;Autobranchia;Heteroconchia;Euhe  
 terodonta;Imparidentia;Venerida;Veneroidea;Veneridae;Mercenaria;Mercenari  
 a mercenaria  
 UdeM00000024193 6596 278.9 UdeM00000024193 XP\_045201987.1 41.6 373  
 195 8 1 360 138 500 9.30E-72 278.9 6596 cellular  
 organisms;Eukaryota;Opisthokonta;Metazoa;Eumetazoa;Bilateria;Protostomia;  
 Spiralia;Lophotrochozoa;Mollusca;Bivalvia;Autobranchia;Heteroconchia;Euhe  
 terodonta;Imparidentia;Venerida;Veneroidea;Veneridae;Mercenaria;Mercenari  
 a mercenaria  
 UdeM00000024194 6596 449.9 UdeM00000024194 XP\_045157916.1 35.1 791  
 481 13 40 804 52 836 6.80E-123 449.9 6596 cellular  
 organisms;Eukaryota;Opisthokonta;Metazoa;Eumetazoa;Bilateria;Protostomia;  
 Spiralia;Lophotrochozoa;Mollusca;Bivalvia;Autobranchia;Heteroconchia;Euhe

terodonta;Imparidentia;Venerida;Veneroidea;Veneridae;Mercenaria;Mercenari  
 a mercenaria  
 UdeM00000024195 6596 458.4 UdeM00000024195 XP\_045157916.1 34.3 831  
 503 14 4 800 7 828 2.00E-125 458.4 6596 cellular  
 organisms;Eukaryota;Opisthokonta;Metazoa;Eumetazoa;Bilateria;Protostomia;  
 Spiralia;Lophotrochozoa;Mollusca;Bivalvia;Autobranhia;Heteroconchia;Euhe  
 terodonta;Imparidentia;Venerida;Veneroidea;Veneridae;Mercenaria;Mercenari  
 a mercenaria  
 UdeM00000024196 6596 448.4 UdeM00000024196 XP\_045157916.1 35.1 784  
 475 13 17 773 52 828 1.90E-122 448.4 6596 cellular  
 organisms;Eukaryota;Opisthokonta;Metazoa;Eumetazoa;Bilateria;Protostomia;  
 Spiralia;Lophotrochozoa;Mollusca;Bivalvia;Autobranhia;Heteroconchia;Euhe  
 terodonta;Imparidentia;Venerida;Veneroidea;Veneridae;Mercenaria;Mercenari  
 a mercenaria  
 UdeM00000024197 6596 574.3 UdeM00000024197 XP\_045200560.1 67 418  
 130 6 1 417 1 411 1.20E-160 574.3 6596 cellular  
 organisms;Eukaryota;Opisthokonta;Metazoa;Eumetazoa;Bilateria;Protostomia;  
 Spiralia;Lophotrochozoa;Mollusca;Bivalvia;Autobranhia;Heteroconchia;Euhe  
 terodonta;Imparidentia;Venerida;Veneroidea;Veneridae;Mercenaria;Mercenari  
 a mercenaria  
 UdeM00000024198 6579 479.6 UdeM00000024198 XP\_033760417.1 36.9 878  
 477 20 10 827 9 869 8.30E-132 479.6 6579 cellular  
 organisms;Eukaryota;Opisthokonta;Metazoa;Eumetazoa;Bilateria;Protostomia;  
 Spiralia;Lophotrochozoa;Mollusca;Bivalvia;Autobranhia;Pteriormorphia;Pect  
 inida;Pectinoidea;Pectinidae;Pecten;Pecten maximus  
 UdeM00000024199 6596 64.7 UdeM00000024199 XP\_045171441.1 25.5 220  
 146 8 437 648 273 482 5.00E-07 64.7 6596 cellular  
 organisms;Eukaryota;Opisthokonta;Metazoa;Eumetazoa;Bilateria;Protostomia;  
 Spiralia;Lophotrochozoa;Mollusca;Bivalvia;Autobranhia;Heteroconchia;Euhe  
 terodonta;Imparidentia;Venerida;Veneroidea;Veneridae;Mercenaria;Mercenari  
 a mercenaria  
 UdeM00000024202 6596 93.6 UdeM00000024202 XP\_045185797.1 21.1 407  
 270 12 302 677 409 795 1.10E-15 93.6 6596 cellular  
 organisms;Eukaryota;Opisthokonta;Metazoa;Eumetazoa;Bilateria;Protostomia;  
 Spiralia;Lophotrochozoa;Mollusca;Bivalvia;Autobranhia;Heteroconchia;Euhe  
 terodonta;Imparidentia;Venerida;Veneroidea;Veneridae;Mercenaria;Mercenari  
 a mercenaria  
 UdeM00000024203 6573 170.2 UdeM00000024203 XP\_021374113.1 60 130  
 51 1 28 157 3 131 2.30E-39 170.2 6573 cellular  
 organisms;Eukaryota;Opisthokonta;Metazoa;Eumetazoa;Bilateria;Protostomia;  
 Spiralia;Lophotrochozoa;Mollusca;Bivalvia;Autobranhia;Pteriormorphia;Pect  
 inida;Pectinoidea;Pectinidae;Mizuhopecten;Mizuhopecten yessoensis  
 UdeM00000024204 6596 99.4 UdeM00000024204 XP\_045162845.1 22.6 430  
 286 12 325 724 326 738 2.00E-17 99.4 6596 cellular  
 organisms;Eukaryota;Opisthokonta;Metazoa;Eumetazoa;Bilateria;Protostomia;  
 Spiralia;Lophotrochozoa;Mollusca;Bivalvia;Autobranhia;Heteroconchia;Euhe  
 terodonta;Imparidentia;Venerida;Veneroidea;Veneridae;Mercenaria;Mercenari  
 a mercenaria  
 UdeM00000024205 6596 93.2 UdeM00000024205 XP\_045185793.1 21.4 421  
 286 11 283 675 391 794 1.40E-15 93.2 6596 cellular  
 organisms;Eukaryota;Opisthokonta;Metazoa;Eumetazoa;Bilateria;Protostomia;  
 Spiralia;Lophotrochozoa;Mollusca;Bivalvia;Autobranhia;Heteroconchia;Euhe  
 terodonta;Imparidentia;Venerida;Veneroidea;Veneridae;Mercenaria;Mercenari  
 a mercenaria

UdeM00000024206 6596 70.9 UdeM00000024206 XP\_045185793.1 20 450  
 295 16 344 749 366 794 8.30E-09 70.9 6596 cellular  
 organisms;Eukaryota;Opisthokonta;Metazoa;Eumetazoa;Bilateria;Protostomia;  
 Spiralia;Lophotrochozoa;Mollusca;Bivalvia;Autobranchia;Heteroconchia;Euhe  
 terodonta;Imparidentia;Venerida;Veneroidea;Veneridae;Mercenaria;Mercenari  
 a mercenaria  
 UdeM00000024208 7654 84.7 UdeM00000024208 XP\_041471785.1 23.9 393  
 245 13 372 739 61 424 5.40E-13 84.7 7654 cellular  
 organisms;Eukaryota;Opisthokonta;Metazoa;Eumetazoa;Bilateria;Deuterostomi  
 a;Echinodermata;Eleutherozoa;Echinozoa;Echinoidea;Euechinoidea;Echinacea;  
 Temnopleuroida;Toxopneustidae;Lytechinus;Lytechinus variegatus  
 UdeM00000024209 6596 71.6 UdeM00000024209 XP\_045191167.1 30.7 140  
 85 4 262 397 12 143 2.80E-09 71.6 6596 cellular  
 organisms;Eukaryota;Opisthokonta;Metazoa;Eumetazoa;Bilateria;Protostomia;  
 Spiralia;Lophotrochozoa;Mollusca;Bivalvia;Autobranchia;Heteroconchia;Euhe  
 terodonta;Imparidentia;Venerida;Veneroidea;Veneridae;Mercenaria;Mercenari  
 a mercenaria  
 UdeM00000024212 6596 100.1 UdeM00000024212 XP\_045172532.1 22.6 390  
 290 9 368 752 400 782 1.20E-17 100.1 6596 cellular  
 organisms;Eukaryota;Opisthokonta;Metazoa;Eumetazoa;Bilateria;Protostomia;  
 Spiralia;Lophotrochozoa;Mollusca;Bivalvia;Autobranchia;Heteroconchia;Euhe  
 terodonta;Imparidentia;Venerida;Veneroidea;Veneridae;Mercenaria;Mercenari  
 a mercenaria  
 UdeM00000024213 7741 131.3 UdeM00000024213 XP\_019620794.1 45.6 114  
 59 1 287 400 561 671 3.60E-27 131.3 7741 cellular  
 organisms;Eukaryota;Opisthokonta;Metazoa;Eumetazoa;Bilateria;Deuterostomi  
 a;Chordata;Cephalochordata;Leptocardii;Amphioxiformes;Branchiostomidae;Br  
 anchiostoma;Branchiostoma belcheri  
 UdeM00000024214 6596 595.1 UdeM00000024214 XP\_045201664.1 32.7 1077  
 661 31 63 1105 8 1054 2.10E-166 595.1 6596 cellular  
 organisms;Eukaryota;Opisthokonta;Metazoa;Eumetazoa;Bilateria;Protostomia;  
 Spiralia;Lophotrochozoa;Mollusca;Bivalvia;Autobranchia;Heteroconchia;Euhe  
 terodonta;Imparidentia;Venerida;Veneroidea;Veneridae;Mercenaria;Mercenari  
 a mercenaria  
 UdeM00000024215 6596 598.6 UdeM00000024215 XP\_045201664.1 32.7 1077  
 662 30 63 1106 8 1054 1.90E-167 598.6 6596 cellular  
 organisms;Eukaryota;Opisthokonta;Metazoa;Eumetazoa;Bilateria;Protostomia;  
 Spiralia;Lophotrochozoa;Mollusca;Bivalvia;Autobranchia;Heteroconchia;Euhe  
 terodonta;Imparidentia;Venerida;Veneroidea;Veneridae;Mercenaria;Mercenari  
 a mercenaria  
 UdeM00000024216 6596 557 UdeM00000024216 XP\_045201664.1 32.9 1032  
 649 28 28 1032 28 1043 6.10E-155 557 6596 cellular  
 organisms;Eukaryota;Opisthokonta;Metazoa;Eumetazoa;Bilateria;Protostomia;  
 Spiralia;Lophotrochozoa;Mollusca;Bivalvia;Autobranchia;Heteroconchia;Euhe  
 terodonta;Imparidentia;Venerida;Veneroidea;Veneridae;Mercenaria;Mercenari  
 a mercenaria  
 UdeM00000024217 7757 190.3 UdeM00000024217 XP\_032835197.1 78.6 117  
 25 0 1 117 90 206 1.40E-45 190.3 7757 cellular  
 organisms;Eukaryota;Opisthokonta;Metazoa;Eumetazoa;Bilateria;Deuterostomi  
 a;Chordata;Craniata;Vertebrata;Cyclostomata;Hyperoartia;Petromyzontiforme  
 s;Petromyzontidae;Petromyzon;Petromyzon marinus  
 UdeM00000024218 6596 349.7 UdeM00000024218 XP\_045201664.1 38.8 480  
 280 10 90 560 115 589 7.30E-93 349.7 6596 cellular  
 organisms;Eukaryota;Opisthokonta;Metazoa;Eumetazoa;Bilateria;Protostomia;

Spiralia; Lophotrochozoa; Mollusca; Bivalvia; Autobranchia; Heteroconchia; Euheterodonta; Imparidentia; Venerida; Veneroidea; Veneridae; Mercenaria; Mercenaria mercenaria

UdeM00000024219 6596 349.7 UdeM00000024219 XP\_045201664.1 38.8 480  
280 10 34 504 115 589 6.60E-93 349.7 6596 cellular  
organisms; Eukaryota; Opisthokonta; Metazoa; Eumetazoa; Bilateria; Protostomia; Spiralia; Lophotrochozoa; Mollusca; Bivalvia; Autobranchia; Heteroconchia; Euheterodonta; Imparidentia; Venerida; Veneroidea; Veneridae; Mercenaria; Mercenaria mercenaria

UdeM00000024220 7739 120.9 UdeM00000024220 XP\_035693202.1 29 303  
203 7 197 490 25 324 6.40E-24 120.9 7739 cellular  
organisms; Eukaryota; Opisthokonta; Metazoa; Eumetazoa; Bilateria; Deuterostomia; Chordata; Cephalochordata; Leptocardii; Amphioxiformes; Branchiostomidae; Branchiostoma; Branchiostoma floridae

UdeM00000038293 6579 410.2 UdeM00000038293 XP\_033743587.1 50.9 381  
181 3 73 448 99 478 3.40E-111 410.2 6579 cellular  
organisms; Eukaryota; Opisthokonta; Metazoa; Eumetazoa; Bilateria; Protostomia; Spiralia; Lophotrochozoa; Mollusca; Bivalvia; Autobranchia; Pteriomorpha; Pectinida; Pectinoidea; Pectinidae; Pecten; Pecten maximus

UdeM00000038294 7574 310.5 UdeM00000038294 XP\_013381563.1 45.9 344  
169 5 36 369 51 387 3.20E-81 310.5 7574 cellular  
organisms; Eukaryota; Opisthokonta; Metazoa; Eumetazoa; Bilateria; Protostomia; Spiralia; Lophotrochozoa; Brachiopoda; Linguliformea; Lingulata; Lingulida; Linguloidea; Lingulidae; Lingula; Lingula anatina

UdeM00000038297 6596 170.6 UdeM00000038297 XP\_045184685.1 83.2 101  
17 0 3 103 859 959 1.00E-39 170.6 6596 cellular  
organisms; Eukaryota; Opisthokonta; Metazoa; Eumetazoa; Bilateria; Protostomia; Spiralia; Lophotrochozoa; Mollusca; Bivalvia; Autobranchia; Heteroconchia; Euheterodonta; Imparidentia; Venerida; Veneroidea; Veneridae; Mercenaria; Mercenaria mercenaria

UdeM00000038296 6596 830.1 UdeM00000038296 XP\_045184685.1 81.9 493  
89 0 5 497 467 959 1.50E-237 830.1 6596 cellular  
organisms; Eukaryota; Opisthokonta; Metazoa; Eumetazoa; Bilateria; Protostomia; Spiralia; Lophotrochozoa; Mollusca; Bivalvia; Autobranchia; Heteroconchia; Euheterodonta; Imparidentia; Venerida; Veneroidea; Veneridae; Mercenaria; Mercenaria mercenaria

UdeM00000038295 6596 1520.4 UdeM00000038295 XP\_045184685.1 76.9  
973 199 4 1 961 1 959 0.00E+00 1520.4 6596  
cellular  
organisms; Eukaryota; Opisthokonta; Metazoa; Eumetazoa; Bilateria; Protostomia; Spiralia; Lophotrochozoa; Mollusca; Bivalvia; Autobranchia; Heteroconchia; Euheterodonta; Imparidentia; Venerida; Veneroidea; Veneridae; Mercenaria; Mercenaria mercenaria

UdeM00000038298 37653 414.8 UdeM00000038298 XP\_014786569.1 59 327  
133 1 1 327 1 326 9.90E-113 414.8 37653 cellular  
organisms; Eukaryota; Opisthokonta; Metazoa; Eumetazoa; Bilateria; Protostomia; Spiralia; Lophotrochozoa; Mollusca; Cephalopoda; Coleoidea; Octopodiformes; Octopoda; Incirrata; Octopodidae; Octopus; Octopus bimaculoides

UdeM00000038299 37653 414.5 UdeM00000038299 XP\_014786569.1 59.3 324  
131 1 3 326 4 326 1.30E-112 414.5 37653 cellular  
organisms; Eukaryota; Opisthokonta; Metazoa; Eumetazoa; Bilateria; Protostomia; Spiralia; Lophotrochozoa; Mollusca; Cephalopoda; Coleoidea; Octopodiformes; Octopoda; Incirrata; Octopodidae; Octopus; Octopus bimaculoides

UdeM00000038300 225164 277.3 UdeM00000038300 XP\_009055461.1 60.5  
 215 85 0 2 216 199 413 1.60E-71 277.3 225164  
 cellular  
 organisms;Eukaryota;Opisthokonta;Metazoa;Eumetazoa;Bilateria;Protostomia;  
 Spiralia;Lophotrochozoa;Mollusca;Gastropoda;Patellogastropoda;Lottioidea;  
 Lottiidae;Lottia;Lottia gigantea  
 UdeM00000038301 225164 413.7 UdeM00000038301 XP\_009055461.1 64.6  
 314 104 1 5 311 100 413 2.10E-112 413.7 225164  
 cellular  
 organisms;Eukaryota;Opisthokonta;Metazoa;Eumetazoa;Bilateria;Protostomia;  
 Spiralia;Lophotrochozoa;Mollusca;Gastropoda;Patellogastropoda;Lottioidea;  
 Lottiidae;Lottia;Lottia gigantea  
 UdeM00000038302 6579 228.8 UdeM00000038302 XP\_033746880.1 56.6 198  
 81 2 4 198 168 363 6.50E-57 228.8 6579 cellular  
 organisms;Eukaryota;Opisthokonta;Metazoa;Eumetazoa;Bilateria;Protostomia;  
 Spiralia;Lophotrochozoa;Mollusca;Bivalvia;Autobranchia;Pteriormorphia;Pect  
 inida;Pectinoidea;Pectinidae;Pecten;Pecten maximus  
 UdeM00000038303 6565 99 UdeM00000038303 XP\_022314409.1 38.5 169  
 86 5 1 151 1147 1315 5.60E-18 99 6565 cellular  
 organisms;Eukaryota;Opisthokonta;Metazoa;Eumetazoa;Bilateria;Protostomia;  
 Spiralia;Lophotrochozoa;Mollusca;Bivalvia;Autobranchia;Pteriormorphia;Ostr  
 eida;Ostreoidea;Ostreidae;Crassostrea;Crassostrea virginica  
 UdeM00000038304 6596 331.6 UdeM00000038304 XP\_045209627.1 46.7 379  
 179 2 284 639 174 552 2.20E-87 331.6 6596 cellular  
 organisms;Eukaryota;Opisthokonta;Metazoa;Eumetazoa;Bilateria;Protostomia;  
 Spiralia;Lophotrochozoa;Mollusca;Bivalvia;Autobranchia;Heteroconchia;Euhe  
 terodonta;Imparidentia;Venerida;Veneroidea;Veneridae;Mercenaria;Mercenari  
 a mercenaria  
 UdeM00000038305 6573 95.5 UdeM00000038305 XP\_021359078.1 39.5 129  
 71 2 62 186 57 182 7.80E-17 95.5 6573 cellular  
 organisms;Eukaryota;Opisthokonta;Metazoa;Eumetazoa;Bilateria;Protostomia;  
 Spiralia;Lophotrochozoa;Mollusca;Bivalvia;Autobranchia;Pteriormorphia;Pect  
 inida;Pectinoidea;Pectinidae;Mizuhopecten;Mizuhopecten yessoensis  
 UdeM00000038306 2607531 157.9 UdeM00000038306 XP\_029645903.1 43.3  
 231 113 7 15 239 414 632 1.60E-35 157.9 2607531  
 cellular  
 organisms;Eukaryota;Opisthokonta;Metazoa;Eumetazoa;Bilateria;Protostomia;  
 Spiralia;Lophotrochozoa;Mollusca;Cephalopoda;Coleoidea;Octopodiformes;Oct  
 opoda;Incirrata;Octopodidae;Octopus;Octopus sinensis  
 UdeM00000038307 2607531 157.9 UdeM00000038307 XP\_029645903.1 42.3  
 227 120 4 15 238 414 632 1.60E-35 157.9 2607531  
 cellular  
 organisms;Eukaryota;Opisthokonta;Metazoa;Eumetazoa;Bilateria;Protostomia;  
 Spiralia;Lophotrochozoa;Mollusca;Cephalopoda;Coleoidea;Octopodiformes;Oct  
 opoda;Incirrata;Octopodidae;Octopus;Octopus sinensis  
 UdeM00000038308 6596 135.2 UdeM00000038308 XP\_045183718.1 83.8 74  
 12 0 1 74 327 400 3.90E-29 135.2 6596 cellular  
 organisms;Eukaryota;Opisthokonta;Metazoa;Eumetazoa;Bilateria;Protostomia;  
 Spiralia;Lophotrochozoa;Mollusca;Bivalvia;Autobranchia;Heteroconchia;Euhe  
 terodonta;Imparidentia;Venerida;Veneroidea;Veneridae;Mercenaria;Mercenari  
 a mercenaria  
 UdeM00000038309 6596 242.3 UdeM00000038309 XP\_045183718.1 65.9 167  
 56 1 89 254 159 325 7.10E-61 242.3 6596 cellular  
 organisms;Eukaryota;Opisthokonta;Metazoa;Eumetazoa;Bilateria;Protostomia;

Spiralia;Lophotrochozoa;Mollusca;Bivalvia;Autobranchia;Heteroconchia;Euherodonta;Imparidentia;Venerida;Veneroidea;Veneridae;Mercenaria;Mercenaria mercenaria

UdeM00000038312 6596 268.9 UdeM00000038312 XP\_045183718.1 75 156  
39 0 1 156 8 163 4.20E-69 268.9 6596 cellular

organisms;Eukaryota;Opisthokonta;Metazoa;Eumetazoa;Bilateria;Protostomia;Spiralia;Lophotrochozoa;Mollusca;Bivalvia;Autobranchia;Heteroconchia;Euherodonta;Imparidentia;Venerida;Veneroidea;Veneridae;Mercenaria;Mercenaria mercenaria

UdeM00000038313 6596 124.8 UdeM00000038313 XP\_045180427.1 49.6 115  
56 1 80 192 159 273 1.30E-25 124.8 6596 cellular

organisms;Eukaryota;Opisthokonta;Metazoa;Eumetazoa;Bilateria;Protostomia;Spiralia;Lophotrochozoa;Mollusca;Bivalvia;Autobranchia;Heteroconchia;Euherodonta;Imparidentia;Venerida;Veneroidea;Veneridae;Mercenaria;Mercenaria mercenaria

UdeM00000038314 400727 338.6 UdeM00000038314 XP\_025083762.1 37  
600 289 17 10 579 7 547 1.60E-89 338.6 400727  
cellular

organisms;Eukaryota;Opisthokonta;Metazoa;Eumetazoa;Bilateria;Protostomia;Spiralia;Lophotrochozoa;Mollusca;Gastropoda;Caenogastropoda;Architaenioglossa;Ampullarioidea;Ampullariidae;Pomacea;Pomacea canaliculata

UdeM00000038319 6579 829.7 UdeM00000038319 XP\_033724993.1 71.4 581  
161 2 8 583 6 586 2.50E-237 829.7 6579 cellular

organisms;Eukaryota;Opisthokonta;Metazoa;Eumetazoa;Bilateria;Protostomia;Spiralia;Lophotrochozoa;Mollusca;Bivalvia;Autobranchia;Pteriomorphia;Pectinida;Pectinoidea;Pectinidae;Pecten;Pecten maximus

UdeM00000038320 29159 238.4 UdeM00000038320 XP\_011449016.2 48.4 217  
104 3 4 214 19 233 1.90E-59 238.4 29159 cellular

organisms;Eukaryota;Opisthokonta;Metazoa;Eumetazoa;Bilateria;Protostomia;Spiralia;Lophotrochozoa;Mollusca;Bivalvia;Autobranchia;Pteriomorphia;Ostreida;Ostreoidea;Ostreidae;Crassostrea;Crassostrea gigas

UdeM00000038321 6579 238.8 UdeM00000038321 XP\_033727457.1 52.9 208  
95 2 9 214 7 213 1.60E-59 238.8 6579 cellular

organisms;Eukaryota;Opisthokonta;Metazoa;Eumetazoa;Bilateria;Protostomia;Spiralia;Lophotrochozoa;Mollusca;Bivalvia;Autobranchia;Pteriomorphia;Pectinida;Pectinoidea;Pectinidae;Pecten;Pecten maximus

UdeM00000038322 6579 235 UdeM00000038322 XP\_033727457.1 40.4 307  
171 4 3 298 4 309 2.80E-58 235 6579 cellular

organisms;Eukaryota;Opisthokonta;Metazoa;Eumetazoa;Bilateria;Protostomia;Spiralia;Lophotrochozoa;Mollusca;Bivalvia;Autobranchia;Pteriomorphia;Pectinida;Pectinoidea;Pectinidae;Pecten;Pecten maximus

UdeM00000038323 6596 156.8 UdeM00000038323 XP\_045183724.1 43.6 165  
91 2 244 407 59 222 1.40E-34 156.8 6596 cellular

organisms;Eukaryota;Opisthokonta;Metazoa;Eumetazoa;Bilateria;Protostomia;Spiralia;Lophotrochozoa;Mollusca;Bivalvia;Autobranchia;Heteroconchia;Euherodonta;Imparidentia;Venerida;Veneroidea;Veneridae;Mercenaria;Mercenaria mercenaria

UdeM00000038324 6596 156.8 UdeM00000038324 XP\_045183724.1 43.6 165  
91 2 131 294 59 222 1.20E-34 156.8 6596 cellular

organisms;Eukaryota;Opisthokonta;Metazoa;Eumetazoa;Bilateria;Protostomia;Spiralia;Lophotrochozoa;Mollusca;Bivalvia;Autobranchia;Heteroconchia;Euherodonta;Imparidentia;Venerida;Veneroidea;Veneridae;Mercenaria;Mercenaria mercenaria



UdeM00000038325 29159 446.4 UdeM00000038325 XP\_034321269.1 82.1 263  
 47 0 1 263 137 399 2.50E-122 446.4 29159 cellular  
 organisms;Eukaryota;Opisthokonta;Metazoa;Eumetazoa;Bilateria;Protostomia;  
 Spiralia;Lophotrochozoa;Mollusca;Bivalvia;Autobranhia;Pteriomorphia;Ostr  
 eida;Ostreoidea;Ostreidae;Crassostrea;Crassostrea gigas  
 UdeM00000038326 29159 568.9 UdeM00000038326 XP\_011440905.1 77.3 384  
 84 1 9 389 3 386 4.90E-159 568.9 29159 cellular  
 organisms;Eukaryota;Opisthokonta;Metazoa;Eumetazoa;Bilateria;Protostomia;  
 Spiralia;Lophotrochozoa;Mollusca;Bivalvia;Autobranhia;Pteriomorphia;Ostr  
 eida;Ostreoidea;Ostreidae;Crassostrea;Crassostrea gigas  
 UdeM00000038327 6596 100.5 UdeM00000038327 XP\_045184699.1 45.3 128  
 54 4 1 113 1 127 1.40E-18 100.5 6596 cellular  
 organisms;Eukaryota;Opisthokonta;Metazoa;Eumetazoa;Bilateria;Protostomia;  
 Spiralia;Lophotrochozoa;Mollusca;Bivalvia;Autobranhia;Heteroconchia;Euhe  
 terodonta;Imparidentia;Venerida;Veneroidea;Veneridae;Mercenaria;Mercenari  
 a mercenaria  
 UdeM00000038328 6565 109.8 UdeM00000038328 XP\_022301314.1 49.8 470  
 185 10 3 459 2 433 9.80E-21 109.8 6565 cellular  
 organisms;Eukaryota;Opisthokonta;Metazoa;Eumetazoa;Bilateria;Protostomia;  
 Spiralia;Lophotrochozoa;Mollusca;Bivalvia;Autobranhia;Pteriomorphia;Ostr  
 eida;Ostreoidea;Ostreidae;Crassostrea;Crassostrea virginica  
 UdeM00000038329 6596 235.3 UdeM00000038329 XP\_045184524.1 44.1 313  
 130 7 28 312 81 376 4.70E-58 235.3 6596 cellular  
 organisms;Eukaryota;Opisthokonta;Metazoa;Eumetazoa;Bilateria;Protostomia;  
 Spiralia;Lophotrochozoa;Mollusca;Bivalvia;Autobranhia;Heteroconchia;Euhe  
 terodonta;Imparidentia;Venerida;Veneroidea;Veneridae;Mercenaria;Mercenari  
 a mercenaria  
 UdeM00000038330 6565 58.2 UdeM00000038330 XP\_022307714.1 68.8 32  
 10 0 1 32 29 60 7.10E-06 58.2 6565 cellular  
 organisms;Eukaryota;Opisthokonta;Metazoa;Eumetazoa;Bilateria;Protostomia;  
 Spiralia;Lophotrochozoa;Mollusca;Bivalvia;Autobranhia;Pteriomorphia;Ostr  
 eida;Ostreoidea;Ostreidae;Crassostrea;Crassostrea virginica  
 UdeM00000038331 6565 189.5 UdeM00000038331 XP\_022329271.1 29.7 532  
 241 11 14 537 10 416 1.10E-44 189.5 6565 cellular  
 organisms;Eukaryota;Opisthokonta;Metazoa;Eumetazoa;Bilateria;Protostomia;  
 Spiralia;Lophotrochozoa;Mollusca;Bivalvia;Autobranhia;Pteriomorphia;Ostr  
 eida;Ostreoidea;Ostreidae;Crassostrea;Crassostrea virginica  
 UdeM00000038332 6945 147.9 UdeM00000038332 XP\_002402827.3 69.2 107  
 24 1 4 101 87 193 7.10E-33 147.9 6945 cellular  
 organisms;Eukaryota;Opisthokonta;Metazoa;Eumetazoa;Bilateria;Protostomia;  
 Ecdysozoa;Panarthropoda;Arthropoda;Chelicerata;Arachnida;Acari;Parasitifo  
 rmes;Ixodida;Ixodoidea;Ixodidae;Ixodinae;Ixodes;Ixodes scapularis  
 UdeM00000038333 6596 384.8 UdeM00000038333 XP\_045184737.1 66.5 275  
 92 0 1 275 1 275 9.20E-104 384.8 6596 cellular  
 organisms;Eukaryota;Opisthokonta;Metazoa;Eumetazoa;Bilateria;Protostomia;  
 Spiralia;Lophotrochozoa;Mollusca;Bivalvia;Autobranhia;Heteroconchia;Euhe  
 terodonta;Imparidentia;Venerida;Veneroidea;Veneridae;Mercenaria;Mercenari  
 a mercenaria  
 UdeM00000038334 6596 310.8 UdeM00000038334 XP\_045183245.1 36.9 786  
 343 20 13 730 13 713 4.70E-81 310.8 6596 cellular  
 organisms;Eukaryota;Opisthokonta;Metazoa;Eumetazoa;Bilateria;Protostomia;  
 Spiralia;Lophotrochozoa;Mollusca;Bivalvia;Autobranhia;Heteroconchia;Euhe  
 terodonta;Imparidentia;Venerida;Veneroidea;Veneridae;Mercenaria;Mercenari  
 a mercenaria

UdeM00000038335 6596 311.6 UdeM00000038335 XP\_045183245.1 36.9 785  
 343 20 13 729 13 713 2.70E-81 311.6 6596 cellular  
 organisms;Eukaryota;Opisthokonta;Metazoa;Eumetazoa;Bilateria;Protostomia;  
 Spiralia;Lophotrochozoa;Mollusca;Bivalvia;Autobranchia;Heteroconchia;Euhe  
 terodonta;Imparidentia;Venerida;Veneroidea;Veneridae;Mercenaria;Mercenari  
 a mercenaria  
 UdeM00000038336 1735272 149.1 UdeM00000038336 XP\_041356123.1 34.2  
 1084 548 29 1 1039 1 964 3.20E-32 149.1 1735272  
 cellular  
 organisms;Eukaryota;Opisthokonta;Metazoa;Eumetazoa;Bilateria;Protostomia;  
 Spiralia;Lophotrochozoa;Mollusca;Gastropoda;Neomphalina;Neomphaloidea;Pel  
 tospiridae;Gigantopelta;Gigantopelta aegis  
 UdeM00000038337 6596 121.7 UdeM00000038337 XP\_045184590.1 62.4 93  
 23 1 1 81 1 93 4.50E-25 121.7 6596 cellular  
 organisms;Eukaryota;Opisthokonta;Metazoa;Eumetazoa;Bilateria;Protostomia;  
 Spiralia;Lophotrochozoa;Mollusca;Bivalvia;Autobranchia;Heteroconchia;Euhe  
 terodonta;Imparidentia;Venerida;Veneroidea;Veneridae;Mercenaria;Mercenari  
 a mercenaria  
 UdeM00000038338 6565 486.1 UdeM00000038338 XP\_022304379.1 70.2 362  
 103 5 5 365 158 515 3.90E-134 486.1 6565 cellular  
 organisms;Eukaryota;Opisthokonta;Metazoa;Eumetazoa;Bilateria;Protostomia;  
 Spiralia;Lophotrochozoa;Mollusca;Bivalvia;Autobranchia;Pteriormorphia;Ostr  
 eida;Ostreoidea;Ostreidae;Crassostrea;Crassostrea virginica  
 UdeM00000038342 400727 360.1 UdeM00000038342 XP\_025084159.1 42.9  
 462 247 7 6 451 63 523 4.00E-96 360.1 400727  
 cellular  
 organisms;Eukaryota;Opisthokonta;Metazoa;Eumetazoa;Bilateria;Protostomia;  
 Spiralia;Lophotrochozoa;Mollusca;Gastropoda;Caenogastropoda;Architaeniogl  
 ossa;Ampullarioidea;Ampullariidae;Pomacea;Pomacea canaliculata  
 UdeM00000038343 10224 136.7 UdeM00000038343 XP\_006817093.1 41.6 185  
 92 4 2 181 7 180 3.00E-29 136.7 10224 cellular  
 organisms;Eukaryota;Opisthokonta;Metazoa;Eumetazoa;Bilateria;Deuterostomi  
 a;Hemichordata;Enteropneusta;Harrimaniidae;Saccoglossus;Saccoglossus  
 kowalevskii  
 UdeM00000038344 6565 87 UdeM00000038344 XP\_022296322.1 34.6 127  
 80 1 97 223 39 162 3.30E-14 87 6565 cellular  
 organisms;Eukaryota;Opisthokonta;Metazoa;Eumetazoa;Bilateria;Protostomia;  
 Spiralia;Lophotrochozoa;Mollusca;Bivalvia;Autobranchia;Pteriormorphia;Ostr  
 eida;Ostreoidea;Ostreidae;Crassostrea;Crassostrea virginica  
 UdeM00000038346 1415580 295.4 UdeM00000038346 XP\_030075314.1 50.6  
 316 137 4 3 315 326 625 8.40E-77 295.4 1415580  
 cellular  
 organisms;Eukaryota;Opisthokonta;Metazoa;Eumetazoa;Bilateria;Deuterostomi  
 a;Chordata;Craniata;Vertebrata;Gnathostomata;Teleostomi;Euteleostomi;Sarc  
 opterygii;Dipnotetrapodomorpha;Tetrapoda;Amphibia;Gymnophiona;Siphonopida  
 e;Microcaecilia;Microcaecilia unicolor  
 UdeM00000038347 7757 206.8 UdeM00000038347 XP\_032835197.1 83.9 118  
 19 0 1 118 52 169 1.50E-50 206.8 7757 cellular  
 organisms;Eukaryota;Opisthokonta;Metazoa;Eumetazoa;Bilateria;Deuterostomi  
 a;Chordata;Craniata;Vertebrata;Cyclostomata;Hyperoartia;Petromyzontiforme  
 s;Petromyzontidae;Petromyzon;Petromyzon marinus  
 UdeM00000038348 260995 80.5 UdeM00000038348 XP\_033812940.1 51.4  
 74 35 1 1 74 1 73 1.00E-12 80.5 260995  
 cellular

organisms;Eukaryota;Opisthokonta;Metazoa;Eumetazoa;Bilateria;Deuterostomi  
a;Chordata;Craniata;Vertebrata;Gnathostomata;Teleostomi;Euteleostomi;Sarc  
opterygii;Dipnotetrapodomorpha;Tetrapoda;Amphibia;Gymnophiona;Dermophiida  
e;Geotrypetes;Geotrypetes seraphini

UdeM00000038349 6596 68.9 UdeM00000038349 XP\_045185108.1 45 80  
38 2 441 515 180 258 2.50E-08 68.9 6596 cellular

organisms;Eukaryota;Opisthokonta;Metazoa;Eumetazoa;Bilateria;Protostomia;  
Spiralia;Lophotrochozoa;Mollusca;Bivalvia;Autobranchia;Heteroconchia;Euhe  
terodonta;Imparidentia;Venerida;Veneroidea;Veneridae;Mercenaria;Mercenari  
a mercenaria

UdeM00000038350 6596 68.9 UdeM00000038350 XP\_045193773.1 27.2 151  
100 4 10 153 87 234 2.00E-08 68.9 6596 cellular

organisms;Eukaryota;Opisthokonta;Metazoa;Eumetazoa;Bilateria;Protostomia;  
Spiralia;Lophotrochozoa;Mollusca;Bivalvia;Autobranchia;Heteroconchia;Euhe  
terodonta;Imparidentia;Venerida;Veneroidea;Veneridae;Mercenaria;Mercenari  
a mercenaria

UdeM00000038351 29159 307.4 UdeM00000038351 XP\_011453276.2 58.2 261  
90 3 1 261 1 242 2.10E-80 307.4 29159 cellular

organisms;Eukaryota;Opisthokonta;Metazoa;Eumetazoa;Bilateria;Protostomia;  
Spiralia;Lophotrochozoa;Mollusca;Bivalvia;Autobranchia;Pteriormorphia;Ostr  
eida;Ostreoidea;Ostreidae;Crassostrea;Crassostrea gigas

UdeM00000038352 6565 134.4 UdeM00000038352 XP\_022303446.1 89.6 67  
7 0 13 79 277 343 7.90E-29 134.4 6565 cellular

organisms;Eukaryota;Opisthokonta;Metazoa;Eumetazoa;Bilateria;Protostomia;  
Spiralia;Lophotrochozoa;Mollusca;Bivalvia;Autobranchia;Pteriormorphia;Ostr  
eida;Ostreoidea;Ostreidae;Crassostrea;Crassostrea virginica

UdeM00000038353 6596 126.7 UdeM00000038353 XP\_045184665.1 61.5 91  
35 0 13 103 367 457 1.70E-26 126.7 6596 cellular

organisms;Eukaryota;Opisthokonta;Metazoa;Eumetazoa;Bilateria;Protostomia;  
Spiralia;Lophotrochozoa;Mollusca;Bivalvia;Autobranchia;Heteroconchia;Euhe  
terodonta;Imparidentia;Venerida;Veneroidea;Veneridae;Mercenaria;Mercenari  
a mercenaria

UdeM00000038354 6565 186.4 UdeM00000038354 XP\_022329307.1 56 150  
65 1 36 184 13 162 3.50E-44 186.4 6565 cellular

organisms;Eukaryota;Opisthokonta;Metazoa;Eumetazoa;Bilateria;Protostomia;  
Spiralia;Lophotrochozoa;Mollusca;Bivalvia;Autobranchia;Pteriormorphia;Ostr  
eida;Ostreoidea;Ostreidae;Crassostrea;Crassostrea virginica

UdeM00000038355 6596 568.2 UdeM00000038355 XP\_045204274.1 49.7 587  
280 6 3 583 2 579 1.20E-158 568.2 6596 cellular

organisms;Eukaryota;Opisthokonta;Metazoa;Eumetazoa;Bilateria;Protostomia;  
Spiralia;Lophotrochozoa;Mollusca;Bivalvia;Autobranchia;Heteroconchia;Euhe  
terodonta;Imparidentia;Venerida;Veneroidea;Veneridae;Mercenaria;Mercenari  
a mercenaria

UdeM00000038356 6596 323.2 UdeM00000038356 XP\_045204106.1 38.7 455  
147 2 5 335 15 461 4.10E-85 323.2 6596 cellular

organisms;Eukaryota;Opisthokonta;Metazoa;Eumetazoa;Bilateria;Protostomia;  
Spiralia;Lophotrochozoa;Mollusca;Bivalvia;Autobranchia;Heteroconchia;Euhe  
terodonta;Imparidentia;Venerida;Veneroidea;Veneridae;Mercenaria;Mercenari  
a mercenaria

UdeM00000038357 6596 563.5 UdeM00000038357 XP\_045204271.1 48.5 586  
289 5 3 583 2 579 3.10E-157 563.5 6596 cellular

organisms;Eukaryota;Opisthokonta;Metazoa;Eumetazoa;Bilateria;Protostomia;  
Spiralia;Lophotrochozoa;Mollusca;Bivalvia;Autobranchia;Heteroconchia;Euhe

terodonta;Imparidentia;Venerida;Veneroidea;Veneridae;Mercenaria;Mercenari  
 a mercenaria  
 UdeM00000038358 6596 477.2 UdeM00000038358 XP\_045195414.1 46.2 578  
 241 8 50 564 7 577 2.80E-131 477.2 6596 cellular  
 organisms;Eukaryota;Opisthokonta;Metazoa;Eumetazoa;Bilateria;Protostomia;  
 Spiralia;Lophotrochozoa;Mollusca;Bivalvia;Autobranhia;Heteroconchia;Euhe  
 terodonta;Imparidentia;Venerida;Veneroidea;Veneridae;Mercenaria;Mercenari  
 a mercenaria  
 UdeM00000038359 6596 567.8 UdeM00000038359 XP\_045204271.1 48.9 587  
 285 6 3 583 2 579 1.60E-158 567.8 6596 cellular  
 organisms;Eukaryota;Opisthokonta;Metazoa;Eumetazoa;Bilateria;Protostomia;  
 Spiralia;Lophotrochozoa;Mollusca;Bivalvia;Autobranhia;Heteroconchia;Euhe  
 terodonta;Imparidentia;Venerida;Veneroidea;Veneridae;Mercenaria;Mercenari  
 a mercenaria  
 UdeM00000038360 6596 574.7 UdeM00000038360 XP\_045204271.1 49.3 586  
 284 5 3 583 2 579 1.30E-160 574.7 6596 cellular  
 organisms;Eukaryota;Opisthokonta;Metazoa;Eumetazoa;Bilateria;Protostomia;  
 Spiralia;Lophotrochozoa;Mollusca;Bivalvia;Autobranhia;Heteroconchia;Euhe  
 terodonta;Imparidentia;Venerida;Veneroidea;Veneridae;Mercenaria;Mercenari  
 a mercenaria  
 UdeM00000038361 6596 573.5 UdeM00000038361 XP\_045204271.1 49.3 584  
 283 5 1 579 4 579 2.90E-160 573.5 6596 cellular  
 organisms;Eukaryota;Opisthokonta;Metazoa;Eumetazoa;Bilateria;Protostomia;  
 Spiralia;Lophotrochozoa;Mollusca;Bivalvia;Autobranhia;Heteroconchia;Euhe  
 terodonta;Imparidentia;Venerida;Veneroidea;Veneridae;Mercenaria;Mercenari  
 a mercenaria  
 UdeM00000038362 6596 242.7 UdeM00000038362 XP\_045204106.1 54.8 228  
 90 3 1 223 133 352 4.60E-61 242.7 6596 cellular  
 organisms;Eukaryota;Opisthokonta;Metazoa;Eumetazoa;Bilateria;Protostomia;  
 Spiralia;Lophotrochozoa;Mollusca;Bivalvia;Autobranhia;Heteroconchia;Euhe  
 terodonta;Imparidentia;Venerida;Veneroidea;Veneridae;Mercenaria;Mercenari  
 a mercenaria  
 UdeM00000038363 6596 122.5 UdeM00000038363 XP\_045202772.1 34.8 207  
 86 3 2 162 378 581 5.00E-25 122.5 6596 cellular  
 organisms;Eukaryota;Opisthokonta;Metazoa;Eumetazoa;Bilateria;Protostomia;  
 Spiralia;Lophotrochozoa;Mollusca;Bivalvia;Autobranhia;Heteroconchia;Euhe  
 terodonta;Imparidentia;Venerida;Veneroidea;Veneridae;Mercenaria;Mercenari  
 a mercenaria  
 UdeM00000038364 6596 556.2 UdeM00000038364 XP\_045195414.1 49.7 578  
 281 6 5 579 7 577 4.90E-155 556.2 6596 cellular  
 organisms;Eukaryota;Opisthokonta;Metazoa;Eumetazoa;Bilateria;Protostomia;  
 Spiralia;Lophotrochozoa;Mollusca;Bivalvia;Autobranhia;Heteroconchia;Euhe  
 terodonta;Imparidentia;Venerida;Veneroidea;Veneridae;Mercenaria;Mercenari  
 a mercenaria  
 UdeM00000038365 6596 592 UdeM00000038365 XP\_045204271.1 50.3 578  
 282 4 3 575 2 579 7.90E-166 592 6596 cellular  
 organisms;Eukaryota;Opisthokonta;Metazoa;Eumetazoa;Bilateria;Protostomia;  
 Spiralia;Lophotrochozoa;Mollusca;Bivalvia;Autobranhia;Heteroconchia;Euhe  
 terodonta;Imparidentia;Venerida;Veneroidea;Veneridae;Mercenaria;Mercenari  
 a mercenaria  
 UdeM00000038366 6596 590.9 UdeM00000038366 XP\_045204271.1 50.3 576  
 281 4 1 571 4 579 1.80E-165 590.9 6596 cellular  
 organisms;Eukaryota;Opisthokonta;Metazoa;Eumetazoa;Bilateria;Protostomia;  
 Spiralia;Lophotrochozoa;Mollusca;Bivalvia;Autobranhia;Heteroconchia;Euhe

terodonta;Imparidentia;Venerida;Veneroidea;Veneridae;Mercenaria;Mercenaria mercenaria  
 UdeM00000038367 6565 192.6 UdeM00000038367 XP\_022303529.1 81.6 114  
 21 0 1 114 1 114 2.80E-46 192.6 6565 cellular  
 organisms;Eukaryota;Opisthokonta;Metazoa;Eumetazoa;Bilateria;Protostomia;  
 Spiralia;Lophotrochozoa;Mollusca;Bivalvia;Autobranchia;Pteriormorphia;Ostr  
 eida;Ostreoidea;Ostreidae;Crassostrea;Crassostrea virginica  
 UdeM00000038368 6500 86.3 UdeM00000038368 XP\_012942458.1 37.5 104  
 65 0 1 104 1 104 2.60E-14 86.3 6500 cellular  
 organisms;Eukaryota;Opisthokonta;Metazoa;Eumetazoa;Bilateria;Protostomia;  
 Spiralia;Lophotrochozoa;Mollusca;Gastropoda;Heterobranchia;Euthyneura;Tec  
 tipleura;Aplysiida;Aplysioidae;Aplysiidae;Aplysia;Aplysia californica  
 UdeM00000038369 6596 384.4 UdeM00000038369 XP\_045185184.1 61.4 293  
 112 1 1 292 1 293 1.30E-103 384.4 6596 cellular  
 organisms;Eukaryota;Opisthokonta;Metazoa;Eumetazoa;Bilateria;Protostomia;  
 Spiralia;Lophotrochozoa;Mollusca;Bivalvia;Autobranchia;Heteroconchia;Euhe  
 terodonta;Imparidentia;Venerida;Veneroidea;Veneridae;Mercenaria;Mercenari  
 a mercenaria  
 UdeM00000038370 6565 89.4 UdeM00000038370 XP\_022288562.1 44.4 108  
 56 1 1 104 73 180 3.80E-15 89.4 6565 cellular  
 organisms;Eukaryota;Opisthokonta;Metazoa;Eumetazoa;Bilateria;Protostomia;  
 Spiralia;Lophotrochozoa;Mollusca;Bivalvia;Autobranchia;Pteriormorphia;Ostr  
 eida;Ostreoidea;Ostreidae;Crassostrea;Crassostrea virginica  
 UdeM00000038372 6596 222.6 UdeM00000038372 XP\_045167221.1 42.6 235  
 135 0 1 235 765 999 5.30E-55 222.6 6596 cellular  
 organisms;Eukaryota;Opisthokonta;Metazoa;Eumetazoa;Bilateria;Protostomia;  
 Spiralia;Lophotrochozoa;Mollusca;Bivalvia;Autobranchia;Heteroconchia;Euhe  
 terodonta;Imparidentia;Venerida;Veneroidea;Veneridae;Mercenaria;Mercenari  
 a mercenaria  
 UdeM00000038371 6596 934.9 UdeM00000038371 XP\_045167221.1 46 988  
 516 8 13 995 25 999 8.70E-269 934.9 6596 cellular  
 organisms;Eukaryota;Opisthokonta;Metazoa;Eumetazoa;Bilateria;Protostomia;  
 Spiralia;Lophotrochozoa;Mollusca;Bivalvia;Autobranchia;Heteroconchia;Euhe  
 terodonta;Imparidentia;Venerida;Veneroidea;Veneridae;Mercenaria;Mercenari  
 a mercenaria  
 UdeM00000038373 409849 133.3 UdeM00000038373 XP\_033828675.1 29.2  
 295 175 9 116 399 606 877 7.00E-28 133.3 409849  
 cellular  
 organisms;Eukaryota;Opisthokonta;Metazoa;Eumetazoa;Bilateria;Deuterostomi  
 a;Chordata;Craniata;Vertebrata;Gnathostomata;Teleostomi;Euteleostomi;Acti  
 nopterygii;Actinopteri;Neopterygii;Teleostei;Osteoglossocephalai;Clupeoce  
 phala;Euteleosteomorpha;Neoteleostei;Eurypterygia;Ctenosquamata;Acanthomo  
 rphata;Euacanthomorphacea;Percomorphaceae;Gobiaria;Gobiiformes;Gobioidei;  
 Gobiidae;Oxudercinae;Periophthalmus;Periophthalmus magnuspinnatus  
 UdeM00000038374 29159 92 UdeM00000038374 XP\_011449844.1 26.3 247  
 173 6 314 553 441 685 2.50E-15 92 29159 cellular  
 organisms;Eukaryota;Opisthokonta;Metazoa;Eumetazoa;Bilateria;Protostomia;  
 Spiralia;Lophotrochozoa;Mollusca;Bivalvia;Autobranchia;Pteriormorphia;Ostr  
 eida;Ostreoidea;Ostreidae;Crassostrea;Crassostrea gigas  
 UdeM00000038375 400727 726.5 UdeM00000038375 XP\_025100369.1 73.5  
 501 102 5 16 514 62 533 2.50E-206 726.5 400727  
 cellular  
 organisms;Eukaryota;Opisthokonta;Metazoa;Eumetazoa;Bilateria;Protostomia;

Spiralia;Lophotrochozoa;Mollusca;Gastropoda;Caenogastropoda;Architaenioglossa;Ampullarioidea;Ampullariidae;Pomacea;Pomacea canaliculata

|                 |      |       |                 |                |      |          |
|-----------------|------|-------|-----------------|----------------|------|----------|
| UdeM00000038376 | 7957 | 189.1 | UdeM00000038376 | XP_026125748.1 | 46.9 | 224      |
| 104             | 4    | 43    | 259             | 161            | 376  | 7.80E-45 |

189.1 7957 cellular organisms;Eukaryota;Opisthokonta;Metazoa;Eumetazoa;Bilateria;Deuterostomia;Chordata;Craniata;Vertebrata;Gnathostomata;Teleostomi;Euteleostomi;Actinopterygii;Actinopteri;Neopterygii;Teleostei;Osteoglossocephalai;Clupeocephala;Otomorpha;Ostariophysi;Otophysi;Cypriniphysae;Cypriniformes;Cyprinidae;Cyprininae;Carassius;Carassius auratus

|                 |      |        |                 |                |      |      |
|-----------------|------|--------|-----------------|----------------|------|------|
| UdeM00000038377 | 6596 | 2155.2 | UdeM00000038377 | XP_045167221.1 | 55.1 |      |
| 1915            | 819  | 17     | 1               | 1904           | 1    | 1886 |

0.00E+00 2155.2 6596 cellular organisms;Eukaryota;Opisthokonta;Metazoa;Eumetazoa;Bilateria;Protostomia;Spiralia;Lophotrochozoa;Mollusca;Bivalvia;Autobranchia;Heteroconchia;Euheterodonta;Imparidentia;Venerida;Veneroidea;Veneridae;Mercenaria;Mercenaria mercenaria

|                 |      |       |                 |                |      |           |
|-----------------|------|-------|-----------------|----------------|------|-----------|
| UdeM00000038378 | 6565 | 421.8 | UdeM00000038378 | XP_022322188.1 | 66.9 | 284       |
| 94              | 0    | 1     | 284             | 1              | 284  | 1.50E-114 |

421.8 6565 cellular organisms;Eukaryota;Opisthokonta;Metazoa;Eumetazoa;Bilateria;Protostomia;Spiralia;Lophotrochozoa;Mollusca;Bivalvia;Autobranchia;Pteriormorphia;Ostreida;Ostreoidea;Ostreidae;Crassostrea;Crassostrea virginica

|                 |      |       |                 |                |      |           |
|-----------------|------|-------|-----------------|----------------|------|-----------|
| UdeM00000038379 | 6596 | 401.4 | UdeM00000038379 | XP_045184696.1 | 74.8 | 254       |
| 60              | 2    | 1     | 250             | 1              | 254  | 9.10E-109 |

401.4 6596 cellular organisms;Eukaryota;Opisthokonta;Metazoa;Eumetazoa;Bilateria;Protostomia;Spiralia;Lophotrochozoa;Mollusca;Bivalvia;Autobranchia;Heteroconchia;Euheterodonta;Imparidentia;Venerida;Veneroidea;Veneridae;Mercenaria;Mercenaria mercenaria

|                 |      |       |                 |                |     |           |
|-----------------|------|-------|-----------------|----------------|-----|-----------|
| UdeM00000038380 | 6579 | 696.4 | UdeM00000038380 | XP_033725616.1 | 57  | 628       |
| 254             | 4    | 1     | 621             | 283            | 901 | 3.20E-197 |

696.4 6579 cellular organisms;Eukaryota;Opisthokonta;Metazoa;Eumetazoa;Bilateria;Protostomia;Spiralia;Lophotrochozoa;Mollusca;Bivalvia;Autobranchia;Pteriormorphia;Pectinida;Pectinoidea;Pectinidae;Pecten;Pecten maximus

|                 |      |     |                 |                |      |          |
|-----------------|------|-----|-----------------|----------------|------|----------|
| UdeM00000038381 | 6596 | 156 | UdeM00000038381 | XP_045184060.1 | 46.8 | 156      |
| 82              | 1    | 62  | 217             | 59             | 213  | 5.50E-35 |

156 6596 cellular organisms;Eukaryota;Opisthokonta;Metazoa;Eumetazoa;Bilateria;Protostomia;Spiralia;Lophotrochozoa;Mollusca;Bivalvia;Autobranchia;Heteroconchia;Euheterodonta;Imparidentia;Venerida;Veneroidea;Veneridae;Mercenaria;Mercenaria mercenaria

|                 |      |       |                 |                |      |          |
|-----------------|------|-------|-----------------|----------------|------|----------|
| UdeM00000038382 | 6573 | 115.2 | UdeM00000038382 | XP_021377955.1 | 65.8 | 76       |
| 26              | 0    | 132   | 207             | 187            | 262  | 1.00E-22 |

115.2 6573 cellular organisms;Eukaryota;Opisthokonta;Metazoa;Eumetazoa;Bilateria;Protostomia;Spiralia;Lophotrochozoa;Mollusca;Bivalvia;Autobranchia;Pteriormorphia;Pectinida;Pectinoidea;Pectinidae;Mizuhopecten;Mizuhopecten yessoensis

|                 |      |       |                 |                |     |           |
|-----------------|------|-------|-----------------|----------------|-----|-----------|
| UdeM00000038383 | 6579 | 613.6 | UdeM00000038383 | XP_033725062.1 | 66  | 441       |
| 143             | 4    | 12    | 445             | 417            | 857 | 2.00E-172 |

613.6 6579 cellular organisms;Eukaryota;Opisthokonta;Metazoa;Eumetazoa;Bilateria;Protostomia;Spiralia;Lophotrochozoa;Mollusca;Bivalvia;Autobranchia;Pteriormorphia;Pectinida;Pectinoidea;Pectinidae;Pecten;Pecten maximus

|                 |        |       |                 |                |      |     |
|-----------------|--------|-------|-----------------|----------------|------|-----|
| UdeM00000038384 | 441366 | 258.5 | UdeM00000038384 | XP_028296753.1 | 43.7 |     |
| 343             | 176    | 9     | 6               | 346            | 32   | 359 |

1.30E-65 258.5 441366 cellular organisms;Eukaryota;Opisthokonta;Metazoa;Eumetazoa;Bilateria;Deuterostomia;Chordata;Craniata;Vertebrata;Gnathostomata;Teleostomi;Euteleostomi;Actinopterygii;Actinopteri;Neopterygii;Teleostei;Osteoglossocephalai;Clupeocephala

phala;Euteleosteomorpha;Neoteleostei;Eurypterygia;Ctenosquamata;Acanthomorphata;Euacanthomorphacea;Percomorphaceae;Ovalentaria;Blenniimorphae;Blenniiformes;Gobiesocoidei;Gobiesocidae;Gobiesocinae;Gouania;Gouania willdenowi

UdeM00000038385 6579 511.1 UdeM00000038385 XP\_033725062.1 56.5 428  
174 4 1 423 1 421 1.30E-141 511.1 6579 cellular  
organisms;Eukaryota;Opisthokonta;Metazoa;Eumetazoa;Bilateria;Protostomia;Spiralia;Lophotrochozoa;Mollusca;Bivalvia;Autobranchia;Pteriomorpha;Pectinida;Pectinoidea;Pectinidae;Pecten;Pecten maximus

UdeM00000038386 6579 436.4 UdeM00000038386 XP\_033725062.1 55.7 366  
153 3 1 364 1 359 3.50E-119 436.4 6579 cellular  
organisms;Eukaryota;Opisthokonta;Metazoa;Eumetazoa;Bilateria;Protostomia;Spiralia;Lophotrochozoa;Mollusca;Bivalvia;Autobranchia;Pteriomorpha;Pectinida;Pectinoidea;Pectinidae;Pecten;Pecten maximus

UdeM00000038387 6596 134 UdeM00000038387 XP\_045169481.1 35.7 168  
101 4 4 165 3 169 1.70E-28 134 6596 cellular  
organisms;Eukaryota;Opisthokonta;Metazoa;Eumetazoa;Bilateria;Protostomia;Spiralia;Lophotrochozoa;Mollusca;Bivalvia;Autobranchia;Heteroconchia;Euheterodonta;Imparidentia;Venerida;Veneroidea;Veneridae;Mercenaria;Mercenaria mercenaria

UdeM00000038388 210632 92.4 UdeM00000038388 XP\_028282933.1 24.4  
271 184 8 42 298 797 1060 1.00E-15 92.4 210632  
cellular

organisms;Eukaryota;Opisthokonta;Metazoa;Eumetazoa;Bilateria;Deuterostomia;Chordata;Craniata;Vertebrata;Gnathostomata;Teleostomi;Euteleostomi;Actinopterygii;Actinopteri;Neopterygii;Teleostei;Osteoglossocephalai;Clupeocephala;Euteleosteomorpha;Neoteleostei;Eurypterygia;Ctenosquamata;Acanthomorphata;Euacanthomorphacea;Percomorphaceae;Ovalentaria;Ovalentaria incertae sedis;Ambassidae;Parambassis;Parambassis ranga

UdeM00000038389 6596 138.3 UdeM00000038389 XP\_045183580.1 55.2 143  
60 3 20 158 941 1083 8.60E-30 138.3 6596 cellular  
organisms;Eukaryota;Opisthokonta;Metazoa;Eumetazoa;Bilateria;Protostomia;Spiralia;Lophotrochozoa;Mollusca;Bivalvia;Autobranchia;Heteroconchia;Euheterodonta;Imparidentia;Venerida;Veneroidea;Veneridae;Mercenaria;Mercenaria mercenaria

UdeM00000038390 225164 298.5 UdeM00000038390 XP\_009062095.1 46  
298 159 2 324 621 6 301 2.00E-77 298.5 225164  
cellular

organisms;Eukaryota;Opisthokonta;Metazoa;Eumetazoa;Bilateria;Protostomia;Spiralia;Lophotrochozoa;Mollusca;Gastropoda;Patellogastropoda;Lottioidae;Lottiidae;Lottia;Lottia gigantea

UdeM00000038391 1735272 1383.2 UdeM00000038391 XP\_041356070.1  
64.1 1063 304 10 6 1041 4 1015 0.00E+00 1383.2  
1735272 cellular

organisms;Eukaryota;Opisthokonta;Metazoa;Eumetazoa;Bilateria;Protostomia;Spiralia;Lophotrochozoa;Mollusca;Gastropoda;Neomphalina;Neomphaloidea;Peltospiridae;Gigantopelta;Gigantopelta aegis

UdeM00000038392 146911 90.5 UdeM00000038392 XP\_015284221.1 38.3  
94 58 0 419 512 189 282 6.90E-15 90.5 146911  
cellular

organisms;Eukaryota;Opisthokonta;Metazoa;Eumetazoa;Bilateria;Deuterostomia;Chordata;Craniata;Vertebrata;Gnathostomata;Teleostomi;Euteleostomi;Sarcopterygii;Dipnotetrapodomorpha;Tetrapoda;Amniota;Sauropsida;Sauria;Lepido

sauria; Squamata; Bifurcata; Gekkota; Gekkonidae; Gekkoninae; Gekko; Gekko  
japonicus  
UdeM00000038393 146911 90.5 UdeM00000038393 XP\_015284221.1 38.3  
94 58 0 429 522 189 282 7.00E-15 90.5 146911  
cellular  
organisms; Eukaryota; Opisthokonta; Metazoa; Eumetazoa; Bilateria; Deuterostomi  
a; Chordata; Craniata; Vertebrata; Gnathostomata; Teleostomi; Euteleostomi; Sarc  
opterygii; Dipnotetrapodomorpha; Tetrapoda; Amniota; Sauropsida; Sauria; Lepido  
sauria; Squamata; Bifurcata; Gekkota; Gekkonidae; Gekkoninae; Gekko; Gekko  
japonicus  
UdeM00000038394 146911 92.4 UdeM00000038394 XP\_015262655.1 53.4  
73 34 0 464 536 400 472 1.90E-15 92.4 146911  
cellular  
organisms; Eukaryota; Opisthokonta; Metazoa; Eumetazoa; Bilateria; Deuterostomi  
a; Chordata; Craniata; Vertebrata; Gnathostomata; Teleostomi; Euteleostomi; Sarc  
opterygii; Dipnotetrapodomorpha; Tetrapoda; Amniota; Sauropsida; Sauria; Lepido  
sauria; Squamata; Bifurcata; Gekkota; Gekkonidae; Gekkoninae; Gekko; Gekko  
japonicus  
UdeM00000038395 6565 206.1 UdeM00000038395 XP\_022288710.1 71.2 118  
34 0 26 143 65 182 3.10E-50 206.1 6565 cellular  
organisms; Eukaryota; Opisthokonta; Metazoa; Eumetazoa; Bilateria; Protostomia;  
Spiralia; Lophotrochozoa; Mollusca; Bivalvia; Autobranchia; Pteriomorpha; Ostr  
eida; Ostreoidea; Ostreidae; Crassostrea; Crassostrea virginica  
UdeM00000038397 1735272 938.7 UdeM00000038397 XP\_041355813.1 59.5  
1040 347 19 4 992 10 1026 5.90E-270 938.7 1735272  
cellular  
organisms; Eukaryota; Opisthokonta; Metazoa; Eumetazoa; Bilateria; Protostomia;  
Spiralia; Lophotrochozoa; Mollusca; Gastropoda; Neomphalina; Neomphaloidea; Pel  
tospiridae; Gigantopelta; Gigantopelta aegis  
UdeM00000038398 6596 428.7 UdeM00000038398 XP\_045183717.1 70.3 290  
84 2 1 289 1 289 5.80E-117 428.7 6596 cellular  
organisms; Eukaryota; Opisthokonta; Metazoa; Eumetazoa; Bilateria; Protostomia;  
Spiralia; Lophotrochozoa; Mollusca; Bivalvia; Autobranchia; Heteroconchia; Eue  
terodonta; Imparidentia; Venerida; Veneroidea; Veneridae; Mercenaria; Mercenari  
a mercenaria  
UdeM00000038400 6565 639.4 UdeM00000038400 XP\_022311756.1 48.4 750  
302 14 33 759 22 709 9.80E-180 639.4 6565 cellular  
organisms; Eukaryota; Opisthokonta; Metazoa; Eumetazoa; Bilateria; Protostomia;  
Spiralia; Lophotrochozoa; Mollusca; Bivalvia; Autobranchia; Pteriomorpha; Ostr  
eida; Ostreoidea; Ostreidae; Crassostrea; Crassostrea virginica  
UdeM00000038403 6596 134.4 UdeM00000038403 XP\_045209241.1 23.3 600  
375 19 32 571 144 718 8.40E-28 134.4 6596 cellular  
organisms; Eukaryota; Opisthokonta; Metazoa; Eumetazoa; Bilateria; Protostomia;  
Spiralia; Lophotrochozoa; Mollusca; Bivalvia; Autobranchia; Heteroconchia; Eue  
terodonta; Imparidentia; Venerida; Veneroidea; Veneridae; Mercenaria; Mercenari  
a mercenaria  
UdeM00000038406 7957 115.5 UdeM00000038406 XP\_026107243.1 24.7 442  
291 15 19 448 623 1034 1.70E-22 115.5 7957 cellular  
organisms; Eukaryota; Opisthokonta; Metazoa; Eumetazoa; Bilateria; Deuterostomi  
a; Chordata; Craniata; Vertebrata; Gnathostomata; Teleostomi; Euteleostomi; Acti  
nopterygii; Actinopteri; Neopterygii; Teleostei; Osteoglossocephalai; Clupeoce  
phala; Otomorpha; Ostariophysi; Otophysi; Cypriniphysae; Cypriniformes; Cyprino  
idei; Cyprinidae; Cyprininae; Carassius; Carassius auratus



UdeM00000038409 1735272 83.6 UdeM00000038409 XP\_041373383.1 33.1  
 151 89 4 63 210 131 272 8.10E-13 83.6 1735272  
 cellular  
 organisms;Eukaryota;Opisthokonta;Metazoa;Eumetazoa;Bilateria;Protostomia;  
 Spiralia;Lophotrochozoa;Mollusca;Gastropoda;Neomphalina;Neomphaloidea;Pel  
 tospiridae;Gigantopelta;Gigantopelta aegis  
 UdeM00000038412 46514 128.3 UdeM00000038412 XP\_038073135.1 42.9 154  
 81 2 258 411 380 526 3.10E-26 128.3 46514 cellular  
 organisms;Eukaryota;Opisthokonta;Metazoa;Eumetazoa;Bilateria;Deuterostomi  
 a;Echinodermata;Eleutherozoa;Asterozoa;Asteroidea;Valvatacea;Valvatida;As  
 terinidae;Patiria;Patiria miniata  
 UdeM00000038413 46514 128.3 UdeM00000038413 XP\_038073135.1 42.9 154  
 81 2 243 396 380 526 3.00E-26 128.3 46514 cellular  
 organisms;Eukaryota;Opisthokonta;Metazoa;Eumetazoa;Bilateria;Deuterostomi  
 a;Echinodermata;Eleutherozoa;Asterozoa;Asteroidea;Valvatacea;Valvatida;As  
 terinidae;Patiria;Patiria miniata  
 UdeM00000038415 6596 106.3 UdeM00000038415 XP\_045209241.1 25.9 394  
 242 17 23 380 332 711 1.40E-19 106.3 6596 cellular  
 organisms;Eukaryota;Opisthokonta;Metazoa;Eumetazoa;Bilateria;Protostomia;  
 Spiralia;Lophotrochozoa;Mollusca;Bivalvia;Autobranchia;Heteroconchia;Euhe  
 terodonta;Imparidentia;Venerida;Veneroidea;Veneridae;Mercenaria;Mercenari  
 a mercenaria  
 UdeM00000038416 7741 269.6 UdeM00000038416 XP\_019622111.1 49.6 280  
 120 3 5 265 1 278 4.20E-69 269.6 7741 cellular  
 organisms;Eukaryota;Opisthokonta;Metazoa;Eumetazoa;Bilateria;Deuterostomi  
 a;Chordata;Cephalochordata;Leptocardii;Amphioxiformes;Branchiostomidae;Br  
 anchiostoma;Branchiostoma belcheri  
 UdeM00000038417 1735272 95.9 UdeM00000038417 XP\_041347151.1 34.3  
 201 117 9 151 345 122 313 2.00E-16 95.9 1735272  
 cellular  
 organisms;Eukaryota;Opisthokonta;Metazoa;Eumetazoa;Bilateria;Protostomia;  
 Spiralia;Lophotrochozoa;Mollusca;Gastropoda;Neomphalina;Neomphaloidea;Pel  
 tospiridae;Gigantopelta;Gigantopelta aegis  
 UdeM00000038418 400727 262.3 UdeM00000038418 XP\_025100004.1 24  
 1375 872 56 535 1834 6 1282 5.10E-66 262.3 400727  
 cellular  
 organisms;Eukaryota;Opisthokonta;Metazoa;Eumetazoa;Bilateria;Protostomia;  
 Spiralia;Lophotrochozoa;Mollusca;Gastropoda;Caenogastropoda;Architaeniogl  
 ossa;Ampullarioidea;Ampullariidae;Pomacea;Pomacea canaliculata  
 UdeM00000038419 742174 149.8 UdeM00000038419 XP\_025199557.1 45.6  
 158 83 2 2 157 306 462 2.90E-33 149.8 742174  
 cellular  
 organisms;Eukaryota;Opisthokonta;Metazoa;Eumetazoa;Bilateria;Protostomia;  
 Ecdysozoa;Panarthropoda;Arthropoda;Mandibulata;Pancrustacea;Hexapoda;Inse  
 cta;Dicondylia;Pterygota;Neoptera;Paraneoptera;Hemiptera;Sternorrhyncha;A  
 phidomorpha;Aphidoidea;Aphididae;Aphidinae;Aphidini;Melanaphis;Melanaphis  
 sacchari  
 UdeM00000038424 225164 100.9 UdeM00000038424 XP\_009058199.1 50.5  
 107 46 2 1 107 1 100 1.00E-18 100.9 225164  
 cellular  
 organisms;Eukaryota;Opisthokonta;Metazoa;Eumetazoa;Bilateria;Protostomia;  
 Spiralia;Lophotrochozoa;Mollusca;Gastropoda;Patellogastropoda;Lottioidae;  
 Lottiidae;Lottia;Lottia gigantea

UdeM00000038425 6579 109.8 UdeM00000038425 XP\_033752673.1 27.6 370  
 143 8 38 316 158 493 7.20E-21 109.8 6579 cellular  
 organisms;Eukaryota;Opisthokonta;Metazoa;Eumetazoa;Bilateria;Protostomia;  
 Spiralia;Lophotrochozoa;Mollusca;Bivalvia;Autobranchia;Pteriomorphia;Pect  
 inida;Pectinoidea;Pectinidae;Pecten;Pecten maximus  
 UdeM00000038427 7604 225.7 UdeM00000038427 XP\_033641066.1 61.7 167  
 64 0 1 167 155 321 4.40E-56 225.7 7604 cellular  
 organisms;Eukaryota;Opisthokonta;Metazoa;Eumetazoa;Bilateria;Deuterostomi  
 a;Echinodermata;Eleutherozoa;Asterozoa;Asteroidea;Forcipulatacea;Forcipul  
 atida;Asteroidea;Asteroidea;Asterias;Asterias rubens  
 UdeM00000038432 1735272 161.8 UdeM00000038432 XP\_041372995.1 25.6  
 535 326 24 250 755 898 1389 5.10E-36 161.8 1735272  
 cellular  
 organisms;Eukaryota;Opisthokonta;Metazoa;Eumetazoa;Bilateria;Protostomia;  
 Spiralia;Lophotrochozoa;Mollusca;Gastropoda;Neomphalina;Neomphaloidea;Pel  
 tospiridae;Gigantopelta;Gigantopelta aegis  
 UdeM00000038433 6596 76.3 UdeM00000038433 XP\_045202067.1 38.1 113  
 66 3 349 460 133 242 1.20E-10 76.3 6596 cellular  
 organisms;Eukaryota;Opisthokonta;Metazoa;Eumetazoa;Bilateria;Protostomia;  
 Spiralia;Lophotrochozoa;Mollusca;Bivalvia;Autobranchia;Heteroconchia;Euhe  
 terodonta;Imparidentia;Venerida;Veneroidea;Veneridae;Mercenaria;Mercenari  
 a mercenaria  
 UdeM00000038436 7957 101.3 UdeM00000038436 XP\_026107247.1 22 567  
 321 21 94 608 187 684 6.60E-18 101.3 7957 cellular  
 organisms;Eukaryota;Opisthokonta;Metazoa;Eumetazoa;Bilateria;Deuterostomi  
 a;Chordata;Craniata;Vertebrata;Gnathostomata;Teleostomi;Euteleostomi;Acti  
 nopterygii;Actinopteri;Neopterygii;Teleostei;Osteoglossocephalai;Clupeoce  
 phala;Otomorpha;Ostariophysi;Otophysi;Cypriniphysae;Cypriniiformes;Cyprino  
 idei;Cyprinidae;Cyprininae;Carassius;Carassius auratus  
 UdeM00000038438 7962 108.2 UdeM00000038438 XP\_042573210.1 24.4 467  
 295 18 147 587 188 622 4.00E-20 108.2 7962 cellular  
 organisms;Eukaryota;Opisthokonta;Metazoa;Eumetazoa;Bilateria;Deuterostomi  
 a;Chordata;Craniata;Vertebrata;Gnathostomata;Teleostomi;Euteleostomi;Acti  
 nopterygii;Actinopteri;Neopterygii;Teleostei;Osteoglossocephalai;Clupeoce  
 phala;Otomorpha;Ostariophysi;Otophysi;Cypriniphysae;Cypriniiformes;Cyprino  
 idei;Cyprinidae;Cyprininae;Cyprinus;Cyprinus carpio  
 UdeM00000014687 6573 90.9 UdeM00000014687 XP\_021365625.1 51.7 87  
 42 0 8 94 40 126 1.70E-15 90.9 6573 cellular  
 organisms;Eukaryota;Opisthokonta;Metazoa;Eumetazoa;Bilateria;Protostomia;  
 Spiralia;Lophotrochozoa;Mollusca;Bivalvia;Autobranchia;Pteriomorphia;Pect  
 inida;Pectinoidea;Pectinidae;Mizuhopecten;Mizuhopecten yessoensis  
 UdeM00000014688 1735272 396.7 UdeM00000014688 XP\_041364708.1 54.4  
 384 151 9 34 406 42 412 3.50E-107 396.7 1735272  
 cellular  
 organisms;Eukaryota;Opisthokonta;Metazoa;Eumetazoa;Bilateria;Protostomia;  
 Spiralia;Lophotrochozoa;Mollusca;Gastropoda;Neomphalina;Neomphaloidea;Pel  
 tospiridae;Gigantopelta;Gigantopelta aegis  
 UdeM00000014689 225164 416.8 UdeM00000014689 XP\_009051273.1 90.6  
 233 22 0 1 233 1 233 1.90E-113 416.8 225164  
 cellular  
 organisms;Eukaryota;Opisthokonta;Metazoa;Eumetazoa;Bilateria;Protostomia;  
 Spiralia;Lophotrochozoa;Mollusca;Gastropoda;Patellogastropoda;Lottioidae;  
 Lottiidae;Lottia;Lottia gigantea

UdeM00000014690 6579 355.9 UdeM00000014690 XP\_033742729.1 30.6 963  
 182 2 1 961 1 479 1.70E-94 355.9 6579 cellular  
 organisms;Eukaryota;Opisthokonta;Metazoa;Eumetazoa;Bilateria;Protostomia;  
 Spiralia;Lophotrochozoa;Mollusca;Bivalvia;Autobranhia;Pteriomorphia;Pect  
 inida;Pectinoidea;Pectinidae;Pecten;Pecten maximus  
 UdeM00000014691 6565 496.9 UdeM00000014691 XP\_022317161.1 60.4 424  
 152 2 9 432 57 464 2.60E-137 496.9 6565 cellular  
 organisms;Eukaryota;Opisthokonta;Metazoa;Eumetazoa;Bilateria;Protostomia;  
 Spiralia;Lophotrochozoa;Mollusca;Bivalvia;Autobranhia;Pteriomorphia;Ostr  
 eida;Ostreoidea;Ostreidae;Crassostrea;Crassostrea virginica  
 UdeM00000014692 6596 666.8 UdeM00000014692 XP\_045213076.1 86.6 366  
 44 1 77 437 29 394 1.90E-188 666.8 6596 cellular  
 organisms;Eukaryota;Opisthokonta;Metazoa;Eumetazoa;Bilateria;Protostomia;  
 Spiralia;Lophotrochozoa;Mollusca;Bivalvia;Autobranhia;Heteroconchia;Euhe  
 terodonta;Imparidentia;Venerida;Veneroidea;Veneridae;Mercenaria;Mercenari  
 a mercenaria  
 UdeM00000014693 6596 459.9 UdeM00000014693 XP\_045213079.1 60.3 360  
 131 4 1 359 1 349 3.50E-126 459.9 6596 cellular  
 organisms;Eukaryota;Opisthokonta;Metazoa;Eumetazoa;Bilateria;Protostomia;  
 Spiralia;Lophotrochozoa;Mollusca;Bivalvia;Autobranhia;Heteroconchia;Euhe  
 terodonta;Imparidentia;Venerida;Veneroidea;Veneridae;Mercenaria;Mercenari  
 a mercenaria  
 UdeM00000014694 6596 138.7 UdeM00000014694 XP\_045213079.1 31.2 571  
 286 17 13 528 349 867 2.30E-29 138.7 6596 cellular  
 organisms;Eukaryota;Opisthokonta;Metazoa;Eumetazoa;Bilateria;Protostomia;  
 Spiralia;Lophotrochozoa;Mollusca;Bivalvia;Autobranhia;Heteroconchia;Euhe  
 terodonta;Imparidentia;Venerida;Veneroidea;Veneridae;Mercenaria;Mercenari  
 a mercenaria  
 UdeM00000014695 6573 203 UdeM00000014695 XP\_021372715.1 39.5 281  
 163 6 27 302 119 397 5.90E-49 203 6573 cellular  
 organisms;Eukaryota;Opisthokonta;Metazoa;Eumetazoa;Bilateria;Protostomia;  
 Spiralia;Lophotrochozoa;Mollusca;Bivalvia;Autobranhia;Pteriomorphia;Pect  
 inida;Pectinoidea;Pectinidae;Mizuhopecten;Mizuhopecten yessoensis  
 UdeM00000014696 225164 250.4 UdeM00000014696 XP\_009060127.1 100  
 110 0 0 1 110 1 110 1.10E-63 250.4 225164  
 cellular  
 organisms;Eukaryota;Opisthokonta;Metazoa;Eumetazoa;Bilateria;Protostomia;  
 Spiralia;Lophotrochozoa;Mollusca;Gastropoda;Patellogastropoda;Lottioidea;  
 Lottiidae;Lottia;Lottia gigantea  
 UdeM00000014697 6573 105.5 UdeM00000014697 XP\_021377231.1 32.8 354  
 208 11 6 347 8 343 1.40E-19 105.5 6573 cellular  
 organisms;Eukaryota;Opisthokonta;Metazoa;Eumetazoa;Bilateria;Protostomia;  
 Spiralia;Lophotrochozoa;Mollusca;Bivalvia;Autobranhia;Pteriomorphia;Pect  
 inida;Pectinoidea;Pectinidae;Mizuhopecten;Mizuhopecten yessoensis  
 UdeM00000014698 6573 101.7 UdeM00000014698 XP\_021377231.1 34.1 302  
 174 10 15 304 55 343 1.70E-18 101.7 6573 cellular  
 organisms;Eukaryota;Opisthokonta;Metazoa;Eumetazoa;Bilateria;Protostomia;  
 Spiralia;Lophotrochozoa;Mollusca;Bivalvia;Autobranhia;Pteriomorphia;Pect  
 inida;Pectinoidea;Pectinidae;Mizuhopecten;Mizuhopecten yessoensis  
 UdeM00000014699 6579 73.2 UdeM00000014699 XP\_033744278.1 55.9 59  
 24 1 61 119 989 1045 3.90E-10 73.2 6579 cellular  
 organisms;Eukaryota;Opisthokonta;Metazoa;Eumetazoa;Bilateria;Protostomia;  
 Spiralia;Lophotrochozoa;Mollusca;Bivalvia;Autobranhia;Pteriomorphia;Pect  
 inida;Pectinoidea;Pectinidae;Pecten;Pecten maximus

UdeM00000014700 29159 270.8 UdeM00000014700 XP\_011454708.2 41.2 711  
 330 20 451 1122 433 1094 7.90E-69 270.8 29159 cellular  
 organisms;Eukaryota;Opisthokonta;Metazoa;Eumetazoa;Bilateria;Protostomia;  
 Spiralia;Lophotrochozoa;Mollusca;Bivalvia;Autobranchia;Pteriormorphia;Ostr  
 eida;Ostreoidea;Ostreidae;Crassostrea;Crassostrea gigas  
 UdeM00000014701 6596 411.4 UdeM00000014701 XP\_045213822.1 43.7 549  
 291 7 10 545 10 553 1.80E-111 411.4 6596 cellular  
 organisms;Eukaryota;Opisthokonta;Metazoa;Eumetazoa;Bilateria;Protostomia;  
 Spiralia;Lophotrochozoa;Mollusca;Bivalvia;Autobranchia;Heteroconchia;Euhe  
 terodonta;Imparidentia;Venerida;Veneroidea;Veneridae;Mercenaria;Mercenari  
 a mercenaria  
 UdeM00000014702 6573 391.7 UdeM00000014702 XP\_021359878.1 61.7 342  
 129 1 16 355 7 348 1.10E-105 391.7 6573 cellular  
 organisms;Eukaryota;Opisthokonta;Metazoa;Eumetazoa;Bilateria;Protostomia;  
 Spiralia;Lophotrochozoa;Mollusca;Bivalvia;Autobranchia;Pteriormorphia;Pect  
 inida;Pectinoidea;Pectinidae;Mizuhopecten;Mizuhopecten yessoensis  
 UdeM00000014703 6596 1155.6 UdeM00000014703 XP\_045214288.1 65.8  
 849 269 6 54 885 61 905 0.00E+00 1155.6 6596  
 cellular  
 organisms;Eukaryota;Opisthokonta;Metazoa;Eumetazoa;Bilateria;Protostomia;  
 Spiralia;Lophotrochozoa;Mollusca;Bivalvia;Autobranchia;Heteroconchia;Euhe  
 terodonta;Imparidentia;Venerida;Veneroidea;Veneridae;Mercenaria;Mercenari  
 a mercenaria  
 UdeM00000014704 6596 698.7 UdeM00000014704 XP\_045214289.1 52.7 755  
 318 10 170 898 201 942 9.50E-198 698.7 6596 cellular  
 organisms;Eukaryota;Opisthokonta;Metazoa;Eumetazoa;Bilateria;Protostomia;  
 Spiralia;Lophotrochozoa;Mollusca;Bivalvia;Autobranchia;Heteroconchia;Euhe  
 terodonta;Imparidentia;Venerida;Veneroidea;Veneridae;Mercenaria;Mercenari  
 a mercenaria  
 UdeM00000014705 6596 58.9 UdeM00000014705 XP\_045198486.1 60 45  
 18 0 1 45 71 115 3.40E-06 58.9 6596 cellular  
 organisms;Eukaryota;Opisthokonta;Metazoa;Eumetazoa;Bilateria;Protostomia;  
 Spiralia;Lophotrochozoa;Mollusca;Bivalvia;Autobranchia;Heteroconchia;Euhe  
 terodonta;Imparidentia;Venerida;Veneroidea;Veneridae;Mercenaria;Mercenari  
 a mercenaria  
 UdeM00000014706 37653 392.5 UdeM00000014706 XP\_014784524.1 53.4 339  
 158 0 16 354 51 389 6.30E-106 392.5 37653 cellular  
 organisms;Eukaryota;Opisthokonta;Metazoa;Eumetazoa;Bilateria;Protostomia;  
 Spiralia;Lophotrochozoa;Mollusca;Cephalopoda;Coleoidea;Octopodiformes;Oct  
 opoda;Incirrata;Octopodidae;Octopus;Octopus bimaculoides  
 UdeM00000014709 6596 337 UdeM00000014709 XP\_045179925.1 68.9 225  
 70 0 24 248 21 245 2.00E-89 337 6596 cellular  
 organisms;Eukaryota;Opisthokonta;Metazoa;Eumetazoa;Bilateria;Protostomia;  
 Spiralia;Lophotrochozoa;Mollusca;Bivalvia;Autobranchia;Heteroconchia;Euhe  
 terodonta;Imparidentia;Venerida;Veneroidea;Veneridae;Mercenaria;Mercenari  
 a mercenaria  
 UdeM00000014710 6596 144.1 UdeM00000014710 XP\_045214366.1 38.5 234  
 104 3 1 233 6 200 2.30E-31 144.1 6596 cellular  
 organisms;Eukaryota;Opisthokonta;Metazoa;Eumetazoa;Bilateria;Protostomia;  
 Spiralia;Lophotrochozoa;Mollusca;Bivalvia;Autobranchia;Heteroconchia;Euhe  
 terodonta;Imparidentia;Venerida;Veneroidea;Veneridae;Mercenaria;Mercenari  
 a mercenaria  
 UdeM00000014711 6579 174.1 UdeM00000014711 XP\_033735825.1 74.6 114  
 29 0 15 128 23 136 1.20E-40 174.1 6579 cellular

organisms;Eukaryota;Opisthokonta;Metazoa;Eumetazoa;Bilateria;Protostomia;  
Spiralia;Lophotrochozoa;Mollusca;Bivalvia;Autobranchia;Pteriomorphia;Pect  
inida;Pectinoidea;Pectinidae;Pecten;Pecten maximus  
UdeM00000014712 6579 174.1 UdeM00000014712 XP\_033735825.1 74.6 114  
29 0 20 133 23 136 1.20E-40 174.1 6579 cellular  
organisms;Eukaryota;Opisthokonta;Metazoa;Eumetazoa;Bilateria;Protostomia;  
Spiralia;Lophotrochozoa;Mollusca;Bivalvia;Autobranchia;Pteriomorphia;Pect  
inida;Pectinoidea;Pectinidae;Pecten;Pecten maximus  
UdeM00000014713 6596 950.3 UdeM00000014713 XP\_045214079.1 84 550  
82 4 4 551 1 546 1.10E-273 950.3 6596 cellular  
organisms;Eukaryota;Opisthokonta;Metazoa;Eumetazoa;Bilateria;Protostomia;  
Spiralia;Lophotrochozoa;Mollusca;Bivalvia;Autobranchia;Heteroconchia;Euhe  
terodonta;Imparidentia;Venerida;Veneroidea;Veneridae;Mercenaria;Mercenari  
a mercenaria  
UdeM00000014714 6579 241.1 UdeM00000014714 XP\_033745194.1 36.9 369  
207 2 1 343 144 512 2.20E-60 241.1 6579 cellular  
organisms;Eukaryota;Opisthokonta;Metazoa;Eumetazoa;Bilateria;Protostomia;  
Spiralia;Lophotrochozoa;Mollusca;Bivalvia;Autobranchia;Pteriomorphia;Pect  
inida;Pectinoidea;Pectinidae;Pecten;Pecten maximus  
UdeM00000014715 6579 152.1 UdeM00000014715 XP\_033752981.1 57.6 125  
53 0 6 130 3 127 4.80E-34 152.1 6579 cellular  
organisms;Eukaryota;Opisthokonta;Metazoa;Eumetazoa;Bilateria;Protostomia;  
Spiralia;Lophotrochozoa;Mollusca;Bivalvia;Autobranchia;Pteriomorphia;Pect  
inida;Pectinoidea;Pectinidae;Pecten;Pecten maximus  
UdeM00000014716 29159 190.7 UdeM00000014716 XP\_034313517.1 59.6 146  
59 0 375 520 215 360 9.50E-45 190.7 29159 cellular  
organisms;Eukaryota;Opisthokonta;Metazoa;Eumetazoa;Bilateria;Protostomia;  
Spiralia;Lophotrochozoa;Mollusca;Bivalvia;Autobranchia;Pteriomorphia;Ostr  
eida;Ostreoidea;Ostreidae;Crassostrea;Crassostrea gigas  
UdeM00000014717 2607531 253.8 UdeM00000014717 XP\_029637007.1 74  
169 42 1 40 206 36 204 1.80E-64 253.8 2607531  
cellular  
organisms;Eukaryota;Opisthokonta;Metazoa;Eumetazoa;Bilateria;Protostomia;  
Spiralia;Lophotrochozoa;Mollusca;Cephalopoda;Coleoidea;Octopodiformes;Oct  
opoda;Incirrata;Octopodidae;Octopus;Octopus sinensis  
UdeM00000014718 6579 294.3 UdeM00000014718 XP\_033734454.1 71.1 194  
52 2 5 196 151 342 1.20E-76 294.3 6579 cellular  
organisms;Eukaryota;Opisthokonta;Metazoa;Eumetazoa;Bilateria;Protostomia;  
Spiralia;Lophotrochozoa;Mollusca;Bivalvia;Autobranchia;Pteriomorphia;Pect  
inida;Pectinoidea;Pectinidae;Pecten;Pecten maximus  
UdeM00000014719 2607531 229.6 UdeM00000014719 XP\_029637007.1 74  
154 38 1 9 160 51 204 2.90E-57 229.6 2607531  
cellular  
organisms;Eukaryota;Opisthokonta;Metazoa;Eumetazoa;Bilateria;Protostomia;  
Spiralia;Lophotrochozoa;Mollusca;Cephalopoda;Coleoidea;Octopodiformes;Oct  
opoda;Incirrata;Octopodidae;Octopus;Octopus sinensis  
UdeM00000014720 6579 292.4 UdeM00000014720 XP\_033734454.1 71.7 191  
50 2 63 251 154 342 5.70E-76 292.4 6579 cellular  
organisms;Eukaryota;Opisthokonta;Metazoa;Eumetazoa;Bilateria;Protostomia;  
Spiralia;Lophotrochozoa;Mollusca;Bivalvia;Autobranchia;Pteriomorphia;Pect  
inida;Pectinoidea;Pectinidae;Pecten;Pecten maximus  
UdeM00000030593 6596 80.9 UdeM00000030593 XP\_045180180.1 63.5 63  
23 0 433 495 404 466 5.30E-12 80.9 6596 cellular  
organisms;Eukaryota;Opisthokonta;Metazoa;Eumetazoa;Bilateria;Protostomia;

Spiralia;Lophotrochozoa;Mollusca;Bivalvia;Autobranchia;Heteroconchia;Euherodonta;Imparidentia;Venerida;Veneroidea;Veneridae;Mercenaria;Mercenaria mercenaria

UdeM00000030594 6596 312.4 UdeM00000030594 XP\_045161567.1 51.3 314  
148 2 4 312 22 335 9.60E-82 312.4 6596 cellular

organisms;Eukaryota;Opisthokonta;Metazoa;Eumetazoa;Bilateria;Protostomia;Spiralia;Lophotrochozoa;Mollusca;Bivalvia;Autobranchia;Heteroconchia;Euherodonta;Imparidentia;Venerida;Veneroidea;Veneridae;Mercenaria;Mercenaria mercenaria

UdeM00000030595 6596 615.5 UdeM00000030595 XP\_045161555.1 92 339  
27 0 1 339 1 339 3.90E-173 615.5 6596 cellular

organisms;Eukaryota;Opisthokonta;Metazoa;Eumetazoa;Bilateria;Protostomia;Spiralia;Lophotrochozoa;Mollusca;Bivalvia;Autobranchia;Heteroconchia;Euherodonta;Imparidentia;Venerida;Veneroidea;Veneridae;Mercenaria;Mercenaria mercenaria

UdeM00000030596 6596 681.4 UdeM00000030596 XP\_045160993.1 56 600  
253 6 4 598 5 598 1.00E-192 681.4 6596 cellular

organisms;Eukaryota;Opisthokonta;Metazoa;Eumetazoa;Bilateria;Protostomia;Spiralia;Lophotrochozoa;Mollusca;Bivalvia;Autobranchia;Heteroconchia;Euherodonta;Imparidentia;Venerida;Veneroidea;Veneridae;Mercenaria;Mercenaria mercenaria

UdeM00000030597 6596 655.6 UdeM00000030597 XP\_045161004.1 65.4 494  
169 2 1 493 1 493 7.70E-185 655.6 6596 cellular

organisms;Eukaryota;Opisthokonta;Metazoa;Eumetazoa;Bilateria;Protostomia;Spiralia;Lophotrochozoa;Mollusca;Bivalvia;Autobranchia;Heteroconchia;Euherodonta;Imparidentia;Venerida;Veneroidea;Veneridae;Mercenaria;Mercenaria mercenaria

UdeM00000030598 6596 659.1 UdeM00000030598 XP\_045161004.1 68.8 619  
176 2 9 627 493 1094 5.80E-186 659.1 6596 cellular

organisms;Eukaryota;Opisthokonta;Metazoa;Eumetazoa;Bilateria;Protostomia;Spiralia;Lophotrochozoa;Mollusca;Bivalvia;Autobranchia;Heteroconchia;Euherodonta;Imparidentia;Venerida;Veneroidea;Veneridae;Mercenaria;Mercenaria mercenaria

UdeM00000030599 6596 624 UdeM00000030599 XP\_045192997.1 49.9 633  
290 12 7 622 23 645 2.10E-175 624 6596 cellular

organisms;Eukaryota;Opisthokonta;Metazoa;Eumetazoa;Bilateria;Protostomia;Spiralia;Lophotrochozoa;Mollusca;Bivalvia;Autobranchia;Heteroconchia;Euherodonta;Imparidentia;Venerida;Veneroidea;Veneridae;Mercenaria;Mercenaria mercenaria

UdeM00000030600 6596 130.2 UdeM00000030600 XP\_045192997.1 59.1 88  
36 0 2 89 558 645 1.80E-27 130.2 6596 cellular

organisms;Eukaryota;Opisthokonta;Metazoa;Eumetazoa;Bilateria;Protostomia;Spiralia;Lophotrochozoa;Mollusca;Bivalvia;Autobranchia;Heteroconchia;Euherodonta;Imparidentia;Venerida;Veneroidea;Veneridae;Mercenaria;Mercenaria mercenaria

UdeM00000030601 1735272 392.5 UdeM00000030601 XP\_041367040.1 50.7  
367 174 4 9 370 1 365 6.20E-106 392.5 1735272

cellular

organisms;Eukaryota;Opisthokonta;Metazoa;Eumetazoa;Bilateria;Protostomia;Spiralia;Lophotrochozoa;Mollusca;Gastropoda;Neomphalina;Neomphaloidea;Peltospiridae;Gigantopelta;Gigantopelta aegis

UdeM00000030602 6596 250 UdeM00000030602 XP\_045192997.1 47.9 259  
118 6 34 280 392 645 4.00E-63 250 6596 cellular

organisms;Eukaryota;Opisthokonta;Metazoa;Eumetazoa;Bilateria;Protostomia;

Spiralia;Lophotrochozoa;Mollusca;Bivalvia;Autobranchia;Heteroconchia;Euherodonta;Imparidentia;Venerida;Veneroidea;Veneridae;Mercenaria;Mercenaria mercenaria

UdeM00000030603 6596 1092 UdeM00000030603 XP\_045156423.1 58.4 957  
381 5 27 966 31 987 0.00E+00 1092 6596 cellular

organisms;Eukaryota;Opisthokonta;Metazoa;Eumetazoa;Bilateria;Protostomia;Spiralia;Lophotrochozoa;Mollusca;Bivalvia;Autobranchia;Heteroconchia;Euherodonta;Imparidentia;Venerida;Veneroidea;Veneridae;Mercenaria;Mercenaria mercenaria

UdeM00000030604 6596 622.1 UdeM00000030604 XP\_045156423.1 46.1 740  
310 7 31 682 29 767 8.50E-175 622.1 6596 cellular

organisms;Eukaryota;Opisthokonta;Metazoa;Eumetazoa;Bilateria;Protostomia;Spiralia;Lophotrochozoa;Mollusca;Bivalvia;Autobranchia;Heteroconchia;Euherodonta;Imparidentia;Venerida;Veneroidea;Veneridae;Mercenaria;Mercenaria mercenaria

UdeM00000030605 37621 301.2 UdeM00000030605 XP\_014679849.1 33.3 622  
146 6 1 354 3 623 1.70E-78 301.2 37621 cellular

organisms;Eukaryota;Opisthokonta;Metazoa;Eumetazoa;Bilateria;Protostomia;Ecdysozoa;Scalidophora;Priapulida;Priapulimorpha;Priapulimorphida;Priapulidae;Priapululus;Priapululus caudatus

UdeM00000030606 6596 220.3 UdeM00000030606 XP\_045156423.1 57.7 189  
80 0 6 194 799 987 2.20E-54 220.3 6596 cellular

organisms;Eukaryota;Opisthokonta;Metazoa;Eumetazoa;Bilateria;Protostomia;Spiralia;Lophotrochozoa;Mollusca;Bivalvia;Autobranchia;Heteroconchia;Euherodonta;Imparidentia;Venerida;Veneroidea;Veneridae;Mercenaria;Mercenaria mercenaria

UdeM00000030607 6596 431 UdeM00000030607 XP\_045156423.1 48.2 479  
227 4 27 498 225 689 2.10E-117 431 6596 cellular

organisms;Eukaryota;Opisthokonta;Metazoa;Eumetazoa;Bilateria;Protostomia;Spiralia;Lophotrochozoa;Mollusca;Bivalvia;Autobranchia;Heteroconchia;Euherodonta;Imparidentia;Venerida;Veneroidea;Veneridae;Mercenaria;Mercenaria mercenaria

UdeM00000030608 6596 271.2 UdeM00000030608 XP\_045163858.1 38.3 368  
211 6 1 361 21 379 2.00E-69 271.2 6596 cellular

organisms;Eukaryota;Opisthokonta;Metazoa;Eumetazoa;Bilateria;Protostomia;Spiralia;Lophotrochozoa;Mollusca;Bivalvia;Autobranchia;Heteroconchia;Euherodonta;Imparidentia;Venerida;Veneroidea;Veneridae;Mercenaria;Mercenaria mercenaria

UdeM00000030609 6596 271.2 UdeM00000030609 XP\_045170965.1 42.3 324  
175 6 48 365 73 390 2.10E-69 271.2 6596 cellular

organisms;Eukaryota;Opisthokonta;Metazoa;Eumetazoa;Bilateria;Protostomia;Spiralia;Lophotrochozoa;Mollusca;Bivalvia;Autobranchia;Heteroconchia;Euherodonta;Imparidentia;Venerida;Veneroidea;Veneridae;Mercenaria;Mercenaria mercenaria

UdeM00000030610 7604 367.9 UdeM00000030610 XP\_033641066.1 53.9 332  
136 2 4 318 3 334 1.50E-98 367.9 7604 cellular

organisms;Eukaryota;Opisthokonta;Metazoa;Eumetazoa;Bilateria;Deuterostomia;Echinodermata;Eleutherozoa;Asterozoa;Asteroidea;Forcipulatacea;Forcipulatida;Asteroidea;Asteroidea;Asterias;Asterias rubens

UdeM00000030611 6579 229.9 UdeM00000030611 XP\_033752673.1 67.5 160  
52 0 1 160 493 652 2.20E-57 229.9 6579 cellular

organisms;Eukaryota;Opisthokonta;Metazoa;Eumetazoa;Bilateria;Protostomia;Spiralia;Lophotrochozoa;Mollusca;Bivalvia;Autobranchia;Pteriomorpha;Pectinida;Pectinoidea;Pectinidae;Pecten;Pecten maximus

UdeM00000030612 6579 197.2 UdeM00000030612 XP\_033752673.1 49.3 207  
 95 3 21 225 273 471 2.20E-47 197.2 6579 cellular  
 organisms;Eukaryota;Opisthokonta;Metazoa;Eumetazoa;Bilateria;Protostomia;  
 Spiralia;Lophotrochozoa;Mollusca;Bivalvia;Autobranhia;Pteriormorphia;Pect  
 inida;Pectinoidea;Pectinidae;Pecten;Pecten maximus  
 UdeM00000030613 6573 183.7 UdeM00000030613 XP\_021367843.1 53.9 180  
 79 3 1 177 31 209 2.20E-43 183.7 6573 cellular  
 organisms;Eukaryota;Opisthokonta;Metazoa;Eumetazoa;Bilateria;Protostomia;  
 Spiralia;Lophotrochozoa;Mollusca;Bivalvia;Autobranhia;Pteriormorphia;Pect  
 inida;Pectinoidea;Pectinidae;Mizuhopecten;Mizuhopecten yessoensis  
 UdeM00000030614 6596 495 UdeM00000030614 XP\_045170291.1 63.2 380  
 133 3 2 380 4 377 8.70E-137 495 6596 cellular  
 organisms;Eukaryota;Opisthokonta;Metazoa;Eumetazoa;Bilateria;Protostomia;  
 Spiralia;Lophotrochozoa;Mollusca;Bivalvia;Autobranhia;Heteroconchia;Euhe  
 terodonta;Imparidentia;Venerida;Veneroidea;Veneridae;Mercenaria;Mercenari  
 a mercenaria  
 UdeM00000030615 6596 239.6 UdeM00000030615 XP\_045170283.1 55.7 323  
 132 3 1 312 1 323 5.40E-60 239.6 6596 cellular  
 organisms;Eukaryota;Opisthokonta;Metazoa;Eumetazoa;Bilateria;Protostomia;  
 Spiralia;Lophotrochozoa;Mollusca;Bivalvia;Autobranhia;Heteroconchia;Euhe  
 terodonta;Imparidentia;Venerida;Veneroidea;Veneridae;Mercenaria;Mercenari  
 a mercenaria  
 UdeM00000030616 6596 637.1 UdeM00000030616 XP\_045170274.1 60.7 527  
 192 4 11 530 10 528 2.00E-179 637.1 6596 cellular  
 organisms;Eukaryota;Opisthokonta;Metazoa;Eumetazoa;Bilateria;Protostomia;  
 Spiralia;Lophotrochozoa;Mollusca;Bivalvia;Autobranhia;Heteroconchia;Euhe  
 terodonta;Imparidentia;Venerida;Veneroidea;Veneridae;Mercenaria;Mercenari  
 a mercenaria  
 UdeM00000030617 6573 828.2 UdeM00000030617 XP\_021366508.1 59.1 738  
 292 4 1 732 5 738 9.50E-237 828.2 6573 cellular  
 organisms;Eukaryota;Opisthokonta;Metazoa;Eumetazoa;Bilateria;Protostomia;  
 Spiralia;Lophotrochozoa;Mollusca;Bivalvia;Autobranhia;Pteriormorphia;Pect  
 inida;Pectinoidea;Pectinidae;Mizuhopecten;Mizuhopecten yessoensis  
 UdeM00000030618 6596 518.8 UdeM00000030618 XP\_045177495.1 59 422  
 173 0 1 422 29 450 6.30E-144 518.8 6596 cellular  
 organisms;Eukaryota;Opisthokonta;Metazoa;Eumetazoa;Bilateria;Protostomia;  
 Spiralia;Lophotrochozoa;Mollusca;Bivalvia;Autobranhia;Heteroconchia;Euhe  
 terodonta;Imparidentia;Venerida;Veneroidea;Veneridae;Mercenaria;Mercenari  
 a mercenaria  
 UdeM00000030619 6596 435.3 UdeM00000030619 XP\_045177476.1 70.5 319  
 92 2 5 321 3 321 7.10E-119 435.3 6596 cellular  
 organisms;Eukaryota;Opisthokonta;Metazoa;Eumetazoa;Bilateria;Protostomia;  
 Spiralia;Lophotrochozoa;Mollusca;Bivalvia;Autobranhia;Heteroconchia;Euhe  
 terodonta;Imparidentia;Venerida;Veneroidea;Veneridae;Mercenaria;Mercenari  
 a mercenaria  
 UdeM00000030620 6596 415.2 UdeM00000030620 XP\_045177436.1 66 326  
 108 3 9 332 13 337 7.70E-113 415.2 6596 cellular  
 organisms;Eukaryota;Opisthokonta;Metazoa;Eumetazoa;Bilateria;Protostomia;  
 Spiralia;Lophotrochozoa;Mollusca;Bivalvia;Autobranhia;Heteroconchia;Euhe  
 terodonta;Imparidentia;Venerida;Veneroidea;Veneridae;Mercenaria;Mercenari  
 a mercenaria  
 UdeM00000030621 6579 152.9 UdeM00000030621 XP\_033736310.1 56.5 154  
 62 2 25 173 10 163 6.10E-34 152.9 6579 cellular  
 organisms;Eukaryota;Opisthokonta;Metazoa;Eumetazoa;Bilateria;Protostomia;



Spiralia; Lophotrochozoa; Mollusca; Bivalvia; Autobranchia; Pteriomorpha; Pectinida; Pectinoidea; Pectinidae; Pecten; Pecten maximus

UdeM00000030622 6579 152.9 UdeM00000030622 XP\_033736310.1 56.5 154  
62 2 18 166 10 163 5.90E-34 152.9 6579 cellular  
organisms; Eukaryota; Opisthokonta; Metazoa; Eumetazoa; Bilateria; Protostomia; Spiralia; Lophotrochozoa; Mollusca; Bivalvia; Autobranchia; Pteriomorpha; Pectinida; Pectinoidea; Pectinidae; Pecten; Pecten maximus

UdeM00000030623 6596 261.5 UdeM00000030623 XP\_045162828.1 63.7 204  
71 1 1 204 1 201 8.70E-67 261.5 6596 cellular  
organisms; Eukaryota; Opisthokonta; Metazoa; Eumetazoa; Bilateria; Protostomia; Spiralia; Lophotrochozoa; Mollusca; Bivalvia; Autobranchia; Heteroconchia; Euheterodonta; Imparidentia; Venerida; Veneroidea; Veneridae; Mercenaria; Mercenaria mercenaria

UdeM00000030624 6596 818.1 UdeM00000030624 XP\_045172018.1 81.6 477  
87 1 33 509 27 502 6.00E-234 818.1 6596 cellular  
organisms; Eukaryota; Opisthokonta; Metazoa; Eumetazoa; Bilateria; Protostomia; Spiralia; Lophotrochozoa; Mollusca; Bivalvia; Autobranchia; Heteroconchia; Euheterodonta; Imparidentia; Venerida; Veneroidea; Veneridae; Mercenaria; Mercenaria mercenaria

UdeM00000030625 6500 113.2 UdeM00000030625 NP\_001191613.1 62.8 78  
29 0 1 78 275 352 1.90E-22 113.2 6500 cellular  
organisms; Eukaryota; Opisthokonta; Metazoa; Eumetazoa; Bilateria; Protostomia; Spiralia; Lophotrochozoa; Mollusca; Gastropoda; Heterobranchia; Euthyneura; Tectipleura; Aplysiida; Aplysioidea; Aplysiidae; Aplysia; Aplysia californica

UdeM00000030626 6596 533.5 UdeM00000030626 XP\_045159951.1 60.2 445  
166 3 5 438 37 481 2.60E-148 533.5 6596 cellular  
organisms; Eukaryota; Opisthokonta; Metazoa; Eumetazoa; Bilateria; Protostomia; Spiralia; Lophotrochozoa; Mollusca; Bivalvia; Autobranchia; Heteroconchia; Euheterodonta; Imparidentia; Venerida; Veneroidea; Veneridae; Mercenaria; Mercenaria mercenaria

UdeM00000030628 6596 412.9 UdeM00000030628 XP\_045159951.1 51.2 445  
142 4 5 374 37 481 4.40E-112 412.9 6596 cellular  
organisms; Eukaryota; Opisthokonta; Metazoa; Eumetazoa; Bilateria; Protostomia; Spiralia; Lophotrochozoa; Mollusca; Bivalvia; Autobranchia; Heteroconchia; Euheterodonta; Imparidentia; Venerida; Veneroidea; Veneridae; Mercenaria; Mercenaria mercenaria

UdeM00000030627 6596 414.8 UdeM00000030627 XP\_045159951.1 50.7 458  
143 5 1 383 32 481 1.20E-112 414.8 6596 cellular  
organisms; Eukaryota; Opisthokonta; Metazoa; Eumetazoa; Bilateria; Protostomia; Spiralia; Lophotrochozoa; Mollusca; Bivalvia; Autobranchia; Heteroconchia; Euheterodonta; Imparidentia; Venerida; Veneroidea; Veneridae; Mercenaria; Mercenaria mercenaria

UdeM00000030630 6596 367.5 UdeM00000030630 XP\_045159951.1 67.6 262  
80 1 5 261 37 298 1.40E-98 367.5 6596 cellular  
organisms; Eukaryota; Opisthokonta; Metazoa; Eumetazoa; Bilateria; Protostomia; Spiralia; Lophotrochozoa; Mollusca; Bivalvia; Autobranchia; Heteroconchia; Euheterodonta; Imparidentia; Venerida; Veneroidea; Veneridae; Mercenaria; Mercenaria mercenaria

UdeM00000030632 6596 367.5 UdeM00000030632 XP\_045159951.1 67.6 262  
80 1 5 261 37 298 1.40E-98 367.5 6596 cellular  
organisms; Eukaryota; Opisthokonta; Metazoa; Eumetazoa; Bilateria; Protostomia; Spiralia; Lophotrochozoa; Mollusca; Bivalvia; Autobranchia; Heteroconchia; Euheterodonta; Imparidentia; Venerida; Veneroidea; Veneridae; Mercenaria; Mercenaria mercenaria

UdeM00000030633 6596 538.9 UdeM00000030633 XP\_045159951.1 61.6 445  
 160 3 5 438 37 481 6.20E-150 538.9 6596 cellular  
 organisms;Eukaryota;Opisthokonta;Metazoa;Eumetazoa;Bilateria;Protostomia;  
 Spiralia;Lophotrochozoa;Mollusca;Bivalvia;Autobranchia;Heteroconchia;Euhe  
 terodonta;Imparidentia;Venerida;Veneroidea;Veneridae;Mercenaria;Mercenari  
 a mercenaria

UdeM00000030635 6596 667.9 UdeM00000030635 XP\_045169093.1 83.5 375  
 62 0 4 378 5 379 7.50E-189 667.9 6596 cellular  
 organisms;Eukaryota;Opisthokonta;Metazoa;Eumetazoa;Bilateria;Protostomia;  
 Spiralia;Lophotrochozoa;Mollusca;Bivalvia;Autobranchia;Heteroconchia;Euhe  
 terodonta;Imparidentia;Venerida;Veneroidea;Veneridae;Mercenaria;Mercenari  
 a mercenaria

UdeM00000030636 6596 662.9 UdeM00000030636 XP\_045214053.1 81.1 375  
 71 0 4 378 5 379 2.40E-187 662.9 6596 cellular  
 organisms;Eukaryota;Opisthokonta;Metazoa;Eumetazoa;Bilateria;Protostomia;  
 Spiralia;Lophotrochozoa;Mollusca;Bivalvia;Autobranchia;Heteroconchia;Euhe  
 terodonta;Imparidentia;Venerida;Veneroidea;Veneridae;Mercenaria;Mercenari  
 a mercenaria

UdeM00000030637 42100 529.6 UdeM00000030637 XP\_032464640.1 79.7 310  
 63 0 5 314 4 313 2.60E-147 529.6 42100 cellular  
 organisms;Eukaryota;Opisthokonta;Metazoa;Eumetazoa;Bilateria;Deuterostomi  
 a;Chordata;Craniata;Vertebrata;Gnathostomata;Teleostomi;Euteleostomi;Sarc  
 opterygii;Dipnotetrapodomorpha;Tetrapoda;Amniota;Mammalia;Theria;Eutheria  
 ;Boreoeutheria;Laurasiatheria;Artiodactyla;Whippomorpha;Cetacea;Odontocet  
 i;Phocoenidae;Phocoena;Phocoena sinus

UdeM00000030638 6596 594 UdeM00000030638 XP\_045214053.1 72.8 375  
 102 0 4 378 5 379 1.40E-166 594 6596 cellular  
 organisms;Eukaryota;Opisthokonta;Metazoa;Eumetazoa;Bilateria;Protostomia;  
 Spiralia;Lophotrochozoa;Mollusca;Bivalvia;Autobranchia;Heteroconchia;Euhe  
 terodonta;Imparidentia;Venerida;Veneroidea;Veneridae;Mercenaria;Mercenari  
 a mercenaria

UdeM00000030639 6573 286.2 UdeM00000030639 XP\_021356943.1 78.8 170  
 36 0 1 170 1 170 2.80E-74 286.2 6573 cellular  
 organisms;Eukaryota;Opisthokonta;Metazoa;Eumetazoa;Bilateria;Protostomia;  
 Spiralia;Lophotrochozoa;Mollusca;Bivalvia;Autobranchia;Pteriomorphia;Pect  
 inida;Pectinoidea;Pectinidae;Mizuhopecten;Mizuhopecten yessoensis

UdeM00000030641 6596 498.4 UdeM00000030641 XP\_045187754.1 52.4 464  
 197 5 1 443 1 461 9.20E-138 498.4 6596 cellular  
 organisms;Eukaryota;Opisthokonta;Metazoa;Eumetazoa;Bilateria;Protostomia;  
 Spiralia;Lophotrochozoa;Mollusca;Bivalvia;Autobranchia;Heteroconchia;Euhe  
 terodonta;Imparidentia;Venerida;Veneroidea;Veneridae;Mercenaria;Mercenari  
 a mercenaria

UdeM00000030642 6565 91.7 UdeM00000030642 XP\_022331123.1 50 94  
 47 0 11 104 32 125 6.10E-16 91.7 6565 cellular  
 organisms;Eukaryota;Opisthokonta;Metazoa;Eumetazoa;Bilateria;Protostomia;  
 Spiralia;Lophotrochozoa;Mollusca;Bivalvia;Autobranchia;Pteriomorphia;Ostr  
 eida;Ostreoidea;Ostreidae;Crassostrea;Crassostrea virginica

UdeM00000030643 6596 572 UdeM00000030643 XP\_045181246.1 78 328  
 70 1 1 326 1636 1963 4.80E-160 572 6596 cellular  
 organisms;Eukaryota;Opisthokonta;Metazoa;Eumetazoa;Bilateria;Protostomia;  
 Spiralia;Lophotrochozoa;Mollusca;Bivalvia;Autobranchia;Heteroconchia;Euhe  
 terodonta;Imparidentia;Venerida;Veneroidea;Veneridae;Mercenaria;Mercenari  
 a mercenaria

UdeM00000030644 6596 549.7 UdeM00000030644 XP\_045181246.1 76.6 333  
 78 0 45 377 1290 1622 3.00E-153 549.7 6596 cellular  
 organisms;Eukaryota;Opisthokonta;Metazoa;Eumetazoa;Bilateria;Protostomia;  
 Spiralia;Lophotrochozoa;Mollusca;Bivalvia;Autobranhia;Heteroconchia;Euhe  
 terodonta;Imparidentia;Venerida;Veneroidea;Veneridae;Mercenaria;Mercenari  
 a mercenaria  
 UdeM00000030645 6596 2169.8 UdeM00000030645 XP\_045181246.1 75.9  
 1290 309 1 1 1288 1 1290 0.00E+00 2169.8 6596  
 cellular  
 organisms;Eukaryota;Opisthokonta;Metazoa;Eumetazoa;Bilateria;Protostomia;  
 Spiralia;Lophotrochozoa;Mollusca;Bivalvia;Autobranhia;Heteroconchia;Euhe  
 terodonta;Imparidentia;Venerida;Veneroidea;Veneridae;Mercenaria;Mercenari  
 a mercenaria  
 UdeM00000030646 6596 268.5 UdeM00000030646 XP\_045185617.1 65.8 184  
 63 0 1 184 25 208 6.50E-69 268.5 6596 cellular  
 organisms;Eukaryota;Opisthokonta;Metazoa;Eumetazoa;Bilateria;Protostomia;  
 Spiralia;Lophotrochozoa;Mollusca;Bivalvia;Autobranhia;Heteroconchia;Euhe  
 terodonta;Imparidentia;Venerida;Veneroidea;Veneridae;Mercenaria;Mercenari  
 a mercenaria  
 UdeM00000030647 6596 1244.2 UdeM00000030647 XP\_045164778.1 70.8  
 978 240 12 1 935 71 1045 0.00E+00 1244.2 6596  
 cellular  
 organisms;Eukaryota;Opisthokonta;Metazoa;Eumetazoa;Bilateria;Protostomia;  
 Spiralia;Lophotrochozoa;Mollusca;Bivalvia;Autobranhia;Heteroconchia;Euhe  
 terodonta;Imparidentia;Venerida;Veneroidea;Veneridae;Mercenaria;Mercenari  
 a mercenaria  
 UdeM00000030648 6573 682.2 UdeM00000030648 XP\_021345460.1 98.5 326  
 5 0 1 326 9 334 3.30E-193 682.2 6573 cellular  
 organisms;Eukaryota;Opisthokonta;Metazoa;Eumetazoa;Bilateria;Protostomia;  
 Spiralia;Lophotrochozoa;Mollusca;Bivalvia;Autobranhia;Pteriomorphia;Pect  
 inida;Pectinoidea;Pectinidae;Mizuhopecten;Mizuhopecten yessoensis  
 UdeM00000030650 6596 439.1 UdeM00000030650 XP\_045174168.1 59.2 390  
 147 4 194 583 378 755 1.00E-119 439.1 6596 cellular  
 organisms;Eukaryota;Opisthokonta;Metazoa;Eumetazoa;Bilateria;Protostomia;  
 Spiralia;Lophotrochozoa;Mollusca;Bivalvia;Autobranhia;Heteroconchia;Euhe  
 terodonta;Imparidentia;Venerida;Veneroidea;Veneridae;Mercenaria;Mercenari  
 a mercenaria  
 UdeM00000030651 6596 439.1 UdeM00000030651 XP\_045174168.1 59.2 390  
 147 4 177 566 378 755 1.00E-119 439.1 6596 cellular  
 organisms;Eukaryota;Opisthokonta;Metazoa;Eumetazoa;Bilateria;Protostomia;  
 Spiralia;Lophotrochozoa;Mollusca;Bivalvia;Autobranhia;Heteroconchia;Euhe  
 terodonta;Imparidentia;Venerida;Veneroidea;Veneridae;Mercenaria;Mercenari  
 a mercenaria  
 UdeM00000030652 6565 469.9 UdeM00000030652 XP\_022330832.1 65.1 350  
 118 2 138 487 88 433 3.90E-129 469.9 6565 cellular  
 organisms;Eukaryota;Opisthokonta;Metazoa;Eumetazoa;Bilateria;Protostomia;  
 Spiralia;Lophotrochozoa;Mollusca;Bivalvia;Autobranhia;Pteriomorphia;Ostr  
 eida;Ostreoidea;Ostreidae;Crassostrea;Crassostrea virginica  
 UdeM00000030653 6565 108.6 UdeM00000030653 XP\_022336169.1 42.5 134  
 58 3 2 125 346 470 6.10E-21 108.6 6565 cellular  
 organisms;Eukaryota;Opisthokonta;Metazoa;Eumetazoa;Bilateria;Protostomia;  
 Spiralia;Lophotrochozoa;Mollusca;Bivalvia;Autobranhia;Pteriomorphia;Ostr  
 eida;Ostreoidea;Ostreidae;Crassostrea;Crassostrea virginica

UdeM00000030654 29159 486.1 UdeM00000030654 XP\_034302097.1 41.9 623  
 335 9 12 630 25 624 7.00E-134 486.1 29159 cellular  
 organisms;Eukaryota;Opisthokonta;Metazoa;Eumetazoa;Bilateria;Protostomia;  
 Spiralia;Lophotrochozoa;Mollusca;Bivalvia;Autobranchia;Pteriomorpha;Ostr  
 eida;Ostreoidea;Ostreidae;Crassostrea;Crassostrea gigas  
 UdeM00000030655 6596 361.3 UdeM00000030655 XP\_045172065.1 31.7 776  
 440 19 21 763 57 775 3.10E-96 361.3 6596 cellular  
 organisms;Eukaryota;Opisthokonta;Metazoa;Eumetazoa;Bilateria;Protostomia;  
 Spiralia;Lophotrochozoa;Mollusca;Bivalvia;Autobranchia;Heteroconchia;Euhe  
 terodonta;Imparidentia;Venerida;Veneroidea;Veneridae;Mercenaria;Mercenari  
 a mercenaria  
 UdeM00000030657 225164 65.1 UdeM00000030657 XP\_009059819.1 44.2  
 86 43 2 93 175 71 154 1.10E-07 65.1 225164  
 cellular  
 organisms;Eukaryota;Opisthokonta;Metazoa;Eumetazoa;Bilateria;Protostomia;  
 Spiralia;Lophotrochozoa;Mollusca;Gastropoda;Patellogastropoda;Lottioidea;  
 Lottiidae;Lottia;Lottia gigantea  
 UdeM00000030658 225164 59.3 UdeM00000030658 XP\_009059819.1 41.9  
 86 45 2 93 175 71 154 5.80E-06 59.3 225164  
 cellular  
 organisms;Eukaryota;Opisthokonta;Metazoa;Eumetazoa;Bilateria;Protostomia;  
 Spiralia;Lophotrochozoa;Mollusca;Gastropoda;Patellogastropoda;Lottioidea;  
 Lottiidae;Lottia;Lottia gigantea  
 UdeM00000030659 29159 826.6 UdeM00000030659 XP\_034323619.1 72.4 543  
 144 1 1 537 85 627 1.80E-236 826.6 29159 cellular  
 organisms;Eukaryota;Opisthokonta;Metazoa;Eumetazoa;Bilateria;Protostomia;  
 Spiralia;Lophotrochozoa;Mollusca;Bivalvia;Autobranchia;Pteriomorpha;Ostr  
 eida;Ostreoidea;Ostreidae;Crassostrea;Crassostrea gigas  
 UdeM00000030660 6573 202.2 UdeM00000030660 XP\_021351448.1 68.8 141  
 44 0 1 141 1 141 5.40E-49 202.2 6573 cellular  
 organisms;Eukaryota;Opisthokonta;Metazoa;Eumetazoa;Bilateria;Protostomia;  
 Spiralia;Lophotrochozoa;Mollusca;Bivalvia;Autobranchia;Pteriomorpha;Pect  
 inida;Pectinoidea;Pectinidae;Mizuhopecten;Mizuhopecten yessoensis  
 UdeM00000030661 6579 683.3 UdeM00000030661 XP\_033734093.1 66.8 594  
 177 5 9 597 139 717 2.70E-193 683.3 6579 cellular  
 organisms;Eukaryota;Opisthokonta;Metazoa;Eumetazoa;Bilateria;Protostomia;  
 Spiralia;Lophotrochozoa;Mollusca;Bivalvia;Autobranchia;Pteriomorpha;Pect  
 inida;Pectinoidea;Pectinidae;Pecten;Pecten maximus  
 UdeM00000030662 6596 1478.4 UdeM00000030662 XP\_045187403.1 83.2  
 844 142 0 7 850 5 848 0.00E+00 1478.4 6596  
 cellular  
 organisms;Eukaryota;Opisthokonta;Metazoa;Eumetazoa;Bilateria;Protostomia;  
 Spiralia;Lophotrochozoa;Mollusca;Bivalvia;Autobranchia;Heteroconchia;Euhe  
 terodonta;Imparidentia;Venerida;Veneroidea;Veneridae;Mercenaria;Mercenari  
 a mercenaria  
 UdeM00000030663 6596 852 UdeM00000030663 XP\_045187400.1 53.3 1042  
 429 14 11 1025 8 1018 7.80E-244 852 6596 cellular  
 organisms;Eukaryota;Opisthokonta;Metazoa;Eumetazoa;Bilateria;Protostomia;  
 Spiralia;Lophotrochozoa;Mollusca;Bivalvia;Autobranchia;Heteroconchia;Euhe  
 terodonta;Imparidentia;Venerida;Veneroidea;Veneridae;Mercenaria;Mercenari  
 a mercenaria  
 UdeM00000030664 29159 63.2 UdeM00000030664 XP\_011419439.1 66.7 48  
 13 1 8 55 71 115 5.20E-07 63.2 29159 cellular  
 organisms;Eukaryota;Opisthokonta;Metazoa;Eumetazoa;Bilateria;Protostomia;

Spiralia; Lophotrochozoa; Mollusca; Bivalvia; Autobranchia; Pteriomorpha; Ostr  
 eida; Ostreidae; Crassostrea; Crassostrea gigas  
 UdeM00000030665 6596 124.8 UdeM00000030665 XP\_045180427.1 49.6 115  
 56 1 80 192 159 273 1.30E-25 124.8 6596 cellular  
 organisms; Eukaryota; Opisthokonta; Metazoa; Eumetazoa; Bilateria; Protostomia;  
 Spiralia; Lophotrochozoa; Mollusca; Bivalvia; Autobranchia; Heteroconchia; Euh  
 terodonta; Imparidentia; Venerida; Veneroidea; Veneridae; Mercenaria; Mercenari  
 a mercenaria  
 UdeM00000030666 29159 936 UdeM00000030666 XP\_011419438.1 71 631  
 176 3 1 627 1 628 2.40E-269 936 29159 cellular  
 organisms; Eukaryota; Opisthokonta; Metazoa; Eumetazoa; Bilateria; Protostomia;  
 Spiralia; Lophotrochozoa; Mollusca; Bivalvia; Autobranchia; Pteriomorpha; Ostr  
 eida; Ostreidae; Crassostrea; Crassostrea gigas  
 UdeM00000030667 6565 171.8 UdeM00000030667 XP\_022291081.1 55.6 142  
 56 3 3 142 1 137 6.40E-40 171.8 6565 cellular  
 organisms; Eukaryota; Opisthokonta; Metazoa; Eumetazoa; Bilateria; Protostomia;  
 Spiralia; Lophotrochozoa; Mollusca; Bivalvia; Autobranchia; Pteriomorpha; Ostr  
 eida; Ostreidae; Crassostrea; Crassostrea virginica  
 UdeM00000030668 6565 174.1 UdeM00000030668 XP\_022328170.1 58.3 139  
 53 2 1 139 1 134 1.30E-40 174.1 6565 cellular  
 organisms; Eukaryota; Opisthokonta; Metazoa; Eumetazoa; Bilateria; Protostomia;  
 Spiralia; Lophotrochozoa; Mollusca; Bivalvia; Autobranchia; Pteriomorpha; Ostr  
 eida; Ostreidae; Crassostrea; Crassostrea virginica  
 UdeM00000030669 1735272 73.9 UdeM00000030669 XP\_041352613.1 56.6  
 53 23 0 20 72 114 166 9.20E-11 73.9 1735272  
 cellular  
 organisms; Eukaryota; Opisthokonta; Metazoa; Eumetazoa; Bilateria; Protostomia;  
 Spiralia; Lophotrochozoa; Mollusca; Gastropoda; Neomphalina; Neomphaloidea; Pel  
 tospiridae; Gigantopelta; Gigantopelta aegis  
 UdeM00000030670 6573 87.8 UdeM00000030670 XP\_021379667.1 69 71  
 21 1 2 71 45 115 7.40E-15 87.8 6573 cellular  
 organisms; Eukaryota; Opisthokonta; Metazoa; Eumetazoa; Bilateria; Protostomia;  
 Spiralia; Lophotrochozoa; Mollusca; Bivalvia; Autobranchia; Pteriomorpha; Pect  
 inida; Pectinoidea; Pectinidae; Mizuhopecten; Mizuhopecten yessoensis  
 UdeM00000030671 6565 164.5 UdeM00000030671 XP\_022331292.1 39 213  
 112 5 68 278 43 239 5.60E-37 164.5 6565 cellular  
 organisms; Eukaryota; Opisthokonta; Metazoa; Eumetazoa; Bilateria; Protostomia;  
 Spiralia; Lophotrochozoa; Mollusca; Bivalvia; Autobranchia; Pteriomorpha; Ostr  
 eida; Ostreidae; Crassostrea; Crassostrea virginica  
 UdeM00000030672 29159 130.2 UdeM00000030672 XP\_011418993.3 23.7 1096  
 634 35 68 1142 99 1013 1.70E-26 130.2 29159 cellular  
 organisms; Eukaryota; Opisthokonta; Metazoa; Eumetazoa; Bilateria; Protostomia;  
 Spiralia; Lophotrochozoa; Mollusca; Bivalvia; Autobranchia; Pteriomorpha; Ostr  
 eida; Ostreidae; Crassostrea; Crassostrea gigas  
 UdeM00000030673 29159 372.9 UdeM00000030673 XP\_011418990.1 72.2 252  
 70 0 12 263 21 272 3.50E-100 372.9 29159 cellular  
 organisms; Eukaryota; Opisthokonta; Metazoa; Eumetazoa; Bilateria; Protostomia;  
 Spiralia; Lophotrochozoa; Mollusca; Bivalvia; Autobranchia; Pteriomorpha; Ostr  
 eida; Ostreidae; Crassostrea; Crassostrea gigas  
 UdeM00000030674 6573 177.9 UdeM00000030674 XP\_021373151.1 64.1 131  
 44 1 1 131 26 153 4.40E-41 177.9 6573 cellular  
 organisms; Eukaryota; Opisthokonta; Metazoa; Eumetazoa; Bilateria; Protostomia;  
 Spiralia; Lophotrochozoa; Mollusca; Bivalvia; Autobranchia; Pteriomorpha; Pect  
 inida; Pectinoidea; Pectinidae; Mizuhopecten; Mizuhopecten yessoensis

UdeM00000030676 6596 995.3 UdeM00000030676 XP\_045176302.1 89.3 553  
 53 2 17 569 142 688 3.10E-287 995.3 6596 cellular  
 organisms;Eukaryota;Opisthokonta;Metazoa;Eumetazoa;Bilateria;Protostomia;  
 Spiralia;Lophotrochozoa;Mollusca;Bivalvia;Autobranchia;Heteroconchia;Euhe  
 terodonta;Imparidentia;Venerida;Veneroidea;Veneridae;Mercenaria;Mercenari  
 a mercenaria  
 UdeM00000030675 6596 1032.7 UdeM00000030675 XP\_045176263.1 79.8  
 658 71 3 17 674 142 737 2.10E-298 1032.7 6596  
 cellular  
 organisms;Eukaryota;Opisthokonta;Metazoa;Eumetazoa;Bilateria;Protostomia;  
 Spiralia;Lophotrochozoa;Mollusca;Bivalvia;Autobranchia;Heteroconchia;Euhe  
 terodonta;Imparidentia;Venerida;Veneroidea;Veneridae;Mercenaria;Mercenari  
 a mercenaria  
 UdeM00000030677 6596 618.2 UdeM00000030677 XP\_045176241.1 46.1 800  
 360 12 1 783 1 746 1.40E-173 618.2 6596 cellular  
 organisms;Eukaryota;Opisthokonta;Metazoa;Eumetazoa;Bilateria;Protostomia;  
 Spiralia;Lophotrochozoa;Mollusca;Bivalvia;Autobranchia;Heteroconchia;Euhe  
 terodonta;Imparidentia;Venerida;Veneroidea;Veneridae;Mercenaria;Mercenari  
 a mercenaria  
 UdeM00000030678 6596 1113.2 UdeM00000030678 XP\_045186106.1 53.2  
 999 441 7 24 1004 31 1020 0.00E+00 1113.2 6596  
 cellular  
 organisms;Eukaryota;Opisthokonta;Metazoa;Eumetazoa;Bilateria;Protostomia;  
 Spiralia;Lophotrochozoa;Mollusca;Bivalvia;Autobranchia;Heteroconchia;Euhe  
 terodonta;Imparidentia;Venerida;Veneroidea;Veneridae;Mercenaria;Mercenari  
 a mercenaria  
 UdeM00000030679 6579 112.5 UdeM00000030679 XP\_033734802.1 30.3 439  
 245 13 1 437 1 380 1.40E-21 112.5 6579 cellular  
 organisms;Eukaryota;Opisthokonta;Metazoa;Eumetazoa;Bilateria;Protostomia;  
 Spiralia;Lophotrochozoa;Mollusca;Bivalvia;Autobranchia;Pteriomorphia;Pect  
 inida;Pectinoidea;Pectinidae;Pecten;Pecten maximus  
 UdeM00000030680 6596 503.4 UdeM00000030680 XP\_045175060.1 35.3 1102  
 547 21 1 1084 1 954 7.00E-139 503.4 6596 cellular  
 organisms;Eukaryota;Opisthokonta;Metazoa;Eumetazoa;Bilateria;Protostomia;  
 Spiralia;Lophotrochozoa;Mollusca;Bivalvia;Autobranchia;Heteroconchia;Euhe  
 terodonta;Imparidentia;Venerida;Veneroidea;Veneridae;Mercenaria;Mercenari  
 a mercenaria  
 UdeM00000030682 6596 652.5 UdeM00000030682 XP\_045170439.1 66 527  
 171 4 3 525 161 683 4.50E-184 652.5 6596 cellular  
 organisms;Eukaryota;Opisthokonta;Metazoa;Eumetazoa;Bilateria;Protostomia;  
 Spiralia;Lophotrochozoa;Mollusca;Bivalvia;Autobranchia;Heteroconchia;Euhe  
 terodonta;Imparidentia;Venerida;Veneroidea;Veneridae;Mercenaria;Mercenari  
 a mercenaria  
 UdeM00000030681 6573 676 UdeM00000030681 XP\_021374213.1 60.8 594  
 219 4 13 593 87 679 4.30E-191 676 6573 cellular  
 organisms;Eukaryota;Opisthokonta;Metazoa;Eumetazoa;Bilateria;Protostomia;  
 Spiralia;Lophotrochozoa;Mollusca;Bivalvia;Autobranchia;Pteriomorphia;Pect  
 inida;Pectinoidea;Pectinidae;Mizuhopecten;Mizuhopecten yessoensis  
 UdeM00000030683 6596 501.9 UdeM00000030683 XP\_045161383.1 52 467  
 212 3 1 466 1 456 9.00E-139 501.9 6596 cellular  
 organisms;Eukaryota;Opisthokonta;Metazoa;Eumetazoa;Bilateria;Protostomia;  
 Spiralia;Lophotrochozoa;Mollusca;Bivalvia;Autobranchia;Heteroconchia;Euhe  
 terodonta;Imparidentia;Venerida;Veneroidea;Veneridae;Mercenaria;Mercenari  
 a mercenaria

UdeM00000030684 6565 515 UdeM00000030684 XP\_022339409.1 52.9 467  
 215 4 1 463 2 467 1.10E-142 515 6565 cellular  
 organisms;Eukaryota;Opisthokonta;Metazoa;Eumetazoa;Bilateria;Protostomia;  
 Spiralia;Lophotrochozoa;Mollusca;Bivalvia;Autobranchia;Pteriomorpha;Ostr  
 eida;Ostreoidea;Ostreidae;Crassostrea;Crassostrea virginica  
 UdeM00000030685 6579 249.2 UdeM00000030685 XP\_033754677.1 55.6 207  
 92 0 1 207 265 471 4.60E-63 249.2 6579 cellular  
 organisms;Eukaryota;Opisthokonta;Metazoa;Eumetazoa;Bilateria;Protostomia;  
 Spiralia;Lophotrochozoa;Mollusca;Bivalvia;Autobranchia;Pteriomorpha;Pect  
 inida;Pectinoidea;Pectinidae;Pecten;Pecten maximus  
 UdeM00000030687 1529436 90.1 UdeM00000030687 XP\_033101539.1 25.3  
 308 103 5 41 223 441 746 4.00E-15 90.1 1529436  
 cellular  
 organisms;Eukaryota;Opisthokonta;Metazoa;Eumetazoa;Bilateria;Deuterostomi  
 a;Echinodermata;Pelmatozoa;Crinoidea;Articulata;Comatulida;Comatulidae;Co  
 matulinae;Anneissia;Anneissia japonica  
 UdeM00000030688 29159 60.8 UdeM00000030688 XP\_034304596.1 43.3 67  
 38 0 2 68 13 79 1.80E-06 60.8 29159 cellular  
 organisms;Eukaryota;Opisthokonta;Metazoa;Eumetazoa;Bilateria;Protostomia;  
 Spiralia;Lophotrochozoa;Mollusca;Bivalvia;Autobranchia;Pteriomorpha;Ostr  
 eida;Ostreoidea;Ostreidae;Crassostrea;Crassostrea gigas  
 UdeM00000030689 6596 488.8 UdeM00000030689 XP\_045161383.1 51.6 455  
 218 2 5 458 4 457 7.60E-135 488.8 6596 cellular  
 organisms;Eukaryota;Opisthokonta;Metazoa;Eumetazoa;Bilateria;Protostomia;  
 Spiralia;Lophotrochozoa;Mollusca;Bivalvia;Autobranchia;Heteroconchia;Euhe  
 terodonta;Imparidentia;Venerida;Veneroidea;Veneridae;Mercenaria;Mercenari  
 a mercenaria  
 UdeM00000030690 6596 80.5 UdeM00000030690 XP\_045187869.1 32.9 158  
 98 4 124 276 195 349 4.50E-12 80.5 6596 cellular  
 organisms;Eukaryota;Opisthokonta;Metazoa;Eumetazoa;Bilateria;Protostomia;  
 Spiralia;Lophotrochozoa;Mollusca;Bivalvia;Autobranchia;Heteroconchia;Euhe  
 terodonta;Imparidentia;Venerida;Veneroidea;Veneridae;Mercenaria;Mercenari  
 a mercenaria  
 UdeM00000030691 6596 57.4 UdeM00000030691 XP\_045176602.1 54.5 44  
 20 0 12 55 414 457 8.20E-06 57.4 6596 cellular  
 organisms;Eukaryota;Opisthokonta;Metazoa;Eumetazoa;Bilateria;Protostomia;  
 Spiralia;Lophotrochozoa;Mollusca;Bivalvia;Autobranchia;Heteroconchia;Euhe  
 terodonta;Imparidentia;Venerida;Veneroidea;Veneridae;Mercenaria;Mercenari  
 a mercenaria  
 UdeM00000030692 6596 310.8 UdeM00000030692 XP\_045212395.1 50.2 313  
 136 4 1 294 1 312 2.00E-81 310.8 6596 cellular  
 organisms;Eukaryota;Opisthokonta;Metazoa;Eumetazoa;Bilateria;Protostomia;  
 Spiralia;Lophotrochozoa;Mollusca;Bivalvia;Autobranchia;Heteroconchia;Euhe  
 terodonta;Imparidentia;Venerida;Veneroidea;Veneridae;Mercenaria;Mercenari  
 a mercenaria  
 UdeM00000030693 6596 166 UdeM00000030693 XP\_045216775.1 55.6 133  
 59 0 4 136 318 450 4.80E-38 166 6596 cellular  
 organisms;Eukaryota;Opisthokonta;Metazoa;Eumetazoa;Bilateria;Protostomia;  
 Spiralia;Lophotrochozoa;Mollusca;Bivalvia;Autobranchia;Heteroconchia;Euhe  
 terodonta;Imparidentia;Venerida;Veneroidea;Veneridae;Mercenaria;Mercenari  
 a mercenaria  
 UdeM00000030694 6596 492.3 UdeM00000030694 XP\_045161383.1 46.4 535  
 207 3 1 534 1 456 8.20E-136 492.3 6596 cellular  
 organisms;Eukaryota;Opisthokonta;Metazoa;Eumetazoa;Bilateria;Protostomia;

Spiralia;Lophotrochozoa;Mollusca;Bivalvia;Autobranchia;Heteroconchia;Euherodonta;Imparidentia;Venerida;Veneroidea;Veneridae;Mercenaria;Mercenaria mercenaria

UdeM00000030696 6579 499.2 UdeM00000030696 XP\_033754677.1 52 469  
218 5 5 469 4 469 5.70E-138 499.2 6579 cellular

organisms;Eukaryota;Opisthokonta;Metazoa;Eumetazoa;Bilateria;Protostomia;Spiralia;Lophotrochozoa;Mollusca;Bivalvia;Autobranchia;Pteriormorphia;Pectinida;Pectinoidea;Pectinidae;Pecten;Pecten maximus

UdeM00000030697 6596 194.9 UdeM00000030697 XP\_045161277.1 48.4 192  
98 1 1 191 1 192 1.00E-46 194.9 6596 cellular

organisms;Eukaryota;Opisthokonta;Metazoa;Eumetazoa;Bilateria;Protostomia;Spiralia;Lophotrochozoa;Mollusca;Bivalvia;Autobranchia;Heteroconchia;Euherodonta;Imparidentia;Venerida;Veneroidea;Veneridae;Mercenaria;Mercenaria mercenaria

UdeM00000030698 1735272 198 UdeM00000030698 XP\_041353064.1 58.8  
153 63 0 1 153 198 350 8.90E-48 198 1735272  
cellular

organisms;Eukaryota;Opisthokonta;Metazoa;Eumetazoa;Bilateria;Protostomia;Spiralia;Lophotrochozoa;Mollusca;Gastropoda;Neomphalina;Neomphaloidea;Peltospiridae;Gigantopelta;Gigantopelta aegis

UdeM00000030699 6596 107.8 UdeM00000030699 XP\_045212395.1 62.5 88  
33 0 1 88 366 453 9.00E-21 107.8 6596 cellular

organisms;Eukaryota;Opisthokonta;Metazoa;Eumetazoa;Bilateria;Protostomia;Spiralia;Lophotrochozoa;Mollusca;Bivalvia;Autobranchia;Heteroconchia;Euherodonta;Imparidentia;Venerida;Veneroidea;Veneridae;Mercenaria;Mercenaria mercenaria

UdeM00000030701 6596 375.9 UdeM00000030701 XP\_045161383.1 49.2 388  
192 3 2 387 69 453 6.10E-101 375.9 6596 cellular

organisms;Eukaryota;Opisthokonta;Metazoa;Eumetazoa;Bilateria;Protostomia;Spiralia;Lophotrochozoa;Mollusca;Bivalvia;Autobranchia;Heteroconchia;Euherodonta;Imparidentia;Venerida;Veneroidea;Veneridae;Mercenaria;Mercenaria mercenaria

UdeM00000030703 1735272 901.4 UdeM00000030703 XP\_041371346.1 44.4  
1032 544 13 98 1113 103 1120 1.20E-258 901.4 1735272  
cellular

organisms;Eukaryota;Opisthokonta;Metazoa;Eumetazoa;Bilateria;Protostomia;Spiralia;Lophotrochozoa;Mollusca;Gastropoda;Neomphalina;Neomphaloidea;Peltospiridae;Gigantopelta;Gigantopelta aegis

UdeM00000030704 6573 1471.1 UdeM00000030704 XP\_021353655.1 78.1  
934 205 0 1 934 1 934 0.00E+00 1471.1 6573  
cellular

organisms;Eukaryota;Opisthokonta;Metazoa;Eumetazoa;Bilateria;Protostomia;Spiralia;Lophotrochozoa;Mollusca;Bivalvia;Autobranchia;Pteriormorphia;Pectinida;Pectinoidea;Pectinidae;Mizuhopecten;Mizuhopecten yessoensis

UdeM00000030705 6596 158.7 UdeM00000030705 XP\_045161221.1 60.4 111  
43 1 1 111 1 110 4.40E-36 158.7 6596 cellular

organisms;Eukaryota;Opisthokonta;Metazoa;Eumetazoa;Bilateria;Protostomia;Spiralia;Lophotrochozoa;Mollusca;Bivalvia;Autobranchia;Heteroconchia;Euherodonta;Imparidentia;Venerida;Veneroidea;Veneridae;Mercenaria;Mercenaria mercenaria

UdeM00000030706 1735272 92.8 UdeM00000030706 XP\_041353466.1 32.9  
255 152 10 1 246 1 245 7.50E-16 92.8 1735272  
cellular

organisms;Eukaryota;Opisthokonta;Metazoa;Eumetazoa;Bilateria;Protostomia;



Spiralia;Lophotrochozoa;Mollusca;Gastropoda;Neomphalina;Neomphaloidea;Pel  
tospiridae;Gigantopelta;Gigantopelta aegis

UdeM00000030707 50429 91.3 UdeM00000030707 XP\_022796476.1 55.1 89  
40 0 1 89 1 89 7.00E-16 91.3 50429 cellular

organisms;Eukaryota;Opisthokonta;Metazoa;Eumetazoa;Cnidaria;Anthozoa;Hexa  
corallia;Scleractinia;Astrocoeniina;Pocilloporidae;Stylophora;Stylophora  
pistillata

UdeM00000030708 6596 329.7 UdeM00000030708 XP\_045162658.1 77.5 213  
45 2 1 213 1 210 2.70E-87 329.7 6596 cellular

organisms;Eukaryota;Opisthokonta;Metazoa;Eumetazoa;Bilateria;Protostomia;  
Spiralia;Lophotrochozoa;Mollusca;Bivalvia;Autobranchia;Heteroconchia;Euhe  
terodonta;Imparidentia;Venerida;Veneroidea;Veneridae;Mercenaria;Mercenari  
a mercenaria

UdeM00000030709 7739 253.4 UdeM00000030709 XP\_035696678.1 63.1 187  
69 0 2 188 423 609 2.20E-64 253.4 7739 cellular

organisms;Eukaryota;Opisthokonta;Metazoa;Eumetazoa;Bilateria;Deuterostomi  
a;Chordata;Cephalochordata;Leptocardii;Amphioxiformes;Branchiostomidae;Br  
anchiostoma;Branchiostoma floridae

UdeM00000030710 6596 439.5 UdeM00000030710 XP\_045162626.1 47.2 449  
207 5 10 450 23 449 6.80E-120 439.5 6596 cellular

organisms;Eukaryota;Opisthokonta;Metazoa;Eumetazoa;Bilateria;Protostomia;  
Spiralia;Lophotrochozoa;Mollusca;Bivalvia;Autobranchia;Heteroconchia;Euhe  
terodonta;Imparidentia;Venerida;Veneroidea;Veneridae;Mercenaria;Mercenari  
a mercenaria

UdeM00000030711 6596 159.1 UdeM00000030711 XP\_045181277.1 33.7 243  
151 6 106 339 139 380 1.00E-35 159.1 6596 cellular

organisms;Eukaryota;Opisthokonta;Metazoa;Eumetazoa;Bilateria;Protostomia;  
Spiralia;Lophotrochozoa;Mollusca;Bivalvia;Autobranchia;Heteroconchia;Euhe  
terodonta;Imparidentia;Venerida;Veneroidea;Veneridae;Mercenaria;Mercenari  
a mercenaria

UdeM00000030712 6596 178.3 UdeM00000030712 XP\_045181277.1 34.4 279  
169 6 83 348 95 372 1.70E-41 178.3 6596 cellular

organisms;Eukaryota;Opisthokonta;Metazoa;Eumetazoa;Bilateria;Protostomia;  
Spiralia;Lophotrochozoa;Mollusca;Bivalvia;Autobranchia;Heteroconchia;Euhe  
terodonta;Imparidentia;Venerida;Veneroidea;Veneridae;Mercenaria;Mercenari  
a mercenaria

UdeM00000030713 6596 188.7 UdeM00000030713 XP\_045181277.1 31.4 344  
203 6 27 361 53 372 1.30E-44 188.7 6596 cellular

organisms;Eukaryota;Opisthokonta;Metazoa;Eumetazoa;Bilateria;Protostomia;  
Spiralia;Lophotrochozoa;Mollusca;Bivalvia;Autobranchia;Heteroconchia;Euhe  
terodonta;Imparidentia;Venerida;Veneroidea;Veneridae;Mercenaria;Mercenari  
a mercenaria

UdeM00000030714 1735272 188.3 UdeM00000030714 XP\_041355827.1 54.4  
160 72 1 2 161 233 391 8.50E-45 188.3 1735272

cellular

organisms;Eukaryota;Opisthokonta;Metazoa;Eumetazoa;Bilateria;Protostomia;  
Spiralia;Lophotrochozoa;Mollusca;Gastropoda;Neomphalina;Neomphaloidea;Pel  
tospiridae;Gigantopelta;Gigantopelta aegis

UdeM00000030715 6596 282.7 UdeM00000030715 XP\_045162626.1 58.9 219  
89 1 10 227 23 241 4.10E-73 282.7 6596 cellular

organisms;Eukaryota;Opisthokonta;Metazoa;Eumetazoa;Bilateria;Protostomia;  
Spiralia;Lophotrochozoa;Mollusca;Bivalvia;Autobranchia;Heteroconchia;Euhe  
terodonta;Imparidentia;Venerida;Veneroidea;Veneridae;Mercenaria;Mercenari  
a mercenaria

UdeM00000030716 6596 155.2 UdeM00000030716 XP\_045181277.1 40 195  
 111 4 15 204 126 319 1.20E-34 155.2 6596 cellular  
 organisms;Eukaryota;Opisthokonta;Metazoa;Eumetazoa;Bilateria;Protostomia;  
 Spiralia;Lophotrochozoa;Mollusca;Bivalvia;Autobranchia;Heteroconchia;Euhe  
 terodonta;Imparidentia;Venerida;Veneroidea;Veneridae;Mercenaria;Mercenari  
 a mercenaria  
 UdeM00000030718 6596 146 UdeM00000030718 XP\_045181277.1 29.6 297  
 163 7 64 315 77 372 8.50E-32 146 6596 cellular  
 organisms;Eukaryota;Opisthokonta;Metazoa;Eumetazoa;Bilateria;Protostomia;  
 Spiralia;Lophotrochozoa;Mollusca;Bivalvia;Autobranchia;Heteroconchia;Euhe  
 terodonta;Imparidentia;Venerida;Veneroidea;Veneridae;Mercenaria;Mercenari  
 a mercenaria  
 UdeM00000030719 6596 65.1 UdeM00000030719 XP\_045177372.1 29 131  
 88 3 1 130 22 148 1.30E-07 65.1 6596 cellular  
 organisms;Eukaryota;Opisthokonta;Metazoa;Eumetazoa;Bilateria;Protostomia;  
 Spiralia;Lophotrochozoa;Mollusca;Bivalvia;Autobranchia;Heteroconchia;Euhe  
 terodonta;Imparidentia;Venerida;Veneroidea;Veneridae;Mercenaria;Mercenari  
 a mercenaria  
 UdeM00000030720 6596 99 UdeM00000030720 XP\_045174482.1 24.3 375  
 239 10 1 336 22 390 1.30E-17 99 6596 cellular  
 organisms;Eukaryota;Opisthokonta;Metazoa;Eumetazoa;Bilateria;Protostomia;  
 Spiralia;Lophotrochozoa;Mollusca;Bivalvia;Autobranchia;Heteroconchia;Euhe  
 terodonta;Imparidentia;Venerida;Veneroidea;Veneridae;Mercenaria;Mercenari  
 a mercenaria  
 UdeM00000030721 6596 79 UdeM00000030721 XP\_045176094.1 48.3 89  
 44 2 26 113 83 170 5.20E-12 79 6596 cellular  
 organisms;Eukaryota;Opisthokonta;Metazoa;Eumetazoa;Bilateria;Protostomia;  
 Spiralia;Lophotrochozoa;Mollusca;Bivalvia;Autobranchia;Heteroconchia;Euhe  
 terodonta;Imparidentia;Venerida;Veneroidea;Veneridae;Mercenaria;Mercenari  
 a mercenaria  
 UdeM00000030722 6596 158.7 UdeM00000030722 XP\_045176094.1 40.2 199  
 109 5 24 219 79 270 8.60E-36 158.7 6596 cellular  
 organisms;Eukaryota;Opisthokonta;Metazoa;Eumetazoa;Bilateria;Protostomia;  
 Spiralia;Lophotrochozoa;Mollusca;Bivalvia;Autobranchia;Heteroconchia;Euhe  
 terodonta;Imparidentia;Venerida;Veneroidea;Veneridae;Mercenaria;Mercenari  
 a mercenaria  
 UdeM00000030723 6596 97.8 UdeM00000030723 XP\_045177373.1 25.5 345  
 232 11 1 334 22 352 2.80E-17 97.8 6596 cellular  
 organisms;Eukaryota;Opisthokonta;Metazoa;Eumetazoa;Bilateria;Protostomia;  
 Spiralia;Lophotrochozoa;Mollusca;Bivalvia;Autobranchia;Heteroconchia;Euhe  
 terodonta;Imparidentia;Venerida;Veneroidea;Veneridae;Mercenaria;Mercenari  
 a mercenaria  
 UdeM00000030724 6596 145.2 UdeM00000030724 XP\_045181277.1 34.6 243  
 149 6 73 309 81 319 1.50E-31 145.2 6596 cellular  
 organisms;Eukaryota;Opisthokonta;Metazoa;Eumetazoa;Bilateria;Protostomia;  
 Spiralia;Lophotrochozoa;Mollusca;Bivalvia;Autobranchia;Heteroconchia;Euhe  
 terodonta;Imparidentia;Venerida;Veneroidea;Veneridae;Mercenaria;Mercenari  
 a mercenaria  
 UdeM00000030726 6596 249.6 UdeM00000030726 XP\_045176664.1 30.7 584  
 346 18 6 553 7 567 9.30E-63 249.6 6596 cellular  
 organisms;Eukaryota;Opisthokonta;Metazoa;Eumetazoa;Bilateria;Protostomia;  
 Spiralia;Lophotrochozoa;Mollusca;Bivalvia;Autobranchia;Heteroconchia;Euhe  
 terodonta;Imparidentia;Venerida;Veneroidea;Veneridae;Mercenaria;Mercenari  
 a mercenaria

UdeM00000030727 48701 87.8 UdeM00000030727 XP\_014866931.1 37.3 134  
 52 2 7 108 254 387 9.20E-15 87.8 48701 cellular  
 organisms;Eukaryota;Opisthokonta;Metazoa;Eumetazoa;Bilateria;Deuterostomi  
 a;Chordata;Craniata;Vertebrata;Gnathostomata;Teleostomi;Euteleostomi;Acti  
 nopterygii;Actinopteri;Neopterygii;Teleostei;Osteoglossocephalai;Clupeoce  
 phala;Euteleostei;Neoteleostei;Eurypterygia;Ctenosquamata;Acanthomo  
 rphata;Euacanthomorpha;Percomorphaceae;Ovalentaria;Atherinomorphae;Cyp  
 rinodontiformes;Cyprinodontoides;Poeciliidae;Poeciliinae;Poecilia;Poecili  
 a mexicana

UdeM00000030729 6596 88.2 UdeM00000030729 XP\_045181277.1 46.9 81  
 42 1 2 82 240 319 1.10E-14 88.2 6596 cellular  
 organisms;Eukaryota;Opisthokonta;Metazoa;Eumetazoa;Bilateria;Protostomia;  
 Spiralia;Lophotrochozoa;Mollusca;Bivalvia;Autobranhia;Heteroconchia;Euhe  
 terodonta;Imparidentia;Venerida;Veneroidea;Veneridae;Mercenaria;Mercenari  
 a mercenaria

UdeM00000030730 1735272 253.8 UdeM00000030730 XP\_041355828.1 52.2  
 245 115 2 11 254 102 345 2.50E-64 253.8 1735272  
 cellular  
 organisms;Eukaryota;Opisthokonta;Metazoa;Eumetazoa;Bilateria;Protostomia;  
 Spiralia;Lophotrochozoa;Mollusca;Gastropoda;Neomphalina;Neomphaloidea;Pel  
 tospiridae;Gigantopelta;Gigantopelta aegis

UdeM00000030732 6596 99.4 UdeM00000030732 XP\_045181277.1 34 156  
 96 4 83 232 137 291 6.70E-18 99.4 6596 cellular  
 organisms;Eukaryota;Opisthokonta;Metazoa;Eumetazoa;Bilateria;Protostomia;  
 Spiralia;Lophotrochozoa;Mollusca;Bivalvia;Autobranhia;Heteroconchia;Euhe  
 terodonta;Imparidentia;Venerida;Veneroidea;Veneridae;Mercenaria;Mercenari  
 a mercenaria

UdeM00000030733 6596 147.5 UdeM00000030733 XP\_045181277.1 35.2 196  
 120 4 11 200 178 372 1.90E-32 147.5 6596 cellular  
 organisms;Eukaryota;Opisthokonta;Metazoa;Eumetazoa;Bilateria;Protostomia;  
 Spiralia;Lophotrochozoa;Mollusca;Bivalvia;Autobranhia;Heteroconchia;Euhe  
 terodonta;Imparidentia;Venerida;Veneroidea;Veneridae;Mercenaria;Mercenari  
 a mercenaria

UdeM00000030735 6596 150.6 UdeM00000030735 XP\_045181277.1 38.3 193  
 112 4 11 197 178 369 2.30E-33 150.6 6596 cellular  
 organisms;Eukaryota;Opisthokonta;Metazoa;Eumetazoa;Bilateria;Protostomia;  
 Spiralia;Lophotrochozoa;Mollusca;Bivalvia;Autobranhia;Heteroconchia;Euhe  
 terodonta;Imparidentia;Venerida;Veneroidea;Veneridae;Mercenaria;Mercenari  
 a mercenaria

UdeM00000030736 6596 119.4 UdeM00000030736 XP\_045181277.1 39.9 143  
 81 3 117 255 178 319 8.70E-24 119.4 6596 cellular  
 organisms;Eukaryota;Opisthokonta;Metazoa;Eumetazoa;Bilateria;Protostomia;  
 Spiralia;Lophotrochozoa;Mollusca;Bivalvia;Autobranhia;Heteroconchia;Euhe  
 terodonta;Imparidentia;Venerida;Veneroidea;Veneridae;Mercenaria;Mercenari  
 a mercenaria

UdeM00000030737 6596 269.2 UdeM00000030737 XP\_045156248.1 34 473  
 234 6 4 426 7 451 9.40E-69 269.2 6596 cellular  
 organisms;Eukaryota;Opisthokonta;Metazoa;Eumetazoa;Bilateria;Protostomia;  
 Spiralia;Lophotrochozoa;Mollusca;Bivalvia;Autobranhia;Heteroconchia;Euhe  
 terodonta;Imparidentia;Venerida;Veneroidea;Veneridae;Mercenaria;Mercenari  
 a mercenaria

UdeM00000030738 1735272 164.5 UdeM00000030738 XP\_041355827.1 51.6  
 155 73 2 2 155 233 386 1.20E-37 164.5 1735272  
 cellular

organisms;Eukaryota;Opisthokonta;Metazoa;Eumetazoa;Bilateria;Protostomia;Spiralia;Lophotrochozoa;Mollusca;Gastropoda;Neomphalina;Neomphaloidea;Peltospiridae;Gigantopelta;Gigantopelta aegis

UdeM00000030739 6596 152.1 UdeM00000030739 XP\_045162626.1 58.1 117  
48 1 29 145 75 190 6.10E-34 152.1 6596 cellular

organisms;Eukaryota;Opisthokonta;Metazoa;Eumetazoa;Bilateria;Protostomia;Spiralia;Lophotrochozoa;Mollusca;Bivalvia;Autobranchia;Heteroconchia;Euherodonta;Imparidentia;Venerida;Veneroidea;Veneridae;Mercenaria;Mercenaria mercenaria

UdeM00000030740 6596 162.9 UdeM00000030740 XP\_045181277.1 35.3 235  
143 5 106 332 139 372 7.10E-37 162.9 6596 cellular

organisms;Eukaryota;Opisthokonta;Metazoa;Eumetazoa;Bilateria;Protostomia;Spiralia;Lophotrochozoa;Mollusca;Bivalvia;Autobranchia;Heteroconchia;Euherodonta;Imparidentia;Venerida;Veneroidea;Veneridae;Mercenaria;Mercenaria mercenaria

UdeM00000030741 6596 118.6 UdeM00000030741 XP\_045176094.1 33.6 229  
119 6 31 253 18 219 1.20E-23 118.6 6596 cellular

organisms;Eukaryota;Opisthokonta;Metazoa;Eumetazoa;Bilateria;Protostomia;Spiralia;Lophotrochozoa;Mollusca;Bivalvia;Autobranchia;Heteroconchia;Euherodonta;Imparidentia;Venerida;Veneroidea;Veneridae;Mercenaria;Mercenaria mercenaria

UdeM00000030742 6596 89.7 UdeM00000030742 XP\_045176094.1 42.6 101  
57 1 115 215 70 169 5.40E-15 89.7 6596 cellular

organisms;Eukaryota;Opisthokonta;Metazoa;Eumetazoa;Bilateria;Protostomia;Spiralia;Lophotrochozoa;Mollusca;Bivalvia;Autobranchia;Heteroconchia;Euherodonta;Imparidentia;Venerida;Veneroidea;Veneridae;Mercenaria;Mercenaria mercenaria

UdeM00000030743 7048 79 UdeM00000030743 XP\_030751512.1 37.2 86  
54 0 140 225 183 268 9.90E-12 79 7048 cellular

organisms;Eukaryota;Opisthokonta;Metazoa;Eumetazoa;Bilateria;Protostomia;Ecdysozoa;Panarthropoda;Arthropoda;Mandibulata;Pancrustacea;Hexapoda;Insecta;Dicondylia;Pterygota;Neoptera;Endopterygota;Coleoptera;Polyphaga;Cucujiformia;Curculionoidea;Curculionidae;Dryophthorinae;Sitophilus;Sitophilus oryzae

UdeM00000030744 6596 143.3 UdeM00000030744 XP\_045181277.1 35.1 208  
121 5 117 311 178 384 5.40E-31 143.3 6596 cellular

organisms;Eukaryota;Opisthokonta;Metazoa;Eumetazoa;Bilateria;Protostomia;Spiralia;Lophotrochozoa;Mollusca;Bivalvia;Autobranchia;Heteroconchia;Euherodonta;Imparidentia;Venerida;Veneroidea;Veneridae;Mercenaria;Mercenaria mercenaria

UdeM00000030745 6596 164.9 UdeM00000030745 XP\_045181277.1 35.6 236  
145 4 75 304 85 319 2.10E-37 164.9 6596 cellular

organisms;Eukaryota;Opisthokonta;Metazoa;Eumetazoa;Bilateria;Protostomia;Spiralia;Lophotrochozoa;Mollusca;Bivalvia;Autobranchia;Heteroconchia;Euherodonta;Imparidentia;Venerida;Veneroidea;Veneridae;Mercenaria;Mercenaria mercenaria

UdeM00000030746 6596 122.5 UdeM00000030746 XP\_045176664.1 39.1 161  
86 3 28 183 367 520 5.70E-25 122.5 6596 cellular

organisms;Eukaryota;Opisthokonta;Metazoa;Eumetazoa;Bilateria;Protostomia;Spiralia;Lophotrochozoa;Mollusca;Bivalvia;Autobranchia;Heteroconchia;Euherodonta;Imparidentia;Venerida;Veneroidea;Veneridae;Mercenaria;Mercenaria mercenaria

UdeM00000033249 30732 142.1 UdeM00000033249 XP\_024118320.1 38.2 207  
114 3 14 207 409 614 7.80E-31 142.1 30732 cellular

organisms;Eukaryota;Opisthokonta;Metazoa;Eumetazoa;Bilateria;Deuterostomi  
a;Chordata;Craniata;Vertebrata;Gnathostomata;Teleostomi;Euteleostomi;Acti  
nopterygii;Actinopteri;Neopterygii;Teleostei;Osteoglossocephalai;Clupeoce  
phala;Euteleosteomorpha;Neoteleostei;Eurypterygia;Ctenosquamata;Acanthomo  
rphata;Euacanthomorphacea;Percomorphaceae;Ovalentaria;Atherinomorphae;Bel  
oniformes;Adrianichthyoidei;Adrianichthyidae;Oryziinae;Oryzias;Oryzias  
melastigma

UdeM00000033250 1529436 70.1 UdeM00000033250 XP\_033102039.1 42.9  
84 44 2 36 119 295 374 2.20E-09 70.1 1529436  
cellular

organisms;Eukaryota;Opisthokonta;Metazoa;Eumetazoa;Bilateria;Deuterostomi  
a;Echinodermata;Pelmatozoa;Crinoidea;Articulata;Comatulida;Comatulidae;Co  
matulinae;Anneissia;Anneissia japonica

UdeM00000033251 6579 240.4 UdeM00000033251 XP\_033752673.1 64.1 181  
64 1 58 238 457 636 2.40E-60 240.4 6579 cellular

organisms;Eukaryota;Opisthokonta;Metazoa;Eumetazoa;Bilateria;Protostomia;  
Spiralia;Lophotrochozoa;Mollusca;Bivalvia;Autobranchia;Pteriormorphia;Pect  
inida;Pectinoidea;Pectinidae;Pecten;Pecten maximus

UdeM00000033253 50429 121.7 UdeM00000033253 XP\_022794541.1 30.5 249  
152 5 1 239 1 238 3.70E-24 121.7 50429 cellular

organisms;Eukaryota;Opisthokonta;Metazoa;Eumetazoa;Cnidaria;Anthozoa;Hexa  
corallia;Scleractinia;Astrocoeniina;Pocilloporidae;Stylophora;Stylophora  
pistillata

UdeM00000033254 6596 285.8 UdeM00000033254 XP\_045169782.1 50.6 265  
130 1 1 264 56 320 5.60E-74 285.8 6596 cellular

organisms;Eukaryota;Opisthokonta;Metazoa;Eumetazoa;Bilateria;Protostomia;  
Spiralia;Lophotrochozoa;Mollusca;Bivalvia;Autobranchia;Heteroconchia;Euhe  
terodonta;Imparidentia;Venerida;Veneroidea;Veneridae;Mercenaria;Mercenari  
a mercenaria

UdeM00000033258 6596 200.7 UdeM00000033258 XP\_045158584.1 54.5 178  
75 4 1 176 33 206 1.60E-48 200.7 6596 cellular

organisms;Eukaryota;Opisthokonta;Metazoa;Eumetazoa;Bilateria;Protostomia;  
Spiralia;Lophotrochozoa;Mollusca;Bivalvia;Autobranchia;Heteroconchia;Euhe  
terodonta;Imparidentia;Venerida;Veneroidea;Veneridae;Mercenaria;Mercenari  
a mercenaria

UdeM00000033260 181472 88.2 UdeM00000033260 XP\_029975096.1 47.7  
86 45 0 2 87 299 384 5.70E-15 88.2 181472

cellular

organisms;Eukaryota;Opisthokonta;Metazoa;Eumetazoa;Bilateria;Deuterostomi  
a;Chordata;Craniata;Vertebrata;Gnathostomata;Teleostomi;Euteleostomi;Acti  
nopterygii;Actinopteri;Neopterygii;Teleostei;Osteoglossocephalai;Clupeoce  
phala;Euteleosteomorpha;Neoteleostei;Eurypterygia;Ctenosquamata;Acanthomo  
rphata;Euacanthomorphacea;Percomorphaceae;Ovalentaria;Blenniimorphae;Blen  
niiformes;Blennioidei;Blenniidae;Salariinae;Salaris;Salaris fasciatus

UdeM00000033261 30732 109.4 UdeM00000033261 XP\_024118320.1 37 173  
95 3 14 173 409 580 4.80E-21 109.4 30732 cellular

organisms;Eukaryota;Opisthokonta;Metazoa;Eumetazoa;Bilateria;Deuterostomi  
a;Chordata;Craniata;Vertebrata;Gnathostomata;Teleostomi;Euteleostomi;Acti  
nopterygii;Actinopteri;Neopterygii;Teleostei;Osteoglossocephalai;Clupeoce  
phala;Euteleosteomorpha;Neoteleostei;Eurypterygia;Ctenosquamata;Acanthomo  
rphata;Euacanthomorphacea;Percomorphaceae;Ovalentaria;Atherinomorphae;Bel  
oniformes;Adrianichthyoidei;Adrianichthyidae;Oryziinae;Oryzias;Oryzias  
melastigma

UdeM00000033262 1529436 70.5 UdeM00000033262 XP\_033102039.1 45.1  
 71 38 1 49 119 305 374 1.70E-09 70.5 1529436  
 cellular  
 organisms;Eukaryota;Opisthokonta;Metazoa;Eumetazoa;Bilateria;Deuterostomi  
 a;Echinodermata;Pelmatozoa;Crinoidea;Articulata;Comatulida;Comatulidae;Co  
 matulinae;Anneissia;Anneissia japonica  
 UdeM00000033263 6579 199.9 UdeM00000033263 XP\_033752673.1 61.5 161  
 61 1 58 218 457 616 3.60E-48 199.9 6579 cellular  
 organisms;Eukaryota;Opisthokonta;Metazoa;Eumetazoa;Bilateria;Protostomia;  
 Spiralia;Lophotrochozoa;Mollusca;Bivalvia;Autobranchia;Pteriormorphia;Pect  
 inida;Pectinoidea;Pectinidae;Pecten;Pecten maximus  
 UdeM00000033264 50429 120.6 UdeM00000033264 XP\_022779123.1 32.6 230  
 136 4 11 235 6 221 9.30E-24 120.6 50429 cellular  
 organisms;Eukaryota;Opisthokonta;Metazoa;Eumetazoa;Cnidaria;Anthozoa;Hexa  
 corallia;Scleractinia;Astrocoeniina;Pocilloporidae;Stylophora;Stylophora  
 pistillata  
 UdeM00000033265 6596 287.7 UdeM00000033265 XP\_045187150.1 38 447  
 179 4 1 354 135 576 2.00E-74 287.7 6596 cellular  
 organisms;Eukaryota;Opisthokonta;Metazoa;Eumetazoa;Bilateria;Protostomia;  
 Spiralia;Lophotrochozoa;Mollusca;Bivalvia;Autobranchia;Heteroconchia;Euhe  
 terodonta;Imparidentia;Venerida;Veneroidea;Veneridae;Mercenaria;Mercenari  
 a mercenaria  
 UdeM00000033266 6596 72.4 UdeM00000033266 XP\_045158901.1 51.6 64  
 31 0 1 64 10 73 2.90E-10 72.4 6596 cellular  
 organisms;Eukaryota;Opisthokonta;Metazoa;Eumetazoa;Bilateria;Protostomia;  
 Spiralia;Lophotrochozoa;Mollusca;Bivalvia;Autobranchia;Heteroconchia;Euhe  
 terodonta;Imparidentia;Venerida;Veneroidea;Veneridae;Mercenaria;Mercenari  
 a mercenaria  
 UdeM00000033267 30611 62.8 UdeM00000033267 XP\_003783397.1 32.7 101  
 68 0 39 139 99 199 4.10E-07 62.8 30611 cellular  
 organisms;Eukaryota;Opisthokonta;Metazoa;Eumetazoa;Bilateria;Deuterostomi  
 a;Chordata;Craniata;Vertebrata;Gnathostomata;Teleostomi;Euteleostomi;Sarc  
 opterygii;Dipnotetrapodomorpha;Tetrapoda;Amniota;Mammalia;Theria;Eutheria  
 ;Boreoeutheria;Euarchontoglires;Primates;Strepsirrhini;Lorisiformes;Galag  
 idae;Otolemur;Otolemur garnettii  
 UdeM00000033696 6565 125.6 UdeM00000033696 XP\_022302274.1 44.1 145  
 58 2 154 276 159 302 1.00E-25 125.6 6565 cellular  
 organisms;Eukaryota;Opisthokonta;Metazoa;Eumetazoa;Bilateria;Protostomia;  
 Spiralia;Lophotrochozoa;Mollusca;Bivalvia;Autobranchia;Pteriormorphia;Ostr  
 eida;Ostreoidea;Ostreidae;Crassostrea;Crassostrea virginica  
 UdeM00000033697 6596 642.5 UdeM00000033697 XP\_045156796.1 47.2 759  
 368 14 47 780 15 765 6.90E-181 642.5 6596 cellular  
 organisms;Eukaryota;Opisthokonta;Metazoa;Eumetazoa;Bilateria;Protostomia;  
 Spiralia;Lophotrochozoa;Mollusca;Bivalvia;Autobranchia;Heteroconchia;Euhe  
 terodonta;Imparidentia;Venerida;Veneroidea;Veneridae;Mercenaria;Mercenari  
 a mercenaria  
 UdeM00000033698 6596 246.5 UdeM00000033698 XP\_045216710.1 52 277  
 124 5 5 277 4 275 4.10E-62 246.5 6596 cellular  
 organisms;Eukaryota;Opisthokonta;Metazoa;Eumetazoa;Bilateria;Protostomia;  
 Spiralia;Lophotrochozoa;Mollusca;Bivalvia;Autobranchia;Heteroconchia;Euhe  
 terodonta;Imparidentia;Venerida;Veneroidea;Veneridae;Mercenaria;Mercenari  
 a mercenaria  
 UdeM00000033699 6596 67.8 UdeM00000033699 XP\_045216710.1 44.3 106  
 54 3 1 105 174 275 1.10E-08 67.8 6596 cellular

organisms;Eukaryota;Opisthokonta;Metazoa;Eumetazoa;Bilateria;Protostomia;Spiralia;Lophotrochozoa;Mollusca;Bivalvia;Autobranhia;Heteroconchia;Euheterodonta;Imparidentia;Venerida;Veneroidea;Veneridae;Mercenaria;Mercenaria mercenaria

UdeM00000036700 50390 197.2 UdeM00000036700 XP\_028127913.1 43.7 231  
129 1 1 231 1 230 2.40E-47 197.2 50390 cellular

organisms;Eukaryota;Opisthokonta;Metazoa;Eumetazoa;Bilateria;Protostomia;Ecdysozoa;Panarthropoda;Arthropoda;Mandibulata;Pancrustacea;Hexapoda;Insecta;Dicondylia;Pterygota;Neoptera;Endopterygota;Coleoptera;Polyphaga;Cucujiformia;Chrysomeloidea;Chrysomelidae;Galerucinae;Luperini;Diabroticina;Diabroticites;Diabrotica;Diabrotica virgifera;Diabrotica virgifera virgifera

UdeM00000036701 6573 603.6 UdeM00000036701 XP\_021348412.1 63.8 469  
162 4 1 461 43 511 2.10E-169 603.6 6573 cellular

organisms;Eukaryota;Opisthokonta;Metazoa;Eumetazoa;Bilateria;Protostomia;Spiralia;Lophotrochozoa;Mollusca;Bivalvia;Autobranhia;Pteriormorphia;Pectinida;Pectinoidea;Pectinidae;Mizuhopecten;Mizuhopecten yessoensis

UdeM00000036702 2607531 708.8 UdeM00000036702 XP\_036363772.1 73.2  
488 119 5 52 533 48 529 5.50E-201 708.8 2607531  
cellular

organisms;Eukaryota;Opisthokonta;Metazoa;Eumetazoa;Bilateria;Protostomia;Spiralia;Lophotrochozoa;Mollusca;Cephalopoda;Coleoidea;Octopodiformes;Octopoda;Incirrata;Octopodidae;Octopus;Octopus sinensis

UdeM00000036703 6596 301.2 UdeM00000036703 XP\_045156584.1 64.1 209  
73 1 3 211 4 210 1.10E-78 301.2 6596 cellular

organisms;Eukaryota;Opisthokonta;Metazoa;Eumetazoa;Bilateria;Protostomia;Spiralia;Lophotrochozoa;Mollusca;Bivalvia;Autobranhia;Heteroconchia;Euheterodonta;Imparidentia;Venerida;Veneroidea;Veneridae;Mercenaria;Mercenaria mercenaria

UdeM00000036704 6596 150.6 UdeM00000036704 XP\_045182101.1 27 423  
287 5 1 423 9 409 4.60E-33 150.6 6596 cellular

organisms;Eukaryota;Opisthokonta;Metazoa;Eumetazoa;Bilateria;Protostomia;Spiralia;Lophotrochozoa;Mollusca;Bivalvia;Autobranhia;Heteroconchia;Euheterodonta;Imparidentia;Venerida;Veneroidea;Veneridae;Mercenaria;Mercenaria mercenaria

UdeM00000036705 6596 157.5 UdeM00000036705 XP\_045187895.1 30.3 389  
251 5 38 426 32 400 3.70E-35 157.5 6596 cellular

organisms;Eukaryota;Opisthokonta;Metazoa;Eumetazoa;Bilateria;Protostomia;Spiralia;Lophotrochozoa;Mollusca;Bivalvia;Autobranhia;Heteroconchia;Euheterodonta;Imparidentia;Venerida;Veneroidea;Veneridae;Mercenaria;Mercenaria mercenaria

UdeM00000036706 6596 147.5 UdeM00000036706 XP\_045187895.1 30.4 388  
246 6 42 428 36 400 3.90E-32 147.5 6596 cellular

organisms;Eukaryota;Opisthokonta;Metazoa;Eumetazoa;Bilateria;Protostomia;Spiralia;Lophotrochozoa;Mollusca;Bivalvia;Autobranhia;Heteroconchia;Euheterodonta;Imparidentia;Venerida;Veneroidea;Veneridae;Mercenaria;Mercenaria mercenaria

UdeM00000036707 1735272 351.7 UdeM00000036707 XP\_041362692.1 74  
235 57 2 1 231 1 235 7.30E-94 351.7 1735272  
cellular

organisms;Eukaryota;Opisthokonta;Metazoa;Eumetazoa;Bilateria;Protostomia;Spiralia;Lophotrochozoa;Mollusca;Gastropoda;Neomphalina;Neomphaloidea;Peltopspiridae;Gigantopelta;Gigantopelta aegis

UdeM00000036708 8030 103.6 UdeM00000036708 XP\_013981613.1 54.2 96  
 39 1 1 91 1 96 1.40E-19 103.6 8030 cellular  
 organisms;Eukaryota;Opisthokonta;Metazoa;Eumetazoa;Bilateria;Deuterostomi  
 a;Chordata;Craniata;Vertebrata;Gnathostomata;Teleostomi;Euteleostomi;Acti  
 nopterygii;Actinopteri;Neopterygii;Teleostei;Osteoglossocephalai;Clupeoce  
 phala;Euteleostomorpha;Protacanthopterygii;Salmoniformes;Salmonidae;Salm  
 oninae;Salmo;Salmo salar

UdeM00000036709 6596 88.6 UdeM00000036709 XP\_045215128.1 78.9 57  
 12 0 1 57 10 66 4.20E-15 88.6 6596 cellular  
 organisms;Eukaryota;Opisthokonta;Metazoa;Eumetazoa;Bilateria;Protostomia;  
 Spiralia;Lophotrochozoa;Mollusca;Bivalvia;Autobranchia;Heteroconchia;Euhe  
 terodonta;Imparidentia;Venerida;Veneroidea;Veneridae;Mercenaria;Mercenari  
 a mercenaria

UdeM00000036710 29159 177.6 UdeM00000036710 XP\_011443561.2 58.2 134  
 55 1 32 164 48 181 1.30E-41 177.6 29159 cellular  
 organisms;Eukaryota;Opisthokonta;Metazoa;Eumetazoa;Bilateria;Protostomia;  
 Spiralia;Lophotrochozoa;Mollusca;Bivalvia;Autobranchia;Pteriormorphia;Ostr  
 eida;Ostreoidea;Ostreidae;Crassostrea;Crassostrea gigas

UdeM00000036711 6596 649 UdeM00000036711 XP\_045188256.1 52.6 635  
 262 7 1 627 1 604 7.20E-183 649 6596 cellular  
 organisms;Eukaryota;Opisthokonta;Metazoa;Eumetazoa;Bilateria;Protostomia;  
 Spiralia;Lophotrochozoa;Mollusca;Bivalvia;Autobranchia;Heteroconchia;Euhe  
 terodonta;Imparidentia;Venerida;Veneroidea;Veneridae;Mercenaria;Mercenari  
 a mercenaria

UdeM00000036712 1735272 573.5 UdeM00000036712 XP\_041372916.1 74.5  
 380 87 3 16 391 96 469 2.80E-160 573.5 1735272  
 cellular  
 organisms;Eukaryota;Opisthokonta;Metazoa;Eumetazoa;Bilateria;Protostomia;  
 Spiralia;Lophotrochozoa;Mollusca;Gastropoda;Neomphalina;Neomphaloidea;Pel  
 tospiridae;Gigantopelta;Gigantopelta aegis

UdeM00000036713 6596 64.3 UdeM00000036713 XP\_045215128.1 53.4 73  
 22 4 144 204 694 766 2.00E-07 64.3 6596 cellular  
 organisms;Eukaryota;Opisthokonta;Metazoa;Eumetazoa;Bilateria;Protostomia;  
 Spiralia;Lophotrochozoa;Mollusca;Bivalvia;Autobranchia;Heteroconchia;Euhe  
 terodonta;Imparidentia;Venerida;Veneroidea;Veneridae;Mercenaria;Mercenari  
 a mercenaria

UdeM00000036714 37653 219.5 UdeM00000036714 XP\_014783344.1 63.7 179  
 57 3 216 386 311 489 8.70E-54 219.5 37653 cellular  
 organisms;Eukaryota;Opisthokonta;Metazoa;Eumetazoa;Bilateria;Protostomia;  
 Spiralia;Lophotrochozoa;Mollusca;Cephalopoda;Coleoidea;Octopodiformes;Oct  
 opoda;Incirrata;Octopodidae;Octopus;Octopus bimaculoides

UdeM00000036715 6579 277.3 UdeM00000036715 XP\_033749450.1 54.6 359  
 145 7 1 355 1 345 3.20E-71 277.3 6579 cellular  
 organisms;Eukaryota;Opisthokonta;Metazoa;Eumetazoa;Bilateria;Protostomia;  
 Spiralia;Lophotrochozoa;Mollusca;Bivalvia;Autobranchia;Pteriormorphia;Pect  
 inida;Pectinoidea;Pectinidae;Pecten;Pecten maximus

UdeM00000036716 6579 411.4 UdeM00000036716 XP\_033749140.1 54.1 481  
 184 13 8 475 4 460 1.60E-111 411.4 6579 cellular  
 organisms;Eukaryota;Opisthokonta;Metazoa;Eumetazoa;Bilateria;Protostomia;  
 Spiralia;Lophotrochozoa;Mollusca;Bivalvia;Autobranchia;Pteriormorphia;Pect  
 inida;Pectinoidea;Pectinidae;Pecten;Pecten maximus

UdeM00000036717 6579 765.4 UdeM00000036717 XP\_033750311.1 59.1 672  
 241 5 6 648 9 675 5.90E-218 765.4 6579 cellular  
 organisms;Eukaryota;Opisthokonta;Metazoa;Eumetazoa;Bilateria;Protostomia;



Spiralia;Lophotrochozoa;Mollusca;Bivalvia;Autobranchia;Pteriormorphia;Pectinida;Pectinoidea;Pectinidae;Pecten;Pecten maximus  
UdeM00000036719 1735272 681.4 UdeM00000036719 XP\_041369897.1 72.8  
519 132 5 101 612 82 598 1.10E-192 681.4 1735272  
cellular

organisms;Eukaryota;Opisthokonta;Metazoa;Eumetazoa;Bilateria;Protostomia;Spiralia;Lophotrochozoa;Mollusca;Gastropoda;Neomphalina;Neomphaloidea;Peltospiridae;Gigantopelta;Gigantopelta aegis

UdeM00000036720 6579 196.8 UdeM00000036720 XP\_033750305.1 65.3 225  
68 3 1 225 1 215 2.90E-47 196.8 6579 cellular

organisms;Eukaryota;Opisthokonta;Metazoa;Eumetazoa;Bilateria;Protostomia;Spiralia;Lophotrochozoa;Mollusca;Bivalvia;Autobranchia;Pteriormorphia;Pectinida;Pectinoidea;Pectinidae;Pecten;Pecten maximus

UdeM00000036721 6565 211.1 UdeM00000036721 XP\_022329218.1 44.6 269  
131 5 24 290 22 274 1.90E-51 211.1 6565 cellular

organisms;Eukaryota;Opisthokonta;Metazoa;Eumetazoa;Bilateria;Protostomia;Spiralia;Lophotrochozoa;Mollusca;Bivalvia;Autobranchia;Pteriormorphia;Ostreida;Ostreoidea;Ostreidae;Crassostrea;Crassostrea virginica

UdeM00000036722 225164 57.8 UdeM00000036722 XP\_009048623.1 50.9  
55 25 1 1 55 1 53 7.60E-06 57.8 225164

cellular

organisms;Eukaryota;Opisthokonta;Metazoa;Eumetazoa;Bilateria;Protostomia;Spiralia;Lophotrochozoa;Mollusca;Gastropoda;Patellogastropoda;Lottioidea;Lottiidae;Lottia;Lottia gigantea

UdeM00000036723 6596 625.5 UdeM00000036723 XP\_045216280.1 63.2 549  
191 4 1 549 1 538 6.20E-176 625.5 6596 cellular

organisms;Eukaryota;Opisthokonta;Metazoa;Eumetazoa;Bilateria;Protostomia;Spiralia;Lophotrochozoa;Mollusca;Bivalvia;Autobranchia;Heteroconchia;Euheterodonta;Imparidentia;Venerida;Veneroidea;Veneridae;Mercenaria;Mercenaria mercenaria

UdeM00000036724 6565 626.3 UdeM00000036724 XP\_022329509.1 60 550  
184 6 1 549 1 515 3.60E-176 626.3 6565 cellular

organisms;Eukaryota;Opisthokonta;Metazoa;Eumetazoa;Bilateria;Protostomia;Spiralia;Lophotrochozoa;Mollusca;Bivalvia;Autobranchia;Pteriormorphia;Ostreida;Ostreoidea;Ostreidae;Crassostrea;Crassostrea virginica

UdeM00000036725 6565 587.4 UdeM00000036725 XP\_022329509.1 59.1 526  
179 6 1 525 25 515 1.80E-164 587.4 6565 cellular

organisms;Eukaryota;Opisthokonta;Metazoa;Eumetazoa;Bilateria;Protostomia;Spiralia;Lophotrochozoa;Mollusca;Bivalvia;Autobranchia;Pteriormorphia;Ostreida;Ostreoidea;Ostreidae;Crassostrea;Crassostrea virginica

UdeM00000036726 6596 929.9 UdeM00000036726 XP\_045216283.1 65 718  
216 12 2 712 3 692 2.00E-267 929.9 6596 cellular

organisms;Eukaryota;Opisthokonta;Metazoa;Eumetazoa;Bilateria;Protostomia;Spiralia;Lophotrochozoa;Mollusca;Bivalvia;Autobranchia;Heteroconchia;Euheterodonta;Imparidentia;Venerida;Veneroidea;Veneridae;Mercenaria;Mercenaria mercenaria

UdeM00000036727 29159 282.3 UdeM00000036727 XP\_011415026.2 78.7 169  
36 0 3 171 47 215 4.20E-73 282.3 29159 cellular

organisms;Eukaryota;Opisthokonta;Metazoa;Eumetazoa;Bilateria;Protostomia;Spiralia;Lophotrochozoa;Mollusca;Bivalvia;Autobranchia;Pteriormorphia;Ostreida;Ostreoidea;Ostreidae;Crassostrea;Crassostrea gigas

UdeM00000036728 6565 110.9 UdeM00000036728 XP\_022327962.1 58.1 93  
37 1 3 93 626 718 8.70E-22 110.9 6565 cellular

organisms;Eukaryota;Opisthokonta;Metazoa;Eumetazoa;Bilateria;Protostomia;

Spiralia;Lophotrochozoa;Mollusca;Bivalvia;Autobranchia;Pteriomorpha;Ostr  
eida;Ostreoidea;Ostreidae;Crassostrea;Crassostrea virginica  
UdeM00000036729 6565 134.4 UdeM00000036729 XP\_022327962.1 54.3 127  
57 1 1 126 445 571 1.10E-28 134.4 6565 cellular  
organisms;Eukaryota;Opisthokonta;Metazoa;Eumetazoa;Bilateria;Protostomia;  
Spiralia;Lophotrochozoa;Mollusca;Bivalvia;Autobranchia;Pteriomorpha;Ostr  
eida;Ostreoidea;Ostreidae;Crassostrea;Crassostrea virginica  
UdeM00000036731 1735272 250.8 UdeM00000036731 XP\_041370529.1 40.6  
367 105 2 16 382 210 463 3.10E-63 250.8 1735272  
cellular  
organisms;Eukaryota;Opisthokonta;Metazoa;Eumetazoa;Bilateria;Protostomia;  
Spiralia;Lophotrochozoa;Mollusca;Gastropoda;Neomphalina;Neomphaloidea;Pel  
tospiridae;Gigantopelta;Gigantopelta aegis  
UdeM00000036733 1735272 238 UdeM00000036733 XP\_041370517.1 62.2  
172 65 0 1 172 43 214 1.10E-59 238 1735272  
cellular  
organisms;Eukaryota;Opisthokonta;Metazoa;Eumetazoa;Bilateria;Protostomia;  
Spiralia;Lophotrochozoa;Mollusca;Gastropoda;Neomphalina;Neomphaloidea;Pel  
tospiridae;Gigantopelta;Gigantopelta aegis  
UdeM00000036734 6596 325.9 UdeM00000036734 XP\_045213493.1 45.5 345  
180 5 1 342 58 397 6.30E-86 325.9 6596 cellular  
organisms;Eukaryota;Opisthokonta;Metazoa;Eumetazoa;Bilateria;Protostomia;  
Spiralia;Lophotrochozoa;Mollusca;Bivalvia;Autobranchia;Heteroconchia;Euhe  
terodonta;Imparidentia;Venerida;Veneroidea;Veneridae;Mercenaria;Mercenari  
a mercenaria  
UdeM00000036735 6579 1045 UdeM00000036735 XP\_033750207.1 58.7 928  
365 5 232 1145 224 1147 6.80E-302 1045 6579 cellular  
organisms;Eukaryota;Opisthokonta;Metazoa;Eumetazoa;Bilateria;Protostomia;  
Spiralia;Lophotrochozoa;Mollusca;Bivalvia;Autobranchia;Pteriomorpha;Pect  
inida;Pectinoidea;Pectinidae;Pecten;Pecten maximus  
UdeM00000036736 6573 156.8 UdeM00000036736 XP\_021346145.1 35.2 301  
170 10 12 304 39 322 5.70E-35 156.8 6573 cellular  
organisms;Eukaryota;Opisthokonta;Metazoa;Eumetazoa;Bilateria;Protostomia;  
Spiralia;Lophotrochozoa;Mollusca;Bivalvia;Autobranchia;Pteriomorpha;Pect  
inida;Pectinoidea;Pectinidae;Mizuhopecten;Mizuhopecten yessoensis  
UdeM00000036737 6573 136.3 UdeM00000036737 XP\_021371818.1 31.1 267  
174 5 17 277 37 299 6.40E-29 136.3 6573 cellular  
organisms;Eukaryota;Opisthokonta;Metazoa;Eumetazoa;Bilateria;Protostomia;  
Spiralia;Lophotrochozoa;Mollusca;Bivalvia;Autobranchia;Pteriomorpha;Pect  
inida;Pectinoidea;Pectinidae;Mizuhopecten;Mizuhopecten yessoensis  
UdeM00000036738 6573 305.8 UdeM00000036738 XP\_021342879.1 53.5 288  
122 4 8 293 5 282 6.00E-80 305.8 6573 cellular  
organisms;Eukaryota;Opisthokonta;Metazoa;Eumetazoa;Bilateria;Protostomia;  
Spiralia;Lophotrochozoa;Mollusca;Bivalvia;Autobranchia;Pteriomorpha;Pect  
inida;Pectinoidea;Pectinidae;Mizuhopecten;Mizuhopecten yessoensis  
UdeM00000036739 6596 812.8 UdeM00000036739 XP\_045215116.1 43.4 1098  
439 26 35 970 41 1117 4.80E-232 812.8 6596 cellular  
organisms;Eukaryota;Opisthokonta;Metazoa;Eumetazoa;Bilateria;Protostomia;  
Spiralia;Lophotrochozoa;Mollusca;Bivalvia;Autobranchia;Heteroconchia;Euhe  
terodonta;Imparidentia;Venerida;Veneroidea;Veneridae;Mercenaria;Mercenari  
a mercenaria  
UdeM00000036740 6596 423.3 UdeM00000036740 XP\_045156405.1 49.9 447  
204 8 1 446 1 428 4.00E-115 423.3 6596 cellular  
organisms;Eukaryota;Opisthokonta;Metazoa;Eumetazoa;Bilateria;Protostomia;

Spiralia;Lophotrochozoa;Mollusca;Bivalvia;Autobranchia;Heteroconchia;Euherodonta;Imparidentia;Venerida;Veneroidea;Veneridae;Mercenaria;Mercenaria mercenaria

UdeM00000036744 6596 272.7 UdeM00000036744 XP\_045156519.1 66.1 257  
77 4 1 251 1 253 4.70E-70 272.7 6596 cellular

organisms;Eukaryota;Opisthokonta;Metazoa;Eumetazoa;Bilateria;Protostomia;Spiralia;Lophotrochozoa;Mollusca;Bivalvia;Autobranchia;Heteroconchia;Euherodonta;Imparidentia;Venerida;Veneroidea;Veneridae;Mercenaria;Mercenaria mercenaria

UdeM00000036745 6596 919.1 UdeM00000036745 XP\_045216911.1 85.9 554  
74 1 1 550 1 554 2.70E-264 919.1 6596 cellular

organisms;Eukaryota;Opisthokonta;Metazoa;Eumetazoa;Bilateria;Protostomia;Spiralia;Lophotrochozoa;Mollusca;Bivalvia;Autobranchia;Heteroconchia;Euherodonta;Imparidentia;Venerida;Veneroidea;Veneridae;Mercenaria;Mercenaria mercenaria

UdeM00000036746 6596 592.8 UdeM00000036746 XP\_045156716.1 74.1 348  
90 0 3 350 2 349 2.90E-166 592.8 6596 cellular

organisms;Eukaryota;Opisthokonta;Metazoa;Eumetazoa;Bilateria;Protostomia;Spiralia;Lophotrochozoa;Mollusca;Bivalvia;Autobranchia;Heteroconchia;Euherodonta;Imparidentia;Venerida;Veneroidea;Veneridae;Mercenaria;Mercenaria mercenaria

UdeM00000036747 6596 110.5 UdeM00000036747 XP\_045156718.1 46.7 137  
47 5 1 133 1 115 1.70E-21 110.5 6596 cellular

organisms;Eukaryota;Opisthokonta;Metazoa;Eumetazoa;Bilateria;Protostomia;Spiralia;Lophotrochozoa;Mollusca;Bivalvia;Autobranchia;Heteroconchia;Euherodonta;Imparidentia;Venerida;Veneroidea;Veneridae;Mercenaria;Mercenaria mercenaria

UdeM00000036748 6579 406 UdeM00000036748 XP\_033750011.1 82.6 247  
43 0 13 259 166 412 3.90E-110 406 6579 cellular

organisms;Eukaryota;Opisthokonta;Metazoa;Eumetazoa;Bilateria;Protostomia;Spiralia;Lophotrochozoa;Mollusca;Bivalvia;Autobranchia;Pteriomorphia;Pectinida;Pectinoidea;Pectinidae;Pecten;Pecten maximus

UdeM00000036749 6596 529.3 UdeM00000036749 XP\_045156721.1 67.7 406  
122 6 156 554 380 783 6.10E-147 529.3 6596 cellular

organisms;Eukaryota;Opisthokonta;Metazoa;Eumetazoa;Bilateria;Protostomia;Spiralia;Lophotrochozoa;Mollusca;Bivalvia;Autobranchia;Heteroconchia;Euherodonta;Imparidentia;Venerida;Veneroidea;Veneridae;Mercenaria;Mercenaria mercenaria

UdeM00000036751 6565 99.8 UdeM00000036751 XP\_022307917.1 29.3 246  
159 8 9 253 11 242 2.40E-17 99.8 6565 cellular

organisms;Eukaryota;Opisthokonta;Metazoa;Eumetazoa;Bilateria;Protostomia;Spiralia;Lophotrochozoa;Mollusca;Bivalvia;Autobranchia;Pteriomorphia;Ostreida;Ostreoidea;Ostreidae;Crassostrea;Crassostrea virginica

UdeM00000036752 6565 99.8 UdeM00000036752 XP\_022307917.1 29.3 246  
159 8 9 253 11 242 2.50E-17 99.8 6565 cellular

organisms;Eukaryota;Opisthokonta;Metazoa;Eumetazoa;Bilateria;Protostomia;Spiralia;Lophotrochozoa;Mollusca;Bivalvia;Autobranchia;Pteriomorphia;Ostreida;Ostreoidea;Ostreidae;Crassostrea;Crassostrea virginica

UdeM00000036755 6596 177.2 UdeM00000036755 XP\_045166426.1 30.6 366  
222 8 105 448 385 740 5.10E-41 177.2 6596 cellular

organisms;Eukaryota;Opisthokonta;Metazoa;Eumetazoa;Bilateria;Protostomia;Spiralia;Lophotrochozoa;Mollusca;Bivalvia;Autobranchia;Heteroconchia;Euherodonta;Imparidentia;Venerida;Veneroidea;Veneridae;Mercenaria;Mercenaria mercenaria

UdeM00000036756 6596 186 UdeM00000036756 XP\_045166426.1 33.1 317  
 201 4 27 334 429 743 8.20E-44 186 6596 cellular  
 organisms;Eukaryota;Opisthokonta;Metazoa;Eumetazoa;Bilateria;Protostomia;  
 Spiralia;Lophotrochozoa;Mollusca;Bivalvia;Autobranchia;Heteroconchia;Euhe  
 terodonta;Imparidentia;Venerida;Veneroidea;Veneridae;Mercenaria;Mercenari  
 a mercenaria  
 UdeM00000036758 6596 173.3 UdeM00000036758 XP\_045166426.1 34 291  
 179 5 1 281 454 741 4.70E-40 173.3 6596 cellular  
 organisms;Eukaryota;Opisthokonta;Metazoa;Eumetazoa;Bilateria;Protostomia;  
 Spiralia;Lophotrochozoa;Mollusca;Bivalvia;Autobranchia;Heteroconchia;Euhe  
 terodonta;Imparidentia;Venerida;Veneroidea;Veneridae;Mercenaria;Mercenari  
 a mercenaria  
 UdeM00000036759 6565 209.9 UdeM00000036759 XP\_022301022.1 34.6 298  
 191 4 1 296 65 360 4.40E-51 209.9 6565 cellular  
 organisms;Eukaryota;Opisthokonta;Metazoa;Eumetazoa;Bilateria;Protostomia;  
 Spiralia;Lophotrochozoa;Mollusca;Bivalvia;Autobranchia;Pteriormorphia;Ostr  
 eida;Ostreoidea;Ostreidae;Crassostrea;Crassostrea virginica  
 UdeM00000036760 6565 280.8 UdeM00000036760 XP\_022342533.1 39.8 372  
 220 4 34 404 57 425 2.90E-72 280.8 6565 cellular  
 organisms;Eukaryota;Opisthokonta;Metazoa;Eumetazoa;Bilateria;Protostomia;  
 Spiralia;Lophotrochozoa;Mollusca;Bivalvia;Autobranchia;Pteriormorphia;Ostr  
 eida;Ostreoidea;Ostreidae;Crassostrea;Crassostrea virginica  
 UdeM00000036761 29159 98.6 UdeM00000036761 XP\_034330187.1 31.8 233  
 138 8 9 230 11 233 1.50E-17 98.6 29159 cellular  
 organisms;Eukaryota;Opisthokonta;Metazoa;Eumetazoa;Bilateria;Protostomia;  
 Spiralia;Lophotrochozoa;Mollusca;Bivalvia;Autobranchia;Pteriormorphia;Ostr  
 eida;Ostreoidea;Ostreidae;Crassostrea;Crassostrea gigas  
 UdeM00000036762 6596 885.6 UdeM00000036762 XP\_045199689.1 51.1 922  
 402 13 262 1149 2 908 6.90E-254 885.6 6596 cellular  
 organisms;Eukaryota;Opisthokonta;Metazoa;Eumetazoa;Bilateria;Protostomia;  
 Spiralia;Lophotrochozoa;Mollusca;Bivalvia;Autobranchia;Heteroconchia;Euhe  
 terodonta;Imparidentia;Venerida;Veneroidea;Veneridae;Mercenaria;Mercenari  
 a mercenaria  
 UdeM00000036763 69319 100.1 UdeM00000036763 XP\_008557311.1 58.4 89  
 35 1 52 138 1231 1319 4.00E-18 100.1 69319 cellular  
 organisms;Eukaryota;Opisthokonta;Metazoa;Eumetazoa;Bilateria;Protostomia;  
 Ecdysozoa;Panarthropoda;Arthropoda;Mandibulata;Pancrustacea;Hexapoda;Inse  
 cta;Dicondylia;Pterygota;Neoptera;Endopterygota;Hymenoptera;Apocrita;Para  
 sitoida;Ichneumonoidea;Braconidae;Microgastrinae;Microplitis;Microplitis  
 demolitor  
 UdeM00000036764 6596 72.4 UdeM00000036764 XP\_045189349.1 31.4 121  
 79 3 5 125 136 252 6.70E-10 72.4 6596 cellular  
 organisms;Eukaryota;Opisthokonta;Metazoa;Eumetazoa;Bilateria;Protostomia;  
 Spiralia;Lophotrochozoa;Mollusca;Bivalvia;Autobranchia;Heteroconchia;Euhe  
 terodonta;Imparidentia;Venerida;Veneroidea;Veneridae;Mercenaria;Mercenari  
 a mercenaria  
 UdeM00000036765 6565 132.9 UdeM00000036765 XP\_022299727.1 50 134  
 66 1 29 162 145 277 4.30E-28 132.9 6565 cellular  
 organisms;Eukaryota;Opisthokonta;Metazoa;Eumetazoa;Bilateria;Protostomia;  
 Spiralia;Lophotrochozoa;Mollusca;Bivalvia;Autobranchia;Pteriormorphia;Ostr  
 eida;Ostreoidea;Ostreidae;Crassostrea;Crassostrea virginica  
 UdeM00000036767 225164 154.8 UdeM00000036767 XP\_009059669.1 33.4  
 287 172 9 31 308 18 294 1.80E-34 154.8 225164  
 cellular

organisms;Eukaryota;Opisthokonta;Metazoa;Eumetazoa;Bilateria;Protostomia; Spiralia;Lophotrochozoa;Mollusca;Gastropoda;Patellogastropoda;Lottioidea; Lottiidae;Lottia;Lottia gigantea

UdeM00000036768 1735272 134 UdeM00000036768 XP\_041374972.1 31  
310 174 8 6 285 214 513 3.10E-28 134 1735272  
cellular

organisms;Eukaryota;Opisthokonta;Metazoa;Eumetazoa;Bilateria;Protostomia; Spiralia;Lophotrochozoa;Mollusca;Gastropoda;Neomphalina;Neomphaloidea;Pel tospiridae;Gigantopelta;Gigantopelta aegis

UdeM00000036769 225164 138.7 UdeM00000036769 XP\_009059669.1 34.3  
248 145 8 11 249 53 291 1.10E-29 138.7 225164  
cellular

organisms;Eukaryota;Opisthokonta;Metazoa;Eumetazoa;Bilateria;Protostomia; Spiralia;Lophotrochozoa;Mollusca;Gastropoda;Patellogastropoda;Lottioidea; Lottiidae;Lottia;Lottia gigantea

UdeM00000036771 6579 380.2 UdeM00000036771 XP\_033750110.1 59.5 296  
120 0 19 314 19 314 3.30E-102 380.2 6579 cellular

organisms;Eukaryota;Opisthokonta;Metazoa;Eumetazoa;Bilateria;Protostomia; Spiralia;Lophotrochozoa;Mollusca;Bivalvia;Autobranchia;Pteriormorphia;Pect inida;Pectinoidea;Pectinidae;Pecten;Pecten maximus

UdeM00000036772 6596 304.7 UdeM00000036772 XP\_045178405.1 53.6 291  
127 4 10 293 8 297 1.30E-79 304.7 6596 cellular

organisms;Eukaryota;Opisthokonta;Metazoa;Eumetazoa;Bilateria;Protostomia; Spiralia;Lophotrochozoa;Mollusca;Bivalvia;Autobranchia;Heteroconchia;Euhe terodonta;Imparidentia;Venerida;Veneroidea;Veneridae;Mercenaria;Mercenari a mercenaria

UdeM00000036773 1735272 368.6 UdeM00000036773 XP\_041362073.1 36.4  
640 392 8 4 640 8 635 1.60E-98 368.6 1735272  
cellular

organisms;Eukaryota;Opisthokonta;Metazoa;Eumetazoa;Bilateria;Protostomia; Spiralia;Lophotrochozoa;Mollusca;Gastropoda;Neomphalina;Neomphaloidea;Pel tospiridae;Gigantopelta;Gigantopelta aegis

UdeM00000036774 6596 427.2 UdeM00000036774 XP\_045156828.1 72.9 280  
73 1 40 319 28 304 1.90E-116 427.2 6596 cellular

organisms;Eukaryota;Opisthokonta;Metazoa;Eumetazoa;Bilateria;Protostomia; Spiralia;Lophotrochozoa;Mollusca;Bivalvia;Autobranchia;Heteroconchia;Euhe terodonta;Imparidentia;Venerida;Veneroidea;Veneridae;Mercenaria;Mercenari a mercenaria

UdeM00000036776 6596 507.7 UdeM00000036776 XP\_045215354.1 68.3 369  
108 1 6 365 7 375 1.20E-140 507.7 6596 cellular

organisms;Eukaryota;Opisthokonta;Metazoa;Eumetazoa;Bilateria;Protostomia; Spiralia;Lophotrochozoa;Mollusca;Bivalvia;Autobranchia;Heteroconchia;Euhe terodonta;Imparidentia;Venerida;Veneroidea;Veneridae;Mercenaria;Mercenari a mercenaria

UdeM00000036777 400727 341.3 UdeM00000036777 XP\_025076929.1 47.5  
356 177 2 30 376 33 387 1.70E-90 341.3 400727  
cellular

organisms;Eukaryota;Opisthokonta;Metazoa;Eumetazoa;Bilateria;Protostomia; Spiralia;Lophotrochozoa;Mollusca;Gastropoda;Caenogastropoda;Architaeniogl ossa;Ampullarioidea;Ampullariidae;Pomacea;Pomacea canaliculata

UdeM00000036778 6596 323.2 UdeM00000036778 XP\_045216426.1 49.6 486  
217 8 29 506 62 527 6.10E-85 323.2 6596 cellular

organisms;Eukaryota;Opisthokonta;Metazoa;Eumetazoa;Bilateria;Protostomia; Spiralia;Lophotrochozoa;Mollusca;Bivalvia;Autobranchia;Heteroconchia;Euhe

terodonta;Imparidentia;Venerida;Veneroidea;Veneridae;Mercenaria;Mercenari  
 a mercenaria  
 UdeM00000036779 6565 123.2 UdeM00000036779 XP\_022299727.1 39.7 136  
 80 2 28 161 587 722 4.90E-25 123.2 6565 cellular  
 organisms;Eukaryota;Opisthokonta;Metazoa;Eumetazoa;Bilateria;Protostomia;  
 Spiralia;Lophotrochozoa;Mollusca;Bivalvia;Autobranchia;Pteriomorpha;Ostr  
 eida;Ostreoidea;Ostreidae;Crassostrea;Crassostrea virginica  
 UdeM00000036780 6596 80.5 UdeM00000036780 XP\_045216426.1 63.6 66  
 23 1 1 66 1 65 1.10E-12 80.5 6596 cellular  
 organisms;Eukaryota;Opisthokonta;Metazoa;Eumetazoa;Bilateria;Protostomia;  
 Spiralia;Lophotrochozoa;Mollusca;Bivalvia;Autobranchia;Heteroconchia;Euhe  
 terodonta;Imparidentia;Venerida;Veneroidea;Veneridae;Mercenaria;Mercenari  
 a mercenaria  
 UdeM00000036784 6579 403.3 UdeM00000036784 XP\_033750114.1 67.7 269  
 87 0 1 269 951 1219 2.40E-109 403.3 6579 cellular  
 organisms;Eukaryota;Opisthokonta;Metazoa;Eumetazoa;Bilateria;Protostomia;  
 Spiralia;Lophotrochozoa;Mollusca;Bivalvia;Autobranchia;Pteriomorpha;Pect  
 inida;Pectinoidea;Pectinidae;Pecten;Pecten maximus  
 UdeM00000036782 6579 405.6 UdeM00000036782 XP\_033750114.1 66.5 275  
 92 0 22 296 945 1219 5.40E-110 405.6 6579 cellular  
 organisms;Eukaryota;Opisthokonta;Metazoa;Eumetazoa;Bilateria;Protostomia;  
 Spiralia;Lophotrochozoa;Mollusca;Bivalvia;Autobranchia;Pteriomorpha;Pect  
 inida;Pectinoidea;Pectinidae;Pecten;Pecten maximus  
 UdeM00000036783 6579 518.5 UdeM00000036783 XP\_033750114.1 50.3 527  
 251 6 739 1260 699 1219 2.40E-143 518.5 6579 cellular  
 organisms;Eukaryota;Opisthokonta;Metazoa;Eumetazoa;Bilateria;Protostomia;  
 Spiralia;Lophotrochozoa;Mollusca;Bivalvia;Autobranchia;Pteriomorpha;Pect  
 inida;Pectinoidea;Pectinidae;Pecten;Pecten maximus  
 UdeM00000036781 6579 518.5 UdeM00000036781 XP\_033750114.1 50.3 527  
 251 6 801 1322 699 1219 2.60E-143 518.5 6579 cellular  
 organisms;Eukaryota;Opisthokonta;Metazoa;Eumetazoa;Bilateria;Protostomia;  
 Spiralia;Lophotrochozoa;Mollusca;Bivalvia;Autobranchia;Pteriomorpha;Pect  
 inida;Pectinoidea;Pectinidae;Pecten;Pecten maximus  
 UdeM00000036785 6596 146.7 UdeM00000036785 XP\_045156413.1 38 237  
 130 8 816 1048 6 229 1.60E-31 146.7 6596 cellular  
 organisms;Eukaryota;Opisthokonta;Metazoa;Eumetazoa;Bilateria;Protostomia;  
 Spiralia;Lophotrochozoa;Mollusca;Bivalvia;Autobranchia;Heteroconchia;Euhe  
 terodonta;Imparidentia;Venerida;Veneroidea;Veneridae;Mercenaria;Mercenari  
 a mercenaria  
 UdeM00000036786 6565 57.8 UdeM00000036786 XP\_022299727.1 41.8 67  
 37 1 1 65 46 112 1.00E-05 57.8 6565 cellular  
 organisms;Eukaryota;Opisthokonta;Metazoa;Eumetazoa;Bilateria;Protostomia;  
 Spiralia;Lophotrochozoa;Mollusca;Bivalvia;Autobranchia;Pteriomorpha;Ostr  
 eida;Ostreoidea;Ostreidae;Crassostrea;Crassostrea virginica  
 UdeM00000036787 400727 141 UdeM00000036787 XP\_025077319.1 59  
 105 43 0 13 117 1328 1432 2.50E-30 141 400727  
 cellular  
 organisms;Eukaryota;Opisthokonta;Metazoa;Eumetazoa;Bilateria;Protostomia;  
 Spiralia;Lophotrochozoa;Mollusca;Gastropoda;Caenogastropoda;Architaeniogl  
 ossa;Ampullarioidea;Ampullariidae;Pomacea;Pomacea canaliculata  
 UdeM00000036788 50390 197.2 UdeM00000036788 XP\_028127913.1 43.7 231  
 129 1 1 231 1 230 2.40E-47 197.2 50390 cellular  
 organisms;Eukaryota;Opisthokonta;Metazoa;Eumetazoa;Bilateria;Protostomia;  
 Ecdysozoa;Panarthropoda;Arthropoda;Mandibulata;Pancrustacea;Hexapoda;Inse

cta;Dicondylia;Pterygota;Neoptera;Endopterygota;Coleoptera;Polyphaga;Cucujiformia;Chrysomeloidea;Chrysomelidae;Galerucinae;Luperini;Diabroticina;Diabroticites;Diabrotica;Diabrotica virgifera;Diabrotica virgifera virgifera

UdeM00000036789 1735272 1598.2 UdeM00000036789 XP\_041370232.1  
62.5 1335 454 9 12 1337 6 1303 0.00E+00 1598.2  
1735272 cellular

organisms;Eukaryota;Opisthokonta;Metazoa;Eumetazoa;Bilateria;Protostomia;Spiralia;Lophotrochozoa;Mollusca;Gastropoda;Neomphalina;Neomphaloidea;Peltospiridae;Gigantopelta;Gigantopelta aegis

UdeM00000036790 202533 171 UdeM00000036790 XP\_035211171.1 47.8  
201 92 5 1 195 1 194 1.50E-39 171 202533  
cellular

organisms;Eukaryota;Opisthokonta;Metazoa;Eumetazoa;Bilateria;Protostomia;Ecdysozoa;Panarthropoda;Arthropoda;Chelicerata;Arachnida;Araneae;Araneomorphae;Entelegynae;Eresoidea;Eresidae;Stegodyphus;Stegodyphus dumicola

UdeM00000036791 29159 79.7 UdeM00000036791 XP\_034325459.1 66.7 72  
23 1 1 71 1169 1240 1.70E-12 79.7 29159 cellular

organisms;Eukaryota;Opisthokonta;Metazoa;Eumetazoa;Bilateria;Protostomia;Spiralia;Lophotrochozoa;Mollusca;Bivalvia;Autobranchia;Pteriormorphia;Ostreida;Ostreoidea;Ostreidae;Crassostrea;Crassostrea gigas

UdeM00000036792 6596 1262.7 UdeM00000036792 XP\_045216450.1 67  
1098 266 24 59 1087 53 1123 0.00E+00 1262.7 6596  
cellular

organisms;Eukaryota;Opisthokonta;Metazoa;Eumetazoa;Bilateria;Protostomia;Spiralia;Lophotrochozoa;Mollusca;Bivalvia;Autobranchia;Heteroconchia;Euheterodonta;Imparidentia;Venerida;Veneroidea;Veneridae;Mercenaria;Mercenaria mercenaria

UdeM00000036794 7739 117.5 UdeM00000036794 XP\_035668293.1 63.5 85  
31 0 44 128 27 111 1.30E-23 117.5 7739 cellular

organisms;Eukaryota;Opisthokonta;Metazoa;Eumetazoa;Bilateria;Deuterostomia;Chordata;Cephalochordata;Leptocardii;Amphioxiformes;Branchiostomidae;Branchiostoma;Branchiostoma floridae

UdeM00000036795 7739 111.7 UdeM00000036795 XP\_035668293.1 65.3 75  
26 0 1 75 37 111 4.40E-22 111.7 7739 cellular

organisms;Eukaryota;Opisthokonta;Metazoa;Eumetazoa;Bilateria;Deuterostomia;Chordata;Cephalochordata;Leptocardii;Amphioxiformes;Branchiostomidae;Branchiostoma;Branchiostoma floridae

UdeM00000036798 29159 115.9 UdeM00000036798 XP\_011437747.1 77.7 121  
27 0 2 122 164 284 3.60E-23 115.9 29159 cellular

organisms;Eukaryota;Opisthokonta;Metazoa;Eumetazoa;Bilateria;Protostomia;Spiralia;Lophotrochozoa;Mollusca;Bivalvia;Autobranchia;Pteriormorphia;Ostreida;Ostreoidea;Ostreidae;Crassostrea;Crassostrea gigas

UdeM00000036797 6573 323.6 UdeM00000036797 XP\_021377187.1 68.7 284  
89 0 1 284 1 284 2.60E-85 323.6 6573 cellular

organisms;Eukaryota;Opisthokonta;Metazoa;Eumetazoa;Bilateria;Protostomia;Spiralia;Lophotrochozoa;Mollusca;Bivalvia;Autobranchia;Pteriormorphia;Pectinida;Pectinoidea;Pectinidae;Mizuhopecten;Mizuhopecten yessoensis

UdeM00000036799 6573 283.9 UdeM00000036799 XP\_021377187.1 73.1 234  
63 0 1 234 1 234 2.30E-73 283.9 6573 cellular

organisms;Eukaryota;Opisthokonta;Metazoa;Eumetazoa;Bilateria;Protostomia;Spiralia;Lophotrochozoa;Mollusca;Bivalvia;Autobranchia;Pteriormorphia;Pectinida;Pectinoidea;Pectinidae;Mizuhopecten;Mizuhopecten yessoensis

UdeM00000036801 6596 181.8 UdeM00000036801 XP\_045216692.1 33.9 336  
 195 11 10 340 311 624 2.00E-42 181.8 6596 cellular  
 organisms;Eukaryota;Opisthokonta;Metazoa;Eumetazoa;Bilateria;Protostomia;  
 Spiralia;Lophotrochozoa;Mollusca;Bivalvia;Autobranhia;Heteroconchia;Euhe  
 terodonta;Imparidentia;Venerida;Veneroidea;Veneridae;Mercenaria;Mercenari  
 a mercenaria

UdeM00000036800 6596 178.3 UdeM00000036800 XP\_045215865.1 29 355  
 212 2 1 315 75 429 2.40E-41 178.3 6596 cellular  
 organisms;Eukaryota;Opisthokonta;Metazoa;Eumetazoa;Bilateria;Protostomia;  
 Spiralia;Lophotrochozoa;Mollusca;Bivalvia;Autobranhia;Heteroconchia;Euhe  
 terodonta;Imparidentia;Venerida;Veneroidea;Veneridae;Mercenaria;Mercenari  
 a mercenaria

UdeM00000036802 6596 153.7 UdeM00000036802 XP\_045216692.1 40 205  
 123 0 6 210 5 209 2.90E-34 153.7 6596 cellular  
 organisms;Eukaryota;Opisthokonta;Metazoa;Eumetazoa;Bilateria;Protostomia;  
 Spiralia;Lophotrochozoa;Mollusca;Bivalvia;Autobranhia;Heteroconchia;Euhe  
 terodonta;Imparidentia;Venerida;Veneroidea;Veneridae;Mercenaria;Mercenari  
 a mercenaria

UdeM00000036803 6596 392.1 UdeM00000036803 XP\_045216692.1 35.7 641  
 386 9 5 639 4 624 1.60E-105 392.1 6596 cellular  
 organisms;Eukaryota;Opisthokonta;Metazoa;Eumetazoa;Bilateria;Protostomia;  
 Spiralia;Lophotrochozoa;Mollusca;Bivalvia;Autobranhia;Heteroconchia;Euhe  
 terodonta;Imparidentia;Venerida;Veneroidea;Veneridae;Mercenaria;Mercenari  
 a mercenaria

UdeM00000036805 6706 151.8 UdeM00000036805 XP\_042235765.1 45.6 158  
 85 1 1 158 1 157 7.60E-34 151.8 6706 cellular  
 organisms;Eukaryota;Opisthokonta;Metazoa;Eumetazoa;Bilateria;Protostomia;  
 Ecdysozoa;Panarthropoda;Arthropoda;Mandibulata;Pancrustacea;Crustacea;Mul  
 ticrustacea;Malacostraca;Eumalacostraca;Eucarida;Decapoda;Pleocyemata;Ast  
 acidea;Nephropoidea;Nephropidae;Homarus;Homarus americanus

UdeM00000036807 225164 161.4 UdeM00000036807 XP\_009046857.1 34  
 288 177 7 110 391 14 294 2.50E-36 161.4 225164  
 cellular  
 organisms;Eukaryota;Opisthokonta;Metazoa;Eumetazoa;Bilateria;Protostomia;  
 Spiralia;Lophotrochozoa;Mollusca;Gastropoda;Patellogastropoda;Lottioidea;  
 Lottiidae;Lottia;Lottia gigantea

UdeM00000036808 1735272 140.2 UdeM00000036808 XP\_041351056.1 32.4  
 253 146 6 12 248 99 342 3.80E-30 140.2 1735272  
 cellular  
 organisms;Eukaryota;Opisthokonta;Metazoa;Eumetazoa;Bilateria;Protostomia;  
 Spiralia;Lophotrochozoa;Mollusca;Gastropoda;Neomphalina;Neomphaloidea;Pel  
 tospiridae;Gigantopelta;Gigantopelta aegis

UdeM00000036809 1735272 137.1 UdeM00000036809 XP\_041365607.1 31  
 287 151 10 23 273 31 306 3.70E-29 137.1 1735272  
 cellular  
 organisms;Eukaryota;Opisthokonta;Metazoa;Eumetazoa;Bilateria;Protostomia;  
 Spiralia;Lophotrochozoa;Mollusca;Gastropoda;Neomphalina;Neomphaloidea;Pel  
 tospiridae;Gigantopelta;Gigantopelta aegis

UdeM00000036810 225164 154.1 UdeM00000036810 XP\_009059669.1 33.9  
 286 171 8 31 307 18 294 3.10E-34 154.1 225164  
 cellular  
 organisms;Eukaryota;Opisthokonta;Metazoa;Eumetazoa;Bilateria;Protostomia;  
 Spiralia;Lophotrochozoa;Mollusca;Gastropoda;Patellogastropoda;Lottioidea;  
 Lottiidae;Lottia;Lottia gigantea



UdeM00000036812 7111 77.4 UdeM00000036812 XP\_026736514.1 35.3 136  
 74 4 51 175 13 145 2.10E-11 77.4 7111 cellular  
 organisms;Eukaryota;Opisthokonta;Metazoa;Eumetazoa;Bilateria;Protostomia;  
 Ecdysozoa;Panarthropoda;Arthropoda;Mandibulata;Pancrustacea;Hexapoda;Inse  
 cta;Dicondylia;Pterygota;Neoptera;Endopterygota;Amphiesmenoptera;Lepidopt  
 era;Glossata;Neolepidoptera;Heteroneura;Ditrysia;Obtectomera;Noctuoidea;N  
 octuidae;Plusiinae;Trichoplusia;Trichoplusia ni  
 UdeM00000036813 6573 149.4 UdeM00000036813 XP\_021346145.1 33.7 285  
 171 7 32 306 46 322 7.60E-33 149.4 6573 cellular  
 organisms;Eukaryota;Opisthokonta;Metazoa;Eumetazoa;Bilateria;Protostomia;  
 Spiralia;Lophotrochozoa;Mollusca;Bivalvia;Autobranhia;Pteriormorphia;Pect  
 inida;Pectinoidea;Pectinidae;Mizuhopecten;Mizuhopecten yessoensis  
 UdeM00000036814 6596 304.3 UdeM00000036814 XP\_045216692.1 30.8 633  
 412 8 18 642 5 619 4.40E-79 304.3 6596 cellular  
 organisms;Eukaryota;Opisthokonta;Metazoa;Eumetazoa;Bilateria;Protostomia;  
 Spiralia;Lophotrochozoa;Mollusca;Bivalvia;Autobranhia;Heteroconchia;Euhe  
 terodonta;Imparidentia;Venerida;Veneroidea;Veneridae;Mercenaria;Mercenari  
 a mercenaria  
 UdeM00000036815 6596 335.9 UdeM00000036815 XP\_045216692.1 32.4 635  
 405 7 15 643 3 619 1.40E-88 335.9 6596 cellular  
 organisms;Eukaryota;Opisthokonta;Metazoa;Eumetazoa;Bilateria;Protostomia;  
 Spiralia;Lophotrochozoa;Mollusca;Bivalvia;Autobranhia;Heteroconchia;Euhe  
 terodonta;Imparidentia;Venerida;Veneroidea;Veneridae;Mercenaria;Mercenari  
 a mercenaria  
 UdeM00000036816 6579 305.4 UdeM00000036816 XP\_033750359.1 59.6 270  
 95 5 15 271 7 275 7.10E-80 305.4 6579 cellular  
 organisms;Eukaryota;Opisthokonta;Metazoa;Eumetazoa;Bilateria;Protostomia;  
 Spiralia;Lophotrochozoa;Mollusca;Bivalvia;Autobranhia;Pteriormorphia;Pect  
 inida;Pectinoidea;Pectinidae;Pecten;Pecten maximus  
 UdeM00000036819 29159 131.7 UdeM00000036819 XP\_034331519.1 45.7 151  
 70 5 22 166 675 819 1.60E-27 131.7 29159 cellular  
 organisms;Eukaryota;Opisthokonta;Metazoa;Eumetazoa;Bilateria;Protostomia;  
 Spiralia;Lophotrochozoa;Mollusca;Bivalvia;Autobranhia;Pteriormorphia;Ostr  
 eida;Ostreoidea;Ostreidae;Crassostrea;Crassostrea gigas  
 UdeM00000036818 6596 284.3 UdeM00000036818 XP\_045216800.1 35.4 511  
 301 11 358 863 418 904 6.50E-73 284.3 6596 cellular  
 organisms;Eukaryota;Opisthokonta;Metazoa;Eumetazoa;Bilateria;Protostomia;  
 Spiralia;Lophotrochozoa;Mollusca;Bivalvia;Autobranhia;Heteroconchia;Euhe  
 terodonta;Imparidentia;Venerida;Veneroidea;Veneridae;Mercenaria;Mercenari  
 a mercenaria  
 UdeM00000036820 6565 425.2 UdeM00000036820 XP\_022329905.1 49.2 490  
 206 10 2 481 57 513 1.10E-115 425.2 6565 cellular  
 organisms;Eukaryota;Opisthokonta;Metazoa;Eumetazoa;Bilateria;Protostomia;  
 Spiralia;Lophotrochozoa;Mollusca;Bivalvia;Autobranhia;Pteriormorphia;Ostr  
 eida;Ostreoidea;Ostreidae;Crassostrea;Crassostrea virginica  
 UdeM00000036821 6596 909.4 UdeM00000036821 XP\_045156185.1 72.7 605  
 154 4 1 600 1 599 2.30E-261 909.4 6596 cellular  
 organisms;Eukaryota;Opisthokonta;Metazoa;Eumetazoa;Bilateria;Protostomia;  
 Spiralia;Lophotrochozoa;Mollusca;Bivalvia;Autobranhia;Heteroconchia;Euhe  
 terodonta;Imparidentia;Venerida;Veneroidea;Veneridae;Mercenaria;Mercenari  
 a mercenaria  
 UdeM00000041730 7574 124.4 UdeM00000041730 XP\_023931285.1 51.9 106  
 47 2 75 176 33 138 4.00E-25 124.4 7574 cellular  
 organisms;Eukaryota;Opisthokonta;Metazoa;Eumetazoa;Bilateria;Protostomia;

Spiralia;Lophotrochozoa;Brachiopoda;Linguliformea;Lingulata;Lingulida;Linguloidea;Lingulidae;Lingula;Lingula anatina

UdeM00000041731 2652724 69.7 UdeM00000041731 XP\_028515036.1 60.5  
43 17 0 174 216 4088 4130 7.00E-09 69.7 2652724  
cellular

organisms;Eukaryota;Opisthokonta;Metazoa;Eumetazoa;Cnidaria;Anthozoa;Hexacorallia;Actiniaria;Aiptasiidae;Exaiptasia;Exaiptasia diaphana

UdeM00000041732 6596 340.1 UdeM00000041732 XP\_045188338.1 52.5 320  
109 4 28 316 430 737 3.10E-90 340.1 6596 cellular

organisms;Eukaryota;Opisthokonta;Metazoa;Eumetazoa;Bilateria;Protostomia;Spiralia;Lophotrochozoa;Mollusca;Bivalvia;Autobranchia;Heteroconchia;Euheterodonta;Imparidentia;Venerida;Veneroidea;Veneridae;Mercenaria;Mercenaria mercenaria

UdeM00000041733 225164 110.9 UdeM00000041733 XP\_009056234.1 60.9  
69 26 1 1 69 536 603 8.10E-22 110.9 225164  
cellular

organisms;Eukaryota;Opisthokonta;Metazoa;Eumetazoa;Bilateria;Protostomia;Spiralia;Lophotrochozoa;Mollusca;Gastropoda;Patellogastropoda;Lottioidae;Lottiidae;Lottia;Lottia gigantea

UdeM00000041734 6596 908.3 UdeM00000041734 XP\_045188338.1 60.5 664  
245 5 145 792 830 1492 6.90E-261 908.3 6596 cellular

organisms;Eukaryota;Opisthokonta;Metazoa;Eumetazoa;Bilateria;Protostomia;Spiralia;Lophotrochozoa;Mollusca;Bivalvia;Autobranchia;Heteroconchia;Euheterodonta;Imparidentia;Venerida;Veneroidea;Veneridae;Mercenaria;Mercenaria mercenaria

UdeM00000041735 2607531 106.7 UdeM00000041735 XP\_029648784.1 69.7  
66 20 0 39 104 14 79 1.80E-20 106.7 2607531  
cellular

organisms;Eukaryota;Opisthokonta;Metazoa;Eumetazoa;Bilateria;Protostomia;Spiralia;Lophotrochozoa;Mollusca;Cephalopoda;Coleoidea;Octopodiformes;Octopoda;Incirrata;Octopodidae;Octopus;Octopus sinensis

UdeM00000041737 2607531 106.3 UdeM00000041737 XP\_029648784.1 69.7  
66 20 0 4 69 14 79 1.60E-20 106.3 2607531  
cellular

organisms;Eukaryota;Opisthokonta;Metazoa;Eumetazoa;Bilateria;Protostomia;Spiralia;Lophotrochozoa;Mollusca;Cephalopoda;Coleoidea;Octopodiformes;Octopoda;Incirrata;Octopodidae;Octopus;Octopus sinensis

UdeM00000041752 6573 190.3 UdeM00000041752 XP\_021347892.1 56.1 157  
69 0 1 157 297 453 1.90E-45 190.3 6573 cellular

organisms;Eukaryota;Opisthokonta;Metazoa;Eumetazoa;Bilateria;Protostomia;Spiralia;Lophotrochozoa;Mollusca;Bivalvia;Autobranchia;Pteriomorpha;Pectinida;Pectinoidea;Pectinidae;Mizuhopecten;Mizuhopecten yessoensis

UdeM00000041753 6596 394.4 UdeM00000041753 XP\_045173837.1 70.2 292  
83 3 1 288 1 292 1.20E-106 394.4 6596 cellular

organisms;Eukaryota;Opisthokonta;Metazoa;Eumetazoa;Bilateria;Protostomia;Spiralia;Lophotrochozoa;Mollusca;Bivalvia;Autobranchia;Heteroconchia;Euheterodonta;Imparidentia;Venerida;Veneroidea;Veneridae;Mercenaria;Mercenaria mercenaria

UdeM00000041754 45351 96.7 UdeM00000041754 XP\_032238514.1 43.9 107  
49 2 4 99 2 108 1.80E-17 96.7 45351 cellular

organisms;Eukaryota;Opisthokonta;Metazoa;Eumetazoa;Cnidaria;Anthozoa;Hexacorallia;Actiniaria;Edwardsiidae;Nematostella;Nematostella vectensis

UdeM00000041755 6565 478 UdeM00000041755 XP\_022343310.1 74.4 293  
73 2 8 298 7 299 8.70E-132 478 6565 cellular

organisms;Eukaryota;Opisthokonta;Metazoa;Eumetazoa;Bilateria;Protostomia; Spiralia;Lophotrochozoa;Mollusca;Bivalvia;Autobranchia;Pteriomorphia;Ostr eida;Ostreoidea;Ostreidae;Crassostrea;Crassostrea virginica

UdeM00000041756 400727 501.5 UdeM00000041756 XP\_025089045.1 76.1  
343 76 2 1 337 1 343 8.30E-139 501.5 400727  
cellular

organisms;Eukaryota;Opisthokonta;Metazoa;Eumetazoa;Bilateria;Protostomia; Spiralia;Lophotrochozoa;Mollusca;Gastropoda;Caenogastropoda;Architaeniogl ossa;Ampullarioidea;Ampullariidae;Pomacea;Pomacea canaliculata

UdeM00000041757 1735272 337.4 UdeM00000041757 XP\_041349728.1 59.8  
264 106 0 9 272 11 274 1.70E-89 337.4 1735272  
cellular

organisms;Eukaryota;Opisthokonta;Metazoa;Eumetazoa;Bilateria;Protostomia; Spiralia;Lophotrochozoa;Mollusca;Gastropoda;Neomphalina;Neomphaloidea;Pel tospiridae;Gigantopelta;Gigantopelta aegis

UdeM00000041758 6596 590.1 UdeM00000041758 XP\_045173485.1 44.3 727  
351 13 62 739 28 749 3.90E-165 590.1 6596 cellular

organisms;Eukaryota;Opisthokonta;Metazoa;Eumetazoa;Bilateria;Protostomia; Spiralia;Lophotrochozoa;Mollusca;Bivalvia;Autobranchia;Heteroconchia;Euhe terodonta;Imparidentia;Venerida;Veneroidea;Veneridae;Mercenaria;Mercenari a mercenaria

UdeM00000041759 6596 1281.5 UdeM00000041759 XP\_045172180.1 78.1  
858 172 3 1 851 1 849 0.00E+00 1281.5 6596  
cellular

organisms;Eukaryota;Opisthokonta;Metazoa;Eumetazoa;Bilateria;Protostomia; Spiralia;Lophotrochozoa;Mollusca;Bivalvia;Autobranchia;Heteroconchia;Euhe terodonta;Imparidentia;Venerida;Veneroidea;Veneridae;Mercenaria;Mercenari a mercenaria

UdeM00000041760 6596 1385.5 UdeM00000041760 XP\_045171874.1 60.7  
1243 401 12 1 1159 1 1240 0.00E+00 1385.5 6596  
cellular

organisms;Eukaryota;Opisthokonta;Metazoa;Eumetazoa;Bilateria;Protostomia; Spiralia;Lophotrochozoa;Mollusca;Bivalvia;Autobranchia;Heteroconchia;Euhe terodonta;Imparidentia;Venerida;Veneroidea;Veneridae;Mercenaria;Mercenari a mercenaria

UdeM00000041761 6579 99.8 UdeM00000041761 XP\_033762037.1 25.8 356  
242 9 160 499 334 683 1.20E-17 99.8 6579 cellular

organisms;Eukaryota;Opisthokonta;Metazoa;Eumetazoa;Bilateria;Protostomia; Spiralia;Lophotrochozoa;Mollusca;Bivalvia;Autobranchia;Pteriomorphia;Pect inida;Pectinoidea;Pectinidae;Pecten;Pecten maximus

UdeM00000041762 1735272 224.6 UdeM00000041762 XP\_041347658.1 71.5  
246 56 3 52 291 43 280 1.70E-55 224.6 1735272  
cellular

organisms;Eukaryota;Opisthokonta;Metazoa;Eumetazoa;Bilateria;Protostomia; Spiralia;Lophotrochozoa;Mollusca;Gastropoda;Neomphalina;Neomphaloidea;Pel tospiridae;Gigantopelta;Gigantopelta aegis

UdeM00000041763 6579 283.5 UdeM00000041763 XP\_033747902.1 49.8 263  
121 2 4 266 3 254 2.80E-73 283.5 6579 cellular

organisms;Eukaryota;Opisthokonta;Metazoa;Eumetazoa;Bilateria;Protostomia; Spiralia;Lophotrochozoa;Mollusca;Bivalvia;Autobranchia;Pteriomorphia;Pect inida;Pectinoidea;Pectinidae;Pecten;Pecten maximus

UdeM00000041764 29159 286.2 UdeM00000041764 XP\_034299976.1 46.9 292  
136 6 70 343 105 395 6.60E-74 286.2 29159 cellular

organisms;Eukaryota;Opisthokonta;Metazoa;Eumetazoa;Bilateria;Protostomia;

Spiralia;Lophotrochozoa;Mollusca;Bivalvia;Autobranchia;Pteriormorphia;Ostr  
eida;Ostreoidea;Ostreidae;Crassostrea;Crassostrea gigas  
UdeM00000041765 6579 292 UdeM00000041765 XP\_033747902.1 51.3 263  
117 2 4 266 3 254 7.90E-76 292 6579 cellular  
organisms;Eukaryota;Opisthokonta;Metazoa;Eumetazoa;Bilateria;Protostomia;  
Spiralia;Lophotrochozoa;Mollusca;Bivalvia;Autobranchia;Pteriormorphia;Pect  
inida;Pectinoidea;Pectinidae;Pecten;Pecten maximus  
UdeM00000041766 1735272 690.3 UdeM00000041766 XP\_041349420.1 42.9  
863 360 18 96 838 100 949 3.10E-195 690.3 1735272  
cellular  
organisms;Eukaryota;Opisthokonta;Metazoa;Eumetazoa;Bilateria;Protostomia;  
Spiralia;Lophotrochozoa;Mollusca;Gastropoda;Neomphalina;Neomphaloidea;Pel  
tospiridae;Gigantopelta;Gigantopelta aegis  
UdeM00000041767 1735272 936.4 UdeM00000041767 XP\_041349420.1 51  
926 427 16 538 1448 36 949 4.30E-269 936.4 1735272  
cellular  
organisms;Eukaryota;Opisthokonta;Metazoa;Eumetazoa;Bilateria;Protostomia;  
Spiralia;Lophotrochozoa;Mollusca;Gastropoda;Neomphalina;Neomphaloidea;Pel  
tospiridae;Gigantopelta;Gigantopelta aegis  
UdeM00000041770 6596 172.9 UdeM00000041770 XP\_045172215.1 54.8 303  
120 4 1 293 1 296 5.90E-40 172.9 6596 cellular  
organisms;Eukaryota;Opisthokonta;Metazoa;Eumetazoa;Bilateria;Protostomia;  
Spiralia;Lophotrochozoa;Mollusca;Bivalvia;Autobranchia;Heteroconchia;Euhe  
terodonta;Imparidentia;Venerida;Veneroidea;Veneridae;Mercenaria;Mercenari  
a mercenaria  
UdeM00000041771 6565 95.5 UdeM00000041771 XP\_022337386.1 24 438  
286 11 115 528 141 555 2.10E-16 95.5 6565 cellular  
organisms;Eukaryota;Opisthokonta;Metazoa;Eumetazoa;Bilateria;Protostomia;  
Spiralia;Lophotrochozoa;Mollusca;Bivalvia;Autobranchia;Pteriormorphia;Ostr  
eida;Ostreoidea;Ostreidae;Crassostrea;Crassostrea virginica  
UdeM00000041772 6565 95.5 UdeM00000041772 XP\_022337386.1 24 438  
286 11 147 560 141 555 2.30E-16 95.5 6565 cellular  
organisms;Eukaryota;Opisthokonta;Metazoa;Eumetazoa;Bilateria;Protostomia;  
Spiralia;Lophotrochozoa;Mollusca;Bivalvia;Autobranchia;Pteriormorphia;Ostr  
eida;Ostreoidea;Ostreidae;Crassostrea;Crassostrea virginica  
UdeM00000041773 6579 306.2 UdeM00000041773 XP\_033743480.1 39 446  
245 10 7 439 22 453 6.90E-80 306.2 6579 cellular  
organisms;Eukaryota;Opisthokonta;Metazoa;Eumetazoa;Bilateria;Protostomia;  
Spiralia;Lophotrochozoa;Mollusca;Bivalvia;Autobranchia;Pteriormorphia;Pect  
inida;Pectinoidea;Pectinidae;Pecten;Pecten maximus  
UdeM00000018353 6596 139 UdeM00000018353 XP\_045206881.1 42.7 164  
82 5 1 159 1 157 5.10E-30 139 6596 cellular  
organisms;Eukaryota;Opisthokonta;Metazoa;Eumetazoa;Bilateria;Protostomia;  
Spiralia;Lophotrochozoa;Mollusca;Bivalvia;Autobranchia;Heteroconchia;Euhe  
terodonta;Imparidentia;Venerida;Veneroidea;Veneridae;Mercenaria;Mercenari  
a mercenaria  
UdeM00000018354 6596 124 UdeM00000018354 XP\_045211380.1 40.3 139  
74 3 15 151 12 143 1.60E-25 124 6596 cellular  
organisms;Eukaryota;Opisthokonta;Metazoa;Eumetazoa;Bilateria;Protostomia;  
Spiralia;Lophotrochozoa;Mollusca;Bivalvia;Autobranchia;Heteroconchia;Euhe  
terodonta;Imparidentia;Venerida;Veneroidea;Veneridae;Mercenaria;Mercenari  
a mercenaria  
UdeM00000018355 6573 1367.1 UdeM00000018355 XP\_021368707.1 43  
1662 922 12 1 1650 1 1648 0.00E+00 1367.1 6573

cellular  
organisms;Eukaryota;Opisthokonta;Metazoa;Eumetazoa;Bilateria;Protostomia;  
Spiralia;Lophotrochozoa;Mollusca;Bivalvia;Autobranchia;Pteriomorpha;Pect  
inida;Pectinoidea;Pectinidae;Mizuhopecten;Mizuhopecten yessoensis  
UdeM00000018357 6596 269.6 UdeM00000018357 XP\_045161140.1 73.7 167  
44 0 24 190 71 237 3.00E-69 269.6 6596 cellular  
organisms;Eukaryota;Opisthokonta;Metazoa;Eumetazoa;Bilateria;Protostomia;  
Spiralia;Lophotrochozoa;Mollusca;Bivalvia;Autobranchia;Heteroconchia;Euhe  
terodonta;Imparidentia;Venerida;Veneroidea;Veneridae;Mercenaria;Mercenari  
a mercenaria  
UdeM00000018359 6596 110.2 UdeM00000018359 XP\_045161140.1 69 71  
22 0 38 108 53 123 1.80E-21 110.2 6596 cellular  
organisms;Eukaryota;Opisthokonta;Metazoa;Eumetazoa;Bilateria;Protostomia;  
Spiralia;Lophotrochozoa;Mollusca;Bivalvia;Autobranchia;Heteroconchia;Euhe  
terodonta;Imparidentia;Venerida;Veneroidea;Veneridae;Mercenaria;Mercenari  
a mercenaria  
UdeM00000018360 400727 399.8 UdeM00000018360 XP\_025108466.1 46.5  
467 237 4 12 478 89 542 6.70E-108 399.8 400727  
cellular  
organisms;Eukaryota;Opisthokonta;Metazoa;Eumetazoa;Bilateria;Protostomia;  
Spiralia;Lophotrochozoa;Mollusca;Gastropoda;Caenogastropoda;Architaeniogl  
ossa;Ampullarioidea;Ampullariidae;Pomacea;Pomacea canaliculata  
UdeM00000018361 70779 161.8 UdeM00000018361 XP\_015770379.1 52.4 143  
65 3 4 145 8 148 6.80E-37 161.8 70779 cellular  
organisms;Eukaryota;Opisthokonta;Metazoa;Eumetazoa;Cnidaria;Anthozoa;Hexa  
corallia;Scleractinia;Astrocoeniina;Acroporidae;Acropora;Acropora  
digitifera  
UdeM00000018362 6565 130.6 UdeM00000018362 XP\_022328252.1 39.8 211  
88 6 1 172 1105 1315 2.00E-27 130.6 6565 cellular  
organisms;Eukaryota;Opisthokonta;Metazoa;Eumetazoa;Bilateria;Protostomia;  
Spiralia;Lophotrochozoa;Mollusca;Bivalvia;Autobranchia;Pteriomorpha;Ostr  
eida;Ostreoidea;Ostreidae;Crassostrea;Crassostrea virginica  
UdeM00000018363 6596 303.9 UdeM00000018363 XP\_045161140.1 63.4 232  
80 2 8 238 10 237 1.80E-79 303.9 6596 cellular  
organisms;Eukaryota;Opisthokonta;Metazoa;Eumetazoa;Bilateria;Protostomia;  
Spiralia;Lophotrochozoa;Mollusca;Bivalvia;Autobranchia;Heteroconchia;Euhe  
terodonta;Imparidentia;Venerida;Veneroidea;Veneridae;Mercenaria;Mercenari  
a mercenaria  
UdeM00000018365 6596 88.2 UdeM00000018365 XP\_045161140.1 72.2 54  
15 0 59 112 71 124 7.70E-15 88.2 6596 cellular  
organisms;Eukaryota;Opisthokonta;Metazoa;Eumetazoa;Bilateria;Protostomia;  
Spiralia;Lophotrochozoa;Mollusca;Bivalvia;Autobranchia;Heteroconchia;Euhe  
terodonta;Imparidentia;Venerida;Veneroidea;Veneridae;Mercenaria;Mercenari  
a mercenaria  
UdeM00000018367 6596 169.9 UdeM00000018367 XP\_045161140.1 65.3 124  
42 1 1 123 1 124 2.10E-39 169.9 6596 cellular  
organisms;Eukaryota;Opisthokonta;Metazoa;Eumetazoa;Bilateria;Protostomia;  
Spiralia;Lophotrochozoa;Mollusca;Bivalvia;Autobranchia;Heteroconchia;Euhe  
terodonta;Imparidentia;Venerida;Veneroidea;Veneridae;Mercenaria;Mercenari  
a mercenaria  
UdeM00000018368 6596 508.8 UdeM00000018368 XP\_045162493.1 47.1 639  
307 8 9 621 11 644 9.60E-141 508.8 6596 cellular  
organisms;Eukaryota;Opisthokonta;Metazoa;Eumetazoa;Bilateria;Protostomia;  
Spiralia;Lophotrochozoa;Mollusca;Bivalvia;Autobranchia;Heteroconchia;Euhe

terodonta;Imparidentia;Venerida;Veneroidea;Veneridae;Mercenaria;Mercenari  
 a mercenaria  
 UdeM00000018369 6596 498.4 UdeM00000018369 XP\_045162391.1 56.4 417  
 180 2 4 420 1 415 8.80E-138 498.4 6596 cellular  
 organisms;Eukaryota;Opisthokonta;Metazoa;Eumetazoa;Bilateria;Protostomia;  
 Spiralia;Lophotrochozoa;Mollusca;Bivalvia;Autobranhia;Heteroconchia;Euhe  
 terodonta;Imparidentia;Venerida;Veneroidea;Veneridae;Mercenaria;Mercenari  
 a mercenaria  
 UdeM00000018370 6596 723.8 UdeM00000018370 XP\_045161554.1 45.8 1631  
 686 48 15 1556 27 1548 1.60E-204 723.8 6596 cellular  
 organisms;Eukaryota;Opisthokonta;Metazoa;Eumetazoa;Bilateria;Protostomia;  
 Spiralia;Lophotrochozoa;Mollusca;Bivalvia;Autobranhia;Heteroconchia;Euhe  
 terodonta;Imparidentia;Venerida;Veneroidea;Veneridae;Mercenaria;Mercenari  
 a mercenaria  
 UdeM00000018371 6596 723.8 UdeM00000018371 XP\_045161554.1 45.8 1631  
 686 48 15 1556 27 1548 1.60E-204 723.8 6596 cellular  
 organisms;Eukaryota;Opisthokonta;Metazoa;Eumetazoa;Bilateria;Protostomia;  
 Spiralia;Lophotrochozoa;Mollusca;Bivalvia;Autobranhia;Heteroconchia;Euhe  
 terodonta;Imparidentia;Venerida;Veneroidea;Veneridae;Mercenaria;Mercenari  
 a mercenaria  
 UdeM00000018372 6596 488 UdeM00000018372 XP\_045161557.1 62 442  
 159 4 36 474 48 483 1.30E-134 488 6596 cellular  
 organisms;Eukaryota;Opisthokonta;Metazoa;Eumetazoa;Bilateria;Protostomia;  
 Spiralia;Lophotrochozoa;Mollusca;Bivalvia;Autobranhia;Heteroconchia;Euhe  
 terodonta;Imparidentia;Venerida;Veneroidea;Veneridae;Mercenaria;Mercenari  
 a mercenaria  
 UdeM00000018373 6596 146.4 UdeM00000018373 XP\_045166258.1 46.9 160  
 80 2 2 161 103 257 3.20E-32 146.4 6596 cellular  
 organisms;Eukaryota;Opisthokonta;Metazoa;Eumetazoa;Bilateria;Protostomia;  
 Spiralia;Lophotrochozoa;Mollusca;Bivalvia;Autobranhia;Heteroconchia;Euhe  
 terodonta;Imparidentia;Venerida;Veneroidea;Veneridae;Mercenaria;Mercenari  
 a mercenaria  
 UdeM00000018374 218467 157.1 UdeM00000018374 XP\_023220759.1 47.2  
 180 93 2 1 179 495 673 2.00E-35 157.1 218467  
 cellular  
 organisms;Eukaryota;Opisthokonta;Metazoa;Eumetazoa;Bilateria;Protostomia;  
 Ecdysozoa;Panarthropoda;Arthropoda;Chelicerata;Arachnida;Scorpiones;Buthi  
 da;Buthoidea;Buthidae;Centruroides;Centruroides sculpturatus  
 UdeM00000018375 114398 213.8 UdeM00000018375 XP\_042913023.1 52  
 202 97 0 35 236 161 362 2.50E-52 213.8 114398  
 cellular  
 organisms;Eukaryota;Opisthokonta;Metazoa;Eumetazoa;Bilateria;Protostomia;  
 Ecdysozoa;Panarthropoda;Arthropoda;Chelicerata;Arachnida;Araneae;Araneomo  
 rphae;Entelegynae;Orbiculariae;Araneoidea;Theridiidae;Parasteatoda;Parast  
 eatoda tepidariorum  
 UdeM00000018376 7668 600.1 UdeM00000018376 XP\_003729577.2 39.4 867  
 478 16 359 1193 65 916 6.10E-168 600.1 7668 cellular  
 organisms;Eukaryota;Opisthokonta;Metazoa;Eumetazoa;Bilateria;Deuterostomi  
 a;Echinodermata;Eleutherozoa;Echinozoa;Echinoidea;Euechinoidea;Echinacea;  
 Camarodonta;Echinidea;Strongylocentrotidae;Strongylocentrotus;Strongyloce  
 ntrotus purpuratus  
 UdeM00000018377 7668 600.1 UdeM00000018377 XP\_003729577.2 39.4 867  
 478 16 353 1187 65 916 6.10E-168 600.1 7668 cellular  
 organisms;Eukaryota;Opisthokonta;Metazoa;Eumetazoa;Bilateria;Deuterostomi

a;Echinodermata;Eleutherozoa;Echinozoa;Echinoidea;Euechinoidea;Echinacea; Camarodonta;Echinidea;Strongylocentrotidae;Strongylocentrotus;Strongylocentrotus purpuratus

UdeM00000018378 37621 406.8 UdeM00000018378 XP\_014672567.1 45.8 421  
212 5 1 408 101 518 3.70E-110 406.8 37621 cellular

organisms;Eukaryota;Opisthokonta;Metazoa;Eumetazoa;Bilateria;Protostomia; Ecdysozoa;Scalidophora;Priapulida;Priapulimorpha;Priapulimorphida;Priapulidae;Priapulus;Priapulus caudatus

UdeM00000018383 6596 755.4 UdeM00000018383 XP\_045162440.1 63.1 564  
208 0 1 564 1 564 5.30E-215 755.4 6596 cellular

organisms;Eukaryota;Opisthokonta;Metazoa;Eumetazoa;Bilateria;Protostomia; Spiralia;Lophotrochozoa;Mollusca;Bivalvia;Autobranchia;Heteroconchia;Euherodonta;Imparidentia;Venerida;Veneroidea;Veneridae;Mercenaria;Mercenaria mercenaria

UdeM00000018384 6596 261.5 UdeM00000018384 XP\_045209032.1 62.1 195  
74 0 6 200 86 280 8.70E-67 261.5 6596 cellular

organisms;Eukaryota;Opisthokonta;Metazoa;Eumetazoa;Bilateria;Protostomia; Spiralia;Lophotrochozoa;Mollusca;Bivalvia;Autobranchia;Heteroconchia;Euherodonta;Imparidentia;Venerida;Veneroidea;Veneridae;Mercenaria;Mercenaria mercenaria

UdeM00000018388 6596 270 UdeM00000018388 XP\_045178408.1 56.1 230  
99 1 2 229 66 295 2.80E-69 270 6596 cellular

organisms;Eukaryota;Opisthokonta;Metazoa;Eumetazoa;Bilateria;Protostomia; Spiralia;Lophotrochozoa;Mollusca;Bivalvia;Autobranchia;Heteroconchia;Euherodonta;Imparidentia;Venerida;Veneroidea;Veneridae;Mercenaria;Mercenaria mercenaria

UdeM00000018389 1529436 257.3 UdeM00000018389 XP\_033103895.1 51.1  
225 109 1 41 264 37 261 2.10E-65 257.3 1529436  
cellular

organisms;Eukaryota;Opisthokonta;Metazoa;Eumetazoa;Bilateria;Deuterostomia;Echinodermata;Pelmatozoa;Crinoidea;Articulata;Comatulida;Comatulidae;Comatulinae;Anneissia;Anneissia japonica

UdeM00000018390 225164 79.3 UdeM00000018390 XP\_009053806.1 21.6  
342 245 8 288 614 150 483 2.20E-11 79.3 225164  
cellular

organisms;Eukaryota;Opisthokonta;Metazoa;Eumetazoa;Bilateria;Protostomia; Spiralia;Lophotrochozoa;Mollusca;Gastropoda;Patellogastropoda;Lottioidea;Lottiidae;Lottia;Lottia gigantea

UdeM00000018391 225164 75.9 UdeM00000018391 XP\_009053806.1 21.5  
344 243 9 83 409 150 483 1.80E-10 75.9 225164  
cellular

organisms;Eukaryota;Opisthokonta;Metazoa;Eumetazoa;Bilateria;Protostomia; Spiralia;Lophotrochozoa;Mollusca;Gastropoda;Patellogastropoda;Lottioidea;Lottiidae;Lottia;Lottia gigantea

UdeM00000018392 6565 701.4 UdeM00000018392 XP\_022346158.1 57.7 593  
243 4 1 589 66 654 9.60E-199 701.4 6565 cellular

organisms;Eukaryota;Opisthokonta;Metazoa;Eumetazoa;Bilateria;Protostomia; Spiralia;Lophotrochozoa;Mollusca;Bivalvia;Autobranchia;Pteriomorpha;Ostreida;Ostreoidea;Ostreidae;Crassostrea;Crassostrea virginica

UdeM00000018393 6596 2773.4 UdeM00000018393 XP\_045165933.1 83.9  
1621 255 5 2 1620 853 2469 0.00E+00 2773.4 6596  
cellular

organisms;Eukaryota;Opisthokonta;Metazoa;Eumetazoa;Bilateria;Protostomia; Spiralia;Lophotrochozoa;Mollusca;Bivalvia;Autobranchia;Heteroconchia;Euherodonta

terodonta;Imparidentia;Venerida;Veneroidea;Veneridae;Mercenaria;Mercenari  
 a mercenaria  
 UdeM00000018394 10224 125.6 UdeM00000018394 XP\_006813844.1 40.2 164  
 98 0 1 164 128 291 7.10E-26 125.6 10224 cellular  
 organisms;Eukaryota;Opisthokonta;Metazoa;Eumetazoa;Bilateria;Deuterostomi  
 a;Hemichordata;Enteropneusta;Harrimaniidae;Saccoglossus;Saccoglossus  
 kowalevskii  
 UdeM00000018395 6596 1358.2 UdeM00000018395 XP\_045165933.1 80.4  
 854 167 0 1 854 1 854 0.00E+00 1358.2 6596  
 cellular  
 organisms;Eukaryota;Opisthokonta;Metazoa;Eumetazoa;Bilateria;Protostomia;  
 Spiralia;Lophotrochozoa;Mollusca;Bivalvia;Autobranchia;Heteroconchia;Euhe  
 terodonta;Imparidentia;Venerida;Veneroidea;Veneridae;Mercenaria;Mercenari  
 a mercenaria  
 UdeM00000018398 6596 170.6 UdeM00000018398 XP\_045163289.1 60.2 226  
 55 7 1 192 1 225 2.20E-39 170.6 6596 cellular  
 organisms;Eukaryota;Opisthokonta;Metazoa;Eumetazoa;Bilateria;Protostomia;  
 Spiralia;Lophotrochozoa;Mollusca;Bivalvia;Autobranchia;Heteroconchia;Euhe  
 terodonta;Imparidentia;Venerida;Veneroidea;Veneridae;Mercenaria;Mercenari  
 a mercenaria  
 UdeM00000018399 6596 152.9 UdeM00000018399 XP\_045163289.1 71.7 99  
 27 1 3 100 219 317 1.10E-33 152.9 6596 cellular  
 organisms;Eukaryota;Opisthokonta;Metazoa;Eumetazoa;Bilateria;Protostomia;  
 Spiralia;Lophotrochozoa;Mollusca;Bivalvia;Autobranchia;Heteroconchia;Euhe  
 terodonta;Imparidentia;Venerida;Veneroidea;Veneridae;Mercenaria;Mercenari  
 a mercenaria  
 UdeM00000018401 29159 177.2 UdeM00000018401 XP\_034299474.1 37.9 261  
 146 4 4 259 312 561 3.20E-41 177.2 29159 cellular  
 organisms;Eukaryota;Opisthokonta;Metazoa;Eumetazoa;Bilateria;Protostomia;  
 Spiralia;Lophotrochozoa;Mollusca;Bivalvia;Autobranchia;Pteriomorphia;Ostr  
 eida;Ostreoidea;Ostreidae;Crassostrea;Crassostrea gigas  
 UdeM00000018402 6565 135.6 UdeM00000018402 XP\_022345446.1 37.2 191  
 113 5 12 199 7 193 8.40E-29 135.6 6565 cellular  
 organisms;Eukaryota;Opisthokonta;Metazoa;Eumetazoa;Bilateria;Protostomia;  
 Spiralia;Lophotrochozoa;Mollusca;Bivalvia;Autobranchia;Pteriomorphia;Ostr  
 eida;Ostreoidea;Ostreidae;Crassostrea;Crassostrea virginica  
 UdeM00000018403 6596 338.6 UdeM00000018403 XP\_045156399.1 58.8 294  
 121 0 43 336 29 322 9.40E-90 338.6 6596 cellular  
 organisms;Eukaryota;Opisthokonta;Metazoa;Eumetazoa;Bilateria;Protostomia;  
 Spiralia;Lophotrochozoa;Mollusca;Bivalvia;Autobranchia;Heteroconchia;Euhe  
 terodonta;Imparidentia;Venerida;Veneroidea;Veneridae;Mercenaria;Mercenari  
 a mercenaria  
 UdeM00000018405 6596 262.3 UdeM00000018405 XP\_045161881.1 46.2 303  
 159 3 9 308 93 394 7.80E-67 262.3 6596 cellular  
 organisms;Eukaryota;Opisthokonta;Metazoa;Eumetazoa;Bilateria;Protostomia;  
 Spiralia;Lophotrochozoa;Mollusca;Bivalvia;Autobranchia;Heteroconchia;Euhe  
 terodonta;Imparidentia;Venerida;Veneroidea;Veneridae;Mercenaria;Mercenari  
 a mercenaria  
 UdeM00000018406 6596 1002.7 UdeM00000018406 XP\_045163409.1 73.5  
 635 168 0 19 653 24 658 2.20E-289 1002.7 6596  
 cellular  
 organisms;Eukaryota;Opisthokonta;Metazoa;Eumetazoa;Bilateria;Protostomia;  
 Spiralia;Lophotrochozoa;Mollusca;Bivalvia;Autobranchia;Heteroconchia;Euhe



terodonta;Imparidentia;Venerida;Veneroidea;Veneridae;Mercenaria;Mercenaria mercenaria  
 UdeM00000018407 6596 146 UdeM00000018407 XP\_045166258.1 47.5 160  
 79 2 2 161 103 257 4.20E-32 146 6596 cellular  
 organisms;Eukaryota;Opisthokonta;Metazoa;Eumetazoa;Bilateria;Protostomia;  
 Spiralia;Lophotrochozoa;Mollusca;Bivalvia;Autobranchia;Heteroconchia;Euhe  
 terodonta;Imparidentia;Venerida;Veneroidea;Veneridae;Mercenaria;Mercenari  
 a mercenaria  
 UdeM00000018408 6596 992.6 UdeM00000018408 XP\_045163409.1 73.2 631  
 169 0 19 649 24 654 3.00E-286 992.6 6596 cellular  
 organisms;Eukaryota;Opisthokonta;Metazoa;Eumetazoa;Bilateria;Protostomia;  
 Spiralia;Lophotrochozoa;Mollusca;Bivalvia;Autobranchia;Heteroconchia;Euhe  
 terodonta;Imparidentia;Venerida;Veneroidea;Veneridae;Mercenaria;Mercenari  
 a mercenaria  
 UdeM00000018409 151771 323.2 UdeM00000018409 XP\_028406951.1 36.4  
 568 313 11 1 540 119 666 6.50E-85 323.2 151771  
 cellular  
 organisms;Eukaryota;Opisthokonta;Metazoa;Eumetazoa;Cnidaria;Anthozoa;Octo  
 corallia;Alcyonacea;Alcyoniina;Nephtheidae;Dendronephthya;Dendronephthya  
 gigantea  
 UdeM00000018410 45264 487.3 UdeM00000018410 XP\_044165143.1 55.3 443  
 191 4 42 481 35 473 2.30E-134 487.3 45264 cellular  
 organisms;Eukaryota;Opisthokonta;Metazoa;Eumetazoa;Cnidaria;Anthozoa;Hexa  
 corallia;Scleractinia;Astrocoeniina;Acroporidae;Acropora;Acropora  
 millepora  
 UdeM00000018412 6596 305.8 UdeM00000018412 XP\_045216906.1 47.2 320  
 158 7 6 321 144 456 6.40E-80 305.8 6596 cellular  
 organisms;Eukaryota;Opisthokonta;Metazoa;Eumetazoa;Bilateria;Protostomia;  
 Spiralia;Lophotrochozoa;Mollusca;Bivalvia;Autobranchia;Heteroconchia;Euhe  
 terodonta;Imparidentia;Venerida;Veneroidea;Veneridae;Mercenaria;Mercenari  
 a mercenaria  
 UdeM00000018413 7906 98.6 UdeM00000018413 XP\_034777329.1 27 237  
 158 7 92 315 23 257 1.60E-17 98.6 7906 cellular  
 organisms;Eukaryota;Opisthokonta;Metazoa;Eumetazoa;Bilateria;Deuterostomi  
 a;Chordata;Craniata;Vertebrata;Gnathostomata;Teleostomi;Euteleostomi;Acti  
 nopterygii;Actinopteri;Chondrostei;Acipenseriformes;Acipenseroides;Acipen  
 seridae;Acipenserinae;Acipenserini;Acipenser;Acipenser ruthenus  
 UdeM00000018414 6579 810.8 UdeM00000018414 XP\_033763872.1 58 724  
 279 10 1 710 1 713 1.60E-231 810.8 6579 cellular  
 organisms;Eukaryota;Opisthokonta;Metazoa;Eumetazoa;Bilateria;Protostomia;  
 Spiralia;Lophotrochozoa;Mollusca;Bivalvia;Autobranchia;Pteriormorphia;Pect  
 inida;Pectinoidea;Pectinidae;Pecten;Pecten maximus  
 UdeM00000018415 6596 371.7 UdeM00000018415 XP\_045163085.1 59.2 314  
 116 4 630 936 473 781 4.50E-99 371.7 6596 cellular  
 organisms;Eukaryota;Opisthokonta;Metazoa;Eumetazoa;Bilateria;Protostomia;  
 Spiralia;Lophotrochozoa;Mollusca;Bivalvia;Autobranchia;Heteroconchia;Euhe  
 terodonta;Imparidentia;Venerida;Veneroidea;Veneridae;Mercenaria;Mercenari  
 a mercenaria  
 UdeM00000018416 6579 374.8 UdeM00000018416 XP\_033763939.1 60 310  
 124 0 15 324 10 319 1.20E-100 374.8 6579 cellular  
 organisms;Eukaryota;Opisthokonta;Metazoa;Eumetazoa;Bilateria;Protostomia;  
 Spiralia;Lophotrochozoa;Mollusca;Bivalvia;Autobranchia;Pteriormorphia;Pect  
 inida;Pectinoidea;Pectinidae;Pecten;Pecten maximus

UdeM00000018417 29159 323.9 UdeM00000018417 XP\_034337081.1 67.7 251  
 78 2 1 250 1 249 1.80E-85 323.9 29159 cellular  
 organisms;Eukaryota;Opisthokonta;Metazoa;Eumetazoa;Bilateria;Protostomia;  
 Spiralia;Lophotrochozoa;Mollusca;Bivalvia;Autobranchia;Pteriomorpha;Ostr  
 eida;Ostreoidea;Ostreidae;Crassostrea;Crassostrea gigas  
 UdeM00000018418 1203425 265.8 UdeM00000018418 XP\_034561064.1 56  
 250 99 4 5 251 20 261 5.70E-68 265.8 1203425  
 cellular  
 organisms;Eukaryota;Opisthokonta;Metazoa;Eumetazoa;Bilateria;Deuterostomi  
 a;Chordata;Craniata;Vertebrata;Gnathostomata;Teleostomi;Euteleostomi;Acti  
 nopterygii;Actinopteri;Neopterygii;Teleostei;Osteoglossocephalai;Clupeoce  
 phala;Euteleostei;Neoteleostei;Eurypterygia;Ctenosquamata;Acanthomo  
 rphata;Euacanthomorpha;Percomorphaceae;Eupercaria;Labriformes;Labridae  
 ;Notolabrus;Notolabrus celidotus  
 UdeM00000018419 6279 224.9 UdeM00000018419 XP\_042930811.1 50 236  
 112 4 3 235 4 236 1.10E-55 224.9 6279 cellular  
 organisms;Eukaryota;Opisthokonta;Metazoa;Eumetazoa;Bilateria;Protostomia;  
 Ecdysozoa;Nematoda;Chromadorea;Rhabditida;Spirulina;Spiruromorpha;Filario  
 idea;Onchocercidae;Brugia;Brugia malayi  
 UdeM00000018420 6596 236.1 UdeM00000018420 XP\_045163986.1 98.3 117  
 2 0 1 117 1 117 2.30E-59 236.1 6596 cellular  
 organisms;Eukaryota;Opisthokonta;Metazoa;Eumetazoa;Bilateria;Protostomia;  
 Spiralia;Lophotrochozoa;Mollusca;Bivalvia;Autobranchia;Heteroconchia;Euhe  
 terodonta;Imparidentia;Venerida;Veneroidea;Veneridae;Mercenaria;Mercenari  
 a mercenaria  
 UdeM00000018421 6579 72 UdeM00000018421 XP\_033761099.1 27.1 321  
 198 10 82 377 3 312 1.90E-09 72 6579 cellular  
 organisms;Eukaryota;Opisthokonta;Metazoa;Eumetazoa;Bilateria;Protostomia;  
 Spiralia;Lophotrochozoa;Mollusca;Bivalvia;Autobranchia;Pteriomorpha;Pect  
 inida;Pectinoidea;Pectinidae;Pecten;Pecten maximus  
 UdeM00000018422 6596 299.7 UdeM00000018422 XP\_045216113.1 34.9 530  
 289 10 50 559 75 568 7.90E-78 299.7 6596 cellular  
 organisms;Eukaryota;Opisthokonta;Metazoa;Eumetazoa;Bilateria;Protostomia;  
 Spiralia;Lophotrochozoa;Mollusca;Bivalvia;Autobranchia;Heteroconchia;Euhe  
 terodonta;Imparidentia;Venerida;Veneroidea;Veneridae;Mercenaria;Mercenari  
 a mercenaria  
 UdeM00000018423 6596 141.4 UdeM00000018423 XP\_045159628.1 40.3 181  
 102 2 10 184 106 286 1.40E-30 141.4 6596 cellular  
 organisms;Eukaryota;Opisthokonta;Metazoa;Eumetazoa;Bilateria;Protostomia;  
 Spiralia;Lophotrochozoa;Mollusca;Bivalvia;Autobranchia;Heteroconchia;Euhe  
 terodonta;Imparidentia;Venerida;Veneroidea;Veneridae;Mercenaria;Mercenari  
 a mercenaria  
 UdeM00000018424 6596 242.7 UdeM00000018424 XP\_045161584.1 53.1 211  
 94 4 40 246 66 275 5.40E-61 242.7 6596 cellular  
 organisms;Eukaryota;Opisthokonta;Metazoa;Eumetazoa;Bilateria;Protostomia;  
 Spiralia;Lophotrochozoa;Mollusca;Bivalvia;Autobranchia;Heteroconchia;Euhe  
 terodonta;Imparidentia;Venerida;Veneroidea;Veneridae;Mercenaria;Mercenari  
 a mercenaria  
 UdeM00000018425 6596 308.9 UdeM00000018425 XP\_045213528.1 43.5 345  
 178 7 36 374 58 391 9.10E-81 308.9 6596 cellular  
 organisms;Eukaryota;Opisthokonta;Metazoa;Eumetazoa;Bilateria;Protostomia;  
 Spiralia;Lophotrochozoa;Mollusca;Bivalvia;Autobranchia;Heteroconchia;Euhe  
 terodonta;Imparidentia;Venerida;Veneroidea;Veneridae;Mercenaria;Mercenari  
 a mercenaria

UdeM00000018426 6573 518.5 UdeM00000018426 XP\_021356537.1 51.1 497  
 223 6 19 513 23 501 1.00E-143 518.5 6573 cellular  
 organisms;Eukaryota;Opisthokonta;Metazoa;Eumetazoa;Bilateria;Protostomia;  
 Spiralia;Lophotrochozoa;Mollusca;Bivalvia;Autobranchia;Pteriomorpha;Pect  
 inida;Pectinoidea;Pectinidae;Mizuhopecten;Mizuhopecten yessoensis  
 UdeM00000018427 225164 501.9 UdeM00000018427 XP\_009059410.1 51.8  
 477 210 7 24 496 28 488 9.80E-139 501.9 225164  
 cellular  
 organisms;Eukaryota;Opisthokonta;Metazoa;Eumetazoa;Bilateria;Protostomia;  
 Spiralia;Lophotrochozoa;Mollusca;Gastropoda;Patellogastropoda;Lottioidea;  
 Lottiidae;Lottia;Lottia gigantea  
 UdeM00000018428 6596 844 UdeM00000018428 XP\_045161479.1 44.4 1103  
 559 20 67 1147 175 1245 2.30E-241 844 6596 cellular  
 organisms;Eukaryota;Opisthokonta;Metazoa;Eumetazoa;Bilateria;Protostomia;  
 Spiralia;Lophotrochozoa;Mollusca;Bivalvia;Autobranchia;Heteroconchia;Euhe  
 terodonta;Imparidentia;Venerida;Veneroidea;Veneridae;Mercenaria;Mercenari  
 a mercenaria  
 UdeM00000018429 1735272 167.9 UdeM00000018429 XP\_041378349.1 59.8  
 127 50 1 36 162 1 126 4.30E-38 167.9 1735272  
 cellular  
 organisms;Eukaryota;Opisthokonta;Metazoa;Eumetazoa;Bilateria;Protostomia;  
 Spiralia;Lophotrochozoa;Mollusca;Gastropoda;Neomphalina;Neomphaloidea;Pel  
 tospiridae;Gigantopelta;Gigantopelta aegis  
 UdeM00000018430 46514 60.1 UdeM00000018430 XP\_038065366.1 51.4 74  
 27 2 32 96 436 509 2.30E-06 60.1 46514 cellular  
 organisms;Eukaryota;Opisthokonta;Metazoa;Eumetazoa;Bilateria;Deuterostomi  
 a;Echinodermata;Eleutherozoa;Asterozoa;Asteroidea;Valvatacea;Valvatida;As  
 terinidae;Patiria;Patiria miniata  
 UdeM00000018431 46514 60.1 UdeM00000018431 XP\_038065366.1 51.4 74  
 27 2 22 86 436 509 2.10E-06 60.1 46514 cellular  
 organisms;Eukaryota;Opisthokonta;Metazoa;Eumetazoa;Bilateria;Deuterostomi  
 a;Echinodermata;Eleutherozoa;Asterozoa;Asteroidea;Valvatacea;Valvatida;As  
 terinidae;Patiria;Patiria miniata  
 UdeM00000018432 1735272 2453.3 UdeM00000018432 XP\_041378534.1  
 68.1 1895 465 19 1 1866 1 1785 0.00E+00 2453.3  
 1735272 cellular  
 organisms;Eukaryota;Opisthokonta;Metazoa;Eumetazoa;Bilateria;Protostomia;  
 Spiralia;Lophotrochozoa;Mollusca;Gastropoda;Neomphalina;Neomphaloidea;Pel  
 tospiridae;Gigantopelta;Gigantopelta aegis  
 UdeM00000018433 6565 191.8 UdeM00000018433 XP\_022327962.1 56.5 168  
 72 1 20 186 202 369 7.70E-46 191.8 6565 cellular  
 organisms;Eukaryota;Opisthokonta;Metazoa;Eumetazoa;Bilateria;Protostomia;  
 Spiralia;Lophotrochozoa;Mollusca;Bivalvia;Autobranchia;Pteriomorpha;Ostr  
 eida;Ostreoidea;Ostreidae;Crassostrea;Crassostrea virginica  
 UdeM00000018434 6596 58.5 UdeM00000018434 XP\_045189070.1 42.7 89  
 44 4 1 85 1 86 5.90E-06 58.5 6596 cellular  
 organisms;Eukaryota;Opisthokonta;Metazoa;Eumetazoa;Bilateria;Protostomia;  
 Spiralia;Lophotrochozoa;Mollusca;Bivalvia;Autobranchia;Heteroconchia;Euhe  
 terodonta;Imparidentia;Venerida;Veneroidea;Veneridae;Mercenaria;Mercenari  
 a mercenaria  
 UdeM00000018435 37621 89.7 UdeM00000018435 XP\_014673388.1 32.4 225  
 137 7 155 367 73 294 8.50E-15 89.7 37621 cellular  
 organisms;Eukaryota;Opisthokonta;Metazoa;Eumetazoa;Bilateria;Protostomia;

Ecdysozoa; Scalidophora; Priapulida; Priapulimorpha; Priapulimorphida; Priapulidae; Priapululus; Priapululus caudatus

UdeM00000018436 6596 495.7 UdeM00000018436 XP\_045161161.1 54.2 421  
180 3 1 410 1 419 5.50E-137 495.7 6596 cellular  
organisms; Eukaryota; Opisthokonta; Metazoa; Eumetazoa; Bilateria; Protostomia; Spiralia; Lophotrochozoa; Mollusca; Bivalvia; Autobranchia; Heteroconchia; Euheterodonta; Imparidentia; Venerida; Veneroidea; Veneridae; Mercenaria; Mercenaria mercenaria

UdeM00000018437 6596 540.8 UdeM00000018437 XP\_045161163.1 79.5 332  
68 0 3 334 4 335 1.20E-150 540.8 6596 cellular  
organisms; Eukaryota; Opisthokonta; Metazoa; Eumetazoa; Bilateria; Protostomia; Spiralia; Lophotrochozoa; Mollusca; Bivalvia; Autobranchia; Heteroconchia; Euheterodonta; Imparidentia; Venerida; Veneroidea; Veneridae; Mercenaria; Mercenaria mercenaria

UdeM00000018438 6573 528.1 UdeM00000018438 XP\_021372848.1 51 612  
240 11 1 564 1 600 1.50E-146 528.1 6573 cellular  
organisms; Eukaryota; Opisthokonta; Metazoa; Eumetazoa; Bilateria; Protostomia; Spiralia; Lophotrochozoa; Mollusca; Bivalvia; Autobranchia; Pteriomorpha; Pectinida; Pectinoidea; Pectinidae; Mizuhopecten; Mizuhopecten yessoensis

UdeM00000018439 6573 244.6 UdeM00000018439 XP\_021372941.1 32.2 624  
319 21 331 910 455 1018 6.80E-61 244.6 6573 cellular  
organisms; Eukaryota; Opisthokonta; Metazoa; Eumetazoa; Bilateria; Protostomia; Spiralia; Lophotrochozoa; Mollusca; Bivalvia; Autobranchia; Pteriomorpha; Pectinida; Pectinoidea; Pectinidae; Mizuhopecten; Mizuhopecten yessoensis

UdeM00000018440 6573 244.6 UdeM00000018440 XP\_021372941.1 32.2 624  
319 21 362 941 455 1018 6.90E-61 244.6 6573 cellular  
organisms; Eukaryota; Opisthokonta; Metazoa; Eumetazoa; Bilateria; Protostomia; Spiralia; Lophotrochozoa; Mollusca; Bivalvia; Autobranchia; Pteriomorpha; Pectinida; Pectinoidea; Pectinidae; Mizuhopecten; Mizuhopecten yessoensis

UdeM00000018442 6579 667.5 UdeM00000018442 XP\_033764098.1 54.9 736  
257 10 1 713 1 684 1.80E-188 667.5 6579 cellular  
organisms; Eukaryota; Opisthokonta; Metazoa; Eumetazoa; Bilateria; Protostomia; Spiralia; Lophotrochozoa; Mollusca; Bivalvia; Autobranchia; Pteriomorpha; Pectinida; Pectinoidea; Pectinidae; Pecten; Pecten maximus

UdeM00000018443 375764 296.6 UdeM00000018443 XP\_029998171.1 62.3  
215 77 1 63 277 90 300 3.30E-77 296.6 375764  
cellular  
organisms; Eukaryota; Opisthokonta; Metazoa; Eumetazoa; Bilateria; Deuterostomia; Chordata; Craniata; Vertebrata; Gnathostomata; Teleostomi; Euteleostomi; Actinopterygii; Actinopteri; Neopterygii; Teleostei; Osteoglossocephalai; Clupeocephala; Euteleostei; Neoteleostei; Eurypterygia; Ctenosquamata; Acanthomorpha; Euacanthomorpha; Percomorphaceae; Gobiaria; Kurtiformes; Apogonoidi; Apogonidae; Apogoninae; Sphaeramia; Sphaeramia orbicularis

UdeM00000018444 1735272 401 UdeM00000018444 XP\_041378410.1 51.8  
336 162 0 8 343 10 345 1.50E-108 401 1735272  
cellular  
organisms; Eukaryota; Opisthokonta; Metazoa; Eumetazoa; Bilateria; Protostomia; Spiralia; Lophotrochozoa; Mollusca; Gastropoda; Neomphalina; Neomphaloidea; Peltopiridae; Gigantopelta; Gigantopelta aegis

UdeM00000018445 29159 82.8 UdeM00000018445 XP\_011444985.1 90.2 41  
4 0 38 78 1 41 2.10E-13 82.8 29159 cellular  
organisms; Eukaryota; Opisthokonta; Metazoa; Eumetazoa; Bilateria; Protostomia; Spiralia; Lophotrochozoa; Mollusca; Bivalvia; Autobranchia; Pteriomorpha; Ostreida; Ostreidae; Crassostrea; Crassostrea gigas

UdeM00000018446 6565 282.7 UdeM00000018446 XP\_022344811.1 69.3 199  
 55 1 6 204 42 234 3.70E-73 282.7 6565 cellular  
 organisms;Eukaryota;Opisthokonta;Metazoa;Eumetazoa;Bilateria;Protostomia;  
 Spiralia;Lophotrochozoa;Mollusca;Bivalvia;Autobranchia;Pteriomorphia;Ostr  
 eida;Ostreoidea;Ostreidae;Crassostrea;Crassostrea virginica  
 UdeM00000018448 6596 506.5 UdeM00000018448 XP\_045162872.1 73.5 317  
 83 1 7 322 6 322 2.50E-140 506.5 6596 cellular  
 organisms;Eukaryota;Opisthokonta;Metazoa;Eumetazoa;Bilateria;Protostomia;  
 Spiralia;Lophotrochozoa;Mollusca;Bivalvia;Autobranchia;Heteroconchia;Euhe  
 terodonta;Imparidentia;Venerida;Veneroidea;Veneridae;Mercenaria;Mercenari  
 a mercenaria  
 UdeM00000018449 7574 347.8 UdeM00000018449 XP\_023930428.1 36.5 512  
 304 11 54 547 74 582 2.50E-92 347.8 7574 cellular  
 organisms;Eukaryota;Opisthokonta;Metazoa;Eumetazoa;Bilateria;Protostomia;  
 Spiralia;Lophotrochozoa;Brachiopoda;Linguliformea;Lingulata;Lingulida;Lin  
 guloidea;Lingulidae;Lingula;Lingula anatina  
 UdeM00000018450 1735272 228 UdeM00000018450 XP\_041378357.1 41.3  
 283 161 3 184 462 85 366 2.40E-56 228 1735272  
 cellular  
 organisms;Eukaryota;Opisthokonta;Metazoa;Eumetazoa;Bilateria;Protostomia;  
 Spiralia;Lophotrochozoa;Mollusca;Gastropoda;Neomphalina;Neomphaloidea;Pel  
 tospiridae;Gigantopelta;Gigantopelta aegis  
 UdeM00000018451 400727 154.5 UdeM00000018451 XP\_025083280.1 52.5  
 183 77 5 1 175 11 191 3.20E-34 154.5 400727  
 cellular  
 organisms;Eukaryota;Opisthokonta;Metazoa;Eumetazoa;Bilateria;Protostomia;  
 Spiralia;Lophotrochozoa;Mollusca;Gastropoda;Caenogastropoda;Architaeniogl  
 ossa;Ampullarioidea;Ampullariidae;Pomacea;Pomacea canaliculata  
 UdeM00000018452 6565 147.5 UdeM00000018452 XP\_022335999.1 28.4 440  
 270 12 3 426 7 417 3.80E-32 147.5 6565 cellular  
 organisms;Eukaryota;Opisthokonta;Metazoa;Eumetazoa;Bilateria;Protostomia;  
 Spiralia;Lophotrochozoa;Mollusca;Bivalvia;Autobranchia;Pteriomorphia;Ostr  
 eida;Ostreoidea;Ostreidae;Crassostrea;Crassostrea virginica  
 UdeM00000018453 6565 146.7 UdeM00000018453 XP\_022335999.1 28.3 441  
 270 12 3 427 7 417 6.50E-32 146.7 6565 cellular  
 organisms;Eukaryota;Opisthokonta;Metazoa;Eumetazoa;Bilateria;Protostomia;  
 Spiralia;Lophotrochozoa;Mollusca;Bivalvia;Autobranchia;Pteriomorphia;Ostr  
 eida;Ostreoidea;Ostreidae;Crassostrea;Crassostrea virginica  
 UdeM00000018454 37653 165.2 UdeM00000018454 XP\_014772623.1 64.5 124  
 43 1 1 124 1 123 1.80E-37 165.2 37653 cellular  
 organisms;Eukaryota;Opisthokonta;Metazoa;Eumetazoa;Bilateria;Protostomia;  
 Spiralia;Lophotrochozoa;Mollusca;Cephalopoda;Coleoidea;Octopodiformes;Oct  
 opoda;Incirrata;Octopodidae;Octopus;Octopus bimaculoides  
 UdeM00000018455 6579 96.3 UdeM00000018455 XP\_033763945.1 36 211  
 117 3 4 197 3 212 7.50E-17 96.3 6579 cellular  
 organisms;Eukaryota;Opisthokonta;Metazoa;Eumetazoa;Bilateria;Protostomia;  
 Spiralia;Lophotrochozoa;Mollusca;Bivalvia;Autobranchia;Pteriomorphia;Pect  
 inida;Pectinoidea;Pectinidae;Pecten;Pecten maximus  
 UdeM00000018456 6596 301.2 UdeM00000018456 XP\_045156225.1 42 386  
 202 8 27 408 12 379 2.30E-78 301.2 6596 cellular  
 organisms;Eukaryota;Opisthokonta;Metazoa;Eumetazoa;Bilateria;Protostomia;  
 Spiralia;Lophotrochozoa;Mollusca;Bivalvia;Autobranchia;Heteroconchia;Euhe  
 terodonta;Imparidentia;Venerida;Veneroidea;Veneridae;Mercenaria;Mercenari  
 a mercenaria

UdeM00000018457 6565 360.1 UdeM00000018457 XP\_022316307.1 38.4 570  
 320 10 1 550 5 563 6.60E-96 360.1 6565 cellular  
 organisms;Eukaryota;Opisthokonta;Metazoa;Eumetazoa;Bilateria;Protostomia;  
 Spiralia;Lophotrochozoa;Mollusca;Bivalvia;Autobranchia;Pteriomorpha;Ostr  
 eida;Ostreoidea;Ostreidae;Crassostrea;Crassostrea virginica  
 UdeM00000018461 6596 99 UdeM00000018461 XP\_045209449.1 29.9 318  
 201 12 200 501 240 551 1.80E-17 99 6596 cellular  
 organisms;Eukaryota;Opisthokonta;Metazoa;Eumetazoa;Bilateria;Protostomia;  
 Spiralia;Lophotrochozoa;Mollusca;Bivalvia;Autobranchia;Heteroconchia;Euhe  
 terodonta;Imparidentia;Venerida;Veneroidea;Veneridae;Mercenaria;Mercenari  
 a mercenaria  
 UdeM00000018462 7574 85.1 UdeM00000018462 XP\_013380319.1 52.8 72  
 34 0 9 80 17 88 1.40E-13 85.1 7574 cellular  
 organisms;Eukaryota;Opisthokonta;Metazoa;Eumetazoa;Bilateria;Protostomia;  
 Spiralia;Lophotrochozoa;Brachiopoda;Linguliformea;Lingulata;Lingulida;Lin  
 guloidea;Lingulidae;Lingula;Lingula anatina  
 UdeM00000018463 6596 304.7 UdeM00000018463 XP\_045156225.1 42.9 382  
 189 11 29 404 21 379 2.10E-79 304.7 6596 cellular  
 organisms;Eukaryota;Opisthokonta;Metazoa;Eumetazoa;Bilateria;Protostomia;  
 Spiralia;Lophotrochozoa;Mollusca;Bivalvia;Autobranchia;Heteroconchia;Euhe  
 terodonta;Imparidentia;Venerida;Veneroidea;Veneridae;Mercenaria;Mercenari  
 a mercenaria  
 UdeM00000018464 6579 139 UdeM00000018464 XP\_033741736.1 61.5 104  
 40 0 139 242 562 665 7.70E-30 139 6579 cellular  
 organisms;Eukaryota;Opisthokonta;Metazoa;Eumetazoa;Bilateria;Protostomia;  
 Spiralia;Lophotrochozoa;Mollusca;Bivalvia;Autobranchia;Pteriomorpha;Pect  
 inida;Pectinoidea;Pectinidae;Pecten;Pecten maximus  
 UdeM00000018465 1735272 308.9 UdeM00000018465 XP\_041377509.1 63.8  
 229 82 1 1 229 1 228 5.40E-81 308.9 1735272  
 cellular  
 organisms;Eukaryota;Opisthokonta;Metazoa;Eumetazoa;Bilateria;Protostomia;  
 Spiralia;Lophotrochozoa;Mollusca;Gastropoda;Neomphalina;Neomphaloidea;Pel  
 tospiridae;Gigantopelta;Gigantopelta aegis  
 UdeM00000018466 6579 180.6 UdeM00000018466 XP\_033764386.1 61.8 123  
 46 1 2 124 11 132 1.50E-42 180.6 6579 cellular  
 organisms;Eukaryota;Opisthokonta;Metazoa;Eumetazoa;Bilateria;Protostomia;  
 Spiralia;Lophotrochozoa;Mollusca;Bivalvia;Autobranchia;Pteriomorpha;Pect  
 inida;Pectinoidea;Pectinidae;Pecten;Pecten maximus  
 UdeM00000018467 6596 224.2 UdeM00000018467 XP\_045163299.1 37.6 362  
 130 4 57 336 641 988 3.20E-55 224.2 6596 cellular  
 organisms;Eukaryota;Opisthokonta;Metazoa;Eumetazoa;Bilateria;Protostomia;  
 Spiralia;Lophotrochozoa;Mollusca;Bivalvia;Autobranchia;Heteroconchia;Euhe  
 terodonta;Imparidentia;Venerida;Veneroidea;Veneridae;Mercenaria;Mercenari  
 a mercenaria  
 UdeM00000018468 6596 656.4 UdeM00000018468 XP\_045183751.1 56.8 519  
 222 2 1 518 23 540 3.10E-185 656.4 6596 cellular  
 organisms;Eukaryota;Opisthokonta;Metazoa;Eumetazoa;Bilateria;Protostomia;  
 Spiralia;Lophotrochozoa;Mollusca;Bivalvia;Autobranchia;Heteroconchia;Euhe  
 terodonta;Imparidentia;Venerida;Veneroidea;Veneridae;Mercenaria;Mercenari  
 a mercenaria  
 UdeM00000018469 6596 1082.4 UdeM00000018469 XP\_045163299.1 52.2  
 1004 467 10 3 1003 4 997 0.00E+00 1082.4 6596  
 cellular  
 organisms;Eukaryota;Opisthokonta;Metazoa;Eumetazoa;Bilateria;Protostomia;

Spiralia;Lophotrochozoa;Mollusca;Bivalvia;Autobranchia;Heteroconchia;Euherodonta;Imparidentia;Venerida;Veneroidea;Veneridae;Mercenaria;Mercenaria mercenaria

UdeM00000018470 6596 406 UdeM00000018470 XP\_045163299.1 55.7 318  
138 1 1 318 4 318 2.30E-109 406 6596 cellular

organisms;Eukaryota;Opisthokonta;Metazoa;Eumetazoa;Bilateria;Protostomia;Spiralia;Lophotrochozoa;Mollusca;Bivalvia;Autobranchia;Heteroconchia;Euherodonta;Imparidentia;Venerida;Veneroidea;Veneridae;Mercenaria;Mercenaria mercenaria

UdeM00000018470 6596 334.3 UdeM00000018470 XP\_045163299.1 52.2 312  
145 2 1354 1665 315 622 8.60E-88 334.3 6596 cellular

organisms;Eukaryota;Opisthokonta;Metazoa;Eumetazoa;Bilateria;Protostomia;Spiralia;Lophotrochozoa;Mollusca;Bivalvia;Autobranchia;Heteroconchia;Euherodonta;Imparidentia;Venerida;Veneroidea;Veneridae;Mercenaria;Mercenaria mercenaria

UdeM00000018471 7739 592.4 UdeM00000018471 XP\_035696678.1 57.8 481  
200 1 2 479 423 903 5.40E-166 592.4 7739 cellular

organisms;Eukaryota;Opisthokonta;Metazoa;Eumetazoa;Bilateria;Deuterostomia;Chordata;Cephalochordata;Leptocardii;Amphioxiformes;Branchiostomidae;Branchiostoma;Branchiostoma floridae

UdeM00000018472 6596 433.3 UdeM00000018472 XP\_045163299.1 59.8 361  
142 3 1 360 639 997 3.00E-118 433.3 6596 cellular

organisms;Eukaryota;Opisthokonta;Metazoa;Eumetazoa;Bilateria;Protostomia;Spiralia;Lophotrochozoa;Mollusca;Bivalvia;Autobranchia;Heteroconchia;Euherodonta;Imparidentia;Venerida;Veneroidea;Veneridae;Mercenaria;Mercenaria mercenaria

UdeM00000018473 6579 155.6 UdeM00000018473 XP\_033731446.1 53 151  
65 2 1 151 1 145 5.10E-35 155.6 6579 cellular

organisms;Eukaryota;Opisthokonta;Metazoa;Eumetazoa;Bilateria;Protostomia;Spiralia;Lophotrochozoa;Mollusca;Bivalvia;Autobranchia;Pteriomorphia;Pectinida;Pectinoidea;Pectinidae;Pecten;Pecten maximus

UdeM00000018474 6565 827 UdeM00000018474 XP\_022343934.1 83.8 468  
76 0 1 468 16 483 1.20E-236 827 6565 cellular

organisms;Eukaryota;Opisthokonta;Metazoa;Eumetazoa;Bilateria;Protostomia;Spiralia;Lophotrochozoa;Mollusca;Bivalvia;Autobranchia;Pteriomorphia;Ostreida;Ostreoidea;Ostreidae;Crassostrea;Crassostrea virginica

UdeM00000018475 6596 282 UdeM00000018475 XP\_045162026.1 44.2 391  
158 9 8 357 219 590 1.80E-72 282 6596 cellular

organisms;Eukaryota;Opisthokonta;Metazoa;Eumetazoa;Bilateria;Protostomia;Spiralia;Lophotrochozoa;Mollusca;Bivalvia;Autobranchia;Heteroconchia;Euherodonta;Imparidentia;Venerida;Veneroidea;Veneridae;Mercenaria;Mercenaria mercenaria

UdeM00000018476 6500 657.5 UdeM00000018476 XP\_012946059.1 72.9 424  
107 2 48 471 622 1037 1.30E-185 657.5 6500 cellular

organisms;Eukaryota;Opisthokonta;Metazoa;Eumetazoa;Bilateria;Protostomia;Spiralia;Lophotrochozoa;Mollusca;Gastropoda;Heterobranchia;Euthyneura;Teptipleura;Aplysiida;Aplysiioidea;Aplysiidae;Aplysia;Aplysia californica

UdeM00000018477 6596 64.7 UdeM00000018477 XP\_045162867.1 36.4 99  
40 3 89 165 223 320 1.30E-07 64.7 6596 cellular

organisms;Eukaryota;Opisthokonta;Metazoa;Eumetazoa;Bilateria;Protostomia;Spiralia;Lophotrochozoa;Mollusca;Bivalvia;Autobranchia;Heteroconchia;Euherodonta;Imparidentia;Venerida;Veneroidea;Veneridae;Mercenaria;Mercenaria mercenaria

UdeM00000018478 6573 728 UdeM00000018478 XP\_021354853.1 48.1 755  
 372 6 212 959 147 888 1.50E-206 728 6573 cellular  
 organisms;Eukaryota;Opisthokonta;Metazoa;Eumetazoa;Bilateria;Protostomia;  
 Spiralia;Lophotrochozoa;Mollusca;Bivalvia;Autobranchia;Pteriormorphia;Pect  
 inida;Pectinoidea;Pectinidae;Mizuhopecten;Mizuhopecten yessoensis  
 UdeM00000018479 6573 728 UdeM00000018479 XP\_021354853.1 48.1 755  
 372 6 212 959 147 888 1.50E-206 728 6573 cellular  
 organisms;Eukaryota;Opisthokonta;Metazoa;Eumetazoa;Bilateria;Protostomia;  
 Spiralia;Lophotrochozoa;Mollusca;Bivalvia;Autobranchia;Pteriormorphia;Pect  
 inida;Pectinoidea;Pectinidae;Mizuhopecten;Mizuhopecten yessoensis  
 UdeM00000018480 6596 84.7 UdeM00000018480 XP\_045192251.1 52.2 92  
 41 2 141 229 328 419 1.60E-13 84.7 6596 cellular  
 organisms;Eukaryota;Opisthokonta;Metazoa;Eumetazoa;Bilateria;Protostomia;  
 Spiralia;Lophotrochozoa;Mollusca;Bivalvia;Autobranchia;Heteroconchia;Euhe  
 terodonta;Imparidentia;Venerida;Veneroidea;Veneridae;Mercenaria;Mercenari  
 a mercenaria  
 UdeM00000018481 1735272 423.7 UdeM00000018481 XP\_041363356.1 34.6  
 784 480 18 9 777 1140 1905 5.00E-115 423.7 1735272  
 cellular  
 organisms;Eukaryota;Opisthokonta;Metazoa;Eumetazoa;Bilateria;Protostomia;  
 Spiralia;Lophotrochozoa;Mollusca;Gastropoda;Neomphalina;Neomphaloidea;Pel  
 tospiridae;Gigantopelta;Gigantopelta aegis  
 UdeM00000018482 1735272 925.6 UdeM00000018482 XP\_041363356.1 38.4  
 1445 828 31 9 1424 1140 2551 7.60E-266 925.6 1735272  
 cellular  
 organisms;Eukaryota;Opisthokonta;Metazoa;Eumetazoa;Bilateria;Protostomia;  
 Spiralia;Lophotrochozoa;Mollusca;Gastropoda;Neomphalina;Neomphaloidea;Pel  
 tospiridae;Gigantopelta;Gigantopelta aegis  
 UdeM00000018483 1735272 923.7 UdeM00000018483 XP\_041363356.1 38.3  
 1439 832 30 9 1418 1140 2551 2.90E-265 923.7 1735272  
 cellular  
 organisms;Eukaryota;Opisthokonta;Metazoa;Eumetazoa;Bilateria;Protostomia;  
 Spiralia;Lophotrochozoa;Mollusca;Gastropoda;Neomphalina;Neomphaloidea;Pel  
 tospiridae;Gigantopelta;Gigantopelta aegis  
 UdeM00000043707 77166 68.6 UdeM00000043707 XP\_019769193.1 46.6 73  
 31 1 2 74 190 254 4.90E-09 68.6 77166 cellular  
 organisms;Eukaryota;Opisthokonta;Metazoa;Eumetazoa;Bilateria;Protostomia;  
 Ecdysozoa;Panarthropoda;Arthropoda;Mandibulata;Pancrustacea;Hexapoda;Inse  
 cta;Dicondylia;Pterygota;Neoptera;Endopterygota;Coleoptera;Polyphaga;Cucu  
 jiformia;Curculionoidea;Curculionidae;Scolytinae;Dendroctonus;Dendroctonu  
 s ponderosae  
 UdeM00000043708 37621 142.9 UdeM00000043708 XP\_014679100.1 37.9 232  
 130 8 768 994 78 300 2.20E-30 142.9 37621 cellular  
 organisms;Eukaryota;Opisthokonta;Metazoa;Eumetazoa;Bilateria;Protostomia;  
 Ecdysozoa;Scalidophora;Priapulida;Priapulimorpha;Priapulimorphida;Priapul  
 idae;Priapululus;Priapululus caudatus  
 UdeM00000039565 6596 266.2 UdeM00000039565 XP\_045187150.1 56.5 230  
 99 1 1 230 229 457 4.00E-68 266.2 6596 cellular  
 organisms;Eukaryota;Opisthokonta;Metazoa;Eumetazoa;Bilateria;Protostomia;  
 Spiralia;Lophotrochozoa;Mollusca;Bivalvia;Autobranchia;Heteroconchia;Euhe  
 terodonta;Imparidentia;Venerida;Veneroidea;Veneridae;Mercenaria;Mercenari  
 a mercenaria  
 UdeM00000039566 6596 190.3 UdeM00000039566 XP\_045169782.1 41.8 225  
 110 2 1 204 56 280 2.60E-45 190.3 6596 cellular



organisms;Eukaryota;Opisthokonta;Metazoa;Eumetazoa;Bilateria;Protostomia;Spiralia;Lophotrochozoa;Mollusca;Bivalvia;Autobranchia;Heteroconchia;Euheterodonta;Imparidentia;Venerida;Veneroidea;Veneridae;Mercenaria;Mercenaria mercenaria

UdeM00000039567 50390 474.2 UdeM00000039567 XP\_028147518.1 59.4 345  
139 1 2 346 43 386 1.60E-130 474.2 50390 cellular

organisms;Eukaryota;Opisthokonta;Metazoa;Eumetazoa;Bilateria;Protostomia;Ecdysozoa;Panarthropoda;Arthropoda;Mandibulata;Pancrustacea;Hexapoda;Insecta;Dicondylia;Pterygota;Neoptera;Endopterygota;Coleoptera;Polyphaga;Cucujiformia;Chrysomeloidea;Chrysomelidae;Galerucinae;Luperini;Diabroticina;Diabroticites;Diabrotica;Diabrotica virgifera;Diabrotica virgifera virgifera

UdeM00000039569 6596 191 UdeM00000039569 XP\_045177776.1 43.3 217  
122 1 182 397 700 916 2.90E-45 191 6596 cellular

organisms;Eukaryota;Opisthokonta;Metazoa;Eumetazoa;Bilateria;Protostomia;Spiralia;Lophotrochozoa;Mollusca;Bivalvia;Autobranchia;Heteroconchia;Euheterodonta;Imparidentia;Venerida;Veneroidea;Veneridae;Mercenaria;Mercenaria mercenaria

UdeM00000039570 6573 115.9 UdeM00000039570 XP\_021371412.1 51.5 97  
46 1 2 98 1012 1107 3.50E-23 115.9 6573 cellular

organisms;Eukaryota;Opisthokonta;Metazoa;Eumetazoa;Bilateria;Protostomia;Spiralia;Lophotrochozoa;Mollusca;Bivalvia;Autobranchia;Pteriormorphia;Pectinida;Pectinoidea;Pectinidae;Mizuhopecten;Mizuhopecten yessoensis

UdeM00000039571 6565 126.3 UdeM00000039571 XP\_022297447.1 39.3 183  
55 2 40 166 38 220 5.50E-26 126.3 6565 cellular

organisms;Eukaryota;Opisthokonta;Metazoa;Eumetazoa;Bilateria;Protostomia;Spiralia;Lophotrochozoa;Mollusca;Bivalvia;Autobranchia;Pteriormorphia;Ostreida;Ostreoidea;Ostreidae;Crassostrea;Crassostrea virginica

UdeM00000039572 283035 254.6 UdeM00000039572 XP\_031171570.1 62.6  
179 67 0 2 180 369 547 1.00E-64 254.6 283035  
cellular

organisms;Eukaryota;Opisthokonta;Metazoa;Eumetazoa;Bilateria;Deuterostomia;Chordata;Craniata;Vertebrata;Gnathostomata;Teleostomi;Euteleostomi;Actinopterygii;Actinopteri;Neopterygii;Teleostei;Osteoglossocephalai;Clupeocephala;Euteleostei;Neoteleostei;Eurypterygia;Ctenosquamata;Acanthomorphata;Euacanthomorphacea;Percomorphaceae;Eupercaria;Perciformes;Percoidi;Percidae;Luciopercinae;Sander;Sander lucioperca

UdeM00000039573 50390 394.8 UdeM00000039573 XP\_028142044.1 58.3 276  
115 0 1 276 148 423 8.90E-107 394.8 50390 cellular

organisms;Eukaryota;Opisthokonta;Metazoa;Eumetazoa;Bilateria;Protostomia;Ecdysozoa;Panarthropoda;Arthropoda;Mandibulata;Pancrustacea;Hexapoda;Insecta;Dicondylia;Pterygota;Neoptera;Endopterygota;Coleoptera;Polyphaga;Cucujiformia;Chrysomeloidea;Chrysomelidae;Galerucinae;Luperini;Diabroticina;Diabroticites;Diabrotica;Diabrotica virgifera;Diabrotica virgifera virgifera

UdeM00000039574 1735272 179.1 UdeM00000039574 XP\_041347065.1 45.1  
206 82 2 1 175 1 206 5.00E-42 179.1 1735272  
cellular

organisms;Eukaryota;Opisthokonta;Metazoa;Eumetazoa;Bilateria;Protostomia;Spiralia;Lophotrochozoa;Mollusca;Gastropoda;Neomphalina;Neomphaloidea;Peltospiridae;Gigantopelta;Gigantopelta aegis

UdeM00000039575 7739 101.3 UdeM00000039575 XP\_035690387.1 35.6 146  
93 1 3 147 443 588 1.10E-18 101.3 7739 cellular

organisms;Eukaryota;Opisthokonta;Metazoa;Eumetazoa;Bilateria;Deuterostomi

a;Chordata;Cephalochordata;Leptocardii;Amphioxiformes;Branchiostomidae;Branchiostoma;Branchiostoma floridae

UdeM00000039576 1735272 148.3 UdeM00000039576 XP\_041373834.1 70.5  
95 28 0 2 96 325 419 7.10E-33 148.3 1735272  
cellular

organisms;Eukaryota;Opisthokonta;Metazoa;Eumetazoa;Bilateria;Protostomia;Spiralia;Lophotrochozoa;Mollusca;Gastropoda;Neomphalina;Neomphaloidea;Peltospiridae;Gigantopelta;Gigantopelta aegis

UdeM00000039579 6565 343.6 UdeM00000039579 XP\_022309566.1 62.2 233  
88 0 1 233 729 961 2.00E-91 343.6 6565 cellular

organisms;Eukaryota;Opisthokonta;Metazoa;Eumetazoa;Bilateria;Protostomia;Spiralia;Lophotrochozoa;Mollusca;Bivalvia;Autobranchia;Pteriormorphia;Ostreida;Ostreoidea;Ostreidae;Crassostrea;Crassostrea virginica

UdeM00000039580 433405 129 UdeM00000039580 XP\_031697755.1 66.7  
81 27 0 2 82 130 210 2.70E-27 129 433405

cellular

organisms;Eukaryota;Opisthokonta;Metazoa;Eumetazoa;Bilateria;Deuterostomia;Chordata;Craniata;Vertebrata;Gnathostomata;Teleostomi;Euteleostomi;Actinopterygii;Actinopteri;Neopterygii;Teleostei;Osteoglossocephalai;Clupeocephala;Euteleosteomorpha;Neoteleostei;Eurypterygia;Ctenosquamata;Acanthomorphata;Euacanthomorphacea;Percomorphaceae;Eupercaria;Perciformes;Cottioidi;Zoarcales;Anarhichadidae;Anarrhichthys;Anarrhichthys ocellatus

UdeM00000039581 50390 206.8 UdeM00000039581 XP\_028153657.1 69.5 128  
39 0 2 129 34 161 1.60E-50 206.8 50390 cellular

organisms;Eukaryota;Opisthokonta;Metazoa;Eumetazoa;Bilateria;Protostomia;Ecdysozoa;Panarthropoda;Arthropoda;Mandibulata;Pancrustacea;Hexapoda;Insecta;Dicondylia;Pterygota;Neoptera;Endopterygota;Coleoptera;Polyphaga;Cucujiformia;Chrysomeloidea;Chrysomelidae;Galerucinae;Luperini;Diabroticina;Diabroticites;Diabrotica;Diabrotica virgifera;Diabrotica virgifera

virgifera  
UdeM00000039582 40690 86.3 UdeM00000039582 XP\_033989749.1 70.4 54  
16 0 1 54 839 892 1.70E-14 86.3 40690 cellular

organisms;Eukaryota;Opisthokonta;Metazoa;Eumetazoa;Bilateria;Deuterostomia;Chordata;Craniata;Vertebrata;Gnathostomata;Teleostomi;Euteleostomi;Actinopterygii;Actinopteri;Neopterygii;Teleostei;Osteoglossocephalai;Clupeocephala;Euteleosteomorpha;Neoteleostei;Eurypterygia;Ctenosquamata;Acanthomorphata;Euacanthomorphacea;Percomorphaceae;Eupercaria;Perciformes;Notothenioidi;Nototheniidae;Trematomus;Trematomus bernacchii

UdeM00000039583 441366 198 UdeM00000039583 XP\_028318794.1 59.5  
148 60 0 1 148 538 685 8.70E-48 198 441366

cellular

organisms;Eukaryota;Opisthokonta;Metazoa;Eumetazoa;Bilateria;Deuterostomia;Chordata;Craniata;Vertebrata;Gnathostomata;Teleostomi;Euteleostomi;Actinopterygii;Actinopteri;Neopterygii;Teleostei;Osteoglossocephalai;Clupeocephala;Euteleosteomorpha;Neoteleostei;Eurypterygia;Ctenosquamata;Acanthomorphata;Euacanthomorphacea;Percomorphaceae;Ovalentaria;Blenniimorphae;Blenniiformes;Gobiesocoidi;Gobiesocidae;Gobiesocinae;Gouania;Gouania willdenowi

UdeM00000039584 8218 387.9 UdeM00000039584 XP\_034089596.1 57.4 291  
124 0 1 291 451 741 1.20E-104 387.9 8218 cellular

organisms;Eukaryota;Opisthokonta;Metazoa;Eumetazoa;Bilateria;Deuterostomia;Chordata;Craniata;Vertebrata;Gnathostomata;Teleostomi;Euteleostomi;Actinopterygii;Actinopteri;Neopterygii;Teleostei;Osteoglossocephalai;Clupeocephala;Euteleosteomorpha;Neoteleostei;Eurypterygia;Ctenosquamata;Acanthomorphata;Euacanthomorphacea;Percomorphaceae;Ovalentaria;Blenniimorphae;Blenniiformes;Gobiesocoidi;Gobiesocidae;Gobiesocinae;Gouania;Gouania willdenowi

rphata;Euacanthomorpha;Percomorphaceae;Eupercaria;Perciformes;Notothenioidae;Bathydraconidae;Gymnodraco;Gymnodraco acuticeps

UdeM00000039585 6573 258.5 UdeM00000039585 XP\_021371412.1 36 406  
220 8 189 557 1118 1520 2.30E-65 258.5 6573 cellular

organisms;Eukaryota;Opisthokonta;Metazoa;Eumetazoa;Bilateria;Protostomia;Spiralia;Lophotrochozoa;Mollusca;Bivalvia;Autobranchia;Pteriormorphia;Pectinida;Pectinoidea;Pectinidae;Mizuhopecten;Mizuhopecten yessoensis

UdeM00000039586 6573 117.9 UdeM00000039586 XP\_021371412.1 52.6 97  
45 1 2 98 1012 1107 9.10E-24 117.9 6573 cellular

organisms;Eukaryota;Opisthokonta;Metazoa;Eumetazoa;Bilateria;Protostomia;Spiralia;Lophotrochozoa;Mollusca;Bivalvia;Autobranchia;Pteriormorphia;Pectinida;Pectinoidea;Pectinidae;Mizuhopecten;Mizuhopecten yessoensis

UdeM00000039587 441366 439.1 UdeM00000039587 XP\_028309531.1 64.8  
307 108 0 155 461 230 536 6.90E-120 439.1 441366  
cellular

organisms;Eukaryota;Opisthokonta;Metazoa;Eumetazoa;Bilateria;Deuterostomia;Chordata;Craniata;Vertebrata;Gnathostomata;Teleostomi;Euteleostomi;Actinopterygii;Actinopteri;Neopterygii;Teleostei;Osteoglossocephalai;Clupeocephala;Euteleosteomorpha;Neoteleostei;Eurypterygia;Ctenosquamata;Acanthomorpha;Euacanthomorpha;Percomorphaceae;Ovalentaria;Blenniimorphae;Blenniiformes;Gobiesocoidei;Gobiesocidae;Gobiesocinae;Gouania;Gouania willdenowi

UdeM00000039588 441366 206.5 UdeM00000039588 XP\_028309546.1 62.8  
148 55 0 1 148 271 418 2.40E-50 206.5 441366  
cellular

organisms;Eukaryota;Opisthokonta;Metazoa;Eumetazoa;Bilateria;Deuterostomia;Chordata;Craniata;Vertebrata;Gnathostomata;Teleostomi;Euteleostomi;Actinopterygii;Actinopteri;Neopterygii;Teleostei;Osteoglossocephalai;Clupeocephala;Euteleosteomorpha;Neoteleostei;Eurypterygia;Ctenosquamata;Acanthomorpha;Euacanthomorpha;Percomorphaceae;Ovalentaria;Blenniimorphae;Blenniiformes;Gobiesocoidei;Gobiesocidae;Gobiesocinae;Gouania;Gouania willdenowi

UdeM00000039589 1735272 179.1 UdeM00000039589 XP\_041347065.1 45.1  
206 82 2 1 175 1 206 5.00E-42 179.1 1735272  
cellular

organisms;Eukaryota;Opisthokonta;Metazoa;Eumetazoa;Bilateria;Protostomia;Spiralia;Lophotrochozoa;Mollusca;Gastropoda;Neomphalina;Neomphaloidea;Peltospiridae;Gigantopelta;Gigantopelta aegis

UdeM00000039590 7739 100.5 UdeM00000039590 XP\_035690387.1 35.6 146  
93 1 3 147 443 588 1.90E-18 100.5 7739 cellular

organisms;Eukaryota;Opisthokonta;Metazoa;Eumetazoa;Bilateria;Deuterostomia;Chordata;Cephalochordata;Leptocardii;Amphioxiformes;Branchiostomidae;Branchiostoma;Branchiostoma floridae

UdeM00000039592 7668 77.8 UdeM00000039592 XP\_030841875.1 51.6 64  
30 1 3 66 71 133 8.70E-12 77.8 7668 cellular

organisms;Eukaryota;Opisthokonta;Metazoa;Eumetazoa;Bilateria;Deuterostomia;Echinodermata;Eleutherozoa;Echinozoa;Echinoidea;Euechinoidea;Echinacea;Camarodonta;Echinidea;Strongylocentrotidae;Strongylocentrotus;Strongylocentrotus purpuratus

UdeM00000039593 150288 268.1 UdeM00000039593 XP\_020788097.1 61.5  
179 69 0 1 179 393 571 8.20E-69 268.1 150288  
cellular

organisms;Eukaryota;Opisthokonta;Metazoa;Eumetazoa;Bilateria;Deuterostomia;Chordata;Craniata;Vertebrata;Gnathostomata;Teleostomi;Euteleostomi;Acti

nopterygii;Actinopteri;Neopterygii;Teleostei;Osteoglossocephalai;Clupeocephala;Euteleostei;Neoteleostei;Eurypterygia;Ctenosquamata;Acanthomorpha;Euacanthomorpha;Percomorphaceae;Gobiaria;Gobiiformes;Gobioidei;Gobiidae;Oxudercinae;Boleophthalmus;Boleophthalmus pectinirostris  
 UdeM00000039594 50390 532.7 UdeM00000039594 XP\_028148951.1 56.8 410  
 177 0 2 411 400 809 4.10E-148 532.7 50390 cellular  
 organisms;Eukaryota;Opisthokonta;Metazoa;Eumetazoa;Bilateria;Protostomia;  
 Ecdysozoa;Panarthropoda;Arthropoda;Mandibulata;Pancrustacea;Hexapoda;Insecta;Dicondylia;Pterygota;Neoptera;Endopterygota;Coleoptera;Polyphaga;Cucujiformia;Chrysomeloidea;Chrysomelidae;Galerucinae;Luperini;Diabroticina;Diabroticites;Diabrotica;Diabrotica virgifera;Diabrotica virgifera  
 virgifera  
 UdeM00000039595 29159 209.1 UdeM00000039595 XP\_034313077.1 77.3 119  
 27 0 1 119 1 119 4.50E-51 209.1 29159 cellular  
 organisms;Eukaryota;Opisthokonta;Metazoa;Eumetazoa;Bilateria;Protostomia;  
 Spiralia;Lophotrochozoa;Mollusca;Bivalvia;Autobranchia;Pteriormorphia;Ostreida;Ostreoidea;Ostreidae;Crassostrea;Crassostrea gigas  
 UdeM00000039596 29159 60.1 UdeM00000039596 XP\_034319277.1 44.2 77  
 38 1 1 72 42 118 1.70E-06 60.1 29159 cellular  
 organisms;Eukaryota;Opisthokonta;Metazoa;Eumetazoa;Bilateria;Protostomia;  
 Spiralia;Lophotrochozoa;Mollusca;Bivalvia;Autobranchia;Pteriormorphia;Ostreida;Ostreoidea;Ostreidae;Crassostrea;Crassostrea gigas  
 UdeM00000039597 6565 123.2 UdeM00000039597 XP\_022306621.1 76.1 71  
 17 0 1 71 1 71 1.30E-25 123.2 6565 cellular  
 organisms;Eukaryota;Opisthokonta;Metazoa;Eumetazoa;Bilateria;Protostomia;  
 Spiralia;Lophotrochozoa;Mollusca;Bivalvia;Autobranchia;Pteriormorphia;Ostreida;Ostreoidea;Ostreidae;Crassostrea;Crassostrea virginica  
 UdeM00000039598 50390 562.8 UdeM00000039598 XP\_028142380.1 59 388  
 159 0 2 389 49 436 3.50E-157 562.8 50390 cellular  
 organisms;Eukaryota;Opisthokonta;Metazoa;Eumetazoa;Bilateria;Protostomia;  
 Ecdysozoa;Panarthropoda;Arthropoda;Mandibulata;Pancrustacea;Hexapoda;Insecta;Dicondylia;Pterygota;Neoptera;Endopterygota;Coleoptera;Polyphaga;Cucujiformia;Chrysomeloidea;Chrysomelidae;Galerucinae;Luperini;Diabroticina;Diabroticites;Diabrotica;Diabrotica virgifera;Diabrotica virgifera  
 virgifera  
 UdeM00000039599 1735272 410.2 UdeM00000039599 XP\_041372570.1 57.8  
 313 131 1 1 312 94 406 2.30E-111 410.2 1735272  
 cellular  
 organisms;Eukaryota;Opisthokonta;Metazoa;Eumetazoa;Bilateria;Protostomia;  
 Spiralia;Lophotrochozoa;Mollusca;Gastropoda;Neomphalina;Neomphaloidea;Peltopspiridae;Gigantopelta;Gigantopelta aegis  
 UdeM00000039600 50390 506.1 UdeM00000039600 XP\_028154228.1 59.6 354  
 143 0 2 355 116 469 3.50E-140 506.1 50390 cellular  
 organisms;Eukaryota;Opisthokonta;Metazoa;Eumetazoa;Bilateria;Protostomia;  
 Ecdysozoa;Panarthropoda;Arthropoda;Mandibulata;Pancrustacea;Hexapoda;Insecta;Dicondylia;Pterygota;Neoptera;Endopterygota;Coleoptera;Polyphaga;Cucujiformia;Chrysomeloidea;Chrysomelidae;Galerucinae;Luperini;Diabroticina;Diabroticites;Diabrotica;Diabrotica virgifera;Diabrotica virgifera  
 virgifera  
 UdeM00000039602 1735272 152.1 UdeM00000039602 XP\_041366822.1 39.2  
 232 134 3 354 579 3 233 4.10E-33 152.1 1735272  
 cellular  
 organisms;Eukaryota;Opisthokonta;Metazoa;Eumetazoa;Bilateria;Protostomia;

Spiralia;Lophotrochozoa;Mollusca;Gastropoda;Neomphalina;Neomphaloidea;Pel  
tospiridae;Gigantopelta;Gigantopelta aegis

UdeM00000039603 441366 755 UdeM00000039603 XP\_028318215.1 60.1  
569 225 2 12 579 130 697 7.20E-215 755 441366  
cellular

organisms;Eukaryota;Opisthokonta;Metazoa;Eumetazoa;Bilateria;Deuterostomi  
a;Chordata;Craniata;Vertebrata;Gnathostomata;Teleostomi;Euteleostomi;Acti  
nopterygii;Actinopteri;Neopterygii;Teleostei;Osteoglossocephalai;Clupeoce  
phala;Euteleosteomorpha;Neoteleostei;Eurypterygia;Ctenosquamata;Acanthomo  
rphata;Euacanthomorphacea;Percomorphaceae;Ovalentaria;Blenniimorphae;Blen  
niiformes;Gobiesocoidei;Gobiesocidae;Gobiesocinae;Gouania;Gouania

willdenowi

UdeM00000039604 6087 271.9 UdeM00000039604 XP\_012565456.1 49.6 272  
123 6 474 742 756 1016 2.40E-69 271.9 6087 cellular

organisms;Eukaryota;Opisthokonta;Metazoa;Eumetazoa;Cnidaria;Hydrozoa;Hydr  
oidolina;Anthoathecata;Aplanulata;Hydridae;Hydra;Hydra vulgaris

UdeM00000039605 441366 115.5 UdeM00000039605 XP\_028309561.1 70.6  
68 20 0 1 68 204 271 2.60E-23 115.5 441366  
cellular

organisms;Eukaryota;Opisthokonta;Metazoa;Eumetazoa;Bilateria;Deuterostomi  
a;Chordata;Craniata;Vertebrata;Gnathostomata;Teleostomi;Euteleostomi;Acti  
nopterygii;Actinopteri;Neopterygii;Teleostei;Osteoglossocephalai;Clupeoce  
phala;Euteleosteomorpha;Neoteleostei;Eurypterygia;Ctenosquamata;Acanthomo  
rphata;Euacanthomorphacea;Percomorphaceae;Ovalentaria;Blenniimorphae;Blen  
niiformes;Gobiesocoidei;Gobiesocidae;Gobiesocinae;Gouania;Gouania

willdenowi

UdeM00000039699 6565 178.7 UdeM00000039699 XP\_022313739.1 68.1 141  
39 2 2 138 186 324 5.00E-42 178.7 6565 cellular

organisms;Eukaryota;Opisthokonta;Metazoa;Eumetazoa;Bilateria;Protostomia;  
Spiralia;Lophotrochozoa;Mollusca;Bivalvia;Autobranchia;Pteriormorphia;Ostr  
eida;Ostreoidea;Ostreidae;Crassostrea;Crassostrea virginica

UdeM00000039700 400727 129.8 UdeM00000039700 XP\_025111532.1 74.7  
91 21 2 24 114 27 115 2.20E-27 129.8 400727

cellular

organisms;Eukaryota;Opisthokonta;Metazoa;Eumetazoa;Bilateria;Protostomia;  
Spiralia;Lophotrochozoa;Mollusca;Gastropoda;Caenogastropoda;Architaeniogl  
ossa;Ampullarioidea;Ampullariidae;Pomacea;Pomacea canaliculata

UdeM00000039701 6596 372.1 UdeM00000039701 XP\_045158706.1 64 289  
97 4 1 282 157 445 6.30E-100 372.1 6596 cellular

organisms;Eukaryota;Opisthokonta;Metazoa;Eumetazoa;Bilateria;Protostomia;  
Spiralia;Lophotrochozoa;Mollusca;Bivalvia;Autobranchia;Heteroconchia;Euhe  
terodonta;Imparidentia;Venerida;Veneroidea;Veneridae;Mercenaria;Mercenari  
a mercenaria

UdeM00000039702 6596 562.4 UdeM00000039702 XP\_045158704.1 42 869  
263 19 1 861 1 636 1.00E-156 562.4 6596 cellular

organisms;Eukaryota;Opisthokonta;Metazoa;Eumetazoa;Bilateria;Protostomia;  
Spiralia;Lophotrochozoa;Mollusca;Bivalvia;Autobranchia;Heteroconchia;Euhe  
terodonta;Imparidentia;Venerida;Veneroidea;Veneridae;Mercenaria;Mercenari  
a mercenaria

UdeM00000039703 6596 396.4 UdeM00000039703 XP\_045190165.1 59.9 297  
119 0 1 297 37 333 3.30E-107 396.4 6596 cellular

organisms;Eukaryota;Opisthokonta;Metazoa;Eumetazoa;Bilateria;Protostomia;  
Spiralia;Lophotrochozoa;Mollusca;Bivalvia;Autobranchia;Heteroconchia;Euhe

terodonta;Imparidentia;Venerida;Veneroidea;Veneridae;Mercenaria;Mercenaria mercenaria

UdeM00000039704 2607531 129 UdeM00000039704 XP\_029649998.1 26.9  
334 230 6 11 332 640 971 1.10E-26 129 2607531  
cellular

organisms;Eukaryota;Opisthokonta;Metazoa;Eumetazoa;Bilateria;Protostomia;Spiralia;Lophotrochozoa;Mollusca;Cephalopoda;Coleoidea;Octopodiformes;Octopoda;Incirrata;Octopodidae;Octopus;Octopus sinensis

UdeM00000039705 6596 82.4 UdeM00000039705 XP\_045166906.1 48.8 84  
36 2 39 115 87 170 6.10E-13 82.4 6596 cellular

organisms;Eukaryota;Opisthokonta;Metazoa;Eumetazoa;Bilateria;Protostomia;Spiralia;Lophotrochozoa;Mollusca;Bivalvia;Autobranchia;Heteroconchia;Euheterodonta;Imparidentia;Venerida;Veneroidea;Veneridae;Mercenaria;Mercenaria mercenaria

UdeM00000039706 2607531 155.6 UdeM00000039706 XP\_029649998.1 27.3  
392 270 7 5 384 583 971 1.30E-34 155.6 2607531  
cellular

organisms;Eukaryota;Opisthokonta;Metazoa;Eumetazoa;Bilateria;Protostomia;Spiralia;Lophotrochozoa;Mollusca;Cephalopoda;Coleoidea;Octopodiformes;Octopoda;Incirrata;Octopodidae;Octopus;Octopus sinensis

UdeM00000039707 2607531 1171.8 UdeM00000039707 XP\_029641601.1  
49.9 1153 473 18 1 1100 217 1317 0.00E+00 1171.8  
2607531 cellular

organisms;Eukaryota;Opisthokonta;Metazoa;Eumetazoa;Bilateria;Protostomia;Spiralia;Lophotrochozoa;Mollusca;Cephalopoda;Coleoidea;Octopodiformes;Octopoda;Incirrata;Octopodidae;Octopus;Octopus sinensis

UdeM00000039708 6596 2467.6 UdeM00000039708 XP\_045159464.1 60.5  
2064 806 7 39 2098 82 2139 0.00E+00 2467.6 6596  
cellular

organisms;Eukaryota;Opisthokonta;Metazoa;Eumetazoa;Bilateria;Protostomia;Spiralia;Lophotrochozoa;Mollusca;Bivalvia;Autobranchia;Heteroconchia;Euheterodonta;Imparidentia;Venerida;Veneroidea;Veneridae;Mercenaria;Mercenaria mercenaria

UdeM00000039709 6596 77 UdeM00000039709 XP\_045159464.1 56.5 69  
29 1 10 77 13 81 1.80E-11 77 6596 cellular

organisms;Eukaryota;Opisthokonta;Metazoa;Eumetazoa;Bilateria;Protostomia;Spiralia;Lophotrochozoa;Mollusca;Bivalvia;Autobranchia;Heteroconchia;Euheterodonta;Imparidentia;Venerida;Veneroidea;Veneridae;Mercenaria;Mercenaria mercenaria

UdeM00000039710 6596 337.4 UdeM00000039710 XP\_045160600.1 85.6 188  
26 1 1 188 1 187 1.20E-89 337.4 6596 cellular

organisms;Eukaryota;Opisthokonta;Metazoa;Eumetazoa;Bilateria;Protostomia;Spiralia;Lophotrochozoa;Mollusca;Bivalvia;Autobranchia;Heteroconchia;Euheterodonta;Imparidentia;Venerida;Veneroidea;Veneridae;Mercenaria;Mercenaria mercenaria

UdeM00000039711 1735272 231.1 UdeM00000039711 XP\_041359385.1 42.7  
281 155 5 1 278 1 278 1.70E-57 231.1 1735272  
cellular

organisms;Eukaryota;Opisthokonta;Metazoa;Eumetazoa;Bilateria;Protostomia;Spiralia;Lophotrochozoa;Mollusca;Gastropoda;Neomphalina;Neomphaloidea;Peltospiridae;Gigantopelta;Gigantopelta aegis

UdeM00000039712 6596 252.7 UdeM00000039712 XP\_045178931.1 61.6 211  
76 2 1 208 31 239 4.10E-64 252.7 6596 cellular

organisms;Eukaryota;Opisthokonta;Metazoa;Eumetazoa;Bilateria;Protostomia;

Spiralia;Lophotrochozoa;Mollusca;Bivalvia;Autobranchia;Heteroconchia;Euherodonta;Imparidentia;Venerida;Veneroidea;Veneridae;Mercenaria;Mercenaria mercenaria

UdeM00000039713 6596 1184.9 UdeM00000039713 XP\_045160998.1 53.8  
1328 495 30 1 1241 1 1297 0.00E+00 1184.9 6596  
cellular

organisms;Eukaryota;Opisthokonta;Metazoa;Eumetazoa;Bilateria;Protostomia;Spiralia;Lophotrochozoa;Mollusca;Bivalvia;Autobranchia;Heteroconchia;Euherodonta;Imparidentia;Venerida;Veneroidea;Veneridae;Mercenaria;Mercenaria mercenaria

UdeM00000039715 29159 119.4 UdeM00000039715 XP\_034331441.1 40.2 169  
98 3 1 169 1 166 5.70E-24 119.4 29159 cellular

organisms;Eukaryota;Opisthokonta;Metazoa;Eumetazoa;Bilateria;Protostomia;Spiralia;Lophotrochozoa;Mollusca;Bivalvia;Autobranchia;Pteriormorphia;Ostreida;Ostreoidea;Ostreidae;Crassostrea;Crassostrea gigas

UdeM00000039714 6596 132.9 UdeM00000039714 XP\_045171063.1 36.2 210  
123 6 2 208 41 242 5.60E-28 132.9 6596 cellular

organisms;Eukaryota;Opisthokonta;Metazoa;Eumetazoa;Bilateria;Protostomia;Spiralia;Lophotrochozoa;Mollusca;Bivalvia;Autobranchia;Heteroconchia;Euherodonta;Imparidentia;Venerida;Veneroidea;Veneridae;Mercenaria;Mercenaria mercenaria

UdeM00000039716 6596 2681.7 UdeM00000039716 XP\_045158836.1 58.8  
2162 855 24 3 2145 650 2794 0.00E+00 2681.7 6596  
cellular

organisms;Eukaryota;Opisthokonta;Metazoa;Eumetazoa;Bilateria;Protostomia;Spiralia;Lophotrochozoa;Mollusca;Bivalvia;Autobranchia;Heteroconchia;Euherodonta;Imparidentia;Venerida;Veneroidea;Veneridae;Mercenaria;Mercenaria mercenaria

UdeM00000039717 6596 658.3 UdeM00000039717 XP\_045158837.1 60.9 489  
189 2 80 567 107 594 8.90E-186 658.3 6596 cellular

organisms;Eukaryota;Opisthokonta;Metazoa;Eumetazoa;Bilateria;Protostomia;Spiralia;Lophotrochozoa;Mollusca;Bivalvia;Autobranchia;Heteroconchia;Euherodonta;Imparidentia;Venerida;Veneroidea;Veneridae;Mercenaria;Mercenaria mercenaria

UdeM00000039719 6596 627.9 UdeM00000039719 XP\_045158838.1 50.8 729  
311 13 1 718 1 692 1.60E-176 627.9 6596 cellular

organisms;Eukaryota;Opisthokonta;Metazoa;Eumetazoa;Bilateria;Protostomia;Spiralia;Lophotrochozoa;Mollusca;Bivalvia;Autobranchia;Heteroconchia;Euherodonta;Imparidentia;Venerida;Veneroidea;Veneridae;Mercenaria;Mercenaria mercenaria

UdeM00000039720 6596 2183.3 UdeM00000039720 XP\_045158016.1 59.2  
1743 691 5 7 1732 4 1743 0.00E+00 2183.3 6596  
cellular

organisms;Eukaryota;Opisthokonta;Metazoa;Eumetazoa;Bilateria;Protostomia;Spiralia;Lophotrochozoa;Mollusca;Bivalvia;Autobranchia;Heteroconchia;Euherodonta;Imparidentia;Venerida;Veneroidea;Veneridae;Mercenaria;Mercenaria mercenaria

UdeM00000039721 6596 324.7 UdeM00000039721 XP\_045157354.1 40.3 407  
220 8 8 409 17 405 1.70E-85 324.7 6596 cellular

organisms;Eukaryota;Opisthokonta;Metazoa;Eumetazoa;Bilateria;Protostomia;Spiralia;Lophotrochozoa;Mollusca;Bivalvia;Autobranchia;Heteroconchia;Euherodonta;Imparidentia;Venerida;Veneroidea;Veneridae;Mercenaria;Mercenaria mercenaria

UdeM00000039722 6596 317.4 UdeM00000039722 XP\_045157354.1 42.3 378  
 207 6 61 432 33 405 2.90E-83 317.4 6596 cellular  
 organisms;Eukaryota;Opisthokonta;Metazoa;Eumetazoa;Bilateria;Protostomia;  
 Spiralia;Lophotrochozoa;Mollusca;Bivalvia;Autobranchia;Heteroconchia;Euhe  
 terodonta;Imparidentia;Venerida;Veneroidea;Veneridae;Mercenaria;Mercenari  
 a mercenaria  
 UdeM00000039725 7574 213.8 UdeM00000039725 XP\_013396983.1 50 204  
 101 1 446 649 305 507 7.60E-52 213.8 7574 cellular  
 organisms;Eukaryota;Opisthokonta;Metazoa;Eumetazoa;Bilateria;Protostomia;  
 Spiralia;Lophotrochozoa;Brachiopoda;Linguliformea;Lingulata;Lingulida;Lin  
 guloidea;Lingulidae;Lingula;Lingula anatina  
 UdeM00000039726 7574 90.5 UdeM00000039726 XP\_013396983.1 44.1 93  
 52 0 52 144 306 398 1.90E-15 90.5 7574 cellular  
 organisms;Eukaryota;Opisthokonta;Metazoa;Eumetazoa;Bilateria;Protostomia;  
 Spiralia;Lophotrochozoa;Brachiopoda;Linguliformea;Lingulata;Lingulida;Lin  
 guloidea;Lingulidae;Lingula;Lingula anatina  
 UdeM00000039727 6596 483.4 UdeM00000039727 XP\_045157463.1 62.3 353  
 132 1 16 368 564 915 2.60E-133 483.4 6596 cellular  
 organisms;Eukaryota;Opisthokonta;Metazoa;Eumetazoa;Bilateria;Protostomia;  
 Spiralia;Lophotrochozoa;Mollusca;Bivalvia;Autobranchia;Heteroconchia;Euhe  
 terodonta;Imparidentia;Venerida;Veneroidea;Veneridae;Mercenaria;Mercenari  
 a mercenaria  
 UdeM00000039728 50390 166.4 UdeM00000039728 XP\_028127913.1 43.7 190  
 106 1 1 190 1 189 3.60E-38 166.4 50390 cellular  
 organisms;Eukaryota;Opisthokonta;Metazoa;Eumetazoa;Bilateria;Protostomia;  
 Ecdysozoa;Panarthropoda;Arthropoda;Mandibulata;Pancrustacea;Hexapoda;Inse  
 cta;Dicondylia;Pterygota;Neoptera;Endopterygota;Coleoptera;Polyphaga;Cucu  
 jiformia;Chrysomeloidea;Chrysomelidae;Galerucinae;Luperini;Diabroticina;D  
 iabroticites;Diabrotica;Diabrotica virgifera;Diabrotica virgifera  
 virgifera  
 UdeM00000039729 7725 146.4 UdeM00000039729 XP\_039263221.1 62.5 112  
 42 0 48 159 9 120 3.90E-32 146.4 7725 cellular  
 organisms;Eukaryota;Opisthokonta;Metazoa;Eumetazoa;Bilateria;Deuterostomi  
 a;Chordata;Tunicata;Ascidiacea;Stolidobranchia;Styelidae;Styela;Styela  
 clava  
 UdeM00000039730 6596 903.7 UdeM00000039730 XP\_045157463.1 76.2 564  
 133 1 3 566 2 564 1.20E-259 903.7 6596 cellular  
 organisms;Eukaryota;Opisthokonta;Metazoa;Eumetazoa;Bilateria;Protostomia;  
 Spiralia;Lophotrochozoa;Mollusca;Bivalvia;Autobranchia;Heteroconchia;Euhe  
 terodonta;Imparidentia;Venerida;Veneroidea;Veneridae;Mercenaria;Mercenari  
 a mercenaria  
 UdeM00000039731 1735272 858.2 UdeM00000039731 XP\_041357355.1 43.2  
 1666 708 21 1 1616 1 1478 1.70E-245 858.2 1735272  
 cellular  
 organisms;Eukaryota;Opisthokonta;Metazoa;Eumetazoa;Bilateria;Protostomia;  
 Spiralia;Lophotrochozoa;Mollusca;Gastropoda;Neomphalina;Neomphaloidea;Pel  
 tospiridae;Gigantopelta;Gigantopelta aegis  
 UdeM00000039733 29159 103.6 UdeM00000039733 XP\_034316161.1 47.2 106  
 56 0 2 107 904 1009 6.70E-19 103.6 29159 cellular  
 organisms;Eukaryota;Opisthokonta;Metazoa;Eumetazoa;Bilateria;Protostomia;  
 Spiralia;Lophotrochozoa;Mollusca;Bivalvia;Autobranchia;Pteriomorphia;Ostr  
 eida;Ostreoidea;Ostreidae;Crassostrea;Crassostrea gigas  
 UdeM00000007777 27675 268.1 UdeM00000007777 XP\_037691920.1 61.9 197  
 69 1 1 197 1533 1723 1.00E-68 268.1 27675 cellular



organisms;Eukaryota;Opisthokonta;Metazoa;Eumetazoa;Bilateria;Deuterostomi  
a;Chordata;Craniata;Vertebrata;Gnathostomata;Teleostomi;Euteleostomi;Sarc  
opterygii;Dipnotetrapodomorpha;Tetrapoda;Amniota;Mammalia;Theria;Eutheria  
;Xenarthra;Pilosa;Folivora;Megalonychidae;Choloepus;Choloepus didactylus  
UdeM00000007778 6579 612.1 UdeM00000007778 XP\_033761031.1 55.8 486  
209 3 1 480 186 671 6.20E-172 612.1 6579 cellular  
organisms;Eukaryota;Opisthokonta;Metazoa;Eumetazoa;Bilateria;Protostomia;  
Spiralia;Lophotrochozoa;Mollusca;Bivalvia;Autobranchia;Pteriormorphia;Pect  
inida;Pectinoidea;Pectinidae;Pecten;Pecten maximus  
UdeM00000007779 6526 67 UdeM00000007779 XP\_013063861.1 31.1 132  
78 4 30 150 40 169 2.40E-08 67 6526 cellular  
organisms;Eukaryota;Opisthokonta;Metazoa;Eumetazoa;Bilateria;Protostomia;  
Spiralia;Lophotrochozoa;Mollusca;Gastropoda;Heterobranchia;Euthyneura;Pan  
pulmonata;Hygrophila;Lymnaeioidea;Planorbidae;Biomphalaria;Biomphalaria  
glabrata  
UdeM00000007780 55291 211.5 UdeM00000007780 XP\_039612684.1 38.2 338  
204 4 226 562 351 684 2.80E-51 211.5 55291 cellular  
organisms;Eukaryota;Opisthokonta;Metazoa;Eumetazoa;Bilateria;Deuterostomi  
a;Chordata;Craniata;Vertebrata;Gnathostomata;Teleostomi;Euteleostomi;Acti  
nopterygii;Cladistia;Polypteriformes;Polypteridae;Polypterus;Polypterus  
senegalus  
UdeM00000007781 6596 818.9 UdeM00000007781 XP\_045201306.1 38.2 1169  
626 15 6 1081 14 1178 7.60E-234 818.9 6596 cellular  
organisms;Eukaryota;Opisthokonta;Metazoa;Eumetazoa;Bilateria;Protostomia;  
Spiralia;Lophotrochozoa;Mollusca;Bivalvia;Autobranchia;Heteroconchia;Euhe  
terodonta;Imparidentia;Venerida;Veneroidea;Veneridae;Mercenaria;Mercenari  
a mercenaria  
UdeM00000007782 6596 896.7 UdeM00000007782 XP\_045201306.1 40 1173  
660 15 4 1138 12 1178 3.00E-257 896.7 6596 cellular  
organisms;Eukaryota;Opisthokonta;Metazoa;Eumetazoa;Bilateria;Protostomia;  
Spiralia;Lophotrochozoa;Mollusca;Bivalvia;Autobranchia;Heteroconchia;Euhe  
terodonta;Imparidentia;Venerida;Veneroidea;Veneridae;Mercenaria;Mercenari  
a mercenaria  
UdeM00000007783 6596 895.6 UdeM00000007783 XP\_045201306.1 39.9 1149  
649 12 20 1131 18 1162 6.60E-257 895.6 6596 cellular  
organisms;Eukaryota;Opisthokonta;Metazoa;Eumetazoa;Bilateria;Protostomia;  
Spiralia;Lophotrochozoa;Mollusca;Bivalvia;Autobranchia;Heteroconchia;Euhe  
terodonta;Imparidentia;Venerida;Veneroidea;Veneridae;Mercenaria;Mercenari  
a mercenaria  
UdeM00000007784 6596 926 UdeM00000007784 XP\_045201306.1 41.1 1174  
650 12 1 1138 10 1178 4.60E-266 926 6596 cellular  
organisms;Eukaryota;Opisthokonta;Metazoa;Eumetazoa;Bilateria;Protostomia;  
Spiralia;Lophotrochozoa;Mollusca;Bivalvia;Autobranchia;Heteroconchia;Euhe  
terodonta;Imparidentia;Venerida;Veneroidea;Veneridae;Mercenaria;Mercenari  
a mercenaria  
UdeM00000007785 6596 863.6 UdeM00000007785 XP\_045201306.1 38.4 1160  
671 15 6 1129 10 1162 2.80E-247 863.6 6596 cellular  
organisms;Eukaryota;Opisthokonta;Metazoa;Eumetazoa;Bilateria;Protostomia;  
Spiralia;Lophotrochozoa;Mollusca;Bivalvia;Autobranchia;Heteroconchia;Euhe  
terodonta;Imparidentia;Venerida;Veneroidea;Veneridae;Mercenaria;Mercenari  
a mercenaria  
UdeM00000007786 6596 853.2 UdeM00000007786 XP\_045201306.1 39.5 1097  
623 14 1 1063 73 1162 3.60E-244 853.2 6596 cellular  
organisms;Eukaryota;Opisthokonta;Metazoa;Eumetazoa;Bilateria;Protostomia;

Spiralia; Lophotrochozoa; Mollusca; Bivalvia; Autobranchia; Heteroconchia; Euheterodonta; Imparidentia; Venerida; Veneroidea; Veneridae; Mercenaria; Mercenaria mercenaria

UdeM00000007787 6596 598.6 UdeM00000007787 XP\_045201315.1 66.7 402  
134 0 12 413 65 466 6.10E-168 598.6 6596 cellular  
organisms; Eukaryota; Opisthokonta; Metazoa; Eumetazoa; Bilateria; Protostomia; Spiralia; Lophotrochozoa; Mollusca; Bivalvia; Autobranchia; Heteroconchia; Euheterodonta; Imparidentia; Venerida; Veneroidea; Veneridae; Mercenaria; Mercenaria mercenaria

UdeM00000007788 6596 64.3 UdeM00000007788 XP\_045201315.1 45.6 68  
37 0 68 135 1 68 2.70E-07 64.3 6596 cellular  
organisms; Eukaryota; Opisthokonta; Metazoa; Eumetazoa; Bilateria; Protostomia; Spiralia; Lophotrochozoa; Mollusca; Bivalvia; Autobranchia; Heteroconchia; Euheterodonta; Imparidentia; Venerida; Veneroidea; Veneridae; Mercenaria; Mercenaria mercenaria

UdeM00000007790 6596 183 UdeM00000007790 XP\_045199637.1 62 158  
56 3 168 325 128 281 6.30E-43 183 6596 cellular  
organisms; Eukaryota; Opisthokonta; Metazoa; Eumetazoa; Bilateria; Protostomia; Spiralia; Lophotrochozoa; Mollusca; Bivalvia; Autobranchia; Heteroconchia; Euheterodonta; Imparidentia; Venerida; Veneroidea; Veneridae; Mercenaria; Mercenaria mercenaria

UdeM00000007791 6565 155.2 UdeM00000007791 XP\_022288562.1 64.9 111  
39 0 2 112 10 120 8.10E-35 155.2 6565 cellular  
organisms; Eukaryota; Opisthokonta; Metazoa; Eumetazoa; Bilateria; Protostomia; Spiralia; Lophotrochozoa; Mollusca; Bivalvia; Autobranchia; Pteriomorphia; Ostreida; Ostreoidea; Ostreidae; Crassostrea; Crassostrea virginica

UdeM00000007793 6579 240 UdeM00000007793 XP\_033731739.1 55.1 196  
88 0 4 199 183 378 2.70E-60 240 6579 cellular  
organisms; Eukaryota; Opisthokonta; Metazoa; Eumetazoa; Bilateria; Protostomia; Spiralia; Lophotrochozoa; Mollusca; Bivalvia; Autobranchia; Pteriomorphia; Pectinida; Pectinoidea; Pectinidae; Pecten; Pecten maximus

UdeM00000007794 6579 217.6 UdeM00000007794 XP\_033731739.1 54.8 177  
80 0 1 177 202 378 1.30E-53 217.6 6579 cellular  
organisms; Eukaryota; Opisthokonta; Metazoa; Eumetazoa; Bilateria; Protostomia; Spiralia; Lophotrochozoa; Mollusca; Bivalvia; Autobranchia; Pteriomorphia; Pectinida; Pectinoidea; Pectinidae; Pecten; Pecten maximus

UdeM00000007795 7757 422.2 UdeM00000007795 XP\_032835197.1 81 252  
48 0 77 328 3 254 6.20E-115 422.2 7757 cellular  
organisms; Eukaryota; Opisthokonta; Metazoa; Eumetazoa; Bilateria; Deuterostomia; Chordata; Craniata; Vertebrata; Cyclostomata; Hyperoartia; Petromyzontiformes; Petromyzontidae; Petromyzon; Petromyzon marinus

UdeM00000007796 46514 146.4 UdeM00000007796 XP\_038071378.1 44.8 163  
82 2 5 164 219 376 3.30E-32 146.4 46514 cellular  
organisms; Eukaryota; Opisthokonta; Metazoa; Eumetazoa; Bilateria; Deuterostomia; Echinodermata; Eleutherozoa; Asterozoa; Asteroidea; Valvatacea; Valvatida; Asterinidae; Patiria; Patiria miniata

UdeM00000007798 29159 138.7 UdeM00000007798 XP\_034315421.1 55.1 147  
59 3 26 167 330 474 7.10E-30 138.7 29159 cellular  
organisms; Eukaryota; Opisthokonta; Metazoa; Eumetazoa; Bilateria; Protostomia; Spiralia; Lophotrochozoa; Mollusca; Bivalvia; Autobranchia; Pteriomorphia; Ostreida; Ostreoidea; Ostreidae; Crassostrea; Crassostrea gigas

UdeM00000030219 6573 260.4 UdeM00000030219 XP\_021355978.1 46 689  
275 17 37 641 28 703 6.70E-66 260.4 6573 cellular  
organisms; Eukaryota; Opisthokonta; Metazoa; Eumetazoa; Bilateria; Protostomia;

Spiralia;Lophotrochozoa;Mollusca;Bivalvia;Autobranchia;Pteriomorpha;Pectinida;Pectinoidea;Pectinidae;Mizuhopecten;Mizuhopecten yessoensis  
 UdeM00000030220 6565 258.5 UdeM00000030220 XP\_022288354.1 50.6 616  
 235 12 92 685 34 602 2.60E-65 258.5 6565 cellular  
 organisms;Eukaryota;Opisthokonta;Metazoa;Eumetazoa;Bilateria;Protostomia;Spiralia;Lophotrochozoa;Mollusca;Bivalvia;Autobranchia;Pteriomorpha;Ostreida;Ostreoidea;Ostreidae;Crassostrea;Crassostrea virginica  
 UdeM00000030221 6565 80.5 UdeM00000030221 XP\_022288370.1 56.9 65  
 28 0 7 71 10 74 4.40E-12 80.5 6565 cellular  
 organisms;Eukaryota;Opisthokonta;Metazoa;Eumetazoa;Bilateria;Protostomia;Spiralia;Lophotrochozoa;Mollusca;Bivalvia;Autobranchia;Pteriomorpha;Ostreida;Ostreoidea;Ostreidae;Crassostrea;Crassostrea virginica  
 UdeM00000030222 29159 258.8 UdeM00000030222 XP\_034329911.1 65.5 197  
 47 1 3 178 1 197 4.90E-66 258.8 29159 cellular  
 organisms;Eukaryota;Opisthokonta;Metazoa;Eumetazoa;Bilateria;Protostomia;Spiralia;Lophotrochozoa;Mollusca;Bivalvia;Autobranchia;Pteriomorpha;Ostreida;Ostreoidea;Ostreidae;Crassostrea;Crassostrea gigas  
 UdeM00000030223 29159 69.3 UdeM00000030223 XP\_034312908.1 36.1 119  
 73 2 1 118 507 623 3.80E-09 69.3 29159 cellular  
 organisms;Eukaryota;Opisthokonta;Metazoa;Eumetazoa;Bilateria;Protostomia;Spiralia;Lophotrochozoa;Mollusca;Bivalvia;Autobranchia;Pteriomorpha;Ostreida;Ostreoidea;Ostreidae;Crassostrea;Crassostrea gigas  
 UdeM00000030226 29159 340.9 UdeM00000030226 XP\_011433091.2 69.1 307  
 89 3 3 309 6 306 1.70E-90 340.9 29159 cellular  
 organisms;Eukaryota;Opisthokonta;Metazoa;Eumetazoa;Bilateria;Protostomia;Spiralia;Lophotrochozoa;Mollusca;Bivalvia;Autobranchia;Pteriomorpha;Ostreida;Ostreoidea;Ostreidae;Crassostrea;Crassostrea gigas  
 UdeM00000030227 29159 340.5 UdeM00000030227 XP\_011433091.2 68.8 308  
 89 3 3 310 6 306 2.20E-90 340.5 29159 cellular  
 organisms;Eukaryota;Opisthokonta;Metazoa;Eumetazoa;Bilateria;Protostomia;Spiralia;Lophotrochozoa;Mollusca;Bivalvia;Autobranchia;Pteriomorpha;Ostreida;Ostreoidea;Ostreidae;Crassostrea;Crassostrea gigas  
 UdeM00000030228 6596 914.4 UdeM00000030228 XP\_045189137.1 84.7 543  
 81 1 1 541 1 543 6.60E-263 914.4 6596 cellular  
 organisms;Eukaryota;Opisthokonta;Metazoa;Eumetazoa;Bilateria;Protostomia;Spiralia;Lophotrochozoa;Mollusca;Bivalvia;Autobranchia;Heteroconchia;Euheterodonta;Imparidentia;Venerida;Veneroidea;Veneridae;Mercenaria;Mercenaria mercenaria  
 UdeM00000030229 6579 770.8 UdeM00000030229 XP\_033756553.1 72 583  
 146 3 28 610 34 599 1.30E-219 770.8 6579 cellular  
 organisms;Eukaryota;Opisthokonta;Metazoa;Eumetazoa;Bilateria;Protostomia;Spiralia;Lophotrochozoa;Mollusca;Bivalvia;Autobranchia;Pteriomorpha;Pectinida;Pectinoidea;Pectinidae;Pecten;Pecten maximus  
 UdeM00000030230 6573 335.5 UdeM00000030230 XP\_021359107.1 45.9 357  
 184 4 7 358 259 611 8.70E-89 335.5 6573 cellular  
 organisms;Eukaryota;Opisthokonta;Metazoa;Eumetazoa;Bilateria;Protostomia;Spiralia;Lophotrochozoa;Mollusca;Bivalvia;Autobranchia;Pteriomorpha;Pectinida;Pectinoidea;Pectinidae;Mizuhopecten;Mizuhopecten yessoensis  
 UdeM00000030231 6573 335.9 UdeM00000030231 XP\_021359107.1 45.9 357  
 184 4 13 364 259 611 6.80E-89 335.9 6573 cellular  
 organisms;Eukaryota;Opisthokonta;Metazoa;Eumetazoa;Bilateria;Protostomia;Spiralia;Lophotrochozoa;Mollusca;Bivalvia;Autobranchia;Pteriomorpha;Pectinida;Pectinoidea;Pectinidae;Mizuhopecten;Mizuhopecten yessoensis

UdeM00000030232 29159 67.8 UdeM00000030232 XP\_034329456.1 49.3 71  
 31 1 82 152 451 516 1.50E-08 67.8 29159 cellular  
 organisms;Eukaryota;Opisthokonta;Metazoa;Eumetazoa;Bilateria;Protostomia;  
 Spiralia;Lophotrochozoa;Mollusca;Bivalvia;Autobranchia;Pteriomorpha;Ostr  
 eida;Ostreoidea;Ostreidae;Crassostrea;Crassostrea gigas  
 UdeM00000030233 6596 184.5 UdeM00000030233 XP\_045202545.1 49 202  
 77 5 10 186 10 210 1.20E-43 184.5 6596 cellular  
 organisms;Eukaryota;Opisthokonta;Metazoa;Eumetazoa;Bilateria;Protostomia;  
 Spiralia;Lophotrochozoa;Mollusca;Bivalvia;Autobranchia;Heteroconchia;Euhe  
 terodonta;Imparidentia;Venerida;Veneroidea;Veneridae;Mercenaria;Mercenari  
 a mercenaria  
 UdeM00000030234 29159 177.6 UdeM00000030234 XP\_011443561.2 58.2 134  
 55 1 32 164 48 181 1.30E-41 177.6 29159 cellular  
 organisms;Eukaryota;Opisthokonta;Metazoa;Eumetazoa;Bilateria;Protostomia;  
 Spiralia;Lophotrochozoa;Mollusca;Bivalvia;Autobranchia;Pteriomorpha;Ostr  
 eida;Ostreoidea;Ostreidae;Crassostrea;Crassostrea gigas  
 UdeM00000030235 29159 453.8 UdeM00000030235 XP\_011443560.2 54.3 396  
 179 2 1 394 323 718 2.40E-124 453.8 29159 cellular  
 organisms;Eukaryota;Opisthokonta;Metazoa;Eumetazoa;Bilateria;Protostomia;  
 Spiralia;Lophotrochozoa;Mollusca;Bivalvia;Autobranchia;Pteriomorpha;Ostr  
 eida;Ostreoidea;Ostreidae;Crassostrea;Crassostrea gigas  
 UdeM00000030236 6596 68.2 UdeM00000030236 XP\_045188256.1 35 160  
 83 5 3 160 122 262 1.20E-08 68.2 6596 cellular  
 organisms;Eukaryota;Opisthokonta;Metazoa;Eumetazoa;Bilateria;Protostomia;  
 Spiralia;Lophotrochozoa;Mollusca;Bivalvia;Autobranchia;Heteroconchia;Euhe  
 terodonta;Imparidentia;Venerida;Veneroidea;Veneridae;Mercenaria;Mercenari  
 a mercenaria  
 UdeM00000030237 1735272 202.2 UdeM00000030237 XP\_041370633.1 49.1  
 216 96 3 38 246 24 232 7.60E-49 202.2 1735272  
 cellular  
 organisms;Eukaryota;Opisthokonta;Metazoa;Eumetazoa;Bilateria;Protostomia;  
 Spiralia;Lophotrochozoa;Mollusca;Gastropoda;Neomphalina;Neomphaloidea;Pel  
 tospiridae;Gigantopelta;Gigantopelta aegis  
 UdeM00000030238 6596 469.2 UdeM00000030238 XP\_045188655.1 43.8 520  
 275 10 12 524 75 584 7.50E-129 469.2 6596 cellular  
 organisms;Eukaryota;Opisthokonta;Metazoa;Eumetazoa;Bilateria;Protostomia;  
 Spiralia;Lophotrochozoa;Mollusca;Bivalvia;Autobranchia;Heteroconchia;Euhe  
 terodonta;Imparidentia;Venerida;Veneroidea;Veneridae;Mercenaria;Mercenari  
 a mercenaria  
 UdeM00000030239 6596 510 UdeM00000030239 XP\_045188656.1 42.3 608  
 318 13 6 604 1 584 4.40E-141 510 6596 cellular  
 organisms;Eukaryota;Opisthokonta;Metazoa;Eumetazoa;Bilateria;Protostomia;  
 Spiralia;Lophotrochozoa;Mollusca;Bivalvia;Autobranchia;Heteroconchia;Euhe  
 terodonta;Imparidentia;Venerida;Veneroidea;Veneridae;Mercenaria;Mercenari  
 a mercenaria  
 UdeM00000030242 29159 173.7 UdeM00000030242 XP\_011454986.2 42.3 227  
 115 7 4 220 9 229 3.00E-40 173.7 29159 cellular  
 organisms;Eukaryota;Opisthokonta;Metazoa;Eumetazoa;Bilateria;Protostomia;  
 Spiralia;Lophotrochozoa;Mollusca;Bivalvia;Autobranchia;Pteriomorpha;Ostr  
 eida;Ostreoidea;Ostreidae;Crassostrea;Crassostrea gigas  
 UdeM00000030243 1735272 108.6 UdeM00000030243 XP\_041368138.1 55.1  
 89 40 0 18 106 11 99 5.30E-21 108.6 1735272  
 cellular  
 organisms;Eukaryota;Opisthokonta;Metazoa;Eumetazoa;Bilateria;Protostomia;

Spiralia; Lophotrochozoa; Mollusca; Gastropoda; Neomphalina; Neomphaloidea; Peltospiridae; Gigantopelta; Gigantopelta aegis

UdeM00000030244 50390 404.1 UdeM00000030244 XP\_028154228.1 59.4 288  
117 0 1 288 210 497 1.60E-109 404.1 50390 cellular  
organisms; Eukaryota; Opisthokonta; Metazoa; Eumetazoa; Bilateria; Protostomia; Ecdysozoa; Panarthropoda; Arthropoda; Mandibulata; Pancrustacea; Hexapoda; Insecta; Dicondylia; Pterygota; Neoptera; Endopterygota; Coleoptera; Polyphaga; Cucujiformia; Chrysomeloidea; Chrysomelidae; Galerucinae; Luperini; Diabroticina; Diabroticites; Diabrotica; Diabrotica virgifera; Diabrotica virgifera virgifera

UdeM00000030246 6565 193.4 UdeM00000030246 XP\_022341445.1 56.8 169  
72 1 2 169 12 180 2.50E-46 193.4 6565 cellular  
organisms; Eukaryota; Opisthokonta; Metazoa; Eumetazoa; Bilateria; Protostomia; Spiralia; Lophotrochozoa; Mollusca; Bivalvia; Autobranchia; Pteriomorpha; Ostreida; Ostreioidea; Ostreidae; Crassostrea; Crassostrea virginica

UdeM00000030247 7574 143.7 UdeM00000030247 XP\_013385162.1 59.3 123  
47 1 1 123 49 168 1.70E-31 143.7 7574 cellular  
organisms; Eukaryota; Opisthokonta; Metazoa; Eumetazoa; Bilateria; Protostomia; Spiralia; Lophotrochozoa; Brachiopoda; Linguliformea; Lingulata; Lingulida; Linguloidea; Lingulidae; Lingula; Lingula anatina

UdeM00000030248 6596 377.1 UdeM00000030248 XP\_045189447.1 57.5 313  
128 1 45 357 42 349 2.50E-101 377.1 6596 cellular  
organisms; Eukaryota; Opisthokonta; Metazoa; Eumetazoa; Bilateria; Protostomia; Spiralia; Lophotrochozoa; Mollusca; Bivalvia; Autobranchia; Heteroconchia; Euheterodonta; Imparidentia; Venerida; Veneroidea; Veneridae; Mercenaria; Mercenaria mercenaria

UdeM00000030250 6500 260 UdeM00000030250 XP\_005089072.1 63.4 183  
67 0 25 207 5 187 2.60E-66 260 6500 cellular  
organisms; Eukaryota; Opisthokonta; Metazoa; Eumetazoa; Bilateria; Protostomia; Spiralia; Lophotrochozoa; Mollusca; Gastropoda; Heterobranchia; Euthyneura; Teptipleura; Aplysiida; Aplysioidea; Aplysiidae; Aplysia; Aplysia californica

UdeM00000030251 6573 323.9 UdeM00000030251 XP\_021355540.1 56.7 330  
136 2 1 326 1 327 2.30E-85 323.9 6573 cellular  
organisms; Eukaryota; Opisthokonta; Metazoa; Eumetazoa; Bilateria; Protostomia; Spiralia; Lophotrochozoa; Mollusca; Bivalvia; Autobranchia; Pteriomorpha; Pectinida; Pectinoidea; Pectinidae; Mizuhopecten; Mizuhopecten yessoensis

UdeM00000030252 6565 1086.2 UdeM00000030252 XP\_022344060.1 87.7  
624 77 0 1 624 1 624 0.00E+00 1086.2 6565  
cellular  
organisms; Eukaryota; Opisthokonta; Metazoa; Eumetazoa; Bilateria; Protostomia; Spiralia; Lophotrochozoa; Mollusca; Bivalvia; Autobranchia; Pteriomorpha; Ostreida; Ostreioidea; Ostreidae; Crassostrea; Crassostrea virginica

UdeM00000030253 6596 170.2 UdeM00000030253 XP\_045188692.1 56.9 137  
59 0 1 137 1 137 1.90E-39 170.2 6596 cellular  
organisms; Eukaryota; Opisthokonta; Metazoa; Eumetazoa; Bilateria; Protostomia; Spiralia; Lophotrochozoa; Mollusca; Bivalvia; Autobranchia; Heteroconchia; Euheterodonta; Imparidentia; Venerida; Veneroidea; Veneridae; Mercenaria; Mercenaria mercenaria

UdeM00000030254 6596 2118.2 UdeM00000030254 XP\_045188703.1 63.7  
1722 547 20 10 1667 139 1846 0.00E+00 2118.2 6596  
cellular  
organisms; Eukaryota; Opisthokonta; Metazoa; Eumetazoa; Bilateria; Protostomia; Spiralia; Lophotrochozoa; Mollusca; Bivalvia; Autobranchia; Heteroconchia; Euheterodonta

terodonta;Imparidentia;Venerida;Veneroidea;Veneridae;Mercenaria;Mercenaria mercenaria

|                 |      |        |    |                 |                |          |        |
|-----------------|------|--------|----|-----------------|----------------|----------|--------|
| UdeM00000030255 | 6596 | 2075.8 |    | UdeM00000030255 | XP_045188703.1 | 62.5     |        |
|                 | 1722 | 529    | 20 | 10              | 1629           | 139      | 1846   |
|                 |      |        |    |                 |                | 0.00E+00 | 2075.8 |
|                 |      |        |    |                 |                |          | 6596   |

cellular

organisms;Eukaryota;Opisthokonta;Metazoa;Eumetazoa;Bilateria;Protostomia;Spiralia;Lophotrochozoa;Mollusca;Bivalvia;Autobranchia;Heteroconchia;Euherodonta;Imparidentia;Venerida;Veneroidea;Veneridae;Mercenaria;Mercenaria mercenaria

|                 |        |     |       |                 |                |          |        |
|-----------------|--------|-----|-------|-----------------|----------------|----------|--------|
| UdeM00000030256 | 400727 |     | 186.4 | UdeM00000030256 | XP_025094436.1 | 32.9     |        |
|                 | 830    | 519 | 6     | 1               | 823            | 8        | 806    |
|                 |        |     |       |                 |                | 1.60E-43 | 186.4  |
|                 |        |     |       |                 |                |          | 400727 |

cellular

organisms;Eukaryota;Opisthokonta;Metazoa;Eumetazoa;Bilateria;Protostomia;Spiralia;Lophotrochozoa;Mollusca;Gastropoda;Caenogastropoda;Architaenioglossa;Ampullarioidea;Ampullariidae;Pomacea;Pomacea canaliculata

|                 |      |       |     |                 |                |      |          |
|-----------------|------|-------|-----|-----------------|----------------|------|----------|
| UdeM00000030257 | 6596 | 170.2 |     | UdeM00000030257 | XP_045189280.1 | 40.8 | 201      |
|                 | 117  | 2     | 932 | 1131            | 355            | 554  | 1.50E-38 |
|                 |      |       |     |                 |                |      | 170.2    |
|                 |      |       |     |                 |                |      | 6596     |

cellular

organisms;Eukaryota;Opisthokonta;Metazoa;Eumetazoa;Bilateria;Protostomia;Spiralia;Lophotrochozoa;Mollusca;Bivalvia;Autobranchia;Heteroconchia;Euherodonta;Imparidentia;Venerida;Veneroidea;Veneridae;Mercenaria;Mercenaria mercenaria

|                 |      |     |    |                 |                |      |          |
|-----------------|------|-----|----|-----------------|----------------|------|----------|
| UdeM00000030258 | 6596 | 302 |    | UdeM00000030258 | XP_045190465.1 | 30.1 | 682      |
|                 | 414  | 16  | 85 | 708             | 36             | 712  | 2.00E-78 |
|                 |      |     |    |                 |                |      | 302      |
|                 |      |     |    |                 |                |      | 6596     |

cellular

organisms;Eukaryota;Opisthokonta;Metazoa;Eumetazoa;Bilateria;Protostomia;Spiralia;Lophotrochozoa;Mollusca;Bivalvia;Autobranchia;Heteroconchia;Euherodonta;Imparidentia;Venerida;Veneroidea;Veneridae;Mercenaria;Mercenaria mercenaria

|                 |      |       |   |                 |                |      |          |
|-----------------|------|-------|---|-----------------|----------------|------|----------|
| UdeM00000030259 | 6579 | 116.3 |   | UdeM00000030259 | XP_033757677.1 | 27.3 | 297      |
|                 | 146  | 6     | 1 | 296             | 26             | 253  | 2.00E-22 |
|                 |      |       |   |                 |                |      | 116.3    |
|                 |      |       |   |                 |                |      | 6579     |

cellular

organisms;Eukaryota;Opisthokonta;Metazoa;Eumetazoa;Bilateria;Protostomia;Spiralia;Lophotrochozoa;Mollusca;Bivalvia;Autobranchia;Pteriomorphia;Pectinida;Pectinoidea;Pectinidae;Pecten;Pecten maximus

|                 |      |       |   |                 |                |      |           |
|-----------------|------|-------|---|-----------------|----------------|------|-----------|
| UdeM00000030261 | 6596 | 677.2 |   | UdeM00000030261 | XP_045190471.1 | 72.9 | 451       |
|                 | 118  | 2     | 1 | 450             | 49             | 496  | 1.50E-191 |
|                 |      |       |   |                 |                |      | 677.2     |
|                 |      |       |   |                 |                |      | 6596      |

cellular

organisms;Eukaryota;Opisthokonta;Metazoa;Eumetazoa;Bilateria;Protostomia;Spiralia;Lophotrochozoa;Mollusca;Bivalvia;Autobranchia;Heteroconchia;Euherodonta;Imparidentia;Venerida;Veneroidea;Veneridae;Mercenaria;Mercenaria mercenaria

|                 |      |       |   |                 |                |      |           |
|-----------------|------|-------|---|-----------------|----------------|------|-----------|
| UdeM00000030260 | 6596 | 756.5 |   | UdeM00000030260 | XP_045190471.1 | 73.4 | 500       |
|                 | 128  | 3     | 1 | 499             | 1              | 496  | 2.10E-215 |
|                 |      |       |   |                 |                |      | 756.5     |
|                 |      |       |   |                 |                |      | 6596      |

cellular

organisms;Eukaryota;Opisthokonta;Metazoa;Eumetazoa;Bilateria;Protostomia;Spiralia;Lophotrochozoa;Mollusca;Bivalvia;Autobranchia;Heteroconchia;Euherodonta;Imparidentia;Venerida;Veneroidea;Veneridae;Mercenaria;Mercenaria mercenaria

|                 |       |      |   |                 |                |      |          |
|-----------------|-------|------|---|-----------------|----------------|------|----------|
| UdeM00000030262 | 29159 | 69.7 |   | UdeM00000030262 | XP_011428398.2 | 35.8 | 151      |
|                 | 71    | 4    | 4 | 128             | 3              | 153  | 3.30E-09 |
|                 |       |      |   |                 |                |      | 69.7     |
|                 |       |      |   |                 |                |      | 29159    |

cellular

organisms;Eukaryota;Opisthokonta;Metazoa;Eumetazoa;Bilateria;Protostomia;Spiralia;Lophotrochozoa;Mollusca;Bivalvia;Autobranchia;Pteriomorphia;Ostreida;Ostreidae;Crassostrea;Crassostrea gigas

|                 |      |       |   |                 |                |      |          |
|-----------------|------|-------|---|-----------------|----------------|------|----------|
| UdeM00000030263 | 6596 | 347.1 |   | UdeM00000030263 | XP_045190475.1 | 37.2 | 635      |
|                 | 350  | 10    | 4 | 605             | 3              | 621  | 2.00E-91 |
|                 |      |       |   |                 |                |      | 347.1    |
|                 |      |       |   |                 |                |      | 6596     |

cellular

organisms;Eukaryota;Opisthokonta;Metazoa;Eumetazoa;Bilateria;Protostomia;Spiralia;Lophotrochozoa;Mollusca;Bivalvia;Autobranchia;Heteroconchia;Euherodonta;Imparidentia;Venerida;Veneroidea;Veneridae;Mercenaria;Mercenaria mercenaria

terodonta;Imparidentia;Venerida;Veneroidea;Veneridae;Mercenaria;Mercenari  
 a mercenaria  
 UdeM00000030263 6596 57.4 UdeM00000030263 XP\_045190475.1 50 62  
 30 1 1281 1341 1031 1092 3.10E-04 57.4 6596 cellular  
 organisms;Eukaryota;Opisthokonta;Metazoa;Eumetazoa;Bilateria;Protostomia;  
 Spiralia;Lophotrochozoa;Mollusca;Bivalvia;Autobranhia;Heteroconchia;Euhe  
 terodonta;Imparidentia;Venerida;Veneroidea;Veneridae;Mercenaria;Mercenari  
 a mercenaria  
 UdeM00000030264 6596 347.1 UdeM00000030264 XP\_045190475.1 38.1 611  
 329 10 4 581 3 597 2.00E-91 347.1 6596 cellular  
 organisms;Eukaryota;Opisthokonta;Metazoa;Eumetazoa;Bilateria;Protostomia;  
 Spiralia;Lophotrochozoa;Mollusca;Bivalvia;Autobranhia;Heteroconchia;Euhe  
 terodonta;Imparidentia;Venerida;Veneroidea;Veneridae;Mercenaria;Mercenari  
 a mercenaria  
 UdeM00000030264 6596 57.4 UdeM00000030264 XP\_045190475.1 50 62  
 30 1 1284 1344 1031 1092 3.10E-04 57.4 6596 cellular  
 organisms;Eukaryota;Opisthokonta;Metazoa;Eumetazoa;Bilateria;Protostomia;  
 Spiralia;Lophotrochozoa;Mollusca;Bivalvia;Autobranhia;Heteroconchia;Euhe  
 terodonta;Imparidentia;Venerida;Veneroidea;Veneridae;Mercenaria;Mercenari  
 a mercenaria  
 UdeM00000030265 6596 271.2 UdeM00000030265 XP\_045189369.1 67.7 189  
 59 2 55 243 206 392 1.30E-69 271.2 6596 cellular  
 organisms;Eukaryota;Opisthokonta;Metazoa;Eumetazoa;Bilateria;Protostomia;  
 Spiralia;Lophotrochozoa;Mollusca;Bivalvia;Autobranhia;Heteroconchia;Euhe  
 terodonta;Imparidentia;Venerida;Veneroidea;Veneridae;Mercenaria;Mercenari  
 a mercenaria  
 UdeM00000030266 6596 476.5 UdeM00000030266 XP\_045210095.1 67.8 323  
 103 1 1 323 1 322 2.80E-131 476.5 6596 cellular  
 organisms;Eukaryota;Opisthokonta;Metazoa;Eumetazoa;Bilateria;Protostomia;  
 Spiralia;Lophotrochozoa;Mollusca;Bivalvia;Autobranhia;Heteroconchia;Euhe  
 terodonta;Imparidentia;Venerida;Veneroidea;Veneridae;Mercenaria;Mercenari  
 a mercenaria  
 UdeM00000030267 6596 474.9 UdeM00000030267 XP\_045210096.1 68.1 317  
 100 1 1 317 1 316 8.10E-131 474.9 6596 cellular  
 organisms;Eukaryota;Opisthokonta;Metazoa;Eumetazoa;Bilateria;Protostomia;  
 Spiralia;Lophotrochozoa;Mollusca;Bivalvia;Autobranhia;Heteroconchia;Euhe  
 terodonta;Imparidentia;Venerida;Veneroidea;Veneridae;Mercenaria;Mercenari  
 a mercenaria  
 UdeM00000030268 6596 475.3 UdeM00000030268 XP\_045210095.1 67.8 323  
 103 1 1 323 1 322 6.20E-131 475.3 6596 cellular  
 organisms;Eukaryota;Opisthokonta;Metazoa;Eumetazoa;Bilateria;Protostomia;  
 Spiralia;Lophotrochozoa;Mollusca;Bivalvia;Autobranhia;Heteroconchia;Euhe  
 terodonta;Imparidentia;Venerida;Veneroidea;Veneridae;Mercenaria;Mercenari  
 a mercenaria  
 UdeM00000030269 6596 475.3 UdeM00000030269 XP\_045210095.1 67.8 323  
 103 1 1 323 1 322 6.20E-131 475.3 6596 cellular  
 organisms;Eukaryota;Opisthokonta;Metazoa;Eumetazoa;Bilateria;Protostomia;  
 Spiralia;Lophotrochozoa;Mollusca;Bivalvia;Autobranhia;Heteroconchia;Euhe  
 terodonta;Imparidentia;Venerida;Veneroidea;Veneridae;Mercenaria;Mercenari  
 a mercenaria  
 UdeM00000030270 6596 224.6 UdeM00000030270 XP\_045210096.1 67.8 143  
 45 1 1 143 1 142 8.30E-56 224.6 6596 cellular  
 organisms;Eukaryota;Opisthokonta;Metazoa;Eumetazoa;Bilateria;Protostomia;  
 Spiralia;Lophotrochozoa;Mollusca;Bivalvia;Autobranhia;Heteroconchia;Euhe

terodonta;Imparidentia;Venerida;Veneroidea;Veneridae;Mercenaria;Mercenaria mercenaria

UdeM00000030271 6596 178.7 UdeM00000030271 XP\_045210095.1 65.3 124  
43 0 1 124 199 322 4.70E-42 178.7 6596 cellular

organisms;Eukaryota;Opisthokonta;Metazoa;Eumetazoa;Bilateria;Protostomia;Spiralia;Lophotrochozoa;Mollusca;Bivalvia;Autobranchia;Heteroconchia;Euherodonta;Imparidentia;Venerida;Veneroidea;Veneridae;Mercenaria;Mercenaria mercenaria

UdeM00000030272 6596 367.1 UdeM00000030272 XP\_045161160.1 56.6 316  
131 2 10 319 5 320 2.30E-98 367.1 6596 cellular

organisms;Eukaryota;Opisthokonta;Metazoa;Eumetazoa;Bilateria;Protostomia;Spiralia;Lophotrochozoa;Mollusca;Bivalvia;Autobranchia;Heteroconchia;Euherodonta;Imparidentia;Venerida;Veneroidea;Veneridae;Mercenaria;Mercenaria mercenaria

UdeM00000030273 6565 287 UdeM00000030273 XP\_022287869.1 68.8 202  
62 1 1 202 1 201 1.90E-74 287 6565 cellular

organisms;Eukaryota;Opisthokonta;Metazoa;Eumetazoa;Bilateria;Protostomia;Spiralia;Lophotrochozoa;Mollusca;Bivalvia;Autobranchia;Pteriormorphia;Ostreida;Ostreoidea;Ostreidae;Crassostrea;Crassostrea virginica

UdeM00000030274 6596 596.3 UdeM00000030274 XP\_045188749.1 56.6 578  
202 10 1 565 1 542 4.10E-167 596.3 6596 cellular

organisms;Eukaryota;Opisthokonta;Metazoa;Eumetazoa;Bilateria;Protostomia;Spiralia;Lophotrochozoa;Mollusca;Bivalvia;Autobranchia;Heteroconchia;Euherodonta;Imparidentia;Venerida;Veneroidea;Veneridae;Mercenaria;Mercenaria mercenaria

UdeM00000030275 6596 647.9 UdeM00000030275 XP\_045205514.1 54.5 596  
247 4 6 577 7 602 1.30E-182 647.9 6596 cellular

organisms;Eukaryota;Opisthokonta;Metazoa;Eumetazoa;Bilateria;Protostomia;Spiralia;Lophotrochozoa;Mollusca;Bivalvia;Autobranchia;Heteroconchia;Euherodonta;Imparidentia;Venerida;Veneroidea;Veneridae;Mercenaria;Mercenaria mercenaria

UdeM00000030276 6596 122.1 UdeM00000030276 XP\_045190046.1 36 516  
318 7 1 507 1 513 2.30E-24 122.1 6596 cellular

organisms;Eukaryota;Opisthokonta;Metazoa;Eumetazoa;Bilateria;Protostomia;Spiralia;Lophotrochozoa;Mollusca;Bivalvia;Autobranchia;Heteroconchia;Euherodonta;Imparidentia;Venerida;Veneroidea;Veneridae;Mercenaria;Mercenaria mercenaria

UdeM00000030278 6596 89 UdeM00000030278 XP\_045189931.1 50 112  
41 5 1 105 1 104 5.00E-15 89 6596 cellular

organisms;Eukaryota;Opisthokonta;Metazoa;Eumetazoa;Bilateria;Protostomia;Spiralia;Lophotrochozoa;Mollusca;Bivalvia;Autobranchia;Heteroconchia;Euherodonta;Imparidentia;Venerida;Veneroidea;Veneridae;Mercenaria;Mercenaria mercenaria

UdeM00000030279 37003 235.3 UdeM00000030279 XP\_024858049.1 39 344  
200 4 1 341 254 590 1.10E-58 235.3 37003 cellular

organisms;Eukaryota;Opisthokonta;Metazoa;Eumetazoa;Bilateria;Deuterostomia;Chordata;Craniata;Vertebrata;Gnathostomata;Teleostomi;Euteleostomi;Actinopterygii;Actinopteri;Neopterygii;Teleostei;Osteoglossocephalai;Clupeocephala;Euteleostei;Neoteleostei;Eurypterygia;Ctenosquamata;Acanthopterygii;Euacanthopterygii;Percomorphaceae;Ovalentaria;Atherinomorphae;Cypselodontiformes;Aplocheiloidei;Rivulidae;Kryptolebias;Kryptolebias marmoratus

UdeM00000030280 2607531 104.8 UdeM00000030280 XP\_029657406.1 60  
90 36 0 1 90 1 90 6.40E-20 104.8 2607531



cellular  
organisms;Eukaryota;Opisthokonta;Metazoa;Eumetazoa;Bilateria;Protostomia;  
Spiralia;Lophotrochozoa;Mollusca;Cephalopoda;Coleoidea;Octopodiformes;Oct  
opoda;Incirrata;Octopodidae;Octopus;Octopus sinensis  
UdeM00000030281 27687 64.3 UdeM00000030281 XP\_028656852.1 35 103  
64 3 4 104 316 417 1.00E-07 64.3 27687 cellular  
organisms;Eukaryota;Opisthokonta;Metazoa;Eumetazoa;Bilateria;Deuterostomi  
a;Chordata;Craniata;Vertebrata;Gnathostomata;Teleostomi;Euteleostomi;Acti  
nopterygii;Cladistia;Polypteriformes;Polypteridae;Erpetoichthys;Erpetoich  
thys calabaricus  
UdeM00000030282 6579 314.3 UdeM00000030282 XP\_033755996.1 59.9 449  
164 7 29 470 157 596 2.60E-82 314.3 6579 cellular  
organisms;Eukaryota;Opisthokonta;Metazoa;Eumetazoa;Bilateria;Protostomia;  
Spiralia;Lophotrochozoa;Mollusca;Bivalvia;Autobranchia;Pteriormorphia;Pect  
inida;Pectinoidea;Pectinidae;Pecten;Pecten maximus  
UdeM00000030283 6579 520.4 UdeM00000030283 XP\_033755943.1 51.3 573  
214 15 8 563 105 629 2.90E-144 520.4 6579 cellular  
organisms;Eukaryota;Opisthokonta;Metazoa;Eumetazoa;Bilateria;Protostomia;  
Spiralia;Lophotrochozoa;Mollusca;Bivalvia;Autobranchia;Pteriormorphia;Pect  
inida;Pectinoidea;Pectinidae;Pecten;Pecten maximus  
UdeM00000030284 52670 73.2 UdeM00000030284 XP\_013880698.1 66 53  
18 0 1 53 169 221 1.50E-10 73.2 52670 cellular  
organisms;Eukaryota;Opisthokonta;Metazoa;Eumetazoa;Bilateria;Deuterostomi  
a;Chordata;Craniata;Vertebrata;Gnathostomata;Teleostomi;Euteleostomi;Acti  
nopterygii;Actinopteri;Neopterygii;Teleostei;Osteoglossocephalai;Clupeoce  
phala;Euteleosteomorpha;Neoteleostei;Eurypterygia;Ctenosquamata;Acanthomo  
rphata;Euacanthomorphacea;Percomorphaceae;Ovalentaria;Atherinomorphae;Cyp  
rinodontiformes;Aplocheiloidei;Rivulidae;Austrofundulus;Austrofundulus  
limnaeus  
UdeM00000030285 6596 122.9 UdeM00000030285 XP\_045190090.1 72 93  
26 0 13 105 7 99 2.60E-25 122.9 6596 cellular  
organisms;Eukaryota;Opisthokonta;Metazoa;Eumetazoa;Bilateria;Protostomia;  
Spiralia;Lophotrochozoa;Mollusca;Bivalvia;Autobranchia;Heteroconchia;Euhe  
terodonta;Imparidentia;Venerida;Veneroidea;Veneridae;Mercenaria;Mercenari  
a mercenaria  
UdeM00000030286 6596 147.1 UdeM00000030286 XP\_045190092.1 42 224  
110 5 11 221 13 229 2.70E-32 147.1 6596 cellular  
organisms;Eukaryota;Opisthokonta;Metazoa;Eumetazoa;Bilateria;Protostomia;  
Spiralia;Lophotrochozoa;Mollusca;Bivalvia;Autobranchia;Heteroconchia;Euhe  
terodonta;Imparidentia;Venerida;Veneroidea;Veneridae;Mercenaria;Mercenari  
a mercenaria  
UdeM00000030287 400727 292.4 UdeM00000030287 XP\_025108466.1 36.7  
532 229 11 1 439 26 542 1.00E-75 292.4 400727  
cellular  
organisms;Eukaryota;Opisthokonta;Metazoa;Eumetazoa;Bilateria;Protostomia;  
Spiralia;Lophotrochozoa;Mollusca;Gastropoda;Caenogastropoda;Architaeniogl  
ossa;Ampullarioidea;Ampullariidae;Pomacea;Pomacea canaliculata  
UdeM00000030289 6596 392.1 UdeM00000030289 XP\_045190691.1 35.8 967  
465 32 8 922 93 955 1.90E-105 392.1 6596 cellular  
organisms;Eukaryota;Opisthokonta;Metazoa;Eumetazoa;Bilateria;Protostomia;  
Spiralia;Lophotrochozoa;Mollusca;Bivalvia;Autobranchia;Heteroconchia;Euhe  
terodonta;Imparidentia;Venerida;Veneroidea;Veneridae;Mercenaria;Mercenari  
a mercenaria

UdeM00000030291 6596 134.4 UdeM00000030291 XP\_045190689.1 71.1 83  
 24 0 8 90 10 92 8.10E-29 134.4 6596 cellular  
 organisms;Eukaryota;Opisthokonta;Metazoa;Eumetazoa;Bilateria;Protostomia;  
 Spiralia;Lophotrochozoa;Mollusca;Bivalvia;Autobranchia;Heteroconchia;Euhe  
 terodonta;Imparidentia;Venerida;Veneroidea;Veneridae;Mercenaria;Mercenari  
 a mercenaria  
 UdeM00000030290 6596 142.9 UdeM00000030290 XP\_045190689.1 69.6 92  
 28 0 1 92 1 92 2.30E-31 142.9 6596 cellular  
 organisms;Eukaryota;Opisthokonta;Metazoa;Eumetazoa;Bilateria;Protostomia;  
 Spiralia;Lophotrochozoa;Mollusca;Bivalvia;Autobranchia;Heteroconchia;Euhe  
 terodonta;Imparidentia;Venerida;Veneroidea;Veneridae;Mercenaria;Mercenari  
 a mercenaria  
 UdeM00000030292 6596 625.9 UdeM00000030292 XP\_045190692.1 52.2 602  
 274 5 22 618 7 599 5.30E-176 625.9 6596 cellular  
 organisms;Eukaryota;Opisthokonta;Metazoa;Eumetazoa;Bilateria;Protostomia;  
 Spiralia;Lophotrochozoa;Mollusca;Bivalvia;Autobranchia;Heteroconchia;Euhe  
 terodonta;Imparidentia;Venerida;Veneroidea;Veneridae;Mercenaria;Mercenari  
 a mercenaria  
 UdeM00000030293 6579 828.6 UdeM00000030293 XP\_033756536.1 82.8 512  
 77 7 30 534 52 559 5.00E-237 828.6 6579 cellular  
 organisms;Eukaryota;Opisthokonta;Metazoa;Eumetazoa;Bilateria;Protostomia;  
 Spiralia;Lophotrochozoa;Mollusca;Bivalvia;Autobranchia;Pteriormorphia;Pect  
 inida;Pectinoidea;Pectinidae;Pecten;Pecten maximus  
 UdeM00000030294 6596 254.6 UdeM00000030294 XP\_045204261.1 44.4 275  
 143 6 59 329 39 307 1.70E-64 254.6 6596 cellular  
 organisms;Eukaryota;Opisthokonta;Metazoa;Eumetazoa;Bilateria;Protostomia;  
 Spiralia;Lophotrochozoa;Mollusca;Bivalvia;Autobranchia;Heteroconchia;Euhe  
 terodonta;Imparidentia;Venerida;Veneroidea;Veneridae;Mercenaria;Mercenari  
 a mercenaria  
 UdeM00000030295 6596 254.6 UdeM00000030295 XP\_045204261.1 44.4 275  
 143 6 101 371 39 307 2.00E-64 254.6 6596 cellular  
 organisms;Eukaryota;Opisthokonta;Metazoa;Eumetazoa;Bilateria;Protostomia;  
 Spiralia;Lophotrochozoa;Mollusca;Bivalvia;Autobranchia;Heteroconchia;Euhe  
 terodonta;Imparidentia;Venerida;Veneroidea;Veneridae;Mercenaria;Mercenari  
 a mercenaria  
 UdeM00000030296 6596 454.9 UdeM00000030296 XP\_045214696.1 37.6 724  
 423 14 1 718 397 1097 1.90E-124 454.9 6596 cellular  
 organisms;Eukaryota;Opisthokonta;Metazoa;Eumetazoa;Bilateria;Protostomia;  
 Spiralia;Lophotrochozoa;Mollusca;Bivalvia;Autobranchia;Heteroconchia;Euhe  
 terodonta;Imparidentia;Venerida;Veneroidea;Veneridae;Mercenaria;Mercenari  
 a mercenaria  
 UdeM00000030297 6596 415.6 UdeM00000030297 XP\_045190542.1 28.5 1054  
 676 22 1001 1998 10 1041 3.50E-112 415.6 6596 cellular  
 organisms;Eukaryota;Opisthokonta;Metazoa;Eumetazoa;Bilateria;Protostomia;  
 Spiralia;Lophotrochozoa;Mollusca;Bivalvia;Autobranchia;Heteroconchia;Euhe  
 terodonta;Imparidentia;Venerida;Veneroidea;Veneridae;Mercenaria;Mercenari  
 a mercenaria  
 UdeM00000030298 6596 407.9 UdeM00000030298 XP\_045214696.1 37 629  
 378 9 1559 2179 479 1097 8.00E-110 407.9 6596 cellular  
 organisms;Eukaryota;Opisthokonta;Metazoa;Eumetazoa;Bilateria;Protostomia;  
 Spiralia;Lophotrochozoa;Mollusca;Bivalvia;Autobranchia;Heteroconchia;Euhe  
 terodonta;Imparidentia;Venerida;Veneroidea;Veneridae;Mercenaria;Mercenari  
 a mercenaria

UdeM00000030299 1735272 300.4 UdeM00000030299 XP\_041362825.1 54  
 263 112 3 1 258 411 669 2.10E-78 300.4 1735272  
 cellular  
 organisms;Eukaryota;Opisthokonta;Metazoa;Eumetazoa;Bilateria;Protostomia;  
 Spiralia;Lophotrochozoa;Mollusca;Gastropoda;Neomphalina;Neomphaloidea;Pel  
 tospiridae;Gigantopelta;Gigantopelta aegis  
 UdeM00000030301 400727 358.2 UdeM00000030301 XP\_025109728.1 48.4  
 376 183 4 26 396 302 671 1.30E-95 358.2 400727  
 cellular  
 organisms;Eukaryota;Opisthokonta;Metazoa;Eumetazoa;Bilateria;Protostomia;  
 Spiralia;Lophotrochozoa;Mollusca;Gastropoda;Caenogastropoda;Architaeniogl  
 ossa;Ampullarioidea;Ampullariidae;Pomacea;Pomacea canaliculata  
 UdeM00000030302 400727 363.6 UdeM00000030302 XP\_025109728.1 48.9  
 376 181 4 26 396 302 671 3.20E-97 363.6 400727  
 cellular  
 organisms;Eukaryota;Opisthokonta;Metazoa;Eumetazoa;Bilateria;Protostomia;  
 Spiralia;Lophotrochozoa;Mollusca;Gastropoda;Caenogastropoda;Architaeniogl  
 ossa;Ampullarioidea;Ampullariidae;Pomacea;Pomacea canaliculata  
 UdeM00000030303 400727 364.8 UdeM00000030303 XP\_025109728.1 48.9  
 376 181 4 26 396 302 671 1.40E-97 364.8 400727  
 cellular  
 organisms;Eukaryota;Opisthokonta;Metazoa;Eumetazoa;Bilateria;Protostomia;  
 Spiralia;Lophotrochozoa;Mollusca;Gastropoda;Caenogastropoda;Architaeniogl  
 ossa;Ampullarioidea;Ampullariidae;Pomacea;Pomacea canaliculata  
 UdeM00000030304 6596 382.1 UdeM00000030304 XP\_045190283.1 67.5 271  
 84 2 2 272 83 349 5.90E-103 382.1 6596 cellular  
 organisms;Eukaryota;Opisthokonta;Metazoa;Eumetazoa;Bilateria;Protostomia;  
 Spiralia;Lophotrochozoa;Mollusca;Bivalvia;Autobranchia;Heteroconchia;Euhe  
 terodonta;Imparidentia;Venerida;Veneroidea;Veneridae;Mercenaria;Mercenari  
 a mercenaria  
 UdeM00000030305 6565 950.7 UdeM00000030305 XP\_022338775.1 83.2 572  
 96 0 1 572 1 572 2.00E-273 950.7 6565 cellular  
 organisms;Eukaryota;Opisthokonta;Metazoa;Eumetazoa;Bilateria;Protostomia;  
 Spiralia;Lophotrochozoa;Mollusca;Bivalvia;Autobranchia;Pteriomorphia;Ostr  
 eida;Ostreoidea;Ostreidae;Crassostrea;Crassostrea virginica  
 UdeM00000030306 6596 538.1 UdeM00000030306 XP\_045189350.1 61.8 450  
 158 4 1 445 3 443 1.10E-149 538.1 6596 cellular  
 organisms;Eukaryota;Opisthokonta;Metazoa;Eumetazoa;Bilateria;Protostomia;  
 Spiralia;Lophotrochozoa;Mollusca;Bivalvia;Autobranchia;Heteroconchia;Euhe  
 terodonta;Imparidentia;Venerida;Veneroidea;Veneridae;Mercenaria;Mercenari  
 a mercenaria  
 UdeM00000030307 6596 1192.2 UdeM00000030307 XP\_045190717.1 36  
 2529 1133 56 12 2247 272 2608 0.00E+00 1192.2 6596  
 cellular  
 organisms;Eukaryota;Opisthokonta;Metazoa;Eumetazoa;Bilateria;Protostomia;  
 Spiralia;Lophotrochozoa;Mollusca;Bivalvia;Autobranchia;Heteroconchia;Euhe  
 terodonta;Imparidentia;Venerida;Veneroidea;Veneridae;Mercenaria;Mercenari  
 a mercenaria  
 UdeM00000030308 29159 175.3 UdeM00000030308 XP\_034312908.1 26.1 651  
 314 19 5 523 6 621 2.10E-40 175.3 29159 cellular  
 organisms;Eukaryota;Opisthokonta;Metazoa;Eumetazoa;Bilateria;Protostomia;  
 Spiralia;Lophotrochozoa;Mollusca;Bivalvia;Autobranchia;Pteriomorphia;Ostr  
 eida;Ostreoidea;Ostreidae;Crassostrea;Crassostrea gigas

UdeM00000030310 29159 175.3 UdeM00000030310 XP\_034312908.1 26.1 651  
 314 19 5 523 6 621 2.10E-40 175.3 29159 cellular  
 organisms;Eukaryota;Opisthokonta;Metazoa;Eumetazoa;Bilateria;Protostomia;  
 Spiralia;Lophotrochozoa;Mollusca;Bivalvia;Autobranchia;Pteriomorphia;Ostr  
 eida;Ostreoidea;Ostreidae;Crassostrea;Crassostrea gigas  
 UdeM00000030312 29159 175.3 UdeM00000030312 XP\_034312908.1 26.1 651  
 314 19 5 523 6 621 2.10E-40 175.3 29159 cellular  
 organisms;Eukaryota;Opisthokonta;Metazoa;Eumetazoa;Bilateria;Protostomia;  
 Spiralia;Lophotrochozoa;Mollusca;Bivalvia;Autobranchia;Pteriomorphia;Ostr  
 eida;Ostreoidea;Ostreidae;Crassostrea;Crassostrea gigas  
 UdeM00000030313 6596 294.7 UdeM00000030313 XP\_045190717.1 54.1 266  
 119 2 4 266 1 266 1.20E-76 294.7 6596 cellular  
 organisms;Eukaryota;Opisthokonta;Metazoa;Eumetazoa;Bilateria;Protostomia;  
 Spiralia;Lophotrochozoa;Mollusca;Bivalvia;Autobranchia;Heteroconchia;Euhe  
 terodonta;Imparidentia;Venerida;Veneroidea;Veneridae;Mercenaria;Mercenari  
 a mercenaria  
 UdeM00000030314 1735272 361.3 UdeM00000030314 XP\_041368919.1 88.4  
 199 23 0 1 199 1 199 1.20E-96 361.3 1735272  
 cellular  
 organisms;Eukaryota;Opisthokonta;Metazoa;Eumetazoa;Bilateria;Protostomia;  
 Spiralia;Lophotrochozoa;Mollusca;Gastropoda;Neomphalina;Neomphaloidea;Pel  
 tospiridae;Gigantopelta;Gigantopelta aegis  
 UdeM00000030315 6573 230.3 UdeM00000030315 XP\_021357529.1 57.8 232  
 85 8 17 245 9 230 3.10E-57 230.3 6573 cellular  
 organisms;Eukaryota;Opisthokonta;Metazoa;Eumetazoa;Bilateria;Protostomia;  
 Spiralia;Lophotrochozoa;Mollusca;Bivalvia;Autobranchia;Pteriomorphia;Pect  
 inida;Pectinoidea;Pectinidae;Mizuhopecten;Mizuhopecten yessoensis  
 UdeM00000030316 6596 463.4 UdeM00000030316 XP\_045190174.1 46.3 609  
 313 7 8 614 9 605 5.00E-127 463.4 6596 cellular  
 organisms;Eukaryota;Opisthokonta;Metazoa;Eumetazoa;Bilateria;Protostomia;  
 Spiralia;Lophotrochozoa;Mollusca;Bivalvia;Autobranchia;Heteroconchia;Euhe  
 terodonta;Imparidentia;Venerida;Veneroidea;Veneridae;Mercenaria;Mercenari  
 a mercenaria  
 UdeM00000030317 6596 140.6 UdeM00000030317 XP\_045167895.1 45.7 140  
 71 4 14 152 15 150 1.80E-30 140.6 6596 cellular  
 organisms;Eukaryota;Opisthokonta;Metazoa;Eumetazoa;Bilateria;Protostomia;  
 Spiralia;Lophotrochozoa;Mollusca;Bivalvia;Autobranchia;Heteroconchia;Euhe  
 terodonta;Imparidentia;Venerida;Veneroidea;Veneridae;Mercenaria;Mercenari  
 a mercenaria  
 UdeM00000030318 6596 142.5 UdeM00000030318 XP\_045182689.1 43.3 157  
 77 5 8 156 6 158 4.70E-31 142.5 6596 cellular  
 organisms;Eukaryota;Opisthokonta;Metazoa;Eumetazoa;Bilateria;Protostomia;  
 Spiralia;Lophotrochozoa;Mollusca;Bivalvia;Autobranchia;Heteroconchia;Euhe  
 terodonta;Imparidentia;Venerida;Veneroidea;Veneridae;Mercenaria;Mercenari  
 a mercenaria  
 UdeM00000030321 37653 543.1 UdeM00000030321 XP\_014768723.1 68.4 408  
 91 7 2 404 16 390 3.10E-151 543.1 37653 cellular  
 organisms;Eukaryota;Opisthokonta;Metazoa;Eumetazoa;Bilateria;Protostomia;  
 Spiralia;Lophotrochozoa;Mollusca;Cephalopoda;Coleoidea;Octopodiformes;Oct  
 opoda;Incirrata;Octopodidae;Octopus;Octopus bimaculoides  
 UdeM00000030324 6596 325.5 UdeM00000030324 XP\_045188999.1 64.7 221  
 78 0 1 221 1 221 5.30E-86 325.5 6596 cellular  
 organisms;Eukaryota;Opisthokonta;Metazoa;Eumetazoa;Bilateria;Protostomia;  
 Spiralia;Lophotrochozoa;Mollusca;Bivalvia;Autobranchia;Heteroconchia;Euhe

terodonta;Imparidentia;Venerida;Veneroidea;Veneridae;Mercenaria;Mercenaria mercenaria  
 UdeM00000030325 6579 166 UdeM00000030325 XP\_033756925.1 43.6 227  
 105 3 24 235 8 226 5.70E-38 166 6579 cellular  
 organisms;Eukaryota;Opisthokonta;Metazoa;Eumetazoa;Bilateria;Protostomia;  
 Spiralia;Lophotrochozoa;Mollusca;Bivalvia;Autobranchia;Pteriomorpha;Pectinida;  
 Pectinoidea;Pectinidae;Pecten;Pecten maximus  
 UdeM00000030326 6579 364.8 UdeM00000030326 XP\_033756925.1 31.2 1025  
 488 31 51 1040 226 1068 3.70E-97 364.8 6579 cellular  
 organisms;Eukaryota;Opisthokonta;Metazoa;Eumetazoa;Bilateria;Protostomia;  
 Spiralia;Lophotrochozoa;Mollusca;Bivalvia;Autobranchia;Pteriomorpha;Pectinida;  
 Pectinoidea;Pectinidae;Pecten;Pecten maximus  
 UdeM00000030327 6596 442.6 UdeM00000030327 XP\_045190405.1 61.7 337  
 127 1 9 343 15 351 4.60E-121 442.6 6596 cellular  
 organisms;Eukaryota;Opisthokonta;Metazoa;Eumetazoa;Bilateria;Protostomia;  
 Spiralia;Lophotrochozoa;Mollusca;Bivalvia;Autobranchia;Heteroconchia;Euheterodonta;  
 Imparidentia;Venerida;Veneroidea;Veneridae;Mercenaria;Mercenaria mercenaria  
 UdeM00000030328 6565 297.4 UdeM00000030328 XP\_022290679.1 63.3 240  
 68 1 1 240 1 220 1.70E-77 297.4 6565 cellular  
 organisms;Eukaryota;Opisthokonta;Metazoa;Eumetazoa;Bilateria;Protostomia;  
 Spiralia;Lophotrochozoa;Mollusca;Bivalvia;Autobranchia;Pteriomorpha;Ostreida;  
 Ostreidae;Crassostrea;Crassostrea virginica  
 UdeM00000030329 1735272 288.1 UdeM00000030329 XP\_041368933.1 46.9  
 335 159 4 6 335 1 321 1.40E-74 288.1 1735272  
 cellular  
 organisms;Eukaryota;Opisthokonta;Metazoa;Eumetazoa;Bilateria;Protostomia;  
 Spiralia;Lophotrochozoa;Mollusca;Gastropoda;Neomphalina;Neomphaloidea;Peltospiridae;  
 Gigantopelta;Gigantopelta aegis  
 UdeM00000030330 6596 1997.6 UdeM00000030330 XP\_045190412.1 84.3  
 1180 154 5 1 1175 1 1154 0.00E+00 1997.6 6596  
 cellular  
 organisms;Eukaryota;Opisthokonta;Metazoa;Eumetazoa;Bilateria;Protostomia;  
 Spiralia;Lophotrochozoa;Mollusca;Bivalvia;Autobranchia;Heteroconchia;Euheterodonta;  
 Imparidentia;Venerida;Veneroidea;Veneridae;Mercenaria;Mercenaria mercenaria  
 UdeM00000030331 6596 3699.4 UdeM00000030331 XP\_045190175.1 87.4  
 2151 263 5 1 2145 1 2148 0.00E+00 3699.4 6596  
 cellular  
 organisms;Eukaryota;Opisthokonta;Metazoa;Eumetazoa;Bilateria;Protostomia;  
 Spiralia;Lophotrochozoa;Mollusca;Bivalvia;Autobranchia;Heteroconchia;Euheterodonta;  
 Imparidentia;Venerida;Veneroidea;Veneridae;Mercenaria;Mercenaria mercenaria  
 UdeM00000030332 6596 1048.5 UdeM00000030332 XP\_045188584.1 78.2  
 684 146 1 9 689 5 688 3.70E-303 1048.5 6596  
 cellular  
 organisms;Eukaryota;Opisthokonta;Metazoa;Eumetazoa;Bilateria;Protostomia;  
 Spiralia;Lophotrochozoa;Mollusca;Bivalvia;Autobranchia;Heteroconchia;Euheterodonta;  
 Imparidentia;Venerida;Veneroidea;Veneridae;Mercenaria;Mercenaria mercenaria  
 UdeM00000030333 6579 364.8 UdeM00000030333 XP\_033757623.1 82.6 207  
 35 1 1 206 1 207 7.40E-98 364.8 6579 cellular  
 organisms;Eukaryota;Opisthokonta;Metazoa;Eumetazoa;Bilateria;Protostomia;

Spiralia;Lophotrochozoa;Mollusca;Bivalvia;Autobranchia;Pteriormorphia;Pectinida;Pectinoidea;Pectinidae;Pecten;Pecten maximus

UdeM00000030334 1735272 562.8 UdeM00000030334 XP\_041369220.1 51.6  
543 241 7 4 544 18 540 4.90E-157 562.8 1735272  
cellular

organisms;Eukaryota;Opisthokonta;Metazoa;Eumetazoa;Bilateria;Protostomia;Spiralia;Lophotrochozoa;Mollusca;Gastropoda;Neomphalina;Neomphaloidea;Peltospiridae;Gigantopelta;Gigantopelta aegis

UdeM00000030335 6596 904 UdeM00000030335 XP\_045190176.1 40.6 1239  
645 26 1 1203 5 1188 2.00E-259 904 6596 cellular

organisms;Eukaryota;Opisthokonta;Metazoa;Eumetazoa;Bilateria;Protostomia;Spiralia;Lophotrochozoa;Mollusca;Bivalvia;Autobranchia;Heteroconchia;Euheterodonta;Imparidentia;Venerida;Veneroidea;Veneridae;Mercenaria;Mercenaria mercenaria

UdeM00000030338 6565 133.3 UdeM00000030338 XP\_022297409.1 39.3 178  
101 4 1 174 82 256 3.10E-28 133.3 6565 cellular

organisms;Eukaryota;Opisthokonta;Metazoa;Eumetazoa;Bilateria;Protostomia;Spiralia;Lophotrochozoa;Mollusca;Bivalvia;Autobranchia;Pteriormorphia;Ostreida;Ostreoidea;Ostreidae;Crassostrea;Crassostrea virginica

UdeM00000030340 29159 115.9 UdeM00000030340 XP\_034339171.1 24.9 418  
214 14 1 321 159 573 9.50E-23 115.9 29159 cellular

organisms;Eukaryota;Opisthokonta;Metazoa;Eumetazoa;Bilateria;Protostomia;Spiralia;Lophotrochozoa;Mollusca;Bivalvia;Autobranchia;Pteriormorphia;Ostreida;Ostreoidea;Ostreidae;Crassostrea;Crassostrea gigas

UdeM00000030342 29159 592.4 UdeM00000030342 XP\_034305523.1 51.2 557  
248 3 53 587 443 997 6.60E-166 592.4 29159 cellular

organisms;Eukaryota;Opisthokonta;Metazoa;Eumetazoa;Bilateria;Protostomia;Spiralia;Lophotrochozoa;Mollusca;Bivalvia;Autobranchia;Pteriormorphia;Ostreida;Ostreoidea;Ostreidae;Crassostrea;Crassostrea gigas

UdeM00000030345 29159 253.8 UdeM00000030345 XP\_034327197.1 26 1175  
705 41 5 1096 3 1095 1.10E-63 253.8 29159 cellular

organisms;Eukaryota;Opisthokonta;Metazoa;Eumetazoa;Bilateria;Protostomia;Spiralia;Lophotrochozoa;Mollusca;Bivalvia;Autobranchia;Pteriormorphia;Ostreida;Ostreoidea;Ostreidae;Crassostrea;Crassostrea gigas

UdeM00000030346 6579 548.5 UdeM00000030346 XP\_033757728.1 53.9 575  
217 11 9 558 1 552 9.90E-153 548.5 6579 cellular

organisms;Eukaryota;Opisthokonta;Metazoa;Eumetazoa;Bilateria;Protostomia;Spiralia;Lophotrochozoa;Mollusca;Bivalvia;Autobranchia;Pteriormorphia;Pectinida;Pectinoidea;Pectinidae;Pecten;Pecten maximus

UdeM00000030348 6596 232.3 UdeM00000030348 XP\_045188168.1 69.9 163  
47 1 5 165 4 166 4.60E-58 232.3 6596 cellular

organisms;Eukaryota;Opisthokonta;Metazoa;Eumetazoa;Bilateria;Protostomia;Spiralia;Lophotrochozoa;Mollusca;Bivalvia;Autobranchia;Heteroconchia;Euheterodonta;Imparidentia;Venerida;Veneroidea;Veneridae;Mercenaria;Mercenaria mercenaria

UdeM00000030347 6596 771.2 UdeM00000030347 XP\_045188168.1 64.1 622  
214 4 5 619 4 623 1.10E-219 771.2 6596 cellular

organisms;Eukaryota;Opisthokonta;Metazoa;Eumetazoa;Bilateria;Protostomia;Spiralia;Lophotrochozoa;Mollusca;Bivalvia;Autobranchia;Heteroconchia;Euheterodonta;Imparidentia;Venerida;Veneroidea;Veneridae;Mercenaria;Mercenaria mercenaria

UdeM00000030349 1735272 293.5 UdeM00000030349 XP\_041370963.1 56  
252 102 3 21 266 11 259 2.70E-76 293.5 1735272  
cellular

organisms;Eukaryota;Opisthokonta;Metazoa;Eumetazoa;Bilateria;Protostomia;Spiralia;Lophotrochozoa;Mollusca;Gastropoda;Neomphalina;Neomphaloidea;Peltospiridae;Gigantopelta;Gigantopelta aegis  
UdeM00000030350 6565 138.3 UdeM00000030350 XP\_022341002.1 61.9 113  
42 1 2 114 648 759 9.40E-30 138.3 6565 cellular  
organisms;Eukaryota;Opisthokonta;Metazoa;Eumetazoa;Bilateria;Protostomia;Spiralia;Lophotrochozoa;Mollusca;Bivalvia;Autobranchia;Pteriormorphia;Ostreida;Ostreioidea;Ostreidae;Crassostrea;Crassostrea virginica  
UdeM00000030351 6565 274.2 UdeM00000030351 XP\_022341004.1 68.4 187  
56 2 40 226 22 205 1.60E-70 274.2 6565 cellular  
organisms;Eukaryota;Opisthokonta;Metazoa;Eumetazoa;Bilateria;Protostomia;Spiralia;Lophotrochozoa;Mollusca;Bivalvia;Autobranchia;Pteriormorphia;Ostreida;Ostreioidea;Ostreidae;Crassostrea;Crassostrea virginica  
UdeM00000030352 6565 274.2 UdeM00000030352 XP\_022341004.1 68.4 187  
56 2 24 210 22 205 1.50E-70 274.2 6565 cellular  
organisms;Eukaryota;Opisthokonta;Metazoa;Eumetazoa;Bilateria;Protostomia;Spiralia;Lophotrochozoa;Mollusca;Bivalvia;Autobranchia;Pteriormorphia;Ostreida;Ostreioidea;Ostreidae;Crassostrea;Crassostrea virginica  
UdeM00000030353 6596 496.9 UdeM00000030353 XP\_045190400.1 71.5 323  
92 0 5 327 2 324 2.10E-137 496.9 6596 cellular  
organisms;Eukaryota;Opisthokonta;Metazoa;Eumetazoa;Bilateria;Protostomia;Spiralia;Lophotrochozoa;Mollusca;Bivalvia;Autobranchia;Heteroconchia;Euheterodonta;Imparidentia;Venerida;Veneroidea;Veneridae;Mercenaria;Mercenaria mercenaria  
UdeM00000028572 6579 300.1 UdeM00000028572 XP\_033727094.1 44.6 350  
183 4 15 359 433 776 3.90E-78 300.1 6579 cellular  
organisms;Eukaryota;Opisthokonta;Metazoa;Eumetazoa;Bilateria;Protostomia;Spiralia;Lophotrochozoa;Mollusca;Bivalvia;Autobranchia;Pteriormorphia;Pectinida;Pectinoidea;Pectinidae;Pecten;Pecten maximus  
UdeM00000028573 400727 243.4 UdeM00000028573 XP\_025089898.1 48.8  
252 116 2 1 245 594 839 3.00E-61 243.4 400727  
cellular  
organisms;Eukaryota;Opisthokonta;Metazoa;Eumetazoa;Bilateria;Protostomia;Spiralia;Lophotrochozoa;Mollusca;Gastropoda;Caenogastropoda;Architaenioglossa;Ampullarioidea;Ampullariidae;Pomacea;Pomacea canaliculata  
UdeM00000028576 6596 132.1 UdeM00000028576 XP\_045180626.1 28.5 312  
192 5 47 352 94 380 1.40E-27 132.1 6596 cellular  
organisms;Eukaryota;Opisthokonta;Metazoa;Eumetazoa;Bilateria;Protostomia;Spiralia;Lophotrochozoa;Mollusca;Bivalvia;Autobranchia;Heteroconchia;Euheterodonta;Imparidentia;Venerida;Veneroidea;Veneridae;Mercenaria;Mercenaria mercenaria  
UdeM00000028575 6596 131.7 UdeM00000028575 XP\_045180626.1 28.5 312  
192 5 47 352 94 380 2.00E-27 131.7 6596 cellular  
organisms;Eukaryota;Opisthokonta;Metazoa;Eumetazoa;Bilateria;Protostomia;Spiralia;Lophotrochozoa;Mollusca;Bivalvia;Autobranchia;Heteroconchia;Euheterodonta;Imparidentia;Venerida;Veneroidea;Veneridae;Mercenaria;Mercenaria mercenaria  
UdeM00000028577 1735272 117.5 UdeM00000028577 XP\_041361359.1 39.7  
156 79 4 1 141 649 804 1.40E-23 117.5 1735272  
cellular  
organisms;Eukaryota;Opisthokonta;Metazoa;Eumetazoa;Bilateria;Protostomia;Spiralia;Lophotrochozoa;Mollusca;Gastropoda;Neomphalina;Neomphaloidea;Peltospiridae;Gigantopelta;Gigantopelta aegis

UdeM00000028578 6596 764.2 UdeM00000028578 XP\_045181034.1 81.5 466  
 84 2 47 511 17 481 1.00E-217 764.2 6596 cellular  
 organisms;Eukaryota;Opisthokonta;Metazoa;Eumetazoa;Bilateria;Protostomia;  
 Spiralia;Lophotrochozoa;Mollusca;Bivalvia;Autobranhia;Heteroconchia;Euhe  
 terodonta;Imparidentia;Venerida;Veneroidea;Veneridae;Mercenaria;Mercenari  
 a mercenaria  
 UdeM00000028581 6596 138.3 UdeM00000028581 XP\_045177695.1 38.1 197  
 95 1 63 259 178 347 1.50E-29 138.3 6596 cellular  
 organisms;Eukaryota;Opisthokonta;Metazoa;Eumetazoa;Bilateria;Protostomia;  
 Spiralia;Lophotrochozoa;Mollusca;Bivalvia;Autobranhia;Heteroconchia;Euhe  
 terodonta;Imparidentia;Venerida;Veneroidea;Veneridae;Mercenaria;Mercenari  
 a mercenaria  
 UdeM00000028582 6565 99.8 UdeM00000028582 XP\_022299602.1 48.8 86  
 43 1 4 89 47 131 2.60E-18 99.8 6565 cellular  
 organisms;Eukaryota;Opisthokonta;Metazoa;Eumetazoa;Bilateria;Protostomia;  
 Spiralia;Lophotrochozoa;Mollusca;Bivalvia;Autobranhia;Pteriormorphia;Ostr  
 eida;Ostreoidea;Ostreidae;Crassostrea;Crassostrea virginica  
 UdeM00000028583 6579 125.2 UdeM00000028583 XP\_033740904.1 47.7 128  
 63 2 60 184 2 128 9.00E-26 125.2 6579 cellular  
 organisms;Eukaryota;Opisthokonta;Metazoa;Eumetazoa;Bilateria;Protostomia;  
 Spiralia;Lophotrochozoa;Mollusca;Bivalvia;Autobranhia;Pteriormorphia;Pect  
 inida;Pectinoidea;Pectinidae;Pecten;Pecten maximus  
 UdeM00000028584 6579 125.2 UdeM00000028584 XP\_033740904.1 47.7 128  
 63 2 62 186 2 128 9.00E-26 125.2 6579 cellular  
 organisms;Eukaryota;Opisthokonta;Metazoa;Eumetazoa;Bilateria;Protostomia;  
 Spiralia;Lophotrochozoa;Mollusca;Bivalvia;Autobranhia;Pteriormorphia;Pect  
 inida;Pectinoidea;Pectinidae;Pecten;Pecten maximus  
 UdeM00000028586 151771 353.6 UdeM00000028586 XP\_028419301.1 51.8  
 332 139 3 2 320 156 479 2.70E-94 353.6 151771  
 cellular  
 organisms;Eukaryota;Opisthokonta;Metazoa;Eumetazoa;Cnidaria;Anthozoa;Octo  
 corallia;Alcyonacea;Alcyoniina;Nephtheidae;Dendronephthya;Dendronephthya  
 gigantea  
 UdeM00000028587 45264 60.1 UdeM00000028587 XP\_044164583.1 34.8 115  
 37 3 68 148 161 271 2.80E-06 60.1 45264 cellular  
 organisms;Eukaryota;Opisthokonta;Metazoa;Eumetazoa;Cnidaria;Anthozoa;Hexa  
 corallia;Scleractinia;Astrocoeniina;Acroporidae;Acropora;Acropora  
 millepora  
 UdeM00000028588 6596 171.8 UdeM00000028588 XP\_045177779.1 40.6 278  
 146 8 9 281 90 353 1.50E-39 171.8 6596 cellular  
 organisms;Eukaryota;Opisthokonta;Metazoa;Eumetazoa;Bilateria;Protostomia;  
 Spiralia;Lophotrochozoa;Mollusca;Bivalvia;Autobranhia;Heteroconchia;Euhe  
 terodonta;Imparidentia;Venerida;Veneroidea;Veneridae;Mercenaria;Mercenari  
 a mercenaria  
 UdeM00000028590 6596 375.9 UdeM00000028590 XP\_045180813.1 51.3 421  
 160 10 2 390 7 414 9.30E-101 375.9 6596 cellular  
 organisms;Eukaryota;Opisthokonta;Metazoa;Eumetazoa;Bilateria;Protostomia;  
 Spiralia;Lophotrochozoa;Mollusca;Bivalvia;Autobranhia;Heteroconchia;Euhe  
 terodonta;Imparidentia;Venerida;Veneroidea;Veneridae;Mercenaria;Mercenari  
 a mercenaria  
 UdeM00000028591 6596 374.8 UdeM00000028591 XP\_045180813.1 51.5 421  
 158 11 2 389 7 414 2.10E-100 374.8 6596 cellular  
 organisms;Eukaryota;Opisthokonta;Metazoa;Eumetazoa;Bilateria;Protostomia;  
 Spiralia;Lophotrochozoa;Mollusca;Bivalvia;Autobranhia;Heteroconchia;Euhe



terodonta;Imparidentia;Venerida;Veneroidea;Veneridae;Mercenaria;Mercenaria mercenaria

UdeM00000028592 6573 349 UdeM00000028592 XP\_021377504.1 35.9 640  
336 16 4 633 8 583 1.30E-92 349 6573 cellular

organisms;Eukaryota;Opisthokonta;Metazoa;Eumetazoa;Bilateria;Protostomia;Spiralia;Lophotrochozoa;Mollusca;Bivalvia;Autobranchia;Pteriormorphia;Pectinida;Pectinoidea;Pectinidae;Mizuhopecten;Mizuhopecten yessoensis

UdeM00000028593 50390 446.4 UdeM00000028593 XP\_028142380.1 49.6 357  
180 0 1 357 85 441 3.30E-122 446.4 50390 cellular

organisms;Eukaryota;Opisthokonta;Metazoa;Eumetazoa;Bilateria;Protostomia;Ecdysozoa;Panarthropoda;Arthropoda;Mandibulata;Pancrustacea;Hexapoda;Insecta;Dicondylia;Pterygota;Neoptera;Endopterygota;Coleoptera;Polyphaga;Cucujiformia;Chrysomeloidea;Chrysomelidae;Galerucinae;Luperini;Diabroticina;Diabroticites;Diabrotica;Diabrotica virgifera;Diabrotica virgifera virgifera

UdeM00000028594 6596 71.2 UdeM00000028594 XP\_045182492.1 65.4 52  
18 0 83 134 91 142 1.30E-09 71.2 6596 cellular

organisms;Eukaryota;Opisthokonta;Metazoa;Eumetazoa;Bilateria;Protostomia;Spiralia;Lophotrochozoa;Mollusca;Bivalvia;Autobranchia;Heteroconchia;Euterodonta;Imparidentia;Venerida;Veneroidea;Veneridae;Mercenaria;Mercenaria mercenaria

UdeM00000028596 6579 646.7 UdeM00000028596 XP\_033727650.1 69.1 521  
125 21 1 502 1 504 2.40E-182 646.7 6579 cellular

organisms;Eukaryota;Opisthokonta;Metazoa;Eumetazoa;Bilateria;Protostomia;Spiralia;Lophotrochozoa;Mollusca;Bivalvia;Autobranchia;Pteriormorphia;Pectinida;Pectinoidea;Pectinidae;Pecten;Pecten maximus

UdeM00000028595 6579 645.6 UdeM00000028595 XP\_033727650.1 69.1 521  
125 21 1 502 1 504 5.40E-182 645.6 6579 cellular

organisms;Eukaryota;Opisthokonta;Metazoa;Eumetazoa;Bilateria;Protostomia;Spiralia;Lophotrochozoa;Mollusca;Bivalvia;Autobranchia;Pteriormorphia;Pectinida;Pectinoidea;Pectinidae;Pecten;Pecten maximus

UdeM00000028597 1735272 221.1 UdeM00000028597 XP\_041361339.1 69.4  
147 44 1 1 146 1 147 9.40E-55 221.1 1735272

cellular

organisms;Eukaryota;Opisthokonta;Metazoa;Eumetazoa;Bilateria;Protostomia;Spiralia;Lophotrochozoa;Mollusca;Gastropoda;Neomphalina;Neomphaloidea;Peltospiridae;Gigantopelta;Gigantopelta aegis

UdeM00000028598 1735272 591.3 UdeM00000028598 XP\_041361664.1 68.8  
525 134 8 1 515 1 505 1.20E-165 591.3 1735272

cellular

organisms;Eukaryota;Opisthokonta;Metazoa;Eumetazoa;Bilateria;Protostomia;Spiralia;Lophotrochozoa;Mollusca;Gastropoda;Neomphalina;Neomphaloidea;Peltospiridae;Gigantopelta;Gigantopelta aegis

UdeM00000028599 10224 291.2 UdeM00000028599 XP\_006820181.1 44.1 354  
190 3 16 362 218 570 1.90E-75 291.2 10224 cellular

organisms;Eukaryota;Opisthokonta;Metazoa;Eumetazoa;Bilateria;Deuterostomia;Hemichordata;Enteropneusta;Harrimaniidae;Saccoglossus;Saccoglossus kowalevskii

UdeM00000028600 1735272 104 UdeM00000028600 XP\_041347065.1 64  
75 27 0 1 75 1 75 8.90E-20 104 1735272

cellular

organisms;Eukaryota;Opisthokonta;Metazoa;Eumetazoa;Bilateria;Protostomia;Spiralia;Lophotrochozoa;Mollusca;Gastropoda;Neomphalina;Neomphaloidea;Peltospiridae;Gigantopelta;Gigantopelta aegis

UdeM00000028601 6596 111.7 UdeM00000028601 XP\_045177695.1 41 144  
 72 1 105 248 226 356 1.40E-21 111.7 6596 cellular  
 organisms;Eukaryota;Opisthokonta;Metazoa;Eumetazoa;Bilateria;Protostomia;  
 Spiralia;Lophotrochozoa;Mollusca;Bivalvia;Autobranchia;Heteroconchia;Euhe  
 terodonta;Imparidentia;Venerida;Veneroidea;Veneridae;Mercenaria;Mercenari  
 a mercenaria

UdeM00000028602 6579 77.4 UdeM00000028602 XP\_033729399.1 34.2 155  
 91 5 2 155 13 157 2.10E-11 77.4 6579 cellular  
 organisms;Eukaryota;Opisthokonta;Metazoa;Eumetazoa;Bilateria;Protostomia;  
 Spiralia;Lophotrochozoa;Mollusca;Bivalvia;Autobranchia;Pteriormorphia;Pect  
 inida;Pectinoidea;Pectinidae;Pecten;Pecten maximus

UdeM00000028603 10224 304.3 UdeM00000028603 XP\_006820181.1 43.4 369  
 201 3 14 375 218 585 2.20E-79 304.3 10224 cellular  
 organisms;Eukaryota;Opisthokonta;Metazoa;Eumetazoa;Bilateria;Deuterostomi  
 a;Hemichordata;Enteropneusta;Harrimaniidae;Saccoglossus;Saccoglossus  
 kowalevskii

UdeM00000028605 74940 66.2 UdeM00000028605 XP\_042173814.1 31.2 125  
 75 5 208 332 206 319 9.10E-08 66.2 74940 cellular  
 organisms;Eukaryota;Opisthokonta;Metazoa;Eumetazoa;Bilateria;Deuterostomi  
 a;Chordata;Craniata;Vertebrata;Gnathostomata;Teleostomi;Euteleostomi;Acti  
 nopterygii;Actinopteri;Neopterygii;Teleostei;Osteoglossocephalai;Clupeoce  
 phala;Euteleosteomorpha;Protacanthopterygii;Salmoniformes;Salmonidae;Salm  
 oninae;Oncorhynchus;Oncorhynchus tshawytscha

UdeM00000028606 46514 86.7 UdeM00000028606 XP\_038064778.1 44.1 102  
 52 2 1 102 673 769 2.30E-14 86.7 46514 cellular  
 organisms;Eukaryota;Opisthokonta;Metazoa;Eumetazoa;Bilateria;Deuterostomi  
 a;Echinodermata;Eleutherozoa;Asterozoa;Asteroidea;Valvatataceae;Valvatida;As  
 terinidae;Patiria;Patiria miniata

UdeM00000028607 1735272 412.9 UdeM00000028607 XP\_041361664.1 76.4  
 271 62 1 1 271 237 505 3.10E-112 412.9 1735272  
 cellular  
 organisms;Eukaryota;Opisthokonta;Metazoa;Eumetazoa;Bilateria;Protostomia;  
 Spiralia;Lophotrochozoa;Mollusca;Gastropoda;Neomphalina;Neomphaloidea;Pel  
 tospiridae;Gigantopelta;Gigantopelta aegis

UdeM00000028608 2652724 100.5 UdeM00000028608 XP\_020914302.1 34.6  
 188 121 2 156 342 7 193 1.10E-17 100.5 2652724  
 cellular  
 organisms;Eukaryota;Opisthokonta;Metazoa;Eumetazoa;Cnidaria;Anthozoa;Hexa  
 corallia;Actiniaria;Aiptasiidae;Exaiptasia;Exaiptasia diaphana

UdeM00000028609 29159 65.5 UdeM00000028609 XP\_034315424.1 36.1 108  
 60 3 57 161 213 314 1.10E-07 65.5 29159 cellular  
 organisms;Eukaryota;Opisthokonta;Metazoa;Eumetazoa;Bilateria;Protostomia;  
 Spiralia;Lophotrochozoa;Mollusca;Bivalvia;Autobranchia;Pteriormorphia;Ostr  
 eida;Ostreidae;Crassostrea;Crassostrea gigas

UdeM00000028611 6565 99.8 UdeM00000028611 XP\_022311947.1 43.9 107  
 58 2 10 115 815 920 2.50E-18 99.8 6565 cellular  
 organisms;Eukaryota;Opisthokonta;Metazoa;Eumetazoa;Bilateria;Protostomia;  
 Spiralia;Lophotrochozoa;Mollusca;Bivalvia;Autobranchia;Pteriormorphia;Ostr  
 eida;Ostreidae;Crassostrea;Crassostrea virginica

UdeM00000028612 46514 100.9 UdeM00000028612 XP\_038062907.1 33.3 168  
 104 4 133 294 321 486 2.80E-18 100.9 46514 cellular  
 organisms;Eukaryota;Opisthokonta;Metazoa;Eumetazoa;Bilateria;Deuterostomi  
 a;Echinodermata;Eleutherozoa;Asterozoa;Asteroidea;Valvatataceae;Valvatida;As  
 terinidae;Patiria;Patiria miniata

UdeM00000028614 7574 105.5 UdeM00000028614 XP\_013382110.1 37.3 153  
 93 2 18 167 47 199 6.60E-20 105.5 7574 cellular  
 organisms;Eukaryota;Opisthokonta;Metazoa;Eumetazoa;Bilateria;Protostomia;  
 Spiralia;Lophotrochozoa;Brachiopoda;Linguliformea;Lingulata;Lingulida;Lin  
 guloidea;Lingulidae;Lingula;Lingula anatina  
 UdeM00000028615 2652724 105.9 UdeM00000028615 XP\_020914302.1 35.9  
 192 119 3 5 193 11 201 2.20E-19 105.9 2652724  
 cellular  
 organisms;Eukaryota;Opisthokonta;Metazoa;Eumetazoa;Cnidaria;Anthozoa;Hexa  
 corallia;Actiniaria;Aiptasiidae;Exaiptasia;Exaiptasia diaphana  
 UdeM00000028617 6596 187.6 UdeM00000028617 XP\_045177779.1 36.6 355  
 189 10 9 357 90 414 3.90E-44 187.6 6596 cellular  
 organisms;Eukaryota;Opisthokonta;Metazoa;Eumetazoa;Bilateria;Protostomia;  
 Spiralia;Lophotrochozoa;Mollusca;Bivalvia;Autobranchia;Heteroconchia;Euhe  
 terodonta;Imparidentia;Venerida;Veneroidea;Veneridae;Mercenaria;Mercenari  
 a mercenaria  
 UdeM00000028616 6596 187.6 UdeM00000028616 XP\_045177779.1 36.6 355  
 189 10 9 357 90 414 7.60E-44 187.6 6596 cellular  
 organisms;Eukaryota;Opisthokonta;Metazoa;Eumetazoa;Bilateria;Protostomia;  
 Spiralia;Lophotrochozoa;Mollusca;Bivalvia;Autobranchia;Heteroconchia;Euhe  
 terodonta;Imparidentia;Venerida;Veneroidea;Veneridae;Mercenaria;Mercenari  
 a mercenaria  
 UdeM00000028618 6596 177.6 UdeM00000028618 XP\_045179269.1 41.8 225  
 118 1 725 949 247 458 7.70E-41 177.6 6596 cellular  
 organisms;Eukaryota;Opisthokonta;Metazoa;Eumetazoa;Bilateria;Protostomia;  
 Spiralia;Lophotrochozoa;Mollusca;Bivalvia;Autobranchia;Heteroconchia;Euhe  
 terodonta;Imparidentia;Venerida;Veneroidea;Veneridae;Mercenaria;Mercenari  
 a mercenaria  
 UdeM00000028619 6105 102.4 UdeM00000028619 XP\_031567569.1 36.1 158  
 89 5 165 318 8 157 1.20E-18 102.4 6105 cellular  
 organisms;Eukaryota;Opisthokonta;Metazoa;Eumetazoa;Cnidaria;Anthozoa;Hexa  
 corallia;Actiniaria;Actiniidae;Actinia;Actinia tenebrosa  
 UdeM00000028620 6105 102.4 UdeM00000028620 XP\_031567569.1 36.1 158  
 89 5 18 171 8 157 6.70E-19 102.4 6105 cellular  
 organisms;Eukaryota;Opisthokonta;Metazoa;Eumetazoa;Cnidaria;Anthozoa;Hexa  
 corallia;Actiniaria;Actiniidae;Actinia;Actinia tenebrosa  
 UdeM00000028621 6573 126.7 UdeM00000028621 XP\_021365717.1 29.1 330  
 194 13 54 369 44 347 8.50E-26 126.7 6573 cellular  
 organisms;Eukaryota;Opisthokonta;Metazoa;Eumetazoa;Bilateria;Protostomia;  
 Spiralia;Lophotrochozoa;Mollusca;Bivalvia;Autobranchia;Pteriormorphia;Pect  
 inida;Pectinoidea;Pectinidae;Mizuhopecten;Mizuhopecten yessoensis  
 UdeM00000028624 6573 95.9 UdeM00000028624 XP\_021365717.1 32.8 174  
 104 6 116 285 127 291 1.10E-16 95.9 6573 cellular  
 organisms;Eukaryota;Opisthokonta;Metazoa;Eumetazoa;Bilateria;Protostomia;  
 Spiralia;Lophotrochozoa;Mollusca;Bivalvia;Autobranchia;Pteriormorphia;Pect  
 inida;Pectinoidea;Pectinidae;Mizuhopecten;Mizuhopecten yessoensis  
 UdeM00000028622 6573 113.2 UdeM00000028622 XP\_021365717.1 30.1 259  
 142 10 116 352 127 368 7.70E-22 113.2 6573 cellular  
 organisms;Eukaryota;Opisthokonta;Metazoa;Eumetazoa;Bilateria;Protostomia;  
 Spiralia;Lophotrochozoa;Mollusca;Bivalvia;Autobranchia;Pteriormorphia;Pect  
 inida;Pectinoidea;Pectinidae;Mizuhopecten;Mizuhopecten yessoensis  
 UdeM00000028623 6596 84.3 UdeM00000028623 XP\_045198771.1 27.6 257  
 161 11 89 328 3154 3402 3.70E-13 84.3 6596 cellular  
 organisms;Eukaryota;Opisthokonta;Metazoa;Eumetazoa;Bilateria;Protostomia;

Spiralia;Lophotrochozoa;Mollusca;Bivalvia;Autobranchia;Heteroconchia;Euherodonta;Imparidentia;Venerida;Veneroidea;Veneridae;Mercenaria;Mercenaria mercenaria

UdeM00000028626 46514 117.9 UdeM00000028626 XP\_038057856.1 26.9 432  
270 18 144 550 523 933 4.50E-23 117.9 46514 cellular

organisms;Eukaryota;Opisthokonta;Metazoa;Eumetazoa;Bilateria;Deuterostomia;Echinodermata;Eleutherozoa;Asterozoa;Asteroidea;Valvatacea;Valvatida;Asterinidae;Patiria;Patiria miniata

UdeM00000028627 46514 128.3 UdeM00000028627 XP\_038057855.1 27.3 414  
264 15 152 548 645 1038 3.40E-26 128.3 46514 cellular

organisms;Eukaryota;Opisthokonta;Metazoa;Eumetazoa;Bilateria;Deuterostomia;Echinodermata;Eleutherozoa;Asterozoa;Asteroidea;Valvatacea;Valvatida;Asterinidae;Patiria;Patiria miniata

UdeM00000028629 29159 397.9 UdeM00000028629 XP\_034332220.1 59.3 317  
121 3 3 315 4 316 1.20E-107 397.9 29159 cellular

organisms;Eukaryota;Opisthokonta;Metazoa;Eumetazoa;Bilateria;Protostomia;Spiralia;Lophotrochozoa;Mollusca;Bivalvia;Autobranchia;Pteriormorphia;Ostreida;Ostreoidea;Ostreidae;Crassostrea;Crassostrea gigas

UdeM00000028631 6573 141 UdeM00000028631 XP\_021372357.1 40.8 157  
93 0 141 297 140 296 3.60E-30 141 6573 cellular

organisms;Eukaryota;Opisthokonta;Metazoa;Eumetazoa;Bilateria;Protostomia;Spiralia;Lophotrochozoa;Mollusca;Bivalvia;Autobranchia;Pteriormorphia;Pectinida;Pectinoidea;Pectinidae;Mizuhopecten;Mizuhopecten yessoensis

UdeM00000028632 6596 161 UdeM00000028632 XP\_045180452.1 37.9 406  
196 17 35 417 2 374 3.30E-36 161 6596 cellular

organisms;Eukaryota;Opisthokonta;Metazoa;Eumetazoa;Bilateria;Protostomia;Spiralia;Lophotrochozoa;Mollusca;Bivalvia;Autobranchia;Heteroconchia;Euherodonta;Imparidentia;Venerida;Veneroidea;Veneridae;Mercenaria;Mercenaria mercenaria

UdeM00000028633 6596 404.8 UdeM00000028633 XP\_045182948.1 62.4 503  
145 3 4 462 12 514 1.50E-109 404.8 6596 cellular

organisms;Eukaryota;Opisthokonta;Metazoa;Eumetazoa;Bilateria;Protostomia;Spiralia;Lophotrochozoa;Mollusca;Bivalvia;Autobranchia;Heteroconchia;Euherodonta;Imparidentia;Venerida;Veneroidea;Veneridae;Mercenaria;Mercenaria mercenaria

UdeM00000028634 29159 61.6 UdeM00000028634 XP\_019917936.2 41.7 72  
37 3 27 95 246 315 6.30E-07 61.6 29159 cellular

organisms;Eukaryota;Opisthokonta;Metazoa;Eumetazoa;Bilateria;Protostomia;Spiralia;Lophotrochozoa;Mollusca;Bivalvia;Autobranchia;Pteriormorphia;Ostreida;Ostreoidea;Ostreidae;Crassostrea;Crassostrea gigas

UdeM00000028635 6596 72.4 UdeM00000028635 XP\_045206350.1 31.1 122  
76 4 134 248 186 306 1.30E-09 72.4 6596 cellular

organisms;Eukaryota;Opisthokonta;Metazoa;Eumetazoa;Bilateria;Protostomia;Spiralia;Lophotrochozoa;Mollusca;Bivalvia;Autobranchia;Heteroconchia;Euherodonta;Imparidentia;Venerida;Veneroidea;Veneridae;Mercenaria;Mercenaria mercenaria

UdeM00000028636 1735272 73.6 UdeM00000028636 XP\_041352358.1 24.3  
304 163 12 55 350 56 300 8.20E-10 73.6 1735272  
cellular

organisms;Eukaryota;Opisthokonta;Metazoa;Eumetazoa;Bilateria;Protostomia;Spiralia;Lophotrochozoa;Mollusca;Gastropoda;Neomphalina;Neomphaloidea;Peltospiridae;Gigantopelta;Gigantopelta aegis

UdeM00000028638 225164 73.6 UdeM00000028638 XP\_009057862.1 25.3  
170 123 3 259 426 30 197 7.50E-10 73.6 225164

cellular  
organisms;Eukaryota;Opisthokonta;Metazoa;Eumetazoa;Bilateria;Protostomia;  
Spiralia;Lophotrochozoa;Mollusca;Gastropoda;Patellogastropoda;Lottioidea;  
Lottiidae;Lottia;Lottia gigantea  
UdeM00000028639 29159 344 UdeM00000028639 XP\_011448276.2 55.6 295  
130 1 7 300 13 307 2.00E-91 344 29159 cellular  
organisms;Eukaryota;Opisthokonta;Metazoa;Eumetazoa;Bilateria;Protostomia;  
Spiralia;Lophotrochozoa;Mollusca;Bivalvia;Autobranchia;Pteriormorphia;Ostr  
eida;Ostreoidea;Ostreidae;Crassostrea;Crassostrea gigas  
UdeM00000028640 1735272 213.4 UdeM00000028640 XP\_041360851.1 56.6  
212 88 2 1 212 1 208 3.20E-52 213.4 1735272  
cellular  
organisms;Eukaryota;Opisthokonta;Metazoa;Eumetazoa;Bilateria;Protostomia;  
Spiralia;Lophotrochozoa;Mollusca;Gastropoda;Neomphalina;Neomphaloidea;Pel  
tospiridae;Gigantopelta;Gigantopelta aegis  
UdeM00000028641 7574 394.8 UdeM00000028641 XP\_013418752.1 84.2 228  
36 0 178 405 206 433 1.30E-106 394.8 7574 cellular  
organisms;Eukaryota;Opisthokonta;Metazoa;Eumetazoa;Bilateria;Protostomia;  
Spiralia;Lophotrochozoa;Brachiopoda;Linguliformea;Lingulata;Lingulida;Lin  
guloidea;Lingulidae;Lingula;Lingula anatina  
UdeM00000028644 77115 369.4 UdeM00000028644 XP\_038133904.1 62.3 273  
101 1 9 281 11 281 4.10E-99 369.4 77115 cellular  
organisms;Eukaryota;Opisthokonta;Metazoa;Eumetazoa;Bilateria;Deuterostomi  
a;Chordata;Craniata;Vertebrata;Gnathostomata;Teleostomi;Euteleostomi;Acti  
nopterygii;Actinopteri;Neopterygii;Teleostei;Osteoglossocephalai;Clupeoce  
phala;Euteleosteomorpha;Neoteleostei;Eurypterygia;Ctenosquamata;Acanthomo  
rphata;Euacanthomorphacea;Percomorphaceae;Ovalentaria;Atherinomorphae;Cyp  
rinodontiformes;Cyprinodontoidei;Cyprinodontidae;Cyprinodontinae;Cyprinod  
ontini;Cyprinodon;Cyprinodon tularosa  
UdeM00000028645 30732 188.3 UdeM00000028645 XP\_024118320.1 44.7 208  
113 2 14 221 409 614 1.00E-44 188.3 30732 cellular  
organisms;Eukaryota;Opisthokonta;Metazoa;Eumetazoa;Bilateria;Deuterostomi  
a;Chordata;Craniata;Vertebrata;Gnathostomata;Teleostomi;Euteleostomi;Acti  
nopterygii;Actinopteri;Neopterygii;Teleostei;Osteoglossocephalai;Clupeoce  
phala;Euteleosteomorpha;Neoteleostei;Eurypterygia;Ctenosquamata;Acanthomo  
rphata;Euacanthomorphacea;Percomorphaceae;Ovalentaria;Atherinomorphae;Bel  
oniformes;Adrianichthyoidei;Adrianichthyidae;Oryziinae;Oryzias;Oryzias  
melastigma  
UdeM00000028647 77115 139.4 UdeM00000028647 XP\_038136846.1 46.5 172  
71 4 6 174 8 161 4.30E-30 139.4 77115 cellular  
organisms;Eukaryota;Opisthokonta;Metazoa;Eumetazoa;Bilateria;Deuterostomi  
a;Chordata;Craniata;Vertebrata;Gnathostomata;Teleostomi;Euteleostomi;Acti  
nopterygii;Actinopteri;Neopterygii;Teleostei;Osteoglossocephalai;Clupeoce  
phala;Euteleosteomorpha;Neoteleostei;Eurypterygia;Ctenosquamata;Acanthomo  
rphata;Euacanthomorphacea;Percomorphaceae;Ovalentaria;Atherinomorphae;Cyp  
rinodontiformes;Cyprinodontoidei;Cyprinodontidae;Cyprinodontinae;Cyprinod  
ontini;Cyprinodon;Cyprinodon tularosa  
UdeM00000028653 6573 602.1 UdeM00000028653 XP\_021343425.1 54.3 543  
240 4 1 540 1 538 7.20E-169 602.1 6573 cellular  
organisms;Eukaryota;Opisthokonta;Metazoa;Eumetazoa;Bilateria;Protostomia;  
Spiralia;Lophotrochozoa;Mollusca;Bivalvia;Autobranchia;Pteriormorphia;Pect  
inida;Pectinoidea;Pectinidae;Mizuhopecten;Mizuhopecten yessoensis  
UdeM00000028654 6596 66.2 UdeM00000028654 XP\_045180239.1 57.6 59  
24 1 306 363 39 97 3.90E-07 66.2 6596 cellular

organisms;Eukaryota;Opisthokonta;Metazoa;Eumetazoa;Bilateria;Protostomia;Spiralia;Lophotrochozoa;Mollusca;Bivalvia;Autobranhia;Heteroconchia;Euherodonta;Imparidentia;Venerida;Veneroidea;Veneridae;Mercenaria;Mercenaria mercenaria

UdeM00000028654 6596 61.6 UdeM00000028654 XP\_045180239.1 77.1 35  
8 0 9 43 4 38 9.70E-06 61.6 6596 cellular

organisms;Eukaryota;Opisthokonta;Metazoa;Eumetazoa;Bilateria;Protostomia;Spiralia;Lophotrochozoa;Mollusca;Bivalvia;Autobranhia;Heteroconchia;Euherodonta;Imparidentia;Venerida;Veneroidea;Veneridae;Mercenaria;Mercenaria mercenaria

UdeM00000028655 6596 66.2 UdeM00000028655 XP\_045180239.1 57.6 59  
24 1 306 363 39 97 3.90E-07 66.2 6596 cellular

organisms;Eukaryota;Opisthokonta;Metazoa;Eumetazoa;Bilateria;Protostomia;Spiralia;Lophotrochozoa;Mollusca;Bivalvia;Autobranhia;Heteroconchia;Euherodonta;Imparidentia;Venerida;Veneroidea;Veneridae;Mercenaria;Mercenaria mercenaria

UdeM00000028655 6596 61.6 UdeM00000028655 XP\_045180239.1 77.1 35  
8 0 9 43 4 38 9.70E-06 61.6 6596 cellular

organisms;Eukaryota;Opisthokonta;Metazoa;Eumetazoa;Bilateria;Protostomia;Spiralia;Lophotrochozoa;Mollusca;Bivalvia;Autobranhia;Heteroconchia;Euherodonta;Imparidentia;Venerida;Veneroidea;Veneridae;Mercenaria;Mercenaria mercenaria

UdeM00000028657 6105 280 UdeM00000028657 XP\_031570315.1 69.3 176  
54 0 1 176 1 176 2.10E-72 280 6105 cellular

organisms;Eukaryota;Opisthokonta;Metazoa;Eumetazoa;Cnidaria;Anthozoa;Hexacorallia;Actiniaria;Actiniidae;Actinia;Actinia tenebrosa

UdeM00000028658 6579 91.7 UdeM00000028658 XP\_033731337.1 32.9 155  
99 3 22 176 174 323 1.20E-15 91.7 6579 cellular

organisms;Eukaryota;Opisthokonta;Metazoa;Eumetazoa;Bilateria;Protostomia;Spiralia;Lophotrochozoa;Mollusca;Bivalvia;Autobranhia;Pteriomorphia;Pectinida;Pectinoidea;Pectinidae;Pecten;Pecten maximus

UdeM00000028659 6573 89.4 UdeM00000028659 XP\_021371412.1 36.4 129  
77 3 22 149 1358 1482 1.00E-14 89.4 6573 cellular

organisms;Eukaryota;Opisthokonta;Metazoa;Eumetazoa;Bilateria;Protostomia;Spiralia;Lophotrochozoa;Mollusca;Bivalvia;Autobranhia;Pteriomorphia;Pectinida;Pectinoidea;Pectinidae;Mizuhopecten;Mizuhopecten yessoensis

UdeM00000028660 6596 212.2 UdeM00000028660 XP\_045189084.1 38.2 296  
131 2 302 597 1550 1793 1.90E-51 212.2 6596 cellular

organisms;Eukaryota;Opisthokonta;Metazoa;Eumetazoa;Bilateria;Protostomia;Spiralia;Lophotrochozoa;Mollusca;Bivalvia;Autobranhia;Heteroconchia;Euherodonta;Imparidentia;Venerida;Veneroidea;Veneridae;Mercenaria;Mercenaria mercenaria

UdeM00000028661 6596 94.7 UdeM00000028661 XP\_045171351.1 60.8 74  
29 0 1 74 248 321 7.00E-17 94.7 6596 cellular

organisms;Eukaryota;Opisthokonta;Metazoa;Eumetazoa;Bilateria;Protostomia;Spiralia;Lophotrochozoa;Mollusca;Bivalvia;Autobranhia;Heteroconchia;Euherodonta;Imparidentia;Venerida;Veneroidea;Veneridae;Mercenaria;Mercenaria mercenaria

UdeM00000028662 6596 61.6 UdeM00000028662 XP\_045188177.1 51.9 52  
25 0 109 160 61 112 1.00E-06 61.6 6596 cellular

organisms;Eukaryota;Opisthokonta;Metazoa;Eumetazoa;Bilateria;Protostomia;Spiralia;Lophotrochozoa;Mollusca;Bivalvia;Autobranhia;Heteroconchia;Euherodonta;Imparidentia;Venerida;Veneroidea;Veneridae;Mercenaria;Mercenaria mercenaria

UdeM00000028666 6105 280 UdeM00000028666 XP\_031570315.1 69.3 176  
 54 0 1 176 1 176 2.10E-72 280 6105 cellular  
 organisms;Eukaryota;Opisthokonta;Metazoa;Eumetazoa;Cnidaria;Anthozoa;Hexa  
 corallia;Actiniaria;Actiniidae;Actinia;Actinia tenebrosa  
 UdeM00000028667 6579 92 UdeM00000028667 XP\_033750135.1 31.6 152  
 99 3 1 152 12 158 7.90E-16 92 6579 cellular  
 organisms;Eukaryota;Opisthokonta;Metazoa;Eumetazoa;Bilateria;Protostomia;  
 Spiralia;Lophotrochozoa;Mollusca;Bivalvia;Autobranchia;Pteriormorphia;Pect  
 inida;Pectinoidea;Pectinidae;Pecten;Pecten maximus  
 UdeM00000028668 6596 256.1 UdeM00000028668 XP\_045189084.1 31.1 575  
 266 7 1 564 1350 1805 1.10E-64 256.1 6596 cellular  
 organisms;Eukaryota;Opisthokonta;Metazoa;Eumetazoa;Bilateria;Protostomia;  
 Spiralia;Lophotrochozoa;Mollusca;Bivalvia;Autobranchia;Heteroconchia;Euhe  
 terodonta;Imparidentia;Venerida;Veneroidea;Veneridae;Mercenaria;Mercenari  
 a mercenaria  
 UdeM00000028669 6596 119 UdeM00000028669 XP\_045176094.1 46 139  
 72 2 1 139 84 219 1.40E-23 119 6596 cellular  
 organisms;Eukaryota;Opisthokonta;Metazoa;Eumetazoa;Bilateria;Protostomia;  
 Spiralia;Lophotrochozoa;Mollusca;Bivalvia;Autobranchia;Heteroconchia;Euhe  
 terodonta;Imparidentia;Venerida;Veneroidea;Veneridae;Mercenaria;Mercenari  
 a mercenaria  
 UdeM00000028670 6596 92.8 UdeM00000028670 XP\_045181277.1 40 110  
 59 2 11 116 266 372 3.40E-16 92.8 6596 cellular  
 organisms;Eukaryota;Opisthokonta;Metazoa;Eumetazoa;Bilateria;Protostomia;  
 Spiralia;Lophotrochozoa;Mollusca;Bivalvia;Autobranchia;Heteroconchia;Euhe  
 terodonta;Imparidentia;Venerida;Veneroidea;Veneridae;Mercenaria;Mercenari  
 a mercenaria  
 UdeM00000028673 6565 330.1 UdeM00000028673 XP\_022325254.1 30.9 627  
 401 13 149 764 64 669 7.50E-87 330.1 6565 cellular  
 organisms;Eukaryota;Opisthokonta;Metazoa;Eumetazoa;Bilateria;Protostomia;  
 Spiralia;Lophotrochozoa;Mollusca;Bivalvia;Autobranchia;Pteriormorphia;Ostr  
 eida;Ostreoidea;Ostreidae;Crassostrea;Crassostrea virginica  
 UdeM00000028674 45264 75.1 UdeM00000028674 XP\_044167111.1 57.1 49  
 21 0 1 49 14 62 5.90E-11 75.1 45264 cellular  
 organisms;Eukaryota;Opisthokonta;Metazoa;Eumetazoa;Cnidaria;Anthozoa;Hexa  
 corallia;Scleractinia;Astrocoeniina;Acroporidae;Acropora;Acropora  
 millepora  
 UdeM00000028675 6596 78.2 UdeM00000028675 XP\_045161001.1 33.3 165  
 89 4 1 149 387 546 1.00E-11 78.2 6596 cellular  
 organisms;Eukaryota;Opisthokonta;Metazoa;Eumetazoa;Bilateria;Protostomia;  
 Spiralia;Lophotrochozoa;Mollusca;Bivalvia;Autobranchia;Heteroconchia;Euhe  
 terodonta;Imparidentia;Venerida;Veneroidea;Veneridae;Mercenaria;Mercenari  
 a mercenaria  
 UdeM00000028678 6596 108.6 UdeM00000028678 XP\_045179269.1 40 150  
 73 1 2 151 322 454 7.50E-21 108.6 6596 cellular  
 organisms;Eukaryota;Opisthokonta;Metazoa;Eumetazoa;Bilateria;Protostomia;  
 Spiralia;Lophotrochozoa;Mollusca;Bivalvia;Autobranchia;Heteroconchia;Euhe  
 terodonta;Imparidentia;Venerida;Veneroidea;Veneridae;Mercenaria;Mercenari  
 a mercenaria  
 UdeM00000028679 6596 95.1 UdeM00000028679 XP\_045171351.1 60.8 74  
 29 0 1 74 248 321 4.30E-17 95.1 6596 cellular  
 organisms;Eukaryota;Opisthokonta;Metazoa;Eumetazoa;Bilateria;Protostomia;  
 Spiralia;Lophotrochozoa;Mollusca;Bivalvia;Autobranchia;Heteroconchia;Euhe

terodonta;Imparidentia;Venerida;Veneroidea;Veneridae;Mercenaria;Mercenari  
 a mercenaria  
 UdeM00000028680 6596 59.3 UdeM00000028680 XP\_045157314.1 42 88  
 50 1 3 89 435 522 7.20E-06 59.3 6596 cellular  
 organisms;Eukaryota;Opisthokonta;Metazoa;Eumetazoa;Bilateria;Protostomia;  
 Spiralia;Lophotrochozoa;Mollusca;Bivalvia;Autobranhia;Heteroconchia;Euhe  
 terodonta;Imparidentia;Venerida;Veneroidea;Veneridae;Mercenaria;Mercenari  
 a mercenaria  
 UdeM00000028682 6579 83.2 UdeM00000028682 XP\_033730626.1 41.3 104  
 59 2 6 108 439 541 2.50E-13 83.2 6579 cellular  
 organisms;Eukaryota;Opisthokonta;Metazoa;Eumetazoa;Bilateria;Protostomia;  
 Spiralia;Lophotrochozoa;Mollusca;Bivalvia;Autobranhia;Pteriormorphia;Pect  
 inida;Pectinoidea;Pectinidae;Pecten;Pecten maximus  
 UdeM00000028683 29159 60.1 UdeM00000028683 XP\_034315424.1 34.3 108  
 62 3 12 116 213 314 3.00E-06 60.1 29159 cellular  
 organisms;Eukaryota;Opisthokonta;Metazoa;Eumetazoa;Bilateria;Protostomia;  
 Spiralia;Lophotrochozoa;Mollusca;Bivalvia;Autobranhia;Pteriormorphia;Ostr  
 eida;Ostreoidea;Ostreidae;Crassostrea;Crassostrea gigas  
 UdeM00000028684 29159 261.9 UdeM00000028684 XP\_011412220.2 25.3 801  
 459 24 2 683 181 961 2.30E-66 261.9 29159 cellular  
 organisms;Eukaryota;Opisthokonta;Metazoa;Eumetazoa;Bilateria;Protostomia;  
 Spiralia;Lophotrochozoa;Mollusca;Bivalvia;Autobranhia;Pteriormorphia;Ostr  
 eida;Ostreoidea;Ostreidae;Crassostrea;Crassostrea gigas  
 UdeM00000028685 6596 247.7 UdeM00000028685 XP\_045206084.1 30.6 532  
 334 12 6 520 183 696 3.80E-62 247.7 6596 cellular  
 organisms;Eukaryota;Opisthokonta;Metazoa;Eumetazoa;Bilateria;Protostomia;  
 Spiralia;Lophotrochozoa;Mollusca;Bivalvia;Autobranhia;Heteroconchia;Euhe  
 terodonta;Imparidentia;Venerida;Veneroidea;Veneridae;Mercenaria;Mercenari  
 a mercenaria  
 UdeM00000028686 6596 97.8 UdeM00000028686 XP\_045206084.1 45.2 104  
 54 2 264 366 78 179 3.00E-17 97.8 6596 cellular  
 organisms;Eukaryota;Opisthokonta;Metazoa;Eumetazoa;Bilateria;Protostomia;  
 Spiralia;Lophotrochozoa;Mollusca;Bivalvia;Autobranhia;Heteroconchia;Euhe  
 terodonta;Imparidentia;Venerida;Veneroidea;Veneridae;Mercenaria;Mercenari  
 a mercenaria  
 UdeM00000028687 6596 382.9 UdeM00000028687 XP\_045177776.1 38.7 561  
 289 7 1 546 405 925 9.70E-103 382.9 6596 cellular  
 organisms;Eukaryota;Opisthokonta;Metazoa;Eumetazoa;Bilateria;Protostomia;  
 Spiralia;Lophotrochozoa;Mollusca;Bivalvia;Autobranhia;Heteroconchia;Euhe  
 terodonta;Imparidentia;Venerida;Veneroidea;Veneridae;Mercenaria;Mercenari  
 a mercenaria  
 UdeM00000028689 6565 95.9 UdeM00000028689 XP\_022308598.1 38.2 152  
 88 5 2 152 21 167 5.40E-17 95.9 6565 cellular  
 organisms;Eukaryota;Opisthokonta;Metazoa;Eumetazoa;Bilateria;Protostomia;  
 Spiralia;Lophotrochozoa;Mollusca;Bivalvia;Autobranhia;Pteriormorphia;Ostr  
 eida;Ostreoidea;Ostreidae;Crassostrea;Crassostrea virginica  
 UdeM00000028690 6596 313.9 UdeM00000028690 XP\_045177779.1 36.7 547  
 277 12 1 545 97 576 4.00E-82 313.9 6596 cellular  
 organisms;Eukaryota;Opisthokonta;Metazoa;Eumetazoa;Bilateria;Protostomia;  
 Spiralia;Lophotrochozoa;Mollusca;Bivalvia;Autobranhia;Heteroconchia;Euhe  
 terodonta;Imparidentia;Venerida;Veneroidea;Veneridae;Mercenaria;Mercenari  
 a mercenaria  
 UdeM00000028692 6596 91.3 UdeM00000028692 XP\_045191531.1 37.6 125  
 71 2 1 120 807 929 2.70E-15 91.3 6596 cellular



organisms;Eukaryota;Opisthokonta;Metazoa;Eumetazoa;Bilateria;Protostomia;Spiralia;Lophotrochozoa;Mollusca;Bivalvia;Autobranhia;Heteroconchia;Euherodonta;Imparidentia;Venerida;Veneroidea;Veneridae;Mercenaria;Mercenaria mercenaria

UdeM00000028693 6596 348.6 UdeM00000028693 XP\_045177776.1 38.4 524  
251 9 1 504 405 876 1.40E-92 348.6 6596 cellular

organisms;Eukaryota;Opisthokonta;Metazoa;Eumetazoa;Bilateria;Protostomia;Spiralia;Lophotrochozoa;Mollusca;Bivalvia;Autobranhia;Heteroconchia;Euherodonta;Imparidentia;Venerida;Veneroidea;Veneridae;Mercenaria;Mercenaria mercenaria

UdeM00000028694 6596 340.9 UdeM00000028694 XP\_045177776.1 32.6 681  
309 8 1 680 405 936 5.10E-90 340.9 6596 cellular

organisms;Eukaryota;Opisthokonta;Metazoa;Eumetazoa;Bilateria;Protostomia;Spiralia;Lophotrochozoa;Mollusca;Bivalvia;Autobranhia;Heteroconchia;Euherodonta;Imparidentia;Venerida;Veneroidea;Veneridae;Mercenaria;Mercenaria mercenaria

UdeM00000028695 37653 147.1 UdeM00000028695 XP\_014782194.1 69.6 92  
28 0 1 92 1 92 2.10E-32 147.1 37653 cellular

organisms;Eukaryota;Opisthokonta;Metazoa;Eumetazoa;Bilateria;Protostomia;Spiralia;Lophotrochozoa;Mollusca;Cephalopoda;Coleoidea;Octopodiformes;Octopoda;Incirrata;Octopodidae;Octopus;Octopus bimaculoides

UdeM00000028696 37653 88.2 UdeM00000028696 XP\_014784938.1 55.6 63  
28 0 1 63 300 362 4.80E-15 88.2 37653 cellular

organisms;Eukaryota;Opisthokonta;Metazoa;Eumetazoa;Bilateria;Protostomia;Spiralia;Lophotrochozoa;Mollusca;Cephalopoda;Coleoidea;Octopodiformes;Octopoda;Incirrata;Octopodidae;Octopus;Octopus bimaculoides

UdeM00000028697 6596 391.3 UdeM00000028697 XP\_045177776.1 38.3 572  
298 7 1 557 405 936 2.80E-105 391.3 6596 cellular

organisms;Eukaryota;Opisthokonta;Metazoa;Eumetazoa;Bilateria;Protostomia;Spiralia;Lophotrochozoa;Mollusca;Bivalvia;Autobranhia;Heteroconchia;Euherodonta;Imparidentia;Venerida;Veneroidea;Veneridae;Mercenaria;Mercenaria mercenaria

UdeM00000028698 29159 193.7 UdeM00000028698 XP\_034334268.1 46.4 194  
101 1 1 194 160 350 2.10E-46 193.7 29159 cellular

organisms;Eukaryota;Opisthokonta;Metazoa;Eumetazoa;Bilateria;Protostomia;Spiralia;Lophotrochozoa;Mollusca;Bivalvia;Autobranhia;Pteriomorphia;Ostreida;Ostreoidea;Ostreidae;Crassostrea;Crassostrea gigas

UdeM00000028699 6565 112.5 UdeM00000028699 XP\_022308598.1 36.8 174  
100 5 165 337 15 179 1.10E-21 112.5 6565 cellular

organisms;Eukaryota;Opisthokonta;Metazoa;Eumetazoa;Bilateria;Protostomia;Spiralia;Lophotrochozoa;Mollusca;Bivalvia;Autobranhia;Pteriomorphia;Ostreida;Ostreoidea;Ostreidae;Crassostrea;Crassostrea virginica

UdeM00000028700 6596 281.6 UdeM00000028700 XP\_045189084.1 35 525  
260 10 1 513 1350 1805 2.10E-72 281.6 6596 cellular

organisms;Eukaryota;Opisthokonta;Metazoa;Eumetazoa;Bilateria;Protostomia;Spiralia;Lophotrochozoa;Mollusca;Bivalvia;Autobranhia;Heteroconchia;Euherodonta;Imparidentia;Venerida;Veneroidea;Veneridae;Mercenaria;Mercenaria mercenaria

UdeM00000028701 202533 329.7 UdeM00000028701 XP\_035218899.1 37.4  
468 270 8 1 447 1 466 5.70E-87 329.7 202533  
cellular

organisms;Eukaryota;Opisthokonta;Metazoa;Eumetazoa;Bilateria;Protostomia;Ecdysozoa;Panarthropoda;Arthropoda;Chelicerata;Arachnida;Araneae;Araneomorphae;Entelegynae;Eresoidea;Eresidae;Stegodyphus;Stegodyphus dumicola

UdeM00000028702 29159 75.5 UdeM00000028702 XP\_034322397.1 28 168  
 98 3 59 226 10 154 1.10E-10 75.5 29159 cellular  
 organisms;Eukaryota;Opisthokonta;Metazoa;Eumetazoa;Bilateria;Protostomia;  
 Spiralia;Lophotrochozoa;Mollusca;Bivalvia;Autobranchia;Pteriomorpha;Ostr  
 eida;Ostreoidea;Ostreidae;Crassostrea;Crassostrea gigas  
 UdeM00000028703 6596 285.8 UdeM00000028703 XP\_045189084.1 35.4 517  
 269 9 1 513 1350 1805 1.20E-73 285.8 6596 cellular  
 organisms;Eukaryota;Opisthokonta;Metazoa;Eumetazoa;Bilateria;Protostomia;  
 Spiralia;Lophotrochozoa;Mollusca;Bivalvia;Autobranchia;Heteroconchia;Euhe  
 terodonta;Imparidentia;Venerida;Veneroidea;Veneridae;Mercenaria;Mercenari  
 a mercenaria  
 UdeM00000005814 6596 136.3 UdeM00000005814 XP\_045172474.1 23.5 702  
 335 25 3 673 338 868 1.90E-28 136.3 6596 cellular  
 organisms;Eukaryota;Opisthokonta;Metazoa;Eumetazoa;Bilateria;Protostomia;  
 Spiralia;Lophotrochozoa;Mollusca;Bivalvia;Autobranchia;Heteroconchia;Euhe  
 terodonta;Imparidentia;Venerida;Veneroidea;Veneridae;Mercenaria;Mercenari  
 a mercenaria  
 UdeM00000005817 1735272 85.5 UdeM00000005817 XP\_041366951.1 43.5  
 85 48 0 40 124 159 243 6.10E-14 85.5 1735272  
 cellular  
 organisms;Eukaryota;Opisthokonta;Metazoa;Eumetazoa;Bilateria;Protostomia;  
 Spiralia;Lophotrochozoa;Mollusca;Gastropoda;Neomphalina;Neomphaloidea;Pel  
 tospiridae;Gigantopelta;Gigantopelta aegis  
 UdeM00000005818 6596 121.7 UdeM00000005818 XP\_045172301.1 26 534  
 313 23 4 525 533 996 3.60E-24 121.7 6596 cellular  
 organisms;Eukaryota;Opisthokonta;Metazoa;Eumetazoa;Bilateria;Protostomia;  
 Spiralia;Lophotrochozoa;Mollusca;Bivalvia;Autobranchia;Heteroconchia;Euhe  
 terodonta;Imparidentia;Venerida;Veneroidea;Veneridae;Mercenaria;Mercenari  
 a mercenaria  
 UdeM00000005820 6596 71.2 UdeM00000005820 XP\_045173448.1 26.8 265  
 178 9 161 417 361 617 3.60E-09 71.2 6596 cellular  
 organisms;Eukaryota;Opisthokonta;Metazoa;Eumetazoa;Bilateria;Protostomia;  
 Spiralia;Lophotrochozoa;Mollusca;Bivalvia;Autobranchia;Heteroconchia;Euhe  
 terodonta;Imparidentia;Venerida;Veneroidea;Veneridae;Mercenaria;Mercenari  
 a mercenaria  
 UdeM00000005821 7574 204.9 UdeM00000005821 XP\_013401097.1 45 271  
 139 3 2 263 458 727 1.50E-49 204.9 7574 cellular  
 organisms;Eukaryota;Opisthokonta;Metazoa;Eumetazoa;Bilateria;Protostomia;  
 Spiralia;Lophotrochozoa;Brachiopoda;Linguliformea;Lingulata;Lingulida;Lin  
 guloidea;Lingulidae;Lingula;Lingula anatina  
 UdeM00000005822 6596 99.8 UdeM00000005822 XP\_045172301.1 22.9 428  
 255 15 6 422 609 972 1.40E-17 99.8 6596 cellular  
 organisms;Eukaryota;Opisthokonta;Metazoa;Eumetazoa;Bilateria;Protostomia;  
 Spiralia;Lophotrochozoa;Mollusca;Bivalvia;Autobranchia;Heteroconchia;Euhe  
 terodonta;Imparidentia;Venerida;Veneroidea;Veneridae;Mercenaria;Mercenari  
 a mercenaria  
 UdeM00000005823 6596 672.5 UdeM00000005823 XP\_045200304.1 72.6 420  
 114 1 48 466 36 455 3.80E-190 672.5 6596 cellular  
 organisms;Eukaryota;Opisthokonta;Metazoa;Eumetazoa;Bilateria;Protostomia;  
 Spiralia;Lophotrochozoa;Mollusca;Bivalvia;Autobranchia;Heteroconchia;Euhe  
 terodonta;Imparidentia;Venerida;Veneroidea;Veneridae;Mercenaria;Mercenari  
 a mercenaria  
 UdeM00000005824 6579 100.1 UdeM00000005824 XP\_033725865.1 30 267  
 96 2 123 298 1 267 5.00E-18 100.1 6579 cellular

organisms;Eukaryota;Opisthokonta;Metazoa;Eumetazoa;Bilateria;Protostomia;Spiralia;Lophotrochozoa;Mollusca;Bivalvia;Autobranchia;Pteriomorpha;Pectinida;Pectinoidea;Pectinidae;Pecten;Pecten maximus

UdeM00000005825 6565 166 UdeM00000005825 XP\_022314529.1 53 151  
71 0 5 155 230 380 3.90E-38 166 6565 cellular

organisms;Eukaryota;Opisthokonta;Metazoa;Eumetazoa;Bilateria;Protostomia;Spiralia;Lophotrochozoa;Mollusca;Bivalvia;Autobranchia;Pteriomorpha;Ostreida;Ostreoidea;Ostreidae;Crassostrea;Crassostrea virginica

UdeM00000005826 6579 202.6 UdeM00000005826 XP\_033726291.1 45 249  
115 3 1 237 1 239 6.10E-49 202.6 6579 cellular

organisms;Eukaryota;Opisthokonta;Metazoa;Eumetazoa;Bilateria;Protostomia;Spiralia;Lophotrochozoa;Mollusca;Bivalvia;Autobranchia;Pteriomorpha;Pectinida;Pectinoidea;Pectinidae;Pecten;Pecten maximus

UdeM00000005827 6565 414.8 UdeM00000005827 XP\_022325507.1 47.9 491  
241 9 146 628 82 565 2.30E-112 414.8 6565 cellular

organisms;Eukaryota;Opisthokonta;Metazoa;Eumetazoa;Bilateria;Protostomia;Spiralia;Lophotrochozoa;Mollusca;Bivalvia;Autobranchia;Pteriomorpha;Ostreida;Ostreoidea;Ostreidae;Crassostrea;Crassostrea virginica

UdeM00000005828 6596 694.5 UdeM00000005828 XP\_045188919.1 80 424  
80 2 1 420 1 423 8.30E-197 694.5 6596 cellular

organisms;Eukaryota;Opisthokonta;Metazoa;Eumetazoa;Bilateria;Protostomia;Spiralia;Lophotrochozoa;Mollusca;Bivalvia;Autobranchia;Heteroconchia;Euheterodonta;Imparidentia;Venerida;Veneroidea;Veneridae;Mercenaria;Mercenaria mercenaria

UdeM00000005829 6596 1310.8 UdeM00000005829 XP\_045179737.1 60.8  
1005 388 2 2 1005 37 1036 0.00E+00 1310.8 6596  
cellular

organisms;Eukaryota;Opisthokonta;Metazoa;Eumetazoa;Bilateria;Protostomia;Spiralia;Lophotrochozoa;Mollusca;Bivalvia;Autobranchia;Heteroconchia;Euheterodonta;Imparidentia;Venerida;Veneroidea;Veneridae;Mercenaria;Mercenaria mercenaria

UdeM00000005831 8081 75.5 UdeM00000005831 XP\_008413165.1 32.8 128  
77 4 20 146 45 164 6.40E-11 75.5 8081 cellular

organisms;Eukaryota;Opisthokonta;Metazoa;Eumetazoa;Bilateria;Deuterostomia;Chordata;Craniata;Vertebrata;Gnathostomata;Teleostomi;Euteleostomi;Actinopterygii;Actinopteri;Neopterygii;Teleostei;Osteoglossocephalai;Clupeocephala;Euteleostei;Neoteleostei;Eurypterygia;Ctenosquamata;Acanthopterygii;Euacanthopterygii;Percomorphaceae;Ovalentaria;Atherinomorpha;Cypripinodontiformes;Cyprinodontiformes;Poeciliidae;Poeciliinae;Poecilia;Poecilia reticulata

UdeM00000005832 6573 97.4 UdeM00000005832 XP\_021374606.1 37.8 119  
64 3 3 118 44 155 1.30E-17 97.4 6573 cellular

organisms;Eukaryota;Opisthokonta;Metazoa;Eumetazoa;Bilateria;Protostomia;Spiralia;Lophotrochozoa;Mollusca;Bivalvia;Autobranchia;Pteriomorpha;Pectinida;Pectinoidea;Pectinidae;Mizuhopecten;Mizuhopecten yessoensis

UdeM00000005833 7739 158.3 UdeM00000005833 XP\_035668231.1 36.6 273  
140 10 171 425 138 395 2.20E-35 158.3 7739 cellular

organisms;Eukaryota;Opisthokonta;Metazoa;Eumetazoa;Bilateria;Deuterostomia;Chordata;Cephalochordata;Leptocardii;Amphioxiformes;Branchiostomidae;Branchiostoma;Branchiostoma floridae

UdeM00000005834 400727 107.8 UdeM00000005834 XP\_025097819.1 36.4  
143 81 1 212 354 16 148 2.80E-20 107.8 400727  
cellular

organisms;Eukaryota;Opisthokonta;Metazoa;Eumetazoa;Bilateria;Protostomia;

Spiralia;Lophotrochozoa;Mollusca;Gastropoda;Caenogastropoda;Architaenioglossa;Ampullarioidea;Ampullariidae;Pomacea;Pomacea canaliculata  
UdeM00000005836 6579 121.7 UdeM00000005836 XP\_033735506.1 29.8 265  
178 4 44 304 48 308 1.70E-24 121.7 6579 cellular  
organisms;Eukaryota;Opisthokonta;Metazoa;Eumetazoa;Bilateria;Protostomia;  
Spiralia;Lophotrochozoa;Mollusca;Bivalvia;Autobranhia;Pteriormorphia;Pect  
inida;Pectinoidea;Pectinidae;Pecten;Pecten maximus  
UdeM00000005835 6579 121.7 UdeM00000005835 XP\_033735506.1 29.8 265  
178 4 188 448 48 308 2.50E-24 121.7 6579 cellular  
organisms;Eukaryota;Opisthokonta;Metazoa;Eumetazoa;Bilateria;Protostomia;  
Spiralia;Lophotrochozoa;Mollusca;Bivalvia;Autobranhia;Pteriormorphia;Pect  
inida;Pectinoidea;Pectinidae;Pecten;Pecten maximus  
UdeM00000005837 6579 175.3 UdeM00000005837 XP\_033735506.1 33.6 292  
183 5 324 615 35 315 2.50E-40 175.3 6579 cellular  
organisms;Eukaryota;Opisthokonta;Metazoa;Eumetazoa;Bilateria;Protostomia;  
Spiralia;Lophotrochozoa;Mollusca;Bivalvia;Autobranhia;Pteriormorphia;Pect  
inida;Pectinoidea;Pectinidae;Pecten;Pecten maximus  
UdeM00000005838 6579 173.3 UdeM00000005838 XP\_033735506.1 32.9 286  
186 4 396 681 38 317 1.00E-39 173.3 6579 cellular  
organisms;Eukaryota;Opisthokonta;Metazoa;Eumetazoa;Bilateria;Protostomia;  
Spiralia;Lophotrochozoa;Mollusca;Bivalvia;Autobranhia;Pteriormorphia;Pect  
inida;Pectinoidea;Pectinidae;Pecten;Pecten maximus  
UdeM00000005839 6565 126.7 UdeM00000005839 XP\_022325827.1 60.2 88  
34 1 12 99 66 152 1.70E-26 126.7 6565 cellular  
organisms;Eukaryota;Opisthokonta;Metazoa;Eumetazoa;Bilateria;Protostomia;  
Spiralia;Lophotrochozoa;Mollusca;Bivalvia;Autobranhia;Pteriormorphia;Ostr  
eida;Ostreoidea;Ostreidae;Crassostrea;Crassostrea virginica  
UdeM00000005840 6596 755 UdeM00000005840 XP\_045195165.1 55.5 740  
280 9 206 922 3 716 1.50E-214 755 6596 cellular  
organisms;Eukaryota;Opisthokonta;Metazoa;Eumetazoa;Bilateria;Protostomia;  
Spiralia;Lophotrochozoa;Mollusca;Bivalvia;Autobranhia;Heteroconchia;Euhe  
terodonta;Imparidentia;Venerida;Veneroidea;Veneridae;Mercenaria;Mercenari  
a mercenaria  
UdeM00000005841 6579 188.3 UdeM00000005841 XP\_033731230.1 47.3 184  
97 0 11 194 18 201 1.20E-44 188.3 6579 cellular  
organisms;Eukaryota;Opisthokonta;Metazoa;Eumetazoa;Bilateria;Protostomia;  
Spiralia;Lophotrochozoa;Mollusca;Bivalvia;Autobranhia;Pteriormorphia;Pect  
inida;Pectinoidea;Pectinidae;Pecten;Pecten maximus  
UdeM00000005842 6596 310.1 UdeM00000005842 XP\_045192274.1 66.3 297  
84 9 1 289 1 289 3.00E-81 310.1 6596 cellular  
organisms;Eukaryota;Opisthokonta;Metazoa;Eumetazoa;Bilateria;Protostomia;  
Spiralia;Lophotrochozoa;Mollusca;Bivalvia;Autobranhia;Heteroconchia;Euhe  
terodonta;Imparidentia;Venerida;Veneroidea;Veneridae;Mercenaria;Mercenari  
a mercenaria  
UdeM00000005843 6579 75.5 UdeM00000005843 XP\_033758492.1 52.7 74  
33 2 11 83 510 582 3.70E-11 75.5 6579 cellular  
organisms;Eukaryota;Opisthokonta;Metazoa;Eumetazoa;Bilateria;Protostomia;  
Spiralia;Lophotrochozoa;Mollusca;Bivalvia;Autobranhia;Pteriormorphia;Pect  
inida;Pectinoidea;Pectinidae;Pecten;Pecten maximus  
UdeM00000005844 6596 218.8 UdeM00000005844 XP\_045192274.1 74.5 153  
33 3 100 247 138 289 7.80E-54 218.8 6596 cellular  
organisms;Eukaryota;Opisthokonta;Metazoa;Eumetazoa;Bilateria;Protostomia;  
Spiralia;Lophotrochozoa;Mollusca;Bivalvia;Autobranhia;Heteroconchia;Euhe

terodonta;Imparidentia;Venerida;Veneroidea;Veneridae;Mercenaria;Mercenaria mercenaria

UdeM00000005845 6596 880.9 UdeM00000005845 XP\_045209396.1 73.1 617  
153 4 9 613 10 625 9.90E-253 880.9 6596 cellular

organisms;Eukaryota;Opisthokonta;Metazoa;Eumetazoa;Bilateria;Protostomia;Spiralia;Lophotrochozoa;Mollusca;Bivalvia;Autobranhia;Heteroconchia;Euherodonta;Imparidentia;Venerida;Veneroidea;Veneridae;Mercenaria;Mercenaria mercenaria

UdeM00000005846 6579 860.9 UdeM00000005846 XP\_033760986.1 67.3 642  
206 2 4 643 3 642 1.00E-246 860.9 6579 cellular

organisms;Eukaryota;Opisthokonta;Metazoa;Eumetazoa;Bilateria;Protostomia;Spiralia;Lophotrochozoa;Mollusca;Bivalvia;Autobranhia;Pteriormorphia;Pectinida;Pectinoidea;Pectinidae;Pecten;Pecten maximus

UdeM00000005847 6579 1327.4 UdeM00000005847 XP\_033739131.1 51  
1294 550 9 1 1224 91 1370 0.00E+00 1327.4 6579

cellular organisms;Eukaryota;Opisthokonta;Metazoa;Eumetazoa;Bilateria;Protostomia;Spiralia;Lophotrochozoa;Mollusca;Bivalvia;Autobranhia;Pteriormorphia;Pectinida;Pectinoidea;Pectinidae;Pecten;Pecten maximus

UdeM00000005848 45264 147.5 UdeM00000005848 XP\_044165535.1 41.2 177  
99 2 28 199 351 527 2.20E-32 147.5 45264 cellular

organisms;Eukaryota;Opisthokonta;Metazoa;Eumetazoa;Cnidaria;Anthozoa;Hexacorallia;Scleractinia;Astrocoeniina;Acroporidae;Acropora;Acropora millepora

UdeM00000005849 29159 68.6 UdeM00000005849 XP\_034330259.1 58.2 55  
23 0 14 68 642 696 6.70E-09 68.6 29159 cellular

organisms;Eukaryota;Opisthokonta;Metazoa;Eumetazoa;Bilateria;Protostomia;Spiralia;Lophotrochozoa;Mollusca;Bivalvia;Autobranhia;Pteriormorphia;Ostreida;Ostreioidea;Ostreidae;Crassostrea;Crassostrea gigas

UdeM00000005850 202533 125.9 UdeM00000005850 XP\_035231949.1 45.2  
126 67 2 1 124 318 443 3.60E-26 125.9 202533

cellular organisms;Eukaryota;Opisthokonta;Metazoa;Eumetazoa;Bilateria;Protostomia;Ecdysozoa;Panarthropoda;Arthropoda;Chelicerata;Arachnida;Araneae;Araneomorphae;Entelegynae;Eresoidea;Eresidae;Stegodyphus;Stegodyphus dumicola

UdeM00000005852 6596 106.3 UdeM00000005852 XP\_045166072.1 32.8 189  
111 5 22 197 21 206 4.60E-20 106.3 6596 cellular

organisms;Eukaryota;Opisthokonta;Metazoa;Eumetazoa;Bilateria;Protostomia;Spiralia;Lophotrochozoa;Mollusca;Bivalvia;Autobranhia;Heteroconchia;Euherodonta;Imparidentia;Venerida;Veneroidea;Veneridae;Mercenaria;Mercenaria mercenaria

UdeM00000005853 6596 125.6 UdeM00000005853 XP\_045192593.1 27.9 323  
209 7 317 623 397 711 2.30E-25 125.6 6596 cellular

organisms;Eukaryota;Opisthokonta;Metazoa;Eumetazoa;Bilateria;Protostomia;Spiralia;Lophotrochozoa;Mollusca;Bivalvia;Autobranhia;Heteroconchia;Euherodonta;Imparidentia;Venerida;Veneroidea;Veneridae;Mercenaria;Mercenaria mercenaria

UdeM00000005854 6579 85.9 UdeM00000005854 XP\_033750915.1 40.4 109  
60 2 1 107 1 106 3.50E-14 85.9 6579 cellular

organisms;Eukaryota;Opisthokonta;Metazoa;Eumetazoa;Bilateria;Protostomia;Spiralia;Lophotrochozoa;Mollusca;Bivalvia;Autobranhia;Pteriormorphia;Pectinida;Pectinoidea;Pectinidae;Pecten;Pecten maximus

UdeM00000005855 6596 94.4 UdeM00000005855 XP\_045192593.1 29.6 206  
133 5 19 218 504 703 2.00E-16 94.4 6596 cellular

organisms;Eukaryota;Opisthokonta;Metazoa;Eumetazoa;Bilateria;Protostomia;Spiralia;Lophotrochozoa;Mollusca;Bivalvia;Autobranchia;Heteroconchia;Euheterodonta;Imparidentia;Venerida;Veneroidea;Veneridae;Mercenaria;Mercenaria mercenaria

UdeM00000005856 6579 86.3 UdeM00000005856 XP\_033745025.1 41.7 108  
58 1 12 119 23 125 9.80E-14 86.3 6579 cellular

organisms;Eukaryota;Opisthokonta;Metazoa;Eumetazoa;Bilateria;Protostomia;Spiralia;Lophotrochozoa;Mollusca;Bivalvia;Autobranchia;Pteriomorpha;Pectinida;Pectinoidea;Pectinidae;Pecten;Pecten maximus

UdeM00000005857 29159 133.7 UdeM00000005857 XP\_011449844.1 20.6 690  
417 18 9 587 13 682 8.10E-28 133.7 29159 cellular

organisms;Eukaryota;Opisthokonta;Metazoa;Eumetazoa;Bilateria;Protostomia;Spiralia;Lophotrochozoa;Mollusca;Bivalvia;Autobranchia;Pteriomorpha;Ostreida;Ostreoidea;Ostreidae;Crassostrea;Crassostrea gigas

UdeM00000005858 6596 268.5 UdeM00000005858 XP\_045201533.1 60.3 219  
87 0 21 239 26 244 8.60E-69 268.5 6596 cellular

organisms;Eukaryota;Opisthokonta;Metazoa;Eumetazoa;Bilateria;Protostomia;Spiralia;Lophotrochozoa;Mollusca;Bivalvia;Autobranchia;Heteroconchia;Euheterodonta;Imparidentia;Venerida;Veneroidea;Veneridae;Mercenaria;Mercenaria mercenaria

UdeM00000005859 6579 134.4 UdeM00000005859 XP\_033759165.1 50 136  
63 2 8 141 7 139 1.10E-28 134.4 6579 cellular

organisms;Eukaryota;Opisthokonta;Metazoa;Eumetazoa;Bilateria;Protostomia;Spiralia;Lophotrochozoa;Mollusca;Bivalvia;Autobranchia;Pteriomorpha;Pectinida;Pectinoidea;Pectinidae;Pecten;Pecten maximus

UdeM00000005860 6596 138.7 UdeM00000005860 XP\_045203675.1 61 105  
40 1 1 104 543 647 4.40E-30 138.7 6596 cellular

organisms;Eukaryota;Opisthokonta;Metazoa;Eumetazoa;Bilateria;Protostomia;Spiralia;Lophotrochozoa;Mollusca;Bivalvia;Autobranchia;Heteroconchia;Euheterodonta;Imparidentia;Venerida;Veneroidea;Veneridae;Mercenaria;Mercenaria mercenaria

UdeM00000005861 6596 411 UdeM00000005861 XP\_045203675.1 44.9 450  
247 1 1 449 58 507 2.00E-111 411 6596 cellular

organisms;Eukaryota;Opisthokonta;Metazoa;Eumetazoa;Bilateria;Protostomia;Spiralia;Lophotrochozoa;Mollusca;Bivalvia;Autobranchia;Heteroconchia;Euheterodonta;Imparidentia;Venerida;Veneroidea;Veneridae;Mercenaria;Mercenaria mercenaria

UdeM00000005862 6579 147.1 UdeM00000005862 XP\_033759165.1 55.6 126  
54 1 22 147 16 139 1.70E-32 147.1 6579 cellular

organisms;Eukaryota;Opisthokonta;Metazoa;Eumetazoa;Bilateria;Protostomia;Spiralia;Lophotrochozoa;Mollusca;Bivalvia;Autobranchia;Pteriomorpha;Pectinida;Pectinoidea;Pectinidae;Pecten;Pecten maximus

UdeM00000005863 6850 68.2 UdeM00000005863 XP\_022251367.1 26.6 143  
95 3 50 192 51 183 1.30E-08 68.2 6850 cellular

organisms;Eukaryota;Opisthokonta;Metazoa;Eumetazoa;Bilateria;Protostomia;Ecdysozoa;Panarthropoda;Arthropoda;Chelicerata;Merostomata;Xiphosura;Limulidae;Limulus;Limulus polyphemus

UdeM00000005865 7957 136.7 UdeM00000005865 XP\_026141005.1 32.8 265  
149 9 126 381 130 374 6.60E-29 136.7 7957 cellular

organisms;Eukaryota;Opisthokonta;Metazoa;Eumetazoa;Bilateria;Deuterostomia;Chordata;Craniata;Vertebrata;Gnathostomata;Teleostomi;Euteleostomi;Actinopterygii;Actinopteri;Neopterygii;Teleostei;Osteoglossocephalai;Clupeocephala;Otomorpha;Ostariophysi;Otophysi;Cypriniphysae;Cypriniformes;Cyprinidei;Cyprinidae;Cyprininae;Carassius;Carassius auratus

UdeM00000005866 294128 63.5 UdeM00000005866 XP\_018015177.1 27.3  
 128 88 2 63 187 167 292 3.30E-07 63.5 294128  
 cellular  
 organisms;Eukaryota;Opisthokonta;Metazoa;Eumetazoa;Bilateria;Protostomia;  
 Ecdysozoa;Panarthropoda;Arthropoda;Mandibulata;Pancrustacea;Crustacea;Mul  
 ticrustacea;Malacostraca;Eumalacostraca;Peracarida;Amphipoda;Senticaudata  
 ;Talitrida;Talitroidea;Hyaellidae;Hyaella;Hyaella azteca  
 UdeM00000005867 29159 62.4 UdeM00000005867 XP\_034302581.1 39.2 74  
 45 0 47 120 49 122 5.10E-07 62.4 29159 cellular  
 organisms;Eukaryota;Opisthokonta;Metazoa;Eumetazoa;Bilateria;Protostomia;  
 Spiralia;Lophotrochozoa;Mollusca;Bivalvia;Autobranchia;Pteriormorphia;Ostr  
 eida;Ostreoidea;Ostreidae;Crassostrea;Crassostrea gigas  
 UdeM00000005868 29159 78.2 UdeM00000005868 XP\_034302581.1 42.9 84  
 48 0 47 130 49 132 9.70E-12 78.2 29159 cellular  
 organisms;Eukaryota;Opisthokonta;Metazoa;Eumetazoa;Bilateria;Protostomia;  
 Spiralia;Lophotrochozoa;Mollusca;Bivalvia;Autobranchia;Pteriormorphia;Ostr  
 eida;Ostreoidea;Ostreidae;Crassostrea;Crassostrea gigas  
 UdeM00000005871 6596 142.9 UdeM00000005871 XP\_045202370.1 60.2 118  
 46 1 32 148 22 139 3.30E-31 142.9 6596 cellular  
 organisms;Eukaryota;Opisthokonta;Metazoa;Eumetazoa;Bilateria;Protostomia;  
 Spiralia;Lophotrochozoa;Mollusca;Bivalvia;Autobranchia;Heteroconchia;Euhe  
 terodonta;Imparidentia;Venerida;Veneroidea;Veneridae;Mercenaria;Mercenari  
 a mercenaria  
 UdeM00000005872 6573 193.4 UdeM00000005872 XP\_021367187.1 39.4 251  
 147 2 14 264 13 258 3.80E-46 193.4 6573 cellular  
 organisms;Eukaryota;Opisthokonta;Metazoa;Eumetazoa;Bilateria;Protostomia;  
 Spiralia;Lophotrochozoa;Mollusca;Bivalvia;Autobranchia;Pteriormorphia;Pect  
 inida;Pectinoidea;Pectinidae;Mizuhopecten;Mizuhopecten yessoensis  
 UdeM00000005873 6573 172.9 UdeM00000005873 XP\_021367190.1 32.9 258  
 169 3 8 264 4 258 5.30E-40 172.9 6573 cellular  
 organisms;Eukaryota;Opisthokonta;Metazoa;Eumetazoa;Bilateria;Protostomia;  
 Spiralia;Lophotrochozoa;Mollusca;Bivalvia;Autobranchia;Pteriormorphia;Pect  
 inida;Pectinoidea;Pectinidae;Mizuhopecten;Mizuhopecten yessoensis  
 UdeM00000005874 6573 191 UdeM00000005874 XP\_021367190.1 37.8 251  
 150 3 13 262 13 258 1.90E-45 191 6573 cellular  
 organisms;Eukaryota;Opisthokonta;Metazoa;Eumetazoa;Bilateria;Protostomia;  
 Spiralia;Lophotrochozoa;Mollusca;Bivalvia;Autobranchia;Pteriormorphia;Pect  
 inida;Pectinoidea;Pectinidae;Mizuhopecten;Mizuhopecten yessoensis  
 UdeM00000005875 6573 186 UdeM00000005875 XP\_021367187.1 39 251  
 148 3 14 264 13 258 6.10E-44 186 6573 cellular  
 organisms;Eukaryota;Opisthokonta;Metazoa;Eumetazoa;Bilateria;Protostomia;  
 Spiralia;Lophotrochozoa;Mollusca;Bivalvia;Autobranchia;Pteriormorphia;Pect  
 inida;Pectinoidea;Pectinidae;Mizuhopecten;Mizuhopecten yessoensis  
 UdeM00000005876 6573 181.8 UdeM00000005876 XP\_021367190.1 39.5 263  
 151 4 3 264 2 257 1.20E-42 181.8 6573 cellular  
 organisms;Eukaryota;Opisthokonta;Metazoa;Eumetazoa;Bilateria;Protostomia;  
 Spiralia;Lophotrochozoa;Mollusca;Bivalvia;Autobranchia;Pteriormorphia;Pect  
 inida;Pectinoidea;Pectinidae;Mizuhopecten;Mizuhopecten yessoensis  
 UdeM00000005878 400727 226.9 UdeM00000005878 XP\_025111774.1 48.4  
 281 133 5 227 504 315 586 6.00E-56 226.9 400727  
 cellular  
 organisms;Eukaryota;Opisthokonta;Metazoa;Eumetazoa;Bilateria;Protostomia;  
 Spiralia;Lophotrochozoa;Mollusca;Gastropoda;Caenogastropoda;Architaeniogl  
 ossa;Ampullarioidea;Ampullariidae;Pomacea;Pomacea canaliculata

UdeM00000005879 6596 702.2 UdeM00000005879 XP\_045197801.1 72.5 458  
 124 1 5 460 1 458 4.40E-199 702.2 6596 cellular  
 organisms;Eukaryota;Opisthokonta;Metazoa;Eumetazoa;Bilateria;Protostomia;  
 Spiralia;Lophotrochozoa;Mollusca;Bivalvia;Autobranhia;Heteroconchia;Euhe  
 terodonta;Imparidentia;Venerida;Veneroidea;Veneridae;Mercenaria;Mercenari  
 a mercenaria  
 UdeM00000005880 6596 68.2 UdeM00000005880 XP\_045166505.1 35.8 148  
 68 3 3 145 4 129 1.00E-08 68.2 6596 cellular  
 organisms;Eukaryota;Opisthokonta;Metazoa;Eumetazoa;Bilateria;Protostomia;  
 Spiralia;Lophotrochozoa;Mollusca;Bivalvia;Autobranhia;Heteroconchia;Euhe  
 terodonta;Imparidentia;Venerida;Veneroidea;Veneridae;Mercenaria;Mercenari  
 a mercenaria  
 UdeM00000005881 6573 266.2 UdeM00000005881 XP\_021340176.1 66 200  
 68 0 1 200 297 496 3.80E-68 266.2 6573 cellular  
 organisms;Eukaryota;Opisthokonta;Metazoa;Eumetazoa;Bilateria;Protostomia;  
 Spiralia;Lophotrochozoa;Mollusca;Bivalvia;Autobranhia;Pteriormorphia;Pect  
 inida;Pectinoidea;Pectinidae;Mizuhopecten;Mizuhopecten yessoensis  
 UdeM00000005882 29159 171.8 UdeM00000005882 XP\_034312908.1 26 651  
 315 19 5 523 6 621 2.30E-39 171.8 29159 cellular  
 organisms;Eukaryota;Opisthokonta;Metazoa;Eumetazoa;Bilateria;Protostomia;  
 Spiralia;Lophotrochozoa;Mollusca;Bivalvia;Autobranhia;Pteriormorphia;Ostr  
 eida;Ostreoidea;Ostreidae;Crassostrea;Crassostrea gigas  
 UdeM00000005884 6579 942.2 UdeM00000005884 XP\_033762888.1 68.8 689  
 206 5 1 685 1 684 3.70E-271 942.2 6579 cellular  
 organisms;Eukaryota;Opisthokonta;Metazoa;Eumetazoa;Bilateria;Protostomia;  
 Spiralia;Lophotrochozoa;Mollusca;Bivalvia;Autobranhia;Pteriormorphia;Pect  
 inida;Pectinoidea;Pectinidae;Pecten;Pecten maximus  
 UdeM00000005885 1735272 342.4 UdeM00000005885 XP\_041369120.1 63.4  
 279 98 2 5 283 8 282 5.50E-91 342.4 1735272  
 cellular  
 organisms;Eukaryota;Opisthokonta;Metazoa;Eumetazoa;Bilateria;Protostomia;  
 Spiralia;Lophotrochozoa;Mollusca;Gastropoda;Neomphalina;Neomphaloidea;Pel  
 tospiridae;Gigantopelta;Gigantopelta aegis  
 UdeM00000005886 6573 501.5 UdeM00000005886 XP\_021341164.1 57.9 565  
 231 6 1 560 1 563 1.40E-138 501.5 6573 cellular  
 organisms;Eukaryota;Opisthokonta;Metazoa;Eumetazoa;Bilateria;Protostomia;  
 Spiralia;Lophotrochozoa;Mollusca;Bivalvia;Autobranhia;Pteriormorphia;Pect  
 inida;Pectinoidea;Pectinidae;Mizuhopecten;Mizuhopecten yessoensis  
 UdeM00000005887 6596 360.5 UdeM00000005887 XP\_045169435.1 69.8 252  
 60 2 1 252 2 237 1.70E-96 360.5 6596 cellular  
 organisms;Eukaryota;Opisthokonta;Metazoa;Eumetazoa;Bilateria;Protostomia;  
 Spiralia;Lophotrochozoa;Mollusca;Bivalvia;Autobranhia;Heteroconchia;Euhe  
 terodonta;Imparidentia;Venerida;Veneroidea;Veneridae;Mercenaria;Mercenari  
 a mercenaria  
 UdeM00000005888 1529436 150.6 UdeM00000005888 XP\_033095325.1 37.7  
 204 124 3 9 211 11 212 2.20E-33 150.6 1529436  
 cellular  
 organisms;Eukaryota;Opisthokonta;Metazoa;Eumetazoa;Bilateria;Deuterostomi  
 a;Echinodermata;Pelmatozoa;Crinoidea;Articulata;Comatulida;Comatulidae;Co  
 matulinae;Anneissia;Anneissia japonica  
 UdeM00000005890 6579 117.1 UdeM00000005890 XP\_033761495.1 61.5 91  
 34 1 36 125 24 114 1.90E-23 117.1 6579 cellular  
 organisms;Eukaryota;Opisthokonta;Metazoa;Eumetazoa;Bilateria;Protostomia;



Spiralia; Lophotrochozoa; Mollusca; Bivalvia; Autobranchia; Pteriomorpha; Pectinida; Pectinoidea; Pectinidae; Pecten; Pecten maximus  
UdeM00000005891 6573 637.5 UdeM00000005891 XP\_021354967.1 48.8 682  
319 10 272 932 250 922 2.80E-179 637.5 6573 cellular  
organisms; Eukaryota; Opisthokonta; Metazoa; Eumetazoa; Bilateria; Protostomia; Spiralia; Lophotrochozoa; Mollusca; Bivalvia; Autobranchia; Pteriomorpha; Pectinida; Pectinoidea; Pectinidae; Mizuhopecten; Mizuhopecten yessoensis  
UdeM00000005892 6573 637.5 UdeM00000005892 XP\_021354967.1 48.8 682  
319 10 244 904 250 922 2.70E-179 637.5 6573 cellular  
organisms; Eukaryota; Opisthokonta; Metazoa; Eumetazoa; Bilateria; Protostomia; Spiralia; Lophotrochozoa; Mollusca; Bivalvia; Autobranchia; Pteriomorpha; Pectinida; Pectinoidea; Pectinidae; Mizuhopecten; Mizuhopecten yessoensis  
UdeM00000005893 6596 637.9 UdeM00000005893 XP\_045192175.1 66.3 748  
252 0 39 786 889 1636 1.70E-179 637.9 6596 cellular  
organisms; Eukaryota; Opisthokonta; Metazoa; Eumetazoa; Bilateria; Protostomia; Spiralia; Lophotrochozoa; Mollusca; Bivalvia; Autobranchia; Heteroconchia; Euheterodonta; Imparidentia; Venerida; Veneroidea; Veneridae; Mercenaria; Mercenaria mercenaria  
UdeM00000005894 6596 852.4 UdeM00000005894 XP\_045192175.1 63.4 596  
213 3 1 595 271 862 3.50E-244 852.4 6596 cellular  
organisms; Eukaryota; Opisthokonta; Metazoa; Eumetazoa; Bilateria; Protostomia; Spiralia; Lophotrochozoa; Mollusca; Bivalvia; Autobranchia; Heteroconchia; Euheterodonta; Imparidentia; Venerida; Veneroidea; Veneridae; Mercenaria; Mercenaria mercenaria  
UdeM00000005895 6596 187.6 UdeM00000005895 XP\_045192175.1 63.8 138  
47 2 22 158 22 157 1.40E-44 187.6 6596 cellular  
organisms; Eukaryota; Opisthokonta; Metazoa; Eumetazoa; Bilateria; Protostomia; Spiralia; Lophotrochozoa; Mollusca; Bivalvia; Autobranchia; Heteroconchia; Euheterodonta; Imparidentia; Venerida; Veneroidea; Veneridae; Mercenaria; Mercenaria mercenaria  
UdeM00000005896 6573 337.8 UdeM00000005896 XP\_021380280.1 52 296  
141 1 1 295 11 306 1.40E-89 337.8 6573 cellular  
organisms; Eukaryota; Opisthokonta; Metazoa; Eumetazoa; Bilateria; Protostomia; Spiralia; Lophotrochozoa; Mollusca; Bivalvia; Autobranchia; Pteriomorpha; Pectinida; Pectinoidea; Pectinidae; Mizuhopecten; Mizuhopecten yessoensis  
UdeM00000005897 6596 474.2 UdeM00000005897 XP\_045197885.1 98.6 221  
3 0 1 221 1 221 9.30E-131 474.2 6596 cellular  
organisms; Eukaryota; Opisthokonta; Metazoa; Eumetazoa; Bilateria; Protostomia; Spiralia; Lophotrochozoa; Mollusca; Bivalvia; Autobranchia; Heteroconchia; Euheterodonta; Imparidentia; Venerida; Veneroidea; Veneridae; Mercenaria; Mercenaria mercenaria  
UdeM00000005898 37621 447.6 UdeM00000005898 XP\_014679849.1 44.2 511  
209 3 10 444 14 524 1.90E-122 447.6 37621 cellular  
organisms; Eukaryota; Opisthokonta; Metazoa; Eumetazoa; Bilateria; Protostomia; Ecdysozoa; Scalidophora; Priapulida; Priapulimorpha; Priapulimorphida; Priapulidae; Priapululus; Priapululus caudatus  
UdeM00000005899 6573 89.4 UdeM00000005899 XP\_021352054.1 61.9 63  
24 0 8 70 65 127 3.80E-15 89.4 6573 cellular  
organisms; Eukaryota; Opisthokonta; Metazoa; Eumetazoa; Bilateria; Protostomia; Spiralia; Lophotrochozoa; Mollusca; Bivalvia; Autobranchia; Pteriomorpha; Pectinida; Pectinoidea; Pectinidae; Mizuhopecten; Mizuhopecten yessoensis  
UdeM00000005900 6596 265.4 UdeM00000005900 XP\_045190165.1 57.7 213  
90 0 1 213 121 333 6.30E-68 265.4 6596 cellular  
organisms; Eukaryota; Opisthokonta; Metazoa; Eumetazoa; Bilateria; Protostomia;

Spiralia;Lophotrochozoa;Mollusca;Bivalvia;Autobranchia;Heteroconchia;Euherodonta;Imparidentia;Venerida;Veneroidea;Veneridae;Mercenaria;Mercenaria mercenaria

UdeM00000005901 6596 261.2 UdeM00000005901 XP\_045190165.1 57.4 209  
89 0 2 210 125 333 1.20E-66 261.2 6596 cellular

organisms;Eukaryota;Opisthokonta;Metazoa;Eumetazoa;Bilateria;Protostomia;Spiralia;Lophotrochozoa;Mollusca;Bivalvia;Autobranchia;Heteroconchia;Euherodonta;Imparidentia;Venerida;Veneroidea;Veneridae;Mercenaria;Mercenaria mercenaria

UdeM00000005902 6596 377.5 UdeM00000005902 XP\_045190165.1 59.6 297  
120 0 1 297 37 333 1.60E-101 377.5 6596 cellular

organisms;Eukaryota;Opisthokonta;Metazoa;Eumetazoa;Bilateria;Protostomia;Spiralia;Lophotrochozoa;Mollusca;Bivalvia;Autobranchia;Heteroconchia;Euherodonta;Imparidentia;Venerida;Veneroidea;Veneridae;Mercenaria;Mercenaria mercenaria

UdeM00000005903 6579 148.3 UdeM00000005903 XP\_033730768.1 56.6 145  
38 2 63 183 105 248 1.00E-32 148.3 6579 cellular

organisms;Eukaryota;Opisthokonta;Metazoa;Eumetazoa;Bilateria;Protostomia;Spiralia;Lophotrochozoa;Mollusca;Bivalvia;Autobranchia;Pteriomorphia;Pectinida;Pectinoidea;Pectinidae;Pecten;Pecten maximus

UdeM00000005904 6579 125.6 UdeM00000005904 XP\_033730768.1 50.3 143  
46 2 64 182 107 248 6.90E-26 125.6 6579 cellular

organisms;Eukaryota;Opisthokonta;Metazoa;Eumetazoa;Bilateria;Protostomia;Spiralia;Lophotrochozoa;Mollusca;Bivalvia;Autobranchia;Pteriomorphia;Pectinida;Pectinoidea;Pectinidae;Pecten;Pecten maximus

UdeM00000005906 6565 342 UdeM00000005906 XP\_022326632.1 60.8 245  
96 0 21 265 11 255 6.90E-91 342 6565 cellular

organisms;Eukaryota;Opisthokonta;Metazoa;Eumetazoa;Bilateria;Protostomia;Spiralia;Lophotrochozoa;Mollusca;Bivalvia;Autobranchia;Pteriomorphia;Ostreida;Ostreoidea;Ostreidae;Crassostrea;Crassostrea virginica

UdeM00000005907 400727 114.8 UdeM00000005907 XP\_025112406.1 49.7  
149 31 2 27 132 251 398 9.00E-23 114.8 400727  
cellular

organisms;Eukaryota;Opisthokonta;Metazoa;Eumetazoa;Bilateria;Protostomia;Spiralia;Lophotrochozoa;Mollusca;Gastropoda;Caenogastropoda;Architaenioglossa;Ampullarioidea;Ampullariidae;Pomacea;Pomacea canaliculata

UdeM00000005908 6579 130.6 UdeM00000005908 XP\_033730768.1 49.7 143  
67 2 30 169 108 248 2.00E-27 130.6 6579 cellular

organisms;Eukaryota;Opisthokonta;Metazoa;Eumetazoa;Bilateria;Protostomia;Spiralia;Lophotrochozoa;Mollusca;Bivalvia;Autobranchia;Pteriomorphia;Pectinida;Pectinoidea;Pectinidae;Pecten;Pecten maximus

UdeM00000005909 6526 358.2 UdeM00000005909 XP\_013084225.1 58.2 280  
117 0 1 280 1 280 9.60E-96 358.2 6526 cellular

organisms;Eukaryota;Opisthokonta;Metazoa;Eumetazoa;Bilateria;Protostomia;Spiralia;Lophotrochozoa;Mollusca;Gastropoda;Heterobranchia;Euthyneura;Pulmonata;Hygrophila;Lymnaeidae;Planorbidae;Biomphalaria;Biomphalaria glabrata

UdeM00000005910 260995 80.9 UdeM00000005910 XP\_033812940.1 51.4  
74 35 1 1 74 1 73 7.90E-13 80.9 260995  
cellular

organisms;Eukaryota;Opisthokonta;Metazoa;Eumetazoa;Bilateria;Deuterostomia;Chordata;Craniata;Vertebrata;Gnathostomata;Teleostomi;Euteleostomi;Sarcopterygii;Dipnotetrapodomorpha;Tetrapoda;Amphibia;Gymnophiona;Dermophiidae;Geotrypetes;Geotrypetes seraphini

UdeM00000005911 7757 498.4 UdeM00000005911 XP\_032835197.1 80.5 308  
 59 1 1 308 52 358 2.10E-137 498.4 7757 cellular  
 organisms;Eukaryota;Opisthokonta;Metazoa;Eumetazoa;Bilateria;Deuterostomi  
 a;Chordata;Craniata;Vertebrata;Cyclostomata;Hyperoartia;Petromyzontiforme  
 s;Petromyzontidae;Petromyzon;Petromyzon marinus  
 UdeM00000005912 6596 302.4 UdeM00000005912 XP\_045163613.1 42.7 347  
 186 7 1 335 1 346 7.30E-79 302.4 6596 cellular  
 organisms;Eukaryota;Opisthokonta;Metazoa;Eumetazoa;Bilateria;Protostomia;  
 Spiralia;Lophotrochozoa;Mollusca;Bivalvia;Autobranhia;Heteroconchia;Euhe  
 terodonta;Imparidentia;Venerida;Veneroidea;Veneridae;Mercenaria;Mercenari  
 a mercenaria  
 UdeM00000005913 6596 422.5 UdeM00000005913 XP\_045163613.1 56.5 345  
 145 3 1 340 1 345 4.90E-115 422.5 6596 cellular  
 organisms;Eukaryota;Opisthokonta;Metazoa;Eumetazoa;Bilateria;Protostomia;  
 Spiralia;Lophotrochozoa;Mollusca;Bivalvia;Autobranhia;Heteroconchia;Euhe  
 terodonta;Imparidentia;Venerida;Veneroidea;Veneridae;Mercenaria;Mercenari  
 a mercenaria  
 UdeM00000005914 6579 160.6 UdeM00000005914 XP\_033748209.1 41.1 207  
 106 3 30 234 6 198 2.40E-36 160.6 6579 cellular  
 organisms;Eukaryota;Opisthokonta;Metazoa;Eumetazoa;Bilateria;Protostomia;  
 Spiralia;Lophotrochozoa;Mollusca;Bivalvia;Autobranhia;Pteriormorphia;Pect  
 inida;Pectinoidea;Pectinidae;Pecten;Pecten maximus  
 UdeM00000005915 6579 160.6 UdeM00000005915 XP\_033748209.1 45.5 165  
 88 1 36 200 36 198 2.10E-36 160.6 6579 cellular  
 organisms;Eukaryota;Opisthokonta;Metazoa;Eumetazoa;Bilateria;Protostomia;  
 Spiralia;Lophotrochozoa;Mollusca;Bivalvia;Autobranhia;Pteriormorphia;Pect  
 inida;Pectinoidea;Pectinidae;Pecten;Pecten maximus  
 UdeM00000005916 6596 149.4 UdeM00000005916 XP\_045177053.1 40.2 204  
 103 6 122 321 243 431 7.70E-33 149.4 6596 cellular  
 organisms;Eukaryota;Opisthokonta;Metazoa;Eumetazoa;Bilateria;Protostomia;  
 Spiralia;Lophotrochozoa;Mollusca;Bivalvia;Autobranhia;Heteroconchia;Euhe  
 terodonta;Imparidentia;Venerida;Veneroidea;Veneridae;Mercenaria;Mercenari  
 a mercenaria  
 UdeM00000005917 7091 181.8 UdeM00000005917 NP\_001040508.1 60.5 147  
 53 3 1 145 32 175 6.60E-43 181.8 7091 cellular  
 organisms;Eukaryota;Opisthokonta;Metazoa;Eumetazoa;Bilateria;Protostomia;  
 Ecdysozoa;Panarthropoda;Arthropoda;Mandibulata;Pancrustacea;Hexapoda;Inse  
 cta;Dicondylia;Pterygota;Neoptera;Endopterygota;Amphiesmenoptera;Lepidopt  
 era;Glossata;Neolepidoptera;Heteroneura;Ditrysia;Obtectomera;Bombycoidea;  
 Bombycidae;Bombycinae;Bombyx;Bombyx mori  
 UdeM00000005919 32264 195.7 UdeM00000005919 XP\_015782728.1 54.7 179  
 64 4 10 184 8 173 5.50E-47 195.7 32264 cellular  
 organisms;Eukaryota;Opisthokonta;Metazoa;Eumetazoa;Bilateria;Protostomia;  
 Ecdysozoa;Panarthropoda;Arthropoda;Chelicerata;Arachnida;Acari;Acariforme  
 s;Trombidiformes;Prostigmata;Eleutherengona;Raphignathae;Tetranychosida;T  
 etranychidae;Tetranychus;Tetranychus urticae  
 UdeM00000005920 6573 89 UdeM00000005920 XP\_021360243.1 63 73  
 20 2 1 67 16 87 2.60E-15 89 6573 cellular  
 organisms;Eukaryota;Opisthokonta;Metazoa;Eumetazoa;Bilateria;Protostomia;  
 Spiralia;Lophotrochozoa;Mollusca;Bivalvia;Autobranhia;Pteriormorphia;Pect  
 inida;Pectinoidea;Pectinidae;Mizuhopecten;Mizuhopecten yessoensis  
 UdeM00000005921 32264 182.6 UdeM00000005921 XP\_015782728.1 55.5 164  
 55 3 64 226 8 154 5.90E-43 182.6 32264 cellular  
 organisms;Eukaryota;Opisthokonta;Metazoa;Eumetazoa;Bilateria;Protostomia;

Ecdysozoa; Panarthropoda; Arthropoda; Chelicerata; Arachnida; Acari; Acariformes; Trombidiformes; Prostigmata; Eleutherengona; Raphignathae; Tetranychoidae; Tetranychidae; Tetranychus; Tetranychus urticae

UdeM00000005922 6579 453.8 UdeM00000005922 XP\_033730768.1 89.9 248  
25 0 1 248 1 248 1.50E-124 453.8 6579 cellular

organisms; Eukaryota; Opisthokonta; Metazoa; Eumetazoa; Bilateria; Protostomia; Spiralia; Lophotrochozoa; Mollusca; Bivalvia; Autobranchia; Pteriomorpha; Pectinida; Pectinoidea; Pectinidae; Pecten; Pecten maximus

UdeM00000005923 6579 756.1 UdeM00000005923 XP\_033730800.1 73.9 541  
88 7 12 501 248 786 3.00E-215 756.1 6579 cellular

organisms; Eukaryota; Opisthokonta; Metazoa; Eumetazoa; Bilateria; Protostomia; Spiralia; Lophotrochozoa; Mollusca; Bivalvia; Autobranchia; Pteriomorpha; Pectinida; Pectinoidea; Pectinidae; Pecten; Pecten maximus

UdeM00000005924 29159 2467.2 UdeM00000005924 XP\_034315520.1 30  
5424 3067 84 1 4748 2 5373 0.00E+00 2467.2

29159 cellular

organisms; Eukaryota; Opisthokonta; Metazoa; Eumetazoa; Bilateria; Protostomia; Spiralia; Lophotrochozoa; Mollusca; Bivalvia; Autobranchia; Pteriomorpha; Ostracida; Ostreoidae; Ostreidae; Crassostrea; Crassostrea gigas

UdeM00000005925 6565 1447.6 UdeM00000005925 XP\_022331790.1 41.2  
1935 1058 17 1 1868 1 1922 0.00E+00 1447.6 6565

cellular

organisms; Eukaryota; Opisthokonta; Metazoa; Eumetazoa; Bilateria; Protostomia; Spiralia; Lophotrochozoa; Mollusca; Bivalvia; Autobranchia; Pteriomorpha; Ostracida; Ostreoidae; Ostreidae; Crassostrea; Crassostrea virginica

UdeM00000005926 6596 1350.9 UdeM00000005926 XP\_045158693.1 45.2  
1514 809 11 2786 4289 90 1593 0.00E+00 1350.9 6596

cellular

organisms; Eukaryota; Opisthokonta; Metazoa; Eumetazoa; Bilateria; Protostomia; Spiralia; Lophotrochozoa; Mollusca; Bivalvia; Autobranchia; Heteroconchia; Euheterodonta; Imparidentia; Venerida; Veneroidea; Veneridae; Mercenaria; Mercenaria mercenaria

UdeM00000005927 6596 499.6 UdeM00000005927 XP\_045158693.1 27.3 1197  
755 16 53 1154 3169 4345 1.10E-137 499.6 6596 cellular

organisms; Eukaryota; Opisthokonta; Metazoa; Eumetazoa; Bilateria; Protostomia; Spiralia; Lophotrochozoa; Mollusca; Bivalvia; Autobranchia; Heteroconchia; Euheterodonta; Imparidentia; Venerida; Veneroidea; Veneridae; Mercenaria; Mercenaria mercenaria

UdeM00000005928 6596 230.3 UdeM00000005928 XP\_045160544.1 44.7 262  
141 3 106 365 1 260 3.80E-57 230.3 6596 cellular

organisms; Eukaryota; Opisthokonta; Metazoa; Eumetazoa; Bilateria; Protostomia; Spiralia; Lophotrochozoa; Mollusca; Bivalvia; Autobranchia; Heteroconchia; Euheterodonta; Imparidentia; Venerida; Veneroidea; Veneridae; Mercenaria; Mercenaria mercenaria

UdeM00000005932 29159 171 UdeM00000005932 XP\_034315520.1 23.1 607  
421 13 94 682 2638 3216 5.40E-39 171 29159 cellular

organisms; Eukaryota; Opisthokonta; Metazoa; Eumetazoa; Bilateria; Protostomia; Spiralia; Lophotrochozoa; Mollusca; Bivalvia; Autobranchia; Pteriomorpha; Ostracida; Ostreoidae; Ostreidae; Crassostrea; Crassostrea gigas

UdeM00000005934 6573 149.8 UdeM00000005934 XP\_021344770.1 26 480  
259 15 1 388 402 877 7.40E-33 149.8 6573 cellular

organisms; Eukaryota; Opisthokonta; Metazoa; Eumetazoa; Bilateria; Protostomia; Spiralia; Lophotrochozoa; Mollusca; Bivalvia; Autobranchia; Pteriomorpha; Pectinida; Pectinoidea; Pectinidae; Mizuhopecten; Mizuhopecten yessoensis

UdeM00000005935 29159 2479.9 UdeM00000005935 XP\_034315520.1 30.5  
 5435 3028 91 1 4748 2 5373 0.00E+00 2479.9  
 29159 cellular  
 organisms;Eukaryota;Opisthokonta;Metazoa;Eumetazoa;Bilateria;Protostomia;  
 Spiralia;Lophotrochozoa;Mollusca;Bivalvia;Autobranchia;Pteriormorphia;Ostr  
 eida;Ostreoidea;Ostreidae;Crassostrea;Crassostrea gigas  
 UdeM00000005936 29159 2476.8 UdeM00000005936 XP\_034315520.1 30.4  
 5435 3031 91 1 4748 2 5373 0.00E+00 2476.8  
 29159 cellular  
 organisms;Eukaryota;Opisthokonta;Metazoa;Eumetazoa;Bilateria;Protostomia;  
 Spiralia;Lophotrochozoa;Mollusca;Bivalvia;Autobranchia;Pteriormorphia;Ostr  
 eida;Ostreoidea;Ostreidae;Crassostrea;Crassostrea gigas  
 UdeM00000005937 29159 1788.9 UdeM00000005937 XP\_034315520.1 34.8  
 3138 1788 44 1 2927 72 3161 0.00E+00 1788.9  
 29159 cellular  
 organisms;Eukaryota;Opisthokonta;Metazoa;Eumetazoa;Bilateria;Protostomia;  
 Spiralia;Lophotrochozoa;Mollusca;Bivalvia;Autobranchia;Pteriormorphia;Ostr  
 eida;Ostreoidea;Ostreidae;Crassostrea;Crassostrea gigas  
 UdeM00000005938 6596 696 UdeM00000005938 XP\_045158693.1 27.8 1761  
 1097 34 1 1653 3051 4744 1.10E-196 696 6596 cellular  
 organisms;Eukaryota;Opisthokonta;Metazoa;Eumetazoa;Bilateria;Protostomia;  
 Spiralia;Lophotrochozoa;Mollusca;Bivalvia;Autobranchia;Heteroconchia;Euhe  
 terodonta;Imparidentia;Venerida;Veneroidea;Veneridae;Mercenaria;Mercenari  
 a mercenaria  
 UdeM00000005939 6596 218.4 UdeM00000005939 XP\_045191629.1 38.6 337  
 181 9 178 503 197 518 2.10E-53 218.4 6596 cellular  
 organisms;Eukaryota;Opisthokonta;Metazoa;Eumetazoa;Bilateria;Protostomia;  
 Spiralia;Lophotrochozoa;Mollusca;Bivalvia;Autobranchia;Heteroconchia;Euhe  
 terodonta;Imparidentia;Venerida;Veneroidea;Veneridae;Mercenaria;Mercenari  
 a mercenaria  
 UdeM00000005940 6596 1234.6 UdeM00000005940 XP\_045191615.1 60  
 1046 404 8 1 1043 1 1035 0.00E+00 1234.6 6596  
 cellular  
 organisms;Eukaryota;Opisthokonta;Metazoa;Eumetazoa;Bilateria;Protostomia;  
 Spiralia;Lophotrochozoa;Mollusca;Bivalvia;Autobranchia;Heteroconchia;Euhe  
 terodonta;Imparidentia;Venerida;Veneroidea;Veneridae;Mercenaria;Mercenari  
 a mercenaria  
 UdeM00000005941 6596 542.7 UdeM00000005941 XP\_045191615.1 60.1 429  
 169 1 1 427 980 1408 4.10E-151 542.7 6596 cellular  
 organisms;Eukaryota;Opisthokonta;Metazoa;Eumetazoa;Bilateria;Protostomia;  
 Spiralia;Lophotrochozoa;Mollusca;Bivalvia;Autobranchia;Heteroconchia;Euhe  
 terodonta;Imparidentia;Venerida;Veneroidea;Veneridae;Mercenaria;Mercenari  
 a mercenaria  
 UdeM00000005942 6596 545.8 UdeM00000005942 XP\_045191615.1 59.1 440  
 169 1 1 440 980 1408 5.00E-152 545.8 6596 cellular  
 organisms;Eukaryota;Opisthokonta;Metazoa;Eumetazoa;Bilateria;Protostomia;  
 Spiralia;Lophotrochozoa;Mollusca;Bivalvia;Autobranchia;Heteroconchia;Euhe  
 terodonta;Imparidentia;Venerida;Veneroidea;Veneridae;Mercenaria;Mercenari  
 a mercenaria  
 UdeM00000005943 6565 255.4 UdeM00000005943 XP\_022324961.1 65.8 193  
 66 0 22 214 1403 1595 6.60E-65 255.4 6565 cellular  
 organisms;Eukaryota;Opisthokonta;Metazoa;Eumetazoa;Bilateria;Protostomia;  
 Spiralia;Lophotrochozoa;Mollusca;Bivalvia;Autobranchia;Pteriormorphia;Ostr  
 eida;Ostreoidea;Ostreidae;Crassostrea;Crassostrea virginica

UdeM00000005944 6596 1063.5 UdeM00000005944 XP\_045191602.1 62.9  
900 320 7 2 895 645 1536 1.40E-307 1063.5 6596  
cellular

organisms;Eukaryota;Opisthokonta;Metazoa;Eumetazoa;Bilateria;Protostomia;  
Spiralia;Lophotrochozoa;Mollusca;Bivalvia;Autobranhia;Heteroconchia;Euhe  
terodonta;Imparidentia;Venerida;Veneroidea;Veneridae;Mercenaria;Mercenari  
a mercenaria

UdeM00000005945 6573 385.6 UdeM00000005945 XP\_021341775.1 49.7 394  
187 4 1 384 1 393 7.50E-104 385.6 6573 cellular

organisms;Eukaryota;Opisthokonta;Metazoa;Eumetazoa;Bilateria;Protostomia;  
Spiralia;Lophotrochozoa;Mollusca;Bivalvia;Autobranhia;Pteriormorphia;Pect  
inida;Pectinoidea;Pectinidae;Mizuhopecten;Mizuhopecten yessoensis

UdeM00000005946 6596 495.7 UdeM00000005946 XP\_045191602.1 64 392  
110 1 1 392 235 595 5.70E-137 495.7 6596 cellular

organisms;Eukaryota;Opisthokonta;Metazoa;Eumetazoa;Bilateria;Protostomia;  
Spiralia;Lophotrochozoa;Mollusca;Bivalvia;Autobranhia;Heteroconchia;Euhe  
terodonta;Imparidentia;Venerida;Veneroidea;Veneridae;Mercenaria;Mercenari  
a mercenaria

UdeM00000005947 6596 313.2 UdeM00000005947 XP\_045191602.1 66 238  
78 2 1 238 1 235 3.00E-82 313.2 6596 cellular

organisms;Eukaryota;Opisthokonta;Metazoa;Eumetazoa;Bilateria;Protostomia;  
Spiralia;Lophotrochozoa;Mollusca;Bivalvia;Autobranhia;Heteroconchia;Euhe  
terodonta;Imparidentia;Venerida;Veneroidea;Veneridae;Mercenaria;Mercenari  
a mercenaria

UdeM00000005948 6596 511.5 UdeM00000005948 XP\_045203324.1 52.5 499  
235 2 5 501 1 499 1.20E-141 511.5 6596 cellular

organisms;Eukaryota;Opisthokonta;Metazoa;Eumetazoa;Bilateria;Protostomia;  
Spiralia;Lophotrochozoa;Mollusca;Bivalvia;Autobranhia;Heteroconchia;Euhe  
terodonta;Imparidentia;Venerida;Veneroidea;Veneridae;Mercenaria;Mercenari  
a mercenaria

UdeM00000005950 6596 462.2 UdeM00000005950 XP\_045203324.1 55.5 429  
189 2 2 428 71 499 7.10E-127 462.2 6596 cellular

organisms;Eukaryota;Opisthokonta;Metazoa;Eumetazoa;Bilateria;Protostomia;  
Spiralia;Lophotrochozoa;Mollusca;Bivalvia;Autobranhia;Heteroconchia;Euhe  
terodonta;Imparidentia;Venerida;Veneroidea;Veneridae;Mercenaria;Mercenari  
a mercenaria

UdeM00000005949 45264 188.3 UdeM00000005949 XP\_044167050.1 57.1 154  
66 0 4 157 5 158 7.60E-45 188.3 45264 cellular

organisms;Eukaryota;Opisthokonta;Metazoa;Eumetazoa;Cnidaria;Anthozoa;Hexa  
corallia;Scleractinia;Astrocoeniina;Acroporidae;Acropora;Acropora  
millepora

UdeM00000005951 1735272 115.9 UdeM00000005951 XP\_041354937.1 57  
107 42 1 188 290 195 301 1.00E-22 115.9 1735272  
cellular

organisms;Eukaryota;Opisthokonta;Metazoa;Eumetazoa;Bilateria;Protostomia;  
Spiralia;Lophotrochozoa;Mollusca;Gastropoda;Neomphalina;Neomphaloidea;Pel  
tospiridae;Gigantopelta;Gigantopelta aegis

UdeM00000005952 6596 479.9 UdeM00000005952 XP\_045188461.1 87.4 270  
34 0 1 270 1 270 2.10E-132 479.9 6596 cellular

organisms;Eukaryota;Opisthokonta;Metazoa;Eumetazoa;Bilateria;Protostomia;  
Spiralia;Lophotrochozoa;Mollusca;Bivalvia;Autobranhia;Heteroconchia;Euhe  
terodonta;Imparidentia;Venerida;Veneroidea;Veneridae;Mercenaria;Mercenari  
a mercenaria

UdeM00000005953 6579 380.6 UdeM00000005953 XP\_033732728.1 57.1 340  
 138 4 1 336 1 336 2.10E-102 380.6 6579 cellular  
 organisms;Eukaryota;Opisthokonta;Metazoa;Eumetazoa;Bilateria;Protostomia;  
 Spiralia;Lophotrochozoa;Mollusca;Bivalvia;Autobranhia;Pteriomorphia;Pect  
 inida;Pectinoidea;Pectinidae;Pecten;Pecten maximus  
 UdeM00000005954 225164 517.7 UdeM00000005954 XP\_009049053.1 97.2  
 246 7 0 41 286 109 354 9.50E-144 517.7 225164  
 cellular  
 organisms;Eukaryota;Opisthokonta;Metazoa;Eumetazoa;Bilateria;Protostomia;  
 Spiralia;Lophotrochozoa;Mollusca;Gastropoda;Patellogastropoda;Lottioidea;  
 Lottiidae;Lottia;Lottia gigantea  
 UdeM00000005955 6579 79 UdeM00000005955 XP\_033759130.1 33.1 169  
 58 4 1 114 1 169 6.10E-12 79 6579 cellular  
 organisms;Eukaryota;Opisthokonta;Metazoa;Eumetazoa;Bilateria;Protostomia;  
 Spiralia;Lophotrochozoa;Mollusca;Bivalvia;Autobranhia;Pteriomorphia;Pect  
 inida;Pectinoidea;Pectinidae;Pecten;Pecten maximus  
 UdeM00000005956 6565 93.2 UdeM00000005956 XP\_022293464.1 25.8 240  
 68 2 1 130 339 578 3.00E-16 93.2 6565 cellular  
 organisms;Eukaryota;Opisthokonta;Metazoa;Eumetazoa;Bilateria;Protostomia;  
 Spiralia;Lophotrochozoa;Mollusca;Bivalvia;Autobranhia;Pteriomorphia;Ostr  
 eida;Ostreoidea;Ostreidae;Crassostrea;Crassostrea virginica  
 UdeM00000005957 6565 102.4 UdeM00000005957 XP\_022293464.1 36.8 163  
 53 4 1 114 1 162 4.60E-19 102.4 6565 cellular  
 organisms;Eukaryota;Opisthokonta;Metazoa;Eumetazoa;Bilateria;Protostomia;  
 Spiralia;Lophotrochozoa;Mollusca;Bivalvia;Autobranhia;Pteriomorphia;Ostr  
 eida;Ostreoidea;Ostreidae;Crassostrea;Crassostrea virginica  
 UdeM00000005958 1735272 134 UdeM00000005958 XP\_041370725.1 70.9  
 103 28 2 1 101 2 104 1.20E-28 134 1735272  
 cellular  
 organisms;Eukaryota;Opisthokonta;Metazoa;Eumetazoa;Bilateria;Protostomia;  
 Spiralia;Lophotrochozoa;Mollusca;Gastropoda;Neomphalina;Neomphaloidea;Pel  
 tospiridae;Gigantopelta;Gigantopelta aegis  
 UdeM00000005959 6565 114.8 UdeM00000005959 XP\_022299727.1 53.4 103  
 47 1 41 143 176 277 1.10E-22 114.8 6565 cellular  
 organisms;Eukaryota;Opisthokonta;Metazoa;Eumetazoa;Bilateria;Protostomia;  
 Spiralia;Lophotrochozoa;Mollusca;Bivalvia;Autobranhia;Pteriomorphia;Ostr  
 eida;Ostreoidea;Ostreidae;Crassostrea;Crassostrea virginica  
 UdeM00000005960 6596 570.5 UdeM00000005960 XP\_045188552.1 51.3 1233  
 440 26 6 1159 3 1154 5.50E-159 570.5 6596 cellular  
 organisms;Eukaryota;Opisthokonta;Metazoa;Eumetazoa;Bilateria;Protostomia;  
 Spiralia;Lophotrochozoa;Mollusca;Bivalvia;Autobranhia;Heteroconchia;Euhe  
 terodonta;Imparidentia;Venerida;Veneroidea;Veneridae;Mercenaria;Mercenari  
 a mercenaria  
 UdeM00000005962 6579 124.4 UdeM00000005962 XP\_033732636.1 50.4 135  
 63 3 11 143 25 157 1.20E-25 124.4 6579 cellular  
 organisms;Eukaryota;Opisthokonta;Metazoa;Eumetazoa;Bilateria;Protostomia;  
 Spiralia;Lophotrochozoa;Mollusca;Bivalvia;Autobranhia;Pteriomorphia;Pect  
 inida;Pectinoidea;Pectinidae;Pecten;Pecten maximus  
 UdeM00000005963 6596 389.8 UdeM00000005963 XP\_045202345.1 45.4 562  
 245 16 6 521 9 554 5.40E-105 389.8 6596 cellular  
 organisms;Eukaryota;Opisthokonta;Metazoa;Eumetazoa;Bilateria;Protostomia;  
 Spiralia;Lophotrochozoa;Mollusca;Bivalvia;Autobranhia;Heteroconchia;Euhe  
 terodonta;Imparidentia;Venerida;Veneroidea;Veneridae;Mercenaria;Mercenari  
 a mercenaria

UdeM00000005964 6573 66.2 UdeM00000005964 XP\_021369632.1 38.3 94  
 49 2 1 85 1 94 3.00E-08 66.2 6573 cellular  
 organisms;Eukaryota;Opisthokonta;Metazoa;Eumetazoa;Bilateria;Protostomia;  
 Spiralia;Lophotrochozoa;Mollusca;Bivalvia;Autobranchia;Pteriormorphia;Pect  
 inida;Pectinoidea;Pectinidae;Mizuhopecten;Mizuhopecten yessoensis  
 UdeM00000005965 6596 790.4 UdeM00000005965 XP\_045202325.1 93 427  
 30 0 1 427 1 427 1.10E-225 790.4 6596 cellular  
 organisms;Eukaryota;Opisthokonta;Metazoa;Eumetazoa;Bilateria;Protostomia;  
 Spiralia;Lophotrochozoa;Mollusca;Bivalvia;Autobranchia;Heteroconchia;Euhe  
 terodonta;Imparidentia;Venerida;Veneroidea;Veneridae;Mercenaria;Mercenari  
 a mercenaria  
 UdeM00000005966 6596 451.1 UdeM00000005966 XP\_045200992.1 78.5 297  
 54 3 1 289 1 295 1.10E-123 451.1 6596 cellular  
 organisms;Eukaryota;Opisthokonta;Metazoa;Eumetazoa;Bilateria;Protostomia;  
 Spiralia;Lophotrochozoa;Mollusca;Bivalvia;Autobranchia;Heteroconchia;Euhe  
 terodonta;Imparidentia;Venerida;Veneroidea;Veneridae;Mercenaria;Mercenari  
 a mercenaria  
 UdeM00000005968 1735272 152.1 UdeM00000005968 XP\_041370053.1 57.5  
 120 51 0 1 120 1 120 4.40E-34 152.1 1735272  
 cellular  
 organisms;Eukaryota;Opisthokonta;Metazoa;Eumetazoa;Bilateria;Protostomia;  
 Spiralia;Lophotrochozoa;Mollusca;Gastropoda;Neomphalina;Neomphaloidea;Pel  
 tospiridae;Gigantopelta;Gigantopelta aegis  
 UdeM00000005969 1608454 125.6 UdeM00000005969 XP\_016340910.1 36.9  
 176 101 4 2 167 104 279 6.10E-26 125.6 1608454  
 cellular  
 organisms;Eukaryota;Opisthokonta;Metazoa;Eumetazoa;Bilateria;Deuterostomi  
 a;Chordata;Craniata;Vertebrata;Gnathostomata;Teleostomi;Euteleostomi;Acti  
 nopterygii;Actinopteri;Neopterygii;Teleostei;Osteoglossocephalai;Clupeoce  
 phala;Otomorpha;Ostariophysi;Otophysi;Cypriniphysae;Cypriniformes;Cyprino  
 idei;Cyprinidae;Cyprininae;Sinocyclocheilus;Sinocyclocheilus anshuiensis  
 UdeM00000005970 6579 156 UdeM00000005970 XP\_033743219.1 39.2 217  
 115 6 26 237 34 238 6.00E-35 156 6579 cellular  
 organisms;Eukaryota;Opisthokonta;Metazoa;Eumetazoa;Bilateria;Protostomia;  
 Spiralia;Lophotrochozoa;Mollusca;Bivalvia;Autobranchia;Pteriormorphia;Pect  
 inida;Pectinoidea;Pectinidae;Pecten;Pecten maximus  
 UdeM00000005971 1735272 625.9 UdeM00000005971 XP\_041369270.1 60.5  
 550 201 7 14 561 9 544 4.80E-176 625.9 1735272  
 cellular  
 organisms;Eukaryota;Opisthokonta;Metazoa;Eumetazoa;Bilateria;Protostomia;  
 Spiralia;Lophotrochozoa;Mollusca;Gastropoda;Neomphalina;Neomphaloidea;Pel  
 tospiridae;Gigantopelta;Gigantopelta aegis  
 UdeM00000005972 6596 376.3 UdeM00000005972 XP\_045193755.1 67.2 338  
 100 5 1 338 12 338 4.00E-101 376.3 6596 cellular  
 organisms;Eukaryota;Opisthokonta;Metazoa;Eumetazoa;Bilateria;Protostomia;  
 Spiralia;Lophotrochozoa;Mollusca;Bivalvia;Autobranchia;Heteroconchia;Euhe  
 terodonta;Imparidentia;Venerida;Veneroidea;Veneridae;Mercenaria;Mercenari  
 a mercenaria  
 UdeM00000005974 1735272 505 UdeM00000005974 XP\_041374468.1 74.5  
 321 82 0 2 322 3 323 7.20E-140 505 1735272  
 cellular  
 organisms;Eukaryota;Opisthokonta;Metazoa;Eumetazoa;Bilateria;Protostomia;  
 Spiralia;Lophotrochozoa;Mollusca;Gastropoda;Neomphalina;Neomphaloidea;Pel  
 tospiridae;Gigantopelta;Gigantopelta aegis



UdeM00000005975 42434 68.6 UdeM00000005975 XP\_039443340.1 49.3 69  
 35 0 61 129 532 600 1.30E-08 68.6 42434 cellular  
 organisms;Eukaryota;Opisthokonta;Metazoa;Eumetazoa;Bilateria;Protostomia;  
 Ecdysozoa;Panarthropoda;Arthropoda;Mandibulata;Pancrustacea;Hexapoda;Inse  
 cta;Dicondylia;Pterygota;Neoptera;Endopterygota;Diptera;Nematocera;Culico  
 morpha;Culicoidea;Culicidae;Culicinae;Culicini;Culex;Culex;Culex pipiens  
 complex;Culex pipiens;Culex pipiens pallens  
 UdeM00000005977 6596 544.7 UdeM00000005977 XP\_045200291.1 55.4 554  
 220 9 1 538 1 543 1.40E-151 544.7 6596 cellular  
 organisms;Eukaryota;Opisthokonta;Metazoa;Eumetazoa;Bilateria;Protostomia;  
 Spiralia;Lophotrochozoa;Mollusca;Bivalvia;Autobranhia;Heteroconchia;Euhe  
 terodonta;Imparidentia;Venerida;Veneroidea;Veneridae;Mercenaria;Mercenari  
 a mercenaria  
 UdeM00000005979 6579 195.3 UdeM00000005979 XP\_033732859.1 46 235  
 119 3 23 249 19 253 1.00E-46 195.3 6579 cellular  
 organisms;Eukaryota;Opisthokonta;Metazoa;Eumetazoa;Bilateria;Protostomia;  
 Spiralia;Lophotrochozoa;Mollusca;Bivalvia;Autobranhia;Pteriormorphia;Pect  
 inida;Pectinoidea;Pectinidae;Pecten;Pecten maximus  
 UdeM00000005978 6579 213.4 UdeM00000005978 XP\_033732859.1 46.2 253  
 128 3 39 283 1 253 4.10E-52 213.4 6579 cellular  
 organisms;Eukaryota;Opisthokonta;Metazoa;Eumetazoa;Bilateria;Protostomia;  
 Spiralia;Lophotrochozoa;Mollusca;Bivalvia;Autobranhia;Pteriormorphia;Pect  
 inida;Pectinoidea;Pectinidae;Pecten;Pecten maximus  
 UdeM00000005980 6579 145.6 UdeM00000005980 XP\_033732857.1 47.1 174  
 89 1 110 280 351 524 1.50E-31 145.6 6579 cellular  
 organisms;Eukaryota;Opisthokonta;Metazoa;Eumetazoa;Bilateria;Protostomia;  
 Spiralia;Lophotrochozoa;Mollusca;Bivalvia;Autobranhia;Pteriormorphia;Pect  
 inida;Pectinoidea;Pectinidae;Pecten;Pecten maximus  
 UdeM00000005982 6596 276.6 UdeM00000005982 XP\_045193875.1 91.8 183  
 13 1 1 183 1 181 2.40E-71 276.6 6596 cellular  
 organisms;Eukaryota;Opisthokonta;Metazoa;Eumetazoa;Bilateria;Protostomia;  
 Spiralia;Lophotrochozoa;Mollusca;Bivalvia;Autobranhia;Heteroconchia;Euhe  
 terodonta;Imparidentia;Venerida;Veneroidea;Veneridae;Mercenaria;Mercenari  
 a mercenaria  
 UdeM00000005983 6596 302 UdeM00000005983 XP\_045159330.1 28.3 2229  
 1121 68 1 1812 1 2168 6.40E-78 302 6596 cellular  
 organisms;Eukaryota;Opisthokonta;Metazoa;Eumetazoa;Bilateria;Protostomia;  
 Spiralia;Lophotrochozoa;Mollusca;Bivalvia;Autobranhia;Heteroconchia;Euhe  
 terodonta;Imparidentia;Venerida;Veneroidea;Veneridae;Mercenaria;Mercenari  
 a mercenaria  
 UdeM00000005984 400727 345.1 UdeM00000005984 XP\_025114343.1 45.3  
 393 200 4 19 397 51 442 1.20E-91 345.1 400727  
 cellular  
 organisms;Eukaryota;Opisthokonta;Metazoa;Eumetazoa;Bilateria;Protostomia;  
 Spiralia;Lophotrochozoa;Mollusca;Gastropoda;Caenogastropoda;Architaeniogl  
 ossa;Ampullarioidea;Ampullariidae;Pomacea;Pomacea canaliculata  
 UdeM00000005985 6596 759.6 UdeM00000005985 XP\_045204414.1 78.7 474  
 101 0 19 492 20 493 2.50E-216 759.6 6596 cellular  
 organisms;Eukaryota;Opisthokonta;Metazoa;Eumetazoa;Bilateria;Protostomia;  
 Spiralia;Lophotrochozoa;Mollusca;Bivalvia;Autobranhia;Heteroconchia;Euhe  
 terodonta;Imparidentia;Venerida;Veneroidea;Veneridae;Mercenaria;Mercenari  
 a mercenaria  
 UdeM00000005986 6596 120.6 UdeM00000005986 XP\_045195454.1 47.1 102  
 53 1 699 799 525 626 9.40E-24 120.6 6596 cellular

organisms;Eukaryota;Opisthokonta;Metazoa;Eumetazoa;Bilateria;Protostomia;Spiralia;Lophotrochozoa;Mollusca;Bivalvia;Autobranchia;Heteroconchia;Euheterodonta;Imparidentia;Venerida;Veneroidea;Veneridae;Mercenaria;Mercenaria mercenaria

UdeM00000005987 6596 120.6 UdeM00000005987 XP\_045195454.1 47.1 102  
53 1 673 773 525 626 9.10E-24 120.6 6596 cellular

organisms;Eukaryota;Opisthokonta;Metazoa;Eumetazoa;Bilateria;Protostomia;Spiralia;Lophotrochozoa;Mollusca;Bivalvia;Autobranchia;Heteroconchia;Euheterodonta;Imparidentia;Venerida;Veneroidea;Veneridae;Mercenaria;Mercenaria mercenaria

UdeM00000005988 28829 58.9 UdeM00000005988 XP\_043867830.1 30.5 141  
80 5 16 153 452 577 6.50E-06 58.9 28829 cellular

organisms;Eukaryota;Opisthokonta;Metazoa;Eumetazoa;Bilateria;Deuterostomia;Chordata;Craniata;Vertebrata;Gnathostomata;Teleostomi;Euteleostomi;Actinopterygii;Actinopteri;Neopterygii;Teleostei;Osteoglossocephalai;Clupeocephala;Euteleostei;Neoteleostei;Eurypterygia;Ctenosquamata;Acanthomorpha;Euacanthomorpha;Percomorphaceae;Carangaria;Pleuronectiformes;Pleuronectoidei;Soleidae;Solea;Solea senegalensis

UdeM00000005989 294128 73.6 UdeM00000005989 XP\_018013344.1 26.2  
164 109 4 48 204 54 212 3.40E-10 73.6 294128  
cellular

organisms;Eukaryota;Opisthokonta;Metazoa;Eumetazoa;Bilateria;Protostomia;Ecdysozoa;Panarthropoda;Arthropoda;Mandibulata;Pancrustacea;Crustacea;Multicrustacea;Malacostraca;Eumalacostraca;Peracarida;Amphipoda;Senticaudata;Talitrida;Talitroidea;Hyalellidae;Hyalella;Hyalella azteca

UdeM00000005991 279965 62.4 UdeM00000005991 XP\_010175983.1 29.5  
122 81 4 71 191 1245 1362 7.40E-07 62.4 279965  
cellular

organisms;Eukaryota;Opisthokonta;Metazoa;Eumetazoa;Bilateria;Deuterostomia;Chordata;Craniata;Vertebrata;Gnathostomata;Teleostomi;Euteleostomi;Sarcopterygii;Dipnotetrapodomorpha;Tetrapoda;Amniota;Sauropsida;Sauria;Archelosauria;Archosauria;Dinosauria;Saurischia;Theropoda;Coelurosauria;Aves;Neognathae;Caprimulgimorphae;Caprimulgiformes;Caprimulgidae;Antrostomus;Antrostomus carolinensis

UdeM00000005992 114398 77 UdeM00000005992 XP\_042898299.1 37.2  
129 74 5 74 201 141 263 3.00E-11 77 114398  
cellular

organisms;Eukaryota;Opisthokonta;Metazoa;Eumetazoa;Bilateria;Protostomia;Ecdysozoa;Panarthropoda;Arthropoda;Chelicerata;Arachnida;Araneae;Araneomorphae;Entelegynae;Orbiculariae;Araneoidea;Theridiidae;Parasteatoda;Parasteatoda tepidariorum

UdeM00000005993 6596 365.9 UdeM00000005993 XP\_045188866.1 71.6 236  
66 1 9 243 278 513 3.90E-98 365.9 6596 cellular

organisms;Eukaryota;Opisthokonta;Metazoa;Eumetazoa;Bilateria;Protostomia;Spiralia;Lophotrochozoa;Mollusca;Bivalvia;Autobranchia;Heteroconchia;Euheterodonta;Imparidentia;Venerida;Veneroidea;Veneridae;Mercenaria;Mercenaria mercenaria

UdeM00000005994 6579 461.1 UdeM00000005994 XP\_033728813.1 56 427  
161 5 1 427 1 400 1.60E-126 461.1 6579 cellular

organisms;Eukaryota;Opisthokonta;Metazoa;Eumetazoa;Bilateria;Protostomia;Spiralia;Lophotrochozoa;Mollusca;Bivalvia;Autobranchia;Pteriomorpha;Pectinida;Pectinoidea;Pectinidae;Pecten;Pecten maximus

UdeM00000005995 6579 461.5 UdeM00000005995 XP\_033728813.1 56 427  
161 5 1 427 1 400 1.20E-126 461.5 6579 cellular

organisms;Eukaryota;Opisthokonta;Metazoa;Eumetazoa;Bilateria;Protostomia;Spiralia;Lophotrochozoa;Mollusca;Bivalvia;Autobranhia;Pteriomorpha;Pectinida;Pectinoidea;Pectinidae;Pecten;Pecten maximus

UdeM00000005998 6596 845.9 UdeM00000005998 XP\_045208826.1 46.1 888  
410 15 24 854 21 896 4.60E-242 845.9 6596 cellular

organisms;Eukaryota;Opisthokonta;Metazoa;Eumetazoa;Bilateria;Protostomia;Spiralia;Lophotrochozoa;Mollusca;Bivalvia;Autobranhia;Heteroconchia;Euheterodonta;Imparidentia;Venerida;Veneroidea;Veneridae;Mercenaria;Mercenaria mercenaria

UdeM00000005999 6596 835.5 UdeM00000005999 XP\_045208826.1 43.6 992  
513 22 6 974 975 1943 7.10E-239 835.5 6596 cellular

organisms;Eukaryota;Opisthokonta;Metazoa;Eumetazoa;Bilateria;Protostomia;Spiralia;Lophotrochozoa;Mollusca;Bivalvia;Autobranhia;Heteroconchia;Euheterodonta;Imparidentia;Venerida;Veneroidea;Veneridae;Mercenaria;Mercenaria mercenaria

UdeM00000006000 7574 272.7 UdeM00000006000 XP\_013395743.2 57.5 261  
109 1 257 515 301 561 9.50E-70 272.7 7574 cellular

organisms;Eukaryota;Opisthokonta;Metazoa;Eumetazoa;Bilateria;Protostomia;Spiralia;Lophotrochozoa;Brachiopoda;Linguliformea;Lingulata;Lingulida;Linguloidea;Lingulidae;Lingula;Lingula anatina

UdeM00000006001 7739 430.3 UdeM00000006001 XP\_035683227.1 74.7 269  
68 0 13 281 49 317 2.00E-117 430.3 7739 cellular

organisms;Eukaryota;Opisthokonta;Metazoa;Eumetazoa;Bilateria;Deuterostomia;Chordata;Cephalochordata;Leptocardii;Amphioxiformes;Branchiostomidae;Branchiostoma;Branchiostoma floridae

UdeM00000006002 7741 213.8 UdeM00000006002 XP\_019619243.1 71.2 132  
38 0 1 132 184 315 1.50E-52 213.8 7741 cellular

organisms;Eukaryota;Opisthokonta;Metazoa;Eumetazoa;Bilateria;Deuterostomia;Chordata;Cephalochordata;Leptocardii;Amphioxiformes;Branchiostomidae;Branchiostoma;Branchiostoma belcheri

UdeM00000006003 400727 615.5 UdeM00000006003 XP\_025113527.1 73.2  
400 105 2 12 410 13 411 4.80E-173 615.5 400727  
cellular

organisms;Eukaryota;Opisthokonta;Metazoa;Eumetazoa;Bilateria;Protostomia;Spiralia;Lophotrochozoa;Mollusca;Gastropoda;Caenogastropoda;Architaenioglossa;Ampullarioidea;Ampullariidae;Pomacea;Pomacea canaliculata

UdeM00000006004 6526 488.4 UdeM00000006004 XP\_013063871.1 81.6 282  
52 0 1 282 134 415 6.10E-135 488.4 6526 cellular

organisms;Eukaryota;Opisthokonta;Metazoa;Eumetazoa;Bilateria;Protostomia;Spiralia;Lophotrochozoa;Mollusca;Gastropoda;Heterobranhia;Euthyneura;Pantpulmonata;Hygrophila;Lymnaeioidea;Planorbidae;Biomphalaria;Biomphalaria glabrata

UdeM00000006005 6596 109.4 UdeM00000006005 XP\_045180427.1 38.4 177  
106 2 76 250 98 273 7.20E-21 109.4 6596 cellular

organisms;Eukaryota;Opisthokonta;Metazoa;Eumetazoa;Bilateria;Protostomia;Spiralia;Lophotrochozoa;Mollusca;Bivalvia;Autobranhia;Heteroconchia;Euheterodonta;Imparidentia;Venerida;Veneroidea;Veneridae;Mercenaria;Mercenaria mercenaria

UdeM00000006006 6596 110.9 UdeM00000006006 XP\_045191135.1 53.6 110  
51 0 1 110 1 110 1.80E-21 110.9 6596 cellular

organisms;Eukaryota;Opisthokonta;Metazoa;Eumetazoa;Bilateria;Protostomia;Spiralia;Lophotrochozoa;Mollusca;Bivalvia;Autobranhia;Heteroconchia;Euheterodonta;Imparidentia;Venerida;Veneroidea;Veneridae;Mercenaria;Mercenaria mercenaria

UdeM00000006007 7574 336.7 UdeM00000006007 XP\_013419749.1 48 356  
 174 5 103 447 153 508 1.60E-88 336.7 7574 cellular  
 organisms;Eukaryota;Opisthokonta;Metazoa;Eumetazoa;Bilateria;Protostomia;  
 Spiralia;Lophotrochozoa;Brachiopoda;Linguliformea;Lingulata;Lingulida;Lin  
 guloidea;Lingulidae;Lingula;Lingula anatina  
 UdeM00000006009 6579 446 UdeM00000006009 XP\_033729541.1 35.1 857  
 465 20 10 826 8 813 2.20E-121 446 6579 cellular  
 organisms;Eukaryota;Opisthokonta;Metazoa;Eumetazoa;Bilateria;Protostomia;  
 Spiralia;Lophotrochozoa;Mollusca;Bivalvia;Autobranchia;Pteriormorphia;Pect  
 inida;Pectinoidea;Pectinidae;Pecten;Pecten maximus  
 UdeM00000006010 6596 791.2 UdeM00000006010 XP\_045190778.1 42 1340  
 673 31 10 1301 20 1303 2.00E-225 791.2 6596 cellular  
 organisms;Eukaryota;Opisthokonta;Metazoa;Eumetazoa;Bilateria;Protostomia;  
 Spiralia;Lophotrochozoa;Mollusca;Bivalvia;Autobranchia;Heteroconchia;Euhe  
 terodonta;Imparidentia;Venerida;Veneroidea;Veneridae;Mercenaria;Mercenari  
 a mercenaria  
 UdeM00000006012 30410 88.6 UdeM00000006012 XP\_042738801.1 20.8 779  
 458 30 26 738 2783 3468 3.70E-14 88.6 30410 cellular  
 organisms;Eukaryota;Opisthokonta;Metazoa;Eumetazoa;Bilateria;Deuterostomi  
 a;Chordata;Craniata;Vertebrata;Gnathostomata;Teleostomi;Euteleostomi;Sarc  
 opterygii;Dipnotetrapodomorpha;Tetrapoda;Amniota;Sauropsida;Sauria;Archel  
 osauria;Archosauria;Dinosauria;Saurischia;Theropoda;Coelurosauria;Aves;Ne  
 ognathae;Galloanserae;Galliformes;Phasianidae;Tetraoninae;Lagopus;Lagopus  
 leucura  
 UdeM00000006013 400727 201.4 UdeM00000006013 XP\_025114528.1 56.6  
 175 75 1 15 189 14 187 1.10E-48 201.4 400727  
 cellular  
 organisms;Eukaryota;Opisthokonta;Metazoa;Eumetazoa;Bilateria;Protostomia;  
 Spiralia;Lophotrochozoa;Mollusca;Gastropoda;Caenogastropoda;Architaeniogl  
 ossa;Ampullarioidea;Ampullariidae;Pomacea;Pomacea canaliculata  
 UdeM00000006014 6565 390.6 UdeM00000006014 XP\_022326280.1 55.6 933  
 339 15 1 921 1 870 5.80E-105 390.6 6565 cellular  
 organisms;Eukaryota;Opisthokonta;Metazoa;Eumetazoa;Bilateria;Protostomia;  
 Spiralia;Lophotrochozoa;Mollusca;Bivalvia;Autobranchia;Pteriormorphia;Ostr  
 eida;Ostreoidea;Ostreidae;Crassostrea;Crassostrea virginica  
 UdeM00000006015 6596 1047 UdeM00000006015 XP\_045197392.1 61.2 863  
 287 7 8 827 111 968 1.30E-302 1047 6596 cellular  
 organisms;Eukaryota;Opisthokonta;Metazoa;Eumetazoa;Bilateria;Protostomia;  
 Spiralia;Lophotrochozoa;Mollusca;Bivalvia;Autobranchia;Heteroconchia;Euhe  
 terodonta;Imparidentia;Venerida;Veneroidea;Veneridae;Mercenaria;Mercenari  
 a mercenaria  
 UdeM00000006016 6579 1058.1 UdeM00000006016 XP\_033730381.1 59.9  
 910 302 12 8 859 92 996 5.80E-306 1058.1 6579  
 cellular  
 organisms;Eukaryota;Opisthokonta;Metazoa;Eumetazoa;Bilateria;Protostomia;  
 Spiralia;Lophotrochozoa;Mollusca;Bivalvia;Autobranchia;Pteriormorphia;Pect  
 inida;Pectinoidea;Pectinidae;Pecten;Pecten maximus  
 UdeM00000006017 6579 1454.1 UdeM00000006017 XP\_033739131.1 54.6  
 1293 571 8 1 1290 91 1370 0.00E+00 1454.1 6579  
 cellular  
 organisms;Eukaryota;Opisthokonta;Metazoa;Eumetazoa;Bilateria;Protostomia;  
 Spiralia;Lophotrochozoa;Mollusca;Bivalvia;Autobranchia;Pteriormorphia;Pect  
 inida;Pectinoidea;Pectinidae;Pecten;Pecten maximus

UdeM00000006018 37621 127.5 UdeM00000006018 XP\_014678940.1 54.2 107  
 49 0 13 119 462 568 1.30E-26 127.5 37621 cellular  
 organisms;Eukaryota;Opisthokonta;Metazoa;Eumetazoa;Bilateria;Protostomia;  
 Ecdysozoa;Scalidophora;Priapulida;Priapulimorpha;Priapulimorphida;Priapul  
 idae;Priapulus;Priapulus caudatus  
 UdeM00000006019 37621 200.7 UdeM00000006019 XP\_014672567.1 54.5 156  
 71 0 10 165 345 500 1.80E-48 200.7 37621 cellular  
 organisms;Eukaryota;Opisthokonta;Metazoa;Eumetazoa;Bilateria;Protostomia;  
 Ecdysozoa;Scalidophora;Priapulida;Priapulimorpha;Priapulimorphida;Priapul  
 idae;Priapulus;Priapulus caudatus  
 UdeM00000006021 6596 856.3 UdeM00000006021 XP\_045197373.1 67.3 694  
 206 8 25 702 35 723 2.70E-245 856.3 6596 cellular  
 organisms;Eukaryota;Opisthokonta;Metazoa;Eumetazoa;Bilateria;Protostomia;  
 Spiralia;Lophotrochozoa;Mollusca;Bivalvia;Autobranchia;Heteroconchia;Euhe  
 terodonta;Imparidentia;Venerida;Veneroidea;Veneridae;Mercenaria;Mercenari  
 a mercenaria  
 UdeM00000006020 6596 1335.1 UdeM00000006020 XP\_045197373.1 73.3  
 948 232 8 25 956 35 977 0.00E+00 1335.1 6596  
 cellular  
 organisms;Eukaryota;Opisthokonta;Metazoa;Eumetazoa;Bilateria;Protostomia;  
 Spiralia;Lophotrochozoa;Mollusca;Bivalvia;Autobranchia;Heteroconchia;Euhe  
 terodonta;Imparidentia;Venerida;Veneroidea;Veneridae;Mercenaria;Mercenari  
 a mercenaria  
 UdeM00000006022 37653 490 UdeM00000006022 XP\_014772824.1 89.4 255  
 27 0 18 272 666 920 2.00E-135 490 37653 cellular  
 organisms;Eukaryota;Opisthokonta;Metazoa;Eumetazoa;Bilateria;Protostomia;  
 Spiralia;Lophotrochozoa;Mollusca;Cephalopoda;Coleoidea;Octopodiformes;Oct  
 opoda;Incirrata;Octopodidae;Octopus;Octopus bimaculoides  
 UdeM00000006023 6573 1015.8 UdeM00000006023 XP\_021349629.1 59.7  
 899 346 8 1 888 67 960 3.40E-293 1015.8 6573  
 cellular  
 organisms;Eukaryota;Opisthokonta;Metazoa;Eumetazoa;Bilateria;Protostomia;  
 Spiralia;Lophotrochozoa;Mollusca;Bivalvia;Autobranchia;Pteriomorphia;Pect  
 inida;Pectinoidea;Pectinidae;Mizuhopecten;Mizuhopecten yessoensis  
 UdeM00000006024 6579 1030 UdeM00000006024 XP\_033730381.1 58.1 934  
 341 10 1 892 65 990 1.80E-297 1030 6579 cellular  
 organisms;Eukaryota;Opisthokonta;Metazoa;Eumetazoa;Bilateria;Protostomia;  
 Spiralia;Lophotrochozoa;Mollusca;Bivalvia;Autobranchia;Pteriomorphia;Pect  
 inida;Pectinoidea;Pectinidae;Pecten;Pecten maximus  
 UdeM00000006025 400727 584.3 UdeM00000006025 XP\_025111850.1 63.6  
 464 160 4 89 543 526 989 1.60E-163 584.3 400727  
 cellular  
 organisms;Eukaryota;Opisthokonta;Metazoa;Eumetazoa;Bilateria;Protostomia;  
 Spiralia;Lophotrochozoa;Mollusca;Gastropoda;Caenogastropoda;Architaeniogl  
 ossa;Ampullarioidea;Ampullariidae;Pomacea;Pomacea canaliculata  
 UdeM00000006026 6573 1011.1 UdeM00000006026 XP\_021349629.1 61  
 910 323 11 1 890 67 964 8.50E-292 1011.1 6573  
 cellular  
 organisms;Eukaryota;Opisthokonta;Metazoa;Eumetazoa;Bilateria;Protostomia;  
 Spiralia;Lophotrochozoa;Mollusca;Bivalvia;Autobranchia;Pteriomorphia;Pect  
 inida;Pectinoidea;Pectinidae;Mizuhopecten;Mizuhopecten yessoensis  
 UdeM00000006027 6596 79.3 UdeM00000006027 XP\_045195286.1 35.5 152  
 93 3 99 248 108 256 7.50E-12 79.3 6596 cellular  
 organisms;Eukaryota;Opisthokonta;Metazoa;Eumetazoa;Bilateria;Protostomia;

Spiralia;Lophotrochozoa;Mollusca;Bivalvia;Autobranchia;Heteroconchia;Euherodonta;Imparidentia;Venerida;Veneroidea;Veneridae;Mercenaria;Mercenaria mercenaria

UdeM00000006028 6579 84 UdeM00000006028 XP\_033750029.1 31.6 155  
99 4 176 330 57 204 4.00E-13 84 6579 cellular

organisms;Eukaryota;Opisthokonta;Metazoa;Eumetazoa;Bilateria;Protostomia;Spiralia;Lophotrochozoa;Mollusca;Bivalvia;Autobranchia;Pteriormorphia;Pectinida;Pectinoidea;Pectinidae;Pecten;Pecten maximus

UdeM00000006029 6573 85.5 UdeM00000006029 XP\_021348414.1 37 135  
82 2 190 324 73 204 1.40E-13 85.5 6573 cellular

organisms;Eukaryota;Opisthokonta;Metazoa;Eumetazoa;Bilateria;Protostomia;Spiralia;Lophotrochozoa;Mollusca;Bivalvia;Autobranchia;Pteriormorphia;Pectinida;Pectinoidea;Pectinidae;Mizuhopecten;Mizuhopecten yessoensis

UdeM00000006030 6573 91.3 UdeM00000006030 XP\_021354625.1 36.7 166  
91 3 44 197 62 225 1.60E-15 91.3 6573 cellular

organisms;Eukaryota;Opisthokonta;Metazoa;Eumetazoa;Bilateria;Protostomia;Spiralia;Lophotrochozoa;Mollusca;Bivalvia;Autobranchia;Pteriormorphia;Pectinida;Pectinoidea;Pectinidae;Mizuhopecten;Mizuhopecten yessoensis

UdeM00000006031 6573 91.7 UdeM00000006031 XP\_021348414.1 39.9 143  
78 5 69 209 68 204 1.30E-15 91.7 6573 cellular

organisms;Eukaryota;Opisthokonta;Metazoa;Eumetazoa;Bilateria;Protostomia;Spiralia;Lophotrochozoa;Mollusca;Bivalvia;Autobranchia;Pteriormorphia;Pectinida;Pectinoidea;Pectinidae;Mizuhopecten;Mizuhopecten yessoensis

UdeM00000006032 400727 65.9 UdeM00000006032 XP\_025113222.1 45  
80 42 2 1 80 185 262 4.00E-08 65.9 400727

cellular

organisms;Eukaryota;Opisthokonta;Metazoa;Eumetazoa;Bilateria;Protostomia;Spiralia;Lophotrochozoa;Mollusca;Gastropoda;Caenogastropoda;Architaenioglossa;Ampullarioidea;Ampullariidae;Pomacea;Pomacea canaliculata

UdeM00000006033 6573 87 UdeM00000006033 XP\_021348414.1 39 141  
82 4 76 216 68 204 3.20E-14 87 6573 cellular

organisms;Eukaryota;Opisthokonta;Metazoa;Eumetazoa;Bilateria;Protostomia;Spiralia;Lophotrochozoa;Mollusca;Bivalvia;Autobranchia;Pteriormorphia;Pectinida;Pectinoidea;Pectinidae;Mizuhopecten;Mizuhopecten yessoensis

UdeM00000006034 6579 84 UdeM00000006034 XP\_033750030.1 33.9 189  
115 5 7 192 26 207 2.50E-13 84 6579 cellular

organisms;Eukaryota;Opisthokonta;Metazoa;Eumetazoa;Bilateria;Protostomia;Spiralia;Lophotrochozoa;Mollusca;Bivalvia;Autobranchia;Pteriormorphia;Pectinida;Pectinoidea;Pectinidae;Pecten;Pecten maximus

UdeM00000006036 6596 538.5 UdeM00000006036 XP\_045193633.1 48.9 585  
292 6 8 590 5 584 1.10E-149 538.5 6596 cellular

organisms;Eukaryota;Opisthokonta;Metazoa;Eumetazoa;Bilateria;Protostomia;Spiralia;Lophotrochozoa;Mollusca;Bivalvia;Autobranchia;Heteroconchia;Euherodonta;Imparidentia;Venerida;Veneroidea;Veneridae;Mercenaria;Mercenaria mercenaria

UdeM00000006037 6596 549.3 UdeM00000006037 XP\_045193633.1 48.8 584  
292 6 8 588 5 584 6.00E-153 549.3 6596 cellular

organisms;Eukaryota;Opisthokonta;Metazoa;Eumetazoa;Bilateria;Protostomia;Spiralia;Lophotrochozoa;Mollusca;Bivalvia;Autobranchia;Heteroconchia;Euherodonta;Imparidentia;Venerida;Veneroidea;Veneridae;Mercenaria;Mercenaria mercenaria

UdeM00000006038 29159 109 UdeM00000006038 XP\_034307582.1 32.7 208  
132 3 7 214 4 203 3.00E-20 109 29159 cellular

organisms;Eukaryota;Opisthokonta;Metazoa;Eumetazoa;Bilateria;Protostomia;

Spiralia;Lophotrochozoa;Mollusca;Bivalvia;Autobranchia;Pteriormorphia;Ostr  
eida;Ostreoidea;Ostreidae;Crassostrea;Crassostrea gigas  
UdeM00000006039 9430 59.3 UdeM00000006039 XP\_024425887.1 29.7 101  
71 0 39 139 298 398 4.50E-06 59.3 9430 cellular  
organisms;Eukaryota;Opisthokonta;Metazoa;Eumetazoa;Bilateria;Deuterostomi  
a;Chordata;Craniata;Vertebrata;Gnathostomata;Teleostomi;Euteleostomi;Sarc  
opterygii;Dipnotetrapodomorpha;Tetrapoda;Amniota;Mammalia;Theria;Eutheria  
;Boreoeutheria;Laurasiatheria;Chiroptera;Microchiroptera;Phyllostomidae;D  
esmodontinae;Desmodus;Desmodus rotundus  
UdeM00000006040 7741 126.7 UdeM00000006040 XP\_019635812.1 36.3 204  
109 6 28 219 22 216 3.80E-26 126.7 7741 cellular  
organisms;Eukaryota;Opisthokonta;Metazoa;Eumetazoa;Bilateria;Deuterostomi  
a;Chordata;Cephalochordata;Leptocardii;Amphioxiformes;Branchiostomidae;Br  
anchiostoma;Branchiostoma belcheri  
UdeM00000006041 6596 172.6 UdeM00000006041 XP\_045193633.1 46 202  
107 2 2 201 269 470 5.30E-40 172.6 6596 cellular  
organisms;Eukaryota;Opisthokonta;Metazoa;Eumetazoa;Bilateria;Protostomia;  
Spiralia;Lophotrochozoa;Mollusca;Bivalvia;Autobranchia;Heteroconchia;Euhe  
terodonta;Imparidentia;Venerida;Veneroidea;Veneridae;Mercenaria;Mercenari  
a mercenaria  
UdeM00000006042 29159 91.7 UdeM00000006042 XP\_034300188.1 51.9 104  
29 3 7 89 135 238 5.30E-16 91.7 29159 cellular  
organisms;Eukaryota;Opisthokonta;Metazoa;Eumetazoa;Bilateria;Protostomia;  
Spiralia;Lophotrochozoa;Mollusca;Bivalvia;Autobranchia;Pteriormorphia;Ostr  
eida;Ostreoidea;Ostreidae;Crassostrea;Crassostrea gigas  
UdeM00000006043 6596 449.1 UdeM00000006043 XP\_045193632.1 44.2 584  
269 8 8 541 5 581 7.80E-123 449.1 6596 cellular  
organisms;Eukaryota;Opisthokonta;Metazoa;Eumetazoa;Bilateria;Protostomia;  
Spiralia;Lophotrochozoa;Mollusca;Bivalvia;Autobranchia;Heteroconchia;Euhe  
terodonta;Imparidentia;Venerida;Veneroidea;Veneridae;Mercenaria;Mercenari  
a mercenaria  
UdeM00000006044 6596 535 UdeM00000006044 XP\_045193632.1 49.3 580  
279 7 12 583 9 581 1.20E-148 535 6596 cellular  
organisms;Eukaryota;Opisthokonta;Metazoa;Eumetazoa;Bilateria;Protostomia;  
Spiralia;Lophotrochozoa;Mollusca;Bivalvia;Autobranchia;Heteroconchia;Euhe  
terodonta;Imparidentia;Venerida;Veneroidea;Veneridae;Mercenaria;Mercenari  
a mercenaria  
UdeM00000006045 6596 527.3 UdeM00000006045 XP\_045193632.1 48.5 584  
290 7 8 587 5 581 2.40E-146 527.3 6596 cellular  
organisms;Eukaryota;Opisthokonta;Metazoa;Eumetazoa;Bilateria;Protostomia;  
Spiralia;Lophotrochozoa;Mollusca;Bivalvia;Autobranchia;Heteroconchia;Euhe  
terodonta;Imparidentia;Venerida;Veneroidea;Veneridae;Mercenaria;Mercenari  
a mercenaria  
UdeM00000006046 6596 551.2 UdeM00000006046 XP\_045193633.1 49.1 580  
288 6 12 588 9 584 1.60E-153 551.2 6596 cellular  
organisms;Eukaryota;Opisthokonta;Metazoa;Eumetazoa;Bilateria;Protostomia;  
Spiralia;Lophotrochozoa;Mollusca;Bivalvia;Autobranchia;Heteroconchia;Euhe  
terodonta;Imparidentia;Venerida;Veneroidea;Veneridae;Mercenaria;Mercenari  
a mercenaria  
UdeM00000006047 6596 551.6 UdeM00000006047 XP\_045193633.1 49.5 580  
286 6 12 588 9 584 1.20E-153 551.6 6596 cellular  
organisms;Eukaryota;Opisthokonta;Metazoa;Eumetazoa;Bilateria;Protostomia;  
Spiralia;Lophotrochozoa;Mollusca;Bivalvia;Autobranchia;Heteroconchia;Euhe

terodonta;Imparidentia;Venerida;Veneroidea;Veneridae;Mercenaria;Mercenaria mercenaria  
 UdeM00000006048 6596 552 UdeM00000006048 XP\_045193633.1 49.5 580  
 286 6 39 615 9 584 9.70E-154 552 6596 cellular  
 organisms;Eukaryota;Opisthokonta;Metazoa;Eumetazoa;Bilateria;Protostomia;  
 Spiralia;Lophotrochozoa;Mollusca;Bivalvia;Autobranhia;Heteroconchia;Euhe  
 terodonta;Imparidentia;Venerida;Veneroidea;Veneridae;Mercenaria;Mercenari  
 a mercenaria  
 UdeM00000006049 59916 145.6 UdeM00000006049 XP\_039965766.1 26.1 529  
 314 13 38 525 100 592 1.90E-31 145.6 59916 cellular  
 organisms;Eukaryota;Opisthokonta;Metazoa;Eumetazoa;Bilateria;Protostomia;  
 Ecdysozoa;Panarthropoda;Arthropoda;Mandibulata;Pancrustacea;Hexapoda;Inse  
 cta;Dicondylia;Pterygota;Neoptera;Endopterygota;Diptera;Brachycera;Muscom  
 orpha;Eremoneura;Cyclorrhapha;Schizophora;Acalyptratae;Tephritoidea;Tephri  
 tidae;Dacinae;Dacini;Bactrocera;Bactrocera;Bactrocera tyroni species  
 complex;Bactrocera tryoni  
 UdeM00000006050 6596 165.6 UdeM00000006050 XP\_045188077.1 30.7 375  
 209 7 64 426 108 443 1.40E-37 165.6 6596 cellular  
 organisms;Eukaryota;Opisthokonta;Metazoa;Eumetazoa;Bilateria;Protostomia;  
 Spiralia;Lophotrochozoa;Mollusca;Bivalvia;Autobranhia;Heteroconchia;Euhe  
 terodonta;Imparidentia;Venerida;Veneroidea;Veneridae;Mercenaria;Mercenari  
 a mercenaria  
 UdeM00000006052 6573 351.7 UdeM00000006052 XP\_021376024.1 96.6 178  
 6 0 1 178 37 214 5.60E-94 351.7 6573 cellular  
 organisms;Eukaryota;Opisthokonta;Metazoa;Eumetazoa;Bilateria;Protostomia;  
 Spiralia;Lophotrochozoa;Mollusca;Bivalvia;Autobranhia;Pteriormorphia;Pect  
 inida;Pectinoidea;Pectinidae;Mizuhopecten;Mizuhopecten yessoensis  
 UdeM00000006053 6596 628.2 UdeM00000006053 XP\_045188086.1 77 417  
 93 1 1 417 1 414 7.20E-177 628.2 6596 cellular  
 organisms;Eukaryota;Opisthokonta;Metazoa;Eumetazoa;Bilateria;Protostomia;  
 Spiralia;Lophotrochozoa;Mollusca;Bivalvia;Autobranhia;Heteroconchia;Euhe  
 terodonta;Imparidentia;Venerida;Veneroidea;Veneridae;Mercenaria;Mercenari  
 a mercenaria  
 UdeM00000006054 6596 206.5 UdeM00000006054 XP\_045188083.1 29.7 958  
 466 39 108 966 7 856 1.60E-49 206.5 6596 cellular  
 organisms;Eukaryota;Opisthokonta;Metazoa;Eumetazoa;Bilateria;Protostomia;  
 Spiralia;Lophotrochozoa;Mollusca;Bivalvia;Autobranhia;Heteroconchia;Euhe  
 terodonta;Imparidentia;Venerida;Veneroidea;Veneridae;Mercenaria;Mercenari  
 a mercenaria  
 UdeM00000006055 29159 71.6 UdeM00000006055 XP\_034300649.1 34.9 186  
 101 8 35 211 728 902 1.30E-09 71.6 29159 cellular  
 organisms;Eukaryota;Opisthokonta;Metazoa;Eumetazoa;Bilateria;Protostomia;  
 Spiralia;Lophotrochozoa;Mollusca;Bivalvia;Autobranhia;Pteriormorphia;Ostr  
 eida;Ostreoidea;Ostreidae;Crassostrea;Crassostrea gigas  
 UdeM00000006056 7574 268.5 UdeM00000006056 XP\_013397413.1 29.8 655  
 309 11 32 581 494 1102 2.80E-68 268.5 7574 cellular  
 organisms;Eukaryota;Opisthokonta;Metazoa;Eumetazoa;Bilateria;Protostomia;  
 Spiralia;Lophotrochozoa;Brachiopoda;Linguliformea;Lingulata;Lingulida;Lin  
 guloidea;Lingulidae;Lingula;Lingula anatina  
 UdeM00000006057 29159 372.9 UdeM00000006057 XP\_011443579.1 89.9 227  
 22 1 1 226 1 227 3.60E-100 372.9 29159 cellular  
 organisms;Eukaryota;Opisthokonta;Metazoa;Eumetazoa;Bilateria;Protostomia;  
 Spiralia;Lophotrochozoa;Mollusca;Bivalvia;Autobranhia;Pteriormorphia;Ostr  
 eida;Ostreoidea;Ostreidae;Crassostrea;Crassostrea gigas



UdeM00000006058 1735272 282 UdeM00000006058 XP\_041369080.1 41.8  
 354 197 3 16 366 1 348 1.10E-72 282 1735272  
 cellular  
 organisms;Eukaryota;Opisthokonta;Metazoa;Eumetazoa;Bilateria;Protostomia;  
 Spiralia;Lophotrochozoa;Mollusca;Gastropoda;Neomphalina;Neomphaloidea;Pel  
 tospiridae;Gigantopelta;Gigantopelta aegis  
 UdeM00000006061 6596 959.1 UdeM00000006061 XP\_045193225.1 52.1 932  
 424 8 136 1056 296 1216 4.50E-276 959.1 6596 cellular  
 organisms;Eukaryota;Opisthokonta;Metazoa;Eumetazoa;Bilateria;Protostomia;  
 Spiralia;Lophotrochozoa;Mollusca;Bivalvia;Autobranchia;Heteroconchia;Euhe  
 terodonta;Imparidentia;Venerida;Veneroidea;Veneridae;Mercenaria;Mercenari  
 a mercenaria  
 UdeM00000006062 6596 461.8 UdeM00000006062 XP\_045199075.1 33 1007  
 426 23 1 846 4 922 1.90E-126 461.8 6596 cellular  
 organisms;Eukaryota;Opisthokonta;Metazoa;Eumetazoa;Bilateria;Protostomia;  
 Spiralia;Lophotrochozoa;Mollusca;Bivalvia;Autobranchia;Heteroconchia;Euhe  
 terodonta;Imparidentia;Venerida;Veneroidea;Veneridae;Mercenaria;Mercenari  
 a mercenaria  
 UdeM00000006063 6596 1013.8 UdeM00000006063 XP\_045199108.1 68.3  
 804 241 6 9 805 29 825 1.20E-292 1013.8 6596  
 cellular  
 organisms;Eukaryota;Opisthokonta;Metazoa;Eumetazoa;Bilateria;Protostomia;  
 Spiralia;Lophotrochozoa;Mollusca;Bivalvia;Autobranchia;Heteroconchia;Euhe  
 terodonta;Imparidentia;Venerida;Veneroidea;Veneridae;Mercenaria;Mercenari  
 a mercenaria  
 UdeM00000006064 6596 861.7 UdeM00000006064 XP\_045199067.1 70.3 553  
 160 3 9 559 50 600 5.50E-247 861.7 6596 cellular  
 organisms;Eukaryota;Opisthokonta;Metazoa;Eumetazoa;Bilateria;Protostomia;  
 Spiralia;Lophotrochozoa;Mollusca;Bivalvia;Autobranchia;Heteroconchia;Euhe  
 terodonta;Imparidentia;Venerida;Veneroidea;Veneridae;Mercenaria;Mercenari  
 a mercenaria  
 UdeM00000006065 6596 854 UdeM00000006065 XP\_045199067.1 68.8 552  
 169 2 196 745 50 600 1.50E-244 854 6596 cellular  
 organisms;Eukaryota;Opisthokonta;Metazoa;Eumetazoa;Bilateria;Protostomia;  
 Spiralia;Lophotrochozoa;Mollusca;Bivalvia;Autobranchia;Heteroconchia;Euhe  
 terodonta;Imparidentia;Venerida;Veneroidea;Veneridae;Mercenaria;Mercenari  
 a mercenaria  
 UdeM00000006066 6596 854 UdeM00000006066 XP\_045199067.1 68.8 552  
 169 2 196 745 50 600 1.50E-244 854 6596 cellular  
 organisms;Eukaryota;Opisthokonta;Metazoa;Eumetazoa;Bilateria;Protostomia;  
 Spiralia;Lophotrochozoa;Mollusca;Bivalvia;Autobranchia;Heteroconchia;Euhe  
 terodonta;Imparidentia;Venerida;Veneroidea;Veneridae;Mercenaria;Mercenari  
 a mercenaria  
 UdeM00000006067 6596 820.8 UdeM00000006067 XP\_045199067.1 68.9 541  
 164 3 19 557 62 600 1.10E-234 820.8 6596 cellular  
 organisms;Eukaryota;Opisthokonta;Metazoa;Eumetazoa;Bilateria;Protostomia;  
 Spiralia;Lophotrochozoa;Mollusca;Bivalvia;Autobranchia;Heteroconchia;Euhe  
 terodonta;Imparidentia;Venerida;Veneroidea;Veneridae;Mercenaria;Mercenari  
 a mercenaria  
 UdeM00000006068 6596 313.5 UdeM00000006068 XP\_045194817.1 57.7 267  
 98 4 2 254 5 270 2.50E-82 313.5 6596 cellular  
 organisms;Eukaryota;Opisthokonta;Metazoa;Eumetazoa;Bilateria;Protostomia;  
 Spiralia;Lophotrochozoa;Mollusca;Bivalvia;Autobranchia;Heteroconchia;Euhe

terodonta;Imparidentia;Venerida;Veneroidea;Veneridae;Mercenaria;Mercenaria mercenaria  
 UdeM00000006069 6596 260.8 UdeM00000006069 XP\_045194817.1 57.2 229  
 80 4 2 216 5 229 1.60E-66 260.8 6596 cellular  
 organisms;Eukaryota;Opisthokonta;Metazoa;Eumetazoa;Bilateria;Protostomia;  
 Spiralia;Lophotrochozoa;Mollusca;Bivalvia;Autobranchia;Heteroconchia;Euhe  
 terodonta;Imparidentia;Venerida;Veneroidea;Veneridae;Mercenaria;Mercenari  
 a mercenaria  
 UdeM00000006070 400727 624 UdeM00000006070 XP\_025112726.1 82.7  
 365 62 1 22 386 5 368 1.30E-175 624 400727  
 cellular  
 organisms;Eukaryota;Opisthokonta;Metazoa;Eumetazoa;Bilateria;Protostomia;  
 Spiralia;Lophotrochozoa;Mollusca;Gastropoda;Caenogastropoda;Architaeniogl  
 ossa;Ampullarioidea;Ampullariidae;Pomacea;Pomacea canaliculata  
 UdeM00000006071 6579 114 UdeM00000006071 XP\_033725348.1 30.3 228  
 147 2 11 238 12 227 3.00E-22 114 6579 cellular  
 organisms;Eukaryota;Opisthokonta;Metazoa;Eumetazoa;Bilateria;Protostomia;  
 Spiralia;Lophotrochozoa;Mollusca;Bivalvia;Autobranchia;Pteriormorphia;Pect  
 inida;Pectinoidea;Pectinidae;Pecten;Pecten maximus  
 UdeM00000006076 150288 116.7 UdeM00000006076 XP\_020780460.1 37.1  
 186 104 3 3 186 31 205 4.40E-23 116.7 150288  
 cellular  
 organisms;Eukaryota;Opisthokonta;Metazoa;Eumetazoa;Bilateria;Deuterostomi  
 a;Chordata;Craniata;Vertebrata;Gnathostomata;Teleostomi;Euteleostomi;Acti  
 nopterygii;Actinopteri;Neopterygii;Teleostei;Osteoglossocephalai;Clupeoce  
 phala;Euteleosteomorpha;Neoteleostei;Eurypterygia;Ctenosquamata;Acanthomo  
 rphata;Euacanthomorphacea;Percomorphaceae;Gobiaria;Gobiiformes;Gobioidei;  
 Gobiidae;Oxudercinae;Boleophthalmus;Boleophthalmus pectinirostris  
 UdeM00000006077 1735272 107.8 UdeM00000006077 XP\_041378104.1 44.6  
 121 67 0 19 139 20 140 1.40E-20 107.8 1735272  
 cellular  
 organisms;Eukaryota;Opisthokonta;Metazoa;Eumetazoa;Bilateria;Protostomia;  
 Spiralia;Lophotrochozoa;Mollusca;Gastropoda;Neomphalina;Neomphaloidea;Pel  
 tospiridae;Gigantopelta;Gigantopelta aegis  
 UdeM00000006079 6579 169.1 UdeM00000006079 XP\_033761495.1 83 94  
 16 0 39 132 167 260 1.00E-38 169.1 6579 cellular  
 organisms;Eukaryota;Opisthokonta;Metazoa;Eumetazoa;Bilateria;Protostomia;  
 Spiralia;Lophotrochozoa;Mollusca;Bivalvia;Autobranchia;Pteriormorphia;Pect  
 inida;Pectinoidea;Pectinidae;Pecten;Pecten maximus  
 UdeM00000006081 6596 610.1 UdeM00000006081 XP\_045190822.1 48 650  
 319 8 13 649 19 662 3.40E-171 610.1 6596 cellular  
 organisms;Eukaryota;Opisthokonta;Metazoa;Eumetazoa;Bilateria;Protostomia;  
 Spiralia;Lophotrochozoa;Mollusca;Bivalvia;Autobranchia;Heteroconchia;Euhe  
 terodonta;Imparidentia;Venerida;Veneroidea;Veneridae;Mercenaria;Mercenari  
 a mercenaria  
 UdeM00000006082 6565 293.9 UdeM00000006082 XP\_022327387.1 44.3 388  
 193 8 15 389 14 391 3.00E-76 293.9 6565 cellular  
 organisms;Eukaryota;Opisthokonta;Metazoa;Eumetazoa;Bilateria;Protostomia;  
 Spiralia;Lophotrochozoa;Mollusca;Bivalvia;Autobranchia;Pteriormorphia;Ostr  
 eida;Ostreoidea;Ostreidae;Crassostrea;Crassostrea virginica  
 UdeM00000006083 6596 88.2 UdeM00000006083 XP\_045190822.1 45.8 96  
 47 1 13 108 19 109 7.00E-15 88.2 6596 cellular  
 organisms;Eukaryota;Opisthokonta;Metazoa;Eumetazoa;Bilateria;Protostomia;  
 Spiralia;Lophotrochozoa;Mollusca;Bivalvia;Autobranchia;Heteroconchia;Euhe

terodonta;Imparidentia;Venerida;Veneroidea;Veneridae;Mercenaria;Mercenari  
 a mercenaria  
 UdeM00000006084 29159 219.5 UdeM00000006084 XP\_011440604.2 42.8 208  
 110 3 25 224 22 228 4.20E-54 219.5 29159 cellular  
 organisms;Eukaryota;Opisthokonta;Metazoa;Eumetazoa;Bilateria;Protostomia;  
 Spiralia;Lophotrochozoa;Mollusca;Bivalvia;Autobranchia;Pteriormorphia;Ostr  
 eida;Ostreoidea;Ostreidae;Crassostrea;Crassostrea gigas  
 UdeM00000006085 6596 227.3 UdeM00000006085 XP\_045195835.1 56.6 221  
 85 3 38 256 85 296 2.30E-56 227.3 6596 cellular  
 organisms;Eukaryota;Opisthokonta;Metazoa;Eumetazoa;Bilateria;Protostomia;  
 Spiralia;Lophotrochozoa;Mollusca;Bivalvia;Autobranchia;Heteroconchia;Euhe  
 terodonta;Imparidentia;Venerida;Veneroidea;Veneridae;Mercenaria;Mercenari  
 a mercenaria  
 UdeM00000006086 37621 124.4 UdeM00000006086 XP\_014678815.1 38.2 207  
 119 4 58 257 38 242 2.50E-25 124.4 37621 cellular  
 organisms;Eukaryota;Opisthokonta;Metazoa;Eumetazoa;Bilateria;Protostomia;  
 Ecdysozoa;Scalidophora;Priapulida;Priapulimorpha;Priapulimorphida;Priapul  
 idae;Priapulul;Priapulul caudatus  
 UdeM00000006087 6565 370.5 UdeM00000006087 XP\_022309155.1 39.9 509  
 269 12 2 483 24 522 3.30E-99 370.5 6565 cellular  
 organisms;Eukaryota;Opisthokonta;Metazoa;Eumetazoa;Bilateria;Protostomia;  
 Spiralia;Lophotrochozoa;Mollusca;Bivalvia;Autobranchia;Pteriormorphia;Ostr  
 eida;Ostreoidea;Ostreidae;Crassostrea;Crassostrea virginica  
 UdeM00000006088 37621 151.8 UdeM00000006088 XP\_014676916.1 35 254  
 140 3 40 286 43 278 1.40E-33 151.8 37621 cellular  
 organisms;Eukaryota;Opisthokonta;Metazoa;Eumetazoa;Bilateria;Protostomia;  
 Ecdysozoa;Scalidophora;Priapulida;Priapulimorpha;Priapulimorphida;Priapul  
 idae;Priapulul;Priapulul caudatus  
 UdeM00000006090 6596 356.3 UdeM00000006090 XP\_045195821.1 62 274  
 103 1 7 280 5 277 3.60E-95 356.3 6596 cellular  
 organisms;Eukaryota;Opisthokonta;Metazoa;Eumetazoa;Bilateria;Protostomia;  
 Spiralia;Lophotrochozoa;Mollusca;Bivalvia;Autobranchia;Heteroconchia;Euhe  
 terodonta;Imparidentia;Venerida;Veneroidea;Veneridae;Mercenaria;Mercenari  
 a mercenaria  
 UdeM00000006089 6596 506.1 UdeM00000006089 XP\_045195821.1 44.1 784  
 356 21 7 728 5 768 8.80E-140 506.1 6596 cellular  
 organisms;Eukaryota;Opisthokonta;Metazoa;Eumetazoa;Bilateria;Protostomia;  
 Spiralia;Lophotrochozoa;Mollusca;Bivalvia;Autobranchia;Heteroconchia;Euhe  
 terodonta;Imparidentia;Venerida;Veneroidea;Veneridae;Mercenaria;Mercenari  
 a mercenaria  
 UdeM00000006091 6565 142.1 UdeM00000006091 XP\_022302274.1 42.1 178  
 101 2 14 191 127 302 7.20E-31 142.1 6565 cellular  
 organisms;Eukaryota;Opisthokonta;Metazoa;Eumetazoa;Bilateria;Protostomia;  
 Spiralia;Lophotrochozoa;Mollusca;Bivalvia;Autobranchia;Pteriormorphia;Ostr  
 eida;Ostreoidea;Ostreidae;Crassostrea;Crassostrea virginica  
 UdeM00000006093 7888 91.3 UdeM00000006093 XP\_043917682.1 32.9 161  
 74 1 1 127 382 542 1.10E-15 91.3 7888 cellular  
 organisms;Eukaryota;Opisthokonta;Metazoa;Eumetazoa;Bilateria;Deuterostomi  
 a;Chordata;Craniata;Vertebrata;Gnathostomata;Teleostomi;Euteleostomi;Sarc  
 opterygii;Dipnotetrapodomorpha;Dipnomorpha;Ceratodontae;Ceratodontiformes  
 ;Lepidosirenoidei;Protopteridae;Protopterus;Protopterus annectens  
 UdeM00000006094 6596 104.4 UdeM00000006094 XP\_045201969.1 65.8 76  
 26 0 1 76 19 94 1.50E-19 104.4 6596 cellular  
 organisms;Eukaryota;Opisthokonta;Metazoa;Eumetazoa;Bilateria;Protostomia;

Spiralia;Lophotrochozoa;Mollusca;Bivalvia;Autobranchia;Heteroconchia;Euherodonta;Imparidentia;Venerida;Veneroidea;Veneridae;Mercenaria;Mercenaria mercenaria

UdeM00000006096 6500 177.6 UdeM00000006096 XP\_035826907.1 40.6 244  
140 3 3 246 303 541 2.00E-41 177.6 6500 cellular

organisms;Eukaryota;Opisthokonta;Metazoa;Eumetazoa;Bilateria;Protostomia;Spiralia;Lophotrochozoa;Mollusca;Gastropoda;Heterobranchia;Euthyneura;Tectipleura;Aplysiida;Aplysioidea;Aplysiidae;Aplysia;Aplysia californica

UdeM00000006097 400727 67.8 UdeM00000006097 XP\_025084271.1 48.3  
58 26 2 26 81 53 108 1.80E-08 67.8 400727  
cellular

organisms;Eukaryota;Opisthokonta;Metazoa;Eumetazoa;Bilateria;Protostomia;Spiralia;Lophotrochozoa;Mollusca;Gastropoda;Caenogastropoda;Architaenioglossa;Ampullarioidea;Ampullariidae;Pomacea;Pomacea canaliculata

UdeM00000006100 6579 317 UdeM00000006100 XP\_033761495.1 77 196  
43 2 3 197 99 293 2.10E-83 317 6579 cellular

organisms;Eukaryota;Opisthokonta;Metazoa;Eumetazoa;Bilateria;Protostomia;Spiralia;Lophotrochozoa;Mollusca;Bivalvia;Autobranchia;Pteriormorphia;Pectinida;Pectinoidea;Pectinidae;Pecten;Pecten maximus

UdeM00000006111 29159 101.3 UdeM00000006111 XP\_019918936.2 63 73  
26 1 1 72 566 638 1.30E-18 101.3 29159 cellular

organisms;Eukaryota;Opisthokonta;Metazoa;Eumetazoa;Bilateria;Protostomia;Spiralia;Lophotrochozoa;Mollusca;Bivalvia;Autobranchia;Pteriormorphia;Ostreida;Ostreioidea;Ostreidae;Crassostrea;Crassostrea gigas

UdeM00000006111 29159 70.1 UdeM00000006111 XP\_019918936.2 52.5 59  
28 0 114 172 914 972 3.10E-09 70.1 29159 cellular

organisms;Eukaryota;Opisthokonta;Metazoa;Eumetazoa;Bilateria;Protostomia;Spiralia;Lophotrochozoa;Mollusca;Bivalvia;Autobranchia;Pteriormorphia;Ostreida;Ostreioidea;Ostreidae;Crassostrea;Crassostrea gigas

UdeM00000006113 6565 68.9 UdeM00000006113 XP\_022288548.1 44.2 86  
32 2 170 239 149 234 9.70E-09 68.9 6565 cellular

organisms;Eukaryota;Opisthokonta;Metazoa;Eumetazoa;Bilateria;Protostomia;Spiralia;Lophotrochozoa;Mollusca;Bivalvia;Autobranchia;Pteriormorphia;Ostreida;Ostreioidea;Ostreidae;Crassostrea;Crassostrea virginica

UdeM00000006114 29159 548.5 UdeM00000006114 XP\_034322046.1 50.8 530  
230 6 2 504 155 680 9.70E-153 548.5 29159 cellular

organisms;Eukaryota;Opisthokonta;Metazoa;Eumetazoa;Bilateria;Protostomia;Spiralia;Lophotrochozoa;Mollusca;Bivalvia;Autobranchia;Pteriormorphia;Ostreida;Ostreioidea;Ostreidae;Crassostrea;Crassostrea gigas

UdeM00000006119 6596 456.1 UdeM00000006119 XP\_045200164.1 85.9 283  
35 2 20 301 10 288 3.60E-125 456.1 6596 cellular

organisms;Eukaryota;Opisthokonta;Metazoa;Eumetazoa;Bilateria;Protostomia;Spiralia;Lophotrochozoa;Mollusca;Bivalvia;Autobranchia;Heteroconchia;Euherodonta;Imparidentia;Venerida;Veneroidea;Veneridae;Mercenaria;Mercenaria mercenaria

UdeM00000006120 6579 359 UdeM00000006120 XP\_033731381.1 68.8 272  
83 1 19 290 273 542 5.70E-96 359 6579 cellular

organisms;Eukaryota;Opisthokonta;Metazoa;Eumetazoa;Bilateria;Protostomia;Spiralia;Lophotrochozoa;Mollusca;Bivalvia;Autobranchia;Pteriormorphia;Pectinida;Pectinoidea;Pectinidae;Pecten;Pecten maximus

UdeM00000006121 307658 61.6 UdeM00000006121 XP\_036150530.1 32.7  
101 61 1 436 536 37 130 3.50E-06 61.6 307658

cellular

organisms;Eukaryota;Opisthokonta;Metazoa;Eumetazoa;Bilateria;Protostomia;

Ecdysozoa; Panarthropoda; Arthropoda; Mandibulata; Pancrustacea; Hexapoda; Insecta; Dicondylia; Pterygota; Neoptera; Endopterygota; Hymenoptera; Apocrita; Aculeata; Formicoidea; Formicidae; Myrmicinae; Solenopsidini; Monomorium; Monomorium pharaonis

UdeM00000006122 6596 404.8 UdeM00000006122 XP\_045200206.1 80.3 264  
52 0 25 288 271 534 9.10E-110 404.8 6596 cellular  
organisms; Eukaryota; Opisthokonta; Metazoa; Eumetazoa; Bilateria; Protostomia; Spiralia; Lophotrochozoa; Mollusca; Bivalvia; Autobranchia; Heteroconchia; Euheterodonta; Imparidentia; Venerida; Veneroidea; Veneridae; Mercenaria; Mercenaria mercenaria

UdeM00000006123 6579 155.2 UdeM00000006123 XP\_033731441.1 37.7 220  
125 6 868 1079 1215 1430 4.60E-34 155.2 6579 cellular  
organisms; Eukaryota; Opisthokonta; Metazoa; Eumetazoa; Bilateria; Protostomia; Spiralia; Lophotrochozoa; Mollusca; Bivalvia; Autobranchia; Pteriomorphia; Pectinida; Pectinoidea; Pectinidae; Pecten; Pecten maximus

UdeM00000006124 6565 208.8 UdeM00000006124 XP\_022328041.1 70.4 135  
39 1 1 135 1 134 4.50E-51 208.8 6565 cellular  
organisms; Eukaryota; Opisthokonta; Metazoa; Eumetazoa; Bilateria; Protostomia; Spiralia; Lophotrochozoa; Mollusca; Bivalvia; Autobranchia; Pteriomorphia; Ostreida; Ostreoidea; Ostreidae; Crassostrea; Crassostrea virginica

UdeM00000006125 6596 333.6 UdeM00000006125 XP\_045193796.1 41.2 398  
222 6 46 437 58 449 3.90E-88 333.6 6596 cellular  
organisms; Eukaryota; Opisthokonta; Metazoa; Eumetazoa; Bilateria; Protostomia; Spiralia; Lophotrochozoa; Mollusca; Bivalvia; Autobranchia; Heteroconchia; Euheterodonta; Imparidentia; Venerida; Veneroidea; Veneridae; Mercenaria; Mercenaria mercenaria

UdeM00000006126 6565 128.6 UdeM00000006126 XP\_022334997.1 43.1 153  
78 3 3 148 28 178 9.20E-27 128.6 6565 cellular  
organisms; Eukaryota; Opisthokonta; Metazoa; Eumetazoa; Bilateria; Protostomia; Spiralia; Lophotrochozoa; Mollusca; Bivalvia; Autobranchia; Pteriomorphia; Ostreida; Ostreoidea; Ostreidae; Crassostrea; Crassostrea virginica

UdeM00000006128 6596 1652.1 UdeM00000006128 XP\_045196087.1 66.8  
1263 396 8 4 1248 5 1262 0.00E+00 1652.1 6596  
cellular  
organisms; Eukaryota; Opisthokonta; Metazoa; Eumetazoa; Bilateria; Protostomia; Spiralia; Lophotrochozoa; Mollusca; Bivalvia; Autobranchia; Heteroconchia; Euheterodonta; Imparidentia; Venerida; Veneroidea; Veneridae; Mercenaria; Mercenaria mercenaria

UdeM00000006129 6573 451.8 UdeM00000006129 XP\_021376771.1 26.6 870  
639 0 5 874 851 1720 2.00E-123 451.8 6573 cellular  
organisms; Eukaryota; Opisthokonta; Metazoa; Eumetazoa; Bilateria; Protostomia; Spiralia; Lophotrochozoa; Mollusca; Bivalvia; Autobranchia; Pteriomorphia; Pectinida; Pectinoidea; Pectinidae; Mizuhopecten; Mizuhopecten yessoensis

UdeM00000006130 6573 810.1 UdeM00000006130 XP\_021376771.1 25.2 1952  
1354 16 59 1996 148 2006 7.20E-231 810.1 6573 cellular  
organisms; Eukaryota; Opisthokonta; Metazoa; Eumetazoa; Bilateria; Protostomia; Spiralia; Lophotrochozoa; Mollusca; Bivalvia; Autobranchia; Pteriomorphia; Pectinida; Pectinoidea; Pectinidae; Mizuhopecten; Mizuhopecten yessoensis

UdeM00000006131 6573 588.6 UdeM00000006131 XP\_021376771.1 25 1427  
978 9 59 1416 148 1551 2.20E-164 588.6 6573 cellular  
organisms; Eukaryota; Opisthokonta; Metazoa; Eumetazoa; Bilateria; Protostomia; Spiralia; Lophotrochozoa; Mollusca; Bivalvia; Autobranchia; Pteriomorphia; Pectinida; Pectinoidea; Pectinidae; Mizuhopecten; Mizuhopecten yessoensis

UdeM00000006132 6596 92.8 UdeM00000006132 XP\_045195403.1 25.5 412  
 229 13 13 415 21 363 1.20E-15 92.8 6596 cellular  
 organisms;Eukaryota;Opisthokonta;Metazoa;Eumetazoa;Bilateria;Protostomia;  
 Spiralia;Lophotrochozoa;Mollusca;Bivalvia;Autobranchia;Heteroconchia;Euhe  
 terodonta;Imparidentia;Venerida;Veneroidea;Veneridae;Mercenaria;Mercenari  
 a mercenaria  
 UdeM00000006133 6596 96.3 UdeM00000006133 XP\_045195403.1 26.3 395  
 229 13 13 397 21 363 1.10E-16 96.3 6596 cellular  
 organisms;Eukaryota;Opisthokonta;Metazoa;Eumetazoa;Bilateria;Protostomia;  
 Spiralia;Lophotrochozoa;Mollusca;Bivalvia;Autobranchia;Heteroconchia;Euhe  
 terodonta;Imparidentia;Venerida;Veneroidea;Veneridae;Mercenaria;Mercenari  
 a mercenaria  
 UdeM00000006134 6596 201.8 UdeM00000006134 XP\_045197631.1 56.1 173  
 73 3 1 171 109 280 7.10E-49 201.8 6596 cellular  
 organisms;Eukaryota;Opisthokonta;Metazoa;Eumetazoa;Bilateria;Protostomia;  
 Spiralia;Lophotrochozoa;Mollusca;Bivalvia;Autobranchia;Heteroconchia;Euhe  
 terodonta;Imparidentia;Venerida;Veneroidea;Veneridae;Mercenaria;Mercenari  
 a mercenaria  
 UdeM00000006137 6596 626.7 UdeM00000006137 XP\_045197750.1 49.4 850  
 310 25 31 837 515 1287 4.20E-176 626.7 6596 cellular  
 organisms;Eukaryota;Opisthokonta;Metazoa;Eumetazoa;Bilateria;Protostomia;  
 Spiralia;Lophotrochozoa;Mollusca;Bivalvia;Autobranchia;Heteroconchia;Euhe  
 terodonta;Imparidentia;Venerida;Veneroidea;Veneridae;Mercenaria;Mercenari  
 a mercenaria  
 UdeM00000006136 6596 1555.8 UdeM00000006136 XP\_045197750.1 64.2  
 1367 364 28 1 1321 1 1287 0.00E+00 1555.8 6596  
 cellular  
 organisms;Eukaryota;Opisthokonta;Metazoa;Eumetazoa;Bilateria;Protostomia;  
 Spiralia;Lophotrochozoa;Mollusca;Bivalvia;Autobranchia;Heteroconchia;Euhe  
 terodonta;Imparidentia;Venerida;Veneroidea;Veneridae;Mercenaria;Mercenari  
 a mercenaria  
 UdeM00000006138 6579 958.4 UdeM00000006138 XP\_033731905.1 59.4 849  
 305 11 17 854 69 888 6.20E-276 958.4 6579 cellular  
 organisms;Eukaryota;Opisthokonta;Metazoa;Eumetazoa;Bilateria;Protostomia;  
 Spiralia;Lophotrochozoa;Mollusca;Bivalvia;Autobranchia;Pteriomorphia;Pect  
 inida;Pectinoidea;Pectinidae;Pecten;Pecten maximus  
 UdeM00000006139 6579 952.2 UdeM00000006139 XP\_033731905.1 59.2 856  
 303 12 17 862 69 888 4.50E-274 952.2 6579 cellular  
 organisms;Eukaryota;Opisthokonta;Metazoa;Eumetazoa;Bilateria;Protostomia;  
 Spiralia;Lophotrochozoa;Mollusca;Bivalvia;Autobranchia;Pteriomorphia;Pect  
 inida;Pectinoidea;Pectinidae;Pecten;Pecten maximus  
 UdeM00000006140 7574 244.6 UdeM00000006140 XP\_013382110.1 58.1 198  
 77 1 1 198 37 228 1.10E-61 244.6 7574 cellular  
 organisms;Eukaryota;Opisthokonta;Metazoa;Eumetazoa;Bilateria;Protostomia;  
 Spiralia;Lophotrochozoa;Brachiopoda;Linguliformea;Lingulata;Lingulida;Lin  
 guloidea;Lingulidae;Lingula;Lingula anatina  
 UdeM00000006141 7574 244.6 UdeM00000006141 XP\_013382110.1 60.3 184  
 73 0 14 197 45 228 1.10E-61 244.6 7574 cellular  
 organisms;Eukaryota;Opisthokonta;Metazoa;Eumetazoa;Bilateria;Protostomia;  
 Spiralia;Lophotrochozoa;Brachiopoda;Linguliformea;Lingulata;Lingulida;Lin  
 guloidea;Lingulidae;Lingula;Lingula anatina  
 UdeM00000006142 7574 119.4 UdeM00000006142 XP\_013384628.1 65.2 89  
 14 2 1 72 33 121 2.00E-24 119.4 7574 cellular  
 organisms;Eukaryota;Opisthokonta;Metazoa;Eumetazoa;Bilateria;Protostomia;

Spiralia;Lophotrochozoa;Brachiopoda;Linguliformea;Lingulata;Lingulida;Linguloidea;Lingulidae;Lingula;Lingula anatina

UdeM00000006144 29159 547.4 UdeM00000006144 XP\_011451351.2 62.2 415  
150 5 1 411 1 412 1.60E-152 547.4 29159 cellular  
organisms;Eukaryota;Opisthokonta;Metazoa;Eumetazoa;Bilateria;Protostomia;  
Spiralia;Lophotrochozoa;Mollusca;Bivalvia;Autobranchia;Pteriomorphia;Ostr  
eida;Ostreoidea;Ostreidae;Crassostrea;Crassostrea gigas

UdeM00000006145 6596 994.2 UdeM00000006145 XP\_045204825.1 76.8 626  
136 4 1 621 1 622 7.50E-287 994.2 6596 cellular  
organisms;Eukaryota;Opisthokonta;Metazoa;Eumetazoa;Bilateria;Protostomia;  
Spiralia;Lophotrochozoa;Mollusca;Bivalvia;Autobranchia;Heteroconchia;Euhe  
terodonta;Imparidentia;Venerida;Veneroidea;Veneridae;Mercenaria;Mercenari  
a mercenaria

UdeM00000006146 6596 269.2 UdeM00000006146 XP\_045173538.1 48.2 307  
143 5 3 301 1 299 6.30E-69 269.2 6596 cellular  
organisms;Eukaryota;Opisthokonta;Metazoa;Eumetazoa;Bilateria;Protostomia;  
Spiralia;Lophotrochozoa;Mollusca;Bivalvia;Autobranchia;Heteroconchia;Euhe  
terodonta;Imparidentia;Venerida;Veneroidea;Veneridae;Mercenaria;Mercenari  
a mercenaria

UdeM00000006148 7741 179.1 UdeM00000006148 XP\_019640655.1 52.1 167  
79 1 5 170 1 167 4.80E-42 179.1 7741 cellular  
organisms;Eukaryota;Opisthokonta;Metazoa;Eumetazoa;Bilateria;Deuterostomi  
a;Chordata;Cephalochordata;Leptocardii;Amphioxiformes;Branchiostomidae;Br  
anchiostoma;Branchiostoma belcheri

UdeM00000006150 2607531 105.1 UdeM00000006150 XP\_029649075.1 40.5  
131 77 1 7 137 138 267 7.40E-20 105.1 2607531  
cellular  
organisms;Eukaryota;Opisthokonta;Metazoa;Eumetazoa;Bilateria;Protostomia;  
Spiralia;Lophotrochozoa;Mollusca;Cephalopoda;Coleoidea;Octopodiformes;Oct  
opoda;Incirrata;Octopodidae;Octopus;Octopus sinensis

UdeM00000006151 29159 437.2 UdeM00000006151 XP\_034300976.1 71.7 290  
81 1 1 290 1 289 1.70E-119 437.2 29159 cellular  
organisms;Eukaryota;Opisthokonta;Metazoa;Eumetazoa;Bilateria;Protostomia;  
Spiralia;Lophotrochozoa;Mollusca;Bivalvia;Autobranchia;Pteriomorphia;Ostr  
eida;Ostreoidea;Ostreidae;Crassostrea;Crassostrea gigas

UdeM00000006152 37653 292 UdeM00000006152 XP\_014771939.1 38.9 404  
227 9 54 449 7 398 1.40E-75 292 37653 cellular  
organisms;Eukaryota;Opisthokonta;Metazoa;Eumetazoa;Bilateria;Protostomia;  
Spiralia;Lophotrochozoa;Mollusca;Cephalopoda;Coleoidea;Octopodiformes;Oct  
opoda;Incirrata;Octopodidae;Octopus;Octopus bimaculoides

UdeM00000006154 29159 75.5 UdeM00000006154 XP\_034300976.1 60.3 58  
23 0 1 58 1 58 1.20E-10 75.5 29159 cellular  
organisms;Eukaryota;Opisthokonta;Metazoa;Eumetazoa;Bilateria;Protostomia;  
Spiralia;Lophotrochozoa;Mollusca;Bivalvia;Autobranchia;Pteriomorphia;Ostr  
eida;Ostreoidea;Ostreidae;Crassostrea;Crassostrea gigas

UdeM00000006155 6596 289.3 UdeM00000006155 XP\_045204120.1 49.2 266  
128 3 1402 1667 1416 1674 3.20E-74 289.3 6596 cellular  
organisms;Eukaryota;Opisthokonta;Metazoa;Eumetazoa;Bilateria;Protostomia;  
Spiralia;Lophotrochozoa;Mollusca;Bivalvia;Autobranchia;Heteroconchia;Euhe  
terodonta;Imparidentia;Venerida;Veneroidea;Veneridae;Mercenaria;Mercenari  
a mercenaria

UdeM00000006156 6596 168.3 UdeM00000006156 XP\_045204120.1 49.4 158  
73 3 1 158 1524 1674 7.80E-39 168.3 6596 cellular  
organisms;Eukaryota;Opisthokonta;Metazoa;Eumetazoa;Bilateria;Protostomia;

Spiralia;Lophotrochozoa;Mollusca;Bivalvia;Autobranchia;Heteroconchia;Euherodonta;Imparidentia;Venerida;Veneroidea;Veneridae;Mercenaria;Mercenaria mercenaria

UdeM00000006157 6579 189.5 UdeM00000006157 XP\_033729873.1 86 121  
15 1 1 119 41 161 2.50E-45 189.5 6579 cellular

organisms;Eukaryota;Opisthokonta;Metazoa;Eumetazoa;Bilateria;Protostomia;Spiralia;Lophotrochozoa;Mollusca;Bivalvia;Autobranchia;Pteriomorphia;Pectinida;Pectinoidea;Pectinidae;Pecten;Pecten maximus

UdeM00000006158 46514 229.6 UdeM00000006158 XP\_038075905.1 44.8 250  
135 2 1 247 39 288 4.50E-57 229.6 46514 cellular

organisms;Eukaryota;Opisthokonta;Metazoa;Eumetazoa;Bilateria;Deuterostomia;Echinodermata;Eleutherozoa;Asterozoa;Asteroidea;Valvatacea;Valvatida;Asterinidae;Patiria;Patiria miniata

UdeM00000006159 46514 228 UdeM00000006159 XP\_038075905.1 44.4 250  
136 2 1 247 39 288 1.30E-56 228 46514 cellular

organisms;Eukaryota;Opisthokonta;Metazoa;Eumetazoa;Bilateria;Deuterostomia;Echinodermata;Eleutherozoa;Asterozoa;Asteroidea;Valvatacea;Valvatida;Asterinidae;Patiria;Patiria miniata

UdeM00000006160 46514 228 UdeM00000006160 XP\_038075905.1 44.4 250  
136 2 1 247 39 288 1.30E-56 228 46514 cellular

organisms;Eukaryota;Opisthokonta;Metazoa;Eumetazoa;Bilateria;Deuterostomia;Echinodermata;Eleutherozoa;Asterozoa;Asteroidea;Valvatacea;Valvatida;Asterinidae;Patiria;Patiria miniata

UdeM00000006161 46514 228 UdeM00000006161 XP\_038075905.1 44.4 250  
136 2 1 247 39 288 1.30E-56 228 46514 cellular

organisms;Eukaryota;Opisthokonta;Metazoa;Eumetazoa;Bilateria;Deuterostomia;Echinodermata;Eleutherozoa;Asterozoa;Asteroidea;Valvatacea;Valvatida;Asterinidae;Patiria;Patiria miniata

UdeM00000006162 133434 182.2 UdeM00000006162 XP\_022110847.1 64.5  
121 43 0 21 141 188 308 4.70E-43 182.2 133434  
cellular

organisms;Eukaryota;Opisthokonta;Metazoa;Eumetazoa;Bilateria;Deuterostomia;Echinodermata;Eleutherozoa;Asterozoa;Asteroidea;Valvatacea;Valvatida;Acanthasteridae;Acanthaster;Acanthaster planci

UdeM00000006163 29159 65.9 UdeM00000006163 XP\_034330722.1 35.1 74  
48 0 7 80 55 128 3.40E-08 65.9 29159 cellular

organisms;Eukaryota;Opisthokonta;Metazoa;Eumetazoa;Bilateria;Protostomia;Spiralia;Lophotrochozoa;Mollusca;Bivalvia;Autobranchia;Pteriomorphia;Ostreida;Ostreoidea;Ostreidae;Crassostrea;Crassostrea gigas

UdeM00000006164 6596 750.4 UdeM00000006164 XP\_045194321.1 44.9 926  
462 18 603 1504 196 1097 4.50E-213 750.4 6596 cellular

organisms;Eukaryota;Opisthokonta;Metazoa;Eumetazoa;Bilateria;Protostomia;Spiralia;Lophotrochozoa;Mollusca;Bivalvia;Autobranchia;Heteroconchia;Euherodonta;Imparidentia;Venerida;Veneroidea;Veneridae;Mercenaria;Mercenaria mercenaria

UdeM00000006164 6596 156.8 UdeM00000006164 XP\_045194321.1 44.9 205  
98 6 12 209 14 210 2.20E-34 156.8 6596 cellular

organisms;Eukaryota;Opisthokonta;Metazoa;Eumetazoa;Bilateria;Protostomia;Spiralia;Lophotrochozoa;Mollusca;Bivalvia;Autobranchia;Heteroconchia;Euherodonta;Imparidentia;Venerida;Veneroidea;Veneridae;Mercenaria;Mercenaria mercenaria

UdeM00000006165 29159 209.9 UdeM00000006165 XP\_019919189.2 52.1 192  
84 3 252 442 445 629 6.50E-51 209.9 29159 cellular

organisms;Eukaryota;Opisthokonta;Metazoa;Eumetazoa;Bilateria;Protostomia;



Spiralia;Lophotrochozoa;Mollusca;Bivalvia;Autobranchia;Pteriomorpha;Ostr  
eida;Ostreoidea;Ostreidae;Crassostrea;Crassostrea gigas  
UdeM00000006166 6596 238.8 UdeM00000006166 XP\_045202247.1 36.7 431  
228 14 14 425 771 1175 1.30E-59 238.8 6596 cellular  
organisms;Eukaryota;Opisthokonta;Metazoa;Eumetazoa;Bilateria;Protostomia;  
Spiralia;Lophotrochozoa;Mollusca;Bivalvia;Autobranchia;Heteroconchia;Euhe  
terodonta;Imparidentia;Venerida;Veneroidea;Veneridae;Mercenaria;Mercenari  
a mercenaria  
UdeM00000006167 6596 172.2 UdeM00000006167 XP\_045197948.1 38.1 239  
137 3 34 268 45 276 9.30E-40 172.2 6596 cellular  
organisms;Eukaryota;Opisthokonta;Metazoa;Eumetazoa;Bilateria;Protostomia;  
Spiralia;Lophotrochozoa;Mollusca;Bivalvia;Autobranchia;Heteroconchia;Euhe  
terodonta;Imparidentia;Venerida;Veneroidea;Veneridae;Mercenaria;Mercenari  
a mercenaria  
UdeM00000006168 6573 144.8 UdeM00000006168 XP\_021367676.1 41.5 147  
84 1 28 172 298 444 1.00E-31 144.8 6573 cellular  
organisms;Eukaryota;Opisthokonta;Metazoa;Eumetazoa;Bilateria;Protostomia;  
Spiralia;Lophotrochozoa;Mollusca;Bivalvia;Autobranchia;Pteriomorpha;Pect  
inida;Pectinoidea;Pectinidae;Mizuhopecten;Mizuhopecten yessoensis  
UdeM00000006169 6596 297.4 UdeM00000006169 XP\_045202247.1 36.2 522  
289 14 22 525 680 1175 3.80E-77 297.4 6596 cellular  
organisms;Eukaryota;Opisthokonta;Metazoa;Eumetazoa;Bilateria;Protostomia;  
Spiralia;Lophotrochozoa;Mollusca;Bivalvia;Autobranchia;Heteroconchia;Euhe  
terodonta;Imparidentia;Venerida;Veneroidea;Veneridae;Mercenaria;Mercenari  
a mercenaria  
UdeM00000006170 6596 146.4 UdeM00000006170 XP\_045189815.1 48.8 123  
63 0 33 155 308 430 3.60E-32 146.4 6596 cellular  
organisms;Eukaryota;Opisthokonta;Metazoa;Eumetazoa;Bilateria;Protostomia;  
Spiralia;Lophotrochozoa;Mollusca;Bivalvia;Autobranchia;Heteroconchia;Euhe  
terodonta;Imparidentia;Venerida;Veneroidea;Veneridae;Mercenaria;Mercenari  
a mercenaria  
UdeM00000006171 29159 58.9 UdeM00000006171 XP\_011430929.2 29.9 174  
89 6 6 146 24 197 6.70E-06 58.9 29159 cellular  
organisms;Eukaryota;Opisthokonta;Metazoa;Eumetazoa;Bilateria;Protostomia;  
Spiralia;Lophotrochozoa;Mollusca;Bivalvia;Autobranchia;Pteriomorpha;Ostr  
eida;Ostreoidea;Ostreidae;Crassostrea;Crassostrea gigas  
UdeM00000006172 6579 416 UdeM00000006172 XP\_033732775.1 55.5 465  
179 6 18 460 361 819 8.10E-113 416 6579 cellular  
organisms;Eukaryota;Opisthokonta;Metazoa;Eumetazoa;Bilateria;Protostomia;  
Spiralia;Lophotrochozoa;Mollusca;Bivalvia;Autobranchia;Pteriomorpha;Pect  
inida;Pectinoidea;Pectinidae;Pecten;Pecten maximus  
UdeM00000006174 29159 463.8 UdeM00000006174 XP\_011443847.2 78.8 283  
60 0 7 289 124 406 1.70E-127 463.8 29159 cellular  
organisms;Eukaryota;Opisthokonta;Metazoa;Eumetazoa;Bilateria;Protostomia;  
Spiralia;Lophotrochozoa;Mollusca;Bivalvia;Autobranchia;Pteriomorpha;Ostr  
eida;Ostreoidea;Ostreidae;Crassostrea;Crassostrea gigas  
UdeM00000006173 6596 475.3 UdeM00000006173 XP\_045201405.1 65.9 384  
122 3 24 407 81 455 7.70E-131 475.3 6596 cellular  
organisms;Eukaryota;Opisthokonta;Metazoa;Eumetazoa;Bilateria;Protostomia;  
Spiralia;Lophotrochozoa;Mollusca;Bivalvia;Autobranchia;Heteroconchia;Euhe  
terodonta;Imparidentia;Venerida;Veneroidea;Veneridae;Mercenaria;Mercenari  
a mercenaria  
UdeM00000006175 6565 802 UdeM00000006175 XP\_022327525.1 79.9 473  
94 1 321 792 86 558 7.00E-229 802 6565 cellular

organisms;Eukaryota;Opisthokonta;Metazoa;Eumetazoa;Bilateria;Protostomia;  
Spiralia;Lophotrochozoa;Mollusca;Bivalvia;Autobranchia;Pteriormorphia;Ostr  
eida;Ostreoidea;Ostreidae;Crassostrea;Crassostrea virginica  
UdeM00000006176 6565 800.8 UdeM00000006176 XP\_022327525.1 80.1 472  
93 1 346 816 87 558 1.60E-228 800.8 6565 cellular  
organisms;Eukaryota;Opisthokonta;Metazoa;Eumetazoa;Bilateria;Protostomia;  
Spiralia;Lophotrochozoa;Mollusca;Bivalvia;Autobranchia;Pteriormorphia;Ostr  
eida;Ostreoidea;Ostreidae;Crassostrea;Crassostrea virginica  
UdeM00000006177 80966 177.6 UdeM00000006177 XP\_022077561.1 56.7 150  
65 0 8 157 122 271 1.30E-41 177.6 80966 cellular  
organisms;Eukaryota;Opisthokonta;Metazoa;Eumetazoa;Bilateria;Deuterostomi  
a;Chordata;Craniata;Vertebrata;Gnathostomata;Teleostomi;Euteleostomi;Acti  
nopterygii;Actinopteri;Neopterygii;Teleostei;Osteoglossocephalai;Clupeoce  
phala;Euteleosteomorpha;Neoteleostei;Eurypterygia;Ctenosquamata;Acanthomo  
rphata;Euacanthomorphacea;Percomorphaceae;Ovalentaria;Ovalentaria  
incertae sedis;Pomacentridae;Acanthochromis;Acanthochromis polyacanthus  
UdeM00000006178 6596 844.3 UdeM00000006178 XP\_045191281.1 75.6 585  
138 4 1 584 583 1163 9.00E-242 844.3 6596 cellular  
organisms;Eukaryota;Opisthokonta;Metazoa;Eumetazoa;Bilateria;Protostomia;  
Spiralia;Lophotrochozoa;Mollusca;Bivalvia;Autobranchia;Heteroconchia;Euhe  
terodonta;Imparidentia;Venerida;Veneroidea;Veneridae;Mercenaria;Mercenari  
a mercenaria  
UdeM00000006179 6579 140.6 UdeM00000006179 XP\_033729575.1 72.1 86  
24 0 47 132 661 746 1.50E-30 140.6 6579 cellular  
organisms;Eukaryota;Opisthokonta;Metazoa;Eumetazoa;Bilateria;Protostomia;  
Spiralia;Lophotrochozoa;Mollusca;Bivalvia;Autobranchia;Pteriormorphia;Pect  
inida;Pectinoidea;Pectinidae;Pecten;Pecten maximus  
UdeM00000006180 6573 758.8 UdeM00000006180 XP\_021341777.1 56.4 642  
273 6 37 673 22 661 5.80E-216 758.8 6573 cellular  
organisms;Eukaryota;Opisthokonta;Metazoa;Eumetazoa;Bilateria;Protostomia;  
Spiralia;Lophotrochozoa;Mollusca;Bivalvia;Autobranchia;Pteriormorphia;Pect  
inida;Pectinoidea;Pectinidae;Mizuhopecten;Mizuhopecten yessoensis  
UdeM00000006181 6596 585.1 UdeM00000006181 XP\_045195968.1 51.3 565  
259 9 6 566 324 876 9.50E-164 585.1 6596 cellular  
organisms;Eukaryota;Opisthokonta;Metazoa;Eumetazoa;Bilateria;Protostomia;  
Spiralia;Lophotrochozoa;Mollusca;Bivalvia;Autobranchia;Heteroconchia;Euhe  
terodonta;Imparidentia;Venerida;Veneroidea;Veneridae;Mercenaria;Mercenari  
a mercenaria  
UdeM00000006182 6596 587.4 UdeM00000006182 XP\_045193589.1 53.4 526  
234 7 22 543 22 540 1.90E-164 587.4 6596 cellular  
organisms;Eukaryota;Opisthokonta;Metazoa;Eumetazoa;Bilateria;Protostomia;  
Spiralia;Lophotrochozoa;Mollusca;Bivalvia;Autobranchia;Heteroconchia;Euhe  
terodonta;Imparidentia;Venerida;Veneroidea;Veneridae;Mercenaria;Mercenari  
a mercenaria  
UdeM00000006183 6596 590.1 UdeM00000006183 XP\_045193598.1 51.3 544  
253 8 24 563 24 559 3.00E-165 590.1 6596 cellular  
organisms;Eukaryota;Opisthokonta;Metazoa;Eumetazoa;Bilateria;Protostomia;  
Spiralia;Lophotrochozoa;Mollusca;Bivalvia;Autobranchia;Heteroconchia;Euhe  
terodonta;Imparidentia;Venerida;Veneroidea;Veneridae;Mercenaria;Mercenari  
a mercenaria  
UdeM00000006184 6596 124.4 UdeM00000006184 XP\_045182869.1 63.6 88  
32 0 7 94 5 92 8.40E-26 124.4 6596 cellular  
organisms;Eukaryota;Opisthokonta;Metazoa;Eumetazoa;Bilateria;Protostomia;  
Spiralia;Lophotrochozoa;Mollusca;Bivalvia;Autobranchia;Heteroconchia;Euhe

terodonta;Imparidentia;Venerida;Veneroidea;Veneridae;Mercenaria;Mercenari  
 a mercenaria  
 UdeM00000006185 6596 564.7 UdeM00000006185 XP\_045193598.1 53.5 525  
 210 9 23 520 23 540 1.30E-157 564.7 6596 cellular  
 organisms;Eukaryota;Opisthokonta;Metazoa;Eumetazoa;Bilateria;Protostomia;  
 Spiralia;Lophotrochozoa;Mollusca;Bivalvia;Autobranchia;Heteroconchia;Euhe  
 terodonta;Imparidentia;Venerida;Veneroidea;Veneridae;Mercenaria;Mercenari  
 a mercenaria  
 UdeM00000006186 6579 99.4 UdeM00000006186 XP\_033727735.1 38.3 120  
 69 2 2 119 458 574 3.40E-18 99.4 6579 cellular  
 organisms;Eukaryota;Opisthokonta;Metazoa;Eumetazoa;Bilateria;Protostomia;  
 Spiralia;Lophotrochozoa;Mollusca;Bivalvia;Autobranchia;Pteriormorphia;Pect  
 inida;Pectinoidea;Pectinidae;Pecten;Pecten maximus  
 UdeM00000006187 6596 609 UdeM00000006187 XP\_045193598.1 52.6 567  
 245 12 5 563 9 559 6.20E-171 609 6596 cellular  
 organisms;Eukaryota;Opisthokonta;Metazoa;Eumetazoa;Bilateria;Protostomia;  
 Spiralia;Lophotrochozoa;Mollusca;Bivalvia;Autobranchia;Heteroconchia;Euhe  
 terodonta;Imparidentia;Venerida;Veneroidea;Veneridae;Mercenaria;Mercenari  
 a mercenaria  
 UdeM00000006188 6596 193.7 UdeM00000006188 XP\_045182869.1 64 139  
 49 1 8 146 6 143 1.60E-46 193.7 6596 cellular  
 organisms;Eukaryota;Opisthokonta;Metazoa;Eumetazoa;Bilateria;Protostomia;  
 Spiralia;Lophotrochozoa;Mollusca;Bivalvia;Autobranchia;Heteroconchia;Euhe  
 terodonta;Imparidentia;Venerida;Veneroidea;Veneridae;Mercenaria;Mercenari  
 a mercenaria  
 UdeM00000006189 6596 226.5 UdeM00000006189 XP\_045182869.1 66.9 154  
 50 1 15 168 13 165 2.70E-56 226.5 6596 cellular  
 organisms;Eukaryota;Opisthokonta;Metazoa;Eumetazoa;Bilateria;Protostomia;  
 Spiralia;Lophotrochozoa;Mollusca;Bivalvia;Autobranchia;Heteroconchia;Euhe  
 terodonta;Imparidentia;Venerida;Veneroidea;Veneridae;Mercenaria;Mercenari  
 a mercenaria  
 UdeM00000006190 6596 269.6 UdeM00000006190 XP\_045195968.1 52 254  
 112 6 2 252 481 727 4.00E-69 269.6 6596 cellular  
 organisms;Eukaryota;Opisthokonta;Metazoa;Eumetazoa;Bilateria;Protostomia;  
 Spiralia;Lophotrochozoa;Mollusca;Bivalvia;Autobranchia;Heteroconchia;Euhe  
 terodonta;Imparidentia;Venerida;Veneroidea;Veneridae;Mercenaria;Mercenari  
 a mercenaria  
 UdeM00000006191 6573 97.1 UdeM00000006191 XP\_021374905.1 41.4 116  
 67 1 2 117 478 592 1.70E-17 97.1 6573 cellular  
 organisms;Eukaryota;Opisthokonta;Metazoa;Eumetazoa;Bilateria;Protostomia;  
 Spiralia;Lophotrochozoa;Mollusca;Bivalvia;Autobranchia;Pteriormorphia;Pect  
 inida;Pectinoidea;Pectinidae;Mizuhopecten;Mizuhopecten yessoensis  
 UdeM00000006192 6596 611.7 UdeM00000006192 XP\_045193598.1 53.7 549  
 234 11 23 563 23 559 9.60E-172 611.7 6596 cellular  
 organisms;Eukaryota;Opisthokonta;Metazoa;Eumetazoa;Bilateria;Protostomia;  
 Spiralia;Lophotrochozoa;Mollusca;Bivalvia;Autobranchia;Heteroconchia;Euhe  
 terodonta;Imparidentia;Venerida;Veneroidea;Veneridae;Mercenaria;Mercenari  
 a mercenaria  
 UdeM00000006193 6596 586.3 UdeM00000006193 XP\_045193598.1 50 550  
 262 9 21 565 21 562 4.30E-164 586.3 6596 cellular  
 organisms;Eukaryota;Opisthokonta;Metazoa;Eumetazoa;Bilateria;Protostomia;  
 Spiralia;Lophotrochozoa;Mollusca;Bivalvia;Autobranchia;Heteroconchia;Euhe  
 terodonta;Imparidentia;Venerida;Veneroidea;Veneridae;Mercenaria;Mercenari  
 a mercenaria

UdeM00000006194 6596 584.3 UdeM00000006194 XP\_045193598.1 51.6 547  
 254 7 1 543 1 540 1.60E-163 584.3 6596 cellular  
 organisms;Eukaryota;Opisthokonta;Metazoa;Eumetazoa;Bilateria;Protostomia;  
 Spiralia;Lophotrochozoa;Mollusca;Bivalvia;Autobranchia;Heteroconchia;Euhe  
 terodonta;Imparidentia;Venerida;Veneroidea;Veneridae;Mercenaria;Mercenari  
 a mercenaria  
 UdeM00000006195 6573 572.8 UdeM00000006195 XP\_021377609.1 50.4 520  
 248 6 25 539 64 578 4.90E-160 572.8 6573 cellular  
 organisms;Eukaryota;Opisthokonta;Metazoa;Eumetazoa;Bilateria;Protostomia;  
 Spiralia;Lophotrochozoa;Mollusca;Bivalvia;Autobranchia;Pteriormorphia;Pect  
 inida;Pectinoidea;Pectinidae;Mizuhopecten;Mizuhopecten yessoensis  
 UdeM00000006196 6596 212.6 UdeM00000006196 XP\_045181035.1 55.6 178  
 75 2 22 199 59 232 4.70E-52 212.6 6596 cellular  
 organisms;Eukaryota;Opisthokonta;Metazoa;Eumetazoa;Bilateria;Protostomia;  
 Spiralia;Lophotrochozoa;Mollusca;Bivalvia;Autobranchia;Heteroconchia;Euhe  
 terodonta;Imparidentia;Venerida;Veneroidea;Veneridae;Mercenaria;Mercenari  
 a mercenaria  
 UdeM00000006197 6596 216.1 UdeM00000006197 XP\_045193589.1 44.9 225  
 96 2 106 302 270 494 7.10E-53 216.1 6596 cellular  
 organisms;Eukaryota;Opisthokonta;Metazoa;Eumetazoa;Bilateria;Protostomia;  
 Spiralia;Lophotrochozoa;Mollusca;Bivalvia;Autobranchia;Heteroconchia;Euhe  
 terodonta;Imparidentia;Venerida;Veneroidea;Veneridae;Mercenaria;Mercenari  
 a mercenaria  
 UdeM00000006198 6596 607.8 UdeM00000006198 XP\_045193598.1 52.8 549  
 239 11 23 563 23 559 1.40E-170 607.8 6596 cellular  
 organisms;Eukaryota;Opisthokonta;Metazoa;Eumetazoa;Bilateria;Protostomia;  
 Spiralia;Lophotrochozoa;Mollusca;Bivalvia;Autobranchia;Heteroconchia;Euhe  
 terodonta;Imparidentia;Venerida;Veneroidea;Veneridae;Mercenaria;Mercenari  
 a mercenaria  
 UdeM00000006199 6596 597.8 UdeM00000006199 XP\_045193598.1 51.4 547  
 255 8 23 565 23 562 1.40E-167 597.8 6596 cellular  
 organisms;Eukaryota;Opisthokonta;Metazoa;Eumetazoa;Bilateria;Protostomia;  
 Spiralia;Lophotrochozoa;Mollusca;Bivalvia;Autobranchia;Heteroconchia;Euhe  
 terodonta;Imparidentia;Venerida;Veneroidea;Veneridae;Mercenaria;Mercenari  
 a mercenaria  
 UdeM00000006200 6596 485.3 UdeM00000006200 XP\_045193589.1 55.7 411  
 171 8 1 407 36 439 7.50E-134 485.3 6596 cellular  
 organisms;Eukaryota;Opisthokonta;Metazoa;Eumetazoa;Bilateria;Protostomia;  
 Spiralia;Lophotrochozoa;Mollusca;Bivalvia;Autobranchia;Heteroconchia;Euhe  
 terodonta;Imparidentia;Venerida;Veneroidea;Veneridae;Mercenaria;Mercenari  
 a mercenaria  
 UdeM00000006201 6596 202.6 UdeM00000006201 XP\_045193529.1 42.6 434  
 216 16 7 413 1 428 1.60E-48 202.6 6596 cellular  
 organisms;Eukaryota;Opisthokonta;Metazoa;Eumetazoa;Bilateria;Protostomia;  
 Spiralia;Lophotrochozoa;Mollusca;Bivalvia;Autobranchia;Heteroconchia;Euhe  
 terodonta;Imparidentia;Venerida;Veneroidea;Veneridae;Mercenaria;Mercenari  
 a mercenaria  
 UdeM00000006202 6596 190.7 UdeM00000006202 XP\_045193529.1 41.3 431  
 217 16 7 404 1 428 6.10E-45 190.7 6596 cellular  
 organisms;Eukaryota;Opisthokonta;Metazoa;Eumetazoa;Bilateria;Protostomia;  
 Spiralia;Lophotrochozoa;Mollusca;Bivalvia;Autobranchia;Heteroconchia;Euhe  
 terodonta;Imparidentia;Venerida;Veneroidea;Veneridae;Mercenaria;Mercenari  
 a mercenaria

UdeM00000006203 6596 86.3 UdeM00000006203 XP\_045193511.1 38.4 138  
 79 4 22 154 23 159 4.00E-14 86.3 6596 cellular  
 organisms;Eukaryota;Opisthokonta;Metazoa;Eumetazoa;Bilateria;Protostomia;  
 Spiralia;Lophotrochozoa;Mollusca;Bivalvia;Autobranchia;Heteroconchia;Euhe  
 terodonta;Imparidentia;Venerida;Veneroidea;Veneridae;Mercenaria;Mercenari  
 a mercenaria  
 UdeM00000006204 29159 182.6 UdeM00000006204 XP\_034304052.1 38.1 323  
 173 11 1 311 11 318 1.80E-42 182.6 29159 cellular  
 organisms;Eukaryota;Opisthokonta;Metazoa;Eumetazoa;Bilateria;Protostomia;  
 Spiralia;Lophotrochozoa;Mollusca;Bivalvia;Autobranchia;Pteriormorphia;Ostr  
 eida;Ostreoidea;Ostreidae;Crassostrea;Crassostrea gigas  
 UdeM00000006206 6689 175.6 UdeM00000006206 XP\_027230835.1 42.5 226  
 126 4 3 227 41 263 7.00E-41 175.6 6689 cellular  
 organisms;Eukaryota;Opisthokonta;Metazoa;Eumetazoa;Bilateria;Protostomia;  
 Ecdysozoa;Panarthropoda;Arthropoda;Mandibulata;Pancrustacea;Crustacea;Mul  
 ticrustacea;Malacostraca;Eumalacostraca;Eucarida;Decapoda;Dendrobranchiat  
 a;Penaeoidea;Penaeidae;Penaeus;Penaeus vannamei  
 UdeM00000006207 29159 129 UdeM00000006207 XP\_011442460.2 36.7 226  
 126 8 10 228 8 223 7.90E-27 129 29159 cellular  
 organisms;Eukaryota;Opisthokonta;Metazoa;Eumetazoa;Bilateria;Protostomia;  
 Spiralia;Lophotrochozoa;Mollusca;Bivalvia;Autobranchia;Pteriormorphia;Ostr  
 eida;Ostreoidea;Ostreidae;Crassostrea;Crassostrea gigas  
 UdeM00000006208 105785 77 UdeM00000006208 XP\_023717879.1 41.5  
 94 46 3 1 93 215 300 1.80E-11 77 105785  
 cellular  
 organisms;Eukaryota;Opisthokonta;Metazoa;Eumetazoa;Bilateria;Protostomia;  
 Ecdysozoa;Panarthropoda;Arthropoda;Mandibulata;Pancrustacea;Hexapoda;Inse  
 cta;Dicondylia;Pterygota;Neoptera;Polyneoptera;Dictyoptera;Blattodea;Blat  
 toidea;Termitoidea;Kalotermitidae;Cryptotermitinae;Cryptotermes;Cryptoter  
 mes secundus  
 UdeM00000006211 6579 563.9 UdeM00000006211 XP\_033760977.1 28.1 1892  
 1001 47 28 1651 9 1808 6.60E-157 563.9 6579 cellular  
 organisms;Eukaryota;Opisthokonta;Metazoa;Eumetazoa;Bilateria;Protostomia;  
 Spiralia;Lophotrochozoa;Mollusca;Bivalvia;Autobranchia;Pteriormorphia;Pect  
 inida;Pectinoidea;Pectinidae;Pecten;Pecten maximus  
 UdeM00000006212 6596 285 UdeM00000006212 XP\_045178398.1 46.8 280  
 147 1 3 280 6 285 1.00E-73 285 6596 cellular  
 organisms;Eukaryota;Opisthokonta;Metazoa;Eumetazoa;Bilateria;Protostomia;  
 Spiralia;Lophotrochozoa;Mollusca;Bivalvia;Autobranchia;Heteroconchia;Euhe  
 terodonta;Imparidentia;Venerida;Veneroidea;Veneridae;Mercenaria;Mercenari  
 a mercenaria  
 UdeM00000006213 6596 669.1 UdeM00000006213 XP\_045178632.1 42.2 806  
 444 9 143 943 62 850 8.40E-189 669.1 6596 cellular  
 organisms;Eukaryota;Opisthokonta;Metazoa;Eumetazoa;Bilateria;Protostomia;  
 Spiralia;Lophotrochozoa;Mollusca;Bivalvia;Autobranchia;Heteroconchia;Euhe  
 terodonta;Imparidentia;Venerida;Veneroidea;Veneridae;Mercenaria;Mercenari  
 a mercenaria  
 UdeM00000006215 6579 161.4 UdeM00000006215 XP\_033731994.1 34.3 315  
 144 7 476 752 286 575 5.60E-36 161.4 6579 cellular  
 organisms;Eukaryota;Opisthokonta;Metazoa;Eumetazoa;Bilateria;Protostomia;  
 Spiralia;Lophotrochozoa;Mollusca;Bivalvia;Autobranchia;Pteriormorphia;Pect  
 inida;Pectinoidea;Pectinidae;Pecten;Pecten maximus  
 UdeM00000006216 6596 974.9 UdeM00000006216 XP\_045198165.1 52.3 951  
 435 8 1 939 3 946 7.10E-281 974.9 6596 cellular

organisms;Eukaryota;Opisthokonta;Metazoa;Eumetazoa;Bilateria;Protostomia;Spiralia;Lophotrochozoa;Mollusca;Bivalvia;Autobranchia;Heteroconchia;Euherodonta;Imparidentia;Venerida;Veneroidea;Veneridae;Mercenaria;Mercenaria mercenaria

UdeM00000006218 6596 103.2 UdeM00000006218 XP\_045199128.1 40.7 140  
81 2 1 138 31 170 2.90E-19 103.2 6596 cellular

organisms;Eukaryota;Opisthokonta;Metazoa;Eumetazoa;Bilateria;Protostomia;Spiralia;Lophotrochozoa;Mollusca;Bivalvia;Autobranchia;Heteroconchia;Euherodonta;Imparidentia;Venerida;Veneroidea;Veneridae;Mercenaria;Mercenaria mercenaria

UdeM00000006219 6596 122.5 UdeM00000006219 XP\_045199123.1 41.9 160  
91 2 1 158 31 190 5.30E-25 122.5 6596 cellular

organisms;Eukaryota;Opisthokonta;Metazoa;Eumetazoa;Bilateria;Protostomia;Spiralia;Lophotrochozoa;Mollusca;Bivalvia;Autobranchia;Heteroconchia;Euherodonta;Imparidentia;Venerida;Veneroidea;Veneridae;Mercenaria;Mercenaria mercenaria

UdeM00000006220 6596 1890.2 UdeM00000006220 XP\_045199153.1 35.9  
3853 1839 66 2 3670 9 3415 0.00E+00 1890.2 6596  
cellular

organisms;Eukaryota;Opisthokonta;Metazoa;Eumetazoa;Bilateria;Protostomia;Spiralia;Lophotrochozoa;Mollusca;Bivalvia;Autobranchia;Heteroconchia;Euherodonta;Imparidentia;Venerida;Veneroidea;Veneridae;Mercenaria;Mercenaria mercenaria

UdeM00000006221 6579 213.8 UdeM00000006221 XP\_033731929.1 37.4 412  
196 15 1 370 11 402 4.20E-52 213.8 6579 cellular

organisms;Eukaryota;Opisthokonta;Metazoa;Eumetazoa;Bilateria;Protostomia;Spiralia;Lophotrochozoa;Mollusca;Bivalvia;Autobranchia;Pteriomorphia;Pectinida;Pectinoidea;Pectinidae;Pecten;Pecten maximus

UdeM00000006222 2607531 272.7 UdeM00000006222 XP\_029655780.1 40.9  
433 234 5 383 811 671 1085 1.50E-69 272.7 2607531  
cellular

organisms;Eukaryota;Opisthokonta;Metazoa;Eumetazoa;Bilateria;Protostomia;Spiralia;Lophotrochozoa;Mollusca;Cephalopoda;Coleoidea;Octopodiformes;Octopoda;Incirrata;Octopodidae;Octopus;Octopus sinensis

UdeM00000006223 6573 148.3 UdeM00000006223 XP\_021373588.1 43.4 274  
115 13 461 717 1181 1431 3.80E-32 148.3 6573 cellular

organisms;Eukaryota;Opisthokonta;Metazoa;Eumetazoa;Bilateria;Protostomia;Spiralia;Lophotrochozoa;Mollusca;Bivalvia;Autobranchia;Pteriomorphia;Pectinida;Pectinoidea;Pectinidae;Mizuhopecten;Mizuhopecten yessoensis

UdeM00000006224 6573 153.3 UdeM00000006224 XP\_021373588.1 44 273  
114 12 461 716 1181 1431 1.20E-33 153.3 6573 cellular

organisms;Eukaryota;Opisthokonta;Metazoa;Eumetazoa;Bilateria;Protostomia;Spiralia;Lophotrochozoa;Mollusca;Bivalvia;Autobranchia;Pteriomorphia;Pectinida;Pectinoidea;Pectinidae;Mizuhopecten;Mizuhopecten yessoensis

UdeM00000006225 6596 762.7 UdeM00000006225 XP\_045202168.1 71.4 553  
140 5 1 536 1 552 4.00E-217 762.7 6596 cellular

organisms;Eukaryota;Opisthokonta;Metazoa;Eumetazoa;Bilateria;Protostomia;Spiralia;Lophotrochozoa;Mollusca;Bivalvia;Autobranchia;Heteroconchia;Euherodonta;Imparidentia;Venerida;Veneroidea;Veneridae;Mercenaria;Mercenaria mercenaria

UdeM00000006226 45264 349.7 UdeM00000006226 XP\_044165535.1 44.8 395  
201 4 2 389 194 578 5.40E-93 349.7 45264 cellular

organisms;Eukaryota;Opisthokonta;Metazoa;Eumetazoa;Cnidaria;Anthozoa;Hexa

corallia;Scleractinia;Astrocoeniina;Acroporidae;Acropora;Acropora  
millepora  
UdeM00000006227 70779 167.5 UdeM00000006227 XP\_015759381.1 38.6 246  
148 1 12 254 490 735 2.20E-38 167.5 70779 cellular  
organisms;Eukaryota;Opisthokonta;Metazoa;Eumetazoa;Cnidaria;Anthozoa;Hexa  
corallia;Scleractinia;Astrocoeniina;Acroporidae;Acropora;Acropora  
digitifera  
UdeM00000006228 63155 125.2 UdeM00000006228 XP\_030585845.1 38.6 171  
98 2 3 168 527 695 8.70E-26 125.2 63155 cellular  
organisms;Eukaryota;Opisthokonta;Metazoa;Eumetazoa;Bilateria;Deuterostomi  
a;Chordata;Craniata;Vertebrata;Gnathostomata;Teleostomi;Euteleostomi;Acti  
nopterygii;Actinopteri;Neopterygii;Teleostei;Osteoglossocephalai;Clupeoce  
phala;Euteleosteoromorpha;Neoteleostei;Eurypterygia;Ctenosquamata;Acanthomo  
rphata;Euacanthomorpha;Percomorphaceae;Ovalentaria;Cichlomorphae;Cichl  
iformes;Cichlidae;New World  
cichlids;Cichlasomatinae;Heroini;Archocentrus;Archocentrus centrarchus  
UdeM00000006230 6596 97.1 UdeM00000006230 XP\_045215263.1 49.5 93  
45 1 372 462 1011 1103 6.40E-17 97.1 6596 cellular  
organisms;Eukaryota;Opisthokonta;Metazoa;Eumetazoa;Bilateria;Protostomia;  
Spiralia;Lophotrochozoa;Mollusca;Bivalvia;Autobranchia;Heteroconchia;Euhe  
terodonta;Imparidentia;Venerida;Veneroidea;Veneridae;Mercenaria;Mercenari  
a mercenaria  
UdeM00000006230 6596 60.5 UdeM00000006230 XP\_045215263.1 61.9 42  
16 0 191 232 10 51 6.70E-06 60.5 6596 cellular  
organisms;Eukaryota;Opisthokonta;Metazoa;Eumetazoa;Bilateria;Protostomia;  
Spiralia;Lophotrochozoa;Mollusca;Bivalvia;Autobranchia;Heteroconchia;Euhe  
terodonta;Imparidentia;Venerida;Veneroidea;Veneridae;Mercenaria;Mercenari  
a mercenaria  
UdeM00000006232 7574 119 UdeM00000006232 XP\_013410728.1 34 282  
117 7 218 437 70 344 1.50E-23 119 7574 cellular  
organisms;Eukaryota;Opisthokonta;Metazoa;Eumetazoa;Bilateria;Protostomia;  
Spiralia;Lophotrochozoa;Brachiopoda;Linguliformea;Lingulata;Lingulida;Lin  
guloidea;Lingulidae;Lingula;Lingula anatina  
UdeM00000006233 7574 118.2 UdeM00000006233 XP\_013410728.1 34 282  
115 7 218 435 70 344 2.50E-23 118.2 7574 cellular  
organisms;Eukaryota;Opisthokonta;Metazoa;Eumetazoa;Bilateria;Protostomia;  
Spiralia;Lophotrochozoa;Brachiopoda;Linguliformea;Lingulata;Lingulida;Lin  
guloidea;Lingulidae;Lingula;Lingula anatina  
UdeM00000006234 72036 95.9 UdeM00000006234 XP\_040577149.1 80.6 62  
12 0 17 78 220 281 2.40E-17 95.9 72036 cellular  
organisms;Eukaryota;Opisthokonta;Metazoa;Eumetazoa;Bilateria;Protostomia;  
Ecdysozoa;Panarthropoda;Arthropoda;Mandibulata;Pancrustacea;Crustacea;Mul  
ticrustacea;Hexanauplia;Copepoda;Neocopepoda;Podoplea;Siphonostomatoida;C  
aligidae;Lepeophtheirus;Lepeophtheirus salmonis  
UdeM00000006235 29159 370.2 UdeM00000006235 XP\_011442459.2 59.6 277  
110 2 10 285 10 285 2.40E-99 370.2 29159 cellular  
organisms;Eukaryota;Opisthokonta;Metazoa;Eumetazoa;Bilateria;Protostomia;  
Spiralia;Lophotrochozoa;Mollusca;Bivalvia;Autobranchia;Pteriormorphia;Ostr  
eida;Ostreoidea;Ostreidae;Crassostrea;Crassostrea gigas  
UdeM00000006236 6565 619.4 UdeM00000006236 XP\_022322314.1 90 341  
27 1 94 427 135 475 3.40E-174 619.4 6565 cellular  
organisms;Eukaryota;Opisthokonta;Metazoa;Eumetazoa;Bilateria;Protostomia;  
Spiralia;Lophotrochozoa;Mollusca;Bivalvia;Autobranchia;Pteriormorphia;Ostr  
eida;Ostreoidea;Ostreidae;Crassostrea;Crassostrea virginica

UdeM00000006237 6565 618.6 UdeM00000006237 XP\_022322316.1 92.7 328  
 24 0 94 421 135 462 5.80E-174 618.6 6565 cellular  
 organisms;Eukaryota;Opisthokonta;Metazoa;Eumetazoa;Bilateria;Protostomia;  
 Spiralia;Lophotrochozoa;Mollusca;Bivalvia;Autobranchia;Pteriormorphia;Ostr  
 eida;Ostreoidea;Ostreidae;Crassostrea;Crassostrea virginica  
 UdeM00000006238 8407 61.2 UdeM00000006238 XP\_040210694.1 54.4 57  
 25 1 30 86 480 535 7.30E-07 61.2 8407 cellular  
 organisms;Eukaryota;Opisthokonta;Metazoa;Eumetazoa;Bilateria;Deuterostomi  
 a;Chordata;Craniata;Vertebrata;Gnathostomata;Teleostomi;Euteleostomi;Sarc  
 opterygii;Dipnotetrapodomorpha;Tetrapoda;Amphibia;Batrachia;Anura;Neobatr  
 achia;Ranoidea;Ranidae;Rana;Rana;Rana temporaria  
 UdeM00000006240 6596 234.6 UdeM00000006240 XP\_045199183.1 53.8 212  
 94 2 7 214 39 250 1.20E-58 234.6 6596 cellular  
 organisms;Eukaryota;Opisthokonta;Metazoa;Eumetazoa;Bilateria;Protostomia;  
 Spiralia;Lophotrochozoa;Mollusca;Bivalvia;Autobranchia;Heteroconchia;Euhe  
 terodonta;Imparidentia;Venerida;Veneroidea;Veneridae;Mercenaria;Mercenari  
 a mercenaria  
 UdeM00000006239 6596 279.6 UdeM00000006239 XP\_045199183.1 55.3 246  
 106 2 4 245 5 250 3.70E-72 279.6 6596 cellular  
 organisms;Eukaryota;Opisthokonta;Metazoa;Eumetazoa;Bilateria;Protostomia;  
 Spiralia;Lophotrochozoa;Mollusca;Bivalvia;Autobranchia;Heteroconchia;Euhe  
 terodonta;Imparidentia;Venerida;Veneroidea;Veneridae;Mercenaria;Mercenari  
 a mercenaria  
 UdeM00000006241 400727 214.5 UdeM00000006241 XP\_025113113.1 44  
 300 144 4 444 731 244 531 5.90E-52 214.5 400727  
 cellular  
 organisms;Eukaryota;Opisthokonta;Metazoa;Eumetazoa;Bilateria;Protostomia;  
 Spiralia;Lophotrochozoa;Mollusca;Gastropoda;Caenogastropoda;Architaeniogl  
 ossa;Ampullarioidea;Ampullariidae;Pomacea;Pomacea canaliculata  
 UdeM00000006243 1735272 681.4 UdeM00000006243 XP\_041368412.1 64.5  
 518 179 2 99 611 108 625 1.10E-192 681.4 1735272  
 cellular  
 organisms;Eukaryota;Opisthokonta;Metazoa;Eumetazoa;Bilateria;Protostomia;  
 Spiralia;Lophotrochozoa;Mollusca;Gastropoda;Neomphalina;Neomphaloidea;Pel  
 tospiridae;Gigantopelta;Gigantopelta aegis  
 UdeM00000006244 7574 139.4 UdeM00000006244 XP\_013417182.2 68.8 93  
 29 0 3 95 436 528 2.40E-30 139.4 7574 cellular  
 organisms;Eukaryota;Opisthokonta;Metazoa;Eumetazoa;Bilateria;Protostomia;  
 Spiralia;Lophotrochozoa;Brachiopoda;Linguliformea;Lingulata;Lingulida;Lin  
 guloidea;Lingulidae;Lingula;Lingula anatina  
 UdeM00000006245 7574 172.2 UdeM00000006245 XP\_013394552.1 31.7 379  
 171 6 10 378 7 307 1.30E-39 172.2 7574 cellular  
 organisms;Eukaryota;Opisthokonta;Metazoa;Eumetazoa;Bilateria;Protostomia;  
 Spiralia;Lophotrochozoa;Brachiopoda;Linguliformea;Lingulata;Lingulida;Lin  
 guloidea;Lingulidae;Lingula;Lingula anatina  
 UdeM00000006246 6596 463.4 UdeM00000006246 XP\_045193039.1 62.6 340  
 125 2 111 449 39 377 3.30E-127 463.4 6596 cellular  
 organisms;Eukaryota;Opisthokonta;Metazoa;Eumetazoa;Bilateria;Protostomia;  
 Spiralia;Lophotrochozoa;Mollusca;Bivalvia;Autobranchia;Heteroconchia;Euhe  
 terodonta;Imparidentia;Venerida;Veneroidea;Veneridae;Mercenaria;Mercenari  
 a mercenaria  
 UdeM00000006247 6596 362.5 UdeM00000006247 XP\_045193039.1 63.2 261  
 94 2 124 383 118 377 6.80E-97 362.5 6596 cellular  
 organisms;Eukaryota;Opisthokonta;Metazoa;Eumetazoa;Bilateria;Protostomia;



Spiralia;Lophotrochozoa;Mollusca;Bivalvia;Autobranchia;Heteroconchia;Euherodonta;Imparidentia;Venerida;Veneroidea;Veneridae;Mercenaria;Mercenaria mercenaria

UdeM00000006248 6579 252.3 UdeM00000006248 XP\_033731069.1 83.5 139  
23 0 21 159 47 185 4.30E-64 252.3 6579 cellular

organisms;Eukaryota;Opisthokonta;Metazoa;Eumetazoa;Bilateria;Protostomia;Spiralia;Lophotrochozoa;Mollusca;Bivalvia;Autobranchia;Pteriomorphia;Pectinida;Pectinoidea;Pectinidae;Pecten;Pecten maximus

UdeM00000006249 6596 313.5 UdeM00000006249 XP\_045193059.1 40.9 440  
194 4 6 403 5 420 3.80E-82 313.5 6596 cellular

organisms;Eukaryota;Opisthokonta;Metazoa;Eumetazoa;Bilateria;Protostomia;Spiralia;Lophotrochozoa;Mollusca;Bivalvia;Autobranchia;Heteroconchia;Euherodonta;Imparidentia;Venerida;Veneroidea;Veneridae;Mercenaria;Mercenaria mercenaria

UdeM00000006250 50429 73.9 UdeM00000006250 XP\_022802576.1 71.7 46  
13 0 1 46 1 46 8.80E-11 73.9 50429 cellular

organisms;Eukaryota;Opisthokonta;Metazoa;Eumetazoa;Cnidaria;Anthozoa;Hexacorallia;Scleractinia;Astrocoeniina;Pocilloporidae;Stylophora;Stylophora pistillata

UdeM00000006251 6596 270.8 UdeM00000006251 XP\_045193101.1 51.2 412  
191 4 1 403 32 442 2.80E-69 270.8 6596 cellular

organisms;Eukaryota;Opisthokonta;Metazoa;Eumetazoa;Bilateria;Protostomia;Spiralia;Lophotrochozoa;Mollusca;Bivalvia;Autobranchia;Heteroconchia;Euherodonta;Imparidentia;Venerida;Veneroidea;Veneridae;Mercenaria;Mercenaria mercenaria

UdeM00000006252 6596 216.9 UdeM00000006252 XP\_045188761.1 27.1 767  
457 17 1 711 3 723 1.30E-52 216.9 6596 cellular

organisms;Eukaryota;Opisthokonta;Metazoa;Eumetazoa;Bilateria;Protostomia;Spiralia;Lophotrochozoa;Mollusca;Bivalvia;Autobranchia;Heteroconchia;Euherodonta;Imparidentia;Venerida;Veneroidea;Veneridae;Mercenaria;Mercenaria mercenaria

UdeM00000006253 6565 718.4 UdeM00000006253 XP\_022327386.1 54.1 712  
318 4 6 710 1 710 9.10E-204 718.4 6565 cellular

organisms;Eukaryota;Opisthokonta;Metazoa;Eumetazoa;Bilateria;Protostomia;Spiralia;Lophotrochozoa;Mollusca;Bivalvia;Autobranchia;Pteriomorphia;Ostreida;Ostreidae;Crassostrea;Crassostrea virginica

UdeM00000006254 6596 448 UdeM00000006254 XP\_045184233.1 69.5 305  
92 1 1 305 1 304 9.90E-123 448 6596 cellular

organisms;Eukaryota;Opisthokonta;Metazoa;Eumetazoa;Bilateria;Protostomia;Spiralia;Lophotrochozoa;Mollusca;Bivalvia;Autobranchia;Heteroconchia;Euherodonta;Imparidentia;Venerida;Veneroidea;Veneridae;Mercenaria;Mercenaria mercenaria

UdeM00000006255 6565 560.5 UdeM00000006255 XP\_022326759.1 51 623  
274 9 6 611 4 612 3.10E-156 560.5 6565 cellular

organisms;Eukaryota;Opisthokonta;Metazoa;Eumetazoa;Bilateria;Protostomia;Spiralia;Lophotrochozoa;Mollusca;Bivalvia;Autobranchia;Pteriomorphia;Ostreida;Ostreidae;Crassostrea;Crassostrea virginica

UdeM00000006256 6565 638.3 UdeM00000006256 XP\_022326759.1 50.9 719  
314 11 6 699 4 708 1.20E-179 638.3 6565 cellular

organisms;Eukaryota;Opisthokonta;Metazoa;Eumetazoa;Bilateria;Protostomia;Spiralia;Lophotrochozoa;Mollusca;Bivalvia;Autobranchia;Pteriomorphia;Ostreida;Ostreidae;Crassostrea;Crassostrea virginica

UdeM00000006257 6596 397.5 UdeM00000006257 XP\_045213671.1 46.5 400  
204 1 18 407 12 411 2.00E-107 397.5 6596 cellular

organisms;Eukaryota;Opisthokonta;Metazoa;Eumetazoa;Bilateria;Protostomia;Spiralia;Lophotrochozoa;Mollusca;Bivalvia;Autobranchia;Heteroconchia;Euheterodonta;Imparidentia;Venerida;Veneroidea;Veneridae;Mercenaria;Mercenaria mercenaria

UdeM00000006258 286706 144.8 UdeM00000006258 XP\_014281393.1 91.8  
73 6 0 1 73 1 73 4.30E-32 144.8 286706  
cellular

organisms;Eukaryota;Opisthokonta;Metazoa;Eumetazoa;Bilateria;Protostomia;Ecdysozoa;Panarthropoda;Arthropoda;Mandibulata;Pancrustacea;Hexapoda;Insecta;Dicondylia;Pterygota;Neoptera;Paraneoptera;Hemiptera;Prosorrhyncha;Heteroptera;Euheteroptera;Neoheteroptera;Panheteroptera;Pentatomomorpha;Pentatomoidea;Pentatomidae;Pentatominae;Halyomorpha;Halyomorpha halys

UdeM00000006259 6596 153.7 UdeM00000006259 XP\_045191302.1 29.8 493  
235 12 44 461 526 982 5.80E-34 153.7 6596 cellular

organisms;Eukaryota;Opisthokonta;Metazoa;Eumetazoa;Bilateria;Protostomia;Spiralia;Lophotrochozoa;Mollusca;Bivalvia;Autobranchia;Heteroconchia;Euheterodonta;Imparidentia;Venerida;Veneroidea;Veneridae;Mercenaria;Mercenaria mercenaria

UdeM00000006261 400727 83.6 UdeM00000006261 XP\_025112735.1 34.9  
129 81 2 2 130 39 164 2.60E-13 83.6 400727  
cellular

organisms;Eukaryota;Opisthokonta;Metazoa;Eumetazoa;Bilateria;Protostomia;Spiralia;Lophotrochozoa;Mollusca;Gastropoda;Caenogastropoda;Architaenioglossa;Ampullarioidea;Ampullariidae;Pomacea;Pomacea canaliculata

UdeM00000006263 6596 571.6 UdeM00000006263 XP\_045193418.1 84.8 330  
50 0 1 330 1 330 6.50E-160 571.6 6596 cellular

organisms;Eukaryota;Opisthokonta;Metazoa;Eumetazoa;Bilateria;Protostomia;Spiralia;Lophotrochozoa;Mollusca;Bivalvia;Autobranchia;Heteroconchia;Euheterodonta;Imparidentia;Venerida;Veneroidea;Veneridae;Mercenaria;Mercenaria mercenaria

UdeM00000006264 6596 852 UdeM00000006264 XP\_045193418.1 72.7 568  
155 0 1 568 1 568 4.20E-244 852 6596 cellular

organisms;Eukaryota;Opisthokonta;Metazoa;Eumetazoa;Bilateria;Protostomia;Spiralia;Lophotrochozoa;Mollusca;Bivalvia;Autobranchia;Heteroconchia;Euheterodonta;Imparidentia;Venerida;Veneroidea;Veneridae;Mercenaria;Mercenaria mercenaria

UdeM00000006265 6596 266.2 UdeM00000006265 XP\_045206378.1 61.2 219  
77 3 1 218 742 953 3.80E-68 266.2 6596 cellular

organisms;Eukaryota;Opisthokonta;Metazoa;Eumetazoa;Bilateria;Protostomia;Spiralia;Lophotrochozoa;Mollusca;Bivalvia;Autobranchia;Heteroconchia;Euheterodonta;Imparidentia;Venerida;Veneroidea;Veneridae;Mercenaria;Mercenaria mercenaria

UdeM00000006266 6596 594 UdeM00000006266 XP\_045206378.1 46.8 744  
283 14 6 657 9 731 2.40E-166 594 6596 cellular

organisms;Eukaryota;Opisthokonta;Metazoa;Eumetazoa;Bilateria;Protostomia;Spiralia;Lophotrochozoa;Mollusca;Bivalvia;Autobranchia;Heteroconchia;Euheterodonta;Imparidentia;Venerida;Veneroidea;Veneridae;Mercenaria;Mercenaria mercenaria

UdeM00000006268 6579 176.8 UdeM00000006268 XP\_033741736.1 52.6 171  
79 1 1 169 671 841 2.50E-41 176.8 6579 cellular

organisms;Eukaryota;Opisthokonta;Metazoa;Eumetazoa;Bilateria;Protostomia;Spiralia;Lophotrochozoa;Mollusca;Bivalvia;Autobranchia;Pteriomorpha;Pectinida;Pectinoidea;Pectinidae;Pecten;Pecten maximus

UdeM00000006269 6596 110.5 UdeM00000006269 XP\_045198381.1 71.6 67  
 19 0 16 82 87 153 1.00E-21 110.5 6596 cellular  
 organisms;Eukaryota;Opisthokonta;Metazoa;Eumetazoa;Bilateria;Protostomia;  
 Spiralia;Lophotrochozoa;Mollusca;Bivalvia;Autobranchia;Heteroconchia;Euhe  
 terodonta;Imparidentia;Venerida;Veneroidea;Veneridae;Mercenaria;Mercenari  
 a mercenaria

UdeM00000006270 6596 94.4 UdeM00000006270 XP\_045198381.1 50 86  
 41 1 1 86 1 84 7.80E-17 94.4 6596 cellular  
 organisms;Eukaryota;Opisthokonta;Metazoa;Eumetazoa;Bilateria;Protostomia;  
 Spiralia;Lophotrochozoa;Mollusca;Bivalvia;Autobranchia;Heteroconchia;Euhe  
 terodonta;Imparidentia;Venerida;Veneroidea;Veneridae;Mercenaria;Mercenari  
 a mercenaria

UdeM00000006271 6596 294.3 UdeM00000006271 XP\_045198447.1 28.6 773  
 497 16 61 795 30 785 6.90E-76 294.3 6596 cellular  
 organisms;Eukaryota;Opisthokonta;Metazoa;Eumetazoa;Bilateria;Protostomia;  
 Spiralia;Lophotrochozoa;Mollusca;Bivalvia;Autobranchia;Heteroconchia;Euhe  
 terodonta;Imparidentia;Venerida;Veneroidea;Veneridae;Mercenaria;Mercenari  
 a mercenaria

UdeM00000006272 260995 79.7 UdeM00000006272 XP\_033812940.1 50  
 74 36 1 1 74 1 73 1.80E-12 79.7 260995  
 cellular  
 organisms;Eukaryota;Opisthokonta;Metazoa;Eumetazoa;Bilateria;Deuterostomi  
 a;Chordata;Craniata;Vertebrata;Gnathostomata;Teleostomi;Euteleostomi;Sarc  
 opterygii;Dipnotetrapodomorpha;Tetrapoda;Amphibia;Gymnophiona;Dermophiida  
 e;Geotrypetes;Geotrypetes seraphini

UdeM00000006273 1415580 550.4 UdeM00000006273 XP\_030075314.1 54.4  
 517 217 3 1 514 125 625 2.40E-153 550.4 1415580  
 cellular  
 organisms;Eukaryota;Opisthokonta;Metazoa;Eumetazoa;Bilateria;Deuterostomi  
 a;Chordata;Craniata;Vertebrata;Gnathostomata;Teleostomi;Euteleostomi;Sarc  
 opterygii;Dipnotetrapodomorpha;Tetrapoda;Amphibia;Gymnophiona;Siphonopida  
 e;Microcaecilia;Microcaecilia unicolor

UdeM00000006274 6596 1143.6 UdeM00000006274 XP\_045204185.1 74.7  
 739 186 1 24 761 22 760 0.00E+00 1143.6 6596  
 cellular  
 organisms;Eukaryota;Opisthokonta;Metazoa;Eumetazoa;Bilateria;Protostomia;  
 Spiralia;Lophotrochozoa;Mollusca;Bivalvia;Autobranchia;Heteroconchia;Euhe  
 terodonta;Imparidentia;Venerida;Veneroidea;Veneridae;Mercenaria;Mercenari  
 a mercenaria

UdeM00000006278 133434 80.1 UdeM00000006278 XP\_022107082.1 37  
 146 81 3 39 173 231 376 3.10E-12 80.1 133434  
 cellular  
 organisms;Eukaryota;Opisthokonta;Metazoa;Eumetazoa;Bilateria;Deuterostomi  
 a;Echinodermata;Eleutherozoa;Asterozoa;Asteroidea;Valvatacea;Valvatida;Ac  
 anthasteridae;Acanthaster;Acanthaster planci

UdeM00000006279 6596 408.7 UdeM00000006279 XP\_045189790.1 43.9 444  
 243 2 7 450 26 463 1.00E-110 408.7 6596 cellular  
 organisms;Eukaryota;Opisthokonta;Metazoa;Eumetazoa;Bilateria;Protostomia;  
 Spiralia;Lophotrochozoa;Mollusca;Bivalvia;Autobranchia;Heteroconchia;Euhe  
 terodonta;Imparidentia;Venerida;Veneroidea;Veneridae;Mercenaria;Mercenari  
 a mercenaria

UdeM00000006280 6596 851.3 UdeM00000006280 XP\_045173950.1 72.4 606  
 137 8 1 597 60 644 7.50E-244 851.3 6596 cellular  
 organisms;Eukaryota;Opisthokonta;Metazoa;Eumetazoa;Bilateria;Protostomia;

Spiralia;Lophotrochozoa;Mollusca;Bivalvia;Autobranchia;Heteroconchia;Euherodonta;Imparidentia;Venerida;Veneroidea;Veneridae;Mercenaria;Mercenaria mercenaria

UdeM00000006281 6565 75.9 UdeM00000006281 XP\_022320976.1 48.8 80  
37 2 5 81 3 81 3.50E-11 75.9 6565 cellular

organisms;Eukaryota;Opisthokonta;Metazoa;Eumetazoa;Bilateria;Protostomia;Spiralia;Lophotrochozoa;Mollusca;Bivalvia;Autobranchia;Pteriormorphia;Ostreida;Ostreoidea;Ostreidae;Crassostrea;Crassostrea virginica

UdeM000000040683 6596 281.6 UdeM000000040683 XP\_045170697.1 41.8 335  
192 3 33 365 30 363 2.20E-72 281.6 6596 cellular

organisms;Eukaryota;Opisthokonta;Metazoa;Eumetazoa;Bilateria;Protostomia;Spiralia;Lophotrochozoa;Mollusca;Bivalvia;Autobranchia;Heteroconchia;Euherodonta;Imparidentia;Venerida;Veneroidea;Veneridae;Mercenaria;Mercenaria mercenaria

UdeM000000040684 6596 255.4 UdeM000000040684 XP\_045170697.1 41.7 307  
176 3 16 320 58 363 1.60E-64 255.4 6596 cellular

organisms;Eukaryota;Opisthokonta;Metazoa;Eumetazoa;Bilateria;Protostomia;Spiralia;Lophotrochozoa;Mollusca;Bivalvia;Autobranchia;Heteroconchia;Euherodonta;Imparidentia;Venerida;Veneroidea;Veneridae;Mercenaria;Mercenaria mercenaria

UdeM000000040685 6596 443 UdeM000000040685 XP\_045171608.1 52.6 865  
323 14 1 790 1 853 8.20E-121 443 6596 cellular

organisms;Eukaryota;Opisthokonta;Metazoa;Eumetazoa;Bilateria;Protostomia;Spiralia;Lophotrochozoa;Mollusca;Bivalvia;Autobranchia;Heteroconchia;Euherodonta;Imparidentia;Venerida;Veneroidea;Veneridae;Mercenaria;Mercenaria mercenaria

UdeM000000040686 29159 491.9 UdeM000000040686 XP\_034299000.1 73.2 328  
86 1 1 328 1 326 6.60E-136 491.9 29159 cellular

organisms;Eukaryota;Opisthokonta;Metazoa;Eumetazoa;Bilateria;Protostomia;Spiralia;Lophotrochozoa;Mollusca;Bivalvia;Autobranchia;Pteriormorphia;Ostreida;Ostreoidea;Ostreidae;Crassostrea;Crassostrea gigas

UdeM000000040687 6596 193 UdeM000000040687 XP\_045173451.1 39.9 253  
145 5 8 255 7 257 4.80E-46 193 6596 cellular

organisms;Eukaryota;Opisthokonta;Metazoa;Eumetazoa;Bilateria;Protostomia;Spiralia;Lophotrochozoa;Mollusca;Bivalvia;Autobranchia;Heteroconchia;Euherodonta;Imparidentia;Venerida;Veneroidea;Veneridae;Mercenaria;Mercenaria mercenaria

UdeM000000040690 6596 242.3 UdeM000000040690 XP\_045177776.1 28.5 561  
308 11 392 887 602 1134 2.80E-60 242.3 6596 cellular

organisms;Eukaryota;Opisthokonta;Metazoa;Eumetazoa;Bilateria;Protostomia;Spiralia;Lophotrochozoa;Mollusca;Bivalvia;Autobranchia;Heteroconchia;Euherodonta;Imparidentia;Venerida;Veneroidea;Veneridae;Mercenaria;Mercenaria mercenaria

UdeM000000040691 6596 310.8 UdeM000000040691 XP\_045172151.1 59.7 253  
99 2 6 256 3 254 1.60E-81 310.8 6596 cellular

organisms;Eukaryota;Opisthokonta;Metazoa;Eumetazoa;Bilateria;Protostomia;Spiralia;Lophotrochozoa;Mollusca;Bivalvia;Autobranchia;Heteroconchia;Euherodonta;Imparidentia;Venerida;Veneroidea;Veneridae;Mercenaria;Mercenaria mercenaria

UdeM000000040692 390379 70.9 UdeM000000040692 XP\_034039899.1 45.2  
62 33 1 3 63 1 62 9.00E-10 70.9 390379

cellular

organisms;Eukaryota;Opisthokonta;Metazoa;Eumetazoa;Bilateria;Deuterostomia;Chordata;Craniata;Vertebrata;Gnathostomata;Teleostomi;Euteleostomi;Acti

nopterygii;Actinopteri;Neopterygii;Teleostei;Osteoglossocephalai;Clupeocephala;Euteleosteomorpha;Neoteleostei;Eurypterygia;Ctenosquamata;Acanthomorphata;Euacanthomorphacea;Percomorphaceae;Batrachoidaria;Batrachoidiformes;Batrachoididae;Thalassophyrinae;Thalassophryne;Thalassophryne amazonica

UdeM00000040693 8078 193.7 UdeM00000040693 XP\_035994673.1 44.9 234  
60 2 1 165 196 429 1.80E-46 193.7 8078 cellular

organisms;Eukaryota;Opisthokonta;Metazoa;Eumetazoa;Bilateria;Deuterostomia;Chordata;Craniata;Vertebrata;Gnathostomata;Teleostomi;Euteleostomi;Actinopterygii;Actinopteri;Neopterygii;Teleostei;Osteoglossocephalai;Clupeocephala;Euteleosteomorpha;Neoteleostei;Eurypterygia;Ctenosquamata;Acanthomorphata;Euacanthomorphacea;Percomorphaceae;Ovalentaria;Atherinomorphae;Cypriodontiformes;Cyprinodontoidei;Fundulidae;Fundulus;Fundulus

heteroclitus

UdeM00000040694 6579 108.2 UdeM00000040694 XP\_033747958.1 60.3 73  
29 0 1 73 87 159 4.50E-21 108.2 6579 cellular

organisms;Eukaryota;Opisthokonta;Metazoa;Eumetazoa;Bilateria;Protostomia;Spiralia;Lophotrochozoa;Mollusca;Bivalvia;Autobranchia;Pteriormorphia;Pectinida;Pectinoidea;Pectinidae;Pecten;Pecten maximus

UdeM00000040695 1735272 201.1 UdeM00000040695 XP\_041348968.1 65  
180 61 2 19 198 23 200 1.40E-48 201.1 1735272

cellular

organisms;Eukaryota;Opisthokonta;Metazoa;Eumetazoa;Bilateria;Protostomia;Spiralia;Lophotrochozoa;Mollusca;Gastropoda;Neomphalina;Neomphaloidea;Peltospiridae;Gigantopelta;Gigantopelta aegis

UdeM00000040697 6596 599.7 UdeM00000040697 XP\_045170732.1 44.5 620  
313 8 17 625 32 631 4.50E-168 599.7 6596 cellular

organisms;Eukaryota;Opisthokonta;Metazoa;Eumetazoa;Bilateria;Protostomia;Spiralia;Lophotrochozoa;Mollusca;Bivalvia;Autobranchia;Heteroconchia;Euheterodonta;Imparidentia;Venerida;Veneroidea;Veneridae;Mercenaria;Mercenaria mercenaria

UdeM00000040698 6596 101.7 UdeM00000040698 XP\_045200489.1 41.7 132  
59 4 32 145 43 174 8.40E-19 101.7 6596 cellular

organisms;Eukaryota;Opisthokonta;Metazoa;Eumetazoa;Bilateria;Protostomia;Spiralia;Lophotrochozoa;Mollusca;Bivalvia;Autobranchia;Heteroconchia;Euheterodonta;Imparidentia;Venerida;Veneroidea;Veneridae;Mercenaria;Mercenaria mercenaria

UdeM00000040699 29159 675.2 UdeM00000040699 XP\_011433620.2 82.5 383  
67 0 1 383 1 383 4.80E-191 675.2 29159 cellular

organisms;Eukaryota;Opisthokonta;Metazoa;Eumetazoa;Bilateria;Protostomia;Spiralia;Lophotrochozoa;Mollusca;Bivalvia;Autobranchia;Pteriormorphia;Ostreida;Ostreioidea;Ostreidae;Crassostrea;Crassostrea gigas

UdeM00000040700 6579 181.8 UdeM00000040700 XP\_033747205.1 65.9 135  
46 0 21 155 6 140 6.70E-43 181.8 6579 cellular

organisms;Eukaryota;Opisthokonta;Metazoa;Eumetazoa;Bilateria;Protostomia;Spiralia;Lophotrochozoa;Mollusca;Bivalvia;Autobranchia;Pteriormorphia;Pectinida;Pectinoidea;Pectinidae;Pecten;Pecten maximus

UdeM00000040701 6579 603.6 UdeM00000040701 XP\_033747206.1 58.4 546  
171 7 1 502 1 534 3.10E-169 603.6 6579 cellular

organisms;Eukaryota;Opisthokonta;Metazoa;Eumetazoa;Bilateria;Protostomia;Spiralia;Lophotrochozoa;Mollusca;Bivalvia;Autobranchia;Pteriormorphia;Pectinida;Pectinoidea;Pectinidae;Pecten;Pecten maximus

UdeM00000040703 6596 969.5 UdeM00000040703 XP\_045173277.1 60.5 1093  
372 21 27 1089 42 1104 3.50E-279 969.5 6596 cellular

organisms;Eukaryota;Opisthokonta;Metazoa;Eumetazoa;Bilateria;Protostomia; Spiralia;Lophotrochozoa;Mollusca;Bivalvia;Autobranchia;Heteroconchia;Euherodonta;Imparidentia;Venerida;Veneroidea;Veneridae;Mercenaria;Mercenaria mercenaria

UdeM00000040704 400727 671.4 UdeM00000040704 XP\_025093011.1 52.7  
628 273 6 1 608 1 624 1.10E-189 671.4 400727  
cellular

organisms;Eukaryota;Opisthokonta;Metazoa;Eumetazoa;Bilateria;Protostomia; Spiralia;Lophotrochozoa;Mollusca;Gastropoda;Caenogastropoda;Architaenioglossa;Ampullarioidea;Ampullariidae;Pomacea;Pomacea canaliculata

UdeM00000040705 1735272 468.4 UdeM00000040705 XP\_041347879.1 51.9  
447 207 4 18 461 21 462 1.10E-128 468.4 1735272  
cellular

organisms;Eukaryota;Opisthokonta;Metazoa;Eumetazoa;Bilateria;Protostomia; Spiralia;Lophotrochozoa;Mollusca;Gastropoda;Neomphalina;Neomphaloidea;Peltospiridae;Gigantopelta;Gigantopelta aegis

UdeM00000040706 6596 92 UdeM00000040706 XP\_045171333.1 50.5 97  
46 1 1 95 1 97 5.00E-16 92 6596 cellular

organisms;Eukaryota;Opisthokonta;Metazoa;Eumetazoa;Bilateria;Protostomia; Spiralia;Lophotrochozoa;Mollusca;Bivalvia;Autobranchia;Heteroconchia;Euherodonta;Imparidentia;Venerida;Veneroidea;Veneridae;Mercenaria;Mercenaria mercenaria

UdeM00000040707 1735272 283.5 UdeM00000040707 XP\_041348750.1 30.9  
547 360 5 25 568 5 536 6.00E-73 283.5 1735272  
cellular

organisms;Eukaryota;Opisthokonta;Metazoa;Eumetazoa;Bilateria;Protostomia; Spiralia;Lophotrochozoa;Mollusca;Gastropoda;Neomphalina;Neomphaloidea;Peltospiridae;Gigantopelta;Gigantopelta aegis

UdeM00000040710 6565 449.5 UdeM00000040710 XP\_022337657.1 67.9 312  
97 1 1 309 1 312 3.40E-123 449.5 6565 cellular

organisms;Eukaryota;Opisthokonta;Metazoa;Eumetazoa;Bilateria;Protostomia; Spiralia;Lophotrochozoa;Mollusca;Bivalvia;Autobranchia;Pteriomorphia;Ostreida;Ostreidae;Crassostrea;Crassostrea virginica

UdeM00000040711 6596 864 UdeM00000040711 XP\_045172318.1 26.2 3231  
1721 96 119 2974 2 2945 5.80E-247 864 6596 cellular

organisms;Eukaryota;Opisthokonta;Metazoa;Eumetazoa;Bilateria;Protostomia; Spiralia;Lophotrochozoa;Mollusca;Bivalvia;Autobranchia;Heteroconchia;Euherodonta;Imparidentia;Venerida;Veneroidea;Veneridae;Mercenaria;Mercenaria mercenaria

UdeM00000040712 6565 132.5 UdeM00000040712 XP\_022344957.1 36.1 238  
141 7 74 304 2797 3030 1.60E-27 132.5 6565 cellular

organisms;Eukaryota;Opisthokonta;Metazoa;Eumetazoa;Bilateria;Protostomia; Spiralia;Lophotrochozoa;Mollusca;Bivalvia;Autobranchia;Pteriomorphia;Ostreida;Ostreidae;Crassostrea;Crassostrea virginica

UdeM00000040713 6573 316.6 UdeM00000040713 XP\_021364772.1 51.8 274  
130 1 5 276 3 276 3.10E-83 316.6 6573 cellular

organisms;Eukaryota;Opisthokonta;Metazoa;Eumetazoa;Bilateria;Protostomia; Spiralia;Lophotrochozoa;Mollusca;Bivalvia;Autobranchia;Pteriomorphia;Pectinida;Pectinoidea;Pectinidae;Mizuhopecten;Mizuhopecten yessoensis

UdeM00000040715 29159 253.4 UdeM00000040715 XP\_034336072.1 30.1 562  
317 14 10 522 627 1161 6.60E-64 253.4 29159 cellular

organisms;Eukaryota;Opisthokonta;Metazoa;Eumetazoa;Bilateria;Protostomia; Spiralia;Lophotrochozoa;Mollusca;Bivalvia;Autobranchia;Pteriomorphia;Ostreida;Ostreidae;Crassostrea;Crassostrea gigas

UdeM00000040716 6573 89.4 UdeM00000040716 XP\_021364755.1 28.2 255  
 128 8 474 724 2559 2762 4.80E-14 89.4 6573 cellular  
 organisms;Eukaryota;Opisthokonta;Metazoa;Eumetazoa;Bilateria;Protostomia;  
 Spiralia;Lophotrochozoa;Mollusca;Bivalvia;Autobranchia;Pteriomorpha;Pect  
 inida;Pectinoidea;Pectinidae;Mizuhopecten;Mizuhopecten yessoensis  
 UdeM00000040717 6596 156 UdeM00000040717 XP\_045200489.1 55.1 138  
 55 3 43 173 31 168 4.50E-35 156 6596 cellular  
 organisms;Eukaryota;Opisthokonta;Metazoa;Eumetazoa;Bilateria;Protostomia;  
 Spiralia;Lophotrochozoa;Mollusca;Bivalvia;Autobranchia;Heteroconchia;Euhe  
 terodonta;Imparidentia;Venerida;Veneroidea;Veneridae;Mercenaria;Mercenari  
 a mercenaria  
 UdeM00000040718 6596 110.9 UdeM00000040718 XP\_045173917.1 48.8 123  
 57 2 11 133 583 699 1.50E-21 110.9 6596 cellular  
 organisms;Eukaryota;Opisthokonta;Metazoa;Eumetazoa;Bilateria;Protostomia;  
 Spiralia;Lophotrochozoa;Mollusca;Bivalvia;Autobranchia;Heteroconchia;Euhe  
 terodonta;Imparidentia;Venerida;Veneroidea;Veneridae;Mercenaria;Mercenari  
 a mercenaria  
 UdeM00000040719 6596 128.3 UdeM00000040719 XP\_045200489.1 47 134  
 63 4 1 127 41 173 7.20E-27 128.3 6596 cellular  
 organisms;Eukaryota;Opisthokonta;Metazoa;Eumetazoa;Bilateria;Protostomia;  
 Spiralia;Lophotrochozoa;Mollusca;Bivalvia;Autobranchia;Heteroconchia;Euhe  
 terodonta;Imparidentia;Venerida;Veneroidea;Veneridae;Mercenaria;Mercenari  
 a mercenaria  
 UdeM00000040720 6596 714.5 UdeM00000040720 XP\_045173922.1 44.8 912  
 442 12 21 924 42 900 1.80E-20 714.5 6596 cellular  
 organisms;Eukaryota;Opisthokonta;Metazoa;Eumetazoa;Bilateria;Protostomia;  
 Spiralia;Lophotrochozoa;Mollusca;Bivalvia;Autobranchia;Heteroconchia;Euhe  
 terodonta;Imparidentia;Venerida;Veneroidea;Veneridae;Mercenaria;Mercenari  
 a mercenaria  
 UdeM00000040721 6596 245.7 UdeM00000040721 XP\_045173917.1 46.7 306  
 148 7 9 311 920 1213 7.70E-62 245.7 6596 cellular  
 organisms;Eukaryota;Opisthokonta;Metazoa;Eumetazoa;Bilateria;Protostomia;  
 Spiralia;Lophotrochozoa;Mollusca;Bivalvia;Autobranchia;Heteroconchia;Euhe  
 terodonta;Imparidentia;Venerida;Veneroidea;Veneridae;Mercenaria;Mercenari  
 a mercenaria  
 UdeM00000040722 6596 384 UdeM00000040722 XP\_045172029.1 56.4 337  
 141 3 5 338 21 354 2.00E-103 384 6596 cellular  
 organisms;Eukaryota;Opisthokonta;Metazoa;Eumetazoa;Bilateria;Protostomia;  
 Spiralia;Lophotrochozoa;Mollusca;Bivalvia;Autobranchia;Heteroconchia;Euhe  
 terodonta;Imparidentia;Venerida;Veneroidea;Veneridae;Mercenaria;Mercenari  
 a mercenaria  
 UdeM00000040723 6565 77.4 UdeM00000040723 XP\_022343476.1 42 100  
 58 0 16 115 10 109 1.30E-11 77.4 6565 cellular  
 organisms;Eukaryota;Opisthokonta;Metazoa;Eumetazoa;Bilateria;Protostomia;  
 Spiralia;Lophotrochozoa;Mollusca;Bivalvia;Autobranchia;Pteriomorpha;Ostr  
 eida;Ostreoidea;Ostreidae;Crassostrea;Crassostrea virginica  
 UdeM00000040724 6573 317.8 UdeM00000040724 XP\_021346354.1 50.5 319  
 147 1 1 319 1 308 1.60E-83 317.8 6573 cellular  
 organisms;Eukaryota;Opisthokonta;Metazoa;Eumetazoa;Bilateria;Protostomia;  
 Spiralia;Lophotrochozoa;Mollusca;Bivalvia;Autobranchia;Pteriomorpha;Pect  
 inida;Pectinoidea;Pectinidae;Mizuhopecten;Mizuhopecten yessoensis  
 UdeM00000040725 6573 331.6 UdeM00000040725 XP\_021346359.1 56.1 269  
 115 2 2 267 3 271 9.30E-88 331.6 6573 cellular  
 organisms;Eukaryota;Opisthokonta;Metazoa;Eumetazoa;Bilateria;Protostomia;

Spiralia; Lophotrochozoa; Mollusca; Bivalvia; Autobranchia; Pteriomorpha; Pectinida; Pectinoidea; Pectinidae; Mizuhopecten; Mizuhopecten yessoensis  
 UdeM00000040726 6573 332.8 UdeM00000040726 XP\_021346359.1 57.8 270  
 109 3 2 266 3 272 4.20E-88 332.8 6573 cellular  
 organisms; Eukaryota; Opisthokonta; Metazoa; Eumetazoa; Bilateria; Protostomia; Spiralia; Lophotrochozoa; Mollusca; Bivalvia; Autobranchia; Pteriomorpha; Pectinida; Pectinoidea; Pectinidae; Mizuhopecten; Mizuhopecten yessoensis  
 UdeM00000040727 6500 140.6 UdeM00000040727 XP\_035825362.1 44.3 192  
 79 3 10 177 45 232 1.90E-30 140.6 6500 cellular  
 organisms; Eukaryota; Opisthokonta; Metazoa; Eumetazoa; Bilateria; Protostomia; Spiralia; Lophotrochozoa; Mollusca; Gastropoda; Heterobranchia; Euthyneura; Teptipleura; Aplysiida; Aplysioidea; Aplysiidae; Aplysia; Aplysia californica  
 UdeM00000040728 6573 146.7 UdeM00000040728 XP\_021346355.1 40.4 267  
 142 3 957 1214 1343 1601 1.90E-31 146.7 6573 cellular  
 organisms; Eukaryota; Opisthokonta; Metazoa; Eumetazoa; Bilateria; Protostomia; Spiralia; Lophotrochozoa; Mollusca; Bivalvia; Autobranchia; Pteriomorpha; Pectinida; Pectinoidea; Pectinidae; Mizuhopecten; Mizuhopecten yessoensis  
 UdeM00000042679 37621 406.8 UdeM00000042679 XP\_014672567.1 45.8 421  
 212 5 1 408 101 518 3.70E-110 406.8 37621 cellular  
 organisms; Eukaryota; Opisthokonta; Metazoa; Eumetazoa; Bilateria; Protostomia; Ecdysozoa; Scalidophora; Priapulida; Priapulimorpha; Priapulimorphida; Priapulidae; Priapululus; Priapululus caudatus  
 UdeM00000042678 7668 600.1 UdeM00000042678 XP\_003729577.2 39.4 867  
 478 16 89 923 65 916 4.70E-168 600.1 7668 cellular  
 organisms; Eukaryota; Opisthokonta; Metazoa; Eumetazoa; Bilateria; Deuterostomia; Echinodermata; Eleutherozoa; Echinozoa; Echinoidea; Euechinoidea; Echinacea; Camarodonta; Echinidea; Strongylocentrotidae; Strongylocentrotus; Strongylocentrotus purpuratus  
 UdeM00000016481 6596 1134 UdeM00000016481 XP\_045170325.1 60.2 1085  
 386 20 78 1147 1253 2306 0.00E+00 1134 6596 cellular  
 organisms; Eukaryota; Opisthokonta; Metazoa; Eumetazoa; Bilateria; Protostomia; Spiralia; Lophotrochozoa; Mollusca; Bivalvia; Autobranchia; Heteroconchia; Euheterodonta; Imparidentia; Venerida; Veneroidea; Veneridae; Mercenaria; Mercenaria mercenaria  
 UdeM00000016482 6596 2527.3 UdeM00000016482 XP\_045170325.1 73.3  
 1744 424 11 18 1739 2316 4039 0.00E+00 2527.3 6596  
 cellular  
 organisms; Eukaryota; Opisthokonta; Metazoa; Eumetazoa; Bilateria; Protostomia; Spiralia; Lophotrochozoa; Mollusca; Bivalvia; Autobranchia; Heteroconchia; Euheterodonta; Imparidentia; Venerida; Veneroidea; Veneridae; Mercenaria; Mercenaria mercenaria  
 UdeM00000016483 6596 1762.3 UdeM00000016483 XP\_045170325.1 75.3  
 1226 265 11 3 1192 4063 5286 0.00E+00 1762.3 6596  
 cellular  
 organisms; Eukaryota; Opisthokonta; Metazoa; Eumetazoa; Bilateria; Protostomia; Spiralia; Lophotrochozoa; Mollusca; Bivalvia; Autobranchia; Heteroconchia; Euheterodonta; Imparidentia; Venerida; Veneroidea; Veneridae; Mercenaria; Mercenaria mercenaria  
 UdeM00000016484 6596 188.7 UdeM00000016484 XP\_045170325.1 89.9 89  
 9 0 1 89 5198 5286 3.20E-45 188.7 6596 cellular  
 organisms; Eukaryota; Opisthokonta; Metazoa; Eumetazoa; Bilateria; Protostomia; Spiralia; Lophotrochozoa; Mollusca; Bivalvia; Autobranchia; Heteroconchia; Euheterodonta; Imparidentia; Venerida; Veneroidea; Veneridae; Mercenaria; Mercenaria mercenaria



UdeM00000016485 6596 409.8 UdeM00000016485 XP\_045170336.1 59.5 351  
 125 6 1 344 1 341 3.40E-111 409.8 6596 cellular  
 organisms;Eukaryota;Opisthokonta;Metazoa;Eumetazoa;Bilateria;Protostomia;  
 Spiralia;Lophotrochozoa;Mollusca;Bivalvia;Autobranhia;Heteroconchia;Euhe  
 terodonta;Imparidentia;Venerida;Veneroidea;Veneridae;Mercenaria;Mercenari  
 a mercenaria  
 UdeM00000016488 6579 238 UdeM00000016488 XP\_033735671.1 66.1 168  
 57 0 4 171 1 168 8.90E-60 238 6579 cellular  
 organisms;Eukaryota;Opisthokonta;Metazoa;Eumetazoa;Bilateria;Protostomia;  
 Spiralia;Lophotrochozoa;Mollusca;Bivalvia;Autobranhia;Pteriormorphia;Pect  
 inida;Pectinoidea;Pectinidae;Pecten;Pecten maximus  
 UdeM00000016490 6579 238.4 UdeM00000016490 XP\_033735671.1 66.7 168  
 56 0 4 171 1 168 6.80E-60 238.4 6579 cellular  
 organisms;Eukaryota;Opisthokonta;Metazoa;Eumetazoa;Bilateria;Protostomia;  
 Spiralia;Lophotrochozoa;Mollusca;Bivalvia;Autobranhia;Pteriormorphia;Pect  
 inida;Pectinoidea;Pectinidae;Pecten;Pecten maximus  
 UdeM00000016491 6579 237.3 UdeM00000016491 XP\_033735671.1 66.1 168  
 57 0 4 171 1 168 1.50E-59 237.3 6579 cellular  
 organisms;Eukaryota;Opisthokonta;Metazoa;Eumetazoa;Bilateria;Protostomia;  
 Spiralia;Lophotrochozoa;Mollusca;Bivalvia;Autobranhia;Pteriormorphia;Pect  
 inida;Pectinoidea;Pectinidae;Pecten;Pecten maximus  
 UdeM00000016493 6579 238.4 UdeM00000016493 XP\_033735671.1 66.7 168  
 56 0 4 171 1 168 6.80E-60 238.4 6579 cellular  
 organisms;Eukaryota;Opisthokonta;Metazoa;Eumetazoa;Bilateria;Protostomia;  
 Spiralia;Lophotrochozoa;Mollusca;Bivalvia;Autobranhia;Pteriormorphia;Pect  
 inida;Pectinoidea;Pectinidae;Pecten;Pecten maximus  
 UdeM00000016494 6526 163.3 UdeM00000016494 XP\_013090201.1 67.3 104  
 34 0 1 104 1 104 1.80E-37 163.3 6526 cellular  
 organisms;Eukaryota;Opisthokonta;Metazoa;Eumetazoa;Bilateria;Protostomia;  
 Spiralia;Lophotrochozoa;Mollusca;Gastropoda;Heterobranhia;Euthyneura;Pan  
 pulmonata;Hygrophila;Lymnaeioidea;Planorbidae;Biomphalaria;Biomphalaria  
 glabrata  
 UdeM00000016496 6596 236.1 UdeM00000016496 XP\_045179769.1 30.5 658  
 315 18 1 588 1 586 1.10E-58 236.1 6596 cellular  
 organisms;Eukaryota;Opisthokonta;Metazoa;Eumetazoa;Bilateria;Protostomia;  
 Spiralia;Lophotrochozoa;Mollusca;Bivalvia;Autobranhia;Heteroconchia;Euhe  
 terodonta;Imparidentia;Venerida;Veneroidea;Veneridae;Mercenaria;Mercenari  
 a mercenaria  
 UdeM00000016497 6596 518.1 UdeM00000016497 XP\_045191538.1 53.9 427  
 194 2 1 424 1 427 1.10E-143 518.1 6596 cellular  
 organisms;Eukaryota;Opisthokonta;Metazoa;Eumetazoa;Bilateria;Protostomia;  
 Spiralia;Lophotrochozoa;Mollusca;Bivalvia;Autobranhia;Heteroconchia;Euhe  
 terodonta;Imparidentia;Venerida;Veneroidea;Veneridae;Mercenaria;Mercenari  
 a mercenaria  
 UdeM00000016498 6596 248.8 UdeM00000016498 XP\_045178270.1 38 416  
 202 8 5 392 18 405 1.10E-62 248.8 6596 cellular  
 organisms;Eukaryota;Opisthokonta;Metazoa;Eumetazoa;Bilateria;Protostomia;  
 Spiralia;Lophotrochozoa;Mollusca;Bivalvia;Autobranhia;Heteroconchia;Euhe  
 terodonta;Imparidentia;Venerida;Veneroidea;Veneridae;Mercenaria;Mercenari  
 a mercenaria  
 UdeM00000016499 6596 411.8 UdeM00000016499 XP\_045178290.1 71.8 316  
 85 4 1 312 1 316 8.00E-112 411.8 6596 cellular  
 organisms;Eukaryota;Opisthokonta;Metazoa;Eumetazoa;Bilateria;Protostomia;  
 Spiralia;Lophotrochozoa;Mollusca;Bivalvia;Autobranhia;Heteroconchia;Euhe

terodonta;Imparidentia;Venerida;Veneroidea;Veneridae;Mercenaria;Mercenaria mercenaria

UdeM00000016500 6596 212.2 UdeM00000016500 XP\_045180923.1 96 101  
4 0 1 101 33 133 3.00E-52 212.2 6596 cellular

organisms;Eukaryota;Opisthokonta;Metazoa;Eumetazoa;Bilateria;Protostomia;Spiralia;Lophotrochozoa;Mollusca;Bivalvia;Autobranchia;Heteroconchia;Euherodonta;Imparidentia;Venerida;Veneroidea;Veneridae;Mercenaria;Mercenaria mercenaria

UdeM00000016502 6596 476.5 UdeM00000016502 XP\_045160236.1 70 353  
100 2 3 353 2 350 3.00E-131 476.5 6596 cellular

organisms;Eukaryota;Opisthokonta;Metazoa;Eumetazoa;Bilateria;Protostomia;Spiralia;Lophotrochozoa;Mollusca;Bivalvia;Autobranchia;Heteroconchia;Euherodonta;Imparidentia;Venerida;Veneroidea;Veneridae;Mercenaria;Mercenaria mercenaria

UdeM00000016503 29159 228.8 UdeM00000016503 XP\_011443022.2 68.7 163  
48 2 8 170 4 163 5.30E-57 228.8 29159 cellular

organisms;Eukaryota;Opisthokonta;Metazoa;Eumetazoa;Bilateria;Protostomia;Spiralia;Lophotrochozoa;Mollusca;Bivalvia;Autobranchia;Pteriomorphia;Ostreida;Ostreoidea;Ostreidae;Crassostrea;Crassostrea gigas

UdeM00000016504 7111 92.4 UdeM00000016504 XP\_026725554.1 65.6 61  
21 0 14 74 6 66 2.60E-16 92.4 7111 cellular

organisms;Eukaryota;Opisthokonta;Metazoa;Eumetazoa;Bilateria;Protostomia;Ecdysozoa;Panarthropoda;Arthropoda;Mandibulata;Pancrustacea;Hexapoda;Insecta;Dicondylia;Pterygota;Neoptera;Endopterygota;Amphiesmenoptera;Lepidoptera;Glossata;Neolepidoptera;Heteroneura;Ditrysia;Obtectomera;Noctuoidea;Noctuidae;Plusiinae;Trichoplusia;Trichoplusia ni

UdeM00000016505 6565 617.1 UdeM00000016505 XP\_022331011.1 77.2 377  
85 1 1 376 1 377 1.60E-173 617.1 6565 cellular

organisms;Eukaryota;Opisthokonta;Metazoa;Eumetazoa;Bilateria;Protostomia;Spiralia;Lophotrochozoa;Mollusca;Bivalvia;Autobranchia;Pteriomorphia;Ostreida;Ostreoidea;Ostreidae;Crassostrea;Crassostrea virginica

UdeM00000016506 6565 617.5 UdeM00000016506 XP\_022331011.1 77.2 377  
85 1 1 376 1 377 1.20E-173 617.5 6565 cellular

organisms;Eukaryota;Opisthokonta;Metazoa;Eumetazoa;Bilateria;Protostomia;Spiralia;Lophotrochozoa;Mollusca;Bivalvia;Autobranchia;Pteriomorphia;Ostreida;Ostreoidea;Ostreidae;Crassostrea;Crassostrea virginica

UdeM00000016507 6596 391 UdeM00000016507 XP\_045172223.1 57.1 338  
132 4 10 337 5 339 1.60E-105 391 6596 cellular

organisms;Eukaryota;Opisthokonta;Metazoa;Eumetazoa;Bilateria;Protostomia;Spiralia;Lophotrochozoa;Mollusca;Bivalvia;Autobranchia;Heteroconchia;Euherodonta;Imparidentia;Venerida;Veneroidea;Veneridae;Mercenaria;Mercenaria mercenaria

UdeM00000016508 6596 390.6 UdeM00000016508 XP\_045172223.1 57.1 338  
132 4 7 334 5 339 2.00E-105 390.6 6596 cellular

organisms;Eukaryota;Opisthokonta;Metazoa;Eumetazoa;Bilateria;Protostomia;Spiralia;Lophotrochozoa;Mollusca;Bivalvia;Autobranchia;Heteroconchia;Euherodonta;Imparidentia;Venerida;Veneroidea;Veneridae;Mercenaria;Mercenaria mercenaria

UdeM00000016509 6596 180.6 UdeM00000016509 XP\_045172257.1 71.1 114  
33 0 77 190 326 439 1.80E-42 180.6 6596 cellular

organisms;Eukaryota;Opisthokonta;Metazoa;Eumetazoa;Bilateria;Protostomia;Spiralia;Lophotrochozoa;Mollusca;Bivalvia;Autobranchia;Heteroconchia;Euherodonta;Imparidentia;Venerida;Veneroidea;Veneridae;Mercenaria;Mercenaria mercenaria

UdeM00000016510 29159 380.6 UdeM00000016510 XP\_011424536.2 79.5 220  
 45 0 39 258 31 250 2.60E-102 380.6 29159 cellular  
 organisms;Eukaryota;Opisthokonta;Metazoa;Eumetazoa;Bilateria;Protostomia;  
 Spiralia;Lophotrochozoa;Mollusca;Bivalvia;Autobranchia;Pteriormorphia;Ostr  
 eida;Ostreoidea;Ostreidae;Crassostrea;Crassostrea gigas  
 UdeM00000016511 6596 281.2 UdeM00000016511 XP\_045172245.1 77.6 170  
 35 1 1 170 1 167 9.80E-73 281.2 6596 cellular  
 organisms;Eukaryota;Opisthokonta;Metazoa;Eumetazoa;Bilateria;Protostomia;  
 Spiralia;Lophotrochozoa;Mollusca;Bivalvia;Autobranchia;Heteroconchia;Euhe  
 terodonta;Imparidentia;Venerida;Veneroidea;Veneridae;Mercenaria;Mercenari  
 a mercenaria  
 UdeM00000016513 8236 142.9 UdeM00000016513 XP\_044216249.1 40.2 214  
 109 6 5 214 6 204 4.90E-31 142.9 8236 cellular  
 organisms;Eukaryota;Opisthokonta;Metazoa;Eumetazoa;Bilateria;Deuterostomi  
 a;Chordata;Craniata;Vertebrata;Gnathostomata;Teleostomi;Euteleostomi;Acti  
 nopterygii;Actinopteri;Neopterygii;Teleostei;Osteoglossocephalai;Clupeoce  
 phala;Euteleosteomorpha;Neoteleostei;Eurypterygia;Ctenosquamata;Acanthomo  
 rphata;Euacanthomorphacea;Percomorphaceae;Pelagiaria;Scombriformes;Scombr  
 idae;Scombrinae;Thunnini;Thunnus;Thunnus albacares  
 UdeM00000016514 7604 90.9 UdeM00000016514 XP\_033641610.1 42.1 121  
 68 2 8 126 160 280 1.30E-15 90.9 7604 cellular  
 organisms;Eukaryota;Opisthokonta;Metazoa;Eumetazoa;Bilateria;Deuterostomi  
 a;Echinodermata;Eleutherozoa;Asterozoa;Asteroidea;Forcipulatacea;Forcipul  
 atida;Asteroidea;Asteroidea;Asterias;Asterias rubens  
 UdeM00000016515 1250792 92.4 UdeM00000016515 XP\_041861569.1 54.8  
 73 33 0 2 74 595 667 2.60E-16 92.4 1250792  
 cellular  
 organisms;Eukaryota;Opisthokonta;Metazoa;Eumetazoa;Bilateria;Deuterostomi  
 a;Chordata;Craniata;Vertebrata;Gnathostomata;Teleostomi;Euteleostomi;Acti  
 nopterygii;Actinopteri;Neopterygii;Teleostei;Osteoglossocephalai;Clupeoce  
 phala;Euteleosteomorpha;Neoteleostei;Eurypterygia;Ctenosquamata;Acanthomo  
 rphata;Euacanthomorphacea;Percomorphaceae;Ovalentaria;Atherinomorphae;Ath  
 eriniformes;Melanotaeniidae;Melanotaenia;Melanotaenia boesemani  
 UdeM00000016516 1203425 138.3 UdeM00000016516 XP\_034535258.1 59.5  
 111 45 0 11 121 11 121 6.60E-30 138.3 1203425  
 cellular  
 organisms;Eukaryota;Opisthokonta;Metazoa;Eumetazoa;Bilateria;Deuterostomi  
 a;Chordata;Craniata;Vertebrata;Gnathostomata;Teleostomi;Euteleostomi;Acti  
 nopterygii;Actinopteri;Neopterygii;Teleostei;Osteoglossocephalai;Clupeoce  
 phala;Euteleosteomorpha;Neoteleostei;Eurypterygia;Ctenosquamata;Acanthomo  
 rphata;Euacanthomorphacea;Percomorphaceae;Eupercaria;Labriformes;Labridae  
 ;Notolabrus;Notolabrus celidotus  
 UdeM00000016519 6596 372.5 UdeM00000016519 XP\_045187851.1 44.8 502  
 232 10 18 479 17 513 8.20E-100 372.5 6596 cellular  
 organisms;Eukaryota;Opisthokonta;Metazoa;Eumetazoa;Bilateria;Protostomia;  
 Spiralia;Lophotrochozoa;Mollusca;Bivalvia;Autobranchia;Heteroconchia;Euhe  
 terodonta;Imparidentia;Venerida;Veneroidea;Veneridae;Mercenaria;Mercenari  
 a mercenaria  
 UdeM00000016521 6596 804.3 UdeM00000016521 XP\_045186725.1 81.5 525  
 91 1 11 535 8 526 9.50E-230 804.3 6596 cellular  
 organisms;Eukaryota;Opisthokonta;Metazoa;Eumetazoa;Bilateria;Protostomia;  
 Spiralia;Lophotrochozoa;Mollusca;Bivalvia;Autobranchia;Heteroconchia;Euhe  
 terodonta;Imparidentia;Venerida;Veneroidea;Veneridae;Mercenaria;Mercenari  
 a mercenaria

UdeM00000016522 61221 77.4 UdeM00000016522 XP\_044292161.1 47.8 92  
 46 1 1 90 1 92 1.30E-11 77.4 61221 cellular  
 organisms;Eukaryota;Opisthokonta;Metazoa;Eumetazoa;Bilateria;Deuterostomi  
 a;Chordata;Craniata;Vertebrata;Gnathostomata;Teleostomi;Euteleostomi;Sarc  
 opterygii;Dipnotetrapodomorpha;Tetrapoda;Amniota;Sauropsida;Sauria;Lepido  
 sauria;Squamata;Bifurcata;Unidentata;Episquamata;Toxicofera;Anguimorpha;P  
 aleoanguimorpha;Varanoidea;Varanidae;Varanus;Varanus komodoensis  
 UdeM00000016523 1735272 728.8 UdeM00000016523 XP\_041353387.1 43.1  
 972 509 11 1 969 1 931 1.10E-206 728.8 1735272  
 cellular  
 organisms;Eukaryota;Opisthokonta;Metazoa;Eumetazoa;Bilateria;Protostomia;  
 Spiralia;Lophotrochozoa;Mollusca;Gastropoda;Neomphalina;Neomphaloidea;Pel  
 tospiridae;Gigantopelta;Gigantopelta aegis  
 UdeM00000016524 6565 177.6 UdeM00000016524 XP\_022299727.1 45.5 200  
 107 1 1 198 46 245 1.60E-41 177.6 6565 cellular  
 organisms;Eukaryota;Opisthokonta;Metazoa;Eumetazoa;Bilateria;Protostomia;  
 Spiralia;Lophotrochozoa;Mollusca;Bivalvia;Autobranchia;Pteriormorpha;Ostr  
 eida;Ostreoidea;Ostreidae;Crassostrea;Crassostrea virginica  
 UdeM00000016525 6596 469.2 UdeM00000016525 XP\_045186711.1 54.3 411  
 188 0 9 419 901 1311 5.60E-129 469.2 6596 cellular  
 organisms;Eukaryota;Opisthokonta;Metazoa;Eumetazoa;Bilateria;Protostomia;  
 Spiralia;Lophotrochozoa;Mollusca;Bivalvia;Autobranchia;Heteroconchia;Euhe  
 terodonta;Imparidentia;Venerida;Veneroidea;Veneridae;Mercenaria;Mercenari  
 a mercenaria  
 UdeM00000016527 225164 433.3 UdeM00000016527 XP\_009057374.1 61.7  
 321 123 0 10 330 4 324 2.70E-118 433.3 225164  
 cellular  
 organisms;Eukaryota;Opisthokonta;Metazoa;Eumetazoa;Bilateria;Protostomia;  
 Spiralia;Lophotrochozoa;Mollusca;Gastropoda;Patellogastropoda;Lottioidea;  
 Lottiidae;Lottia;Lottia gigantea  
 UdeM00000016528 29159 1125.2 UdeM00000016528 XP\_011443426.2 51  
 1148 528 15 1 1132 1 1129 0.00E+00 1125.2  
 29159 cellular  
 organisms;Eukaryota;Opisthokonta;Metazoa;Eumetazoa;Bilateria;Protostomia;  
 Spiralia;Lophotrochozoa;Mollusca;Bivalvia;Autobranchia;Pteriormorpha;Ostr  
 eida;Ostreoidea;Ostreidae;Crassostrea;Crassostrea gigas  
 UdeM00000016529 400727 669.5 UdeM00000016529 XP\_025104142.1 54.6  
 643 272 6 2 641 16 641 4.40E-189 669.5 400727  
 cellular  
 organisms;Eukaryota;Opisthokonta;Metazoa;Eumetazoa;Bilateria;Protostomia;  
 Spiralia;Lophotrochozoa;Mollusca;Gastropoda;Caenogastropoda;Architaeniogl  
 ossa;Ampullarioidea;Ampullariidae;Pomacea;Pomacea canaliculata  
 UdeM00000016530 7906 152.9 UdeM00000016530 XP\_033861987.2 51.4 142  
 69 0 13 154 629 770 3.30E-34 152.9 7906 cellular  
 organisms;Eukaryota;Opisthokonta;Metazoa;Eumetazoa;Bilateria;Deuterostomi  
 a;Chordata;Craniata;Vertebrata;Gnathostomata;Teleostomi;Euteleostomi;Acti  
 nopterygii;Actinopteri;Chondrostei;Acipenseriformes;Acipenseroides;Acipen  
 seridae;Acipenserinae;Acipenserini;Acipenser;Acipenser ruthenus  
 UdeM00000016531 6596 79.7 UdeM00000016531 XP\_045197645.1 50 72  
 35 1 1 71 46 117 3.30E-12 79.7 6596 cellular  
 organisms;Eukaryota;Opisthokonta;Metazoa;Eumetazoa;Bilateria;Protostomia;  
 Spiralia;Lophotrochozoa;Mollusca;Bivalvia;Autobranchia;Heteroconchia;Euhe  
 terodonta;Imparidentia;Venerida;Veneroidea;Veneridae;Mercenaria;Mercenari  
 a mercenaria

UdeM00000016533 6596 108.6 UdeM00000016533 XP\_045181327.1 58.7 104  
 35 2 1 104 1 96 5.30E-21 108.6 6596 cellular  
 organisms;Eukaryota;Opisthokonta;Metazoa;Eumetazoa;Bilateria;Protostomia;  
 Spiralia;Lophotrochozoa;Mollusca;Bivalvia;Autobranhia;Heteroconchia;Euhe  
 terodonta;Imparidentia;Venerida;Veneroidea;Veneridae;Mercenaria;Mercenari  
 a mercenaria  
 UdeM00000016534 6596 1784.2 UdeM00000016534 XP\_045181400.1 57  
 1884 639 37 10 1804 143 1943 0.00E+00 1784.2 6596  
 cellular  
 organisms;Eukaryota;Opisthokonta;Metazoa;Eumetazoa;Bilateria;Protostomia;  
 Spiralia;Lophotrochozoa;Mollusca;Bivalvia;Autobranhia;Heteroconchia;Euhe  
 terodonta;Imparidentia;Venerida;Veneroidea;Veneridae;Mercenaria;Mercenari  
 a mercenaria  
 UdeM00000016535 6596 1765 UdeM00000016535 XP\_045181400.1 56.8 1883  
 621 38 10 1781 143 1943 0.00E+00 1765 6596 cellular  
 organisms;Eukaryota;Opisthokonta;Metazoa;Eumetazoa;Bilateria;Protostomia;  
 Spiralia;Lophotrochozoa;Mollusca;Bivalvia;Autobranhia;Heteroconchia;Euhe  
 terodonta;Imparidentia;Venerida;Veneroidea;Veneridae;Mercenaria;Mercenari  
 a mercenaria  
 UdeM00000016536 6579 618.6 UdeM00000016536 XP\_033734614.1 68.5 409  
 129 0 1 409 1 409 5.70E-174 618.6 6579 cellular  
 organisms;Eukaryota;Opisthokonta;Metazoa;Eumetazoa;Bilateria;Protostomia;  
 Spiralia;Lophotrochozoa;Mollusca;Bivalvia;Autobranhia;Pteriomorphia;Pect  
 inida;Pectinoidea;Pectinidae;Pecten;Pecten maximus  
 UdeM00000016537 6573 197.6 UdeM00000016537 XP\_021340873.1 69.7 165  
 44 3 1 161 1 163 1.30E-47 197.6 6573 cellular  
 organisms;Eukaryota;Opisthokonta;Metazoa;Eumetazoa;Bilateria;Protostomia;  
 Spiralia;Lophotrochozoa;Mollusca;Bivalvia;Autobranhia;Pteriomorphia;Pect  
 inida;Pectinoidea;Pectinidae;Mizuhopecten;Mizuhopecten yessoensis  
 UdeM00000016538 6573 199.5 UdeM00000016538 XP\_021340875.1 77.6 143  
 30 2 1 143 1 141 2.90E-48 199.5 6573 cellular  
 organisms;Eukaryota;Opisthokonta;Metazoa;Eumetazoa;Bilateria;Protostomia;  
 Spiralia;Lophotrochozoa;Mollusca;Bivalvia;Autobranhia;Pteriomorphia;Pect  
 inida;Pectinoidea;Pectinidae;Mizuhopecten;Mizuhopecten yessoensis  
 UdeM00000016539 6565 666.4 UdeM00000016539 XP\_022329527.1 61.6 513  
 192 3 58 570 75 582 3.30E-188 666.4 6565 cellular  
 organisms;Eukaryota;Opisthokonta;Metazoa;Eumetazoa;Bilateria;Protostomia;  
 Spiralia;Lophotrochozoa;Mollusca;Bivalvia;Autobranhia;Pteriomorphia;Ostr  
 eida;Ostreoidea;Ostreidae;Crassostrea;Crassostrea virginica  
 UdeM00000016541 29159 118.2 UdeM00000016541 XP\_034325306.1 47.4 133  
 56 4 1 130 12 133 7.70E-24 118.2 29159 cellular  
 organisms;Eukaryota;Opisthokonta;Metazoa;Eumetazoa;Bilateria;Protostomia;  
 Spiralia;Lophotrochozoa;Mollusca;Bivalvia;Autobranhia;Pteriomorphia;Ostr  
 eida;Ostreoidea;Ostreidae;Crassostrea;Crassostrea gigas  
 UdeM00000016542 6573 204.9 UdeM00000016542 XP\_021340248.1 63.3 158  
 58 0 1 158 1 158 7.70E-50 204.9 6573 cellular  
 organisms;Eukaryota;Opisthokonta;Metazoa;Eumetazoa;Bilateria;Protostomia;  
 Spiralia;Lophotrochozoa;Mollusca;Bivalvia;Autobranhia;Pteriomorphia;Pect  
 inida;Pectinoidea;Pectinidae;Mizuhopecten;Mizuhopecten yessoensis  
 UdeM00000016544 185453 167.9 UdeM00000016544 XP\_006835429.1 59  
 139 57 0 1 139 1 139 9.20E-39 167.9 185453  
 cellular  
 organisms;Eukaryota;Opisthokonta;Metazoa;Eumetazoa;Bilateria;Deuterostomi  
 a;Chordata;Craniata;Vertebrata;Gnathostomata;Teleostomi;Euteleostomi;Sarc

opterygii;Dipnotetrapodomorpha;Tetrapoda;Amniota;Mammalia;Theria;Eutheria  
;Afrotheria;Chrysochloridae;Chrysochlorinae;Chrysochloris;Chrysochloris  
asiatica

|                 |      |        |   |                 |                |      |          |        |      |
|-----------------|------|--------|---|-----------------|----------------|------|----------|--------|------|
| UdeM00000016545 | 6596 | 1134.8 |   | UdeM00000016545 | XP_045179894.1 | 65.2 |          |        |      |
| 960             | 164  | 12     | 1 | 955             | 1              | 795  | 0.00E+00 | 1134.8 | 6596 |

cellular

organisms;Eukaryota;Opisthokonta;Metazoa;Eumetazoa;Bilateria;Protostomia;  
Spiralia;Lophotrochozoa;Mollusca;Bivalvia;Autobranchia;Heteroconchia;Euhe  
terodonta;Imparidentia;Venerida;Veneroidea;Veneridae;Mercenaria;Mercenari  
a mercenaria

|                 |      |     |     |                 |                |          |     |      |          |
|-----------------|------|-----|-----|-----------------|----------------|----------|-----|------|----------|
| UdeM00000033976 | 6596 | 213 |     | UdeM00000033976 | XP_045196404.1 | 38.4     | 294 |      |          |
| 164             | 5    | 167 | 447 | 500             | 789            | 7.80E-52 | 213 | 6596 | cellular |

organisms;Eukaryota;Opisthokonta;Metazoa;Eumetazoa;Bilateria;Protostomia;  
Spiralia;Lophotrochozoa;Mollusca;Bivalvia;Autobranchia;Heteroconchia;Euhe  
terodonta;Imparidentia;Venerida;Veneroidea;Veneridae;Mercenaria;Mercenari  
a mercenaria

|                 |         |   |      |                 |                |      |          |      |         |
|-----------------|---------|---|------|-----------------|----------------|------|----------|------|---------|
| UdeM00000033977 | 1234273 |   | 78.6 | UdeM00000033977 | XP_027000537.1 | 31.2 |          |      |         |
| 112             | 77      | 0 | 76   | 187             | 70             | 181  | 1.60E-11 | 78.6 | 1234273 |

cellular

organisms;Eukaryota;Opisthokonta;Metazoa;Eumetazoa;Bilateria;Deuterostomi  
a;Chordata;Craniata;Vertebrata;Gnathostomata;Teleostomi;Euteleostomi;Acti  
nopterygii;Actinopteri;Neopterygii;Teleostei;Osteoglossocephalai;Clupeoce  
phala;Otomorpha;Ostariophysi;Otophysi;Characiphysae;Siluriformes;Siluroid  
ei;Bagridae;Tachysurus;Tachysurus fulvidraco

|                 |         |   |      |                 |                |      |          |      |         |
|-----------------|---------|---|------|-----------------|----------------|------|----------|------|---------|
| UdeM00000033978 | 1234273 |   | 81.6 | UdeM00000033978 | XP_027000537.1 | 32.2 |          |      |         |
| 118             | 78      | 1 | 76   | 193             | 70             | 185  | 1.20E-12 | 81.6 | 1234273 |

cellular

organisms;Eukaryota;Opisthokonta;Metazoa;Eumetazoa;Bilateria;Deuterostomi  
a;Chordata;Craniata;Vertebrata;Gnathostomata;Teleostomi;Euteleostomi;Acti  
nopterygii;Actinopteri;Neopterygii;Teleostei;Osteoglossocephalai;Clupeoce  
phala;Otomorpha;Ostariophysi;Otophysi;Characiphysae;Siluriformes;Siluroid  
ei;Bagridae;Tachysurus;Tachysurus fulvidraco

|                 |       |       |     |                 |                |          |       |       |          |
|-----------------|-------|-------|-----|-----------------|----------------|----------|-------|-------|----------|
| UdeM00000033979 | 45264 | 182.6 |     | UdeM00000033979 | XP_044184028.1 | 51.8     | 195   |       |          |
| 89              | 3     | 42    | 235 | 68              | 258            | 6.60E-43 | 182.6 | 45264 | cellular |

organisms;Eukaryota;Opisthokonta;Metazoa;Eumetazoa;Cnidaria;Anthozoa;Hexa  
corallia;Scleractinia;Astrocoeniina;Acroporidae;Acropora;Acropora  
millepora

|                 |      |       |     |                 |                |          |       |      |          |
|-----------------|------|-------|-----|-----------------|----------------|----------|-------|------|----------|
| UdeM00000033980 | 6596 | 208.4 |     | UdeM00000033980 | XP_045196404.1 | 39.2     | 273   |      |          |
| 160             | 3    | 343   | 609 | 517             | 789            | 2.60E-50 | 208.4 | 6596 | cellular |

organisms;Eukaryota;Opisthokonta;Metazoa;Eumetazoa;Bilateria;Protostomia;  
Spiralia;Lophotrochozoa;Mollusca;Bivalvia;Autobranchia;Heteroconchia;Euhe  
terodonta;Imparidentia;Venerida;Veneroidea;Veneridae;Mercenaria;Mercenari  
a mercenaria

|                 |      |       |     |                 |                |          |       |      |          |
|-----------------|------|-------|-----|-----------------|----------------|----------|-------|------|----------|
| UdeM00000033982 | 6596 | 209.5 |     | UdeM00000033982 | XP_045186528.1 | 36.9     | 306   |      |          |
| 157             | 5    | 167   | 460 | 380             | 661            | 8.90E-51 | 209.5 | 6596 | cellular |

organisms;Eukaryota;Opisthokonta;Metazoa;Eumetazoa;Bilateria;Protostomia;  
Spiralia;Lophotrochozoa;Mollusca;Bivalvia;Autobranchia;Heteroconchia;Euhe  
terodonta;Imparidentia;Venerida;Veneroidea;Veneridae;Mercenaria;Mercenari  
a mercenaria

|                 |        |   |    |                 |                |      |          |    |        |
|-----------------|--------|---|----|-----------------|----------------|------|----------|----|--------|
| UdeM00000033983 | 225164 |   | 77 | UdeM00000033983 | XP_009050595.1 | 43.4 |          |    |        |
| 76              | 43     | 0 | 9  | 84              | 84             | 159  | 5.60E-11 | 77 | 225164 |

cellular

organisms;Eukaryota;Opisthokonta;Metazoa;Eumetazoa;Bilateria;Protostomia;

Spiralia;Lophotrochozoa;Mollusca;Gastropoda;Patellogastropoda;Lottioidea;Lottiidae;Lottia;Lottia gigantea

UdeM00000033984 6573 73.9 UdeM00000033984 XP\_021365162.1 40.5 74  
43 1 15 88 555 627 5.60E-10 73.9 6573 cellular

organisms;Eukaryota;Opisthokonta;Metazoa;Eumetazoa;Bilateria;Protostomia;Spiralia;Lophotrochozoa;Mollusca;Bivalvia;Autobranhia;Pteriomorphia;Pectinida;Pectinoidea;Pectinidae;Mizuhopecten;Mizuhopecten yessoensis

UdeM00000033985 6596 247.3 UdeM00000033985 XP\_045196404.1 30.4 480  
231 7 316 785 403 789 6.50E-62 247.3 6596 cellular

organisms;Eukaryota;Opisthokonta;Metazoa;Eumetazoa;Bilateria;Protostomia;Spiralia;Lophotrochozoa;Mollusca;Bivalvia;Autobranhia;Heteroconchia;Euheterodonta;Imparidentia;Venerida;Veneroidea;Veneridae;Mercenaria;Mercenaria mercenaria

UdeM00000033990 6596 118.2 UdeM00000033990 XP\_045198980.1 23 716  
477 26 18 697 8 685 4.20E-23 118.2 6596 cellular

organisms;Eukaryota;Opisthokonta;Metazoa;Eumetazoa;Bilateria;Protostomia;Spiralia;Lophotrochozoa;Mollusca;Bivalvia;Autobranhia;Heteroconchia;Euheterodonta;Imparidentia;Venerida;Veneroidea;Veneridae;Mercenaria;Mercenaria mercenaria

UdeM00000033992 6573 151.4 UdeM00000033992 XP\_021346787.1 48.8 164  
81 1 7 170 46 206 1.10E-33 151.4 6573 cellular

organisms;Eukaryota;Opisthokonta;Metazoa;Eumetazoa;Bilateria;Protostomia;Spiralia;Lophotrochozoa;Mollusca;Bivalvia;Autobranhia;Pteriomorphia;Pectinida;Pectinoidea;Pectinidae;Mizuhopecten;Mizuhopecten yessoensis

UdeM00000033993 6573 181.4 UdeM00000033993 XP\_021349185.1 50.9 232  
98 6 26 249 14 237 1.40E-42 181.4 6573 cellular

organisms;Eukaryota;Opisthokonta;Metazoa;Eumetazoa;Bilateria;Protostomia;Spiralia;Lophotrochozoa;Mollusca;Bivalvia;Autobranhia;Pteriomorphia;Pectinida;Pectinoidea;Pectinidae;Mizuhopecten;Mizuhopecten yessoensis

UdeM00000033994 6596 166.8 UdeM00000033994 XP\_045196496.1 29.3 692  
396 13 49 724 55 669 1.00E-37 166.8 6596 cellular

organisms;Eukaryota;Opisthokonta;Metazoa;Eumetazoa;Bilateria;Protostomia;Spiralia;Lophotrochozoa;Mollusca;Bivalvia;Autobranhia;Heteroconchia;Euheterodonta;Imparidentia;Venerida;Veneroidea;Veneridae;Mercenaria;Mercenaria mercenaria

UdeM00000033995 1735272 432.6 UdeM00000033995 XP\_041351670.1 58.5  
354 143 2 22 375 20 369 5.30E-118 432.6 1735272

cellular

organisms;Eukaryota;Opisthokonta;Metazoa;Eumetazoa;Bilateria;Protostomia;Spiralia;Lophotrochozoa;Mollusca;Gastropoda;Neomphalina;Neomphaloidea;Peltospiridae;Gigantopelta;Gigantopelta aegis

UdeM00000033996 6596 2197.9 UdeM00000033996 XP\_045198695.1 46.4  
2611 1135 21 1 2371 1 2587 0.00E+00 2197.9 6596

cellular

organisms;Eukaryota;Opisthokonta;Metazoa;Eumetazoa;Bilateria;Protostomia;Spiralia;Lophotrochozoa;Mollusca;Bivalvia;Autobranhia;Heteroconchia;Euheterodonta;Imparidentia;Venerida;Veneroidea;Veneridae;Mercenaria;Mercenaria mercenaria

UdeM00000033997 6596 279.6 UdeM00000033997 XP\_045198695.1 50 310  
150 2 2 310 2641 2946 4.80E-72 279.6 6596 cellular

organisms;Eukaryota;Opisthokonta;Metazoa;Eumetazoa;Bilateria;Protostomia;Spiralia;Lophotrochozoa;Mollusca;Bivalvia;Autobranhia;Heteroconchia;Euheterodonta;Imparidentia;Venerida;Veneroidea;Veneridae;Mercenaria;Mercenaria mercenaria

UdeM00000033998 6596 653.3 UdeM00000033998 XP\_045197975.1 39 1052  
 611 18 283 1325 960 1989 7.20E-184 653.3 6596 cellular  
 organisms;Eukaryota;Opisthokonta;Metazoa;Eumetazoa;Bilateria;Protostomia;  
 Spiralia;Lophotrochozoa;Mollusca;Bivalvia;Autobranhia;Heteroconchia;Euhe  
 terodonta;Imparidentia;Venerida;Veneroidea;Veneridae;Mercenaria;Mercenari  
 a mercenaria

UdeM00000034000 6596 107.1 UdeM00000034000 XP\_045181920.1 52.7 110  
 42 3 1 102 55 162 2.30E-20 107.1 6596 cellular  
 organisms;Eukaryota;Opisthokonta;Metazoa;Eumetazoa;Bilateria;Protostomia;  
 Spiralia;Lophotrochozoa;Mollusca;Bivalvia;Autobranhia;Heteroconchia;Euhe  
 terodonta;Imparidentia;Venerida;Veneroidea;Veneridae;Mercenaria;Mercenari  
 a mercenaria

UdeM00000034001 37621 92.4 UdeM00000034001 XP\_014676916.1 27.8 205  
 77 3 11 147 195 396 5.10E-16 92.4 37621 cellular  
 organisms;Eukaryota;Opisthokonta;Metazoa;Eumetazoa;Bilateria;Protostomia;  
 Ecdysozoa;Scalidophora;Priapulida;Priapulimorpha;Priapulimorphida;Priapul  
 idae;Priapululus;Priapululus caudatus

UdeM00000034002 481459 255.4 UdeM00000034002 XP\_040031014.1 34.9  
 395 234 6 23 410 75 453 1.30E-64 255.4 481459  
 cellular  
 organisms;Eukaryota;Opisthokonta;Metazoa;Eumetazoa;Bilateria;Deuterostomi  
 a;Chordata;Craniata;Vertebrata;Gnathostomata;Teleostomi;Euteleostomi;Acti  
 nopterygii;Actinopteri;Neopterygii;Teleostei;Osteoglossocephalai;Clupeoce  
 phala;Euteleosteomorpha;Neoteleostei;Eurypterygia;Ctenosquamata;Acanthomo  
 rphata;Euacanthomorphacea;Percomorphaceae;Eupercaria;Perciformes;Cottioid  
 ei;Gasterosteales;Gasterosteidae;Gasterosteus;Gasterosteus  
 aculeatus;Gasterosteus aculeatus aculeatus

UdeM00000034006 6596 588.6 UdeM00000034006 XP\_045197975.1 39.1 932  
 538 17 184 1105 1078 1989 1.80E-164 588.6 6596 cellular  
 organisms;Eukaryota;Opisthokonta;Metazoa;Eumetazoa;Bilateria;Protostomia;  
 Spiralia;Lophotrochozoa;Mollusca;Bivalvia;Autobranhia;Heteroconchia;Euhe  
 terodonta;Imparidentia;Venerida;Veneroidea;Veneridae;Mercenaria;Mercenari  
 a mercenaria

UdeM00000044407 108931 183 UdeM00000044407 XP\_039295486.1 41.4  
 249 131 8 1 241 48 289 4.70E-43 183 108931  
 cellular  
 organisms;Eukaryota;Opisthokonta;Metazoa;Eumetazoa;Bilateria;Protostomia;  
 Ecdysozoa;Panarthropoda;Arthropoda;Mandibulata;Pancrustacea;Hexapoda;Inse  
 cta;Dicondylia;Pterygota;Neoptera;Paraneoptera;Hemiptera;Auchenorrhyncha;  
 Fulgoromorpha;Fulgoroidea;Delphacidae;Delphacinae;Nilaparvata;Nilaparvata  
 lugens

UdeM00000026176 6596 828.9 UdeM00000026176 XP\_045173003.1 65.2 610  
 119 4 4 581 69 617 4.10E-237 828.9 6596 cellular  
 organisms;Eukaryota;Opisthokonta;Metazoa;Eumetazoa;Bilateria;Protostomia;  
 Spiralia;Lophotrochozoa;Mollusca;Bivalvia;Autobranhia;Heteroconchia;Euhe  
 terodonta;Imparidentia;Venerida;Veneroidea;Veneridae;Mercenaria;Mercenari  
 a mercenaria

UdeM00000026179 6596 345.5 UdeM00000026179 XP\_045213471.1 69.6 247  
 71 2 1 243 1 247 5.50E-92 345.5 6596 cellular  
 organisms;Eukaryota;Opisthokonta;Metazoa;Eumetazoa;Bilateria;Protostomia;  
 Spiralia;Lophotrochozoa;Mollusca;Bivalvia;Autobranhia;Heteroconchia;Euhe  
 terodonta;Imparidentia;Venerida;Veneroidea;Veneridae;Mercenaria;Mercenari  
 a mercenaria



UdeM00000026180 6565 76.3 UdeM00000026180 XP\_022337731.1 50.6 83  
 40 1 77 159 128 209 4.10E-11 76.3 6565 cellular  
 organisms;Eukaryota;Opisthokonta;Metazoa;Eumetazoa;Bilateria;Protostomia;  
 Spiralia;Lophotrochozoa;Mollusca;Bivalvia;Autobranchia;Pteriomorpha;Ostr  
 eida;Ostreoidea;Ostreidae;Crassostrea;Crassostrea virginica  
 UdeM00000026181 6579 329.7 UdeM00000026181 XP\_033728194.1 38.1 546  
 277 13 158 662 124 649 8.50E-87 329.7 6579 cellular  
 organisms;Eukaryota;Opisthokonta;Metazoa;Eumetazoa;Bilateria;Protostomia;  
 Spiralia;Lophotrochozoa;Mollusca;Bivalvia;Autobranchia;Pteriomorpha;Pect  
 inida;Pectinoidea;Pectinidae;Pecten;Pecten maximus  
 UdeM00000026182 6565 492.3 UdeM00000026182 XP\_022297037.1 50 534  
 238 6 6 532 11 522 8.00E-136 492.3 6565 cellular  
 organisms;Eukaryota;Opisthokonta;Metazoa;Eumetazoa;Bilateria;Protostomia;  
 Spiralia;Lophotrochozoa;Mollusca;Bivalvia;Autobranchia;Pteriomorpha;Ostr  
 eida;Ostreoidea;Ostreidae;Crassostrea;Crassostrea virginica  
 UdeM00000026183 6596 419.5 UdeM00000026183 XP\_045212349.1 44.7 570  
 155 5 147 686 230 669 8.40E-114 419.5 6596 cellular  
 organisms;Eukaryota;Opisthokonta;Metazoa;Eumetazoa;Bilateria;Protostomia;  
 Spiralia;Lophotrochozoa;Mollusca;Bivalvia;Autobranchia;Heteroconchia;Euhe  
 terodonta;Imparidentia;Venerida;Veneroidea;Veneridae;Mercenaria;Mercenari  
 a mercenaria  
 UdeM00000026184 6596 218.4 UdeM00000026184 XP\_045210631.1 53 198  
 87 2 1 193 6 202 8.40E-54 218.4 6596 cellular  
 organisms;Eukaryota;Opisthokonta;Metazoa;Eumetazoa;Bilateria;Protostomia;  
 Spiralia;Lophotrochozoa;Mollusca;Bivalvia;Autobranchia;Heteroconchia;Euhe  
 terodonta;Imparidentia;Venerida;Veneroidea;Veneridae;Mercenaria;Mercenari  
 a mercenaria  
 UdeM00000026185 6596 448 UdeM00000026185 XP\_045210631.1 51.9 449  
 183 7 1 426 6 444 2.20E-122 448 6596 cellular  
 organisms;Eukaryota;Opisthokonta;Metazoa;Eumetazoa;Bilateria;Protostomia;  
 Spiralia;Lophotrochozoa;Mollusca;Bivalvia;Autobranchia;Heteroconchia;Euhe  
 terodonta;Imparidentia;Venerida;Veneroidea;Veneridae;Mercenaria;Mercenari  
 a mercenaria  
 UdeM00000026185 6596 447.6 UdeM00000026185 XP\_045210631.1 40.9 694  
 248 15 1 671 6 560 2.80E-122 447.6 6596 cellular  
 organisms;Eukaryota;Opisthokonta;Metazoa;Eumetazoa;Bilateria;Protostomia;  
 Spiralia;Lophotrochozoa;Mollusca;Bivalvia;Autobranchia;Heteroconchia;Euhe  
 terodonta;Imparidentia;Venerida;Veneroidea;Veneridae;Mercenaria;Mercenari  
 a mercenaria  
 UdeM00000026186 1735272 124.4 UdeM00000026186 XP\_041360711.1 33.7  
 196 117 3 5 198 6 190 1.80E-25 124.4 1735272  
 cellular  
 organisms;Eukaryota;Opisthokonta;Metazoa;Eumetazoa;Bilateria;Protostomia;  
 Spiralia;Lophotrochozoa;Mollusca;Gastropoda;Neomphalina;Neomphaloidea;Pel  
 tospiridae;Gigantopelta;Gigantopelta aegis  
 UdeM00000026187 6596 589.3 UdeM00000026187 XP\_045210631.1 53.4 683  
 235 9 113 728 661 1327 6.50E-165 589.3 6596 cellular  
 organisms;Eukaryota;Opisthokonta;Metazoa;Eumetazoa;Bilateria;Protostomia;  
 Spiralia;Lophotrochozoa;Mollusca;Bivalvia;Autobranchia;Heteroconchia;Euhe  
 terodonta;Imparidentia;Venerida;Veneroidea;Veneridae;Mercenaria;Mercenari  
 a mercenaria  
 UdeM00000026188 38358 78.2 UdeM00000026188 XP\_037028175.1 40.7 113  
 59 2 41 148 41 150 1.00E-11 78.2 38358 cellular  
 organisms;Eukaryota;Opisthokonta;Metazoa;Eumetazoa;Bilateria;Protostomia;

Ecdysozoa; Panarthropoda; Arthropoda; Mandibulata; Pancrustacea; Hexapoda; Insecta; Dicondylia; Pterygota; Neoptera; Endopterygota; Diptera; Nematocera; Bibionomorpha; Sciaroidea; Sciaridae; Bradysia; Bradysia coprophila

UdeM00000026189 6573 240 UdeM00000026189 XP\_021375710.1 73.9 157  
40 1 1 156 18 174 2.50E-60 240 6573 cellular

organisms; Eukaryota; Opisthokonta; Metazoa; Eumetazoa; Bilateria; Protostomia; Spiralia; Lophotrochozoa; Mollusca; Bivalvia; Autobranchia; Pteriomorpha; Pectinida; Pectinoidea; Pectinidae; Mizuhopecten; Mizuhopecten yessoensis

UdeM00000026190 1735272 514.6 UdeM00000026190 XP\_041363020.1 74.4  
336 85 1 30 364 135 470 1.10E-142 514.6 1735272  
cellular

organisms; Eukaryota; Opisthokonta; Metazoa; Eumetazoa; Bilateria; Protostomia; Spiralia; Lophotrochozoa; Mollusca; Gastropoda; Neomphalina; Neomphaloidea; Peltospiridae; Gigantopelta; Gigantopelta aegis

UdeM00000026191 1735272 486.9 UdeM00000026191 XP\_041363020.1 44.8  
609 240 11 17 613 486 1010 3.80E-134 486.9 1735272  
cellular

organisms; Eukaryota; Opisthokonta; Metazoa; Eumetazoa; Bilateria; Protostomia; Spiralia; Lophotrochozoa; Mollusca; Gastropoda; Neomphalina; Neomphaloidea; Peltospiridae; Gigantopelta; Gigantopelta aegis

UdeM00000026192 6596 211.5 UdeM00000026192 XP\_045214529.1 80 125  
25 0 1 125 1 125 6.40E-52 211.5 6596 cellular

organisms; Eukaryota; Opisthokonta; Metazoa; Eumetazoa; Bilateria; Protostomia; Spiralia; Lophotrochozoa; Mollusca; Bivalvia; Autobranchia; Heteroconchia; Euheterodonta; Imparidentia; Venerida; Veneroidea; Veneridae; Mercenaria; Mercenaria mercenaria

UdeM00000026193 6596 869.8 UdeM00000026193 XP\_045214525.1 57.2 806  
306 12 2 783 8 798 2.70E-249 869.8 6596 cellular

organisms; Eukaryota; Opisthokonta; Metazoa; Eumetazoa; Bilateria; Protostomia; Spiralia; Lophotrochozoa; Mollusca; Bivalvia; Autobranchia; Heteroconchia; Euheterodonta; Imparidentia; Venerida; Veneroidea; Veneridae; Mercenaria; Mercenaria mercenaria

UdeM00000026194 6596 449.1 UdeM00000026194 XP\_045210993.1 47.6 534  
248 6 23 551 388 894 8.10E-123 449.1 6596 cellular

organisms; Eukaryota; Opisthokonta; Metazoa; Eumetazoa; Bilateria; Protostomia; Spiralia; Lophotrochozoa; Mollusca; Bivalvia; Autobranchia; Heteroconchia; Euheterodonta; Imparidentia; Venerida; Veneroidea; Veneridae; Mercenaria; Mercenaria mercenaria

UdeM00000026195 6596 442.6 UdeM00000026195 XP\_045210993.1 48.4 502  
231 4 2 499 388 865 6.80E-121 442.6 6596 cellular

organisms; Eukaryota; Opisthokonta; Metazoa; Eumetazoa; Bilateria; Protostomia; Spiralia; Lophotrochozoa; Mollusca; Bivalvia; Autobranchia; Heteroconchia; Euheterodonta; Imparidentia; Venerida; Veneroidea; Veneridae; Mercenaria; Mercenaria mercenaria

UdeM00000026196 6596 259.2 UdeM00000026196 XP\_045210993.1 43.2 405  
122 9 1 313 1 389 1.10E-65 259.2 6596 cellular

organisms; Eukaryota; Opisthokonta; Metazoa; Eumetazoa; Bilateria; Protostomia; Spiralia; Lophotrochozoa; Mollusca; Bivalvia; Autobranchia; Heteroconchia; Euheterodonta; Imparidentia; Venerida; Veneroidea; Veneridae; Mercenaria; Mercenaria mercenaria

UdeM00000026197 6573 1168.7 UdeM00000026197 XP\_021370544.1 85.2  
674 93 3 1 667 1 674 0.00E+00 1168.7 6573  
cellular

organisms; Eukaryota; Opisthokonta; Metazoa; Eumetazoa; Bilateria; Protostomia;

Spiralia;Lophotrochozoa;Mollusca;Bivalvia;Autobranchia;Pteriormorphia;Pectinida;Pectinoidea;Pectinidae;Mizuhopecten;Mizuhopecten yessoensis  
UdeM00000026198 6573 1169.5 UdeM00000026198 XP\_021370544.1 84.4  
681 99 3 1 674 1 681 0.00E+00 1169.5 6573  
cellular  
organisms;Eukaryota;Opisthokonta;Metazoa;Eumetazoa;Bilateria;Protostomia;  
Spiralia;Lophotrochozoa;Mollusca;Bivalvia;Autobranchia;Pteriormorphia;Pectinida;Pectinoidea;Pectinidae;Mizuhopecten;Mizuhopecten yessoensis  
UdeM00000026199 6579 236.1 UdeM00000026199 XP\_033738286.1 81.7 131  
24 0 34 164 677 807 3.20E-59 236.1 6579 cellular  
organisms;Eukaryota;Opisthokonta;Metazoa;Eumetazoa;Bilateria;Protostomia;  
Spiralia;Lophotrochozoa;Mollusca;Bivalvia;Autobranchia;Pteriormorphia;Pectinida;Pectinoidea;Pectinidae;Pecten;Pecten maximus  
UdeM00000026200 225164 419.5 UdeM00000026200 XP\_009065179.1 42.3  
478 262 5 28 496 9 481 6.10E-114 419.5 225164  
cellular  
organisms;Eukaryota;Opisthokonta;Metazoa;Eumetazoa;Bilateria;Protostomia;  
Spiralia;Lophotrochozoa;Mollusca;Gastropoda;Patellogastropoda;Lottioidea;  
Lottiidae;Lottia;Lottia gigantea  
UdeM00000026201 6579 418.3 UdeM00000026201 XP\_033743634.1 41.6 488  
279 4 14 500 4 486 1.40E-113 418.3 6579 cellular  
organisms;Eukaryota;Opisthokonta;Metazoa;Eumetazoa;Bilateria;Protostomia;  
Spiralia;Lophotrochozoa;Mollusca;Bivalvia;Autobranchia;Pteriormorphia;Pectinida;Pectinoidea;Pectinidae;Pecten;Pecten maximus  
UdeM00000026202 6500 90.5 UdeM00000026202 XP\_005104231.2 43 107  
57 3 15 120 24 127 1.60E-15 90.5 6500 cellular  
organisms;Eukaryota;Opisthokonta;Metazoa;Eumetazoa;Bilateria;Protostomia;  
Spiralia;Lophotrochozoa;Mollusca;Gastropoda;Heterobranchia;Euthyneura;Tectipleura;Aplysiida;Aplysioidea;Aplysiidae;Aplysia;Aplysia californica  
UdeM00000026203 6573 340.9 UdeM00000026203 XP\_021367081.1 43.5 384  
211 3 8 390 108 486 2.20E-90 340.9 6573 cellular  
organisms;Eukaryota;Opisthokonta;Metazoa;Eumetazoa;Bilateria;Protostomia;  
Spiralia;Lophotrochozoa;Mollusca;Bivalvia;Autobranchia;Pteriormorphia;Pectinida;Pectinoidea;Pectinidae;Mizuhopecten;Mizuhopecten yessoensis  
UdeM00000026204 6573 431 UdeM00000026204 XP\_021367081.1 43.8 482  
265 4 20 500 10 486 2.00E-117 431 6573 cellular  
organisms;Eukaryota;Opisthokonta;Metazoa;Eumetazoa;Bilateria;Protostomia;  
Spiralia;Lophotrochozoa;Mollusca;Bivalvia;Autobranchia;Pteriormorphia;Pectinida;Pectinoidea;Pectinidae;Mizuhopecten;Mizuhopecten yessoensis  
UdeM00000026205 6573 429.1 UdeM00000026205 XP\_021367081.1 43.2 482  
268 4 19 499 10 486 7.70E-117 429.1 6573 cellular  
organisms;Eukaryota;Opisthokonta;Metazoa;Eumetazoa;Bilateria;Protostomia;  
Spiralia;Lophotrochozoa;Mollusca;Bivalvia;Autobranchia;Pteriormorphia;Pectinida;Pectinoidea;Pectinidae;Mizuhopecten;Mizuhopecten yessoensis  
UdeM00000026206 6579 431.8 UdeM00000026206 XP\_033743634.1 42.6 488  
274 4 14 500 4 486 1.20E-117 431.8 6579 cellular  
organisms;Eukaryota;Opisthokonta;Metazoa;Eumetazoa;Bilateria;Protostomia;  
Spiralia;Lophotrochozoa;Mollusca;Bivalvia;Autobranchia;Pteriormorphia;Pectinida;Pectinoidea;Pectinidae;Pecten;Pecten maximus  
UdeM00000026207 6573 441 UdeM00000026207 XP\_021367081.1 45.2 482  
258 4 20 500 10 486 2.00E-120 441 6573 cellular  
organisms;Eukaryota;Opisthokonta;Metazoa;Eumetazoa;Bilateria;Protostomia;  
Spiralia;Lophotrochozoa;Mollusca;Bivalvia;Autobranchia;Pteriormorphia;Pectinida;Pectinoidea;Pectinidae;Mizuhopecten;Mizuhopecten yessoensis

UdeM00000026208 6573 365.9 UdeM00000026208 XP\_021367081.1 46.5 383  
 201 2 11 393 108 486 6.30E-98 365.9 6573 cellular  
 organisms;Eukaryota;Opisthokonta;Metazoa;Eumetazoa;Bilateria;Protostomia;  
 Spiralia;Lophotrochozoa;Mollusca;Bivalvia;Autobranhia;Pteriormorphia;Pect  
 inida;Pectinoidea;Pectinidae;Mizuhopecten;Mizuhopecten yessoensis  
 UdeM00000026209 7604 319.7 UdeM00000026209 XP\_033628145.1 47.5 339  
 162 7 6 338 3 331 4.50E-84 319.7 7604 cellular  
 organisms;Eukaryota;Opisthokonta;Metazoa;Eumetazoa;Bilateria;Deuterostomi  
 a;Echinodermata;Eleutherozoa;Asterozoa;Asteroidea;Forcipulatacea;Forcipul  
 atida;Asteroidea;Asteroidea;Asteroidea;Asteroidea;Asteroidea;Asteroidea  
 UdeM00000026210 1735272 362.8 UdeM00000026210 XP\_041362608.1 46.9  
 414 155 6 1 398 1 365 6.10E-97 362.8 1735272  
 cellular  
 organisms;Eukaryota;Opisthokonta;Metazoa;Eumetazoa;Bilateria;Protostomia;  
 Spiralia;Lophotrochozoa;Mollusca;Gastropoda;Neomphalina;Neomphaloidea;Pel  
 tospiridae;Gigantopelta;Gigantopelta aegis  
 UdeM00000026211 6573 283.9 UdeM00000026211 XP\_021357469.1 67.9 209  
 66 1 1 209 1 208 1.90E-73 283.9 6573 cellular  
 organisms;Eukaryota;Opisthokonta;Metazoa;Eumetazoa;Bilateria;Protostomia;  
 Spiralia;Lophotrochozoa;Mollusca;Bivalvia;Autobranhia;Pteriormorphia;Pect  
 inida;Pectinoidea;Pectinidae;Mizuhopecten;Mizuhopecten yessoensis  
 UdeM00000026212 6573 216.5 UdeM00000026212 XP\_021357469.1 67.3 162  
 52 1 1 162 48 208 3.10E-53 216.5 6573 cellular  
 organisms;Eukaryota;Opisthokonta;Metazoa;Eumetazoa;Bilateria;Protostomia;  
 Spiralia;Lophotrochozoa;Mollusca;Bivalvia;Autobranhia;Pteriormorphia;Pect  
 inida;Pectinoidea;Pectinidae;Mizuhopecten;Mizuhopecten yessoensis  
 UdeM00000026213 400727 183 UdeM00000026213 XP\_025091667.1 62.9  
 178 63 3 17 193 19 194 3.70E-43 183 400727  
 cellular  
 organisms;Eukaryota;Opisthokonta;Metazoa;Eumetazoa;Bilateria;Protostomia;  
 Spiralia;Lophotrochozoa;Mollusca;Gastropoda;Caenogastropoda;Architaeniogl  
 ossa;Ampullarioidea;Ampullariidae;Pomacea;Pomacea canaliculata  
 UdeM00000026214 6596 177.9 UdeM00000026214 XP\_045211721.1 56.2 169  
 73 1 1 169 1 168 1.10E-41 177.9 6596 cellular  
 organisms;Eukaryota;Opisthokonta;Metazoa;Eumetazoa;Bilateria;Protostomia;  
 Spiralia;Lophotrochozoa;Mollusca;Bivalvia;Autobranhia;Heteroconchia;Euhe  
 terodonta;Imparidentia;Venerida;Veneroidea;Veneridae;Mercenaria;Mercenari  
 a mercenaria  
 UdeM00000026215 6596 468.4 UdeM00000026215 XP\_045211819.1 88.1 260  
 31 0 1 260 1 260 6.00E-129 468.4 6596 cellular  
 organisms;Eukaryota;Opisthokonta;Metazoa;Eumetazoa;Bilateria;Protostomia;  
 Spiralia;Lophotrochozoa;Mollusca;Bivalvia;Autobranhia;Heteroconchia;Euhe  
 terodonta;Imparidentia;Venerida;Veneroidea;Veneridae;Mercenaria;Mercenari  
 a mercenaria  
 UdeM00000026216 1735272 151.8 UdeM00000026216 XP\_041363976.1 57.4  
 155 63 1 9 163 101 252 8.20E-34 151.8 1735272  
 cellular  
 organisms;Eukaryota;Opisthokonta;Metazoa;Eumetazoa;Bilateria;Protostomia;  
 Spiralia;Lophotrochozoa;Mollusca;Gastropoda;Neomphalina;Neomphaloidea;Pel  
 tospiridae;Gigantopelta;Gigantopelta aegis  
 UdeM00000026217 6573 460.7 UdeM00000026217 XP\_021348923.1 70.7 311  
 90 1 50 359 231 541 1.70E-126 460.7 6573 cellular  
 organisms;Eukaryota;Opisthokonta;Metazoa;Eumetazoa;Bilateria;Protostomia;

Spiralia; Lophotrochozoa; Mollusca; Bivalvia; Autobranchia; Pteriomorpha; Pectinida; Pectinoidea; Pectinidae; Mizuhopecten; Mizuhopecten yessoensis  
UdeM00000026218 6565 481.1 UdeM00000026218 XP\_022316906.1 80.5 440  
65 4 1 427 7 438 1.70E-132 481.1 6565 cellular  
organisms; Eukaryota; Opisthokonta; Metazoa; Eumetazoa; Bilateria; Protostomia; Spiralia; Lophotrochozoa; Mollusca; Bivalvia; Autobranchia; Pteriomorpha; Ostr  
eida; Ostreidae; Crassostrea; Crassostrea virginica  
UdeM00000026219 6565 437.2 UdeM00000026219 XP\_022317262.1 95.8 216  
9 0 1 216 1 216 1.20E-119 437.2 6565 cellular  
organisms; Eukaryota; Opisthokonta; Metazoa; Eumetazoa; Bilateria; Protostomia; Spiralia; Lophotrochozoa; Mollusca; Bivalvia; Autobranchia; Pteriomorpha; Ostr  
eida; Ostreidae; Crassostrea; Crassostrea virginica  
UdeM00000026220 37653 430.6 UdeM00000026220 XP\_014771012.1 91.4 222  
19 0 1 222 1 222 1.20E-117 430.6 37653 cellular  
organisms; Eukaryota; Opisthokonta; Metazoa; Eumetazoa; Bilateria; Protostomia; Spiralia; Lophotrochozoa; Mollusca; Cephalopoda; Coleoidea; Octopodiformes; Oct  
opoda; Incirrata; Octopodidae; Octopus; Octopus bimaculoides  
UdeM00000026221 7739 480.7 UdeM00000026221 XP\_035668787.1 59.8 371  
147 2 37 406 58 427 1.80E-132 480.7 7739 cellular  
organisms; Eukaryota; Opisthokonta; Metazoa; Eumetazoa; Bilateria; Deuterostomi  
a; Chordata; Cephalochordata; Leptocardii; Amphioxiformes; Branchiostomidae; Br  
anchiostoma; Branchiostoma floridae  
UdeM00000026222 6565 486.9 UdeM00000026222 XP\_022321102.1 60.7 374  
147 0 33 406 33 406 2.60E-134 486.9 6565 cellular  
organisms; Eukaryota; Opisthokonta; Metazoa; Eumetazoa; Bilateria; Protostomia; Spiralia; Lophotrochozoa; Mollusca; Bivalvia; Autobranchia; Pteriomorpha; Ostr  
eida; Ostreidae; Crassostrea; Crassostrea virginica  
UdeM00000026223 7741 469.9 UdeM00000026223 XP\_019635464.1 56.8 380  
160 3 25 403 44 420 3.20E-129 469.9 7741 cellular  
organisms; Eukaryota; Opisthokonta; Metazoa; Eumetazoa; Bilateria; Deuterostomi  
a; Chordata; Cephalochordata; Leptocardii; Amphioxiformes; Branchiostomidae; Br  
anchiostoma; Branchiostoma belcheri  
UdeM00000026224 7739 470.3 UdeM00000026224 XP\_035668787.1 56.8 375  
157 2 34 408 60 429 2.50E-129 470.3 7739 cellular  
organisms; Eukaryota; Opisthokonta; Metazoa; Eumetazoa; Bilateria; Deuterostomi  
a; Chordata; Cephalochordata; Leptocardii; Amphioxiformes; Branchiostomidae; Br  
anchiostoma; Branchiostoma floridae  
UdeM00000026225 133434 240.7 UdeM00000026225 XP\_022086624.1 98.4  
128 2 0 1 128 1 128 1.00E-60 240.7 133434  
cellular  
organisms; Eukaryota; Opisthokonta; Metazoa; Eumetazoa; Bilateria; Deuterostomi  
a; Echinodermata; Eleutherozoa; Asterozoa; Asteroidea; Valvatacea; Valvatida; Ac  
anthasteridae; Acanthaster; Acanthaster planci  
UdeM00000026226 6596 194.9 UdeM00000026226 XP\_045212179.1 48.5 204  
95 3 10 210 7 203 1.10E-46 194.9 6596 cellular  
organisms; Eukaryota; Opisthokonta; Metazoa; Eumetazoa; Bilateria; Protostomia; Spiralia; Lophotrochozoa; Mollusca; Bivalvia; Autobranchia; Heteroconchia; Eue  
terodonta; Imparidentia; Venerida; Veneroidea; Veneridae; Mercenaria; Mercenari  
a mercenaria  
UdeM00000026230 8364 127.9 UdeM00000026230 XP\_031750186.1 53.2 109  
51 0 44 152 181 289 1.20E-26 127.9 8364 cellular  
organisms; Eukaryota; Opisthokonta; Metazoa; Eumetazoa; Bilateria; Deuterostomi  
a; Chordata; Craniata; Vertebrata; Gnathostomata; Teleostomi; Euteleostomi; Sarc

opterygii;Dipnotetrapodomorpha;Tetrapoda;Amphibia;Batrachia;Anura;Pipoidea;Pipidae;Xenopodinae;Xenopus;Silurana;Xenopus tropicalis  
 UdeM00000026231 225164 290 UdeM00000026231 XP\_009045306.1 36.8  
 448 264 9 126 562 3 442 6.90E-75 290 225164  
 cellular  
 organisms;Eukaryota;Opisthokonta;Metazoa;Eumetazoa;Bilateria;Protostomia;Spiralia;Lophotrochozoa;Mollusca;Gastropoda;Patellogastropoda;Lottioidea;Lottiidae;Lottia;Lottia gigantea  
 UdeM00000026232 225164 289.7 UdeM00000026232 XP\_009045306.1 36.8  
 448 264 9 131 567 3 442 9.00E-75 289.7 225164  
 cellular  
 organisms;Eukaryota;Opisthokonta;Metazoa;Eumetazoa;Bilateria;Protostomia;Spiralia;Lophotrochozoa;Mollusca;Gastropoda;Patellogastropoda;Lottioidea;Lottiidae;Lottia;Lottia gigantea  
 UdeM00000026233 225164 84.3 UdeM00000026233 XP\_009045306.1 24.8  
 302 161 12 36 327 3 248 3.10E-13 84.3 225164  
 cellular  
 organisms;Eukaryota;Opisthokonta;Metazoa;Eumetazoa;Bilateria;Protostomia;Spiralia;Lophotrochozoa;Mollusca;Gastropoda;Patellogastropoda;Lottioidea;Lottiidae;Lottia;Lottia gigantea  
 UdeM00000026234 6565 159.8 UdeM00000026234 XP\_022328252.1 44.5 211  
 99 5 1 193 1105 1315 3.40E-36 159.8 6565 cellular  
 organisms;Eukaryota;Opisthokonta;Metazoa;Eumetazoa;Bilateria;Protostomia;Spiralia;Lophotrochozoa;Mollusca;Bivalvia;Autobranchia;Pteriormorphia;Ostreida;Ostreioidea;Ostreidae;Crassostrea;Crassostrea virginica  
 UdeM00000026236 6596 373.2 UdeM00000026236 XP\_045208460.1 51.7 360  
 166 3 23 381 21 373 3.80E-100 373.2 6596 cellular  
 organisms;Eukaryota;Opisthokonta;Metazoa;Eumetazoa;Bilateria;Protostomia;Spiralia;Lophotrochozoa;Mollusca;Bivalvia;Autobranchia;Heteroconchia;Euheterodonta;Imparidentia;Venerida;Veneroidea;Veneridae;Mercenaria;Mercenaria mercenaria  
 UdeM00000026237 133434 120.2 UdeM00000026237 XP\_022111697.1 63.6  
 88 32 0 168 255 134 221 3.90E-24 120.2 133434  
 cellular  
 organisms;Eukaryota;Opisthokonta;Metazoa;Eumetazoa;Bilateria;Deuterostomia;Echinodermata;Eleutherozoa;Asterozoa;Asteroidea;Valvatacea;Valvatida;Acanthasteridae;Acanthaster;Acanthaster planci  
 UdeM00000026238 6596 699.5 UdeM00000026238 XP\_045210868.1 59.7 653  
 222 6 1 636 623 1251 3.90E-198 699.5 6596 cellular  
 organisms;Eukaryota;Opisthokonta;Metazoa;Eumetazoa;Bilateria;Protostomia;Spiralia;Lophotrochozoa;Mollusca;Bivalvia;Autobranchia;Heteroconchia;Euheterodonta;Imparidentia;Venerida;Veneroidea;Veneridae;Mercenaria;Mercenaria mercenaria  
 UdeM00000026239 6596 546.2 UdeM00000026239 XP\_045210868.1 70.2 363  
 108 0 11 373 618 980 3.20E-152 546.2 6596 cellular  
 organisms;Eukaryota;Opisthokonta;Metazoa;Eumetazoa;Bilateria;Protostomia;Spiralia;Lophotrochozoa;Mollusca;Bivalvia;Autobranchia;Heteroconchia;Euheterodonta;Imparidentia;Venerida;Veneroidea;Veneridae;Mercenaria;Mercenaria mercenaria  
 UdeM00000026240 6596 407.9 UdeM00000026240 XP\_045210868.1 70.7 273  
 80 0 1 273 708 980 1.00E-110 407.9 6596 cellular  
 organisms;Eukaryota;Opisthokonta;Metazoa;Eumetazoa;Bilateria;Protostomia;Spiralia;Lophotrochozoa;Mollusca;Bivalvia;Autobranchia;Heteroconchia;Euheterodonta;Imparidentia;Venerida;Veneroidea;Veneridae;Mercenaria;Mercenaria mercenaria

terodonta;Imparidentia;Venerida;Veneroidea;Veneridae;Mercenaria;Mercenari  
 a mercenaria  
 UdeM00000026241 6596 697.2 UdeM00000026241 XP\_045210868.1 57.3 637  
 208 4 11 584 618 1253 1.80E-197 697.2 6596 cellular  
 organisms;Eukaryota;Opisthokonta;Metazoa;Eumetazoa;Bilateria;Protostomia;  
 Spiralia;Lophotrochozoa;Mollusca;Bivalvia;Autobranchia;Heteroconchia;Euhe  
 terodonta;Imparidentia;Venerida;Veneroidea;Veneridae;Mercenaria;Mercenari  
 a mercenaria  
 UdeM00000026242 6596 592.4 UdeM00000026242 XP\_045210868.1 55.9 571  
 188 4 15 522 684 1253 5.50E-166 592.4 6596 cellular  
 organisms;Eukaryota;Opisthokonta;Metazoa;Eumetazoa;Bilateria;Protostomia;  
 Spiralia;Lophotrochozoa;Mollusca;Bivalvia;Autobranchia;Heteroconchia;Euhe  
 terodonta;Imparidentia;Venerida;Veneroidea;Veneridae;Mercenaria;Mercenari  
 a mercenaria  
 UdeM00000026243 6596 694.1 UdeM00000026243 XP\_045210868.1 50.2 699  
 265 6 25 651 1276 1963 1.70E-196 694.1 6596 cellular  
 organisms;Eukaryota;Opisthokonta;Metazoa;Eumetazoa;Bilateria;Protostomia;  
 Spiralia;Lophotrochozoa;Mollusca;Bivalvia;Autobranchia;Heteroconchia;Euhe  
 terodonta;Imparidentia;Venerida;Veneroidea;Veneridae;Mercenaria;Mercenari  
 a mercenaria  
 UdeM00000026244 6596 409.1 UdeM00000026244 XP\_045213758.1 62.1 285  
 93 1 9 278 37 321 4.60E-111 409.1 6596 cellular  
 organisms;Eukaryota;Opisthokonta;Metazoa;Eumetazoa;Bilateria;Protostomia;  
 Spiralia;Lophotrochozoa;Mollusca;Bivalvia;Autobranchia;Heteroconchia;Euhe  
 terodonta;Imparidentia;Venerida;Veneroidea;Veneridae;Mercenaria;Mercenari  
 a mercenaria  
 UdeM00000026245 6596 222.2 UdeM00000026245 XP\_045213758.1 66.7 150  
 47 1 72 221 123 269 6.40E-55 222.2 6596 cellular  
 organisms;Eukaryota;Opisthokonta;Metazoa;Eumetazoa;Bilateria;Protostomia;  
 Spiralia;Lophotrochozoa;Mollusca;Bivalvia;Autobranchia;Heteroconchia;Euhe  
 terodonta;Imparidentia;Venerida;Veneroidea;Veneridae;Mercenaria;Mercenari  
 a mercenaria  
 UdeM00000026247 6596 419.9 UdeM00000026247 XP\_045213758.1 60.9 317  
 118 3 290 600 5 321 5.60E-114 419.9 6596 cellular  
 organisms;Eukaryota;Opisthokonta;Metazoa;Eumetazoa;Bilateria;Protostomia;  
 Spiralia;Lophotrochozoa;Mollusca;Bivalvia;Autobranchia;Heteroconchia;Euhe  
 terodonta;Imparidentia;Venerida;Veneroidea;Veneridae;Mercenaria;Mercenari  
 a mercenaria  
 UdeM00000026248 6596 400.6 UdeM00000026248 XP\_045214883.1 63.1 279  
 103 0 1 279 1 279 1.60E-108 400.6 6596 cellular  
 organisms;Eukaryota;Opisthokonta;Metazoa;Eumetazoa;Bilateria;Protostomia;  
 Spiralia;Lophotrochozoa;Mollusca;Bivalvia;Autobranchia;Heteroconchia;Euhe  
 terodonta;Imparidentia;Venerida;Veneroidea;Veneridae;Mercenaria;Mercenari  
 a mercenaria  
 UdeM00000026249 6596 383.6 UdeM00000026249 XP\_045213758.1 60.8 283  
 107 1 5 287 45 323 2.10E-103 383.6 6596 cellular  
 organisms;Eukaryota;Opisthokonta;Metazoa;Eumetazoa;Bilateria;Protostomia;  
 Spiralia;Lophotrochozoa;Mollusca;Bivalvia;Autobranchia;Heteroconchia;Euhe  
 terodonta;Imparidentia;Venerida;Veneroidea;Veneridae;Mercenaria;Mercenari  
 a mercenaria  
 UdeM00000026250 6596 379 UdeM00000026250 XP\_045213758.1 60.1 283  
 109 1 5 287 45 323 5.30E-102 379 6596 cellular  
 organisms;Eukaryota;Opisthokonta;Metazoa;Eumetazoa;Bilateria;Protostomia;  
 Spiralia;Lophotrochozoa;Mollusca;Bivalvia;Autobranchia;Heteroconchia;Euhe

terodonta;Imparidentia;Venerida;Veneroidea;Veneridae;Mercenaria;Mercenari  
 a mercenaria  
 UdeM00000026251 6596 383.6 UdeM00000026251 XP\_045213758.1 60.8 283  
 107 1 5 287 45 323 2.10E-103 383.6 6596 cellular  
 organisms;Eukaryota;Opisthokonta;Metazoa;Eumetazoa;Bilateria;Protostomia;  
 Spiralia;Lophotrochozoa;Mollusca;Bivalvia;Autobranchia;Heteroconchia;Euhe  
 terodonta;Imparidentia;Venerida;Veneroidea;Veneridae;Mercenaria;Mercenari  
 a mercenaria  
 UdeM00000026252 6596 379 UdeM00000026252 XP\_045213758.1 60.1 283  
 109 1 5 287 45 323 5.30E-102 379 6596 cellular  
 organisms;Eukaryota;Opisthokonta;Metazoa;Eumetazoa;Bilateria;Protostomia;  
 Spiralia;Lophotrochozoa;Mollusca;Bivalvia;Autobranchia;Heteroconchia;Euhe  
 terodonta;Imparidentia;Venerida;Veneroidea;Veneridae;Mercenaria;Mercenari  
 a mercenaria  
 UdeM00000026253 6596 379 UdeM00000026253 XP\_045213758.1 62.6 265  
 95 1 12 276 63 323 5.10E-102 379 6596 cellular  
 organisms;Eukaryota;Opisthokonta;Metazoa;Eumetazoa;Bilateria;Protostomia;  
 Spiralia;Lophotrochozoa;Mollusca;Bivalvia;Autobranchia;Heteroconchia;Euhe  
 terodonta;Imparidentia;Venerida;Veneroidea;Veneridae;Mercenaria;Mercenari  
 a mercenaria  
 UdeM00000026254 6596 330.5 UdeM00000026254 XP\_045213758.1 53.4 283  
 128 1 5 287 45 323 2.10E-87 330.5 6596 cellular  
 organisms;Eukaryota;Opisthokonta;Metazoa;Eumetazoa;Bilateria;Protostomia;  
 Spiralia;Lophotrochozoa;Mollusca;Bivalvia;Autobranchia;Heteroconchia;Euhe  
 terodonta;Imparidentia;Venerida;Veneroidea;Veneridae;Mercenaria;Mercenari  
 a mercenaria  
 UdeM00000026255 6573 398.3 UdeM00000026255 XP\_021354794.1 90.6 202  
 18 1 1 202 1 201 5.90E-108 398.3 6573 cellular  
 organisms;Eukaryota;Opisthokonta;Metazoa;Eumetazoa;Bilateria;Protostomia;  
 Spiralia;Lophotrochozoa;Mollusca;Bivalvia;Autobranchia;Pteriormorphia;Pect  
 inida;Pectinoidea;Pectinidae;Mizuhopecten;Mizuhopecten yessoensis  
 UdeM00000026256 1735272 330.5 UdeM00000026256 XP\_041363581.1 59.9  
 247 99 0 39 285 33 279 2.20E-87 330.5 1735272  
 cellular  
 organisms;Eukaryota;Opisthokonta;Metazoa;Eumetazoa;Bilateria;Protostomia;  
 Spiralia;Lophotrochozoa;Mollusca;Gastropoda;Neomphalina;Neomphaloidea;Pel  
 tospiridae;Gigantopelta;Gigantopelta aegis  
 UdeM00000026257 6596 775 UdeM00000026257 XP\_045214682.1 73.9 525  
 127 1 1 515 1 525 5.90E-221 775 6596 cellular  
 organisms;Eukaryota;Opisthokonta;Metazoa;Eumetazoa;Bilateria;Protostomia;  
 Spiralia;Lophotrochozoa;Mollusca;Bivalvia;Autobranchia;Heteroconchia;Euhe  
 terodonta;Imparidentia;Venerida;Veneroidea;Veneridae;Mercenaria;Mercenari  
 a mercenaria  
 UdeM00000026258 1735272 550.8 UdeM00000026258 XP\_041362667.1 56.3  
 549 201 12 1 536 1 523 1.90E-153 550.8 1735272  
 cellular  
 organisms;Eukaryota;Opisthokonta;Metazoa;Eumetazoa;Bilateria;Protostomia;  
 Spiralia;Lophotrochozoa;Mollusca;Gastropoda;Neomphalina;Neomphaloidea;Pel  
 tospiridae;Gigantopelta;Gigantopelta aegis  
 UdeM00000026259 6596 388.3 UdeM00000026259 XP\_045214577.1 73.5 238  
 63 0 1 238 1 238 7.30E-105 388.3 6596 cellular  
 organisms;Eukaryota;Opisthokonta;Metazoa;Eumetazoa;Bilateria;Protostomia;  
 Spiralia;Lophotrochozoa;Mollusca;Bivalvia;Autobranchia;Heteroconchia;Euhe



terodonta;Imparidentia;Venerida;Veneroidea;Veneridae;Mercenaria;Mercenari  
 a mercenaria  
 UdeM00000026260 6596 429.9 UdeM00000026260 XP\_045214573.1 62.1 464  
 146 3 10 462 13 457 4.20E-117 429.9 6596 cellular  
 organisms;Eukaryota;Opisthokonta;Metazoa;Eumetazoa;Bilateria;Protostomia;  
 Spiralia;Lophotrochozoa;Mollusca;Bivalvia;Autobranchia;Heteroconchia;Euhe  
 terodonta;Imparidentia;Venerida;Veneroidea;Veneridae;Mercenaria;Mercenari  
 a mercenaria  
 UdeM00000026261 6596 903.7 UdeM00000026261 XP\_045214592.1 48.7 1162  
 416 27 23 1149 21 1037 2.50E-259 903.7 6596 cellular  
 organisms;Eukaryota;Opisthokonta;Metazoa;Eumetazoa;Bilateria;Protostomia;  
 Spiralia;Lophotrochozoa;Mollusca;Bivalvia;Autobranchia;Heteroconchia;Euhe  
 terodonta;Imparidentia;Venerida;Veneroidea;Veneridae;Mercenaria;Mercenari  
 a mercenaria  
 UdeM00000026262 6596 555.1 UdeM00000026262 XP\_045211466.1 73.2 351  
 94 0 3 353 7 357 6.60E-155 555.1 6596 cellular  
 organisms;Eukaryota;Opisthokonta;Metazoa;Eumetazoa;Bilateria;Protostomia;  
 Spiralia;Lophotrochozoa;Mollusca;Bivalvia;Autobranchia;Heteroconchia;Euhe  
 terodonta;Imparidentia;Venerida;Veneroidea;Veneridae;Mercenaria;Mercenari  
 a mercenaria  
 UdeM00000026265 6579 62.8 UdeM00000026265 XP\_033752164.1 32.1 140  
 72 4 1 124 326 458 3.70E-07 62.8 6579 cellular  
 organisms;Eukaryota;Opisthokonta;Metazoa;Eumetazoa;Bilateria;Protostomia;  
 Spiralia;Lophotrochozoa;Mollusca;Bivalvia;Autobranchia;Pteriormorphia;Pect  
 inida;Pectinoidea;Pectinidae;Pecten;Pecten maximus  
 UdeM00000026264 6579 86.7 UdeM00000026264 XP\_033730826.1 31.2 170  
 92 4 1 156 206 364 2.90E-14 86.7 6579 cellular  
 organisms;Eukaryota;Opisthokonta;Metazoa;Eumetazoa;Bilateria;Protostomia;  
 Spiralia;Lophotrochozoa;Mollusca;Bivalvia;Autobranchia;Pteriormorphia;Pect  
 inida;Pectinoidea;Pectinidae;Pecten;Pecten maximus  
 UdeM00000026263 6579 206.5 UdeM00000026263 XP\_033752164.1 38.9 321  
 167 7 17 317 147 458 5.20E-50 206.5 6579 cellular  
 organisms;Eukaryota;Opisthokonta;Metazoa;Eumetazoa;Bilateria;Protostomia;  
 Spiralia;Lophotrochozoa;Mollusca;Bivalvia;Autobranchia;Pteriormorphia;Pect  
 inida;Pectinoidea;Pectinidae;Pecten;Pecten maximus  
 UdeM00000026266 46514 95.1 UdeM00000026266 XP\_038055161.1 42.5 127  
 67 2 28 149 45 170 1.80E-16 95.1 46514 cellular  
 organisms;Eukaryota;Opisthokonta;Metazoa;Eumetazoa;Bilateria;Deuterostomi  
 a;Echinodermata;Eleutherozoa;Asterozoa;Asteroidea;Valvatacea;Valvatida;As  
 terinidae;Patiria;Patiria miniata  
 UdeM00000026267 6573 146.7 UdeM00000026267 XP\_021357146.1 61.9 113  
 43 0 1 113 250 362 3.00E-32 146.7 6573 cellular  
 organisms;Eukaryota;Opisthokonta;Metazoa;Eumetazoa;Bilateria;Protostomia;  
 Spiralia;Lophotrochozoa;Mollusca;Bivalvia;Autobranchia;Pteriormorphia;Pect  
 inida;Pectinoidea;Pectinidae;Mizuhopecten;Mizuhopecten yessoensis  
 UdeM00000026268 6565 133.7 UdeM00000026268 XP\_022299727.1 50 134  
 66 1 29 162 145 277 2.50E-28 133.7 6565 cellular  
 organisms;Eukaryota;Opisthokonta;Metazoa;Eumetazoa;Bilateria;Protostomia;  
 Spiralia;Lophotrochozoa;Mollusca;Bivalvia;Autobranchia;Pteriormorphia;Ostr  
 eida;Ostreoidea;Ostreidae;Crassostrea;Crassostrea virginica  
 UdeM00000026269 6596 852.4 UdeM00000026269 XP\_045213008.1 68.3 637  
 194 4 6 636 3 637 4.00E-244 852.4 6596 cellular  
 organisms;Eukaryota;Opisthokonta;Metazoa;Eumetazoa;Bilateria;Protostomia;  
 Spiralia;Lophotrochozoa;Mollusca;Bivalvia;Autobranchia;Heteroconchia;Euhe

terodonta;Imparidentia;Venerida;Veneroidea;Veneridae;Mercenaria;Mercenari  
 a mercenaria  
 UdeM00000026270 6579 289.7 UdeM00000026270 XP\_033749429.1 77.2 184  
 42 0 3 186 2 185 3.40E-75 289.7 6579 cellular  
 organisms;Eukaryota;Opisthokonta;Metazoa;Eumetazoa;Bilateria;Protostomia;  
 Spiralia;Lophotrochozoa;Mollusca;Bivalvia;Autobranhia;Pteriormorphia;Pect  
 inida;Pectinoidea;Pectinidae;Pecten;Pecten maximus  
 UdeM00000026271 6596 531.2 UdeM00000026271 XP\_045213007.1 60.8 451  
 170 2 1 449 214 659 1.40E-147 531.2 6596 cellular  
 organisms;Eukaryota;Opisthokonta;Metazoa;Eumetazoa;Bilateria;Protostomia;  
 Spiralia;Lophotrochozoa;Mollusca;Bivalvia;Autobranhia;Heteroconchia;Euhe  
 terodonta;Imparidentia;Venerida;Veneroidea;Veneridae;Mercenaria;Mercenari  
 a mercenaria  
 UdeM00000026272 6596 852.8 UdeM00000026272 XP\_045213007.1 64.1 691  
 238 5 6 689 17 704 4.90E-244 852.8 6596 cellular  
 organisms;Eukaryota;Opisthokonta;Metazoa;Eumetazoa;Bilateria;Protostomia;  
 Spiralia;Lophotrochozoa;Mollusca;Bivalvia;Autobranhia;Heteroconchia;Euhe  
 terodonta;Imparidentia;Venerida;Veneroidea;Veneridae;Mercenaria;Mercenari  
 a mercenaria  
 UdeM00000026273 6596 674.5 UdeM00000026273 XP\_045211966.1 84.8 376  
 56 1 4 378 3 378 8.00E-191 674.5 6596 cellular  
 organisms;Eukaryota;Opisthokonta;Metazoa;Eumetazoa;Bilateria;Protostomia;  
 Spiralia;Lophotrochozoa;Mollusca;Bivalvia;Autobranhia;Heteroconchia;Euhe  
 terodonta;Imparidentia;Venerida;Veneroidea;Veneridae;Mercenaria;Mercenari  
 a mercenaria  
 UdeM00000026275 6596 287.3 UdeM00000026275 XP\_045211584.1 41 361  
 196 4 1 360 78 422 2.70E-74 287.3 6596 cellular  
 organisms;Eukaryota;Opisthokonta;Metazoa;Eumetazoa;Bilateria;Protostomia;  
 Spiralia;Lophotrochozoa;Mollusca;Bivalvia;Autobranhia;Heteroconchia;Euhe  
 terodonta;Imparidentia;Venerida;Veneroidea;Veneridae;Mercenaria;Mercenari  
 a mercenaria  
 UdeM00000026274 6596 371.3 UdeM00000026274 XP\_045211584.1 43.5 425  
 223 4 9 432 14 422 1.70E-99 371.3 6596 cellular  
 organisms;Eukaryota;Opisthokonta;Metazoa;Eumetazoa;Bilateria;Protostomia;  
 Spiralia;Lophotrochozoa;Mollusca;Bivalvia;Autobranhia;Heteroconchia;Euhe  
 terodonta;Imparidentia;Venerida;Veneroidea;Veneridae;Mercenaria;Mercenari  
 a mercenaria  
 UdeM00000026276 6596 246.5 UdeM00000026276 XP\_045211478.1 52.5 257  
 108 3 4 246 2 258 3.80E-62 246.5 6596 cellular  
 organisms;Eukaryota;Opisthokonta;Metazoa;Eumetazoa;Bilateria;Protostomia;  
 Spiralia;Lophotrochozoa;Mollusca;Bivalvia;Autobranhia;Heteroconchia;Euhe  
 terodonta;Imparidentia;Venerida;Veneroidea;Veneridae;Mercenaria;Mercenari  
 a mercenaria  
 UdeM00000026277 6596 216.9 UdeM00000026277 XP\_045211478.1 56.6 196  
 75 1 8 193 52 247 2.30E-53 216.9 6596 cellular  
 organisms;Eukaryota;Opisthokonta;Metazoa;Eumetazoa;Bilateria;Protostomia;  
 Spiralia;Lophotrochozoa;Mollusca;Bivalvia;Autobranhia;Heteroconchia;Euhe  
 terodonta;Imparidentia;Venerida;Veneroidea;Veneridae;Mercenaria;Mercenari  
 a mercenaria  
 UdeM00000026278 6596 179.5 UdeM00000026278 XP\_045211478.1 42.9 240  
 85 3 20 207 27 266 4.70E-42 179.5 6596 cellular  
 organisms;Eukaryota;Opisthokonta;Metazoa;Eumetazoa;Bilateria;Protostomia;  
 Spiralia;Lophotrochozoa;Mollusca;Bivalvia;Autobranhia;Heteroconchia;Euhe

terodonta;Imparidentia;Venerida;Veneroidea;Veneridae;Mercenaria;Mercenari  
 a mercenaria  
 UdeM00000026279 6596 658.7 UdeM00000026279 XP\_045211966.1 83.6 371  
 60 1 35 404 8 378 4.80E-186 658.7 6596 cellular  
 organisms;Eukaryota;Opisthokonta;Metazoa;Eumetazoa;Bilateria;Protostomia;  
 Spiralia;Lophotrochozoa;Mollusca;Bivalvia;Autobranchia;Heteroconchia;Euhe  
 terodonta;Imparidentia;Venerida;Veneroidea;Veneridae;Mercenaria;Mercenari  
 a mercenaria  
 UdeM00000026280 6596 175.6 UdeM00000026280 XP\_045211478.1 55.6 160  
 61 2 2 151 99 258 5.30E-41 175.6 6596 cellular  
 organisms;Eukaryota;Opisthokonta;Metazoa;Eumetazoa;Bilateria;Protostomia;  
 Spiralia;Lophotrochozoa;Mollusca;Bivalvia;Autobranchia;Heteroconchia;Euhe  
 terodonta;Imparidentia;Venerida;Veneroidea;Veneridae;Mercenaria;Mercenari  
 a mercenaria  
 UdeM00000026281 6565 92.4 UdeM00000026281 XP\_022314459.1 60.5 81  
 30 1 4 84 2 80 2.90E-16 92.4 6565 cellular  
 organisms;Eukaryota;Opisthokonta;Metazoa;Eumetazoa;Bilateria;Protostomia;  
 Spiralia;Lophotrochozoa;Mollusca;Bivalvia;Autobranchia;Pteriormorphia;Ostr  
 eida;Ostreoidea;Ostreidae;Crassostrea;Crassostrea virginica  
 UdeM00000026282 6596 245.4 UdeM00000026282 XP\_045211478.1 56.2 224  
 88 1 5 218 24 247 6.90E-62 245.4 6596 cellular  
 organisms;Eukaryota;Opisthokonta;Metazoa;Eumetazoa;Bilateria;Protostomia;  
 Spiralia;Lophotrochozoa;Mollusca;Bivalvia;Autobranchia;Heteroconchia;Euhe  
 terodonta;Imparidentia;Venerida;Veneroidea;Veneridae;Mercenaria;Mercenari  
 a mercenaria  
 UdeM00000026283 6596 250 UdeM00000026283 XP\_045211478.1 54.6 240  
 98 2 20 248 27 266 3.30E-63 250 6596 cellular  
 organisms;Eukaryota;Opisthokonta;Metazoa;Eumetazoa;Bilateria;Protostomia;  
 Spiralia;Lophotrochozoa;Mollusca;Bivalvia;Autobranchia;Heteroconchia;Euhe  
 terodonta;Imparidentia;Venerida;Veneroidea;Veneridae;Mercenaria;Mercenari  
 a mercenaria  
 UdeM00000026284 6596 279.6 UdeM00000026284 XP\_045211478.1 57.2 257  
 96 2 4 246 2 258 3.80E-72 279.6 6596 cellular  
 organisms;Eukaryota;Opisthokonta;Metazoa;Eumetazoa;Bilateria;Protostomia;  
 Spiralia;Lophotrochozoa;Mollusca;Bivalvia;Autobranchia;Heteroconchia;Euhe  
 terodonta;Imparidentia;Venerida;Veneroidea;Veneridae;Mercenaria;Mercenari  
 a mercenaria  
 UdeM00000026285 6596 290 UdeM00000026285 XP\_045211478.1 58.6 261  
 94 2 4 250 2 262 2.80E-75 290 6596 cellular  
 organisms;Eukaryota;Opisthokonta;Metazoa;Eumetazoa;Bilateria;Protostomia;  
 Spiralia;Lophotrochozoa;Mollusca;Bivalvia;Autobranchia;Heteroconchia;Euhe  
 terodonta;Imparidentia;Venerida;Veneroidea;Veneridae;Mercenaria;Mercenari  
 a mercenaria  
 UdeM00000026286 6596 596.7 UdeM00000026286 XP\_045212862.1 87.5 313  
 39 0 5 317 6 318 1.80E-167 596.7 6596 cellular  
 organisms;Eukaryota;Opisthokonta;Metazoa;Eumetazoa;Bilateria;Protostomia;  
 Spiralia;Lophotrochozoa;Mollusca;Bivalvia;Autobranchia;Heteroconchia;Euhe  
 terodonta;Imparidentia;Venerida;Veneroidea;Veneridae;Mercenaria;Mercenari  
 a mercenaria  
 UdeM00000026287 1735272 325.9 UdeM00000026287 XP\_041363365.1 82.7  
 179 31 0 74 252 136 314 4.70E-86 325.9 1735272  
 cellular  
 organisms;Eukaryota;Opisthokonta;Metazoa;Eumetazoa;Bilateria;Protostomia;

Spiralia;Lophotrochozoa;Mollusca;Gastropoda;Neomphalina;Neomphaloidea;Pel  
tospiridae;Gigantopelta;Gigantopelta aegis  
UdeM00000026288 1735272 325.9 UdeM00000026288 XP\_041363365.1 82.7  
179 31 0 74 252 136 314 4.70E-86 325.9 1735272  
cellular  
organisms;Eukaryota;Opisthokonta;Metazoa;Eumetazoa;Bilateria;Protostomia;  
Spiralia;Lophotrochozoa;Mollusca;Gastropoda;Neomphalina;Neomphaloidea;Pel  
tospiridae;Gigantopelta;Gigantopelta aegis  
UdeM00000026290 29159 73.9 UdeM00000026290 XP\_034312815.1 27.5 178  
114 7 2 165 21 197 1.90E-09 73.9 29159 cellular  
organisms;Eukaryota;Opisthokonta;Metazoa;Eumetazoa;Bilateria;Protostomia;  
Spiralia;Lophotrochozoa;Mollusca;Bivalvia;Autobranchia;Pteriormorphia;Ostr  
eida;Ostreoidea;Ostreidae;Crassostrea;Crassostrea gigas  
UdeM00000026291 41117 127.1 UdeM00000026291 XP\_037070315.1 69.1 81  
25 0 95 175 84 164 2.20E-26 127.1 41117 cellular  
organisms;Eukaryota;Opisthokonta;Metazoa;Eumetazoa;Bilateria;Protostomia;  
Ecdysozoa;Panarthropoda;Arthropoda;Mandibulata;Pancrustacea;Crustacea;Mul  
ticrustacea;Hexanauplia;Thecostraca;Cirripectida;Thoracica;Pedunculata;Scal  
pellomorpha;Pollicipedidae;Pollicipes;Pollicipes pollicipes  
UdeM00000026292 6596 573.9 UdeM00000026292 XP\_045214260.1 51.3 686  
279 11 1 666 1 651 2.60E-160 573.9 6596 cellular  
organisms;Eukaryota;Opisthokonta;Metazoa;Eumetazoa;Bilateria;Protostomia;  
Spiralia;Lophotrochozoa;Mollusca;Bivalvia;Autobranchia;Heteroconchia;Euhe  
terodonta;Imparidentia;Venerida;Veneroidea;Veneridae;Mercenaria;Mercenari  
a mercenaria  
UdeM00000026293 6596 161 UdeM00000026293 XP\_045214261.1 66.7 120  
39 1 1 120 4 122 9.50E-37 161 6596 cellular  
organisms;Eukaryota;Opisthokonta;Metazoa;Eumetazoa;Bilateria;Protostomia;  
Spiralia;Lophotrochozoa;Mollusca;Bivalvia;Autobranchia;Heteroconchia;Euhe  
terodonta;Imparidentia;Venerida;Veneroidea;Veneridae;Mercenaria;Mercenari  
a mercenaria  
UdeM00000026294 6596 249.6 UdeM00000026294 XP\_045211122.1 42.4 269  
144 3 52 320 43 300 5.40E-63 249.6 6596 cellular  
organisms;Eukaryota;Opisthokonta;Metazoa;Eumetazoa;Bilateria;Protostomia;  
Spiralia;Lophotrochozoa;Mollusca;Bivalvia;Autobranchia;Heteroconchia;Euhe  
terodonta;Imparidentia;Venerida;Veneroidea;Veneridae;Mercenaria;Mercenari  
a mercenaria  
UdeM00000026295 6596 97.1 UdeM00000026295 XP\_045211122.1 47.9 94  
45 3 45 135 39 131 2.00E-17 97.1 6596 cellular  
organisms;Eukaryota;Opisthokonta;Metazoa;Eumetazoa;Bilateria;Protostomia;  
Spiralia;Lophotrochozoa;Mollusca;Bivalvia;Autobranchia;Heteroconchia;Euhe  
terodonta;Imparidentia;Venerida;Veneroidea;Veneridae;Mercenaria;Mercenari  
a mercenaria  
UdeM00000026296 6596 1116.7 UdeM00000026296 XP\_045212294.1 43.1  
1328 649 25 42 1310 27 1306 0.00E+00 1116.7 6596  
cellular  
organisms;Eukaryota;Opisthokonta;Metazoa;Eumetazoa;Bilateria;Protostomia;  
Spiralia;Lophotrochozoa;Mollusca;Bivalvia;Autobranchia;Heteroconchia;Euhe  
terodonta;Imparidentia;Venerida;Veneroidea;Veneridae;Mercenaria;Mercenari  
a mercenaria  
UdeM00000026297 45264 87 UdeM00000026297 XP\_044165524.1 50 80  
40 0 35 114 90 169 1.90E-14 87 45264 cellular  
organisms;Eukaryota;Opisthokonta;Metazoa;Eumetazoa;Cnidaria;Anthozoa;Hexa

corallia;Scleractinia;Astrocoeniina;Acroporidae;Acropora;Acropora  
 millepora  
 UdeM00000026298 7654 1800.4 UdeM00000026298 XP\_041481081.1 44.4  
 2429 1026 58 14 2386 116 2275 0.00E+00 1800.4 7654  
 cellular  
 organisms;Eukaryota;Opisthokonta;Metazoa;Eumetazoa;Bilateria;Deuterostomi  
 a;Echinodermata;Eleutherozoa;Echinozoa;Echinoidea;Euechinoidea;Echinacea;  
 Temnopleuroidea;Toxopneustidae;Lytechinus;Lytechinus variegatus  
 UdeM00000026299 6596 340.5 UdeM00000026299 XP\_045212294.1 37.6 519  
 254 13 9 507 6 474 3.70E-90 340.5 6596 cellular  
 organisms;Eukaryota;Opisthokonta;Metazoa;Eumetazoa;Bilateria;Protostomia;  
 Spiralia;Lophotrochozoa;Mollusca;Bivalvia;Autobranchia;Heteroconchia;Euhe  
 terodonta;Imparidentia;Venerida;Veneroidea;Veneridae;Mercenaria;Mercenari  
 a mercenaria  
 UdeM00000026300 29159 104 UdeM00000026300 XP\_011445221.2 50 96  
 43 1 285 380 159 249 4.40E-19 104 29159 cellular  
 organisms;Eukaryota;Opisthokonta;Metazoa;Eumetazoa;Bilateria;Protostomia;  
 Spiralia;Lophotrochozoa;Mollusca;Bivalvia;Autobranchia;Pteriormorphia;Ostr  
 eida;Ostreoidea;Ostreidae;Crassostrea;Crassostrea gigas  
 UdeM00000026301 7574 200.3 UdeM00000026301 XP\_013414884.1 59.3 172  
 69 1 1 172 24 194 2.00E-48 200.3 7574 cellular  
 organisms;Eukaryota;Opisthokonta;Metazoa;Eumetazoa;Bilateria;Protostomia;  
 Spiralia;Lophotrochozoa;Brachiopoda;Linguliformea;Lingulata;Lingulida;Lin  
 guloidea;Lingulidae;Lingula;Lingula anatina  
 UdeM00000026304 6579 109.4 UdeM00000026304 XP\_033735087.1 45.3 137  
 68 4 6 136 41 176 3.80E-21 109.4 6579 cellular  
 organisms;Eukaryota;Opisthokonta;Metazoa;Eumetazoa;Bilateria;Protostomia;  
 Spiralia;Lophotrochozoa;Mollusca;Bivalvia;Autobranchia;Pteriormorphia;Pect  
 inida;Pectinoidea;Pectinidae;Pecten;Pecten maximus  
 UdeM00000026303 400727 120.6 UdeM00000026303 XP\_025101913.1 31.7  
 341 193 13 4 322 186 508 3.90E-24 120.6 400727  
 cellular  
 organisms;Eukaryota;Opisthokonta;Metazoa;Eumetazoa;Bilateria;Protostomia;  
 Spiralia;Lophotrochozoa;Mollusca;Gastropoda;Caenogastropoda;Architaeniogl  
 ossa;Ampullarioidea;Ampullariidae;Pomacea;Pomacea canaliculata  
 UdeM00000026305 6565 354.4 UdeM00000026305 XP\_022317236.1 63.1 268  
 94 2 7 274 8 270 1.30E-94 354.4 6565 cellular  
 organisms;Eukaryota;Opisthokonta;Metazoa;Eumetazoa;Bilateria;Protostomia;  
 Spiralia;Lophotrochozoa;Mollusca;Bivalvia;Autobranchia;Pteriormorphia;Ostr  
 eida;Ostreoidea;Ostreidae;Crassostrea;Crassostrea virginica  
 UdeM00000026306 6573 86.3 UdeM00000026306 XP\_021346645.1 44.4 108  
 59 1 1 107 1 108 5.70E-14 86.3 6573 cellular  
 organisms;Eukaryota;Opisthokonta;Metazoa;Eumetazoa;Bilateria;Protostomia;  
 Spiralia;Lophotrochozoa;Mollusca;Bivalvia;Autobranchia;Pteriormorphia;Pect  
 inida;Pectinoidea;Pectinidae;Mizuhopecten;Mizuhopecten yessoensis  
 UdeM00000026308 37653 124 UdeM00000026308 XP\_014779377.1 53.5 114  
 53 0 3 116 308 421 5.00E-25 124 37653 cellular  
 organisms;Eukaryota;Opisthokonta;Metazoa;Eumetazoa;Bilateria;Protostomia;  
 Spiralia;Lophotrochozoa;Mollusca;Cephalopoda;Coleoidea;Octopodiformes;Oct  
 opoda;Incirrata;Octopodidae;Octopus;Octopus bimaculoides  
 UdeM00000026309 6573 325.9 UdeM00000026309 XP\_021342914.1 63.4 235  
 86 0 5 239 31 265 6.80E-86 325.9 6573 cellular  
 organisms;Eukaryota;Opisthokonta;Metazoa;Eumetazoa;Bilateria;Protostomia;

Spiralia;Lophotrochozoa;Mollusca;Bivalvia;Autobranchia;Pteriormorphia;Pectinida;Pectinoidea;Pectinidae;Mizuhopecten;Mizuhopecten yessoensis  
UdeM00000026310 400727 165.2 UdeM00000026310 XP\_025096194.1 62.4  
117 44 0 2 118 81 197 5.20E-38 165.2 400727  
cellular  
organisms;Eukaryota;Opisthokonta;Metazoa;Eumetazoa;Bilateria;Protostomia;  
Spiralia;Lophotrochozoa;Mollusca;Gastropoda;Caenogastropoda;Architaenioglossa;Ampullarioidea;Ampullariidae;Pomacea;Pomacea canaliculata  
UdeM00000026311 6579 68.2 UdeM00000026311 XP\_033737792.1 53.7 54  
25 0 22 75 25 78 6.70E-09 68.2 6579 cellular  
organisms;Eukaryota;Opisthokonta;Metazoa;Eumetazoa;Bilateria;Protostomia;  
Spiralia;Lophotrochozoa;Mollusca;Bivalvia;Autobranchia;Pteriormorphia;Pectinida;Pectinoidea;Pectinidae;Pecten;Pecten maximus  
UdeM00000026312 6596 224.6 UdeM00000026312 XP\_045211217.1 58.5 171  
64 2 18 186 20 185 1.10E-55 224.6 6596 cellular  
organisms;Eukaryota;Opisthokonta;Metazoa;Eumetazoa;Bilateria;Protostomia;  
Spiralia;Lophotrochozoa;Mollusca;Bivalvia;Autobranchia;Heteroconchia;Euheterodonta;Imparidentia;Venerida;Veneroidea;Veneridae;Mercenaria;Mercenaria mercenaria  
UdeM00000026313 6596 253.4 UdeM00000026313 XP\_045214070.1 65.5 194  
64 2 11 201 351 544 3.10E-64 253.4 6596 cellular  
organisms;Eukaryota;Opisthokonta;Metazoa;Eumetazoa;Bilateria;Protostomia;  
Spiralia;Lophotrochozoa;Mollusca;Bivalvia;Autobranchia;Heteroconchia;Euheterodonta;Imparidentia;Venerida;Veneroidea;Veneridae;Mercenaria;Mercenaria mercenaria  
UdeM00000026314 6596 97.8 UdeM00000026314 XP\_045214070.1 55.1 158  
61 5 141 292 197 350 2.40E-17 97.8 6596 cellular  
organisms;Eukaryota;Opisthokonta;Metazoa;Eumetazoa;Bilateria;Protostomia;  
Spiralia;Lophotrochozoa;Mollusca;Bivalvia;Autobranchia;Heteroconchia;Euheterodonta;Imparidentia;Venerida;Veneroidea;Veneridae;Mercenaria;Mercenaria mercenaria  
UdeM00000026315 6565 194.9 UdeM00000026315 XP\_022315438.1 54.1 194  
88 1 5 197 3 196 1.00E-46 194.9 6565 cellular  
organisms;Eukaryota;Opisthokonta;Metazoa;Eumetazoa;Bilateria;Protostomia;  
Spiralia;Lophotrochozoa;Mollusca;Bivalvia;Autobranchia;Pteriormorphia;Ostreida;Ostreidae;Crassostrea;Crassostrea virginica  
UdeM00000026316 29159 302.4 UdeM00000026316 XP\_019924512.2 58.6 256  
104 2 16 271 199 452 5.90E-79 302.4 29159 cellular  
organisms;Eukaryota;Opisthokonta;Metazoa;Eumetazoa;Bilateria;Protostomia;  
Spiralia;Lophotrochozoa;Mollusca;Bivalvia;Autobranchia;Pteriormorphia;Ostreida;Ostreidae;Crassostrea;Crassostrea gigas  
UdeM00000026318 2652724 175.6 UdeM00000026318 XP\_020913146.1 49.5  
194 97 1 167 360 177 369 1.40E-40 175.6 2652724  
cellular  
organisms;Eukaryota;Opisthokonta;Metazoa;Eumetazoa;Cnidaria;Anthozoa;Hexacorallia;Actiniaria;Aiptasiidae;Exaiptasia;Exaiptasia diaphana  
UdeM00000026319 6579 195.7 UdeM00000026319 XP\_033729790.1 45.5 209  
114 0 10 218 17 225 6.30E-47 195.7 6579 cellular  
organisms;Eukaryota;Opisthokonta;Metazoa;Eumetazoa;Bilateria;Protostomia;  
Spiralia;Lophotrochozoa;Mollusca;Bivalvia;Autobranchia;Pteriormorphia;Pectinida;Pectinoidea;Pectinidae;Pecten;Pecten maximus  
UdeM00000026320 6596 181.8 UdeM00000026320 XP\_045212945.1 47.4 194  
85 3 1 178 1 193 9.40E-43 181.8 6596 cellular  
organisms;Eukaryota;Opisthokonta;Metazoa;Eumetazoa;Bilateria;Protostomia;

Spiralia;Lophotrochozoa;Mollusca;Bivalvia;Autobranchia;Heteroconchia;Euheterodonta;Imparidentia;Venerida;Veneroidea;Veneridae;Mercenaria;Mercenaria mercenaria

UdeM00000026321 1735272 111.7 UdeM00000026321 XP\_041363855.1 50  
104 49 1 6 106 4 107 5.80E-22 111.7 1735272  
cellular

organisms;Eukaryota;Opisthokonta;Metazoa;Eumetazoa;Bilateria;Protostomia;Spiralia;Lophotrochozoa;Mollusca;Gastropoda;Neomphalina;Neomphaloidea;Peltospiridae;Gigantopelta;Gigantopelta aegis

UdeM00000026323 6596 92 UdeM00000026323 XP\_045214989.1 34.5 177  
83 4 30 197 4 156 8.90E-16 92 6596 cellular

organisms;Eukaryota;Opisthokonta;Metazoa;Eumetazoa;Bilateria;Protostomia;Spiralia;Lophotrochozoa;Mollusca;Bivalvia;Autobranchia;Heteroconchia;Euheterodonta;Imparidentia;Venerida;Veneroidea;Veneridae;Mercenaria;Mercenaria mercenaria

UdeM00000026322 6596 90.9 UdeM00000026322 XP\_045214989.1 34.5 177  
83 4 7 174 4 156 1.80E-15 90.9 6596 cellular

organisms;Eukaryota;Opisthokonta;Metazoa;Eumetazoa;Bilateria;Protostomia;Spiralia;Lophotrochozoa;Mollusca;Bivalvia;Autobranchia;Heteroconchia;Euheterodonta;Imparidentia;Venerida;Veneroidea;Veneridae;Mercenaria;Mercenaria mercenaria

UdeM00000026324 1735272 265 UdeM00000026324 XP\_041363440.1 62.7  
185 69 0 2 186 178 362 7.40E-68 265 1735272

cellular  
organisms;Eukaryota;Opisthokonta;Metazoa;Eumetazoa;Bilateria;Protostomia;Spiralia;Lophotrochozoa;Mollusca;Gastropoda;Neomphalina;Neomphaloidea;Peltospiridae;Gigantopelta;Gigantopelta aegis

UdeM00000026325 6565 304.7 UdeM00000026325 XP\_022313971.1 53.8 251  
111 1 4 249 3 253 1.10E-79 304.7 6565 cellular

organisms;Eukaryota;Opisthokonta;Metazoa;Eumetazoa;Bilateria;Protostomia;Spiralia;Lophotrochozoa;Mollusca;Bivalvia;Autobranchia;Pteriomorphia;Ostreida;Ostreoidea;Ostreidae;Crassostrea;Crassostrea virginica

UdeM00000026326 6565 330.1 UdeM00000026326 XP\_022313971.1 55.8 265  
112 1 4 263 3 267 2.60E-87 330.1 6565 cellular

organisms;Eukaryota;Opisthokonta;Metazoa;Eumetazoa;Bilateria;Protostomia;Spiralia;Lophotrochozoa;Mollusca;Bivalvia;Autobranchia;Pteriomorphia;Ostreida;Ostreoidea;Ostreidae;Crassostrea;Crassostrea virginica

UdeM00000026327 1735272 212.2 UdeM00000026327 XP\_041364079.1 32.5  
363 212 10 1 357 12 347 1.40E-51 212.2 1735272

cellular  
organisms;Eukaryota;Opisthokonta;Metazoa;Eumetazoa;Bilateria;Protostomia;Spiralia;Lophotrochozoa;Mollusca;Gastropoda;Neomphalina;Neomphaloidea;Peltospiridae;Gigantopelta;Gigantopelta aegis

UdeM00000026328 29159 1011.5 UdeM00000026328 XP\_034312617.1 36.4  
1674 970 52 119 1747 376 1999 1.30E-291 1011.5

29159 cellular  
organisms;Eukaryota;Opisthokonta;Metazoa;Eumetazoa;Bilateria;Protostomia;Spiralia;Lophotrochozoa;Mollusca;Bivalvia;Autobranchia;Pteriomorphia;Ostreida;Ostreoidea;Ostreidae;Crassostrea;Crassostrea gigas

UdeM00000026329 1735272 211.8 UdeM00000026329 XP\_041364085.1 29.4  
445 181 14 100 531 202 526 2.10E-51 211.8 1735272

cellular  
organisms;Eukaryota;Opisthokonta;Metazoa;Eumetazoa;Bilateria;Protostomia;

Spiralia;Lophotrochozoa;Mollusca;Gastropoda;Neomphalina;Neomphaloidea;Pel  
tospiridae;Gigantopelta;Gigantopelta aegis  
UdeM00000026330 29159 687.2 UdeM00000026330 XP\_034312617.1 33.3 1312  
736 36 7 1215 2574 3849 3.90E-194 687.2 29159 cellular  
organisms;Eukaryota;Opisthokonta;Metazoa;Eumetazoa;Bilateria;Protostomia;  
Spiralia;Lophotrochozoa;Mollusca;Bivalvia;Autobranchia;Pteriormorphia;Ostre  
ida;Ostreoidea;Ostreidae;Crassostrea;Crassostrea gigas  
UdeM00000040033 7574 263.5 UdeM00000040033 XP\_013403126.1 66.8 184  
59 1 50 233 1 182 2.60E-67 263.5 7574 cellular  
organisms;Eukaryota;Opisthokonta;Metazoa;Eumetazoa;Bilateria;Protostomia;  
Spiralia;Lophotrochozoa;Brachiopoda;Linguliformea;Lingulata;Lingulida;Lin  
guloidea;Lingulidae;Lingula;Lingula anatina  
UdeM00000040034 6596 222.2 UdeM00000040034 XP\_045189893.1 56.7 215  
85 4 1 214 1 208 1.30E-54 222.2 6596 cellular  
organisms;Eukaryota;Opisthokonta;Metazoa;Eumetazoa;Bilateria;Protostomia;  
Spiralia;Lophotrochozoa;Mollusca;Bivalvia;Autobranchia;Heteroconchia;Euhe  
terodonta;Imparidentia;Venerida;Veneroidea;Veneridae;Mercenaria;Mercenari  
a mercenaria  
UdeM00000040035 6573 280 UdeM00000040035 XP\_021378504.1 41.4 423  
222 6 4 407 3 418 5.10E-72 280 6573 cellular  
organisms;Eukaryota;Opisthokonta;Metazoa;Eumetazoa;Bilateria;Protostomia;  
Spiralia;Lophotrochozoa;Mollusca;Bivalvia;Autobranchia;Pteriormorphia;Pect  
inida;Pectinoidea;Pectinidae;Mizuhopecten;Mizuhopecten yessoensis  
UdeM00000040036 6579 283.1 UdeM00000040036 XP\_033757139.1 41.5 419  
236 4 4 415 3 419 6.20E-73 283.1 6579 cellular  
organisms;Eukaryota;Opisthokonta;Metazoa;Eumetazoa;Bilateria;Protostomia;  
Spiralia;Lophotrochozoa;Mollusca;Bivalvia;Autobranchia;Pteriormorphia;Pect  
inida;Pectinoidea;Pectinidae;Pecten;Pecten maximus  
UdeM00000040037 6596 240 UdeM00000040037 XP\_045188861.1 42.1 337  
176 7 8 335 5 331 4.70E-60 240 6596 cellular  
organisms;Eukaryota;Opisthokonta;Metazoa;Eumetazoa;Bilateria;Protostomia;  
Spiralia;Lophotrochozoa;Mollusca;Bivalvia;Autobranchia;Heteroconchia;Euhe  
terodonta;Imparidentia;Venerida;Veneroidea;Veneridae;Mercenaria;Mercenari  
a mercenaria  
UdeM00000040038 6596 298.9 UdeM00000040038 XP\_045188498.1 38.8 560  
257 11 7 518 7 528 1.30E-77 298.9 6596 cellular  
organisms;Eukaryota;Opisthokonta;Metazoa;Eumetazoa;Bilateria;Protostomia;  
Spiralia;Lophotrochozoa;Mollusca;Bivalvia;Autobranchia;Heteroconchia;Euhe  
terodonta;Imparidentia;Venerida;Veneroidea;Veneridae;Mercenaria;Mercenari  
a mercenaria  
UdeM00000040039 6596 330.1 UdeM00000040039 XP\_045190426.1 63.4 235  
86 0 8 242 10 244 2.50E-87 330.1 6596 cellular  
organisms;Eukaryota;Opisthokonta;Metazoa;Eumetazoa;Bilateria;Protostomia;  
Spiralia;Lophotrochozoa;Mollusca;Bivalvia;Autobranchia;Heteroconchia;Euhe  
terodonta;Imparidentia;Venerida;Veneroidea;Veneridae;Mercenaria;Mercenari  
a mercenaria  
UdeM00000040041 6573 378.3 UdeM00000040041 XP\_021350804.1 73.6 239  
58 2 1 237 1 236 8.00E-102 378.3 6573 cellular  
organisms;Eukaryota;Opisthokonta;Metazoa;Eumetazoa;Bilateria;Protostomia;  
Spiralia;Lophotrochozoa;Mollusca;Bivalvia;Autobranchia;Pteriormorphia;Pect  
inida;Pectinoidea;Pectinidae;Mizuhopecten;Mizuhopecten yessoensis  
UdeM00000040043 6565 146.7 UdeM00000040043 XP\_022299727.1 52.4 145  
69 0 23 167 131 275 3.00E-32 146.7 6565 cellular  
organisms;Eukaryota;Opisthokonta;Metazoa;Eumetazoa;Bilateria;Protostomia;



Spiralia;Lophotrochozoa;Mollusca;Bivalvia;Autobranchia;Pteriomorpha;Ostr  
eida;Ostreoidea;Ostreidae;Crassostrea;Crassostrea virginica  
UdeM00000040044 6596 1285.4 UdeM00000040044 XP\_045188649.1 57.8  
1160 350 9 11 1163 12 1038 0.00E+00 1285.4 6596  
cellular  
organisms;Eukaryota;Opisthokonta;Metazoa;Eumetazoa;Bilateria;Protostomia;  
Spiralia;Lophotrochozoa;Mollusca;Bivalvia;Autobranchia;Heteroconchia;Euhe  
terodonta;Imparidentia;Venerida;Veneroidea;Veneridae;Mercenaria;Mercenari  
a mercenaria  
UdeM00000040045 6596 1285.4 UdeM00000040045 XP\_045188649.1 57.8  
1160 350 9 46 1198 12 1038 0.00E+00 1285.4 6596  
cellular  
organisms;Eukaryota;Opisthokonta;Metazoa;Eumetazoa;Bilateria;Protostomia;  
Spiralia;Lophotrochozoa;Mollusca;Bivalvia;Autobranchia;Heteroconchia;Euhe  
terodonta;Imparidentia;Venerida;Veneroidea;Veneridae;Mercenaria;Mercenari  
a mercenaria  
UdeM00000040046 6579 243.4 UdeM00000040046 XP\_033756358.1 60.4 197  
77 1 20 216 893 1088 2.60E-61 243.4 6579 cellular  
organisms;Eukaryota;Opisthokonta;Metazoa;Eumetazoa;Bilateria;Protostomia;  
Spiralia;Lophotrochozoa;Mollusca;Bivalvia;Autobranchia;Pteriomorpha;Pect  
inida;Pectinoidea;Pectinidae;Pecten;Pecten maximus  
UdeM00000040047 6565 476.1 UdeM00000040047 XP\_022340940.1 41 712  
340 11 6 702 106 752 7.70E-131 476.1 6565 cellular  
organisms;Eukaryota;Opisthokonta;Metazoa;Eumetazoa;Bilateria;Protostomia;  
Spiralia;Lophotrochozoa;Mollusca;Bivalvia;Autobranchia;Pteriomorpha;Ostr  
eida;Ostreoidea;Ostreidae;Crassostrea;Crassostrea virginica  
UdeM00000040048 6565 256.5 UdeM00000040048 XP\_022340942.1 63 192  
69 1 4 195 1 190 2.70E-65 256.5 6565 cellular  
organisms;Eukaryota;Opisthokonta;Metazoa;Eumetazoa;Bilateria;Protostomia;  
Spiralia;Lophotrochozoa;Mollusca;Bivalvia;Autobranchia;Pteriomorpha;Ostr  
eida;Ostreoidea;Ostreidae;Crassostrea;Crassostrea virginica  
UdeM00000040049 6565 256.9 UdeM00000040049 XP\_022340942.1 63 192  
69 1 1 192 1 190 2.00E-65 256.9 6565 cellular  
organisms;Eukaryota;Opisthokonta;Metazoa;Eumetazoa;Bilateria;Protostomia;  
Spiralia;Lophotrochozoa;Mollusca;Bivalvia;Autobranchia;Pteriomorpha;Ostr  
eida;Ostreoidea;Ostreidae;Crassostrea;Crassostrea virginica  
UdeM00000040050 6596 329.7 UdeM00000040050 XP\_045190580.1 66.4 232  
77 1 1 231 12 243 3.00E-87 329.7 6596 cellular  
organisms;Eukaryota;Opisthokonta;Metazoa;Eumetazoa;Bilateria;Protostomia;  
Spiralia;Lophotrochozoa;Mollusca;Bivalvia;Autobranchia;Heteroconchia;Euhe  
terodonta;Imparidentia;Venerida;Veneroidea;Veneridae;Mercenaria;Mercenari  
a mercenaria  
UdeM00000040051 6596 354.4 UdeM00000040051 XP\_045189645.1 74.3 226  
57 1 1 225 1 226 1.10E-94 354.4 6596 cellular  
organisms;Eukaryota;Opisthokonta;Metazoa;Eumetazoa;Bilateria;Protostomia;  
Spiralia;Lophotrochozoa;Mollusca;Bivalvia;Autobranchia;Heteroconchia;Euhe  
terodonta;Imparidentia;Venerida;Veneroidea;Veneridae;Mercenaria;Mercenari  
a mercenaria  
UdeM00000040052 29159 436.8 UdeM00000040052 XP\_011440861.2 55.3 423  
179 7 4 419 1 420 3.10E-119 436.8 29159 cellular  
organisms;Eukaryota;Opisthokonta;Metazoa;Eumetazoa;Bilateria;Protostomia;  
Spiralia;Lophotrochozoa;Mollusca;Bivalvia;Autobranchia;Pteriomorpha;Ostr  
eida;Ostreoidea;Ostreidae;Crassostrea;Crassostrea gigas

UdeM00000040053 29159 436.4 UdeM00000040053 XP\_011440861.2 55.1 423  
 180 7 4 419 1 420 4.10E-119 436.4 29159 cellular  
 organisms;Eukaryota;Opisthokonta;Metazoa;Eumetazoa;Bilateria;Protostomia;  
 Spiralia;Lophotrochozoa;Mollusca;Bivalvia;Autobranchia;Pteriormorphia;Ostr  
 eida;Ostreoidea;Ostreidae;Crassostrea;Crassostrea gigas  
 UdeM00000040054 225164 382.9 UdeM00000040054 XP\_009058439.1 49.8  
 414 192 7 39 441 9 417 5.60E-103 382.9 225164  
 cellular  
 organisms;Eukaryota;Opisthokonta;Metazoa;Eumetazoa;Bilateria;Protostomia;  
 Spiralia;Lophotrochozoa;Mollusca;Gastropoda;Patellogastropoda;Lottioidea;  
 Lottiidae;Lottia;Lottia gigantea  
 UdeM00000040055 6596 492.3 UdeM00000040055 XP\_045203502.1 45.2 569  
 297 8 65 628 40 598 9.30E-136 492.3 6596 cellular  
 organisms;Eukaryota;Opisthokonta;Metazoa;Eumetazoa;Bilateria;Protostomia;  
 Spiralia;Lophotrochozoa;Mollusca;Bivalvia;Autobranchia;Heteroconchia;Euhe  
 terodonta;Imparidentia;Venerida;Veneroidea;Veneridae;Mercenaria;Mercenari  
 a mercenaria  
 UdeM00000040056 6596 121.7 UdeM00000040056 XP\_045203481.1 32.2 205  
 136 2 1 202 406 610 1.20E-24 121.7 6596 cellular  
 organisms;Eukaryota;Opisthokonta;Metazoa;Eumetazoa;Bilateria;Protostomia;  
 Spiralia;Lophotrochozoa;Mollusca;Bivalvia;Autobranchia;Heteroconchia;Euhe  
 terodonta;Imparidentia;Venerida;Veneroidea;Veneridae;Mercenaria;Mercenari  
 a mercenaria  
 UdeM00000040057 6596 92 UdeM00000040057 XP\_045203481.1 61 77  
 27 1 83 156 206 282 7.10E-16 92 6596 cellular  
 organisms;Eukaryota;Opisthokonta;Metazoa;Eumetazoa;Bilateria;Protostomia;  
 Spiralia;Lophotrochozoa;Mollusca;Bivalvia;Autobranchia;Heteroconchia;Euhe  
 terodonta;Imparidentia;Venerida;Veneroidea;Veneridae;Mercenaria;Mercenari  
 a mercenaria  
 UdeM00000040058 6596 441.4 UdeM00000040058 XP\_045203481.1 43.1 559  
 259 10 65 574 114 662 1.80E-120 441.4 6596 cellular  
 organisms;Eukaryota;Opisthokonta;Metazoa;Eumetazoa;Bilateria;Protostomia;  
 Spiralia;Lophotrochozoa;Mollusca;Bivalvia;Autobranchia;Heteroconchia;Euhe  
 terodonta;Imparidentia;Venerida;Veneroidea;Veneridae;Mercenaria;Mercenari  
 a mercenaria  
 UdeM00000040059 6596 63.5 UdeM00000040059 XP\_045203481.1 42.7 75  
 40 2 6 79 602 674 1.40E-07 63.5 6596 cellular  
 organisms;Eukaryota;Opisthokonta;Metazoa;Eumetazoa;Bilateria;Protostomia;  
 Spiralia;Lophotrochozoa;Mollusca;Bivalvia;Autobranchia;Heteroconchia;Euhe  
 terodonta;Imparidentia;Venerida;Veneroidea;Veneridae;Mercenaria;Mercenari  
 a mercenaria  
 UdeM00000040060 6596 148.3 UdeM00000040060 XP\_045203502.1 39.1 207  
 124 2 9 215 244 448 1.20E-32 148.3 6596 cellular  
 organisms;Eukaryota;Opisthokonta;Metazoa;Eumetazoa;Bilateria;Protostomia;  
 Spiralia;Lophotrochozoa;Mollusca;Bivalvia;Autobranchia;Heteroconchia;Euhe  
 terodonta;Imparidentia;Venerida;Veneroidea;Veneridae;Mercenaria;Mercenari  
 a mercenaria  
 UdeM00000040061 6596 61.6 UdeM00000040061 XP\_045181401.1 53.2 62  
 25 2 2 61 14 73 4.60E-07 61.6 6596 cellular  
 organisms;Eukaryota;Opisthokonta;Metazoa;Eumetazoa;Bilateria;Protostomia;  
 Spiralia;Lophotrochozoa;Mollusca;Bivalvia;Autobranchia;Heteroconchia;Euhe  
 terodonta;Imparidentia;Venerida;Veneroidea;Veneridae;Mercenaria;Mercenari  
 a mercenaria

UdeM00000040062 6596 455.3 UdeM00000040062 XP\_045203481.1 42 598  
 276 11 10 557 86 662 1.10E-124 455.3 6596 cellular  
 organisms;Eukaryota;Opisthokonta;Metazoa;Eumetazoa;Bilateria;Protostomia;  
 Spiralia;Lophotrochozoa;Mollusca;Bivalvia;Autobranchia;Heteroconchia;Euhe  
 terodonta;Imparidentia;Venerida;Veneroidea;Veneridae;Mercenaria;Mercenari  
 a mercenaria  
 UdeM00000040063 6596 489.2 UdeM00000040063 XP\_045203481.1 43.7 597  
 314 9 20 608 80 662 7.80E-135 489.2 6596 cellular  
 organisms;Eukaryota;Opisthokonta;Metazoa;Eumetazoa;Bilateria;Protostomia;  
 Spiralia;Lophotrochozoa;Mollusca;Bivalvia;Autobranchia;Heteroconchia;Euhe  
 terodonta;Imparidentia;Venerida;Veneroidea;Veneridae;Mercenaria;Mercenari  
 a mercenaria  
 UdeM00000040064 6596 140.6 UdeM00000040064 XP\_045203481.1 27.4 351  
 172 5 14 284 327 674 3.10E-30 140.6 6596 cellular  
 organisms;Eukaryota;Opisthokonta;Metazoa;Eumetazoa;Bilateria;Protostomia;  
 Spiralia;Lophotrochozoa;Mollusca;Bivalvia;Autobranchia;Heteroconchia;Euhe  
 terodonta;Imparidentia;Venerida;Veneroidea;Veneridae;Mercenaria;Mercenari  
 a mercenaria  
 UdeM00000040065 6596 473.4 UdeM00000040065 XP\_045203481.1 44 564  
 294 7 70 626 114 662 4.60E-130 473.4 6596 cellular  
 organisms;Eukaryota;Opisthokonta;Metazoa;Eumetazoa;Bilateria;Protostomia;  
 Spiralia;Lophotrochozoa;Mollusca;Bivalvia;Autobranchia;Heteroconchia;Euhe  
 terodonta;Imparidentia;Venerida;Veneroidea;Veneridae;Mercenaria;Mercenari  
 a mercenaria  
 UdeM00000040066 6596 493.8 UdeM00000040066 XP\_045203481.1 44.7 559  
 292 8 63 614 114 662 3.20E-136 493.8 6596 cellular  
 organisms;Eukaryota;Opisthokonta;Metazoa;Eumetazoa;Bilateria;Protostomia;  
 Spiralia;Lophotrochozoa;Mollusca;Bivalvia;Autobranchia;Heteroconchia;Euhe  
 terodonta;Imparidentia;Venerida;Veneroidea;Veneridae;Mercenaria;Mercenari  
 a mercenaria  
 UdeM00000040067 6579 486.1 UdeM00000040067 XP\_033756892.1 71.8 323  
 91 0 7 329 3 325 3.50E-134 486.1 6579 cellular  
 organisms;Eukaryota;Opisthokonta;Metazoa;Eumetazoa;Bilateria;Protostomia;  
 Spiralia;Lophotrochozoa;Mollusca;Bivalvia;Autobranchia;Pteriomorphia;Pect  
 inida;Pectinoidea;Pectinidae;Pecten;Pecten maximus  
 UdeM00000040068 29159 67.4 UdeM00000040068 XP\_011414575.2 27.5 182  
 117 4 11 177 14 195 2.20E-08 67.4 29159 cellular  
 organisms;Eukaryota;Opisthokonta;Metazoa;Eumetazoa;Bilateria;Protostomia;  
 Spiralia;Lophotrochozoa;Mollusca;Bivalvia;Autobranchia;Pteriomorphia;Ostr  
 eida;Ostreoidea;Ostreidae;Crassostrea;Crassostrea gigas  
 UdeM00000040069 29159 138.3 UdeM00000040069 XP\_011414575.2 84.6 78  
 12 0 2 79 188 265 7.40E-30 138.3 29159 cellular  
 organisms;Eukaryota;Opisthokonta;Metazoa;Eumetazoa;Bilateria;Protostomia;  
 Spiralia;Lophotrochozoa;Mollusca;Bivalvia;Autobranchia;Pteriomorphia;Ostr  
 eida;Ostreoidea;Ostreidae;Crassostrea;Crassostrea gigas  
 UdeM00000040070 6596 184.9 UdeM00000040070 XP\_045188950.1 69.8 129  
 39 0 173 301 2 130 1.70E-43 184.9 6596 cellular  
 organisms;Eukaryota;Opisthokonta;Metazoa;Eumetazoa;Bilateria;Protostomia;  
 Spiralia;Lophotrochozoa;Mollusca;Bivalvia;Autobranchia;Heteroconchia;Euhe  
 terodonta;Imparidentia;Venerida;Veneroidea;Veneridae;Mercenaria;Mercenari  
 a mercenaria  
 UdeM00000040071 6596 132.9 UdeM00000040071 XP\_045188950.1 57.3 124  
 53 0 158 281 2 125 7.00E-28 132.9 6596 cellular  
 organisms;Eukaryota;Opisthokonta;Metazoa;Eumetazoa;Bilateria;Protostomia;

Spiralia;Lophotrochozoa;Mollusca;Bivalvia;Autobranchia;Heteroconchia;Euherodonta;Imparidentia;Venerida;Veneroidea;Veneridae;Mercenaria;Mercenaria mercenaria

UdeM00000040072 6565 200.3 UdeM00000040072 XP\_022287126.1 44.9 274  
131 8 11 267 7 277 3.30E-48 200.3 6565 cellular

organisms;Eukaryota;Opisthokonta;Metazoa;Eumetazoa;Bilateria;Protostomia;Spiralia;Lophotrochozoa;Mollusca;Bivalvia;Autobranchia;Pteriomorpha;Ostreida;Ostreoidea;Ostreidae;Crassostrea;Crassostrea virginica

UdeM00000040073 29159 206.5 UdeM00000040073 XP\_011414574.2 46.9 262  
113 8 11 255 14 266 4.70E-50 206.5 29159 cellular

organisms;Eukaryota;Opisthokonta;Metazoa;Eumetazoa;Bilateria;Protostomia;Spiralia;Lophotrochozoa;Mollusca;Bivalvia;Autobranchia;Pteriomorpha;Ostreida;Ostreoidea;Ostreidae;Crassostrea;Crassostrea gigas

UdeM00000040074 29159 206.8 UdeM00000040074 XP\_011414574.2 48 256  
110 7 10 251 13 259 3.70E-50 206.8 29159 cellular

organisms;Eukaryota;Opisthokonta;Metazoa;Eumetazoa;Bilateria;Protostomia;Spiralia;Lophotrochozoa;Mollusca;Bivalvia;Autobranchia;Pteriomorpha;Ostreida;Ostreoidea;Ostreidae;Crassostrea;Crassostrea gigas

UdeM00000040075 6596 179.9 UdeM00000040075 XP\_045190970.1 38.4 331  
151 12 1 285 1 324 4.80E-42 179.9 6596 cellular

organisms;Eukaryota;Opisthokonta;Metazoa;Eumetazoa;Bilateria;Protostomia;Spiralia;Lophotrochozoa;Mollusca;Bivalvia;Autobranchia;Heteroconchia;Euherodonta;Imparidentia;Venerida;Veneroidea;Veneridae;Mercenaria;Mercenaria mercenaria

UdeM00000040077 6596 595.1 UdeM00000040077 XP\_045189063.1 65.9 454  
155 0 10 463 18 471 7.50E-167 595.1 6596 cellular

organisms;Eukaryota;Opisthokonta;Metazoa;Eumetazoa;Bilateria;Protostomia;Spiralia;Lophotrochozoa;Mollusca;Bivalvia;Autobranchia;Heteroconchia;Euherodonta;Imparidentia;Venerida;Veneroidea;Veneridae;Mercenaria;Mercenaria mercenaria

UdeM00000040078 6596 262.3 UdeM00000040078 XP\_045190293.1 20.3 1485  
808 35 71 1209 106 1561 4.10E-66 262.3 6596 cellular

organisms;Eukaryota;Opisthokonta;Metazoa;Eumetazoa;Bilateria;Protostomia;Spiralia;Lophotrochozoa;Mollusca;Bivalvia;Autobranchia;Heteroconchia;Euherodonta;Imparidentia;Venerida;Veneroidea;Veneridae;Mercenaria;Mercenaria mercenaria

UdeM00000040080 6596 197.6 UdeM00000040080 XP\_045190300.1 34.4 305  
188 5 1487 1785 3 301 1.30E-46 197.6 6596 cellular

organisms;Eukaryota;Opisthokonta;Metazoa;Eumetazoa;Bilateria;Protostomia;Spiralia;Lophotrochozoa;Mollusca;Bivalvia;Autobranchia;Heteroconchia;Euherodonta;Imparidentia;Venerida;Veneroidea;Veneridae;Mercenaria;Mercenaria mercenaria

UdeM00000040081 400727 180.3 UdeM00000040081 XP\_025106400.1 49.2  
187 95 0 142 328 533 719 4.20E-42 180.3 400727

cellular  
organisms;Eukaryota;Opisthokonta;Metazoa;Eumetazoa;Bilateria;Protostomia;Spiralia;Lophotrochozoa;Mollusca;Gastropoda;Caenogastropoda;Architaenioglossa;Ampullarioidea;Ampullariidae;Pomacea;Pomacea canaliculata

UdeM00000040082 6596 515.8 UdeM00000040082 XP\_045190295.1 26.4 1406  
837 32 414 1679 7 1354 2.40E-142 515.8 6596 cellular

organisms;Eukaryota;Opisthokonta;Metazoa;Eumetazoa;Bilateria;Protostomia;Spiralia;Lophotrochozoa;Mollusca;Bivalvia;Autobranchia;Heteroconchia;Euherodonta;Imparidentia;Venerida;Veneroidea;Veneridae;Mercenaria;Mercenaria mercenaria

UdeM00000040083 6565 227.3 UdeM00000040083 XP\_022342573.1 45.9 259  
 128 6 6 258 571 823 2.30E-56 227.3 6565 cellular  
 organisms;Eukaryota;Opisthokonta;Metazoa;Eumetazoa;Bilateria;Protostomia;  
 Spiralia;Lophotrochozoa;Mollusca;Bivalvia;Autobranchia;Pteriomorphia;Ostr  
 eida;Ostreoidea;Ostreidae;Crassostrea;Crassostrea virginica  
 UdeM00000040084 6596 738.4 UdeM00000040084 XP\_045189835.1 55.4 624  
 272 5 26 644 26 648 7.80E-210 738.4 6596 cellular  
 organisms;Eukaryota;Opisthokonta;Metazoa;Eumetazoa;Bilateria;Protostomia;  
 Spiralia;Lophotrochozoa;Mollusca;Bivalvia;Autobranchia;Heteroconchia;Euhe  
 terodonta;Imparidentia;Venerida;Veneroidea;Veneridae;Mercenaria;Mercenari  
 a mercenaria  
 UdeM00000040085 1735272 99 UdeM00000040085 XP\_041369517.1 77.8  
 63 14 0 1 63 180 242 3.40E-18 99 1735272  
 cellular  
 organisms;Eukaryota;Opisthokonta;Metazoa;Eumetazoa;Bilateria;Protostomia;  
 Spiralia;Lophotrochozoa;Mollusca;Gastropoda;Neomphalina;Neomphaloidea;Pel  
 tospiridae;Gigantopelta;Gigantopelta aegis  
 UdeM00000040086 6596 203.8 UdeM00000040086 XP\_045189133.1 44.6 312  
 132 12 9 299 6 297 3.20E-49 203.8 6596 cellular  
 organisms;Eukaryota;Opisthokonta;Metazoa;Eumetazoa;Bilateria;Protostomia;  
 Spiralia;Lophotrochozoa;Mollusca;Bivalvia;Autobranchia;Heteroconchia;Euhe  
 terodonta;Imparidentia;Venerida;Veneroidea;Veneridae;Mercenaria;Mercenari  
 a mercenaria  
 UdeM00000040087 6596 121.7 UdeM00000040087 XP\_045188971.1 27 482  
 261 14 153 551 45 518 2.90E-24 121.7 6596 cellular  
 organisms;Eukaryota;Opisthokonta;Metazoa;Eumetazoa;Bilateria;Protostomia;  
 Spiralia;Lophotrochozoa;Mollusca;Bivalvia;Autobranchia;Heteroconchia;Euhe  
 terodonta;Imparidentia;Venerida;Veneroidea;Veneridae;Mercenaria;Mercenari  
 a mercenaria  
 UdeM00000040088 7574 84.7 UdeM00000040088 XP\_013420132.1 27.3 227  
 120 6 15 201 6 227 4.60E-13 84.7 7574 cellular  
 organisms;Eukaryota;Opisthokonta;Metazoa;Eumetazoa;Bilateria;Protostomia;  
 Spiralia;Lophotrochozoa;Brachiopoda;Linguliformea;Lingulata;Lingulida;Lin  
 guloidea;Lingulidae;Lingula;Lingula anatina  
 UdeM00000040089 6596 219.5 UdeM00000040089 XP\_045199200.1 36.9 352  
 215 3 10 361 2 346 7.10E-54 219.5 6596 cellular  
 organisms;Eukaryota;Opisthokonta;Metazoa;Eumetazoa;Bilateria;Protostomia;  
 Spiralia;Lophotrochozoa;Mollusca;Bivalvia;Autobranchia;Heteroconchia;Euhe  
 terodonta;Imparidentia;Venerida;Veneroidea;Veneridae;Mercenaria;Mercenari  
 a mercenaria  
 UdeM00000040090 6573 251.1 UdeM00000040090 XP\_021379030.1 46.3 294  
 146 4 50 339 31 316 2.00E-63 251.1 6573 cellular  
 organisms;Eukaryota;Opisthokonta;Metazoa;Eumetazoa;Bilateria;Protostomia;  
 Spiralia;Lophotrochozoa;Mollusca;Bivalvia;Autobranchia;Pteriomorphia;Pect  
 inida;Pectinoidea;Pectinidae;Mizuhopecten;Mizuhopecten yessoensis  
 UdeM00000040092 6596 243.4 UdeM00000040092 XP\_045166814.1 48.3 296  
 134 6 77 362 3 289 4.50E-61 243.4 6596 cellular  
 organisms;Eukaryota;Opisthokonta;Metazoa;Eumetazoa;Bilateria;Protostomia;  
 Spiralia;Lophotrochozoa;Mollusca;Bivalvia;Autobranchia;Heteroconchia;Euhe  
 terodonta;Imparidentia;Venerida;Veneroidea;Veneridae;Mercenaria;Mercenari  
 a mercenaria  
 UdeM00000040093 6596 258.5 UdeM00000040093 XP\_045166814.1 49.3 296  
 137 7 49 339 3 290 1.30E-65 258.5 6596 cellular  
 organisms;Eukaryota;Opisthokonta;Metazoa;Eumetazoa;Bilateria;Protostomia;

Spiralia;Lophotrochozoa;Mollusca;Bivalvia;Autobranchia;Heteroconchia;Euherodonta;Imparidentia;Venerida;Veneroidea;Veneridae;Mercenaria;Mercenaria mercenaria

UdeM00000040094 6596 253.8 UdeM00000040094 XP\_045212938.1 49.3 272  
115 5 2 272 95 344 2.50E-64 253.8 6596 cellular

organisms;Eukaryota;Opisthokonta;Metazoa;Eumetazoa;Bilateria;Protostomia;Spiralia;Lophotrochozoa;Mollusca;Bivalvia;Autobranchia;Heteroconchia;Euherodonta;Imparidentia;Venerida;Veneroidea;Veneridae;Mercenaria;Mercenaria mercenaria

UdeM00000040095 6596 255 UdeM00000040095 XP\_045170869.1 49.3 276  
113 7 88 356 46 301 1.40E-64 255 6596 cellular

organisms;Eukaryota;Opisthokonta;Metazoa;Eumetazoa;Bilateria;Protostomia;Spiralia;Lophotrochozoa;Mollusca;Bivalvia;Autobranchia;Heteroconchia;Euherodonta;Imparidentia;Venerida;Veneroidea;Veneridae;Mercenaria;Mercenaria mercenaria

UdeM00000040096 6596 247.7 UdeM00000040096 XP\_045206794.1 55.3 215  
92 1 63 277 84 294 1.80E-62 247.7 6596 cellular

organisms;Eukaryota;Opisthokonta;Metazoa;Eumetazoa;Bilateria;Protostomia;Spiralia;Lophotrochozoa;Mollusca;Bivalvia;Autobranchia;Heteroconchia;Euherodonta;Imparidentia;Venerida;Veneroidea;Veneridae;Mercenaria;Mercenaria mercenaria

UdeM00000040097 6579 240 UdeM00000040097 XP\_033738578.1 58.6 191  
76 2 24 214 96 283 3.00E-60 240 6579 cellular

organisms;Eukaryota;Opisthokonta;Metazoa;Eumetazoa;Bilateria;Protostomia;Spiralia;Lophotrochozoa;Mollusca;Bivalvia;Autobranchia;Pteriormorphia;Pectinida;Pectinoidea;Pectinidae;Pecten;Pecten maximus

UdeM00000040099 9986 60.1 UdeM00000040099 XP\_008253697.2 36.3 91  
56 1 106 196 161 249 4.10E-06 60.1 9986 cellular

organisms;Eukaryota;Opisthokonta;Metazoa;Eumetazoa;Bilateria;Deuterostomia;Chordata;Craniata;Vertebrata;Gnathostomata;Teleostomi;Euteleostomi;Sarcopterygii;Dipnotetrapodomorpha;Tetrapoda;Amniota;Mammalia;Theria;Eutheria;Boreoeutheria;Euarchontoglires;Glires;Lagomorpha;Leporidae;Oryctolagus;Oryctolagus cuniculus

UdeM00000040101 6596 1469.1 UdeM00000040101 XP\_045189005.1 86.7  
897 115 2 4 896 1 897 0.00E+00 1469.1 6596  
cellular

organisms;Eukaryota;Opisthokonta;Metazoa;Eumetazoa;Bilateria;Protostomia;Spiralia;Lophotrochozoa;Mollusca;Bivalvia;Autobranchia;Heteroconchia;Euherodonta;Imparidentia;Venerida;Veneroidea;Veneridae;Mercenaria;Mercenaria mercenaria

UdeM00000040102 6596 117.9 UdeM00000040102 XP\_045189004.1 43.9 171  
85 3 10 170 24 193 1.40E-23 117.9 6596 cellular

organisms;Eukaryota;Opisthokonta;Metazoa;Eumetazoa;Bilateria;Protostomia;Spiralia;Lophotrochozoa;Mollusca;Bivalvia;Autobranchia;Heteroconchia;Euherodonta;Imparidentia;Venerida;Veneroidea;Veneridae;Mercenaria;Mercenaria mercenaria

UdeM00000040103 6596 647.9 UdeM00000040103 XP\_045188256.1 52.4 635  
263 7 1 627 1 604 1.60E-182 647.9 6596 cellular

organisms;Eukaryota;Opisthokonta;Metazoa;Eumetazoa;Bilateria;Protostomia;Spiralia;Lophotrochozoa;Mollusca;Bivalvia;Autobranchia;Heteroconchia;Euherodonta;Imparidentia;Venerida;Veneroidea;Veneridae;Mercenaria;Mercenaria mercenaria

UdeM00000040104 29159 176.8 UdeM00000040104 XP\_011443561.2 57.5 134  
56 1 32 164 48 181 2.30E-41 176.8 29159 cellular

organisms;Eukaryota;Opisthokonta;Metazoa;Eumetazoa;Bilateria;Protostomia;Spiralia;Lophotrochozoa;Mollusca;Bivalvia;Autobranchia;Pteriormorphia;Ostreida;Ostreoidea;Ostreidae;Crassostrea;Crassostrea gigas

UdeM00000040105 6596 186.4 UdeM00000040105 XP\_045202545.1 49.3 207  
69 6 10 186 10 210 3.30E-44 186.4 6596 cellular

organisms;Eukaryota;Opisthokonta;Metazoa;Eumetazoa;Bilateria;Protostomia;Spiralia;Lophotrochozoa;Mollusca;Bivalvia;Autobranchia;Heteroconchia;Euheterodonta;Imparidentia;Venerida;Veneroidea;Veneridae;Mercenaria;Mercenaria mercenaria

UdeM00000040106 7888 129 UdeM00000040106 XP\_043938984.1 28.1 398  
242 14 4 374 7 387 1.30E-26 129 7888 cellular

organisms;Eukaryota;Opisthokonta;Metazoa;Eumetazoa;Bilateria;Deuterostomia;Chordata;Craniata;Vertebrata;Gnathostomata;Teleostomi;Euteleostomi;Sarcopterygii;Dipnotetrapodomorpha;Dipnomorpha;Ceratodontae;Ceratodontiformes;Lepidosirenoidei;Protopteridae;Protopterus;Protopterus annectens

UdeM00000040107 6579 909.4 UdeM00000040107 XP\_033757705.1 67.8 637  
204 1 1 636 2 638 2.50E-261 909.4 6579 cellular

organisms;Eukaryota;Opisthokonta;Metazoa;Eumetazoa;Bilateria;Protostomia;Spiralia;Lophotrochozoa;Mollusca;Bivalvia;Autobranchia;Pteriormorphia;Pectinida;Pectinoidea;Pectinidae;Pecten;Pecten maximus

UdeM00000040108 6596 188.7 UdeM00000040108 XP\_045191200.1 61.2 165  
54 2 53 213 13 171 7.50E-45 188.7 6596 cellular

organisms;Eukaryota;Opisthokonta;Metazoa;Eumetazoa;Bilateria;Protostomia;Spiralia;Lophotrochozoa;Mollusca;Bivalvia;Autobranchia;Heteroconchia;Euheterodonta;Imparidentia;Venerida;Veneroidea;Veneridae;Mercenaria;Mercenaria mercenaria

UdeM00000040109 6596 188.7 UdeM00000040109 XP\_045191200.1 61.2 165  
54 2 51 211 13 171 7.40E-45 188.7 6596 cellular

organisms;Eukaryota;Opisthokonta;Metazoa;Eumetazoa;Bilateria;Protostomia;Spiralia;Lophotrochozoa;Mollusca;Bivalvia;Autobranchia;Heteroconchia;Euheterodonta;Imparidentia;Venerida;Veneroidea;Veneridae;Mercenaria;Mercenaria mercenaria

UdeM00000040111 1735272 361.3 UdeM00000040111 XP\_041368570.1 56.8  
301 129 1 22 321 18 318 1.50E-96 361.3 1735272  
cellular

organisms;Eukaryota;Opisthokonta;Metazoa;Eumetazoa;Bilateria;Protostomia;Spiralia;Lophotrochozoa;Mollusca;Gastropoda;Neomphalina;Neomphaloidea;Peltospiridae;Gigantopelta;Gigantopelta aegis

UdeM00000040112 6596 78.6 UdeM00000040112 XP\_045188786.1 29 145  
97 2 237 379 168 308 1.90E-11 78.6 6596 cellular

organisms;Eukaryota;Opisthokonta;Metazoa;Eumetazoa;Bilateria;Protostomia;Spiralia;Lophotrochozoa;Mollusca;Bivalvia;Autobranchia;Heteroconchia;Euheterodonta;Imparidentia;Venerida;Veneroidea;Veneridae;Mercenaria;Mercenaria mercenaria

UdeM00000040113 6596 488 UdeM00000040113 XP\_045203481.1 41.4 640  
342 10 9 630 51 675 1.80E-134 488 6596 cellular

organisms;Eukaryota;Opisthokonta;Metazoa;Eumetazoa;Bilateria;Protostomia;Spiralia;Lophotrochozoa;Mollusca;Bivalvia;Autobranchia;Heteroconchia;Euheterodonta;Imparidentia;Venerida;Veneroidea;Veneridae;Mercenaria;Mercenaria mercenaria

UdeM00000040114 6596 380.6 UdeM00000040114 XP\_045203481.1 43.1 473  
247 8 3 468 218 675 2.90E-102 380.6 6596 cellular

organisms;Eukaryota;Opisthokonta;Metazoa;Eumetazoa;Bilateria;Protostomia;Spiralia;Lophotrochozoa;Mollusca;Bivalvia;Autobranchia;Heteroconchia;Euheterodonta;Imparidentia;Venerida;Veneroidea;Veneridae;Mercenaria;Mercenaria mercenaria

terodonta;Imparidentia;Venerida;Veneroidea;Veneridae;Mercenaria;Mercenaria mercenaria

UdeM00000040115 400727 159.5 UdeM00000040115 XP\_025093987.1 52.2  
159 70 2 63 221 41 193 5.10E-36 159.5 400727  
cellular

organisms;Eukaryota;Opisthokonta;Metazoa;Eumetazoa;Bilateria;Protostomia;Spiralia;Lophotrochozoa;Mollusca;Gastropoda;Caenogastropoda;Architaenioglossa;Ampullarioidea;Ampullariidae;Pomacea;Pomacea canaliculata

UdeM00000040116 29159 312 UdeM00000040116 XP\_011454560.1 62.6 230  
85 1 3 232 637 865 6.40E-82 312 29159 cellular

organisms;Eukaryota;Opisthokonta;Metazoa;Eumetazoa;Bilateria;Protostomia;Spiralia;Lophotrochozoa;Mollusca;Bivalvia;Autobranchia;Pteriormorphia;Ostreida;Ostreoidea;Ostreidae;Crassostrea;Crassostrea gigas

UdeM00000040117 6596 729.9 UdeM00000040117 XP\_045190481.1 58.7 685  
254 7 6 676 1 670 2.90E-207 729.9 6596 cellular

organisms;Eukaryota;Opisthokonta;Metazoa;Eumetazoa;Bilateria;Protostomia;Spiralia;Lophotrochozoa;Mollusca;Bivalvia;Autobranchia;Heteroconchia;Euheterodonta;Imparidentia;Venerida;Veneroidea;Veneridae;Mercenaria;Mercenaria mercenaria

UdeM00000040118 6573 701 UdeM00000040118 XP\_021352489.1 61.3 499  
185 3 34 527 42 537 1.10E-198 701 6573 cellular

organisms;Eukaryota;Opisthokonta;Metazoa;Eumetazoa;Bilateria;Protostomia;Spiralia;Lophotrochozoa;Mollusca;Bivalvia;Autobranchia;Pteriormorphia;Pectinida;Pectinoidea;Pectinidae;Mizuhopecten;Mizuhopecten yessoensis

UdeM00000040119 6596 894 UdeM00000040119 XP\_045189642.1 53.4 870  
378 9 4 852 3 866 1.40E-256 894 6596 cellular

organisms;Eukaryota;Opisthokonta;Metazoa;Eumetazoa;Bilateria;Protostomia;Spiralia;Lophotrochozoa;Mollusca;Bivalvia;Autobranchia;Heteroconchia;Euheterodonta;Imparidentia;Venerida;Veneroidea;Veneridae;Mercenaria;Mercenaria mercenaria

UdeM00000040120 37621 97.1 UdeM00000040120 XP\_014673954.1 51.2 80  
38 1 444 522 267 346 7.50E-17 97.1 37621 cellular

organisms;Eukaryota;Opisthokonta;Metazoa;Eumetazoa;Bilateria;Protostomia;Ecdysozoa;Scalidophora;Priapulida;Priapulimorpha;Priapulimorphida;Priapulidae;Priapululus;Priapululus caudatus

UdeM00000040121 6596 114.4 UdeM00000040121 XP\_045189682.1 53.8 91  
41 1 642 731 359 449 6.20E-22 114.4 6596 cellular

organisms;Eukaryota;Opisthokonta;Metazoa;Eumetazoa;Bilateria;Protostomia;Spiralia;Lophotrochozoa;Mollusca;Bivalvia;Autobranchia;Heteroconchia;Euheterodonta;Imparidentia;Venerida;Veneroidea;Veneridae;Mercenaria;Mercenaria mercenaria

UdeM00000040121 6596 70.9 UdeM00000040121 XP\_045189682.1 50.7 69  
34 0 15 83 9 77 7.90E-09 70.9 6596 cellular

organisms;Eukaryota;Opisthokonta;Metazoa;Eumetazoa;Bilateria;Protostomia;Spiralia;Lophotrochozoa;Mollusca;Bivalvia;Autobranchia;Heteroconchia;Euheterodonta;Imparidentia;Venerida;Veneroidea;Veneridae;Mercenaria;Mercenaria mercenaria

UdeM00000040122 225164 297.4 UdeM00000040122 XP\_009050966.1 38.6  
396 239 4 28 423 38 429 3.30E-77 297.4 225164

cellular

organisms;Eukaryota;Opisthokonta;Metazoa;Eumetazoa;Bilateria;Protostomia;Spiralia;Lophotrochozoa;Mollusca;Gastropoda;Patellogastropoda;Lottioidae;Lottiidae;Lottia;Lottia gigantea



UdeM00000040123 6596 210.3 UdeM00000040123 XP\_045189700.1 45.5 290  
 122 9 21 291 26 298 3.40E-51 210.3 6596 cellular  
 organisms;Eukaryota;Opisthokonta;Metazoa;Eumetazoa;Bilateria;Protostomia;  
 Spiralia;Lophotrochozoa;Mollusca;Bivalvia;Autobranchia;Heteroconchia;Euhe  
 terodonta;Imparidentia;Venerida;Veneroidea;Veneridae;Mercenaria;Mercenari  
 a mercenaria  
 UdeM00000040124 6573 386 UdeM00000040124 XP\_021345996.1 49.1 379  
 193 0 9 387 14 392 5.80E-104 386 6573 cellular  
 organisms;Eukaryota;Opisthokonta;Metazoa;Eumetazoa;Bilateria;Protostomia;  
 Spiralia;Lophotrochozoa;Mollusca;Bivalvia;Autobranchia;Pteriormorphia;Pect  
 inida;Pectinoidea;Pectinidae;Mizuhopecten;Mizuhopecten yessoensis  
 UdeM00000040125 6596 144.1 UdeM00000040125 XP\_045189316.1 48.5 171  
 79 4 18 183 11 177 1.90E-31 144.1 6596 cellular  
 organisms;Eukaryota;Opisthokonta;Metazoa;Eumetazoa;Bilateria;Protostomia;  
 Spiralia;Lophotrochozoa;Mollusca;Bivalvia;Autobranchia;Heteroconchia;Euhe  
 terodonta;Imparidentia;Venerida;Veneroidea;Veneridae;Mercenaria;Mercenari  
 a mercenaria  
 UdeM00000040126 6565 316.6 UdeM00000040126 XP\_022337045.1 53 313  
 136 6 7 313 8 315 3.60E-83 316.6 6565 cellular  
 organisms;Eukaryota;Opisthokonta;Metazoa;Eumetazoa;Bilateria;Protostomia;  
 Spiralia;Lophotrochozoa;Mollusca;Bivalvia;Autobranchia;Pteriormorphia;Ostr  
 eida;Ostreoidea;Ostreidae;Crassostrea;Crassostrea virginica  
 UdeM00000040127 6579 252.7 UdeM00000040127 XP\_033751112.1 40.8 289  
 165 4 12 298 76 360 5.90E-64 252.7 6579 cellular  
 organisms;Eukaryota;Opisthokonta;Metazoa;Eumetazoa;Bilateria;Protostomia;  
 Spiralia;Lophotrochozoa;Mollusca;Bivalvia;Autobranchia;Pteriormorphia;Pect  
 inida;Pectinoidea;Pectinidae;Pecten;Pecten maximus  
 UdeM00000040128 6573 301.6 UdeM00000040128 XP\_021354732.1 46.5 288  
 151 2 78 365 77 361 1.40E-78 301.6 6573 cellular  
 organisms;Eukaryota;Opisthokonta;Metazoa;Eumetazoa;Bilateria;Protostomia;  
 Spiralia;Lophotrochozoa;Mollusca;Bivalvia;Autobranchia;Pteriormorphia;Pect  
 inida;Pectinoidea;Pectinidae;Mizuhopecten;Mizuhopecten yessoensis  
 UdeM00000040130 6596 339 UdeM00000040130 XP\_045188510.1 54.2 354  
 157 3 122 473 396 746 9.90E-90 339 6596 cellular  
 organisms;Eukaryota;Opisthokonta;Metazoa;Eumetazoa;Bilateria;Protostomia;  
 Spiralia;Lophotrochozoa;Mollusca;Bivalvia;Autobranchia;Heteroconchia;Euhe  
 terodonta;Imparidentia;Venerida;Veneroidea;Veneridae;Mercenaria;Mercenari  
 a mercenaria  
 UdeM00000040131 6596 113.2 UdeM00000040131 XP\_045188521.1 41.9 217  
 74 6 22 188 77 291 4.40E-22 113.2 6596 cellular  
 organisms;Eukaryota;Opisthokonta;Metazoa;Eumetazoa;Bilateria;Protostomia;  
 Spiralia;Lophotrochozoa;Mollusca;Bivalvia;Autobranchia;Heteroconchia;Euhe  
 terodonta;Imparidentia;Venerida;Veneroidea;Veneridae;Mercenaria;Mercenari  
 a mercenaria  
 UdeM00000040132 6596 154.5 UdeM00000040132 XP\_045185048.1 35 260  
 129 5 7 250 8 243 2.10E-34 154.5 6596 cellular  
 organisms;Eukaryota;Opisthokonta;Metazoa;Eumetazoa;Bilateria;Protostomia;  
 Spiralia;Lophotrochozoa;Mollusca;Bivalvia;Autobranchia;Heteroconchia;Euhe  
 terodonta;Imparidentia;Venerida;Veneroidea;Veneridae;Mercenaria;Mercenari  
 a mercenaria  
 UdeM00000040133 1735272 424.1 UdeM00000040133 XP\_041356266.1 51.1  
 407 189 4 51 454 209 608 2.30E-115 424.1 1735272  
 cellular  
 organisms;Eukaryota;Opisthokonta;Metazoa;Eumetazoa;Bilateria;Protostomia;

Spiralia; Lophotrochozoa; Mollusca; Gastropoda; Neomphalina; Neomphaloidea; Pelto-  
 tospiridae; Gigantopelta; Gigantopelta aegis

UdeM00000040134 6596 229.9 UdeM00000040134 XP\_045188522.1 38.9 419  
 109 9 61 334 328 744 4.60E-57 229.9 6596 cellular  
 organisms; Eukaryota; Opisthokonta; Metazoa; Eumetazoa; Bilateria; Protostomia;  
 Spiralia; Lophotrochozoa; Mollusca; Bivalvia; Autobranchia; Heteroconchia; Eue-  
 terodonta; Imparidentia; Venerida; Veneroidea; Veneridae; Mercenaria; Mercenari-  
 a mercenaria

UdeM00000040135 6579 126.3 UdeM00000040135 XP\_033757364.1 31.7 379  
 196 12 1 323 1 372 6.90E-26 126.3 6579 cellular  
 organisms; Eukaryota; Opisthokonta; Metazoa; Eumetazoa; Bilateria; Protostomia;  
 Spiralia; Lophotrochozoa; Mollusca; Bivalvia; Autobranchia; Pteriomorpha; Pect-  
 inida; Pectinoidea; Pectinidae; Pecten; Pecten maximus

UdeM00000040136 6573 95.9 UdeM00000040136 XP\_021355525.1 31.8 267  
 141 12 7 254 6 250 7.90E-17 95.9 6573 cellular  
 organisms; Eukaryota; Opisthokonta; Metazoa; Eumetazoa; Bilateria; Protostomia;  
 Spiralia; Lophotrochozoa; Mollusca; Bivalvia; Autobranchia; Pteriomorpha; Pect-  
 inida; Pectinoidea; Pectinidae; Mizuhopecten; Mizuhopecten yessoensis

UdeM00000040137 6596 1016.5 UdeM00000040137 XP\_045189730.1 68.4  
 947 291 3 18 958 401 1345 2.20E-293 1016.5 6596  
 cellular  
 organisms; Eukaryota; Opisthokonta; Metazoa; Eumetazoa; Bilateria; Protostomia;  
 Spiralia; Lophotrochozoa; Mollusca; Bivalvia; Autobranchia; Heteroconchia; Eue-  
 terodonta; Imparidentia; Venerida; Veneroidea; Veneridae; Mercenaria; Mercenari-  
 a mercenaria

UdeM00000040138 6596 201.4 UdeM00000040138 XP\_045189730.1 72 189  
 40 3 1 189 1 176 2.10E-48 201.4 6596 cellular  
 organisms; Eukaryota; Opisthokonta; Metazoa; Eumetazoa; Bilateria; Protostomia;  
 Spiralia; Lophotrochozoa; Mollusca; Bivalvia; Autobranchia; Heteroconchia; Eue-  
 terodonta; Imparidentia; Venerida; Veneroidea; Veneridae; Mercenaria; Mercenari-  
 a mercenaria

UdeM00000040139 6596 1208.7 UdeM00000040139 XP\_045189355.1 78.9  
 785 152 4 7 788 9 782 0.00E+00 1208.7 6596  
 cellular  
 organisms; Eukaryota; Opisthokonta; Metazoa; Eumetazoa; Bilateria; Protostomia;  
 Spiralia; Lophotrochozoa; Mollusca; Bivalvia; Autobranchia; Heteroconchia; Eue-  
 terodonta; Imparidentia; Venerida; Veneroidea; Veneridae; Mercenaria; Mercenari-  
 a mercenaria

UdeM00000040140 29159 113.6 UdeM00000040140 XP\_019926412.2 51.6 126  
 58 1 1 123 1 126 2.30E-22 113.6 29159 cellular  
 organisms; Eukaryota; Opisthokonta; Metazoa; Eumetazoa; Bilateria; Protostomia;  
 Spiralia; Lophotrochozoa; Mollusca; Bivalvia; Autobranchia; Pteriomorpha; Ostr-  
 eida; Ostreoidea; Ostreidae; Crassostrea; Crassostrea gigas

UdeM00000040142 29159 62.4 UdeM00000040142 XP\_034328747.1 26.5 196  
 133 6 28 219 60 248 8.80E-07 62.4 29159 cellular  
 organisms; Eukaryota; Opisthokonta; Metazoa; Eumetazoa; Bilateria; Protostomia;  
 Spiralia; Lophotrochozoa; Mollusca; Bivalvia; Autobranchia; Pteriomorpha; Ostr-  
 eida; Ostreoidea; Ostreidae; Crassostrea; Crassostrea gigas

UdeM00000040143 29159 62.4 UdeM00000040143 XP\_034328747.1 26.5 196  
 133 6 15 206 60 248 8.30E-07 62.4 29159 cellular  
 organisms; Eukaryota; Opisthokonta; Metazoa; Eumetazoa; Bilateria; Protostomia;  
 Spiralia; Lophotrochozoa; Mollusca; Bivalvia; Autobranchia; Pteriomorpha; Ostr-  
 eida; Ostreoidea; Ostreidae; Crassostrea; Crassostrea gigas

UdeM00000040145 1203425 114.4 UdeM00000040145 XP\_034535258.1 54.5  
88 40 0 46 133 224 311 1.10E-22 114.4 1203425  
cellular

organisms;Eukaryota;Opisthokonta;Metazoa;Eumetazoa;Bilateria;Deuterostomi  
a;Chordata;Craniata;Vertebrata;Gnathostomata;Teleostomi;Euteleostomi;Acti  
nopterygii;Actinopteri;Neopterygii;Teleostei;Osteoglossocephalai;Clupeoce  
phala;Euteleosteomorpha;Neoteleostei;Eurypterygia;Ctenosquamata;Acanthomo  
rphata;Euacanthomorphacea;Percomorphaceae;Eupercaria;Labriformes;Labridae  
;Notolabrus;Notolabrus celidotus

UdeM00000040148 1250792 199.9 UdeM00000040148 XP\_041860347.1 34.5  
336 119 1 6 240 4 339 3.70E-48 199.9 1250792  
cellular

organisms;Eukaryota;Opisthokonta;Metazoa;Eumetazoa;Bilateria;Deuterostomi  
a;Chordata;Craniata;Vertebrata;Gnathostomata;Teleostomi;Euteleostomi;Acti  
nopterygii;Actinopteri;Neopterygii;Teleostei;Osteoglossocephalai;Clupeoce  
phala;Euteleosteomorpha;Neoteleostei;Eurypterygia;Ctenosquamata;Acanthomo  
rphata;Euacanthomorphacea;Percomorphaceae;Ovalentaria;Atherinomorphae;Ath  
eriniformes;Melanotaeniidae;Melanotaenia;Melanotaenia boesemani

UdeM00000040168 6596 72 UdeM00000040168 XP\_045190933.1 31.1 132  
78 5 18 141 17 143 6.80E-10 72 6596 cellular

organisms;Eukaryota;Opisthokonta;Metazoa;Eumetazoa;Bilateria;Protostomia;  
Spiralia;Lophotrochozoa;Mollusca;Bivalvia;Autobranchia;Heteroconchia;Euhe  
terodonta;Imparidentia;Venerida;Veneroidea;Veneridae;Mercenaria;Mercenari  
a mercenaria

UdeM00000040169 225164 63.2 UdeM00000040169 XP\_009062547.1 30.3  
142 91 5 8 145 7 144 3.40E-07 63.2 225164  
cellular

organisms;Eukaryota;Opisthokonta;Metazoa;Eumetazoa;Bilateria;Protostomia;  
Spiralia;Lophotrochozoa;Mollusca;Gastropoda;Patellogastropoda;Lottioidea;  
Lottiidae;Lottia;Lottia gigantea

UdeM00000040175 225164 59.7 UdeM00000040175 XP\_009062547.1 35.2  
122 71 5 7 121 24 144 3.20E-06 59.7 225164  
cellular

organisms;Eukaryota;Opisthokonta;Metazoa;Eumetazoa;Bilateria;Protostomia;  
Spiralia;Lophotrochozoa;Mollusca;Gastropoda;Patellogastropoda;Lottioidea;  
Lottiidae;Lottia;Lottia gigantea

UdeM00000040177 6596 200.7 UdeM00000040177 XP\_045190494.1 72.2 126  
35 0 1 126 5 130 1.30E-48 200.7 6596 cellular

organisms;Eukaryota;Opisthokonta;Metazoa;Eumetazoa;Bilateria;Protostomia;  
Spiralia;Lophotrochozoa;Mollusca;Bivalvia;Autobranchia;Heteroconchia;Euhe  
terodonta;Imparidentia;Venerida;Veneroidea;Veneridae;Mercenaria;Mercenari  
a mercenaria

UdeM00000040178 1735272 527.3 UdeM00000040178 XP\_041367924.1 81.2  
324 61 0 23 346 8 331 1.50E-146 527.3 1735272  
cellular

organisms;Eukaryota;Opisthokonta;Metazoa;Eumetazoa;Bilateria;Protostomia;  
Spiralia;Lophotrochozoa;Mollusca;Gastropoda;Neomphalina;Neomphaloidea;Pel  
tospiridae;Gigantopelta;Gigantopelta aegis

UdeM00000040179 1735272 530.8 UdeM00000040179 XP\_041367924.1 82.6  
322 54 1 1 320 10 331 1.20E-147 530.8 1735272  
cellular

organisms;Eukaryota;Opisthokonta;Metazoa;Eumetazoa;Bilateria;Protostomia;  
Spiralia;Lophotrochozoa;Mollusca;Gastropoda;Neomphalina;Neomphaloidea;Pel  
tospiridae;Gigantopelta;Gigantopelta aegis

UdeM00000040180 29159 250.4 UdeM00000040180 XP\_034328898.1 62.2 172  
 65 0 16 187 65 236 1.80E-63 250.4 29159 cellular  
 organisms;Eukaryota;Opisthokonta;Metazoa;Eumetazoa;Bilateria;Protostomia;  
 Spiralia;Lophotrochozoa;Mollusca;Bivalvia;Autobranchia;Pteriomorphia;Ostr  
 eida;Ostreoidea;Ostreidae;Crassostrea;Crassostrea gigas  
 UdeM00000040181 29159 302.8 UdeM00000040181 XP\_011422762.2 58.7 235  
 91 3 5 233 1 235 3.90E-79 302.8 29159 cellular  
 organisms;Eukaryota;Opisthokonta;Metazoa;Eumetazoa;Bilateria;Protostomia;  
 Spiralia;Lophotrochozoa;Mollusca;Bivalvia;Autobranchia;Pteriomorphia;Ostr  
 eida;Ostreoidea;Ostreidae;Crassostrea;Crassostrea gigas  
 UdeM00000040182 1735272 109.8 UdeM00000040182 XP\_041367924.1 69  
 84 26 0 33 116 251 334 2.50E-21 109.8 1735272  
 cellular  
 organisms;Eukaryota;Opisthokonta;Metazoa;Eumetazoa;Bilateria;Protostomia;  
 Spiralia;Lophotrochozoa;Mollusca;Gastropoda;Neomphalina;Neomphaloidea;Pel  
 tospiridae;Gigantopelta;Gigantopelta aegis  
 UdeM00000040183 7054 206.5 UdeM00000040183 XP\_031350379.1 41.2 294  
 156 6 5 281 60 353 4.60E-50 206.5 7054 cellular  
 organisms;Eukaryota;Opisthokonta;Metazoa;Eumetazoa;Bilateria;Protostomia;  
 Ecdysozoa;Panarthropoda;Arthropoda;Mandibulata;Pancrustacea;Hexapoda;Inse  
 cta;Dicondylia;Pterygota;Neoptera;Endopterygota;Coleoptera;Polyphaga;Elat  
 eriformia;Elateroidea;Lampyridae;Lampyrinae;Photinus;Photinus pyralis  
 UdeM00000040184 7719 66.6 UdeM00000040184 XP\_004227365.1 58.2 55  
 23 0 30 84 106 160 1.80E-08 66.6 7719 cellular  
 organisms;Eukaryota;Opisthokonta;Metazoa;Eumetazoa;Bilateria;Deuterostomi  
 a;Chordata;Tunicata;Ascidiacea;Phlebobranchia;Cionidae;Ciona;Ciona  
 intestinalis  
 UdeM00000040185 29159 249.2 UdeM00000040185 XP\_034328898.1 62.8 172  
 64 0 16 187 65 236 4.10E-63 249.2 29159 cellular  
 organisms;Eukaryota;Opisthokonta;Metazoa;Eumetazoa;Bilateria;Protostomia;  
 Spiralia;Lophotrochozoa;Mollusca;Bivalvia;Autobranchia;Pteriomorphia;Ostr  
 eida;Ostreoidea;Ostreidae;Crassostrea;Crassostrea gigas  
 UdeM00000040186 6565 58.9 UdeM00000040186 XP\_022292556.1 44.3 61  
 34 0 64 124 310 370 5.80E-06 58.9 6565 cellular  
 organisms;Eukaryota;Opisthokonta;Metazoa;Eumetazoa;Bilateria;Protostomia;  
 Spiralia;Lophotrochozoa;Mollusca;Bivalvia;Autobranchia;Pteriomorphia;Ostr  
 eida;Ostreoidea;Ostreidae;Crassostrea;Crassostrea virginica  
 UdeM00000040187 29159 251.9 UdeM00000040187 XP\_034328898.1 63.3 177  
 63 1 6 180 60 236 6.10E-64 251.9 29159 cellular  
 organisms;Eukaryota;Opisthokonta;Metazoa;Eumetazoa;Bilateria;Protostomia;  
 Spiralia;Lophotrochozoa;Mollusca;Bivalvia;Autobranchia;Pteriomorphia;Ostr  
 eida;Ostreoidea;Ostreidae;Crassostrea;Crassostrea gigas  
 UdeM00000040188 29159 303.1 UdeM00000040188 XP\_011422762.2 57.9 235  
 95 1 5 235 1 235 3.00E-79 303.1 29159 cellular  
 organisms;Eukaryota;Opisthokonta;Metazoa;Eumetazoa;Bilateria;Protostomia;  
 Spiralia;Lophotrochozoa;Mollusca;Bivalvia;Autobranchia;Pteriomorphia;Ostr  
 eida;Ostreoidea;Ostreidae;Crassostrea;Crassostrea gigas  
 UdeM00000040189 6596 295 UdeM00000040189 XP\_045208502.1 60.6 218  
 81 1 17 234 22 234 8.20E-77 295 6596 cellular  
 organisms;Eukaryota;Opisthokonta;Metazoa;Eumetazoa;Bilateria;Protostomia;  
 Spiralia;Lophotrochozoa;Mollusca;Bivalvia;Autobranchia;Heteroconchia;Euhe  
 terodonta;Imparidentia;Venerida;Veneroidea;Veneridae;Mercenaria;Mercenari  
 a mercenaria

UdeM00000040190 6596 311.2 UdeM00000040190 XP\_045188503.1 57.5 266  
 106 2 50 308 60 325 1.50E-81 311.2 6596 cellular  
 organisms;Eukaryota;Opisthokonta;Metazoa;Eumetazoa;Bilateria;Protostomia;  
 Spiralia;Lophotrochozoa;Mollusca;Bivalvia;Autobranchia;Heteroconchia;Euhe  
 terodonta;Imparidentia;Venerida;Veneroidea;Veneridae;Mercenaria;Mercenari  
 a mercenaria  
 UdeM00000040192 6596 203.4 UdeM00000040192 XP\_045190979.1 39.8 299  
 176 3 24 318 27 325 4.40E-49 203.4 6596 cellular  
 organisms;Eukaryota;Opisthokonta;Metazoa;Eumetazoa;Bilateria;Protostomia;  
 Spiralia;Lophotrochozoa;Mollusca;Bivalvia;Autobranchia;Heteroconchia;Euhe  
 terodonta;Imparidentia;Venerida;Veneroidea;Veneridae;Mercenaria;Mercenari  
 a mercenaria  
 UdeM00000040193 6596 92.8 UdeM00000040193 XP\_045189175.1 50.6 81  
 40 0 76 156 32 112 4.20E-16 92.8 6596 cellular  
 organisms;Eukaryota;Opisthokonta;Metazoa;Eumetazoa;Bilateria;Protostomia;  
 Spiralia;Lophotrochozoa;Mollusca;Bivalvia;Autobranchia;Heteroconchia;Euhe  
 terodonta;Imparidentia;Venerida;Veneroidea;Veneridae;Mercenaria;Mercenari  
 a mercenaria  
 UdeM00000026611 6596 1532.3 UdeM00000026611 XP\_045214498.1 72.8  
 1094 260 11 6 1072 14 1096 0.00E+00 1532.3 6596  
 cellular  
 organisms;Eukaryota;Opisthokonta;Metazoa;Eumetazoa;Bilateria;Protostomia;  
 Spiralia;Lophotrochozoa;Mollusca;Bivalvia;Autobranchia;Heteroconchia;Euhe  
 terodonta;Imparidentia;Venerida;Veneroidea;Veneridae;Mercenaria;Mercenari  
 a mercenaria  
 UdeM00000026612 29159 303.5 UdeM00000026612 XP\_034312903.1 54 300  
 124 3 1 300 783 1068 2.90E-79 303.5 29159 cellular  
 organisms;Eukaryota;Opisthokonta;Metazoa;Eumetazoa;Bilateria;Protostomia;  
 Spiralia;Lophotrochozoa;Mollusca;Bivalvia;Autobranchia;Pteriormorphia;Ostr  
 eida;Ostreoidea;Ostreidae;Crassostrea;Crassostrea gigas  
 UdeM00000026613 6596 567.4 UdeM00000026613 XP\_045214491.1 48.6 979  
 423 21 1 941 1 937 3.40E-158 567.4 6596 cellular  
 organisms;Eukaryota;Opisthokonta;Metazoa;Eumetazoa;Bilateria;Protostomia;  
 Spiralia;Lophotrochozoa;Mollusca;Bivalvia;Autobranchia;Heteroconchia;Euhe  
 terodonta;Imparidentia;Venerida;Veneroidea;Veneridae;Mercenaria;Mercenari  
 a mercenaria  
 UdeM00000026614 6596 392.1 UdeM00000026614 XP\_045214491.1 63.5 277  
 100 1 1 277 1 276 6.20E-106 392.1 6596 cellular  
 organisms;Eukaryota;Opisthokonta;Metazoa;Eumetazoa;Bilateria;Protostomia;  
 Spiralia;Lophotrochozoa;Mollusca;Bivalvia;Autobranchia;Heteroconchia;Euhe  
 terodonta;Imparidentia;Venerida;Veneroidea;Veneridae;Mercenaria;Mercenari  
 a mercenaria  
 UdeM00000026615 225164 166 UdeM00000026615 XP\_009045420.1 71.2  
 104 30 0 7 110 9 112 2.90E-38 166 225164  
 cellular  
 organisms;Eukaryota;Opisthokonta;Metazoa;Eumetazoa;Bilateria;Protostomia;  
 Spiralia;Lophotrochozoa;Mollusca;Gastropoda;Patellogastropoda;Lottioidae;  
 Lottiidae;Lottia;Lottia gigantea  
 UdeM00000026616 225164 175.3 UdeM00000026616 XP\_009045420.1 70.3  
 118 34 1 18 135 110 226 5.50E-41 175.3 225164  
 cellular  
 organisms;Eukaryota;Opisthokonta;Metazoa;Eumetazoa;Bilateria;Protostomia;  
 Spiralia;Lophotrochozoa;Mollusca;Gastropoda;Patellogastropoda;Lottioidae;  
 Lottiidae;Lottia;Lottia gigantea

UdeM00000026617 400727 528.9 UdeM00000026617 XP\_025097011.1 78.4  
 306 66 0 5 310 6 311 4.50E-147 528.9 400727  
 cellular  
 organisms;Eukaryota;Opisthokonta;Metazoa;Eumetazoa;Bilateria;Protostomia;  
 Spiralia;Lophotrochozoa;Mollusca;Gastropoda;Caenogastropoda;Architaenioglossa;  
 Ampullarioidea;Ampullariidae;Pomacea;Pomacea canaliculata  
 UdeM00000026619 7741 225.7 UdeM00000026619 XP\_019641574.1 64.9 148  
 48 1 19 162 39 186 4.20E-56 225.7 7741 cellular  
 organisms;Eukaryota;Opisthokonta;Metazoa;Eumetazoa;Bilateria;Deuterostomia;  
 Chordata;Cephalochordata;Leptocardii;Amphioxiformes;Branchiostomidae;Branchiostoma;  
 Branchiostoma belcheri  
 UdeM00000026620 6565 654.8 UdeM00000026620 XP\_022316143.1 71.4 447  
 124 2 98 544 7 449 9.40E-185 654.8 6565 cellular  
 organisms;Eukaryota;Opisthokonta;Metazoa;Eumetazoa;Bilateria;Protostomia;  
 Spiralia;Lophotrochozoa;Mollusca;Bivalvia;Autobranchia;Pteriormorphia;Ostreida;  
 Ostreioidea;Ostreidae;Crassostrea;Crassostrea virginica  
 UdeM00000026621 6596 77.8 UdeM00000026621 XP\_045213408.1 40.1 182  
 101 4 1 179 1 177 8.50E-11 77.8 6596 cellular  
 organisms;Eukaryota;Opisthokonta;Metazoa;Eumetazoa;Bilateria;Protostomia;  
 Spiralia;Lophotrochozoa;Mollusca;Bivalvia;Autobranchia;Heteroconchia;Euheterodonta;  
 Imparidentia;Venerida;Veneroidea;Veneridae;Mercenaria;Mercenaria mercenaria  
 UdeM00000026622 6573 926 UdeM00000026622 XP\_021380126.1 70.1 686  
 168 11 2 670 3 668 2.70E-266 926 6573 cellular  
 organisms;Eukaryota;Opisthokonta;Metazoa;Eumetazoa;Bilateria;Protostomia;  
 Spiralia;Lophotrochozoa;Mollusca;Bivalvia;Autobranchia;Pteriormorphia;Pectinida;  
 Pectinoidea;Pectinidae;Mizuhopecten;Mizuhopecten yessoensis  
 UdeM00000026623 225164 121.3 UdeM00000026623 XP\_009049696.1 47.8  
 134 64 2 1 131 1 131 9.60E-25 121.3 225164  
 cellular  
 organisms;Eukaryota;Opisthokonta;Metazoa;Eumetazoa;Bilateria;Protostomia;  
 Spiralia;Lophotrochozoa;Mollusca;Gastropoda;Patellogastropoda;Lottioidae;  
 Lottiidae;Lottia;Lottia gigantea  
 UdeM00000026624 6596 860.1 UdeM00000026624 XP\_045213860.1 84.2 481  
 76 0 98 578 82 562 1.60E-246 860.1 6596 cellular  
 organisms;Eukaryota;Opisthokonta;Metazoa;Eumetazoa;Bilateria;Protostomia;  
 Spiralia;Lophotrochozoa;Mollusca;Bivalvia;Autobranchia;Heteroconchia;Euheterodonta;  
 Imparidentia;Venerida;Veneroidea;Veneridae;Mercenaria;Mercenaria mercenaria  
 UdeM00000026625 6596 1339.7 UdeM00000026625 XP\_045213859.1 70.1  
 968 260 12 1 951 1 956 0.00E+00 1339.7 6596  
 cellular  
 organisms;Eukaryota;Opisthokonta;Metazoa;Eumetazoa;Bilateria;Protostomia;  
 Spiralia;Lophotrochozoa;Mollusca;Bivalvia;Autobranchia;Heteroconchia;Euheterodonta;  
 Imparidentia;Venerida;Veneroidea;Veneridae;Mercenaria;Mercenaria mercenaria  
 UdeM00000026626 6573 554.3 UdeM00000026626 XP\_021350519.1 62 424  
 148 4 5 416 11 433 1.40E-154 554.3 6573 cellular  
 organisms;Eukaryota;Opisthokonta;Metazoa;Eumetazoa;Bilateria;Protostomia;  
 Spiralia;Lophotrochozoa;Mollusca;Bivalvia;Autobranchia;Pteriormorphia;Pectinida;  
 Pectinoidea;Pectinidae;Mizuhopecten;Mizuhopecten yessoensis  
 UdeM00000026627 6596 1879.4 UdeM00000026627 XP\_045213852.1 72.4  
 1313 321 16 11 1318 20 1296 0.00E+00 1879.4 6596  
 cellular

organisms;Eukaryota;Opisthokonta;Metazoa;Eumetazoa;Bilateria;Protostomia;Spiralia;Lophotrochozoa;Mollusca;Bivalvia;Autobranchia;Heteroconchia;Euherodonta;Imparidentia;Venerida;Veneroidea;Veneridae;Mercenaria;Mercenaria mercenaria

UdeM00000026628 6579 318.5 UdeM00000026628 XP\_033734243.1 79.8 183  
37 0 107 289 782 964 8.50E-84 318.5 6579 cellular

organisms;Eukaryota;Opisthokonta;Metazoa;Eumetazoa;Bilateria;Protostomia;Spiralia;Lophotrochozoa;Mollusca;Bivalvia;Autobranchia;Pteriomorphia;Pectinida;Pectinoidea;Pectinidae;Pecten;Pecten maximus

UdeM00000026629 6596 1155.6 UdeM00000026629 XP\_045213846.1 60.2  
959 350 6 4 959 5 934 0.00E+00 1155.6 6596  
cellular

organisms;Eukaryota;Opisthokonta;Metazoa;Eumetazoa;Bilateria;Protostomia;Spiralia;Lophotrochozoa;Mollusca;Bivalvia;Autobranchia;Heteroconchia;Euherodonta;Imparidentia;Venerida;Veneroidea;Veneridae;Mercenaria;Mercenaria mercenaria

UdeM00000026631 6565 813.5 UdeM00000026631 XP\_022315964.1 59 1170  
371 22 1 1146 1 1085 3.30E-232 813.5 6565 cellular

organisms;Eukaryota;Opisthokonta;Metazoa;Eumetazoa;Bilateria;Protostomia;Spiralia;Lophotrochozoa;Mollusca;Bivalvia;Autobranchia;Pteriomorphia;Ostreida;Ostreoidea;Ostreidae;Crassostrea;Crassostrea virginica

UdeM00000026632 6596 283.9 UdeM00000026632 XP\_045211971.1 59.3 221  
88 1 1 221 9 227 1.80E-73 283.9 6596 cellular

organisms;Eukaryota;Opisthokonta;Metazoa;Eumetazoa;Bilateria;Protostomia;Spiralia;Lophotrochozoa;Mollusca;Bivalvia;Autobranchia;Heteroconchia;Euherodonta;Imparidentia;Venerida;Veneroidea;Veneridae;Mercenaria;Mercenaria mercenaria

UdeM00000026634 6573 424.1 UdeM00000026634 XP\_021345667.1 76.9 299  
65 3 1 298 1 296 1.60E-115 424.1 6573 cellular

organisms;Eukaryota;Opisthokonta;Metazoa;Eumetazoa;Bilateria;Protostomia;Spiralia;Lophotrochozoa;Mollusca;Bivalvia;Autobranchia;Pteriomorphia;Pectinida;Pectinoidea;Pectinidae;Mizuhopecten;Mizuhopecten yessoensis

UdeM00000026635 29159 1049.7 UdeM00000026635 XP\_034312496.1 90.5  
555 53 0 1 555 1 555 1.30E-303 1049.7  
29159 cellular

organisms;Eukaryota;Opisthokonta;Metazoa;Eumetazoa;Bilateria;Protostomia;Spiralia;Lophotrochozoa;Mollusca;Bivalvia;Autobranchia;Pteriomorphia;Ostreida;Ostreoidea;Ostreidae;Crassostrea;Crassostrea gigas

UdeM00000026636 6596 107.5 UdeM00000026636 XP\_045214215.1 35.8 173  
102 3 3 174 7 171 1.90E-20 107.5 6596 cellular

organisms;Eukaryota;Opisthokonta;Metazoa;Eumetazoa;Bilateria;Protostomia;Spiralia;Lophotrochozoa;Mollusca;Bivalvia;Autobranchia;Heteroconchia;Euherodonta;Imparidentia;Venerida;Veneroidea;Veneridae;Mercenaria;Mercenaria mercenaria

UdeM00000026637 6596 511.9 UdeM00000026637 XP\_045214215.1 63.1 385  
134 4 13 389 236 620 7.10E-142 511.9 6596 cellular

organisms;Eukaryota;Opisthokonta;Metazoa;Eumetazoa;Bilateria;Protostomia;Spiralia;Lophotrochozoa;Mollusca;Bivalvia;Autobranchia;Heteroconchia;Euherodonta;Imparidentia;Venerida;Veneroidea;Veneridae;Mercenaria;Mercenaria mercenaria

UdeM00000026638 6579 428.3 UdeM00000026638 XP\_033747802.1 72.5 276  
76 0 8 283 9 284 7.60E-117 428.3 6579 cellular

organisms;Eukaryota;Opisthokonta;Metazoa;Eumetazoa;Bilateria;Protostomia;

Spiralia; Lophotrochozoa; Mollusca; Bivalvia; Autobranchia; Pteriomorpha; Pectinida; Pectinoidea; Pectinidae; Pecten; Pecten maximus  
UdeM00000026639 6596 662.9 UdeM00000026639 XP\_045214217.1 51.5 691  
239 14 19 699 16 620 4.40E-187 662.9 6596 cellular  
organisms; Eukaryota; Opisthokonta; Metazoa; Eumetazoa; Bilateria; Protostomia; Spiralia; Lophotrochozoa; Mollusca; Bivalvia; Autobranchia; Heteroconchia; Euheterodonta; Imparidentia; Venerida; Veneroidea; Veneridae; Mercenaria; Mercenaria mercenaria  
UdeM00000026640 6596 680.6 UdeM00000026640 XP\_045214217.1 54.3 647  
243 11 19 654 16 620 1.90E-192 680.6 6596 cellular  
organisms; Eukaryota; Opisthokonta; Metazoa; Eumetazoa; Bilateria; Protostomia; Spiralia; Lophotrochozoa; Mollusca; Bivalvia; Autobranchia; Heteroconchia; Euheterodonta; Imparidentia; Venerida; Veneroidea; Veneridae; Mercenaria; Mercenaria mercenaria  
UdeM00000026641 6579 270.4 UdeM00000026641 XP\_033742679.1 68.1 185  
54 3 1 180 1 185 1.70E-69 270.4 6579 cellular  
organisms; Eukaryota; Opisthokonta; Metazoa; Eumetazoa; Bilateria; Protostomia; Spiralia; Lophotrochozoa; Mollusca; Bivalvia; Autobranchia; Pteriomorpha; Pectinida; Pectinoidea; Pectinidae; Pecten; Pecten maximus  
UdeM00000026642 6573 180.3 UdeM00000026642 XP\_021341640.1 26.5 483  
298 9 9 480 6 442 6.00E-42 180.3 6573 cellular  
organisms; Eukaryota; Opisthokonta; Metazoa; Eumetazoa; Bilateria; Protostomia; Spiralia; Lophotrochozoa; Mollusca; Bivalvia; Autobranchia; Pteriomorpha; Pectinida; Pectinoidea; Pectinidae; Mizuhopecten; Mizuhopecten yessoensis  
UdeM00000026643 1735272 120.6 UdeM00000026643 XP\_041362863.1 58.5  
118 38 3 1 110 1 115 1.70E-24 120.6 1735272  
cellular  
organisms; Eukaryota; Opisthokonta; Metazoa; Eumetazoa; Bilateria; Protostomia; Spiralia; Lophotrochozoa; Mollusca; Gastropoda; Neomphalina; Neomphaloidea; Peltospiridae; Gigantopelta; Gigantopelta aegis  
UdeM00000026645 6596 361.7 UdeM00000026645 XP\_045213568.1 82.3 209  
37 0 32 240 18 226 7.30E-97 361.7 6596 cellular  
organisms; Eukaryota; Opisthokonta; Metazoa; Eumetazoa; Bilateria; Protostomia; Spiralia; Lophotrochozoa; Mollusca; Bivalvia; Autobranchia; Heteroconchia; Euheterodonta; Imparidentia; Venerida; Veneroidea; Veneridae; Mercenaria; Mercenaria mercenaria  
UdeM00000026644 6596 361.7 UdeM00000026644 XP\_045213568.1 82.3 209  
37 0 43 251 18 226 7.60E-97 361.7 6596 cellular  
organisms; Eukaryota; Opisthokonta; Metazoa; Eumetazoa; Bilateria; Protostomia; Spiralia; Lophotrochozoa; Mollusca; Bivalvia; Autobranchia; Heteroconchia; Euheterodonta; Imparidentia; Venerida; Veneroidea; Veneridae; Mercenaria; Mercenaria mercenaria  
UdeM00000026646 400727 187.6 UdeM00000026646 XP\_025113133.1 50.3  
167 83 0 1 167 1 167 1.50E-44 187.6 400727  
cellular  
organisms; Eukaryota; Opisthokonta; Metazoa; Eumetazoa; Bilateria; Protostomia; Spiralia; Lophotrochozoa; Mollusca; Gastropoda; Caenogastropoda; Architaenioglossa; Ampullarioidea; Ampullariidae; Pomacea; Pomacea canaliculata  
UdeM00000026647 6526 132.5 UdeM00000026647 XP\_013061833.1 51.7 120  
58 0 1 120 37 156 4.40E-28 132.5 6526 cellular  
organisms; Eukaryota; Opisthokonta; Metazoa; Eumetazoa; Bilateria; Protostomia; Spiralia; Lophotrochozoa; Mollusca; Gastropoda; Heterobranchia; Euthyneura; Planorbida; Hygrophila; Lymnaeidae; Planorbidae; Biomphalaria; Biomphalaria glabrata



UdeM00000026648 6579 524.2 UdeM00000026648 XP\_033744115.1 63.1 393  
 139 3 1 393 1 387 1.40E-145 524.2 6579 cellular  
 organisms;Eukaryota;Opisthokonta;Metazoa;Eumetazoa;Bilateria;Protostomia;  
 Spiralia;Lophotrochozoa;Mollusca;Bivalvia;Autobranhia;Pteriormorphia;Pect  
 inida;Pectinoidea;Pectinidae;Pecten;Pecten maximus  
 UdeM00000026649 6596 256.9 UdeM00000026649 XP\_045212627.1 33.5 484  
 219 12 1 455 1 410 4.80E-65 256.9 6596 cellular  
 organisms;Eukaryota;Opisthokonta;Metazoa;Eumetazoa;Bilateria;Protostomia;  
 Spiralia;Lophotrochozoa;Mollusca;Bivalvia;Autobranhia;Heteroconchia;Euhe  
 terodonta;Imparidentia;Venerida;Veneroidea;Veneridae;Mercenaria;Mercenari  
 a mercenaria  
 UdeM00000026650 6596 100.9 UdeM00000026650 XP\_045212627.1 56.9 72  
 28 1 5 76 342 410 7.70E-19 100.9 6596 cellular  
 organisms;Eukaryota;Opisthokonta;Metazoa;Eumetazoa;Bilateria;Protostomia;  
 Spiralia;Lophotrochozoa;Mollusca;Bivalvia;Autobranhia;Heteroconchia;Euhe  
 terodonta;Imparidentia;Venerida;Veneroidea;Veneridae;Mercenaria;Mercenari  
 a mercenaria  
 UdeM00000026651 6579 636 UdeM00000026651 XP\_033745854.1 71.4 413  
 118 0 1 413 1 413 3.40E-179 636 6579 cellular  
 organisms;Eukaryota;Opisthokonta;Metazoa;Eumetazoa;Bilateria;Protostomia;  
 Spiralia;Lophotrochozoa;Mollusca;Bivalvia;Autobranhia;Pteriormorphia;Pect  
 inida;Pectinoidea;Pectinidae;Pecten;Pecten maximus  
 UdeM00000026652 6565 278.5 UdeM00000026652 XP\_022318104.1 72.8 184  
 50 0 38 221 12 195 7.50E-72 278.5 6565 cellular  
 organisms;Eukaryota;Opisthokonta;Metazoa;Eumetazoa;Bilateria;Protostomia;  
 Spiralia;Lophotrochozoa;Mollusca;Bivalvia;Autobranhia;Pteriormorphia;Ostr  
 eida;Ostreoidea;Ostreidae;Crassostrea;Crassostrea virginica  
 UdeM00000026653 29159 587.4 UdeM00000026653 XP\_011414849.2 73.8 363  
 95 0 12 374 14 376 1.30E-164 587.4 29159 cellular  
 organisms;Eukaryota;Opisthokonta;Metazoa;Eumetazoa;Bilateria;Protostomia;  
 Spiralia;Lophotrochozoa;Mollusca;Bivalvia;Autobranhia;Pteriormorphia;Ostr  
 eida;Ostreoidea;Ostreidae;Crassostrea;Crassostrea gigas  
 UdeM00000026654 6596 427.9 UdeM00000026654 XP\_045212140.1 52.6 449  
 198 4 9 453 14 451 1.60E-116 427.9 6596 cellular  
 organisms;Eukaryota;Opisthokonta;Metazoa;Eumetazoa;Bilateria;Protostomia;  
 Spiralia;Lophotrochozoa;Mollusca;Bivalvia;Autobranhia;Heteroconchia;Euhe  
 terodonta;Imparidentia;Venerida;Veneroidea;Veneridae;Mercenaria;Mercenari  
 a mercenaria  
 UdeM00000026655 6596 68.2 UdeM00000026655 XP\_045178109.1 24.3 276  
 173 6 46 314 2 248 2.20E-08 68.2 6596 cellular  
 organisms;Eukaryota;Opisthokonta;Metazoa;Eumetazoa;Bilateria;Protostomia;  
 Spiralia;Lophotrochozoa;Mollusca;Bivalvia;Autobranhia;Heteroconchia;Euhe  
 terodonta;Imparidentia;Venerida;Veneroidea;Veneridae;Mercenaria;Mercenari  
 a mercenaria  
 UdeM00000026656 6596 105.5 UdeM00000026656 XP\_045179881.1 33.6 149  
 82 2 48 179 51 199 7.00E-20 105.5 6596 cellular  
 organisms;Eukaryota;Opisthokonta;Metazoa;Eumetazoa;Bilateria;Protostomia;  
 Spiralia;Lophotrochozoa;Mollusca;Bivalvia;Autobranhia;Heteroconchia;Euhe  
 terodonta;Imparidentia;Venerida;Veneroidea;Veneridae;Mercenaria;Mercenari  
 a mercenaria  
 UdeM00000026657 46731 95.5 UdeM00000026657 XP\_027042029.1 39.8 133  
 78 1 25 157 32 162 8.80E-17 95.5 46731 cellular  
 organisms;Eukaryota;Opisthokonta;Metazoa;Eumetazoa;Cnidaria;Anthozoa;Hexa

corallia;Scleractinia;Astrocoeniina;Pocilloporidae;Pocillopora;Pocillopora damicornis  
 UdeM00000026658 6596 172.9 UdeM00000026658 XP\_045212145.1 55.6 126  
 56 0 12 137 12 137 2.80E-40 172.9 6596 cellular  
 organisms;Eukaryota;Opisthokonta;Metazoa;Eumetazoa;Bilateria;Protostomia;  
 Spiralia;Lophotrochozoa;Mollusca;Bivalvia;Autobranchia;Heteroconchia;Euheterodonta;  
 Imparidentia;Venerida;Veneroidea;Veneridae;Mercenaria;Mercenaria mercenaria  
 UdeM00000026659 6596 339.3 UdeM00000026659 XP\_045211403.1 82.6 201  
 35 0 1 201 1 201 3.30E-90 339.3 6596 cellular  
 organisms;Eukaryota;Opisthokonta;Metazoa;Eumetazoa;Bilateria;Protostomia;  
 Spiralia;Lophotrochozoa;Mollusca;Bivalvia;Autobranchia;Heteroconchia;Euheterodonta;  
 Imparidentia;Venerida;Veneroidea;Veneridae;Mercenaria;Mercenaria mercenaria  
 UdeM00000026660 6596 878.2 UdeM00000026660 XP\_045212324.1 68.4 648  
 189 4 6 653 5 636 6.40E-252 878.2 6596 cellular  
 organisms;Eukaryota;Opisthokonta;Metazoa;Eumetazoa;Bilateria;Protostomia;  
 Spiralia;Lophotrochozoa;Mollusca;Bivalvia;Autobranchia;Heteroconchia;Euheterodonta;  
 Imparidentia;Venerida;Veneroidea;Veneridae;Mercenaria;Mercenaria mercenaria  
 UdeM00000026663 29159 281.6 UdeM00000026663 XP\_019930499.2 64.7 215  
 76 0 1 215 441 655 8.60E-73 281.6 29159 cellular  
 organisms;Eukaryota;Opisthokonta;Metazoa;Eumetazoa;Bilateria;Protostomia;  
 Spiralia;Lophotrochozoa;Mollusca;Bivalvia;Autobranchia;Pteriomorpha;Ostreida;  
 Ostreidae;Crassostrea;Crassostrea gigas  
 UdeM00000026664 6573 60.5 UdeM00000026664 XP\_021347551.1 41.2 85  
 43 2 23 102 7 89 1.70E-06 60.5 6573 cellular  
 organisms;Eukaryota;Opisthokonta;Metazoa;Eumetazoa;Bilateria;Protostomia;  
 Spiralia;Lophotrochozoa;Mollusca;Bivalvia;Autobranchia;Pteriomorpha;Pectinida;  
 Pectinoidea;Pectinidae;Mizuhopecten;Mizuhopecten yessoensis  
 UdeM00000026665 6526 590.9 UdeM00000026665 XP\_013084912.1 69.3 430  
 115 2 1 413 1 430 1.30E-165 590.9 6526 cellular  
 organisms;Eukaryota;Opisthokonta;Metazoa;Eumetazoa;Bilateria;Protostomia;  
 Spiralia;Lophotrochozoa;Mollusca;Gastropoda;Heterobranchia;Euthyneura;Pulmonata;  
 Hygrophila;Lymnaeidae;Planorbidae;Biomphalaria;Biomphalaria glabrata  
 UdeM00000026666 29159 501.1 UdeM00000026666 XP\_019926413.2 74.2 337  
 85 2 1 336 1 336 1.10E-138 501.1 29159 cellular  
 organisms;Eukaryota;Opisthokonta;Metazoa;Eumetazoa;Bilateria;Protostomia;  
 Spiralia;Lophotrochozoa;Mollusca;Bivalvia;Autobranchia;Pteriomorpha;Ostreida;  
 Ostreidae;Crassostrea;Crassostrea gigas  
 UdeM00000026667 6579 441.4 UdeM00000026667 XP\_033746926.1 72.9 291  
 79 0 1 291 42 332 8.80E-121 441.4 6579 cellular  
 organisms;Eukaryota;Opisthokonta;Metazoa;Eumetazoa;Bilateria;Protostomia;  
 Spiralia;Lophotrochozoa;Mollusca;Bivalvia;Autobranchia;Pteriomorpha;Pectinida;  
 Pectinoidea;Pectinidae;Pecten;Pecten maximus  
 UdeM00000026668 6500 145.6 UdeM00000026668 XP\_005101028.1 65.2 92  
 32 0 1 92 1 92 3.20E-32 145.6 6500 cellular  
 organisms;Eukaryota;Opisthokonta;Metazoa;Eumetazoa;Bilateria;Protostomia;  
 Spiralia;Lophotrochozoa;Mollusca;Gastropoda;Heterobranchia;Euthyneura;Tentaclepura;  
 Aplysiida;Aplysiidae;Aplysia;Aplysia californica  
 UdeM00000026669 29159 344.4 UdeM00000026669 XP\_011432048.1 64.5 273  
 83 3 1 273 1 259 1.40E-91 344.4 29159 cellular  
 organisms;Eukaryota;Opisthokonta;Metazoa;Eumetazoa;Bilateria;Protostomia;

Spiralia;Lophotrochozoa;Mollusca;Bivalvia;Autobranchia;Pteriormorphia;Ostr  
eida;Ostreoidea;Ostreidae;Crassostrea;Crassostrea gigas

UdeM00000026670 1735272 343.2 UdeM00000026670 XP\_041362557.1 69.6  
257 76 2 15 271 17 271 3.10E-91 343.2 1735272  
cellular

organisms;Eukaryota;Opisthokonta;Metazoa;Eumetazoa;Bilateria;Protostomia;  
Spiralia;Lophotrochozoa;Mollusca;Gastropoda;Neomphalina;Neomphaloidea;Pel  
tospiridae;Gigantopelta;Gigantopelta aegis

UdeM00000026671 1735272 340.5 UdeM00000026671 XP\_041362557.1 79.8  
208 41 1 1 208 65 271 1.50E-90 340.5 1735272  
cellular

organisms;Eukaryota;Opisthokonta;Metazoa;Eumetazoa;Bilateria;Protostomia;  
Spiralia;Lophotrochozoa;Mollusca;Gastropoda;Neomphalina;Neomphaloidea;Pel  
tospiridae;Gigantopelta;Gigantopelta aegis

UdeM00000026672 1735272 129.8 UdeM00000026672 XP\_041362494.1 41.5  
176 95 2 15 190 446 613 3.70E-27 129.8 1735272  
cellular

organisms;Eukaryota;Opisthokonta;Metazoa;Eumetazoa;Bilateria;Protostomia;  
Spiralia;Lophotrochozoa;Mollusca;Gastropoda;Neomphalina;Neomphaloidea;Pel  
tospiridae;Gigantopelta;Gigantopelta aegis

UdeM00000026673 6596 672.5 UdeM00000026673 XP\_045213223.1 60.3 521  
201 2 7 525 1 517 5.00E-190 672.5 6596 cellular

organisms;Eukaryota;Opisthokonta;Metazoa;Eumetazoa;Bilateria;Protostomia;  
Spiralia;Lophotrochozoa;Mollusca;Bivalvia;Autobranchia;Heteroconchia;Euhe  
terodonta;Imparidentia;Venerida;Veneroidea;Veneridae;Mercenaria;Mercenari  
a mercenaria

UdeM00000026674 6596 330.9 UdeM00000026674 XP\_045213224.1 54.5 264  
116 1 27 286 63 326 1.90E-87 330.9 6596 cellular

organisms;Eukaryota;Opisthokonta;Metazoa;Eumetazoa;Bilateria;Protostomia;  
Spiralia;Lophotrochozoa;Mollusca;Bivalvia;Autobranchia;Heteroconchia;Euhe  
terodonta;Imparidentia;Venerida;Veneroidea;Veneridae;Mercenaria;Mercenari  
a mercenaria

UdeM00000026684 6596 244.6 UdeM00000026684 XP\_045211824.1 74.1 158  
41 0 9 166 65 222 9.00E-62 244.6 6596 cellular

organisms;Eukaryota;Opisthokonta;Metazoa;Eumetazoa;Bilateria;Protostomia;  
Spiralia;Lophotrochozoa;Mollusca;Bivalvia;Autobranchia;Heteroconchia;Euhe  
terodonta;Imparidentia;Venerida;Veneroidea;Veneridae;Mercenaria;Mercenari  
a mercenaria

UdeM00000026685 6579 420.6 UdeM00000026685 XP\_033729693.1 54.8 372  
163 4 12 378 8 379 2.10E-114 420.6 6579 cellular

organisms;Eukaryota;Opisthokonta;Metazoa;Eumetazoa;Bilateria;Protostomia;  
Spiralia;Lophotrochozoa;Mollusca;Bivalvia;Autobranchia;Pteriormorphia;Pect  
inida;Pectinoidea;Pectinidae;Pecten;Pecten maximus

UdeM00000026686 6579 110.9 UdeM00000026686 XP\_033731763.1 48.4 122  
51 3 68 188 19 129 1.80E-21 110.9 6579 cellular

organisms;Eukaryota;Opisthokonta;Metazoa;Eumetazoa;Bilateria;Protostomia;  
Spiralia;Lophotrochozoa;Mollusca;Bivalvia;Autobranchia;Pteriormorphia;Pect  
inida;Pectinoidea;Pectinidae;Pecten;Pecten maximus

UdeM00000026687 6596 134 UdeM00000026687 XP\_045211822.1 25.4 666  
423 18 11 652 12 627 1.10E-27 134 6596 cellular

organisms;Eukaryota;Opisthokonta;Metazoa;Eumetazoa;Bilateria;Protostomia;  
Spiralia;Lophotrochozoa;Mollusca;Bivalvia;Autobranchia;Heteroconchia;Euhe  
terodonta;Imparidentia;Venerida;Veneroidea;Veneridae;Mercenaria;Mercenari  
a mercenaria

UdeM00000026688 6596 91.7 UdeM00000026688 XP\_045211846.1 33.6 223  
 142 4 1 218 1 222 1.70E-15 91.7 6596 cellular  
 organisms;Eukaryota;Opisthokonta;Metazoa;Eumetazoa;Bilateria;Protostomia;  
 Spiralia;Lophotrochozoa;Mollusca;Bivalvia;Autobranchia;Heteroconchia;Euhe  
 terodonta;Imparidentia;Venerida;Veneroidea;Veneridae;Mercenaria;Mercenari  
 a mercenaria  
 UdeM00000026689 6579 379.4 UdeM00000026689 XP\_033733533.1 59.1 313  
 124 2 5 315 11 321 4.80E-102 379.4 6579 cellular  
 organisms;Eukaryota;Opisthokonta;Metazoa;Eumetazoa;Bilateria;Protostomia;  
 Spiralia;Lophotrochozoa;Mollusca;Bivalvia;Autobranchia;Pteriormorphia;Pect  
 inida;Pectinoidea;Pectinidae;Pecten;Pecten maximus  
 UdeM00000026690 27687 168.7 UdeM00000026690 XP\_028673527.1 56.6 145  
 61 1 22 166 206 348 6.30E-39 168.7 27687 cellular  
 organisms;Eukaryota;Opisthokonta;Metazoa;Eumetazoa;Bilateria;Deuterostomi  
 a;Chordata;Craniata;Vertebrata;Gnathostomata;Teleostomi;Euteleostomi;Acti  
 nopterygii;Cladistia;Polypteriformes;Polypteridae;Erpetoichthys;Erpetoich  
 thys calabaricus  
 UdeM00000026691 6596 68.2 UdeM00000026691 XP\_045212365.1 39 82  
 47 1 2 83 283 361 5.90E-09 68.2 6596 cellular  
 organisms;Eukaryota;Opisthokonta;Metazoa;Eumetazoa;Bilateria;Protostomia;  
 Spiralia;Lophotrochozoa;Mollusca;Bivalvia;Autobranchia;Heteroconchia;Euhe  
 terodonta;Imparidentia;Venerida;Veneroidea;Veneridae;Mercenaria;Mercenari  
 a mercenaria  
 UdeM00000026692 400727 287.7 UdeM00000026692 XP\_025100468.1 92.9  
 156 11 0 16 171 44 199 9.50E-75 287.7 400727  
 cellular  
 organisms;Eukaryota;Opisthokonta;Metazoa;Eumetazoa;Bilateria;Protostomia;  
 Spiralia;Lophotrochozoa;Mollusca;Gastropoda;Caenogastropoda;Architaeniogl  
 ossa;Ampullarioidea;Ampullariidae;Pomacea;Pomacea canaliculata  
 UdeM00000026693 29159 236.5 UdeM00000026693 XP\_011429058.1 75.2 149  
 37 0 6 154 2 150 2.30E-59 236.5 29159 cellular  
 organisms;Eukaryota;Opisthokonta;Metazoa;Eumetazoa;Bilateria;Protostomia;  
 Spiralia;Lophotrochozoa;Mollusca;Bivalvia;Autobranchia;Pteriormorphia;Ostr  
 eida;Ostreidae;Crassostrea;Crassostrea gigas  
 UdeM00000026694 29159 232.6 UdeM00000026694 XP\_011429059.1 74.8 147  
 37 0 6 152 2 148 3.30E-58 232.6 29159 cellular  
 organisms;Eukaryota;Opisthokonta;Metazoa;Eumetazoa;Bilateria;Protostomia;  
 Spiralia;Lophotrochozoa;Mollusca;Bivalvia;Autobranchia;Pteriormorphia;Ostr  
 eida;Ostreidae;Crassostrea;Crassostrea gigas  
 UdeM00000026695 6596 650.6 UdeM00000026695 XP\_045211600.1 67 506  
 155 5 19 513 90 594 1.80E-183 650.6 6596 cellular  
 organisms;Eukaryota;Opisthokonta;Metazoa;Eumetazoa;Bilateria;Protostomia;  
 Spiralia;Lophotrochozoa;Mollusca;Bivalvia;Autobranchia;Heteroconchia;Euhe  
 terodonta;Imparidentia;Venerida;Veneroidea;Veneridae;Mercenaria;Mercenari  
 a mercenaria  
 UdeM00000026696 215358 101.3 UdeM00000026696 XP\_027134537.1 36.4  
 231 116 8 10 239 46 246 1.80E-18 101.3 215358  
 cellular  
 organisms;Eukaryota;Opisthokonta;Metazoa;Eumetazoa;Bilateria;Deuterostomi  
 a;Chordata;Craniata;Vertebrata;Gnathostomata;Teleostomi;Euteleostomi;Acti  
 nopterygii;Actinopteri;Neopterygii;Teleostei;Osteoglossocephalai;Clupeoce  
 phala;Euteleosteomorpha;Neoteleostei;Eurypterygia;Ctenosquamata;Acanthomo  
 rphata;Euacanthomorphacea;Percomorphaceae;Eupercaria;Eupercaria incertae  
 sedis;Sciaenidae;Larimichthys;Larimichthys crocea

UdeM00000026697 6596 426.8 UdeM00000026697 XP\_045211600.1 43.7 533  
 272 10 25 536 88 613 4.10E-116 426.8 6596 cellular  
 organisms;Eukaryota;Opisthokonta;Metazoa;Eumetazoa;Bilateria;Protostomia;  
 Spiralia;Lophotrochozoa;Mollusca;Bivalvia;Autobranchia;Heteroconchia;Euhe  
 terodonta;Imparidentia;Venerida;Veneroidea;Veneridae;Mercenaria;Mercenari  
 a mercenaria

UdeM00000026698 6596 400.6 UdeM00000026698 XP\_045211600.1 45.9 468  
 223 9 1 445 127 587 2.80E-108 400.6 6596 cellular  
 organisms;Eukaryota;Opisthokonta;Metazoa;Eumetazoa;Bilateria;Protostomia;  
 Spiralia;Lophotrochozoa;Mollusca;Bivalvia;Autobranchia;Heteroconchia;Euhe  
 terodonta;Imparidentia;Venerida;Veneroidea;Veneridae;Mercenaria;Mercenari  
 a mercenaria

UdeM00000026699 1735272 169.9 UdeM00000026699 XP\_041374267.1 35.1  
 268 157 6 1 256 68 330 4.30E-39 169.9 1735272  
 cellular  
 organisms;Eukaryota;Opisthokonta;Metazoa;Eumetazoa;Bilateria;Protostomia;  
 Spiralia;Lophotrochozoa;Mollusca;Gastropoda;Neomphalina;Neomphaloidea;Pel  
 tospiridae;Gigantopelta;Gigantopelta aegis

UdeM00000026701 2607531 96.3 UdeM00000026701 XP\_029636731.1 60.5  
 76 30 0 67 142 713 788 3.40E-17 96.3 2607531  
 cellular  
 organisms;Eukaryota;Opisthokonta;Metazoa;Eumetazoa;Bilateria;Protostomia;  
 Spiralia;Lophotrochozoa;Mollusca;Cephalopoda;Coleoidea;Octopodiformes;Oct  
 opoda;Incirrata;Octopodidae;Octopus;Octopus sinensis

UdeM00000026700 2607531 96.3 UdeM00000026700 XP\_029636731.1 60.5  
 76 30 0 382 457 713 788 1.10E-16 96.3 2607531  
 cellular  
 organisms;Eukaryota;Opisthokonta;Metazoa;Eumetazoa;Bilateria;Protostomia;  
 Spiralia;Lophotrochozoa;Mollusca;Cephalopoda;Coleoidea;Octopodiformes;Oct  
 opoda;Incirrata;Octopodidae;Octopus;Octopus sinensis

UdeM00000026702 6596 867.1 UdeM00000026702 XP\_045214115.1 64.6 695  
 234 7 72 759 549 1238 1.80E-248 867.1 6596 cellular  
 organisms;Eukaryota;Opisthokonta;Metazoa;Eumetazoa;Bilateria;Protostomia;  
 Spiralia;Lophotrochozoa;Mollusca;Bivalvia;Autobranchia;Heteroconchia;Euhe  
 terodonta;Imparidentia;Venerida;Veneroidea;Veneridae;Mercenaria;Mercenari  
 a mercenaria

UdeM00000026703 6596 588.2 UdeM00000026703 XP\_045214115.1 68 415  
 127 3 13 421 136 550 8.70E-165 588.2 6596 cellular  
 organisms;Eukaryota;Opisthokonta;Metazoa;Eumetazoa;Bilateria;Protostomia;  
 Spiralia;Lophotrochozoa;Mollusca;Bivalvia;Autobranchia;Heteroconchia;Euhe  
 terodonta;Imparidentia;Venerida;Veneroidea;Veneridae;Mercenaria;Mercenari  
 a mercenaria

UdeM00000026704 1735272 92.8 UdeM00000026704 XP\_041359638.1 36.7  
 147 85 2 3 148 93 232 5.10E-16 92.8 1735272  
 cellular  
 organisms;Eukaryota;Opisthokonta;Metazoa;Eumetazoa;Bilateria;Protostomia;  
 Spiralia;Lophotrochozoa;Mollusca;Gastropoda;Neomphalina;Neomphaloidea;Pel  
 tospiridae;Gigantopelta;Gigantopelta aegis

UdeM00000026709 6596 694.9 UdeM00000026709 XP\_045211600.1 65 572  
 177 9 1 558 46 608 8.60E-197 694.9 6596 cellular  
 organisms;Eukaryota;Opisthokonta;Metazoa;Eumetazoa;Bilateria;Protostomia;  
 Spiralia;Lophotrochozoa;Mollusca;Bivalvia;Autobranchia;Heteroconchia;Euhe  
 terodonta;Imparidentia;Venerida;Veneroidea;Veneridae;Mercenaria;Mercenari  
 a mercenaria

UdeM00000026710 6596 698.4 UdeM00000026710 XP\_045212554.1 63.3 559  
 163 6 216 764 314 840 1.90E-197 698.4 6596 cellular  
 organisms;Eukaryota;Opisthokonta;Metazoa;Eumetazoa;Bilateria;Protostomia;  
 Spiralia;Lophotrochozoa;Mollusca;Bivalvia;Autobranchia;Heteroconchia;Euhe  
 terodonta;Imparidentia;Venerida;Veneroidea;Veneridae;Mercenaria;Mercenari  
 a mercenaria  
 UdeM00000026711 6573 225.7 UdeM00000026711 XP\_021354818.1 25.6 839  
 537 26 7 817 10 789 2.10E-55 225.7 6573 cellular  
 organisms;Eukaryota;Opisthokonta;Metazoa;Eumetazoa;Bilateria;Protostomia;  
 Spiralia;Lophotrochozoa;Mollusca;Bivalvia;Autobranchia;Pteriormorphia;Pect  
 inida;Pectinoidea;Pectinidae;Mizuhopecten;Mizuhopecten yessoensis  
 UdeM00000026712 6596 665.2 UdeM00000026712 XP\_045213319.1 52.4 706  
 298 12 112 787 126 823 1.00E-187 665.2 6596 cellular  
 organisms;Eukaryota;Opisthokonta;Metazoa;Eumetazoa;Bilateria;Protostomia;  
 Spiralia;Lophotrochozoa;Mollusca;Bivalvia;Autobranchia;Heteroconchia;Euhe  
 terodonta;Imparidentia;Venerida;Veneroidea;Veneridae;Mercenaria;Mercenari  
 a mercenaria  
 UdeM00000026713 6596 662.5 UdeM00000026713 XP\_045213319.1 53.3 677  
 283 11 115 766 155 823 6.40E-187 662.5 6596 cellular  
 organisms;Eukaryota;Opisthokonta;Metazoa;Eumetazoa;Bilateria;Protostomia;  
 Spiralia;Lophotrochozoa;Mollusca;Bivalvia;Autobranchia;Heteroconchia;Euhe  
 terodonta;Imparidentia;Venerida;Veneroidea;Veneridae;Mercenaria;Mercenari  
 a mercenaria  
 UdeM00000026714 6596 662.1 UdeM00000026714 XP\_045213319.1 53.4 676  
 290 10 115 772 155 823 8.40E-187 662.1 6596 cellular  
 organisms;Eukaryota;Opisthokonta;Metazoa;Eumetazoa;Bilateria;Protostomia;  
 Spiralia;Lophotrochozoa;Mollusca;Bivalvia;Autobranchia;Heteroconchia;Euhe  
 terodonta;Imparidentia;Venerida;Veneroidea;Veneridae;Mercenaria;Mercenari  
 a mercenaria  
 UdeM00000026715 6596 664.8 UdeM00000026715 XP\_045213319.1 54.2 662  
 270 11 35 671 170 823 1.10E-187 664.8 6596 cellular  
 organisms;Eukaryota;Opisthokonta;Metazoa;Eumetazoa;Bilateria;Protostomia;  
 Spiralia;Lophotrochozoa;Mollusca;Bivalvia;Autobranchia;Heteroconchia;Euhe  
 terodonta;Imparidentia;Venerida;Veneroidea;Veneridae;Mercenaria;Mercenari  
 a mercenaria  
 UdeM00000026716 37653 390.6 UdeM00000026716 XP\_014767752.1 69 268  
 82 1 1 267 170 437 1.60E-105 390.6 37653 cellular  
 organisms;Eukaryota;Opisthokonta;Metazoa;Eumetazoa;Bilateria;Protostomia;  
 Spiralia;Lophotrochozoa;Mollusca;Cephalopoda;Coleoidea;Octopodiformes;Oct  
 opoda;Incirrata;Octopodidae;Octopus;Octopus bimaculoides  
 UdeM00000026717 6565 925.2 UdeM00000026717 XP\_022319136.1 62.1 728  
 272 4 1 727 1 725 5.00E-266 925.2 6565 cellular  
 organisms;Eukaryota;Opisthokonta;Metazoa;Eumetazoa;Bilateria;Protostomia;  
 Spiralia;Lophotrochozoa;Mollusca;Bivalvia;Autobranchia;Pteriormorphia;Ostr  
 eida;Ostreoidea;Ostreidae;Crassostrea;Crassostrea virginica  
 UdeM00000026718 225164 108.6 UdeM00000026718 XP\_009063652.1 41.1  
 129 75 1 19 147 29 156 7.40E-21 108.6 225164  
 cellular  
 organisms;Eukaryota;Opisthokonta;Metazoa;Eumetazoa;Bilateria;Protostomia;  
 Spiralia;Lophotrochozoa;Mollusca;Gastropoda;Patellogastropoda;Lottioida;  
 Lottiidae;Lottia;Lottia gigantea  
 UdeM00000026719 225164 106.3 UdeM00000026719 XP\_009062157.1 39.1  
 133 79 1 41 171 61 193 4.10E-20 106.3 225164  
 cellular

organisms;Eukaryota;Opisthokonta;Metazoa;Eumetazoa;Bilateria;Protostomia; Spiralia;Lophotrochozoa;Mollusca;Gastropoda;Patellogastropoda;Lottioidea; Lottiidae;Lottia;Lottia gigantea

UdeM00000026720 225164 107.8 UdeM00000026720 XP\_009062157.1 37  
138 83 1 22 159 61 194 1.30E-20 107.8 225164  
cellular

organisms;Eukaryota;Opisthokonta;Metazoa;Eumetazoa;Bilateria;Protostomia; Spiralia;Lophotrochozoa;Mollusca;Gastropoda;Patellogastropoda;Lottioidea; Lottiidae;Lottia;Lottia gigantea

UdeM00000026721 6565 85.9 UdeM00000026721 XP\_022315143.1 84.8 46  
7 0 1 46 1 46 3.40E-14 85.9 6565 cellular

organisms;Eukaryota;Opisthokonta;Metazoa;Eumetazoa;Bilateria;Protostomia; Spiralia;Lophotrochozoa;Mollusca;Bivalvia;Autobranchia;Pteriormorphia;Ostr eida;Ostreoidea;Ostreidae;Crassostrea;Crassostrea virginica

UdeM00000026722 6565 208.4 UdeM00000026722 XP\_022315144.1 83.3 132  
22 0 1 132 1 132 5.80E-51 208.4 6565 cellular

organisms;Eukaryota;Opisthokonta;Metazoa;Eumetazoa;Bilateria;Protostomia; Spiralia;Lophotrochozoa;Mollusca;Bivalvia;Autobranchia;Pteriormorphia;Ostr eida;Ostreoidea;Ostreidae;Crassostrea;Crassostrea virginica

UdeM00000026723 6596 667.2 UdeM00000026723 XP\_045214917.1 56.6 581  
235 6 147 722 63 631 2.60E-188 667.2 6596 cellular

organisms;Eukaryota;Opisthokonta;Metazoa;Eumetazoa;Bilateria;Protostomia; Spiralia;Lophotrochozoa;Mollusca;Bivalvia;Autobranchia;Heteroconchia;Euhe terodonta;Imparidentia;Venerida;Veneroidea;Veneridae;Mercenaria;Mercenari a mercenaria

UdeM00000026724 6596 597.4 UdeM00000026724 XP\_045214913.1 48.5 606  
307 3 2 602 16 621 2.00E-167 597.4 6596 cellular

organisms;Eukaryota;Opisthokonta;Metazoa;Eumetazoa;Bilateria;Protostomia; Spiralia;Lophotrochozoa;Mollusca;Bivalvia;Autobranchia;Heteroconchia;Euhe terodonta;Imparidentia;Venerida;Veneroidea;Veneridae;Mercenaria;Mercenari a mercenaria

UdeM00000026725 6596 427.6 UdeM00000026725 XP\_045214909.1 47.3 497  
219 4 3 494 8 466 2.30E-116 427.6 6596 cellular

organisms;Eukaryota;Opisthokonta;Metazoa;Eumetazoa;Bilateria;Protostomia; Spiralia;Lophotrochozoa;Mollusca;Bivalvia;Autobranchia;Heteroconchia;Euhe terodonta;Imparidentia;Venerida;Veneroidea;Veneridae;Mercenaria;Mercenari a mercenaria

UdeM00000026726 6596 534.6 UdeM00000026726 XP\_045214906.1 75.1 350  
82 2 14 359 7 355 1.00E-148 534.6 6596 cellular

organisms;Eukaryota;Opisthokonta;Metazoa;Eumetazoa;Bilateria;Protostomia; Spiralia;Lophotrochozoa;Mollusca;Bivalvia;Autobranchia;Heteroconchia;Euhe terodonta;Imparidentia;Venerida;Veneroidea;Veneridae;Mercenaria;Mercenari a mercenaria

UdeM00000026727 6596 291.2 UdeM00000026727 XP\_045211715.1 34 424  
269 5 19 435 27 446 2.30E-75 291.2 6596 cellular

organisms;Eukaryota;Opisthokonta;Metazoa;Eumetazoa;Bilateria;Protostomia; Spiralia;Lophotrochozoa;Mollusca;Bivalvia;Autobranchia;Heteroconchia;Euhe terodonta;Imparidentia;Venerida;Veneroidea;Veneridae;Mercenaria;Mercenari a mercenaria

UdeM00000026729 6596 106.3 UdeM00000026729 XP\_045214189.1 67.1 79  
26 0 27 105 140 218 2.50E-20 106.3 6596 cellular

organisms;Eukaryota;Opisthokonta;Metazoa;Eumetazoa;Bilateria;Protostomia; Spiralia;Lophotrochozoa;Mollusca;Bivalvia;Autobranchia;Heteroconchia;Euhe

terodonta;Imparidentia;Venerida;Veneroidea;Veneridae;Mercenaria;Mercenari  
 a mercenaria  
 UdeM00000026728 6596 292.4 UdeM00000026728 XP\_045214189.1 64.4 219  
 77 1 1 219 1 218 5.00E-76 292.4 6596 cellular  
 organisms;Eukaryota;Opisthokonta;Metazoa;Eumetazoa;Bilateria;Protostomia;  
 Spiralia;Lophotrochozoa;Mollusca;Bivalvia;Autobranchia;Heteroconchia;Euhe  
 terodonta;Imparidentia;Venerida;Veneroidea;Veneridae;Mercenaria;Mercenari  
 a mercenaria  
 UdeM00000026730 6565 92 UdeM00000026730 XP\_022322655.1 49.5 99  
 47 3 1 99 1 96 4.90E-16 92 6565 cellular  
 organisms;Eukaryota;Opisthokonta;Metazoa;Eumetazoa;Bilateria;Protostomia;  
 Spiralia;Lophotrochozoa;Mollusca;Bivalvia;Autobranchia;Pteriomorphia;Ostr  
 eida;Ostreoidea;Ostreidae;Crassostrea;Crassostrea virginica  
 UdeM00000026731 29159 266.2 UdeM00000026731 XP\_034299474.1 42.7 323  
 172 3 1 321 415 726 5.80E-68 266.2 29159 cellular  
 organisms;Eukaryota;Opisthokonta;Metazoa;Eumetazoa;Bilateria;Protostomia;  
 Spiralia;Lophotrochozoa;Mollusca;Bivalvia;Autobranchia;Pteriomorphia;Ostr  
 eida;Ostreoidea;Ostreidae;Crassostrea;Crassostrea gigas  
 UdeM00000026732 29159 214.2 UdeM00000026732 XP\_034330911.1 58.2 177  
 65 4 8 179 226 398 1.60E-52 214.2 29159 cellular  
 organisms;Eukaryota;Opisthokonta;Metazoa;Eumetazoa;Bilateria;Protostomia;  
 Spiralia;Lophotrochozoa;Mollusca;Bivalvia;Autobranchia;Pteriomorphia;Ostr  
 eida;Ostreoidea;Ostreidae;Crassostrea;Crassostrea gigas  
 UdeM00000026733 6596 239.2 UdeM00000026733 XP\_045214229.1 59.9 197  
 79 0 1 197 1 197 4.60E-60 239.2 6596 cellular  
 organisms;Eukaryota;Opisthokonta;Metazoa;Eumetazoa;Bilateria;Protostomia;  
 Spiralia;Lophotrochozoa;Mollusca;Bivalvia;Autobranchia;Heteroconchia;Euhe  
 terodonta;Imparidentia;Venerida;Veneroidea;Veneridae;Mercenaria;Mercenari  
 a mercenaria  
 UdeM00000026734 6579 121.7 UdeM00000026734 XP\_033755002.1 32.1 240  
 150 4 11 237 23 262 1.40E-24 121.7 6579 cellular  
 organisms;Eukaryota;Opisthokonta;Metazoa;Eumetazoa;Bilateria;Protostomia;  
 Spiralia;Lophotrochozoa;Mollusca;Bivalvia;Autobranchia;Pteriomorphia;Pect  
 inida;Pectinoidea;Pectinidae;Pecten;Pecten maximus  
 UdeM00000026736 6596 600.5 UdeM00000026736 XP\_045181498.1 53.2 558  
 258 2 1 557 2 557 2.20E-168 600.5 6596 cellular  
 organisms;Eukaryota;Opisthokonta;Metazoa;Eumetazoa;Bilateria;Protostomia;  
 Spiralia;Lophotrochozoa;Mollusca;Bivalvia;Autobranchia;Heteroconchia;Euhe  
 terodonta;Imparidentia;Venerida;Veneroidea;Veneridae;Mercenaria;Mercenari  
 a mercenaria  
 UdeM00000026737 6596 683.3 UdeM00000026737 XP\_045206108.1 29.8 1548  
 910 30 1 1518 606 2006 7.00E-193 683.3 6596 cellular  
 organisms;Eukaryota;Opisthokonta;Metazoa;Eumetazoa;Bilateria;Protostomia;  
 Spiralia;Lophotrochozoa;Mollusca;Bivalvia;Autobranchia;Heteroconchia;Euhe  
 terodonta;Imparidentia;Venerida;Veneroidea;Veneridae;Mercenaria;Mercenari  
 a mercenaria  
 UdeM00000026738 6579 573.9 UdeM00000026738 XP\_033732123.1 45.9 590  
 296 10 13 591 2 579 2.30E-160 573.9 6579 cellular  
 organisms;Eukaryota;Opisthokonta;Metazoa;Eumetazoa;Bilateria;Protostomia;  
 Spiralia;Lophotrochozoa;Mollusca;Bivalvia;Autobranchia;Pteriomorphia;Pect  
 inida;Pectinoidea;Pectinidae;Pecten;Pecten maximus  
 UdeM00000026739 6596 72.4 UdeM00000026739 XP\_045215254.1 28.9 142  
 100 1 7 147 2139 2280 7.00E-10 72.4 6596 cellular  
 organisms;Eukaryota;Opisthokonta;Metazoa;Eumetazoa;Bilateria;Protostomia;



Spiralia;Lophotrochozoa;Mollusca;Bivalvia;Autobranchia;Heteroconchia;Euherodonta;Imparidentia;Venerida;Veneroidea;Veneridae;Mercenaria;Mercenaria mercenaria

UdeM00000026740 6565 111.7 UdeM00000026740 XP\_022316839.1 34.6 214  
128 5 6 210 7 217 1.20E-21 111.7 6565 cellular

organisms;Eukaryota;Opisthokonta;Metazoa;Eumetazoa;Bilateria;Protostomia;Spiralia;Lophotrochozoa;Mollusca;Bivalvia;Autobranchia;Pteriomorphia;Ostreida;Ostreoidea;Ostreidae;Crassostrea;Crassostrea virginica

UdeM00000026741 37653 105.9 UdeM00000026741 XP\_014770695.1 29.8 258  
88 4 1 165 1 258 5.60E-20 105.9 37653 cellular

organisms;Eukaryota;Opisthokonta;Metazoa;Eumetazoa;Bilateria;Protostomia;Spiralia;Lophotrochozoa;Mollusca;Cephalopoda;Coleoidea;Octopodiformes;Octopoda;Incirrata;Octopodidae;Octopus;Octopus bimaculoides

UdeM00000026743 6596 560.1 UdeM00000026743 XP\_045213819.1 75.7 346  
83 1 3 348 1 345 2.00E-156 560.1 6596 cellular

organisms;Eukaryota;Opisthokonta;Metazoa;Eumetazoa;Bilateria;Protostomia;Spiralia;Lophotrochozoa;Mollusca;Bivalvia;Autobranchia;Heteroconchia;Euherodonta;Imparidentia;Venerida;Veneroidea;Veneridae;Mercenaria;Mercenaria mercenaria

UdeM00000026744 6573 120.6 UdeM00000026744 XP\_021357572.1 46 187  
85 3 1 175 1 183 2.10E-24 120.6 6573 cellular

organisms;Eukaryota;Opisthokonta;Metazoa;Eumetazoa;Bilateria;Protostomia;Spiralia;Lophotrochozoa;Mollusca;Bivalvia;Autobranchia;Pteriomorphia;Pectinida;Pectinoidea;Pectinidae;Mizuhopecten;Mizuhopecten yessoensis

UdeM00000026745 6596 234.2 UdeM00000026745 XP\_045213888.1 59.6 193  
77 1 1 192 174 366 1.60E-58 234.2 6596 cellular

organisms;Eukaryota;Opisthokonta;Metazoa;Eumetazoa;Bilateria;Protostomia;Spiralia;Lophotrochozoa;Mollusca;Bivalvia;Autobranchia;Heteroconchia;Euherodonta;Imparidentia;Venerida;Veneroidea;Veneridae;Mercenaria;Mercenaria mercenaria

UdeM00000026746 6596 80.9 UdeM00000026746 XP\_045187321.1 30.3 188  
122 5 1 182 1 185 1.90E-12 80.9 6596 cellular

organisms;Eukaryota;Opisthokonta;Metazoa;Eumetazoa;Bilateria;Protostomia;Spiralia;Lophotrochozoa;Mollusca;Bivalvia;Autobranchia;Heteroconchia;Euherodonta;Imparidentia;Venerida;Veneroidea;Veneridae;Mercenaria;Mercenaria mercenaria

UdeM00000026747 6596 231.5 UdeM00000026747 XP\_045211536.1 50.4 262  
107 5 6 262 6 249 1.20E-57 231.5 6596 cellular

organisms;Eukaryota;Opisthokonta;Metazoa;Eumetazoa;Bilateria;Protostomia;Spiralia;Lophotrochozoa;Mollusca;Bivalvia;Autobranchia;Heteroconchia;Euherodonta;Imparidentia;Venerida;Veneroidea;Veneridae;Mercenaria;Mercenaria mercenaria

UdeM00000026749 6596 157.1 UdeM00000026749 XP\_045212078.1 66.9 121  
40 0 2 122 5 125 1.40E-35 157.1 6596 cellular

organisms;Eukaryota;Opisthokonta;Metazoa;Eumetazoa;Bilateria;Protostomia;Spiralia;Lophotrochozoa;Mollusca;Bivalvia;Autobranchia;Heteroconchia;Euherodonta;Imparidentia;Venerida;Veneroidea;Veneridae;Mercenaria;Mercenaria mercenaria

UdeM00000026750 2607531 148.7 UdeM00000026750 XP\_029652203.1 67.9  
106 33 1 1 105 1 106 1.60E-32 148.7 2607531 cellular

organisms;Eukaryota;Opisthokonta;Metazoa;Eumetazoa;Bilateria;Protostomia;Spiralia;Lophotrochozoa;Mollusca;Cephalopoda;Coleoidea;Octopodiformes;Octopoda;Incirrata;Octopodidae;Octopus;Octopus sinensis

UdeM00000026751 6596 152.1 UdeM00000026751 XP\_045213629.1 33.3 306  
 186 6 32 337 41 328 2.60E-33 152.1 6596 cellular  
 organisms;Eukaryota;Opisthokonta;Metazoa;Eumetazoa;Bilateria;Protostomia;  
 Spiralia;Lophotrochozoa;Mollusca;Bivalvia;Autobranchia;Heteroconchia;Euhe  
 terodonta;Imparidentia;Venerida;Veneroidea;Veneridae;Mercenaria;Mercenari  
 a mercenaria  
 UdeM00000026753 6596 149.4 UdeM00000026753 XP\_045213629.1 31.9 323  
 208 7 22 340 18 332 1.70E-32 149.4 6596 cellular  
 organisms;Eukaryota;Opisthokonta;Metazoa;Eumetazoa;Bilateria;Protostomia;  
 Spiralia;Lophotrochozoa;Mollusca;Bivalvia;Autobranchia;Heteroconchia;Euhe  
 terodonta;Imparidentia;Venerida;Veneroidea;Veneridae;Mercenaria;Mercenari  
 a mercenaria  
 UdeM00000026754 1735272 65.9 UdeM00000026754 XP\_041354416.1 36.6  
 101 63 1 47 147 58 157 5.40E-08 65.9 1735272  
 cellular  
 organisms;Eukaryota;Opisthokonta;Metazoa;Eumetazoa;Bilateria;Protostomia;  
 Spiralia;Lophotrochozoa;Mollusca;Gastropoda;Neomphalina;Neomphaloidea;Pel  
 tospiridae;Gigantopelta;Gigantopelta aegis  
 UdeM00000026755 29159 134 UdeM00000026755 XP\_034323059.1 28.4 345  
 227 9 8 342 139 473 3.50E-28 134 29159 cellular  
 organisms;Eukaryota;Opisthokonta;Metazoa;Eumetazoa;Bilateria;Protostomia;  
 Spiralia;Lophotrochozoa;Mollusca;Bivalvia;Autobranchia;Pteriormorphia;Ostr  
 eida;Ostreoidea;Ostreidae;Crassostrea;Crassostrea gigas  
 UdeM00000026756 29159 139.4 UdeM00000026756 XP\_034323059.1 27.4 376  
 251 10 3 368 110 473 9.10E-30 139.4 29159 cellular  
 organisms;Eukaryota;Opisthokonta;Metazoa;Eumetazoa;Bilateria;Protostomia;  
 Spiralia;Lophotrochozoa;Mollusca;Bivalvia;Autobranchia;Pteriormorphia;Ostr  
 eida;Ostreoidea;Ostreidae;Crassostrea;Crassostrea gigas  
 UdeM00000026757 6579 391.7 UdeM00000026757 XP\_033731739.1 61.4 280  
 108 0 1 280 99 378 7.70E-106 391.7 6579 cellular  
 organisms;Eukaryota;Opisthokonta;Metazoa;Eumetazoa;Bilateria;Protostomia;  
 Spiralia;Lophotrochozoa;Mollusca;Bivalvia;Autobranchia;Pteriormorphia;Pect  
 inida;Pectinoidea;Pectinidae;Pecten;Pecten maximus  
 UdeM00000026758 6573 61.2 UdeM00000026758 XP\_021341725.1 60.4 48  
 19 0 1 48 1 48 7.80E-07 61.2 6573 cellular  
 organisms;Eukaryota;Opisthokonta;Metazoa;Eumetazoa;Bilateria;Protostomia;  
 Spiralia;Lophotrochozoa;Mollusca;Bivalvia;Autobranchia;Pteriormorphia;Pect  
 inida;Pectinoidea;Pectinidae;Mizuhopecten;Mizuhopecten yessoensis  
 UdeM00000026759 6596 676.8 UdeM00000026759 XP\_045214646.1 54.7 684  
 297 6 52 733 95 767 3.40E-191 676.8 6596 cellular  
 organisms;Eukaryota;Opisthokonta;Metazoa;Eumetazoa;Bilateria;Protostomia;  
 Spiralia;Lophotrochozoa;Mollusca;Bivalvia;Autobranchia;Heteroconchia;Euhe  
 terodonta;Imparidentia;Venerida;Veneroidea;Veneridae;Mercenaria;Mercenari  
 a mercenaria  
 UdeM00000026760 6596 273.9 UdeM00000026760 XP\_045214417.1 54.8 263  
 118 1 1 263 1 262 2.20E-70 273.9 6596 cellular  
 organisms;Eukaryota;Opisthokonta;Metazoa;Eumetazoa;Bilateria;Protostomia;  
 Spiralia;Lophotrochozoa;Mollusca;Bivalvia;Autobranchia;Heteroconchia;Euhe  
 terodonta;Imparidentia;Venerida;Veneroidea;Veneridae;Mercenaria;Mercenari  
 a mercenaria  
 UdeM00000026761 6596 305.4 UdeM00000026761 XP\_045214417.1 59 268  
 109 1 1 268 1 267 6.90E-80 305.4 6596 cellular  
 organisms;Eukaryota;Opisthokonta;Metazoa;Eumetazoa;Bilateria;Protostomia;  
 Spiralia;Lophotrochozoa;Mollusca;Bivalvia;Autobranchia;Heteroconchia;Euhe

terodonta;Imparidentia;Venerida;Veneroidea;Veneridae;Mercenaria;Mercenaria mercenaria

UdeM00000026762 6596 458.8 UdeM00000026762 XP\_045213278.1 78.5 307  
66 0 1 307 1 307 7.80E-126 458.8 6596 cellular

organisms;Eukaryota;Opisthokonta;Metazoa;Eumetazoa;Bilateria;Protostomia;Spiralia;Lophotrochozoa;Mollusca;Bivalvia;Autobranchia;Heteroconchia;Euheterodonta;Imparidentia;Venerida;Veneroidea;Veneridae;Mercenaria;Mercenaria mercenaria

UdeM00000026763 225164 609.8 UdeM00000026763 XP\_009060170.1 64.8  
432 151 1 1 431 52 483 2.80E-171 609.8 225164  
cellular

organisms;Eukaryota;Opisthokonta;Metazoa;Eumetazoa;Bilateria;Protostomia;Spiralia;Lophotrochozoa;Mollusca;Gastropoda;Patellogastropoda;Lottioidea;Lottiidae;Lottia;Lottia gigantea

UdeM00000026764 6565 626.3 UdeM00000026764 XP\_022318614.1 63 467  
171 2 22 487 17 482 3.20E-176 626.3 6565 cellular

organisms;Eukaryota;Opisthokonta;Metazoa;Eumetazoa;Bilateria;Protostomia;Spiralia;Lophotrochozoa;Mollusca;Bivalvia;Autobranchia;Pteriormorphia;Ostreida;Ostreioidea;Ostreidae;Crassostrea;Crassostrea virginica

UdeM00000026765 6565 642.1 UdeM00000026765 XP\_022318614.1 64.8 466  
162 2 23 487 18 482 5.70E-181 642.1 6565 cellular

organisms;Eukaryota;Opisthokonta;Metazoa;Eumetazoa;Bilateria;Protostomia;Spiralia;Lophotrochozoa;Mollusca;Bivalvia;Autobranchia;Pteriormorphia;Ostreida;Ostreioidea;Ostreidae;Crassostrea;Crassostrea virginica

UdeM00000026766 1735272 945.7 UdeM00000026766 XP\_041363033.1 68.3  
671 131 8 1 669 14 604 3.30E-272 945.7 1735272  
cellular

organisms;Eukaryota;Opisthokonta;Metazoa;Eumetazoa;Bilateria;Protostomia;Spiralia;Lophotrochozoa;Mollusca;Gastropoda;Neomphalina;Neomphaloidea;Peltospiridae;Gigantopelta;Gigantopelta aegis

UdeM00000026768 6596 587.4 UdeM00000026768 XP\_045212457.1 73.9 368  
96 0 383 750 215 582 2.50E-164 587.4 6596 cellular

organisms;Eukaryota;Opisthokonta;Metazoa;Eumetazoa;Bilateria;Protostomia;Spiralia;Lophotrochozoa;Mollusca;Bivalvia;Autobranchia;Heteroconchia;Euheterodonta;Imparidentia;Venerida;Veneroidea;Veneridae;Mercenaria;Mercenaria mercenaria

UdeM00000026769 6596 589 UdeM00000026769 XP\_045212457.1 73.7 369  
97 0 139 507 214 582 5.90E-165 589 6596 cellular

organisms;Eukaryota;Opisthokonta;Metazoa;Eumetazoa;Bilateria;Protostomia;Spiralia;Lophotrochozoa;Mollusca;Bivalvia;Autobranchia;Heteroconchia;Euheterodonta;Imparidentia;Venerida;Veneroidea;Veneridae;Mercenaria;Mercenaria mercenaria

UdeM00000026770 6596 240 UdeM00000026770 XP\_045212455.1 60.4 182  
71 1 55 235 33 214 3.20E-60 240 6596 cellular

organisms;Eukaryota;Opisthokonta;Metazoa;Eumetazoa;Bilateria;Protostomia;Spiralia;Lophotrochozoa;Mollusca;Bivalvia;Autobranchia;Heteroconchia;Euheterodonta;Imparidentia;Venerida;Veneroidea;Veneridae;Mercenaria;Mercenaria mercenaria

UdeM00000026771 6596 240.7 UdeM00000026771 XP\_045212455.1 59.4 187  
75 1 55 240 33 219 2.00E-60 240.7 6596 cellular

organisms;Eukaryota;Opisthokonta;Metazoa;Eumetazoa;Bilateria;Protostomia;Spiralia;Lophotrochozoa;Mollusca;Bivalvia;Autobranchia;Heteroconchia;Euheterodonta;Imparidentia;Venerida;Veneroidea;Veneridae;Mercenaria;Mercenaria mercenaria

UdeM00000026773 6573 73.9 UdeM00000026773 XP\_021370068.1 29.7 209  
 135 8 3 206 72 273 3.90E-10 73.9 6573 cellular  
 organisms;Eukaryota;Opisthokonta;Metazoa;Eumetazoa;Bilateria;Protostomia;  
 Spiralia;Lophotrochozoa;Mollusca;Bivalvia;Autobranhia;Pteriomorpha;Pect  
 inida;Pectinoidea;Pectinidae;Mizuhopecten;Mizuhopecten yessoensis  
 UdeM00000026774 6573 80.9 UdeM00000026774 XP\_021370068.1 29.7 212  
 131 8 3 206 72 273 3.20E-12 80.9 6573 cellular  
 organisms;Eukaryota;Opisthokonta;Metazoa;Eumetazoa;Bilateria;Protostomia;  
 Spiralia;Lophotrochozoa;Mollusca;Bivalvia;Autobranhia;Pteriomorpha;Pect  
 inida;Pectinoidea;Pectinidae;Mizuhopecten;Mizuhopecten yessoensis  
 UdeM00000026775 6596 406.4 UdeM00000026775 XP\_045214155.1 55.7 393  
 162 4 34 418 16 404 4.50E-110 406.4 6596 cellular  
 organisms;Eukaryota;Opisthokonta;Metazoa;Eumetazoa;Bilateria;Protostomia;  
 Spiralia;Lophotrochozoa;Mollusca;Bivalvia;Autobranhia;Heteroconchia;Euhe  
 terodonta;Imparidentia;Venerida;Veneroidea;Veneridae;Mercenaria;Mercenari  
 a mercenaria  
 UdeM00000026776 6596 409.5 UdeM00000026776 XP\_045214155.1 56 393  
 161 4 34 418 16 404 5.30E-111 409.5 6596 cellular  
 organisms;Eukaryota;Opisthokonta;Metazoa;Eumetazoa;Bilateria;Protostomia;  
 Spiralia;Lophotrochozoa;Mollusca;Bivalvia;Autobranhia;Heteroconchia;Euhe  
 terodonta;Imparidentia;Venerida;Veneroidea;Veneridae;Mercenaria;Mercenari  
 a mercenaria  
 UdeM00000026777 10228 58.2 UdeM00000026777 XP\_002118406.1 56.2 48  
 21 0 1 48 535 582 6.40E-06 58.2 10228 cellular  
 organisms;Eukaryota;Opisthokonta;Metazoa;Eumetazoa;Placozoa;Trichoplacida  
 e;Trichoplax;Trichoplax adhaerens  
 UdeM00000026778 6596 353.6 UdeM00000026778 XP\_045214154.1 79.9 199  
 40 0 1 199 1 199 1.70E-94 353.6 6596 cellular  
 organisms;Eukaryota;Opisthokonta;Metazoa;Eumetazoa;Bilateria;Protostomia;  
 Spiralia;Lophotrochozoa;Mollusca;Bivalvia;Autobranhia;Heteroconchia;Euhe  
 terodonta;Imparidentia;Venerida;Veneroidea;Veneridae;Mercenaria;Mercenari  
 a mercenaria  
 UdeM00000026779 6596 607.1 UdeM00000026779 XP\_045212355.1 33.5 1063  
 566 17 303 1351 167 1102 6.40E-170 607.1 6596 cellular  
 organisms;Eukaryota;Opisthokonta;Metazoa;Eumetazoa;Bilateria;Protostomia;  
 Spiralia;Lophotrochozoa;Mollusca;Bivalvia;Autobranhia;Heteroconchia;Euhe  
 terodonta;Imparidentia;Venerida;Veneroidea;Veneridae;Mercenaria;Mercenari  
 a mercenaria  
 UdeM00000026780 29159 1305.8 UdeM00000026780 XP\_034312450.1 40.8  
 1706 893 37 1 1685 2346 3955 0.00E+00 1305.8  
 29159 cellular  
 organisms;Eukaryota;Opisthokonta;Metazoa;Eumetazoa;Bilateria;Protostomia;  
 Spiralia;Lophotrochozoa;Mollusca;Bivalvia;Autobranhia;Pteriomorpha;Ostr  
 eida;Ostreoidea;Ostreidae;Crassostrea;Crassostrea gigas  
 UdeM00000026781 29159 1501.5 UdeM00000026781 XP\_034312450.1 34.8  
 2628 1329 53 2 2564 29 2337 0.00E+00 1501.5  
 29159 cellular  
 organisms;Eukaryota;Opisthokonta;Metazoa;Eumetazoa;Bilateria;Protostomia;  
 Spiralia;Lophotrochozoa;Mollusca;Bivalvia;Autobranhia;Pteriomorpha;Ostr  
 eida;Ostreoidea;Ostreidae;Crassostrea;Crassostrea gigas  
 UdeM00000026782 6596 911 UdeM00000026782 XP\_045212561.1 66.1 697  
 229 4 28 721 7 699 9.70E-262 911 6596 cellular  
 organisms;Eukaryota;Opisthokonta;Metazoa;Eumetazoa;Bilateria;Protostomia;  
 Spiralia;Lophotrochozoa;Mollusca;Bivalvia;Autobranhia;Heteroconchia;Euhe

terodonta;Imparidentia;Venerida;Veneroidea;Veneridae;Mercenaria;Mercenaria mercenaria  
 UdeM00000026783 6565 167.5 UdeM00000026783 XP\_022317569.1 56.4 638  
 190 8 24 658 17 569 5.50E-38 167.5 6565 cellular  
 organisms;Eukaryota;Opisthokonta;Metazoa;Eumetazoa;Bilateria;Protostomia;  
 Spiralia;Lophotrochozoa;Mollusca;Bivalvia;Autobranchia;Pteriormorphia;Ostr  
 eida;Ostreoidea;Ostreidae;Crassostrea;Crassostrea virginica  
 UdeM00000026784 6596 577.4 UdeM00000026784 XP\_045212564.1 66.4 449  
 130 10 1 432 26 470 1.50E-161 577.4 6596 cellular  
 organisms;Eukaryota;Opisthokonta;Metazoa;Eumetazoa;Bilateria;Protostomia;  
 Spiralia;Lophotrochozoa;Mollusca;Bivalvia;Autobranchia;Heteroconchia;Euhe  
 terodonta;Imparidentia;Venerida;Veneroidea;Veneridae;Mercenaria;Mercenari  
 a mercenaria  
 UdeM00000026785 29159 323.2 UdeM00000026785 XP\_034322590.1 46.6 365  
 160 8 5 339 7 366 4.10E-85 323.2 29159 cellular  
 organisms;Eukaryota;Opisthokonta;Metazoa;Eumetazoa;Bilateria;Protostomia;  
 Spiralia;Lophotrochozoa;Mollusca;Bivalvia;Autobranchia;Pteriormorphia;Ostr  
 eida;Ostreoidea;Ostreidae;Crassostrea;Crassostrea gigas  
 UdeM00000026786 46514 112.8 UdeM00000026786 XP\_038055793.1 35.9 206  
 116 4 11 204 181 382 7.00E-22 112.8 46514 cellular  
 organisms;Eukaryota;Opisthokonta;Metazoa;Eumetazoa;Bilateria;Deuterostomi  
 a;Echinodermata;Eleutherozoa;Asterozoa;Asteroidea;Valvatacea;Valvatida;As  
 terinidae;Patiria;Patiria miniata  
 UdeM00000026787 6596 461.8 UdeM00000026787 XP\_045187415.1 40.2 617  
 349 10 4 613 3 606 1.30E-126 461.8 6596 cellular  
 organisms;Eukaryota;Opisthokonta;Metazoa;Eumetazoa;Bilateria;Protostomia;  
 Spiralia;Lophotrochozoa;Mollusca;Bivalvia;Autobranchia;Heteroconchia;Euhe  
 terodonta;Imparidentia;Venerida;Veneroidea;Veneridae;Mercenaria;Mercenari  
 a mercenaria  
 UdeM00000026790 6596 459.5 UdeM00000026790 XP\_045187415.1 40.2 615  
 342 11 9 613 8 606 6.60E-126 459.5 6596 cellular  
 organisms;Eukaryota;Opisthokonta;Metazoa;Eumetazoa;Bilateria;Protostomia;  
 Spiralia;Lophotrochozoa;Mollusca;Bivalvia;Autobranchia;Heteroconchia;Euhe  
 terodonta;Imparidentia;Venerida;Veneroidea;Veneridae;Mercenaria;Mercenari  
 a mercenaria  
 UdeM00000026792 6596 232.3 UdeM00000026792 XP\_045159151.1 46.6 219  
 117 0 9 227 297 515 6.30E-58 232.3 6596 cellular  
 organisms;Eukaryota;Opisthokonta;Metazoa;Eumetazoa;Bilateria;Protostomia;  
 Spiralia;Lophotrochozoa;Mollusca;Bivalvia;Autobranchia;Heteroconchia;Euhe  
 terodonta;Imparidentia;Venerida;Veneroidea;Veneridae;Mercenaria;Mercenari  
 a mercenaria  
 UdeM00000026793 6596 453.4 UdeM00000026793 XP\_045187415.1 40 615  
 343 11 9 613 8 606 4.70E-124 453.4 6596 cellular  
 organisms;Eukaryota;Opisthokonta;Metazoa;Eumetazoa;Bilateria;Protostomia;  
 Spiralia;Lophotrochozoa;Mollusca;Bivalvia;Autobranchia;Heteroconchia;Euhe  
 terodonta;Imparidentia;Venerida;Veneroidea;Veneridae;Mercenaria;Mercenari  
 a mercenaria  
 UdeM00000026794 6579 443.7 UdeM00000026794 XP\_033737001.1 36 619  
 372 7 8 623 34 631 3.80E-121 443.7 6579 cellular  
 organisms;Eukaryota;Opisthokonta;Metazoa;Eumetazoa;Bilateria;Protostomia;  
 Spiralia;Lophotrochozoa;Mollusca;Bivalvia;Autobranchia;Pteriormorphia;Pect  
 inida;Pectinoidea;Pectinidae;Pecten;Pecten maximus  
 UdeM00000026795 225164 98.6 UdeM00000026795 XP\_009062157.1 34.8  
 164 105 2 7 169 28 190 3.30E-17 98.6 225164

cellular  
organisms;Eukaryota;Opisthokonta;Metazoa;Eumetazoa;Bilateria;Protostomia;  
Spiralia;Lophotrochozoa;Mollusca;Gastropoda;Patellogastropoda;Lottioidea;  
Lottiidae;Lottia;Lottia gigantea

UdeM00000026797 225164 96.3 UdeM00000026797 XP\_009062157.1 34.4  
163 105 2 8 169 29 190 1.60E-16 96.3 225164

cellular  
organisms;Eukaryota;Opisthokonta;Metazoa;Eumetazoa;Bilateria;Protostomia;  
Spiralia;Lophotrochozoa;Mollusca;Gastropoda;Patellogastropoda;Lottioidea;  
Lottiidae;Lottia;Lottia gigantea

UdeM00000026798 6573 86.7 UdeM00000026798 XP\_021375023.1 35.2 125  
80 1 47 170 38 162 3.50E-14 86.7 6573 cellular

organisms;Eukaryota;Opisthokonta;Metazoa;Eumetazoa;Bilateria;Protostomia;  
Spiralia;Lophotrochozoa;Mollusca;Bivalvia;Autobranchia;Pteriormorphia;Pect  
inida;Pectinoidea;Pectinidae;Mizuhopecten;Mizuhopecten yessoensis

UdeM00000026800 6596 272.7 UdeM00000026800 XP\_045212587.1 57.8 223  
94 0 1 223 140 362 4.20E-70 272.7 6596 cellular

organisms;Eukaryota;Opisthokonta;Metazoa;Eumetazoa;Bilateria;Protostomia;  
Spiralia;Lophotrochozoa;Mollusca;Bivalvia;Autobranchia;Heteroconchia;Euhe  
terodonta;Imparidentia;Venerida;Veneroidea;Veneridae;Mercenaria;Mercenari  
a mercenaria

UdeM00000026801 400727 1110.5 UdeM00000026801 XP\_025086735.1  
75.2 726 168 4 1 718 1 722 0.00E+00 1110.5

400727 cellular  
organisms;Eukaryota;Opisthokonta;Metazoa;Eumetazoa;Bilateria;Protostomia;  
Spiralia;Lophotrochozoa;Mollusca;Gastropoda;Caenogastropoda;Architaeniogl  
ossa;Ampullarioidea;Ampullariidae;Pomacea;Pomacea canaliculata

UdeM00000026802 1735272 237.3 UdeM00000026802 XP\_041348564.1 44.7  
291 137 3 251 518 291 580 5.20E-59 237.3 1735272

cellular  
organisms;Eukaryota;Opisthokonta;Metazoa;Eumetazoa;Bilateria;Protostomia;  
Spiralia;Lophotrochozoa;Mollusca;Gastropoda;Neomphalina;Neomphaloidea;Pel  
tospiridae;Gigantopelta;Gigantopelta aegis

UdeM00000026803 6500 137.1 UdeM00000026803 XP\_005093832.1 43.4 182  
98 2 295 472 223 403 6.70E-29 137.1 6500 cellular

organisms;Eukaryota;Opisthokonta;Metazoa;Eumetazoa;Bilateria;Protostomia;  
Spiralia;Lophotrochozoa;Mollusca;Gastropoda;Heterobranchia;Euthyneura;Tec  
tipleura;Aplysiida;Aplysioidea;Aplysiidae;Aplysia;Aplysia californica

UdeM00000026805 4232 180.6 UdeM00000026805 XP\_021992378.1 81.7 104  
19 0 1 104 68 171 1.00E-42 180.6 4232 cellular

organisms;Eukaryota;Viridiplantae;Streptophyta;Streptophytina;Embryophyta  
;Tracheophyta;Euphyllophyta;Spermatophyta;Magnoliopsida;Mesangiospermae;e  
udicotyledons;Gunneridae;Pentapetalae;asterids;campanulids;Asterales;Aste  
raceae;Asteroideae;Heliantheae alliance;Heliantheae;Helianthus;Helianthus  
annuus

UdeM00000026804 556484 284.3 UdeM00000026804 XP\_002177462.1 81.7  
164 30 0 1 164 1 164 1.00E-73 284.3 556484

cellular  
organisms;Eukaryota;Sar;Stramenopiles;Ochrophyta;Bacillariophyta;Bacillar  
iophyceae;Bacillariophycidae;Naviculales;Phaeodactylaceae;Phaeodactylum;P  
haeodactylum tricorutum;Phaeodactylum tricorutum CCAP 1055/1

UdeM00000026806 29159 236.9 UdeM00000026806 XP\_034316161.1 42.9 287  
158 4 1 284 718 1001 3.30E-59 236.9 29159 cellular

organisms;Eukaryota;Opisthokonta;Metazoa;Eumetazoa;Bilateria;Protostomia;

Spiralia;Lophotrochozoa;Mollusca;Bivalvia;Autobranchia;Pteriormorphia;Ostr  
eida;Ostreoidea;Ostreidae;Crassostrea;Crassostrea gigas  
UdeM00000026807 7725 262.7 UdeM00000026807 XP\_039256161.1 77.5 160  
36 0 12 171 19 178 3.30E-67 262.7 7725 cellular  
organisms;Eukaryota;Opisthokonta;Metazoa;Eumetazoa;Bilateria;Deuterostomi  
a;Chordata;Tunicata;Ascidiacea;Stolidobranchia;Styelidae;Styela;Styela  
clava  
UdeM00000026808 6596 1410.2 UdeM00000026808 XP\_045210947.1 49.8  
2049 816 42 22 1898 122 2130 0.00E+00 1410.2 6596  
cellular  
organisms;Eukaryota;Opisthokonta;Metazoa;Eumetazoa;Bilateria;Protostomia;  
Spiralia;Lophotrochozoa;Mollusca;Bivalvia;Autobranchia;Heteroconchia;Euhe  
terodonta;Imparidentia;Venerida;Veneroidea;Veneridae;Mercenaria;Mercenari  
a mercenaria  
UdeM00000026810 6579 141.7 UdeM00000026810 XP\_033756850.1 65.5 116  
39 1 1 115 1 116 7.00E-31 141.7 6579 cellular  
organisms;Eukaryota;Opisthokonta;Metazoa;Eumetazoa;Bilateria;Protostomia;  
Spiralia;Lophotrochozoa;Mollusca;Bivalvia;Autobranchia;Pteriormorphia;Pect  
inida;Pectinoidea;Pectinidae;Pecten;Pecten maximus  
UdeM00000026811 1735272 2868.6 UdeM00000026811 XP\_041363716.1  
58.9 2749 944 45 4 2643 21 2693 0.00E+00 2868.6  
1735272 cellular  
organisms;Eukaryota;Opisthokonta;Metazoa;Eumetazoa;Bilateria;Protostomia;  
Spiralia;Lophotrochozoa;Mollusca;Gastropoda;Neomphalina;Neomphaloidea;Pel  
tospiridae;Gigantopelta;Gigantopelta aegis  
UdeM00000026811 1735272 429.9 UdeM00000026811 XP\_041363716.1 29.1  
2421 1213 83 5412 7709 2937 4976 7.10E-116 429.9 1735272  
cellular  
organisms;Eukaryota;Opisthokonta;Metazoa;Eumetazoa;Bilateria;Protostomia;  
Spiralia;Lophotrochozoa;Mollusca;Gastropoda;Neomphalina;Neomphaloidea;Pel  
tospiridae;Gigantopelta;Gigantopelta aegis  
UdeM00000026812 1735272 2869.7 UdeM00000026812 XP\_041363718.1  
59.2 2731 936 44 4 2632 21 2675 0.00E+00 2869.7  
1735272 cellular  
organisms;Eukaryota;Opisthokonta;Metazoa;Eumetazoa;Bilateria;Protostomia;  
Spiralia;Lophotrochozoa;Mollusca;Gastropoda;Neomphalina;Neomphaloidea;Pel  
tospiridae;Gigantopelta;Gigantopelta aegis  
UdeM00000026812 1735272 429.9 UdeM00000026812 XP\_041363718.1 29.1  
2421 1213 83 5401 7698 2919 4958 7.10E-116 429.9 1735272  
cellular  
organisms;Eukaryota;Opisthokonta;Metazoa;Eumetazoa;Bilateria;Protostomia;  
Spiralia;Lophotrochozoa;Mollusca;Gastropoda;Neomphalina;Neomphaloidea;Pel  
tospiridae;Gigantopelta;Gigantopelta aegis  
UdeM00000026813 29159 150.2 UdeM00000026813 XP\_034313442.1 56.7 134  
53 4 34 165 5177 5307 2.50E-33 150.2 29159 cellular  
organisms;Eukaryota;Opisthokonta;Metazoa;Eumetazoa;Bilateria;Protostomia;  
Spiralia;Lophotrochozoa;Mollusca;Bivalvia;Autobranchia;Pteriormorphia;Ostr  
eida;Ostreoidea;Ostreidae;Crassostrea;Crassostrea gigas  
UdeM00000026815 29159 94 UdeM00000026815 XP\_034339171.1 39.5 124  
72 2 7 127 564 687 1.60E-16 94 29159 cellular  
organisms;Eukaryota;Opisthokonta;Metazoa;Eumetazoa;Bilateria;Protostomia;  
Spiralia;Lophotrochozoa;Mollusca;Bivalvia;Autobranchia;Pteriormorphia;Ostr  
eida;Ostreoidea;Ostreidae;Crassostrea;Crassostrea gigas

UdeM00000026817 6596 117.5 UdeM00000026817 XP\_045212290.1 54.9 102  
 45 1 123 224 118 218 2.20E-23 117.5 6596 cellular  
 organisms;Eukaryota;Opisthokonta;Metazoa;Eumetazoa;Bilateria;Protostomia;  
 Spiralia;Lophotrochozoa;Mollusca;Bivalvia;Autobranhia;Heteroconchia;Euhe  
 terodonta;Imparidentia;Venerida;Veneroidea;Veneridae;Mercenaria;Mercenari  
 a mercenaria  
 UdeM00000026818 7574 179.9 UdeM00000026818 XP\_013387012.1 47 304  
 126 8 6 297 4 284 4.90E-42 179.9 7574 cellular  
 organisms;Eukaryota;Opisthokonta;Metazoa;Eumetazoa;Bilateria;Protostomia;  
 Spiralia;Lophotrochozoa;Brachiopoda;Linguliformea;Lingulata;Lingulida;Lin  
 guloidea;Lingulidae;Lingula;Lingula anatina  
 UdeM00000026819 6596 125.9 UdeM00000026819 XP\_045212283.1 63.9 97  
 34 1 18 114 10 105 6.00E-26 125.9 6596 cellular  
 organisms;Eukaryota;Opisthokonta;Metazoa;Eumetazoa;Bilateria;Protostomia;  
 Spiralia;Lophotrochozoa;Mollusca;Bivalvia;Autobranhia;Heteroconchia;Euhe  
 terodonta;Imparidentia;Venerida;Veneroidea;Veneridae;Mercenaria;Mercenari  
 a mercenaria  
 UdeM00000026820 1735272 535.8 UdeM00000026820 XP\_041364224.1 33.7  
 912 538 23 16 874 129 1026 3.30E-148 535.8 1735272  
 cellular  
 organisms;Eukaryota;Opisthokonta;Metazoa;Eumetazoa;Bilateria;Protostomia;  
 Spiralia;Lophotrochozoa;Mollusca;Gastropoda;Neomphalina;Neomphaloidea;Pel  
 tospiridae;Gigantopelta;Gigantopelta aegis  
 UdeM00000026821 6573 481.5 UdeM00000026821 XP\_021344281.1 40.9 616  
 345 10 33 635 2366 2975 1.70E-132 481.5 6573 cellular  
 organisms;Eukaryota;Opisthokonta;Metazoa;Eumetazoa;Bilateria;Protostomia;  
 Spiralia;Lophotrochozoa;Mollusca;Bivalvia;Autobranhia;Pteriormorphia;Pect  
 inida;Pectinoidea;Pectinidae;Mizuhopecten;Mizuhopecten yessoensis  
 UdeM00000026822 6596 765.8 UdeM00000026822 XP\_045212287.1 51.5 705  
 334 6 1018 1720 338 1036 1.20E-217 765.8 6596 cellular  
 organisms;Eukaryota;Opisthokonta;Metazoa;Eumetazoa;Bilateria;Protostomia;  
 Spiralia;Lophotrochozoa;Mollusca;Bivalvia;Autobranhia;Heteroconchia;Euhe  
 terodonta;Imparidentia;Venerida;Veneroidea;Veneridae;Mercenaria;Mercenari  
 a mercenaria  
 UdeM00000026823 6689 293.5 UdeM00000026823 XP\_027238029.1 92.5 146  
 11 0 1 146 1 146 1.50E-76 293.5 6689 cellular  
 organisms;Eukaryota;Opisthokonta;Metazoa;Eumetazoa;Bilateria;Protostomia;  
 Ecdysozoa;Panarthropoda;Arthropoda;Mandibulata;Pancrustacea;Crustacea;Mul  
 ticrustacea;Malacostraca;Eumalacostraca;Eucarida;Decapoda;Dendrobranchiat  
 a;Penaeoidea;Penaeidae;Penaeus;Penaeus vannamei  
 UdeM00000026824 6579 610.9 UdeM00000026824 XP\_033755014.1 47.2 829  
 378 17 11 805 1029 1831 2.30E-171 610.9 6579 cellular  
 organisms;Eukaryota;Opisthokonta;Metazoa;Eumetazoa;Bilateria;Protostomia;  
 Spiralia;Lophotrochozoa;Mollusca;Bivalvia;Autobranhia;Pteriormorphia;Pect  
 inida;Pectinoidea;Pectinidae;Pecten;Pecten maximus  
 UdeM00000026825 7054 65.1 UdeM00000026825 XP\_031346849.1 41.4 87  
 49 1 39 123 69 155 9.80E-08 65.1 7054 cellular  
 organisms;Eukaryota;Opisthokonta;Metazoa;Eumetazoa;Bilateria;Protostomia;  
 Ecdysozoa;Panarthropoda;Arthropoda;Mandibulata;Pancrustacea;Hexapoda;Inse  
 cta;Dicondylia;Pterygota;Neoptera;Endopterygota;Coleoptera;Polyphaga;Elat  
 eriformia;Elateroidea;Lampyridae;Lampyrinae;Photinus;Photinus pyralis  
 UdeM00000026826 6565 779.6 UdeM00000026826 XP\_022319461.1 44.8 1015  
 520 20 8 1015 46 1027 4.80E-222 779.6 6565 cellular  
 organisms;Eukaryota;Opisthokonta;Metazoa;Eumetazoa;Bilateria;Protostomia;



Spiralia;Lophotrochozoa;Mollusca;Bivalvia;Autobranchia;Pteriormorphia;Ostr  
eida;Ostreoidea;Ostreidae;Crassostrea;Crassostrea virginica  
UdeM00000026827 400727 141.4 UdeM00000026827 XP\_025080377.1 35.5  
203 126 1 43 240 26 228 1.60E-30 141.4 400727  
cellular

organisms;Eukaryota;Opisthokonta;Metazoa;Eumetazoa;Bilateria;Protostomia;  
Spiralia;Lophotrochozoa;Mollusca;Gastropoda;Caenogastropoda;Architaeniogl  
ossa;Ampullarioidea;Ampullariidae;Pomacea;Pomacea canaliculata  
UdeM00000026828 6565 457.2 UdeM00000026828 XP\_022319465.1 37.9 847  
485 17 6 830 3 830 4.80E-125 457.2 6565 cellular

organisms;Eukaryota;Opisthokonta;Metazoa;Eumetazoa;Bilateria;Protostomia;  
Spiralia;Lophotrochozoa;Mollusca;Bivalvia;Autobranchia;Pteriormorphia;Ostr  
eida;Ostreoidea;Ostreidae;Crassostrea;Crassostrea virginica  
UdeM00000026829 6596 339.3 UdeM00000026829 XP\_045197975.1 67.5 246  
79 1 78 323 1666 1910 6.10E-90 339.3 6596 cellular

organisms;Eukaryota;Opisthokonta;Metazoa;Eumetazoa;Bilateria;Protostomia;  
Spiralia;Lophotrochozoa;Mollusca;Bivalvia;Autobranchia;Heteroconchia;Euhe  
terodonta;Imparidentia;Venerida;Veneroidea;Veneridae;Mercenaria;Mercenari  
a mercenaria

UdeM00000026830 29159 99.4 UdeM00000026830 XP\_034307341.1 42.9 98  
56 0 11 108 211 308 3.00E-18 99.4 29159 cellular

organisms;Eukaryota;Opisthokonta;Metazoa;Eumetazoa;Bilateria;Protostomia;  
Spiralia;Lophotrochozoa;Mollusca;Bivalvia;Autobranchia;Pteriormorphia;Ostr  
eida;Ostreoidea;Ostreidae;Crassostrea;Crassostrea gigas

UdeM00000026831 6565 420.2 UdeM00000026831 XP\_022319461.1 40.7 678  
341 17 28 670 32 683 9.70E-114 420.2 6565 cellular

organisms;Eukaryota;Opisthokonta;Metazoa;Eumetazoa;Bilateria;Protostomia;  
Spiralia;Lophotrochozoa;Mollusca;Bivalvia;Autobranchia;Pteriormorphia;Ostr  
eida;Ostreoidea;Ostreidae;Crassostrea;Crassostrea virginica

UdeM00000026832 6565 420.2 UdeM00000026832 XP\_022319461.1 40.7 678  
341 17 28 670 32 683 9.70E-114 420.2 6565 cellular

organisms;Eukaryota;Opisthokonta;Metazoa;Eumetazoa;Bilateria;Protostomia;  
Spiralia;Lophotrochozoa;Mollusca;Bivalvia;Autobranchia;Pteriormorphia;Ostr  
eida;Ostreoidea;Ostreidae;Crassostrea;Crassostrea virginica

UdeM00000026833 29159 1032.7 UdeM00000026833 XP\_011437708.2 38.1  
1842 1032 43 96 1873 3 1799 5.70E-298 1032.7  
29159 cellular

organisms;Eukaryota;Opisthokonta;Metazoa;Eumetazoa;Bilateria;Protostomia;  
Spiralia;Lophotrochozoa;Mollusca;Bivalvia;Autobranchia;Pteriormorphia;Ostr  
eida;Ostreoidea;Ostreidae;Crassostrea;Crassostrea gigas

UdeM00000026834 6596 663.3 UdeM00000026834 XP\_045211746.1 64.9 465  
163 0 128 592 9 473 2.90E-187 663.3 6596 cellular

organisms;Eukaryota;Opisthokonta;Metazoa;Eumetazoa;Bilateria;Protostomia;  
Spiralia;Lophotrochozoa;Mollusca;Bivalvia;Autobranchia;Heteroconchia;Euhe  
terodonta;Imparidentia;Venerida;Veneroidea;Veneridae;Mercenaria;Mercenari  
a mercenaria

UdeM00000026835 225164 170.2 UdeM00000026835 XP\_009063528.1 41  
205 120 1 1 205 1 204 2.70E-39 170.2 225164  
cellular

organisms;Eukaryota;Opisthokonta;Metazoa;Eumetazoa;Bilateria;Protostomia;  
Spiralia;Lophotrochozoa;Mollusca;Gastropoda;Patellogastropoda;Lottioida;  
Lottiidae;Lottia;Lottia gigantea

UdeM00000026836 6596 1544.6 UdeM00000026836 XP\_045211745.1 65.9  
1141 359 7 11 1124 83 1220 0.00E+00 1544.6 6596

cellular  
organisms;Eukaryota;Opisthokonta;Metazoa;Eumetazoa;Bilateria;Protostomia;  
Spiralia;Lophotrochozoa;Mollusca;Bivalvia;Autobranhia;Heteroconchia;Euhe  
terodonta;Imparidentia;Venerida;Veneroidea;Veneridae;Mercenaria;Mercenari  
a mercenaria  
UdeM00000026837 6596 736.1 UdeM00000026837 XP\_045211741.1 49.4 1147  
446 17 1 1125 1 1035 7.20E-209 736.1 6596 cellular  
organisms;Eukaryota;Opisthokonta;Metazoa;Eumetazoa;Bilateria;Protostomia;  
Spiralia;Lophotrochozoa;Mollusca;Bivalvia;Autobranhia;Heteroconchia;Euhe  
terodonta;Imparidentia;Venerida;Veneroidea;Veneridae;Mercenaria;Mercenari  
a mercenaria  
UdeM00000026838 6565 340.9 UdeM00000026838 XP\_022317771.1 64.7 252  
89 0 1 252 1 252 1.40E-90 340.9 6565 cellular  
organisms;Eukaryota;Opisthokonta;Metazoa;Eumetazoa;Bilateria;Protostomia;  
Spiralia;Lophotrochozoa;Mollusca;Bivalvia;Autobranhia;Pteriormorphia;Ostr  
eida;Ostreoidea;Ostreidae;Crassostrea;Crassostrea virginica  
UdeM00000026839 6596 410.2 UdeM00000026839 XP\_045170790.1 56.9 360  
155 0 7 366 11 370 2.90E-111 410.2 6596 cellular  
organisms;Eukaryota;Opisthokonta;Metazoa;Eumetazoa;Bilateria;Protostomia;  
Spiralia;Lophotrochozoa;Mollusca;Bivalvia;Autobranhia;Heteroconchia;Euhe  
terodonta;Imparidentia;Venerida;Veneroidea;Veneridae;Mercenaria;Mercenari  
a mercenaria  
UdeM00000026840 6596 793.1 UdeM00000026840 XP\_045214161.1 33.4 1430  
807 31 10 1322 143 1544 5.50E-226 793.1 6596 cellular  
organisms;Eukaryota;Opisthokonta;Metazoa;Eumetazoa;Bilateria;Protostomia;  
Spiralia;Lophotrochozoa;Mollusca;Bivalvia;Autobranhia;Heteroconchia;Euhe  
terodonta;Imparidentia;Venerida;Veneroidea;Veneridae;Mercenaria;Mercenari  
a mercenaria  
UdeM00000026841 29159 735.7 UdeM00000026841 XP\_011433534.2 77.8 491  
106 2 1 490 1 489 3.80E-209 735.7 29159 cellular  
organisms;Eukaryota;Opisthokonta;Metazoa;Eumetazoa;Bilateria;Protostomia;  
Spiralia;Lophotrochozoa;Mollusca;Bivalvia;Autobranhia;Pteriormorphia;Ostr  
eida;Ostreoidea;Ostreidae;Crassostrea;Crassostrea gigas  
UdeM00000026842 6596 372.9 UdeM00000026842 XP\_045211860.1 44.2 446  
223 7 12 438 83 521 5.80E-100 372.9 6596 cellular  
organisms;Eukaryota;Opisthokonta;Metazoa;Eumetazoa;Bilateria;Protostomia;  
Spiralia;Lophotrochozoa;Mollusca;Bivalvia;Autobranhia;Heteroconchia;Euhe  
terodonta;Imparidentia;Venerida;Veneroidea;Veneridae;Mercenaria;Mercenari  
a mercenaria  
UdeM00000026843 6596 341.3 UdeM00000026843 XP\_045213472.1 72.9 218  
59 0 151 368 119 336 1.60E-90 341.3 6596 cellular  
organisms;Eukaryota;Opisthokonta;Metazoa;Eumetazoa;Bilateria;Protostomia;  
Spiralia;Lophotrochozoa;Mollusca;Bivalvia;Autobranhia;Heteroconchia;Euhe  
terodonta;Imparidentia;Venerida;Veneroidea;Veneridae;Mercenaria;Mercenari  
a mercenaria  
UdeM00000026844 6573 371.3 UdeM00000026844 XP\_021380172.1 54 341  
151 5 115 453 4 340 1.80E-99 371.3 6573 cellular  
organisms;Eukaryota;Opisthokonta;Metazoa;Eumetazoa;Bilateria;Protostomia;  
Spiralia;Lophotrochozoa;Mollusca;Bivalvia;Autobranhia;Pteriormorphia;Pect  
inida;Pectinoidea;Pectinidae;Mizuhopecten;Mizuhopecten yessoensis  
UdeM00000026845 1735272 253.8 UdeM00000026845 XP\_041364680.1 75.4  
171 39 2 51 220 49 217 3.00E-64 253.8 1735272  
cellular  
organisms;Eukaryota;Opisthokonta;Metazoa;Eumetazoa;Bilateria;Protostomia;

Spiralia;Lophotrochozoa;Mollusca;Gastropoda;Neomphalina;Neomphaloidea;Pel  
tospiridae;Gigantopelta;Gigantopelta aegis  
UdeM00000026846 6573 1426.8 UdeM00000026846 XP\_021369729.1 75.1  
927 229 1 2 928 3 927 0.00E+00 1426.8 6573  
cellular  
organisms;Eukaryota;Opisthokonta;Metazoa;Eumetazoa;Bilateria;Protostomia;  
Spiralia;Lophotrochozoa;Mollusca;Bivalvia;Autobranchia;Pteriormorphia;Pect  
inida;Pectinoidea;Pectinidae;Mizuhopecten;Mizuhopecten yessoensis  
UdeM00000026847 6596 417.9 UdeM00000026847 XP\_045214925.1 35.5 679  
398 11 5 660 1 662 2.30E-113 417.9 6596 cellular  
organisms;Eukaryota;Opisthokonta;Metazoa;Eumetazoa;Bilateria;Protostomia;  
Spiralia;Lophotrochozoa;Mollusca;Bivalvia;Autobranchia;Heteroconchia;Euhe  
terodonta;Imparidentia;Venerida;Veneroidea;Veneridae;Mercenaria;Mercenari  
a mercenaria  
UdeM00000026848 6596 920.6 UdeM00000026848 XP\_045210941.1 66.9 695  
223 5 4 694 2833 3524 1.20E-264 920.6 6596 cellular  
organisms;Eukaryota;Opisthokonta;Metazoa;Eumetazoa;Bilateria;Protostomia;  
Spiralia;Lophotrochozoa;Mollusca;Bivalvia;Autobranchia;Heteroconchia;Euhe  
terodonta;Imparidentia;Venerida;Veneroidea;Veneridae;Mercenaria;Mercenari  
a mercenaria  
UdeM00000026849 6596 646.4 UdeM00000026849 XP\_045210941.1 61.7 519  
197 2 1 518 2305 2822 3.20E-182 646.4 6596 cellular  
organisms;Eukaryota;Opisthokonta;Metazoa;Eumetazoa;Bilateria;Protostomia;  
Spiralia;Lophotrochozoa;Mollusca;Bivalvia;Autobranchia;Heteroconchia;Euhe  
terodonta;Imparidentia;Venerida;Veneroidea;Veneridae;Mercenaria;Mercenari  
a mercenaria  
UdeM00000026850 6579 2560 UdeM00000026850 XP\_033755477.1 57.9 2310  
920 19 124 2423 131 2398 0.00E+00 2560 6579 cellular  
organisms;Eukaryota;Opisthokonta;Metazoa;Eumetazoa;Bilateria;Protostomia;  
Spiralia;Lophotrochozoa;Mollusca;Bivalvia;Autobranchia;Pteriormorphia;Pect  
inida;Pectinoidea;Pectinidae;Pecten;Pecten maximus  
UdeM00000026851 6579 62 UdeM00000026851 XP\_033741736.1 56.5 46  
20 0 24 69 796 841 4.00E-07 62 6579 cellular  
organisms;Eukaryota;Opisthokonta;Metazoa;Eumetazoa;Bilateria;Protostomia;  
Spiralia;Lophotrochozoa;Mollusca;Bivalvia;Autobranchia;Pteriormorphia;Pect  
inida;Pectinoidea;Pectinidae;Pecten;Pecten maximus  
UdeM00000026852 6500 144.4 UdeM00000026852 XP\_005097310.1 52 123  
56 1 89 211 28 147 1.60E-31 144.4 6500 cellular  
organisms;Eukaryota;Opisthokonta;Metazoa;Eumetazoa;Bilateria;Protostomia;  
Spiralia;Lophotrochozoa;Mollusca;Gastropoda;Heterobranchia;Euthyneura;Tec  
tipleura;Aplysiida;Aplysioidea;Aplysiidae;Aplysia;Aplysia californica  
UdeM00000026853 1735272 68.6 UdeM00000026853 XP\_041360711.1 34.7  
101 62 1 5 101 6 106 5.60E-09 68.6 1735272  
cellular  
organisms;Eukaryota;Opisthokonta;Metazoa;Eumetazoa;Bilateria;Protostomia;  
Spiralia;Lophotrochozoa;Mollusca;Gastropoda;Neomphalina;Neomphaloidea;Pel  
tospiridae;Gigantopelta;Gigantopelta aegis  
UdeM00000026854 1735272 65.9 UdeM00000026854 XP\_041360711.1 33.7  
101 63 1 5 101 6 106 3.60E-08 65.9 1735272  
cellular  
organisms;Eukaryota;Opisthokonta;Metazoa;Eumetazoa;Bilateria;Protostomia;  
Spiralia;Lophotrochozoa;Mollusca;Gastropoda;Neomphalina;Neomphaloidea;Pel  
tospiridae;Gigantopelta;Gigantopelta aegis

UdeM00000026855 6596 872.8 UdeM00000026855 XP\_045211700.1 59.3 865  
 309 13 1 853 1 834 3.40E-250 872.8 6596 cellular  
 organisms;Eukaryota;Opisthokonta;Metazoa;Eumetazoa;Bilateria;Protostomia;  
 Spiralia;Lophotrochozoa;Mollusca;Bivalvia;Autobranchia;Heteroconchia;Euhe  
 terodonta;Imparidentia;Venerida;Veneroidea;Veneridae;Mercenaria;Mercenari  
 a mercenaria

UdeM00000026856 6596 509.6 UdeM00000026856 XP\_045214810.1 81.9 310  
 56 0 1 310 1 310 2.80E-141 509.6 6596 cellular  
 organisms;Eukaryota;Opisthokonta;Metazoa;Eumetazoa;Bilateria;Protostomia;  
 Spiralia;Lophotrochozoa;Mollusca;Bivalvia;Autobranchia;Heteroconchia;Euhe  
 terodonta;Imparidentia;Venerida;Veneroidea;Veneridae;Mercenaria;Mercenari  
 a mercenaria

UdeM00000026857 6596 259.2 UdeM00000026857 XP\_045215009.1 52.8 233  
 107 2 1 230 1 233 5.00E-66 259.2 6596 cellular  
 organisms;Eukaryota;Opisthokonta;Metazoa;Eumetazoa;Bilateria;Protostomia;  
 Spiralia;Lophotrochozoa;Mollusca;Bivalvia;Autobranchia;Heteroconchia;Euhe  
 terodonta;Imparidentia;Venerida;Veneroidea;Veneridae;Mercenaria;Mercenari  
 a mercenaria

UdeM00000026858 6596 268.1 UdeM00000026858 XP\_045215009.1 56.8 220  
 92 2 15 231 15 234 1.10E-68 268.1 6596 cellular  
 organisms;Eukaryota;Opisthokonta;Metazoa;Eumetazoa;Bilateria;Protostomia;  
 Spiralia;Lophotrochozoa;Mollusca;Bivalvia;Autobranchia;Heteroconchia;Euhe  
 terodonta;Imparidentia;Venerida;Veneroidea;Veneridae;Mercenaria;Mercenari  
 a mercenaria

UdeM00000026859 6596 259.2 UdeM00000026859 XP\_045215009.1 54.1 220  
 98 2 15 231 15 234 4.90E-66 259.2 6596 cellular  
 organisms;Eukaryota;Opisthokonta;Metazoa;Eumetazoa;Bilateria;Protostomia;  
 Spiralia;Lophotrochozoa;Mollusca;Bivalvia;Autobranchia;Heteroconchia;Euhe  
 terodonta;Imparidentia;Venerida;Veneroidea;Veneridae;Mercenaria;Mercenari  
 a mercenaria

UdeM00000026860 6596 599 UdeM00000026860 XP\_045198360.1 60.6 469  
 173 5 11 478 25 482 5.40E-168 599 6596 cellular  
 organisms;Eukaryota;Opisthokonta;Metazoa;Eumetazoa;Bilateria;Protostomia;  
 Spiralia;Lophotrochozoa;Mollusca;Bivalvia;Autobranchia;Heteroconchia;Euhe  
 terodonta;Imparidentia;Venerida;Veneroidea;Veneridae;Mercenaria;Mercenari  
 a mercenaria

UdeM00000026862 6579 1354.7 UdeM00000026862 XP\_033758019.1 66.3  
 1353 378 12 7 1328 9 1314 0.00E+00 1354.7 6579  
 cellular  
 organisms;Eukaryota;Opisthokonta;Metazoa;Eumetazoa;Bilateria;Protostomia;  
 Spiralia;Lophotrochozoa;Mollusca;Bivalvia;Autobranchia;Pteriomorphia;Pect  
 inida;Pectinoidea;Pectinidae;Pecten;Pecten maximus

UdeM00000026861 6579 1355.5 UdeM00000026861 XP\_033758019.1 66.3  
 1353 378 12 18 1339 9 1314 0.00E+00 1355.5 6579  
 cellular  
 organisms;Eukaryota;Opisthokonta;Metazoa;Eumetazoa;Bilateria;Protostomia;  
 Spiralia;Lophotrochozoa;Mollusca;Bivalvia;Autobranchia;Pteriomorphia;Pect  
 inida;Pectinoidea;Pectinidae;Pecten;Pecten maximus

UdeM00000026863 6596 181.8 UdeM00000026863 XP\_045209807.1 53.7 175  
 80 1 1 174 1 175 7.50E-43 181.8 6596 cellular  
 organisms;Eukaryota;Opisthokonta;Metazoa;Eumetazoa;Bilateria;Protostomia;  
 Spiralia;Lophotrochozoa;Mollusca;Bivalvia;Autobranchia;Heteroconchia;Euhe  
 terodonta;Imparidentia;Venerida;Veneroidea;Veneridae;Mercenaria;Mercenari  
 a mercenaria

UdeM00000026865 6565 190.3 UdeM00000026865 XP\_022327899.1 53.6 168  
 78 0 7 174 4 171 2.10E-45 190.3 6565 cellular  
 organisms;Eukaryota;Opisthokonta;Metazoa;Eumetazoa;Bilateria;Protostomia;  
 Spiralia;Lophotrochozoa;Mollusca;Bivalvia;Autobranchia;Pteriomorpha;Ostr  
 eida;Ostreoidea;Ostreidae;Crassostrea;Crassostrea virginica  
 UdeM00000026866 6565 195.3 UdeM00000026866 XP\_022327899.1 55 169  
 76 0 7 175 4 172 6.60E-47 195.3 6565 cellular  
 organisms;Eukaryota;Opisthokonta;Metazoa;Eumetazoa;Bilateria;Protostomia;  
 Spiralia;Lophotrochozoa;Mollusca;Bivalvia;Autobranchia;Pteriomorpha;Ostr  
 eida;Ostreoidea;Ostreidae;Crassostrea;Crassostrea virginica  
 UdeM00000026867 29159 69.3 UdeM00000026867 XP\_034317284.1 41.9 93  
 48 3 1 90 109 198 3.60E-09 69.3 29159 cellular  
 organisms;Eukaryota;Opisthokonta;Metazoa;Eumetazoa;Bilateria;Protostomia;  
 Spiralia;Lophotrochozoa;Mollusca;Bivalvia;Autobranchia;Pteriomorpha;Ostr  
 eida;Ostreoidea;Ostreidae;Crassostrea;Crassostrea gigas  
 UdeM00000026868 6579 150.2 UdeM00000026868 XP\_033728731.1 47 166  
 65 2 9 151 11 176 2.10E-33 150.2 6579 cellular  
 organisms;Eukaryota;Opisthokonta;Metazoa;Eumetazoa;Bilateria;Protostomia;  
 Spiralia;Lophotrochozoa;Mollusca;Bivalvia;Autobranchia;Pteriomorpha;Pect  
 inida;Pectinoidea;Pectinidae;Pecten;Pecten maximus  
 UdeM00000026869 6596 64.3 UdeM00000026869 XP\_045187287.1 39.8 88  
 48 2 6 93 522 604 1.20E-07 64.3 6596 cellular  
 organisms;Eukaryota;Opisthokonta;Metazoa;Eumetazoa;Bilateria;Protostomia;  
 Spiralia;Lophotrochozoa;Mollusca;Bivalvia;Autobranchia;Heteroconchia;Euhe  
 terodonta;Imparidentia;Venerida;Veneroidea;Veneridae;Mercenaria;Mercenari  
 a mercenaria  
 UdeM00000026870 6596 297 UdeM00000026870 XP\_045187276.1 49.4 318  
 148 1 3 320 277 581 3.40E-77 297 6596 cellular  
 organisms;Eukaryota;Opisthokonta;Metazoa;Eumetazoa;Bilateria;Protostomia;  
 Spiralia;Lophotrochozoa;Mollusca;Bivalvia;Autobranchia;Heteroconchia;Euhe  
 terodonta;Imparidentia;Venerida;Veneroidea;Veneridae;Mercenaria;Mercenari  
 a mercenaria  
 UdeM00000026871 6596 251.1 UdeM00000026871 XP\_045187277.1 62.4 202  
 76 0 1 202 1 202 1.20E-63 251.1 6596 cellular  
 organisms;Eukaryota;Opisthokonta;Metazoa;Eumetazoa;Bilateria;Protostomia;  
 Spiralia;Lophotrochozoa;Mollusca;Bivalvia;Autobranchia;Heteroconchia;Euhe  
 terodonta;Imparidentia;Venerida;Veneroidea;Veneridae;Mercenaria;Mercenari  
 a mercenaria  
 UdeM00000026872 6565 748 UdeM00000026872 XP\_022325896.1 51.9 771  
 290 12 12 767 19 723 1.20E-212 748 6565 cellular  
 organisms;Eukaryota;Opisthokonta;Metazoa;Eumetazoa;Bilateria;Protostomia;  
 Spiralia;Lophotrochozoa;Mollusca;Bivalvia;Autobranchia;Pteriomorpha;Ostr  
 eida;Ostreoidea;Ostreidae;Crassostrea;Crassostrea virginica  
 UdeM00000026873 6596 404.4 UdeM00000026873 XP\_045214091.1 70.9 268  
 71 1 5 272 3 263 1.10E-109 404.4 6596 cellular  
 organisms;Eukaryota;Opisthokonta;Metazoa;Eumetazoa;Bilateria;Protostomia;  
 Spiralia;Lophotrochozoa;Mollusca;Bivalvia;Autobranchia;Heteroconchia;Euhe  
 terodonta;Imparidentia;Venerida;Veneroidea;Veneridae;Mercenaria;Mercenari  
 a mercenaria  
 UdeM00000026874 1735272 143.7 UdeM00000026874 XP\_041363031.1 53.8  
 119 55 0 9 127 35 153 1.70E-31 143.7 1735272  
 cellular  
 organisms;Eukaryota;Opisthokonta;Metazoa;Eumetazoa;Bilateria;Protostomia;

Spiralia;Lophotrochozoa;Mollusca;Gastropoda;Neomphalina;Neomphaloidea;Pel  
tospiridae;Gigantopelta;Gigantopelta aegis  
UdeM00000026875 6579 739.6 UdeM00000026875 XP\_033744648.1 43.5 1086  
491 25 21 1064 681 1685 5.70E-210 739.6 6579 cellular  
organisms;Eukaryota;Opisthokonta;Metazoa;Eumetazoa;Bilateria;Protostomia;  
Spiralia;Lophotrochozoa;Mollusca;Bivalvia;Autobranchia;Pteriormorphia;Pect  
inida;Pectinoidea;Pectinidae;Pecten;Pecten maximus  
UdeM00000026876 6596 719.2 UdeM00000026876 XP\_045214093.1 56.2 641  
267 4 27 666 33 660 5.10E-204 719.2 6596 cellular  
organisms;Eukaryota;Opisthokonta;Metazoa;Eumetazoa;Bilateria;Protostomia;  
Spiralia;Lophotrochozoa;Mollusca;Bivalvia;Autobranchia;Heteroconchia;Euhe  
terodonta;Imparidentia;Venerida;Veneroidea;Veneridae;Mercenaria;Mercenari  
a mercenaria  
UdeM00000026877 386614 333.6 UdeM00000026877 XP\_032896621.1 51.2  
338 142 7 1 326 1 327 1.40E-87 333.6 386614  
cellular  
organisms;Eukaryota;Opisthokonta;Metazoa;Eumetazoa;Bilateria;Deuterostomi  
a;Chordata;Craniata;Vertebrata;Gnathostomata;Chondrichthyes;Elasmobranchi  
i;Batoidea;Rajiformes;Rajidae;Amblyraja;Amblyraja radiata  
UdeM00000026878 386614 333.6 UdeM00000026878 XP\_032896621.1 51.2  
338 142 7 1 326 1 327 1.40E-87 333.6 386614  
cellular  
organisms;Eukaryota;Opisthokonta;Metazoa;Eumetazoa;Bilateria;Deuterostomi  
a;Chordata;Craniata;Vertebrata;Gnathostomata;Chondrichthyes;Elasmobranchi  
i;Batoidea;Rajiformes;Rajidae;Amblyraja;Amblyraja radiata  
UdeM00000026879 6596 132.5 UdeM00000026879 XP\_045212429.1 71.9 89  
25 0 1 89 1 89 2.70E-28 132.5 6596 cellular  
organisms;Eukaryota;Opisthokonta;Metazoa;Eumetazoa;Bilateria;Protostomia;  
Spiralia;Lophotrochozoa;Mollusca;Bivalvia;Autobranchia;Heteroconchia;Euhe  
terodonta;Imparidentia;Venerida;Veneroidea;Veneridae;Mercenaria;Mercenari  
a mercenaria  
UdeM00000026880 6579 228 UdeM00000026880 XP\_033747412.1 57.3 178  
74 1 1 176 5 182 9.20E-57 228 6579 cellular  
organisms;Eukaryota;Opisthokonta;Metazoa;Eumetazoa;Bilateria;Protostomia;  
Spiralia;Lophotrochozoa;Mollusca;Bivalvia;Autobranchia;Pteriormorphia;Pect  
inida;Pectinoidea;Pectinidae;Pecten;Pecten maximus  
UdeM00000026881 6596 1119 UdeM00000026881 XP\_045214177.1 63.1 949  
299 18 1 929 1 918 0.00E+00 1119 6596 cellular  
organisms;Eukaryota;Opisthokonta;Metazoa;Eumetazoa;Bilateria;Protostomia;  
Spiralia;Lophotrochozoa;Mollusca;Bivalvia;Autobranchia;Heteroconchia;Euhe  
terodonta;Imparidentia;Venerida;Veneroidea;Veneridae;Mercenaria;Mercenari  
a mercenaria  
UdeM00000026882 6573 387.1 UdeM00000026882 XP\_021379429.1 58 348  
132 5 11 347 4 348 2.40E-104 387.1 6573 cellular  
organisms;Eukaryota;Opisthokonta;Metazoa;Eumetazoa;Bilateria;Protostomia;  
Spiralia;Lophotrochozoa;Mollusca;Bivalvia;Autobranchia;Pteriormorphia;Pect  
inida;Pectinoidea;Pectinidae;Mizuhopecten;Mizuhopecten yessoensis  
UdeM00000026883 6573 400.2 UdeM00000026883 XP\_021379429.1 56.7 374  
146 6 5 365 4 374 2.90E-108 400.2 6573 cellular  
organisms;Eukaryota;Opisthokonta;Metazoa;Eumetazoa;Bilateria;Protostomia;  
Spiralia;Lophotrochozoa;Mollusca;Bivalvia;Autobranchia;Pteriormorphia;Pect  
inida;Pectinoidea;Pectinidae;Mizuhopecten;Mizuhopecten yessoensis  
UdeM00000026884 7574 313.5 UdeM00000026884 XP\_013389988.1 55.3 264  
117 1 10 273 5 267 2.60E-82 313.5 7574 cellular

organisms;Eukaryota;Opisthokonta;Metazoa;Eumetazoa;Bilateria;Protostomia;Spiralia;Lophotrochozoa;Brachiopoda;Linguliformea;Lingulata;Lingulida;Linguloidea;Lingulidae;Lingula;Lingula anatina

UdeM00000026887 6596 268.1 UdeM00000026887 XP\_045215009.1 57.3 218  
90 2 16 230 16 233 1.10E-68 268.1 6596 cellular

organisms;Eukaryota;Opisthokonta;Metazoa;Eumetazoa;Bilateria;Protostomia;Spiralia;Lophotrochozoa;Mollusca;Bivalvia;Autobranchia;Heteroconchia;Euheterodonta;Imparidentia;Venerida;Veneroidea;Veneridae;Mercenaria;Mercenaria mercenaria

UdeM00000026889 6596 186 UdeM00000026889 XP\_045216906.1 33.5 355  
112 7 1 233 1 353 5.30E-44 186 6596 cellular

organisms;Eukaryota;Opisthokonta;Metazoa;Eumetazoa;Bilateria;Protostomia;Spiralia;Lophotrochozoa;Mollusca;Bivalvia;Autobranchia;Heteroconchia;Euheterodonta;Imparidentia;Venerida;Veneroidea;Veneridae;Mercenaria;Mercenaria mercenaria

UdeM00000026891 29159 65.5 UdeM00000026891 XP\_034317668.1 60.8 51  
20 0 42 92 817 867 4.30E-08 65.5 29159 cellular

organisms;Eukaryota;Opisthokonta;Metazoa;Eumetazoa;Bilateria;Protostomia;Spiralia;Lophotrochozoa;Mollusca;Bivalvia;Autobranchia;Pteriormorphia;Ostreida;Ostreioidea;Ostreidae;Crassostrea;Crassostrea gigas

UdeM00000026892 7906 85.5 UdeM00000026892 XP\_034777329.1 33.6 146  
89 4 5 143 113 257 6.60E-14 85.5 7906 cellular

organisms;Eukaryota;Opisthokonta;Metazoa;Eumetazoa;Bilateria;Deuterostomia;Chordata;Craniata;Vertebrata;Gnathostomata;Teleostomi;Euteleostomi;Actinopterygii;Actinopteri;Chondrostei;Acipenseriformes;Acipenserioidei;Acipenseridae;Acipenserinae;Acipenserini;Acipenser;Acipenser ruthenus

UdeM00000026893 1735272 675.2 UdeM00000026893 XP\_041363084.1 83.1  
391 65 1 5 394 17 407 4.90E-191 675.2 1735272  
cellular

organisms;Eukaryota;Opisthokonta;Metazoa;Eumetazoa;Bilateria;Protostomia;Spiralia;Lophotrochozoa;Mollusca;Gastropoda;Neomphalina;Neomphaloidea;Peltospiridae;Gigantopelta;Gigantopelta aegis

UdeM00000026894 1735272 533.5 UdeM00000026894 XP\_041363084.1 68.8  
391 60 2 5 333 17 407 2.00E-148 533.5 1735272  
cellular

organisms;Eukaryota;Opisthokonta;Metazoa;Eumetazoa;Bilateria;Protostomia;Spiralia;Lophotrochozoa;Mollusca;Gastropoda;Neomphalina;Neomphaloidea;Peltospiridae;Gigantopelta;Gigantopelta aegis

UdeM00000026895 7739 77.8 UdeM00000026895 XP\_035659254.1 38.3 133  
73 5 6 132 37 166 1.20E-11 77.8 7739 cellular

organisms;Eukaryota;Opisthokonta;Metazoa;Eumetazoa;Bilateria;Deuterostomia;Chordata;Cephalochordata;Leptocardii;Amphioxiformes;Branchiostomidae;Branchiostoma;Branchiostoma floridae

UdeM00000026896 1735272 432.6 UdeM00000026896 XP\_041363084.1 81.9  
254 45 1 5 257 17 270 3.70E-118 432.6 1735272  
cellular

organisms;Eukaryota;Opisthokonta;Metazoa;Eumetazoa;Bilateria;Protostomia;Spiralia;Lophotrochozoa;Mollusca;Gastropoda;Neomphalina;Neomphaloidea;Peltospiridae;Gigantopelta;Gigantopelta aegis

UdeM00000044340 37032 72.8 UdeM00000044340 XP\_029777003.1 26.8 246  
144 9 79 296 18 255 8.30E-10 72.8 37032 cellular

organisms;Eukaryota;Opisthokonta;Metazoa;Eumetazoa;Bilateria;Deuterostomia;Chordata;Craniata;Vertebrata;Gnathostomata;Teleostomi;Euteleostomi;Sarcopterygii;Dipnotetrapodomorpha;Tetrapoda;Amniota;Mammalia;Theria;Eutheria

;Boreoeutheria;Laurasiatheria;Carnivora;Feliformia;Herpestidae;Suricata;S  
uricata suricatta  
UdeM00000044339 6579 65.5 UdeM00000044339 XP\_033760293.1 24.4 283  
178 9 47 302 94 367 1.40E-07 65.5 6579 cellular  
organisms;Eukaryota;Opisthokonta;Metazoa;Eumetazoa;Bilateria;Protostomia;  
Spiralia;Lophotrochozoa;Mollusca;Bivalvia;Autobranchia;Pteriormorphia;Pect  
inida;Pectinoidea;Pectinidae;Pecten;Pecten maximus  
UdeM00000014057 6596 145.6 UdeM00000014057 XP\_045201962.1 39 213  
96 5 81 269 74 276 9.20E-32 145.6 6596 cellular  
organisms;Eukaryota;Opisthokonta;Metazoa;Eumetazoa;Bilateria;Protostomia;  
Spiralia;Lophotrochozoa;Mollusca;Bivalvia;Autobranchia;Heteroconchia;Euhe  
terodonta;Imparidentia;Venerida;Veneroidea;Veneridae;Mercenaria;Mercenari  
a mercenaria  
UdeM00000014058 400727 157.5 UdeM00000014058 XP\_025116054.1 36.1  
296 152 10 134 394 30 323 4.10E-35 157.5 400727  
cellular  
organisms;Eukaryota;Opisthokonta;Metazoa;Eumetazoa;Bilateria;Protostomia;  
Spiralia;Lophotrochozoa;Mollusca;Gastropoda;Caenogastropoda;Architaeniogl  
ossa;Ampullarioidea;Ampullariidae;Pomacea;Pomacea canaliculata  
UdeM00000014059 7604 112.8 UdeM00000014059 XP\_033646908.1 31.7 221  
128 6 12 216 404 617 1.10E-21 112.8 7604 cellular  
organisms;Eukaryota;Opisthokonta;Metazoa;Eumetazoa;Bilateria;Deuterostomi  
a;Echinodermata;Eleutherozoa;Asterozoa;Asteroidea;Forcipulatacea;Forcipul  
atida;Asteroiidae;Asteroidea;Asteroidea rubens  
UdeM00000014060 400727 154.1 UdeM00000014060 XP\_025101777.1 29.4  
374 239 9 22 376 455 822 4.90E-34 154.1 400727  
cellular  
organisms;Eukaryota;Opisthokonta;Metazoa;Eumetazoa;Bilateria;Protostomia;  
Spiralia;Lophotrochozoa;Mollusca;Gastropoda;Caenogastropoda;Architaeniogl  
ossa;Ampullarioidea;Ampullariidae;Pomacea;Pomacea canaliculata  
UdeM00000014061 37653 219.5 UdeM00000014061 XP\_014782122.1 40.2 264  
155 2 145 407 131 392 7.60E-54 219.5 37653 cellular  
organisms;Eukaryota;Opisthokonta;Metazoa;Eumetazoa;Bilateria;Protostomia;  
Spiralia;Lophotrochozoa;Mollusca;Cephalopoda;Coleoidea;Octopodiformes;Oct  
opoda;Incirrata;Octopodidae;Octopus;Octopus bimaculoides  
UdeM00000014062 400727 129.8 UdeM00000014062 XP\_025101495.1 35.9  
223 120 7 79 283 2878 3095 5.50E-27 129.8 400727  
cellular  
organisms;Eukaryota;Opisthokonta;Metazoa;Eumetazoa;Bilateria;Protostomia;  
Spiralia;Lophotrochozoa;Mollusca;Gastropoda;Caenogastropoda;Architaeniogl  
ossa;Ampullarioidea;Ampullariidae;Pomacea;Pomacea canaliculata  
UdeM00000014063 400727 134.4 UdeM00000014063 XP\_025101593.1 26.7  
389 228 12 23 377 981 1346 3.80E-28 134.4 400727  
cellular  
organisms;Eukaryota;Opisthokonta;Metazoa;Eumetazoa;Bilateria;Protostomia;  
Spiralia;Lophotrochozoa;Mollusca;Gastropoda;Caenogastropoda;Architaeniogl  
ossa;Ampullarioidea;Ampullariidae;Pomacea;Pomacea canaliculata  
UdeM00000014065 400727 158.3 UdeM00000014065 XP\_025101777.1 29.7  
374 211 10 23 372 456 801 2.50E-35 158.3 400727  
cellular  
organisms;Eukaryota;Opisthokonta;Metazoa;Eumetazoa;Bilateria;Protostomia;  
Spiralia;Lophotrochozoa;Mollusca;Gastropoda;Caenogastropoda;Architaeniogl  
ossa;Ampullarioidea;Ampullariidae;Pomacea;Pomacea canaliculata



UdeM00000014066 400727 147.9 UdeM00000014066 XP\_025101777.1 28.7  
 387 211 11 23 385 456 801 3.50E-32 147.9 400727  
 cellular  
 organisms;Eukaryota;Opisthokonta;Metazoa;Eumetazoa;Bilateria;Protostomia;  
 Spiralia;Lophotrochozoa;Mollusca;Gastropoda;Caenogastropoda;Architaenioglossa;  
 Ampullarioidea;Ampullariidae;Pomacea;Pomacea canaliculata  
 UdeM00000014067 400727 189.1 UdeM00000014067 XP\_025101777.1 34.9  
 387 206 14 45 409 456 818 1.30E-44 189.1 400727  
 cellular  
 organisms;Eukaryota;Opisthokonta;Metazoa;Eumetazoa;Bilateria;Protostomia;  
 Spiralia;Lophotrochozoa;Mollusca;Gastropoda;Caenogastropoda;Architaenioglossa;  
 Ampullarioidea;Ampullariidae;Pomacea;Pomacea canaliculata  
 UdeM00000014068 400727 149.8 UdeM00000014068 XP\_025116054.1 34.8  
 296 144 10 131 379 30 323 9.10E-33 149.8 400727  
 cellular  
 organisms;Eukaryota;Opisthokonta;Metazoa;Eumetazoa;Bilateria;Protostomia;  
 Spiralia;Lophotrochozoa;Mollusca;Gastropoda;Caenogastropoda;Architaenioglossa;  
 Ampullarioidea;Ampullariidae;Pomacea;Pomacea canaliculata  
 UdeM00000014069 6596 295.4 UdeM00000014069 XP\_045156670.1 29.7 667  
 439 11 93 749 57 703 2.00E-76 295.4 6596 cellular  
 organisms;Eukaryota;Opisthokonta;Metazoa;Eumetazoa;Bilateria;Protostomia;  
 Spiralia;Lophotrochozoa;Mollusca;Bivalvia;Autobranchia;Heteroconchia;Euheterodonta;  
 Imparidentia;Venerida;Veneroidea;Veneridae;Mercenaria;Mercenaria mercenaria  
 UdeM00000014071 6596 414.8 UdeM00000014071 XP\_045201284.1 62.9 334  
 107 6 1 320 28 358 9.70E-113 414.8 6596 cellular  
 organisms;Eukaryota;Opisthokonta;Metazoa;Eumetazoa;Bilateria;Protostomia;  
 Spiralia;Lophotrochozoa;Mollusca;Bivalvia;Autobranchia;Heteroconchia;Euheterodonta;  
 Imparidentia;Venerida;Veneroidea;Veneridae;Mercenaria;Mercenaria mercenaria  
 UdeM00000014072 6596 509.6 UdeM00000014072 XP\_045204674.1 47.7 575  
 291 6 1 570 7 576 5.20E-141 509.6 6596 cellular  
 organisms;Eukaryota;Opisthokonta;Metazoa;Eumetazoa;Bilateria;Protostomia;  
 Spiralia;Lophotrochozoa;Mollusca;Bivalvia;Autobranchia;Heteroconchia;Euheterodonta;  
 Imparidentia;Venerida;Veneroidea;Veneridae;Mercenaria;Mercenaria mercenaria  
 UdeM00000014073 6596 297 UdeM00000014073 XP\_045204106.1 49.1 328  
 159 3 1 321 103 429 3.40E-77 297 6596 cellular  
 organisms;Eukaryota;Opisthokonta;Metazoa;Eumetazoa;Bilateria;Protostomia;  
 Spiralia;Lophotrochozoa;Mollusca;Bivalvia;Autobranchia;Heteroconchia;Euheterodonta;  
 Imparidentia;Venerida;Veneroidea;Veneridae;Mercenaria;Mercenaria mercenaria  
 UdeM00000014074 6596 459.9 UdeM00000014074 XP\_045204106.1 52 456  
 208 5 8 453 15 469 3.90E-126 459.9 6596 cellular  
 organisms;Eukaryota;Opisthokonta;Metazoa;Eumetazoa;Bilateria;Protostomia;  
 Spiralia;Lophotrochozoa;Mollusca;Bivalvia;Autobranchia;Heteroconchia;Euheterodonta;  
 Imparidentia;Venerida;Veneroidea;Veneridae;Mercenaria;Mercenaria mercenaria  
 UdeM00000014075 29159 61.2 UdeM00000014075 XP\_034300591.1 31.8 107  
 71 2 1 106 309 414 9.40E-07 61.2 29159 cellular  
 organisms;Eukaryota;Opisthokonta;Metazoa;Eumetazoa;Bilateria;Protostomia;  
 Spiralia;Lophotrochozoa;Mollusca;Bivalvia;Autobranchia;Pteriomorpha;Ostreida;  
 Ostreioidea;Ostreidae;Crassostrea;Crassostrea gigas

UdeM00000014076 6579 458 UdeM00000014076 XP\_033757991.1 33.9 881  
 506 18 29 897 55 871 2.80E-125 458 6579 cellular  
 organisms;Eukaryota;Opisthokonta;Metazoa;Eumetazoa;Bilateria;Protostomia;  
 Spiralia;Lophotrochozoa;Mollusca;Bivalvia;Autobranchia;Pteriormorphia;Pect  
 inida;Pectinoidea;Pectinidae;Pecten;Pecten maximus  
 UdeM00000014077 6565 118.6 UdeM00000014077 XP\_022325149.1 40.6 160  
 94 1 10 168 797 956 8.20E-24 118.6 6565 cellular  
 organisms;Eukaryota;Opisthokonta;Metazoa;Eumetazoa;Bilateria;Protostomia;  
 Spiralia;Lophotrochozoa;Mollusca;Bivalvia;Autobranchia;Pteriormorphia;Ostr  
 eida;Ostreoidea;Ostreidae;Crassostrea;Crassostrea virginica  
 UdeM00000014078 6596 112.5 UdeM00000014078 XP\_045202954.1 46.3 123  
 65 1 15 136 393 515 5.80E-22 112.5 6596 cellular  
 organisms;Eukaryota;Opisthokonta;Metazoa;Eumetazoa;Bilateria;Protostomia;  
 Spiralia;Lophotrochozoa;Mollusca;Bivalvia;Autobranchia;Heteroconchia;Euhe  
 terodonta;Imparidentia;Venerida;Veneroidea;Veneridae;Mercenaria;Mercenari  
 a mercenaria  
 UdeM00000014079 6579 453.4 UdeM00000014079 XP\_033746771.1 33.4 876  
 513 15 28 891 33 850 7.00E-124 453.4 6579 cellular  
 organisms;Eukaryota;Opisthokonta;Metazoa;Eumetazoa;Bilateria;Protostomia;  
 Spiralia;Lophotrochozoa;Mollusca;Bivalvia;Autobranchia;Pteriormorphia;Pect  
 inida;Pectinoidea;Pectinidae;Pecten;Pecten maximus  
 UdeM00000014080 6579 451.4 UdeM00000014080 XP\_033757991.1 33 896  
 520 17 13 895 43 871 2.60E-123 451.4 6579 cellular  
 organisms;Eukaryota;Opisthokonta;Metazoa;Eumetazoa;Bilateria;Protostomia;  
 Spiralia;Lophotrochozoa;Mollusca;Bivalvia;Autobranchia;Pteriormorphia;Pect  
 inida;Pectinoidea;Pectinidae;Pecten;Pecten maximus  
 UdeM00000014081 1735272 171.8 UdeM00000014081 XP\_041347857.1 32.7  
 321 180 3 35 351 37 325 1.60E-39 171.8 1735272  
 cellular  
 organisms;Eukaryota;Opisthokonta;Metazoa;Eumetazoa;Bilateria;Protostomia;  
 Spiralia;Lophotrochozoa;Mollusca;Gastropoda;Neomphalina;Neomphaloidea;Pel  
 tospiridae;Gigantopelta;Gigantopelta aegis  
 UdeM00000014082 6579 127.5 UdeM00000014082 XP\_033757991.1 56.8 111  
 46 2 1 109 709 819 1.40E-26 127.5 6579 cellular  
 organisms;Eukaryota;Opisthokonta;Metazoa;Eumetazoa;Bilateria;Protostomia;  
 Spiralia;Lophotrochozoa;Mollusca;Bivalvia;Autobranchia;Pteriormorphia;Pect  
 inida;Pectinoidea;Pectinidae;Pecten;Pecten maximus  
 UdeM00000014083 6573 452.6 UdeM00000014083 XP\_021346851.1 32.5 873  
 520 15 29 891 32 845 1.20E-123 452.6 6573 cellular  
 organisms;Eukaryota;Opisthokonta;Metazoa;Eumetazoa;Bilateria;Protostomia;  
 Spiralia;Lophotrochozoa;Mollusca;Bivalvia;Autobranchia;Pteriormorphia;Pect  
 inida;Pectinoidea;Pectinidae;Mizuhopecten;Mizuhopecten yessoensis  
 UdeM00000014084 6579 455.3 UdeM00000014084 XP\_033746771.1 33.7 835  
 488 14 4 832 74 848 1.70E-124 455.3 6579 cellular  
 organisms;Eukaryota;Opisthokonta;Metazoa;Eumetazoa;Bilateria;Protostomia;  
 Spiralia;Lophotrochozoa;Mollusca;Bivalvia;Autobranchia;Pteriormorphia;Pect  
 inida;Pectinoidea;Pectinidae;Pecten;Pecten maximus  
 UdeM00000014085 6579 451.1 UdeM00000014085 XP\_033746771.1 33.8 835  
 488 15 4 832 74 849 3.20E-123 451.1 6579 cellular  
 organisms;Eukaryota;Opisthokonta;Metazoa;Eumetazoa;Bilateria;Protostomia;  
 Spiralia;Lophotrochozoa;Mollusca;Bivalvia;Autobranchia;Pteriormorphia;Pect  
 inida;Pectinoidea;Pectinidae;Pecten;Pecten maximus  
 UdeM00000014086 6596 355.9 UdeM00000014086 XP\_045163753.1 71.4 231  
 66 0 29 259 18 248 4.40E-95 355.9 6596 cellular

organisms;Eukaryota;Opisthokonta;Metazoa;Eumetazoa;Bilateria;Protostomia;Spiralia;Lophotrochozoa;Mollusca;Bivalvia;Autobranhia;Heteroconchia;Euherodonta;Imparidentia;Venerida;Veneroidea;Veneridae;Mercenaria;Mercenaria mercenaria

UdeM00000014087 6596 482.3 UdeM00000014087 XP\_045161284.1 65.3 395  
90 5 1 394 1 349 6.10E-133 482.3 6596 cellular

organisms;Eukaryota;Opisthokonta;Metazoa;Eumetazoa;Bilateria;Protostomia;Spiralia;Lophotrochozoa;Mollusca;Bivalvia;Autobranhia;Heteroconchia;Euherodonta;Imparidentia;Venerida;Veneroidea;Veneridae;Mercenaria;Mercenaria mercenaria

UdeM00000014088 6596 424.9 UdeM00000014088 XP\_045161284.1 72.8 294  
75 3 1 293 1 290 9.10E-116 424.9 6596 cellular

organisms;Eukaryota;Opisthokonta;Metazoa;Eumetazoa;Bilateria;Protostomia;Spiralia;Lophotrochozoa;Mollusca;Bivalvia;Autobranhia;Heteroconchia;Euherodonta;Imparidentia;Venerida;Veneroidea;Veneridae;Mercenaria;Mercenaria mercenaria

UdeM00000014089 441366 381.7 UdeM00000014089 XP\_028318209.1 63.3  
264 97 0 8 271 555 818 7.70E-103 381.7 441366  
cellular

organisms;Eukaryota;Opisthokonta;Metazoa;Eumetazoa;Bilateria;Deuterostomia;Chordata;Craniata;Vertebrata;Gnathostomata;Teleostomi;Euteleostomi;Actinopterygii;Actinopteri;Neopterygii;Teleostei;Osteoglossocephalai;Clupeocephala;Euteleostei;Neoteleostei;Eurypterygia;Ctenosquamata;Acanthomorpha;Euacanthomorpha;Percomorphaceae;Ovalentaria;Blenniiformes;Blenniiformes;Gobiesocoidei;Gobiesocidae;Gobiesocinae;Gouania;Gouania willdenowi

UdeM00000014090 6565 293.9 UdeM00000014090 XP\_022309566.1 55.9 213  
94 0 4 216 663 875 1.70E-76 293.9 6565 cellular

organisms;Eukaryota;Opisthokonta;Metazoa;Eumetazoa;Bilateria;Protostomia;Spiralia;Lophotrochozoa;Mollusca;Bivalvia;Autobranhia;Pteriomorpha;Ostreida;Ostreioidea;Ostreidae;Crassostrea;Crassostrea virginica

UdeM00000014091 151771 111.3 UdeM00000014091 XP\_028408207.1 39.5  
157 94 1 84 240 138 293 1.70E-21 111.3 151771

cellular

organisms;Eukaryota;Opisthokonta;Metazoa;Eumetazoa;Cnidaria;Anthozoa;Octocorallia;Alcyonacea;Alcyoniina;Nephtheidae;Dendronephthya;Dendronephthya gigantea

UdeM00000014092 6565 370.9 UdeM00000014092 XP\_022308109.1 57.8 263  
111 0 3 265 513 775 1.40E-99 370.9 6565 cellular

organisms;Eukaryota;Opisthokonta;Metazoa;Eumetazoa;Bilateria;Protostomia;Spiralia;Lophotrochozoa;Mollusca;Bivalvia;Autobranhia;Pteriomorpha;Ostreida;Ostreioidea;Ostreidae;Crassostrea;Crassostrea virginica

UdeM00000014093 50390 453.8 UdeM00000014093 XP\_028152419.1 53.6 366  
170 0 5 370 207 572 2.20E-124 453.8 50390 cellular

organisms;Eukaryota;Opisthokonta;Metazoa;Eumetazoa;Bilateria;Protostomia;Ecdysozoa;Panarthropoda;Arthropoda;Mandibulata;Pancrustacea;Hexapoda;Insecta;Dicondylia;Pterygota;Neoptera;Endopterygota;Coleoptera;Polyphaga;Cucujiformia;Chrysomeloidea;Chrysomelidae;Galerucinae;Luperini;Diabroticina;Diabroticites;Diabrotica;Diabrotica virgifera;Diabrotica virgifera virgifera

UdeM00000014095 6596 78.6 UdeM00000014095 XP\_045157916.1 34.8 141  
90 2 8 147 689 828 8.80E-12 78.6 6596 cellular

organisms;Eukaryota;Opisthokonta;Metazoa;Eumetazoa;Bilateria;Protostomia;Spiralia;Lophotrochozoa;Mollusca;Bivalvia;Autobranhia;Heteroconchia;Euherodonta

terodonta;Imparidentia;Venerida;Veneroidea;Veneridae;Mercenaria;Mercenari  
 a mercenaria  
 UdeM00000014096 6596 219.2 UdeM00000014096 XP\_045201803.1 37.2 355  
 169 9 99 404 114 463 9.80E-54 219.2 6596 cellular  
 organisms;Eukaryota;Opisthokonta;Metazoa;Eumetazoa;Bilateria;Protostomia;  
 Spiralia;Lophotrochozoa;Mollusca;Bivalvia;Autobranhia;Heteroconchia;Euhe  
 terodonta;Imparidentia;Venerida;Veneroidea;Veneridae;Mercenaria;Mercenari  
 a mercenaria  
 UdeM00000014099 6573 61.2 UdeM00000014099 XP\_021341725.1 60.4 48  
 19 0 1 48 1 48 7.80E-07 61.2 6573 cellular  
 organisms;Eukaryota;Opisthokonta;Metazoa;Eumetazoa;Bilateria;Protostomia;  
 Spiralia;Lophotrochozoa;Mollusca;Bivalvia;Autobranhia;Pteriormorphia;Pect  
 inida;Pectinoidea;Pectinidae;Mizuhopecten;Mizuhopecten yessoensis  
 UdeM00000014100 6579 224.6 UdeM00000014100 XP\_033731739.1 57.2 173  
 74 0 1 173 206 378 1.00E-55 224.6 6579 cellular  
 organisms;Eukaryota;Opisthokonta;Metazoa;Eumetazoa;Bilateria;Protostomia;  
 Spiralia;Lophotrochozoa;Mollusca;Bivalvia;Autobranhia;Pteriormorphia;Pect  
 inida;Pectinoidea;Pectinidae;Pecten;Pecten maximus  
 UdeM00000014101 6579 394.4 UdeM00000014101 XP\_033731739.1 61.8 280  
 107 0 1 280 99 378 1.20E-106 394.4 6579 cellular  
 organisms;Eukaryota;Opisthokonta;Metazoa;Eumetazoa;Bilateria;Protostomia;  
 Spiralia;Lophotrochozoa;Mollusca;Bivalvia;Autobranhia;Pteriormorphia;Pect  
 inida;Pectinoidea;Pectinidae;Pecten;Pecten maximus  
 UdeM00000014109 6596 213 UdeM00000014109 XP\_045201803.1 32.3 409  
 224 9 49 417 68 463 7.30E-52 213 6596 cellular  
 organisms;Eukaryota;Opisthokonta;Metazoa;Eumetazoa;Bilateria;Protostomia;  
 Spiralia;Lophotrochozoa;Mollusca;Bivalvia;Autobranhia;Heteroconchia;Euhe  
 terodonta;Imparidentia;Venerida;Veneroidea;Veneridae;Mercenaria;Mercenari  
 a mercenaria  
 UdeM00000014110 6596 200.3 UdeM00000014110 XP\_045201803.1 32.8 400  
 217 11 58 410 69 463 4.80E-48 200.3 6596 cellular  
 organisms;Eukaryota;Opisthokonta;Metazoa;Eumetazoa;Bilateria;Protostomia;  
 Spiralia;Lophotrochozoa;Mollusca;Bivalvia;Autobranhia;Heteroconchia;Euhe  
 terodonta;Imparidentia;Venerida;Veneroidea;Veneridae;Mercenaria;Mercenari  
 a mercenaria  
 UdeM00000014111 6596 200.3 UdeM00000014111 XP\_045201803.1 32.8 400  
 217 11 65 417 69 463 4.90E-48 200.3 6596 cellular  
 organisms;Eukaryota;Opisthokonta;Metazoa;Eumetazoa;Bilateria;Protostomia;  
 Spiralia;Lophotrochozoa;Mollusca;Bivalvia;Autobranhia;Heteroconchia;Euhe  
 terodonta;Imparidentia;Venerida;Veneroidea;Veneridae;Mercenaria;Mercenari  
 a mercenaria  
 UdeM00000014115 6596 103.2 UdeM00000014115 XP\_045200359.1 41.5 340  
 145 7 1 298 1 328 5.80E-19 103.2 6596 cellular  
 organisms;Eukaryota;Opisthokonta;Metazoa;Eumetazoa;Bilateria;Protostomia;  
 Spiralia;Lophotrochozoa;Mollusca;Bivalvia;Autobranhia;Heteroconchia;Euhe  
 terodonta;Imparidentia;Venerida;Veneroidea;Veneridae;Mercenaria;Mercenari  
 a mercenaria  
 UdeM00000014116 6596 84.7 UdeM00000014116 XP\_045200359.1 44.2 267  
 127 3 4 256 70 328 1.80E-13 84.7 6596 cellular  
 organisms;Eukaryota;Opisthokonta;Metazoa;Eumetazoa;Bilateria;Protostomia;  
 Spiralia;Lophotrochozoa;Mollusca;Bivalvia;Autobranhia;Heteroconchia;Euhe  
 terodonta;Imparidentia;Venerida;Veneroidea;Veneridae;Mercenaria;Mercenari  
 a mercenaria

UdeM00000014117 6596 729.6 UdeM00000014117 XP\_045201446.1 64 641  
 206 9 1 633 1 624 3.50E-207 729.6 6596 cellular  
 organisms;Eukaryota;Opisthokonta;Metazoa;Eumetazoa;Bilateria;Protostomia;  
 Spiralia;Lophotrochozoa;Mollusca;Bivalvia;Autobranchia;Heteroconchia;Euhe  
 terodonta;Imparidentia;Venerida;Veneroidea;Veneridae;Mercenaria;Mercenari  
 a mercenaria  
 UdeM00000014118 6596 129.8 UdeM00000014118 XP\_045201451.1 68.7 83  
 26 0 1 83 1 83 1.60E-27 129.8 6596 cellular  
 organisms;Eukaryota;Opisthokonta;Metazoa;Eumetazoa;Bilateria;Protostomia;  
 Spiralia;Lophotrochozoa;Mollusca;Bivalvia;Autobranchia;Heteroconchia;Euhe  
 terodonta;Imparidentia;Venerida;Veneroidea;Veneridae;Mercenaria;Mercenari  
 a mercenaria  
 UdeM00000014119 6500 185.3 UdeM00000014119 XP\_035829589.1 34.1 419  
 224 14 109 508 206 591 2.10E-43 185.3 6500 cellular  
 organisms;Eukaryota;Opisthokonta;Metazoa;Eumetazoa;Bilateria;Protostomia;  
 Spiralia;Lophotrochozoa;Mollusca;Gastropoda;Heterobranchia;Euthyneura;Tec  
 tiptleura;Aplysiida;Aplysioidea;Aplysiidae;Aplysia;Aplysia californica  
 UdeM00000014120 6596 261.9 UdeM00000014120 XP\_045201951.1 47.4 291  
 149 2 1 289 1 289 9.70E-67 261.9 6596 cellular  
 organisms;Eukaryota;Opisthokonta;Metazoa;Eumetazoa;Bilateria;Protostomia;  
 Spiralia;Lophotrochozoa;Mollusca;Bivalvia;Autobranchia;Heteroconchia;Euhe  
 terodonta;Imparidentia;Venerida;Veneroidea;Veneridae;Mercenaria;Mercenari  
 a mercenaria  
 UdeM00000014121 6596 259.2 UdeM00000014121 XP\_045201951.1 47.9 292  
 148 2 1 290 1 290 6.30E-66 259.2 6596 cellular  
 organisms;Eukaryota;Opisthokonta;Metazoa;Eumetazoa;Bilateria;Protostomia;  
 Spiralia;Lophotrochozoa;Mollusca;Bivalvia;Autobranchia;Heteroconchia;Euhe  
 terodonta;Imparidentia;Venerida;Veneroidea;Veneridae;Mercenaria;Mercenari  
 a mercenaria  
 UdeM00000014122 6565 714.5 UdeM00000014122 XP\_022341021.1 62.6 559  
 204 4 69 624 73 629 1.20E-202 714.5 6565 cellular  
 organisms;Eukaryota;Opisthokonta;Metazoa;Eumetazoa;Bilateria;Protostomia;  
 Spiralia;Lophotrochozoa;Mollusca;Bivalvia;Autobranchia;Pteriomorphia;Ostr  
 eida;Ostreoidea;Ostreidae;Crassostrea;Crassostrea virginica  
 UdeM00000014123 6596 308.9 UdeM00000014123 XP\_045201064.1 57.1 294  
 121 3 8 297 7 299 7.20E-81 308.9 6596 cellular  
 organisms;Eukaryota;Opisthokonta;Metazoa;Eumetazoa;Bilateria;Protostomia;  
 Spiralia;Lophotrochozoa;Mollusca;Bivalvia;Autobranchia;Heteroconchia;Euhe  
 terodonta;Imparidentia;Venerida;Veneroidea;Veneridae;Mercenaria;Mercenari  
 a mercenaria  
 UdeM00000014124 29159 98.2 UdeM00000014124 XP\_034318586.1 43.5 138  
 73 3 132 264 224 361 4.20E-17 98.2 29159 cellular  
 organisms;Eukaryota;Opisthokonta;Metazoa;Eumetazoa;Bilateria;Protostomia;  
 Spiralia;Lophotrochozoa;Mollusca;Bivalvia;Autobranchia;Pteriomorphia;Ostr  
 eida;Ostreoidea;Ostreidae;Crassostrea;Crassostrea gigas  
 UdeM00000014125 29159 73.6 UdeM00000014125 XP\_011453058.2 29.1 158  
 101 5 92 242 158 311 4.00E-10 73.6 29159 cellular  
 organisms;Eukaryota;Opisthokonta;Metazoa;Eumetazoa;Bilateria;Protostomia;  
 Spiralia;Lophotrochozoa;Mollusca;Bivalvia;Autobranchia;Pteriomorphia;Ostr  
 eida;Ostreoidea;Ostreidae;Crassostrea;Crassostrea gigas  
 UdeM00000014127 29159 68.9 UdeM00000014127 XP\_011453058.2 26 154  
 103 3 37 184 163 311 7.50E-09 68.9 29159 cellular  
 organisms;Eukaryota;Opisthokonta;Metazoa;Eumetazoa;Bilateria;Protostomia;

Spiralia;Lophotrochozoa;Mollusca;Bivalvia;Autobranchia;Pteriormorphia;Ostr  
eida;Ostreoidea;Ostreidae;Crassostrea;Crassostrea gigas  
UdeM00000014128 29159 102.1 UdeM00000014128 XP\_011453058.2 28.5 239  
152 8 6 231 76 308 1.00E-18 102.1 29159 cellular  
organisms;Eukaryota;Opisthokonta;Metazoa;Eumetazoa;Bilateria;Protostomia;  
Spiralia;Lophotrochozoa;Mollusca;Bivalvia;Autobranchia;Pteriormorphia;Ostr  
eida;Ostreoidea;Ostreidae;Crassostrea;Crassostrea gigas  
UdeM00000014129 6573 77.8 UdeM00000014129 XP\_021340408.1 33.1 133  
85 2 36 164 211 343 1.40E-11 77.8 6573 cellular  
organisms;Eukaryota;Opisthokonta;Metazoa;Eumetazoa;Bilateria;Protostomia;  
Spiralia;Lophotrochozoa;Mollusca;Bivalvia;Autobranchia;Pteriormorphia;Pect  
inida;Pectinoidea;Pectinidae;Mizuhopecten;Mizuhopecten yessoensis  
UdeM00000014130 6596 102.1 UdeM00000014130 XP\_045200770.1 30.4 276  
175 8 17 284 6 272 1.20E-18 102.1 6596 cellular  
organisms;Eukaryota;Opisthokonta;Metazoa;Eumetazoa;Bilateria;Protostomia;  
Spiralia;Lophotrochozoa;Mollusca;Bivalvia;Autobranchia;Heteroconchia;Euhe  
terodonta;Imparidentia;Venerida;Veneroidea;Veneridae;Mercenaria;Mercenari  
a mercenaria  
UdeM00000014131 6596 203.8 UdeM00000014131 XP\_045193707.1 37.9 282  
174 1 1 281 11 292 4.70E-49 203.8 6596 cellular  
organisms;Eukaryota;Opisthokonta;Metazoa;Eumetazoa;Bilateria;Protostomia;  
Spiralia;Lophotrochozoa;Mollusca;Bivalvia;Autobranchia;Heteroconchia;Euhe  
terodonta;Imparidentia;Venerida;Veneroidea;Veneridae;Mercenaria;Mercenari  
a mercenaria  
UdeM00000014133 6596 97.8 UdeM00000014133 XP\_045202063.1 31.3 265  
169 7 26 284 16 273 2.30E-17 97.8 6596 cellular  
organisms;Eukaryota;Opisthokonta;Metazoa;Eumetazoa;Bilateria;Protostomia;  
Spiralia;Lophotrochozoa;Mollusca;Bivalvia;Autobranchia;Heteroconchia;Euhe  
terodonta;Imparidentia;Venerida;Veneroidea;Veneridae;Mercenaria;Mercenari  
a mercenaria  
UdeM00000014134 29159 97.4 UdeM00000014134 XP\_011453058.2 30 280  
173 10 17 282 38 308 3.10E-17 97.4 29159 cellular  
organisms;Eukaryota;Opisthokonta;Metazoa;Eumetazoa;Bilateria;Protostomia;  
Spiralia;Lophotrochozoa;Mollusca;Bivalvia;Autobranchia;Pteriormorphia;Ostr  
eida;Ostreoidea;Ostreidae;Crassostrea;Crassostrea gigas  
UdeM00000014135 6596 213 UdeM00000014135 XP\_045193707.1 39.7 282  
169 1 1 281 11 292 7.70E-52 213 6596 cellular  
organisms;Eukaryota;Opisthokonta;Metazoa;Eumetazoa;Bilateria;Protostomia;  
Spiralia;Lophotrochozoa;Mollusca;Bivalvia;Autobranchia;Heteroconchia;Euhe  
terodonta;Imparidentia;Venerida;Veneroidea;Veneridae;Mercenaria;Mercenari  
a mercenaria  
UdeM00000014138 6596 142.9 UdeM00000014138 XP\_045214901.1 25.2 404  
274 11 8 402 50 434 1.20E-30 142.9 6596 cellular  
organisms;Eukaryota;Opisthokonta;Metazoa;Eumetazoa;Bilateria;Protostomia;  
Spiralia;Lophotrochozoa;Mollusca;Bivalvia;Autobranchia;Heteroconchia;Euhe  
terodonta;Imparidentia;Venerida;Veneroidea;Veneridae;Mercenaria;Mercenari  
a mercenaria  
UdeM00000014139 6573 142.1 UdeM00000014139 XP\_021350427.1 22.9 783  
472 30 4 697 32 771 2.60E-30 142.1 6573 cellular  
organisms;Eukaryota;Opisthokonta;Metazoa;Eumetazoa;Bilateria;Protostomia;  
Spiralia;Lophotrochozoa;Mollusca;Bivalvia;Autobranchia;Pteriormorphia;Pect  
inida;Pectinoidea;Pectinidae;Mizuhopecten;Mizuhopecten yessoensis  
UdeM00000014140 6565 102.8 UdeM00000014140 XP\_022287876.1 42.6 136  
66 2 2 137 813 936 3.60E-19 102.8 6565 cellular

organisms;Eukaryota;Opisthokonta;Metazoa;Eumetazoa;Bilateria;Protostomia;Spiralia;Lophotrochozoa;Mollusca;Bivalvia;Autobranhia;Pteriormorphia;Ostr eida;Ostreoidea;Ostreidae;Crassostrea;Crassostrea virginica  
UdeM00000014141 45264 92.8 UdeM00000014141 XP\_044165535.1 32.8 174  
105 3 1 162 435 608 5.20E-16 92.8 45264 cellular  
organisms;Eukaryota;Opisthokonta;Metazoa;Eumetazoa;Cnidaria;Anthozoa;Hexa corallia;Scleractinia;Astrocoeniina;Acroporidae;Acropora;Acropora millepora  
UdeM00000014142 6596 192.2 UdeM00000014142 XP\_045199744.1 24.5 881  
413 21 1 643 1 867 2.10E-45 192.2 6596 cellular  
organisms;Eukaryota;Opisthokonta;Metazoa;Eumetazoa;Bilateria;Protostomia;Spiralia;Lophotrochozoa;Mollusca;Bivalvia;Autobranhia;Heteroconchia;Euhe terodonta;Imparidentia;Venerida;Veneroidea;Veneridae;Mercenaria;Mercenari a mercenaria  
UdeM00000014143 6596 213.4 UdeM00000014143 XP\_045199681.1 27.6 673  
458 15 51 713 74 727 9.80E-52 213.4 6596 cellular  
organisms;Eukaryota;Opisthokonta;Metazoa;Eumetazoa;Bilateria;Protostomia;Spiralia;Lophotrochozoa;Mollusca;Bivalvia;Autobranhia;Heteroconchia;Euhe terodonta;Imparidentia;Venerida;Veneroidea;Veneridae;Mercenaria;Mercenari a mercenaria  
UdeM00000014144 6565 215.3 UdeM00000014144 XP\_022291968.1 28.1 631  
415 16 8 620 279 888 2.20E-52 215.3 6565 cellular  
organisms;Eukaryota;Opisthokonta;Metazoa;Eumetazoa;Bilateria;Protostomia;Spiralia;Lophotrochozoa;Mollusca;Bivalvia;Autobranhia;Pteriormorphia;Ostr eida;Ostreoidea;Ostreidae;Crassostrea;Crassostrea virginica  
UdeM00000014145 6596 231.1 UdeM00000014145 XP\_045157684.1 30.2 679  
442 19 44 711 41 698 4.50E-57 231.1 6596 cellular  
organisms;Eukaryota;Opisthokonta;Metazoa;Eumetazoa;Bilateria;Protostomia;Spiralia;Lophotrochozoa;Mollusca;Bivalvia;Autobranhia;Heteroconchia;Euhe terodonta;Imparidentia;Venerida;Veneroidea;Veneridae;Mercenaria;Mercenari a mercenaria  
UdeM00000014146 6573 60.1 UdeM00000014146 XP\_021363676.1 59.6 47  
19 0 33 79 129 175 1.50E-06 60.1 6573 cellular  
organisms;Eukaryota;Opisthokonta;Metazoa;Eumetazoa;Bilateria;Protostomia;Spiralia;Lophotrochozoa;Mollusca;Bivalvia;Autobranhia;Pteriormorphia;Pect inida;Pectinoidea;Pectinidae;Mizuhopecten;Mizuhopecten yessoensis  
UdeM00000014147 6596 216.5 UdeM00000014147 XP\_045179344.1 27.6 674  
437 22 73 715 168 821 1.20E-52 216.5 6596 cellular  
organisms;Eukaryota;Opisthokonta;Metazoa;Eumetazoa;Bilateria;Protostomia;Spiralia;Lophotrochozoa;Mollusca;Bivalvia;Autobranhia;Heteroconchia;Euhe terodonta;Imparidentia;Venerida;Veneroidea;Veneridae;Mercenaria;Mercenari a mercenaria  
UdeM00000014148 1735272 573.5 UdeM00000014148 XP\_041357332.1 93.7  
301 19 0 1 301 3 303 1.60E-160 573.5 1735272  
cellular  
organisms;Eukaryota;Opisthokonta;Metazoa;Eumetazoa;Bilateria;Protostomia;Spiralia;Lophotrochozoa;Mollusca;Gastropoda;Neomphalina;Neomphaloidea;Pel tospiridae;Gigantopelta;Gigantopelta aegis  
UdeM00000014149 1735272 218 UdeM00000014149 XP\_041354210.1 26.9  
651 390 18 17 617 88 702 3.50E-53 218 1735272  
cellular  
organisms;Eukaryota;Opisthokonta;Metazoa;Eumetazoa;Bilateria;Protostomia;Spiralia;Lophotrochozoa;Mollusca;Gastropoda;Neomphalina;Neomphaloidea;Pel tospiridae;Gigantopelta;Gigantopelta aegis

UdeM00000014151 6596 198.4 UdeM00000014151 XP\_045194217.1 33.3 447  
 248 16 3 432 114 527 2.30E-47 198.4 6596 cellular  
 organisms;Eukaryota;Opisthokonta;Metazoa;Eumetazoa;Bilateria;Protostomia;  
 Spiralia;Lophotrochozoa;Mollusca;Bivalvia;Autobranchia;Heteroconchia;Euhe  
 terodonta;Imparidentia;Venerida;Veneroidea;Veneridae;Mercenaria;Mercenari  
 a mercenaria

UdeM00000014150 6596 197.6 UdeM00000014150 XP\_045194217.1 32.3 474  
 271 16 48 504 87 527 4.50E-47 197.6 6596 cellular  
 organisms;Eukaryota;Opisthokonta;Metazoa;Eumetazoa;Bilateria;Protostomia;  
 Spiralia;Lophotrochozoa;Mollusca;Bivalvia;Autobranchia;Heteroconchia;Euhe  
 terodonta;Imparidentia;Venerida;Veneroidea;Veneridae;Mercenaria;Mercenari  
 a mercenaria

UdeM00000014152 6596 198.4 UdeM00000014152 XP\_045187249.1 33.5 466  
 249 18 34 481 375 797 2.50E-47 198.4 6596 cellular  
 organisms;Eukaryota;Opisthokonta;Metazoa;Eumetazoa;Bilateria;Protostomia;  
 Spiralia;Lophotrochozoa;Mollusca;Bivalvia;Autobranchia;Heteroconchia;Euhe  
 terodonta;Imparidentia;Venerida;Veneroidea;Veneridae;Mercenaria;Mercenari  
 a mercenaria

UdeM00000014153 6596 197.6 UdeM00000014153 XP\_045194217.1 33.5 478  
 260 18 48 504 87 527 4.50E-47 197.6 6596 cellular  
 organisms;Eukaryota;Opisthokonta;Metazoa;Eumetazoa;Bilateria;Protostomia;  
 Spiralia;Lophotrochozoa;Mollusca;Bivalvia;Autobranchia;Heteroconchia;Euhe  
 terodonta;Imparidentia;Venerida;Veneroidea;Veneridae;Mercenaria;Mercenari  
 a mercenaria

UdeM00000014155 6596 172.9 UdeM00000014155 XP\_045194217.1 34.5 371  
 197 13 48 407 87 422 8.60E-40 172.9 6596 cellular  
 organisms;Eukaryota;Opisthokonta;Metazoa;Eumetazoa;Bilateria;Protostomia;  
 Spiralia;Lophotrochozoa;Mollusca;Bivalvia;Autobranchia;Heteroconchia;Euhe  
 terodonta;Imparidentia;Venerida;Veneroidea;Veneridae;Mercenaria;Mercenari  
 a mercenaria

UdeM00000014156 6596 431 UdeM00000014156 XP\_045201257.1 59.1 413  
 151 2 63 463 34 440 1.90E-117 431 6596 cellular  
 organisms;Eukaryota;Opisthokonta;Metazoa;Eumetazoa;Bilateria;Protostomia;  
 Spiralia;Lophotrochozoa;Mollusca;Bivalvia;Autobranchia;Heteroconchia;Euhe  
 terodonta;Imparidentia;Venerida;Veneroidea;Veneridae;Mercenaria;Mercenari  
 a mercenaria

UdeM00000014157 6596 594.7 UdeM00000014157 XP\_045201256.1 64.8 483  
 154 4 123 589 64 546 1.30E-166 594.7 6596 cellular  
 organisms;Eukaryota;Opisthokonta;Metazoa;Eumetazoa;Bilateria;Protostomia;  
 Spiralia;Lophotrochozoa;Mollusca;Bivalvia;Autobranchia;Heteroconchia;Euhe  
 terodonta;Imparidentia;Venerida;Veneroidea;Veneridae;Mercenaria;Mercenari  
 a mercenaria

UdeM00000014158 6596 398.7 UdeM00000014158 XP\_045202154.1 69.3 290  
 84 1 19 303 15 304 6.80E-108 398.7 6596 cellular  
 organisms;Eukaryota;Opisthokonta;Metazoa;Eumetazoa;Bilateria;Protostomia;  
 Spiralia;Lophotrochozoa;Mollusca;Bivalvia;Autobranchia;Heteroconchia;Euhe  
 terodonta;Imparidentia;Venerida;Veneroidea;Veneridae;Mercenaria;Mercenari  
 a mercenaria

UdeM00000014159 6596 618.6 UdeM00000014159 XP\_045199514.1 67 509  
 143 12 1 498 1 495 6.90E-174 618.6 6596 cellular  
 organisms;Eukaryota;Opisthokonta;Metazoa;Eumetazoa;Bilateria;Protostomia;  
 Spiralia;Lophotrochozoa;Mollusca;Bivalvia;Autobranchia;Heteroconchia;Euhe  
 terodonta;Imparidentia;Venerida;Veneroidea;Veneridae;Mercenaria;Mercenari  
 a mercenaria



UdeM00000014160 6596 153.7 UdeM00000014160 XP\_045214901.1 27.6 395  
 271 5 15 404 62 446 1.20E-33 153.7 6596 cellular  
 organisms;Eukaryota;Opisthokonta;Metazoa;Eumetazoa;Bilateria;Protostomia;  
 Spiralia;Lophotrochozoa;Mollusca;Bivalvia;Autobranchia;Heteroconchia;Euhe  
 terodonta;Imparidentia;Venerida;Veneroidea;Veneridae;Mercenaria;Mercenari  
 a mercenaria  
 UdeM00000014161 6596 773.9 UdeM00000014161 XP\_045200495.1 51.4 937  
 353 21 123 980 76 989 2.60E-220 773.9 6596 cellular  
 organisms;Eukaryota;Opisthokonta;Metazoa;Eumetazoa;Bilateria;Protostomia;  
 Spiralia;Lophotrochozoa;Mollusca;Bivalvia;Autobranchia;Heteroconchia;Euhe  
 terodonta;Imparidentia;Venerida;Veneroidea;Veneridae;Mercenaria;Mercenari  
 a mercenaria  
 UdeM00000014162 6596 106.7 UdeM00000014162 XP\_045200495.1 34.4 334  
 157 12 2 285 668 989 5.90E-20 106.7 6596 cellular  
 organisms;Eukaryota;Opisthokonta;Metazoa;Eumetazoa;Bilateria;Protostomia;  
 Spiralia;Lophotrochozoa;Mollusca;Bivalvia;Autobranchia;Heteroconchia;Euhe  
 terodonta;Imparidentia;Venerida;Veneroidea;Veneridae;Mercenaria;Mercenari  
 a mercenaria  
 UdeM00000014163 29159 459.9 UdeM00000014163 XP\_011426483.2 63.3 338  
 123 1 2 339 3 339 2.80E-126 459.9 29159 cellular  
 organisms;Eukaryota;Opisthokonta;Metazoa;Eumetazoa;Bilateria;Protostomia;  
 Spiralia;Lophotrochozoa;Mollusca;Bivalvia;Autobranchia;Pteriormorphia;Ostr  
 eida;Ostreoidea;Ostreidae;Crassostrea;Crassostrea gigas  
 UdeM00000014164 29159 396.7 UdeM00000014164 XP\_034329313.1 64.1 287  
 102 1 2 288 3 288 2.50E-107 396.7 29159 cellular  
 organisms;Eukaryota;Opisthokonta;Metazoa;Eumetazoa;Bilateria;Protostomia;  
 Spiralia;Lophotrochozoa;Mollusca;Bivalvia;Autobranchia;Pteriormorphia;Ostr  
 eida;Ostreoidea;Ostreidae;Crassostrea;Crassostrea gigas  
 UdeM00000014165 6596 408.3 UdeM00000014165 XP\_045199549.1 46.9 441  
 214 6 3 429 64 498 1.20E-110 408.3 6596 cellular  
 organisms;Eukaryota;Opisthokonta;Metazoa;Eumetazoa;Bilateria;Protostomia;  
 Spiralia;Lophotrochozoa;Mollusca;Bivalvia;Autobranchia;Heteroconchia;Euhe  
 terodonta;Imparidentia;Venerida;Veneroidea;Veneridae;Mercenaria;Mercenari  
 a mercenaria  
 UdeM00000014166 2652724 152.1 UdeM00000014166 XP\_020903442.1 33.3  
 309 172 5 9 286 2 307 1.00E-33 152.1 2652724  
 cellular  
 organisms;Eukaryota;Opisthokonta;Metazoa;Eumetazoa;Cnidaria;Anthozoa;Hexa  
 corallia;Actiniaria;Aiptasiidae;Exaiptasia;Exaiptasia diaphana  
 UdeM00000014167 6565 417.5 UdeM00000014167 XP\_022295544.1 46.7 488  
 232 6 7 475 18 496 2.20E-113 417.5 6565 cellular  
 organisms;Eukaryota;Opisthokonta;Metazoa;Eumetazoa;Bilateria;Protostomia;  
 Spiralia;Lophotrochozoa;Mollusca;Bivalvia;Autobranchia;Pteriormorphia;Ostr  
 eida;Ostreoidea;Ostreidae;Crassostrea;Crassostrea virginica  
 UdeM00000014168 6596 477.2 UdeM00000014168 XP\_045199549.1 50.1 483  
 219 7 19 486 22 497 2.40E-131 477.2 6596 cellular  
 organisms;Eukaryota;Opisthokonta;Metazoa;Eumetazoa;Bilateria;Protostomia;  
 Spiralia;Lophotrochozoa;Mollusca;Bivalvia;Autobranchia;Heteroconchia;Euhe  
 terodonta;Imparidentia;Venerida;Veneroidea;Veneridae;Mercenaria;Mercenari  
 a mercenaria  
 UdeM00000014169 7668 173.3 UdeM00000014169 XP\_030839944.1 35.8 293  
 107 5 13 303 138 351 6.10E-40 173.3 7668 cellular  
 organisms;Eukaryota;Opisthokonta;Metazoa;Eumetazoa;Bilateria;Deuterostomi  
 a;Echinodermata;Eleutherozoa;Echinozoa;Echinoidea;Euechinoidea;Echinacea;

Camarodonta;Echinidea;Strongylocentrotidae;Strongylocentrotus;Strongylocentrotus purpuratus

UdeM00000014170 7757 120.2 UdeM00000014170 XP\_032837241.1 39.4 180  
94 6 19 190 96 268 3.70E-24 120.2 7757 cellular

organisms;Eukaryota;Opisthokonta;Metazoa;Eumetazoa;Bilateria;Deuterostomia;Chordata;Craniata;Vertebrata;Cyclostomata;Hyperoartia;Petromyzontiformes;Petromyzontidae;Petromyzon;Petromyzon marinus

UdeM00000014172 6579 738 UdeM00000014172 XP\_033759442.1 89.1 411  
42 2 138 547 22 430 8.50E-210 738 6579 cellular

organisms;Eukaryota;Opisthokonta;Metazoa;Eumetazoa;Bilateria;Protostomia;Spiralia;Lophotrochozoa;Mollusca;Bivalvia;Autobranchia;Pteriormorphia;Pectinida;Pectinoidea;Pectinidae;Pecten;Pecten maximus

UdeM00000014173 6596 1295 UdeM00000014173 XP\_045199841.1 58.9 1115  
369 5 1 1061 1 1080 0.00E+00 1295 6596 cellular

organisms;Eukaryota;Opisthokonta;Metazoa;Eumetazoa;Bilateria;Protostomia;Spiralia;Lophotrochozoa;Mollusca;Bivalvia;Autobranchia;Heteroconchia;Euheterodonta;Imparidentia;Venerida;Veneroidea;Veneridae;Mercenaria;Mercenaria mercenaria

UdeM00000014174 6596 295.4 UdeM00000014174 XP\_045201413.1 48.1 295  
147 2 7 301 3 291 8.90E-77 295.4 6596 cellular

organisms;Eukaryota;Opisthokonta;Metazoa;Eumetazoa;Bilateria;Protostomia;Spiralia;Lophotrochozoa;Mollusca;Bivalvia;Autobranchia;Heteroconchia;Euheterodonta;Imparidentia;Venerida;Veneroidea;Veneridae;Mercenaria;Mercenaria mercenaria

UdeM00000014175 6596 343.6 UdeM00000014175 XP\_045201128.1 34.4 524  
298 9 31 512 85 604 4.70E-91 343.6 6596 cellular

organisms;Eukaryota;Opisthokonta;Metazoa;Eumetazoa;Bilateria;Protostomia;Spiralia;Lophotrochozoa;Mollusca;Bivalvia;Autobranchia;Heteroconchia;Euheterodonta;Imparidentia;Venerida;Veneroidea;Veneridae;Mercenaria;Mercenaria mercenaria

UdeM00000014176 7574 318.5 UdeM00000014176 XP\_013389170.1 37.4 465  
262 12 6 444 679 1140 1.30E-83 318.5 7574 cellular

organisms;Eukaryota;Opisthokonta;Metazoa;Eumetazoa;Bilateria;Protostomia;Spiralia;Lophotrochozoa;Brachiopoda;Linguliformea;Lingulata;Lingulida;Linguloidea;Lingulidae;Lingula;Lingula anatina

UdeM00000014178 7574 240.4 UdeM00000014178 XP\_013419235.1 44.4 252  
127 3 8 246 186 437 2.60E-60 240.4 7574 cellular

organisms;Eukaryota;Opisthokonta;Metazoa;Eumetazoa;Bilateria;Protostomia;Spiralia;Lophotrochozoa;Brachiopoda;Linguliformea;Lingulata;Lingulida;Linguloidea;Lingulidae;Lingula;Lingula anatina

UdeM00000014177 6596 119.8 UdeM00000014177 XP\_045201128.1 44 134  
72 2 14 147 705 835 3.20E-24 119.8 6596 cellular

organisms;Eukaryota;Opisthokonta;Metazoa;Eumetazoa;Bilateria;Protostomia;Spiralia;Lophotrochozoa;Mollusca;Bivalvia;Autobranchia;Heteroconchia;Euheterodonta;Imparidentia;Venerida;Veneroidea;Veneridae;Mercenaria;Mercenaria mercenaria

UdeM00000014179 29159 1289.6 UdeM00000014179 XP\_011443137.1 87.6  
723 90 0 1 723 1 723 0.00E+00 1289.6

29159 cellular

organisms;Eukaryota;Opisthokonta;Metazoa;Eumetazoa;Bilateria;Protostomia;Spiralia;Lophotrochozoa;Mollusca;Bivalvia;Autobranchia;Pteriormorphia;Ostreida;Ostreoidea;Ostreidae;Crassostrea;Crassostrea gigas

UdeM00000014180 6579 483.4 UdeM00000014180 XP\_033759982.1 80.4 280  
55 0 1 280 1 280 1.90E-133 483.4 6579 cellular

organisms;Eukaryota;Opisthokonta;Metazoa;Eumetazoa;Bilateria;Protostomia; Spiralia;Lophotrochozoa;Mollusca;Bivalvia;Autobranchia;Pteriomorpha;Pect inida;Pectinoidea;Pectinidae;Pecten;Pecten maximus

UdeM00000014181 6565 476.5 UdeM00000014181 XP\_022342327.1 84.8 256  
39 0 1 256 1 256 2.20E-131 476.5 6565 cellular

organisms;Eukaryota;Opisthokonta;Metazoa;Eumetazoa;Bilateria;Protostomia; Spiralia;Lophotrochozoa;Mollusca;Bivalvia;Autobranchia;Pteriomorpha;Ostr eida;Ostreoidea;Ostreidae;Crassostrea;Crassostrea virginica

UdeM00000014182 400727 59.3 UdeM00000014182 XP\_025099449.1 21  
200 137 4 10 191 132 328 6.20E-06 59.3 400727  
cellular

organisms;Eukaryota;Opisthokonta;Metazoa;Eumetazoa;Bilateria;Protostomia; Spiralia;Lophotrochozoa;Mollusca;Gastropoda;Caenogastropoda;Architaeniogl ossa;Ampullarioidea;Ampullariidae;Pomacea;Pomacea canaliculata

UdeM00000014184 6565 111.7 UdeM00000014184 XP\_022341973.1 94.8 58  
3 0 1 58 705 762 3.20E-22 111.7 6565 cellular

organisms;Eukaryota;Opisthokonta;Metazoa;Eumetazoa;Bilateria;Protostomia; Spiralia;Lophotrochozoa;Mollusca;Bivalvia;Autobranchia;Pteriomorpha;Ostr eida;Ostreoidea;Ostreidae;Crassostrea;Crassostrea virginica

UdeM00000014185 6579 1297.3 UdeM00000014185 XP\_033759377.1 86.9  
761 98 2 3 762 4 763 0.00E+00 1297.3 6579  
cellular

organisms;Eukaryota;Opisthokonta;Metazoa;Eumetazoa;Bilateria;Protostomia; Spiralia;Lophotrochozoa;Mollusca;Bivalvia;Autobranchia;Pteriomorpha;Pect inida;Pectinoidea;Pectinidae;Pecten;Pecten maximus

UdeM00000014186 50390 175.6 UdeM00000014186 XP\_028127913.1 44.7 199  
109 1 1 199 1 198 6.20E-41 175.6 50390 cellular

organisms;Eukaryota;Opisthokonta;Metazoa;Eumetazoa;Bilateria;Protostomia; Ecdysozoa;Panarthropoda;Arthropoda;Mandibulata;Pancrustacea;Hexapoda;Inse cta;Dicondylia;Pterygota;Neoptera;Endopterygota;Coleoptera;Polyphaga;Cucu jiformia;Chrysomeloidea;Chrysomelidae;Galerucinae;Luperini;Diabroticina;D iabroticites;Diabrotica;Diabrotica virgifera;Diabrotica virgifera  
virgifera

UdeM00000014187 6579 349.4 UdeM00000014187 XP\_033760753.1 32.4 722  
384 13 6 655 5 694 1.00E-92 349.4 6579 cellular

organisms;Eukaryota;Opisthokonta;Metazoa;Eumetazoa;Bilateria;Protostomia; Spiralia;Lophotrochozoa;Mollusca;Bivalvia;Autobranchia;Pteriomorpha;Pect inida;Pectinoidea;Pectinidae;Pecten;Pecten maximus

UdeM00000014191 6596 476.1 UdeM00000014191 XP\_045199452.1 77.3 295  
66 1 5 298 6 300 3.30E-131 476.1 6596 cellular

organisms;Eukaryota;Opisthokonta;Metazoa;Eumetazoa;Bilateria;Protostomia; Spiralia;Lophotrochozoa;Mollusca;Bivalvia;Autobranchia;Heteroconchia;Euhe terodonta;Imparidentia;Venerida;Veneroidea;Veneridae;Mercenaria;Mercenari a mercenaria

UdeM00000014192 225164 119.8 UdeM00000014192 XP\_009056574.1 84.4  
64 10 0 3 66 65 128 2.40E-24 119.8 225164  
cellular

organisms;Eukaryota;Opisthokonta;Metazoa;Eumetazoa;Bilateria;Protostomia; Spiralia;Lophotrochozoa;Mollusca;Gastropoda;Patellogastropoda;Lottioidae; Lottiidae;Lottia;Lottia gigantea

UdeM00000014193 6596 275.8 UdeM00000014193 XP\_045200097.1 59.8 254  
79 5 4 247 5 245 5.50E-71 275.8 6596 cellular

organisms;Eukaryota;Opisthokonta;Metazoa;Eumetazoa;Bilateria;Protostomia; Spiralia;Lophotrochozoa;Mollusca;Bivalvia;Autobranchia;Heteroconchia;Euhe

terodonta;Imparidentia;Venerida;Veneroidea;Veneridae;Mercenaria;Mercenari  
 a mercenaria  
 UdeM00000014194 6596 775.8 UdeM00000014194 XP\_045200357.1 84.1 472  
 63 3 5 465 227 697 3.10E-221 775.8 6596 cellular  
 organisms;Eukaryota;Opisthokonta;Metazoa;Eumetazoa;Bilateria;Protostomia;  
 Spiralia;Lophotrochozoa;Mollusca;Bivalvia;Autobranhia;Heteroconchia;Euhe  
 terodonta;Imparidentia;Venerida;Veneroidea;Veneridae;Mercenaria;Mercenari  
 a mercenaria  
 UdeM00000014195 6596 238.8 UdeM00000014195 XP\_045200353.1 81.6 152  
 28 0 1 152 1 152 5.70E-60 238.8 6596 cellular  
 organisms;Eukaryota;Opisthokonta;Metazoa;Eumetazoa;Bilateria;Protostomia;  
 Spiralia;Lophotrochozoa;Mollusca;Bivalvia;Autobranhia;Heteroconchia;Euhe  
 terodonta;Imparidentia;Venerida;Veneroidea;Veneridae;Mercenaria;Mercenari  
 a mercenaria  
 UdeM00000014196 6579 119.4 UdeM00000014196 XP\_033728274.1 36.2 207  
 101 3 1 180 1 203 4.80E-24 119.4 6579 cellular  
 organisms;Eukaryota;Opisthokonta;Metazoa;Eumetazoa;Bilateria;Protostomia;  
 Spiralia;Lophotrochozoa;Mollusca;Bivalvia;Autobranhia;Pteriormorphia;Pect  
 inida;Pectinoidea;Pectinidae;Pecten;Pecten maximus  
 UdeM00000014197 6565 527.7 UdeM00000014197 XP\_022292728.1 59.1 418  
 171 0 1 418 304 721 1.30E-146 527.7 6565 cellular  
 organisms;Eukaryota;Opisthokonta;Metazoa;Eumetazoa;Bilateria;Protostomia;  
 Spiralia;Lophotrochozoa;Mollusca;Bivalvia;Autobranhia;Pteriormorphia;Ostr  
 eida;Ostreoidea;Ostreidae;Crassostrea;Crassostrea virginica  
 UdeM00000014198 29159 253.8 UdeM00000014198 XP\_034328871.1 65.4 234  
 51 3 1 233 1 205 2.10E-64 253.8 29159 cellular  
 organisms;Eukaryota;Opisthokonta;Metazoa;Eumetazoa;Bilateria;Protostomia;  
 Spiralia;Lophotrochozoa;Mollusca;Bivalvia;Autobranhia;Pteriormorphia;Ostr  
 eida;Ostreoidea;Ostreidae;Crassostrea;Crassostrea gigas  
 UdeM00000014199 1735272 106.7 UdeM00000014199 XP\_041346864.1 34.1  
 135 88 1 55 188 12 146 4.50E-20 106.7 1735272  
 cellular  
 organisms;Eukaryota;Opisthokonta;Metazoa;Eumetazoa;Bilateria;Protostomia;  
 Spiralia;Lophotrochozoa;Mollusca;Gastropoda;Neomphalina;Neomphaloidea;Pel  
 tospiridae;Gigantopelta;Gigantopelta aegis  
 UdeM00000014200 29159 150.6 UdeM00000014200 XP\_019926413.2 49.7 157  
 72 3 66 222 460 609 2.80E-33 150.6 29159 cellular  
 organisms;Eukaryota;Opisthokonta;Metazoa;Eumetazoa;Bilateria;Protostomia;  
 Spiralia;Lophotrochozoa;Mollusca;Bivalvia;Autobranhia;Pteriormorphia;Ostr  
 eida;Ostreoidea;Ostreidae;Crassostrea;Crassostrea gigas  
 UdeM00000014200 29159 113.2 UdeM00000014200 XP\_019926413.2 73.6 72  
 19 0 1 72 1 72 5.00E-22 113.2 29159 cellular  
 organisms;Eukaryota;Opisthokonta;Metazoa;Eumetazoa;Bilateria;Protostomia;  
 Spiralia;Lophotrochozoa;Mollusca;Bivalvia;Autobranhia;Pteriormorphia;Ostr  
 eida;Ostreoidea;Ostreidae;Crassostrea;Crassostrea gigas  
 UdeM00000014201 29159 698.7 UdeM00000014201 XP\_034306709.1 43 905  
 216 1 5 909 8 612 9.50E-198 698.7 29159 cellular  
 organisms;Eukaryota;Opisthokonta;Metazoa;Eumetazoa;Bilateria;Protostomia;  
 Spiralia;Lophotrochozoa;Mollusca;Bivalvia;Autobranhia;Pteriormorphia;Ostr  
 eida;Ostreoidea;Ostreidae;Crassostrea;Crassostrea gigas  
 UdeM00000014202 225164 515.8 UdeM00000014202 XP\_009044459.1 61.4  
 417 157 3 25 441 1 413 5.60E-143 515.8 225164  
 cellular  
 organisms;Eukaryota;Opisthokonta;Metazoa;Eumetazoa;Bilateria;Protostomia;

Spiralia;Lophotrochozoa;Mollusca;Gastropoda;Patellogastropoda;Lottioidea;Lottiidae;Lottia;Lottia gigantea

UdeM00000014203 6565 457.6 UdeM00000014203 XP\_022341850.1 48.9 640  
253 5 7 632 17 596 9.00E-125 457.6 6565 cellular  
organisms;Eukaryota;Opisthokonta;Metazoa;Eumetazoa;Bilateria;Protostomia;  
Spiralia;Lophotrochozoa;Mollusca;Bivalvia;Autobranchia;Pteriormorphia;Ostr  
eida;Ostreoidea;Ostreidae;Crassostrea;Crassostrea virginica

UdeM00000014204 6596 342.8 UdeM00000014204 XP\_045195108.1 27.6 1471  
623 29 82 1499 13 1094 2.20E-90 342.8 6596 cellular  
organisms;Eukaryota;Opisthokonta;Metazoa;Eumetazoa;Bilateria;Protostomia;  
Spiralia;Lophotrochozoa;Mollusca;Bivalvia;Autobranchia;Heteroconchia;Euhe  
terodonta;Imparidentia;Venerida;Veneroidea;Veneridae;Mercenaria;Mercenari  
a mercenaria

UdeM00000014205 6596 453 UdeM00000014205 XP\_045195108.1 30.6 1417  
642 28 81 1491 13 1094 1.50E-123 453 6596 cellular  
organisms;Eukaryota;Opisthokonta;Metazoa;Eumetazoa;Bilateria;Protostomia;  
Spiralia;Lophotrochozoa;Mollusca;Bivalvia;Autobranchia;Heteroconchia;Euhe  
terodonta;Imparidentia;Venerida;Veneroidea;Veneridae;Mercenaria;Mercenari  
a mercenaria

UdeM00000014206 6596 493 UdeM00000014206 XP\_045195108.1 33 1347  
630 24 81 1420 13 1094 1.20E-135 493 6596 cellular  
organisms;Eukaryota;Opisthokonta;Metazoa;Eumetazoa;Bilateria;Protostomia;  
Spiralia;Lophotrochozoa;Mollusca;Bivalvia;Autobranchia;Heteroconchia;Euhe  
terodonta;Imparidentia;Venerida;Veneroidea;Veneridae;Mercenaria;Mercenari  
a mercenaria

UdeM00000014207 6573 80.5 UdeM00000014207 XP\_021339530.1 45.5 88  
46 2 1 87 57 143 1.20E-12 80.5 6573 cellular  
organisms;Eukaryota;Opisthokonta;Metazoa;Eumetazoa;Bilateria;Protostomia;  
Spiralia;Lophotrochozoa;Mollusca;Bivalvia;Autobranchia;Pteriormorphia;Pect  
inida;Pectinoidea;Pectinidae;Mizuhopecten;Mizuhopecten yessoensis

UdeM00000014209 30331 92 UdeM00000014209 XP\_044145241.1 29.4 279  
185 9 1 275 214 484 1.30E-15 92 30331 cellular  
organisms;Eukaryota;Opisthokonta;Metazoa;Eumetazoa;Bilateria;Deuterostomi  
a;Chordata;Craniata;Vertebrata;Gnathostomata;Teleostomi;Euteleostomi;Sarc  
opterygii;Dipnotetrapodomorpha;Tetrapoda;Amphibia;Batrachia;Anura;Neobatr  
achia;Hyloidea;Bufonidae;Bufo;Bufo gargarizans

UdeM00000014210 6596 974.2 UdeM00000014210 XP\_045199987.1 64.2 790  
253 14 1 769 507 1287 9.90E-281 974.2 6596 cellular  
organisms;Eukaryota;Opisthokonta;Metazoa;Eumetazoa;Bilateria;Protostomia;  
Spiralia;Lophotrochozoa;Mollusca;Bivalvia;Autobranchia;Heteroconchia;Euhe  
terodonta;Imparidentia;Venerida;Veneroidea;Veneridae;Mercenaria;Mercenari  
a mercenaria

UdeM00000014211 29159 145.6 UdeM00000014211 XP\_019926413.2 86.6 82  
10 1 1 81 97 178 2.80E-32 145.6 29159 cellular  
organisms;Eukaryota;Opisthokonta;Metazoa;Eumetazoa;Bilateria;Protostomia;  
Spiralia;Lophotrochozoa;Mollusca;Bivalvia;Autobranchia;Pteriormorphia;Ostr  
eida;Ostreoidea;Ostreidae;Crassostrea;Crassostrea gigas

UdeM00000014212 29159 87.4 UdeM00000014212 XP\_034305599.1 34.9 129  
81 2 2 127 728 856 1.50E-14 87.4 29159 cellular  
organisms;Eukaryota;Opisthokonta;Metazoa;Eumetazoa;Bilateria;Protostomia;  
Spiralia;Lophotrochozoa;Mollusca;Bivalvia;Autobranchia;Pteriormorphia;Ostr  
eida;Ostreoidea;Ostreidae;Crassostrea;Crassostrea gigas

UdeM00000014213 6596 453.4 UdeM00000014213 XP\_045199987.1 57.8 391  
109 1 1 391 163 497 3.20E-124 453.4 6596 cellular

organisms;Eukaryota;Opisthokonta;Metazoa;Eumetazoa;Bilateria;Protostomia;Spiralia;Lophotrochozoa;Mollusca;Bivalvia;Autobranchia;Heteroconchia;Euheterodonta;Imparidentia;Venerida;Veneroidea;Veneridae;Mercenaria;Mercenaria mercenaria

UdeM00000014215 6596 151.8 UdeM00000014215 XP\_045199604.1 77.8 90  
20 0 3 92 5 94 4.40E-34 151.8 6596 cellular

organisms;Eukaryota;Opisthokonta;Metazoa;Eumetazoa;Bilateria;Protostomia;Spiralia;Lophotrochozoa;Mollusca;Bivalvia;Autobranchia;Heteroconchia;Euheterodonta;Imparidentia;Venerida;Veneroidea;Veneridae;Mercenaria;Mercenaria mercenaria

UdeM00000014216 6596 228.4 UdeM00000014216 XP\_045199604.1 83.3 126  
21 0 3 128 5 130 5.20E-57 228.4 6596 cellular

organisms;Eukaryota;Opisthokonta;Metazoa;Eumetazoa;Bilateria;Protostomia;Spiralia;Lophotrochozoa;Mollusca;Bivalvia;Autobranchia;Heteroconchia;Euheterodonta;Imparidentia;Venerida;Veneroidea;Veneridae;Mercenaria;Mercenaria mercenaria

UdeM00000014217 29159 221.9 UdeM00000014217 XP\_011441922.1 69.3 153  
47 0 10 162 5 157 6.10E-55 221.9 29159 cellular

organisms;Eukaryota;Opisthokonta;Metazoa;Eumetazoa;Bilateria;Protostomia;Spiralia;Lophotrochozoa;Mollusca;Bivalvia;Autobranchia;Pteriormorphia;Ostreida;Ostreoidea;Ostreidae;Crassostrea;Crassostrea gigas

UdeM00000034500 7054 283.1 UdeM00000034500 XP\_031350480.1 42.2 351  
142 2 1 290 117 467 4.00E-73 283.1 7054 cellular

organisms;Eukaryota;Opisthokonta;Metazoa;Eumetazoa;Bilateria;Protostomia;Ecdysozoa;Panarthropoda;Arthropoda;Mandibulata;Pancrustacea;Hexapoda;Insecta;Dicondylia;Pterygota;Neoptera;Endopterygota;Coleoptera;Polyphaga;Elaterriformia;Elateroidea;Lampyridae;Lampyrinae;Photinus;Photinus pyralis

UdeM00000034504 37653 136 UdeM00000034504 XP\_014789722.1 66 100  
34 0 23 122 1529 1628 3.40E-29 136 37653 cellular

organisms;Eukaryota;Opisthokonta;Metazoa;Eumetazoa;Bilateria;Protostomia;Spiralia;Lophotrochozoa;Mollusca;Cephalopoda;Coleoidea;Octopodiformes;Octopoda;Incirrata;Octopodidae;Octopus;Octopus bimaculoides

UdeM00000034505 6596 173.3 UdeM00000034505 XP\_045181000.1 49.8 215  
29 1 15 150 1329 1543 2.30E-40 173.3 6596 cellular

organisms;Eukaryota;Opisthokonta;Metazoa;Eumetazoa;Bilateria;Protostomia;Spiralia;Lophotrochozoa;Mollusca;Bivalvia;Autobranchia;Heteroconchia;Euheterodonta;Imparidentia;Venerida;Veneroidea;Veneridae;Mercenaria;Mercenaria mercenaria

UdeM00000034506 6596 83.2 UdeM00000034506 XP\_045181000.1 83.3 54  
8 1 46 99 1171 1223 3.10E-13 83.2 6596 cellular

organisms;Eukaryota;Opisthokonta;Metazoa;Eumetazoa;Bilateria;Protostomia;Spiralia;Lophotrochozoa;Mollusca;Bivalvia;Autobranchia;Heteroconchia;Euheterodonta;Imparidentia;Venerida;Veneroidea;Veneridae;Mercenaria;Mercenaria mercenaria

UdeM00000034507 1735272 228 UdeM00000034507 XP\_041346684.1 33.4  
431 226 10 1 377 403 826 2.00E-56 228 1735272  
cellular

organisms;Eukaryota;Opisthokonta;Metazoa;Eumetazoa;Bilateria;Protostomia;Spiralia;Lophotrochozoa;Mollusca;Gastropoda;Neomphalina;Neomphaloidea;Peltospiridae;Gigantopelta;Gigantopelta aegis

UdeM00000034508 1735272 60.1 UdeM00000034508 XP\_041379276.1 30.8  
146 89 6 43 183 25 163 3.50E-06 60.1 1735272  
cellular

organisms;Eukaryota;Opisthokonta;Metazoa;Eumetazoa;Bilateria;Protostomia;

Spiralia; Lophotrochozoa; Mollusca; Gastropoda; Neomphalina; Neomphaloidea; Peltospiridae; Gigantopelta; Gigantopelta aegis

UdeM00000034509 6596 280 UdeM00000034509 XP\_045182317.1 40.3 427  
211 9 36 441 224 627 5.40E-72 280 6596 cellular  
organisms; Eukaryota; Opisthokonta; Metazoa; Eumetazoa; Bilateria; Protostomia; Spiralia; Lophotrochozoa; Mollusca; Bivalvia; Autobranchia; Heteroconchia; Euheterodonta; Imparidentia; Venerida; Veneroidea; Veneridae; Mercenaria; Mercenaria mercenaria

UdeM00000034510 7054 406 UdeM00000034510 XP\_031350480.1 52.7 351  
165 1 1 350 117 467 4.90E-110 406 7054 cellular  
organisms; Eukaryota; Opisthokonta; Metazoa; Eumetazoa; Bilateria; Protostomia; Ecdysozoa; Panarthropoda; Arthropoda; Mandibulata; Pancrustacea; Hexapoda; Insecta; Dicondylia; Pterygota; Neoptera; Endopterygota; Coleoptera; Polyphaga; Elateriformia; Elateroidea; Lampyridae; Lampyrinae; Photinus; Photinus pyralis

UdeM00000034512 6596 164.5 UdeM00000034512 XP\_045182313.1 24.5 1108  
400 26 38 1098 496 1213 7.80E-37 164.5 6596 cellular  
organisms; Eukaryota; Opisthokonta; Metazoa; Eumetazoa; Bilateria; Protostomia; Spiralia; Lophotrochozoa; Mollusca; Bivalvia; Autobranchia; Heteroconchia; Euheterodonta; Imparidentia; Venerida; Veneroidea; Veneridae; Mercenaria; Mercenaria mercenaria

UdeM00000034513 6565 189.9 UdeM00000034513 XP\_022334993.1 52.5 177  
82 1 21 195 374 550 3.10E-45 189.9 6565 cellular  
organisms; Eukaryota; Opisthokonta; Metazoa; Eumetazoa; Bilateria; Protostomia; Spiralia; Lophotrochozoa; Mollusca; Bivalvia; Autobranchia; Pteriomorphia; Ostreida; Ostreoidea; Ostreidae; Crassostrea; Crassostrea virginica

UdeM00000034514 6565 297.4 UdeM00000034514 XP\_022334993.1 59.6 240  
94 3 1 238 574 812 1.70E-77 297.4 6565 cellular  
organisms; Eukaryota; Opisthokonta; Metazoa; Eumetazoa; Bilateria; Protostomia; Spiralia; Lophotrochozoa; Mollusca; Bivalvia; Autobranchia; Pteriomorphia; Ostreida; Ostreoidea; Ostreidae; Crassostrea; Crassostrea virginica

UdeM00000034515 6596 98.2 UdeM00000034515 XP\_045208792.1 43.3 134  
72 3 1 132 1 132 1.30E-17 98.2 6596 cellular  
organisms; Eukaryota; Opisthokonta; Metazoa; Eumetazoa; Bilateria; Protostomia; Spiralia; Lophotrochozoa; Mollusca; Bivalvia; Autobranchia; Heteroconchia; Euheterodonta; Imparidentia; Venerida; Veneroidea; Veneridae; Mercenaria; Mercenaria mercenaria

UdeM00000034516 6565 162.9 UdeM00000034516 XP\_022337267.1 38 305  
109 9 11 237 264 566 5.10E-37 162.9 6565 cellular  
organisms; Eukaryota; Opisthokonta; Metazoa; Eumetazoa; Bilateria; Protostomia; Spiralia; Lophotrochozoa; Mollusca; Bivalvia; Autobranchia; Pteriomorphia; Ostreida; Ostreoidea; Ostreidae; Crassostrea; Crassostrea virginica

UdeM00000034521 6565 201.8 UdeM00000034521 XP\_022322655.1 53.7 175  
80 1 52 225 387 561 9.30E-49 201.8 6565 cellular  
organisms; Eukaryota; Opisthokonta; Metazoa; Eumetazoa; Bilateria; Protostomia; Spiralia; Lophotrochozoa; Mollusca; Bivalvia; Autobranchia; Pteriomorphia; Ostreida; Ostreoidea; Ostreidae; Crassostrea; Crassostrea virginica

UdeM00000034522 29159 88.6 UdeM00000034522 XP\_034299474.1 40.7 91  
52 1 1 91 415 503 4.60E-15 88.6 29159 cellular  
organisms; Eukaryota; Opisthokonta; Metazoa; Eumetazoa; Bilateria; Protostomia; Spiralia; Lophotrochozoa; Mollusca; Bivalvia; Autobranchia; Pteriomorphia; Ostreida; Ostreoidea; Ostreidae; Crassostrea; Crassostrea gigas

UdeM00000034523 29159 126.7 UdeM00000034523 XP\_034330911.1 62 92  
33 2 1 91 308 398 1.60E-26 126.7 29159 cellular  
organisms; Eukaryota; Opisthokonta; Metazoa; Eumetazoa; Bilateria; Protostomia;

Spiralia; Lophotrochozoa; Mollusca; Bivalvia; Autobranchia; Pteriomorphia; Ostr  
eida; Ostreoida; Ostreidae; Crassostrea; Crassostrea gigas  
UdeM00000034524 90988 250.8 UdeM00000034524 XP\_039535825.1 55.1 216  
97 0 1 216 111 326 1.60E-63 250.8 90988 cellular  
organisms; Eukaryota; Opisthokonta; Metazoa; Eumetazoa; Bilateria; Deuterostomi  
a; Chordata; Craniata; Vertebrata; Gnathostomata; Teleostomi; Euteleostomi; Acti  
nopterygii; Actinopteri; Neopterygii; Teleostei; Osteoglossocephalai; Clupeoce  
phala; Otomorpha; Ostariophysi; Otophysi; Cypriniphysae; Cypriniiformes; Cyprino  
idei; Leuciscidae; Pogonichthyinae; Pimephales; Pimephales promelas  
UdeM00000034525 50429 73.6 UdeM00000034525 XP\_022804186.1 36.6 145  
88 2 1 141 430 574 2.30E-10 73.6 50429 cellular  
organisms; Eukaryota; Opisthokonta; Metazoa; Eumetazoa; Cnidaria; Anthozoa; Hexa  
corallia; Scleractinia; Astrocoeniina; Pocilloporidae; Stylophora; Stylophora  
pistillata  
UdeM00000034526 50429 70.5 UdeM00000034526 XP\_022804186.1 40.9 93  
52 1 1 90 430 522 1.80E-09 70.5 50429 cellular  
organisms; Eukaryota; Opisthokonta; Metazoa; Eumetazoa; Cnidaria; Anthozoa; Hexa  
corallia; Scleractinia; Astrocoeniina; Pocilloporidae; Stylophora; Stylophora  
pistillata  
UdeM00000034530 6579 864.8 UdeM00000034530 XP\_033728194.1 47.8 988  
445 17 158 1094 124 1091 1.30E-247 864.8 6579 cellular  
organisms; Eukaryota; Opisthokonta; Metazoa; Eumetazoa; Bilateria; Protostomia;  
Spiralia; Lophotrochozoa; Mollusca; Bivalvia; Autobranchia; Pteriomorphia; Pect  
inida; Pectinoidea; Pectinidae; Pecten; Pecten maximus  
UdeM00000034531 6596 441.4 UdeM00000034531 XP\_045182316.1 36.9 862  
384 22 43 858 408 1155 2.60E-120 441.4 6596 cellular  
organisms; Eukaryota; Opisthokonta; Metazoa; Eumetazoa; Bilateria; Protostomia;  
Spiralia; Lophotrochozoa; Mollusca; Bivalvia; Autobranchia; Heteroconchia; Eue  
terodonta; Imparidentia; Venerida; Veneroidea; Veneridae; Mercenaria; Mercenari  
a mercenaria  
UdeM00000034532 6596 441.4 UdeM00000034532 XP\_045182316.1 36.9 862  
384 22 43 858 408 1155 2.60E-120 441.4 6596 cellular  
organisms; Eukaryota; Opisthokonta; Metazoa; Eumetazoa; Bilateria; Protostomia;  
Spiralia; Lophotrochozoa; Mollusca; Bivalvia; Autobranchia; Heteroconchia; Eue  
terodonta; Imparidentia; Venerida; Veneroidea; Veneridae; Mercenaria; Mercenari  
a mercenaria  
UdeM00000034533 7054 474.6 UdeM00000034533 XP\_031328250.1 49.3 467  
235 2 1 465 1 467 1.50E-130 474.6 7054 cellular  
organisms; Eukaryota; Opisthokonta; Metazoa; Eumetazoa; Bilateria; Protostomia;  
Ecdysozoa; Panarthropoda; Arthropoda; Mandibulata; Pancrustacea; Hexapoda; Inse  
cta; Dicondylia; Pterygota; Neoptera; Endopterygota; Coleoptera; Polyphaga; Elat  
eriformia; Elateroidea; Lampyridae; Lampyrinae; Photinus; Photinus pyralis  
UdeM00000034537 7054 415.2 UdeM00000034537 XP\_031328250.1 45.6 467  
204 4 1 417 1 467 9.60E-113 415.2 7054 cellular  
organisms; Eukaryota; Opisthokonta; Metazoa; Eumetazoa; Bilateria; Protostomia;  
Ecdysozoa; Panarthropoda; Arthropoda; Mandibulata; Pancrustacea; Hexapoda; Inse  
cta; Dicondylia; Pterygota; Neoptera; Endopterygota; Coleoptera; Polyphaga; Elat  
eriformia; Elateroidea; Lampyridae; Lampyrinae; Photinus; Photinus pyralis  
UdeM00000034538 6596 81.3 UdeM00000034538 XP\_045201969.1 39 154  
80 4 1 146 19 166 1.40E-12 81.3 6596 cellular  
organisms; Eukaryota; Opisthokonta; Metazoa; Eumetazoa; Bilateria; Protostomia;  
Spiralia; Lophotrochozoa; Mollusca; Bivalvia; Autobranchia; Heteroconchia; Eue  
terodonta; Imparidentia; Venerida; Veneroidea; Veneridae; Mercenaria; Mercenari  
a mercenaria



UdeM00000034539 6596 119.8 UdeM00000034539 XP\_045202346.1 38.8 152  
 89 2 6 156 16 164 3.20E-24 119.8 6596 cellular  
 organisms;Eukaryota;Opisthokonta;Metazoa;Eumetazoa;Bilateria;Protostomia;  
 Spiralia;Lophotrochozoa;Mollusca;Bivalvia;Autobranchia;Heteroconchia;Euhe  
 terodonta;Imparidentia;Venerida;Veneroidea;Veneridae;Mercenaria;Mercenari  
 a mercenaria  
 UdeM00000034544 6565 221.5 UdeM00000034544 XP\_022299727.1 48.1 233  
 118 2 1 231 46 277 1.30E-54 221.5 6565 cellular  
 organisms;Eukaryota;Opisthokonta;Metazoa;Eumetazoa;Bilateria;Protostomia;  
 Spiralia;Lophotrochozoa;Mollusca;Bivalvia;Autobranchia;Pteriormorphia;Ostr  
 eida;Ostreoidea;Ostreidae;Crassostrea;Crassostrea virginica  
 UdeM00000034546 6565 121.7 UdeM00000034546 XP\_022334993.1 37.1 213  
 122 4 33 235 1 211 1.40E-24 121.7 6565 cellular  
 organisms;Eukaryota;Opisthokonta;Metazoa;Eumetazoa;Bilateria;Protostomia;  
 Spiralia;Lophotrochozoa;Mollusca;Bivalvia;Autobranchia;Pteriormorphia;Ostr  
 eida;Ostreoidea;Ostreidae;Crassostrea;Crassostrea virginica  
 UdeM00000034547 6565 139.4 UdeM00000034547 XP\_022334993.1 48.8 129  
 66 0 25 153 327 455 3.80E-30 139.4 6565 cellular  
 organisms;Eukaryota;Opisthokonta;Metazoa;Eumetazoa;Bilateria;Protostomia;  
 Spiralia;Lophotrochozoa;Mollusca;Bivalvia;Autobranchia;Pteriormorphia;Ostr  
 eida;Ostreoidea;Ostreidae;Crassostrea;Crassostrea virginica  
 UdeM00000034548 6565 65.5 UdeM00000034548 XP\_022334993.1 48.6 70  
 34 1 1 68 481 550 3.10E-08 65.5 6565 cellular  
 organisms;Eukaryota;Opisthokonta;Metazoa;Eumetazoa;Bilateria;Protostomia;  
 Spiralia;Lophotrochozoa;Mollusca;Bivalvia;Autobranchia;Pteriormorphia;Ostr  
 eida;Ostreoidea;Ostreidae;Crassostrea;Crassostrea virginica  
 UdeM00000034549 6565 295 UdeM00000034549 XP\_022334993.1 58.3 240  
 98 2 1 239 574 812 8.50E-77 295 6565 cellular  
 organisms;Eukaryota;Opisthokonta;Metazoa;Eumetazoa;Bilateria;Protostomia;  
 Spiralia;Lophotrochozoa;Mollusca;Bivalvia;Autobranchia;Pteriormorphia;Ostr  
 eida;Ostreoidea;Ostreidae;Crassostrea;Crassostrea virginica  
 UdeM00000034550 7654 70.9 UdeM00000034550 XP\_041473734.1 35.5 110  
 63 1 1 102 629 738 1.20E-09 70.9 7654 cellular  
 organisms;Eukaryota;Opisthokonta;Metazoa;Eumetazoa;Bilateria;Deuterostomi  
 a;Echinodermata;Eleutherozoa;Echinozoa;Echinoidea;Euechinoidea;Echinacea;  
 Temnopleuroidea;Toxopneustidae;Lytechinus;Lytechinus variegatus  
 UdeM00000008515 6565 175.6 UdeM00000008515 XP\_022304473.1 51.3 189  
 58 1 1 155 1282 1470 4.80E-41 175.6 6565 cellular  
 organisms;Eukaryota;Opisthokonta;Metazoa;Eumetazoa;Bilateria;Protostomia;  
 Spiralia;Lophotrochozoa;Mollusca;Bivalvia;Autobranchia;Pteriormorphia;Ostr  
 eida;Ostreoidea;Ostreidae;Crassostrea;Crassostrea virginica  
 UdeM00000008516 6596 126.3 UdeM00000008516 XP\_045170267.1 60.4 91  
 36 0 65 155 480 570 3.80E-26 126.3 6596 cellular  
 organisms;Eukaryota;Opisthokonta;Metazoa;Eumetazoa;Bilateria;Protostomia;  
 Spiralia;Lophotrochozoa;Mollusca;Bivalvia;Autobranchia;Heteroconchia;Euhe  
 terodonta;Imparidentia;Venerida;Veneroidea;Veneridae;Mercenaria;Mercenari  
 a mercenaria  
 UdeM00000008517 6596 424.1 UdeM00000008517 XP\_045176360.1 50.3 493  
 201 9 1 455 29 515 2.30E-115 424.1 6596 cellular  
 organisms;Eukaryota;Opisthokonta;Metazoa;Eumetazoa;Bilateria;Protostomia;  
 Spiralia;Lophotrochozoa;Mollusca;Bivalvia;Autobranchia;Heteroconchia;Euhe  
 terodonta;Imparidentia;Venerida;Veneroidea;Veneridae;Mercenaria;Mercenari  
 a mercenaria

UdeM00000008518 6596 75.5 UdeM00000008518 XP\_045168954.1 31.2 192  
 108 5 3 172 4 193 8.50E-11 75.5 6596 cellular  
 organisms;Eukaryota;Opisthokonta;Metazoa;Eumetazoa;Bilateria;Protostomia;  
 Spiralia;Lophotrochozoa;Mollusca;Bivalvia;Autobranchia;Heteroconchia;Euhe  
 terodonta;Imparidentia;Venerida;Veneroidea;Veneridae;Mercenaria;Mercenari  
 a mercenaria

UdeM00000008519 6565 984.6 UdeM00000008519 XP\_022308017.1 36.8 1589  
 881 37 3 1540 4 1520 1.50E-282 984.6 6565 cellular  
 organisms;Eukaryota;Opisthokonta;Metazoa;Eumetazoa;Bilateria;Protostomia;  
 Spiralia;Lophotrochozoa;Mollusca;Bivalvia;Autobranchia;Pteriormorphia;Ostr  
 eida;Ostreoidea;Ostreidae;Crassostrea;Crassostrea virginica

UdeM00000008520 6565 984.6 UdeM00000008520 XP\_022308017.1 36.8 1589  
 881 37 3 1540 4 1520 1.50E-282 984.6 6565 cellular  
 organisms;Eukaryota;Opisthokonta;Metazoa;Eumetazoa;Bilateria;Protostomia;  
 Spiralia;Lophotrochozoa;Mollusca;Bivalvia;Autobranchia;Pteriormorphia;Ostr  
 eida;Ostreoidea;Ostreidae;Crassostrea;Crassostrea virginica

UdeM00000008521 6565 487.3 UdeM00000008521 XP\_022308017.1 33.4 943  
 526 32 684 1589 13738 14615 7.60E-134 487.3 6565 cellular  
 organisms;Eukaryota;Opisthokonta;Metazoa;Eumetazoa;Bilateria;Protostomia;  
 Spiralia;Lophotrochozoa;Mollusca;Bivalvia;Autobranchia;Pteriormorphia;Ostr  
 eida;Ostreoidea;Ostreidae;Crassostrea;Crassostrea virginica

UdeM00000008522 6565 322 UdeM00000008522 XP\_022308017.1 29.5 733  
 424 24 45 731 13863 14548 2.10E-84 322 6565 cellular  
 organisms;Eukaryota;Opisthokonta;Metazoa;Eumetazoa;Bilateria;Protostomia;  
 Spiralia;Lophotrochozoa;Mollusca;Bivalvia;Autobranchia;Pteriormorphia;Ostr  
 eida;Ostreoidea;Ostreidae;Crassostrea;Crassostrea virginica

UdeM00000008524 2607531 681.4 UdeM00000008524 XP\_036361565.1 35.6  
 1025 612 25 2 1010 579 1571 6.60E-192 681.4 2607531  
 cellular  
 organisms;Eukaryota;Opisthokonta;Metazoa;Eumetazoa;Bilateria;Protostomia;  
 Spiralia;Lophotrochozoa;Mollusca;Cephalopoda;Coleoidea;Octopodiformes;Oct  
 opoda;Incirrata;Octopodidae;Octopus;Octopus sinensis

UdeM00000008525 2607531 681.4 UdeM00000008525 XP\_036361565.1 35.6  
 1025 612 25 2 1010 579 1571 6.60E-192 681.4 2607531  
 cellular  
 organisms;Eukaryota;Opisthokonta;Metazoa;Eumetazoa;Bilateria;Protostomia;  
 Spiralia;Lophotrochozoa;Mollusca;Cephalopoda;Coleoidea;Octopodiformes;Oct  
 opoda;Incirrata;Octopodidae;Octopus;Octopus sinensis

UdeM00000008527 6565 144.4 UdeM00000008527 XP\_022308017.1 52.4 124  
 58 1 1 124 447 569 9.60E-32 144.4 6565 cellular  
 organisms;Eukaryota;Opisthokonta;Metazoa;Eumetazoa;Bilateria;Protostomia;  
 Spiralia;Lophotrochozoa;Mollusca;Bivalvia;Autobranchia;Pteriormorphia;Ostr  
 eida;Ostreoidea;Ostreidae;Crassostrea;Crassostrea virginica

UdeM00000008528 6579 161.4 UdeM00000008528 XP\_033761532.1 33.7 285  
 175 8 1 276 159 438 1.70E-36 161.4 6579 cellular  
 organisms;Eukaryota;Opisthokonta;Metazoa;Eumetazoa;Bilateria;Protostomia;  
 Spiralia;Lophotrochozoa;Mollusca;Bivalvia;Autobranchia;Pteriormorphia;Pect  
 inida;Pectinoidea;Pectinidae;Pecten;Pecten maximus

UdeM00000008530 6565 391.3 UdeM00000008530 XP\_022308017.1 32 829  
 437 32 130 911 13864 14612 3.30E-105 391.3 6565 cellular  
 organisms;Eukaryota;Opisthokonta;Metazoa;Eumetazoa;Bilateria;Protostomia;  
 Spiralia;Lophotrochozoa;Mollusca;Bivalvia;Autobranchia;Pteriormorphia;Ostr  
 eida;Ostreoidea;Ostreidae;Crassostrea;Crassostrea virginica

UdeM00000008531 6565 419.9 UdeM00000008531 XP\_022308017.1 33.5 802  
 433 30 130 884 13864 14612 8.30E-114 419.9 6565 cellular  
 organisms;Eukaryota;Opisthokonta;Metazoa;Eumetazoa;Bilateria;Protostomia;  
 Spiralia;Lophotrochozoa;Mollusca;Bivalvia;Autobranchia;Pteriomorphia;Ostr  
 eida;Ostreoidea;Ostreidae;Crassostrea;Crassostrea virginica  
 UdeM00000008532 225164 63.9 UdeM00000008532 XP\_009062566.1 24.8  
 359 219 10 197 548 926 1240 7.50E-07 63.9 225164  
 cellular  
 organisms;Eukaryota;Opisthokonta;Metazoa;Eumetazoa;Bilateria;Protostomia;  
 Spiralia;Lophotrochozoa;Mollusca;Gastropoda;Patellogastropoda;Lottioidea;  
 Lottiidae;Lottia;Lottia gigantea  
 UdeM00000008533 2607531 350.9 UdeM00000008533 XP\_036361565.1 50  
 344 158 8 11 353 1249 1579 1.30E-92 350.9 2607531  
 cellular  
 organisms;Eukaryota;Opisthokonta;Metazoa;Eumetazoa;Bilateria;Protostomia;  
 Spiralia;Lophotrochozoa;Mollusca;Cephalopoda;Coleoidea;Octopodiformes;Oct  
 opoda;Incirrata;Octopodidae;Octopus;Octopus sinensis  
 UdeM00000008534 2607531 350.9 UdeM00000008534 XP\_036361565.1 50  
 344 158 8 11 353 1249 1579 1.30E-92 350.9 2607531  
 cellular  
 organisms;Eukaryota;Opisthokonta;Metazoa;Eumetazoa;Bilateria;Protostomia;  
 Spiralia;Lophotrochozoa;Mollusca;Cephalopoda;Coleoidea;Octopodiformes;Oct  
 opoda;Incirrata;Octopodidae;Octopus;Octopus sinensis  
 UdeM00000008535 2607531 343.6 UdeM00000008535 XP\_036361565.1 49  
 345 162 8 11 354 1249 1580 2.10E-90 343.6 2607531  
 cellular  
 organisms;Eukaryota;Opisthokonta;Metazoa;Eumetazoa;Bilateria;Protostomia;  
 Spiralia;Lophotrochozoa;Mollusca;Cephalopoda;Coleoidea;Octopodiformes;Oct  
 opoda;Incirrata;Octopodidae;Octopus;Octopus sinensis  
 UdeM00000008536 2607531 350.9 UdeM00000008536 XP\_036361565.1 50  
 344 158 8 11 353 1249 1579 1.40E-92 350.9 2607531  
 cellular  
 organisms;Eukaryota;Opisthokonta;Metazoa;Eumetazoa;Bilateria;Protostomia;  
 Spiralia;Lophotrochozoa;Mollusca;Cephalopoda;Coleoidea;Octopodiformes;Oct  
 opoda;Incirrata;Octopodidae;Octopus;Octopus sinensis  
 UdeM00000008537 6565 637.5 UdeM00000008537 XP\_022308017.1 33 1120  
 617 28 99 1116 158 1246 3.20E-179 637.5 6565 cellular  
 organisms;Eukaryota;Opisthokonta;Metazoa;Eumetazoa;Bilateria;Protostomia;  
 Spiralia;Lophotrochozoa;Mollusca;Bivalvia;Autobranchia;Pteriomorphia;Ostr  
 eida;Ostreoidea;Ostreidae;Crassostrea;Crassostrea virginica  
 UdeM00000008538 6596 577 UdeM00000008538 XP\_045168885.1 40.2 1341  
 451 33 30 1145 159 1373 8.60E-161 577 6596 cellular  
 organisms;Eukaryota;Opisthokonta;Metazoa;Eumetazoa;Bilateria;Protostomia;  
 Spiralia;Lophotrochozoa;Mollusca;Bivalvia;Autobranchia;Heteroconchia;Euhe  
 terodonta;Imparidentia;Venerida;Veneroidea;Veneridae;Mercenaria;Mercenari  
 a mercenaria  
 UdeM00000008539 6596 144.4 UdeM00000008539 XP\_045168885.1 57.8 128  
 52 2 4 131 24 149 1.80E-31 144.4 6596 cellular  
 organisms;Eukaryota;Opisthokonta;Metazoa;Eumetazoa;Bilateria;Protostomia;  
 Spiralia;Lophotrochozoa;Mollusca;Bivalvia;Autobranchia;Heteroconchia;Euhe  
 terodonta;Imparidentia;Venerida;Veneroidea;Veneridae;Mercenaria;Mercenari  
 a mercenaria  
 UdeM00000008540 6596 333.2 UdeM00000008540 XP\_045170025.1 80.3 218  
 38 4 1 218 18 230 2.50E-88 333.2 6596 cellular

organisms;Eukaryota;Opisthokonta;Metazoa;Eumetazoa;Bilateria;Protostomia;Spiralia;Lophotrochozoa;Mollusca;Bivalvia;Autobranhia;Heteroconchia;Euheterodonta;Imparidentia;Venerida;Veneroidea;Veneridae;Mercenaria;Mercenaria mercenaria

UdeM00000008541 6596 490.3 UdeM00000008541 XP\_045170427.1 73.6 303  
79 1 84 386 67 368 2.20E-135 490.3 6596 cellular

organisms;Eukaryota;Opisthokonta;Metazoa;Eumetazoa;Bilateria;Protostomia;Spiralia;Lophotrochozoa;Mollusca;Bivalvia;Autobranhia;Heteroconchia;Euheterodonta;Imparidentia;Venerida;Veneroidea;Veneridae;Mercenaria;Mercenaria mercenaria

UdeM00000008543 29159 344 UdeM00000008543 XP\_034322590.1 45.6 425  
186 12 5 397 7 418 2.70E-91 344 29159 cellular

organisms;Eukaryota;Opisthokonta;Metazoa;Eumetazoa;Bilateria;Protostomia;Spiralia;Lophotrochozoa;Mollusca;Bivalvia;Autobranhia;Pteriomorphia;Ostreida;Ostreoidea;Ostreidae;Crassostrea;Crassostrea gigas

UdeM00000008544 6573 158.3 UdeM00000008544 XP\_021376346.1 78.3 106  
22 1 1 105 1 106 6.20E-36 158.3 6573 cellular

organisms;Eukaryota;Opisthokonta;Metazoa;Eumetazoa;Bilateria;Protostomia;Spiralia;Lophotrochozoa;Mollusca;Bivalvia;Autobranhia;Pteriomorphia;Pectinida;Pectinoidea;Pectinidae;Mizuhopecten;Mizuhopecten yessoensis

UdeM00000008545 6573 158.7 UdeM00000008545 XP\_021376346.1 78.3 106  
22 1 1 105 1 106 4.10E-36 158.7 6573 cellular

organisms;Eukaryota;Opisthokonta;Metazoa;Eumetazoa;Bilateria;Protostomia;Spiralia;Lophotrochozoa;Mollusca;Bivalvia;Autobranhia;Pteriomorphia;Pectinida;Pectinoidea;Pectinidae;Mizuhopecten;Mizuhopecten yessoensis

UdeM00000008546 37621 78.2 UdeM00000008546 XP\_014677462.1 44.9 98  
30 1 1 74 38 135 6.80E-12 78.2 37621 cellular

organisms;Eukaryota;Opisthokonta;Metazoa;Eumetazoa;Bilateria;Protostomia;Ecdysozoa;Scalidophora;Priapulida;Priapulimorpha;Priapulimorphida;Priapulidae;Priapululus;Priapululus caudatus

UdeM00000008547 37621 78.2 UdeM00000008547 XP\_014677462.1 44.9 98  
30 1 1 74 38 135 6.80E-12 78.2 37621 cellular

organisms;Eukaryota;Opisthokonta;Metazoa;Eumetazoa;Bilateria;Protostomia;Ecdysozoa;Scalidophora;Priapulida;Priapulimorpha;Priapulimorphida;Priapulidae;Priapululus;Priapululus caudatus

UdeM00000008548 6573 158.3 UdeM00000008548 XP\_021376346.1 78.3 106  
22 1 1 105 1 106 5.60E-36 158.3 6573 cellular

organisms;Eukaryota;Opisthokonta;Metazoa;Eumetazoa;Bilateria;Protostomia;Spiralia;Lophotrochozoa;Mollusca;Bivalvia;Autobranhia;Pteriomorphia;Pectinida;Pectinoidea;Pectinidae;Mizuhopecten;Mizuhopecten yessoensis

UdeM00000008549 10116 254.6 UdeM00000008549 XP\_038968845.1 60.7 201  
72 2 1 195 118 317 1.40E-64 254.6 10116 cellular

organisms;Eukaryota;Opisthokonta;Metazoa;Eumetazoa;Bilateria;Deuterostomia;Chordata;Craniata;Vertebrata;Gnathostomata;Teleostomi;Euteleostomi;Sarcopterygii;Dipnotetrapodomorpha;Tetrapoda;Amniota;Mammalia;Theria;Eutheria;Boreoeutheria;Euarchontoglires;Glires;Rodentia;Myomorpha;Muroidea;Muridae;Murinae;Rattus;Rattus norvegicus

UdeM00000008553 6596 109 UdeM00000008553 XP\_045169827.1 28.9 394  
216 14 3 347 329 707 1.40E-20 109 6596 cellular

organisms;Eukaryota;Opisthokonta;Metazoa;Eumetazoa;Bilateria;Protostomia;Spiralia;Lophotrochozoa;Mollusca;Bivalvia;Autobranhia;Heteroconchia;Euheterodonta;Imparidentia;Venerida;Veneroidea;Veneridae;Mercenaria;Mercenaria mercenaria

UdeM00000008554 6579 342 UdeM00000008554 XP\_033761856.1 49.7 300  
 151 0 1 300 28 327 7.80E-91 342 6579 cellular  
 organisms;Eukaryota;Opisthokonta;Metazoa;Eumetazoa;Bilateria;Protostomia;  
 Spiralia;Lophotrochozoa;Mollusca;Bivalvia;Autobranchia;Pteriomorpha;Pect  
 inida;Pectinoidea;Pectinidae;Pecten;Pecten maximus  
 UdeM00000008555 6596 95.5 UdeM00000008555 XP\_045168714.1 50 88  
 44 0 65 152 57 144 7.10E-17 95.5 6596 cellular  
 organisms;Eukaryota;Opisthokonta;Metazoa;Eumetazoa;Bilateria;Protostomia;  
 Spiralia;Lophotrochozoa;Mollusca;Bivalvia;Autobranchia;Heteroconchia;Euhe  
 terodonta;Imparidentia;Venerida;Veneroidea;Veneridae;Mercenaria;Mercenari  
 a mercenaria  
 UdeM00000008556 6596 94 UdeM00000008556 XP\_045168714.1 51.8 85  
 41 0 65 149 57 141 2.00E-16 94 6596 cellular  
 organisms;Eukaryota;Opisthokonta;Metazoa;Eumetazoa;Bilateria;Protostomia;  
 Spiralia;Lophotrochozoa;Mollusca;Bivalvia;Autobranchia;Heteroconchia;Euhe  
 terodonta;Imparidentia;Venerida;Veneroidea;Veneridae;Mercenaria;Mercenari  
 a mercenaria  
 UdeM00000008557 29159 662.5 UdeM00000008557 XP\_034317768.1 58.1 516  
 210 2 109 619 126 640 5.20E-187 662.5 29159 cellular  
 organisms;Eukaryota;Opisthokonta;Metazoa;Eumetazoa;Bilateria;Protostomia;  
 Spiralia;Lophotrochozoa;Mollusca;Bivalvia;Autobranchia;Pteriomorpha;Ostr  
 eida;Ostreoidea;Ostreidae;Crassostrea;Crassostrea gigas  
 UdeM00000008559 29159 267.3 UdeM00000008559 XP\_034317768.1 68.8 173  
 54 0 143 315 126 298 2.70E-68 267.3 29159 cellular  
 organisms;Eukaryota;Opisthokonta;Metazoa;Eumetazoa;Bilateria;Protostomia;  
 Spiralia;Lophotrochozoa;Mollusca;Bivalvia;Autobranchia;Pteriomorpha;Ostr  
 eida;Ostreoidea;Ostreidae;Crassostrea;Crassostrea gigas  
 UdeM00000008558 29159 725.7 UdeM00000008558 XP\_034317768.1 62 513  
 194 1 143 655 126 637 5.30E-206 725.7 29159 cellular  
 organisms;Eukaryota;Opisthokonta;Metazoa;Eumetazoa;Bilateria;Protostomia;  
 Spiralia;Lophotrochozoa;Mollusca;Bivalvia;Autobranchia;Pteriomorpha;Ostr  
 eida;Ostreoidea;Ostreidae;Crassostrea;Crassostrea gigas  
 UdeM00000008560 6565 82.4 UdeM00000008560 XP\_022303321.1 69.8 53  
 16 0 81 133 136 188 4.70E-13 82.4 6565 cellular  
 organisms;Eukaryota;Opisthokonta;Metazoa;Eumetazoa;Bilateria;Protostomia;  
 Spiralia;Lophotrochozoa;Mollusca;Bivalvia;Autobranchia;Pteriomorpha;Ostr  
 eida;Ostreoidea;Ostreidae;Crassostrea;Crassostrea virginica  
 UdeM00000008561 6579 431 UdeM00000008561 XP\_033761800.1 56.2 338  
 145 3 2 337 258 594 1.40E-117 431 6579 cellular  
 organisms;Eukaryota;Opisthokonta;Metazoa;Eumetazoa;Bilateria;Protostomia;  
 Spiralia;Lophotrochozoa;Mollusca;Bivalvia;Autobranchia;Pteriomorpha;Pect  
 inida;Pectinoidea;Pectinidae;Pecten;Pecten maximus  
 UdeM00000008562 6579 473.8 UdeM00000008562 XP\_033761800.1 53.6 388  
 177 3 2 387 258 644 2.10E-130 473.8 6579 cellular  
 organisms;Eukaryota;Opisthokonta;Metazoa;Eumetazoa;Bilateria;Protostomia;  
 Spiralia;Lophotrochozoa;Mollusca;Bivalvia;Autobranchia;Pteriomorpha;Pect  
 inida;Pectinoidea;Pectinidae;Pecten;Pecten maximus  
 UdeM00000008563 29159 345.5 UdeM00000008563 XP\_034317768.1 47 389  
 180 5 3 386 4 371 9.30E-92 345.5 29159 cellular  
 organisms;Eukaryota;Opisthokonta;Metazoa;Eumetazoa;Bilateria;Protostomia;  
 Spiralia;Lophotrochozoa;Mollusca;Bivalvia;Autobranchia;Pteriomorpha;Ostr  
 eida;Ostreoidea;Ostreidae;Crassostrea;Crassostrea gigas  
 UdeM00000008564 400727 408.3 UdeM00000008564 XP\_025094271.1 64.4  
 264 93 1 1 264 385 647 7.60E-111 408.3 400727

cellular  
organisms;Eukaryota;Opisthokonta;Metazoa;Eumetazoa;Bilateria;Protostomia;  
Spiralia;Lophotrochozoa;Mollusca;Gastropoda;Caenogastropoda;Architaenioglossa;  
Ampullarioidea;Ampullariidae;Pomacea;Pomacea canaliculata  
UdeM00000008566 29159 339.3 UdeM00000008566 XP\_034317768.1 44.9 425  
172 7 24 443 4 371 7.20E-90 339.3 29159 cellular  
organisms;Eukaryota;Opisthokonta;Metazoa;Eumetazoa;Bilateria;Protostomia;  
Spiralia;Lophotrochozoa;Mollusca;Bivalvia;Autobranchia;Pteriomorpha;Ostreida;  
Ostreoidea;Ostreidae;Crassostrea;Crassostrea gigas  
UdeM00000008565 29159 760 UdeM00000008565 XP\_034317768.1 55.2 660  
269 7 24 678 4 641 2.60E-216 760 29159 cellular  
organisms;Eukaryota;Opisthokonta;Metazoa;Eumetazoa;Bilateria;Protostomia;  
Spiralia;Lophotrochozoa;Mollusca;Bivalvia;Autobranchia;Pteriomorpha;Ostreida;  
Ostreoidea;Ostreidae;Crassostrea;Crassostrea gigas  
UdeM00000008567 400727 411 UdeM00000008567 XP\_025094271.1 65.2  
264 91 1 1 264 385 647 1.20E-111 411 400727  
cellular  
organisms;Eukaryota;Opisthokonta;Metazoa;Eumetazoa;Bilateria;Protostomia;  
Spiralia;Lophotrochozoa;Mollusca;Gastropoda;Caenogastropoda;Architaenioglossa;  
Ampullarioidea;Ampullariidae;Pomacea;Pomacea canaliculata  
UdeM00000008568 6596 586.3 UdeM00000008568 XP\_045216190.1 42.6 850  
375 21 15 825 90 865 6.20E-164 586.3 6596 cellular  
organisms;Eukaryota;Opisthokonta;Metazoa;Eumetazoa;Bilateria;Protostomia;  
Spiralia;Lophotrochozoa;Mollusca;Bivalvia;Autobranchia;Heteroconchia;Euheterodonta;  
Imparidentia;Venerida;Veneroidea;Veneridae;Mercenaria;Mercenaria mercenaria  
UdeM00000008569 6579 225.7 UdeM00000008569 XP\_033761311.1 45.6 281  
138 2 1 281 1 266 7.50E-56 225.7 6579 cellular  
organisms;Eukaryota;Opisthokonta;Metazoa;Eumetazoa;Bilateria;Protostomia;  
Spiralia;Lophotrochozoa;Mollusca;Bivalvia;Autobranchia;Pteriomorpha;Pectinida;  
Pectinoidea;Pectinidae;Pecten;Pecten maximus  
UdeM00000008571 6596 335.9 UdeM00000008571 XP\_045167947.1 47.1 416  
203 11 13 416 7 417 1.10E-88 335.9 6596 cellular  
organisms;Eukaryota;Opisthokonta;Metazoa;Eumetazoa;Bilateria;Protostomia;  
Spiralia;Lophotrochozoa;Mollusca;Bivalvia;Autobranchia;Heteroconchia;Euheterodonta;  
Imparidentia;Venerida;Veneroidea;Veneridae;Mercenaria;Mercenaria mercenaria  
UdeM00000008572 6596 87.4 UdeM00000008572 XP\_045168266.1 54.4 79  
35 1 66 144 454 531 1.60E-14 87.4 6596 cellular  
organisms;Eukaryota;Opisthokonta;Metazoa;Eumetazoa;Bilateria;Protostomia;  
Spiralia;Lophotrochozoa;Mollusca;Bivalvia;Autobranchia;Heteroconchia;Euheterodonta;  
Imparidentia;Venerida;Veneroidea;Veneridae;Mercenaria;Mercenaria mercenaria  
UdeM00000008573 6579 1164.1 UdeM00000008573 XP\_033761696.1 59.3  
1005 393 9 1 997 1 997 0.00E+00 1164.1 6579  
cellular  
organisms;Eukaryota;Opisthokonta;Metazoa;Eumetazoa;Bilateria;Protostomia;  
Spiralia;Lophotrochozoa;Mollusca;Bivalvia;Autobranchia;Pteriomorpha;Pectinida;  
Pectinoidea;Pectinidae;Pecten;Pecten maximus  
UdeM00000008574 6579 1159.4 UdeM00000008574 XP\_033761696.1 59.2  
1007 393 10 1 999 1 997 0.00E+00 1159.4 6579  
cellular  
organisms;Eukaryota;Opisthokonta;Metazoa;Eumetazoa;Bilateria;Protostomia;

Spiralia;Lophotrochozoa;Mollusca;Bivalvia;Autobranchia;Pteriormorphia;Pectinida;Pectinoidea;Pectinidae;Pecten;Pecten maximus  
UdeM00000008575 6579 1126.3 UdeM00000008575 XP\_033761696.1 58  
1007 388 11 1 982 1 997 0.00E+00 1126.3 6579  
cellular  
organisms;Eukaryota;Opisthokonta;Metazoa;Eumetazoa;Bilateria;Protostomia;  
Spiralia;Lophotrochozoa;Mollusca;Bivalvia;Autobranchia;Pteriormorphia;Pectinida;Pectinoidea;Pectinidae;Pecten;Pecten maximus  
UdeM00000008576 37653 344.7 UdeM00000008576 XP\_014791275.1 33.7 707  
352 18 181 864 122 734 3.30E-91 344.7 37653 cellular  
organisms;Eukaryota;Opisthokonta;Metazoa;Eumetazoa;Bilateria;Protostomia;  
Spiralia;Lophotrochozoa;Mollusca;Cephalopoda;Coleoidea;Octopodiformes;Octopoda;Incirrata;Octopodidae;Octopus;Octopus bimaculoides  
UdeM00000008577 37653 344.7 UdeM00000008577 XP\_014791275.1 33.7 707  
352 18 173 856 122 734 3.30E-91 344.7 37653 cellular  
organisms;Eukaryota;Opisthokonta;Metazoa;Eumetazoa;Bilateria;Protostomia;  
Spiralia;Lophotrochozoa;Mollusca;Cephalopoda;Coleoidea;Octopodiformes;Octopoda;Incirrata;Octopodidae;Octopus;Octopus bimaculoides  
UdeM00000008578 6579 117.1 UdeM00000008578 XP\_033739317.1 36.1 191  
117 3 3 193 288 473 2.60E-23 117.1 6579 cellular  
organisms;Eukaryota;Opisthokonta;Metazoa;Eumetazoa;Bilateria;Protostomia;  
Spiralia;Lophotrochozoa;Mollusca;Bivalvia;Autobranchia;Pteriormorphia;Pectinida;Pectinoidea;Pectinidae;Pecten;Pecten maximus  
UdeM00000008581 6579 118.2 UdeM00000008581 XP\_033761565.1 54.4 103  
43 1 61 159 197 299 9.30E-24 118.2 6579 cellular  
organisms;Eukaryota;Opisthokonta;Metazoa;Eumetazoa;Bilateria;Protostomia;  
Spiralia;Lophotrochozoa;Mollusca;Bivalvia;Autobranchia;Pteriormorphia;Pectinida;Pectinoidea;Pectinidae;Pecten;Pecten maximus  
UdeM00000008582 6500 144.1 UdeM00000008582 XP\_035829052.1 44.7 208  
93 5 117 302 8 215 3.10E-31 144.1 6500 cellular  
organisms;Eukaryota;Opisthokonta;Metazoa;Eumetazoa;Bilateria;Protostomia;  
Spiralia;Lophotrochozoa;Mollusca;Gastropoda;Heterobranchia;Euthyneura;Teptipleura;Aplysiida;Aplysiioidea;Aplysiidae;Aplysia;Aplysia californica  
UdeM00000008583 6596 378.6 UdeM00000008583 XP\_045167556.1 48 440  
136 6 20 375 16 446 9.00E-102 378.6 6596 cellular  
organisms;Eukaryota;Opisthokonta;Metazoa;Eumetazoa;Bilateria;Protostomia;  
Spiralia;Lophotrochozoa;Mollusca;Bivalvia;Autobranchia;Heteroconchia;Euheterodonta;Imparidentia;Venerida;Veneroidea;Veneridae;Mercenaria;Mercenaria mercenaria  
UdeM00000008584 7741 279.3 UdeM00000008584 XP\_019622111.1 50.9 281  
133 4 65 343 1 278 6.80E-72 279.3 7741 cellular  
organisms;Eukaryota;Opisthokonta;Metazoa;Eumetazoa;Bilateria;Deuterostomia;Chordata;Cephalochordata;Leptocardii;Amphioxiformes;Branchiostomidae;Branchiostoma;Branchiostoma belcheri  
UdeM00000008585 6596 480.3 UdeM00000008585 XP\_045167556.1 58.9 404  
151 6 21 413 23 422 2.60E-132 480.3 6596 cellular  
organisms;Eukaryota;Opisthokonta;Metazoa;Eumetazoa;Bilateria;Protostomia;  
Spiralia;Lophotrochozoa;Mollusca;Bivalvia;Autobranchia;Heteroconchia;Euheterodonta;Imparidentia;Venerida;Veneroidea;Veneridae;Mercenaria;Mercenaria mercenaria  
UdeM00000008586 1735272 267.7 UdeM00000008586 XP\_041372487.1 30.3  
633 393 18 33 625 53 677 3.70E-68 267.7 1735272  
cellular  
organisms;Eukaryota;Opisthokonta;Metazoa;Eumetazoa;Bilateria;Protostomia;

Spiralia; Lophotrochozoa; Mollusca; Gastropoda; Neomphalina; Neomphaloidea; Peltospiridae; Gigantopelta; Gigantopelta aegis

|                 |      |    |    |                 |                |          |                  |
|-----------------|------|----|----|-----------------|----------------|----------|------------------|
| UdeM00000008587 | 6573 | 62 |    | UdeM00000008587 | XP_021367662.1 | 43.1     | 72               |
| 36              | 2    | 28 | 99 | 174             | 240            | 5.90E-07 | 62 6573 cellular |

organisms; Eukaryota; Opisthokonta; Metazoa; Eumetazoa; Bilateria; Protostomia; Spiralia; Lophotrochozoa; Mollusca; Bivalvia; Autobranchia; Pteriomorpha; Pectinida; Pectinoidea; Pectinidae; Mizuhopecten; Mizuhopecten yessoensis

|                 |      |      |     |                 |                |          |                    |
|-----------------|------|------|-----|-----------------|----------------|----------|--------------------|
| UdeM00000008588 | 6565 | 73.6 |     | UdeM00000008588 | XP_022310967.1 | 34.2     | 149                |
| 84              | 5    | 2    | 143 | 227             | 368            | 4.50E-10 | 73.6 6565 cellular |

organisms; Eukaryota; Opisthokonta; Metazoa; Eumetazoa; Bilateria; Protostomia; Spiralia; Lophotrochozoa; Mollusca; Bivalvia; Autobranchia; Pteriomorpha; Ostreida; Ostreoidea; Ostreidae; Crassostrea; Crassostrea virginica

|                 |        |   |     |                 |                |      |                              |
|-----------------|--------|---|-----|-----------------|----------------|------|------------------------------|
| UdeM00000008593 | 225164 |   | 312 | UdeM00000008593 | XP_009052166.1 | 47.5 |                              |
| 335             | 122    | 4 | 2   | 322             | 5              | 299  | 8.90E-82 312 225164 cellular |

organisms; Eukaryota; Opisthokonta; Metazoa; Eumetazoa; Bilateria; Protostomia; Spiralia; Lophotrochozoa; Mollusca; Gastropoda; Patellogastropoda; Lottioidea; Lottiidae; Lottia; Lottia gigantea

|                 |      |       |     |                 |                |           |                     |
|-----------------|------|-------|-----|-----------------|----------------|-----------|---------------------|
| UdeM00000008594 | 6573 | 570.5 |     | UdeM00000008594 | XP_021375189.1 | 34.9      | 911                 |
| 511             | 20   | 3     | 851 | 2               | 892            | 3.70E-159 | 570.5 6573 cellular |

organisms; Eukaryota; Opisthokonta; Metazoa; Eumetazoa; Bilateria; Protostomia; Spiralia; Lophotrochozoa; Mollusca; Bivalvia; Autobranchia; Pteriomorpha; Pectinida; Pectinoidea; Pectinidae; Mizuhopecten; Mizuhopecten yessoensis

|                 |      |      |     |                 |                |          |                    |
|-----------------|------|------|-----|-----------------|----------------|----------|--------------------|
| UdeM00000008595 | 6596 | 78.2 |     | UdeM00000008595 | XP_045159468.1 | 31.4     | 159                |
| 99              | 2    | 16   | 170 | 115             | 267            | 1.10E-11 | 78.2 6596 cellular |

organisms; Eukaryota; Opisthokonta; Metazoa; Eumetazoa; Bilateria; Protostomia; Spiralia; Lophotrochozoa; Mollusca; Bivalvia; Autobranchia; Heteroconchia; Euheterodonta; Imparidentia; Venerida; Veneroidea; Veneridae; Mercenaria; Mercenaria mercenaria

|                 |      |       |     |                 |                |          |                     |
|-----------------|------|-------|-----|-----------------|----------------|----------|---------------------|
| UdeM00000008597 | 6596 | 221.1 |     | UdeM00000008597 | XP_045170111.1 | 59       | 173                 |
| 70              | 1    | 39    | 210 | 6               | 178            | 1.30E-54 | 221.1 6596 cellular |

organisms; Eukaryota; Opisthokonta; Metazoa; Eumetazoa; Bilateria; Protostomia; Spiralia; Lophotrochozoa; Mollusca; Bivalvia; Autobranchia; Heteroconchia; Euheterodonta; Imparidentia; Venerida; Veneroidea; Veneridae; Mercenaria; Mercenaria mercenaria

|                 |      |       |     |                 |                |           |                     |
|-----------------|------|-------|-----|-----------------|----------------|-----------|---------------------|
| UdeM00000008598 | 6565 | 404.1 |     | UdeM00000008598 | XP_022287302.1 | 45        | 473                 |
| 230             | 9    | 30    | 496 | 71              | 519            | 2.70E-109 | 404.1 6565 cellular |

organisms; Eukaryota; Opisthokonta; Metazoa; Eumetazoa; Bilateria; Protostomia; Spiralia; Lophotrochozoa; Mollusca; Bivalvia; Autobranchia; Pteriomorpha; Ostreida; Ostreoidea; Ostreidae; Crassostrea; Crassostrea virginica

|                 |      |       |     |                 |                |          |                     |
|-----------------|------|-------|-----|-----------------|----------------|----------|---------------------|
| UdeM00000008599 | 6596 | 335.5 |     | UdeM00000008599 | XP_045169901.1 | 37.4     | 514                 |
| 312             | 5    | 15    | 522 | 16              | 525            | 1.20E-88 | 335.5 6596 cellular |

organisms; Eukaryota; Opisthokonta; Metazoa; Eumetazoa; Bilateria; Protostomia; Spiralia; Lophotrochozoa; Mollusca; Bivalvia; Autobranchia; Heteroconchia; Euheterodonta; Imparidentia; Venerida; Veneroidea; Veneridae; Mercenaria; Mercenaria mercenaria

|                 |      |       |     |                 |                |          |                     |
|-----------------|------|-------|-----|-----------------|----------------|----------|---------------------|
| UdeM00000008600 | 6573 | 232.6 |     | UdeM00000008600 | XP_021376410.1 | 51.5     | 229                 |
| 95              | 3    | 2     | 217 | 60              | 285            | 4.70E-58 | 232.6 6573 cellular |

organisms; Eukaryota; Opisthokonta; Metazoa; Eumetazoa; Bilateria; Protostomia; Spiralia; Lophotrochozoa; Mollusca; Bivalvia; Autobranchia; Pteriomorpha; Pectinida; Pectinoidea; Pectinidae; Mizuhopecten; Mizuhopecten yessoensis

|                 |      |       |     |                 |                |          |                     |
|-----------------|------|-------|-----|-----------------|----------------|----------|---------------------|
| UdeM00000008601 | 6573 | 241.1 |     | UdeM00000008601 | XP_021376410.1 | 52.8     | 231                 |
| 104             | 3    | 2     | 232 | 60              | 285            | 1.40E-60 | 241.1 6573 cellular |

organisms; Eukaryota; Opisthokonta; Metazoa; Eumetazoa; Bilateria; Protostomia;



Spiralia; Lophotrochozoa; Mollusca; Bivalvia; Autobranchia; Pteriomorpha; Pectinida; Pectinoidea; Pectinidae; Mizuhopecten; Mizuhopecten yessoensis

UdeM00000008602 6596 202.6 UdeM00000008602 XP\_045169980.1 50 208  
99 3 1 205 1 206 4.80E-49 202.6 6596 cellular  
organisms; Eukaryota; Opisthokonta; Metazoa; Eumetazoa; Bilateria; Protostomia; Spiralia; Lophotrochozoa; Mollusca; Bivalvia; Autobranchia; Heteroconchia; Euheterodonta; Imparidentia; Venerida; Veneroidea; Veneridae; Mercenaria; Mercenaria mercenaria

UdeM00000008604 7668 103.6 UdeM00000008604 XP\_030845483.1 43.7 119  
66 1 21 138 382 500 7.30E-19 103.6 7668 cellular  
organisms; Eukaryota; Opisthokonta; Metazoa; Eumetazoa; Bilateria; Deuterostomia; Echinodermata; Eleutherozoa; Echinozoa; Echinoidea; Euechinoidea; Echinacea; Camarodonta; Echinidea; Strongylocentrotidae; Strongylocentrotus; Strongylocentrotus purpuratus

UdeM00000008611 7741 125.2 UdeM00000008611 XP\_019626645.1 43 158  
73 2 11 151 171 328 7.40E-26 125.2 7741 cellular  
organisms; Eukaryota; Opisthokonta; Metazoa; Eumetazoa; Bilateria; Deuterostomia; Chordata; Cephalochordata; Leptocardii; Amphioxiformes; Branchiostomidae; Branchiostoma; Branchiostoma belcheri

UdeM00000008620 400727 354.4 UdeM00000008620 XP\_025089284.1 56  
336 123 2 5 315 11 346 1.80E-94 354.4 400727  
cellular  
organisms; Eukaryota; Opisthokonta; Metazoa; Eumetazoa; Bilateria; Protostomia; Spiralia; Lophotrochozoa; Mollusca; Gastropoda; Caenogastropoda; Architaenioglossa; Ampullarioidea; Ampullariidae; Pomacea; Pomacea canaliculata

UdeM00000008621 400727 371.7 UdeM00000008621 XP\_025089284.1 57.1  
347 133 3 5 346 11 346 1.20E-99 371.7 400727  
cellular  
organisms; Eukaryota; Opisthokonta; Metazoa; Eumetazoa; Bilateria; Protostomia; Spiralia; Lophotrochozoa; Mollusca; Gastropoda; Caenogastropoda; Architaenioglossa; Ampullarioidea; Ampullariidae; Pomacea; Pomacea canaliculata

UdeM00000008622 6596 698.4 UdeM00000008622 XP\_045169290.1 63.2 505  
179 4 20 519 3 505 7.20E-198 698.4 6596 cellular  
organisms; Eukaryota; Opisthokonta; Metazoa; Eumetazoa; Bilateria; Protostomia; Spiralia; Lophotrochozoa; Mollusca; Bivalvia; Autobranchia; Heteroconchia; Euheterodonta; Imparidentia; Venerida; Veneroidea; Veneridae; Mercenaria; Mercenaria mercenaria

UdeM00000008623 6596 146 UdeM00000008623 XP\_045176242.1 50.3 143  
67 3 58 199 46 185 5.30E-32 146 6596 cellular  
organisms; Eukaryota; Opisthokonta; Metazoa; Eumetazoa; Bilateria; Protostomia; Spiralia; Lophotrochozoa; Mollusca; Bivalvia; Autobranchia; Heteroconchia; Euheterodonta; Imparidentia; Venerida; Veneroidea; Veneridae; Mercenaria; Mercenaria mercenaria

UdeM00000008624 6596 327.4 UdeM00000008624 XP\_045168397.1 44.4 385  
190 9 16 384 6 382 2.50E-86 327.4 6596 cellular  
organisms; Eukaryota; Opisthokonta; Metazoa; Eumetazoa; Bilateria; Protostomia; Spiralia; Lophotrochozoa; Mollusca; Bivalvia; Autobranchia; Heteroconchia; Euheterodonta; Imparidentia; Venerida; Veneroidea; Veneridae; Mercenaria; Mercenaria mercenaria

UdeM00000008625 45264 386.3 UdeM00000008625 XP\_044179186.1 58.8 318  
130 1 28 345 87 403 4.20E-104 386.3 45264 cellular  
organisms; Eukaryota; Opisthokonta; Metazoa; Eumetazoa; Cnidaria; Anthozoa; Hexacorallia; Scleractinia; Astrocoeniina; Acroporidae; Acropora; Acropora millepora

UdeM00000008626 6596 267.3 UdeM00000008626 XP\_045176530.1 47.8 272  
 138 2 25 296 24 291 2.30E-68 267.3 6596 cellular  
 organisms;Eukaryota;Opisthokonta;Metazoa;Eumetazoa;Bilateria;Protostomia;  
 Spiralia;Lophotrochozoa;Mollusca;Bivalvia;Autobranhia;Heteroconchia;Euhe  
 terodonta;Imparidentia;Venerida;Veneroidea;Veneridae;Mercenaria;Mercenari  
 a mercenaria  
 UdeM00000008627 6596 317.4 UdeM00000008627 XP\_045168396.1 47.5 337  
 161 6 1 326 28 359 2.40E-83 317.4 6596 cellular  
 organisms;Eukaryota;Opisthokonta;Metazoa;Eumetazoa;Bilateria;Protostomia;  
 Spiralia;Lophotrochozoa;Mollusca;Bivalvia;Autobranhia;Heteroconchia;Euhe  
 terodonta;Imparidentia;Venerida;Veneroidea;Veneridae;Mercenaria;Mercenari  
 a mercenaria  
 UdeM00000008628 1735272 424.1 UdeM00000008628 XP\_041356266.1 51.1  
 407 189 4 51 454 209 608 2.30E-115 424.1 1735272  
 cellular  
 organisms;Eukaryota;Opisthokonta;Metazoa;Eumetazoa;Bilateria;Protostomia;  
 Spiralia;Lophotrochozoa;Mollusca;Gastropoda;Neomphalina;Neomphaloidea;Pel  
 tospiridae;Gigantopelta;Gigantopelta aegis  
 UdeM00000008629 6596 154.5 UdeM00000008629 XP\_045185048.1 35 260  
 129 5 7 250 8 243 2.10E-34 154.5 6596 cellular  
 organisms;Eukaryota;Opisthokonta;Metazoa;Eumetazoa;Bilateria;Protostomia;  
 Spiralia;Lophotrochozoa;Mollusca;Bivalvia;Autobranhia;Heteroconchia;Euhe  
 terodonta;Imparidentia;Venerida;Veneroidea;Veneridae;Mercenaria;Mercenari  
 a mercenaria  
 UdeM00000008630 6596 310.8 UdeM00000008630 XP\_045168398.1 43.4 364  
 193 5 15 367 13 374 2.70E-81 310.8 6596 cellular  
 organisms;Eukaryota;Opisthokonta;Metazoa;Eumetazoa;Bilateria;Protostomia;  
 Spiralia;Lophotrochozoa;Mollusca;Bivalvia;Autobranhia;Heteroconchia;Euhe  
 terodonta;Imparidentia;Venerida;Veneroidea;Veneridae;Mercenaria;Mercenari  
 a mercenaria  
 UdeM00000008631 6596 141.4 UdeM00000008631 XP\_045168396.1 51.1 137  
 59 2 17 145 34 170 1.10E-30 141.4 6596 cellular  
 organisms;Eukaryota;Opisthokonta;Metazoa;Eumetazoa;Bilateria;Protostomia;  
 Spiralia;Lophotrochozoa;Mollusca;Bivalvia;Autobranhia;Heteroconchia;Euhe  
 terodonta;Imparidentia;Venerida;Veneroidea;Veneridae;Mercenaria;Mercenari  
 a mercenaria  
 UdeM00000008633 6596 163.3 UdeM00000008633 XP\_045168398.1 48.9 174  
 72 3 39 195 5 178 3.30E-37 163.3 6596 cellular  
 organisms;Eukaryota;Opisthokonta;Metazoa;Eumetazoa;Bilateria;Protostomia;  
 Spiralia;Lophotrochozoa;Mollusca;Bivalvia;Autobranhia;Heteroconchia;Euhe  
 terodonta;Imparidentia;Venerida;Veneroidea;Veneridae;Mercenaria;Mercenari  
 a mercenaria  
 UdeM00000008637 6596 97.4 UdeM00000008637 XP\_045157176.1 28.2 213  
 143 4 1 208 1 208 2.30E-17 97.4 6596 cellular  
 organisms;Eukaryota;Opisthokonta;Metazoa;Eumetazoa;Bilateria;Protostomia;  
 Spiralia;Lophotrochozoa;Mollusca;Bivalvia;Autobranhia;Heteroconchia;Euhe  
 terodonta;Imparidentia;Venerida;Veneroidea;Veneridae;Mercenaria;Mercenari  
 a mercenaria  
 UdeM00000008638 6596 411.8 UdeM00000008638 XP\_045167701.1 63.3 319  
 116 1 4 321 20 338 8.30E-112 411.8 6596 cellular  
 organisms;Eukaryota;Opisthokonta;Metazoa;Eumetazoa;Bilateria;Protostomia;  
 Spiralia;Lophotrochozoa;Mollusca;Bivalvia;Autobranhia;Heteroconchia;Euhe  
 terodonta;Imparidentia;Venerida;Veneroidea;Veneridae;Mercenaria;Mercenari  
 a mercenaria

UdeM00000008639 2607531 590.5 UdeM00000008639 XP\_029643543.1 29.4  
 1461 822 33 187 1552 14 1359 6.40E-165 590.5 2607531  
 cellular  
 organisms;Eukaryota;Opisthokonta;Metazoa;Eumetazoa;Bilateria;Protostomia;  
 Spiralia;Lophotrochozoa;Mollusca;Cephalopoda;Coleoidea;Octopodiformes;Oct  
 opoda;Incirrata;Octopodidae;Octopus;Octopus sinensis  
 UdeM00000008640 6596 79.7 UdeM00000008640 XP\_045194847.1 41 100  
 56 1 34 133 98 194 3.30E-12 79.7 6596 cellular  
 organisms;Eukaryota;Opisthokonta;Metazoa;Eumetazoa;Bilateria;Protostomia;  
 Spiralia;Lophotrochozoa;Mollusca;Bivalvia;Autobranchia;Heteroconchia;Euhe  
 terodonta;Imparidentia;Venerida;Veneroidea;Veneridae;Mercenaria;Mercenari  
 a mercenaria  
 UdeM00000008641 45264 106.3 UdeM00000008641 XP\_044184037.1 31.4 194  
 91 2 106 257 171 364 6.00E-20 106.3 45264 cellular  
 organisms;Eukaryota;Opisthokonta;Metazoa;Eumetazoa;Cnidaria;Anthozoa;Hexa  
 corallia;Scleractinia;Astrocoeniina;Acroporidae;Acropora;Acropora  
 millepora  
 UdeM00000008645 6596 201.4 UdeM00000008645 XP\_045170403.1 82.1 117  
 21 0 1 117 1 117 6.20E-49 201.4 6596 cellular  
 organisms;Eukaryota;Opisthokonta;Metazoa;Eumetazoa;Bilateria;Protostomia;  
 Spiralia;Lophotrochozoa;Mollusca;Bivalvia;Autobranchia;Heteroconchia;Euhe  
 terodonta;Imparidentia;Venerida;Veneroidea;Veneridae;Mercenaria;Mercenari  
 a mercenaria  
 UdeM00000008644 6596 378.6 UdeM00000008644 XP\_045170403.1 84.8 217  
 33 0 1 217 1 217 5.20E-102 378.6 6596 cellular  
 organisms;Eukaryota;Opisthokonta;Metazoa;Eumetazoa;Bilateria;Protostomia;  
 Spiralia;Lophotrochozoa;Mollusca;Bivalvia;Autobranchia;Heteroconchia;Euhe  
 terodonta;Imparidentia;Venerida;Veneroidea;Veneridae;Mercenaria;Mercenari  
 a mercenaria  
 UdeM00000008646 6596 729.2 UdeM00000008646 XP\_045167542.1 82.9 421  
 72 0 50 470 387 807 3.40E-207 729.2 6596 cellular  
 organisms;Eukaryota;Opisthokonta;Metazoa;Eumetazoa;Bilateria;Protostomia;  
 Spiralia;Lophotrochozoa;Mollusca;Bivalvia;Autobranchia;Heteroconchia;Euhe  
 terodonta;Imparidentia;Venerida;Veneroidea;Veneridae;Mercenaria;Mercenari  
 a mercenaria  
 UdeM00000008648 6573 647.5 UdeM00000008648 XP\_021374246.1 75.7 428  
 87 6 72 484 160 585 1.40E-182 647.5 6573 cellular  
 organisms;Eukaryota;Opisthokonta;Metazoa;Eumetazoa;Bilateria;Protostomia;  
 Spiralia;Lophotrochozoa;Mollusca;Bivalvia;Autobranchia;Pteriomorphia;Pect  
 inida;Pectinoidea;Pectinidae;Mizuhopecten;Mizuhopecten yessoensis  
 UdeM00000008649 6596 142.1 UdeM00000008649 XP\_045168183.1 81.2 85  
 15 1 1 84 64 148 4.60E-31 142.1 6596 cellular  
 organisms;Eukaryota;Opisthokonta;Metazoa;Eumetazoa;Bilateria;Protostomia;  
 Spiralia;Lophotrochozoa;Mollusca;Bivalvia;Autobranchia;Heteroconchia;Euhe  
 terodonta;Imparidentia;Venerida;Veneroidea;Veneridae;Mercenaria;Mercenari  
 a mercenaria  
 UdeM00000008651 6596 340.1 UdeM00000008651 XP\_045169072.1 37.6 521  
 295 10 6 511 5 510 5.10E-90 340.1 6596 cellular  
 organisms;Eukaryota;Opisthokonta;Metazoa;Eumetazoa;Bilateria;Protostomia;  
 Spiralia;Lophotrochozoa;Mollusca;Bivalvia;Autobranchia;Heteroconchia;Euhe  
 terodonta;Imparidentia;Venerida;Veneroidea;Veneridae;Mercenaria;Mercenari  
 a mercenaria  
 UdeM00000008652 6579 332 UdeM00000008652 XP\_033761736.1 35.5 555  
 334 10 4 539 413 962 1.40E-87 332 6579 cellular

organisms;Eukaryota;Opisthokonta;Metazoa;Eumetazoa;Bilateria;Protostomia;Spiralia;Lophotrochozoa;Mollusca;Bivalvia;Autobranchia;Pteriomorpha;Pectinida;Pectinoidea;Pectinidae;Pecten;Pecten maximus

UdeM00000008653 29159 380.9 UdeM00000008653 XP\_034309513.1 29.4 934  
595 20 73 979 30 926 4.80E-102 380.9 29159 cellular

organisms;Eukaryota;Opisthokonta;Metazoa;Eumetazoa;Bilateria;Protostomia;Spiralia;Lophotrochozoa;Mollusca;Bivalvia;Autobranchia;Pteriomorpha;Ostreida;Ostreoidea;Ostreidae;Crassostrea;Crassostrea gigas

UdeM00000008654 6596 279.3 UdeM00000008654 XP\_045168650.1 67.6 204  
66 0 32 235 8 211 4.70E-72 279.3 6596 cellular

organisms;Eukaryota;Opisthokonta;Metazoa;Eumetazoa;Bilateria;Protostomia;Spiralia;Lophotrochozoa;Mollusca;Bivalvia;Autobranchia;Heteroconchia;Euheterodonta;Imparidentia;Venerida;Veneroidea;Veneridae;Mercenaria;Mercenaria mercenaria

UdeM00000008655 6596 288.9 UdeM00000008655 XP\_045168650.1 68.2 211  
67 0 1 211 1 211 5.30E-75 288.9 6596 cellular

organisms;Eukaryota;Opisthokonta;Metazoa;Eumetazoa;Bilateria;Protostomia;Spiralia;Lophotrochozoa;Mollusca;Bivalvia;Autobranchia;Heteroconchia;Euheterodonta;Imparidentia;Venerida;Veneroidea;Veneridae;Mercenaria;Mercenaria mercenaria

UdeM00000008656 6596 245.4 UdeM00000008656 XP\_045168755.1 45.8 262  
131 5 50 308 23 276 9.80E-62 245.4 6596 cellular

organisms;Eukaryota;Opisthokonta;Metazoa;Eumetazoa;Bilateria;Protostomia;Spiralia;Lophotrochozoa;Mollusca;Bivalvia;Autobranchia;Heteroconchia;Euheterodonta;Imparidentia;Venerida;Veneroidea;Veneridae;Mercenaria;Mercenaria mercenaria

UdeM00000008657 6579 153.3 UdeM00000008657 XP\_033762306.1 57.3 124  
53 0 1 124 319 442 2.00E-34 153.3 6579 cellular

organisms;Eukaryota;Opisthokonta;Metazoa;Eumetazoa;Bilateria;Protostomia;Spiralia;Lophotrochozoa;Mollusca;Bivalvia;Autobranchia;Pteriomorpha;Pectinida;Pectinoidea;Pectinidae;Pecten;Pecten maximus

UdeM00000008658 6579 367.9 UdeM00000008658 XP\_033762306.1 61.6 271  
104 0 1 271 330 600 1.30E-98 367.9 6579 cellular

organisms;Eukaryota;Opisthokonta;Metazoa;Eumetazoa;Bilateria;Protostomia;Spiralia;Lophotrochozoa;Mollusca;Bivalvia;Autobranchia;Pteriomorpha;Pectinida;Pectinoidea;Pectinidae;Pecten;Pecten maximus

UdeM00000008659 6596 941.4 UdeM00000008659 XP\_045168486.1 55.1 965  
379 16 7 953 66 994 8.80E-271 941.4 6596 cellular

organisms;Eukaryota;Opisthokonta;Metazoa;Eumetazoa;Bilateria;Protostomia;Spiralia;Lophotrochozoa;Mollusca;Bivalvia;Autobranchia;Heteroconchia;Euheterodonta;Imparidentia;Venerida;Veneroidea;Veneridae;Mercenaria;Mercenaria mercenaria

UdeM00000008660 6596 244.2 UdeM00000008660 XP\_045167700.1 35 511  
265 11 1 479 2 477 3.50E-61 244.2 6596 cellular

organisms;Eukaryota;Opisthokonta;Metazoa;Eumetazoa;Bilateria;Protostomia;Spiralia;Lophotrochozoa;Mollusca;Bivalvia;Autobranchia;Heteroconchia;Euheterodonta;Imparidentia;Venerida;Veneroidea;Veneridae;Mercenaria;Mercenaria mercenaria

UdeM00000008661 2607531 569.3 UdeM00000008661 XP\_029641406.1 57.1  
527 210 4 4 525 3 518 5.20E-159 569.3 2607531  
cellular

organisms;Eukaryota;Opisthokonta;Metazoa;Eumetazoa;Bilateria;Protostomia;Spiralia;Lophotrochozoa;Mollusca;Cephalopoda;Coleoidea;Octopodiformes;Octopoda;Incirrata;Octopodidae;Octopus;Octopus sinensis

UdeM00000008662 2607531 571.6 UdeM00000008662 XP\_029641406.1 57.1  
 527 189 4 4 504 3 518 1.00E-159 571.6 2607531  
 cellular  
 organisms;Eukaryota;Opisthokonta;Metazoa;Eumetazoa;Bilateria;Protostomia;  
 Spiralia;Lophotrochozoa;Mollusca;Cephalopoda;Coleoidea;Octopodiformes;Oct  
 opoda;Incirrata;Octopodidae;Octopus;Octopus sinensis  
 UdeM00000008663 6579 396.4 UdeM00000008663 XP\_033730566.1 53.1 360  
 164 1 2 356 4 363 4.00E-107 396.4 6579 cellular  
 organisms;Eukaryota;Opisthokonta;Metazoa;Eumetazoa;Bilateria;Protostomia;  
 Spiralia;Lophotrochozoa;Mollusca;Bivalvia;Autobranchia;Pteriormorphia;Pect  
 inida;Pectinoidea;Pectinidae;Pecten;Pecten maximus  
 UdeM00000008664 6596 105.1 UdeM00000008664 XP\_045168645.1 81.4 102  
 19 0 78 179 295 396 9.40E-20 105.1 6596 cellular  
 organisms;Eukaryota;Opisthokonta;Metazoa;Eumetazoa;Bilateria;Protostomia;  
 Spiralia;Lophotrochozoa;Mollusca;Bivalvia;Autobranchia;Heteroconchia;Euhe  
 terodonta;Imparidentia;Venerida;Veneroidea;Veneridae;Mercenaria;Mercenari  
 a mercenaria  
 UdeM00000008667 6596 391.7 UdeM00000008667 XP\_045169565.1 59.9 387  
 119 6 1 363 1 375 6.50E-105 391.7 6596 cellular  
 organisms;Eukaryota;Opisthokonta;Metazoa;Eumetazoa;Bilateria;Protostomia;  
 Spiralia;Lophotrochozoa;Mollusca;Bivalvia;Autobranchia;Heteroconchia;Euhe  
 terodonta;Imparidentia;Venerida;Veneroidea;Veneridae;Mercenaria;Mercenari  
 a mercenaria  
 UdeM00000008666 6596 391.7 UdeM00000008666 XP\_045169565.1 59.9 387  
 119 6 1 363 1 375 6.50E-105 391.7 6596 cellular  
 organisms;Eukaryota;Opisthokonta;Metazoa;Eumetazoa;Bilateria;Protostomia;  
 Spiralia;Lophotrochozoa;Mollusca;Bivalvia;Autobranchia;Heteroconchia;Euhe  
 terodonta;Imparidentia;Venerida;Veneroidea;Veneridae;Mercenaria;Mercenari  
 a mercenaria  
 UdeM00000008665 6596 391.7 UdeM00000008665 XP\_045169565.1 59.9 387  
 119 6 1 363 1 375 6.50E-105 391.7 6596 cellular  
 organisms;Eukaryota;Opisthokonta;Metazoa;Eumetazoa;Bilateria;Protostomia;  
 Spiralia;Lophotrochozoa;Mollusca;Bivalvia;Autobranchia;Heteroconchia;Euhe  
 terodonta;Imparidentia;Venerida;Veneroidea;Veneridae;Mercenaria;Mercenari  
 a mercenaria  
 UdeM00000008668 6596 1267.3 UdeM00000008668 XP\_045167952.1 71.8  
 854 223 7 1 846 1 844 0.00E+00 1267.3 6596  
 cellular  
 organisms;Eukaryota;Opisthokonta;Metazoa;Eumetazoa;Bilateria;Protostomia;  
 Spiralia;Lophotrochozoa;Mollusca;Bivalvia;Autobranchia;Heteroconchia;Euhe  
 terodonta;Imparidentia;Venerida;Veneroidea;Veneridae;Mercenaria;Mercenari  
 a mercenaria  
 UdeM00000008669 6596 1255.7 UdeM00000008669 XP\_045167952.1 70.4  
 871 223 8 1 863 1 844 0.00E+00 1255.7 6596  
 cellular  
 organisms;Eukaryota;Opisthokonta;Metazoa;Eumetazoa;Bilateria;Protostomia;  
 Spiralia;Lophotrochozoa;Mollusca;Bivalvia;Autobranchia;Heteroconchia;Euhe  
 terodonta;Imparidentia;Venerida;Veneroidea;Veneridae;Mercenaria;Mercenari  
 a mercenaria  
 UdeM00000008670 6596 223 UdeM00000008670 XP\_045167484.1 48 223  
 109 3 9 230 7 223 7.50E-55 223 6596 cellular  
 organisms;Eukaryota;Opisthokonta;Metazoa;Eumetazoa;Bilateria;Protostomia;  
 Spiralia;Lophotrochozoa;Mollusca;Bivalvia;Autobranchia;Heteroconchia;Euhe

terodonta;Imparidentia;Venerida;Veneroidea;Veneridae;Mercenaria;Mercenari  
 a mercenaria  
 UdeM00000008671 6596 395.6 UdeM00000008671 XP\_045156529.1 79.4 248  
 51 0 4 251 3 250 4.80E-107 395.6 6596 cellular  
 organisms;Eukaryota;Opisthokonta;Metazoa;Eumetazoa;Bilateria;Protostomia;  
 Spiralia;Lophotrochozoa;Mollusca;Bivalvia;Autobranhia;Heteroconchia;Euhe  
 terodonta;Imparidentia;Venerida;Veneroidea;Veneridae;Mercenaria;Mercenari  
 a mercenaria  
 UdeM00000008672 6565 259.2 UdeM00000008672 XP\_022327962.1 53.8 238  
 109 1 34 270 132 369 5.70E-66 259.2 6565 cellular  
 organisms;Eukaryota;Opisthokonta;Metazoa;Eumetazoa;Bilateria;Protostomia;  
 Spiralia;Lophotrochozoa;Mollusca;Bivalvia;Autobranhia;Pteriormorphia;Ostr  
 eida;Ostreoidea;Ostreidae;Crassostrea;Crassostrea virginica  
 UdeM00000008673 6565 170.6 UdeM00000008673 XP\_022327962.1 50 164  
 80 1 1 162 555 718 1.60E-39 170.6 6565 cellular  
 organisms;Eukaryota;Opisthokonta;Metazoa;Eumetazoa;Bilateria;Protostomia;  
 Spiralia;Lophotrochozoa;Mollusca;Bivalvia;Autobranhia;Pteriormorphia;Ostr  
 eida;Ostreoidea;Ostreidae;Crassostrea;Crassostrea virginica  
 UdeM00000008674 6596 389.8 UdeM00000008674 XP\_045167947.1 48.5 454  
 222 9 25 472 63 510 4.90E-105 389.8 6596 cellular  
 organisms;Eukaryota;Opisthokonta;Metazoa;Eumetazoa;Bilateria;Protostomia;  
 Spiralia;Lophotrochozoa;Mollusca;Bivalvia;Autobranhia;Heteroconchia;Euhe  
 terodonta;Imparidentia;Venerida;Veneroidea;Veneridae;Mercenaria;Mercenari  
 a mercenaria  
 UdeM00000008675 6565 206.1 UdeM00000008675 XP\_022304768.1 49.3 205  
 103 1 1 205 308 511 4.40E-50 206.1 6565 cellular  
 organisms;Eukaryota;Opisthokonta;Metazoa;Eumetazoa;Bilateria;Protostomia;  
 Spiralia;Lophotrochozoa;Mollusca;Bivalvia;Autobranhia;Pteriormorphia;Ostr  
 eida;Ostreoidea;Ostreidae;Crassostrea;Crassostrea virginica  
 UdeM00000008676 6596 288.1 UdeM00000008676 XP\_045162309.1 53.5 269  
 125 0 42 310 173 441 1.80E-74 288.1 6596 cellular  
 organisms;Eukaryota;Opisthokonta;Metazoa;Eumetazoa;Bilateria;Protostomia;  
 Spiralia;Lophotrochozoa;Mollusca;Bivalvia;Autobranhia;Heteroconchia;Euhe  
 terodonta;Imparidentia;Venerida;Veneroidea;Veneridae;Mercenaria;Mercenari  
 a mercenaria  
 UdeM00000008677 2607531 84.3 UdeM00000008677 XP\_029653524.1 30.1  
 209 108 6 6 207 51 228 2.00E-13 84.3 2607531  
 cellular  
 organisms;Eukaryota;Opisthokonta;Metazoa;Eumetazoa;Bilateria;Protostomia;  
 Spiralia;Lophotrochozoa;Mollusca;Cephalopoda;Coleoidea;Octopodiformes;Oct  
 opoda;Incirrata;Octopodidae;Octopus;Octopus sinensis  
 UdeM00000008679 6596 634 UdeM00000008679 XP\_045169258.1 46.6 685  
 352 5 13 685 52 734 2.20E-178 634 6596 cellular  
 organisms;Eukaryota;Opisthokonta;Metazoa;Eumetazoa;Bilateria;Protostomia;  
 Spiralia;Lophotrochozoa;Mollusca;Bivalvia;Autobranhia;Heteroconchia;Euhe  
 terodonta;Imparidentia;Venerida;Veneroidea;Veneridae;Mercenaria;Mercenari  
 a mercenaria  
 UdeM00000008680 1735272 1119.8 UdeM00000008680 XP\_041366905.1  
 54.8 1010 447 7 112 1117 28 1031 0.00E+00 1119.8  
 1735272 cellular  
 organisms;Eukaryota;Opisthokonta;Metazoa;Eumetazoa;Bilateria;Protostomia;  
 Spiralia;Lophotrochozoa;Mollusca;Gastropoda;Neomphalina;Neomphaloidea;Pel  
 tospiridae;Gigantopelta;Gigantopelta aegis

UdeM00000008682 6596 222.6 UdeM00000008682 XP\_045174680.1 55.4 186  
 79 3 82 263 20 205 5.80E-55 222.6 6596 cellular  
 organisms;Eukaryota;Opisthokonta;Metazoa;Eumetazoa;Bilateria;Protostomia;  
 Spiralia;Lophotrochozoa;Mollusca;Bivalvia;Autobranchia;Heteroconchia;Euhe  
 terodonta;Imparidentia;Venerida;Veneroidea;Veneridae;Mercenaria;Mercenari  
 a mercenaria

UdeM00000008683 6596 222.6 UdeM00000008683 XP\_045177314.1 53.3 182  
 83 2 23 203 93 273 4.50E-55 222.6 6596 cellular  
 organisms;Eukaryota;Opisthokonta;Metazoa;Eumetazoa;Bilateria;Protostomia;  
 Spiralia;Lophotrochozoa;Mollusca;Bivalvia;Autobranchia;Heteroconchia;Euhe  
 terodonta;Imparidentia;Venerida;Veneroidea;Veneridae;Mercenaria;Mercenari  
 a mercenaria

UdeM00000008684 6596 159.5 UdeM00000008684 XP\_045169258.1 54.1 133  
 60 1 13 145 52 183 3.40E-36 159.5 6596 cellular  
 organisms;Eukaryota;Opisthokonta;Metazoa;Eumetazoa;Bilateria;Protostomia;  
 Spiralia;Lophotrochozoa;Mollusca;Bivalvia;Autobranchia;Heteroconchia;Euhe  
 terodonta;Imparidentia;Venerida;Veneroidea;Veneridae;Mercenaria;Mercenari  
 a mercenaria

UdeM00000008685 37653 189.9 UdeM00000008685 XP\_014788692.1 32.5 363  
 212 8 2 350 218 561 5.60E-45 189.9 37653 cellular  
 organisms;Eukaryota;Opisthokonta;Metazoa;Eumetazoa;Bilateria;Protostomia;  
 Spiralia;Lophotrochozoa;Mollusca;Cephalopoda;Coleoidea;Octopodiformes;Oct  
 opoda;Incirrata;Octopodidae;Octopus;Octopus bimaculoides

UdeM00000008686 7955 109.4 UdeM00000008686 XP\_021326206.1 31.6 212  
 138 3 13 222 9 215 2.60E-20 109.4 7955 cellular  
 organisms;Eukaryota;Opisthokonta;Metazoa;Eumetazoa;Bilateria;Deuterostomi  
 a;Chordata;Craniata;Vertebrata;Gnathostomata;Teleostomi;Euteleostomi;Acti  
 nopterygii;Actinopteri;Neopterygii;Teleostei;Osteoglossocephalai;Clupeoce  
 phala;Otomorpha;Ostariophysi;Otophysi;Cypriniphysae;Cypriniiformes;Cyprino  
 ideii;Danionidae;Danioninae;Danio;Danio rerio

UdeM00000008688 6596 220.7 UdeM00000008688 XP\_045174680.1 54.5 187  
 81 3 47 229 19 205 1.90E-54 220.7 6596 cellular  
 organisms;Eukaryota;Opisthokonta;Metazoa;Eumetazoa;Bilateria;Protostomia;  
 Spiralia;Lophotrochozoa;Mollusca;Bivalvia;Autobranchia;Heteroconchia;Euhe  
 terodonta;Imparidentia;Venerida;Veneroidea;Veneridae;Mercenaria;Mercenari  
 a mercenaria

UdeM00000008689 6596 221.1 UdeM00000008689 XP\_045162545.1 43.7 245  
 122 5 30 262 29 269 1.70E-54 221.1 6596 cellular  
 organisms;Eukaryota;Opisthokonta;Metazoa;Eumetazoa;Bilateria;Protostomia;  
 Spiralia;Lophotrochozoa;Mollusca;Bivalvia;Autobranchia;Heteroconchia;Euhe  
 terodonta;Imparidentia;Venerida;Veneroidea;Veneridae;Mercenaria;Mercenari  
 a mercenaria

UdeM00000008690 6596 192.6 UdeM00000008690 XP\_045177314.1 53.5 159  
 73 1 6 163 115 273 4.00E-46 192.6 6596 cellular  
 organisms;Eukaryota;Opisthokonta;Metazoa;Eumetazoa;Bilateria;Protostomia;  
 Spiralia;Lophotrochozoa;Mollusca;Bivalvia;Autobranchia;Heteroconchia;Euhe  
 terodonta;Imparidentia;Venerida;Veneroidea;Veneridae;Mercenaria;Mercenari  
 a mercenaria

UdeM00000008691 7741 286.2 UdeM00000008691 XP\_019622111.1 51.1 280  
 134 3 5 283 1 278 4.60E-74 286.2 7741 cellular  
 organisms;Eukaryota;Opisthokonta;Metazoa;Eumetazoa;Bilateria;Deuterostomi  
 a;Chordata;Cephalochordata;Leptocardii;Amphioxiformes;Branchiostomidae;Br  
 anchiostoma;Branchiostoma belcheri

UdeM00000008692 7739 308.5 UdeM00000008692 XP\_035696678.1 65.4 211  
 73 0 2 212 423 633 6.50E-81 308.5 7739 cellular  
 organisms;Eukaryota;Opisthokonta;Metazoa;Eumetazoa;Bilateria;Deuterostomi  
 a;Chordata;Cephalochordata;Leptocardii;Amphioxiformes;Branchiostomidae;Br  
 anchiostoma;Branchiostoma floridae  
 UdeM00000008693 6596 218.8 UdeM00000008693 XP\_045169790.1 41.8 251  
 130 3 28 263 35 284 8.40E-54 218.8 6596 cellular  
 organisms;Eukaryota;Opisthokonta;Metazoa;Eumetazoa;Bilateria;Protostomia;  
 Spiralia;Lophotrochozoa;Mollusca;Bivalvia;Autobranhia;Heteroconchia;Euhe  
 terodonta;Imparidentia;Venerida;Veneroidea;Veneridae;Mercenaria;Mercenari  
 a mercenaria  
 UdeM00000008694 7741 126.3 UdeM00000008694 XP\_019643784.1 65.9 82  
 28 0 1 82 343 424 1.80E-26 126.3 7741 cellular  
 organisms;Eukaryota;Opisthokonta;Metazoa;Eumetazoa;Bilateria;Deuterostomi  
 a;Chordata;Cephalochordata;Leptocardii;Amphioxiformes;Branchiostomidae;Br  
 anchiostoma;Branchiostoma belcheri  
 UdeM00000008695 6573 210.7 UdeM00000008695 XP\_021367410.1 32.5 449  
 281 12 154 595 314 747 6.10E-51 210.7 6573 cellular  
 organisms;Eukaryota;Opisthokonta;Metazoa;Eumetazoa;Bilateria;Protostomia;  
 Spiralia;Lophotrochozoa;Mollusca;Bivalvia;Autobranhia;Pteriormorphia;Pect  
 inida;Pectinoidea;Pectinidae;Mizuhopecten;Mizuhopecten yessoensis  
 UdeM00000008696 6596 350.1 UdeM00000008696 XP\_045180259.1 51.1 419  
 169 5 154 563 35 426 5.20E-93 350.1 6596 cellular  
 organisms;Eukaryota;Opisthokonta;Metazoa;Eumetazoa;Bilateria;Protostomia;  
 Spiralia;Lophotrochozoa;Mollusca;Bivalvia;Autobranhia;Heteroconchia;Euhe  
 terodonta;Imparidentia;Venerida;Veneroidea;Veneridae;Mercenaria;Mercenari  
 a mercenaria  
 UdeM00000008697 45264 216.9 UdeM00000008697 XP\_044165535.1 46.4 220  
 114 1 1 216 305 524 3.50E-53 216.9 45264 cellular  
 organisms;Eukaryota;Opisthokonta;Metazoa;Eumetazoa;Cnidaria;Anthozoa;Hexa  
 corallia;Scleractinia;Astrocoeniina;Acroporidae;Acropora;Acropora  
 millepora  
 UdeM00000008698 6596 421.4 UdeM00000008698 XP\_045168679.1 57.1 380  
 154 3 1 380 1 371 1.30E-114 421.4 6596 cellular  
 organisms;Eukaryota;Opisthokonta;Metazoa;Eumetazoa;Bilateria;Protostomia;  
 Spiralia;Lophotrochozoa;Mollusca;Bivalvia;Autobranhia;Heteroconchia;Euhe  
 terodonta;Imparidentia;Venerida;Veneroidea;Veneridae;Mercenaria;Mercenari  
 a mercenaria  
 UdeM00000008699 6565 706.1 UdeM00000008699 XP\_022307098.1 57 733  
 219 14 442 1162 447 1095 1.00E-199 706.1 6565 cellular  
 organisms;Eukaryota;Opisthokonta;Metazoa;Eumetazoa;Bilateria;Protostomia;  
 Spiralia;Lophotrochozoa;Mollusca;Bivalvia;Autobranhia;Pteriormorphia;Ostr  
 eida;Ostreoidea;Ostreidae;Crassostrea;Crassostrea virginica  
 UdeM00000008701 6573 92 UdeM00000008701 XP\_021376432.1 55.2 67  
 30 0 1 67 23 89 6.50E-16 92 6573 cellular  
 organisms;Eukaryota;Opisthokonta;Metazoa;Eumetazoa;Bilateria;Protostomia;  
 Spiralia;Lophotrochozoa;Mollusca;Bivalvia;Autobranhia;Pteriormorphia;Pect  
 inida;Pectinoidea;Pectinidae;Mizuhopecten;Mizuhopecten yessoensis  
 UdeM00000008702 6596 470.3 UdeM00000008702 XP\_045171418.1 62.5 355  
 125 3 110 458 86 438 2.80E-129 470.3 6596 cellular  
 organisms;Eukaryota;Opisthokonta;Metazoa;Eumetazoa;Bilateria;Protostomia;  
 Spiralia;Lophotrochozoa;Mollusca;Bivalvia;Autobranhia;Heteroconchia;Euhe  
 terodonta;Imparidentia;Venerida;Veneroidea;Veneridae;Mercenaria;Mercenari  
 a mercenaria



UdeM00000008703 6573 215.7 UdeM00000008703 XP\_021346189.1 54.5 189  
 80 2 1 187 22 206 5.10E-53 215.7 6573 cellular  
 organisms;Eukaryota;Opisthokonta;Metazoa;Eumetazoa;Bilateria;Protostomia;  
 Spiralia;Lophotrochozoa;Mollusca;Bivalvia;Autobranchia;Pteriomorpha;Pect  
 inida;Pectinoidea;Pectinidae;Mizuhopecten;Mizuhopecten yessoensis  
 UdeM00000008705 6596 350.1 UdeM00000008705 XP\_045171416.1 55.9 299  
 129 2 75 373 495 790 3.40E-93 350.1 6596 cellular  
 organisms;Eukaryota;Opisthokonta;Metazoa;Eumetazoa;Bilateria;Protostomia;  
 Spiralia;Lophotrochozoa;Mollusca;Bivalvia;Autobranchia;Heteroconchia;Euhe  
 terodonta;Imparidentia;Venerida;Veneroidea;Veneridae;Mercenaria;Mercenari  
 a mercenaria  
 UdeM00000008706 6596 883.2 UdeM00000008706 XP\_045168393.1 86 521  
 71 1 1 519 2 522 1.60E-253 883.2 6596 cellular  
 organisms;Eukaryota;Opisthokonta;Metazoa;Eumetazoa;Bilateria;Protostomia;  
 Spiralia;Lophotrochozoa;Mollusca;Bivalvia;Autobranchia;Heteroconchia;Euhe  
 terodonta;Imparidentia;Venerida;Veneroidea;Veneridae;Mercenaria;Mercenari  
 a mercenaria  
 UdeM00000008707 6573 73.2 UdeM00000008707 XP\_021345519.1 53.3 75  
 34 1 5 78 10 84 1.70E-10 73.2 6573 cellular  
 organisms;Eukaryota;Opisthokonta;Metazoa;Eumetazoa;Bilateria;Protostomia;  
 Spiralia;Lophotrochozoa;Mollusca;Bivalvia;Autobranchia;Pteriomorpha;Pect  
 inida;Pectinoidea;Pectinidae;Mizuhopecten;Mizuhopecten yessoensis  
 UdeM00000008708 6565 1832 UdeM00000008708 XP\_022293176.1 82.3 1093  
 185 3 1 1089 1 1088 0.00E+00 1832 6565 cellular  
 organisms;Eukaryota;Opisthokonta;Metazoa;Eumetazoa;Bilateria;Protostomia;  
 Spiralia;Lophotrochozoa;Mollusca;Bivalvia;Autobranchia;Pteriomorpha;Ostr  
 eida;Ostreoidea;Ostreidae;Crassostrea;Crassostrea virginica  
 UdeM00000008709 6579 1896.3 UdeM00000008709 XP\_033762870.1 86.2  
 1252 154 2 1 1233 1 1252 0.00E+00 1896.3 6579  
 cellular  
 organisms;Eukaryota;Opisthokonta;Metazoa;Eumetazoa;Bilateria;Protostomia;  
 Spiralia;Lophotrochozoa;Mollusca;Bivalvia;Autobranchia;Pteriomorpha;Pect  
 inida;Pectinoidea;Pectinidae;Pecten;Pecten maximus  
 UdeM00000008710 6579 125.6 UdeM00000008710 XP\_033762073.1 48.1 106  
 55 0 72 177 32 137 6.50E-26 125.6 6579 cellular  
 organisms;Eukaryota;Opisthokonta;Metazoa;Eumetazoa;Bilateria;Protostomia;  
 Spiralia;Lophotrochozoa;Mollusca;Bivalvia;Autobranchia;Pteriomorpha;Pect  
 inida;Pectinoidea;Pectinidae;Pecten;Pecten maximus  
 UdeM00000008711 6596 414.1 UdeM00000008711 XP\_045187415.1 36.9 613  
 366 10 9 614 8 606 3.20E-112 414.1 6596 cellular  
 organisms;Eukaryota;Opisthokonta;Metazoa;Eumetazoa;Bilateria;Protostomia;  
 Spiralia;Lophotrochozoa;Mollusca;Bivalvia;Autobranchia;Heteroconchia;Euhe  
 terodonta;Imparidentia;Venerida;Veneroidea;Veneridae;Mercenaria;Mercenari  
 a mercenaria  
 UdeM00000008712 6596 422.5 UdeM00000008712 XP\_045187415.1 38.3 582  
 342 9 38 613 36 606 8.90E-115 422.5 6596 cellular  
 organisms;Eukaryota;Opisthokonta;Metazoa;Eumetazoa;Bilateria;Protostomia;  
 Spiralia;Lophotrochozoa;Mollusca;Bivalvia;Autobranchia;Heteroconchia;Euhe  
 terodonta;Imparidentia;Venerida;Veneroidea;Veneridae;Mercenaria;Mercenari  
 a mercenaria  
 UdeM00000008713 400727 85.5 UdeM00000008713 XP\_025099750.1 40  
 100 56 2 158 253 1 100 1.10E-13 85.5 400727  
 cellular  
 organisms;Eukaryota;Opisthokonta;Metazoa;Eumetazoa;Bilateria;Protostomia;

Spiralia;Lophotrochozoa;Mollusca;Gastropoda;Caenogastropoda;Architaenioglossa;Ampullarioidea;Ampullariidae;Pomacea;Pomacea canaliculata  
 UdeM00000008714 400727 439.9 UdeM00000008714 XP\_025095521.1 60.2  
 379 144 2 105 480 99 473 4.20E-120 439.9 400727  
 cellular  
 organisms;Eukaryota;Opisthokonta;Metazoa;Eumetazoa;Bilateria;Protostomia;  
 Spiralia;Lophotrochozoa;Mollusca;Gastropoda;Caenogastropoda;Architaenioglossa;Ampullarioidea;Ampullariidae;Pomacea;Pomacea canaliculata  
 UdeM00000008715 6596 270.4 UdeM00000008715 XP\_045168116.1 74.9 167  
 41 1 16 181 7 173 1.70E-69 270.4 6596 cellular  
 organisms;Eukaryota;Opisthokonta;Metazoa;Eumetazoa;Bilateria;Protostomia;  
 Spiralia;Lophotrochozoa;Mollusca;Bivalvia;Autobranchia;Heteroconchia;Euherodonta;Imparidentia;Venerida;Veneroidea;Veneridae;Mercenaria;Mercenaria mercenaria  
 UdeM00000008716 6596 249.6 UdeM00000008716 XP\_045168109.1 68.1 163  
 52 0 5 167 9 171 2.90E-63 249.6 6596 cellular  
 organisms;Eukaryota;Opisthokonta;Metazoa;Eumetazoa;Bilateria;Protostomia;  
 Spiralia;Lophotrochozoa;Mollusca;Bivalvia;Autobranchia;Heteroconchia;Euherodonta;Imparidentia;Venerida;Veneroidea;Veneridae;Mercenaria;Mercenaria mercenaria  
 UdeM00000008718 6596 317.8 UdeM00000008718 XP\_045206316.1 48.4 353  
 159 4 45 377 84 433 2.30E-83 317.8 6596 cellular  
 organisms;Eukaryota;Opisthokonta;Metazoa;Eumetazoa;Bilateria;Protostomia;  
 Spiralia;Lophotrochozoa;Mollusca;Bivalvia;Autobranchia;Heteroconchia;Euherodonta;Imparidentia;Venerida;Veneroidea;Veneridae;Mercenaria;Mercenaria mercenaria  
 UdeM00000008722 6596 647.5 UdeM00000008722 XP\_045169531.1 70.4 456  
 131 3 285 736 17 472 2.00E-182 647.5 6596 cellular  
 organisms;Eukaryota;Opisthokonta;Metazoa;Eumetazoa;Bilateria;Protostomia;  
 Spiralia;Lophotrochozoa;Mollusca;Bivalvia;Autobranchia;Heteroconchia;Euherodonta;Imparidentia;Venerida;Veneroidea;Veneridae;Mercenaria;Mercenaria mercenaria  
 UdeM00000008723 6596 380.6 UdeM00000008723 XP\_045168149.1 42.3 556  
 242 9 45 598 22 500 3.80E-102 380.6 6596 cellular  
 organisms;Eukaryota;Opisthokonta;Metazoa;Eumetazoa;Bilateria;Protostomia;  
 Spiralia;Lophotrochozoa;Mollusca;Bivalvia;Autobranchia;Heteroconchia;Euherodonta;Imparidentia;Venerida;Veneroidea;Veneridae;Mercenaria;Mercenaria mercenaria  
 UdeM00000008724 7741 283.1 UdeM00000008724 XP\_019622111.1 50.7 280  
 135 3 5 283 1 278 3.90E-73 283.1 7741 cellular  
 organisms;Eukaryota;Opisthokonta;Metazoa;Eumetazoa;Bilateria;Deuterostomia;Chordata;Cephalochordata;Leptocardii;Amphioxiformes;Branchiostomidae;Branchiostoma;Branchiostoma belcheri  
 UdeM00000008725 6500 1990.7 UdeM00000008725 XP\_005106456.1 87.4  
 1353 140 5 1 1348 1 1328 0.00E+00 1990.7 6500  
 cellular  
 organisms;Eukaryota;Opisthokonta;Metazoa;Eumetazoa;Bilateria;Protostomia;  
 Spiralia;Lophotrochozoa;Mollusca;Gastropoda;Heterobranchia;Euthyneura;Tectipleura;Aplysiida;Aplysioidea;Aplysiidae;Aplysia;Aplysia californica  
 UdeM00000008726 1735272 195.3 UdeM00000008726 XP\_041365143.1 72.3  
 137 35 1 2 135 4 140 5.20E-47 195.3 1735272  
 cellular  
 organisms;Eukaryota;Opisthokonta;Metazoa;Eumetazoa;Bilateria;Protostomia;

Spiralia;Lophotrochozoa;Mollusca;Gastropoda;Neomphalina;Neomphaloidea;Pel  
tospiridae;Gigantopelta;Gigantopelta aegis  
UdeM00000008727 7574 70.9 UdeM00000008727 XP\_013388573.1 40 95  
51 4 20 113 374 463 1.20E-09 70.9 7574 cellular  
organisms;Eukaryota;Opisthokonta;Metazoa;Eumetazoa;Bilateria;Protostomia;  
Spiralia;Lophotrochozoa;Brachiopoda;Linguliformea;Lingulata;Lingulida;Lin  
guloidea;Lingulidae;Lingula;Lingula anatina  
UdeM00000008728 400727 289.7 UdeM00000008728 XP\_025093647.1 64.7  
215 72 1 15 229 12 222 3.40E-75 289.7 400727  
cellular  
organisms;Eukaryota;Opisthokonta;Metazoa;Eumetazoa;Bilateria;Protostomia;  
Spiralia;Lophotrochozoa;Mollusca;Gastropoda;Caenogastropoda;Architaeniogl  
ossa;Ampullarioidea;Ampullariidae;Pomacea;Pomacea canaliculata  
UdeM00000008729 29159 346.3 UdeM00000008729 XP\_011428925.2 63.1 271  
94 3 1 268 1 268 3.60E-92 346.3 29159 cellular  
organisms;Eukaryota;Opisthokonta;Metazoa;Eumetazoa;Bilateria;Protostomia;  
Spiralia;Lophotrochozoa;Mollusca;Bivalvia;Autobranchia;Pteriormorphia;Ostr  
eida;Ostreoidea;Ostreidae;Crassostrea;Crassostrea gigas  
UdeM00000008730 48498 366.3 UdeM00000008730 XP\_020627207.1 31.6 794  
364 14 2 699 72 782 1.10E-97 366.3 48498 cellular  
organisms;Eukaryota;Opisthokonta;Metazoa;Eumetazoa;Cnidaria;Anthozoa;Hexa  
corallia;Scleractinia;Faviina;Merulinidae;Orbicella;Orbicella faveolata  
UdeM00000008731 6579 195.7 UdeM00000008731 XP\_033739209.1 48.3 211  
97 2 9 218 2 201 7.20E-47 195.7 6579 cellular  
organisms;Eukaryota;Opisthokonta;Metazoa;Eumetazoa;Bilateria;Protostomia;  
Spiralia;Lophotrochozoa;Mollusca;Bivalvia;Autobranchia;Pteriormorphia;Pect  
inida;Pectinoidea;Pectinidae;Pecten;Pecten maximus  
UdeM00000008732 6596 476.9 UdeM00000008732 XP\_045168220.1 73.5 355  
66 9 49 396 24 357 2.60E-131 476.9 6596 cellular  
organisms;Eukaryota;Opisthokonta;Metazoa;Eumetazoa;Bilateria;Protostomia;  
Spiralia;Lophotrochozoa;Mollusca;Bivalvia;Autobranchia;Heteroconchia;Euhe  
terodonta;Imparidentia;Venerida;Veneroidea;Veneridae;Mercenaria;Mercenari  
a mercenaria  
UdeM00000008734 6596 468 UdeM00000008734 XP\_045168220.1 69.6 375  
66 9 49 416 24 357 1.20E-128 468 6596 cellular  
organisms;Eukaryota;Opisthokonta;Metazoa;Eumetazoa;Bilateria;Protostomia;  
Spiralia;Lophotrochozoa;Mollusca;Bivalvia;Autobranchia;Heteroconchia;Euhe  
terodonta;Imparidentia;Venerida;Veneroidea;Veneridae;Mercenaria;Mercenari  
a mercenaria  
UdeM00000008733 6596 459.5 UdeM00000008733 XP\_045168214.1 74.9 334  
68 8 36 358 67 395 3.90E-126 459.5 6596 cellular  
organisms;Eukaryota;Opisthokonta;Metazoa;Eumetazoa;Bilateria;Protostomia;  
Spiralia;Lophotrochozoa;Mollusca;Bivalvia;Autobranchia;Heteroconchia;Euhe  
terodonta;Imparidentia;Venerida;Veneroidea;Veneridae;Mercenaria;Mercenari  
a mercenaria  
UdeM00000008735 1735272 572.4 UdeM00000008735 XP\_041367066.1 57.6  
484 197 5 18 496 14 494 5.80E-160 572.4 1735272  
cellular  
organisms;Eukaryota;Opisthokonta;Metazoa;Eumetazoa;Bilateria;Protostomia;  
Spiralia;Lophotrochozoa;Mollusca;Gastropoda;Neomphalina;Neomphaloidea;Pel  
tospiridae;Gigantopelta;Gigantopelta aegis  
UdeM00000008736 6565 813.9 UdeM00000008736 XP\_022307044.1 76.1 532  
125 2 10 539 9 540 1.20E-232 813.9 6565 cellular  
organisms;Eukaryota;Opisthokonta;Metazoa;Eumetazoa;Bilateria;Protostomia;

Spiralia;Lophotrochozoa;Mollusca;Bivalvia;Autobranchia;Pteriormorphia;Ostr  
eida;Ostreoidea;Ostreidae;Crassostrea;Crassostrea virginica  
UdeM00000008737 29159 638.3 UdeM00000008737 XP\_011435705.2 54 654  
265 6 1 622 1 650 1.00E-179 638.3 29159 cellular  
organisms;Eukaryota;Opisthokonta;Metazoa;Eumetazoa;Bilateria;Protostomia;  
Spiralia;Lophotrochozoa;Mollusca;Bivalvia;Autobranchia;Pteriormorphia;Ostr  
eida;Ostreoidea;Ostreidae;Crassostrea;Crassostrea gigas  
UdeM00000008738 6596 287.7 UdeM00000008738 XP\_045168994.1 63.6 220  
77 3 1 218 1 219 1.20E-74 287.7 6596 cellular  
organisms;Eukaryota;Opisthokonta;Metazoa;Eumetazoa;Bilateria;Protostomia;  
Spiralia;Lophotrochozoa;Mollusca;Bivalvia;Autobranchia;Heteroconchia;Euhe  
terodonta;Imparidentia;Venerida;Veneroidea;Veneridae;Mercenaria;Mercenari  
a mercenaria  
UdeM00000008741 7962 80.9 UdeM00000008741 XP\_042572250.1 39.4 104  
58 2 1 103 274 373 1.40E-12 80.9 7962 cellular  
organisms;Eukaryota;Opisthokonta;Metazoa;Eumetazoa;Bilateria;Deuterostomi  
a;Chordata;Craniata;Vertebrata;Gnathostomata;Teleostomi;Euteleostomi;Acti  
nopterygii;Actinopteri;Neopterygii;Teleostei;Osteoglossocephalai;Clupeoce  
phala;Otomorpha;Ostariophysi;Otophysi;Cypriniphysae;Cypriniiformes;Cyprino  
idei;Cyprinidae;Cyprininae;Cyprinus;Cyprinus carpio  
UdeM00000008745 225164 78.2 UdeM00000008745 XP\_009045903.1 54.5  
66 30 0 3 68 59 124 4.60E-12 78.2 225164  
cellular  
organisms;Eukaryota;Opisthokonta;Metazoa;Eumetazoa;Bilateria;Protostomia;  
Spiralia;Lophotrochozoa;Mollusca;Gastropoda;Patellogastropoda;Lottioidea;  
Lottiidae;Lottia;Lottia gigantea  
UdeM00000008749 6596 145.2 UdeM00000008749 XP\_045169083.1 45 149  
82 0 6 154 5 153 7.10E-32 145.2 6596 cellular  
organisms;Eukaryota;Opisthokonta;Metazoa;Eumetazoa;Bilateria;Protostomia;  
Spiralia;Lophotrochozoa;Mollusca;Bivalvia;Autobranchia;Heteroconchia;Euhe  
terodonta;Imparidentia;Venerida;Veneroidea;Veneridae;Mercenaria;Mercenari  
a mercenaria  
UdeM00000008750 6596 145.6 UdeM00000008750 XP\_045169083.1 43.6 149  
84 0 6 154 5 153 5.40E-32 145.6 6596 cellular  
organisms;Eukaryota;Opisthokonta;Metazoa;Eumetazoa;Bilateria;Protostomia;  
Spiralia;Lophotrochozoa;Mollusca;Bivalvia;Autobranchia;Heteroconchia;Euhe  
terodonta;Imparidentia;Venerida;Veneroidea;Veneridae;Mercenaria;Mercenari  
a mercenaria  
UdeM00000008751 6596 79.7 UdeM00000008751 XP\_045168982.1 35.3 139  
85 3 73 209 18 153 5.50E-12 79.7 6596 cellular  
organisms;Eukaryota;Opisthokonta;Metazoa;Eumetazoa;Bilateria;Protostomia;  
Spiralia;Lophotrochozoa;Mollusca;Bivalvia;Autobranchia;Heteroconchia;Euhe  
terodonta;Imparidentia;Venerida;Veneroidea;Veneridae;Mercenaria;Mercenari  
a mercenaria  
UdeM00000008752 6565 91.3 UdeM00000008752 XP\_022324211.1 33.9 165  
92 5 36 197 33 183 3.70E-15 91.3 6565 cellular  
organisms;Eukaryota;Opisthokonta;Metazoa;Eumetazoa;Bilateria;Protostomia;  
Spiralia;Lophotrochozoa;Mollusca;Bivalvia;Autobranchia;Pteriormorphia;Ostr  
eida;Ostreoidea;Ostreidae;Crassostrea;Crassostrea virginica  
UdeM00000008752 6565 75.1 UdeM00000008752 XP\_022324211.1 30.3 119  
81 1 363 479 644 762 2.70E-10 75.1 6565 cellular  
organisms;Eukaryota;Opisthokonta;Metazoa;Eumetazoa;Bilateria;Protostomia;  
Spiralia;Lophotrochozoa;Mollusca;Bivalvia;Autobranchia;Pteriormorphia;Ostr  
eida;Ostreoidea;Ostreidae;Crassostrea;Crassostrea virginica

UdeM00000008763 225164 128.3 UdeM00000008763 XP\_009064035.1 74.7  
 91 22 1 42 132 26 115 1.30E-26 128.3 225164  
 cellular  
 organisms;Eukaryota;Opisthokonta;Metazoa;Eumetazoa;Bilateria;Protostomia;  
 Spiralia;Lophotrochozoa;Mollusca;Gastropoda;Patellogastropoda;Lottioidea;  
 Lottiidae;Lottia;Lottia gigantea  
 UdeM00000008764 29159 73.9 UdeM00000008764 XP\_011447406.2 40 135  
 70 5 4 134 7 134 1.70E-10 73.9 29159 cellular  
 organisms;Eukaryota;Opisthokonta;Metazoa;Eumetazoa;Bilateria;Protostomia;  
 Spiralia;Lophotrochozoa;Mollusca;Bivalvia;Autobranchia;Pteriormorphia;Ostr  
 eida;Ostreoidea;Ostreidae;Crassostrea;Crassostrea gigas  
 UdeM00000008765 29159 68.9 UdeM00000008765 XP\_011447506.2 35.8 137  
 78 4 2 132 5 137 5.60E-09 68.9 29159 cellular  
 organisms;Eukaryota;Opisthokonta;Metazoa;Eumetazoa;Bilateria;Protostomia;  
 Spiralia;Lophotrochozoa;Mollusca;Bivalvia;Autobranchia;Pteriormorphia;Ostr  
 eida;Ostreoidea;Ostreidae;Crassostrea;Crassostrea gigas  
 UdeM00000008766 6596 72 UdeM00000008766 XP\_045169806.1 36.8 144  
 74 5 1 134 1 137 6.60E-10 72 6596 cellular  
 organisms;Eukaryota;Opisthokonta;Metazoa;Eumetazoa;Bilateria;Protostomia;  
 Spiralia;Lophotrochozoa;Mollusca;Bivalvia;Autobranchia;Heteroconchia;Euhe  
 terodonta;Imparidentia;Venerida;Veneroidea;Veneridae;Mercenaria;Mercenari  
 a mercenaria  
 UdeM00000008768 37653 556.2 UdeM00000008768 XP\_014782474.1 49.5 695  
 234 16 1 591 1 682 5.50E-155 556.2 37653 cellular  
 organisms;Eukaryota;Opisthokonta;Metazoa;Eumetazoa;Bilateria;Protostomia;  
 Spiralia;Lophotrochozoa;Mollusca;Cephalopoda;Coleoidea;Octopodiformes;Oct  
 opoda;Incirrata;Octopodidae;Octopus;Octopus bimaculoides  
 UdeM00000008767 37653 556.2 UdeM00000008767 XP\_014782474.1 49.5 695  
 234 16 1 591 1 682 5.80E-155 556.2 37653 cellular  
 organisms;Eukaryota;Opisthokonta;Metazoa;Eumetazoa;Bilateria;Protostomia;  
 Spiralia;Lophotrochozoa;Mollusca;Cephalopoda;Coleoidea;Octopodiformes;Oct  
 opoda;Incirrata;Octopodidae;Octopus;Octopus bimaculoides  
 UdeM00000008769 37653 554.7 UdeM00000008769 XP\_014782474.1 49.4 695  
 234 16 1 590 1 682 1.70E-154 554.7 37653 cellular  
 organisms;Eukaryota;Opisthokonta;Metazoa;Eumetazoa;Bilateria;Protostomia;  
 Spiralia;Lophotrochozoa;Mollusca;Cephalopoda;Coleoidea;Octopodiformes;Oct  
 opoda;Incirrata;Octopodidae;Octopus;Octopus bimaculoides  
 UdeM00000008770 6573 268.9 UdeM00000008770 XP\_021342664.1 58.4 221  
 92 0 1 221 1 221 6.10E-69 268.9 6573 cellular  
 organisms;Eukaryota;Opisthokonta;Metazoa;Eumetazoa;Bilateria;Protostomia;  
 Spiralia;Lophotrochozoa;Mollusca;Bivalvia;Autobranchia;Pteriormorphia;Pect  
 inida;Pectinoidea;Pectinidae;Mizuhopecten;Mizuhopecten yessoensis  
 UdeM00000008771 46731 71.6 UdeM00000008771 XP\_027044268.1 57.7 52  
 22 0 48 99 27 78 2.20E-09 71.6 46731 cellular  
 organisms;Eukaryota;Opisthokonta;Metazoa;Eumetazoa;Cnidaria;Anthozoa;Hexa  
 corallia;Scleractinia;Astrocoeniina;Pocilloporidae;Pocillopora;Pocillopor  
 a damicornis  
 UdeM00000008772 6596 233 UdeM00000008772 XP\_045169115.1 61.2 327  
 127 0 4 330 30 356 5.40E-58 233 6596 cellular  
 organisms;Eukaryota;Opisthokonta;Metazoa;Eumetazoa;Bilateria;Protostomia;  
 Spiralia;Lophotrochozoa;Mollusca;Bivalvia;Autobranchia;Heteroconchia;Euhe  
 terodonta;Imparidentia;Venerida;Veneroidea;Veneridae;Mercenaria;Mercenari  
 a mercenaria

UdeM00000008773 6596 627.9 UdeM00000008773 XP\_045168041.1 59.7 514  
 207 0 7 520 814 1327 1.20E-176 627.9 6596 cellular  
 organisms;Eukaryota;Opisthokonta;Metazoa;Eumetazoa;Bilateria;Protostomia;  
 Spiralia;Lophotrochozoa;Mollusca;Bivalvia;Autobranchia;Heteroconchia;Euhe  
 terodonta;Imparidentia;Venerida;Veneroidea;Veneridae;Mercenaria;Mercenari  
 a mercenaria  
 UdeM00000008774 6596 900.2 UdeM00000008774 XP\_045168041.1 54.9 822  
 351 8 1 816 1 808 1.90E-258 900.2 6596 cellular  
 organisms;Eukaryota;Opisthokonta;Metazoa;Eumetazoa;Bilateria;Protostomia;  
 Spiralia;Lophotrochozoa;Mollusca;Bivalvia;Autobranchia;Heteroconchia;Euhe  
 terodonta;Imparidentia;Venerida;Veneroidea;Veneridae;Mercenaria;Mercenari  
 a mercenaria  
 UdeM00000008775 6596 964.9 UdeM00000008775 XP\_045168392.1 53.9 878  
 365 17 1 850 1 866 6.60E-278 964.9 6596 cellular  
 organisms;Eukaryota;Opisthokonta;Metazoa;Eumetazoa;Bilateria;Protostomia;  
 Spiralia;Lophotrochozoa;Mollusca;Bivalvia;Autobranchia;Heteroconchia;Euhe  
 terodonta;Imparidentia;Venerida;Veneroidea;Veneridae;Mercenaria;Mercenari  
 a mercenaria  
 UdeM00000008776 6573 65.9 UdeM00000008776 XP\_021373219.1 29 186  
 131 1 97 281 17 202 1.00E-07 65.9 6573 cellular  
 organisms;Eukaryota;Opisthokonta;Metazoa;Eumetazoa;Bilateria;Protostomia;  
 Spiralia;Lophotrochozoa;Mollusca;Bivalvia;Autobranchia;Pteriomorphia;Pect  
 inida;Pectinoidea;Pectinidae;Mizuhopecten;Mizuhopecten yessoensis  
 UdeM00000008777 6573 246.1 UdeM00000008777 XP\_021367908.1 49 298  
 117 10 3 275 14 301 5.10E-62 246.1 6573 cellular  
 organisms;Eukaryota;Opisthokonta;Metazoa;Eumetazoa;Bilateria;Protostomia;  
 Spiralia;Lophotrochozoa;Mollusca;Bivalvia;Autobranchia;Pteriomorphia;Pect  
 inida;Pectinoidea;Pectinidae;Mizuhopecten;Mizuhopecten yessoensis  
 UdeM00000008778 6596 713.4 UdeM00000008778 XP\_045169366.1 48.7 743  
 370 6 1 741 15 748 3.10E-202 713.4 6596 cellular  
 organisms;Eukaryota;Opisthokonta;Metazoa;Eumetazoa;Bilateria;Protostomia;  
 Spiralia;Lophotrochozoa;Mollusca;Bivalvia;Autobranchia;Heteroconchia;Euhe  
 terodonta;Imparidentia;Venerida;Veneroidea;Veneridae;Mercenaria;Mercenari  
 a mercenaria  
 UdeM00000008779 6565 767.3 UdeM00000008779 XP\_022309151.1 54.5 696  
 231 7 21 714 30 641 1.70E-218 767.3 6565 cellular  
 organisms;Eukaryota;Opisthokonta;Metazoa;Eumetazoa;Bilateria;Protostomia;  
 Spiralia;Lophotrochozoa;Mollusca;Bivalvia;Autobranchia;Pteriomorphia;Ostr  
 eida;Ostreoidea;Ostreidae;Crassostrea;Crassostrea virginica  
 UdeM00000008780 29159 395.6 UdeM00000008780 XP\_011432635.2 69.1 256  
 79 0 1 256 48 303 4.90E-107 395.6 29159 cellular  
 organisms;Eukaryota;Opisthokonta;Metazoa;Eumetazoa;Bilateria;Protostomia;  
 Spiralia;Lophotrochozoa;Mollusca;Bivalvia;Autobranchia;Pteriomorphia;Ostr  
 eida;Ostreoidea;Ostreidae;Crassostrea;Crassostrea gigas  
 UdeM00000008781 29159 329.7 UdeM00000008781 XP\_011432635.2 71.8 202  
 57 0 1 202 48 249 2.70E-87 329.7 29159 cellular  
 organisms;Eukaryota;Opisthokonta;Metazoa;Eumetazoa;Bilateria;Protostomia;  
 Spiralia;Lophotrochozoa;Mollusca;Bivalvia;Autobranchia;Pteriomorphia;Ostr  
 eida;Ostreoidea;Ostreidae;Crassostrea;Crassostrea gigas  
 UdeM00000008782 6596 330.9 UdeM00000008782 XP\_045169039.1 24.9 1667  
 761 45 8 1503 7 1353 8.60E-87 330.9 6596 cellular  
 organisms;Eukaryota;Opisthokonta;Metazoa;Eumetazoa;Bilateria;Protostomia;  
 Spiralia;Lophotrochozoa;Mollusca;Bivalvia;Autobranchia;Heteroconchia;Euhe

terodonta;Imparidentia;Venerida;Veneroidea;Veneridae;Mercenaria;Mercenari  
 a mercenaria  
 UdeM00000008783 6573 165.6 UdeM00000008783 XP\_021366565.1 42.1 195  
 102 5 22 207 57 249 6.90E-38 165.6 6573 cellular  
 organisms;Eukaryota;Opisthokonta;Metazoa;Eumetazoa;Bilateria;Protostomia;  
 Spiralia;Lophotrochozoa;Mollusca;Bivalvia;Autobranchia;Pteriomorpha;Pect  
 inida;Pectinoidea;Pectinidae;Mizuhopecten;Mizuhopecten yessoensis  
 UdeM00000008784 6596 208.8 UdeM00000008784 XP\_045168149.1 49.3 207  
 102 2 10 213 124 330 1.10E-50 208.8 6596 cellular  
 organisms;Eukaryota;Opisthokonta;Metazoa;Eumetazoa;Bilateria;Protostomia;  
 Spiralia;Lophotrochozoa;Mollusca;Bivalvia;Autobranchia;Heteroconchia;Euhe  
 terodonta;Imparidentia;Venerida;Veneroidea;Veneridae;Mercenaria;Mercenari  
 a mercenaria  
 UdeM00000008786 6596 165.6 UdeM00000008786 XP\_045168149.1 49.4 170  
 79 3 8 170 180 349 1.20E-37 165.6 6596 cellular  
 organisms;Eukaryota;Opisthokonta;Metazoa;Eumetazoa;Bilateria;Protostomia;  
 Spiralia;Lophotrochozoa;Mollusca;Bivalvia;Autobranchia;Heteroconchia;Euhe  
 terodonta;Imparidentia;Venerida;Veneroidea;Veneridae;Mercenaria;Mercenari  
 a mercenaria  
 UdeM00000008787 6596 200.3 UdeM00000008787 XP\_045168149.1 46.4 207  
 108 2 10 213 124 330 3.90E-48 200.3 6596 cellular  
 organisms;Eukaryota;Opisthokonta;Metazoa;Eumetazoa;Bilateria;Protostomia;  
 Spiralia;Lophotrochozoa;Mollusca;Bivalvia;Autobranchia;Heteroconchia;Euhe  
 terodonta;Imparidentia;Venerida;Veneroidea;Veneridae;Mercenaria;Mercenari  
 a mercenaria  
 UdeM00000008788 6596 180.3 UdeM00000008788 XP\_045176140.1 60.4 134  
 53 0 13 146 8 141 2.30E-42 180.3 6596 cellular  
 organisms;Eukaryota;Opisthokonta;Metazoa;Eumetazoa;Bilateria;Protostomia;  
 Spiralia;Lophotrochozoa;Mollusca;Bivalvia;Autobranchia;Heteroconchia;Euhe  
 terodonta;Imparidentia;Venerida;Veneroidea;Veneridae;Mercenaria;Mercenari  
 a mercenaria  
 UdeM00000008790 6573 77 UdeM00000008790 XP\_021363897.1 38.1 84  
 51 1 87 169 636 719 2.60E-11 77 6573 cellular  
 organisms;Eukaryota;Opisthokonta;Metazoa;Eumetazoa;Bilateria;Protostomia;  
 Spiralia;Lophotrochozoa;Mollusca;Bivalvia;Autobranchia;Pteriomorpha;Pect  
 inida;Pectinoidea;Pectinidae;Mizuhopecten;Mizuhopecten yessoensis  
 UdeM00000008791 6596 142.1 UdeM00000008791 XP\_045185339.1 52.6 133  
 59 2 8 140 375 503 5.30E-31 142.1 6596 cellular  
 organisms;Eukaryota;Opisthokonta;Metazoa;Eumetazoa;Bilateria;Protostomia;  
 Spiralia;Lophotrochozoa;Mollusca;Bivalvia;Autobranchia;Heteroconchia;Euhe  
 terodonta;Imparidentia;Venerida;Veneroidea;Veneridae;Mercenaria;Mercenari  
 a mercenaria  
 UdeM00000008792 6596 179.9 UdeM00000008792 XP\_045177580.1 33.8 328  
 185 10 47 368 12 313 6.40E-42 179.9 6596 cellular  
 organisms;Eukaryota;Opisthokonta;Metazoa;Eumetazoa;Bilateria;Protostomia;  
 Spiralia;Lophotrochozoa;Mollusca;Bivalvia;Autobranchia;Heteroconchia;Euhe  
 terodonta;Imparidentia;Venerida;Veneroidea;Veneridae;Mercenaria;Mercenari  
 a mercenaria  
 UdeM00000008793 6596 611.7 UdeM00000008793 XP\_045177580.1 29.3 1619  
 997 41 422 1985 12 1537 3.40E-171 611.7 6596 cellular  
 organisms;Eukaryota;Opisthokonta;Metazoa;Eumetazoa;Bilateria;Protostomia;  
 Spiralia;Lophotrochozoa;Mollusca;Bivalvia;Autobranchia;Heteroconchia;Euhe  
 terodonta;Imparidentia;Venerida;Veneroidea;Veneridae;Mercenaria;Mercenari  
 a mercenaria

UdeM00000008794 303518 85.5 UdeM00000008794 XP\_005737363.1 35.5  
121 75 3 3 122 1350 1468 5.70E-14 85.5 303518  
cellular

organisms;Eukaryota;Opisthokonta;Metazoa;Eumetazoa;Bilateria;Deuterostomi  
a;Chordata;Craniata;Vertebrata;Gnathostomata;Teleostomi;Euteleostomi;Acti  
nopterygii;Actinopteri;Neopterygii;Teleostei;Osteoglossocephalai;Clupeoce  
phala;Euteleostomorpha;Neoteleostei;Eurypterygia;Ctenosquamata;Acanthomo  
rphata;Euacanthomorpha;Percomorphaceae;Ovalentaria;Cichlomorphae;Cichl  
iformes;Cichlidae;African

cichlids;Pseudocrenilabrinae;Haplochromini;Pundamilia;Pundamilia nyererei

UdeM00000008795 6596 628.2 UdeM00000008795 XP\_045185339.1 50.1 706  
296 11 3 698 6 665 1.20E-176 628.2 6596 cellular

organisms;Eukaryota;Opisthokonta;Metazoa;Eumetazoa;Bilateria;Protostomia;  
Spiralia;Lophotrochozoa;Mollusca;Bivalvia;Autobranchia;Heteroconchia;Euhe  
terodonta;Imparidentia;Venerida;Veneroidea;Veneridae;Mercenaria;Mercenari  
a mercenaria

UdeM00000008796 225164 580.1 UdeM00000008796 XP\_009047650.1 67.7  
396 127 1 35 429 5 400 2.30E-162 580.1 225164  
cellular

organisms;Eukaryota;Opisthokonta;Metazoa;Eumetazoa;Bilateria;Protostomia;  
Spiralia;Lophotrochozoa;Mollusca;Gastropoda;Patellogastropoda;Lottioidea;  
Lottiidae;Lottia;Lottia gigantea

UdeM00000008798 6573 85.9 UdeM00000008798 XP\_021348414.1 37.2 129  
79 2 10 137 77 204 4.70E-14 85.9 6573 cellular

organisms;Eukaryota;Opisthokonta;Metazoa;Eumetazoa;Bilateria;Protostomia;  
Spiralia;Lophotrochozoa;Mollusca;Bivalvia;Autobranchia;Pteriormorphia;Pect  
inida;Pectinoidea;Pectinidae;Mizuhopecten;Mizuhopecten yessoensis

UdeM00000008799 7913 58.5 UdeM00000008799 XP\_041082893.1 35.4 96  
58 2 50 143 370 463 7.90E-06 58.5 7913 cellular

organisms;Eukaryota;Opisthokonta;Metazoa;Eumetazoa;Bilateria;Deuterostomi  
a;Chordata;Craniata;Vertebrata;Gnathostomata;Teleostomi;Euteleostomi;Acti  
nopterygii;Actinopteri;Chondrostei;Acipenseriformes;Acipenseroidi;Polyod  
ontidae;Polyodontinae;Polyodontini;Polyodon;Polyodon spathula

UdeM00000008801 6596 178.3 UdeM00000008801 XP\_045170610.1 72.5 109  
28 1 1 109 1 107 5.20E-42 178.3 6596 cellular

organisms;Eukaryota;Opisthokonta;Metazoa;Eumetazoa;Bilateria;Protostomia;  
Spiralia;Lophotrochozoa;Mollusca;Bivalvia;Autobranchia;Heteroconchia;Euhe  
terodonta;Imparidentia;Venerida;Veneroidea;Veneridae;Mercenaria;Mercenari  
a mercenaria

UdeM00000008802 6596 170.2 UdeM00000008802 XP\_045170610.1 71.6 109  
29 2 1 109 1 107 1.40E-39 170.2 6596 cellular

organisms;Eukaryota;Opisthokonta;Metazoa;Eumetazoa;Bilateria;Protostomia;  
Spiralia;Lophotrochozoa;Mollusca;Bivalvia;Autobranchia;Heteroconchia;Euhe  
terodonta;Imparidentia;Venerida;Veneroidea;Veneridae;Mercenaria;Mercenari  
a mercenaria

UdeM00000008803 6596 193.7 UdeM00000008803 XP\_045170610.1 77.1 109  
23 1 1 109 1 107 1.20E-46 193.7 6596 cellular

organisms;Eukaryota;Opisthokonta;Metazoa;Eumetazoa;Bilateria;Protostomia;  
Spiralia;Lophotrochozoa;Mollusca;Bivalvia;Autobranchia;Heteroconchia;Euhe  
terodonta;Imparidentia;Venerida;Veneroidea;Veneridae;Mercenaria;Mercenari  
a mercenaria

UdeM00000008804 6596 393.3 UdeM00000008804 XP\_045167777.1 42.6 524  
270 10 1 513 48 551 6.10E-106 393.3 6596 cellular

organisms;Eukaryota;Opisthokonta;Metazoa;Eumetazoa;Bilateria;Protostomia;



Spiralia;Lophotrochozoa;Mollusca;Bivalvia;Autobranchia;Heteroconchia;Euherodonta;Imparidentia;Venerida;Veneroidea;Veneridae;Mercenaria;Mercenaria mercenaria

|                 |      |        |                 |                |      |     |          |        |      |
|-----------------|------|--------|-----------------|----------------|------|-----|----------|--------|------|
| UdeM00000008805 | 6596 | 1103.6 | UdeM00000008805 | XP_045167946.1 | 63.5 |     |          |        |      |
| 822             | 298  | 2      | 36              | 856            | 37   | 857 | 0.00E+00 | 1103.6 | 6596 |

cellular

organisms;Eukaryota;Opisthokonta;Metazoa;Eumetazoa;Bilateria;Protostomia;Spiralia;Lophotrochozoa;Mollusca;Bivalvia;Autobranchia;Heteroconchia;Euherodonta;Imparidentia;Venerida;Veneroidea;Veneridae;Mercenaria;Mercenaria mercenaria

|                 |      |       |                 |                |      |          |       |      |          |
|-----------------|------|-------|-----------------|----------------|------|----------|-------|------|----------|
| UdeM00000008806 | 6596 | 152.1 | UdeM00000008806 | XP_045167943.1 | 77.5 | 89       |       |      |          |
| 20              | 0    | 36    | 124             | 37             | 125  | 4.60E-34 | 152.1 | 6596 | cellular |

organisms;Eukaryota;Opisthokonta;Metazoa;Eumetazoa;Bilateria;Protostomia;Spiralia;Lophotrochozoa;Mollusca;Bivalvia;Autobranchia;Heteroconchia;Euherodonta;Imparidentia;Venerida;Veneroidea;Veneridae;Mercenaria;Mercenaria mercenaria

|                 |      |       |                 |                |      |          |       |      |          |
|-----------------|------|-------|-----------------|----------------|------|----------|-------|------|----------|
| UdeM00000008807 | 6526 | 322.4 | UdeM00000008807 | XP_013095701.1 | 65.1 | 415      |       |      |          |
| 112             | 7    | 1     | 406             | 60             | 450  | 8.90E-85 | 322.4 | 6526 | cellular |

organisms;Eukaryota;Opisthokonta;Metazoa;Eumetazoa;Bilateria;Protostomia;Spiralia;Lophotrochozoa;Mollusca;Gastropoda;Heterobranchia;Euthyneura;Panpulmonata;Hygrophila;Lymnaeidae;Planorbidae;Biomphalaria;Biomphalaria glabrata

|                 |      |       |                 |                |      |          |       |      |          |
|-----------------|------|-------|-----------------|----------------|------|----------|-------|------|----------|
| UdeM00000008808 | 6596 | 215.7 | UdeM00000008808 | XP_045169627.1 | 43.1 | 260      |       |      |          |
| 139             | 6    | 59    | 312             | 61             | 317  | 9.10E-53 | 215.7 | 6596 | cellular |

organisms;Eukaryota;Opisthokonta;Metazoa;Eumetazoa;Bilateria;Protostomia;Spiralia;Lophotrochozoa;Mollusca;Bivalvia;Autobranchia;Heteroconchia;Euherodonta;Imparidentia;Venerida;Veneroidea;Veneridae;Mercenaria;Mercenaria mercenaria

|                 |      |       |                 |                |      |          |       |      |          |
|-----------------|------|-------|-----------------|----------------|------|----------|-------|------|----------|
| UdeM00000008809 | 6573 | 130.6 | UdeM00000008809 | XP_021341869.1 | 33.8 | 240      |       |      |          |
| 112             | 5    | 240   | 469             | 35             | 237  | 8.90E-27 | 130.6 | 6573 | cellular |

organisms;Eukaryota;Opisthokonta;Metazoa;Eumetazoa;Bilateria;Protostomia;Spiralia;Lophotrochozoa;Mollusca;Bivalvia;Autobranchia;Pteriomorpha;Pectinida;Pectinoidea;Pectinidae;Mizuhopecten;Mizuhopecten yessoensis

|                 |      |       |                 |                |     |           |       |      |          |
|-----------------|------|-------|-----------------|----------------|-----|-----------|-------|------|----------|
| UdeM00000008810 | 6596 | 619.8 | UdeM00000008810 | XP_045170605.1 | 67  | 610       |       |      |          |
| 198             | 2    | 4     | 612             | 3              | 610 | 3.80E-174 | 619.8 | 6596 | cellular |

organisms;Eukaryota;Opisthokonta;Metazoa;Eumetazoa;Bilateria;Protostomia;Spiralia;Lophotrochozoa;Mollusca;Bivalvia;Autobranchia;Heteroconchia;Euherodonta;Imparidentia;Venerida;Veneroidea;Veneridae;Mercenaria;Mercenaria mercenaria

|                 |      |       |                 |                |      |          |       |      |          |
|-----------------|------|-------|-----------------|----------------|------|----------|-------|------|----------|
| UdeM00000008811 | 6596 | 352.1 | UdeM00000008811 | XP_045169000.1 | 69.5 | 226      |       |      |          |
| 69              | 0    | 58    | 283             | 101            | 326  | 6.80E-94 | 352.1 | 6596 | cellular |

organisms;Eukaryota;Opisthokonta;Metazoa;Eumetazoa;Bilateria;Protostomia;Spiralia;Lophotrochozoa;Mollusca;Bivalvia;Autobranchia;Heteroconchia;Euherodonta;Imparidentia;Venerida;Veneroidea;Veneridae;Mercenaria;Mercenaria mercenaria

|                 |      |      |                 |                |      |          |      |      |          |
|-----------------|------|------|-----------------|----------------|------|----------|------|------|----------|
| UdeM00000008812 | 7668 | 64.3 | UdeM00000008812 | XP_011673985.1 | 53.8 | 52       |      |      |          |
| 24              | 0    | 28   | 79              | 646            | 697  | 2.50E-07 | 64.3 | 7668 | cellular |

organisms;Eukaryota;Opisthokonta;Metazoa;Eumetazoa;Bilateria;Deuterostomia;Echinodermata;Eleutherozoa;Echinozoa;Echinoidea;Euechinoidea;Echinacea;Camarodonta;Echinidea;Strongylocentrotidae;Strongylocentrotus;Strongylocentrotus purpuratus

|                 |        |        |                 |                |     |    |     |          |        |
|-----------------|--------|--------|-----------------|----------------|-----|----|-----|----------|--------|
| UdeM00000008813 | 400727 | 1073.5 | UdeM00000008813 | XP_025094847.1 |     |    |     |          |        |
| 74.2            | 697    | 154    | 2               | 37             | 707 | 71 | 767 | 8.0e-311 | 1073.5 |

400727 cellular

organisms;Eukaryota;Opisthokonta;Metazoa;Eumetazoa;Bilateria;Protostomia;Spiralia;Lophotrochozoa;Mollusca;Gastropoda;Caenogastropoda;Architaenioglossa;Ampullarioidea;Ampullariidae;Pomacea;Pomacea canaliculata

UdeM00000008814 1735272 136.3 UdeM00000008814 XP\_041366367.1 56.6  
122 51 1 7 128 70 189 2.70E-29 136.3 1735272  
cellular

organisms;Eukaryota;Opisthokonta;Metazoa;Eumetazoa;Bilateria;Protostomia;Spiralia;Lophotrochozoa;Mollusca;Gastropoda;Neomphalina;Neomphaloidea;Peltospiridae;Gigantopelta;Gigantopelta aegis

UdeM00000008815 1735272 378.3 UdeM00000008815 XP\_041366367.1 64.1  
273 97 1 1 273 191 462 8.60E-102 378.3 1735272  
cellular

organisms;Eukaryota;Opisthokonta;Metazoa;Eumetazoa;Bilateria;Protostomia;Spiralia;Lophotrochozoa;Mollusca;Gastropoda;Neomphalina;Neomphaloidea;Peltospiridae;Gigantopelta;Gigantopelta aegis

UdeM00000008816 6596 970.3 UdeM00000008816 XP\_045168928.1 46.8 1107  
538 21 2 1076 147 1234 2.00E-279 970.3 6596 cellular

organisms;Eukaryota;Opisthokonta;Metazoa;Eumetazoa;Bilateria;Protostomia;Spiralia;Lophotrochozoa;Mollusca;Bivalvia;Autobranchia;Heteroconchia;Euheterodonta;Imparidentia;Venerida;Veneroidea;Veneridae;Mercenaria;Mercenaria mercenaria

UdeM00000008817 6565 582.4 UdeM00000008817 XP\_022303819.1 46.9 653  
302 9 11 661 5 614 7.30E-163 582.4 6565 cellular

organisms;Eukaryota;Opisthokonta;Metazoa;Eumetazoa;Bilateria;Protostomia;Spiralia;Lophotrochozoa;Mollusca;Bivalvia;Autobranchia;Pteriormorphia;Ostreida;Ostreoidea;Ostreidae;Crassostrea;Crassostrea virginica

UdeM00000008818 6596 485 UdeM00000008818 XP\_045168754.1 40.1 730  
385 12 6 727 10 695 1.70E-133 485 6596 cellular

organisms;Eukaryota;Opisthokonta;Metazoa;Eumetazoa;Bilateria;Protostomia;Spiralia;Lophotrochozoa;Mollusca;Bivalvia;Autobranchia;Heteroconchia;Euheterodonta;Imparidentia;Venerida;Veneroidea;Veneridae;Mercenaria;Mercenaria mercenaria

UdeM00000008819 6596 485 UdeM00000008819 XP\_045168754.1 40.1 730  
385 12 6 727 10 695 1.70E-133 485 6596 cellular

organisms;Eukaryota;Opisthokonta;Metazoa;Eumetazoa;Bilateria;Protostomia;Spiralia;Lophotrochozoa;Mollusca;Bivalvia;Autobranchia;Heteroconchia;Euheterodonta;Imparidentia;Venerida;Veneroidea;Veneridae;Mercenaria;Mercenaria mercenaria

UdeM00000008821 151771 220.3 UdeM00000008821 XP\_028406951.1 34.6  
419 230 10 3 393 148 550 4.30E-54 220.3 151771  
cellular

organisms;Eukaryota;Opisthokonta;Metazoa;Eumetazoa;Cnidaria;Anthozoa;Octocorallia;Alcyonacea;Alcyoniina;Nephtheidae;Dendronephthya;Dendronephthya gigantea

UdeM00000008822 6596 154.5 UdeM00000008822 XP\_045170495.1 72 339  
81 5 22 348 12 348 2.60E-34 154.5 6596 cellular

organisms;Eukaryota;Opisthokonta;Metazoa;Eumetazoa;Bilateria;Protostomia;Spiralia;Lophotrochozoa;Mollusca;Bivalvia;Autobranchia;Heteroconchia;Euheterodonta;Imparidentia;Venerida;Veneroidea;Veneridae;Mercenaria;Mercenaria mercenaria

UdeM00000008823 6596 981.1 UdeM00000008823 XP\_045168944.1 76.2 585  
138 1 3 586 1 585 6.40E-283 981.1 6596 cellular

organisms;Eukaryota;Opisthokonta;Metazoa;Eumetazoa;Bilateria;Protostomia;Spiralia;Lophotrochozoa;Mollusca;Bivalvia;Autobranchia;Heteroconchia;Euheterodonta

terodonta;Imparidentia;Venerida;Veneroidea;Veneridae;Mercenaria;Mercenari  
a mercenaria

|                 |      |        |    |                 |                |    |      |          |        |      |
|-----------------|------|--------|----|-----------------|----------------|----|------|----------|--------|------|
| UdeM00000008824 | 6596 | 3391.3 |    | UdeM00000008824 | XP_045167608.1 | 61 |      |          |        |      |
|                 | 2935 | 962    | 31 | 10              | 2859           | 13 | 2850 | 0.00E+00 | 3391.3 | 6596 |

cellular

organisms;Eukaryota;Opisthokonta;Metazoa;Eumetazoa;Bilateria;Protostomia;  
Spiralia;Lophotrochozoa;Mollusca;Bivalvia;Autobranhia;Heteroconchia;Euhe  
terodonta;Imparidentia;Venerida;Veneroidea;Veneridae;Mercenaria;Mercenari  
a mercenaria

|                 |      |        |    |                 |                |      |      |          |        |      |
|-----------------|------|--------|----|-----------------|----------------|------|------|----------|--------|------|
| UdeM00000008825 | 6596 | 3225.6 |    | UdeM00000008825 | XP_045167608.1 | 63.7 |      |          |        |      |
|                 | 2606 | 876    | 20 | 1               | 2559           | 2853 | 5434 | 0.00E+00 | 3225.6 | 6596 |

cellular

organisms;Eukaryota;Opisthokonta;Metazoa;Eumetazoa;Bilateria;Protostomia;  
Spiralia;Lophotrochozoa;Mollusca;Bivalvia;Autobranhia;Heteroconchia;Euhe  
terodonta;Imparidentia;Venerida;Veneroidea;Veneridae;Mercenaria;Mercenari  
a mercenaria

|                 |      |       |   |                 |                |     |          |       |      |          |
|-----------------|------|-------|---|-----------------|----------------|-----|----------|-------|------|----------|
| UdeM00000008826 | 6579 | 349.7 |   | UdeM00000008826 | XP_033761447.1 | 56  | 398      |       |      |          |
|                 | 124  | 5     | 1 | 397             | 1              | 348 | 5.20E-93 | 349.7 | 6579 | cellular |

organisms;Eukaryota;Opisthokonta;Metazoa;Eumetazoa;Bilateria;Protostomia;  
Spiralia;Lophotrochozoa;Mollusca;Bivalvia;Autobranhia;Pteriormorphia;Pect  
inida;Pectinoidea;Pectinidae;Pecten;Pecten maximus

|                 |      |       |   |                 |                |      |          |       |      |          |
|-----------------|------|-------|---|-----------------|----------------|------|----------|-------|------|----------|
| UdeM00000008827 | 6579 | 321.6 |   | UdeM00000008827 | XP_033761447.1 | 73.8 | 256      |       |      |          |
|                 | 65   | 2     | 1 | 255             | 1              | 255  | 1.80E-84 | 321.6 | 6579 | cellular |

organisms;Eukaryota;Opisthokonta;Metazoa;Eumetazoa;Bilateria;Protostomia;  
Spiralia;Lophotrochozoa;Mollusca;Bivalvia;Autobranhia;Pteriormorphia;Pect  
inida;Pectinoidea;Pectinidae;Pecten;Pecten maximus

|                 |       |     |   |                 |                |      |           |     |       |          |
|-----------------|-------|-----|---|-----------------|----------------|------|-----------|-----|-------|----------|
| UdeM00000008828 | 29159 | 958 |   | UdeM00000008828 | XP_034309394.1 | 70.4 | 673       |     |       |          |
|                 | 133   | 8   | 1 | 667             | 1              | 613  | 6.40E-276 | 958 | 29159 | cellular |

organisms;Eukaryota;Opisthokonta;Metazoa;Eumetazoa;Bilateria;Protostomia;  
Spiralia;Lophotrochozoa;Mollusca;Bivalvia;Autobranhia;Pteriormorphia;Ostr  
eida;Ostreoidea;Ostreidae;Crassostrea;Crassostrea gigas

|                 |      |       |   |                 |                |      |          |       |      |          |
|-----------------|------|-------|---|-----------------|----------------|------|----------|-------|------|----------|
| UdeM00000008830 | 6565 | 305.1 |   | UdeM00000008830 | XP_022304784.1 | 67.1 | 286      |       |      |          |
|                 | 68   | 10    | 5 | 272             | 7              | 284  | 9.20E-80 | 305.1 | 6565 | cellular |

organisms;Eukaryota;Opisthokonta;Metazoa;Eumetazoa;Bilateria;Protostomia;  
Spiralia;Lophotrochozoa;Mollusca;Bivalvia;Autobranhia;Pteriormorphia;Ostr  
eida;Ostreoidea;Ostreidae;Crassostrea;Crassostrea virginica

|                 |      |       |   |                 |                |      |          |       |      |          |
|-----------------|------|-------|---|-----------------|----------------|------|----------|-------|------|----------|
| UdeM00000008831 | 6565 | 337.4 |   | UdeM00000008831 | XP_022304784.1 | 71.7 | 286      |       |      |          |
|                 | 69   | 9     | 5 | 286             | 7              | 284  | 1.80E-89 | 337.4 | 6565 | cellular |

organisms;Eukaryota;Opisthokonta;Metazoa;Eumetazoa;Bilateria;Protostomia;  
Spiralia;Lophotrochozoa;Mollusca;Bivalvia;Autobranhia;Pteriormorphia;Ostr  
eida;Ostreoidea;Ostreidae;Crassostrea;Crassostrea virginica

|                 |      |       |    |                 |                |      |          |       |      |          |
|-----------------|------|-------|----|-----------------|----------------|------|----------|-------|------|----------|
| UdeM00000008832 | 6565 | 355.9 |    | UdeM00000008832 | XP_022304784.1 | 75.5 | 286      |       |      |          |
|                 | 59   | 9     | 43 | 325             | 7              | 284  | 5.40E-95 | 355.9 | 6565 | cellular |

organisms;Eukaryota;Opisthokonta;Metazoa;Eumetazoa;Bilateria;Protostomia;  
Spiralia;Lophotrochozoa;Mollusca;Bivalvia;Autobranhia;Pteriormorphia;Ostr  
eida;Ostreoidea;Ostreidae;Crassostrea;Crassostrea virginica

|                 |       |      |    |                 |                |      |          |      |       |          |
|-----------------|-------|------|----|-----------------|----------------|------|----------|------|-------|----------|
| UdeM00000008833 | 46731 | 98.2 |    | UdeM00000008833 | XP_027042029.1 | 41.8 | 134      |      |       |          |
|                 | 74    | 2    | 25 | 157             | 32             | 162  | 1.00E-17 | 98.2 | 46731 | cellular |

organisms;Eukaryota;Opisthokonta;Metazoa;Eumetazoa;Cnidaria;Anthozoa;Hexa  
corallia;Scleractinia;Astrocoeniina;Pocilloporidae;Pocillopora;Pocillopor  
a damicornis

|                 |      |       |   |                 |                |      |          |       |      |          |
|-----------------|------|-------|---|-----------------|----------------|------|----------|-------|------|----------|
| UdeM00000008834 | 6579 | 252.3 |   | UdeM00000008834 | XP_033731739.1 | 59.2 | 191      |       |      |          |
|                 | 78   | 0     | 1 | 191             | 188            | 378  | 5.00E-64 | 252.3 | 6579 | cellular |

organisms;Eukaryota;Opisthokonta;Metazoa;Eumetazoa;Bilateria;Protostomia;

Spiralia;Lophotrochozoa;Mollusca;Bivalvia;Autobranchia;Pteriormorphia;Pectinida;Pectinoidea;Pectinidae;Pecten;Pecten maximus  
UdeM00000008835 6573 61.6 UdeM00000008835 XP\_021341725.1 60.4 48  
19 0 40 87 1 48 6.10E-07 61.6 6573 cellular  
organisms;Eukaryota;Opisthokonta;Metazoa;Eumetazoa;Bilateria;Protostomia;  
Spiralia;Lophotrochozoa;Mollusca;Bivalvia;Autobranchia;Pteriormorphia;Pectinida;Pectinoidea;Pectinidae;Mizuhopecten;Mizuhopecten yessoensis  
UdeM00000008836 151771 372.1 UdeM00000008836 XP\_028419301.1 62.8  
277 102 1 10 286 161 436 6.90E-100 372.1 151771  
cellular  
organisms;Eukaryota;Opisthokonta;Metazoa;Eumetazoa;Cnidaria;Anthozoa;Octocorallia;Alcyonacea;Alcyoniina;Nephtheidae;Dendronephthya;Dendronephthya gigantea  
UdeM00000008837 6596 115.9 UdeM00000008837 XP\_045168804.1 32.9 243  
119 6 10 211 630 869 7.60E-23 115.9 6596 cellular  
organisms;Eukaryota;Opisthokonta;Metazoa;Eumetazoa;Bilateria;Protostomia;  
Spiralia;Lophotrochozoa;Mollusca;Bivalvia;Autobranchia;Heteroconchia;Euheterodonta;Imparidentia;Venerida;Veneroidea;Veneridae;Mercenaria;Mercenaria mercenaria  
UdeM00000008838 6596 75.5 UdeM00000008838 XP\_045211012.1 39.4 99  
55 2 2 97 309 405 7.20E-11 75.5 6596 cellular  
organisms;Eukaryota;Opisthokonta;Metazoa;Eumetazoa;Bilateria;Protostomia;  
Spiralia;Lophotrochozoa;Mollusca;Bivalvia;Autobranchia;Heteroconchia;Euheterodonta;Imparidentia;Venerida;Veneroidea;Veneridae;Mercenaria;Mercenaria mercenaria  
UdeM00000008839 6579 265.8 UdeM00000008839 XP\_033761371.1 41.2 452  
198 13 6 414 2 428 9.60E-68 265.8 6579 cellular  
organisms;Eukaryota;Opisthokonta;Metazoa;Eumetazoa;Bilateria;Protostomia;  
Spiralia;Lophotrochozoa;Mollusca;Bivalvia;Autobranchia;Pteriormorphia;Pectinida;Pectinoidea;Pectinidae;Pecten;Pecten maximus  
UdeM00000008842 6573 162.5 UdeM00000008842 XP\_021376228.1 33.4 359  
154 13 22 330 28 351 9.30E-37 162.5 6573 cellular  
organisms;Eukaryota;Opisthokonta;Metazoa;Eumetazoa;Bilateria;Protostomia;  
Spiralia;Lophotrochozoa;Mollusca;Bivalvia;Autobranchia;Pteriormorphia;Pectinida;Pectinoidea;Pectinidae;Mizuhopecten;Mizuhopecten yessoensis  
UdeM00000008840 6596 518.8 UdeM00000008840 XP\_045168853.1 39.7 890  
391 27 14 803 11 854 1.20E-143 518.8 6596 cellular  
organisms;Eukaryota;Opisthokonta;Metazoa;Eumetazoa;Bilateria;Protostomia;  
Spiralia;Lophotrochozoa;Mollusca;Bivalvia;Autobranchia;Heteroconchia;Euheterodonta;Imparidentia;Venerida;Veneroidea;Veneridae;Mercenaria;Mercenaria mercenaria  
UdeM00000008841 6596 535 UdeM00000008841 XP\_045168853.1 40.7 902  
438 29 14 876 11 854 1.70E-148 535 6596 cellular  
organisms;Eukaryota;Opisthokonta;Metazoa;Eumetazoa;Bilateria;Protostomia;  
Spiralia;Lophotrochozoa;Mollusca;Bivalvia;Autobranchia;Heteroconchia;Euheterodonta;Imparidentia;Venerida;Veneroidea;Veneridae;Mercenaria;Mercenaria mercenaria  
UdeM00000008843 6596 523.1 UdeM00000008843 XP\_045168853.1 39.8 898  
424 28 14 848 11 854 6.70E-145 523.1 6596 cellular  
organisms;Eukaryota;Opisthokonta;Metazoa;Eumetazoa;Bilateria;Protostomia;  
Spiralia;Lophotrochozoa;Mollusca;Bivalvia;Autobranchia;Heteroconchia;Euheterodonta;Imparidentia;Venerida;Veneroidea;Veneridae;Mercenaria;Mercenaria mercenaria

UdeM00000008844 29159 296.2 UdeM00000008844 XP\_034309014.1 68.1 210  
 65 1 44 253 39 246 4.00E-77 296.2 29159 cellular  
 organisms;Eukaryota;Opisthokonta;Metazoa;Eumetazoa;Bilateria;Protostomia;  
 Spiralia;Lophotrochozoa;Mollusca;Bivalvia;Autobranchia;Pteriomorpha;Ostr  
 eida;Ostreoidea;Ostreidae;Crassostrea;Crassostrea gigas  
 UdeM00000008845 29159 135.2 UdeM00000008845 XP\_034309013.1 65 103  
 34 1 2 104 146 246 4.80E-29 135.2 29159 cellular  
 organisms;Eukaryota;Opisthokonta;Metazoa;Eumetazoa;Bilateria;Protostomia;  
 Spiralia;Lophotrochozoa;Mollusca;Bivalvia;Autobranchia;Pteriomorpha;Ostr  
 eida;Ostreoidea;Ostreidae;Crassostrea;Crassostrea gigas  
 UdeM00000008846 6573 461.5 UdeM00000008846 XP\_021376348.1 64.7 391  
 123 5 27 404 66 454 1.10E-126 461.5 6573 cellular  
 organisms;Eukaryota;Opisthokonta;Metazoa;Eumetazoa;Bilateria;Protostomia;  
 Spiralia;Lophotrochozoa;Mollusca;Bivalvia;Autobranchia;Pteriomorpha;Pect  
 inida;Pectinoidea;Pectinidae;Mizuhopecten;Mizuhopecten yessoensis  
 UdeM00000008848 29159 762.7 UdeM00000008848 XP\_011435912.1 97.8 400  
 8 1 1 399 8 407 2.40E-217 762.7 29159 cellular  
 organisms;Eukaryota;Opisthokonta;Metazoa;Eumetazoa;Bilateria;Protostomia;  
 Spiralia;Lophotrochozoa;Mollusca;Bivalvia;Autobranchia;Pteriomorpha;Ostr  
 eida;Ostreoidea;Ostreidae;Crassostrea;Crassostrea gigas  
 UdeM00000008847 29159 766.5 UdeM00000008847 XP\_011435912.1 97.5 403  
 9 1 3 404 5 407 1.60E-218 766.5 29159 cellular  
 organisms;Eukaryota;Opisthokonta;Metazoa;Eumetazoa;Bilateria;Protostomia;  
 Spiralia;Lophotrochozoa;Mollusca;Bivalvia;Autobranchia;Pteriomorpha;Ostr  
 eida;Ostreoidea;Ostreidae;Crassostrea;Crassostrea gigas  
 UdeM00000008849 6596 811.6 UdeM00000008849 XP\_045170569.1 49.2 821  
 364 7 8 801 13 807 8.90E-232 811.6 6596 cellular  
 organisms;Eukaryota;Opisthokonta;Metazoa;Eumetazoa;Bilateria;Protostomia;  
 Spiralia;Lophotrochozoa;Mollusca;Bivalvia;Autobranchia;Heteroconchia;Euhe  
 terodonta;Imparidentia;Venerida;Veneroidea;Veneridae;Mercenaria;Mercenari  
 a mercenaria  
 UdeM00000008853 6565 258.8 UdeM00000008853 XP\_022306299.1 56.1 255  
 80 6 1 235 1 243 7.10E-66 258.8 6565 cellular  
 organisms;Eukaryota;Opisthokonta;Metazoa;Eumetazoa;Bilateria;Protostomia;  
 Spiralia;Lophotrochozoa;Mollusca;Bivalvia;Autobranchia;Pteriomorpha;Ostr  
 eida;Ostreoidea;Ostreidae;Crassostrea;Crassostrea virginica  
 UdeM00000008852 6565 484.6 UdeM00000008852 XP\_022306299.1 65.2 382  
 101 6 1 362 1 370 1.40E-133 484.6 6565 cellular  
 organisms;Eukaryota;Opisthokonta;Metazoa;Eumetazoa;Bilateria;Protostomia;  
 Spiralia;Lophotrochozoa;Mollusca;Bivalvia;Autobranchia;Pteriomorpha;Ostr  
 eida;Ostreoidea;Ostreidae;Crassostrea;Crassostrea virginica  
 UdeM00000008854 29159 521.5 UdeM00000008854 XP\_034317768.1 85.1 262  
 39 0 1 262 375 636 6.00E-145 521.5 29159 cellular  
 organisms;Eukaryota;Opisthokonta;Metazoa;Eumetazoa;Bilateria;Protostomia;  
 Spiralia;Lophotrochozoa;Mollusca;Bivalvia;Autobranchia;Pteriomorpha;Ostr  
 eida;Ostreoidea;Ostreidae;Crassostrea;Crassostrea gigas  
 UdeM00000008855 29159 83.2 UdeM00000008855 XP\_011432002.2 31.2 215  
 138 5 156 365 30 239 7.70E-13 83.2 29159 cellular  
 organisms;Eukaryota;Opisthokonta;Metazoa;Eumetazoa;Bilateria;Protostomia;  
 Spiralia;Lophotrochozoa;Mollusca;Bivalvia;Autobranchia;Pteriomorpha;Ostr  
 eida;Ostreoidea;Ostreidae;Crassostrea;Crassostrea gigas  
 UdeM00000008856 6596 590.5 UdeM00000008856 XP\_045169140.1 44 778  
 362 17 8 777 9 720 3.20E-165 590.5 6596 cellular  
 organisms;Eukaryota;Opisthokonta;Metazoa;Eumetazoa;Bilateria;Protostomia;

Spiralia;Lophotrochozoa;Mollusca;Bivalvia;Autobranchia;Heteroconchia;Euherodonta;Imparidentia;Venerida;Veneroidea;Veneridae;Mercenaria;Mercenaria mercenaria

UdeM00000008857 2607531 78.6 UdeM00000008857 XP\_029639985.1 31.6  
250 125 8 3 215 4 244 4.00E-11 78.6 2607531  
cellular

organisms;Eukaryota;Opisthokonta;Metazoa;Eumetazoa;Bilateria;Protostomia;Spiralia;Lophotrochozoa;Mollusca;Cephalopoda;Coleoidea;Octopodiformes;Octopoda;Incirrata;Octopodidae;Octopus;Octopus sinensis

UdeM00000008858 6573 82.8 UdeM00000008858 XP\_021349553.1 42.6 141  
72 4 385 524 1149 1281 1.40E-12 82.8 6573 cellular

organisms;Eukaryota;Opisthokonta;Metazoa;Eumetazoa;Bilateria;Protostomia;Spiralia;Lophotrochozoa;Mollusca;Bivalvia;Autobranchia;Pteriormorphia;Pectinida;Pectinoidea;Pectinidae;Mizuhopecten;Mizuhopecten yessoensis

UdeM00000008859 7209 351.3 UdeM00000008859 XP\_003141875.1 93.4 181  
12 0 1 181 1 181 7.40E-94 351.3 7209 cellular

organisms;Eukaryota;Opisthokonta;Metazoa;Eumetazoa;Bilateria;Protostomia;Ecdysozoa;Nematoda;Chromadorea;Rhabditida;Spirulina;Spiruromorpha;Filarioidea;Onchocercidae;Loa;Loa loa

UdeM00000028552 29159 198.4 UdeM00000028552 XP\_034318133.1 34.2 415  
228 14 189 564 698 1106 2.50E-47 198.4 29159 cellular

organisms;Eukaryota;Opisthokonta;Metazoa;Eumetazoa;Bilateria;Protostomia;Spiralia;Lophotrochozoa;Mollusca;Bivalvia;Autobranchia;Pteriormorphia;Ostreida;Ostreoidea;Ostreidae;Crassostrea;Crassostrea gigas

UdeM00000028553 218467 86.7 UdeM00000028553 XP\_023212120.1 40.8  
103 61 0 1 103 16 118 5.30E-14 86.7 218467  
cellular

organisms;Eukaryota;Opisthokonta;Metazoa;Eumetazoa;Bilateria;Protostomia;Ecdysozoa;Panarthropoda;Arthropoda;Chelicerata;Arachnida;Scorpiones;Buthida;Buthoidea;Buthidae;Centruroides;Centruroides sculpturatus

UdeM00000028554 1735272 249.6 UdeM00000028554 XP\_041360734.1 59.6  
188 73 3 6 191 642 828 3.30E-63 249.6 1735272  
cellular

organisms;Eukaryota;Opisthokonta;Metazoa;Eumetazoa;Bilateria;Protostomia;Spiralia;Lophotrochozoa;Mollusca;Gastropoda;Neomphalina;Neomphaloidea;Peltospiridae;Gigantopelta;Gigantopelta aegis

UdeM00000028556 1735272 104.4 UdeM00000028556 XP\_041369289.1 74.6  
67 17 0 107 173 84 150 1.50E-19 104.4 1735272  
cellular

organisms;Eukaryota;Opisthokonta;Metazoa;Eumetazoa;Bilateria;Protostomia;Spiralia;Lophotrochozoa;Mollusca;Gastropoda;Neomphalina;Neomphaloidea;Peltospiridae;Gigantopelta;Gigantopelta aegis

UdeM00000028557 6596 141.4 UdeM00000028557 XP\_045158356.1 27.7 311  
219 4 2 306 961 1271 2.70E-30 141.4 6596 cellular

organisms;Eukaryota;Opisthokonta;Metazoa;Eumetazoa;Bilateria;Protostomia;Spiralia;Lophotrochozoa;Mollusca;Bivalvia;Autobranchia;Heteroconchia;Euherodonta;Imparidentia;Venerida;Veneroidea;Veneridae;Mercenaria;Mercenaria mercenaria

UdeM00000028559 6565 161.8 UdeM00000028559 XP\_022335825.1 42.8 180  
103 0 274 453 608 787 4.30E-36 161.8 6565 cellular

organisms;Eukaryota;Opisthokonta;Metazoa;Eumetazoa;Bilateria;Protostomia;Spiralia;Lophotrochozoa;Mollusca;Bivalvia;Autobranchia;Pteriormorphia;Ostreida;Ostreoidea;Ostreidae;Crassostrea;Crassostrea virginica

UdeM00000028560 6596 243.8 UdeM00000028560 XP\_045188551.1 59 195  
 77 3 73 266 3281 3473 2.50E-61 243.8 6596 cellular  
 organisms;Eukaryota;Opisthokonta;Metazoa;Eumetazoa;Bilateria;Protostomia;  
 Spiralia;Lophotrochozoa;Mollusca;Bivalvia;Autobranchia;Heteroconchia;Euhe  
 terodonta;Imparidentia;Venerida;Veneroidea;Veneridae;Mercenaria;Mercenari  
 a mercenaria  
 UdeM00000028561 6596 243 UdeM00000028561 XP\_045188551.1 59 195  
 77 3 40 233 3281 3473 3.70E-61 243 6596 cellular  
 organisms;Eukaryota;Opisthokonta;Metazoa;Eumetazoa;Bilateria;Protostomia;  
 Spiralia;Lophotrochozoa;Mollusca;Bivalvia;Autobranchia;Heteroconchia;Euhe  
 terodonta;Imparidentia;Venerida;Veneroidea;Veneridae;Mercenaria;Mercenari  
 a mercenaria  
 UdeM00000028562 6596 210.3 UdeM00000028562 XP\_045188551.1 60.4 159  
 61 2 1 158 3316 3473 1.80E-51 210.3 6596 cellular  
 organisms;Eukaryota;Opisthokonta;Metazoa;Eumetazoa;Bilateria;Protostomia;  
 Spiralia;Lophotrochozoa;Mollusca;Bivalvia;Autobranchia;Heteroconchia;Euhe  
 terodonta;Imparidentia;Venerida;Veneroidea;Veneridae;Mercenaria;Mercenari  
 a mercenaria  
 UdeM00000028564 225164 262.3 UdeM00000028564 XP\_009056900.1 32.8  
 482 304 8 3 469 375 851 2.80E-66 262.3 225164  
 cellular  
 organisms;Eukaryota;Opisthokonta;Metazoa;Eumetazoa;Bilateria;Protostomia;  
 Spiralia;Lophotrochozoa;Mollusca;Gastropoda;Patellogastropoda;Lottioidea;  
 Lottiidae;Lottia;Lottia gigantea  
 UdeM00000028565 29159 519.6 UdeM00000028565 XP\_034336525.1 28.6 1480  
 889 42 75 1502 571 1935 1.30E-143 519.6 29159 cellular  
 organisms;Eukaryota;Opisthokonta;Metazoa;Eumetazoa;Bilateria;Protostomia;  
 Spiralia;Lophotrochozoa;Mollusca;Bivalvia;Autobranchia;Pteriormorphia;Ostr  
 eida;Ostreoidea;Ostreidae;Crassostrea;Crassostrea gigas  
 UdeM00000028567 441366 176.4 UdeM00000028567 XP\_028296753.1 39.4  
 254 146 6 6 258 32 278 5.00E-41 176.4 441366  
 cellular  
 organisms;Eukaryota;Opisthokonta;Metazoa;Eumetazoa;Bilateria;Deuterostomi  
 a;Chordata;Craniata;Vertebrata;Gnathostomata;Teleostomi;Euteleostomi;Acti  
 nopterygii;Actinopteri;Neopterygii;Teleostei;Osteoglossocephalai;Clupeoce  
 phala;Euteleosteomorpha;Neoteleostei;Eurypterygia;Ctenosquamata;Acanthomo  
 rphata;Euacanthomorphacea;Percomorphaceae;Ovalentaria;Blenniimorphae;Blen  
 niiformes;Gobiesocoidei;Gobiesocidae;Gobiesocinae;Gouania;Gouania  
 willdenowi  
 UdeM00000028568 6573 161 UdeM00000028568 XP\_021366916.1 33.2 304  
 182 6 86 387 1915 2199 3.60E-36 161 6573 cellular  
 organisms;Eukaryota;Opisthokonta;Metazoa;Eumetazoa;Bilateria;Protostomia;  
 Spiralia;Lophotrochozoa;Mollusca;Bivalvia;Autobranchia;Pteriormorphia;Pect  
 inida;Pectinoidea;Pectinidae;Mizuhopecten;Mizuhopecten yessoensis  
 UdeM00000028569 6573 394.4 UdeM00000028569 XP\_021355423.1 31.4 999  
 560 29 54 987 1565 2503 4.20E-106 394.4 6573 cellular  
 organisms;Eukaryota;Opisthokonta;Metazoa;Eumetazoa;Bilateria;Protostomia;  
 Spiralia;Lophotrochozoa;Mollusca;Bivalvia;Autobranchia;Pteriormorphia;Pect  
 inida;Pectinoidea;Pectinidae;Mizuhopecten;Mizuhopecten yessoensis  
 UdeM00000028570 6573 402.5 UdeM00000028570 XP\_021355423.1 34 846  
 473 26 27 821 1692 2503 1.30E-108 402.5 6573 cellular  
 organisms;Eukaryota;Opisthokonta;Metazoa;Eumetazoa;Bilateria;Protostomia;  
 Spiralia;Lophotrochozoa;Mollusca;Bivalvia;Autobranchia;Pteriormorphia;Pect  
 inida;Pectinoidea;Pectinidae;Mizuhopecten;Mizuhopecten yessoensis

UdeM00000028571 6573 181.4 UdeM00000028571 XP\_021354329.1 42.5 212  
 117 4 10 218 481 690 4.00E-42 181.4 6573 cellular  
 organisms;Eukaryota;Opisthokonta;Metazoa;Eumetazoa;Bilateria;Protostomia;  
 Spiralia;Lophotrochozoa;Mollusca;Bivalvia;Autobranchia;Pteriormorphia;Pect  
 inida;Pectinoidea;Pectinidae;Mizuhopecten;Mizuhopecten yessoensis  
 UdeM00000005646 7539 101.3 UdeM00000005646 XP\_023019945.1 58.4 77  
 32 0 1 77 818 894 1.40E-18 101.3 7539 cellular  
 organisms;Eukaryota;Opisthokonta;Metazoa;Eumetazoa;Bilateria;Protostomia;  
 Ecdysozoa;Panarthropoda;Arthropoda;Mandibulata;Pancrustacea;Hexapoda;Inse  
 cta;Dicondylia;Pterygota;Neoptera;Endopterygota;Coleoptera;Polyphaga;Cucu  
 jiformia;Chrysomeloidea;Chrysomelidae;Chrysomelinae;Doryphorini;Leptinota  
 rsa;Leptinotarsa decemlineata  
 UdeM00000005647 50429 87.8 UdeM00000005647 XP\_022808032.1 48.2 85  
 44 0 1 85 392 476 8.50E-15 87.8 50429 cellular  
 organisms;Eukaryota;Opisthokonta;Metazoa;Eumetazoa;Cnidaria;Anthozoa;Hexa  
 corallia;Scleractinia;Astrocoeniina;Pocilloporidae;Stylophora;Stylophora  
 pistillata  
 UdeM00000005649 1232801 74.7 UdeM00000005649 XP\_043213886.1 43.5  
 69 39 0 330 398 370 438 3.00E-10 74.7 1232801  
 cellular  
 organisms;Eukaryota;Opisthokonta;Metazoa;Eumetazoa;Bilateria;Protostomia;  
 Ecdysozoa;Panarthropoda;Arthropoda;Mandibulata;Pancrustacea;Crustacea;Mul  
 ticrustacea;Hexanauplia;Thecostraca;Cirripedia;Thoracica;Sessilia;Balanid  
 ae;Amphibalanus;Amphibalanus amphitrite  
 UdeM00000005650 6596 70.9 UdeM00000005650 XP\_045184309.1 35.2 142  
 83 4 12 149 300 436 1.70E-09 70.9 6596 cellular  
 organisms;Eukaryota;Opisthokonta;Metazoa;Eumetazoa;Bilateria;Protostomia;  
 Spiralia;Lophotrochozoa;Mollusca;Bivalvia;Autobranchia;Heteroconchia;Euhe  
 terodonta;Imparidentia;Venerida;Veneroidea;Veneridae;Mercenaria;Mercenari  
 a mercenaria  
 UdeM00000005651 6596 236.5 UdeM00000005651 XP\_045183385.1 53.6 209  
 95 2 104 311 103 310 4.60E-59 236.5 6596 cellular  
 organisms;Eukaryota;Opisthokonta;Metazoa;Eumetazoa;Bilateria;Protostomia;  
 Spiralia;Lophotrochozoa;Mollusca;Bivalvia;Autobranchia;Heteroconchia;Euhe  
 terodonta;Imparidentia;Venerida;Veneroidea;Veneridae;Mercenaria;Mercenari  
 a mercenaria  
 UdeM00000005652 6596 231.1 UdeM00000005652 XP\_045185790.1 51.9 210  
 99 2 102 311 101 308 1.90E-57 231.1 6596 cellular  
 organisms;Eukaryota;Opisthokonta;Metazoa;Eumetazoa;Bilateria;Protostomia;  
 Spiralia;Lophotrochozoa;Mollusca;Bivalvia;Autobranchia;Heteroconchia;Euhe  
 terodonta;Imparidentia;Venerida;Veneroidea;Veneridae;Mercenaria;Mercenari  
 a mercenaria  
 UdeM00000005653 6596 83.6 UdeM00000005653 XP\_045185209.1 26.1 180  
 113 4 119 283 257 431 4.50E-13 83.6 6596 cellular  
 organisms;Eukaryota;Opisthokonta;Metazoa;Eumetazoa;Bilateria;Protostomia;  
 Spiralia;Lophotrochozoa;Mollusca;Bivalvia;Autobranchia;Heteroconchia;Euhe  
 terodonta;Imparidentia;Venerida;Veneroidea;Veneridae;Mercenaria;Mercenari  
 a mercenaria  
 UdeM00000005654 8355 104.8 UdeM00000005654 XP\_041437190.1 51.7 89  
 43 0 1 89 225 313 6.10E-20 104.8 8355 cellular  
 organisms;Eukaryota;Opisthokonta;Metazoa;Eumetazoa;Bilateria;Deuterostomi  
 a;Chordata;Craniata;Vertebrata;Gnathostomata;Teleostomi;Euteleostomi;Sarc  
 opterygii;Dipnotetrapodomorpha;Tetrapoda;Amphibia;Batrachia;Anura;Pipoide  
 a;Pipidae;Xenopodinae;Xenopus;Xenopus;Xenopus laevis



UdeM00000005655 133434 178.7 UdeM00000005655 XP\_022107434.1 48.1  
 181 90 3 1 178 104 283 6.60E-42 178.7 133434  
 cellular  
 organisms;Eukaryota;Opisthokonta;Metazoa;Eumetazoa;Bilateria;Deuterostomi  
 a;Echinodermata;Eleutherozoa;Asterozoa;Asteroidea;Valvatacea;Valvatida;Ac  
 anthasteridae;Acanthaster;Acanthaster planci  
 UdeM00000005657 6596 81.6 UdeM00000005657 XP\_045184309.1 32.2 171  
 96 5 65 220 271 436 1.40E-12 81.6 6596 cellular  
 organisms;Eukaryota;Opisthokonta;Metazoa;Eumetazoa;Bilateria;Protostomia;  
 Spiralia;Lophotrochozoa;Mollusca;Bivalvia;Autobranchia;Heteroconchia;Euhe  
 terodonta;Imparidentia;Venerida;Veneroidea;Veneridae;Mercenaria;Mercenari  
 a mercenaria  
 UdeM00000005658 133434 210.3 UdeM00000005658 XP\_022107440.1 50.3  
 191 92 1 37 227 60 247 2.60E-51 210.3 133434  
 cellular  
 organisms;Eukaryota;Opisthokonta;Metazoa;Eumetazoa;Bilateria;Deuterostomi  
 a;Echinodermata;Eleutherozoa;Asterozoa;Asteroidea;Valvatacea;Valvatida;Ac  
 anthasteridae;Acanthaster;Acanthaster planci  
 UdeM00000005659 6596 229.2 UdeM00000005659 XP\_045184650.1 50 208  
 102 2 54 261 103 308 6.30E-57 229.2 6596 cellular  
 organisms;Eukaryota;Opisthokonta;Metazoa;Eumetazoa;Bilateria;Protostomia;  
 Spiralia;Lophotrochozoa;Mollusca;Bivalvia;Autobranchia;Heteroconchia;Euhe  
 terodonta;Imparidentia;Venerida;Veneroidea;Veneridae;Mercenaria;Mercenari  
 a mercenaria  
 UdeM00000005661 133434 222.2 UdeM00000005661 XP\_022107440.1 47.3  
 226 113 3 37 259 60 282 7.50E-55 222.2 133434  
 cellular  
 organisms;Eukaryota;Opisthokonta;Metazoa;Eumetazoa;Bilateria;Deuterostomi  
 a;Echinodermata;Eleutherozoa;Asterozoa;Asteroidea;Valvatacea;Valvatida;Ac  
 anthasteridae;Acanthaster;Acanthaster planci  
 UdeM00000005662 6596 82 UdeM00000005662 XP\_045184309.1 32.5 166  
 92 5 195 345 276 436 1.60E-12 82 6596 cellular  
 organisms;Eukaryota;Opisthokonta;Metazoa;Eumetazoa;Bilateria;Protostomia;  
 Spiralia;Lophotrochozoa;Mollusca;Bivalvia;Autobranchia;Heteroconchia;Euhe  
 terodonta;Imparidentia;Venerida;Veneroidea;Veneridae;Mercenaria;Mercenari  
 a mercenaria  
 UdeM00000005663 6596 73.2 UdeM00000005663 XP\_045184309.1 32.1 156  
 85 6 155 295 287 436 6.50E-10 73.2 6596 cellular  
 organisms;Eukaryota;Opisthokonta;Metazoa;Eumetazoa;Bilateria;Protostomia;  
 Spiralia;Lophotrochozoa;Mollusca;Bivalvia;Autobranchia;Heteroconchia;Euhe  
 terodonta;Imparidentia;Venerida;Veneroidea;Veneridae;Mercenaria;Mercenari  
 a mercenaria  
 UdeM00000005664 6573 70.1 UdeM00000005664 XP\_021370011.1 25.7 350  
 216 13 13 336 823 1154 6.30E-09 70.1 6573 cellular  
 organisms;Eukaryota;Opisthokonta;Metazoa;Eumetazoa;Bilateria;Protostomia;  
 Spiralia;Lophotrochozoa;Mollusca;Bivalvia;Autobranchia;Pteriomorphia;Pect  
 inida;Pectinoidea;Pectinidae;Mizuhopecten;Mizuhopecten yessoensis  
 UdeM00000005665 6579 544.3 UdeM00000005665 XP\_033751335.1 30.9 1989  
 1159 80 10 1867 432 2336 6.60E-151 544.3 6579 cellular  
 organisms;Eukaryota;Opisthokonta;Metazoa;Eumetazoa;Bilateria;Protostomia;  
 Spiralia;Lophotrochozoa;Mollusca;Bivalvia;Autobranchia;Pteriomorphia;Pect  
 inida;Pectinoidea;Pectinidae;Pecten;Pecten maximus  
 UdeM00000005667 7739 151.8 UdeM00000005667 XP\_035685155.1 49 145  
 68 2 22 160 86 230 7.70E-34 151.8 7739 cellular

organisms;Eukaryota;Opisthokonta;Metazoa;Eumetazoa;Bilateria;Deuterostomi  
a;Chordata;Cephalochordata;Leptocardii;Amphioxiformes;Branchiostomidae;Br  
anchiostoma;Branchiostoma floridae

UdeM00000005668 6596 347.4 UdeM00000005668 XP\_045215420.1 63.3 251  
91 1 72 322 67 316 1.90E-92 347.4 6596 cellular

organisms;Eukaryota;Opisthokonta;Metazoa;Eumetazoa;Bilateria;Protostomia;  
Spiralia;Lophotrochozoa;Mollusca;Bivalvia;Autobranchia;Heteroconchia;Euhe  
terodonta;Imparidentia;Venerida;Veneroidea;Veneridae;Mercenaria;Mercenari  
a mercenaria

UdeM00000005670 6087 79 UdeM00000005670 XP\_012554075.1 42.3 97  
52 3 4 98 84 178 5.00E-12 79 6087 cellular

organisms;Eukaryota;Opisthokonta;Metazoa;Eumetazoa;Cnidaria;Hydrozoa;Hydr  
oidolina;Anthoathecata;Aplanulata;Hydridae;Hydra;Hydra vulgaris

UdeM00000005671 70779 271.9 UdeM00000005671 XP\_015757156.1 42.6 326  
179 4 41 364 14 333 1.20E-69 271.9 70779 cellular

organisms;Eukaryota;Opisthokonta;Metazoa;Eumetazoa;Cnidaria;Anthozoa;Hexa  
corallia;Scleractinia;Astrocoeniina;Acroporidae;Acropora;Acropora  
digitifera

UdeM00000005672 6596 357.1 UdeM00000005672 XP\_045215420.1 64.1 251  
89 1 72 322 67 316 2.40E-95 357.1 6596 cellular

organisms;Eukaryota;Opisthokonta;Metazoa;Eumetazoa;Bilateria;Protostomia;  
Spiralia;Lophotrochozoa;Mollusca;Bivalvia;Autobranchia;Heteroconchia;Euhe  
terodonta;Imparidentia;Venerida;Veneroidea;Veneridae;Mercenaria;Mercenari  
a mercenaria

UdeM00000005673 29159 130.2 UdeM00000005673 XP\_034299474.1 54.6 119  
50 1 20 134 350 468 2.20E-27 130.2 29159 cellular

organisms;Eukaryota;Opisthokonta;Metazoa;Eumetazoa;Bilateria;Protostomia;  
Spiralia;Lophotrochozoa;Mollusca;Bivalvia;Autobranchia;Pteriormorphia;Ostr  
eida;Ostreoidea;Ostreidae;Crassostrea;Crassostrea gigas

UdeM00000005674 29159 72.8 UdeM00000005674 XP\_034299474.1 49.3 75  
34 1 1 71 394 468 2.30E-10 72.8 29159 cellular

organisms;Eukaryota;Opisthokonta;Metazoa;Eumetazoa;Bilateria;Protostomia;  
Spiralia;Lophotrochozoa;Mollusca;Bivalvia;Autobranchia;Pteriormorphia;Ostr  
eida;Ostreoidea;Ostreidae;Crassostrea;Crassostrea gigas

UdeM00000005675 7725 132.5 UdeM00000005675 XP\_039256391.1 56.8 111  
44 1 7 113 136 246 3.50E-28 132.5 7725 cellular

organisms;Eukaryota;Opisthokonta;Metazoa;Eumetazoa;Bilateria;Deuterostomi  
a;Chordata;Tunicata;Ascidiacea;Stolidobranchia;Styelidae;Styela;Styela  
clava

UdeM00000005677 7370 102.4 UdeM00000005677 XP\_019893886.1 54.7 86  
39 0 11 96 169 254 3.20E-19 102.4 7370 cellular

organisms;Eukaryota;Opisthokonta;Metazoa;Eumetazoa;Bilateria;Protostomia;  
Ecdysozoa;Panarthropoda;Arthropoda;Mandibulata;Pancrustacea;Hexapoda;Inse  
cta;Dicondylia;Pterygota;Neoptera;Endopterygota;Diptera;Brachycera;Muscom  
orpha;Eremoneura;Cyclorrhapha;Schizophora;Calyptratae;Muscoidea;Muscidae;  
Muscinae;Muscini;Musca;Musca;Musca domestica

UdeM00000005678 1735272 115.2 UdeM00000005678 XP\_041361004.1 52.8  
106 49 1 1 106 76 180 5.50E-23 115.2 1735272  
cellular

organisms;Eukaryota;Opisthokonta;Metazoa;Eumetazoa;Bilateria;Protostomia;  
Spiralia;Lophotrochozoa;Mollusca;Gastropoda;Neomphalina;Neomphaloidea;Pel  
tospiridae;Gigantopelta;Gigantopelta aegis

UdeM00000005680 13164 172.6 UdeM00000005680 XP\_022180657.1 43 186  
96 3 2 177 48 233 4.80E-40 172.6 13164 cellular

organisms;Eukaryota;Opisthokonta;Metazoa;Eumetazoa;Bilateria;Protostomia;Ecdysozoa;Panarthropoda;Arthropoda;Mandibulata;Pancrustacea;Hexapoda;Insecta;Dicondylia;Pterygota;Neoptera;Paraneoptera;Hemiptera;Sternorrhyncha;Aphidomorpha;Aphidoidea;Aphididae;Aphidinae;Macrosiphini;Myzus;Myzus persicae

UdeM00000005679 1735272 144.1 UdeM00000005679 XP\_041361004.1 51.1  
135 65 1 95 229 47 180 2.30E-31 144.1 1735272  
cellular

organisms;Eukaryota;Opisthokonta;Metazoa;Eumetazoa;Bilateria;Protostomia;Spiralia;Lophotrochozoa;Mollusca;Gastropoda;Neomphalina;Neomphaloidea;Peltospiridae;Gigantopelta;Gigantopelta aegis

UdeM00000005681 72036 70.5 UdeM00000005681 XP\_040576246.1 29 183  
79 3 1 133 1 182 1.90E-09 70.5 72036 cellular

organisms;Eukaryota;Opisthokonta;Metazoa;Eumetazoa;Bilateria;Protostomia;Ecdysozoa;Panarthropoda;Arthropoda;Mandibulata;Pancrustacea;Crustacea;Multicrustacea;Hexanauplia;Copepoda;Neocopepoda;Podoplea;Siphonostomatoida;Caligidae;Lepeophtheirus;Lepeophtheirus salmonis

UdeM00000005682 7725 135.6 UdeM00000005682 XP\_039267079.1 51.2 125  
58 2 15 137 185 308 4.90E-29 135.6 7725 cellular

organisms;Eukaryota;Opisthokonta;Metazoa;Eumetazoa;Bilateria;Deuterostomia;Chordata;Tunicata;Ascidiacea;Stolidobranchia;Styelidae;Styela;Styela clava

UdeM00000005687 7574 211.8 UdeM00000005687 XP\_023929924.1 55.7 176  
75 1 1 173 127 302 6.80E-52 211.8 7574 cellular

organisms;Eukaryota;Opisthokonta;Metazoa;Eumetazoa;Bilateria;Protostomia;Spiralia;Lophotrochozoa;Brachiopoda;Linguliformea;Lingulata;Lingulida;Linguloidea;Lingulidae;Lingula;Lingula anatina

UdeM00000005688 6596 249.2 UdeM00000005688 XP\_045185790.1 55.5 209  
92 1 100 308 101 308 6.80E-63 249.2 6596 cellular

organisms;Eukaryota;Opisthokonta;Metazoa;Eumetazoa;Bilateria;Protostomia;Spiralia;Lophotrochozoa;Mollusca;Bivalvia;Autobranchia;Heteroconchia;Euheterodonta;Imparidentia;Venerida;Veneroidea;Veneridae;Mercenaria;Mercenaria mercenaria

UdeM00000005689 1735272 99.4 UdeM00000005689 XP\_041361004.1 47.2  
106 55 1 1 106 76 180 3.10E-18 99.4 1735272  
cellular

organisms;Eukaryota;Opisthokonta;Metazoa;Eumetazoa;Bilateria;Protostomia;Spiralia;Lophotrochozoa;Mollusca;Gastropoda;Neomphalina;Neomphaloidea;Peltospiridae;Gigantopelta;Gigantopelta aegis

UdeM00000005690 6596 241.9 UdeM00000005690 XP\_045185790.1 53.1 213  
99 1 100 312 101 312 1.10E-60 241.9 6596 cellular

organisms;Eukaryota;Opisthokonta;Metazoa;Eumetazoa;Bilateria;Protostomia;Spiralia;Lophotrochozoa;Mollusca;Bivalvia;Autobranchia;Heteroconchia;Euheterodonta;Imparidentia;Venerida;Veneroidea;Veneridae;Mercenaria;Mercenaria mercenaria

UdeM00000005691 6596 248.8 UdeM00000005691 XP\_045184650.1 53.1 209  
97 1 100 308 101 308 8.90E-63 248.8 6596 cellular

organisms;Eukaryota;Opisthokonta;Metazoa;Eumetazoa;Bilateria;Protostomia;Spiralia;Lophotrochozoa;Mollusca;Bivalvia;Autobranchia;Heteroconchia;Euheterodonta;Imparidentia;Venerida;Veneroidea;Veneridae;Mercenaria;Mercenaria mercenaria

UdeM00000005692 6596 250 UdeM00000005692 XP\_045184650.1 55 209  
93 1 100 308 101 308 4.00E-63 250 6596 cellular

organisms;Eukaryota;Opisthokonta;Metazoa;Eumetazoa;Bilateria;Protostomia;

Spiralia;Lophotrochozoa;Mollusca;Bivalvia;Autobranchia;Heteroconchia;Euherodonta;Imparidentia;Venerida;Veneroidea;Veneridae;Mercenaria;Mercenaria mercenaria

UdeM00000005693 6596 259.6 UdeM00000005693 XP\_045185790.1 56 209  
91 1 72 280 101 308 4.60E-66 259.6 6596 cellular

organisms;Eukaryota;Opisthokonta;Metazoa;Eumetazoa;Bilateria;Protostomia;Spiralia;Lophotrochozoa;Mollusca;Bivalvia;Autobranchia;Heteroconchia;Euherodonta;Imparidentia;Venerida;Veneroidea;Veneridae;Mercenaria;Mercenaria mercenaria

UdeM00000005694 35570 107.1 UdeM00000005694 XP\_013098284.1 45.5 110  
53 1 61 163 188 297 2.20E-20 107.1 35570 cellular

organisms;Eukaryota;Opisthokonta;Metazoa;Eumetazoa;Bilateria;Protostomia;Ecdysozoa;Panarthropoda;Arthropoda;Mandibulata;Pancrustacea;Hexapoda;Insecta;Dicondylia;Pterygota;Neoptera;Endopterygota;Diptera;Brachycera;Muscomorpha;Eremoneura;Cyclorrhapha;Schizophora;Calyptratae;Muscoidea;Muscidae;Muscinae;Stomoxyni;Stomoxys;Stomoxys calcitrans

UdeM00000005695 133434 251.1 UdeM00000005695 XP\_022107440.1 52.6  
228 94 3 88 311 64 281 1.80E-63 251.1 133434  
cellular

organisms;Eukaryota;Opisthokonta;Metazoa;Eumetazoa;Bilateria;Deuterostomia;Echinodermata;Eleutherozoa;Asterozoa;Asteroidea;Valvataceae;Valvatida;Acanthasteridae;Acanthaster;Acanthaster planci

UdeM00000005696 6596 253.8 UdeM00000005696 XP\_045184650.1 54.1 209  
95 1 100 308 101 308 2.80E-64 253.8 6596 cellular

organisms;Eukaryota;Opisthokonta;Metazoa;Eumetazoa;Bilateria;Protostomia;Spiralia;Lophotrochozoa;Mollusca;Bivalvia;Autobranchia;Heteroconchia;Euherodonta;Imparidentia;Venerida;Veneroidea;Veneridae;Mercenaria;Mercenaria mercenaria

UdeM00000005697 6596 248.1 UdeM00000005697 XP\_045184650.1 54.1 209  
95 1 102 310 101 308 1.50E-62 248.1 6596 cellular

organisms;Eukaryota;Opisthokonta;Metazoa;Eumetazoa;Bilateria;Protostomia;Spiralia;Lophotrochozoa;Mollusca;Bivalvia;Autobranchia;Heteroconchia;Euherodonta;Imparidentia;Venerida;Veneroidea;Veneridae;Mercenaria;Mercenaria mercenaria

UdeM00000005698 6573 260.4 UdeM00000005698 XP\_021357933.1 67 176  
58 0 1 176 1 176 1.80E-66 260.4 6573 cellular

organisms;Eukaryota;Opisthokonta;Metazoa;Eumetazoa;Bilateria;Protostomia;Spiralia;Lophotrochozoa;Mollusca;Bivalvia;Autobranchia;Pteriomorphia;Pectinida;Pectinoidea;Pectinidae;Mizuhopecten;Mizuhopecten yessoensis

UdeM00000005699 2607531 183.3 UdeM00000005699 XP\_029641087.1 69.2  
130 40 0 3 132 11 140 2.00E-43 183.3 2607531  
cellular

organisms;Eukaryota;Opisthokonta;Metazoa;Eumetazoa;Bilateria;Protostomia;Spiralia;Lophotrochozoa;Mollusca;Cephalopoda;Coleoidea;Octopodiformes;Octopoda;Incirrata;Octopodidae;Octopus;Octopus sinensis

UdeM00000005701 29159 424.5 UdeM00000005701 XP\_011412923.2 82 255  
46 0 1 255 1 255 9.80E-116 424.5 29159 cellular

organisms;Eukaryota;Opisthokonta;Metazoa;Eumetazoa;Bilateria;Protostomia;Spiralia;Lophotrochozoa;Mollusca;Bivalvia;Autobranchia;Pteriomorphia;Ostreida;Ostreoidea;Ostreidae;Crassostrea;Crassostrea gigas

UdeM00000005700 29159 424.5 UdeM00000005700 XP\_011412923.2 82 255  
46 0 1 255 1 255 9.80E-116 424.5 29159 cellular

organisms;Eukaryota;Opisthokonta;Metazoa;Eumetazoa;Bilateria;Protostomia;

Spiralia;Lophotrochozoa;Mollusca;Bivalvia;Autobranchia;Pteriormorphia;Ostr  
eida;Ostreoidea;Ostreidae;Crassostrea;Crassostrea gigas  
UdeM00000005702 6596 379 UdeM00000005702 XP\_045209721.1 50.5 442  
185 7 1 421 20 448 8.50E-102 379 6596 cellular  
organisms;Eukaryota;Opisthokonta;Metazoa;Eumetazoa;Bilateria;Protostomia;  
Spiralia;Lophotrochozoa;Mollusca;Bivalvia;Autobranchia;Heteroconchia;Euhe  
terodonta;Imparidentia;Venerida;Veneroidea;Veneridae;Mercenaria;Mercenari  
a mercenaria  
UdeM00000005703 6596 1120.5 UdeM00000005703 XP\_045209513.1 80.3  
747 143 2 1 747 1 743 0.00E+00 1120.5 6596  
cellular  
organisms;Eukaryota;Opisthokonta;Metazoa;Eumetazoa;Bilateria;Protostomia;  
Spiralia;Lophotrochozoa;Mollusca;Bivalvia;Autobranchia;Heteroconchia;Euhe  
terodonta;Imparidentia;Venerida;Veneroidea;Veneridae;Mercenaria;Mercenari  
a mercenaria  
UdeM00000005704 6596 809.3 UdeM00000005704 XP\_045209507.1 46.6 902  
458 7 1 882 1 898 4.90E-231 809.3 6596 cellular  
organisms;Eukaryota;Opisthokonta;Metazoa;Eumetazoa;Bilateria;Protostomia;  
Spiralia;Lophotrochozoa;Mollusca;Bivalvia;Autobranchia;Heteroconchia;Euhe  
terodonta;Imparidentia;Venerida;Veneroidea;Veneridae;Mercenaria;Mercenari  
a mercenaria  
UdeM00000005705 6596 146 UdeM00000005705 XP\_045209507.1 53.4 236  
60 8 7 198 898 1127 5.20E-32 146 6596 cellular  
organisms;Eukaryota;Opisthokonta;Metazoa;Eumetazoa;Bilateria;Protostomia;  
Spiralia;Lophotrochozoa;Mollusca;Bivalvia;Autobranchia;Heteroconchia;Euhe  
terodonta;Imparidentia;Venerida;Veneroidea;Veneridae;Mercenaria;Mercenari  
a mercenaria  
UdeM00000005706 6596 94.7 UdeM00000005706 XP\_045209506.1 26.8 436  
238 16 42 465 31 397 3.70E-16 94.7 6596 cellular  
organisms;Eukaryota;Opisthokonta;Metazoa;Eumetazoa;Bilateria;Protostomia;  
Spiralia;Lophotrochozoa;Mollusca;Bivalvia;Autobranchia;Heteroconchia;Euhe  
terodonta;Imparidentia;Venerida;Veneroidea;Veneridae;Mercenaria;Mercenari  
a mercenaria  
UdeM00000005707 6596 327 UdeM00000005707 XP\_045208738.1 33.9 950  
415 28 1 825 23 884 9.60E-86 327 6596 cellular  
organisms;Eukaryota;Opisthokonta;Metazoa;Eumetazoa;Bilateria;Protostomia;  
Spiralia;Lophotrochozoa;Mollusca;Bivalvia;Autobranchia;Heteroconchia;Euhe  
terodonta;Imparidentia;Venerida;Veneroidea;Veneridae;Mercenaria;Mercenari  
a mercenaria  
UdeM00000005708 6596 263.8 UdeM00000005708 XP\_045208738.1 35.1 701  
284 20 8 587 15 665 5.20E-67 263.8 6596 cellular  
organisms;Eukaryota;Opisthokonta;Metazoa;Eumetazoa;Bilateria;Protostomia;  
Spiralia;Lophotrochozoa;Mollusca;Bivalvia;Autobranchia;Heteroconchia;Euhe  
terodonta;Imparidentia;Venerida;Veneroidea;Veneridae;Mercenaria;Mercenari  
a mercenaria  
UdeM00000005709 6596 218 UdeM00000005709 XP\_045210433.1 68.6 245  
47 10 2216 2456 2121 2339 1.30E-52 218 6596 cellular  
organisms;Eukaryota;Opisthokonta;Metazoa;Eumetazoa;Bilateria;Protostomia;  
Spiralia;Lophotrochozoa;Mollusca;Bivalvia;Autobranchia;Heteroconchia;Euhe  
terodonta;Imparidentia;Venerida;Veneroidea;Veneridae;Mercenaria;Mercenari  
a mercenaria  
UdeM00000005712 6596 140.2 UdeM00000005712 XP\_045210437.1 71.3 94  
26 1 1 93 533 626 1.30E-30 140.2 6596 cellular  
organisms;Eukaryota;Opisthokonta;Metazoa;Eumetazoa;Bilateria;Protostomia;

Spiralia;Lophotrochozoa;Mollusca;Bivalvia;Autobranchia;Heteroconchia;Euherodonta;Imparidentia;Venerida;Veneroidea;Veneridae;Mercenaria;Mercenaria mercenaria

UdeM00000005711 6596 636.3 UdeM00000005711 XP\_045210437.1 57.6 649  
230 14 1 627 1 626 4.00E-179 636.3 6596 cellular

organisms;Eukaryota;Opisthokonta;Metazoa;Eumetazoa;Bilateria;Protostomia;Spiralia;Lophotrochozoa;Mollusca;Bivalvia;Autobranchia;Heteroconchia;Euherodonta;Imparidentia;Venerida;Veneroidea;Veneridae;Mercenaria;Mercenaria mercenaria

UdeM00000005713 6596 1162.5 UdeM00000005713 XP\_045210293.1 54.4  
1027 461 6 5 1026 22 1046 0.00E+00 1162.5 6596  
cellular

organisms;Eukaryota;Opisthokonta;Metazoa;Eumetazoa;Bilateria;Protostomia;Spiralia;Lophotrochozoa;Mollusca;Bivalvia;Autobranchia;Heteroconchia;Euherodonta;Imparidentia;Venerida;Veneroidea;Veneridae;Mercenaria;Mercenaria mercenaria

UdeM00000005714 6596 434.5 UdeM00000005714 XP\_045207098.1 63.8 1393  
386 21 2 1354 1 1315 5.00E-118 434.5 6596 cellular

organisms;Eukaryota;Opisthokonta;Metazoa;Eumetazoa;Bilateria;Protostomia;Spiralia;Lophotrochozoa;Mollusca;Bivalvia;Autobranchia;Heteroconchia;Euherodonta;Imparidentia;Venerida;Veneroidea;Veneridae;Mercenaria;Mercenaria mercenaria

UdeM00000005717 6596 182.6 UdeM00000005717 XP\_045209962.1 82.2 101  
18 0 1 101 1 101 2.60E-43 182.6 6596 cellular

organisms;Eukaryota;Opisthokonta;Metazoa;Eumetazoa;Bilateria;Protostomia;Spiralia;Lophotrochozoa;Mollusca;Bivalvia;Autobranchia;Heteroconchia;Euherodonta;Imparidentia;Venerida;Veneroidea;Veneridae;Mercenaria;Mercenaria mercenaria

UdeM00000005715 6596 182.2 UdeM00000005715 XP\_045209962.1 82.2 101  
18 0 23 123 1 101 4.10E-43 182.2 6596 cellular

organisms;Eukaryota;Opisthokonta;Metazoa;Eumetazoa;Bilateria;Protostomia;Spiralia;Lophotrochozoa;Mollusca;Bivalvia;Autobranchia;Heteroconchia;Euherodonta;Imparidentia;Venerida;Veneroidea;Veneridae;Mercenaria;Mercenaria mercenaria

UdeM00000005716 6596 182.6 UdeM00000005716 XP\_045209962.1 82.2 101  
18 0 44 144 1 101 3.60E-43 182.6 6596 cellular

organisms;Eukaryota;Opisthokonta;Metazoa;Eumetazoa;Bilateria;Protostomia;Spiralia;Lophotrochozoa;Mollusca;Bivalvia;Autobranchia;Heteroconchia;Euherodonta;Imparidentia;Venerida;Veneroidea;Veneridae;Mercenaria;Mercenaria mercenaria

UdeM00000005720 6596 184.1 UdeM00000005720 XP\_045209968.1 95.7 92  
4 0 1 92 1 92 1.10E-43 184.1 6596 cellular

organisms;Eukaryota;Opisthokonta;Metazoa;Eumetazoa;Bilateria;Protostomia;Spiralia;Lophotrochozoa;Mollusca;Bivalvia;Autobranchia;Heteroconchia;Euherodonta;Imparidentia;Venerida;Veneroidea;Veneridae;Mercenaria;Mercenaria mercenaria

UdeM00000005718 6596 400.2 UdeM00000005718 XP\_045209970.1 96.9 192  
6 0 1 192 1 192 1.80E-108 400.2 6596 cellular

organisms;Eukaryota;Opisthokonta;Metazoa;Eumetazoa;Bilateria;Protostomia;Spiralia;Lophotrochozoa;Mollusca;Bivalvia;Autobranchia;Heteroconchia;Euherodonta;Imparidentia;Venerida;Veneroidea;Veneridae;Mercenaria;Mercenaria mercenaria

UdeM00000005719 6596 393.3 UdeM00000005719 XP\_045209970.1 94.4 197  
6 1 1 197 1 192 2.30E-106 393.3 6596 cellular

organisms;Eukaryota;Opisthokonta;Metazoa;Eumetazoa;Bilateria;Protostomia;Spiralia;Lophotrochozoa;Mollusca;Bivalvia;Autobranchia;Heteroconchia;Euheterodonta;Imparidentia;Venerida;Veneroidea;Veneridae;Mercenaria;Mercenaria mercenaria

UdeM00000005721 6596 394.4 UdeM00000005721 XP\_045209968.1 95.3 193  
9 0 1 193 1 193 1.00E-106 394.4 6596 cellular

organisms;Eukaryota;Opisthokonta;Metazoa;Eumetazoa;Bilateria;Protostomia;Spiralia;Lophotrochozoa;Mollusca;Bivalvia;Autobranchia;Heteroconchia;Euheterodonta;Imparidentia;Venerida;Veneroidea;Veneridae;Mercenaria;Mercenaria mercenaria

UdeM00000005724 6596 524.6 UdeM00000005724 XP\_045209974.1 36.2 871  
501 17 1051 1902 1 835 5.20E-145 524.6 6596 cellular

organisms;Eukaryota;Opisthokonta;Metazoa;Eumetazoa;Bilateria;Protostomia;Spiralia;Lophotrochozoa;Mollusca;Bivalvia;Autobranchia;Heteroconchia;Euheterodonta;Imparidentia;Venerida;Veneroidea;Veneridae;Mercenaria;Mercenaria mercenaria

UdeM00000005725 29159 623.2 UdeM00000005725 XP\_011451299.2 38.8 984  
452 19 20 1000 5 841 5.60E-175 623.2 29159 cellular

organisms;Eukaryota;Opisthokonta;Metazoa;Eumetazoa;Bilateria;Protostomia;Spiralia;Lophotrochozoa;Mollusca;Bivalvia;Autobranchia;Pteriormorphia;Ostreida;Ostreoidea;Ostreidae;Crassostrea;Crassostrea gigas

UdeM00000005726 6596 300.8 UdeM00000005726 XP\_045202339.1 36.5 657  
284 19 17 582 35 649 8.90E-78 300.8 6596 cellular

organisms;Eukaryota;Opisthokonta;Metazoa;Eumetazoa;Bilateria;Protostomia;Spiralia;Lophotrochozoa;Mollusca;Bivalvia;Autobranchia;Heteroconchia;Euheterodonta;Imparidentia;Venerida;Veneroidea;Veneridae;Mercenaria;Mercenaria mercenaria

UdeM00000005727 133901 122.5 UdeM00000005727 XP\_026285677.1 28.4  
285 183 7 244 515 91 367 1.70E-24 122.5 133901  
cellular

organisms;Eukaryota;Opisthokonta;Metazoa;Eumetazoa;Bilateria;Protostomia;Ecdysozoa;Panarthropoda;Arthropoda;Mandibulata;Pancrustacea;Hexapoda;Insecta;Dicondylia;Pterygota;Neoptera;Paraneoptera;Thysanoptera;Terebrantia;Thripidae;Thripidae;Thripinae;Frankliniella;Frankliniella occidentalis

UdeM00000005728 133901 122.5 UdeM00000005728 XP\_026285677.1 28.4  
285 183 7 243 514 91 367 1.60E-24 122.5 133901  
cellular

organisms;Eukaryota;Opisthokonta;Metazoa;Eumetazoa;Bilateria;Protostomia;Ecdysozoa;Panarthropoda;Arthropoda;Mandibulata;Pancrustacea;Hexapoda;Insecta;Dicondylia;Pterygota;Neoptera;Paraneoptera;Thysanoptera;Terebrantia;Thripidae;Thripidae;Thripinae;Frankliniella;Frankliniella occidentalis

UdeM00000005729 161013 135.6 UdeM00000005729 XP\_034232639.1 31.5  
254 155 5 250 497 284 524 1.80E-28 135.6 161013  
cellular

organisms;Eukaryota;Opisthokonta;Metazoa;Eumetazoa;Bilateria;Protostomia;Ecdysozoa;Panarthropoda;Arthropoda;Mandibulata;Pancrustacea;Hexapoda;Insecta;Dicondylia;Pterygota;Neoptera;Paraneoptera;Thysanoptera;Terebrantia;Thripidae;Thripidae;Thripinae;Thrips;Thrips palmi

UdeM00000005730 1735272 1317.4 UdeM00000005730 XP\_041356450.1  
55.5 1166 506 10 1 1159 1 1160 0.00E+00 1317.4  
1735272 cellular

organisms;Eukaryota;Opisthokonta;Metazoa;Eumetazoa;Bilateria;Protostomia;Spiralia;Lophotrochozoa;Mollusca;Gastropoda;Neomphalina;Neomphaloidea;Peltopiridae;Gigantopelta;Gigantopelta aegis

UdeM00000005731 1735272 622.5 UdeM00000005731 XP\_041356450.1 60.2  
 472 181 4 1 468 1 469 4.50E-175 622.5 1735272  
 cellular  
 organisms;Eukaryota;Opisthokonta;Metazoa;Eumetazoa;Bilateria;Protostomia;  
 Spiralia;Lophotrochozoa;Mollusca;Gastropoda;Neomphalina;Neomphaloidea;Pel  
 tospiridae;Gigantopelta;Gigantopelta aegis  
 UdeM00000005732 2607531 234.2 UdeM00000005732 XP\_029646130.2 42.6  
 277 155 2 10 282 29 305 2.10E-58 234.2 2607531  
 cellular  
 organisms;Eukaryota;Opisthokonta;Metazoa;Eumetazoa;Bilateria;Protostomia;  
 Spiralia;Lophotrochozoa;Mollusca;Cephalopoda;Coleoidea;Octopodiformes;Oct  
 opoda;Incirrata;Octopodidae;Octopus;Octopus sinensis  
 UdeM00000005733 6596 339.7 UdeM00000005733 XP\_045184057.1 49.1 336  
 170 1 1 336 1 335 4.20E-90 339.7 6596 cellular  
 organisms;Eukaryota;Opisthokonta;Metazoa;Eumetazoa;Bilateria;Protostomia;  
 Spiralia;Lophotrochozoa;Mollusca;Bivalvia;Autobranchia;Heteroconchia;Euhe  
 terodonta;Imparidentia;Venerida;Veneroidea;Veneridae;Mercenaria;Mercenari  
 a mercenaria  
 UdeM00000005734 6565 582 UdeM00000005734 XP\_022306251.1 44.4 631  
 336 7 86 708 378 1001 1.00E-162 582 6565 cellular  
 organisms;Eukaryota;Opisthokonta;Metazoa;Eumetazoa;Bilateria;Protostomia;  
 Spiralia;Lophotrochozoa;Mollusca;Bivalvia;Autobranchia;Pteriormorphia;Ostr  
 eida;Ostreoidea;Ostreidae;Crassostrea;Crassostrea virginica  
 UdeM00000005735 1735272 181.8 UdeM00000005735 XP\_041352678.1 36  
 278 167 7 127 398 283 555 1.70E-42 181.8 1735272  
 cellular  
 organisms;Eukaryota;Opisthokonta;Metazoa;Eumetazoa;Bilateria;Protostomia;  
 Spiralia;Lophotrochozoa;Mollusca;Gastropoda;Neomphalina;Neomphaloidea;Pel  
 tospiridae;Gigantopelta;Gigantopelta aegis  
 UdeM00000005737 6565 349 UdeM00000005737 XP\_022303494.1 66.9 251  
 83 0 1 251 1 251 5.10E-93 349 6565 cellular  
 organisms;Eukaryota;Opisthokonta;Metazoa;Eumetazoa;Bilateria;Protostomia;  
 Spiralia;Lophotrochozoa;Mollusca;Bivalvia;Autobranchia;Pteriormorphia;Ostr  
 eida;Ostreoidea;Ostreidae;Crassostrea;Crassostrea virginica  
 UdeM00000005736 6596 415.2 UdeM00000005736 XP\_045171270.1 65.3 326  
 111 1 1 324 1 326 7.50E-113 415.2 6596 cellular  
 organisms;Eukaryota;Opisthokonta;Metazoa;Eumetazoa;Bilateria;Protostomia;  
 Spiralia;Lophotrochozoa;Mollusca;Bivalvia;Autobranchia;Heteroconchia;Euhe  
 terodonta;Imparidentia;Venerida;Veneroidea;Veneridae;Mercenaria;Mercenari  
 a mercenaria  
 UdeM00000005739 7574 134.4 UdeM00000005739 XP\_013414864.2 60.6 104  
 40 1 26 128 38 141 1.00E-28 134.4 7574 cellular  
 organisms;Eukaryota;Opisthokonta;Metazoa;Eumetazoa;Bilateria;Protostomia;  
 Spiralia;Lophotrochozoa;Brachiopoda;Linguliformea;Lingulata;Lingulida;Lin  
 guloidea;Lingulidae;Lingula;Lingula anatina  
 UdeM00000005740 7574 132.1 UdeM00000005740 XP\_013414864.2 61.4 101  
 38 1 1 100 41 141 4.00E-28 132.1 7574 cellular  
 organisms;Eukaryota;Opisthokonta;Metazoa;Eumetazoa;Bilateria;Protostomia;  
 Spiralia;Lophotrochozoa;Brachiopoda;Linguliformea;Lingulata;Lingulida;Lin  
 guloidea;Lingulidae;Lingula;Lingula anatina  
 UdeM00000005741 29159 248.8 UdeM00000005741 XP\_034318481.1 39.7 476  
 215 16 206 624 400 860 1.80E-62 248.8 29159 cellular  
 organisms;Eukaryota;Opisthokonta;Metazoa;Eumetazoa;Bilateria;Protostomia;



Spiralia; Lophotrochozoa; Mollusca; Bivalvia; Autobranchia; Pteriomorpha; Ostr  
eida; Ostreoidea; Ostreidae; Crassostrea; Crassostrea gigas  
UdeM00000005742 29159 577.8 UdeM00000005742 XP\_034318481.1 52.1 681  
251 17 1 624 198 860 1.70E-161 577.8 29159 cellular  
organisms; Eukaryota; Opisthokonta; Metazoa; Eumetazoa; Bilateria; Protostomia;  
Spiralia; Lophotrochozoa; Mollusca; Bivalvia; Autobranchia; Pteriomorpha; Ostr  
eida; Ostreoidea; Ostreidae; Crassostrea; Crassostrea gigas  
UdeM00000005744 29159 344.7 UdeM00000005744 XP\_034318481.1 78 200  
44 0 1 200 1 200 7.90E-92 344.7 29159 cellular  
organisms; Eukaryota; Opisthokonta; Metazoa; Eumetazoa; Bilateria; Protostomia;  
Spiralia; Lophotrochozoa; Mollusca; Bivalvia; Autobranchia; Pteriomorpha; Ostr  
eida; Ostreoidea; Ostreidae; Crassostrea; Crassostrea gigas  
UdeM00000005745 6573 572.4 UdeM00000005745 XP\_021371477.1 73.6 405  
99 5 1 400 1 402 4.50E-160 572.4 6573 cellular  
organisms; Eukaryota; Opisthokonta; Metazoa; Eumetazoa; Bilateria; Protostomia;  
Spiralia; Lophotrochozoa; Mollusca; Bivalvia; Autobranchia; Pteriomorpha; Pect  
inida; Pectinoidea; Pectinidae; Mizuhopecten; Mizuhopecten yessoensis  
UdeM00000005746 6573 545.4 UdeM00000005746 XP\_021371477.1 75 372  
88 3 1 370 1 369 6.10E-152 545.4 6573 cellular  
organisms; Eukaryota; Opisthokonta; Metazoa; Eumetazoa; Bilateria; Protostomia;  
Spiralia; Lophotrochozoa; Mollusca; Bivalvia; Autobranchia; Pteriomorpha; Pect  
inida; Pectinoidea; Pectinidae; Mizuhopecten; Mizuhopecten yessoensis  
UdeM00000005747 6596 610.9 UdeM00000005747 XP\_045185077.1 53.4 603  
245 10 6 602 5 577 1.80E-171 610.9 6596 cellular  
organisms; Eukaryota; Opisthokonta; Metazoa; Eumetazoa; Bilateria; Protostomia;  
Spiralia; Lophotrochozoa; Mollusca; Bivalvia; Autobranchia; Heteroconchia; Eue  
terodonta; Imparidentia; Venerida; Veneroidea; Veneridae; Mercenaria; Mercenari  
a mercenaria  
UdeM00000005748 6596 282.7 UdeM00000005748 XP\_045185077.1 56.8 250  
105 2 1 247 328 577 4.70E-73 282.7 6596 cellular  
organisms; Eukaryota; Opisthokonta; Metazoa; Eumetazoa; Bilateria; Protostomia;  
Spiralia; Lophotrochozoa; Mollusca; Bivalvia; Autobranchia; Heteroconchia; Eue  
terodonta; Imparidentia; Venerida; Veneroidea; Veneridae; Mercenaria; Mercenari  
a mercenaria  
UdeM00000005751 6596 373.6 UdeM00000005751 XP\_045183844.1 41.4 522  
251 10 22 522 65 552 4.10E-100 373.6 6596 cellular  
organisms; Eukaryota; Opisthokonta; Metazoa; Eumetazoa; Bilateria; Protostomia;  
Spiralia; Lophotrochozoa; Mollusca; Bivalvia; Autobranchia; Heteroconchia; Eue  
terodonta; Imparidentia; Venerida; Veneroidea; Veneridae; Mercenaria; Mercenari  
a mercenaria  
UdeM00000005752 6596 306.6 UdeM00000005752 XP\_045183844.1 33.4 638  
249 19 10 561 10 557 6.60E-80 306.6 6596 cellular  
organisms; Eukaryota; Opisthokonta; Metazoa; Eumetazoa; Bilateria; Protostomia;  
Spiralia; Lophotrochozoa; Mollusca; Bivalvia; Autobranchia; Heteroconchia; Eue  
terodonta; Imparidentia; Venerida; Veneroidea; Veneridae; Mercenaria; Mercenari  
a mercenaria  
UdeM00000005753 7574 612.1 UdeM00000005753 XP\_013381957.1 55.1 635  
207 12 44 606 64 692 9.50E-172 612.1 7574 cellular  
organisms; Eukaryota; Opisthokonta; Metazoa; Eumetazoa; Bilateria; Protostomia;  
Spiralia; Lophotrochozoa; Brachiopoda; Linguliformea; Lingulata; Lingulida; Lin  
guloidea; Lingulidae; Lingula; Lingula anatina  
UdeM00000005754 7574 610.9 UdeM00000005754 XP\_013381957.1 55.2 632  
205 12 44 600 64 692 2.10E-171 610.9 7574 cellular  
organisms; Eukaryota; Opisthokonta; Metazoa; Eumetazoa; Bilateria; Protostomia;

Spiralia;Lophotrochozoa;Brachiopoda;Linguliformea;Lingulata;Lingulida;Linguloidea;Lingulidae;Lingula;Lingula anatina

UdeM00000005755 400727 575.5 UdeM00000005755 XP\_025082169.1 62.9  
480 149 4 6 457 13 491 6.40E-161 575.5 400727  
cellular

organisms;Eukaryota;Opisthokonta;Metazoa;Eumetazoa;Bilateria;Protostomia;Spiralia;Lophotrochozoa;Mollusca;Gastropoda;Caenogastropoda;Architaenioglossa;Ampullarioidea;Ampullariidae;Pomacea;Pomacea canaliculata

UdeM00000005756 225164 75.1 UdeM00000005756 XP\_009058199.1 38.8  
103 36 2 1 103 1 76 5.90E-111 75.1 225164  
cellular

organisms;Eukaryota;Opisthokonta;Metazoa;Eumetazoa;Bilateria;Protostomia;Spiralia;Lophotrochozoa;Mollusca;Gastropoda;Patellogastropoda;Lottioidae;Lottiidae;Lottia;Lottia gigantea

UdeM00000005757 6573 112.1 UdeM00000005757 XP\_021367843.1 57.5 87  
33 1 35 117 337 423 5.80E-22 112.1 6573 cellular

organisms;Eukaryota;Opisthokonta;Metazoa;Eumetazoa;Bilateria;Protostomia;Spiralia;Lophotrochozoa;Mollusca;Bivalvia;Autobranchia;Pteriomorphia;Pectinida;Pectinoidea;Pectinidae;Mizuhopecten;Mizuhopecten yessoensis

UdeM00000005759 6596 724.9 UdeM00000005759 XP\_045183347.1 55.6 662  
278 6 359 1014 359 1010 1.40E-205 724.9 6596 cellular

organisms;Eukaryota;Opisthokonta;Metazoa;Eumetazoa;Bilateria;Protostomia;Spiralia;Lophotrochozoa;Mollusca;Bivalvia;Autobranchia;Heteroconchia;Euheterodonta;Imparidentia;Venerida;Veneroidea;Veneridae;Mercenaria;Mercenaria mercenaria

UdeM00000005760 6596 119.8 UdeM00000005760 XP\_045183770.1 46.2 119  
62 2 31 148 23 140 7.00E-24 119.8 6596 cellular

organisms;Eukaryota;Opisthokonta;Metazoa;Eumetazoa;Bilateria;Protostomia;Spiralia;Lophotrochozoa;Mollusca;Bivalvia;Autobranchia;Heteroconchia;Euheterodonta;Imparidentia;Venerida;Veneroidea;Veneridae;Mercenaria;Mercenaria mercenaria

UdeM00000005761 6596 119.8 UdeM00000005761 XP\_045183770.1 46.2 119  
62 2 31 148 23 140 8.70E-24 119.8 6596 cellular

organisms;Eukaryota;Opisthokonta;Metazoa;Eumetazoa;Bilateria;Protostomia;Spiralia;Lophotrochozoa;Mollusca;Bivalvia;Autobranchia;Heteroconchia;Euheterodonta;Imparidentia;Venerida;Veneroidea;Veneridae;Mercenaria;Mercenaria mercenaria

UdeM00000005762 6565 97.1 UdeM00000005762 XP\_022310890.1 42.2 90  
52 0 77 166 17 106 2.40E-17 97.1 6565 cellular

organisms;Eukaryota;Opisthokonta;Metazoa;Eumetazoa;Bilateria;Protostomia;Spiralia;Lophotrochozoa;Mollusca;Bivalvia;Autobranchia;Pteriomorphia;Ostreida;Ostreoidae;Ostreidae;Crassostrea;Crassostrea virginica

UdeM00000005763 29159 137.1 UdeM00000005763 XP\_034320651.1 31.8 280  
144 11 205 451 29 294 6.80E-29 137.1 29159 cellular

organisms;Eukaryota;Opisthokonta;Metazoa;Eumetazoa;Bilateria;Protostomia;Spiralia;Lophotrochozoa;Mollusca;Bivalvia;Autobranchia;Pteriomorphia;Ostreida;Ostreoidae;Ostreidae;Crassostrea;Crassostrea gigas

UdeM00000005766 6573 75.1 UdeM00000005766 XP\_021359095.1 33 115  
69 2 99 208 231 342 1.20E-10 75.1 6573 cellular

organisms;Eukaryota;Opisthokonta;Metazoa;Eumetazoa;Bilateria;Protostomia;Spiralia;Lophotrochozoa;Mollusca;Bivalvia;Autobranchia;Pteriomorphia;Pectinida;Pectinoidea;Pectinidae;Mizuhopecten;Mizuhopecten yessoensis

UdeM00000005767 6596 670.2 UdeM00000005767 XP\_045193213.1 70.5 468  
138 0 45 512 66 533 2.20E-189 670.2 6596 cellular

organisms;Eukaryota;Opisthokonta;Metazoa;Eumetazoa;Bilateria;Protostomia;Spiralia;Lophotrochozoa;Mollusca;Bivalvia;Autobranchia;Heteroconchia;Euheterodonta;Imparidentia;Venerida;Veneroidea;Veneridae;Mercenaria;Mercenaria mercenaria

UdeM00000005768 6596 118.6 UdeM00000005768 XP\_045184177.1 47.6 145  
64 5 152 291 1 138 1.30E-23 118.6 6596 cellular

organisms;Eukaryota;Opisthokonta;Metazoa;Eumetazoa;Bilateria;Protostomia;Spiralia;Lophotrochozoa;Mollusca;Bivalvia;Autobranchia;Heteroconchia;Euheterodonta;Imparidentia;Venerida;Veneroidea;Veneridae;Mercenaria;Mercenaria mercenaria

UdeM00000005769 1735272 82.4 UdeM00000005769 XP\_041379277.1 28.5  
228 149 8 51 269 33 255 1.20E-12 82.4 1735272  
cellular

organisms;Eukaryota;Opisthokonta;Metazoa;Eumetazoa;Bilateria;Protostomia;Spiralia;Lophotrochozoa;Mollusca;Gastropoda;Neomphalina;Neomphaloidea;Peltospiridae;Gigantopelta;Gigantopelta aegis

UdeM00000005770 1735272 574.3 UdeM00000005770 XP\_041347279.1 41.2  
746 407 11 1 717 1 743 2.10E-160 574.3 1735272  
cellular

organisms;Eukaryota;Opisthokonta;Metazoa;Eumetazoa;Bilateria;Protostomia;Spiralia;Lophotrochozoa;Mollusca;Gastropoda;Neomphalina;Neomphaloidea;Peltospiridae;Gigantopelta;Gigantopelta aegis

UdeM00000005771 1735272 192.6 UdeM00000005771 XP\_041347279.1 70.1  
117 35 0 1 117 766 882 2.90E-46 192.6 1735272  
cellular

organisms;Eukaryota;Opisthokonta;Metazoa;Eumetazoa;Bilateria;Protostomia;Spiralia;Lophotrochozoa;Mollusca;Gastropoda;Neomphalina;Neomphaloidea;Peltospiridae;Gigantopelta;Gigantopelta aegis

UdeM00000005772 29159 92 UdeM00000005772 XP\_011447757.2 45.2 93  
45 3 115 201 223 315 1.70E-15 92 29159 cellular

organisms;Eukaryota;Opisthokonta;Metazoa;Eumetazoa;Bilateria;Protostomia;Spiralia;Lophotrochozoa;Mollusca;Bivalvia;Autobranchia;Pteriomorphia;Ostreida;Ostreoidea;Ostreidae;Crassostrea;Crassostrea gigas

UdeM00000005773 6596 157.1 UdeM00000005773 XP\_045215078.1 38.9 473  
188 8 22 433 3 435 5.20E-35 157.1 6596 cellular

organisms;Eukaryota;Opisthokonta;Metazoa;Eumetazoa;Bilateria;Protostomia;Spiralia;Lophotrochozoa;Mollusca;Bivalvia;Autobranchia;Heteroconchia;Euheterodonta;Imparidentia;Venerida;Veneroidea;Veneridae;Mercenaria;Mercenaria mercenaria

UdeM00000005774 29159 92 UdeM00000005774 XP\_011447757.2 45.2 93  
45 3 11 97 223 315 1.30E-15 92 29159 cellular

organisms;Eukaryota;Opisthokonta;Metazoa;Eumetazoa;Bilateria;Protostomia;Spiralia;Lophotrochozoa;Mollusca;Bivalvia;Autobranchia;Pteriomorphia;Ostreida;Ostreoidea;Ostreidae;Crassostrea;Crassostrea gigas

UdeM00000005775 6596 443.7 UdeM00000005775 XP\_045168364.1 51.8 570  
249 7 15 561 21 587 3.40E-121 443.7 6596 cellular

organisms;Eukaryota;Opisthokonta;Metazoa;Eumetazoa;Bilateria;Protostomia;Spiralia;Lophotrochozoa;Mollusca;Bivalvia;Autobranchia;Heteroconchia;Euheterodonta;Imparidentia;Venerida;Veneroidea;Veneridae;Mercenaria;Mercenaria mercenaria

UdeM00000005776 6596 805.8 UdeM00000005776 XP\_045207434.1 52.1 721  
341 4 90 809 108 825 4.90E-230 805.8 6596 cellular

organisms;Eukaryota;Opisthokonta;Metazoa;Eumetazoa;Bilateria;Protostomia;Spiralia;Lophotrochozoa;Mollusca;Bivalvia;Autobranchia;Heteroconchia;Euheterodonta;Imparidentia;Venerida;Veneroidea;Veneridae;Mercenaria;Mercenaria mercenaria

terodonta;Imparidentia;Venerida;Veneroidea;Veneridae;Mercenaria;Mercenaria mercenaria  
 UdeM00000005777 6565 363.2 UdeM00000005777 XP\_022306772.1 79.5 224  
 44 2 5 228 26 247 2.40E-97 363.2 6565 cellular  
 organisms;Eukaryota;Opisthokonta;Metazoa;Eumetazoa;Bilateria;Protostomia;  
 Spiralia;Lophotrochozoa;Mollusca;Bivalvia;Autobranchia;Pteriomorpha;Ostr  
 eida;Ostreoidea;Ostreidae;Crassostrea;Crassostrea virginica  
 UdeM00000005778 6573 223.8 UdeM00000005778 XP\_021362470.1 26.4 996  
 625 29 29 977 67 1001 9.70E-55 223.8 6573 cellular  
 organisms;Eukaryota;Opisthokonta;Metazoa;Eumetazoa;Bilateria;Protostomia;  
 Spiralia;Lophotrochozoa;Mollusca;Bivalvia;Autobranchia;Pteriomorpha;Pect  
 inida;Pectinoidea;Pectinidae;Mizuhopecten;Mizuhopecten yessoensis  
 UdeM00000005779 6573 221.5 UdeM00000005779 XP\_021362470.1 26.4 1014  
 624 31 68 1038 67 1001 5.10E-54 221.5 6573 cellular  
 organisms;Eukaryota;Opisthokonta;Metazoa;Eumetazoa;Bilateria;Protostomia;  
 Spiralia;Lophotrochozoa;Mollusca;Bivalvia;Autobranchia;Pteriomorpha;Pect  
 inida;Pectinoidea;Pectinidae;Mizuhopecten;Mizuhopecten yessoensis  
 UdeM00000005780 6596 349 UdeM00000005780 XP\_045183211.1 72.6 237  
 64 1 1 236 1 237 4.80E-93 349 6596 cellular  
 organisms;Eukaryota;Opisthokonta;Metazoa;Eumetazoa;Bilateria;Protostomia;  
 Spiralia;Lophotrochozoa;Mollusca;Bivalvia;Autobranchia;Heteroconchia;Euhe  
 terodonta;Imparidentia;Venerida;Veneroidea;Veneridae;Mercenaria;Mercenari  
 a mercenaria  
 UdeM00000005781 2607531 229.9 UdeM00000005781 XP\_029645013.1 30.8  
 675 360 19 36 638 1290 1929 8.90E-57 229.9 2607531  
 cellular  
 organisms;Eukaryota;Opisthokonta;Metazoa;Eumetazoa;Bilateria;Protostomia;  
 Spiralia;Lophotrochozoa;Mollusca;Cephalopoda;Coleoidea;Octopodiformes;Oct  
 opoda;Incirrata;Octopodidae;Octopus;Octopus sinensis  
 UdeM00000005782 6596 892.5 UdeM00000005782 XP\_045185208.1 41.1 1510  
 725 43 235 1655 305 1738 1.00E-255 892.5 6596 cellular  
 organisms;Eukaryota;Opisthokonta;Metazoa;Eumetazoa;Bilateria;Protostomia;  
 Spiralia;Lophotrochozoa;Mollusca;Bivalvia;Autobranchia;Heteroconchia;Euhe  
 terodonta;Imparidentia;Venerida;Veneroidea;Veneridae;Mercenaria;Mercenari  
 a mercenaria  
 UdeM00000005783 6579 159.8 UdeM00000005783 XP\_033725483.1 31.1 366  
 217 9 1 345 11 362 6.90E-36 159.8 6579 cellular  
 organisms;Eukaryota;Opisthokonta;Metazoa;Eumetazoa;Bilateria;Protostomia;  
 Spiralia;Lophotrochozoa;Mollusca;Bivalvia;Autobranchia;Pteriomorpha;Pect  
 inida;Pectinoidea;Pectinidae;Pecten;Pecten maximus  
 UdeM00000005784 6579 748 UdeM00000005784 XP\_033724909.1 80.2 520  
 54 8 1 478 1 513 7.20E-213 748 6579 cellular  
 organisms;Eukaryota;Opisthokonta;Metazoa;Eumetazoa;Bilateria;Protostomia;  
 Spiralia;Lophotrochozoa;Mollusca;Bivalvia;Autobranchia;Pteriomorpha;Pect  
 inida;Pectinoidea;Pectinidae;Pecten;Pecten maximus  
 UdeM00000005785 6579 625.2 UdeM00000005785 XP\_033725354.1 71.8 440  
 113 8 157 595 135 564 8.80E-176 625.2 6579 cellular  
 organisms;Eukaryota;Opisthokonta;Metazoa;Eumetazoa;Bilateria;Protostomia;  
 Spiralia;Lophotrochozoa;Mollusca;Bivalvia;Autobranchia;Pteriomorpha;Pect  
 inida;Pectinoidea;Pectinidae;Pecten;Pecten maximus  
 UdeM00000005786 29159 310.8 UdeM00000005786 XP\_034330861.1 44.4 302  
 162 3 73 372 740 1037 2.70E-81 310.8 29159 cellular  
 organisms;Eukaryota;Opisthokonta;Metazoa;Eumetazoa;Bilateria;Protostomia;

Spiralia; Lophotrochozoa; Mollusca; Bivalvia; Autobranchia; Pteriomorphia; Ostr  
eida; Ostreoida; Ostreidae; Crassostrea; Crassostrea gigas  
UdeM00000005787 6596 391.3 UdeM00000005787 XP\_045181993.1 50.9 342  
162 1 96 437 425 760 1.60E-105 391.3 6596 cellular  
organisms; Eukaryota; Opisthokonta; Metazoa; Eumetazoa; Bilateria; Protostomia;  
Spiralia; Lophotrochozoa; Mollusca; Bivalvia; Autobranchia; Heteroconchia; Eue  
terodonta; Imparidentia; Venerida; Veneroidea; Veneridae; Mercenaria; Mercenari  
a mercenaria  
UdeM00000005788 6596 232.6 UdeM00000005788 XP\_045182321.1 49.8 211  
106 0 1 211 282 492 4.60E-58 232.6 6596 cellular  
organisms; Eukaryota; Opisthokonta; Metazoa; Eumetazoa; Bilateria; Protostomia;  
Spiralia; Lophotrochozoa; Mollusca; Bivalvia; Autobranchia; Heteroconchia; Eue  
terodonta; Imparidentia; Venerida; Veneroidea; Veneridae; Mercenaria; Mercenari  
a mercenaria  
UdeM00000005789 6596 146 UdeM00000005789 XP\_045181993.1 46.1 128  
63 1 133 260 420 541 6.80E-32 146 6596 cellular  
organisms; Eukaryota; Opisthokonta; Metazoa; Eumetazoa; Bilateria; Protostomia;  
Spiralia; Lophotrochozoa; Mollusca; Bivalvia; Autobranchia; Heteroconchia; Eue  
terodonta; Imparidentia; Venerida; Veneroidea; Veneridae; Mercenaria; Mercenari  
a mercenaria  
UdeM00000005790 6573 300.4 UdeM00000005790 XP\_021354542.1 63.1 225  
75 3 20 241 4 223 2.00E-78 300.4 6573 cellular  
organisms; Eukaryota; Opisthokonta; Metazoa; Eumetazoa; Bilateria; Protostomia;  
Spiralia; Lophotrochozoa; Mollusca; Bivalvia; Autobranchia; Pteriomorphia; Pect  
inida; Pectinoidea; Pectinidae; Mizuhopecten; Mizuhopecten yessoensis  
UdeM00000005791 6596 103.2 UdeM00000005791 XP\_045169862.1 37.5 152  
71 3 61 190 7 156 4.10E-19 103.2 6596 cellular  
organisms; Eukaryota; Opisthokonta; Metazoa; Eumetazoa; Bilateria; Protostomia;  
Spiralia; Lophotrochozoa; Mollusca; Bivalvia; Autobranchia; Heteroconchia; Eue  
terodonta; Imparidentia; Venerida; Veneroidea; Veneridae; Mercenaria; Mercenari  
a mercenaria  
UdeM00000005793 6565 218 UdeM00000005793 XP\_022309494.1 40.4 267  
155 3 2 264 478 744 1.40E-53 218 6565 cellular  
organisms; Eukaryota; Opisthokonta; Metazoa; Eumetazoa; Bilateria; Protostomia;  
Spiralia; Lophotrochozoa; Mollusca; Bivalvia; Autobranchia; Pteriomorphia; Ostr  
eida; Ostreoida; Ostreidae; Crassostrea; Crassostrea virginica  
UdeM00000005794 7668 100.1 UdeM00000005794 XP\_030830869.1 39.8 118  
70 1 105 221 494 611 3.70E-18 100.1 7668 cellular  
organisms; Eukaryota; Opisthokonta; Metazoa; Eumetazoa; Bilateria; Deuterostomi  
a; Echinodermata; Eleutherozoa; Echinozoa; Echinoidea; Euechinoidea; Echinacea;  
Camarodonta; Echinidea; Strongylocentrotidae; Strongylocentrotus; Strongyloce  
ntrotus purpuratus  
UdeM00000005795 586833 99.8 UdeM00000005795 XP\_029921783.1 53.8  
78 36 0 277 354 544 621 7.70E-18 99.8 586833  
cellular  
organisms; Eukaryota; Opisthokonta; Metazoa; Eumetazoa; Bilateria; Deuterostomi  
a; Chordata; Craniata; Vertebrata; Gnathostomata; Teleostomi; Euteleostomi; Acti  
nopterygii; Actinopteri; Neopterygii; Teleostei; Osteoglossocephalai; Clupeoce  
phala; Euteleosteomorpha; Neoteleostei; Eurypterygia; Ctenosquamata; Acanthomo  
rphata; Euacanthomorpha; Holocentrimorphaceae; Holocentriformes; Holocentr  
idae; Myripristinae; Myripristis; Myripristis murdjan  
UdeM00000005796 8384 93.2 UdeM00000005796 XP\_040285602.1 40.2 102  
60 1 223 323 102 203 6.60E-16 93.2 8384 cellular  
organisms; Eukaryota; Opisthokonta; Metazoa; Eumetazoa; Bilateria; Deuterostomi

a;Chordata;Craniata;Vertebrata;Gnathostomata;Teleostomi;Euteleostomi;Sarcopterygii;Dipnotetrapodomorpha;Tetrapoda;Amphibia;Batrachia;Anura;Neobatrachia;Hylloidea;Bufonidae;Bufo;Bufo bufo

UdeM00000005797 6850 97.4 UdeM00000005797 XP\_022254331.1 56.2 73  
32 0 564 636 423 495 6.90E-17 97.4 6850 cellular  
organisms;Eukaryota;Opisthokonta;Metazoa;Eumetazoa;Bilateria;Protostomia;Ecdysozoa;Panarthropoda;Arthropoda;Chelicerata;Merostomata;Xiphosura;Limulidae;Limulus;Limulus polyphemus

UdeM00000005799 6596 137.1 UdeM00000005799 XP\_045189682.1 29.2 465  
264 14 1 444 1 421 5.50E-29 137.1 6596 cellular  
organisms;Eukaryota;Opisthokonta;Metazoa;Eumetazoa;Bilateria;Protostomia;Spiralia;Lophotrochozoa;Mollusca;Bivalvia;Autobranchia;Heteroconchia;Euherodonta;Imparidentia;Venerida;Veneroidea;Veneridae;Mercenaria;Mercenaria mercenaria

UdeM00000005798 6596 136.7 UdeM00000005798 XP\_045189682.1 29.2 465  
264 14 3 446 1 421 7.20E-29 136.7 6596 cellular  
organisms;Eukaryota;Opisthokonta;Metazoa;Eumetazoa;Bilateria;Protostomia;Spiralia;Lophotrochozoa;Mollusca;Bivalvia;Autobranchia;Heteroconchia;Euherodonta;Imparidentia;Venerida;Veneroidea;Veneridae;Mercenaria;Mercenaria mercenaria

UdeM00000005800 6596 160.6 UdeM00000005800 XP\_045189682.1 27.3 542  
285 15 5 538 9 449 5.60E-36 160.6 6596 cellular  
organisms;Eukaryota;Opisthokonta;Metazoa;Eumetazoa;Bilateria;Protostomia;Spiralia;Lophotrochozoa;Mollusca;Bivalvia;Autobranchia;Heteroconchia;Euherodonta;Imparidentia;Venerida;Veneroidea;Veneridae;Mercenaria;Mercenaria mercenaria

UdeM00000005807 6596 652.5 UdeM00000005807 XP\_045184919.1 51.7 644  
292 12 6 638 6 641 5.50E-184 652.5 6596 cellular  
organisms;Eukaryota;Opisthokonta;Metazoa;Eumetazoa;Bilateria;Protostomia;Spiralia;Lophotrochozoa;Mollusca;Bivalvia;Autobranchia;Heteroconchia;Euherodonta;Imparidentia;Venerida;Veneroidea;Veneridae;Mercenaria;Mercenaria mercenaria

UdeM00000005808 6596 549.3 UdeM00000005808 XP\_045184814.1 46.9 646  
318 13 14 643 8 644 6.60E-153 549.3 6596 cellular  
organisms;Eukaryota;Opisthokonta;Metazoa;Eumetazoa;Bilateria;Protostomia;Spiralia;Lophotrochozoa;Mollusca;Bivalvia;Autobranchia;Heteroconchia;Euherodonta;Imparidentia;Venerida;Veneroidea;Veneridae;Mercenaria;Mercenaria mercenaria

UdeM00000005809 6579 171 UdeM00000005809 XP\_033725684.1 50 174  
77 2 17 180 72 245 1.40E-39 171 6579 cellular  
organisms;Eukaryota;Opisthokonta;Metazoa;Eumetazoa;Bilateria;Protostomia;Spiralia;Lophotrochozoa;Mollusca;Bivalvia;Autobranchia;Pteriomorpha;Pectinida;Pectinoidea;Pectinidae;Pecten;Pecten maximus

UdeM00000005810 6596 312 UdeM00000005810 XP\_045184446.1 49.7 328  
160 5 60 385 140 464 1.10E-81 312 6596 cellular  
organisms;Eukaryota;Opisthokonta;Metazoa;Eumetazoa;Bilateria;Protostomia;Spiralia;Lophotrochozoa;Mollusca;Bivalvia;Autobranchia;Heteroconchia;Euherodonta;Imparidentia;Venerida;Veneroidea;Veneridae;Mercenaria;Mercenaria mercenaria

UdeM00000005811 6596 303.9 UdeM00000005811 XP\_045184446.1 47.9 340  
160 5 60 397 140 464 3.10E-79 303.9 6596 cellular  
organisms;Eukaryota;Opisthokonta;Metazoa;Eumetazoa;Bilateria;Protostomia;Spiralia;Lophotrochozoa;Mollusca;Bivalvia;Autobranchia;Heteroconchia;Euherodonta;Imparidentia;Venerida;Veneroidea;Veneridae;Mercenaria;Mercenaria mercenaria

terodonta;Imparidentia;Venerida;Veneroidea;Veneridae;Mercenaria;Mercenaria mercenaria  
 UdeM000000042757 6706 152.5 UdeM000000042757 XP\_042235765.1 44.6 157  
 87 0 1 157 1 157 4.50E-34 152.5 6706 cellular  
 organisms;Eukaryota;Opisthokonta;Metazoa;Eumetazoa;Bilateria;Protostomia;  
 Ecdysozoa;Panarthropoda;Arthropoda;Mandibulata;Pancrustacea;Crustacea;Mul  
 ticrustacea;Malacostraca;Eumalacostraca;Eucarida;Decapoda;Pleocyemata;Ast  
 acidea;Nephropoidea;Nephropidae;Homarus;Homarus americanus  
 UdeM000000042759 6565 144.8 UdeM000000042759 XP\_022334993.1 76.5 81  
 19 0 38 118 733 813 6.90E-32 144.8 6565 cellular  
 organisms;Eukaryota;Opisthokonta;Metazoa;Eumetazoa;Bilateria;Protostomia;  
 Spiralia;Lophotrochozoa;Mollusca;Bivalvia;Autobranchia;Pteriormorphia;Ostr  
 eida;Ostreoidea;Ostreidae;Crassostrea;Crassostrea virginica  
 UdeM000000042761 6565 97.4 UdeM000000042761 XP\_022305631.1 49.5 109  
 49 2 2 104 67 175 1.30E-17 97.4 6565 cellular  
 organisms;Eukaryota;Opisthokonta;Metazoa;Eumetazoa;Bilateria;Protostomia;  
 Spiralia;Lophotrochozoa;Mollusca;Bivalvia;Autobranchia;Pteriormorphia;Ostr  
 eida;Ostreoidea;Ostreidae;Crassostrea;Crassostrea virginica  
 UdeM000000002602 6596 209.5 UdeM000000002602 XP\_045183440.1 57.8 187  
 74 3 1 186 198 380 5.50E-51 209.5 6596 cellular  
 organisms;Eukaryota;Opisthokonta;Metazoa;Eumetazoa;Bilateria;Protostomia;  
 Spiralia;Lophotrochozoa;Mollusca;Bivalvia;Autobranchia;Heteroconchia;Euhe  
 terodonta;Imparidentia;Venerida;Veneroidea;Veneridae;Mercenaria;Mercenari  
 a mercenaria  
 UdeM000000002603 6105 146 UdeM000000002603 XP\_031568563.1 46.6 176  
 91 3 39 213 3 176 5.60E-32 146 6105 cellular  
 organisms;Eukaryota;Opisthokonta;Metazoa;Eumetazoa;Cnidaria;Anthozoa;Hexa  
 corallia;Actiniaria;Actiniidae;Actinia;Actinia tenebrosa  
 UdeM000000002604 6596 1045 UdeM000000002604 XP\_045181186.1 78.8 670  
 100 7 16 658 26 680 3.90E-302 1045 6596 cellular  
 organisms;Eukaryota;Opisthokonta;Metazoa;Eumetazoa;Bilateria;Protostomia;  
 Spiralia;Lophotrochozoa;Mollusca;Bivalvia;Autobranchia;Heteroconchia;Euhe  
 terodonta;Imparidentia;Venerida;Veneroidea;Veneridae;Mercenaria;Mercenari  
 a mercenaria  
 UdeM000000002605 6596 100.5 UdeM000000002605 XP\_045180431.1 55.3 94  
 41 1 1215 1308 246 338 1.70E-17 100.5 6596 cellular  
 organisms;Eukaryota;Opisthokonta;Metazoa;Eumetazoa;Bilateria;Protostomia;  
 Spiralia;Lophotrochozoa;Mollusca;Bivalvia;Autobranchia;Heteroconchia;Euhe  
 terodonta;Imparidentia;Venerida;Veneroidea;Veneridae;Mercenaria;Mercenari  
 a mercenaria  
 UdeM000000002606 6579 839 UdeM000000002606 XP\_033727809.1 84.3 466  
 70 3 1 466 1 463 3.10E-240 839 6579 cellular  
 organisms;Eukaryota;Opisthokonta;Metazoa;Eumetazoa;Bilateria;Protostomia;  
 Spiralia;Lophotrochozoa;Mollusca;Bivalvia;Autobranchia;Pteriormorphia;Pect  
 inida;Pectinoidea;Pectinidae;Pecten;Pecten maximus  
 UdeM000000002607 6596 430.3 UdeM000000002607 XP\_045206212.1 42.9 525  
 284 5 6 518 3 523 3.70E-117 430.3 6596 cellular  
 organisms;Eukaryota;Opisthokonta;Metazoa;Eumetazoa;Bilateria;Protostomia;  
 Spiralia;Lophotrochozoa;Mollusca;Bivalvia;Autobranchia;Heteroconchia;Euhe  
 terodonta;Imparidentia;Venerida;Veneroidea;Veneridae;Mercenaria;Mercenari  
 a mercenaria  
 UdeM000000002608 7574 67.4 UdeM000000002608 XP\_013389734.1 25.7 148  
 105 3 49 191 55 202 2.60E-08 67.4 7574 cellular  
 organisms;Eukaryota;Opisthokonta;Metazoa;Eumetazoa;Bilateria;Protostomia;

Spiralia;Lophotrochozoa;Brachiopoda;Linguliformea;Lingulata;Lingulida;Linguloidea;Lingulidae;Lingula;Lingula anatina

UdeM00000002609 7574 60.5 UdeM00000002609 XP\_013389750.1 24.8 149  
105 3 59 201 55 202 3.40E-06 60.5 7574 cellular  
organisms;Eukaryota;Opisthokonta;Metazoa;Eumetazoa;Bilateria;Protostomia;  
Spiralia;Lophotrochozoa;Brachiopoda;Linguliformea;Lingulata;Lingulida;Linguloidea;Lingulidae;Lingula;Lingula anatina

UdeM00000002610 6596 69.3 UdeM00000002610 XP\_045212703.1 24.2 219  
147 5 1 217 1 202 7.20E-09 69.3 6596 cellular  
organisms;Eukaryota;Opisthokonta;Metazoa;Eumetazoa;Bilateria;Protostomia;  
Spiralia;Lophotrochozoa;Mollusca;Bivalvia;Autobranchia;Heteroconchia;Euherodonta;Imparidentia;Venerida;Veneroidea;Veneridae;Mercenaria;Mercenaria mercenaria

UdeM00000002611 6579 245.7 UdeM00000002611 XP\_033726569.1 47.2 271  
142 1 172 441 44 314 1.10E-61 245.7 6579 cellular  
organisms;Eukaryota;Opisthokonta;Metazoa;Eumetazoa;Bilateria;Protostomia;  
Spiralia;Lophotrochozoa;Mollusca;Bivalvia;Autobranchia;Pteriormorphia;Pectinida;Pectinoidea;Pectinidae;Pecten;Pecten maximus

UdeM00000002612 1735272 89.7 UdeM00000002612 XP\_041361537.1 50.5  
91 45 0 183 273 47 137 6.10E-15 89.7 1735272  
cellular  
organisms;Eukaryota;Opisthokonta;Metazoa;Eumetazoa;Bilateria;Protostomia;  
Spiralia;Lophotrochozoa;Mollusca;Gastropoda;Neomphalina;Neomphaloidea;Peltospiridae;Gigantopelta;Gigantopelta aegis

UdeM00000002614 6579 241.9 UdeM00000002614 XP\_033726569.1 43.5 299  
162 3 194 485 16 314 1.70E-60 241.9 6579 cellular  
organisms;Eukaryota;Opisthokonta;Metazoa;Eumetazoa;Bilateria;Protostomia;  
Spiralia;Lophotrochozoa;Mollusca;Bivalvia;Autobranchia;Pteriormorphia;Pectinida;Pectinoidea;Pectinidae;Pecten;Pecten maximus

UdeM00000002615 6579 243.4 UdeM00000002615 XP\_033726569.1 45.5 299  
156 3 150 441 16 314 5.30E-61 243.4 6579 cellular  
organisms;Eukaryota;Opisthokonta;Metazoa;Eumetazoa;Bilateria;Protostomia;  
Spiralia;Lophotrochozoa;Mollusca;Bivalvia;Autobranchia;Pteriormorphia;Pectinida;Pectinoidea;Pectinidae;Pecten;Pecten maximus

UdeM00000002617 146911 76.3 UdeM00000002617 XP\_015261337.1 48.8  
82 41 1 133 213 614 695 5.40E-11 76.3 146911  
cellular  
organisms;Eukaryota;Opisthokonta;Metazoa;Eumetazoa;Bilateria;Deuterostomia;Chordata;Craniata;Vertebrata;Gnathostomata;Teleostomi;Euteleostomi;Sarcopterygii;Dipnotetrapodomorpha;Tetrapoda;Amniota;Sauropsida;Sauria;Lepidosauria;Squamata;Bifurcata;Gekkota;Gekkonidae;Gekkoninae;Gekko;Gekko japonicus

UdeM00000002618 6565 245.7 UdeM00000002618 XP\_022312923.1 46.1 269  
142 2 62 327 22 290 8.00E-62 245.7 6565 cellular  
organisms;Eukaryota;Opisthokonta;Metazoa;Eumetazoa;Bilateria;Protostomia;  
Spiralia;Lophotrochozoa;Mollusca;Bivalvia;Autobranchia;Pteriormorphia;Ostreida;Ostreoidea;Ostreidae;Crassostrea;Crassostrea virginica

UdeM00000002619 1735272 85.9 UdeM00000002619 XP\_041361537.1 50.5  
93 46 0 183 275 47 139 8.90E-14 85.9 1735272  
cellular  
organisms;Eukaryota;Opisthokonta;Metazoa;Eumetazoa;Bilateria;Protostomia;  
Spiralia;Lophotrochozoa;Mollusca;Gastropoda;Neomphalina;Neomphaloidea;Peltospiridae;Gigantopelta;Gigantopelta aegis



UdeM00000002620 6579 248.4 UdeM00000002620 XP\_033726569.1 44.3 300  
 160 3 145 437 16 315 1.60E-62 248.4 6579 cellular  
 organisms;Eukaryota;Opisthokonta;Metazoa;Eumetazoa;Bilateria;Protostomia;  
 Spiralia;Lophotrochozoa;Mollusca;Bivalvia;Autobranchia;Pteriomorphia;Pect  
 inida;Pectinoidea;Pectinidae;Pecten;Pecten maximus  
 UdeM00000002621 33528 109.4 UdeM00000002621 XP\_043957434.1 45.5 112  
 60 1 1 112 274 384 3.10E-21 109.4 33528 cellular  
 organisms;Eukaryota;Opisthokonta;Metazoa;Eumetazoa;Bilateria;Deuterostomi  
 a;Chordata;Craniata;Vertebrata;Gnathostomata;Teleostomi;Euteleostomi;Acti  
 nopterygii;Actinopteri;Neopterygii;Teleostei;Osteoglossocephalai;Clupeoce  
 phala;Euteleosteomorpha;Neoteleostei;Eurypterygia;Ctenosquamata;Acanthomo  
 rphata;Euacanthomorpha;Percomorphaceae;Ovalentaria;Atherinomorphae;Cyp  
 rinodontiformes;Cyprinodontoidei;Poeciliidae;Poeciliinae;Gambusia;Gambusi  
 a affinis  
 UdeM00000002623 6579 265.4 UdeM00000002623 XP\_033726569.1 48.3 302  
 149 3 13 307 13 314 9.20E-68 265.4 6579 cellular  
 organisms;Eukaryota;Opisthokonta;Metazoa;Eumetazoa;Bilateria;Protostomia;  
 Spiralia;Lophotrochozoa;Mollusca;Bivalvia;Autobranchia;Pteriomorphia;Pect  
 inida;Pectinoidea;Pectinidae;Pecten;Pecten maximus  
 UdeM00000002624 6565 429.1 UdeM00000002624 XP\_022317590.1 59 332  
 131 4 1 331 1 328 5.10E-117 429.1 6565 cellular  
 organisms;Eukaryota;Opisthokonta;Metazoa;Eumetazoa;Bilateria;Protostomia;  
 Spiralia;Lophotrochozoa;Mollusca;Bivalvia;Autobranchia;Pteriomorphia;Ostr  
 eida;Ostreidae;Crassostrea;Crassostrea virginica  
 UdeM00000002625 6596 668.3 UdeM00000002625 XP\_045181569.1 77 404  
 92 1 9 412 6 408 7.00E-189 668.3 6596 cellular  
 organisms;Eukaryota;Opisthokonta;Metazoa;Eumetazoa;Bilateria;Protostomia;  
 Spiralia;Lophotrochozoa;Mollusca;Bivalvia;Autobranchia;Heteroconchia;Euhe  
 terodonta;Imparidentia;Venerida;Veneroidea;Veneridae;Mercenaria;Mercenari  
 a mercenaria  
 UdeM00000002626 29159 127.9 UdeM00000002626 XP\_011432031.1 45.1 144  
 70 2 1 135 1 144 1.00E-26 127.9 29159 cellular  
 organisms;Eukaryota;Opisthokonta;Metazoa;Eumetazoa;Bilateria;Protostomia;  
 Spiralia;Lophotrochozoa;Mollusca;Bivalvia;Autobranchia;Pteriomorphia;Ostr  
 eida;Ostreidae;Crassostrea;Crassostrea gigas  
 UdeM00000002627 29159 133.7 UdeM00000002627 XP\_011432031.1 45.8 144  
 69 2 1 135 1 144 1.80E-28 133.7 29159 cellular  
 organisms;Eukaryota;Opisthokonta;Metazoa;Eumetazoa;Bilateria;Protostomia;  
 Spiralia;Lophotrochozoa;Mollusca;Bivalvia;Autobranchia;Pteriomorphia;Ostr  
 eida;Ostreidae;Crassostrea;Crassostrea gigas  
 UdeM00000002628 29159 131.7 UdeM00000002628 XP\_011432031.1 45.1 144  
 70 2 1 135 1 144 6.90E-28 131.7 29159 cellular  
 organisms;Eukaryota;Opisthokonta;Metazoa;Eumetazoa;Bilateria;Protostomia;  
 Spiralia;Lophotrochozoa;Mollusca;Bivalvia;Autobranchia;Pteriomorphia;Ostr  
 eida;Ostreidae;Crassostrea;Crassostrea gigas  
 UdeM00000002629 6565 119.4 UdeM00000002629 XP\_022315860.1 44.3 131  
 72 1 3 132 4 134 3.70E-24 119.4 6565 cellular  
 organisms;Eukaryota;Opisthokonta;Metazoa;Eumetazoa;Bilateria;Protostomia;  
 Spiralia;Lophotrochozoa;Mollusca;Bivalvia;Autobranchia;Pteriomorphia;Ostr  
 eida;Ostreidae;Crassostrea;Crassostrea virginica  
 UdeM00000002630 6596 222.6 UdeM00000002630 XP\_045180333.1 47.6 250  
 130 1 2 251 4 252 5.90E-55 222.6 6596 cellular  
 organisms;Eukaryota;Opisthokonta;Metazoa;Eumetazoa;Bilateria;Protostomia;  
 Spiralia;Lophotrochozoa;Mollusca;Bivalvia;Autobranchia;Heteroconchia;Euhe

terodonta;Imparidentia;Venerida;Veneroidea;Veneridae;Mercenaria;Mercenari  
 a mercenaria  
 UdeM00000002631 6596 332 UdeM00000002631 XP\_045180333.1 65.7 245  
 83 1 39 282 11 255 7.30E-88 332 6596 cellular  
 organisms;Eukaryota;Opisthokonta;Metazoa;Eumetazoa;Bilateria;Protostomia;  
 Spiralia;Lophotrochozoa;Mollusca;Bivalvia;Autobranhia;Heteroconchia;Euhe  
 terodonta;Imparidentia;Venerida;Veneroidea;Veneridae;Mercenaria;Mercenari  
 a mercenaria  
 UdeM00000002632 6596 204.9 UdeM00000002632 XP\_045180962.1 28.3 488  
 290 5 1 431 72 556 2.00E-49 204.9 6596 cellular  
 organisms;Eukaryota;Opisthokonta;Metazoa;Eumetazoa;Bilateria;Protostomia;  
 Spiralia;Lophotrochozoa;Mollusca;Bivalvia;Autobranhia;Heteroconchia;Euhe  
 terodonta;Imparidentia;Venerida;Veneroidea;Veneridae;Mercenaria;Mercenari  
 a mercenaria  
 UdeM00000002633 6596 215.3 UdeM00000002633 XP\_045180962.1 26.6 564  
 331 6 1 560 72 556 2.00E-52 215.3 6596 cellular  
 organisms;Eukaryota;Opisthokonta;Metazoa;Eumetazoa;Bilateria;Protostomia;  
 Spiralia;Lophotrochozoa;Mollusca;Bivalvia;Autobranhia;Heteroconchia;Euhe  
 terodonta;Imparidentia;Venerida;Veneroidea;Veneridae;Mercenaria;Mercenari  
 a mercenaria  
 UdeM00000002634 6596 214.5 UdeM00000002634 XP\_045180962.1 32.5 526  
 295 10 1 507 72 556 3.00E-52 214.5 6596 cellular  
 organisms;Eukaryota;Opisthokonta;Metazoa;Eumetazoa;Bilateria;Protostomia;  
 Spiralia;Lophotrochozoa;Mollusca;Bivalvia;Autobranhia;Heteroconchia;Euhe  
 terodonta;Imparidentia;Venerida;Veneroidea;Veneridae;Mercenaria;Mercenari  
 a mercenaria  
 UdeM00000002635 6573 192.6 UdeM00000002635 XP\_021358322.1 36.5 329  
 196 6 194 514 39 362 1.30E-45 192.6 6573 cellular  
 organisms;Eukaryota;Opisthokonta;Metazoa;Eumetazoa;Bilateria;Protostomia;  
 Spiralia;Lophotrochozoa;Mollusca;Bivalvia;Autobranhia;Pteriomorphia;Pect  
 inida;Pectinoidea;Pectinidae;Mizuhopecten;Mizuhopecten yessoensis  
 UdeM00000002636 6573 197.2 UdeM00000002636 XP\_021358322.1 34.7 366  
 230 6 152 514 3 362 5.20E-47 197.2 6573 cellular  
 organisms;Eukaryota;Opisthokonta;Metazoa;Eumetazoa;Bilateria;Protostomia;  
 Spiralia;Lophotrochozoa;Mollusca;Bivalvia;Autobranhia;Pteriomorphia;Pect  
 inida;Pectinoidea;Pectinidae;Mizuhopecten;Mizuhopecten yessoensis  
 UdeM00000002637 6573 197.2 UdeM00000002637 XP\_021358322.1 38.1 302  
 181 4 216 515 65 362 5.20E-47 197.2 6573 cellular  
 organisms;Eukaryota;Opisthokonta;Metazoa;Eumetazoa;Bilateria;Protostomia;  
 Spiralia;Lophotrochozoa;Mollusca;Bivalvia;Autobranhia;Pteriomorphia;Pect  
 inida;Pectinoidea;Pectinidae;Mizuhopecten;Mizuhopecten yessoensis  
 UdeM00000002638 6596 549.3 UdeM00000002638 XP\_045181417.1 58.2 445  
 179 4 37 477 13 454 4.90E-153 549.3 6596 cellular  
 organisms;Eukaryota;Opisthokonta;Metazoa;Eumetazoa;Bilateria;Protostomia;  
 Spiralia;Lophotrochozoa;Mollusca;Bivalvia;Autobranhia;Heteroconchia;Euhe  
 terodonta;Imparidentia;Venerida;Veneroidea;Veneridae;Mercenaria;Mercenari  
 a mercenaria  
 UdeM00000002639 6596 475.3 UdeM00000002639 XP\_045181417.1 57.8 391  
 158 4 37 423 13 400 8.20E-131 475.3 6596 cellular  
 organisms;Eukaryota;Opisthokonta;Metazoa;Eumetazoa;Bilateria;Protostomia;  
 Spiralia;Lophotrochozoa;Mollusca;Bivalvia;Autobranhia;Heteroconchia;Euhe  
 terodonta;Imparidentia;Venerida;Veneroidea;Veneridae;Mercenaria;Mercenari  
 a mercenaria

UdeM00000002640 6596 349.7 UdeM00000002640 XP\_045181991.1 55.6 297  
 131 1 1 297 1 296 3.50E-93 349.7 6596 cellular  
 organisms;Eukaryota;Opisthokonta;Metazoa;Eumetazoa;Bilateria;Protostomia;  
 Spiralia;Lophotrochozoa;Mollusca;Bivalvia;Autobranchia;Heteroconchia;Euhe  
 terodonta;Imparidentia;Venerida;Veneroidea;Veneridae;Mercenaria;Mercenari  
 a mercenaria  
 UdeM00000002641 29159 714.1 UdeM00000002641 XP\_034312152.1 82.5 520  
 84 3 1 520 1 513 1.20E-202 714.1 29159 cellular  
 organisms;Eukaryota;Opisthokonta;Metazoa;Eumetazoa;Bilateria;Protostomia;  
 Spiralia;Lophotrochozoa;Mollusca;Bivalvia;Autobranchia;Pteriormorphia;Ostr  
 eida;Ostreoidea;Ostreidae;Crassostrea;Crassostrea gigas  
 UdeM00000002643 29159 121.3 UdeM00000002643 XP\_034301812.1 46.6 163  
 77 1 21 183 1690 1842 1.30E-24 121.3 29159 cellular  
 organisms;Eukaryota;Opisthokonta;Metazoa;Eumetazoa;Bilateria;Protostomia;  
 Spiralia;Lophotrochozoa;Mollusca;Bivalvia;Autobranchia;Pteriormorphia;Ostr  
 eida;Ostreoidea;Ostreidae;Crassostrea;Crassostrea gigas  
 UdeM00000002642 6596 1506.5 UdeM00000002642 XP\_045182733.1 59.8  
 1930 589 25 1 1787 1 1886 0.00E+00 1506.5 6596  
 cellular  
 organisms;Eukaryota;Opisthokonta;Metazoa;Eumetazoa;Bilateria;Protostomia;  
 Spiralia;Lophotrochozoa;Mollusca;Bivalvia;Autobranchia;Heteroconchia;Euhe  
 terodonta;Imparidentia;Venerida;Veneroidea;Veneridae;Mercenaria;Mercenari  
 a mercenaria  
 UdeM00000002644 6596 1442.9 UdeM00000002644 XP\_045182732.1 64.6  
 1510 401 17 1 1418 1 1469 0.00E+00 1442.9 6596  
 cellular  
 organisms;Eukaryota;Opisthokonta;Metazoa;Eumetazoa;Bilateria;Protostomia;  
 Spiralia;Lophotrochozoa;Mollusca;Bivalvia;Autobranchia;Heteroconchia;Euhe  
 terodonta;Imparidentia;Venerida;Veneroidea;Veneridae;Mercenaria;Mercenari  
 a mercenaria  
 UdeM00000002645 6596 234.6 UdeM00000002645 XP\_045182730.1 89.3 121  
 13 0 1 121 1 121 6.80E-59 234.6 6596 cellular  
 organisms;Eukaryota;Opisthokonta;Metazoa;Eumetazoa;Bilateria;Protostomia;  
 Spiralia;Lophotrochozoa;Mollusca;Bivalvia;Autobranchia;Heteroconchia;Euhe  
 terodonta;Imparidentia;Venerida;Veneroidea;Veneridae;Mercenaria;Mercenari  
 a mercenaria  
 UdeM00000002646 6596 222.6 UdeM00000002646 XP\_045181051.1 40.2 371  
 186 9 8 354 1 359 1.10E-54 222.6 6596 cellular  
 organisms;Eukaryota;Opisthokonta;Metazoa;Eumetazoa;Bilateria;Protostomia;  
 Spiralia;Lophotrochozoa;Mollusca;Bivalvia;Autobranchia;Heteroconchia;Euhe  
 terodonta;Imparidentia;Venerida;Veneroidea;Veneridae;Mercenaria;Mercenari  
 a mercenaria  
 UdeM00000002647 29159 157.5 UdeM00000002647 XP\_034300882.1 47.5 223  
 97 7 1 217 17 225 1.90E-35 157.5 29159 cellular  
 organisms;Eukaryota;Opisthokonta;Metazoa;Eumetazoa;Bilateria;Protostomia;  
 Spiralia;Lophotrochozoa;Mollusca;Bivalvia;Autobranchia;Pteriormorphia;Ostr  
 eida;Ostreoidea;Ostreidae;Crassostrea;Crassostrea gigas  
 UdeM00000002648 6596 202.6 UdeM00000002648 XP\_045182026.1 74.6 138  
 35 0 40 177 31 168 4.20E-49 202.6 6596 cellular  
 organisms;Eukaryota;Opisthokonta;Metazoa;Eumetazoa;Bilateria;Protostomia;  
 Spiralia;Lophotrochozoa;Mollusca;Bivalvia;Autobranchia;Heteroconchia;Euhe  
 terodonta;Imparidentia;Venerida;Veneroidea;Veneridae;Mercenaria;Mercenari  
 a mercenaria

UdeM00000002649 6596 156.4 UdeM00000002649 XP\_045182026.1 86 93  
 13 0 2 94 76 168 1.80E-35 156.4 6596 cellular  
 organisms;Eukaryota;Opisthokonta;Metazoa;Eumetazoa;Bilateria;Protostomia;  
 Spiralia;Lophotrochozoa;Mollusca;Bivalvia;Autobranhia;Heteroconchia;Euhe  
 terodonta;Imparidentia;Venerida;Veneroidea;Veneridae;Mercenaria;Mercenari  
 a mercenaria

UdeM00000002650 6596 384.4 UdeM00000002650 XP\_045162054.1 35.2 559  
 341 6 9 548 6 562 2.40E-103 384.4 6596 cellular  
 organisms;Eukaryota;Opisthokonta;Metazoa;Eumetazoa;Bilateria;Protostomia;  
 Spiralia;Lophotrochozoa;Mollusca;Bivalvia;Autobranhia;Heteroconchia;Euhe  
 terodonta;Imparidentia;Venerida;Veneroidea;Veneridae;Mercenaria;Mercenari  
 a mercenaria

UdeM00000002651 1735272 127.1 UdeM00000002651 XP\_041360528.1 24.9  
 422 249 10 10 373 11 422 4.70E-26 127.1 1735272  
 cellular  
 organisms;Eukaryota;Opisthokonta;Metazoa;Eumetazoa;Bilateria;Protostomia;  
 Spiralia;Lophotrochozoa;Mollusca;Gastropoda;Neomphalina;Neomphaloidea;Pel  
 tospiridae;Gigantopelta;Gigantopelta aegis

UdeM00000002652 1735272 135.6 UdeM00000002652 XP\_041361066.1 26.5  
 423 249 13 1 369 7 421 1.30E-28 135.6 1735272  
 cellular  
 organisms;Eukaryota;Opisthokonta;Metazoa;Eumetazoa;Bilateria;Protostomia;  
 Spiralia;Lophotrochozoa;Mollusca;Gastropoda;Neomphalina;Neomphaloidea;Pel  
 tospiridae;Gigantopelta;Gigantopelta aegis

UdeM00000002653 6596 164.9 UdeM00000002653 XP\_045180962.1 27.7 488  
 245 9 1 383 72 556 2.10E-37 164.9 6596 cellular  
 organisms;Eukaryota;Opisthokonta;Metazoa;Eumetazoa;Bilateria;Protostomia;  
 Spiralia;Lophotrochozoa;Mollusca;Bivalvia;Autobranhia;Heteroconchia;Euhe  
 terodonta;Imparidentia;Venerida;Veneroidea;Veneridae;Mercenaria;Mercenari  
 a mercenaria

UdeM00000002654 6596 163.3 UdeM00000002654 XP\_045180962.1 27.8 479  
 238 9 3 376 81 556 6.00E-37 163.3 6596 cellular  
 organisms;Eukaryota;Opisthokonta;Metazoa;Eumetazoa;Bilateria;Protostomia;  
 Spiralia;Lophotrochozoa;Mollusca;Bivalvia;Autobranhia;Heteroconchia;Euhe  
 terodonta;Imparidentia;Venerida;Veneroidea;Veneridae;Mercenaria;Mercenari  
 a mercenaria

UdeM00000002655 6596 121.3 UdeM00000002655 XP\_045180962.1 31.1 225  
 144 4 1 221 72 289 1.90E-24 121.3 6596 cellular  
 organisms;Eukaryota;Opisthokonta;Metazoa;Eumetazoa;Bilateria;Protostomia;  
 Spiralia;Lophotrochozoa;Mollusca;Bivalvia;Autobranhia;Heteroconchia;Euhe  
 terodonta;Imparidentia;Venerida;Veneroidea;Veneridae;Mercenaria;Mercenari  
 a mercenaria

UdeM00000002656 6596 160.2 UdeM00000002656 XP\_045180962.1 43.8 208  
 113 3 1 208 72 275 5.50E-36 160.2 6596 cellular  
 organisms;Eukaryota;Opisthokonta;Metazoa;Eumetazoa;Bilateria;Protostomia;  
 Spiralia;Lophotrochozoa;Mollusca;Bivalvia;Autobranhia;Heteroconchia;Euhe  
 terodonta;Imparidentia;Venerida;Veneroidea;Veneridae;Mercenaria;Mercenari  
 a mercenaria

UdeM00000002657 6596 245.4 UdeM00000002657 XP\_045180962.1 33.3 499  
 234 12 1 413 72 557 1.30E-61 245.4 6596 cellular  
 organisms;Eukaryota;Opisthokonta;Metazoa;Eumetazoa;Bilateria;Protostomia;  
 Spiralia;Lophotrochozoa;Mollusca;Bivalvia;Autobranhia;Heteroconchia;Euhe  
 terodonta;Imparidentia;Venerida;Veneroidea;Veneridae;Mercenaria;Mercenari  
 a mercenaria

UdeM00000002659 6596 186.4 UdeM00000002659 XP\_045180962.1 28.7 491  
 263 10 34 444 72 555 7.80E-44 186.4 6596 cellular  
 organisms;Eukaryota;Opisthokonta;Metazoa;Eumetazoa;Bilateria;Protostomia;  
 Spiralia;Lophotrochozoa;Mollusca;Bivalvia;Autobranchia;Heteroconchia;Euhe  
 terodonta;Imparidentia;Venerida;Veneroidea;Veneridae;Mercenaria;Mercenari  
 a mercenaria  
 UdeM00000002660 6596 185.7 UdeM00000002660 XP\_045180962.1 28.7 491  
 263 10 1 411 72 555 1.20E-43 185.7 6596 cellular  
 organisms;Eukaryota;Opisthokonta;Metazoa;Eumetazoa;Bilateria;Protostomia;  
 Spiralia;Lophotrochozoa;Mollusca;Bivalvia;Autobranchia;Heteroconchia;Euhe  
 terodonta;Imparidentia;Venerida;Veneroidea;Veneridae;Mercenaria;Mercenari  
 a mercenaria  
 UdeM00000002661 6573 731.5 UdeM00000002661 XP\_021378182.1 49 743  
 311 10 43 781 31 709 1.10E-207 731.5 6573 cellular  
 organisms;Eukaryota;Opisthokonta;Metazoa;Eumetazoa;Bilateria;Protostomia;  
 Spiralia;Lophotrochozoa;Mollusca;Bivalvia;Autobranchia;Pteriormorphia;Pect  
 inida;Pectinoidea;Pectinidae;Mizuhopecten;Mizuhopecten yessoensis  
 UdeM00000002662 6573 738.4 UdeM00000002662 XP\_021378182.1 49.7 733  
 311 9 43 771 31 709 9.20E-210 738.4 6573 cellular  
 organisms;Eukaryota;Opisthokonta;Metazoa;Eumetazoa;Bilateria;Protostomia;  
 Spiralia;Lophotrochozoa;Mollusca;Bivalvia;Autobranchia;Pteriormorphia;Pect  
 inida;Pectinoidea;Pectinidae;Mizuhopecten;Mizuhopecten yessoensis  
 UdeM00000002663 6596 427.9 UdeM00000002663 XP\_045181993.1 49.1 432  
 216 2 23 454 332 759 1.60E-116 427.9 6596 cellular  
 organisms;Eukaryota;Opisthokonta;Metazoa;Eumetazoa;Bilateria;Protostomia;  
 Spiralia;Lophotrochozoa;Mollusca;Bivalvia;Autobranchia;Heteroconchia;Euhe  
 terodonta;Imparidentia;Venerida;Veneroidea;Veneridae;Mercenaria;Mercenari  
 a mercenaria  
 UdeM00000002664 6596 139.8 UdeM00000002664 XP\_045180579.1 30.9 564  
 237 12 7 494 9 495 9.20E-30 139.8 6596 cellular  
 organisms;Eukaryota;Opisthokonta;Metazoa;Eumetazoa;Bilateria;Protostomia;  
 Spiralia;Lophotrochozoa;Mollusca;Bivalvia;Autobranchia;Heteroconchia;Euhe  
 terodonta;Imparidentia;Venerida;Veneroidea;Veneridae;Mercenaria;Mercenari  
 a mercenaria  
 UdeM00000002665 6596 535 UdeM00000002665 XP\_045167548.1 49.6 540  
 243 8 34 569 14 528 1.20E-148 535 6596 cellular  
 organisms;Eukaryota;Opisthokonta;Metazoa;Eumetazoa;Bilateria;Protostomia;  
 Spiralia;Lophotrochozoa;Mollusca;Bivalvia;Autobranchia;Heteroconchia;Euhe  
 terodonta;Imparidentia;Venerida;Veneroidea;Veneridae;Mercenaria;Mercenari  
 a mercenaria  
 UdeM00000002667 7574 70.1 UdeM00000002667 XP\_013388573.1 42.7 82  
 43 1 98 179 351 428 3.40E-09 70.1 7574 cellular  
 organisms;Eukaryota;Opisthokonta;Metazoa;Eumetazoa;Bilateria;Protostomia;  
 Spiralia;Lophotrochozoa;Brachiopoda;Linguliformea;Lingulata;Lingulida;Lin  
 guloidea;Lingulidae;Lingula;Lingula anatina  
 UdeM00000002668 29159 117.1 UdeM00000002668 XP\_034299594.1 37.8 156  
 97 0 1 156 508 663 2.50E-23 117.1 29159 cellular  
 organisms;Eukaryota;Opisthokonta;Metazoa;Eumetazoa;Bilateria;Protostomia;  
 Spiralia;Lophotrochozoa;Mollusca;Bivalvia;Autobranchia;Pteriormorphia;Ostr  
 eida;Ostreoidea;Ostreidae;Crassostrea;Crassostrea gigas  
 UdeM00000002670 6596 416.8 UdeM00000002670 XP\_045180650.1 49 412  
 187 7 38 445 131 523 3.50E-113 416.8 6596 cellular  
 organisms;Eukaryota;Opisthokonta;Metazoa;Eumetazoa;Bilateria;Protostomia;  
 Spiralia;Lophotrochozoa;Mollusca;Bivalvia;Autobranchia;Heteroconchia;Euhe

terodonta;Imparidentia;Venerida;Veneroidea;Veneridae;Mercenaria;Mercenari  
 a mercenaria  
 UdeM00000002671 6596 302.8 UdeM00000002671 XP\_045180650.1 52.5 276  
 121 5 7 278 254 523 4.70E-79 302.8 6596 cellular  
 organisms;Eukaryota;Opisthokonta;Metazoa;Eumetazoa;Bilateria;Protostomia;  
 Spiralia;Lophotrochozoa;Mollusca;Bivalvia;Autobranhia;Heteroconchia;Euhe  
 terodonta;Imparidentia;Venerida;Veneroidea;Veneridae;Mercenaria;Mercenari  
 a mercenaria  
 UdeM00000002672 6573 94.4 UdeM00000002672 XP\_021348422.1 61.1 72  
 28 0 5 76 520 591 9.40E-17 94.4 6573 cellular  
 organisms;Eukaryota;Opisthokonta;Metazoa;Eumetazoa;Bilateria;Protostomia;  
 Spiralia;Lophotrochozoa;Mollusca;Bivalvia;Autobranhia;Pteriormorphia;Pect  
 inida;Pectinoidea;Pectinidae;Mizuhopecten;Mizuhopecten yessoensis  
 UdeM00000002674 29159 172.9 UdeM00000002674 XP\_034298997.1 36.2 282  
 157 5 134 406 28 295 8.50E-40 172.9 29159 cellular  
 organisms;Eukaryota;Opisthokonta;Metazoa;Eumetazoa;Bilateria;Protostomia;  
 Spiralia;Lophotrochozoa;Mollusca;Bivalvia;Autobranhia;Pteriormorphia;Ostr  
 eida;Ostreoidea;Ostreidae;Crassostrea;Crassostrea gigas  
 UdeM00000002679 6596 134.4 UdeM00000002679 XP\_045156248.1 30.6 248  
 145 3 4 251 7 227 2.00E-28 134.4 6596 cellular  
 organisms;Eukaryota;Opisthokonta;Metazoa;Eumetazoa;Bilateria;Protostomia;  
 Spiralia;Lophotrochozoa;Mollusca;Bivalvia;Autobranhia;Heteroconchia;Euhe  
 terodonta;Imparidentia;Venerida;Veneroidea;Veneridae;Mercenaria;Mercenari  
 a mercenaria  
 UdeM00000002680 6596 134.4 UdeM00000002680 XP\_045156248.1 30.6 248  
 145 3 4 251 7 227 2.10E-28 134.4 6596 cellular  
 organisms;Eukaryota;Opisthokonta;Metazoa;Eumetazoa;Bilateria;Protostomia;  
 Spiralia;Lophotrochozoa;Mollusca;Bivalvia;Autobranhia;Heteroconchia;Euhe  
 terodonta;Imparidentia;Venerida;Veneroidea;Veneridae;Mercenaria;Mercenari  
 a mercenaria  
 UdeM00000002681 6573 89.7 UdeM00000002681 XP\_021353616.1 35.1 148  
 83 4 12 148 1251 1396 4.10E-15 89.7 6573 cellular  
 organisms;Eukaryota;Opisthokonta;Metazoa;Eumetazoa;Bilateria;Protostomia;  
 Spiralia;Lophotrochozoa;Mollusca;Bivalvia;Autobranhia;Pteriormorphia;Pect  
 inida;Pectinoidea;Pectinidae;Mizuhopecten;Mizuhopecten yessoensis  
 UdeM00000002683 400727 144.8 UdeM00000002683 XP\_025092521.1 61.2  
 116 44 1 16 130 10 125 7.70E-32 144.8 400727  
 cellular  
 organisms;Eukaryota;Opisthokonta;Metazoa;Eumetazoa;Bilateria;Protostomia;  
 Spiralia;Lophotrochozoa;Mollusca;Gastropoda;Caenogastropoda;Architaeniogl  
 ossa;Ampullarioidea;Ampullariidae;Pomacea;Pomacea canaliculata  
 UdeM00000002684 6596 119.4 UdeM00000002684 XP\_045213216.1 47.4 133  
 68 2 1 131 418 550 3.50E-24 119.4 6596 cellular  
 organisms;Eukaryota;Opisthokonta;Metazoa;Eumetazoa;Bilateria;Protostomia;  
 Spiralia;Lophotrochozoa;Mollusca;Bivalvia;Autobranhia;Heteroconchia;Euhe  
 terodonta;Imparidentia;Venerida;Veneroidea;Veneridae;Mercenaria;Mercenari  
 a mercenaria  
 UdeM00000002688 6526 134.4 UdeM00000002688 NP\_001298190.1 87.9 116  
 12 1 1 116 1 114 9.20E-29 134.4 6526 cellular  
 organisms;Eukaryota;Opisthokonta;Metazoa;Eumetazoa;Bilateria;Protostomia;  
 Spiralia;Lophotrochozoa;Mollusca;Gastropoda;Heterobranhia;Euthyneura;Pan  
 pulmonata;Hygrophila;Lymnaeioidea;Planorbidae;Biomphalaria;Biomphalaria  
 glabrata

UdeM00000002689 6526 133.3 UdeM00000002689 NP\_001298190.1 85.7 119  
 12 1 1 119 1 114 2.10E-28 133.3 6526 cellular  
 organisms;Eukaryota;Opisthokonta;Metazoa;Eumetazoa;Bilateria;Protostomia;  
 Spiralia;Lophotrochozoa;Mollusca;Gastropoda;Heterobranchia;Euthyneura;Pan  
 pulmonata;Hygrophila;Lymnaeidae;Planorbidae;Biomphalaria;Biomphalaria  
 glabrata  
 UdeM00000002690 6573 182.2 UdeM00000002690 XP\_021359302.1 27.3 510  
 327 11 16 492 12 510 1.70E-42 182.2 6573 cellular  
 organisms;Eukaryota;Opisthokonta;Metazoa;Eumetazoa;Bilateria;Protostomia;  
 Spiralia;Lophotrochozoa;Mollusca;Bivalvia;Autobranchia;Pteriormorphia;Pect  
 inida;Pectinoidea;Pectinidae;Mizuhopecten;Mizuhopecten yessoensis  
 UdeM00000002692 400727 386.7 UdeM00000002692 XP\_025090120.1 48.1  
 397 172 8 8 394 11 383 3.60E-104 386.7 400727  
 cellular  
 organisms;Eukaryota;Opisthokonta;Metazoa;Eumetazoa;Bilateria;Protostomia;  
 Spiralia;Lophotrochozoa;Mollusca;Gastropoda;Caenogastropoda;Architaeniogl  
 ossa;Ampullarioidea;Ampullariidae;Pomacea;Pomacea canaliculata  
 UdeM00000002693 6579 2139 UdeM00000002693 XP\_033726593.1 86.1 1181  
 164 0 1 1181 1 1181 0.00E+00 2139 6579 cellular  
 organisms;Eukaryota;Opisthokonta;Metazoa;Eumetazoa;Bilateria;Protostomia;  
 Spiralia;Lophotrochozoa;Mollusca;Bivalvia;Autobranchia;Pteriormorphia;Pect  
 inida;Pectinoidea;Pectinidae;Pecten;Pecten maximus  
 UdeM00000002694 8478 91.3 UdeM00000002694 XP\_005314995.1 43.8 96  
 49 3 40 130 430 525 1.20E-15 91.3 8478 cellular  
 organisms;Eukaryota;Opisthokonta;Metazoa;Eumetazoa;Bilateria;Deuterostomi  
 a;Chordata;Craniata;Vertebrata;Gnathostomata;Teleostomi;Euteleostomi;Sarc  
 opterygii;Dipnotetrapodomorpha;Tetrapoda;Amniota;Sauropsida;Sauria;Archel  
 osauria;Testudinata;Testudines;Cryptodira;Durocryptodira;Testudinoidea;Em  
 ydidae;Chrysemys;Chrysemys picta;Chrysemys picta bellii  
 UdeM00000002695 6596 609 UdeM00000002695 XP\_045180578.1 40.3 2011  
 905 50 35 1850 86 1995 2.00E-170 609 6596 cellular  
 organisms;Eukaryota;Opisthokonta;Metazoa;Eumetazoa;Bilateria;Protostomia;  
 Spiralia;Lophotrochozoa;Mollusca;Bivalvia;Autobranchia;Heteroconchia;Euhe  
 terodonta;Imparidentia;Venerida;Veneroidea;Veneridae;Mercenaria;Mercenari  
 a mercenaria  
 UdeM00000002696 6596 60.5 UdeM00000002696 XP\_045183837.1 40.8 71  
 42 0 32 102 243 313 2.80E-06 60.5 6596 cellular  
 organisms;Eukaryota;Opisthokonta;Metazoa;Eumetazoa;Bilateria;Protostomia;  
 Spiralia;Lophotrochozoa;Mollusca;Bivalvia;Autobranchia;Heteroconchia;Euhe  
 terodonta;Imparidentia;Venerida;Veneroidea;Veneridae;Mercenaria;Mercenari  
 a mercenaria  
 UdeM00000002699 6596 314.3 UdeM00000002699 XP\_045206055.1 32.6 605  
 379 17 59 646 78 670 3.60E-82 314.3 6596 cellular  
 organisms;Eukaryota;Opisthokonta;Metazoa;Eumetazoa;Bilateria;Protostomia;  
 Spiralia;Lophotrochozoa;Mollusca;Bivalvia;Autobranchia;Heteroconchia;Euhe  
 terodonta;Imparidentia;Venerida;Veneroidea;Veneridae;Mercenaria;Mercenari  
 a mercenaria  
 UdeM00000002700 6596 298.5 UdeM00000002700 XP\_045177112.1 31.9 642  
 381 19 23 621 44 672 2.00E-77 298.5 6596 cellular  
 organisms;Eukaryota;Opisthokonta;Metazoa;Eumetazoa;Bilateria;Protostomia;  
 Spiralia;Lophotrochozoa;Mollusca;Bivalvia;Autobranchia;Heteroconchia;Euhe  
 terodonta;Imparidentia;Venerida;Veneroidea;Veneridae;Mercenaria;Mercenari  
 a mercenaria

UdeM00000002702 6596 329.3 UdeM00000002702 XP\_045206084.1 32.3 675  
 389 21 25 643 78 740 1.20E-86 329.3 6596 cellular  
 organisms;Eukaryota;Opisthokonta;Metazoa;Eumetazoa;Bilateria;Protostomia;  
 Spiralia;Lophotrochozoa;Mollusca;Bivalvia;Autobranhia;Heteroconchia;Euhe  
 terodonta;Imparidentia;Venerida;Veneroidea;Veneridae;Mercenaria;Mercenari  
 a mercenaria

UdeM00000002701 6596 375.9 UdeM00000002701 XP\_045206084.1 34 676  
 413 20 100 755 78 740 1.30E-100 375.9 6596 cellular  
 organisms;Eukaryota;Opisthokonta;Metazoa;Eumetazoa;Bilateria;Protostomia;  
 Spiralia;Lophotrochozoa;Mollusca;Bivalvia;Autobranhia;Heteroconchia;Euhe  
 terodonta;Imparidentia;Venerida;Veneroidea;Veneridae;Mercenaria;Mercenari  
 a mercenaria

UdeM00000002703 6596 312.4 UdeM00000002703 XP\_045206084.1 32.6 595  
 371 18 10 585 157 740 1.50E-81 312.4 6596 cellular  
 organisms;Eukaryota;Opisthokonta;Metazoa;Eumetazoa;Bilateria;Protostomia;  
 Spiralia;Lophotrochozoa;Mollusca;Bivalvia;Autobranhia;Heteroconchia;Euhe  
 terodonta;Imparidentia;Venerida;Veneroidea;Veneridae;Mercenaria;Mercenari  
 a mercenaria

UdeM00000002704 6596 434.1 UdeM00000002704 XP\_045209918.1 31 854  
 493 21 1 780 124 955 4.20E-118 434.1 6596 cellular  
 organisms;Eukaryota;Opisthokonta;Metazoa;Eumetazoa;Bilateria;Protostomia;  
 Spiralia;Lophotrochozoa;Mollusca;Bivalvia;Autobranhia;Heteroconchia;Euhe  
 terodonta;Imparidentia;Venerida;Veneroidea;Veneridae;Mercenaria;Mercenari  
 a mercenaria

UdeM00000002705 6596 625.9 UdeM00000002705 XP\_045181024.1 34.1 1086  
 655 21 6 1049 16 1082 9.40E-176 625.9 6596 cellular  
 organisms;Eukaryota;Opisthokonta;Metazoa;Eumetazoa;Bilateria;Protostomia;  
 Spiralia;Lophotrochozoa;Mollusca;Bivalvia;Autobranhia;Heteroconchia;Euhe  
 terodonta;Imparidentia;Venerida;Veneroidea;Veneridae;Mercenaria;Mercenari  
 a mercenaria

UdeM00000002706 7668 111.7 UdeM00000002706 XP\_030847080.1 39.9 153  
 79 4 1 148 1 145 9.20E-22 111.7 7668 cellular  
 organisms;Eukaryota;Opisthokonta;Metazoa;Eumetazoa;Bilateria;Deuterostomi  
 a;Echinodermata;Eleutherozoa;Echinozoa;Echinoidea;Euechinoidea;Echinacea;  
 Camarodonta;Echinidea;Strongylocentrotidae;Strongylocentrotus;Strongyloce  
 ntrotus purpuratus

UdeM00000002711 6596 60.5 UdeM00000002711 XP\_045183837.1 33 103  
 64 2 32 133 243 341 4.40E-06 60.5 6596 cellular  
 organisms;Eukaryota;Opisthokonta;Metazoa;Eumetazoa;Bilateria;Protostomia;  
 Spiralia;Lophotrochozoa;Mollusca;Bivalvia;Autobranhia;Heteroconchia;Euhe  
 terodonta;Imparidentia;Venerida;Veneroidea;Veneridae;Mercenaria;Mercenari  
 a mercenaria

UdeM00000002712 6596 599.4 UdeM00000002712 XP\_045209913.1 35.4 995  
 566 24 32 974 31 1000 9.50E-168 599.4 6596 cellular  
 organisms;Eukaryota;Opisthokonta;Metazoa;Eumetazoa;Bilateria;Protostomia;  
 Spiralia;Lophotrochozoa;Mollusca;Bivalvia;Autobranhia;Heteroconchia;Euhe  
 terodonta;Imparidentia;Venerida;Veneroidea;Veneridae;Mercenaria;Mercenari  
 a mercenaria

UdeM00000002713 6596 63.2 UdeM00000002713 XP\_045183837.1 43.7 71  
 40 0 32 102 243 313 5.90E-07 63.2 6596 cellular  
 organisms;Eukaryota;Opisthokonta;Metazoa;Eumetazoa;Bilateria;Protostomia;  
 Spiralia;Lophotrochozoa;Mollusca;Bivalvia;Autobranhia;Heteroconchia;Euhe  
 terodonta;Imparidentia;Venerida;Veneroidea;Veneridae;Mercenaria;Mercenari  
 a mercenaria



UdeM00000002714 400727 169.9 UdeM00000002714 XP\_025113942.1 73.6  
 106 28 0 5 110 5 110 3.70E-39 169.9 400727  
 cellular  
 organisms;Eukaryota;Opisthokonta;Metazoa;Eumetazoa;Bilateria;Protostomia;  
 Spiralia;Lophotrochozoa;Mollusca;Gastropoda;Caenogastropoda;Architaenioglossa;  
 Ampullarioidea;Ampullariidae;Pomacea;Pomacea canaliculata  
 UdeM00000002715 400727 218.4 UdeM00000002715 XP\_025113942.1 75  
 136 34 0 5 140 5 140 6.40E-54 218.4 400727  
 cellular  
 organisms;Eukaryota;Opisthokonta;Metazoa;Eumetazoa;Bilateria;Protostomia;  
 Spiralia;Lophotrochozoa;Mollusca;Gastropoda;Caenogastropoda;Architaenioglossa;  
 Ampullarioidea;Ampullariidae;Pomacea;Pomacea canaliculata  
 UdeM00000002716 6596 368.2 UdeM00000002716 XP\_045181024.1 39.2 526  
 298 11 82 593 565 1082 2.10E-98 368.2 6596 cellular  
 organisms;Eukaryota;Opisthokonta;Metazoa;Eumetazoa;Bilateria;Protostomia;  
 Spiralia;Lophotrochozoa;Mollusca;Bivalvia;Autobranchia;Heteroconchia;Euheterodonta;  
 Imparidentia;Venerida;Veneroidea;Veneridae;Mercenaria;Mercenaria mercenaria  
 UdeM00000002717 6596 101.7 UdeM00000002717 XP\_045209913.1 29.7 192  
 132 3 1 191 184 373 1.10E-18 101.7 6596 cellular  
 organisms;Eukaryota;Opisthokonta;Metazoa;Eumetazoa;Bilateria;Protostomia;  
 Spiralia;Lophotrochozoa;Mollusca;Bivalvia;Autobranchia;Heteroconchia;Euheterodonta;  
 Imparidentia;Venerida;Veneroidea;Veneridae;Mercenaria;Mercenaria mercenaria  
 UdeM00000002718 6596 132.1 UdeM00000002718 XP\_045209913.1 46.5 155  
 76 4 20 171 31 181 6.80E-28 132.1 6596 cellular  
 organisms;Eukaryota;Opisthokonta;Metazoa;Eumetazoa;Bilateria;Protostomia;  
 Spiralia;Lophotrochozoa;Mollusca;Bivalvia;Autobranchia;Heteroconchia;Euheterodonta;  
 Imparidentia;Venerida;Veneroidea;Veneridae;Mercenaria;Mercenaria mercenaria  
 UdeM00000002719 7668 115.2 UdeM00000002719 XP\_030847080.1 40.9 149  
 81 3 1 147 1 144 8.30E-23 115.2 7668 cellular  
 organisms;Eukaryota;Opisthokonta;Metazoa;Eumetazoa;Bilateria;Deuterostomia;  
 Echinodermata;Eleutherozoa;Echinozoa;Echinoidea;Euechinoidea;Echinacea;  
 Camarodonta;Echinidea;Strongylocentrotidae;Strongylocentrotus;Strongylocentrotus purpuratus  
 UdeM00000002721 6596 63.2 UdeM00000002721 XP\_045183837.1 43.7 71  
 40 0 32 102 243 313 5.90E-07 63.2 6596 cellular  
 organisms;Eukaryota;Opisthokonta;Metazoa;Eumetazoa;Bilateria;Protostomia;  
 Spiralia;Lophotrochozoa;Mollusca;Bivalvia;Autobranchia;Heteroconchia;Euheterodonta;  
 Imparidentia;Venerida;Veneroidea;Veneridae;Mercenaria;Mercenaria mercenaria  
 UdeM00000002722 400727 169.9 UdeM00000002722 XP\_025113942.1 73.6  
 106 28 0 5 110 5 110 3.40E-39 169.9 400727  
 cellular  
 organisms;Eukaryota;Opisthokonta;Metazoa;Eumetazoa;Bilateria;Protostomia;  
 Spiralia;Lophotrochozoa;Mollusca;Gastropoda;Caenogastropoda;Architaenioglossa;  
 Ampullarioidea;Ampullariidae;Pomacea;Pomacea canaliculata  
 UdeM00000002723 6596 402.5 UdeM00000002723 XP\_045181024.1 36 633  
 379 12 8 619 426 1053 1.00E-108 402.5 6596 cellular  
 organisms;Eukaryota;Opisthokonta;Metazoa;Eumetazoa;Bilateria;Protostomia;  
 Spiralia;Lophotrochozoa;Mollusca;Bivalvia;Autobranchia;Heteroconchia;Euheterodonta;  
 Imparidentia;Venerida;Veneroidea;Veneridae;Mercenaria;Mercenaria mercenaria

UdeM00000002724 6596 233 UdeM00000002724 XP\_045209913.1 35.8 371  
 213 8 20 371 31 395 6.00E-58 233 6596 cellular  
 organisms;Eukaryota;Opisthokonta;Metazoa;Eumetazoa;Bilateria;Protostomia;  
 Spiralia;Lophotrochozoa;Mollusca;Bivalvia;Autobranhia;Heteroconchia;Euhe  
 terodonta;Imparidentia;Venerida;Veneroidea;Veneridae;Mercenaria;Mercenari  
 a mercenaria

UdeM00000002726 6596 600.1 UdeM00000002726 XP\_045209913.1 35.4 995  
 566 24 32 974 31 1000 5.50E-168 600.1 6596 cellular  
 organisms;Eukaryota;Opisthokonta;Metazoa;Eumetazoa;Bilateria;Protostomia;  
 Spiralia;Lophotrochozoa;Mollusca;Bivalvia;Autobranhia;Heteroconchia;Euhe  
 terodonta;Imparidentia;Venerida;Veneroidea;Veneridae;Mercenaria;Mercenari  
 a mercenaria

UdeM00000002727 6579 196.8 UdeM00000002727 XP\_033729790.1 45.3 214  
 117 0 10 223 17 230 3.40E-47 196.8 6579 cellular  
 organisms;Eukaryota;Opisthokonta;Metazoa;Eumetazoa;Bilateria;Protostomia;  
 Spiralia;Lophotrochozoa;Mollusca;Bivalvia;Autobranhia;Pteriormorphia;Pect  
 inida;Pectinoidea;Pectinidae;Pecten;Pecten maximus

UdeM00000002728 2652724 175.6 UdeM00000002728 XP\_020913146.1 49.5  
 194 97 1 167 360 177 369 1.40E-40 175.6 2652724  
 cellular  
 organisms;Eukaryota;Opisthokonta;Metazoa;Eumetazoa;Cnidaria;Anthozoa;Hexa  
 corallia;Actiniaria;Aiptasiidae;Exaiptasia;Exaiptasia diaphana

UdeM00000002730 6596 86.3 UdeM00000002730 XP\_045213829.1 47.3 93  
 46 2 13 104 1 91 3.50E-14 86.3 6596 cellular  
 organisms;Eukaryota;Opisthokonta;Metazoa;Eumetazoa;Bilateria;Protostomia;  
 Spiralia;Lophotrochozoa;Mollusca;Bivalvia;Autobranhia;Heteroconchia;Euhe  
 terodonta;Imparidentia;Venerida;Veneroidea;Veneridae;Mercenaria;Mercenari  
 a mercenaria

UdeM00000002731 6596 60.8 UdeM00000002731 XP\_045183837.1 42.3 71  
 41 0 32 102 243 313 3.10E-06 60.8 6596 cellular  
 organisms;Eukaryota;Opisthokonta;Metazoa;Eumetazoa;Bilateria;Protostomia;  
 Spiralia;Lophotrochozoa;Mollusca;Bivalvia;Autobranhia;Heteroconchia;Euhe  
 terodonta;Imparidentia;Venerida;Veneroidea;Veneridae;Mercenaria;Mercenari  
 a mercenaria

UdeM00000002735 6596 133.3 UdeM00000002735 XP\_045171063.1 44.4 135  
 75 0 35 169 72 206 3.00E-28 133.3 6596 cellular  
 organisms;Eukaryota;Opisthokonta;Metazoa;Eumetazoa;Bilateria;Protostomia;  
 Spiralia;Lophotrochozoa;Mollusca;Bivalvia;Autobranhia;Heteroconchia;Euhe  
 terodonta;Imparidentia;Venerida;Veneroidea;Veneridae;Mercenaria;Mercenari  
 a mercenaria

UdeM00000002736 6596 373.2 UdeM00000002736 XP\_045156810.1 37.1 663  
 353 12 3 615 14 662 6.20E-100 373.2 6596 cellular  
 organisms;Eukaryota;Opisthokonta;Metazoa;Eumetazoa;Bilateria;Protostomia;  
 Spiralia;Lophotrochozoa;Mollusca;Bivalvia;Autobranhia;Heteroconchia;Euhe  
 terodonta;Imparidentia;Venerida;Veneroidea;Veneridae;Mercenaria;Mercenari  
 a mercenaria

UdeM00000002737 6596 384.8 UdeM00000002737 XP\_045156810.1 37.1 676  
 361 12 1 626 1 662 2.10E-103 384.8 6596 cellular  
 organisms;Eukaryota;Opisthokonta;Metazoa;Eumetazoa;Bilateria;Protostomia;  
 Spiralia;Lophotrochozoa;Mollusca;Bivalvia;Autobranhia;Heteroconchia;Euhe  
 terodonta;Imparidentia;Venerida;Veneroidea;Veneridae;Mercenaria;Mercenari  
 a mercenaria

UdeM00000002738 6579 389.8 UdeM00000002738 XP\_033727520.1 72.6 281  
 75 1 1 281 1 279 2.90E-105 389.8 6579 cellular

organisms;Eukaryota;Opisthokonta;Metazoa;Eumetazoa;Bilateria;Protostomia;Spiralia;Lophotrochozoa;Mollusca;Bivalvia;Autobranchia;Pteriomorphia;Pectinida;Pectinoidea;Pectinidae;Pecten;Pecten maximus

UdeM00000002739 6596 265.4 UdeM00000002739 XP\_045181058.1 61.9 194  
74 0 1 194 1 194 5.80E-68 265.4 6596 cellular

organisms;Eukaryota;Opisthokonta;Metazoa;Eumetazoa;Bilateria;Protostomia;Spiralia;Lophotrochozoa;Mollusca;Bivalvia;Autobranchia;Heteroconchia;Euherodonta;Imparidentia;Venerida;Veneroidea;Veneridae;Mercenaria;Mercenaria mercenaria

UdeM00000002740 6596 180.3 UdeM00000002740 XP\_045180916.1 38.9 216  
126 2 5 215 5 219 3.10E-42 180.3 6596 cellular

organisms;Eukaryota;Opisthokonta;Metazoa;Eumetazoa;Bilateria;Protostomia;Spiralia;Lophotrochozoa;Mollusca;Bivalvia;Autobranchia;Heteroconchia;Euherodonta;Imparidentia;Venerida;Veneroidea;Veneridae;Mercenaria;Mercenaria mercenaria

UdeM00000002741 6596 177.2 UdeM00000002741 XP\_045180916.1 37.3 212  
132 1 1 212 1 211 2.40E-41 177.2 6596 cellular

organisms;Eukaryota;Opisthokonta;Metazoa;Eumetazoa;Bilateria;Protostomia;Spiralia;Lophotrochozoa;Mollusca;Bivalvia;Autobranchia;Heteroconchia;Euherodonta;Imparidentia;Venerida;Veneroidea;Veneridae;Mercenaria;Mercenaria mercenaria

UdeM00000002744 6596 407.9 UdeM00000002744 XP\_045181718.1 55 440  
158 15 1 426 43 456 1.60E-110 407.9 6596 cellular

organisms;Eukaryota;Opisthokonta;Metazoa;Eumetazoa;Bilateria;Protostomia;Spiralia;Lophotrochozoa;Mollusca;Bivalvia;Autobranchia;Heteroconchia;Euherodonta;Imparidentia;Venerida;Veneroidea;Veneridae;Mercenaria;Mercenaria mercenaria

UdeM00000002745 7741 195.7 UdeM00000002745 XP\_019622111.1 49.7 193  
95 2 1 193 88 278 5.60E-47 195.7 7741 cellular

organisms;Eukaryota;Opisthokonta;Metazoa;Eumetazoa;Bilateria;Deuterostomia;Chordata;Cephalochordata;Leptocardii;Amphioxiformes;Branchiostomidae;Branchiostoma;Branchiostoma belcheri

UdeM00000002746 6596 330.9 UdeM00000002746 XP\_045180727.1 73.4 297  
63 7 17 301 78 370 1.80E-87 330.9 6596 cellular

organisms;Eukaryota;Opisthokonta;Metazoa;Eumetazoa;Bilateria;Protostomia;Spiralia;Lophotrochozoa;Mollusca;Bivalvia;Autobranchia;Heteroconchia;Euherodonta;Imparidentia;Venerida;Veneroidea;Veneridae;Mercenaria;Mercenaria mercenaria

UdeM00000002747 6596 223.8 UdeM00000002747 XP\_045181177.1 51.1 280  
102 9 1 253 1 272 2.90E-55 223.8 6596 cellular

organisms;Eukaryota;Opisthokonta;Metazoa;Eumetazoa;Bilateria;Protostomia;Spiralia;Lophotrochozoa;Mollusca;Bivalvia;Autobranchia;Heteroconchia;Euherodonta;Imparidentia;Venerida;Veneroidea;Veneridae;Mercenaria;Mercenaria mercenaria

UdeM00000002748 6565 160.2 UdeM00000002748 XP\_022287646.1 27.5 411  
150 3 1 264 126 535 3.60E-36 160.2 6565 cellular

organisms;Eukaryota;Opisthokonta;Metazoa;Eumetazoa;Bilateria;Protostomia;Spiralia;Lophotrochozoa;Mollusca;Bivalvia;Autobranchia;Pteriomorphia;Ostreida;Ostreoidea;Ostreidae;Crassostrea;Crassostrea virginica

UdeM00000002749 6565 121.3 UdeM00000002749 XP\_022287659.1 37.5 152  
95 0 1 152 157 308 1.10E-24 121.3 6565 cellular

organisms;Eukaryota;Opisthokonta;Metazoa;Eumetazoa;Bilateria;Protostomia;Spiralia;Lophotrochozoa;Mollusca;Bivalvia;Autobranchia;Pteriomorphia;Ostreida;Ostreoidea;Ostreidae;Crassostrea;Crassostrea virginica

UdeM00000002750 6579 75.1 UdeM00000002750 XP\_033739131.1 56.1 57  
 25 0 1 57 188 244 5.10E-11 75.1 6579 cellular  
 organisms;Eukaryota;Opisthokonta;Metazoa;Eumetazoa;Bilateria;Protostomia;  
 Spiralia;Lophotrochozoa;Mollusca;Bivalvia;Autobranchia;Pteriormorphia;Pect  
 inida;Pectinoidea;Pectinidae;Pecten;Pecten maximus  
 UdeM00000002752 70779 83.6 UdeM00000002752 XP\_015777172.1 38.1 97  
 60 0 5 101 41 137 1.80E-13 83.6 70779 cellular  
 organisms;Eukaryota;Opisthokonta;Metazoa;Eumetazoa;Cnidaria;Anthozoa;Hexa  
 corallia;Scleractinia;Astrocoeniina;Acroporidae;Acropora;Acropora  
 digitifera  
 UdeM00000002754 6579 84.3 UdeM00000002754 XP\_033744239.1 63.2 57  
 21 0 1 57 188 244 8.50E-14 84.3 6579 cellular  
 organisms;Eukaryota;Opisthokonta;Metazoa;Eumetazoa;Bilateria;Protostomia;  
 Spiralia;Lophotrochozoa;Mollusca;Bivalvia;Autobranchia;Pteriormorphia;Pect  
 inida;Pectinoidea;Pectinidae;Pecten;Pecten maximus  
 UdeM00000002755 13397 188.7 UdeM00000002755 XP\_041069600.1 65.9 123  
 42 0 3 125 307 429 4.50E-45 188.7 13397 cellular  
 organisms;Eukaryota;Opisthokonta;Metazoa;Eumetazoa;Bilateria;Deuterostomi  
 a;Chordata;Craniata;Vertebrata;Gnathostomata;Chondrichthyes;Elasmobranchi  
 i;Selachii;Galeomorphii;Galeoidea;Lamniformes;Alopiidae;Lamninae;Carcharo  
 don;Carcharodon carcharias  
 UdeM00000002757 6565 486.9 UdeM00000002757 XP\_022309566.1 59.6 339  
 137 0 3 341 561 899 2.10E-134 486.9 6565 cellular  
 organisms;Eukaryota;Opisthokonta;Metazoa;Eumetazoa;Bilateria;Protostomia;  
 Spiralia;Lophotrochozoa;Mollusca;Bivalvia;Autobranchia;Pteriormorphia;Ostr  
 eida;Ostreoidea;Ostreidae;Crassostrea;Crassostrea virginica  
 UdeM00000002758 150288 215.3 UdeM00000002758 XP\_020788097.1 58.6  
 145 60 0 2 146 392 536 5.40E-53 215.3 150288  
 cellular  
 organisms;Eukaryota;Opisthokonta;Metazoa;Eumetazoa;Bilateria;Deuterostomi  
 a;Chordata;Craniata;Vertebrata;Gnathostomata;Teleostomi;Euteleostomi;Acti  
 nopterygii;Actinopteri;Neopterygii;Teleostei;Osteoglossocephalai;Clupeoce  
 phala;Euteleosteomorpha;Neoteleostei;Eurypterygia;Ctenosquamata;Acanthomo  
 rphata;Euacanthomorphacea;Percomorphaceae;Gobiaria;Gobiiformes;Gobioidei;  
 Gobiidae;Oxudercinae;Boleophthalmus;Boleophthalmus pectinirostris  
 UdeM00000002759 29159 86.3 UdeM00000002759 XP\_034321670.1 52.7 91  
 38 2 7 93 276 365 2.30E-14 86.3 29159 cellular  
 organisms;Eukaryota;Opisthokonta;Metazoa;Eumetazoa;Bilateria;Protostomia;  
 Spiralia;Lophotrochozoa;Mollusca;Bivalvia;Autobranchia;Pteriormorphia;Ostr  
 eida;Ostreoidea;Ostreidae;Crassostrea;Crassostrea gigas  
 UdeM00000002763 29159 516.2 UdeM00000002763 XP\_034318666.1 59.8 400  
 161 0 2 401 376 775 4.20E-143 516.2 29159 cellular  
 organisms;Eukaryota;Opisthokonta;Metazoa;Eumetazoa;Bilateria;Protostomia;  
 Spiralia;Lophotrochozoa;Mollusca;Bivalvia;Autobranchia;Pteriormorphia;Ostr  
 eida;Ostreoidea;Ostreidae;Crassostrea;Crassostrea gigas  
 UdeM00000002764 29159 61.2 UdeM00000002764 XP\_034318948.1 67.6 37  
 12 0 1 37 374 410 6.80E-07 61.2 29159 cellular  
 organisms;Eukaryota;Opisthokonta;Metazoa;Eumetazoa;Bilateria;Protostomia;  
 Spiralia;Lophotrochozoa;Mollusca;Bivalvia;Autobranchia;Pteriormorphia;Ostr  
 eida;Ostreoidea;Ostreidae;Crassostrea;Crassostrea gigas  
 UdeM00000002765 6565 263.8 UdeM00000002765 XP\_022288662.1 51.3 271  
 48 1 11 197 117 387 1.70E-67 263.8 6565 cellular  
 organisms;Eukaryota;Opisthokonta;Metazoa;Eumetazoa;Bilateria;Protostomia;

Spiralia; Lophotrochozoa; Mollusca; Bivalvia; Autobranchia; Pteriomorpha; Ostr  
 eida; Ostreoidea; Ostreidae; Crassostrea; Crassostrea virginica  
 UdeM00000002766 6573 474.6 UdeM00000002766 XP\_021342792.1 60.7 387  
 148 3 1 383 80 466 1.20E-130 474.6 6573 cellular  
 organisms; Eukaryota; Opisthokonta; Metazoa; Eumetazoa; Bilateria; Protostomia;  
 Spiralia; Lophotrochozoa; Mollusca; Bivalvia; Autobranchia; Pteriomorpha; Pect  
 inida; Pectinoidea; Pectinidae; Mizuhopecten; Mizuhopecten yessoensis  
 UdeM00000002768 6579 246.9 UdeM00000002768 XP\_033739239.1 48.9 268  
 118 5 136 384 79 346 5.20E-62 246.9 6579 cellular  
 organisms; Eukaryota; Opisthokonta; Metazoa; Eumetazoa; Bilateria; Protostomia;  
 Spiralia; Lophotrochozoa; Mollusca; Bivalvia; Autobranchia; Pteriomorpha; Pect  
 inida; Pectinoidea; Pectinidae; Pecten; Pecten maximus  
 UdeM00000002769 6573 89 UdeM00000002769 XP\_021365625.1 42.5 120  
 67 2 1 118 7 126 7.50E-15 89 6573 cellular  
 organisms; Eukaryota; Opisthokonta; Metazoa; Eumetazoa; Bilateria; Protostomia;  
 Spiralia; Lophotrochozoa; Mollusca; Bivalvia; Autobranchia; Pteriomorpha; Pect  
 inida; Pectinoidea; Pectinidae; Mizuhopecten; Mizuhopecten yessoensis  
 UdeM00000002770 6573 443.4 UdeM00000002770 XP\_021342792.1 59.3 366  
 145 3 5 366 101 466 2.90E-121 443.4 6573 cellular  
 organisms; Eukaryota; Opisthokonta; Metazoa; Eumetazoa; Bilateria; Protostomia;  
 Spiralia; Lophotrochozoa; Mollusca; Bivalvia; Autobranchia; Pteriomorpha; Pect  
 inida; Pectinoidea; Pectinidae; Mizuhopecten; Mizuhopecten yessoensis  
 UdeM00000002772 2652724 174.1 UdeM00000002772 XP\_020903442.1 47.7  
 199 80 1 9 183 2 200 2.40E-40 174.1 2652724  
 cellular  
 organisms; Eukaryota; Opisthokonta; Metazoa; Eumetazoa; Cnidaria; Anthozoa; Hexa  
 corallia; Actiniaria; Aiptasiidae; Exaiptasia; Exaiptasia diaphana  
 UdeM00000002773 278856 788.9 UdeM00000002773 XP\_032528088.1 55.8  
 593 262 0 1 593 147 739 4.60E-225 788.9 278856  
 cellular  
 organisms; Eukaryota; Opisthokonta; Metazoa; Eumetazoa; Bilateria; Protostomia;  
 Ecdysozoa; Panarthropoda; Arthropoda; Mandibulata; Pancrustacea; Hexapoda; Inse  
 cta; Dicondylia; Pterygota; Neoptera; Endopterygota; Amphiesmenoptera; Lepidopt  
 era; Glossata; Neolepidoptera; Heteroneura; Ditrysia; Obtectomera; Papilionoide  
 a; Nymphalidae; Danainae; Danaini; Danaina; Danaus; Danaus; Danaus  
 plexippus; Danaus plexippus plexippus  
 UdeM00000002774 278856 714.5 UdeM00000002774 XP\_032528088.1 55.9  
 537 237 0 1 537 147 683 9.90E-203 714.5 278856  
 cellular  
 organisms; Eukaryota; Opisthokonta; Metazoa; Eumetazoa; Bilateria; Protostomia;  
 Ecdysozoa; Panarthropoda; Arthropoda; Mandibulata; Pancrustacea; Hexapoda; Inse  
 cta; Dicondylia; Pterygota; Neoptera; Endopterygota; Amphiesmenoptera; Lepidopt  
 era; Glossata; Neolepidoptera; Heteroneura; Ditrysia; Obtectomera; Papilionoide  
 a; Nymphalidae; Danainae; Danaini; Danaina; Danaus; Danaus; Danaus  
 plexippus; Danaus plexippus plexippus  
 UdeM00000002776 29159 401.4 UdeM00000002776 XP\_034318666.1 66.2 284  
 96 0 89 372 358 641 1.30E-108 401.4 29159 cellular  
 organisms; Eukaryota; Opisthokonta; Metazoa; Eumetazoa; Bilateria; Protostomia;  
 Spiralia; Lophotrochozoa; Mollusca; Bivalvia; Autobranchia; Pteriomorpha; Ostr  
 eida; Ostreoidea; Ostreidae; Crassostrea; Crassostrea gigas  
 UdeM00000002777 6565 83.2 UdeM00000002777 XP\_022306954.1 37.8 119  
 70 2 1 115 679 797 3.10E-13 83.2 6565 cellular  
 organisms; Eukaryota; Opisthokonta; Metazoa; Eumetazoa; Bilateria; Protostomia;

Spiralia; Lophotrochozoa; Mollusca; Bivalvia; Autobranchia; Pteriomorphia; Ostr  
eida; Ostreoidae; Ostreidae; Crassostrea; Crassostrea virginica  
UdeM00000002778 150288 292.4 UdeM00000002778 XP\_020788097.1 59.2  
201 82 0 1 201 365 565 4.50E-76 292.4 150288  
cellular

organisms; Eukaryota; Opisthokonta; Metazoa; Eumetazoa; Bilateria; Deuterostomi  
a; Chordata; Craniata; Vertebrata; Gnathostomata; Teleostomi; Euteleostomi; Acti  
nopterygii; Actinopteri; Neopterygii; Teleostei; Osteoglossocephalai; Clupeoce  
phala; Euteleostomorpha; Neoteleostei; Eurypterygia; Ctenosquamata; Acanthomo  
rphata; Euacanthomorphacea; Percomorphaceae; Gobiaria; Gobiiformes; Gobioidi  
e; Gobiidae; Oxudercinae; Boleophthalmus; Boleophthalmus pectinirostris

UdeM00000002779 45264 221.1 UdeM00000002779 XP\_044179091.1 59.5 158  
64 0 2 159 369 526 1.10E-54 221.1 45264 cellular

organisms; Eukaryota; Opisthokonta; Metazoa; Eumetazoa; Cnidaria; Anthozoa; Hexa  
corallia; Scleractinia; Astrocoeniina; Acroporidae; Acropora; Acropora  
millepora

UdeM00000002780 6565 103.6 UdeM00000002780 XP\_022322825.1 41.7 127  
73 1 5 130 326 452 2.10E-19 103.6 6565 cellular

organisms; Eukaryota; Opisthokonta; Metazoa; Eumetazoa; Bilateria; Protostomia;  
Spiralia; Lophotrochozoa; Mollusca; Bivalvia; Autobranchia; Pteriomorphia; Ostr  
eida; Ostreoidae; Ostreidae; Crassostrea; Crassostrea virginica

UdeM00000002781 29159 68.9 UdeM00000002781 XP\_034322772.1 52.5 59  
28 0 1 59 1 59 6.10E-09 68.9 29159 cellular

organisms; Eukaryota; Opisthokonta; Metazoa; Eumetazoa; Bilateria; Protostomia;  
Spiralia; Lophotrochozoa; Mollusca; Bivalvia; Autobranchia; Pteriomorphia; Ostr  
eida; Ostreoidae; Ostreidae; Crassostrea; Crassostrea gigas

UdeM00000002782 6573 79 UdeM00000002782 XP\_021365625.1 57.6 59  
25 0 23 81 47 105 8.70E-12 79 6573 cellular

organisms; Eukaryota; Opisthokonta; Metazoa; Eumetazoa; Bilateria; Protostomia;  
Spiralia; Lophotrochozoa; Mollusca; Bivalvia; Autobranchia; Pteriomorphia; Pect  
inida; Pectinoidea; Pectinidae; Mizuhopecten; Mizuhopecten yessoensis

UdeM00000002783 6573 62 UdeM00000002783 XP\_021365625.1 53.1 49  
23 0 61 109 58 106 1.10E-06 62 6573 cellular

organisms; Eukaryota; Opisthokonta; Metazoa; Eumetazoa; Bilateria; Protostomia;  
Spiralia; Lophotrochozoa; Mollusca; Bivalvia; Autobranchia; Pteriomorphia; Pect  
inida; Pectinoidea; Pectinidae; Mizuhopecten; Mizuhopecten yessoensis

UdeM00000002784 6573 87.8 UdeM00000002784 XP\_021365625.1 49.4 87  
44 0 61 147 40 126 2.20E-14 87.8 6573 cellular

organisms; Eukaryota; Opisthokonta; Metazoa; Eumetazoa; Bilateria; Protostomia;  
Spiralia; Lophotrochozoa; Mollusca; Bivalvia; Autobranchia; Pteriomorphia; Pect  
inida; Pectinoidea; Pectinidae; Mizuhopecten; Mizuhopecten yessoensis

UdeM00000002785 150288 470.3 UdeM00000002785 XP\_020788097.1 57.5  
341 145 0 1 341 225 565 2.10E-129 470.3 150288  
cellular

organisms; Eukaryota; Opisthokonta; Metazoa; Eumetazoa; Bilateria; Deuterostomi  
a; Chordata; Craniata; Vertebrata; Gnathostomata; Teleostomi; Euteleostomi; Acti  
nopterygii; Actinopteri; Neopterygii; Teleostei; Osteoglossocephalai; Clupeoce  
phala; Euteleostomorpha; Neoteleostei; Eurypterygia; Ctenosquamata; Acanthomo  
rphata; Euacanthomorphacea; Percomorphaceae; Gobiaria; Gobiiformes; Gobioidi  
e; Gobiidae; Oxudercinae; Boleophthalmus; Boleophthalmus pectinirostris

UdeM00000002786 50390 375.2 UdeM00000002786 XP\_028154228.1 53.4 290  
134 1 2 291 340 628 7.80E-101 375.2 50390 cellular

organisms; Eukaryota; Opisthokonta; Metazoa; Eumetazoa; Bilateria; Protostomia;  
Ecdysozoa; Panarthropoda; Arthropoda; Mandibulata; Pancrustacea; Hexapoda; Inse

cta;Dicondylia;Pterygota;Neoptera;Endopterygota;Coleoptera;Polyphaga;Cucujiformia;Chrysomeloidea;Chrysomelidae;Galerucinae;Luperini;Diabroticina;Diabroticites;Diabrotica;Diabrotica virgifera;Diabrotica virgifera virgifera

UdeM00000002787 194408 75.5 UdeM00000002787 XP\_029442979.1 47.3  
74 39 0 9 82 1526 1599 4.10E-11 75.5 194408  
cellular

organisms;Eukaryota;Opisthokonta;Metazoa;Eumetazoa;Bilateria;Deuterostomia;Chordata;Craniata;Vertebrata;Gnathostomata;Teleostomi;Euteleostomi;Sarcopterygii;Dipnotetrapodomorpha;Tetrapoda;Amphibia;Gymnophiona;Rhinatremaidae;Rhinatrema;Rhinatrema bivittatum

UdeM00000002788 8218 387.5 UdeM00000002788 XP\_034089596.1 61 267  
104 0 1 267 451 717 1.40E-104 387.5 8218 cellular

organisms;Eukaryota;Opisthokonta;Metazoa;Eumetazoa;Bilateria;Deuterostomia;Chordata;Craniata;Vertebrata;Gnathostomata;Teleostomi;Euteleostomi;Actinopterygii;Actinopteri;Neopterygii;Teleostei;Osteoglossocephalai;Clupeocephala;Euteleosteomorpha;Neoteleostei;Eurypterygia;Ctenosquamata;Acanthomorpha;Euacanthomorpha;Percomorphaceae;Eupercaria;Perciformes;Notothenioidei;Bathdraconidae;Gymnodraco;Gymnodraco acuticeps

UdeM00000002789 225164 307 UdeM00000002789 XP\_009062377.1 60.7  
211 76 1 1 204 175 385 1.80E-80 307 225164  
cellular

organisms;Eukaryota;Opisthokonta;Metazoa;Eumetazoa;Bilateria;Protostomia;Spiralia;Lophotrochozoa;Mollusca;Gastropoda;Patellogastropoda;Lottioidea;Lottiidae;Lottia;Lottia gigantea

UdeM00000002790 7739 371.7 UdeM00000002790 XP\_035665938.1 42.5 464  
234 8 29 469 381 834 1.40E-99 371.7 7739 cellular

organisms;Eukaryota;Opisthokonta;Metazoa;Eumetazoa;Bilateria;Deuterostomia;Chordata;Cephalochordata;Leptocardii;Amphioxiformes;Branchiostomidae;Branchiostoma;Branchiostoma floridae

UdeM00000002791 278856 565.1 UdeM00000002791 XP\_032528089.1 54.5  
433 192 2 1 433 178 605 7.90E-158 565.1 278856  
cellular

organisms;Eukaryota;Opisthokonta;Metazoa;Eumetazoa;Bilateria;Protostomia;Ecdysozoa;Panarthropoda;Arthropoda;Mandibulata;Pancrustacea;Hexapoda;Insecta;Dicondylia;Pterygota;Neoptera;Endopterygota;Amphiesmenoptera;Lepidoptera;Glossata;Neolepidoptera;Heteroneura;Ditrysia;Obtectomera;Papilionoidea;Nymphalidae;Danainae;Danaini;Danaina;Danaus;Danaus;Danaus plexippus;Danaus plexippus plexippus

UdeM00000002792 7574 71.2 UdeM00000002792 XP\_013389723.1 29.9 177  
101 4 54 213 55 225 2.00E-09 71.2 7574 cellular

organisms;Eukaryota;Opisthokonta;Metazoa;Eumetazoa;Bilateria;Protostomia;Spiralia;Lophotrochozoa;Brachiopoda;Linguliformea;Lingulata;Lingulida;Linguloidea;Lingulidae;Lingula;Lingula anatina

UdeM00000002793 7574 71.2 UdeM00000002793 XP\_013389723.1 30.5 177  
99 5 54 212 55 225 1.90E-09 71.2 7574 cellular

organisms;Eukaryota;Opisthokonta;Metazoa;Eumetazoa;Bilateria;Protostomia;Spiralia;Lophotrochozoa;Brachiopoda;Linguliformea;Lingulata;Lingulida;Linguloidea;Lingulidae;Lingula;Lingula anatina

UdeM00000002794 7574 70.9 UdeM00000002794 XP\_013389723.1 30.5 177  
99 5 54 212 55 225 2.50E-09 70.9 7574 cellular

organisms;Eukaryota;Opisthokonta;Metazoa;Eumetazoa;Bilateria;Protostomia;Spiralia;Lophotrochozoa;Brachiopoda;Linguliformea;Lingulata;Lingulida;Linguloidea;Lingulidae;Lingula;Lingula anatina

UdeM00000002795 1735272 107.1 UdeM00000002795 XP\_041379274.1 47.7  
 111 56 2 43 151 128 238 2.10E-20 107.1 1735272  
 cellular  
 organisms;Eukaryota;Opisthokonta;Metazoa;Eumetazoa;Bilateria;Protostomia;  
 Spiralia;Lophotrochozoa;Mollusca;Gastropoda;Neomphalina;Neomphaloidea;Pel  
 tospiridae;Gigantopelta;Gigantopelta aegis  
 UdeM00000002796 150288 272.7 UdeM00000002796 XP\_020788097.1 63.6  
 176 64 0 3 178 396 571 4.90E-70 272.7 150288  
 cellular  
 organisms;Eukaryota;Opisthokonta;Metazoa;Eumetazoa;Bilateria;Deuterostomi  
 a;Chordata;Craniata;Vertebrata;Gnathostomata;Teleostomi;Euteleostomi;Acti  
 nopterygii;Actinopteri;Neopterygii;Teleostei;Osteoglossocephalai;Clupeoce  
 phala;Euteleosteomorpha;Neoteleostei;Eurypterygia;Ctenosquamata;Acanthomo  
 rphata;Euacanthomorphacea;Percomorphaceae;Gobiaria;Gobiiformes;Gobioidei;  
 Gobiidae;Oxudercinae;Boleophthalmus;Boleophthalmus pectinirostris  
 UdeM00000002797 8090 87 UdeM00000002797 XP\_004081012.1 68.3 63  
 20 0 32 94 130 192 1.60E-14 87 8090 cellular  
 organisms;Eukaryota;Opisthokonta;Metazoa;Eumetazoa;Bilateria;Deuterostomi  
 a;Chordata;Craniata;Vertebrata;Gnathostomata;Teleostomi;Euteleostomi;Acti  
 nopterygii;Actinopteri;Neopterygii;Teleostei;Osteoglossocephalai;Clupeoce  
 phala;Euteleosteomorpha;Neoteleostei;Eurypterygia;Ctenosquamata;Acanthomo  
 rphata;Euacanthomorphacea;Percomorphaceae;Ovalentaria;Atherinomorphae;Bel  
 oniformes;Adrianichthyoidei;Adrianichthyidae;Oryziinae;Oryzias;Oryzias  
 latipes  
 UdeM00000002799 6573 60.1 UdeM00000002799 XP\_021352044.1 71.9 32  
 9 0 1 32 98 129 1.40E-06 60.1 6573 cellular  
 organisms;Eukaryota;Opisthokonta;Metazoa;Eumetazoa;Bilateria;Protostomia;  
 Spiralia;Lophotrochozoa;Mollusca;Bivalvia;Autobranchia;Pteriormorphia;Pect  
 inida;Pectinoidea;Pectinidae;Mizuhopecten;Mizuhopecten yessoensis  
 UdeM00000002801 150288 301.6 UdeM00000002801 XP\_020788097.1 61.4  
 207 80 0 1 207 365 571 7.90E-79 301.6 150288  
 cellular  
 organisms;Eukaryota;Opisthokonta;Metazoa;Eumetazoa;Bilateria;Deuterostomi  
 a;Chordata;Craniata;Vertebrata;Gnathostomata;Teleostomi;Euteleostomi;Acti  
 nopterygii;Actinopteri;Neopterygii;Teleostei;Osteoglossocephalai;Clupeoce  
 phala;Euteleosteomorpha;Neoteleostei;Eurypterygia;Ctenosquamata;Acanthomo  
 rphata;Euacanthomorphacea;Percomorphaceae;Gobiaria;Gobiiformes;Gobioidei;  
 Gobiidae;Oxudercinae;Boleophthalmus;Boleophthalmus pectinirostris  
 UdeM00000002802 8030 79 UdeM00000002802 XP\_014036531.1 72.5 51  
 14 0 66 116 143 193 5.70E-12 79 8030 cellular  
 organisms;Eukaryota;Opisthokonta;Metazoa;Eumetazoa;Bilateria;Deuterostomi  
 a;Chordata;Craniata;Vertebrata;Gnathostomata;Teleostomi;Euteleostomi;Acti  
 nopterygii;Actinopteri;Neopterygii;Teleostei;Osteoglossocephalai;Clupeoce  
 phala;Euteleosteomorpha;Protacanthopterygii;Salmoniformes;Salmonidae;Salm  
 oninae;Salmo;Salmo salar  
 UdeM00000002803 6579 100.9 UdeM00000002803 XP\_033757997.1 38.2 173  
 94 2 4 175 876 1036 1.90E-18 100.9 6579 cellular  
 organisms;Eukaryota;Opisthokonta;Metazoa;Eumetazoa;Bilateria;Protostomia;  
 Spiralia;Lophotrochozoa;Mollusca;Bivalvia;Autobranchia;Pteriormorphia;Pect  
 inida;Pectinoidea;Pectinidae;Pecten;Pecten maximus  
 UdeM00000002804 303518 95.1 UdeM00000002804 XP\_013764411.1 53.8  
 91 39 1 2 89 712 802 6.40E-17 95.1 303518  
 cellular  
 organisms;Eukaryota;Opisthokonta;Metazoa;Eumetazoa;Bilateria;Deuterostomi



a;Chordata;Craniata;Vertebrata;Gnathostomata;Teleostomi;Euteleostomi;Actinopterygii;Actinopteri;Neopterygii;Teleostei;Osteoglossocephalai;Clupeocephala;Euteleostei;Neoteleostei;Eurypterygia;Ctenosquamata;Acanthomorphata;Euacanthomorphacea;Percomorphaceae;Ovalentaria;Cichlomorphae;Cichliformes;Cichlidae;African

cichlids;Pseudocrenilabrinae;Haplochromini;Pundamilia;Pundamilia nyererei  
UdeM00000002805 30732 57.8 UdeM00000002805 XP\_024136425.1 49.2 61  
31 0 33 93 140 200 9.00E-06 57.8 30732 cellular

organisms;Eukaryota;Opisthokonta;Metazoa;Eumetazoa;Bilateria;Deuterostomia;Chordata;Craniata;Vertebrata;Gnathostomata;Teleostomi;Euteleostomi;Actinopterygii;Actinopteri;Neopterygii;Teleostei;Osteoglossocephalai;Clupeocephala;Euteleostei;Neoteleostei;Eurypterygia;Ctenosquamata;Acanthomorphata;Euacanthomorphacea;Percomorphaceae;Ovalentaria;Atherinomorphae;Beloniformes;Adrianichthyoidei;Adrianichthyidae;Oryziinae;Oryzias;Oryzias melastigma

UdeM00000015711 6596 1281.9 UdeM00000015711 XP\_045205736.1 74.9  
832 199 4 1 825 1 829 0.00E+00 1281.9 6596  
cellular

organisms;Eukaryota;Opisthokonta;Metazoa;Eumetazoa;Bilateria;Protostomia;Spiralia;Lophotrochozoa;Mollusca;Bivalvia;Autobranchia;Heteroconchia;Euheterodonta;Imparidentia;Venerida;Veneroidea;Veneridae;Mercenaria;Mercenaria mercenaria

UdeM00000015712 1735272 548.1 UdeM00000015712 XP\_041359684.1 57.8  
599 213 13 8 596 823 1391 1.40E-152 548.1 1735272  
cellular

organisms;Eukaryota;Opisthokonta;Metazoa;Eumetazoa;Bilateria;Protostomia;Spiralia;Lophotrochozoa;Mollusca;Gastropoda;Neomphalina;Neomphaloidea;Peltospiridae;Gigantopelta;Gigantopelta aegis

UdeM00000015713 6596 236.5 UdeM00000015713 XP\_045206979.1 58.5 265  
80 9 1 259 1 241 5.10E-59 236.5 6596 cellular

organisms;Eukaryota;Opisthokonta;Metazoa;Eumetazoa;Bilateria;Protostomia;Spiralia;Lophotrochozoa;Mollusca;Bivalvia;Autobranchia;Heteroconchia;Euheterodonta;Imparidentia;Venerida;Veneroidea;Veneridae;Mercenaria;Mercenaria mercenaria

UdeM00000015714 6596 538.5 UdeM00000015714 XP\_045205470.1 50.1 509  
245 2 25 532 87 587 9.90E-150 538.5 6596 cellular

organisms;Eukaryota;Opisthokonta;Metazoa;Eumetazoa;Bilateria;Protostomia;Spiralia;Lophotrochozoa;Mollusca;Bivalvia;Autobranchia;Heteroconchia;Euheterodonta;Imparidentia;Venerida;Veneroidea;Veneridae;Mercenaria;Mercenaria mercenaria

UdeM00000015715 6579 581.3 UdeM00000015715 XP\_033743742.1 49.2 683  
285 11 6 642 83 749 1.60E-162 581.3 6579 cellular

organisms;Eukaryota;Opisthokonta;Metazoa;Eumetazoa;Bilateria;Protostomia;Spiralia;Lophotrochozoa;Mollusca;Bivalvia;Autobranchia;Pteriormorphia;Pectinida;Pectinoidea;Pectinidae;Pecten;Pecten maximus

UdeM00000015716 6596 146.7 UdeM00000015716 XP\_045206419.1 71 100  
29 0 1 100 1 100 1.70E-32 146.7 6596 cellular

organisms;Eukaryota;Opisthokonta;Metazoa;Eumetazoa;Bilateria;Protostomia;Spiralia;Lophotrochozoa;Mollusca;Bivalvia;Autobranchia;Heteroconchia;Euheterodonta;Imparidentia;Venerida;Veneroidea;Veneridae;Mercenaria;Mercenaria mercenaria

UdeM00000015718 6596 721.5 UdeM00000015718 XP\_045203812.1 43.8 1143  
510 22 1 1101 75 1127 1.70E-204 721.5 6596 cellular

organisms;Eukaryota;Opisthokonta;Metazoa;Eumetazoa;Bilateria;Protostomia;

Spiralia;Lophotrochozoa;Mollusca;Bivalvia;Autobranchia;Heteroconchia;Euherodonta;Imparidentia;Venerida;Veneroidea;Veneridae;Mercenaria;Mercenaria mercenaria

UdeM00000015719 29159 393.3 UdeM00000015719 XP\_011449387.2 60.8 319  
125 0 6 324 3 321 3.10E-106 393.3 29159 cellular

organisms;Eukaryota;Opisthokonta;Metazoa;Eumetazoa;Bilateria;Protostomia;Spiralia;Lophotrochozoa;Mollusca;Bivalvia;Autobranchia;Pteriormorphia;Ostreida;Ostreioidea;Ostreidae;Crassostrea;Crassostrea gigas

UdeM00000015720 6500 307 UdeM00000015720 XP\_005108430.1 56.7 263  
113 1 37 298 61 323 2.80E-80 307 6500 cellular

organisms;Eukaryota;Opisthokonta;Metazoa;Eumetazoa;Bilateria;Protostomia;Spiralia;Lophotrochozoa;Mollusca;Gastropoda;Heterobranchia;Euthyneura;Tectipleura;Aplysiida;Aplysioidea;Aplysiidae;Aplysia;Aplysia californica

UdeM00000015721 29159 209.5 UdeM00000015721 XP\_011449387.2 53.5 202  
94 0 38 239 120 321 4.90E-51 209.5 29159 cellular

organisms;Eukaryota;Opisthokonta;Metazoa;Eumetazoa;Bilateria;Protostomia;Spiralia;Lophotrochozoa;Mollusca;Bivalvia;Autobranchia;Pteriormorphia;Ostreida;Ostreioidea;Ostreidae;Crassostrea;Crassostrea gigas

UdeM00000015722 29159 364.8 UdeM00000015722 XP\_011449387.2 55.6 322  
141 1 4 325 2 321 1.20E-97 364.8 29159 cellular

organisms;Eukaryota;Opisthokonta;Metazoa;Eumetazoa;Bilateria;Protostomia;Spiralia;Lophotrochozoa;Mollusca;Bivalvia;Autobranchia;Pteriormorphia;Ostreida;Ostreioidea;Ostreidae;Crassostrea;Crassostrea gigas

UdeM00000015723 6596 226.5 UdeM00000015723 XP\_045204800.1 34.7 392  
237 6 24 408 1 380 6.20E-56 226.5 6596 cellular

organisms;Eukaryota;Opisthokonta;Metazoa;Eumetazoa;Bilateria;Protostomia;Spiralia;Lophotrochozoa;Mollusca;Bivalvia;Autobranchia;Heteroconchia;Euherodonta;Imparidentia;Venerida;Veneroidea;Veneridae;Mercenaria;Mercenaria mercenaria

UdeM00000015724 6579 60.8 UdeM00000015724 XP\_033742126.1 37.8 90  
50 2 9 92 13 102 8.80E-06 60.8 6579 cellular

organisms;Eukaryota;Opisthokonta;Metazoa;Eumetazoa;Bilateria;Protostomia;Spiralia;Lophotrochozoa;Mollusca;Bivalvia;Autobranchia;Pteriormorphia;Pectinida;Pectinoidea;Pectinidae;Pecten;Pecten maximus

UdeM00000015726 6596 129.4 UdeM00000015726 XP\_045212483.1 41.2 187  
100 2 2 188 6 182 4.90E-27 129.4 6596 cellular

organisms;Eukaryota;Opisthokonta;Metazoa;Eumetazoa;Bilateria;Protostomia;Spiralia;Lophotrochozoa;Mollusca;Bivalvia;Autobranchia;Heteroconchia;Euherodonta;Imparidentia;Venerida;Veneroidea;Veneridae;Mercenaria;Mercenaria mercenaria

UdeM00000015728 225164 76.3 UdeM00000015728 XP\_009063428.1 36.4  
99 61 2 35 132 57 154 3.60E-11 76.3 225164

cellular

organisms;Eukaryota;Opisthokonta;Metazoa;Eumetazoa;Bilateria;Protostomia;Spiralia;Lophotrochozoa;Mollusca;Gastropoda;Patellogastropoda;Lottiioidea;Lottiidae;Lottia;Lottia gigantea

UdeM00000015729 225164 68.9 UdeM00000015729 XP\_009063428.1 36.4  
99 55 3 34 125 57 154 5.50E-09 68.9 225164

cellular

organisms;Eukaryota;Opisthokonta;Metazoa;Eumetazoa;Bilateria;Protostomia;Spiralia;Lophotrochozoa;Mollusca;Gastropoda;Patellogastropoda;Lottiioidea;Lottiidae;Lottia;Lottia gigantea

UdeM00000015730 225164 68.9 UdeM00000015730 XP\_009063428.1 36.4  
99 55 3 139 230 57 154 9.80E-09 68.9 225164

cellular  
organisms;Eukaryota;Opisthokonta;Metazoa;Eumetazoa;Bilateria;Protostomia;  
Spiralia;Lophotrochozoa;Mollusca;Gastropoda;Patellogastropoda;Lottioidea;  
Lottiidae;Lottia;Lottia gigantea  
UdeM00000015731 7574 109 UdeM00000015731 XP\_023932024.1 40.9 154  
85 5 2 153 205 354 6.10E-21 109 7574 cellular  
organisms;Eukaryota;Opisthokonta;Metazoa;Eumetazoa;Bilateria;Protostomia;  
Spiralia;Lophotrochozoa;Brachiopoda;Linguliformea;Lingulata;Lingulida;Lin  
guloidea;Lingulidae;Lingula;Lingula anatina  
UdeM00000015732 6596 417.5 UdeM00000015732 XP\_045208575.1 67.3 312  
102 0 29 340 17 328 1.70E-113 417.5 6596 cellular  
organisms;Eukaryota;Opisthokonta;Metazoa;Eumetazoa;Bilateria;Protostomia;  
Spiralia;Lophotrochozoa;Mollusca;Bivalvia;Autobranchia;Heteroconchia;Euhe  
terodonta;Imparidentia;Venerida;Veneroidea;Veneridae;Mercenaria;Mercenari  
a mercenaria  
UdeM00000015733 6579 231.5 UdeM00000015733 XP\_033731124.1 43.7 293  
138 5 11 278 6 296 1.40E-57 231.5 6579 cellular  
organisms;Eukaryota;Opisthokonta;Metazoa;Eumetazoa;Bilateria;Protostomia;  
Spiralia;Lophotrochozoa;Mollusca;Bivalvia;Autobranchia;Pteriomorpha;Pect  
inida;Pectinoidea;Pectinidae;Pecten;Pecten maximus  
UdeM00000015734 29159 1773.4 UdeM00000015734 XP\_011429373.2 84.2  
1024 158 2 1 1021 1 1023 0.00E+00 1773.4  
29159 cellular  
organisms;Eukaryota;Opisthokonta;Metazoa;Eumetazoa;Bilateria;Protostomia;  
Spiralia;Lophotrochozoa;Mollusca;Bivalvia;Autobranchia;Pteriomorpha;Ostr  
eida;Ostreoidea;Ostreidae;Crassostrea;Crassostrea gigas  
UdeM00000015735 7719 65.1 UdeM00000015735 XP\_004227365.1 49.3 73  
36 1 8 80 89 160 5.00E-08 65.1 7719 cellular  
organisms;Eukaryota;Opisthokonta;Metazoa;Eumetazoa;Bilateria;Deuterostomi  
a;Chordata;Tunicata;Ascidiacea;Phlebobranchia;Cionidae;Ciona;Ciona  
intestinalis  
UdeM00000015736 742174 188.7 UdeM00000015736 XP\_025202695.1 39.4  
251 131 7 4 234 96 345 8.30E-45 188.7 742174  
cellular  
organisms;Eukaryota;Opisthokonta;Metazoa;Eumetazoa;Bilateria;Protostomia;  
Ecdysozoa;Panarthropoda;Arthropoda;Mandibulata;Pancrustacea;Hexapoda;Inse  
cta;Dicondylia;Pterygota;Neoptera;Paraneoptera;Hemiptera;Sternorrhyncha;A  
phidomorpha;Aphidoidea;Aphididae;Aphidinae;Aphidini;Melanaphis;Melanaphis  
sacchari  
UdeM00000015737 143948 62 UdeM00000015737 XP\_015371586.1 40  
75 37 3 1 68 1 74 3.60E-07 62 143948  
cellular  
organisms;Eukaryota;Opisthokonta;Metazoa;Eumetazoa;Bilateria;Protostomia;  
Ecdysozoa;Panarthropoda;Arthropoda;Mandibulata;Pancrustacea;Hexapoda;Inse  
cta;Dicondylia;Pterygota;Neoptera;Paraneoptera;Hemiptera;Sternorrhyncha;A  
phidomorpha;Aphidoidea;Aphididae;Aphidinae;Macrosiphini;Diuraphis;Diuraph  
is noxia  
UdeM00000015738 6526 445.7 UdeM00000015738 XP\_013075004.1 52.7 431  
200 2 11 439 74 502 7.00E-122 445.7 6526 cellular  
organisms;Eukaryota;Opisthokonta;Metazoa;Eumetazoa;Bilateria;Protostomia;  
Spiralia;Lophotrochozoa;Mollusca;Gastropoda;Heterobranchia;Euthyneura;Pan  
pulmonata;Hygrophila;Lymnaeioidea;Planorbidae;Biophalaria;Biophalaria  
glabrata

UdeM00000015739 6596 717.2 UdeM00000015739 XP\_045205879.1 42.7 1036  
 508 21 1 1009 1 977 2.90E-203 717.2 6596 cellular  
 organisms;Eukaryota;Opisthokonta;Metazoa;Eumetazoa;Bilateria;Protostomia;  
 Spiralia;Lophotrochozoa;Mollusca;Bivalvia;Autobranhia;Heteroconchia;Euhe  
 terodonta;Imparidentia;Venerida;Veneroidea;Veneridae;Mercenaria;Mercenari  
 a mercenaria  
 UdeM00000015740 6579 1037.7 UdeM00000015740 XP\_033743452.1 54  
 1039 436 11 14 1043 9 1014 1.00E-299 1037.7 6579  
 cellular  
 organisms;Eukaryota;Opisthokonta;Metazoa;Eumetazoa;Bilateria;Protostomia;  
 Spiralia;Lophotrochozoa;Mollusca;Bivalvia;Autobranhia;Pteriormorphia;Pect  
 inida;Pectinoidea;Pectinidae;Pecten;Pecten maximus  
 UdeM00000015741 6579 1041.6 UdeM00000015741 XP\_033743452.1 62.8  
 809 298 3 10 816 62 869 6.70E-301 1041.6 6579  
 cellular  
 organisms;Eukaryota;Opisthokonta;Metazoa;Eumetazoa;Bilateria;Protostomia;  
 Spiralia;Lophotrochozoa;Mollusca;Bivalvia;Autobranhia;Pteriormorphia;Pect  
 inida;Pectinoidea;Pectinidae;Pecten;Pecten maximus  
 UdeM00000015742 6579 69.3 UdeM00000015742 XP\_033743331.1 30.5 151  
 92 7 14 155 36 182 1.10E-08 69.3 6579 cellular  
 organisms;Eukaryota;Opisthokonta;Metazoa;Eumetazoa;Bilateria;Protostomia;  
 Spiralia;Lophotrochozoa;Mollusca;Bivalvia;Autobranhia;Pteriormorphia;Pect  
 inida;Pectinoidea;Pectinidae;Pecten;Pecten maximus  
 UdeM00000015743 37621 62 UdeM00000015743 XP\_014676347.1 47.5 61  
 32 0 34 94 54 114 4.80E-07 62 37621 cellular  
 organisms;Eukaryota;Opisthokonta;Metazoa;Eumetazoa;Bilateria;Protostomia;  
 Ecdysozoa;Scalidophora;Priapulida;Priapulimorpha;Priapulimorphida;Priapul  
 idae;Priapulul;Priapulul caudatus  
 UdeM00000015744 6579 66.2 UdeM00000015744 XP\_033743331.1 31.2 154  
 87 8 5 143 26 175 1.10E-07 66.2 6579 cellular  
 organisms;Eukaryota;Opisthokonta;Metazoa;Eumetazoa;Bilateria;Protostomia;  
 Spiralia;Lophotrochozoa;Mollusca;Bivalvia;Autobranhia;Pteriormorphia;Pect  
 inida;Pectinoidea;Pectinidae;Pecten;Pecten maximus  
 UdeM00000015748 6596 356.3 UdeM00000015748 XP\_045206033.1 36.6 612  
 341 14 315 886 664 1268 1.10E-94 356.3 6596 cellular  
 organisms;Eukaryota;Opisthokonta;Metazoa;Eumetazoa;Bilateria;Protostomia;  
 Spiralia;Lophotrochozoa;Mollusca;Bivalvia;Autobranhia;Heteroconchia;Euhe  
 terodonta;Imparidentia;Venerida;Veneroidea;Veneridae;Mercenaria;Mercenari  
 a mercenaria  
 UdeM00000015749 6573 247.3 UdeM00000015749 XP\_021339064.1 84.9 152  
 23 0 20 171 106 257 1.40E-62 247.3 6573 cellular  
 organisms;Eukaryota;Opisthokonta;Metazoa;Eumetazoa;Bilateria;Protostomia;  
 Spiralia;Lophotrochozoa;Mollusca;Bivalvia;Autobranhia;Pteriormorphia;Pect  
 inida;Pectinoidea;Pectinidae;Mizuhopecten;Mizuhopecten yessoensis  
 UdeM00000015750 6596 607.1 UdeM00000015750 XP\_045205460.1 48 688  
 297 7 35 664 50 734 2.70E-170 607.1 6596 cellular  
 organisms;Eukaryota;Opisthokonta;Metazoa;Eumetazoa;Bilateria;Protostomia;  
 Spiralia;Lophotrochozoa;Mollusca;Bivalvia;Autobranhia;Heteroconchia;Euhe  
 terodonta;Imparidentia;Venerida;Veneroidea;Veneridae;Mercenaria;Mercenari  
 a mercenaria  
 UdeM00000015751 29159 70.5 UdeM00000015751 XP\_011456021.2 68.9 45  
 14 0 59 103 96 140 1.60E-09 70.5 29159 cellular  
 organisms;Eukaryota;Opisthokonta;Metazoa;Eumetazoa;Bilateria;Protostomia;

Spiralia;Lophotrochozoa;Mollusca;Bivalvia;Autobranchia;Pteriormorphia;Ostr  
eida;Ostreoidea;Ostreidae;Crassostrea;Crassostrea gigas  
UdeM00000015752 400727 170.2 UdeM00000015752 XP\_025087556.1 44.1  
261 115 4 60 318 97 328 4.10E-39 170.2 400727  
cellular

organisms;Eukaryota;Opisthokonta;Metazoa;Eumetazoa;Bilateria;Protostomia;  
Spiralia;Lophotrochozoa;Mollusca;Gastropoda;Caenogastropoda;Architaeniogl  
ossa;Ampullarioidea;Ampullariidae;Pomacea;Pomacea canaliculata

UdeM00000015753 6596 605.1 UdeM00000015753 XP\_045204652.1 52 600  
276 9 13 607 12 604 9.90E-170 605.1 6596 cellular

organisms;Eukaryota;Opisthokonta;Metazoa;Eumetazoa;Bilateria;Protostomia;  
Spiralia;Lophotrochozoa;Mollusca;Bivalvia;Autobranchia;Heteroconchia;Euhe  
terodonta;Imparidentia;Venerida;Veneroidea;Veneridae;Mercenaria;Mercenari  
a mercenaria

UdeM00000015755 6596 191.4 UdeM00000015755 XP\_045202239.1 25.2 727  
448 23 8 683 12 693 3.70E-45 191.4 6596 cellular

organisms;Eukaryota;Opisthokonta;Metazoa;Eumetazoa;Bilateria;Protostomia;  
Spiralia;Lophotrochozoa;Mollusca;Bivalvia;Autobranchia;Heteroconchia;Euhe  
terodonta;Imparidentia;Venerida;Veneroidea;Veneridae;Mercenaria;Mercenari  
a mercenaria

UdeM00000015763 6596 150.2 UdeM00000015763 XP\_045206641.1 42.4 172  
99 0 91 262 29 200 6.10E-33 150.2 6596 cellular

organisms;Eukaryota;Opisthokonta;Metazoa;Eumetazoa;Bilateria;Protostomia;  
Spiralia;Lophotrochozoa;Mollusca;Bivalvia;Autobranchia;Heteroconchia;Euhe  
terodonta;Imparidentia;Venerida;Veneroidea;Veneridae;Mercenaria;Mercenari  
a mercenaria

UdeM00000015766 6596 252.7 UdeM00000015766 XP\_045203106.1 55.1 236  
99 4 23 253 30 263 5.00E-64 252.7 6596 cellular

organisms;Eukaryota;Opisthokonta;Metazoa;Eumetazoa;Bilateria;Protostomia;  
Spiralia;Lophotrochozoa;Mollusca;Bivalvia;Autobranchia;Heteroconchia;Euhe  
terodonta;Imparidentia;Venerida;Veneroidea;Veneridae;Mercenaria;Mercenari  
a mercenaria

UdeM00000015767 6596 460.3 UdeM00000015767 XP\_045203106.1 60.4 391  
147 5 12 397 30 417 2.50E-126 460.3 6596 cellular

organisms;Eukaryota;Opisthokonta;Metazoa;Eumetazoa;Bilateria;Protostomia;  
Spiralia;Lophotrochozoa;Mollusca;Bivalvia;Autobranchia;Heteroconchia;Euhe  
terodonta;Imparidentia;Venerida;Veneroidea;Veneridae;Mercenaria;Mercenari  
a mercenaria

UdeM00000015771 1735272 99 UdeM00000015771 XP\_041359604.1 71.9  
57 16 0 253 309 196 252 1.10E-17 99 1735272

cellular

organisms;Eukaryota;Opisthokonta;Metazoa;Eumetazoa;Bilateria;Protostomia;  
Spiralia;Lophotrochozoa;Mollusca;Gastropoda;Neomphalina;Neomphaloidea;Pel  
tospiridae;Gigantopelta;Gigantopelta aegis

UdeM00000015772 6596 505.4 UdeM00000015772 XP\_045203679.1 63.4 393  
139 3 251 643 154 541 1.10E-139 505.4 6596 cellular

organisms;Eukaryota;Opisthokonta;Metazoa;Eumetazoa;Bilateria;Protostomia;  
Spiralia;Lophotrochozoa;Mollusca;Bivalvia;Autobranchia;Heteroconchia;Euhe  
terodonta;Imparidentia;Venerida;Veneroidea;Veneridae;Mercenaria;Mercenari  
a mercenaria

UdeM00000015774 6596 143.7 UdeM00000015774 XP\_045206677.1 57.3 171  
62 1 1 160 290 460 2.10E-31 143.7 6596 cellular

organisms;Eukaryota;Opisthokonta;Metazoa;Eumetazoa;Bilateria;Protostomia;  
Spiralia;Lophotrochozoa;Mollusca;Bivalvia;Autobranchia;Heteroconchia;Euhe

terodonta;Imparidentia;Venerida;Veneroidea;Veneridae;Mercenaria;Mercenari  
a mercenaria

UdeM00000015776 6596 219.2 UdeM00000015776 XP\_045206677.1 64.8 159  
50 1 8 160 32 190 4.70E-54 219.2 6596 cellular

organisms;Eukaryota;Opisthokonta;Metazoa;Eumetazoa;Bilateria;Protostomia;  
Spiralia;Lophotrochozoa;Mollusca;Bivalvia;Autobranhia;Heteroconchia;Euhe  
terodonta;Imparidentia;Venerida;Veneroidea;Veneridae;Mercenaria;Mercenari  
a mercenaria

UdeM00000015777 6596 557.4 UdeM00000015777 XP\_045206057.1 63.1 434  
148 4 26 458 24 446 1.70E-155 557.4 6596 cellular

organisms;Eukaryota;Opisthokonta;Metazoa;Eumetazoa;Bilateria;Protostomia;  
Spiralia;Lophotrochozoa;Mollusca;Bivalvia;Autobranhia;Heteroconchia;Euhe  
terodonta;Imparidentia;Venerida;Veneroidea;Veneridae;Mercenaria;Mercenari  
a mercenaria

UdeM00000015778 6596 708.4 UdeM00000015778 XP\_045203586.1 61.1 581  
211 5 10 580 32 607 7.70E-201 708.4 6596 cellular

organisms;Eukaryota;Opisthokonta;Metazoa;Eumetazoa;Bilateria;Protostomia;  
Spiralia;Lophotrochozoa;Mollusca;Bivalvia;Autobranhia;Heteroconchia;Euhe  
terodonta;Imparidentia;Venerida;Veneroidea;Veneridae;Mercenaria;Mercenari  
a mercenaria

UdeM00000015779 6596 1659.8 UdeM00000015779 XP\_045203586.1 61.2  
1397 433 9 10 1402 32 1323 0.00E+00 1659.8 6596  
cellular

organisms;Eukaryota;Opisthokonta;Metazoa;Eumetazoa;Bilateria;Protostomia;  
Spiralia;Lophotrochozoa;Mollusca;Bivalvia;Autobranhia;Heteroconchia;Euhe  
terodonta;Imparidentia;Venerida;Veneroidea;Veneridae;Mercenaria;Mercenari  
a mercenaria

UdeM00000015780 29159 218.4 UdeM00000015780 XP\_034299850.1 84.5 129  
20 0 1 129 1 129 5.70E-54 218.4 29159 cellular

organisms;Eukaryota;Opisthokonta;Metazoa;Eumetazoa;Bilateria;Protostomia;  
Spiralia;Lophotrochozoa;Mollusca;Bivalvia;Autobranhia;Pteriomorphia;Ostr  
eida;Ostreoidea;Ostreidae;Crassostrea;Crassostrea gigas

UdeM00000015781 6596 1398.3 UdeM00000015781 XP\_045205012.1 85.1  
798 119 0 1 798 1 798 0.00E+00 1398.3 6596  
cellular

organisms;Eukaryota;Opisthokonta;Metazoa;Eumetazoa;Bilateria;Protostomia;  
Spiralia;Lophotrochozoa;Mollusca;Bivalvia;Autobranhia;Heteroconchia;Euhe  
terodonta;Imparidentia;Venerida;Veneroidea;Veneridae;Mercenaria;Mercenari  
a mercenaria

UdeM00000015782 6596 136.3 UdeM00000015782 XP\_045203604.1 32.4 262  
168 6 26 280 21 280 1.10E-28 136.3 6596 cellular

organisms;Eukaryota;Opisthokonta;Metazoa;Eumetazoa;Bilateria;Protostomia;  
Spiralia;Lophotrochozoa;Mollusca;Bivalvia;Autobranhia;Heteroconchia;Euhe  
terodonta;Imparidentia;Venerida;Veneroidea;Veneridae;Mercenaria;Mercenari  
a mercenaria

UdeM00000015783 29159 2131.3 UdeM00000015783 XP\_034301364.1 81.8  
1259 227 1 5 1261 13 1271 0.00E+00 2131.3  
29159 cellular

organisms;Eukaryota;Opisthokonta;Metazoa;Eumetazoa;Bilateria;Protostomia;  
Spiralia;Lophotrochozoa;Mollusca;Bivalvia;Autobranhia;Pteriomorphia;Ostr  
eida;Ostreoidea;Ostreidae;Crassostrea;Crassostrea gigas

UdeM00000015784 1735272 802 UdeM00000015784 XP\_041358059.1 61.4  
664 234 6 29 674 10 669 5.90E-229 802 1735272  
cellular

organisms;Eukaryota;Opisthokonta;Metazoa;Eumetazoa;Bilateria;Protostomia;  
Spiralia;Lophotrochozoa;Mollusca;Gastropoda;Neomphalina;Neomphaloidea;Pel  
tospiridae;Gigantopelta;Gigantopelta aegis  
UdeM00000015785 6573 280.4 UdeM00000015785 XP\_021348269.1 66.2 201  
68 0 6 206 661 861 1.80E-72 280.4 6573 cellular  
organisms;Eukaryota;Opisthokonta;Metazoa;Eumetazoa;Bilateria;Protostomia;  
Spiralia;Lophotrochozoa;Mollusca;Bivalvia;Autobranchia;Pteriormorphia;Pect  
inida;Pectinoidea;Pectinidae;Mizuhopecten;Mizuhopecten yessoensis  
UdeM00000013578 6596 85.5 UdeM00000013578 XP\_045208259.1 37.5 128  
28 2 26 101 305 432 4.30E-14 85.5 6596 cellular  
organisms;Eukaryota;Opisthokonta;Metazoa;Eumetazoa;Bilateria;Protostomia;  
Spiralia;Lophotrochozoa;Mollusca;Bivalvia;Autobranchia;Heteroconchia;Euhe  
terodonta;Imparidentia;Venerida;Veneroidea;Veneridae;Mercenaria;Mercenari  
a mercenaria  
UdeM00000013579 6596 111.7 UdeM00000013579 XP\_045180427.1 38.4 177  
106 2 76 250 98 273 1.40E-21 111.7 6596 cellular  
organisms;Eukaryota;Opisthokonta;Metazoa;Eumetazoa;Bilateria;Protostomia;  
Spiralia;Lophotrochozoa;Mollusca;Bivalvia;Autobranchia;Heteroconchia;Euhe  
terodonta;Imparidentia;Venerida;Veneroidea;Veneridae;Mercenaria;Mercenari  
a mercenaria  
UdeM00000013580 6565 70.1 UdeM00000013580 XP\_022300575.1 44 84  
39 2 138 221 169 244 4.30E-09 70.1 6565 cellular  
organisms;Eukaryota;Opisthokonta;Metazoa;Eumetazoa;Bilateria;Protostomia;  
Spiralia;Lophotrochozoa;Mollusca;Bivalvia;Autobranchia;Pteriormorphia;Ostr  
eida;Ostreoidea;Ostreidae;Crassostrea;Crassostrea virginica  
UdeM00000013581 6565 408.3 UdeM00000013581 XP\_022287155.1 46.1 488  
238 8 1 468 306 788 1.30E-110 408.3 6565 cellular  
organisms;Eukaryota;Opisthokonta;Metazoa;Eumetazoa;Bilateria;Protostomia;  
Spiralia;Lophotrochozoa;Mollusca;Bivalvia;Autobranchia;Pteriormorphia;Ostr  
eida;Ostreoidea;Ostreidae;Crassostrea;Crassostrea virginica  
UdeM00000013583 7668 62.4 UdeM00000013583 XP\_030833544.1 31.8 110  
59 3 5 98 461 570 6.60E-07 62.4 7668 cellular  
organisms;Eukaryota;Opisthokonta;Metazoa;Eumetazoa;Bilateria;Deuterostomi  
a;Echinodermata;Eleutherozoa;Echinozoa;Echinoidea;Euechinoidea;Echinacea;  
Camarodonta;Echinidea;Strongylocentrotidae;Strongylocentrotus;Strongyloce  
ntrotus purpuratus  
UdeM00000013582 7668 62.4 UdeM00000013582 XP\_030833544.1 31.8 110  
59 3 5 98 461 570 7.00E-07 62.4 7668 cellular  
organisms;Eukaryota;Opisthokonta;Metazoa;Eumetazoa;Bilateria;Deuterostomi  
a;Echinodermata;Eleutherozoa;Echinozoa;Echinoidea;Euechinoidea;Echinacea;  
Camarodonta;Echinidea;Strongylocentrotidae;Strongylocentrotus;Strongyloce  
ntrotus purpuratus  
UdeM00000013588 6596 104.8 UdeM00000013588 XP\_045181000.1 73 63  
17 0 1 63 904 966 7.60E-20 104.8 6596 cellular  
organisms;Eukaryota;Opisthokonta;Metazoa;Eumetazoa;Bilateria;Protostomia;  
Spiralia;Lophotrochozoa;Mollusca;Bivalvia;Autobranchia;Heteroconchia;Euhe  
terodonta;Imparidentia;Venerida;Veneroidea;Veneridae;Mercenaria;Mercenari  
a mercenaria  
UdeM00000013590 6596 290.8 UdeM00000013590 XP\_045181000.1 64.5 245  
33 1 97 287 1333 1577 2.00E-75 290.8 6596 cellular  
organisms;Eukaryota;Opisthokonta;Metazoa;Eumetazoa;Bilateria;Protostomia;  
Spiralia;Lophotrochozoa;Mollusca;Bivalvia;Autobranchia;Heteroconchia;Euhe  
terodonta;Imparidentia;Venerida;Veneroidea;Veneridae;Mercenaria;Mercenari  
a mercenaria

UdeM00000013592 6596 68.9 UdeM00000013592 XP\_045208259.1 50.7 67  
 30 1 8 71 239 305 3.80E-09 68.9 6596 cellular  
 organisms;Eukaryota;Opisthokonta;Metazoa;Eumetazoa;Bilateria;Protostomia;  
 Spiralia;Lophotrochozoa;Mollusca;Bivalvia;Autobranchia;Heteroconchia;Euhe  
 terodonta;Imparidentia;Venerida;Veneroidea;Veneridae;Mercenaria;Mercenari  
 a mercenaria  
 UdeM00000013591 29159 67.8 UdeM00000013591 XP\_034319534.1 53.7 67  
 28 1 8 71 378 444 1.00E-08 67.8 29159 cellular  
 organisms;Eukaryota;Opisthokonta;Metazoa;Eumetazoa;Bilateria;Protostomia;  
 Spiralia;Lophotrochozoa;Mollusca;Bivalvia;Autobranchia;Pteriormorphia;Ostr  
 eida;Ostreoidea;Ostreidae;Crassostrea;Crassostrea gigas  
 UdeM00000041723 6596 73.6 UdeM00000041723 XP\_045202912.1 23.5 362  
 250 11 20 368 362 709 1.10E-09 73.6 6596 cellular  
 organisms;Eukaryota;Opisthokonta;Metazoa;Eumetazoa;Bilateria;Protostomia;  
 Spiralia;Lophotrochozoa;Mollusca;Bivalvia;Autobranchia;Heteroconchia;Euhe  
 terodonta;Imparidentia;Venerida;Veneroidea;Veneridae;Mercenaria;Mercenari  
 a mercenaria  
 UdeM00000041724 6579 507.3 UdeM00000041724 XP\_033740878.1 40.3 759  
 342 13 1 692 1 715 3.10E-140 507.3 6579 cellular  
 organisms;Eukaryota;Opisthokonta;Metazoa;Eumetazoa;Bilateria;Protostomia;  
 Spiralia;Lophotrochozoa;Mollusca;Bivalvia;Autobranchia;Pteriormorphia;Pect  
 inida;Pectinoidea;Pectinidae;Pecten;Pecten maximus  
 UdeM00000041725 29159 176.8 UdeM00000041725 XP\_034318677.1 41.3 283  
 139 9 253 522 6 274 1.80E-40 176.8 29159 cellular  
 organisms;Eukaryota;Opisthokonta;Metazoa;Eumetazoa;Bilateria;Protostomia;  
 Spiralia;Lophotrochozoa;Mollusca;Bivalvia;Autobranchia;Pteriormorphia;Ostr  
 eida;Ostreoidea;Ostreidae;Crassostrea;Crassostrea gigas  
 UdeM00000041728 37653 142.5 UdeM00000041728 XP\_014782194.1 58.8 114  
 46 1 1 114 1 113 4.40E-31 142.5 37653 cellular  
 organisms;Eukaryota;Opisthokonta;Metazoa;Eumetazoa;Bilateria;Protostomia;  
 Spiralia;Lophotrochozoa;Mollusca;Cephalopoda;Coleoidea;Octopodiformes;Oct  
 opoda;Incirrata;Octopodidae;Octopus;Octopus bimaculoides  
 UdeM00000041837 29159 470.3 UdeM00000041837 XP\_011456886.2 38.6 687  
 371 15 259 922 71 729 5.60E-129 470.3 29159 cellular  
 organisms;Eukaryota;Opisthokonta;Metazoa;Eumetazoa;Bilateria;Protostomia;  
 Spiralia;Lophotrochozoa;Mollusca;Bivalvia;Autobranchia;Pteriormorphia;Ostr  
 eida;Ostreoidea;Ostreidae;Crassostrea;Crassostrea gigas  
 UdeM00000041838 29159 67.8 UdeM00000041838 XP\_034329456.1 49.3 71  
 31 1 82 152 451 516 1.50E-08 67.8 29159 cellular  
 organisms;Eukaryota;Opisthokonta;Metazoa;Eumetazoa;Bilateria;Protostomia;  
 Spiralia;Lophotrochozoa;Mollusca;Bivalvia;Autobranchia;Pteriormorphia;Ostr  
 eida;Ostreoidea;Ostreidae;Crassostrea;Crassostrea gigas  
 UdeM00000041839 6596 178.7 UdeM00000041839 XP\_045211867.1 37.7 297  
 153 8 154 440 22 296 1.60E-41 178.7 6596 cellular  
 organisms;Eukaryota;Opisthokonta;Metazoa;Eumetazoa;Bilateria;Protostomia;  
 Spiralia;Lophotrochozoa;Mollusca;Bivalvia;Autobranchia;Heteroconchia;Euhe  
 terodonta;Imparidentia;Venerida;Veneroidea;Veneridae;Mercenaria;Mercenari  
 a mercenaria  
 UdeM00000041840 6596 75.9 UdeM00000041840 XP\_045211867.1 43.9 82  
 44 2 1 81 324 404 4.00E-11 75.9 6596 cellular  
 organisms;Eukaryota;Opisthokonta;Metazoa;Eumetazoa;Bilateria;Protostomia;  
 Spiralia;Lophotrochozoa;Mollusca;Bivalvia;Autobranchia;Heteroconchia;Euhe  
 terodonta;Imparidentia;Venerida;Veneroidea;Veneridae;Mercenaria;Mercenari  
 a mercenaria



UdeM00000041841 29159 164.1 UdeM00000041841 XP\_011456886.2 46.6 178  
 91 2 1 174 398 575 2.20E-37 164.1 29159 cellular  
 organisms;Eukaryota;Opisthokonta;Metazoa;Eumetazoa;Bilateria;Protostomia;  
 Spiralia;Lophotrochozoa;Mollusca;Bivalvia;Autobranhia;Pteriomorphia;Ostr  
 eida;Ostreoidea;Ostreidae;Crassostrea;Crassostrea gigas  
 UdeM00000040264 6596 197.2 UdeM00000040264 XP\_045215622.1 43.4 242  
 125 4 19 249 41 281 3.30E-47 197.2 6596 cellular  
 organisms;Eukaryota;Opisthokonta;Metazoa;Eumetazoa;Bilateria;Protostomia;  
 Spiralia;Lophotrochozoa;Mollusca;Bivalvia;Autobranhia;Heteroconchia;Euhe  
 terodonta;Imparidentia;Venerida;Veneroidea;Veneridae;Mercenaria;Mercenari  
 a mercenaria  
 UdeM00000040266 6596 95.1 UdeM00000040266 XP\_045173268.1 27.8 407  
 238 12 112 502 127 493 2.70E-16 95.1 6596 cellular  
 organisms;Eukaryota;Opisthokonta;Metazoa;Eumetazoa;Bilateria;Protostomia;  
 Spiralia;Lophotrochozoa;Mollusca;Bivalvia;Autobranhia;Heteroconchia;Euhe  
 terodonta;Imparidentia;Venerida;Veneroidea;Veneridae;Mercenaria;Mercenari  
 a mercenaria  
 UdeM00000040267 6573 124 UdeM00000040267 XP\_021366034.1 40.9 159  
 78 6 46 199 31 178 2.70E-25 124 6573 cellular  
 organisms;Eukaryota;Opisthokonta;Metazoa;Eumetazoa;Bilateria;Protostomia;  
 Spiralia;Lophotrochozoa;Mollusca;Bivalvia;Autobranhia;Pteriomorphia;Pect  
 inida;Pectinoidea;Pectinidae;Mizuhopecten;Mizuhopecten yessoensis  
 UdeM00000040268 6573 130.2 UdeM00000040268 XP\_021366034.1 40.9 159  
 79 5 45 198 31 179 3.10E-27 130.2 6573 cellular  
 organisms;Eukaryota;Opisthokonta;Metazoa;Eumetazoa;Bilateria;Protostomia;  
 Spiralia;Lophotrochozoa;Mollusca;Bivalvia;Autobranhia;Pteriomorphia;Pect  
 inida;Pectinoidea;Pectinidae;Mizuhopecten;Mizuhopecten yessoensis  
 UdeM00000040269 6596 316.2 UdeM00000040269 XP\_045171280.1 43.8 354  
 184 3 11 363 10 349 5.30E-83 316.2 6596 cellular  
 organisms;Eukaryota;Opisthokonta;Metazoa;Eumetazoa;Bilateria;Protostomia;  
 Spiralia;Lophotrochozoa;Mollusca;Bivalvia;Autobranhia;Heteroconchia;Euhe  
 terodonta;Imparidentia;Venerida;Veneroidea;Veneridae;Mercenaria;Mercenari  
 a mercenaria  
 UdeM00000040271 225164 329.3 UdeM00000040271 XP\_009051580.1 54.4  
 283 127 1 2 284 8 288 4.70E-87 329.3 225164  
 cellular  
 organisms;Eukaryota;Opisthokonta;Metazoa;Eumetazoa;Bilateria;Protostomia;  
 Spiralia;Lophotrochozoa;Mollusca;Gastropoda;Patellogastropoda;Lottioidea;  
 Lottiidae;Lottia;Lottia gigantea  
 UdeM00000040272 6596 430.6 UdeM00000040272 XP\_045171647.1 56.2 434  
 160 7 30 444 14 436 2.50E-117 430.6 6596 cellular  
 organisms;Eukaryota;Opisthokonta;Metazoa;Eumetazoa;Bilateria;Protostomia;  
 Spiralia;Lophotrochozoa;Mollusca;Bivalvia;Autobranhia;Heteroconchia;Euhe  
 terodonta;Imparidentia;Venerida;Veneroidea;Veneridae;Mercenaria;Mercenari  
 a mercenaria  
 UdeM00000040273 29159 183.7 UdeM00000040273 XP\_011446263.1 65.7 140  
 48 0 1 140 1 140 1.60E-43 183.7 29159 cellular  
 organisms;Eukaryota;Opisthokonta;Metazoa;Eumetazoa;Bilateria;Protostomia;  
 Spiralia;Lophotrochozoa;Mollusca;Bivalvia;Autobranhia;Pteriomorphia;Ostr  
 eida;Ostreoidea;Ostreidae;Crassostrea;Crassostrea gigas  
 UdeM00000040274 6596 134.4 UdeM00000040274 XP\_045172700.1 58.2 110  
 46 0 1 110 33 142 8.80E-29 134.4 6596 cellular  
 organisms;Eukaryota;Opisthokonta;Metazoa;Eumetazoa;Bilateria;Protostomia;  
 Spiralia;Lophotrochozoa;Mollusca;Bivalvia;Autobranhia;Heteroconchia;Euhe

terodonta;Imparidentia;Venerida;Veneroidea;Veneridae;Mercenaria;Mercenaria mercenaria  
 UdeM00000040275 6579 179.1 UdeM00000040275 XP\_033747826.1 60.3 141  
 56 0 1 141 1 141 3.90E-42 179.1 6579 cellular  
 organisms;Eukaryota;Opisthokonta;Metazoa;Eumetazoa;Bilateria;Protostomia;  
 Spiralia;Lophotrochozoa;Mollusca;Bivalvia;Autobranchia;Pteriomorpha;Pectinida;  
 Pectinoidea;Pectinidae;Pecten;Pecten maximus  
 UdeM00000040276 29159 317 UdeM00000040276 XP\_034317111.1 55.8 283  
 124 1 2 283 171 453 2.50E-83 317 29159 cellular  
 organisms;Eukaryota;Opisthokonta;Metazoa;Eumetazoa;Bilateria;Protostomia;  
 Spiralia;Lophotrochozoa;Mollusca;Bivalvia;Autobranchia;Pteriomorpha;Ostreida;  
 Ostreidae;Crassostrea;Crassostrea gigas  
 UdeM00000040277 6596 719.9 UdeM00000040277 XP\_045174126.1 76 450  
 108 0 26 475 202 651 2.10E-204 719.9 6596 cellular  
 organisms;Eukaryota;Opisthokonta;Metazoa;Eumetazoa;Bilateria;Protostomia;  
 Spiralia;Lophotrochozoa;Mollusca;Bivalvia;Autobranchia;Heteroconchia;Euheterodonta;  
 Imparidentia;Venerida;Veneroidea;Veneridae;Mercenaria;Mercenaria mercenaria  
 UdeM00000040278 6596 199.5 UdeM00000040278 XP\_045174126.1 71.3 129  
 37 0 1 129 203 331 2.60E-48 199.5 6596 cellular  
 organisms;Eukaryota;Opisthokonta;Metazoa;Eumetazoa;Bilateria;Protostomia;  
 Spiralia;Lophotrochozoa;Mollusca;Bivalvia;Autobranchia;Heteroconchia;Euheterodonta;  
 Imparidentia;Venerida;Veneroidea;Veneridae;Mercenaria;Mercenaria mercenaria  
 UdeM00000040281 88015 68.9 UdeM00000040281 XP\_023328598.1 65 40  
 14 0 101 140 116 155 5.70E-09 68.9 88015 cellular  
 organisms;Eukaryota;Opisthokonta;Metazoa;Eumetazoa;Bilateria;Protostomia;  
 Ecdysozoa;Panarthropoda;Arthropoda;Mandibulata;Pancrustacea;Crustacea;Multicrustacea;  
 Hexanauplia;Copepoda;Neocopepoda;Gymnoplea;Calanoida;Temoridae;Eurytemora;  
 Eurytemora affinis  
 UdeM00000040282 6573 620.2 UdeM00000040282 XP\_021370410.1 55.6 603  
 259 6 3 603 4 599 3.10E-174 620.2 6573 cellular  
 organisms;Eukaryota;Opisthokonta;Metazoa;Eumetazoa;Bilateria;Protostomia;  
 Spiralia;Lophotrochozoa;Mollusca;Bivalvia;Autobranchia;Pteriomorpha;Pectinida;  
 Pectinoidea;Pectinidae;Mizuhopecten;Mizuhopecten yessoensis  
 UdeM00000040283 6579 97.1 UdeM00000040283 XP\_033748800.1 55 140  
 58 2 6 140 11 150 8.80E-17 97.1 6579 cellular  
 organisms;Eukaryota;Opisthokonta;Metazoa;Eumetazoa;Bilateria;Protostomia;  
 Spiralia;Lophotrochozoa;Mollusca;Bivalvia;Autobranchia;Pteriomorpha;Pectinida;  
 Pectinoidea;Pectinidae;Pecten;Pecten maximus  
 UdeM00000040284 6596 649.4 UdeM00000040284 XP\_045171751.1 87.4 349  
 44 0 1 349 1 349 2.70E-183 649.4 6596 cellular  
 organisms;Eukaryota;Opisthokonta;Metazoa;Eumetazoa;Bilateria;Protostomia;  
 Spiralia;Lophotrochozoa;Mollusca;Bivalvia;Autobranchia;Heteroconchia;Euheterodonta;  
 Imparidentia;Venerida;Veneroidea;Veneridae;Mercenaria;Mercenaria mercenaria  
 UdeM00000040285 6565 378.3 UdeM00000040285 XP\_022345729.1 78.4 227  
 49 0 1 227 1 227 7.10E-102 378.3 6565 cellular  
 organisms;Eukaryota;Opisthokonta;Metazoa;Eumetazoa;Bilateria;Protostomia;  
 Spiralia;Lophotrochozoa;Mollusca;Bivalvia;Autobranchia;Pteriomorpha;Ostreida;  
 Ostreidae;Crassostrea;Crassostrea virginica  
 UdeM00000040286 6596 1287.7 UdeM00000040286 XP\_045173342.1 49.5  
 1331 603 14 1 1290 1 1303 0.00E+00 1287.7 6596  
 cellular

organisms;Eukaryota;Opisthokonta;Metazoa;Eumetazoa;Bilateria;Protostomia;  
Spiralia;Lophotrochozoa;Mollusca;Bivalvia;Autobranhia;Heteroconchia;Euhe  
terodonta;Imparidentia;Venerida;Veneroidea;Veneridae;Mercenaria;Mercenari  
a mercenaria  
UdeM00000040287 6565 458.8 UdeM00000040287 XP\_022340689.1 54.3 658  
222 10 1 628 1 609 1.20E-125 458.8 6565 cellular  
organisms;Eukaryota;Opisthokonta;Metazoa;Eumetazoa;Bilateria;Protostomia;  
Spiralia;Lophotrochozoa;Mollusca;Bivalvia;Autobranhia;Pteriormorphia;Ostr  
eida;Ostreoidea;Ostreidae;Crassostrea;Crassostrea virginica  
UdeM00000040288 400727 125.2 UdeM00000040288 XP\_025108466.1 40.3  
186 102 2 27 212 358 534 1.10E-25 125.2 400727  
cellular  
organisms;Eukaryota;Opisthokonta;Metazoa;Eumetazoa;Bilateria;Protostomia;  
Spiralia;Lophotrochozoa;Mollusca;Gastropoda;Caenogastropoda;Architaeniogl  
ossa;Ampullarioidea;Ampullariidae;Pomacea;Pomacea canaliculata  
UdeM00000040290 10224 229.2 UdeM00000040290 XP\_006813844.1 46.8 235  
125 0 1 235 128 362 5.60E-57 229.2 10224 cellular  
organisms;Eukaryota;Opisthokonta;Metazoa;Eumetazoa;Bilateria;Deuterostomi  
a;Hemichordata;Enteropneusta;Harrimaniidae;Saccoglossus;Saccoglossus  
kowalevskii  
UdeM00000040289 10224 230.7 UdeM00000040289 XP\_006813844.1 46.8 237  
126 0 2 238 126 362 1.90E-57 230.7 10224 cellular  
organisms;Eukaryota;Opisthokonta;Metazoa;Eumetazoa;Bilateria;Deuterostomi  
a;Hemichordata;Enteropneusta;Harrimaniidae;Saccoglossus;Saccoglossus  
kowalevskii  
UdeM00000040291 6596 247.7 UdeM00000040291 XP\_045173613.1 39 472  
220 15 474 928 1154 1574 6.10E-62 247.7 6596 cellular  
organisms;Eukaryota;Opisthokonta;Metazoa;Eumetazoa;Bilateria;Protostomia;  
Spiralia;Lophotrochozoa;Mollusca;Bivalvia;Autobranhia;Heteroconchia;Euhe  
terodonta;Imparidentia;Venerida;Veneroidea;Veneridae;Mercenaria;Mercenari  
a mercenaria  
UdeM00000040291 6596 58.9 UdeM00000040291 XP\_045173613.1 53.8 52  
24 0 70 121 715 766 4.00E-05 58.9 6596 cellular  
organisms;Eukaryota;Opisthokonta;Metazoa;Eumetazoa;Bilateria;Protostomia;  
Spiralia;Lophotrochozoa;Mollusca;Bivalvia;Autobranhia;Heteroconchia;Euhe  
terodonta;Imparidentia;Venerida;Veneroidea;Veneridae;Mercenaria;Mercenari  
a mercenaria  
UdeM00000040292 6596 572.4 UdeM00000040292 XP\_045171216.1 67.9 390  
125 0 1 390 1 390 4.40E-160 572.4 6596 cellular  
organisms;Eukaryota;Opisthokonta;Metazoa;Eumetazoa;Bilateria;Protostomia;  
Spiralia;Lophotrochozoa;Mollusca;Bivalvia;Autobranhia;Heteroconchia;Euhe  
terodonta;Imparidentia;Venerida;Veneroidea;Veneridae;Mercenaria;Mercenari  
a mercenaria  
UdeM00000040293 6573 456.8 UdeM00000040293 XP\_021372779.1 57.8 481  
178 11 2 461 48 524 3.20E-125 456.8 6573 cellular  
organisms;Eukaryota;Opisthokonta;Metazoa;Eumetazoa;Bilateria;Protostomia;  
Spiralia;Lophotrochozoa;Mollusca;Bivalvia;Autobranhia;Pteriormorphia;Pect  
inida;Pectinoidea;Pectinidae;Mizuhopecten;Mizuhopecten yessoensis  
UdeM00000040296 13686 276.6 UdeM00000040296 XP\_011170408.3 39 408  
209 4 1 370 471 876 5.80E-71 276.6 13686 cellular  
organisms;Eukaryota;Opisthokonta;Metazoa;Eumetazoa;Bilateria;Protostomia;  
Ecdysozoa;Panarthropoda;Arthropoda;Mandibulata;Pancrustacea;Hexapoda;Inse  
cta;Dicondylia;Pterygota;Neoptera;Endopterygota;Hymenoptera;Apocrita;Acul

eata;Formicoidea;Formicidae;Myrmicinae;Solenopsidini;Solenopsis;Solenopsi  
s invicta

UdeM00000040297 6565 420.6 UdeM00000040297 XP\_022342886.1 53.7 464  
185 10 3 451 23 471 2.50E-114 420.6 6565 cellular

organisms;Eukaryota;Opisthokonta;Metazoa;Eumetazoa;Bilateria;Protostomia;  
Spiralia;Lophotrochozoa;Mollusca;Bivalvia;Autobranhia;Pteriomorphia;Ostr  
eida;Ostreoidea;Ostreidae;Crassostrea;Crassostrea virginica

UdeM00000040298 6573 667.2 UdeM00000040298 XP\_021372772.1 62.5 501  
183 3 7 506 5 501 1.70E-188 667.2 6573 cellular

organisms;Eukaryota;Opisthokonta;Metazoa;Eumetazoa;Bilateria;Protostomia;  
Spiralia;Lophotrochozoa;Mollusca;Bivalvia;Autobranhia;Pteriomorphia;Pect  
inida;Pectinoidea;Pectinidae;Mizuhopecten;Mizuhopecten yessoensis

UdeM00000040299 7574 1294.6 UdeM00000040299 XP\_013413194.1 79.5  
772 147 2 1 761 1 772 0.00E+00 1294.6 7574  
cellular

organisms;Eukaryota;Opisthokonta;Metazoa;Eumetazoa;Bilateria;Protostomia;  
Spiralia;Lophotrochozoa;Brachiopoda;Linguliformea;Lingulata;Lingulida;Lin  
guloidea;Lingulidae;Lingula;Lingula anatina

UdeM00000040300 6596 599.7 UdeM00000040300 XP\_045173225.1 75.1 373  
92 1 28 400 60 431 2.70E-168 599.7 6596 cellular

organisms;Eukaryota;Opisthokonta;Metazoa;Eumetazoa;Bilateria;Protostomia;  
Spiralia;Lophotrochozoa;Mollusca;Bivalvia;Autobranhia;Heteroconchia;Euhe  
terodonta;Imparidentia;Venerida;Veneroidea;Veneridae;Mercenaria;Mercenari  
a mercenaria

UdeM00000040302 6596 463.8 UdeM00000040302 XP\_045172803.1 40.9 634  
324 10 219 846 224 812 4.80E-127 463.8 6596 cellular

organisms;Eukaryota;Opisthokonta;Metazoa;Eumetazoa;Bilateria;Protostomia;  
Spiralia;Lophotrochozoa;Mollusca;Bivalvia;Autobranhia;Heteroconchia;Euhe  
terodonta;Imparidentia;Venerida;Veneroidea;Veneridae;Mercenaria;Mercenari  
a mercenaria

UdeM00000040304 6596 89.4 UdeM00000040304 XP\_045171536.1 57.7 71  
30 0 41 111 1 71 3.20E-15 89.4 6596 cellular

organisms;Eukaryota;Opisthokonta;Metazoa;Eumetazoa;Bilateria;Protostomia;  
Spiralia;Lophotrochozoa;Mollusca;Bivalvia;Autobranhia;Heteroconchia;Euhe  
terodonta;Imparidentia;Venerida;Veneroidea;Veneridae;Mercenaria;Mercenari  
a mercenaria

UdeM00000040305 6565 246.9 UdeM00000040305 XP\_022345336.1 43.8 290  
162 1 1 290 1 289 3.60E-62 246.9 6565 cellular

organisms;Eukaryota;Opisthokonta;Metazoa;Eumetazoa;Bilateria;Protostomia;  
Spiralia;Lophotrochozoa;Mollusca;Bivalvia;Autobranhia;Pteriomorphia;Ostr  
eida;Ostreoidea;Ostreidae;Crassostrea;Crassostrea virginica

UdeM00000040306 29159 86.7 UdeM00000040306 XP\_034330377.1 24.7 397  
235 14 22 381 30 399 7.40E-14 86.7 29159 cellular

organisms;Eukaryota;Opisthokonta;Metazoa;Eumetazoa;Bilateria;Protostomia;  
Spiralia;Lophotrochozoa;Mollusca;Bivalvia;Autobranhia;Pteriomorphia;Ostr  
eida;Ostreoidea;Ostreidae;Crassostrea;Crassostrea gigas

UdeM00000040308 2607531 155.6 UdeM00000040308 XP\_036361187.1 27.9  
405 260 14 126 520 251 633 1.80E-34 155.6 2607531  
cellular

organisms;Eukaryota;Opisthokonta;Metazoa;Eumetazoa;Bilateria;Protostomia;  
Spiralia;Lophotrochozoa;Mollusca;Cephalopoda;Coleoidea;Octopodiformes;Oct  
opoda;Incirrata;Octopodidae;Octopus;Octopus sinensis

UdeM00000040309 6596 184.1 UdeM00000040309 XP\_045172129.1 41 293  
152 7 1 281 1 284 2.40E-43 184.1 6596 cellular

organisms;Eukaryota;Opisthokonta;Metazoa;Eumetazoa;Bilateria;Protostomia;Spiralia;Lophotrochozoa;Mollusca;Bivalvia;Autobranchia;Heteroconchia;Euherodonta;Imparidentia;Venerida;Veneroidea;Veneridae;Mercenaria;Mercenaria mercenaria

UdeM00000040310 6596 326.6 UdeM00000040310 XP\_045171619.1 78.9 185  
39 0 1 185 1 185 2.00E-86 326.6 6596 cellular

organisms;Eukaryota;Opisthokonta;Metazoa;Eumetazoa;Bilateria;Protostomia;Spiralia;Lophotrochozoa;Mollusca;Bivalvia;Autobranchia;Heteroconchia;Euherodonta;Imparidentia;Venerida;Veneroidea;Veneridae;Mercenaria;Mercenaria mercenaria

UdeM00000040311 6596 205.3 UdeM00000040311 XP\_045171620.1 67.4 175  
46 1 1 175 1 164 6.40E-50 205.3 6596 cellular

organisms;Eukaryota;Opisthokonta;Metazoa;Eumetazoa;Bilateria;Protostomia;Spiralia;Lophotrochozoa;Mollusca;Bivalvia;Autobranchia;Heteroconchia;Euherodonta;Imparidentia;Venerida;Veneroidea;Veneridae;Mercenaria;Mercenaria mercenaria

UdeM00000040312 6596 582 UdeM00000040312 XP\_045173781.1 61.6 505  
179 8 1 505 1 490 7.20E-163 582 6596 cellular

organisms;Eukaryota;Opisthokonta;Metazoa;Eumetazoa;Bilateria;Protostomia;Spiralia;Lophotrochozoa;Mollusca;Bivalvia;Autobranchia;Heteroconchia;Euherodonta;Imparidentia;Venerida;Veneroidea;Veneridae;Mercenaria;Mercenaria mercenaria

UdeM00000040313 6596 168.7 UdeM00000040313 XP\_045173616.1 50 150  
75 0 1 150 1 150 5.80E-39 168.7 6596 cellular

organisms;Eukaryota;Opisthokonta;Metazoa;Eumetazoa;Bilateria;Protostomia;Spiralia;Lophotrochozoa;Mollusca;Bivalvia;Autobranchia;Heteroconchia;Euherodonta;Imparidentia;Venerida;Veneroidea;Veneridae;Mercenaria;Mercenaria mercenaria

UdeM00000040315 6596 419.9 UdeM00000040315 XP\_045171293.1 59.5 343  
137 1 4 344 7 349 3.40E-114 419.9 6596 cellular

organisms;Eukaryota;Opisthokonta;Metazoa;Eumetazoa;Bilateria;Protostomia;Spiralia;Lophotrochozoa;Mollusca;Bivalvia;Autobranchia;Heteroconchia;Euherodonta;Imparidentia;Venerida;Veneroidea;Veneridae;Mercenaria;Mercenaria mercenaria

UdeM00000040316 6565 270.4 UdeM00000040316 XP\_022341799.1 73.5 204  
54 0 23 226 2 205 2.10E-69 270.4 6565 cellular

organisms;Eukaryota;Opisthokonta;Metazoa;Eumetazoa;Bilateria;Protostomia;Spiralia;Lophotrochozoa;Mollusca;Bivalvia;Autobranchia;Pteriomorphia;Ostreida;Ostreoidea;Ostreidae;Crassostrea;Crassostrea virginica

UdeM00000040317 29159 239.2 UdeM00000040317 XP\_011435483.1 57.2 201  
86 0 1 201 1 201 5.20E-60 239.2 29159 cellular

organisms;Eukaryota;Opisthokonta;Metazoa;Eumetazoa;Bilateria;Protostomia;Spiralia;Lophotrochozoa;Mollusca;Bivalvia;Autobranchia;Pteriomorphia;Ostreida;Ostreoidea;Ostreidae;Crassostrea;Crassostrea gigas

UdeM00000040318 6596 270.8 UdeM00000040318 XP\_045172451.1 63.9 191  
67 1 1 191 1 189 1.30E-69 270.8 6596 cellular

organisms;Eukaryota;Opisthokonta;Metazoa;Eumetazoa;Bilateria;Protostomia;Spiralia;Lophotrochozoa;Mollusca;Bivalvia;Autobranchia;Heteroconchia;Euherodonta;Imparidentia;Venerida;Veneroidea;Veneridae;Mercenaria;Mercenaria mercenaria

UdeM00000040319 6565 293.5 UdeM00000040319 XP\_022286253.1 45.3 342  
108 3 2 342 193 456 3.50E-76 293.5 6565 cellular

organisms;Eukaryota;Opisthokonta;Metazoa;Eumetazoa;Bilateria;Protostomia;

Spiralia; Lophotrochozoa; Mollusca; Bivalvia; Autobranchia; Pteriomorpha; Ostr  
eida; Ostreidae; Crassostrea; Crassostrea virginica  
UdeM00000040320 6526 448.7 UdeM00000040320 XP\_013062198.1 64.5 366  
115 3 41 404 28 380 7.70E-123 448.7 6526 cellular  
organisms; Eukaryota; Opisthokonta; Metazoa; Eumetazoa; Bilateria; Protostomia;  
Spiralia; Lophotrochozoa; Mollusca; Gastropoda; Heterobranchia; Euthyneura; Pan  
pulmonata; Hygrophila; Lymnaeidae; Planorbidae; Biomphalaria; Biomphalaria  
glabrata  
UdeM00000040321 6596 1955.3 UdeM00000040321 XP\_045172964.1 70  
1424 352 8 2 1404 3 1372 0.00E+00 1955.3 6596  
cellular  
organisms; Eukaryota; Opisthokonta; Metazoa; Eumetazoa; Bilateria; Protostomia;  
Spiralia; Lophotrochozoa; Mollusca; Bivalvia; Autobranchia; Heteroconchia; Eue  
terodonta; Imparidentia; Venerida; Veneroidea; Veneridae; Mercenaria; Mercenari  
a mercenaria  
UdeM00000040322 6596 657.5 UdeM00000040322 XP\_045172964.1 68.6 475  
148 1 14 488 899 1372 1.30E-185 657.5 6596 cellular  
organisms; Eukaryota; Opisthokonta; Metazoa; Eumetazoa; Bilateria; Protostomia;  
Spiralia; Lophotrochozoa; Mollusca; Bivalvia; Autobranchia; Heteroconchia; Eue  
terodonta; Imparidentia; Venerida; Veneroidea; Veneridae; Mercenaria; Mercenari  
a mercenaria  
UdeM00000040323 7574 226.9 UdeM00000040323 XP\_013403739.1 51.8 218  
101 2 140 353 61 278 1.50E-55 226.9 7574 cellular  
organisms; Eukaryota; Opisthokonta; Metazoa; Eumetazoa; Bilateria; Protostomia;  
Spiralia; Lophotrochozoa; Brachiopoda; Linguliformea; Lingulata; Lingulida; Lin  
guloidea; Lingulidae; Lingula; Lingula anatina  
UdeM00000040324 6596 431 UdeM00000040324 XP\_045171290.1 58 345  
139 2 5 343 309 653 1.40E-117 431 6596 cellular  
organisms; Eukaryota; Opisthokonta; Metazoa; Eumetazoa; Bilateria; Protostomia;  
Spiralia; Lophotrochozoa; Mollusca; Bivalvia; Autobranchia; Heteroconchia; Eue  
terodonta; Imparidentia; Venerida; Veneroidea; Veneridae; Mercenaria; Mercenari  
a mercenaria  
UdeM00000040325 46731 100.1 UdeM00000040325 XP\_027042029.1 42.5 134  
73 2 25 157 32 162 2.70E-18 100.1 46731 cellular  
organisms; Eukaryota; Opisthokonta; Metazoa; Eumetazoa; Cnidaria; Anthozoa; Hexa  
corallia; Scleractinia; Astrocoeniina; Pocilloporidae; Pocillopora; Pocillopor  
a damicornis  
UdeM00000040326 6579 489.2 UdeM00000040326 XP\_033747674.1 84.9 285  
43 0 1 285 1 285 3.60E-135 489.2 6579 cellular  
organisms; Eukaryota; Opisthokonta; Metazoa; Eumetazoa; Bilateria; Protostomia;  
Spiralia; Lophotrochozoa; Mollusca; Bivalvia; Autobranchia; Pteriomorpha; Pect  
inida; Pectinoidea; Pectinidae; Pecten; Pecten maximus  
UdeM00000040327 6596 347.4 UdeM00000040327 XP\_045171687.1 93.1 175  
12 0 1 175 141 315 1.00E-92 347.4 6596 cellular  
organisms; Eukaryota; Opisthokonta; Metazoa; Eumetazoa; Bilateria; Protostomia;  
Spiralia; Lophotrochozoa; Mollusca; Bivalvia; Autobranchia; Heteroconchia; Eue  
terodonta; Imparidentia; Venerida; Veneroidea; Veneridae; Mercenaria; Mercenari  
a mercenaria  
UdeM00000040328 6565 171 UdeM00000040328 XP\_022341252.1 72.5 138  
25 3 1 137 1 126 1.70E-38 171 6565 cellular  
organisms; Eukaryota; Opisthokonta; Metazoa; Eumetazoa; Bilateria; Protostomia;  
Spiralia; Lophotrochozoa; Mollusca; Bivalvia; Autobranchia; Pteriomorpha; Ostr  
eida; Ostreidae; Crassostrea; Crassostrea virginica

UdeM00000040329 6573 223.4 UdeM00000040329 XP\_021356610.1 44.5 263  
 119 5 4 263 33 271 1.20E-54 223.4 6573 cellular  
 organisms;Eukaryota;Opisthokonta;Metazoa;Eumetazoa;Bilateria;Protostomia;  
 Spiralia;Lophotrochozoa;Mollusca;Bivalvia;Autobranhia;Pteriomorpha;Pect  
 inida;Pectinoidea;Pectinidae;Mizuhopecten;Mizuhopecten yessoensis  
 UdeM00000040330 6596 391.3 UdeM00000040330 XP\_045171808.1 40 580  
 309 17 5 559 18 583 2.00E-105 391.3 6596 cellular  
 organisms;Eukaryota;Opisthokonta;Metazoa;Eumetazoa;Bilateria;Protostomia;  
 Spiralia;Lophotrochozoa;Mollusca;Bivalvia;Autobranhia;Heteroconchia;Euhe  
 terodonta;Imparidentia;Venerida;Veneroidea;Veneridae;Mercenaria;Mercenari  
 a mercenaria  
 UdeM00000040331 6945 84.7 UdeM00000040331 XP\_040065097.1 28.5 193  
 112 4 59 225 85 277 2.20E-13 84.7 6945 cellular  
 organisms;Eukaryota;Opisthokonta;Metazoa;Eumetazoa;Bilateria;Protostomia;  
 Ecdysozoa;Panarthropoda;Arthropoda;Chelicerata;Arachnida;Acari;Parasitifo  
 rmes;Ixodida;Ixodoidea;Ixodidae;Ixodinae;Ixodes;Ixodes scapularis  
 UdeM00000040332 6596 389 UdeM00000040332 XP\_045171808.1 38.8 554  
 301 17 30 558 18 558 1.10E-104 389 6596 cellular  
 organisms;Eukaryota;Opisthokonta;Metazoa;Eumetazoa;Bilateria;Protostomia;  
 Spiralia;Lophotrochozoa;Mollusca;Bivalvia;Autobranhia;Heteroconchia;Euhe  
 terodonta;Imparidentia;Venerida;Veneroidea;Veneridae;Mercenaria;Mercenari  
 a mercenaria  
 UdeM00000040333 6579 620.2 UdeM00000040333 XP\_033748269.1 47.7 703  
 328 10 1 685 1 681 3.40E-174 620.2 6579 cellular  
 organisms;Eukaryota;Opisthokonta;Metazoa;Eumetazoa;Bilateria;Protostomia;  
 Spiralia;Lophotrochozoa;Mollusca;Bivalvia;Autobranhia;Pteriomorpha;Pect  
 inida;Pectinoidea;Pectinidae;Pecten;Pecten maximus  
 UdeM00000040334 29159 377.1 UdeM00000040334 XP\_034339024.1 81.5 222  
 41 0 33 254 623 844 1.80E-101 377.1 29159 cellular  
 organisms;Eukaryota;Opisthokonta;Metazoa;Eumetazoa;Bilateria;Protostomia;  
 Spiralia;Lophotrochozoa;Mollusca;Bivalvia;Autobranhia;Pteriomorpha;Ostr  
 eida;Ostreoidea;Ostreidae;Crassostrea;Crassostrea gigas  
 UdeM00000040335 10224 174.1 UdeM00000040335 XP\_006814936.1 40.2 241  
 136 4 111 346 64 301 3.10E-40 174.1 10224 cellular  
 organisms;Eukaryota;Opisthokonta;Metazoa;Eumetazoa;Bilateria;Deuterostomi  
 a;Hemichordata;Enteropneusta;Harrimaniidae;Saccoglossus;Saccoglossus  
 kowalevskii  
 UdeM00000040336 10224 83.2 UdeM00000040336 XP\_002740528.1 36.6 142  
 60 4 2 121 106 239 2.80E-13 83.2 10224 cellular  
 organisms;Eukaryota;Opisthokonta;Metazoa;Eumetazoa;Bilateria;Deuterostomi  
 a;Hemichordata;Enteropneusta;Harrimaniidae;Saccoglossus;Saccoglossus  
 kowalevskii  
 UdeM00000040337 6596 729.6 UdeM00000040337 XP\_045171466.1 61.9 557  
 207 4 3 557 1022 1575 3.10E-207 729.6 6596 cellular  
 organisms;Eukaryota;Opisthokonta;Metazoa;Eumetazoa;Bilateria;Protostomia;  
 Spiralia;Lophotrochozoa;Mollusca;Bivalvia;Autobranhia;Heteroconchia;Euhe  
 terodonta;Imparidentia;Venerida;Veneroidea;Veneridae;Mercenaria;Mercenari  
 a mercenaria  
 UdeM00000040338 7574 109.4 UdeM00000040338 XP\_023933229.1 66.7 78  
 25 1 4 80 1 78 2.20E-21 109.4 7574 cellular  
 organisms;Eukaryota;Opisthokonta;Metazoa;Eumetazoa;Bilateria;Protostomia;  
 Spiralia;Lophotrochozoa;Brachiopoda;Linguliformea;Lingulata;Lingulida;Lin  
 guloidea;Lingulidae;Lingula;Lingula anatina

UdeM00000040339 6565 687.6 UdeM00000040339 XP\_022339610.1 74.3 614  
 134 6 1 604 1 600 1.50E-194 687.6 6565 cellular  
 organisms;Eukaryota;Opisthokonta;Metazoa;Eumetazoa;Bilateria;Protostomia;  
 Spiralia;Lophotrochozoa;Mollusca;Bivalvia;Autobranchia;Pteriormorphia;Ostr  
 eida;Ostreoidea;Ostreidae;Crassostrea;Crassostrea virginica  
 UdeM00000040340 6579 746.1 UdeM00000040340 XP\_033748496.1 60.7 633  
 217 7 14 640 10 616 3.70E-212 746.1 6579 cellular  
 organisms;Eukaryota;Opisthokonta;Metazoa;Eumetazoa;Bilateria;Protostomia;  
 Spiralia;Lophotrochozoa;Mollusca;Bivalvia;Autobranchia;Pteriormorphia;Pect  
 inida;Pectinoidea;Pectinidae;Pecten;Pecten maximus  
 UdeM00000040342 6596 797.7 UdeM00000040342 XP\_045172199.1 60.4 707  
 267 7 5 699 2 707 1.20E-227 797.7 6596 cellular  
 organisms;Eukaryota;Opisthokonta;Metazoa;Eumetazoa;Bilateria;Protostomia;  
 Spiralia;Lophotrochozoa;Mollusca;Bivalvia;Autobranchia;Heteroconchia;Euhe  
 terodonta;Imparidentia;Venerida;Veneroidea;Veneridae;Mercenaria;Mercenari  
 a mercenaria  
 UdeM00000040343 2607531 110.5 UdeM00000040343 XP\_029637241.1 44.6  
 305 127 7 1 263 1 305 3.20E-21 110.5 2607531  
 cellular  
 organisms;Eukaryota;Opisthokonta;Metazoa;Eumetazoa;Bilateria;Protostomia;  
 Spiralia;Lophotrochozoa;Mollusca;Cephalopoda;Coleoidea;Octopodiformes;Oct  
 opoda;Incirrata;Octopodidae;Octopus;Octopus sinensis  
 UdeM00000040344 6565 676.4 UdeM00000040344 XP\_022320201.1 42.5 1161  
 507 22 1 1122 11 1050 6.40E-191 676.4 6565 cellular  
 organisms;Eukaryota;Opisthokonta;Metazoa;Eumetazoa;Bilateria;Protostomia;  
 Spiralia;Lophotrochozoa;Mollusca;Bivalvia;Autobranchia;Pteriormorphia;Ostr  
 eida;Ostreoidea;Ostreidae;Crassostrea;Crassostrea virginica  
 UdeM00000040345 225164 214.2 UdeM00000040345 XP\_009051789.1 89.7  
 116 12 0 1 116 1 116 9.30E-53 214.2 225164  
 cellular  
 organisms;Eukaryota;Opisthokonta;Metazoa;Eumetazoa;Bilateria;Protostomia;  
 Spiralia;Lophotrochozoa;Mollusca;Gastropoda;Patellogastropoda;Lottioidea;  
 Lottiidae;Lottia;Lottia gigantea  
 UdeM00000040346 1735272 258.5 UdeM00000040346 XP\_041348973.1 59.5  
 205 80 2 1 203 1 204 7.40E-66 258.5 1735272  
 cellular  
 organisms;Eukaryota;Opisthokonta;Metazoa;Eumetazoa;Bilateria;Protostomia;  
 Spiralia;Lophotrochozoa;Mollusca;Gastropoda;Neomphalina;Neomphaloidea;Pel  
 tospiridae;Gigantopelta;Gigantopelta aegis  
 UdeM00000040347 6596 1724.5 UdeM00000040347 XP\_045170872.1 59.6  
 1460 529 15 1 1418 1 1441 0.00E+00 1724.5 6596  
 cellular  
 organisms;Eukaryota;Opisthokonta;Metazoa;Eumetazoa;Bilateria;Protostomia;  
 Spiralia;Lophotrochozoa;Mollusca;Bivalvia;Autobranchia;Heteroconchia;Euhe  
 terodonta;Imparidentia;Venerida;Veneroidea;Veneridae;Mercenaria;Mercenari  
 a mercenaria  
 UdeM00000040348 6596 1724.5 UdeM00000040348 XP\_045170872.1 59.5  
 1462 537 15 1 1428 1 1441 0.00E+00 1724.5 6596  
 cellular  
 organisms;Eukaryota;Opisthokonta;Metazoa;Eumetazoa;Bilateria;Protostomia;  
 Spiralia;Lophotrochozoa;Mollusca;Bivalvia;Autobranchia;Heteroconchia;Euhe  
 terodonta;Imparidentia;Venerida;Veneroidea;Veneridae;Mercenaria;Mercenari  
 a mercenaria



UdeM00000040349 218467 66.2 UdeM00000040349 XP\_023216677.1 57.9  
 57 23 1 47 102 1237 1293 2.80E-08 66.2 218467  
 cellular  
 organisms;Eukaryota;Opisthokonta;Metazoa;Eumetazoa;Bilateria;Protostomia;  
 Ecdysozoa;Panarthropoda;Arthropoda;Chelicerata;Arachnida;Scorpiones;Buthi  
 da;Buthoidea;Buthidae;Centruroides;Centruroides sculpturatus  
 UdeM00000040352 37621 186 UdeM00000040352 XP\_014677462.1 51.1 188  
 88 3 1 187 1 185 4.30E-44 186 37621 cellular  
 organisms;Eukaryota;Opisthokonta;Metazoa;Eumetazoa;Bilateria;Protostomia;  
 Ecdysozoa;Scalidophora;Priapulida;Priapulimorpha;Priapulimorphida;Priapul  
 idae;Priapulus;Priapulus caudatus  
 UdeM00000040353 6596 111.7 UdeM00000040353 XP\_045172277.1 30.7 443  
 200 9 1 406 1 373 2.30E-21 111.7 6596 cellular  
 organisms;Eukaryota;Opisthokonta;Metazoa;Eumetazoa;Bilateria;Protostomia;  
 Spiralia;Lophotrochozoa;Mollusca;Bivalvia;Autobranchia;Heteroconchia;Euhe  
 terodonta;Imparidentia;Venerida;Veneroidea;Veneridae;Mercenaria;Mercenari  
 a mercenaria  
 UdeM00000040354 6596 261.5 UdeM00000040354 XP\_045172837.1 63.6 195  
 52 1 61 236 1288 1482 1.00E-66 261.5 6596 cellular  
 organisms;Eukaryota;Opisthokonta;Metazoa;Eumetazoa;Bilateria;Protostomia;  
 Spiralia;Lophotrochozoa;Mollusca;Bivalvia;Autobranchia;Heteroconchia;Euhe  
 terodonta;Imparidentia;Venerida;Veneroidea;Veneridae;Mercenaria;Mercenari  
 a mercenaria  
 UdeM00000040355 6565 228.8 UdeM00000040355 XP\_022339658.1 38.4 539  
 240 14 99 611 2 474 2.10E-56 228.8 6565 cellular  
 organisms;Eukaryota;Opisthokonta;Metazoa;Eumetazoa;Bilateria;Protostomia;  
 Spiralia;Lophotrochozoa;Mollusca;Bivalvia;Autobranchia;Pteriormorphia;Ostr  
 eida;Ostreoidea;Ostreidae;Crassostrea;Crassostrea virginica  
 UdeM00000040356 7574 101.7 UdeM00000040356 XP\_013396733.1 36.2 188  
 94 4 5 166 60 247 9.50E-19 101.7 7574 cellular  
 organisms;Eukaryota;Opisthokonta;Metazoa;Eumetazoa;Bilateria;Protostomia;  
 Spiralia;Lophotrochozoa;Brachiopoda;Linguliformea;Lingulata;Lingulida;Lin  
 guloidea;Lingulidae;Lingula;Lingula anatina  
 UdeM00000040357 6579 612.5 UdeM00000040357 XP\_033747529.1 50.8 634  
 285 3 27 634 29 661 6.20E-172 612.5 6579 cellular  
 organisms;Eukaryota;Opisthokonta;Metazoa;Eumetazoa;Bilateria;Protostomia;  
 Spiralia;Lophotrochozoa;Mollusca;Bivalvia;Autobranchia;Pteriormorphia;Pect  
 inida;Pectinoidea;Pectinidae;Pecten;Pecten maximus  
 UdeM00000040358 7574 90.1 UdeM00000040358 XP\_013384015.1 51.5 101  
 48 1 6 106 186 285 3.20E-15 90.1 7574 cellular  
 organisms;Eukaryota;Opisthokonta;Metazoa;Eumetazoa;Bilateria;Protostomia;  
 Spiralia;Lophotrochozoa;Brachiopoda;Linguliformea;Lingulata;Lingulida;Lin  
 guloidea;Lingulidae;Lingula;Lingula anatina  
 UdeM00000040359 7574 80.1 UdeM00000040359 XP\_013384015.1 57.9 76  
 31 1 6 81 186 260 1.40E-12 80.1 7574 cellular  
 organisms;Eukaryota;Opisthokonta;Metazoa;Eumetazoa;Bilateria;Protostomia;  
 Spiralia;Lophotrochozoa;Brachiopoda;Linguliformea;Lingulata;Lingulida;Lin  
 guloidea;Lingulidae;Lingula;Lingula anatina  
 UdeM00000040361 400727 443.4 UdeM00000040361 XP\_025091762.1 68.7  
 300 84 3 1 296 132 425 2.40E-121 443.4 400727  
 cellular  
 organisms;Eukaryota;Opisthokonta;Metazoa;Eumetazoa;Bilateria;Protostomia;  
 Spiralia;Lophotrochozoa;Mollusca;Gastropoda;Caenogastropoda;Architaeniogl  
 ossa;Ampullarioidea;Ampullariidae;Pomacea;Pomacea canaliculata

UdeM00000040362 6526 110.9 UdeM00000040362 XP\_013062194.1 37.2 129  
 81 0 1 129 15 143 1.30E-21 110.9 6526 cellular  
 organisms;Eukaryota;Opisthokonta;Metazoa;Eumetazoa;Bilateria;Protostomia;  
 Spiralia;Lophotrochozoa;Mollusca;Gastropoda;Heterobranchia;Euthyneura;Pan  
 pulmonata;Hygrophila;Lymnaeidae;Planorbidae;Biomphalaria;Biomphalaria  
 glabrata  
 UdeM00000040363 37653 181.8 UdeM00000040363 XP\_014775498.1 46.7 212  
 110 2 17 227 131 340 1.00E-42 181.8 37653 cellular  
 organisms;Eukaryota;Opisthokonta;Metazoa;Eumetazoa;Bilateria;Protostomia;  
 Spiralia;Lophotrochozoa;Mollusca;Cephalopoda;Coleoidea;Octopodiformes;Oct  
 opoda;Incirrata;Octopodidae;Octopus;Octopus bimaculoides  
 UdeM00000040364 6579 159.8 UdeM00000040364 XP\_033746073.1 57.3 131  
 56 0 19 149 7 137 2.60E-36 159.8 6579 cellular  
 organisms;Eukaryota;Opisthokonta;Metazoa;Eumetazoa;Bilateria;Protostomia;  
 Spiralia;Lophotrochozoa;Mollusca;Bivalvia;Autobranchia;Pteriomorpha;Pect  
 inida;Pectinoidea;Pectinidae;Pecten;Pecten maximus  
 UdeM00000040365 6579 147.9 UdeM00000040365 XP\_033748755.1 37 238  
 143 5 16 250 68 301 1.70E-32 147.9 6579 cellular  
 organisms;Eukaryota;Opisthokonta;Metazoa;Eumetazoa;Bilateria;Protostomia;  
 Spiralia;Lophotrochozoa;Mollusca;Bivalvia;Autobranchia;Pteriomorpha;Pect  
 inida;Pectinoidea;Pectinidae;Pecten;Pecten maximus  
 UdeM00000040366 6573 162.2 UdeM00000040366 XP\_021342173.1 40.2 209  
 122 2 2 207 45 253 9.60E-37 162.2 6573 cellular  
 organisms;Eukaryota;Opisthokonta;Metazoa;Eumetazoa;Bilateria;Protostomia;  
 Spiralia;Lophotrochozoa;Mollusca;Bivalvia;Autobranchia;Pteriomorpha;Pect  
 inida;Pectinoidea;Pectinidae;Mizuhopecten;Mizuhopecten yessoensis  
 UdeM00000040367 6579 188.3 UdeM00000040367 XP\_033748753.1 39.4 249  
 147 3 1 246 1 248 1.40E-44 188.3 6579 cellular  
 organisms;Eukaryota;Opisthokonta;Metazoa;Eumetazoa;Bilateria;Protostomia;  
 Spiralia;Lophotrochozoa;Mollusca;Bivalvia;Autobranchia;Pteriomorpha;Pect  
 inida;Pectinoidea;Pectinidae;Pecten;Pecten maximus  
 UdeM00000010237 72036 289.7 UdeM00000010237 XP\_040576246.1 39.1 437  
 214 10 21 413 32 460 6.10E-75 289.7 72036 cellular  
 organisms;Eukaryota;Opisthokonta;Metazoa;Eumetazoa;Bilateria;Protostomia;  
 Ecdysozoa;Panarthropoda;Arthropoda;Mandibulata;Pancrustacea;Crustacea;Mul  
 ticrustacea;Hexanauplia;Copepoda;Neocopepoda;Podoplea;Siphonostomatoida;C  
 aligidae;Lepeophtheirus;Lepeophtheirus salmonis  
 UdeM00000010238 6596 346.7 UdeM00000010238 XP\_045188630.1 59.6 317  
 115 5 1 311 74 383 3.20E-92 346.7 6596 cellular  
 organisms;Eukaryota;Opisthokonta;Metazoa;Eumetazoa;Bilateria;Protostomia;  
 Spiralia;Lophotrochozoa;Mollusca;Bivalvia;Autobranchia;Heteroconchia;Euhe  
 terodonta;Imparidentia;Venerida;Veneroidea;Veneridae;Mercenaria;Mercenari  
 a mercenaria  
 UdeM00000010239 400682 80.1 UdeM00000010239 XP\_003390251.1 41.7  
 96 53 1 34 129 541 633 2.30E-12 80.1 400682  
 cellular  
 organisms;Eukaryota;Opisthokonta;Metazoa;Porifera;Demospongiae;Heteroscle  
 romorpha;Haplosclerida;Niphatidae;Amphimedon;Amphimedon queenslandica  
 UdeM00000010240 400682 80.1 UdeM00000010240 XP\_003390251.1 41.7  
 96 53 1 53 148 541 633 2.60E-12 80.1 400682  
 cellular  
 organisms;Eukaryota;Opisthokonta;Metazoa;Porifera;Demospongiae;Heteroscle  
 romorpha;Haplosclerida;Niphatidae;Amphimedon;Amphimedon queenslandica

UdeM00000010241 63155 93.2 UdeM00000010241 XP\_030580840.1 47.3 93  
 48 1 2 94 431 522 2.00E-16 93.2 63155 cellular  
 organisms;Eukaryota;Opisthokonta;Metazoa;Eumetazoa;Bilateria;Deuterostomi  
 a;Chordata;Craniata;Vertebrata;Gnathostomata;Teleostomi;Euteleostomi;Acti  
 nopterygii;Actinopteri;Neopterygii;Teleostei;Osteoglossocephalai;Clupeoce  
 phala;Euteleosteomorpha;Neoteleostei;Eurypterygia;Ctenosquamata;Acanthomo  
 rphata;Euacanthomorpha;Percomorphaceae;Ovalentaria;Cichlomorphae;Cichl  
 iformes;Cichlidae;New World  
 cichlids;Cichlasomatinae;Heroini;Archocentrus;Archocentrus centrarchus  
 UdeM00000010243 6596 129.8 UdeM00000010243 XP\_045208737.1 40.2 204  
 101 9 126 315 320 516 9.70E-27 129.8 6596 cellular  
 organisms;Eukaryota;Opisthokonta;Metazoa;Eumetazoa;Bilateria;Protostomia;  
 Spiralia;Lophotrochozoa;Mollusca;Bivalvia;Autobranchia;Heteroconchia;Euhe  
 terodonta;Imparidentia;Venerida;Veneroidea;Veneridae;Mercenaria;Mercenari  
 a mercenaria  
 UdeM00000010244 8407 93.2 UdeM00000010244 XP\_040204260.1 43.8 89  
 47 1 1 86 178 266 1.90E-16 93.2 8407 cellular  
 organisms;Eukaryota;Opisthokonta;Metazoa;Eumetazoa;Bilateria;Deuterostomi  
 a;Chordata;Craniata;Vertebrata;Gnathostomata;Teleostomi;Euteleostomi;Sarc  
 opterygii;Dipnotetrapodomorpha;Tetrapoda;Amphibia;Batrachia;Anura;Neobatr  
 achia;Ranoidea;Ranidae;Rana;Rana;Rana temporaria  
 UdeM00000010245 6596 505.8 UdeM00000010245 XP\_045165078.1 46.9 614  
 239 11 1 551 1 590 7.20E-140 505.8 6596 cellular  
 organisms;Eukaryota;Opisthokonta;Metazoa;Eumetazoa;Bilateria;Protostomia;  
 Spiralia;Lophotrochozoa;Mollusca;Bivalvia;Autobranchia;Heteroconchia;Euhe  
 terodonta;Imparidentia;Venerida;Veneroidea;Veneridae;Mercenaria;Mercenari  
 a mercenaria  
 UdeM00000010246 6596 884.8 UdeM00000010246 XP\_045189428.1 38.4 1264  
 715 19 2 1226 117 1355 1.30E-253 884.8 6596 cellular  
 organisms;Eukaryota;Opisthokonta;Metazoa;Eumetazoa;Bilateria;Protostomia;  
 Spiralia;Lophotrochozoa;Mollusca;Bivalvia;Autobranchia;Heteroconchia;Euhe  
 terodonta;Imparidentia;Venerida;Veneroidea;Veneridae;Mercenaria;Mercenari  
 a mercenaria  
 UdeM00000010247 6596 386.3 UdeM00000010247 XP\_045189428.1 46.7 390  
 183 1 2 366 117 506 4.20E-104 386.3 6596 cellular  
 organisms;Eukaryota;Opisthokonta;Metazoa;Eumetazoa;Bilateria;Protostomia;  
 Spiralia;Lophotrochozoa;Mollusca;Bivalvia;Autobranchia;Heteroconchia;Euhe  
 terodonta;Imparidentia;Venerida;Veneroidea;Veneridae;Mercenaria;Mercenari  
 a mercenaria  
 UdeM00000010248 6596 412.1 UdeM00000010248 XP\_045179101.1 41.9 537  
 302 5 13 539 23 559 1.10E-111 412.1 6596 cellular  
 organisms;Eukaryota;Opisthokonta;Metazoa;Eumetazoa;Bilateria;Protostomia;  
 Spiralia;Lophotrochozoa;Mollusca;Bivalvia;Autobranchia;Heteroconchia;Euhe  
 terodonta;Imparidentia;Venerida;Veneroidea;Veneridae;Mercenaria;Mercenari  
 a mercenaria  
 UdeM00000010249 6596 961.4 UdeM00000010249 XP\_045179101.1 43.2 1156  
 603 11 13 1123 23 1169 9.70E-277 961.4 6596 cellular  
 organisms;Eukaryota;Opisthokonta;Metazoa;Eumetazoa;Bilateria;Protostomia;  
 Spiralia;Lophotrochozoa;Mollusca;Bivalvia;Autobranchia;Heteroconchia;Euhe  
 terodonta;Imparidentia;Venerida;Veneroidea;Veneridae;Mercenaria;Mercenari  
 a mercenaria  
 UdeM00000010250 6596 405.2 UdeM00000010250 XP\_045189428.1 35.8 657  
 397 12 78 721 711 1355 1.70E-109 405.2 6596 cellular  
 organisms;Eukaryota;Opisthokonta;Metazoa;Eumetazoa;Bilateria;Protostomia;

Spiralia;Lophotrochozoa;Mollusca;Bivalvia;Autobranchia;Heteroconchia;Euherodonta;Imparidentia;Venerida;Veneroidea;Veneridae;Mercenaria;Mercenaria mercenaria

UdeM00000010251 6573 1650.2 UdeM00000010251 XP\_021378529.1 77.1  
1203 276 0 98 1300 3 1205 0.00E+00 1650.2 6573  
cellular

organisms;Eukaryota;Opisthokonta;Metazoa;Eumetazoa;Bilateria;Protostomia;Spiralia;Lophotrochozoa;Mollusca;Bivalvia;Autobranchia;Pteriormorphia;Pectinida;Pectinoidea;Pectinidae;Mizuhopecten;Mizuhopecten yessoensis

UdeM00000010252 29159 77.8 UdeM00000010252 XP\_034328854.1 30.6 160  
98 4 69 215 33 192 5.40E-10 77.8 29159 cellular

organisms;Eukaryota;Opisthokonta;Metazoa;Eumetazoa;Bilateria;Protostomia;Spiralia;Lophotrochozoa;Mollusca;Bivalvia;Autobranchia;Pteriormorphia;Ostreida;Ostreoidea;Ostreidae;Crassostrea;Crassostrea gigas

UdeM00000010255 29159 81.6 UdeM00000010255 XP\_034328854.1 34.3 137  
81 2 52 180 57 192 7.80E-12 81.6 29159 cellular

organisms;Eukaryota;Opisthokonta;Metazoa;Eumetazoa;Bilateria;Protostomia;Spiralia;Lophotrochozoa;Mollusca;Bivalvia;Autobranchia;Pteriormorphia;Ostreida;Ostreoidea;Ostreidae;Crassostrea;Crassostrea gigas

UdeM00000010257 29159 71.2 UdeM00000010257 XP\_034328854.1 34.6 127  
76 3 16 135 66 192 7.40E-09 71.2 29159 cellular

organisms;Eukaryota;Opisthokonta;Metazoa;Eumetazoa;Bilateria;Protostomia;Spiralia;Lophotrochozoa;Mollusca;Bivalvia;Autobranchia;Pteriormorphia;Ostreida;Ostreoidea;Ostreidae;Crassostrea;Crassostrea gigas

UdeM00000010259 6706 84 UdeM00000010259 XP\_042235765.1 46.8 77  
41 0 1 77 1 77 9.50E-14 84 6706 cellular

organisms;Eukaryota;Opisthokonta;Metazoa;Eumetazoa;Bilateria;Protostomia;Ecdysozoa;Panarthropoda;Arthropoda;Mandibulata;Pancrustacea;Crustacea;Multicrustacea;Malacostraca;Eumalacostraca;Eucarida;Decapoda;Pleocyemata;Astacidea;Nephropoidea;Nephropidae;Homarus;Homarus americanus

UdeM00000010260 6596 57.8 UdeM00000010260 XP\_045208792.1 37.2 94  
49 3 3 91 27 115 9.50E-06 57.8 6596 cellular

organisms;Eukaryota;Opisthokonta;Metazoa;Eumetazoa;Bilateria;Protostomia;Spiralia;Lophotrochozoa;Mollusca;Bivalvia;Autobranchia;Heteroconchia;Euherodonta;Imparidentia;Venerida;Veneroidea;Veneridae;Mercenaria;Mercenaria mercenaria

UdeM00000010263 6596 196.4 UdeM00000010263 XP\_045190732.1 40.6 229  
129 4 298 522 530 755 8.80E-47 196.4 6596 cellular

organisms;Eukaryota;Opisthokonta;Metazoa;Eumetazoa;Bilateria;Protostomia;Spiralia;Lophotrochozoa;Mollusca;Bivalvia;Autobranchia;Heteroconchia;Euherodonta;Imparidentia;Venerida;Veneroidea;Veneridae;Mercenaria;Mercenaria mercenaria

UdeM00000010264 6565 218.4 UdeM00000010264 XP\_022321940.1 24.5 678  
438 14 30 676 16 650 3.00E-53 218.4 6565 cellular

organisms;Eukaryota;Opisthokonta;Metazoa;Eumetazoa;Bilateria;Protostomia;Spiralia;Lophotrochozoa;Mollusca;Bivalvia;Autobranchia;Pteriormorphia;Ostreida;Ostreoidea;Ostreidae;Crassostrea;Crassostrea virginica

UdeM00000010265 6579 120.6 UdeM00000010265 XP\_033757704.1 35.7 359  
191 8 1 351 171 497 4.10E-24 120.6 6579 cellular

organisms;Eukaryota;Opisthokonta;Metazoa;Eumetazoa;Bilateria;Protostomia;Spiralia;Lophotrochozoa;Mollusca;Bivalvia;Autobranchia;Pteriormorphia;Pectinida;Pectinoidea;Pectinidae;Pecten;Pecten maximus

UdeM00000010266 6579 431 UdeM00000010266 XP\_033757704.1 50.8 530  
220 9 1 522 1 497 2.10E-117 431 6579 cellular

organisms;Eukaryota;Opisthokonta;Metazoa;Eumetazoa;Bilateria;Protostomia; Spiralia;Lophotrochozoa;Mollusca;Bivalvia;Autobranchia;Pteriormorphia;Pect inida;Pectinoidea;Pectinidae;Pecten;Pecten maximus

UdeM00000010267 1735272 247.3 UdeM00000010267 XP\_041372815.1 55.8  
208 92 0 1 208 82 289 1.70E-62 247.3 1735272  
cellular

organisms;Eukaryota;Opisthokonta;Metazoa;Eumetazoa;Bilateria;Protostomia; Spiralia;Lophotrochozoa;Mollusca;Gastropoda;Neomphalina;Neomphaloidea;Pel tospiridae;Gigantopelta;Gigantopelta aegis

UdeM00000010268 6573 68.9 UdeM00000010268 XP\_021375193.1 34.7 144  
84 4 1 136 202 343 5.70E-09 68.9 6573 cellular

organisms;Eukaryota;Opisthokonta;Metazoa;Eumetazoa;Bilateria;Protostomia; Spiralia;Lophotrochozoa;Mollusca;Bivalvia;Autobranchia;Pteriormorphia;Pect inida;Pectinoidea;Pectinidae;Mizuhopecten;Mizuhopecten yessoensis

UdeM00000010269 29159 362.5 UdeM00000010269 XP\_011421352.1 75.7 230  
55 1 6 234 5 234 4.20E-97 362.5 29159 cellular

organisms;Eukaryota;Opisthokonta;Metazoa;Eumetazoa;Bilateria;Protostomia; Spiralia;Lophotrochozoa;Mollusca;Bivalvia;Autobranchia;Pteriormorphia;Ostr eida;Ostreoidea;Ostreidae;Crassostrea;Crassostrea gigas

UdeM00000010270 6596 1342.4 UdeM00000010270 XP\_045188915.1 49.6  
1598 666 34 7 1555 164 1671 0.00E+00 1342.4 6596  
cellular

organisms;Eukaryota;Opisthokonta;Metazoa;Eumetazoa;Bilateria;Protostomia; Spiralia;Lophotrochozoa;Mollusca;Bivalvia;Autobranchia;Heteroconchia;Euhe terodonta;Imparidentia;Venerida;Veneroidea;Veneridae;Mercenaria;Mercenari a mercenaria

UdeM00000010271 6565 218.8 UdeM00000010271 XP\_022343373.1 34 423  
253 11 966 1368 402 818 4.40E-53 218.8 6565 cellular

organisms;Eukaryota;Opisthokonta;Metazoa;Eumetazoa;Bilateria;Protostomia; Spiralia;Lophotrochozoa;Mollusca;Bivalvia;Autobranchia;Pteriormorphia;Ostr eida;Ostreoidea;Ostreidae;Crassostrea;Crassostrea virginica

UdeM00000010272 6596 391.3 UdeM00000010272 XP\_045189350.1 52.7 389  
153 5 3 382 14 380 1.60E-105 391.3 6596 cellular

organisms;Eukaryota;Opisthokonta;Metazoa;Eumetazoa;Bilateria;Protostomia; Spiralia;Lophotrochozoa;Mollusca;Bivalvia;Autobranchia;Heteroconchia;Euhe terodonta;Imparidentia;Venerida;Veneroidea;Veneridae;Mercenaria;Mercenari a mercenaria

UdeM00000010273 6596 524.6 UdeM00000010273 XP\_045188647.1 59.8 475  
150 7 22 462 20 487 1.20E-145 524.6 6596 cellular

organisms;Eukaryota;Opisthokonta;Metazoa;Eumetazoa;Bilateria;Protostomia; Spiralia;Lophotrochozoa;Mollusca;Bivalvia;Autobranchia;Heteroconchia;Euhe terodonta;Imparidentia;Venerida;Veneroidea;Veneridae;Mercenaria;Mercenari a mercenaria

UdeM00000010278 29159 98.2 UdeM00000010278 XP\_011430493.2 36.4 645  
262 22 1 562 1 580 4.80E-17 98.2 29159 cellular

organisms;Eukaryota;Opisthokonta;Metazoa;Eumetazoa;Bilateria;Protostomia; Spiralia;Lophotrochozoa;Mollusca;Bivalvia;Autobranchia;Pteriormorphia;Ostr eida;Ostreoidea;Ostreidae;Crassostrea;Crassostrea gigas

UdeM00000010279 400727 523.9 UdeM00000010279 XP\_025093986.1 52.8  
523 246 1 21 543 213 734 2.50E-145 523.9 400727  
cellular

organisms;Eukaryota;Opisthokonta;Metazoa;Eumetazoa;Bilateria;Protostomia; Spiralia;Lophotrochozoa;Mollusca;Gastropoda;Caenogastropoda;Architaeniogl ossa;Ampullarioidea;Ampullariidae;Pomacea;Pomacea canaliculata

UdeM00000010280 1735272 584.7 UdeM00000010280 XP\_041368310.1 45.5  
 741 359 7 1 737 1 700 1.60E-163 584.7 1735272  
 cellular  
 organisms;Eukaryota;Opisthokonta;Metazoa;Eumetazoa;Bilateria;Protostomia;  
 Spiralia;Lophotrochozoa;Mollusca;Gastropoda;Neomphalina;Neomphaloidea;Pel  
 tospiridae;Gigantopelta;Gigantopelta aegis  
 UdeM00000010281 1735272 99 UdeM00000010281 XP\_041368310.1 39.5  
 157 76 5 1 153 1 142 8.00E-18 99 1735272  
 cellular  
 organisms;Eukaryota;Opisthokonta;Metazoa;Eumetazoa;Bilateria;Protostomia;  
 Spiralia;Lophotrochozoa;Mollusca;Gastropoda;Neomphalina;Neomphaloidea;Pel  
 tospiridae;Gigantopelta;Gigantopelta aegis  
 UdeM00000010282 400727 957.6 UdeM00000010282 XP\_025096688.1 94.6  
 503 25 1 8 510 14 514 6.50E-276 957.6 400727  
 cellular  
 organisms;Eukaryota;Opisthokonta;Metazoa;Eumetazoa;Bilateria;Protostomia;  
 Spiralia;Lophotrochozoa;Mollusca;Gastropoda;Caenogastropoda;Architaeniogl  
 ossa;Ampullarioidea;Ampullariidae;Pomacea;Pomacea canaliculata  
 UdeM00000010283 6596 273.1 UdeM00000010283 XP\_045189935.1 58.7 298  
 116 4 1 296 1 293 4.20E-70 273.1 6596 cellular  
 organisms;Eukaryota;Opisthokonta;Metazoa;Eumetazoa;Bilateria;Protostomia;  
 Spiralia;Lophotrochozoa;Mollusca;Bivalvia;Autobranchia;Heteroconchia;Euhe  
 terodonta;Imparidentia;Venerida;Veneroidea;Veneridae;Mercenaria;Mercenari  
 a mercenaria  
 UdeM00000010284 6596 772.3 UdeM00000010284 XP\_045190633.1 56.9 684  
 273 10 1 673 12 684 5.20E-220 772.3 6596 cellular  
 organisms;Eukaryota;Opisthokonta;Metazoa;Eumetazoa;Bilateria;Protostomia;  
 Spiralia;Lophotrochozoa;Mollusca;Bivalvia;Autobranchia;Heteroconchia;Euhe  
 terodonta;Imparidentia;Venerida;Veneroidea;Veneridae;Mercenaria;Mercenari  
 a mercenaria  
 UdeM00000010285 6573 206.1 UdeM00000010285 XP\_021371969.1 32.9 407  
 235 10 1 382 16 409 8.20E-50 206.1 6573 cellular  
 organisms;Eukaryota;Opisthokonta;Metazoa;Eumetazoa;Bilateria;Protostomia;  
 Spiralia;Lophotrochozoa;Mollusca;Bivalvia;Autobranchia;Pteriomorphia;Pect  
 inida;Pectinoidea;Pectinidae;Mizuhopecten;Mizuhopecten yessoensis  
 UdeM00000010286 6579 166 UdeM00000010286 XP\_033757478.1 42.2 173  
 93 2 147 312 252 424 7.70E-38 166 6579 cellular  
 organisms;Eukaryota;Opisthokonta;Metazoa;Eumetazoa;Bilateria;Protostomia;  
 Spiralia;Lophotrochozoa;Mollusca;Bivalvia;Autobranchia;Pteriomorphia;Pect  
 inida;Pectinoidea;Pectinidae;Pecten;Pecten maximus  
 UdeM00000010287 6579 187.2 UdeM00000010287 XP\_033757765.1 72.4 127  
 35 0 252 378 140 266 3.90E-44 187.2 6579 cellular  
 organisms;Eukaryota;Opisthokonta;Metazoa;Eumetazoa;Bilateria;Protostomia;  
 Spiralia;Lophotrochozoa;Mollusca;Bivalvia;Autobranchia;Pteriomorphia;Pect  
 inida;Pectinoidea;Pectinidae;Pecten;Pecten maximus  
 UdeM00000010288 6596 730.3 UdeM00000010288 XP\_045190315.1 56.2 649  
 283 1 1 649 1 648 2.20E-207 730.3 6596 cellular  
 organisms;Eukaryota;Opisthokonta;Metazoa;Eumetazoa;Bilateria;Protostomia;  
 Spiralia;Lophotrochozoa;Mollusca;Bivalvia;Autobranchia;Heteroconchia;Euhe  
 terodonta;Imparidentia;Venerida;Veneroidea;Veneridae;Mercenaria;Mercenari  
 a mercenaria  
 UdeM00000010289 6596 728.4 UdeM00000010289 XP\_045190315.1 56.2 651  
 284 1 1 651 1 650 8.40E-207 728.4 6596 cellular  
 organisms;Eukaryota;Opisthokonta;Metazoa;Eumetazoa;Bilateria;Protostomia;

Spiralia;Lophotrochozoa;Mollusca;Bivalvia;Autobranchia;Heteroconchia;Euherodonta;Imparidentia;Venerida;Veneroidea;Veneridae;Mercenaria;Mercenaria mercenaria

UdeM00000010290 6573 195.3 UdeM00000010290 XP\_021371897.1 38.5 343  
199 5 255 591 533 869 4.10E-46 195.3 6573 cellular

organisms;Eukaryota;Opisthokonta;Metazoa;Eumetazoa;Bilateria;Protostomia;Spiralia;Lophotrochozoa;Mollusca;Bivalvia;Autobranchia;Pteriormorphia;Pectinida;Pectinoidea;Pectinidae;Mizuhopecten;Mizuhopecten yessoensis

UdeM00000010291 6565 453.8 UdeM00000010291 XP\_022335499.1 37 875  
525 10 21 883 25 885 5.80E-124 453.8 6565 cellular

organisms;Eukaryota;Opisthokonta;Metazoa;Eumetazoa;Bilateria;Protostomia;Spiralia;Lophotrochozoa;Mollusca;Bivalvia;Autobranchia;Pteriormorphia;Ostreida;Ostreoidea;Ostreidae;Crassostrea;Crassostrea virginica

UdeM00000010292 6565 393.3 UdeM00000010292 XP\_022335499.1 34.6 875  
511 11 21 848 25 885 9.00E-106 393.3 6565 cellular

organisms;Eukaryota;Opisthokonta;Metazoa;Eumetazoa;Bilateria;Protostomia;Spiralia;Lophotrochozoa;Mollusca;Bivalvia;Autobranchia;Pteriormorphia;Ostreida;Ostreoidea;Ostreidae;Crassostrea;Crassostrea virginica

UdeM00000010293 6579 120.2 UdeM00000010293 XP\_033756687.1 27.8 442  
239 16 1 388 1 416 6.40E-24 120.2 6579 cellular

organisms;Eukaryota;Opisthokonta;Metazoa;Eumetazoa;Bilateria;Protostomia;Spiralia;Lophotrochozoa;Mollusca;Bivalvia;Autobranchia;Pteriormorphia;Pectinida;Pectinoidea;Pectinidae;Pecten;Pecten maximus

UdeM00000010294 7574 146.4 UdeM00000010294 XP\_013389724.1 36.5 233  
110 6 28 255 81 280 5.40E-32 146.4 7574 cellular

organisms;Eukaryota;Opisthokonta;Metazoa;Eumetazoa;Bilateria;Protostomia;Spiralia;Lophotrochozoa;Brachiopoda;Linguliformea;Lingulata;Lingulida;Linguloidea;Lingulidae;Lingula;Lingula anatina

UdeM00000010295 79782 90.9 UdeM00000010295 XP\_014241698.2 37 135  
71 5 2 132 657 781 2.80E-15 90.9 79782 cellular

organisms;Eukaryota;Opisthokonta;Metazoa;Eumetazoa;Bilateria;Protostomia;Ecdysozoa;Panarthropoda;Arthropoda;Mandibulata;Pancrustacea;Hexapoda;Insecta;Dicondylia;Pterygota;Neoptera;Paraneoptera;Hemiptera;Prosorrhyncha;Heteroptera;Euheteroptera;Neoheteroptera;Panheteroptera;Cimicomorpha;Cimicoidea;Cimicidae;Cimex;Cimex lectularius

UdeM00000010296 6565 137.9 UdeM00000010296 XP\_022345847.1 43.7 199  
100 4 1 191 1 195 1.40E-29 137.9 6565 cellular

organisms;Eukaryota;Opisthokonta;Metazoa;Eumetazoa;Bilateria;Protostomia;Spiralia;Lophotrochozoa;Mollusca;Bivalvia;Autobranchia;Pteriormorphia;Ostreida;Ostreoidea;Ostreidae;Crassostrea;Crassostrea virginica

UdeM00000010297 6565 199.1 UdeM00000010297 XP\_022345846.1 39.1 248  
147 1 1 248 1 244 6.70E-48 199.1 6565 cellular

organisms;Eukaryota;Opisthokonta;Metazoa;Eumetazoa;Bilateria;Protostomia;Spiralia;Lophotrochozoa;Mollusca;Bivalvia;Autobranchia;Pteriormorphia;Ostreida;Ostreoidea;Ostreidae;Crassostrea;Crassostrea virginica

UdeM00000010298 1735272 72.4 UdeM00000010298 XP\_041377266.1 35.4  
127 62 3 1 121 166 278 4.50E-10 72.4 1735272

cellular

organisms;Eukaryota;Opisthokonta;Metazoa;Eumetazoa;Bilateria;Protostomia;Spiralia;Lophotrochozoa;Mollusca;Gastropoda;Neomphalina;Neomphaloidea;Peltopspiridae;Gigantopelta;Gigantopelta aegis

UdeM00000010299 151771 141 UdeM00000010299 XP\_028415639.1 43.1  
188 100 3 1 185 620 803 2.70E-30 141 151771

cellular

organisms;Eukaryota;Opisthokonta;Metazoa;Eumetazoa;Cnidaria;Anthozoa;Octo  
corallia;Alcyonacea;Alcyoniina;Nephtheidae;Dendronephthya;Dendronephthya  
gigantea

UdeM00000010300 6596 260 UdeM00000010300 XP\_045191056.1 40.5 363  
189 7 35 375 97 454 9.30E-66 260 6596 cellular

organisms;Eukaryota;Opisthokonta;Metazoa;Eumetazoa;Bilateria;Protostomia;  
Spiralia;Lophotrochozoa;Mollusca;Bivalvia;Autobranchia;Heteroconchia;Euhe  
terodonta;Imparidentia;Venerida;Veneroidea;Veneridae;Mercenaria;Mercenari  
a mercenaria

UdeM00000010301 29159 245 UdeM00000010301 XP\_011414578.2 26.7 707  
395 11 28 612 32 737 2.70E-61 245 29159 cellular

organisms;Eukaryota;Opisthokonta;Metazoa;Eumetazoa;Bilateria;Protostomia;  
Spiralia;Lophotrochozoa;Mollusca;Bivalvia;Autobranchia;Pteriormorphia;Ostr  
eida;Ostreoidea;Ostreidae;Crassostrea;Crassostrea gigas

UdeM00000010302 6579 98.2 UdeM00000010302 XP\_033749245.1 30.9 220  
135 6 442 656 64 271 4.10E-17 98.2 6579 cellular

organisms;Eukaryota;Opisthokonta;Metazoa;Eumetazoa;Bilateria;Protostomia;  
Spiralia;Lophotrochozoa;Mollusca;Bivalvia;Autobranchia;Pteriormorphia;Pect  
inida;Pectinoidea;Pectinidae;Pecten;Pecten maximus

UdeM00000010303 114398 429.5 UdeM00000010303 XP\_042903861.1 38.9  
609 361 6 1 605 1 602 7.20E-117 429.5 114398

cellular

organisms;Eukaryota;Opisthokonta;Metazoa;Eumetazoa;Bilateria;Protostomia;  
Ecdysozoa;Panarthropoda;Arthropoda;Chelicerata;Arachnida;Araneae;Araneomo  
rphae;Entelegynae;Orbiculariae;Araneoidea;Theridiidae;Parasteatoda;Parast  
eatoda tepidariorum

UdeM00000010305 114398 429.5 UdeM00000010305 XP\_042903861.1 38.9  
609 361 6 1 605 1 602 7.20E-117 429.5 114398

cellular

organisms;Eukaryota;Opisthokonta;Metazoa;Eumetazoa;Bilateria;Protostomia;  
Ecdysozoa;Panarthropoda;Arthropoda;Chelicerata;Arachnida;Araneae;Araneomo  
rphae;Entelegynae;Orbiculariae;Araneoidea;Theridiidae;Parasteatoda;Parast  
eatoda tepidariorum

UdeM00000010306 6596 263.5 UdeM00000010306 XP\_045191056.1 42 367  
187 8 52 401 97 454 4.90E-67 263.5 6596 cellular

organisms;Eukaryota;Opisthokonta;Metazoa;Eumetazoa;Bilateria;Protostomia;  
Spiralia;Lophotrochozoa;Mollusca;Bivalvia;Autobranchia;Heteroconchia;Euhe  
terodonta;Imparidentia;Venerida;Veneroidea;Veneridae;Mercenaria;Mercenari  
a mercenaria

UdeM00000010307 6596 282.7 UdeM00000010307 XP\_045191056.1 36.3 444  
254 6 206 627 18 454 1.20E-72 282.7 6596 cellular

organisms;Eukaryota;Opisthokonta;Metazoa;Eumetazoa;Bilateria;Protostomia;  
Spiralia;Lophotrochozoa;Mollusca;Bivalvia;Autobranchia;Heteroconchia;Euhe  
terodonta;Imparidentia;Venerida;Veneroidea;Veneridae;Mercenaria;Mercenari  
a mercenaria

UdeM00000010308 1735272 219.5 UdeM00000010308 XP\_041376747.1 25.4  
916 571 30 87 940 11 876 1.80E-53 219.5 1735272

cellular

organisms;Eukaryota;Opisthokonta;Metazoa;Eumetazoa;Bilateria;Protostomia;  
Spiralia;Lophotrochozoa;Mollusca;Gastropoda;Neomphalina;Neomphaloidea;Pel  
tospiridae;Gigantopelta;Gigantopelta aegis

UdeM00000010309 6573 232.3 UdeM00000010309 XP\_021356721.1 50.2 267  
114 6 8 257 10 274 7.70E-58 232.3 6573 cellular

organisms;Eukaryota;Opisthokonta;Metazoa;Eumetazoa;Bilateria;Protostomia;



Spiralia; Lophotrochozoa; Mollusca; Bivalvia; Autobranchia; Pteriomorpha; Pectinida; Pectinoidea; Pectinidae; Mizuhopecten; Mizuhopecten yessoensis

UdeM00000010310 6596 289.3 UdeM00000010310 XP\_045190123.1 72 193  
53 1 96 288 297 488 5.60E-75 289.3 6596 cellular  
organisms; Eukaryota; Opisthokonta; Metazoa; Eumetazoa; Bilateria; Protostomia; Spiralia; Lophotrochozoa; Mollusca; Bivalvia; Autobranchia; Heteroconchia; Euheterodonta; Imparidentia; Venerida; Veneroidea; Veneridae; Mercenaria; Mercenaria mercenaria

UdeM00000010311 6596 221.5 UdeM00000010311 XP\_045167210.1 33.5 409  
234 5 2 388 607 999 1.90E-54 221.5 6596 cellular  
organisms; Eukaryota; Opisthokonta; Metazoa; Eumetazoa; Bilateria; Protostomia; Spiralia; Lophotrochozoa; Mollusca; Bivalvia; Autobranchia; Heteroconchia; Euheterodonta; Imparidentia; Venerida; Veneroidea; Veneridae; Mercenaria; Mercenaria mercenaria

UdeM00000010312 6596 131.7 UdeM00000010312 XP\_045181714.1 27.3 348  
237 7 8 346 19 359 2.40E-27 131.7 6596 cellular  
organisms; Eukaryota; Opisthokonta; Metazoa; Eumetazoa; Bilateria; Protostomia; Spiralia; Lophotrochozoa; Mollusca; Bivalvia; Autobranchia; Heteroconchia; Euheterodonta; Imparidentia; Venerida; Veneroidea; Veneridae; Mercenaria; Mercenaria mercenaria

UdeM00000010313 6596 242.3 UdeM00000010313 XP\_045167210.1 35.5 409  
246 5 2 408 607 999 1.10E-60 242.3 6596 cellular  
organisms; Eukaryota; Opisthokonta; Metazoa; Eumetazoa; Bilateria; Protostomia; Spiralia; Lophotrochozoa; Mollusca; Bivalvia; Autobranchia; Heteroconchia; Euheterodonta; Imparidentia; Venerida; Veneroidea; Veneridae; Mercenaria; Mercenaria mercenaria

UdeM00000010314 6596 63.9 UdeM00000010314 XP\_045201901.1 25.6 164  
111 4 23 179 164 323 2.40E-07 63.9 6596 cellular  
organisms; Eukaryota; Opisthokonta; Metazoa; Eumetazoa; Bilateria; Protostomia; Spiralia; Lophotrochozoa; Mollusca; Bivalvia; Autobranchia; Heteroconchia; Euheterodonta; Imparidentia; Venerida; Veneroidea; Veneridae; Mercenaria; Mercenaria mercenaria

UdeM00000010315 6596 805.8 UdeM00000010315 XP\_045167210.1 34.2 1549  
916 21 692 2211 585 2058 1.30E-229 805.8 6596 cellular  
organisms; Eukaryota; Opisthokonta; Metazoa; Eumetazoa; Bilateria; Protostomia; Spiralia; Lophotrochozoa; Mollusca; Bivalvia; Autobranchia; Heteroconchia; Euheterodonta; Imparidentia; Venerida; Veneroidea; Veneridae; Mercenaria; Mercenaria mercenaria

UdeM00000010316 6565 704.9 UdeM00000010316 XP\_022288108.1 71.6 476  
134 1 101 576 10 484 8.80E-200 704.9 6565 cellular  
organisms; Eukaryota; Opisthokonta; Metazoa; Eumetazoa; Bilateria; Protostomia; Spiralia; Lophotrochozoa; Mollusca; Bivalvia; Autobranchia; Pteriomorpha; Ostreida; Ostreoidea; Ostreidae; Crassostrea; Crassostrea virginica

UdeM00000010318 29159 976.9 UdeM00000010318 XP\_011451561.2 56.5 987  
377 12 1 979 1 943 2.10E-281 976.9 29159 cellular  
organisms; Eukaryota; Opisthokonta; Metazoa; Eumetazoa; Bilateria; Protostomia; Spiralia; Lophotrochozoa; Mollusca; Bivalvia; Autobranchia; Pteriomorpha; Ostreida; Ostreoidea; Ostreidae; Crassostrea; Crassostrea gigas

UdeM00000010319 6596 627.9 UdeM00000010319 XP\_045190623.1 93.8 323  
20 0 1 323 1 323 7.40E-177 627.9 6596 cellular  
organisms; Eukaryota; Opisthokonta; Metazoa; Eumetazoa; Bilateria; Protostomia; Spiralia; Lophotrochozoa; Mollusca; Bivalvia; Autobranchia; Heteroconchia; Euheterodonta; Imparidentia; Venerida; Veneroidea; Veneridae; Mercenaria; Mercenaria mercenaria

UdeM00000010320 6596 630.2 UdeM00000010320 XP\_045190623.1 93.8 324  
 20 0 1 324 1 324 1.50E-177 630.2 6596 cellular  
 organisms;Eukaryota;Opisthokonta;Metazoa;Eumetazoa;Bilateria;Protostomia;  
 Spiralia;Lophotrochozoa;Mollusca;Bivalvia;Autobranchia;Heteroconchia;Euhe  
 terodonta;Imparidentia;Venerida;Veneroidea;Veneridae;Mercenaria;Mercenari  
 a mercenaria  
 UdeM00000010321 6596 658.7 UdeM00000010321 XP\_045190038.1 70.7 474  
 135 2 1 474 4 473 5.70E-186 658.7 6596 cellular  
 organisms;Eukaryota;Opisthokonta;Metazoa;Eumetazoa;Bilateria;Protostomia;  
 Spiralia;Lophotrochozoa;Mollusca;Bivalvia;Autobranchia;Heteroconchia;Euhe  
 terodonta;Imparidentia;Venerida;Veneroidea;Veneridae;Mercenaria;Mercenari  
 a mercenaria  
 UdeM00000010322 6573 310.8 UdeM00000010322 XP\_021352298.1 57.9 261  
 104 2 30 287 29 286 1.80E-81 310.8 6573 cellular  
 organisms;Eukaryota;Opisthokonta;Metazoa;Eumetazoa;Bilateria;Protostomia;  
 Spiralia;Lophotrochozoa;Mollusca;Bivalvia;Autobranchia;Pteriormorphia;Pect  
 inida;Pectinoidea;Pectinidae;Mizuhopecten;Mizuhopecten yessoensis  
 UdeM00000010323 6573 335.9 UdeM00000010323 XP\_021352298.1 56.8 285  
 117 2 3 284 5 286 5.20E-89 335.9 6573 cellular  
 organisms;Eukaryota;Opisthokonta;Metazoa;Eumetazoa;Bilateria;Protostomia;  
 Spiralia;Lophotrochozoa;Mollusca;Bivalvia;Autobranchia;Pteriormorphia;Pect  
 inida;Pectinoidea;Pectinidae;Mizuhopecten;Mizuhopecten yessoensis  
 UdeM00000010324 224129 77.8 UdeM00000010324 XP\_025833403.1 55.4  
 56 25 0 63 118 1656 1711 1.10E-11 77.8 224129  
 cellular  
 organisms;Eukaryota;Opisthokonta;Metazoa;Eumetazoa;Bilateria;Protostomia;  
 Ecdysozoa;Panarthropoda;Arthropoda;Mandibulata;Pancrustacea;Hexapoda;Inse  
 cta;Dicondylia;Pterygota;Neoptera;Endopterygota;Coleoptera;Polyphaga;Elat  
 eriformia;Buprestoidea;Buprestidae;Agrilinae;Agrilus;Agrilus planipennis  
 UdeM00000010325 224129 77.8 UdeM00000010325 XP\_025833403.1 55.4  
 56 25 0 141 196 1656 1711 1.80E-11 77.8 224129  
 cellular  
 organisms;Eukaryota;Opisthokonta;Metazoa;Eumetazoa;Bilateria;Protostomia;  
 Ecdysozoa;Panarthropoda;Arthropoda;Mandibulata;Pancrustacea;Hexapoda;Inse  
 cta;Dicondylia;Pterygota;Neoptera;Endopterygota;Coleoptera;Polyphaga;Elat  
 eriformia;Buprestoidea;Buprestidae;Agrilinae;Agrilus;Agrilus planipennis  
 UdeM00000010327 7950 144.8 UdeM00000010327 XP\_042565679.1 25 511  
 343 11 8 504 21 505 3.00E-31 144.8 7950 cellular  
 organisms;Eukaryota;Opisthokonta;Metazoa;Eumetazoa;Bilateria;Deuterostomi  
 a;Chordata;Craniata;Vertebrata;Gnathostomata;Teleostomi;Euteleostomi;Acti  
 nopterygii;Actinopteri;Neopterygii;Teleostei;Osteoglossocephalai;Clupeoce  
 phala;Otomorpha;Clupei;Clupeiformes;Clupeoidei;Clupeidae;Clupeinae;Clupea  
 ;Clupea harengus  
 UdeM00000010328 7913 82.4 UdeM00000010328 XP\_041093149.1 32.5 154  
 100 3 13 163 83 235 5.80E-13 82.4 7913 cellular  
 organisms;Eukaryota;Opisthokonta;Metazoa;Eumetazoa;Bilateria;Deuterostomi  
 a;Chordata;Craniata;Vertebrata;Gnathostomata;Teleostomi;Euteleostomi;Acti  
 nopterygii;Actinopteri;Chondrostei;Acipenseriformes;Acipenseroides;Polyod  
 ontidae;Polyodontinae;Polyodontini;Polyodon;Polyodon spathula  
 UdeM00000010329 118141 151.4 UdeM00000010329 XP\_036372061.1 30.9  
 282 186 4 3 276 4 284 3.20E-33 151.4 118141  
 cellular  
 organisms;Eukaryota;Opisthokonta;Metazoa;Eumetazoa;Bilateria;Deuterostomi  
 a;Chordata;Craniata;Vertebrata;Gnathostomata;Teleostomi;Euteleostomi;Acti

nopterygii;Actinopteri;Neopterygii;Teleostei;Elopocephalai;Elopocephala;E  
 lopomorpha;Elopiformes;Megalopidae;Megalops;Megalops cyprinoides  
 UdeM00000010330 27687 114 UdeM00000010330 XP\_028648757.1 27.9 326  
 210 10 4 314 11 326 5.00E-22 114 27687 cellular  
 organisms;Eukaryota;Opisthokonta;Metazoa;Eumetazoa;Bilateria;Deuterostomi  
 a;Chordata;Craniata;Vertebrata;Gnathostomata;Teleostomi;Euteleostomi;Acti  
 nopterygii;Cladistia;Polypteriformes;Polypteridae;Erpetoichthys;Erpetoich  
 thys calabaricus  
 UdeM00000010331 27687 114 UdeM00000010331 XP\_028648757.1 27.9 326  
 210 10 4 314 11 326 4.20E-22 114 27687 cellular  
 organisms;Eukaryota;Opisthokonta;Metazoa;Eumetazoa;Bilateria;Deuterostomi  
 a;Chordata;Craniata;Vertebrata;Gnathostomata;Teleostomi;Euteleostomi;Acti  
 nopterygii;Cladistia;Polypteriformes;Polypteridae;Erpetoichthys;Erpetoich  
 thys calabaricus  
 UdeM00000010334 390379 73.9 UdeM00000010334 XP\_034025591.1 35.6  
 118 74 2 6 122 2 118 1.70E-10 73.9 390379  
 cellular  
 organisms;Eukaryota;Opisthokonta;Metazoa;Eumetazoa;Bilateria;Deuterostomi  
 a;Chordata;Craniata;Vertebrata;Gnathostomata;Teleostomi;Euteleostomi;Acti  
 nopterygii;Actinopteri;Neopterygii;Teleostei;Osteoglossocephalai;Clupeoce  
 phala;Euteleosteomorpha;Neoteleostei;Eurypterygia;Ctenosquamata;Acanthomo  
 rphata;Euacanthomorphacea;Percomorphaceae;Batrachoidaria;Batrachoidiforme  
 s;Batrachoididae;Thalassophyrinae;Thalassophryne;Thalassophryne  
 amazonica  
 UdeM00000010335 27706 188 UdeM00000010335 XP\_038574946.1 31 387  
 248 7 2 375 3 383 3.10E-44 188 27706 cellular  
 organisms;Eukaryota;Opisthokonta;Metazoa;Eumetazoa;Bilateria;Deuterostomi  
 a;Chordata;Craniata;Vertebrata;Gnathostomata;Teleostomi;Euteleostomi;Acti  
 nopterygii;Actinopteri;Neopterygii;Teleostei;Osteoglossocephalai;Clupeoce  
 phala;Euteleosteomorpha;Neoteleostei;Eurypterygia;Ctenosquamata;Acanthomo  
 rphata;Euacanthomorphacea;Percomorphaceae;Eupercaria;Centrarchiformes;Cen  
 trarchoidei;Centrarchidae;Micropterus;Micropterus salmoides  
 UdeM00000010336 7918 127.1 UdeM00000010336 XP\_015215173.1 38.2 191  
 115 2 2 190 3 192 2.50E-26 127.1 7918 cellular  
 organisms;Eukaryota;Opisthokonta;Metazoa;Eumetazoa;Bilateria;Deuterostomi  
 a;Chordata;Craniata;Vertebrata;Gnathostomata;Teleostomi;Euteleostomi;Acti  
 nopterygii;Actinopteri;Neopterygii;Holostei;Semionotiformes;Lepisosteidae  
 ;Lepisosteus;Lepisosteus oculatus  
 UdeM00000010337 27706 179.9 UdeM00000010337 XP\_038574946.1 31.3 387  
 247 7 2 375 3 383 8.40E-42 179.9 27706 cellular  
 organisms;Eukaryota;Opisthokonta;Metazoa;Eumetazoa;Bilateria;Deuterostomi  
 a;Chordata;Craniata;Vertebrata;Gnathostomata;Teleostomi;Euteleostomi;Acti  
 nopterygii;Actinopteri;Neopterygii;Teleostei;Osteoglossocephalai;Clupeoce  
 phala;Euteleosteomorpha;Neoteleostei;Eurypterygia;Ctenosquamata;Acanthomo  
 rphata;Euacanthomorphacea;Percomorphaceae;Eupercaria;Centrarchiformes;Cen  
 trarchoidei;Centrarchidae;Micropterus;Micropterus salmoides  
 UdeM00000010338 35019 181.4 UdeM00000010338 XP\_013928539.1 28.8 399  
 266 7 41 431 2 390 3.20E-42 181.4 35019 cellular  
 organisms;Eukaryota;Opisthokonta;Metazoa;Eumetazoa;Bilateria;Deuterostomi  
 a;Chordata;Craniata;Vertebrata;Gnathostomata;Teleostomi;Euteleostomi;Sarc  
 opterygii;Dipnotetrapodomorpha;Tetrapoda;Amniota;Sauropsida;Sauria;Lepido  
 sauria;Squamata;Bifurcata;Unidentata;Episquamata;Toxicofera;Serpentes;Col  
 ubroidea;Colubridae;Natricinae;Thamnophis;Thamnophis sirtalis

UdeM00000010339 7918 94.7 UdeM00000010339 XP\_015215173.1 34.1 164  
 106 2 2 164 3 165 1.20E-16 94.7 7918 cellular  
 organisms;Eukaryota;Opisthokonta;Metazoa;Eumetazoa;Bilateria;Deuterostomi  
 a;Chordata;Craniata;Vertebrata;Gnathostomata;Teleostomi;Euteleostomi;Acti  
 nopterygii;Actinopteri;Neopterygii;Holostei;Semionotiformes;Lepisosteidae  
 ;Lepisosteus;Lepisosteus oculatus

UdeM00000010340 7918 97.8 UdeM00000010340 XP\_015215173.1 37.6 141  
 85 2 7 145 10 149 1.20E-17 97.8 7918 cellular  
 organisms;Eukaryota;Opisthokonta;Metazoa;Eumetazoa;Bilateria;Deuterostomi  
 a;Chordata;Craniata;Vertebrata;Gnathostomata;Teleostomi;Euteleostomi;Acti  
 nopterygii;Actinopteri;Neopterygii;Holostei;Semionotiformes;Lepisosteidae  
 ;Lepisosteus;Lepisosteus oculatus

UdeM00000044330 29159 155.6 UdeM00000044330 XP\_011419444.2 40.4 213  
 123 3 10 220 21 231 7.50E-35 155.6 29159 cellular  
 organisms;Eukaryota;Opisthokonta;Metazoa;Eumetazoa;Bilateria;Protostomia;  
 Spiralia;Lophotrochozoa;Mollusca;Bivalvia;Autobranchia;Pteriormorphia;Ostr  
 eida;Ostreoidea;Ostreidae;Crassostrea;Crassostrea gigas

UdeM00000044332 6596 120.9 UdeM00000044332 XP\_045189084.1 34.3 181  
 112 3 1 180 1872 2046 1.60E-24 120.9 6596 cellular  
 organisms;Eukaryota;Opisthokonta;Metazoa;Eumetazoa;Bilateria;Protostomia;  
 Spiralia;Lophotrochozoa;Mollusca;Bivalvia;Autobranchia;Heteroconchia;Euhe  
 terodonta;Imparidentia;Venerida;Veneroidea;Veneridae;Mercenaria;Mercenari  
 a mercenaria

UdeM00000044331 6596 82.4 UdeM00000044331 XP\_045177776.1 50.6 89  
 43 1 41 129 826 913 1.30E-12 82.4 6596 cellular  
 organisms;Eukaryota;Opisthokonta;Metazoa;Eumetazoa;Bilateria;Protostomia;  
 Spiralia;Lophotrochozoa;Mollusca;Bivalvia;Autobranchia;Heteroconchia;Euhe  
 terodonta;Imparidentia;Venerida;Veneroidea;Veneridae;Mercenaria;Mercenari  
 a mercenaria

UdeM00000006282 6573 82 UdeM00000006282 XP\_021340236.1 32.5 157  
 95 3 147 296 202 354 1.40E-12 82 6573 cellular  
 organisms;Eukaryota;Opisthokonta;Metazoa;Eumetazoa;Bilateria;Protostomia;  
 Spiralia;Lophotrochozoa;Mollusca;Bivalvia;Autobranchia;Pteriormorphia;Pect  
 inida;Pectinoidea;Pectinidae;Mizuhopecten;Mizuhopecten yessoensis

UdeM00000006284 1735272 178.7 UdeM00000006284 XP\_041361769.1 29  
 445 283 10 229 666 247 665 2.50E-41 178.7 1735272  
 cellular  
 organisms;Eukaryota;Opisthokonta;Metazoa;Eumetazoa;Bilateria;Protostomia;  
 Spiralia;Lophotrochozoa;Mollusca;Gastropoda;Neomphalina;Neomphaloidea;Pel  
 tospiridae;Gigantopelta;Gigantopelta aegis

UdeM00000006285 6596 474.6 UdeM00000006285 XP\_045216264.1 44.4 698  
 353 11 6 674 7 698 2.30E-130 474.6 6596 cellular  
 organisms;Eukaryota;Opisthokonta;Metazoa;Eumetazoa;Bilateria;Protostomia;  
 Spiralia;Lophotrochozoa;Mollusca;Bivalvia;Autobranchia;Heteroconchia;Euhe  
 terodonta;Imparidentia;Venerida;Veneroidea;Veneridae;Mercenaria;Mercenari  
 a mercenaria

UdeM00000006286 400727 320.1 UdeM00000006286 XP\_025078139.1 86.1  
 187 25 1 1 186 1 187 1.90E-84 320.1 400727  
 cellular  
 organisms;Eukaryota;Opisthokonta;Metazoa;Eumetazoa;Bilateria;Protostomia;  
 Spiralia;Lophotrochozoa;Mollusca;Gastropoda;Caenogastropoda;Architaeniogl  
 ossa;Ampullarioidea;Ampullariidae;Pomacea;Pomacea canaliculata

UdeM00000006287 6596 654.4 UdeM00000006287 XP\_045156767.1 72.1 463  
 58 3 3 461 2 397 1.00E-184 654.4 6596 cellular

organisms;Eukaryota;Opisthokonta;Metazoa;Eumetazoa;Bilateria;Protostomia;Spiralia;Lophotrochozoa;Mollusca;Bivalvia;Autobranchia;Heteroconchia;Euherodonta;Imparidentia;Venerida;Veneroidea;Veneridae;Mercenaria;Mercenaria mercenaria

UdeM00000006288 6596 327 UdeM00000006288 XP\_045156695.1 52.2 372  
165 4 1 369 1 362 3.10E-86 327 6596 cellular

organisms;Eukaryota;Opisthokonta;Metazoa;Eumetazoa;Bilateria;Protostomia;Spiralia;Lophotrochozoa;Mollusca;Bivalvia;Autobranchia;Heteroconchia;Euherodonta;Imparidentia;Venerida;Veneroidea;Veneridae;Mercenaria;Mercenaria mercenaria

UdeM00000006289 6573 1159.4 UdeM00000006289 XP\_021357580.1 62.6  
960 331 7 56 1006 199 1139 0.00E+00 1159.4 6573  
cellular

organisms;Eukaryota;Opisthokonta;Metazoa;Eumetazoa;Bilateria;Protostomia;Spiralia;Lophotrochozoa;Mollusca;Bivalvia;Autobranchia;Pteriomorphia;Pectinida;Pectinoidea;Pectinidae;Mizuhopecten;Mizuhopecten yessoensis

UdeM00000006290 6596 117.5 UdeM00000006290 XP\_045215170.1 62.3 114  
33 4 19 125 22 132 1.30E-23 117.5 6596 cellular

organisms;Eukaryota;Opisthokonta;Metazoa;Eumetazoa;Bilateria;Protostomia;Spiralia;Lophotrochozoa;Mollusca;Bivalvia;Autobranchia;Heteroconchia;Euherodonta;Imparidentia;Venerida;Veneroidea;Veneridae;Mercenaria;Mercenaria mercenaria

UdeM00000006293 6596 279.6 UdeM00000006293 XP\_045156566.1 48.2 299  
139 4 34 323 51 342 5.70E-72 279.6 6596 cellular

organisms;Eukaryota;Opisthokonta;Metazoa;Eumetazoa;Bilateria;Protostomia;Spiralia;Lophotrochozoa;Mollusca;Bivalvia;Autobranchia;Heteroconchia;Euherodonta;Imparidentia;Venerida;Veneroidea;Veneridae;Mercenaria;Mercenaria mercenaria

UdeM00000006294 6596 348.2 UdeM00000006294 XP\_045192117.1 30 811  
479 15 14 756 147 936 2.90E-92 348.2 6596 cellular

organisms;Eukaryota;Opisthokonta;Metazoa;Eumetazoa;Bilateria;Protostomia;Spiralia;Lophotrochozoa;Mollusca;Bivalvia;Autobranchia;Heteroconchia;Euherodonta;Imparidentia;Venerida;Veneroidea;Veneridae;Mercenaria;Mercenaria mercenaria

UdeM00000006295 6596 325.9 UdeM00000006295 XP\_045192117.1 32 634  
397 8 11 631 324 936 1.30E-85 325.9 6596 cellular

organisms;Eukaryota;Opisthokonta;Metazoa;Eumetazoa;Bilateria;Protostomia;Spiralia;Lophotrochozoa;Mollusca;Bivalvia;Autobranchia;Heteroconchia;Euherodonta;Imparidentia;Venerida;Veneroidea;Veneridae;Mercenaria;Mercenaria mercenaria

UdeM00000006296 29159 104.8 UdeM00000006296 XP\_034331275.1 31.5 295  
168 10 44 306 28 320 2.20E-19 104.8 29159 cellular

organisms;Eukaryota;Opisthokonta;Metazoa;Eumetazoa;Bilateria;Protostomia;Spiralia;Lophotrochozoa;Mollusca;Bivalvia;Autobranchia;Pteriomorphia;Ostreida;Ostreoidea;Ostreidae;Crassostrea;Crassostrea gigas

UdeM00000006297 6596 329.7 UdeM00000006297 XP\_045192117.1 32.3 634  
395 9 11 631 324 936 9.10E-87 329.7 6596 cellular

organisms;Eukaryota;Opisthokonta;Metazoa;Eumetazoa;Bilateria;Protostomia;Spiralia;Lophotrochozoa;Mollusca;Bivalvia;Autobranchia;Heteroconchia;Euherodonta;Imparidentia;Venerida;Veneroidea;Veneridae;Mercenaria;Mercenaria mercenaria

UdeM00000006298 6596 413.3 UdeM00000006298 XP\_045192117.1 30.8 956  
595 19 12 930 11 936 8.80E-112 413.3 6596 cellular

organisms;Eukaryota;Opisthokonta;Metazoa;Eumetazoa;Bilateria;Protostomia;

Spiralia;Lophotrochozoa;Mollusca;Bivalvia;Autobranchia;Heteroconchia;Euherodonta;Imparidentia;Venerida;Veneroidea;Veneridae;Mercenaria;Mercenaria mercenaria

UdeM00000006299 29159 148.7 UdeM00000006299 XP\_011439301.1 61.8 102  
35 2 30 130 12 110 5.30E-33 148.7 29159 cellular

organisms;Eukaryota;Opisthokonta;Metazoa;Eumetazoa;Bilateria;Protostomia;Spiralia;Lophotrochozoa;Mollusca;Bivalvia;Autobranchia;Pteriormorphia;Ostreida;Ostreioidea;Ostreidae;Crassostrea;Crassostrea gigas

UdeM00000006300 6565 410.2 UdeM00000006300 XP\_022328906.1 59.7 347  
91 4 1 309 1 336 3.40E-111 410.2 6565 cellular

organisms;Eukaryota;Opisthokonta;Metazoa;Eumetazoa;Bilateria;Protostomia;Spiralia;Lophotrochozoa;Mollusca;Bivalvia;Autobranchia;Pteriormorphia;Ostreida;Ostreioidea;Ostreidae;Crassostrea;Crassostrea virginica

UdeM00000006301 225164 552.7 UdeM00000006301 XP\_009059440.1 59.9  
431 171 1 46 474 39 469 4.40E-154 552.7 225164

cellular

organisms;Eukaryota;Opisthokonta;Metazoa;Eumetazoa;Bilateria;Protostomia;Spiralia;Lophotrochozoa;Mollusca;Gastropoda;Patellogastropoda;Lottioidea;Lottiidae;Lottia;Lottia gigantea

UdeM00000006302 225164 90.1 UdeM00000006302 XP\_009058199.1 50  
94 40 2 11 104 2 88 1.90E-15 90.1 225164

cellular

organisms;Eukaryota;Opisthokonta;Metazoa;Eumetazoa;Bilateria;Protostomia;Spiralia;Lophotrochozoa;Mollusca;Gastropoda;Patellogastropoda;Lottioidea;Lottiidae;Lottia;Lottia gigantea

UdeM00000006303 6579 80.5 UdeM00000006303 XP\_033752673.1 46.1 76  
38 1 6 78 576 651 1.10E-12 80.5 6579 cellular

organisms;Eukaryota;Opisthokonta;Metazoa;Eumetazoa;Bilateria;Protostomia;Spiralia;Lophotrochozoa;Mollusca;Bivalvia;Autobranchia;Pteriormorphia;Pectinida;Pectinoidea;Pectinidae;Pecten;Pecten maximus

UdeM00000006304 181472 77.8 UdeM00000006304 XP\_029975096.1 39.6  
111 43 2 1 87 274 384 7.70E-12 77.8 181472

cellular

organisms;Eukaryota;Opisthokonta;Metazoa;Eumetazoa;Bilateria;Deuterostomia;Chordata;Craniata;Vertebrata;Gnathostomata;Teleostomi;Euteleostomi;Actinopterygii;Actinopteri;Neopterygii;Teleostei;Osteoglossocephalai;Clupeocephala;Euteleostei;Neoteleostei;Eurypterygia;Ctenosquamata;Acanthomorphata;Euacanthomorphacea;Percomorphaceae;Ovalentaria;Blenniiformes;Blenniiformes;Blennioidei;Blenniidae;Salariinae;Salaris;Salaris fasciatus

UdeM00000006305 225164 85.9 UdeM00000006305 XP\_009058200.1 45.3  
106 58 0 1 106 1 106 4.00E-14 85.9 225164

cellular

organisms;Eukaryota;Opisthokonta;Metazoa;Eumetazoa;Bilateria;Protostomia;Spiralia;Lophotrochozoa;Mollusca;Gastropoda;Patellogastropoda;Lottioidea;Lottiidae;Lottia;Lottia gigantea

UdeM00000006306 10224 178.3 UdeM00000006306 XP\_006814006.1 58.5 142  
58 1 1 142 1 141 6.80E-42 178.3 10224 cellular

organisms;Eukaryota;Opisthokonta;Metazoa;Eumetazoa;Bilateria;Deuterostomia;Hemichordata;Enteropneusta;Harrimaniidae;Saccoglossus;Saccoglossus kowalevskii

UdeM00000006307 6596 127.5 UdeM00000006307 XP\_045215883.1 46.3 136  
71 2 1 136 1 134 1.40E-26 127.5 6596 cellular

organisms;Eukaryota;Opisthokonta;Metazoa;Eumetazoa;Bilateria;Protostomia;Spiralia;Lophotrochozoa;Mollusca;Bivalvia;Autobranchia;Heteroconchia;Euherodonta

terodonta;Imparidentia;Venerida;Veneroidea;Veneridae;Mercenaria;Mercenari  
 a mercenaria  
 UdeM00000006308 6596 182.2 UdeM00000006308 XP\_045191307.1 33.9 381  
 210 8 1 380 35 374 1.30E-42 182.2 6596 cellular  
 organisms;Eukaryota;Opisthokonta;Metazoa;Eumetazoa;Bilateria;Protostomia;  
 Spiralia;Lophotrochozoa;Mollusca;Bivalvia;Autobranhia;Heteroconchia;Euhe  
 terodonta;Imparidentia;Venerida;Veneroidea;Veneridae;Mercenaria;Mercenari  
 a mercenaria  
 UdeM00000006310 6596 291.6 UdeM00000006310 XP\_045215923.1 55 262  
 114 3 3 263 39 297 1.00E-75 291.6 6596 cellular  
 organisms;Eukaryota;Opisthokonta;Metazoa;Eumetazoa;Bilateria;Protostomia;  
 Spiralia;Lophotrochozoa;Mollusca;Bivalvia;Autobranhia;Heteroconchia;Euhe  
 terodonta;Imparidentia;Venerida;Veneroidea;Veneridae;Mercenaria;Mercenari  
 a mercenaria  
 UdeM00000006311 6565 60.1 UdeM00000006311 XP\_022299013.1 40.3 67  
 40 0 26 92 146 212 2.00E-06 60.1 6565 cellular  
 organisms;Eukaryota;Opisthokonta;Metazoa;Eumetazoa;Bilateria;Protostomia;  
 Spiralia;Lophotrochozoa;Mollusca;Bivalvia;Autobranhia;Pteriormorphia;Ostr  
 eida;Ostreoidea;Ostreidae;Crassostrea;Crassostrea virginica  
 UdeM00000006315 6596 1237.6 UdeM00000006315 XP\_045216299.1 74  
 799 174 3 27 823 27 793 0.00E+00 1237.6 6596  
 cellular  
 organisms;Eukaryota;Opisthokonta;Metazoa;Eumetazoa;Bilateria;Protostomia;  
 Spiralia;Lophotrochozoa;Mollusca;Bivalvia;Autobranhia;Heteroconchia;Euhe  
 terodonta;Imparidentia;Venerida;Veneroidea;Veneridae;Mercenaria;Mercenari  
 a mercenaria  
 UdeM00000006316 6596 346.3 UdeM00000006316 XP\_045216301.1 52.9 350  
 135 3 16 335 22 371 4.80E-92 346.3 6596 cellular  
 organisms;Eukaryota;Opisthokonta;Metazoa;Eumetazoa;Bilateria;Protostomia;  
 Spiralia;Lophotrochozoa;Mollusca;Bivalvia;Autobranhia;Heteroconchia;Euhe  
 terodonta;Imparidentia;Venerida;Veneroidea;Veneridae;Mercenaria;Mercenari  
 a mercenaria  
 UdeM00000006317 6596 130.2 UdeM00000006317 XP\_045216301.1 51.7 362  
 124 5 408 762 738 1055 1.10E-26 130.2 6596 cellular  
 organisms;Eukaryota;Opisthokonta;Metazoa;Eumetazoa;Bilateria;Protostomia;  
 Spiralia;Lophotrochozoa;Mollusca;Bivalvia;Autobranhia;Heteroconchia;Euhe  
 terodonta;Imparidentia;Venerida;Veneroidea;Veneridae;Mercenaria;Mercenari  
 a mercenaria  
 UdeM00000006318 6596 85.9 UdeM00000006318 XP\_045156521.1 23.2 413  
 268 10 1017 1417 1030 1405 4.70E-13 85.9 6596 cellular  
 organisms;Eukaryota;Opisthokonta;Metazoa;Eumetazoa;Bilateria;Protostomia;  
 Spiralia;Lophotrochozoa;Mollusca;Bivalvia;Autobranhia;Heteroconchia;Euhe  
 terodonta;Imparidentia;Venerida;Veneroidea;Veneridae;Mercenaria;Mercenari  
 a mercenaria  
 UdeM00000006319 6596 75.5 UdeM00000006319 XP\_045156224.1 52.7 74  
 34 1 39 112 43 115 1.80E-10 75.5 6596 cellular  
 organisms;Eukaryota;Opisthokonta;Metazoa;Eumetazoa;Bilateria;Protostomia;  
 Spiralia;Lophotrochozoa;Mollusca;Bivalvia;Autobranhia;Heteroconchia;Euhe  
 terodonta;Imparidentia;Venerida;Veneroidea;Veneridae;Mercenaria;Mercenari  
 a mercenaria  
 UdeM00000006320 1735272 136.3 UdeM00000006320 XP\_041356266.1 58.2  
 98 41 0 1 98 511 608 2.10E-29 136.3 1735272  
 cellular  
 organisms;Eukaryota;Opisthokonta;Metazoa;Eumetazoa;Bilateria;Protostomia;

Spiralia;Lophotrochozoa;Mollusca;Gastropoda;Neomphalina;Neomphaloidea;Pel  
tospiridae;Gigantopelta;Gigantopelta aegis  
UdeM00000006321 2652724 110.5 UdeM00000006321 XP\_020896433.1 34.9  
166 103 3 1 164 27 189 3.80E-21 110.5 2652724  
cellular  
organisms;Eukaryota;Opisthokonta;Metazoa;Eumetazoa;Cnidaria;Anthozoa;Hexa  
corallia;Actiniaria;Aiptasiidae;Exaiptasia;Exaiptasia diaphana  
UdeM00000006322 6573 72 UdeM00000006322 XP\_021346189.1 59.6 57  
23 0 1 57 22 78 5.50E-10 72 6573 cellular  
organisms;Eukaryota;Opisthokonta;Metazoa;Eumetazoa;Bilateria;Protostomia;  
Spiralia;Lophotrochozoa;Mollusca;Bivalvia;Autobranchia;Pteriormorphia;Pect  
inida;Pectinoidea;Pectinidae;Mizuhopecten;Mizuhopecten yessoensis  
UdeM00000006323 2652724 177.9 UdeM00000006323 XP\_020913146.1 54.2  
168 77 0 98 265 172 339 1.70E-41 177.9 2652724  
cellular  
organisms;Eukaryota;Opisthokonta;Metazoa;Eumetazoa;Cnidaria;Anthozoa;Hexa  
corallia;Actiniaria;Aiptasiidae;Exaiptasia;Exaiptasia diaphana  
UdeM00000006324 29159 1157.5 UdeM00000006324 XP\_011418148.2 78.4  
689 147 2 12 699 27 714 0.00E+00 1157.5  
29159 cellular  
organisms;Eukaryota;Opisthokonta;Metazoa;Eumetazoa;Bilateria;Protostomia;  
Spiralia;Lophotrochozoa;Mollusca;Bivalvia;Autobranchia;Pteriormorphia;Ostr  
eida;Ostreoidea;Ostreidae;Crassostrea;Crassostrea gigas  
UdeM00000006325 29159 583.2 UdeM00000006325 XP\_034323397.1 60.5 476  
184 2 8 479 2 477 3.30E-163 583.2 29159 cellular  
organisms;Eukaryota;Opisthokonta;Metazoa;Eumetazoa;Bilateria;Protostomia;  
Spiralia;Lophotrochozoa;Mollusca;Bivalvia;Autobranchia;Pteriormorphia;Ostr  
eida;Ostreoidea;Ostreidae;Crassostrea;Crassostrea gigas  
UdeM00000006326 6579 533.1 UdeM00000006326 XP\_033750315.1 62.2 429  
145 3 7 418 16 444 3.20E-148 533.1 6579 cellular  
organisms;Eukaryota;Opisthokonta;Metazoa;Eumetazoa;Bilateria;Protostomia;  
Spiralia;Lophotrochozoa;Mollusca;Bivalvia;Autobranchia;Pteriormorphia;Pect  
inida;Pectinoidea;Pectinidae;Pecten;Pecten maximus  
UdeM00000006327 29159 58.9 UdeM00000006327 XP\_034317976.1 57.1 56  
24 0 14 69 119 174 3.50E-06 58.9 29159 cellular  
organisms;Eukaryota;Opisthokonta;Metazoa;Eumetazoa;Bilateria;Protostomia;  
Spiralia;Lophotrochozoa;Mollusca;Bivalvia;Autobranchia;Pteriormorphia;Ostr  
eida;Ostreoidea;Ostreidae;Crassostrea;Crassostrea gigas  
UdeM00000006328 29159 226.9 UdeM00000006328 XP\_034317976.1 56.5 191  
82 1 3 192 363 553 2.40E-56 226.9 29159 cellular  
organisms;Eukaryota;Opisthokonta;Metazoa;Eumetazoa;Bilateria;Protostomia;  
Spiralia;Lophotrochozoa;Mollusca;Bivalvia;Autobranchia;Pteriormorphia;Ostr  
eida;Ostreoidea;Ostreidae;Crassostrea;Crassostrea gigas  
UdeM00000006329 29159 76.3 UdeM00000006329 XP\_034317976.1 52.9 70  
32 1 1 69 484 553 2.20E-11 76.3 29159 cellular  
organisms;Eukaryota;Opisthokonta;Metazoa;Eumetazoa;Bilateria;Protostomia;  
Spiralia;Lophotrochozoa;Mollusca;Bivalvia;Autobranchia;Pteriormorphia;Ostr  
eida;Ostreoidea;Ostreidae;Crassostrea;Crassostrea gigas  
UdeM00000006330 6573 108.2 UdeM00000006330 XP\_021347744.1 45.9 111  
59 1 1 111 52 161 7.00E-21 108.2 6573 cellular  
organisms;Eukaryota;Opisthokonta;Metazoa;Eumetazoa;Bilateria;Protostomia;  
Spiralia;Lophotrochozoa;Mollusca;Bivalvia;Autobranchia;Pteriormorphia;Pect  
inida;Pectinoidea;Pectinidae;Mizuhopecten;Mizuhopecten yessoensis



UdeM00000006331 6596 2000.7 UdeM00000006331 XP\_045216804.1 62.6  
 1582 487 13 11 1496 17 1590 0.00E+00 2000.7 6596  
 cellular  
 organisms;Eukaryota;Opisthokonta;Metazoa;Eumetazoa;Bilateria;Protostomia;  
 Spiralia;Lophotrochozoa;Mollusca;Bivalvia;Autobranchia;Heteroconchia;Euhe  
 terodonta;Imparidentia;Venerida;Veneroidea;Veneridae;Mercenaria;Mercenari  
 a mercenaria  
 UdeM00000006332 6573 277.3 UdeM00000006332 XP\_021342862.1 54.5 277  
 117 4 268 538 435 708 4.10E-71 277.3 6573 cellular  
 organisms;Eukaryota;Opisthokonta;Metazoa;Eumetazoa;Bilateria;Protostomia;  
 Spiralia;Lophotrochozoa;Mollusca;Bivalvia;Autobranchia;Pteriormorphia;Pect  
 inida;Pectinoidea;Pectinidae;Mizuhopecten;Mizuhopecten yessoensis  
 UdeM00000006334 1735272 256.9 UdeM00000006334 XP\_041372274.1 27.8  
 677 391 17 16 686 28 612 8.80E-65 256.9 1735272  
 cellular  
 organisms;Eukaryota;Opisthokonta;Metazoa;Eumetazoa;Bilateria;Protostomia;  
 Spiralia;Lophotrochozoa;Mollusca;Gastropoda;Neomphalina;Neomphaloidea;Pel  
 tospiridae;Gigantopelta;Gigantopelta aegis  
 UdeM00000006335 1735272 256.9 UdeM00000006335 XP\_041372274.1 27.8  
 677 391 17 15 685 28 612 8.80E-65 256.9 1735272  
 cellular  
 organisms;Eukaryota;Opisthokonta;Metazoa;Eumetazoa;Bilateria;Protostomia;  
 Spiralia;Lophotrochozoa;Mollusca;Gastropoda;Neomphalina;Neomphaloidea;Pel  
 tospiridae;Gigantopelta;Gigantopelta aegis  
 UdeM00000006336 6596 637.1 UdeM00000006336 XP\_045215999.1 61 508  
 182 4 1 500 7 506 1.90E-179 637.1 6596 cellular  
 organisms;Eukaryota;Opisthokonta;Metazoa;Eumetazoa;Bilateria;Protostomia;  
 Spiralia;Lophotrochozoa;Mollusca;Bivalvia;Autobranchia;Heteroconchia;Euhe  
 terodonta;Imparidentia;Venerida;Veneroidea;Veneridae;Mercenaria;Mercenari  
 a mercenaria  
 UdeM00000006337 9913 338.2 UdeM00000006337 XP\_002686314.2 38.6 477  
 279 4 16 482 10 482 2.10E-89 338.2 9913 cellular  
 organisms;Eukaryota;Opisthokonta;Metazoa;Eumetazoa;Bilateria;Deuterostomi  
 a;Chordata;Craniata;Vertebrata;Gnathostomata;Teleostomi;Euteleostomi;Sarc  
 opterygii;Dipnotetrapodomorpha;Tetrapoda;Amniota;Mammalia;Theria;Eutheria  
 ;Boreoeutheria;Laurasiatheria;Artiodactyla;Ruminantia;Pecora;Bovidae;Bovi  
 nae;Bos;Bos taurus  
 UdeM00000006338 9913 293.9 UdeM00000006338 XP\_002686314.2 35.6 477  
 263 5 16 452 10 482 4.20E-76 293.9 9913 cellular  
 organisms;Eukaryota;Opisthokonta;Metazoa;Eumetazoa;Bilateria;Deuterostomi  
 a;Chordata;Craniata;Vertebrata;Gnathostomata;Teleostomi;Euteleostomi;Sarc  
 opterygii;Dipnotetrapodomorpha;Tetrapoda;Amniota;Mammalia;Theria;Eutheria  
 ;Boreoeutheria;Laurasiatheria;Artiodactyla;Ruminantia;Pecora;Bovidae;Bovi  
 nae;Bos;Bos taurus  
 UdeM00000006339 50954 491.9 UdeM00000006339 XP\_037357174.1 49.7 481  
 237 3 10 486 7 486 1.20E-135 491.9 50954 cellular  
 organisms;Eukaryota;Opisthokonta;Metazoa;Eumetazoa;Bilateria;Deuterostomi  
 a;Chordata;Craniata;Vertebrata;Gnathostomata;Teleostomi;Euteleostomi;Sarc  
 opterygii;Dipnotetrapodomorpha;Tetrapoda;Amniota;Mammalia;Theria;Eutheria  
 ;Boreoeutheria;Laurasiatheria;Eulipotyphla;Talpidae;Talpa;Talpa  
 occidentalis  
 UdeM00000006340 6573 316.6 UdeM00000006340 XP\_021357620.1 58.6 302  
 92 7 1 297 1 274 3.70E-83 316.6 6573 cellular  
 organisms;Eukaryota;Opisthokonta;Metazoa;Eumetazoa;Bilateria;Protostomia;

Spiralia;Lophotrochozoa;Mollusca;Bivalvia;Autobranchia;Pteriormorphia;Pectinida;Pectinoidea;Pectinidae;Mizuhopecten;Mizuhopecten yessoensis  
UdeM00000006341 6596 497.3 UdeM00000006341 XP\_045215171.1 55.5 488  
198 10 29 509 1403 1878 2.40E-137 497.3 6596 cellular  
organisms;Eukaryota;Opisthokonta;Metazoa;Eumetazoa;Bilateria;Protostomia;  
Spiralia;Lophotrochozoa;Mollusca;Bivalvia;Autobranchia;Heteroconchia;Euherodonta;Imparidentia;Venerida;Veneroidea;Veneridae;Mercenaria;Mercenaria mercenaria  
UdeM00000006342 37653 161.8 UdeM00000006342 XP\_014785453.1 31.3 422  
251 14 51 464 56 446 2.10E-36 161.8 37653 cellular  
organisms;Eukaryota;Opisthokonta;Metazoa;Eumetazoa;Bilateria;Protostomia;  
Spiralia;Lophotrochozoa;Mollusca;Cephalopoda;Coleoidea;Octopodiformes;Octopoda;Incirrata;Octopodidae;Octopus;Octopus bimaculoides  
UdeM00000006343 6596 313.2 UdeM00000006343 XP\_045156175.1 46.3 387  
185 5 1 365 11 396 4.60E-82 313.2 6596 cellular  
organisms;Eukaryota;Opisthokonta;Metazoa;Eumetazoa;Bilateria;Protostomia;  
Spiralia;Lophotrochozoa;Mollusca;Bivalvia;Autobranchia;Heteroconchia;Euherodonta;Imparidentia;Venerida;Veneroidea;Veneridae;Mercenaria;Mercenaria mercenaria  
UdeM00000006344 6596 1642.5 UdeM00000006344 XP\_045156171.1 72.6  
1129 295 9 1 1117 1 1127 0.00E+00 1642.5 6596  
cellular  
organisms;Eukaryota;Opisthokonta;Metazoa;Eumetazoa;Bilateria;Protostomia;  
Spiralia;Lophotrochozoa;Mollusca;Bivalvia;Autobranchia;Heteroconchia;Euherodonta;Imparidentia;Venerida;Veneroidea;Veneridae;Mercenaria;Mercenaria mercenaria  
UdeM00000006345 1735272 686.8 UdeM00000006345 XP\_041366560.1 62.6  
554 192 5 31 572 43 593 2.50E-194 686.8 1735272  
cellular  
organisms;Eukaryota;Opisthokonta;Metazoa;Eumetazoa;Bilateria;Protostomia;  
Spiralia;Lophotrochozoa;Mollusca;Gastropoda;Neomphalina;Neomphaloidea;Peltospiridae;Gigantopelta;Gigantopelta aegis  
UdeM00000006347 10224 153.3 UdeM00000006347 XP\_002731709.1 57.9 121  
50 1 1 120 72 192 2.00E-34 153.3 10224 cellular  
organisms;Eukaryota;Opisthokonta;Metazoa;Eumetazoa;Bilateria;Deuterostomia;Hemichordata;Enteropneusta;Harrimaniidae;Saccoglossus;Saccoglossus kowalevskii  
UdeM00000006348 6579 294.3 UdeM00000006348 XP\_033750716.1 27.3 770  
482 22 8 741 5 732 4.40E-76 294.3 6579 cellular  
organisms;Eukaryota;Opisthokonta;Metazoa;Eumetazoa;Bilateria;Protostomia;  
Spiralia;Lophotrochozoa;Mollusca;Bivalvia;Autobranchia;Pteriormorphia;Pectinida;Pectinoidea;Pectinidae;Pecten;Pecten maximus  
UdeM00000006350 6565 171.4 UdeM00000006350 XP\_022333645.1 64.4 132  
44 1 1 129 1 132 7.60E-40 171.4 6565 cellular  
organisms;Eukaryota;Opisthokonta;Metazoa;Eumetazoa;Bilateria;Protostomia;  
Spiralia;Lophotrochozoa;Mollusca;Bivalvia;Autobranchia;Pteriormorphia;Ostreida;Ostreoidea;Ostreidae;Crassostrea;Crassostrea virginica  
UdeM00000006349 6596 877.1 UdeM00000006349 XP\_045216315.1 76.9 541  
119 1 1 535 1 541 1.10E-251 877.1 6596 cellular  
organisms;Eukaryota;Opisthokonta;Metazoa;Eumetazoa;Bilateria;Protostomia;  
Spiralia;Lophotrochozoa;Mollusca;Bivalvia;Autobranchia;Heteroconchia;Euherodonta;Imparidentia;Venerida;Veneroidea;Veneridae;Mercenaria;Mercenaria mercenaria

UdeM00000006351 6573 656.8 UdeM00000006351 XP\_021348761.1 41.7 1043  
 498 22 29 1022 105 1086 4.70E-185 656.8 6573 cellular  
 organisms;Eukaryota;Opisthokonta;Metazoa;Eumetazoa;Bilateria;Protostomia;  
 Spiralia;Lophotrochozoa;Mollusca;Bivalvia;Autobranchia;Pteriormorphia;Pect  
 inida;Pectinoidea;Pectinidae;Mizuhopecten;Mizuhopecten yessoensis  
 UdeM00000006352 6500 66.2 UdeM00000006352 XP\_005090219.1 66 47  
 16 0 56 102 28 74 8.30E-08 66.2 6500 cellular  
 organisms;Eukaryota;Opisthokonta;Metazoa;Eumetazoa;Bilateria;Protostomia;  
 Spiralia;Lophotrochozoa;Mollusca;Gastropoda;Heterobranchia;Euthyneura;Tec  
 tipleura;Aplysiida;Aplysioidea;Aplysiidae;Aplysia;Aplysia californica  
 UdeM00000006353 6596 159.1 UdeM00000006353 XP\_045216338.1 75.5 106  
 26 0 55 160 30 135 4.80E-36 159.1 6596 cellular  
 organisms;Eukaryota;Opisthokonta;Metazoa;Eumetazoa;Bilateria;Protostomia;  
 Spiralia;Lophotrochozoa;Mollusca;Bivalvia;Autobranchia;Heteroconchia;Euhe  
 terodonta;Imparidentia;Venerida;Veneroidea;Veneridae;Mercenaria;Mercenari  
 a mercenaria  
 UdeM00000006354 6596 443 UdeM00000006354 XP\_045216338.1 64.6 345  
 119 1 55 396 30 374 4.10E-121 443 6596 cellular  
 organisms;Eukaryota;Opisthokonta;Metazoa;Eumetazoa;Bilateria;Protostomia;  
 Spiralia;Lophotrochozoa;Mollusca;Bivalvia;Autobranchia;Heteroconchia;Euhe  
 terodonta;Imparidentia;Venerida;Veneroidea;Veneridae;Mercenaria;Mercenari  
 a mercenaria  
 UdeM00000006355 6596 159.8 UdeM00000006355 XP\_045216338.1 75.5 106  
 26 0 67 172 30 135 3.00E-36 159.8 6596 cellular  
 organisms;Eukaryota;Opisthokonta;Metazoa;Eumetazoa;Bilateria;Protostomia;  
 Spiralia;Lophotrochozoa;Mollusca;Bivalvia;Autobranchia;Heteroconchia;Euhe  
 terodonta;Imparidentia;Venerida;Veneroidea;Veneridae;Mercenaria;Mercenari  
 a mercenaria  
 UdeM00000006356 6596 308.1 UdeM00000006356 XP\_045216338.1 63.6 242  
 85 1 11 252 132 370 1.00E-80 308.1 6596 cellular  
 organisms;Eukaryota;Opisthokonta;Metazoa;Eumetazoa;Bilateria;Protostomia;  
 Spiralia;Lophotrochozoa;Mollusca;Bivalvia;Autobranchia;Heteroconchia;Euhe  
 terodonta;Imparidentia;Venerida;Veneroidea;Veneridae;Mercenaria;Mercenari  
 a mercenaria  
 UdeM00000006357 6596 454.5 UdeM00000006357 XP\_045216338.1 65.9 352  
 118 1 50 399 16 367 1.40E-124 454.5 6596 cellular  
 organisms;Eukaryota;Opisthokonta;Metazoa;Eumetazoa;Bilateria;Protostomia;  
 Spiralia;Lophotrochozoa;Mollusca;Bivalvia;Autobranchia;Heteroconchia;Euhe  
 terodonta;Imparidentia;Venerida;Veneroidea;Veneridae;Mercenaria;Mercenari  
 a mercenaria  
 UdeM00000006358 37653 528.9 UdeM00000006358 XP\_014791411.1 60.7 430  
 162 2 1 427 85 510 6.10E-147 528.9 37653 cellular  
 organisms;Eukaryota;Opisthokonta;Metazoa;Eumetazoa;Bilateria;Protostomia;  
 Spiralia;Lophotrochozoa;Mollusca;Cephalopoda;Coleoidea;Octopodiformes;Oct  
 opoda;Incirrata;Octopodidae;Octopus;Octopus bimaculoides  
 UdeM00000006359 7574 405.2 UdeM00000006359 XP\_023932423.1 64 358  
 117 6 1 351 38 390 9.30E-110 405.2 7574 cellular  
 organisms;Eukaryota;Opisthokonta;Metazoa;Eumetazoa;Bilateria;Protostomia;  
 Spiralia;Lophotrochozoa;Brachiopoda;Linguliformea;Lingulata;Lingulida;Lin  
 guloidea;Lingulidae;Lingula;Lingula anatina  
 UdeM00000006360 7574 406 UdeM00000006360 XP\_023932423.1 64 358  
 117 6 1 351 38 390 5.50E-110 406 7574 cellular  
 organisms;Eukaryota;Opisthokonta;Metazoa;Eumetazoa;Bilateria;Protostomia;

Spiralia;Lophotrochozoa;Brachiopoda;Linguliformea;Lingulata;Lingulida;Linguloidea;Lingulidae;Lingula;Lingula anatina

UdeM00000006364 6573 868.6 UdeM00000006364 XP\_021348464.1 68 806  
214 13 184 977 177 950 7.50E-249 868.6 6573 cellular  
organisms;Eukaryota;Opisthokonta;Metazoa;Eumetazoa;Bilateria;Protostomia;  
Spiralia;Lophotrochozoa;Mollusca;Bivalvia;Autobranchia;Pteriormorphia;Pect  
inida;Pectinoidea;Pectinidae;Mizuhopecten;Mizuhopecten yessoensis

UdeM00000006361 6573 886.3 UdeM00000006361 XP\_021348462.1 70.4 794  
205 13 192 969 177 956 3.40E-254 886.3 6573 cellular  
organisms;Eukaryota;Opisthokonta;Metazoa;Eumetazoa;Bilateria;Protostomia;  
Spiralia;Lophotrochozoa;Mollusca;Bivalvia;Autobranchia;Pteriormorphia;Pect  
inida;Pectinoidea;Pectinidae;Mizuhopecten;Mizuhopecten yessoensis

UdeM00000006362 6573 871.7 UdeM00000006362 XP\_021348464.1 68.2 807  
215 13 192 989 177 950 8.90E-250 871.7 6573 cellular  
organisms;Eukaryota;Opisthokonta;Metazoa;Eumetazoa;Bilateria;Protostomia;  
Spiralia;Lophotrochozoa;Mollusca;Bivalvia;Autobranchia;Pteriormorphia;Pect  
inida;Pectinoidea;Pectinidae;Mizuhopecten;Mizuhopecten yessoensis

UdeM00000006363 6573 889.8 UdeM00000006363 XP\_021348462.1 70.6 795  
206 13 192 973 177 956 3.10E-255 889.8 6573 cellular  
organisms;Eukaryota;Opisthokonta;Metazoa;Eumetazoa;Bilateria;Protostomia;  
Spiralia;Lophotrochozoa;Mollusca;Bivalvia;Autobranchia;Pteriormorphia;Pect  
inida;Pectinoidea;Pectinidae;Mizuhopecten;Mizuhopecten yessoensis

UdeM00000006365 6596 371.7 UdeM00000006365 XP\_045156480.1 48.4 368  
183 4 5 370 3 365 1.30E-99 371.7 6596 cellular  
organisms;Eukaryota;Opisthokonta;Metazoa;Eumetazoa;Bilateria;Protostomia;  
Spiralia;Lophotrochozoa;Mollusca;Bivalvia;Autobranchia;Heteroconchia;Euhe  
terodonta;Imparidentia;Venerida;Veneroidea;Veneridae;Mercenaria;Mercenari  
a mercenaria

UdeM00000006366 6596 569.3 UdeM00000006366 XP\_045215290.1 36 1097  
528 32 721 1717 696 1718 1.70E-158 569.3 6596 cellular  
organisms;Eukaryota;Opisthokonta;Metazoa;Eumetazoa;Bilateria;Protostomia;  
Spiralia;Lophotrochozoa;Mollusca;Bivalvia;Autobranchia;Heteroconchia;Euhe  
terodonta;Imparidentia;Venerida;Veneroidea;Veneridae;Mercenaria;Mercenari  
a mercenaria

UdeM00000006367 6596 662.9 UdeM00000006367 XP\_045156489.1 59.8 587  
215 10 6 578 120 699 7.00E-187 662.9 6596 cellular  
organisms;Eukaryota;Opisthokonta;Metazoa;Eumetazoa;Bilateria;Protostomia;  
Spiralia;Lophotrochozoa;Mollusca;Bivalvia;Autobranchia;Heteroconchia;Euhe  
terodonta;Imparidentia;Venerida;Veneroidea;Veneridae;Mercenaria;Mercenari  
a mercenaria

UdeM00000006368 37653 268.1 UdeM00000006368 XP\_014778144.1 85.4 151  
22 0 3 153 2 152 7.00E-69 268.1 37653 cellular  
organisms;Eukaryota;Opisthokonta;Metazoa;Eumetazoa;Bilateria;Protostomia;  
Spiralia;Lophotrochozoa;Mollusca;Cephalopoda;Coleoidea;Octopodiformes;Oct  
opoda;Incirrata;Octopodidae;Octopus;Octopus bimaculoides

UdeM00000006369 6579 1034.2 UdeM00000006369 XP\_033750084.1 55.2  
978 418 12 5 976 11 974 1.00E-298 1034.2 6579  
cellular  
organisms;Eukaryota;Opisthokonta;Metazoa;Eumetazoa;Bilateria;Protostomia;  
Spiralia;Lophotrochozoa;Mollusca;Bivalvia;Autobranchia;Pteriormorphia;Pect  
inida;Pectinoidea;Pectinidae;Pecten;Pecten maximus

UdeM00000006370 29159 250.8 UdeM00000006370 XP\_034325933.1 60.1 208  
78 1 1 208 1 203 1.60E-63 250.8 29159 cellular  
organisms;Eukaryota;Opisthokonta;Metazoa;Eumetazoa;Bilateria;Protostomia;

Spiralia;Lophotrochozoa;Mollusca;Bivalvia;Autobranchia;Pteriormorphia;Ostr  
eida;Ostreoidea;Ostreidae;Crassostrea;Crassostrea gigas  
UdeM00000006371 400727 146.7 UdeM00000006371 XP\_025076589.1 68.5  
213 62 2 1 211 1 210 3.30E-32 146.7 400727  
cellular  
organisms;Eukaryota;Opisthokonta;Metazoa;Eumetazoa;Bilateria;Protostomia;  
Spiralia;Lophotrochozoa;Mollusca;Gastropoda;Caenogastropoda;Architaeniogl  
ossa;Ampullarioidea;Ampullariidae;Pomacea;Pomacea canaliculata  
UdeM00000006372 6596 855.1 UdeM00000006372 XP\_045156515.1 63.2 653  
234 3 1 651 1 649 5.70E-245 855.1 6596 cellular  
organisms;Eukaryota;Opisthokonta;Metazoa;Eumetazoa;Bilateria;Protostomia;  
Spiralia;Lophotrochozoa;Mollusca;Bivalvia;Autobranchia;Heteroconchia;Euhe  
terodonta;Imparidentia;Venerida;Veneroidea;Veneridae;Mercenaria;Mercenari  
a mercenaria  
UdeM00000006373 29159 88.6 UdeM00000006373 XP\_034307341.1 40.9 110  
57 2 9 110 230 339 1.00E-14 88.6 29159 cellular  
organisms;Eukaryota;Opisthokonta;Metazoa;Eumetazoa;Bilateria;Protostomia;  
Spiralia;Lophotrochozoa;Mollusca;Bivalvia;Autobranchia;Pteriormorphia;Ostr  
eida;Ostreoidea;Ostreidae;Crassostrea;Crassostrea gigas  
UdeM00000006375 6596 187.6 UdeM00000006375 XP\_045156514.1 49.5 188  
94 1 1 187 34 221 1.70E-44 187.6 6596 cellular  
organisms;Eukaryota;Opisthokonta;Metazoa;Eumetazoa;Bilateria;Protostomia;  
Spiralia;Lophotrochozoa;Mollusca;Bivalvia;Autobranchia;Heteroconchia;Euhe  
terodonta;Imparidentia;Venerida;Veneroidea;Veneridae;Mercenaria;Mercenari  
a mercenaria  
UdeM00000006376 1735272 382.5 UdeM00000006376 XP\_041365122.1 61.5  
283 109 0 29 311 75 357 5.20E-103 382.5 1735272  
cellular  
organisms;Eukaryota;Opisthokonta;Metazoa;Eumetazoa;Bilateria;Protostomia;  
Spiralia;Lophotrochozoa;Mollusca;Gastropoda;Neomphalina;Neomphaloidea;Pel  
tospiridae;Gigantopelta;Gigantopelta aegis  
UdeM00000006377 1735272 382.5 UdeM00000006377 XP\_041365122.1 61.5  
283 109 0 17 299 75 357 5.00E-103 382.5 1735272  
cellular  
organisms;Eukaryota;Opisthokonta;Metazoa;Eumetazoa;Bilateria;Protostomia;  
Spiralia;Lophotrochozoa;Mollusca;Gastropoda;Neomphalina;Neomphaloidea;Pel  
tospiridae;Gigantopelta;Gigantopelta aegis  
UdeM00000006379 6596 82 UdeM00000006379 XP\_045215963.1 62.9 62  
22 1 7 68 47 107 3.90E-13 82 6596 cellular  
organisms;Eukaryota;Opisthokonta;Metazoa;Eumetazoa;Bilateria;Protostomia;  
Spiralia;Lophotrochozoa;Mollusca;Bivalvia;Autobranchia;Heteroconchia;Euhe  
terodonta;Imparidentia;Venerida;Veneroidea;Veneridae;Mercenaria;Mercenari  
a mercenaria  
UdeM00000006378 6596 779.6 UdeM00000006378 XP\_045215963.1 69.7 532  
152 2 7 530 47 577 2.50E-222 779.6 6596 cellular  
organisms;Eukaryota;Opisthokonta;Metazoa;Eumetazoa;Bilateria;Protostomia;  
Spiralia;Lophotrochozoa;Mollusca;Bivalvia;Autobranchia;Heteroconchia;Euhe  
terodonta;Imparidentia;Venerida;Veneroidea;Veneridae;Mercenaria;Mercenari  
a mercenaria  
UdeM00000006380 6596 702.2 UdeM00000006380 XP\_045215963.1 70.6 470  
130 1 198 659 108 577 6.20E-199 702.2 6596 cellular  
organisms;Eukaryota;Opisthokonta;Metazoa;Eumetazoa;Bilateria;Protostomia;  
Spiralia;Lophotrochozoa;Mollusca;Bivalvia;Autobranchia;Heteroconchia;Euhe

terodonta;Imparidentia;Venerida;Veneroidea;Veneridae;Mercenaria;Mercenari  
 a mercenaria  
 UdeM00000006381 6596 800.4 UdeM00000006381 XP\_045156733.1 55.4 746  
 294 12 2 728 6 731 1.90E-228 800.4 6596 cellular  
 organisms;Eukaryota;Opisthokonta;Metazoa;Eumetazoa;Bilateria;Protostomia;  
 Spiralia;Lophotrochozoa;Mollusca;Bivalvia;Autobranhia;Heteroconchia;Euhe  
 terodonta;Imparidentia;Venerida;Veneroidea;Veneridae;Mercenaria;Mercenari  
 a mercenaria  
 UdeM00000006383 29159 133.3 UdeM00000006383 XP\_034339171.1 50.8 130  
 62 1 2 129 32 161 2.40E-28 133.3 29159 cellular  
 organisms;Eukaryota;Opisthokonta;Metazoa;Eumetazoa;Bilateria;Protostomia;  
 Spiralia;Lophotrochozoa;Mollusca;Bivalvia;Autobranhia;Pteriormorphia;Ostr  
 eida;Ostreoidea;Ostreidae;Crassostrea;Crassostrea gigas  
 UdeM00000006382 29159 132.5 UdeM00000006382 XP\_034339171.1 50.8 130  
 62 1 22 149 32 161 4.70E-28 132.5 29159 cellular  
 organisms;Eukaryota;Opisthokonta;Metazoa;Eumetazoa;Bilateria;Protostomia;  
 Spiralia;Lophotrochozoa;Mollusca;Bivalvia;Autobranhia;Pteriormorphia;Ostr  
 eida;Ostreoidea;Ostreidae;Crassostrea;Crassostrea gigas  
 UdeM00000006384 1735272 255.4 UdeM00000006384 XP\_041373203.1 58.3  
 204 80 3 6 206 315 516 6.30E-65 255.4 1735272  
 cellular  
 organisms;Eukaryota;Opisthokonta;Metazoa;Eumetazoa;Bilateria;Protostomia;  
 Spiralia;Lophotrochozoa;Mollusca;Gastropoda;Neomphalina;Neomphaloidea;Pel  
 tospiridae;Gigantopelta;Gigantopelta aegis  
 UdeM00000006385 1735272 401.4 UdeM00000006385 XP\_041373203.1 61  
 300 114 2 18 317 17 313 1.10E-108 401.4 1735272  
 cellular  
 organisms;Eukaryota;Opisthokonta;Metazoa;Eumetazoa;Bilateria;Protostomia;  
 Spiralia;Lophotrochozoa;Mollusca;Gastropoda;Neomphalina;Neomphaloidea;Pel  
 tospiridae;Gigantopelta;Gigantopelta aegis  
 UdeM00000006386 6596 138.3 UdeM00000006386 XP\_045156403.1 63.2 95  
 35 0 2 96 63 157 5.30E-30 138.3 6596 cellular  
 organisms;Eukaryota;Opisthokonta;Metazoa;Eumetazoa;Bilateria;Protostomia;  
 Spiralia;Lophotrochozoa;Mollusca;Bivalvia;Autobranhia;Heteroconchia;Euhe  
 terodonta;Imparidentia;Venerida;Veneroidea;Veneridae;Mercenaria;Mercenari  
 a mercenaria  
 UdeM00000006387 6596 232.6 UdeM00000006387 XP\_045216803.1 63.5 181  
 64 1 1 181 2 180 4.20E-58 232.6 6596 cellular  
 organisms;Eukaryota;Opisthokonta;Metazoa;Eumetazoa;Bilateria;Protostomia;  
 Spiralia;Lophotrochozoa;Mollusca;Bivalvia;Autobranhia;Heteroconchia;Euhe  
 terodonta;Imparidentia;Venerida;Veneroidea;Veneridae;Mercenaria;Mercenari  
 a mercenaria  
 UdeM00000006388 6573 164.1 UdeM00000006388 XP\_021355850.1 33.7 252  
 153 7 39 284 49 292 2.60E-37 164.1 6573 cellular  
 organisms;Eukaryota;Opisthokonta;Metazoa;Eumetazoa;Bilateria;Protostomia;  
 Spiralia;Lophotrochozoa;Mollusca;Bivalvia;Autobranhia;Pteriormorphia;Pect  
 inida;Pectinoidea;Pectinidae;Mizuhopecten;Mizuhopecten yessoensis  
 UdeM00000006389 400727 117.1 UdeM00000006389 XP\_025077375.1 55.6  
 99 42 1 35 131 31 129 1.70E-23 117.1 400727  
 cellular  
 organisms;Eukaryota;Opisthokonta;Metazoa;Eumetazoa;Bilateria;Protostomia;  
 Spiralia;Lophotrochozoa;Mollusca;Gastropoda;Caenogastropoda;Architaeniogl  
 ossa;Ampullarioidea;Ampullariidae;Pomacea;Pomacea canaliculata

UdeM00000006390 6596 502.3 UdeM00000006390 XP\_045156402.1 54.4 485  
 205 7 1 475 1 479 7.40E-139 502.3 6596 cellular  
 organisms;Eukaryota;Opisthokonta;Metazoa;Eumetazoa;Bilateria;Protostomia;  
 Spiralia;Lophotrochozoa;Mollusca;Bivalvia;Autobranhia;Heteroconchia;Euhe  
 terodonta;Imparidentia;Venerida;Veneroidea;Veneridae;Mercenaria;Mercenari  
 a mercenaria  
 UdeM00000006391 6573 63.2 UdeM00000006391 XP\_021346183.1 29.5 183  
 113 4 983 1153 1213 1391 4.00E-06 63.2 6573 cellular  
 organisms;Eukaryota;Opisthokonta;Metazoa;Eumetazoa;Bilateria;Protostomia;  
 Spiralia;Lophotrochozoa;Mollusca;Bivalvia;Autobranhia;Pteriormorphia;Pect  
 inida;Pectinoidea;Pectinidae;Mizuhopecten;Mizuhopecten yessoensis  
 UdeM00000006392 1735272 317.8 UdeM00000006392 XP\_041370368.1 40.8  
 478 221 8 3 418 89 566 2.10E-83 317.8 1735272  
 cellular  
 organisms;Eukaryota;Opisthokonta;Metazoa;Eumetazoa;Bilateria;Protostomia;  
 Spiralia;Lophotrochozoa;Mollusca;Gastropoda;Neomphalina;Neomphaloidea;Pel  
 tospiridae;Gigantopelta;Gigantopelta aegis  
 UdeM00000006393 6579 344.7 UdeM00000006393 XP\_033750821.1 43.2 488  
 235 11 19 480 1343 1814 1.80E-91 344.7 6579 cellular  
 organisms;Eukaryota;Opisthokonta;Metazoa;Eumetazoa;Bilateria;Protostomia;  
 Spiralia;Lophotrochozoa;Mollusca;Bivalvia;Autobranhia;Pteriormorphia;Pect  
 inida;Pectinoidea;Pectinidae;Pecten;Pecten maximus  
 UdeM00000006396 6573 200.7 UdeM00000006396 XP\_021376553.1 48.6 216  
 109 2 2 215 225 440 2.60E-48 200.7 6573 cellular  
 organisms;Eukaryota;Opisthokonta;Metazoa;Eumetazoa;Bilateria;Protostomia;  
 Spiralia;Lophotrochozoa;Mollusca;Bivalvia;Autobranhia;Pteriormorphia;Pect  
 inida;Pectinoidea;Pectinidae;Mizuhopecten;Mizuhopecten yessoensis  
 UdeM00000006397 6596 111.7 UdeM00000006397 XP\_045156661.1 51.7 116  
 49 2 157 272 32 140 7.20E-21 111.7 6596 cellular  
 organisms;Eukaryota;Opisthokonta;Metazoa;Eumetazoa;Bilateria;Protostomia;  
 Spiralia;Lophotrochozoa;Mollusca;Bivalvia;Autobranhia;Heteroconchia;Euhe  
 terodonta;Imparidentia;Venerida;Veneroidea;Veneridae;Mercenaria;Mercenari  
 a mercenaria  
 UdeM00000006398 6500 348.6 UdeM00000006398 NP\_001191465.1 89.4 189  
 20 0 1 189 1 189 6.80E-93 348.6 6500 cellular  
 organisms;Eukaryota;Opisthokonta;Metazoa;Eumetazoa;Bilateria;Protostomia;  
 Spiralia;Lophotrochozoa;Mollusca;Gastropoda;Heterobranhia;Euthyneura;Tec  
 tipleura;Aplysiida;Aplysioidea;Aplysiidae;Aplysia;Aplysia californica  
 UdeM00000006399 6565 244.6 UdeM00000006399 XP\_022332709.1 80.6 180  
 34 1 1 180 63 241 9.70E-62 244.6 6565 cellular  
 organisms;Eukaryota;Opisthokonta;Metazoa;Eumetazoa;Bilateria;Protostomia;  
 Spiralia;Lophotrochozoa;Mollusca;Bivalvia;Autobranhia;Pteriormorphia;Ostr  
 eida;Ostreoidea;Ostreidae;Crassostrea;Crassostrea virginica  
 UdeM00000006400 6596 241.9 UdeM00000006400 XP\_045156665.1 68.1 166  
 53 0 1 166 39 204 5.80E-61 241.9 6596 cellular  
 organisms;Eukaryota;Opisthokonta;Metazoa;Eumetazoa;Bilateria;Protostomia;  
 Spiralia;Lophotrochozoa;Mollusca;Bivalvia;Autobranhia;Heteroconchia;Euhe  
 terodonta;Imparidentia;Venerida;Veneroidea;Veneridae;Mercenaria;Mercenari  
 a mercenaria  
 UdeM00000006401 6579 254.2 UdeM00000006401 XP\_033749958.1 65.1 172  
 60 0 91 262 74 245 1.80E-64 254.2 6579 cellular  
 organisms;Eukaryota;Opisthokonta;Metazoa;Eumetazoa;Bilateria;Protostomia;  
 Spiralia;Lophotrochozoa;Mollusca;Bivalvia;Autobranhia;Pteriormorphia;Pect  
 inida;Pectinoidea;Pectinidae;Pecten;Pecten maximus

UdeM00000006402 6596 88.2 UdeM00000006402 XP\_045216308.1 44.7 103  
 52 2 4 103 785 885 7.40E-15 88.2 6596 cellular  
 organisms;Eukaryota;Opisthokonta;Metazoa;Eumetazoa;Bilateria;Protostomia;  
 Spiralia;Lophotrochozoa;Mollusca;Bivalvia;Autobranchia;Heteroconchia;Euhe  
 terodonta;Imparidentia;Venerida;Veneroidea;Veneridae;Mercenaria;Mercenari  
 a mercenaria

UdeM00000006403 6596 653.3 UdeM00000006403 XP\_045216308.1 39.5 901  
 483 7 15 904 36 885 4.60E-184 653.3 6596 cellular  
 organisms;Eukaryota;Opisthokonta;Metazoa;Eumetazoa;Bilateria;Protostomia;  
 Spiralia;Lophotrochozoa;Mollusca;Bivalvia;Autobranchia;Heteroconchia;Euhe  
 terodonta;Imparidentia;Venerida;Veneroidea;Veneridae;Mercenaria;Mercenari  
 a mercenaria

UdeM00000006404 6596 557.4 UdeM00000006404 XP\_045156679.1 62.7 410  
 145 2 101 510 6 407 1.90E-155 557.4 6596 cellular  
 organisms;Eukaryota;Opisthokonta;Metazoa;Eumetazoa;Bilateria;Protostomia;  
 Spiralia;Lophotrochozoa;Mollusca;Bivalvia;Autobranchia;Heteroconchia;Euhe  
 terodonta;Imparidentia;Venerida;Veneroidea;Veneridae;Mercenaria;Mercenari  
 a mercenaria

UdeM00000006405 6596 565.1 UdeM00000006405 XP\_045156679.1 63.8 403  
 145 1 101 503 6 407 9.10E-158 565.1 6596 cellular  
 organisms;Eukaryota;Opisthokonta;Metazoa;Eumetazoa;Bilateria;Protostomia;  
 Spiralia;Lophotrochozoa;Mollusca;Bivalvia;Autobranchia;Heteroconchia;Euhe  
 terodonta;Imparidentia;Venerida;Veneroidea;Veneridae;Mercenaria;Mercenari  
 a mercenaria

UdeM00000006406 6596 292.7 UdeM00000006406 XP\_045156679.1 62 205  
 78 0 2 206 203 407 3.60E-76 292.7 6596 cellular  
 organisms;Eukaryota;Opisthokonta;Metazoa;Eumetazoa;Bilateria;Protostomia;  
 Spiralia;Lophotrochozoa;Mollusca;Bivalvia;Autobranchia;Heteroconchia;Euhe  
 terodonta;Imparidentia;Venerida;Veneroidea;Veneridae;Mercenaria;Mercenari  
 a mercenaria

UdeM00000006408 1735272 302.4 UdeM00000006408 XP\_041364055.1 42.7  
 365 207 2 1 364 1977 2340 7.90E-79 302.4 1735272  
 cellular  
 organisms;Eukaryota;Opisthokonta;Metazoa;Eumetazoa;Bilateria;Protostomia;  
 Spiralia;Lophotrochozoa;Mollusca;Gastropoda;Neomphalina;Neomphaloidea;Pel  
 tospiridae;Gigantopelta;Gigantopelta aegis

UdeM00000006409 6596 2643.6 UdeM00000006409 XP\_045215276.1 56.8  
 2342 978 16 6 2331 5 2329 0.00E+00 2643.6 6596  
 cellular  
 organisms;Eukaryota;Opisthokonta;Metazoa;Eumetazoa;Bilateria;Protostomia;  
 Spiralia;Lophotrochozoa;Mollusca;Bivalvia;Autobranchia;Heteroconchia;Euhe  
 terodonta;Imparidentia;Venerida;Veneroidea;Veneridae;Mercenaria;Mercenari  
 a mercenaria

UdeM00000006410 29159 254.6 UdeM00000006410 XP\_011416820.2 67.8 174  
 54 1 4 175 15 188 1.00E-64 254.6 29159 cellular  
 organisms;Eukaryota;Opisthokonta;Metazoa;Eumetazoa;Bilateria;Protostomia;  
 Spiralia;Lophotrochozoa;Mollusca;Bivalvia;Autobranchia;Pteriomorphia;Ostr  
 eida;Ostreoidea;Ostreidae;Crassostrea;Crassostrea gigas

UdeM00000006411 6596 77 UdeM00000006411 XP\_045216766.1 36.5 148  
 93 1 67 214 45 191 4.40E-11 77 6596 cellular  
 organisms;Eukaryota;Opisthokonta;Metazoa;Eumetazoa;Bilateria;Protostomia;  
 Spiralia;Lophotrochozoa;Mollusca;Bivalvia;Autobranchia;Heteroconchia;Euhe  
 terodonta;Imparidentia;Venerida;Veneroidea;Veneridae;Mercenaria;Mercenari  
 a mercenaria



UdeM00000006412 6596 1179.1 UdeM00000006412 XP\_045216766.1 60.4  
 1072 404 7 54 1117 290 1349 0.00E+00 1179.1 6596  
 cellular  
 organisms;Eukaryota;Opisthokonta;Metazoa;Eumetazoa;Bilateria;Protostomia;  
 Spiralia;Lophotrochozoa;Mollusca;Bivalvia;Autobranhia;Heteroconchia;Euhe  
 terodonta;Imparidentia;Venerida;Veneroidea;Veneridae;Mercenaria;Mercenari  
 a mercenaria  
 UdeM00000006413 29159 111.3 UdeM00000006413 XP\_019919767.2 24.3 482  
 289 13 301 714 168 641 1.50E-20 111.3 29159 cellular  
 organisms;Eukaryota;Opisthokonta;Metazoa;Eumetazoa;Bilateria;Protostomia;  
 Spiralia;Lophotrochozoa;Mollusca;Bivalvia;Autobranhia;Pteriormorphia;Ostr  
 eida;Ostreoidea;Ostreidae;Crassostrea;Crassostrea gigas  
 UdeM00000006414 6596 1422.5 UdeM00000006414 XP\_045216538.1 72.5  
 958 257 4 15 968 9 964 0.00E+00 1422.5 6596  
 cellular  
 organisms;Eukaryota;Opisthokonta;Metazoa;Eumetazoa;Bilateria;Protostomia;  
 Spiralia;Lophotrochozoa;Mollusca;Bivalvia;Autobranhia;Heteroconchia;Euhe  
 terodonta;Imparidentia;Venerida;Veneroidea;Veneridae;Mercenaria;Mercenari  
 a mercenaria  
 UdeM00000006415 6596 926 UdeM00000006415 XP\_045216539.1 78 558  
 123 0 1 558 1 558 2.20E-266 926 6596 cellular  
 organisms;Eukaryota;Opisthokonta;Metazoa;Eumetazoa;Bilateria;Protostomia;  
 Spiralia;Lophotrochozoa;Mollusca;Bivalvia;Autobranhia;Heteroconchia;Euhe  
 terodonta;Imparidentia;Venerida;Veneroidea;Veneridae;Mercenaria;Mercenari  
 a mercenaria  
 UdeM00000006416 2607531 172.9 UdeM00000006416 XP\_036361781.1 24.3  
 647 428 16 113 726 108 725 1.50E-39 172.9 2607531  
 cellular  
 organisms;Eukaryota;Opisthokonta;Metazoa;Eumetazoa;Bilateria;Protostomia;  
 Spiralia;Lophotrochozoa;Mollusca;Cephalopoda;Coleoidea;Octopodiformes;Oct  
 opoda;Incirrata;Octopodidae;Octopus;Octopus sinensis  
 UdeM00000006417 6573 436 UdeM00000006417 XP\_021377146.1 36 1053  
 532 31 20 962 733 1753 2.20E-118 436 6573 cellular  
 organisms;Eukaryota;Opisthokonta;Metazoa;Eumetazoa;Bilateria;Protostomia;  
 Spiralia;Lophotrochozoa;Mollusca;Bivalvia;Autobranhia;Pteriormorphia;Pect  
 inida;Pectinoidea;Pectinidae;Mizuhopecten;Mizuhopecten yessoensis  
 UdeM00000006418 6565 81.6 UdeM00000006418 XP\_022310266.1 63.3 60  
 22 0 1 60 216 275 4.80E-13 81.6 6565 cellular  
 organisms;Eukaryota;Opisthokonta;Metazoa;Eumetazoa;Bilateria;Protostomia;  
 Spiralia;Lophotrochozoa;Mollusca;Bivalvia;Autobranhia;Pteriormorphia;Ostr  
 eida;Ostreoidea;Ostreidae;Crassostrea;Crassostrea virginica  
 UdeM00000006419 29159 305.1 UdeM00000006419 XP\_011444271.2 40 635  
 336 13 147 752 101 719 2.50E-79 305.1 29159 cellular  
 organisms;Eukaryota;Opisthokonta;Metazoa;Eumetazoa;Bilateria;Protostomia;  
 Spiralia;Lophotrochozoa;Mollusca;Bivalvia;Autobranhia;Pteriormorphia;Ostr  
 eida;Ostreoidea;Ostreidae;Crassostrea;Crassostrea gigas  
 UdeM00000006420 29159 306.6 UdeM00000006420 XP\_011444271.2 39.7 642  
 337 14 172 786 101 719 9.10E-80 306.6 29159 cellular  
 organisms;Eukaryota;Opisthokonta;Metazoa;Eumetazoa;Bilateria;Protostomia;  
 Spiralia;Lophotrochozoa;Mollusca;Bivalvia;Autobranhia;Pteriormorphia;Ostr  
 eida;Ostreoidea;Ostreidae;Crassostrea;Crassostrea gigas  
 UdeM00000006421 151771 235 UdeM00000006421 XP\_028419301.1 45.1  
 273 91 3 42 257 34 304 1.10E-58 235 151771  
 cellular

organisms;Eukaryota;Opisthokonta;Metazoa;Eumetazoa;Cnidaria;Anthozoa;Octo  
corallia;Alcyonacea;Alcyoniina;Nephtheidae;Dendronephthya;Dendronephthya  
gigantea

UdeM00000006422 151771 235 UdeM00000006422 XP\_028419301.1 45.1  
273 91 3 27 242 34 304 1.00E-58 235 151771  
cellular

organisms;Eukaryota;Opisthokonta;Metazoa;Eumetazoa;Cnidaria;Anthozoa;Octo  
corallia;Alcyonacea;Alcyoniina;Nephtheidae;Dendronephthya;Dendronephthya  
gigantea

UdeM00000006423 70779 96.3 UdeM00000006423 XP\_015747352.1 44.4 108  
58 1 2 107 297 404 2.80E-17 96.3 70779 cellular

organisms;Eukaryota;Opisthokonta;Metazoa;Eumetazoa;Cnidaria;Anthozoa;Hexa  
corallia;Scleractinia;Astrocoeniina;Acroporidae;Acropora;Acropora  
digitifera

UdeM00000006424 45264 81.6 UdeM00000006424 XP\_044164583.1 54 87  
33 3 27 110 189 271 6.70E-13 81.6 45264 cellular

organisms;Eukaryota;Opisthokonta;Metazoa;Eumetazoa;Cnidaria;Anthozoa;Hexa  
corallia;Scleractinia;Astrocoeniina;Acroporidae;Acropora;Acropora  
millepora

UdeM00000006425 6596 152.5 UdeM00000006425 XP\_045216702.1 42.9 203  
109 2 1 202 1 197 1.20E-33 152.5 6596 cellular

organisms;Eukaryota;Opisthokonta;Metazoa;Eumetazoa;Bilateria;Protostomia;  
Spiralia;Lophotrochozoa;Mollusca;Bivalvia;Autobranchia;Heteroconchia;Euhe  
terodonta;Imparidentia;Venerida;Veneroidea;Veneridae;Mercenaria;Mercenari  
a mercenaria

UdeM00000006426 6579 237.7 UdeM00000006426 XP\_033750128.1 39.8 492  
241 13 59 537 46 495 3.70E-59 237.7 6579 cellular

organisms;Eukaryota;Opisthokonta;Metazoa;Eumetazoa;Bilateria;Protostomia;  
Spiralia;Lophotrochozoa;Mollusca;Bivalvia;Autobranchia;Pteriormorphia;Pect  
inida;Pectinoidea;Pectinidae;Pecten;Pecten maximus

UdeM00000006427 6579 235.7 UdeM00000006427 XP\_033750128.1 40 483  
244 12 59 528 46 495 1.40E-58 235.7 6579 cellular

organisms;Eukaryota;Opisthokonta;Metazoa;Eumetazoa;Bilateria;Protostomia;  
Spiralia;Lophotrochozoa;Mollusca;Bivalvia;Autobranchia;Pteriormorphia;Pect  
inida;Pectinoidea;Pectinidae;Pecten;Pecten maximus

UdeM00000006428 6565 135.2 UdeM00000006428 XP\_022299727.1 48.9 139  
70 1 4 142 140 277 7.70E-29 135.2 6565 cellular

organisms;Eukaryota;Opisthokonta;Metazoa;Eumetazoa;Bilateria;Protostomia;  
Spiralia;Lophotrochozoa;Mollusca;Bivalvia;Autobranchia;Pteriormorphia;Ostr  
eida;Ostreoidea;Ostreidae;Crassostrea;Crassostrea virginica

UdeM00000006429 29159 115.9 UdeM00000006429 XP\_011444271.2 35.7 213  
116 7 17 209 508 719 6.10E-23 115.9 29159 cellular

organisms;Eukaryota;Opisthokonta;Metazoa;Eumetazoa;Bilateria;Protostomia;  
Spiralia;Lophotrochozoa;Mollusca;Bivalvia;Autobranchia;Pteriormorphia;Ostr  
eida;Ostreoidea;Ostreidae;Crassostrea;Crassostrea gigas

UdeM00000006430 6573 101.7 UdeM00000006430 XP\_021377146.1 52.6 95  
44 1 99 193 729 822 2.80E-18 101.7 6573 cellular

organisms;Eukaryota;Opisthokonta;Metazoa;Eumetazoa;Bilateria;Protostomia;  
Spiralia;Lophotrochozoa;Mollusca;Bivalvia;Autobranchia;Pteriormorphia;Pect  
inida;Pectinoidea;Pectinidae;Mizuhopecten;Mizuhopecten yessoensis

UdeM00000006431 6596 550.8 UdeM00000006431 XP\_045156675.1 50.2 619  
234 10 62 624 66 666 2.20E-153 550.8 6596 cellular

organisms;Eukaryota;Opisthokonta;Metazoa;Eumetazoa;Bilateria;Protostomia;  
Spiralia;Lophotrochozoa;Mollusca;Bivalvia;Autobranchia;Heteroconchia;Euhe

terodonta;Imparidentia;Venerida;Veneroidea;Veneridae;Mercenaria;Mercenari  
 a mercenaria  
 UdeM00000006432 6596 289.7 UdeM00000006432 XP\_045216361.1 56 252  
 99 1 4 243 5 256 3.60E-75 289.7 6596 cellular  
 organisms;Eukaryota;Opisthokonta;Metazoa;Eumetazoa;Bilateria;Protostomia;  
 Spiralia;Lophotrochozoa;Mollusca;Bivalvia;Autobranhia;Heteroconchia;Euhe  
 terodonta;Imparidentia;Venerida;Veneroidea;Veneridae;Mercenaria;Mercenari  
 a mercenaria  
 UdeM00000006433 6573 275.4 UdeM00000006433 XP\_021356454.1 51 253  
 114 6 16 262 8 256 7.50E-71 275.4 6573 cellular  
 organisms;Eukaryota;Opisthokonta;Metazoa;Eumetazoa;Bilateria;Protostomia;  
 Spiralia;Lophotrochozoa;Mollusca;Bivalvia;Autobranhia;Pteriormorphia;Pect  
 inida;Pectinoidea;Pectinidae;Mizuhopecten;Mizuhopecten yessoensis  
 UdeM00000006435 6596 294.3 UdeM00000006435 XP\_045216179.1 51.4 282  
 132 3 14 293 22 300 1.80E-76 294.3 6596 cellular  
 organisms;Eukaryota;Opisthokonta;Metazoa;Eumetazoa;Bilateria;Protostomia;  
 Spiralia;Lophotrochozoa;Mollusca;Bivalvia;Autobranhia;Heteroconchia;Euhe  
 terodonta;Imparidentia;Venerida;Veneroidea;Veneridae;Mercenaria;Mercenari  
 a mercenaria  
 UdeM00000006436 6596 265.4 UdeM00000006436 XP\_045216176.1 57.6 229  
 90 2 63 290 45 267 1.00E-67 265.4 6596 cellular  
 organisms;Eukaryota;Opisthokonta;Metazoa;Eumetazoa;Bilateria;Protostomia;  
 Spiralia;Lophotrochozoa;Mollusca;Bivalvia;Autobranhia;Heteroconchia;Euhe  
 terodonta;Imparidentia;Venerida;Veneroidea;Veneridae;Mercenaria;Mercenari  
 a mercenaria  
 UdeM00000006437 6596 226.1 UdeM00000006437 XP\_045176664.1 30.1 561  
 308 19 3 489 15 565 9.80E-56 226.1 6596 cellular  
 organisms;Eukaryota;Opisthokonta;Metazoa;Eumetazoa;Bilateria;Protostomia;  
 Spiralia;Lophotrochozoa;Mollusca;Bivalvia;Autobranhia;Heteroconchia;Euhe  
 terodonta;Imparidentia;Venerida;Veneroidea;Veneridae;Mercenaria;Mercenari  
 a mercenaria  
 UdeM00000006439 6596 688 UdeM00000006439 XP\_045156855.1 66.2 557  
 161 8 5 547 100 643 1.00E-194 688 6596 cellular  
 organisms;Eukaryota;Opisthokonta;Metazoa;Eumetazoa;Bilateria;Protostomia;  
 Spiralia;Lophotrochozoa;Mollusca;Bivalvia;Autobranhia;Heteroconchia;Euhe  
 terodonta;Imparidentia;Venerida;Veneroidea;Veneridae;Mercenaria;Mercenari  
 a mercenaria  
 UdeM00000006440 6579 139.8 UdeM00000006440 XP\_033750646.1 64.3 98  
 34 1 1 97 1 98 1.90E-30 139.8 6579 cellular  
 organisms;Eukaryota;Opisthokonta;Metazoa;Eumetazoa;Bilateria;Protostomia;  
 Spiralia;Lophotrochozoa;Mollusca;Bivalvia;Autobranhia;Pteriormorphia;Pect  
 inida;Pectinoidea;Pectinidae;Pecten;Pecten maximus  
 UdeM00000006441 6573 171.4 UdeM00000006441 XP\_021347440.1 32.6 423  
 223 9 1 381 1 403 2.50E-39 171.4 6573 cellular  
 organisms;Eukaryota;Opisthokonta;Metazoa;Eumetazoa;Bilateria;Protostomia;  
 Spiralia;Lophotrochozoa;Mollusca;Bivalvia;Autobranhia;Pteriormorphia;Pect  
 inida;Pectinoidea;Pectinidae;Mizuhopecten;Mizuhopecten yessoensis  
 UdeM00000006442 29159 245 UdeM00000006442 XP\_011442081.2 44.6 267  
 136 5 1 256 1 266 1.20E-61 245 29159 cellular  
 organisms;Eukaryota;Opisthokonta;Metazoa;Eumetazoa;Bilateria;Protostomia;  
 Spiralia;Lophotrochozoa;Mollusca;Bivalvia;Autobranhia;Pteriormorphia;Ostr  
 eida;Ostreoidea;Ostreidae;Crassostrea;Crassostrea gigas  
 UdeM00000006443 6596 390.6 UdeM00000006443 XP\_045215844.1 63 494  
 154 6 13 478 10 502 2.90E-105 390.6 6596 cellular

organisms;Eukaryota;Opisthokonta;Metazoa;Eumetazoa;Bilateria;Protostomia;Spiralia;Lophotrochozoa;Mollusca;Bivalvia;Autobranchia;Heteroconchia;Euherodonta;Imparidentia;Venerida;Veneroidea;Veneridae;Mercenaria;Mercenaria mercenaria

UdeM00000006444 6596 218.8 UdeM00000006444 XP\_045216917.1 54.3 210  
75 1 4 213 3 191 6.80E-54 218.8 6596 cellular

organisms;Eukaryota;Opisthokonta;Metazoa;Eumetazoa;Bilateria;Protostomia;Spiralia;Lophotrochozoa;Mollusca;Bivalvia;Autobranchia;Heteroconchia;Euherodonta;Imparidentia;Venerida;Veneroidea;Veneridae;Mercenaria;Mercenaria mercenaria

UdeM00000006445 6596 231.1 UdeM00000006445 XP\_045216709.1 61.1 175  
68 0 2 176 565 739 1.10E-57 231.1 6596 cellular

organisms;Eukaryota;Opisthokonta;Metazoa;Eumetazoa;Bilateria;Protostomia;Spiralia;Lophotrochozoa;Mollusca;Bivalvia;Autobranchia;Heteroconchia;Euherodonta;Imparidentia;Venerida;Veneroidea;Veneridae;Mercenaria;Mercenaria mercenaria

UdeM00000006446 6565 1056.2 UdeM00000006446 XP\_022331335.1 69.8  
736 213 3 1 736 1 727 1.90E-305 1056.2 6565  
cellular

organisms;Eukaryota;Opisthokonta;Metazoa;Eumetazoa;Bilateria;Protostomia;Spiralia;Lophotrochozoa;Mollusca;Bivalvia;Autobranchia;Pteriormorphia;Ostreida;Ostreoidea;Ostreidae;Crassostrea;Crassostrea virginica

UdeM00000006447 6596 275 UdeM00000006447 XP\_045176530.1 49.8 275  
126 5 27 296 24 291 1.10E-70 275 6596 cellular

organisms;Eukaryota;Opisthokonta;Metazoa;Eumetazoa;Bilateria;Protostomia;Spiralia;Lophotrochozoa;Mollusca;Bivalvia;Autobranchia;Heteroconchia;Euherodonta;Imparidentia;Venerida;Veneroidea;Veneridae;Mercenaria;Mercenaria mercenaria

UdeM00000006448 6596 297.7 UdeM00000006448 XP\_045176530.1 51.8 274  
126 4 27 300 24 291 1.60E-77 297.7 6596 cellular

organisms;Eukaryota;Opisthokonta;Metazoa;Eumetazoa;Bilateria;Protostomia;Spiralia;Lophotrochozoa;Mollusca;Bivalvia;Autobranchia;Heteroconchia;Euherodonta;Imparidentia;Venerida;Veneroidea;Veneridae;Mercenaria;Mercenaria mercenaria

UdeM00000006449 6596 1541.2 UdeM00000006449 XP\_045216154.1 67.7  
1162 354 7 61 1204 45 1203 0.00E+00 1541.2 6596  
cellular

organisms;Eukaryota;Opisthokonta;Metazoa;Eumetazoa;Bilateria;Protostomia;Spiralia;Lophotrochozoa;Mollusca;Bivalvia;Autobranchia;Heteroconchia;Euherodonta;Imparidentia;Venerida;Veneroidea;Veneridae;Mercenaria;Mercenaria mercenaria

UdeM00000006452 6596 346.7 UdeM00000006452 XP\_045188650.1 38.3 480  
292 3 4 480 3 481 5.10E-92 346.7 6596 cellular

organisms;Eukaryota;Opisthokonta;Metazoa;Eumetazoa;Bilateria;Protostomia;Spiralia;Lophotrochozoa;Mollusca;Bivalvia;Autobranchia;Heteroconchia;Euherodonta;Imparidentia;Venerida;Veneroidea;Veneridae;Mercenaria;Mercenaria mercenaria

UdeM00000006453 6596 296.6 UdeM00000006453 XP\_045176530.1 51.1 274  
128 4 27 300 24 291 3.70E-77 296.6 6596 cellular

organisms;Eukaryota;Opisthokonta;Metazoa;Eumetazoa;Bilateria;Protostomia;Spiralia;Lophotrochozoa;Mollusca;Bivalvia;Autobranchia;Heteroconchia;Euherodonta;Imparidentia;Venerida;Veneroidea;Veneridae;Mercenaria;Mercenaria mercenaria

UdeM00000006454 6596 281.6 UdeM00000006454 XP\_045169572.1 39.6 434  
 194 10 45 415 32 460 1.70E-72 281.6 6596 cellular  
 organisms;Eukaryota;Opisthokonta;Metazoa;Eumetazoa;Bilateria;Protostomia;  
 Spiralia;Lophotrochozoa;Mollusca;Bivalvia;Autobranchia;Heteroconchia;Euhe  
 terodonta;Imparidentia;Venerida;Veneroidea;Veneridae;Mercenaria;Mercenari  
 a mercenaria  
 UdeM00000006455 6706 143.7 UdeM00000006455 XP\_042235765.1 43.3 157  
 89 0 1 157 1 157 2.10E-31 143.7 6706 cellular  
 organisms;Eukaryota;Opisthokonta;Metazoa;Eumetazoa;Bilateria;Protostomia;  
 Ecdysozoa;Panarthropoda;Arthropoda;Mandibulata;Pancrustacea;Crustacea;Mul  
 ticrustacea;Malacostraca;Eumalacostraca;Eucarida;Decapoda;Pleocyemata;Ast  
 acidea;Nephropoidea;Nephropidae;Homarus;Homarus americanus  
 UdeM00000006456 1735272 152.9 UdeM00000006456 XP\_041349428.1 42.5  
 186 107 0 87 272 47 232 5.90E-34 152.9 1735272  
 cellular  
 organisms;Eukaryota;Opisthokonta;Metazoa;Eumetazoa;Bilateria;Protostomia;  
 Spiralia;Lophotrochozoa;Mollusca;Gastropoda;Neomphalina;Neomphaloidea;Pel  
 tospiridae;Gigantopelta;Gigantopelta aegis  
 UdeM00000006457 72036 142.5 UdeM00000006457 XP\_040576246.1 41.1 185  
 107 2 16 198 71 255 5.80E-31 142.5 72036 cellular  
 organisms;Eukaryota;Opisthokonta;Metazoa;Eumetazoa;Bilateria;Protostomia;  
 Ecdysozoa;Panarthropoda;Arthropoda;Mandibulata;Pancrustacea;Crustacea;Mul  
 ticrustacea;Hexanauplia;Copepoda;Neocopepoda;Podoplea;Siphonostomatoida;C  
 aligidae;Lepeophtheirus;Lepeophtheirus salmonis  
 UdeM00000006458 6596 354.4 UdeM00000006458 XP\_045216150.1 54.5 332  
 140 8 16 341 25 351 1.90E-94 354.4 6596 cellular  
 organisms;Eukaryota;Opisthokonta;Metazoa;Eumetazoa;Bilateria;Protostomia;  
 Spiralia;Lophotrochozoa;Mollusca;Bivalvia;Autobranchia;Heteroconchia;Euhe  
 terodonta;Imparidentia;Venerida;Veneroidea;Veneridae;Mercenaria;Mercenari  
 a mercenaria  
 UdeM00000006459 6579 810.4 UdeM00000006459 XP\_033750282.1 69.5 541  
 161 2 1 537 1 541 1.30E-231 810.4 6579 cellular  
 organisms;Eukaryota;Opisthokonta;Metazoa;Eumetazoa;Bilateria;Protostomia;  
 Spiralia;Lophotrochozoa;Mollusca;Bivalvia;Autobranchia;Pteriomorphia;Pect  
 inida;Pectinoidea;Pectinidae;Pecten;Pecten maximus  
 UdeM00000006460 6596 120.6 UdeM00000006460 XP\_045216735.1 30 247  
 152 4 29 258 45 287 3.10E-24 120.6 6596 cellular  
 organisms;Eukaryota;Opisthokonta;Metazoa;Eumetazoa;Bilateria;Protostomia;  
 Spiralia;Lophotrochozoa;Mollusca;Bivalvia;Autobranchia;Heteroconchia;Euhe  
 terodonta;Imparidentia;Venerida;Veneroidea;Veneridae;Mercenaria;Mercenari  
 a mercenaria  
 UdeM00000006461 29159 680.2 UdeM00000006461 XP\_034325124.1 55.7 628  
 232 9 7 610 5 610 2.30E-192 680.2 29159 cellular  
 organisms;Eukaryota;Opisthokonta;Metazoa;Eumetazoa;Bilateria;Protostomia;  
 Spiralia;Lophotrochozoa;Mollusca;Bivalvia;Autobranchia;Pteriomorphia;Ostr  
 eida;Ostreoidea;Ostreidae;Crassostrea;Crassostrea gigas  
 UdeM00000006462 29159 192.6 UdeM00000006462 XP\_034311349.1 48.7 234  
 93 6 1 212 1 229 5.30E-46 192.6 29159 cellular  
 organisms;Eukaryota;Opisthokonta;Metazoa;Eumetazoa;Bilateria;Protostomia;  
 Spiralia;Lophotrochozoa;Mollusca;Bivalvia;Autobranchia;Pteriomorphia;Ostr  
 eida;Ostreoidea;Ostreidae;Crassostrea;Crassostrea gigas  
 UdeM00000006463 29159 507.7 UdeM00000006463 XP\_034313077.1 71.5 323  
 92 0 1 323 1 323 1.10E-140 507.7 29159 cellular  
 organisms;Eukaryota;Opisthokonta;Metazoa;Eumetazoa;Bilateria;Protostomia;

Spiralia;Lophotrochozoa;Mollusca;Bivalvia;Autobranchia;Pteriormorphia;Ostr  
eida;Ostreoidea;Ostreidae;Crassostrea;Crassostrea gigas  
UdeM00000006464 6596 677.9 UdeM00000006464 XP\_045216859.1 54.2 605  
259 3 1 587 1 605 1.40E-191 677.9 6596 cellular  
organisms;Eukaryota;Opisthokonta;Metazoa;Eumetazoa;Bilateria;Protostomia;  
Spiralia;Lophotrochozoa;Mollusca;Bivalvia;Autobranchia;Heteroconchia;Euhe  
terodonta;Imparidentia;Venerida;Veneroidea;Veneridae;Mercenaria;Mercenari  
a mercenaria  
UdeM00000006465 29159 133.7 UdeM00000006465 XP\_034319278.1 54.8 115  
48 2 2 115 37 148 1.90E-28 133.7 29159 cellular  
organisms;Eukaryota;Opisthokonta;Metazoa;Eumetazoa;Bilateria;Protostomia;  
Spiralia;Lophotrochozoa;Mollusca;Bivalvia;Autobranchia;Pteriormorphia;Ostr  
eida;Ostreoidea;Ostreidae;Crassostrea;Crassostrea gigas  
UdeM00000006466 6596 775.4 UdeM00000006466 XP\_045216859.1 57.9 648  
250 4 1 625 1 648 5.50E-221 775.4 6596 cellular  
organisms;Eukaryota;Opisthokonta;Metazoa;Eumetazoa;Bilateria;Protostomia;  
Spiralia;Lophotrochozoa;Mollusca;Bivalvia;Autobranchia;Heteroconchia;Euhe  
terodonta;Imparidentia;Venerida;Veneroidea;Veneridae;Mercenaria;Mercenari  
a mercenaria  
UdeM00000006467 6573 424.1 UdeM00000006467 XP\_021377202.1 69.6 480  
139 3 11 484 12 490 2.40E-115 424.1 6573 cellular  
organisms;Eukaryota;Opisthokonta;Metazoa;Eumetazoa;Bilateria;Protostomia;  
Spiralia;Lophotrochozoa;Mollusca;Bivalvia;Autobranchia;Pteriormorphia;Pect  
inida;Pectinoidea;Pectinidae;Mizuhopecten;Mizuhopecten yessoensis  
UdeM00000006468 6573 501.9 UdeM00000006468 XP\_021377197.1 62.8 379  
140 1 1 379 3 380 7.10E-139 501.9 6573 cellular  
organisms;Eukaryota;Opisthokonta;Metazoa;Eumetazoa;Bilateria;Protostomia;  
Spiralia;Lophotrochozoa;Mollusca;Bivalvia;Autobranchia;Pteriormorphia;Pect  
inida;Pectinoidea;Pectinidae;Mizuhopecten;Mizuhopecten yessoensis  
UdeM00000006469 6596 438 UdeM00000006469 XP\_045156653.1 85.8 260  
37 0 1 260 1 260 8.70E-120 438 6596 cellular  
organisms;Eukaryota;Opisthokonta;Metazoa;Eumetazoa;Bilateria;Protostomia;  
Spiralia;Lophotrochozoa;Mollusca;Bivalvia;Autobranchia;Heteroconchia;Euhe  
terodonta;Imparidentia;Venerida;Veneroidea;Veneridae;Mercenaria;Mercenari  
a mercenaria  
UdeM00000006470 6596 310.1 UdeM00000006470 XP\_045216176.1 60.5 238  
93 1 35 271 34 271 3.20E-81 310.1 6596 cellular  
organisms;Eukaryota;Opisthokonta;Metazoa;Eumetazoa;Bilateria;Protostomia;  
Spiralia;Lophotrochozoa;Mollusca;Bivalvia;Autobranchia;Heteroconchia;Euhe  
terodonta;Imparidentia;Venerida;Veneroidea;Veneridae;Mercenaria;Mercenari  
a mercenaria  
UdeM00000006471 6596 152.1 UdeM00000006471 XP\_045206316.1 45.3 181  
98 1 28 207 66 246 7.60E-34 152.1 6596 cellular  
organisms;Eukaryota;Opisthokonta;Metazoa;Eumetazoa;Bilateria;Protostomia;  
Spiralia;Lophotrochozoa;Mollusca;Bivalvia;Autobranchia;Heteroconchia;Euhe  
terodonta;Imparidentia;Venerida;Veneroidea;Veneridae;Mercenaria;Mercenari  
a mercenaria  
UdeM00000006472 6596 87.8 UdeM00000006472 XP\_045201969.1 54.9 91  
33 2 1 83 19 109 1.50E-14 87.8 6596 cellular  
organisms;Eukaryota;Opisthokonta;Metazoa;Eumetazoa;Bilateria;Protostomia;  
Spiralia;Lophotrochozoa;Mollusca;Bivalvia;Autobranchia;Heteroconchia;Euhe  
terodonta;Imparidentia;Venerida;Veneroidea;Veneridae;Mercenaria;Mercenari  
a mercenaria

UdeM00000006473 6596 508.8 UdeM00000006473 XP\_045215778.1 44.5 739  
 298 17 10 706 9 677 1.10E-140 508.8 6596 cellular  
 organisms;Eukaryota;Opisthokonta;Metazoa;Eumetazoa;Bilateria;Protostomia;  
 Spiralia;Lophotrochozoa;Mollusca;Bivalvia;Autobranchia;Heteroconchia;Euhe  
 terodonta;Imparidentia;Venerida;Veneroidea;Veneridae;Mercenaria;Mercenari  
 a mercenaria  
 UdeM00000006474 6596 169.5 UdeM00000006474 XP\_045216239.1 32.2 314  
 197 4 34 333 66 377 7.90E-39 169.5 6596 cellular  
 organisms;Eukaryota;Opisthokonta;Metazoa;Eumetazoa;Bilateria;Protostomia;  
 Spiralia;Lophotrochozoa;Mollusca;Bivalvia;Autobranchia;Heteroconchia;Euhe  
 terodonta;Imparidentia;Venerida;Veneroidea;Veneridae;Mercenaria;Mercenari  
 a mercenaria  
 UdeM00000006475 9238 103.6 UdeM00000006475 XP\_009329258.1 34.5 145  
 82 2 1 135 195 336 2.10E-19 103.6 9238 cellular  
 organisms;Eukaryota;Opisthokonta;Metazoa;Eumetazoa;Bilateria;Deuterostomi  
 a;Chordata;Craniata;Vertebrata;Gnathostomata;Teleostomi;Euteleostomi;Sarc  
 opterygii;Dipnotetrapodomorpha;Tetrapoda;Amniota;Sauropsida;Sauria;Archel  
 osauria;Archosauria;Dinosauria;Saurischia;Theropoda;Coelurosauria;Aves;Ne  
 ognathae;Sphenisciformes;Spheniscidae;Pygoscelis;Pygoscelis adeliae  
 UdeM00000006476 6596 167.2 UdeM00000006476 XP\_045156366.1 34.7 274  
 80 2 4 178 5 278 2.00E-38 167.2 6596 cellular  
 organisms;Eukaryota;Opisthokonta;Metazoa;Eumetazoa;Bilateria;Protostomia;  
 Spiralia;Lophotrochozoa;Mollusca;Bivalvia;Autobranchia;Heteroconchia;Euhe  
 terodonta;Imparidentia;Venerida;Veneroidea;Veneridae;Mercenaria;Mercenari  
 a mercenaria  
 UdeM00000006477 6596 369.4 UdeM00000006477 XP\_045156366.1 47.1 399  
 178 4 13 379 228 625 5.50E-99 369.4 6596 cellular  
 organisms;Eukaryota;Opisthokonta;Metazoa;Eumetazoa;Bilateria;Protostomia;  
 Spiralia;Lophotrochozoa;Mollusca;Bivalvia;Autobranchia;Heteroconchia;Euhe  
 terodonta;Imparidentia;Venerida;Veneroidea;Veneridae;Mercenaria;Mercenari  
 a mercenaria  
 UdeM00000006478 6573 175.6 UdeM00000006478 XP\_021368649.1 61.3 137  
 51 2 21 156 489 624 4.80E-41 175.6 6573 cellular  
 organisms;Eukaryota;Opisthokonta;Metazoa;Eumetazoa;Bilateria;Protostomia;  
 Spiralia;Lophotrochozoa;Mollusca;Bivalvia;Autobranchia;Pteriomorphia;Pect  
 inida;Pectinoidea;Pectinidae;Mizuhopecten;Mizuhopecten yessoensis  
 UdeM00000006479 6596 373.6 UdeM00000006479 XP\_045201099.1 64.4 264  
 93 1 25 287 1 264 2.20E-100 373.6 6596 cellular  
 organisms;Eukaryota;Opisthokonta;Metazoa;Eumetazoa;Bilateria;Protostomia;  
 Spiralia;Lophotrochozoa;Mollusca;Bivalvia;Autobranchia;Heteroconchia;Euhe  
 terodonta;Imparidentia;Venerida;Veneroidea;Veneridae;Mercenaria;Mercenari  
 a mercenaria  
 UdeM00000006480 29159 177.6 UdeM00000006480 XP\_011443561.2 58.2 134  
 55 1 32 164 48 181 1.30E-41 177.6 29159 cellular  
 organisms;Eukaryota;Opisthokonta;Metazoa;Eumetazoa;Bilateria;Protostomia;  
 Spiralia;Lophotrochozoa;Mollusca;Bivalvia;Autobranchia;Pteriomorphia;Ostr  
 eida;Ostreoidea;Ostreidae;Crassostrea;Crassostrea gigas  
 UdeM00000006481 6596 184.5 UdeM00000006481 XP\_045202545.1 49 202  
 77 5 10 186 10 210 1.20E-43 184.5 6596 cellular  
 organisms;Eukaryota;Opisthokonta;Metazoa;Eumetazoa;Bilateria;Protostomia;  
 Spiralia;Lophotrochozoa;Mollusca;Bivalvia;Autobranchia;Heteroconchia;Euhe  
 terodonta;Imparidentia;Venerida;Veneroidea;Veneridae;Mercenaria;Mercenari  
 a mercenaria

UdeM00000006482 6596 583.6 UdeM00000006482 XP\_045156366.1 53.7 486  
 223 1 5 490 6 489 2.40E-163 583.6 6596 cellular  
 organisms;Eukaryota;Opisthokonta;Metazoa;Eumetazoa;Bilateria;Protostomia;  
 Spiralia;Lophotrochozoa;Mollusca;Bivalvia;Autobranchia;Heteroconchia;Euhe  
 terodonta;Imparidentia;Venerida;Veneroidea;Veneridae;Mercenaria;Mercenari  
 a mercenaria  
 UdeM00000006483 6596 288.9 UdeM00000006483 XP\_045178703.1 58 243  
 99 1 45 287 29 268 7.20E-75 288.9 6596 cellular  
 organisms;Eukaryota;Opisthokonta;Metazoa;Eumetazoa;Bilateria;Protostomia;  
 Spiralia;Lophotrochozoa;Mollusca;Bivalvia;Autobranchia;Heteroconchia;Euhe  
 terodonta;Imparidentia;Venerida;Veneroidea;Veneridae;Mercenaria;Mercenari  
 a mercenaria  
 UdeM00000006484 6596 1205.3 UdeM00000006484 XP\_045156391.1 60.9  
 1543 492 23 1 1479 55 1549 0.00E+00 1205.3 6596  
 cellular  
 organisms;Eukaryota;Opisthokonta;Metazoa;Eumetazoa;Bilateria;Protostomia;  
 Spiralia;Lophotrochozoa;Mollusca;Bivalvia;Autobranchia;Heteroconchia;Euhe  
 terodonta;Imparidentia;Venerida;Veneroidea;Veneridae;Mercenaria;Mercenari  
 a mercenaria  
 UdeM00000006485 6412 93.2 UdeM00000006485 XP\_009017993.1 46.7 92  
 48 1 7 98 12 102 2.10E-16 93.2 6412 cellular  
 organisms;Eukaryota;Opisthokonta;Metazoa;Eumetazoa;Bilateria;Protostomia;  
 Spiralia;Lophotrochozoa;Annelida;Clitellata;Hirudinea;Rhynchobdellida;Glo  
 ssiphoniidae;Helobdella;Helobdella robusta  
 UdeM00000006486 6573 530 UdeM00000006486 XP\_021362179.1 70.6 422  
 92 8 1 411 1 401 2.60E-147 530 6573 cellular  
 organisms;Eukaryota;Opisthokonta;Metazoa;Eumetazoa;Bilateria;Protostomia;  
 Spiralia;Lophotrochozoa;Mollusca;Bivalvia;Autobranchia;Pteriomorphia;Pect  
 inida;Pectinoidea;Pectinidae;Mizuhopecten;Mizuhopecten yessoensis  
 UdeM00000006487 1203425 60.1 UdeM00000006487 XP\_034539012.1 36.7  
 109 60 4 101 202 213 319 4.00E-06 60.1 1203425  
 cellular  
 organisms;Eukaryota;Opisthokonta;Metazoa;Eumetazoa;Bilateria;Deuterostomi  
 a;Chordata;Craniata;Vertebrata;Gnathostomata;Teleostomi;Euteleostomi;Acti  
 nopterygii;Actinopteri;Neopterygii;Teleostei;Osteoglossocephalai;Clupeoce  
 phala;Euteleosteomorpha;Neoteleostei;Eurypterygia;Ctenosquamata;Acanthomo  
 rphata;Euacanthomorphacea;Percomorphaceae;Eupercaria;Labriformes;Labridae  
 ;Notolabrus;Notolabrus celidotus  
 UdeM00000006489 6596 1364.4 UdeM00000006489 XP\_045156829.1 63.8  
 1050 364 6 4 1047 1 1040 0.00E+00 1364.4 6596  
 cellular  
 organisms;Eukaryota;Opisthokonta;Metazoa;Eumetazoa;Bilateria;Protostomia;  
 Spiralia;Lophotrochozoa;Mollusca;Bivalvia;Autobranchia;Heteroconchia;Euhe  
 terodonta;Imparidentia;Venerida;Veneroidea;Veneridae;Mercenaria;Mercenari  
 a mercenaria  
 UdeM00000006490 6573 186.4 UdeM00000006490 XP\_021355866.1 40.3 290  
 156 6 20 295 16 302 5.20E-44 186.4 6573 cellular  
 organisms;Eukaryota;Opisthokonta;Metazoa;Eumetazoa;Bilateria;Protostomia;  
 Spiralia;Lophotrochozoa;Mollusca;Bivalvia;Autobranchia;Pteriomorphia;Pect  
 inida;Pectinoidea;Pectinidae;Mizuhopecten;Mizuhopecten yessoensis  
 UdeM00000006491 6596 392.5 UdeM00000006491 XP\_045156843.1 62 295  
 112 0 9 303 287 581 5.00E-106 392.5 6596 cellular  
 organisms;Eukaryota;Opisthokonta;Metazoa;Eumetazoa;Bilateria;Protostomia;  
 Spiralia;Lophotrochozoa;Mollusca;Bivalvia;Autobranchia;Heteroconchia;Euhe



terodonta;Imparidentia;Venerida;Veneroidea;Veneridae;Mercenaria;Mercenaria mercenaria  
 UdeM00000006492 29159 386.3 UdeM00000006492 XP\_011451447.2 71.5 267  
 75 1 1 267 1 266 3.20E-104 386.3 29159 cellular  
 organisms;Eukaryota;Opisthokonta;Metazoa;Eumetazoa;Bilateria;Protostomia;  
 Spiralia;Lophotrochozoa;Mollusca;Bivalvia;Autobranchia;Pteriomorpha;Ostreida;  
 Ostreidae;Crassostrea;Crassostrea gigas  
 UdeM00000006495 6573 311.2 UdeM00000006495 XP\_021369654.1 47.1 378  
 178 7 24 395 31 392 2.40E-81 311.2 6573 cellular  
 organisms;Eukaryota;Opisthokonta;Metazoa;Eumetazoa;Bilateria;Protostomia;  
 Spiralia;Lophotrochozoa;Mollusca;Bivalvia;Autobranchia;Pteriomorpha;Pectinida;  
 Pectinoidea;Pectinidae;Mizuhopecten;Mizuhopecten yessoensis  
 UdeM00000006494 6573 311.2 UdeM00000006494 XP\_021369654.1 47.1 378  
 178 7 24 395 31 392 2.40E-81 311.2 6573 cellular  
 organisms;Eukaryota;Opisthokonta;Metazoa;Eumetazoa;Bilateria;Protostomia;  
 Spiralia;Lophotrochozoa;Mollusca;Bivalvia;Autobranchia;Pteriomorpha;Pectinida;  
 Pectinoidea;Pectinidae;Mizuhopecten;Mizuhopecten yessoensis  
 UdeM00000006497 6573 308.5 UdeM00000006497 XP\_021369654.1 46.8 378  
 179 7 24 395 31 392 1.50E-80 308.5 6573 cellular  
 organisms;Eukaryota;Opisthokonta;Metazoa;Eumetazoa;Bilateria;Protostomia;  
 Spiralia;Lophotrochozoa;Mollusca;Bivalvia;Autobranchia;Pteriomorpha;Pectinida;  
 Pectinoidea;Pectinidae;Mizuhopecten;Mizuhopecten yessoensis  
 UdeM00000006496 6573 308.5 UdeM00000006496 XP\_021369654.1 46.8 378  
 179 7 24 395 31 392 1.50E-80 308.5 6573 cellular  
 organisms;Eukaryota;Opisthokonta;Metazoa;Eumetazoa;Bilateria;Protostomia;  
 Spiralia;Lophotrochozoa;Mollusca;Bivalvia;Autobranchia;Pteriomorpha;Pectinida;  
 Pectinoidea;Pectinidae;Mizuhopecten;Mizuhopecten yessoensis  
 UdeM00000006499 6579 278.9 UdeM00000006499 XP\_033750780.1 28.2 737  
 484 18 1 727 1 702 1.90E-71 278.9 6579 cellular  
 organisms;Eukaryota;Opisthokonta;Metazoa;Eumetazoa;Bilateria;Protostomia;  
 Spiralia;Lophotrochozoa;Mollusca;Bivalvia;Autobranchia;Pteriomorpha;Pectinida;  
 Pectinoidea;Pectinidae;Pecten;Pecten maximus  
 UdeM00000006500 6579 313.5 UdeM00000006500 XP\_033749631.1 43.3 480  
 230 13 26 498 33 477 7.00E-82 313.5 6579 cellular  
 organisms;Eukaryota;Opisthokonta;Metazoa;Eumetazoa;Bilateria;Protostomia;  
 Spiralia;Lophotrochozoa;Mollusca;Bivalvia;Autobranchia;Pteriomorpha;Pectinida;  
 Pectinoidea;Pectinidae;Pecten;Pecten maximus  
 UdeM00000006501 400727 166.4 UdeM00000006501 XP\_025077308.1 51.7  
 145 69 1 6 149 5 149 2.80E-38 166.4 400727  
 cellular  
 organisms;Eukaryota;Opisthokonta;Metazoa;Eumetazoa;Bilateria;Protostomia;  
 Spiralia;Lophotrochozoa;Mollusca;Gastropoda;Caenogastropoda;Architaenioglossa;  
 Ampullarioidea;Ampullariidae;Pomacea;Pomacea canaliculata  
 UdeM00000006502 6596 485.7 UdeM00000006502 XP\_045216271.1 70 323  
 95 1 1 321 34 356 4.50E-134 485.7 6596 cellular  
 organisms;Eukaryota;Opisthokonta;Metazoa;Eumetazoa;Bilateria;Protostomia;  
 Spiralia;Lophotrochozoa;Mollusca;Bivalvia;Autobranchia;Heteroconchia;Euherodonta;  
 Imparidentia;Venerida;Veneroidea;Veneridae;Mercenaria;Mercenaria mercenaria  
 UdeM00000006503 6596 246.1 UdeM00000006503 XP\_045216269.1 57.1 247  
 99 1 5 244 1 247 4.60E-62 246.1 6596 cellular  
 organisms;Eukaryota;Opisthokonta;Metazoa;Eumetazoa;Bilateria;Protostomia;  
 Spiralia;Lophotrochozoa;Mollusca;Bivalvia;Autobranchia;Heteroconchia;Euherodonta;

terodonta;Imparidentia;Venerida;Veneroidea;Veneridae;Mercenaria;Mercenari  
 a mercenaria  
 UdeM00000006504 6596 597 UdeM00000006504 XP\_045216268.1 58.8 483  
 198 1 10 492 2 483 2.10E-167 597 6596 cellular  
 organisms;Eukaryota;Opisthokonta;Metazoa;Eumetazoa;Bilateria;Protostomia;  
 Spiralia;Lophotrochozoa;Mollusca;Bivalvia;Autobranhia;Heteroconchia;Euhe  
 terodonta;Imparidentia;Venerida;Veneroidea;Veneridae;Mercenaria;Mercenari  
 a mercenaria  
 UdeM00000006505 6596 1588.5 UdeM00000006505 XP\_045156734.1 46.8  
 1727 886 14 5 1727 7 1705 0.00E+00 1588.5 6596  
 cellular  
 organisms;Eukaryota;Opisthokonta;Metazoa;Eumetazoa;Bilateria;Protostomia;  
 Spiralia;Lophotrochozoa;Mollusca;Bivalvia;Autobranhia;Heteroconchia;Euhe  
 terodonta;Imparidentia;Venerida;Veneroidea;Veneridae;Mercenaria;Mercenari  
 a mercenaria  
 UdeM00000006507 29159 216.9 UdeM00000006507 XP\_034312908.1 28.4 649  
 341 20 9 564 6 623 6.80E-53 216.9 29159 cellular  
 organisms;Eukaryota;Opisthokonta;Metazoa;Eumetazoa;Bilateria;Protostomia;  
 Spiralia;Lophotrochozoa;Mollusca;Bivalvia;Autobranhia;Pteriormorphia;Ostr  
 eida;Ostreoidea;Ostreidae;Crassostrea;Crassostrea gigas  
 UdeM00000006508 29159 72.4 UdeM00000006508 XP\_034307878.1 32.3 99  
 67 0 1 99 92 190 1.10E-09 72.4 29159 cellular  
 organisms;Eukaryota;Opisthokonta;Metazoa;Eumetazoa;Bilateria;Protostomia;  
 Spiralia;Lophotrochozoa;Mollusca;Bivalvia;Autobranhia;Pteriormorphia;Ostr  
 eida;Ostreoidea;Ostreidae;Crassostrea;Crassostrea gigas  
 UdeM00000006510 6596 72.8 UdeM00000006510 XP\_045206353.1 33.6 143  
 75 4 1 130 189 324 4.20E-10 72.8 6596 cellular  
 organisms;Eukaryota;Opisthokonta;Metazoa;Eumetazoa;Bilateria;Protostomia;  
 Spiralia;Lophotrochozoa;Mollusca;Bivalvia;Autobranhia;Heteroconchia;Euhe  
 terodonta;Imparidentia;Venerida;Veneroidea;Veneridae;Mercenaria;Mercenari  
 a mercenaria  
 UdeM00000006513 6596 353.2 UdeM00000006513 XP\_045216686.1 49.8 811  
 340 14 1 787 1 768 1.60E-93 353.2 6596 cellular  
 organisms;Eukaryota;Opisthokonta;Metazoa;Eumetazoa;Bilateria;Protostomia;  
 Spiralia;Lophotrochozoa;Mollusca;Bivalvia;Autobranhia;Heteroconchia;Euhe  
 terodonta;Imparidentia;Venerida;Veneroidea;Veneridae;Mercenaria;Mercenari  
 a mercenaria  
 UdeM00000006514 6596 353.2 UdeM00000006514 XP\_045216686.1 49.8 811  
 340 14 1 787 1 768 1.60E-93 353.2 6596 cellular  
 organisms;Eukaryota;Opisthokonta;Metazoa;Eumetazoa;Bilateria;Protostomia;  
 Spiralia;Lophotrochozoa;Mollusca;Bivalvia;Autobranhia;Heteroconchia;Euhe  
 terodonta;Imparidentia;Venerida;Veneroidea;Veneridae;Mercenaria;Mercenari  
 a mercenaria  
 UdeM00000006515 6596 353.2 UdeM00000006515 XP\_045216686.1 49.8 811  
 340 14 1 787 1 768 1.50E-93 353.2 6596 cellular  
 organisms;Eukaryota;Opisthokonta;Metazoa;Eumetazoa;Bilateria;Protostomia;  
 Spiralia;Lophotrochozoa;Mollusca;Bivalvia;Autobranhia;Heteroconchia;Euhe  
 terodonta;Imparidentia;Venerida;Veneroidea;Veneridae;Mercenaria;Mercenari  
 a mercenaria  
 UdeM00000006516 6579 196.8 UdeM00000006516 XP\_033741736.1 52.9 187  
 86 1 1 185 671 857 2.60E-47 196.8 6579 cellular  
 organisms;Eukaryota;Opisthokonta;Metazoa;Eumetazoa;Bilateria;Protostomia;  
 Spiralia;Lophotrochozoa;Mollusca;Bivalvia;Autobranhia;Pteriormorphia;Pect  
 inida;Pectinoidea;Pectinidae;Pecten;Pecten maximus

UdeM00000006517 7574 116.7 UdeM00000006517 XP\_013410728.1 51.1 131  
 58 2 351 476 215 344 8.10E-23 116.7 7574 cellular  
 organisms;Eukaryota;Opisthokonta;Metazoa;Eumetazoa;Bilateria;Protostomia;  
 Spiralia;Lophotrochozoa;Brachiopoda;Linguliformea;Lingulata;Lingulida;Lin  
 guloidea;Lingulidae;Lingula;Lingula anatina  
 UdeM00000006518 7574 116.7 UdeM00000006518 XP\_013410728.1 51.1 131  
 58 2 353 478 215 344 8.10E-23 116.7 7574 cellular  
 organisms;Eukaryota;Opisthokonta;Metazoa;Eumetazoa;Bilateria;Protostomia;  
 Spiralia;Lophotrochozoa;Brachiopoda;Linguliformea;Lingulata;Lingulida;Lin  
 guloidea;Lingulidae;Lingula;Lingula anatina  
 UdeM00000006519 6596 544.7 UdeM00000006519 XP\_045216642.1 50.4 573  
 253 10 254 823 44 588 2.10E-151 544.7 6596 cellular  
 organisms;Eukaryota;Opisthokonta;Metazoa;Eumetazoa;Bilateria;Protostomia;  
 Spiralia;Lophotrochozoa;Mollusca;Bivalvia;Autobranchia;Heteroconchia;Euhe  
 terodonta;Imparidentia;Venerida;Veneroidea;Veneridae;Mercenaria;Mercenari  
 a mercenaria  
 UdeM00000006521 6596 202.6 UdeM00000006521 XP\_045215820.1 43.9 262  
 127 6 6 254 7 261 6.10E-49 202.6 6596 cellular  
 organisms;Eukaryota;Opisthokonta;Metazoa;Eumetazoa;Bilateria;Protostomia;  
 Spiralia;Lophotrochozoa;Mollusca;Bivalvia;Autobranchia;Heteroconchia;Euhe  
 terodonta;Imparidentia;Venerida;Veneroidea;Veneridae;Mercenaria;Mercenari  
 a mercenaria  
 UdeM00000006522 6596 413.3 UdeM00000006522 XP\_045215662.1 53.5 387  
 168 2 1 375 1 387 3.30E-112 413.3 6596 cellular  
 organisms;Eukaryota;Opisthokonta;Metazoa;Eumetazoa;Bilateria;Protostomia;  
 Spiralia;Lophotrochozoa;Mollusca;Bivalvia;Autobranchia;Heteroconchia;Euhe  
 terodonta;Imparidentia;Venerida;Veneroidea;Veneridae;Mercenaria;Mercenari  
 a mercenaria  
 UdeM00000006523 6596 459.1 UdeM00000006523 XP\_045215663.1 36.7 1117  
 497 32 1 1029 432 1426 1.40E-125 459.1 6596 cellular  
 organisms;Eukaryota;Opisthokonta;Metazoa;Eumetazoa;Bilateria;Protostomia;  
 Spiralia;Lophotrochozoa;Mollusca;Bivalvia;Autobranchia;Heteroconchia;Euhe  
 terodonta;Imparidentia;Venerida;Veneroidea;Veneridae;Mercenaria;Mercenari  
 a mercenaria  
 UdeM00000006524 6596 944.5 UdeM00000006524 XP\_045215663.1 45.2 1548  
 605 35 1 1427 1 1426 1.60E-271 944.5 6596 cellular  
 organisms;Eukaryota;Opisthokonta;Metazoa;Eumetazoa;Bilateria;Protostomia;  
 Spiralia;Lophotrochozoa;Mollusca;Bivalvia;Autobranchia;Heteroconchia;Euhe  
 terodonta;Imparidentia;Venerida;Veneroidea;Veneridae;Mercenaria;Mercenari  
 a mercenaria  
 UdeM00000006525 6105 1149 UdeM00000006525 XP\_031555859.1 27.8 3637  
 2179 108 38 3428 3 3438 0.00E+00 1149 6105 cellular  
 organisms;Eukaryota;Opisthokonta;Metazoa;Eumetazoa;Cnidaria;Anthozoa;Hexa  
 corallia;Actiniaria;Actiniidae;Actinia;Actinia tenebrosa  
 UdeM00000006526 6105 1127.1 UdeM00000006526 XP\_031555859.1 27.7  
 3620 2196 114 38 3419 3 3438 0.00E+00 1127.1 6105  
 cellular  
 organisms;Eukaryota;Opisthokonta;Metazoa;Eumetazoa;Cnidaria;Anthozoa;Hexa  
 corallia;Actiniaria;Actiniidae;Actinia;Actinia tenebrosa  
 UdeM00000006527 6596 445.3 UdeM00000006527 XP\_045215472.1 54.3 403  
 182 2 1 402 1 402 8.50E-122 445.3 6596 cellular  
 organisms;Eukaryota;Opisthokonta;Metazoa;Eumetazoa;Bilateria;Protostomia;  
 Spiralia;Lophotrochozoa;Mollusca;Bivalvia;Autobranchia;Heteroconchia;Euhe

terodonta;Imparidentia;Venerida;Veneroidea;Veneridae;Mercenaria;Mercenari  
 a mercenaria  
 UdeM00000006528 9689 79.7 UdeM00000006528 XP\_042780561.1 23.6 275  
 181 10 28 290 2971 3228 9.70E-12 79.7 9689 cellular  
 organisms;Eukaryota;Opisthokonta;Metazoa;Eumetazoa;Bilateria;Deuterostomi  
 a;Chordata;Craniata;Vertebrata;Gnathostomata;Teleostomi;Euteleostomi;Sarc  
 opterygii;Dipnotetrapodomorpha;Tetrapoda;Amniota;Mammalia;Theria;Eutheria  
 ;Boreoeutheria;Laurasiatheria;Carnivora;Feliformia;Felidae;Pantherinae;Pa  
 nthera;Panthera leo  
 UdeM00000006529 29159 1558.9 UdeM00000006529 XP\_034321209.1 66.5  
 1361 406 10 9 1337 66 1408 0.00E+00 1558.9  
 29159 cellular  
 organisms;Eukaryota;Opisthokonta;Metazoa;Eumetazoa;Bilateria;Protostomia;  
 Spiralia;Lophotrochozoa;Mollusca;Bivalvia;Autobranchia;Pteriormorphia;Ostr  
 eida;Ostreoidea;Ostreidae;Crassostrea;Crassostrea gigas  
 UdeM00000006530 6573 785 UdeM00000006530 XP\_021345689.1 78.9 513  
 105 3 503 1012 1405 1917 1.10E-223 785 6573 cellular  
 organisms;Eukaryota;Opisthokonta;Metazoa;Eumetazoa;Bilateria;Protostomia;  
 Spiralia;Lophotrochozoa;Mollusca;Bivalvia;Autobranchia;Pteriormorphia;Pect  
 inida;Pectinoidea;Pectinidae;Mizuhopecten;Mizuhopecten yessoensis  
 UdeM00000006531 6596 157.5 UdeM00000006531 XP\_045182138.1 30.8 344  
 231 3 114 453 58 398 4.00E-35 157.5 6596 cellular  
 organisms;Eukaryota;Opisthokonta;Metazoa;Eumetazoa;Bilateria;Protostomia;  
 Spiralia;Lophotrochozoa;Mollusca;Bivalvia;Autobranchia;Heteroconchia;Euhe  
 terodonta;Imparidentia;Venerida;Veneroidea;Veneridae;Mercenaria;Mercenari  
 a mercenaria  
 UdeM00000006532 6596 260 UdeM00000006532 XP\_045208212.1 34 479  
 274 13 73 516 96 567 6.40E-66 260 6596 cellular  
 organisms;Eukaryota;Opisthokonta;Metazoa;Eumetazoa;Bilateria;Protostomia;  
 Spiralia;Lophotrochozoa;Mollusca;Bivalvia;Autobranchia;Heteroconchia;Euhe  
 terodonta;Imparidentia;Venerida;Veneroidea;Veneridae;Mercenaria;Mercenari  
 a mercenaria  
 UdeM00000006533 6596 253.1 UdeM00000006533 XP\_045208212.1 33 466  
 272 10 168 600 95 553 9.50E-64 253.1 6596 cellular  
 organisms;Eukaryota;Opisthokonta;Metazoa;Eumetazoa;Bilateria;Protostomia;  
 Spiralia;Lophotrochozoa;Mollusca;Bivalvia;Autobranchia;Heteroconchia;Euhe  
 terodonta;Imparidentia;Venerida;Veneroidea;Veneridae;Mercenaria;Mercenari  
 a mercenaria  
 UdeM00000006534 6596 258.5 UdeM00000006534 XP\_045208212.1 33 460  
 278 9 28 459 96 553 1.70E-65 258.5 6596 cellular  
 organisms;Eukaryota;Opisthokonta;Metazoa;Eumetazoa;Bilateria;Protostomia;  
 Spiralia;Lophotrochozoa;Mollusca;Bivalvia;Autobranchia;Heteroconchia;Euhe  
 terodonta;Imparidentia;Venerida;Veneroidea;Veneridae;Mercenaria;Mercenari  
 a mercenaria  
 UdeM00000006535 6596 248.4 UdeM00000006535 XP\_045208212.1 33.6 461  
 272 13 39 468 96 553 1.80E-62 248.4 6596 cellular  
 organisms;Eukaryota;Opisthokonta;Metazoa;Eumetazoa;Bilateria;Protostomia;  
 Spiralia;Lophotrochozoa;Mollusca;Bivalvia;Autobranchia;Heteroconchia;Euhe  
 terodonta;Imparidentia;Venerida;Veneroidea;Veneridae;Mercenaria;Mercenari  
 a mercenaria  
 UdeM00000006536 6596 111.7 UdeM00000006536 XP\_045209755.1 38.3 175  
 98 4 3 169 367 539 9.30E-22 111.7 6596 cellular  
 organisms;Eukaryota;Opisthokonta;Metazoa;Eumetazoa;Bilateria;Protostomia;  
 Spiralia;Lophotrochozoa;Mollusca;Bivalvia;Autobranchia;Heteroconchia;Euhe

terodonta;Imparidentia;Venerida;Veneroidea;Veneridae;Mercenaria;Mercenari  
 a mercenaria  
 UdeM00000006537 6596 74.3 UdeM00000006537 XP\_045208212.1 43.2 88  
 46 3 25 111 97 181 1.10E-10 74.3 6596 cellular  
 organisms;Eukaryota;Opisthokonta;Metazoa;Eumetazoa;Bilateria;Protostomia;  
 Spiralia;Lophotrochozoa;Mollusca;Bivalvia;Autobranhia;Heteroconchia;Euhe  
 terodonta;Imparidentia;Venerida;Veneroidea;Veneridae;Mercenaria;Mercenari  
 a mercenaria  
 UdeM00000006538 6596 229.2 UdeM00000006538 XP\_045208212.1 30.2 474  
 299 12 33 477 96 566 1.10E-56 229.2 6596 cellular  
 organisms;Eukaryota;Opisthokonta;Metazoa;Eumetazoa;Bilateria;Protostomia;  
 Spiralia;Lophotrochozoa;Mollusca;Bivalvia;Autobranhia;Heteroconchia;Euhe  
 terodonta;Imparidentia;Venerida;Veneroidea;Veneridae;Mercenaria;Mercenari  
 a mercenaria  
 UdeM00000006539 6596 260 UdeM00000006539 XP\_045208212.1 33.9 475  
 278 11 23 465 96 566 5.80E-66 260 6596 cellular  
 organisms;Eukaryota;Opisthokonta;Metazoa;Eumetazoa;Bilateria;Protostomia;  
 Spiralia;Lophotrochozoa;Mollusca;Bivalvia;Autobranhia;Heteroconchia;Euhe  
 terodonta;Imparidentia;Venerida;Veneroidea;Veneridae;Mercenaria;Mercenari  
 a mercenaria  
 UdeM00000006540 6573 361.7 UdeM00000006540 XP\_021371247.1 35 566  
 357 8 12 572 80 639 1.70E-96 361.7 6573 cellular  
 organisms;Eukaryota;Opisthokonta;Metazoa;Eumetazoa;Bilateria;Protostomia;  
 Spiralia;Lophotrochozoa;Mollusca;Bivalvia;Autobranhia;Pteriormorphia;Pect  
 inida;Pectinoidea;Pectinidae;Mizuhopecten;Mizuhopecten yessoensis  
 UdeM00000006541 6596 259.2 UdeM00000006541 XP\_045208212.1 32.9 474  
 280 12 7 444 95 566 9.40E-66 259.2 6596 cellular  
 organisms;Eukaryota;Opisthokonta;Metazoa;Eumetazoa;Bilateria;Protostomia;  
 Spiralia;Lophotrochozoa;Mollusca;Bivalvia;Autobranhia;Heteroconchia;Euhe  
 terodonta;Imparidentia;Venerida;Veneroidea;Veneridae;Mercenaria;Mercenari  
 a mercenaria  
 UdeM00000006542 29159 121.7 UdeM00000006542 XP\_034313014.1 41.6 161  
 80 4 1 152 347 502 9.10E-25 121.7 29159 cellular  
 organisms;Eukaryota;Opisthokonta;Metazoa;Eumetazoa;Bilateria;Protostomia;  
 Spiralia;Lophotrochozoa;Mollusca;Bivalvia;Autobranhia;Pteriormorphia;Ostr  
 eida;Ostreoidea;Ostreidae;Crassostrea;Crassostrea gigas  
 UdeM00000006543 6596 112.8 UdeM00000006543 XP\_045182957.1 34.3 169  
 109 2 10 176 39 207 4.30E-22 112.8 6596 cellular  
 organisms;Eukaryota;Opisthokonta;Metazoa;Eumetazoa;Bilateria;Protostomia;  
 Spiralia;Lophotrochozoa;Mollusca;Bivalvia;Autobranhia;Heteroconchia;Euhe  
 terodonta;Imparidentia;Venerida;Veneroidea;Veneridae;Mercenaria;Mercenari  
 a mercenaria  
 UdeM00000006544 114398 425.2 UdeM00000006544 XP\_042903861.1 38.6  
 609 363 6 1 605 1 602 1.30E-115 425.2 114398  
 cellular  
 organisms;Eukaryota;Opisthokonta;Metazoa;Eumetazoa;Bilateria;Protostomia;  
 Ecdysozoa;Panarthropoda;Arthropoda;Chelicerata;Arachnida;Araneae;Araneomo  
 rphae;Entelegynae;Orbiculariae;Araneoidea;Theridiidae;Parasteatoda;Parast  
 eatoda tepidariorum  
 UdeM00000006545 6596 261.9 UdeM00000006545 XP\_045208212.1 32.9 474  
 280 12 7 444 95 566 1.50E-66 261.9 6596 cellular  
 organisms;Eukaryota;Opisthokonta;Metazoa;Eumetazoa;Bilateria;Protostomia;  
 Spiralia;Lophotrochozoa;Mollusca;Bivalvia;Autobranhia;Heteroconchia;Euhe

terodonta;Imparidentia;Venerida;Veneroidea;Veneridae;Mercenaria;Mercenari  
 a mercenaria  
 UdeM00000037751 6596 122.1 UdeM00000037751 XP\_045207896.1 43.1 130  
 72 2 18 145 19 148 6.50E-25 122.1 6596 cellular  
 organisms;Eukaryota;Opisthokonta;Metazoa;Eumetazoa;Bilateria;Protostomia;  
 Spiralia;Lophotrochozoa;Mollusca;Bivalvia;Autobranchia;Heteroconchia;Euhe  
 terodonta;Imparidentia;Venerida;Veneroidea;Veneridae;Mercenaria;Mercenari  
 a mercenaria  
 UdeM00000037752 6596 131 UdeM00000037752 XP\_045190986.1 43.2 155  
 72 7 4 147 18 167 1.30E-27 131 6596 cellular  
 organisms;Eukaryota;Opisthokonta;Metazoa;Eumetazoa;Bilateria;Protostomia;  
 Spiralia;Lophotrochozoa;Mollusca;Bivalvia;Autobranchia;Heteroconchia;Euhe  
 terodonta;Imparidentia;Venerida;Veneroidea;Veneridae;Mercenaria;Mercenari  
 a mercenaria  
 UdeM00000037753 6596 372.1 UdeM00000037753 XP\_045189424.1 71.5 260  
 72 2 1 258 1 260 5.80E-100 372.1 6596 cellular  
 organisms;Eukaryota;Opisthokonta;Metazoa;Eumetazoa;Bilateria;Protostomia;  
 Spiralia;Lophotrochozoa;Mollusca;Bivalvia;Autobranchia;Heteroconchia;Euhe  
 terodonta;Imparidentia;Venerida;Veneroidea;Veneridae;Mercenaria;Mercenari  
 a mercenaria  
 UdeM00000037754 6596 381.3 UdeM00000037754 XP\_045189035.1 43.7 659  
 311 20 144 781 292 911 2.90E-102 381.3 6596 cellular  
 organisms;Eukaryota;Opisthokonta;Metazoa;Eumetazoa;Bilateria;Protostomia;  
 Spiralia;Lophotrochozoa;Mollusca;Bivalvia;Autobranchia;Heteroconchia;Euhe  
 terodonta;Imparidentia;Venerida;Veneroidea;Veneridae;Mercenaria;Mercenari  
 a mercenaria  
 UdeM00000037755 7574 100.9 UdeM00000037755 XP\_013413350.1 70.9 258  
 59 1 1 258 1 242 2.90E-18 100.9 7574 cellular  
 organisms;Eukaryota;Opisthokonta;Metazoa;Eumetazoa;Bilateria;Protostomia;  
 Spiralia;Lophotrochozoa;Brachiopoda;Linguliformea;Lingulata;Lingulida;Lin  
 guloidea;Lingulidae;Lingula;Lingula anatina  
 UdeM00000037756 2607531 306.2 UdeM00000037756 XP\_029657462.1 56.2  
 276 121 0 92 367 7 282 5.50E-80 306.2 2607531  
 cellular  
 organisms;Eukaryota;Opisthokonta;Metazoa;Eumetazoa;Bilateria;Protostomia;  
 Spiralia;Lophotrochozoa;Mollusca;Cephalopoda;Coleoidea;Octopodiformes;Oct  
 opoda;Incirrata;Octopodidae;Octopus;Octopus sinensis  
 UdeM00000037757 6596 69.7 UdeM00000037757 XP\_045199277.1 37.3 102  
 60 1 7 104 32 133 2.50E-09 69.7 6596 cellular  
 organisms;Eukaryota;Opisthokonta;Metazoa;Eumetazoa;Bilateria;Protostomia;  
 Spiralia;Lophotrochozoa;Mollusca;Bivalvia;Autobranchia;Heteroconchia;Euhe  
 terodonta;Imparidentia;Venerida;Veneroidea;Veneridae;Mercenaria;Mercenari  
 a mercenaria  
 UdeM00000037758 6596 69.7 UdeM00000037758 XP\_045199277.1 37.3 102  
 60 1 7 104 32 133 2.50E-09 69.7 6596 cellular  
 organisms;Eukaryota;Opisthokonta;Metazoa;Eumetazoa;Bilateria;Protostomia;  
 Spiralia;Lophotrochozoa;Mollusca;Bivalvia;Autobranchia;Heteroconchia;Euhe  
 terodonta;Imparidentia;Venerida;Veneroidea;Veneridae;Mercenaria;Mercenari  
 a mercenaria  
 UdeM00000041844 6596 191.8 UdeM00000041844 XP\_045177776.1 36.6 317  
 179 8 1 312 405 704 1.40E-45 191.8 6596 cellular  
 organisms;Eukaryota;Opisthokonta;Metazoa;Eumetazoa;Bilateria;Protostomia;  
 Spiralia;Lophotrochozoa;Mollusca;Bivalvia;Autobranchia;Heteroconchia;Euhe

terodonta;Imparidentia;Venerida;Veneroidea;Veneridae;Mercenaria;Mercenaria mercenaria  
 UdeM00000041845 6596 191.8 UdeM00000041845 XP\_045177776.1 36.6 317  
 179 8 1 312 405 704 2.50E-45 191.8 6596 cellular  
 organisms;Eukaryota;Opisthokonta;Metazoa;Eumetazoa;Bilateria;Protostomia;  
 Spiralia;Lophotrochozoa;Mollusca;Bivalvia;Autobranhia;Heteroconchia;Euhe  
 terodonta;Imparidentia;Venerida;Veneroidea;Veneridae;Mercenaria;Mercenari  
 a mercenaria  
 UdeM00000041846 6596 109.8 UdeM00000041846 XP\_045188183.1 40.9 159  
 87 5 2 158 85 238 4.80E-21 109.8 6596 cellular  
 organisms;Eukaryota;Opisthokonta;Metazoa;Eumetazoa;Bilateria;Protostomia;  
 Spiralia;Lophotrochozoa;Mollusca;Bivalvia;Autobranhia;Heteroconchia;Euhe  
 terodonta;Imparidentia;Venerida;Veneroidea;Veneridae;Mercenaria;Mercenari  
 a mercenaria  
 UdeM00000041847 45351 89.7 UdeM00000041847 XP\_032236999.1 35.1 151  
 82 2 9 144 11 160 4.30E-15 89.7 45351 cellular  
 organisms;Eukaryota;Opisthokonta;Metazoa;Eumetazoa;Cnidaria;Anthozoa;Hexa  
 corallia;Actiniaria;Edwardsiidae;Nematostella;Nematostella vectensis  
 UdeM00000041848 37653 82.8 UdeM00000041848 XP\_014767494.1 81.2 48  
 9 0 4 51 1001 1048 1.90E-13 82.8 37653 cellular  
 organisms;Eukaryota;Opisthokonta;Metazoa;Eumetazoa;Bilateria;Protostomia;  
 Spiralia;Lophotrochozoa;Mollusca;Cephalopoda;Coleoidea;Octopodiformes;Oct  
 opoda;Incirrata;Octopodidae;Octopus;Octopus bimaculoides  
 UdeM00000041850 6565 121.3 UdeM00000041850 XP\_022299602.1 40 175  
 100 4 265 438 2 172 6.00E-24 121.3 6565 cellular  
 organisms;Eukaryota;Opisthokonta;Metazoa;Eumetazoa;Bilateria;Protostomia;  
 Spiralia;Lophotrochozoa;Mollusca;Bivalvia;Autobranhia;Pteriormorphia;Ostr  
 eida;Ostreoidea;Ostreidae;Crassostrea;Crassostrea virginica  
 UdeM00000043790 6945 87 UdeM00000043790 XP\_040065097.1 31.2 170  
 91 4 59 202 85 254 4.50E-14 87 6945 cellular  
 organisms;Eukaryota;Opisthokonta;Metazoa;Eumetazoa;Bilateria;Protostomia;  
 Ecdysozoa;Panarthropoda;Arthropoda;Chelicerata;Arachnida;Acari;Parasitifo  
 rmes;Ixodida;Ixodoidea;Ixodidae;Ixodinae;Ixodes;Ixodes scapularis  
 UdeM00000043791 6596 374.8 UdeM00000043791 XP\_045215193.1 55.9 347  
 138 4 1 343 1 336 1.20E-100 374.8 6596 cellular  
 organisms;Eukaryota;Opisthokonta;Metazoa;Eumetazoa;Bilateria;Protostomia;  
 Spiralia;Lophotrochozoa;Mollusca;Bivalvia;Autobranhia;Heteroconchia;Euhe  
 terodonta;Imparidentia;Venerida;Veneroidea;Veneridae;Mercenaria;Mercenari  
 a mercenaria  
 UdeM00000043872 1735272 156.4 UdeM00000043872 XP\_041365180.1 38.6  
 202 120 1 50 247 164 365 4.80E-35 156.4 1735272  
 cellular  
 organisms;Eukaryota;Opisthokonta;Metazoa;Eumetazoa;Bilateria;Protostomia;  
 Spiralia;Lophotrochozoa;Mollusca;Gastropoda;Neomphalina;Neomphaloidea;Pel  
 tospiridae;Gigantopelta;Gigantopelta aegis  
 UdeM00000043873 6526 165.6 UdeM00000043873 XP\_013062038.1 42.1 228  
 122 4 46 267 470 693 9.80E-38 165.6 6526 cellular  
 organisms;Eukaryota;Opisthokonta;Metazoa;Eumetazoa;Bilateria;Protostomia;  
 Spiralia;Lophotrochozoa;Mollusca;Gastropoda;Heterobranhia;Euthyneura;Pan  
 pulmonata;Hygrophila;Lymnaeioidea;Planorbidae;Biomphalaria;Biomphalaria  
 glabrata  
 UdeM00000043874 6579 213.8 UdeM00000043874 XP\_033746632.1 75.4 142  
 34 1 9 150 8 148 1.50E-52 213.8 6579 cellular  
 organisms;Eukaryota;Opisthokonta;Metazoa;Eumetazoa;Bilateria;Protostomia;

Spiralia;Lophotrochozoa;Mollusca;Bivalvia;Autobranchia;Pteriormorphia;Pectinida;Pectinoidea;Pectinidae;Pecten;Pecten maximus  
UdeM00000043875 6573 684.1 UdeM00000043875 XP\_021376508.1 72 454  
126 1 1 454 156 608 1.20E-193 684.1 6573 cellular  
organisms;Eukaryota;Opisthokonta;Metazoa;Eumetazoa;Bilateria;Protostomia;  
Spiralia;Lophotrochozoa;Mollusca;Bivalvia;Autobranchia;Pteriormorphia;Pectinida;Pectinoidea;Pectinidae;Mizuhopecten;Mizuhopecten yessoensis  
UdeM00000043877 1735272 68.2 UdeM00000043877 XP\_041379611.1 53.8  
65 29 1 1 65 1 64 5.40E-09 68.2 1735272  
cellular  
organisms;Eukaryota;Opisthokonta;Metazoa;Eumetazoa;Bilateria;Protostomia;  
Spiralia;Lophotrochozoa;Mollusca;Gastropoda;Neomphalina;Neomphaloidea;Pel  
tospiridae;Gigantopelta;Gigantopelta aegis  
UdeM00000043878 6596 1074.3 UdeM00000043878 XP\_045166777.1 74.3  
740 182 3 3 741 10 742 8.4e-311 1074.3 6596  
cellular  
organisms;Eukaryota;Opisthokonta;Metazoa;Eumetazoa;Bilateria;Protostomia;  
Spiralia;Lophotrochozoa;Mollusca;Bivalvia;Autobranchia;Heteroconchia;Euhe  
terodonta;Imparidentia;Venerida;Veneroidea;Veneridae;Mercenaria;Mercenari  
a mercenaria  
UdeM00000043879 6579 594.7 UdeM00000043879 XP\_033746113.1 66.4 423  
140 2 5 425 24 446 9.10E-167 594.7 6579 cellular  
organisms;Eukaryota;Opisthokonta;Metazoa;Eumetazoa;Bilateria;Protostomia;  
Spiralia;Lophotrochozoa;Mollusca;Bivalvia;Autobranchia;Pteriormorphia;Pectinida;Pectinoidea;Pectinidae;Pecten;Pecten maximus  
UdeM00000043880 6596 932.6 UdeM00000043880 XP\_045164938.1 73.4 595  
155 1 1 595 48 639 2.60E-268 932.6 6596 cellular  
organisms;Eukaryota;Opisthokonta;Metazoa;Eumetazoa;Bilateria;Protostomia;  
Spiralia;Lophotrochozoa;Mollusca;Bivalvia;Autobranchia;Heteroconchia;Euhe  
terodonta;Imparidentia;Venerida;Veneroidea;Veneridae;Mercenaria;Mercenari  
a mercenaria  
UdeM00000043881 6565 413.7 UdeM00000043881 XP\_022299316.1 73.1 279  
72 1 1 276 1 279 2.20E-112 413.7 6565 cellular  
organisms;Eukaryota;Opisthokonta;Metazoa;Eumetazoa;Bilateria;Protostomia;  
Spiralia;Lophotrochozoa;Mollusca;Bivalvia;Autobranchia;Pteriormorphia;Ostr  
eida;Ostreoidea;Ostreidae;Crassostrea;Crassostrea virginica  
UdeM00000043882 6596 1318.1 UdeM00000043882 XP\_045167135.1 74.3  
892 209 7 14 894 267 1149 0.00E+00 1318.1 6596  
cellular  
organisms;Eukaryota;Opisthokonta;Metazoa;Eumetazoa;Bilateria;Protostomia;  
Spiralia;Lophotrochozoa;Mollusca;Bivalvia;Autobranchia;Heteroconchia;Euhe  
terodonta;Imparidentia;Venerida;Veneroidea;Veneridae;Mercenaria;Mercenari  
a mercenaria  
UdeM00000043883 37653 279.6 UdeM00000043883 XP\_014768504.1 93.2 146  
10 0 14 159 72 217 2.40E-72 279.6 37653 cellular  
organisms;Eukaryota;Opisthokonta;Metazoa;Eumetazoa;Bilateria;Protostomia;  
Spiralia;Lophotrochozoa;Mollusca;Cephalopoda;Coleoidea;Octopodiformes;Oct  
opoda;Incirrata;Octopodidae;Octopus;Octopus bimaculoides  
UdeM00000043884 37653 370.2 UdeM00000043884 XP\_014768504.1 94.3 192  
11 0 1 192 26 217 1.60E-99 370.2 37653 cellular  
organisms;Eukaryota;Opisthokonta;Metazoa;Eumetazoa;Bilateria;Protostomia;  
Spiralia;Lophotrochozoa;Mollusca;Cephalopoda;Coleoidea;Octopodiformes;Oct  
opoda;Incirrata;Octopodidae;Octopus;Octopus bimaculoides



UdeM00000043885 2652724 263.5 UdeM00000043885 XP\_020904734.1 67.7  
 189 61 0 6 194 4 192 2.20E-67 263.5 2652724  
 cellular  
 organisms;Eukaryota;Opisthokonta;Metazoa;Eumetazoa;Cnidaria;Anthozoa;Hexa  
 corallia;Actiniaria;Aiptasiidae;Exaiptasia;Exaiptasia diaphana  
 UdeM00000043886 6105 248.1 UdeM00000043886 XP\_031571234.1 63.2 185  
 68 0 5 189 4 188 9.50E-63 248.1 6105 cellular  
 organisms;Eukaryota;Opisthokonta;Metazoa;Eumetazoa;Cnidaria;Anthozoa;Hexa  
 corallia;Actiniaria;Actiniidae;Actinia;Actinia tenebrosa  
 UdeM00000043887 7668 267.3 UdeM00000043887 XP\_011678806.1 71 183  
 53 0 5 187 3 185 1.50E-68 267.3 7668 cellular  
 organisms;Eukaryota;Opisthokonta;Metazoa;Eumetazoa;Bilateria;Deuterostomi  
 a;Echinodermata;Eleutherozoa;Echinozoa;Echinoidea;Euechinoidea;Echinacea;  
 Camarodonta;Echinidea;Strongylocentrotidae;Strongylocentrotus;Strongyloce  
 ntrotus purpuratus  
 UdeM00000043888 29159 684.5 UdeM00000043888 XP\_034306028.1 55.9 755  
 292 10 460 1193 39 773 2.40E-193 684.5 29159 cellular  
 organisms;Eukaryota;Opisthokonta;Metazoa;Eumetazoa;Bilateria;Protostomia;  
 Spiralia;Lophotrochozoa;Mollusca;Bivalvia;Autobranchia;Pteriormorphia;Ostr  
 eida;Ostreoidea;Ostreidae;Crassostrea;Crassostrea gigas  
 UdeM00000043889 7396 92.8 UdeM00000043889 XP\_037889425.1 61.1 72  
 24 1 7 78 5 72 2.10E-16 92.8 7396 cellular  
 organisms;Eukaryota;Opisthokonta;Metazoa;Eumetazoa;Bilateria;Protostomia;  
 Ecdysozoa;Panarthropoda;Arthropoda;Mandibulata;Pancrustacea;Hexapoda;Inse  
 cta;Dicondylia;Pterygota;Neoptera;Endopterygota;Diptera;Brachycera;Muscom  
 orpha;Eremoneura;Cyclorrhapha;Schizophora;Calyptratae;Hippoboscoidea;Glos  
 sinidae;Glossina;Nemorhina;Glossina fuscipes  
 UdeM00000043890 29159 646.7 UdeM00000043890 XP\_011431535.1 77.7 399  
 89 0 1 399 1 399 1.90E-182 646.7 29159 cellular  
 organisms;Eukaryota;Opisthokonta;Metazoa;Eumetazoa;Bilateria;Protostomia;  
 Spiralia;Lophotrochozoa;Mollusca;Bivalvia;Autobranchia;Pteriormorphia;Ostr  
 eida;Ostreoidea;Ostreidae;Crassostrea;Crassostrea gigas  
 UdeM00000043891 6596 453.4 UdeM00000043891 XP\_045164110.1 74.1 297  
 76 1 1 297 167 462 2.30E-124 453.4 6596 cellular  
 organisms;Eukaryota;Opisthokonta;Metazoa;Eumetazoa;Bilateria;Protostomia;  
 Spiralia;Lophotrochozoa;Mollusca;Bivalvia;Autobranchia;Heteroconchia;Euhe  
 terodonta;Imparidentia;Venerida;Veneroidea;Veneridae;Mercenaria;Mercenari  
 a mercenaria  
 UdeM00000043892 6596 135.2 UdeM00000043892 XP\_045164111.1 67.5 114  
 32 3 43 156 37 145 7.50E-29 135.2 6596 cellular  
 organisms;Eukaryota;Opisthokonta;Metazoa;Eumetazoa;Bilateria;Protostomia;  
 Spiralia;Lophotrochozoa;Mollusca;Bivalvia;Autobranchia;Heteroconchia;Euhe  
 terodonta;Imparidentia;Venerida;Veneroidea;Veneridae;Mercenaria;Mercenari  
 a mercenaria  
 UdeM00000043893 6596 134.4 UdeM00000043893 XP\_045166707.1 25.1 601  
 332 27 6 577 32 543 9.10E-28 134.4 6596 cellular  
 organisms;Eukaryota;Opisthokonta;Metazoa;Eumetazoa;Bilateria;Protostomia;  
 Spiralia;Lophotrochozoa;Mollusca;Bivalvia;Autobranchia;Heteroconchia;Euhe  
 terodonta;Imparidentia;Venerida;Veneroidea;Veneridae;Mercenaria;Mercenari  
 a mercenaria  
 UdeM00000043894 114398 417.2 UdeM00000043894 XP\_042903861.1 39.7  
 574 335 6 1 570 1 567 3.50E-113 417.2 114398  
 cellular  
 organisms;Eukaryota;Opisthokonta;Metazoa;Eumetazoa;Bilateria;Protostomia;

Ecdysozoa; Panarthropoda; Arthropoda; Chelicerata; Arachnida; Araneae; Araneomorphae; Entelegynae; Orbiculariae; Araneoidea; Theridiidae; Parasteatoda; Parasteatoda tepidariorum

UdeM00000043895 114398 363.6 UdeM00000043895 XP\_042903861.1 38.9  
512 302 6 1 508 1 505 4.10E-97 363.6 114398  
cellular

organisms; Eukaryota; Opisthokonta; Metazoa; Eumetazoa; Bilateria; Protostomia; Ecdysozoa; Panarthropoda; Arthropoda; Chelicerata; Arachnida; Araneae; Araneomorphae; Entelegynae; Orbiculariae; Araneoidea; Theridiidae; Parasteatoda; Parasteatoda tepidariorum

UdeM00000043896 6596 498 UdeM00000043896 XP\_045164766.1 51.5 581  
243 13 2 565 20 578 1.50E-137 498 6596 cellular

organisms; Eukaryota; Opisthokonta; Metazoa; Eumetazoa; Bilateria; Protostomia; Spiralia; Lophotrochozoa; Mollusca; Bivalvia; Autobranchia; Heteroconchia; Euheterodonta; Imparidentia; Venerida; Veneroidea; Veneridae; Mercenaria; Mercenaria mercenaria

UdeM00000043897 6596 195.3 UdeM00000043897 XP\_045164712.1 26.1 618  
387 20 47 614 34 631 2.50E-46 195.3 6596 cellular

organisms; Eukaryota; Opisthokonta; Metazoa; Eumetazoa; Bilateria; Protostomia; Spiralia; Lophotrochozoa; Mollusca; Bivalvia; Autobranchia; Heteroconchia; Euheterodonta; Imparidentia; Venerida; Veneroidea; Veneridae; Mercenaria; Mercenaria mercenaria

UdeM00000043898 6596 94.7 UdeM00000043898 XP\_045163677.1 23.5 324  
226 6 73 375 72 394 2.70E-16 94.7 6596 cellular

organisms; Eukaryota; Opisthokonta; Metazoa; Eumetazoa; Bilateria; Protostomia; Spiralia; Lophotrochozoa; Mollusca; Bivalvia; Autobranchia; Heteroconchia; Euheterodonta; Imparidentia; Venerida; Veneroidea; Veneridae; Mercenaria; Mercenaria mercenaria

UdeM00000043900 6596 216.5 UdeM00000043900 XP\_045166251.1 34.3 356  
217 6 100 441 168 520 7.10E-53 216.5 6596 cellular

organisms; Eukaryota; Opisthokonta; Metazoa; Eumetazoa; Bilateria; Protostomia; Spiralia; Lophotrochozoa; Mollusca; Bivalvia; Autobranchia; Heteroconchia; Euheterodonta; Imparidentia; Venerida; Veneroidea; Veneridae; Mercenaria; Mercenaria mercenaria

UdeM00000043901 6596 196.1 UdeM00000043901 XP\_045166251.1 30.5 364  
220 6 46 395 176 520 8.90E-47 196.1 6596 cellular

organisms; Eukaryota; Opisthokonta; Metazoa; Eumetazoa; Bilateria; Protostomia; Spiralia; Lophotrochozoa; Mollusca; Bivalvia; Autobranchia; Heteroconchia; Euheterodonta; Imparidentia; Venerida; Veneroidea; Veneridae; Mercenaria; Mercenaria mercenaria

UdeM00000043902 6596 123.6 UdeM00000043902 XP\_045178046.1 26.3 315  
204 6 117 405 88 400 5.80E-25 123.6 6596 cellular

organisms; Eukaryota; Opisthokonta; Metazoa; Eumetazoa; Bilateria; Protostomia; Spiralia; Lophotrochozoa; Mollusca; Bivalvia; Autobranchia; Heteroconchia; Euheterodonta; Imparidentia; Venerida; Veneroidea; Veneridae; Mercenaria; Mercenaria mercenaria

UdeM00000043905 6596 530.4 UdeM00000043905 XP\_045164558.1 69.4 392  
107 5 1 391 1 380 1.90E-147 530.4 6596 cellular

organisms; Eukaryota; Opisthokonta; Metazoa; Eumetazoa; Bilateria; Protostomia; Spiralia; Lophotrochozoa; Mollusca; Bivalvia; Autobranchia; Heteroconchia; Euheterodonta; Imparidentia; Venerida; Veneroidea; Veneridae; Mercenaria; Mercenaria mercenaria

UdeM00000043903 6596 531.9 UdeM00000043903 XP\_045164560.1 69.2 396  
108 6 1 394 1 384 6.80E-148 531.9 6596 cellular

organisms;Eukaryota;Opisthokonta;Metazoa;Eumetazoa;Bilateria;Protostomia;Spiralia;Lophotrochozoa;Mollusca;Bivalvia;Autobranhia;Heteroconchia;Euheterodonta;Imparidentia;Venerida;Veneroidea;Veneridae;Mercenaria;Mercenaria mercenaria

UdeM00000043904 6596 530 UdeM00000043904 XP\_045164558.1 69.4 392  
107 5 1 391 1 380 2.60E-147 530 6596 cellular

organisms;Eukaryota;Opisthokonta;Metazoa;Eumetazoa;Bilateria;Protostomia;Spiralia;Lophotrochozoa;Mollusca;Bivalvia;Autobranhia;Heteroconchia;Euheterodonta;Imparidentia;Venerida;Veneroidea;Veneridae;Mercenaria;Mercenaria mercenaria

UdeM00000043906 6596 249.6 UdeM00000043906 XP\_045165974.1 58.1 203  
85 0 9 211 348 550 3.60E-63 249.6 6596 cellular

organisms;Eukaryota;Opisthokonta;Metazoa;Eumetazoa;Bilateria;Protostomia;Spiralia;Lophotrochozoa;Mollusca;Bivalvia;Autobranhia;Heteroconchia;Euheterodonta;Imparidentia;Venerida;Veneroidea;Veneridae;Mercenaria;Mercenaria mercenaria

UdeM00000043907 6579 357.5 UdeM00000043907 XP\_033745000.1 68.4 225  
71 0 93 317 220 444 1.90E-95 357.5 6579 cellular

organisms;Eukaryota;Opisthokonta;Metazoa;Eumetazoa;Bilateria;Protostomia;Spiralia;Lophotrochozoa;Mollusca;Bivalvia;Autobranhia;Pteriormorphia;Pectinida;Pectinoidea;Pectinidae;Pecten;Pecten maximus

UdeM00000043909 225164 71.6 UdeM00000043909 XP\_009064933.1 36.6  
131 67 4 1 117 56 184 1.50E-09 71.6 225164

cellular

organisms;Eukaryota;Opisthokonta;Metazoa;Eumetazoa;Bilateria;Protostomia;Spiralia;Lophotrochozoa;Mollusca;Gastropoda;Patellogastropoda;Lottioidea;Lottiidae;Lottia;Lottia gigantea

UdeM00000043908 225164 136 UdeM00000043908 XP\_009064933.1 41.1  
180 90 4 2 167 7 184 7.60E-29 136 225164

cellular

organisms;Eukaryota;Opisthokonta;Metazoa;Eumetazoa;Bilateria;Protostomia;Spiralia;Lophotrochozoa;Mollusca;Gastropoda;Patellogastropoda;Lottioidea;Lottiidae;Lottia;Lottia gigantea

UdeM00000043910 6573 652.9 UdeM00000043910 XP\_021356972.1 83.4 392  
38 1 1 365 29 420 2.40E-184 652.9 6573 cellular

organisms;Eukaryota;Opisthokonta;Metazoa;Eumetazoa;Bilateria;Protostomia;Spiralia;Lophotrochozoa;Mollusca;Bivalvia;Autobranhia;Pteriormorphia;Pectinida;Pectinoidea;Pectinidae;Mizuhopecten;Mizuhopecten yessoensis

UdeM00000043911 6596 1514.2 UdeM00000043911 XP\_045214991.1 48.8  
1589 746 21 1 1541 1 1570 0.00E+00 1514.2 6596

cellular

organisms;Eukaryota;Opisthokonta;Metazoa;Eumetazoa;Bilateria;Protostomia;Spiralia;Lophotrochozoa;Mollusca;Bivalvia;Autobranhia;Heteroconchia;Euheterodonta;Imparidentia;Venerida;Veneroidea;Veneridae;Mercenaria;Mercenaria mercenaria

UdeM00000043912 6596 1143.3 UdeM00000043912 XP\_045165894.1 81.9  
756 128 3 1 752 1 751 0.00E+00 1143.3 6596

cellular

organisms;Eukaryota;Opisthokonta;Metazoa;Eumetazoa;Bilateria;Protostomia;Spiralia;Lophotrochozoa;Mollusca;Bivalvia;Autobranhia;Heteroconchia;Euheterodonta;Imparidentia;Venerida;Veneroidea;Veneridae;Mercenaria;Mercenaria mercenaria

UdeM00000043913 6596 1060.8 UdeM00000043913 XP\_045166997.1 46  
1206 578 14 1 1185 1 1154 1.20E-306 1060.8 6596

cellular  
organisms;Eukaryota;Opisthokonta;Metazoa;Eumetazoa;Bilateria;Protostomia;  
Spiralia;Lophotrochozoa;Mollusca;Bivalvia;Autobranhia;Heteroconchia;Euhe  
terodonta;Imparidentia;Venerida;Veneroidea;Veneridae;Mercenaria;Mercenari  
a mercenaria  
UdeM00000043914 6579 188.3 UdeM00000043914 XP\_033744880.1 32.5 507  
255 16 17 509 1215 1648 2.30E-44 188.3 6579 cellular  
organisms;Eukaryota;Opisthokonta;Metazoa;Eumetazoa;Bilateria;Protostomia;  
Spiralia;Lophotrochozoa;Mollusca;Bivalvia;Autobranhia;Pteriormorphia;Pect  
inida;Pectinoidea;Pectinidae;Pecten;Pecten maximus  
UdeM00000043915 6579 188.3 UdeM00000043915 XP\_033744880.1 32.5 510  
257 16 24 519 1212 1648 2.40E-44 188.3 6579 cellular  
organisms;Eukaryota;Opisthokonta;Metazoa;Eumetazoa;Bilateria;Protostomia;  
Spiralia;Lophotrochozoa;Mollusca;Bivalvia;Autobranhia;Pteriormorphia;Pect  
inida;Pectinoidea;Pectinidae;Pecten;Pecten maximus  
UdeM00000043916 742174 661.8 UdeM00000043916 XP\_025208820.1 72.3  
441 121 1 1 440 1 441 6.20E-187 661.8 742174  
cellular  
organisms;Eukaryota;Opisthokonta;Metazoa;Eumetazoa;Bilateria;Protostomia;  
Ecdysozoa;Panarthropoda;Arthropoda;Mandibulata;Pancrustacea;Hexapoda;Inse  
cta;Dicondylia;Pterygota;Neoptera;Paraneoptera;Hemiptera;Sternorrhyncha;A  
phidomorpha;Aphidoidea;Aphididae;Aphidinae;Aphidini;Melanaphis;Melanaphis  
sacchari  
UdeM00000043917 1735272 1390.2 UdeM00000043917 XP\_041349539.1  
52.7 1354 483 12 30 1369 28 1237 0.00E+00 1390.2  
1735272 cellular  
organisms;Eukaryota;Opisthokonta;Metazoa;Eumetazoa;Bilateria;Protostomia;  
Spiralia;Lophotrochozoa;Mollusca;Gastropoda;Neomphalina;Neomphaloidea;Pel  
tospiridae;Gigantopelta;Gigantopelta aegis  
UdeM00000043918 6565 199.9 UdeM00000043918 XP\_022334649.1 37.5 339  
186 4 13 344 8 327 5.30E-48 199.9 6565 cellular  
organisms;Eukaryota;Opisthokonta;Metazoa;Eumetazoa;Bilateria;Protostomia;  
Spiralia;Lophotrochozoa;Mollusca;Bivalvia;Autobranhia;Pteriormorphia;Ostr  
eida;Ostreioidea;Ostreidae;Crassostrea;Crassostrea virginica  
UdeM00000043919 6596 293.9 UdeM00000043919 XP\_045165297.1 54.8 263  
111 4 17 276 81 338 4.90E-76 293.9 6596 cellular  
organisms;Eukaryota;Opisthokonta;Metazoa;Eumetazoa;Bilateria;Protostomia;  
Spiralia;Lophotrochozoa;Mollusca;Bivalvia;Autobranhia;Heteroconchia;Euhe  
terodonta;Imparidentia;Venerida;Veneroidea;Veneridae;Mercenaria;Mercenari  
a mercenaria  
UdeM00000043920 6596 1162.5 UdeM00000043920 XP\_045167054.1 52.5  
1258 524 21 25 1255 28 1238 0.00E+00 1162.5 6596  
cellular  
organisms;Eukaryota;Opisthokonta;Metazoa;Eumetazoa;Bilateria;Protostomia;  
Spiralia;Lophotrochozoa;Mollusca;Bivalvia;Autobranhia;Heteroconchia;Euhe  
terodonta;Imparidentia;Venerida;Veneroidea;Veneridae;Mercenaria;Mercenari  
a mercenaria  
UdeM00000043921 6596 553.1 UdeM00000043921 XP\_045164623.1 36 947  
447 18 52 970 11 826 9.20E-154 553.1 6596 cellular  
organisms;Eukaryota;Opisthokonta;Metazoa;Eumetazoa;Bilateria;Protostomia;  
Spiralia;Lophotrochozoa;Mollusca;Bivalvia;Autobranhia;Heteroconchia;Euhe  
terodonta;Imparidentia;Venerida;Veneroidea;Veneridae;Mercenaria;Mercenari  
a mercenaria

UdeM00000043922 2607531 169.9 UdeM00000043922 XP\_029658075.1 41  
 244 125 2 60 285 23 265 5.20E-39 169.9 2607531  
 cellular  
 organisms;Eukaryota;Opisthokonta;Metazoa;Eumetazoa;Bilateria;Protostomia;  
 Spiralia;Lophotrochozoa;Mollusca;Cephalopoda;Coleoidea;Octopodiformes;Oct  
 opoda;Incirrata;Octopodidae;Octopus;Octopus sinensis  
 UdeM00000043923 2607531 138.3 UdeM00000043923 XP\_029658075.1 46.8  
 158 84 0 23 180 81 238 9.80E-30 138.3 2607531  
 cellular  
 organisms;Eukaryota;Opisthokonta;Metazoa;Eumetazoa;Bilateria;Protostomia;  
 Spiralia;Lophotrochozoa;Mollusca;Cephalopoda;Coleoidea;Octopodiformes;Oct  
 opoda;Incirrata;Octopodidae;Octopus;Octopus sinensis  
 UdeM00000043924 6596 767.3 UdeM00000043924 XP\_045165215.1 78 446  
 98 0 1 446 1 446 1.10E-218 767.3 6596 cellular  
 organisms;Eukaryota;Opisthokonta;Metazoa;Eumetazoa;Bilateria;Protostomia;  
 Spiralia;Lophotrochozoa;Mollusca;Bivalvia;Autobranchia;Heteroconchia;Euhe  
 terodonta;Imparidentia;Venerida;Veneroidea;Veneridae;Mercenaria;Mercenari  
 a mercenaria  
 UdeM00000043925 6596 169.1 UdeM00000043925 XP\_045206989.1 48.7 154  
 75 2 5 155 20 172 4.70E-39 169.1 6596 cellular  
 organisms;Eukaryota;Opisthokonta;Metazoa;Eumetazoa;Bilateria;Protostomia;  
 Spiralia;Lophotrochozoa;Mollusca;Bivalvia;Autobranchia;Heteroconchia;Euhe  
 terodonta;Imparidentia;Venerida;Veneroidea;Veneridae;Mercenaria;Mercenari  
 a mercenaria  
 UdeM00000043926 6596 178.3 UdeM00000043926 XP\_045206989.1 50.3 165  
 74 4 1 161 17 177 7.70E-42 178.3 6596 cellular  
 organisms;Eukaryota;Opisthokonta;Metazoa;Eumetazoa;Bilateria;Protostomia;  
 Spiralia;Lophotrochozoa;Mollusca;Bivalvia;Autobranchia;Heteroconchia;Euhe  
 terodonta;Imparidentia;Venerida;Veneroidea;Veneridae;Mercenaria;Mercenari  
 a mercenaria  
 UdeM00000043927 6596 825.5 UdeM00000043927 XP\_045164327.1 68.3 558  
 176 1 20 577 16 572 4.40E-236 825.5 6596 cellular  
 organisms;Eukaryota;Opisthokonta;Metazoa;Eumetazoa;Bilateria;Protostomia;  
 Spiralia;Lophotrochozoa;Mollusca;Bivalvia;Autobranchia;Heteroconchia;Euhe  
 terodonta;Imparidentia;Venerida;Veneroidea;Veneridae;Mercenaria;Mercenari  
 a mercenaria  
 UdeM00000043928 8090 117.9 UdeM00000043928 XP\_004073479.1 39.2 158  
 79 3 6 160 263 406 1.20E-23 117.9 8090 cellular  
 organisms;Eukaryota;Opisthokonta;Metazoa;Eumetazoa;Bilateria;Deuterostomi  
 a;Chordata;Craniata;Vertebrata;Gnathostomata;Teleostomi;Euteleostomi;Acti  
 nopterygii;Actinopteri;Neopterygii;Teleostei;Osteoglossocephalai;Clupeoce  
 phala;Euteleosteomorpha;Neoteleostei;Eurypterygia;Ctenosquamata;Acanthomo  
 rphata;Euacanthomorphacea;Percomorphaceae;Ovalentaria;Atherinomorphae;Bel  
 oniformes;Adrianichthyoidei;Adrianichthyidae;Oryziinae;Oryzias;Oryzias  
 latipes  
 UdeM00000043929 27794 133.7 UdeM00000043929 XP\_043351521.1 34 206  
 111 3 12 195 143 345 2.60E-28 133.7 27794 cellular  
 organisms;Eukaryota;Opisthokonta;Metazoa;Eumetazoa;Bilateria;Deuterostomi  
 a;Chordata;Craniata;Vertebrata;Gnathostomata;Teleostomi;Euteleostomi;Sarc  
 opterygii;Dipnotetrapodomorpha;Tetrapoda;Amniota;Sauropsida;Sauria;Archel  
 osauria;Testudinata;Testudines;Cryptodira;Durocryptodira;Americhelydia;Ch  
 elonioidea;Dermochelyidae;Dermochelys;Dermochelys coriacea  
 UdeM00000043930 30195 135.6 UdeM00000043930 XP\_012165052.2 32.5 194  
 119 3 9 195 23 211 6.90E-29 135.6 30195 cellular

organisms;Eukaryota;Opisthokonta;Metazoa;Eumetazoa;Bilateria;Protostomia;  
Ecdysozoa;Panarthropoda;Arthropoda;Mandibulata;Pancrustacea;Hexapoda;Inse  
cta;Dicondylia;Pterygota;Neoptera;Endopterygota;Hymenoptera;Apocrita;Acul  
eata;Apoidea;Apidae;Apinae;Bombini;Bombus;Bombus;Bombus terrestris  
UdeM00000043931 9103 121.3 UdeM00000043931 XP\_019477770.1 31.7 221  
117 3 2 200 186 394 1.40E-24 121.3 9103 cellular  
organisms;Eukaryota;Opisthokonta;Metazoa;Eumetazoa;Bilateria;Deuterostomi  
a;Chordata;Craniata;Vertebrata;Gnathostomata;Teleostomi;Euteleostomi;Sarc  
opterygii;Dipnotetrapodomorpha;Tetrapoda;Amniota;Sauropsida;Sauria;Archel  
osauria;Archosauria;Dinosauria;Saurischia;Theropoda;Coelurosauria;Aves;Ne  
ognathae;Galloanserae;Galliformes;Phasianidae;Meleagridinae;Meleagris;Mel  
eagris gallopavo  
UdeM00000043932 7830 115.9 UdeM00000043932 XP\_038633355.1 33.9 189  
114 2 22 201 237 423 5.90E-23 115.9 7830 cellular  
organisms;Eukaryota;Opisthokonta;Metazoa;Eumetazoa;Bilateria;Deuterostomi  
a;Chordata;Craniata;Vertebrata;Gnathostomata;Chondrichthyes;Elasmobranchi  
i;Selachii;Galeomorphii;Galeoidea;Carcharhiniformes;Scyliorhinidae;Scyllo  
rhinus;Scyliorhinus canicula  
UdeM00000043933 6596 2509.6 UdeM00000043933 XP\_045195034.1 34.1  
5022 2966 106 273 5067 137 5040 0.00E+00 2509.6 6596  
cellular  
organisms;Eukaryota;Opisthokonta;Metazoa;Eumetazoa;Bilateria;Protostomia;  
Spiralia;Lophotrochozoa;Mollusca;Bivalvia;Autobranchia;Heteroconchia;Euhe  
terodonta;Imparidentia;Venerida;Veneroidea;Veneridae;Mercenaria;Mercenari  
a mercenaria  
UdeM00000043934 6596 486.1 UdeM00000043934 XP\_045195034.1 27.9 1351  
852 33 36 1300 3726 5040 1.40E-133 486.1 6596 cellular  
organisms;Eukaryota;Opisthokonta;Metazoa;Eumetazoa;Bilateria;Protostomia;  
Spiralia;Lophotrochozoa;Mollusca;Bivalvia;Autobranchia;Heteroconchia;Euhe  
terodonta;Imparidentia;Venerida;Veneroidea;Veneridae;Mercenaria;Mercenari  
a mercenaria  
UdeM00000043935 6596 112.5 UdeM00000043935 XP\_045195034.1 29.6 324  
172 8 4 279 3107 3422 9.40E-22 112.5 6596 cellular  
organisms;Eukaryota;Opisthokonta;Metazoa;Eumetazoa;Bilateria;Protostomia;  
Spiralia;Lophotrochozoa;Mollusca;Bivalvia;Autobranchia;Heteroconchia;Euhe  
terodonta;Imparidentia;Venerida;Veneroidea;Veneridae;Mercenaria;Mercenari  
a mercenaria  
UdeM00000043936 6565 201.4 UdeM00000043936 XP\_022335825.1 43.5 246  
135 3 4 246 543 787 4.00E-48 201.4 6565 cellular  
organisms;Eukaryota;Opisthokonta;Metazoa;Eumetazoa;Bilateria;Protostomia;  
Spiralia;Lophotrochozoa;Mollusca;Bivalvia;Autobranchia;Pteriomorphia;Ostr  
eida;Ostreoidea;Ostreidae;Crassostrea;Crassostrea virginica  
UdeM00000043938 6565 107.8 UdeM00000043938 XP\_022337267.1 33.5 254  
119 8 11 214 264 517 4.60E-20 107.8 6565 cellular  
organisms;Eukaryota;Opisthokonta;Metazoa;Eumetazoa;Bilateria;Protostomia;  
Spiralia;Lophotrochozoa;Mollusca;Bivalvia;Autobranchia;Pteriomorphia;Ostr  
eida;Ostreoidea;Ostreidae;Crassostrea;Crassostrea virginica  
UdeM00000043939 6565 104.8 UdeM00000043939 XP\_022337267.1 33.5 254  
106 9 11 201 264 517 3.80E-19 104.8 6565 cellular  
organisms;Eukaryota;Opisthokonta;Metazoa;Eumetazoa;Bilateria;Protostomia;  
Spiralia;Lophotrochozoa;Mollusca;Bivalvia;Autobranchia;Pteriomorphia;Ostr  
eida;Ostreoidea;Ostreidae;Crassostrea;Crassostrea virginica  
UdeM00000043940 6596 2459.5 UdeM00000043940 XP\_045195034.1 33.5  
5028 2920 106 130 4981 227 5006 0.00E+00 2459.5 6596

cellular  
organisms;Eukaryota;Opisthokonta;Metazoa;Eumetazoa;Bilateria;Protostomia;  
Spiralia;Lophotrochozoa;Mollusca;Bivalvia;Autobranchia;Heteroconchia;Euhe  
terodonta;Imparidentia;Venerida;Veneroidea;Veneridae;Mercenaria;Mercenari  
a mercenaria

|                 |      |        |    |      |     |      |          |                 |                |      |
|-----------------|------|--------|----|------|-----|------|----------|-----------------|----------------|------|
| UdeM00000043943 | 6596 | 2505.7 |    |      |     |      |          | UdeM00000043943 | XP_045195034.1 | 34.4 |
| 4979            | 2891 | 109    | 10 | 4763 | 211 | 5039 | 0.00E+00 | 2505.7          | 6596           |      |

cellular  
organisms;Eukaryota;Opisthokonta;Metazoa;Eumetazoa;Bilateria;Protostomia;  
Spiralia;Lophotrochozoa;Mollusca;Bivalvia;Autobranchia;Heteroconchia;Euhe  
terodonta;Imparidentia;Venerida;Veneroidea;Veneridae;Mercenaria;Mercenari  
a mercenaria

|                 |      |        |     |      |     |      |          |                 |                |      |
|-----------------|------|--------|-----|------|-----|------|----------|-----------------|----------------|------|
| UdeM00000043944 | 6596 | 2514.6 |     |      |     |      |          | UdeM00000043944 | XP_045195034.1 | 34.7 |
| 4912            | 2829 | 102    | 409 | 5049 | 237 | 5040 | 0.00E+00 | 2514.6          | 6596           |      |

cellular  
organisms;Eukaryota;Opisthokonta;Metazoa;Eumetazoa;Bilateria;Protostomia;  
Spiralia;Lophotrochozoa;Mollusca;Bivalvia;Autobranchia;Heteroconchia;Euhe  
terodonta;Imparidentia;Venerida;Veneroidea;Veneridae;Mercenaria;Mercenari  
a mercenaria

|                 |         |       |   |     |     |     |          |                 |                |      |
|-----------------|---------|-------|---|-----|-----|-----|----------|-----------------|----------------|------|
| UdeM00000043945 | 1437191 | 153.3 |   |     |     |     |          | UdeM00000043945 | XP_029054816.1 | 44.4 |
| 162             | 87      | 2     | 1 | 159 | 302 | 463 | 2.60E-34 | 153.3           | 1437191        |      |

cellular  
organisms;Eukaryota;Opisthokonta;Metazoa;Eumetazoa;Bilateria;Protostomia;  
Ecdysozoa;Panarthropoda;Arthropoda;Mandibulata;Pancrustacea;Hexapoda;Inse  
cta;Dicondylia;Pterygota;Neoptera;Endopterygota;Hymenoptera;Apocrita;Acul  
eata;Apoidea;Megachilidae;Megachilinae;Osmiini;Osmia;Osmia bicornis;Osmia  
bicornis bicornis

|                 |      |        |     |      |     |      |          |                 |                |      |
|-----------------|------|--------|-----|------|-----|------|----------|-----------------|----------------|------|
| UdeM00000043946 | 6596 | 2457.2 |     |      |     |      |          | UdeM00000043946 | XP_045195034.1 | 33.8 |
| 4955            | 2870 | 102    | 448 | 5233 | 329 | 5041 | 0.00E+00 | 2457.2          | 6596           |      |

cellular  
organisms;Eukaryota;Opisthokonta;Metazoa;Eumetazoa;Bilateria;Protostomia;  
Spiralia;Lophotrochozoa;Mollusca;Bivalvia;Autobranchia;Heteroconchia;Euhe  
terodonta;Imparidentia;Venerida;Veneroidea;Veneridae;Mercenaria;Mercenari  
a mercenaria

|                 |      |       |     |   |     |           |       |                 |                |      |     |
|-----------------|------|-------|-----|---|-----|-----------|-------|-----------------|----------------|------|-----|
| UdeM00000043947 | 6579 | 625.5 |     |   |     |           |       | UdeM00000043947 | XP_033740878.1 | 48.5 | 742 |
| 314             | 12   | 1     | 699 | 1 | 717 | 7.90E-176 | 625.5 | 6579            | cellular       |      |     |

organisms;Eukaryota;Opisthokonta;Metazoa;Eumetazoa;Bilateria;Protostomia;  
Spiralia;Lophotrochozoa;Mollusca;Bivalvia;Autobranchia;Pteriomorphia;Pect  
inida;Pectinoidea;Pectinidae;Pecten;Pecten maximus

|                 |      |       |     |     |     |          |       |                 |                |      |     |
|-----------------|------|-------|-----|-----|-----|----------|-------|-----------------|----------------|------|-----|
| UdeM00000043948 | 6579 | 194.5 |     |     |     |          |       | UdeM00000043948 | XP_033741736.1 | 52.9 | 187 |
| 86              | 1    | 1     | 185 | 671 | 857 | 1.30E-46 | 194.5 | 6579            | cellular       |      |     |

organisms;Eukaryota;Opisthokonta;Metazoa;Eumetazoa;Bilateria;Protostomia;  
Spiralia;Lophotrochozoa;Mollusca;Bivalvia;Autobranchia;Pteriomorphia;Pect  
inida;Pectinoidea;Pectinidae;Pecten;Pecten maximus

|                 |      |       |     |   |     |           |       |                 |                |      |     |
|-----------------|------|-------|-----|---|-----|-----------|-------|-----------------|----------------|------|-----|
| UdeM00000043950 | 6579 | 619.4 |     |   |     |           |       | UdeM00000043950 | XP_033740878.1 | 47.8 | 742 |
| 319             | 11   | 1     | 699 | 1 | 717 | 5.70E-174 | 619.4 | 6579            | cellular       |      |     |

organisms;Eukaryota;Opisthokonta;Metazoa;Eumetazoa;Bilateria;Protostomia;  
Spiralia;Lophotrochozoa;Mollusca;Bivalvia;Autobranchia;Pteriomorphia;Pect  
inida;Pectinoidea;Pectinidae;Pecten;Pecten maximus

|                 |         |       |   |     |   |     |          |                 |                |      |  |
|-----------------|---------|-------|---|-----|---|-----|----------|-----------------|----------------|------|--|
| UdeM00000043951 | 1735272 | 144.4 |   |     |   |     |          | UdeM00000043951 | XP_041347828.1 | 48.3 |  |
| 145             | 70      | 1     | 4 | 148 | 8 | 147 | 1.50E-31 | 144.4           | 1735272        |      |  |

cellular  
organisms;Eukaryota;Opisthokonta;Metazoa;Eumetazoa;Bilateria;Protostomia;

Spiralia; Lophotrochozoa; Mollusca; Gastropoda; Neomphalina; Neomphaloidea; Pelto-  
 tospiridae; Gigantopelta; Gigantopelta aegis

UdeM00000043952 7574 134 UdeM00000043952 XP\_013383519.1 32.2 366  
 177 14 798 1133 785 1109 1.20E-27 134 7574 cellular  
 organisms; Eukaryota; Opisthokonta; Metazoa; Eumetazoa; Bilateria; Protostomia;  
 Spiralia; Lophotrochozoa; Brachiopoda; Linguliformea; Lingulata; Lingulida; Lin-  
 guloidea; Lingulidae; Lingula; Lingula anatina

UdeM00000043953 6596 584.3 UdeM00000043953 XP\_045164578.1 70.4 450  
 127 4 14 462 581 1025 1.30E-163 584.3 6596 cellular  
 organisms; Eukaryota; Opisthokonta; Metazoa; Eumetazoa; Bilateria; Protostomia;  
 Spiralia; Lophotrochozoa; Mollusca; Bivalvia; Autobranchia; Heteroconchia; Eue-  
 terodonta; Imparidentia; Venerida; Veneroidea; Veneridae; Mercenaria; Mercenari-  
 a mercenaria

UdeM00000043954 6596 413.3 UdeM00000043954 XP\_045164578.1 69.6 293  
 87 2 21 312 313 604 6.70E-112 413.3 6596 cellular  
 organisms; Eukaryota; Opisthokonta; Metazoa; Eumetazoa; Bilateria; Protostomia;  
 Spiralia; Lophotrochozoa; Mollusca; Bivalvia; Autobranchia; Heteroconchia; Eue-  
 terodonta; Imparidentia; Venerida; Veneroidea; Veneridae; Mercenaria; Mercenari-  
 a mercenaria

UdeM00000043955 6596 844 UdeM00000043955 XP\_045164577.1 68.6 601  
 187 2 4 603 6 605 1.20E-241 844 6596 cellular  
 organisms; Eukaryota; Opisthokonta; Metazoa; Eumetazoa; Bilateria; Protostomia;  
 Spiralia; Lophotrochozoa; Mollusca; Bivalvia; Autobranchia; Heteroconchia; Eue-  
 terodonta; Imparidentia; Venerida; Veneroidea; Veneridae; Mercenaria; Mercenari-  
 a mercenaria

UdeM00000043956 6596 554.7 UdeM00000043956 XP\_045164580.1 55.8 484  
 198 3 1 469 1 483 1.00E-153 554.7 6596 cellular  
 organisms; Eukaryota; Opisthokonta; Metazoa; Eumetazoa; Bilateria; Protostomia;  
 Spiralia; Lophotrochozoa; Mollusca; Bivalvia; Autobranchia; Heteroconchia; Eue-  
 terodonta; Imparidentia; Venerida; Veneroidea; Veneridae; Mercenaria; Mercenari-  
 a mercenaria

UdeM00000043957 6596 576.6 UdeM00000043957 XP\_045164580.1 57.2 484  
 201 2 1 479 1 483 2.50E-160 576.6 6596 cellular  
 organisms; Eukaryota; Opisthokonta; Metazoa; Eumetazoa; Bilateria; Protostomia;  
 Spiralia; Lophotrochozoa; Mollusca; Bivalvia; Autobranchia; Heteroconchia; Eue-  
 terodonta; Imparidentia; Venerida; Veneroidea; Veneridae; Mercenaria; Mercenari-  
 a mercenaria

UdeM00000043958 6596 1508 UdeM00000043958 XP\_045166227.1 59.6 1204  
 472 7 7 1200 5 1204 0.00E+00 1508 6596 cellular  
 organisms; Eukaryota; Opisthokonta; Metazoa; Eumetazoa; Bilateria; Protostomia;  
 Spiralia; Lophotrochozoa; Mollusca; Bivalvia; Autobranchia; Heteroconchia; Eue-  
 terodonta; Imparidentia; Venerida; Veneroidea; Veneridae; Mercenaria; Mercenari-  
 a mercenaria

UdeM00000043959 6596 99.8 UdeM00000043959 XP\_045164574.1 40 125  
 68 4 1 124 1 119 8.50E-18 99.8 6596 cellular  
 organisms; Eukaryota; Opisthokonta; Metazoa; Eumetazoa; Bilateria; Protostomia;  
 Spiralia; Lophotrochozoa; Mollusca; Bivalvia; Autobranchia; Heteroconchia; Eue-  
 terodonta; Imparidentia; Venerida; Veneroidea; Veneridae; Mercenaria; Mercenari-  
 a mercenaria

UdeM00000043960 29159 85.9 UdeM00000043960 XP\_034317213.1 46.1 89  
 47 1 10 98 16 103 1.20E-13 85.9 29159 cellular  
 organisms; Eukaryota; Opisthokonta; Metazoa; Eumetazoa; Bilateria; Protostomia;  
 Spiralia; Lophotrochozoa; Mollusca; Bivalvia; Autobranchia; Pteriomorphia; Ostr-  
 eida; Ostreoida; Ostreidae; Crassostrea; Crassostrea gigas



UdeM00000043961 29159 85.9 UdeM00000043961 XP\_034317213.1 46.1 89  
 47 1 10 98 16 103 1.10E-13 85.9 29159 cellular  
 organisms;Eukaryota;Opisthokonta;Metazoa;Eumetazoa;Bilateria;Protostomia;  
 Spiralia;Lophotrochozoa;Mollusca;Bivalvia;Autobranchia;Pteriomorphia;Ostr  
 eida;Ostreoidea;Ostreidae;Crassostrea;Crassostrea gigas  
 UdeM00000043962 191870 102.8 UdeM00000043962 XP\_044516074.1 26  
 385 226 11 63 417 162 517 1.10E-18 102.8 191870  
 cellular  
 organisms;Eukaryota;Opisthokonta;Metazoa;Eumetazoa;Bilateria;Deuterostomi  
 a;Chordata;Craniata;Vertebrata;Gnathostomata;Teleostomi;Euteleostomi;Sarc  
 opterygii;Dipnotetrapodomorpha;Tetrapoda;Amniota;Mammalia;Theria;Metather  
 ia;Didelphimorphia;Didelphidae;Didelphinae;Gracilinanus;Gracilinanus  
 agilis  
 UdeM00000043963 118141 87.8 UdeM00000043963 XP\_036382454.1 33.3  
 177 102 5 64 227 143 316 2.10E-14 87.8 118141  
 cellular  
 organisms;Eukaryota;Opisthokonta;Metazoa;Eumetazoa;Bilateria;Deuterostomi  
 a;Chordata;Craniata;Vertebrata;Gnathostomata;Teleostomi;Euteleostomi;Acti  
 nopterygii;Actinopteri;Neopterygii;Teleostei;Elopocephalai;Elopocephala;E  
 lopomorpha;Elopiformes;Megalopidae;Megalops;Megalops cyprinoides  
 UdeM00000043964 118141 87.8 UdeM00000043964 XP\_036382454.1 33.3  
 177 102 5 64 227 143 316 2.10E-14 87.8 118141  
 cellular  
 organisms;Eukaryota;Opisthokonta;Metazoa;Eumetazoa;Bilateria;Deuterostomi  
 a;Chordata;Craniata;Vertebrata;Gnathostomata;Teleostomi;Euteleostomi;Acti  
 nopterygii;Actinopteri;Neopterygii;Teleostei;Elopocephalai;Elopocephala;E  
 lopomorpha;Elopiformes;Megalopidae;Megalops;Megalops cyprinoides  
 UdeM00000043965 7739 71.2 UdeM00000043965 XP\_035660271.1 33.7 83  
 53 1 37 119 170 250 1.20E-09 71.2 7739 cellular  
 organisms;Eukaryota;Opisthokonta;Metazoa;Eumetazoa;Bilateria;Deuterostomi  
 a;Chordata;Cephalochordata;Leptocardii;Amphioxiformes;Branchiostomidae;Br  
 anchiostoma;Branchiostoma floridae  
 UdeM00000043966 7739 91.7 UdeM00000043966 XP\_035682735.1 37.6 133  
 79 4 76 206 19 149 1.30E-15 91.7 7739 cellular  
 organisms;Eukaryota;Opisthokonta;Metazoa;Eumetazoa;Bilateria;Deuterostomi  
 a;Chordata;Cephalochordata;Leptocardii;Amphioxiformes;Branchiostomidae;Br  
 anchiostoma;Branchiostoma floridae  
 UdeM00000043967 29159 149.1 UdeM00000043967 XP\_034330386.1 41.8 213  
 98 6 18 205 111 322 7.40E-33 149.1 29159 cellular  
 organisms;Eukaryota;Opisthokonta;Metazoa;Eumetazoa;Bilateria;Protostomia;  
 Spiralia;Lophotrochozoa;Mollusca;Bivalvia;Autobranchia;Pteriomorphia;Ostr  
 eida;Ostreoidea;Ostreidae;Crassostrea;Crassostrea gigas  
 UdeM00000043968 7739 99.8 UdeM00000043968 XP\_035682735.1 34.3 172  
 108 5 76 245 19 187 5.30E-18 99.8 7739 cellular  
 organisms;Eukaryota;Opisthokonta;Metazoa;Eumetazoa;Bilateria;Deuterostomi  
 a;Chordata;Cephalochordata;Leptocardii;Amphioxiformes;Branchiostomidae;Br  
 anchiostoma;Branchiostoma floridae  
 UdeM00000043969 7739 98.2 UdeM00000043969 XP\_035682735.1 34.3 169  
 106 5 76 242 19 184 1.50E-17 98.2 7739 cellular  
 organisms;Eukaryota;Opisthokonta;Metazoa;Eumetazoa;Bilateria;Deuterostomi  
 a;Chordata;Cephalochordata;Leptocardii;Amphioxiformes;Branchiostomidae;Br  
 anchiostoma;Branchiostoma floridae  
 UdeM00000043970 43700 72.8 UdeM00000043970 XP\_020473061.1 29.2 178  
 105 4 33 208 165 323 6.90E-10 72.8 43700 cellular

organisms;Eukaryota;Opisthokonta;Metazoa;Eumetazoa;Bilateria;Deuterostomi  
a;Chordata;Craniata;Vertebrata;Gnathostomata;Teleostomi;Euteleostomi;Acti  
nopterygii;Actinopteri;Neopterygii;Teleostei;Osteoglossocephalai;Clupeoce  
phala;Euteleostomorpha;Neoteleostei;Eurypterygia;Ctenosquamata;Acanthomo  
rphata;Euacanthomorpha;Percomorphaceae;Anabantaria;Synbranchiformes;Sy  
nbranchoidei;Synbranchidae;Monopterus;Monopterus albus

UdeM00000043971 7897 96.3 UdeM00000043971 XP\_006008200.2 26.9 286  
185 8 200 467 4 283 1.40E-16 96.3 7897 cellular

organisms;Eukaryota;Opisthokonta;Metazoa;Eumetazoa;Bilateria;Deuterostomi  
a;Chordata;Craniata;Vertebrata;Gnathostomata;Teleostomi;Euteleostomi;Sarc  
opterygii;Coelacanthomorpha;Coelacanthiformes;Coelacanthidae;Latimeria;La  
timeria chalumnae

UdeM00000043972 191870 89.7 UdeM00000043972 XP\_044516074.1 28.7  
261 146 9 1 245 166 402 6.50E-15 89.7 191870  
cellular

organisms;Eukaryota;Opisthokonta;Metazoa;Eumetazoa;Bilateria;Deuterostomi  
a;Chordata;Craniata;Vertebrata;Gnathostomata;Teleostomi;Euteleostomi;Sarc  
opterygii;Dipnotetrapodomorpha;Tetrapoda;Amniota;Mammalia;Theria;Metather  
ia;Didelphimorphia;Didelphidae;Didelphinae;Gracilinanus;Gracilinanus  
agilis

UdeM00000043973 6596 356.3 UdeM00000043973 XP\_045164961.1 68.3 331  
104 1 38 368 105 434 6.00E-95 356.3 6596 cellular

organisms;Eukaryota;Opisthokonta;Metazoa;Eumetazoa;Bilateria;Protostomia;  
Spiralia;Lophotrochozoa;Mollusca;Bivalvia;Autobranchia;Heteroconchia;Euhe  
terodonta;Imparidentia;Venerida;Veneroidea;Veneridae;Mercenaria;Mercenari  
a mercenaria

UdeM00000043974 6596 690.3 UdeM00000043974 XP\_045166530.1 67 458  
148 2 2 456 4 461 1.70E-195 690.3 6596 cellular

organisms;Eukaryota;Opisthokonta;Metazoa;Eumetazoa;Bilateria;Protostomia;  
Spiralia;Lophotrochozoa;Mollusca;Bivalvia;Autobranchia;Heteroconchia;Euhe  
terodonta;Imparidentia;Venerida;Veneroidea;Veneridae;Mercenaria;Mercenari  
a mercenaria

UdeM00000043975 6596 1293.5 UdeM00000043975 XP\_045164494.1 78.2  
958 209 0 1 958 1 958 0.00E+00 1293.5 6596  
cellular

organisms;Eukaryota;Opisthokonta;Metazoa;Eumetazoa;Bilateria;Protostomia;  
Spiralia;Lophotrochozoa;Mollusca;Bivalvia;Autobranchia;Heteroconchia;Euhe  
terodonta;Imparidentia;Venerida;Veneroidea;Veneridae;Mercenaria;Mercenari  
a mercenaria

UdeM00000043976 6565 833.6 UdeM00000043976 XP\_022295968.1 94.1 456  
27 0 1 456 1 456 1.20E-238 833.6 6565 cellular

organisms;Eukaryota;Opisthokonta;Metazoa;Eumetazoa;Bilateria;Protostomia;  
Spiralia;Lophotrochozoa;Mollusca;Bivalvia;Autobranchia;Pteriomorpha;Ostr  
eida;Ostreoidea;Ostreidae;Crassostrea;Crassostrea virginica

UdeM00000043977 7574 898.3 UdeM00000043977 XP\_013409211.1 93.9 476  
29 0 1 476 1 476 4.30E-258 898.3 7574 cellular

organisms;Eukaryota;Opisthokonta;Metazoa;Eumetazoa;Bilateria;Protostomia;  
Spiralia;Lophotrochozoa;Brachiopoda;Linguliformea;Lingulata;Lingulida;Lin  
guloidea;Lingulidae;Lingula;Lingula anatina

UdeM00000043978 6596 451.1 UdeM00000043978 XP\_045166192.1 54.8 378  
169 2 22 398 23 399 1.50E-123 451.1 6596 cellular

organisms;Eukaryota;Opisthokonta;Metazoa;Eumetazoa;Bilateria;Protostomia;  
Spiralia;Lophotrochozoa;Mollusca;Bivalvia;Autobranchia;Heteroconchia;Euhe

terodonta;Imparidentia;Venerida;Veneroidea;Veneridae;Mercenaria;Mercenari  
 a mercenaria  
 UdeM00000043979 6596 132.1 UdeM00000043979 XP\_045166192.1 56 109  
 47 1 454 562 292 399 2.20E-27 132.1 6596 cellular  
 organisms;Eukaryota;Opisthokonta;Metazoa;Eumetazoa;Bilateria;Protostomia;  
 Spiralia;Lophotrochozoa;Mollusca;Bivalvia;Autobranhia;Heteroconchia;Euhe  
 terodonta;Imparidentia;Venerida;Veneroidea;Veneridae;Mercenaria;Mercenari  
 a mercenaria  
 UdeM00000043980 6579 455.7 UdeM00000043980 XP\_033744623.1 62.9 453  
 112 14 1 449 2 402 7.90E-125 455.7 6579 cellular  
 organisms;Eukaryota;Opisthokonta;Metazoa;Eumetazoa;Bilateria;Protostomia;  
 Spiralia;Lophotrochozoa;Mollusca;Bivalvia;Autobranhia;Pteriormorphia;Pect  
 inida;Pectinoidea;Pectinidae;Pecten;Pecten maximus  
 UdeM00000043982 6573 98.6 UdeM00000043982 XP\_021354625.1 32.1 212  
 133 6 6 207 14 224 1.00E-17 98.6 6573 cellular  
 organisms;Eukaryota;Opisthokonta;Metazoa;Eumetazoa;Bilateria;Protostomia;  
 Spiralia;Lophotrochozoa;Mollusca;Bivalvia;Autobranhia;Pteriormorphia;Pect  
 inida;Pectinoidea;Pectinidae;Mizuhopecten;Mizuhopecten yessoensis  
 UdeM00000043983 6573 89 UdeM00000043983 XP\_021354625.1 28.8 215  
 144 4 6 211 14 228 8.10E-15 89 6573 cellular  
 organisms;Eukaryota;Opisthokonta;Metazoa;Eumetazoa;Bilateria;Protostomia;  
 Spiralia;Lophotrochozoa;Mollusca;Bivalvia;Autobranhia;Pteriormorphia;Pect  
 inida;Pectinoidea;Pectinidae;Mizuhopecten;Mizuhopecten yessoensis  
 UdeM00000043984 6573 91.3 UdeM00000043984 XP\_021354625.1 33.7 166  
 108 2 44 207 59 224 1.60E-15 91.3 6573 cellular  
 organisms;Eukaryota;Opisthokonta;Metazoa;Eumetazoa;Bilateria;Protostomia;  
 Spiralia;Lophotrochozoa;Mollusca;Bivalvia;Autobranhia;Pteriormorphia;Pect  
 inida;Pectinoidea;Pectinidae;Mizuhopecten;Mizuhopecten yessoensis  
 UdeM00000043985 6573 94 UdeM00000043985 XP\_021354625.1 36.9 168  
 102 4 44 209 59 224 2.50E-16 94 6573 cellular  
 organisms;Eukaryota;Opisthokonta;Metazoa;Eumetazoa;Bilateria;Protostomia;  
 Spiralia;Lophotrochozoa;Mollusca;Bivalvia;Autobranhia;Pteriormorphia;Pect  
 inida;Pectinoidea;Pectinidae;Mizuhopecten;Mizuhopecten yessoensis  
 UdeM00000043986 6573 95.1 UdeM00000043986 XP\_021354625.1 37.1 167  
 101 4 44 207 59 224 1.10E-16 95.1 6573 cellular  
 organisms;Eukaryota;Opisthokonta;Metazoa;Eumetazoa;Bilateria;Protostomia;  
 Spiralia;Lophotrochozoa;Mollusca;Bivalvia;Autobranhia;Pteriormorphia;Pect  
 inida;Pectinoidea;Pectinidae;Mizuhopecten;Mizuhopecten yessoensis  
 UdeM00000043987 6573 95.1 UdeM00000043987 XP\_021354625.1 36.5 170  
 104 4 17 183 56 224 1.00E-16 95.1 6573 cellular  
 organisms;Eukaryota;Opisthokonta;Metazoa;Eumetazoa;Bilateria;Protostomia;  
 Spiralia;Lophotrochozoa;Mollusca;Bivalvia;Autobranhia;Pteriormorphia;Pect  
 inida;Pectinoidea;Pectinidae;Mizuhopecten;Mizuhopecten yessoensis  
 UdeM00000043988 6573 91.3 UdeM00000043988 XP\_021354625.1 33.7 166  
 108 2 44 207 59 224 1.60E-15 91.3 6573 cellular  
 organisms;Eukaryota;Opisthokonta;Metazoa;Eumetazoa;Bilateria;Protostomia;  
 Spiralia;Lophotrochozoa;Mollusca;Bivalvia;Autobranhia;Pteriormorphia;Pect  
 inida;Pectinoidea;Pectinidae;Mizuhopecten;Mizuhopecten yessoensis  
 UdeM00000043989 6573 95.1 UdeM00000043989 XP\_021354625.1 37.1 167  
 101 4 44 207 59 224 1.10E-16 95.1 6573 cellular  
 organisms;Eukaryota;Opisthokonta;Metazoa;Eumetazoa;Bilateria;Protostomia;  
 Spiralia;Lophotrochozoa;Mollusca;Bivalvia;Autobranhia;Pteriormorphia;Pect  
 inida;Pectinoidea;Pectinidae;Mizuhopecten;Mizuhopecten yessoensis

UdeM00000043990 6573 94 UdeM00000043990 XP\_021354625.1 36.9 168  
 102 4 44 209 59 224 2.50E-16 94 6573 cellular  
 organisms;Eukaryota;Opisthokonta;Metazoa;Eumetazoa;Bilateria;Protostomia;  
 Spiralia;Lophotrochozoa;Mollusca;Bivalvia;Autobranhia;Pteriormorphia;Pect  
 inida;Pectinoidea;Pectinidae;Mizuhopecten;Mizuhopecten yessoensis  
 UdeM00000043991 6573 95.1 UdeM00000043991 XP\_021354625.1 36.5 170  
 104 4 17 183 56 224 1.00E-16 95.1 6573 cellular  
 organisms;Eukaryota;Opisthokonta;Metazoa;Eumetazoa;Bilateria;Protostomia;  
 Spiralia;Lophotrochozoa;Mollusca;Bivalvia;Autobranhia;Pteriormorphia;Pect  
 inida;Pectinoidea;Pectinidae;Mizuhopecten;Mizuhopecten yessoensis  
 UdeM00000043992 6573 91.3 UdeM00000043992 XP\_021354625.1 33.7 166  
 108 2 44 207 59 224 1.60E-15 91.3 6573 cellular  
 organisms;Eukaryota;Opisthokonta;Metazoa;Eumetazoa;Bilateria;Protostomia;  
 Spiralia;Lophotrochozoa;Mollusca;Bivalvia;Autobranhia;Pteriormorphia;Pect  
 inida;Pectinoidea;Pectinidae;Mizuhopecten;Mizuhopecten yessoensis  
 UdeM00000043993 6573 94 UdeM00000043993 XP\_021354625.1 36.9 168  
 102 4 44 209 59 224 2.50E-16 94 6573 cellular  
 organisms;Eukaryota;Opisthokonta;Metazoa;Eumetazoa;Bilateria;Protostomia;  
 Spiralia;Lophotrochozoa;Mollusca;Bivalvia;Autobranhia;Pteriormorphia;Pect  
 inida;Pectinoidea;Pectinidae;Mizuhopecten;Mizuhopecten yessoensis  
 UdeM00000043994 6573 95.1 UdeM00000043994 XP\_021354625.1 37.1 167  
 101 4 44 207 59 224 1.10E-16 95.1 6573 cellular  
 organisms;Eukaryota;Opisthokonta;Metazoa;Eumetazoa;Bilateria;Protostomia;  
 Spiralia;Lophotrochozoa;Mollusca;Bivalvia;Autobranhia;Pteriormorphia;Pect  
 inida;Pectinoidea;Pectinidae;Mizuhopecten;Mizuhopecten yessoensis  
 UdeM00000043995 6573 95.1 UdeM00000043995 XP\_021354625.1 36.5 170  
 104 4 17 183 56 224 1.00E-16 95.1 6573 cellular  
 organisms;Eukaryota;Opisthokonta;Metazoa;Eumetazoa;Bilateria;Protostomia;  
 Spiralia;Lophotrochozoa;Mollusca;Bivalvia;Autobranhia;Pteriormorphia;Pect  
 inida;Pectinoidea;Pectinidae;Mizuhopecten;Mizuhopecten yessoensis  
 UdeM00000043996 6573 85.9 UdeM00000043996 XP\_021354625.1 33.5 167  
 107 4 44 207 59 224 6.80E-14 85.9 6573 cellular  
 organisms;Eukaryota;Opisthokonta;Metazoa;Eumetazoa;Bilateria;Protostomia;  
 Spiralia;Lophotrochozoa;Mollusca;Bivalvia;Autobranhia;Pteriormorphia;Pect  
 inida;Pectinoidea;Pectinidae;Mizuhopecten;Mizuhopecten yessoensis  
 UdeM00000043997 6596 89.4 UdeM00000043997 XP\_045170602.1 35.5 155  
 96 3 47 198 114 267 5.90E-15 89.4 6596 cellular  
 organisms;Eukaryota;Opisthokonta;Metazoa;Eumetazoa;Bilateria;Protostomia;  
 Spiralia;Lophotrochozoa;Mollusca;Bivalvia;Autobranhia;Heteroconchia;Euhe  
 terodonta;Imparidentia;Venerida;Veneroidea;Veneridae;Mercenaria;Mercenari  
 a mercenaria  
 UdeM00000043999 6596 70.5 UdeM00000043999 XP\_045206710.1 27.3 198  
 126 5 21 208 47 236 3.00E-09 70.5 6596 cellular  
 organisms;Eukaryota;Opisthokonta;Metazoa;Eumetazoa;Bilateria;Protostomia;  
 Spiralia;Lophotrochozoa;Mollusca;Bivalvia;Autobranhia;Heteroconchia;Euhe  
 terodonta;Imparidentia;Venerida;Veneroidea;Veneridae;Mercenaria;Mercenari  
 a mercenaria  
 UdeM00000044000 6596 73.9 UdeM00000044000 XP\_045169963.1 28 207  
 131 5 7 207 6 200 2.70E-10 73.9 6596 cellular  
 organisms;Eukaryota;Opisthokonta;Metazoa;Eumetazoa;Bilateria;Protostomia;  
 Spiralia;Lophotrochozoa;Mollusca;Bivalvia;Autobranhia;Heteroconchia;Euhe  
 terodonta;Imparidentia;Venerida;Veneroidea;Veneridae;Mercenaria;Mercenari  
 a mercenaria

UdeM00000044001 6596 278.5 UdeM00000044001 XP\_045166199.1 52.1 288  
 132 4 1 284 20 305 9.60E-72 278.5 6596 cellular  
 organisms;Eukaryota;Opisthokonta;Metazoa;Eumetazoa;Bilateria;Protostomia;  
 Spiralia;Lophotrochozoa;Mollusca;Bivalvia;Autobranchia;Heteroconchia;Euhe  
 terodonta;Imparidentia;Venerida;Veneroidea;Veneridae;Mercenaria;Mercenari  
 a mercenaria  
 UdeM00000044002 1735272 86.3 UdeM00000044002 XP\_041349537.1 47.5  
 99 46 1 7 105 5 97 8.60E-14 86.3 1735272  
 cellular  
 organisms;Eukaryota;Opisthokonta;Metazoa;Eumetazoa;Bilateria;Protostomia;  
 Spiralia;Lophotrochozoa;Mollusca;Gastropoda;Neomphalina;Neomphaloidea;Pel  
 tospiridae;Gigantopelta;Gigantopelta aegis  
 UdeM00000044003 6596 99.8 UdeM00000044003 XP\_045166588.1 41.9 129  
 73 2 235 362 47 174 7.90E-18 99.8 6596 cellular  
 organisms;Eukaryota;Opisthokonta;Metazoa;Eumetazoa;Bilateria;Protostomia;  
 Spiralia;Lophotrochozoa;Mollusca;Bivalvia;Autobranchia;Heteroconchia;Euhe  
 terodonta;Imparidentia;Venerida;Veneroidea;Veneridae;Mercenaria;Mercenari  
 a mercenaria  
 UdeM00000044004 7741 283.9 UdeM00000044004 XP\_019619576.1 34.3 431  
 248 14 70 479 735 1151 5.00E-73 283.9 7741 cellular  
 organisms;Eukaryota;Opisthokonta;Metazoa;Eumetazoa;Bilateria;Deuterostomi  
 a;Chordata;Cephalochordata;Leptocardii;Amphioxiformes;Branchiostomidae;Br  
 anchiostoma;Branchiostoma belcheri  
 UdeM00000044005 6596 236.5 UdeM00000044005 XP\_045166555.1 51.8 228  
 104 2 1 222 1 228 3.30E-59 236.5 6596 cellular  
 organisms;Eukaryota;Opisthokonta;Metazoa;Eumetazoa;Bilateria;Protostomia;  
 Spiralia;Lophotrochozoa;Mollusca;Bivalvia;Autobranchia;Heteroconchia;Euhe  
 terodonta;Imparidentia;Venerida;Veneroidea;Veneridae;Mercenaria;Mercenari  
 a mercenaria  
 UdeM00000044007 6596 508.4 UdeM00000044007 XP\_045165037.1 64.4 609  
 194 3 1 588 1 607 1.20E-140 508.4 6596 cellular  
 organisms;Eukaryota;Opisthokonta;Metazoa;Eumetazoa;Bilateria;Protostomia;  
 Spiralia;Lophotrochozoa;Mollusca;Bivalvia;Autobranchia;Heteroconchia;Euhe  
 terodonta;Imparidentia;Venerida;Veneroidea;Veneridae;Mercenaria;Mercenari  
 a mercenaria  
 UdeM00000044008 7574 526.9 UdeM00000044008 XP\_013384141.1 73.3 315  
 84 0 23 337 27 341 2.50E-146 526.9 7574 cellular  
 organisms;Eukaryota;Opisthokonta;Metazoa;Eumetazoa;Bilateria;Protostomia;  
 Spiralia;Lophotrochozoa;Brachiopoda;Linguliformea;Lingulata;Lingulida;Lin  
 guloidea;Lingulidae;Lingula;Lingula anatina  
 UdeM00000044009 6565 540.8 UdeM00000044009 XP\_022299873.1 79.2 342  
 49 1 44 385 247 566 1.40E-150 540.8 6565 cellular  
 organisms;Eukaryota;Opisthokonta;Metazoa;Eumetazoa;Bilateria;Protostomia;  
 Spiralia;Lophotrochozoa;Mollusca;Bivalvia;Autobranchia;Pteriomorphia;Ostr  
 eida;Ostreoidea;Ostreidae;Crassostrea;Crassostrea virginica  
 UdeM00000044010 6565 552.7 UdeM00000044010 XP\_022299873.1 84.7 320  
 49 0 44 363 247 566 3.40E-154 552.7 6565 cellular  
 organisms;Eukaryota;Opisthokonta;Metazoa;Eumetazoa;Bilateria;Protostomia;  
 Spiralia;Lophotrochozoa;Mollusca;Bivalvia;Autobranchia;Pteriomorphia;Ostr  
 eida;Ostreoidea;Ostreidae;Crassostrea;Crassostrea virginica  
 UdeM00000044011 6573 146.4 UdeM00000044011 XP\_021350399.1 33 321  
 177 6 18 308 1 313 6.60E-32 146.4 6573 cellular  
 organisms;Eukaryota;Opisthokonta;Metazoa;Eumetazoa;Bilateria;Protostomia;

Spiralia; Lophotrochozoa; Mollusca; Bivalvia; Autobranchia; Pteriomorpha; Pectinida; Pectinoidea; Pectinidae; Mizuhopecten; Mizuhopecten yessoensis  
UdeM00000044012 6565 217.6 UdeM00000044012 XP\_022299727.1 46.8 233  
121 2 1 231 46 277 1.80E-53 217.6 6565 cellular  
organisms; Eukaryota; Opisthokonta; Metazoa; Eumetazoa; Bilateria; Protostomia; Spiralia; Lophotrochozoa; Mollusca; Bivalvia; Autobranchia; Pteriomorpha; Ostr  
eida; Ostreidae; Crassostrea; Crassostrea virginica  
UdeM00000044013 29159 235 UdeM00000044013 XP\_011444407.2 84.8 165  
12 2 1 163 32 185 7.10E-59 235 29159 cellular  
organisms; Eukaryota; Opisthokonta; Metazoa; Eumetazoa; Bilateria; Protostomia; Spiralia; Lophotrochozoa; Mollusca; Bivalvia; Autobranchia; Pteriomorpha; Ostr  
eida; Ostreidae; Crassostrea; Crassostrea gigas  
UdeM00000044015 29159 226.9 UdeM00000044015 XP\_011444407.2 84 162  
16 2 1 160 32 185 1.90E-56 226.9 29159 cellular  
organisms; Eukaryota; Opisthokonta; Metazoa; Eumetazoa; Bilateria; Protostomia; Spiralia; Lophotrochozoa; Mollusca; Bivalvia; Autobranchia; Pteriomorpha; Ostr  
eida; Ostreidae; Crassostrea; Crassostrea gigas  
UdeM00000044014 29159 313.9 UdeM00000044014 XP\_011444404.2 85 207  
20 1 1 207 1 196 1.50E-82 313.9 29159 cellular  
organisms; Eukaryota; Opisthokonta; Metazoa; Eumetazoa; Bilateria; Protostomia; Spiralia; Lophotrochozoa; Mollusca; Bivalvia; Autobranchia; Pteriomorpha; Ostr  
eida; Ostreidae; Crassostrea; Crassostrea gigas  
UdeM00000044016 50429 108.2 UdeM00000044016 XP\_022785721.1 55.3 94  
42 0 1 94 64 157 1.80E-20 108.2 50429 cellular  
organisms; Eukaryota; Opisthokonta; Metazoa; Eumetazoa; Cnidaria; Anthozoa; Hexa  
corallia; Scleractinia; Astrocoeniina; Pocilloporidae; Stylophora; Stylophora  
pistillata  
UdeM00000044017 6565 120.9 UdeM00000044017 XP\_022302097.1 49.2 130  
63 2 776 905 550 676 8.30E-24 120.9 6565 cellular  
organisms; Eukaryota; Opisthokonta; Metazoa; Eumetazoa; Bilateria; Protostomia; Spiralia; Lophotrochozoa; Mollusca; Bivalvia; Autobranchia; Pteriomorpha; Ostr  
eida; Ostreidae; Crassostrea; Crassostrea virginica  
UdeM00000044018 6565 120.9 UdeM00000044018 XP\_022302097.1 49.2 130  
63 2 755 884 550 676 8.10E-24 120.9 6565 cellular  
organisms; Eukaryota; Opisthokonta; Metazoa; Eumetazoa; Bilateria; Protostomia; Spiralia; Lophotrochozoa; Mollusca; Bivalvia; Autobranchia; Pteriomorpha; Ostr  
eida; Ostreidae; Crassostrea; Crassostrea virginica  
UdeM00000044019 6596 1122.8 UdeM00000044019 XP\_045166422.1 44.3  
1451 740 22 15 1432 599 2014 0.00E+00 1122.8 6596  
cellular  
organisms; Eukaryota; Opisthokonta; Metazoa; Eumetazoa; Bilateria; Protostomia; Spiralia; Lophotrochozoa; Mollusca; Bivalvia; Autobranchia; Heteroconchia; Eue  
terodonta; Imparidentia; Venerida; Veneroidea; Veneridae; Mercenaria; Mercenari  
a mercenaria  
UdeM00000044020 6565 191.4 UdeM00000044020 XP\_022297635.1 43.6 218  
122 1 12 228 14 231 2.00E-45 191.4 6565 cellular  
organisms; Eukaryota; Opisthokonta; Metazoa; Eumetazoa; Bilateria; Protostomia; Spiralia; Lophotrochozoa; Mollusca; Bivalvia; Autobranchia; Pteriomorpha; Ostr  
eida; Ostreidae; Crassostrea; Crassostrea virginica  
UdeM00000044021 6596 398.3 UdeM00000044021 XP\_045164539.1 49.8 818  
336 12 67 857 52 821 2.70E-107 398.3 6596 cellular  
organisms; Eukaryota; Opisthokonta; Metazoa; Eumetazoa; Bilateria; Protostomia; Spiralia; Lophotrochozoa; Mollusca; Bivalvia; Autobranchia; Heteroconchia; Eue

terodonta;Imparidentia;Venerida;Veneroidea;Veneridae;Mercenaria;Mercenari  
 a mercenaria  
 UdeM00000044022 6596 243 UdeM00000044022 XP\_045166747.1 56.4 202  
 88 0 1 202 1 202 3.20E-61 243 6596 cellular  
 organisms;Eukaryota;Opisthokonta;Metazoa;Eumetazoa;Bilateria;Protostomia;  
 Spiralia;Lophotrochozoa;Mollusca;Bivalvia;Autobranhia;Heteroconchia;Euhe  
 terodonta;Imparidentia;Venerida;Veneroidea;Veneridae;Mercenaria;Mercenari  
 a mercenaria  
 UdeM00000044023 6596 206.5 UdeM00000044023 XP\_045166747.1 62 158  
 60 0 30 187 46 203 3.10E-50 206.5 6596 cellular  
 organisms;Eukaryota;Opisthokonta;Metazoa;Eumetazoa;Bilateria;Protostomia;  
 Spiralia;Lophotrochozoa;Mollusca;Bivalvia;Autobranhia;Heteroconchia;Euhe  
 terodonta;Imparidentia;Venerida;Veneroidea;Veneridae;Mercenaria;Mercenari  
 a mercenaria  
 UdeM00000044024 6596 342.8 UdeM00000044024 XP\_045160273.1 39 459  
 248 5 2 430 18 474 6.30E-91 342.8 6596 cellular  
 organisms;Eukaryota;Opisthokonta;Metazoa;Eumetazoa;Bilateria;Protostomia;  
 Spiralia;Lophotrochozoa;Mollusca;Bivalvia;Autobranhia;Heteroconchia;Euhe  
 terodonta;Imparidentia;Venerida;Veneroidea;Veneridae;Mercenaria;Mercenari  
 a mercenaria  
 UdeM00000044026 6573 1013.8 UdeM00000044026 XP\_021373866.1 63.7  
 788 274 4 1 777 62 848 1.10E-292 1013.8 6573  
 cellular  
 organisms;Eukaryota;Opisthokonta;Metazoa;Eumetazoa;Bilateria;Protostomia;  
 Spiralia;Lophotrochozoa;Mollusca;Bivalvia;Autobranhia;Pteriomorphia;Pect  
 inida;Pectinoidea;Pectinidae;Mizuhopecten;Mizuhopecten yessoensis  
 UdeM00000044027 6573 1006.5 UdeM00000044027 XP\_021373866.1 62.9  
 798 274 5 1 787 62 848 1.80E-290 1006.5 6573  
 cellular  
 organisms;Eukaryota;Opisthokonta;Metazoa;Eumetazoa;Bilateria;Protostomia;  
 Spiralia;Lophotrochozoa;Mollusca;Bivalvia;Autobranhia;Pteriomorphia;Pect  
 inida;Pectinoidea;Pectinidae;Mizuhopecten;Mizuhopecten yessoensis  
 UdeM00000044029 6596 285.4 UdeM00000044029 XP\_045160031.1 57.1 303  
 92 8 1 295 1 273 8.10E-74 285.4 6596 cellular  
 organisms;Eukaryota;Opisthokonta;Metazoa;Eumetazoa;Bilateria;Protostomia;  
 Spiralia;Lophotrochozoa;Mollusca;Bivalvia;Autobranhia;Heteroconchia;Euhe  
 terodonta;Imparidentia;Venerida;Veneroidea;Veneridae;Mercenaria;Mercenari  
 a mercenaria  
 UdeM00000044030 6596 834.3 UdeM00000044030 XP\_045160595.1 68 596  
 176 6 4 587 5 597 9.40E-239 834.3 6596 cellular  
 organisms;Eukaryota;Opisthokonta;Metazoa;Eumetazoa;Bilateria;Protostomia;  
 Spiralia;Lophotrochozoa;Mollusca;Bivalvia;Autobranhia;Heteroconchia;Euhe  
 terodonta;Imparidentia;Venerida;Veneroidea;Veneridae;Mercenaria;Mercenari  
 a mercenaria  
 UdeM00000044031 6565 65.5 UdeM00000044031 XP\_022314709.1 26.6 173  
 117 2 47 219 51 213 9.90E-08 65.5 6565 cellular  
 organisms;Eukaryota;Opisthokonta;Metazoa;Eumetazoa;Bilateria;Protostomia;  
 Spiralia;Lophotrochozoa;Mollusca;Bivalvia;Autobranhia;Pteriomorphia;Ostr  
 eida;Ostreoidea;Ostreidae;Crassostrea;Crassostrea virginica  
 UdeM00000044032 6596 201.8 UdeM00000044032 XP\_045159603.1 28.6 626  
 372 16 1 576 1 601 2.30E-48 201.8 6596 cellular  
 organisms;Eukaryota;Opisthokonta;Metazoa;Eumetazoa;Bilateria;Protostomia;  
 Spiralia;Lophotrochozoa;Mollusca;Bivalvia;Autobranhia;Heteroconchia;Euhe

terodonta;Imparidentia;Venerida;Veneroidea;Veneridae;Mercenaria;Mercenaria mercenaria

UdeM00000044033 6573 225.3 UdeM00000044033 XP\_021378968.1 26.3 727  
447 29 40 727 28 704 2.60E-55 225.3 6573 cellular

organisms;Eukaryota;Opisthokonta;Metazoa;Eumetazoa;Bilateria;Protostomia;Spiralia;Lophotrochozoa;Mollusca;Bivalvia;Autobranhia;Pteriomorphia;Pectinida;Pectinoidea;Pectinidae;Mizuhopecten;Mizuhopecten yessoensis

UdeM00000044034 6596 310.8 UdeM00000044034 XP\_045159316.1 64.3 227  
80 1 53 279 28 253 1.70E-81 310.8 6596 cellular

organisms;Eukaryota;Opisthokonta;Metazoa;Eumetazoa;Bilateria;Protostomia;Spiralia;Lophotrochozoa;Mollusca;Bivalvia;Autobranhia;Heteroconchia;Euheterodonta;Imparidentia;Venerida;Veneroidea;Veneridae;Mercenaria;Mercenaria mercenaria

UdeM00000044035 29159 62.4 UdeM00000044035 XP\_034323708.1 27.9 129  
91 2 98 225 35 162 8.80E-07 62.4 29159 cellular

organisms;Eukaryota;Opisthokonta;Metazoa;Eumetazoa;Bilateria;Protostomia;Spiralia;Lophotrochozoa;Mollusca;Bivalvia;Autobranhia;Pteriomorphia;Ostreida;Ostreoidea;Ostreidae;Crassostrea;Crassostrea gigas

UdeM00000044036 6579 302 UdeM00000044036 XP\_033737545.1 47.2 396  
184 10 1 384 1 383 1.10E-78 302 6579 cellular

organisms;Eukaryota;Opisthokonta;Metazoa;Eumetazoa;Bilateria;Protostomia;Spiralia;Lophotrochozoa;Mollusca;Bivalvia;Autobranhia;Pteriomorphia;Pectinida;Pectinoidea;Pectinidae;Pecten;Pecten maximus

UdeM00000044037 6596 1493.8 UdeM00000044037 XP\_045158247.1 67.3  
1125 358 5 1 1122 18 1135 0.00E+00 1493.8 6596  
cellular

organisms;Eukaryota;Opisthokonta;Metazoa;Eumetazoa;Bilateria;Protostomia;Spiralia;Lophotrochozoa;Mollusca;Bivalvia;Autobranhia;Heteroconchia;Euheterodonta;Imparidentia;Venerida;Veneroidea;Veneridae;Mercenaria;Mercenaria mercenaria

UdeM00000044038 1735272 109.4 UdeM00000044038 XP\_041359145.1 66.7  
102 28 2 14 115 1128 1223 6.00E-21 109.4 1735272  
cellular

organisms;Eukaryota;Opisthokonta;Metazoa;Eumetazoa;Bilateria;Protostomia;Spiralia;Lophotrochozoa;Mollusca;Gastropoda;Neomphalina;Neomphaloidea;Peltospiridae;Gigantopelta;Gigantopelta aegis

UdeM00000044039 6596 1021.5 UdeM00000044039 XP\_045158245.1 74.1  
667 172 1 1 667 60 725 4.70E-295 1021.5 6596  
cellular

organisms;Eukaryota;Opisthokonta;Metazoa;Eumetazoa;Bilateria;Protostomia;Spiralia;Lophotrochozoa;Mollusca;Bivalvia;Autobranhia;Heteroconchia;Euheterodonta;Imparidentia;Venerida;Veneroidea;Veneridae;Mercenaria;Mercenaria mercenaria

UdeM00000044040 6596 307 UdeM00000044040 XP\_045159887.1 46.6 949  
452 17 2 907 3 939 8.10E-80 307 6596 cellular

organisms;Eukaryota;Opisthokonta;Metazoa;Eumetazoa;Bilateria;Protostomia;Spiralia;Lophotrochozoa;Mollusca;Bivalvia;Autobranhia;Heteroconchia;Euheterodonta;Imparidentia;Venerida;Veneroidea;Veneridae;Mercenaria;Mercenaria mercenaria

UdeM00000044041 6573 584.3 UdeM00000044041 XP\_021377246.1 51.9 672  
299 9 227 890 15 670 2.60E-163 584.3 6573 cellular

organisms;Eukaryota;Opisthokonta;Metazoa;Eumetazoa;Bilateria;Protostomia;Spiralia;Lophotrochozoa;Mollusca;Bivalvia;Autobranhia;Pteriomorphia;Pectinida;Pectinoidea;Pectinidae;Mizuhopecten;Mizuhopecten yessoensis



UdeM00000044042 6579 96.7 UdeM00000044042 XP\_033754238.1 41.6 125  
 44 3 1 97 1 124 1.90E-17 96.7 6579 cellular  
 organisms;Eukaryota;Opisthokonta;Metazoa;Eumetazoa;Bilateria;Protostomia;  
 Spiralia;Lophotrochozoa;Mollusca;Bivalvia;Autobranchia;Pteriomorpha;Pect  
 inida;Pectinoidea;Pectinidae;Pecten;Pecten maximus  
 UdeM00000044044 1735272 428.3 UdeM00000044044 XP\_041363028.1 67.3  
 303 99 0 4 306 3 305 8.10E-117 428.3 1735272  
 cellular  
 organisms;Eukaryota;Opisthokonta;Metazoa;Eumetazoa;Bilateria;Protostomia;  
 Spiralia;Lophotrochozoa;Mollusca;Gastropoda;Neomphalina;Neomphaloidea;Pel  
 tospiridae;Gigantopelta;Gigantopelta aegis  
 UdeM00000044045 2652724 307 UdeM00000044045 XP\_028513366.1 69.3  
 218 67 0 136 353 73 290 3.20E-80 307 2652724  
 cellular  
 organisms;Eukaryota;Opisthokonta;Metazoa;Eumetazoa;Cnidaria;Anthozoa;Hexa  
 corallia;Actiniaria;Aiptasiidae;Exaiptasia;Exaiptasia diaphana  
 UdeM00000044046 2652724 293.9 UdeM00000044046 XP\_028513366.1 68.5  
 213 67 0 1 213 78 290 1.80E-76 293.9 2652724  
 cellular  
 organisms;Eukaryota;Opisthokonta;Metazoa;Eumetazoa;Cnidaria;Anthozoa;Hexa  
 corallia;Actiniaria;Aiptasiidae;Exaiptasia;Exaiptasia diaphana  
 UdeM00000044047 6596 420.6 UdeM00000044047 XP\_045159726.1 67 315  
 91 3 1 302 1 315 2.40E-114 420.6 6596 cellular  
 organisms;Eukaryota;Opisthokonta;Metazoa;Eumetazoa;Bilateria;Protostomia;  
 Spiralia;Lophotrochozoa;Mollusca;Bivalvia;Autobranchia;Heteroconchia;Euhe  
 terodonta;Imparidentia;Venerida;Veneroidea;Veneridae;Mercenaria;Mercenari  
 a mercenaria  
 UdeM00000044048 7574 152.1 UdeM00000044048 XP\_013388573.1 35.6 278  
 159 8 38 313 301 560 1.20E-33 152.1 7574 cellular  
 organisms;Eukaryota;Opisthokonta;Metazoa;Eumetazoa;Bilateria;Protostomia;  
 Spiralia;Lophotrochozoa;Brachiopoda;Linguliformea;Lingulata;Lingulida;Lin  
 guloidea;Lingulidae;Lingula;Lingula anatina  
 UdeM00000044049 6596 1117.4 UdeM00000044049 XP\_045159736.1 71.5  
 793 224 1 207 999 3 793 0.00E+00 1117.4 6596  
 cellular  
 organisms;Eukaryota;Opisthokonta;Metazoa;Eumetazoa;Bilateria;Protostomia;  
 Spiralia;Lophotrochozoa;Mollusca;Bivalvia;Autobranchia;Heteroconchia;Euhe  
 terodonta;Imparidentia;Venerida;Veneroidea;Veneridae;Mercenaria;Mercenari  
 a mercenaria  
 UdeM00000044050 6596 1117.4 UdeM00000044050 XP\_045159736.1 71.4  
 798 220 3 207 1003 3 793 0.00E+00 1117.4 6596  
 cellular  
 organisms;Eukaryota;Opisthokonta;Metazoa;Eumetazoa;Bilateria;Protostomia;  
 Spiralia;Lophotrochozoa;Mollusca;Bivalvia;Autobranchia;Heteroconchia;Euhe  
 terodonta;Imparidentia;Venerida;Veneroidea;Veneridae;Mercenaria;Mercenari  
 a mercenaria  
 UdeM00000044052 6596 307.4 UdeM00000044052 XP\_045158722.1 57.8 256  
 97 5 6 256 22 271 1.90E-80 307.4 6596 cellular  
 organisms;Eukaryota;Opisthokonta;Metazoa;Eumetazoa;Bilateria;Protostomia;  
 Spiralia;Lophotrochozoa;Mollusca;Bivalvia;Autobranchia;Heteroconchia;Euhe  
 terodonta;Imparidentia;Venerida;Veneroidea;Veneridae;Mercenaria;Mercenari  
 a mercenaria  
 UdeM00000044053 225164 176.8 UdeM00000044053 XP\_009062311.1 51.7  
 145 67 1 3 144 2 146 2.00E-41 176.8 225164

cellular  
organisms;Eukaryota;Opisthokonta;Metazoa;Eumetazoa;Bilateria;Protostomia;  
Spiralia;Lophotrochozoa;Mollusca;Gastropoda;Patellogastropoda;Lottioidea;  
Lottiidae;Lottia;Lottia gigantea  
UdeM00000001179 6596 197.2 UdeM00000001179 XP\_045197699.1 43.7 222  
125 0 98 319 38 259 3.20E-47 197.2 6596 cellular  
organisms;Eukaryota;Opisthokonta;Metazoa;Eumetazoa;Bilateria;Protostomia;  
Spiralia;Lophotrochozoa;Mollusca;Bivalvia;Autobranchia;Heteroconchia;Euhe  
terodonta;Imparidentia;Venerida;Veneroidea;Veneridae;Mercenaria;Mercenari  
a mercenaria  
UdeM00000001180 37653 89.4 UdeM00000001180 XP\_014783301.1 47.4 78  
41 0 30 107 45 122 3.70E-14 89.4 37653 cellular  
organisms;Eukaryota;Opisthokonta;Metazoa;Eumetazoa;Bilateria;Protostomia;  
Spiralia;Lophotrochozoa;Mollusca;Cephalopoda;Coleoidea;Octopodiformes;Oct  
opoda;Incirrata;Octopodidae;Octopus;Octopus bimaculoides  
UdeM00000001181 6596 489.6 UdeM00000001181 XP\_045171625.1 38.7 677  
388 17 249 903 280 951 8.70E-135 489.6 6596 cellular  
organisms;Eukaryota;Opisthokonta;Metazoa;Eumetazoa;Bilateria;Protostomia;  
Spiralia;Lophotrochozoa;Mollusca;Bivalvia;Autobranchia;Heteroconchia;Euhe  
terodonta;Imparidentia;Venerida;Veneroidea;Veneridae;Mercenaria;Mercenari  
a mercenaria  
UdeM00000001182 6596 508.4 UdeM00000001182 XP\_045171625.1 39.5 707  
395 19 195 874 251 951 1.80E-140 508.4 6596 cellular  
organisms;Eukaryota;Opisthokonta;Metazoa;Eumetazoa;Bilateria;Protostomia;  
Spiralia;Lophotrochozoa;Mollusca;Bivalvia;Autobranchia;Heteroconchia;Euhe  
terodonta;Imparidentia;Venerida;Veneroidea;Veneridae;Mercenaria;Mercenari  
a mercenaria  
UdeM00000001183 6596 386.3 UdeM00000001183 XP\_045183782.1 55.2 335  
139 4 84 412 53 382 4.80E-104 386.3 6596 cellular  
organisms;Eukaryota;Opisthokonta;Metazoa;Eumetazoa;Bilateria;Protostomia;  
Spiralia;Lophotrochozoa;Mollusca;Bivalvia;Autobranchia;Heteroconchia;Euhe  
terodonta;Imparidentia;Venerida;Veneroidea;Veneridae;Mercenaria;Mercenari  
a mercenaria  
UdeM00000001188 400727 196.4 UdeM00000001188 XP\_025084182.1 65.9  
132 45 0 4 135 3 134 2.70E-47 196.4 400727  
cellular  
organisms;Eukaryota;Opisthokonta;Metazoa;Eumetazoa;Bilateria;Protostomia;  
Spiralia;Lophotrochozoa;Mollusca;Gastropoda;Caenogastropoda;Architaeniogl  
ossa;Ampullarioidea;Ampullariidae;Pomacea;Pomacea canaliculata  
UdeM00000001189 225164 129 UdeM00000001189 XP\_009056591.1 52.6  
95 44 1 34 128 25 118 5.60E-27 129 225164  
cellular  
organisms;Eukaryota;Opisthokonta;Metazoa;Eumetazoa;Bilateria;Protostomia;  
Spiralia;Lophotrochozoa;Mollusca;Gastropoda;Patellogastropoda;Lottioidea;  
Lottiidae;Lottia;Lottia gigantea  
UdeM00000001190 7574 224.2 UdeM00000001190 XP\_013385009.1 70.3 145  
43 0 1 145 7 151 1.20E-55 224.2 7574 cellular  
organisms;Eukaryota;Opisthokonta;Metazoa;Eumetazoa;Bilateria;Protostomia;  
Spiralia;Lophotrochozoa;Brachiopoda;Linguliformea;Lingulata;Lingulida;Lin  
guloidea;Lingulidae;Lingula;Lingula anatina  
UdeM00000001192 7574 268.1 UdeM00000001192 XP\_013417597.1 55.2 250  
110 2 2 250 22 270 2.00E-68 268.1 7574 cellular  
organisms;Eukaryota;Opisthokonta;Metazoa;Eumetazoa;Bilateria;Protostomia;

Spiralia;Lophotrochozoa;Brachiopoda;Linguliformea;Lingulata;Lingulida;Linguloidea;Lingulidae;Lingula;Lingula anatina

UdeM00000001193 7574 268.1 UdeM00000001193 XP\_013417597.1 55.2 250  
110 2 2 250 22 270 2.00E-68 268.1 7574 cellular  
organisms;Eukaryota;Opisthokonta;Metazoa;Eumetazoa;Bilateria;Protostomia;  
Spiralia;Lophotrochozoa;Brachiopoda;Linguliformea;Lingulata;Lingulida;Linguloidea;Lingulidae;Lingula;Lingula anatina

UdeM00000001191 6596 912.9 UdeM00000001191 XP\_045184887.1 47.4 1490  
610 31 57 1391 1 1471 4.90E-262 912.9 6596 cellular  
organisms;Eukaryota;Opisthokonta;Metazoa;Eumetazoa;Bilateria;Protostomia;  
Spiralia;Lophotrochozoa;Mollusca;Bivalvia;Autobranchia;Heteroconchia;Euheterodonta;Imparidentia;Venerida;Veneroidea;Veneridae;Mercenaria;Mercenaria mercenaria

UdeM00000001194 6596 802.4 UdeM00000001194 XP\_045184887.1 51.5 1027  
421 26 137 1114 473 1471 7.50E-229 802.4 6596 cellular  
organisms;Eukaryota;Opisthokonta;Metazoa;Eumetazoa;Bilateria;Protostomia;  
Spiralia;Lophotrochozoa;Mollusca;Bivalvia;Autobranchia;Heteroconchia;Euheterodonta;Imparidentia;Venerida;Veneroidea;Veneridae;Mercenaria;Mercenaria mercenaria

UdeM00000001196 1735272 68.9 UdeM00000001196 XP\_041362472.1 41.4  
87 50 1 1 86 185 271 4.60E-09 68.9 1735272  
cellular  
organisms;Eukaryota;Opisthokonta;Metazoa;Eumetazoa;Bilateria;Protostomia;  
Spiralia;Lophotrochozoa;Mollusca;Gastropoda;Neomphalina;Neomphaloidea;Peltospiridae;Gigantopelta;Gigantopelta aegis

UdeM00000001197 6596 106.3 UdeM00000001197 XP\_045170709.1 65.3 75  
26 0 101 175 363 437 4.20E-20 106.3 6596 cellular  
organisms;Eukaryota;Opisthokonta;Metazoa;Eumetazoa;Bilateria;Protostomia;  
Spiralia;Lophotrochozoa;Mollusca;Bivalvia;Autobranchia;Heteroconchia;Euheterodonta;Imparidentia;Venerida;Veneroidea;Veneridae;Mercenaria;Mercenaria mercenaria

UdeM00000001199 29159 162.2 UdeM00000001199 XP\_019926412.2 42.6 204  
108 5 1 202 275 471 7.20E-37 162.2 29159 cellular  
organisms;Eukaryota;Opisthokonta;Metazoa;Eumetazoa;Bilateria;Protostomia;  
Spiralia;Lophotrochozoa;Mollusca;Bivalvia;Autobranchia;Pteriormorphia;Ostreida;Ostreoidea;Ostreidae;Crassostrea;Crassostrea gigas

UdeM00000001200 45264 458 UdeM00000001200 XP\_044179186.1 48.8 488  
236 7 16 499 3 480 1.60E-125 458 45264 cellular  
organisms;Eukaryota;Opisthokonta;Metazoa;Eumetazoa;Cnidaria;Anthozoa;Hexacorallia;Scleractinia;Astrocoeniina;Acroporidae;Acropora;Acropora millepora

UdeM00000001201 481459 256.5 UdeM00000001201 XP\_040031014.1 35.6  
376 226 4 197 567 89 453 7.80E-65 256.5 481459  
cellular  
organisms;Eukaryota;Opisthokonta;Metazoa;Eumetazoa;Bilateria;Deuterostomia;Chordata;Craniata;Vertebrata;Gnathostomata;Teleostomi;Euteleostomi;Actinopterygii;Actinopteri;Neopterygii;Teleostei;Osteoglossocephalai;Clupeocephala;Euteleostei;Neoteleostei;Eurypterygia;Ctenosquamata;Acanthomorphata;Euacanthomorphacea;Percomorphaceae;Eupercaria;Perciformes;Cottioidei;Gasterosteales;Gasterosteidae;Gasterosteus;Gasterosteus aculeatus;Gasterosteus aculeatus aculeatus

UdeM00000001204 6573 234.6 UdeM00000001204 XP\_021351637.1 58.9 185  
76 0 1 185 1 185 1.30E-58 234.6 6573 cellular  
organisms;Eukaryota;Opisthokonta;Metazoa;Eumetazoa;Bilateria;Protostomia;

Spiralia; Lophotrochozoa; Mollusca; Bivalvia; Autobranchia; Pteriomorpha; Pectinida; Pectinoidea; Pectinidae; Mizuhopecten; Mizuhopecten yessoensis

UdeM00000001205 6579 105.9 UdeM00000001205 XP\_033756770.1 70.7 75  
21 1 1 75 267 340 2.30E-20 105.9 6579 cellular  
organisms; Eukaryota; Opisthokonta; Metazoa; Eumetazoa; Bilateria; Protostomia; Spiralia; Lophotrochozoa; Mollusca; Bivalvia; Autobranchia; Pteriomorpha; Pectinida; Pectinoidea; Pectinidae; Pecten; Pecten maximus

UdeM00000001206 6596 459.9 UdeM00000001206 XP\_045184005.1 67.4 322  
105 0 19 340 73 394 2.80E-126 459.9 6596 cellular  
organisms; Eukaryota; Opisthokonta; Metazoa; Eumetazoa; Bilateria; Protostomia; Spiralia; Lophotrochozoa; Mollusca; Bivalvia; Autobranchia; Heteroconchia; Euheterodonta; Imparidentia; Venerida; Veneroidea; Veneridae; Mercenaria; Mercenaria mercenaria

UdeM00000001207 6596 257.7 UdeM00000001207 XP\_045176242.1 57.9 209  
85 3 105 313 75 280 1.90E-65 257.7 6596 cellular  
organisms; Eukaryota; Opisthokonta; Metazoa; Eumetazoa; Bilateria; Protostomia; Spiralia; Lophotrochozoa; Mollusca; Bivalvia; Autobranchia; Heteroconchia; Euheterodonta; Imparidentia; Venerida; Veneroidea; Veneridae; Mercenaria; Mercenaria mercenaria

UdeM00000001208 6596 258.8 UdeM00000001208 XP\_045176242.1 58.4 209  
84 3 102 310 75 280 8.60E-66 258.8 6596 cellular  
organisms; Eukaryota; Opisthokonta; Metazoa; Eumetazoa; Bilateria; Protostomia; Spiralia; Lophotrochozoa; Mollusca; Bivalvia; Autobranchia; Heteroconchia; Euheterodonta; Imparidentia; Venerida; Veneroidea; Veneridae; Mercenaria; Mercenaria mercenaria

UdeM00000001209 6596 218 UdeM00000001209 XP\_045176242.1 60.2 166  
64 2 57 222 75 238 1.20E-53 218 6596 cellular  
organisms; Eukaryota; Opisthokonta; Metazoa; Eumetazoa; Bilateria; Protostomia; Spiralia; Lophotrochozoa; Mollusca; Bivalvia; Autobranchia; Heteroconchia; Euheterodonta; Imparidentia; Venerida; Veneroidea; Veneridae; Mercenaria; Mercenaria mercenaria

UdeM00000001210 6596 253.1 UdeM00000001210 XP\_045176242.1 57.4 209  
86 3 102 310 75 280 4.70E-64 253.1 6596 cellular  
organisms; Eukaryota; Opisthokonta; Metazoa; Eumetazoa; Bilateria; Protostomia; Spiralia; Lophotrochozoa; Mollusca; Bivalvia; Autobranchia; Heteroconchia; Euheterodonta; Imparidentia; Venerida; Veneroidea; Veneridae; Mercenaria; Mercenaria mercenaria

UdeM00000001211 6526 171 UdeM00000001211 XP\_013073210.1 36.7 256  
159 3 57 312 105 357 2.40E-39 171 6526 cellular  
organisms; Eukaryota; Opisthokonta; Metazoa; Eumetazoa; Bilateria; Protostomia; Spiralia; Lophotrochozoa; Mollusca; Gastropoda; Heterobranchia; Euthyneura; Panpulmonata; Hygrophila; Lymnaeidae; Planorbidae; Biomphalaria; Biomphalaria glabrata

UdeM00000001212 6565 132.9 UdeM00000001212 XP\_022305415.1 82.2 501  
88 1 1 501 1 500 1.10E-27 132.9 6565 cellular  
organisms; Eukaryota; Opisthokonta; Metazoa; Eumetazoa; Bilateria; Protostomia; Spiralia; Lophotrochozoa; Mollusca; Bivalvia; Autobranchia; Pteriomorpha; Ostreida; Ostreidae; Crassostrea; Crassostrea virginica

UdeM00000001214 2607531 73.9 UdeM00000001214 XP\_029653429.1 70.7  
58 16 1 3 60 28 84 3.50E-10 73.9 2607531  
cellular  
organisms; Eukaryota; Opisthokonta; Metazoa; Eumetazoa; Bilateria; Protostomia; Spiralia; Lophotrochozoa; Mollusca; Cephalopoda; Coleoidea; Octopodiformes; Octopoda; Incirrata; Octopodidae; Octopus; Octopus sinensis

UdeM00000001215 6596 154.1 UdeM00000001215 XP\_045160376.1 52 152  
 50 3 1 129 28 179 1.30E-34 154.1 6596 cellular  
 organisms;Eukaryota;Opisthokonta;Metazoa;Eumetazoa;Bilateria;Protostomia;  
 Spiralia;Lophotrochozoa;Mollusca;Bivalvia;Autobranchia;Heteroconchia;Euhe  
 terodonta;Imparidentia;Venerida;Veneroidea;Veneridae;Mercenaria;Mercenari  
 a mercenaria  
 UdeM00000001216 6573 101.7 UdeM00000001216 XP\_021372908.1 54.4 90  
 41 0 1 90 259 348 5.50E-19 101.7 6573 cellular  
 organisms;Eukaryota;Opisthokonta;Metazoa;Eumetazoa;Bilateria;Protostomia;  
 Spiralia;Lophotrochozoa;Mollusca;Bivalvia;Autobranchia;Pteriormorphia;Pect  
 inida;Pectinoidea;Pectinidae;Mizuhopecten;Mizuhopecten yessoensis  
 UdeM00000001217 6596 179.5 UdeM00000001217 XP\_045179120.1 68.1 116  
 36 1 48 163 1 115 3.50E-42 179.5 6596 cellular  
 organisms;Eukaryota;Opisthokonta;Metazoa;Eumetazoa;Bilateria;Protostomia;  
 Spiralia;Lophotrochozoa;Mollusca;Bivalvia;Autobranchia;Heteroconchia;Euhe  
 terodonta;Imparidentia;Venerida;Veneroidea;Veneridae;Mercenaria;Mercenari  
 a mercenaria  
 UdeM00000001218 6596 314.3 UdeM00000001218 XP\_045201099.1 57.1 261  
 79 1 275 502 1 261 2.90E-82 314.3 6596 cellular  
 organisms;Eukaryota;Opisthokonta;Metazoa;Eumetazoa;Bilateria;Protostomia;  
 Spiralia;Lophotrochozoa;Mollusca;Bivalvia;Autobranchia;Heteroconchia;Euhe  
 terodonta;Imparidentia;Venerida;Veneroidea;Veneridae;Mercenaria;Mercenari  
 a mercenaria  
 UdeM00000001219 8355 62.4 UdeM00000001219 XP\_041441910.1 24 246  
 174 7 1 240 273 511 9.10E-07 62.4 8355 cellular  
 organisms;Eukaryota;Opisthokonta;Metazoa;Eumetazoa;Bilateria;Deuterostomi  
 a;Chordata;Craniata;Vertebrata;Gnathostomata;Teleostomi;Euteleostomi;Sarc  
 opterygii;Dipnotetrapodomorpha;Tetrapoda;Amphibia;Batrachia;Anura;Pipoide  
 a;Pipidae;Xenopodinae;Xenopus;Xenopus;Xenopus laevis  
 UdeM00000001220 27687 103.6 UdeM00000001220 XP\_028656852.1 39.4 137  
 79 4 4 137 316 451 2.20E-19 103.6 27687 cellular  
 organisms;Eukaryota;Opisthokonta;Metazoa;Eumetazoa;Bilateria;Deuterostomi  
 a;Chordata;Craniata;Vertebrata;Gnathostomata;Teleostomi;Euteleostomi;Acti  
 nopterygii;Cladistia;Polypteriformes;Polypteridae;Erpetoichthys;Erpetoich  
 thys calabaricus  
 UdeM00000001221 6596 80.9 UdeM00000001221 XP\_045192251.1 51.6 91  
 41 2 88 175 328 418 1.80E-12 80.9 6596 cellular  
 organisms;Eukaryota;Opisthokonta;Metazoa;Eumetazoa;Bilateria;Protostomia;  
 Spiralia;Lophotrochozoa;Mollusca;Bivalvia;Autobranchia;Heteroconchia;Euhe  
 terodonta;Imparidentia;Venerida;Veneroidea;Veneridae;Mercenaria;Mercenari  
 a mercenaria  
 UdeM00000001222 6596 80.9 UdeM00000001222 XP\_045192251.1 51.6 91  
 41 2 274 361 328 418 3.70E-12 80.9 6596 cellular  
 organisms;Eukaryota;Opisthokonta;Metazoa;Eumetazoa;Bilateria;Protostomia;  
 Spiralia;Lophotrochozoa;Mollusca;Bivalvia;Autobranchia;Heteroconchia;Euhe  
 terodonta;Imparidentia;Venerida;Veneroidea;Veneridae;Mercenaria;Mercenari  
 a mercenaria  
 UdeM00000001225 1735272 436.8 UdeM00000001225 XP\_041346684.1 33.1  
 825 503 20 108 895 25 837 8.00E-119 436.8 1735272  
 cellular  
 organisms;Eukaryota;Opisthokonta;Metazoa;Eumetazoa;Bilateria;Protostomia;  
 Spiralia;Lophotrochozoa;Mollusca;Gastropoda;Neomphalina;Neomphaloidea;Pel  
 tospiridae;Gigantopelta;Gigantopelta aegis

UdeM00000001227 45264 105.5 UdeM00000001227 XP\_044167875.1 34.4 192  
 116 2 1 192 433 614 2.40E-19 105.5 45264 cellular  
 organisms;Eukaryota;Opisthokonta;Metazoa;Eumetazoa;Cnidaria;Anthozoa;Hexa  
 corallia;Scleractinia;Astrocoeniina;Acroporidae;Acropora;Acropora  
 millepora  
 UdeM00000001228 45264 105.5 UdeM00000001228 XP\_044167875.1 34.4 192  
 116 2 1 192 433 614 2.40E-19 105.5 45264 cellular  
 organisms;Eukaryota;Opisthokonta;Metazoa;Eumetazoa;Cnidaria;Anthozoa;Hexa  
 corallia;Scleractinia;Astrocoeniina;Acroporidae;Acropora;Acropora  
 millepora  
 UdeM00000001229 6565 169.5 UdeM00000001229 XP\_022308825.1 52.3 151  
 70 2 1 150 1 150 3.30E-39 169.5 6565 cellular  
 organisms;Eukaryota;Opisthokonta;Metazoa;Eumetazoa;Bilateria;Protostomia;  
 Spiralia;Lophotrochozoa;Mollusca;Bivalvia;Autobranchia;Pteriormorphia;Ostr  
 eida;Ostreoidea;Ostreidae;Crassostrea;Crassostrea virginica  
 UdeM00000001230 6579 92 UdeM00000001230 XP\_033729790.1 47.9 94  
 49 0 10 103 17 110 5.00E-16 92 6579 cellular  
 organisms;Eukaryota;Opisthokonta;Metazoa;Eumetazoa;Bilateria;Protostomia;  
 Spiralia;Lophotrochozoa;Mollusca;Bivalvia;Autobranchia;Pteriormorphia;Pect  
 inida;Pectinoidea;Pectinidae;Pecten;Pecten maximus  
 UdeM00000001231 6596 107.5 UdeM00000001231 XP\_045215344.1 31.7 202  
 129 3 77 276 560 754 2.90E-20 107.5 6596 cellular  
 organisms;Eukaryota;Opisthokonta;Metazoa;Eumetazoa;Bilateria;Protostomia;  
 Spiralia;Lophotrochozoa;Mollusca;Bivalvia;Autobranchia;Heteroconchia;Euhe  
 terodonta;Imparidentia;Venerida;Veneroidea;Veneridae;Mercenaria;Mercenari  
 a mercenaria  
 UdeM00000001232 181472 98.2 UdeM00000001232 XP\_029968728.1 29.1  
 234 153 6 73 301 99 324 2.00E-17 98.2 181472  
 cellular  
 organisms;Eukaryota;Opisthokonta;Metazoa;Eumetazoa;Bilateria;Deuterostomi  
 a;Chordata;Craniata;Vertebrata;Gnathostomata;Teleostomi;Euteleostomi;Acti  
 nopterygii;Actinopteri;Neopterygii;Teleostei;Osteoglossocephalai;Clupeoce  
 phala;Euteleosteomorpha;Neoteleostei;Eurypterygia;Ctenosquamata;Acanthomo  
 rphata;Euacanthomorphacea;Percomorphaceae;Ovalentaria;Blenniimorphae;Blen  
 niiformes;Blennioidei;Blenniidae;Salariinae;Salaris;Salaris fasciatus  
 UdeM00000001233 6596 107.8 UdeM00000001233 XP\_045215344.1 32.2 202  
 128 3 79 278 560 754 2.30E-20 107.8 6596 cellular  
 organisms;Eukaryota;Opisthokonta;Metazoa;Eumetazoa;Bilateria;Protostomia;  
 Spiralia;Lophotrochozoa;Mollusca;Bivalvia;Autobranchia;Heteroconchia;Euhe  
 terodonta;Imparidentia;Venerida;Veneroidea;Veneridae;Mercenaria;Mercenari  
 a mercenaria  
 UdeM00000001236 286706 69.3 UdeM00000001236 XP\_014290745.1 33.1  
 121 73 6 104 217 139 258 7.20E-09 69.3 286706  
 cellular  
 organisms;Eukaryota;Opisthokonta;Metazoa;Eumetazoa;Bilateria;Protostomia;  
 Ecdysozoa;Panarthropoda;Arthropoda;Mandibulata;Pancrustacea;Hexapoda;Inse  
 cta;Dicondylia;Pterygota;Neoptera;Paraneoptera;Hemiptera;Prosorrhyncha;He  
 teroptera;Euheteroptera;Neoheteroptera;Panheteroptera;Pentatomomorpha;Pen  
 tatomoidea;Pentatomidae;Pentatominae;Halyomorpha;Halyomorpha halys  
 UdeM00000001237 286706 69.3 UdeM00000001237 XP\_014290745.1 33.1  
 121 73 6 95 208 139 258 6.90E-09 69.3 286706  
 cellular  
 organisms;Eukaryota;Opisthokonta;Metazoa;Eumetazoa;Bilateria;Protostomia;  
 Ecdysozoa;Panarthropoda;Arthropoda;Mandibulata;Pancrustacea;Hexapoda;Inse

cta;Dicondylia;Pterygota;Neoptera;Paraneoptera;Hemiptera;Prosorrhyncha;Heteroptera;Euheteroptera;Neoheteroptera;Panheteroptera;Pentatomomorpha;Pentatomoidea;Pentatomidae;Pentatominae;Halyomorpha;Halyomorpha halys

UdeM00000001240 1234273 66.2 UdeM00000001240 XP\_026994462.1 27.5  
167 111 4 41 207 7 163 5.70E-08 66.2 1234273  
cellular

organisms;Eukaryota;Opisthokonta;Metazoa;Eumetazoa;Bilateria;Deuterostomia;Chordata;Craniata;Vertebrata;Gnathostomata;Teleostomi;Euteleostomi;Actinopterygii;Actinopteri;Neopterygii;Teleostei;Osteoglossocephalai;Clupeocephala;Otomorpha;Ostariophysi;Otophysi;Characiphysae;Siluriformes;Siluridae;Bagridae;Tachysurus;Tachysurus fulvidraco

UdeM00000001241 6596 84 UdeM00000001241 XP\_045183821.1 42.3 97  
50 3 93 183 144 240 2.80E-13 84 6596 cellular

organisms;Eukaryota;Opisthokonta;Metazoa;Eumetazoa;Bilateria;Protostomia;Spiralia;Lophotrochozoa;Mollusca;Bivalvia;Autobranchia;Heteroconchia;Euheterodonta;Imparidentia;Venerida;Veneroidea;Veneridae;Mercenaria;Mercenaria mercenaria

UdeM00000001242 29159 235 UdeM00000001242 XP\_034321382.1 31 484  
193 10 113 536 16 418 3.00E-58 235 29159 cellular

organisms;Eukaryota;Opisthokonta;Metazoa;Eumetazoa;Bilateria;Protostomia;Spiralia;Lophotrochozoa;Mollusca;Bivalvia;Autobranchia;Pteriormorpha;Ostreida;Ostreidae;Crassostrea;Crassostrea gigas

UdeM00000001243 6596 359 UdeM00000001243 XP\_045187557.1 31 780  
339 23 52 732 3 682 1.40E-95 359 6596 cellular

organisms;Eukaryota;Opisthokonta;Metazoa;Eumetazoa;Bilateria;Protostomia;Spiralia;Lophotrochozoa;Mollusca;Bivalvia;Autobranchia;Heteroconchia;Euheterodonta;Imparidentia;Venerida;Veneroidea;Veneridae;Mercenaria;Mercenaria mercenaria

UdeM00000001244 6565 105.5 UdeM00000001244 XP\_022310008.1 54.2 96  
40 3 3 96 5 98 4.10E-20 105.5 6565 cellular

organisms;Eukaryota;Opisthokonta;Metazoa;Eumetazoa;Bilateria;Protostomia;Spiralia;Lophotrochozoa;Mollusca;Bivalvia;Autobranchia;Pteriormorpha;Ostreida;Ostreidae;Crassostrea;Crassostrea virginica

UdeM00000001247 6596 632.5 UdeM00000001247 XP\_045184739.1 40.5 991  
549 21 1 972 168 1136 1.20E-177 632.5 6596 cellular

organisms;Eukaryota;Opisthokonta;Metazoa;Eumetazoa;Bilateria;Protostomia;Spiralia;Lophotrochozoa;Mollusca;Bivalvia;Autobranchia;Heteroconchia;Euheterodonta;Imparidentia;Venerida;Veneroidea;Veneridae;Mercenaria;Mercenaria mercenaria

UdeM00000001249 6596 446 UdeM00000001249 XP\_045184940.1 57.7 471  
165 9 3 462 235 682 5.90E-122 446 6596 cellular

organisms;Eukaryota;Opisthokonta;Metazoa;Eumetazoa;Bilateria;Protostomia;Spiralia;Lophotrochozoa;Mollusca;Bivalvia;Autobranchia;Heteroconchia;Euheterodonta;Imparidentia;Venerida;Veneroidea;Veneridae;Mercenaria;Mercenaria mercenaria

UdeM00000001248 6596 529.6 UdeM00000001248 XP\_045184940.1 48.4 734  
299 19 3 712 5 682 6.10E-147 529.6 6596 cellular

organisms;Eukaryota;Opisthokonta;Metazoa;Eumetazoa;Bilateria;Protostomia;Spiralia;Lophotrochozoa;Mollusca;Bivalvia;Autobranchia;Heteroconchia;Euheterodonta;Imparidentia;Venerida;Veneroidea;Veneridae;Mercenaria;Mercenaria mercenaria

UdeM00000001250 6573 258.5 UdeM00000001250 XP\_021376968.1 52.6 228  
106 1 334 561 397 622 3.70E-65 258.5 6573 cellular

organisms;Eukaryota;Opisthokonta;Metazoa;Eumetazoa;Bilateria;Protostomia;

Spiralia; Lophotrochozoa; Mollusca; Bivalvia; Autobranchia; Pteriomorpha; Pectinida; Pectinoidea; Pectinidae; Mizuhopecten; Mizuhopecten yessoensis  
UdeM00000001251 6573 289.3 UdeM00000001251 XP\_021376968.1 52.5 261  
118 2 302 562 368 622 3.70E-74 289.3 6573 cellular  
organisms; Eukaryota; Opisthokonta; Metazoa; Eumetazoa; Bilateria; Protostomia; Spiralia; Lophotrochozoa; Mollusca; Bivalvia; Autobranchia; Pteriomorpha; Pectinida; Pectinoidea; Pectinidae; Mizuhopecten; Mizuhopecten yessoensis  
UdeM00000001252 6596 109 UdeM00000001252 XP\_045164125.1 52.5 99  
47 0 1 99 320 418 4.30E-21 109 6596 cellular  
organisms; Eukaryota; Opisthokonta; Metazoa; Eumetazoa; Bilateria; Protostomia; Spiralia; Lophotrochozoa; Mollusca; Bivalvia; Autobranchia; Heteroconchia; Euheterodonta; Imparidentia; Venerida; Veneroidea; Veneridae; Mercenaria; Mercenaria mercenaria  
UdeM00000001253 6565 125.9 UdeM00000001253 XP\_022327962.1 53.4 116  
52 1 2 115 603 718 3.20E-26 125.9 6565 cellular  
organisms; Eukaryota; Opisthokonta; Metazoa; Eumetazoa; Bilateria; Protostomia; Spiralia; Lophotrochozoa; Mollusca; Bivalvia; Autobranchia; Pteriomorpha; Ostreida; Ostreoidea; Ostreidae; Crassostrea; Crassostrea virginica  
UdeM00000001254 6579 735.7 UdeM00000001254 XP\_033724973.1 46.3 799  
405 12 3 788 2 789 6.10E-209 735.7 6579 cellular  
organisms; Eukaryota; Opisthokonta; Metazoa; Eumetazoa; Bilateria; Protostomia; Spiralia; Lophotrochozoa; Mollusca; Bivalvia; Autobranchia; Pteriomorpha; Pectinida; Pectinoidea; Pectinidae; Pecten; Pecten maximus  
UdeM00000001255 6596 3602.4 UdeM00000001255 XP\_045183974.1 74.6  
2608 621 6 1 2598 1 2577 0.00E+00 3602.4 6596  
cellular  
organisms; Eukaryota; Opisthokonta; Metazoa; Eumetazoa; Bilateria; Protostomia; Spiralia; Lophotrochozoa; Mollusca; Bivalvia; Autobranchia; Heteroconchia; Euheterodonta; Imparidentia; Venerida; Veneroidea; Veneridae; Mercenaria; Mercenaria mercenaria  
UdeM000000026897 6596 157.1 UdeM000000026897 XP\_045213761.1 39.1 274  
138 10 1 263 31 286 3.90E-35 157.1 6596 cellular  
organisms; Eukaryota; Opisthokonta; Metazoa; Eumetazoa; Bilateria; Protostomia; Spiralia; Lophotrochozoa; Mollusca; Bivalvia; Autobranchia; Heteroconchia; Euheterodonta; Imparidentia; Venerida; Veneroidea; Veneridae; Mercenaria; Mercenaria mercenaria  
UdeM000000026899 6526 478.8 UdeM000000026899 XP\_013062640.1 74.5 330  
82 1 1 330 1 328 5.80E-132 478.8 6526 cellular  
organisms; Eukaryota; Opisthokonta; Metazoa; Eumetazoa; Bilateria; Protostomia; Spiralia; Lophotrochozoa; Mollusca; Gastropoda; Heterobranchia; Euthyneura; Panpulmonata; Hygrophila; Lymnaeidae; Planorbidae; Biomphalaria; Biomphalaria glabrata  
UdeM000000026900 6596 137.9 UdeM000000026900 XP\_045214019.1 33.6 384  
176 13 137 452 154 526 3.20E-29 137.9 6596 cellular  
organisms; Eukaryota; Opisthokonta; Metazoa; Eumetazoa; Bilateria; Protostomia; Spiralia; Lophotrochozoa; Mollusca; Bivalvia; Autobranchia; Heteroconchia; Euheterodonta; Imparidentia; Venerida; Veneroidea; Veneridae; Mercenaria; Mercenaria mercenaria  
UdeM000000026901 6596 131 UdeM000000026901 XP\_045214019.1 32.3 541  
261 16 1 453 3 526 4.00E-27 131 6596 cellular  
organisms; Eukaryota; Opisthokonta; Metazoa; Eumetazoa; Bilateria; Protostomia; Spiralia; Lophotrochozoa; Mollusca; Bivalvia; Autobranchia; Heteroconchia; Euheterodonta; Imparidentia; Venerida; Veneroidea; Veneridae; Mercenaria; Mercenaria mercenaria



UdeM00000026902 6579 410.6 UdeM00000026902 XP\_033751404.1 73.8 275  
 72 0 1 275 1 275 1.70E-111 410.6 6579 cellular  
 organisms;Eukaryota;Opisthokonta;Metazoa;Eumetazoa;Bilateria;Protostomia;  
 Spiralia;Lophotrochozoa;Mollusca;Bivalvia;Autobranchia;Pteriomorpha;Pect  
 inida;Pectinoidea;Pectinidae;Pecten;Pecten maximus  
 UdeM00000026903 6596 156.4 UdeM00000026903 XP\_045194930.1 44.7 206  
 102 4 1 206 111 304 4.40E-35 156.4 6596 cellular  
 organisms;Eukaryota;Opisthokonta;Metazoa;Eumetazoa;Bilateria;Protostomia;  
 Spiralia;Lophotrochozoa;Mollusca;Bivalvia;Autobranchia;Heteroconchia;Euhe  
 terodonta;Imparidentia;Venerida;Veneroidea;Veneridae;Mercenaria;Mercenari  
 a mercenaria  
 UdeM00000026904 6596 448.7 UdeM00000026904 XP\_045212676.1 58.2 428  
 158 4 10 428 12 427 8.40E-123 448.7 6596 cellular  
 organisms;Eukaryota;Opisthokonta;Metazoa;Eumetazoa;Bilateria;Protostomia;  
 Spiralia;Lophotrochozoa;Mollusca;Bivalvia;Autobranchia;Heteroconchia;Euhe  
 terodonta;Imparidentia;Venerida;Veneroidea;Veneridae;Mercenaria;Mercenari  
 a mercenaria  
 UdeM00000026905 6596 401.4 UdeM00000026905 XP\_045214945.1 59.4 340  
 102 3 1 305 38 376 1.10E-108 401.4 6596 cellular  
 organisms;Eukaryota;Opisthokonta;Metazoa;Eumetazoa;Bilateria;Protostomia;  
 Spiralia;Lophotrochozoa;Mollusca;Bivalvia;Autobranchia;Heteroconchia;Euhe  
 terodonta;Imparidentia;Venerida;Veneroidea;Veneridae;Mercenaria;Mercenari  
 a mercenaria  
 UdeM00000026906 6573 578.9 UdeM00000026906 XP\_021341299.1 79 357  
 74 1 29 385 5 360 4.60E-162 578.9 6573 cellular  
 organisms;Eukaryota;Opisthokonta;Metazoa;Eumetazoa;Bilateria;Protostomia;  
 Spiralia;Lophotrochozoa;Mollusca;Bivalvia;Autobranchia;Pteriomorpha;Pect  
 inida;Pectinoidea;Pectinidae;Mizuhopecten;Mizuhopecten yessoensis  
 UdeM00000026907 6573 578.9 UdeM00000026907 XP\_021341299.1 79 357  
 74 1 4 360 5 360 4.30E-162 578.9 6573 cellular  
 organisms;Eukaryota;Opisthokonta;Metazoa;Eumetazoa;Bilateria;Protostomia;  
 Spiralia;Lophotrochozoa;Mollusca;Bivalvia;Autobranchia;Pteriomorpha;Pect  
 inida;Pectinoidea;Pectinidae;Mizuhopecten;Mizuhopecten yessoensis  
 UdeM00000026908 6596 191.8 UdeM00000026908 XP\_045214943.1 27.2 558  
 355 15 414 961 492 1008 4.00E-45 191.8 6596 cellular  
 organisms;Eukaryota;Opisthokonta;Metazoa;Eumetazoa;Bilateria;Protostomia;  
 Spiralia;Lophotrochozoa;Mollusca;Bivalvia;Autobranchia;Heteroconchia;Euhe  
 terodonta;Imparidentia;Venerida;Veneroidea;Veneridae;Mercenaria;Mercenari  
 a mercenaria  
 UdeM00000026909 6573 470.7 UdeM00000026909 XP\_021341289.1 86.7 263  
 34 1 11 272 15 277 1.30E-129 470.7 6573 cellular  
 organisms;Eukaryota;Opisthokonta;Metazoa;Eumetazoa;Bilateria;Protostomia;  
 Spiralia;Lophotrochozoa;Mollusca;Bivalvia;Autobranchia;Pteriomorpha;Pect  
 inida;Pectinoidea;Pectinidae;Mizuhopecten;Mizuhopecten yessoensis  
 UdeM00000026910 29159 267.3 UdeM00000026910 XP\_034311585.1 40 380  
 217 2 20 389 27 405 3.20E-68 267.3 29159 cellular  
 organisms;Eukaryota;Opisthokonta;Metazoa;Eumetazoa;Bilateria;Protostomia;  
 Spiralia;Lophotrochozoa;Mollusca;Bivalvia;Autobranchia;Pteriomorpha;Ostr  
 eida;Ostreoidea;Ostreidae;Crassostrea;Crassostrea gigas  
 UdeM00000026911 400727 335.5 UdeM00000026911 XP\_025110164.1 24.1  
 1844 934 53 151 1608 327 2090 3.70E-88 335.5 400727  
 cellular  
 organisms;Eukaryota;Opisthokonta;Metazoa;Eumetazoa;Bilateria;Protostomia;

Spiralia;Lophotrochozoa;Mollusca;Gastropoda;Caenogastropoda;Architaenioglossa;Ampullarioidea;Ampullariidae;Pomacea;Pomacea canaliculata  
 UdeM00000026912 6579 528.1 UdeM00000026912 XP\_033738046.1 53.5 492  
 219 5 3 492 2 485 1.20E-146 528.1 6579 cellular  
 organisms;Eukaryota;Opisthokonta;Metazoa;Eumetazoa;Bilateria;Protostomia;  
 Spiralia;Lophotrochozoa;Mollusca;Bivalvia;Autobranhia;Pteriormorphia;Pectinida;  
 Pectinoidea;Pectinidae;Pecten;Pecten maximus  
 UdeM00000026913 6579 856.7 UdeM00000026913 XP\_033741603.1 81.7 497  
 91 0 46 542 41 537 1.60E-245 856.7 6579 cellular  
 organisms;Eukaryota;Opisthokonta;Metazoa;Eumetazoa;Bilateria;Protostomia;  
 Spiralia;Lophotrochozoa;Mollusca;Bivalvia;Autobranhia;Pteriormorphia;Pectinida;  
 Pectinoidea;Pectinidae;Pecten;Pecten maximus  
 UdeM00000026915 6573 239.2 UdeM00000026915 XP\_021354704.1 58.9 202  
 76 2 1 202 1 195 4.70E-60 239.2 6573 cellular  
 organisms;Eukaryota;Opisthokonta;Metazoa;Eumetazoa;Bilateria;Protostomia;  
 Spiralia;Lophotrochozoa;Mollusca;Bivalvia;Autobranhia;Pteriormorphia;Pectinida;  
 Pectinoidea;Pectinidae;Mizuhopecten;Mizuhopecten yessoensis  
 UdeM00000026914 6573 749.6 UdeM00000026914 XP\_021354704.1 68 543  
 166 3 1 542 1 536 2.80E-213 749.6 6573 cellular  
 organisms;Eukaryota;Opisthokonta;Metazoa;Eumetazoa;Bilateria;Protostomia;  
 Spiralia;Lophotrochozoa;Mollusca;Bivalvia;Autobranhia;Pteriormorphia;Pectinida;  
 Pectinoidea;Pectinidae;Mizuhopecten;Mizuhopecten yessoensis  
 UdeM00000026916 6596 365.2 UdeM00000026916 XP\_045213988.1 67.3 441  
 120 6 1 422 1 436 1.20E-97 365.2 6596 cellular  
 organisms;Eukaryota;Opisthokonta;Metazoa;Eumetazoa;Bilateria;Protostomia;  
 Spiralia;Lophotrochozoa;Mollusca;Bivalvia;Autobranhia;Heteroconchia;Euheterodonta;  
 Imparidentia;Venerida;Veneroidea;Veneridae;Mercenaria;Mercenaria mercenaria  
 UdeM00000026917 29159 544.3 UdeM00000026917 XP\_011436637.2 60.5 400  
 152 1 7 400 7 406 1.40E-151 544.3 29159 cellular  
 organisms;Eukaryota;Opisthokonta;Metazoa;Eumetazoa;Bilateria;Protostomia;  
 Spiralia;Lophotrochozoa;Mollusca;Bivalvia;Autobranhia;Pteriormorphia;Ostreida;  
 Ostreioidea;Ostreidae;Crassostrea;Crassostrea gigas  
 UdeM00000026918 6579 470.3 UdeM00000026918 XP\_033733827.1 64 325  
 117 0 5 329 3 327 2.00E-129 470.3 6579 cellular  
 organisms;Eukaryota;Opisthokonta;Metazoa;Eumetazoa;Bilateria;Protostomia;  
 Spiralia;Lophotrochozoa;Mollusca;Bivalvia;Autobranhia;Pteriormorphia;Pectinida;  
 Pectinoidea;Pectinidae;Pecten;Pecten maximus  
 UdeM00000026919 6596 90.5 UdeM00000026919 XP\_045211864.1 36.5 115  
 73 0 32 146 33 147 2.50E-15 90.5 6596 cellular  
 organisms;Eukaryota;Opisthokonta;Metazoa;Eumetazoa;Bilateria;Protostomia;  
 Spiralia;Lophotrochozoa;Mollusca;Bivalvia;Autobranhia;Heteroconchia;Euheterodonta;  
 Imparidentia;Venerida;Veneroidea;Veneridae;Mercenaria;Mercenaria mercenaria  
 UdeM00000026920 225164 394 UdeM00000026920 XP\_009062090.1 40.6  
 569 318 9 55 619 31 583 3.90E-106 394 225164  
 cellular  
 organisms;Eukaryota;Opisthokonta;Metazoa;Eumetazoa;Bilateria;Protostomia;  
 Spiralia;Lophotrochozoa;Mollusca;Gastropoda;Patellogastropoda;Lottiioidea;  
 Lottiidae;Lottia;Lottia gigantea  
 UdeM00000026921 6596 154.5 UdeM00000026921 XP\_045212087.1 45.6 171  
 65 4 23 166 23 192 1.20E-34 154.5 6596 cellular  
 organisms;Eukaryota;Opisthokonta;Metazoa;Eumetazoa;Bilateria;Protostomia;  
 Spiralia;Lophotrochozoa;Mollusca;Bivalvia;Autobranhia;Heteroconchia;Euheterodonta;

terodonta;Imparidentia;Venerida;Veneroidea;Veneridae;Mercenaria;Mercenaria mercenaria  
 UdeM00000026922 43179 160.2 UdeM00000026922 XP\_040138649.1 59 117  
 48 0 475 591 30 146 7.90E-36 160.2 43179 cellular  
 organisms;Eukaryota;Opisthokonta;Metazoa;Eumetazoa;Bilateria;Deuterostomia;Chordata;Craniata;Vertebrata;Gnathostomata;Teleostomi;Euteleostomi;Sarcopterygii;Dipnotetrapodomorpha;Tetrapoda;Amniota;Mammalia;Theria;Eutheria;Boreoeutheria;Euarchontoglires;Glires;Rodentia;Sciuromorpha;Sciuridae;Xerinae;Marmotini;Ictidomys;Ictidomys tridecemlineatus  
 UdeM00000026923 6596 441 UdeM00000026923 XP\_045210653.1 56.3 375  
 145 5 1 359 1 372 1.40E-120 441 6596 cellular  
 organisms;Eukaryota;Opisthokonta;Metazoa;Eumetazoa;Bilateria;Protostomia;Spiralia;Lophotrochozoa;Mollusca;Bivalvia;Autobranchia;Heteroconchia;Euheterodonta;Imparidentia;Venerida;Veneroidea;Veneridae;Mercenaria;Mercenaria mercenaria  
 UdeM00000026924 6596 442.2 UdeM00000026924 XP\_045210653.1 56.7 379  
 133 6 1 355 1 372 6.30E-121 442.2 6596 cellular  
 organisms;Eukaryota;Opisthokonta;Metazoa;Eumetazoa;Bilateria;Protostomia;Spiralia;Lophotrochozoa;Mollusca;Bivalvia;Autobranchia;Heteroconchia;Euheterodonta;Imparidentia;Venerida;Veneroidea;Veneridae;Mercenaria;Mercenaria mercenaria  
 UdeM00000026925 6579 1036.2 UdeM00000026925 XP\_033753061.1 76.3  
 642 148 1 1 642 1 638 1.80E-299 1036.2 6579  
 cellular  
 organisms;Eukaryota;Opisthokonta;Metazoa;Eumetazoa;Bilateria;Protostomia;Spiralia;Lophotrochozoa;Mollusca;Bivalvia;Autobranchia;Pteriomorpha;Pectinida;Pectinoidea;Pectinidae;Pecten;Pecten maximus  
 UdeM00000026926 6565 765.4 UdeM00000026926 XP\_022313454.1 85 453  
 68 0 1 453 1 453 4.10E-218 765.4 6565 cellular  
 organisms;Eukaryota;Opisthokonta;Metazoa;Eumetazoa;Bilateria;Protostomia;Spiralia;Lophotrochozoa;Mollusca;Bivalvia;Autobranchia;Pteriomorpha;Ostreida;Ostreoidea;Ostreidae;Crassostrea;Crassostrea virginica  
 UdeM00000026927 6596 320.1 UdeM00000026927 XP\_045212568.1 31.3 715  
 413 18 103 740 169 882 7.80E-84 320.1 6596 cellular  
 organisms;Eukaryota;Opisthokonta;Metazoa;Eumetazoa;Bilateria;Protostomia;Spiralia;Lophotrochozoa;Mollusca;Bivalvia;Autobranchia;Heteroconchia;Euheterodonta;Imparidentia;Venerida;Veneroidea;Veneridae;Mercenaria;Mercenaria mercenaria  
 UdeM00000026928 6596 379.8 UdeM00000026928 XP\_045212571.1 32.7 700  
 402 6 4 640 175 868 7.50E-102 379.8 6596 cellular  
 organisms;Eukaryota;Opisthokonta;Metazoa;Eumetazoa;Bilateria;Protostomia;Spiralia;Lophotrochozoa;Mollusca;Bivalvia;Autobranchia;Heteroconchia;Euheterodonta;Imparidentia;Venerida;Veneroidea;Veneridae;Mercenaria;Mercenaria mercenaria  
 UdeM00000026929 2607531 545.8 UdeM00000026929 XP\_029634113.1 71.9  
 381 93 4 27 407 2 368 4.70E-152 545.8 2607531  
 cellular  
 organisms;Eukaryota;Opisthokonta;Metazoa;Eumetazoa;Bilateria;Protostomia;Spiralia;Lophotrochozoa;Mollusca;Cephalopoda;Coleoidea;Octopodiformes;Octopoda;Incirrata;Octopodidae;Octopus;Octopus sinensis  
 UdeM00000026931 6565 108.2 UdeM00000026931 XP\_022315090.1 48 100  
 52 0 11 110 214 313 1.10E-20 108.2 6565 cellular  
 organisms;Eukaryota;Opisthokonta;Metazoa;Eumetazoa;Bilateria;Protostomia;

Spiralia;Lophotrochozoa;Mollusca;Bivalvia;Autobranchia;Pteriormorphia;Ostr  
eida;Ostreoidea;Ostreidae;Crassostrea;Crassostrea virginica  
UdeM00000026932 6579 98.6 UdeM00000026932 XP\_033748186.1 52.5 80  
38 0 1 80 240 319 7.00E-18 98.6 6579 cellular  
organisms;Eukaryota;Opisthokonta;Metazoa;Eumetazoa;Bilateria;Protostomia;  
Spiralia;Lophotrochozoa;Mollusca;Bivalvia;Autobranchia;Pteriormorphia;Pect  
inida;Pectinoidea;Pectinidae;Pecten;Pecten maximus  
UdeM00000026933 6596 359.8 UdeM00000026933 XP\_045210936.1 49.9 419  
189 8 32 441 25 431 5.10E-96 359.8 6596 cellular  
organisms;Eukaryota;Opisthokonta;Metazoa;Eumetazoa;Bilateria;Protostomia;  
Spiralia;Lophotrochozoa;Mollusca;Bivalvia;Autobranchia;Heteroconchia;Euhe  
terodonta;Imparidentia;Venerida;Veneroidea;Veneridae;Mercenaria;Mercenari  
a mercenaria  
UdeM00000026934 6596 219.2 UdeM00000026934 XP\_045157373.1 30.6 422  
279 10 1740 2152 1 417 6.80E-53 219.2 6596 cellular  
organisms;Eukaryota;Opisthokonta;Metazoa;Eumetazoa;Bilateria;Protostomia;  
Spiralia;Lophotrochozoa;Mollusca;Bivalvia;Autobranchia;Heteroconchia;Euhe  
terodonta;Imparidentia;Venerida;Veneroidea;Veneridae;Mercenaria;Mercenari  
a mercenaria  
UdeM00000026936 6596 260.8 UdeM00000026936 XP\_045211590.1 68.4 187  
58 1 1 186 303 489 1.40E-66 260.8 6596 cellular  
organisms;Eukaryota;Opisthokonta;Metazoa;Eumetazoa;Bilateria;Protostomia;  
Spiralia;Lophotrochozoa;Mollusca;Bivalvia;Autobranchia;Heteroconchia;Euhe  
terodonta;Imparidentia;Venerida;Veneroidea;Veneridae;Mercenaria;Mercenari  
a mercenaria  
UdeM00000026935 6596 647.5 UdeM00000026935 XP\_045211590.1 66.2 473  
157 3 18 488 18 489 1.30E-182 647.5 6596 cellular  
organisms;Eukaryota;Opisthokonta;Metazoa;Eumetazoa;Bilateria;Protostomia;  
Spiralia;Lophotrochozoa;Mollusca;Bivalvia;Autobranchia;Heteroconchia;Euhe  
terodonta;Imparidentia;Venerida;Veneroidea;Veneridae;Mercenaria;Mercenari  
a mercenaria  
UdeM00000026938 6573 481.9 UdeM00000026938 XP\_021380149.1 62.4 386  
136 2 2 387 116 492 7.80E-133 481.9 6573 cellular  
organisms;Eukaryota;Opisthokonta;Metazoa;Eumetazoa;Bilateria;Protostomia;  
Spiralia;Lophotrochozoa;Mollusca;Bivalvia;Autobranchia;Pteriormorphia;Pect  
inida;Pectinoidea;Pectinidae;Mizuhopecten;Mizuhopecten yessoensis  
UdeM00000026937 6573 592.4 UdeM00000026937 XP\_021380149.1 62.6 468  
166 2 36 503 34 492 5.30E-166 592.4 6573 cellular  
organisms;Eukaryota;Opisthokonta;Metazoa;Eumetazoa;Bilateria;Protostomia;  
Spiralia;Lophotrochozoa;Mollusca;Bivalvia;Autobranchia;Pteriormorphia;Pect  
inida;Pectinoidea;Pectinidae;Mizuhopecten;Mizuhopecten yessoensis  
UdeM00000026939 6565 132.5 UdeM00000026939 XP\_022310266.1 48.6 148  
71 1 146 293 184 326 9.00E-28 132.5 6565 cellular  
organisms;Eukaryota;Opisthokonta;Metazoa;Eumetazoa;Bilateria;Protostomia;  
Spiralia;Lophotrochozoa;Mollusca;Bivalvia;Autobranchia;Pteriormorphia;Ostr  
eida;Ostreoidea;Ostreidae;Crassostrea;Crassostrea virginica  
UdeM00000026940 225164 87.4 UdeM00000026940 XP\_009058199.1 51.2  
86 35 2 1 86 31 109 9.70E-15 87.4 225164  
cellular  
organisms;Eukaryota;Opisthokonta;Metazoa;Eumetazoa;Bilateria;Protostomia;  
Spiralia;Lophotrochozoa;Mollusca;Gastropoda;Patellogastropoda;Lottioida;  
Lottiidae;Lottia;Lottia gigantea  
UdeM00000026941 6573 186.4 UdeM00000026941 XP\_021367843.1 34 347  
83 4 5 215 327 663 3.80E-44 186.4 6573 cellular

organisms;Eukaryota;Opisthokonta;Metazoa;Eumetazoa;Bilateria;Protostomia;  
 Spiralia;Lophotrochozoa;Mollusca;Bivalvia;Autobranchia;Pteriomorpha;Pect  
 inida;Pectinoidea;Pectinidae;Mizuhopecten;Mizuhopecten yessoensis  
 UdeM00000026942 37003 164.5 UdeM00000026942 XP\_017289200.1 49.7 143  
 72 0 34 176 241 383 1.30E-37 164.5 37003 cellular  
 organisms;Eukaryota;Opisthokonta;Metazoa;Eumetazoa;Bilateria;Deuterostomi  
 a;Chordata;Craniata;Vertebrata;Gnathostomata;Teleostomi;Euteleostomi;Acti  
 nopterygii;Actinopteri;Neopterygii;Teleostei;Osteoglossocephalai;Clupeoce  
 phala;Euteleosteomorpha;Neoteleostei;Eurypterygia;Ctenosquamata;Acanthomo  
 rphata;Euacanthomorphacea;Percomorphaceae;Ovalentaria;Atherinomorphae;Cyp  
 rinodontiformes;Aplocheiloidei;Rivulidae;Kryptolebias;Kryptolebias  
 marmoratus  
 UdeM00000026943 225164 110.2 UdeM00000026943 XP\_009057737.1 31.2  
 215 138 4 2 208 39 251 3.30E-21 110.2 225164  
 cellular  
 organisms;Eukaryota;Opisthokonta;Metazoa;Eumetazoa;Bilateria;Protostomia;  
 Spiralia;Lophotrochozoa;Mollusca;Gastropoda;Patellogastropoda;Lottioidea;  
 Lottiidae;Lottia;Lottia gigantea  
 UdeM00000026944 6596 373.2 UdeM00000026944 XP\_045214268.1 55.5 373  
 161 2 2 374 3 370 3.80E-100 373.2 6596 cellular  
 organisms;Eukaryota;Opisthokonta;Metazoa;Eumetazoa;Bilateria;Protostomia;  
 Spiralia;Lophotrochozoa;Mollusca;Bivalvia;Autobranchia;Heteroconchia;Euhe  
 terodonta;Imparidentia;Venerida;Veneroidea;Veneridae;Mercenaria;Mercenari  
 a mercenaria  
 UdeM00000018187 29159 301.6 UdeM00000018187 XP\_034334009.1 83.1 172  
 29 0 1 172 1 172 6.40E-79 301.6 29159 cellular  
 organisms;Eukaryota;Opisthokonta;Metazoa;Eumetazoa;Bilateria;Protostomia;  
 Spiralia;Lophotrochozoa;Mollusca;Bivalvia;Autobranchia;Pteriomorpha;Ostr  
 eida;Ostreoidea;Ostreidae;Crassostrea;Crassostrea gigas  
 UdeM00000018189 6579 360.9 UdeM00000018189 XP\_033741366.1 58.6 365  
 145 4 9 372 36 395 1.90E-96 360.9 6579 cellular  
 organisms;Eukaryota;Opisthokonta;Metazoa;Eumetazoa;Bilateria;Protostomia;  
 Spiralia;Lophotrochozoa;Mollusca;Bivalvia;Autobranchia;Pteriomorpha;Pect  
 inida;Pectinoidea;Pectinidae;Pecten;Pecten maximus  
 UdeM00000018191 6579 769.6 UdeM00000018191 XP\_033741352.1 35.1 1372  
 767 27 584 1931 753 2024 9.30E-219 769.6 6579 cellular  
 organisms;Eukaryota;Opisthokonta;Metazoa;Eumetazoa;Bilateria;Protostomia;  
 Spiralia;Lophotrochozoa;Mollusca;Bivalvia;Autobranchia;Heteroconchia;Euhe  
 terodonta;Imparidentia;Venerida;Veneroidea;Veneridae;Mercenaria;Mercenari  
 a mercenaria  
 UdeM00000018192 6596 288.5 UdeM00000018192 XP\_045198734.1 53.4 266  
 116 5 9 268 5 268 9.90E-75 288.5 6596 cellular  
 organisms;Eukaryota;Opisthokonta;Metazoa;Eumetazoa;Bilateria;Protostomia;  
 Spiralia;Lophotrochozoa;Mollusca;Bivalvia;Autobranchia;Heteroconchia;Euhe  
 terodonta;Imparidentia;Venerida;Veneroidea;Veneridae;Mercenaria;Mercenari  
 a mercenaria  
 UdeM00000018193 6596 245.7 UdeM00000018193 XP\_045198734.1 59.3 194  
 76 3 1 193 77 268 5.60E-62 245.7 6596 cellular  
 organisms;Eukaryota;Opisthokonta;Metazoa;Eumetazoa;Bilateria;Protostomia;  
 Spiralia;Lophotrochozoa;Mollusca;Bivalvia;Autobranchia;Heteroconchia;Euhe  
 terodonta;Imparidentia;Venerida;Veneroidea;Veneridae;Mercenaria;Mercenari  
 a mercenaria  
 UdeM00000018194 6596 619.8 UdeM00000018194 XP\_045198734.1 55.8 604  
 256 4 12 605 269 871 3.70E-174 619.8 6596 cellular  
 organisms;Eukaryota;Opisthokonta;Metazoa;Eumetazoa;Bilateria;Protostomia;

Spiralia;Lophotrochozoa;Mollusca;Bivalvia;Autobranchia;Heteroconchia;Euherodonta;Imparidentia;Venerida;Veneroidea;Veneridae;Mercenaria;Mercenaria mercenaria

UdeM00000018196 6596 532.3 UdeM00000018196 XP\_045197905.1 71 372  
101 1 42 406 38 409 5.40E-148 532.3 6596 cellular

organisms;Eukaryota;Opisthokonta;Metazoa;Eumetazoa;Bilateria;Protostomia;Spiralia;Lophotrochozoa;Mollusca;Bivalvia;Autobranchia;Heteroconchia;Euherodonta;Imparidentia;Venerida;Veneroidea;Veneridae;Mercenaria;Mercenaria mercenaria

UdeM00000018197 6565 179.5 UdeM00000018197 XP\_022293810.1 58.9 146  
59 1 1 145 1 146 3.70E-42 179.5 6565 cellular

organisms;Eukaryota;Opisthokonta;Metazoa;Eumetazoa;Bilateria;Protostomia;Spiralia;Lophotrochozoa;Mollusca;Bivalvia;Autobranchia;Pteriomorpha;Ostreida;Ostreoidea;Ostreidae;Crassostrea;Crassostrea virginica

UdeM00000018198 1735272 519.2 UdeM00000018198 XP\_041350633.1 58.3  
408 169 1 2 408 5 412 4.70E-144 519.2 1735272  
cellular

organisms;Eukaryota;Opisthokonta;Metazoa;Eumetazoa;Bilateria;Protostomia;Spiralia;Lophotrochozoa;Mollusca;Gastropoda;Neomphalina;Neomphaloidea;Peltospiridae;Gigantopelta;Gigantopelta aegis

UdeM00000018199 6596 115.9 UdeM00000018199 XP\_045206739.1 31.5 317  
190 11 4 300 7 316 2.00E-22 115.9 6596 cellular

organisms;Eukaryota;Opisthokonta;Metazoa;Eumetazoa;Bilateria;Protostomia;Spiralia;Lophotrochozoa;Mollusca;Bivalvia;Autobranchia;Heteroconchia;Euherodonta;Imparidentia;Venerida;Veneroidea;Veneridae;Mercenaria;Mercenaria mercenaria

UdeM00000018200 29159 67.8 UdeM00000018200 XP\_034330911.1 39.6 101  
57 2 1 100 162 259 1.10E-08 67.8 29159 cellular

organisms;Eukaryota;Opisthokonta;Metazoa;Eumetazoa;Bilateria;Protostomia;Spiralia;Lophotrochozoa;Mollusca;Bivalvia;Autobranchia;Pteriomorpha;Ostreida;Ostreoidea;Ostreidae;Crassostrea;Crassostrea gigas

UdeM00000018201 6565 115.9 UdeM00000018201 XP\_022290343.1 34.4 192  
108 2 1 192 126 299 5.70E-23 115.9 6565 cellular

organisms;Eukaryota;Opisthokonta;Metazoa;Eumetazoa;Bilateria;Protostomia;Spiralia;Lophotrochozoa;Mollusca;Bivalvia;Autobranchia;Pteriomorpha;Ostreida;Ostreoidea;Ostreidae;Crassostrea;Crassostrea virginica

UdeM00000018202 29159 211.5 UdeM00000018202 XP\_034299474.1 43.9 262  
139 4 3 260 239 496 1.70E-51 211.5 29159 cellular

organisms;Eukaryota;Opisthokonta;Metazoa;Eumetazoa;Bilateria;Protostomia;Spiralia;Lophotrochozoa;Mollusca;Bivalvia;Autobranchia;Pteriomorpha;Ostreida;Ostreoidea;Ostreidae;Crassostrea;Crassostrea gigas

UdeM00000018203 6579 2302.7 UdeM00000018203 XP\_033739910.1 70.9  
1651 421 12 1 1642 1 1601 0.00E+00 2302.7 6579  
cellular

organisms;Eukaryota;Opisthokonta;Metazoa;Eumetazoa;Bilateria;Protostomia;Spiralia;Lophotrochozoa;Mollusca;Bivalvia;Autobranchia;Pteriomorpha;Pectinida;Pectinoidea;Pectinidae;Pecten;Pecten maximus

UdeM00000018204 6573 347.4 UdeM00000018204 XP\_021362846.1 40.1 479  
267 8 1 474 1 464 2.90E-92 347.4 6573 cellular

organisms;Eukaryota;Opisthokonta;Metazoa;Eumetazoa;Bilateria;Protostomia;Spiralia;Lophotrochozoa;Mollusca;Bivalvia;Autobranchia;Pteriomorpha;Pectinida;Pectinoidea;Pectinidae;Mizuhopecten;Mizuhopecten yessoensis

UdeM00000018205 6565 332 UdeM00000018205 XP\_022293850.1 89.6 173  
18 0 1 173 1590 1762 4.50E-88 332 6565 cellular

organisms;Eukaryota;Opisthokonta;Metazoa;Eumetazoa;Bilateria;Protostomia;Spiralia;Lophotrochozoa;Mollusca;Bivalvia;Autobranhia;Pteriomorphia;Ostr  
eida;Ostreoidea;Ostreidae;Crassostrea;Crassostrea virginica  
UdeM00000018206 29159 254.6 UdeM00000018206 XP\_034332027.1 41.7 338  
187 6 15 350 11 340 1.90E-64 254.6 29159 cellular  
organisms;Eukaryota;Opisthokonta;Metazoa;Eumetazoa;Bilateria;Protostomia;Spiralia;Lophotrochozoa;Mollusca;Bivalvia;Autobranhia;Pteriomorphia;Ostr  
eida;Ostreoidea;Ostreidae;Crassostrea;Crassostrea gigas  
UdeM00000018207 225164 307.8 UdeM00000018207 XP\_009055956.1 74.7  
194 49 0 2 195 1783 1976 1.00E-80 307.8 225164  
cellular  
organisms;Eukaryota;Opisthokonta;Metazoa;Eumetazoa;Bilateria;Protostomia;Spiralia;Lophotrochozoa;Mollusca;Gastropoda;Patellogastropoda;Lottioidea;  
Lottiidae;Lottia;Lottia gigantea  
UdeM00000018208 6565 289.3 UdeM00000018208 XP\_022293850.1 68.3 199  
63 0 1 199 1995 2193 3.80E-75 289.3 6565 cellular  
organisms;Eukaryota;Opisthokonta;Metazoa;Eumetazoa;Bilateria;Protostomia;Spiralia;Lophotrochozoa;Mollusca;Bivalvia;Autobranhia;Pteriomorphia;Ostr  
eida;Ostreoidea;Ostreidae;Crassostrea;Crassostrea virginica  
UdeM00000018209 6596 328.2 UdeM00000018209 XP\_045196661.1 46.1 371  
181 10 87 451 87 444 1.80E-86 328.2 6596 cellular  
organisms;Eukaryota;Opisthokonta;Metazoa;Eumetazoa;Bilateria;Protostomia;Spiralia;Lophotrochozoa;Mollusca;Bivalvia;Autobranhia;Heteroconchia;Euhe  
terodonta;Imparidentia;Venerida;Veneroidea;Veneridae;Mercenaria;Mercenari  
a mercenaria  
UdeM00000018210 2607531 71.2 UdeM00000018210 XP\_029634650.1 29.9  
234 123 10 30 251 140 344 2.10E-09 71.2 2607531  
cellular  
organisms;Eukaryota;Opisthokonta;Metazoa;Eumetazoa;Bilateria;Protostomia;Spiralia;Lophotrochozoa;Mollusca;Cephalopoda;Coleoidea;Octopodiformes;Oct  
opoda;Incirrata;Octopodidae;Octopus;Octopus sinensis  
UdeM00000018211 6596 421 UdeM00000018211 XP\_045196659.1 59.6 366  
141 4 1 365 1 360 1.50E-114 421 6596 cellular  
organisms;Eukaryota;Opisthokonta;Metazoa;Eumetazoa;Bilateria;Protostomia;Spiralia;Lophotrochozoa;Mollusca;Bivalvia;Autobranhia;Heteroconchia;Euhe  
terodonta;Imparidentia;Venerida;Veneroidea;Veneridae;Mercenaria;Mercenari  
a mercenaria  
UdeM00000018212 6573 305.1 UdeM00000018212 XP\_021352585.1 73.6 235  
58 2 1 234 7 238 7.90E-80 305.1 6573 cellular  
organisms;Eukaryota;Opisthokonta;Metazoa;Eumetazoa;Bilateria;Protostomia;Spiralia;Lophotrochozoa;Mollusca;Bivalvia;Autobranhia;Pteriomorphia;Pect  
inida;Pectinoidea;Pectinidae;Mizuhopecten;Mizuhopecten yessoensis  
UdeM00000018217 6573 167.2 UdeM00000018217 XP\_021360757.1 60.9 151  
56 3 444 591 601 751 7.10E-38 167.2 6573 cellular  
organisms;Eukaryota;Opisthokonta;Metazoa;Eumetazoa;Bilateria;Protostomia;Spiralia;Lophotrochozoa;Mollusca;Bivalvia;Autobranhia;Pteriomorphia;Pect  
inida;Pectinoidea;Pectinidae;Mizuhopecten;Mizuhopecten yessoensis  
UdeM00000018216 400727 457.6 UdeM00000018216 XP\_025099108.1 57.1  
431 175 5 445 865 639 1069 3.60E-125 457.6 400727  
cellular  
organisms;Eukaryota;Opisthokonta;Metazoa;Eumetazoa;Bilateria;Protostomia;Spiralia;Lophotrochozoa;Mollusca;Gastropoda;Caenogastropoda;Architaeniogl  
ossa;Ampullarioidea;Ampullariidae;Pomacea;Pomacea canaliculata

UdeM00000018218 6596 321.6 UdeM00000018218 XP\_045196653.1 69.6 227  
 67 2 11 236 777 1002 8.70E-85 321.6 6596 cellular  
 organisms;Eukaryota;Opisthokonta;Metazoa;Eumetazoa;Bilateria;Protostomia;  
 Spiralia;Lophotrochozoa;Mollusca;Bivalvia;Autobranchia;Heteroconchia;Euhe  
 terodonta;Imparidentia;Venerida;Veneroidea;Veneridae;Mercenaria;Mercenari  
 a mercenaria  
 UdeM00000018219 6596 727.6 UdeM00000018219 XP\_045198721.1 45.5 1036  
 480 29 97 1086 926 1922 2.30E-206 727.6 6596 cellular  
 organisms;Eukaryota;Opisthokonta;Metazoa;Eumetazoa;Bilateria;Protostomia;  
 Spiralia;Lophotrochozoa;Mollusca;Bivalvia;Autobranchia;Heteroconchia;Euhe  
 terodonta;Imparidentia;Venerida;Veneroidea;Veneridae;Mercenaria;Mercenari  
 a mercenaria  
 UdeM00000018219 6596 101.3 UdeM00000018219 XP\_045198721.1 73.8 65  
 17 0 7 71 289 353 8.00E-18 101.3 6596 cellular  
 organisms;Eukaryota;Opisthokonta;Metazoa;Eumetazoa;Bilateria;Protostomia;  
 Spiralia;Lophotrochozoa;Mollusca;Bivalvia;Autobranchia;Heteroconchia;Euhe  
 terodonta;Imparidentia;Venerida;Veneroidea;Veneridae;Mercenaria;Mercenari  
 a mercenaria  
 UdeM00000018220 6596 143.7 UdeM00000018220 XP\_045198721.1 48.7 154  
 72 3 5 154 4 154 2.40E-31 143.7 6596 cellular  
 organisms;Eukaryota;Opisthokonta;Metazoa;Eumetazoa;Bilateria;Protostomia;  
 Spiralia;Lophotrochozoa;Mollusca;Bivalvia;Autobranchia;Heteroconchia;Euhe  
 terodonta;Imparidentia;Venerida;Veneroidea;Veneridae;Mercenaria;Mercenari  
 a mercenaria  
 UdeM00000018221 6596 372.1 UdeM00000018221 XP\_045196434.1 42.2 453  
 254 3 5 449 4 456 1.00E-99 372.1 6596 cellular  
 organisms;Eukaryota;Opisthokonta;Metazoa;Eumetazoa;Bilateria;Protostomia;  
 Spiralia;Lophotrochozoa;Mollusca;Bivalvia;Autobranchia;Heteroconchia;Euhe  
 terodonta;Imparidentia;Venerida;Veneroidea;Veneridae;Mercenaria;Mercenari  
 a mercenaria  
 UdeM00000018222 6596 376.3 UdeM00000018222 XP\_045196434.1 43.5 453  
 251 4 1 449 22 473 5.30E-101 376.3 6596 cellular  
 organisms;Eukaryota;Opisthokonta;Metazoa;Eumetazoa;Bilateria;Protostomia;  
 Spiralia;Lophotrochozoa;Mollusca;Bivalvia;Autobranchia;Heteroconchia;Euhe  
 terodonta;Imparidentia;Venerida;Veneroidea;Veneridae;Mercenaria;Mercenari  
 a mercenaria  
 UdeM00000018223 6596 424.5 UdeM00000018223 XP\_045197322.1 56.1 526  
 138 14 1 460 1 499 1.80E-115 424.5 6596 cellular  
 organisms;Eukaryota;Opisthokonta;Metazoa;Eumetazoa;Bilateria;Protostomia;  
 Spiralia;Lophotrochozoa;Mollusca;Bivalvia;Autobranchia;Heteroconchia;Euhe  
 terodonta;Imparidentia;Venerida;Veneroidea;Veneridae;Mercenaria;Mercenari  
 a mercenaria  
 UdeM00000018224 6579 747.3 UdeM00000018224 XP\_033739400.1 71.4 525  
 145 4 1 523 1 522 1.30E-212 747.3 6579 cellular  
 organisms;Eukaryota;Opisthokonta;Metazoa;Eumetazoa;Bilateria;Protostomia;  
 Spiralia;Lophotrochozoa;Mollusca;Bivalvia;Autobranchia;Pteriomorphia;Pect  
 inida;Pectinoidea;Pectinidae;Pecten;Pecten maximus  
 UdeM00000044066 29159 287 UdeM00000044066 XP\_034304693.1 73.6 507  
 101 2 3 508 4 478 5.50E-74 287 29159 cellular  
 organisms;Eukaryota;Opisthokonta;Metazoa;Eumetazoa;Bilateria;Protostomia;  
 Spiralia;Lophotrochozoa;Mollusca;Bivalvia;Autobranchia;Pteriomorphia;Ostr  
 eida;Ostreoidea;Ostreidae;Crassostrea;Crassostrea gigas  
 UdeM00000044067 6596 807.7 UdeM00000044067 XP\_045176982.1 81.2 463  
 87 0 4 466 7 469 7.50E-231 807.7 6596 cellular



organisms;Eukaryota;Opisthokonta;Metazoa;Eumetazoa;Bilateria;Protostomia; Spiralia;Lophotrochozoa;Mollusca;Bivalvia;Autobranchia;Heteroconchia;Euherodonta;Imparidentia;Venerida;Veneroidea;Veneridae;Mercenaria;Mercenaria mercenaria

UdeM00000044068 6596 243.8 UdeM00000044068 XP\_045174249.1 42.6 324  
178 5 5 322 507 828 3.00E-61 243.8 6596 cellular

organisms;Eukaryota;Opisthokonta;Metazoa;Eumetazoa;Bilateria;Protostomia; Spiralia;Lophotrochozoa;Mollusca;Bivalvia;Autobranchia;Heteroconchia;Euherodonta;Imparidentia;Venerida;Veneroidea;Veneridae;Mercenaria;Mercenaria mercenaria

UdeM00000044069 7906 95.9 UdeM00000044069 XP\_033883484.2 41.3 143  
74 4 119 258 10 145 8.90E-17 95.9 7906 cellular

organisms;Eukaryota;Opisthokonta;Metazoa;Eumetazoa;Bilateria;Deuterostomia;Chordata;Craniata;Vertebrata;Gnathostomata;Teleostomi;Euteleostomi;Actinopterygii;Actinopteri;Chondrostei;Acipenseriformes;Acipenseroides;Acipenseridae;Acipenserinae;Acipenserini;Acipenser;Acipenser ruthenus

UdeM00000044070 400727 215.7 UdeM00000044070 XP\_025109625.1 46.7  
261 131 6 15 270 358 615 7.40E-53 215.7 400727  
cellular

organisms;Eukaryota;Opisthokonta;Metazoa;Eumetazoa;Bilateria;Protostomia; Spiralia;Lophotrochozoa;Mollusca;Gastropoda;Caenogastropoda;Architaenioglossa;Ampullarioidea;Ampullariidae;Pomacea;Pomacea canaliculata

UdeM00000044071 6596 183.7 UdeM00000044071 XP\_045175513.1 35.5 352  
196 11 39 367 14 357 4.40E-43 183.7 6596 cellular

organisms;Eukaryota;Opisthokonta;Metazoa;Eumetazoa;Bilateria;Protostomia; Spiralia;Lophotrochozoa;Mollusca;Bivalvia;Autobranchia;Heteroconchia;Euherodonta;Imparidentia;Venerida;Veneroidea;Veneridae;Mercenaria;Mercenaria mercenaria

UdeM00000044072 7906 107.8 UdeM00000044072 XP\_033861300.1 38 184  
107 2 13 192 8 188 1.60E-20 107.8 7906 cellular

organisms;Eukaryota;Opisthokonta;Metazoa;Eumetazoa;Bilateria;Deuterostomia;Chordata;Craniata;Vertebrata;Gnathostomata;Teleostomi;Euteleostomi;Actinopterygii;Actinopteri;Chondrostei;Acipenseriformes;Acipenseroides;Acipenseridae;Acipenserinae;Acipenserini;Acipenser;Acipenser ruthenus

UdeM00000044074 400727 207.2 UdeM00000044074 XP\_025109625.1 48.2  
253 120 6 4 251 370 616 2.40E-50 207.2 400727  
cellular

organisms;Eukaryota;Opisthokonta;Metazoa;Eumetazoa;Bilateria;Protostomia; Spiralia;Lophotrochozoa;Mollusca;Gastropoda;Caenogastropoda;Architaenioglossa;Ampullarioidea;Ampullariidae;Pomacea;Pomacea canaliculata

UdeM00000044073 6596 363.6 UdeM00000044073 XP\_045175517.1 37 643  
324 17 1 581 1 624 4.60E-97 363.6 6596 cellular

organisms;Eukaryota;Opisthokonta;Metazoa;Eumetazoa;Bilateria;Protostomia; Spiralia;Lophotrochozoa;Mollusca;Bivalvia;Autobranchia;Heteroconchia;Euherodonta;Imparidentia;Venerida;Veneroidea;Veneridae;Mercenaria;Mercenaria mercenaria

UdeM00000043448 6596 312.8 UdeM00000043448 XP\_045195108.1 54.1 331  
133 8 177 506 782 1094 8.20E-82 312.8 6596 cellular

organisms;Eukaryota;Opisthokonta;Metazoa;Eumetazoa;Bilateria;Protostomia; Spiralia;Lophotrochozoa;Mollusca;Bivalvia;Autobranchia;Heteroconchia;Euherodonta;Imparidentia;Venerida;Veneroidea;Veneridae;Mercenaria;Mercenaria mercenaria

UdeM00000043449 6596 229.2 UdeM00000043449 XP\_045195108.1 40.7 351  
167 6 81 424 13 329 1.00E-56 229.2 6596 cellular

organisms;Eukaryota;Opisthokonta;Metazoa;Eumetazoa;Bilateria;Protostomia;Spiralia;Lophotrochozoa;Mollusca;Bivalvia;Autobranhia;Heteroconchia;Euherodonta;Imparidentia;Venerida;Veneroidea;Veneridae;Mercenaria;Mercenaria mercenaria

UdeM00000043467 6596 188 UdeM00000043467 XP\_045208337.1 49.5 192  
97 0 1 192 110 301 1.20E-44 188 6596 cellular

organisms;Eukaryota;Opisthokonta;Metazoa;Eumetazoa;Bilateria;Protostomia;Spiralia;Lophotrochozoa;Mollusca;Bivalvia;Autobranhia;Heteroconchia;Euherodonta;Imparidentia;Venerida;Veneroidea;Veneridae;Mercenaria;Mercenaria mercenaria

UdeM00000043468 6596 281.6 UdeM00000043468 XP\_045208337.1 44.6 334  
176 3 1 325 329 662 1.30E-72 281.6 6596 cellular

organisms;Eukaryota;Opisthokonta;Metazoa;Eumetazoa;Bilateria;Protostomia;Spiralia;Lophotrochozoa;Mollusca;Bivalvia;Autobranhia;Heteroconchia;Euherodonta;Imparidentia;Venerida;Veneroidea;Veneridae;Mercenaria;Mercenaria mercenaria

UdeM00000022989 6579 352.8 UdeM00000022989 XP\_033741736.1 54.3 317  
143 1 1 315 541 857 4.70E-94 352.8 6579 cellular

organisms;Eukaryota;Opisthokonta;Metazoa;Eumetazoa;Bilateria;Protostomia;Spiralia;Lophotrochozoa;Mollusca;Bivalvia;Autobranhia;Pteriomorphia;Pectinida;Pectinoidea;Pectinidae;Pecten;Pecten maximus

UdeM00000022990 6579 207.6 UdeM00000022990 XP\_033741736.1 49.8 211  
104 1 1 209 647 857 1.60E-50 207.6 6579 cellular

organisms;Eukaryota;Opisthokonta;Metazoa;Eumetazoa;Bilateria;Protostomia;Spiralia;Lophotrochozoa;Mollusca;Bivalvia;Autobranhia;Pteriomorphia;Pectinida;Pectinoidea;Pectinidae;Pecten;Pecten maximus

UdeM00000022991 6579 313.9 UdeM00000022991 XP\_033743748.1 54.4 340  
123 8 109 442 166 479 3.20E-82 313.9 6579 cellular

organisms;Eukaryota;Opisthokonta;Metazoa;Eumetazoa;Bilateria;Protostomia;Spiralia;Lophotrochozoa;Mollusca;Bivalvia;Autobranhia;Pteriomorphia;Pectinida;Pectinoidea;Pectinidae;Pecten;Pecten maximus

UdeM00000022992 6573 267.3 UdeM00000022992 XP\_021339108.1 66.8 202  
60 3 31 231 289 484 1.80E-68 267.3 6573 cellular

organisms;Eukaryota;Opisthokonta;Metazoa;Eumetazoa;Bilateria;Protostomia;Spiralia;Lophotrochozoa;Mollusca;Bivalvia;Autobranhia;Pteriomorphia;Pectinida;Pectinoidea;Pectinidae;Mizuhopecten;Mizuhopecten yessoensis

UdeM00000022994 1735272 552.4 UdeM00000022994 XP\_041358505.1 69.5  
384 113 3 85 465 76 458 6.30E-154 552.4 1735272  
cellular

organisms;Eukaryota;Opisthokonta;Metazoa;Eumetazoa;Bilateria;Protostomia;Spiralia;Lophotrochozoa;Mollusca;Gastropoda;Neomphalina;Neomphaloidea;Peltospiridae;Gigantopelta;Gigantopelta aegis

UdeM00000022995 6596 737.3 UdeM00000022995 XP\_045205218.1 41.9 984  
427 11 1 852 1 971 2.30E-209 737.3 6596 cellular

organisms;Eukaryota;Opisthokonta;Metazoa;Eumetazoa;Bilateria;Protostomia;Spiralia;Lophotrochozoa;Mollusca;Bivalvia;Autobranhia;Heteroconchia;Euherodonta;Imparidentia;Venerida;Veneroidea;Veneridae;Mercenaria;Mercenaria mercenaria

UdeM00000022997 1735272 71.2 UdeM00000022997 XP\_041358972.1 34.4  
96 63 0 1 96 1 96 7.90E-10 71.2 1735272  
cellular

organisms;Eukaryota;Opisthokonta;Metazoa;Eumetazoa;Bilateria;Protostomia;Spiralia;Lophotrochozoa;Mollusca;Gastropoda;Neomphalina;Neomphaloidea;Peltospiridae;Gigantopelta;Gigantopelta aegis

UdeM00000022998 6596 565.5 UdeM00000022998 XP\_045205217.1 42.6 730  
 379 5 41 737 58 780 1.00E-157 565.5 6596 cellular  
 organisms;Eukaryota;Opisthokonta;Metazoa;Eumetazoa;Bilateria;Protostomia;  
 Spiralia;Lophotrochozoa;Mollusca;Bivalvia;Autobranhia;Heteroconchia;Euhe  
 terodonta;Imparidentia;Venerida;Veneroidea;Veneridae;Mercenaria;Mercenari  
 a mercenaria

UdeM00000022999 6596 532.3 UdeM00000022999 XP\_045205217.1 38.5 807  
 379 6 41 814 58 780 1.10E-147 532.3 6596 cellular  
 organisms;Eukaryota;Opisthokonta;Metazoa;Eumetazoa;Bilateria;Protostomia;  
 Spiralia;Lophotrochozoa;Mollusca;Bivalvia;Autobranhia;Heteroconchia;Euhe  
 terodonta;Imparidentia;Venerida;Veneroidea;Veneridae;Mercenaria;Mercenari  
 a mercenaria

UdeM00000023000 6596 166 UdeM00000023000 XP\_045204557.1 33.9 298  
 184 9 12 304 307 596 1.10E-37 166 6596 cellular  
 organisms;Eukaryota;Opisthokonta;Metazoa;Eumetazoa;Bilateria;Protostomia;  
 Spiralia;Lophotrochozoa;Mollusca;Bivalvia;Autobranhia;Heteroconchia;Euhe  
 terodonta;Imparidentia;Venerida;Veneroidea;Veneridae;Mercenaria;Mercenari  
 a mercenaria

UdeM00000023002 6596 165.6 UdeM00000023002 XP\_045206695.1 35.9 273  
 164 6 36 300 13 282 1.50E-37 165.6 6596 cellular  
 organisms;Eukaryota;Opisthokonta;Metazoa;Eumetazoa;Bilateria;Protostomia;  
 Spiralia;Lophotrochozoa;Mollusca;Bivalvia;Autobranhia;Heteroconchia;Euhe  
 terodonta;Imparidentia;Venerida;Veneroidea;Veneridae;Mercenaria;Mercenari  
 a mercenaria

UdeM00000023003 6596 96.3 UdeM00000023003 XP\_045206695.1 33.2 190  
 114 4 87 269 99 282 1.10E-16 96.3 6596 cellular  
 organisms;Eukaryota;Opisthokonta;Metazoa;Eumetazoa;Bilateria;Protostomia;  
 Spiralia;Lophotrochozoa;Mollusca;Bivalvia;Autobranhia;Heteroconchia;Euhe  
 terodonta;Imparidentia;Venerida;Veneroidea;Veneridae;Mercenaria;Mercenari  
 a mercenaria

UdeM00000023004 6596 223.8 UdeM00000023004 XP\_045204557.1 39 295  
 172 4 15 306 309 598 4.10E-55 223.8 6596 cellular  
 organisms;Eukaryota;Opisthokonta;Metazoa;Eumetazoa;Bilateria;Protostomia;  
 Spiralia;Lophotrochozoa;Mollusca;Bivalvia;Autobranhia;Heteroconchia;Euhe  
 terodonta;Imparidentia;Venerida;Veneroidea;Veneridae;Mercenaria;Mercenari  
 a mercenaria

UdeM00000023005 6596 184.5 UdeM00000023005 XP\_045204557.1 37.4 265  
 156 5 1 261 345 603 2.40E-43 184.5 6596 cellular  
 organisms;Eukaryota;Opisthokonta;Metazoa;Eumetazoa;Bilateria;Protostomia;  
 Spiralia;Lophotrochozoa;Mollusca;Bivalvia;Autobranhia;Heteroconchia;Euhe  
 terodonta;Imparidentia;Venerida;Veneroidea;Veneridae;Mercenaria;Mercenari  
 a mercenaria

UdeM00000023006 6596 184.5 UdeM00000023006 XP\_045204557.1 37.4 265  
 156 5 1 261 345 603 2.50E-43 184.5 6596 cellular  
 organisms;Eukaryota;Opisthokonta;Metazoa;Eumetazoa;Bilateria;Protostomia;  
 Spiralia;Lophotrochozoa;Mollusca;Bivalvia;Autobranhia;Heteroconchia;Euhe  
 terodonta;Imparidentia;Venerida;Veneroidea;Veneridae;Mercenaria;Mercenari  
 a mercenaria

UdeM00000023007 6596 166 UdeM00000023007 XP\_045204557.1 33.3 315  
 164 8 3 281 299 603 1.80E-37 166 6596 cellular  
 organisms;Eukaryota;Opisthokonta;Metazoa;Eumetazoa;Bilateria;Protostomia;  
 Spiralia;Lophotrochozoa;Mollusca;Bivalvia;Autobranhia;Heteroconchia;Euhe  
 terodonta;Imparidentia;Venerida;Veneroidea;Veneridae;Mercenaria;Mercenari  
 a mercenaria

UdeM00000023008 6596 246.5 UdeM00000023008 XP\_045204557.1 29.7 602  
 323 18 3 514 5 596 9.00E-62 246.5 6596 cellular  
 organisms;Eukaryota;Opisthokonta;Metazoa;Eumetazoa;Bilateria;Protostomia;  
 Spiralia;Lophotrochozoa;Mollusca;Bivalvia;Autobranchia;Heteroconchia;Euhe  
 terodonta;Imparidentia;Venerida;Veneroidea;Veneridae;Mercenaria;Mercenari  
 a mercenaria  
 UdeM00000023009 6596 240.4 UdeM00000023009 XP\_045204557.1 29.2 602  
 320 17 3 508 5 596 6.40E-60 240.4 6596 cellular  
 organisms;Eukaryota;Opisthokonta;Metazoa;Eumetazoa;Bilateria;Protostomia;  
 Spiralia;Lophotrochozoa;Mollusca;Bivalvia;Autobranchia;Heteroconchia;Euhe  
 terodonta;Imparidentia;Venerida;Veneroidea;Veneridae;Mercenaria;Mercenari  
 a mercenaria  
 UdeM00000023010 6596 139.8 UdeM00000023010 XP\_045204383.1 34.7 259  
 153 7 1 249 58 310 7.70E-30 139.8 6596 cellular  
 organisms;Eukaryota;Opisthokonta;Metazoa;Eumetazoa;Bilateria;Protostomia;  
 Spiralia;Lophotrochozoa;Mollusca;Bivalvia;Autobranchia;Heteroconchia;Euhe  
 terodonta;Imparidentia;Venerida;Veneroidea;Veneridae;Mercenaria;Mercenari  
 a mercenaria  
 UdeM00000023011 6596 139.8 UdeM00000023011 XP\_045204383.1 34.7 259  
 153 7 1 249 58 310 7.00E-30 139.8 6596 cellular  
 organisms;Eukaryota;Opisthokonta;Metazoa;Eumetazoa;Bilateria;Protostomia;  
 Spiralia;Lophotrochozoa;Mollusca;Bivalvia;Autobranchia;Heteroconchia;Euhe  
 terodonta;Imparidentia;Venerida;Veneroidea;Veneridae;Mercenaria;Mercenari  
 a mercenaria  
 UdeM00000023012 6596 223.8 UdeM00000023012 XP\_045204557.1 39 295  
 172 4 15 306 309 598 3.90E-55 223.8 6596 cellular  
 organisms;Eukaryota;Opisthokonta;Metazoa;Eumetazoa;Bilateria;Protostomia;  
 Spiralia;Lophotrochozoa;Mollusca;Bivalvia;Autobranchia;Heteroconchia;Euhe  
 terodonta;Imparidentia;Venerida;Veneroidea;Veneridae;Mercenaria;Mercenari  
 a mercenaria  
 UdeM00000023014 6573 176.8 UdeM00000023014 XP\_021351250.1 38.2 238  
 139 4 28 261 717 950 3.70E-41 176.8 6573 cellular  
 organisms;Eukaryota;Opisthokonta;Metazoa;Eumetazoa;Bilateria;Protostomia;  
 Spiralia;Lophotrochozoa;Mollusca;Bivalvia;Autobranchia;Pteriomorphia;Pect  
 inida;Pectinoidea;Pectinidae;Mizuhopecten;Mizuhopecten yessoensis  
 UdeM00000023015 6596 181 UdeM00000023015 XP\_045204557.1 35.6 315  
 181 8 3 305 299 603 6.60E-42 181 6596 cellular  
 organisms;Eukaryota;Opisthokonta;Metazoa;Eumetazoa;Bilateria;Protostomia;  
 Spiralia;Lophotrochozoa;Mollusca;Bivalvia;Autobranchia;Heteroconchia;Euhe  
 terodonta;Imparidentia;Venerida;Veneroidea;Veneridae;Mercenaria;Mercenari  
 a mercenaria  
 UdeM00000023016 6596 275 UdeM00000023016 XP\_045204557.1 31.7 603  
 343 18 3 547 5 596 2.50E-70 275 6596 cellular  
 organisms;Eukaryota;Opisthokonta;Metazoa;Eumetazoa;Bilateria;Protostomia;  
 Spiralia;Lophotrochozoa;Mollusca;Bivalvia;Autobranchia;Heteroconchia;Euhe  
 terodonta;Imparidentia;Venerida;Veneroidea;Veneridae;Mercenaria;Mercenari  
 a mercenaria  
 UdeM00000023017 6596 139.8 UdeM00000023017 XP\_045204383.1 34.7 259  
 153 7 1 249 58 310 7.00E-30 139.8 6596 cellular  
 organisms;Eukaryota;Opisthokonta;Metazoa;Eumetazoa;Bilateria;Protostomia;  
 Spiralia;Lophotrochozoa;Mollusca;Bivalvia;Autobranchia;Heteroconchia;Euhe  
 terodonta;Imparidentia;Venerida;Veneroidea;Veneridae;Mercenaria;Mercenari  
 a mercenaria

UdeM00000023018 6596 223.8 UdeM00000023018 XP\_045204557.1 39 295  
 172 4 15 306 309 598 3.90E-55 223.8 6596 cellular  
 organisms;Eukaryota;Opisthokonta;Metazoa;Eumetazoa;Bilateria;Protostomia;  
 Spiralia;Lophotrochozoa;Mollusca;Bivalvia;Autobranchia;Heteroconchia;Euhe  
 terodonta;Imparidentia;Venerida;Veneroidea;Veneridae;Mercenaria;Mercenari  
 a mercenaria  
 UdeM00000023020 6573 162.2 UdeM00000023020 XP\_021351250.1 39.5 210  
 121 3 1 208 745 950 7.60E-37 162.2 6573 cellular  
 organisms;Eukaryota;Opisthokonta;Metazoa;Eumetazoa;Bilateria;Protostomia;  
 Spiralia;Lophotrochozoa;Mollusca;Bivalvia;Autobranchia;Pteriormorphia;Pect  
 inida;Pectinoidea;Pectinidae;Mizuhopecten;Mizuhopecten yessoensis  
 UdeM00000023021 6596 146.4 UdeM00000023021 XP\_045204557.1 32.4 315  
 185 9 3 299 299 603 1.50E-31 146.4 6596 cellular  
 organisms;Eukaryota;Opisthokonta;Metazoa;Eumetazoa;Bilateria;Protostomia;  
 Spiralia;Lophotrochozoa;Mollusca;Bivalvia;Autobranchia;Heteroconchia;Euhe  
 terodonta;Imparidentia;Venerida;Veneroidea;Veneridae;Mercenaria;Mercenari  
 a mercenaria  
 UdeM00000023022 6596 243.4 UdeM00000023022 XP\_045204557.1 30 603  
 325 17 3 519 5 596 7.70E-61 243.4 6596 cellular  
 organisms;Eukaryota;Opisthokonta;Metazoa;Eumetazoa;Bilateria;Protostomia;  
 Spiralia;Lophotrochozoa;Mollusca;Bivalvia;Autobranchia;Heteroconchia;Euhe  
 terodonta;Imparidentia;Venerida;Veneroidea;Veneridae;Mercenaria;Mercenari  
 a mercenaria  
 UdeM00000023023 6596 155.2 UdeM00000023023 XP\_045204557.1 33.7 282  
 178 6 30 305 319 597 1.80E-34 155.2 6596 cellular  
 organisms;Eukaryota;Opisthokonta;Metazoa;Eumetazoa;Bilateria;Protostomia;  
 Spiralia;Lophotrochozoa;Mollusca;Bivalvia;Autobranchia;Heteroconchia;Euhe  
 terodonta;Imparidentia;Venerida;Veneroidea;Veneridae;Mercenaria;Mercenari  
 a mercenaria  
 UdeM00000023024 6596 129 UdeM00000023024 XP\_045204557.1 46.1 141  
 70 2 9 147 462 598 1.10E-26 129 6596 cellular  
 organisms;Eukaryota;Opisthokonta;Metazoa;Eumetazoa;Bilateria;Protostomia;  
 Spiralia;Lophotrochozoa;Mollusca;Bivalvia;Autobranchia;Heteroconchia;Euhe  
 terodonta;Imparidentia;Venerida;Veneroidea;Veneridae;Mercenaria;Mercenari  
 a mercenaria  
 UdeM00000023025 6596 132.1 UdeM00000023025 XP\_045204557.1 38.1 194  
 110 5 35 224 398 585 1.40E-27 132.1 6596 cellular  
 organisms;Eukaryota;Opisthokonta;Metazoa;Eumetazoa;Bilateria;Protostomia;  
 Spiralia;Lophotrochozoa;Mollusca;Bivalvia;Autobranchia;Heteroconchia;Euhe  
 terodonta;Imparidentia;Venerida;Veneroidea;Veneridae;Mercenaria;Mercenari  
 a mercenaria  
 UdeM00000023026 6596 196.8 UdeM00000023026 XP\_045204557.1 36.2 315  
 188 7 3 314 299 603 1.20E-46 196.8 6596 cellular  
 organisms;Eukaryota;Opisthokonta;Metazoa;Eumetazoa;Bilateria;Protostomia;  
 Spiralia;Lophotrochozoa;Mollusca;Bivalvia;Autobranchia;Heteroconchia;Euhe  
 terodonta;Imparidentia;Venerida;Veneroidea;Veneridae;Mercenaria;Mercenari  
 a mercenaria  
 UdeM00000023027 6565 954.5 UdeM00000023027 XP\_022322377.1 27.5 2881  
 1694 89 1 2582 891 3676 2.80E-274 954.5 6565 cellular  
 organisms;Eukaryota;Opisthokonta;Metazoa;Eumetazoa;Bilateria;Protostomia;  
 Spiralia;Lophotrochozoa;Mollusca;Bivalvia;Autobranchia;Pteriormorphia;Ostr  
 eida;Ostreoidea;Ostreidae;Crassostrea;Crassostrea virginica  
 UdeM00000023028 29159 463.4 UdeM00000023028 XP\_034301243.1 32 1087  
 650 37 3 1045 45 1086 8.40E-127 463.4 29159 cellular

organisms;Eukaryota;Opisthokonta;Metazoa;Eumetazoa;Bilateria;Protostomia; Spiralia;Lophotrochozoa;Mollusca;Bivalvia;Autobranchia;Pteriormorphia;Ostr eida;Ostreoidea;Ostreidae;Crassostrea;Crassostrea gigas

UdeM00000023029 6565 1870.9 UdeM00000023029 XP\_022322378.1 30.3  
4759 2853 175 1880 6399 19 4553 0.00E+00 1870.9 6565  
cellular

organisms;Eukaryota;Opisthokonta;Metazoa;Eumetazoa;Bilateria;Protostomia; Spiralia;Lophotrochozoa;Mollusca;Bivalvia;Autobranchia;Pteriormorphia;Ostr eida;Ostreoidea;Ostreidae;Crassostrea;Crassostrea virginica

UdeM00000023031 6596 201.1 UdeM00000023031 XP\_045206200.1 39 310  
169 9 16 320 12 306 4.30E-48 201.1 6596 cellular

organisms;Eukaryota;Opisthokonta;Metazoa;Eumetazoa;Bilateria;Protostomia; Spiralia;Lophotrochozoa;Mollusca;Bivalvia;Autobranchia;Heteroconchia;Euhe terodonta;Imparidentia;Venerida;Veneroidea;Veneridae;Mercenaria;Mercenari a mercenaria

UdeM00000023033 6596 104.8 UdeM00000023033 XP\_045206203.1 32.5 197  
120 4 125 308 1284 1480 2.20E-19 104.8 6596 cellular

organisms;Eukaryota;Opisthokonta;Metazoa;Eumetazoa;Bilateria;Protostomia; Spiralia;Lophotrochozoa;Mollusca;Bivalvia;Autobranchia;Heteroconchia;Euhe terodonta;Imparidentia;Venerida;Veneroidea;Veneridae;Mercenaria;Mercenari a mercenaria

UdeM00000023032 6596 158.3 UdeM00000023032 XP\_045206203.1 28.4 538  
311 20 618 1126 988 1480 5.80E-35 158.3 6596 cellular

organisms;Eukaryota;Opisthokonta;Metazoa;Eumetazoa;Bilateria;Protostomia; Spiralia;Lophotrochozoa;Mollusca;Bivalvia;Autobranchia;Heteroconchia;Euhe terodonta;Imparidentia;Venerida;Veneroidea;Veneridae;Mercenaria;Mercenari a mercenaria

UdeM00000023034 6596 204.5 UdeM00000023034 XP\_045206203.1 27.9 867  
419 32 315 1032 706 1515 6.40E-49 204.5 6596 cellular

organisms;Eukaryota;Opisthokonta;Metazoa;Eumetazoa;Bilateria;Protostomia; Spiralia;Lophotrochozoa;Mollusca;Bivalvia;Autobranchia;Heteroconchia;Euhe terodonta;Imparidentia;Venerida;Veneroidea;Veneridae;Mercenaria;Mercenari a mercenaria

UdeM00000023035 6596 120.6 UdeM00000023035 XP\_045206203.1 41.4 145  
82 3 72 216 46 187 2.50E-24 120.6 6596 cellular

organisms;Eukaryota;Opisthokonta;Metazoa;Eumetazoa;Bilateria;Protostomia; Spiralia;Lophotrochozoa;Mollusca;Bivalvia;Autobranchia;Heteroconchia;Euhe terodonta;Imparidentia;Venerida;Veneroidea;Veneridae;Mercenaria;Mercenari a mercenaria

UdeM00000023036 6596 224.2 UdeM00000023036 XP\_045206203.1 29.1 842  
417 28 239 943 720 1518 7.10E-55 224.2 6596 cellular

organisms;Eukaryota;Opisthokonta;Metazoa;Eumetazoa;Bilateria;Protostomia; Spiralia;Lophotrochozoa;Mollusca;Bivalvia;Autobranchia;Heteroconchia;Euhe terodonta;Imparidentia;Venerida;Veneroidea;Veneridae;Mercenaria;Mercenari a mercenaria

UdeM00000023037 6596 187.6 UdeM00000023037 XP\_045206203.1 43.3 208  
115 3 65 272 46 250 2.50E-44 187.6 6596 cellular

organisms;Eukaryota;Opisthokonta;Metazoa;Eumetazoa;Bilateria;Protostomia; Spiralia;Lophotrochozoa;Mollusca;Bivalvia;Autobranchia;Heteroconchia;Euhe terodonta;Imparidentia;Venerida;Veneroidea;Veneridae;Mercenaria;Mercenari a mercenaria

UdeM00000023038 6596 119 UdeM00000023038 XP\_045206203.1 40.7 145  
83 3 65 209 46 187 7.20E-24 119 6596 cellular

organisms;Eukaryota;Opisthokonta;Metazoa;Eumetazoa;Bilateria;Protostomia;

Spiralia;Lophotrochozoa;Mollusca;Bivalvia;Autobranchia;Heteroconchia;Euherodonta;Imparidentia;Venerida;Veneroidea;Veneridae;Mercenaria;Mercenaria mercenaria

UdeM00000023039 6596 194.5 UdeM00000023039 XP\_045204387.1 30.6 559  
317 14 579 1094 474 1004 7.30E-46 194.5 6596 cellular

organisms;Eukaryota;Opisthokonta;Metazoa;Eumetazoa;Bilateria;Protostomia;Spiralia;Lophotrochozoa;Mollusca;Bivalvia;Autobranchia;Heteroconchia;Euherodonta;Imparidentia;Venerida;Veneroidea;Veneridae;Mercenaria;Mercenaria mercenaria

UdeM00000023040 6596 144.4 UdeM00000023040 XP\_045204388.1 35.7 280  
160 8 24 287 22 297 5.30E-31 144.4 6596 cellular

organisms;Eukaryota;Opisthokonta;Metazoa;Eumetazoa;Bilateria;Protostomia;Spiralia;Lophotrochozoa;Mollusca;Bivalvia;Autobranchia;Heteroconchia;Euherodonta;Imparidentia;Venerida;Veneroidea;Veneridae;Mercenaria;Mercenaria mercenaria

UdeM00000023042 6565 145.2 UdeM00000023042 XP\_022334994.1 33.2 325  
179 10 1 291 1 321 1.30E-31 145.2 6565 cellular

organisms;Eukaryota;Opisthokonta;Metazoa;Eumetazoa;Bilateria;Protostomia;Spiralia;Lophotrochozoa;Mollusca;Bivalvia;Autobranchia;Pteriomorphia;Ostreida;Ostreoidea;Ostreidae;Crassostrea;Crassostrea virginica

UdeM00000023043 6565 481.9 UdeM00000023043 XP\_022334993.1 59.8 398  
156 3 9 403 461 857 8.10E-133 481.9 6565 cellular

organisms;Eukaryota;Opisthokonta;Metazoa;Eumetazoa;Bilateria;Protostomia;Spiralia;Lophotrochozoa;Mollusca;Bivalvia;Autobranchia;Pteriomorphia;Ostreida;Ostreoidea;Ostreidae;Crassostrea;Crassostrea virginica

UdeM00000023044 6565 458 UdeM00000023044 XP\_022334993.1 59.8 378  
148 3 1 375 481 857 1.20E-125 458 6565 cellular

organisms;Eukaryota;Opisthokonta;Metazoa;Eumetazoa;Bilateria;Protostomia;Spiralia;Lophotrochozoa;Mollusca;Bivalvia;Autobranchia;Pteriomorphia;Ostreida;Ostreoidea;Ostreidae;Crassostrea;Crassostrea virginica

UdeM00000023046 6596 100.5 UdeM00000023046 XP\_045204388.1 32.1 234  
143 6 24 242 22 254 3.20E-18 100.5 6596 cellular

organisms;Eukaryota;Opisthokonta;Metazoa;Eumetazoa;Bilateria;Protostomia;Spiralia;Lophotrochozoa;Mollusca;Bivalvia;Autobranchia;Heteroconchia;Euherodonta;Imparidentia;Venerida;Veneroidea;Veneridae;Mercenaria;Mercenaria mercenaria

UdeM00000023049 6596 151.8 UdeM00000023049 XP\_045216906.1 66.3 101  
33 1 33 133 282 381 8.00E-34 151.8 6596 cellular

organisms;Eukaryota;Opisthokonta;Metazoa;Eumetazoa;Bilateria;Protostomia;Spiralia;Lophotrochozoa;Mollusca;Bivalvia;Autobranchia;Heteroconchia;Euherodonta;Imparidentia;Venerida;Veneroidea;Veneridae;Mercenaria;Mercenaria mercenaria

UdeM00000023051 29159 288.9 UdeM00000023051 XP\_034315642.1 48.7 306  
152 2 1 306 371 671 8.00E-75 288.9 29159 cellular

organisms;Eukaryota;Opisthokonta;Metazoa;Eumetazoa;Bilateria;Protostomia;Spiralia;Lophotrochozoa;Mollusca;Bivalvia;Autobranchia;Pteriomorphia;Ostreida;Ostreoidea;Ostreidae;Crassostrea;Crassostrea gigas

UdeM00000023053 6596 85.9 UdeM00000023053 XP\_045204388.1 36.5 170  
95 5 24 184 22 187 7.80E-14 85.9 6596 cellular

organisms;Eukaryota;Opisthokonta;Metazoa;Eumetazoa;Bilateria;Protostomia;Spiralia;Lophotrochozoa;Mollusca;Bivalvia;Autobranchia;Heteroconchia;Euherodonta;Imparidentia;Venerida;Veneroidea;Veneridae;Mercenaria;Mercenaria mercenaria

UdeM00000023055 6579 153.3 UdeM00000023055 XP\_033730552.1 64.4 101  
 36 0 40 140 84 184 2.30E-34 153.3 6579 cellular  
 organisms;Eukaryota;Opisthokonta;Metazoa;Eumetazoa;Bilateria;Protostomia;  
 Spiralia;Lophotrochozoa;Mollusca;Bivalvia;Autobranhia;Pteriormorphia;Pect  
 inida;Pectinoidea;Pectinidae;Pecten;Pecten maximus  
 UdeM00000023056 6573 67.8 UdeM00000023056 XP\_021359061.1 25.3 328  
 161 13 2 327 158 403 3.00E-08 67.8 6573 cellular  
 organisms;Eukaryota;Opisthokonta;Metazoa;Eumetazoa;Bilateria;Protostomia;  
 Spiralia;Lophotrochozoa;Mollusca;Bivalvia;Autobranhia;Pteriormorphia;Pect  
 inida;Pectinoidea;Pectinidae;Mizuhopecten;Mizuhopecten yessoensis  
 UdeM00000023057 6596 622.9 UdeM00000023057 XP\_045204491.1 44.6 682  
 347 5 10 686 8 663 5.10E-175 622.9 6596 cellular  
 organisms;Eukaryota;Opisthokonta;Metazoa;Eumetazoa;Bilateria;Protostomia;  
 Spiralia;Lophotrochozoa;Mollusca;Bivalvia;Autobranhia;Heteroconchia;Euhe  
 terodonta;Imparidentia;Venerida;Veneroidea;Veneridae;Mercenaria;Mercenari  
 a mercenaria  
 UdeM00000023058 1735272 862.1 UdeM00000023058 XP\_041359735.1 67.4  
 607 198 0 19 625 54 660 4.50E-247 862.1 1735272  
 cellular  
 organisms;Eukaryota;Opisthokonta;Metazoa;Eumetazoa;Bilateria;Protostomia;  
 Spiralia;Lophotrochozoa;Mollusca;Gastropoda;Neomphalina;Neomphaloidea;Pel  
 tospiridae;Gigantopelta;Gigantopelta aegis  
 UdeM00000023059 6500 365.5 UdeM00000023059 XP\_005091177.1 68.8 256  
 80 0 1 256 415 670 5.40E-98 365.5 6500 cellular  
 organisms;Eukaryota;Opisthokonta;Metazoa;Eumetazoa;Bilateria;Protostomia;  
 Spiralia;Lophotrochozoa;Mollusca;Gastropoda;Heterobranhia;Euthyneura;Tec  
 tipleura;Aplysiida;Aplysioida;Aplysiidae;Aplysia;Aplysia californica  
 UdeM00000023060 6579 158.7 UdeM00000023060 XP\_033743128.1 28.3 396  
 230 5 15 357 29 423 1.40E-35 158.7 6579 cellular  
 organisms;Eukaryota;Opisthokonta;Metazoa;Eumetazoa;Bilateria;Protostomia;  
 Spiralia;Lophotrochozoa;Mollusca;Bivalvia;Autobranhia;Pteriormorphia;Pect  
 inida;Pectinoidea;Pectinidae;Pecten;Pecten maximus  
 UdeM00000023061 6596 134.4 UdeM00000023061 XP\_045180519.1 26.2 355  
 248 4 13 353 39 393 2.90E-28 134.4 6596 cellular  
 organisms;Eukaryota;Opisthokonta;Metazoa;Eumetazoa;Bilateria;Protostomia;  
 Spiralia;Lophotrochozoa;Mollusca;Bivalvia;Autobranhia;Heteroconchia;Euhe  
 terodonta;Imparidentia;Venerida;Veneroidea;Veneridae;Mercenaria;Mercenari  
 a mercenaria  
 UdeM00000023062 6573 187.6 UdeM00000023062 XP\_021374354.1 43 193  
 105 1 13 200 20 212 1.60E-44 187.6 6573 cellular  
 organisms;Eukaryota;Opisthokonta;Metazoa;Eumetazoa;Bilateria;Protostomia;  
 Spiralia;Lophotrochozoa;Mollusca;Bivalvia;Autobranhia;Pteriormorphia;Pect  
 inida;Pectinoidea;Pectinidae;Mizuhopecten;Mizuhopecten yessoensis  
 UdeM00000023064 1735272 92 UdeM00000023064 XP\_041347065.1 43.9  
 114 63 1 19 131 75 188 7.00E-16 92 1735272  
 cellular  
 organisms;Eukaryota;Opisthokonta;Metazoa;Eumetazoa;Bilateria;Protostomia;  
 Spiralia;Lophotrochozoa;Mollusca;Gastropoda;Neomphalina;Neomphaloidea;Pel  
 tospiridae;Gigantopelta;Gigantopelta aegis  
 UdeM00000023065 6087 106.3 UdeM00000023065 XP\_012553882.1 24.4 336  
 135 4 13 229 8 343 5.50E-20 106.3 6087 cellular  
 organisms;Eukaryota;Opisthokonta;Metazoa;Eumetazoa;Cnidaria;Hydrozoa;Hydr  
 oidolina;Anthoathecata;Aplanulata;Hydridae;Hydra;Hydra vulgaris



UdeM00000023066 1735272 93.2 UdeM00000023066 XP\_041347065.1 44.7  
 114 62 1 19 131 75 188 3.10E-16 93.2 1735272  
 cellular  
 organisms;Eukaryota;Opisthokonta;Metazoa;Eumetazoa;Bilateria;Protostomia;  
 Spiralia;Lophotrochozoa;Mollusca;Gastropoda;Neomphalina;Neomphaloidea;Pel  
 tospiridae;Gigantopelta;Gigantopelta aegis  
 UdeM00000023067 6573 104.4 UdeM00000023067 XP\_021375729.1 44.4 99  
 55 0 13 111 13 111 1.90E-19 104.4 6573 cellular  
 organisms;Eukaryota;Opisthokonta;Metazoa;Eumetazoa;Bilateria;Protostomia;  
 Spiralia;Lophotrochozoa;Mollusca;Bivalvia;Autobranchia;Pteriormorphia;Pect  
 inida;Pectinoidea;Pectinidae;Mizuhopecten;Mizuhopecten yessoensis  
 UdeM00000023068 6573 104.4 UdeM00000023068 XP\_021375729.1 44.4 99  
 55 0 13 111 13 111 1.90E-19 104.4 6573 cellular  
 organisms;Eukaryota;Opisthokonta;Metazoa;Eumetazoa;Bilateria;Protostomia;  
 Spiralia;Lophotrochozoa;Mollusca;Bivalvia;Autobranchia;Pteriormorphia;Pect  
 inida;Pectinoidea;Pectinidae;Mizuhopecten;Mizuhopecten yessoensis  
 UdeM00000023069 6573 104.4 UdeM00000023069 XP\_021375729.1 44.4 99  
 55 0 13 111 13 111 1.90E-19 104.4 6573 cellular  
 organisms;Eukaryota;Opisthokonta;Metazoa;Eumetazoa;Bilateria;Protostomia;  
 Spiralia;Lophotrochozoa;Mollusca;Bivalvia;Autobranchia;Pteriormorphia;Pect  
 inida;Pectinoidea;Pectinidae;Mizuhopecten;Mizuhopecten yessoensis  
 UdeM00000023070 1735272 59.7 UdeM00000023070 XP\_041378840.1 37.3  
 83 51 1 2 84 71 152 2.40E-06 59.7 1735272  
 cellular  
 organisms;Eukaryota;Opisthokonta;Metazoa;Eumetazoa;Bilateria;Protostomia;  
 Spiralia;Lophotrochozoa;Mollusca;Gastropoda;Neomphalina;Neomphaloidea;Pel  
 tospiridae;Gigantopelta;Gigantopelta aegis  
 UdeM00000023071 1735272 79.7 UdeM00000023071 XP\_041378840.1 50  
 72 36 0 2 73 263 334 1.70E-12 79.7 1735272  
 cellular  
 organisms;Eukaryota;Opisthokonta;Metazoa;Eumetazoa;Bilateria;Protostomia;  
 Spiralia;Lophotrochozoa;Mollusca;Gastropoda;Neomphalina;Neomphaloidea;Pel  
 tospiridae;Gigantopelta;Gigantopelta aegis  
 UdeM00000023072 1735272 73.9 UdeM00000023072 XP\_041378840.1 56.1  
 57 25 0 2 58 263 319 8.40E-11 73.9 1735272  
 cellular  
 organisms;Eukaryota;Opisthokonta;Metazoa;Eumetazoa;Bilateria;Protostomia;  
 Spiralia;Lophotrochozoa;Mollusca;Gastropoda;Neomphalina;Neomphaloidea;Pel  
 tospiridae;Gigantopelta;Gigantopelta aegis  
 UdeM00000023073 29159 140.6 UdeM00000023073 XP\_011412511.2 27.7 365  
 230 7 9 342 27 388 3.90E-30 140.6 29159 cellular  
 organisms;Eukaryota;Opisthokonta;Metazoa;Eumetazoa;Bilateria;Protostomia;  
 Spiralia;Lophotrochozoa;Mollusca;Bivalvia;Autobranchia;Pteriormorphia;Ostr  
 eida;Ostreoidea;Ostreidae;Crassostrea;Crassostrea gigas  
 UdeM00000023074 1735272 157.9 UdeM00000023074 XP\_041378840.1 41.1  
 197 89 4 2 198 263 432 1.40E-35 157.9 1735272  
 cellular  
 organisms;Eukaryota;Opisthokonta;Metazoa;Eumetazoa;Bilateria;Protostomia;  
 Spiralia;Lophotrochozoa;Mollusca;Gastropoda;Neomphalina;Neomphaloidea;Pel  
 tospiridae;Gigantopelta;Gigantopelta aegis  
 UdeM00000023075 1735272 93.6 UdeM00000023075 XP\_041347065.1 43.5  
 115 64 1 19 132 74 188 2.40E-16 93.6 1735272  
 cellular  
 organisms;Eukaryota;Opisthokonta;Metazoa;Eumetazoa;Bilateria;Protostomia;

Spiralia; Lophotrochozoa; Mollusca; Gastropoda; Neomphalina; Neomphaloidea; Peltospiridae; Gigantopelta; Gigantopelta aegis

UdeM00000023076 6579 182.2 UdeM00000023076 XP\_033743128.1 29.7 404  
229 4 11 364 25 423 1.20E-42 182.2 6579 cellular  
organisms; Eukaryota; Opisthokonta; Metazoa; Eumetazoa; Bilateria; Protostomia; Spiralia; Lophotrochozoa; Mollusca; Bivalvia; Autobranchia; Pteriomorpha; Pectinida; Pectinoidea; Pectinidae; Pecten; Pecten maximus

UdeM00000023077 6596 152.5 UdeM00000023077 XP\_045165062.1 36.9 352  
210 5 17 360 12 359 1.00E-33 152.5 6596 cellular  
organisms; Eukaryota; Opisthokonta; Metazoa; Eumetazoa; Bilateria; Protostomia; Spiralia; Lophotrochozoa; Mollusca; Bivalvia; Autobranchia; Heteroconchia; Euheterodonta; Imparidentia; Venerida; Veneroidea; Veneridae; Mercenaria; Mercenaria mercenaria

UdeM00000023078 29159 569.7 UdeM00000023078 NP\_001292263.1 68.6 382  
117 2 12 393 11 389 2.90E-159 569.7 29159 cellular  
organisms; Eukaryota; Opisthokonta; Metazoa; Eumetazoa; Bilateria; Protostomia; Spiralia; Lophotrochozoa; Mollusca; Bivalvia; Autobranchia; Pteriomorpha; Ostreida; Ostreoidea; Ostreidae; Crassostrea; Crassostrea gigas

UdeM00000023079 7574 99 UdeM00000023079 XP\_013386219.1 71.4 70  
20 0 3 72 2 71 3.80E-18 99 7574 cellular  
organisms; Eukaryota; Opisthokonta; Metazoa; Eumetazoa; Bilateria; Protostomia; Spiralia; Lophotrochozoa; Brachiopoda; Linguliformea; Lingulata; Lingulida; Linguloidea; Lingulidae; Lingula; Lingula anatina

UdeM00000023080 6579 377.9 UdeM00000023080 XP\_033742229.1 42.3 555  
288 7 166 696 536 1082 3.10E-101 377.9 6579 cellular  
organisms; Eukaryota; Opisthokonta; Metazoa; Eumetazoa; Bilateria; Protostomia; Spiralia; Lophotrochozoa; Mollusca; Bivalvia; Autobranchia; Pteriomorpha; Pectinida; Pectinoidea; Pectinidae; Pecten; Pecten maximus

UdeM00000023081 6579 409.8 UdeM00000023081 XP\_033742229.1 51.3 411  
185 5 1 407 1 400 4.30E-111 409.8 6579 cellular  
organisms; Eukaryota; Opisthokonta; Metazoa; Eumetazoa; Bilateria; Protostomia; Spiralia; Lophotrochozoa; Mollusca; Bivalvia; Autobranchia; Pteriomorpha; Pectinida; Pectinoidea; Pectinidae; Pecten; Pecten maximus

UdeM00000023082 6565 513.1 UdeM00000023082 XP\_022326012.1 81.8 297  
54 0 36 332 1 297 2.80E-142 513.1 6565 cellular  
organisms; Eukaryota; Opisthokonta; Metazoa; Eumetazoa; Bilateria; Protostomia; Spiralia; Lophotrochozoa; Mollusca; Bivalvia; Autobranchia; Pteriomorpha; Ostreida; Ostreoidea; Ostreidae; Crassostrea; Crassostrea virginica

UdeM00000023084 6596 233.8 UdeM00000023084 XP\_045205159.1 30.6 578  
184 6 1 576 1 363 5.70E-58 233.8 6596 cellular  
organisms; Eukaryota; Opisthokonta; Metazoa; Eumetazoa; Bilateria; Protostomia; Spiralia; Lophotrochozoa; Mollusca; Bivalvia; Autobranchia; Heteroconchia; Euheterodonta; Imparidentia; Venerida; Veneroidea; Veneridae; Mercenaria; Mercenaria mercenaria

UdeM00000023083 6596 219.2 UdeM00000023083 XP\_045205159.1 30 554  
186 5 1 552 1 354 1.40E-53 219.2 6596 cellular  
organisms; Eukaryota; Opisthokonta; Metazoa; Eumetazoa; Bilateria; Protostomia; Spiralia; Lophotrochozoa; Mollusca; Bivalvia; Autobranchia; Heteroconchia; Euheterodonta; Imparidentia; Venerida; Veneroidea; Veneridae; Mercenaria; Mercenaria mercenaria

UdeM00000023085 1735272 295.8 UdeM00000023085 XP\_041357276.1 62.7  
228 77 4 1 225 1 223 4.90E-77 295.8 1735272  
cellular  
organisms; Eukaryota; Opisthokonta; Metazoa; Eumetazoa; Bilateria; Protostomia;

Spiralia;Lophotrochozoa;Mollusca;Gastropoda;Neomphalina;Neomphaloidea;Pel  
 tospiridae;Gigantopelta;Gigantopelta aegis  
 UdeM00000023086 6565 201.4 UdeM00000023086 XP\_022321239.1 42.6 235  
 134 1 1 235 1 234 1.60E-48 201.4 6565 cellular  
 organisms;Eukaryota;Opisthokonta;Metazoa;Eumetazoa;Bilateria;Protostomia;  
 Spiralia;Lophotrochozoa;Mollusca;Bivalvia;Autobranchia;Pteriormorphia;Ostr  
 eida;Ostreoidea;Ostreidae;Crassostrea;Crassostrea virginica  
 UdeM00000023088 6596 883.2 UdeM00000023088 XP\_045204397.1 45.7 1005  
 505 19 3 982 47 1035 3.10E-253 883.2 6596 cellular  
 organisms;Eukaryota;Opisthokonta;Metazoa;Eumetazoa;Bilateria;Protostomia;  
 Spiralia;Lophotrochozoa;Mollusca;Bivalvia;Autobranchia;Heteroconchia;Euhe  
 terodonta;Imparidentia;Venerida;Veneroidea;Veneridae;Mercenaria;Mercenari  
 a mercenaria  
 UdeM00000023087 6596 885.2 UdeM00000023087 XP\_045204397.1 45.4 1015  
 510 20 19 1005 37 1035 8.30E-254 885.2 6596 cellular  
 organisms;Eukaryota;Opisthokonta;Metazoa;Eumetazoa;Bilateria;Protostomia;  
 Spiralia;Lophotrochozoa;Mollusca;Bivalvia;Autobranchia;Heteroconchia;Euhe  
 terodonta;Imparidentia;Venerida;Veneroidea;Veneridae;Mercenaria;Mercenari  
 a mercenaria  
 UdeM00000023089 6596 305.4 UdeM00000023089 XP\_045204397.1 39.6 412  
 227 10 19 417 37 439 1.10E-79 305.4 6596 cellular  
 organisms;Eukaryota;Opisthokonta;Metazoa;Eumetazoa;Bilateria;Protostomia;  
 Spiralia;Lophotrochozoa;Mollusca;Bivalvia;Autobranchia;Heteroconchia;Euhe  
 terodonta;Imparidentia;Venerida;Veneroidea;Veneridae;Mercenaria;Mercenari  
 a mercenaria  
 UdeM00000023091 6596 271.2 UdeM00000023091 XP\_045188650.1 31 477  
 304 7 11 464 7 481 2.60E-69 271.2 6596 cellular  
 organisms;Eukaryota;Opisthokonta;Metazoa;Eumetazoa;Bilateria;Protostomia;  
 Spiralia;Lophotrochozoa;Mollusca;Bivalvia;Autobranchia;Heteroconchia;Euhe  
 terodonta;Imparidentia;Venerida;Veneroidea;Veneridae;Mercenaria;Mercenari  
 a mercenaria  
 UdeM00000023090 6596 271.9 UdeM00000023090 XP\_045188650.1 31 477  
 304 7 22 475 7 481 1.60E-69 271.9 6596 cellular  
 organisms;Eukaryota;Opisthokonta;Metazoa;Eumetazoa;Bilateria;Protostomia;  
 Spiralia;Lophotrochozoa;Mollusca;Bivalvia;Autobranchia;Heteroconchia;Euhe  
 terodonta;Imparidentia;Venerida;Veneroidea;Veneridae;Mercenaria;Mercenari  
 a mercenaria  
 UdeM00000023092 6596 63.5 UdeM00000023092 XP\_045204832.1 52.9 51  
 24 0 503 553 210 260 9.50E-07 63.5 6596 cellular  
 organisms;Eukaryota;Opisthokonta;Metazoa;Eumetazoa;Bilateria;Protostomia;  
 Spiralia;Lophotrochozoa;Mollusca;Bivalvia;Autobranchia;Heteroconchia;Euhe  
 terodonta;Imparidentia;Venerida;Veneroidea;Veneridae;Mercenaria;Mercenari  
 a mercenaria  
 UdeM00000023093 6596 63.5 UdeM00000023093 XP\_045204832.1 52.9 51  
 24 0 489 539 210 260 9.30E-07 63.5 6596 cellular  
 organisms;Eukaryota;Opisthokonta;Metazoa;Eumetazoa;Bilateria;Protostomia;  
 Spiralia;Lophotrochozoa;Mollusca;Bivalvia;Autobranchia;Heteroconchia;Euhe  
 terodonta;Imparidentia;Venerida;Veneroidea;Veneridae;Mercenaria;Mercenari  
 a mercenaria  
 UdeM00000023094 6596 165.2 UdeM00000023094 XP\_045165062.1 36 347  
 211 2 14 349 6 352 1.50E-37 165.2 6596 cellular  
 organisms;Eukaryota;Opisthokonta;Metazoa;Eumetazoa;Bilateria;Protostomia;  
 Spiralia;Lophotrochozoa;Mollusca;Bivalvia;Autobranchia;Heteroconchia;Euhe

terodonta;Imparidentia;Venerida;Veneroidea;Veneridae;Mercenaria;Mercenaria mercenaria

UdeM00000023095 6596 300.8 UdeM00000023095 XP\_045205601.1 39 444  
252 9 10 439 9 447 2.90E-78 300.8 6596 cellular

organisms;Eukaryota;Opisthokonta;Metazoa;Eumetazoa;Bilateria;Protostomia;Spiralia;Lophotrochozoa;Mollusca;Bivalvia;Autobranhia;Heteroconchia;Euherodonta;Imparidentia;Venerida;Veneroidea;Veneridae;Mercenaria;Mercenaria mercenaria

UdeM00000023096 6596 2125.1 UdeM00000023096 XP\_045205601.1 44.4  
2619 1305 46 7 2517 427 3002 0.00E+00 2125.1 6596  
cellular

organisms;Eukaryota;Opisthokonta;Metazoa;Eumetazoa;Bilateria;Protostomia;Spiralia;Lophotrochozoa;Mollusca;Bivalvia;Autobranhia;Heteroconchia;Euherodonta;Imparidentia;Venerida;Veneroidea;Veneridae;Mercenaria;Mercenaria mercenaria

UdeM00000023097 6596 634.8 UdeM00000023097 XP\_045205602.1 48.3 662  
326 9 1 653 3090 3744 1.50E-178 634.8 6596 cellular

organisms;Eukaryota;Opisthokonta;Metazoa;Eumetazoa;Bilateria;Protostomia;Spiralia;Lophotrochozoa;Mollusca;Bivalvia;Autobranhia;Heteroconchia;Euherodonta;Imparidentia;Venerida;Veneroidea;Veneridae;Mercenaria;Mercenaria mercenaria

UdeM00000023100 6579 232.3 UdeM00000023100 XP\_033732436.1 31.7 464  
283 10 44 495 17 458 1.80E-57 232.3 6579 cellular

organisms;Eukaryota;Opisthokonta;Metazoa;Eumetazoa;Bilateria;Protostomia;Spiralia;Lophotrochozoa;Mollusca;Bivalvia;Autobranhia;Pteriormorphia;Pectinida;Pectinoidea;Pectinidae;Pecten;Pecten maximus

UdeM00000023101 6596 1576.6 UdeM00000023101 XP\_045203204.1 65.8  
1279 386 11 1 1238 1 1268 0.00E+00 1576.6 6596  
cellular

organisms;Eukaryota;Opisthokonta;Metazoa;Eumetazoa;Bilateria;Protostomia;Spiralia;Lophotrochozoa;Mollusca;Bivalvia;Autobranhia;Heteroconchia;Euherodonta;Imparidentia;Venerida;Veneroidea;Veneridae;Mercenaria;Mercenaria mercenaria

UdeM00000023103 6596 4486.8 UdeM00000023103 XP\_045203204.1 67.7  
3542 1008 50 1 3466 1273 4754 0.00E+00 4486.8 6596  
cellular

organisms;Eukaryota;Opisthokonta;Metazoa;Eumetazoa;Bilateria;Protostomia;Spiralia;Lophotrochozoa;Mollusca;Bivalvia;Autobranhia;Heteroconchia;Euherodonta;Imparidentia;Venerida;Veneroidea;Veneridae;Mercenaria;Mercenaria mercenaria

UdeM00000023104 6579 848.2 UdeM00000023104 XP\_033743350.1 82.8 460  
76 1 4 463 4325 4781 4.90E-243 848.2 6579 cellular

organisms;Eukaryota;Opisthokonta;Metazoa;Eumetazoa;Bilateria;Protostomia;Spiralia;Lophotrochozoa;Mollusca;Bivalvia;Autobranhia;Pteriormorphia;Pectinida;Pectinoidea;Pectinidae;Pecten;Pecten maximus

UdeM00000023105 6596 286.6 UdeM00000023105 XP\_045203881.1 62.3 228  
82 3 15 242 66 289 3.10E-74 286.6 6596 cellular

organisms;Eukaryota;Opisthokonta;Metazoa;Eumetazoa;Bilateria;Protostomia;Spiralia;Lophotrochozoa;Mollusca;Bivalvia;Autobranhia;Heteroconchia;Euherodonta;Imparidentia;Venerida;Veneroidea;Veneridae;Mercenaria;Mercenaria mercenaria

UdeM00000023106 6596 441.4 UdeM00000023106 XP\_045203879.1 96.1 231  
9 0 1 231 1 231 7.50E-121 441.4 6596 cellular

organisms;Eukaryota;Opisthokonta;Metazoa;Eumetazoa;Bilateria;Protostomia;

Spiralia;Lophotrochozoa;Mollusca;Bivalvia;Autobranchia;Heteroconchia;Euherodonta;Imparidentia;Venerida;Veneroidea;Veneridae;Mercenaria;Mercenaria mercenaria

UdeM00000023107 6596 375.6 UdeM00000023107 XP\_045203879.1 97.4 195  
5 0 1 195 1 195 4.80E-101 375.6 6596 cellular

organisms;Eukaryota;Opisthokonta;Metazoa;Eumetazoa;Bilateria;Protostomia;Spiralia;Lophotrochozoa;Mollusca;Bivalvia;Autobranchia;Heteroconchia;Euherodonta;Imparidentia;Venerida;Veneroidea;Veneridae;Mercenaria;Mercenaria mercenaria

UdeM00000023108 6526 1262.7 UdeM00000023108 XP\_013091937.1 68  
937 261 7 1 900 715 1649 0.00E+00 1262.7 6526  
cellular

organisms;Eukaryota;Opisthokonta;Metazoa;Eumetazoa;Bilateria;Protostomia;Spiralia;Lophotrochozoa;Mollusca;Gastropoda;Heterobranchia;Euthyneura;Panpulmonata;Hygrophila;Lymnaeidae;Planorbidae;Biophalaria;Biophalaria glabrata

UdeM00000023109 6596 279.3 UdeM00000023109 XP\_045203875.1 34.2 766  
399 21 24 723 4 730 1.40E-71 279.3 6596 cellular

organisms;Eukaryota;Opisthokonta;Metazoa;Eumetazoa;Bilateria;Protostomia;Spiralia;Lophotrochozoa;Mollusca;Bivalvia;Autobranchia;Heteroconchia;Euherodonta;Imparidentia;Venerida;Veneroidea;Veneridae;Mercenaria;Mercenaria mercenaria

UdeM00000023110 6596 576.2 UdeM00000023110 XP\_045203141.1 49.3 533  
265 1 35 562 27 559 4.60E-161 576.2 6596 cellular

organisms;Eukaryota;Opisthokonta;Metazoa;Eumetazoa;Bilateria;Protostomia;Spiralia;Lophotrochozoa;Mollusca;Bivalvia;Autobranchia;Heteroconchia;Euherodonta;Imparidentia;Venerida;Veneroidea;Veneridae;Mercenaria;Mercenaria mercenaria

UdeM00000023111 37621 111.7 UdeM00000023111 XP\_014679849.1 69.1 81  
24 1 8 87 150 230 4.80E-22 111.7 37621 cellular

organisms;Eukaryota;Opisthokonta;Metazoa;Eumetazoa;Bilateria;Protostomia;Ecdysozoa;Scalidophora;Priapulida;Priapulimorpha;Priapulimorphida;Priapulidae;Priapululus;Priapululus caudatus

UdeM00000023112 37621 297 UdeM00000023112 XP\_014679849.1 57 230  
92 3 2 224 394 623 2.10E-77 297 37621 cellular

organisms;Eukaryota;Opisthokonta;Metazoa;Eumetazoa;Bilateria;Protostomia;Ecdysozoa;Scalidophora;Priapulida;Priapulimorpha;Priapulimorphida;Priapulidae;Priapululus;Priapululus caudatus

UdeM00000023113 37621 418.7 UdeM00000023113 XP\_014679849.1 58.2 325  
129 3 3 320 299 623 6.70E-114 418.7 37621 cellular

organisms;Eukaryota;Opisthokonta;Metazoa;Eumetazoa;Bilateria;Protostomia;Ecdysozoa;Scalidophora;Priapulida;Priapulimorpha;Priapulimorphida;Priapulidae;Priapululus;Priapululus caudatus

UdeM00000023114 37621 113.2 UdeM00000023114 XP\_014679849.1 35 214  
40 2 1 115 17 230 2.20E-22 113.2 37621 cellular

organisms;Eukaryota;Opisthokonta;Metazoa;Eumetazoa;Bilateria;Protostomia;Ecdysozoa;Scalidophora;Priapulida;Priapulimorpha;Priapulimorphida;Priapulidae;Priapululus;Priapululus caudatus

UdeM00000023115 6573 217.2 UdeM00000023115 XP\_021378328.1 38.8 742  
337 16 83 794 699 1353 7.30E-53 217.2 6573 cellular

organisms;Eukaryota;Opisthokonta;Metazoa;Eumetazoa;Bilateria;Protostomia;Spiralia;Lophotrochozoa;Mollusca;Bivalvia;Autobranchia;Pteriomorpha;Pectinida;Pectinoidea;Pectinidae;Mizuhopecten;Mizuhopecten yessoensis

UdeM00000023116 6573 214.9 UdeM00000023116 XP\_021378328.1 38.7 742  
 338 16 83 794 699 1353 3.70E-52 214.9 6573 cellular  
 organisms;Eukaryota;Opisthokonta;Metazoa;Eumetazoa;Bilateria;Protostomia;  
 Spiralia;Lophotrochozoa;Mollusca;Bivalvia;Autobranchia;Pteriomorpha;Pect  
 inida;Pectinoidea;Pectinidae;Mizuhopecten;Mizuhopecten yessoensis  
 UdeM00000023117 6579 132.9 UdeM00000023117 XP\_033744256.1 74.4 90  
 19 1 108 197 1293 1378 4.60E-28 132.9 6579 cellular  
 organisms;Eukaryota;Opisthokonta;Metazoa;Eumetazoa;Bilateria;Protostomia;  
 Spiralia;Lophotrochozoa;Mollusca;Bivalvia;Autobranchia;Pteriomorpha;Pect  
 inida;Pectinoidea;Pectinidae;Pecten;Pecten maximus  
 UdeM00000023118 29159 338.6 UdeM00000023118 XP\_019926413.2 65.1 261  
 84 3 1 261 356 609 8.40E-90 338.6 29159 cellular  
 organisms;Eukaryota;Opisthokonta;Metazoa;Eumetazoa;Bilateria;Protostomia;  
 Spiralia;Lophotrochozoa;Mollusca;Bivalvia;Autobranchia;Pteriomorpha;Ostr  
 eida;Ostreoidea;Ostreidae;Crassostrea;Crassostrea gigas  
 UdeM00000023119 29159 557 UdeM00000023119 XP\_034303187.1 60.7 591  
 186 8 1 570 1 566 2.80E-155 557 29159 cellular  
 organisms;Eukaryota;Opisthokonta;Metazoa;Eumetazoa;Bilateria;Protostomia;  
 Spiralia;Lophotrochozoa;Mollusca;Bivalvia;Autobranchia;Pteriomorpha;Ostr  
 eida;Ostreoidea;Ostreidae;Crassostrea;Crassostrea gigas  
 UdeM00000023120 6596 300.4 UdeM00000023120 XP\_045204422.1 61.1 239  
 91 2 380 618 490 726 5.10E-78 300.4 6596 cellular  
 organisms;Eukaryota;Opisthokonta;Metazoa;Eumetazoa;Bilateria;Protostomia;  
 Spiralia;Lophotrochozoa;Mollusca;Bivalvia;Autobranchia;Heteroconchia;Euhe  
 terodonta;Imparidentia;Venerida;Veneroidea;Veneridae;Mercenaria;Mercenari  
 a mercenaria  
 UdeM00000023121 6596 410.6 UdeM00000023121 XP\_045205609.1 71.6 275  
 77 1 12 285 1 275 1.60E-111 410.6 6596 cellular  
 organisms;Eukaryota;Opisthokonta;Metazoa;Eumetazoa;Bilateria;Protostomia;  
 Spiralia;Lophotrochozoa;Mollusca;Bivalvia;Autobranchia;Heteroconchia;Euhe  
 terodonta;Imparidentia;Venerida;Veneroidea;Veneridae;Mercenaria;Mercenari  
 a mercenaria  
 UdeM00000023122 6596 392.9 UdeM00000023122 XP\_045205605.1 37.5 597  
 349 13 30 613 40 625 7.50E-106 392.9 6596 cellular  
 organisms;Eukaryota;Opisthokonta;Metazoa;Eumetazoa;Bilateria;Protostomia;  
 Spiralia;Lophotrochozoa;Mollusca;Bivalvia;Autobranchia;Heteroconchia;Euhe  
 terodonta;Imparidentia;Venerida;Veneroidea;Veneridae;Mercenaria;Mercenari  
 a mercenaria  
 UdeM00000023123 6596 392.9 UdeM00000023123 XP\_045205605.1 37.5 597  
 349 13 21 604 40 625 7.40E-106 392.9 6596 cellular  
 organisms;Eukaryota;Opisthokonta;Metazoa;Eumetazoa;Bilateria;Protostomia;  
 Spiralia;Lophotrochozoa;Mollusca;Bivalvia;Autobranchia;Heteroconchia;Euhe  
 terodonta;Imparidentia;Venerida;Veneroidea;Veneridae;Mercenaria;Mercenari  
 a mercenaria  
 UdeM00000023124 6596 1113.6 UdeM00000023124 XP\_045205604.1 62.9  
 946 300 12 2 913 3 931 0.00E+00 1113.6 6596  
 cellular  
 organisms;Eukaryota;Opisthokonta;Metazoa;Eumetazoa;Bilateria;Protostomia;  
 Spiralia;Lophotrochozoa;Mollusca;Bivalvia;Autobranchia;Heteroconchia;Euhe  
 terodonta;Imparidentia;Venerida;Veneroidea;Veneridae;Mercenaria;Mercenari  
 a mercenaria  
 UdeM00000023125 6596 69.7 UdeM00000023125 XP\_045205610.1 44.4 108  
 53 3 95 201 193 294 4.90E-09 69.7 6596 cellular  
 organisms;Eukaryota;Opisthokonta;Metazoa;Eumetazoa;Bilateria;Protostomia;

Spiralia;Lophotrochozoa;Mollusca;Bivalvia;Autobranchia;Heteroconchia;Euherodonta;Imparidentia;Venerida;Veneroidea;Veneridae;Mercenaria;Mercenaria mercenaria

UdeM00000023126 6596 127.9 UdeM00000023126 XP\_045205611.1 82.6 69  
12 0 1 69 13 81 5.10E-27 127.9 6596 cellular

organisms;Eukaryota;Opisthokonta;Metazoa;Eumetazoa;Bilateria;Protostomia;Spiralia;Lophotrochozoa;Mollusca;Bivalvia;Autobranchia;Heteroconchia;Euherodonta;Imparidentia;Venerida;Veneroidea;Veneridae;Mercenaria;Mercenaria mercenaria

UdeM00000023128 6596 1388.6 UdeM00000023128 XP\_045205613.1 50  
2403 978 60 3 2299 5 2290 0.00E+00 1388.6 6596  
cellular

organisms;Eukaryota;Opisthokonta;Metazoa;Eumetazoa;Bilateria;Protostomia;Spiralia;Lophotrochozoa;Mollusca;Bivalvia;Autobranchia;Heteroconchia;Euherodonta;Imparidentia;Venerida;Veneroidea;Veneridae;Mercenaria;Mercenaria mercenaria

UdeM00000023129 6596 276.2 UdeM00000023129 XP\_045203373.1 52.6 272  
96 2 74 345 186 424 5.80E-71 276.2 6596 cellular

organisms;Eukaryota;Opisthokonta;Metazoa;Eumetazoa;Bilateria;Protostomia;Spiralia;Lophotrochozoa;Mollusca;Bivalvia;Autobranchia;Heteroconchia;Euherodonta;Imparidentia;Venerida;Veneroidea;Veneridae;Mercenaria;Mercenaria mercenaria

UdeM00000023130 6596 379 UdeM00000023130 XP\_045160790.1 41.8 596  
281 14 9 569 69 633 1.70E-101 379 6596 cellular

organisms;Eukaryota;Opisthokonta;Metazoa;Eumetazoa;Bilateria;Protostomia;Spiralia;Lophotrochozoa;Mollusca;Bivalvia;Autobranchia;Heteroconchia;Euherodonta;Imparidentia;Venerida;Veneroidea;Veneridae;Mercenaria;Mercenaria mercenaria

UdeM00000023131 6596 61.2 UdeM00000023131 XP\_045160790.1 52.7 55  
26 0 1 55 1 55 1.30E-06 61.2 6596 cellular

organisms;Eukaryota;Opisthokonta;Metazoa;Eumetazoa;Bilateria;Protostomia;Spiralia;Lophotrochozoa;Mollusca;Bivalvia;Autobranchia;Heteroconchia;Euherodonta;Imparidentia;Venerida;Veneroidea;Veneridae;Mercenaria;Mercenaria mercenaria

UdeM00000023133 6573 147.1 UdeM00000023133 XP\_021364054.1 31.7 331  
200 9 1 309 6 332 5.60E-32 147.1 6573 cellular

organisms;Eukaryota;Opisthokonta;Metazoa;Eumetazoa;Bilateria;Protostomia;Spiralia;Lophotrochozoa;Mollusca;Bivalvia;Autobranchia;Pteriomorphia;Pectinida;Pectinoidea;Pectinidae;Mizuhopecten;Mizuhopecten yessoensis

UdeM00000023134 6573 147.1 UdeM00000023134 XP\_021364054.1 31.7 331  
200 9 1 309 6 332 5.50E-32 147.1 6573 cellular

organisms;Eukaryota;Opisthokonta;Metazoa;Eumetazoa;Bilateria;Protostomia;Spiralia;Lophotrochozoa;Mollusca;Bivalvia;Autobranchia;Pteriomorphia;Pectinida;Pectinoidea;Pectinidae;Mizuhopecten;Mizuhopecten yessoensis

UdeM00000023135 6573 129.8 UdeM00000023135 XP\_021364054.1 38.4 203  
113 5 1 192 6 207 3.90E-27 129.8 6573 cellular

organisms;Eukaryota;Opisthokonta;Metazoa;Eumetazoa;Bilateria;Protostomia;Spiralia;Lophotrochozoa;Mollusca;Bivalvia;Autobranchia;Pteriomorphia;Pectinida;Pectinoidea;Pectinidae;Mizuhopecten;Mizuhopecten yessoensis

UdeM00000023136 6596 171.4 UdeM00000023136 XP\_045169933.1 26.4 552  
333 12 175 683 213 734 4.00E-39 171.4 6596 cellular

organisms;Eukaryota;Opisthokonta;Metazoa;Eumetazoa;Bilateria;Protostomia;Spiralia;Lophotrochozoa;Mollusca;Bivalvia;Autobranchia;Heteroconchia;Euherodonta

terodonta;Imparidentia;Venerida;Veneroidea;Veneridae;Mercenaria;Mercenari  
 a mercenaria  
 UdeM00000023137 6596 167.2 UdeM00000023137 XP\_045202239.1 24.6 725  
 454 22 8 687 12 688 7.60E-38 167.2 6596 cellular  
 organisms;Eukaryota;Opisthokonta;Metazoa;Eumetazoa;Bilateria;Protostomia;  
 Spiralia;Lophotrochozoa;Mollusca;Bivalvia;Autobranchia;Heteroconchia;Euhe  
 terodonta;Imparidentia;Venerida;Veneroidea;Veneridae;Mercenaria;Mercenari  
 a mercenaria  
 UdeM00000023138 6596 180.3 UdeM00000023138 XP\_045202238.1 27.1 579  
 338 20 162 695 157 696 8.70E-42 180.3 6596 cellular  
 organisms;Eukaryota;Opisthokonta;Metazoa;Eumetazoa;Bilateria;Protostomia;  
 Spiralia;Lophotrochozoa;Mollusca;Bivalvia;Autobranchia;Heteroconchia;Euhe  
 terodonta;Imparidentia;Venerida;Veneroidea;Veneridae;Mercenaria;Mercenari  
 a mercenaria  
 UdeM00000023139 6596 149.1 UdeM00000023139 XP\_045167997.1 29.9 335  
 224 6 8 340 6 331 1.10E-32 149.1 6596 cellular  
 organisms;Eukaryota;Opisthokonta;Metazoa;Eumetazoa;Bilateria;Protostomia;  
 Spiralia;Lophotrochozoa;Mollusca;Bivalvia;Autobranchia;Heteroconchia;Euhe  
 terodonta;Imparidentia;Venerida;Veneroidea;Veneridae;Mercenaria;Mercenari  
 a mercenaria  
 UdeM00000023142 6596 133.3 UdeM00000023142 XP\_045201791.1 24.7 530  
 340 12 3 496 89 595 8.70E-28 133.3 6596 cellular  
 organisms;Eukaryota;Opisthokonta;Metazoa;Eumetazoa;Bilateria;Protostomia;  
 Spiralia;Lophotrochozoa;Mollusca;Bivalvia;Autobranchia;Heteroconchia;Euhe  
 terodonta;Imparidentia;Venerida;Veneroidea;Veneridae;Mercenaria;Mercenari  
 a mercenaria  
 UdeM00000023144 6565 59.7 UdeM00000023144 XP\_022304821.1 32.4 139  
 88 2 1 133 283 421 7.80E-06 59.7 6565 cellular  
 organisms;Eukaryota;Opisthokonta;Metazoa;Eumetazoa;Bilateria;Protostomia;  
 Spiralia;Lophotrochozoa;Mollusca;Bivalvia;Autobranchia;Pteriomorphia;Ostr  
 eida;Ostreoidea;Ostreidae;Crassostrea;Crassostrea virginica  
 UdeM00000023146 6596 116.3 UdeM00000023146 XP\_045201791.1 24.3 423  
 284 9 2 395 170 585 9.20E-23 116.3 6596 cellular  
 organisms;Eukaryota;Opisthokonta;Metazoa;Eumetazoa;Bilateria;Protostomia;  
 Spiralia;Lophotrochozoa;Mollusca;Bivalvia;Autobranchia;Heteroconchia;Euhe  
 terodonta;Imparidentia;Venerida;Veneroidea;Veneridae;Mercenaria;Mercenari  
 a mercenaria  
 UdeM00000023149 6565 84 UdeM00000023149 XP\_022287605.1 27.5 240  
 99 6 5 186 102 324 2.50E-13 84 6565 cellular  
 organisms;Eukaryota;Opisthokonta;Metazoa;Eumetazoa;Bilateria;Protostomia;  
 Spiralia;Lophotrochozoa;Mollusca;Bivalvia;Autobranchia;Pteriomorphia;Ostr  
 eida;Ostreoidea;Ostreidae;Crassostrea;Crassostrea virginica  
 UdeM00000023150 6596 112.8 UdeM00000023150 XP\_045206250.1 37.7 175  
 100 5 4 176 569 736 4.40E-22 112.8 6596 cellular  
 organisms;Eukaryota;Opisthokonta;Metazoa;Eumetazoa;Bilateria;Protostomia;  
 Spiralia;Lophotrochozoa;Mollusca;Bivalvia;Autobranchia;Heteroconchia;Euhe  
 terodonta;Imparidentia;Venerida;Veneroidea;Veneridae;Mercenaria;Mercenari  
 a mercenaria  
 UdeM00000023151 6596 182.6 UdeM00000023151 XP\_045201791.1 26.2 530  
 349 10 177 677 69 585 1.70E-42 182.6 6596 cellular  
 organisms;Eukaryota;Opisthokonta;Metazoa;Eumetazoa;Bilateria;Protostomia;  
 Spiralia;Lophotrochozoa;Mollusca;Bivalvia;Autobranchia;Heteroconchia;Euhe  
 terodonta;Imparidentia;Venerida;Veneroidea;Veneridae;Mercenaria;Mercenari  
 a mercenaria



UdeM00000023155 6573 153.3 UdeM00000023155 XP\_021370310.1 31.5 349  
 207 12 5 340 8 337 1.10E-33 153.3 6573 cellular  
 organisms;Eukaryota;Opisthokonta;Metazoa;Eumetazoa;Bilateria;Protostomia;  
 Spiralia;Lophotrochozoa;Mollusca;Bivalvia;Autobranhia;Pteriomorphia;Pect  
 inida;Pectinoidea;Pectinidae;Mizuhopecten;Mizuhopecten yessoensis  
 UdeM00000023156 6596 58.9 UdeM00000023156 XP\_045201791.1 30.2 106  
 68 2 2 103 170 273 8.00E-06 58.9 6596 cellular  
 organisms;Eukaryota;Opisthokonta;Metazoa;Eumetazoa;Bilateria;Protostomia;  
 Spiralia;Lophotrochozoa;Mollusca;Bivalvia;Autobranhia;Heteroconchia;Euhe  
 terodonta;Imparidentia;Venerida;Veneroidea;Veneridae;Mercenaria;Mercenari  
 a mercenaria  
 UdeM00000023158 6573 69.7 UdeM00000023158 XP\_021341134.1 37.9 87  
 50 1 43 125 160 246 3.00E-09 69.7 6573 cellular  
 organisms;Eukaryota;Opisthokonta;Metazoa;Eumetazoa;Bilateria;Protostomia;  
 Spiralia;Lophotrochozoa;Mollusca;Bivalvia;Autobranhia;Pteriomorphia;Pect  
 inida;Pectinoidea;Pectinidae;Mizuhopecten;Mizuhopecten yessoensis  
 UdeM00000023159 6596 161.8 UdeM00000023159 XP\_045201791.1 25.4 543  
 345 14 174 679 66 585 3.20E-36 161.8 6596 cellular  
 organisms;Eukaryota;Opisthokonta;Metazoa;Eumetazoa;Bilateria;Protostomia;  
 Spiralia;Lophotrochozoa;Mollusca;Bivalvia;Autobranhia;Heteroconchia;Euhe  
 terodonta;Imparidentia;Venerida;Veneroidea;Veneridae;Mercenaria;Mercenari  
 a mercenaria  
 UdeM00000023160 6596 92.4 UdeM00000023160 XP\_045167997.1 35 160  
 96 3 8 165 196 349 9.60E-16 92.4 6596 cellular  
 organisms;Eukaryota;Opisthokonta;Metazoa;Eumetazoa;Bilateria;Protostomia;  
 Spiralia;Lophotrochozoa;Mollusca;Bivalvia;Autobranhia;Heteroconchia;Euhe  
 terodonta;Imparidentia;Venerida;Veneroidea;Veneridae;Mercenaria;Mercenari  
 a mercenaria  
 UdeM00000023162 6596 62.4 UdeM00000023162 XP\_045184729.1 28.5 144  
 86 4 61 196 565 699 7.50E-07 62.4 6596 cellular  
 organisms;Eukaryota;Opisthokonta;Metazoa;Eumetazoa;Bilateria;Protostomia;  
 Spiralia;Lophotrochozoa;Mollusca;Bivalvia;Autobranhia;Heteroconchia;Euhe  
 terodonta;Imparidentia;Venerida;Veneroidea;Veneridae;Mercenaria;Mercenari  
 a mercenaria  
 UdeM00000023163 6573 96.3 UdeM00000023163 XP\_021362994.1 27.3 264  
 179 6 5 265 7 260 6.30E-17 96.3 6573 cellular  
 organisms;Eukaryota;Opisthokonta;Metazoa;Eumetazoa;Bilateria;Protostomia;  
 Spiralia;Lophotrochozoa;Mollusca;Bivalvia;Autobranhia;Pteriomorphia;Pect  
 inida;Pectinoidea;Pectinidae;Mizuhopecten;Mizuhopecten yessoensis  
 UdeM00000023165 6565 62.4 UdeM00000023165 XP\_022304821.1 30.9 139  
 90 2 1 133 283 421 5.30E-07 62.4 6565 cellular  
 organisms;Eukaryota;Opisthokonta;Metazoa;Eumetazoa;Bilateria;Protostomia;  
 Spiralia;Lophotrochozoa;Mollusca;Bivalvia;Autobranhia;Pteriomorphia;Ostr  
 eida;Ostreoidea;Ostreidae;Crassostrea;Crassostrea virginica  
 UdeM00000023168 6579 67.8 UdeM00000023168 XP\_033759652.1 38.6 70  
 43 0 7 76 198 267 7.50E-09 67.8 6579 cellular  
 organisms;Eukaryota;Opisthokonta;Metazoa;Eumetazoa;Bilateria;Protostomia;  
 Spiralia;Lophotrochozoa;Mollusca;Bivalvia;Autobranhia;Pteriomorphia;Pect  
 inida;Pectinoidea;Pectinidae;Pecten;Pecten maximus  
 UdeM00000023169 1735272 145.2 UdeM00000023169 XP\_041369520.1 42.9  
 168 92 4 15 179 592 758 8.30E-32 145.2 1735272  
 cellular  
 organisms;Eukaryota;Opisthokonta;Metazoa;Eumetazoa;Bilateria;Protostomia;

Spiralia;Lophotrochozoa;Mollusca;Gastropoda;Neomphalina;Neomphaloidea;Pel  
tospiridae;Gigantopelta;Gigantopelta aegis  
UdeM00000023171 6565 327.8 UdeM00000023171 XP\_022320668.1 39.9 521  
204 13 15 444 129 631 2.20E-86 327.8 6565 cellular  
organisms;Eukaryota;Opisthokonta;Metazoa;Eumetazoa;Bilateria;Protostomia;  
Spiralia;Lophotrochozoa;Mollusca;Bivalvia;Autobranchia;Pteriormorphia;Ostr  
eida;Ostreoidea;Ostreidae;Crassostrea;Crassostrea virginica  
UdeM00000023170 6565 470.3 UdeM00000023170 XP\_022320668.1 38.9 774  
321 17 11 661 5 749 4.10E-129 470.3 6565 cellular  
organisms;Eukaryota;Opisthokonta;Metazoa;Eumetazoa;Bilateria;Protostomia;  
Spiralia;Lophotrochozoa;Mollusca;Bivalvia;Autobranchia;Pteriormorphia;Ostr  
eida;Ostreoidea;Ostreidae;Crassostrea;Crassostrea virginica  
UdeM00000023172 6565 128.3 UdeM00000023172 XP\_022345797.1 67.9 84  
27 0 1 84 1 84 5.50E-27 128.3 6565 cellular  
organisms;Eukaryota;Opisthokonta;Metazoa;Eumetazoa;Bilateria;Protostomia;  
Spiralia;Lophotrochozoa;Mollusca;Bivalvia;Autobranchia;Pteriormorphia;Ostr  
eida;Ostreoidea;Ostreidae;Crassostrea;Crassostrea virginica  
UdeM00000023173 1735272 622.1 UdeM00000023173 XP\_041369520.1 54.2  
553 244 4 31 576 40 590 7.70E-175 622.1 1735272  
cellular  
organisms;Eukaryota;Opisthokonta;Metazoa;Eumetazoa;Bilateria;Protostomia;  
Spiralia;Lophotrochozoa;Mollusca;Gastropoda;Neomphalina;Neomphaloidea;Pel  
tospiridae;Gigantopelta;Gigantopelta aegis  
UdeM00000023174 13735 111.3 UdeM00000023174 XP\_014435189.1 24.3 383  
227 10 4 366 594 933 2.60E-21 111.3 13735 cellular  
organisms;Eukaryota;Opisthokonta;Metazoa;Eumetazoa;Bilateria;Deuterostomi  
a;Chordata;Craniata;Vertebrata;Gnathostomata;Teleostomi;Euteleostomi;Sarc  
opterygii;Dipnotetrapodomorpha;Tetrapoda;Amniota;Sauropsida;Sauria;Archel  
osauria;Testudinata;Testudines;Cryptodira;Trionychia;Trionychidae;Pelodis  
cus;Pelodiscus sinensis  
UdeM00000023175 6579 417.5 UdeM00000023175 XP\_033742246.1 52.5 398  
169 5 20 405 5 394 1.90E-113 417.5 6579 cellular  
organisms;Eukaryota;Opisthokonta;Metazoa;Eumetazoa;Bilateria;Protostomia;  
Spiralia;Lophotrochozoa;Mollusca;Bivalvia;Autobranchia;Pteriormorphia;Pect  
inida;Pectinoidea;Pectinidae;Pecten;Pecten maximus  
UdeM00000023177 29159 125.9 UdeM00000023177 XP\_034322429.1 36.2 218  
73 2 19 170 28 245 6.80E-26 125.9 29159 cellular  
organisms;Eukaryota;Opisthokonta;Metazoa;Eumetazoa;Bilateria;Protostomia;  
Spiralia;Lophotrochozoa;Mollusca;Bivalvia;Autobranchia;Pteriormorphia;Ostr  
eida;Ostreoidea;Ostreidae;Crassostrea;Crassostrea gigas  
UdeM00000023178 6596 494.6 UdeM00000023178 XP\_045205113.1 65 432  
134 12 3 425 2 425 1.30E-136 494.6 6596 cellular  
organisms;Eukaryota;Opisthokonta;Metazoa;Eumetazoa;Bilateria;Protostomia;  
Spiralia;Lophotrochozoa;Mollusca;Bivalvia;Autobranchia;Heteroconchia;Euhe  
terodonta;Imparidentia;Venerida;Veneroidea;Veneridae;Mercenaria;Mercenari  
a mercenaria  
UdeM00000023179 6596 166.4 UdeM00000023179 XP\_045201791.1 25.6 535  
346 12 179 679 69 585 1.30E-37 166.4 6596 cellular  
organisms;Eukaryota;Opisthokonta;Metazoa;Eumetazoa;Bilateria;Protostomia;  
Spiralia;Lophotrochozoa;Mollusca;Bivalvia;Autobranchia;Heteroconchia;Euhe  
terodonta;Imparidentia;Venerida;Veneroidea;Veneridae;Mercenaria;Mercenari  
a mercenaria  
UdeM00000023180 29159 96.3 UdeM00000023180 XP\_034317111.1 56 75  
33 0 1 75 1 75 1.90E-17 96.3 29159 cellular

organisms;Eukaryota;Opisthokonta;Metazoa;Eumetazoa;Bilateria;Protostomia;Spiralia;Lophotrochozoa;Mollusca;Bivalvia;Autobranhia;Pteriormorphia;Ostreida;Ostreioidea;Ostreidae;Crassostrea;Crassostrea gigas  
UdeM00000023181 29159 109.4 UdeM00000023181 XP\_034317111.1 56.3 87  
38 0 2 88 171 257 2.50E-21 109.4 29159 cellular  
organisms;Eukaryota;Opisthokonta;Metazoa;Eumetazoa;Bilateria;Protostomia;Spiralia;Lophotrochozoa;Mollusca;Bivalvia;Autobranhia;Pteriormorphia;Ostreida;Ostreioidea;Ostreidae;Crassostrea;Crassostrea gigas  
UdeM00000023182 29159 326.6 UdeM00000023182 XP\_034317111.1 58.8 257  
106 0 1 257 1 257 2.80E-86 326.6 29159 cellular  
organisms;Eukaryota;Opisthokonta;Metazoa;Eumetazoa;Bilateria;Protostomia;Spiralia;Lophotrochozoa;Mollusca;Bivalvia;Autobranhia;Pteriormorphia;Ostreida;Ostreioidea;Ostreidae;Crassostrea;Crassostrea gigas  
UdeM00000023183 6596 174.1 UdeM00000023183 XP\_045202238.1 25 567  
319 16 173 679 166 686 6.20E-40 174.1 6596 cellular  
organisms;Eukaryota;Opisthokonta;Metazoa;Eumetazoa;Bilateria;Protostomia;Spiralia;Lophotrochozoa;Mollusca;Bivalvia;Autobranhia;Heteroconchia;Euheterodonta;Imparidentia;Venerida;Veneroidea;Veneridae;Mercenaria;Mercenaria mercenaria  
UdeM00000023184 29159 515.8 UdeM00000023184 XP\_019918074.2 59.9 434  
165 3 1 433 1 426 5.50E-143 515.8 29159 cellular  
organisms;Eukaryota;Opisthokonta;Metazoa;Eumetazoa;Bilateria;Protostomia;Spiralia;Lophotrochozoa;Mollusca;Bivalvia;Autobranhia;Pteriormorphia;Ostreida;Ostreioidea;Ostreidae;Crassostrea;Crassostrea gigas  
UdeM00000023185 6579 1891.7 UdeM00000023185 XP\_033742511.1 81.5  
1149 203 4 16 1157 22 1168 0.00E+00 1891.7 6579  
cellular  
organisms;Eukaryota;Opisthokonta;Metazoa;Eumetazoa;Bilateria;Protostomia;Spiralia;Lophotrochozoa;Mollusca;Bivalvia;Autobranhia;Pteriormorphia;Pectinida;Pectinoidea;Pectinidae;Pecten;Pecten maximus  
UdeM00000023186 6596 763.1 UdeM00000023186 XP\_045157887.1 41.1 997  
566 11 17 998 16 1006 4.60E-217 763.1 6596 cellular  
organisms;Eukaryota;Opisthokonta;Metazoa;Eumetazoa;Bilateria;Protostomia;Spiralia;Lophotrochozoa;Mollusca;Bivalvia;Autobranhia;Heteroconchia;Euheterodonta;Imparidentia;Venerida;Veneroidea;Veneridae;Mercenaria;Mercenaria mercenaria  
UdeM00000023187 6596 772.3 UdeM00000023187 XP\_045157887.1 41.6 1006  
561 11 23 1012 16 1010 7.60E-220 772.3 6596 cellular  
organisms;Eukaryota;Opisthokonta;Metazoa;Eumetazoa;Bilateria;Protostomia;Spiralia;Lophotrochozoa;Mollusca;Bivalvia;Autobranhia;Heteroconchia;Euheterodonta;Imparidentia;Venerida;Veneroidea;Veneridae;Mercenaria;Mercenaria mercenaria  
UdeM00000023188 6596 140.2 UdeM00000023188 XP\_045167997.1 31.3 355  
224 8 10 357 8 349 5.70E-30 140.2 6596 cellular  
organisms;Eukaryota;Opisthokonta;Metazoa;Eumetazoa;Bilateria;Protostomia;Spiralia;Lophotrochozoa;Mollusca;Bivalvia;Autobranhia;Heteroconchia;Euheterodonta;Imparidentia;Venerida;Veneroidea;Veneridae;Mercenaria;Mercenaria mercenaria  
UdeM00000023189 6596 1699.5 UdeM00000023189 XP\_045203316.1 63.7  
1293 456 8 1 1289 1 1283 0.00E+00 1699.5 6596  
cellular  
organisms;Eukaryota;Opisthokonta;Metazoa;Eumetazoa;Bilateria;Protostomia;Spiralia;Lophotrochozoa;Mollusca;Bivalvia;Autobranhia;Heteroconchia;Euheterodonta;Imparidentia;Venerida;Veneroidea;Veneridae;Mercenaria;Mercenaria mercenaria

terodonta;Imparidentia;Venerida;Veneroidea;Veneridae;Mercenaria;Mercenari  
 a mercenaria  
 UdeM00000023190 6579 276.2 UdeM00000023190 XP\_033743315.1 80.3 274  
 54 0 1 274 1 274 4.60E-71 276.2 6579 cellular  
 organisms;Eukaryota;Opisthokonta;Metazoa;Eumetazoa;Bilateria;Protostomia;  
 Spiralia;Lophotrochozoa;Mollusca;Bivalvia;Autobranhia;Pteriomorphia;Pect  
 inida;Pectinoidea;Pectinidae;Pecten;Pecten maximus  
 UdeM00000023191 6579 276.2 UdeM00000023191 XP\_033743315.1 80.3 274  
 54 0 2 275 1 274 4.60E-71 276.2 6579 cellular  
 organisms;Eukaryota;Opisthokonta;Metazoa;Eumetazoa;Bilateria;Protostomia;  
 Spiralia;Lophotrochozoa;Mollusca;Bivalvia;Autobranhia;Pteriomorphia;Pect  
 inida;Pectinoidea;Pectinidae;Pecten;Pecten maximus  
 UdeM00000023192 6596 521.2 UdeM00000023192 XP\_045204897.1 49.4 549  
 266 6 26 572 30 568 1.80E-144 521.2 6596 cellular  
 organisms;Eukaryota;Opisthokonta;Metazoa;Eumetazoa;Bilateria;Protostomia;  
 Spiralia;Lophotrochozoa;Mollusca;Bivalvia;Autobranhia;Heteroconchia;Euhe  
 terodonta;Imparidentia;Venerida;Veneroidea;Veneridae;Mercenaria;Mercenari  
 a mercenaria  
 UdeM00000023193 6573 149.1 UdeM00000023193 XP\_021346231.1 40 295  
 144 10 220 508 196 463 1.70E-32 149.1 6573 cellular  
 organisms;Eukaryota;Opisthokonta;Metazoa;Eumetazoa;Bilateria;Protostomia;  
 Spiralia;Lophotrochozoa;Mollusca;Bivalvia;Autobranhia;Pteriomorphia;Pect  
 inida;Pectinoidea;Pectinidae;Mizuhopecten;Mizuhopecten yessoensis  
 UdeM00000023197 6573 234.6 UdeM00000023197 XP\_021346229.1 82.7 196  
 32 1 3 196 5 200 1.10E-58 234.6 6573 cellular  
 organisms;Eukaryota;Opisthokonta;Metazoa;Eumetazoa;Bilateria;Protostomia;  
 Spiralia;Lophotrochozoa;Mollusca;Bivalvia;Autobranhia;Pteriomorphia;Pect  
 inida;Pectinoidea;Pectinidae;Mizuhopecten;Mizuhopecten yessoensis  
 UdeM00000023198 6579 73.6 UdeM00000023198 XP\_033758100.1 41.2 80  
 47 0 3 82 36 115 1.70E-10 73.6 6579 cellular  
 organisms;Eukaryota;Opisthokonta;Metazoa;Eumetazoa;Bilateria;Protostomia;  
 Spiralia;Lophotrochozoa;Mollusca;Bivalvia;Autobranhia;Pteriomorphia;Pect  
 inida;Pectinoidea;Pectinidae;Pecten;Pecten maximus  
 UdeM00000023199 6596 330.1 UdeM00000023199 XP\_045204811.1 45.8 454  
 213 5 266 695 309 753 6.80E-87 330.1 6596 cellular  
 organisms;Eukaryota;Opisthokonta;Metazoa;Eumetazoa;Bilateria;Protostomia;  
 Spiralia;Lophotrochozoa;Mollusca;Bivalvia;Autobranhia;Heteroconchia;Euhe  
 terodonta;Imparidentia;Venerida;Veneroidea;Veneridae;Mercenaria;Mercenari  
 a mercenaria  
 UdeM00000023200 6596 317 UdeM00000023200 XP\_045204808.1 60.2 367  
 133 1 211 577 233 586 4.90E-83 317 6596 cellular  
 organisms;Eukaryota;Opisthokonta;Metazoa;Eumetazoa;Bilateria;Protostomia;  
 Spiralia;Lophotrochozoa;Mollusca;Bivalvia;Autobranhia;Heteroconchia;Euhe  
 terodonta;Imparidentia;Venerida;Veneroidea;Veneridae;Mercenaria;Mercenari  
 a mercenaria  
 UdeM00000023201 6596 317 UdeM00000023201 XP\_045204808.1 60.2 367  
 133 1 210 576 233 586 4.90E-83 317 6596 cellular  
 organisms;Eukaryota;Opisthokonta;Metazoa;Eumetazoa;Bilateria;Protostomia;  
 Spiralia;Lophotrochozoa;Mollusca;Bivalvia;Autobranhia;Heteroconchia;Euhe  
 terodonta;Imparidentia;Venerida;Veneroidea;Veneridae;Mercenaria;Mercenari  
 a mercenaria  
 UdeM00000023202 1735272 1158.7 UdeM00000023202 XP\_041360029.1  
 74.2 739 181 3 6 740 20 752 0.00E+00 1158.7  
 1735272 cellular

organisms;Eukaryota;Opisthokonta;Metazoa;Eumetazoa;Bilateria;Protostomia;Spiralia;Lophotrochozoa;Mollusca;Gastropoda;Neomphalina;Neomphaloidea;Peltospiridae;Gigantopelta;Gigantopelta aegis

UdeM00000023205 6565 248.8 UdeM00000023205 XP\_022297447.1 55.3 217  
79 3 2 202 75 289 7.10E-63 248.8 6565 cellular

organisms;Eukaryota;Opisthokonta;Metazoa;Eumetazoa;Bilateria;Protostomia;Spiralia;Lophotrochozoa;Mollusca;Bivalvia;Autobranchia;Pteriormorphia;Ostreida;Ostreoidea;Ostreidae;Crassostrea;Crassostrea virginica

UdeM00000023206 6579 71.6 UdeM00000023206 XP\_033756770.1 54.9 71  
31 1 18 88 264 333 5.60E-10 71.6 6579 cellular

organisms;Eukaryota;Opisthokonta;Metazoa;Eumetazoa;Bilateria;Protostomia;Spiralia;Lophotrochozoa;Mollusca;Bivalvia;Autobranchia;Pteriormorphia;Pectinida;Pectinoidea;Pectinidae;Pecten;Pecten maximus

UdeM00000023207 202533 327 UdeM00000023207 XP\_035218899.1 37.7  
467 268 9 80 524 1 466 4.30E-86 327 202533  
cellular

organisms;Eukaryota;Opisthokonta;Metazoa;Eumetazoa;Bilateria;Protostomia;Ecdysozoa;Panarthropoda;Arthropoda;Chelicerata;Arachnida;Araneae;Araneomorphae;Entelegynae;Eresoidea;Eresidae;Stegodyphus;Stegodyphus dumicola

UdeM00000023208 6596 397.5 UdeM00000023208 XP\_045205795.1 73.6 265  
66 3 1 261 1 265 1.30E-107 397.5 6596 cellular

organisms;Eukaryota;Opisthokonta;Metazoa;Eumetazoa;Bilateria;Protostomia;Spiralia;Lophotrochozoa;Mollusca;Bivalvia;Autobranchia;Heteroconchia;Euheterodonta;Imparidentia;Venerida;Veneroidea;Veneridae;Mercenaria;Mercenaria mercenaria

UdeM00000023209 37653 139.4 UdeM00000023209 XP\_014782226.1 59.3 113  
42 2 5 117 5 113 5.10E-30 139.4 37653 cellular

organisms;Eukaryota;Opisthokonta;Metazoa;Eumetazoa;Bilateria;Protostomia;Spiralia;Lophotrochozoa;Mollusca;Cephalopoda;Coleoidea;Octopodiformes;Octopoda;Incirrata;Octopodidae;Octopus;Octopus bimaculoides

UdeM00000023210 6596 311.2 UdeM00000023210 XP\_045176330.1 46.6 328  
173 2 1 327 1 327 1.60E-81 311.2 6596 cellular

organisms;Eukaryota;Opisthokonta;Metazoa;Eumetazoa;Bilateria;Protostomia;Spiralia;Lophotrochozoa;Mollusca;Bivalvia;Autobranchia;Heteroconchia;Euheterodonta;Imparidentia;Venerida;Veneroidea;Veneridae;Mercenaria;Mercenaria mercenaria

UdeM00000023211 6596 303.5 UdeM00000023211 XP\_045176330.1 46.2 331  
172 3 1 328 1 328 3.30E-79 303.5 6596 cellular

organisms;Eukaryota;Opisthokonta;Metazoa;Eumetazoa;Bilateria;Protostomia;Spiralia;Lophotrochozoa;Mollusca;Bivalvia;Autobranchia;Heteroconchia;Euheterodonta;Imparidentia;Venerida;Veneroidea;Veneridae;Mercenaria;Mercenaria mercenaria

UdeM00000023212 1735272 331.3 UdeM00000023212 XP\_041359894.1 62.1  
261 98 1 13 272 6 266 3.90E-87 331.3 1735272  
cellular

organisms;Eukaryota;Opisthokonta;Metazoa;Eumetazoa;Bilateria;Protostomia;Spiralia;Lophotrochozoa;Mollusca;Gastropoda;Neomphalina;Neomphaloidea;Peltospiridae;Gigantopelta;Gigantopelta aegis

UdeM00000023213 9986 194.9 UdeM00000023213 XP\_002716954.1 41.8 263  
144 2 144 404 296 551 2.00E-46 194.9 9986 cellular

organisms;Eukaryota;Opisthokonta;Metazoa;Eumetazoa;Bilateria;Deuterostomia;Chordata;Craniata;Vertebrata;Gnathostomata;Teleostomi;Euteleostomi;Sarcopterygii;Dipnotetrapodomorpha;Tetrapoda;Amniota;Mammalia;Theria;Eutheria

;Boreoeutheria;Euarchontoglires;Glires;Lagomorpha;Leporidae;Oryctolagus;Oryctolagus cuniculus

UdeM00000023215 6596 295.8 UdeM00000023215 XP\_045174627.1 19.6 1918  
499 29 10 937 921 2785 2.00E-76 295.8 6596 cellular  
organisms;Eukaryota;Opisthokonta;Metazoa;Eumetazoa;Bilateria;Protostomia;  
Spiralia;Lophotrochozoa;Mollusca;Bivalvia;Autobranchia;Heteroconchia;Euhe  
terodonta;Imparidentia;Venerida;Veneroidea;Veneridae;Mercenaria;Mercenari  
a mercenaria

UdeM00000023216 6596 295.4 UdeM00000023216 XP\_045176442.1 32.6 641  
329 11 11 549 309 948 1.50E-76 295.4 6596 cellular  
organisms;Eukaryota;Opisthokonta;Metazoa;Eumetazoa;Bilateria;Protostomia;  
Spiralia;Lophotrochozoa;Mollusca;Bivalvia;Autobranchia;Heteroconchia;Euhe  
terodonta;Imparidentia;Venerida;Veneroidea;Veneridae;Mercenaria;Mercenari  
a mercenaria

UdeM00000023217 6579 216.1 UdeM00000023217 XP\_033731739.1 54.2 177  
80 1 1 176 202 378 3.60E-53 216.1 6579 cellular  
organisms;Eukaryota;Opisthokonta;Metazoa;Eumetazoa;Bilateria;Protostomia;  
Spiralia;Lophotrochozoa;Mollusca;Bivalvia;Autobranchia;Pteriormorphia;Pect  
inida;Pectinoidea;Pectinidae;Pecten;Pecten maximus

UdeM00000023219 6579 1418.3 UdeM00000023219 XP\_033751294.1 39.3  
2048 1071 37 7 2017 1002 2914 0.00E+00 1418.3 6579  
cellular  
organisms;Eukaryota;Opisthokonta;Metazoa;Eumetazoa;Bilateria;Protostomia;  
Spiralia;Lophotrochozoa;Mollusca;Bivalvia;Autobranchia;Pteriormorphia;Pect  
inida;Pectinoidea;Pectinidae;Pecten;Pecten maximus

UdeM00000023220 6596 1065.4 UdeM00000023220 XP\_045174627.1 32.6  
2099 1042 37 31 1998 34 1891 8.50E-308 1065.4 6596  
cellular  
organisms;Eukaryota;Opisthokonta;Metazoa;Eumetazoa;Bilateria;Protostomia;  
Spiralia;Lophotrochozoa;Mollusca;Bivalvia;Autobranchia;Heteroconchia;Euhe  
terodonta;Imparidentia;Venerida;Veneroidea;Veneridae;Mercenaria;Mercenari  
a mercenaria

UdeM00000023221 7668 139 UdeM00000023221 XP\_030849760.1 36 253  
158 4 1 250 615 866 9.20E-30 139 7668 cellular  
organisms;Eukaryota;Opisthokonta;Metazoa;Eumetazoa;Bilateria;Deuterostomi  
a;Echinodermata;Eleutherozoa;Echinozoa;Echinoidea;Euechinoidea;Echinacea;  
Camarodonta;Echinidea;Strongylocentrotidae;Strongylocentrotus;Strongyloce  
ntrotus purpuratus

UdeM00000023222 6596 398.3 UdeM00000023222 XP\_045174619.1 32.1 950  
466 22 31 828 39 961 2.40E-107 398.3 6596 cellular  
organisms;Eukaryota;Opisthokonta;Metazoa;Eumetazoa;Bilateria;Protostomia;  
Spiralia;Lophotrochozoa;Mollusca;Bivalvia;Autobranchia;Heteroconchia;Euhe  
terodonta;Imparidentia;Venerida;Veneroidea;Veneridae;Mercenaria;Mercenari  
a mercenaria

UdeM00000023223 400727 114 UdeM00000023223 XP\_025087312.1 34.1  
261 141 7 12 243 38 296 2.70E-22 114 400727  
cellular  
organisms;Eukaryota;Opisthokonta;Metazoa;Eumetazoa;Bilateria;Protostomia;  
Spiralia;Lophotrochozoa;Mollusca;Gastropoda;Caenogastropoda;Architaeniogl  
ossa;Ampullarioidea;Ampullariidae;Pomacea;Pomacea canaliculata

UdeM00000023224 6596 1157.1 UdeM00000023224 XP\_045206698.1 59.5  
1016 403 4 9 1020 238 1249 0.00E+00 1157.1 6596  
cellular  
organisms;Eukaryota;Opisthokonta;Metazoa;Eumetazoa;Bilateria;Protostomia;

Spiralia;Lophotrochozoa;Mollusca;Bivalvia;Autobranchia;Heteroconchia;Euherodonta;Imparidentia;Venerida;Veneroidea;Veneridae;Mercenaria;Mercenaria mercenaria

UdeM00000023225 6596 1060.1 UdeM00000023225 XP\_045206698.1 56.2  
1008 395 5 1 965 246 1249 1.70E-306 1060.1 6596  
cellular

organisms;Eukaryota;Opisthokonta;Metazoa;Eumetazoa;Bilateria;Protostomia;Spiralia;Lophotrochozoa;Mollusca;Bivalvia;Autobranchia;Heteroconchia;Euherodonta;Imparidentia;Venerida;Veneroidea;Veneridae;Mercenaria;Mercenaria mercenaria

UdeM00000023226 6596 1062 UdeM00000023226 XP\_045206698.1 56.2 1008  
393 5 1 963 246 1249 4.50E-307 1062 6596 cellular

organisms;Eukaryota;Opisthokonta;Metazoa;Eumetazoa;Bilateria;Protostomia;Spiralia;Lophotrochozoa;Mollusca;Bivalvia;Autobranchia;Heteroconchia;Euherodonta;Imparidentia;Venerida;Veneroidea;Veneridae;Mercenaria;Mercenaria mercenaria

UdeM00000023227 6596 1330.1 UdeM00000023227 XP\_045203259.1 74.5  
881 212 2 1 871 1 878 0.00E+00 1330.1 6596  
cellular

organisms;Eukaryota;Opisthokonta;Metazoa;Eumetazoa;Bilateria;Protostomia;Spiralia;Lophotrochozoa;Mollusca;Bivalvia;Autobranchia;Heteroconchia;Euherodonta;Imparidentia;Venerida;Veneroidea;Veneridae;Mercenaria;Mercenaria mercenaria

UdeM00000023228 6596 565.5 UdeM00000023228 XP\_045205659.1 76.1 356  
81 2 24 377 24 377 5.30E-158 565.5 6596 cellular

organisms;Eukaryota;Opisthokonta;Metazoa;Eumetazoa;Bilateria;Protostomia;Spiralia;Lophotrochozoa;Mollusca;Bivalvia;Autobranchia;Heteroconchia;Euherodonta;Imparidentia;Venerida;Veneroidea;Veneridae;Mercenaria;Mercenaria mercenaria

UdeM00000023229 6596 3292.3 UdeM00000023229 XP\_045206463.1 64.4  
2439 775 12 114 2467 535 2964 0.00E+00 3292.3 6596  
cellular

organisms;Eukaryota;Opisthokonta;Metazoa;Eumetazoa;Bilateria;Protostomia;Spiralia;Lophotrochozoa;Mollusca;Bivalvia;Autobranchia;Heteroconchia;Euherodonta;Imparidentia;Venerida;Veneroidea;Veneridae;Mercenaria;Mercenaria mercenaria

UdeM00000023230 6596 3241.1 UdeM00000023230 XP\_045206463.1 63.6  
2439 770 12 114 2442 535 2964 0.00E+00 3241.1 6596  
cellular

organisms;Eukaryota;Opisthokonta;Metazoa;Eumetazoa;Bilateria;Protostomia;Spiralia;Lophotrochozoa;Mollusca;Bivalvia;Autobranchia;Heteroconchia;Euherodonta;Imparidentia;Venerida;Veneroidea;Veneridae;Mercenaria;Mercenaria mercenaria

UdeM00000023231 6596 3231.8 UdeM00000023231 XP\_045206463.1 63.4  
2439 772 13 114 2440 535 2964 0.00E+00 3231.8 6596  
cellular

organisms;Eukaryota;Opisthokonta;Metazoa;Eumetazoa;Bilateria;Protostomia;Spiralia;Lophotrochozoa;Mollusca;Bivalvia;Autobranchia;Heteroconchia;Euherodonta;Imparidentia;Venerida;Veneroidea;Veneridae;Mercenaria;Mercenaria mercenaria

UdeM00000023232 6596 147.1 UdeM00000023232 XP\_045206463.1 35 437  
195 11 21 394 29 439 5.00E-32 147.1 6596 cellular

organisms;Eukaryota;Opisthokonta;Metazoa;Eumetazoa;Bilateria;Protostomia;Spiralia;Lophotrochozoa;Mollusca;Bivalvia;Autobranchia;Heteroconchia;Euherodonta;Imparidentia;Venerida;Veneroidea;Veneridae;Mercenaria;Mercenaria mercenaria

terodonta;Imparidentia;Venerida;Veneroidea;Veneridae;Mercenaria;Mercenaria mercenaria  
 UdeM00000023233 6579 398.7 UdeM00000023233 XP\_033743608.1 61.2 420  
 154 4 3 415 1 418 1.00E-107 398.7 6579 cellular  
 organisms;Eukaryota;Opisthokonta;Metazoa;Eumetazoa;Bilateria;Protostomia;Spiralia;Lophotrochozoa;Mollusca;Bivalvia;Autobranhia;Pteriomorphia;Pectinida;Pectinoidea;Pectinidae;Pecten;Pecten maximus  
 UdeM00000023234 6579 419.1 UdeM00000023234 XP\_033743608.1 62.4 425  
 146 5 3 420 1 418 7.30E-114 419.1 6579 cellular  
 organisms;Eukaryota;Opisthokonta;Metazoa;Eumetazoa;Bilateria;Protostomia;Spiralia;Lophotrochozoa;Mollusca;Bivalvia;Autobranhia;Pteriomorphia;Pectinida;Pectinoidea;Pectinidae;Pecten;Pecten maximus  
 UdeM00000023235 6596 839 UdeM00000023235 XP\_045206071.1 52.7 795  
 328 7 11 798 24 777 5.20E-240 839 6596 cellular  
 organisms;Eukaryota;Opisthokonta;Metazoa;Eumetazoa;Bilateria;Protostomia;Spiralia;Lophotrochozoa;Mollusca;Bivalvia;Autobranhia;Heteroconchia;Euheterodonta;Imparidentia;Venerida;Veneroidea;Veneridae;Mercenaria;Mercenaria mercenaria  
 UdeM00000023237 6596 218.8 UdeM00000023237 XP\_045176440.1 29.2 497  
 265 5 10 420 18 513 1.40E-53 218.8 6596 cellular  
 organisms;Eukaryota;Opisthokonta;Metazoa;Eumetazoa;Bilateria;Protostomia;Spiralia;Lophotrochozoa;Mollusca;Bivalvia;Autobranhia;Heteroconchia;Euheterodonta;Imparidentia;Venerida;Veneroidea;Veneridae;Mercenaria;Mercenaria mercenaria  
 UdeM00000023238 6596 658.7 UdeM00000023238 XP\_045204849.1 73.8 473  
 124 0 6 478 55 527 5.80E-186 658.7 6596 cellular  
 organisms;Eukaryota;Opisthokonta;Metazoa;Eumetazoa;Bilateria;Protostomia;Spiralia;Lophotrochozoa;Mollusca;Bivalvia;Autobranhia;Heteroconchia;Euheterodonta;Imparidentia;Venerida;Veneroidea;Veneridae;Mercenaria;Mercenaria mercenaria  
 UdeM00000023239 2607531 187.6 UdeM00000023239 XP\_029644040.1 44.7  
 237 119 5 1 227 1 235 2.80E-44 187.6 2607531  
 cellular  
 organisms;Eukaryota;Opisthokonta;Metazoa;Eumetazoa;Bilateria;Protostomia;Spiralia;Lophotrochozoa;Mollusca;Cephalopoda;Coleoidea;Octopodiformes;Octopoda;Incirrata;Octopodidae;Octopus;Octopus sinensis  
 UdeM00000023240 6565 623.6 UdeM00000023240 XP\_022325113.1 67.5 428  
 139 0 27 454 173 600 1.90E-175 623.6 6565 cellular  
 organisms;Eukaryota;Opisthokonta;Metazoa;Eumetazoa;Bilateria;Protostomia;Spiralia;Lophotrochozoa;Mollusca;Bivalvia;Autobranhia;Pteriomorphia;Ostreida;Ostreoidea;Ostreidae;Crassostrea;Crassostrea virginica  
 UdeM00000023241 400727 215.7 UdeM00000023241 XP\_025085387.1 61.7  
 167 60 2 1 164 1 166 4.60E-53 215.7 400727  
 cellular  
 organisms;Eukaryota;Opisthokonta;Metazoa;Eumetazoa;Bilateria;Protostomia;Spiralia;Lophotrochozoa;Mollusca;Gastropoda;Caenogastropoda;Architaenioglossa;Ampullarioidea;Ampullariidae;Pomacea;Pomacea canaliculata  
 UdeM00000023242 6573 127.5 UdeM00000023242 XP\_021367057.1 57.7 111  
 43 2 1 108 1 110 1.10E-26 127.5 6573 cellular  
 organisms;Eukaryota;Opisthokonta;Metazoa;Eumetazoa;Bilateria;Protostomia;Spiralia;Lophotrochozoa;Mollusca;Bivalvia;Autobranhia;Pteriomorphia;Pectinida;Pectinoidea;Pectinidae;Mizuhopecten;Mizuhopecten yessoensis  
 UdeM00000023243 6596 426.8 UdeM00000023243 XP\_045205126.1 71.4 269  
 77 0 1 269 1 269 2.10E-116 426.8 6596 cellular



organisms;Eukaryota;Opisthokonta;Metazoa;Eumetazoa;Bilateria;Protostomia;Spiralia;Lophotrochozoa;Mollusca;Bivalvia;Autobranchia;Heteroconchia;Euherodonta;Imparidentia;Venerida;Veneroidea;Veneridae;Mercenaria;Mercenaria mercenaria

UdeM00000023244 2607531 67.8 UdeM00000023244 XP\_036359170.1 31.7  
139 91 3 9 145 11 147 5.10E-08 67.8 2607531  
cellular

organisms;Eukaryota;Opisthokonta;Metazoa;Eumetazoa;Bilateria;Protostomia;Spiralia;Lophotrochozoa;Mollusca;Cephalopoda;Coleoidea;Octopodiformes;Octopoda;Incirrata;Octopodidae;Octopus;Octopus sinensis

UdeM00000023245 29159 99 UdeM00000023245 XP\_034303918.1 50 102  
51 0 51 152 16 117 6.90E-18 99 29159 cellular

organisms;Eukaryota;Opisthokonta;Metazoa;Eumetazoa;Bilateria;Protostomia;Spiralia;Lophotrochozoa;Mollusca;Bivalvia;Autobranchia;Pteriormorphia;Ostreida;Ostreoidea;Ostreidae;Crassostrea;Crassostrea gigas

UdeM00000023246 6596 1061.2 UdeM00000023246 XP\_045202870.1 46.6  
1193 591 18 23 1198 133 1296 9.60E-307 1061.2 6596  
cellular

organisms;Eukaryota;Opisthokonta;Metazoa;Eumetazoa;Bilateria;Protostomia;Spiralia;Lophotrochozoa;Mollusca;Bivalvia;Autobranchia;Heteroconchia;Euherodonta;Imparidentia;Venerida;Veneroidea;Veneridae;Mercenaria;Mercenaria mercenaria

UdeM00000023247 6596 312 UdeM00000023247 XP\_045205130.1 53.5 284  
108 2 4 287 5 264 8.50E-82 312 6596 cellular

organisms;Eukaryota;Opisthokonta;Metazoa;Eumetazoa;Bilateria;Protostomia;Spiralia;Lophotrochozoa;Mollusca;Bivalvia;Autobranchia;Heteroconchia;Euherodonta;Imparidentia;Venerida;Veneroidea;Veneridae;Mercenaria;Mercenaria mercenaria

UdeM00000023248 6596 357.8 UdeM00000023248 XP\_045205127.1 77.6 219  
48 1 1 218 1 219 9.60E-96 357.8 6596 cellular

organisms;Eukaryota;Opisthokonta;Metazoa;Eumetazoa;Bilateria;Protostomia;Spiralia;Lophotrochozoa;Mollusca;Bivalvia;Autobranchia;Heteroconchia;Euherodonta;Imparidentia;Venerida;Veneroidea;Veneridae;Mercenaria;Mercenaria mercenaria

UdeM00000023249 6596 58.5 UdeM00000023249 XP\_045203570.1 34.3 140  
78 6 15 146 15 148 8.00E-06 58.5 6596 cellular

organisms;Eukaryota;Opisthokonta;Metazoa;Eumetazoa;Bilateria;Protostomia;Spiralia;Lophotrochozoa;Mollusca;Bivalvia;Autobranchia;Heteroconchia;Euherodonta;Imparidentia;Venerida;Veneroidea;Veneridae;Mercenaria;Mercenaria mercenaria

UdeM00000023251 6596 714.1 UdeM00000023251 XP\_045203036.1 69.6 474  
140 2 13 486 29 498 2.00E-202 714.1 6596 cellular

organisms;Eukaryota;Opisthokonta;Metazoa;Eumetazoa;Bilateria;Protostomia;Spiralia;Lophotrochozoa;Mollusca;Bivalvia;Autobranchia;Heteroconchia;Euherodonta;Imparidentia;Venerida;Veneroidea;Veneridae;Mercenaria;Mercenaria mercenaria

UdeM00000023253 6596 435.3 UdeM00000023253 XP\_045206732.1 57.5 353  
150 0 1 353 1 353 7.70E-119 435.3 6596 cellular

organisms;Eukaryota;Opisthokonta;Metazoa;Eumetazoa;Bilateria;Protostomia;Spiralia;Lophotrochozoa;Mollusca;Bivalvia;Autobranchia;Heteroconchia;Euherodonta;Imparidentia;Venerida;Veneroidea;Veneridae;Mercenaria;Mercenaria mercenaria

UdeM00000023252 6596 655.6 UdeM00000023252 XP\_045206732.1 52.6 588  
273 3 1 584 1 586 5.90E-185 655.6 6596 cellular

organisms;Eukaryota;Opisthokonta;Metazoa;Eumetazoa;Bilateria;Protostomia;Spiralia;Lophotrochozoa;Mollusca;Bivalvia;Autobranhia;Heteroconchia;Euherodonta;Imparidentia;Venerida;Veneroidea;Veneridae;Mercenaria;Mercenaria mercenaria

UdeM00000023254 6596 470.7 UdeM00000023254 XP\_045206732.1 57.7 385  
162 1 12 395 25 409 1.80E-129 470.7 6596 cellular

organisms;Eukaryota;Opisthokonta;Metazoa;Eumetazoa;Bilateria;Protostomia;Spiralia;Lophotrochozoa;Mollusca;Bivalvia;Autobranhia;Heteroconchia;Euherodonta;Imparidentia;Venerida;Veneroidea;Veneridae;Mercenaria;Mercenaria mercenaria

UdeM00000023255 6596 226.1 UdeM00000023255 XP\_045206732.1 45.7 232  
120 3 26 253 357 586 5.00E-56 226.1 6596 cellular

organisms;Eukaryota;Opisthokonta;Metazoa;Eumetazoa;Bilateria;Protostomia;Spiralia;Lophotrochozoa;Mollusca;Bivalvia;Autobranhia;Heteroconchia;Euherodonta;Imparidentia;Venerida;Veneroidea;Veneridae;Mercenaria;Mercenaria mercenaria

UdeM00000023256 6596 186.8 UdeM00000023256 XP\_045206732.1 46.1 178  
91 2 1 175 411 586 2.30E-44 186.8 6596 cellular

organisms;Eukaryota;Opisthokonta;Metazoa;Eumetazoa;Bilateria;Protostomia;Spiralia;Lophotrochozoa;Mollusca;Bivalvia;Autobranhia;Heteroconchia;Euherodonta;Imparidentia;Venerida;Veneroidea;Veneridae;Mercenaria;Mercenaria mercenaria

UdeM00000023257 6596 153.3 UdeM00000023257 XP\_045204787.1 49.1 169  
84 1 1 167 1 169 2.70E-34 153.3 6596 cellular

organisms;Eukaryota;Opisthokonta;Metazoa;Eumetazoa;Bilateria;Protostomia;Spiralia;Lophotrochozoa;Mollusca;Bivalvia;Autobranhia;Heteroconchia;Euherodonta;Imparidentia;Venerida;Veneroidea;Veneridae;Mercenaria;Mercenaria mercenaria

UdeM00000023258 1735272 532.7 UdeM00000023258 XP\_041359181.1 51.4  
519 203 5 17 535 19 488 5.30E-148 532.7 1735272  
cellular

organisms;Eukaryota;Opisthokonta;Metazoa;Eumetazoa;Bilateria;Protostomia;Spiralia;Lophotrochozoa;Mollusca;Gastropoda;Neomphalina;Neomphaloidea;Peltospiridae;Gigantopelta;Gigantopelta aegis

UdeM00000023259 6596 710.7 UdeM00000023259 XP\_045204781.1 58.5 660  
187 9 38 690 34 613 1.80E-201 710.7 6596 cellular

organisms;Eukaryota;Opisthokonta;Metazoa;Eumetazoa;Bilateria;Protostomia;Spiralia;Lophotrochozoa;Mollusca;Bivalvia;Autobranhia;Heteroconchia;Euherodonta;Imparidentia;Venerida;Veneroidea;Veneridae;Mercenaria;Mercenaria mercenaria

UdeM00000023261 6596 410.6 UdeM00000023261 XP\_045203712.1 53 402  
162 5 1 379 446 843 2.20E-111 410.6 6596 cellular

organisms;Eukaryota;Opisthokonta;Metazoa;Eumetazoa;Bilateria;Protostomia;Spiralia;Lophotrochozoa;Mollusca;Bivalvia;Autobranhia;Heteroconchia;Euherodonta;Imparidentia;Venerida;Veneroidea;Veneridae;Mercenaria;Mercenaria mercenaria

UdeM00000023262 6596 78.2 UdeM00000023262 XP\_045203711.1 31.6 215  
120 8 75 275 148 349 1.90E-11 78.2 6596 cellular

organisms;Eukaryota;Opisthokonta;Metazoa;Eumetazoa;Bilateria;Protostomia;Spiralia;Lophotrochozoa;Mollusca;Bivalvia;Autobranhia;Heteroconchia;Euherodonta;Imparidentia;Venerida;Veneroidea;Veneridae;Mercenaria;Mercenaria mercenaria

UdeM00000023265 6596 463.8 UdeM00000023265 XP\_045205253.1 70.7 335  
95 2 225 556 244 578 3.20E-127 463.8 6596 cellular

organisms;Eukaryota;Opisthokonta;Metazoa;Eumetazoa;Bilateria;Protostomia;Spiralia;Lophotrochozoa;Mollusca;Bivalvia;Autobranchia;Heteroconchia;Euherodonta;Imparidentia;Venerida;Veneroidea;Veneridae;Mercenaria;Mercenaria mercenaria

UdeM00000023268 6596 328.2 UdeM00000023268 XP\_045203549.1 32.4 583  
352 12 51 594 433 1012 2.20E-86 328.2 6596 cellular

organisms;Eukaryota;Opisthokonta;Metazoa;Eumetazoa;Bilateria;Protostomia;Spiralia;Lophotrochozoa;Mollusca;Bivalvia;Autobranchia;Heteroconchia;Euherodonta;Imparidentia;Venerida;Veneroidea;Veneridae;Mercenaria;Mercenaria mercenaria

UdeM00000023266 6596 328.2 UdeM00000023266 XP\_045203549.1 32.4 583  
352 12 539 1082 433 1012 4.00E-86 328.2 6596 cellular

organisms;Eukaryota;Opisthokonta;Metazoa;Eumetazoa;Bilateria;Protostomia;Spiralia;Lophotrochozoa;Mollusca;Bivalvia;Autobranchia;Heteroconchia;Euherodonta;Imparidentia;Venerida;Veneroidea;Veneridae;Mercenaria;Mercenaria mercenaria

UdeM00000023267 6596 328.2 UdeM00000023267 XP\_045203549.1 32.4 583  
352 12 538 1081 433 1012 4.00E-86 328.2 6596 cellular

organisms;Eukaryota;Opisthokonta;Metazoa;Eumetazoa;Bilateria;Protostomia;Spiralia;Lophotrochozoa;Mollusca;Bivalvia;Autobranchia;Heteroconchia;Euherodonta;Imparidentia;Venerida;Veneroidea;Veneridae;Mercenaria;Mercenaria mercenaria

UdeM00000023269 6596 139.8 UdeM00000023269 XP\_045205253.1 67 106  
35 0 2 107 368 473 2.40E-30 139.8 6596 cellular

organisms;Eukaryota;Opisthokonta;Metazoa;Eumetazoa;Bilateria;Protostomia;Spiralia;Lophotrochozoa;Mollusca;Bivalvia;Autobranchia;Heteroconchia;Euherodonta;Imparidentia;Venerida;Veneroidea;Veneridae;Mercenaria;Mercenaria mercenaria

UdeM00000023270 6596 335.5 UdeM00000023270 XP\_045203549.1 30.7 717  
435 15 165 830 307 1012 1.90E-88 335.5 6596 cellular

organisms;Eukaryota;Opisthokonta;Metazoa;Eumetazoa;Bilateria;Protostomia;Spiralia;Lophotrochozoa;Mollusca;Bivalvia;Autobranchia;Heteroconchia;Euherodonta;Imparidentia;Venerida;Veneroidea;Veneridae;Mercenaria;Mercenaria mercenaria

UdeM00000023271 6596 75.9 UdeM00000023271 XP\_045206174.1 33.9 171  
84 6 32 190 26 179 2.30E-10 75.9 6596 cellular

organisms;Eukaryota;Opisthokonta;Metazoa;Eumetazoa;Bilateria;Protostomia;Spiralia;Lophotrochozoa;Mollusca;Bivalvia;Autobranchia;Heteroconchia;Euherodonta;Imparidentia;Venerida;Veneroidea;Veneridae;Mercenaria;Mercenaria mercenaria

UdeM00000023272 6596 331.3 UdeM00000023272 XP\_045203549.1 35.4 585  
337 14 51 599 433 1012 2.70E-87 331.3 6596 cellular

organisms;Eukaryota;Opisthokonta;Metazoa;Eumetazoa;Bilateria;Protostomia;Spiralia;Lophotrochozoa;Mollusca;Bivalvia;Autobranchia;Heteroconchia;Euherodonta;Imparidentia;Venerida;Veneroidea;Veneridae;Mercenaria;Mercenaria mercenaria

UdeM00000023274 6596 329.7 UdeM00000023274 XP\_045203549.1 32.1 658  
386 16 456 1061 364 1012 1.40E-86 329.7 6596 cellular

organisms;Eukaryota;Opisthokonta;Metazoa;Eumetazoa;Bilateria;Protostomia;Spiralia;Lophotrochozoa;Mollusca;Bivalvia;Autobranchia;Heteroconchia;Euherodonta;Imparidentia;Venerida;Veneroidea;Veneridae;Mercenaria;Mercenaria mercenaria

UdeM00000023275 6596 329.7 UdeM00000023275 XP\_045203549.1 32.1 658  
386 16 443 1048 364 1012 1.30E-86 329.7 6596 cellular

organisms;Eukaryota;Opisthokonta;Metazoa;Eumetazoa;Bilateria;Protostomia;Spiralia;Lophotrochozoa;Mollusca;Bivalvia;Autobranchia;Heteroconchia;Euherodonta;Imparidentia;Venerida;Veneroidea;Veneridae;Mercenaria;Mercenaria mercenaria

UdeM00000023276 50390 263.5 UdeM00000023276 XP\_028127913.1 40.8 331  
190 3 1 330 1 326 3.70E-67 263.5 50390 cellular

organisms;Eukaryota;Opisthokonta;Metazoa;Eumetazoa;Bilateria;Protostomia;Ecdysozoa;Panarthropoda;Arthropoda;Mandibulata;Pancrustacea;Hexapoda;Insecta;Dicondylia;Pterygota;Neoptera;Endopterygota;Coleoptera;Polyphaga;Cucujiformia;Chrysomeloidea;Chrysomelidae;Galerucinae;Luperini;Diabroticina;Diabroticites;Diabrotica;Diabrotica virgifera;Diabrotica virgifera virgifera

UdeM00000023277 7725 142.9 UdeM00000023277 XP\_039263221.1 60 115  
46 0 45 159 6 120 4.30E-31 142.9 7725 cellular

organisms;Eukaryota;Opisthokonta;Metazoa;Eumetazoa;Bilateria;Deuterostomia;Chordata;Tunicata;Ascidiacea;Stolidobranchia;Styelidae;Styela;Styela clava

UdeM00000023278 6596 330.5 UdeM00000023278 XP\_045203549.1 33.3 576  
345 11 643 1181 439 1012 8.90E-87 330.5 6596 cellular

organisms;Eukaryota;Opisthokonta;Metazoa;Eumetazoa;Bilateria;Protostomia;Spiralia;Lophotrochozoa;Mollusca;Bivalvia;Autobranchia;Heteroconchia;Euherodonta;Imparidentia;Venerida;Veneroidea;Veneridae;Mercenaria;Mercenaria mercenaria

UdeM00000023280 6596 297.7 UdeM00000023280 XP\_045206033.1 35.1 513  
293 11 285 760 689 1198 4.10E-77 297.7 6596 cellular

organisms;Eukaryota;Opisthokonta;Metazoa;Eumetazoa;Bilateria;Protostomia;Spiralia;Lophotrochozoa;Mollusca;Bivalvia;Autobranchia;Heteroconchia;Euherodonta;Imparidentia;Venerida;Veneroidea;Veneridae;Mercenaria;Mercenaria mercenaria

UdeM00000023281 6596 77.8 UdeM00000023281 XP\_045209795.1 37.5 136  
79 4 24 157 191 322 1.40E-11 77.8 6596 cellular

organisms;Eukaryota;Opisthokonta;Metazoa;Eumetazoa;Bilateria;Protostomia;Spiralia;Lophotrochozoa;Mollusca;Bivalvia;Autobranchia;Heteroconchia;Euherodonta;Imparidentia;Venerida;Veneroidea;Veneridae;Mercenaria;Mercenaria mercenaria

UdeM00000023282 6596 347.4 UdeM00000023282 XP\_045203549.1 35.1 582  
339 11 543 1087 433 1012 6.50E-92 347.4 6596 cellular

organisms;Eukaryota;Opisthokonta;Metazoa;Eumetazoa;Bilateria;Protostomia;Spiralia;Lophotrochozoa;Mollusca;Bivalvia;Autobranchia;Heteroconchia;Euherodonta;Imparidentia;Venerida;Veneroidea;Veneridae;Mercenaria;Mercenaria mercenaria

UdeM00000023283 6596 336.3 UdeM00000023283 XP\_045206033.1 33.9 605  
353 14 19 583 659 1256 8.20E-89 336.3 6596 cellular

organisms;Eukaryota;Opisthokonta;Metazoa;Eumetazoa;Bilateria;Protostomia;Spiralia;Lophotrochozoa;Mollusca;Bivalvia;Autobranchia;Heteroconchia;Euherodonta;Imparidentia;Venerida;Veneroidea;Veneridae;Mercenaria;Mercenaria mercenaria

UdeM00000023284 6596 73.6 UdeM00000023284 XP\_045209795.1 26.9 171  
112 4 2 164 1067 1232 7.00E-10 73.6 6596 cellular

organisms;Eukaryota;Opisthokonta;Metazoa;Eumetazoa;Bilateria;Protostomia;Spiralia;Lophotrochozoa;Mollusca;Bivalvia;Autobranchia;Heteroconchia;Euherodonta;Imparidentia;Venerida;Veneroidea;Veneridae;Mercenaria;Mercenaria mercenaria

UdeM00000023285 6596 73.6 UdeM00000023285 XP\_045209795.1 26.9 171  
 112 4 2 164 1067 1232 7.00E-10 73.6 6596 cellular  
 organisms;Eukaryota;Opisthokonta;Metazoa;Eumetazoa;Bilateria;Protostomia;  
 Spiralia;Lophotrochozoa;Mollusca;Bivalvia;Autobranchia;Heteroconchia;Euhe  
 terodonta;Imparidentia;Venerida;Veneroidea;Veneridae;Mercenaria;Mercenari  
 a mercenaria  
 UdeM00000023286 29159 117.9 UdeM00000023286 XP\_019926412.2 48.1 135  
 67 1 1 132 1 135 1.00E-23 117.9 29159 cellular  
 organisms;Eukaryota;Opisthokonta;Metazoa;Eumetazoa;Bilateria;Protostomia;  
 Spiralia;Lophotrochozoa;Mollusca;Bivalvia;Autobranchia;Pteriormorphia;Ostr  
 eida;Ostreoidea;Ostreidae;Crassostrea;Crassostrea gigas  
 UdeM00000023287 6596 63.9 UdeM00000023287 XP\_045205318.1 24.5 163  
 112 3 70 232 1861 2012 3.20E-07 63.9 6596 cellular  
 organisms;Eukaryota;Opisthokonta;Metazoa;Eumetazoa;Bilateria;Protostomia;  
 Spiralia;Lophotrochozoa;Mollusca;Bivalvia;Autobranchia;Heteroconchia;Euhe  
 terodonta;Imparidentia;Venerida;Veneroidea;Veneridae;Mercenaria;Mercenari  
 a mercenaria  
 UdeM00000023288 6596 280 UdeM00000023288 XP\_045205438.1 42.7 375  
 195 7 66 434 801 1161 5.20E-72 280 6596 cellular  
 organisms;Eukaryota;Opisthokonta;Metazoa;Eumetazoa;Bilateria;Protostomia;  
 Spiralia;Lophotrochozoa;Mollusca;Bivalvia;Autobranchia;Heteroconchia;Euhe  
 terodonta;Imparidentia;Venerida;Veneroidea;Veneridae;Mercenaria;Mercenari  
 a mercenaria  
 UdeM00000023289 6596 77.8 UdeM00000023289 XP\_045209795.1 30.2 172  
 108 4 22 186 1068 1234 4.20E-11 77.8 6596 cellular  
 organisms;Eukaryota;Opisthokonta;Metazoa;Eumetazoa;Bilateria;Protostomia;  
 Spiralia;Lophotrochozoa;Mollusca;Bivalvia;Autobranchia;Heteroconchia;Euhe  
 terodonta;Imparidentia;Venerida;Veneroidea;Veneridae;Mercenaria;Mercenari  
 a mercenaria  
 UdeM00000023291 6596 314.3 UdeM00000023291 XP\_045203549.1 29.7 718  
 416 16 350 990 307 1012 5.50E-82 314.3 6596 cellular  
 organisms;Eukaryota;Opisthokonta;Metazoa;Eumetazoa;Bilateria;Protostomia;  
 Spiralia;Lophotrochozoa;Mollusca;Bivalvia;Autobranchia;Heteroconchia;Euhe  
 terodonta;Imparidentia;Venerida;Veneroidea;Veneridae;Mercenaria;Mercenari  
 a mercenaria  
 UdeM00000023292 6596 324.3 UdeM00000023292 XP\_045206033.1 33.3 583  
 348 12 51 595 689 1268 3.20E-85 324.3 6596 cellular  
 organisms;Eukaryota;Opisthokonta;Metazoa;Eumetazoa;Bilateria;Protostomia;  
 Spiralia;Lophotrochozoa;Mollusca;Bivalvia;Autobranchia;Heteroconchia;Euhe  
 terodonta;Imparidentia;Venerida;Veneroidea;Veneridae;Mercenaria;Mercenari  
 a mercenaria  
 UdeM00000023293 6596 79.3 UdeM00000023293 XP\_045206174.1 37.2 172  
 77 8 18 176 26 179 1.10E-11 79.3 6596 cellular  
 organisms;Eukaryota;Opisthokonta;Metazoa;Eumetazoa;Bilateria;Protostomia;  
 Spiralia;Lophotrochozoa;Mollusca;Bivalvia;Autobranchia;Heteroconchia;Euhe  
 terodonta;Imparidentia;Venerida;Veneroidea;Veneridae;Mercenaria;Mercenari  
 a mercenaria  
 UdeM00000023294 29159 113.6 UdeM00000023294 XP\_019926412.2 48.1 135  
 67 1 1 132 1 135 1.90E-22 113.6 29159 cellular  
 organisms;Eukaryota;Opisthokonta;Metazoa;Eumetazoa;Bilateria;Protostomia;  
 Spiralia;Lophotrochozoa;Mollusca;Bivalvia;Autobranchia;Pteriormorphia;Ostr  
 eida;Ostreoidea;Ostreidae;Crassostrea;Crassostrea gigas  
 UdeM00000023295 6596 414.8 UdeM00000023295 XP\_045203907.1 66.2 346  
 104 5 25 357 99 444 1.10E-112 414.8 6596 cellular

organisms;Eukaryota;Opisthokonta;Metazoa;Eumetazoa;Bilateria;Protostomia;Spiralia;Lophotrochozoa;Mollusca;Bivalvia;Autobranchia;Heteroconchia;Euherodonta;Imparidentia;Venerida;Veneroidea;Veneridae;Mercenaria;Mercenaria mercenaria

UdeM00000023296 6596 119 UdeM00000023296 XP\_045203908.1 47.7 132  
60 3 1 132 11 133 5.00E-24 119 6596 cellular

organisms;Eukaryota;Opisthokonta;Metazoa;Eumetazoa;Bilateria;Protostomia;Spiralia;Lophotrochozoa;Mollusca;Bivalvia;Autobranchia;Heteroconchia;Euherodonta;Imparidentia;Venerida;Veneroidea;Veneridae;Mercenaria;Mercenaria mercenaria

UdeM00000023297 6596 312 UdeM00000023297 XP\_045203917.1 59.8 239  
90 1 1 233 105 343 6.50E-82 312 6596 cellular

organisms;Eukaryota;Opisthokonta;Metazoa;Eumetazoa;Bilateria;Protostomia;Spiralia;Lophotrochozoa;Mollusca;Bivalvia;Autobranchia;Heteroconchia;Euherodonta;Imparidentia;Venerida;Veneroidea;Veneridae;Mercenaria;Mercenaria mercenaria

UdeM00000023299 6596 251.9 UdeM00000023299 XP\_045203921.1 35.9 412  
245 7 5 401 15 422 3.10E-63 251.9 6596 cellular

organisms;Eukaryota;Opisthokonta;Metazoa;Eumetazoa;Bilateria;Protostomia;Spiralia;Lophotrochozoa;Mollusca;Bivalvia;Autobranchia;Heteroconchia;Euherodonta;Imparidentia;Venerida;Veneroidea;Veneridae;Mercenaria;Mercenaria mercenaria

UdeM00000023300 6596 154.8 UdeM00000023300 XP\_045203921.1 33.2 301  
186 4 8 296 125 422 4.50E-34 154.8 6596 cellular

organisms;Eukaryota;Opisthokonta;Metazoa;Eumetazoa;Bilateria;Protostomia;Spiralia;Lophotrochozoa;Mollusca;Bivalvia;Autobranchia;Heteroconchia;Euherodonta;Imparidentia;Venerida;Veneroidea;Veneridae;Mercenaria;Mercenaria mercenaria

UdeM00000023301 6565 746.9 UdeM00000023301 XP\_022324121.1 74.9 517  
126 3 1 516 12 525 1.90E-212 746.9 6565 cellular

organisms;Eukaryota;Opisthokonta;Metazoa;Eumetazoa;Bilateria;Protostomia;Spiralia;Lophotrochozoa;Mollusca;Bivalvia;Autobranchia;Pteriomorphia;Ostreida;Ostreoidea;Ostreidae;Crassostrea;Crassostrea virginica

UdeM00000023302 6565 697.2 UdeM00000023302 XP\_022324121.1 73.5 517  
134 2 1 517 12 525 1.70E-197 697.2 6565 cellular

organisms;Eukaryota;Opisthokonta;Metazoa;Eumetazoa;Bilateria;Protostomia;Spiralia;Lophotrochozoa;Mollusca;Bivalvia;Autobranchia;Pteriomorphia;Ostreida;Ostreoidea;Ostreidae;Crassostrea;Crassostrea virginica

UdeM00000023304 6579 292.4 UdeM00000023304 XP\_033744102.1 57.3 262  
99 4 1 251 1661 1920 5.70E-76 292.4 6579 cellular

organisms;Eukaryota;Opisthokonta;Metazoa;Eumetazoa;Bilateria;Protostomia;Spiralia;Lophotrochozoa;Mollusca;Bivalvia;Autobranchia;Pteriomorphia;Pectinida;Pectinoidea;Pectinidae;Pecten;Pecten maximus

UdeM00000023303 6596 1267.3 UdeM00000023303 XP\_045205709.1 55.8  
1592 651 21 158 1715 146 1719 0.00E+00 1267.3 6596  
cellular

organisms;Eukaryota;Opisthokonta;Metazoa;Eumetazoa;Bilateria;Protostomia;Spiralia;Lophotrochozoa;Mollusca;Bivalvia;Autobranchia;Heteroconchia;Euherodonta;Imparidentia;Venerida;Veneroidea;Veneridae;Mercenaria;Mercenaria mercenaria

UdeM00000023305 6596 1267.3 UdeM00000023305 XP\_045205709.1 55.7  
1592 651 21 158 1712 146 1719 0.00E+00 1267.3 6596  
cellular

organisms;Eukaryota;Opisthokonta;Metazoa;Eumetazoa;Bilateria;Protostomia;

Spiralia;Lophotrochozoa;Mollusca;Bivalvia;Autobranchia;Heteroconchia;Euherodonta;Imparidentia;Venerida;Veneroidea;Veneridae;Mercenaria;Mercenaria mercenaria

UdeM00000023306 6500 134.4 UdeM00000023306 XP\_035825388.1 35 343  
92 4 174 506 47 268 1.00E-27 134.4 6500 cellular

organisms;Eukaryota;Opisthokonta;Metazoa;Eumetazoa;Bilateria;Protostomia;Spiralia;Lophotrochozoa;Mollusca;Gastropoda;Heterobranchia;Euthyneura;Tectipleura;Aplysiida;Aplysioidea;Aplysiidae;Aplysia;Aplysia californica

UdeM00000023307 1203425 114 UdeM00000023307 XP\_034539546.1 70.9  
86 22 2 166 248 154 239 4.00E-22 114 1203425  
cellular

organisms;Eukaryota;Opisthokonta;Metazoa;Eumetazoa;Bilateria;Deuterostomia;Chordata;Craniata;Vertebrata;Gnathostomata;Teleostomi;Euteleostomi;Actinopterygii;Actinopteri;Neopterygii;Teleostei;Osteoglossocephalai;Clupeocephala;Euteleostei;Neoteleostei;Eurypterygia;Ctenosquamata;Acanthomorphata;Euacanthomorphacea;Percomorphaceae;Eupercaria;Labriformes;Labridae;Notolabrus;Notolabrus celidotus

UdeM00000023310 6596 230.3 UdeM00000023310 XP\_045203869.1 43 330  
182 1 2 331 41 364 3.60E-57 230.3 6596 cellular

organisms;Eukaryota;Opisthokonta;Metazoa;Eumetazoa;Bilateria;Protostomia;Spiralia;Lophotrochozoa;Mollusca;Bivalvia;Autobranchia;Heteroconchia;Euherodonta;Imparidentia;Venerida;Veneroidea;Veneridae;Mercenaria;Mercenaria mercenaria

UdeM00000023312 6596 123.2 UdeM00000023312 XP\_045203716.1 76.8 112  
25 1 1 111 1 112 2.00E-25 123.2 6596 cellular

organisms;Eukaryota;Opisthokonta;Metazoa;Eumetazoa;Bilateria;Protostomia;Spiralia;Lophotrochozoa;Mollusca;Bivalvia;Autobranchia;Heteroconchia;Euherodonta;Imparidentia;Venerida;Veneroidea;Veneridae;Mercenaria;Mercenaria mercenaria

UdeM00000023313 6596 388.3 UdeM00000023313 XP\_045203713.1 81 232  
44 0 1 232 1 232 7.70E-105 388.3 6596 cellular

organisms;Eukaryota;Opisthokonta;Metazoa;Eumetazoa;Bilateria;Protostomia;Spiralia;Lophotrochozoa;Mollusca;Bivalvia;Autobranchia;Heteroconchia;Euherodonta;Imparidentia;Venerida;Veneroidea;Veneridae;Mercenaria;Mercenaria mercenaria

UdeM00000023314 1735272 808.9 UdeM00000023314 XP\_041359788.1 66.9  
692 215 6 1 692 1 678 5.00E-231 808.9 1735272

cellular  
organisms;Eukaryota;Opisthokonta;Metazoa;Eumetazoa;Bilateria;Protostomia;Spiralia;Lophotrochozoa;Mollusca;Gastropoda;Neomphalina;Neomphaloidea;Peltospiridae;Gigantopelta;Gigantopelta aegis

UdeM00000023315 2607531 177.2 UdeM00000023315 XP\_029644040.1 43.1  
239 120 5 1 227 1 235 3.90E-41 177.2 2607531

cellular  
organisms;Eukaryota;Opisthokonta;Metazoa;Eumetazoa;Bilateria;Protostomia;Spiralia;Lophotrochozoa;Mollusca;Cephalopoda;Coleoidea;Octopodiformes;Octopoda;Incirrata;Octopodidae;Octopus;Octopus sinensis

UdeM00000023316 2607531 179.5 UdeM00000023316 XP\_029644040.1 42.9  
247 129 5 1 237 1 245 7.80E-42 179.5 2607531

cellular  
organisms;Eukaryota;Opisthokonta;Metazoa;Eumetazoa;Bilateria;Protostomia;Spiralia;Lophotrochozoa;Mollusca;Cephalopoda;Coleoidea;Octopodiformes;Octopoda;Incirrata;Octopodidae;Octopus;Octopus sinensis

UdeM00000023317 37653 179.1 UdeM00000023317 XP\_014775218.1 52.1 169  
 80 1 1 169 1 168 8.30E-42 179.1 37653 cellular  
 organisms;Eukaryota;Opisthokonta;Metazoa;Eumetazoa;Bilateria;Protostomia;  
 Spiralia;Lophotrochozoa;Mollusca;Cephalopoda;Coleoidea;Octopodiformes;Oct  
 opoda;Incirrata;Octopodidae;Octopus;Octopus bimaculoides  
 UdeM00000023318 29159 110.9 UdeM00000023318 XP\_011429879.2 26.5 336  
 202 11 1 331 1 296 3.10E-21 110.9 29159 cellular  
 organisms;Eukaryota;Opisthokonta;Metazoa;Eumetazoa;Bilateria;Protostomia;  
 Spiralia;Lophotrochozoa;Mollusca;Bivalvia;Autobranchia;Pteriormorphia;Ostr  
 eida;Ostreoidea;Ostreidae;Crassostrea;Crassostrea gigas  
 UdeM00000023319 6579 85.1 UdeM00000023319 XP\_033742355.1 53.2 79  
 37 0 1 79 1 79 1.90E-13 85.1 6579 cellular  
 organisms;Eukaryota;Opisthokonta;Metazoa;Eumetazoa;Bilateria;Protostomia;  
 Spiralia;Lophotrochozoa;Mollusca;Bivalvia;Autobranchia;Pteriormorphia;Pect  
 inida;Pectinoidea;Pectinidae;Pecten;Pecten maximus  
 UdeM00000023320 29159 261.5 UdeM00000023320 XP\_011428224.2 71.5 165  
 47 0 7 171 5 169 7.40E-67 261.5 29159 cellular  
 organisms;Eukaryota;Opisthokonta;Metazoa;Eumetazoa;Bilateria;Protostomia;  
 Spiralia;Lophotrochozoa;Mollusca;Bivalvia;Autobranchia;Pteriormorphia;Ostr  
 eida;Ostreoidea;Ostreidae;Crassostrea;Crassostrea gigas  
 UdeM00000023321 6596 1511.9 UdeM00000023321 XP\_045203579.1 53.1  
 1669 690 21 1 1644 1 1601 0.00E+00 1511.9 6596  
 cellular  
 organisms;Eukaryota;Opisthokonta;Metazoa;Eumetazoa;Bilateria;Protostomia;  
 Spiralia;Lophotrochozoa;Mollusca;Bivalvia;Autobranchia;Heteroconchia;Euhe  
 terodonta;Imparidentia;Venerida;Veneroidea;Veneridae;Mercenaria;Mercenari  
 a mercenaria  
 UdeM00000023323 6579 513.1 UdeM00000023323 XP\_033743919.1 61.7 412  
 153 2 2 408 164 575 3.50E-142 513.1 6579 cellular  
 organisms;Eukaryota;Opisthokonta;Metazoa;Eumetazoa;Bilateria;Protostomia;  
 Spiralia;Lophotrochozoa;Mollusca;Bivalvia;Autobranchia;Pteriormorphia;Pect  
 inida;Pectinoidea;Pectinidae;Pecten;Pecten maximus  
 UdeM00000023324 6596 381.3 UdeM00000023324 XP\_045203568.1 47.7 493  
 209 12 5 485 4 459 1.80E-102 381.3 6596 cellular  
 organisms;Eukaryota;Opisthokonta;Metazoa;Eumetazoa;Bilateria;Protostomia;  
 Spiralia;Lophotrochozoa;Mollusca;Bivalvia;Autobranchia;Heteroconchia;Euhe  
 terodonta;Imparidentia;Venerida;Veneroidea;Veneridae;Mercenaria;Mercenari  
 a mercenaria  
 UdeM00000023325 6573 598.2 UdeM00000023325 XP\_021364039.1 93.3 300  
 20 0 29 328 488 787 6.30E-168 598.2 6573 cellular  
 organisms;Eukaryota;Opisthokonta;Metazoa;Eumetazoa;Bilateria;Protostomia;  
 Spiralia;Lophotrochozoa;Mollusca;Bivalvia;Autobranchia;Pteriormorphia;Pect  
 inida;Pectinoidea;Pectinidae;Mizuhopecten;Mizuhopecten yessoensis  
 UdeM00000023326 6596 429.9 UdeM00000023326 XP\_045203305.1 54 452  
 189 6 13 455 402 843 4.50E-117 429.9 6596 cellular  
 organisms;Eukaryota;Opisthokonta;Metazoa;Eumetazoa;Bilateria;Protostomia;  
 Spiralia;Lophotrochozoa;Mollusca;Bivalvia;Autobranchia;Heteroconchia;Euhe  
 terodonta;Imparidentia;Venerida;Veneroidea;Veneridae;Mercenaria;Mercenari  
 a mercenaria  
 UdeM00000023327 6596 998 UdeM00000023327 XP\_045203305.1 62.3 859  
 284 10 1 835 1 843 7.30E-288 998 6596 cellular  
 organisms;Eukaryota;Opisthokonta;Metazoa;Eumetazoa;Bilateria;Protostomia;  
 Spiralia;Lophotrochozoa;Mollusca;Bivalvia;Autobranchia;Heteroconchia;Euhe



terodonta;Imparidentia;Venerida;Veneroidea;Veneridae;Mercenaria;Mercenaria mercenaria  
 UdeM00000023328 1735272 101.3 UdeM00000023328 XP\_041360270.1 45.4  
 108 59 0 59 166 4 111 1.30E-18 101.3 1735272  
 cellular  
 organisms;Eukaryota;Opisthokonta;Metazoa;Eumetazoa;Bilateria;Protostomia;  
 Spiralia;Lophotrochozoa;Mollusca;Gastropoda;Neomphalina;Neomphaloidea;Pel  
 tospiridae;Gigantopelta;Gigantopelta aegis  
 UdeM00000023329 225164 101.3 UdeM00000023329 XP\_009054179.1 47.5  
 118 61 1 4 120 2 119 8.90E-19 101.3 225164  
 cellular  
 organisms;Eukaryota;Opisthokonta;Metazoa;Eumetazoa;Bilateria;Protostomia;  
 Spiralia;Lophotrochozoa;Mollusca;Gastropoda;Patellogastropoda;Lottioidea;  
 Lottiidae;Lottia;Lottia gigantea  
 UdeM00000023331 114398 421 UdeM00000023331 XP\_042903861.1 40.1  
 574 333 6 1 570 1 567 2.40E-114 421 114398  
 cellular  
 organisms;Eukaryota;Opisthokonta;Metazoa;Eumetazoa;Bilateria;Protostomia;  
 Ecdysozoa;Panarthropoda;Arthropoda;Chelicerata;Arachnida;Araneae;Araneomo  
 rphae;Entelegynae;Orbiculariae;Araneoidea;Theridiidae;Parasteatoda;Parast  
 eatoda tepidariorum  
 UdeM00000023332 6565 947.2 UdeM00000023332 XP\_022322477.1 68.8 673  
 207 2 3 672 263 935 1.20E-272 947.2 6565 cellular  
 organisms;Eukaryota;Opisthokonta;Metazoa;Eumetazoa;Bilateria;Protostomia;  
 Spiralia;Lophotrochozoa;Mollusca;Bivalvia;Autobranchia;Pteriormorphia;Ostr  
 eida;Ostreoidea;Ostreidae;Crassostrea;Crassostrea virginica  
 UdeM00000023333 6573 202.2 UdeM00000023333 XP\_021364925.1 44.2 351  
 140 13 4 351 6 303 1.10E-48 202.2 6573 cellular  
 organisms;Eukaryota;Opisthokonta;Metazoa;Eumetazoa;Bilateria;Protostomia;  
 Spiralia;Lophotrochozoa;Mollusca;Bivalvia;Autobranchia;Pteriormorphia;Pect  
 inida;Pectinoidea;Pectinidae;Mizuhopecten;Mizuhopecten yessoensis  
 UdeM00000023334 6596 160.6 UdeM00000023334 XP\_045205233.1 72 107  
 30 0 1 107 153 259 1.10E-36 160.6 6596 cellular  
 organisms;Eukaryota;Opisthokonta;Metazoa;Eumetazoa;Bilateria;Protostomia;  
 Spiralia;Lophotrochozoa;Mollusca;Bivalvia;Autobranchia;Heteroconchia;Euhe  
 terodonta;Imparidentia;Venerida;Veneroidea;Veneridae;Mercenaria;Mercenari  
 a mercenaria  
 UdeM00000023335 6596 361.7 UdeM00000023335 XP\_045205233.1 71.8 259  
 69 1 1 255 1 259 7.90E-97 361.7 6596 cellular  
 organisms;Eukaryota;Opisthokonta;Metazoa;Eumetazoa;Bilateria;Protostomia;  
 Spiralia;Lophotrochozoa;Mollusca;Bivalvia;Autobranchia;Heteroconchia;Euhe  
 terodonta;Imparidentia;Venerida;Veneroidea;Veneridae;Mercenaria;Mercenari  
 a mercenaria  
 UdeM00000023336 6596 119.8 UdeM00000023336 XP\_045211158.1 25.9 560  
 338 22 10 546 7 512 1.20E-23 119.8 6596 cellular  
 organisms;Eukaryota;Opisthokonta;Metazoa;Eumetazoa;Bilateria;Protostomia;  
 Spiralia;Lophotrochozoa;Mollusca;Bivalvia;Autobranchia;Heteroconchia;Euhe  
 terodonta;Imparidentia;Venerida;Veneroidea;Veneridae;Mercenaria;Mercenari  
 a mercenaria  
 UdeM00000023337 29159 500.4 UdeM00000023337 XP\_019927056.2 35 1260  
 669 28 10 1218 9 1169 1.20E-137 500.4 29159 cellular  
 organisms;Eukaryota;Opisthokonta;Metazoa;Eumetazoa;Bilateria;Protostomia;  
 Spiralia;Lophotrochozoa;Mollusca;Bivalvia;Autobranchia;Pteriormorphia;Ostr  
 eida;Ostreoidea;Ostreidae;Crassostrea;Crassostrea gigas

UdeM00000023337 29159 79.3 UdeM00000023337 XP\_019927056.2 62 71  
 27 0 2114 2184 1680 1750 6.60E-11 79.3 29159 cellular  
 organisms;Eukaryota;Opisthokonta;Metazoa;Eumetazoa;Bilateria;Protostomia;  
 Spiralia;Lophotrochozoa;Mollusca;Bivalvia;Autobranchia;Pteriomorphia;Ostr  
 eida;Ostreoidea;Ostreidae;Crassostrea;Crassostrea gigas  
 UdeM00000023338 6596 305.4 UdeM00000023338 XP\_045173781.1 47.4 323  
 168 1 52 374 108 428 1.50E-79 305.4 6596 cellular  
 organisms;Eukaryota;Opisthokonta;Metazoa;Eumetazoa;Bilateria;Protostomia;  
 Spiralia;Lophotrochozoa;Mollusca;Bivalvia;Autobranchia;Heteroconchia;Euhe  
 terodonta;Imparidentia;Venerida;Veneroidea;Veneridae;Mercenaria;Mercenari  
 a mercenaria  
 UdeM00000023339 6596 1175.2 UdeM00000023339 XP\_045203813.1 72.6  
 769 204 3 2 766 404 1169 0.00E+00 1175.2 6596  
 cellular  
 organisms;Eukaryota;Opisthokonta;Metazoa;Eumetazoa;Bilateria;Protostomia;  
 Spiralia;Lophotrochozoa;Mollusca;Bivalvia;Autobranchia;Heteroconchia;Euhe  
 terodonta;Imparidentia;Venerida;Veneroidea;Veneridae;Mercenaria;Mercenari  
 a mercenaria  
 UdeM00000023340 6596 664.8 UdeM00000023340 XP\_045203813.1 79.2 419  
 75 1 2 420 3 409 9.10E-188 664.8 6596 cellular  
 organisms;Eukaryota;Opisthokonta;Metazoa;Eumetazoa;Bilateria;Protostomia;  
 Spiralia;Lophotrochozoa;Mollusca;Bivalvia;Autobranchia;Heteroconchia;Euhe  
 terodonta;Imparidentia;Venerida;Veneroidea;Veneridae;Mercenaria;Mercenari  
 a mercenaria  
 UdeM00000023341 6596 229.6 UdeM00000023341 XP\_045203814.1 63.2 152  
 56 0 1 152 1 152 2.80E-57 229.6 6596 cellular  
 organisms;Eukaryota;Opisthokonta;Metazoa;Eumetazoa;Bilateria;Protostomia;  
 Spiralia;Lophotrochozoa;Mollusca;Bivalvia;Autobranchia;Heteroconchia;Euhe  
 terodonta;Imparidentia;Venerida;Veneroidea;Veneridae;Mercenaria;Mercenari  
 a mercenaria  
 UdeM00000023342 6565 571.6 UdeM00000023342 XP\_022326362.1 57.3 485  
 197 4 23 504 19 496 9.70E-160 571.6 6565 cellular  
 organisms;Eukaryota;Opisthokonta;Metazoa;Eumetazoa;Bilateria;Protostomia;  
 Spiralia;Lophotrochozoa;Mollusca;Bivalvia;Autobranchia;Pteriomorphia;Ostr  
 eida;Ostreoidea;Ostreidae;Crassostrea;Crassostrea virginica  
 UdeM00000023343 6596 745.7 UdeM00000023343 XP\_045203884.1 43 953  
 506 8 5 940 10 942 9.00E-212 745.7 6596 cellular  
 organisms;Eukaryota;Opisthokonta;Metazoa;Eumetazoa;Bilateria;Protostomia;  
 Spiralia;Lophotrochozoa;Mollusca;Bivalvia;Autobranchia;Heteroconchia;Euhe  
 terodonta;Imparidentia;Venerida;Veneroidea;Veneridae;Mercenaria;Mercenari  
 a mercenaria  
 UdeM00000023344 6596 746.5 UdeM00000023344 XP\_045203884.1 43 953  
 506 8 14 949 10 942 5.30E-212 746.5 6596 cellular  
 organisms;Eukaryota;Opisthokonta;Metazoa;Eumetazoa;Bilateria;Protostomia;  
 Spiralia;Lophotrochozoa;Mollusca;Bivalvia;Autobranchia;Heteroconchia;Euhe  
 terodonta;Imparidentia;Venerida;Veneroidea;Veneridae;Mercenaria;Mercenari  
 a mercenaria  
 UdeM00000023345 6596 707.2 UdeM00000023345 XP\_045203882.1 39.3 1160  
 632 17 1 1109 1 1139 3.30E-200 707.2 6596 cellular  
 organisms;Eukaryota;Opisthokonta;Metazoa;Eumetazoa;Bilateria;Protostomia;  
 Spiralia;Lophotrochozoa;Mollusca;Bivalvia;Autobranchia;Heteroconchia;Euhe  
 terodonta;Imparidentia;Venerida;Veneroidea;Veneridae;Mercenaria;Mercenari  
 a mercenaria

UdeM00000023347 6596 684.9 UdeM00000023347 XP\_045204772.1 41.5 1029  
 543 18 5 994 50 1058 1.60E-193 684.9 6596 cellular  
 organisms;Eukaryota;Opisthokonta;Metazoa;Eumetazoa;Bilateria;Protostomia;  
 Spiralia;Lophotrochozoa;Mollusca;Bivalvia;Autobranchia;Heteroconchia;Euhe  
 terodonta;Imparidentia;Venerida;Veneroidea;Veneridae;Mercenaria;Mercenari  
 a mercenaria  
 UdeM00000023348 6596 868.2 UdeM00000023348 XP\_045204771.1 47.5 996  
 483 16 1 961 1 991 1.00E-248 868.2 6596 cellular  
 organisms;Eukaryota;Opisthokonta;Metazoa;Eumetazoa;Bilateria;Protostomia;  
 Spiralia;Lophotrochozoa;Mollusca;Bivalvia;Autobranchia;Heteroconchia;Euhe  
 terodonta;Imparidentia;Venerida;Veneroidea;Veneridae;Mercenaria;Mercenari  
 a mercenaria  
 UdeM00000023349 6596 723.8 UdeM00000023349 XP\_045204771.1 42 1011  
 499 19 1 929 59 1064 2.80E-205 723.8 6596 cellular  
 organisms;Eukaryota;Opisthokonta;Metazoa;Eumetazoa;Bilateria;Protostomia;  
 Spiralia;Lophotrochozoa;Mollusca;Bivalvia;Autobranchia;Heteroconchia;Euhe  
 terodonta;Imparidentia;Venerida;Veneroidea;Veneridae;Mercenaria;Mercenari  
 a mercenaria  
 UdeM00000023350 6596 724.2 UdeM00000023350 XP\_045204771.1 40.3 1064  
 558 15 6 994 3 1064 2.30E-205 724.2 6596 cellular  
 organisms;Eukaryota;Opisthokonta;Metazoa;Eumetazoa;Bilateria;Protostomia;  
 Spiralia;Lophotrochozoa;Mollusca;Bivalvia;Autobranchia;Heteroconchia;Euhe  
 terodonta;Imparidentia;Venerida;Veneroidea;Veneridae;Mercenaria;Mercenari  
 a mercenaria  
 UdeM00000023351 1735272 124.8 UdeM00000023351 XP\_041357708.1 66  
 100 32 1 12 111 16 113 7.00E-26 124.8 1735272  
 cellular  
 organisms;Eukaryota;Opisthokonta;Metazoa;Eumetazoa;Bilateria;Protostomia;  
 Spiralia;Lophotrochozoa;Mollusca;Gastropoda;Neomphalina;Neomphaloidea;Pel  
 tospiridae;Gigantopelta;Gigantopelta aegis  
 UdeM00000023352 1735272 127.1 UdeM00000023352 XP\_041357708.1 61.8  
 110 40 1 12 121 16 123 1.70E-26 127.1 1735272  
 cellular  
 organisms;Eukaryota;Opisthokonta;Metazoa;Eumetazoa;Bilateria;Protostomia;  
 Spiralia;Lophotrochozoa;Mollusca;Gastropoda;Neomphalina;Neomphaloidea;Pel  
 tospiridae;Gigantopelta;Gigantopelta aegis  
 UdeM00000023353 6596 157.1 UdeM00000023353 XP\_045206566.1 56.1 155  
 61 4 62 215 287 435 2.50E-35 157.1 6596 cellular  
 organisms;Eukaryota;Opisthokonta;Metazoa;Eumetazoa;Bilateria;Protostomia;  
 Spiralia;Lophotrochozoa;Mollusca;Bivalvia;Autobranchia;Heteroconchia;Euhe  
 terodonta;Imparidentia;Venerida;Veneroidea;Veneridae;Mercenaria;Mercenari  
 a mercenaria  
 UdeM00000023354 29159 149.8 UdeM00000023354 XP\_034301601.1 44.9 187  
 101 1 2 186 521 707 3.40E-33 149.8 29159 cellular  
 organisms;Eukaryota;Opisthokonta;Metazoa;Eumetazoa;Bilateria;Protostomia;  
 Spiralia;Lophotrochozoa;Mollusca;Bivalvia;Autobranchia;Pteriomorphia;Ostr  
 eida;Ostreoidea;Ostreidae;Crassostrea;Crassostrea gigas  
 UdeM00000023355 6565 164.9 UdeM00000023355 XP\_022328045.1 70.2 114  
 32 1 3 116 231 342 7.30E-38 164.9 6565 cellular  
 organisms;Eukaryota;Opisthokonta;Metazoa;Eumetazoa;Bilateria;Protostomia;  
 Spiralia;Lophotrochozoa;Mollusca;Bivalvia;Autobranchia;Pteriomorphia;Ostr  
 eida;Ostreoidea;Ostreidae;Crassostrea;Crassostrea virginica  
 UdeM00000023357 6573 894.4 UdeM00000023357 XP\_021367040.1 45.9 1356  
 555 18 4 1334 3 1205 1.70E-256 894.4 6573 cellular

organisms;Eukaryota;Opisthokonta;Metazoa;Eumetazoa;Bilateria;Protostomia; Spiralia;Lophotrochozoa;Mollusca;Bivalvia;Autobranchia;Pteriomorpha;Pect inida;Pectinoidea;Pectinidae;Mizuhopecten;Mizuhopecten yessoensis

UdeM00000023359 6526 165.6 UdeM00000023359 XP\_013062038.1 42.1 228  
122 4 46 267 470 693 9.80E-38 165.6 6526 cellular

organisms;Eukaryota;Opisthokonta;Metazoa;Eumetazoa;Bilateria;Protostomia; Spiralia;Lophotrochozoa;Mollusca;Gastropoda;Heterobranchia;Euthyneura;Pan pulmonata;Hygrophila;Lymnaeoidea;Planorbidae;Biomphalaria;Biomphalaria glabrata

UdeM00000023360 1735272 156.4 UdeM00000023360 XP\_041365180.1 38.6  
202 120 1 50 247 164 365 4.80E-35 156.4 1735272  
cellular

organisms;Eukaryota;Opisthokonta;Metazoa;Eumetazoa;Bilateria;Protostomia; Spiralia;Lophotrochozoa;Mollusca;Gastropoda;Neomphalina;Neomphaloidea;Pel tospiridae;Gigantopelta;Gigantopelta aegis

UdeM00000023361 6596 146.4 UdeM00000023361 XP\_045206733.1 36.4 280  
147 8 74 323 147 425 6.70E-32 146.4 6596 cellular

organisms;Eukaryota;Opisthokonta;Metazoa;Eumetazoa;Bilateria;Protostomia; Spiralia;Lophotrochozoa;Mollusca;Bivalvia;Autobranchia;Heteroconchia;Euhe terodonta;Imparidentia;Venerida;Veneroidea;Veneridae;Mercenaria;Mercenari a mercenaria

UdeM00000023362 6579 402.5 UdeM00000023362 XP\_033743064.1 49 400  
196 5 4 397 91 488 6.30E-109 402.5 6579 cellular

organisms;Eukaryota;Opisthokonta;Metazoa;Eumetazoa;Bilateria;Protostomia; Spiralia;Lophotrochozoa;Mollusca;Bivalvia;Autobranchia;Pteriomorpha;Pect inida;Pectinoidea;Pectinidae;Pecten;Pecten maximus

UdeM00000023363 6579 490.3 UdeM00000023363 XP\_033743064.1 49.2 490  
240 6 1 483 1 488 2.80E-135 490.3 6579 cellular

organisms;Eukaryota;Opisthokonta;Metazoa;Eumetazoa;Bilateria;Protostomia; Spiralia;Lophotrochozoa;Mollusca;Bivalvia;Autobranchia;Pteriomorpha;Pect inida;Pectinoidea;Pectinidae;Pecten;Pecten maximus

UdeM00000023364 6596 88.2 UdeM00000023364 XP\_045204696.1 36.9 149  
81 2 49 188 19 163 1.50E-14 88.2 6596 cellular

organisms;Eukaryota;Opisthokonta;Metazoa;Eumetazoa;Bilateria;Protostomia; Spiralia;Lophotrochozoa;Mollusca;Bivalvia;Autobranchia;Heteroconchia;Euhe terodonta;Imparidentia;Venerida;Veneroidea;Veneridae;Mercenaria;Mercenari a mercenaria

UdeM00000023365 6596 3289.2 UdeM00000023365 XP\_045183964.1 75.4  
2335 541 5 1 2333 1 2304 0.00E+00 3289.2 6596  
cellular

organisms;Eukaryota;Opisthokonta;Metazoa;Eumetazoa;Bilateria;Protostomia; Spiralia;Lophotrochozoa;Mollusca;Bivalvia;Autobranchia;Heteroconchia;Euhe terodonta;Imparidentia;Venerida;Veneroidea;Veneridae;Mercenaria;Mercenari a mercenaria

UdeM00000023372 7604 208.4 UdeM00000023372 XP\_033641610.1 40.5 311  
175 6 78 384 7 311 4.80E-50 208.4 7604 cellular

organisms;Eukaryota;Opisthokonta;Metazoa;Eumetazoa;Bilateria;Deuterostomi a;Echinodermata;Eleutherozoa;Asterozoa;Asteroidea;Forcipulatacea;Forcipul atida;Asteroidea;Asterias;Asterias rubens

UdeM00000023373 7604 223.8 UdeM00000023373 XP\_033641610.1 41 334  
187 6 85 414 7 334 4.20E-55 223.8 7604 cellular

organisms;Eukaryota;Opisthokonta;Metazoa;Eumetazoa;Bilateria;Deuterostomi a;Echinodermata;Eleutherozoa;Asterozoa;Asteroidea;Forcipulatacea;Forcipul atida;Asteroidea;Asterias;Asterias rubens

UdeM00000023374 8236 127.1 UdeM00000023374 XP\_044216249.1 43.3 164  
 76 4 1 163 37 184 2.10E-26 127.1 8236 cellular  
 organisms;Eukaryota;Opisthokonta;Metazoa;Eumetazoa;Bilateria;Deuterostomi  
 a;Chordata;Craniata;Vertebrata;Gnathostomata;Teleostomi;Euteleostomi;Acti  
 nopterygii;Actinopteri;Neopterygii;Teleostei;Osteoglossocephalai;Clupeoce  
 phala;Euteleostei;Neoteleostei;Eurypterygia;Ctenosquamata;Acanthomo  
 rphata;Euacanthomorpha;Percomorphaceae;Pelagiaria;Scombriformes;Scombr  
 idae;Scombrinae;Thunnini;Thunnus;Thunnus albacares

UdeM00000023387 6596 583.6 UdeM00000023387 XP\_045183955.1 65.7 432  
 144 2 1 431 1 429 2.30E-163 583.6 6596 cellular  
 organisms;Eukaryota;Opisthokonta;Metazoa;Eumetazoa;Bilateria;Protostomia;  
 Spiralia;Lophotrochozoa;Mollusca;Bivalvia;Autobranchia;Heteroconchia;Euhe  
 terodonta;Imparidentia;Venerida;Veneroidea;Veneridae;Mercenaria;Mercenari  
 a mercenaria

UdeM00000030494 6596 274.2 UdeM00000030494 XP\_045171316.1 39.2 406  
 225 6 33 421 31 431 2.80E-70 274.2 6596 cellular  
 organisms;Eukaryota;Opisthokonta;Metazoa;Eumetazoa;Bilateria;Protostomia;  
 Spiralia;Lophotrochozoa;Mollusca;Bivalvia;Autobranchia;Heteroconchia;Euhe  
 terodonta;Imparidentia;Venerida;Veneroidea;Veneridae;Mercenaria;Mercenari  
 a mercenaria

UdeM00000030495 37653 222.6 UdeM00000030495 XP\_014779039.1 37.3 365  
 217 6 4 358 401 763 7.90E-55 222.6 37653 cellular  
 organisms;Eukaryota;Opisthokonta;Metazoa;Eumetazoa;Bilateria;Protostomia;  
 Spiralia;Lophotrochozoa;Mollusca;Cephalopoda;Coleoidea;Octopodiformes;Oct  
 opoda;Incirrata;Octopodidae;Octopus;Octopus bimaculoides

UdeM00000030497 151771 375.9 UdeM00000030497 XP\_028419301.1 50.1  
 379 130 3 42 363 34 410 6.00E-101 375.9 151771  
 cellular  
 organisms;Eukaryota;Opisthokonta;Metazoa;Eumetazoa;Cnidaria;Anthozoa;Octo  
 corallia;Alcyonacea;Alcyoniina;Nephtheidae;Dendronephthya;Dendronephthya  
 gigantea

UdeM00000030498 218467 149.8 UdeM00000030498 XP\_023216565.1 28.9  
 329 218 7 97 422 136 451 7.60E-33 149.8 218467  
 cellular  
 organisms;Eukaryota;Opisthokonta;Metazoa;Eumetazoa;Bilateria;Protostomia;  
 Ecdysozoa;Panarthropoda;Arthropoda;Chelicerata;Arachnida;Scorpiones;Buthi  
 da;Buthoidea;Buthidae;Centruroides;Centruroides sculpturatus

UdeM00000030499 218467 120.9 UdeM00000030499 XP\_023216565.1 26.1  
 329 209 7 50 357 136 451 3.20E-24 120.9 218467  
 cellular  
 organisms;Eukaryota;Opisthokonta;Metazoa;Eumetazoa;Bilateria;Protostomia;  
 Ecdysozoa;Panarthropoda;Arthropoda;Chelicerata;Arachnida;Scorpiones;Buthi  
 da;Buthoidea;Buthidae;Centruroides;Centruroides sculpturatus

UdeM00000030500 1735272 255 UdeM00000030500 XP\_041351875.1 57.1  
 231 99 0 1 231 195 425 9.60E-65 255 1735272  
 cellular  
 organisms;Eukaryota;Opisthokonta;Metazoa;Eumetazoa;Bilateria;Protostomia;  
 Spiralia;Lophotrochozoa;Mollusca;Gastropoda;Neomphalina;Neomphaloidea;Pel  
 tospiridae;Gigantopelta;Gigantopelta aegis

UdeM00000030501 1735272 406 UdeM00000030501 XP\_041351875.1 55.1  
 379 165 2 51 427 50 425 6.10E-110 406 1735272  
 cellular  
 organisms;Eukaryota;Opisthokonta;Metazoa;Eumetazoa;Bilateria;Protostomia;

Spiralia; Lophotrochozoa; Mollusca; Gastropoda; Neomphalina; Neomphaloidea; Pelto-  
 tospiridae; Gigantopelta; Gigantopelta aegis

UdeM00000030502 6579 414.1 UdeM00000030502 XP\_033734276.1 46 452  
 239 5 5 453 50 499 2.40E-112 414.1 6579 cellular  
 organisms; Eukaryota; Opisthokonta; Metazoa; Eumetazoa; Bilateria; Protostomia;  
 Spiralia; Lophotrochozoa; Mollusca; Bivalvia; Autobranchia; Pteriomorpha; Pect-  
 inida; Pectinoidea; Pectinidae; Pecten; Pecten maximus

UdeM00000030503 6579 425.2 UdeM00000030503 XP\_033734276.1 45.2 493  
 258 8 9 492 10 499 1.10E-115 425.2 6579 cellular  
 organisms; Eukaryota; Opisthokonta; Metazoa; Eumetazoa; Bilateria; Protostomia;  
 Spiralia; Lophotrochozoa; Mollusca; Bivalvia; Autobranchia; Pteriomorpha; Pect-  
 inida; Pectinoidea; Pectinidae; Pecten; Pecten maximus

UdeM00000030504 6573 666.4 UdeM00000030504 XP\_021379975.1 61.6 570  
 194 10 1 561 1 554 3.30E-188 666.4 6573 cellular  
 organisms; Eukaryota; Opisthokonta; Metazoa; Eumetazoa; Bilateria; Protostomia;  
 Spiralia; Lophotrochozoa; Mollusca; Bivalvia; Autobranchia; Pteriomorpha; Pect-  
 inida; Pectinoidea; Pectinidae; Mizuhopecten; Mizuhopecten yessoensis

UdeM00000030507 6565 268.1 UdeM00000030507 XP\_022312737.1 47 279  
 140 4 2 278 99 371 1.30E-68 268.1 6565 cellular  
 organisms; Eukaryota; Opisthokonta; Metazoa; Eumetazoa; Bilateria; Protostomia;  
 Spiralia; Lophotrochozoa; Mollusca; Bivalvia; Autobranchia; Pteriomorpha; Ostr-  
 eida; Ostreidae; Crassostrea; Crassostrea virginica

UdeM00000030506 6565 278.9 UdeM00000030506 XP\_022312737.1 47.3 292  
 146 4 46 335 86 371 8.80E-72 278.9 6565 cellular  
 organisms; Eukaryota; Opisthokonta; Metazoa; Eumetazoa; Bilateria; Protostomia;  
 Spiralia; Lophotrochozoa; Mollusca; Bivalvia; Autobranchia; Pteriomorpha; Ostr-  
 eida; Ostreidae; Crassostrea; Crassostrea virginica

UdeM00000030508 6596 268.9 UdeM00000030508 XP\_045171316.1 38.7 406  
 227 6 33 421 31 431 1.20E-68 268.9 6596 cellular  
 organisms; Eukaryota; Opisthokonta; Metazoa; Eumetazoa; Bilateria; Protostomia;  
 Spiralia; Lophotrochozoa; Mollusca; Bivalvia; Autobranchia; Heteroconchia; Eue-  
 terodonta; Imparidentia; Venerida; Veneroidea; Veneridae; Mercenaria; Mercenari-  
 a mercenaria

UdeM00000030509 6565 280.8 UdeM00000030509 XP\_022312737.1 47.3 292  
 146 4 46 335 86 371 2.30E-72 280.8 6565 cellular  
 organisms; Eukaryota; Opisthokonta; Metazoa; Eumetazoa; Bilateria; Protostomia;  
 Spiralia; Lophotrochozoa; Mollusca; Bivalvia; Autobranchia; Pteriomorpha; Ostr-  
 eida; Ostreidae; Crassostrea; Crassostrea virginica

UdeM00000030510 6565 280.8 UdeM00000030510 XP\_022312737.1 47.3 292  
 146 4 46 335 86 371 2.30E-72 280.8 6565 cellular  
 organisms; Eukaryota; Opisthokonta; Metazoa; Eumetazoa; Bilateria; Protostomia;  
 Spiralia; Lophotrochozoa; Mollusca; Bivalvia; Autobranchia; Pteriomorpha; Ostr-  
 eida; Ostreidae; Crassostrea; Crassostrea virginica

UdeM00000030511 6596 276.2 UdeM00000030511 XP\_045171316.1 39.4 406  
 224 6 33 421 31 431 7.40E-71 276.2 6596 cellular  
 organisms; Eukaryota; Opisthokonta; Metazoa; Eumetazoa; Bilateria; Protostomia;  
 Spiralia; Lophotrochozoa; Mollusca; Bivalvia; Autobranchia; Heteroconchia; Eue-  
 terodonta; Imparidentia; Venerida; Veneroidea; Veneridae; Mercenaria; Mercenari-  
 a mercenaria

UdeM00000030512 6565 280.4 UdeM00000030512 XP\_022312737.1 46.4 291  
 150 3 46 335 86 371 3.00E-72 280.4 6565 cellular  
 organisms; Eukaryota; Opisthokonta; Metazoa; Eumetazoa; Bilateria; Protostomia;  
 Spiralia; Lophotrochozoa; Mollusca; Bivalvia; Autobranchia; Pteriomorpha; Ostr-  
 eida; Ostreidae; Crassostrea; Crassostrea virginica

UdeM00000030513 6596 755.7 UdeM00000030513 XP\_045164022.1 64.6 608  
 205 5 24 624 6 610 5.90E-215 755.7 6596 cellular  
 organisms;Eukaryota;Opisthokonta;Metazoa;Eumetazoa;Bilateria;Protostomia;  
 Spiralia;Lophotrochozoa;Mollusca;Bivalvia;Autobranchia;Heteroconchia;Euhe  
 terodonta;Imparidentia;Venerida;Veneroidea;Veneridae;Mercenaria;Mercenari  
 a mercenaria  
 UdeM00000030514 6596 147.9 UdeM00000030514 XP\_045181811.1 46.8 156  
 80 3 1 154 166 320 1.20E-32 147.9 6596 cellular  
 organisms;Eukaryota;Opisthokonta;Metazoa;Eumetazoa;Bilateria;Protostomia;  
 Spiralia;Lophotrochozoa;Mollusca;Bivalvia;Autobranchia;Heteroconchia;Euhe  
 terodonta;Imparidentia;Venerida;Veneroidea;Veneridae;Mercenaria;Mercenari  
 a mercenaria  
 UdeM00000030515 225164 63.9 UdeM00000030515 XP\_009060625.1 50.8  
 61 26 2 1 58 66 125 1.10E-07 63.9 225164  
 cellular  
 organisms;Eukaryota;Opisthokonta;Metazoa;Eumetazoa;Bilateria;Protostomia;  
 Spiralia;Lophotrochozoa;Mollusca;Gastropoda;Patellogastropoda;Lottioidea;  
 Lottiidae;Lottia;Lottia gigantea  
 UdeM00000030516 6573 729.2 UdeM00000030516 XP\_021379914.1 82.1 643  
 99 5 445 1081 498 1130 7.80E-207 729.2 6573 cellular  
 organisms;Eukaryota;Opisthokonta;Metazoa;Eumetazoa;Bilateria;Protostomia;  
 Spiralia;Lophotrochozoa;Mollusca;Bivalvia;Autobranchia;Pteriormorphia;Pect  
 inida;Pectinoidea;Pectinidae;Mizuhopecten;Mizuhopecten yessoensis  
 UdeM00000030517 1735272 255.8 UdeM00000030517 XP\_041352353.1 68.6  
 185 58 0 11 195 13 197 4.60E-65 255.8 1735272  
 cellular  
 organisms;Eukaryota;Opisthokonta;Metazoa;Eumetazoa;Bilateria;Protostomia;  
 Spiralia;Lophotrochozoa;Mollusca;Gastropoda;Neomphalina;Neomphaloidea;Pel  
 tospiridae;Gigantopelta;Gigantopelta aegis  
 UdeM00000030518 29159 264.2 UdeM00000030518 XP\_034316161.1 45 291  
 159 1 1 290 718 1008 1.90E-67 264.2 29159 cellular  
 organisms;Eukaryota;Opisthokonta;Metazoa;Eumetazoa;Bilateria;Protostomia;  
 Spiralia;Lophotrochozoa;Mollusca;Bivalvia;Autobranchia;Pteriormorphia;Ostr  
 eida;Ostreoidea;Ostreidae;Crassostrea;Crassostrea gigas  
 UdeM00000030519 6565 280.8 UdeM00000030519 XP\_022312737.1 46 291  
 151 3 46 335 86 371 2.30E-72 280.8 6565 cellular  
 organisms;Eukaryota;Opisthokonta;Metazoa;Eumetazoa;Bilateria;Protostomia;  
 Spiralia;Lophotrochozoa;Mollusca;Bivalvia;Autobranchia;Pteriormorphia;Ostr  
 eida;Ostreoidea;Ostreidae;Crassostrea;Crassostrea virginica  
 UdeM00000030520 6565 280.8 UdeM00000030520 XP\_022312737.1 46 291  
 151 3 34 323 86 371 2.20E-72 280.8 6565 cellular  
 organisms;Eukaryota;Opisthokonta;Metazoa;Eumetazoa;Bilateria;Protostomia;  
 Spiralia;Lophotrochozoa;Mollusca;Bivalvia;Autobranchia;Pteriormorphia;Ostr  
 eida;Ostreoidea;Ostreidae;Crassostrea;Crassostrea virginica  
 UdeM00000030521 6596 142.1 UdeM00000030521 XP\_045170155.1 66.3 199  
 61 1 167 365 44 236 1.40E-30 142.1 6596 cellular  
 organisms;Eukaryota;Opisthokonta;Metazoa;Eumetazoa;Bilateria;Protostomia;  
 Spiralia;Lophotrochozoa;Mollusca;Bivalvia;Autobranchia;Heteroconchia;Euhe  
 terodonta;Imparidentia;Venerida;Veneroidea;Veneridae;Mercenaria;Mercenari  
 a mercenaria  
 UdeM00000030522 6596 947.2 UdeM00000030522 XP\_045181168.1 74.1 837  
 207 3 1 832 1 832 2.10E-272 947.2 6596 cellular  
 organisms;Eukaryota;Opisthokonta;Metazoa;Eumetazoa;Bilateria;Protostomia;  
 Spiralia;Lophotrochozoa;Mollusca;Bivalvia;Autobranchia;Heteroconchia;Euhe

terodonta;Imparidentia;Venerida;Veneroidea;Veneridae;Mercenaria;Mercenaria mercenaria

UdeM00000030522 6596 68.9 UdeM00000030522 XP\_045181168.1 46.6 88  
40 2 1130 1217 950 1030 5.00E-08 68.9 6596 cellular

organisms;Eukaryota;Opisthokonta;Metazoa;Eumetazoa;Bilateria;Protostomia;Spiralia;Lophotrochozoa;Mollusca;Bivalvia;Autobranchia;Heteroconchia;Euherodonta;Imparidentia;Venerida;Veneroidea;Veneridae;Mercenaria;Mercenaria mercenaria

UdeM00000030523 6500 106.7 UdeM00000030523 XP\_005099828.1 75 72  
18 0 12 83 1038 1109 1.50E-20 106.7 6500 cellular

organisms;Eukaryota;Opisthokonta;Metazoa;Eumetazoa;Bilateria;Protostomia;Spiralia;Lophotrochozoa;Mollusca;Gastropoda;Heterobranchia;Euthyneura;Tectipleura;Aplysiida;Aplysioidea;Aplysiidae;Aplysia;Aplysia californica

UdeM00000030524 6565 114.8 UdeM00000030524 XP\_022297037.1 39.1 174  
99 3 6 174 11 182 2.00E-22 114.8 6565 cellular

organisms;Eukaryota;Opisthokonta;Metazoa;Eumetazoa;Bilateria;Protostomia;Spiralia;Lophotrochozoa;Mollusca;Bivalvia;Autobranchia;Pteriormorphia;Ostreida;Ostreioidea;Ostreidae;Crassostrea;Crassostrea virginica

UdeM00000030525 1735272 272.7 UdeM00000030525 XP\_041355171.1 72.6  
186 48 3 11 195 43 226 3.70E-70 272.7 1735272

cellular

organisms;Eukaryota;Opisthokonta;Metazoa;Eumetazoa;Bilateria;Protostomia;Spiralia;Lophotrochozoa;Mollusca;Gastropoda;Neomphalina;Neomphaloidea;Peltospiridae;Gigantopelta;Gigantopelta aegis

UdeM00000030526 6596 162.2 UdeM00000030526 XP\_045177433.1 44.9 156  
72 2 14 164 4 150 3.20E-36 162.2 6596 cellular

organisms;Eukaryota;Opisthokonta;Metazoa;Eumetazoa;Bilateria;Protostomia;Spiralia;Lophotrochozoa;Mollusca;Bivalvia;Autobranchia;Heteroconchia;Euherodonta;Imparidentia;Venerida;Veneroidea;Veneridae;Mercenaria;Mercenaria mercenaria

UdeM00000030527 8407 109 UdeM00000030527 XP\_040208265.1 38.9 131  
77 3 72 201 255 383 9.60E-21 109 8407 cellular

organisms;Eukaryota;Opisthokonta;Metazoa;Eumetazoa;Bilateria;Deuterostomia;Chordata;Craniata;Vertebrata;Gnathostomata;Teleostomi;Euteleostomi;Sarcopterygii;Dipnotetrapodomorpha;Tetrapoda;Amphibia;Batrachia;Anura;Neobatrachia;Ranoidea;Ranidae;Rana;Rana;Rana temporaria

UdeM00000030528 8407 99.4 UdeM00000030528 XP\_040208265.1 41.2 114  
64 3 1 113 272 383 5.10E-18 99.4 8407 cellular

organisms;Eukaryota;Opisthokonta;Metazoa;Eumetazoa;Bilateria;Deuterostomia;Chordata;Craniata;Vertebrata;Gnathostomata;Teleostomi;Euteleostomi;Sarcopterygii;Dipnotetrapodomorpha;Tetrapoda;Amphibia;Batrachia;Anura;Neobatrachia;Ranoidea;Ranidae;Rana;Rana;Rana temporaria

UdeM00000030529 6596 160.2 UdeM00000030529 XP\_045184682.1 32.1 299  
188 7 5 297 11 300 4.00E-36 160.2 6596 cellular

organisms;Eukaryota;Opisthokonta;Metazoa;Eumetazoa;Bilateria;Protostomia;Spiralia;Lophotrochozoa;Mollusca;Bivalvia;Autobranchia;Heteroconchia;Euherodonta;Imparidentia;Venerida;Veneroidea;Veneridae;Mercenaria;Mercenaria mercenaria

UdeM00000030531 6596 184.5 UdeM00000030531 XP\_045184682.1 35.7 300  
174 9 6 295 10 300 2.00E-43 184.5 6596 cellular

organisms;Eukaryota;Opisthokonta;Metazoa;Eumetazoa;Bilateria;Protostomia;Spiralia;Lophotrochozoa;Mollusca;Bivalvia;Autobranchia;Heteroconchia;Euherodonta;Imparidentia;Venerida;Veneroidea;Veneridae;Mercenaria;Mercenaria mercenaria



UdeM00000030532 29159 241.9 UdeM00000030532 XP\_011432869.1 70.7 147  
 42 1 3 149 5 150 5.80E-61 241.9 29159 cellular  
 organisms;Eukaryota;Opisthokonta;Metazoa;Eumetazoa;Bilateria;Protostomia;  
 Spiralia;Lophotrochozoa;Mollusca;Bivalvia;Autobranchia;Pteriomorpha;Ostr  
 eida;Ostreoidea;Ostreidae;Crassostrea;Crassostrea gigas  
 UdeM00000030533 6500 429.1 UdeM00000030533 XP\_005102960.1 68 297  
 90 2 1 297 1 292 4.60E-117 429.1 6500 cellular  
 organisms;Eukaryota;Opisthokonta;Metazoa;Eumetazoa;Bilateria;Protostomia;  
 Spiralia;Lophotrochozoa;Mollusca;Gastropoda;Heterobranchia;Euthyneura;Tec  
 tipleura;Aplysiida;Aplysioidea;Aplysiidae;Aplysia;Aplysia californica  
 UdeM00000030534 29159 152.5 UdeM00000030534 XP\_011415145.2 73 89  
 24 0 3 91 4 92 3.10E-34 152.5 29159 cellular  
 organisms;Eukaryota;Opisthokonta;Metazoa;Eumetazoa;Bilateria;Protostomia;  
 Spiralia;Lophotrochozoa;Mollusca;Bivalvia;Autobranchia;Pteriomorpha;Ostr  
 eida;Ostreoidea;Ostreidae;Crassostrea;Crassostrea gigas  
 UdeM00000030535 6596 118.2 UdeM00000030535 XP\_045180523.1 63.9 83  
 30 0 13 95 45 127 1.80E-23 118.2 6596 cellular  
 organisms;Eukaryota;Opisthokonta;Metazoa;Eumetazoa;Bilateria;Protostomia;  
 Spiralia;Lophotrochozoa;Mollusca;Bivalvia;Autobranchia;Heteroconchia;Euhe  
 terodonta;Imparidentia;Venerida;Veneroidea;Veneridae;Mercenaria;Mercenari  
 a mercenaria  
 UdeM00000030536 6596 118.2 UdeM00000030536 XP\_045180523.1 63.9 83  
 30 0 13 95 45 127 2.10E-23 118.2 6596 cellular  
 organisms;Eukaryota;Opisthokonta;Metazoa;Eumetazoa;Bilateria;Protostomia;  
 Spiralia;Lophotrochozoa;Mollusca;Bivalvia;Autobranchia;Heteroconchia;Euhe  
 terodonta;Imparidentia;Venerida;Veneroidea;Veneridae;Mercenaria;Mercenari  
 a mercenaria  
 UdeM00000030537 6596 139.4 UdeM00000030537 XP\_045180523.1 38 308  
 190 1 870 1176 1579 1886 2.90E-29 139.4 6596 cellular  
 organisms;Eukaryota;Opisthokonta;Metazoa;Eumetazoa;Bilateria;Protostomia;  
 Spiralia;Lophotrochozoa;Mollusca;Bivalvia;Autobranchia;Heteroconchia;Euhe  
 terodonta;Imparidentia;Venerida;Veneroidea;Veneridae;Mercenaria;Mercenari  
 a mercenaria  
 UdeM00000030538 6596 107.5 UdeM00000030538 XP\_045180523.1 69.1 81  
 25 0 1 81 1900 1980 1.20E-20 107.5 6596 cellular  
 organisms;Eukaryota;Opisthokonta;Metazoa;Eumetazoa;Bilateria;Protostomia;  
 Spiralia;Lophotrochozoa;Mollusca;Bivalvia;Autobranchia;Heteroconchia;Euhe  
 terodonta;Imparidentia;Venerida;Veneroidea;Veneridae;Mercenaria;Mercenari  
 a mercenaria  
 UdeM00000030539 6500 253.1 UdeM00000030539 XP\_035825114.1 70.3 195  
 58 0 2 196 1550 1744 5.50E-64 253.1 6500 cellular  
 organisms;Eukaryota;Opisthokonta;Metazoa;Eumetazoa;Bilateria;Protostomia;  
 Spiralia;Lophotrochozoa;Mollusca;Gastropoda;Heterobranchia;Euthyneura;Tec  
 tipleura;Aplysiida;Aplysioidea;Aplysiidae;Aplysia;Aplysia californica  
 UdeM00000030541 6573 147.9 UdeM00000030541 XP\_021347272.1 73.5 102  
 27 0 2 103 1503 1604 1.80E-32 147.9 6573 cellular  
 organisms;Eukaryota;Opisthokonta;Metazoa;Eumetazoa;Bilateria;Protostomia;  
 Spiralia;Lophotrochozoa;Mollusca;Bivalvia;Autobranchia;Pteriomorpha;Pect  
 inida;Pectinoidea;Pectinidae;Mizuhopecten;Mizuhopecten yessoensis  
 UdeM00000030540 6596 125.6 UdeM00000030540 XP\_045181593.1 43.5 161  
 85 2 1 161 1 155 1.00E-25 125.6 6596 cellular  
 organisms;Eukaryota;Opisthokonta;Metazoa;Eumetazoa;Bilateria;Protostomia;  
 Spiralia;Lophotrochozoa;Mollusca;Bivalvia;Autobranchia;Heteroconchia;Euhe

terodonta;Imparidentia;Venerida;Veneroidea;Veneridae;Mercenaria;Mercenari  
 a mercenaria  
 UdeM00000030542 6596 639 UdeM00000030542 XP\_045180471.1 42.8 747  
 403 8 1 738 1 732 7.30E-180 639 6596 cellular  
 organisms;Eukaryota;Opisthokonta;Metazoa;Eumetazoa;Bilateria;Protostomia;  
 Spiralia;Lophotrochozoa;Mollusca;Bivalvia;Autobranhia;Heteroconchia;Euhe  
 terodonta;Imparidentia;Venerida;Veneroidea;Veneridae;Mercenaria;Mercenari  
 a mercenaria  
 UdeM00000030543 6596 631.3 UdeM00000030543 XP\_045180471.1 42.4 754  
 403 9 1 745 1 732 1.50E-177 631.3 6596 cellular  
 organisms;Eukaryota;Opisthokonta;Metazoa;Eumetazoa;Bilateria;Protostomia;  
 Spiralia;Lophotrochozoa;Mollusca;Bivalvia;Autobranhia;Heteroconchia;Euhe  
 terodonta;Imparidentia;Venerida;Veneroidea;Veneridae;Mercenaria;Mercenari  
 a mercenaria  
 UdeM00000030544 6565 99.4 UdeM00000030544 XP\_022297447.1 47.3 112  
 55 1 16 123 249 360 3.90E-18 99.4 6565 cellular  
 organisms;Eukaryota;Opisthokonta;Metazoa;Eumetazoa;Bilateria;Protostomia;  
 Spiralia;Lophotrochozoa;Mollusca;Bivalvia;Autobranhia;Pteriomorphia;Ostr  
 eida;Ostreoidea;Ostreidae;Crassostrea;Crassostrea virginica  
 UdeM00000030545 7574 299.3 UdeM00000030545 XP\_013381563.1 42 393  
 201 8 5 384 10 388 7.60E-78 299.3 7574 cellular  
 organisms;Eukaryota;Opisthokonta;Metazoa;Eumetazoa;Bilateria;Protostomia;  
 Spiralia;Lophotrochozoa;Brachiopoda;Linguliformea;Lingulata;Lingulida;Lin  
 guloidea;Lingulidae;Lingula;Lingula anatina  
 UdeM00000030547 6579 1069.3 UdeM00000030547 XP\_033746880.1 53.8  
 986 424 9 1 954 503 1488 0.00E+00 1069.3 6579  
 cellular  
 organisms;Eukaryota;Opisthokonta;Metazoa;Eumetazoa;Bilateria;Protostomia;  
 Spiralia;Lophotrochozoa;Mollusca;Bivalvia;Autobranhia;Pteriomorphia;Pect  
 inida;Pectinoidea;Pectinidae;Pecten;Pecten maximus  
 UdeM00000030548 6565 163.3 UdeM00000030548 XP\_022328252.1 45 211  
 98 5 1 193 1105 1315 3.10E-37 163.3 6565 cellular  
 organisms;Eukaryota;Opisthokonta;Metazoa;Eumetazoa;Bilateria;Protostomia;  
 Spiralia;Lophotrochozoa;Mollusca;Bivalvia;Autobranhia;Pteriomorphia;Ostr  
 eida;Ostreoidea;Ostreidae;Crassostrea;Crassostrea virginica  
 UdeM00000030550 6596 231.9 UdeM00000030550 XP\_045202146.1 47.5 240  
 111 3 75 301 76 313 1.10E-57 231.9 6596 cellular  
 organisms;Eukaryota;Opisthokonta;Metazoa;Eumetazoa;Bilateria;Protostomia;  
 Spiralia;Lophotrochozoa;Mollusca;Bivalvia;Autobranhia;Heteroconchia;Euhe  
 terodonta;Imparidentia;Venerida;Veneroidea;Veneridae;Mercenaria;Mercenari  
 a mercenaria  
 UdeM00000030551 6596 200.7 UdeM00000030551 XP\_045186011.1 38.9 419  
 190 16 576 985 637 998 8.80E-48 200.7 6596 cellular  
 organisms;Eukaryota;Opisthokonta;Metazoa;Eumetazoa;Bilateria;Protostomia;  
 Spiralia;Lophotrochozoa;Mollusca;Bivalvia;Autobranhia;Heteroconchia;Euhe  
 terodonta;Imparidentia;Venerida;Veneroidea;Veneridae;Mercenaria;Mercenari  
 a mercenaria  
 UdeM00000030552 6579 320.9 UdeM00000030552 XP\_033734310.1 40 463  
 272 5 6 465 9 468 2.90E-84 320.9 6579 cellular  
 organisms;Eukaryota;Opisthokonta;Metazoa;Eumetazoa;Bilateria;Protostomia;  
 Spiralia;Lophotrochozoa;Mollusca;Bivalvia;Autobranhia;Pteriomorphia;Pect  
 inida;Pectinoidea;Pectinidae;Pecten;Pecten maximus  
 UdeM00000030553 6579 321.6 UdeM00000030553 XP\_033734310.1 40 458  
 269 5 6 460 9 463 1.60E-84 321.6 6579 cellular

organisms;Eukaryota;Opisthokonta;Metazoa;Eumetazoa;Bilateria;Protostomia; Spiralia;Lophotrochozoa;Mollusca;Bivalvia;Autobranhia;Pteriormorphia;Pect inida;Pectinoidea;Pectinidae;Pecten;Pecten maximus

UdeM00000030554 6579 994.6 UdeM00000030554 XP\_033734598.1 66.2 662  
223 1 55 715 180 841 6.60E-287 994.6 6579 cellular

organisms;Eukaryota;Opisthokonta;Metazoa;Eumetazoa;Bilateria;Protostomia; Spiralia;Lophotrochozoa;Mollusca;Bivalvia;Autobranhia;Pteriormorphia;Pect inida;Pectinoidea;Pectinidae;Pecten;Pecten maximus

UdeM00000030555 6579 989.2 UdeM00000030555 XP\_033734596.1 65.9 660  
224 1 5 663 192 851 2.60E-285 989.2 6579 cellular

organisms;Eukaryota;Opisthokonta;Metazoa;Eumetazoa;Bilateria;Protostomia; Spiralia;Lophotrochozoa;Mollusca;Bivalvia;Autobranhia;Pteriormorphia;Pect inida;Pectinoidea;Pectinidae;Pecten;Pecten maximus

UdeM00000030556 6579 984.2 UdeM00000030556 XP\_033734596.1 65.7 662  
224 2 5 665 192 851 8.30E-284 984.2 6579 cellular

organisms;Eukaryota;Opisthokonta;Metazoa;Eumetazoa;Bilateria;Protostomia; Spiralia;Lophotrochozoa;Mollusca;Bivalvia;Autobranhia;Pteriormorphia;Pect inida;Pectinoidea;Pectinidae;Pecten;Pecten maximus

UdeM00000030557 6573 109.4 UdeM00000030557 XP\_021340861.1 52.2 136  
54 3 1 132 4 132 4.80E-21 109.4 6573 cellular

organisms;Eukaryota;Opisthokonta;Metazoa;Eumetazoa;Bilateria;Protostomia; Spiralia;Lophotrochozoa;Mollusca;Bivalvia;Autobranhia;Pteriormorphia;Pect inida;Pectinoidea;Pectinidae;Mizuhopecten;Mizuhopecten yessoensis

UdeM00000030558 400727 106.7 UdeM00000030558 XP\_025090012.1 49.3  
144 61 3 24 155 25 168 2.70E-20 106.7 400727  
cellular

organisms;Eukaryota;Opisthokonta;Metazoa;Eumetazoa;Bilateria;Protostomia; Spiralia;Lophotrochozoa;Mollusca;Gastropoda;Caenogastropoda;Architaeniogl ossa;Ampullarioidea;Ampullariidae;Pomacea;Pomacea canaliculata

UdeM00000030560 441366 322 UdeM00000030560 XP\_028296753.1 39.3  
499 268 12 6 490 32 509 1.30E-84 322 441366  
cellular

organisms;Eukaryota;Opisthokonta;Metazoa;Eumetazoa;Bilateria;Deuterostomi a;Chordata;Craniata;Vertebrata;Gnathostomata;Teleostomi;Euteleostomi;Acti nopterygii;Actinopteri;Neopterygii;Teleostei;Osteoglossocephalai;Clupeoce phala;Euteleosteomorpha;Neoteleostei;Eurypterygia;Ctenosquamata;Acanthomo rphata;Euacanthomorphacea;Percomorphaceae;Ovalentaria;Blenniimorphae;Blen niiformes;Gobiesocoidei;Gobiesocidae;Gobiesocinae;Gouania;Gouania willdenowi

UdeM00000030562 29159 178.3 UdeM00000030562 XP\_011425869.2 29.2 559  
286 14 1 515 108 600 2.40E-41 178.3 29159 cellular

organisms;Eukaryota;Opisthokonta;Metazoa;Eumetazoa;Bilateria;Protostomia; Spiralia;Lophotrochozoa;Mollusca;Bivalvia;Autobranhia;Pteriormorphia;Ostr eida;Ostreoidea;Ostreidae;Crassostrea;Crassostrea gigas

UdeM00000030563 50390 214.5 UdeM00000030563 XP\_028127913.1 42.1 259  
149 1 1 259 1 258 2.10E-52 214.5 50390 cellular

organisms;Eukaryota;Opisthokonta;Metazoa;Eumetazoa;Bilateria;Protostomia; Ecdysozoa;Panarthropoda;Arthropoda;Mandibulata;Pancrustacea;Hexapoda;Inse cta;Dicondylia;Pterygota;Neoptera;Endopterygota;Coleoptera;Polyphaga;Cucu jiformia;Chrysomeloidea;Chrysomelidae;Galerucinae;Luperini;Diabroticina;D iabroticites;Diabrotica;Diabrotica virgifera;Diabrotica virgifera virgifera

UdeM00000030564 29159 108.2 UdeM00000030564 XP\_011430997.2 35.6 194  
113 7 62 248 46 234 2.40E-20 108.2 29159 cellular

organisms;Eukaryota;Opisthokonta;Metazoa;Eumetazoa;Bilateria;Protostomia;Spiralia;Lophotrochozoa;Mollusca;Bivalvia;Autobranchia;Pteriormorphia;Ostreida;Ostreoidea;Ostreidae;Crassostrea;Crassostrea gigas

UdeM00000030565 6596 199.1 UdeM00000030565 XP\_045204562.1 27.7 674  
331 21 1 565 1 627 1.90E-47 199.1 6596 cellular

organisms;Eukaryota;Opisthokonta;Metazoa;Eumetazoa;Bilateria;Protostomia;Spiralia;Lophotrochozoa;Mollusca;Bivalvia;Autobranchia;Heteroconchia;Euheterodonta;Imparidentia;Venerida;Veneroidea;Veneridae;Mercenaria;Mercenaria mercenaria

UdeM00000030566 6579 176 UdeM00000030566 XP\_033734149.1 61.8 152  
56 2 54 204 27 177 1.80E-40 176 6579 cellular

organisms;Eukaryota;Opisthokonta;Metazoa;Eumetazoa;Bilateria;Protostomia;Spiralia;Lophotrochozoa;Mollusca;Bivalvia;Autobranchia;Pteriormorphia;Pectinida;Pectinoidea;Pectinidae;Pecten;Pecten maximus

UdeM00000030567 6579 369 UdeM00000030567 XP\_033734149.1 36.9 593  
349 13 1 581 183 762 1.10E-98 369 6579 cellular

organisms;Eukaryota;Opisthokonta;Metazoa;Eumetazoa;Bilateria;Protostomia;Spiralia;Lophotrochozoa;Mollusca;Bivalvia;Autobranchia;Pteriormorphia;Pectinida;Pectinoidea;Pectinidae;Pecten;Pecten maximus

UdeM00000030570 6579 511.9 UdeM00000030570 XP\_033733570.1 78.9 318  
67 0 3 320 804 1121 5.80E-142 511.9 6579 cellular

organisms;Eukaryota;Opisthokonta;Metazoa;Eumetazoa;Bilateria;Protostomia;Spiralia;Lophotrochozoa;Mollusca;Bivalvia;Autobranchia;Pteriormorphia;Pectinida;Pectinoidea;Pectinidae;Pecten;Pecten maximus

UdeM00000030569 6596 785.8 UdeM00000030569 XP\_045184086.1 72.1 537  
136 2 2 538 621 1143 3.50E-224 785.8 6596 cellular

organisms;Eukaryota;Opisthokonta;Metazoa;Eumetazoa;Bilateria;Protostomia;Spiralia;Lophotrochozoa;Mollusca;Bivalvia;Autobranchia;Heteroconchia;Euheterodonta;Imparidentia;Venerida;Veneroidea;Veneridae;Mercenaria;Mercenaria mercenaria

UdeM00000030571 6596 426.8 UdeM00000030571 XP\_045184086.1 39.2 627  
321 13 1 578 1 616 4.40E-116 426.8 6596 cellular

organisms;Eukaryota;Opisthokonta;Metazoa;Eumetazoa;Bilateria;Protostomia;Spiralia;Lophotrochozoa;Mollusca;Bivalvia;Autobranchia;Heteroconchia;Euheterodonta;Imparidentia;Venerida;Veneroidea;Veneridae;Mercenaria;Mercenaria mercenaria

UdeM00000030572 29159 286.6 UdeM00000030572 XP\_034323682.1 78.1 178  
38 1 1 177 1 178 2.50E-74 286.6 29159 cellular

organisms;Eukaryota;Opisthokonta;Metazoa;Eumetazoa;Bilateria;Protostomia;Spiralia;Lophotrochozoa;Mollusca;Bivalvia;Autobranchia;Pteriormorphia;Ostreida;Ostreoidea;Ostreidae;Crassostrea;Crassostrea gigas

UdeM00000030573 29159 915.2 UdeM00000030573 XP\_034323682.1 80.4 556  
108 1 1 555 1 556 4.30E-263 915.2 29159 cellular

organisms;Eukaryota;Opisthokonta;Metazoa;Eumetazoa;Bilateria;Protostomia;Spiralia;Lophotrochozoa;Mollusca;Bivalvia;Autobranchia;Pteriormorphia;Ostreida;Ostreoidea;Ostreidae;Crassostrea;Crassostrea gigas

UdeM00000030574 1735272 540 UdeM00000030574 XP\_041351578.1 83.6  
323 53 0 1 323 194 516 2.10E-150 540 1735272  
cellular

organisms;Eukaryota;Opisthokonta;Metazoa;Eumetazoa;Bilateria;Protostomia;Spiralia;Lophotrochozoa;Mollusca;Gastropoda;Neomphalina;Neomphaloidea;Peltospiridae;Gigantopelta;Gigantopelta aegis

UdeM00000030575 6596 222.6 UdeM00000030575 XP\_045164886.1 33 569  
239 17 19 553 22 482 1.20E-54 222.6 6596 cellular

organisms;Eukaryota;Opisthokonta;Metazoa;Eumetazoa;Bilateria;Protostomia;Spiralia;Lophotrochozoa;Mollusca;Bivalvia;Autobranchia;Heteroconchia;Euheterodonta;Imparidentia;Venerida;Veneroidea;Veneridae;Mercenaria;Mercenaria mercenaria

UdeM00000030576 6500 384.4 UdeM00000030576 XP\_012941013.1 81.1 238  
33 1 18 243 497 734 1.10E-103 384.4 6500 cellular

organisms;Eukaryota;Opisthokonta;Metazoa;Eumetazoa;Bilateria;Protostomia;Spiralia;Lophotrochozoa;Mollusca;Gastropoda;Heterobranchia;Euthyneura;Tectipleura;Aplysiida;Aplysioidea;Aplysiidae;Aplysia;Aplysia californica

UdeM00000030578 7574 350.1 UdeM00000030578 XP\_013381989.1 48 373  
188 4 32 403 91 458 3.70E-93 350.1 7574 cellular

organisms;Eukaryota;Opisthokonta;Metazoa;Eumetazoa;Bilateria;Protostomia;Spiralia;Lophotrochozoa;Brachiopoda;Linguliformea;Lingulata;Lingulida;Linguloidea;Lingulidae;Lingula;Lingula anatina

UdeM00000030579 7574 384.4 UdeM00000030579 XP\_013381989.1 48.4 395  
198 4 73 466 69 458 2.00E-103 384.4 7574 cellular

organisms;Eukaryota;Opisthokonta;Metazoa;Eumetazoa;Bilateria;Protostomia;Spiralia;Lophotrochozoa;Brachiopoda;Linguliformea;Lingulata;Lingulida;Linguloidea;Lingulidae;Lingula;Lingula anatina

UdeM00000030580 6573 255.4 UdeM00000030580 XP\_021351455.1 44.1 256  
135 1 21 276 105 352 8.50E-65 255.4 6573 cellular

organisms;Eukaryota;Opisthokonta;Metazoa;Eumetazoa;Bilateria;Protostomia;Spiralia;Lophotrochozoa;Mollusca;Bivalvia;Autobranchia;Pteriormorphia;Pectinida;Pectinoidea;Pectinidae;Mizuhopecten;Mizuhopecten yessoensis

UdeM00000030581 6596 206.5 UdeM00000030581 XP\_045158354.1 47.2 218  
114 1 18 234 102 319 4.00E-50 206.5 6596 cellular

organisms;Eukaryota;Opisthokonta;Metazoa;Eumetazoa;Bilateria;Protostomia;Spiralia;Lophotrochozoa;Mollusca;Bivalvia;Autobranchia;Heteroconchia;Euheterodonta;Imparidentia;Venerida;Veneroidea;Veneridae;Mercenaria;Mercenaria mercenaria

UdeM00000030582 6596 350.5 UdeM00000030582 XP\_045158354.1 53 319  
150 0 1 319 1 319 2.30E-93 350.5 6596 cellular

organisms;Eukaryota;Opisthokonta;Metazoa;Eumetazoa;Bilateria;Protostomia;Spiralia;Lophotrochozoa;Mollusca;Bivalvia;Autobranchia;Heteroconchia;Euheterodonta;Imparidentia;Venerida;Veneroidea;Veneridae;Mercenaria;Mercenaria mercenaria

UdeM00000030583 6596 138.7 UdeM00000030583 XP\_045158354.1 60.8 102  
40 0 1 102 1 102 6.10E-30 138.7 6596 cellular

organisms;Eukaryota;Opisthokonta;Metazoa;Eumetazoa;Bilateria;Protostomia;Spiralia;Lophotrochozoa;Mollusca;Bivalvia;Autobranchia;Heteroconchia;Euheterodonta;Imparidentia;Venerida;Veneroidea;Veneridae;Mercenaria;Mercenaria mercenaria

UdeM00000030584 6573 64.7 UdeM00000030584 XP\_021364016.1 45.6 68  
37 0 13 80 279 346 6.40E-08 64.7 6573 cellular

organisms;Eukaryota;Opisthokonta;Metazoa;Eumetazoa;Bilateria;Protostomia;Spiralia;Lophotrochozoa;Mollusca;Bivalvia;Autobranchia;Pteriormorphia;Pectinida;Pectinoidea;Pectinidae;Mizuhopecten;Mizuhopecten yessoensis

UdeM00000030585 6596 266.2 UdeM00000030585 XP\_045158354.1 58.1 217  
91 0 1 217 1 217 3.80E-68 266.2 6596 cellular

organisms;Eukaryota;Opisthokonta;Metazoa;Eumetazoa;Bilateria;Protostomia;Spiralia;Lophotrochozoa;Mollusca;Bivalvia;Autobranchia;Heteroconchia;Euheterodonta;Imparidentia;Venerida;Veneroidea;Veneridae;Mercenaria;Mercenaria mercenaria

UdeM00000030586 6596 167.5 UdeM00000030586 XP\_045158354.1 45.9 181  
 97 1 22 201 139 319 1.80E-38 167.5 6596 cellular  
 organisms;Eukaryota;Opisthokonta;Metazoa;Eumetazoa;Bilateria;Protostomia;  
 Spiralia;Lophotrochozoa;Mollusca;Bivalvia;Autobranhia;Heteroconchia;Euhe  
 terodonta;Imparidentia;Venerida;Veneroidea;Veneridae;Mercenaria;Mercenari  
 a mercenaria  
 UdeM00000030587 6596 332 UdeM00000030587 XP\_045158354.1 50.5 329  
 152 2 1 328 1 319 8.70E-88 332 6596 cellular  
 organisms;Eukaryota;Opisthokonta;Metazoa;Eumetazoa;Bilateria;Protostomia;  
 Spiralia;Lophotrochozoa;Mollusca;Bivalvia;Autobranhia;Heteroconchia;Euhe  
 terodonta;Imparidentia;Venerida;Veneroidea;Veneridae;Mercenaria;Mercenari  
 a mercenaria  
 UdeM00000030588 6596 1061.6 UdeM00000030588 XP\_045186998.1 59.2  
 934 327 11 1 891 31 953 5.50E-307 1061.6 6596  
 cellular  
 organisms;Eukaryota;Opisthokonta;Metazoa;Eumetazoa;Bilateria;Protostomia;  
 Spiralia;Lophotrochozoa;Mollusca;Bivalvia;Autobranhia;Heteroconchia;Euhe  
 terodonta;Imparidentia;Venerida;Veneroidea;Veneridae;Mercenaria;Mercenari  
 a mercenaria  
 UdeM00000030589 6596 176 UdeM00000030589 XP\_045186999.1 48.9 235  
 105 6 1 231 5 228 5.70E-41 176 6596 cellular  
 organisms;Eukaryota;Opisthokonta;Metazoa;Eumetazoa;Bilateria;Protostomia;  
 Spiralia;Lophotrochozoa;Mollusca;Bivalvia;Autobranhia;Heteroconchia;Euhe  
 terodonta;Imparidentia;Venerida;Veneroidea;Veneridae;Mercenaria;Mercenari  
 a mercenaria  
 UdeM00000041852 6596 177.6 UdeM00000041852 XP\_045162129.1 32 375  
 239 9 7 367 540 912 3.10E-41 177.6 6596 cellular  
 organisms;Eukaryota;Opisthokonta;Metazoa;Eumetazoa;Bilateria;Protostomia;  
 Spiralia;Lophotrochozoa;Mollusca;Bivalvia;Autobranhia;Heteroconchia;Euhe  
 terodonta;Imparidentia;Venerida;Veneroidea;Veneridae;Mercenaria;Mercenari  
 a mercenaria  
 UdeM00000041853 6596 91.3 UdeM00000041853 XP\_045162129.1 36.5 167  
 97 5 7 164 540 706 1.60E-15 91.3 6596 cellular  
 organisms;Eukaryota;Opisthokonta;Metazoa;Eumetazoa;Bilateria;Protostomia;  
 Spiralia;Lophotrochozoa;Mollusca;Bivalvia;Autobranhia;Heteroconchia;Euhe  
 terodonta;Imparidentia;Venerida;Veneroidea;Veneridae;Mercenaria;Mercenari  
 a mercenaria  
 UdeM00000041854 6596 95.1 UdeM00000041854 XP\_045162129.1 35 180  
 108 5 7 177 540 719 9.40E-17 95.1 6596 cellular  
 organisms;Eukaryota;Opisthokonta;Metazoa;Eumetazoa;Bilateria;Protostomia;  
 Spiralia;Lophotrochozoa;Mollusca;Bivalvia;Autobranhia;Heteroconchia;Euhe  
 terodonta;Imparidentia;Venerida;Veneroidea;Veneridae;Mercenaria;Mercenari  
 a mercenaria  
 UdeM00000041855 6596 193 UdeM00000041855 XP\_045161961.1 27.8 697  
 429 23 87 732 99 772 1.50E-45 193 6596 cellular  
 organisms;Eukaryota;Opisthokonta;Metazoa;Eumetazoa;Bilateria;Protostomia;  
 Spiralia;Lophotrochozoa;Mollusca;Bivalvia;Autobranhia;Heteroconchia;Euhe  
 terodonta;Imparidentia;Venerida;Veneroidea;Veneridae;Mercenaria;Mercenari  
 a mercenaria  
 UdeM00000041859 6596 108.2 UdeM00000041859 XP\_045215643.1 44.3 115  
 61 1 1 112 1 115 1.80E-20 108.2 6596 cellular  
 organisms;Eukaryota;Opisthokonta;Metazoa;Eumetazoa;Bilateria;Protostomia;  
 Spiralia;Lophotrochozoa;Mollusca;Bivalvia;Autobranhia;Heteroconchia;Euhe

terodonta;Imparidentia;Venerida;Veneroidea;Veneridae;Mercenaria;Mercenaria mercenaria

UdeM00000041860 6565 86.3 UdeM00000041860 XP\_022311846.1 37.7 138  
28 1 94 173 21 158 4.40E-14 86.3 6565 cellular

organisms;Eukaryota;Opisthokonta;Metazoa;Eumetazoa;Bilateria;Protostomia;Spiralia;Lophotrochozoa;Mollusca;Bivalvia;Autobranchia;Pteriomorpha;Ostreida;Ostreoidea;Ostreidae;Crassostrea;Crassostrea virginica

UdeM00000041862 70779 72 UdeM00000041862 XP\_015777172.1 34 100  
66 0 44 143 38 137 6.90E-10 72 70779 cellular

organisms;Eukaryota;Opisthokonta;Metazoa;Eumetazoa;Cnidaria;Anthozoa;Hexacorallia;Scleractinia;Astrocoeniina;Acroporidae;Acropora;Acropora digitifera

UdeM00000041865 6596 137.9 UdeM00000041865 XP\_045162610.1 25.7 690  
399 26 84 719 101 730 5.30E-29 137.9 6596 cellular

organisms;Eukaryota;Opisthokonta;Metazoa;Eumetazoa;Bilateria;Protostomia;Spiralia;Lophotrochozoa;Mollusca;Bivalvia;Autobranchia;Heteroconchia;Euheterodonta;Imparidentia;Venerida;Veneroidea;Veneridae;Mercenaria;Mercenaria mercenaria

UdeM00000041867 6565 95.1 UdeM00000041867 XP\_022314409.1 37.9 169  
87 5 1 151 1147 1315 8.00E-17 95.1 6565 cellular

organisms;Eukaryota;Opisthokonta;Metazoa;Eumetazoa;Bilateria;Protostomia;Spiralia;Lophotrochozoa;Mollusca;Bivalvia;Autobranchia;Pteriomorpha;Ostreida;Ostreoidea;Ostreidae;Crassostrea;Crassostrea virginica

UdeM00000041866 6565 156.8 UdeM00000041866 XP\_022328252.1 44.3 210  
99 5 1 192 1106 1315 2.90E-35 156.8 6565 cellular

organisms;Eukaryota;Opisthokonta;Metazoa;Eumetazoa;Bilateria;Protostomia;Spiralia;Lophotrochozoa;Mollusca;Bivalvia;Autobranchia;Pteriomorpha;Ostreida;Ostreoidea;Ostreidae;Crassostrea;Crassostrea virginica

UdeM00000041868 6596 203.8 UdeM00000041868 XP\_045180324.1 37.5 304  
158 4 2 305 16 287 3.80E-49 203.8 6596 cellular

organisms;Eukaryota;Opisthokonta;Metazoa;Eumetazoa;Bilateria;Protostomia;Spiralia;Lophotrochozoa;Mollusca;Bivalvia;Autobranchia;Heteroconchia;Euheterodonta;Imparidentia;Venerida;Veneroidea;Veneridae;Mercenaria;Mercenaria mercenaria

UdeM00000041870 6596 194.1 UdeM00000041870 XP\_045162129.1 31.6 433  
275 11 7 420 540 970 4.30E-46 194.1 6596 cellular

organisms;Eukaryota;Opisthokonta;Metazoa;Eumetazoa;Bilateria;Protostomia;Spiralia;Lophotrochozoa;Mollusca;Bivalvia;Autobranchia;Heteroconchia;Euheterodonta;Imparidentia;Venerida;Veneroidea;Veneridae;Mercenaria;Mercenaria mercenaria

UdeM00000041871 6596 159.5 UdeM00000041871 XP\_045161961.1 27.8 575  
339 20 79 609 100 642 1.40E-35 159.5 6596 cellular

organisms;Eukaryota;Opisthokonta;Metazoa;Eumetazoa;Bilateria;Protostomia;Spiralia;Lophotrochozoa;Mollusca;Bivalvia;Autobranchia;Heteroconchia;Euheterodonta;Imparidentia;Venerida;Veneroidea;Veneridae;Mercenaria;Mercenaria mercenaria

UdeM00000041873 6596 80.5 UdeM00000041873 XP\_045209463.1 34.4 131  
83 3 1 128 180 310 1.80E-12 80.5 6596 cellular

organisms;Eukaryota;Opisthokonta;Metazoa;Eumetazoa;Bilateria;Protostomia;Spiralia;Lophotrochozoa;Mollusca;Bivalvia;Autobranchia;Heteroconchia;Euheterodonta;Imparidentia;Venerida;Veneroidea;Veneridae;Mercenaria;Mercenaria mercenaria

UdeM00000041874 6596 106.3 UdeM00000041874 XP\_045190923.1 74.6 67  
17 0 167 233 464 530 5.40E-20 106.3 6596 cellular

organisms;Eukaryota;Opisthokonta;Metazoa;Eumetazoa;Bilateria;Protostomia;Spiralia;Lophotrochozoa;Mollusca;Bivalvia;Autobranchia;Heteroconchia;Euherodonta;Imparidentia;Venerida;Veneroidea;Veneridae;Mercenaria;Mercenaria mercenaria

UdeM00000041875 6596 126.3 UdeM00000041875 XP\_045158584.1 33.8 234  
88 4 14 180 391 624 3.90E-26 126.3 6596 cellular

organisms;Eukaryota;Opisthokonta;Metazoa;Eumetazoa;Bilateria;Protostomia;Spiralia;Lophotrochozoa;Mollusca;Bivalvia;Autobranchia;Heteroconchia;Euherodonta;Imparidentia;Venerida;Veneroidea;Veneridae;Mercenaria;Mercenaria mercenaria

UdeM00000041876 6596 127.5 UdeM00000041876 XP\_045158584.1 52.8 127  
54 4 16 140 69 191 1.60E-26 127.5 6596 cellular

organisms;Eukaryota;Opisthokonta;Metazoa;Eumetazoa;Bilateria;Protostomia;Spiralia;Lophotrochozoa;Mollusca;Bivalvia;Autobranchia;Heteroconchia;Euherodonta;Imparidentia;Venerida;Veneroidea;Veneridae;Mercenaria;Mercenaria mercenaria

UdeM00000041877 6596 105.1 UdeM00000041877 XP\_045209446.1 30.4 263  
168 8 4 261 230 482 2.00E-19 105.1 6596 cellular

organisms;Eukaryota;Opisthokonta;Metazoa;Eumetazoa;Bilateria;Protostomia;Spiralia;Lophotrochozoa;Mollusca;Bivalvia;Autobranchia;Heteroconchia;Euherodonta;Imparidentia;Venerida;Veneroidea;Veneridae;Mercenaria;Mercenaria mercenaria

UdeM00000041879 6573 204.9 UdeM00000041879 XP\_021372025.1 35.8 363  
148 6 1 280 44 404 1.30E-49 204.9 6573 cellular

organisms;Eukaryota;Opisthokonta;Metazoa;Eumetazoa;Bilateria;Protostomia;Spiralia;Lophotrochozoa;Mollusca;Bivalvia;Autobranchia;Pteriomorphia;Pectinida;Pectinoidea;Pectinidae;Mizuhopecten;Mizuhopecten yessoensis

UdeM00000041881 6579 99 UdeM00000041881 XP\_033730093.1 33.6 214  
133 6 1 212 416 622 8.40E-18 99 6579 cellular

organisms;Eukaryota;Opisthokonta;Metazoa;Eumetazoa;Bilateria;Protostomia;Spiralia;Lophotrochozoa;Mollusca;Bivalvia;Autobranchia;Pteriomorphia;Pectinida;Pectinoidea;Pectinidae;Pecten;Pecten maximus

UdeM00000034553 29159 684.1 UdeM00000034553 XP\_011452894.2 76.6 435  
96 3 5 437 1 431 1.20E-193 684.1 29159 cellular

organisms;Eukaryota;Opisthokonta;Metazoa;Eumetazoa;Bilateria;Protostomia;Spiralia;Lophotrochozoa;Mollusca;Bivalvia;Autobranchia;Pteriomorphia;Ostreida;Ostreoidea;Ostreidae;Crassostrea;Crassostrea gigas

UdeM00000034554 6526 198.7 UdeM00000034554 XP\_013096494.1 56.8 192  
75 2 233 421 445 631 2.00E-47 198.7 6526 cellular

organisms;Eukaryota;Opisthokonta;Metazoa;Eumetazoa;Bilateria;Protostomia;Spiralia;Lophotrochozoa;Mollusca;Gastropoda;Heterobranchia;Euthyneura;Panpulmonata;Hygrophila;Lymnaeoidea;Planorbidae;Biophalaria;Biophalaria glabrata

UdeM00000034555 6596 200.3 UdeM00000034555 XP\_045161129.1 27.3 901  
496 27 92 885 113 961 1.00E-47 200.3 6596 cellular

organisms;Eukaryota;Opisthokonta;Metazoa;Eumetazoa;Bilateria;Protostomia;Spiralia;Lophotrochozoa;Mollusca;Bivalvia;Autobranchia;Heteroconchia;Euherodonta;Imparidentia;Venerida;Veneroidea;Veneridae;Mercenaria;Mercenaria mercenaria

UdeM00000034556 6579 383.6 UdeM00000034556 XP\_033724812.1 46.8 641  
306 20 253 867 261 892 6.50E-103 383.6 6579 cellular

organisms;Eukaryota;Opisthokonta;Metazoa;Eumetazoa;Bilateria;Protostomia;Spiralia;Lophotrochozoa;Mollusca;Bivalvia;Autobranchia;Pteriomorphia;Pectinida;Pectinoidea;Pectinidae;Pecten;Pecten maximus



UdeM00000034557 6579 375.9 UdeM00000034557 XP\_033724812.1 44.3 645  
 320 21 253 871 261 892 1.40E-100 375.9 6579 cellular  
 organisms;Eukaryota;Opisthokonta;Metazoa;Eumetazoa;Bilateria;Protostomia;  
 Spiralia;Lophotrochozoa;Mollusca;Bivalvia;Autobranchia;Pteriormorphia;Pect  
 inida;Pectinoidea;Pectinidae;Pecten;Pecten maximus  
 UdeM00000034558 6579 217.2 UdeM00000034558 XP\_033724812.1 45 411  
 190 18 252 638 261 659 6.20E-53 217.2 6579 cellular  
 organisms;Eukaryota;Opisthokonta;Metazoa;Eumetazoa;Bilateria;Protostomia;  
 Spiralia;Lophotrochozoa;Mollusca;Bivalvia;Autobranchia;Pteriormorphia;Pect  
 inida;Pectinoidea;Pectinidae;Pecten;Pecten maximus  
 UdeM00000034559 6596 567 UdeM00000034559 XP\_045163178.1 68.4 370  
 117 0 1 370 356 725 1.80E-158 567 6596 cellular  
 organisms;Eukaryota;Opisthokonta;Metazoa;Eumetazoa;Bilateria;Protostomia;  
 Spiralia;Lophotrochozoa;Mollusca;Bivalvia;Autobranchia;Heteroconchia;Euhe  
 terodonta;Imparidentia;Venerida;Veneroidea;Veneridae;Mercenaria;Mercenari  
 a mercenaria  
 UdeM00000034560 6596 1006.9 UdeM00000034560 XP\_045163178.1 63.7  
 728 261 2 1 728 1 725 1.30E-290 1006.9 6596  
 cellular  
 organisms;Eukaryota;Opisthokonta;Metazoa;Eumetazoa;Bilateria;Protostomia;  
 Spiralia;Lophotrochozoa;Mollusca;Bivalvia;Autobranchia;Heteroconchia;Euhe  
 terodonta;Imparidentia;Venerida;Veneroidea;Veneridae;Mercenaria;Mercenari  
 a mercenaria  
 UdeM00000034561 29159 316.6 UdeM00000034561 XP\_034317111.1 55.8 283  
 124 1 2 283 171 453 3.20E-83 316.6 29159 cellular  
 organisms;Eukaryota;Opisthokonta;Metazoa;Eumetazoa;Bilateria;Protostomia;  
 Spiralia;Lophotrochozoa;Mollusca;Bivalvia;Autobranchia;Pteriormorphia;Ostr  
 eida;Ostreoidea;Ostreidae;Crassostrea;Crassostrea gigas  
 UdeM00000034563 7574 143.3 UdeM00000034563 XP\_013410226.1 67 106  
 29 1 40 139 2 107 2.50E-31 143.3 7574 cellular  
 organisms;Eukaryota;Opisthokonta;Metazoa;Eumetazoa;Bilateria;Protostomia;  
 Spiralia;Lophotrochozoa;Brachiopoda;Linguliformea;Lingulata;Lingulida;Lin  
 guloidea;Lingulidae;Lingula;Lingula anatina  
 UdeM00000034564 6596 479.6 UdeM00000034564 XP\_045162524.1 69.3 332  
 102 0 172 503 341 672 5.20E-132 479.6 6596 cellular  
 organisms;Eukaryota;Opisthokonta;Metazoa;Eumetazoa;Bilateria;Protostomia;  
 Spiralia;Lophotrochozoa;Mollusca;Bivalvia;Autobranchia;Heteroconchia;Euhe  
 terodonta;Imparidentia;Venerida;Veneroidea;Veneridae;Mercenaria;Mercenari  
 a mercenaria  
 UdeM00000034565 225164 117.9 UdeM00000034565 XP\_009058025.1 41.7  
 204 97 5 1 203 1 183 1.80E-23 117.9 225164  
 cellular  
 organisms;Eukaryota;Opisthokonta;Metazoa;Eumetazoa;Bilateria;Protostomia;  
 Spiralia;Lophotrochozoa;Mollusca;Gastropoda;Patellogastropoda;Lottioida;  
 Lottiidae;Lottia;Lottia gigantea  
 UdeM00000034566 1735272 295.4 UdeM00000034566 XP\_041377576.1 65  
 217 76 0 4 220 523 739 7.80E-77 295.4 1735272  
 cellular  
 organisms;Eukaryota;Opisthokonta;Metazoa;Eumetazoa;Bilateria;Protostomia;  
 Spiralia;Lophotrochozoa;Mollusca;Gastropoda;Neomphalina;Neomphaloidea;Pel  
 tospiridae;Gigantopelta;Gigantopelta aegis  
 UdeM00000034568 7574 124.8 UdeM00000034568 XP\_023932024.1 39.7 189  
 102 5 10 197 231 408 1.40E-25 124.8 7574 cellular  
 organisms;Eukaryota;Opisthokonta;Metazoa;Eumetazoa;Bilateria;Protostomia;

Spiralia;Lophotrochozoa;Brachiopoda;Linguliformea;Lingulata;Lingulida;Linguloidea;Lingulidae;Lingula;Lingula anatina  
UdeM00000034569 6596 187.2 UdeM00000034569 XP\_045162810.1 51.4 179  
85 1 1 177 1 179 1.90E-44 187.2 6596 cellular  
organisms;Eukaryota;Opisthokonta;Metazoa;Eumetazoa;Bilateria;Protostomia;  
Spiralia;Lophotrochozoa;Mollusca;Bivalvia;Autobranhia;Heteroconchia;Euherodonta;Imparidentia;Venerida;Veneroidea;Veneridae;Mercenaria;Mercenaria mercenaria  
UdeM00000034570 6573 96.3 UdeM00000034570 XP\_021339238.1 38.1 126  
71 2 776 897 817 939 2.10E-16 96.3 6573 cellular  
organisms;Eukaryota;Opisthokonta;Metazoa;Eumetazoa;Bilateria;Protostomia;  
Spiralia;Lophotrochozoa;Mollusca;Bivalvia;Autobranhia;Pteriormorphia;Pectinida;Pectinoidea;Pectinidae;Mizuhopecten;Mizuhopecten yessoensis  
UdeM00000034571 6596 1172.5 UdeM00000034571 XP\_045163022.1 41.7  
1536 841 11 19 1521 141 1655 0.00E+00 1172.5 6596  
cellular  
organisms;Eukaryota;Opisthokonta;Metazoa;Eumetazoa;Bilateria;Protostomia;  
Spiralia;Lophotrochozoa;Mollusca;Bivalvia;Autobranhia;Heteroconchia;Euherodonta;Imparidentia;Venerida;Veneroidea;Veneridae;Mercenaria;Mercenaria mercenaria  
UdeM00000034573 6596 121.7 UdeM00000034573 XP\_045162893.1 49.7 153  
45 6 1 143 1 131 8.40E-25 121.7 6596 cellular  
organisms;Eukaryota;Opisthokonta;Metazoa;Eumetazoa;Bilateria;Protostomia;  
Spiralia;Lophotrochozoa;Mollusca;Bivalvia;Autobranhia;Heteroconchia;Euherodonta;Imparidentia;Venerida;Veneroidea;Veneridae;Mercenaria;Mercenaria mercenaria  
UdeM00000034574 6579 105.1 UdeM00000034574 XP\_033764390.1 70.6 85  
21 3 265 347 68 150 1.90E-19 105.1 6579 cellular  
organisms;Eukaryota;Opisthokonta;Metazoa;Eumetazoa;Bilateria;Protostomia;  
Spiralia;Lophotrochozoa;Mollusca;Bivalvia;Autobranhia;Pteriormorphia;Pectinida;Pectinoidea;Pectinidae;Pecten;Pecten maximus  
UdeM00000034575 6579 730.7 UdeM00000034575 XP\_033764394.1 71 542  
140 9 1 535 1 532 1.40E-207 730.7 6579 cellular  
organisms;Eukaryota;Opisthokonta;Metazoa;Eumetazoa;Bilateria;Protostomia;  
Spiralia;Lophotrochozoa;Mollusca;Bivalvia;Autobranhia;Pteriormorphia;Pectinida;Pectinoidea;Pectinidae;Pecten;Pecten maximus  
UdeM00000034578 7574 183.3 UdeM00000034578 XP\_013393586.1 50.5 182  
86 3 1 179 1 181 2.70E-43 183.3 7574 cellular  
organisms;Eukaryota;Opisthokonta;Metazoa;Eumetazoa;Bilateria;Protostomia;  
Spiralia;Lophotrochozoa;Brachiopoda;Linguliformea;Lingulata;Lingulida;Linguloidea;Lingulidae;Lingula;Lingula anatina  
UdeM00000034579 1735272 60.1 UdeM00000034579 XP\_041377717.1 30.6  
157 93 4 73 227 111 253 4.30E-06 60.1 1735272  
cellular  
organisms;Eukaryota;Opisthokonta;Metazoa;Eumetazoa;Bilateria;Protostomia;  
Spiralia;Lophotrochozoa;Mollusca;Gastropoda;Neomphalina;Neomphaloidea;Peltospiridae;Gigantopelta;Gigantopelta aegis  
UdeM00000034580 6596 353.6 UdeM00000034580 XP\_045162407.1 49.3 444  
216 5 10 446 12 453 3.70E-94 353.6 6596 cellular  
organisms;Eukaryota;Opisthokonta;Metazoa;Eumetazoa;Bilateria;Protostomia;  
Spiralia;Lophotrochozoa;Mollusca;Bivalvia;Autobranhia;Heteroconchia;Euherodonta;Imparidentia;Venerida;Veneroidea;Veneridae;Mercenaria;Mercenaria mercenaria

UdeM00000034581 6596 333.2 UdeM00000034581 XP\_045162999.1 65 243  
 79 2 1 241 1 239 3.00E-88 333.2 6596 cellular  
 organisms;Eukaryota;Opisthokonta;Metazoa;Eumetazoa;Bilateria;Protostomia;  
 Spiralia;Lophotrochozoa;Mollusca;Bivalvia;Autobranhia;Heteroconchia;Euhe  
 terodonta;Imparidentia;Venerida;Veneroidea;Veneridae;Mercenaria;Mercenari  
 a mercenaria  
 UdeM00000034582 45264 339.3 UdeM00000034582 XP\_044165143.1 56.7 305  
 118 4 42 336 35 335 6.50E-90 339.3 45264 cellular  
 organisms;Eukaryota;Opisthokonta;Metazoa;Eumetazoa;Cnidaria;Anthozoa;Hexa  
 corallia;Scleractinia;Astrocoeniina;Acroporidae;Acropora;Acropora  
 millepora  
 UdeM00000034583 6596 280.4 UdeM00000034583 XP\_045161569.1 72.5 189  
 49 2 7 193 3 190 1.70E-72 280.4 6596 cellular  
 organisms;Eukaryota;Opisthokonta;Metazoa;Eumetazoa;Bilateria;Protostomia;  
 Spiralia;Lophotrochozoa;Mollusca;Bivalvia;Autobranhia;Heteroconchia;Euhe  
 terodonta;Imparidentia;Venerida;Veneroidea;Veneridae;Mercenaria;Mercenari  
 a mercenaria  
 UdeM00000034584 6596 287.7 UdeM00000034584 XP\_045161566.1 38.5 530  
 253 11 1 461 1 526 2.60E-74 287.7 6596 cellular  
 organisms;Eukaryota;Opisthokonta;Metazoa;Eumetazoa;Bilateria;Protostomia;  
 Spiralia;Lophotrochozoa;Mollusca;Bivalvia;Autobranhia;Heteroconchia;Euhe  
 terodonta;Imparidentia;Venerida;Veneroidea;Veneridae;Mercenaria;Mercenari  
 a mercenaria  
 UdeM00000034585 29159 276.9 UdeM00000034585 XP\_034337082.1 35.8 520  
 259 11 1 450 1 515 4.40E-71 276.9 29159 cellular  
 organisms;Eukaryota;Opisthokonta;Metazoa;Eumetazoa;Bilateria;Protostomia;  
 Spiralia;Lophotrochozoa;Mollusca;Bivalvia;Autobranhia;Pteriormorphia;Ostr  
 eida;Ostreoidea;Ostreidae;Crassostrea;Crassostrea gigas  
 UdeM00000034586 29159 733.8 UdeM00000034586 XP\_034299341.1 82.9 433  
 74 0 33 465 1 433 1.40E-208 733.8 29159 cellular  
 organisms;Eukaryota;Opisthokonta;Metazoa;Eumetazoa;Bilateria;Protostomia;  
 Spiralia;Lophotrochozoa;Mollusca;Bivalvia;Autobranhia;Pteriormorphia;Ostr  
 eida;Ostreoidea;Ostreidae;Crassostrea;Crassostrea gigas  
 UdeM00000034587 6596 332 UdeM00000034587 XP\_045169018.1 61.7 248  
 91 3 24 269 26 271 6.90E-88 332 6596 cellular  
 organisms;Eukaryota;Opisthokonta;Metazoa;Eumetazoa;Bilateria;Protostomia;  
 Spiralia;Lophotrochozoa;Mollusca;Bivalvia;Autobranhia;Heteroconchia;Euhe  
 terodonta;Imparidentia;Venerida;Veneroidea;Veneridae;Mercenaria;Mercenari  
 a mercenaria  
 UdeM00000034588 6596 332 UdeM00000034588 XP\_045169018.1 61.7 248  
 91 3 30 275 26 271 7.10E-88 332 6596 cellular  
 organisms;Eukaryota;Opisthokonta;Metazoa;Eumetazoa;Bilateria;Protostomia;  
 Spiralia;Lophotrochozoa;Mollusca;Bivalvia;Autobranhia;Heteroconchia;Euhe  
 terodonta;Imparidentia;Venerida;Veneroidea;Veneridae;Mercenaria;Mercenari  
 a mercenaria  
 UdeM00000034590 6596 333.2 UdeM00000034590 XP\_045169018.1 62.1 248  
 90 3 24 269 26 271 3.10E-88 333.2 6596 cellular  
 organisms;Eukaryota;Opisthokonta;Metazoa;Eumetazoa;Bilateria;Protostomia;  
 Spiralia;Lophotrochozoa;Mollusca;Bivalvia;Autobranhia;Heteroconchia;Euhe  
 terodonta;Imparidentia;Venerida;Veneroidea;Veneridae;Mercenaria;Mercenari  
 a mercenaria  
 UdeM00000034591 6596 333.2 UdeM00000034591 XP\_045169018.1 62.1 248  
 90 3 30 275 26 271 3.20E-88 333.2 6596 cellular  
 organisms;Eukaryota;Opisthokonta;Metazoa;Eumetazoa;Bilateria;Protostomia;

Spiralia;Lophotrochozoa;Mollusca;Bivalvia;Autobranchia;Heteroconchia;Euherodonta;Imparidentia;Venerida;Veneroidea;Veneridae;Mercenaria;Mercenaria mercenaria

UdeM00000034589 6596 333.2 UdeM00000034589 XP\_045169018.1 62.1 248  
90 3 32 277 26 271 3.20E-88 333.2 6596 cellular

organisms;Eukaryota;Opisthokonta;Metazoa;Eumetazoa;Bilateria;Protostomia;Spiralia;Lophotrochozoa;Mollusca;Bivalvia;Autobranchia;Heteroconchia;Euherodonta;Imparidentia;Venerida;Veneroidea;Veneridae;Mercenaria;Mercenaria mercenaria

UdeM00000034593 6596 332 UdeM00000034593 XP\_045169018.1 61.7 248  
91 3 24 269 26 271 6.90E-88 332 6596 cellular

organisms;Eukaryota;Opisthokonta;Metazoa;Eumetazoa;Bilateria;Protostomia;Spiralia;Lophotrochozoa;Mollusca;Bivalvia;Autobranchia;Heteroconchia;Euherodonta;Imparidentia;Venerida;Veneroidea;Veneridae;Mercenaria;Mercenaria mercenaria

UdeM00000034592 6596 332 UdeM00000034592 XP\_045169018.1 61.7 248  
91 3 32 277 26 271 7.10E-88 332 6596 cellular

organisms;Eukaryota;Opisthokonta;Metazoa;Eumetazoa;Bilateria;Protostomia;Spiralia;Lophotrochozoa;Mollusca;Bivalvia;Autobranchia;Heteroconchia;Euherodonta;Imparidentia;Venerida;Veneroidea;Veneridae;Mercenaria;Mercenaria mercenaria

UdeM00000034594 2607531 161.4 UdeM00000034594 XP\_036363882.1 48.8  
168 75 5 2 160 8 173 1.10E-36 161.4 2607531

cellular

organisms;Eukaryota;Opisthokonta;Metazoa;Eumetazoa;Bilateria;Protostomia;Spiralia;Lophotrochozoa;Mollusca;Cephalopoda;Coleoidea;Octopodiformes;Octopoda;Incirrata;Octopodidae;Octopus;Octopus sinensis

UdeM00000034595 6573 923.3 UdeM00000034595 XP\_021364892.1 51.4 932  
416 11 12 921 14 930 2.40E-265 923.3 6573 cellular

organisms;Eukaryota;Opisthokonta;Metazoa;Eumetazoa;Bilateria;Protostomia;Spiralia;Lophotrochozoa;Mollusca;Bivalvia;Autobranchia;Pteriomorphia;Pectinida;Pectinoidea;Pectinidae;Mizuhopecten;Mizuhopecten yessoensis

UdeM00000034596 6596 608.6 UdeM00000034596 XP\_045161356.1 56 457  
192 3 347 797 359 812 1.10E-170 608.6 6596 cellular

organisms;Eukaryota;Opisthokonta;Metazoa;Eumetazoa;Bilateria;Protostomia;Spiralia;Lophotrochozoa;Mollusca;Bivalvia;Autobranchia;Heteroconchia;Euherodonta;Imparidentia;Venerida;Veneroidea;Veneridae;Mercenaria;Mercenaria mercenaria

UdeM00000034597 6596 177.9 UdeM00000034597 XP\_045163901.1 38.8 291  
159 7 1 280 20 302 1.80E-41 177.9 6596 cellular

organisms;Eukaryota;Opisthokonta;Metazoa;Eumetazoa;Bilateria;Protostomia;Spiralia;Lophotrochozoa;Mollusca;Bivalvia;Autobranchia;Heteroconchia;Euherodonta;Imparidentia;Venerida;Veneroidea;Veneridae;Mercenaria;Mercenaria mercenaria

UdeM00000034598 6596 413.7 UdeM00000034598 XP\_045194575.1 35.4 562  
351 7 14 572 16 568 3.80E-112 413.7 6596 cellular

organisms;Eukaryota;Opisthokonta;Metazoa;Eumetazoa;Bilateria;Protostomia;Spiralia;Lophotrochozoa;Mollusca;Bivalvia;Autobranchia;Heteroconchia;Euherodonta;Imparidentia;Venerida;Veneroidea;Veneridae;Mercenaria;Mercenaria mercenaria

UdeM00000034599 6565 146.7 UdeM00000034599 XP\_022343501.1 38.5 195  
114 2 6 195 10 203 3.00E-32 146.7 6565 cellular

organisms;Eukaryota;Opisthokonta;Metazoa;Eumetazoa;Bilateria;Protostomia;

Spiralia;Lophotrochozoa;Mollusca;Bivalvia;Autobranchia;Pteriormorphia;Ostr  
eida;Ostreoidea;Ostreidae;Crassostrea;Crassostrea virginica  
UdeM00000034600 6596 158.3 UdeM00000034600 XP\_045163901.1 43.6 202  
105 3 1 196 20 218 1.30E-35 158.3 6596 cellular  
organisms;Eukaryota;Opisthokonta;Metazoa;Eumetazoa;Bilateria;Protostomia;  
Spiralia;Lophotrochozoa;Mollusca;Bivalvia;Autobranchia;Heteroconchia;Euhe  
terodonta;Imparidentia;Venerida;Veneroidea;Veneridae;Mercenaria;Mercenari  
a mercenaria  
UdeM00000034601 6596 411.8 UdeM00000034601 XP\_045194575.1 35.7 561  
351 6 14 572 16 568 1.50E-111 411.8 6596 cellular  
organisms;Eukaryota;Opisthokonta;Metazoa;Eumetazoa;Bilateria;Protostomia;  
Spiralia;Lophotrochozoa;Mollusca;Bivalvia;Autobranchia;Heteroconchia;Euhe  
terodonta;Imparidentia;Venerida;Veneroidea;Veneridae;Mercenaria;Mercenari  
a mercenaria  
UdeM00000034603 6596 406 UdeM00000034603 XP\_045194575.1 35.3 563  
352 6 14 574 16 568 8.00E-110 406 6596 cellular  
organisms;Eukaryota;Opisthokonta;Metazoa;Eumetazoa;Bilateria;Protostomia;  
Spiralia;Lophotrochozoa;Mollusca;Bivalvia;Autobranchia;Heteroconchia;Euhe  
terodonta;Imparidentia;Venerida;Veneroidea;Veneridae;Mercenaria;Mercenari  
a mercenaria  
UdeM00000034604 6596 268.1 UdeM00000034604 XP\_045161541.1 47.5 314  
151 6 4 310 10 316 1.50E-68 268.1 6596 cellular  
organisms;Eukaryota;Opisthokonta;Metazoa;Eumetazoa;Bilateria;Protostomia;  
Spiralia;Lophotrochozoa;Mollusca;Bivalvia;Autobranchia;Heteroconchia;Euhe  
terodonta;Imparidentia;Venerida;Veneroidea;Veneridae;Mercenaria;Mercenari  
a mercenaria  
UdeM00000034605 6596 276.2 UdeM00000034605 XP\_045161541.1 48.3 302  
144 4 17 313 22 316 5.60E-71 276.2 6596 cellular  
organisms;Eukaryota;Opisthokonta;Metazoa;Eumetazoa;Bilateria;Protostomia;  
Spiralia;Lophotrochozoa;Mollusca;Bivalvia;Autobranchia;Heteroconchia;Euhe  
terodonta;Imparidentia;Venerida;Veneroidea;Veneridae;Mercenaria;Mercenari  
a mercenaria  
UdeM00000034608 29159 218.8 UdeM00000034608 XP\_034299474.1 45.3 247  
133 1 6 250 509 755 7.90E-54 218.8 29159 cellular  
organisms;Eukaryota;Opisthokonta;Metazoa;Eumetazoa;Bilateria;Protostomia;  
Spiralia;Lophotrochozoa;Mollusca;Bivalvia;Autobranchia;Pteriormorphia;Ostr  
eida;Ostreoidea;Ostreidae;Crassostrea;Crassostrea gigas  
UdeM00000034609 29159 209.9 UdeM00000034609 XP\_034330911.1 47.1 221  
105 5 10 219 269 488 3.20E-51 209.9 29159 cellular  
organisms;Eukaryota;Opisthokonta;Metazoa;Eumetazoa;Bilateria;Protostomia;  
Spiralia;Lophotrochozoa;Mollusca;Bivalvia;Autobranchia;Pteriormorphia;Ostr  
eida;Ostreoidea;Ostreidae;Crassostrea;Crassostrea gigas  
UdeM00000034610 6596 258.1 UdeM00000034610 XP\_045161541.1 46.9 320  
157 7 12 323 1 315 1.70E-65 258.1 6596 cellular  
organisms;Eukaryota;Opisthokonta;Metazoa;Eumetazoa;Bilateria;Protostomia;  
Spiralia;Lophotrochozoa;Mollusca;Bivalvia;Autobranchia;Heteroconchia;Euhe  
terodonta;Imparidentia;Venerida;Veneroidea;Veneridae;Mercenaria;Mercenari  
a mercenaria  
UdeM00000034611 6596 714.9 UdeM00000034611 XP\_045162121.1 49.7 724  
332 8 1 720 1 696 1.00E-202 714.9 6596 cellular  
organisms;Eukaryota;Opisthokonta;Metazoa;Eumetazoa;Bilateria;Protostomia;  
Spiralia;Lophotrochozoa;Mollusca;Bivalvia;Autobranchia;Heteroconchia;Euhe  
terodonta;Imparidentia;Venerida;Veneroidea;Veneridae;Mercenaria;Mercenari  
a mercenaria

UdeM00000034612 6596 254.6 UdeM00000034612 XP\_045163271.1 38.9 383  
 195 7 135 512 162 510 2.70E-64 254.6 6596 cellular  
 organisms;Eukaryota;Opisthokonta;Metazoa;Eumetazoa;Bilateria;Protostomia;  
 Spiralia;Lophotrochozoa;Mollusca;Bivalvia;Autobranchia;Heteroconchia;Euhe  
 terodonta;Imparidentia;Venerida;Veneroidea;Veneridae;Mercenaria;Mercenari  
 a mercenaria  
 UdeM00000034613 6596 214.5 UdeM00000034613 XP\_045162121.1 65 140  
 49 0 1 140 332 471 8.40E-53 214.5 6596 cellular  
 organisms;Eukaryota;Opisthokonta;Metazoa;Eumetazoa;Bilateria;Protostomia;  
 Spiralia;Lophotrochozoa;Mollusca;Bivalvia;Autobranchia;Heteroconchia;Euhe  
 terodonta;Imparidentia;Venerida;Veneroidea;Veneridae;Mercenaria;Mercenari  
 a mercenaria  
 UdeM00000034614 6596 311.2 UdeM00000034614 XP\_045163271.1 68.5 203  
 64 0 3 205 680 882 9.70E-82 311.2 6596 cellular  
 organisms;Eukaryota;Opisthokonta;Metazoa;Eumetazoa;Bilateria;Protostomia;  
 Spiralia;Lophotrochozoa;Mollusca;Bivalvia;Autobranchia;Heteroconchia;Euhe  
 terodonta;Imparidentia;Venerida;Veneroidea;Veneridae;Mercenaria;Mercenari  
 a mercenaria  
 UdeM00000034615 6596 463 UdeM00000034615 XP\_045162063.1 51.1 448  
 188 4 42 460 27 472 4.40E-127 463 6596 cellular  
 organisms;Eukaryota;Opisthokonta;Metazoa;Eumetazoa;Bilateria;Protostomia;  
 Spiralia;Lophotrochozoa;Mollusca;Bivalvia;Autobranchia;Heteroconchia;Euhe  
 terodonta;Imparidentia;Venerida;Veneroidea;Veneridae;Mercenaria;Mercenari  
 a mercenaria  
 UdeM00000034618 6596 374.4 UdeM00000034618 XP\_045162732.1 59.8 386  
 113 15 3 353 5 383 1.60E-100 374.4 6596 cellular  
 organisms;Eukaryota;Opisthokonta;Metazoa;Eumetazoa;Bilateria;Protostomia;  
 Spiralia;Lophotrochozoa;Mollusca;Bivalvia;Autobranchia;Heteroconchia;Euhe  
 terodonta;Imparidentia;Venerida;Veneroidea;Veneridae;Mercenaria;Mercenari  
 a mercenaria  
 UdeM00000034619 6596 859.4 UdeM00000034619 XP\_045162733.1 62.2 756  
 257 10 1 741 79 820 3.40E-246 859.4 6596 cellular  
 organisms;Eukaryota;Opisthokonta;Metazoa;Eumetazoa;Bilateria;Protostomia;  
 Spiralia;Lophotrochozoa;Mollusca;Bivalvia;Autobranchia;Heteroconchia;Euhe  
 terodonta;Imparidentia;Venerida;Veneroidea;Veneridae;Mercenaria;Mercenari  
 a mercenaria  
 UdeM00000034622 7574 295 UdeM00000034622 XP\_013401097.1 48.3 346  
 169 3 1 337 386 730 1.20E-76 295 7574 cellular  
 organisms;Eukaryota;Opisthokonta;Metazoa;Eumetazoa;Bilateria;Protostomia;  
 Spiralia;Lophotrochozoa;Brachiopoda;Linguliformea;Lingulata;Lingulida;Lin  
 guloidea;Lingulidae;Lingula;Lingula anatina  
 UdeM00000034623 6596 347.1 UdeM00000034623 XP\_045161704.1 70.8 219  
 64 0 1 219 62 280 4.10E-92 347.1 6596 cellular  
 organisms;Eukaryota;Opisthokonta;Metazoa;Eumetazoa;Bilateria;Protostomia;  
 Spiralia;Lophotrochozoa;Mollusca;Bivalvia;Autobranchia;Heteroconchia;Euhe  
 terodonta;Imparidentia;Venerida;Veneroidea;Veneridae;Mercenaria;Mercenari  
 a mercenaria  
 UdeM00000034624 6565 116.3 UdeM00000034624 XP\_022292622.1 39.9 163  
 76 3 251 395 449 607 8.80E-23 116.3 6565 cellular  
 organisms;Eukaryota;Opisthokonta;Metazoa;Eumetazoa;Bilateria;Protostomia;  
 Spiralia;Lophotrochozoa;Mollusca;Bivalvia;Autobranchia;Pteriomorphia;Ostr  
 eida;Ostreoidea;Ostreidae;Crassostrea;Crassostrea virginica  
 UdeM00000034625 6596 682.2 UdeM00000034625 XP\_045161699.1 69.5 486  
 141 4 5 487 52 533 6.50E-193 682.2 6596 cellular

organisms;Eukaryota;Opisthokonta;Metazoa;Eumetazoa;Bilateria;Protostomia;Spiralia;Lophotrochozoa;Mollusca;Bivalvia;Autobranchia;Heteroconchia;Euheterodonta;Imparidentia;Venerida;Veneroidea;Veneridae;Mercenaria;Mercenaria mercenaria

UdeM00000034626 6573 325.1 UdeM00000034626 XP\_021353552.1 62.1 224  
83 1 18 239 173 396 7.60E-86 325.1 6573 cellular

organisms;Eukaryota;Opisthokonta;Metazoa;Eumetazoa;Bilateria;Protostomia;Spiralia;Lophotrochozoa;Mollusca;Bivalvia;Autobranchia;Pteriomorpha;Pectinida;Pectinoidea;Pectinidae;Mizuhopecten;Mizuhopecten yessoensis

UdeM00000034627 6573 166.4 UdeM00000034627 XP\_021353552.1 52.4 164  
73 3 1 162 41 201 3.70E-38 166.4 6573 cellular

organisms;Eukaryota;Opisthokonta;Metazoa;Eumetazoa;Bilateria;Protostomia;Spiralia;Lophotrochozoa;Mollusca;Bivalvia;Autobranchia;Pteriomorpha;Pectinida;Pectinoidea;Pectinidae;Mizuhopecten;Mizuhopecten yessoensis

UdeM00000034628 6573 142.5 UdeM00000034628 XP\_021353552.1 50.7 142  
65 3 1 140 61 199 4.70E-31 142.5 6573 cellular

organisms;Eukaryota;Opisthokonta;Metazoa;Eumetazoa;Bilateria;Protostomia;Spiralia;Lophotrochozoa;Mollusca;Bivalvia;Autobranchia;Pteriomorpha;Pectinida;Pectinoidea;Pectinidae;Mizuhopecten;Mizuhopecten yessoensis

UdeM00000034629 6573 443.7 UdeM00000034629 XP\_021353532.1 48.7 437  
212 6 1 432 1 430 4.50E-121 443.7 6573 cellular

organisms;Eukaryota;Opisthokonta;Metazoa;Eumetazoa;Bilateria;Protostomia;Spiralia;Lophotrochozoa;Mollusca;Bivalvia;Autobranchia;Pteriomorpha;Pectinida;Pectinoidea;Pectinidae;Mizuhopecten;Mizuhopecten yessoensis

UdeM00000034632 6500 597.4 UdeM00000034632 XP\_035829085.1 46.3 598  
299 5 1 580 1109 1702 1.90E-167 597.4 6500 cellular

organisms;Eukaryota;Opisthokonta;Metazoa;Eumetazoa;Bilateria;Protostomia;Spiralia;Lophotrochozoa;Mollusca;Gastropoda;Heterobranchia;Euthyneura;Tectipleura;Aplysiida;Aplysioidea;Aplysiidae;Aplysia;Aplysia californica

UdeM00000034633 29159 716.8 UdeM00000034633 XP\_011419274.2 39 1060  
580 22 8 1040 634 1653 3.90E-203 716.8 29159 cellular

organisms;Eukaryota;Opisthokonta;Metazoa;Eumetazoa;Bilateria;Protostomia;Spiralia;Lophotrochozoa;Mollusca;Bivalvia;Autobranchia;Pteriomorpha;Ostreida;Ostreoidea;Ostreidae;Crassostrea;Crassostrea gigas

UdeM00000034634 6500 718 UdeM00000034634 XP\_035829085.1 38.9 1015  
541 22 40 1019 735 1705 1.70E-203 718 6500 cellular

organisms;Eukaryota;Opisthokonta;Metazoa;Eumetazoa;Bilateria;Protostomia;Spiralia;Lophotrochozoa;Mollusca;Gastropoda;Heterobranchia;Euthyneura;Tectipleura;Aplysiida;Aplysioidea;Aplysiidae;Aplysia;Aplysia californica

UdeM00000034635 400727 589 UdeM00000034635 XP\_025083075.1 55.4  
549 200 4 4 510 12 557 8.00E-165 589 400727

cellular

organisms;Eukaryota;Opisthokonta;Metazoa;Eumetazoa;Bilateria;Protostomia;Spiralia;Lophotrochozoa;Mollusca;Gastropoda;Caenogastropoda;Architaenioglossa;Ampullarioidea;Ampullariidae;Pomacea;Pomacea canaliculata

UdeM00000034636 6596 238 UdeM00000034636 XP\_045187536.1 71.6 169  
47 1 1 169 317 484 8.60E-60 238 6596 cellular

organisms;Eukaryota;Opisthokonta;Metazoa;Eumetazoa;Bilateria;Protostomia;Spiralia;Lophotrochozoa;Mollusca;Bivalvia;Autobranchia;Heteroconchia;Euheterodonta;Imparidentia;Venerida;Veneroidea;Veneridae;Mercenaria;Mercenaria mercenaria

UdeM00000034637 6596 120.9 UdeM00000034637 XP\_045187536.1 67.4 89  
29 0 1 89 396 484 8.10E-25 120.9 6596 cellular

organisms;Eukaryota;Opisthokonta;Metazoa;Eumetazoa;Bilateria;Protostomia;

Spiralia;Lophotrochozoa;Mollusca;Bivalvia;Autobranchia;Heteroconchia;Euherodonta;Imparidentia;Venerida;Veneroidea;Veneridae;Mercenaria;Mercenaria mercenaria

UdeM00000034638 6596 365.2 UdeM00000034638 XP\_045163098.1 89.3 197  
21 0 1 197 1 197 5.50E-98 365.2 6596 cellular

organisms;Eukaryota;Opisthokonta;Metazoa;Eumetazoa;Bilateria;Protostomia;Spiralia;Lophotrochozoa;Mollusca;Bivalvia;Autobranchia;Heteroconchia;Euherodonta;Imparidentia;Venerida;Veneroidea;Veneridae;Mercenaria;Mercenaria mercenaria

UdeM00000034639 6596 649.4 UdeM00000034639 XP\_045163098.1 85.1 363  
54 0 1 363 1 363 2.70E-183 649.4 6596 cellular

organisms;Eukaryota;Opisthokonta;Metazoa;Eumetazoa;Bilateria;Protostomia;Spiralia;Lophotrochozoa;Mollusca;Bivalvia;Autobranchia;Heteroconchia;Euherodonta;Imparidentia;Venerida;Veneroidea;Veneridae;Mercenaria;Mercenaria mercenaria

UdeM00000034640 6579 526.2 UdeM00000034640 XP\_033763114.1 74.2 353  
88 2 1 352 22 372 3.40E-146 526.2 6579 cellular

organisms;Eukaryota;Opisthokonta;Metazoa;Eumetazoa;Bilateria;Protostomia;Spiralia;Lophotrochozoa;Mollusca;Bivalvia;Autobranchia;Pteriomorpha;Pectinida;Pectinoidea;Pectinidae;Pecten;Pecten maximus

UdeM00000034642 6596 241.5 UdeM00000034642 XP\_045163028.1 39.2 365  
208 4 11 369 12 368 1.90E-60 241.5 6596 cellular

organisms;Eukaryota;Opisthokonta;Metazoa;Eumetazoa;Bilateria;Protostomia;Spiralia;Lophotrochozoa;Mollusca;Bivalvia;Autobranchia;Heteroconchia;Euherodonta;Imparidentia;Venerida;Veneroidea;Veneridae;Mercenaria;Mercenaria mercenaria

UdeM00000034643 6596 954.5 UdeM00000034643 XP\_045162193.1 61.5 738  
272 6 119 846 3021 3756 1.10E-274 954.5 6596 cellular

organisms;Eukaryota;Opisthokonta;Metazoa;Eumetazoa;Bilateria;Protostomia;Spiralia;Lophotrochozoa;Mollusca;Bivalvia;Autobranchia;Heteroconchia;Euherodonta;Imparidentia;Venerida;Veneroidea;Veneridae;Mercenaria;Mercenaria mercenaria

UdeM00000034644 6596 109.8 UdeM00000034644 XP\_045162193.1 36 150  
94 2 13 161 458 606 3.50E-21 109.8 6596 cellular

organisms;Eukaryota;Opisthokonta;Metazoa;Eumetazoa;Bilateria;Protostomia;Spiralia;Lophotrochozoa;Mollusca;Bivalvia;Autobranchia;Heteroconchia;Euherodonta;Imparidentia;Venerida;Veneroidea;Veneridae;Mercenaria;Mercenaria mercenaria

UdeM00000034645 7539 80.5 UdeM00000034645 XP\_023018827.1 42.9 84  
47 1 8 91 3649 3731 1.70E-12 80.5 7539 cellular

organisms;Eukaryota;Opisthokonta;Metazoa;Eumetazoa;Bilateria;Protostomia;Ecdysozoa;Panarthropoda;Arthropoda;Mandibulata;Pancrustacea;Hexapoda;Insecta;Dicondylia;Pterygota;Neoptera;Endopterygota;Coleoptera;Polyphaga;Cucujiformia;Chrysomeloidea;Chrysomelidae;Chrysomelinae;Doryphorini;Leptinotarsa;Leptinotarsa decemlineata

UdeM00000034647 279965 83.6 UdeM00000034647 XP\_010165004.2 34.7  
144 66 7 19 156 1274 1395 3.30E-13 83.6 279965

cellular  
organisms;Eukaryota;Opisthokonta;Metazoa;Eumetazoa;Bilateria;Deuterostomia;Chordata;Craniata;Vertebrata;Gnathostomata;Teleostomi;Euteleostomi;Sarcopterygii;Dipnotetrapodomorpha;Tetrapoda;Amniota;Sauropsida;Sauria;Archelosauria;Archosauria;Dinosauria;Saurischia;Theropoda;Coelurosauria;Aves;Neognathae;Caprimulgimorphae;Caprimulgiformes;Caprimulgidae;Antrostomus;Antrostomus carolinensis



UdeM00000034648 279965 67.8 UdeM00000034648 XP\_010165004.2 41.2  
80 38 3 2 77 1307 1381 1.40E-08 67.8 279965  
cellular

organisms;Eukaryota;Opisthokonta;Metazoa;Eumetazoa;Bilateria;Deuterostomi  
a;Chordata;Craniata;Vertebrata;Gnathostomata;Teleostomi;Euteleostomi;Sarc  
opterygii;Dipnotetrapodomorpha;Tetrapoda;Amniota;Sauropsida;Sauria;Archel  
osauria;Archosauria;Dinosauria;Saurischia;Theropoda;Coelurosauria;Aves;Ne  
ognathae;Caprimulgimorphae;Caprimulgiformes;Caprimulgidae;Antrostomus;Ant  
rostomus carolinensis

UdeM00000034649 6596 144.1 UdeM00000034649 XP\_045162193.1 29.1 361  
197 9 150 460 366 717 6.40E-31 144.1 6596 cellular

organisms;Eukaryota;Opisthokonta;Metazoa;Eumetazoa;Bilateria;Protostomia;  
Spiralia;Lophotrochozoa;Mollusca;Bivalvia;Autobranchia;Heteroconchia;Euhe  
terodonta;Imparidentia;Venerida;Veneroidea;Veneridae;Mercenaria;Mercenari  
a mercenaria

UdeM00000034650 6596 144.1 UdeM00000034650 XP\_045162193.1 29.1 361  
197 9 150 460 366 717 6.10E-31 144.1 6596 cellular

organisms;Eukaryota;Opisthokonta;Metazoa;Eumetazoa;Bilateria;Protostomia;  
Spiralia;Lophotrochozoa;Mollusca;Bivalvia;Autobranchia;Heteroconchia;Euhe  
terodonta;Imparidentia;Venerida;Veneroidea;Veneridae;Mercenaria;Mercenari  
a mercenaria

UdeM00000034651 6526 420.6 UdeM00000034651 XP\_013068089.1 65.9 311  
104 1 75 383 47 357 2.10E-114 420.6 6526 cellular

organisms;Eukaryota;Opisthokonta;Metazoa;Eumetazoa;Bilateria;Protostomia;  
Spiralia;Lophotrochozoa;Mollusca;Gastropoda;Heterobranchia;Euthyneura;Pan  
pulmonata;Hygrophila;Lymnaeioidea;Planorbidae;Biomphalaria;Biomphalaria  
glabrata

UdeM00000034652 6596 78.6 UdeM00000034652 XP\_045163170.1 28.7 321  
214 7 1 310 1 317 3.60E-11 78.6 6596 cellular

organisms;Eukaryota;Opisthokonta;Metazoa;Eumetazoa;Bilateria;Protostomia;  
Spiralia;Lophotrochozoa;Mollusca;Bivalvia;Autobranchia;Heteroconchia;Euhe  
terodonta;Imparidentia;Venerida;Veneroidea;Veneridae;Mercenaria;Mercenari  
a mercenaria

UdeM00000034653 400682 121.7 UdeM00000034653 XP\_003390251.1 35.5  
214 122 4 12 221 432 633 1.20E-24 121.7 400682  
cellular

organisms;Eukaryota;Opisthokonta;Metazoa;Porifera;Demospongiae;Heteroscle  
romorpha;Haplosclerida;Niphatidae;Amphimedon;Amphimedon queenslandica

UdeM00000034654 1735272 1073.5 UdeM00000034654 XP\_041378592.1  
63.9 775 263 4 1 771 15 776 8.7e-311 1073.5  
1735272 cellular

organisms;Eukaryota;Opisthokonta;Metazoa;Eumetazoa;Bilateria;Protostomia;  
Spiralia;Lophotrochozoa;Mollusca;Gastropoda;Neomphalina;Neomphaloidea;Pel  
tospiridae;Gigantopelta;Gigantopelta aegis

UdeM00000034655 7888 159.5 UdeM00000034655 XP\_043944824.1 44 200  
110 2 2 201 1015 1212 4.60E-36 159.5 7888 cellular

organisms;Eukaryota;Opisthokonta;Metazoa;Eumetazoa;Bilateria;Deuterostomi  
a;Chordata;Craniata;Vertebrata;Gnathostomata;Teleostomi;Euteleostomi;Sarc  
opterygii;Dipnotetrapodomorpha;Dipnomorpha;Ceratodontae;Ceratodontiformes  
;Lepidosirenoidei;Protopteridae;Protopterus;Protopterus annectens

UdeM00000034656 6573 1009.6 UdeM00000034656 XP\_021340843.1 70.7  
670 194 2 353 1020 103 772 2.80E-291 1009.6 6573  
cellular

organisms;Eukaryota;Opisthokonta;Metazoa;Eumetazoa;Bilateria;Protostomia;

Spiralia; Lophotrochozoa; Mollusca; Bivalvia; Autobranchia; Pteriomorpha; Pectinida; Pectinoidea; Pectinidae; Mizuhopecten; Mizuhopecten yessoensis  
UdeM00000034657 1735272 238.8 UdeM00000034657 XP\_041377293.1 32.4  
515 276 13 175 661 101 571 2.40E-59 238.8 1735272  
cellular  
organisms; Eukaryota; Opisthokonta; Metazoa; Eumetazoa; Bilateria; Protostomia; Spiralia; Lophotrochozoa; Mollusca; Gastropoda; Neomphalina; Neomphaloidea; Peltospiridae; Gigantopelta; Gigantopelta aegis  
UdeM00000034658 1735272 324.7 UdeM00000034658 XP\_041378518.1 44.2  
412 176 3 28 437 127 486 2.10E-85 324.7 1735272  
cellular  
organisms; Eukaryota; Opisthokonta; Metazoa; Eumetazoa; Bilateria; Protostomia; Spiralia; Lophotrochozoa; Mollusca; Gastropoda; Neomphalina; Neomphaloidea; Peltospiridae; Gigantopelta; Gigantopelta aegis  
UdeM00000034659 225164 107.8 UdeM00000034659 XP\_009050448.1 31.5  
515 280 20 20 504 1179 1650 4.00E-20 107.8 225164  
cellular  
organisms; Eukaryota; Opisthokonta; Metazoa; Eumetazoa; Bilateria; Protostomia; Spiralia; Lophotrochozoa; Mollusca; Gastropoda; Patellogastropoda; Lottioidea; Lottiidae; Lottia; Lottia gigantea  
UdeM00000012486 52239 67.8 UdeM00000012486 XP\_033942098.1 31.7 126  
80 2 3 125 7 129 1.30E-08 67.8 52239 cellular  
organisms; Eukaryota; Opisthokonta; Metazoa; Eumetazoa; Bilateria; Deuterostomia; Chordata; Craniata; Vertebrata; Gnathostomata; Teleostomi; Euteleostomi; Actinopterygii; Actinopteri; Neopterygii; Teleostei; Osteoglossocephalai; Clupeocephala; Euteleostomorpha; Neoteleostei; Eurypterygia; Ctenosquamata; Acanthomorpha; Euacanthomorpha; Percomorphaceae; Eupercaria; Perciformes; Notothenioidei; Channichthyidae; Pseudochaenichthys; Pseudochaenichthys georgianus  
UdeM00000012487 6596 257.3 UdeM00000012487 XP\_045210929.1 34.2 415  
264 5 10 417 96 508 3.80E-65 257.3 6596 cellular  
organisms; Eukaryota; Opisthokonta; Metazoa; Eumetazoa; Bilateria; Protostomia; Spiralia; Lophotrochozoa; Mollusca; Bivalvia; Autobranchia; Heteroconchia; Euheterodonta; Imparidentia; Venerida; Veneroidea; Veneridae; Mercenaria; Mercenaria mercenaria  
UdeM00000012488 7574 91.3 UdeM00000012488 XP\_013408964.1 35.5 155  
89 7 37 186 32 180 1.50E-15 91.3 7574 cellular  
organisms; Eukaryota; Opisthokonta; Metazoa; Eumetazoa; Bilateria; Protostomia; Spiralia; Lophotrochozoa; Brachiopoda; Linguliformea; Lingulata; Lingulida; Linguloidea; Lingulidae; Lingula; Lingula anatina  
UdeM00000012489 6596 73.2 UdeM00000012489 XP\_045162336.1 40.2 102  
47 3 85 174 38 137 4.00E-10 73.2 6596 cellular  
organisms; Eukaryota; Opisthokonta; Metazoa; Eumetazoa; Bilateria; Protostomia; Spiralia; Lophotrochozoa; Mollusca; Bivalvia; Autobranchia; Heteroconchia; Euheterodonta; Imparidentia; Venerida; Veneroidea; Veneridae; Mercenaria; Mercenaria mercenaria  
UdeM00000012490 6596 268.9 UdeM00000012490 XP\_045167321.1 28.5 705  
392 17 4 602 3 701 1.60E-68 268.9 6596 cellular  
organisms; Eukaryota; Opisthokonta; Metazoa; Eumetazoa; Bilateria; Protostomia; Spiralia; Lophotrochozoa; Mollusca; Bivalvia; Autobranchia; Heteroconchia; Euheterodonta; Imparidentia; Venerida; Veneroidea; Veneridae; Mercenaria; Mercenaria mercenaria  
UdeM00000012491 6596 235.7 UdeM00000012491 XP\_045171998.1 61.3 186  
72 0 15 200 512 697 5.10E-59 235.7 6596 cellular  
organisms; Eukaryota; Opisthokonta; Metazoa; Eumetazoa; Bilateria; Protostomia;

Spiralia;Lophotrochozoa;Mollusca;Bivalvia;Autobranchia;Heteroconchia;Euherodonta;Imparidentia;Venerida;Veneroidea;Veneridae;Mercenaria;Mercenaria mercenaria

UdeM00000012492 6596 260.8 UdeM00000012492 XP\_045171998.1 74.2 163  
42 0 4 166 342 504 1.30E-66 260.8 6596 cellular

organisms;Eukaryota;Opisthokonta;Metazoa;Eumetazoa;Bilateria;Protostomia;Spiralia;Lophotrochozoa;Mollusca;Bivalvia;Autobranchia;Heteroconchia;Euherodonta;Imparidentia;Venerida;Veneroidea;Veneridae;Mercenaria;Mercenaria mercenaria

UdeM00000012493 7574 90.9 UdeM00000012493 XP\_013408964.1 37 165  
73 10 37 186 32 180 2.00E-15 90.9 7574 cellular

organisms;Eukaryota;Opisthokonta;Metazoa;Eumetazoa;Bilateria;Protostomia;Spiralia;Lophotrochozoa;Brachiopoda;Linguliformea;Lingulata;Lingulida;Linguloidea;Lingulidae;Lingula;Lingula anatina

UdeM00000012494 6596 308.5 UdeM00000012494 XP\_045199387.1 30.9 706  
435 15 4 667 3 697 2.00E-80 308.5 6596 cellular

organisms;Eukaryota;Opisthokonta;Metazoa;Eumetazoa;Bilateria;Protostomia;Spiralia;Lophotrochozoa;Mollusca;Bivalvia;Autobranchia;Heteroconchia;Euherodonta;Imparidentia;Venerida;Veneroidea;Veneridae;Mercenaria;Mercenaria mercenaria

UdeM00000012495 6596 235.7 UdeM00000012495 XP\_045171998.1 61.3 186  
72 0 15 200 512 697 5.10E-59 235.7 6596 cellular

organisms;Eukaryota;Opisthokonta;Metazoa;Eumetazoa;Bilateria;Protostomia;Spiralia;Lophotrochozoa;Mollusca;Bivalvia;Autobranchia;Heteroconchia;Euherodonta;Imparidentia;Venerida;Veneroidea;Veneridae;Mercenaria;Mercenaria mercenaria

UdeM00000012496 6596 258.8 UdeM00000012496 XP\_045171998.1 73.5 166  
41 1 4 169 342 504 4.90E-66 258.8 6596 cellular

organisms;Eukaryota;Opisthokonta;Metazoa;Eumetazoa;Bilateria;Protostomia;Spiralia;Lophotrochozoa;Mollusca;Bivalvia;Autobranchia;Heteroconchia;Euherodonta;Imparidentia;Venerida;Veneroidea;Veneridae;Mercenaria;Mercenaria mercenaria

UdeM00000012497 7574 90.9 UdeM00000012497 XP\_013408964.1 37 165  
73 10 37 186 32 180 2.00E-15 90.9 7574 cellular

organisms;Eukaryota;Opisthokonta;Metazoa;Eumetazoa;Bilateria;Protostomia;Spiralia;Lophotrochozoa;Brachiopoda;Linguliformea;Lingulata;Lingulida;Linguloidea;Lingulidae;Lingula;Lingula anatina

UdeM00000012498 6596 308.1 UdeM00000012498 XP\_045199387.1 30.6 709  
433 16 4 667 3 697 2.70E-80 308.1 6596 cellular

organisms;Eukaryota;Opisthokonta;Metazoa;Eumetazoa;Bilateria;Protostomia;Spiralia;Lophotrochozoa;Mollusca;Bivalvia;Autobranchia;Heteroconchia;Euherodonta;Imparidentia;Venerida;Veneroidea;Veneridae;Mercenaria;Mercenaria mercenaria

UdeM00000012499 6596 233.4 UdeM00000012499 XP\_045171998.1 60.8 186  
73 0 15 200 512 697 2.50E-58 233.4 6596 cellular

organisms;Eukaryota;Opisthokonta;Metazoa;Eumetazoa;Bilateria;Protostomia;Spiralia;Lophotrochozoa;Mollusca;Bivalvia;Autobranchia;Heteroconchia;Euherodonta;Imparidentia;Venerida;Veneroidea;Veneridae;Mercenaria;Mercenaria mercenaria

UdeM00000012500 6596 258.8 UdeM00000012500 XP\_045171998.1 74.4 160  
41 0 4 163 342 501 4.80E-66 258.8 6596 cellular

organisms;Eukaryota;Opisthokonta;Metazoa;Eumetazoa;Bilateria;Protostomia;Spiralia;Lophotrochozoa;Mollusca;Bivalvia;Autobranchia;Heteroconchia;Euherodonta;Imparidentia;Venerida;Veneroidea;Veneridae;Mercenaria;Mercenaria mercenaria

terodonta;Imparidentia;Venerida;Veneroidea;Veneridae;Mercenaria;Mercenari  
 a mercenaria  
 UdeM00000012501 7574 90.9 UdeM00000012501 XP\_013408964.1 37 165  
 73 10 30 179 32 180 1.90E-15 90.9 7574 cellular  
 organisms;Eukaryota;Opisthokonta;Metazoa;Eumetazoa;Bilateria;Protostomia;  
 Spiralia;Lophotrochozoa;Brachiopoda;Linguliformea;Lingulata;Lingulida;Lin  
 guloidea;Lingulidae;Lingula;Lingula anatina  
 UdeM00000012502 6596 315.5 UdeM00000012502 XP\_045167321.1 31.2 709  
 434 19 4 668 3 701 1.70E-82 315.5 6596 cellular  
 organisms;Eukaryota;Opisthokonta;Metazoa;Eumetazoa;Bilateria;Protostomia;  
 Spiralia;Lophotrochozoa;Mollusca;Bivalvia;Autobranchia;Heteroconchia;Euhe  
 terodonta;Imparidentia;Venerida;Veneroidea;Veneridae;Mercenaria;Mercenari  
 a mercenaria  
 UdeM00000012503 6596 235.7 UdeM00000012503 XP\_045171998.1 61.3 186  
 72 0 15 200 512 697 5.10E-59 235.7 6596 cellular  
 organisms;Eukaryota;Opisthokonta;Metazoa;Eumetazoa;Bilateria;Protostomia;  
 Spiralia;Lophotrochozoa;Mollusca;Bivalvia;Autobranchia;Heteroconchia;Euhe  
 terodonta;Imparidentia;Venerida;Veneroidea;Veneridae;Mercenaria;Mercenari  
 a mercenaria  
 UdeM00000012504 6596 810.8 UdeM00000012504 XP\_045171998.1 82.1 475  
 85 0 38 512 30 504 9.80E-232 810.8 6596 cellular  
 organisms;Eukaryota;Opisthokonta;Metazoa;Eumetazoa;Bilateria;Protostomia;  
 Spiralia;Lophotrochozoa;Mollusca;Bivalvia;Autobranchia;Heteroconchia;Euhe  
 terodonta;Imparidentia;Venerida;Veneroidea;Veneridae;Mercenaria;Mercenari  
 a mercenaria  
 UdeM00000012505 6596 453 UdeM00000012505 XP\_045173186.1 46.8 487  
 251 6 37 521 7 487 5.20E-124 453 6596 cellular  
 organisms;Eukaryota;Opisthokonta;Metazoa;Eumetazoa;Bilateria;Protostomia;  
 Spiralia;Lophotrochozoa;Mollusca;Bivalvia;Autobranchia;Heteroconchia;Euhe  
 terodonta;Imparidentia;Venerida;Veneroidea;Veneridae;Mercenaria;Mercenari  
 a mercenaria  
 UdeM00000012506 6596 433 UdeM00000012506 XP\_045173186.1 48.1 453  
 227 6 4 454 41 487 4.90E-118 433 6596 cellular  
 organisms;Eukaryota;Opisthokonta;Metazoa;Eumetazoa;Bilateria;Protostomia;  
 Spiralia;Lophotrochozoa;Mollusca;Bivalvia;Autobranchia;Heteroconchia;Euhe  
 terodonta;Imparidentia;Venerida;Veneroidea;Veneridae;Mercenaria;Mercenari  
 a mercenaria  
 UdeM00000012507 27687 65.1 UdeM00000012507 XP\_028660295.1 33.1 139  
 84 2 12 145 162 296 9.20E-08 65.1 27687 cellular  
 organisms;Eukaryota;Opisthokonta;Metazoa;Eumetazoa;Bilateria;Deuterostomi  
 a;Chordata;Craniata;Vertebrata;Gnathostomata;Teleostomi;Euteleostomi;Acti  
 nopterygii;Cladistia;Polypteriformes;Polypteridae;Erpetoichthys;Erpetoich  
 thys calabaricus  
 UdeM00000012508 6596 461.8 UdeM00000012508 XP\_045171519.1 69.2 321  
 98 1 14 333 3 323 7.20E-127 461.8 6596 cellular  
 organisms;Eukaryota;Opisthokonta;Metazoa;Eumetazoa;Bilateria;Protostomia;  
 Spiralia;Lophotrochozoa;Mollusca;Bivalvia;Autobranchia;Heteroconchia;Euhe  
 terodonta;Imparidentia;Venerida;Veneroidea;Veneridae;Mercenaria;Mercenari  
 a mercenaria  
 UdeM00000012510 6573 124 UdeM00000012510 XP\_021358820.1 75.3 73  
 18 0 2 74 99 171 8.00E-26 124 6573 cellular  
 organisms;Eukaryota;Opisthokonta;Metazoa;Eumetazoa;Bilateria;Protostomia;  
 Spiralia;Lophotrochozoa;Mollusca;Bivalvia;Autobranchia;Pteriomorphia;Pect  
 inida;Pectinoidea;Pectinidae;Mizuhopecten;Mizuhopecten yessoensis

UdeM00000012512 6596 198 UdeM00000012512 XP\_045173173.1 50.2 205  
 98 3 10 211 5 208 1.20E-47 198 6596 cellular  
 organisms;Eukaryota;Opisthokonta;Metazoa;Eumetazoa;Bilateria;Protostomia;  
 Spiralia;Lophotrochozoa;Mollusca;Bivalvia;Autobranhia;Heteroconchia;Euhe  
 terodonta;Imparidentia;Venerida;Veneroidea;Veneridae;Mercenaria;Mercenari  
 a mercenaria  
 UdeM00000012513 6573 179.9 UdeM00000012513 XP\_021358820.1 84.2 95  
 15 0 4 98 3 97 2.40E-42 179.9 6573 cellular  
 organisms;Eukaryota;Opisthokonta;Metazoa;Eumetazoa;Bilateria;Protostomia;  
 Spiralia;Lophotrochozoa;Mollusca;Bivalvia;Autobranhia;Pteriormorphia;Pect  
 inida;Pectinoidea;Pectinidae;Mizuhopecten;Mizuhopecten yessoensis  
 UdeM00000012514 225164 239.2 UdeM00000012514 XP\_009057687.1 71.5  
 151 39 2 1 149 1 149 3.80E-60 239.2 225164  
 cellular  
 organisms;Eukaryota;Opisthokonta;Metazoa;Eumetazoa;Bilateria;Protostomia;  
 Spiralia;Lophotrochozoa;Mollusca;Gastropoda;Patellogastropoda;Lottioidea;  
 Lottiidae;Lottia;Lottia gigantea  
 UdeM00000012515 6596 334.3 UdeM00000012515 XP\_045173144.1 81.8 181  
 33 0 23 203 133 313 1.10E-88 334.3 6596 cellular  
 organisms;Eukaryota;Opisthokonta;Metazoa;Eumetazoa;Bilateria;Protostomia;  
 Spiralia;Lophotrochozoa;Mollusca;Bivalvia;Autobranhia;Heteroconchia;Euhe  
 terodonta;Imparidentia;Venerida;Veneroidea;Veneridae;Mercenaria;Mercenari  
 a mercenaria  
 UdeM00000012518 6596 526.2 UdeM00000012518 XP\_045173144.1 43.8 683  
 329 12 2 664 339 986 6.20E-146 526.2 6596 cellular  
 organisms;Eukaryota;Opisthokonta;Metazoa;Eumetazoa;Bilateria;Protostomia;  
 Spiralia;Lophotrochozoa;Mollusca;Bivalvia;Autobranhia;Heteroconchia;Euhe  
 terodonta;Imparidentia;Venerida;Veneroidea;Veneridae;Mercenaria;Mercenari  
 a mercenaria  
 UdeM00000012519 6565 640.2 UdeM00000012519 XP\_022339521.1 77.7 381  
 85 0 2 382 1619 1999 1.70E-180 640.2 6565 cellular  
 organisms;Eukaryota;Opisthokonta;Metazoa;Eumetazoa;Bilateria;Protostomia;  
 Spiralia;Lophotrochozoa;Mollusca;Bivalvia;Autobranhia;Pteriormorphia;Ostr  
 eida;Ostreioidea;Ostreidae;Crassostrea;Crassostrea virginica  
 UdeM00000012522 6596 95.5 UdeM00000012522 XP\_045171142.1 54.5 101  
 43 3 6 106 3 100 4.80E-17 95.5 6596 cellular  
 organisms;Eukaryota;Opisthokonta;Metazoa;Eumetazoa;Bilateria;Protostomia;  
 Spiralia;Lophotrochozoa;Mollusca;Bivalvia;Autobranhia;Heteroconchia;Euhe  
 terodonta;Imparidentia;Venerida;Veneroidea;Veneridae;Mercenaria;Mercenari  
 a mercenaria  
 UdeM00000012523 29159 95.9 UdeM00000012523 XP\_034336683.1 45 109  
 57 2 2 110 6 111 3.70E-17 95.9 29159 cellular  
 organisms;Eukaryota;Opisthokonta;Metazoa;Eumetazoa;Bilateria;Protostomia;  
 Spiralia;Lophotrochozoa;Mollusca;Bivalvia;Autobranhia;Pteriormorphia;Ostr  
 eida;Ostreioidea;Ostreidae;Crassostrea;Crassostrea gigas  
 UdeM00000012524 6526 364.8 UdeM00000012524 XP\_013068368.1 65.4 260  
 88 2 3 262 1 258 1.40E-97 364.8 6526 cellular  
 organisms;Eukaryota;Opisthokonta;Metazoa;Eumetazoa;Bilateria;Protostomia;  
 Spiralia;Lophotrochozoa;Mollusca;Gastropoda;Heterobranhia;Euthyneura;Pan  
 pulmonata;Hygrophila;Lymnaeioidea;Planorbidae;Biophalaria;Biophalaria  
 glabrata  
 UdeM00000012525 6573 93.6 UdeM00000012525 XP\_021365625.1 48 98  
 51 0 24 121 29 126 2.50E-16 93.6 6573 cellular  
 organisms;Eukaryota;Opisthokonta;Metazoa;Eumetazoa;Bilateria;Protostomia;

Spiralia;Lophotrochozoa;Mollusca;Bivalvia;Autobranchia;Pteriormorphia;Pectinida;Pectinoidea;Pectinidae;Mizuhopecten;Mizuhopecten yessoensis  
UdeM00000012526 6565 4608.5 UdeM00000012526 XP\_022317104.1 77.2  
2902 626 1 15 2916 278 3144 0.00E+00 4608.5 6565  
cellular  
organisms;Eukaryota;Opisthokonta;Metazoa;Eumetazoa;Bilateria;Protostomia;  
Spiralia;Lophotrochozoa;Mollusca;Bivalvia;Autobranchia;Pteriormorphia;Ostr  
eida;Ostreoidea;Ostreidae;Crassostrea;Crassostrea virginica  
UdeM00000012527 6596 2308.5 UdeM00000012527 XP\_045171731.1 84.1  
1320 210 0 33 1352 3189 4508 0.00E+00 2308.5 6596  
cellular  
organisms;Eukaryota;Opisthokonta;Metazoa;Eumetazoa;Bilateria;Protostomia;  
Spiralia;Lophotrochozoa;Mollusca;Bivalvia;Autobranchia;Heteroconchia;Euhe  
terodonta;Imparidentia;Venerida;Veneroidea;Veneridae;Mercenaria;Mercenari  
a mercenaria  
UdeM00000012528 225164 337.8 UdeM00000012528 XP\_009054033.1 76.1  
209 48 1 1 209 1 207 9.80E-90 337.8 225164  
cellular  
organisms;Eukaryota;Opisthokonta;Metazoa;Eumetazoa;Bilateria;Protostomia;  
Spiralia;Lophotrochozoa;Mollusca;Gastropoda;Patellogastropoda;Lottioidea;  
Lottiidae;Lottia;Lottia gigantea  
UdeM00000012530 6596 176.8 UdeM00000012530 XP\_045172377.1 75 104  
25 1 1 103 1 104 1.40E-41 176.8 6596 cellular  
organisms;Eukaryota;Opisthokonta;Metazoa;Eumetazoa;Bilateria;Protostomia;  
Spiralia;Lophotrochozoa;Mollusca;Bivalvia;Autobranchia;Heteroconchia;Euhe  
terodonta;Imparidentia;Venerida;Veneroidea;Veneridae;Mercenaria;Mercenari  
a mercenaria  
UdeM00000012529 6596 290.4 UdeM00000012529 XP\_045172377.1 70.9 189  
54 1 1 188 1 189 1.60E-75 290.4 6596 cellular  
organisms;Eukaryota;Opisthokonta;Metazoa;Eumetazoa;Bilateria;Protostomia;  
Spiralia;Lophotrochozoa;Mollusca;Bivalvia;Autobranchia;Heteroconchia;Euhe  
terodonta;Imparidentia;Venerida;Veneroidea;Veneridae;Mercenaria;Mercenari  
a mercenaria  
UdeM00000012532 29159 279.6 UdeM00000012532 XP\_034313251.1 52.3 262  
123 2 1 260 1 262 4.10E-72 279.6 29159 cellular  
organisms;Eukaryota;Opisthokonta;Metazoa;Eumetazoa;Bilateria;Protostomia;  
Spiralia;Lophotrochozoa;Mollusca;Bivalvia;Autobranchia;Pteriormorphia;Ostr  
eida;Ostreoidea;Ostreidae;Crassostrea;Crassostrea gigas  
UdeM00000012533 7739 159.1 UdeM00000012533 XP\_035677667.1 32 400  
234 10 6 377 7 396 1.10E-35 159.1 7739 cellular  
organisms;Eukaryota;Opisthokonta;Metazoa;Eumetazoa;Bilateria;Deuterostomi  
a;Chordata;Cephalochordata;Leptocardii;Amphioxiformes;Branchiostomidae;Br  
anchiostoma;Branchiostoma floridae  
UdeM00000012534 6596 877.5 UdeM00000012534 XP\_045172679.1 75.7 555  
132 1 9 563 7 558 1.10E-251 877.5 6596 cellular  
organisms;Eukaryota;Opisthokonta;Metazoa;Eumetazoa;Bilateria;Protostomia;  
Spiralia;Lophotrochozoa;Mollusca;Bivalvia;Autobranchia;Heteroconchia;Euhe  
terodonta;Imparidentia;Venerida;Veneroidea;Veneridae;Mercenaria;Mercenari  
a mercenaria  
UdeM00000012535 6596 725.7 UdeM00000012535 XP\_045173140.1 80.8 448  
86 0 1 448 1 448 3.60E-206 725.7 6596 cellular  
organisms;Eukaryota;Opisthokonta;Metazoa;Eumetazoa;Bilateria;Protostomia;  
Spiralia;Lophotrochozoa;Mollusca;Bivalvia;Autobranchia;Heteroconchia;Euhe

terodonta;Imparidentia;Venerida;Veneroidea;Veneridae;Mercenaria;Mercenari  
 a mercenaria  
 UdeM00000012536 6596 171.4 UdeM00000012536 XP\_045173139.1 41.1 282  
 123 6 1 241 1 280 1.40E-39 171.4 6596 cellular  
 organisms;Eukaryota;Opisthokonta;Metazoa;Eumetazoa;Bilateria;Protostomia;  
 Spiralia;Lophotrochozoa;Mollusca;Bivalvia;Autobranhia;Heteroconchia;Euhe  
 terodonta;Imparidentia;Venerida;Veneroidea;Veneridae;Mercenaria;Mercenari  
 a mercenaria  
 UdeM00000012537 6596 311.2 UdeM00000012537 XP\_045172179.1 32.6 608  
 346 13 7 559 11 609 2.60E-81 311.2 6596 cellular  
 organisms;Eukaryota;Opisthokonta;Metazoa;Eumetazoa;Bilateria;Protostomia;  
 Spiralia;Lophotrochozoa;Mollusca;Bivalvia;Autobranhia;Heteroconchia;Euhe  
 terodonta;Imparidentia;Venerida;Veneroidea;Veneridae;Mercenaria;Mercenari  
 a mercenaria  
 UdeM00000012538 6596 404.1 UdeM00000012538 XP\_045172179.1 39.5 610  
 325 11 3 575 9 611 3.10E-109 404.1 6596 cellular  
 organisms;Eukaryota;Opisthokonta;Metazoa;Eumetazoa;Bilateria;Protostomia;  
 Spiralia;Lophotrochozoa;Mollusca;Bivalvia;Autobranhia;Heteroconchia;Euhe  
 terodonta;Imparidentia;Venerida;Veneroidea;Veneridae;Mercenaria;Mercenari  
 a mercenaria  
 UdeM00000012539 6596 403.3 UdeM00000012539 XP\_045172179.1 40 610  
 322 11 3 575 9 611 5.20E-109 403.3 6596 cellular  
 organisms;Eukaryota;Opisthokonta;Metazoa;Eumetazoa;Bilateria;Protostomia;  
 Spiralia;Lophotrochozoa;Mollusca;Bivalvia;Autobranhia;Heteroconchia;Euhe  
 terodonta;Imparidentia;Venerida;Veneroidea;Veneridae;Mercenaria;Mercenari  
 a mercenaria  
 UdeM00000012540 6596 161.4 UdeM00000012540 XP\_045172305.1 38.7 230  
 133 3 2 224 8 236 1.60E-36 161.4 6596 cellular  
 organisms;Eukaryota;Opisthokonta;Metazoa;Eumetazoa;Bilateria;Protostomia;  
 Spiralia;Lophotrochozoa;Mollusca;Bivalvia;Autobranhia;Heteroconchia;Euhe  
 terodonta;Imparidentia;Venerida;Veneroidea;Veneridae;Mercenaria;Mercenari  
 a mercenaria  
 UdeM00000012541 6596 354.4 UdeM00000012541 XP\_045172179.1 35.6 610  
 351 11 5 579 9 611 2.80E-94 354.4 6596 cellular  
 organisms;Eukaryota;Opisthokonta;Metazoa;Eumetazoa;Bilateria;Protostomia;  
 Spiralia;Lophotrochozoa;Mollusca;Bivalvia;Autobranhia;Heteroconchia;Euhe  
 terodonta;Imparidentia;Venerida;Veneroidea;Veneridae;Mercenaria;Mercenari  
 a mercenaria  
 UdeM00000012542 6579 114.4 UdeM00000012542 XP\_033739636.1 53.7 95  
 44 0 45 139 42 136 1.20E-22 114.4 6579 cellular  
 organisms;Eukaryota;Opisthokonta;Metazoa;Eumetazoa;Bilateria;Protostomia;  
 Spiralia;Lophotrochozoa;Mollusca;Bivalvia;Autobranhia;Pteriomorphia;Pect  
 inida;Pectinoidea;Pectinidae;Pecten;Pecten maximus  
 UdeM00000012543 6596 343.2 UdeM00000012543 XP\_045172179.1 39.8 475  
 271 7 18 484 144 611 5.40E-91 343.2 6596 cellular  
 organisms;Eukaryota;Opisthokonta;Metazoa;Eumetazoa;Bilateria;Protostomia;  
 Spiralia;Lophotrochozoa;Mollusca;Bivalvia;Autobranhia;Heteroconchia;Euhe  
 terodonta;Imparidentia;Venerida;Veneroidea;Veneridae;Mercenaria;Mercenari  
 a mercenaria  
 UdeM00000012545 6579 287.3 UdeM00000012545 XP\_033762187.1 54.6 271  
 112 6 46 309 63 329 2.30E-74 287.3 6579 cellular  
 organisms;Eukaryota;Opisthokonta;Metazoa;Eumetazoa;Bilateria;Protostomia;  
 Spiralia;Lophotrochozoa;Mollusca;Bivalvia;Autobranhia;Pteriomorphia;Pect  
 inida;Pectinoidea;Pectinidae;Pecten;Pecten maximus

UdeM00000012547 6579 268.5 UdeM00000012547 XP\_033751112.1 43.2 287  
 159 2 67 351 77 361 1.20E-68 268.5 6579 cellular  
 organisms;Eukaryota;Opisthokonta;Metazoa;Eumetazoa;Bilateria;Protostomia;  
 Spiralia;Lophotrochozoa;Mollusca;Bivalvia;Autobranchia;Pteriomorpha;Pect  
 inida;Pectinoidea;Pectinidae;Pecten;Pecten maximus  
 UdeM00000012548 6526 174.5 UdeM00000012548 XP\_013073210.1 36.7 256  
 159 3 57 312 105 357 2.20E-40 174.5 6526 cellular  
 organisms;Eukaryota;Opisthokonta;Metazoa;Eumetazoa;Bilateria;Protostomia;  
 Spiralia;Lophotrochozoa;Mollusca;Gastropoda;Heterobranchia;Euthyneura;Pan  
 pulmonata;Hygrophila;Lymnaeoidea;Planorbidae;Biomphalaria;Biomphalaria  
 glabrata  
 UdeM00000012549 6579 267.7 UdeM00000012549 XP\_033751112.1 44.5 290  
 158 2 95 384 75 361 2.30E-68 267.7 6579 cellular  
 organisms;Eukaryota;Opisthokonta;Metazoa;Eumetazoa;Bilateria;Protostomia;  
 Spiralia;Lophotrochozoa;Mollusca;Bivalvia;Autobranchia;Pteriomorpha;Pect  
 inida;Pectinoidea;Pectinidae;Pecten;Pecten maximus  
 UdeM00000012550 29159 137.5 UdeM00000012550 XP\_034331441.1 40.7 177  
 100 3 22 195 45 219 1.90E-29 137.5 29159 cellular  
 organisms;Eukaryota;Opisthokonta;Metazoa;Eumetazoa;Bilateria;Protostomia;  
 Spiralia;Lophotrochozoa;Mollusca;Bivalvia;Autobranchia;Pteriomorpha;Ostr  
 eida;Ostreoidea;Ostreidae;Crassostrea;Crassostrea gigas  
 UdeM00000012551 29159 116.7 UdeM00000012551 XP\_034339171.1 34.4 186  
 109 5 1 174 452 636 3.00E-23 116.7 29159 cellular  
 organisms;Eukaryota;Opisthokonta;Metazoa;Eumetazoa;Bilateria;Protostomia;  
 Spiralia;Lophotrochozoa;Mollusca;Bivalvia;Autobranchia;Pteriomorpha;Ostr  
 eida;Ostreoidea;Ostreidae;Crassostrea;Crassostrea gigas  
 UdeM00000012552 29159 84 UdeM00000012552 XP\_034331441.1 41.8 110  
 57 3 1 104 722 830 1.40E-13 84 29159 cellular  
 organisms;Eukaryota;Opisthokonta;Metazoa;Eumetazoa;Bilateria;Protostomia;  
 Spiralia;Lophotrochozoa;Mollusca;Bivalvia;Autobranchia;Pteriomorpha;Ostr  
 eida;Ostreoidea;Ostreidae;Crassostrea;Crassostrea gigas  
 UdeM00000012553 6526 143.3 UdeM00000012553 XP\_013086474.1 42.6 169  
 91 2 58 221 28 195 3.80E-31 143.3 6526 cellular  
 organisms;Eukaryota;Opisthokonta;Metazoa;Eumetazoa;Bilateria;Protostomia;  
 Spiralia;Lophotrochozoa;Mollusca;Gastropoda;Heterobranchia;Euthyneura;Pan  
 pulmonata;Hygrophila;Lymnaeoidea;Planorbidae;Biomphalaria;Biomphalaria  
 glabrata  
 UdeM00000012554 29159 164.5 UdeM00000012554 XP\_011435143.2 33.3 270  
 169 4 2 264 117 382 1.90E-37 164.5 29159 cellular  
 organisms;Eukaryota;Opisthokonta;Metazoa;Eumetazoa;Bilateria;Protostomia;  
 Spiralia;Lophotrochozoa;Mollusca;Bivalvia;Autobranchia;Pteriomorpha;Ostr  
 eida;Ostreoidea;Ostreidae;Crassostrea;Crassostrea gigas  
 UdeM00000012555 6579 408.7 UdeM00000012555 XP\_033743085.1 50 378  
 184 3 71 444 321 697 9.80E-111 408.7 6579 cellular  
 organisms;Eukaryota;Opisthokonta;Metazoa;Eumetazoa;Bilateria;Protostomia;  
 Spiralia;Lophotrochozoa;Mollusca;Bivalvia;Autobranchia;Pteriomorpha;Pect  
 inida;Pectinoidea;Pectinidae;Pecten;Pecten maximus  
 UdeM00000012556 6579 90.1 UdeM00000012556 XP\_033727573.1 30.5 190  
 114 4 13 185 45 233 6.00E-15 90.1 6579 cellular  
 organisms;Eukaryota;Opisthokonta;Metazoa;Eumetazoa;Bilateria;Protostomia;  
 Spiralia;Lophotrochozoa;Mollusca;Bivalvia;Autobranchia;Pteriomorpha;Pect  
 inida;Pectinoidea;Pectinidae;Pecten;Pecten maximus  
 UdeM00000012558 6596 248.1 UdeM00000012558 XP\_045172014.1 50.1 419  
 141 7 1 380 1 390 1.90E-62 248.1 6596 cellular



organisms;Eukaryota;Opisthokonta;Metazoa;Eumetazoa;Bilateria;Protostomia; Spiralia;Lophotrochozoa;Mollusca;Bivalvia;Autobranchia;Heteroconchia;Euheterodonta;Imparidentia;Venerida;Veneroidea;Veneridae;Mercenaria;Mercenaria mercenaria

UdeM00000012561 29159 1064.3 UdeM00000012561 XP\_011449176.2 74.1  
854 212 6 1 849 1 850 8.20E-308 1064.3  
29159 cellular

organisms;Eukaryota;Opisthokonta;Metazoa;Eumetazoa;Bilateria;Protostomia; Spiralia;Lophotrochozoa;Mollusca;Bivalvia;Autobranchia;Pteriormorphia;Ostreida;Ostreoidea;Ostreidae;Crassostrea;Crassostrea gigas

UdeM00000012562 64144 272.3 UdeM00000012562 XP\_026199060.1 70.1 187  
56 0 33 219 45 231 5.40E-70 272.3 64144 cellular

organisms;Eukaryota;Opisthokonta;Metazoa;Eumetazoa;Bilateria;Deuterostomia;Chordata;Craniata;Vertebrata;Gnathostomata;Teleostomi;Euteleostomi;Actinopterygii;Actinopteri;Neopterygii;Teleostei;Osteoglossocephalai;Clupeocephala;Euteleostei;Neoteleostei;Eurypterygia;Ctenosquamata;Acanthomorphata;Euacanthomorphacea;Percomorphaceae;Anabantaria;Anabantiformes;Anabantoidei;Anabantidae;Anabas;Anabas testudineus

UdeM00000012563 225164 384 UdeM00000012563 XP\_009052010.1 50.4  
381 178 3 6 385 2 372 2.30E-103 384 225164  
cellular

organisms;Eukaryota;Opisthokonta;Metazoa;Eumetazoa;Bilateria;Protostomia; Spiralia;Lophotrochozoa;Mollusca;Gastropoda;Patellogastropoda;Lottioidae;Lottiidae;Lottia;Lottia gigantea

UdeM00000012564 6596 1518.4 UdeM00000012564 XP\_045179737.1 69  
1046 302 6 11 1055 10 1034 0.00E+00 1518.4 6596  
cellular

organisms;Eukaryota;Opisthokonta;Metazoa;Eumetazoa;Bilateria;Protostomia; Spiralia;Lophotrochozoa;Mollusca;Bivalvia;Autobranchia;Heteroconchia;Euheterodonta;Imparidentia;Venerida;Veneroidea;Veneridae;Mercenaria;Mercenaria mercenaria

UdeM00000012565 6573 282.7 UdeM00000012565 XP\_021365984.1 44.4 342  
153 4 36 373 32 340 6.80E-73 282.7 6573 cellular

organisms;Eukaryota;Opisthokonta;Metazoa;Eumetazoa;Bilateria;Protostomia; Spiralia;Lophotrochozoa;Mollusca;Bivalvia;Autobranchia;Pteriormorphia;Pectinida;Pectinoidea;Pectinidae;Mizuhopecten;Mizuhopecten yessoensis

UdeM00000012566 6596 271.2 UdeM00000012566 XP\_045201671.1 62.3 207  
77 1 41 246 35 241 1.40E-69 271.2 6596 cellular

organisms;Eukaryota;Opisthokonta;Metazoa;Eumetazoa;Bilateria;Protostomia; Spiralia;Lophotrochozoa;Mollusca;Bivalvia;Autobranchia;Heteroconchia;Euheterodonta;Imparidentia;Venerida;Veneroidea;Veneridae;Mercenaria;Mercenaria mercenaria

UdeM00000012567 29159 757.7 UdeM00000012567 XP\_034312821.1 35.8 1818  
1023 38 524 2263 206 1957 4.30E-215 757.7 29159 cellular

organisms;Eukaryota;Opisthokonta;Metazoa;Eumetazoa;Bilateria;Protostomia; Spiralia;Lophotrochozoa;Mollusca;Bivalvia;Autobranchia;Pteriormorphia;Ostreida;Ostreoidea;Ostreidae;Crassostrea;Crassostrea gigas

UdeM00000012568 1735272 334.3 UdeM00000012568 XP\_041378518.1 49.6  
740 359 9 29 766 433 1160 4.00E-88 334.3 1735272  
cellular

organisms;Eukaryota;Opisthokonta;Metazoa;Eumetazoa;Bilateria;Protostomia; Spiralia;Lophotrochozoa;Mollusca;Gastropoda;Neomphalina;Neomphaloidea;Peltopiridae;Gigantopelta;Gigantopelta aegis

UdeM00000012569 103695 443.7 UdeM00000012569 XP\_020662684.1 35.4  
854 485 20 875 1680 331 1165 1.00E-120 443.7 103695  
cellular

organisms;Eukaryota;Opisthokonta;Metazoa;Eumetazoa;Bilateria;Deuterostomi  
a;Chordata;Craniata;Vertebrata;Gnathostomata;Teleostomi;Euteleostomi;Sarc  
opterygii;Dipnotetrapodomorpha;Tetrapoda;Amniota;Sauropsida;Sauria;Lepido  
sauria;Squamata;Bifurcata;Unidentata;Episquamata;Toxicofera;Iguania;Acrod  
onta;Agamidae;Amphibolurinae;Pogona;Pogona vitticeps

UdeM00000012570 29159 157.9 UdeM00000012570 XP\_034312821.1 53.6 140  
64 1 1 139 1818 1957 9.90E-36 157.9 29159 cellular

organisms;Eukaryota;Opisthokonta;Metazoa;Eumetazoa;Bilateria;Protostomia;  
Spiralia;Lophotrochozoa;Mollusca;Bivalvia;Autobranchia;Pteriormorphia;Ostr  
eida;Ostreioidea;Ostreidae;Crassostrea;Crassostrea gigas

UdeM00000012571 29159 365.5 UdeM00000012571 XP\_034312821.1 45.5 761  
387 11 21 759 1203 1957 1.60E-97 365.5 29159 cellular

organisms;Eukaryota;Opisthokonta;Metazoa;Eumetazoa;Bilateria;Protostomia;  
Spiralia;Lophotrochozoa;Mollusca;Bivalvia;Autobranchia;Pteriormorphia;Ostr  
eida;Ostreioidea;Ostreidae;Crassostrea;Crassostrea gigas

UdeM00000012574 6596 332 UdeM00000012574 XP\_045165243.1 84.3 204  
32 0 267 470 248 451 1.20E-87 332 6596 cellular

organisms;Eukaryota;Opisthokonta;Metazoa;Eumetazoa;Bilateria;Protostomia;  
Spiralia;Lophotrochozoa;Mollusca;Bivalvia;Autobranchia;Heteroconchia;Euhe  
terodonta;Imparidentia;Venerida;Veneroidea;Veneridae;Mercenaria;Mercenari  
a mercenaria

UdeM00000012573 6596 332 UdeM00000012573 XP\_045165243.1 84.3 204  
32 0 272 475 248 451 1.20E-87 332 6596 cellular

organisms;Eukaryota;Opisthokonta;Metazoa;Eumetazoa;Bilateria;Protostomia;  
Spiralia;Lophotrochozoa;Mollusca;Bivalvia;Autobranchia;Heteroconchia;Euhe  
terodonta;Imparidentia;Venerida;Veneroidea;Veneridae;Mercenaria;Mercenari  
a mercenaria

UdeM00000012575 6596 332 UdeM00000012575 XP\_045165243.1 84.3 204  
32 0 305 508 248 451 1.30E-87 332 6596 cellular

organisms;Eukaryota;Opisthokonta;Metazoa;Eumetazoa;Bilateria;Protostomia;  
Spiralia;Lophotrochozoa;Mollusca;Bivalvia;Autobranchia;Heteroconchia;Euhe  
terodonta;Imparidentia;Venerida;Veneroidea;Veneridae;Mercenaria;Mercenari  
a mercenaria

UdeM00000012576 6596 424.1 UdeM00000012576 XP\_045174021.1 86.5 237  
32 0 1 237 1 237 1.20E-115 424.1 6596 cellular

organisms;Eukaryota;Opisthokonta;Metazoa;Eumetazoa;Bilateria;Protostomia;  
Spiralia;Lophotrochozoa;Mollusca;Bivalvia;Autobranchia;Heteroconchia;Euhe  
terodonta;Imparidentia;Venerida;Veneroidea;Veneridae;Mercenaria;Mercenari  
a mercenaria

UdeM00000012578 400727 211.5 UdeM00000012578 XP\_025091148.1 52.1  
213 97 1 11 218 7 219 1.10E-51 211.5 400727

cellular

organisms;Eukaryota;Opisthokonta;Metazoa;Eumetazoa;Bilateria;Protostomia;  
Spiralia;Lophotrochozoa;Mollusca;Gastropoda;Caenogastropoda;Architaeniogl  
ossa;Ampullarioidea;Ampullariidae;Pomacea;Pomacea canaliculata

UdeM00000012579 6596 519.2 UdeM00000012579 XP\_045171252.1 80.1 296  
58 1 17 312 42 336 4.20E-144 519.2 6596 cellular

organisms;Eukaryota;Opisthokonta;Metazoa;Eumetazoa;Bilateria;Protostomia;  
Spiralia;Lophotrochozoa;Mollusca;Bivalvia;Autobranchia;Heteroconchia;Euhe  
terodonta;Imparidentia;Venerida;Veneroidea;Veneridae;Mercenaria;Mercenari  
a mercenaria

UdeM00000012580 29159 441 UdeM00000012580 XP\_011427392.2 51.5 433  
 197 8 55 482 66 490 1.90E-120 441 29159 cellular  
 organisms;Eukaryota;Opisthokonta;Metazoa;Eumetazoa;Bilateria;Protostomia;  
 Spiralia;Lophotrochozoa;Mollusca;Bivalvia;Autobranchia;Pteriomorpha;Ostr  
 eida;Ostreoidea;Ostreidae;Crassostrea;Crassostrea gigas  
 UdeM00000012581 6573 400.6 UdeM00000012581 XP\_021346678.1 47.7 436  
 218 7 12 441 111 542 2.60E-108 400.6 6573 cellular  
 organisms;Eukaryota;Opisthokonta;Metazoa;Eumetazoa;Bilateria;Protostomia;  
 Spiralia;Lophotrochozoa;Mollusca;Bivalvia;Autobranchia;Pteriomorpha;Pect  
 inida;Pectinoidea;Pectinidae;Mizuhopecten;Mizuhopecten yessoensis  
 UdeM00000012582 29159 159.5 UdeM00000012582 XP\_011435497.2 26.3 460  
 296 11 26 453 8 456 1.00E-35 159.5 29159 cellular  
 organisms;Eukaryota;Opisthokonta;Metazoa;Eumetazoa;Bilateria;Protostomia;  
 Spiralia;Lophotrochozoa;Mollusca;Bivalvia;Autobranchia;Pteriomorpha;Ostr  
 eida;Ostreoidea;Ostreidae;Crassostrea;Crassostrea gigas  
 UdeM00000012583 1735272 302 UdeM00000012583 XP\_041350277.1 83.9  
 161 26 0 23 183 339 499 5.30E-79 302 1735272  
 cellular  
 organisms;Eukaryota;Opisthokonta;Metazoa;Eumetazoa;Bilateria;Protostomia;  
 Spiralia;Lophotrochozoa;Mollusca;Gastropoda;Neomphalina;Neomphaloidea;Pel  
 tospiridae;Gigantopelta;Gigantopelta aegis  
 UdeM00000012584 6573 65.5 UdeM00000012584 XP\_021346686.1 55.4 65  
 27 2 4 67 7 70 4.70E-08 65.5 6573 cellular  
 organisms;Eukaryota;Opisthokonta;Metazoa;Eumetazoa;Bilateria;Protostomia;  
 Spiralia;Lophotrochozoa;Mollusca;Bivalvia;Autobranchia;Pteriomorpha;Pect  
 inida;Pectinoidea;Pectinidae;Mizuhopecten;Mizuhopecten yessoensis  
 UdeM00000012585 6579 217.2 UdeM00000012585 XP\_033748577.1 36.1 523  
 247 18 17 497 107 584 8.00E-53 217.2 6579 cellular  
 organisms;Eukaryota;Opisthokonta;Metazoa;Eumetazoa;Bilateria;Protostomia;  
 Spiralia;Lophotrochozoa;Mollusca;Bivalvia;Autobranchia;Pteriomorpha;Pect  
 inida;Pectinoidea;Pectinidae;Pecten;Pecten maximus  
 UdeM00000012586 6596 978.4 UdeM00000012586 XP\_045165411.1 78.7 635  
 99 2 6 604 4 638 4.10E-282 978.4 6596 cellular  
 organisms;Eukaryota;Opisthokonta;Metazoa;Eumetazoa;Bilateria;Protostomia;  
 Spiralia;Lophotrochozoa;Mollusca;Bivalvia;Autobranchia;Heteroconchia;Euhe  
 terodonta;Imparidentia;Venerida;Veneroidea;Veneridae;Mercenaria;Mercenari  
 a mercenaria  
 UdeM00000012587 6596 1016.9 UdeM00000012587 XP\_045165411.1 80.9  
 635 119 2 6 638 4 638 1.10E-293 1016.9 6596  
 cellular  
 organisms;Eukaryota;Opisthokonta;Metazoa;Eumetazoa;Bilateria;Protostomia;  
 Spiralia;Lophotrochozoa;Mollusca;Bivalvia;Autobranchia;Heteroconchia;Euhe  
 terodonta;Imparidentia;Venerida;Veneroidea;Veneridae;Mercenaria;Mercenari  
 a mercenaria  
 UdeM00000012588 6596 1011.5 UdeM00000012588 XP\_045165411.1 80.9  
 635 119 2 6 638 4 638 4.60E-292 1011.5 6596  
 cellular  
 organisms;Eukaryota;Opisthokonta;Metazoa;Eumetazoa;Bilateria;Protostomia;  
 Spiralia;Lophotrochozoa;Mollusca;Bivalvia;Autobranchia;Heteroconchia;Euhe  
 terodonta;Imparidentia;Venerida;Veneroidea;Veneridae;Mercenaria;Mercenari  
 a mercenaria  
 UdeM00000012589 6596 1021.1 UdeM00000012589 XP\_045165411.1 81.4  
 635 116 2 6 638 4 638 5.90E-295 1021.1 6596  
 cellular

organisms;Eukaryota;Opisthokonta;Metazoa;Eumetazoa;Bilateria;Protostomia;Spiralia;Lophotrochozoa;Mollusca;Bivalvia;Autobranhia;Heteroconchia;Euherodonta;Imparidentia;Venerida;Veneroidea;Veneridae;Mercenaria;Mercenaria mercenaria

UdeM00000012590 6596 1018.5 UdeM00000012590 XP\_045165411.1 81.1  
635 118 2 6 638 4 638 3.80E-294 1018.5 6596  
cellular

organisms;Eukaryota;Opisthokonta;Metazoa;Eumetazoa;Bilateria;Protostomia;Spiralia;Lophotrochozoa;Mollusca;Bivalvia;Autobranhia;Heteroconchia;Euherodonta;Imparidentia;Venerida;Veneroidea;Veneridae;Mercenaria;Mercenaria mercenaria

UdeM00000012591 6596 1016.9 UdeM00000012591 XP\_045165411.1 81.1  
635 118 2 6 638 4 638 1.10E-293 1016.9 6596  
cellular

organisms;Eukaryota;Opisthokonta;Metazoa;Eumetazoa;Bilateria;Protostomia;Spiralia;Lophotrochozoa;Mollusca;Bivalvia;Autobranhia;Heteroconchia;Euherodonta;Imparidentia;Venerida;Veneroidea;Veneridae;Mercenaria;Mercenaria mercenaria

UdeM00000012592 6596 963.8 UdeM00000012592 XP\_045165411.1 77.4 638  
136 4 6 638 4 638 1.10E-277 963.8 6596 cellular

organisms;Eukaryota;Opisthokonta;Metazoa;Eumetazoa;Bilateria;Protostomia;Spiralia;Lophotrochozoa;Mollusca;Bivalvia;Autobranhia;Heteroconchia;Euherodonta;Imparidentia;Venerida;Veneroidea;Veneridae;Mercenaria;Mercenaria mercenaria

UdeM00000012594 224129 560.1 UdeM00000012594 XP\_018332229.1 85.6  
327 45 1 1 327 1 325 1.90E-156 560.1 224129  
cellular

organisms;Eukaryota;Opisthokonta;Metazoa;Eumetazoa;Bilateria;Protostomia;Ecdysozoa;Panarthropoda;Arthropoda;Mandibulata;Pancrustacea;Hexapoda;Insecta;Dicondylia;Pterygota;Neoptera;Endopterygota;Coleoptera;Polyphaga;Elateriformia;Buprestoidea;Buprestidae;Agrilinae;Agrilus;Agrilus planipennis

UdeM00000012595 6596 417.9 UdeM00000012595 XP\_045165401.1 75.1 285  
69 2 1 283 354 638 1.00E-113 417.9 6596 cellular

organisms;Eukaryota;Opisthokonta;Metazoa;Eumetazoa;Bilateria;Protostomia;Spiralia;Lophotrochozoa;Mollusca;Bivalvia;Autobranhia;Heteroconchia;Euherodonta;Imparidentia;Venerida;Veneroidea;Veneridae;Mercenaria;Mercenaria mercenaria

UdeM00000012596 6596 1021.1 UdeM00000012596 XP\_045165411.1 81.4  
635 116 2 6 638 4 638 5.90E-295 1021.1 6596  
cellular

organisms;Eukaryota;Opisthokonta;Metazoa;Eumetazoa;Bilateria;Protostomia;Spiralia;Lophotrochozoa;Mollusca;Bivalvia;Autobranhia;Heteroconchia;Euherodonta;Imparidentia;Venerida;Veneroidea;Veneridae;Mercenaria;Mercenaria mercenaria

UdeM00000012597 6596 286.6 UdeM00000012597 XP\_045173340.1 72.9 218  
59 0 1 218 1 218 2.80E-74 286.6 6596 cellular

organisms;Eukaryota;Opisthokonta;Metazoa;Eumetazoa;Bilateria;Protostomia;Spiralia;Lophotrochozoa;Mollusca;Bivalvia;Autobranhia;Heteroconchia;Euherodonta;Imparidentia;Venerida;Veneroidea;Veneridae;Mercenaria;Mercenaria mercenaria

UdeM00000012598 6596 1064.3 UdeM00000012598 XP\_045173339.1 48.1  
1383 562 23 8 1346 5 1275 1.30E-307 1064.3 6596  
cellular

organisms;Eukaryota;Opisthokonta;Metazoa;Eumetazoa;Bilateria;Protostomia;

Spiralia;Lophotrochozoa;Mollusca;Bivalvia;Autobranchia;Heteroconchia;Euherodonta;Imparidentia;Venerida;Veneroidea;Veneridae;Mercenaria;Mercenaria mercenaria

UdeM00000012599 6596 221.1 UdeM00000012599 XP\_045173590.1 65.8 152  
52 0 1 152 401 552 9.80E-55 221.1 6596 cellular

organisms;Eukaryota;Opisthokonta;Metazoa;Eumetazoa;Bilateria;Protostomia;Spiralia;Lophotrochozoa;Mollusca;Bivalvia;Autobranchia;Heteroconchia;Euherodonta;Imparidentia;Venerida;Veneroidea;Veneridae;Mercenaria;Mercenaria mercenaria

UdeM00000012600 133434 120.2 UdeM00000012600 XP\_022111697.1 63.6  
88 32 0 146 233 134 221 3.60E-24 120.2 133434  
cellular

organisms;Eukaryota;Opisthokonta;Metazoa;Eumetazoa;Bilateria;Deuterostomia;Echinodermata;Eleutherozoa;Asterozoa;Asteroidea;Valvatacea;Valvatida;Acanthasteridae;Acanthaster;Acanthaster planci

UdeM00000012601 6596 573.9 UdeM00000012601 XP\_045173590.1 65.7 405  
127 3 1 402 1 396 1.60E-160 573.9 6596 cellular

organisms;Eukaryota;Opisthokonta;Metazoa;Eumetazoa;Bilateria;Protostomia;Spiralia;Lophotrochozoa;Mollusca;Bivalvia;Autobranchia;Heteroconchia;Euherodonta;Imparidentia;Venerida;Veneroidea;Veneridae;Mercenaria;Mercenaria mercenaria

UdeM00000012602 6579 211.8 UdeM00000012602 XP\_033748291.1 34.9 539  
283 14 1 487 18 540 1.90E-51 211.8 6579 cellular

organisms;Eukaryota;Opisthokonta;Metazoa;Eumetazoa;Bilateria;Protostomia;Spiralia;Lophotrochozoa;Mollusca;Bivalvia;Autobranchia;Pteriormorphia;Pectinida;Pectinoidea;Pectinidae;Pecten;Pecten maximus

UdeM00000012603 6565 444.1 UdeM00000012603 XP\_022338576.1 53.6 405  
185 3 33 435 53 456 2.10E-121 444.1 6565 cellular

organisms;Eukaryota;Opisthokonta;Metazoa;Eumetazoa;Bilateria;Protostomia;Spiralia;Lophotrochozoa;Mollusca;Bivalvia;Autobranchia;Pteriormorphia;Ostreida;Ostreioidea;Ostreidae;Crassostrea;Crassostrea virginica

UdeM00000012604 6573 662.5 UdeM00000012604 XP\_021366493.1 35 1144  
661 31 5 1103 778 1883 9.40E-187 662.5 6573 cellular

organisms;Eukaryota;Opisthokonta;Metazoa;Eumetazoa;Bilateria;Protostomia;Spiralia;Lophotrochozoa;Mollusca;Bivalvia;Autobranchia;Pteriormorphia;Pectinida;Pectinoidea;Pectinidae;Mizuhopecten;Mizuhopecten yessoensis

UdeM00000012605 6596 280.4 UdeM00000012605 XP\_045183440.1 43.3 353  
154 4 44 354 32 380 4.00E-72 280.4 6596 cellular

organisms;Eukaryota;Opisthokonta;Metazoa;Eumetazoa;Bilateria;Protostomia;Spiralia;Lophotrochozoa;Mollusca;Bivalvia;Autobranchia;Heteroconchia;Euherodonta;Imparidentia;Venerida;Veneroidea;Veneridae;Mercenaria;Mercenaria mercenaria

UdeM00000012606 6565 441.8 UdeM00000012606 XP\_022338576.1 53.1 405  
187 3 33 435 53 456 1.10E-120 441.8 6565 cellular

organisms;Eukaryota;Opisthokonta;Metazoa;Eumetazoa;Bilateria;Protostomia;Spiralia;Lophotrochozoa;Mollusca;Bivalvia;Autobranchia;Pteriormorphia;Ostreida;Ostreioidea;Ostreidae;Crassostrea;Crassostrea virginica

UdeM00000012607 6596 186.8 UdeM00000012607 XP\_045171967.1 33.2 349  
196 7 1 318 1 343 4.30E-44 186.8 6596 cellular

organisms;Eukaryota;Opisthokonta;Metazoa;Eumetazoa;Bilateria;Protostomia;Spiralia;Lophotrochozoa;Mollusca;Bivalvia;Autobranchia;Heteroconchia;Euherodonta;Imparidentia;Venerida;Veneroidea;Veneridae;Mercenaria;Mercenaria mercenaria

UdeM00000012608 6573 154.5 UdeM00000012608 XP\_021345245.1 32.5 292  
 177 6 1 280 1 284 2.10E-34 154.5 6573 cellular  
 organisms;Eukaryota;Opisthokonta;Metazoa;Eumetazoa;Bilateria;Protostomia;  
 Spiralia;Lophotrochozoa;Mollusca;Bivalvia;Autobranchia;Pteriormorphia;Pect  
 inida;Pectinoidea;Pectinidae;Mizuhopecten;Mizuhopecten yessoensis  
 UdeM00000012609 6596 95.1 UdeM00000012609 XP\_045171464.1 35.9 192  
 115 5 153 342 171 356 2.10E-16 95.1 6596 cellular  
 organisms;Eukaryota;Opisthokonta;Metazoa;Eumetazoa;Bilateria;Protostomia;  
 Spiralia;Lophotrochozoa;Mollusca;Bivalvia;Autobranchia;Heteroconchia;Euhe  
 terodonta;Imparidentia;Venerida;Veneroidea;Veneridae;Mercenaria;Mercenari  
 a mercenaria  
 UdeM00000012610 6596 430.6 UdeM00000012610 XP\_045171465.1 40.3 1365  
 560 27 40 1289 389 1613 6.80E-117 430.6 6596 cellular  
 organisms;Eukaryota;Opisthokonta;Metazoa;Eumetazoa;Bilateria;Protostomia;  
 Spiralia;Lophotrochozoa;Mollusca;Bivalvia;Autobranchia;Heteroconchia;Euhe  
 terodonta;Imparidentia;Venerida;Veneroidea;Veneridae;Mercenaria;Mercenari  
 a mercenaria  
 UdeM00000012611 6596 455.7 UdeM00000012611 XP\_045172838.1 41.4 585  
 313 15 1 564 28 603 9.40E-125 455.7 6596 cellular  
 organisms;Eukaryota;Opisthokonta;Metazoa;Eumetazoa;Bilateria;Protostomia;  
 Spiralia;Lophotrochozoa;Mollusca;Bivalvia;Autobranchia;Heteroconchia;Euhe  
 terodonta;Imparidentia;Venerida;Veneroidea;Veneridae;Mercenaria;Mercenari  
 a mercenaria  
 UdeM00000012613 6500 129 UdeM00000012613 XP\_012935876.1 43.3 141  
 77 1 3 140 187 327 5.00E-27 129 6500 cellular  
 organisms;Eukaryota;Opisthokonta;Metazoa;Eumetazoa;Bilateria;Protostomia;  
 Spiralia;Lophotrochozoa;Mollusca;Gastropoda;Heterobranchia;Euthyneura;Tec  
 tipleura;Aplysiida;Aplysioidea;Aplysiidae;Aplysia;Aplysia californica  
 UdeM00000012612 225164 177.2 UdeM00000012612 XP\_009055553.1 39.4  
 198 116 2 68 261 108 305 2.90E-41 177.2 225164  
 cellular  
 organisms;Eukaryota;Opisthokonta;Metazoa;Eumetazoa;Bilateria;Protostomia;  
 Spiralia;Lophotrochozoa;Mollusca;Gastropoda;Patellogastropoda;Lottioidea;  
 Lottiidae;Lottia;Lottia gigantea  
 UdeM00000012614 225164 231.1 UdeM00000012614 XP\_009055553.1 38.3  
 282 155 4 68 337 108 382 2.10E-57 231.1 225164  
 cellular  
 organisms;Eukaryota;Opisthokonta;Metazoa;Eumetazoa;Bilateria;Protostomia;  
 Spiralia;Lophotrochozoa;Mollusca;Gastropoda;Patellogastropoda;Lottioidea;  
 Lottiidae;Lottia;Lottia gigantea  
 UdeM00000012615 1735272 232.6 UdeM00000012615 XP\_041356773.1 40.1  
 289 165 6 66 346 86 374 7.30E-58 232.6 1735272  
 cellular  
 organisms;Eukaryota;Opisthokonta;Metazoa;Eumetazoa;Bilateria;Protostomia;  
 Spiralia;Lophotrochozoa;Mollusca;Gastropoda;Neomphalina;Neomphaloidea;Pel  
 tospiridae;Gigantopelta;Gigantopelta aegis  
 UdeM00000012616 225164 209.5 UdeM00000012616 XP\_009055553.1 39.4  
 254 141 4 1 245 133 382 4.90E-51 209.5 225164  
 cellular  
 organisms;Eukaryota;Opisthokonta;Metazoa;Eumetazoa;Bilateria;Protostomia;  
 Spiralia;Lophotrochozoa;Mollusca;Gastropoda;Patellogastropoda;Lottioidea;  
 Lottiidae;Lottia;Lottia gigantea  
 UdeM00000012617 225164 201.8 UdeM00000012617 XP\_009055553.1 38.7  
 261 146 5 17 268 127 382 1.10E-48 201.8 225164

cellular  
organisms;Eukaryota;Opisthokonta;Metazoa;Eumetazoa;Bilateria;Protostomia;  
Spiralia;Lophotrochozoa;Mollusca;Gastropoda;Patellogastropoda;Lottioidea;  
Lottiidae;Lottia;Lottia gigantea  
UdeM00000012618 225164 228.8 UdeM00000012618 XP\_009055553.1 38  
297 163 5 55 337 93 382 1.10E-56 228.8 225164  
cellular  
organisms;Eukaryota;Opisthokonta;Metazoa;Eumetazoa;Bilateria;Protostomia;  
Spiralia;Lophotrochozoa;Mollusca;Gastropoda;Patellogastropoda;Lottioidea;  
Lottiidae;Lottia;Lottia gigantea  
UdeM00000012619 1735272 211.5 UdeM00000012619 XP\_041356773.1 40.4  
260 149 5 1 254 115 374 1.30E-51 211.5 1735272  
cellular  
organisms;Eukaryota;Opisthokonta;Metazoa;Eumetazoa;Bilateria;Protostomia;  
Spiralia;Lophotrochozoa;Mollusca;Gastropoda;Neomphalina;Neomphaloidea;Pel  
tospiridae;Gigantopelta;Gigantopelta aegis  
UdeM00000012622 1735272 63.9 UdeM00000012622 XP\_041356773.1 39.3  
89 51 3 1 86 286 374 1.10E-07 63.9 1735272  
cellular  
organisms;Eukaryota;Opisthokonta;Metazoa;Eumetazoa;Bilateria;Protostomia;  
Spiralia;Lophotrochozoa;Mollusca;Gastropoda;Neomphalina;Neomphaloidea;Pel  
tospiridae;Gigantopelta;Gigantopelta aegis  
UdeM00000012623 6565 133.3 UdeM00000012623 XP\_022324535.1 37.1 175  
102 4 3 171 190 362 3.10E-28 133.3 6565 cellular  
organisms;Eukaryota;Opisthokonta;Metazoa;Eumetazoa;Bilateria;Protostomia;  
Spiralia;Lophotrochozoa;Mollusca;Bivalvia;Autobranchia;Pteriormorphia;Ostr  
eida;Ostreoidea;Ostreidae;Crassostrea;Crassostrea virginica  
UdeM00000012621 6565 231.9 UdeM00000012621 XP\_022324535.1 40.6 271  
153 4 74 338 94 362 1.30E-57 231.9 6565 cellular  
organisms;Eukaryota;Opisthokonta;Metazoa;Eumetazoa;Bilateria;Protostomia;  
Spiralia;Lophotrochozoa;Mollusca;Bivalvia;Autobranchia;Pteriormorphia;Ostr  
eida;Ostreoidea;Ostreidae;Crassostrea;Crassostrea virginica  
UdeM00000012624 6596 342 UdeM00000012624 XP\_045172449.1 76.2 223  
52 1 215 436 15 237 1.10E-90 342 6596 cellular  
organisms;Eukaryota;Opisthokonta;Metazoa;Eumetazoa;Bilateria;Protostomia;  
Spiralia;Lophotrochozoa;Mollusca;Bivalvia;Autobranchia;Heteroconchia;Euhe  
terodonta;Imparidentia;Venerida;Veneroidea;Veneridae;Mercenaria;Mercenari  
a mercenaria  
UdeM00000012626 6596 422.2 UdeM00000012626 XP\_045172438.1 55.2 516  
144 10 1 438 1105 1611 8.30E-115 422.2 6596 cellular  
organisms;Eukaryota;Opisthokonta;Metazoa;Eumetazoa;Bilateria;Protostomia;  
Spiralia;Lophotrochozoa;Mollusca;Bivalvia;Autobranchia;Heteroconchia;Euhe  
terodonta;Imparidentia;Venerida;Veneroidea;Veneridae;Mercenaria;Mercenari  
a mercenaria  
UdeM00000012627 6596 136.3 UdeM00000012627 XP\_045172189.1 58.8 182  
75 0 137 318 12 193 6.70E-29 136.3 6596 cellular  
organisms;Eukaryota;Opisthokonta;Metazoa;Eumetazoa;Bilateria;Protostomia;  
Spiralia;Lophotrochozoa;Mollusca;Bivalvia;Autobranchia;Heteroconchia;Euhe  
terodonta;Imparidentia;Venerida;Veneroidea;Veneridae;Mercenaria;Mercenari  
a mercenaria  
UdeM00000012628 6573 88.2 UdeM00000012628 XP\_021364802.1 33.6 262  
171 2 59 320 5 263 2.10E-14 88.2 6573 cellular  
organisms;Eukaryota;Opisthokonta;Metazoa;Eumetazoa;Bilateria;Protostomia;

Spiralia; Lophotrochozoa; Mollusca; Bivalvia; Autobranchia; Pteriomorpha; Pectinida; Pectinoidea; Pectinidae; Mizuhopecten; Mizuhopecten yessoensis  
UdeM00000012629 29159 251.5 UdeM00000012629 XP\_011422557.1 77.2 162  
36 1 26 187 22 182 8.30E-64 251.5 29159 cellular  
organisms; Eukaryota; Opisthokonta; Metazoa; Eumetazoa; Bilateria; Protostomia; Spiralia; Lophotrochozoa; Mollusca; Bivalvia; Autobranchia; Pteriomorpha; Ostr  
eida; Ostreoidea; Ostreidae; Crassostrea; Crassostrea gigas  
UdeM00000012630 6596 250.4 UdeM00000012630 XP\_045172387.1 45.8 297  
138 7 33 311 38 329 3.20E-63 250.4 6596 cellular  
organisms; Eukaryota; Opisthokonta; Metazoa; Eumetazoa; Bilateria; Protostomia; Spiralia; Lophotrochozoa; Mollusca; Bivalvia; Autobranchia; Heteroconchia; Eue  
terodonta; Imparidentia; Venerida; Veneroidea; Veneridae; Mercenaria; Mercenari  
a mercenaria  
UdeM00000012631 6596 98.2 UdeM00000012631 XP\_045172387.1 64.6 65  
23 0 4 68 329 393 4.70E-18 98.2 6596 cellular  
organisms; Eukaryota; Opisthokonta; Metazoa; Eumetazoa; Bilateria; Protostomia; Spiralia; Lophotrochozoa; Mollusca; Bivalvia; Autobranchia; Heteroconchia; Eue  
terodonta; Imparidentia; Venerida; Veneroidea; Veneridae; Mercenaria; Mercenari  
a mercenaria  
UdeM00000012632 7913 132.9 UdeM00000012632 XP\_041115007.1 28.3 364  
222 12 6 368 8 333 9.20E-28 132.9 7913 cellular  
organisms; Eukaryota; Opisthokonta; Metazoa; Eumetazoa; Bilateria; Deuterostomi  
a; Chordata; Craniata; Vertebrata; Gnathostomata; Teleostomi; Euteleostomi; Acti  
nopterygii; Actinopteri; Chondrostei; Acipenseriformes; Acipenseroidei; Polyod  
ontidae; Polyodontinae; Polyodontini; Polyodon; Polyodon spathula  
UdeM00000012635 6573 123.6 UdeM00000012635 XP\_021356047.1 46.9 130  
68 1 25 153 149 278 2.10E-25 123.6 6573 cellular  
organisms; Eukaryota; Opisthokonta; Metazoa; Eumetazoa; Bilateria; Protostomia; Spiralia; Lophotrochozoa; Mollusca; Bivalvia; Autobranchia; Pteriomorpha; Pect  
inida; Pectinoidea; Pectinidae; Mizuhopecten; Mizuhopecten yessoensis  
UdeM00000012634 6573 123.6 UdeM00000012634 XP\_021356047.1 46.9 130  
68 1 77 205 149 278 2.90E-25 123.6 6573 cellular  
organisms; Eukaryota; Opisthokonta; Metazoa; Eumetazoa; Bilateria; Protostomia; Spiralia; Lophotrochozoa; Mollusca; Bivalvia; Autobranchia; Pteriomorpha; Pect  
inida; Pectinoidea; Pectinidae; Mizuhopecten; Mizuhopecten yessoensis  
UdeM00000012636 45264 470.7 UdeM00000012636 XP\_044165143.1 54.7 428  
187 4 42 466 35 458 2.20E-129 470.7 45264 cellular  
organisms; Eukaryota; Opisthokonta; Metazoa; Eumetazoa; Cnidaria; Anthozoa; Hexa  
corallia; Scleractinia; Astrocoeniina; Acroporidae; Acropora; Acropora  
millepora  
UdeM00000012637 29159 105.5 UdeM00000012637 XP\_034312519.1 64.3 84  
30 0 2 85 228 311 4.10E-20 105.5 29159 cellular  
organisms; Eukaryota; Opisthokonta; Metazoa; Eumetazoa; Bilateria; Protostomia; Spiralia; Lophotrochozoa; Mollusca; Bivalvia; Autobranchia; Pteriomorpha; Ostr  
eida; Ostreoidea; Ostreidae; Crassostrea; Crassostrea gigas  
UdeM00000012638 7913 125.6 UdeM00000012638 XP\_041115007.1 30.5 233  
146 7 2 234 4 220 8.80E-26 125.6 7913 cellular  
organisms; Eukaryota; Opisthokonta; Metazoa; Eumetazoa; Bilateria; Deuterostomi  
a; Chordata; Craniata; Vertebrata; Gnathostomata; Teleostomi; Euteleostomi; Acti  
nopterygii; Actinopteri; Chondrostei; Acipenseriformes; Acipenseroidei; Polyod  
ontidae; Polyodontinae; Polyodontini; Polyodon; Polyodon spathula  
UdeM00000012640 6596 134.4 UdeM00000012640 XP\_045184114.1 20.8 792  
573 20 151 932 299 1046 1.10E-27 134.4 6596 cellular  
organisms; Eukaryota; Opisthokonta; Metazoa; Eumetazoa; Bilateria; Protostomia;



Spiralia;Lophotrochozoa;Mollusca;Bivalvia;Autobranchia;Heteroconchia;Euherodonta;Imparidentia;Venerida;Veneroidea;Veneridae;Mercenaria;Mercenaria mercenaria

UdeM00000012641 6596 84 UdeM00000012641 XP\_045202576.1 57.7 78  
26 1 10 80 137 214 2.10E-13 84 6596 cellular

organisms;Eukaryota;Opisthokonta;Metazoa;Eumetazoa;Bilateria;Protostomia;Spiralia;Lophotrochozoa;Mollusca;Bivalvia;Autobranchia;Heteroconchia;Euherodonta;Imparidentia;Venerida;Veneroidea;Veneridae;Mercenaria;Mercenaria mercenaria

UdeM00000012642 6596 88.6 UdeM00000012642 XP\_045202576.1 56 91  
32 2 1 83 124 214 8.60E-15 88.6 6596 cellular

organisms;Eukaryota;Opisthokonta;Metazoa;Eumetazoa;Bilateria;Protostomia;Spiralia;Lophotrochozoa;Mollusca;Bivalvia;Autobranchia;Heteroconchia;Euherodonta;Imparidentia;Venerida;Veneroidea;Veneridae;Mercenaria;Mercenaria mercenaria

UdeM00000012643 6596 242.7 UdeM00000012643 XP\_045206316.1 50.6 241  
118 1 32 271 84 324 5.60E-61 242.7 6596 cellular

organisms;Eukaryota;Opisthokonta;Metazoa;Eumetazoa;Bilateria;Protostomia;Spiralia;Lophotrochozoa;Mollusca;Bivalvia;Autobranchia;Heteroconchia;Euherodonta;Imparidentia;Venerida;Veneroidea;Veneridae;Mercenaria;Mercenaria mercenaria

UdeM00000012645 6596 84 UdeM00000012645 XP\_045202576.1 57.7 78  
26 1 10 80 137 214 2.10E-13 84 6596 cellular

organisms;Eukaryota;Opisthokonta;Metazoa;Eumetazoa;Bilateria;Protostomia;Spiralia;Lophotrochozoa;Mollusca;Bivalvia;Autobranchia;Heteroconchia;Euherodonta;Imparidentia;Venerida;Veneroidea;Veneridae;Mercenaria;Mercenaria mercenaria

UdeM00000012644 6596 88.6 UdeM00000012644 XP\_045202576.1 56 91  
32 2 1 83 124 214 8.60E-15 88.6 6596 cellular

organisms;Eukaryota;Opisthokonta;Metazoa;Eumetazoa;Bilateria;Protostomia;Spiralia;Lophotrochozoa;Mollusca;Bivalvia;Autobranchia;Heteroconchia;Euherodonta;Imparidentia;Venerida;Veneroidea;Veneridae;Mercenaria;Mercenaria mercenaria

UdeM00000012646 6596 216.5 UdeM00000012646 XP\_045206316.1 51.2 217  
104 2 11 225 108 324 3.50E-53 216.5 6596 cellular

organisms;Eukaryota;Opisthokonta;Metazoa;Eumetazoa;Bilateria;Protostomia;Spiralia;Lophotrochozoa;Mollusca;Bivalvia;Autobranchia;Heteroconchia;Euherodonta;Imparidentia;Venerida;Veneroidea;Veneridae;Mercenaria;Mercenaria mercenaria

UdeM00000012647 6596 160.6 UdeM00000012647 XP\_045192981.1 21.8 1139  
724 37 282 1383 157 1165 1.40E-35 160.6 6596 cellular

organisms;Eukaryota;Opisthokonta;Metazoa;Eumetazoa;Bilateria;Protostomia;Spiralia;Lophotrochozoa;Mollusca;Bivalvia;Autobranchia;Heteroconchia;Euherodonta;Imparidentia;Venerida;Veneroidea;Veneridae;Mercenaria;Mercenaria mercenaria

UdeM00000012648 6596 184.9 UdeM00000012648 XP\_045192981.1 21.7 1146  
749 37 349 1443 210 1258 7.60E-43 184.9 6596 cellular

organisms;Eukaryota;Opisthokonta;Metazoa;Eumetazoa;Bilateria;Protostomia;Spiralia;Lophotrochozoa;Mollusca;Bivalvia;Autobranchia;Heteroconchia;Euherodonta;Imparidentia;Venerida;Veneroidea;Veneridae;Mercenaria;Mercenaria mercenaria

UdeM00000012649 6565 60.1 UdeM00000012649 XP\_022290339.1 35.4 96  
61 1 31 125 39 134 3.10E-06 60.1 6565 cellular

organisms;Eukaryota;Opisthokonta;Metazoa;Eumetazoa;Bilateria;Protostomia;

Spiralia; Lophotrochozoa; Mollusca; Bivalvia; Autobranchia; Pteriomorphia; Ostr  
eida; Ostreoidae; Ostreidae; Crassostrea; Crassostrea virginica  
UdeM00000012650 7739 354.4 UdeM00000012650 XP\_035696678.1 52.2 322  
151 1 377 695 582 903 3.50E-94 354.4 7739 cellular  
organisms; Eukaryota; Opisthokonta; Metazoa; Eumetazoa; Bilateria; Deuterostomi  
a; Chordata; Cephalochordata; Leptocardii; Amphioxiformes; Branchiostomidae; Br  
anchiostoma; Branchiostoma floridae  
UdeM00000012651 6596 172.9 UdeM00000012651 XP\_045192981.1 21.3 1271  
829 40 34 1219 255 1439 2.50E-39 172.9 6596 cellular  
organisms; Eukaryota; Opisthokonta; Metazoa; Eumetazoa; Bilateria; Protostomia;  
Spiralia; Lophotrochozoa; Mollusca; Bivalvia; Autobranchia; Heteroconchia; Eue  
terodonta; Imparidentia; Venerida; Veneroidea; Veneridae; Mercenaria; Mercenari  
a mercenaria  
UdeM00000012652 8078 62.8 UdeM00000012652 XP\_035990535.1 47.5 59  
29 1 7 65 2 58 2.20E-07 62.8 8078 cellular  
organisms; Eukaryota; Opisthokonta; Metazoa; Eumetazoa; Bilateria; Deuterostomi  
a; Chordata; Craniata; Vertebrata; Gnathostomata; Teleostomi; Euteleostomi; Acti  
nopterygii; Actinopteri; Neopterygii; Teleostei; Osteoglossocephalai; Clupeoce  
phala; Euteleosteomorpha; Neoteleostei; Eurypterygia; Ctenosquamata; Acanthomo  
rphata; Euacanthomorphacea; Percomorphaceae; Ovalentaria; Atherinomorphae; Cyp  
rinodontiformes; Cyprinodontoidei; Fundulidae; Fundulus; Fundulus  
heteroclitus  
UdeM00000012653 1676925 177.9 UdeM00000012653 XP\_023657625.1 43.8  
224 119 2 2 224 99 316 1.40E-41 177.9 1676925  
cellular  
organisms; Eukaryota; Opisthokonta; Metazoa; Eumetazoa; Bilateria; Deuterostomi  
a; Chordata; Craniata; Vertebrata; Gnathostomata; Teleostomi; Euteleostomi; Acti  
nopterygii; Actinopteri; Neopterygii; Teleostei; Osteoglossocephalai; Osteoglo  
ssocephala; Osteoglossomorpha; Osteoglossiformes; Mormyridae; Paramormyrops; P  
aramormyrops kingsleyae  
UdeM00000012654 400682 119 UdeM00000012654 XP\_003390251.1 36  
214 121 4 12 221 432 633 7.60E-24 119 400682  
cellular  
organisms; Eukaryota; Opisthokonta; Metazoa; Porifera; Demospongiae; Heteroscle  
romorpha; Haplosclerida; Niphatidae; Amphimedon; Amphimedon queenslandica  
UdeM00000012655 7574 141.7 UdeM00000012655 XP\_013388573.1 37.2 234  
128 7 96 327 349 565 1.70E-30 141.7 7574 cellular  
organisms; Eukaryota; Opisthokonta; Metazoa; Eumetazoa; Bilateria; Protostomia;  
Spiralia; Lophotrochozoa; Brachiopoda; Linguliformea; Lingulata; Lingulida; Lin  
guloidea; Lingulidae; Lingula; Lingula anatina  
UdeM00000012656 29159 94.7 UdeM00000012656 XP\_034331441.1 43.1 109  
62 0 1 109 1 109 7.80E-17 94.7 29159 cellular  
organisms; Eukaryota; Opisthokonta; Metazoa; Eumetazoa; Bilateria; Protostomia;  
Spiralia; Lophotrochozoa; Mollusca; Bivalvia; Autobranchia; Pteriomorphia; Ostr  
eida; Ostreoidae; Ostreidae; Crassostrea; Crassostrea gigas  
UdeM00000012657 63155 110.2 UdeM00000012657 XP\_030608364.1 37.1 167  
85 8 5 170 8 155 2.80E-21 110.2 63155 cellular  
organisms; Eukaryota; Opisthokonta; Metazoa; Eumetazoa; Bilateria; Deuterostomi  
a; Chordata; Craniata; Vertebrata; Gnathostomata; Teleostomi; Euteleostomi; Acti  
nopterygii; Actinopteri; Neopterygii; Teleostei; Osteoglossocephalai; Clupeoce  
phala; Euteleosteomorpha; Neoteleostei; Eurypterygia; Ctenosquamata; Acanthomo  
rphata; Euacanthomorphacea; Percomorphaceae; Ovalentaria; Cichlomorphae; Cichl  
iformes; Cichlidae; New World  
cichlids; Cichlasomatinae; Heroini; Archocentrus; Archocentrus centrarchus

UdeM00000012658 6596 127.1 UdeM00000012658 XP\_045180427.1 33.6 274  
 127 4 1 220 1 273 3.00E-26 127.1 6596 cellular  
 organisms;Eukaryota;Opisthokonta;Metazoa;Eumetazoa;Bilateria;Protostomia;  
 Spiralia;Lophotrochozoa;Mollusca;Bivalvia;Autobranchia;Heteroconchia;Euhe  
 terodonta;Imparidentia;Venerida;Veneroidea;Veneridae;Mercenaria;Mercenari  
 a mercenaria  
 UdeM00000012659 225164 186.8 UdeM00000012659 XP\_009051619.1 35.2  
 315 192 3 7 312 710 1021 4.20E-44 186.8 225164  
 cellular  
 organisms;Eukaryota;Opisthokonta;Metazoa;Eumetazoa;Bilateria;Protostomia;  
 Spiralia;Lophotrochozoa;Mollusca;Gastropoda;Patellogastropoda;Lottioidea;  
 Lottiidae;Lottia;Lottia gigantea  
 UdeM00000012660 6573 115.2 UdeM00000012660 XP\_021357887.1 30.9 288  
 109 4 21 307 26 224 1.50E-22 115.2 6573 cellular  
 organisms;Eukaryota;Opisthokonta;Metazoa;Eumetazoa;Bilateria;Protostomia;  
 Spiralia;Lophotrochozoa;Mollusca;Bivalvia;Autobranchia;Pteriormorphia;Pect  
 inida;Pectinoidea;Pectinidae;Mizuhopecten;Mizuhopecten yessoensis  
 UdeM00000012661 6596 252.7 UdeM00000012661 XP\_045202652.1 37.4 385  
 138 6 10 295 187 567 6.10E-64 252.7 6596 cellular  
 organisms;Eukaryota;Opisthokonta;Metazoa;Eumetazoa;Bilateria;Protostomia;  
 Spiralia;Lophotrochozoa;Mollusca;Bivalvia;Autobranchia;Heteroconchia;Euhe  
 terodonta;Imparidentia;Venerida;Veneroidea;Veneridae;Mercenaria;Mercenari  
 a mercenaria  
 UdeM00000012662 29159 157.1 UdeM00000012662 XP\_034318677.1 43.1 225  
 104 7 1 215 68 278 2.50E-35 157.1 29159 cellular  
 organisms;Eukaryota;Opisthokonta;Metazoa;Eumetazoa;Bilateria;Protostomia;  
 Spiralia;Lophotrochozoa;Mollusca;Bivalvia;Autobranchia;Pteriormorphia;Ostr  
 eida;Ostreoidea;Ostreidae;Crassostrea;Crassostrea gigas  
 UdeM00000012663 6596 131.7 UdeM00000012663 XP\_045215232.1 28.6 308  
 69 2 6 162 160 467 9.90E-28 131.7 6596 cellular  
 organisms;Eukaryota;Opisthokonta;Metazoa;Eumetazoa;Bilateria;Protostomia;  
 Spiralia;Lophotrochozoa;Mollusca;Bivalvia;Autobranchia;Heteroconchia;Euhe  
 terodonta;Imparidentia;Venerida;Veneroidea;Veneridae;Mercenaria;Mercenari  
 a mercenaria  
 UdeM00000012664 6596 181 UdeM00000012664 XP\_045192981.1 21.2 1259  
 869 36 349 1577 210 1375 1.20E-41 181 6596 cellular  
 organisms;Eukaryota;Opisthokonta;Metazoa;Eumetazoa;Bilateria;Protostomia;  
 Spiralia;Lophotrochozoa;Mollusca;Bivalvia;Autobranchia;Heteroconchia;Euhe  
 terodonta;Imparidentia;Venerida;Veneroidea;Veneridae;Mercenaria;Mercenari  
 a mercenaria  
 UdeM00000012666 6596 153.7 UdeM00000012666 XP\_045192981.1 26.1 532  
 354 14 285 810 158 656 1.40E-33 153.7 6596 cellular  
 organisms;Eukaryota;Opisthokonta;Metazoa;Eumetazoa;Bilateria;Protostomia;  
 Spiralia;Lophotrochozoa;Mollusca;Bivalvia;Autobranchia;Heteroconchia;Euhe  
 terodonta;Imparidentia;Venerida;Veneroidea;Veneridae;Mercenaria;Mercenari  
 a mercenaria  
 UdeM00000012667 6596 168.7 UdeM00000012667 XP\_045192981.1 20.9 1199  
 809 39 168 1327 255 1353 5.00E-38 168.7 6596 cellular  
 organisms;Eukaryota;Opisthokonta;Metazoa;Eumetazoa;Bilateria;Protostomia;  
 Spiralia;Lophotrochozoa;Mollusca;Bivalvia;Autobranchia;Heteroconchia;Euhe  
 terodonta;Imparidentia;Venerida;Veneroidea;Veneridae;Mercenaria;Mercenari  
 a mercenaria  
 UdeM00000012668 6596 84 UdeM00000012668 XP\_045202576.1 57.7 78  
 26 1 10 80 137 214 2.10E-13 84 6596 cellular

organisms;Eukaryota;Opisthokonta;Metazoa;Eumetazoa;Bilateria;Protostomia;Spiralia;Lophotrochozoa;Mollusca;Bivalvia;Autobranhia;Heteroconchia;Euherodonta;Imparidentia;Venerida;Veneroidea;Veneridae;Mercenaria;Mercenaria mercenaria

UdeM00000012669 6596 88.6 UdeM00000012669 XP\_045202576.1 56 91  
32 2 1 83 124 214 8.60E-15 88.6 6596 cellular

organisms;Eukaryota;Opisthokonta;Metazoa;Eumetazoa;Bilateria;Protostomia;Spiralia;Lophotrochozoa;Mollusca;Bivalvia;Autobranhia;Heteroconchia;Euherodonta;Imparidentia;Venerida;Veneroidea;Veneridae;Mercenaria;Mercenaria mercenaria

UdeM00000012670 6596 218 UdeM00000012670 XP\_045206316.1 50.7 217  
106 1 11 226 108 324 1.20E-53 218 6596 cellular

organisms;Eukaryota;Opisthokonta;Metazoa;Eumetazoa;Bilateria;Protostomia;Spiralia;Lophotrochozoa;Mollusca;Bivalvia;Autobranhia;Heteroconchia;Euherodonta;Imparidentia;Venerida;Veneroidea;Veneridae;Mercenaria;Mercenaria mercenaria

UdeM00000012671 6596 176.4 UdeM00000012671 XP\_045192981.1 21.1 1271  
873 36 402 1607 252 1457 3.30E-40 176.4 6596 cellular

organisms;Eukaryota;Opisthokonta;Metazoa;Eumetazoa;Bilateria;Protostomia;Spiralia;Lophotrochozoa;Mollusca;Bivalvia;Autobranhia;Heteroconchia;Euherodonta;Imparidentia;Venerida;Veneroidea;Veneridae;Mercenaria;Mercenaria mercenaria

UdeM00000012672 1735272 462.6 UdeM00000012672 XP\_041348132.1 41.6  
668 363 10 3 660 19 669 8.30E-127 462.6 1735272  
cellular

organisms;Eukaryota;Opisthokonta;Metazoa;Eumetazoa;Bilateria;Protostomia;Spiralia;Lophotrochozoa;Mollusca;Gastropoda;Neomphalina;Neomphaloidea;Peltospiridae;Gigantopelta;Gigantopelta aegis

UdeM00000012673 1735272 429.9 UdeM00000012673 XP\_041348132.1 37.3  
745 363 11 3 737 19 669 6.70E-117 429.9 1735272  
cellular

organisms;Eukaryota;Opisthokonta;Metazoa;Eumetazoa;Bilateria;Protostomia;Spiralia;Lophotrochozoa;Mollusca;Gastropoda;Neomphalina;Neomphaloidea;Peltospiridae;Gigantopelta;Gigantopelta aegis

UdeM00000012674 6596 343.2 UdeM00000012674 XP\_045157219.1 41.4 485  
261 6 1 472 1 475 6.20E-91 343.2 6596 cellular

organisms;Eukaryota;Opisthokonta;Metazoa;Eumetazoa;Bilateria;Protostomia;Spiralia;Lophotrochozoa;Mollusca;Bivalvia;Autobranhia;Heteroconchia;Euherodonta;Imparidentia;Venerida;Veneroidea;Veneridae;Mercenaria;Mercenaria mercenaria

UdeM00000012676 1735272 84 UdeM00000012676 XP\_041374253.1 24.9  
197 147 1 1 196 95 291 1.00E-12 84 1735272  
cellular

organisms;Eukaryota;Opisthokonta;Metazoa;Eumetazoa;Bilateria;Protostomia;Spiralia;Lophotrochozoa;Mollusca;Gastropoda;Neomphalina;Neomphaloidea;Peltospiridae;Gigantopelta;Gigantopelta aegis

UdeM00000012677 7741 204.9 UdeM00000012677 XP\_019640655.1 50.5 196  
95 2 1 195 38 232 9.30E-50 204.9 7741 cellular

organisms;Eukaryota;Opisthokonta;Metazoa;Eumetazoa;Bilateria;Deuterostomia;Chordata;Cephalochordata;Leptocardii;Amphioxiformes;Branchiostomidae;Branchiostoma;Branchiostoma belcheri

UdeM00000012679 6596 1251.5 UdeM00000012679 XP\_045173723.1 87.2  
836 103 3 9 843 6 838 0.00E+00 1251.5 6596  
cellular

organisms;Eukaryota;Opisthokonta;Metazoa;Eumetazoa;Bilateria;Protostomia;Spiralia;Lophotrochozoa;Mollusca;Bivalvia;Autobranchia;Heteroconchia;Euherodonta;Imparidentia;Venerida;Veneroidea;Veneridae;Mercenaria;Mercenaria mercenaria

UdeM00000012680 6579 401.4 UdeM00000012680 XP\_033747707.1 60.1 308  
122 1 76 382 162 469 1.30E-108 401.4 6579 cellular

organisms;Eukaryota;Opisthokonta;Metazoa;Eumetazoa;Bilateria;Protostomia;Spiralia;Lophotrochozoa;Mollusca;Bivalvia;Autobranchia;Pteriomorpha;Pectinida;Pectinoidea;Pectinidae;Pecten;Pecten maximus

UdeM00000012681 6579 401.4 UdeM00000012681 XP\_033747707.1 60.1 308  
122 1 88 394 162 469 1.40E-108 401.4 6579 cellular

organisms;Eukaryota;Opisthokonta;Metazoa;Eumetazoa;Bilateria;Protostomia;Spiralia;Lophotrochozoa;Mollusca;Bivalvia;Autobranchia;Pteriomorpha;Pectinida;Pectinoidea;Pectinidae;Pecten;Pecten maximus

UdeM00000012682 29159 96.3 UdeM00000012682 XP\_011449481.2 52.7 112  
41 4 197 298 177 286 7.20E-17 96.3 29159 cellular

organisms;Eukaryota;Opisthokonta;Metazoa;Eumetazoa;Bilateria;Protostomia;Spiralia;Lophotrochozoa;Mollusca;Bivalvia;Autobranchia;Pteriomorpha;Ostreida;Ostreoidea;Ostreidae;Crassostrea;Crassostrea gigas

UdeM00000012683 225164 143.7 UdeM00000012683 XP\_009053751.1 39.3  
229 127 5 4 223 3 228 3.00E-31 143.7 225164  
cellular

organisms;Eukaryota;Opisthokonta;Metazoa;Eumetazoa;Bilateria;Protostomia;Spiralia;Lophotrochozoa;Mollusca;Gastropoda;Patellogastropoda;Lottioidae;Lottiidae;Lottia;Lottia gigantea

UdeM00000012684 6500 126.3 UdeM00000012684 XP\_005100292.1 38.5 205  
105 5 30 230 64 251 6.00E-26 126.3 6500 cellular

organisms;Eukaryota;Opisthokonta;Metazoa;Eumetazoa;Bilateria;Protostomia;Spiralia;Lophotrochozoa;Mollusca;Gastropoda;Heterobranchia;Euthyneura;Tectipleura;Aplysiida;Aplysioidea;Aplysiidae;Aplysia;Aplysia californica

UdeM00000012685 6596 482.6 UdeM00000012685 XP\_045173676.1 83.3 281  
46 1 1 281 1 280 3.30E-133 482.6 6596 cellular

organisms;Eukaryota;Opisthokonta;Metazoa;Eumetazoa;Bilateria;Protostomia;Spiralia;Lophotrochozoa;Mollusca;Bivalvia;Autobranchia;Heteroconchia;Euherodonta;Imparidentia;Venerida;Veneroidea;Veneridae;Mercenaria;Mercenaria mercenaria

UdeM00000012686 400727 406.8 UdeM00000012686 XP\_025090191.1 93.3  
208 14 0 50 257 6 213 2.10E-110 406.8 400727  
cellular

organisms;Eukaryota;Opisthokonta;Metazoa;Eumetazoa;Bilateria;Protostomia;Spiralia;Lophotrochozoa;Mollusca;Gastropoda;Caenogastropoda;Architaenioglossa;Ampullarioidea;Ampullariidae;Pomacea;Pomacea canaliculata

UdeM00000012688 6596 151.8 UdeM00000012688 XP\_045173197.1 68 122  
33 1 1 116 1 122 6.10E-34 151.8 6596 cellular

organisms;Eukaryota;Opisthokonta;Metazoa;Eumetazoa;Bilateria;Protostomia;Spiralia;Lophotrochozoa;Mollusca;Bivalvia;Autobranchia;Heteroconchia;Euherodonta;Imparidentia;Venerida;Veneroidea;Veneridae;Mercenaria;Mercenaria mercenaria

UdeM00000012687 6596 448.4 UdeM00000012687 XP\_045173196.1 89.4 263  
28 0 1 263 1 263 7.10E-123 448.4 6596 cellular

organisms;Eukaryota;Opisthokonta;Metazoa;Eumetazoa;Bilateria;Protostomia;Spiralia;Lophotrochozoa;Mollusca;Bivalvia;Autobranchia;Heteroconchia;Euherodonta;Imparidentia;Venerida;Veneroidea;Veneridae;Mercenaria;Mercenaria mercenaria

UdeM00000012689 6596 147.9 UdeM00000012689 XP\_045173196.1 97.5 80  
 2 0 1 80 185 264 7.30E-33 147.9 6596 cellular  
 organisms;Eukaryota;Opisthokonta;Metazoa;Eumetazoa;Bilateria;Protostomia;  
 Spiralia;Lophotrochozoa;Mollusca;Bivalvia;Autobranchia;Heteroconchia;Euhe  
 terodonta;Imparidentia;Venerida;Veneroidea;Veneridae;Mercenaria;Mercenari  
 a mercenaria  
 UdeM00000012690 6596 501.9 UdeM00000012690 XP\_045171052.1 60.7 428  
 168 0 137 564 82 509 1.10E-138 501.9 6596 cellular  
 organisms;Eukaryota;Opisthokonta;Metazoa;Eumetazoa;Bilateria;Protostomia;  
 Spiralia;Lophotrochozoa;Mollusca;Bivalvia;Autobranchia;Heteroconchia;Euhe  
 terodonta;Imparidentia;Venerida;Veneroidea;Veneridae;Mercenaria;Mercenari  
 a mercenaria  
 UdeM00000012691 6596 515.8 UdeM00000012691 XP\_045171052.1 60.8 439  
 172 0 137 575 82 520 7.80E-143 515.8 6596 cellular  
 organisms;Eukaryota;Opisthokonta;Metazoa;Eumetazoa;Bilateria;Protostomia;  
 Spiralia;Lophotrochozoa;Mollusca;Bivalvia;Autobranchia;Heteroconchia;Euhe  
 terodonta;Imparidentia;Venerida;Veneroidea;Veneridae;Mercenaria;Mercenari  
 a mercenaria  
 UdeM00000012692 6596 233.4 UdeM00000012692 XP\_045171594.1 32.7 762  
 380 29 1 702 35 723 8.70E-58 233.4 6596 cellular  
 organisms;Eukaryota;Opisthokonta;Metazoa;Eumetazoa;Bilateria;Protostomia;  
 Spiralia;Lophotrochozoa;Mollusca;Bivalvia;Autobranchia;Heteroconchia;Euhe  
 terodonta;Imparidentia;Venerida;Veneroidea;Veneridae;Mercenaria;Mercenari  
 a mercenaria  
 UdeM00000012693 6565 176 UdeM00000012693 XP\_022344363.1 58.4 137  
 57 0 1 137 1 137 3.30E-41 176 6565 cellular  
 organisms;Eukaryota;Opisthokonta;Metazoa;Eumetazoa;Bilateria;Protostomia;  
 Spiralia;Lophotrochozoa;Mollusca;Bivalvia;Autobranchia;Pteriomorphia;Ostr  
 eida;Ostreoidea;Ostreidae;Crassostrea;Crassostrea virginica  
 UdeM00000012694 6596 169.5 UdeM00000012694 XP\_045173276.1 60.2 118  
 47 0 26 143 24 141 3.20E-39 169.5 6596 cellular  
 organisms;Eukaryota;Opisthokonta;Metazoa;Eumetazoa;Bilateria;Protostomia;  
 Spiralia;Lophotrochozoa;Mollusca;Bivalvia;Autobranchia;Heteroconchia;Euhe  
 terodonta;Imparidentia;Venerida;Veneroidea;Veneridae;Mercenaria;Mercenari  
 a mercenaria  
 UdeM00000012695 6579 255.8 UdeM00000012695 XP\_033748071.1 45.6 272  
 143 4 8 278 7 274 6.50E-65 255.8 6579 cellular  
 organisms;Eukaryota;Opisthokonta;Metazoa;Eumetazoa;Bilateria;Protostomia;  
 Spiralia;Lophotrochozoa;Mollusca;Bivalvia;Autobranchia;Pteriomorphia;Pect  
 inida;Pectinoidea;Pectinidae;Pecten;Pecten maximus  
 UdeM00000012696 6579 720.3 UdeM00000012696 XP\_033748016.1 73.1 469  
 123 2 5 470 5 473 1.60E-204 720.3 6579 cellular  
 organisms;Eukaryota;Opisthokonta;Metazoa;Eumetazoa;Bilateria;Protostomia;  
 Spiralia;Lophotrochozoa;Mollusca;Bivalvia;Autobranchia;Pteriomorphia;Pect  
 inida;Pectinoidea;Pectinidae;Pecten;Pecten maximus  
 UdeM00000012697 29159 433.7 UdeM00000012697 XP\_034338747.1 71.2 285  
 78 2 3 284 2 285 1.80E-118 433.7 29159 cellular  
 organisms;Eukaryota;Opisthokonta;Metazoa;Eumetazoa;Bilateria;Protostomia;  
 Spiralia;Lophotrochozoa;Mollusca;Bivalvia;Autobranchia;Pteriomorphia;Ostr  
 eida;Ostreoidea;Ostreidae;Crassostrea;Crassostrea gigas  
 UdeM00000012698 29159 126.7 UdeM00000012698 XP\_011424388.2 34.6 182  
 119 0 2 183 164 345 3.10E-26 126.7 29159 cellular  
 organisms;Eukaryota;Opisthokonta;Metazoa;Eumetazoa;Bilateria;Protostomia;

Spiralia;Lophotrochozoa;Mollusca;Bivalvia;Autobranchia;Pteriomorpha;Ostr  
eida;Ostreoidea;Ostreidae;Crassostrea;Crassostrea gigas  
UdeM00000012699 6579 387.1 UdeM00000012699 XP\_033747846.1 48.8 363  
186 0 33 395 14 376 2.70E-104 387.1 6579 cellular  
organisms;Eukaryota;Opisthokonta;Metazoa;Eumetazoa;Bilateria;Protostomia;  
Spiralia;Lophotrochozoa;Mollusca;Bivalvia;Autobranchia;Pteriomorpha;Pect  
inida;Pectinoidea;Pectinidae;Pecten;Pecten maximus  
UdeM00000012701 6596 834.7 UdeM00000012701 XP\_045171917.1 74.5 533  
136 0 2 534 14 546 6.60E-239 834.7 6596 cellular  
organisms;Eukaryota;Opisthokonta;Metazoa;Eumetazoa;Bilateria;Protostomia;  
Spiralia;Lophotrochozoa;Mollusca;Bivalvia;Autobranchia;Heteroconchia;Euhe  
terodonta;Imparidentia;Venerida;Veneroidea;Veneridae;Mercenaria;Mercenari  
a mercenaria  
UdeM00000012700 6596 904.4 UdeM00000012700 XP\_045171917.1 68.3 646  
199 3 2 647 14 653 8.10E-260 904.4 6596 cellular  
organisms;Eukaryota;Opisthokonta;Metazoa;Eumetazoa;Bilateria;Protostomia;  
Spiralia;Lophotrochozoa;Mollusca;Bivalvia;Autobranchia;Heteroconchia;Euhe  
terodonta;Imparidentia;Venerida;Veneroidea;Veneridae;Mercenaria;Mercenari  
a mercenaria  
UdeM00000012702 6596 854.4 UdeM00000012702 XP\_045171917.1 67.7 617  
192 2 3 619 44 653 9.20E-245 854.4 6596 cellular  
organisms;Eukaryota;Opisthokonta;Metazoa;Eumetazoa;Bilateria;Protostomia;  
Spiralia;Lophotrochozoa;Mollusca;Bivalvia;Autobranchia;Heteroconchia;Euhe  
terodonta;Imparidentia;Venerida;Veneroidea;Veneridae;Mercenaria;Mercenari  
a mercenaria  
UdeM00000012703 6573 223 UdeM00000012703 XP\_021358194.1 37.6 303  
174 5 14 304 7 306 5.10E-55 223 6573 cellular  
organisms;Eukaryota;Opisthokonta;Metazoa;Eumetazoa;Bilateria;Protostomia;  
Spiralia;Lophotrochozoa;Mollusca;Bivalvia;Autobranchia;Pteriomorpha;Pect  
inida;Pectinoidea;Pectinidae;Mizuhopecten;Mizuhopecten yessoensis  
UdeM00000012704 6573 167.9 UdeM00000012704 XP\_021358194.1 38.7 225  
126 3 1 216 85 306 1.40E-38 167.9 6573 cellular  
organisms;Eukaryota;Opisthokonta;Metazoa;Eumetazoa;Bilateria;Protostomia;  
Spiralia;Lophotrochozoa;Mollusca;Bivalvia;Autobranchia;Pteriomorpha;Pect  
inida;Pectinoidea;Pectinidae;Mizuhopecten;Mizuhopecten yessoensis  
UdeM00000012705 6579 681 UdeM00000012705 XP\_033747393.1 78.2 417  
87 2 15 427 388 804 9.60E-193 681 6579 cellular  
organisms;Eukaryota;Opisthokonta;Metazoa;Eumetazoa;Bilateria;Protostomia;  
Spiralia;Lophotrochozoa;Mollusca;Bivalvia;Autobranchia;Pteriomorpha;Pect  
inida;Pectinoidea;Pectinidae;Pecten;Pecten maximus  
UdeM00000012706 6596 386.7 UdeM00000012706 XP\_045172135.1 64.2 302  
104 3 1 300 1 300 2.60E-104 386.7 6596 cellular  
organisms;Eukaryota;Opisthokonta;Metazoa;Eumetazoa;Bilateria;Protostomia;  
Spiralia;Lophotrochozoa;Mollusca;Bivalvia;Autobranchia;Heteroconchia;Euhe  
terodonta;Imparidentia;Venerida;Veneroidea;Veneridae;Mercenaria;Mercenari  
a mercenaria  
UdeM00000012707 6573 121.7 UdeM00000012707 XP\_021374752.1 43.4 143  
74 2 6 141 5 147 7.60E-25 121.7 6573 cellular  
organisms;Eukaryota;Opisthokonta;Metazoa;Eumetazoa;Bilateria;Protostomia;  
Spiralia;Lophotrochozoa;Mollusca;Bivalvia;Autobranchia;Pteriomorpha;Pect  
inida;Pectinoidea;Pectinidae;Mizuhopecten;Mizuhopecten yessoensis  
UdeM00000012708 6565 633.6 UdeM00000012708 XP\_022339665.1 55.1 630  
195 12 6 615 4 565 2.50E-178 633.6 6565 cellular  
organisms;Eukaryota;Opisthokonta;Metazoa;Eumetazoa;Bilateria;Protostomia;

Spiralia;Lophotrochozoa;Mollusca;Bivalvia;Autobranchia;Pteriormorphia;Ostr  
eida;Ostreoidea;Ostreidae;Crassostrea;Crassostrea virginica  
UdeM00000012709 6579 302 UdeM00000012709 XP\_033748575.1 48.5 324  
152 6 15 332 608 922 9.70E-79 302 6579 cellular  
organisms;Eukaryota;Opisthokonta;Metazoa;Eumetazoa;Bilateria;Protostomia;  
Spiralia;Lophotrochozoa;Mollusca;Bivalvia;Autobranchia;Pteriormorphia;Pect  
inida;Pectinoidea;Pectinidae;Pecten;Pecten maximus  
UdeM00000012710 400727 375.9 UdeM00000012710 XP\_025090767.1 42.7  
468 203 8 34 495 113 521 7.80E-101 375.9 400727  
cellular  
organisms;Eukaryota;Opisthokonta;Metazoa;Eumetazoa;Bilateria;Protostomia;  
Spiralia;Lophotrochozoa;Mollusca;Gastropoda;Caenogastropoda;Architaeniogl  
ossa;Ampullarioidea;Ampullariidae;Pomacea;Pomacea canaliculata  
UdeM00000012711 6596 1419.1 UdeM00000012711 XP\_045172712.1 62.7  
1158 364 7 2 1150 43 1141 0.00E+00 1419.1 6596  
cellular  
organisms;Eukaryota;Opisthokonta;Metazoa;Eumetazoa;Bilateria;Protostomia;  
Spiralia;Lophotrochozoa;Mollusca;Bivalvia;Autobranchia;Heteroconchia;Euhe  
terodonta;Imparidentia;Venerida;Veneroidea;Veneridae;Mercenaria;Mercenari  
a mercenaria  
UdeM00000012712 6596 159.1 UdeM00000012712 XP\_045172715.1 81.3 134  
25 0 3 136 7 140 4.10E-36 159.1 6596 cellular  
organisms;Eukaryota;Opisthokonta;Metazoa;Eumetazoa;Bilateria;Protostomia;  
Spiralia;Lophotrochozoa;Mollusca;Bivalvia;Autobranchia;Heteroconchia;Euhe  
terodonta;Imparidentia;Venerida;Veneroidea;Veneridae;Mercenaria;Mercenari  
a mercenaria  
UdeM00000012713 6573 257.7 UdeM00000012713 XP\_021362193.1 55 251  
84 5 1 224 1 249 1.50E-65 257.7 6573 cellular  
organisms;Eukaryota;Opisthokonta;Metazoa;Eumetazoa;Bilateria;Protostomia;  
Spiralia;Lophotrochozoa;Mollusca;Bivalvia;Autobranchia;Pteriormorphia;Pect  
inida;Pectinoidea;Pectinidae;Mizuhopecten;Mizuhopecten yessoensis  
UdeM00000012714 6596 640.2 UdeM00000012714 XP\_045158673.1 59.3 511  
198 6 47 555 46 548 2.50E-180 640.2 6596 cellular  
organisms;Eukaryota;Opisthokonta;Metazoa;Eumetazoa;Bilateria;Protostomia;  
Spiralia;Lophotrochozoa;Mollusca;Bivalvia;Autobranchia;Heteroconchia;Euhe  
terodonta;Imparidentia;Venerida;Veneroidea;Veneridae;Mercenaria;Mercenari  
a mercenaria  
UdeM00000012715 6573 658.7 UdeM00000012715 XP\_021362192.1 57.9 534  
210 8 27 554 29 553 6.80E-186 658.7 6573 cellular  
organisms;Eukaryota;Opisthokonta;Metazoa;Eumetazoa;Bilateria;Protostomia;  
Spiralia;Lophotrochozoa;Mollusca;Bivalvia;Autobranchia;Pteriormorphia;Pect  
inida;Pectinoidea;Pectinidae;Mizuhopecten;Mizuhopecten yessoensis  
UdeM00000012716 6596 276.2 UdeM00000012716 XP\_045158673.1 70.9 175  
50 1 4 177 370 544 3.20E-71 276.2 6596 cellular  
organisms;Eukaryota;Opisthokonta;Metazoa;Eumetazoa;Bilateria;Protostomia;  
Spiralia;Lophotrochozoa;Mollusca;Bivalvia;Autobranchia;Heteroconchia;Euhe  
terodonta;Imparidentia;Venerida;Veneroidea;Veneridae;Mercenaria;Mercenari  
a mercenaria  
UdeM00000012717 6596 508.1 UdeM00000012717 XP\_045171932.1 80.3 304  
60 0 5 308 866 1169 8.10E-141 508.1 6596 cellular  
organisms;Eukaryota;Opisthokonta;Metazoa;Eumetazoa;Bilateria;Protostomia;  
Spiralia;Lophotrochozoa;Mollusca;Bivalvia;Autobranchia;Heteroconchia;Euhe  
terodonta;Imparidentia;Venerida;Veneroidea;Veneridae;Mercenaria;Mercenari  
a mercenaria



|                                                                                                                                                                                                                                       |       |        |                 |                |        |
|---------------------------------------------------------------------------------------------------------------------------------------------------------------------------------------------------------------------------------------|-------|--------|-----------------|----------------|--------|
| UdeM00000012718                                                                                                                                                                                                                       | 6596  | 1069.3 | UdeM00000012718 | XP_045171932.1 | 43.1   |
| 1474                                                                                                                                                                                                                                  | 228   | 2      | 58              | 1531           | 11     |
|                                                                                                                                                                                                                                       |       |        | 873             | 0.00E+00       | 1069.3 |
| cellular                                                                                                                                                                                                                              |       |        |                 |                | 6596   |
| organisms;Eukaryota;Opisthokonta;Metazoa;Eumetazoa;Bilateria;Protostomia;Spiralia;Lophotrochozoa;Mollusca;Bivalvia;Autobranchia;Heteroconchia;Euherodonta;Imparidentia;Venerida;Veneroidea;Veneridae;Mercenaria;Mercenaria mercenaria |       |        |                 |                |        |
| UdeM00000012719                                                                                                                                                                                                                       | 6596  | 294.3  | UdeM00000012719 | XP_045173620.1 | 40.5   |
| 238                                                                                                                                                                                                                                   | 15    | 91     | 582             | 14             | 467    |
|                                                                                                                                                                                                                                       |       |        | 3.50E-76        | 294.3          | 6596   |
| cellular                                                                                                                                                                                                                              |       |        |                 |                |        |
| organisms;Eukaryota;Opisthokonta;Metazoa;Eumetazoa;Bilateria;Protostomia;Spiralia;Lophotrochozoa;Mollusca;Bivalvia;Autobranchia;Heteroconchia;Euherodonta;Imparidentia;Venerida;Veneroidea;Veneridae;Mercenaria;Mercenaria mercenaria |       |        |                 |                |        |
| UdeM00000012721                                                                                                                                                                                                                       | 6596  | 124.8  | UdeM00000012721 | XP_045174016.1 | 50.3   |
| 76                                                                                                                                                                                                                                    | 2     | 18     | 186             | 20             | 183    |
|                                                                                                                                                                                                                                       |       |        | 6.10E-25        | 124.8          | 6596   |
| cellular                                                                                                                                                                                                                              |       |        |                 |                |        |
| organisms;Eukaryota;Opisthokonta;Metazoa;Eumetazoa;Bilateria;Protostomia;Spiralia;Lophotrochozoa;Mollusca;Bivalvia;Autobranchia;Heteroconchia;Euherodonta;Imparidentia;Venerida;Veneroidea;Veneridae;Mercenaria;Mercenaria mercenaria |       |        |                 |                |        |
| UdeM00000012720                                                                                                                                                                                                                       | 6596  | 126.3  | UdeM00000012720 | XP_045174017.1 | 49.4   |
| 80                                                                                                                                                                                                                                    | 2     | 8      | 181             | 3              | 171    |
|                                                                                                                                                                                                                                       |       |        | 2.10E-25        | 126.3          | 6596   |
| cellular                                                                                                                                                                                                                              |       |        |                 |                |        |
| organisms;Eukaryota;Opisthokonta;Metazoa;Eumetazoa;Bilateria;Protostomia;Spiralia;Lophotrochozoa;Mollusca;Bivalvia;Autobranchia;Heteroconchia;Euherodonta;Imparidentia;Venerida;Veneroidea;Veneridae;Mercenaria;Mercenaria mercenaria |       |        |                 |                |        |
| UdeM00000012722                                                                                                                                                                                                                       | 6596  | 233.4  | UdeM00000012722 | XP_045174019.1 | 52.3   |
| 90                                                                                                                                                                                                                                    | 1     | 1      | 195             | 1              | 192    |
|                                                                                                                                                                                                                                       |       |        | 2.50E-58        | 233.4          | 6596   |
| cellular                                                                                                                                                                                                                              |       |        |                 |                |        |
| organisms;Eukaryota;Opisthokonta;Metazoa;Eumetazoa;Bilateria;Protostomia;Spiralia;Lophotrochozoa;Mollusca;Bivalvia;Autobranchia;Heteroconchia;Euherodonta;Imparidentia;Venerida;Veneroidea;Veneridae;Mercenaria;Mercenaria mercenaria |       |        |                 |                |        |
| UdeM00000012723                                                                                                                                                                                                                       | 6596  | 228    | UdeM00000012723 | XP_045173113.1 | 50     |
| 45                                                                                                                                                                                                                                    | 3     | 5      | 161             | 22             | 242    |
|                                                                                                                                                                                                                                       |       |        | 8.60E-57        | 228            | 6596   |
| cellular                                                                                                                                                                                                                              |       |        |                 |                |        |
| organisms;Eukaryota;Opisthokonta;Metazoa;Eumetazoa;Bilateria;Protostomia;Spiralia;Lophotrochozoa;Mollusca;Bivalvia;Autobranchia;Heteroconchia;Euherodonta;Imparidentia;Venerida;Veneroidea;Veneridae;Mercenaria;Mercenaria mercenaria |       |        |                 |                |        |
| UdeM00000012724                                                                                                                                                                                                                       | 37653 | 68.6   | UdeM00000012724 | XP_014773118.1 | 56.2   |
| 24                                                                                                                                                                                                                                    | 2     | 71     | 133             | 27             | 87     |
|                                                                                                                                                                                                                                       |       |        | 7.10E-09        | 68.6           | 37653  |
| cellular                                                                                                                                                                                                                              |       |        |                 |                |        |
| organisms;Eukaryota;Opisthokonta;Metazoa;Eumetazoa;Bilateria;Protostomia;Spiralia;Lophotrochozoa;Mollusca;Cephalopoda;Coleoidea;Octopodiformes;Octopoda;Incirrata;Octopodidae;Octopus;Octopus bimaculoides                            |       |        |                 |                |        |
| UdeM00000012726                                                                                                                                                                                                                       | 6565  | 69.7   | UdeM00000012726 | XP_022340599.1 | 26.4   |
| 155                                                                                                                                                                                                                                   | 4     | 44     | 270             | 43             | 262    |
|                                                                                                                                                                                                                                       |       |        | 6.50E-09        | 69.7           | 6565   |
| cellular                                                                                                                                                                                                                              |       |        |                 |                |        |
| organisms;Eukaryota;Opisthokonta;Metazoa;Eumetazoa;Bilateria;Protostomia;Spiralia;Lophotrochozoa;Mollusca;Bivalvia;Autobranchia;Pteriomorphia;Ostreida;Ostreoidea;Ostreidae;Crassostrea;Crassostrea virginica                         |       |        |                 |                |        |
| UdeM00000012725                                                                                                                                                                                                                       | 6579  | 138.3  | UdeM00000012725 | XP_033747586.1 | 27.6   |
| 253                                                                                                                                                                                                                                   | 5     | 7      | 368             | 4              | 365    |
|                                                                                                                                                                                                                                       |       |        | 2.00E-29        | 138.3          | 6579   |
| cellular                                                                                                                                                                                                                              |       |        |                 |                |        |
| organisms;Eukaryota;Opisthokonta;Metazoa;Eumetazoa;Bilateria;Protostomia;Spiralia;Lophotrochozoa;Mollusca;Bivalvia;Autobranchia;Pteriomorphia;Pectinida;Pectinoidea;Pectinidae;Pecten;Pecten maximus                                  |       |        |                 |                |        |
| UdeM00000012727                                                                                                                                                                                                                       | 6565  | 58.9   | UdeM00000012727 | XP_022322825.1 | 40.3   |
| 42                                                                                                                                                                                                                                    | 1     | 39     | 109             | 381            | 452    |
|                                                                                                                                                                                                                                       |       |        | 5.00E-06        | 58.9           | 6565   |
| cellular                                                                                                                                                                                                                              |       |        |                 |                |        |

organisms;Eukaryota;Opisthokonta;Metazoa;Eumetazoa;Bilateria;Protostomia;Spiralia;Lophotrochozoa;Mollusca;Bivalvia;Autobranhia;Pteriormorphia;Ostreida;Ostreioidea;Ostreidae;Crassostrea;Crassostrea virginica  
UdeM00000012728 6565 228.4 UdeM00000012728 XP\_022336729.1 51.5 260  
99 5 5 264 4 236 1.10E-56 228.4 6565 cellular

organisms;Eukaryota;Opisthokonta;Metazoa;Eumetazoa;Bilateria;Protostomia;Spiralia;Lophotrochozoa;Mollusca;Bivalvia;Autobranhia;Pteriormorphia;Ostreida;Ostreioidea;Ostreidae;Crassostrea;Crassostrea virginica  
UdeM00000012729 6573 1236.9 UdeM00000012729 XP\_021373101.1 49.4  
1343 612 10 3 1293 109 1435 0.00E+00 1236.9 6573  
cellular

organisms;Eukaryota;Opisthokonta;Metazoa;Eumetazoa;Bilateria;Protostomia;Spiralia;Lophotrochozoa;Mollusca;Bivalvia;Autobranhia;Pteriormorphia;Pectinida;Pectinoidea;Pectinidae;Mizuhopecten;Mizuhopecten yessoensis  
UdeM00000012731 6596 141 UdeM00000012731 XP\_045172965.1 36.9 295  
131 9 28 319 176 418 3.10E-30 141 6596 cellular

organisms;Eukaryota;Opisthokonta;Metazoa;Eumetazoa;Bilateria;Protostomia;Spiralia;Lophotrochozoa;Mollusca;Bivalvia;Autobranhia;Heteroconchia;Euherodonta;Imparidentia;Venerida;Veneroidea;Veneridae;Mercenaria;Mercenaria mercenaria  
UdeM00000012732 225164 65.9 UdeM00000012732 XP\_009045146.1 25.5  
593 285 22 187 750 161 625 4.40E-07 65.9 225164  
cellular

organisms;Eukaryota;Opisthokonta;Metazoa;Eumetazoa;Bilateria;Protostomia;Spiralia;Lophotrochozoa;Mollusca;Gastropoda;Patellogastropoda;Lottioidea;Lottiidae;Lottia;Lottia gigantea  
UdeM00000012733 6565 234.2 UdeM00000012733 XP\_022344216.1 41.2 872  
478 15 85 943 752 1601 6.90E-58 234.2 6565 cellular

organisms;Eukaryota;Opisthokonta;Metazoa;Eumetazoa;Bilateria;Protostomia;Spiralia;Lophotrochozoa;Mollusca;Bivalvia;Autobranhia;Pteriormorphia;Ostreida;Ostreioidea;Ostreidae;Crassostrea;Crassostrea virginica  
UdeM00000012734 6596 243.4 UdeM00000012734 XP\_045173958.1 61.8 199  
74 2 37 234 631 828 2.80E-61 243.4 6596 cellular

organisms;Eukaryota;Opisthokonta;Metazoa;Eumetazoa;Bilateria;Protostomia;Spiralia;Lophotrochozoa;Mollusca;Bivalvia;Autobranhia;Heteroconchia;Euherodonta;Imparidentia;Venerida;Veneroidea;Veneridae;Mercenaria;Mercenaria mercenaria  
UdeM00000012735 6596 250.8 UdeM00000012735 XP\_045173958.1 60.1 213  
78 3 70 281 622 828 2.10E-63 250.8 6596 cellular

organisms;Eukaryota;Opisthokonta;Metazoa;Eumetazoa;Bilateria;Protostomia;Spiralia;Lophotrochozoa;Mollusca;Bivalvia;Autobranhia;Heteroconchia;Euherodonta;Imparidentia;Venerida;Veneroidea;Veneridae;Mercenaria;Mercenaria mercenaria  
UdeM00000012736 6579 236.9 UdeM00000012736 XP\_033748567.1 38.4 406  
190 10 2 384 8 376 5.00E-59 236.9 6579 cellular

organisms;Eukaryota;Opisthokonta;Metazoa;Eumetazoa;Bilateria;Protostomia;Spiralia;Lophotrochozoa;Mollusca;Bivalvia;Autobranhia;Pteriormorphia;Pectinida;Pectinoidea;Pectinidae;Pecten;Pecten maximus  
UdeM00000012737 6579 236.9 UdeM00000012737 XP\_033748567.1 38.4 406  
190 10 2 384 8 376 5.20E-59 236.9 6579 cellular

organisms;Eukaryota;Opisthokonta;Metazoa;Eumetazoa;Bilateria;Protostomia;Spiralia;Lophotrochozoa;Mollusca;Bivalvia;Autobranhia;Pteriormorphia;Pectinida;Pectinoidea;Pectinidae;Pecten;Pecten maximus

UdeM00000012738 6596 111.7 UdeM00000012738 XP\_045173952.1 38.6 223  
 108 7 1 212 71 275 1.20E-21 111.7 6596 cellular  
 organisms;Eukaryota;Opisthokonta;Metazoa;Eumetazoa;Bilateria;Protostomia;  
 Spiralia;Lophotrochozoa;Mollusca;Bivalvia;Autobranchia;Heteroconchia;Euhe  
 terodonta;Imparidentia;Venerida;Veneroidea;Veneridae;Mercenaria;Mercenari  
 a mercenaria  
 UdeM00000012739 1735272 4602.7 UdeM00000012739 XP\_041349285.1  
 94.3 2367 129 2 1 2366 1 2363 0.00E+00 4602.7  
 1735272 cellular  
 organisms;Eukaryota;Opisthokonta;Metazoa;Eumetazoa;Bilateria;Protostomia;  
 Spiralia;Lophotrochozoa;Mollusca;Gastropoda;Neomphalina;Neomphaloidea;Pel  
 tospiridae;Gigantopelta;Gigantopelta aegis  
 UdeM00000012740 8407 78.2 UdeM00000012740 XP\_040177830.1 44.2 113  
 51 6 29 131 366 476 3.60E-11 78.2 8407 cellular  
 organisms;Eukaryota;Opisthokonta;Metazoa;Eumetazoa;Bilateria;Deuterostomi  
 a;Chordata;Craniata;Vertebrata;Gnathostomata;Teleostomi;Euteleostomi;Sarc  
 opterygii;Dipnotetrapodomorpha;Tetrapoda;Amphibia;Batrachia;Anura;Neobatr  
 achia;Ranoidea;Ranidae;Rana;Rana;Rana temporaria  
 UdeM00000012741 6596 111.3 UdeM00000012741 XP\_045182968.1 35.3 139  
 89 1 70 208 334 471 1.60E-21 111.3 6596 cellular  
 organisms;Eukaryota;Opisthokonta;Metazoa;Eumetazoa;Bilateria;Protostomia;  
 Spiralia;Lophotrochozoa;Mollusca;Bivalvia;Autobranchia;Heteroconchia;Euhe  
 terodonta;Imparidentia;Venerida;Veneroidea;Veneridae;Mercenaria;Mercenari  
 a mercenaria  
 UdeM00000012742 6596 161.4 UdeM00000012742 XP\_045206316.1 33 276  
 165 5 25 286 100 369 1.70E-36 161.4 6596 cellular  
 organisms;Eukaryota;Opisthokonta;Metazoa;Eumetazoa;Bilateria;Protostomia;  
 Spiralia;Lophotrochozoa;Mollusca;Bivalvia;Autobranchia;Heteroconchia;Euhe  
 terodonta;Imparidentia;Venerida;Veneroidea;Veneridae;Mercenaria;Mercenari  
 a mercenaria  
 UdeM00000012743 6596 141.7 UdeM00000012743 XP\_045196272.1 32.9 283  
 172 7 2 272 352 628 1.50E-30 141.7 6596 cellular  
 organisms;Eukaryota;Opisthokonta;Metazoa;Eumetazoa;Bilateria;Protostomia;  
 Spiralia;Lophotrochozoa;Mollusca;Bivalvia;Autobranchia;Heteroconchia;Euhe  
 terodonta;Imparidentia;Venerida;Veneroidea;Veneridae;Mercenaria;Mercenari  
 a mercenaria  
 UdeM00000012750 6579 137.5 UdeM00000012750 XP\_033758185.1 40.3 201  
 86 5 171 371 5 171 3.50E-29 137.5 6579 cellular  
 organisms;Eukaryota;Opisthokonta;Metazoa;Eumetazoa;Bilateria;Protostomia;  
 Spiralia;Lophotrochozoa;Mollusca;Bivalvia;Autobranchia;Pteriormorphia;Pect  
 inida;Pectinoidea;Pectinidae;Pecten;Pecten maximus  
 UdeM00000012751 6596 134.8 UdeM00000012751 XP\_045177816.1 59.5 121  
 46 1 1 121 391 508 7.30E-29 134.8 6596 cellular  
 organisms;Eukaryota;Opisthokonta;Metazoa;Eumetazoa;Bilateria;Protostomia;  
 Spiralia;Lophotrochozoa;Mollusca;Bivalvia;Autobranchia;Heteroconchia;Euhe  
 terodonta;Imparidentia;Venerida;Veneroidea;Veneridae;Mercenaria;Mercenari  
 a mercenaria  
 UdeM00000012753 6596 174.9 UdeM00000012753 XP\_045172844.1 51.2 170  
 75 4 1 166 1 166 8.80E-41 174.9 6596 cellular  
 organisms;Eukaryota;Opisthokonta;Metazoa;Eumetazoa;Bilateria;Protostomia;  
 Spiralia;Lophotrochozoa;Mollusca;Bivalvia;Autobranchia;Heteroconchia;Euhe  
 terodonta;Imparidentia;Venerida;Veneroidea;Veneridae;Mercenaria;Mercenari  
 a mercenaria

UdeM00000012754 6596 92.8 UdeM00000012754 XP\_045214032.1 21.4 570  
 369 18 145 681 36 559 2.70E-15 92.8 6596 cellular  
 organisms;Eukaryota;Opisthokonta;Metazoa;Eumetazoa;Bilateria;Protostomia;  
 Spiralia;Lophotrochozoa;Mollusca;Bivalvia;Autobranhia;Heteroconchia;Euhe  
 terodonta;Imparidentia;Venerida;Veneroidea;Veneridae;Mercenaria;Mercenari  
 a mercenaria

UdeM00000012758 6596 117.9 UdeM00000012758 XP\_045157636.1 26.2 366  
 252 9 424 780 1 357 6.20E-23 117.9 6596 cellular  
 organisms;Eukaryota;Opisthokonta;Metazoa;Eumetazoa;Bilateria;Protostomia;  
 Spiralia;Lophotrochozoa;Mollusca;Bivalvia;Autobranhia;Heteroconchia;Euhe  
 terodonta;Imparidentia;Venerida;Veneroidea;Veneridae;Mercenaria;Mercenari  
 a mercenaria

UdeM00000012759 6596 117.9 UdeM00000012759 XP\_045157636.1 26.2 366  
 252 9 424 780 1 357 9.90E-23 117.9 6596 cellular  
 organisms;Eukaryota;Opisthokonta;Metazoa;Eumetazoa;Bilateria;Protostomia;  
 Spiralia;Lophotrochozoa;Mollusca;Bivalvia;Autobranhia;Heteroconchia;Euhe  
 terodonta;Imparidentia;Venerida;Veneroidea;Veneridae;Mercenaria;Mercenari  
 a mercenaria

UdeM00000012761 6573 231.9 UdeM00000012761 XP\_021343061.1 37.3 295  
 180 3 2 295 3 293 1.10E-57 231.9 6573 cellular  
 organisms;Eukaryota;Opisthokonta;Metazoa;Eumetazoa;Bilateria;Protostomia;  
 Spiralia;Lophotrochozoa;Mollusca;Bivalvia;Autobranhia;Pteriormorphia;Pect  
 inida;Pectinoidea;Pectinidae;Mizuhopecten;Mizuhopecten yessoensis

UdeM00000012762 6596 185.3 UdeM00000012762 XP\_045173115.1 38.6 228  
 138 1 1 226 67 294 9.20E-44 185.3 6596 cellular  
 organisms;Eukaryota;Opisthokonta;Metazoa;Eumetazoa;Bilateria;Protostomia;  
 Spiralia;Lophotrochozoa;Mollusca;Bivalvia;Autobranhia;Heteroconchia;Euhe  
 terodonta;Imparidentia;Venerida;Veneroidea;Veneridae;Mercenaria;Mercenari  
 a mercenaria

UdeM00000012763 6596 172.6 UdeM00000012763 XP\_045172907.1 35.9 262  
 158 5 1 258 1 256 6.70E-40 172.6 6596 cellular  
 organisms;Eukaryota;Opisthokonta;Metazoa;Eumetazoa;Bilateria;Protostomia;  
 Spiralia;Lophotrochozoa;Mollusca;Bivalvia;Autobranhia;Heteroconchia;Euhe  
 terodonta;Imparidentia;Venerida;Veneroidea;Veneridae;Mercenaria;Mercenari  
 a mercenaria

UdeM00000012764 6596 86.7 UdeM00000012764 XP\_045172907.1 40.2 132  
 69 5 1 128 1 126 2.60E-14 86.7 6596 cellular  
 organisms;Eukaryota;Opisthokonta;Metazoa;Eumetazoa;Bilateria;Protostomia;  
 Spiralia;Lophotrochozoa;Mollusca;Bivalvia;Autobranhia;Heteroconchia;Euhe  
 terodonta;Imparidentia;Venerida;Veneroidea;Veneridae;Mercenaria;Mercenari  
 a mercenaria

UdeM00000043503 6596 352.8 UdeM00000043503 XP\_045170511.1 29.5 818  
 476 27 337 1086 97 881 1.80E-93 352.8 6596 cellular  
 organisms;Eukaryota;Opisthokonta;Metazoa;Eumetazoa;Bilateria;Protostomia;  
 Spiralia;Lophotrochozoa;Mollusca;Bivalvia;Autobranhia;Heteroconchia;Euhe  
 terodonta;Imparidentia;Venerida;Veneroidea;Veneridae;Mercenaria;Mercenari  
 a mercenaria

UdeM00000043505 6596 348.6 UdeM00000043505 XP\_045170511.1 29.7 752  
 438 23 15 710 213 929 2.30E-92 348.6 6596 cellular  
 organisms;Eukaryota;Opisthokonta;Metazoa;Eumetazoa;Bilateria;Protostomia;  
 Spiralia;Lophotrochozoa;Mollusca;Bivalvia;Autobranhia;Heteroconchia;Euhe  
 terodonta;Imparidentia;Venerida;Veneroidea;Veneridae;Mercenaria;Mercenari  
 a mercenaria

UdeM00000031280 225164 98.6 UdeM00000031280 XP\_009054455.1 20.7  
 468 343 7 1 463 95 539 2.30E-17 98.6 225164  
 cellular  
 organisms;Eukaryota;Opisthokonta;Metazoa;Eumetazoa;Bilateria;Protostomia;  
 Spiralia;Lophotrochozoa;Mollusca;Gastropoda;Patellogastropoda;Lottioidea;  
 Lottiidae;Lottia;Lottia gigantea  
 UdeM00000031281 225164 98.6 UdeM00000031281 XP\_009054455.1 20.7  
 468 343 7 1 463 95 539 2.30E-17 98.6 225164  
 cellular  
 organisms;Eukaryota;Opisthokonta;Metazoa;Eumetazoa;Bilateria;Protostomia;  
 Spiralia;Lophotrochozoa;Mollusca;Gastropoda;Patellogastropoda;Lottioidea;  
 Lottiidae;Lottia;Lottia gigantea  
 UdeM00000031282 225164 98.6 UdeM00000031282 XP\_009054455.1 20.7  
 468 343 7 1 463 95 539 2.30E-17 98.6 225164  
 cellular  
 organisms;Eukaryota;Opisthokonta;Metazoa;Eumetazoa;Bilateria;Protostomia;  
 Spiralia;Lophotrochozoa;Mollusca;Gastropoda;Patellogastropoda;Lottioidea;  
 Lottiidae;Lottia;Lottia gigantea  
 UdeM00000031283 225164 98.6 UdeM00000031283 XP\_009054455.1 20.7  
 468 343 7 1 463 95 539 2.30E-17 98.6 225164  
 cellular  
 organisms;Eukaryota;Opisthokonta;Metazoa;Eumetazoa;Bilateria;Protostomia;  
 Spiralia;Lophotrochozoa;Mollusca;Gastropoda;Patellogastropoda;Lottioidea;  
 Lottiidae;Lottia;Lottia gigantea  
 UdeM00000031285 6573 85.5 UdeM00000031285 XP\_021346266.1 37.1 132  
 77 3 6 134 27 155 2.60E-13 85.5 6573 cellular  
 organisms;Eukaryota;Opisthokonta;Metazoa;Eumetazoa;Bilateria;Protostomia;  
 Spiralia;Lophotrochozoa;Mollusca;Bivalvia;Autobranchia;Pteriomorphia;Pect  
 inida;Pectinoidea;Pectinidae;Mizuhopecten;Mizuhopecten yessoensis  
 UdeM00000031286 6573 543.9 UdeM00000031286 XP\_021352116.1 65.5 426  
 119 5 1 424 1 400 1.80E-151 543.9 6573 cellular  
 organisms;Eukaryota;Opisthokonta;Metazoa;Eumetazoa;Bilateria;Protostomia;  
 Spiralia;Lophotrochozoa;Mollusca;Bivalvia;Autobranchia;Pteriomorphia;Pect  
 inida;Pectinoidea;Pectinidae;Mizuhopecten;Mizuhopecten yessoensis  
 UdeM00000031287 6596 2367.8 UdeM00000031287 XP\_045204208.1 49.5  
 2940 1198 60 1 2822 14 2783 0.00E+00 2367.8 6596  
 cellular  
 organisms;Eukaryota;Opisthokonta;Metazoa;Eumetazoa;Bilateria;Protostomia;  
 Spiralia;Lophotrochozoa;Mollusca;Bivalvia;Autobranchia;Heteroconchia;Euhe  
 terodonta;Imparidentia;Venerida;Veneroidea;Veneridae;Mercenaria;Mercenari  
 a mercenaria  
 UdeM00000031288 6596 388.7 UdeM00000031288 XP\_045204693.1 59.2 341  
 115 5 1 323 568 902 1.00E-104 388.7 6596 cellular  
 organisms;Eukaryota;Opisthokonta;Metazoa;Eumetazoa;Bilateria;Protostomia;  
 Spiralia;Lophotrochozoa;Mollusca;Bivalvia;Autobranchia;Heteroconchia;Euhe  
 terodonta;Imparidentia;Venerida;Veneroidea;Veneridae;Mercenaria;Mercenari  
 a mercenaria  
 UdeM00000031289 1735272 161.4 UdeM00000031289 XP\_041359345.1 63.9  
 122 44 0 3 124 444 565 1.20E-36 161.4 1735272  
 cellular  
 organisms;Eukaryota;Opisthokonta;Metazoa;Eumetazoa;Bilateria;Protostomia;  
 Spiralia;Lophotrochozoa;Mollusca;Gastropoda;Neomphalina;Neomphaloidea;Pel  
 tospiridae;Gigantopelta;Gigantopelta aegis

UdeM00000031291 6596 362.1 UdeM00000031291 XP\_045204696.1 47.7 413  
 185 7 24 412 28 433 1.00E-96 362.1 6596 cellular  
 organisms;Eukaryota;Opisthokonta;Metazoa;Eumetazoa;Bilateria;Protostomia;  
 Spiralia;Lophotrochozoa;Mollusca;Bivalvia;Autobranchia;Heteroconchia;Euhe  
 terodonta;Imparidentia;Venerida;Veneroidea;Veneridae;Mercenaria;Mercenari  
 a mercenaria  
 UdeM00000031290 6596 364.8 UdeM00000031290 XP\_045204696.1 48.4 401  
 180 6 49 425 36 433 1.60E-97 364.8 6596 cellular  
 organisms;Eukaryota;Opisthokonta;Metazoa;Eumetazoa;Bilateria;Protostomia;  
 Spiralia;Lophotrochozoa;Mollusca;Bivalvia;Autobranchia;Heteroconchia;Euhe  
 terodonta;Imparidentia;Venerida;Veneroidea;Veneridae;Mercenaria;Mercenari  
 a mercenaria  
 UdeM00000031293 6565 374 UdeM00000031293 XP\_022327428.1 47.2 422  
 216 5 24 440 7 426 2.60E-100 374 6565 cellular  
 organisms;Eukaryota;Opisthokonta;Metazoa;Eumetazoa;Bilateria;Protostomia;  
 Spiralia;Lophotrochozoa;Mollusca;Bivalvia;Autobranchia;Pteriormorphia;Ostr  
 eida;Ostreoidea;Ostreidae;Crassostrea;Crassostrea virginica  
 UdeM00000031292 6565 374 UdeM00000031292 XP\_022327428.1 47.2 422  
 216 5 33 449 7 426 2.70E-100 374 6565 cellular  
 organisms;Eukaryota;Opisthokonta;Metazoa;Eumetazoa;Bilateria;Protostomia;  
 Spiralia;Lophotrochozoa;Mollusca;Bivalvia;Autobranchia;Pteriormorphia;Ostr  
 eida;Ostreoidea;Ostreidae;Crassostrea;Crassostrea virginica  
 UdeM00000031294 6579 911.8 UdeM00000031294 XP\_033742990.1 69.5 622  
 188 1 1 622 1 620 4.90E-262 911.8 6579 cellular  
 organisms;Eukaryota;Opisthokonta;Metazoa;Eumetazoa;Bilateria;Protostomia;  
 Spiralia;Lophotrochozoa;Mollusca;Bivalvia;Autobranchia;Pteriormorphia;Pect  
 inida;Pectinoidea;Pectinidae;Pecten;Pecten maximus  
 UdeM00000031295 1735272 139.8 UdeM00000031295 XP\_041358868.1 71.4  
 91 26 0 4 94 2 92 1.80E-30 139.8 1735272  
 cellular  
 organisms;Eukaryota;Opisthokonta;Metazoa;Eumetazoa;Bilateria;Protostomia;  
 Spiralia;Lophotrochozoa;Mollusca;Gastropoda;Neomphalina;Neomphaloidea;Pel  
 tospiridae;Gigantopelta;Gigantopelta aegis  
 UdeM00000031296 6596 321.2 UdeM00000031296 XP\_045203143.1 53.9 256  
 114 4 1 254 1 254 1.20E-84 321.2 6596 cellular  
 organisms;Eukaryota;Opisthokonta;Metazoa;Eumetazoa;Bilateria;Protostomia;  
 Spiralia;Lophotrochozoa;Mollusca;Bivalvia;Autobranchia;Heteroconchia;Euhe  
 terodonta;Imparidentia;Venerida;Veneroidea;Veneridae;Mercenaria;Mercenari  
 a mercenaria  
 UdeM00000031297 6596 166.4 UdeM00000031297 XP\_045203143.1 60 120  
 46 2 1 119 1 119 2.40E-38 166.4 6596 cellular  
 organisms;Eukaryota;Opisthokonta;Metazoa;Eumetazoa;Bilateria;Protostomia;  
 Spiralia;Lophotrochozoa;Mollusca;Bivalvia;Autobranchia;Heteroconchia;Euhe  
 terodonta;Imparidentia;Venerida;Veneroidea;Veneridae;Mercenaria;Mercenari  
 a mercenaria  
 UdeM00000031298 29159 73.2 UdeM00000031298 XP\_019926167.2 45.2 93  
 45 2 1 92 282 369 3.10E-10 73.2 29159 cellular  
 organisms;Eukaryota;Opisthokonta;Metazoa;Eumetazoa;Bilateria;Protostomia;  
 Spiralia;Lophotrochozoa;Mollusca;Bivalvia;Autobranchia;Pteriormorphia;Ostr  
 eida;Ostreoidea;Ostreidae;Crassostrea;Crassostrea gigas  
 UdeM00000031299 6596 113.6 UdeM00000031299 XP\_045206618.1 45.5 145  
 69 4 48 190 252 388 3.00E-22 113.6 6596 cellular  
 organisms;Eukaryota;Opisthokonta;Metazoa;Eumetazoa;Bilateria;Protostomia;  
 Spiralia;Lophotrochozoa;Mollusca;Bivalvia;Autobranchia;Heteroconchia;Euhe

terodonta;Imparidentia;Venerida;Veneroidea;Veneridae;Mercenaria;Mercenari  
 a mercenaria  
 UdeM00000031300 6596 310.1 UdeM00000031300 XP\_045203527.1 49.2 333  
 162 2 21 346 14 346 3.70E-81 310.1 6596 cellular  
 organisms;Eukaryota;Opisthokonta;Metazoa;Eumetazoa;Bilateria;Protostomia;  
 Spiralia;Lophotrochozoa;Mollusca;Bivalvia;Autobranchia;Heteroconchia;Euhe  
 terodonta;Imparidentia;Venerida;Veneroidea;Veneridae;Mercenaria;Mercenari  
 a mercenaria  
 UdeM00000031301 6596 320.5 UdeM00000031301 XP\_045203527.1 52.5 303  
 144 0 44 346 44 346 2.70E-84 320.5 6596 cellular  
 organisms;Eukaryota;Opisthokonta;Metazoa;Eumetazoa;Bilateria;Protostomia;  
 Spiralia;Lophotrochozoa;Mollusca;Bivalvia;Autobranchia;Heteroconchia;Euhe  
 terodonta;Imparidentia;Venerida;Veneroidea;Veneridae;Mercenaria;Mercenari  
 a mercenaria  
 UdeM00000031302 6596 70.1 UdeM00000031302 XP\_045203527.1 48.7 78  
 38 1 24 101 25 100 2.10E-09 70.1 6596 cellular  
 organisms;Eukaryota;Opisthokonta;Metazoa;Eumetazoa;Bilateria;Protostomia;  
 Spiralia;Lophotrochozoa;Mollusca;Bivalvia;Autobranchia;Heteroconchia;Euhe  
 terodonta;Imparidentia;Venerida;Veneroidea;Veneridae;Mercenaria;Mercenari  
 a mercenaria  
 UdeM00000031303 6596 127.5 UdeM00000031303 XP\_045203527.1 50.8 124  
 55 2 1 118 226 349 1.10E-26 127.5 6596 cellular  
 organisms;Eukaryota;Opisthokonta;Metazoa;Eumetazoa;Bilateria;Protostomia;  
 Spiralia;Lophotrochozoa;Mollusca;Bivalvia;Autobranchia;Heteroconchia;Euhe  
 terodonta;Imparidentia;Venerida;Veneroidea;Veneridae;Mercenaria;Mercenari  
 a mercenaria  
 UdeM00000031305 6596 345.9 UdeM00000031305 XP\_045203528.1 55 338  
 129 6 1 335 352 669 5.80E-92 345.9 6596 cellular  
 organisms;Eukaryota;Opisthokonta;Metazoa;Eumetazoa;Bilateria;Protostomia;  
 Spiralia;Lophotrochozoa;Mollusca;Bivalvia;Autobranchia;Heteroconchia;Euhe  
 terodonta;Imparidentia;Venerida;Veneroidea;Veneridae;Mercenaria;Mercenari  
 a mercenaria  
 UdeM00000031304 6596 555.1 UdeM00000031304 XP\_045203530.1 57 532  
 192 9 9 530 58 562 1.00E-154 555.1 6596 cellular  
 organisms;Eukaryota;Opisthokonta;Metazoa;Eumetazoa;Bilateria;Protostomia;  
 Spiralia;Lophotrochozoa;Mollusca;Bivalvia;Autobranchia;Heteroconchia;Euhe  
 terodonta;Imparidentia;Venerida;Veneroidea;Veneridae;Mercenaria;Mercenari  
 a mercenaria  
 UdeM00000044441 42514 136.3 UdeM00000044441 XP\_037403362.1 51.1 135  
 58 3 9 138 72 203 3.10E-29 136.3 42514 cellular  
 organisms;Eukaryota;Opisthokonta;Metazoa;Eumetazoa;Bilateria;Deuterostomi  
 a;Chordata;Craniata;Vertebrata;Gnathostomata;Teleostomi;Euteleostomi;Acti  
 nopterygii;Actinopteri;Neopterygii;Teleostei;Osteoglossocephalai;Clupeoce  
 phala;Otomorpha;Ostariophysi;Otophysi;Characiphysae;Characiformes;Characo  
 idei;Serrasalminae;Pygocentrus;Pygocentrus nattereri  
 UdeM00000011091 6573 140.2 UdeM00000011091 XP\_021356527.1 37.7 207  
 126 3 35 241 34 237 4.30E-30 140.2 6573 cellular  
 organisms;Eukaryota;Opisthokonta;Metazoa;Eumetazoa;Bilateria;Protostomia;  
 Spiralia;Lophotrochozoa;Mollusca;Bivalvia;Autobranchia;Pteriomorphia;Pect  
 inida;Pectinoidea;Pectinidae;Mizuhopecten;Mizuhopecten yessoensis  
 UdeM00000011092 6565 108.6 UdeM00000011092 XP\_022299405.1 38.7 163  
 99 1 19 181 197 358 1.10E-20 108.6 6565 cellular  
 organisms;Eukaryota;Opisthokonta;Metazoa;Eumetazoa;Bilateria;Protostomia;

Spiralia; Lophotrochozoa; Mollusca; Bivalvia; Autobranchia; Pteriomorphia; Ostr  
 eida; Ostreoidae; Ostreidae; Crassostrea; Crassostrea virginica  
 UdeM00000011093 29144 132.1 UdeM00000011093 XP\_030636303.1 39.3 211  
 117 5 17 225 7 208 1.20E-27 132.1 29144 cellular  
 organisms; Eukaryota; Opisthokonta; Metazoa; Eumetazoa; Bilateria; Deuterostomi  
 a; Chordata; Craniata; Vertebrata; Gnathostomata; Teleostomi; Euteleostomi; Acti  
 nopterygii; Actinopteri; Neopterygii; Teleostei; Osteoglossocephalai; Clupeoce  
 phala; Otomorpha; Ostariophysi; Anotophysii; Gonorynchiformes; Chanoidei; Chanid  
 ae; Chanos; Chanos chanos  
 UdeM00000011094 6596 162.9 UdeM00000011094 XP\_045172301.1 25.9 664  
 376 26 6 645 399 970 1.80E-36 162.9 6596 cellular  
 organisms; Eukaryota; Opisthokonta; Metazoa; Eumetazoa; Bilateria; Protostomia;  
 Spiralia; Lophotrochozoa; Mollusca; Bivalvia; Autobranchia; Heteroconchia; Eue  
 terodonta; Imparidentia; Venerida; Veneroidea; Veneridae; Mercenaria; Mercenari  
 a mercenaria  
 UdeM00000011095 6596 189.1 UdeM00000011095 XP\_045172301.1 25.7 820  
 494 30 459 1255 367 1094 3.70E-44 189.1 6596 cellular  
 organisms; Eukaryota; Opisthokonta; Metazoa; Eumetazoa; Bilateria; Protostomia;  
 Spiralia; Lophotrochozoa; Mollusca; Bivalvia; Autobranchia; Heteroconchia; Eue  
 terodonta; Imparidentia; Venerida; Veneroidea; Veneridae; Mercenaria; Mercenari  
 a mercenaria  
 UdeM00000011096 1735272 694.9 UdeM00000011096 XP\_041368128.1 53.1  
 734 327 6 47 767 1 730 1.20E-196 694.9 1735272  
 cellular  
 organisms; Eukaryota; Opisthokonta; Metazoa; Eumetazoa; Bilateria; Protostomia;  
 Spiralia; Lophotrochozoa; Mollusca; Gastropoda; Neomphalina; Neomphaloidea; Pel  
 tospiridae; Gigantopelta; Gigantopelta aegis  
 UdeM00000011099 6579 434.5 UdeM00000011099 XP\_033732454.1 66.6 302  
 101 0 1 302 28 329 1.10E-118 434.5 6579 cellular  
 organisms; Eukaryota; Opisthokonta; Metazoa; Eumetazoa; Bilateria; Protostomia;  
 Spiralia; Lophotrochozoa; Mollusca; Bivalvia; Autobranchia; Pteriomorphia; Pect  
 inida; Pectinoidea; Pectinidae; Pecten; Pecten maximus  
 UdeM00000011100 6579 179.1 UdeM00000011100 XP\_033732457.1 83.2 113  
 19 0 14 126 19 131 3.60E-42 179.1 6579 cellular  
 organisms; Eukaryota; Opisthokonta; Metazoa; Eumetazoa; Bilateria; Protostomia;  
 Spiralia; Lophotrochozoa; Mollusca; Bivalvia; Autobranchia; Pteriomorphia; Pect  
 inida; Pectinoidea; Pectinidae; Pecten; Pecten maximus  
 UdeM00000011101 6579 375.2 UdeM00000011101 XP\_033727585.1 34.6 615  
 316 10 96 707 80 611 1.90E-100 375.2 6579 cellular  
 organisms; Eukaryota; Opisthokonta; Metazoa; Eumetazoa; Bilateria; Protostomia;  
 Spiralia; Lophotrochozoa; Mollusca; Bivalvia; Autobranchia; Pteriomorphia; Pect  
 inida; Pectinoidea; Pectinidae; Pecten; Pecten maximus  
 UdeM00000011102 6596 313.9 UdeM00000011102 XP\_045189007.1 34.9 548  
 320 15 2 524 66 601 3.90E-82 313.9 6596 cellular  
 organisms; Eukaryota; Opisthokonta; Metazoa; Eumetazoa; Bilateria; Protostomia;  
 Spiralia; Lophotrochozoa; Mollusca; Bivalvia; Autobranchia; Heteroconchia; Eue  
 terodonta; Imparidentia; Venerida; Veneroidea; Veneridae; Mercenaria; Mercenari  
 a mercenaria  
 UdeM00000011107 6596 490.7 UdeM00000011107 XP\_045211522.1 33.9 924  
 507 28 27 884 2143 3028 3.90E-135 490.7 6596 cellular  
 organisms; Eukaryota; Opisthokonta; Metazoa; Eumetazoa; Bilateria; Protostomia;  
 Spiralia; Lophotrochozoa; Mollusca; Bivalvia; Autobranchia; Heteroconchia; Eue  
 terodonta; Imparidentia; Venerida; Veneroidea; Veneridae; Mercenaria; Mercenari  
 a mercenaria



UdeM00000011108 6596 510.8 UdeM00000011108 XP\_045211522.1 33 1019  
 574 33 17 966 2050 3028 4.10E-141 510.8 6596 cellular  
 organisms;Eukaryota;Opisthokonta;Metazoa;Eumetazoa;Bilateria;Protostomia;  
 Spiralia;Lophotrochozoa;Mollusca;Bivalvia;Autobranchia;Heteroconchia;Euhe  
 terodonta;Imparidentia;Venerida;Veneroidea;Veneridae;Mercenaria;Mercenari  
 a mercenaria  
 UdeM00000011109 6579 209.1 UdeM00000011109 XP\_033745542.1 39.3 285  
 152 10 27 301 30 303 8.40E-51 209.1 6579 cellular  
 organisms;Eukaryota;Opisthokonta;Metazoa;Eumetazoa;Bilateria;Protostomia;  
 Spiralia;Lophotrochozoa;Mollusca;Bivalvia;Autobranchia;Pteriormorphia;Pect  
 inida;Pectinoidea;Pectinidae;Pecten;Pecten maximus  
 UdeM00000011114 6579 182.2 UdeM00000011114 XP\_033745542.1 42.7 225  
 116 8 7 226 66 282 9.30E-43 182.2 6579 cellular  
 organisms;Eukaryota;Opisthokonta;Metazoa;Eumetazoa;Bilateria;Protostomia;  
 Spiralia;Lophotrochozoa;Mollusca;Bivalvia;Autobranchia;Pteriormorphia;Pect  
 inida;Pectinoidea;Pectinidae;Pecten;Pecten maximus  
 UdeM00000011115 6573 146 UdeM00000011115 XP\_021365342.1 38.8 260  
 131 12 32 282 12 252 7.50E-32 146 6573 cellular  
 organisms;Eukaryota;Opisthokonta;Metazoa;Eumetazoa;Bilateria;Protostomia;  
 Spiralia;Lophotrochozoa;Mollusca;Bivalvia;Autobranchia;Pteriormorphia;Pect  
 inida;Pectinoidea;Pectinidae;Mizuhopecten;Mizuhopecten yessoensis  
 UdeM00000011116 6596 405.6 UdeM00000011116 XP\_045211522.1 33.2 738  
 399 20 77 756 2347 3048 1.40E-109 405.6 6596 cellular  
 organisms;Eukaryota;Opisthokonta;Metazoa;Eumetazoa;Bilateria;Protostomia;  
 Spiralia;Lophotrochozoa;Mollusca;Bivalvia;Autobranchia;Heteroconchia;Euhe  
 terodonta;Imparidentia;Venerida;Veneroidea;Veneridae;Mercenaria;Mercenari  
 a mercenaria  
 UdeM00000011117 6596 1394 UdeM00000011117 XP\_045198724.1 54.7 1290  
 484 8 294 1494 2 1279 0.00E+00 1394 6596 cellular  
 organisms;Eukaryota;Opisthokonta;Metazoa;Eumetazoa;Bilateria;Protostomia;  
 Spiralia;Lophotrochozoa;Mollusca;Bivalvia;Autobranchia;Heteroconchia;Euhe  
 terodonta;Imparidentia;Venerida;Veneroidea;Veneridae;Mercenaria;Mercenari  
 a mercenaria  
 UdeM00000011118 6565 537.7 UdeM00000011118 XP\_022320952.1 66.5 522  
 134 10 4 508 12 509 2.10E-149 537.7 6565 cellular  
 organisms;Eukaryota;Opisthokonta;Metazoa;Eumetazoa;Bilateria;Protostomia;  
 Spiralia;Lophotrochozoa;Mollusca;Bivalvia;Autobranchia;Pteriormorphia;Ostr  
 eida;Ostreoidea;Ostreidae;Crassostrea;Crassostrea virginica  
 UdeM00000011119 6596 218.8 UdeM00000011119 XP\_045156575.1 73.2 183  
 40 2 12 185 268 450 7.00E-54 218.8 6596 cellular  
 organisms;Eukaryota;Opisthokonta;Metazoa;Eumetazoa;Bilateria;Protostomia;  
 Spiralia;Lophotrochozoa;Mollusca;Bivalvia;Autobranchia;Heteroconchia;Euhe  
 terodonta;Imparidentia;Venerida;Veneroidea;Veneridae;Mercenaria;Mercenari  
 a mercenaria  
 UdeM00000011120 6596 141 UdeM00000011120 XP\_045184655.1 32.3 260  
 174 2 1 259 76 334 2.20E-30 141 6596 cellular  
 organisms;Eukaryota;Opisthokonta;Metazoa;Eumetazoa;Bilateria;Protostomia;  
 Spiralia;Lophotrochozoa;Mollusca;Bivalvia;Autobranchia;Heteroconchia;Euhe  
 terodonta;Imparidentia;Venerida;Veneroidea;Veneridae;Mercenaria;Mercenari  
 a mercenaria  
 UdeM00000011121 6596 149.8 UdeM00000011121 XP\_045184655.1 33.1 260  
 171 3 1 258 76 334 4.70E-33 149.8 6596 cellular  
 organisms;Eukaryota;Opisthokonta;Metazoa;Eumetazoa;Bilateria;Protostomia;  
 Spiralia;Lophotrochozoa;Mollusca;Bivalvia;Autobranchia;Heteroconchia;Euhe

terodonta;Imparidentia;Venerida;Veneroidea;Veneridae;Mercenaria;Mercenaria mercenaria  
 UdeM00000011122 6526 176.4 UdeM00000011122 XP\_013073891.1 32.9 337  
 210 4 41 377 74 394 6.80E-41 176.4 6526 cellular  
 organisms;Eukaryota;Opisthokonta;Metazoa;Eumetazoa;Bilateria;Protostomia;  
 Spiralia;Lophotrochozoa;Mollusca;Gastropoda;Heterobranchia;Euthyneura;Pan  
 pulmonata;Hygrophila;Lymnaeidae;Planorbidae;Biophalaria;Biophalaria  
 glabrata  
 UdeM00000011123 6596 177.2 UdeM00000011123 XP\_045202507.1 43.2 227  
 108 5 3 208 7 233 2.20E-41 177.2 6596 cellular  
 organisms;Eukaryota;Opisthokonta;Metazoa;Eumetazoa;Bilateria;Protostomia;  
 Spiralia;Lophotrochozoa;Mollusca;Bivalvia;Autobranchia;Heteroconchia;Euhe  
 terodonta;Imparidentia;Venerida;Veneroidea;Veneridae;Mercenaria;Mercenari  
 a mercenaria  
 UdeM00000011124 29159 149.8 UdeM00000011124 XP\_011445270.2 46.5 159  
 80 1 33 186 360 518 3.50E-33 149.8 29159 cellular  
 organisms;Eukaryota;Opisthokonta;Metazoa;Eumetazoa;Bilateria;Protostomia;  
 Spiralia;Lophotrochozoa;Mollusca;Bivalvia;Autobranchia;Pteriormorphia;Ostr  
 eida;Ostreidae;Crassostrea;Crassostrea gigas  
 UdeM00000011125 6573 337.8 UdeM00000011125 XP\_021362376.1 69.8 235  
 71 0 4 238 9 243 1.10E-89 337.8 6573 cellular  
 organisms;Eukaryota;Opisthokonta;Metazoa;Eumetazoa;Bilateria;Protostomia;  
 Spiralia;Lophotrochozoa;Mollusca;Bivalvia;Autobranchia;Pteriormorphia;Pect  
 inida;Pectinoidea;Pectinidae;Mizuhopecten;Mizuhopecten yessoensis  
 UdeM00000011126 6596 569.3 UdeM00000011126 XP\_045192713.1 93.7 301  
 19 0 1 301 1 301 2.90E-159 569.3 6596 cellular  
 organisms;Eukaryota;Opisthokonta;Metazoa;Eumetazoa;Bilateria;Protostomia;  
 Spiralia;Lophotrochozoa;Mollusca;Bivalvia;Autobranchia;Heteroconchia;Euhe  
 terodonta;Imparidentia;Venerida;Veneroidea;Veneridae;Mercenaria;Mercenari  
 a mercenaria  
 UdeM00000011127 6596 119.8 UdeM00000011127 XP\_045180427.1 46.3 177  
 92 2 76 250 98 273 5.30E-24 119.8 6596 cellular  
 organisms;Eukaryota;Opisthokonta;Metazoa;Eumetazoa;Bilateria;Protostomia;  
 Spiralia;Lophotrochozoa;Mollusca;Bivalvia;Autobranchia;Heteroconchia;Euhe  
 terodonta;Imparidentia;Venerida;Veneroidea;Veneridae;Mercenaria;Mercenari  
 a mercenaria  
 UdeM00000011128 90988 112.5 UdeM00000011128 XP\_039529744.1 38 137  
 84 1 6 141 387 523 4.70E-22 112.5 90988 cellular  
 organisms;Eukaryota;Opisthokonta;Metazoa;Eumetazoa;Bilateria;Deuterostomi  
 a;Chordata;Craniata;Vertebrata;Gnathostomata;Teleostomi;Euteleostomi;Acti  
 nopterygii;Actinopteri;Neopterygii;Teleostei;Osteoglossocephalai;Clupeoce  
 phala;Otomorpha;Ostariophysi;Otophysi;Cypriniphysae;Cypriniformes;Cyprino  
 ideii;Leuciscidae;Pogonichthyinae;Pimephales;Pimephales promelas  
 UdeM00000011129 6596 585.5 UdeM00000011129 XP\_045192713.1 95.1 288  
 14 0 7 294 301 588 3.80E-164 585.5 6596 cellular  
 organisms;Eukaryota;Opisthokonta;Metazoa;Eumetazoa;Bilateria;Protostomia;  
 Spiralia;Lophotrochozoa;Mollusca;Bivalvia;Autobranchia;Heteroconchia;Euhe  
 terodonta;Imparidentia;Venerida;Veneroidea;Veneridae;Mercenaria;Mercenari  
 a mercenaria  
 UdeM00000011130 29159 72.8 UdeM00000011130 XP\_019926413.2 86.5 37  
 5 0 1 37 292 328 1.90E-10 72.8 29159 cellular  
 organisms;Eukaryota;Opisthokonta;Metazoa;Eumetazoa;Bilateria;Protostomia;  
 Spiralia;Lophotrochozoa;Mollusca;Bivalvia;Autobranchia;Pteriormorphia;Ostr  
 eida;Ostreidae;Crassostrea;Crassostrea gigas

UdeM00000011131 6579 84.3 UdeM00000011131 XP\_033750975.1 53.6 69  
 31 1 78 145 440 508 1.40E-13 84.3 6579 cellular  
 organisms;Eukaryota;Opisthokonta;Metazoa;Eumetazoa;Bilateria;Protostomia;  
 Spiralia;Lophotrochozoa;Mollusca;Bivalvia;Autobranchia;Pteriormorphia;Pect  
 inida;Pectinoidea;Pectinidae;Pecten;Pecten maximus  
 UdeM00000011132 6596 163.7 UdeM00000011132 XP\_045170628.1 54.6 130  
 59 0 1 130 27 156 1.70E-37 163.7 6596 cellular  
 organisms;Eukaryota;Opisthokonta;Metazoa;Eumetazoa;Bilateria;Protostomia;  
 Spiralia;Lophotrochozoa;Mollusca;Bivalvia;Autobranchia;Heteroconchia;Euhe  
 terodonta;Imparidentia;Venerida;Veneroidea;Veneridae;Mercenaria;Mercenari  
 a mercenaria  
 UdeM00000011133 29159 72 UdeM00000011133 XP\_034324494.1 38.8 85  
 52 0 52 136 165 249 8.20E-10 72 29159 cellular  
 organisms;Eukaryota;Opisthokonta;Metazoa;Eumetazoa;Bilateria;Protostomia;  
 Spiralia;Lophotrochozoa;Mollusca;Bivalvia;Autobranchia;Pteriormorphia;Ostr  
 eida;Ostreoidea;Ostreidae;Crassostrea;Crassostrea gigas  
 UdeM00000011134 6596 350.5 UdeM00000011134 XP\_045190171.1 31.1 1110  
 589 34 1 979 1 1065 6.90E-93 350.5 6596 cellular  
 organisms;Eukaryota;Opisthokonta;Metazoa;Eumetazoa;Bilateria;Protostomia;  
 Spiralia;Lophotrochozoa;Mollusca;Bivalvia;Autobranchia;Heteroconchia;Euhe  
 terodonta;Imparidentia;Venerida;Veneroidea;Veneridae;Mercenaria;Mercenari  
 a mercenaria  
 UdeM00000011135 6579 841.6 UdeM00000011135 XP\_033728893.1 59.1 787  
 294 10 50 816 40 818 8.10E-241 841.6 6579 cellular  
 organisms;Eukaryota;Opisthokonta;Metazoa;Eumetazoa;Bilateria;Protostomia;  
 Spiralia;Lophotrochozoa;Mollusca;Bivalvia;Autobranchia;Pteriormorphia;Pect  
 inida;Pectinoidea;Pectinidae;Pecten;Pecten maximus  
 UdeM00000011138 50390 66.6 UdeM00000011138 XP\_028143308.1 39.5 76  
 46 0 1 76 59 134 1.90E-08 66.6 50390 cellular  
 organisms;Eukaryota;Opisthokonta;Metazoa;Eumetazoa;Bilateria;Protostomia;  
 Ecdysozoa;Panarthropoda;Arthropoda;Mandibulata;Pancrustacea;Hexapoda;Inse  
 cta;Dicondylia;Pterygota;Neoptera;Endopterygota;Coleoptera;Polyphaga;Cucu  
 jiformia;Chrysomeloidea;Chrysomelidae;Galerucinae;Luperini;Diabroticina;D  
 iabroticites;Diabrotica;Diabrotica virgifera;Diabrotica virgifera  
 virgifera  
 UdeM00000011139 224129 106.3 UdeM00000011139 XP\_025834090.1 52.4  
 103 43 1 5 101 663 765 2.70E-20 106.3 224129  
 cellular  
 organisms;Eukaryota;Opisthokonta;Metazoa;Eumetazoa;Bilateria;Protostomia;  
 Ecdysozoa;Panarthropoda;Arthropoda;Mandibulata;Pancrustacea;Hexapoda;Inse  
 cta;Dicondylia;Pterygota;Neoptera;Endopterygota;Coleoptera;Polyphaga;Elat  
 eriformia;Buprestoidea;Buprestidae;Agrilinae;Agrilus;Agrilus planipennis  
 UdeM00000011140 6579 3773.8 UdeM00000011140 XP\_033760673.1 58  
 3553 1236 59 1 3408 1 3441 0.00E+00 3773.8 6579  
 cellular  
 organisms;Eukaryota;Opisthokonta;Metazoa;Eumetazoa;Bilateria;Protostomia;  
 Spiralia;Lophotrochozoa;Mollusca;Bivalvia;Autobranchia;Pteriormorphia;Pect  
 inida;Pectinoidea;Pectinidae;Pecten;Pecten maximus  
 UdeM00000011141 6596 4155.9 UdeM00000011141 XP\_045191928.1 87.5  
 2447 299 3 1 2440 1 2447 0.00E+00 4155.9 6596  
 cellular  
 organisms;Eukaryota;Opisthokonta;Metazoa;Eumetazoa;Bilateria;Protostomia;  
 Spiralia;Lophotrochozoa;Mollusca;Bivalvia;Autobranchia;Heteroconchia;Euhe

terodonta;Imparidentia;Venerida;Veneroidea;Veneridae;Mercenaria;Mercenaria mercenaria  
 UdeM00000011142 6573 167.5 UdeM00000011142 XP\_021352012.1 28 542  
 322 13 10 501 6 529 4.20E-38 167.5 6573 cellular  
 organisms;Eukaryota;Opisthokonta;Metazoa;Eumetazoa;Bilateria;Protostomia;  
 Spiralia;Lophotrochozoa;Mollusca;Bivalvia;Autobranhia;Pteriomorphia;Pectinida;  
 Pectinoidea;Pectinidae;Mizuhopecten;Mizuhopecten yessoensis  
 UdeM00000011143 1735272 176.8 UdeM00000011143 XP\_041369436.1 40.7  
 204 120 1 52 255 10 212 3.60E-41 176.8 1735272  
 cellular  
 organisms;Eukaryota;Opisthokonta;Metazoa;Eumetazoa;Bilateria;Protostomia;  
 Spiralia;Lophotrochozoa;Mollusca;Gastropoda;Neomphalina;Neomphaloidea;Pelto-  
 spiridae;Gigantopelta;Gigantopelta aegis  
 UdeM00000011144 6596 647.1 UdeM00000011144 XP\_045194772.1 44.9 744  
 348 12 3 694 12 745 2.60E-182 647.1 6596 cellular  
 organisms;Eukaryota;Opisthokonta;Metazoa;Eumetazoa;Bilateria;Protostomia;  
 Spiralia;Lophotrochozoa;Mollusca;Bivalvia;Autobranhia;Heteroconchia;Euhetero-  
 terodonta;Imparidentia;Venerida;Veneroidea;Veneridae;Mercenaria;Mercenaria  
 a mercenaria  
 UdeM00000011145 37653 63.9 UdeM00000011145 XP\_014783575.1 48.1 54  
 28 0 43 96 43 96 1.50E-07 63.9 37653 cellular  
 organisms;Eukaryota;Opisthokonta;Metazoa;Eumetazoa;Bilateria;Protostomia;  
 Spiralia;Lophotrochozoa;Mollusca;Cephalopoda;Coleoidea;Octopodiformes;Octo-  
 poda;Incirrata;Octopodidae;Octopus;Octopus bimaculoides  
 UdeM00000011146 6573 71.6 UdeM00000011146 XP\_021362152.1 49.3 69  
 35 0 20 88 29 97 6.40E-10 71.6 6573 cellular  
 organisms;Eukaryota;Opisthokonta;Metazoa;Eumetazoa;Bilateria;Protostomia;  
 Spiralia;Lophotrochozoa;Mollusca;Bivalvia;Autobranhia;Pteriomorphia;Pectinida;  
 Pectinoidea;Pectinidae;Mizuhopecten;Mizuhopecten yessoensis  
 UdeM00000011149 6573 150.6 UdeM00000011149 XP\_021380258.1 62.9 105  
 38 1 2 105 1440 1544 1.10E-33 150.6 6573 cellular  
 organisms;Eukaryota;Opisthokonta;Metazoa;Eumetazoa;Bilateria;Protostomia;  
 Spiralia;Lophotrochozoa;Mollusca;Bivalvia;Autobranhia;Pteriomorphia;Pectinida;  
 Pectinoidea;Pectinidae;Mizuhopecten;Mizuhopecten yessoensis  
 UdeM00000011150 6596 1236.5 UdeM00000011150 XP\_045189154.1 50  
 1332 639 18 224 1538 13 1334 0.00E+00 1236.5 6596  
 cellular  
 organisms;Eukaryota;Opisthokonta;Metazoa;Eumetazoa;Bilateria;Protostomia;  
 Spiralia;Lophotrochozoa;Mollusca;Bivalvia;Autobranhia;Heteroconchia;Euhetero-  
 terodonta;Imparidentia;Venerida;Veneroidea;Veneridae;Mercenaria;Mercenaria  
 a mercenaria  
 UdeM00000011151 29159 526.2 UdeM00000011151 XP\_011438047.2 48.5 540  
 259 10 14 538 23 558 6.70E-146 526.2 29159 cellular  
 organisms;Eukaryota;Opisthokonta;Metazoa;Eumetazoa;Bilateria;Protostomia;  
 Spiralia;Lophotrochozoa;Mollusca;Bivalvia;Autobranhia;Pteriomorphia;Ostre-  
 ida;Ostreoidea;Ostreidae;Crassostrea;Crassostrea gigas  
 UdeM00000011152 29159 506.1 UdeM00000011152 XP\_011438047.2 44.5 589  
 303 11 10 579 9 592 7.00E-140 506.1 29159 cellular  
 organisms;Eukaryota;Opisthokonta;Metazoa;Eumetazoa;Bilateria;Protostomia;  
 Spiralia;Lophotrochozoa;Mollusca;Bivalvia;Autobranhia;Pteriomorphia;Ostre-  
 ida;Ostreoidea;Ostreidae;Crassostrea;Crassostrea gigas  
 UdeM00000011153 37653 355.5 UdeM00000011153 XP\_014769846.1 91.4 187  
 16 0 1 187 1 187 4.20E-95 355.5 37653 cellular  
 organisms;Eukaryota;Opisthokonta;Metazoa;Eumetazoa;Bilateria;Protostomia;

Spiralia; Lophotrochozoa; Mollusca; Cephalopoda; Coleoidea; Octopodiformes; Octopoda; Incirrata; Octopodidae; Octopus; Octopus bimaculoides

UdeM00000011154 29159 474.2 UdeM00000011154 XP\_034334367.1 47.2 521  
187 6 6 440 126 644 1.90E-130 474.2 29159 cellular  
organisms; Eukaryota; Opisthokonta; Metazoa; Eumetazoa; Bilateria; Protostomia; Spiralia; Lophotrochozoa; Mollusca; Bivalvia; Autobranchia; Pteriomorpha; Ostracida; Ostreidae; Crassostrea; Crassostrea gigas

UdeM00000011155 29159 125.6 UdeM00000011155 XP\_011451530.1 48 125  
62 2 69 190 74 198 7.00E-26 125.6 29159 cellular  
organisms; Eukaryota; Opisthokonta; Metazoa; Eumetazoa; Bilateria; Protostomia; Spiralia; Lophotrochozoa; Mollusca; Bivalvia; Autobranchia; Pteriomorpha; Ostracida; Ostreidae; Crassostrea; Crassostrea gigas

UdeM00000011158 225164 75.1 UdeM00000011158 XP\_009056751.1 51.2  
82 38 2 1 82 372 451 7.60E-11 75.1 225164  
cellular  
organisms; Eukaryota; Opisthokonta; Metazoa; Eumetazoa; Bilateria; Protostomia; Spiralia; Lophotrochozoa; Mollusca; Gastropoda; Patellogastropoda; Lottiidae; Lottia; Lottia gigantea

UdeM00000011159 6596 125.2 UdeM00000011159 XP\_045170628.1 54.5 99  
45 0 1 99 1 99 5.80E-26 125.2 6596 cellular  
organisms; Eukaryota; Opisthokonta; Metazoa; Eumetazoa; Bilateria; Protostomia; Spiralia; Lophotrochozoa; Mollusca; Bivalvia; Autobranchia; Heteroconchia; Euheterodonta; Imparidentia; Venerida; Veneroidea; Veneridae; Mercenaria; Mercenaria mercenaria

UdeM00000011160 6596 136.7 UdeM00000011160 XP\_045159488.1 85.7 70  
10 0 1 70 1 70 1.20E-29 136.7 6596 cellular  
organisms; Eukaryota; Opisthokonta; Metazoa; Eumetazoa; Bilateria; Protostomia; Spiralia; Lophotrochozoa; Mollusca; Bivalvia; Autobranchia; Heteroconchia; Euheterodonta; Imparidentia; Venerida; Veneroidea; Veneridae; Mercenaria; Mercenaria mercenaria

UdeM00000011165 202533 157.9 UdeM00000011165 XP\_035225712.1 44.6  
166 87 2 22 182 7 172 1.20E-35 157.9 202533  
cellular  
organisms; Eukaryota; Opisthokonta; Metazoa; Eumetazoa; Bilateria; Protostomia; Ecdysozoa; Panarthropoda; Arthropoda; Chelicerata; Arachnida; Araneae; Araneomorphae; Entelegynae; Eresoidea; Eresidae; Stegodyphus; Stegodyphus dumicola

UdeM00000011166 6596 94.7 UdeM00000011166 XP\_045206950.1 62.3 69  
26 0 1 69 1 69 5.40E-17 94.7 6596 cellular  
organisms; Eukaryota; Opisthokonta; Metazoa; Eumetazoa; Bilateria; Protostomia; Spiralia; Lophotrochozoa; Mollusca; Bivalvia; Autobranchia; Heteroconchia; Euheterodonta; Imparidentia; Venerida; Veneroidea; Veneridae; Mercenaria; Mercenaria mercenaria

UdeM00000011167 6573 363.6 UdeM00000011167 XP\_021373560.1 42.8 470  
84 1 1 285 1 470 2.30E-97 363.6 6573 cellular  
organisms; Eukaryota; Opisthokonta; Metazoa; Eumetazoa; Bilateria; Protostomia; Spiralia; Lophotrochozoa; Mollusca; Bivalvia; Autobranchia; Pteriomorpha; Pectinida; Pectinoidea; Pectinidae; Mizuhopecten; Mizuhopecten yessoensis

UdeM00000011168 6596 639.4 UdeM00000011168 XP\_045198281.1 64.9 481  
165 2 1 481 1 477 3.70E-180 639.4 6596 cellular  
organisms; Eukaryota; Opisthokonta; Metazoa; Eumetazoa; Bilateria; Protostomia; Spiralia; Lophotrochozoa; Mollusca; Bivalvia; Autobranchia; Heteroconchia; Euheterodonta; Imparidentia; Venerida; Veneroidea; Veneridae; Mercenaria; Mercenaria mercenaria

UdeM00000011169 6596 708.4 UdeM00000011169 XP\_045198289.1 48.5 1053  
 442 26 2 988 496 1514 1.30E-200 708.4 6596 cellular  
 organisms;Eukaryota;Opisthokonta;Metazoa;Eumetazoa;Bilateria;Protostomia;  
 Spiralia;Lophotrochozoa;Mollusca;Bivalvia;Autobranhia;Heteroconchia;Euhe  
 terodonta;Imparidentia;Venerida;Veneroidea;Veneridae;Mercenaria;Mercenari  
 a mercenaria  
 UdeM00000011170 6596 82.4 UdeM00000011170 XP\_045162331.1 25 276  
 180 7 1 262 501 763 1.90E-12 82.4 6596 cellular  
 organisms;Eukaryota;Opisthokonta;Metazoa;Eumetazoa;Bilateria;Protostomia;  
 Spiralia;Lophotrochozoa;Mollusca;Bivalvia;Autobranhia;Heteroconchia;Euhe  
 terodonta;Imparidentia;Venerida;Veneroidea;Veneridae;Mercenaria;Mercenari  
 a mercenaria  
 UdeM00000011171 6565 562 UdeM00000011171 XP\_022325871.1 48.3 540  
 268 5 1 538 1 531 8.60E-157 562 6565 cellular  
 organisms;Eukaryota;Opisthokonta;Metazoa;Eumetazoa;Bilateria;Protostomia;  
 Spiralia;Lophotrochozoa;Mollusca;Bivalvia;Autobranhia;Pteriormorphia;Ostr  
 eida;Ostreoidea;Ostreidae;Crassostrea;Crassostrea virginica  
 UdeM00000011174 70779 105.5 UdeM00000011174 XP\_015764363.1 33.5 182  
 98 4 5 166 6 184 7.30E-20 105.5 70779 cellular  
 organisms;Eukaryota;Opisthokonta;Metazoa;Eumetazoa;Cnidaria;Anthozoa;Hexa  
 corallia;Scleractinia;Astrocoeniina;Acroporidae;Acropora;Acropora  
 digitifera  
 UdeM00000011175 29159 546.6 UdeM00000011175 XP\_034303685.1 47.1 529  
 276 3 9 537 8 532 3.70E-152 546.6 29159 cellular  
 organisms;Eukaryota;Opisthokonta;Metazoa;Eumetazoa;Bilateria;Protostomia;  
 Spiralia;Lophotrochozoa;Mollusca;Bivalvia;Autobranhia;Pteriormorphia;Ostr  
 eida;Ostreoidea;Ostreidae;Crassostrea;Crassostrea gigas  
 UdeM00000011177 6596 147.9 UdeM00000011177 XP\_045194738.1 72.2 97  
 26 1 7 102 9 105 7.80E-33 147.9 6596 cellular  
 organisms;Eukaryota;Opisthokonta;Metazoa;Eumetazoa;Bilateria;Protostomia;  
 Spiralia;Lophotrochozoa;Mollusca;Bivalvia;Autobranhia;Heteroconchia;Euhe  
 terodonta;Imparidentia;Venerida;Veneroidea;Veneridae;Mercenaria;Mercenari  
 a mercenaria  
 UdeM00000011178 6596 702.6 UdeM00000011178 XP\_045194738.1 70.4 466  
 137 1 7 471 9 474 3.40E-199 702.6 6596 cellular  
 organisms;Eukaryota;Opisthokonta;Metazoa;Eumetazoa;Bilateria;Protostomia;  
 Spiralia;Lophotrochozoa;Mollusca;Bivalvia;Autobranhia;Heteroconchia;Euhe  
 terodonta;Imparidentia;Venerida;Veneroidea;Veneridae;Mercenaria;Mercenari  
 a mercenaria  
 UdeM00000011179 6596 819.7 UdeM00000011179 XP\_045190333.1 59.1 685  
 269 6 1 683 1 676 2.80E-234 819.7 6596 cellular  
 organisms;Eukaryota;Opisthokonta;Metazoa;Eumetazoa;Bilateria;Protostomia;  
 Spiralia;Lophotrochozoa;Mollusca;Bivalvia;Autobranhia;Heteroconchia;Euhe  
 terodonta;Imparidentia;Venerida;Veneroidea;Veneridae;Mercenaria;Mercenari  
 a mercenaria  
 UdeM00000011180 6596 713.4 UdeM00000011180 XP\_045190345.1 70.5 511  
 140 4 1 511 1 500 2.10E-202 713.4 6596 cellular  
 organisms;Eukaryota;Opisthokonta;Metazoa;Eumetazoa;Bilateria;Protostomia;  
 Spiralia;Lophotrochozoa;Mollusca;Bivalvia;Autobranhia;Heteroconchia;Euhe  
 terodonta;Imparidentia;Venerida;Veneroidea;Veneridae;Mercenaria;Mercenari  
 a mercenaria  
 UdeM00000011181 6596 143.7 UdeM00000011181 XP\_045188603.1 27.3 439  
 275 15 2 414 386 806 7.30E-31 143.7 6596 cellular  
 organisms;Eukaryota;Opisthokonta;Metazoa;Eumetazoa;Bilateria;Protostomia;

Spiralia;Lophotrochozoa;Mollusca;Bivalvia;Autobranchia;Heteroconchia;Euherodonta;Imparidentia;Venerida;Veneroidea;Veneridae;Mercenaria;Mercenaria mercenaria

UdeM00000011182 10224 127.9 UdeM00000011182 XP\_002740205.2 30.9 272  
166 5 4 275 48 297 3.10E-26 127.9 10224 cellular  
organisms;Eukaryota;Opisthokonta;Metazoa;Eumetazoa;Bilateria;Deuterostomia;Hemichordata;Enteropneusta;Harrimaniidae;Saccoglossus;Saccoglossus kowalevskii

UdeM00000011183 1735272 171.8 UdeM00000011183 XP\_041367923.1 41.9  
210 114 3 48 249 110 319 1.10E-39 171.8 1735272  
cellular  
organisms;Eukaryota;Opisthokonta;Metazoa;Eumetazoa;Bilateria;Protostomia;Spiralia;Lophotrochozoa;Mollusca;Gastropoda;Neomphalina;Neomphaloidea;Peltospiridae;Gigantopelta;Gigantopelta aegis

UdeM00000011184 6596 152.5 UdeM00000011184 XP\_045163453.1 27.1 450  
290 14 114 544 371 801 1.60E-33 152.5 6596 cellular  
organisms;Eukaryota;Opisthokonta;Metazoa;Eumetazoa;Bilateria;Protostomia;Spiralia;Lophotrochozoa;Mollusca;Bivalvia;Autobranchia;Heteroconchia;Euherodonta;Imparidentia;Venerida;Veneroidea;Veneridae;Mercenaria;Mercenaria mercenaria

UdeM00000011185 6596 106.3 UdeM00000011185 XP\_045162670.1 23.1 762  
490 28 2 717 127 838 2.30E-19 106.3 6596 cellular  
organisms;Eukaryota;Opisthokonta;Metazoa;Eumetazoa;Bilateria;Protostomia;Spiralia;Lophotrochozoa;Mollusca;Bivalvia;Autobranchia;Heteroconchia;Euherodonta;Imparidentia;Venerida;Veneroidea;Veneridae;Mercenaria;Mercenaria mercenaria

UdeM00000011187 6596 151.8 UdeM00000011187 XP\_045200348.1 26.1 475  
316 14 63 514 486 948 3.80E-33 151.8 6596 cellular  
organisms;Eukaryota;Opisthokonta;Metazoa;Eumetazoa;Bilateria;Protostomia;Spiralia;Lophotrochozoa;Mollusca;Bivalvia;Autobranchia;Heteroconchia;Euherodonta;Imparidentia;Venerida;Veneroidea;Veneridae;Mercenaria;Mercenaria mercenaria

UdeM00000011188 10224 136 UdeM00000011188 XP\_002740205.2 35.2 244  
136 5 4 247 48 269 1.10E-28 136 10224 cellular  
organisms;Eukaryota;Opisthokonta;Metazoa;Eumetazoa;Bilateria;Deuterostomia;Hemichordata;Enteropneusta;Harrimaniidae;Saccoglossus;Saccoglossus kowalevskii

UdeM00000011189 6596 376.7 UdeM00000011189 XP\_045188318.1 61.3 297  
114 1 2 297 6 302 2.70E-101 376.7 6596 cellular  
organisms;Eukaryota;Opisthokonta;Metazoa;Eumetazoa;Bilateria;Protostomia;Spiralia;Lophotrochozoa;Mollusca;Bivalvia;Autobranchia;Heteroconchia;Euherodonta;Imparidentia;Venerida;Veneroidea;Veneridae;Mercenaria;Mercenaria mercenaria

UdeM00000011190 6596 493.4 UdeM00000011190 XP\_045188272.1 36.8 1163  
524 28 34 1124 347 1370 7.60E-136 493.4 6596 cellular  
organisms;Eukaryota;Opisthokonta;Metazoa;Eumetazoa;Bilateria;Protostomia;Spiralia;Lophotrochozoa;Mollusca;Bivalvia;Autobranchia;Heteroconchia;Euherodonta;Imparidentia;Venerida;Veneroidea;Veneridae;Mercenaria;Mercenaria mercenaria

UdeM00000011192 6596 489.2 UdeM00000011192 XP\_045201943.1 72 457  
114 2 1 455 60 504 5.70E-135 489.2 6596 cellular  
organisms;Eukaryota;Opisthokonta;Metazoa;Eumetazoa;Bilateria;Protostomia;Spiralia;Lophotrochozoa;Mollusca;Bivalvia;Autobranchia;Heteroconchia;Euherodonta;Imparidentia;Venerida;Veneroidea;Veneridae;Mercenaria;Mercenaria mercenaria

terodonta;Imparidentia;Venerida;Veneroidea;Veneridae;Mercenaria;Mercenari  
 a mercenaria  
 UdeM00000011193 6573 269.2 UdeM00000011193 XP\_021361918.1 77.1 157  
 36 0 36 192 563 719 3.90E-69 269.2 6573 cellular  
 organisms;Eukaryota;Opisthokonta;Metazoa;Eumetazoa;Bilateria;Protostomia;  
 Spiralia;Lophotrochozoa;Mollusca;Bivalvia;Autobranhia;Pteriomorpha;Pect  
 inida;Pectinoidea;Pectinidae;Mizuhopecten;Mizuhopecten yessoensis  
 UdeM00000011194 6596 481.9 UdeM00000011194 XP\_045201943.1 64.1 457  
 149 2 1 454 60 504 9.10E-133 481.9 6596 cellular  
 organisms;Eukaryota;Opisthokonta;Metazoa;Eumetazoa;Bilateria;Protostomia;  
 Spiralia;Lophotrochozoa;Mollusca;Bivalvia;Autobranhia;Heteroconchia;Euhe  
 terodonta;Imparidentia;Venerida;Veneroidea;Veneridae;Mercenaria;Mercenari  
 a mercenaria  
 UdeM00000011195 29159 473 UdeM00000011195 XP\_011442101.1 80.5 292  
 56 1 9 299 2 293 2.80E-130 473 29159 cellular  
 organisms;Eukaryota;Opisthokonta;Metazoa;Eumetazoa;Bilateria;Protostomia;  
 Spiralia;Lophotrochozoa;Mollusca;Bivalvia;Autobranhia;Pteriomorpha;Ostr  
 eida;Ostreoidea;Ostreidae;Crassostrea;Crassostrea gigas  
 UdeM00000011196 6596 279.3 UdeM00000011196 XP\_045181413.1 46.2 1610  
 800 16 1 1578 11 1586 3.10E-71 279.3 6596 cellular  
 organisms;Eukaryota;Opisthokonta;Metazoa;Eumetazoa;Bilateria;Protostomia;  
 Spiralia;Lophotrochozoa;Mollusca;Bivalvia;Autobranhia;Heteroconchia;Euhe  
 terodonta;Imparidentia;Venerida;Veneroidea;Veneridae;Mercenaria;Mercenari  
 a mercenaria  
 UdeM00000011197 6596 218.8 UdeM00000011197 XP\_045201123.1 38.8 495  
 242 15 1 488 175 615 1.80E-53 218.8 6596 cellular  
 organisms;Eukaryota;Opisthokonta;Metazoa;Eumetazoa;Bilateria;Protostomia;  
 Spiralia;Lophotrochozoa;Mollusca;Bivalvia;Autobranhia;Heteroconchia;Euhe  
 terodonta;Imparidentia;Venerida;Veneroidea;Veneridae;Mercenaria;Mercenari  
 a mercenaria  
 UdeM00000011199 6596 141.4 UdeM00000011199 XP\_045211479.1 59.8 117  
 44 2 16 130 14 129 9.70E-31 141.4 6596 cellular  
 organisms;Eukaryota;Opisthokonta;Metazoa;Eumetazoa;Bilateria;Protostomia;  
 Spiralia;Lophotrochozoa;Mollusca;Bivalvia;Autobranhia;Heteroconchia;Euhe  
 terodonta;Imparidentia;Venerida;Veneroidea;Veneridae;Mercenaria;Mercenari  
 a mercenaria  
 UdeM00000011200 6573 234.2 UdeM00000011200 XP\_021375729.1 41.5 287  
 143 5 1 262 340 626 2.00E-58 234.2 6573 cellular  
 organisms;Eukaryota;Opisthokonta;Metazoa;Eumetazoa;Bilateria;Protostomia;  
 Spiralia;Lophotrochozoa;Mollusca;Bivalvia;Autobranhia;Pteriomorpha;Pect  
 inida;Pectinoidea;Pectinidae;Mizuhopecten;Mizuhopecten yessoensis  
 UdeM00000011201 6596 70.9 UdeM00000011201 XP\_045195845.1 46.1 76  
 40 1 58 133 55 129 1.40E-09 70.9 6596 cellular  
 organisms;Eukaryota;Opisthokonta;Metazoa;Eumetazoa;Bilateria;Protostomia;  
 Spiralia;Lophotrochozoa;Mollusca;Bivalvia;Autobranhia;Heteroconchia;Euhe  
 terodonta;Imparidentia;Venerida;Veneroidea;Veneridae;Mercenaria;Mercenari  
 a mercenaria  
 UdeM00000011203 6596 879.8 UdeM00000011203 XP\_045191341.1 62.1 746  
 255 8 24 752 632 1366 2.50E-252 879.8 6596 cellular  
 organisms;Eukaryota;Opisthokonta;Metazoa;Eumetazoa;Bilateria;Protostomia;  
 Spiralia;Lophotrochozoa;Mollusca;Bivalvia;Autobranhia;Heteroconchia;Euhe  
 terodonta;Imparidentia;Venerida;Veneroidea;Veneridae;Mercenaria;Mercenari  
 a mercenaria



UdeM00000011204 6573 261.9 UdeM00000011204 XP\_021354586.1 46 274  
 143 2 1 274 3 271 1.10E-66 261.9 6573 cellular  
 organisms;Eukaryota;Opisthokonta;Metazoa;Eumetazoa;Bilateria;Protostomia;  
 Spiralia;Lophotrochozoa;Mollusca;Bivalvia;Autobranchia;Pteriomorpha;Pect  
 inida;Pectinoidea;Pectinidae;Mizuhopecten;Mizuhopecten yessoensis  
 UdeM00000011205 6573 261.9 UdeM00000011205 XP\_021354586.1 46.7 274  
 141 2 1 274 3 271 1.10E-66 261.9 6573 cellular  
 organisms;Eukaryota;Opisthokonta;Metazoa;Eumetazoa;Bilateria;Protostomia;  
 Spiralia;Lophotrochozoa;Mollusca;Bivalvia;Autobranchia;Pteriomorpha;Pect  
 inida;Pectinoidea;Pectinidae;Mizuhopecten;Mizuhopecten yessoensis  
 UdeM00000011206 6573 282.3 UdeM00000011206 XP\_021354586.1 50.2 273  
 132 1 1 273 3 271 7.70E-73 282.3 6573 cellular  
 organisms;Eukaryota;Opisthokonta;Metazoa;Eumetazoa;Bilateria;Protostomia;  
 Spiralia;Lophotrochozoa;Mollusca;Bivalvia;Autobranchia;Pteriomorpha;Pect  
 inida;Pectinoidea;Pectinidae;Mizuhopecten;Mizuhopecten yessoensis  
 UdeM00000011207 6573 423.7 UdeM00000011207 XP\_021354586.1 43.7 529  
 257 6 13 505 16 539 3.90E-115 423.7 6573 cellular  
 organisms;Eukaryota;Opisthokonta;Metazoa;Eumetazoa;Bilateria;Protostomia;  
 Spiralia;Lophotrochozoa;Mollusca;Bivalvia;Autobranchia;Pteriomorpha;Pect  
 inida;Pectinoidea;Pectinidae;Mizuhopecten;Mizuhopecten yessoensis  
 UdeM00000011208 6573 378.3 UdeM00000011208 XP\_021354582.1 41.6 527  
 222 7 24 472 101 619 1.70E-101 378.3 6573 cellular  
 organisms;Eukaryota;Opisthokonta;Metazoa;Eumetazoa;Bilateria;Protostomia;  
 Spiralia;Lophotrochozoa;Mollusca;Bivalvia;Autobranchia;Pteriomorpha;Pect  
 inida;Pectinoidea;Pectinidae;Mizuhopecten;Mizuhopecten yessoensis  
 UdeM00000011209 6596 419.9 UdeM00000011209 XP\_045191341.1 42.4 536  
 243 5 27 496 634 1169 5.30E-114 419.9 6596 cellular  
 organisms;Eukaryota;Opisthokonta;Metazoa;Eumetazoa;Bilateria;Protostomia;  
 Spiralia;Lophotrochozoa;Mollusca;Bivalvia;Autobranchia;Heteroconchia;Euhe  
 terodonta;Imparidentia;Venerida;Veneroidea;Veneridae;Mercenaria;Mercenari  
 a mercenaria  
 UdeM00000011210 6596 414.1 UdeM00000011210 XP\_045191341.1 42.1 542  
 242 6 27 502 634 1169 2.90E-112 414.1 6596 cellular  
 organisms;Eukaryota;Opisthokonta;Metazoa;Eumetazoa;Bilateria;Protostomia;  
 Spiralia;Lophotrochozoa;Mollusca;Bivalvia;Autobranchia;Heteroconchia;Euhe  
 terodonta;Imparidentia;Venerida;Veneroidea;Veneridae;Mercenaria;Mercenari  
 a mercenaria  
 UdeM00000011211 6596 438 UdeM00000011211 XP\_045191341.1 44.6 542  
 251 8 43 539 632 1169 2.00E-119 438 6596 cellular  
 organisms;Eukaryota;Opisthokonta;Metazoa;Eumetazoa;Bilateria;Protostomia;  
 Spiralia;Lophotrochozoa;Mollusca;Bivalvia;Autobranchia;Heteroconchia;Euhe  
 terodonta;Imparidentia;Venerida;Veneroidea;Veneridae;Mercenaria;Mercenari  
 a mercenaria  
 UdeM00000011213 36176 173.7 UdeM00000011213 XP\_043561851.1 23.1 886  
 500 32 27 901 88 803 1.20E-39 173.7 36176 cellular  
 organisms;Eukaryota;Opisthokonta;Metazoa;Eumetazoa;Bilateria;Deuterostomi  
 a;Chordata;Craniata;Vertebrata;Gnathostomata;Chondrichthyes;Elasmobranchi  
 i;Selachii;Galeomorphii;Galeoidea;Orectolobiformes;Hemiscylliidae;Chiloscyllium  
 plagiolum;Chiloscyllium plagiolum  
 UdeM00000011214 29159 245 UdeM00000011214 XP\_034301321.1 33 454  
 249 12 12 451 22 434 1.90E-61 245 29159 cellular  
 organisms;Eukaryota;Opisthokonta;Metazoa;Eumetazoa;Bilateria;Protostomia;  
 Spiralia;Lophotrochozoa;Mollusca;Bivalvia;Autobranchia;Pteriomorpha;Ostr  
 eida;Ostreoidea;Ostreidae;Crassostrea;Crassostrea gigas

UdeM00000011216 6573 118.6 UdeM00000011216 XP\_021339848.1 83.6 61  
 10 0 85 145 95 155 6.60E-24 118.6 6573 cellular  
 organisms;Eukaryota;Opisthokonta;Metazoa;Eumetazoa;Bilateria;Protostomia;  
 Spiralia;Lophotrochozoa;Mollusca;Bivalvia;Autobranchia;Pteriomorphia;Pect  
 inida;Pectinoidea;Pectinidae;Mizuhopecten;Mizuhopecten yessoensis  
 UdeM00000011217 7998 234.6 UdeM00000011217 NP\_001244306.1 69.1 162  
 49 1 207 368 4 164 2.10E-58 234.6 7998 cellular  
 organisms;Eukaryota;Opisthokonta;Metazoa;Eumetazoa;Bilateria;Deuterostomi  
 a;Chordata;Craniata;Vertebrata;Gnathostomata;Teleostomi;Euteleostomi;Acti  
 nopterygii;Actinopteri;Neopterygii;Teleostei;Osteoglossocephalai;Clupeoce  
 phala;Otomorpha;Ostariophysi;Otophysi;Characiphysae;Siluriformes;Siluroid  
 ei;Ictaluridae;Ictalurus;Ictalurus punctatus  
 UdeM00000011218 1735272 156.4 UdeM00000011218 XP\_041367785.1 27  
 437 238 13 75 440 173 599 1.30E-34 156.4 1735272  
 cellular  
 organisms;Eukaryota;Opisthokonta;Metazoa;Eumetazoa;Bilateria;Protostomia;  
 Spiralia;Lophotrochozoa;Mollusca;Gastropoda;Neomphalina;Neomphaloidea;Pel  
 tospiridae;Gigantopelta;Gigantopelta aegis  
 UdeM00000011219 6596 168.7 UdeM00000011219 XP\_045198185.1 33.7 371  
 176 16 36 342 196 560 2.10E-38 168.7 6596 cellular  
 organisms;Eukaryota;Opisthokonta;Metazoa;Eumetazoa;Bilateria;Protostomia;  
 Spiralia;Lophotrochozoa;Mollusca;Bivalvia;Autobranchia;Heteroconchia;Euhe  
 terodonta;Imparidentia;Venerida;Veneroidea;Veneridae;Mercenaria;Mercenari  
 a mercenaria  
 UdeM00000011220 6596 498.4 UdeM00000011220 XP\_045194783.1 78.5 284  
 61 0 18 301 14 297 6.20E-138 498.4 6596 cellular  
 organisms;Eukaryota;Opisthokonta;Metazoa;Eumetazoa;Bilateria;Protostomia;  
 Spiralia;Lophotrochozoa;Mollusca;Bivalvia;Autobranchia;Heteroconchia;Euhe  
 terodonta;Imparidentia;Venerida;Veneroidea;Veneridae;Mercenaria;Mercenari  
 a mercenaria  
 UdeM00000011221 6412 278.1 UdeM00000011221 XP\_009023307.1 28.2 701  
 429 25 46 688 269 953 4.00E-71 278.1 6412 cellular  
 organisms;Eukaryota;Opisthokonta;Metazoa;Eumetazoa;Bilateria;Protostomia;  
 Spiralia;Lophotrochozoa;Annelida;Clitellata;Hirudinea;Rhynchobdellida;Glo  
 ssisphoniidae;Helobdella;Helobdella robusta  
 UdeM00000011222 6565 136.3 UdeM00000011222 XP\_022286598.1 36.5 296  
 158 9 16 305 78 349 6.70E-29 136.3 6565 cellular  
 organisms;Eukaryota;Opisthokonta;Metazoa;Eumetazoa;Bilateria;Protostomia;  
 Spiralia;Lophotrochozoa;Mollusca;Bivalvia;Autobranchia;Pteriomorphia;Ostr  
 eida;Ostreoidea;Ostreidae;Crassostrea;Crassostrea virginica  
 UdeM00000011223 6565 249.2 UdeM00000011223 XP\_022335990.1 67.3 171  
 56 0 3 173 343 513 4.50E-63 249.2 6565 cellular  
 organisms;Eukaryota;Opisthokonta;Metazoa;Eumetazoa;Bilateria;Protostomia;  
 Spiralia;Lophotrochozoa;Mollusca;Bivalvia;Autobranchia;Pteriomorphia;Ostr  
 eida;Ostreoidea;Ostreidae;Crassostrea;Crassostrea virginica  
 UdeM00000011225 6596 109 UdeM00000011225 XP\_045202636.1 30.7 335  
 191 8 3 327 100 403 1.20E-20 109 6596 cellular  
 organisms;Eukaryota;Opisthokonta;Metazoa;Eumetazoa;Bilateria;Protostomia;  
 Spiralia;Lophotrochozoa;Mollusca;Bivalvia;Autobranchia;Heteroconchia;Euhe  
 terodonta;Imparidentia;Venerida;Veneroidea;Veneridae;Mercenaria;Mercenari  
 a mercenaria  
 UdeM00000011226 6596 287.3 UdeM00000011226 XP\_045214278.1 42.4 384  
 181 4 15 392 16 365 2.90E-74 287.3 6596 cellular  
 organisms;Eukaryota;Opisthokonta;Metazoa;Eumetazoa;Bilateria;Protostomia;

Spiralia;Lophotrochozoa;Mollusca;Bivalvia;Autobranchia;Heteroconchia;Euherodonta;Imparidentia;Venerida;Veneroidea;Veneridae;Mercenaria;Mercenaria mercenaria

UdeM00000011227 6596 216.9 UdeM00000011227 XP\_045214278.1 30.2 693  
334 17 1 567 456 1124 7.00E-53 216.9 6596 cellular

organisms;Eukaryota;Opisthokonta;Metazoa;Eumetazoa;Bilateria;Protostomia;Spiralia;Lophotrochozoa;Mollusca;Bivalvia;Autobranchia;Heteroconchia;Euherodonta;Imparidentia;Venerida;Veneroidea;Veneridae;Mercenaria;Mercenaria mercenaria

UdeM00000011228 400727 313.9 UdeM00000011228 XP\_025112388.1 70  
203 61 0 71 273 73 275 2.00E-82 313.9 400727  
cellular

organisms;Eukaryota;Opisthokonta;Metazoa;Eumetazoa;Bilateria;Protostomia;Spiralia;Lophotrochozoa;Mollusca;Gastropoda;Caenogastropoda;Architaenioglossa;Ampullarioidea;Ampullariidae;Pomacea;Pomacea canaliculata

UdeM00000011229 400727 312.8 UdeM00000011229 XP\_025112388.1 59.9  
252 93 2 13 263 31 275 4.30E-82 312.8 400727  
cellular

organisms;Eukaryota;Opisthokonta;Metazoa;Eumetazoa;Bilateria;Protostomia;Spiralia;Lophotrochozoa;Mollusca;Gastropoda;Caenogastropoda;Architaenioglossa;Ampullarioidea;Ampullariidae;Pomacea;Pomacea canaliculata

UdeM00000011230 6596 540 UdeM00000011230 XP\_045201882.1 71 389  
101 5 1 388 1 378 2.40E-150 540 6596 cellular

organisms;Eukaryota;Opisthokonta;Metazoa;Eumetazoa;Bilateria;Protostomia;Spiralia;Lophotrochozoa;Mollusca;Bivalvia;Autobranchia;Heteroconchia;Euherodonta;Imparidentia;Venerida;Veneroidea;Veneridae;Mercenaria;Mercenaria mercenaria

UdeM00000011231 6596 858.2 UdeM00000011231 XP\_045201914.1 58 807  
322 11 1 799 1 798 8.20E-246 858.2 6596 cellular

organisms;Eukaryota;Opisthokonta;Metazoa;Eumetazoa;Bilateria;Protostomia;Spiralia;Lophotrochozoa;Mollusca;Bivalvia;Autobranchia;Heteroconchia;Euherodonta;Imparidentia;Venerida;Veneroidea;Veneridae;Mercenaria;Mercenaria mercenaria

UdeM00000011232 10224 383.6 UdeM00000011232 XP\_002735040.1 52.2 372  
152 4 5 376 6 351 3.00E-103 383.6 10224 cellular

organisms;Eukaryota;Opisthokonta;Metazoa;Eumetazoa;Bilateria;Deuterostomia;Hemichordata;Enteropneusta;Harrimaniidae;Saccoglossus;Saccoglossus kowalevskii

UdeM00000011236 225164 307.4 UdeM00000011236 XP\_009048425.1 65.9  
214 72 1 12 224 27 240 1.50E-80 307.4 225164  
cellular

organisms;Eukaryota;Opisthokonta;Metazoa;Eumetazoa;Bilateria;Protostomia;Spiralia;Lophotrochozoa;Mollusca;Gastropoda;Patellogastropoda;Lottiidae;Lottia;Lottia gigantea

UdeM00000011237 6565 167.2 UdeM00000011237 XP\_022328321.1 77 122  
28 0 1 122 1 122 1.40E-38 167.2 6565 cellular

organisms;Eukaryota;Opisthokonta;Metazoa;Eumetazoa;Bilateria;Protostomia;Spiralia;Lophotrochozoa;Mollusca;Bivalvia;Autobranchia;Pteriomorpha;Ostreida;Ostreidae;Crassostrea;Crassostrea virginica

UdeM00000011238 400727 205.7 UdeM00000011238 XP\_025112983.1 66.2  
151 51 0 1 151 1 151 4.20E-50 205.7 400727

cellular

organisms;Eukaryota;Opisthokonta;Metazoa;Eumetazoa;Bilateria;Protostomia;

Spiralia; Lophotrochozoa; Mollusca; Gastropoda; Caenogastropoda; Architaenioglossa; Ampullarioidea; Ampullariidae; Pomacea; Pomacea canaliculata

UdeM00000011239 6596 445.3 UdeM00000011239 XP\_045207016.1 48.2 504  
232 12 7 506 4 482 1.10E-121 445.3 6596 cellular  
organisms; Eukaryota; Opisthokonta; Metazoa; Eumetazoa; Bilateria; Protostomia; Spiralia; Lophotrochozoa; Mollusca; Bivalvia; Autobranchia; Heteroconchia; Euheterodonta; Imparidentia; Venerida; Veneroidea; Veneridae; Mercenaria; Mercenaria mercenaria

UdeM00000011240 6596 193.7 UdeM00000011240 XP\_045204855.1 46.6 558  
251 4 2 519 358 908 5.70E-46 193.7 6596 cellular  
organisms; Eukaryota; Opisthokonta; Metazoa; Eumetazoa; Bilateria; Protostomia; Spiralia; Lophotrochozoa; Mollusca; Bivalvia; Autobranchia; Heteroconchia; Euheterodonta; Imparidentia; Venerida; Veneroidea; Veneridae; Mercenaria; Mercenaria mercenaria

UdeM00000011241 7054 432.2 UdeM00000011241 XP\_031328250.1 49.6 425  
213 1 1 424 1 425 8.00E-118 432.2 7054 cellular  
organisms; Eukaryota; Opisthokonta; Metazoa; Eumetazoa; Bilateria; Protostomia; Ecdysozoa; Panarthropoda; Arthropoda; Mandibulata; Pancrustacea; Hexapoda; Insecta; Dicondylia; Pterygota; Neoptera; Endopterygota; Coleoptera; Polyphaga; Elateriformia; Elateroidea; Lampyridae; Lampyrinae; Photinus; Photinus pyralis

UdeM00000011242 1735272 146.7 UdeM00000011242 XP\_041368331.1 44.7  
371 202 2 1 369 1 370 5.70E-32 146.7 1735272  
cellular  
organisms; Eukaryota; Opisthokonta; Metazoa; Eumetazoa; Bilateria; Protostomia; Spiralia; Lophotrochozoa; Mollusca; Gastropoda; Neomphalina; Neomphaloidea; Peltospiridae; Gigantopelta; Gigantopelta aegis

UdeM00000011243 1735272 153.7 UdeM00000011243 XP\_041370549.1 34.9  
284 120 5 12 294 164 383 3.70E-34 153.7 1735272  
cellular  
organisms; Eukaryota; Opisthokonta; Metazoa; Eumetazoa; Bilateria; Protostomia; Spiralia; Lophotrochozoa; Mollusca; Gastropoda; Neomphalina; Neomphaloidea; Peltospiridae; Gigantopelta; Gigantopelta aegis

UdeM00000011245 6596 527.3 UdeM00000011245 XP\_045197814.1 50.6 530  
261 1 15 543 16 545 2.30E-146 527.3 6596 cellular  
organisms; Eukaryota; Opisthokonta; Metazoa; Eumetazoa; Bilateria; Protostomia; Spiralia; Lophotrochozoa; Mollusca; Bivalvia; Autobranchia; Heteroconchia; Euheterodonta; Imparidentia; Venerida; Veneroidea; Veneridae; Mercenaria; Mercenaria mercenaria

UdeM00000011246 1735272 1169.1 UdeM00000011246 XP\_041368565.1  
56.9 1005 413 9 33 1034 20 1007 0.00E+00 1169.1  
1735272 cellular  
organisms; Eukaryota; Opisthokonta; Metazoa; Eumetazoa; Bilateria; Protostomia; Spiralia; Lophotrochozoa; Mollusca; Gastropoda; Neomphalina; Neomphaloidea; Peltospiridae; Gigantopelta; Gigantopelta aegis

UdeM00000011247 6596 669.5 UdeM00000011247 XP\_045191539.1 57 542  
229 3 14 555 11 548 3.90E-189 669.5 6596 cellular  
organisms; Eukaryota; Opisthokonta; Metazoa; Eumetazoa; Bilateria; Protostomia; Spiralia; Lophotrochozoa; Mollusca; Bivalvia; Autobranchia; Heteroconchia; Euheterodonta; Imparidentia; Venerida; Veneroidea; Veneridae; Mercenaria; Mercenaria mercenaria

UdeM00000011248 7998 59.7 UdeM00000011248 XP\_017323142.1 46.1 76  
37 2 17 90 58 131 2.20E-06 59.7 7998 cellular  
organisms; Eukaryota; Opisthokonta; Metazoa; Eumetazoa; Bilateria; Deuterostomia; Chordata; Craniata; Vertebrata; Gnathostomata; Teleostomi; Euteleostomi; Acti

nopterygii;Actinopteri;Neopterygii;Teleostei;Osteoglossocephalai;Clupeocephala;Otomorpha;Ostariophysi;Otophysi;Characiphysae;Siluriformes;Siluroid ei;Ictaluridae;Ictalurus;Ictalurus punctatus

UdeM00000011249 6573 213 UdeM00000011249 XP\_021369519.1 45.6 261  
125 7 7 258 10 262 4.50E-52 213 6573 cellular

organisms;Eukaryota;Opisthokonta;Metazoa;Eumetazoa;Bilateria;Protostomia;Spiralia;Lophotrochozoa;Mollusca;Bivalvia;Autobranchia;Pteriormorphia;Pectinida;Pectinoidea;Pectinidae;Mizuhopecten;Mizuhopecten yessoensis

UdeM00000011250 6573 193.7 UdeM00000011250 XP\_021369519.1 47.7 216  
99 5 42 248 52 262 2.70E-46 193.7 6573 cellular

organisms;Eukaryota;Opisthokonta;Metazoa;Eumetazoa;Bilateria;Protostomia;Spiralia;Lophotrochozoa;Mollusca;Bivalvia;Autobranchia;Pteriormorphia;Pectinida;Pectinoidea;Pectinidae;Mizuhopecten;Mizuhopecten yessoensis

UdeM00000011251 6573 194.9 UdeM00000011251 XP\_021369519.1 47.3 226  
104 6 6 222 43 262 1.10E-46 194.9 6573 cellular

organisms;Eukaryota;Opisthokonta;Metazoa;Eumetazoa;Bilateria;Protostomia;Spiralia;Lophotrochozoa;Mollusca;Bivalvia;Autobranchia;Pteriormorphia;Pectinida;Pectinoidea;Pectinidae;Mizuhopecten;Mizuhopecten yessoensis

UdeM00000011253 6573 214.9 UdeM00000011253 XP\_021369519.1 46 261  
124 7 7 258 10 262 1.20E-52 214.9 6573 cellular

organisms;Eukaryota;Opisthokonta;Metazoa;Eumetazoa;Bilateria;Protostomia;Spiralia;Lophotrochozoa;Mollusca;Bivalvia;Autobranchia;Pteriormorphia;Pectinida;Pectinoidea;Pectinidae;Mizuhopecten;Mizuhopecten yessoensis

UdeM00000011254 6573 68.9 UdeM00000011254 XP\_021369519.1 35.1 148  
60 4 36 150 83 227 6.10E-09 68.9 6573 cellular

organisms;Eukaryota;Opisthokonta;Metazoa;Eumetazoa;Bilateria;Protostomia;Spiralia;Lophotrochozoa;Mollusca;Bivalvia;Autobranchia;Pteriormorphia;Pectinida;Pectinoidea;Pectinidae;Mizuhopecten;Mizuhopecten yessoensis

UdeM00000011255 6565 78.6 UdeM00000011255 XP\_022311060.1 51.3 78  
36 1 77 154 28 103 8.10E-12 78.6 6565 cellular

organisms;Eukaryota;Opisthokonta;Metazoa;Eumetazoa;Bilateria;Protostomia;Spiralia;Lophotrochozoa;Mollusca;Bivalvia;Autobranchia;Pteriormorphia;Ostreida;Ostreoidea;Ostreidae;Crassostrea;Crassostrea virginica

UdeM00000011257 7868 65.5 UdeM00000011257 NP\_001279192.1 58.6 58  
19 2 6 58 41 98 4.80E-08 65.5 7868 cellular

organisms;Eukaryota;Opisthokonta;Metazoa;Eumetazoa;Bilateria;Deuterostomia;Chordata;Craniata;Vertebrata;Gnathostomata;Chondrichthyes;Holocephali;Chimaeriformes;Callorhynchidae;Callorhynchus;Callorhynchus milii

UdeM00000011258 6565 117.9 UdeM00000011258 XP\_022319276.1 51.4 111  
49 2 11 121 156 261 9.40E-24 117.9 6565 cellular

organisms;Eukaryota;Opisthokonta;Metazoa;Eumetazoa;Bilateria;Protostomia;Spiralia;Lophotrochozoa;Mollusca;Bivalvia;Autobranchia;Pteriormorphia;Ostreida;Ostreoidea;Ostreidae;Crassostrea;Crassostrea virginica

UdeM00000011259 6596 126.7 UdeM00000011259 XP\_045171063.1 38.8 165  
99 2 15 179 7 169 3.00E-26 126.7 6596 cellular

organisms;Eukaryota;Opisthokonta;Metazoa;Eumetazoa;Bilateria;Protostomia;Spiralia;Lophotrochozoa;Mollusca;Bivalvia;Autobranchia;Heteroconchia;Euheterodonta;Imparidentia;Venerida;Veneroidea;Veneridae;Mercenaria;Mercenaria mercenaria

UdeM00000011264 1735272 1705.3 UdeM00000011264 XP\_041370347.1  
37.9 2265 1067 23 7 1939 4 2261 0.00E+00 1705.3

1735272 cellular

organisms;Eukaryota;Opisthokonta;Metazoa;Eumetazoa;Bilateria;Protostomia;

Spiralia;Lophotrochozoa;Mollusca;Gastropoda;Neomphalina;Neomphaloidea;Pel  
tospiridae;Gigantopelta;Gigantopelta aegis

UdeM00000011266 260615 195.7 UdeM00000011266 XP\_039385216.1 62.2  
180 18 2 1 130 347 526 3.80E-47 195.7 260615  
cellular

organisms;Eukaryota;Opisthokonta;Metazoa;Eumetazoa;Bilateria;Deuterostomi  
a;Chordata;Craniata;Vertebrata;Gnathostomata;Teleostomi;Euteleostomi;Sarc  
opterygii;Dipnotetrapodomorpha;Tetrapoda;Amniota;Sauropsida;Sauria;Archel  
osauria;Testudinata;Testudines;Cryptodira;Durocryptodira;Testudinoidea;Ge  
oemydidae;Geoemydinae;Mauremys;Mauremys reevesii

UdeM00000011267 6573 1228.4 UdeM00000011267 XP\_021380178.1 60.3  
984 352 10 132 1104 794 1749 0.00E+00 1228.4 6573  
cellular

organisms;Eukaryota;Opisthokonta;Metazoa;Eumetazoa;Bilateria;Protostomia;  
Spiralia;Lophotrochozoa;Mollusca;Bivalvia;Autobranchia;Pteriomorpha;Pect  
inida;Pectinoidea;Pectinidae;Mizuhopecten;Mizuhopecten yessoensis

UdeM00000011268 6596 191.8 UdeM00000011268 XP\_045205873.1 50.8 187  
80 4 213 395 237 415 1.70E-45 191.8 6596 cellular

organisms;Eukaryota;Opisthokonta;Metazoa;Eumetazoa;Bilateria;Protostomia;  
Spiralia;Lophotrochozoa;Mollusca;Bivalvia;Autobranchia;Heteroconchia;Euhe  
terodonta;Imparidentia;Venerida;Veneroidea;Veneridae;Mercenaria;Mercenari  
a mercenaria

UdeM00000011270 6579 896.7 UdeM00000011270 XP\_033730374.1 71.2 639  
180 3 455 1091 459 1095 2.90E-257 896.7 6579 cellular

organisms;Eukaryota;Opisthokonta;Metazoa;Eumetazoa;Bilateria;Protostomia;  
Spiralia;Lophotrochozoa;Mollusca;Bivalvia;Autobranchia;Pteriomorpha;Pect  
inida;Pectinoidea;Pectinidae;Pecten;Pecten maximus

UdeM00000011269 6579 1340.5 UdeM00000011269 XP\_033730374.1 70.2  
945 277 4 455 1397 459 1400 0.00E+00 1340.5 6579  
cellular

organisms;Eukaryota;Opisthokonta;Metazoa;Eumetazoa;Bilateria;Protostomia;  
Spiralia;Lophotrochozoa;Mollusca;Bivalvia;Autobranchia;Pteriomorpha;Pect  
inida;Pectinoidea;Pectinidae;Pecten;Pecten maximus

UdeM00000011271 37653 476.5 UdeM00000011271 XP\_014774431.1 73.3 300  
79 1 38 337 1184 1482 3.30E-131 476.5 37653 cellular

organisms;Eukaryota;Opisthokonta;Metazoa;Eumetazoa;Bilateria;Protostomia;  
Spiralia;Lophotrochozoa;Mollusca;Cephalopoda;Coleoidea;Octopodiformes;Oct  
opoda;Incirrata;Octopodidae;Octopus;Octopus bimaculoides

UdeM00000011272 6596 282.3 UdeM00000011272 XP\_045200231.1 63.1 268  
79 3 1 252 116 379 5.90E-73 282.3 6596 cellular

organisms;Eukaryota;Opisthokonta;Metazoa;Eumetazoa;Bilateria;Protostomia;  
Spiralia;Lophotrochozoa;Mollusca;Bivalvia;Autobranchia;Heteroconchia;Euhe  
terodonta;Imparidentia;Venerida;Veneroidea;Veneridae;Mercenaria;Mercenari  
a mercenaria

UdeM00000011273 29159 102.4 UdeM00000011273 XP\_034302659.1 60 75  
30 0 28 102 5115 5189 3.40E-19 102.4 29159 cellular

organisms;Eukaryota;Opisthokonta;Metazoa;Eumetazoa;Bilateria;Protostomia;  
Spiralia;Lophotrochozoa;Mollusca;Bivalvia;Autobranchia;Pteriomorpha;Ostr  
eida;Ostreoidea;Ostreidae;Crassostrea;Crassostrea gigas

UdeM00000011274 6573 5953.2 UdeM00000011274 XP\_021371158.1 69  
4503 1292 34 23 4488 679 5113 0.00E+00 5953.2 6573  
cellular

organisms;Eukaryota;Opisthokonta;Metazoa;Eumetazoa;Bilateria;Protostomia;

Spiralia; Lophotrochozoa; Mollusca; Bivalvia; Autobranchia; Pteriomorpha; Pectinida; Pectinoidea; Pectinidae; Mizuhopecten; Mizuhopecten yessoensis  
UdeM00000011275 6596 755 UdeM00000011275 XP\_045212931.1 61.7 699  
249 7 5 686 4 700 8.40E-215 755 6596 cellular  
organisms; Eukaryota; Opisthokonta; Metazoa; Eumetazoa; Bilateria; Protostomia; Spiralia; Lophotrochozoa; Mollusca; Bivalvia; Autobranchia; Heteroconchia; Euheterodonta; Imparidentia; Venerida; Veneroidea; Veneridae; Mercenaria; Mercenaria mercenaria  
UdeM00000011276 10224 134.8 UdeM00000011276 XP\_002740205.2 36.2 229  
123 5 4 229 48 256 2.80E-28 134.8 10224 cellular  
organisms; Eukaryota; Opisthokonta; Metazoa; Eumetazoa; Bilateria; Deuterostomia; Hemichordata; Enteropneusta; Harrimaniidae; Saccoglossus; Saccoglossus kowalevskii  
UdeM00000011277 6579 877.5 UdeM00000011277 XP\_033760558.1 34.5 1527  
973 6 543 2065 1340 2843 3.40E-251 877.5 6579 cellular  
organisms; Eukaryota; Opisthokonta; Metazoa; Eumetazoa; Bilateria; Protostomia; Spiralia; Lophotrochozoa; Mollusca; Bivalvia; Autobranchia; Pteriomorpha; Pectinida; Pectinoidea; Pectinidae; Pecten; Pecten maximus  
UdeM00000011278 6579 164.9 UdeM00000011278 XP\_033729790.1 31.8 355  
153 3 10 280 17 366 1.70E-37 164.9 6579 cellular  
organisms; Eukaryota; Opisthokonta; Metazoa; Eumetazoa; Bilateria; Protostomia; Spiralia; Lophotrochozoa; Mollusca; Bivalvia; Autobranchia; Pteriomorpha; Pectinida; Pectinoidea; Pectinidae; Pecten; Pecten maximus  
UdeM00000011279 6579 148.3 UdeM00000011279 XP\_033729790.1 47.3 146  
77 0 10 155 17 162 8.20E-33 148.3 6579 cellular  
organisms; Eukaryota; Opisthokonta; Metazoa; Eumetazoa; Bilateria; Protostomia; Spiralia; Lophotrochozoa; Mollusca; Bivalvia; Autobranchia; Pteriomorpha; Pectinida; Pectinoidea; Pectinidae; Pecten; Pecten maximus  
UdeM00000011282 6500 72 UdeM00000011282 XP\_005100473.1 48.3 60  
29 1 16 75 164 221 9.30E-10 72 6500 cellular  
organisms; Eukaryota; Opisthokonta; Metazoa; Eumetazoa; Bilateria; Protostomia; Spiralia; Lophotrochozoa; Mollusca; Gastropoda; Heterobranchia; Euthyneura; Teptipleura; Aplysiida; Aplysioidea; Aplysiidae; Aplysia; Aplysia californica  
UdeM00000011284 6573 832 UdeM00000011284 XP\_021366299.1 32.3 1327  
896 2 998 2323 15 1340 1.80E-237 832 6573 cellular  
organisms; Eukaryota; Opisthokonta; Metazoa; Eumetazoa; Bilateria; Protostomia; Spiralia; Lophotrochozoa; Mollusca; Bivalvia; Autobranchia; Pteriomorpha; Pectinida; Pectinoidea; Pectinidae; Mizuhopecten; Mizuhopecten yessoensis  
UdeM00000011286 10224 133.7 UdeM00000011286 XP\_002740205.2 36.4 228  
122 5 4 228 48 255 3.20E-28 133.7 10224 cellular  
organisms; Eukaryota; Opisthokonta; Metazoa; Eumetazoa; Bilateria; Deuterostomia; Hemichordata; Enteropneusta; Harrimaniidae; Saccoglossus; Saccoglossus kowalevskii  
UdeM00000011285 10224 134.8 UdeM00000011285 XP\_002740205.2 36.2 229  
123 5 4 229 48 256 2.80E-28 134.8 10224 cellular  
organisms; Eukaryota; Opisthokonta; Metazoa; Eumetazoa; Bilateria; Deuterostomia; Hemichordata; Enteropneusta; Harrimaniidae; Saccoglossus; Saccoglossus kowalevskii  
UdeM00000011287 6579 1025.8 UdeM00000011287 XP\_033760558.1 31.9  
2172 1364 24 17 2163 746 2827 9.20E-296 1025.8 6579  
cellular  
organisms; Eukaryota; Opisthokonta; Metazoa; Eumetazoa; Bilateria; Protostomia; Spiralia; Lophotrochozoa; Mollusca; Bivalvia; Autobranchia; Pteriomorpha; Pectinida; Pectinoidea; Pectinidae; Pecten; Pecten maximus

UdeM00000011288 6579 150.2 UdeM00000011288 XP\_033729790.1 47.9 146  
 76 0 10 155 17 162 2.20E-33 150.2 6579 cellular  
 organisms;Eukaryota;Opisthokonta;Metazoa;Eumetazoa;Bilateria;Protostomia;  
 Spiralia;Lophotrochozoa;Mollusca;Bivalvia;Autobranchia;Pteriormorphia;Pect  
 inida;Pectinoidea;Pectinidae;Pecten;Pecten maximus  
 UdeM00000011292 55291 108.6 UdeM00000011292 XP\_039601029.1 26 346  
 197 11 4 308 25 352 2.00E-20 108.6 55291 cellular  
 organisms;Eukaryota;Opisthokonta;Metazoa;Eumetazoa;Bilateria;Deuterostomi  
 a;Chordata;Craniata;Vertebrata;Gnathostomata;Teleostomi;Euteleostomi;Acti  
 nopterygii;Cladistia;Polypteriformes;Polypteridae;Polypterus;Polypterus  
 senegalus  
 UdeM00000011294 1735272 78.6 UdeM00000011294 XP\_041374672.1 27.9  
 190 120 5 7 181 146 333 9.50E-12 78.6 1735272  
 cellular  
 organisms;Eukaryota;Opisthokonta;Metazoa;Eumetazoa;Bilateria;Protostomia;  
 Spiralia;Lophotrochozoa;Mollusca;Gastropoda;Neomphalina;Neomphaloidea;Pel  
 tospiridae;Gigantopelta;Gigantopelta aegis  
 UdeM00000011295 6573 740.7 UdeM00000011295 XP\_021366299.1 33.3 1125  
 749 1 209 1332 82 1206 3.20E-210 740.7 6573 cellular  
 organisms;Eukaryota;Opisthokonta;Metazoa;Eumetazoa;Bilateria;Protostomia;  
 Spiralia;Lophotrochozoa;Mollusca;Bivalvia;Autobranchia;Pteriormorphia;Pect  
 inida;Pectinoidea;Pectinidae;Mizuhopecten;Mizuhopecten yessoensis  
 UdeM00000011296 6579 131 UdeM00000011296 XP\_033729790.1 50 124  
 62 0 10 133 17 140 1.20E-27 131 6579 cellular  
 organisms;Eukaryota;Opisthokonta;Metazoa;Eumetazoa;Bilateria;Protostomia;  
 Spiralia;Lophotrochozoa;Mollusca;Bivalvia;Autobranchia;Pteriormorphia;Pect  
 inida;Pectinoidea;Pectinidae;Pecten;Pecten maximus  
 UdeM00000011298 2652724 94 UdeM00000011298 XP\_028513771.1 45  
 111 61 0 2 112 109 219 1.40E-16 94 2652724  
 cellular  
 organisms;Eukaryota;Opisthokonta;Metazoa;Eumetazoa;Cnidaria;Anthozoa;Hexa  
 corallia;Actiniaria;Aiptasiidae;Exaiptasia;Exaiptasia diaphana  
 UdeM00000011300 6596 66.6 UdeM00000011300 XP\_045180785.1 26.6 158  
 106 6 12 162 76 230 3.80E-08 66.6 6596 cellular  
 organisms;Eukaryota;Opisthokonta;Metazoa;Eumetazoa;Bilateria;Protostomia;  
 Spiralia;Lophotrochozoa;Mollusca;Bivalvia;Autobranchia;Heteroconchia;Euhe  
 terodonta;Imparidentia;Venerida;Veneroidea;Veneridae;Mercenaria;Mercenari  
 a mercenaria  
 UdeM00000011301 10224 129.8 UdeM00000011301 XP\_002740205.2 29.8 325  
 193 9 4 318 48 347 8.40E-27 129.8 10224 cellular  
 organisms;Eukaryota;Opisthokonta;Metazoa;Eumetazoa;Bilateria;Deuterostomi  
 a;Hemichordata;Enteropneusta;Harrimaniidae;Saccoglossus;Saccoglossus  
 kowalevskii  
 UdeM00000011302 1735272 119.8 UdeM00000011302 XP\_041374024.1 26.8  
 340 217 7 12 326 421 753 6.70E-24 119.8 1735272  
 cellular  
 organisms;Eukaryota;Opisthokonta;Metazoa;Eumetazoa;Bilateria;Protostomia;  
 Spiralia;Lophotrochozoa;Mollusca;Gastropoda;Neomphalina;Neomphaloidea;Pel  
 tospiridae;Gigantopelta;Gigantopelta aegis  
 UdeM00000011303 6596 445.7 UdeM00000011303 XP\_045200043.1 57 351  
 149 2 1 350 38 387 5.60E-122 445.7 6596 cellular  
 organisms;Eukaryota;Opisthokonta;Metazoa;Eumetazoa;Bilateria;Protostomia;  
 Spiralia;Lophotrochozoa;Mollusca;Bivalvia;Autobranchia;Heteroconchia;Euhe



terodonta;Imparidentia;Venerida;Veneroidea;Veneridae;Mercenaria;Mercenaria mercenaria

UdeM00000011304 6596 445.7 UdeM00000011304 XP\_045200043.1 54.5 380  
167 3 7 381 9 387 6.10E-122 445.7 6596 cellular

organisms;Eukaryota;Opisthokonta;Metazoa;Eumetazoa;Bilateria;Protostomia;Spiralia;Lophotrochozoa;Mollusca;Bivalvia;Autobranhia;Heteroconchia;Euherodonta;Imparidentia;Venerida;Veneroidea;Veneridae;Mercenaria;Mercenaria mercenaria

UdeM00000011305 6596 233.4 UdeM00000011305 XP\_045200030.1 24.6 874  
579 19 106 926 863 1709 1.20E-57 233.4 6596 cellular

organisms;Eukaryota;Opisthokonta;Metazoa;Eumetazoa;Bilateria;Protostomia;Spiralia;Lophotrochozoa;Mollusca;Bivalvia;Autobranhia;Heteroconchia;Euherodonta;Imparidentia;Venerida;Veneroidea;Veneridae;Mercenaria;Mercenaria mercenaria

UdeM00000011306 1735272 423.7 UdeM00000011306 XP\_041368258.1 63.2  
323 119 0 1 323 1 323 2.10E-115 423.7 1735272  
cellular

organisms;Eukaryota;Opisthokonta;Metazoa;Eumetazoa;Bilateria;Protostomia;Spiralia;Lophotrochozoa;Mollusca;Gastropoda;Neomphalina;Neomphaloidea;Peltospiridae;Gigantopelta;Gigantopelta aegis

UdeM00000011309 6596 152.1 UdeM00000011309 XP\_045202653.1 43.2 213  
74 3 1 166 53 265 6.30E-34 152.1 6596 cellular

organisms;Eukaryota;Opisthokonta;Metazoa;Eumetazoa;Bilateria;Protostomia;Spiralia;Lophotrochozoa;Mollusca;Bivalvia;Autobranhia;Heteroconchia;Euherodonta;Imparidentia;Venerida;Veneroidea;Veneridae;Mercenaria;Mercenaria mercenaria

UdeM00000011311 6573 523.9 UdeM00000011311 XP\_021370704.1 38.6 741  
445 5 40 772 62 800 4.00E-145 523.9 6573 cellular

organisms;Eukaryota;Opisthokonta;Metazoa;Eumetazoa;Bilateria;Protostomia;Spiralia;Lophotrochozoa;Mollusca;Bivalvia;Autobranhia;Pteriomorphia;Pectinida;Pectinoidea;Pectinidae;Mizuhopecten;Mizuhopecten yessoensis

UdeM00000011312 6579 581.3 UdeM00000011312 XP\_033738752.1 35.9 935  
581 9 42 966 10 936 2.40E-162 581.3 6579 cellular

organisms;Eukaryota;Opisthokonta;Metazoa;Eumetazoa;Bilateria;Protostomia;Spiralia;Lophotrochozoa;Mollusca;Bivalvia;Autobranhia;Pteriomorphia;Pectinida;Pectinoidea;Pectinidae;Pecten;Pecten maximus

UdeM00000011313 6596 491.5 UdeM00000011313 XP\_045161796.1 42.7 1346  
548 59 1641 2877 1672 2903 7.30E-135 491.5 6596 cellular

organisms;Eukaryota;Opisthokonta;Metazoa;Eumetazoa;Bilateria;Protostomia;Spiralia;Lophotrochozoa;Mollusca;Bivalvia;Autobranhia;Heteroconchia;Euherodonta;Imparidentia;Venerida;Veneroidea;Veneridae;Mercenaria;Mercenaria mercenaria

UdeM00000011314 6596 499.2 UdeM00000011314 XP\_045161796.1 42.9 1343  
547 58 1641 2874 1672 2903 3.50E-137 499.2 6596 cellular

organisms;Eukaryota;Opisthokonta;Metazoa;Eumetazoa;Bilateria;Protostomia;Spiralia;Lophotrochozoa;Mollusca;Bivalvia;Autobranhia;Heteroconchia;Euherodonta;Imparidentia;Venerida;Veneroidea;Veneridae;Mercenaria;Mercenaria mercenaria

UdeM00000011315 6596 456.4 UdeM00000011315 XP\_045161796.1 41.3 1343  
541 58 1641 2847 1672 2903 2.60E-124 456.4 6596 cellular

organisms;Eukaryota;Opisthokonta;Metazoa;Eumetazoa;Bilateria;Protostomia;Spiralia;Lophotrochozoa;Mollusca;Bivalvia;Autobranhia;Heteroconchia;Euherodonta;Imparidentia;Venerida;Veneroidea;Veneridae;Mercenaria;Mercenaria mercenaria

UdeM00000011316 6596 496.9 UdeM00000011316 XP\_045161796.1 42 1347  
 557 58 1641 2878 1672 2903 1.70E-136 496.9 6596 cellular  
 organisms;Eukaryota;Opisthokonta;Metazoa;Eumetazoa;Bilateria;Protostomia;  
 Spiralia;Lophotrochozoa;Mollusca;Bivalvia;Autobranchia;Heteroconchia;Euhe  
 terodonta;Imparidentia;Venerida;Veneroidea;Veneridae;Mercenaria;Mercenari  
 a mercenaria  
 UdeM00000011317 6573 606.3 UdeM00000011317 XP\_021367246.1 55.9 994  
 414 4 21 1012 19 990 9.30E-170 606.3 6573 cellular  
 organisms;Eukaryota;Opisthokonta;Metazoa;Eumetazoa;Bilateria;Protostomia;  
 Spiralia;Lophotrochozoa;Mollusca;Bivalvia;Autobranchia;Pteriormorphia;Pect  
 inida;Pectinoidea;Pectinidae;Mizuhopecten;Mizuhopecten yessoensis  
 UdeM00000011318 6596 1466.8 UdeM00000011318 XP\_045191407.1 86  
 1048 145 2 1 1047 1 1047 0.00E+00 1466.8 6596  
 cellular  
 organisms;Eukaryota;Opisthokonta;Metazoa;Eumetazoa;Bilateria;Protostomia;  
 Spiralia;Lophotrochozoa;Mollusca;Bivalvia;Autobranchia;Heteroconchia;Euhe  
 terodonta;Imparidentia;Venerida;Veneroidea;Veneridae;Mercenaria;Mercenari  
 a mercenaria  
 UdeM00000011319 6596 575.5 UdeM00000011319 XP\_045188691.1 68.6 398  
 111 4 2 385 6 403 5.20E-161 575.5 6596 cellular  
 organisms;Eukaryota;Opisthokonta;Metazoa;Eumetazoa;Bilateria;Protostomia;  
 Spiralia;Lophotrochozoa;Mollusca;Bivalvia;Autobranchia;Heteroconchia;Euhe  
 terodonta;Imparidentia;Venerida;Veneroidea;Veneridae;Mercenaria;Mercenari  
 a mercenaria  
 UdeM00000011320 6596 456.1 UdeM00000011320 XP\_045188691.1 55.9 383  
 158 2 15 386 17 399 4.60E-125 456.1 6596 cellular  
 organisms;Eukaryota;Opisthokonta;Metazoa;Eumetazoa;Bilateria;Protostomia;  
 Spiralia;Lophotrochozoa;Mollusca;Bivalvia;Autobranchia;Heteroconchia;Euhe  
 terodonta;Imparidentia;Venerida;Veneroidea;Veneridae;Mercenaria;Mercenari  
 a mercenaria  
 UdeM00000011321 6596 321.2 UdeM00000011321 XP\_045188691.1 44.4 387  
 164 7 7 353 14 389 1.60E-84 321.2 6596 cellular  
 organisms;Eukaryota;Opisthokonta;Metazoa;Eumetazoa;Bilateria;Protostomia;  
 Spiralia;Lophotrochozoa;Mollusca;Bivalvia;Autobranchia;Heteroconchia;Euhe  
 terodonta;Imparidentia;Venerida;Veneroidea;Veneridae;Mercenaria;Mercenari  
 a mercenaria  
 UdeM00000011322 6596 371.7 UdeM00000011322 XP\_045188691.1 48.8 371  
 177 4 23 391 30 389 1.20E-99 371.7 6596 cellular  
 organisms;Eukaryota;Opisthokonta;Metazoa;Eumetazoa;Bilateria;Protostomia;  
 Spiralia;Lophotrochozoa;Mollusca;Bivalvia;Autobranchia;Heteroconchia;Euhe  
 terodonta;Imparidentia;Venerida;Veneroidea;Veneridae;Mercenaria;Mercenari  
 a mercenaria  
 UdeM00000011323 6565 367.9 UdeM00000011323 XP\_022325508.1 40.6 552  
 249 12 103 644 93 575 3.00E-98 367.9 6565 cellular  
 organisms;Eukaryota;Opisthokonta;Metazoa;Eumetazoa;Bilateria;Protostomia;  
 Spiralia;Lophotrochozoa;Mollusca;Bivalvia;Autobranchia;Pteriormorphia;Ostr  
 eida;Ostreoidea;Ostreidae;Crassostrea;Crassostrea virginica  
 UdeM00000011324 6565 293.5 UdeM00000011324 XP\_022325508.1 46.9 320  
 146 2 103 400 93 410 5.40E-76 293.5 6565 cellular  
 organisms;Eukaryota;Opisthokonta;Metazoa;Eumetazoa;Bilateria;Protostomia;  
 Spiralia;Lophotrochozoa;Mollusca;Bivalvia;Autobranchia;Pteriormorphia;Ostr  
 eida;Ostreoidea;Ostreidae;Crassostrea;Crassostrea virginica  
 UdeM00000011325 6565 293.5 UdeM00000011325 XP\_022325508.1 46.9 320  
 146 2 57 354 93 410 4.90E-76 293.5 6565 cellular

organisms;Eukaryota;Opisthokonta;Metazoa;Eumetazoa;Bilateria;Protostomia; Spiralia;Lophotrochozoa;Mollusca;Bivalvia;Autobranchia;Pteriormorphia;Ostr eida;Ostreoidea;Ostreidae;Crassostrea;Crassostrea virginica

UdeM00000011326 6565 338.6 UdeM00000011326 XP\_022325508.1 52.2 318  
149 2 36 352 93 408 1.00E-89 338.6 6565 cellular

organisms;Eukaryota;Opisthokonta;Metazoa;Eumetazoa;Bilateria;Protostomia; Spiralia;Lophotrochozoa;Mollusca;Bivalvia;Autobranchia;Pteriormorphia;Ostr eida;Ostreoidea;Ostreidae;Crassostrea;Crassostrea virginica

UdeM00000011327 1232801 83.2 UdeM00000011327 XP\_043204463.1 35.8  
134 79 4 1 133 451 578 4.70E-13 83.2 1232801  
cellular

organisms;Eukaryota;Opisthokonta;Metazoa;Eumetazoa;Bilateria;Protostomia; Ecdysozoa;Panarthropoda;Arthropoda;Mandibulata;Pancrustacea;Crustacea;Mul ticrustacea;Hexanauplia;Thecostraca;Cirripedia;Thoracica;Sessilia;Balanid ae;Amphibalanus;Amphibalanus amphitrite

UdeM00000011328 6596 706.8 UdeM00000011328 XP\_045173785.1 61.8 555  
207 4 55 607 65 616 2.30E-200 706.8 6596 cellular

organisms;Eukaryota;Opisthokonta;Metazoa;Eumetazoa;Bilateria;Protostomia; Spiralia;Lophotrochozoa;Mollusca;Bivalvia;Autobranchia;Heteroconchia;Euhe terodonta;Imparidentia;Venerida;Veneroidea;Veneridae;Mercenaria;Mercenari a mercenaria

UdeM00000011329 6105 129.8 UdeM00000011329 XP\_031568117.1 46.8 139  
74 0 47 185 13 151 3.60E-27 129.8 6105 cellular

organisms;Eukaryota;Opisthokonta;Metazoa;Eumetazoa;Cnidaria;Anthozoa;Hexa corallia;Actiniaria;Actiniidae;Actinia;Actinia tenebrosa

UdeM00000011330 6596 170.6 UdeM00000011330 XP\_045183440.1 54.4 158  
68 2 10 167 227 380 2.70E-39 170.6 6596 cellular

organisms;Eukaryota;Opisthokonta;Metazoa;Eumetazoa;Bilateria;Protostomia; Spiralia;Lophotrochozoa;Mollusca;Bivalvia;Autobranchia;Heteroconchia;Euhe terodonta;Imparidentia;Venerida;Veneroidea;Veneridae;Mercenaria;Mercenari a mercenaria

UdeM00000011332 2652724 89.7 UdeM00000011332 XP\_028513771.1 46.5  
99 53 0 1 99 73 171 2.20E-15 89.7 2652724  
cellular

organisms;Eukaryota;Opisthokonta;Metazoa;Eumetazoa;Cnidaria;Anthozoa;Hexa corallia;Actiniaria;Aiptasiidae;Exaiptasia;Exaiptasia diaphana

UdeM00000011335 29159 157.5 UdeM00000011335 XP\_019926412.2 37.4 222  
125 5 1 219 275 485 2.10E-35 157.5 29159 cellular

organisms;Eukaryota;Opisthokonta;Metazoa;Eumetazoa;Bilateria;Protostomia; Spiralia;Lophotrochozoa;Mollusca;Bivalvia;Autobranchia;Pteriormorphia;Ostr eida;Ostreoidea;Ostreidae;Crassostrea;Crassostrea gigas

UdeM00000011336 8078 171.4 UdeM00000011336 XP\_035989482.1 51.3 156  
76 0 24 179 27 182 1.30E-39 171.4 8078 cellular

organisms;Eukaryota;Opisthokonta;Metazoa;Eumetazoa;Bilateria;Deuterostomi a;Chordata;Craniata;Vertebrata;Gnathostomata;Teleostomi;Euteleostomi;Acti nopterygii;Actinopteri;Neopterygii;Teleostei;Osteoglossocephalai;Clupeoce phala;Euteleosteomorpha;Neoteleostei;Eurypterygia;Ctenosquamata;Acanthomo rphata;Euacanthomorphacea;Percomorphaceae;Ovalentaria;Atherinomorphae;Cyp rinodontiformes;Cyprinodontoidei;Fundulidae;Fundulus;Fundulus heteroclitus

UdeM00000011337 7054 67.4 UdeM00000011337 XP\_031330401.1 50.9 55  
24 1 2 53 388 442 1.10E-08 67.4 7054 cellular

organisms;Eukaryota;Opisthokonta;Metazoa;Eumetazoa;Bilateria;Protostomia; Ecdysozoa;Panarthropoda;Arthropoda;Mandibulata;Pancrustacea;Hexapoda;Inse

cta;Dicondylia;Pterygota;Neoptera;Endopterygota;Coleoptera;Polyphaga;Elat  
eriformia;Elateroidea;Lampyridae;Lampyrinae;Photinus;Photinus pyralis  
UdeM00000011338 6596 277.3 UdeM00000011338 XP\_045184729.1 29.4 712  
464 12 4 700 3 690 5.40E-71 277.3 6596 cellular  
organisms;Eukaryota;Opisthokonta;Metazoa;Eumetazoa;Bilateria;Protostomia;  
Spiralia;Lophotrochozoa;Mollusca;Bivalvia;Autobranhia;Heteroconchia;Euhe  
terodonta;Imparidentia;Venerida;Veneroidea;Veneridae;Mercenaria;Mercenari  
a mercenaria  
UdeM00000011340 6596 558.5 UdeM00000011340 XP\_045173785.1 61.4 440  
168 2 58 496 68 506 8.60E-156 558.5 6596 cellular  
organisms;Eukaryota;Opisthokonta;Metazoa;Eumetazoa;Bilateria;Protostomia;  
Spiralia;Lophotrochozoa;Mollusca;Bivalvia;Autobranhia;Heteroconchia;Euhe  
terodonta;Imparidentia;Venerida;Veneroidea;Veneridae;Mercenaria;Mercenari  
a mercenaria  
UdeM00000011341 6579 484.6 UdeM00000011341 XP\_033740344.1 55.6 444  
150 3 50 450 101 540 1.40E-133 484.6 6579 cellular  
organisms;Eukaryota;Opisthokonta;Metazoa;Eumetazoa;Bilateria;Protostomia;  
Spiralia;Lophotrochozoa;Mollusca;Bivalvia;Autobranhia;Pteriormorphia;Pect  
inida;Pectinoidea;Pectinidae;Pecten;Pecten maximus  
UdeM00000011342 7054 90.5 UdeM00000011342 XP\_031350480.1 46 87  
46 1 22 107 381 467 1.40E-15 90.5 7054 cellular  
organisms;Eukaryota;Opisthokonta;Metazoa;Eumetazoa;Bilateria;Protostomia;  
Ecdysozoa;Panarthropoda;Arthropoda;Mandibulata;Pancrustacea;Hexapoda;Inse  
cta;Dicondylia;Pterygota;Neoptera;Endopterygota;Coleoptera;Polyphaga;Elat  
eriformia;Elateroidea;Lampyridae;Lampyrinae;Photinus;Photinus pyralis  
UdeM00000011344 6596 93.6 UdeM00000011344 XP\_045201791.1 40 110  
66 0 2 111 478 587 1.90E-16 93.6 6596 cellular  
organisms;Eukaryota;Opisthokonta;Metazoa;Eumetazoa;Bilateria;Protostomia;  
Spiralia;Lophotrochozoa;Mollusca;Bivalvia;Autobranhia;Heteroconchia;Euhe  
terodonta;Imparidentia;Venerida;Veneroidea;Veneridae;Mercenaria;Mercenari  
a mercenaria  
UdeM00000011345 6596 90.9 UdeM00000011345 XP\_045181416.1 25.3 269  
179 5 1 261 260 514 2.60E-15 90.9 6596 cellular  
organisms;Eukaryota;Opisthokonta;Metazoa;Eumetazoa;Bilateria;Protostomia;  
Spiralia;Lophotrochozoa;Mollusca;Bivalvia;Autobranhia;Heteroconchia;Euhe  
terodonta;Imparidentia;Venerida;Veneroidea;Veneridae;Mercenaria;Mercenari  
a mercenaria  
UdeM00000011346 6596 107.5 UdeM00000011346 XP\_045194229.1 32.3 232  
133 7 6 226 15 233 2.30E-20 107.5 6596 cellular  
organisms;Eukaryota;Opisthokonta;Metazoa;Eumetazoa;Bilateria;Protostomia;  
Spiralia;Lophotrochozoa;Mollusca;Bivalvia;Autobranhia;Heteroconchia;Euhe  
terodonta;Imparidentia;Venerida;Veneroidea;Veneridae;Mercenaria;Mercenari  
a mercenaria  
UdeM00000011347 6573 125.6 UdeM00000011347 XP\_021359218.1 67 88  
29 0 2 89 422 509 4.30E-26 125.6 6573 cellular  
organisms;Eukaryota;Opisthokonta;Metazoa;Eumetazoa;Bilateria;Protostomia;  
Spiralia;Lophotrochozoa;Mollusca;Bivalvia;Autobranhia;Pteriormorphia;Pect  
inida;Pectinoidea;Pectinidae;Mizuhopecten;Mizuhopecten yessoensis  
UdeM00000011348 6596 116.3 UdeM00000011348 XP\_045160729.1 41.1 158  
84 1 26 183 546 694 4.20E-23 116.3 6596 cellular  
organisms;Eukaryota;Opisthokonta;Metazoa;Eumetazoa;Bilateria;Protostomia;  
Spiralia;Lophotrochozoa;Mollusca;Bivalvia;Autobranhia;Heteroconchia;Euhe  
terodonta;Imparidentia;Venerida;Veneroidea;Veneridae;Mercenaria;Mercenari  
a mercenaria

UdeM00000011349 6573 176 UdeM00000011349 XP\_021359218.1 53.2 158  
 74 0 1 158 352 509 4.30E-41 176 6573 cellular  
 organisms;Eukaryota;Opisthokonta;Metazoa;Eumetazoa;Bilateria;Protostomia;  
 Spiralia;Lophotrochozoa;Mollusca;Bivalvia;Autobranhia;Pteriormorphia;Pect  
 inida;Pectinoidea;Pectinidae;Mizuhopecten;Mizuhopecten yessoensis  
 UdeM00000011350 6565 128.6 UdeM00000011350 XP\_022314272.1 51.9 129  
 57 1 22 145 407 535 6.40E-27 128.6 6565 cellular  
 organisms;Eukaryota;Opisthokonta;Metazoa;Eumetazoa;Bilateria;Protostomia;  
 Spiralia;Lophotrochozoa;Mollusca;Bivalvia;Autobranhia;Pteriormorphia;Ostr  
 eida;Ostreoidea;Ostreidae;Crassostrea;Crassostrea virginica  
 UdeM00000011351 6573 117.5 UdeM00000011351 XP\_021359218.1 49.1 108  
 55 0 1 108 352 459 1.20E-23 117.5 6573 cellular  
 organisms;Eukaryota;Opisthokonta;Metazoa;Eumetazoa;Bilateria;Protostomia;  
 Spiralia;Lophotrochozoa;Mollusca;Bivalvia;Autobranhia;Pteriormorphia;Pect  
 inida;Pectinoidea;Pectinidae;Mizuhopecten;Mizuhopecten yessoensis  
 UdeM00000011352 6573 162.5 UdeM00000011352 XP\_021359218.1 50 158  
 77 1 1 156 352 509 4.80E-37 162.5 6573 cellular  
 organisms;Eukaryota;Opisthokonta;Metazoa;Eumetazoa;Bilateria;Protostomia;  
 Spiralia;Lophotrochozoa;Mollusca;Bivalvia;Autobranhia;Pteriormorphia;Pect  
 inida;Pectinoidea;Pectinidae;Mizuhopecten;Mizuhopecten yessoensis  
 UdeM00000011354 6596 184.9 UdeM00000011354 XP\_045201862.1 34.8 336  
 203 6 5 336 4 327 1.70E-43 184.9 6596 cellular  
 organisms;Eukaryota;Opisthokonta;Metazoa;Eumetazoa;Bilateria;Protostomia;  
 Spiralia;Lophotrochozoa;Mollusca;Bivalvia;Autobranhia;Heteroconchia;Euhe  
 terodonta;Imparidentia;Venerida;Veneroidea;Veneridae;Mercenaria;Mercenari  
 a mercenaria  
 UdeM00000011356 6596 227.3 UdeM00000011356 XP\_045201869.1 28.7 631  
 416 13 7 625 6 614 5.60E-56 227.3 6596 cellular  
 organisms;Eukaryota;Opisthokonta;Metazoa;Eumetazoa;Bilateria;Protostomia;  
 Spiralia;Lophotrochozoa;Mollusca;Bivalvia;Autobranhia;Heteroconchia;Euhe  
 terodonta;Imparidentia;Venerida;Veneroidea;Veneridae;Mercenaria;Mercenari  
 a mercenaria  
 UdeM00000011357 6596 84 UdeM00000011357 XP\_045212653.1 31.3 163  
 110 1 17 177 39 201 2.20E-13 84 6596 cellular  
 organisms;Eukaryota;Opisthokonta;Metazoa;Eumetazoa;Bilateria;Protostomia;  
 Spiralia;Lophotrochozoa;Mollusca;Bivalvia;Autobranhia;Heteroconchia;Euhe  
 terodonta;Imparidentia;Venerida;Veneroidea;Veneridae;Mercenaria;Mercenari  
 a mercenaria  
 UdeM00000011358 6596 107.1 UdeM00000011358 XP\_045202892.1 36.1 205  
 113 6 28 224 60 254 3.10E-20 107.1 6596 cellular  
 organisms;Eukaryota;Opisthokonta;Metazoa;Eumetazoa;Bilateria;Protostomia;  
 Spiralia;Lophotrochozoa;Mollusca;Bivalvia;Autobranhia;Heteroconchia;Euhe  
 terodonta;Imparidentia;Venerida;Veneroidea;Veneridae;Mercenaria;Mercenari  
 a mercenaria  
 UdeM00000011359 29159 245.7 UdeM00000011359 XP\_034317101.1 43.4 318  
 158 7 26 336 92 394 8.10E-62 245.7 29159 cellular  
 organisms;Eukaryota;Opisthokonta;Metazoa;Eumetazoa;Bilateria;Protostomia;  
 Spiralia;Lophotrochozoa;Mollusca;Bivalvia;Autobranhia;Pteriormorphia;Ostr  
 eida;Ostreoidea;Ostreidae;Crassostrea;Crassostrea gigas  
 UdeM00000011360 29159 338.2 UdeM00000011360 XP\_034322046.1 58.7 271  
 108 2 1 271 416 682 9.70E-90 338.2 29159 cellular  
 organisms;Eukaryota;Opisthokonta;Metazoa;Eumetazoa;Bilateria;Protostomia;  
 Spiralia;Lophotrochozoa;Mollusca;Bivalvia;Autobranhia;Pteriormorphia;Ostr  
 eida;Ostreoidea;Ostreidae;Crassostrea;Crassostrea gigas

UdeM00000011361 29159 214.9 UdeM00000011361 XP\_011451530.1 53 183  
 85 1 71 252 84 266 1.20E-52 214.9 29159 cellular  
 organisms;Eukaryota;Opisthokonta;Metazoa;Eumetazoa;Bilateria;Protostomia;  
 Spiralia;Lophotrochozoa;Mollusca;Bivalvia;Autobranchia;Pteriormorphia;Ostr  
 eida;Ostreoidea;Ostreidae;Crassostrea;Crassostrea gigas  
 UdeM00000011362 6596 449.9 UdeM00000011362 XP\_045211522.1 33.3 851  
 458 26 9 789 2238 3048 6.80E-123 449.9 6596 cellular  
 organisms;Eukaryota;Opisthokonta;Metazoa;Eumetazoa;Bilateria;Protostomia;  
 Spiralia;Lophotrochozoa;Mollusca;Bivalvia;Autobranchia;Heteroconchia;Euhe  
 terodonta;Imparidentia;Venerida;Veneroidea;Veneridae;Mercenaria;Mercenari  
 a mercenaria  
 UdeM00000011363 6579 211.1 UdeM00000011363 XP\_033745542.1 39.3 298  
 162 11 8 296 11 298 2.20E-51 211.1 6579 cellular  
 organisms;Eukaryota;Opisthokonta;Metazoa;Eumetazoa;Bilateria;Protostomia;  
 Spiralia;Lophotrochozoa;Mollusca;Bivalvia;Autobranchia;Pteriormorphia;Pect  
 inida;Pectinoidea;Pectinidae;Pecten;Pecten maximus  
 UdeM00000011364 6596 219.9 UdeM00000011364 XP\_045189789.1 57.8 192  
 71 3 1 186 153 340 3.50E-54 219.9 6596 cellular  
 organisms;Eukaryota;Opisthokonta;Metazoa;Eumetazoa;Bilateria;Protostomia;  
 Spiralia;Lophotrochozoa;Mollusca;Bivalvia;Autobranchia;Heteroconchia;Euhe  
 terodonta;Imparidentia;Venerida;Veneroidea;Veneridae;Mercenaria;Mercenari  
 a mercenaria  
 UdeM00000011367 6579 517.7 UdeM00000011367 XP\_033740344.1 55.5 474  
 164 3 50 480 101 570 1.60E-143 517.7 6579 cellular  
 organisms;Eukaryota;Opisthokonta;Metazoa;Eumetazoa;Bilateria;Protostomia;  
 Spiralia;Lophotrochozoa;Mollusca;Bivalvia;Autobranchia;Pteriormorphia;Pect  
 inida;Pectinoidea;Pectinidae;Pecten;Pecten maximus  
 UdeM00000011368 6596 193.7 UdeM00000011368 XP\_045201862.1 33.1 375  
 236 7 5 375 4 367 5.60E-46 193.7 6596 cellular  
 organisms;Eukaryota;Opisthokonta;Metazoa;Eumetazoa;Bilateria;Protostomia;  
 Spiralia;Lophotrochozoa;Mollusca;Bivalvia;Autobranchia;Heteroconchia;Euhe  
 terodonta;Imparidentia;Venerida;Veneroidea;Veneridae;Mercenaria;Mercenari  
 a mercenaria  
 UdeM00000011369 6596 120.6 UdeM00000011369 XP\_045160729.1 37.4 222  
 121 4 13 230 487 694 2.80E-24 120.6 6596 cellular  
 organisms;Eukaryota;Opisthokonta;Metazoa;Eumetazoa;Bilateria;Protostomia;  
 Spiralia;Lophotrochozoa;Mollusca;Bivalvia;Autobranchia;Heteroconchia;Euhe  
 terodonta;Imparidentia;Venerida;Veneroidea;Veneridae;Mercenaria;Mercenari  
 a mercenaria  
 UdeM00000011370 6596 124.8 UdeM00000011370 XP\_045211573.1 31.1 251  
 164 5 3 250 2 246 1.60E-25 124.8 6596 cellular  
 organisms;Eukaryota;Opisthokonta;Metazoa;Eumetazoa;Bilateria;Protostomia;  
 Spiralia;Lophotrochozoa;Mollusca;Bivalvia;Autobranchia;Heteroconchia;Euhe  
 terodonta;Imparidentia;Venerida;Veneroidea;Veneridae;Mercenaria;Mercenari  
 a mercenaria  
 UdeM00000011371 6596 201.1 UdeM00000011371 XP\_045201869.1 28.2 553  
 367 11 2 542 118 652 3.90E-48 201.1 6596 cellular  
 organisms;Eukaryota;Opisthokonta;Metazoa;Eumetazoa;Bilateria;Protostomia;  
 Spiralia;Lophotrochozoa;Mollusca;Bivalvia;Autobranchia;Heteroconchia;Euhe  
 terodonta;Imparidentia;Venerida;Veneroidea;Veneridae;Mercenaria;Mercenari  
 a mercenaria  
 UdeM00000011373 6579 625.9 UdeM00000011373 XP\_033732565.1 51.7 640  
 270 10 1 608 4 636 5.30E-176 625.9 6579 cellular  
 organisms;Eukaryota;Opisthokonta;Metazoa;Eumetazoa;Bilateria;Protostomia;

Spiralia; Lophotrochozoa; Mollusca; Bivalvia; Autobranchia; Pteriomorpha; Pectinida; Pectinoidea; Pectinidae; Pecten; Pecten maximus  
UdeM00000011374 6579 622.9 UdeM00000011374 XP\_033732564.1 52.6 614  
257 8 2 587 31 638 4.40E-175 622.9 6579 cellular  
organisms; Eukaryota; Opisthokonta; Metazoa; Eumetazoa; Bilateria; Protostomia; Spiralia; Lophotrochozoa; Mollusca; Bivalvia; Autobranchia; Pteriomorpha; Pectinida; Pectinoidea; Pectinidae; Pecten; Pecten maximus  
UdeM00000011375 6565 1225.7 UdeM00000011375 XP\_022321932.1 42  
1474 736 25 41 1410 22 1480 0.00E+00 1225.7 6565  
cellular  
organisms; Eukaryota; Opisthokonta; Metazoa; Eumetazoa; Bilateria; Protostomia; Spiralia; Lophotrochozoa; Mollusca; Bivalvia; Autobranchia; Pteriomorpha; Ostracoda; Ostreidae; Crassostrea; Crassostrea virginica  
UdeM00000011376 6573 712.6 UdeM00000011376 XP\_021351151.1 40.1 1069  
590 26 3 1033 1411 2467 7.20E-202 712.6 6573 cellular  
organisms; Eukaryota; Opisthokonta; Metazoa; Eumetazoa; Bilateria; Protostomia; Spiralia; Lophotrochozoa; Mollusca; Bivalvia; Autobranchia; Pteriomorpha; Pectinida; Pectinoidea; Pectinidae; Mizuhopecten; Mizuhopecten yessoensis  
UdeM00000011377 6596 276.2 UdeM00000011377 XP\_045193706.1 67.4 230  
57 8 6 227 169 388 3.80E-71 276.2 6596 cellular  
organisms; Eukaryota; Opisthokonta; Metazoa; Eumetazoa; Bilateria; Protostomia; Spiralia; Lophotrochozoa; Mollusca; Bivalvia; Autobranchia; Heteroconchia; Euheterodonta; Imparidentia; Venerida; Veneroidea; Veneridae; Mercenaria; Mercenaria mercenaria  
UdeM00000011378 6596 279.3 UdeM00000011378 XP\_045193706.1 83.2 155  
25 1 16 169 11 165 3.40E-72 279.3 6596 cellular  
organisms; Eukaryota; Opisthokonta; Metazoa; Eumetazoa; Bilateria; Protostomia; Spiralia; Lophotrochozoa; Mollusca; Bivalvia; Autobranchia; Heteroconchia; Euheterodonta; Imparidentia; Venerida; Veneroidea; Veneridae; Mercenaria; Mercenaria mercenaria  
UdeM00000011379 10224 187.6 UdeM00000011379 NP\_001158395.1 43.1 204  
113 1 62 265 33 233 3.00E-44 187.6 10224 cellular  
organisms; Eukaryota; Opisthokonta; Metazoa; Eumetazoa; Bilateria; Deuterostomia; Hemichordata; Enteropneusta; Harrimaniidae; Saccoglossus; Saccoglossus kowalevskii  
UdeM00000011380 6579 278.9 UdeM00000011380 XP\_033728585.1 52.5 242  
112 1 1 239 1 242 6.30E-72 278.9 6579 cellular  
organisms; Eukaryota; Opisthokonta; Metazoa; Eumetazoa; Bilateria; Protostomia; Spiralia; Lophotrochozoa; Mollusca; Bivalvia; Autobranchia; Pteriomorpha; Pectinida; Pectinoidea; Pectinidae; Pecten; Pecten maximus  
UdeM00000011382 29159 273.9 UdeM00000011382 XP\_011436154.3 43.3 314  
172 1 67 380 34 341 3.70E-70 273.9 29159 cellular  
organisms; Eukaryota; Opisthokonta; Metazoa; Eumetazoa; Bilateria; Protostomia; Spiralia; Lophotrochozoa; Mollusca; Bivalvia; Autobranchia; Pteriomorpha; Ostracoda; Ostreidae; Crassostrea; Crassostrea gigas  
UdeM00000011383 6573 656.8 UdeM00000011383 XP\_021380189.1 61.7 553  
170 2 1 511 1 553 2.30E-185 656.8 6573 cellular  
organisms; Eukaryota; Opisthokonta; Metazoa; Eumetazoa; Bilateria; Protostomia; Spiralia; Lophotrochozoa; Mollusca; Bivalvia; Autobranchia; Pteriomorpha; Pectinida; Pectinoidea; Pectinidae; Mizuhopecten; Mizuhopecten yessoensis  
UdeM00000011387 8032 432.6 UdeM00000011387 XP\_029558453.1 44.9 477  
263 0 10 486 9 485 8.40E-118 432.6 8032 cellular  
organisms; Eukaryota; Opisthokonta; Metazoa; Eumetazoa; Bilateria; Deuterostomia; Chordata; Craniata; Vertebrata; Gnathostomata; Teleostomi; Euteleostomi; Acti

nopterygii;Actinopteri;Neopterygii;Teleostei;Osteoglossocephalai;Clupeocephala;Euteleostei;Protacanthopterygii;Salmoniformes;Salmonidae;Salmoninae;Salmo;Salmo trutta  
 UdeM00000011388 6596 275.8 UdeM00000011388 XP\_045181306.1 65.5 197  
 67 1 4 199 18 214 4.40E-71 275.8 6596 cellular  
 organisms;Eukaryota;Opisthokonta;Metazoa;Eumetazoa;Bilateria;Protostomia;Spiralia;Lophotrochozoa;Mollusca;Bivalvia;Autobranchia;Heteroconchia;Euheterodonta;Imparidentia;Venerida;Veneroidea;Veneridae;Mercenaria;Mercenaria mercenaria  
 UdeM00000011389 29159 210.7 UdeM00000011389 XP\_034300374.1 52.1 192  
 85 1 1 185 3 194 1.70E-51 210.7 29159 cellular  
 organisms;Eukaryota;Opisthokonta;Metazoa;Eumetazoa;Bilateria;Protostomia;Spiralia;Lophotrochozoa;Mollusca;Bivalvia;Autobranchia;Pteriormorphia;Ostreida;Ostreioidea;Ostreidae;Crassostrea;Crassostrea gigas  
 UdeM00000011390 29159 669.5 UdeM00000011390 XP\_034300374.1 50.4 689  
 322 6 1 680 3 680 4.60E-189 669.5 29159 cellular  
 organisms;Eukaryota;Opisthokonta;Metazoa;Eumetazoa;Bilateria;Protostomia;Spiralia;Lophotrochozoa;Mollusca;Bivalvia;Autobranchia;Pteriormorphia;Ostreida;Ostreioidea;Ostreidae;Crassostrea;Crassostrea gigas  
 UdeM00000011391 6596 369.4 UdeM00000011391 XP\_045200581.1 66.8 274  
 90 1 11 284 6 278 4.20E-99 369.4 6596 cellular  
 organisms;Eukaryota;Opisthokonta;Metazoa;Eumetazoa;Bilateria;Protostomia;Spiralia;Lophotrochozoa;Mollusca;Bivalvia;Autobranchia;Heteroconchia;Euheterodonta;Imparidentia;Venerida;Veneroidea;Veneridae;Mercenaria;Mercenaria mercenaria  
 UdeM00000011392 6573 119.4 UdeM00000011392 XP\_021341398.1 60.4 91  
 34 1 1 89 108 198 2.50E-24 119.4 6573 cellular  
 organisms;Eukaryota;Opisthokonta;Metazoa;Eumetazoa;Bilateria;Protostomia;Spiralia;Lophotrochozoa;Mollusca;Bivalvia;Autobranchia;Pteriormorphia;Pectinida;Pectinoidea;Pectinidae;Mizuhopecten;Mizuhopecten yessoensis  
 UdeM00000011393 6596 214.9 UdeM00000011393 XP\_045200561.1 71.1 149  
 41 2 54 201 74 221 9.20E-53 214.9 6596 cellular  
 organisms;Eukaryota;Opisthokonta;Metazoa;Eumetazoa;Bilateria;Protostomia;Spiralia;Lophotrochozoa;Mollusca;Bivalvia;Autobranchia;Heteroconchia;Euheterodonta;Imparidentia;Venerida;Veneroidea;Veneridae;Mercenaria;Mercenaria mercenaria  
 UdeM00000011395 6573 271.6 UdeM00000011395 XP\_021352112.1 46.6 264  
 141 0 159 422 121 384 1.80E-69 271.6 6573 cellular  
 organisms;Eukaryota;Opisthokonta;Metazoa;Eumetazoa;Bilateria;Protostomia;Spiralia;Lophotrochozoa;Mollusca;Bivalvia;Autobranchia;Pteriormorphia;Pectinida;Pectinoidea;Pectinidae;Mizuhopecten;Mizuhopecten yessoensis  
 UdeM00000011396 6596 350.9 UdeM00000011396 XP\_045204875.1 53.2 301  
 139 2 120 419 144 443 2.30E-93 350.9 6596 cellular  
 organisms;Eukaryota;Opisthokonta;Metazoa;Eumetazoa;Bilateria;Protostomia;Spiralia;Lophotrochozoa;Mollusca;Bivalvia;Autobranchia;Heteroconchia;Euheterodonta;Imparidentia;Venerida;Veneroidea;Veneridae;Mercenaria;Mercenaria mercenaria  
 UdeM00000011397 6596 721.1 UdeM00000011397 XP\_045162359.1 47.1 732  
 361 7 1 715 1 723 1.40E-204 721.1 6596 cellular  
 organisms;Eukaryota;Opisthokonta;Metazoa;Eumetazoa;Bilateria;Protostomia;Spiralia;Lophotrochozoa;Mollusca;Bivalvia;Autobranchia;Heteroconchia;Euheterodonta;Imparidentia;Venerida;Veneroidea;Veneridae;Mercenaria;Mercenaria mercenaria



UdeM00000011398 6579 310.1 UdeM00000011398 XP\_033760558.1 37.1 455  
 285 1 56 509 1950 2404 5.40E-81 310.1 6579 cellular  
 organisms;Eukaryota;Opisthokonta;Metazoa;Eumetazoa;Bilateria;Protostomia;  
 Spiralia;Lophotrochozoa;Mollusca;Bivalvia;Autobranchia;Pteriormorphia;Pect  
 inida;Pectinoidea;Pectinidae;Pecten;Pecten maximus  
 UdeM00000011399 1735272 133.3 UdeM00000011399 XP\_041374024.1 25.8  
 395 257 10 12 382 421 803 6.80E-28 133.3 1735272  
 cellular  
 organisms;Eukaryota;Opisthokonta;Metazoa;Eumetazoa;Bilateria;Protostomia;  
 Spiralia;Lophotrochozoa;Mollusca;Gastropoda;Neomphalina;Neomphaloidea;Pel  
 tospiridae;Gigantopelta;Gigantopelta aegis  
 UdeM00000011401 10224 111.3 UdeM00000011401 XP\_002740205.2 39.6 164  
 84 3 4 167 48 196 1.40E-21 111.3 10224 cellular  
 organisms;Eukaryota;Opisthokonta;Metazoa;Eumetazoa;Bilateria;Deuterostomi  
 a;Hemichordata;Enteropneusta;Harrimaniidae;Saccoglossus;Saccoglossus  
 kowalevskii  
 UdeM00000011403 6596 515 UdeM00000011403 XP\_045192877.1 41.5 1041  
 461 27 3 978 38 995 2.10E-142 515 6596 cellular  
 organisms;Eukaryota;Opisthokonta;Metazoa;Eumetazoa;Bilateria;Protostomia;  
 Spiralia;Lophotrochozoa;Mollusca;Bivalvia;Autobranchia;Heteroconchia;Euhe  
 terodonta;Imparidentia;Venerida;Veneroidea;Veneridae;Mercenaria;Mercenari  
 a mercenaria  
 UdeM00000011402 6596 563.5 UdeM00000011402 XP\_045192877.1 42.3 1071  
 470 27 19 1024 8 995 5.40E-157 563.5 6596 cellular  
 organisms;Eukaryota;Opisthokonta;Metazoa;Eumetazoa;Bilateria;Protostomia;  
 Spiralia;Lophotrochozoa;Mollusca;Bivalvia;Autobranchia;Heteroconchia;Euhe  
 terodonta;Imparidentia;Venerida;Veneroidea;Veneridae;Mercenaria;Mercenari  
 a mercenaria  
 UdeM00000011404 6596 116.7 UdeM00000011404 XP\_045192745.1 53.8 93  
 43 0 19 111 8 100 2.10E-23 116.7 6596 cellular  
 organisms;Eukaryota;Opisthokonta;Metazoa;Eumetazoa;Bilateria;Protostomia;  
 Spiralia;Lophotrochozoa;Mollusca;Bivalvia;Autobranchia;Heteroconchia;Euhe  
 terodonta;Imparidentia;Venerida;Veneroidea;Veneridae;Mercenaria;Mercenari  
 a mercenaria  
 UdeM00000011405 6596 551.6 UdeM00000011405 XP\_045192908.1 73.9 376  
 87 2 1 376 1 365 7.80E-154 551.6 6596 cellular  
 organisms;Eukaryota;Opisthokonta;Metazoa;Eumetazoa;Bilateria;Protostomia;  
 Spiralia;Lophotrochozoa;Mollusca;Bivalvia;Autobranchia;Heteroconchia;Euhe  
 terodonta;Imparidentia;Venerida;Veneroidea;Veneridae;Mercenaria;Mercenari  
 a mercenaria  
 UdeM00000011406 6596 142.9 UdeM00000011406 XP\_045192891.1 69.4 111  
 23 3 1 111 289 388 2.50E-31 142.9 6596 cellular  
 organisms;Eukaryota;Opisthokonta;Metazoa;Eumetazoa;Bilateria;Protostomia;  
 Spiralia;Lophotrochozoa;Mollusca;Bivalvia;Autobranchia;Heteroconchia;Euhe  
 terodonta;Imparidentia;Venerida;Veneroidea;Veneridae;Mercenaria;Mercenari  
 a mercenaria  
 UdeM00000011407 1735272 225.3 UdeM00000011407 XP\_041370813.1 59.5  
 227 55 5 102 305 70 282 1.10E-55 225.3 1735272  
 cellular  
 organisms;Eukaryota;Opisthokonta;Metazoa;Eumetazoa;Bilateria;Protostomia;  
 Spiralia;Lophotrochozoa;Mollusca;Gastropoda;Neomphalina;Neomphaloidea;Pel  
 tospiridae;Gigantopelta;Gigantopelta aegis  
 UdeM00000011408 6596 331.3 UdeM00000011408 XP\_045183440.1 48.4 353  
 177 3 45 396 32 380 1.90E-87 331.3 6596 cellular

organisms;Eukaryota;Opisthokonta;Metazoa;Eumetazoa;Bilateria;Protostomia;Spiralia;Lophotrochozoa;Mollusca;Bivalvia;Autobranhia;Heteroconchia;Euheterodonta;Imparidentia;Venerida;Veneroidea;Veneridae;Mercenaria;Mercenaria mercenaria

UdeM00000011410 6579 274.2 UdeM00000011410 XP\_033731805.1 86.2 152  
21 0 14 165 203 354 1.10E-70 274.2 6579 cellular

organisms;Eukaryota;Opisthokonta;Metazoa;Eumetazoa;Bilateria;Protostomia;Spiralia;Lophotrochozoa;Mollusca;Bivalvia;Autobranhia;Pteriormorphia;Pectinida;Pectinoidea;Pectinidae;Pecten;Pecten maximus

UdeM00000011409 6596 295.8 UdeM00000011409 XP\_045202484.1 67.8 264  
68 8 62 312 185 444 6.40E-77 295.8 6596 cellular

organisms;Eukaryota;Opisthokonta;Metazoa;Eumetazoa;Bilateria;Protostomia;Spiralia;Lophotrochozoa;Mollusca;Bivalvia;Autobranhia;Heteroconchia;Euheterodonta;Imparidentia;Venerida;Veneroidea;Veneridae;Mercenaria;Mercenaria mercenaria

UdeM00000011411 6579 89.7 UdeM00000011411 XP\_033758050.1 52.1 73  
35 0 45 117 33 105 3.60E-15 89.7 6579 cellular

organisms;Eukaryota;Opisthokonta;Metazoa;Eumetazoa;Bilateria;Protostomia;Spiralia;Lophotrochozoa;Mollusca;Bivalvia;Autobranhia;Pteriormorphia;Pectinida;Pectinoidea;Pectinidae;Pecten;Pecten maximus

UdeM00000011415 6596 147.9 UdeM00000011415 XP\_045163453.1 24.8 616  
410 24 149 737 398 987 8.10E-32 147.9 6596 cellular

organisms;Eukaryota;Opisthokonta;Metazoa;Eumetazoa;Bilateria;Protostomia;Spiralia;Lophotrochozoa;Mollusca;Bivalvia;Autobranhia;Heteroconchia;Euheterodonta;Imparidentia;Venerida;Veneroidea;Veneridae;Mercenaria;Mercenaria mercenaria

UdeM00000011416 29159 438 UdeM00000011416 XP\_011431939.2 53.9 414  
183 4 1 412 34 441 1.50E-119 438 29159 cellular

organisms;Eukaryota;Opisthokonta;Metazoa;Eumetazoa;Bilateria;Protostomia;Spiralia;Lophotrochozoa;Mollusca;Bivalvia;Autobranhia;Pteriormorphia;Ostreida;Ostreoidea;Ostreidae;Crassostrea;Crassostrea gigas

UdeM00000011417 6579 395.6 UdeM00000011417 XP\_033763454.1 82.8 325  
52 2 139 463 100 420 8.80E-107 395.6 6579 cellular

organisms;Eukaryota;Opisthokonta;Metazoa;Eumetazoa;Bilateria;Protostomia;Spiralia;Lophotrochozoa;Mollusca;Bivalvia;Autobranhia;Pteriormorphia;Pectinida;Pectinoidea;Pectinidae;Pecten;Pecten maximus

UdeM00000011420 6596 374.4 UdeM00000011420 XP\_045214042.1 39.1 580  
295 11 1 561 1 541 2.90E-100 374.4 6596 cellular

organisms;Eukaryota;Opisthokonta;Metazoa;Eumetazoa;Bilateria;Protostomia;Spiralia;Lophotrochozoa;Mollusca;Bivalvia;Autobranhia;Heteroconchia;Euheterodonta;Imparidentia;Venerida;Veneroidea;Veneridae;Mercenaria;Mercenaria mercenaria

UdeM00000011421 6596 850.1 UdeM00000011421 XP\_045201014.1 55.4 751  
316 6 2 746 33 770 2.10E-243 850.1 6596 cellular

organisms;Eukaryota;Opisthokonta;Metazoa;Eumetazoa;Bilateria;Protostomia;Spiralia;Lophotrochozoa;Mollusca;Bivalvia;Autobranhia;Heteroconchia;Euheterodonta;Imparidentia;Venerida;Veneroidea;Veneridae;Mercenaria;Mercenaria mercenaria

UdeM00000011422 6596 169.9 UdeM00000011422 XP\_045214042.1 40.1 247  
136 4 37 276 695 936 5.60E-39 169.9 6596 cellular

organisms;Eukaryota;Opisthokonta;Metazoa;Eumetazoa;Bilateria;Protostomia;Spiralia;Lophotrochozoa;Mollusca;Bivalvia;Autobranhia;Heteroconchia;Euheterodonta;Imparidentia;Venerida;Veneroidea;Veneridae;Mercenaria;Mercenaria mercenaria

UdeM00000011424 6596 122.9 UdeM00000011424 XP\_045172183.1 39.3 183  
 104 4 56 234 104 283 7.90E-25 122.9 6596 cellular  
 organisms;Eukaryota;Opisthokonta;Metazoa;Eumetazoa;Bilateria;Protostomia;  
 Spiralia;Lophotrochozoa;Mollusca;Bivalvia;Autobranchia;Heteroconchia;Euhe  
 terodonta;Imparidentia;Venerida;Veneroidea;Veneridae;Mercenaria;Mercenari  
 a mercenaria  
 UdeM00000011425 6596 189.5 UdeM00000011425 XP\_045172183.1 40.5 264  
 149 4 10 270 285 543 5.70E-45 189.5 6596 cellular  
 organisms;Eukaryota;Opisthokonta;Metazoa;Eumetazoa;Bilateria;Protostomia;  
 Spiralia;Lophotrochozoa;Mollusca;Bivalvia;Autobranchia;Heteroconchia;Euhe  
 terodonta;Imparidentia;Venerida;Veneroidea;Veneridae;Mercenaria;Mercenari  
 a mercenaria  
 UdeM00000011426 6596 410.6 UdeM00000011426 XP\_045188171.1 34.8 966  
 552 22 293 1216 230 1159 8.60E-111 410.6 6596 cellular  
 organisms;Eukaryota;Opisthokonta;Metazoa;Eumetazoa;Bilateria;Protostomia;  
 Spiralia;Lophotrochozoa;Mollusca;Bivalvia;Autobranchia;Heteroconchia;Euhe  
 terodonta;Imparidentia;Venerida;Veneroidea;Veneridae;Mercenaria;Mercenari  
 a mercenaria  
 UdeM00000011427 6596 658.3 UdeM00000011427 XP\_045190226.1 80.5 395  
 74 1 22 416 207 598 6.50E-186 658.3 6596 cellular  
 organisms;Eukaryota;Opisthokonta;Metazoa;Eumetazoa;Bilateria;Protostomia;  
 Spiralia;Lophotrochozoa;Mollusca;Bivalvia;Autobranchia;Heteroconchia;Euhe  
 terodonta;Imparidentia;Venerida;Veneroidea;Veneridae;Mercenaria;Mercenari  
 a mercenaria  
 UdeM00000011428 1735272 485.7 UdeM00000011428 XP\_041369494.1 85.3  
 293 43 0 12 304 20 312 4.40E-134 485.7 1735272  
 cellular  
 organisms;Eukaryota;Opisthokonta;Metazoa;Eumetazoa;Bilateria;Protostomia;  
 Spiralia;Lophotrochozoa;Mollusca;Gastropoda;Neomphalina;Neomphaloidea;Pel  
 tospiridae;Gigantopelta;Gigantopelta aegis  
 UdeM00000011429 6579 282.7 UdeM00000011429 XP\_033763701.1 88.2 152  
 18 0 1 152 1 152 2.70E-73 282.7 6579 cellular  
 organisms;Eukaryota;Opisthokonta;Metazoa;Eumetazoa;Bilateria;Protostomia;  
 Spiralia;Lophotrochozoa;Mollusca;Bivalvia;Autobranchia;Pteriormorphia;Pect  
 inida;Pectinoidea;Pectinidae;Pecten;Pecten maximus  
 UdeM00000011430 6500 148.3 UdeM00000011430 XP\_012943867.1 51.8 137  
 66 0 4 140 5 141 7.70E-33 148.3 6500 cellular  
 organisms;Eukaryota;Opisthokonta;Metazoa;Eumetazoa;Bilateria;Protostomia;  
 Spiralia;Lophotrochozoa;Mollusca;Gastropoda;Heterobranchia;Euthyneura;Tec  
 tipleura;Aplysiida;Aplysioidea;Aplysiidae;Aplysia;Aplysia californica  
 UdeM00000011431 6500 116.7 UdeM00000011431 XP\_012943867.1 51.8 110  
 53 0 4 113 5 114 2.00E-23 116.7 6500 cellular  
 organisms;Eukaryota;Opisthokonta;Metazoa;Eumetazoa;Bilateria;Protostomia;  
 Spiralia;Lophotrochozoa;Mollusca;Gastropoda;Heterobranchia;Euthyneura;Tec  
 tipleura;Aplysiida;Aplysioidea;Aplysiidae;Aplysia;Aplysia californica  
 UdeM00000011432 6500 142.5 UdeM00000011432 XP\_012943867.1 51.1 137  
 67 0 4 140 5 141 4.20E-31 142.5 6500 cellular  
 organisms;Eukaryota;Opisthokonta;Metazoa;Eumetazoa;Bilateria;Protostomia;  
 Spiralia;Lophotrochozoa;Mollusca;Gastropoda;Heterobranchia;Euthyneura;Tec  
 tipleura;Aplysiida;Aplysioidea;Aplysiidae;Aplysia;Aplysia californica  
 UdeM00000011433 6500 141.4 UdeM00000011433 XP\_012943867.1 55.7 122  
 54 0 6 127 20 141 8.50E-31 141.4 6500 cellular  
 organisms;Eukaryota;Opisthokonta;Metazoa;Eumetazoa;Bilateria;Protostomia;

Spiralia;Lophotrochozoa;Mollusca;Gastropoda;Heterobranchia;Euthyneura;Tectipleura;Aplysiida;Aplysioidea;Aplysiidae;Aplysia;Aplysia californica  
 UdeM00000011434 6500 141 UdeM00000011434 XP\_012943867.1 53.7 136  
 61 1 94 229 6 139 2.00E-30 141 6500 cellular  
 organisms;Eukaryota;Opisthokonta;Metazoa;Eumetazoa;Bilateria;Protostomia;  
 Spiralia;Lophotrochozoa;Mollusca;Gastropoda;Heterobranchia;Euthyneura;Tectipleura;Aplysiida;Aplysioidea;Aplysiidae;Aplysia;Aplysia californica  
 UdeM00000011435 6565 124.4 UdeM00000011435 XP\_022324519.1 56.5 108  
 47 0 1 108 31 138 9.10E-26 124.4 6565 cellular  
 organisms;Eukaryota;Opisthokonta;Metazoa;Eumetazoa;Bilateria;Protostomia;  
 Spiralia;Lophotrochozoa;Mollusca;Bivalvia;Autobranchia;Pteriormorphia;Ostreida;Ostreioidea;Ostreidae;Crassostrea;Crassostrea virginica  
 UdeM00000011436 29159 437.6 UdeM00000011436 XP\_034314164.1 33.7 790  
 464 20 53 808 87 850 4.20E-119 437.6 29159 cellular  
 organisms;Eukaryota;Opisthokonta;Metazoa;Eumetazoa;Bilateria;Protostomia;  
 Spiralia;Lophotrochozoa;Mollusca;Bivalvia;Autobranchia;Pteriormorphia;Ostreida;Ostreioidea;Ostreidae;Crassostrea;Crassostrea gigas  
 UdeM00000011437 29159 437.6 UdeM00000011437 XP\_034314164.1 33.7 790  
 464 20 53 808 87 850 3.80E-119 437.6 29159 cellular  
 organisms;Eukaryota;Opisthokonta;Metazoa;Eumetazoa;Bilateria;Protostomia;  
 Spiralia;Lophotrochozoa;Mollusca;Bivalvia;Autobranchia;Pteriormorphia;Ostreida;Ostreioidea;Ostreidae;Crassostrea;Crassostrea gigas  
 UdeM00000011438 6573 438.3 UdeM00000011438 XP\_021356985.1 34 761  
 460 17 7 740 97 842 2.50E-119 438.3 6573 cellular  
 organisms;Eukaryota;Opisthokonta;Metazoa;Eumetazoa;Bilateria;Protostomia;  
 Spiralia;Lophotrochozoa;Mollusca;Bivalvia;Autobranchia;Pteriormorphia;Pectinida;Pectinoidea;Pectinidae;Mizuhopecten;Mizuhopecten yessoensis  
 UdeM00000011439 29159 66.6 UdeM00000011439 XP\_034317667.1 28.1 121  
 83 2 34 150 311 431 3.20E-08 66.6 29159 cellular  
 organisms;Eukaryota;Opisthokonta;Metazoa;Eumetazoa;Bilateria;Protostomia;  
 Spiralia;Lophotrochozoa;Mollusca;Bivalvia;Autobranchia;Pteriormorphia;Ostreida;Ostreioidea;Ostreidae;Crassostrea;Crassostrea gigas  
 UdeM00000011440 6573 459.5 UdeM00000011440 XP\_021356985.1 34.6 777  
 464 18 7 754 78 839 1.00E-125 459.5 6573 cellular  
 organisms;Eukaryota;Opisthokonta;Metazoa;Eumetazoa;Bilateria;Protostomia;  
 Spiralia;Lophotrochozoa;Mollusca;Bivalvia;Autobranchia;Pteriormorphia;Pectinida;Pectinoidea;Pectinidae;Mizuhopecten;Mizuhopecten yessoensis  
 UdeM00000011442 6573 442.2 UdeM00000011442 XP\_021356985.1 34.2 780  
 439 22 7 727 78 842 1.30E-120 442.2 6573 cellular  
 organisms;Eukaryota;Opisthokonta;Metazoa;Eumetazoa;Bilateria;Protostomia;  
 Spiralia;Lophotrochozoa;Mollusca;Bivalvia;Autobranchia;Pteriormorphia;Pectinida;Pectinoidea;Pectinidae;Mizuhopecten;Mizuhopecten yessoensis  
 UdeM00000011443 29159 400.2 UdeM00000011443 XP\_034301655.1 31.9 767  
 403 21 9 665 68 825 5.20E-108 400.2 29159 cellular  
 organisms;Eukaryota;Opisthokonta;Metazoa;Eumetazoa;Bilateria;Protostomia;  
 Spiralia;Lophotrochozoa;Mollusca;Bivalvia;Autobranchia;Pteriormorphia;Ostreida;Ostreioidea;Ostreidae;Crassostrea;Crassostrea gigas  
 UdeM00000011444 6573 454.9 UdeM00000011444 XP\_021356985.1 34.8 781  
 457 20 34 781 78 839 2.60E-124 454.9 6573 cellular  
 organisms;Eukaryota;Opisthokonta;Metazoa;Eumetazoa;Bilateria;Protostomia;  
 Spiralia;Lophotrochozoa;Mollusca;Bivalvia;Autobranchia;Pteriormorphia;Pectinida;Pectinoidea;Pectinidae;Mizuhopecten;Mizuhopecten yessoensis  
 UdeM00000011445 29159 60.5 UdeM00000011445 XP\_011436865.2 35.4 99  
 64 0 73 171 24 122 2.80E-06 60.5 29159 cellular

organisms;Eukaryota;Opisthokonta;Metazoa;Eumetazoa;Bilateria;Protostomia;Spiralia;Lophotrochozoa;Mollusca;Bivalvia;Autobranchia;Pteriomorphia;Ostreida;Ostreoidea;Ostreidae;Crassostrea;Crassostrea gigas

UdeM00000011446 37621 142.9 UdeM00000011446 XP\_014679100.1 37.2 234  
132 7 90 317 78 302 7.00E-31 142.9 37621 cellular

organisms;Eukaryota;Opisthokonta;Metazoa;Eumetazoa;Bilateria;Protostomia;Ecdysozoa;Scalidophora;Priapulida;Priapulimorpha;Priapulimorphida;Priapulidae;Priapulus;Priapulus caudatus

UdeM00000011447 158456 89.4 UdeM00000011447 XP\_028998265.1 27.5  
218 124 6 33 225 179 387 7.00E-15 89.4 158456  
cellular

organisms;Eukaryota;Opisthokonta;Metazoa;Eumetazoa;Bilateria;Deuterostomia;Chordata;Craniata;Vertebrata;Gnathostomata;Teleostomi;Euteleostomi;Actinopterygii;Actinopteri;Neopterygii;Teleostei;Osteoglossocephalai;Clupeocephala;Euteleostei;Neoteleostei;Eurypterygia;Ctenosquamata;Acanthomorpha;Euacanthomorpha;Percomorphaceae;Anabantaria;Anabantiformes;Anabantoidei;Osphronemidae;Macropodinae;Betta;Betta splendens

UdeM00000011448 59729 103.2 UdeM00000011448 XP\_041577555.1 30.7 218  
143 4 228 444 27 237 9.60E-19 103.2 59729 cellular

organisms;Eukaryota;Opisthokonta;Metazoa;Eumetazoa;Bilateria;Deuterostomia;Chordata;Craniata;Vertebrata;Gnathostomata;Teleostomi;Euteleostomi;Sarcopterygii;Dipnotetrapodomorpha;Tetrapoda;Amniota;Sauropsida;Sauria;Archelosauria;Archosauria;Dinosauria;Saurischia;Theropoda;Coelurosauria;Aves;Neognathae;Passeriformes;Passeroidea;Estrildidae;Estrildinae;Taeniopygia;Taeniopygia guttata

UdeM00000011451 225164 132.1 UdeM00000011451 XP\_009047588.1 49.2  
126 64 0 85 210 28 153 8.50E-28 132.1 225164  
cellular

organisms;Eukaryota;Opisthokonta;Metazoa;Eumetazoa;Bilateria;Protostomia;Spiralia;Lophotrochozoa;Mollusca;Gastropoda;Patellogastropoda;Lottioidea;Lottiidae;Lottia;Lottia gigantea

UdeM00000011452 6565 120.9 UdeM00000011452 XP\_022326564.1 44 134  
73 1 24 155 16 149 1.50E-24 120.9 6565 cellular

organisms;Eukaryota;Opisthokonta;Metazoa;Eumetazoa;Bilateria;Protostomia;Spiralia;Lophotrochozoa;Mollusca;Bivalvia;Autobranchia;Pteriomorphia;Ostreida;Ostreoidea;Ostreidae;Crassostrea;Crassostrea virginica

UdeM00000011453 6573 188.3 UdeM00000011453 XP\_021361559.1 73.9 134  
34 1 1 134 1 133 6.20E-45 188.3 6573 cellular

organisms;Eukaryota;Opisthokonta;Metazoa;Eumetazoa;Bilateria;Protostomia;Spiralia;Lophotrochozoa;Mollusca;Bivalvia;Autobranchia;Pteriomorphia;Pectinida;Pectinoidea;Pectinidae;Mizuhopecten;Mizuhopecten yessoensis

UdeM00000011456 7739 66.6 UdeM00000011456 XP\_035663387.1 42.7 75  
43 0 32 106 190 264 3.30E-08 66.6 7739 cellular

organisms;Eukaryota;Opisthokonta;Metazoa;Eumetazoa;Bilateria;Deuterostomia;Chordata;Cephalochordata;Leptocardii;Amphioxiformes;Branchiostomidae;Branchiostoma;Branchiostoma floridae

UdeM00000011457 6596 145.6 UdeM00000011457 XP\_045167997.1 29.6 388  
242 12 11 381 4 377 2.40E-31 145.6 6596 cellular

organisms;Eukaryota;Opisthokonta;Metazoa;Eumetazoa;Bilateria;Protostomia;Spiralia;Lophotrochozoa;Mollusca;Bivalvia;Autobranchia;Heteroconchia;Euheterodonta;Imparidentia;Venerida;Veneroidea;Veneridae;Mercenaria;Mercenaria mercenaria

UdeM00000011458 6596 779.2 UdeM00000011458 XP\_045176255.1 47.3 1115  
488 23 56 1083 1059 2160 6.60E-22 779.2 6596 cellular

organisms;Eukaryota;Opisthokonta;Metazoa;Eumetazoa;Bilateria;Protostomia;Spiralia;Lophotrochozoa;Mollusca;Bivalvia;Autobranchia;Heteroconchia;Euheterodonta;Imparidentia;Venerida;Veneroidea;Veneridae;Mercenaria;Mercenaria mercenaria

UdeM00000011459 6573 74.3 UdeM00000011459 XP\_021349042.1 25.5 542  
266 16 385 850 362 841 9.60E-10 74.3 6573 cellular

organisms;Eukaryota;Opisthokonta;Metazoa;Eumetazoa;Bilateria;Protostomia;Spiralia;Lophotrochozoa;Mollusca;Bivalvia;Autobranchia;Pteriormorphia;Pectinida;Pectinoidea;Pectinidae;Mizuhopecten;Mizuhopecten yessoensis

UdeM00000011460 225164 336.3 UdeM00000011460 XP\_009050356.1 77.9  
217 48 0 1 217 1 217 3.00E-89 336.3 225164  
cellular

organisms;Eukaryota;Opisthokonta;Metazoa;Eumetazoa;Bilateria;Protostomia;Spiralia;Lophotrochozoa;Mollusca;Gastropoda;Patellogastropoda;Lottioidea;Lottiidae;Lottia;Lottia gigantea

UdeM00000011461 225164 337.4 UdeM00000011461 XP\_009050356.1 78.3  
217 47 0 1 217 1 217 1.30E-89 337.4 225164  
cellular

organisms;Eukaryota;Opisthokonta;Metazoa;Eumetazoa;Bilateria;Protostomia;Spiralia;Lophotrochozoa;Mollusca;Gastropoda;Patellogastropoda;Lottioidea;Lottiidae;Lottia;Lottia gigantea

UdeM00000011463 6596 395.6 UdeM00000011463 XP\_045194698.1 49.7 479  
209 11 1 459 1 467 1.10E-106 395.6 6596 cellular

organisms;Eukaryota;Opisthokonta;Metazoa;Eumetazoa;Bilateria;Protostomia;Spiralia;Lophotrochozoa;Mollusca;Bivalvia;Autobranchia;Heteroconchia;Euheterodonta;Imparidentia;Venerida;Veneroidea;Veneridae;Mercenaria;Mercenaria mercenaria

UdeM00000011464 6596 122.9 UdeM00000011464 XP\_045194709.1 21.4 692  
334 13 16 655 28 561 1.60E-24 122.9 6596 cellular

organisms;Eukaryota;Opisthokonta;Metazoa;Eumetazoa;Bilateria;Protostomia;Spiralia;Lophotrochozoa;Mollusca;Bivalvia;Autobranchia;Heteroconchia;Euheterodonta;Imparidentia;Venerida;Veneroidea;Veneridae;Mercenaria;Mercenaria mercenaria

UdeM00000011465 6596 126.7 UdeM00000011465 XP\_045194698.1 57.8 116  
49 0 99 214 465 580 3.50E-26 126.7 6596 cellular

organisms;Eukaryota;Opisthokonta;Metazoa;Eumetazoa;Bilateria;Protostomia;Spiralia;Lophotrochozoa;Mollusca;Bivalvia;Autobranchia;Heteroconchia;Euheterodonta;Imparidentia;Venerida;Veneroidea;Veneridae;Mercenaria;Mercenaria mercenaria

UdeM00000011466 6579 149.4 UdeM00000011466 XP\_033753652.1 31.3 345  
217 11 26 361 25 358 8.60E-33 149.4 6579 cellular

organisms;Eukaryota;Opisthokonta;Metazoa;Eumetazoa;Bilateria;Protostomia;Spiralia;Lophotrochozoa;Mollusca;Bivalvia;Autobranchia;Pteriormorphia;Pectinida;Pectinoidea;Pectinidae;Pecten;Pecten maximus

UdeM00000011467 6579 154.5 UdeM00000011467 XP\_033753652.1 31.4 369  
230 13 2 361 4 358 2.70E-34 154.5 6579 cellular

organisms;Eukaryota;Opisthokonta;Metazoa;Eumetazoa;Bilateria;Protostomia;Spiralia;Lophotrochozoa;Mollusca;Bivalvia;Autobranchia;Pteriormorphia;Pectinida;Pectinoidea;Pectinidae;Pecten;Pecten maximus

UdeM00000011468 6573 193.7 UdeM00000011468 XP\_021369519.1 47.7 216  
99 5 330 536 52 262 5.90E-46 193.7 6573 cellular

organisms;Eukaryota;Opisthokonta;Metazoa;Eumetazoa;Bilateria;Protostomia;Spiralia;Lophotrochozoa;Mollusca;Bivalvia;Autobranchia;Pteriormorphia;Pectinida;Pectinoidea;Pectinidae;Mizuhopecten;Mizuhopecten yessoensis

UdeM00000011469 6573 213 UdeM00000011469 XP\_021369519.1 45.6 261  
 125 7 7 258 10 262 4.50E-52 213 6573 cellular  
 organisms;Eukaryota;Opisthokonta;Metazoa;Eumetazoa;Bilateria;Protostomia;  
 Spiralia;Lophotrochozoa;Mollusca;Bivalvia;Autobranchia;Pteriomorpha;Pect  
 inida;Pectinoidea;Pectinidae;Mizuhopecten;Mizuhopecten yessoensis  
 UdeM00000011470 6573 184.9 UdeM00000011470 XP\_021369519.1 46.8 216  
 100 6 87 292 52 262 1.50E-43 184.9 6573 cellular  
 organisms;Eukaryota;Opisthokonta;Metazoa;Eumetazoa;Bilateria;Protostomia;  
 Spiralia;Lophotrochozoa;Mollusca;Bivalvia;Autobranchia;Pteriomorpha;Pect  
 inida;Pectinoidea;Pectinidae;Mizuhopecten;Mizuhopecten yessoensis  
 UdeM00000011471 6573 205.3 UdeM00000011471 XP\_021369519.1 45.2 261  
 125 8 7 257 10 262 9.40E-50 205.3 6573 cellular  
 organisms;Eukaryota;Opisthokonta;Metazoa;Eumetazoa;Bilateria;Protostomia;  
 Spiralia;Lophotrochozoa;Mollusca;Bivalvia;Autobranchia;Pteriomorpha;Pect  
 inida;Pectinoidea;Pectinidae;Mizuhopecten;Mizuhopecten yessoensis  
 UdeM00000011472 6573 201.1 UdeM00000011472 XP\_021369519.1 44.4 261  
 116 8 7 246 10 262 1.70E-48 201.1 6573 cellular  
 organisms;Eukaryota;Opisthokonta;Metazoa;Eumetazoa;Bilateria;Protostomia;  
 Spiralia;Lophotrochozoa;Mollusca;Bivalvia;Autobranchia;Pteriomorpha;Pect  
 inida;Pectinoidea;Pectinidae;Mizuhopecten;Mizuhopecten yessoensis  
 UdeM00000011473 6573 67.4 UdeM00000011473 XP\_021369519.1 44.1 93  
 49 1 22 111 83 175 1.50E-08 67.4 6573 cellular  
 organisms;Eukaryota;Opisthokonta;Metazoa;Eumetazoa;Bilateria;Protostomia;  
 Spiralia;Lophotrochozoa;Mollusca;Bivalvia;Autobranchia;Pteriomorpha;Pect  
 inida;Pectinoidea;Pectinidae;Mizuhopecten;Mizuhopecten yessoensis  
 UdeM00000011474 6500 142.9 UdeM00000011474 XP\_012946305.1 29.1 375  
 221 12 25 363 30 395 8.10E-31 142.9 6500 cellular  
 organisms;Eukaryota;Opisthokonta;Metazoa;Eumetazoa;Bilateria;Protostomia;  
 Spiralia;Lophotrochozoa;Mollusca;Gastropoda;Heterobranchia;Euthyneura;Tec  
 tipleura;Aplysiida;Aplysioidea;Aplysiidae;Aplysia;Aplysia californica  
 UdeM00000011475 151771 123.6 UdeM00000011475 XP\_028417951.1 44.8  
 134 73 1 43 176 7 139 2.50E-25 123.6 151771  
 cellular  
 organisms;Eukaryota;Opisthokonta;Metazoa;Eumetazoa;Cnidaria;Anthozoa;Octo  
 corallia;Alcyonacea;Alcyoniina;Nephtheidae;Dendronephthya;Dendronephthya  
 gigantea  
 UdeM00000011476 6565 129 UdeM00000011476 XP\_022310266.1 48.6 146  
 70 1 146 291 184 324 9.60E-27 129 6565 cellular  
 organisms;Eukaryota;Opisthokonta;Metazoa;Eumetazoa;Bilateria;Protostomia;  
 Spiralia;Lophotrochozoa;Mollusca;Bivalvia;Autobranchia;Pteriomorpha;Ostr  
 eida;Ostreoidea;Ostreidae;Crassostrea;Crassostrea virginica  
 UdeM00000011477 6596 201.1 UdeM00000011477 XP\_045183440.1 56.1 187  
 77 3 1 186 198 380 2.00E-48 201.1 6596 cellular  
 organisms;Eukaryota;Opisthokonta;Metazoa;Eumetazoa;Bilateria;Protostomia;  
 Spiralia;Lophotrochozoa;Mollusca;Bivalvia;Autobranchia;Heteroconchia;Euhe  
 terodonta;Imparidentia;Venerida;Veneroidea;Veneridae;Mercenaria;Mercenari  
 a mercenaria  
 UdeM00000011478 6579 1009.2 UdeM00000011478 XP\_033730381.1 57.4  
 940 333 12 1 881 65 996 3.20E-29 1009.2 6579  
 cellular  
 organisms;Eukaryota;Opisthokonta;Metazoa;Eumetazoa;Bilateria;Protostomia;  
 Spiralia;Lophotrochozoa;Mollusca;Bivalvia;Autobranchia;Pteriomorpha;Pect  
 inida;Pectinoidea;Pectinidae;Pecten;Pecten maximus

UdeM00000011479 1735272 516.2 UdeM00000011479 XP\_041369495.1 50.3  
 477 234 2 11 484 45 521 4.70E-143 516.2 1735272  
 cellular  
 organisms;Eukaryota;Opisthokonta;Metazoa;Eumetazoa;Bilateria;Protostomia;  
 Spiralia;Lophotrochozoa;Mollusca;Gastropoda;Neomphalina;Neomphaloidea;Pel  
 tospiridae;Gigantopelta;Gigantopelta aegis  
 UdeM00000011480 29159 623.2 UdeM00000011480 XP\_034339032.1 70.3 437  
 122 4 1 431 1 435 3.20E-175 623.2 29159 cellular  
 organisms;Eukaryota;Opisthokonta;Metazoa;Eumetazoa;Bilateria;Protostomia;  
 Spiralia;Lophotrochozoa;Mollusca;Bivalvia;Autobranchia;Pteriormorphia;Ostr  
 eida;Ostreoidea;Ostreidae;Crassostrea;Crassostrea gigas  
 UdeM00000011481 6596 1174.8 UdeM00000011481 XP\_045188162.1 81.4  
 731 131 3 202 930 433 1160 0.00E+00 1174.8 6596  
 cellular  
 organisms;Eukaryota;Opisthokonta;Metazoa;Eumetazoa;Bilateria;Protostomia;  
 Spiralia;Lophotrochozoa;Mollusca;Bivalvia;Autobranchia;Heteroconchia;Euhe  
 terodonta;Imparidentia;Venerida;Veneroidea;Veneridae;Mercenaria;Mercenari  
 a mercenaria  
 UdeM00000011482 6596 539.3 UdeM00000011482 XP\_045197229.1 87.5 304  
 37 1 2 304 15 318 3.20E-150 539.3 6596 cellular  
 organisms;Eukaryota;Opisthokonta;Metazoa;Eumetazoa;Bilateria;Protostomia;  
 Spiralia;Lophotrochozoa;Mollusca;Bivalvia;Autobranchia;Heteroconchia;Euhe  
 terodonta;Imparidentia;Venerida;Veneroidea;Veneridae;Mercenaria;Mercenari  
 a mercenaria  
 UdeM00000011483 6596 539.3 UdeM00000011483 XP\_045197229.1 86.7 308  
 40 1 7 313 11 318 3.30E-150 539.3 6596 cellular  
 organisms;Eukaryota;Opisthokonta;Metazoa;Eumetazoa;Bilateria;Protostomia;  
 Spiralia;Lophotrochozoa;Mollusca;Bivalvia;Autobranchia;Heteroconchia;Euhe  
 terodonta;Imparidentia;Venerida;Veneroidea;Veneridae;Mercenaria;Mercenari  
 a mercenaria  
 UdeM00000011484 6579 362.8 UdeM00000011484 XP\_033728658.1 59.7 305  
 110 4 10 301 13 317 4.10E-97 362.8 6579 cellular  
 organisms;Eukaryota;Opisthokonta;Metazoa;Eumetazoa;Bilateria;Protostomia;  
 Spiralia;Lophotrochozoa;Mollusca;Bivalvia;Autobranchia;Pteriormorphia;Pect  
 inida;Pectinoidea;Pectinidae;Pecten;Pecten maximus  
 UdeM00000011485 6596 460.7 UdeM00000011485 XP\_045194766.1 47.5 547  
 241 9 120 652 242 756 3.10E-126 460.7 6596 cellular  
 organisms;Eukaryota;Opisthokonta;Metazoa;Eumetazoa;Bilateria;Protostomia;  
 Spiralia;Lophotrochozoa;Mollusca;Bivalvia;Autobranchia;Heteroconchia;Euhe  
 terodonta;Imparidentia;Venerida;Veneroidea;Veneridae;Mercenaria;Mercenari  
 a mercenaria  
 UdeM00000011486 6579 77 UdeM00000011486 XP\_033762752.1 46.2 78  
 42 0 5 82 185 262 1.20E-11 77 6579 cellular  
 organisms;Eukaryota;Opisthokonta;Metazoa;Eumetazoa;Bilateria;Protostomia;  
 Spiralia;Lophotrochozoa;Mollusca;Bivalvia;Autobranchia;Pteriormorphia;Pect  
 inida;Pectinoidea;Pectinidae;Pecten;Pecten maximus  
 UdeM00000011487 6596 217.2 UdeM00000011487 XP\_045208999.1 45.8 264  
 97 3 4 265 11 230 2.40E-53 217.2 6596 cellular  
 organisms;Eukaryota;Opisthokonta;Metazoa;Eumetazoa;Bilateria;Protostomia;  
 Spiralia;Lophotrochozoa;Mollusca;Bivalvia;Autobranchia;Heteroconchia;Euhe  
 terodonta;Imparidentia;Venerida;Veneroidea;Veneridae;Mercenaria;Mercenari  
 a mercenaria  
 UdeM00000011488 29159 240 UdeM00000011488 XP\_011449627.2 36.8 400  
 223 10 4 381 6 397 5.10E-60 240 29159 cellular



organisms;Eukaryota;Opisthokonta;Metazoa;Eumetazoa;Bilateria;Protostomia;Spiralia;Lophotrochozoa;Mollusca;Bivalvia;Autobranchia;Pteriormorphia;Ostreida;Ostreoidea;Ostreidae;Crassostrea;Crassostrea gigas

UdeM00000011489 6596 320.9 UdeM00000011489 XP\_045206316.1 41.2 485  
206 9 17 441 59 524 2.60E-84 320.9 6596 cellular

organisms;Eukaryota;Opisthokonta;Metazoa;Eumetazoa;Bilateria;Protostomia;Spiralia;Lophotrochozoa;Mollusca;Bivalvia;Autobranchia;Heteroconchia;Euheterodonta;Imparidentia;Venerida;Veneroidea;Veneridae;Mercenaria;Mercenaria mercenaria

UdeM00000011490 6596 242.3 UdeM00000011490 XP\_045199609.1 38.2 422  
209 13 8 382 6 422 1.00E-60 242.3 6596 cellular

organisms;Eukaryota;Opisthokonta;Metazoa;Eumetazoa;Bilateria;Protostomia;Spiralia;Lophotrochozoa;Mollusca;Bivalvia;Autobranchia;Heteroconchia;Euheterodonta;Imparidentia;Venerida;Veneroidea;Veneridae;Mercenaria;Mercenaria mercenaria

UdeM00000011491 6596 242.3 UdeM00000011491 XP\_045199609.1 38.2 422  
210 13 8 383 6 422 1.00E-60 242.3 6596 cellular

organisms;Eukaryota;Opisthokonta;Metazoa;Eumetazoa;Bilateria;Protostomia;Spiralia;Lophotrochozoa;Mollusca;Bivalvia;Autobranchia;Heteroconchia;Euheterodonta;Imparidentia;Venerida;Veneroidea;Veneridae;Mercenaria;Mercenaria mercenaria

UdeM00000011493 7539 143.3 UdeM00000011493 XP\_023019945.1 46 139  
73 1 19 155 755 893 3.50E-31 143.3 7539 cellular

organisms;Eukaryota;Opisthokonta;Metazoa;Eumetazoa;Bilateria;Protostomia;Ecdysozoa;Panarthropoda;Arthropoda;Mandibulata;Pancrustacea;Hexapoda;Insecta;Dicondylia;Pterygota;Neoptera;Endopterygota;Coleoptera;Polyphaga;Cucujiformia;Chrysomeloidea;Chrysomelidae;Chrysomelinae;Doryphorini;Leptinotarsa;Leptinotarsa decemlineata

UdeM00000011494 1735272 180.6 UdeM00000011494 XP\_041378242.1 44.4  
266 102 3 73 294 389 652 5.20E-42 180.6 1735272  
cellular

organisms;Eukaryota;Opisthokonta;Metazoa;Eumetazoa;Bilateria;Protostomia;Spiralia;Lophotrochozoa;Mollusca;Gastropoda;Neomphalina;Neomphaloidea;Peltospiridae;Gigantopelta;Gigantopelta aegis

UdeM00000011495 6596 102.1 UdeM00000011495 XP\_045210831.1 40.6 165  
83 3 1 150 1 165 7.10E-19 102.1 6596 cellular

organisms;Eukaryota;Opisthokonta;Metazoa;Eumetazoa;Bilateria;Protostomia;Spiralia;Lophotrochozoa;Mollusca;Bivalvia;Autobranchia;Heteroconchia;Euheterodonta;Imparidentia;Venerida;Veneroidea;Veneridae;Mercenaria;Mercenaria mercenaria

UdeM00000011496 6596 334.7 UdeM00000011496 XP\_045187150.1 47 394  
167 4 1 357 229 617 1.40E-88 334.7 6596 cellular

organisms;Eukaryota;Opisthokonta;Metazoa;Eumetazoa;Bilateria;Protostomia;Spiralia;Lophotrochozoa;Mollusca;Bivalvia;Autobranchia;Heteroconchia;Euheterodonta;Imparidentia;Venerida;Veneroidea;Veneridae;Mercenaria;Mercenaria mercenaria

UdeM00000011498 6596 240.4 UdeM00000011498 XP\_045199609.1 38.5 418  
206 13 12 383 10 422 3.90E-60 240.4 6596 cellular

organisms;Eukaryota;Opisthokonta;Metazoa;Eumetazoa;Bilateria;Protostomia;Spiralia;Lophotrochozoa;Mollusca;Bivalvia;Autobranchia;Heteroconchia;Euheterodonta;Imparidentia;Venerida;Veneroidea;Veneridae;Mercenaria;Mercenaria mercenaria

UdeM00000011499 29159 89.7 UdeM00000011499 XP\_034315421.1 38.9 126  
74 2 40 165 221 343 3.70E-15 89.7 29159 cellular

organisms;Eukaryota;Opisthokonta;Metazoa;Eumetazoa;Bilateria;Protostomia;  
Spiralia;Lophotrochozoa;Mollusca;Bivalvia;Autobranchia;Pteriomorpha;Ostr  
eida;Ostreoidea;Ostreidae;Crassostrea;Crassostrea gigas  
UdeM00000011500 6565 131.3 UdeM00000011500 XP\_022306954.1 48.3 118  
61 0 63 180 831 948 1.20E-27 131.3 6565 cellular  
organisms;Eukaryota;Opisthokonta;Metazoa;Eumetazoa;Bilateria;Protostomia;  
Spiralia;Lophotrochozoa;Mollusca;Bivalvia;Autobranchia;Pteriomorpha;Ostr  
eida;Ostreoidea;Ostreidae;Crassostrea;Crassostrea virginica  
UdeM00000011501 29159 221.1 UdeM00000011501 XP\_011449627.2 36.3 399  
225 10 5 382 7 397 2.40E-54 221.1 29159 cellular  
organisms;Eukaryota;Opisthokonta;Metazoa;Eumetazoa;Bilateria;Protostomia;  
Spiralia;Lophotrochozoa;Mollusca;Bivalvia;Autobranchia;Pteriomorpha;Ostr  
eida;Ostreoidea;Ostreidae;Crassostrea;Crassostrea gigas  
UdeM00000011502 6596 231.9 UdeM00000011502 XP\_045199609.1 37.9 422  
211 13 8 383 6 422 1.40E-57 231.9 6596 cellular  
organisms;Eukaryota;Opisthokonta;Metazoa;Eumetazoa;Bilateria;Protostomia;  
Spiralia;Lophotrochozoa;Mollusca;Bivalvia;Autobranchia;Heteroconchia;Euhe  
terodonta;Imparidentia;Venerida;Veneroidea;Veneridae;Mercenaria;Mercenari  
a mercenaria  
UdeM00000011503 29159 229.2 UdeM00000011503 XP\_011449627.2 48 250  
116 5 24 267 156 397 6.30E-57 229.2 29159 cellular  
organisms;Eukaryota;Opisthokonta;Metazoa;Eumetazoa;Bilateria;Protostomia;  
Spiralia;Lophotrochozoa;Mollusca;Bivalvia;Autobranchia;Pteriomorpha;Ostr  
eida;Ostreoidea;Ostreidae;Crassostrea;Crassostrea gigas  
UdeM00000011504 6596 869.8 UdeM00000011504 XP\_045196507.1 61 724  
243 9 8 696 18 737 2.40E-249 869.8 6596 cellular  
organisms;Eukaryota;Opisthokonta;Metazoa;Eumetazoa;Bilateria;Protostomia;  
Spiralia;Lophotrochozoa;Mollusca;Bivalvia;Autobranchia;Heteroconchia;Euhe  
terodonta;Imparidentia;Venerida;Veneroidea;Veneridae;Mercenaria;Mercenari  
a mercenaria  
UdeM00000011506 6565 799.3 UdeM00000011506 XP\_022323262.1 59.6 732  
274 8 13 727 4 730 4.20E-228 799.3 6565 cellular  
organisms;Eukaryota;Opisthokonta;Metazoa;Eumetazoa;Bilateria;Protostomia;  
Spiralia;Lophotrochozoa;Mollusca;Bivalvia;Autobranchia;Pteriomorpha;Ostr  
eida;Ostreoidea;Ostreidae;Crassostrea;Crassostrea virginica  
UdeM00000011507 6565 763.5 UdeM00000011507 XP\_022323261.1 53.7 817  
281 10 1 807 1 730 2.80E-217 763.5 6565 cellular  
organisms;Eukaryota;Opisthokonta;Metazoa;Eumetazoa;Bilateria;Protostomia;  
Spiralia;Lophotrochozoa;Mollusca;Bivalvia;Autobranchia;Pteriomorpha;Ostr  
eida;Ostreoidea;Ostreidae;Crassostrea;Crassostrea virginica  
UdeM00000011508 6565 755.4 UdeM00000011508 XP\_022323261.1 52.4 837  
281 10 1 827 1 730 7.80E-215 755.4 6565 cellular  
organisms;Eukaryota;Opisthokonta;Metazoa;Eumetazoa;Bilateria;Protostomia;  
Spiralia;Lophotrochozoa;Mollusca;Bivalvia;Autobranchia;Pteriomorpha;Ostr  
eida;Ostreoidea;Ostreidae;Crassostrea;Crassostrea virginica  
UdeM00000011509 6596 334.3 UdeM00000011509 XP\_045201815.1 32.5 794  
448 20 45 795 44 792 4.30E-88 334.3 6596 cellular  
organisms;Eukaryota;Opisthokonta;Metazoa;Eumetazoa;Bilateria;Protostomia;  
Spiralia;Lophotrochozoa;Mollusca;Bivalvia;Autobranchia;Heteroconchia;Euhe  
terodonta;Imparidentia;Venerida;Veneroidea;Veneridae;Mercenaria;Mercenari  
a mercenaria  
UdeM00000011510 6596 349 UdeM00000011510 XP\_045201815.1 32.1 782  
472 16 22 771 29 783 1.60E-92 349 6596 cellular  
organisms;Eukaryota;Opisthokonta;Metazoa;Eumetazoa;Bilateria;Protostomia;

Spiralia;Lophotrochozoa;Mollusca;Bivalvia;Autobranchia;Heteroconchia;Euherodonta;Imparidentia;Venerida;Veneroidea;Veneridae;Mercenaria;Mercenaria mercenaria

UdeM00000011511 6596 602.4 UdeM00000011511 XP\_045211172.1 74.3 358  
92 0 3 360 11 368 3.70E-169 602.4 6596 cellular

organisms;Eukaryota;Opisthokonta;Metazoa;Eumetazoa;Bilateria;Protostomia;Spiralia;Lophotrochozoa;Mollusca;Bivalvia;Autobranchia;Heteroconchia;Euherodonta;Imparidentia;Venerida;Veneroidea;Veneridae;Mercenaria;Mercenaria mercenaria

UdeM00000011512 6596 636 UdeM00000011512 XP\_045190964.1 65.8 471  
158 3 2 470 1 470 3.90E-179 636 6596 cellular

organisms;Eukaryota;Opisthokonta;Metazoa;Eumetazoa;Bilateria;Protostomia;Spiralia;Lophotrochozoa;Mollusca;Bivalvia;Autobranchia;Heteroconchia;Euherodonta;Imparidentia;Venerida;Veneroidea;Veneridae;Mercenaria;Mercenaria mercenaria

UdeM00000011513 400727 529.3 UdeM00000011513 XP\_025114076.1 68.1  
367 79 3 6 347 24 377 3.80E-147 529.3 400727  
cellular

organisms;Eukaryota;Opisthokonta;Metazoa;Eumetazoa;Bilateria;Protostomia;Spiralia;Lophotrochozoa;Mollusca;Gastropoda;Caenogastropoda;Architaenioglossa;Ampullarioidea;Ampullariidae;Pomacea;Pomacea canaliculata

UdeM00000011514 29159 609.4 UdeM00000011514 XP\_011419208.2 78.4 352  
75 1 9 360 8 358 3.00E-171 609.4 29159 cellular

organisms;Eukaryota;Opisthokonta;Metazoa;Eumetazoa;Bilateria;Protostomia;Spiralia;Lophotrochozoa;Mollusca;Bivalvia;Autobranchia;Pteriormorphia;Ostreida;Ostreioidea;Ostreidae;Crassostrea;Crassostrea gigas

UdeM00000011516 6500 629.8 UdeM00000011516 XP\_012943766.1 79 357  
75 0 5 361 9 365 2.20E-177 629.8 6500 cellular

organisms;Eukaryota;Opisthokonta;Metazoa;Eumetazoa;Bilateria;Protostomia;Spiralia;Lophotrochozoa;Mollusca;Gastropoda;Heterobranchia;Euthyneura;Tectipleura;Aplysiida;Aplysiioidea;Aplysiidae;Aplysia;Aplysia californica

UdeM00000011517 6596 156.8 UdeM00000011517 XP\_045190872.1 34 282  
186 0 134 415 2 283 7.00E-35 156.8 6596 cellular

organisms;Eukaryota;Opisthokonta;Metazoa;Eumetazoa;Bilateria;Protostomia;Spiralia;Lophotrochozoa;Mollusca;Bivalvia;Autobranchia;Heteroconchia;Euherodonta;Imparidentia;Venerida;Veneroidea;Veneridae;Mercenaria;Mercenaria mercenaria

UdeM00000011518 6573 677.6 UdeM00000011518 XP\_021341745.1 44 1609  
725 33 157 1687 1499 3009 4.20E-191 677.6 6573 cellular

organisms;Eukaryota;Opisthokonta;Metazoa;Eumetazoa;Bilateria;Protostomia;Spiralia;Lophotrochozoa;Mollusca;Bivalvia;Autobranchia;Pteriormorphia;Pectinida;Pectinoidea;Pectinidae;Mizuhopecten;Mizuhopecten yessoensis

UdeM00000011519 6573 287 UdeM00000011519 XP\_021341745.1 35.8 1034  
562 31 8 987 333 1318 9.70E-74 287 6573 cellular

organisms;Eukaryota;Opisthokonta;Metazoa;Eumetazoa;Bilateria;Protostomia;Spiralia;Lophotrochozoa;Mollusca;Bivalvia;Autobranchia;Pteriormorphia;Pectinida;Pectinoidea;Pectinidae;Mizuhopecten;Mizuhopecten yessoensis

UdeM00000011520 6573 290 UdeM00000011520 XP\_021341745.1 35.8 1052  
535 33 8 985 333 1318 1.10E-74 290 6573 cellular

organisms;Eukaryota;Opisthokonta;Metazoa;Eumetazoa;Bilateria;Protostomia;Spiralia;Lophotrochozoa;Mollusca;Bivalvia;Autobranchia;Pteriormorphia;Pectinida;Pectinoidea;Pectinidae;Mizuhopecten;Mizuhopecten yessoensis

UdeM00000011522 6565 142.5 UdeM00000011522 XP\_022322359.1 82.4 85  
15 0 6 90 254 338 4.50E-31 142.5 6565 cellular

organisms;Eukaryota;Opisthokonta;Metazoa;Eumetazoa;Bilateria;Protostomia;Spiralia;Lophotrochozoa;Mollusca;Bivalvia;Autobranchia;Pteriomorpha;Ostreida;Ostreoidea;Ostreidae;Crassostrea;Crassostrea virginica  
UdeM00000011521 6579 404.4 UdeM00000011521 XP\_033728952.1 62.3 313  
110 3 1 306 13 324 1.60E-109 404.4 6579 cellular  
organisms;Eukaryota;Opisthokonta;Metazoa;Eumetazoa;Bilateria;Protostomia;Spiralia;Lophotrochozoa;Mollusca;Bivalvia;Autobranchia;Pteriomorpha;Pectinida;Pectinoidea;Pectinidae;Pecten;Pecten maximus  
UdeM00000011523 6579 396.4 UdeM00000011523 XP\_033728952.1 68 275  
88 0 1 275 50 324 3.90E-107 396.4 6579 cellular  
organisms;Eukaryota;Opisthokonta;Metazoa;Eumetazoa;Bilateria;Protostomia;Spiralia;Lophotrochozoa;Mollusca;Bivalvia;Autobranchia;Pteriomorpha;Pectinida;Pectinoidea;Pectinidae;Pecten;Pecten maximus  
UdeM00000011525 6500 94 UdeM00000011525 XP\_005092832.1 52.5 80  
38 0 7 86 254 333 1.00E-16 94 6500 cellular  
organisms;Eukaryota;Opisthokonta;Metazoa;Eumetazoa;Bilateria;Protostomia;Spiralia;Lophotrochozoa;Mollusca;Gastropoda;Heterobranchia;Euthyneura;Teptipleura;Aplysiida;Aplysioidea;Aplysiidae;Aplysia;Aplysia californica  
UdeM00000011526 6573 292.7 UdeM00000011526 XP\_021365545.1 54.8 250  
113 0 1 250 1 250 4.50E-76 292.7 6573 cellular  
organisms;Eukaryota;Opisthokonta;Metazoa;Eumetazoa;Bilateria;Protostomia;Spiralia;Lophotrochozoa;Mollusca;Bivalvia;Autobranchia;Pteriomorpha;Pectinida;Pectinoidea;Pectinidae;Mizuhopecten;Mizuhopecten yessoensis  
UdeM00000011527 225164 370.5 UdeM00000011527 XP\_009065531.1 77  
222 51 0 4 225 5 226 1.50E-99 370.5 225164  
cellular  
organisms;Eukaryota;Opisthokonta;Metazoa;Eumetazoa;Bilateria;Protostomia;Spiralia;Lophotrochozoa;Mollusca;Gastropoda;Patellogastropoda;Lottioidea;Lottiidae;Lottia;Lottia gigantea  
UdeM00000011528 6596 602.1 UdeM00000011528 XP\_045186101.1 43.7 796  
335 11 100 788 161 950 1.00E-168 602.1 6596 cellular  
organisms;Eukaryota;Opisthokonta;Metazoa;Eumetazoa;Bilateria;Protostomia;Spiralia;Lophotrochozoa;Mollusca;Bivalvia;Autobranchia;Heteroconchia;Euheterodonta;Imparidentia;Venerida;Veneroidea;Veneridae;Mercenaria;Mercenaria mercenaria  
UdeM00000011529 6596 152.1 UdeM00000011529 XP\_045185505.1 37.9 314  
172 13 1 297 1 308 1.10E-33 152.1 6596 cellular  
organisms;Eukaryota;Opisthokonta;Metazoa;Eumetazoa;Bilateria;Protostomia;Spiralia;Lophotrochozoa;Mollusca;Bivalvia;Autobranchia;Heteroconchia;Euheterodonta;Imparidentia;Venerida;Veneroidea;Veneridae;Mercenaria;Mercenaria mercenaria  
UdeM00000011530 6596 69.7 UdeM00000011530 XP\_045185979.1 45.1 113  
48 5 7 117 320 420 2.80E-09 69.7 6596 cellular  
organisms;Eukaryota;Opisthokonta;Metazoa;Eumetazoa;Bilateria;Protostomia;Spiralia;Lophotrochozoa;Mollusca;Bivalvia;Autobranchia;Heteroconchia;Euheterodonta;Imparidentia;Venerida;Veneroidea;Veneridae;Mercenaria;Mercenaria mercenaria  
UdeM00000011531 6596 72.8 UdeM00000011531 XP\_045185505.1 39.2 120  
47 5 7 112 441 548 3.30E-10 72.8 6596 cellular  
organisms;Eukaryota;Opisthokonta;Metazoa;Eumetazoa;Bilateria;Protostomia;Spiralia;Lophotrochozoa;Mollusca;Bivalvia;Autobranchia;Heteroconchia;Euheterodonta;Imparidentia;Venerida;Veneroidea;Veneridae;Mercenaria;Mercenaria mercenaria

UdeM00000011532 451745 61.6 UdeM00000011532 XP\_037553707.1 38.2  
 89 54 1 62 150 506 593 9.80E-07 61.6 451745  
 cellular  
 organisms;Eukaryota;Opisthokonta;Metazoa;Eumetazoa;Bilateria;Deuterostomi  
 a;Chordata;Craniata;Vertebrata;Gnathostomata;Teleostomi;Euteleostomi;Acti  
 nopterygii;Actinopteri;Neopterygii;Teleostei;Osteoglossocephalai;Clupeoce  
 phala;Euteleosteomorpha;Neoteleostei;Eurypterygia;Ctenosquamata;Acanthomo  
 rphata;Euacanthomorpha;Percomorphaceae;Ovalentaria;Atherinomorphae;Cyp  
 rinodontiformes;Aplocheiloidei;Rivulidae;Nematolebias;Nematolebias whitei  
 UdeM00000011533 1735272 515 UdeM00000011533 XP\_041368936.1 37.9  
 1115 565 16 10 1109 9 1011 5.00E-142 515 1735272  
 cellular  
 organisms;Eukaryota;Opisthokonta;Metazoa;Eumetazoa;Bilateria;Protostomia;  
 Spiralia;Lophotrochozoa;Mollusca;Gastropoda;Neomphalina;Neomphaloidea;Pel  
 tospiridae;Gigantopelta;Gigantopelta aegis  
 UdeM00000011534 6596 364.4 UdeM00000011534 XP\_045195345.1 69.1 243  
 74 1 1 242 1 243 1.10E-97 364.4 6596 cellular  
 organisms;Eukaryota;Opisthokonta;Metazoa;Eumetazoa;Bilateria;Protostomia;  
 Spiralia;Lophotrochozoa;Mollusca;Bivalvia;Autobranchia;Heteroconchia;Euhe  
 terodonta;Imparidentia;Venerida;Veneroidea;Veneridae;Mercenaria;Mercenari  
 a mercenaria  
 UdeM00000011535 6596 796.6 UdeM00000011535 XP\_045195336.1 80.8 526  
 97 3 1 525 1 523 1.90E-227 796.6 6596 cellular  
 organisms;Eukaryota;Opisthokonta;Metazoa;Eumetazoa;Bilateria;Protostomia;  
 Spiralia;Lophotrochozoa;Mollusca;Bivalvia;Autobranchia;Heteroconchia;Euhe  
 terodonta;Imparidentia;Venerida;Veneroidea;Veneridae;Mercenaria;Mercenari  
 a mercenaria  
 UdeM00000011536 6596 190.7 UdeM00000011536 XP\_045172484.1 23.9 637  
 441 16 10 627 70 681 6.20E-45 190.7 6596 cellular  
 organisms;Eukaryota;Opisthokonta;Metazoa;Eumetazoa;Bilateria;Protostomia;  
 Spiralia;Lophotrochozoa;Mollusca;Bivalvia;Autobranchia;Heteroconchia;Euhe  
 terodonta;Imparidentia;Venerida;Veneroidea;Veneridae;Mercenaria;Mercenari  
 a mercenaria  
 UdeM00000011542 6596 429.5 UdeM00000011542 XP\_045198598.1 80.4 270  
 53 0 18 287 4 273 3.40E-117 429.5 6596 cellular  
 organisms;Eukaryota;Opisthokonta;Metazoa;Eumetazoa;Bilateria;Protostomia;  
 Spiralia;Lophotrochozoa;Mollusca;Bivalvia;Autobranchia;Heteroconchia;Euhe  
 terodonta;Imparidentia;Venerida;Veneroidea;Veneridae;Mercenaria;Mercenari  
 a mercenaria  
 UdeM00000011543 6596 562.4 UdeM00000011543 XP\_045190325.1 84.2 323  
 50 1 23 345 36 357 4.00E-157 562.4 6596 cellular  
 organisms;Eukaryota;Opisthokonta;Metazoa;Eumetazoa;Bilateria;Protostomia;  
 Spiralia;Lophotrochozoa;Mollusca;Bivalvia;Autobranchia;Heteroconchia;Euhe  
 terodonta;Imparidentia;Venerida;Veneroidea;Veneridae;Mercenaria;Mercenari  
 a mercenaria  
 UdeM00000011544 29159 698.7 UdeM00000011544 XP\_011436849.2 58 607  
 242 5 1 602 1 599 7.20E-198 698.7 29159 cellular  
 organisms;Eukaryota;Opisthokonta;Metazoa;Eumetazoa;Bilateria;Protostomia;  
 Spiralia;Lophotrochozoa;Mollusca;Bivalvia;Autobranchia;Pteriomorphia;Ostr  
 eida;Ostreoidea;Ostreidae;Crassostrea;Crassostrea gigas  
 UdeM00000011545 1735272 847.8 UdeM00000011545 XP\_041368214.1 73.1  
 579 149 3 3 574 312 890 8.00E-243 847.8 1735272  
 cellular  
 organisms;Eukaryota;Opisthokonta;Metazoa;Eumetazoa;Bilateria;Protostomia;

Spiralia;Lophotrochozoa;Mollusca;Gastropoda;Neomphalina;Neomphaloidea;Pel  
tospiridae;Gigantopelta;Gigantopelta aegis  
UdeM00000011546 1735272 308.5 UdeM00000011546 XP\_041370713.1 56.5  
248 108 0 9 256 69 316 8.60E-81 308.5 1735272  
cellular

organisms;Eukaryota;Opisthokonta;Metazoa;Eumetazoa;Bilateria;Protostomia;  
Spiralia;Lophotrochozoa;Mollusca;Gastropoda;Neomphalina;Neomphaloidea;Pel  
tospiridae;Gigantopelta;Gigantopelta aegis  
UdeM00000011547 1735272 374.4 UdeM00000011547 XP\_041370713.1 54.8  
312 134 1 3 307 5 316 1.50E-100 374.4 1735272  
cellular

organisms;Eukaryota;Opisthokonta;Metazoa;Eumetazoa;Bilateria;Protostomia;  
Spiralia;Lophotrochozoa;Mollusca;Gastropoda;Neomphalina;Neomphaloidea;Pel  
tospiridae;Gigantopelta;Gigantopelta aegis  
UdeM00000011548 6579 176 UdeM00000011548 XP\_033763918.1 42 288  
156 6 60 343 7 287 8.10E-41 176 6579 cellular

organisms;Eukaryota;Opisthokonta;Metazoa;Eumetazoa;Bilateria;Protostomia;  
Spiralia;Lophotrochozoa;Mollusca;Bivalvia;Autobranchia;Pteriomorphia;Pect  
inida;Pectinoidea;Pectinidae;Pecten;Pecten maximus  
UdeM00000011549 6573 928.7 UdeM00000011549 XP\_021380272.1 99.8 452  
1 0 1 452 1 452 2.80E-267 928.7 6573 cellular

organisms;Eukaryota;Opisthokonta;Metazoa;Eumetazoa;Bilateria;Protostomia;  
Spiralia;Lophotrochozoa;Mollusca;Bivalvia;Autobranchia;Pteriomorphia;Pect  
inida;Pectinoidea;Pectinidae;Mizuhopecten;Mizuhopecten yessoensis  
UdeM00000011550 6596 573.2 UdeM00000011550 XP\_045187864.1 68 428  
122 5 1 415 1 426 3.00E-160 573.2 6596 cellular

organisms;Eukaryota;Opisthokonta;Metazoa;Eumetazoa;Bilateria;Protostomia;  
Spiralia;Lophotrochozoa;Mollusca;Bivalvia;Autobranchia;Heteroconchia;Euhe  
terodonta;Imparidentia;Venerida;Veneroidea;Veneridae;Mercenaria;Mercenari  
a mercenaria

UdeM00000011551 6565 131.7 UdeM00000011551 XP\_022299727.1 33.3 231  
77 3 1 155 46 275 9.30E-28 131.7 6565 cellular  
organisms;Eukaryota;Opisthokonta;Metazoa;Eumetazoa;Bilateria;Protostomia;  
Spiralia;Lophotrochozoa;Mollusca;Bivalvia;Autobranchia;Pteriomorphia;Ostr  
eida;Ostreoidea;Ostreidae;Crassostrea;Crassostrea virginica

UdeM00000011552 6579 806.2 UdeM00000011552 XP\_033732346.1 68.3 618  
194 1 18 633 418 1035 3.00E-230 806.2 6579 cellular  
organisms;Eukaryota;Opisthokonta;Metazoa;Eumetazoa;Bilateria;Protostomia;  
Spiralia;Lophotrochozoa;Mollusca;Bivalvia;Autobranchia;Pteriomorphia;Pect  
inida;Pectinoidea;Pectinidae;Pecten;Pecten maximus

UdeM00000011553 6596 93.6 UdeM00000011553 XP\_045163807.1 61.6 73  
28 0 211 283 141 213 4.40E-16 93.6 6596 cellular  
organisms;Eukaryota;Opisthokonta;Metazoa;Eumetazoa;Bilateria;Protostomia;  
Spiralia;Lophotrochozoa;Mollusca;Bivalvia;Autobranchia;Heteroconchia;Euhe  
terodonta;Imparidentia;Venerida;Veneroidea;Veneridae;Mercenaria;Mercenari  
a mercenaria

UdeM00000011554 1735272 143.3 UdeM00000011554 XP\_041367923.1 40  
195 105 3 1 185 154 346 3.20E-31 143.3 1735272  
cellular

organisms;Eukaryota;Opisthokonta;Metazoa;Eumetazoa;Bilateria;Protostomia;  
Spiralia;Lophotrochozoa;Mollusca;Gastropoda;Neomphalina;Neomphaloidea;Pel  
tospiridae;Gigantopelta;Gigantopelta aegis

UdeM00000011555 8090 178.7 UdeM00000011555 XP\_023808455.1 28.6 504  
311 12 1 470 419 907 1.90E-41 178.7 8090 cellular

organisms;Eukaryota;Opisthokonta;Metazoa;Eumetazoa;Bilateria;Deuterostomi  
a;Chordata;Craniata;Vertebrata;Gnathostomata;Teleostomi;Euteleostomi;Acti  
nopterygii;Actinopteri;Neopterygii;Teleostei;Osteoglossocephalai;Clupeoce  
phala;Euteleosteomorpha;Neoteleostei;Eurypterygia;Ctenosquamata;Acanthomo  
rphata;Euacanthomorpha;Percomorphaceae;Ovalentaria;Atherinomorphae;Bel  
oniformes;Adrianichthyoidei;Adrianichthyidae;Oryziinae;Oryzias;Oryzias  
latipes

UdeM00000011556 10224 70.1 UdeM00000011556 XP\_006822644.1 27.8 205  
131 5 1 203 24 213 4.00E-09 70.1 10224 cellular

organisms;Eukaryota;Opisthokonta;Metazoa;Eumetazoa;Bilateria;Deuterostomi  
a;Hemichordata;Enteropneusta;Harrimaniidae;Saccoglossus;Saccoglossus  
kowalevskii

UdeM00000011558 29159 260 UdeM00000011558 XP\_034318948.1 47 268  
140 1 1 266 686 953 3.30E-66 260 29159 cellular

organisms;Eukaryota;Opisthokonta;Metazoa;Eumetazoa;Bilateria;Protostomia;  
Spiralia;Lophotrochozoa;Mollusca;Bivalvia;Autobranchia;Pteriomorpha;Ostr  
eida;Ostreoidea;Ostreidae;Crassostrea;Crassostrea gigas

UdeM00000011557 6565 225.7 UdeM00000011557 XP\_022306954.1 40.3 303  
144 6 165 435 651 948 1.10E-55 225.7 6565 cellular

organisms;Eukaryota;Opisthokonta;Metazoa;Eumetazoa;Bilateria;Protostomia;  
Spiralia;Lophotrochozoa;Mollusca;Bivalvia;Autobranchia;Pteriomorpha;Ostr  
eida;Ostreoidea;Ostreidae;Crassostrea;Crassostrea virginica

UdeM00000011557 6565 122.1 UdeM00000011557 XP\_022306954.1 33.6 223  
123 4 1 214 4 210 1.80E-24 122.1 6565 cellular

organisms;Eukaryota;Opisthokonta;Metazoa;Eumetazoa;Bilateria;Protostomia;  
Spiralia;Lophotrochozoa;Mollusca;Bivalvia;Autobranchia;Pteriomorpha;Ostr  
eida;Ostreoidea;Ostreidae;Crassostrea;Crassostrea virginica

UdeM00000011560 29159 194.9 UdeM00000011560 XP\_034315421.1 51.9 206  
93 3 122 323 271 474 1.60E-46 194.9 29159 cellular

organisms;Eukaryota;Opisthokonta;Metazoa;Eumetazoa;Bilateria;Protostomia;  
Spiralia;Lophotrochozoa;Mollusca;Bivalvia;Autobranchia;Pteriomorpha;Ostr  
eida;Ostreoidea;Ostreidae;Crassostrea;Crassostrea gigas

UdeM00000011561 6579 302.8 UdeM00000011561 XP\_033729660.1 71.6 222  
57 2 21 236 554 775 5.30E-79 302.8 6579 cellular

organisms;Eukaryota;Opisthokonta;Metazoa;Eumetazoa;Bilateria;Protostomia;  
Spiralia;Lophotrochozoa;Mollusca;Bivalvia;Autobranchia;Pteriomorpha;Pect  
inida;Pectinoidea;Pectinidae;Pecten;Pecten maximus

UdeM00000011562 6596 1005 UdeM00000011562 XP\_045198471.1 82.9 598  
101 1 1 597 1 598 4.30E-290 1005 6596 cellular

organisms;Eukaryota;Opisthokonta;Metazoa;Eumetazoa;Bilateria;Protostomia;  
Spiralia;Lophotrochozoa;Mollusca;Bivalvia;Autobranchia;Heteroconchia;Euhe  
terodonta;Imparidentia;Venerida;Veneroidea;Veneridae;Mercenaria;Mercenari  
a mercenaria

UdeM00000011563 6596 1006.9 UdeM00000011563 XP\_045198471.1 83.3  
598 99 1 1 597 1 598 1.10E-290 1006.9 6596  
cellular

organisms;Eukaryota;Opisthokonta;Metazoa;Eumetazoa;Bilateria;Protostomia;  
Spiralia;Lophotrochozoa;Mollusca;Bivalvia;Autobranchia;Heteroconchia;Euhe  
terodonta;Imparidentia;Venerida;Veneroidea;Veneridae;Mercenaria;Mercenari  
a mercenaria

UdeM00000011564 133434 350.9 UdeM00000011564 XP\_022085153.1 74.8  
218 54 1 1 218 2 218 1.20E-93 350.9 133434  
cellular

organisms;Eukaryota;Opisthokonta;Metazoa;Eumetazoa;Bilateria;Deuterostomi

a;Echinodermata;Eleutherozoa;Asterozoa;Asteroidea;Valvatacea;Valvatida;Acanthasteridae;Acanthaster;Acanthaster planci

UdeM00000011565 7741 927.2 UdeM00000011565 XP\_019635977.1 99.6 451  
2 0 1 451 1 451 8.20E-267 927.2 7741 cellular  
organisms;Eukaryota;Opisthokonta;Metazoa;Eumetazoa;Bilateria;Deuterostomia;Chordata;Cephalochordata;Leptocardii;Amphioxiformes;Branchiostomidae;Branchiostoma;Branchiostoma belcheri

UdeM00000011566 7741 925.2 UdeM00000011566 XP\_019635977.1 99.6 450  
2 0 38 487 2 451 3.30E-266 925.2 7741 cellular  
organisms;Eukaryota;Opisthokonta;Metazoa;Eumetazoa;Bilateria;Deuterostomia;Chordata;Cephalochordata;Leptocardii;Amphioxiformes;Branchiostomidae;Branchiostoma;Branchiostoma belcheri

UdeM00000011567 6596 608.6 UdeM00000011567 XP\_045189298.1 81.1 429  
52 7 3 403 8 435 7.70E-171 608.6 6596 cellular  
organisms;Eukaryota;Opisthokonta;Metazoa;Eumetazoa;Bilateria;Protostomia;Spiralia;Lophotrochozoa;Mollusca;Bivalvia;Autobranchia;Heteroconchia;Euheterodonta;Imparidentia;Venerida;Veneroidea;Veneridae;Mercenaria;Mercenaria mercenaria

UdeM00000011568 6596 594.7 UdeM00000011568 XP\_045189298.1 80 429  
48 7 3 394 8 435 1.10E-166 594.7 6596 cellular  
organisms;Eukaryota;Opisthokonta;Metazoa;Eumetazoa;Bilateria;Protostomia;Spiralia;Lophotrochozoa;Mollusca;Bivalvia;Autobranchia;Heteroconchia;Euheterodonta;Imparidentia;Venerida;Veneroidea;Veneridae;Mercenaria;Mercenaria mercenaria

UdeM00000011569 6596 605.9 UdeM00000011569 XP\_045189298.1 80.4 429  
48 6 3 396 8 435 4.90E-170 605.9 6596 cellular  
organisms;Eukaryota;Opisthokonta;Metazoa;Eumetazoa;Bilateria;Protostomia;Spiralia;Lophotrochozoa;Mollusca;Bivalvia;Autobranchia;Heteroconchia;Euheterodonta;Imparidentia;Venerida;Veneroidea;Veneridae;Mercenaria;Mercenaria mercenaria

UdeM00000011570 1735272 183.3 UdeM00000011570 XP\_041371097.1 27.8  
618 285 20 19 493 415 1014 7.40E-43 183.3 1735272  
cellular  
organisms;Eukaryota;Opisthokonta;Metazoa;Eumetazoa;Bilateria;Protostomia;Spiralia;Lophotrochozoa;Mollusca;Gastropoda;Neomphalina;Neomphaloidea;Peltospiridae;Gigantopelta;Gigantopelta aegis

UdeM00000011571 6596 169.9 UdeM00000011571 XP\_045203602.1 33.8 346  
206 10 9 346 47 377 9.30E-39 169.9 6596 cellular  
organisms;Eukaryota;Opisthokonta;Metazoa;Eumetazoa;Bilateria;Protostomia;Spiralia;Lophotrochozoa;Mollusca;Bivalvia;Autobranchia;Heteroconchia;Euheterodonta;Imparidentia;Venerida;Veneroidea;Veneridae;Mercenaria;Mercenaria mercenaria

UdeM00000011572 6565 120.2 UdeM00000011572 XP\_022322237.1 86.2 65  
9 0 17 81 16 80 1.30E-24 120.2 6565 cellular  
organisms;Eukaryota;Opisthokonta;Metazoa;Eumetazoa;Bilateria;Protostomia;Spiralia;Lophotrochozoa;Mollusca;Bivalvia;Autobranchia;Pteriomorphia;Ostreida;Ostreoidea;Ostreidae;Crassostrea;Crassostrea virginica

UdeM00000011573 6596 3369.3 UdeM00000011573 XP\_045214634.1 54.9  
2964 1196 11 1 2905 113 2994 0.00E+00 3369.3 6596  
cellular  
organisms;Eukaryota;Opisthokonta;Metazoa;Eumetazoa;Bilateria;Protostomia;Spiralia;Lophotrochozoa;Mollusca;Bivalvia;Autobranchia;Heteroconchia;Euheterodonta;Imparidentia;Venerida;Veneroidea;Veneridae;Mercenaria;Mercenaria mercenaria



UdeM00000011574 1735272 261.2 UdeM00000011574 XP\_041368541.1 59  
 178 73 0 4 181 3594 3771 1.00E-66 261.2 1735272  
 cellular  
 organisms;Eukaryota;Opisthokonta;Metazoa;Eumetazoa;Bilateria;Protostomia;  
 Spiralia;Lophotrochozoa;Mollusca;Gastropoda;Neomphalina;Neomphaloidea;Pel  
 tospiridae;Gigantopelta;Gigantopelta aegis  
 UdeM00000011575 6596 1122.1 UdeM00000011575 XP\_045214634.1 60.4  
 854 314 6 11 861 3223 4055 0.00E+00 1122.1 6596  
 cellular  
 organisms;Eukaryota;Opisthokonta;Metazoa;Eumetazoa;Bilateria;Protostomia;  
 Spiralia;Lophotrochozoa;Mollusca;Bivalvia;Autobranchia;Heteroconchia;Euhe  
 terodonta;Imparidentia;Venerida;Veneroidea;Veneridae;Mercenaria;Mercenari  
 a mercenaria  
 UdeM00000011576 6596 421.4 UdeM00000011576 XP\_045214634.1 61.3 318  
 106 2 9 326 3755 4055 1.10E-114 421.4 6596 cellular  
 organisms;Eukaryota;Opisthokonta;Metazoa;Eumetazoa;Bilateria;Protostomia;  
 Spiralia;Lophotrochozoa;Mollusca;Bivalvia;Autobranchia;Heteroconchia;Euhe  
 terodonta;Imparidentia;Venerida;Veneroidea;Veneridae;Mercenaria;Mercenari  
 a mercenaria  
 UdeM00000011580 6596 1004.6 UdeM00000011580 XP\_045197337.1 51.8  
 1276 473 22 1 1249 1 1161 1.10E-289 1004.6 6596  
 cellular  
 organisms;Eukaryota;Opisthokonta;Metazoa;Eumetazoa;Bilateria;Protostomia;  
 Spiralia;Lophotrochozoa;Mollusca;Bivalvia;Autobranchia;Heteroconchia;Euhe  
 terodonta;Imparidentia;Venerida;Veneroidea;Veneridae;Mercenaria;Mercenari  
 a mercenaria  
 UdeM00000011581 6596 1011.1 UdeM00000011581 XP\_045197337.1 52.5  
 1258 471 22 1 1229 1 1161 1.20E-291 1011.1 6596  
 cellular  
 organisms;Eukaryota;Opisthokonta;Metazoa;Eumetazoa;Bilateria;Protostomia;  
 Spiralia;Lophotrochozoa;Mollusca;Bivalvia;Autobranchia;Heteroconchia;Euhe  
 terodonta;Imparidentia;Venerida;Veneroidea;Veneridae;Mercenaria;Mercenari  
 a mercenaria  
 UdeM00000011582 1735272 99 UdeM00000011582 XP\_041378840.1 53.2  
 77 36 0 7 83 235 311 3.60E-18 99 1735272  
 cellular  
 organisms;Eukaryota;Opisthokonta;Metazoa;Eumetazoa;Bilateria;Protostomia;  
 Spiralia;Lophotrochozoa;Mollusca;Gastropoda;Neomphalina;Neomphaloidea;Pel  
 tospiridae;Gigantopelta;Gigantopelta aegis  
 UdeM00000011583 1735272 98.6 UdeM00000011583 XP\_041378840.1 53.2  
 77 36 0 7 83 235 311 5.20E-18 98.6 1735272  
 cellular  
 organisms;Eukaryota;Opisthokonta;Metazoa;Eumetazoa;Bilateria;Protostomia;  
 Spiralia;Lophotrochozoa;Mollusca;Gastropoda;Neomphalina;Neomphaloidea;Pel  
 tospiridae;Gigantopelta;Gigantopelta aegis  
 UdeM00000011584 7574 198.7 UdeM00000011584 XP\_013382110.1 42 257  
 107 3 14 234 45 295 8.00E-48 198.7 7574 cellular  
 organisms;Eukaryota;Opisthokonta;Metazoa;Eumetazoa;Bilateria;Protostomia;  
 Spiralia;Lophotrochozoa;Brachiopoda;Linguliformea;Lingulata;Lingulida;Lin  
 guloidea;Lingulidae;Lingula;Lingula anatina  
 UdeM00000011585 37653 143.7 UdeM00000011585 XP\_014773457.1 41.5 183  
 92 4 225 395 174 353 5.40E-31 143.7 37653 cellular  
 organisms;Eukaryota;Opisthokonta;Metazoa;Eumetazoa;Bilateria;Protostomia;

Spiralia; Lophotrochozoa; Mollusca; Cephalopoda; Coleoidea; Octopodiformes; Octopoda; Incirrata; Octopodidae; Octopus; Octopus bimaculoides

UdeM00000011586 6579 988.8 UdeM00000011586 XP\_033732617.1 46.1 1231  
365 14 1 1224 62 1000 7.80E-285 988.8 6579 cellular  
organisms; Eukaryota; Opisthokonta; Metazoa; Eumetazoa; Bilateria; Protostomia; Spiralia; Lophotrochozoa; Mollusca; Bivalvia; Autobranchia; Pteriomorpha; Pectinida; Pectinoidea; Pectinidae; Pecten; Pecten maximus

UdeM00000011587 6596 932.9 UdeM00000011587 XP\_045195737.1 60.6 785  
294 5 7 780 5 785 2.60E-268 932.9 6596 cellular  
organisms; Eukaryota; Opisthokonta; Metazoa; Eumetazoa; Bilateria; Protostomia; Spiralia; Lophotrochozoa; Mollusca; Bivalvia; Autobranchia; Heteroconchia; Euheterodonta; Imparidentia; Venerida; Veneroidea; Veneridae; Mercenaria; Mercenaria mercenaria

UdeM00000011588 6596 139.4 UdeM00000011588 XP\_045202652.1 49.3 152  
56 2 1 131 1 152 3.20E-30 139.4 6596 cellular  
organisms; Eukaryota; Opisthokonta; Metazoa; Eumetazoa; Bilateria; Protostomia; Spiralia; Lophotrochozoa; Mollusca; Bivalvia; Autobranchia; Heteroconchia; Euheterodonta; Imparidentia; Venerida; Veneroidea; Veneridae; Mercenaria; Mercenaria mercenaria

UdeM00000011589 6596 118.2 UdeM00000011589 XP\_045188039.1 69.7 76  
23 0 1 76 44 119 5.60E-24 118.2 6596 cellular  
organisms; Eukaryota; Opisthokonta; Metazoa; Eumetazoa; Bilateria; Protostomia; Spiralia; Lophotrochozoa; Mollusca; Bivalvia; Autobranchia; Heteroconchia; Euheterodonta; Imparidentia; Venerida; Veneroidea; Veneridae; Mercenaria; Mercenaria mercenaria

UdeM00000011590 6596 136.7 UdeM00000011590 XP\_045202653.1 47.2 163  
81 2 1 163 53 210 2.70E-29 136.7 6596 cellular  
organisms; Eukaryota; Opisthokonta; Metazoa; Eumetazoa; Bilateria; Protostomia; Spiralia; Lophotrochozoa; Mollusca; Bivalvia; Autobranchia; Heteroconchia; Euheterodonta; Imparidentia; Venerida; Veneroidea; Veneridae; Mercenaria; Mercenaria mercenaria

UdeM00000011591 70779 73.6 UdeM00000011591 XP\_015772101.1 50.7 73  
32 1 1 73 1 69 1.50E-10 73.6 70779 cellular  
organisms; Eukaryota; Opisthokonta; Metazoa; Eumetazoa; Cnidaria; Anthozoa; Hexacorallia; Scleractinia; Astrocoeniina; Acroporidae; Acropora; Acropora digitifera

UdeM00000011592 1735272 92.8 UdeM00000011592 XP\_041350033.1 29.8  
218 75 3 1 144 74 287 4.40E-16 92.8 1735272  
cellular  
organisms; Eukaryota; Opisthokonta; Metazoa; Eumetazoa; Bilateria; Protostomia; Spiralia; Lophotrochozoa; Mollusca; Gastropoda; Neomphalina; Neomphaloidea; Peltopspiridae; Gigantopelta; Gigantopelta aegis

UdeM00000011593 8049 259.2 UdeM00000011593 XP\_030193753.1 35.9 376  
225 4 131 501 17 381 1.10E-65 259.2 8049 cellular  
organisms; Eukaryota; Opisthokonta; Metazoa; Eumetazoa; Bilateria; Deuterostomia; Chordata; Craniata; Vertebrata; Gnathostomata; Teleostomi; Euteleostomi; Actinopterygii; Actinopteri; Neopterygii; Teleostei; Osteoglossocephalai; Clupeocephala; Euteleostei; Neoteleostei; Eurypterygia; Ctenosquamata; Acanthopterygii; Paracanthopterygii; Zeiogadaria; Gadariae; Gadiformes; Gadoidei; Gadidae; Gadus; Gadus morhua

UdeM00000011595 52670 74.7 UdeM00000011595 XP\_013855145.1 35.3 119  
75 1 7 123 289 407 1.20E-10 74.7 52670 cellular  
organisms; Eukaryota; Opisthokonta; Metazoa; Eumetazoa; Bilateria; Deuterostomia; Chordata; Craniata; Vertebrata; Gnathostomata; Teleostomi; Euteleostomi; Actinopterygii; Actinopteri; Neopterygii; Teleostei; Osteoglossocephalai; Clupeocephala; Euteleostei; Neoteleostei; Eurypterygia; Ctenosquamata; Acanthopterygii; Paracanthopterygii; Zeiogadaria; Gadariae; Gadiformes; Gadoidei; Gadidae; Gadus; Gadus morhua

nopterygii;Actinopteri;Neopterygii;Teleostei;Osteoglossocephalai;Clupeocephala;Euteleostei;Neoteleostei;Eurypterygia;Ctenosquamata;Acanthomorpha;Euacanthomorpha;Percomorphaceae;Ovalentaria;Atherinomorpha;Cypriodontiformes;Aplocheiloidei;Rivulidae;Austrofundulus;Austrofundulus limnaeus

UdeM00000011596 6579 600.9 UdeM00000011596 XP\_033732612.1 51.2 1035  
432 12 1 978 1 1019 2.90E-168 600.9 6579 cellular

organisms;Eukaryota;Opisthokonta;Metazoa;Eumetazoa;Bilateria;Protostomia;Spiralia;Lophotrochozoa;Mollusca;Bivalvia;Autobranchia;Pteriormorphia;Pectinida;Pectinoidea;Pectinidae;Pecten;Pecten maximus

UdeM00000011597 6565 121.3 UdeM00000011597 XP\_022299727.1 35.2 233  
93 3 1 176 46 277 1.40E-24 121.3 6565 cellular

organisms;Eukaryota;Opisthokonta;Metazoa;Eumetazoa;Bilateria;Protostomia;Spiralia;Lophotrochozoa;Mollusca;Bivalvia;Autobranchia;Pteriormorphia;Ostreida;Ostreioidea;Ostreidae;Crassostrea;Crassostrea virginica

UdeM00000011598 7739 128.3 UdeM00000011598 XP\_035658706.1 92.6 68  
5 0 1 68 31 98 3.90E-27 128.3 7739 cellular

organisms;Eukaryota;Opisthokonta;Metazoa;Eumetazoa;Bilateria;Deuterostomia;Chordata;Cephalochordata;Leptocardii;Amphioxiformes;Branchiostomidae;Branchiostoma;Branchiostoma floridae

UdeM00000011599 6565 61.6 UdeM00000011599 XP\_022299023.1 48.5 68  
34 1 1 68 148 214 4.70E-07 61.6 6565 cellular

organisms;Eukaryota;Opisthokonta;Metazoa;Eumetazoa;Bilateria;Protostomia;Spiralia;Lophotrochozoa;Mollusca;Bivalvia;Autobranchia;Pteriormorphia;Ostreida;Ostreioidea;Ostreidae;Crassostrea;Crassostrea virginica

UdeM00000011600 7741 158.7 UdeM00000011600 XP\_019640655.1 49 153  
77 1 1 152 38 190 5.90E-36 158.7 7741 cellular

organisms;Eukaryota;Opisthokonta;Metazoa;Eumetazoa;Bilateria;Deuterostomia;Chordata;Cephalochordata;Leptocardii;Amphioxiformes;Branchiostomidae;Branchiostoma;Branchiostoma belcheri

UdeM00000011601 6565 103.6 UdeM00000011601 XP\_022323617.1 67.1 79  
22 1 1 79 259 333 1.20E-19 103.6 6565 cellular

organisms;Eukaryota;Opisthokonta;Metazoa;Eumetazoa;Bilateria;Protostomia;Spiralia;Lophotrochozoa;Mollusca;Bivalvia;Autobranchia;Pteriormorphia;Ostreida;Ostreioidea;Ostreidae;Crassostrea;Crassostrea virginica

UdeM00000011603 6596 429.5 UdeM00000011603 XP\_045189459.1 79.1 277  
57 1 1 276 275 551 3.30E-117 429.5 6596 cellular

organisms;Eukaryota;Opisthokonta;Metazoa;Eumetazoa;Bilateria;Protostomia;Spiralia;Lophotrochozoa;Mollusca;Bivalvia;Autobranchia;Heteroconchia;Euherterodonta;Imparidentia;Venerida;Veneroidea;Veneridae;Mercenaria;Mercenaria mercenaria

UdeM00000011602 6596 540.4 UdeM00000011602 XP\_045189459.1 79.8 401  
80 1 1 400 275 675 3.40E-150 540.4 6596 cellular

organisms;Eukaryota;Opisthokonta;Metazoa;Eumetazoa;Bilateria;Protostomia;Spiralia;Lophotrochozoa;Mollusca;Bivalvia;Autobranchia;Heteroconchia;Euherterodonta;Imparidentia;Venerida;Veneroidea;Veneridae;Mercenaria;Mercenaria mercenaria

UdeM00000011604 6596 1445.6 UdeM00000011604 XP\_045189635.1 75.1  
1006 203 5 1 1005 837 1796 0.00E+00 1445.6 6596

cellular

organisms;Eukaryota;Opisthokonta;Metazoa;Eumetazoa;Bilateria;Protostomia;Spiralia;Lophotrochozoa;Mollusca;Bivalvia;Autobranchia;Heteroconchia;Euherterodonta;Imparidentia;Venerida;Veneroidea;Veneridae;Mercenaria;Mercenaria mercenaria

UdeM00000011605 6596 1471.8 UdeM00000011605 XP\_045189635.1 78.6  
 962 203 3 1 961 837 1796 0.00E+00 1471.8 6596  
 cellular  
 organisms;Eukaryota;Opisthokonta;Metazoa;Eumetazoa;Bilateria;Protostomia;  
 Spiralia;Lophotrochozoa;Mollusca;Bivalvia;Autobranchia;Heteroconchia;Euhe  
 terodonta;Imparidentia;Venerida;Veneroidea;Veneridae;Mercenaria;Mercenari  
 a mercenaria  
 UdeM00000011606 6596 1446.4 UdeM00000011606 XP\_045189635.1 77.3  
 970 205 5 1 965 837 1796 0.00E+00 1446.4 6596  
 cellular  
 organisms;Eukaryota;Opisthokonta;Metazoa;Eumetazoa;Bilateria;Protostomia;  
 Spiralia;Lophotrochozoa;Mollusca;Bivalvia;Autobranchia;Heteroconchia;Euhe  
 terodonta;Imparidentia;Venerida;Veneroidea;Veneridae;Mercenaria;Mercenari  
 a mercenaria  
 UdeM00000011607 6565 263.8 UdeM00000011607 XP\_022323617.1 50.4 427  
 170 18 34 434 2132 2542 3.70E-67 263.8 6565 cellular  
 organisms;Eukaryota;Opisthokonta;Metazoa;Eumetazoa;Bilateria;Protostomia;  
 Spiralia;Lophotrochozoa;Mollusca;Bivalvia;Autobranchia;Pteriormorphia;Ostr  
 eida;Ostreioidea;Ostreidae;Crassostrea;Crassostrea virginica  
 UdeM00000011609 6596 705.3 UdeM00000011609 XP\_045189252.1 67.8 519  
 155 4 16 523 13 530 5.90E-200 705.3 6596 cellular  
 organisms;Eukaryota;Opisthokonta;Metazoa;Eumetazoa;Bilateria;Protostomia;  
 Spiralia;Lophotrochozoa;Mollusca;Bivalvia;Autobranchia;Heteroconchia;Euhe  
 terodonta;Imparidentia;Venerida;Veneroidea;Veneridae;Mercenaria;Mercenari  
 a mercenaria  
 UdeM00000011610 400727 431.8 UdeM00000011610 XP\_025112678.1 58.9  
 336 135 1 29 364 28 360 1.50E-117 431.8 400727  
 cellular  
 organisms;Eukaryota;Opisthokonta;Metazoa;Eumetazoa;Bilateria;Protostomia;  
 Spiralia;Lophotrochozoa;Mollusca;Gastropoda;Caenogastropoda;Architaeniogl  
 ossa;Ampullarioidea;Ampullariidae;Pomacea;Pomacea canaliculata  
 UdeM00000011611 400727 433.7 UdeM00000011611 XP\_025112678.1 58.9  
 336 135 1 10 345 28 360 2.20E-118 433.7 400727  
 cellular  
 organisms;Eukaryota;Opisthokonta;Metazoa;Eumetazoa;Bilateria;Protostomia;  
 Spiralia;Lophotrochozoa;Mollusca;Gastropoda;Caenogastropoda;Architaeniogl  
 ossa;Ampullarioidea;Ampullariidae;Pomacea;Pomacea canaliculata  
 UdeM00000011612 29159 335.9 UdeM00000011612 XP\_011435096.2 63.3 256  
 93 1 8 262 373 628 4.70E-89 335.9 29159 cellular  
 organisms;Eukaryota;Opisthokonta;Metazoa;Eumetazoa;Bilateria;Protostomia;  
 Spiralia;Lophotrochozoa;Mollusca;Bivalvia;Autobranchia;Pteriormorphia;Ostr  
 eida;Ostreioidea;Ostreidae;Crassostrea;Crassostrea gigas  
 UdeM00000011613 29159 132.9 UdeM00000011613 XP\_011445438.1 24.3 461  
 273 12 14 466 11 403 1.20E-27 132.9 29159 cellular  
 organisms;Eukaryota;Opisthokonta;Metazoa;Eumetazoa;Bilateria;Protostomia;  
 Spiralia;Lophotrochozoa;Mollusca;Bivalvia;Autobranchia;Pteriormorphia;Ostr  
 eida;Ostreioidea;Ostreidae;Crassostrea;Crassostrea gigas  
 UdeM00000011614 64176 166 UdeM00000011614 XP\_028567204.1 27.1 462  
 285 22 225 673 2697 3119 2.00E-37 166 64176 cellular  
 organisms;Eukaryota;Opisthokonta;Metazoa;Eumetazoa;Bilateria;Deuterostomi  
 a;Chordata;Craniata;Vertebrata;Gnathostomata;Teleostomi;Euteleostomi;Sarc  
 opterygii;Dipnotetrapodomorpha;Tetrapoda;Amniota;Sauropsida;Sauria;Lepido  
 sauria;Squamata;Bifurcata;Unidentata;Episquamata;Laterata;Lacertibaenia;L  
 acertidae;Lacertinae;Podarcis;Podarcis muralis

UdeM00000011615 45264 163.7 UdeM00000011615 XP\_044180189.1 27.5 432  
 284 15 428 853 3260 3668 1.20E-36 163.7 45264 cellular  
 organisms;Eukaryota;Opisthokonta;Metazoa;Eumetazoa;Cnidaria;Anthozoa;Hexa  
 corallia;Scleractinia;Astrocoeniina;Acroporidae;Acropora;Acropora  
 millepora  
 UdeM00000011616 64176 161 UdeM00000011616 XP\_028567204.1 26.7 427  
 251 18 385 805 2696 3066 8.00E-36 161 64176 cellular  
 organisms;Eukaryota;Opisthokonta;Metazoa;Eumetazoa;Bilateria;Deuterostomi  
 a;Chordata;Craniata;Vertebrata;Gnathostomata;Teleostomi;Euteleostomi;Sarc  
 opterygii;Dipnotetrapodomorpha;Tetrapoda;Amniota;Sauropsida;Sauria;Lepido  
 sauria;Squamata;Bifurcata;Unidentata;Episquamata;Laterata;Lacertibaenia;L  
 acertidae;Lacertinae;Podarcis;Podarcis muralis  
 UdeM00000011617 61221 128.3 UdeM00000011617 XP\_044284061.1 29.6 280  
 160 10 390 666 2533 2778 4.30E-26 128.3 61221 cellular  
 organisms;Eukaryota;Opisthokonta;Metazoa;Eumetazoa;Bilateria;Deuterostomi  
 a;Chordata;Craniata;Vertebrata;Gnathostomata;Teleostomi;Euteleostomi;Sarc  
 opterygii;Dipnotetrapodomorpha;Tetrapoda;Amniota;Sauropsida;Sauria;Lepido  
 sauria;Squamata;Bifurcata;Unidentata;Episquamata;Toxicofera;Anguimorpha;P  
 aleoanguimorpha;Varanoidea;Varanidae;Varanus;Varanus komodoensis  
 UdeM00000011618 7654 82.4 UdeM00000011618 XP\_041476506.1 36.3 124  
 70 3 65 186 397 513 7.20E-13 82.4 7654 cellular  
 organisms;Eukaryota;Opisthokonta;Metazoa;Eumetazoa;Bilateria;Deuterostomi  
 a;Echinodermata;Eleutherozoa;Echinozoa;Echinoidea;Euechinoidea;Echinacea;  
 Temnopleuroidea;Toxopneustidae;Lytechinus;Lytechinus variegatus  
 UdeM00000011619 7654 84.7 UdeM00000011619 XP\_041476506.1 36.3 124  
 70 3 353 474 397 513 3.50E-13 84.7 7654 cellular  
 organisms;Eukaryota;Opisthokonta;Metazoa;Eumetazoa;Bilateria;Deuterostomi  
 a;Echinodermata;Eleutherozoa;Echinozoa;Echinoidea;Euechinoidea;Echinacea;  
 Temnopleuroidea;Toxopneustidae;Lytechinus;Lytechinus variegatus  
 UdeM00000011620 37653 74.7 UdeM00000011620 XP\_014783575.1 31.7 120  
 79 2 11 130 6 122 1.10E-10 74.7 37653 cellular  
 organisms;Eukaryota;Opisthokonta;Metazoa;Eumetazoa;Bilateria;Protostomia;  
 Spiralia;Lophotrochozoa;Mollusca;Cephalopoda;Coleoidea;Octopodiformes;Oct  
 opoda;Incirrata;Octopodidae;Octopus;Octopus bimaculoides  
 UdeM00000011621 225164 65.1 UdeM00000011621 XP\_009065599.1 28.2  
 149 74 4 29 153 59 198 9.20E-08 65.1 225164  
 cellular  
 organisms;Eukaryota;Opisthokonta;Metazoa;Eumetazoa;Bilateria;Protostomia;  
 Spiralia;Lophotrochozoa;Mollusca;Gastropoda;Patellogastropoda;Lottioidea;  
 Lottiidae;Lottia;Lottia gigantea  
 UdeM00000011623 6596 389.4 UdeM00000011623 XP\_045198960.1 39.2 783  
 345 14 114 801 710 1456 1.10E-104 389.4 6596 cellular  
 organisms;Eukaryota;Opisthokonta;Metazoa;Eumetazoa;Bilateria;Protostomia;  
 Spiralia;Lophotrochozoa;Mollusca;Bivalvia;Autobranchia;Heteroconchia;Euhe  
 terodonta;Imparidentia;Venerida;Veneroidea;Veneridae;Mercenaria;Mercenari  
 a mercenaria  
 UdeM00000011622 6596 555.4 UdeM00000011622 XP\_045198960.1 41.8 1516  
 651 25 30 1409 36 1456 2.00E-154 555.4 6596 cellular  
 organisms;Eukaryota;Opisthokonta;Metazoa;Eumetazoa;Bilateria;Protostomia;  
 Spiralia;Lophotrochozoa;Mollusca;Bivalvia;Autobranchia;Heteroconchia;Euhe  
 terodonta;Imparidentia;Venerida;Veneroidea;Veneridae;Mercenaria;Mercenari  
 a mercenaria  
 UdeM00000011624 6596 538.9 UdeM00000011624 XP\_045198960.1 41 1524  
 675 24 30 1432 36 1456 2.00E-149 538.9 6596 cellular

organisms;Eukaryota;Opisthokonta;Metazoa;Eumetazoa;Bilateria;Protostomia;Spiralia;Lophotrochozoa;Mollusca;Bivalvia;Autobranchia;Heteroconchia;Euheterodonta;Imparidentia;Venerida;Veneroidea;Veneridae;Mercenaria;Mercenaria mercenaria

UdeM00000011625 6500 214.2 UdeM00000011625 XP\_005103567.1 73.4 143  
38 0 1 143 1 143 1.10E-52 214.2 6500 cellular

organisms;Eukaryota;Opisthokonta;Metazoa;Eumetazoa;Bilateria;Protostomia;Spiralia;Lophotrochozoa;Mollusca;Gastropoda;Heterobranchia;Euthyneura;Tectipleura;Aplysiida;Aplysioidea;Aplysiidae;Aplysia;Aplysia californica

UdeM00000011626 6596 194.5 UdeM00000011626 XP\_045205279.1 100 96  
0 0 1 96 1 96 6.20E-47 194.5 6596 cellular

organisms;Eukaryota;Opisthokonta;Metazoa;Eumetazoa;Bilateria;Protostomia;Spiralia;Lophotrochozoa;Mollusca;Bivalvia;Autobranchia;Heteroconchia;Euheterodonta;Imparidentia;Venerida;Veneroidea;Veneridae;Mercenaria;Mercenaria mercenaria

UdeM00000011627 45264 164.5 UdeM00000011627 XP\_044167060.1 35.8 324  
191 7 6 319 5 321 2.30E-37 164.5 45264 cellular

organisms;Eukaryota;Opisthokonta;Metazoa;Eumetazoa;Cnidaria;Anthozoa;Hexacorallia;Scleractinia;Astrocoeniina;Acroporidae;Acropora;Acropora millepora

UdeM00000011628 6596 253.4 UdeM00000011628 XP\_045181920.1 51.6 217  
104 1 1 217 55 270 2.70E-64 253.4 6596 cellular

organisms;Eukaryota;Opisthokonta;Metazoa;Eumetazoa;Bilateria;Protostomia;Spiralia;Lophotrochozoa;Mollusca;Bivalvia;Autobranchia;Heteroconchia;Euheterodonta;Imparidentia;Venerida;Veneroidea;Veneridae;Mercenaria;Mercenaria mercenaria

UdeM00000011629 6565 161 UdeM00000011629 XP\_022328252.1 44.8 210  
98 5 1 192 1106 1315 1.50E-36 161 6565 cellular

organisms;Eukaryota;Opisthokonta;Metazoa;Eumetazoa;Bilateria;Protostomia;Spiralia;Lophotrochozoa;Mollusca;Bivalvia;Autobranchia;Pteriomorphia;Ostreida;Ostreioidea;Ostreidae;Crassostrea;Crassostrea virginica

UdeM00000011630 6565 344.4 UdeM00000011630 XP\_022328252.1 50.5 364  
161 6 1 346 953 1315 1.70E-91 344.4 6565 cellular

organisms;Eukaryota;Opisthokonta;Metazoa;Eumetazoa;Bilateria;Protostomia;Spiralia;Lophotrochozoa;Mollusca;Bivalvia;Autobranchia;Pteriomorphia;Ostreida;Ostreioidea;Ostreidae;Crassostrea;Crassostrea virginica

UdeM00000011631 6596 145.6 UdeM00000011631 XP\_045201841.1 36 222  
136 2 145 360 200 421 1.20E-31 145.6 6596 cellular

organisms;Eukaryota;Opisthokonta;Metazoa;Eumetazoa;Bilateria;Protostomia;Spiralia;Lophotrochozoa;Mollusca;Bivalvia;Autobranchia;Heteroconchia;Euheterodonta;Imparidentia;Venerida;Veneroidea;Veneridae;Mercenaria;Mercenaria mercenaria

UdeM00000011632 29159 281.6 UdeM00000011632 XP\_034300849.1 46.9 456  
119 3 118 573 563 895 2.30E-72 281.6 29159 cellular

organisms;Eukaryota;Opisthokonta;Metazoa;Eumetazoa;Bilateria;Protostomia;Spiralia;Lophotrochozoa;Mollusca;Bivalvia;Autobranchia;Pteriomorphia;Ostreida;Ostreioidea;Ostreidae;Crassostrea;Crassostrea gigas

UdeM00000011633 6573 184.1 UdeM00000011633 XP\_021362361.1 52.4 187  
89 0 3356 3542 300 486 3.10E-42 184.1 6573 cellular

organisms;Eukaryota;Opisthokonta;Metazoa;Eumetazoa;Bilateria;Protostomia;Spiralia;Lophotrochozoa;Mollusca;Bivalvia;Autobranchia;Pteriomorphia;Pectinida;Pectinoidea;Pectinidae;Mizuhopecten;Mizuhopecten yessoensis

UdeM00000011634 6579 303.1 UdeM00000011634 XP\_033732387.1 56.5 317  
123 4 1 312 6 312 2.00E-78 303.1 6579 cellular

organisms;Eukaryota;Opisthokonta;Metazoa;Eumetazoa;Bilateria;Protostomia;Spiralia;Lophotrochozoa;Mollusca;Bivalvia;Autobranchia;Pteriomorphia;Pectinida;Pectinoidea;Pectinidae;Pecten;Pecten maximus

UdeM00000011635 400727 320.9 UdeM00000011635 XP\_025112993.1 48.4  
351 130 3 5 351 10 313 2.10E-84 320.9 400727

cellular

organisms;Eukaryota;Opisthokonta;Metazoa;Eumetazoa;Bilateria;Protostomia;Spiralia;Lophotrochozoa;Mollusca;Gastropoda;Caenogastropoda;Architaenioglossa;Ampullarioidea;Ampullariidae;Pomacea;Pomacea canaliculata

UdeM00000011636 400727 367.9 UdeM00000011636 XP\_025113000.1 60.1  
318 105 5 48 362 11 309 1.50E-98 367.9 400727

cellular

organisms;Eukaryota;Opisthokonta;Metazoa;Eumetazoa;Bilateria;Protostomia;Spiralia;Lophotrochozoa;Mollusca;Gastropoda;Caenogastropoda;Architaenioglossa;Ampullarioidea;Ampullariidae;Pomacea;Pomacea canaliculata

UdeM00000011637 6596 293.5 UdeM00000011637 XP\_045165679.1 60.6 350  
129 3 14 362 356 697 3.70E-76 293.5 6596 cellular

organisms;Eukaryota;Opisthokonta;Metazoa;Eumetazoa;Bilateria;Protostomia;Spiralia;Lophotrochozoa;Mollusca;Bivalvia;Autobranchia;Heteroconchia;Euheterodonta;Imparidentia;Venerida;Veneroidea;Veneridae;Mercenaria;Mercenaria mercenaria

UdeM00000011638 6596 591.3 UdeM00000011638 XP\_045204836.1 71.2 393  
111 2 1 393 1 391 9.30E-166 591.3 6596 cellular

organisms;Eukaryota;Opisthokonta;Metazoa;Eumetazoa;Bilateria;Protostomia;Spiralia;Lophotrochozoa;Mollusca;Bivalvia;Autobranchia;Heteroconchia;Euheterodonta;Imparidentia;Venerida;Veneroidea;Veneridae;Mercenaria;Mercenaria mercenaria

UdeM00000011639 6596 189.5 UdeM00000011639 XP\_045186486.1 37.7 345  
169 8 1 331 1 313 1.20E-44 189.5 6596 cellular

organisms;Eukaryota;Opisthokonta;Metazoa;Eumetazoa;Bilateria;Protostomia;Spiralia;Lophotrochozoa;Mollusca;Bivalvia;Autobranchia;Heteroconchia;Euheterodonta;Imparidentia;Venerida;Veneroidea;Veneridae;Mercenaria;Mercenaria mercenaria

UdeM00000011640 6596 104 UdeM00000011640 XP\_045186486.1 33.8 195  
101 4 2 182 133 313 4.40E-19 104 6596 cellular

organisms;Eukaryota;Opisthokonta;Metazoa;Eumetazoa;Bilateria;Protostomia;Spiralia;Lophotrochozoa;Mollusca;Bivalvia;Autobranchia;Heteroconchia;Euheterodonta;Imparidentia;Venerida;Veneroidea;Veneridae;Mercenaria;Mercenaria mercenaria

UdeM00000011641 6596 199.1 UdeM00000011641 XP\_045186394.1 72.4 123  
34 0 1 123 1 123 3.20E-48 199.1 6596 cellular

organisms;Eukaryota;Opisthokonta;Metazoa;Eumetazoa;Bilateria;Protostomia;Spiralia;Lophotrochozoa;Mollusca;Bivalvia;Autobranchia;Heteroconchia;Euheterodonta;Imparidentia;Venerida;Veneroidea;Veneridae;Mercenaria;Mercenaria mercenaria

UdeM00000011643 6596 188.3 UdeM00000011643 XP\_045186180.1 71.1 114  
32 1 5 117 13 126 5.40E-45 188.3 6596 cellular

organisms;Eukaryota;Opisthokonta;Metazoa;Eumetazoa;Bilateria;Protostomia;Spiralia;Lophotrochozoa;Mollusca;Bivalvia;Autobranchia;Heteroconchia;Euheterodonta;Imparidentia;Venerida;Veneroidea;Veneridae;Mercenaria;Mercenaria mercenaria

UdeM00000011642 6596 188.3 UdeM00000011642 XP\_045186180.1 71.1 114  
32 1 5 117 13 126 5.40E-45 188.3 6596 cellular

organisms;Eukaryota;Opisthokonta;Metazoa;Eumetazoa;Bilateria;Protostomia;

Spiralia;Lophotrochozoa;Mollusca;Bivalvia;Autobranchia;Heteroconchia;Euherodonta;Imparidentia;Venerida;Veneroidea;Veneridae;Mercenaria;Mercenaria mercenaria

UdeM00000011644 6596 188.3 UdeM00000011644 XP\_045186180.1 71.1 114  
32 1 5 117 13 126 5.40E-45 188.3 6596 cellular

organisms;Eukaryota;Opisthokonta;Metazoa;Eumetazoa;Bilateria;Protostomia;Spiralia;Lophotrochozoa;Mollusca;Bivalvia;Autobranchia;Heteroconchia;Euherodonta;Imparidentia;Venerida;Veneroidea;Veneridae;Mercenaria;Mercenaria mercenaria

UdeM00000011645 1735272 127.1 UdeM00000011645 XP\_041370101.1 62.2  
111 41 1 11 120 4 114 1.70E-26 127.1 1735272  
cellular

organisms;Eukaryota;Opisthokonta;Metazoa;Eumetazoa;Bilateria;Protostomia;Spiralia;Lophotrochozoa;Mollusca;Gastropoda;Neomphalina;Neomphaloidea;Peltopspiridae;Gigantopelta;Gigantopelta aegis

UdeM00000011646 29159 650.6 UdeM00000011646 XP\_011449094.1 76.6 381  
86 1 10 387 141 521 1.30E-183 650.6 29159 cellular

organisms;Eukaryota;Opisthokonta;Metazoa;Eumetazoa;Bilateria;Protostomia;Spiralia;Lophotrochozoa;Mollusca;Bivalvia;Autobranchia;Pteriormorphia;Ostreida;Ostreioidea;Ostreidae;Crassostrea;Crassostrea gigas

UdeM00000011647 225164 68.9 UdeM00000011647 XP\_009066026.1 26.4  
349 235 12 23 360 26 363 1.90E-08 68.9 225164  
cellular

organisms;Eukaryota;Opisthokonta;Metazoa;Eumetazoa;Bilateria;Protostomia;Spiralia;Lophotrochozoa;Mollusca;Gastropoda;Patellogastropoda;Lottioidea;Lottiidae;Lottia;Lottia gigantea

UdeM00000011648 6596 110.5 UdeM00000011648 XP\_045202205.1 37.4 198  
103 7 28 221 15 195 2.70E-21 110.5 6596 cellular

organisms;Eukaryota;Opisthokonta;Metazoa;Eumetazoa;Bilateria;Protostomia;Spiralia;Lophotrochozoa;Mollusca;Bivalvia;Autobranchia;Heteroconchia;Euherodonta;Imparidentia;Venerida;Veneroidea;Veneridae;Mercenaria;Mercenaria mercenaria

UdeM00000011649 6596 616.7 UdeM00000011649 XP\_045189694.1 82.1 386  
56 6 1 378 1 381 2.00E-173 616.7 6596 cellular

organisms;Eukaryota;Opisthokonta;Metazoa;Eumetazoa;Bilateria;Protostomia;Spiralia;Lophotrochozoa;Mollusca;Bivalvia;Autobranchia;Heteroconchia;Euherodonta;Imparidentia;Venerida;Veneroidea;Veneridae;Mercenaria;Mercenaria mercenaria

UdeM00000011650 6579 470.3 UdeM00000011650 XP\_033762715.1 68 306  
98 0 18 323 31 336 2.00E-129 470.3 6579 cellular

organisms;Eukaryota;Opisthokonta;Metazoa;Eumetazoa;Bilateria;Protostomia;Spiralia;Lophotrochozoa;Mollusca;Bivalvia;Autobranchia;Pteriormorphia;Pectinida;Pectinoidea;Pectinidae;Pecten;Pecten maximus

UdeM00000011651 6526 157.1 UdeM00000011651 XP\_013085871.1 68.7 99  
31 0 19 117 12 110 1.60E-35 157.1 6526 cellular

organisms;Eukaryota;Opisthokonta;Metazoa;Eumetazoa;Bilateria;Protostomia;Spiralia;Lophotrochozoa;Mollusca;Gastropoda;Heterobranchia;Euthyneura;Pantapulmonata;Hygrophila;Lymnaeoidea;Planorbidae;Biomphalaria;Biomphalaria glabrata

UdeM00000011652 6573 251.5 UdeM00000011652 XP\_021375983.1 75 144  
36 0 63 206 47 190 9.30E-64 251.5 6573 cellular

organisms;Eukaryota;Opisthokonta;Metazoa;Eumetazoa;Bilateria;Protostomia;Spiralia;Lophotrochozoa;Mollusca;Bivalvia;Autobranchia;Pteriormorphia;Pectinida;Pectinoidea;Pectinidae;Mizuhopecten;Mizuhopecten yessoensis



UdeM00000011654 8078 292.7 UdeM00000011654 XP\_035994673.1 60.3 234  
 63 1 1 204 196 429 3.60E-76 292.7 8078 cellular  
 organisms;Eukaryota;Opisthokonta;Metazoa;Eumetazoa;Bilateria;Deuterostomi  
 a;Chordata;Craniata;Vertebrata;Gnathostomata;Teleostomi;Euteleostomi;Acti  
 nopterygii;Actinopteri;Neopterygii;Teleostei;Osteoglossocephalai;Clupeoce  
 phala;Euteleostei;Neoteleostei;Eurypterygia;Ctenosquamata;Acanthomo  
 rphata;Euacanthomorpha;Percomorphaceae;Ovalentaria;Atherinomorphae;Cyp  
 rinodontiformes;Cyprinodontoides;Fundulidae;Fundulus;Fundulus  
 heteroclitus

UdeM00000011657 29159 119.8 UdeM00000011657 XP\_019926413.2 30 317  
 59 5 1 161 292 601 4.30E-24 119.8 29159 cellular  
 organisms;Eukaryota;Opisthokonta;Metazoa;Eumetazoa;Bilateria;Protostomia;  
 Spiralia;Lophotrochozoa;Mollusca;Bivalvia;Autobranchia;Pteriormorphia;Ostr  
 eida;Ostreidae;Crassostrea;Crassostrea gigas

UdeM00000011658 29159 203 UdeM00000011658 XP\_019926413.2 73.5 136  
 35 1 1 135 1 136 2.40E-49 203 29159 cellular  
 organisms;Eukaryota;Opisthokonta;Metazoa;Eumetazoa;Bilateria;Protostomia;  
 Spiralia;Lophotrochozoa;Mollusca;Bivalvia;Autobranchia;Pteriormorphia;Ostr  
 eida;Ostreidae;Crassostrea;Crassostrea gigas

UdeM00000011660 6565 296.2 UdeM00000011660 XP\_022324031.1 41.1 406  
 221 7 46 436 6 408 8.50E-77 296.2 6565 cellular  
 organisms;Eukaryota;Opisthokonta;Metazoa;Eumetazoa;Bilateria;Protostomia;  
 Spiralia;Lophotrochozoa;Mollusca;Bivalvia;Autobranchia;Pteriormorphia;Ostr  
 eida;Ostreidae;Crassostrea;Crassostrea virginica

UdeM00000011661 6596 114 UdeM00000011661 XP\_045194463.1 33.8 240  
 124 7 11 220 28 262 2.50E-22 114 6596 cellular  
 organisms;Eukaryota;Opisthokonta;Metazoa;Eumetazoa;Bilateria;Protostomia;  
 Spiralia;Lophotrochozoa;Mollusca;Bivalvia;Autobranchia;Heteroconchia;Euhe  
 terodonta;Imparidentia;Venerida;Veneroidea;Veneridae;Mercenaria;Mercenari  
 a mercenaria

UdeM00000011662 2652724 395.6 UdeM00000011662 XP\_028512668.1 39  
 472 261 5 44 488 71 542 1.20E-106 395.6 2652724  
 cellular  
 organisms;Eukaryota;Opisthokonta;Metazoa;Eumetazoa;Cnidaria;Anthozoa;Hexa  
 corallia;Actiniaria;Aiptasiidae;Exaiptasia;Exaiptasia diaphana

UdeM00000011663 2652724 395.6 UdeM00000011663 XP\_028512668.1 39  
 472 261 5 14 458 71 542 1.10E-106 395.6 2652724  
 cellular  
 organisms;Eukaryota;Opisthokonta;Metazoa;Eumetazoa;Cnidaria;Anthozoa;Hexa  
 corallia;Actiniaria;Aiptasiidae;Exaiptasia;Exaiptasia diaphana

UdeM00000011664 6596 152.5 UdeM00000011664 XP\_045200750.1 45 149  
 82 0 10 158 9 157 4.60E-34 152.5 6596 cellular  
 organisms;Eukaryota;Opisthokonta;Metazoa;Eumetazoa;Bilateria;Protostomia;  
 Spiralia;Lophotrochozoa;Mollusca;Bivalvia;Autobranchia;Heteroconchia;Euhe  
 terodonta;Imparidentia;Venerida;Veneroidea;Veneridae;Mercenaria;Mercenari  
 a mercenaria

UdeM00000011665 6596 268.9 UdeM00000011665 XP\_045200737.1 47.3 313  
 145 5 66 364 67 373 1.30E-68 268.9 6596 cellular  
 organisms;Eukaryota;Opisthokonta;Metazoa;Eumetazoa;Bilateria;Protostomia;  
 Spiralia;Lophotrochozoa;Mollusca;Bivalvia;Autobranchia;Heteroconchia;Euhe  
 terodonta;Imparidentia;Venerida;Veneroidea;Veneridae;Mercenaria;Mercenari  
 a mercenaria

UdeM00000011666 6596 66.6 UdeM00000011666 XP\_045175451.1 42.1 95  
 55 0 355 449 427 521 9.20E-08 66.6 6596 cellular

organisms;Eukaryota;Opisthokonta;Metazoa;Eumetazoa;Bilateria;Protostomia;Spiralia;Lophotrochozoa;Mollusca;Bivalvia;Autobranhia;Heteroconchia;Euherodonta;Imparidentia;Venerida;Veneroidea;Veneridae;Mercenaria;Mercenaria mercenaria

UdeM00000011667 6579 330.9 UdeM00000011667 XP\_033762673.1 63 254  
94 0 1 254 1 254 1.50E-87 330.9 6579 cellular

organisms;Eukaryota;Opisthokonta;Metazoa;Eumetazoa;Bilateria;Protostomia;Spiralia;Lophotrochozoa;Mollusca;Bivalvia;Autobranhia;Pteriormorphia;Pectinida;Pectinoidea;Pectinidae;Pecten;Pecten maximus

UdeM00000011668 46514 89.4 UdeM00000011668 XP\_038062873.1 57.5 73  
31 0 1 73 21 93 2.70E-15 89.4 46514 cellular

organisms;Eukaryota;Opisthokonta;Metazoa;Eumetazoa;Bilateria;Deuterostomia;Echinodermata;Eleutherozoa;Asterozoa;Asteroidea;Valvatacea;Valvatida;Asterinidae;Patiria;Patiria miniata

UdeM00000011669 6579 294.7 UdeM00000011669 XP\_033762673.1 57.1 254  
109 0 1 254 1 254 1.20E-76 294.7 6579 cellular

organisms;Eukaryota;Opisthokonta;Metazoa;Eumetazoa;Bilateria;Protostomia;Spiralia;Lophotrochozoa;Mollusca;Bivalvia;Autobranhia;Pteriormorphia;Pectinida;Pectinoidea;Pectinidae;Pecten;Pecten maximus

UdeM00000011670 29159 111.3 UdeM00000011670 XP\_011452223.2 32.4 219  
104 10 4 217 48 227 3.40E-21 111.3 29159 cellular

organisms;Eukaryota;Opisthokonta;Metazoa;Eumetazoa;Bilateria;Protostomia;Spiralia;Lophotrochozoa;Mollusca;Bivalvia;Autobranhia;Pteriormorphia;Ostreida;Ostreioidea;Ostreidae;Crassostrea;Crassostrea gigas

UdeM00000011671 29159 106.7 UdeM00000011671 XP\_011452223.2 32.9 213  
99 10 23 230 54 227 8.70E-20 106.7 29159 cellular

organisms;Eukaryota;Opisthokonta;Metazoa;Eumetazoa;Bilateria;Protostomia;Spiralia;Lophotrochozoa;Mollusca;Bivalvia;Autobranhia;Pteriormorphia;Ostreida;Ostreioidea;Ostreidae;Crassostrea;Crassostrea gigas

UdeM00000011672 29159 101.3 UdeM00000011672 XP\_011440604.2 42.9 119  
64 3 3 117 1 119 1.00E-18 101.3 29159 cellular

organisms;Eukaryota;Opisthokonta;Metazoa;Eumetazoa;Bilateria;Protostomia;Spiralia;Lophotrochozoa;Mollusca;Bivalvia;Autobranhia;Pteriormorphia;Ostreida;Ostreioidea;Ostreidae;Crassostrea;Crassostrea gigas

UdeM00000011676 7574 310.8 UdeM00000011676 XP\_013381563.1 43.6 344  
175 7 91 424 52 386 2.80E-81 310.8 7574 cellular

organisms;Eukaryota;Opisthokonta;Metazoa;Eumetazoa;Bilateria;Protostomia;Spiralia;Lophotrochozoa;Brachiopoda;Linguliformea;Lingulata;Lingulida;Linguloidea;Lingulidae;Lingula;Lingula anatina

UdeM00000011677 6596 126.3 UdeM00000011677 XP\_045190077.1 56.1 123  
47 2 1 118 1 121 2.50E-26 126.3 6596 cellular

organisms;Eukaryota;Opisthokonta;Metazoa;Eumetazoa;Bilateria;Protostomia;Spiralia;Lophotrochozoa;Mollusca;Bivalvia;Autobranhia;Heteroconchia;Euherodonta;Imparidentia;Venerida;Veneroidea;Veneridae;Mercenaria;Mercenaria mercenaria

UdeM00000011679 70779 83.6 UdeM00000011679 XP\_015777172.1 39.4 94  
57 0 5 98 43 136 2.10E-13 83.6 70779 cellular

organisms;Eukaryota;Opisthokonta;Metazoa;Eumetazoa;Cnidaria;Anthozoa;Hexacorallia;Scleractinia;Astrocoeniina;Acroporidae;Acropora;Acropora digitifera

UdeM00000011680 70779 84.3 UdeM00000011680 XP\_015777172.1 38.9 95  
58 0 5 99 43 137 1.00E-13 84.3 70779 cellular

organisms;Eukaryota;Opisthokonta;Metazoa;Eumetazoa;Cnidaria;Anthozoa;Hexacorallia

corallia;Scleractinia;Astrocoeniina;Acroporidae;Acropora;Acropora  
 digitifera  
 UdeM00000011682 225164 99.4 UdeM00000011682 XP\_009054455.1 20.7  
 468 343 7 1 463 95 539 1.30E-17 99.4 225164  
 cellular  
 organisms;Eukaryota;Opisthokonta;Metazoa;Eumetazoa;Bilateria;Protostomia;  
 Spiralia;Lophotrochozoa;Mollusca;Gastropoda;Patellogastropoda;Lottioidea;  
 Lottiidae;Lottia;Lottia gigantea  
 UdeM00000042417 1735272 121.7 UdeM00000042417 XP\_041379632.1 32.8  
 274 170 6 73 343 231 493 1.90E-24 121.7 1735272  
 cellular  
 organisms;Eukaryota;Opisthokonta;Metazoa;Eumetazoa;Bilateria;Protostomia;  
 Spiralia;Lophotrochozoa;Mollusca;Gastropoda;Neomphalina;Neomphaloidea;Pel  
 tospiridae;Gigantopelta;Gigantopelta aegis  
 UdeM00000042423 6565 100.5 UdeM00000042423 XP\_022299012.1 42.1 121  
 68 1 41 161 26 144 2.00E-18 100.5 6565 cellular  
 organisms;Eukaryota;Opisthokonta;Metazoa;Eumetazoa;Bilateria;Protostomia;  
 Spiralia;Lophotrochozoa;Mollusca;Bivalvia;Autobranchia;Pteriormorphia;Ostr  
 eida;Ostreioidea;Ostreidae;Crassostrea;Crassostrea virginica  
 UdeM00000042424 29159 327.8 UdeM00000042424 XP\_034334268.1 52.3 285  
 133 1 1 285 69 350 1.40E-86 327.8 29159 cellular  
 organisms;Eukaryota;Opisthokonta;Metazoa;Eumetazoa;Bilateria;Protostomia;  
 Spiralia;Lophotrochozoa;Mollusca;Bivalvia;Autobranchia;Pteriormorphia;Ostr  
 eida;Ostreioidea;Ostreidae;Crassostrea;Crassostrea gigas  
 UdeM00000042425 7604 79.3 UdeM00000042425 XP\_033647944.1 49.3 69  
 35 0 8 76 11 79 2.30E-12 79.3 7604 cellular  
 organisms;Eukaryota;Opisthokonta;Metazoa;Eumetazoa;Bilateria;Deuterostomi  
 a;Echinodermata;Eleutherozoa;Asterozoa;Asteroidea;Forcipulatacea;Forcipul  
 atida;Asteroiidae;Asturias;Asturias rubens  
 UdeM00000039734 6596 375.2 UdeM00000039734 XP\_045210058.1 63.2 299  
 75 3 1 293 1 270 7.80E-101 375.2 6596 cellular  
 organisms;Eukaryota;Opisthokonta;Metazoa;Eumetazoa;Bilateria;Protostomia;  
 Spiralia;Lophotrochozoa;Mollusca;Bivalvia;Autobranchia;Heteroconchia;Euhe  
 terodonta;Imparidentia;Venerida;Veneroidea;Veneridae;Mercenaria;Mercenari  
 a mercenaria  
 UdeM00000039736 6596 453 UdeM00000039736 XP\_045210058.1 78.9 270  
 57 0 1 270 1 270 2.70E-124 453 6596 cellular  
 organisms;Eukaryota;Opisthokonta;Metazoa;Eumetazoa;Bilateria;Protostomia;  
 Spiralia;Lophotrochozoa;Mollusca;Bivalvia;Autobranchia;Heteroconchia;Euhe  
 terodonta;Imparidentia;Venerida;Veneroidea;Veneridae;Mercenaria;Mercenari  
 a mercenaria  
 UdeM00000039737 6596 117.9 UdeM00000039737 XP\_045202576.1 47.7 151  
 71 2 1 143 87 237 1.60E-23 117.9 6596 cellular  
 organisms;Eukaryota;Opisthokonta;Metazoa;Eumetazoa;Bilateria;Protostomia;  
 Spiralia;Lophotrochozoa;Mollusca;Bivalvia;Autobranchia;Heteroconchia;Euhe  
 terodonta;Imparidentia;Venerida;Veneroidea;Veneridae;Mercenaria;Mercenari  
 a mercenaria  
 UdeM00000039738 6596 178.3 UdeM00000039738 XP\_045206316.1 48.4 186  
 95 1 51 235 90 275 1.10E-41 178.3 6596 cellular  
 organisms;Eukaryota;Opisthokonta;Metazoa;Eumetazoa;Bilateria;Protostomia;  
 Spiralia;Lophotrochozoa;Mollusca;Bivalvia;Autobranchia;Heteroconchia;Euhe  
 terodonta;Imparidentia;Venerida;Veneroidea;Veneridae;Mercenaria;Mercenari  
 a mercenaria

UdeM00000039739 6596 222.2 UdeM00000039739 XP\_045186396.1 35.7 294  
 186 2 92 385 26 316 1.10E-54 222.2 6596 cellular  
 organisms;Eukaryota;Opisthokonta;Metazoa;Eumetazoa;Bilateria;Protostomia;  
 Spiralia;Lophotrochozoa;Mollusca;Bivalvia;Autobranchia;Heteroconchia;Euhe  
 terodonta;Imparidentia;Venerida;Veneroidea;Veneridae;Mercenaria;Mercenari  
 a mercenaria  
 UdeM00000039742 6596 117.5 UdeM00000039742 XP\_045202576.1 47.7 151  
 71 2 1 143 87 237 2.10E-23 117.5 6596 cellular  
 organisms;Eukaryota;Opisthokonta;Metazoa;Eumetazoa;Bilateria;Protostomia;  
 Spiralia;Lophotrochozoa;Mollusca;Bivalvia;Autobranchia;Heteroconchia;Euhe  
 terodonta;Imparidentia;Venerida;Veneroidea;Veneridae;Mercenaria;Mercenari  
 a mercenaria  
 UdeM00000039743 6596 183.3 UdeM00000039743 XP\_045206316.1 49.5 186  
 93 1 51 235 90 275 3.50E-43 183.3 6596 cellular  
 organisms;Eukaryota;Opisthokonta;Metazoa;Eumetazoa;Bilateria;Protostomia;  
 Spiralia;Lophotrochozoa;Mollusca;Bivalvia;Autobranchia;Heteroconchia;Euhe  
 terodonta;Imparidentia;Venerida;Veneroidea;Veneridae;Mercenaria;Mercenari  
 a mercenaria  
 UdeM00000039744 6596 222.2 UdeM00000039744 XP\_045186396.1 35.7 294  
 186 2 214 507 26 316 1.50E-54 222.2 6596 cellular  
 organisms;Eukaryota;Opisthokonta;Metazoa;Eumetazoa;Bilateria;Protostomia;  
 Spiralia;Lophotrochozoa;Mollusca;Bivalvia;Autobranchia;Heteroconchia;Euhe  
 terodonta;Imparidentia;Venerida;Veneroidea;Veneridae;Mercenaria;Mercenari  
 a mercenaria  
 UdeM00000039747 6596 223.8 UdeM00000039747 XP\_045186396.1 36.1 294  
 187 1 96 389 25 317 3.90E-55 223.8 6596 cellular  
 organisms;Eukaryota;Opisthokonta;Metazoa;Eumetazoa;Bilateria;Protostomia;  
 Spiralia;Lophotrochozoa;Mollusca;Bivalvia;Autobranchia;Heteroconchia;Euhe  
 terodonta;Imparidentia;Venerida;Veneroidea;Veneridae;Mercenaria;Mercenari  
 a mercenaria  
 UdeM00000039748 6596 235.3 UdeM00000039748 XP\_045186396.1 37.1 294  
 184 1 194 487 25 317 1.60E-58 235.3 6596 cellular  
 organisms;Eukaryota;Opisthokonta;Metazoa;Eumetazoa;Bilateria;Protostomia;  
 Spiralia;Lophotrochozoa;Mollusca;Bivalvia;Autobranchia;Heteroconchia;Euhe  
 terodonta;Imparidentia;Venerida;Veneroidea;Veneridae;Mercenaria;Mercenari  
 a mercenaria  
 UdeM00000039749 6596 222.6 UdeM00000039749 XP\_045210059.1 53 217  
 96 3 18 234 24 234 5.30E-55 222.6 6596 cellular  
 organisms;Eukaryota;Opisthokonta;Metazoa;Eumetazoa;Bilateria;Protostomia;  
 Spiralia;Lophotrochozoa;Mollusca;Bivalvia;Autobranchia;Heteroconchia;Euhe  
 terodonta;Imparidentia;Venerida;Veneroidea;Veneridae;Mercenaria;Mercenari  
 a mercenaria  
 UdeM00000039750 6596 290 UdeM00000039750 XP\_045207432.1 49.5 285  
 141 2 17 299 16 299 3.50E-75 290 6596 cellular  
 organisms;Eukaryota;Opisthokonta;Metazoa;Eumetazoa;Bilateria;Protostomia;  
 Spiralia;Lophotrochozoa;Mollusca;Bivalvia;Autobranchia;Heteroconchia;Euhe  
 terodonta;Imparidentia;Venerida;Veneroidea;Veneridae;Mercenaria;Mercenari  
 a mercenaria  
 UdeM00000039751 6596 251.1 UdeM00000039751 XP\_045207432.1 48.4 256  
 126 2 1 251 45 299 1.80E-63 251.1 6596 cellular  
 organisms;Eukaryota;Opisthokonta;Metazoa;Eumetazoa;Bilateria;Protostomia;  
 Spiralia;Lophotrochozoa;Mollusca;Bivalvia;Autobranchia;Heteroconchia;Euhe  
 terodonta;Imparidentia;Venerida;Veneroidea;Veneridae;Mercenaria;Mercenari  
 a mercenaria

UdeM00000039752 6596 732.3 UdeM00000039752 XP\_045207076.1 44.8 824  
 433 10 10 822 11 823 7.00E-208 732.3 6596 cellular  
 organisms;Eukaryota;Opisthokonta;Metazoa;Eumetazoa;Bilateria;Protostomia;  
 Spiralia;Lophotrochozoa;Mollusca;Bivalvia;Autobranhia;Heteroconchia;Euhe  
 terodonta;Imparidentia;Venerida;Veneroidea;Veneridae;Mercenaria;Mercenari  
 a mercenaria  
 UdeM00000039753 6596 1318.1 UdeM00000039753 XP\_045207071.1 60.6  
 1221 398 16 27 1176 18 1226 0.00E+00 1318.1 6596  
 cellular  
 organisms;Eukaryota;Opisthokonta;Metazoa;Eumetazoa;Bilateria;Protostomia;  
 Spiralia;Lophotrochozoa;Mollusca;Bivalvia;Autobranhia;Heteroconchia;Euhe  
 terodonta;Imparidentia;Venerida;Veneroidea;Veneridae;Mercenaria;Mercenari  
 a mercenaria  
 UdeM00000039754 6579 367.9 UdeM00000039754 XP\_033732916.1 76.3 228  
 54 0 4 231 3 230 1.00E-98 367.9 6579 cellular  
 organisms;Eukaryota;Opisthokonta;Metazoa;Eumetazoa;Bilateria;Protostomia;  
 Spiralia;Lophotrochozoa;Mollusca;Bivalvia;Autobranhia;Pteriormorphia;Pect  
 inida;Pectinoidea;Pectinidae;Pecten;Pecten maximus  
 UdeM00000039755 6579 119 UdeM00000039755 XP\_033731739.1 53.8 93  
 43 0 3 95 268 360 3.40E-24 119 6579 cellular  
 organisms;Eukaryota;Opisthokonta;Metazoa;Eumetazoa;Bilateria;Protostomia;  
 Spiralia;Lophotrochozoa;Mollusca;Bivalvia;Autobranhia;Pteriormorphia;Pect  
 inida;Pectinoidea;Pectinidae;Pecten;Pecten maximus  
 UdeM00000039756 6596 312 UdeM00000039756 XP\_045209702.1 42.1 560  
 264 16 1 517 1 543 1.40E-81 312 6596 cellular  
 organisms;Eukaryota;Opisthokonta;Metazoa;Eumetazoa;Bilateria;Protostomia;  
 Spiralia;Lophotrochozoa;Mollusca;Bivalvia;Autobranhia;Heteroconchia;Euhe  
 terodonta;Imparidentia;Venerida;Veneroidea;Veneridae;Mercenaria;Mercenari  
 a mercenaria  
 UdeM00000039757 6596 302.8 UdeM00000039757 XP\_045209702.1 51.3 351  
 126 11 47 360 543 885 7.70E-79 302.8 6596 cellular  
 organisms;Eukaryota;Opisthokonta;Metazoa;Eumetazoa;Bilateria;Protostomia;  
 Spiralia;Lophotrochozoa;Mollusca;Bivalvia;Autobranhia;Heteroconchia;Euhe  
 terodonta;Imparidentia;Venerida;Veneroidea;Veneridae;Mercenaria;Mercenari  
 a mercenaria  
 UdeM00000039758 6596 725.3 UdeM00000039758 XP\_045210376.1 64 561  
 193 4 94 651 74 628 6.90E-206 725.3 6596 cellular  
 organisms;Eukaryota;Opisthokonta;Metazoa;Eumetazoa;Bilateria;Protostomia;  
 Spiralia;Lophotrochozoa;Mollusca;Bivalvia;Autobranhia;Heteroconchia;Euhe  
 terodonta;Imparidentia;Venerida;Veneroidea;Veneridae;Mercenaria;Mercenari  
 a mercenaria  
 UdeM00000039759 6579 58.9 UdeM00000039759 XP\_033730472.1 32.6 86  
 57 1 1 86 203 287 5.50E-06 58.9 6579 cellular  
 organisms;Eukaryota;Opisthokonta;Metazoa;Eumetazoa;Bilateria;Protostomia;  
 Spiralia;Lophotrochozoa;Mollusca;Bivalvia;Autobranhia;Pteriormorphia;Pect  
 inida;Pectinoidea;Pectinidae;Pecten;Pecten maximus  
 UdeM00000039760 1735272 160.6 UdeM00000039760 XP\_041363019.1 52.5  
 139 63 1 38 176 76 211 2.00E-36 160.6 1735272  
 cellular  
 organisms;Eukaryota;Opisthokonta;Metazoa;Eumetazoa;Bilateria;Protostomia;  
 Spiralia;Lophotrochozoa;Mollusca;Gastropoda;Neomphalina;Neomphaloidea;Pel  
 tospiridae;Gigantopelta;Gigantopelta aegis  
 UdeM00000039761 1735272 154.5 UdeM00000039761 XP\_041363019.1 51.5  
 134 65 0 34 167 71 204 1.40E-34 154.5 1735272

cellular  
organisms;Eukaryota;Opisthokonta;Metazoa;Eumetazoa;Bilateria;Protostomia;  
Spiralia;Lophotrochozoa;Mollusca;Gastropoda;Neomphalina;Neomphaloidea;Pel  
tospiridae;Gigantopelta;Gigantopelta aegis  
UdeM00000039763 6596 250.8 UdeM00000039763 XP\_045210369.1 59 195  
80 0 10 204 1100 1294 1.60E-63 250.8 6596 cellular  
organisms;Eukaryota;Opisthokonta;Metazoa;Eumetazoa;Bilateria;Protostomia;  
Spiralia;Lophotrochozoa;Mollusca;Bivalvia;Autobranchia;Heteroconchia;Euhe  
terodonta;Imparidentia;Venerida;Veneroidea;Veneridae;Mercenaria;Mercenari  
a mercenaria  
UdeM00000039764 6565 126.7 UdeM00000039764 XP\_022299727.1 48.2 139  
70 2 4 141 140 277 2.70E-26 126.7 6565 cellular  
organisms;Eukaryota;Opisthokonta;Metazoa;Eumetazoa;Bilateria;Protostomia;  
Spiralia;Lophotrochozoa;Mollusca;Bivalvia;Autobranchia;Pteriormorphia;Ostr  
eida;Ostreoidea;Ostreidae;Crassostrea;Crassostrea virginica  
UdeM00000039765 6596 271.9 UdeM00000039765 XP\_045210369.1 54.8 230  
104 0 8 237 868 1097 8.40E-70 271.9 6596 cellular  
organisms;Eukaryota;Opisthokonta;Metazoa;Eumetazoa;Bilateria;Protostomia;  
Spiralia;Lophotrochozoa;Mollusca;Bivalvia;Autobranchia;Heteroconchia;Euhe  
terodonta;Imparidentia;Venerida;Veneroidea;Veneridae;Mercenaria;Mercenari  
a mercenaria  
UdeM00000039766 6596 247.7 UdeM00000039766 XP\_045210369.1 55.6 207  
92 0 8 214 868 1074 1.40E-62 247.7 6596 cellular  
organisms;Eukaryota;Opisthokonta;Metazoa;Eumetazoa;Bilateria;Protostomia;  
Spiralia;Lophotrochozoa;Mollusca;Bivalvia;Autobranchia;Heteroconchia;Euhe  
terodonta;Imparidentia;Venerida;Veneroidea;Veneridae;Mercenaria;Mercenari  
a mercenaria  
UdeM00000039767 6596 680.2 UdeM00000039767 XP\_045210369.1 46.2 795  
400 12 11 795 84 860 3.10E-192 680.2 6596 cellular  
organisms;Eukaryota;Opisthokonta;Metazoa;Eumetazoa;Bilateria;Protostomia;  
Spiralia;Lophotrochozoa;Mollusca;Bivalvia;Autobranchia;Heteroconchia;Euhe  
terodonta;Imparidentia;Venerida;Veneroidea;Veneridae;Mercenaria;Mercenari  
a mercenaria  
UdeM00000039768 6596 650.2 UdeM00000039768 XP\_045210369.1 46.1 766  
385 12 11 766 84 831 3.30E-183 650.2 6596 cellular  
organisms;Eukaryota;Opisthokonta;Metazoa;Eumetazoa;Bilateria;Protostomia;  
Spiralia;Lophotrochozoa;Mollusca;Bivalvia;Autobranchia;Heteroconchia;Euhe  
terodonta;Imparidentia;Venerida;Veneroidea;Veneridae;Mercenaria;Mercenari  
a mercenaria  
UdeM00000039771 6596 77.4 UdeM00000039771 XP\_045208452.1 36.8 106  
66 1 369 474 36 140 6.30E-11 77.4 6596 cellular  
organisms;Eukaryota;Opisthokonta;Metazoa;Eumetazoa;Bilateria;Protostomia;  
Spiralia;Lophotrochozoa;Mollusca;Bivalvia;Autobranchia;Heteroconchia;Euhe  
terodonta;Imparidentia;Venerida;Veneroidea;Veneridae;Mercenaria;Mercenari  
a mercenaria  
UdeM00000039774 6596 163.3 UdeM00000039774 XP\_045207139.1 47.1 187  
97 1 3 189 2 186 3.10E-37 163.3 6596 cellular  
organisms;Eukaryota;Opisthokonta;Metazoa;Eumetazoa;Bilateria;Protostomia;  
Spiralia;Lophotrochozoa;Mollusca;Bivalvia;Autobranchia;Heteroconchia;Euhe  
terodonta;Imparidentia;Venerida;Veneroidea;Veneridae;Mercenaria;Mercenari  
a mercenaria  
UdeM00000039775 6573 436.8 UdeM00000039775 XP\_021348784.1 42.7 919  
382 23 3 884 4 814 6.50E-119 436.8 6573 cellular  
organisms;Eukaryota;Opisthokonta;Metazoa;Eumetazoa;Bilateria;Protostomia;

Spiralia;Lophotrochozoa;Mollusca;Bivalvia;Autobranchia;Pteriomorpha;Pectinida;Pectinoidea;Pectinidae;Mizuhopecten;Mizuhopecten yessoensis  
 UdeM00000039776 6596 202.6 UdeM00000039776 XP\_045207818.1 67.8 149  
 44 2 40 184 3 151 4.30E-49 202.6 6596 cellular  
 organisms;Eukaryota;Opisthokonta;Metazoa;Eumetazoa;Bilateria;Protostomia;Spiralia;Lophotrochozoa;Mollusca;Bivalvia;Autobranchia;Heteroconchia;Euherodonta;Imparidentia;Venerida;Veneroidea;Veneridae;Mercenaria;Mercenaria mercenaria  
 UdeM00000039777 6596 583.6 UdeM00000039777 XP\_045207189.1 59.9 484  
 191 1 45 528 55 535 2.60E-163 583.6 6596 cellular  
 organisms;Eukaryota;Opisthokonta;Metazoa;Eumetazoa;Bilateria;Protostomia;Spiralia;Lophotrochozoa;Mollusca;Bivalvia;Autobranchia;Heteroconchia;Euherodonta;Imparidentia;Venerida;Veneroidea;Veneridae;Mercenaria;Mercenaria mercenaria  
 UdeM00000039778 6596 1288.9 UdeM00000039778 XP\_045209098.1 55.1  
 1178 498 5 21 1177 1888 3055 0.00E+00 1288.9 6596  
 cellular  
 organisms;Eukaryota;Opisthokonta;Metazoa;Eumetazoa;Bilateria;Protostomia;Spiralia;Lophotrochozoa;Mollusca;Bivalvia;Autobranchia;Heteroconchia;Euherodonta;Imparidentia;Venerida;Veneroidea;Veneridae;Mercenaria;Mercenaria mercenaria  
 UdeM00000039779 6596 1353.2 UdeM00000039779 XP\_045209098.1 54.5  
 1256 541 8 10 1247 1878 3120 0.00E+00 1353.2 6596  
 cellular  
 organisms;Eukaryota;Opisthokonta;Metazoa;Eumetazoa;Bilateria;Protostomia;Spiralia;Lophotrochozoa;Mollusca;Bivalvia;Autobranchia;Heteroconchia;Euherodonta;Imparidentia;Venerida;Veneroidea;Veneridae;Mercenaria;Mercenaria mercenaria  
 UdeM00000039781 6573 688.3 UdeM00000039781 XP\_021357092.1 37.6 1137  
 623 15 1 1098 1 1089 1.70E-194 688.3 6573 cellular  
 organisms;Eukaryota;Opisthokonta;Metazoa;Eumetazoa;Bilateria;Protostomia;Spiralia;Lophotrochozoa;Mollusca;Bivalvia;Autobranchia;Pteriomorpha;Pectinida;Pectinoidea;Pectinidae;Mizuhopecten;Mizuhopecten yessoensis  
 UdeM00000039783 225164 469.5 UdeM00000039783 XP\_009046545.1 69.1  
 327 100 1 30 356 18 343 3.90E-129 469.5 225164  
 cellular  
 organisms;Eukaryota;Opisthokonta;Metazoa;Eumetazoa;Bilateria;Protostomia;Spiralia;Lophotrochozoa;Mollusca;Gastropoda;Patellogastropoda;Lottiidae;Lottia;Lottia gigantea  
 UdeM00000039785 6579 450.7 UdeM00000039785 XP\_033759783.1 57.4 376  
 156 4 2 374 83 457 1.90E-123 450.7 6579 cellular  
 organisms;Eukaryota;Opisthokonta;Metazoa;Eumetazoa;Bilateria;Protostomia;Spiralia;Lophotrochozoa;Mollusca;Bivalvia;Autobranchia;Pteriomorpha;Pectinida;Pectinoidea;Pectinidae;Pecten;Pecten maximus  
 UdeM00000039786 6579 278.9 UdeM00000039786 XP\_033759783.1 38.4 437  
 80 6 21 269 22 457 7.00E-72 278.9 6579 cellular  
 organisms;Eukaryota;Opisthokonta;Metazoa;Eumetazoa;Bilateria;Protostomia;Spiralia;Lophotrochozoa;Mollusca;Bivalvia;Autobranchia;Pteriomorpha;Pectinida;Pectinoidea;Pectinidae;Pecten;Pecten maximus  
 UdeM00000039789 225164 1459.5 UdeM00000039789 XP\_009059178.1  
 84.3 858 131 3 1 857 370 1224 0.00E+00 1459.5  
 225164 cellular  
 organisms;Eukaryota;Opisthokonta;Metazoa;Eumetazoa;Bilateria;Protostomia;

Spiralia;Lophotrochozoa;Mollusca;Gastropoda;Patellogastropoda;Lottioidea;Lottiidae;Lottia;Lottia gigantea

UdeM00000039788 225164 2173.3 UdeM00000039788 XP\_009059178.1  
85.2 1227 177 3 1 1226 1 1224 0.00E+00 2173.3  
225164 cellular

organisms;Eukaryota;Opisthokonta;Metazoa;Eumetazoa;Bilateria;Protostomia;Spiralia;Lophotrochozoa;Mollusca;Gastropoda;Patellogastropoda;Lottioidea;Lottiidae;Lottia;Lottia gigantea

UdeM00000039790 6579 1115.5 UdeM00000039790 XP\_033732029.1 63.8  
860 308 2 62 919 222 1080 0.00E+00 1115.5 6579  
cellular

organisms;Eukaryota;Opisthokonta;Metazoa;Eumetazoa;Bilateria;Protostomia;Spiralia;Lophotrochozoa;Mollusca;Bivalvia;Autobranchia;Pteriormorphia;Pectinida;Pectinoidea;Pectinidae;Pecten;Pecten maximus

UdeM00000039792 400727 336.3 UdeM00000039792 XP\_025081059.1 87.7  
187 23 0 1 187 42 228 3.00E-89 336.3 400727  
cellular

organisms;Eukaryota;Opisthokonta;Metazoa;Eumetazoa;Bilateria;Protostomia;Spiralia;Lophotrochozoa;Mollusca;Gastropoda;Caenogastropoda;Architaenioglossa;Ampullarioidea;Ampullariidae;Pomacea;Pomacea canaliculata

UdeM00000039793 400727 145.2 UdeM00000039793 XP\_025081059.1 72.3  
94 26 0 1 94 42 135 4.40E-32 145.2 400727  
cellular

organisms;Eukaryota;Opisthokonta;Metazoa;Eumetazoa;Bilateria;Protostomia;Spiralia;Lophotrochozoa;Mollusca;Gastropoda;Caenogastropoda;Architaenioglossa;Ampullarioidea;Ampullariidae;Pomacea;Pomacea canaliculata

UdeM00000039794 37653 228.4 UdeM00000039794 XP\_014776436.1 70.7 198  
30 2 19 211 44 218 8.50E-57 228.4 37653 cellular

organisms;Eukaryota;Opisthokonta;Metazoa;Eumetazoa;Bilateria;Protostomia;Spiralia;Lophotrochozoa;Mollusca;Cephalopoda;Coleoidea;Octopodiformes;Octopoda;Incirrata;Octopodidae;Octopus;Octopus bimaculoides

UdeM00000039795 37653 246.9 UdeM00000039795 XP\_014776436.1 75.8 198  
24 2 19 215 44 218 2.30E-62 246.9 37653 cellular

organisms;Eukaryota;Opisthokonta;Metazoa;Eumetazoa;Bilateria;Protostomia;Spiralia;Lophotrochozoa;Mollusca;Cephalopoda;Coleoidea;Octopodiformes;Octopoda;Incirrata;Octopodidae;Octopus;Octopus bimaculoides

UdeM00000039796 37653 262.3 UdeM00000039796 XP\_014776436.1 85.7 175  
24 1 19 192 44 218 4.80E-67 262.3 37653 cellular

organisms;Eukaryota;Opisthokonta;Metazoa;Eumetazoa;Bilateria;Protostomia;Spiralia;Lophotrochozoa;Mollusca;Cephalopoda;Coleoidea;Octopodiformes;Octopoda;Incirrata;Octopodidae;Octopus;Octopus bimaculoides

UdeM00000039797 37653 243.8 UdeM00000039797 XP\_014776436.1 80 175  
30 1 19 188 44 218 1.70E-61 243.8 37653 cellular

organisms;Eukaryota;Opisthokonta;Metazoa;Eumetazoa;Bilateria;Protostomia;Spiralia;Lophotrochozoa;Mollusca;Cephalopoda;Coleoidea;Octopodiformes;Octopoda;Incirrata;Octopodidae;Octopus;Octopus bimaculoides

UdeM00000039798 400727 255 UdeM00000039798 XP\_025082270.1 64.6  
181 61 1 23 200 30 210 1.30E-64 255 400727  
cellular

organisms;Eukaryota;Opisthokonta;Metazoa;Eumetazoa;Bilateria;Protostomia;Spiralia;Lophotrochozoa;Mollusca;Gastropoda;Caenogastropoda;Architaenioglossa;Ampullarioidea;Ampullariidae;Pomacea;Pomacea canaliculata

UdeM00000039799 400727 255 UdeM00000039799 XP\_025082270.1 64.6  
181 61 1 23 200 30 210 1.30E-64 255 400727



cellular  
organisms;Eukaryota;Opisthokonta;Metazoa;Eumetazoa;Bilateria;Protostomia;  
Spiralia;Lophotrochozoa;Mollusca;Gastropoda;Caenogastropoda;Architaeniogl  
ossa;Ampullarioidea;Ampullariidae;Pomacea;Pomacea canaliculata  
UdeM00000039800 400727 255 UdeM00000039800 XP\_025082270.1 64.6  
181 61 1 23 200 30 210 1.30E-64 255 400727

cellular  
organisms;Eukaryota;Opisthokonta;Metazoa;Eumetazoa;Bilateria;Protostomia;  
Spiralia;Lophotrochozoa;Mollusca;Gastropoda;Caenogastropoda;Architaeniogl  
ossa;Ampullarioidea;Ampullariidae;Pomacea;Pomacea canaliculata  
UdeM00000039801 400727 255 UdeM00000039801 XP\_025082270.1 64.6  
181 61 1 23 200 30 210 1.30E-64 255 400727

cellular  
organisms;Eukaryota;Opisthokonta;Metazoa;Eumetazoa;Bilateria;Protostomia;  
Spiralia;Lophotrochozoa;Mollusca;Gastropoda;Caenogastropoda;Architaeniogl  
ossa;Ampullarioidea;Ampullariidae;Pomacea;Pomacea canaliculata  
UdeM00000039803 1735272 625.9 UdeM00000039803 XP\_041372160.1 41.2  
849 452 12 13 840 1180 2002 7.20E-176 625.9 1735272

cellular  
organisms;Eukaryota;Opisthokonta;Metazoa;Eumetazoa;Bilateria;Protostomia;  
Spiralia;Lophotrochozoa;Mollusca;Gastropoda;Neomphalina;Neomphaloidea;Pel  
tospiridae;Gigantopelta;Gigantopelta aegis  
UdeM00000039804 6596 600.9 UdeM00000039804 XP\_045209803.1 40.5 730  
374 13 34 708 25 749 2.10E-168 600.9 6596 cellular

organisms;Eukaryota;Opisthokonta;Metazoa;Eumetazoa;Bilateria;Protostomia;  
Spiralia;Lophotrochozoa;Mollusca;Bivalvia;Autobranchia;Heteroconchia;Euhe  
terodonta;Imparidentia;Venerida;Veneroidea;Veneridae;Mercenaria;Mercenari  
a mercenaria  
UdeM00000039806 6596 1055.4 UdeM00000039806 XP\_045209078.1 23.9  
3575 1372 78 8 2312 7 3501 1.10E-304 1055.4 6596

cellular  
organisms;Eukaryota;Opisthokonta;Metazoa;Eumetazoa;Bilateria;Protostomia;  
Spiralia;Lophotrochozoa;Mollusca;Bivalvia;Autobranchia;Heteroconchia;Euhe  
terodonta;Imparidentia;Venerida;Veneroidea;Veneridae;Mercenaria;Mercenari  
a mercenaria  
UdeM00000039807 6596 1060.4 UdeM00000039807 XP\_045209078.1 23.9  
3575 1372 77 8 2313 7 3501 3.40E-306 1060.4 6596

cellular  
organisms;Eukaryota;Opisthokonta;Metazoa;Eumetazoa;Bilateria;Protostomia;  
Spiralia;Lophotrochozoa;Mollusca;Bivalvia;Autobranchia;Heteroconchia;Euhe  
terodonta;Imparidentia;Venerida;Veneroidea;Veneridae;Mercenaria;Mercenari  
a mercenaria  
UdeM00000039808 6573 85.5 UdeM00000039808 XP\_021349937.1 35.7 115  
72 2 1 114 1 114 5.00E-14 85.5 6573 cellular

organisms;Eukaryota;Opisthokonta;Metazoa;Eumetazoa;Bilateria;Protostomia;  
Spiralia;Lophotrochozoa;Mollusca;Bivalvia;Autobranchia;Pteriomorphia;Pect  
inida;Pectinoidea;Pectinidae;Mizuhopecten;Mizuhopecten yessoensis  
UdeM00000039809 29159 307.8 UdeM00000039809 XP\_011435335.2 51 355  
131 7 2 356 45 356 1.80E-80 307.8 29159 cellular

organisms;Eukaryota;Opisthokonta;Metazoa;Eumetazoa;Bilateria;Protostomia;  
Spiralia;Lophotrochozoa;Mollusca;Bivalvia;Autobranchia;Pteriomorphia;Ostr  
eida;Ostreoidea;Ostreidae;Crassostrea;Crassostrea gigas  
UdeM00000039810 6596 167.2 UdeM00000039810 XP\_045207458.1 47.2 161  
79 2 7 163 2 160 1.80E-38 167.2 6596 cellular

organisms;Eukaryota;Opisthokonta;Metazoa;Eumetazoa;Bilateria;Protostomia;Spiralia;Lophotrochozoa;Mollusca;Bivalvia;Autobranhia;Heteroconchia;Euherodonta;Imparidentia;Venerida;Veneroidea;Veneridae;Mercenaria;Mercenaria mercenaria

UdeM00000039811 6596 180.6 UdeM00000039811 XP\_045207458.1 51 143  
70 0 11 153 7 149 1.50E-42 180.6 6596 cellular

organisms;Eukaryota;Opisthokonta;Metazoa;Eumetazoa;Bilateria;Protostomia;Spiralia;Lophotrochozoa;Mollusca;Bivalvia;Autobranhia;Heteroconchia;Euherodonta;Imparidentia;Venerida;Veneroidea;Veneridae;Mercenaria;Mercenaria mercenaria

UdeM00000039815 29159 110.9 UdeM00000039815 XP\_034315421.1 54.5 112  
46 2 3 110 364 474 1.10E-21 110.9 29159 cellular

organisms;Eukaryota;Opisthokonta;Metazoa;Eumetazoa;Bilateria;Protostomia;Spiralia;Lophotrochozoa;Mollusca;Bivalvia;Autobranhia;Pteriomorphia;Ostreida;Ostreoidea;Ostreidae;Crassostrea;Crassostrea gigas

UdeM00000039816 37621 99.8 UdeM00000039816 XP\_014663462.1 43.5 108  
51 2 4 111 25 122 3.00E-18 99.8 37621 cellular

organisms;Eukaryota;Opisthokonta;Metazoa;Eumetazoa;Bilateria;Protostomia;Ecdysozoa;Scalidophora;Priapulida;Priapulimorpha;Priapulimorphida;Priapulidae;Priapululus;Priapululus caudatus

UdeM00000039817 7574 269.2 UdeM00000039817 XP\_023932024.1 43.4 334  
182 5 60 390 30 359 8.00E-69 269.2 7574 cellular

organisms;Eukaryota;Opisthokonta;Metazoa;Eumetazoa;Bilateria;Protostomia;Spiralia;Lophotrochozoa;Brachiopoda;Linguliformea;Lingulata;Lingulida;Linguloidea;Lingulidae;Lingula;Lingula anatina

UdeM00000039818 6565 303.9 UdeM00000039818 XP\_022292556.1 47.9 315  
160 3 4 315 31 344 2.40E-79 303.9 6565 cellular

organisms;Eukaryota;Opisthokonta;Metazoa;Eumetazoa;Bilateria;Protostomia;Spiralia;Lophotrochozoa;Mollusca;Bivalvia;Autobranhia;Pteriomorphia;Ostreida;Ostreoidea;Ostreidae;Crassostrea;Crassostrea virginica

UdeM00000039819 6573 94.7 UdeM00000039819 XP\_021368513.1 40.3 134  
72 2 2 135 325 450 9.40E-17 94.7 6573 cellular

organisms;Eukaryota;Opisthokonta;Metazoa;Eumetazoa;Bilateria;Protostomia;Spiralia;Lophotrochozoa;Mollusca;Bivalvia;Autobranhia;Pteriomorphia;Pectinida;Pectinoidea;Pectinidae;Mizuhopecten;Mizuhopecten yessoensis

UdeM00000039820 6565 331.6 UdeM00000039820 XP\_022292556.1 45.8 367  
163 3 7 337 61 427 1.20E-87 331.6 6565 cellular

organisms;Eukaryota;Opisthokonta;Metazoa;Eumetazoa;Bilateria;Protostomia;Spiralia;Lophotrochozoa;Mollusca;Bivalvia;Autobranhia;Pteriomorphia;Ostreida;Ostreoidea;Ostreidae;Crassostrea;Crassostrea virginica

UdeM00000042879 6596 374.4 UdeM00000042879 XP\_045173200.1 48.9 438  
175 7 4 402 1 428 1.80E-100 374.4 6596 cellular

organisms;Eukaryota;Opisthokonta;Metazoa;Eumetazoa;Bilateria;Protostomia;Spiralia;Lophotrochozoa;Mollusca;Bivalvia;Autobranhia;Heteroconchia;Euherodonta;Imparidentia;Venerida;Veneroidea;Veneridae;Mercenaria;Mercenaria mercenaria

UdeM00000042880 6596 614 UdeM00000042880 XP\_045189332.1 77.4 390  
87 1 1 389 1 390 1.30E-172 614 6596 cellular

organisms;Eukaryota;Opisthokonta;Metazoa;Eumetazoa;Bilateria;Protostomia;Spiralia;Lophotrochozoa;Mollusca;Bivalvia;Autobranhia;Heteroconchia;Euherodonta;Imparidentia;Venerida;Veneroidea;Veneridae;Mercenaria;Mercenaria mercenaria

UdeM00000042882 6596 690.6 UdeM00000042882 XP\_045189331.1 87.2 453  
49 4 1 448 1 449 1.30E-195 690.6 6596 cellular

organisms;Eukaryota;Opisthokonta;Metazoa;Eumetazoa;Bilateria;Protostomia;Spiralia;Lophotrochozoa;Mollusca;Bivalvia;Autobranchia;Heteroconchia;Euherodonta;Imparidentia;Venerida;Veneroidea;Veneridae;Mercenaria;Mercenaria mercenaria

UdeM00000042883 6596 655.2 UdeM00000042883 XP\_045189331.1 89 417  
43 1 1 414 33 449 5.50E-185 655.2 6596 cellular

organisms;Eukaryota;Opisthokonta;Metazoa;Eumetazoa;Bilateria;Protostomia;Spiralia;Lophotrochozoa;Mollusca;Bivalvia;Autobranchia;Heteroconchia;Euherodonta;Imparidentia;Venerida;Veneroidea;Veneridae;Mercenaria;Mercenaria mercenaria

UdeM00000042884 6579 292.4 UdeM00000042884 XP\_033756795.1 59.2 233  
91 1 1 229 1 233 5.40E-76 292.4 6579 cellular

organisms;Eukaryota;Opisthokonta;Metazoa;Eumetazoa;Bilateria;Protostomia;Spiralia;Lophotrochozoa;Mollusca;Bivalvia;Autobranchia;Pteriormorphia;Pectinida;Pectinoidea;Pectinidae;Pecten;Pecten maximus

UdeM00000042885 6596 391.3 UdeM00000042885 XP\_045189317.1 33.6 789  
436 17 1 780 1 710 2.90E-105 391.3 6596 cellular

organisms;Eukaryota;Opisthokonta;Metazoa;Eumetazoa;Bilateria;Protostomia;Spiralia;Lophotrochozoa;Mollusca;Bivalvia;Autobranchia;Heteroconchia;Euherodonta;Imparidentia;Venerida;Veneroidea;Veneridae;Mercenaria;Mercenaria mercenaria

UdeM00000042886 6596 321.2 UdeM00000042886 XP\_045190565.1 40.7 405  
217 5 13 405 15 408 1.80E-84 321.2 6596 cellular

organisms;Eukaryota;Opisthokonta;Metazoa;Eumetazoa;Bilateria;Protostomia;Spiralia;Lophotrochozoa;Mollusca;Bivalvia;Autobranchia;Heteroconchia;Euherodonta;Imparidentia;Venerida;Veneroidea;Veneridae;Mercenaria;Mercenaria mercenaria

UdeM00000042887 6596 254.2 UdeM00000042887 XP\_045187824.1 35.8 394  
230 6 20 402 19 400 2.80E-64 254.2 6596 cellular

organisms;Eukaryota;Opisthokonta;Metazoa;Eumetazoa;Bilateria;Protostomia;Spiralia;Lophotrochozoa;Mollusca;Bivalvia;Autobranchia;Heteroconchia;Euherodonta;Imparidentia;Venerida;Veneroidea;Veneridae;Mercenaria;Mercenaria mercenaria

UdeM00000042888 6596 317.8 UdeM00000042888 XP\_045190997.1 45.3 342  
186 1 29 370 14 354 2.70E-83 317.8 6596 cellular

organisms;Eukaryota;Opisthokonta;Metazoa;Eumetazoa;Bilateria;Protostomia;Spiralia;Lophotrochozoa;Mollusca;Bivalvia;Autobranchia;Heteroconchia;Euherodonta;Imparidentia;Venerida;Veneroidea;Veneridae;Mercenaria;Mercenaria mercenaria

UdeM00000042889 6596 318.2 UdeM00000042889 XP\_045190565.1 44.5 393  
210 5 16 404 16 404 1.60E-83 318.2 6596 cellular

organisms;Eukaryota;Opisthokonta;Metazoa;Eumetazoa;Bilateria;Protostomia;Spiralia;Lophotrochozoa;Mollusca;Bivalvia;Autobranchia;Heteroconchia;Euherodonta;Imparidentia;Venerida;Veneroidea;Veneridae;Mercenaria;Mercenaria mercenaria

UdeM00000042890 1735272 418.3 UdeM00000042890 XP\_041368606.1 35.2  
676 373 6 42 715 62 674 2.00E-113 418.3 1735272  
cellular

organisms;Eukaryota;Opisthokonta;Metazoa;Eumetazoa;Bilateria;Protostomia;Spiralia;Lophotrochozoa;Mollusca;Gastropoda;Neomphalina;Neomphaloidea;Peltopiridae;Gigantopelta;Gigantopelta aegis

UdeM00000042891 6596 362.1 UdeM00000042891 XP\_045188211.1 52.7 366  
149 4 1 345 1 363 8.00E-97 362.1 6596 cellular

organisms;Eukaryota;Opisthokonta;Metazoa;Eumetazoa;Bilateria;Protostomia;

Spiralia;Lophotrochozoa;Mollusca;Bivalvia;Autobranchia;Heteroconchia;Euheterodonta;Imparidentia;Venerida;Veneroidea;Veneridae;Mercenaria;Mercenaria mercenaria

UdeM00000042892 6573 296.6 UdeM00000042892 XP\_021353225.1 35.3 743  
354 22 1 670 1 689 8.10E-77 296.6 6573 cellular

organisms;Eukaryota;Opisthokonta;Metazoa;Eumetazoa;Bilateria;Protostomia;Spiralia;Lophotrochozoa;Mollusca;Bivalvia;Autobranchia;Pteriormorphia;Pectinida;Pectinoidea;Pectinidae;Mizuhopecten;Mizuhopecten yessoensis

UdeM00000042893 6596 1375.9 UdeM00000042893 XP\_045158029.1 44.8  
1621 861 21 2 1604 132 1737 0.00E+00 1375.9 6596  
cellular

organisms;Eukaryota;Opisthokonta;Metazoa;Eumetazoa;Bilateria;Protostomia;Spiralia;Lophotrochozoa;Mollusca;Bivalvia;Autobranchia;Heteroconchia;Euheterodonta;Imparidentia;Venerida;Veneroidea;Veneridae;Mercenaria;Mercenaria mercenaria

UdeM00000042896 7604 303.5 UdeM00000042896 XP\_033633146.1 41 390  
212 3 262 633 29 418 6.90E-79 303.5 7604 cellular

organisms;Eukaryota;Opisthokonta;Metazoa;Eumetazoa;Bilateria;Deuterostomia;Echinodermata;Eleutherozoa;Asterozoa;Asteroidea;Forcipulatacea;Forcipulatacida;Asteroidea;Asteroidea;Asteroidea rubens

UdeM00000042898 29159 87 UdeM00000042898 XP\_034329650.1 45.8 72  
39 0 9 80 307 378 1.20E-14 87 29159 cellular

organisms;Eukaryota;Opisthokonta;Metazoa;Eumetazoa;Bilateria;Protostomia;Spiralia;Lophotrochozoa;Mollusca;Bivalvia;Autobranchia;Pteriormorphia;Ostreida;Ostreoidea;Ostreidae;Crassostrea;Crassostrea gigas

UdeM00000042899 29159 523.9 UdeM00000042899 XP\_034302047.1 35.8 839  
528 8 14 849 87 917 4.00E-145 523.9 29159 cellular

organisms;Eukaryota;Opisthokonta;Metazoa;Eumetazoa;Bilateria;Protostomia;Spiralia;Lophotrochozoa;Mollusca;Bivalvia;Autobranchia;Pteriormorphia;Ostreida;Ostreoidea;Ostreidae;Crassostrea;Crassostrea gigas

UdeM00000042901 7668 236.1 UdeM00000042901 XP\_011666894.1 40.2 343  
179 8 7 332 5 338 6.70E-59 236.1 7668 cellular

organisms;Eukaryota;Opisthokonta;Metazoa;Eumetazoa;Bilateria;Deuterostomia;Echinodermata;Eleutherozoa;Echinozoa;Echinoidea;Euechinoidea;Echinacea;Camarodonta;Echinidea;Strongylocentrotidae;Strongylocentrotus;Strongylocentrotus purpuratus

UdeM00000042902 441366 160.2 UdeM00000042902 XP\_028326620.1 46.8  
186 90 4 20 204 103 280 3.00E-36 160.2 441366  
cellular

organisms;Eukaryota;Opisthokonta;Metazoa;Eumetazoa;Bilateria;Deuterostomia;Chordata;Craniata;Vertebrata;Gnathostomata;Teleostomi;Euteleostomi;Actinopterygii;Actinopteri;Neopterygii;Teleostei;Osteoglossocephalai;Clupeocephala;Euteleostei;Neoteleostei;Eurypterygia;Ctenosquamata;Acanthopterygii;Euacanthopterygii;Percomorphaceae;Ovalentaria;Blenniiformes;Blenniiformes;Gobiesocidae;Gobiesocidae;Gobiesocinae;Gouania;Gouania willdenowi

UdeM00000042903 6596 288.5 UdeM00000042903 XP\_045204116.1 52.6 340  
148 8 1 334 5 337 1.10E-74 288.5 6596 cellular

organisms;Eukaryota;Opisthokonta;Metazoa;Eumetazoa;Bilateria;Protostomia;Spiralia;Lophotrochozoa;Mollusca;Bivalvia;Autobranchia;Heteroconchia;Euheterodonta;Imparidentia;Venerida;Veneroidea;Veneridae;Mercenaria;Mercenaria mercenaria

UdeM00000042904 6596 134.4 UdeM00000042904 XP\_045203359.1 33.9 251  
158 4 208 453 48 295 3.60E-28 134.4 6596 cellular

organisms;Eukaryota;Opisthokonta;Metazoa;Eumetazoa;Bilateria;Protostomia;Spiralia;Lophotrochozoa;Mollusca;Bivalvia;Autobranhia;Heteroconchia;Euheterodonta;Imparidentia;Venerida;Veneroidea;Veneridae;Mercenaria;Mercenaria mercenaria

UdeM00000042906 10224 347.4 UdeM00000042906 XP\_002736880.1 58.3 283  
116 2 32 312 35 317 2.20E-92 347.4 10224 cellular

organisms;Eukaryota;Opisthokonta;Metazoa;Eumetazoa;Bilateria;Deuterostomia;Hemichordata;Enteropneusta;Harrimaniidae;Saccoglossus;Saccoglossus kowalevskii

UdeM00000042907 6596 757.7 UdeM00000042907 XP\_045203695.1 59.1 618  
248 4 1 615 66 681 1.20E-215 757.7 6596 cellular

organisms;Eukaryota;Opisthokonta;Metazoa;Eumetazoa;Bilateria;Protostomia;Spiralia;Lophotrochozoa;Mollusca;Bivalvia;Autobranhia;Heteroconchia;Euheterodonta;Imparidentia;Venerida;Veneroidea;Veneridae;Mercenaria;Mercenaria mercenaria

UdeM00000042908 29159 525.8 UdeM00000042908 XP\_011451018.2 54.3 497  
224 2 108 604 263 756 7.70E-146 525.8 29159 cellular

organisms;Eukaryota;Opisthokonta;Metazoa;Eumetazoa;Bilateria;Protostomia;Spiralia;Lophotrochozoa;Mollusca;Bivalvia;Autobranhia;Pteriormorphia;Ostreida;Ostreoidea;Ostreidae;Crassostrea;Crassostrea gigas

UdeM00000042909 29159 527.7 UdeM00000042909 XP\_011451018.2 54.3 501  
226 2 108 608 263 760 2.10E-146 527.7 29159 cellular

organisms;Eukaryota;Opisthokonta;Metazoa;Eumetazoa;Bilateria;Protostomia;Spiralia;Lophotrochozoa;Mollusca;Bivalvia;Autobranhia;Pteriormorphia;Ostreida;Ostreoidea;Ostreidae;Crassostrea;Crassostrea gigas

UdeM00000042910 29159 96.7 UdeM00000042910 XP\_011451009.2 40.8 125  
72 1 128 252 263 385 4.60E-17 96.7 29159 cellular

organisms;Eukaryota;Opisthokonta;Metazoa;Eumetazoa;Bilateria;Protostomia;Spiralia;Lophotrochozoa;Mollusca;Bivalvia;Autobranhia;Pteriormorphia;Ostreida;Ostreoidea;Ostreidae;Crassostrea;Crassostrea gigas

UdeM00000042911 114398 427.6 UdeM00000042911 XP\_042903861.1 38.9  
609 361 6 1 605 1 602 2.70E-116 427.6 114398  
cellular

organisms;Eukaryota;Opisthokonta;Metazoa;Eumetazoa;Bilateria;Protostomia;Ecdysozoa;Panarthropoda;Arthropoda;Chelicerata;Arachnida;Araneae;Araneomorphae;Entelegynae;Orbiculariae;Araneoidea;Theridiidae;Parasteatoda;Parasteatoda tepidariorum

UdeM00000042912 6596 718.8 UdeM00000042912 XP\_045204309.1 51.2 729  
318 13 4 714 172 880 7.20E-204 718.8 6596 cellular

organisms;Eukaryota;Opisthokonta;Metazoa;Eumetazoa;Bilateria;Protostomia;Spiralia;Lophotrochozoa;Mollusca;Bivalvia;Autobranhia;Heteroconchia;Euheterodonta;Imparidentia;Venerida;Veneroidea;Veneridae;Mercenaria;Mercenaria mercenaria

UdeM00000042913 114398 428.3 UdeM00000042913 XP\_042903861.1 38.8  
609 362 6 1 605 1 602 1.60E-116 428.3 114398  
cellular

organisms;Eukaryota;Opisthokonta;Metazoa;Eumetazoa;Bilateria;Protostomia;Ecdysozoa;Panarthropoda;Arthropoda;Chelicerata;Arachnida;Araneae;Araneomorphae;Entelegynae;Orbiculariae;Araneoidea;Theridiidae;Parasteatoda;Parasteatoda tepidariorum

UdeM00000042914 6596 130.2 UdeM00000042914 XP\_045206207.1 51.2 121  
59 0 62 182 1 121 3.00E-27 130.2 6596 cellular

organisms;Eukaryota;Opisthokonta;Metazoa;Eumetazoa;Bilateria;Protostomia;Spiralia;Lophotrochozoa;Mollusca;Bivalvia;Autobranhia;Heteroconchia;Euheterodonta

terodonta;Imparidentia;Venerida;Veneroidea;Veneridae;Mercenaria;Mercenari  
 a mercenaria  
 UdeM00000042915 6573 94.7 UdeM00000042915 XP\_021365625.1 52.9 87  
 41 0 14 100 40 126 1.50E-16 94.7 6573 cellular  
 organisms;Eukaryota;Opisthokonta;Metazoa;Eumetazoa;Bilateria;Protostomia;  
 Spiralia;Lophotrochozoa;Mollusca;Bivalvia;Autobranchia;Pteriomorpha;Pect  
 inida;Pectinoidea;Pectinidae;Mizuhopecten;Mizuhopecten yessoensis  
 UdeM00000017366 6596 104.4 UdeM00000017366 XP\_045176094.1 53.3 90  
 41 1 162 251 81 169 2.90E-19 104.4 6596 cellular  
 organisms;Eukaryota;Opisthokonta;Metazoa;Eumetazoa;Bilateria;Protostomia;  
 Spiralia;Lophotrochozoa;Mollusca;Bivalvia;Autobranchia;Heteroconchia;Euhe  
 terodonta;Imparidentia;Venerida;Veneroidea;Veneridae;Mercenaria;Mercenari  
 a mercenaria  
 UdeM00000017367 6596 127.9 UdeM00000017367 XP\_045176094.1 42.3 163  
 85 3 156 312 81 240 2.50E-26 127.9 6596 cellular  
 organisms;Eukaryota;Opisthokonta;Metazoa;Eumetazoa;Bilateria;Protostomia;  
 Spiralia;Lophotrochozoa;Mollusca;Bivalvia;Autobranchia;Heteroconchia;Euhe  
 terodonta;Imparidentia;Venerida;Veneroidea;Veneridae;Mercenaria;Mercenari  
 a mercenaria  
 UdeM00000017368 6565 456.4 UdeM00000017368 XP\_022324540.1 35.8 858  
 516 19 20 873 27 853 9.20E-125 456.4 6565 cellular  
 organisms;Eukaryota;Opisthokonta;Metazoa;Eumetazoa;Bilateria;Protostomia;  
 Spiralia;Lophotrochozoa;Mollusca;Bivalvia;Autobranchia;Pteriomorpha;Ostr  
 eida;Ostreoidea;Ostreidae;Crassostrea;Crassostrea virginica  
 UdeM00000017369 6565 333.6 UdeM00000017369 XP\_022337291.1 32.1 864  
 490 27 7 809 62 889 8.20E-88 333.6 6565 cellular  
 organisms;Eukaryota;Opisthokonta;Metazoa;Eumetazoa;Bilateria;Protostomia;  
 Spiralia;Lophotrochozoa;Mollusca;Bivalvia;Autobranchia;Pteriomorpha;Ostr  
 eida;Ostreoidea;Ostreidae;Crassostrea;Crassostrea virginica  
 UdeM00000017370 6596 526.2 UdeM00000017370 XP\_045173468.1 38.4 872  
 497 20 4 860 2 848 9.60E-146 526.2 6596 cellular  
 organisms;Eukaryota;Opisthokonta;Metazoa;Eumetazoa;Bilateria;Protostomia;  
 Spiralia;Lophotrochozoa;Mollusca;Bivalvia;Autobranchia;Heteroconchia;Euhe  
 terodonta;Imparidentia;Venerida;Veneroidea;Veneridae;Mercenaria;Mercenari  
 a mercenaria  
 UdeM00000017371 6579 452.2 UdeM00000017371 XP\_033727403.1 39.4 617  
 347 13 44 649 43 643 1.10E-123 452.2 6579 cellular  
 organisms;Eukaryota;Opisthokonta;Metazoa;Eumetazoa;Bilateria;Protostomia;  
 Spiralia;Lophotrochozoa;Mollusca;Bivalvia;Autobranchia;Pteriomorpha;Pect  
 inida;Pectinoidea;Pectinidae;Pecten;Pecten maximus  
 UdeM00000017373 6579 453.8 UdeM00000017373 XP\_033727403.1 38.5 618  
 362 7 38 647 31 638 3.90E-124 453.8 6579 cellular  
 organisms;Eukaryota;Opisthokonta;Metazoa;Eumetazoa;Bilateria;Protostomia;  
 Spiralia;Lophotrochozoa;Mollusca;Bivalvia;Autobranchia;Pteriomorpha;Pect  
 inida;Pectinoidea;Pectinidae;Pecten;Pecten maximus  
 UdeM00000017374 6596 189.9 UdeM00000017374 XP\_045215724.1 25.1 546  
 343 10 7 536 240 735 8.90E-45 189.9 6596 cellular  
 organisms;Eukaryota;Opisthokonta;Metazoa;Eumetazoa;Bilateria;Protostomia;  
 Spiralia;Lophotrochozoa;Mollusca;Bivalvia;Autobranchia;Heteroconchia;Euhe  
 terodonta;Imparidentia;Venerida;Veneroidea;Veneridae;Mercenaria;Mercenari  
 a mercenaria  
 UdeM00000017375 6596 166.8 UdeM00000017375 XP\_045182112.1 27.4 485  
 294 10 67 544 311 744 8.10E-38 166.8 6596 cellular  
 organisms;Eukaryota;Opisthokonta;Metazoa;Eumetazoa;Bilateria;Protostomia;

Spiralia;Lophotrochozoa;Mollusca;Bivalvia;Autobranchia;Heteroconchia;Euherodonta;Imparidentia;Venerida;Veneroidea;Veneridae;Mercenaria;Mercenaria mercenaria

UdeM00000017376 6596 407.5 UdeM00000017376 XP\_045180699.1 40.8 574  
283 9 2 540 133 684 2.70E-110 407.5 6596 cellular

organisms;Eukaryota;Opisthokonta;Metazoa;Eumetazoa;Bilateria;Protostomia;Spiralia;Lophotrochozoa;Mollusca;Bivalvia;Autobranchia;Heteroconchia;Euherodonta;Imparidentia;Venerida;Veneroidea;Veneridae;Mercenaria;Mercenaria mercenaria

UdeM00000017377 6596 479.2 UdeM00000017377 XP\_045180699.1 43.4 636  
297 12 41 641 77 684 8.60E-132 479.2 6596 cellular

organisms;Eukaryota;Opisthokonta;Metazoa;Eumetazoa;Bilateria;Protostomia;Spiralia;Lophotrochozoa;Mollusca;Bivalvia;Autobranchia;Heteroconchia;Euherodonta;Imparidentia;Venerida;Veneroidea;Veneridae;Mercenaria;Mercenaria mercenaria

UdeM00000017381 6573 149.8 UdeM00000017381 XP\_021343481.1 33.7 261  
133 7 26 283 28 251 6.20E-33 149.8 6573 cellular

organisms;Eukaryota;Opisthokonta;Metazoa;Eumetazoa;Bilateria;Protostomia;Spiralia;Lophotrochozoa;Mollusca;Bivalvia;Autobranchia;Pteriomorphia;Pectinida;Pectinoidea;Pectinidae;Mizuhopecten;Mizuhopecten yessoensis

UdeM00000017380 6573 149.8 UdeM00000017380 XP\_021343481.1 33.7 261  
133 7 54 311 28 251 6.70E-33 149.8 6573 cellular

organisms;Eukaryota;Opisthokonta;Metazoa;Eumetazoa;Bilateria;Protostomia;Spiralia;Lophotrochozoa;Mollusca;Bivalvia;Autobranchia;Pteriomorphia;Pectinida;Pectinoidea;Pectinidae;Mizuhopecten;Mizuhopecten yessoensis

UdeM00000017382 6596 373.6 UdeM00000017382 XP\_045177776.1 38.3 520  
301 5 1 517 405 907 5.30E-100 373.6 6596 cellular

organisms;Eukaryota;Opisthokonta;Metazoa;Eumetazoa;Bilateria;Protostomia;Spiralia;Lophotrochozoa;Mollusca;Bivalvia;Autobranchia;Heteroconchia;Euherodonta;Imparidentia;Venerida;Veneroidea;Veneridae;Mercenaria;Mercenaria mercenaria

UdeM00000017383 6596 492.7 UdeM00000017383 XP\_045177776.1 35.7 734  
446 7 1 731 405 1115 8.40E-136 492.7 6596 cellular

organisms;Eukaryota;Opisthokonta;Metazoa;Eumetazoa;Bilateria;Protostomia;Spiralia;Lophotrochozoa;Mollusca;Bivalvia;Autobranchia;Heteroconchia;Euherodonta;Imparidentia;Venerida;Veneroidea;Veneridae;Mercenaria;Mercenaria mercenaria

UdeM00000017384 6596 389.8 UdeM00000017384 XP\_045177776.1 37.7 554  
316 6 1 548 405 935 7.30E-105 389.8 6596 cellular

organisms;Eukaryota;Opisthokonta;Metazoa;Eumetazoa;Bilateria;Protostomia;Spiralia;Lophotrochozoa;Mollusca;Bivalvia;Autobranchia;Heteroconchia;Euherodonta;Imparidentia;Venerida;Veneroidea;Veneridae;Mercenaria;Mercenaria mercenaria

UdeM00000017387 6596 101.3 UdeM00000017387 XP\_045177776.1 57.5 80  
34 0 1 80 405 484 6.60E-19 101.3 6596 cellular

organisms;Eukaryota;Opisthokonta;Metazoa;Eumetazoa;Bilateria;Protostomia;Spiralia;Lophotrochozoa;Mollusca;Bivalvia;Autobranchia;Heteroconchia;Euherodonta;Imparidentia;Venerida;Veneroidea;Veneridae;Mercenaria;Mercenaria mercenaria

UdeM00000017390 6565 120.6 UdeM00000017390 XP\_022302393.1 47.7 128  
54 3 3 129 59 174 2.00E-24 120.6 6565 cellular

organisms;Eukaryota;Opisthokonta;Metazoa;Eumetazoa;Bilateria;Protostomia;Spiralia;Lophotrochozoa;Mollusca;Bivalvia;Autobranchia;Pteriomorphia;Ostreida;Ostreoidea;Ostreidae;Crassostrea;Crassostrea virginica

UdeM00000017391 6596 210.3 UdeM00000017391 XP\_045206702.1 25.1 750  
 484 14 47 767 37 737 8.90E-51 210.3 6596 cellular  
 organisms;Eukaryota;Opisthokonta;Metazoa;Eumetazoa;Bilateria;Protostomia;  
 Spiralia;Lophotrochozoa;Mollusca;Bivalvia;Autobranchia;Heteroconchia;Euhe  
 terodonta;Imparidentia;Venerida;Veneroidea;Veneridae;Mercenaria;Mercenari  
 a mercenaria

UdeM00000017395 6596 100.1 UdeM00000017395 XP\_045182112.1 31.8 173  
 118 0 1 173 572 744 3.20E-18 100.1 6596 cellular  
 organisms;Eukaryota;Opisthokonta;Metazoa;Eumetazoa;Bilateria;Protostomia;  
 Spiralia;Lophotrochozoa;Mollusca;Bivalvia;Autobranchia;Heteroconchia;Euhe  
 terodonta;Imparidentia;Venerida;Veneroidea;Veneridae;Mercenaria;Mercenari  
 a mercenaria

UdeM00000017396 6596 201.8 UdeM00000017396 XP\_045161856.1 27.1 764  
 478 14 15 750 34 746 3.10E-48 201.8 6596 cellular  
 organisms;Eukaryota;Opisthokonta;Metazoa;Eumetazoa;Bilateria;Protostomia;  
 Spiralia;Lophotrochozoa;Mollusca;Bivalvia;Autobranchia;Heteroconchia;Euhe  
 terodonta;Imparidentia;Venerida;Veneroidea;Veneridae;Mercenaria;Mercenari  
 a mercenaria

UdeM00000017397 6596 103.6 UdeM00000017397 XP\_045206136.1 32.7 171  
 111 2 144 310 253 423 4.90E-19 103.6 6596 cellular  
 organisms;Eukaryota;Opisthokonta;Metazoa;Eumetazoa;Bilateria;Protostomia;  
 Spiralia;Lophotrochozoa;Mollusca;Bivalvia;Autobranchia;Heteroconchia;Euhe  
 terodonta;Imparidentia;Venerida;Veneroidea;Veneridae;Mercenaria;Mercenari  
 a mercenaria

UdeM00000017398 6596 277.3 UdeM00000017398 XP\_045187052.1 48.3 292  
 144 4 18 306 47 334 2.30E-71 277.3 6596 cellular  
 organisms;Eukaryota;Opisthokonta;Metazoa;Eumetazoa;Bilateria;Protostomia;  
 Spiralia;Lophotrochozoa;Mollusca;Bivalvia;Autobranchia;Heteroconchia;Euhe  
 terodonta;Imparidentia;Venerida;Veneroidea;Veneridae;Mercenaria;Mercenari  
 a mercenaria

UdeM00000017399 6596 166.4 UdeM00000017399 XP\_045206702.1 21.3 748  
 419 14 47 671 37 737 1.30E-37 166.4 6596 cellular  
 organisms;Eukaryota;Opisthokonta;Metazoa;Eumetazoa;Bilateria;Protostomia;  
 Spiralia;Lophotrochozoa;Mollusca;Bivalvia;Autobranchia;Heteroconchia;Euhe  
 terodonta;Imparidentia;Venerida;Veneroidea;Veneridae;Mercenaria;Mercenari  
 a mercenaria

UdeM00000017400 6596 212.2 UdeM00000017400 XP\_045206702.1 24.4 755  
 483 14 47 767 37 737 2.40E-51 212.2 6596 cellular  
 organisms;Eukaryota;Opisthokonta;Metazoa;Eumetazoa;Bilateria;Protostomia;  
 Spiralia;Lophotrochozoa;Mollusca;Bivalvia;Autobranchia;Heteroconchia;Euhe  
 terodonta;Imparidentia;Venerida;Veneroidea;Veneridae;Mercenaria;Mercenari  
 a mercenaria

UdeM00000017401 6596 168.7 UdeM00000017401 XP\_045182112.1 27.4 405  
 243 5 6 406 387 744 1.60E-38 168.7 6596 cellular  
 organisms;Eukaryota;Opisthokonta;Metazoa;Eumetazoa;Bilateria;Protostomia;  
 Spiralia;Lophotrochozoa;Mollusca;Bivalvia;Autobranchia;Heteroconchia;Euhe  
 terodonta;Imparidentia;Venerida;Veneroidea;Veneridae;Mercenaria;Mercenari  
 a mercenaria

UdeM00000017403 6565 94.4 UdeM00000017403 XP\_022310590.1 40.7 108  
 64 0 219 326 483 590 3.00E-16 94.4 6565 cellular  
 organisms;Eukaryota;Opisthokonta;Metazoa;Eumetazoa;Bilateria;Protostomia;  
 Spiralia;Lophotrochozoa;Mollusca;Bivalvia;Autobranchia;Pteriormorphia;Ostr  
 eida;Ostreoidea;Ostreidae;Crassostrea;Crassostrea virginica



UdeM00000017405 6573 150.6 UdeM00000017405 XP\_021343481.1 34.1 261  
 132 7 26 283 28 251 3.70E-33 150.6 6573 cellular  
 organisms;Eukaryota;Opisthokonta;Metazoa;Eumetazoa;Bilateria;Protostomia;  
 Spiralia;Lophotrochozoa;Mollusca;Bivalvia;Autobranhia;Pteriomorphia;Pect  
 inida;Pectinoidea;Pectinidae;Mizuhopecten;Mizuhopecten yessoensis  
 UdeM00000017406 29159 97.1 UdeM00000017406 XP\_034325075.1 31.1 183  
 87 2 100 243 15 197 3.50E-17 97.1 29159 cellular  
 organisms;Eukaryota;Opisthokonta;Metazoa;Eumetazoa;Bilateria;Protostomia;  
 Spiralia;Lophotrochozoa;Mollusca;Bivalvia;Autobranhia;Pteriomorphia;Ostr  
 eida;Ostreoidea;Ostreidae;Crassostrea;Crassostrea gigas  
 UdeM00000017407 6596 369.4 UdeM00000017407 XP\_045177776.1 37.8 526  
 307 5 1 523 405 913 9.90E-99 369.4 6596 cellular  
 organisms;Eukaryota;Opisthokonta;Metazoa;Eumetazoa;Bilateria;Protostomia;  
 Spiralia;Lophotrochozoa;Mollusca;Bivalvia;Autobranhia;Heteroconchia;Euhe  
 terodonta;Imparidentia;Venerida;Veneroidea;Veneridae;Mercenaria;Mercenari  
 a mercenaria  
 UdeM00000017409 6596 97.8 UdeM00000017409 XP\_045177776.1 51.8 85  
 41 0 6 90 823 907 2.10E-17 97.8 6596 cellular  
 organisms;Eukaryota;Opisthokonta;Metazoa;Eumetazoa;Bilateria;Protostomia;  
 Spiralia;Lophotrochozoa;Mollusca;Bivalvia;Autobranhia;Heteroconchia;Euhe  
 terodonta;Imparidentia;Venerida;Veneroidea;Veneridae;Mercenaria;Mercenari  
 a mercenaria  
 UdeM00000017410 6596 278.5 UdeM00000017410 XP\_045177776.1 36.2 434  
 257 5 1 431 405 821 1.50E-71 278.5 6596 cellular  
 organisms;Eukaryota;Opisthokonta;Metazoa;Eumetazoa;Bilateria;Protostomia;  
 Spiralia;Lophotrochozoa;Mollusca;Bivalvia;Autobranhia;Heteroconchia;Euhe  
 terodonta;Imparidentia;Venerida;Veneroidea;Veneridae;Mercenaria;Mercenari  
 a mercenaria  
 UdeM00000017411 6596 79.7 UdeM00000017411 XP\_045186033.1 30.4 158  
 108 2 241 398 23 178 9.80E-12 79.7 6596 cellular  
 organisms;Eukaryota;Opisthokonta;Metazoa;Eumetazoa;Bilateria;Protostomia;  
 Spiralia;Lophotrochozoa;Mollusca;Bivalvia;Autobranhia;Heteroconchia;Euhe  
 terodonta;Imparidentia;Venerida;Veneroidea;Veneridae;Mercenaria;Mercenari  
 a mercenaria  
 UdeM00000017412 6579 265.4 UdeM00000017412 XP\_033730606.1 43.9 358  
 184 8 1 347 1 352 1.00E-67 265.4 6579 cellular  
 organisms;Eukaryota;Opisthokonta;Metazoa;Eumetazoa;Bilateria;Protostomia;  
 Spiralia;Lophotrochozoa;Mollusca;Bivalvia;Autobranhia;Pteriomorphia;Pect  
 inida;Pectinoidea;Pectinidae;Pecten;Pecten maximus  
 UdeM00000017413 6565 120.6 UdeM00000017413 XP\_022299602.1 45.5 132  
 70 2 238 369 2 131 4.40E-24 120.6 6565 cellular  
 organisms;Eukaryota;Opisthokonta;Metazoa;Eumetazoa;Bilateria;Protostomia;  
 Spiralia;Lophotrochozoa;Mollusca;Bivalvia;Autobranhia;Pteriomorphia;Ostr  
 eida;Ostreoidea;Ostreidae;Crassostrea;Crassostrea virginica  
 UdeM00000017414 6573 182.6 UdeM00000017414 XP\_021371412.1 41.2 238  
 130 5 82 313 970 1203 8.20E-43 182.6 6573 cellular  
 organisms;Eukaryota;Opisthokonta;Metazoa;Eumetazoa;Bilateria;Protostomia;  
 Spiralia;Lophotrochozoa;Mollusca;Bivalvia;Autobranhia;Pteriomorphia;Pect  
 inida;Pectinoidea;Pectinidae;Mizuhopecten;Mizuhopecten yessoensis  
 UdeM00000017415 6596 213.4 UdeM00000017415 XP\_045215724.1 24.2 795  
 500 22 33 786 4 736 1.10E-51 213.4 6596 cellular  
 organisms;Eukaryota;Opisthokonta;Metazoa;Eumetazoa;Bilateria;Protostomia;  
 Spiralia;Lophotrochozoa;Mollusca;Bivalvia;Autobranhia;Heteroconchia;Euhe

terodonta;Imparidentia;Venerida;Veneroidea;Veneridae;Mercenaria;Mercenaria mercenaria

UdeM00000017416 1735272 768.5 UdeM00000017416 XP\_041373141.1 50.1  
796 373 8 7 786 12 799 8.40E-219 768.5 1735272  
cellular

organisms;Eukaryota;Opisthokonta;Metazoa;Eumetazoa;Bilateria;Protostomia;Spiralia;Lophotrochozoa;Mollusca;Gastropoda;Neomphalina;Neomphaloidea;Peltospiridae;Gigantopelta;Gigantopelta aegis

UdeM00000017417 1735272 313.5 UdeM00000017417 XP\_041379319.1 49.2  
301 150 2 1 300 624 922 2.90E-82 313.5 1735272  
cellular

organisms;Eukaryota;Opisthokonta;Metazoa;Eumetazoa;Bilateria;Protostomia;Spiralia;Lophotrochozoa;Mollusca;Gastropoda;Neomphalina;Neomphaloidea;Peltospiridae;Gigantopelta;Gigantopelta aegis

UdeM00000017418 94835 60.5 UdeM00000017418 XP\_019382070.1 29.7 145  
94 5 174 318 307 443 4.70E-06 60.5 94835 cellular

organisms;Eukaryota;Opisthokonta;Metazoa;Eumetazoa;Bilateria;Deuterostomia;Chordata;Craniata;Vertebrata;Gnathostomata;Teleostomi;Euteleostomi;Sarcopterygii;Dipnotetrapodomorpha;Tetrapoda;Amniota;Sauropsida;Sauria;Archelosauria;Archosauria;Crocodylia;Longirostres;Gavialidae;Gavialinae;Gavialis;Gavialis gangeticus

UdeM00000017419 6596 152.5 UdeM00000017419 XP\_045182455.1 27.2 408  
250 7 1 406 391 753 1.20E-33 152.5 6596 cellular

organisms;Eukaryota;Opisthokonta;Metazoa;Eumetazoa;Bilateria;Protostomia;Spiralia;Lophotrochozoa;Mollusca;Bivalvia;Autobranchia;Heteroconchia;Euheterodonta;Imparidentia;Venerida;Veneroidea;Veneridae;Mercenaria;Mercenaria mercenaria

UdeM00000017420 6596 343.2 UdeM00000017420 XP\_045177779.1 36.7 507  
312 5 1 505 80 579 7.40E-91 343.2 6596 cellular

organisms;Eukaryota;Opisthokonta;Metazoa;Eumetazoa;Bilateria;Protostomia;Spiralia;Lophotrochozoa;Mollusca;Bivalvia;Autobranchia;Heteroconchia;Euheterodonta;Imparidentia;Venerida;Veneroidea;Veneridae;Mercenaria;Mercenaria mercenaria

UdeM00000017421 6596 211.1 UdeM00000017421 XP\_045206702.1 25.1 749  
485 12 47 767 37 737 5.20E-51 211.1 6596 cellular

organisms;Eukaryota;Opisthokonta;Metazoa;Eumetazoa;Bilateria;Protostomia;Spiralia;Lophotrochozoa;Mollusca;Bivalvia;Autobranchia;Heteroconchia;Euheterodonta;Imparidentia;Venerida;Veneroidea;Veneridae;Mercenaria;Mercenaria mercenaria

UdeM00000017423 6596 112.1 UdeM00000017423 XP\_045206136.1 31.1 164  
109 1 59 222 270 429 9.40E-22 112.1 6596 cellular

organisms;Eukaryota;Opisthokonta;Metazoa;Eumetazoa;Bilateria;Protostomia;Spiralia;Lophotrochozoa;Mollusca;Bivalvia;Autobranchia;Heteroconchia;Euheterodonta;Imparidentia;Venerida;Veneroidea;Veneridae;Mercenaria;Mercenaria mercenaria

UdeM00000017424 6573 150.6 UdeM00000017424 XP\_021343481.1 34.1 261  
132 7 26 283 28 251 3.70E-33 150.6 6573 cellular

organisms;Eukaryota;Opisthokonta;Metazoa;Eumetazoa;Bilateria;Protostomia;Spiralia;Lophotrochozoa;Mollusca;Bivalvia;Autobranchia;Pteriomorpha;Pectinida;Pectinoidea;Pectinidae;Mizuhopecten;Mizuhopecten yessoensis

UdeM00000017425 6596 377.1 UdeM00000017425 XP\_045177779.1 37.8 527  
301 5 1 516 97 607 4.60E-101 377.1 6596 cellular

organisms;Eukaryota;Opisthokonta;Metazoa;Eumetazoa;Bilateria;Protostomia;Spiralia;Lophotrochozoa;Mollusca;Bivalvia;Autobranchia;Heteroconchia;Euheterodonta

terodonta;Imparidentia;Venerida;Veneroidea;Veneridae;Mercenaria;Mercenaria mercenaria  
 UdeM00000017430 6573 177.9 UdeM00000017430 XP\_021346189.1 49.7 185  
 65 3 1 161 22 202 1.00E-41 177.9 6573 cellular  
 organisms;Eukaryota;Opisthokonta;Metazoa;Eumetazoa;Bilateria;Protostomia;  
 Spiralia;Lophotrochozoa;Mollusca;Bivalvia;Autobranchia;Pteriomorpha;Pectinida;  
 Pectinoidea;Pectinidae;Mizuhopecten;Mizuhopecten yessoensis  
 UdeM00000017431 7668 318.2 UdeM00000017431 XP\_030845845.1 38.3 413  
 166 1 55 378 29 441 1.70E-83 318.2 7668 cellular  
 organisms;Eukaryota;Opisthokonta;Metazoa;Eumetazoa;Bilateria;Deuterostomia;  
 Echinodermata;Eleutherozoa;Echinozoa;Echinoidea;Euechinoidea;Echinacea;  
 Camarodonta;Echinidea;Strongylocentrotidae;Strongylocentrotus;Strongylocentrotus purpuratus  
 UdeM00000017432 6596 95.5 UdeM00000017432 XP\_045216400.1 34 159  
 101 3 3 160 39 194 6.90E-17 95.5 6596 cellular  
 organisms;Eukaryota;Opisthokonta;Metazoa;Eumetazoa;Bilateria;Protostomia;  
 Spiralia;Lophotrochozoa;Mollusca;Bivalvia;Autobranchia;Heteroconchia;Euheterodonta;  
 Imparidentia;Venerida;Veneroidea;Veneridae;Mercenaria;Mercenaria mercenaria  
 UdeM00000017433 6565 123.6 UdeM00000017433 XP\_022299602.1 45.5 132  
 70 2 89 220 2 131 3.20E-25 123.6 6565 cellular  
 organisms;Eukaryota;Opisthokonta;Metazoa;Eumetazoa;Bilateria;Protostomia;  
 Spiralia;Lophotrochozoa;Mollusca;Bivalvia;Autobranchia;Pteriomorpha;Ostreida;  
 Ostreidae;Crassostrea;Crassostrea virginica  
 UdeM00000017434 6596 342.8 UdeM00000017434 XP\_045177776.1 38.7 520  
 264 6 1 476 405 913 7.10E-91 342.8 6596 cellular  
 organisms;Eukaryota;Opisthokonta;Metazoa;Eumetazoa;Bilateria;Protostomia;  
 Spiralia;Lophotrochozoa;Mollusca;Bivalvia;Autobranchia;Heteroconchia;Euheterodonta;  
 Imparidentia;Venerida;Veneroidea;Veneridae;Mercenaria;Mercenaria mercenaria  
 UdeM00000017435 6596 293.1 UdeM00000017435 XP\_045177776.1 43.1 346  
 192 3 38 381 609 951 8.30E-76 293.1 6596 cellular  
 organisms;Eukaryota;Opisthokonta;Metazoa;Eumetazoa;Bilateria;Protostomia;  
 Spiralia;Lophotrochozoa;Mollusca;Bivalvia;Autobranchia;Heteroconchia;Euheterodonta;  
 Imparidentia;Venerida;Veneroidea;Veneridae;Mercenaria;Mercenaria mercenaria  
 UdeM00000017437 6596 143.3 UdeM00000017437 XP\_045182112.1 29.2 264  
 184 3 1 263 483 744 4.70E-31 143.3 6596 cellular  
 organisms;Eukaryota;Opisthokonta;Metazoa;Eumetazoa;Bilateria;Protostomia;  
 Spiralia;Lophotrochozoa;Mollusca;Bivalvia;Autobranchia;Heteroconchia;Euheterodonta;  
 Imparidentia;Venerida;Veneroidea;Veneridae;Mercenaria;Mercenaria mercenaria  
 UdeM00000017438 6596 158.3 UdeM00000017438 XP\_045182112.1 27 403  
 247 5 6 406 387 744 2.20E-35 158.3 6596 cellular  
 organisms;Eukaryota;Opisthokonta;Metazoa;Eumetazoa;Bilateria;Protostomia;  
 Spiralia;Lophotrochozoa;Mollusca;Bivalvia;Autobranchia;Heteroconchia;Euheterodonta;  
 Imparidentia;Venerida;Veneroidea;Veneridae;Mercenaria;Mercenaria mercenaria  
 UdeM00000017439 6596 170.6 UdeM00000017439 XP\_045182112.1 27.7 405  
 242 5 6 406 387 744 4.20E-39 170.6 6596 cellular  
 organisms;Eukaryota;Opisthokonta;Metazoa;Eumetazoa;Bilateria;Protostomia;  
 Spiralia;Lophotrochozoa;Mollusca;Bivalvia;Autobranchia;Heteroconchia;Euheterodonta;  
 Imparidentia;Venerida;Veneroidea;Veneridae;Mercenaria;Mercenaria mercenaria

UdeM00000017440 6596 161.4 UdeM00000017440 XP\_045182112.1 26.6 403  
 249 4 6 406 387 744 2.60E-36 161.4 6596 cellular  
 organisms;Eukaryota;Opisthokonta;Metazoa;Eumetazoa;Bilateria;Protostomia;  
 Spiralia;Lophotrochozoa;Mollusca;Bivalvia;Autobranhia;Heteroconchia;Euhe  
 terodonta;Imparidentia;Venerida;Veneroidea;Veneridae;Mercenaria;Mercenari  
 a mercenaria

UdeM00000017442 6596 136.7 UdeM00000017442 XP\_045182112.1 31.1 264  
 179 3 1 263 483 744 4.50E-29 136.7 6596 cellular  
 organisms;Eukaryota;Opisthokonta;Metazoa;Eumetazoa;Bilateria;Protostomia;  
 Spiralia;Lophotrochozoa;Mollusca;Bivalvia;Autobranhia;Heteroconchia;Euhe  
 terodonta;Imparidentia;Venerida;Veneroidea;Veneridae;Mercenaria;Mercenari  
 a mercenaria

UdeM00000017443 6596 205.7 UdeM00000017443 XP\_045206702.1 24.7 750  
 487 14 47 767 37 737 2.20E-49 205.7 6596 cellular  
 organisms;Eukaryota;Opisthokonta;Metazoa;Eumetazoa;Bilateria;Protostomia;  
 Spiralia;Lophotrochozoa;Mollusca;Bivalvia;Autobranhia;Heteroconchia;Euhe  
 terodonta;Imparidentia;Venerida;Veneroidea;Veneridae;Mercenaria;Mercenari  
 a mercenaria

UdeM00000017446 6596 90.1 UdeM00000017446 XP\_045182112.1 35.7 129  
 83 0 40 168 616 744 3.20E-15 90.1 6596 cellular  
 organisms;Eukaryota;Opisthokonta;Metazoa;Eumetazoa;Bilateria;Protostomia;  
 Spiralia;Lophotrochozoa;Mollusca;Bivalvia;Autobranhia;Heteroconchia;Euhe  
 terodonta;Imparidentia;Venerida;Veneroidea;Veneridae;Mercenaria;Mercenari  
 a mercenaria

UdeM00000017447 6596 199.9 UdeM00000017447 XP\_045161856.1 26.2 764  
 485 14 49 784 34 746 1.20E-47 199.9 6596 cellular  
 organisms;Eukaryota;Opisthokonta;Metazoa;Eumetazoa;Bilateria;Protostomia;  
 Spiralia;Lophotrochozoa;Mollusca;Bivalvia;Autobranhia;Heteroconchia;Euhe  
 terodonta;Imparidentia;Venerida;Veneroidea;Veneridae;Mercenaria;Mercenari  
 a mercenaria

UdeM00000017448 6596 107.1 UdeM00000017448 XP\_045206136.1 33.3 171  
 110 2 144 310 253 423 4.40E-20 107.1 6596 cellular  
 organisms;Eukaryota;Opisthokonta;Metazoa;Eumetazoa;Bilateria;Protostomia;  
 Spiralia;Lophotrochozoa;Mollusca;Bivalvia;Autobranhia;Heteroconchia;Euhe  
 terodonta;Imparidentia;Venerida;Veneroidea;Veneridae;Mercenaria;Mercenari  
 a mercenaria

UdeM00000017449 6596 185.3 UdeM00000017449 XP\_045206702.1 23.9 748  
 495 16 47 767 37 737 3.10E-43 185.3 6596 cellular  
 organisms;Eukaryota;Opisthokonta;Metazoa;Eumetazoa;Bilateria;Protostomia;  
 Spiralia;Lophotrochozoa;Mollusca;Bivalvia;Autobranhia;Heteroconchia;Euhe  
 terodonta;Imparidentia;Venerida;Veneroidea;Veneridae;Mercenaria;Mercenari  
 a mercenaria

UdeM00000017450 6596 75.5 UdeM00000017450 XP\_045192984.1 27.4 168  
 120 2 34 201 13 178 1.00E-10 75.5 6596 cellular  
 organisms;Eukaryota;Opisthokonta;Metazoa;Eumetazoa;Bilateria;Protostomia;  
 Spiralia;Lophotrochozoa;Mollusca;Bivalvia;Autobranhia;Heteroconchia;Euhe  
 terodonta;Imparidentia;Venerida;Veneroidea;Veneridae;Mercenaria;Mercenari  
 a mercenaria

UdeM00000017451 6596 251.9 UdeM00000017451 XP\_045177776.1 33.1 538  
 311 14 1 518 405 913 3.70E-63 251.9 6596 cellular  
 organisms;Eukaryota;Opisthokonta;Metazoa;Eumetazoa;Bilateria;Protostomia;  
 Spiralia;Lophotrochozoa;Mollusca;Bivalvia;Autobranhia;Heteroconchia;Euhe  
 terodonta;Imparidentia;Venerida;Veneroidea;Veneridae;Mercenaria;Mercenari  
 a mercenaria

UdeM00000017452 6565 468.8 UdeM00000017452 XP\_022320668.1 44.9 593  
 258 10 281 825 185 756 1.50E-128 468.8 6565 cellular  
 organisms;Eukaryota;Opisthokonta;Metazoa;Eumetazoa;Bilateria;Protostomia;  
 Spiralia;Lophotrochozoa;Mollusca;Bivalvia;Autobranchia;Pteriomorphia;Ostr  
 eida;Ostreoidea;Ostreidae;Crassostrea;Crassostrea virginica  
 UdeM00000017453 29159 148.7 UdeM00000017453 XP\_034339171.1 39.8 211  
 119 6 7 213 564 770 8.60E-33 148.7 29159 cellular  
 organisms;Eukaryota;Opisthokonta;Metazoa;Eumetazoa;Bilateria;Protostomia;  
 Spiralia;Lophotrochozoa;Mollusca;Bivalvia;Autobranchia;Pteriomorphia;Ostr  
 eida;Ostreoidea;Ostreidae;Crassostrea;Crassostrea gigas  
 UdeM00000017454 6596 157.9 UdeM00000017454 XP\_045182112.1 26.4 405  
 247 5 6 406 387 744 2.80E-35 157.9 6596 cellular  
 organisms;Eukaryota;Opisthokonta;Metazoa;Eumetazoa;Bilateria;Protostomia;  
 Spiralia;Lophotrochozoa;Mollusca;Bivalvia;Autobranchia;Heteroconchia;Euhe  
 terodonta;Imparidentia;Venerida;Veneroidea;Veneridae;Mercenaria;Mercenari  
 a mercenaria  
 UdeM00000017456 6596 149.4 UdeM00000017456 XP\_045182112.1 25.4 401  
 256 2 6 406 387 744 1.00E-32 149.4 6596 cellular  
 organisms;Eukaryota;Opisthokonta;Metazoa;Eumetazoa;Bilateria;Protostomia;  
 Spiralia;Lophotrochozoa;Mollusca;Bivalvia;Autobranchia;Heteroconchia;Euhe  
 terodonta;Imparidentia;Venerida;Veneroidea;Veneridae;Mercenaria;Mercenari  
 a mercenaria  
 UdeM00000017457 6596 115.9 UdeM00000017457 XP\_045182112.1 31.2 231  
 151 3 6 232 518 744 7.30E-23 115.9 6596 cellular  
 organisms;Eukaryota;Opisthokonta;Metazoa;Eumetazoa;Bilateria;Protostomia;  
 Spiralia;Lophotrochozoa;Mollusca;Bivalvia;Autobranchia;Heteroconchia;Euhe  
 terodonta;Imparidentia;Venerida;Veneroidea;Veneridae;Mercenaria;Mercenari  
 a mercenaria  
 UdeM00000017458 6596 185.7 UdeM00000017458 XP\_045182112.1 23.5 799  
 515 18 80 849 13 744 2.60E-43 185.7 6596 cellular  
 organisms;Eukaryota;Opisthokonta;Metazoa;Eumetazoa;Bilateria;Protostomia;  
 Spiralia;Lophotrochozoa;Mollusca;Bivalvia;Autobranchia;Heteroconchia;Euhe  
 terodonta;Imparidentia;Venerida;Veneroidea;Veneridae;Mercenaria;Mercenari  
 a mercenaria  
 UdeM00000044083 6596 460.7 UdeM00000044083 XP\_045207279.1 81.9 270  
 49 0 1 270 156 425 1.30E-126 460.7 6596 cellular  
 organisms;Eukaryota;Opisthokonta;Metazoa;Eumetazoa;Bilateria;Protostomia;  
 Spiralia;Lophotrochozoa;Mollusca;Bivalvia;Autobranchia;Heteroconchia;Euhe  
 terodonta;Imparidentia;Venerida;Veneroidea;Veneridae;Mercenaria;Mercenari  
 a mercenaria  
 UdeM00000044084 29159 101.3 UdeM00000044084 XP\_034307341.1 42.9 98  
 56 0 11 108 211 308 8.00E-19 101.3 29159 cellular  
 organisms;Eukaryota;Opisthokonta;Metazoa;Eumetazoa;Bilateria;Protostomia;  
 Spiralia;Lophotrochozoa;Mollusca;Bivalvia;Autobranchia;Pteriomorphia;Ostr  
 eida;Ostreoidea;Ostreidae;Crassostrea;Crassostrea gigas  
 UdeM00000044085 6579 102.8 UdeM00000044085 XP\_033729790.1 35.3 153  
 94 2 39 190 84 232 1.10E-18 102.8 6579 cellular  
 organisms;Eukaryota;Opisthokonta;Metazoa;Eumetazoa;Bilateria;Protostomia;  
 Spiralia;Lophotrochozoa;Mollusca;Bivalvia;Autobranchia;Pteriomorphia;Pect  
 inida;Pectinoidea;Pectinidae;Pecten;Pecten maximus  
 UdeM00000044086 6579 91.3 UdeM00000044086 XP\_033761565.1 47.2 89  
 47 0 155 243 195 283 1.90E-15 91.3 6579 cellular  
 organisms;Eukaryota;Opisthokonta;Metazoa;Eumetazoa;Bilateria;Protostomia;

Spiralia;Lophotrochozoa;Mollusca;Bivalvia;Autobranchia;Pteriormorphia;Pectinida;Pectinoidea;Pectinidae;Pecten;Pecten maximus  
UdeM00000044089 6596 317.4 UdeM00000044089 XP\_045208720.1 25.4 1252  
624 32 8 974 50 1276 6.40E-83 317.4 6596 cellular  
organisms;Eukaryota;Opisthokonta;Metazoa;Eumetazoa;Bilateria;Protostomia;  
Spiralia;Lophotrochozoa;Mollusca;Bivalvia;Autobranchia;Heteroconchia;Euherodonta;Imparidentia;Venerida;Veneroidea;Veneridae;Mercenaria;Mercenaria mercenaria  
UdeM00000044091 45351 80.1 UdeM00000044091 XP\_001623471.2 34.5 145  
77 3 10 138 12 154 2.50E-12 80.1 45351 cellular  
organisms;Eukaryota;Opisthokonta;Metazoa;Eumetazoa;Cnidaria;Anthozoa;Hexacorallia;Actiniaria;Edwardsiidae;Nematostella;Nematostella vectensis  
UdeM00000044092 29159 344 UdeM00000044092 XP\_034330259.1 39.4 490  
253 13 1 483 331 783 3.20E-91 344 29159 cellular  
organisms;Eukaryota;Opisthokonta;Metazoa;Eumetazoa;Bilateria;Protostomia;  
Spiralia;Lophotrochozoa;Mollusca;Bivalvia;Autobranchia;Pteriormorphia;Ostreida;Ostreoidea;Ostreidae;Crassostrea;Crassostrea gigas  
UdeM00000044095 6579 317.4 UdeM00000044095 XP\_033747061.1 49.1 340  
166 4 1 339 22 355 2.20E-83 317.4 6579 cellular  
organisms;Eukaryota;Opisthokonta;Metazoa;Eumetazoa;Bilateria;Protostomia;  
Spiralia;Lophotrochozoa;Mollusca;Bivalvia;Autobranchia;Pteriormorphia;Pectinida;Pectinoidea;Pectinidae;Pecten;Pecten maximus  
UdeM00000044096 7739 121.7 UdeM00000044096 XP\_035686596.1 28.9 304  
153 8 1 251 1 294 1.40E-24 121.7 7739 cellular  
organisms;Eukaryota;Opisthokonta;Metazoa;Eumetazoa;Bilateria;Deuterostomia;Chordata;Cephalochordata;Leptocardii;Amphioxiformes;Branchiostomidae;Branchiostoma;Branchiostoma floridae  
UdeM00000044098 6565 99.4 UdeM00000044098 XP\_022287303.1 29.8 238  
113 7 19 204 459 694 6.40E-18 99.4 6565 cellular  
organisms;Eukaryota;Opisthokonta;Metazoa;Eumetazoa;Bilateria;Protostomia;  
Spiralia;Lophotrochozoa;Mollusca;Bivalvia;Autobranchia;Pteriormorphia;Ostreida;Ostreoidea;Ostreidae;Crassostrea;Crassostrea virginica  
UdeM00000044099 6565 471.1 UdeM00000044099 XP\_022334993.1 52.5 451  
176 6 3 450 381 796 1.60E-129 471.1 6565 cellular  
organisms;Eukaryota;Opisthokonta;Metazoa;Eumetazoa;Bilateria;Protostomia;  
Spiralia;Lophotrochozoa;Mollusca;Bivalvia;Autobranchia;Pteriormorphia;Ostreida;Ostreoidea;Ostreidae;Crassostrea;Crassostrea virginica  
UdeM00000044101 6579 303.1 UdeM00000044101 XP\_033756871.1 31.8 655  
410 16 4 642 22 655 1.00E-78 303.1 6579 cellular  
organisms;Eukaryota;Opisthokonta;Metazoa;Eumetazoa;Bilateria;Protostomia;  
Spiralia;Lophotrochozoa;Mollusca;Bivalvia;Autobranchia;Pteriormorphia;Pectinida;Pectinoidea;Pectinidae;Pecten;Pecten maximus  
UdeM00000044103 6596 352.1 UdeM00000044103 XP\_045166082.1 31.6 895  
487 19 23 900 17 803 2.20E-93 352.1 6596 cellular  
organisms;Eukaryota;Opisthokonta;Metazoa;Eumetazoa;Bilateria;Protostomia;  
Spiralia;Lophotrochozoa;Mollusca;Bivalvia;Autobranchia;Heteroconchia;Euherodonta;Imparidentia;Venerida;Veneroidea;Veneridae;Mercenaria;Mercenaria mercenaria  
UdeM00000044105 29159 284.3 UdeM00000044105 XP\_011428416.3 32.4 584  
360 16 29 588 20 592 3.80E-73 284.3 29159 cellular  
organisms;Eukaryota;Opisthokonta;Metazoa;Eumetazoa;Bilateria;Protostomia;  
Spiralia;Lophotrochozoa;Mollusca;Bivalvia;Autobranchia;Pteriormorphia;Ostreida;Ostreoidea;Ostreidae;Crassostrea;Crassostrea gigas

UdeM00000044106 29159 266.9 UdeM00000044106 XP\_011428416.3 31.1 575  
 347 16 29 565 20 583 5.90E-68 266.9 29159 cellular  
 organisms;Eukaryota;Opisthokonta;Metazoa;Eumetazoa;Bilateria;Protostomia;  
 Spiralia;Lophotrochozoa;Mollusca;Bivalvia;Autobranchia;Pteriormorphia;Ostr  
 eida;Ostreoidea;Ostreidae;Crassostrea;Crassostrea gigas  
 UdeM00000030355 6596 146.7 UdeM00000030355 XP\_045169559.1 71 107  
 30 1 7 113 16 121 2.10E-32 146.7 6596 cellular  
 organisms;Eukaryota;Opisthokonta;Metazoa;Eumetazoa;Bilateria;Protostomia;  
 Spiralia;Lophotrochozoa;Mollusca;Bivalvia;Autobranchia;Heteroconchia;Euhe  
 terodonta;Imparidentia;Venerida;Veneroidea;Veneridae;Mercenaria;Mercenari  
 a mercenaria  
 UdeM00000030356 6596 305.4 UdeM00000030356 XP\_045169559.1 59 268  
 101 3 19 280 122 386 7.20E-80 305.4 6596 cellular  
 organisms;Eukaryota;Opisthokonta;Metazoa;Eumetazoa;Bilateria;Protostomia;  
 Spiralia;Lophotrochozoa;Mollusca;Bivalvia;Autobranchia;Heteroconchia;Euhe  
 terodonta;Imparidentia;Venerida;Veneroidea;Veneridae;Mercenaria;Mercenari  
 a mercenaria  
 UdeM00000030357 6596 534.6 UdeM00000030357 XP\_045168616.1 55 469  
 208 3 1 467 16 483 1.20E-148 534.6 6596 cellular  
 organisms;Eukaryota;Opisthokonta;Metazoa;Eumetazoa;Bilateria;Protostomia;  
 Spiralia;Lophotrochozoa;Mollusca;Bivalvia;Autobranchia;Heteroconchia;Euhe  
 terodonta;Imparidentia;Venerida;Veneroidea;Veneridae;Mercenaria;Mercenari  
 a mercenaria  
 UdeM00000030358 7955 134.8 UdeM00000030358 NP\_955902.1 77.4 84 19  
 0 3 86 4 87 5.30E-29 134.8 7955 cellular  
 organisms;Eukaryota;Opisthokonta;Metazoa;Eumetazoa;Bilateria;Deuterostomi  
 a;Chordata;Craniata;Vertebrata;Gnathostomata;Teleostomi;Euteleostomi;Acti  
 nopterygii;Actinopteri;Neopterygii;Teleostei;Osteoglossocephalai;Clupeoce  
 phala;Otomorpha;Ostariophysi;Otophysi;Cypriniphysae;Cypriniiformes;Cyprino  
 ideii;Danionidae;Danioninae;Danio;Danio rerio  
 UdeM00000030359 6596 506.5 UdeM00000030359 XP\_045168375.1 40.2 966  
 440 22 1 867 361 1287 7.90E-140 506.5 6596 cellular  
 organisms;Eukaryota;Opisthokonta;Metazoa;Eumetazoa;Bilateria;Protostomia;  
 Spiralia;Lophotrochozoa;Mollusca;Bivalvia;Autobranchia;Heteroconchia;Euhe  
 terodonta;Imparidentia;Venerida;Veneroidea;Veneridae;Mercenaria;Mercenari  
 a mercenaria  
 UdeM00000030360 6596 146 UdeM00000030360 XP\_045168378.1 47.7 174  
 74 5 12 184 22 179 5.00E-32 146 6596 cellular  
 organisms;Eukaryota;Opisthokonta;Metazoa;Eumetazoa;Bilateria;Protostomia;  
 Spiralia;Lophotrochozoa;Mollusca;Bivalvia;Autobranchia;Heteroconchia;Euhe  
 terodonta;Imparidentia;Venerida;Veneroidea;Veneridae;Mercenaria;Mercenari  
 a mercenaria  
 UdeM00000030361 6596 136.7 UdeM00000030361 XP\_045168369.1 66.3 104  
 34 1 9 111 42 145 1.80E-29 136.7 6596 cellular  
 organisms;Eukaryota;Opisthokonta;Metazoa;Eumetazoa;Bilateria;Protostomia;  
 Spiralia;Lophotrochozoa;Mollusca;Bivalvia;Autobranchia;Heteroconchia;Euhe  
 terodonta;Imparidentia;Venerida;Veneroidea;Veneridae;Mercenaria;Mercenari  
 a mercenaria  
 UdeM00000030362 6596 429.5 UdeM00000030362 XP\_045206867.1 39.3 578  
 333 7 8 573 12 583 6.80E-117 429.5 6596 cellular  
 organisms;Eukaryota;Opisthokonta;Metazoa;Eumetazoa;Bilateria;Protostomia;  
 Spiralia;Lophotrochozoa;Mollusca;Bivalvia;Autobranchia;Heteroconchia;Euhe  
 terodonta;Imparidentia;Venerida;Veneroidea;Veneridae;Mercenaria;Mercenari  
 a mercenaria

UdeM00000030363 6596 501.9 UdeM00000030363 XP\_045168505.1 50.9 534  
 206 9 4 483 14 545 9.30E-139 501.9 6596 cellular  
 organisms;Eukaryota;Opisthokonta;Metazoa;Eumetazoa;Bilateria;Protostomia;  
 Spiralia;Lophotrochozoa;Mollusca;Bivalvia;Autobranchia;Heteroconchia;Euhe  
 terodonta;Imparidentia;Venerida;Veneroidea;Veneridae;Mercenaria;Mercenari  
 a mercenaria

UdeM00000030364 6596 490.7 UdeM00000030364 XP\_045168505.1 49.3 552  
 206 10 4 501 14 545 2.20E-135 490.7 6596 cellular  
 organisms;Eukaryota;Opisthokonta;Metazoa;Eumetazoa;Bilateria;Protostomia;  
 Spiralia;Lophotrochozoa;Mollusca;Bivalvia;Autobranchia;Heteroconchia;Euhe  
 terodonta;Imparidentia;Venerida;Veneroidea;Veneridae;Mercenaria;Mercenari  
 a mercenaria

UdeM00000030365 7739 580.9 UdeM00000030365 XP\_035696678.1 57.2 481  
 203 1 2 479 423 903 1.60E-162 580.9 7739 cellular  
 organisms;Eukaryota;Opisthokonta;Metazoa;Eumetazoa;Bilateria;Deuterostomi  
 a;Chordata;Cephalochordata;Leptocardii;Amphioxiformes;Branchiostomidae;Br  
 anchiostoma;Branchiostoma floridae

UdeM00000030366 1735272 500.4 UdeM00000030366 XP\_041366704.1 65.9  
 346 115 2 7 352 3 345 2.40E-138 500.4 1735272  
 cellular  
 organisms;Eukaryota;Opisthokonta;Metazoa;Eumetazoa;Bilateria;Protostomia;  
 Spiralia;Lophotrochozoa;Mollusca;Gastropoda;Neomphalina;Neomphaloidea;Pel  
 tospiridae;Gigantopelta;Gigantopelta aegis

UdeM00000030367 6596 268.9 UdeM00000030367 XP\_045169901.1 36.3 496  
 280 6 95 572 3 480 2.30E-68 268.9 6596 cellular  
 organisms;Eukaryota;Opisthokonta;Metazoa;Eumetazoa;Bilateria;Protostomia;  
 Spiralia;Lophotrochozoa;Mollusca;Bivalvia;Autobranchia;Heteroconchia;Euhe  
 terodonta;Imparidentia;Venerida;Veneroidea;Veneridae;Mercenaria;Mercenari  
 a mercenaria

UdeM00000030368 6596 288.1 UdeM00000030368 XP\_045169901.1 36.4 461  
 275 7 54 506 53 503 2.40E-74 288.1 6596 cellular  
 organisms;Eukaryota;Opisthokonta;Metazoa;Eumetazoa;Bilateria;Protostomia;  
 Spiralia;Lophotrochozoa;Mollusca;Bivalvia;Autobranchia;Heteroconchia;Euhe  
 terodonta;Imparidentia;Venerida;Veneroidea;Veneridae;Mercenaria;Mercenari  
 a mercenaria

UdeM00000030369 6596 293.5 UdeM00000030369 XP\_045169901.1 35.9 454  
 283 4 54 504 55 503 5.50E-76 293.5 6596 cellular  
 organisms;Eukaryota;Opisthokonta;Metazoa;Eumetazoa;Bilateria;Protostomia;  
 Spiralia;Lophotrochozoa;Mollusca;Bivalvia;Autobranchia;Heteroconchia;Euhe  
 terodonta;Imparidentia;Venerida;Veneroidea;Veneridae;Mercenaria;Mercenari  
 a mercenaria

UdeM00000030370 6596 198.7 UdeM00000030370 XP\_045168752.1 59.8 164  
 63 1 2 165 14 174 5.70E-48 198.7 6596 cellular  
 organisms;Eukaryota;Opisthokonta;Metazoa;Eumetazoa;Bilateria;Protostomia;  
 Spiralia;Lophotrochozoa;Mollusca;Bivalvia;Autobranchia;Heteroconchia;Euhe  
 terodonta;Imparidentia;Venerida;Veneroidea;Veneridae;Mercenaria;Mercenari  
 a mercenaria

UdeM00000030371 6579 602.1 UdeM00000030371 XP\_033749460.1 73.4 387  
 99 2 1 383 1 387 5.10E-169 602.1 6579 cellular  
 organisms;Eukaryota;Opisthokonta;Metazoa;Eumetazoa;Bilateria;Protostomia;  
 Spiralia;Lophotrochozoa;Mollusca;Bivalvia;Autobranchia;Pteriomorphia;Pect  
 inida;Pectinoidea;Pectinidae;Pecten;Pecten maximus

UdeM00000030372 6579 575.1 UdeM00000030372 XP\_033749460.1 75 352  
 88 0 6 357 36 387 6.20E-161 575.1 6579 cellular



organisms;Eukaryota;Opisthokonta;Metazoa;Eumetazoa;Bilateria;Protostomia;  
Spiralia;Lophotrochozoa;Mollusca;Bivalvia;Autobranchia;Pteriomorphia;Pect  
inida;Pectinoidea;Pectinidae;Pecten;Pecten maximus  
UdeM00000030373 6596 177.2 UdeM00000030373 XP\_045168175.1 46.6 193  
91 3 7 187 6 198 2.30E-41 177.2 6596 cellular  
organisms;Eukaryota;Opisthokonta;Metazoa;Eumetazoa;Bilateria;Protostomia;  
Spiralia;Lophotrochozoa;Mollusca;Bivalvia;Autobranchia;Heteroconchia;Euhe  
terodonta;Imparidentia;Venerida;Veneroidea;Veneridae;Mercenaria;Mercenari  
a mercenaria  
UdeM00000030374 8049 259.2 UdeM00000030374 XP\_030193753.1 35.9 376  
225 4 131 501 17 381 1.10E-65 259.2 8049 cellular  
organisms;Eukaryota;Opisthokonta;Metazoa;Eumetazoa;Bilateria;Deuterostomi  
a;Chordata;Craniata;Vertebrata;Gnathostomata;Teleostomi;Euteleostomi;Acti  
nopterygii;Actinopteri;Neopterygii;Teleostei;Osteoglossocephalai;Clupeoce  
phala;Euteleostei;Neoteleostei;Eurypterygia;Ctenosquamata;Acanthomo  
rphata;Paracanthopterygii;Zeiogadaria;Gadariae;Gadiformes;Gadoidei;Gadida  
e;Gadus;Gadus morhua  
UdeM00000030375 6596 108.6 UdeM00000030375 XP\_045168178.1 42.6 162  
85 4 1 161 1 155 7.70E-21 108.6 6596 cellular  
organisms;Eukaryota;Opisthokonta;Metazoa;Eumetazoa;Bilateria;Protostomia;  
Spiralia;Lophotrochozoa;Mollusca;Bivalvia;Autobranchia;Heteroconchia;Euhe  
terodonta;Imparidentia;Venerida;Veneroidea;Veneridae;Mercenaria;Mercenari  
a mercenaria  
UdeM00000030377 6573 665.2 UdeM00000030377 XP\_021358634.1 60.7 488  
181 4 12 490 10 495 6.30E-188 665.2 6573 cellular  
organisms;Eukaryota;Opisthokonta;Metazoa;Eumetazoa;Bilateria;Protostomia;  
Spiralia;Lophotrochozoa;Mollusca;Bivalvia;Autobranchia;Pteriomorphia;Pect  
inida;Pectinoidea;Pectinidae;Mizuhopecten;Mizuhopecten yessoensis  
UdeM00000030378 6573 667.9 UdeM00000030378 XP\_021358634.1 60.3 494  
194 2 1 493 3 495 9.70E-189 667.9 6573 cellular  
organisms;Eukaryota;Opisthokonta;Metazoa;Eumetazoa;Bilateria;Protostomia;  
Spiralia;Lophotrochozoa;Mollusca;Bivalvia;Autobranchia;Pteriomorphia;Pect  
inida;Pectinoidea;Pectinidae;Mizuhopecten;Mizuhopecten yessoensis  
UdeM00000030379 6579 194.9 UdeM00000030379 XP\_033726452.1 45 229  
123 2 9 237 57 282 1.40E-46 194.9 6579 cellular  
organisms;Eukaryota;Opisthokonta;Metazoa;Eumetazoa;Bilateria;Protostomia;  
Spiralia;Lophotrochozoa;Mollusca;Bivalvia;Autobranchia;Pteriomorphia;Pect  
inida;Pectinoidea;Pectinidae;Pecten;Pecten maximus  
UdeM00000030380 400727 174.1 UdeM00000030380 XP\_025093379.1 73.4  
109 29 0 1 109 1 109 9.80E-41 174.1 400727  
cellular  
organisms;Eukaryota;Opisthokonta;Metazoa;Eumetazoa;Bilateria;Protostomia;  
Spiralia;Lophotrochozoa;Mollusca;Gastropoda;Caenogastropoda;Architaeniogl  
ossa;Ampullarioidea;Ampullariidae;Pomacea;Pomacea canaliculata  
UdeM00000030381 6596 752.3 UdeM00000030381 XP\_045169280.1 41.3 1141  
506 24 1 1074 1 1044 8.60E-214 752.3 6596 cellular  
organisms;Eukaryota;Opisthokonta;Metazoa;Eumetazoa;Bilateria;Protostomia;  
Spiralia;Lophotrochozoa;Mollusca;Bivalvia;Autobranchia;Heteroconchia;Euhe  
terodonta;Imparidentia;Venerida;Veneroidea;Veneridae;Mercenaria;Mercenari  
a mercenaria  
UdeM00000030382 6579 563.1 UdeM00000030382 XP\_033762276.1 75.6 336  
80 1 1 336 1 334 2.30E-157 563.1 6579 cellular  
organisms;Eukaryota;Opisthokonta;Metazoa;Eumetazoa;Bilateria;Protostomia;

Spiralia;Lophotrochozoa;Mollusca;Bivalvia;Autobranchia;Pteriomorpha;Pectinida;Pectinoidea;Pectinidae;Pecten;Pecten maximus

UdeM00000030383 6596 553.5 UdeM00000030383 XP\_045168483.1 69.8 400  
119 1 1 398 1 400 2.20E-154 553.5 6596 cellular

organisms;Eukaryota;Opisthokonta;Metazoa;Eumetazoa;Bilateria;Protostomia;Spiralia;Lophotrochozoa;Mollusca;Bivalvia;Autobranchia;Heteroconchia;Euheterodonta;Imparidentia;Venerida;Veneroidea;Veneridae;Mercenaria;Mercenaria mercenaria

UdeM00000030384 6596 1626.3 UdeM00000030384 XP\_045200063.1 77  
1075 220 10 71 1138 86 1140 0.00E+00 1626.3 6596  
cellular

organisms;Eukaryota;Opisthokonta;Metazoa;Eumetazoa;Bilateria;Protostomia;Spiralia;Lophotrochozoa;Mollusca;Bivalvia;Autobranchia;Heteroconchia;Euheterodonta;Imparidentia;Venerida;Veneroidea;Veneridae;Mercenaria;Mercenaria mercenaria

UdeM00000030385 6596 1635.9 UdeM00000030385 XP\_045200063.1 78  
1060 223 8 71 1125 86 1140 0.00E+00 1635.9 6596  
cellular

organisms;Eukaryota;Opisthokonta;Metazoa;Eumetazoa;Bilateria;Protostomia;Spiralia;Lophotrochozoa;Mollusca;Bivalvia;Autobranchia;Heteroconchia;Euheterodonta;Imparidentia;Venerida;Veneroidea;Veneridae;Mercenaria;Mercenaria mercenaria

UdeM00000030386 6596 1046.2 UdeM00000030386 XP\_045200394.1 68.8  
709 221 0 1 709 1 709 1.90E-302 1046.2 6596  
cellular

organisms;Eukaryota;Opisthokonta;Metazoa;Eumetazoa;Bilateria;Protostomia;Spiralia;Lophotrochozoa;Mollusca;Bivalvia;Autobranchia;Heteroconchia;Euheterodonta;Imparidentia;Venerida;Veneroidea;Veneridae;Mercenaria;Mercenaria mercenaria

UdeM00000030387 6573 90.1 UdeM00000030387 XP\_021376647.1 59.4 69  
27 1 7 75 1 68 1.70E-15 90.1 6573 cellular

organisms;Eukaryota;Opisthokonta;Metazoa;Eumetazoa;Bilateria;Protostomia;Spiralia;Lophotrochozoa;Mollusca;Bivalvia;Autobranchia;Pteriomorpha;Pectinida;Pectinoidea;Pectinidae;Mizuhopecten;Mizuhopecten yessoensis

UdeM00000030388 6596 103.6 UdeM00000030388 XP\_045202441.1 27.4 252  
146 6 1 250 119 335 3.80E-19 103.6 6596 cellular

organisms;Eukaryota;Opisthokonta;Metazoa;Eumetazoa;Bilateria;Protostomia;Spiralia;Lophotrochozoa;Mollusca;Bivalvia;Autobranchia;Heteroconchia;Euheterodonta;Imparidentia;Venerida;Veneroidea;Veneridae;Mercenaria;Mercenaria mercenaria

UdeM00000030389 1735272 526.2 UdeM00000030389 XP\_041349303.1 52.4  
504 235 5 17 517 24 525 4.80E-146 526.2 1735272  
cellular

organisms;Eukaryota;Opisthokonta;Metazoa;Eumetazoa;Bilateria;Protostomia;Spiralia;Lophotrochozoa;Mollusca;Gastropoda;Neomphalina;Neomphaloidea;Peltospiridae;Gigantopelta;Gigantopelta aegis

UdeM00000030390 1735272 173.3 UdeM00000030390 XP\_041350563.1 76.3  
114 24 1 1 114 1 111 1.80E-40 173.3 1735272  
cellular

organisms;Eukaryota;Opisthokonta;Metazoa;Eumetazoa;Bilateria;Protostomia;Spiralia;Lophotrochozoa;Mollusca;Gastropoda;Neomphalina;Neomphaloidea;Peltospiridae;Gigantopelta;Gigantopelta aegis

UdeM00000030391 29159 615.9 UdeM00000030391 XP\_034330109.1 54.9 559  
236 4 1 543 1 559 5.00E-173 615.9 29159 cellular

organisms;Eukaryota;Opisthokonta;Metazoa;Eumetazoa;Bilateria;Protostomia;Spiralia;Lophotrochozoa;Mollusca;Bivalvia;Autobranchia;Pteriomorpha;Ostr

UdeM00000030392 6596 220.3 UdeM00000030392 XP\_045190923.1 70.7 150  
44 0 88 237 381 530 2.60E-54 220.3 6596 cellular

organisms;Eukaryota;Opisthokonta;Metazoa;Eumetazoa;Bilateria;Protostomia;Spiralia;Lophotrochozoa;Mollusca;Bivalvia;Autobranchia;Heteroconchia;Euhe  
terodonta;Imparidentia;Venerida;Veneroidea;Veneridae;Mercenaria;Mercenari  
a mercenaria

UdeM00000030393 6596 275 UdeM00000030393 XP\_045190923.1 34.5 530  
98 6 1 281 1 530 1.00E-70 275 6596 cellular

organisms;Eukaryota;Opisthokonta;Metazoa;Eumetazoa;Bilateria;Protostomia;Spiralia;Lophotrochozoa;Mollusca;Bivalvia;Autobranchia;Heteroconchia;Euhe  
terodonta;Imparidentia;Venerida;Veneroidea;Veneridae;Mercenaria;Mercenari  
a mercenaria

UdeM00000030395 6596 71.2 UdeM00000030395 XP\_045177372.1 31.7 161  
99 5 1 157 7 160 2.30E-09 71.2 6596 cellular

organisms;Eukaryota;Opisthokonta;Metazoa;Eumetazoa;Bilateria;Protostomia;Spiralia;Lophotrochozoa;Mollusca;Bivalvia;Autobranchia;Heteroconchia;Euhe  
terodonta;Imparidentia;Venerida;Veneroidea;Veneridae;Mercenaria;Mercenari  
a mercenaria

UdeM00000030396 6596 107.8 UdeM00000030396 XP\_045177373.1 23.2 569  
237 18 8 390 7 561 6.10E-20 107.8 6596 cellular

organisms;Eukaryota;Opisthokonta;Metazoa;Eumetazoa;Bilateria;Protostomia;Spiralia;Lophotrochozoa;Mollusca;Bivalvia;Autobranchia;Heteroconchia;Euhe  
terodonta;Imparidentia;Venerida;Veneroidea;Veneridae;Mercenaria;Mercenari  
a mercenaria

UdeM00000030397 6596 89.7 UdeM00000030397 XP\_045177372.1 29.6 247  
145 9 5 235 6 239 9.70E-15 89.7 6596 cellular

organisms;Eukaryota;Opisthokonta;Metazoa;Eumetazoa;Bilateria;Protostomia;Spiralia;Lophotrochozoa;Mollusca;Bivalvia;Autobranchia;Heteroconchia;Euhe  
terodonta;Imparidentia;Venerida;Veneroidea;Veneridae;Mercenaria;Mercenari  
a mercenaria

UdeM00000030398 6596 97.8 UdeM00000030398 XP\_045175693.1 34.6 153  
86 6 237 377 1015 1165 3.10E-17 97.8 6596 cellular

organisms;Eukaryota;Opisthokonta;Metazoa;Eumetazoa;Bilateria;Protostomia;Spiralia;Lophotrochozoa;Mollusca;Bivalvia;Autobranchia;Heteroconchia;Euhe  
terodonta;Imparidentia;Venerida;Veneroidea;Veneridae;Mercenaria;Mercenari  
a mercenaria

UdeM00000030399 6596 86.7 UdeM00000030399 XP\_045177372.1 28.3 240  
155 6 8 236 7 240 5.40E-14 86.7 6596 cellular

organisms;Eukaryota;Opisthokonta;Metazoa;Eumetazoa;Bilateria;Protostomia;Spiralia;Lophotrochozoa;Mollusca;Bivalvia;Autobranchia;Heteroconchia;Euhe  
terodonta;Imparidentia;Venerida;Veneroidea;Veneridae;Mercenaria;Mercenari  
a mercenaria

UdeM00000030400 6596 85.5 UdeM00000030400 XP\_045177373.1 28.3 237  
142 6 161 381 20 244 1.60E-13 85.5 6596 cellular

organisms;Eukaryota;Opisthokonta;Metazoa;Eumetazoa;Bilateria;Protostomia;Spiralia;Lophotrochozoa;Mollusca;Bivalvia;Autobranchia;Heteroconchia;Euhe  
terodonta;Imparidentia;Venerida;Veneroidea;Veneridae;Mercenaria;Mercenari  
a mercenaria

UdeM00000030401 6596 100.1 UdeM00000030401 XP\_045175693.1 33.1 314  
155 12 63 323 1016 1327 5.40E-18 100.1 6596 cellular

organisms;Eukaryota;Opisthokonta;Metazoa;Eumetazoa;Bilateria;Protostomia;

Spiralia;Lophotrochozoa;Mollusca;Bivalvia;Autobranchia;Heteroconchia;Euherodonta;Imparidentia;Venerida;Veneroidea;Veneridae;Mercenaria;Mercenaria mercenaria

UdeM00000030402 6596 120.6 UdeM00000030402 XP\_045176094.1 35.9 306  
156 10 233 504 118 417 6.00E-24 120.6 6596 cellular

organisms;Eukaryota;Opisthokonta;Metazoa;Eumetazoa;Bilateria;Protostomia;Spiralia;Lophotrochozoa;Mollusca;Bivalvia;Autobranchia;Heteroconchia;Euherodonta;Imparidentia;Venerida;Veneroidea;Veneridae;Mercenaria;Mercenaria mercenaria

UdeM00000030403 6596 138.3 UdeM00000030403 XP\_045176094.1 30.5 256  
158 6 199 438 1 252 2.50E-29 138.3 6596 cellular

organisms;Eukaryota;Opisthokonta;Metazoa;Eumetazoa;Bilateria;Protostomia;Spiralia;Lophotrochozoa;Mollusca;Bivalvia;Autobranchia;Heteroconchia;Euherodonta;Imparidentia;Venerida;Veneroidea;Veneridae;Mercenaria;Mercenaria mercenaria

UdeM00000030404 29159 140.2 UdeM00000030404 XP\_034325075.1 40.8 184  
105 2 120 300 15 197 4.40E-30 140.2 29159 cellular

organisms;Eukaryota;Opisthokonta;Metazoa;Eumetazoa;Bilateria;Protostomia;Spiralia;Lophotrochozoa;Mollusca;Bivalvia;Autobranchia;Pteriomorphia;Ostreida;Ostreoidea;Ostreidae;Crassostrea;Crassostrea gigas

UdeM00000030407 6596 191 UdeM00000030407 XP\_045177373.1 28.4 573  
302 23 21 516 20 561 4.20E-45 191 6596 cellular

organisms;Eukaryota;Opisthokonta;Metazoa;Eumetazoa;Bilateria;Protostomia;Spiralia;Lophotrochozoa;Mollusca;Bivalvia;Autobranchia;Heteroconchia;Euherodonta;Imparidentia;Venerida;Veneroidea;Veneridae;Mercenaria;Mercenaria mercenaria

UdeM00000030408 6579 82 UdeM00000030408 XP\_033727573.1 30.3 198  
121 4 6 187 66 262 1.30E-12 82 6579 cellular

organisms;Eukaryota;Opisthokonta;Metazoa;Eumetazoa;Bilateria;Protostomia;Spiralia;Lophotrochozoa;Mollusca;Bivalvia;Autobranchia;Pteriomorphia;Pectinida;Pectinoidea;Pectinidae;Pecten;Pecten maximus

UdeM00000030409 6596 150.6 UdeM00000030409 XP\_045176094.1 32.1 271  
161 8 10 261 10 276 5.10E-33 150.6 6596 cellular

organisms;Eukaryota;Opisthokonta;Metazoa;Eumetazoa;Bilateria;Protostomia;Spiralia;Lophotrochozoa;Mollusca;Bivalvia;Autobranchia;Heteroconchia;Euherodonta;Imparidentia;Venerida;Veneroidea;Veneridae;Mercenaria;Mercenaria mercenaria

UdeM00000030410 6596 81.6 UdeM00000030410 XP\_045177373.1 37.2 164  
85 7 5 164 11 160 1.50E-12 81.6 6596 cellular

organisms;Eukaryota;Opisthokonta;Metazoa;Eumetazoa;Bilateria;Protostomia;Spiralia;Lophotrochozoa;Mollusca;Bivalvia;Autobranchia;Heteroconchia;Euherodonta;Imparidentia;Venerida;Veneroidea;Veneridae;Mercenaria;Mercenaria mercenaria

UdeM00000030411 6596 81.3 UdeM00000030411 XP\_045177373.1 27.6 290  
151 13 177 436 11 271 4.60E-12 81.3 6596 cellular

organisms;Eukaryota;Opisthokonta;Metazoa;Eumetazoa;Bilateria;Protostomia;Spiralia;Lophotrochozoa;Mollusca;Bivalvia;Autobranchia;Heteroconchia;Euherodonta;Imparidentia;Venerida;Veneroidea;Veneridae;Mercenaria;Mercenaria mercenaria

UdeM00000030412 6596 160.2 UdeM00000030412 XP\_045175693.1 31.3 278  
168 8 132 391 899 1171 8.10E-36 160.2 6596 cellular

organisms;Eukaryota;Opisthokonta;Metazoa;Eumetazoa;Bilateria;Protostomia;Spiralia;Lophotrochozoa;Mollusca;Bivalvia;Autobranchia;Heteroconchia;Euherodonta;Imparidentia;Venerida;Veneroidea;Veneridae;Mercenaria;Mercenaria mercenaria

terodonta;Imparidentia;Venerida;Veneroidea;Veneridae;Mercenaria;Mercenari  
 a mercenaria  
 UdeM00000030413 6596 136.7 UdeM00000030413 XP\_045175693.1 27.4 336  
 212 10 145 463 829 1149 7.50E-29 136.7 6596 cellular  
 organisms;Eukaryota;Opisthokonta;Metazoa;Eumetazoa;Bilateria;Protostomia;  
 Spiralia;Lophotrochozoa;Mollusca;Bivalvia;Autobranchia;Heteroconchia;Euhe  
 terodonta;Imparidentia;Venerida;Veneroidea;Veneridae;Mercenaria;Mercenari  
 a mercenaria  
 UdeM00000030414 6596 142.5 UdeM00000030414 XP\_045174485.1 25.8 570  
 260 17 22 438 654 1213 1.60E-30 142.5 6596 cellular  
 organisms;Eukaryota;Opisthokonta;Metazoa;Eumetazoa;Bilateria;Protostomia;  
 Spiralia;Lophotrochozoa;Mollusca;Bivalvia;Autobranchia;Heteroconchia;Euhe  
 terodonta;Imparidentia;Venerida;Veneroidea;Veneridae;Mercenaria;Mercenari  
 a mercenaria  
 UdeM00000030415 6596 80.1 UdeM00000030415 XP\_045188597.1 28 218  
 138 8 17 221 91 302 3.90E-12 80.1 6596 cellular  
 organisms;Eukaryota;Opisthokonta;Metazoa;Eumetazoa;Bilateria;Protostomia;  
 Spiralia;Lophotrochozoa;Mollusca;Bivalvia;Autobranchia;Heteroconchia;Euhe  
 terodonta;Imparidentia;Venerida;Veneroidea;Veneridae;Mercenaria;Mercenari  
 a mercenaria  
 UdeM00000030418 6596 194.9 UdeM00000030418 XP\_045196603.1 33.3 378  
 228 10 35 396 82 451 2.20E-46 194.9 6596 cellular  
 organisms;Eukaryota;Opisthokonta;Metazoa;Eumetazoa;Bilateria;Protostomia;  
 Spiralia;Lophotrochozoa;Mollusca;Bivalvia;Autobranchia;Heteroconchia;Euhe  
 terodonta;Imparidentia;Venerida;Veneroidea;Veneridae;Mercenaria;Mercenari  
 a mercenaria  
 UdeM00000030420 29159 639.4 UdeM00000030420 XP\_034303860.1 46.7 751  
 289 14 5 659 21 756 5.00E-180 639.4 29159 cellular  
 organisms;Eukaryota;Opisthokonta;Metazoa;Eumetazoa;Bilateria;Protostomia;  
 Spiralia;Lophotrochozoa;Mollusca;Bivalvia;Autobranchia;Pteriormorphia;Ostr  
 eida;Ostreoidea;Ostreidae;Crassostrea;Crassostrea gigas  
 UdeM00000030423 6596 188.3 UdeM00000030423 XP\_045196603.1 33 379  
 228 11 35 396 82 451 2.00E-44 188.3 6596 cellular  
 organisms;Eukaryota;Opisthokonta;Metazoa;Eumetazoa;Bilateria;Protostomia;  
 Spiralia;Lophotrochozoa;Mollusca;Bivalvia;Autobranchia;Heteroconchia;Euhe  
 terodonta;Imparidentia;Venerida;Veneroidea;Veneridae;Mercenaria;Mercenari  
 a mercenaria  
 UdeM00000030421 6596 188.3 UdeM00000030421 XP\_045196603.1 33 379  
 228 11 35 396 82 451 2.00E-44 188.3 6596 cellular  
 organisms;Eukaryota;Opisthokonta;Metazoa;Eumetazoa;Bilateria;Protostomia;  
 Spiralia;Lophotrochozoa;Mollusca;Bivalvia;Autobranchia;Heteroconchia;Euhe  
 terodonta;Imparidentia;Venerida;Veneroidea;Veneridae;Mercenaria;Mercenari  
 a mercenaria  
 UdeM00000030422 6596 188.3 UdeM00000030422 XP\_045196603.1 33 379  
 228 11 35 396 82 451 2.00E-44 188.3 6596 cellular  
 organisms;Eukaryota;Opisthokonta;Metazoa;Eumetazoa;Bilateria;Protostomia;  
 Spiralia;Lophotrochozoa;Mollusca;Bivalvia;Autobranchia;Heteroconchia;Euhe  
 terodonta;Imparidentia;Venerida;Veneroidea;Veneridae;Mercenaria;Mercenari  
 a mercenaria  
 UdeM00000030425 7739 105.5 UdeM00000030425 XP\_035674774.1 57.1 84  
 36 0 5 88 31 114 3.60E-20 105.5 7739 cellular  
 organisms;Eukaryota;Opisthokonta;Metazoa;Eumetazoa;Bilateria;Deuterostomi  
 a;Chordata;Cephalochordata;Leptocardii;Amphioxiformes;Branchiostomidae;Br  
 anchiostoma;Branchiostoma floridae

UdeM00000030426 29159 184.5 UdeM00000030426 XP\_019921528.2 41.5 234  
 127 4 94 318 21 253 2.80E-43 184.5 29159 cellular  
 organisms;Eukaryota;Opisthokonta;Metazoa;Eumetazoa;Bilateria;Protostomia;  
 Spiralia;Lophotrochozoa;Mollusca;Bivalvia;Autobranchia;Pteriomorphia;Ostr  
 eida;Ostreoidea;Ostreidae;Crassostrea;Crassostrea gigas  
 UdeM00000030427 6596 414.5 UdeM00000030427 XP\_045199686.1 45.5 545  
 249 13 3 510 5 538 2.10E-112 414.5 6596 cellular  
 organisms;Eukaryota;Opisthokonta;Metazoa;Eumetazoa;Bilateria;Protostomia;  
 Spiralia;Lophotrochozoa;Mollusca;Bivalvia;Autobranchia;Heteroconchia;Euhe  
 terodonta;Imparidentia;Venerida;Veneroidea;Veneridae;Mercenaria;Mercenari  
 a mercenaria  
 UdeM00000030428 6596 490.7 UdeM00000030428 XP\_045199686.1 63.9 360  
 125 2 72 428 637 994 1.90E-135 490.7 6596 cellular  
 organisms;Eukaryota;Opisthokonta;Metazoa;Eumetazoa;Bilateria;Protostomia;  
 Spiralia;Lophotrochozoa;Mollusca;Bivalvia;Autobranchia;Heteroconchia;Euhe  
 terodonta;Imparidentia;Venerida;Veneroidea;Veneridae;Mercenaria;Mercenari  
 a mercenaria  
 UdeM00000030429 6500 240.7 UdeM00000030429 XP\_005106411.1 75.2 145  
 36 0 1 145 1 145 1.10E-60 240.7 6500 cellular  
 organisms;Eukaryota;Opisthokonta;Metazoa;Eumetazoa;Bilateria;Protostomia;  
 Spiralia;Lophotrochozoa;Mollusca;Gastropoda;Heterobranchia;Euthyneura;Tec  
 tipleura;Aplysiida;Aplysioidea;Aplysiidae;Aplysia;Aplysia californica  
 UdeM00000030430 6596 197.2 UdeM00000030430 XP\_045187150.1 51.5 204  
 93 3 40 242 291 489 2.50E-47 197.2 6596 cellular  
 organisms;Eukaryota;Opisthokonta;Metazoa;Eumetazoa;Bilateria;Protostomia;  
 Spiralia;Lophotrochozoa;Mollusca;Bivalvia;Autobranchia;Heteroconchia;Euhe  
 terodonta;Imparidentia;Venerida;Veneroidea;Veneridae;Mercenaria;Mercenari  
 a mercenaria  
 UdeM00000030431 6596 224.9 UdeM00000030431 XP\_045187150.1 37.5 360  
 126 5 1 266 135 489 1.20E-55 224.9 6596 cellular  
 organisms;Eukaryota;Opisthokonta;Metazoa;Eumetazoa;Bilateria;Protostomia;  
 Spiralia;Lophotrochozoa;Mollusca;Bivalvia;Autobranchia;Heteroconchia;Euhe  
 terodonta;Imparidentia;Venerida;Veneroidea;Veneridae;Mercenaria;Mercenari  
 a mercenaria  
 UdeM00000030432 6579 1454.9 UdeM00000030432 XP\_033759958.1 69.1  
 1271 392 1 3 1273 9 1278 0.00E+00 1454.9 6579  
 cellular  
 organisms;Eukaryota;Opisthokonta;Metazoa;Eumetazoa;Bilateria;Protostomia;  
 Spiralia;Lophotrochozoa;Mollusca;Bivalvia;Autobranchia;Pteriomorphia;Pect  
 inida;Pectinoidea;Pectinidae;Pecten;Pecten maximus  
 UdeM00000030433 37653 601.7 UdeM00000030433 XP\_014771666.1 77.9 362  
 74 1 12 367 36 397 6.50E-169 601.7 37653 cellular  
 organisms;Eukaryota;Opisthokonta;Metazoa;Eumetazoa;Bilateria;Protostomia;  
 Spiralia;Lophotrochozoa;Mollusca;Cephalopoda;Coleoidea;Octopodiformes;Oct  
 opoda;Incirrata;Octopodidae;Octopus;Octopus bimaculoides  
 UdeM00000030434 6573 71.6 UdeM00000030434 XP\_021340356.1 29.8 151  
 99 3 135 280 206 354 1.80E-09 71.6 6573 cellular  
 organisms;Eukaryota;Opisthokonta;Metazoa;Eumetazoa;Bilateria;Protostomia;  
 Spiralia;Lophotrochozoa;Mollusca;Bivalvia;Autobranchia;Pteriomorphia;Pect  
 inida;Pectinoidea;Pectinidae;Mizuhopecten;Mizuhopecten yessoensis  
 UdeM00000030435 29139 65.5 UdeM00000030435 XP\_027702208.1 27.4 157  
 105 3 215 371 106 253 1.70E-07 65.5 29139 cellular  
 organisms;Eukaryota;Opisthokonta;Metazoa;Eumetazoa;Bilateria;Deuterostomi  
 a;Chordata;Craniata;Vertebrata;Gnathostomata;Teleostomi;Euteleostomi;Sarc

opterygii;Dipnotetrapodomorpha;Tetrapoda;Amniota;Mammalia;Theria;Metatheria;Diprotodontia;Vombatidae;Vombatus;Vombatus ursinus  
 UdeM00000030437 6565 64.7 UdeM00000030437 XP\_022286544.1 22.2 275  
 187 6 34 282 37 310 2.20E-07 64.7 6565 cellular  
 organisms;Eukaryota;Opisthokonta;Metazoa;Eumetazoa;Bilateria;Protostomia;Spiralia;Lophotrochozoa;Mollusca;Bivalvia;Autobranchia;Pteriomorpha;Ostreida;Ostreoidea;Ostreidae;Crassostrea;Crassostrea virginica  
 UdeM00000030438 6573 68.2 UdeM00000030438 XP\_021340236.1 31 158  
 99 4 24 173 197 352 1.20E-08 68.2 6573 cellular  
 organisms;Eukaryota;Opisthokonta;Metazoa;Eumetazoa;Bilateria;Protostomia;Spiralia;Lophotrochozoa;Mollusca;Bivalvia;Autobranchia;Pteriomorpha;Pectinida;Pectinoidea;Pectinidae;Mizuhopecten;Mizuhopecten yessoensis  
 UdeM00000030441 150288 69.7 UdeM00000030441 XP\_020774544.1 32.9  
 167 93 5 39 195 121 278 4.70E-09 69.7 150288  
 cellular  
 organisms;Eukaryota;Opisthokonta;Metazoa;Eumetazoa;Bilateria;Deuterostomia;Chordata;Craniata;Vertebrata;Gnathostomata;Teleostomi;Euteleostomi;Actinopterygii;Actinopteri;Neopterygii;Teleostei;Osteoglossocephalai;Clupeocephala;Euteleostei;Neoteleostei;Eurypterygia;Ctenosquamata;Acanthomorpha;Euacanthomorpha;Percomorphaceae;Gobiaria;Gobiiformes;Gobioidei;Gobiidae;Oxudercinae;Boleophthalmus;Boleophthalmus pectinirostris  
 UdeM00000030446 29159 68.6 UdeM00000030446 XP\_034330341.1 21.1 199  
 150 3 299 497 3691 3882 2.70E-08 68.6 29159 cellular  
 organisms;Eukaryota;Opisthokonta;Metazoa;Eumetazoa;Bilateria;Protostomia;Spiralia;Lophotrochozoa;Mollusca;Bivalvia;Autobranchia;Pteriomorpha;Ostreida;Ostreoidea;Ostreidae;Crassostrea;Crassostrea gigas  
 UdeM00000030448 6596 100.1 UdeM00000030448 XP\_045201849.1 33.9 168  
 102 4 105 266 186 350 5.40E-18 100.1 6596 cellular  
 organisms;Eukaryota;Opisthokonta;Metazoa;Eumetazoa;Bilateria;Protostomia;Spiralia;Lophotrochozoa;Mollusca;Bivalvia;Autobranchia;Heteroconchia;Euheterodonta;Imparidentia;Venerida;Veneroidea;Veneridae;Mercenaria;Mercenaria mercenaria  
 UdeM00000030449 6596 156.8 UdeM00000030449 XP\_045201849.1 26.8 493  
 296 18 1 455 478 943 6.70E-35 156.8 6596 cellular  
 organisms;Eukaryota;Opisthokonta;Metazoa;Eumetazoa;Bilateria;Protostomia;Spiralia;Lophotrochozoa;Mollusca;Bivalvia;Autobranchia;Heteroconchia;Euheterodonta;Imparidentia;Venerida;Veneroidea;Veneridae;Mercenaria;Mercenaria mercenaria  
 UdeM00000030455 7054 247.3 UdeM00000030455 XP\_031327742.1 47.3 243  
 128 0 581 823 139 381 7.10E-62 247.3 7054 cellular  
 organisms;Eukaryota;Opisthokonta;Metazoa;Eumetazoa;Bilateria;Protostomia;Ecdysozoa;Panarthropoda;Arthropoda;Mandibulata;Pancrustacea;Hexapoda;Insecta;Dicondylia;Pterygota;Neoptera;Endopterygota;Coleoptera;Polyphaga;Elateriformia;Elateroidea;Lampyridae;Lampyrinae;Photinus;Photinus pyralis  
 UdeM00000030456 202533 336.7 UdeM00000030456 XP\_035218899.1 37.3  
 467 270 7 1 445 1 466 4.70E-89 336.7 202533  
 cellular  
 organisms;Eukaryota;Opisthokonta;Metazoa;Eumetazoa;Bilateria;Protostomia;Ecdysozoa;Panarthropoda;Arthropoda;Chelicerata;Arachnida;Araneae;Araneomorphae;Entelegynae;Eresoidea;Eresidae;Stegodyphus;Stegodyphus dumicola  
 UdeM00000030460 6596 360.1 UdeM00000030460 XP\_045211214.1 39.1 516  
 296 7 6 506 5 517 4.60E-96 360.1 6596 cellular  
 organisms;Eukaryota;Opisthokonta;Metazoa;Eumetazoa;Bilateria;Protostomia;Spiralia;Lophotrochozoa;Mollusca;Bivalvia;Autobranchia;Heteroconchia;Euheterodonta;Imparidentia;Venerida;Veneroidea;Veneridae;Mercenaria;Mercenaria mercenaria

terodonta;Imparidentia;Venerida;Veneroidea;Veneridae;Mercenaria;Mercenari  
 a mercenaria  
 UdeM00000030461 6596 537.3 UdeM00000030461 XP\_045211214.1 40.7 738  
 417 10 6 727 5 737 3.00E-149 537.3 6596 cellular  
 organisms;Eukaryota;Opisthokonta;Metazoa;Eumetazoa;Bilateria;Protostomia;  
 Spiralia;Lophotrochozoa;Mollusca;Bivalvia;Autobranhia;Heteroconchia;Euhe  
 terodonta;Imparidentia;Venerida;Veneroidea;Veneridae;Mercenaria;Mercenari  
 a mercenaria  
 UdeM00000041115 29159 176.8 UdeM00000041115 XP\_034312908.1 25.8 651  
 316 16 5 523 6 621 7.30E-41 176.8 29159 cellular  
 organisms;Eukaryota;Opisthokonta;Metazoa;Eumetazoa;Bilateria;Protostomia;  
 Spiralia;Lophotrochozoa;Mollusca;Bivalvia;Autobranhia;Pteriormorphia;Ostr  
 eida;Ostreoidea;Ostreidae;Crassostrea;Crassostrea gigas  
 UdeM00000041116 29159 176.8 UdeM00000041116 XP\_034312908.1 25.8 651  
 316 16 5 523 6 621 7.30E-41 176.8 29159 cellular  
 organisms;Eukaryota;Opisthokonta;Metazoa;Eumetazoa;Bilateria;Protostomia;  
 Spiralia;Lophotrochozoa;Mollusca;Bivalvia;Autobranhia;Pteriormorphia;Ostr  
 eida;Ostreoidea;Ostreidae;Crassostrea;Crassostrea gigas  
 UdeM00000044186 83332 233.8 UdeM00000044186 NP\_217389.1 73.8 164 43  
 0 30 193 56 219 1.80E-58 233.8 83332 cellular  
 organisms;Bacteria;Terrabacteria  
 group;Actinobacteria;Actinomycetia;Corynebacteriales;Mycobacteriaceae;Myc  
 obacterium;Mycobacterium tuberculosis complex;Mycobacterium  
 tuberculosis;Mycobacterium tuberculosis H37Rv  
 UdeM00000039675 6596 157.1 UdeM00000039675 XP\_045179271.1 37.2 274  
 137 5 1 266 273 519 3.00E-35 157.1 6596 cellular  
 organisms;Eukaryota;Opisthokonta;Metazoa;Eumetazoa;Bilateria;Protostomia;  
 Spiralia;Lophotrochozoa;Mollusca;Bivalvia;Autobranhia;Heteroconchia;Euhe  
 terodonta;Imparidentia;Venerida;Veneroidea;Veneridae;Mercenaria;Mercenari  
 a mercenaria  
 UdeM00000039677 6596 139.4 UdeM00000039677 XP\_045171063.1 36 222  
 135 6 2 221 41 257 5.60E-30 139.4 6596 cellular  
 organisms;Eukaryota;Opisthokonta;Metazoa;Eumetazoa;Bilateria;Protostomia;  
 Spiralia;Lophotrochozoa;Mollusca;Bivalvia;Autobranhia;Heteroconchia;Euhe  
 terodonta;Imparidentia;Venerida;Veneroidea;Veneridae;Mercenaria;Mercenari  
 a mercenaria  
 UdeM00000039678 29159 66.2 UdeM00000039678 XP\_034339171.1 36.2 94  
 54 2 1 88 452 545 4.10E-08 66.2 29159 cellular  
 organisms;Eukaryota;Opisthokonta;Metazoa;Eumetazoa;Bilateria;Protostomia;  
 Spiralia;Lophotrochozoa;Mollusca;Bivalvia;Autobranhia;Pteriormorphia;Ostr  
 eida;Ostreoidea;Ostreidae;Crassostrea;Crassostrea gigas  
 UdeM00000039680 7574 147.1 UdeM00000039680 XP\_013389395.1 37 219  
 128 5 2 212 749 965 2.70E-32 147.1 7574 cellular  
 organisms;Eukaryota;Opisthokonta;Metazoa;Eumetazoa;Bilateria;Protostomia;  
 Spiralia;Lophotrochozoa;Brachiopoda;Linguliformea;Lingulata;Lingulida;Lin  
 guloidea;Lingulidae;Lingula;Lingula anatina  
 UdeM00000039681 7574 137.9 UdeM00000039681 XP\_013389395.1 36.1 219  
 130 5 2 212 749 965 1.60E-29 137.9 7574 cellular  
 organisms;Eukaryota;Opisthokonta;Metazoa;Eumetazoa;Bilateria;Protostomia;  
 Spiralia;Lophotrochozoa;Brachiopoda;Linguliformea;Lingulata;Lingulida;Lin  
 guloidea;Lingulidae;Lingula;Lingula anatina  
 UdeM00000039682 7739 111.7 UdeM00000039682 XP\_035696040.1 36.2 174  
 96 5 2 164 807 976 9.20E-22 111.7 7739 cellular  
 organisms;Eukaryota;Opisthokonta;Metazoa;Eumetazoa;Bilateria;Deuterostomi



a;Chordata;Cephalochordata;Leptocardii;Amphioxiformes;Branchiostomidae;Branchiostoma;Branchiostoma floridae

UdeM00000039683 7574 139.8 UdeM00000039683 XP\_013390464.1 36.9 225  
123 7 2 215 770 986 4.10E-30 139.8 7574 cellular  
organisms;Eukaryota;Opisthokonta;Metazoa;Eumetazoa;Bilateria;Protostomia;  
Spiralia;Lophotrochozoa;Brachiopoda;Linguliformea;Lingulata;Lingulida;Linguloidea;Lingulidae;Lingula;Lingula anatina

UdeM00000039684 7574 131 UdeM00000039684 XP\_013390464.1 38.7 186  
102 5 2 179 770 951 1.90E-27 131 7574 cellular  
organisms;Eukaryota;Opisthokonta;Metazoa;Eumetazoa;Bilateria;Protostomia;  
Spiralia;Lophotrochozoa;Brachiopoda;Linguliformea;Lingulata;Lingulida;Linguloidea;Lingulidae;Lingula;Lingula anatina

UdeM00000039685 6596 104.4 UdeM00000039685 XP\_045177674.1 66.2 74  
25 0 1 74 328 401 1.10E-19 104.4 6596 cellular  
organisms;Eukaryota;Opisthokonta;Metazoa;Eumetazoa;Bilateria;Protostomia;  
Spiralia;Lophotrochozoa;Mollusca;Bivalvia;Autobranchia;Heteroconchia;Euheterodonta;Imparidentia;Venerida;Veneroidea;Veneridae;Mercenaria;Mercenaria mercenaria

UdeM00000039686 7574 92.8 UdeM00000039686 XP\_013410728.1 29 293  
150 6 97 341 56 338 9.30E-16 92.8 7574 cellular  
organisms;Eukaryota;Opisthokonta;Metazoa;Eumetazoa;Bilateria;Protostomia;  
Spiralia;Lophotrochozoa;Brachiopoda;Linguliformea;Lingulata;Lingulida;Linguloidea;Lingulidae;Lingula;Lingula anatina

UdeM00000039687 7574 531.9 UdeM00000039687 XP\_013380319.1 63.6 379  
130 1 1 371 33 411 1.20E-147 531.9 7574 cellular  
organisms;Eukaryota;Opisthokonta;Metazoa;Eumetazoa;Bilateria;Protostomia;  
Spiralia;Lophotrochozoa;Brachiopoda;Linguliformea;Lingulata;Lingulida;Linguloidea;Lingulidae;Lingula;Lingula anatina

UdeM00000039688 6596 85.1 UdeM00000039688 XP\_045177776.1 45.3 95  
52 0 7 101 819 913 6.20E-14 85.1 6596 cellular  
organisms;Eukaryota;Opisthokonta;Metazoa;Eumetazoa;Bilateria;Protostomia;  
Spiralia;Lophotrochozoa;Mollusca;Bivalvia;Autobranchia;Heteroconchia;Euheterodonta;Imparidentia;Venerida;Veneroidea;Veneridae;Mercenaria;Mercenaria mercenaria

UdeM00000039689 29159 111.7 UdeM00000039689 XP\_034305547.1 30.7 225  
146 6 47 266 21 240 1.50E-21 111.7 29159 cellular  
organisms;Eukaryota;Opisthokonta;Metazoa;Eumetazoa;Bilateria;Protostomia;  
Spiralia;Lophotrochozoa;Mollusca;Bivalvia;Autobranchia;Pteriomorphia;Ostreida;Ostreoidea;Ostreidae;Crassostrea;Crassostrea gigas

UdeM00000039690 6596 150.2 UdeM00000039690 XP\_045164107.1 47.3 165  
77 2 45 200 2247 2410 2.80E-33 150.2 6596 cellular  
organisms;Eukaryota;Opisthokonta;Metazoa;Eumetazoa;Bilateria;Protostomia;  
Spiralia;Lophotrochozoa;Mollusca;Bivalvia;Autobranchia;Heteroconchia;Euheterodonta;Imparidentia;Venerida;Veneroidea;Veneridae;Mercenaria;Mercenaria mercenaria

UdeM00000039691 6573 181.8 UdeM00000039691 XP\_021354477.1 35 343  
130 4 3 252 1764 2106 1.10E-42 181.8 6573 cellular  
organisms;Eukaryota;Opisthokonta;Metazoa;Eumetazoa;Bilateria;Protostomia;  
Spiralia;Lophotrochozoa;Mollusca;Bivalvia;Autobranchia;Pteriomorphia;Pectinida;Pectinoidea;Pectinidae;Mizuhopecten;Mizuhopecten yessoensis

UdeM00000039692 6573 152.5 UdeM00000039692 XP\_021354477.1 47.9 163  
85 0 1 163 1944 2106 4.60E-34 152.5 6573 cellular  
organisms;Eukaryota;Opisthokonta;Metazoa;Eumetazoa;Bilateria;Protostomia;

Spiralia;Lophotrochozoa;Mollusca;Bivalvia;Autobranchia;Pteriomorpha;Pectinida;Pectinoidea;Pectinidae;Mizuhopecten;Mizuhopecten yessoensis  
UdeM00000039693 6565 100.9 UdeM00000039693 XP\_022308598.1 36.6 164  
96 4 2 164 21 177 1.70E-18 100.9 6565 cellular  
organisms;Eukaryota;Opisthokonta;Metazoa;Eumetazoa;Bilateria;Protostomia;  
Spiralia;Lophotrochozoa;Mollusca;Bivalvia;Autobranchia;Pteriomorpha;Ostr  
eida;Ostreoidea;Ostreidae;Crassostrea;Crassostrea virginica  
UdeM00000039694 7741 59.3 UdeM00000039694 XP\_019620661.1 36.5 104  
64 2 90 191 27 130 7.60E-06 59.3 7741 cellular  
organisms;Eukaryota;Opisthokonta;Metazoa;Eumetazoa;Bilateria;Deuterostomi  
a;Chordata;Cephalochordata;Leptocardii;Amphioxiformes;Branchiostomidae;Br  
anchiostoma;Branchiostoma belcheri  
UdeM00000039695 6596 204.9 UdeM00000039695 XP\_045189084.1 30.6 422  
229 5 54 472 1459 1819 2.30E-49 204.9 6596 cellular  
organisms;Eukaryota;Opisthokonta;Metazoa;Eumetazoa;Bilateria;Protostomia;  
Spiralia;Lophotrochozoa;Mollusca;Bivalvia;Autobranchia;Heteroconchia;Euhe  
terodonta;Imparidentia;Venerida;Veneroidea;Veneridae;Mercenaria;Mercenari  
a mercenaria  
UdeM00000039696 6579 60.8 UdeM00000039696 XP\_033725865.1 35.4 99  
64 0 64 162 169 267 1.80E-06 60.8 6579 cellular  
organisms;Eukaryota;Opisthokonta;Metazoa;Eumetazoa;Bilateria;Protostomia;  
Spiralia;Lophotrochozoa;Mollusca;Bivalvia;Autobranchia;Pteriomorpha;Pect  
inida;Pectinoidea;Pectinidae;Pecten;Pecten maximus  
UdeM00000039697 6596 915.2 UdeM00000039697 XP\_045164107.1 59.8 767  
297 3 134 893 2301 3063 6.60E-263 915.2 6596 cellular  
organisms;Eukaryota;Opisthokonta;Metazoa;Eumetazoa;Bilateria;Protostomia;  
Spiralia;Lophotrochozoa;Mollusca;Bivalvia;Autobranchia;Heteroconchia;Euhe  
terodonta;Imparidentia;Venerida;Veneroidea;Veneridae;Mercenaria;Mercenari  
a mercenaria  
UdeM00000039698 1735272 464.9 UdeM00000039698 XP\_041360663.1 36.9  
837 439 21 144 924 901 1704 2.50E-127 464.9 1735272  
cellular  
organisms;Eukaryota;Opisthokonta;Metazoa;Eumetazoa;Bilateria;Protostomia;  
Spiralia;Lophotrochozoa;Mollusca;Gastropoda;Neomphalina;Neomphaloidea;Pel  
tospiridae;Gigantopelta;Gigantopelta aegis  
UdeM00000044168 6565 90.9 UdeM00000044168 XP\_022288855.1 41.3 121  
65 5 20 139 973 1088 3.10E-15 90.9 6565 cellular  
organisms;Eukaryota;Opisthokonta;Metazoa;Eumetazoa;Bilateria;Protostomia;  
Spiralia;Lophotrochozoa;Mollusca;Bivalvia;Autobranchia;Pteriomorpha;Ostr  
eida;Ostreoidea;Ostreidae;Crassostrea;Crassostrea virginica  
UdeM00000044169 6579 121.3 UdeM00000044169 XP\_033744257.1 42.1 140  
81 0 83 222 154 293 1.60E-24 121.3 6579 cellular  
organisms;Eukaryota;Opisthokonta;Metazoa;Eumetazoa;Bilateria;Protostomia;  
Spiralia;Lophotrochozoa;Mollusca;Bivalvia;Autobranchia;Pteriomorpha;Pect  
inida;Pectinoidea;Pectinidae;Pecten;Pecten maximus  
UdeM00000044171 6596 114.4 UdeM00000044171 XP\_045191674.1 24.8 262  
173 9 16 273 1574 1815 3.60E-22 114.4 6596 cellular  
organisms;Eukaryota;Opisthokonta;Metazoa;Eumetazoa;Bilateria;Protostomia;  
Spiralia;Lophotrochozoa;Mollusca;Bivalvia;Autobranchia;Heteroconchia;Euhe  
terodonta;Imparidentia;Venerida;Veneroidea;Veneridae;Mercenaria;Mercenari  
a mercenaria  
UdeM00000044172 6579 116.7 UdeM00000044172 XP\_033744257.1 41.4 140  
82 0 1 140 154 293 2.60E-23 116.7 6579 cellular  
organisms;Eukaryota;Opisthokonta;Metazoa;Eumetazoa;Bilateria;Protostomia;

Spiralia; Lophotrochozoa; Mollusca; Bivalvia; Autobranchia; Pteriomorpha; Pectinida; Pectinoidea; Pectinidae; Pecten; Pecten maximus  
UdeM00000044174 6565 86.3 UdeM00000044174 XP\_022288855.1 39.4 127  
65 6 20 145 973 1088 7.70E-14 86.3 6565 cellular  
organisms; Eukaryota; Opisthokonta; Metazoa; Eumetazoa; Bilateria; Protostomia; Spiralia; Lophotrochozoa; Mollusca; Bivalvia; Autobranchia; Pteriomorpha; Ostr  
eida; Ostreidae; Crassostrea; Crassostrea virginica  
UdeM00000044175 6579 116.7 UdeM00000044175 XP\_033744257.1 41.4 140  
82 0 1 140 154 293 2.60E-23 116.7 6579 cellular  
organisms; Eukaryota; Opisthokonta; Metazoa; Eumetazoa; Bilateria; Protostomia; Spiralia; Lophotrochozoa; Mollusca; Bivalvia; Autobranchia; Pteriomorpha; Pect  
inida; Pectinoidea; Pectinidae; Pecten; Pecten maximus  
UdeM00000044177 6565 90.9 UdeM00000044177 XP\_022288855.1 41.3 121  
65 5 20 139 973 1088 3.10E-15 90.9 6565 cellular  
organisms; Eukaryota; Opisthokonta; Metazoa; Eumetazoa; Bilateria; Protostomia; Spiralia; Lophotrochozoa; Mollusca; Bivalvia; Autobranchia; Pteriomorpha; Ostr  
eida; Ostreidae; Crassostrea; Crassostrea virginica  
UdeM00000044178 6579 116.7 UdeM00000044178 XP\_033744257.1 41.4 140  
82 0 1 140 154 293 2.60E-23 116.7 6579 cellular  
organisms; Eukaryota; Opisthokonta; Metazoa; Eumetazoa; Bilateria; Protostomia; Spiralia; Lophotrochozoa; Mollusca; Bivalvia; Autobranchia; Pteriomorpha; Pect  
inida; Pectinoidea; Pectinidae; Pecten; Pecten maximus  
UdeM00000044181 6565 90.9 UdeM00000044181 XP\_022288855.1 41.3 121  
65 5 20 139 973 1088 3.10E-15 90.9 6565 cellular  
organisms; Eukaryota; Opisthokonta; Metazoa; Eumetazoa; Bilateria; Protostomia; Spiralia; Lophotrochozoa; Mollusca; Bivalvia; Autobranchia; Pteriomorpha; Ostr  
eida; Ostreidae; Crassostrea; Crassostrea virginica  
UdeM00000044180 6565 90.1 UdeM00000044180 XP\_022288855.1 41.6 113  
62 4 96 207 979 1088 6.40E-15 90.1 6565 cellular  
organisms; Eukaryota; Opisthokonta; Metazoa; Eumetazoa; Bilateria; Protostomia; Spiralia; Lophotrochozoa; Mollusca; Bivalvia; Autobranchia; Pteriomorpha; Ostr  
eida; Ostreidae; Crassostrea; Crassostrea virginica  
UdeM00000044182 6579 121.3 UdeM00000044182 XP\_033744257.1 42.1 140  
81 0 83 222 154 293 1.60E-24 121.3 6579 cellular  
organisms; Eukaryota; Opisthokonta; Metazoa; Eumetazoa; Bilateria; Protostomia; Spiralia; Lophotrochozoa; Mollusca; Bivalvia; Autobranchia; Pteriomorpha; Pect  
inida; Pectinoidea; Pectinidae; Pecten; Pecten maximus  
UdeM00000044061 6945 84.3 UdeM00000044061 XP\_040065097.1 28.5 193  
112 4 59 225 85 277 2.90E-13 84.3 6945 cellular  
organisms; Eukaryota; Opisthokonta; Metazoa; Eumetazoa; Bilateria; Protostomia; Ecdysozoa; Panarthropoda; Arthropoda; Chelicerata; Arachnida; Acari; Parasitifo  
rmes; Ixodida; Ixodoidea; Ixodidae; Ixodinae; Ixodes; Ixodes scapularis  
UdeM00000044062 218467 88.6 UdeM00000044062 XP\_023232316.1 33.8  
151 89 3 42 181 35 185 1.50E-14 88.6 218467  
cellular  
organisms; Eukaryota; Opisthokonta; Metazoa; Eumetazoa; Bilateria; Protostomia; Ecdysozoa; Panarthropoda; Arthropoda; Chelicerata; Arachnida; Scorpiones; Buthi  
da; Buthoidea; Buthidae; Centruroides; Centruroides sculpturatus  
UdeM00000044063 6945 86.3 UdeM00000044063 XP\_040065097.1 31.7 167  
103 4 26 181 52 218 7.50E-14 86.3 6945 cellular  
organisms; Eukaryota; Opisthokonta; Metazoa; Eumetazoa; Bilateria; Protostomia; Ecdysozoa; Panarthropoda; Arthropoda; Chelicerata; Arachnida; Acari; Parasitifo  
rmes; Ixodida; Ixodoidea; Ixodidae; Ixodinae; Ixodes; Ixodes scapularis

UdeM00000041282 6596 231.5 UdeM00000041282 XP\_045204261.1 41.8 275  
 150 6 57 327 39 307 1.60E-57 231.5 6596 cellular  
 organisms;Eukaryota;Opisthokonta;Metazoa;Eumetazoa;Bilateria;Protostomia;  
 Spiralia;Lophotrochozoa;Mollusca;Bivalvia;Autobranhia;Heteroconchia;Euhe  
 terodonta;Imparidentia;Venerida;Veneroidea;Veneridae;Mercenaria;Mercenari  
 a mercenaria

UdeM00000041283 6596 179.9 UdeM00000041283 XP\_045179870.1 36.2 282  
 171 5 53 327 198 477 5.80E-42 179.9 6596 cellular  
 organisms;Eukaryota;Opisthokonta;Metazoa;Eumetazoa;Bilateria;Protostomia;  
 Spiralia;Lophotrochozoa;Mollusca;Bivalvia;Autobranhia;Heteroconchia;Euhe  
 terodonta;Imparidentia;Venerida;Veneroidea;Veneridae;Mercenaria;Mercenari  
 a mercenaria

UdeM00000041284 6596 229.6 UdeM00000041284 XP\_045202146.1 46.4 239  
 113 3 46 271 77 313 5.10E-57 229.6 6596 cellular  
 organisms;Eukaryota;Opisthokonta;Metazoa;Eumetazoa;Bilateria;Protostomia;  
 Spiralia;Lophotrochozoa;Mollusca;Bivalvia;Autobranhia;Heteroconchia;Euhe  
 terodonta;Imparidentia;Venerida;Veneroidea;Veneridae;Mercenaria;Mercenari  
 a mercenaria

UdeM00000041285 6573 261.5 UdeM00000041285 XP\_021352111.1 44.1 286  
 156 3 110 391 135 420 1.70E-66 261.5 6573 cellular  
 organisms;Eukaryota;Opisthokonta;Metazoa;Eumetazoa;Bilateria;Protostomia;  
 Spiralia;Lophotrochozoa;Mollusca;Bivalvia;Autobranhia;Pteriormorphia;Pect  
 inida;Pectinoidea;Pectinidae;Mizuhopecten;Mizuhopecten yessoensis

UdeM00000041287 6573 320.1 UdeM00000041287 XP\_021375058.1 55.8 274  
 119 1 39 310 117 390 3.10E-84 320.1 6573 cellular  
 organisms;Eukaryota;Opisthokonta;Metazoa;Eumetazoa;Bilateria;Protostomia;  
 Spiralia;Lophotrochozoa;Mollusca;Bivalvia;Autobranhia;Pteriormorphia;Pect  
 inida;Pectinoidea;Pectinidae;Mizuhopecten;Mizuhopecten yessoensis

UdeM00000041289 6579 374.8 UdeM00000041289 XP\_033748359.1 37.8 598  
 326 9 230 782 100 696 3.20E-100 374.8 6579 cellular  
 organisms;Eukaryota;Opisthokonta;Metazoa;Eumetazoa;Bilateria;Protostomia;  
 Spiralia;Lophotrochozoa;Mollusca;Bivalvia;Autobranhia;Pteriormorphia;Pect  
 inida;Pectinoidea;Pectinidae;Pecten;Pecten maximus

UdeM00000041290 1735272 182.6 UdeM00000041290 XP\_041361735.1 35.8  
 274 149 6 1 262 68 326 6.70E-43 182.6 1735272  
 cellular  
 organisms;Eukaryota;Opisthokonta;Metazoa;Eumetazoa;Bilateria;Protostomia;  
 Spiralia;Lophotrochozoa;Mollusca;Gastropoda;Neomphalina;Neomphaloidea;Pel  
 tospiridae;Gigantopelta;Gigantopelta aegis

UdeM00000041292 7739 335.1 UdeM00000041292 XP\_035691534.1 36.6 612  
 352 13 9 594 560 1161 1.90E-88 335.1 7739 cellular  
 organisms;Eukaryota;Opisthokonta;Metazoa;Eumetazoa;Bilateria;Deuterostomi  
 a;Chordata;Cephalochordata;Leptocardii;Amphioxiformes;Branchiostomidae;Br  
 anchiostoma;Branchiostoma floridae

UdeM00000041293 6596 91.7 UdeM00000041293 XP\_045204875.1 40.4 94  
 55 1 46 138 309 402 8.70E-16 91.7 6596 cellular  
 organisms;Eukaryota;Opisthokonta;Metazoa;Eumetazoa;Bilateria;Protostomia;  
 Spiralia;Lophotrochozoa;Mollusca;Bivalvia;Autobranhia;Heteroconchia;Euhe  
 terodonta;Imparidentia;Venerida;Veneroidea;Veneridae;Mercenaria;Mercenari  
 a mercenaria

UdeM00000041295 7654 72.8 UdeM00000041295 XP\_041463763.1 44.2 95  
 48 2 5 97 941 1032 2.70E-10 72.8 7654 cellular  
 organisms;Eukaryota;Opisthokonta;Metazoa;Eumetazoa;Bilateria;Deuterostomi

a;Echinodermata;Eleutherozoa;Echinozoa;Echinoidea;Euechinoidea;Echinacea;  
 Temnopleuroidea;Toxopneustidae;Lytechinus;Lytechinus variegatus  
 UdeM00000041297 6596 334.7 UdeM00000041297 XP\_045161465.1 55.5 272  
 120 1 67 337 46 317 1.30E-88 334.7 6596 cellular  
 organisms;Eukaryota;Opisthokonta;Metazoa;Eumetazoa;Bilateria;Protostomia;  
 Spiralia;Lophotrochozoa;Mollusca;Bivalvia;Autobranchia;Heteroconchia;Euhe  
 terodonta;Imparidentia;Venerida;Veneroidea;Veneridae;Mercenaria;Mercenari  
 a mercenaria  
 UdeM00000041299 6596 256.5 UdeM00000041299 XP\_045179599.1 55.2 230  
 97 2 40 263 49 278 3.70E-65 256.5 6596 cellular  
 organisms;Eukaryota;Opisthokonta;Metazoa;Eumetazoa;Bilateria;Protostomia;  
 Spiralia;Lophotrochozoa;Mollusca;Bivalvia;Autobranchia;Heteroconchia;Euhe  
 terodonta;Imparidentia;Venerida;Veneroidea;Veneridae;Mercenaria;Mercenari  
 a mercenaria  
 UdeM00000041300 1735272 181.4 UdeM00000041300 XP\_041361735.1 35.6  
 270 167 5 2 269 62 326 1.50E-42 181.4 1735272  
 cellular  
 organisms;Eukaryota;Opisthokonta;Metazoa;Eumetazoa;Bilateria;Protostomia;  
 Spiralia;Lophotrochozoa;Mollusca;Gastropoda;Neomphalina;Neomphaloidea;Pel  
 tospiridae;Gigantopelta;Gigantopelta aegis  
 UdeM00000033625 6596 414.1 UdeM00000033625 XP\_045209793.1 52.4 477  
 226 1 8 484 822 1297 2.50E-112 414.1 6596 cellular  
 organisms;Eukaryota;Opisthokonta;Metazoa;Eumetazoa;Bilateria;Protostomia;  
 Spiralia;Lophotrochozoa;Mollusca;Bivalvia;Autobranchia;Heteroconchia;Euhe  
 terodonta;Imparidentia;Venerida;Veneroidea;Veneridae;Mercenaria;Mercenari  
 a mercenaria  
 UdeM00000033626 6596 304.7 UdeM00000033626 XP\_045208580.1 53.3 291  
 136 0 11 301 8 298 1.40E-79 304.7 6596 cellular  
 organisms;Eukaryota;Opisthokonta;Metazoa;Eumetazoa;Bilateria;Protostomia;  
 Spiralia;Lophotrochozoa;Mollusca;Bivalvia;Autobranchia;Heteroconchia;Euhe  
 terodonta;Imparidentia;Venerida;Veneroidea;Veneridae;Mercenaria;Mercenari  
 a mercenaria  
 UdeM00000033627 6596 316.6 UdeM00000033627 XP\_045208580.1 55.8 285  
 125 1 68 352 3 286 4.10E-83 316.6 6596 cellular  
 organisms;Eukaryota;Opisthokonta;Metazoa;Eumetazoa;Bilateria;Protostomia;  
 Spiralia;Lophotrochozoa;Mollusca;Bivalvia;Autobranchia;Heteroconchia;Euhe  
 terodonta;Imparidentia;Venerida;Veneroidea;Veneridae;Mercenaria;Mercenari  
 a mercenaria  
 UdeM00000033628 6596 221.5 UdeM00000033628 XP\_045193084.1 31.1 441  
 277 9 241 666 28 456 3.30E-54 221.5 6596 cellular  
 organisms;Eukaryota;Opisthokonta;Metazoa;Eumetazoa;Bilateria;Protostomia;  
 Spiralia;Lophotrochozoa;Mollusca;Bivalvia;Autobranchia;Heteroconchia;Euhe  
 terodonta;Imparidentia;Venerida;Veneroidea;Veneridae;Mercenaria;Mercenari  
 a mercenaria  
 UdeM00000033629 29159 214.5 UdeM00000033629 XP\_034312908.1 28.2 649  
 342 20 9 564 6 623 3.40E-52 214.5 29159 cellular  
 organisms;Eukaryota;Opisthokonta;Metazoa;Eumetazoa;Bilateria;Protostomia;  
 Spiralia;Lophotrochozoa;Mollusca;Bivalvia;Autobranchia;Pteriomorphia;Ostr  
 eida;Ostreoidea;Ostreidae;Crassostrea;Crassostrea gigas  
 UdeM00000033630 29159 73.9 UdeM00000033630 XP\_034307878.1 32.3 99  
 67 0 1 99 92 190 3.70E-10 73.9 29159 cellular  
 organisms;Eukaryota;Opisthokonta;Metazoa;Eumetazoa;Bilateria;Protostomia;  
 Spiralia;Lophotrochozoa;Mollusca;Bivalvia;Autobranchia;Pteriomorphia;Ostr  
 eida;Ostreoidea;Ostreidae;Crassostrea;Crassostrea gigas

UdeM00000033633 7574 104.8 UdeM00000033633 XP\_013418747.1 34 153  
 90 2 227 372 42 190 2.50E-19 104.8 7574 cellular  
 organisms;Eukaryota;Opisthokonta;Metazoa;Eumetazoa;Bilateria;Protostomia;  
 Spiralia;Lophotrochozoa;Brachiopoda;Linguliformea;Lingulata;Lingulida;Lin  
 guloidea;Lingulidae;Lingula;Lingula anatina  
 UdeM00000033635 6596 170.6 UdeM00000033635 XP\_045193084.1 26.3 540  
 282 14 60 520 28 530 5.20E-39 170.6 6596 cellular  
 organisms;Eukaryota;Opisthokonta;Metazoa;Eumetazoa;Bilateria;Protostomia;  
 Spiralia;Lophotrochozoa;Mollusca;Bivalvia;Autobranchia;Heteroconchia;Euhe  
 terodonta;Imparidentia;Venerida;Veneroidea;Veneridae;Mercenaria;Mercenari  
 a mercenaria  
 UdeM00000033636 6596 85.5 UdeM00000033636 XP\_045214418.1 41.5 106  
 60 2 14 118 106 210 5.00E-14 85.5 6596 cellular  
 organisms;Eukaryota;Opisthokonta;Metazoa;Eumetazoa;Bilateria;Protostomia;  
 Spiralia;Lophotrochozoa;Mollusca;Bivalvia;Autobranchia;Heteroconchia;Euhe  
 terodonta;Imparidentia;Venerida;Veneroidea;Veneridae;Mercenaria;Mercenari  
 a mercenaria  
 UdeM00000033638 225164 95.9 UdeM00000033638 XP\_009062316.1 33.2  
 184 115 5 4 186 319 495 6.20E-17 95.9 225164  
 cellular  
 organisms;Eukaryota;Opisthokonta;Metazoa;Eumetazoa;Bilateria;Protostomia;  
 Spiralia;Lophotrochozoa;Mollusca;Gastropoda;Patellogastropoda;Lottioida;  
 Lottiidae;Lottia;Lottia gigantea  
 UdeM00000033639 6596 119.4 UdeM00000033639 XP\_045176094.1 37.5 176  
 104 5 13 186 83 254 1.00E-23 119.4 6596 cellular  
 organisms;Eukaryota;Opisthokonta;Metazoa;Eumetazoa;Bilateria;Protostomia;  
 Spiralia;Lophotrochozoa;Mollusca;Bivalvia;Autobranchia;Heteroconchia;Euhe  
 terodonta;Imparidentia;Venerida;Veneroidea;Veneridae;Mercenaria;Mercenari  
 a mercenaria  
 UdeM00000033641 6565 73.2 UdeM00000033641 XP\_022321940.1 18.7 198  
 161 0 3 200 178 375 4.40E-10 73.2 6565 cellular  
 organisms;Eukaryota;Opisthokonta;Metazoa;Eumetazoa;Bilateria;Protostomia;  
 Spiralia;Lophotrochozoa;Mollusca;Bivalvia;Autobranchia;Pteriomorphia;Ostr  
 eida;Ostreoida;Ostreidae;Crassostrea;Crassostrea virginica  
 UdeM00000033642 6596 136.7 UdeM00000033642 XP\_045206071.1 24 359  
 266 3 15 370 28 382 5.90E-29 136.7 6596 cellular  
 organisms;Eukaryota;Opisthokonta;Metazoa;Eumetazoa;Bilateria;Protostomia;  
 Spiralia;Lophotrochozoa;Mollusca;Bivalvia;Autobranchia;Heteroconchia;Euhe  
 terodonta;Imparidentia;Venerida;Veneroidea;Veneridae;Mercenaria;Mercenari  
 a mercenaria  
 UdeM00000033643 6596 158.7 UdeM00000033643 XP\_045185034.1 25.5 662  
 420 18 139 767 118 739 3.00E-35 158.7 6596 cellular  
 organisms;Eukaryota;Opisthokonta;Metazoa;Eumetazoa;Bilateria;Protostomia;  
 Spiralia;Lophotrochozoa;Mollusca;Bivalvia;Autobranchia;Heteroconchia;Euhe  
 terodonta;Imparidentia;Venerida;Veneroidea;Veneridae;Mercenaria;Mercenari  
 a mercenaria  
 UdeM00000033645 6596 157.1 UdeM00000033645 XP\_045187893.1 25.8 794  
 494 26 1 756 5 741 8.60E-35 157.1 6596 cellular  
 organisms;Eukaryota;Opisthokonta;Metazoa;Eumetazoa;Bilateria;Protostomia;  
 Spiralia;Lophotrochozoa;Mollusca;Bivalvia;Autobranchia;Heteroconchia;Euhe  
 terodonta;Imparidentia;Venerida;Veneroidea;Veneridae;Mercenaria;Mercenari  
 a mercenaria  
 UdeM00000033646 29159 173.3 UdeM00000033646 XP\_011449844.1 22.9 498  
 382 2 2 497 177 674 7.80E-40 173.3 29159 cellular

organisms;Eukaryota;Opisthokonta;Metazoa;Eumetazoa;Bilateria;Protostomia;Spiralia;Lophotrochozoa;Mollusca;Bivalvia;Autobranchia;Pteriomorphia;Ostreida;Ostreoidea;Ostreidae;Crassostrea;Crassostrea gigas  
UdeM00000033647 6596 71.2 UdeM00000033647 XP\_045203541.1 22.2 198  
134 3 2 181 72 267 1.90E-09 71.2 6596 cellular

organisms;Eukaryota;Opisthokonta;Metazoa;Eumetazoa;Bilateria;Protostomia;Spiralia;Lophotrochozoa;Mollusca;Bivalvia;Autobranchia;Heteroconchia;Euheterodonta;Imparidentia;Venerida;Veneroidea;Veneridae;Mercenaria;Mercenaria mercenaria  
UdeM00000033649 6596 134.4 UdeM00000033649 XP\_045190373.1 26 292  
207 5 38 329 1693 1975 3.00E-28 134.4 6596 cellular

organisms;Eukaryota;Opisthokonta;Metazoa;Eumetazoa;Bilateria;Protostomia;Spiralia;Lophotrochozoa;Mollusca;Bivalvia;Autobranchia;Heteroconchia;Euheterodonta;Imparidentia;Venerida;Veneroidea;Veneridae;Mercenaria;Mercenaria mercenaria  
UdeM00000033650 6565 79 UdeM00000033650 XP\_022311215.1 30 217  
133 7 49 254 146 354 1.20E-11 79 6565 cellular

organisms;Eukaryota;Opisthokonta;Metazoa;Eumetazoa;Bilateria;Protostomia;Spiralia;Lophotrochozoa;Mollusca;Bivalvia;Autobranchia;Pteriomorphia;Ostreida;Ostreoidea;Ostreidae;Crassostrea;Crassostrea virginica  
UdeM00000033651 29159 368.6 UdeM00000033651 XP\_034320142.1 28.6 1005  
604 32 16 968 28 970 2.70E-98 368.6 29159 cellular

organisms;Eukaryota;Opisthokonta;Metazoa;Eumetazoa;Bilateria;Protostomia;Spiralia;Lophotrochozoa;Mollusca;Bivalvia;Autobranchia;Pteriomorphia;Ostreida;Ostreoidea;Ostreidae;Crassostrea;Crassostrea gigas  
UdeM00000033652 6596 331.6 UdeM00000033652 XP\_045164114.1 29.3 898  
550 32 3 873 139 978 3.30E-87 331.6 6596 cellular

organisms;Eukaryota;Opisthokonta;Metazoa;Eumetazoa;Bilateria;Protostomia;Spiralia;Lophotrochozoa;Mollusca;Bivalvia;Autobranchia;Heteroconchia;Euheterodonta;Imparidentia;Venerida;Veneroidea;Veneridae;Mercenaria;Mercenaria mercenaria  
UdeM00000033654 29159 94.4 UdeM00000033654 XP\_011449844.1 22.9 223  
166 2 2 221 177 396 2.00E-16 94.4 29159 cellular

organisms;Eukaryota;Opisthokonta;Metazoa;Eumetazoa;Bilateria;Protostomia;Spiralia;Lophotrochozoa;Mollusca;Bivalvia;Autobranchia;Pteriomorphia;Ostreida;Ostreoidea;Ostreidae;Crassostrea;Crassostrea gigas  
UdeM00000033655 225164 107.8 UdeM00000033655 XP\_009057378.1 34.3  
143 91 1 493 635 16 155 5.10E-20 107.8 225164  
cellular

organisms;Eukaryota;Opisthokonta;Metazoa;Eumetazoa;Bilateria;Protostomia;Spiralia;Lophotrochozoa;Mollusca;Gastropoda;Patellogastropoda;Lottiidae;Lottia;Lottia gigantea  
UdeM00000033656 6565 176.8 UdeM00000033656 XP\_022287884.1 27.1 498  
322 15 168 646 516 991 1.00E-40 176.8 6565 cellular

organisms;Eukaryota;Opisthokonta;Metazoa;Eumetazoa;Bilateria;Protostomia;Spiralia;Lophotrochozoa;Mollusca;Bivalvia;Autobranchia;Pteriomorphia;Ostreida;Ostreoidea;Ostreidae;Crassostrea;Crassostrea virginica  
UdeM00000033657 29159 370.9 UdeM00000033657 XP\_034320142.1 28.7 1005  
603 32 29 981 28 970 5.50E-99 370.9 29159 cellular

organisms;Eukaryota;Opisthokonta;Metazoa;Eumetazoa;Bilateria;Protostomia;Spiralia;Lophotrochozoa;Mollusca;Bivalvia;Autobranchia;Pteriomorphia;Ostreida;Ostreoidea;Ostreidae;Crassostrea;Crassostrea gigas  
UdeM00000033658 6596 375.9 UdeM00000033658 XP\_045201849.1 27.7 1022  
659 32 22 997 27 1014 1.70E-100 375.9 6596 cellular

organisms;Eukaryota;Opisthokonta;Metazoa;Eumetazoa;Bilateria;Protostomia;  
 Spiralia;Lophotrochozoa;Mollusca;Bivalvia;Autobranchia;Heteroconchia;Euhe  
 terodonta;Imparidentia;Venerida;Veneroidea;Veneridae;Mercenaria;Mercenari  
 a mercenaria  
 UdeM00000044405 6579 224.6 UdeM00000044405 XP\_033731124.1 41.3 310  
 153 7 10 294 6 311 1.70E-55 224.6 6579 cellular  
 organisms;Eukaryota;Opisthokonta;Metazoa;Eumetazoa;Bilateria;Protostomia;  
 Spiralia;Lophotrochozoa;Mollusca;Bivalvia;Autobranchia;Pteriormorphia;Pect  
 inida;Pectinoidea;Pectinidae;Pecten;Pecten maximus  
 UdeM00000009311 6596 650.6 UdeM00000009311 XP\_045210331.1 81.7 405  
 72 2 1 403 1 405 1.40E-183 650.6 6596 cellular  
 organisms;Eukaryota;Opisthokonta;Metazoa;Eumetazoa;Bilateria;Protostomia;  
 Spiralia;Lophotrochozoa;Mollusca;Bivalvia;Autobranchia;Heteroconchia;Euhe  
 terodonta;Imparidentia;Venerida;Veneroidea;Veneridae;Mercenaria;Mercenari  
 a mercenaria  
 UdeM00000009312 6579 152.9 UdeM00000009312 XP\_033757817.1 46.2 197  
 89 4 1 181 1 196 3.90E-34 152.9 6579 cellular  
 organisms;Eukaryota;Opisthokonta;Metazoa;Eumetazoa;Bilateria;Protostomia;  
 Spiralia;Lophotrochozoa;Mollusca;Bivalvia;Autobranchia;Pteriormorphia;Pect  
 inida;Pectinoidea;Pectinidae;Pecten;Pecten maximus  
 UdeM00000009313 6565 860.5 UdeM00000009313 XP\_022323231.1 58.5 832  
 303 14 4 814 40 850 2.00E-246 860.5 6565 cellular  
 organisms;Eukaryota;Opisthokonta;Metazoa;Eumetazoa;Bilateria;Protostomia;  
 Spiralia;Lophotrochozoa;Mollusca;Bivalvia;Autobranchia;Pteriormorphia;Ostr  
 eida;Ostreoidea;Ostreidae;Crassostrea;Crassostrea virginica  
 UdeM00000009314 46514 141.4 UdeM00000009314 XP\_038062328.1 34.6 246  
 159 1 22 265 131 376 1.70E-30 141.4 46514 cellular  
 organisms;Eukaryota;Opisthokonta;Metazoa;Eumetazoa;Bilateria;Deuterostomi  
 a;Echinodermata;Eleutherozoa;Asterozoa;Asteroidea;Valvatacea;Valvatida;As  
 terinidae;Patiria;Patiria miniata  
 UdeM00000009316 6579 150.2 UdeM00000009316 XP\_033739209.1 53.4 131  
 61 0 9 139 2 132 1.90E-33 150.2 6579 cellular  
 organisms;Eukaryota;Opisthokonta;Metazoa;Eumetazoa;Bilateria;Protostomia;  
 Spiralia;Lophotrochozoa;Mollusca;Bivalvia;Autobranchia;Pteriormorphia;Pect  
 inida;Pectinoidea;Pectinidae;Pecten;Pecten maximus  
 UdeM00000009317 6526 83.6 UdeM00000009317 XP\_013067337.1 95.2 42  
 2 0 1 42 1 42 2.30E-13 83.6 6526 cellular  
 organisms;Eukaryota;Opisthokonta;Metazoa;Eumetazoa;Bilateria;Protostomia;  
 Spiralia;Lophotrochozoa;Mollusca;Gastropoda;Heterobranchia;Euthyneura;Pan  
 pulmonata;Hygrophila;Lymnaeoidea;Planorbidae;Biomphalaria;Biomphalaria  
 glabrata  
 UdeM00000009318 6526 334.3 UdeM00000009318 XP\_013094297.1 38.7 507  
 308 3 3 507 38 543 2.90E-88 334.3 6526 cellular  
 organisms;Eukaryota;Opisthokonta;Metazoa;Eumetazoa;Bilateria;Protostomia;  
 Spiralia;Lophotrochozoa;Mollusca;Gastropoda;Heterobranchia;Euthyneura;Pan  
 pulmonata;Hygrophila;Lymnaeoidea;Planorbidae;Biomphalaria;Biomphalaria  
 glabrata  
 UdeM00000009319 6596 420.6 UdeM00000009319 XP\_045178453.1 63.1 290  
 106 1 7 295 25 314 1.60E-114 420.6 6596 cellular  
 organisms;Eukaryota;Opisthokonta;Metazoa;Eumetazoa;Bilateria;Protostomia;  
 Spiralia;Lophotrochozoa;Mollusca;Bivalvia;Autobranchia;Heteroconchia;Euhe  
 terodonta;Imparidentia;Venerida;Veneroidea;Veneridae;Mercenaria;Mercenari  
 a mercenaria



UdeM00000009320 6500 337.8 UdeM00000009320 XP\_005105670.1 59 256  
 104 1 8 262 23 278 1.30E-89 337.8 6500 cellular  
 organisms;Eukaryota;Opisthokonta;Metazoa;Eumetazoa;Bilateria;Protostomia;  
 Spiralia;Lophotrochozoa;Mollusca;Gastropoda;Heterobranchia;Euthyneura;Tec  
 tipleura;Aplysiida;Aplysioidea;Aplysiidae;Aplysia;Aplysia californica  
 UdeM00000009321 1735272 777.3 UdeM00000009321 XP\_041373706.1 68.2  
 654 186 5 1 641 1 645 1.50E-221 777.3 1735272  
 cellular  
 organisms;Eukaryota;Opisthokonta;Metazoa;Eumetazoa;Bilateria;Protostomia;  
 Spiralia;Lophotrochozoa;Mollusca;Gastropoda;Neomphalina;Neomphaloidea;Pel  
 tospiridae;Gigantopelta;Gigantopelta aegis  
 UdeM00000009322 6565 135.2 UdeM00000009322 XP\_022319986.1 72.3 83  
 23 0 7 89 18 100 4.20E-29 135.2 6565 cellular  
 organisms;Eukaryota;Opisthokonta;Metazoa;Eumetazoa;Bilateria;Protostomia;  
 Spiralia;Lophotrochozoa;Mollusca;Bivalvia;Autobranchia;Pteriormorphia;Ostr  
 eida;Ostreioidea;Ostreidae;Crassostrea;Crassostrea virginica  
 UdeM00000009323 29159 395.2 UdeM00000009323 XP\_011429655.2 67.4 288  
 90 2 17 304 24 307 7.70E-107 395.2 29159 cellular  
 organisms;Eukaryota;Opisthokonta;Metazoa;Eumetazoa;Bilateria;Protostomia;  
 Spiralia;Lophotrochozoa;Mollusca;Bivalvia;Autobranchia;Pteriormorphia;Ostr  
 eida;Ostreioidea;Ostreidae;Crassostrea;Crassostrea gigas  
 UdeM00000009324 6565 74.7 UdeM00000009324 XP\_022337163.1 31.8 148  
 94 4 72 216 167 310 1.60E-10 74.7 6565 cellular  
 organisms;Eukaryota;Opisthokonta;Metazoa;Eumetazoa;Bilateria;Protostomia;  
 Spiralia;Lophotrochozoa;Mollusca;Bivalvia;Autobranchia;Pteriormorphia;Ostr  
 eida;Ostreioidea;Ostreidae;Crassostrea;Crassostrea virginica  
 UdeM00000009325 6565 81.3 UdeM00000009325 XP\_022337163.1 33.8 139  
 86 3 7 142 175 310 1.20E-12 81.3 6565 cellular  
 organisms;Eukaryota;Opisthokonta;Metazoa;Eumetazoa;Bilateria;Protostomia;  
 Spiralia;Lophotrochozoa;Mollusca;Bivalvia;Autobranchia;Pteriormorphia;Ostr  
 eida;Ostreioidea;Ostreidae;Crassostrea;Crassostrea virginica  
 UdeM00000009326 6579 171 UdeM00000009326 XP\_033747151.1 46.2 182  
 90 3 778 955 35 212 7.30E-39 171 6579 cellular  
 organisms;Eukaryota;Opisthokonta;Metazoa;Eumetazoa;Bilateria;Protostomia;  
 Spiralia;Lophotrochozoa;Mollusca;Bivalvia;Autobranchia;Pteriormorphia;Pect  
 inida;Pectinoidea;Pectinidae;Pecten;Pecten maximus  
 UdeM00000009327 6579 172.6 UdeM00000009327 XP\_033747151.1 46.2 182  
 90 3 306 483 35 212 1.30E-39 172.6 6579 cellular  
 organisms;Eukaryota;Opisthokonta;Metazoa;Eumetazoa;Bilateria;Protostomia;  
 Spiralia;Lophotrochozoa;Mollusca;Bivalvia;Autobranchia;Pteriormorphia;Pect  
 inida;Pectinoidea;Pectinidae;Pecten;Pecten maximus  
 UdeM00000009328 6579 170.6 UdeM00000009328 XP\_033747151.1 40.3 216  
 117 4 311 518 1 212 5.20E-39 170.6 6579 cellular  
 organisms;Eukaryota;Opisthokonta;Metazoa;Eumetazoa;Bilateria;Protostomia;  
 Spiralia;Lophotrochozoa;Mollusca;Bivalvia;Autobranchia;Pteriormorphia;Pect  
 inida;Pectinoidea;Pectinidae;Pecten;Pecten maximus  
 UdeM00000009329 6579 170.6 UdeM00000009329 XP\_033747151.1 40.3 216  
 117 4 187 394 1 212 3.90E-39 170.6 6579 cellular  
 organisms;Eukaryota;Opisthokonta;Metazoa;Eumetazoa;Bilateria;Protostomia;  
 Spiralia;Lophotrochozoa;Mollusca;Bivalvia;Autobranchia;Pteriormorphia;Pect  
 inida;Pectinoidea;Pectinidae;Pecten;Pecten maximus  
 UdeM00000009330 6105 115.5 UdeM00000009330 XP\_031574328.1 42.1 126  
 68 2 28 148 24 149 5.80E-23 115.5 6105 cellular

organisms;Eukaryota;Opisthokonta;Metazoa;Eumetazoa;Cnidaria;Anthozoa;Hexa  
corallia;Actiniaria;Actiniidae;Actinia;Actinia tenebrosa  
UdeM00000009331 6105 115.5 UdeM00000009331 XP\_031574328.1 42.1 126  
68 2 28 148 24 149 5.80E-23 115.5 6105 cellular  
organisms;Eukaryota;Opisthokonta;Metazoa;Eumetazoa;Cnidaria;Anthozoa;Hexa  
corallia;Actiniaria;Actiniidae;Actinia;Actinia tenebrosa  
UdeM00000009332 55291 260 UdeM00000009332 XP\_039605055.1 34.3 408  
217 7 24 431 400 756 5.40E-66 260 55291 cellular  
organisms;Eukaryota;Opisthokonta;Metazoa;Eumetazoa;Bilateria;Deuterostomi  
a;Chordata;Craniata;Vertebrata;Gnathostomata;Teleostomi;Euteleostomi;Acti  
nopterygii;Cladistia;Polypteriformes;Polypteridae;Polypterus;Polypterus  
senegalus  
UdeM00000009333 6596 256.1 UdeM00000009333 XP\_045184074.1 72.7 176  
48 0 10 185 2 177 3.30E-65 256.1 6596 cellular  
organisms;Eukaryota;Opisthokonta;Metazoa;Eumetazoa;Bilateria;Protostomia;  
Spiralia;Lophotrochozoa;Mollusca;Bivalvia;Autobranchia;Heteroconchia;Euhe  
terodonta;Imparidentia;Venerida;Veneroidea;Veneridae;Mercenaria;Mercenari  
a mercenaria  
UdeM00000009334 1735272 135.2 UdeM00000009334 XP\_041356485.1 31.2  
474 265 13 578 1022 620 1061 5.00E-28 135.2 1735272  
cellular  
organisms;Eukaryota;Opisthokonta;Metazoa;Eumetazoa;Bilateria;Protostomia;  
Spiralia;Lophotrochozoa;Mollusca;Gastropoda;Neomphalina;Neomphaloidea;Pel  
tospiridae;Gigantopelta;Gigantopelta aegis  
UdeM00000009335 224129 422.5 UdeM00000009335 XP\_025833580.1 51.8  
394 175 4 56 440 48 435 9.20E-115 422.5 224129  
cellular  
organisms;Eukaryota;Opisthokonta;Metazoa;Eumetazoa;Bilateria;Protostomia;  
Ecdysozoa;Panarthropoda;Arthropoda;Mandibulata;Pancrustacea;Hexapoda;Inse  
cta;Dicondylia;Pterygota;Neoptera;Endopterygota;Coleoptera;Polyphaga;Elat  
eriformia;Buprestoidea;Buprestidae;Agrilinae;Agrilus;Agrilus planipennis  
UdeM00000009336 224129 422.5 UdeM00000009336 XP\_025833580.1 51.8  
394 175 4 45 429 48 435 9.00E-115 422.5 224129  
cellular  
organisms;Eukaryota;Opisthokonta;Metazoa;Eumetazoa;Bilateria;Protostomia;  
Ecdysozoa;Panarthropoda;Arthropoda;Mandibulata;Pancrustacea;Hexapoda;Inse  
cta;Dicondylia;Pterygota;Neoptera;Endopterygota;Coleoptera;Polyphaga;Elat  
eriformia;Buprestoidea;Buprestidae;Agrilinae;Agrilus;Agrilus planipennis  
UdeM00000009337 400727 419.5 UdeM00000009337 XP\_025096955.1 49.4  
415 206 3 55 469 23 433 7.70E-114 419.5 400727  
cellular  
organisms;Eukaryota;Opisthokonta;Metazoa;Eumetazoa;Bilateria;Protostomia;  
Spiralia;Lophotrochozoa;Mollusca;Gastropoda;Caenogastropoda;Architaeniogl  
ossa;Ampullarioidea;Ampullariidae;Pomacea;Pomacea canaliculata  
UdeM00000009339 1735272 140.2 UdeM00000009339 XP\_041373446.1 40.2  
224 124 6 32 249 1 220 3.80E-30 140.2 1735272  
cellular  
organisms;Eukaryota;Opisthokonta;Metazoa;Eumetazoa;Bilateria;Protostomia;  
Spiralia;Lophotrochozoa;Mollusca;Gastropoda;Neomphalina;Neomphaloidea;Pel  
tospiridae;Gigantopelta;Gigantopelta aegis  
UdeM00000009340 6573 134 UdeM00000009340 XP\_021342948.1 39 213  
87 8 32 206 1 208 2.20E-28 134 6573 cellular  
organisms;Eukaryota;Opisthokonta;Metazoa;Eumetazoa;Bilateria;Protostomia;

Spiralia; Lophotrochozoa; Mollusca; Bivalvia; Autobranchia; Pteriomorpha; Pectinida; Pectinoidea; Pectinidae; Mizuhopecten; Mizuhopecten yessoensis  
UdeM00000009341 8078 287.7 UdeM00000009341 XP\_035994673.1 59 234  
66 1 1 204 196 429 1.10E-74 287.7 8078 cellular  
organisms; Eukaryota; Opisthokonta; Metazoa; Eumetazoa; Bilateria; Deuterostomia; Chordata; Craniata; Vertebrata; Gnathostomata; Teleostomi; Euteleostomi; Actinopterygii; Actinopteri; Neopterygii; Teleostei; Osteoglossocephalai; Clupeocephala; Euteleostei; Neoteleostei; Eurypterygia; Ctenosquamata; Acanthomorphata; Euacanthomorphacea; Percomorphaceae; Ovalentaria; Atherinomorphae; Cyprinodontiformes; Cyprinodontoides; Fundulidae; Fundulus; Fundulus heteroclitus  
UdeM00000009342 225164 355.9 UdeM00000009342 XP\_009057189.1 44.7  
425 217 3 59 483 9 415 8.20E-95 355.9 225164  
cellular  
organisms; Eukaryota; Opisthokonta; Metazoa; Eumetazoa; Bilateria; Protostomia; Spiralia; Lophotrochozoa; Mollusca; Gastropoda; Patellogastropoda; Lottioidea; Lottiidae; Lottia; Lottia gigantea  
UdeM00000009343 1735272 256.5 UdeM00000009343 XP\_041352547.1 43.1  
304 165 3 45 343 122 422 4.70E-65 256.5 1735272  
cellular  
organisms; Eukaryota; Opisthokonta; Metazoa; Eumetazoa; Bilateria; Protostomia; Spiralia; Lophotrochozoa; Mollusca; Gastropoda; Neomphalina; Neomphaloidea; Peltospiridae; Gigantopelta; Gigantopelta aegis  
UdeM00000009345 41117 759.2 UdeM00000009345 XP\_037085028.1 80 446  
89 0 1 446 1 446 2.90E-216 759.2 41117 cellular  
organisms; Eukaryota; Opisthokonta; Metazoa; Eumetazoa; Bilateria; Protostomia; Ecdysozoa; Panarthropoda; Arthropoda; Mandibulata; Pancrustacea; Crustacea; Multicrustacea; Hexanauplia; Thecostraca; Cirripedia; Thoracica; Pedunculata; Scalpellomorpha; Pollicipedidae; Pollicipes; Pollicipes pollicipes  
UdeM00000009346 1735272 97.4 UdeM00000009346 XP\_041356248.1 45.7  
94 51 0 59 152 6 99 1.60E-17 97.4 1735272  
cellular  
organisms; Eukaryota; Opisthokonta; Metazoa; Eumetazoa; Bilateria; Protostomia; Spiralia; Lophotrochozoa; Mollusca; Gastropoda; Neomphalina; Neomphaloidea; Peltospiridae; Gigantopelta; Gigantopelta aegis  
UdeM00000009348 7054 107.8 UdeM00000009348 XP\_031350480.1 49.5 93  
46 1 14 105 375 467 8.30E-21 107.8 7054 cellular  
organisms; Eukaryota; Opisthokonta; Metazoa; Eumetazoa; Bilateria; Protostomia; Ecdysozoa; Panarthropoda; Arthropoda; Mandibulata; Pancrustacea; Hexapoda; Insecta; Dicondylia; Pterygota; Neoptera; Endopterygota; Coleoptera; Polyphaga; Elateriformia; Elateroidea; Lampyridae; Lampyrinae; Photinus; Photinus pyralis  
UdeM00000009351 6596 72 UdeM00000009351 XP\_045209648.1 65.4 52  
18 0 27 78 759 810 8.60E-10 72 6596 cellular  
organisms; Eukaryota; Opisthokonta; Metazoa; Eumetazoa; Bilateria; Protostomia; Spiralia; Lophotrochozoa; Mollusca; Bivalvia; Autobranchia; Heteroconchia; Euheterodonta; Imparidentia; Venerida; Veneroidea; Veneridae; Mercenaria; Mercenaria mercenaria  
UdeM00000009352 6596 327.4 UdeM00000009352 XP\_045209649.1 31.9 752  
464 21 40 763 42 773 4.90E-86 327.4 6596 cellular  
organisms; Eukaryota; Opisthokonta; Metazoa; Eumetazoa; Bilateria; Protostomia; Spiralia; Lophotrochozoa; Mollusca; Bivalvia; Autobranchia; Heteroconchia; Euheterodonta; Imparidentia; Venerida; Veneroidea; Veneridae; Mercenaria; Mercenaria mercenaria

UdeM00000009353 29159 129.8 UdeM00000009353 XP\_034316161.1 54 100  
 46 0 1 100 718 817 2.00E-27 129.8 29159 cellular  
 organisms;Eukaryota;Opisthokonta;Metazoa;Eumetazoa;Bilateria;Protostomia;  
 Spiralia;Lophotrochozoa;Mollusca;Bivalvia;Autobranhia;Pteriormorphia;Ostr  
 eida;Ostreoidea;Ostreidae;Crassostrea;Crassostrea gigas  
 UdeM00000009354 6573 236.9 UdeM00000009354 XP\_021377871.1 56.8 199  
 85 1 18 216 13 210 2.80E-59 236.9 6573 cellular  
 organisms;Eukaryota;Opisthokonta;Metazoa;Eumetazoa;Bilateria;Protostomia;  
 Spiralia;Lophotrochozoa;Mollusca;Bivalvia;Autobranhia;Pteriormorphia;Pect  
 inida;Pectinoidea;Pectinidae;Mizuhopecten;Mizuhopecten yessoensis  
 UdeM00000009355 6573 227.6 UdeM00000009355 XP\_021377871.1 63.2 174  
 63 1 1 174 317 489 1.20E-56 227.6 6573 cellular  
 organisms;Eukaryota;Opisthokonta;Metazoa;Eumetazoa;Bilateria;Protostomia;  
 Spiralia;Lophotrochozoa;Mollusca;Bivalvia;Autobranhia;Pteriormorphia;Pect  
 inida;Pectinoidea;Pectinidae;Mizuhopecten;Mizuhopecten yessoensis  
 UdeM00000009356 6573 449.9 UdeM00000009356 XP\_021377871.1 50.8 461  
 218 4 4 462 36 489 4.10E-123 449.9 6573 cellular  
 organisms;Eukaryota;Opisthokonta;Metazoa;Eumetazoa;Bilateria;Protostomia;  
 Spiralia;Lophotrochozoa;Mollusca;Bivalvia;Autobranhia;Pteriormorphia;Pect  
 inida;Pectinoidea;Pectinidae;Mizuhopecten;Mizuhopecten yessoensis  
 UdeM00000009358 6596 387.9 UdeM00000009358 XP\_045185217.1 59.4 318  
 122 3 21 336 14 326 2.20E-104 387.9 6596 cellular  
 organisms;Eukaryota;Opisthokonta;Metazoa;Eumetazoa;Bilateria;Protostomia;  
 Spiralia;Lophotrochozoa;Mollusca;Bivalvia;Autobranhia;Heteroconchia;Euhe  
 terodonta;Imparidentia;Venerida;Veneroidea;Veneridae;Mercenaria;Mercenari  
 a mercenaria  
 UdeM00000009360 2607531 256.1 UdeM00000009360 XP\_036371126.1 37.9  
 314 183 4 156 466 413 717 8.80E-65 256.1 2607531  
 cellular  
 organisms;Eukaryota;Opisthokonta;Metazoa;Eumetazoa;Bilateria;Protostomia;  
 Spiralia;Lophotrochozoa;Mollusca;Cephalopoda;Coleoidea;Octopodiformes;Oct  
 opoda;Incirrata;Octopodidae;Octopus;Octopus sinensis  
 UdeM00000036153 6573 241.9 UdeM00000036153 XP\_021353812.1 46.5 316  
 145 6 1 298 1 310 1.10E-60 241.9 6573 cellular  
 organisms;Eukaryota;Opisthokonta;Metazoa;Eumetazoa;Bilateria;Protostomia;  
 Spiralia;Lophotrochozoa;Mollusca;Bivalvia;Autobranhia;Pteriormorphia;Pect  
 inida;Pectinoidea;Pectinidae;Mizuhopecten;Mizuhopecten yessoensis  
 UdeM00000036154 6596 226.9 UdeM00000036154 XP\_045187338.1 65.7 172  
 51 3 1 164 1 172 1.90E-56 226.9 6596 cellular  
 organisms;Eukaryota;Opisthokonta;Metazoa;Eumetazoa;Bilateria;Protostomia;  
 Spiralia;Lophotrochozoa;Mollusca;Bivalvia;Autobranhia;Heteroconchia;Euhe  
 terodonta;Imparidentia;Venerida;Veneroidea;Veneridae;Mercenaria;Mercenari  
 a mercenaria  
 UdeM00000036155 6596 243 UdeM00000036155 XP\_045187337.1 59.7 186  
 75 0 4 189 20 205 3.10E-61 243 6596 cellular  
 organisms;Eukaryota;Opisthokonta;Metazoa;Eumetazoa;Bilateria;Protostomia;  
 Spiralia;Lophotrochozoa;Mollusca;Bivalvia;Autobranhia;Heteroconchia;Euhe  
 terodonta;Imparidentia;Venerida;Veneroidea;Veneridae;Mercenaria;Mercenari  
 a mercenaria  
 UdeM00000036156 6596 675.6 UdeM00000036156 XP\_045166954.1 67.8 451  
 143 1 10 458 310 760 4.30E-191 675.6 6596 cellular  
 organisms;Eukaryota;Opisthokonta;Metazoa;Eumetazoa;Bilateria;Protostomia;  
 Spiralia;Lophotrochozoa;Mollusca;Bivalvia;Autobranhia;Heteroconchia;Euhe

terodonta;Imparidentia;Venerida;Veneroidea;Veneridae;Mercenaria;Mercenaria mercenaria

UdeM00000036157 6596 297.7 UdeM00000036157 XP\_045166954.1 88.7 151  
17 0 8 158 161 311 8.60E-78 297.7 6596 cellular

organisms;Eukaryota;Opisthokonta;Metazoa;Eumetazoa;Bilateria;Protostomia;Spiralia;Lophotrochozoa;Mollusca;Bivalvia;Autobranchia;Heteroconchia;Euherodonta;Imparidentia;Venerida;Veneroidea;Veneridae;Mercenaria;Mercenaria mercenaria

UdeM00000036158 6596 154.8 UdeM00000036158 XP\_045166954.1 62.2 127  
39 2 13 139 15 132 9.10E-35 154.8 6596 cellular

organisms;Eukaryota;Opisthokonta;Metazoa;Eumetazoa;Bilateria;Protostomia;Spiralia;Lophotrochozoa;Mollusca;Bivalvia;Autobranchia;Heteroconchia;Euherodonta;Imparidentia;Venerida;Veneroidea;Veneridae;Mercenaria;Mercenaria mercenaria

UdeM00000036159 6596 1026.5 UdeM00000036159 XP\_045166963.1 59.3  
1104 356 15 1 1070 1 1045 2.30E-296 1026.5 6596  
cellular

organisms;Eukaryota;Opisthokonta;Metazoa;Eumetazoa;Bilateria;Protostomia;Spiralia;Lophotrochozoa;Mollusca;Bivalvia;Autobranchia;Heteroconchia;Euherodonta;Imparidentia;Venerida;Veneroidea;Veneridae;Mercenaria;Mercenaria mercenaria

UdeM00000036160 6573 2137.5 UdeM00000036160 XP\_021345432.1 59  
1809 678 16 1 1803 2 1752 0.00E+00 2137.5 6573  
cellular

organisms;Eukaryota;Opisthokonta;Metazoa;Eumetazoa;Bilateria;Protostomia;Spiralia;Lophotrochozoa;Mollusca;Bivalvia;Autobranchia;Pteriomorphia;Pectinida;Pectinoidea;Pectinidae;Mizuhopecten;Mizuhopecten yessoensis

UdeM00000036161 1735272 269.2 UdeM00000036161 XP\_041351538.1 60.1  
208 81 1 1 208 57 262 4.40E-69 269.2 1735272  
cellular

organisms;Eukaryota;Opisthokonta;Metazoa;Eumetazoa;Bilateria;Protostomia;Spiralia;Lophotrochozoa;Mollusca;Gastropoda;Neomphalina;Neomphaloidea;Peltospiridae;Gigantopelta;Gigantopelta aegis

UdeM00000036162 6573 419.1 UdeM00000036162 XP\_021345436.1 80.5 292  
49 2 64 347 75 366 5.60E-114 419.1 6573 cellular

organisms;Eukaryota;Opisthokonta;Metazoa;Eumetazoa;Bilateria;Protostomia;Spiralia;Lophotrochozoa;Mollusca;Bivalvia;Autobranchia;Pteriomorphia;Pectinida;Pectinoidea;Pectinidae;Mizuhopecten;Mizuhopecten yessoensis

UdeM00000036163 6573 419.9 UdeM00000036163 XP\_021345436.1 78.6 290  
48 3 68 343 77 366 3.20E-114 419.9 6573 cellular

organisms;Eukaryota;Opisthokonta;Metazoa;Eumetazoa;Bilateria;Protostomia;Spiralia;Lophotrochozoa;Mollusca;Bivalvia;Autobranchia;Pteriomorphia;Pectinida;Pectinoidea;Pectinidae;Mizuhopecten;Mizuhopecten yessoensis

UdeM00000036164 6596 451.8 UdeM00000036164 XP\_045166671.1 51.2 453  
214 4 3 451 39 488 1.00E-123 451.8 6596 cellular

organisms;Eukaryota;Opisthokonta;Metazoa;Eumetazoa;Bilateria;Protostomia;Spiralia;Lophotrochozoa;Mollusca;Bivalvia;Autobranchia;Heteroconchia;Euherodonta;Imparidentia;Venerida;Veneroidea;Veneridae;Mercenaria;Mercenaria mercenaria

UdeM00000036165 6573 577.8 UdeM00000036165 XP\_021371270.1 71.7 534  
135 4 1 526 1 526 1.40E-161 577.8 6573 cellular

organisms;Eukaryota;Opisthokonta;Metazoa;Eumetazoa;Bilateria;Protostomia;Spiralia;Lophotrochozoa;Mollusca;Bivalvia;Autobranchia;Pteriomorphia;Pectinida;Pectinoidea;Pectinidae;Mizuhopecten;Mizuhopecten yessoensis

UdeM00000036166 6596 535.4 UdeM00000036166 XP\_045209735.1 35 904  
 521 15 20 890 23 892 1.40E-148 535.4 6596 cellular  
 organisms;Eukaryota;Opisthokonta;Metazoa;Eumetazoa;Bilateria;Protostomia;  
 Spiralia;Lophotrochozoa;Mollusca;Bivalvia;Autobranhia;Heteroconchia;Euhe  
 terodonta;Imparidentia;Venerida;Veneroidea;Veneridae;Mercenaria;Mercenari  
 a mercenaria

UdeM00000036167 6596 538.1 UdeM00000036167 XP\_045209735.1 34.7 901  
 529 17 20 892 23 892 2.10E-149 538.1 6596 cellular  
 organisms;Eukaryota;Opisthokonta;Metazoa;Eumetazoa;Bilateria;Protostomia;  
 Spiralia;Lophotrochozoa;Mollusca;Bivalvia;Autobranhia;Heteroconchia;Euhe  
 terodonta;Imparidentia;Venerida;Veneroidea;Veneridae;Mercenaria;Mercenari  
 a mercenaria

UdeM00000036168 6596 538.1 UdeM00000036168 XP\_045209735.1 34.7 901  
 529 17 20 892 23 892 2.10E-149 538.1 6596 cellular  
 organisms;Eukaryota;Opisthokonta;Metazoa;Eumetazoa;Bilateria;Protostomia;  
 Spiralia;Lophotrochozoa;Mollusca;Bivalvia;Autobranhia;Heteroconchia;Euhe  
 terodonta;Imparidentia;Venerida;Veneroidea;Veneridae;Mercenaria;Mercenari  
 a mercenaria

UdeM00000036169 6596 234.2 UdeM00000036169 XP\_045209735.1 33.6 408  
 243 6 3 405 505 889 3.00E-58 234.2 6596 cellular  
 organisms;Eukaryota;Opisthokonta;Metazoa;Eumetazoa;Bilateria;Protostomia;  
 Spiralia;Lophotrochozoa;Mollusca;Bivalvia;Autobranhia;Heteroconchia;Euhe  
 terodonta;Imparidentia;Venerida;Veneroidea;Veneridae;Mercenaria;Mercenari  
 a mercenaria

UdeM00000036170 6596 224.6 UdeM00000036170 XP\_045209735.1 31 429  
 201 8 20 355 23 449 2.10E-55 224.6 6596 cellular  
 organisms;Eukaryota;Opisthokonta;Metazoa;Eumetazoa;Bilateria;Protostomia;  
 Spiralia;Lophotrochozoa;Mollusca;Bivalvia;Autobranhia;Heteroconchia;Euhe  
 terodonta;Imparidentia;Venerida;Veneroidea;Veneridae;Mercenaria;Mercenari  
 a mercenaria

UdeM00000036171 6596 516.5 UdeM00000036171 XP\_045209735.1 34.1 911  
 537 19 9 890 19 895 6.50E-143 516.5 6596 cellular  
 organisms;Eukaryota;Opisthokonta;Metazoa;Eumetazoa;Bilateria;Protostomia;  
 Spiralia;Lophotrochozoa;Mollusca;Bivalvia;Autobranhia;Heteroconchia;Euhe  
 terodonta;Imparidentia;Venerida;Veneroidea;Veneridae;Mercenaria;Mercenari  
 a mercenaria

UdeM00000036172 6596 81.6 UdeM00000036172 XP\_045209735.1 37.3 110  
 69 0 5 114 780 889 7.00E-13 81.6 6596 cellular  
 organisms;Eukaryota;Opisthokonta;Metazoa;Eumetazoa;Bilateria;Protostomia;  
 Spiralia;Lophotrochozoa;Mollusca;Bivalvia;Autobranhia;Heteroconchia;Euhe  
 terodonta;Imparidentia;Venerida;Veneroidea;Veneridae;Mercenaria;Mercenari  
 a mercenaria

UdeM00000036173 6596 90.5 UdeM00000036173 XP\_045209735.1 36.3 113  
 72 0 5 117 780 892 1.60E-15 90.5 6596 cellular  
 organisms;Eukaryota;Opisthokonta;Metazoa;Eumetazoa;Bilateria;Protostomia;  
 Spiralia;Lophotrochozoa;Mollusca;Bivalvia;Autobranhia;Heteroconchia;Euhe  
 terodonta;Imparidentia;Venerida;Veneroidea;Veneridae;Mercenaria;Mercenari  
 a mercenaria

UdeM00000036174 6596 70.1 UdeM00000036174 XP\_045209735.1 34.2 111  
 71 1 4 112 779 889 2.10E-09 70.1 6596 cellular  
 organisms;Eukaryota;Opisthokonta;Metazoa;Eumetazoa;Bilateria;Protostomia;  
 Spiralia;Lophotrochozoa;Mollusca;Bivalvia;Autobranhia;Heteroconchia;Euhe  
 terodonta;Imparidentia;Venerida;Veneroidea;Veneridae;Mercenaria;Mercenari  
 a mercenaria

UdeM00000036175 6596 86.7 UdeM00000036175 XP\_045209735.1 36.8 114  
 72 0 4 117 779 892 2.30E-14 86.7 6596 cellular  
 organisms;Eukaryota;Opisthokonta;Metazoa;Eumetazoa;Bilateria;Protostomia;  
 Spiralia;Lophotrochozoa;Mollusca;Bivalvia;Autobranchia;Heteroconchia;Euhe  
 terodonta;Imparidentia;Venerida;Veneroidea;Veneridae;Mercenaria;Mercenari  
 a mercenaria  
 UdeM00000036176 6596 503.4 UdeM00000036176 XP\_045185503.1 60.2 440  
 172 3 1 438 1 439 2.80E-139 503.4 6596 cellular  
 organisms;Eukaryota;Opisthokonta;Metazoa;Eumetazoa;Bilateria;Protostomia;  
 Spiralia;Lophotrochozoa;Mollusca;Bivalvia;Autobranchia;Heteroconchia;Euhe  
 terodonta;Imparidentia;Venerida;Veneroidea;Veneridae;Mercenaria;Mercenari  
 a mercenaria  
 UdeM00000036177 7574 658.7 UdeM00000036177 XP\_013388894.1 58.1 583  
 227 7 5 577 6 581 7.50E-186 658.7 7574 cellular  
 organisms;Eukaryota;Opisthokonta;Metazoa;Eumetazoa;Bilateria;Protostomia;  
 Spiralia;Lophotrochozoa;Brachiopoda;Linguliformea;Lingulata;Lingulida;Lin  
 guloidea;Lingulidae;Lingula;Lingula anatina  
 UdeM00000036178 6596 226.5 UdeM00000036178 XP\_045160601.1 28.6 636  
 146 6 126 457 244 875 7.00E-56 226.5 6596 cellular  
 organisms;Eukaryota;Opisthokonta;Metazoa;Eumetazoa;Bilateria;Protostomia;  
 Spiralia;Lophotrochozoa;Mollusca;Bivalvia;Autobranchia;Heteroconchia;Euhe  
 terodonta;Imparidentia;Venerida;Veneroidea;Veneridae;Mercenaria;Mercenari  
 a mercenaria  
 UdeM00000036179 45264 269.6 UdeM00000036179 XP\_044165535.1 48.8 254  
 126 1 1 250 294 547 1.50E-68 269.6 45264 cellular  
 organisms;Eukaryota;Opisthokonta;Metazoa;Eumetazoa;Cnidaria;Anthozoa;Hexa  
 corallia;Scleractinia;Astrocoeniina;Acroporidae;Acropora;Acropora  
 millepora  
 UdeM00000036180 6596 337 UdeM00000036180 XP\_045187802.1 45.2 407  
 204 11 4 398 51 450 3.30E-89 337 6596 cellular  
 organisms;Eukaryota;Opisthokonta;Metazoa;Eumetazoa;Bilateria;Protostomia;  
 Spiralia;Lophotrochozoa;Mollusca;Bivalvia;Autobranchia;Heteroconchia;Euhe  
 terodonta;Imparidentia;Venerida;Veneroidea;Veneridae;Mercenaria;Mercenari  
 a mercenaria  
 UdeM00000036182 6596 283.1 UdeM00000036182 XP\_045187802.1 49.7 304  
 134 9 1 289 48 347 4.40E-73 283.1 6596 cellular  
 organisms;Eukaryota;Opisthokonta;Metazoa;Eumetazoa;Bilateria;Protostomia;  
 Spiralia;Lophotrochozoa;Mollusca;Bivalvia;Autobranchia;Heteroconchia;Euhe  
 terodonta;Imparidentia;Venerida;Veneroidea;Veneridae;Mercenaria;Mercenari  
 a mercenaria  
 UdeM00000036181 6596 321.2 UdeM00000036181 XP\_045187802.1 45.9 379  
 182 10 1 360 48 422 1.70E-84 321.2 6596 cellular  
 organisms;Eukaryota;Opisthokonta;Metazoa;Eumetazoa;Bilateria;Protostomia;  
 Spiralia;Lophotrochozoa;Mollusca;Bivalvia;Autobranchia;Heteroconchia;Euhe  
 terodonta;Imparidentia;Venerida;Veneroidea;Veneridae;Mercenaria;Mercenari  
 a mercenaria  
 UdeM00000036183 400727 58.5 UdeM00000036183 XP\_025111790.1 32.9  
 82 55 0 32 113 504 585 6.70E-06 58.5 400727  
 cellular  
 organisms;Eukaryota;Opisthokonta;Metazoa;Eumetazoa;Bilateria;Protostomia;  
 Spiralia;Lophotrochozoa;Mollusca;Gastropoda;Caenogastropoda;Architaeniogl  
 ossa;Ampullarioidea;Ampullariidae;Pomacea;Pomacea canaliculata  
 UdeM00000036184 6596 248.4 UdeM00000036184 XP\_045187806.1 62.7 201  
 71 3 1 197 1 201 8.50E-63 248.4 6596 cellular

organisms;Eukaryota;Opisthokonta;Metazoa;Eumetazoa;Bilateria;Protostomia;Spiralia;Lophotrochozoa;Mollusca;Bivalvia;Autobranchia;Heteroconchia;Euheterodonta;Imparidentia;Venerida;Veneroidea;Veneridae;Mercenaria;Mercenaria mercenaria

UdeM00000036185 6596 174.9 UdeM00000036185 XP\_045174845.1 67.4 132  
38 2 7 136 46 174 7.50E-41 174.9 6596 cellular

organisms;Eukaryota;Opisthokonta;Metazoa;Eumetazoa;Bilateria;Protostomia;Spiralia;Lophotrochozoa;Mollusca;Bivalvia;Autobranchia;Heteroconchia;Euheterodonta;Imparidentia;Venerida;Veneroidea;Veneridae;Mercenaria;Mercenaria mercenaria

UdeM00000036186 29159 189.9 UdeM00000036186 XP\_019924248.1 48.6 220  
104 3 7 225 5 216 3.60E-45 189.9 29159 cellular

organisms;Eukaryota;Opisthokonta;Metazoa;Eumetazoa;Bilateria;Protostomia;Spiralia;Lophotrochozoa;Mollusca;Bivalvia;Autobranchia;Pteriormorphia;Ostreida;Ostreoidea;Ostreidae;Crassostrea;Crassostrea gigas

UdeM00000036187 80966 186 UdeM00000036187 XP\_022077561.1 56.4 156  
68 0 1 156 116 271 3.60E-44 186 80966 cellular

organisms;Eukaryota;Opisthokonta;Metazoa;Eumetazoa;Bilateria;Deuterostomia;Chordata;Craniata;Vertebrata;Gnathostomata;Teleostomi;Euteleostomi;Actinopterygii;Actinopteri;Neopterygii;Teleostei;Osteoglossocephalai;Clupeocephala;Euteleostei;Neoteleostei;Eurypterygia;Ctenosquamata;Acanthomorphata;Euacanthomorphacea;Percomorphaceae;Ovalentaria;Ovalentaria incertae sedis;Pomacentridae;Acanthochromis;Acanthochromis polyacanthus

UdeM00000036188 6573 241.5 UdeM00000036188 XP\_021362074.1 60.2 186  
73 1 30 214 183 368 1.00E-60 241.5 6573 cellular

organisms;Eukaryota;Opisthokonta;Metazoa;Eumetazoa;Bilateria;Protostomia;Spiralia;Lophotrochozoa;Mollusca;Bivalvia;Autobranchia;Pteriormorphia;Pectinida;Pectinoidea;Pectinidae;Mizuhopecten;Mizuhopecten yessoensis

UdeM00000036190 6565 438 UdeM00000036190 XP\_022332036.1 71.1 315  
88 2 1 313 376 689 1.10E-119 438 6565 cellular

organisms;Eukaryota;Opisthokonta;Metazoa;Eumetazoa;Bilateria;Protostomia;Spiralia;Lophotrochozoa;Mollusca;Bivalvia;Autobranchia;Pteriormorphia;Ostreida;Ostreoidea;Ostreidae;Crassostrea;Crassostrea virginica

UdeM00000036191 6596 254.6 UdeM00000036191 XP\_045174845.1 69.5 177  
49 2 1 175 1 174 1.10E-64 254.6 6596 cellular

organisms;Eukaryota;Opisthokonta;Metazoa;Eumetazoa;Bilateria;Protostomia;Spiralia;Lophotrochozoa;Mollusca;Bivalvia;Autobranchia;Heteroconchia;Euheterodonta;Imparidentia;Venerida;Veneroidea;Veneridae;Mercenaria;Mercenaria mercenaria

UdeM00000036192 6565 186.8 UdeM00000036192 XP\_022333753.1 60.5 147  
58 0 7 153 5 151 3.50E-44 186.8 6565 cellular

organisms;Eukaryota;Opisthokonta;Metazoa;Eumetazoa;Bilateria;Protostomia;Spiralia;Lophotrochozoa;Mollusca;Bivalvia;Autobranchia;Pteriormorphia;Ostreida;Ostreoidea;Ostreidae;Crassostrea;Crassostrea virginica

UdeM00000036193 6565 1094.3 UdeM00000036193 XP\_022332036.1 65.2  
831 284 4 27 853 48 877 0.00E+00 1094.3 6565  
cellular

organisms;Eukaryota;Opisthokonta;Metazoa;Eumetazoa;Bilateria;Protostomia;Spiralia;Lophotrochozoa;Mollusca;Bivalvia;Autobranchia;Pteriormorphia;Ostreida;Ostreoidea;Ostreidae;Crassostrea;Crassostrea virginica

UdeM00000036194 6579 434.5 UdeM00000036194 XP\_033734764.1 68.3 325  
87 4 1 321 1 313 1.20E-118 434.5 6579 cellular

organisms;Eukaryota;Opisthokonta;Metazoa;Eumetazoa;Bilateria;Protostomia;



Spiralia;Lophotrochozoa;Mollusca;Bivalvia;Autobranchia;Pteriormorphia;Pectinida;Pectinoidea;Pectinidae;Pecten;Pecten maximus  
UdeM00000036195 29159 1137.1 UdeM00000036195 XP\_011437945.1 76.8  
747 143 7 1 741 1 723 0.00E+00 1137.1  
29159 cellular  
organisms;Eukaryota;Opisthokonta;Metazoa;Eumetazoa;Bilateria;Protostomia;Spiralia;Lophotrochozoa;Mollusca;Bivalvia;Autobranchia;Pteriormorphia;Ostreida;Ostreoidea;Ostreidae;Crassostrea;Crassostrea gigas  
UdeM00000036196 6579 974.5 UdeM00000036196 XP\_033734456.1 42.4 1497  
683 27 1 1386 49 1477 1.40E-280 974.5 6579 cellular  
organisms;Eukaryota;Opisthokonta;Metazoa;Eumetazoa;Bilateria;Protostomia;Spiralia;Lophotrochozoa;Mollusca;Bivalvia;Autobranchia;Pteriormorphia;Pectinida;Pectinoidea;Pectinidae;Pecten;Pecten maximus  
UdeM00000036197 400727 61.6 UdeM00000036197 XP\_025105663.1 36.3  
102 60 1 89 190 97 193 1.30E-06 61.6 400727  
cellular  
organisms;Eukaryota;Opisthokonta;Metazoa;Eumetazoa;Bilateria;Protostomia;Spiralia;Lophotrochozoa;Mollusca;Gastropoda;Caenogastropoda;Architaenioglossa;Ampullarioidea;Ampullariidae;Pomacea;Pomacea canaliculata  
UdeM00000036198 6596 1615.5 UdeM00000036198 XP\_045173685.1 54  
1755 707 22 42 1759 72 1763 0.00E+00 1615.5 6596  
cellular  
organisms;Eukaryota;Opisthokonta;Metazoa;Eumetazoa;Bilateria;Protostomia;Spiralia;Lophotrochozoa;Mollusca;Bivalvia;Autobranchia;Heteroconchia;Euheterodonta;Imparidentia;Venerida;Veneroidea;Veneridae;Mercenaria;Mercenaria mercenaria  
UdeM00000036199 6596 697.2 UdeM00000036199 XP\_045173685.1 53.3 647  
291 5 11 651 1867 2508 2.00E-197 697.2 6596 cellular  
organisms;Eukaryota;Opisthokonta;Metazoa;Eumetazoa;Bilateria;Protostomia;Spiralia;Lophotrochozoa;Mollusca;Bivalvia;Autobranchia;Heteroconchia;Euheterodonta;Imparidentia;Venerida;Veneroidea;Veneridae;Mercenaria;Mercenaria mercenaria  
UdeM00000036200 10224 96.7 UdeM00000036200 XP\_006815030.1 47.9 96  
45 3 3 97 427 518 5.20E-17 96.7 10224 cellular  
organisms;Eukaryota;Opisthokonta;Metazoa;Eumetazoa;Bilateria;Deuterostomia;Hemichordata;Enteropneusta;Harrimaniidae;Saccoglossus;Saccoglossus kowalevskii  
UdeM00000036201 6573 298.1 UdeM00000036201 XP\_021359541.1 35.4 466  
244 9 2 424 10 461 2.00E-77 298.1 6573 cellular  
organisms;Eukaryota;Opisthokonta;Metazoa;Eumetazoa;Bilateria;Protostomia;Spiralia;Lophotrochozoa;Mollusca;Bivalvia;Autobranchia;Pteriormorphia;Pectinida;Pectinoidea;Pectinidae;Mizuhopecten;Mizuhopecten yessoensis  
UdeM00000036202 6596 173.3 UdeM00000036202 XP\_045215622.1 43.7 197  
109 2 14 208 87 283 3.30E-40 173.3 6596 cellular  
organisms;Eukaryota;Opisthokonta;Metazoa;Eumetazoa;Bilateria;Protostomia;Spiralia;Lophotrochozoa;Mollusca;Bivalvia;Autobranchia;Heteroconchia;Euheterodonta;Imparidentia;Venerida;Veneroidea;Veneridae;Mercenaria;Mercenaria mercenaria  
UdeM00000036203 6579 246.9 UdeM00000036203 XP\_033743480.1 38.5 366  
207 9 67 428 30 381 4.80E-62 246.9 6579 cellular  
organisms;Eukaryota;Opisthokonta;Metazoa;Eumetazoa;Bilateria;Protostomia;Spiralia;Lophotrochozoa;Mollusca;Bivalvia;Autobranchia;Pteriormorphia;Pectinida;Pectinoidea;Pectinidae;Pecten;Pecten maximus

UdeM00000036204 29159 178.7 UdeM00000036204 XP\_034312908.1 26.3 651  
 313 19 5 523 6 621 1.90E-41 178.7 29159 cellular  
 organisms;Eukaryota;Opisthokonta;Metazoa;Eumetazoa;Bilateria;Protostomia;  
 Spiralia;Lophotrochozoa;Mollusca;Bivalvia;Autobranchia;Pteriormorphia;Ostr  
 eida;Ostreoidea;Ostreidae;Crassostrea;Crassostrea gigas  
 UdeM00000036205 6579 344.7 UdeM00000036205 XP\_033743480.1 40.6 463  
 256 10 33 491 30 477 2.70E-91 344.7 6579 cellular  
 organisms;Eukaryota;Opisthokonta;Metazoa;Eumetazoa;Bilateria;Protostomia;  
 Spiralia;Lophotrochozoa;Mollusca;Bivalvia;Autobranchia;Pteriormorphia;Pect  
 inida;Pectinoidea;Pectinidae;Pecten;Pecten maximus  
 UdeM00000036206 29159 117.5 UdeM00000036206 XP\_034330259.1 47.5 122  
 55 3 1 122 519 631 1.30E-23 117.5 29159 cellular  
 organisms;Eukaryota;Opisthokonta;Metazoa;Eumetazoa;Bilateria;Protostomia;  
 Spiralia;Lophotrochozoa;Mollusca;Bivalvia;Autobranchia;Pteriormorphia;Ostr  
 eida;Ostreoidea;Ostreidae;Crassostrea;Crassostrea gigas  
 UdeM00000036208 3981 184.5 UdeM00000036208 XP\_021672724.1 60.5 152  
 59 1 1 151 1 152 1.00E-43 184.5 3981 cellular  
 organisms;Eukaryota;Viridiplantae;Streptophyta;Streptophytina;Embryophyta  
 ;Tracheophyta;Euphylllophyta;Spermatophyta;Magnoliopsida;Mesangiospermae;e  
 udicotyledons;Gunneridae;Pentapetalae;rosids;fabids;Malpighiales;Euphorbi  
 aceae;Crotonoideae;Micrandreae;Hevea;Hevea brasiliensis  
 UdeM00000036209 6579 250.4 UdeM00000036209 XP\_033734573.1 87.4 143  
 18 0 26 168 1 143 1.70E-63 250.4 6579 cellular  
 organisms;Eukaryota;Opisthokonta;Metazoa;Eumetazoa;Bilateria;Protostomia;  
 Spiralia;Lophotrochozoa;Mollusca;Bivalvia;Autobranchia;Pteriormorphia;Pect  
 inida;Pectinoidea;Pectinidae;Pecten;Pecten maximus  
 UdeM00000036210 6596 132.5 UdeM00000036210 XP\_045169236.1 43.4 159  
 86 2 1179 1337 1183 1337 4.00E-27 132.5 6596 cellular  
 organisms;Eukaryota;Opisthokonta;Metazoa;Eumetazoa;Bilateria;Protostomia;  
 Spiralia;Lophotrochozoa;Mollusca;Bivalvia;Autobranchia;Heteroconchia;Euhe  
 terodonta;Imparidentia;Venerida;Veneroidea;Veneridae;Mercenaria;Mercenari  
 a mercenaria  
 UdeM00000036211 6596 124 UdeM00000036211 XP\_045187622.1 28 440  
 233 10 32 456 23 393 5.00E-25 124 6596 cellular  
 organisms;Eukaryota;Opisthokonta;Metazoa;Eumetazoa;Bilateria;Protostomia;  
 Spiralia;Lophotrochozoa;Mollusca;Bivalvia;Autobranchia;Heteroconchia;Euhe  
 terodonta;Imparidentia;Venerida;Veneroidea;Veneridae;Mercenaria;Mercenari  
 a mercenaria  
 UdeM00000036212 6596 454.5 UdeM00000036212 XP\_045169245.1 46.8 511  
 254 8 56 551 20 527 1.90E-124 454.5 6596 cellular  
 organisms;Eukaryota;Opisthokonta;Metazoa;Eumetazoa;Bilateria;Protostomia;  
 Spiralia;Lophotrochozoa;Mollusca;Bivalvia;Autobranchia;Heteroconchia;Euhe  
 terodonta;Imparidentia;Venerida;Veneroidea;Veneridae;Mercenaria;Mercenari  
 a mercenaria  
 UdeM00000036214 6596 236.1 UdeM00000036214 XP\_045169094.1 59.7 191  
 75 2 1 189 1 191 3.70E-59 236.1 6596 cellular  
 organisms;Eukaryota;Opisthokonta;Metazoa;Eumetazoa;Bilateria;Protostomia;  
 Spiralia;Lophotrochozoa;Mollusca;Bivalvia;Autobranchia;Heteroconchia;Euhe  
 terodonta;Imparidentia;Venerida;Veneroidea;Veneridae;Mercenaria;Mercenari  
 a mercenaria  
 UdeM00000036215 6596 236.9 UdeM00000036215 XP\_045169094.1 55.8 190  
 84 0 1 190 1 190 2.20E-59 236.9 6596 cellular  
 organisms;Eukaryota;Opisthokonta;Metazoa;Eumetazoa;Bilateria;Protostomia;  
 Spiralia;Lophotrochozoa;Mollusca;Bivalvia;Autobranchia;Heteroconchia;Euhe

terodonta;Imparidentia;Venerida;Veneroidea;Veneridae;Mercenaria;Mercenaria mercenaria

UdeM00000036216 400727 690.3 UdeM00000036216 XP\_025103463.1 53.2  
697 299 8 2 696 3 674 2.60E-195 690.3 400727  
cellular

organisms;Eukaryota;Opisthokonta;Metazoa;Eumetazoa;Bilateria;Protostomia;Spiralia;Lophotrochozoa;Mollusca;Gastropoda;Caenogastropoda;Architaenioglossa;Ampullarioidea;Ampullariidae;Pomacea;Pomacea canaliculata

UdeM00000036217 6596 63.9 UdeM00000036217 XP\_045160225.1 57.6 59  
25 0 91 149 109 167 2.00E-07 63.9 6596 cellular

organisms;Eukaryota;Opisthokonta;Metazoa;Eumetazoa;Bilateria;Protostomia;Spiralia;Lophotrochozoa;Mollusca;Bivalvia;Autobranchia;Heteroconchia;Euheterodonta;Imparidentia;Venerida;Veneroidea;Veneridae;Mercenaria;Mercenaria mercenaria

UdeM00000036219 6579 313.2 UdeM00000036219 XP\_033734692.1 46.5 325  
169 3 1 321 1 324 4.00E-82 313.2 6579 cellular

organisms;Eukaryota;Opisthokonta;Metazoa;Eumetazoa;Bilateria;Protostomia;Spiralia;Lophotrochozoa;Mollusca;Bivalvia;Autobranchia;Pteriomorphia;Pectinida;Pectinoidea;Pectinidae;Pecten;Pecten maximus

UdeM00000036221 6596 146 UdeM00000036221 XP\_045196567.1 57.6 118  
49 1 65 182 3 119 4.80E-32 146 6596 cellular

organisms;Eukaryota;Opisthokonta;Metazoa;Eumetazoa;Bilateria;Protostomia;Spiralia;Lophotrochozoa;Mollusca;Bivalvia;Autobranchia;Heteroconchia;Euheterodonta;Imparidentia;Venerida;Veneroidea;Veneridae;Mercenaria;Mercenaria mercenaria

UdeM00000036222 6565 794.3 UdeM00000036222 XP\_022297807.1 38.7 1300  
775 12 115 1405 196 1482 2.80E-226 794.3 6565 cellular

organisms;Eukaryota;Opisthokonta;Metazoa;Eumetazoa;Bilateria;Protostomia;Spiralia;Lophotrochozoa;Mollusca;Bivalvia;Autobranchia;Pteriomorphia;Ostreida;Ostreoidea;Ostreidae;Crassostrea;Crassostrea virginica

UdeM00000036223 6565 219.9 UdeM00000036223 XP\_022301041.1 51.9 335  
154 2 1 328 1488 1822 7.30E-54 219.9 6565 cellular

organisms;Eukaryota;Opisthokonta;Metazoa;Eumetazoa;Bilateria;Protostomia;Spiralia;Lophotrochozoa;Mollusca;Bivalvia;Autobranchia;Pteriomorphia;Ostreida;Ostreoidea;Ostreidae;Crassostrea;Crassostrea virginica

UdeM00000036224 6565 13434.2 UdeM00000036224 XP\_022297807.1 43.7  
19706 10052 238 3 19293 1828 20909 0.00E+00 13434.2 6565

cellular

organisms;Eukaryota;Opisthokonta;Metazoa;Eumetazoa;Bilateria;Protostomia;Spiralia;Lophotrochozoa;Mollusca;Bivalvia;Autobranchia;Pteriomorphia;Ostreida;Ostreoidea;Ostreidae;Crassostrea;Crassostrea virginica

UdeM00000036225 6596 385.2 UdeM00000036225 XP\_045187150.1 50 394  
192 2 1 394 229 617 1.00E-103 385.2 6596 cellular

organisms;Eukaryota;Opisthokonta;Metazoa;Eumetazoa;Bilateria;Protostomia;Spiralia;Lophotrochozoa;Mollusca;Bivalvia;Autobranchia;Heteroconchia;Euheterodonta;Imparidentia;Venerida;Veneroidea;Veneridae;Mercenaria;Mercenaria mercenaria

UdeM00000036226 6596 195.7 UdeM00000036226 XP\_045169782.1 47.4 192  
100 1 1 191 56 247 5.50E-47 195.7 6596 cellular

organisms;Eukaryota;Opisthokonta;Metazoa;Eumetazoa;Bilateria;Protostomia;Spiralia;Lophotrochozoa;Mollusca;Bivalvia;Autobranchia;Heteroconchia;Euheterodonta;Imparidentia;Venerida;Veneroidea;Veneridae;Mercenaria;Mercenaria mercenaria

UdeM00000036228 6596 835.1 UdeM00000036228 XP\_045165863.1 55.8 754  
 321 3 23 764 9 762 7.10E-239 835.1 6596 cellular  
 organisms;Eukaryota;Opisthokonta;Metazoa;Eumetazoa;Bilateria;Protostomia;  
 Spiralia;Lophotrochozoa;Mollusca;Bivalvia;Autobranchia;Heteroconchia;Euhe  
 terodonta;Imparidentia;Venerida;Veneroidea;Veneridae;Mercenaria;Mercenari  
 a mercenaria

UdeM00000036229 6596 285 UdeM00000036229 XP\_045165895.1 53.7 296  
 95 8 1 287 1 263 1.40E-73 285 6596 cellular  
 organisms;Eukaryota;Opisthokonta;Metazoa;Eumetazoa;Bilateria;Protostomia;  
 Spiralia;Lophotrochozoa;Mollusca;Bivalvia;Autobranchia;Heteroconchia;Euhe  
 terodonta;Imparidentia;Venerida;Veneroidea;Veneridae;Mercenaria;Mercenari  
 a mercenaria

UdeM00000036230 6579 495.4 UdeM00000036230 XP\_033734471.1 72.4 351  
 97 0 1 351 1 351 6.20E-137 495.4 6579 cellular  
 organisms;Eukaryota;Opisthokonta;Metazoa;Eumetazoa;Bilateria;Protostomia;  
 Spiralia;Lophotrochozoa;Mollusca;Bivalvia;Autobranchia;Pteriormorphia;Pect  
 inida;Pectinoidea;Pectinidae;Pecten;Pecten maximus

UdeM00000036231 6596 241.9 UdeM00000036231 XP\_045165916.1 65.4 211  
 62 3 1 210 1 201 7.80E-61 241.9 6596 cellular  
 organisms;Eukaryota;Opisthokonta;Metazoa;Eumetazoa;Bilateria;Protostomia;  
 Spiralia;Lophotrochozoa;Mollusca;Bivalvia;Autobranchia;Heteroconchia;Euhe  
 terodonta;Imparidentia;Venerida;Veneroidea;Veneridae;Mercenaria;Mercenari  
 a mercenaria

UdeM00000036232 6596 1489.9 UdeM00000036232 XP\_045165928.1 81.2  
 882 144 5 1 877 1 865 0.00E+00 1489.9 6596  
 cellular  
 organisms;Eukaryota;Opisthokonta;Metazoa;Eumetazoa;Bilateria;Protostomia;  
 Spiralia;Lophotrochozoa;Mollusca;Bivalvia;Autobranchia;Heteroconchia;Euhe  
 terodonta;Imparidentia;Venerida;Veneroidea;Veneridae;Mercenaria;Mercenari  
 a mercenaria

UdeM00000036233 6596 1261.5 UdeM00000036233 XP\_045165928.1 79.6  
 771 135 5 1 766 1 754 0.00E+00 1261.5 6596  
 cellular  
 organisms;Eukaryota;Opisthokonta;Metazoa;Eumetazoa;Bilateria;Protostomia;  
 Spiralia;Lophotrochozoa;Mollusca;Bivalvia;Autobranchia;Heteroconchia;Euhe  
 terodonta;Imparidentia;Venerida;Veneroidea;Veneridae;Mercenaria;Mercenari  
 a mercenaria

UdeM00000036234 6596 220.7 UdeM00000036234 XP\_045165946.1 60.6 170  
 66 1 5 174 6 174 1.50E-54 220.7 6596 cellular  
 organisms;Eukaryota;Opisthokonta;Metazoa;Eumetazoa;Bilateria;Protostomia;  
 Spiralia;Lophotrochozoa;Mollusca;Bivalvia;Autobranchia;Heteroconchia;Euhe  
 terodonta;Imparidentia;Venerida;Veneroidea;Veneridae;Mercenaria;Mercenari  
 a mercenaria

UdeM00000036236 2607531 374.4 UdeM00000036236 XP\_029642491.1 66.9  
 293 68 4 20 285 271 561 1.30E-100 374.4 2607531  
 cellular  
 organisms;Eukaryota;Opisthokonta;Metazoa;Eumetazoa;Bilateria;Protostomia;  
 Spiralia;Lophotrochozoa;Mollusca;Cephalopoda;Coleoidea;Octopodiformes;Oct  
 opoda;Incirrata;Octopodidae;Octopus;Octopus sinensis

UdeM00000036235 6596 443.4 UdeM00000036235 XP\_045165634.1 69.9 336  
 70 5 29 337 269 600 2.70E-121 443.4 6596 cellular  
 organisms;Eukaryota;Opisthokonta;Metazoa;Eumetazoa;Bilateria;Protostomia;  
 Spiralia;Lophotrochozoa;Mollusca;Bivalvia;Autobranchia;Heteroconchia;Euhe

terodonta;Imparidentia;Venerida;Veneroidea;Veneridae;Mercenaria;Mercenaria mercenaria

UdeM00000036237 90988 114.8 UdeM00000036237 XP\_039535825.1 64.3 84  
30 0 1 84 111 194 8.00E-23 114.8 90988 cellular

organisms;Eukaryota;Opisthokonta;Metazoa;Eumetazoa;Bilateria;Deuterostomia;Chordata;Craniata;Vertebrata;Gnathostomata;Teleostomi;Euteleostomi;Actinopterygii;Actinopteri;Neopterygii;Teleostei;Osteoglossocephalai;Clupeocephala;Otomorpha;Ostariophysi;Otophysi;Cypriniphysae;Cypriniiformes;Cyprinidae;Leuciscidae;Pogonichthyinae;Pimephales;Pimephales promelas

UdeM00000036238 283035 115.9 UdeM00000036238 XP\_035852032.1 38  
158 96 1 4 161 76 231 4.80E-23 115.9 283035

cellular

organisms;Eukaryota;Opisthokonta;Metazoa;Eumetazoa;Bilateria;Deuterostomia;Chordata;Craniata;Vertebrata;Gnathostomata;Teleostomi;Euteleostomi;Actinopterygii;Actinopteri;Neopterygii;Teleostei;Osteoglossocephalai;Clupeocephala;Euteleosteomorpha;Neoteleostei;Eurypterygia;Ctenosquamata;Acanthomorpha;Euacanthomorpha;Percomorphaceae;Eupercaria;Perciformes;Percidae;Percidae;Luciopercinae;Sander;Sander lucioperca

UdeM00000036239 29159 101.3 UdeM00000036239 XP\_034323867.1 36.3 124  
76 2 8 128 4 127 1.00E-18 101.3 29159 cellular

organisms;Eukaryota;Opisthokonta;Metazoa;Eumetazoa;Bilateria;Protostomia;Spiralia;Lophotrochozoa;Mollusca;Bivalvia;Autobranchia;Pteriormorphia;Ostreida;Ostreoidea;Ostreidae;Crassostrea;Crassostrea gigas

UdeM00000036240 1735272 511.9 UdeM00000036240 XP\_041353604.1 55.6  
453 176 9 15 456 22 460 8.30E-142 511.9 1735272

cellular

organisms;Eukaryota;Opisthokonta;Metazoa;Eumetazoa;Bilateria;Protostomia;Spiralia;Lophotrochozoa;Mollusca;Gastropoda;Neomphalina;Neomphaloidea;Peltospiridae;Gigantopelta;Gigantopelta aegis

UdeM00000036241 7574 468 UdeM00000036241 XP\_013389106.1 62.6 353  
131 1 5 357 2 353 1.10E-128 468 7574 cellular

organisms;Eukaryota;Opisthokonta;Metazoa;Eumetazoa;Bilateria;Protostomia;Spiralia;Lophotrochozoa;Brachiopoda;Linguliformea;Lingulata;Lingulida;Linguloidea;Lingulidae;Lingula;Lingula anatina

UdeM00000036242 1735272 266.5 UdeM00000036242 XP\_041350608.1 49.2  
435 196 7 9 430 11 433 5.70E-68 266.5 1735272

cellular

organisms;Eukaryota;Opisthokonta;Metazoa;Eumetazoa;Bilateria;Protostomia;Spiralia;Lophotrochozoa;Mollusca;Gastropoda;Neomphalina;Neomphaloidea;Peltospiridae;Gigantopelta;Gigantopelta aegis

UdeM00000036243 45264 241.1 UdeM00000036243 XP\_044165535.1 47.4 232  
118 1 1 228 294 525 1.40E-60 241.1 45264 cellular

organisms;Eukaryota;Opisthokonta;Metazoa;Eumetazoa;Cnidaria;Anthozoa;Hexacorallia;Scleractinia;Astrocoeniina;Acroporidae;Acropora;Acropora millepora

UdeM00000036244 6596 404.4 UdeM00000036244 XP\_045161775.1 56.3 316  
136 1 109 424 26 339 1.90E-109 404.4 6596 cellular

organisms;Eukaryota;Opisthokonta;Metazoa;Eumetazoa;Bilateria;Protostomia;Spiralia;Lophotrochozoa;Mollusca;Bivalvia;Autobranchia;Heteroconchia;Euterodonta;Imparidentia;Venerida;Veneroidea;Veneridae;Mercenaria;Mercenaria mercenaria

UdeM00000036245 1735272 174.5 UdeM00000036245 XP\_041367923.1 38.3  
243 137 4 1 232 154 394 1.60E-40 174.5 1735272

cellular

organisms;Eukaryota;Opisthokonta;Metazoa;Eumetazoa;Bilateria;Protostomia; Spiralia;Lophotrochozoa;Mollusca;Gastropoda;Neomphalina;Neomphaloidea;Pel tospiridae;Gigantopelta;Gigantopelta aegis

UdeM00000036246 1735272 84 UdeM00000036246 XP\_041367923.1 36  
139 21 1 1 71 1 139 8.80E-14 84 1735272

cellular

organisms;Eukaryota;Opisthokonta;Metazoa;Eumetazoa;Bilateria;Protostomia; Spiralia;Lophotrochozoa;Mollusca;Gastropoda;Neomphalina;Neomphaloidea;Pel tospiridae;Gigantopelta;Gigantopelta aegis

UdeM00000036247 6565 94 UdeM00000036247 XP\_022303441.1 32.2 255  
149 6 1 248 1 238 3.00E-16 94 6565 cellular

organisms;Eukaryota;Opisthokonta;Metazoa;Eumetazoa;Bilateria;Protostomia; Spiralia;Lophotrochozoa;Mollusca;Bivalvia;Autobranchia;Pteriomorphia;Ostr eida;Ostreoidea;Ostreidae;Crassostrea;Crassostrea virginica

UdeM00000036248 6596 86.7 UdeM00000036248 XP\_045161798.1 44.8 105  
54 1 5 109 1 101 2.10E-14 86.7 6596 cellular

organisms;Eukaryota;Opisthokonta;Metazoa;Eumetazoa;Bilateria;Protostomia; Spiralia;Lophotrochozoa;Mollusca;Bivalvia;Autobranchia;Heteroconchia;Euhe terodonta;Imparidentia;Venerida;Veneroidea;Veneridae;Mercenaria;Mercenari a mercenaria

UdeM00000036249 6596 254.6 UdeM00000036249 XP\_045161798.1 96.3 135  
5 0 1 135 105 239 7.10E-65 254.6 6596 cellular

organisms;Eukaryota;Opisthokonta;Metazoa;Eumetazoa;Bilateria;Protostomia; Spiralia;Lophotrochozoa;Mollusca;Bivalvia;Autobranchia;Heteroconchia;Euhe terodonta;Imparidentia;Venerida;Veneroidea;Veneridae;Mercenaria;Mercenari a mercenaria

UdeM00000036250 6573 507.3 UdeM00000036250 XP\_021341922.1 79.3 299  
62 0 9 307 6 304 1.40E-140 507.3 6573 cellular

organisms;Eukaryota;Opisthokonta;Metazoa;Eumetazoa;Bilateria;Protostomia; Spiralia;Lophotrochozoa;Mollusca;Bivalvia;Autobranchia;Pteriomorphia;Pect inida;Pectinoidea;Pectinidae;Mizuhopecten;Mizuhopecten yessoensis

UdeM00000036251 1735272 175.3 UdeM00000036251 XP\_041354627.1 78.3  
106 23 0 57 162 47 152 6.70E-41 175.3 1735272

cellular

organisms;Eukaryota;Opisthokonta;Metazoa;Eumetazoa;Bilateria;Protostomia; Spiralia;Lophotrochozoa;Mollusca;Gastropoda;Neomphalina;Neomphaloidea;Pel tospiridae;Gigantopelta;Gigantopelta aegis

UdeM00000036252 6596 632.1 UdeM00000036252 XP\_045164668.1 56.4 658  
235 20 3 627 80 718 8.30E-178 632.1 6596 cellular

organisms;Eukaryota;Opisthokonta;Metazoa;Eumetazoa;Bilateria;Protostomia; Spiralia;Lophotrochozoa;Mollusca;Bivalvia;Autobranchia;Heteroconchia;Euhe terodonta;Imparidentia;Venerida;Veneroidea;Veneridae;Mercenaria;Mercenari a mercenaria

UdeM00000036253 6596 822.8 UdeM00000036253 XP\_045187090.1 44.8 1012  
455 17 3 967 137 1091 4.70E-235 822.8 6596 cellular

organisms;Eukaryota;Opisthokonta;Metazoa;Eumetazoa;Bilateria;Protostomia; Spiralia;Lophotrochozoa;Mollusca;Bivalvia;Autobranchia;Heteroconchia;Euhe terodonta;Imparidentia;Venerida;Veneroidea;Veneridae;Mercenaria;Mercenari a mercenaria

UdeM00000036254 6596 261.2 UdeM00000036254 XP\_045187094.1 45 418  
158 13 233 645 197 547 3.60E-66 261.2 6596 cellular

organisms;Eukaryota;Opisthokonta;Metazoa;Eumetazoa;Bilateria;Protostomia; Spiralia;Lophotrochozoa;Mollusca;Bivalvia;Autobranchia;Heteroconchia;Euhe

terodonta;Imparidentia;Venerida;Veneroidea;Veneridae;Mercenaria;Mercenaria mercenaria  
 UdeM00000036256 7757 188.7 UdeM00000036256 XP\_032835197.1 57.4 190  
 29 2 2 139 149 338 5.70E-45 188.7 7757 cellular  
 organisms;Eukaryota;Opisthokonta;Metazoa;Eumetazoa;Bilateria;Deuterostomia;Chordata;Craniata;Vertebrata;Cyclostomata;Hyperoartia;Petromyzontiformes;Petromyzontidae;Petromyzon;Petromyzon marinus  
 UdeM00000036257 7757 283.9 UdeM00000036257 XP\_032835197.1 72 207  
 30 1 1 179 28 234 1.40E-73 283.9 7757 cellular  
 organisms;Eukaryota;Opisthokonta;Metazoa;Eumetazoa;Bilateria;Deuterostomia;Chordata;Craniata;Vertebrata;Cyclostomata;Hyperoartia;Petromyzontiformes;Petromyzontidae;Petromyzon;Petromyzon marinus  
 UdeM00000036258 7757 291.6 UdeM00000036258 XP\_032835197.1 72.2 212  
 31 1 1 184 23 234 7.10E-76 291.6 7757 cellular  
 organisms;Eukaryota;Opisthokonta;Metazoa;Eumetazoa;Bilateria;Deuterostomia;Chordata;Craniata;Vertebrata;Cyclostomata;Hyperoartia;Petromyzontiformes;Petromyzontidae;Petromyzon;Petromyzon marinus  
 UdeM00000036261 6579 153.3 UdeM00000036261 XP\_033734797.1 54 126  
 58 0 16 141 189 314 6.10E-34 153.3 6579 cellular  
 organisms;Eukaryota;Opisthokonta;Metazoa;Eumetazoa;Bilateria;Protostomia;Spiralia;Lophotrochozoa;Mollusca;Bivalvia;Autobranchia;Pteriormorphia;Pectinida;Pectinoidea;Pectinidae;Pecten;Pecten maximus  
 UdeM00000036262 6573 180.6 UdeM00000036262 XP\_021378750.1 43.1 188  
 107 0 1 188 1 188 1.80E-42 180.6 6573 cellular  
 organisms;Eukaryota;Opisthokonta;Metazoa;Eumetazoa;Bilateria;Protostomia;Spiralia;Lophotrochozoa;Mollusca;Bivalvia;Autobranchia;Pteriormorphia;Pectinida;Pectinoidea;Pectinidae;Mizuhopecten;Mizuhopecten yessoensis  
 UdeM00000036264 6596 368.6 UdeM00000036264 XP\_045187731.1 56.7 321  
 136 2 19 339 19 336 8.50E-99 368.6 6596 cellular  
 organisms;Eukaryota;Opisthokonta;Metazoa;Eumetazoa;Bilateria;Protostomia;Spiralia;Lophotrochozoa;Mollusca;Bivalvia;Autobranchia;Heteroconchia;Euheterodonta;Imparidentia;Venerida;Veneroidea;Veneridae;Mercenaria;Mercenaria mercenaria  
 UdeM00000036265 6596 4862.4 UdeM00000036265 XP\_045213898.1 54.4  
 5136 1972 47 56 4894 6615 11677 0.00E+00 4862.4 6596  
 cellular  
 organisms;Eukaryota;Opisthokonta;Metazoa;Eumetazoa;Bilateria;Protostomia;Spiralia;Lophotrochozoa;Mollusca;Bivalvia;Autobranchia;Heteroconchia;Euheterodonta;Imparidentia;Venerida;Veneroidea;Veneridae;Mercenaria;Mercenaria mercenaria  
 UdeM00000036266 6596 4801.5 UdeM00000036266 XP\_045213898.1 54.7  
 4960 1908 43 56 4748 6615 11501 0.00E+00 4801.5 6596  
 cellular  
 organisms;Eukaryota;Opisthokonta;Metazoa;Eumetazoa;Bilateria;Protostomia;Spiralia;Lophotrochozoa;Mollusca;Bivalvia;Autobranchia;Heteroconchia;Euheterodonta;Imparidentia;Venerida;Veneroidea;Veneridae;Mercenaria;Mercenaria mercenaria  
 UdeM00000036267 6596 540.8 UdeM00000036267 XP\_045213898.1 47.9 748  
 343 16 1 740 5860 6568 2.80E-150 540.8 6596 cellular  
 organisms;Eukaryota;Opisthokonta;Metazoa;Eumetazoa;Bilateria;Protostomia;Spiralia;Lophotrochozoa;Mollusca;Bivalvia;Autobranchia;Heteroconchia;Euheterodonta;Imparidentia;Venerida;Veneroidea;Veneridae;Mercenaria;Mercenaria mercenaria

UdeM00000036268 6596 8150 UdeM00000036268 XP\_045213898.1 69.6 5965  
 1581 11 22 5955 54 5814 0.00E+00 8150 6596 cellular  
 organisms;Eukaryota;Opisthokonta;Metazoa;Eumetazoa;Bilateria;Protostomia;  
 Spiralia;Lophotrochozoa;Mollusca;Bivalvia;Autobranchia;Heteroconchia;Euhe  
 terodonta;Imparidentia;Venerida;Veneroidea;Veneridae;Mercenaria;Mercenari  
 a mercenaria  
 UdeM00000036271 29159 160.2 UdeM00000036271 XP\_011450183.2 40.6 212  
 122 2 10 221 1497 1704 3.00E-36 160.2 29159 cellular  
 organisms;Eukaryota;Opisthokonta;Metazoa;Eumetazoa;Bilateria;Protostomia;  
 Spiralia;Lophotrochozoa;Mollusca;Bivalvia;Autobranchia;Pteriormorphia;Ostr  
 eida;Ostreoidea;Ostreidae;Crassostrea;Crassostrea gigas  
 UdeM00000036270 29159 197.6 UdeM00000036270 XP\_011450183.2 37.1 291  
 179 2 6 296 1418 1704 2.30E-47 197.6 29159 cellular  
 organisms;Eukaryota;Opisthokonta;Metazoa;Eumetazoa;Bilateria;Protostomia;  
 Spiralia;Lophotrochozoa;Mollusca;Bivalvia;Autobranchia;Pteriormorphia;Ostr  
 eida;Ostreoidea;Ostreidae;Crassostrea;Crassostrea gigas  
 UdeM00000036272 6596 424.9 UdeM00000036272 XP\_045187390.1 36.1 723  
 410 13 16 691 711 1428 2.30E-115 424.9 6596 cellular  
 organisms;Eukaryota;Opisthokonta;Metazoa;Eumetazoa;Bilateria;Protostomia;  
 Spiralia;Lophotrochozoa;Mollusca;Bivalvia;Autobranchia;Heteroconchia;Euhe  
 terodonta;Imparidentia;Venerida;Veneroidea;Veneridae;Mercenaria;Mercenari  
 a mercenaria  
 UdeM00000036274 6596 207.2 UdeM00000036274 XP\_045187390.1 57.1 168  
 72 0 1 168 464 631 1.60E-50 207.2 6596 cellular  
 organisms;Eukaryota;Opisthokonta;Metazoa;Eumetazoa;Bilateria;Protostomia;  
 Spiralia;Lophotrochozoa;Mollusca;Bivalvia;Autobranchia;Heteroconchia;Euhe  
 terodonta;Imparidentia;Venerida;Veneroidea;Veneridae;Mercenaria;Mercenari  
 a mercenaria  
 UdeM00000036273 6596 605.9 UdeM00000036273 XP\_045187390.1 55.1 561  
 229 6 1 543 76 631 5.00E-170 605.9 6596 cellular  
 organisms;Eukaryota;Opisthokonta;Metazoa;Eumetazoa;Bilateria;Protostomia;  
 Spiralia;Lophotrochozoa;Mollusca;Bivalvia;Autobranchia;Heteroconchia;Euhe  
 terodonta;Imparidentia;Venerida;Veneroidea;Veneridae;Mercenaria;Mercenari  
 a mercenaria  
 UdeM00000036275 6596 71.2 UdeM00000036275 XP\_045187391.1 44.1 68  
 38 0 13 80 16 83 1.10E-09 71.2 6596 cellular  
 organisms;Eukaryota;Opisthokonta;Metazoa;Eumetazoa;Bilateria;Protostomia;  
 Spiralia;Lophotrochozoa;Mollusca;Bivalvia;Autobranchia;Heteroconchia;Euhe  
 terodonta;Imparidentia;Venerida;Veneroidea;Veneridae;Mercenaria;Mercenari  
 a mercenaria  
 UdeM00000036276 6596 204.1 UdeM00000036276 XP\_045187391.1 73.4 128  
 34 0 1 128 144 271 1.00E-49 204.1 6596 cellular  
 organisms;Eukaryota;Opisthokonta;Metazoa;Eumetazoa;Bilateria;Protostomia;  
 Spiralia;Lophotrochozoa;Mollusca;Bivalvia;Autobranchia;Heteroconchia;Euhe  
 terodonta;Imparidentia;Venerida;Veneroidea;Veneridae;Mercenaria;Mercenari  
 a mercenaria  
 UdeM00000036277 29159 198 UdeM00000036277 XP\_011450183.2 37.5 291  
 178 2 25 315 1418 1704 1.80E-47 198 29159 cellular  
 organisms;Eukaryota;Opisthokonta;Metazoa;Eumetazoa;Bilateria;Protostomia;  
 Spiralia;Lophotrochozoa;Mollusca;Bivalvia;Autobranchia;Pteriormorphia;Ostr  
 eida;Ostreoidea;Ostreidae;Crassostrea;Crassostrea gigas  
 UdeM00000036278 6596 89.7 UdeM00000036278 XP\_045187390.1 31.9 188  
 122 3 51 235 1244 1428 6.20E-15 89.7 6596 cellular  
 organisms;Eukaryota;Opisthokonta;Metazoa;Eumetazoa;Bilateria;Protostomia;



Spiralia;Lophotrochozoa;Mollusca;Bivalvia;Autobranchia;Heteroconchia;Euherodonta;Imparidentia;Venerida;Veneroidea;Veneridae;Mercenaria;Mercenaria mercenaria

UdeM00000036279 6596 1090.1 UdeM00000036279 XP\_045187390.1 44.4  
1366 680 20 1 1299 76 1428 0.00E+00 1090.1 6596  
cellular

organisms;Eukaryota;Opisthokonta;Metazoa;Eumetazoa;Bilateria;Protostomia;Spiralia;Lophotrochozoa;Mollusca;Bivalvia;Autobranchia;Heteroconchia;Euherodonta;Imparidentia;Venerida;Veneroidea;Veneridae;Mercenaria;Mercenaria mercenaria

UdeM00000036280 6596 1007.3 UdeM00000036280 XP\_045187390.1 46  
1193 567 18 1 1129 76 1255 1.70E-290 1007.3 6596  
cellular

organisms;Eukaryota;Opisthokonta;Metazoa;Eumetazoa;Bilateria;Protostomia;Spiralia;Lophotrochozoa;Mollusca;Bivalvia;Autobranchia;Heteroconchia;Euherodonta;Imparidentia;Venerida;Veneroidea;Veneridae;Mercenaria;Mercenaria mercenaria

UdeM00000036281 6596 371.7 UdeM00000036281 XP\_045187391.1 67.3 257  
83 1 6 261 16 272 7.70E-100 371.7 6596 cellular

organisms;Eukaryota;Opisthokonta;Metazoa;Eumetazoa;Bilateria;Protostomia;Spiralia;Lophotrochozoa;Mollusca;Bivalvia;Autobranchia;Heteroconchia;Euherodonta;Imparidentia;Venerida;Veneroidea;Veneridae;Mercenaria;Mercenaria mercenaria

UdeM00000036282 1735272 408.3 UdeM00000036282 XP\_041352824.1 68.3  
479 136 4 2 471 4 475 1.30E-110 408.3 1735272  
cellular

organisms;Eukaryota;Opisthokonta;Metazoa;Eumetazoa;Bilateria;Protostomia;Spiralia;Lophotrochozoa;Mollusca;Gastropoda;Neomphalina;Neomphaloidea;Peltospiridae;Gigantopelta;Gigantopelta aegis

UdeM00000036283 6596 293.5 UdeM00000036283 XP\_045167100.1 83.9 168  
25 2 193 359 321 487 3.60E-76 293.5 6596 cellular

organisms;Eukaryota;Opisthokonta;Metazoa;Eumetazoa;Bilateria;Protostomia;Spiralia;Lophotrochozoa;Mollusca;Bivalvia;Autobranchia;Heteroconchia;Euherodonta;Imparidentia;Venerida;Veneroidea;Veneridae;Mercenaria;Mercenaria mercenaria

UdeM00000036284 6596 187.2 UdeM00000036284 XP\_045173520.1 61.9 155  
58 1 59 213 5 158 2.20E-44 187.2 6596 cellular

organisms;Eukaryota;Opisthokonta;Metazoa;Eumetazoa;Bilateria;Protostomia;Spiralia;Lophotrochozoa;Mollusca;Bivalvia;Autobranchia;Heteroconchia;Euherodonta;Imparidentia;Venerida;Veneroidea;Veneridae;Mercenaria;Mercenaria mercenaria

UdeM00000036287 6573 345.5 UdeM00000036287 XP\_021341909.1 59 300  
123 0 1 300 1 300 6.80E-92 345.5 6573 cellular

organisms;Eukaryota;Opisthokonta;Metazoa;Eumetazoa;Bilateria;Protostomia;Spiralia;Lophotrochozoa;Mollusca;Bivalvia;Autobranchia;Pteriomorphia;Pectinida;Pectinoidea;Pectinidae;Mizuhopecten;Mizuhopecten yessoensis

UdeM00000036286 6573 364 UdeM00000036286 XP\_021341909.1 58 324  
136 0 1 324 1 324 2.00E-97 364 6573 cellular

organisms;Eukaryota;Opisthokonta;Metazoa;Eumetazoa;Bilateria;Protostomia;Spiralia;Lophotrochozoa;Mollusca;Bivalvia;Autobranchia;Pteriomorphia;Pectinida;Pectinoidea;Pectinidae;Mizuhopecten;Mizuhopecten yessoensis

UdeM00000036288 6596 82.8 UdeM00000036288 XP\_045183498.1 31.1 235  
135 7 202 419 173 397 1.10E-12 82.8 6596 cellular

organisms;Eukaryota;Opisthokonta;Metazoa;Eumetazoa;Bilateria;Protostomia;

Spiralia;Lophotrochozoa;Mollusca;Bivalvia;Autobranchia;Heteroconchia;Euherodonta;Imparidentia;Venerida;Veneroidea;Veneridae;Mercenaria;Mercenaria mercenaria

UdeM00000036289 6596 196.1 UdeM00000036289 XP\_045186700.1 87 100  
13 0 1 100 1 100 2.20E-47 196.1 6596 cellular

organisms;Eukaryota;Opisthokonta;Metazoa;Eumetazoa;Bilateria;Protostomia;Spiralia;Lophotrochozoa;Mollusca;Bivalvia;Autobranchia;Heteroconchia;Euherodonta;Imparidentia;Venerida;Veneroidea;Veneridae;Mercenaria;Mercenaria mercenaria

UdeM00000036290 29159 377.1 UdeM00000036290 XP\_034323825.1 57.8 327  
135 1 1 324 1 327 2.30E-101 377.1 29159 cellular

organisms;Eukaryota;Opisthokonta;Metazoa;Eumetazoa;Bilateria;Protostomia;Spiralia;Lophotrochozoa;Mollusca;Bivalvia;Autobranchia;Pteriomorpha;Ostreida;Ostreoidea;Ostreidae;Crassostrea;Crassostrea gigas

UdeM00000036291 6573 449.1 UdeM00000036291 XP\_021368716.1 45.8 1296  
512 33 181 1391 172 1361 2.00E-122 449.1 6573 cellular

organisms;Eukaryota;Opisthokonta;Metazoa;Eumetazoa;Bilateria;Protostomia;Spiralia;Lophotrochozoa;Mollusca;Bivalvia;Autobranchia;Pteriomorpha;Pectinida;Pectinoidea;Pectinidae;Mizuhopecten;Mizuhopecten yessoensis

UdeM00000036292 6596 283.5 UdeM00000036292 XP\_045180458.1 82.7 179  
28 2 1 179 4 179 1.90E-73 283.5 6596 cellular

organisms;Eukaryota;Opisthokonta;Metazoa;Eumetazoa;Bilateria;Protostomia;Spiralia;Lophotrochozoa;Mollusca;Bivalvia;Autobranchia;Heteroconchia;Euherodonta;Imparidentia;Venerida;Veneroidea;Veneridae;Mercenaria;Mercenaria mercenaria

UdeM00000036293 6579 310.5 UdeM00000036293 XP\_033734099.1 51.5 423  
171 10 2 399 61 474 3.20E-81 310.5 6579 cellular

organisms;Eukaryota;Opisthokonta;Metazoa;Eumetazoa;Bilateria;Protostomia;Spiralia;Lophotrochozoa;Mollusca;Bivalvia;Autobranchia;Pteriomorpha;Pectinida;Pectinoidea;Pectinidae;Pecten;Pecten maximus

UdeM00000036294 6579 310.5 UdeM00000036294 XP\_033734099.1 51.5 423  
171 10 2 399 61 474 3.20E-81 310.5 6579 cellular

organisms;Eukaryota;Opisthokonta;Metazoa;Eumetazoa;Bilateria;Protostomia;Spiralia;Lophotrochozoa;Mollusca;Bivalvia;Autobranchia;Pteriomorpha;Pectinida;Pectinoidea;Pectinidae;Pecten;Pecten maximus

UdeM00000036295 6596 183.7 UdeM00000036295 XP\_045171589.1 56.9 160  
65 1 2 157 113 272 3.50E-43 183.7 6596 cellular

organisms;Eukaryota;Opisthokonta;Metazoa;Eumetazoa;Bilateria;Protostomia;Spiralia;Lophotrochozoa;Mollusca;Bivalvia;Autobranchia;Heteroconchia;Euherodonta;Imparidentia;Venerida;Veneroidea;Veneridae;Mercenaria;Mercenaria mercenaria

UdeM00000036296 6596 84.7 UdeM00000036296 XP\_045174811.1 50 108  
47 4 48 149 636 742 1.10E-13 84.7 6596 cellular

organisms;Eukaryota;Opisthokonta;Metazoa;Eumetazoa;Bilateria;Protostomia;Spiralia;Lophotrochozoa;Mollusca;Bivalvia;Autobranchia;Heteroconchia;Euherodonta;Imparidentia;Venerida;Veneroidea;Veneridae;Mercenaria;Mercenaria mercenaria

UdeM00000036297 6596 222.2 UdeM00000036297 XP\_045174811.1 76.8 138  
32 0 1 138 1 138 4.50E-55 222.2 6596 cellular

organisms;Eukaryota;Opisthokonta;Metazoa;Eumetazoa;Bilateria;Protostomia;Spiralia;Lophotrochozoa;Mollusca;Bivalvia;Autobranchia;Heteroconchia;Euherodonta;Imparidentia;Venerida;Veneroidea;Veneridae;Mercenaria;Mercenaria mercenaria

UdeM00000036298 6565 216.5 UdeM00000036298 XP\_022334539.1 51.1 190  
 93 0 25 214 63 252 4.70E-53 216.5 6565 cellular  
 organisms;Eukaryota;Opisthokonta;Metazoa;Eumetazoa;Bilateria;Protostomia;  
 Spiralia;Lophotrochozoa;Mollusca;Bivalvia;Autobranhia;Pteriomorphia;Ostr  
 eida;Ostreoidea;Ostreidae;Crassostrea;Crassostrea virginica  
 UdeM00000036299 6565 218.8 UdeM00000036299 XP\_022334537.1 51.6 192  
 93 0 25 216 63 254 9.50E-54 218.8 6565 cellular  
 organisms;Eukaryota;Opisthokonta;Metazoa;Eumetazoa;Bilateria;Protostomia;  
 Spiralia;Lophotrochozoa;Mollusca;Bivalvia;Autobranhia;Pteriomorphia;Ostr  
 eida;Ostreoidea;Ostreidae;Crassostrea;Crassostrea virginica  
 UdeM00000036300 6596 449.1 UdeM00000036300 XP\_045187408.1 74.2 279  
 72 0 47 325 1 279 4.70E-123 449.1 6596 cellular  
 organisms;Eukaryota;Opisthokonta;Metazoa;Eumetazoa;Bilateria;Protostomia;  
 Spiralia;Lophotrochozoa;Mollusca;Bivalvia;Autobranhia;Heteroconchia;Euhe  
 terodonta;Imparidentia;Venerida;Veneroidea;Veneridae;Mercenaria;Mercenari  
 a mercenaria  
 UdeM00000036301 6596 100.1 UdeM00000036301 XP\_045187406.1 24.4 907  
 490 24 10 770 45 901 1.40E-17 100.1 6596 cellular  
 organisms;Eukaryota;Opisthokonta;Metazoa;Eumetazoa;Bilateria;Protostomia;  
 Spiralia;Lophotrochozoa;Mollusca;Bivalvia;Autobranhia;Heteroconchia;Euhe  
 terodonta;Imparidentia;Venerida;Veneroidea;Veneridae;Mercenaria;Mercenari  
 a mercenaria  
 UdeM00000036302 6500 371.7 UdeM00000036302 XP\_005098344.1 38.7 509  
 296 8 42 543 37 536 1.80E-99 371.7 6500 cellular  
 organisms;Eukaryota;Opisthokonta;Metazoa;Eumetazoa;Bilateria;Protostomia;  
 Spiralia;Lophotrochozoa;Mollusca;Gastropoda;Heterobranhia;Euthyneura;Tec  
 tipleura;Aplysiida;Aplysioidea;Aplysiidae;Aplysia;Aplysia californica  
 UdeM00000036303 1735272 151.8 UdeM00000036303 XP\_041352605.1 28.3  
 364 231 10 39 385 67 417 1.80E-33 151.8 1735272  
 cellular  
 organisms;Eukaryota;Opisthokonta;Metazoa;Eumetazoa;Bilateria;Protostomia;  
 Spiralia;Lophotrochozoa;Mollusca;Gastropoda;Neomphalina;Neomphaloidea;Pel  
 tospiridae;Gigantopelta;Gigantopelta aegis  
 UdeM00000036305 6573 558.1 UdeM00000036305 XP\_021362076.1 35.6 1153  
 631 31 81 1186 322 1409 2.70E-155 558.1 6573 cellular  
 organisms;Eukaryota;Opisthokonta;Metazoa;Eumetazoa;Bilateria;Protostomia;  
 Spiralia;Lophotrochozoa;Mollusca;Bivalvia;Autobranhia;Pteriomorphia;Pect  
 inida;Pectinoidea;Pectinidae;Mizuhopecten;Mizuhopecten yessoensis  
 UdeM00000036306 6596 329.3 UdeM00000036306 XP\_045186495.1 62 274  
 100 3 3 274 39 310 4.60E-87 329.3 6596 cellular  
 organisms;Eukaryota;Opisthokonta;Metazoa;Eumetazoa;Bilateria;Protostomia;  
 Spiralia;Lophotrochozoa;Mollusca;Bivalvia;Autobranhia;Heteroconchia;Euhe  
 terodonta;Imparidentia;Venerida;Veneroidea;Veneridae;Mercenaria;Mercenari  
 a mercenaria  
 UdeM00000036307 6596 410.2 UdeM00000036307 XP\_045186495.1 66 306  
 103 1 11 316 4 308 2.40E-111 410.2 6596 cellular  
 organisms;Eukaryota;Opisthokonta;Metazoa;Eumetazoa;Bilateria;Protostomia;  
 Spiralia;Lophotrochozoa;Mollusca;Bivalvia;Autobranhia;Heteroconchia;Euhe  
 terodonta;Imparidentia;Venerida;Veneroidea;Veneridae;Mercenaria;Mercenari  
 a mercenaria  
 UdeM00000036310 1735272 115.9 UdeM00000036310 XP\_041378840.1 54.3  
 94 43 0 2 95 263 356 4.40E-23 115.9 1735272  
 cellular  
 organisms;Eukaryota;Opisthokonta;Metazoa;Eumetazoa;Bilateria;Protostomia;

Spiralia;Lophotrochozoa;Mollusca;Gastropoda;Neomphalina;Neomphaloidea;Pel  
tospiridae;Gigantopelta;Gigantopelta aegis

UdeM00000036309 1735272 73.2 UdeM00000036309 XP\_041378840.1 56.1  
57 25 0 2 58 263 319 2.30E-10 73.2 1735272  
cellular

organisms;Eukaryota;Opisthokonta;Metazoa;Eumetazoa;Bilateria;Protostomia;  
Spiralia;Lophotrochozoa;Mollusca;Gastropoda;Neomphalina;Neomphaloidea;Pel  
tospiridae;Gigantopelta;Gigantopelta aegis

UdeM00000036311 6596 59.3 UdeM00000036311 XP\_045161332.1 27.6 221  
55 5 64 189 133 343 6.50E-06 59.3 6596 cellular

organisms;Eukaryota;Opisthokonta;Metazoa;Eumetazoa;Bilateria;Protostomia;  
Spiralia;Lophotrochozoa;Mollusca;Bivalvia;Autobranchia;Heteroconchia;Euhe  
terodonta;Imparidentia;Venerida;Veneroidea;Veneridae;Mercenaria;Mercenari  
a mercenaria

UdeM00000021644 6596 129.4 UdeM00000021644 XP\_045195656.1 48.8 123  
63 0 1 123 450 572 8.00E-27 129.4 6596 cellular

organisms;Eukaryota;Opisthokonta;Metazoa;Eumetazoa;Bilateria;Protostomia;  
Spiralia;Lophotrochozoa;Mollusca;Bivalvia;Autobranchia;Heteroconchia;Euhe  
terodonta;Imparidentia;Venerida;Veneroidea;Veneridae;Mercenaria;Mercenari  
a mercenaria

UdeM00000021646 6596 81.6 UdeM00000021646 XP\_045195656.1 32.3 235  
146 7 2 226 84 315 3.20E-12 81.6 6596 cellular

organisms;Eukaryota;Opisthokonta;Metazoa;Eumetazoa;Bilateria;Protostomia;  
Spiralia;Lophotrochozoa;Mollusca;Bivalvia;Autobranchia;Heteroconchia;Euhe  
terodonta;Imparidentia;Venerida;Veneroidea;Veneridae;Mercenaria;Mercenari  
a mercenaria

UdeM00000021647 6565 324.3 UdeM00000021647 XP\_022288472.1 74.9 227  
56 1 1 227 1 226 1.20E-85 324.3 6565 cellular

organisms;Eukaryota;Opisthokonta;Metazoa;Eumetazoa;Bilateria;Protostomia;  
Spiralia;Lophotrochozoa;Mollusca;Bivalvia;Autobranchia;Pteriomorphia;Ostr  
eida;Ostreoidea;Ostreidae;Crassostrea;Crassostrea virginica

UdeM00000021648 6565 134.4 UdeM00000021648 XP\_022287662.1 63 100  
36 1 1 100 114 212 7.90E-29 134.4 6565 cellular

organisms;Eukaryota;Opisthokonta;Metazoa;Eumetazoa;Bilateria;Protostomia;  
Spiralia;Lophotrochozoa;Mollusca;Bivalvia;Autobranchia;Pteriomorphia;Ostr  
eida;Ostreoidea;Ostreidae;Crassostrea;Crassostrea virginica

UdeM00000021649 6573 119.8 UdeM00000021649 XP\_021355633.1 46.9 130  
68 1 9 137 11 140 3.80E-24 119.8 6573 cellular

organisms;Eukaryota;Opisthokonta;Metazoa;Eumetazoa;Bilateria;Protostomia;  
Spiralia;Lophotrochozoa;Mollusca;Bivalvia;Autobranchia;Pteriomorphia;Pect  
inida;Pectinoidea;Pectinidae;Mizuhopecten;Mizuhopecten yessoensis

UdeM00000021650 7739 218 UdeM00000021650 XP\_035659254.1 40 320  
174 9 9 315 655 969 1.70E-53 218 7739 cellular

organisms;Eukaryota;Opisthokonta;Metazoa;Eumetazoa;Bilateria;Deuterostomi  
a;Chordata;Cephalochordata;Leptocardii;Amphioxiformes;Branchiostomidae;Br  
anchiostoma;Branchiostoma floridae

UdeM00000021652 225164 277.7 UdeM00000021652 XP\_009055403.1 61.7  
227 87 0 1 227 1 227 1.30E-71 277.7 225164  
cellular

organisms;Eukaryota;Opisthokonta;Metazoa;Eumetazoa;Bilateria;Protostomia;  
Spiralia;Lophotrochozoa;Mollusca;Gastropoda;Patellogastropoda;Lottioidae;  
Lottiidae;Lottia;Lottia gigantea

UdeM00000021653 6596 201.4 UdeM00000021653 XP\_045195660.1 57.1 177  
66 3 5 181 4 170 9.50E-49 201.4 6596 cellular

organisms;Eukaryota;Opisthokonta;Metazoa;Eumetazoa;Bilateria;Protostomia; Spiralia;Lophotrochozoa;Mollusca;Bivalvia;Autobranchia;Heteroconchia;Euherodonta;Imparidentia;Venerida;Veneroidea;Veneridae;Mercenaria;Mercenaria mercenaria

UdeM00000021654 6579 1637.5 UdeM00000021654 XP\_033741577.1 63.8  
1276 447 8 8 1278 8 1273 0.00E+00 1637.5 6579  
cellular

organisms;Eukaryota;Opisthokonta;Metazoa;Eumetazoa;Bilateria;Protostomia; Spiralia;Lophotrochozoa;Mollusca;Bivalvia;Autobranchia;Pteriomorpha;Pectinida;Pectinoidea;Pectinidae;Pecten;Pecten maximus

UdeM00000021655 1735272 790 UdeM00000021655 XP\_041350708.1 59.2  
579 215 3 24 601 1622 2180 2.10E-225 790 1735272  
cellular

organisms;Eukaryota;Opisthokonta;Metazoa;Eumetazoa;Bilateria;Protostomia; Spiralia;Lophotrochozoa;Mollusca;Gastropoda;Neomphalina;Neomphaloidea;Peltopspiridae;Gigantopelta;Gigantopelta aegis

UdeM00000021656 6596 2998.8 UdeM00000021656 XP\_045195662.1 54.7  
2993 1280 21 30 2979 277 3235 0.00E+00 2998.8 6596  
cellular

organisms;Eukaryota;Opisthokonta;Metazoa;Eumetazoa;Bilateria;Protostomia; Spiralia;Lophotrochozoa;Mollusca;Bivalvia;Autobranchia;Heteroconchia;Euherodonta;Imparidentia;Venerida;Veneroidea;Veneridae;Mercenaria;Mercenaria mercenaria

UdeM00000021657 6596 227.6 UdeM00000021657 XP\_045195662.1 37 370  
220 7 1 362 1 365 2.50E-56 227.6 6596 cellular

organisms;Eukaryota;Opisthokonta;Metazoa;Eumetazoa;Bilateria;Protostomia; Spiralia;Lophotrochozoa;Mollusca;Bivalvia;Autobranchia;Heteroconchia;Euherodonta;Imparidentia;Venerida;Veneroidea;Veneridae;Mercenaria;Mercenaria mercenaria

UdeM00000021658 6596 99.4 UdeM00000021658 XP\_045196460.1 26.6 335  
227 8 7 327 8 337 9.40E-18 99.4 6596 cellular

organisms;Eukaryota;Opisthokonta;Metazoa;Eumetazoa;Bilateria;Protostomia; Spiralia;Lophotrochozoa;Mollusca;Bivalvia;Autobranchia;Heteroconchia;Euherodonta;Imparidentia;Venerida;Veneroidea;Veneridae;Mercenaria;Mercenaria mercenaria

UdeM00000021659 7668 230.3 UdeM00000021659 XP\_003730043.3 38 321  
197 2 7 327 6 324 4.00E-57 230.3 7668 cellular

organisms;Eukaryota;Opisthokonta;Metazoa;Eumetazoa;Bilateria;Deuterostomia;Echinodermata;Eleutherozoa;Echinozoa;Echinoidea;Euechinoidea;Echinacea;Camarodonta;Echinidea;Strongylocentrotidae;Strongylocentrotus;Strongylocentrotus purpuratus

UdeM00000021660 7668 216.9 UdeM00000021660 XP\_003730043.3 38 303  
186 2 1 303 24 324 4.30E-53 216.9 7668 cellular

organisms;Eukaryota;Opisthokonta;Metazoa;Eumetazoa;Bilateria;Deuterostomia;Echinodermata;Eleutherozoa;Echinozoa;Echinoidea;Euechinoidea;Echinacea;Camarodonta;Echinidea;Strongylocentrotidae;Strongylocentrotus;Strongylocentrotus purpuratus

UdeM00000021661 6596 713.4 UdeM00000021661 XP\_045197758.1 73.4 462  
118 3 1 461 1 458 1.90E-202 713.4 6596 cellular

organisms;Eukaryota;Opisthokonta;Metazoa;Eumetazoa;Bilateria;Protostomia; Spiralia;Lophotrochozoa;Mollusca;Bivalvia;Autobranchia;Heteroconchia;Euherodonta;Imparidentia;Venerida;Veneroidea;Veneridae;Mercenaria;Mercenaria mercenaria

UdeM00000021662 225164 374.8 UdeM00000021662 XP\_009055926.1 63.9  
 277 94 1 15 285 34 310 1.20E-100 374.8 225164  
 cellular  
 organisms;Eukaryota;Opisthokonta;Metazoa;Eumetazoa;Bilateria;Protostomia;  
 Spiralia;Lophotrochozoa;Mollusca;Gastropoda;Patellogastropoda;Lottioidea;  
 Lottiidae;Lottia;Lottia gigantea  
 UdeM00000021663 29159 185.7 UdeM00000021663 XP\_011448507.2 53.9 165  
 63 1 15 166 34 198 5.00E-44 185.7 29159 cellular  
 organisms;Eukaryota;Opisthokonta;Metazoa;Eumetazoa;Bilateria;Protostomia;  
 Spiralia;Lophotrochozoa;Mollusca;Bivalvia;Autobranchia;Pteriormorphia;Ostr  
 eida;Ostreoidea;Ostreidae;Crassostrea;Crassostrea gigas  
 UdeM00000021665 6596 443 UdeM00000021665 XP\_045197754.1 78.4 264  
 57 0 83 346 208 471 3.60E-121 443 6596 cellular  
 organisms;Eukaryota;Opisthokonta;Metazoa;Eumetazoa;Bilateria;Protostomia;  
 Spiralia;Lophotrochozoa;Mollusca;Bivalvia;Autobranchia;Heteroconchia;Euhe  
 terodonta;Imparidentia;Venerida;Veneroidea;Veneridae;Mercenaria;Mercenari  
 a mercenaria  
 UdeM00000021666 6596 600.1 UdeM00000021666 XP\_045197758.1 67.9 427  
 130 3 349 769 33 458 3.90E-168 600.1 6596 cellular  
 organisms;Eukaryota;Opisthokonta;Metazoa;Eumetazoa;Bilateria;Protostomia;  
 Spiralia;Lophotrochozoa;Mollusca;Bivalvia;Autobranchia;Heteroconchia;Euhe  
 terodonta;Imparidentia;Venerida;Veneroidea;Veneridae;Mercenaria;Mercenari  
 a mercenaria  
 UdeM00000021667 29058 171 UdeM00000021667 XP\_021199371.1 34.1 311  
 194 4 10 311 64 372 3.80E-39 171 29058 cellular  
 organisms;Eukaryota;Opisthokonta;Metazoa;Eumetazoa;Bilateria;Protostomia;  
 Ecdysozoa;Panarthropoda;Arthropoda;Mandibulata;Pancrustacea;Hexapoda;Inse  
 cta;Dicondylia;Pterygota;Neoptera;Endopterygota;Amphiesmenoptera;Lepidopt  
 era;Glossata;Neolepidoptera;Heteroneura;Ditrysia;Obtectomera;Noctuoidea;N  
 octuidae;Heliothinae;Helicoverpa;Helicoverpa armigera  
 UdeM00000021669 6596 545.4 UdeM00000021669 XP\_045195356.1 41.7 786  
 355 17 15 772 47 757 1.10E-151 545.4 6596 cellular  
 organisms;Eukaryota;Opisthokonta;Metazoa;Eumetazoa;Bilateria;Protostomia;  
 Spiralia;Lophotrochozoa;Mollusca;Bivalvia;Autobranchia;Heteroconchia;Euhe  
 terodonta;Imparidentia;Venerida;Veneroidea;Veneridae;Mercenaria;Mercenari  
 a mercenaria  
 UdeM00000021673 6579 124.4 UdeM00000021673 XP\_033728274.1 36.7 207  
 100 3 1 180 1 203 1.50E-25 124.4 6579 cellular  
 organisms;Eukaryota;Opisthokonta;Metazoa;Eumetazoa;Bilateria;Protostomia;  
 Spiralia;Lophotrochozoa;Mollusca;Bivalvia;Autobranchia;Pteriormorphia;Pect  
 inida;Pectinoidea;Pectinidae;Pecten;Pecten maximus  
 UdeM00000021674 6565 528.9 UdeM00000021674 XP\_022292728.1 58.9 419  
 172 0 1 419 304 722 6.00E-147 528.9 6565 cellular  
 organisms;Eukaryota;Opisthokonta;Metazoa;Eumetazoa;Bilateria;Protostomia;  
 Spiralia;Lophotrochozoa;Mollusca;Bivalvia;Autobranchia;Pteriormorphia;Ostr  
 eida;Ostreoidea;Ostreidae;Crassostrea;Crassostrea virginica  
 UdeM00000021675 6596 97.1 UdeM00000021675 XP\_045196423.1 41.7 144  
 62 4 1 132 1 134 1.80E-17 97.1 6596 cellular  
 organisms;Eukaryota;Opisthokonta;Metazoa;Eumetazoa;Bilateria;Protostomia;  
 Spiralia;Lophotrochozoa;Mollusca;Bivalvia;Autobranchia;Heteroconchia;Euhe  
 terodonta;Imparidentia;Venerida;Veneroidea;Veneridae;Mercenaria;Mercenari  
 a mercenaria  
 UdeM00000021676 6573 245 UdeM00000021676 XP\_021369376.1 38.7 380  
 218 6 9 379 3 376 1.60E-61 245 6573 cellular

organisms;Eukaryota;Opisthokonta;Metazoa;Eumetazoa;Bilateria;Protostomia;Spiralia;Lophotrochozoa;Mollusca;Bivalvia;Autobranchia;Pteriomorpha;Pectinida;Pectinoidea;Pectinidae;Mizuhopecten;Mizuhopecten yessoensis

UdeM00000021677 1735272 308.5 UdeM00000021677 XP\_041369131.1 57.5  
261 107 2 31 291 35 291 9.70E-81 308.5 1735272

cellular

organisms;Eukaryota;Opisthokonta;Metazoa;Eumetazoa;Bilateria;Protostomia;Spiralia;Lophotrochozoa;Mollusca;Gastropoda;Neomphalina;Neomphaloidea;Peltospiridae;Gigantopelta;Gigantopelta aegis

UdeM00000021678 6596 552 UdeM00000021678 XP\_045197175.1 65.6 439  
142 5 29 459 492 929 7.30E-154 552 6596 cellular

organisms;Eukaryota;Opisthokonta;Metazoa;Eumetazoa;Bilateria;Protostomia;Spiralia;Lophotrochozoa;Mollusca;Bivalvia;Autobranchia;Heteroconchia;Euheterodonta;Imparidentia;Venerida;Veneroidea;Veneridae;Mercenaria;Mercenaria mercenaria

UdeM00000021679 6596 354 UdeM00000021679 XP\_045197197.1 49.5 392  
181 8 22 412 110 485 2.60E-94 354 6596 cellular

organisms;Eukaryota;Opisthokonta;Metazoa;Eumetazoa;Bilateria;Protostomia;Spiralia;Lophotrochozoa;Mollusca;Bivalvia;Autobranchia;Heteroconchia;Euheterodonta;Imparidentia;Venerida;Veneroidea;Veneridae;Mercenaria;Mercenaria mercenaria

UdeM00000021680 29159 416 UdeM00000021680 XP\_011453499.2 70 290  
87 0 1 290 1 290 3.90E-113 416 29159 cellular

organisms;Eukaryota;Opisthokonta;Metazoa;Eumetazoa;Bilateria;Protostomia;Spiralia;Lophotrochozoa;Mollusca;Bivalvia;Autobranchia;Pteriomorpha;Ostreida;Ostreoidea;Ostreidae;Crassostrea;Crassostrea gigas

UdeM00000021681 29159 365.9 UdeM00000021681 XP\_011453499.2 75.1 237  
59 0 1 237 1 237 4.10E-98 365.9 29159 cellular

organisms;Eukaryota;Opisthokonta;Metazoa;Eumetazoa;Bilateria;Protostomia;Spiralia;Lophotrochozoa;Mollusca;Bivalvia;Autobranchia;Pteriomorpha;Ostreida;Ostreoidea;Ostreidae;Crassostrea;Crassostrea gigas

UdeM00000021682 29159 365.5 UdeM00000021682 XP\_011451831.2 34.3 703  
399 16 4 681 18 682 1.60E-97 365.5 29159 cellular

organisms;Eukaryota;Opisthokonta;Metazoa;Eumetazoa;Bilateria;Protostomia;Spiralia;Lophotrochozoa;Mollusca;Bivalvia;Autobranchia;Pteriomorpha;Ostreida;Ostreoidea;Ostreidae;Crassostrea;Crassostrea gigas

UdeM00000021683 7906 142.5 UdeM00000021683 XP\_033888145.2 53.4 131  
57 2 11 141 808 934 1.40E-30 142.5 7906 cellular

organisms;Eukaryota;Opisthokonta;Metazoa;Eumetazoa;Bilateria;Deuterostomia;Chordata;Craniata;Vertebrata;Gnathostomata;Teleostomi;Euteleostomi;Actinopterygii;Actinopteri;Chondrostei;Acipenseriformes;Acipenseroides;Acipenseridae;Acipenserinae;Acipenserini;Acipenser;Acipenser ruthenus

UdeM00000021684 6596 729.9 UdeM00000021684 XP\_045197040.1 50.2 849  
310 10 1468 2258 1874 2667 9.50E-207 729.9 6596 cellular

organisms;Eukaryota;Opisthokonta;Metazoa;Eumetazoa;Bilateria;Protostomia;Spiralia;Lophotrochozoa;Mollusca;Bivalvia;Autobranchia;Heteroconchia;Euheterodonta;Imparidentia;Venerida;Veneroidea;Veneridae;Mercenaria;Mercenaria mercenaria

UdeM00000021685 1735272 101.3 UdeM00000021685 XP\_041356267.1 50.5  
107 52 1 40 145 202 308 1.40E-18 101.3 1735272

cellular

organisms;Eukaryota;Opisthokonta;Metazoa;Eumetazoa;Bilateria;Protostomia;Spiralia;Lophotrochozoa;Mollusca;Gastropoda;Neomphalina;Neomphaloidea;Peltospiridae;Gigantopelta;Gigantopelta aegis

UdeM00000021686 2607531 162.2 UdeM00000021686 XP\_029646182.1 49.8  
 237 106 8 1 227 4 237 1.40E-36 162.2 2607531  
 cellular  
 organisms;Eukaryota;Opisthokonta;Metazoa;Eumetazoa;Bilateria;Protostomia;  
 Spiralia;Lophotrochozoa;Mollusca;Cephalopoda;Coleoidea;Octopodiformes;Oct  
 opoda;Incirrata;Octopodidae;Octopus;Octopus sinensis  
 UdeM00000021687 6565 132.1 UdeM00000021687 XP\_022292375.1 59.3 118  
 35 3 1139 1254 816 922 4.90E-27 132.1 6565 cellular  
 organisms;Eukaryota;Opisthokonta;Metazoa;Eumetazoa;Bilateria;Protostomia;  
 Spiralia;Lophotrochozoa;Mollusca;Bivalvia;Autobranchia;Pteriormorphia;Ostr  
 eida;Ostreoidea;Ostreidae;Crassostrea;Crassostrea virginica  
 UdeM00000021688 6596 1678.7 UdeM00000021688 XP\_045197090.1 72.1  
 1117 305 4 8 1119 2114 3228 0.00E+00 1678.7 6596  
 cellular  
 organisms;Eukaryota;Opisthokonta;Metazoa;Eumetazoa;Bilateria;Protostomia;  
 Spiralia;Lophotrochozoa;Mollusca;Bivalvia;Autobranchia;Heteroconchia;Euhe  
 terodonta;Imparidentia;Venerida;Veneroidea;Veneridae;Mercenaria;Mercenari  
 a mercenaria  
 UdeM00000021689 6596 2720.3 UdeM00000021689 XP\_045197090.1 70.1  
 1931 494 13 2 1859 200 2119 0.00E+00 2720.3 6596  
 cellular  
 organisms;Eukaryota;Opisthokonta;Metazoa;Eumetazoa;Bilateria;Protostomia;  
 Spiralia;Lophotrochozoa;Mollusca;Bivalvia;Autobranchia;Heteroconchia;Euhe  
 terodonta;Imparidentia;Venerida;Veneroidea;Veneridae;Mercenaria;Mercenari  
 a mercenaria  
 UdeM00000021690 6596 291.6 UdeM00000021690 XP\_045197090.1 76.8 185  
 43 0 1 185 1 185 7.20E-76 291.6 6596 cellular  
 organisms;Eukaryota;Opisthokonta;Metazoa;Eumetazoa;Bilateria;Protostomia;  
 Spiralia;Lophotrochozoa;Mollusca;Bivalvia;Autobranchia;Heteroconchia;Euhe  
 terodonta;Imparidentia;Venerida;Veneroidea;Veneridae;Mercenaria;Mercenari  
 a mercenaria  
 UdeM00000021691 6596 579.3 UdeM00000021691 XP\_045199072.1 87.1 317  
 41 0 1 317 1 317 2.90E-162 579.3 6596 cellular  
 organisms;Eukaryota;Opisthokonta;Metazoa;Eumetazoa;Bilateria;Protostomia;  
 Spiralia;Lophotrochozoa;Mollusca;Bivalvia;Autobranchia;Heteroconchia;Euhe  
 terodonta;Imparidentia;Venerida;Veneroidea;Veneridae;Mercenaria;Mercenari  
 a mercenaria  
 UdeM00000021692 6579 187.6 UdeM00000021692 XP\_033736589.1 51.3 191  
 90 2 147 336 8 196 2.80E-44 187.6 6579 cellular  
 organisms;Eukaryota;Opisthokonta;Metazoa;Eumetazoa;Bilateria;Protostomia;  
 Spiralia;Lophotrochozoa;Mollusca;Bivalvia;Autobranchia;Pteriormorphia;Pect  
 inida;Pectinoidea;Pectinidae;Pecten;Pecten maximus  
 UdeM00000021693 6573 412.5 UdeM00000021693 XP\_021366734.1 56.2 390  
 157 6 1 381 143 527 5.70E-112 412.5 6573 cellular  
 organisms;Eukaryota;Opisthokonta;Metazoa;Eumetazoa;Bilateria;Protostomia;  
 Spiralia;Lophotrochozoa;Mollusca;Bivalvia;Autobranchia;Pteriormorphia;Pect  
 inida;Pectinoidea;Pectinidae;Mizuhopecten;Mizuhopecten yessoensis  
 UdeM00000001300 6596 209.1 UdeM00000001300 XP\_045176893.1 27.1 665  
 420 15 1 655 4 613 2.00E-50 209.1 6596 cellular  
 organisms;Eukaryota;Opisthokonta;Metazoa;Eumetazoa;Bilateria;Protostomia;  
 Spiralia;Lophotrochozoa;Mollusca;Bivalvia;Autobranchia;Heteroconchia;Euhe  
 terodonta;Imparidentia;Venerida;Veneroidea;Veneridae;Mercenaria;Mercenari  
 a mercenaria



UdeM00000001301 6565 138.7 UdeM00000001301 XP\_022318420.1 48.4 124  
 64 0 369 492 73 196 5.50E-29 138.7 6565 cellular  
 organisms;Eukaryota;Opisthokonta;Metazoa;Eumetazoa;Bilateria;Protostomia;  
 Spiralia;Lophotrochozoa;Mollusca;Bivalvia;Autobranchia;Pteriormorphia;Ostr  
 eida;Ostreoidea;Ostreidae;Crassostrea;Crassostrea virginica  
 UdeM00000001302 29159 138.7 UdeM00000001302 XP\_011451070.1 62.7 110  
 41 0 1 110 1 110 4.60E-30 138.7 29159 cellular  
 organisms;Eukaryota;Opisthokonta;Metazoa;Eumetazoa;Bilateria;Protostomia;  
 Spiralia;Lophotrochozoa;Mollusca;Bivalvia;Autobranchia;Pteriormorphia;Ostr  
 eida;Ostreoidea;Ostreidae;Crassostrea;Crassostrea gigas  
 UdeM00000001303 6596 537 UdeM00000001303 XP\_045175289.1 44.4 807  
 297 16 5 765 53 753 4.20E-149 537 6596 cellular  
 organisms;Eukaryota;Opisthokonta;Metazoa;Eumetazoa;Bilateria;Protostomia;  
 Spiralia;Lophotrochozoa;Mollusca;Bivalvia;Autobranchia;Heteroconchia;Euhe  
 terodonta;Imparidentia;Venerida;Veneroidea;Veneridae;Mercenaria;Mercenari  
 a mercenaria  
 UdeM00000001304 6596 120.6 UdeM00000001304 XP\_045175285.1 45.6 147  
 77 1 114 257 888 1034 3.00E-24 120.6 6596 cellular  
 organisms;Eukaryota;Opisthokonta;Metazoa;Eumetazoa;Bilateria;Protostomia;  
 Spiralia;Lophotrochozoa;Mollusca;Bivalvia;Autobranchia;Heteroconchia;Euhe  
 terodonta;Imparidentia;Venerida;Veneroidea;Veneridae;Mercenaria;Mercenari  
 a mercenaria  
 UdeM00000001306 6596 858.2 UdeM00000001306 XP\_045177320.1 75.4 513  
 126 0 4 516 15 527 5.30E-246 858.2 6596 cellular  
 organisms;Eukaryota;Opisthokonta;Metazoa;Eumetazoa;Bilateria;Protostomia;  
 Spiralia;Lophotrochozoa;Mollusca;Bivalvia;Autobranchia;Heteroconchia;Euhe  
 terodonta;Imparidentia;Venerida;Veneroidea;Veneridae;Mercenaria;Mercenari  
 a mercenaria  
 UdeM00000001307 6596 229.2 UdeM00000001307 XP\_045174232.1 62.1 182  
 66 2 6 186 7 186 4.40E-57 229.2 6596 cellular  
 organisms;Eukaryota;Opisthokonta;Metazoa;Eumetazoa;Bilateria;Protostomia;  
 Spiralia;Lophotrochozoa;Mollusca;Bivalvia;Autobranchia;Heteroconchia;Euhe  
 terodonta;Imparidentia;Venerida;Veneroidea;Veneridae;Mercenaria;Mercenari  
 a mercenaria  
 UdeM00000001308 6596 229.2 UdeM00000001308 XP\_045174232.1 62.1 182  
 66 2 6 186 7 186 4.90E-57 229.2 6596 cellular  
 organisms;Eukaryota;Opisthokonta;Metazoa;Eumetazoa;Bilateria;Protostomia;  
 Spiralia;Lophotrochozoa;Mollusca;Bivalvia;Autobranchia;Heteroconchia;Euhe  
 terodonta;Imparidentia;Venerida;Veneroidea;Veneridae;Mercenaria;Mercenari  
 a mercenaria  
 UdeM00000001309 6596 71.2 UdeM00000001309 XP\_045174232.1 77.9 149  
 33 0 5 153 188 336 1.30E-09 71.2 6596 cellular  
 organisms;Eukaryota;Opisthokonta;Metazoa;Eumetazoa;Bilateria;Protostomia;  
 Spiralia;Lophotrochozoa;Mollusca;Bivalvia;Autobranchia;Heteroconchia;Euhe  
 terodonta;Imparidentia;Venerida;Veneroidea;Veneridae;Mercenaria;Mercenari  
 a mercenaria  
 UdeM00000001310 6596 312 UdeM00000001310 XP\_045174237.1 51.7 350  
 144 7 14 354 374 707 9.80E-82 312 6596 cellular  
 organisms;Eukaryota;Opisthokonta;Metazoa;Eumetazoa;Bilateria;Protostomia;  
 Spiralia;Lophotrochozoa;Mollusca;Bivalvia;Autobranchia;Heteroconchia;Euhe  
 terodonta;Imparidentia;Venerida;Veneroidea;Veneridae;Mercenaria;Mercenari  
 a mercenaria  
 UdeM00000001311 6596 282.3 UdeM00000001311 XP\_045174232.1 68.7 201  
 61 2 26 225 585 784 5.30E-73 282.3 6596 cellular

organisms;Eukaryota;Opisthokonta;Metazoa;Eumetazoa;Bilateria;Protostomia; Spiralia;Lophotrochozoa;Mollusca;Bivalvia;Autobranchia;Heteroconchia;Euherodonta;Imparidentia;Venerida;Veneroidea;Veneridae;Mercenaria;Mercenaria mercenaria

UdeM00000001312 2607531 313.5 UdeM00000001312 XP\_029636107.1 49.7  
318 122 4 14 331 658 937 3.90E-82 313.5 2607531  
cellular

organisms;Eukaryota;Opisthokonta;Metazoa;Eumetazoa;Bilateria;Protostomia; Spiralia;Lophotrochozoa;Mollusca;Cephalopoda;Coleoidea;Octopodiformes;Octopoda;Incirrata;Octopodidae;Octopus;Octopus sinensis

UdeM00000001313 6500 313.9 UdeM00000001313 XP\_012938387.1 50.3 320  
122 3 14 333 470 752 3.00E-82 313.9 6500 cellular

organisms;Eukaryota;Opisthokonta;Metazoa;Eumetazoa;Bilateria;Protostomia; Spiralia;Lophotrochozoa;Mollusca;Gastropoda;Heterobranchia;Euthyneura;Teptipleura;Aplysiida;Aplysioidea;Aplysiidae;Aplysia;Aplysia californica

UdeM00000001316 6596 216.1 UdeM00000001316 XP\_045185723.1 37 362  
200 7 7 361 455 795 9.00E-53 216.1 6596 cellular

organisms;Eukaryota;Opisthokonta;Metazoa;Eumetazoa;Bilateria;Protostomia; Spiralia;Lophotrochozoa;Mollusca;Bivalvia;Autobranchia;Heteroconchia;Euherodonta;Imparidentia;Venerida;Veneroidea;Veneridae;Mercenaria;Mercenaria mercenaria

UdeM00000001317 6596 391.7 UdeM00000001317 XP\_045188223.1 50.6 362  
175 2 1 362 308 665 1.00E-105 391.7 6596 cellular

organisms;Eukaryota;Opisthokonta;Metazoa;Eumetazoa;Bilateria;Protostomia; Spiralia;Lophotrochozoa;Mollusca;Bivalvia;Autobranchia;Heteroconchia;Euherodonta;Imparidentia;Venerida;Veneroidea;Veneridae;Mercenaria;Mercenaria mercenaria

UdeM00000001318 6596 122.1 UdeM00000001318 XP\_045206982.1 51 104  
51 0 4 107 80 183 4.80E-25 122.1 6596 cellular

organisms;Eukaryota;Opisthokonta;Metazoa;Eumetazoa;Bilateria;Protostomia; Spiralia;Lophotrochozoa;Mollusca;Bivalvia;Autobranchia;Heteroconchia;Euherodonta;Imparidentia;Venerida;Veneroidea;Veneridae;Mercenaria;Mercenaria mercenaria

UdeM00000001319 6596 528.5 UdeM00000001319 XP\_045175044.1 43.3 619  
344 4 29 645 25 638 1.20E-146 528.5 6596 cellular

organisms;Eukaryota;Opisthokonta;Metazoa;Eumetazoa;Bilateria;Protostomia; Spiralia;Lophotrochozoa;Mollusca;Bivalvia;Autobranchia;Heteroconchia;Euherodonta;Imparidentia;Venerida;Veneroidea;Veneridae;Mercenaria;Mercenaria mercenaria

UdeM00000001320 6596 748.4 UdeM00000001320 XP\_045175045.1 43.6 896  
482 10 13 895 3 888 1.10E-212 748.4 6596 cellular

organisms;Eukaryota;Opisthokonta;Metazoa;Eumetazoa;Bilateria;Protostomia; Spiralia;Lophotrochozoa;Mollusca;Bivalvia;Autobranchia;Heteroconchia;Euherodonta;Imparidentia;Venerida;Veneroidea;Veneridae;Mercenaria;Mercenaria mercenaria

UdeM00000001321 45264 97.8 UdeM00000001321 XP\_044184709.1 51.7 87  
42 0 38 124 55 141 2.20E-17 97.8 45264 cellular

organisms;Eukaryota;Opisthokonta;Metazoa;Eumetazoa;Cnidaria;Anthozoa;Hexacorallia;Scleractinia;Astrocoeniina;Acroporidae;Acropora;Acropora millepora

UdeM00000001322 1529436 167.2 UdeM00000001322 XP\_033095325.1 49.1  
159 80 1 4 161 100 258 2.00E-38 167.2 1529436  
cellular

organisms;Eukaryota;Opisthokonta;Metazoa;Eumetazoa;Bilateria;Deuterostomi

a;Echinodermata;Pelmatozoa;Crinoidea;Articulata;Comatulida;Comatulidae;Comatulinae;Anneissia;Anneissia japonica

UdeM00000001323 45264 95.9 UdeM00000001323 XP\_044165143.1 46.7 107  
55 2 2 106 367 473 3.60E-17 95.9 45264 cellular  
organisms;Eukaryota;Opisthokonta;Metazoa;Eumetazoa;Cnidaria;Anthozoa;Hexacorallia;Scleractinia;Astrocoeniina;Acroporidae;Acropora;Acropora millepora

UdeM00000001324 45264 365.2 UdeM00000001324 XP\_044165143.1 45.8 443  
174 6 27 407 35 473 1.10E-97 365.2 45264 cellular  
organisms;Eukaryota;Opisthokonta;Metazoa;Eumetazoa;Cnidaria;Anthozoa;Hexacorallia;Scleractinia;Astrocoeniina;Acroporidae;Acropora;Acropora millepora

UdeM00000001325 45264 314.7 UdeM00000001325 XP\_044165143.1 56.9 274  
113 2 42 314 35 304 1.30E-82 314.7 45264 cellular  
organisms;Eukaryota;Opisthokonta;Metazoa;Eumetazoa;Cnidaria;Anthozoa;Hexacorallia;Scleractinia;Astrocoeniina;Acroporidae;Acropora;Acropora millepora

UdeM00000001326 6596 743.4 UdeM00000001326 XP\_045175045.1 44 878  
472 9 30 897 25 892 3.50E-211 743.4 6596 cellular  
organisms;Eukaryota;Opisthokonta;Metazoa;Eumetazoa;Bilateria;Protostomia;Spiralia;Lophotrochozoa;Mollusca;Bivalvia;Autobranchia;Heteroconchia;Euheterodonta;Imparidentia;Venerida;Veneroidea;Veneridae;Mercenaria;Mercenaria mercenaria

UdeM00000001327 6596 370.2 UdeM00000001327 XP\_045175869.1 53.3 332  
149 3 6 332 21 351 3.00E-99 370.2 6596 cellular  
organisms;Eukaryota;Opisthokonta;Metazoa;Eumetazoa;Bilateria;Protostomia;Spiralia;Lophotrochozoa;Mollusca;Bivalvia;Autobranchia;Heteroconchia;Euheterodonta;Imparidentia;Venerida;Veneroidea;Veneridae;Mercenaria;Mercenaria mercenaria

UdeM00000001328 6596 699.5 UdeM00000001328 XP\_045176166.1 63.2 517  
190 0 1 517 1 517 3.20E-198 699.5 6596 cellular  
organisms;Eukaryota;Opisthokonta;Metazoa;Eumetazoa;Bilateria;Protostomia;Spiralia;Lophotrochozoa;Mollusca;Bivalvia;Autobranchia;Heteroconchia;Euheterodonta;Imparidentia;Venerida;Veneroidea;Veneridae;Mercenaria;Mercenaria mercenaria

UdeM00000001329 29159 929.5 UdeM00000001329 XP\_034318291.1 78.2 568  
113 1 18 574 39 606 2.10E-267 929.5 29159 cellular  
organisms;Eukaryota;Opisthokonta;Metazoa;Eumetazoa;Bilateria;Protostomia;Spiralia;Lophotrochozoa;Mollusca;Bivalvia;Autobranchia;Pteriomorphia;Ostreida;Ostreoidea;Ostreidae;Crassostrea;Crassostrea gigas

UdeM00000001330 29159 966.5 UdeM00000001330 XP\_011445026.2 79.2 582  
120 1 18 598 39 620 1.60E-278 966.5 29159 cellular  
organisms;Eukaryota;Opisthokonta;Metazoa;Eumetazoa;Bilateria;Protostomia;Spiralia;Lophotrochozoa;Mollusca;Bivalvia;Autobranchia;Pteriomorphia;Ostreida;Ostreoidea;Ostreidae;Crassostrea;Crassostrea gigas

UdeM00000001332 29159 939.1 UdeM00000001332 XP\_034318291.1 79 568  
108 1 18 574 39 606 2.60E-270 939.1 29159 cellular  
organisms;Eukaryota;Opisthokonta;Metazoa;Eumetazoa;Bilateria;Protostomia;Spiralia;Lophotrochozoa;Mollusca;Bivalvia;Autobranchia;Pteriomorphia;Ostreida;Ostreoidea;Ostreidae;Crassostrea;Crassostrea gigas

UdeM00000001331 6596 918.7 UdeM00000001331 XP\_045176057.1 78.2 573  
95 1 10 552 94 666 3.50E-264 918.7 6596 cellular  
organisms;Eukaryota;Opisthokonta;Metazoa;Eumetazoa;Bilateria;Protostomia;Spiralia;Lophotrochozoa;Mollusca;Bivalvia;Autobranchia;Heteroconchia;Euheterodonta

terodonta;Imparidentia;Venerida;Veneroidea;Veneridae;Mercenaria;Mercenari  
 a mercenaria  
 UdeM00000001333 6596 928.7 UdeM00000001333 XP\_045176057.1 80.1 572  
 101 4 7 572 76 640 3.60E-267 928.7 6596 cellular  
 organisms;Eukaryota;Opisthokonta;Metazoa;Eumetazoa;Bilateria;Protostomia;  
 Spiralia;Lophotrochozoa;Mollusca;Bivalvia;Autobranhia;Heteroconchia;Euhe  
 terodonta;Imparidentia;Venerida;Veneroidea;Veneridae;Mercenaria;Mercenari  
 a mercenaria  
 UdeM00000001334 6596 100.5 UdeM00000001334 XP\_045176056.1 55.8 95  
 40 2 1 95 1 93 1.30E-18 100.5 6596 cellular  
 organisms;Eukaryota;Opisthokonta;Metazoa;Eumetazoa;Bilateria;Protostomia;  
 Spiralia;Lophotrochozoa;Mollusca;Bivalvia;Autobranhia;Heteroconchia;Euhe  
 terodonta;Imparidentia;Venerida;Veneroidea;Veneridae;Mercenaria;Mercenari  
 a mercenaria  
 UdeM00000001335 6573 375.2 UdeM00000001335 XP\_021340663.1 88.2 204  
 24 0 1 204 1 204 5.40E-101 375.2 6573 cellular  
 organisms;Eukaryota;Opisthokonta;Metazoa;Eumetazoa;Bilateria;Protostomia;  
 Spiralia;Lophotrochozoa;Mollusca;Bivalvia;Autobranhia;Pteriormorphia;Pect  
 inida;Pectinoidea;Pectinidae;Mizuhopecten;Mizuhopecten yessoensis  
 UdeM00000001336 6573 381.7 UdeM00000001336 XP\_021349453.1 70 237  
 71 0 1 237 10 246 6.70E-103 381.7 6573 cellular  
 organisms;Eukaryota;Opisthokonta;Metazoa;Eumetazoa;Bilateria;Protostomia;  
 Spiralia;Lophotrochozoa;Mollusca;Bivalvia;Autobranhia;Pteriormorphia;Pect  
 inida;Pectinoidea;Pectinidae;Mizuhopecten;Mizuhopecten yessoensis  
 UdeM00000001337 6596 318.5 UdeM00000001337 XP\_045174880.1 39.6 414  
 228 4 176 570 395 805 1.70E-83 318.5 6596 cellular  
 organisms;Eukaryota;Opisthokonta;Metazoa;Eumetazoa;Bilateria;Protostomia;  
 Spiralia;Lophotrochozoa;Mollusca;Bivalvia;Autobranhia;Heteroconchia;Euhe  
 terodonta;Imparidentia;Venerida;Veneroidea;Veneridae;Mercenaria;Mercenari  
 a mercenaria  
 UdeM00000001338 6596 315.5 UdeM00000001338 XP\_045174880.1 39.4 414  
 230 4 176 571 395 805 1.40E-82 315.5 6596 cellular  
 organisms;Eukaryota;Opisthokonta;Metazoa;Eumetazoa;Bilateria;Protostomia;  
 Spiralia;Lophotrochozoa;Mollusca;Bivalvia;Autobranhia;Heteroconchia;Euhe  
 terodonta;Imparidentia;Venerida;Veneroidea;Veneridae;Mercenaria;Mercenari  
 a mercenaria  
 UdeM00000001339 6596 528.5 UdeM00000001339 XP\_045175512.1 34.5 1615  
 644 54 34 1584 22 1286 3.00E-146 528.5 6596 cellular  
 organisms;Eukaryota;Opisthokonta;Metazoa;Eumetazoa;Bilateria;Protostomia;  
 Spiralia;Lophotrochozoa;Mollusca;Bivalvia;Autobranhia;Heteroconchia;Euhe  
 terodonta;Imparidentia;Venerida;Veneroidea;Veneridae;Mercenaria;Mercenari  
 a mercenaria  
 UdeM00000001340 6565 236.1 UdeM00000001340 XP\_022286640.1 63.9 166  
 59 1 4 168 3 168 1.00E-58 236.1 6565 cellular  
 organisms;Eukaryota;Opisthokonta;Metazoa;Eumetazoa;Bilateria;Protostomia;  
 Spiralia;Lophotrochozoa;Mollusca;Bivalvia;Autobranhia;Pteriormorphia;Ostre  
 eida;Ostreoidea;Ostreidae;Crassostrea;Crassostrea virginica  
 UdeM00000001342 6596 234.6 UdeM00000001342 XP\_045175506.1 46.1 531  
 227 11 2 525 767 1245 6.60E-58 234.6 6596 cellular  
 organisms;Eukaryota;Opisthokonta;Metazoa;Eumetazoa;Bilateria;Protostomia;  
 Spiralia;Lophotrochozoa;Mollusca;Bivalvia;Autobranhia;Heteroconchia;Euhe  
 terodonta;Imparidentia;Venerida;Veneroidea;Veneridae;Mercenaria;Mercenari  
 a mercenaria

UdeM00000001343 45264 149.8 UdeM00000001343 XP\_044184288.1 41.7 180  
 98 2 46 222 43 218 6.40E-33 149.8 45264 cellular  
 organisms;Eukaryota;Opisthokonta;Metazoa;Eumetazoa;Cnidaria;Anthozoa;Hexa  
 corallia;Scleractinia;Astrocoeniina;Acroporidae;Acropora;Acropora  
 millepora  
 UdeM00000001344 1529436 126.7 UdeM00000001344 XP\_033095325.1 50.9  
 112 55 0 1 112 69 180 3.20E-26 126.7 1529436  
 cellular  
 organisms;Eukaryota;Opisthokonta;Metazoa;Eumetazoa;Bilateria;Deuterostomi  
 a;Echinodermata;Pelmatozoa;Crinoidea;Articulata;Comatulida;Comatulidae;Co  
 matulinae;Anneissia;Anneissia japonica  
 UdeM00000001345 151771 421.4 UdeM00000001345 XP\_028419301.1 50.3  
 449 192 6 42 462 34 479 1.50E-114 421.4 151771  
 cellular  
 organisms;Eukaryota;Opisthokonta;Metazoa;Eumetazoa;Cnidaria;Anthozoa;Octo  
 corallia;Alcyonacea;Alcyoniina;Nephtheidae;Dendronephthya;Dendronephthya  
 gigantea  
 UdeM00000001346 6573 1460.7 UdeM00000001346 XP\_021353301.1 67  
 1075 338 5 1 1058 1 1075 0.00E+00 1460.7 6573  
 cellular  
 organisms;Eukaryota;Opisthokonta;Metazoa;Eumetazoa;Bilateria;Protostomia;  
 Spiralia;Lophotrochozoa;Mollusca;Bivalvia;Autobranchia;Pteriormorphia;Pect  
 inida;Pectinoidea;Pectinidae;Mizuhopecten;Mizuhopecten yessoensis  
 UdeM00000001347 37621 402.5 UdeM00000001347 XP\_014672567.1 45.6 421  
 213 5 1 408 101 518 7.10E-109 402.5 37621 cellular  
 organisms;Eukaryota;Opisthokonta;Metazoa;Eumetazoa;Bilateria;Protostomia;  
 Ecdysozoa;Scalidophora;Priapulida;Priapulimorpha;Priapulimorphida;Priapul  
 idae;Priapululus;Priapululus caudatus  
 UdeM00000001348 7668 591.7 UdeM00000001348 XP\_003729577.2 39.1 867  
 481 16 49 883 65 916 1.60E-165 591.7 7668 cellular  
 organisms;Eukaryota;Opisthokonta;Metazoa;Eumetazoa;Bilateria;Deuterostomi  
 a;Echinodermata;Eleutherozoa;Echinozoa;Echinoidea;Euechinoidea;Echinacea;  
 Camarodonta;Echinidea;Strongylocentrotidae;Strongylocentrotus;Strongyloce  
 ntrotus purpuratus  
 UdeM00000001349 7668 585.5 UdeM00000001349 XP\_003729577.2 39.3 855  
 472 16 85 907 77 916 1.20E-163 585.5 7668 cellular  
 organisms;Eukaryota;Opisthokonta;Metazoa;Eumetazoa;Bilateria;Deuterostomi  
 a;Echinodermata;Eleutherozoa;Echinozoa;Echinoidea;Euechinoidea;Echinacea;  
 Camarodonta;Echinidea;Strongylocentrotidae;Strongylocentrotus;Strongyloce  
 ntrotus purpuratus  
 UdeM00000001351 6596 309.3 UdeM00000001351 XP\_045176608.1 44.2 450  
 172 14 26 440 47 452 7.90E-81 309.3 6596 cellular  
 organisms;Eukaryota;Opisthokonta;Metazoa;Eumetazoa;Bilateria;Protostomia;  
 Spiralia;Lophotrochozoa;Mollusca;Bivalvia;Autobranchia;Heteroconchia;Euhe  
 terodonta;Imparidentia;Venerida;Veneroidea;Veneridae;Mercenaria;Mercenari  
 a mercenaria  
 UdeM00000001352 6579 69.3 UdeM00000001352 XP\_033753254.1 83.3 36  
 6 0 2 37 367 402 1.20E-09 69.3 6579 cellular  
 organisms;Eukaryota;Opisthokonta;Metazoa;Eumetazoa;Bilateria;Protostomia;  
 Spiralia;Lophotrochozoa;Mollusca;Bivalvia;Autobranchia;Pteriormorphia;Pect  
 inida;Pectinoidea;Pectinidae;Pecten;Pecten maximus  
 UdeM00000001353 6596 561.6 UdeM00000001353 XP\_045177772.1 75.6 386  
 92 2 5 389 903 1287 7.80E-157 561.6 6596 cellular  
 organisms;Eukaryota;Opisthokonta;Metazoa;Eumetazoa;Bilateria;Protostomia;

Spiralia;Lophotrochozoa;Mollusca;Bivalvia;Autobranchia;Heteroconchia;Euherodonta;Imparidentia;Venerida;Veneroidea;Veneridae;Mercenaria;Mercenaria mercenaria

UdeM00000001354 6596 1867.8 UdeM00000001354 XP\_045177770.1 72.6  
1309 333 9 1 1301 1 1291 0.00E+00 1867.8 6596  
cellular

organisms;Eukaryota;Opisthokonta;Metazoa;Eumetazoa;Bilateria;Protostomia;Spiralia;Lophotrochozoa;Mollusca;Bivalvia;Autobranchia;Heteroconchia;Euherodonta;Imparidentia;Venerida;Veneroidea;Veneridae;Mercenaria;Mercenaria mercenaria

UdeM00000001355 6596 971.5 UdeM00000001355 XP\_045177029.1 58.3 797  
308 8 7 782 6 799 6.50E-280 971.5 6596 cellular

organisms;Eukaryota;Opisthokonta;Metazoa;Eumetazoa;Bilateria;Protostomia;Spiralia;Lophotrochozoa;Mollusca;Bivalvia;Autobranchia;Heteroconchia;Euherodonta;Imparidentia;Venerida;Veneroidea;Veneridae;Mercenaria;Mercenaria mercenaria

UdeM00000001356 6596 111.7 UdeM00000001356 XP\_045177029.1 64.2 81  
26 1 43 123 565 642 6.90E-22 111.7 6596 cellular

organisms;Eukaryota;Opisthokonta;Metazoa;Eumetazoa;Bilateria;Protostomia;Spiralia;Lophotrochozoa;Mollusca;Bivalvia;Autobranchia;Heteroconchia;Euherodonta;Imparidentia;Venerida;Veneroidea;Veneridae;Mercenaria;Mercenaria mercenaria

UdeM00000001357 1735272 416.8 UdeM00000001357 XP\_041354468.1 60.6  
340 130 2 66 405 33 368 3.30E-113 416.8 1735272  
cellular

organisms;Eukaryota;Opisthokonta;Metazoa;Eumetazoa;Bilateria;Protostomia;Spiralia;Lophotrochozoa;Mollusca;Gastropoda;Neomphalina;Neomphaloidea;Peltospiridae;Gigantopelta;Gigantopelta aegis

UdeM00000001358 6596 278.5 UdeM00000001358 XP\_045177093.1 46.8 312  
158 3 1 308 1 308 1.00E-71 278.5 6596 cellular

organisms;Eukaryota;Opisthokonta;Metazoa;Eumetazoa;Bilateria;Protostomia;Spiralia;Lophotrochozoa;Mollusca;Bivalvia;Autobranchia;Heteroconchia;Euherodonta;Imparidentia;Venerida;Veneroidea;Veneridae;Mercenaria;Mercenaria mercenaria

UdeM00000001359 6565 686 UdeM00000001359 XP\_022320075.1 45.5 765  
401 6 1 758 1 756 5.30E-194 686 6565 cellular

organisms;Eukaryota;Opisthokonta;Metazoa;Eumetazoa;Bilateria;Protostomia;Spiralia;Lophotrochozoa;Mollusca;Bivalvia;Autobranchia;Pteriomorpha;Ostreida;Ostreoidea;Ostreidae;Crassostrea;Crassostrea virginica

UdeM00000001360 6596 563.1 UdeM00000001360 XP\_045175077.1 73.8 351  
76 1 1 351 1 335 2.40E-157 563.1 6596 cellular

organisms;Eukaryota;Opisthokonta;Metazoa;Eumetazoa;Bilateria;Protostomia;Spiralia;Lophotrochozoa;Mollusca;Bivalvia;Autobranchia;Heteroconchia;Euherodonta;Imparidentia;Venerida;Veneroidea;Veneridae;Mercenaria;Mercenaria mercenaria

UdeM00000001361 6596 574.7 UdeM00000001361 XP\_045175077.1 77.3 335  
76 0 1 335 1 335 7.60E-161 574.7 6596 cellular

organisms;Eukaryota;Opisthokonta;Metazoa;Eumetazoa;Bilateria;Protostomia;Spiralia;Lophotrochozoa;Mollusca;Bivalvia;Autobranchia;Heteroconchia;Euherodonta;Imparidentia;Venerida;Veneroidea;Veneridae;Mercenaria;Mercenaria mercenaria

UdeM00000001362 6565 495.4 UdeM00000001362 XP\_022341528.1 47.7 499  
219 6 1 499 1 457 8.80E-137 495.4 6565 cellular

organisms;Eukaryota;Opisthokonta;Metazoa;Eumetazoa;Bilateria;Protostomia;

Spiralia;Lophotrochozoa;Mollusca;Bivalvia;Autobranchia;Pteriormorphia;Ostr  
eida;Ostreoidea;Ostreidae;Crassostrea;Crassostrea virginica  
UdeM00000001363 1735272 95.1 UdeM00000001363 XP\_041367524.1 61.3  
62 24 0 49 110 43 104 7.00E-17 95.1 1735272  
cellular  
organisms;Eukaryota;Opisthokonta;Metazoa;Eumetazoa;Bilateria;Protostomia;  
Spiralia;Lophotrochozoa;Mollusca;Gastropoda;Neomphalina;Neomphaloidea;Pel  
tospiridae;Gigantopelta;Gigantopelta aegis  
UdeM00000001364 6596 174.5 UdeM00000001364 XP\_045177008.1 38.8 232  
141 1 22 253 11 241 1.70E-40 174.5 6596 cellular  
organisms;Eukaryota;Opisthokonta;Metazoa;Eumetazoa;Bilateria;Protostomia;  
Spiralia;Lophotrochozoa;Mollusca;Bivalvia;Autobranchia;Heteroconchia;Euhe  
terodonta;Imparidentia;Venerida;Veneroidea;Veneridae;Mercenaria;Mercenari  
a mercenaria  
UdeM00000001366 6573 145.6 UdeM00000001366 XP\_021345746.1 38.3 201  
116 3 5 200 55 252 6.80E-32 145.6 6573 cellular  
organisms;Eukaryota;Opisthokonta;Metazoa;Eumetazoa;Bilateria;Protostomia;  
Spiralia;Lophotrochozoa;Mollusca;Bivalvia;Autobranchia;Pteriormorphia;Pect  
inida;Pectinoidea;Pectinidae;Mizuhopecten;Mizuhopecten yessoensis  
UdeM00000001367 6596 583.9 UdeM00000001367 XP\_045174993.1 75 344  
86 0 1 344 1 344 1.60E-163 583.9 6596 cellular  
organisms;Eukaryota;Opisthokonta;Metazoa;Eumetazoa;Bilateria;Protostomia;  
Spiralia;Lophotrochozoa;Mollusca;Bivalvia;Autobranchia;Heteroconchia;Euhe  
terodonta;Imparidentia;Venerida;Veneroidea;Veneridae;Mercenaria;Mercenari  
a mercenaria  
UdeM00000001368 6596 296.6 UdeM00000001368 XP\_045176632.1 50.5 289  
137 4 53 336 341 628 4.10E-77 296.6 6596 cellular  
organisms;Eukaryota;Opisthokonta;Metazoa;Eumetazoa;Bilateria;Protostomia;  
Spiralia;Lophotrochozoa;Mollusca;Bivalvia;Autobranchia;Heteroconchia;Euhe  
terodonta;Imparidentia;Venerida;Veneroidea;Veneridae;Mercenaria;Mercenari  
a mercenaria  
UdeM00000001369 6596 285.8 UdeM00000001369 XP\_045176632.1 56 241  
97 3 53 284 341 581 6.80E-74 285.8 6596 cellular  
organisms;Eukaryota;Opisthokonta;Metazoa;Eumetazoa;Bilateria;Protostomia;  
Spiralia;Lophotrochozoa;Mollusca;Bivalvia;Autobranchia;Heteroconchia;Euhe  
terodonta;Imparidentia;Venerida;Veneroidea;Veneridae;Mercenaria;Mercenari  
a mercenaria  
UdeM00000001370 6596 196.4 UdeM00000001370 XP\_045173066.1 34.2 322  
203 6 23 339 36 353 5.70E-47 196.4 6596 cellular  
organisms;Eukaryota;Opisthokonta;Metazoa;Eumetazoa;Bilateria;Protostomia;  
Spiralia;Lophotrochozoa;Mollusca;Bivalvia;Autobranchia;Heteroconchia;Euhe  
terodonta;Imparidentia;Venerida;Veneroidea;Veneridae;Mercenaria;Mercenari  
a mercenaria  
UdeM00000001371 6596 195.7 UdeM00000001371 XP\_045173066.1 36 297  
181 6 20 311 61 353 9.00E-47 195.7 6596 cellular  
organisms;Eukaryota;Opisthokonta;Metazoa;Eumetazoa;Bilateria;Protostomia;  
Spiralia;Lophotrochozoa;Mollusca;Bivalvia;Autobranchia;Heteroconchia;Euhe  
terodonta;Imparidentia;Venerida;Veneroidea;Veneridae;Mercenaria;Mercenari  
a mercenaria  
UdeM00000001372 6579 229.2 UdeM00000001372 XP\_033739127.1 39.8 244  
146 1 7 250 23 265 5.90E-57 229.2 6579 cellular  
organisms;Eukaryota;Opisthokonta;Metazoa;Eumetazoa;Bilateria;Protostomia;  
Spiralia;Lophotrochozoa;Mollusca;Bivalvia;Autobranchia;Pteriormorphia;Pect  
inida;Pectinoidea;Pectinidae;Pecten;Pecten maximus

UdeM00000001373 7654 58.5 UdeM00000001373 XP\_041482248.1 36.4 99  
 52 2 6 93 281 379 5.80E-06 58.5 7654 cellular  
 organisms;Eukaryota;Opisthokonta;Metazoa;Eumetazoa;Bilateria;Deuterostomi  
 a;Echinodermata;Eleutherozoa;Echinozoa;Echinoidea;Euechinoidea;Echinacea;  
 Temnopleuroida;Toxopneustidae;Lytechinus;Lytechinus variegatus  
 UdeM00000001375 6579 215.7 UdeM00000001375 XP\_033739127.1 40.2 229  
 136 1 4 232 38 265 6.30E-53 215.7 6579 cellular  
 organisms;Eukaryota;Opisthokonta;Metazoa;Eumetazoa;Bilateria;Protostomia;  
 Spiralia;Lophotrochozoa;Mollusca;Bivalvia;Autobranhia;Pteriormorphia;Pect  
 inida;Pectinoidea;Pectinidae;Pecten;Pecten maximus  
 UdeM00000001377 6596 136.7 UdeM00000001377 XP\_045209337.1 31 255  
 163 7 1 251 14 259 4.80E-29 136.7 6596 cellular  
 organisms;Eukaryota;Opisthokonta;Metazoa;Eumetazoa;Bilateria;Protostomia;  
 Spiralia;Lophotrochozoa;Mollusca;Bivalvia;Autobranhia;Heteroconchia;Euhe  
 terodonta;Imparidentia;Venerida;Veneroidea;Veneridae;Mercenaria;Mercenari  
 a mercenaria  
 UdeM00000001378 6596 1560 UdeM00000001378 XP\_045176565.1 80.2 1040  
 205 1 1 1040 1 1039 0.00E+00 1560 6596 cellular  
 organisms;Eukaryota;Opisthokonta;Metazoa;Eumetazoa;Bilateria;Protostomia;  
 Spiralia;Lophotrochozoa;Mollusca;Bivalvia;Autobranhia;Heteroconchia;Euhe  
 terodonta;Imparidentia;Venerida;Veneroidea;Veneridae;Mercenaria;Mercenari  
 a mercenaria  
 UdeM00000001380 6573 105.5 UdeM00000001380 XP\_021341418.1 42 131  
 74 2 9 138 37 166 9.90E-20 105.5 6573 cellular  
 organisms;Eukaryota;Opisthokonta;Metazoa;Eumetazoa;Bilateria;Protostomia;  
 Spiralia;Lophotrochozoa;Mollusca;Bivalvia;Autobranhia;Pteriormorphia;Pect  
 inida;Pectinoidea;Pectinidae;Mizuhopecten;Mizuhopecten yessoensis  
 UdeM00000001381 6596 246.1 UdeM00000001381 XP\_045160797.1 44.7 342  
 189 0 1 342 1 342 8.60E-61 246.1 6596 cellular  
 organisms;Eukaryota;Opisthokonta;Metazoa;Eumetazoa;Bilateria;Protostomia;  
 Spiralia;Lophotrochozoa;Mollusca;Bivalvia;Autobranhia;Heteroconchia;Euhe  
 terodonta;Imparidentia;Venerida;Veneroidea;Veneridae;Mercenaria;Mercenari  
 a mercenaria  
 UdeM00000001382 6596 151.8 UdeM00000001382 XP\_045177393.1 40.9 193  
 113 1 7 198 7 199 1.10E-33 151.8 6596 cellular  
 organisms;Eukaryota;Opisthokonta;Metazoa;Eumetazoa;Bilateria;Protostomia;  
 Spiralia;Lophotrochozoa;Mollusca;Bivalvia;Autobranhia;Heteroconchia;Euhe  
 terodonta;Imparidentia;Venerida;Veneroidea;Veneridae;Mercenaria;Mercenari  
 a mercenaria  
 UdeM00000001383 6596 146.4 UdeM00000001383 XP\_045176960.1 42.9 184  
 99 3 1 179 1 183 3.60E-32 146.4 6596 cellular  
 organisms;Eukaryota;Opisthokonta;Metazoa;Eumetazoa;Bilateria;Protostomia;  
 Spiralia;Lophotrochozoa;Mollusca;Bivalvia;Autobranhia;Heteroconchia;Euhe  
 terodonta;Imparidentia;Venerida;Veneroidea;Veneridae;Mercenaria;Mercenari  
 a mercenaria  
 UdeM00000001384 6596 996.5 UdeM00000001384 XP\_045175661.1 52.1 889  
 411 8 10 888 293 1176 2.20E-287 996.5 6596 cellular  
 organisms;Eukaryota;Opisthokonta;Metazoa;Eumetazoa;Bilateria;Protostomia;  
 Spiralia;Lophotrochozoa;Mollusca;Bivalvia;Autobranhia;Heteroconchia;Euhe  
 terodonta;Imparidentia;Venerida;Veneroidea;Veneridae;Mercenaria;Mercenari  
 a mercenaria  
 UdeM00000001385 6596 994.6 UdeM00000001385 XP\_045175661.1 51.6 901  
 409 9 10 900 293 1176 8.30E-287 994.6 6596 cellular  
 organisms;Eukaryota;Opisthokonta;Metazoa;Eumetazoa;Bilateria;Protostomia;



Spiralia;Lophotrochozoa;Mollusca;Bivalvia;Autobranchia;Heteroconchia;Euherodonta;Imparidentia;Venerida;Veneroidea;Veneridae;Mercenaria;Mercenaria mercenaria

UdeM00000001386 6596 996.5 UdeM00000001386 XP\_045175661.1 52 895  
409 9 10 894 293 1176 2.20E-287 996.5 6596 cellular

organisms;Eukaryota;Opisthokonta;Metazoa;Eumetazoa;Bilateria;Protostomia;Spiralia;Lophotrochozoa;Mollusca;Bivalvia;Autobranchia;Heteroconchia;Euherodonta;Imparidentia;Venerida;Veneroidea;Veneridae;Mercenaria;Mercenaria mercenaria

UdeM00000001387 6573 308.5 UdeM00000001387 XP\_021357130.1 78.7 197  
42 0 326 522 313 509 1.60E-80 308.5 6573 cellular

organisms;Eukaryota;Opisthokonta;Metazoa;Eumetazoa;Bilateria;Protostomia;Spiralia;Lophotrochozoa;Mollusca;Bivalvia;Autobranchia;Pteriormorphia;Pectinida;Pectinoidea;Pectinidae;Mizuhopecten;Mizuhopecten yessoensis

UdeM00000001389 45351 390.2 UdeM00000001389 XP\_032219150.1 29.9 927  
517 28 9 915 10 823 8.60E-105 390.2 45351 cellular

organisms;Eukaryota;Opisthokonta;Metazoa;Eumetazoa;Cnidaria;Anthozoa;Hexacorallia;Actiniaria;Edwardsiidae;Nematostella;Nematostella vectensis

UdeM00000001390 6596 613.6 UdeM00000001390 XP\_045175868.1 76.4 382  
89 1 1 382 1 381 1.70E-172 613.6 6596 cellular

organisms;Eukaryota;Opisthokonta;Metazoa;Eumetazoa;Bilateria;Protostomia;Spiralia;Lophotrochozoa;Mollusca;Bivalvia;Autobranchia;Heteroconchia;Euherodonta;Imparidentia;Venerida;Veneroidea;Veneridae;Mercenaria;Mercenaria mercenaria

UdeM00000001391 6596 448 UdeM00000001391 XP\_045174469.1 48.1 595  
229 14 84 657 91 626 2.10E-122 448 6596 cellular

organisms;Eukaryota;Opisthokonta;Metazoa;Eumetazoa;Bilateria;Protostomia;Spiralia;Lophotrochozoa;Mollusca;Bivalvia;Autobranchia;Heteroconchia;Euherodonta;Imparidentia;Venerida;Veneroidea;Veneridae;Mercenaria;Mercenaria mercenaria

UdeM00000001394 6596 296.2 UdeM00000001394 XP\_045176951.1 91.3 149  
13 0 3 151 27 175 2.40E-77 296.2 6596 cellular

organisms;Eukaryota;Opisthokonta;Metazoa;Eumetazoa;Bilateria;Protostomia;Spiralia;Lophotrochozoa;Mollusca;Bivalvia;Autobranchia;Heteroconchia;Euherodonta;Imparidentia;Venerida;Veneroidea;Veneridae;Mercenaria;Mercenaria mercenaria

UdeM00000001395 6596 347.4 UdeM00000001395 XP\_045176951.1 93.1 175  
12 0 1 175 1 175 1.00E-92 347.4 6596 cellular

organisms;Eukaryota;Opisthokonta;Metazoa;Eumetazoa;Bilateria;Protostomia;Spiralia;Lophotrochozoa;Mollusca;Bivalvia;Autobranchia;Heteroconchia;Euherodonta;Imparidentia;Venerida;Veneroidea;Veneridae;Mercenaria;Mercenaria mercenaria

UdeM00000001397 6596 842.4 UdeM00000001397 XP\_045175501.1 55.8 799  
312 12 14 784 112 897 4.60E-241 842.4 6596 cellular

organisms;Eukaryota;Opisthokonta;Metazoa;Eumetazoa;Bilateria;Protostomia;Spiralia;Lophotrochozoa;Mollusca;Bivalvia;Autobranchia;Heteroconchia;Euherodonta;Imparidentia;Venerida;Veneroidea;Veneridae;Mercenaria;Mercenaria mercenaria

UdeM00000001398 6596 864.4 UdeM00000001398 XP\_045175502.1 54.8 857  
333 10 12 825 5 850 1.20E-247 864.4 6596 cellular

organisms;Eukaryota;Opisthokonta;Metazoa;Eumetazoa;Bilateria;Protostomia;Spiralia;Lophotrochozoa;Mollusca;Bivalvia;Autobranchia;Heteroconchia;Euherodonta;Imparidentia;Venerida;Veneroidea;Veneridae;Mercenaria;Mercenaria mercenaria

UdeM00000001399 29159 211.1 UdeM00000001399 XP\_011427495.2 76 146  
 34 1 1 145 1 146 2.20E-51 211.1 29159 cellular  
 organisms;Eukaryota;Opisthokonta;Metazoa;Eumetazoa;Bilateria;Protostomia;  
 Spiralia;Lophotrochozoa;Mollusca;Bivalvia;Autobranhia;Pteriomorpha;Ostr  
 eida;Ostreoidea;Ostreidae;Crassostrea;Crassostrea gigas  
 UdeM00000001400 6565 210.3 UdeM00000001400 XP\_022300453.1 74.5 149  
 37 1 1 148 1 149 1.70E-51 210.3 6565 cellular  
 organisms;Eukaryota;Opisthokonta;Metazoa;Eumetazoa;Bilateria;Protostomia;  
 Spiralia;Lophotrochozoa;Mollusca;Bivalvia;Autobranhia;Pteriomorpha;Ostr  
 eida;Ostreoidea;Ostreidae;Crassostrea;Crassostrea virginica  
 UdeM00000001401 6579 223.4 UdeM00000001401 XP\_033752869.1 81.8 121  
 21 1 22 142 3 122 2.50E-55 223.4 6579 cellular  
 organisms;Eukaryota;Opisthokonta;Metazoa;Eumetazoa;Bilateria;Protostomia;  
 Spiralia;Lophotrochozoa;Mollusca;Bivalvia;Autobranhia;Pteriomorpha;Pect  
 inida;Pectinoidea;Pectinidae;Pecten;Pecten maximus  
 UdeM00000001402 6596 134.4 UdeM00000001402 XP\_045175451.1 51.9 131  
 51 1 15 133 397 527 1.10E-28 134.4 6596 cellular  
 organisms;Eukaryota;Opisthokonta;Metazoa;Eumetazoa;Bilateria;Protostomia;  
 Spiralia;Lophotrochozoa;Mollusca;Bivalvia;Autobranhia;Heteroconchia;Euhe  
 terodonta;Imparidentia;Venerida;Veneroidea;Veneridae;Mercenaria;Mercenari  
 a mercenaria  
 UdeM00000001403 6596 213 UdeM00000001403 XP\_045175451.1 30.3 542  
 333 16 7 521 4 527 9.10E-52 213 6596 cellular  
 organisms;Eukaryota;Opisthokonta;Metazoa;Eumetazoa;Bilateria;Protostomia;  
 Spiralia;Lophotrochozoa;Mollusca;Bivalvia;Autobranhia;Heteroconchia;Euhe  
 terodonta;Imparidentia;Venerida;Veneroidea;Veneridae;Mercenaria;Mercenari  
 a mercenaria  
 UdeM00000001405 400727 155.6 UdeM00000001405 XP\_025086071.1 81.1  
 90 17 0 1 90 59 148 3.00E-35 155.6 400727  
 cellular  
 organisms;Eukaryota;Opisthokonta;Metazoa;Eumetazoa;Bilateria;Protostomia;  
 Spiralia;Lophotrochozoa;Mollusca;Gastropoda;Caenogastropoda;Architaeniogl  
 ossa;Ampullarioidea;Ampullariidae;Pomacea;Pomacea canaliculata  
 UdeM00000001404 10224 229.2 UdeM00000001404 XP\_002735002.1 78.8 137  
 29 0 13 149 11 147 3.50E-57 229.2 10224 cellular  
 organisms;Eukaryota;Opisthokonta;Metazoa;Eumetazoa;Bilateria;Deuterostomi  
 a;Hemichordata;Enteropneusta;Harrimaniidae;Saccoglossus;Saccoglossus  
 kowalevskii  
 UdeM00000001406 10224 173.3 UdeM00000001406 XP\_006820181.1 46.8 190  
 101 0 1 190 164 353 2.90E-40 173.3 10224 cellular  
 organisms;Eukaryota;Opisthokonta;Metazoa;Eumetazoa;Bilateria;Deuterostomi  
 a;Hemichordata;Enteropneusta;Harrimaniidae;Saccoglossus;Saccoglossus  
 kowalevskii  
 UdeM00000001407 10224 142.9 UdeM00000001407 XP\_006820181.1 43.3 180  
 94 3 3 175 373 551 3.90E-31 142.9 10224 cellular  
 organisms;Eukaryota;Opisthokonta;Metazoa;Eumetazoa;Bilateria;Deuterostomi  
 a;Hemichordata;Enteropneusta;Harrimaniidae;Saccoglossus;Saccoglossus  
 kowalevskii  
 UdeM00000001409 6596 87 UdeM00000001409 XP\_045177330.1 26.6 478  
 228 21 59 455 175 610 7.10E-14 87 6596 cellular  
 organisms;Eukaryota;Opisthokonta;Metazoa;Eumetazoa;Bilateria;Protostomia;  
 Spiralia;Lophotrochozoa;Mollusca;Bivalvia;Autobranhia;Heteroconchia;Euhe  
 terodonta;Imparidentia;Venerida;Veneroidea;Veneridae;Mercenaria;Mercenari  
 a mercenaria

UdeM00000001410 6596 682.9 UdeM00000001410 XP\_045177330.1 45.5 951  
 383 27 59 924 175 1075 5.50E-193 682.9 6596 cellular  
 organisms;Eukaryota;Opisthokonta;Metazoa;Eumetazoa;Bilateria;Protostomia;  
 Spiralia;Lophotrochozoa;Mollusca;Bivalvia;Autobranchia;Heteroconchia;Euhe  
 terodonta;Imparidentia;Venerida;Veneroidea;Veneridae;Mercenaria;Mercenari  
 a mercenaria

UdeM00000001411 6596 797 UdeM00000001411 XP\_045174517.1 33.9 2142  
 830 61 17 1976 116 1854 5.70E-227 797 6596 cellular  
 organisms;Eukaryota;Opisthokonta;Metazoa;Eumetazoa;Bilateria;Protostomia;  
 Spiralia;Lophotrochozoa;Mollusca;Bivalvia;Autobranchia;Heteroconchia;Euhe  
 terodonta;Imparidentia;Venerida;Veneroidea;Veneridae;Mercenaria;Mercenari  
 a mercenaria

UdeM00000001412 6596 534.6 UdeM00000001412 XP\_045175485.1 53.4 513  
 217 8 39 541 42 542 1.40E-148 534.6 6596 cellular  
 organisms;Eukaryota;Opisthokonta;Metazoa;Eumetazoa;Bilateria;Protostomia;  
 Spiralia;Lophotrochozoa;Mollusca;Bivalvia;Autobranchia;Heteroconchia;Euhe  
 terodonta;Imparidentia;Venerida;Veneroidea;Veneridae;Mercenaria;Mercenari  
 a mercenaria

UdeM00000001413 6565 514.6 UdeM00000001413 XP\_022332622.1 78.5 302  
 65 0 4 305 6 307 8.50E-143 514.6 6565 cellular  
 organisms;Eukaryota;Opisthokonta;Metazoa;Eumetazoa;Bilateria;Protostomia;  
 Spiralia;Lophotrochozoa;Mollusca;Bivalvia;Autobranchia;Pteriormorphia;Ostr  
 eida;Ostreoidea;Ostreidae;Crassostrea;Crassostrea virginica

UdeM00000001414 6596 807.4 UdeM00000001414 XP\_045176706.1 71.4 646  
 183 2 89 734 95 738 1.50E-230 807.4 6596 cellular  
 organisms;Eukaryota;Opisthokonta;Metazoa;Eumetazoa;Bilateria;Protostomia;  
 Spiralia;Lophotrochozoa;Mollusca;Bivalvia;Autobranchia;Heteroconchia;Euhe  
 terodonta;Imparidentia;Venerida;Veneroidea;Veneridae;Mercenaria;Mercenari  
 a mercenaria

UdeM00000001415 6596 540 UdeM00000001415 XP\_045174342.1 45.9 699  
 287 17 2 648 49 708 4.40E-150 540 6596 cellular  
 organisms;Eukaryota;Opisthokonta;Metazoa;Eumetazoa;Bilateria;Protostomia;  
 Spiralia;Lophotrochozoa;Mollusca;Bivalvia;Autobranchia;Heteroconchia;Euhe  
 terodonta;Imparidentia;Venerida;Veneroidea;Veneridae;Mercenaria;Mercenari  
 a mercenaria

UdeM00000001416 6596 801.6 UdeM00000001416 XP\_045176706.1 71.6 649  
 176 2 86 727 91 738 8.30E-229 801.6 6596 cellular  
 organisms;Eukaryota;Opisthokonta;Metazoa;Eumetazoa;Bilateria;Protostomia;  
 Spiralia;Lophotrochozoa;Mollusca;Bivalvia;Autobranchia;Heteroconchia;Euhe  
 terodonta;Imparidentia;Venerida;Veneroidea;Veneridae;Mercenaria;Mercenari  
 a mercenaria

UdeM00000001417 6596 802.7 UdeM00000001417 XP\_045176706.1 72.7 649  
 172 2 86 730 91 738 3.70E-229 802.7 6596 cellular  
 organisms;Eukaryota;Opisthokonta;Metazoa;Eumetazoa;Bilateria;Protostomia;  
 Spiralia;Lophotrochozoa;Mollusca;Bivalvia;Autobranchia;Heteroconchia;Euhe  
 terodonta;Imparidentia;Venerida;Veneroidea;Veneridae;Mercenaria;Mercenari  
 a mercenaria

UdeM00000001418 6596 569.3 UdeM00000001418 XP\_045176697.1 73.1 368  
 98 1 32 399 409 775 3.80E-159 569.3 6596 cellular  
 organisms;Eukaryota;Opisthokonta;Metazoa;Eumetazoa;Bilateria;Protostomia;  
 Spiralia;Lophotrochozoa;Mollusca;Bivalvia;Autobranchia;Heteroconchia;Euhe  
 terodonta;Imparidentia;Venerida;Veneroidea;Veneridae;Mercenaria;Mercenari  
 a mercenaria

UdeM00000001419 29159 294.3 UdeM00000001419 XP\_034317111.1 55 262  
 118 0 2 263 171 432 3.00E-76 294.3 29159 cellular  
 organisms;Eukaryota;Opisthokonta;Metazoa;Eumetazoa;Bilateria;Protostomia;  
 Spiralia;Lophotrochozoa;Mollusca;Bivalvia;Autobranchia;Pteriormorphia;Ostr  
 eida;Ostreoidea;Ostreidae;Crassostrea;Crassostrea gigas  
 UdeM00000001420 6596 547.4 UdeM00000001420 XP\_045176980.1 67.7 396  
 122 2 1 395 1 391 1.50E-152 547.4 6596 cellular  
 organisms;Eukaryota;Opisthokonta;Metazoa;Eumetazoa;Bilateria;Protostomia;  
 Spiralia;Lophotrochozoa;Mollusca;Bivalvia;Autobranchia;Heteroconchia;Euhe  
 terodonta;Imparidentia;Venerida;Veneroidea;Veneridae;Mercenaria;Mercenari  
 a mercenaria  
 UdeM00000001421 1735272 584.3 UdeM00000001421 XP\_041367289.1 70.9  
 422 122 1 1 422 1 421 1.50E-163 584.3 1735272  
 cellular  
 organisms;Eukaryota;Opisthokonta;Metazoa;Eumetazoa;Bilateria;Protostomia;  
 Spiralia;Lophotrochozoa;Mollusca;Gastropoda;Neomphalina;Neomphaloidea;Pel  
 tospiridae;Gigantopelta;Gigantopelta aegis  
 UdeM00000001422 6596 1240.7 UdeM00000001422 XP\_045174873.1 66.7  
 953 307 7 1 947 1 949 0.00E+00 1240.7 6596  
 cellular  
 organisms;Eukaryota;Opisthokonta;Metazoa;Eumetazoa;Bilateria;Protostomia;  
 Spiralia;Lophotrochozoa;Mollusca;Bivalvia;Autobranchia;Heteroconchia;Euhe  
 terodonta;Imparidentia;Venerida;Veneroidea;Veneridae;Mercenaria;Mercenari  
 a mercenaria  
 UdeM00000001423 6596 348.6 UdeM00000001423 XP\_045161716.1 81 211  
 40 0 1 211 1 211 5.70E-93 348.6 6596 cellular  
 organisms;Eukaryota;Opisthokonta;Metazoa;Eumetazoa;Bilateria;Protostomia;  
 Spiralia;Lophotrochozoa;Mollusca;Bivalvia;Autobranchia;Heteroconchia;Euhe  
 terodonta;Imparidentia;Venerida;Veneroidea;Veneridae;Mercenaria;Mercenari  
 a mercenaria  
 UdeM00000001424 6596 275.8 UdeM00000001424 XP\_045194411.1 29.2 739  
 463 20 84 788 40 752 1.80E-70 275.8 6596 cellular  
 organisms;Eukaryota;Opisthokonta;Metazoa;Eumetazoa;Bilateria;Protostomia;  
 Spiralia;Lophotrochozoa;Mollusca;Bivalvia;Autobranchia;Heteroconchia;Euhe  
 terodonta;Imparidentia;Venerida;Veneroidea;Veneridae;Mercenaria;Mercenari  
 a mercenaria  
 UdeM00000001426 6596 437.2 UdeM00000001426 XP\_045175151.1 48.9 446  
 211 6 19 448 33 477 2.60E-119 437.2 6596 cellular  
 organisms;Eukaryota;Opisthokonta;Metazoa;Eumetazoa;Bilateria;Protostomia;  
 Spiralia;Lophotrochozoa;Mollusca;Bivalvia;Autobranchia;Heteroconchia;Euhe  
 terodonta;Imparidentia;Venerida;Veneroidea;Veneridae;Mercenaria;Mercenari  
 a mercenaria  
 UdeM00000001425 6596 437.2 UdeM00000001425 XP\_045175151.1 48.9 446  
 211 6 35 464 33 477 2.60E-119 437.2 6596 cellular  
 organisms;Eukaryota;Opisthokonta;Metazoa;Eumetazoa;Bilateria;Protostomia;  
 Spiralia;Lophotrochozoa;Mollusca;Bivalvia;Autobranchia;Heteroconchia;Euhe  
 terodonta;Imparidentia;Venerida;Veneroidea;Veneridae;Mercenaria;Mercenari  
 a mercenaria  
 UdeM00000001427 6579 536.6 UdeM00000001427 XP\_033751222.1 87.9 306  
 36 1 1 305 1 306 2.40E-149 536.6 6579 cellular  
 organisms;Eukaryota;Opisthokonta;Metazoa;Eumetazoa;Bilateria;Protostomia;  
 Spiralia;Lophotrochozoa;Mollusca;Bivalvia;Autobranchia;Pteriormorphia;Pect  
 inida;Pectinoidea;Pectinidae;Pecten;Pecten maximus

UdeM00000001428 6579 278.5 UdeM00000001428 XP\_033753377.1 67.2 195  
 64 0 1 195 1 195 6.70E-72 278.5 6579 cellular  
 organisms;Eukaryota;Opisthokonta;Metazoa;Eumetazoa;Bilateria;Protostomia;  
 Spiralia;Lophotrochozoa;Mollusca;Bivalvia;Autobranchia;Pteriormorphia;Pect  
 inida;Pectinoidea;Pectinidae;Pecten;Pecten maximus  
 UdeM00000001429 6596 511.5 UdeM00000001429 XP\_045175375.1 64.5 375  
 116 2 1 372 1 361 9.80E-142 511.5 6596 cellular  
 organisms;Eukaryota;Opisthokonta;Metazoa;Eumetazoa;Bilateria;Protostomia;  
 Spiralia;Lophotrochozoa;Mollusca;Bivalvia;Autobranchia;Heteroconchia;Euhe  
 terodonta;Imparidentia;Venerida;Veneroidea;Veneridae;Mercenaria;Mercenari  
 a mercenaria  
 UdeM00000001430 6596 360.9 UdeM00000001430 XP\_045177258.1 64 367  
 122 3 1 358 1 366 1.90E-96 360.9 6596 cellular  
 organisms;Eukaryota;Opisthokonta;Metazoa;Eumetazoa;Bilateria;Protostomia;  
 Spiralia;Lophotrochozoa;Mollusca;Bivalvia;Autobranchia;Heteroconchia;Euhe  
 terodonta;Imparidentia;Venerida;Veneroidea;Veneridae;Mercenaria;Mercenari  
 a mercenaria  
 UdeM00000001431 6596 345.1 UdeM00000001431 XP\_045176008.1 53.6 323  
 147 3 2 322 1 322 9.50E-92 345.1 6596 cellular  
 organisms;Eukaryota;Opisthokonta;Metazoa;Eumetazoa;Bilateria;Protostomia;  
 Spiralia;Lophotrochozoa;Mollusca;Bivalvia;Autobranchia;Heteroconchia;Euhe  
 terodonta;Imparidentia;Venerida;Veneroidea;Veneridae;Mercenaria;Mercenari  
 a mercenaria  
 UdeM00000001432 6596 318.9 UdeM00000001432 XP\_045176008.1 55 282  
 126 1 2 283 31 311 6.50E-84 318.9 6596 cellular  
 organisms;Eukaryota;Opisthokonta;Metazoa;Eumetazoa;Bilateria;Protostomia;  
 Spiralia;Lophotrochozoa;Mollusca;Bivalvia;Autobranchia;Heteroconchia;Euhe  
 terodonta;Imparidentia;Venerida;Veneroidea;Veneridae;Mercenaria;Mercenari  
 a mercenaria  
 UdeM00000001433 6596 310.1 UdeM00000001433 XP\_045176330.1 49.5 305  
 152 2 26 329 28 331 3.50E-81 310.1 6596 cellular  
 organisms;Eukaryota;Opisthokonta;Metazoa;Eumetazoa;Bilateria;Protostomia;  
 Spiralia;Lophotrochozoa;Mollusca;Bivalvia;Autobranchia;Heteroconchia;Euhe  
 terodonta;Imparidentia;Venerida;Veneroidea;Veneridae;Mercenaria;Mercenari  
 a mercenaria  
 UdeM00000001434 225164 622.9 UdeM00000001434 XP\_009046252.1 59.8  
 460 182 2 72 531 60 516 3.90E-175 622.9 225164  
 cellular  
 organisms;Eukaryota;Opisthokonta;Metazoa;Eumetazoa;Bilateria;Protostomia;  
 Spiralia;Lophotrochozoa;Mollusca;Gastropoda;Patellogastropoda;Lottioidea;  
 Lottiidae;Lottia;Lottia gigantea  
 UdeM00000001436 6565 67 UdeM00000001436 XP\_022335730.1 41.1 95  
 49 2 1 93 597 686 7.40E-08 67 6565 cellular  
 organisms;Eukaryota;Opisthokonta;Metazoa;Eumetazoa;Bilateria;Protostomia;  
 Spiralia;Lophotrochozoa;Mollusca;Bivalvia;Autobranchia;Pteriormorphia;Ostr  
 eida;Ostreoidea;Ostreidae;Crassostrea;Crassostrea virginica  
 UdeM00000001435 6565 77 UdeM00000001435 XP\_022335730.1 42.3 104  
 53 2 4 105 588 686 7.30E-11 77 6565 cellular  
 organisms;Eukaryota;Opisthokonta;Metazoa;Eumetazoa;Bilateria;Protostomia;  
 Spiralia;Lophotrochozoa;Mollusca;Bivalvia;Autobranchia;Pteriormorphia;Ostr  
 eida;Ostreoidea;Ostreidae;Crassostrea;Crassostrea virginica  
 UdeM00000001437 6579 359 UdeM00000001437 XP\_033752089.1 47 351  
 161 4 27 368 22 356 7.50E-96 359 6579 cellular  
 organisms;Eukaryota;Opisthokonta;Metazoa;Eumetazoa;Bilateria;Protostomia;

Spiralia; Lophotrochozoa; Mollusca; Bivalvia; Autobranchia; Pteriomorpha; Pectinida; Pectinoidea; Pectinidae; Pecten; Pecten maximus

UdeM00000001438 6579 350.9 UdeM00000001438 XP\_033752089.1 47.4 344  
156 4 1 335 29 356 1.90E-93 350.9 6579 cellular  
organisms; Eukaryota; Opisthokonta; Metazoa; Eumetazoa; Bilateria; Protostomia; Spiralia; Lophotrochozoa; Mollusca; Bivalvia; Autobranchia; Pteriomorpha; Pectinida; Pectinoidea; Pectinidae; Pecten; Pecten maximus

UdeM00000001439 6596 725.3 UdeM00000001439 XP\_045177278.1 57.6 592  
243 3 1 585 26 616 6.80E-206 725.3 6596 cellular  
organisms; Eukaryota; Opisthokonta; Metazoa; Eumetazoa; Bilateria; Protostomia; Spiralia; Lophotrochozoa; Mollusca; Bivalvia; Autobranchia; Heteroconchia; Euheterodonta; Imparidentia; Venerida; Veneroidea; Veneridae; Mercenaria; Mercenaria mercenaria

UdeM00000001440 6596 317 UdeM00000001440 XP\_045177278.1 50.8 266  
131 0 1 266 26 291 2.30E-83 317 6596 cellular  
organisms; Eukaryota; Opisthokonta; Metazoa; Eumetazoa; Bilateria; Protostomia; Spiralia; Lophotrochozoa; Mollusca; Bivalvia; Autobranchia; Heteroconchia; Euheterodonta; Imparidentia; Venerida; Veneroidea; Veneridae; Mercenaria; Mercenaria mercenaria

UdeM00000001441 6596 1019.2 UdeM00000001441 XP\_045174268.1 79.9  
631 122 3 1 628 1 629 2.20E-294 1019.2 6596  
cellular  
organisms; Eukaryota; Opisthokonta; Metazoa; Eumetazoa; Bilateria; Protostomia; Spiralia; Lophotrochozoa; Mollusca; Bivalvia; Autobranchia; Heteroconchia; Euheterodonta; Imparidentia; Venerida; Veneroidea; Veneridae; Mercenaria; Mercenaria mercenaria

UdeM00000001443 6596 470.3 UdeM00000001443 XP\_045177366.1 60.2 369  
146 1 2 369 69 437 2.30E-129 470.3 6596 cellular  
organisms; Eukaryota; Opisthokonta; Metazoa; Eumetazoa; Bilateria; Protostomia; Spiralia; Lophotrochozoa; Mollusca; Bivalvia; Autobranchia; Heteroconchia; Euheterodonta; Imparidentia; Venerida; Veneroidea; Veneridae; Mercenaria; Mercenaria mercenaria

UdeM00000001442 6596 519.6 UdeM00000001442 XP\_045177366.1 59.2 412  
167 1 2 412 26 437 3.70E-144 519.6 6596 cellular  
organisms; Eukaryota; Opisthokonta; Metazoa; Eumetazoa; Bilateria; Protostomia; Spiralia; Lophotrochozoa; Mollusca; Bivalvia; Autobranchia; Heteroconchia; Euheterodonta; Imparidentia; Venerida; Veneroidea; Veneridae; Mercenaria; Mercenaria mercenaria

UdeM00000001444 1735272 380.2 UdeM00000001444 XP\_041358762.1 51.9  
618 247 6 1 604 1 582 5.00E-102 380.2 1735272  
cellular  
organisms; Eukaryota; Opisthokonta; Metazoa; Eumetazoa; Bilateria; Protostomia; Spiralia; Lophotrochozoa; Mollusca; Gastropoda; Neomphalina; Neomphaloidea; Peltospiridae; Gigantopelta; Gigantopelta aegis

UdeM00000001445 6573 570.5 UdeM00000001445 XP\_021343672.1 55.4 495  
214 4 20 514 27 514 2.20E-159 570.5 6573 cellular  
organisms; Eukaryota; Opisthokonta; Metazoa; Eumetazoa; Bilateria; Protostomia; Spiralia; Lophotrochozoa; Mollusca; Bivalvia; Autobranchia; Pteriomorpha; Pectinida; Pectinoidea; Pectinidae; Mizuhopecten; Mizuhopecten yessoensis

UdeM00000001446 6579 584.3 UdeM00000001446 XP\_033750563.1 55.7 515  
213 6 8 515 4 510 1.50E-163 584.3 6579 cellular  
organisms; Eukaryota; Opisthokonta; Metazoa; Eumetazoa; Bilateria; Protostomia; Spiralia; Lophotrochozoa; Mollusca; Bivalvia; Autobranchia; Pteriomorpha; Pectinida; Pectinoidea; Pectinidae; Pecten; Pecten maximus

UdeM00000001448 1735272 752.3 UdeM00000001448 XP\_041367483.1 58.6  
 630 237 9 37 650 7 628 5.80E-214 752.3 1735272  
 cellular  
 organisms;Eukaryota;Opisthokonta;Metazoa;Eumetazoa;Bilateria;Protostomia;  
 Spiralia;Lophotrochozoa;Mollusca;Gastropoda;Neomphalina;Neomphaloidea;Pel  
 tospiridae;Gigantopelta;Gigantopelta aegis  
 UdeM00000001449 6579 550.1 UdeM00000001449 XP\_033753505.1 67.8 379  
 122 0 12 390 33 411 2.40E-153 550.1 6579 cellular  
 organisms;Eukaryota;Opisthokonta;Metazoa;Eumetazoa;Bilateria;Protostomia;  
 Spiralia;Lophotrochozoa;Mollusca;Bivalvia;Autobranchia;Pteriormorphia;Pect  
 inida;Pectinoidea;Pectinidae;Pecten;Pecten maximus  
 UdeM00000001450 6596 219.5 UdeM00000001450 XP\_045175978.1 51 206  
 98 2 1 206 1 203 4.80E-54 219.5 6596 cellular  
 organisms;Eukaryota;Opisthokonta;Metazoa;Eumetazoa;Bilateria;Protostomia;  
 Spiralia;Lophotrochozoa;Mollusca;Bivalvia;Autobranchia;Heteroconchia;Euhe  
 terodonta;Imparidentia;Venerida;Veneroidea;Veneridae;Mercenaria;Mercenari  
 a mercenaria  
 UdeM00000001451 6573 346.7 UdeM00000001451 XP\_021349447.1 52.4 357  
 157 3 24 377 55 401 4.70E-92 346.7 6573 cellular  
 organisms;Eukaryota;Opisthokonta;Metazoa;Eumetazoa;Bilateria;Protostomia;  
 Spiralia;Lophotrochozoa;Mollusca;Bivalvia;Autobranchia;Pteriormorphia;Pect  
 inida;Pectinoidea;Pectinidae;Mizuhopecten;Mizuhopecten yessoensis  
 UdeM00000001452 225164 199.5 UdeM00000001452 XP\_009051525.1 69  
 158 49 0 61 218 85 242 4.40E-48 199.5 225164  
 cellular  
 organisms;Eukaryota;Opisthokonta;Metazoa;Eumetazoa;Bilateria;Protostomia;  
 Spiralia;Lophotrochozoa;Mollusca;Gastropoda;Patellogastropoda;Lottioidea;  
 Lottiidae;Lottia;Lottia gigantea  
 UdeM00000001454 6596 396.4 UdeM00000001454 XP\_045176317.1 36.2 1333  
 657 35 31 1347 31 1186 1.60E-106 396.4 6596 cellular  
 organisms;Eukaryota;Opisthokonta;Metazoa;Eumetazoa;Bilateria;Protostomia;  
 Spiralia;Lophotrochozoa;Mollusca;Bivalvia;Autobranchia;Heteroconchia;Euhe  
 terodonta;Imparidentia;Venerida;Veneroidea;Veneridae;Mercenaria;Mercenari  
 a mercenaria  
 UdeM00000001455 6596 383.3 UdeM00000001455 XP\_045175664.1 62.1 346  
 115 10 4 339 3 342 3.30E-103 383.3 6596 cellular  
 organisms;Eukaryota;Opisthokonta;Metazoa;Eumetazoa;Bilateria;Protostomia;  
 Spiralia;Lophotrochozoa;Mollusca;Bivalvia;Autobranchia;Heteroconchia;Euhe  
 terodonta;Imparidentia;Venerida;Veneroidea;Veneridae;Mercenaria;Mercenari  
 a mercenaria  
 UdeM00000001456 6573 510.4 UdeM00000001456 XP\_021345711.1 54.5 468  
 205 4 27 487 18 484 2.60E-141 510.4 6573 cellular  
 organisms;Eukaryota;Opisthokonta;Metazoa;Eumetazoa;Bilateria;Protostomia;  
 Spiralia;Lophotrochozoa;Mollusca;Bivalvia;Autobranchia;Pteriormorphia;Pect  
 inida;Pectinoidea;Pectinidae;Mizuhopecten;Mizuhopecten yessoensis  
 UdeM00000001457 6579 364.4 UdeM00000001457 XP\_033749183.1 50.3 352  
 171 2 6 354 68 418 1.80E-97 364.4 6579 cellular  
 organisms;Eukaryota;Opisthokonta;Metazoa;Eumetazoa;Bilateria;Protostomia;  
 Spiralia;Lophotrochozoa;Mollusca;Bivalvia;Autobranchia;Pteriormorphia;Pect  
 inida;Pectinoidea;Pectinidae;Pecten;Pecten maximus  
 UdeM00000001458 6579 307.8 UdeM00000001458 XP\_033749183.1 46.6 350  
 176 7 2 343 139 485 1.80E-80 307.8 6579 cellular  
 organisms;Eukaryota;Opisthokonta;Metazoa;Eumetazoa;Bilateria;Protostomia;

Spiralia; Lophotrochozoa; Mollusca; Bivalvia; Autobranchia; Pteriomorpha; Pectinida; Pectinoidea; Pectinidae; Pecten; Pecten maximus

UdeM00000001459 6579 419.9 UdeM00000001459 XP\_033749183.1 49.8 422  
206 4 6 422 68 488 4.00E-114 419.9 6579 cellular  
organisms; Eukaryota; Opisthokonta; Metazoa; Eumetazoa; Bilateria; Protostomia; Spiralia; Lophotrochozoa; Mollusca; Bivalvia; Autobranchia; Pteriomorpha; Pectinida; Pectinoidea; Pectinidae; Pecten; Pecten maximus

UdeM00000001460 6579 489.6 UdeM00000001460 XP\_033749183.1 50.3 473  
224 5 8 478 22 485 4.70E-135 489.6 6579 cellular  
organisms; Eukaryota; Opisthokonta; Metazoa; Eumetazoa; Bilateria; Protostomia; Spiralia; Lophotrochozoa; Mollusca; Bivalvia; Autobranchia; Pteriomorpha; Pectinida; Pectinoidea; Pectinidae; Pecten; Pecten maximus

UdeM00000001462 6579 488.4 UdeM00000001462 XP\_033749183.1 51.4 467  
213 5 8 463 22 485 1.00E-134 488.4 6579 cellular  
organisms; Eukaryota; Opisthokonta; Metazoa; Eumetazoa; Bilateria; Protostomia; Spiralia; Lophotrochozoa; Mollusca; Bivalvia; Autobranchia; Pteriomorpha; Pectinida; Pectinoidea; Pectinidae; Pecten; Pecten maximus

UdeM00000001461 6579 488.4 UdeM00000001461 XP\_033749183.1 51.4 467  
213 5 27 482 22 485 1.10E-134 488.4 6579 cellular  
organisms; Eukaryota; Opisthokonta; Metazoa; Eumetazoa; Bilateria; Protostomia; Spiralia; Lophotrochozoa; Mollusca; Bivalvia; Autobranchia; Pteriomorpha; Pectinida; Pectinoidea; Pectinidae; Pecten; Pecten maximus

UdeM00000001463 6596 390.2 UdeM00000001463 XP\_045177367.1 52.8 341  
154 3 1 337 1 338 2.80E-105 390.2 6596 cellular  
organisms; Eukaryota; Opisthokonta; Metazoa; Eumetazoa; Bilateria; Protostomia; Spiralia; Lophotrochozoa; Mollusca; Bivalvia; Autobranchia; Heteroconchia; Euheterodonta; Imparidentia; Venerida; Veneroidea; Veneridae; Mercenaria; Mercenaria mercenaria

UdeM00000001466 1735272 103.2 UdeM00000001466 XP\_041372946.1 38.3  
107 63 1 14 120 51 154 2.50E-19 103.2 1735272  
cellular  
organisms; Eukaryota; Opisthokonta; Metazoa; Eumetazoa; Bilateria; Protostomia; Spiralia; Lophotrochozoa; Mollusca; Gastropoda; Neomphalina; Neomphaloidea; Peltospiridae; Gigantopelta; Gigantopelta aegis

UdeM00000001467 6596 224.9 UdeM00000001467 XP\_045206316.1 52.4 212  
100 1 26 236 123 334 1.00E-55 224.9 6596 cellular  
organisms; Eukaryota; Opisthokonta; Metazoa; Eumetazoa; Bilateria; Protostomia; Spiralia; Lophotrochozoa; Mollusca; Bivalvia; Autobranchia; Heteroconchia; Euheterodonta; Imparidentia; Venerida; Veneroidea; Veneridae; Mercenaria; Mercenaria mercenaria

UdeM00000001468 6596 221.5 UdeM00000001468 XP\_045206316.1 52.2 207  
98 1 2 207 128 334 1.00E-54 221.5 6596 cellular  
organisms; Eukaryota; Opisthokonta; Metazoa; Eumetazoa; Bilateria; Protostomia; Spiralia; Lophotrochozoa; Mollusca; Bivalvia; Autobranchia; Heteroconchia; Euheterodonta; Imparidentia; Venerida; Veneroidea; Veneridae; Mercenaria; Mercenaria mercenaria

UdeM00000001469 6596 141.4 UdeM00000001469 XP\_045167895.1 46.6 133  
67 2 12 143 20 149 1.10E-30 141.4 6596 cellular  
organisms; Eukaryota; Opisthokonta; Metazoa; Eumetazoa; Bilateria; Protostomia; Spiralia; Lophotrochozoa; Mollusca; Bivalvia; Autobranchia; Heteroconchia; Euheterodonta; Imparidentia; Venerida; Veneroidea; Veneridae; Mercenaria; Mercenaria mercenaria

UdeM00000001470 6596 137.9 UdeM00000001470 XP\_045167895.1 45.1 133  
69 2 20 151 20 149 1.20E-29 137.9 6596 cellular



organisms;Eukaryota;Opisthokonta;Metazoa;Eumetazoa;Bilateria;Protostomia;Spiralia;Lophotrochozoa;Mollusca;Bivalvia;Autobranchia;Heteroconchia;Euheterodonta;Imparidentia;Venerida;Veneroidea;Veneridae;Mercenaria;Mercenaria mercenaria

|                 |        |       |                 |                |      |    |          |       |        |
|-----------------|--------|-------|-----------------|----------------|------|----|----------|-------|--------|
| UdeM00000001472 | 225164 | 138.3 | UdeM00000001472 | XP_009057901.1 | 75.6 |    |          |       |        |
| 82              | 20     | 0     | 3               | 84             | 2    | 83 | 4.70E-30 | 138.3 | 225164 |

cellular

organisms;Eukaryota;Opisthokonta;Metazoa;Eumetazoa;Bilateria;Protostomia;Spiralia;Lophotrochozoa;Mollusca;Gastropoda;Patellogastropoda;Lottioidea;Lottiidae;Lottia;Lottia gigantea

|                 |       |       |                 |                |      |          |       |       |          |
|-----------------|-------|-------|-----------------|----------------|------|----------|-------|-------|----------|
| UdeM00000001474 | 29159 | 177.2 | UdeM00000001474 | XP_034318351.1 | 91.8 | 98       |       |       |          |
| 8               | 0     | 46    | 143             | 16             | 113  | 1.60E-41 | 177.2 | 29159 | cellular |

organisms;Eukaryota;Opisthokonta;Metazoa;Eumetazoa;Bilateria;Protostomia;Spiralia;Lophotrochozoa;Mollusca;Bivalvia;Autobranchia;Pteriormorphia;Ostreida;Ostreoidea;Ostreidae;Crassostrea;Crassostrea gigas

|                 |      |        |                 |                |      |      |          |        |      |
|-----------------|------|--------|-----------------|----------------|------|------|----------|--------|------|
| UdeM00000001475 | 6596 | 1346.6 | UdeM00000001475 | XP_045177288.1 | 75.8 |      |          |        |      |
| 977             | 195  | 4      | 33              | 1004           | 113  | 1053 | 0.00E+00 | 1346.6 | 6596 |

cellular

organisms;Eukaryota;Opisthokonta;Metazoa;Eumetazoa;Bilateria;Protostomia;Spiralia;Lophotrochozoa;Mollusca;Bivalvia;Autobranchia;Heteroconchia;Euheterodonta;Imparidentia;Venerida;Veneroidea;Veneridae;Mercenaria;Mercenaria mercenaria

|                 |      |     |                 |                |      |          |     |      |          |
|-----------------|------|-----|-----------------|----------------|------|----------|-----|------|----------|
| UdeM00000001476 | 6579 | 275 | UdeM00000001476 | XP_033752294.1 | 33.3 | 438      |     |      |          |
| 269             | 11   | 26  | 456             | 31             | 452  | 1.70E-70 | 275 | 6579 | cellular |

organisms;Eukaryota;Opisthokonta;Metazoa;Eumetazoa;Bilateria;Protostomia;Spiralia;Lophotrochozoa;Mollusca;Bivalvia;Autobranchia;Pteriormorphia;Pectinida;Pectinoidea;Pectinidae;Pecten;Pecten maximus

|                 |      |       |                 |                |      |           |       |      |          |
|-----------------|------|-------|-----------------|----------------|------|-----------|-------|------|----------|
| UdeM00000001477 | 6579 | 506.5 | UdeM00000001477 | XP_033753392.1 | 67.5 | 381       |       |      |          |
| 118             | 5    | 10    | 388             | 4              | 380  | 3.00E-140 | 506.5 | 6579 | cellular |

organisms;Eukaryota;Opisthokonta;Metazoa;Eumetazoa;Bilateria;Protostomia;Spiralia;Lophotrochozoa;Mollusca;Bivalvia;Autobranchia;Pteriormorphia;Pectinida;Pectinoidea;Pectinidae;Pecten;Pecten maximus

|                 |      |     |                 |                |      |           |     |      |          |
|-----------------|------|-----|-----------------|----------------|------|-----------|-----|------|----------|
| UdeM00000001478 | 6596 | 604 | UdeM00000001478 | XP_045177015.1 | 64.7 | 447       |     |      |          |
| 154             | 2    | 1   | 447             | 2              | 444  | 1.60E-169 | 604 | 6596 | cellular |

organisms;Eukaryota;Opisthokonta;Metazoa;Eumetazoa;Bilateria;Protostomia;Spiralia;Lophotrochozoa;Mollusca;Bivalvia;Autobranchia;Heteroconchia;Euheterodonta;Imparidentia;Venerida;Veneroidea;Veneridae;Mercenaria;Mercenaria mercenaria

|                 |      |       |                 |                |      |           |       |      |          |
|-----------------|------|-------|-----------------|----------------|------|-----------|-------|------|----------|
| UdeM00000001481 | 6573 | 887.5 | UdeM00000001481 | XP_021338880.1 | 54.6 | 842       |       |      |          |
| 354             | 7    | 2     | 832             | 34             | 858  | 1.50E-254 | 887.5 | 6573 | cellular |

organisms;Eukaryota;Opisthokonta;Metazoa;Eumetazoa;Bilateria;Protostomia;Spiralia;Lophotrochozoa;Mollusca;Bivalvia;Autobranchia;Pteriormorphia;Pectinida;Pectinoidea;Pectinidae;Mizuhopecten;Mizuhopecten yessoensis

|                 |      |       |                 |                |      |           |       |      |          |
|-----------------|------|-------|-----------------|----------------|------|-----------|-------|------|----------|
| UdeM00000001480 | 6573 | 887.5 | UdeM00000001480 | XP_021338880.1 | 54.6 | 842       |       |      |          |
| 354             | 7    | 2     | 832             | 34             | 858  | 1.60E-254 | 887.5 | 6573 | cellular |

organisms;Eukaryota;Opisthokonta;Metazoa;Eumetazoa;Bilateria;Protostomia;Spiralia;Lophotrochozoa;Mollusca;Bivalvia;Autobranchia;Pteriormorphia;Pectinida;Pectinoidea;Pectinidae;Mizuhopecten;Mizuhopecten yessoensis

|                 |        |     |                 |                |    |     |           |     |        |
|-----------------|--------|-----|-----------------|----------------|----|-----|-----------|-----|--------|
| UdeM00000001482 | 400727 | 386 | UdeM00000001482 | XP_025088721.1 | 62 |     |           |     |        |
| 305             | 111    | 3   | 4               | 304            | 6  | 309 | 4.80E-104 | 386 | 400727 |

cellular

organisms;Eukaryota;Opisthokonta;Metazoa;Eumetazoa;Bilateria;Protostomia;Spiralia;Lophotrochozoa;Mollusca;Gastropoda;Caenogastropoda;Architaenioglossa;Ampullarioidea;Ampullariidae;Pomacea;Pomacea canaliculata

UdeM00000001483 7739 412.5 UdeM00000001483 XP\_035691534.1 37 736  
 422 16 367 1071 437 1161 1.60E-111 412.5 7739 cellular  
 organisms;Eukaryota;Opisthokonta;Metazoa;Eumetazoa;Bilateria;Deuterostomi  
 a;Chordata;Cephalochordata;Leptocardii;Amphioxiformes;Branchiostomidae;Br  
 anchiostoma;Branchiostoma floridae  
 UdeM00000001484 400727 58.5 UdeM00000001484 XP\_025088721.1 44.6  
 74 40 1 1 73 315 388 4.20E-06 58.5 400727  
 cellular  
 organisms;Eukaryota;Opisthokonta;Metazoa;Eumetazoa;Bilateria;Protostomia;  
 Spiralia;Lophotrochozoa;Mollusca;Gastropoda;Caenogastropoda;Architaeniogl  
 ossa;Ampullarioidea;Ampullariidae;Pomacea;Pomacea canaliculata  
 UdeM00000001485 29159 352.8 UdeM00000001485 XP\_011450778.2 61.2 276  
 107 0 39 314 11 286 4.70E-94 352.8 29159 cellular  
 organisms;Eukaryota;Opisthokonta;Metazoa;Eumetazoa;Bilateria;Protostomia;  
 Spiralia;Lophotrochozoa;Mollusca;Bivalvia;Autobranchia;Pteriomorphia;Ostr  
 eida;Ostreoidae;Ostreidae;Crassostrea;Crassostrea gigas  
 UdeM00000001486 6596 434.1 UdeM00000001486 XP\_045176652.1 72.8 272  
 73 1 1 271 2 273 1.70E-118 434.1 6596 cellular  
 organisms;Eukaryota;Opisthokonta;Metazoa;Eumetazoa;Bilateria;Protostomia;  
 Spiralia;Lophotrochozoa;Mollusca;Bivalvia;Autobranchia;Heteroconchia;Euhe  
 terodonta;Imparidentia;Venerida;Veneroidea;Veneridae;Mercenaria;Mercenari  
 a mercenaria  
 UdeM00000001487 105023 129 UdeM00000001487 XP\_015828284.1 40  
 185 101 3 31 211 142 320 7.00E-27 129 105023  
 cellular  
 organisms;Eukaryota;Opisthokonta;Metazoa;Eumetazoa;Bilateria;Deuterostomi  
 a;Chordata;Craniata;Vertebrata;Gnathostomata;Teleostomi;Euteleostomi;Acti  
 nopterygii;Actinopteri;Neopterygii;Teleostei;Osteoglossocephalai;Clupeoce  
 phala;Euteleosteomorpha;Neoteleostei;Eurypterygia;Ctenosquamata;Acanthomo  
 rphata;Euacanthomorphacea;Percomorphaceae;Ovalentaria;Atherinomorphae;Cyp  
 rinodontiformes;Aplocheiloidei;Nothobranchiidae;Nothobranchius;Nothbranc  
 hius furzeri  
 UdeM00000001488 6565 707.6 UdeM00000001488 XP\_022338696.1 81.1 418  
 77 2 140 556 9 425 1.30E-200 707.6 6565 cellular  
 organisms;Eukaryota;Opisthokonta;Metazoa;Eumetazoa;Bilateria;Protostomia;  
 Spiralia;Lophotrochozoa;Mollusca;Bivalvia;Autobranchia;Pteriomorphia;Ostr  
 eida;Ostreoidae;Ostreidae;Crassostrea;Crassostrea virginica  
 UdeM00000001489 6596 521.2 UdeM00000001489 XP\_045175233.1 77.1 349  
 71 1 1 349 1 340 1.00E-144 521.2 6596 cellular  
 organisms;Eukaryota;Opisthokonta;Metazoa;Eumetazoa;Bilateria;Protostomia;  
 Spiralia;Lophotrochozoa;Mollusca;Bivalvia;Autobranchia;Heteroconchia;Euhe  
 terodonta;Imparidentia;Venerida;Veneroidea;Veneridae;Mercenaria;Mercenari  
 a mercenaria  
 UdeM00000001490 1735272 240.7 UdeM00000001490 XP\_041365979.1 40  
 425 211 12 1 411 1 395 3.20E-60 240.7 1735272  
 cellular  
 organisms;Eukaryota;Opisthokonta;Metazoa;Eumetazoa;Bilateria;Protostomia;  
 Spiralia;Lophotrochozoa;Mollusca;Gastropoda;Neomphalina;Neomphaloidea;Pel  
 tospiridae;Gigantopelta;Gigantopelta aegis  
 UdeM00000001491 6579 641 UdeM00000001491 XP\_033753319.1 55.5 782  
 252 21 5 728 4 747 1.90E-180 641 6579 cellular  
 organisms;Eukaryota;Opisthokonta;Metazoa;Eumetazoa;Bilateria;Protostomia;  
 Spiralia;Lophotrochozoa;Mollusca;Bivalvia;Autobranchia;Pteriomorphia;Pect  
 inida;Pectinoidea;Pectinidae;Pecten;Pecten maximus

UdeM00000001492 6596 643.7 UdeM00000001492 XP\_045176752.1 58.2 752  
 260 17 1 730 1 720 2.90E-181 643.7 6596 cellular  
 organisms;Eukaryota;Opisthokonta;Metazoa;Eumetazoa;Bilateria;Protostomia;  
 Spiralia;Lophotrochozoa;Mollusca;Bivalvia;Autobranchia;Heteroconchia;Euhe  
 terodonta;Imparidentia;Venerida;Veneroidea;Veneridae;Mercenaria;Mercenari  
 a mercenaria  
 UdeM00000001493 6579 641 UdeM00000001493 XP\_033753319.1 56.1 779  
 251 21 5 727 4 747 1.90E-180 641 6579 cellular  
 organisms;Eukaryota;Opisthokonta;Metazoa;Eumetazoa;Bilateria;Protostomia;  
 Spiralia;Lophotrochozoa;Mollusca;Bivalvia;Autobranchia;Pteriormorphia;Pect  
 inida;Pectinoidea;Pectinidae;Pecten;Pecten maximus  
 UdeM00000001494 6579 404.4 UdeM00000001494 XP\_033752048.1 64.6 378  
 132 2 1 377 1 377 2.20E-109 404.4 6579 cellular  
 organisms;Eukaryota;Opisthokonta;Metazoa;Eumetazoa;Bilateria;Protostomia;  
 Spiralia;Lophotrochozoa;Mollusca;Bivalvia;Autobranchia;Pteriormorphia;Pect  
 inida;Pectinoidea;Pectinidae;Pecten;Pecten maximus  
 UdeM00000001495 6579 389 UdeM00000001495 XP\_033752049.1 64.8 366  
 127 2 1 365 1 365 9.50E-105 389 6579 cellular  
 organisms;Eukaryota;Opisthokonta;Metazoa;Eumetazoa;Bilateria;Protostomia;  
 Spiralia;Lophotrochozoa;Mollusca;Bivalvia;Autobranchia;Pteriormorphia;Pect  
 inida;Pectinoidea;Pectinidae;Pecten;Pecten maximus  
 UdeM00000001497 6596 259.2 UdeM00000001497 XP\_045174842.1 69.4 183  
 56 0 7 189 15 197 4.00E-66 259.2 6596 cellular  
 organisms;Eukaryota;Opisthokonta;Metazoa;Eumetazoa;Bilateria;Protostomia;  
 Spiralia;Lophotrochozoa;Mollusca;Bivalvia;Autobranchia;Heteroconchia;Euhe  
 terodonta;Imparidentia;Venerida;Veneroidea;Veneridae;Mercenaria;Mercenari  
 a mercenaria  
 UdeM00000001498 260615 166.4 UdeM00000001498 XP\_039383630.1 53.9  
 180 26 2 1 123 160 339 2.30E-38 166.4 260615  
 cellular  
 organisms;Eukaryota;Opisthokonta;Metazoa;Eumetazoa;Bilateria;Deuterostomi  
 a;Chordata;Craniata;Vertebrata;Gnathostomata;Teleostomi;Euteleostomi;Sarc  
 opterygii;Dipnotetrapodomorpha;Tetrapoda;Amniota;Sauropsida;Sauria;Archel  
 osauria;Testudinata;Testudines;Cryptodira;Durocryptodira;Testudinoidea;Ge  
 oemydidae;Geoemydinae;Mauremys;Mauremys reevesii  
 UdeM00000001499 6596 394 UdeM00000001499 XP\_045176963.1 37.4 725  
 357 22 3 707 14 661 3.90E-106 394 6596 cellular  
 organisms;Eukaryota;Opisthokonta;Metazoa;Eumetazoa;Bilateria;Protostomia;  
 Spiralia;Lophotrochozoa;Mollusca;Bivalvia;Autobranchia;Heteroconchia;Euhe  
 terodonta;Imparidentia;Venerida;Veneroidea;Veneridae;Mercenaria;Mercenari  
 a mercenaria  
 UdeM00000001500 6596 181.4 UdeM00000001500 XP\_045176354.1 67.5 126  
 40 1 29 154 36 160 8.70E-43 181.4 6596 cellular  
 organisms;Eukaryota;Opisthokonta;Metazoa;Eumetazoa;Bilateria;Protostomia;  
 Spiralia;Lophotrochozoa;Mollusca;Bivalvia;Autobranchia;Heteroconchia;Euhe  
 terodonta;Imparidentia;Venerida;Veneroidea;Veneridae;Mercenaria;Mercenari  
 a mercenaria  
 UdeM00000001502 225164 169.1 UdeM00000001502 XP\_009051743.1 74.8  
 107 27 0 3 109 15 121 3.20E-39 169.1 225164  
 cellular  
 organisms;Eukaryota;Opisthokonta;Metazoa;Eumetazoa;Bilateria;Protostomia;  
 Spiralia;Lophotrochozoa;Mollusca;Gastropoda;Patellogastropoda;Lottioidae;  
 Lottiidae;Lottia;Lottia gigantea

UdeM00000001501 29159 185.3 UdeM00000001501 XP\_011447694.1 73.3 120  
 32 0 1 120 1 120 4.70E-44 185.3 29159 cellular  
 organisms;Eukaryota;Opisthokonta;Metazoa;Eumetazoa;Bilateria;Protostomia;  
 Spiralia;Lophotrochozoa;Mollusca;Bivalvia;Autobranchia;Pteriormorphia;Ostr  
 eida;Ostreoidea;Ostreidae;Crassostrea;Crassostrea gigas  
 UdeM00000001503 6579 649.4 UdeM00000001503 XP\_033753100.1 43.9 813  
 414 8 5 809 12 790 5.90E-183 649.4 6579 cellular  
 organisms;Eukaryota;Opisthokonta;Metazoa;Eumetazoa;Bilateria;Protostomia;  
 Spiralia;Lophotrochozoa;Mollusca;Bivalvia;Autobranchia;Pteriormorphia;Pect  
 inida;Pectinoidea;Pectinidae;Pecten;Pecten maximus  
 UdeM00000001504 6596 476.9 UdeM00000001504 XP\_045176835.1 43.4 576  
 285 8 6 544 6 577 4.70E-131 476.9 6596 cellular  
 organisms;Eukaryota;Opisthokonta;Metazoa;Eumetazoa;Bilateria;Protostomia;  
 Spiralia;Lophotrochozoa;Mollusca;Bivalvia;Autobranchia;Heteroconchia;Euhe  
 terodonta;Imparidentia;Venerida;Veneroidea;Veneridae;Mercenaria;Mercenari  
 a mercenaria  
 UdeM00000001505 6573 1224.2 UdeM00000001505 XP\_021359609.1 36.7  
 2664 1254 72 9 2499 22 2426 0.00E+00 1224.2 6573  
 cellular  
 organisms;Eukaryota;Opisthokonta;Metazoa;Eumetazoa;Bilateria;Protostomia;  
 Spiralia;Lophotrochozoa;Mollusca;Bivalvia;Autobranchia;Pteriormorphia;Pect  
 inida;Pectinoidea;Pectinidae;Mizuhopecten;Mizuhopecten yessoensis  
 UdeM00000001506 1735272 391.3 UdeM00000001506 XP\_041366089.1 49.7  
 378 182 4 45 418 26 399 1.50E-105 391.3 1735272  
 cellular  
 organisms;Eukaryota;Opisthokonta;Metazoa;Eumetazoa;Bilateria;Protostomia;  
 Spiralia;Lophotrochozoa;Mollusca;Gastropoda;Neomphalina;Neomphaloidea;Pel  
 tospiridae;Gigantopelta;Gigantopelta aegis  
 UdeM00000001507 6579 1914.8 UdeM00000001507 XP\_033753365.1 60.1  
 1610 600 15 29 1621 19 1602 0.00E+00 1914.8 6579  
 cellular  
 organisms;Eukaryota;Opisthokonta;Metazoa;Eumetazoa;Bilateria;Protostomia;  
 Spiralia;Lophotrochozoa;Mollusca;Bivalvia;Autobranchia;Pteriormorphia;Pect  
 inida;Pectinoidea;Pectinidae;Pecten;Pecten maximus  
 UdeM00000001508 1735272 104 UdeM00000001508 XP\_041365593.1 86  
 57 8 0 1 57 1083 1139 6.60E-20 104 1735272  
 cellular  
 organisms;Eukaryota;Opisthokonta;Metazoa;Eumetazoa;Bilateria;Protostomia;  
 Spiralia;Lophotrochozoa;Mollusca;Gastropoda;Neomphalina;Neomphaloidea;Pel  
 tospiridae;Gigantopelta;Gigantopelta aegis  
 UdeM00000001509 6573 1960.3 UdeM00000001509 XP\_021371373.1 83  
 1141 193 1 1 1141 1 1140 0.00E+00 1960.3 6573  
 cellular  
 organisms;Eukaryota;Opisthokonta;Metazoa;Eumetazoa;Bilateria;Protostomia;  
 Spiralia;Lophotrochozoa;Mollusca;Bivalvia;Autobranchia;Pteriormorphia;Pect  
 inida;Pectinoidea;Pectinidae;Mizuhopecten;Mizuhopecten yessoensis  
 UdeM00000001510 6579 900.6 UdeM00000001510 XP\_033753237.1 72.6 620  
 147 5 11 625 3 604 1.10E-258 900.6 6579 cellular  
 organisms;Eukaryota;Opisthokonta;Metazoa;Eumetazoa;Bilateria;Protostomia;  
 Spiralia;Lophotrochozoa;Mollusca;Bivalvia;Autobranchia;Pteriormorphia;Pect  
 inida;Pectinoidea;Pectinidae;Pecten;Pecten maximus  
 UdeM00000001511 7574 834.7 UdeM00000001511 XP\_013381205.1 74 557  
 135 3 1 555 1 549 6.80E-239 834.7 7574 cellular  
 organisms;Eukaryota;Opisthokonta;Metazoa;Eumetazoa;Bilateria;Protostomia;

Spiralia;Lophotrochozoa;Brachiopoda;Linguliformea;Lingulata;Lingulida;Linguloidea;Lingulidae;Lingula;Lingula anatina

UdeM00000001512 6596 248.8 UdeM00000001512 XP\_045175129.1 62.6 182  
67 1 25 205 14 195 5.90E-63 248.8 6596 cellular

organisms;Eukaryota;Opisthokonta;Metazoa;Eumetazoa;Bilateria;Protostomia;Spiralia;Lophotrochozoa;Mollusca;Bivalvia;Autobranhia;Heteroconchia;Euherodonta;Imparidentia;Venerida;Veneroidea;Veneridae;Mercenaria;Mercenaria mercenaria

UdeM00000001514 6573 672.9 UdeM00000001514 XP\_021371369.1 31.6 1677  
799 37 532 1979 104 1661 1.20E-189 672.9 6573 cellular

organisms;Eukaryota;Opisthokonta;Metazoa;Eumetazoa;Bilateria;Protostomia;Spiralia;Lophotrochozoa;Mollusca;Bivalvia;Autobranhia;Pteriomorphia;Pectinida;Pectinoidea;Pectinidae;Mizuhopecten;Mizuhopecten yessoensis

UdeM00000001515 6596 161.8 UdeM00000001515 XP\_045175094.1 83.1 89  
15 0 1 89 1 89 5.10E-37 161.8 6596 cellular

organisms;Eukaryota;Opisthokonta;Metazoa;Eumetazoa;Bilateria;Protostomia;Spiralia;Lophotrochozoa;Mollusca;Bivalvia;Autobranhia;Heteroconchia;Euherodonta;Imparidentia;Venerida;Veneroidea;Veneridae;Mercenaria;Mercenaria mercenaria

UdeM00000001516 29159 176.4 UdeM00000001516 XP\_011423091.1 89.8 88  
9 0 5 92 6 93 2.80E-41 176.4 29159 cellular

organisms;Eukaryota;Opisthokonta;Metazoa;Eumetazoa;Bilateria;Protostomia;Spiralia;Lophotrochozoa;Mollusca;Bivalvia;Autobranhia;Pteriomorphia;Ostreida;Ostreoidea;Ostreidae;Crassostrea;Crassostrea gigas

UdeM00000001517 29159 176.4 UdeM00000001517 XP\_011423091.1 89.8 88  
9 0 5 92 6 93 2.80E-41 176.4 29159 cellular

organisms;Eukaryota;Opisthokonta;Metazoa;Eumetazoa;Bilateria;Protostomia;Spiralia;Lophotrochozoa;Mollusca;Bivalvia;Autobranhia;Pteriomorphia;Ostreida;Ostreoidea;Ostreidae;Crassostrea;Crassostrea gigas

UdeM00000001519 6596 112.8 UdeM00000001519 XP\_045180427.1 39 177  
105 2 76 250 98 273 6.50E-22 112.8 6596 cellular

organisms;Eukaryota;Opisthokonta;Metazoa;Eumetazoa;Bilateria;Protostomia;Spiralia;Lophotrochozoa;Mollusca;Bivalvia;Autobranhia;Heteroconchia;Euherodonta;Imparidentia;Venerida;Veneroidea;Veneridae;Mercenaria;Mercenaria mercenaria

UdeM00000001520 6596 73.9 UdeM00000001520 XP\_045194941.1 64.2 67  
24 0 1 67 1 67 8.70E-11 73.9 6596 cellular

organisms;Eukaryota;Opisthokonta;Metazoa;Eumetazoa;Bilateria;Protostomia;Spiralia;Lophotrochozoa;Mollusca;Bivalvia;Autobranhia;Heteroconchia;Euherodonta;Imparidentia;Venerida;Veneroidea;Veneridae;Mercenaria;Mercenaria mercenaria

UdeM00000001521 6596 1218 UdeM00000001521 XP\_045174975.1 46.9 1597  
552 37 58 1429 93 1618 0.00E+00 1218 6596 cellular

organisms;Eukaryota;Opisthokonta;Metazoa;Eumetazoa;Bilateria;Protostomia;Spiralia;Lophotrochozoa;Mollusca;Bivalvia;Autobranhia;Heteroconchia;Euherodonta;Imparidentia;Venerida;Veneroidea;Veneridae;Mercenaria;Mercenaria mercenaria

UdeM00000001522 6596 1233.4 UdeM00000001522 XP\_045174974.1 47.6  
1587 541 36 58 1408 93 1625 0.00E+00 1233.4 6596

cellular  
organisms;Eukaryota;Opisthokonta;Metazoa;Eumetazoa;Bilateria;Protostomia;Spiralia;Lophotrochozoa;Mollusca;Bivalvia;Autobranhia;Heteroconchia;Euherodonta;Imparidentia;Venerida;Veneroidea;Veneridae;Mercenaria;Mercenaria mercenaria

UdeM00000001523 6596 400.6 UdeM00000001523 XP\_045175128.1 73.3 266  
 70 1 1 266 1 265 1.60E-108 400.6 6596 cellular  
 organisms;Eukaryota;Opisthokonta;Metazoa;Eumetazoa;Bilateria;Protostomia;  
 Spiralia;Lophotrochozoa;Mollusca;Bivalvia;Autobranchia;Heteroconchia;Euhe  
 terodonta;Imparidentia;Venerida;Veneroidea;Veneridae;Mercenaria;Mercenari  
 a mercenaria  
 UdeM00000001525 1735272 100.9 UdeM00000001525 XP\_041365892.1 34.7  
 144 93 1 1 143 1601 1744 2.00E-18 100.9 1735272  
 cellular  
 organisms;Eukaryota;Opisthokonta;Metazoa;Eumetazoa;Bilateria;Protostomia;  
 Spiralia;Lophotrochozoa;Mollusca;Gastropoda;Neomphalina;Neomphaloidea;Pel  
 tospiridae;Gigantopelta;Gigantopelta aegis  
 UdeM00000001524 7654 118.2 UdeM00000001524 XP\_041481100.1 35.9 184  
 101 4 626 795 1462 1642 4.80E-23 118.2 7654 cellular  
 organisms;Eukaryota;Opisthokonta;Metazoa;Eumetazoa;Bilateria;Deuterostomi  
 a;Echinodermata;Eleutherozoa;Echinozoa;Echinoidea;Euechinoidea;Echinacea;  
 Temnopleuroidea;Toxopneustidae;Lytechinus;Lytechinus variegatus  
 UdeM00000001526 6579 498.8 UdeM00000001526 XP\_033753234.1 62.6 422  
 144 5 43 457 16 430 7.60E-138 498.8 6579 cellular  
 organisms;Eukaryota;Opisthokonta;Metazoa;Eumetazoa;Bilateria;Protostomia;  
 Spiralia;Lophotrochozoa;Mollusca;Bivalvia;Autobranchia;Pteriormorphia;Pect  
 inida;Pectinoidea;Pectinidae;Pecten;Pecten maximus  
 UdeM00000001527 6579 109.8 UdeM00000001527 XP\_033728194.1 41.1 146  
 77 2 89 230 166 306 5.60E-21 109.8 6579 cellular  
 organisms;Eukaryota;Opisthokonta;Metazoa;Eumetazoa;Bilateria;Protostomia;  
 Spiralia;Lophotrochozoa;Mollusca;Bivalvia;Autobranchia;Pteriormorphia;Pect  
 inida;Pectinoidea;Pectinidae;Pecten;Pecten maximus  
 UdeM00000001531 8267 71.6 UdeM00000001531 XP\_034464103.1 25.3 182  
 129 3 9 185 18 197 1.20E-09 71.6 8267 cellular  
 organisms;Eukaryota;Opisthokonta;Metazoa;Eumetazoa;Bilateria;Deuterostomi  
 a;Chordata;Craniata;Vertebrata;Gnathostomata;Teleostomi;Euteleostomi;Acti  
 nopterygii;Actinopteri;Neopterygii;Teleostei;Osteoglossocephalai;Clupeoce  
 phala;Euteleosteomorpha;Neoteleostei;Eurypterygia;Ctenosquamata;Acanthomo  
 rphata;Euacanthomorphacea;Percomorphaceae;Carangaria;Pleuronectiformes;Pl  
 euronectoidei;Pleuronectidae;Hippoglossus;Hippoglossus hippoglossus  
 UdeM00000001532 6596 439.5 UdeM00000001532 XP\_045175625.1 42.3 494  
 281 2 39 531 12 502 6.20E-120 439.5 6596 cellular  
 organisms;Eukaryota;Opisthokonta;Metazoa;Eumetazoa;Bilateria;Protostomia;  
 Spiralia;Lophotrochozoa;Mollusca;Bivalvia;Autobranchia;Heteroconchia;Euhe  
 terodonta;Imparidentia;Venerida;Veneroidea;Veneridae;Mercenaria;Mercenari  
 a mercenaria  
 UdeM00000001533 6596 89.7 UdeM00000001533 XP\_045183801.1 31.9 185  
 106 5 37 211 11 185 5.50E-15 89.7 6596 cellular  
 organisms;Eukaryota;Opisthokonta;Metazoa;Eumetazoa;Bilateria;Protostomia;  
 Spiralia;Lophotrochozoa;Mollusca;Bivalvia;Autobranchia;Heteroconchia;Euhe  
 terodonta;Imparidentia;Venerida;Veneroidea;Veneridae;Mercenaria;Mercenari  
 a mercenaria  
 UdeM00000001534 6596 439.1 UdeM00000001534 XP\_045175625.1 42.3 494  
 281 2 39 531 12 502 8.10E-120 439.1 6596 cellular  
 organisms;Eukaryota;Opisthokonta;Metazoa;Eumetazoa;Bilateria;Protostomia;  
 Spiralia;Lophotrochozoa;Mollusca;Bivalvia;Autobranchia;Heteroconchia;Euhe  
 terodonta;Imparidentia;Venerida;Veneroidea;Veneridae;Mercenaria;Mercenari  
 a mercenaria

UdeM00000001535 28737 238.8 UdeM00000001535 XP\_006903666.1 42 274  
 154 4 383 653 266 537 1.90E-59 238.8 28737 cellular  
 organisms;Eukaryota;Opisthokonta;Metazoa;Eumetazoa;Bilateria;Deuterostomi  
 a;Chordata;Craniata;Vertebrata;Gnathostomata;Teleostomi;Euteleostomi;Sarc  
 opterygii;Dipnotetrapodomorpha;Tetrapoda;Amniota;Mammalia;Theria;Eutheria  
 ;Afrotheria;Macroscelidea;Macroscelididae;Elephantulus;Elephantulus  
 edwardii

UdeM00000001536 6596 233 UdeM00000001536 XP\_045176079.1 41.4 384  
 192 11 37 410 1 361 6.70E-58 233 6596 cellular  
 organisms;Eukaryota;Opisthokonta;Metazoa;Eumetazoa;Bilateria;Protostomia;  
 Spiralia;Lophotrochozoa;Mollusca;Bivalvia;Autobranchia;Heteroconchia;Euhe  
 terodonta;Imparidentia;Venerida;Veneroidea;Veneridae;Mercenaria;Mercenari  
 a mercenaria

UdeM00000001537 6500 361.7 UdeM00000001537 XP\_012935262.1 73.8 225  
 57 1 1 225 2 224 8.10E-97 361.7 6500 cellular  
 organisms;Eukaryota;Opisthokonta;Metazoa;Eumetazoa;Bilateria;Protostomia;  
 Spiralia;Lophotrochozoa;Mollusca;Gastropoda;Heterobranchia;Euthyneura;Tec  
 tipleura;Aplysiida;Aplysioidea;Aplysiidae;Aplysia;Aplysia californica

UdeM00000001539 1529436 99 UdeM00000001539 XP\_033095325.1 54.8  
 84 37 1 4 86 155 238 3.80E-18 99 1529436  
 cellular  
 organisms;Eukaryota;Opisthokonta;Metazoa;Eumetazoa;Bilateria;Deuterostomi  
 a;Echinodermata;Pelmatozoa;Crinoidea;Articulata;Comatulida;Comatulidae;Co  
 matulinae;Anneissia;Anneissia japonica

UdeM00000001538 1529436 107.8 UdeM00000001538 XP\_033095325.1 50  
 100 49 1 1 99 139 238 9.10E-21 107.8 1529436  
 cellular  
 organisms;Eukaryota;Opisthokonta;Metazoa;Eumetazoa;Bilateria;Deuterostomi  
 a;Echinodermata;Pelmatozoa;Crinoidea;Articulata;Comatulida;Comatulidae;Co  
 matulinae;Anneissia;Anneissia japonica

UdeM00000001540 151771 86.3 UdeM00000001540 XP\_028406951.1 29.8  
 208 93 5 7 162 212 418 4.10E-14 86.3 151771  
 cellular  
 organisms;Eukaryota;Opisthokonta;Metazoa;Eumetazoa;Cnidaria;Anthozoa;Octo  
 corallia;Alcyonacea;Alcyoniina;Nephtheidae;Dendronephthya;Dendronephthya  
 gigantea

UdeM00000001541 6596 671.8 UdeM00000001541 XP\_045175281.1 70.2 457  
 131 2 127 578 168 624 7.90E-190 671.8 6596 cellular  
 organisms;Eukaryota;Opisthokonta;Metazoa;Eumetazoa;Bilateria;Protostomia;  
 Spiralia;Lophotrochozoa;Mollusca;Bivalvia;Autobranchia;Heteroconchia;Euhe  
 terodonta;Imparidentia;Venerida;Veneroidea;Veneridae;Mercenaria;Mercenari  
 a mercenaria

UdeM00000001542 6573 576.6 UdeM00000001542 XP\_021358489.1 60.2 510  
 194 2 1 501 1 510 3.00E-161 576.6 6573 cellular  
 organisms;Eukaryota;Opisthokonta;Metazoa;Eumetazoa;Bilateria;Protostomia;  
 Spiralia;Lophotrochozoa;Mollusca;Bivalvia;Autobranchia;Pteriomorphia;Pect  
 inida;Pectinoidea;Pectinidae;Mizuhopecten;Mizuhopecten yessoensis

UdeM00000001543 6579 650.2 UdeM00000001543 XP\_033751781.1 63.1 491  
 178 2 11 499 35 524 2.10E-183 650.2 6579 cellular  
 organisms;Eukaryota;Opisthokonta;Metazoa;Eumetazoa;Bilateria;Protostomia;  
 Spiralia;Lophotrochozoa;Mollusca;Bivalvia;Autobranchia;Pteriomorphia;Pect  
 inida;Pectinoidea;Pectinidae;Pecten;Pecten maximus

UdeM00000001545 6596 188.3 UdeM00000001545 XP\_045182379.1 43.1 248  
 136 3 12 259 407 649 1.30E-44 188.3 6596 cellular

organisms;Eukaryota;Opisthokonta;Metazoa;Eumetazoa;Bilateria;Protostomia;Spiralia;Lophotrochozoa;Mollusca;Bivalvia;Autobranchia;Heteroconchia;Euherodonta;Imparidentia;Venerida;Veneroidea;Veneridae;Mercenaria;Mercenaria mercenaria

UdeM00000001546 1826170 75.9 UdeM00000001546 YP\_009254794.1 21.8  
362 254 8 3 355 497 838 1.60E-10 75.9 1826170

Viruses;Varidnaviria;Bamfordvirae;Nucleocytoviricota;Megaviricetes;Pimascovirales;Marseilleviridae;Marseillevirus;unclassified  
Marseillevirus;Tokyovirus A1

UdeM00000001547 1826170 75.5 UdeM00000001547 YP\_009254794.1 22.1  
362 253 8 3 355 497 838 2.90E-10 75.5 1826170

Viruses;Varidnaviria;Bamfordvirae;Nucleocytoviricota;Megaviricetes;Pimascovirales;Marseilleviridae;Marseillevirus;unclassified  
Marseillevirus;Tokyovirus A1

UdeM00000001548 6596 335.5 UdeM00000001548 XP\_045182688.1 49.1 330  
166 1 190 519 79 406 1.20E-88 335.5 6596 cellular

organisms;Eukaryota;Opisthokonta;Metazoa;Eumetazoa;Bilateria;Protostomia;Spiralia;Lophotrochozoa;Mollusca;Bivalvia;Autobranchia;Heteroconchia;Euherodonta;Imparidentia;Venerida;Veneroidea;Veneridae;Mercenaria;Mercenaria mercenaria

UdeM00000001549 6596 652.5 UdeM00000001549 XP\_045182688.1 45.1 727  
374 4 3 706 13 737 7.10E-184 652.5 6596 cellular

organisms;Eukaryota;Opisthokonta;Metazoa;Eumetazoa;Bilateria;Protostomia;Spiralia;Lophotrochozoa;Mollusca;Bivalvia;Autobranchia;Heteroconchia;Euherodonta;Imparidentia;Venerida;Veneroidea;Veneridae;Mercenaria;Mercenaria mercenaria

UdeM00000001550 6596 1448.7 UdeM00000001550 XP\_045175080.1 85.3  
898 131 1 1 898 1 897 0.00E+00 1448.7 6596  
cellular

organisms;Eukaryota;Opisthokonta;Metazoa;Eumetazoa;Bilateria;Protostomia;Spiralia;Lophotrochozoa;Mollusca;Bivalvia;Autobranchia;Heteroconchia;Euherodonta;Imparidentia;Venerida;Veneroidea;Veneridae;Mercenaria;Mercenaria mercenaria

UdeM00000001551 6596 244.2 UdeM00000001551 XP\_045176961.1 86.4 140  
19 0 1 140 1 140 9.90E-62 244.2 6596 cellular

organisms;Eukaryota;Opisthokonta;Metazoa;Eumetazoa;Bilateria;Protostomia;Spiralia;Lophotrochozoa;Mollusca;Bivalvia;Autobranchia;Heteroconchia;Euherodonta;Imparidentia;Venerida;Veneroidea;Veneridae;Mercenaria;Mercenaria mercenaria

UdeM00000001552 6596 226.5 UdeM00000001552 XP\_045175132.1 41.7 254  
136 3 32 278 36 284 7.10E-56 226.5 6596 cellular

organisms;Eukaryota;Opisthokonta;Metazoa;Eumetazoa;Bilateria;Protostomia;Spiralia;Lophotrochozoa;Mollusca;Bivalvia;Autobranchia;Heteroconchia;Euherodonta;Imparidentia;Venerida;Veneroidea;Veneridae;Mercenaria;Mercenaria mercenaria

UdeM00000001554 6596 300.8 UdeM00000001554 XP\_045177111.1 51.1 272  
128 3 2 270 48 317 1.90E-77 300.8 6596 cellular

organisms;Eukaryota;Opisthokonta;Metazoa;Eumetazoa;Bilateria;Protostomia;Spiralia;Lophotrochozoa;Mollusca;Bivalvia;Autobranchia;Heteroconchia;Euherodonta;Imparidentia;Venerida;Veneroidea;Veneridae;Mercenaria;Mercenaria mercenaria

UdeM00000001555 6596 230.3 UdeM00000001555 XP\_045175132.1 42.6 251  
142 2 42 290 34 284 5.00E-57 230.3 6596 cellular

organisms;Eukaryota;Opisthokonta;Metazoa;Eumetazoa;Bilateria;Protostomia;



Spiralia;Lophotrochozoa;Mollusca;Bivalvia;Autobranchia;Heteroconchia;Euherodonta;Imparidentia;Venerida;Veneroidea;Veneridae;Mercenaria;Mercenaria mercenaria

UdeM00000001557 6596 302.4 UdeM00000001557 XP\_045177111.1 50.4 278  
133 3 2 276 48 323 1.50E-78 302.4 6596 cellular

organisms;Eukaryota;Opisthokonta;Metazoa;Eumetazoa;Bilateria;Protostomia;Spiralia;Lophotrochozoa;Mollusca;Bivalvia;Autobranchia;Heteroconchia;Euherodonta;Imparidentia;Venerida;Veneroidea;Veneridae;Mercenaria;Mercenaria mercenaria

UdeM00000001558 6596 193.7 UdeM00000001558 XP\_045176496.1 40.1 242  
144 1 21 262 21 261 2.90E-46 193.7 6596 cellular

organisms;Eukaryota;Opisthokonta;Metazoa;Eumetazoa;Bilateria;Protostomia;Spiralia;Lophotrochozoa;Mollusca;Bivalvia;Autobranchia;Heteroconchia;Euherodonta;Imparidentia;Venerida;Veneroidea;Veneridae;Mercenaria;Mercenaria mercenaria

UdeM00000001559 29159 402.9 UdeM00000001559 XP\_011444932.2 42.8 477  
268 4 10 483 52 526 5.80E-109 402.9 29159 cellular

organisms;Eukaryota;Opisthokonta;Metazoa;Eumetazoa;Bilateria;Protostomia;Spiralia;Lophotrochozoa;Mollusca;Bivalvia;Autobranchia;Pteriomorphia;Ostreida;Ostreoidea;Ostreidae;Crassostrea;Crassostrea gigas

UdeM00000001564 6596 326.6 UdeM00000001564 XP\_045174798.1 76.8 211  
49 0 1 211 847 1057 2.40E-86 326.6 6596 cellular

organisms;Eukaryota;Opisthokonta;Metazoa;Eumetazoa;Bilateria;Protostomia;Spiralia;Lophotrochozoa;Mollusca;Bivalvia;Autobranchia;Heteroconchia;Euherodonta;Imparidentia;Venerida;Veneroidea;Veneridae;Mercenaria;Mercenaria mercenaria

UdeM00000001565 6596 936.8 UdeM00000001565 XP\_045174798.1 77.7 588  
126 3 2 588 233 816 1.40E-269 936.8 6596 cellular

organisms;Eukaryota;Opisthokonta;Metazoa;Eumetazoa;Bilateria;Protostomia;Spiralia;Lophotrochozoa;Mollusca;Bivalvia;Autobranchia;Heteroconchia;Euherodonta;Imparidentia;Venerida;Veneroidea;Veneridae;Mercenaria;Mercenaria mercenaria

UdeM00000001566 6596 175.3 UdeM00000001566 XP\_045174798.1 65.2 138  
47 1 1 137 1 138 6.50E-41 175.3 6596 cellular

organisms;Eukaryota;Opisthokonta;Metazoa;Eumetazoa;Bilateria;Protostomia;Spiralia;Lophotrochozoa;Mollusca;Bivalvia;Autobranchia;Heteroconchia;Euherodonta;Imparidentia;Venerida;Veneroidea;Veneridae;Mercenaria;Mercenaria mercenaria

UdeM00000001567 6596 607.4 UdeM00000001567 XP\_045175243.1 53.5 630  
214 12 21 646 77 631 2.30E-170 607.4 6596 cellular

organisms;Eukaryota;Opisthokonta;Metazoa;Eumetazoa;Bilateria;Protostomia;Spiralia;Lophotrochozoa;Mollusca;Bivalvia;Autobranchia;Heteroconchia;Euherodonta;Imparidentia;Venerida;Veneroidea;Veneridae;Mercenaria;Mercenaria mercenaria

UdeM00000001568 6596 150.2 UdeM00000001568 XP\_045175168.1 60.6 104  
41 0 5 108 2 105 1.50E-33 150.2 6596 cellular

organisms;Eukaryota;Opisthokonta;Metazoa;Eumetazoa;Bilateria;Protostomia;Spiralia;Lophotrochozoa;Mollusca;Bivalvia;Autobranchia;Heteroconchia;Euherodonta;Imparidentia;Venerida;Veneroidea;Veneridae;Mercenaria;Mercenaria mercenaria

UdeM00000001569 6579 270.8 UdeM00000001569 XP\_033752644.1 49.8 273  
123 5 1 265 1 267 1.90E-69 270.8 6579 cellular

organisms;Eukaryota;Opisthokonta;Metazoa;Eumetazoa;Bilateria;Protostomia;

Spiralia; Lophotrochozoa; Mollusca; Bivalvia; Autobranchia; Pteriomorpha; Pectinida; Pectinoidea; Pectinidae; Pecten; Pecten maximus  
UdeM00000001570 6579 263.8 UdeM00000001570 XP\_033752644.1 48.9 278  
123 6 1 270 1 267 2.30E-67 263.8 6579 cellular  
organisms; Eukaryota; Opisthokonta; Metazoa; Eumetazoa; Bilateria; Protostomia; Spiralia; Lophotrochozoa; Mollusca; Bivalvia; Autobranchia; Pteriomorpha; Pectinida; Pectinoidea; Pectinidae; Pecten; Pecten maximus  
UdeM00000001571 37653 344.4 UdeM00000001571 XP\_014775400.1 42.9 471  
198 11 19 425 2 465 2.10E-91 344.4 37653 cellular  
organisms; Eukaryota; Opisthokonta; Metazoa; Eumetazoa; Bilateria; Protostomia; Spiralia; Lophotrochozoa; Mollusca; Cephalopoda; Coleoidea; Octopodiformes; Octopoda; Incirrata; Octopodidae; Octopus; Octopus bimaculoides  
UdeM00000001572 6500 396.7 UdeM00000001572 XP\_005109012.1 67.2 296  
95 1 1 296 1 294 2.50E-107 396.7 6500 cellular  
organisms; Eukaryota; Opisthokonta; Metazoa; Eumetazoa; Bilateria; Protostomia; Spiralia; Lophotrochozoa; Mollusca; Gastropoda; Heterobranchia; Euthyneura; Teptipleura; Aplysiida; Aplysioidea; Aplysiidae; Aplysia; Aplysia californica  
UdeM00000001573 2607531 110.2 UdeM00000001573 XP\_036358767.1 54.2  
83 38 0 122 204 84 166 3.30E-21 110.2 2607531  
cellular  
organisms; Eukaryota; Opisthokonta; Metazoa; Eumetazoa; Bilateria; Protostomia; Spiralia; Lophotrochozoa; Mollusca; Cephalopoda; Coleoidea; Octopodiformes; Octopoda; Incirrata; Octopodidae; Octopus; Octopus sinensis  
UdeM00000001574 37621 73.2 UdeM00000001574 XP\_014670482.1 41.7 72  
42 0 23 94 50 121 2.60E-10 73.2 37621 cellular  
organisms; Eukaryota; Opisthokonta; Metazoa; Eumetazoa; Bilateria; Protostomia; Ecdysozoa; Scalidophora; Priapulida; Priapulimorpha; Priapulimorphida; Priapulidae; Priapululus; Priapululus caudatus  
UdeM00000001575 225164 342 UdeM00000001575 XP\_009043606.1 47.7  
365 187 2 7 367 26 390 9.10E-91 342 225164  
cellular  
organisms; Eukaryota; Opisthokonta; Metazoa; Eumetazoa; Bilateria; Protostomia; Spiralia; Lophotrochozoa; Mollusca; Gastropoda; Patellogastropoda; Lottioidea; Lottiidae; Lottia; Lottia gigantea  
UdeM00000001576 7574 173.3 UdeM00000001576 XP\_013382110.1 60.8 125  
49 0 1 125 113 237 2.00E-40 173.3 7574 cellular  
organisms; Eukaryota; Opisthokonta; Metazoa; Eumetazoa; Bilateria; Protostomia; Spiralia; Lophotrochozoa; Brachiopoda; Linguliformea; Lingulata; Lingulida; Linguloidea; Lingulidae; Lingula; Lingula anatina  
UdeM00000001577 7574 102.8 UdeM00000001577 XP\_013384628.1 35.7 185  
98 4 6 173 99 279 4.40E-19 102.8 7574 cellular  
organisms; Eukaryota; Opisthokonta; Metazoa; Eumetazoa; Bilateria; Protostomia; Spiralia; Lophotrochozoa; Brachiopoda; Linguliformea; Lingulata; Lingulida; Linguloidea; Lingulidae; Lingula; Lingula anatina  
UdeM00000001578 29159 150.2 UdeM00000001578 XP\_034338151.1 62.3 114  
42 1 1 114 285 397 1.60E-33 150.2 29159 cellular  
organisms; Eukaryota; Opisthokonta; Metazoa; Eumetazoa; Bilateria; Protostomia; Spiralia; Lophotrochozoa; Mollusca; Bivalvia; Autobranchia; Pteriomorpha; Ostreida; Ostreioidea; Ostreidae; Crassostrea; Crassostrea gigas  
UdeM00000001579 6573 349.4 UdeM00000001579 XP\_021368044.1 43.2 412  
216 6 90 486 154 562 7.60E-93 349.4 6573 cellular  
organisms; Eukaryota; Opisthokonta; Metazoa; Eumetazoa; Bilateria; Protostomia; Spiralia; Lophotrochozoa; Mollusca; Bivalvia; Autobranchia; Pteriomorpha; Pectinida; Pectinoidea; Pectinidae; Mizuhopecten; Mizuhopecten yessoensis

UdeM00000001580 6579 639 UdeM00000001580 XP\_033751708.1 61 585  
 154 14 152 678 124 692 7.10E-180 639 6579 cellular  
 organisms;Eukaryota;Opisthokonta;Metazoa;Eumetazoa;Bilateria;Protostomia;  
 Spiralia;Lophotrochozoa;Mollusca;Bivalvia;Autobranchia;Pteriormorphia;Pect  
 inida;Pectinoidea;Pectinidae;Pecten;Pecten maximus  
 UdeM00000001581 6596 962.6 UdeM00000001581 XP\_045174478.1 64 956  
 315 7 41 990 28 960 3.90E-277 962.6 6596 cellular  
 organisms;Eukaryota;Opisthokonta;Metazoa;Eumetazoa;Bilateria;Protostomia;  
 Spiralia;Lophotrochozoa;Mollusca;Bivalvia;Autobranchia;Heteroconchia;Euhe  
 terodonta;Imparidentia;Venerida;Veneroidea;Veneridae;Mercenaria;Mercenari  
 a mercenaria  
 UdeM00000001582 6596 190.3 UdeM00000001582 XP\_045175240.1 33.6 428  
 241 12 118 534 337 732 8.80E-45 190.3 6596 cellular  
 organisms;Eukaryota;Opisthokonta;Metazoa;Eumetazoa;Bilateria;Protostomia;  
 Spiralia;Lophotrochozoa;Mollusca;Bivalvia;Autobranchia;Heteroconchia;Euhe  
 terodonta;Imparidentia;Venerida;Veneroidea;Veneridae;Mercenaria;Mercenari  
 a mercenaria  
 UdeM00000001583 29159 281.2 UdeM00000001583 XP\_011434351.2 34.6 581  
 304 17 23 580 193 720 4.00E-72 281.2 29159 cellular  
 organisms;Eukaryota;Opisthokonta;Metazoa;Eumetazoa;Bilateria;Protostomia;  
 Spiralia;Lophotrochozoa;Mollusca;Bivalvia;Autobranchia;Pteriormorphia;Ostr  
 eida;Ostreoidea;Ostreidae;Crassostrea;Crassostrea gigas  
 UdeM00000001584 7739 279.3 UdeM00000001584 XP\_035661194.1 57.1 219  
 91 1 40 258 99 314 1.70E-71 279.3 7739 cellular  
 organisms;Eukaryota;Opisthokonta;Metazoa;Eumetazoa;Bilateria;Deuterostomi  
 a;Chordata;Cephalochordata;Leptocardii;Amphioxiformes;Branchiostomidae;Br  
 anchiostoma;Branchiostoma floridae  
 UdeM00000001585 29159 191 UdeM00000001585 XP\_011443807.2 53.2 188  
 80 3 2 184 9 193 1.30E-45 191 29159 cellular  
 organisms;Eukaryota;Opisthokonta;Metazoa;Eumetazoa;Bilateria;Protostomia;  
 Spiralia;Lophotrochozoa;Mollusca;Bivalvia;Autobranchia;Pteriormorphia;Ostr  
 eida;Ostreoidea;Ostreidae;Crassostrea;Crassostrea gigas  
 UdeM00000001586 6596 343.2 UdeM00000001586 XP\_045174464.1 56.7 289  
 116 5 12 294 8 293 3.50E-91 343.2 6596 cellular  
 organisms;Eukaryota;Opisthokonta;Metazoa;Eumetazoa;Bilateria;Protostomia;  
 Spiralia;Lophotrochozoa;Mollusca;Bivalvia;Autobranchia;Heteroconchia;Euhe  
 terodonta;Imparidentia;Venerida;Veneroidea;Veneridae;Mercenaria;Mercenari  
 a mercenaria  
 UdeM00000001587 6596 1209.5 UdeM00000001587 XP\_045174464.1 56.8  
 1051 426 7 5 1031 293 1339 0.00E+00 1209.5 6596  
 cellular  
 organisms;Eukaryota;Opisthokonta;Metazoa;Eumetazoa;Bilateria;Protostomia;  
 Spiralia;Lophotrochozoa;Mollusca;Bivalvia;Autobranchia;Heteroconchia;Euhe  
 terodonta;Imparidentia;Venerida;Veneroidea;Veneridae;Mercenaria;Mercenari  
 a mercenaria  
 UdeM00000001588 6596 576.6 UdeM00000001588 XP\_045174464.1 45 707  
 238 9 10 570 6 707 3.50E-161 576.6 6596 cellular  
 organisms;Eukaryota;Opisthokonta;Metazoa;Eumetazoa;Bilateria;Protostomia;  
 Spiralia;Lophotrochozoa;Mollusca;Bivalvia;Autobranchia;Heteroconchia;Euhe  
 terodonta;Imparidentia;Venerida;Veneroidea;Veneridae;Mercenaria;Mercenari  
 a mercenaria  
 UdeM00000001589 6596 730.7 UdeM00000001589 XP\_045174464.1 57.3 620  
 217 2 2 573 720 1339 1.40E-207 730.7 6596 cellular  
 organisms;Eukaryota;Opisthokonta;Metazoa;Eumetazoa;Bilateria;Protostomia;

Spiralia;Lophotrochozoa;Mollusca;Bivalvia;Autobranchia;Heteroconchia;Euherodonta;Imparidentia;Venerida;Veneroidea;Veneridae;Mercenaria;Mercenaria mercenaria

UdeM00000001590 6596 260 UdeM00000001590 XP\_045176110.1 68.6 185  
55 3 1 184 369 551 2.30E-66 260 6596 cellular

organisms;Eukaryota;Opisthokonta;Metazoa;Eumetazoa;Bilateria;Protostomia;Spiralia;Lophotrochozoa;Mollusca;Bivalvia;Autobranchia;Heteroconchia;Euherodonta;Imparidentia;Venerida;Veneroidea;Veneridae;Mercenaria;Mercenaria mercenaria

UdeM00000001591 6596 830.9 UdeM00000001591 XP\_045176112.1 75.6 501  
119 3 24 523 27 525 9.20E-238 830.9 6596 cellular

organisms;Eukaryota;Opisthokonta;Metazoa;Eumetazoa;Bilateria;Protostomia;Spiralia;Lophotrochozoa;Mollusca;Bivalvia;Autobranchia;Heteroconchia;Euherodonta;Imparidentia;Venerida;Veneroidea;Veneridae;Mercenaria;Mercenaria mercenaria

UdeM00000001592 6573 113.2 UdeM00000001592 XP\_021368218.1 43.8 130  
57 3 12 125 643 772 2.40E-22 113.2 6573 cellular

organisms;Eukaryota;Opisthokonta;Metazoa;Eumetazoa;Bilateria;Protostomia;Spiralia;Lophotrochozoa;Mollusca;Bivalvia;Autobranchia;Pteriormorphia;Pectinida;Pectinoidea;Pectinidae;Mizuhopecten;Mizuhopecten yessoensis

UdeM00000001593 6596 90.1 UdeM00000001593 XP\_045175529.1 36.5 96  
61 0 40 135 10 105 3.50E-15 90.1 6596 cellular

organisms;Eukaryota;Opisthokonta;Metazoa;Eumetazoa;Bilateria;Protostomia;Spiralia;Lophotrochozoa;Mollusca;Bivalvia;Autobranchia;Heteroconchia;Euherodonta;Imparidentia;Venerida;Veneroidea;Veneridae;Mercenaria;Mercenaria mercenaria

UdeM00000001594 6596 696.4 UdeM00000001594 XP\_045175521.1 73.6 451  
119 0 1 451 1 451 2.30E-197 696.4 6596 cellular

organisms;Eukaryota;Opisthokonta;Metazoa;Eumetazoa;Bilateria;Protostomia;Spiralia;Lophotrochozoa;Mollusca;Bivalvia;Autobranchia;Heteroconchia;Euherodonta;Imparidentia;Venerida;Veneroidea;Veneridae;Mercenaria;Mercenaria mercenaria

UdeM00000001595 6596 64.3 UdeM00000001595 XP\_045169421.1 44.3 70  
26 1 141 197 53 122 2.10E-07 64.3 6596 cellular

organisms;Eukaryota;Opisthokonta;Metazoa;Eumetazoa;Bilateria;Protostomia;Spiralia;Lophotrochozoa;Mollusca;Bivalvia;Autobranchia;Heteroconchia;Euherodonta;Imparidentia;Venerida;Veneroidea;Veneridae;Mercenaria;Mercenaria mercenaria

UdeM00000001597 6596 255.8 UdeM00000001597 XP\_045171063.1 45.7 265  
139 2 19 279 34 297 6.60E-65 255.8 6596 cellular

organisms;Eukaryota;Opisthokonta;Metazoa;Eumetazoa;Bilateria;Protostomia;Spiralia;Lophotrochozoa;Mollusca;Bivalvia;Autobranchia;Heteroconchia;Euherodonta;Imparidentia;Venerida;Veneroidea;Veneridae;Mercenaria;Mercenaria mercenaria

UdeM00000001596 6596 282 UdeM00000001596 XP\_045171063.1 46 298  
150 3 1 288 1 297 8.80E-73 282 6596 cellular

organisms;Eukaryota;Opisthokonta;Metazoa;Eumetazoa;Bilateria;Protostomia;Spiralia;Lophotrochozoa;Mollusca;Bivalvia;Autobranchia;Heteroconchia;Euherodonta;Imparidentia;Venerida;Veneroidea;Veneridae;Mercenaria;Mercenaria mercenaria

UdeM00000001598 29159 2522.3 UdeM00000001598 XP\_034301655.1 38.7  
3531 1857 46 4 3409 85 3433 0.00E+00 2522.3  
29159 cellular

organisms;Eukaryota;Opisthokonta;Metazoa;Eumetazoa;Bilateria;Protostomia;

Spiralia;Lophotrochozoa;Mollusca;Bivalvia;Autobranchia;Pteriormorphia;Ostr  
eida;Ostreoidea;Ostreidae;Crassostrea;Crassostrea gigas  
UdeM00000001600 29159 2142.9 UdeM00000001600 XP\_034301655.1 41.3  
2673 1473 30 2 2613 797 3433 0.00E+00 2142.9  
29159 cellular  
organisms;Eukaryota;Opisthokonta;Metazoa;Eumetazoa;Bilateria;Protostomia;  
Spiralia;Lophotrochozoa;Mollusca;Bivalvia;Autobranchia;Pteriormorphia;Ostr  
eida;Ostreoidea;Ostreidae;Crassostrea;Crassostrea gigas  
UdeM00000001601 29159 2140.9 UdeM00000001601 XP\_034301655.1 41.2  
2673 1466 29 2 2603 797 3433 0.00E+00 2140.9  
29159 cellular  
organisms;Eukaryota;Opisthokonta;Metazoa;Eumetazoa;Bilateria;Protostomia;  
Spiralia;Lophotrochozoa;Mollusca;Bivalvia;Autobranchia;Pteriormorphia;Ostr  
eida;Ostreoidea;Ostreidae;Crassostrea;Crassostrea gigas  
UdeM00000001602 6087 83.6 UdeM00000001602 XP\_012558222.1 41.2 97  
56 1 1 96 137 233 1.60E-13 83.6 6087 cellular  
organisms;Eukaryota;Opisthokonta;Metazoa;Eumetazoa;Cnidaria;Hydrozoa;Hydr  
oidolina;Anthoathecata;Aplanulata;Hydridae;Hydra;Hydra vulgaris  
UdeM00000001603 29159 529.6 UdeM00000001603 XP\_034314164.1 37.1 735  
436 9 30 753 33 752 7.00E-147 529.6 29159 cellular  
organisms;Eukaryota;Opisthokonta;Metazoa;Eumetazoa;Bilateria;Protostomia;  
Spiralia;Lophotrochozoa;Mollusca;Bivalvia;Autobranchia;Pteriormorphia;Ostr  
eida;Ostreoidea;Ostreidae;Crassostrea;Crassostrea gigas  
UdeM00000001604 29159 1258.4 UdeM00000001604 XP\_034301655.1 42  
1552 876 13 30 1572 1897 3433 0.00E+00 1258.4  
29159 cellular  
organisms;Eukaryota;Opisthokonta;Metazoa;Eumetazoa;Bilateria;Protostomia;  
Spiralia;Lophotrochozoa;Mollusca;Bivalvia;Autobranchia;Pteriormorphia;Ostr  
eida;Ostreoidea;Ostreidae;Crassostrea;Crassostrea gigas  
UdeM00000001605 114398 329.3 UdeM00000001605 XP\_042903861.1 38.1  
480 286 6 1 476 1 473 8.20E-87 329.3 114398  
cellular  
organisms;Eukaryota;Opisthokonta;Metazoa;Eumetazoa;Bilateria;Protostomia;  
Ecdysozoa;Panarthropoda;Arthropoda;Chelicerata;Arachnida;Araneae;Araneomo  
rphae;Entelegynae;Orbiculariae;Araneoidea;Theridiidae;Parasteatoda;Parast  
eatoda tepidariorum  
UdeM00000001606 29159 1300.4 UdeM00000001606 XP\_034301655.1 39.2  
1731 948 24 43 1699 85 1784 0.00E+00 1300.4  
29159 cellular  
organisms;Eukaryota;Opisthokonta;Metazoa;Eumetazoa;Bilateria;Protostomia;  
Spiralia;Lophotrochozoa;Mollusca;Bivalvia;Autobranchia;Pteriormorphia;Ostr  
eida;Ostreoidea;Ostreidae;Crassostrea;Crassostrea gigas  
UdeM00000001608 29159 2050 UdeM00000001608 XP\_034301655.1 31.7 4011  
1716 41 30 3824 231 3433 0.00E+00 2050 29159 cellular  
organisms;Eukaryota;Opisthokonta;Metazoa;Eumetazoa;Bilateria;Protostomia;  
Spiralia;Lophotrochozoa;Mollusca;Bivalvia;Autobranchia;Pteriormorphia;Ostr  
eida;Ostreoidea;Ostreidae;Crassostrea;Crassostrea gigas  
UdeM00000001610 29159 2318.5 UdeM00000001610 XP\_034301655.1 34.8  
3816 1830 39 30 3799 231 3433 0.00E+00 2318.5  
29159 cellular  
organisms;Eukaryota;Opisthokonta;Metazoa;Eumetazoa;Bilateria;Protostomia;  
Spiralia;Lophotrochozoa;Mollusca;Bivalvia;Autobranchia;Pteriormorphia;Ostr  
eida;Ostreoidea;Ostreidae;Crassostrea;Crassostrea gigas

UdeM00000001611 6565 136.7 UdeM00000001611 XP\_022316847.1 41.4 174  
 87 5 9 170 8 178 3.10E-29 136.7 6565 cellular  
 organisms;Eukaryota;Opisthokonta;Metazoa;Eumetazoa;Bilateria;Protostomia;  
 Spiralia;Lophotrochozoa;Mollusca;Bivalvia;Autobranchia;Pteriomorpha;Ostr  
 eida;Ostreoidea;Ostreidae;Crassostrea;Crassostrea virginica  
 UdeM00000001612 29159 822.4 UdeM00000001612 XP\_034301655.1 39.7 1143  
 662 13 1 1130 2300 3428 7.10E-235 822.4 29159 cellular  
 organisms;Eukaryota;Opisthokonta;Metazoa;Eumetazoa;Bilateria;Protostomia;  
 Spiralia;Lophotrochozoa;Mollusca;Bivalvia;Autobranchia;Pteriomorpha;Ostr  
 eida;Ostreoidea;Ostreidae;Crassostrea;Crassostrea gigas  
 UdeM00000001613 6573 1563.1 UdeM00000001613 XP\_021356985.1 38.4  
 2265 1218 42 9 2168 90 2282 0.00E+00 1563.1 6573  
 cellular  
 organisms;Eukaryota;Opisthokonta;Metazoa;Eumetazoa;Bilateria;Protostomia;  
 Spiralia;Lophotrochozoa;Mollusca;Bivalvia;Autobranchia;Pteriomorpha;Pect  
 inida;Pectinoidea;Pectinidae;Mizuhopecten;Mizuhopecten yessoensis  
 UdeM00000001614 6573 1659.8 UdeM00000001614 XP\_021356985.1 40  
 2220 1198 37 9 2122 90 2282 0.00E+00 1659.8 6573  
 cellular  
 organisms;Eukaryota;Opisthokonta;Metazoa;Eumetazoa;Bilateria;Protostomia;  
 Spiralia;Lophotrochozoa;Mollusca;Bivalvia;Autobranchia;Pteriomorpha;Pect  
 inida;Pectinoidea;Pectinidae;Mizuhopecten;Mizuhopecten yessoensis  
 UdeM00000001615 6573 253.1 UdeM00000001615 XP\_021343061.1 44.5 301  
 153 5 34 333 8 295 5.10E-64 253.1 6573 cellular  
 organisms;Eukaryota;Opisthokonta;Metazoa;Eumetazoa;Bilateria;Protostomia;  
 Spiralia;Lophotrochozoa;Mollusca;Bivalvia;Autobranchia;Pteriomorpha;Pect  
 inida;Pectinoidea;Pectinidae;Mizuhopecten;Mizuhopecten yessoensis  
 UdeM00000001616 6573 252.3 UdeM00000001616 XP\_021343061.1 44.5 301  
 153 5 34 333 8 295 8.60E-64 252.3 6573 cellular  
 organisms;Eukaryota;Opisthokonta;Metazoa;Eumetazoa;Bilateria;Protostomia;  
 Spiralia;Lophotrochozoa;Mollusca;Bivalvia;Autobranchia;Pteriomorpha;Pect  
 inida;Pectinoidea;Pectinidae;Mizuhopecten;Mizuhopecten yessoensis  
 UdeM00000001617 6596 1297.7 UdeM00000001617 XP\_045176046.1 53.2  
 1266 513 18 6 1209 7 1255 0.00E+00 1297.7 6596  
 cellular  
 organisms;Eukaryota;Opisthokonta;Metazoa;Eumetazoa;Bilateria;Protostomia;  
 Spiralia;Lophotrochozoa;Mollusca;Bivalvia;Autobranchia;Heteroconchia;Euhe  
 terodonta;Imparidentia;Venerida;Veneroidea;Veneridae;Mercenaria;Mercenari  
 a mercenaria  
 UdeM00000001618 6596 505.8 UdeM00000001618 XP\_045174328.1 59.4 458  
 168 4 44 495 44 489 6.50E-140 505.8 6596 cellular  
 organisms;Eukaryota;Opisthokonta;Metazoa;Eumetazoa;Bilateria;Protostomia;  
 Spiralia;Lophotrochozoa;Mollusca;Bivalvia;Autobranchia;Heteroconchia;Euhe  
 terodonta;Imparidentia;Venerida;Veneroidea;Veneridae;Mercenaria;Mercenari  
 a mercenaria  
 UdeM00000001619 6596 387.1 UdeM00000001619 XP\_045174327.1 77.9 226  
 50 0 5 230 15 240 1.60E-104 387.1 6596 cellular  
 organisms;Eukaryota;Opisthokonta;Metazoa;Eumetazoa;Bilateria;Protostomia;  
 Spiralia;Lophotrochozoa;Mollusca;Bivalvia;Autobranchia;Heteroconchia;Euhe  
 terodonta;Imparidentia;Venerida;Veneroidea;Veneridae;Mercenaria;Mercenari  
 a mercenaria  
 UdeM00000001620 6706 151.4 UdeM00000001620 XP\_042235765.1 44.2 156  
 87 0 1 156 1 156 9.90E-34 151.4 6706 cellular  
 organisms;Eukaryota;Opisthokonta;Metazoa;Eumetazoa;Bilateria;Protostomia;

Ecdysozoa; Panarthropoda; Arthropoda; Mandibulata; Pancrustacea; Crustacea; Multicrustacea; Malacostraca; Eumalacostraca; Eucarida; Decapoda; Pleocyemata; Astacidea; Nephropoidea; Nephropidae; Homarus; Homarus americanus

UdeM00000001621 6573 313.5 UdeM00000001621 XP\_021349494.1 40.4 443  
235 12 56 489 165 587 4.70E-82 313.5 6573 cellular  
organisms; Eukaryota; Opisthokonta; Metazoa; Eumetazoa; Bilateria; Protostomia; Spiralia; Lophotrochozoa; Mollusca; Bivalvia; Autobranchia; Pteriomorpha; Pectinida; Pectinoidea; Pectinidae; Mizuhopecten; Mizuhopecten yessoensis

UdeM00000001622 29159 317.4 UdeM00000001622 XP\_034330213.1 46.8 316  
151 5 9 322 3 303 2.60E-83 317.4 29159 cellular  
organisms; Eukaryota; Opisthokonta; Metazoa; Eumetazoa; Bilateria; Protostomia; Spiralia; Lophotrochozoa; Mollusca; Bivalvia; Autobranchia; Pteriomorpha; Ostreida; Ostreidae; Crassostrea; Crassostrea gigas

UdeM00000001623 6596 223.4 UdeM00000001623 XP\_045195116.1 32.3 356  
232 4 91 444 104 452 6.10E-55 223.4 6596 cellular  
organisms; Eukaryota; Opisthokonta; Metazoa; Eumetazoa; Bilateria; Protostomia; Spiralia; Lophotrochozoa; Mollusca; Bivalvia; Autobranchia; Heteroconchia; Euheterodonta; Imparidentia; Venerida; Veneroidea; Veneridae; Mercenaria; Mercenaria mercenaria

UdeM00000001624 6596 223.4 UdeM00000001624 XP\_045195116.1 32.3 356  
232 4 90 443 104 452 6.10E-55 223.4 6596 cellular  
organisms; Eukaryota; Opisthokonta; Metazoa; Eumetazoa; Bilateria; Protostomia; Spiralia; Lophotrochozoa; Mollusca; Bivalvia; Autobranchia; Heteroconchia; Euheterodonta; Imparidentia; Venerida; Veneroidea; Veneridae; Mercenaria; Mercenaria mercenaria

UdeM00000001625 6596 214.5 UdeM00000001625 XP\_045195116.1 31 371  
246 5 148 516 104 466 3.20E-52 214.5 6596 cellular  
organisms; Eukaryota; Opisthokonta; Metazoa; Eumetazoa; Bilateria; Protostomia; Spiralia; Lophotrochozoa; Mollusca; Bivalvia; Autobranchia; Heteroconchia; Euheterodonta; Imparidentia; Venerida; Veneroidea; Veneridae; Mercenaria; Mercenaria mercenaria

UdeM00000001626 6596 225.7 UdeM00000001626 XP\_045195116.1 33.1 356  
229 4 101 454 104 452 1.30E-55 225.7 6596 cellular  
organisms; Eukaryota; Opisthokonta; Metazoa; Eumetazoa; Bilateria; Protostomia; Spiralia; Lophotrochozoa; Mollusca; Bivalvia; Autobranchia; Heteroconchia; Euheterodonta; Imparidentia; Venerida; Veneroidea; Veneridae; Mercenaria; Mercenaria mercenaria

UdeM00000001627 6596 208.4 UdeM00000001627 XP\_045195116.1 30.4 342  
231 3 157 496 104 440 2.30E-50 208.4 6596 cellular  
organisms; Eukaryota; Opisthokonta; Metazoa; Eumetazoa; Bilateria; Protostomia; Spiralia; Lophotrochozoa; Mollusca; Bivalvia; Autobranchia; Heteroconchia; Euheterodonta; Imparidentia; Venerida; Veneroidea; Veneridae; Mercenaria; Mercenaria mercenaria

UdeM00000001628 6526 111.3 UdeM00000001628 XP\_013090314.1 50.4 131  
48 3 417 547 232 345 4.00E-21 111.3 6526 cellular  
organisms; Eukaryota; Opisthokonta; Metazoa; Eumetazoa; Bilateria; Protostomia; Spiralia; Lophotrochozoa; Mollusca; Gastropoda; Heterobranchia; Euthyneura; Panpulmonata; Hygrophila; Lymnaeidae; Planorbidae; Biomphalaria; Biomphalaria glabrata

UdeM00000001629 6596 1591.2 UdeM00000001629 XP\_045174835.1 55.8  
1439 597 13 1 1408 1 1431 0.00E+00 1591.2 6596  
cellular  
organisms; Eukaryota; Opisthokonta; Metazoa; Eumetazoa; Bilateria; Protostomia; Spiralia; Lophotrochozoa; Mollusca; Bivalvia; Autobranchia; Heteroconchia; Euheterodonta

terodonta;Imparidentia;Venerida;Veneroidea;Veneridae;Mercenaria;Mercenaria mercenaria  
 UdeM00000001630 29159 156 UdeM00000001630 XP\_011431181.2 87.8 82  
 8 1 1 82 28 107 4.30E-35 156 29159 cellular  
 organisms;Eukaryota;Opisthokonta;Metazoa;Eumetazoa;Bilateria;Protostomia;  
 Spiralia;Lophotrochozoa;Mollusca;Bivalvia;Autobranchia;Pteriomorpha;Ostreida;  
 Ostreidae;Crassostrea;Crassostrea gigas  
 UdeM00000001631 6412 79.7 UdeM00000001631 XP\_009018103.1 76 50  
 11 1 2 51 37 85 3.10E-12 79.7 6412 cellular  
 organisms;Eukaryota;Opisthokonta;Metazoa;Eumetazoa;Bilateria;Protostomia;  
 Spiralia;Lophotrochozoa;Annelida;Clitellata;Hirudinea;Rhynchobdellida;Glossiphoniidae;  
 Helobdella;Helobdella robusta  
 UdeM00000001632 6596 642.9 UdeM00000001632 XP\_045176002.1 63.9 570  
 192 3 1 569 1 557 3.90E-181 642.9 6596 cellular  
 organisms;Eukaryota;Opisthokonta;Metazoa;Eumetazoa;Bilateria;Protostomia;  
 Spiralia;Lophotrochozoa;Mollusca;Bivalvia;Autobranchia;Heteroconchia;Euheterodonta;  
 Imparidentia;Venerida;Veneroidea;Veneridae;Mercenaria;Mercenaria mercenaria  
 UdeM00000001633 6596 268.1 UdeM00000001633 XP\_045174903.1 64 203  
 72 1 1 203 1 202 9.30E-69 268.1 6596 cellular  
 organisms;Eukaryota;Opisthokonta;Metazoa;Eumetazoa;Bilateria;Protostomia;  
 Spiralia;Lophotrochozoa;Mollusca;Bivalvia;Autobranchia;Heteroconchia;Euheterodonta;  
 Imparidentia;Venerida;Veneroidea;Veneridae;Mercenaria;Mercenaria mercenaria  
 UdeM00000001634 1735272 117.5 UdeM00000001634 XP\_041358895.1 55.3  
 94 38 2 20 109 4 97 1.10E-23 117.5 1735272  
 cellular  
 organisms;Eukaryota;Opisthokonta;Metazoa;Eumetazoa;Bilateria;Protostomia;  
 Spiralia;Lophotrochozoa;Mollusca;Gastropoda;Neomphalina;Neomphaloidea;Peltospiridae;  
 Gigantopelta;Gigantopelta aegis  
 UdeM00000001636 6579 426.8 UdeM00000001636 XP\_033752540.1 66.3 522  
 165 4 68 581 234 752 4.50E-116 426.8 6579 cellular  
 organisms;Eukaryota;Opisthokonta;Metazoa;Eumetazoa;Bilateria;Protostomia;  
 Spiralia;Lophotrochozoa;Mollusca;Bivalvia;Autobranchia;Pteriomorpha;Pectinida;  
 Pectinoidea;Pectinidae;Pecten;Pecten maximus  
 UdeM00000001637 6596 392.1 UdeM00000001637 XP\_045175367.1 83.3 234  
 37 2 69 300 1 234 6.30E-106 392.1 6596 cellular  
 organisms;Eukaryota;Opisthokonta;Metazoa;Eumetazoa;Bilateria;Protostomia;  
 Spiralia;Lophotrochozoa;Mollusca;Bivalvia;Autobranchia;Heteroconchia;Euheterodonta;  
 Imparidentia;Venerida;Veneroidea;Veneridae;Mercenaria;Mercenaria mercenaria  
 UdeM00000001647 6596 258.5 UdeM00000001647 XP\_045177337.1 53.6 250  
 91 2 15 264 189 413 9.50E-66 258.5 6596 cellular  
 organisms;Eukaryota;Opisthokonta;Metazoa;Eumetazoa;Bilateria;Protostomia;  
 Spiralia;Lophotrochozoa;Mollusca;Bivalvia;Autobranchia;Heteroconchia;Euheterodonta;  
 Imparidentia;Venerida;Veneroidea;Veneridae;Mercenaria;Mercenaria mercenaria  
 UdeM00000001648 6596 542 UdeM00000001648 XP\_045177337.1 61.1 437  
 158 4 6 441 414 839 7.30E-151 542 6596 cellular  
 organisms;Eukaryota;Opisthokonta;Metazoa;Eumetazoa;Bilateria;Protostomia;  
 Spiralia;Lophotrochozoa;Mollusca;Bivalvia;Autobranchia;Heteroconchia;Euheterodonta;  
 Imparidentia;Venerida;Veneroidea;Veneridae;Mercenaria;Mercenaria mercenaria



UdeM00000001649 6596 294.3 UdeM00000001649 XP\_045177123.1 40.3 516  
 244 16 129 624 145 616 3.80E-76 294.3 6596 cellular  
 organisms;Eukaryota;Opisthokonta;Metazoa;Eumetazoa;Bilateria;Protostomia;  
 Spiralia;Lophotrochozoa;Mollusca;Bivalvia;Autobranchia;Heteroconchia;Euhe  
 terodonta;Imparidentia;Venerida;Veneroidea;Veneridae;Mercenaria;Mercenari  
 a mercenaria  
 UdeM00000001651 6596 629.8 UdeM00000001651 XP\_045175655.1 78.8 392  
 83 0 7 398 34 425 2.40E-177 629.8 6596 cellular  
 organisms;Eukaryota;Opisthokonta;Metazoa;Eumetazoa;Bilateria;Protostomia;  
 Spiralia;Lophotrochozoa;Mollusca;Bivalvia;Autobranchia;Heteroconchia;Euhe  
 terodonta;Imparidentia;Venerida;Veneroidea;Veneridae;Mercenaria;Mercenari  
 a mercenaria  
 UdeM00000001654 9601 113.2 UdeM00000001654 XP\_024093036.1 36.1 202  
 116 7 327 524 311 503 1.00E-21 113.2 9601 cellular  
 organisms;Eukaryota;Opisthokonta;Metazoa;Eumetazoa;Bilateria;Deuterostomi  
 a;Chordata;Craniata;Vertebrata;Gnathostomata;Teleostomi;Euteleostomi;Sarc  
 opterygii;Dipnotetrapodomorpha;Tetrapoda;Amniota;Mammalia;Theria;Eutheria  
 ;Boreoeutheria;Euarchontoglires;Primates;Haplorrhini;Simiiformes;Catarri  
 ni;Hominoidea;Hominidae;Ponginae;Pongo;Pongo abelii  
 UdeM00000001655 46514 114 UdeM00000001655 XP\_038062048.1 24.8 471  
 294 17 5 446 51 490 5.00E-22 114 46514 cellular  
 organisms;Eukaryota;Opisthokonta;Metazoa;Eumetazoa;Bilateria;Deuterostomi  
 a;Echinodermata;Eleutherozoa;Asterozoa;Asteroidea;Valvatacea;Valvatida;As  
 terinidae;Patiria;Patiria miniata  
 UdeM00000001656 6596 317.4 UdeM00000001656 XP\_045216906.1 48.1 316  
 158 5 6 318 144 456 2.10E-83 317.4 6596 cellular  
 organisms;Eukaryota;Opisthokonta;Metazoa;Eumetazoa;Bilateria;Protostomia;  
 Spiralia;Lophotrochozoa;Mollusca;Bivalvia;Autobranchia;Heteroconchia;Euhe  
 terodonta;Imparidentia;Venerida;Veneroidea;Veneridae;Mercenaria;Mercenari  
 a mercenaria  
 UdeM00000001657 29159 493.4 UdeM00000001657 XP\_034318217.1 34.3 878  
 471 22 45 835 16 874 5.60E-136 493.4 29159 cellular  
 organisms;Eukaryota;Opisthokonta;Metazoa;Eumetazoa;Bilateria;Protostomia;  
 Spiralia;Lophotrochozoa;Mollusca;Bivalvia;Autobranchia;Pteriormorphia;Ostr  
 eida;Ostreioidea;Ostreidae;Crassostrea;Crassostrea gigas  
 UdeM00000001658 29159 527.7 UdeM00000001658 XP\_034318217.1 35 878  
 500 21 45 870 16 874 2.80E-146 527.7 29159 cellular  
 organisms;Eukaryota;Opisthokonta;Metazoa;Eumetazoa;Bilateria;Protostomia;  
 Spiralia;Lophotrochozoa;Mollusca;Bivalvia;Autobranchia;Pteriormorphia;Ostr  
 eida;Ostreioidea;Ostreidae;Crassostrea;Crassostrea gigas  
 UdeM00000001660 70779 83.6 UdeM00000001660 XP\_015777172.1 38.7 93  
 57 0 2 94 45 137 1.70E-13 83.6 70779 cellular  
 organisms;Eukaryota;Opisthokonta;Metazoa;Eumetazoa;Cnidaria;Anthozoa;Hexa  
 corallia;Scleractinia;Astrocoeniina;Acroporidae;Acropora;Acropora  
 digitifera  
 UdeM00000001661 6565 68.6 UdeM00000001661 XP\_022299838.1 46.9 49  
 26 0 69 117 59 107 6.30E-09 68.6 6565 cellular  
 organisms;Eukaryota;Opisthokonta;Metazoa;Eumetazoa;Bilateria;Protostomia;  
 Spiralia;Lophotrochozoa;Mollusca;Bivalvia;Autobranchia;Pteriormorphia;Ostr  
 eida;Ostreioidea;Ostreidae;Crassostrea;Crassostrea virginica  
 UdeM00000001662 6579 302.8 UdeM00000001662 XP\_033748087.1 43.2 354  
 197 3 6 358 58 408 6.00E-79 302.8 6579 cellular  
 organisms;Eukaryota;Opisthokonta;Metazoa;Eumetazoa;Bilateria;Protostomia;

Spiralia; Lophotrochozoa; Mollusca; Bivalvia; Autobranchia; Pteriomorphia; Pectinida; Pectinoidea; Pectinidae; Pecten; Pecten maximus  
UdeM00000001663 6596 568.2 UdeM00000001663 XP\_045175481.1 59.2 449  
177 3 1 444 35 482 1.30E-158 568.2 6596 cellular  
organisms; Eukaryota; Opisthokonta; Metazoa; Eumetazoa; Bilateria; Protostomia; Spiralia; Lophotrochozoa; Mollusca; Bivalvia; Autobranchia; Heteroconchia; Euheterodonta; Imparidentia; Venerida; Veneroidea; Veneridae; Mercenaria; Mercenaria mercenaria  
UdeM00000001665 215358 121.3 UdeM00000001665 XP\_019113880.2 29.4  
327 218 7 1 320 1 321 3.00E-24 121.3 215358  
cellular  
organisms; Eukaryota; Opisthokonta; Metazoa; Eumetazoa; Bilateria; Deuterostomia; Chordata; Craniata; Vertebrata; Gnathostomata; Teleostomi; Euteleostomi; Actinopterygii; Actinopteri; Neopterygii; Teleostei; Osteoglossocephalai; Clupeocephala; Euteleostei; Neoteleostei; Eurypterygia; Ctenosquamata; Acanthomorphata; Euacanthomorphacea; Percomorphaceae; Eupercaria; Eupercaria incertae sedis; Sciaenidae; Larimichthys; Larimichthys crocea  
UdeM00000001664 215358 120.9 UdeM00000001664 XP\_019113880.2 29.4  
327 218 7 39 358 1 321 4.20E-24 120.9 215358  
cellular  
organisms; Eukaryota; Opisthokonta; Metazoa; Eumetazoa; Bilateria; Deuterostomia; Chordata; Craniata; Vertebrata; Gnathostomata; Teleostomi; Euteleostomi; Actinopterygii; Actinopteri; Neopterygii; Teleostei; Osteoglossocephalai; Clupeocephala; Euteleostei; Neoteleostei; Eurypterygia; Ctenosquamata; Acanthomorphata; Euacanthomorphacea; Percomorphaceae; Eupercaria; Eupercaria incertae sedis; Sciaenidae; Larimichthys; Larimichthys crocea  
UdeM00000001666 6573 107.5 UdeM00000001666 XP\_021378878.1 41.3 121  
70 1 1 121 14 133 6.40E-20 107.5 6573 cellular  
organisms; Eukaryota; Opisthokonta; Metazoa; Eumetazoa; Bilateria; Protostomia; Spiralia; Lophotrochozoa; Mollusca; Bivalvia; Autobranchia; Pteriomorphia; Pectinida; Pectinoidea; Pectinidae; Mizuhopecten; Mizuhopecten yessoensis  
UdeM00000001667 400727 451.8 UdeM00000001667 XP\_025115894.1 79.8  
272 55 0 43 314 57 328 7.00E-124 451.8 400727  
cellular  
organisms; Eukaryota; Opisthokonta; Metazoa; Eumetazoa; Bilateria; Protostomia; Spiralia; Lophotrochozoa; Mollusca; Gastropoda; Caenogastropoda; Architaenioglossa; Ampullarioidea; Ampullariidae; Pomacea; Pomacea canaliculata  
UdeM00000001668 29159 874.8 UdeM00000001668 XP\_011442560.1 56.3 903  
315 24 15 892 371 1218 9.50E-251 874.8 29159 cellular  
organisms; Eukaryota; Opisthokonta; Metazoa; Eumetazoa; Bilateria; Protostomia; Spiralia; Lophotrochozoa; Mollusca; Bivalvia; Autobranchia; Pteriomorphia; Ostreida; Ostreidae; Crassostrea; Crassostrea gigas  
UdeM00000001669 1735272 422.9 UdeM00000001669 XP\_041365884.1 74  
331 73 6 1 322 1 327 3.60E-115 422.9 1735272  
cellular  
organisms; Eukaryota; Opisthokonta; Metazoa; Eumetazoa; Bilateria; Protostomia; Spiralia; Lophotrochozoa; Mollusca; Gastropoda; Neomphalina; Neomphaloidea; Peltopiridae; Gigantopelta; Gigantopelta aegis  
UdeM00000001670 6596 782.7 UdeM00000001670 XP\_045176200.1 65.9 534  
178 3 1 534 35 564 2.90E-223 782.7 6596 cellular  
organisms; Eukaryota; Opisthokonta; Metazoa; Eumetazoa; Bilateria; Protostomia; Spiralia; Lophotrochozoa; Mollusca; Bivalvia; Autobranchia; Heteroconchia; Euheterodonta; Imparidentia; Venerida; Veneroidea; Veneridae; Mercenaria; Mercenaria mercenaria

UdeM00000001671 6596 762.7 UdeM00000001671 XP\_045177209.1 54.8 950  
 358 26 1 923 38 943 5.50E-217 762.7 6596 cellular  
 organisms;Eukaryota;Opisthokonta;Metazoa;Eumetazoa;Bilateria;Protostomia;  
 Spiralia;Lophotrochozoa;Mollusca;Bivalvia;Autobranchia;Heteroconchia;Euhe  
 terodonta;Imparidentia;Venerida;Veneroidea;Veneridae;Mercenaria;Mercenari  
 a mercenaria  
 UdeM00000001672 6573 1307.7 UdeM00000001672 XP\_021358460.1 75.6  
 1157 252 15 1 1142 1 1142 0.00E+00 1307.7 6573  
 cellular  
 organisms;Eukaryota;Opisthokonta;Metazoa;Eumetazoa;Bilateria;Protostomia;  
 Spiralia;Lophotrochozoa;Mollusca;Bivalvia;Autobranchia;Pteriormorphia;Pect  
 inida;Pectinoidea;Pectinidae;Mizuhopecten;Mizuhopecten yessoensis  
 UdeM00000001673 6573 1339.7 UdeM00000001673 XP\_021358460.1 75.6  
 1179 248 15 1 1166 1 1152 0.00E+00 1339.7 6573  
 cellular  
 organisms;Eukaryota;Opisthokonta;Metazoa;Eumetazoa;Bilateria;Protostomia;  
 Spiralia;Lophotrochozoa;Mollusca;Bivalvia;Autobranchia;Pteriormorphia;Pect  
 inida;Pectinoidea;Pectinidae;Mizuhopecten;Mizuhopecten yessoensis  
 UdeM00000001674 6573 158.3 UdeM00000001674 XP\_021340276.1 31.4 484  
 263 14 31 471 1 458 2.40E-35 158.3 6573 cellular  
 organisms;Eukaryota;Opisthokonta;Metazoa;Eumetazoa;Bilateria;Protostomia;  
 Spiralia;Lophotrochozoa;Mollusca;Bivalvia;Autobranchia;Pteriormorphia;Pect  
 inida;Pectinoidea;Pectinidae;Mizuhopecten;Mizuhopecten yessoensis  
 UdeM00000001675 6596 282.7 UdeM00000001675 XP\_045175665.1 43.2 338  
 178 6 17 347 18 348 6.20E-73 282.7 6596 cellular  
 organisms;Eukaryota;Opisthokonta;Metazoa;Eumetazoa;Bilateria;Protostomia;  
 Spiralia;Lophotrochozoa;Mollusca;Bivalvia;Autobranchia;Heteroconchia;Euhe  
 terodonta;Imparidentia;Venerida;Veneroidea;Veneridae;Mercenaria;Mercenari  
 a mercenaria  
 UdeM00000001676 6596 537.7 UdeM00000001676 XP\_045204271.1 47 583  
 295 6 5 579 4 580 1.80E-149 537.7 6596 cellular  
 organisms;Eukaryota;Opisthokonta;Metazoa;Eumetazoa;Bilateria;Protostomia;  
 Spiralia;Lophotrochozoa;Mollusca;Bivalvia;Autobranchia;Heteroconchia;Euhe  
 terodonta;Imparidentia;Venerida;Veneroidea;Veneridae;Mercenaria;Mercenari  
 a mercenaria  
 UdeM00000001677 6596 550.4 UdeM00000001677 XP\_045204271.1 47.9 583  
 290 7 5 579 4 580 2.70E-153 550.4 6596 cellular  
 organisms;Eukaryota;Opisthokonta;Metazoa;Eumetazoa;Bilateria;Protostomia;  
 Spiralia;Lophotrochozoa;Mollusca;Bivalvia;Autobranchia;Heteroconchia;Euhe  
 terodonta;Imparidentia;Venerida;Veneroidea;Veneridae;Mercenaria;Mercenari  
 a mercenaria  
 UdeM00000001678 29159 75.1 UdeM00000001678 XP\_034339171.1 48 75  
 37 1 2 74 16 90 5.20E-11 75.1 29159 cellular  
 organisms;Eukaryota;Opisthokonta;Metazoa;Eumetazoa;Bilateria;Protostomia;  
 Spiralia;Lophotrochozoa;Mollusca;Bivalvia;Autobranchia;Pteriormorphia;Ostr  
 eida;Ostreoidea;Ostreidae;Crassostrea;Crassostrea gigas  
 UdeM00000001679 6596 521.2 UdeM00000001679 XP\_045204271.1 45.9 582  
 303 5 5 579 4 580 1.70E-144 521.2 6596 cellular  
 organisms;Eukaryota;Opisthokonta;Metazoa;Eumetazoa;Bilateria;Protostomia;  
 Spiralia;Lophotrochozoa;Mollusca;Bivalvia;Autobranchia;Heteroconchia;Euhe  
 terodonta;Imparidentia;Venerida;Veneroidea;Veneridae;Mercenaria;Mercenari  
 a mercenaria  
 UdeM00000001680 133434 82.8 UdeM00000001680 XP\_022094832.1 35.5  
 141 58 2 2 109 347 487 3.30E-13 82.8 133434

cellular  
organisms;Eukaryota;Opisthokonta;Metazoa;Eumetazoa;Bilateria;Deuterostomi  
a;Echinodermata;Eleutherozoa;Asterozoa;Asteroidea;Valvatacea;Valvatida;Ac  
anthasteridae;Acanthaster;Acanthaster planci  
UdeM00000001681 6596 515.4 UdeM00000001681 XP\_045204271.1 46.1 583  
296 8 5 575 4 580 9.40E-143 515.4 6596 cellular  
organisms;Eukaryota;Opisthokonta;Metazoa;Eumetazoa;Bilateria;Protostomia;  
Spiralia;Lophotrochozoa;Mollusca;Bivalvia;Autobranchia;Heteroconchia;Euhe  
terodonta;Imparidentia;Venerida;Veneroidea;Veneridae;Mercenaria;Mercenari  
a mercenaria  
UdeM00000001682 6596 327.4 UdeM00000001682 XP\_045172730.1 44.5 353  
190 2 22 368 95 447 2.30E-86 327.4 6596 cellular  
organisms;Eukaryota;Opisthokonta;Metazoa;Eumetazoa;Bilateria;Protostomia;  
Spiralia;Lophotrochozoa;Mollusca;Bivalvia;Autobranchia;Heteroconchia;Euhe  
terodonta;Imparidentia;Venerida;Veneroidea;Veneridae;Mercenaria;Mercenari  
a mercenaria  
UdeM00000001683 6573 107.1 UdeM00000001683 XP\_021355916.1 39.5 124  
74 1 2 125 461 583 1.70E-20 107.1 6573 cellular  
organisms;Eukaryota;Opisthokonta;Metazoa;Eumetazoa;Bilateria;Protostomia;  
Spiralia;Lophotrochozoa;Mollusca;Bivalvia;Autobranchia;Pteriormorphia;Pect  
inida;Pectinoidea;Pectinidae;Mizuhopecten;Mizuhopecten yessoensis  
UdeM00000001684 6596 545 UdeM00000001684 XP\_045204271.1 47.2 578  
299 6 6 579 5 580 1.10E-151 545 6596 cellular  
organisms;Eukaryota;Opisthokonta;Metazoa;Eumetazoa;Bilateria;Protostomia;  
Spiralia;Lophotrochozoa;Mollusca;Bivalvia;Autobranchia;Heteroconchia;Euhe  
terodonta;Imparidentia;Venerida;Veneroidea;Veneridae;Mercenaria;Mercenari  
a mercenaria  
UdeM00000001685 6565 367.5 UdeM00000001685 XP\_022339040.1 45 480  
251 8 4 478 6 477 2.70E-98 367.5 6565 cellular  
organisms;Eukaryota;Opisthokonta;Metazoa;Eumetazoa;Bilateria;Protostomia;  
Spiralia;Lophotrochozoa;Mollusca;Bivalvia;Autobranchia;Pteriormorphia;Ostr  
eida;Ostreoidea;Ostreidae;Crassostrea;Crassostrea virginica  
UdeM00000001686 6596 543.5 UdeM00000001686 XP\_045204271.1 48.1 580  
293 7 5 579 4 580 3.30E-151 543.5 6596 cellular  
organisms;Eukaryota;Opisthokonta;Metazoa;Eumetazoa;Bilateria;Protostomia;  
Spiralia;Lophotrochozoa;Mollusca;Bivalvia;Autobranchia;Heteroconchia;Euhe  
terodonta;Imparidentia;Venerida;Veneroidea;Veneridae;Mercenaria;Mercenari  
a mercenaria  
UdeM00000001687 1735272 311.6 UdeM00000001687 XP\_041366057.1 68.3  
221 69 1 1 220 1 221 8.00E-82 311.6 1735272  
cellular  
organisms;Eukaryota;Opisthokonta;Metazoa;Eumetazoa;Bilateria;Protostomia;  
Spiralia;Lophotrochozoa;Mollusca;Gastropoda;Neomphalina;Neomphaloidea;Pel  
tospiridae;Gigantopelta;Gigantopelta aegis  
UdeM00000001688 29159 60.1 UdeM00000001688 XP\_011447691.2 29 131  
89 2 34 164 386 512 3.40E-06 60.1 29159 cellular  
organisms;Eukaryota;Opisthokonta;Metazoa;Eumetazoa;Bilateria;Protostomia;  
Spiralia;Lophotrochozoa;Mollusca;Bivalvia;Autobranchia;Pteriormorphia;Ostr  
eida;Ostreoidea;Ostreidae;Crassostrea;Crassostrea gigas  
UdeM00000001690 6596 175.6 UdeM00000001690 XP\_045182558.1 37.7 239  
140 5 3 236 159 393 7.40E-41 175.6 6596 cellular  
organisms;Eukaryota;Opisthokonta;Metazoa;Eumetazoa;Bilateria;Protostomia;  
Spiralia;Lophotrochozoa;Mollusca;Bivalvia;Autobranchia;Heteroconchia;Euhe

terodonta;Imparidentia;Venerida;Veneroidea;Veneridae;Mercenaria;Mercenari  
 a mercenaria  
 UdeM00000001691 6596 743.8 UdeM00000001691 XP\_045174859.1 72.1 530  
 133 6 24 547 29 549 1.50E-211 743.8 6596 cellular  
 organisms;Eukaryota;Opisthokonta;Metazoa;Eumetazoa;Bilateria;Protostomia;  
 Spiralia;Lophotrochozoa;Mollusca;Bivalvia;Autobranchia;Heteroconchia;Euhe  
 terodonta;Imparidentia;Venerida;Veneroidea;Veneridae;Mercenaria;Mercenari  
 a mercenaria  
 UdeM00000001692 225164 172.9 UdeM00000001692 XP\_009051679.1 50.9  
 161 69 2 1 161 1 151 3.30E-40 172.9 225164  
 cellular  
 organisms;Eukaryota;Opisthokonta;Metazoa;Eumetazoa;Bilateria;Protostomia;  
 Spiralia;Lophotrochozoa;Mollusca;Gastropoda;Patellogastropoda;Lottioidea;  
 Lottiidae;Lottia;Lottia gigantea  
 UdeM00000001693 6596 131.3 UdeM00000001693 XP\_045174194.1 23 586  
 373 14 1 562 113 644 3.70E-27 131.3 6596 cellular  
 organisms;Eukaryota;Opisthokonta;Metazoa;Eumetazoa;Bilateria;Protostomia;  
 Spiralia;Lophotrochozoa;Mollusca;Bivalvia;Autobranchia;Heteroconchia;Euhe  
 terodonta;Imparidentia;Venerida;Veneroidea;Veneridae;Mercenaria;Mercenari  
 a mercenaria  
 UdeM00000001694 6579 1199.1 UdeM00000001694 XP\_033731116.1 76.2  
 780 176 4 68 846 82 852 0.00E+00 1199.1 6579  
 cellular  
 organisms;Eukaryota;Opisthokonta;Metazoa;Eumetazoa;Bilateria;Protostomia;  
 Spiralia;Lophotrochozoa;Mollusca;Bivalvia;Autobranchia;Pteriormorphia;Pect  
 inida;Pectinoidea;Pectinidae;Pecten;Pecten maximus  
 UdeM00000001696 1735272 87.8 UdeM00000001696 XP\_041365502.1 78.8  
 52 11 0 141 192 110 161 1.70E-14 87.8 1735272  
 cellular  
 organisms;Eukaryota;Opisthokonta;Metazoa;Eumetazoa;Bilateria;Protostomia;  
 Spiralia;Lophotrochozoa;Mollusca;Gastropoda;Neomphalina;Neomphaloidea;Pel  
 tospiridae;Gigantopelta;Gigantopelta aegis  
 UdeM00000001695 37653 296.2 UdeM00000001695 XP\_014788540.1 48 571  
 249 13 136 671 233 790 2.10E-76 296.2 37653 cellular  
 organisms;Eukaryota;Opisthokonta;Metazoa;Eumetazoa;Bilateria;Protostomia;  
 Spiralia;Lophotrochozoa;Mollusca;Cephalopoda;Coleoidea;Octopodiformes;Oct  
 opoda;Incirrata;Octopodidae;Octopus;Octopus bimaculoides  
 UdeM00000001697 6596 228.4 UdeM00000001697 XP\_045176757.1 56.3 467  
 159 12 40 490 128 565 4.50E-56 228.4 6596 cellular  
 organisms;Eukaryota;Opisthokonta;Metazoa;Eumetazoa;Bilateria;Protostomia;  
 Spiralia;Lophotrochozoa;Mollusca;Bivalvia;Autobranchia;Heteroconchia;Euhe  
 terodonta;Imparidentia;Venerida;Veneroidea;Veneridae;Mercenaria;Mercenari  
 a mercenaria  
 UdeM00000001700 29159 285 UdeM00000001700 XP\_011413131.2 62 216  
 82 0 15 230 14 229 8.30E-74 285 29159 cellular  
 organisms;Eukaryota;Opisthokonta;Metazoa;Eumetazoa;Bilateria;Protostomia;  
 Spiralia;Lophotrochozoa;Mollusca;Bivalvia;Autobranchia;Pteriormorphia;Ostr  
 eida;Ostreoidea;Ostreidae;Crassostrea;Crassostrea gigas  
 UdeM00000001701 6579 521.5 UdeM00000001701 XP\_033751716.1 81.4 339  
 54 3 20 351 1 337 8.10E-145 521.5 6579 cellular  
 organisms;Eukaryota;Opisthokonta;Metazoa;Eumetazoa;Bilateria;Protostomia;  
 Spiralia;Lophotrochozoa;Mollusca;Bivalvia;Autobranchia;Pteriormorphia;Pect  
 inida;Pectinoidea;Pectinidae;Pecten;Pecten maximus

UdeM00000001702 6596 664.5 UdeM00000001702 XP\_045176730.1 64.9 479  
 163 2 1 476 1 477 1.00E-187 664.5 6596 cellular  
 organisms;Eukaryota;Opisthokonta;Metazoa;Eumetazoa;Bilateria;Protostomia;  
 Spiralia;Lophotrochozoa;Mollusca;Bivalvia;Autobranchia;Heteroconchia;Euhe  
 terodonta;Imparidentia;Venerida;Veneroidea;Veneridae;Mercenaria;Mercenari  
 a mercenaria

UdeM00000001704 6596 360.5 UdeM00000001704 XP\_045177776.1 39.7 544  
 306 8 127 664 386 913 6.00E-96 360.5 6596 cellular  
 organisms;Eukaryota;Opisthokonta;Metazoa;Eumetazoa;Bilateria;Protostomia;  
 Spiralia;Lophotrochozoa;Mollusca;Bivalvia;Autobranchia;Heteroconchia;Euhe  
 terodonta;Imparidentia;Venerida;Veneroidea;Veneridae;Mercenaria;Mercenari  
 a mercenaria

UdeM00000001705 6596 376.7 UdeM00000001705 XP\_045177776.1 37.8 590  
 332 8 72 650 386 951 7.90E-101 376.7 6596 cellular  
 organisms;Eukaryota;Opisthokonta;Metazoa;Eumetazoa;Bilateria;Protostomia;  
 Spiralia;Lophotrochozoa;Mollusca;Bivalvia;Autobranchia;Heteroconchia;Euhe  
 terodonta;Imparidentia;Venerida;Veneroidea;Veneridae;Mercenaria;Mercenari  
 a mercenaria

UdeM00000001706 6596 62.4 UdeM00000001706 XP\_045176413.1 22.3 220  
 122 9 11 213 344 531 1.00E-06 62.4 6596 cellular  
 organisms;Eukaryota;Opisthokonta;Metazoa;Eumetazoa;Bilateria;Protostomia;  
 Spiralia;Lophotrochozoa;Mollusca;Bivalvia;Autobranchia;Heteroconchia;Euhe  
 terodonta;Imparidentia;Venerida;Veneroidea;Veneridae;Mercenaria;Mercenari  
 a mercenaria

UdeM00000001707 6596 99.4 UdeM00000001707 XP\_045173143.1 53.9 89  
 35 2 2 84 160 248 4.30E-18 99.4 6596 cellular  
 organisms;Eukaryota;Opisthokonta;Metazoa;Eumetazoa;Bilateria;Protostomia;  
 Spiralia;Lophotrochozoa;Mollusca;Bivalvia;Autobranchia;Heteroconchia;Euhe  
 terodonta;Imparidentia;Venerida;Veneroidea;Veneridae;Mercenaria;Mercenari  
 a mercenaria

UdeM00000001708 8078 90.9 UdeM00000001708 XP\_036002885.1 44.4 108  
 50 4 1 98 1 108 1.00E-15 90.9 8078 cellular  
 organisms;Eukaryota;Opisthokonta;Metazoa;Eumetazoa;Bilateria;Deuterostomi  
 a;Chordata;Craniata;Vertebrata;Gnathostomata;Teleostomi;Euteleostomi;Acti  
 nopterygii;Actinopteri;Neopterygii;Teleostei;Osteoglossocephalai;Clupeoce  
 phala;Euteleosteomorpha;Neoteleostei;Eurypterygia;Ctenosquamata;Acanthomo  
 rphata;Euacanthomorphacea;Percomorphaceae;Ovalentaria;Atherinomorphae;Cyp  
 rinodontiformes;Cyprinodontoidei;Fundulidae;Fundulus;Fundulus  
 heteroclitus

UdeM00000001709 8078 91.7 UdeM00000001709 XP\_036002885.1 41 122  
 62 4 1 112 1 122 7.80E-16 91.7 8078 cellular  
 organisms;Eukaryota;Opisthokonta;Metazoa;Eumetazoa;Bilateria;Deuterostomi  
 a;Chordata;Craniata;Vertebrata;Gnathostomata;Teleostomi;Euteleostomi;Acti  
 nopterygii;Actinopteri;Neopterygii;Teleostei;Osteoglossocephalai;Clupeoce  
 phala;Euteleosteomorpha;Neoteleostei;Eurypterygia;Ctenosquamata;Acanthomo  
 rphata;Euacanthomorphacea;Percomorphaceae;Ovalentaria;Atherinomorphae;Cyp  
 rinodontiformes;Cyprinodontoidei;Fundulidae;Fundulus;Fundulus  
 heteroclitus

UdeM00000001711 6565 151.8 UdeM00000001711 XP\_022310266.1 34 356  
 186 12 1 337 1 326 1.60E-33 151.8 6565 cellular  
 organisms;Eukaryota;Opisthokonta;Metazoa;Eumetazoa;Bilateria;Protostomia;  
 Spiralia;Lophotrochozoa;Mollusca;Bivalvia;Autobranchia;Pteriormorphia;Ostr  
 eida;Ostreoidea;Ostreidae;Crassostrea;Crassostrea virginica

UdeM00000001712 6596 139 UdeM00000001712 XP\_045178868.1 68.4 98  
 31 0 1 98 1 98 4.50E-30 139 6596 cellular  
 organisms;Eukaryota;Opisthokonta;Metazoa;Eumetazoa;Bilateria;Protostomia;  
 Spiralia;Lophotrochozoa;Mollusca;Bivalvia;Autobranchia;Heteroconchia;Euhe  
 terodonta;Imparidentia;Venerida;Veneroidea;Veneridae;Mercenaria;Mercenari  
 a mercenaria  
 UdeM00000001714 6596 478 UdeM00000001714 XP\_045177779.1 37.4 730  
 411 15 1 713 97 797 3.90E-131 478 6596 cellular  
 organisms;Eukaryota;Opisthokonta;Metazoa;Eumetazoa;Bilateria;Protostomia;  
 Spiralia;Lophotrochozoa;Mollusca;Bivalvia;Autobranchia;Heteroconchia;Euhe  
 terodonta;Imparidentia;Venerida;Veneroidea;Veneridae;Mercenaria;Mercenari  
 a mercenaria  
 UdeM00000001715 6596 478 UdeM00000001715 XP\_045161521.1 35.9 893  
 509 25 1 860 1 863 2.90E-131 478 6596 cellular  
 organisms;Eukaryota;Opisthokonta;Metazoa;Eumetazoa;Bilateria;Protostomia;  
 Spiralia;Lophotrochozoa;Mollusca;Bivalvia;Autobranchia;Heteroconchia;Euhe  
 terodonta;Imparidentia;Venerida;Veneroidea;Veneridae;Mercenaria;Mercenari  
 a mercenaria  
 UdeM00000001716 6565 105.9 UdeM00000001716 XP\_022298867.1 32.3 254  
 143 11 46 276 31 278 1.30E-19 105.9 6565 cellular  
 organisms;Eukaryota;Opisthokonta;Metazoa;Eumetazoa;Bilateria;Protostomia;  
 Spiralia;Lophotrochozoa;Mollusca;Bivalvia;Autobranchia;Pteriormorphia;Ostr  
 eida;Ostreoidea;Ostreidae;Crassostrea;Crassostrea virginica  
 UdeM00000001717 6579 270.4 UdeM00000001717 XP\_033756999.1 45.9 283  
 147 3 1 282 1 278 2.60E-69 270.4 6579 cellular  
 organisms;Eukaryota;Opisthokonta;Metazoa;Eumetazoa;Bilateria;Protostomia;  
 Spiralia;Lophotrochozoa;Mollusca;Bivalvia;Autobranchia;Pteriormorphia;Pect  
 inida;Pectinoidea;Pectinidae;Pecten;Pecten maximus  
 UdeM00000001718 6579 258.1 UdeM00000001718 XP\_033756999.1 44.5 283  
 151 3 1 282 1 278 1.30E-65 258.1 6579 cellular  
 organisms;Eukaryota;Opisthokonta;Metazoa;Eumetazoa;Bilateria;Protostomia;  
 Spiralia;Lophotrochozoa;Mollusca;Bivalvia;Autobranchia;Pteriormorphia;Pect  
 inida;Pectinoidea;Pectinidae;Pecten;Pecten maximus  
 UdeM00000001719 6596 392.1 UdeM00000001719 XP\_045201849.1 28.5 998  
 610 29 15 961 86 1030 2.20E-105 392.1 6596 cellular  
 organisms;Eukaryota;Opisthokonta;Metazoa;Eumetazoa;Bilateria;Protostomia;  
 Spiralia;Lophotrochozoa;Mollusca;Bivalvia;Autobranchia;Heteroconchia;Euhe  
 terodonta;Imparidentia;Venerida;Veneroidea;Veneridae;Mercenaria;Mercenari  
 a mercenaria  
 UdeM00000001721 6579 246.1 UdeM00000001721 XP\_033739239.1 48.9 268  
 118 6 129 377 79 346 9.30E-62 246.1 6579 cellular  
 organisms;Eukaryota;Opisthokonta;Metazoa;Eumetazoa;Bilateria;Protostomia;  
 Spiralia;Lophotrochozoa;Mollusca;Bivalvia;Autobranchia;Pteriormorphia;Pect  
 inida;Pectinoidea;Pectinidae;Pecten;Pecten maximus  
 UdeM00000001723 260615 92.4 UdeM00000001723 XP\_039397569.1 25.3  
 261 189 4 43 302 349 604 1.00E-15 92.4 260615  
 cellular  
 organisms;Eukaryota;Opisthokonta;Metazoa;Eumetazoa;Bilateria;Deuterostomi  
 a;Chordata;Craniata;Vertebrata;Gnathostomata;Teleostomi;Euteleostomi;Sarc  
 opterygii;Dipnotetrapodomorpha;Tetrapoda;Amniota;Sauropsida;Sauria;Archel  
 osauria;Testudinata;Testudines;Cryptodira;Durocryptodira;Testudinoidea;Ge  
 oemydidae;Geoemydinae;Mauremys;Mauremys reevesii  
 UdeM00000001724 7741 198.4 UdeM00000001724 XP\_019616261.1 54 163  
 74 1 6 167 6 168 7.50E-48 198.4 7741 cellular

organisms;Eukaryota;Opisthokonta;Metazoa;Eumetazoa;Bilateria;Deuterostomia;Chordata;Cephalochordata;Leptocardii;Amphioxiformes;Branchiostomidae;Branchiostoma;Branchiostoma belcheri

UdeM00000001725 6596 1956.4 UdeM00000001725 XP\_045202317.1 42.3  
2344 878 37 62 1979 43 2338 0.00E+00 1956.4 6596  
cellular

organisms;Eukaryota;Opisthokonta;Metazoa;Eumetazoa;Bilateria;Protostomia;Spiralia;Lophotrochozoa;Mollusca;Bivalvia;Autobranchia;Heteroconchia;Euheterodonta;Imparidentia;Venerida;Veneroidea;Veneridae;Mercenaria;Mercenaria mercenaria

UdeM00000001726 6596 1388.2 UdeM00000001726 XP\_045202317.1 45.8  
1492 547 14 22 1262 2609 4090 0.00E+00 1388.2 6596  
cellular

organisms;Eukaryota;Opisthokonta;Metazoa;Eumetazoa;Bilateria;Protostomia;Spiralia;Lophotrochozoa;Mollusca;Bivalvia;Autobranchia;Heteroconchia;Euheterodonta;Imparidentia;Venerida;Veneroidea;Veneridae;Mercenaria;Mercenaria mercenaria

UdeM00000001727 6596 971.8 UdeM00000001727 XP\_045202317.1 51.4 914  
417 9 18 915 3188 4090 5.90E-280 971.8 6596 cellular

organisms;Eukaryota;Opisthokonta;Metazoa;Eumetazoa;Bilateria;Protostomia;Spiralia;Lophotrochozoa;Mollusca;Bivalvia;Autobranchia;Heteroconchia;Euheterodonta;Imparidentia;Venerida;Veneroidea;Veneridae;Mercenaria;Mercenaria mercenaria

UdeM00000001729 45351 967.6 UdeM00000001729 XP\_032238577.1 49.1 837  
425 1 24 859 343 1179 1.00E-278 967.6 45351 cellular

organisms;Eukaryota;Opisthokonta;Metazoa;Eumetazoa;Cnidaria;Anthozoa;Hexacorallia;Actiniaria;Edwardsiidae;Nematostella;Nematostella vectensis

UdeM00000001731 6596 1242.6 UdeM00000001731 XP\_045202317.1 49.8  
1177 523 14 24 1136 2725 3897 0.00E+00 1242.6 6596  
cellular

organisms;Eukaryota;Opisthokonta;Metazoa;Eumetazoa;Bilateria;Protostomia;Spiralia;Lophotrochozoa;Mollusca;Bivalvia;Autobranchia;Heteroconchia;Euheterodonta;Imparidentia;Venerida;Veneroidea;Veneridae;Mercenaria;Mercenaria mercenaria

UdeM00000001732 6596 354 UdeM00000001732 XP\_045199895.1 44.4 487  
249 5 229 714 218 683 5.10E-94 354 6596 cellular

organisms;Eukaryota;Opisthokonta;Metazoa;Eumetazoa;Bilateria;Protostomia;Spiralia;Lophotrochozoa;Mollusca;Bivalvia;Autobranchia;Heteroconchia;Euheterodonta;Imparidentia;Venerida;Veneroidea;Veneridae;Mercenaria;Mercenaria mercenaria

UdeM00000001733 6596 466.1 UdeM00000001733 XP\_045201497.1 67.5 311  
101 0 1 311 1 311 3.60E-128 466.1 6596 cellular

organisms;Eukaryota;Opisthokonta;Metazoa;Eumetazoa;Bilateria;Protostomia;Spiralia;Lophotrochozoa;Mollusca;Bivalvia;Autobranchia;Heteroconchia;Euheterodonta;Imparidentia;Venerida;Veneroidea;Veneridae;Mercenaria;Mercenaria mercenaria

UdeM00000001734 6565 179.5 UdeM00000001734 XP\_022288944.1 78.6 117  
20 1 1 112 1 117 2.50E-42 179.5 6565 cellular

organisms;Eukaryota;Opisthokonta;Metazoa;Eumetazoa;Bilateria;Protostomia;Spiralia;Lophotrochozoa;Mollusca;Bivalvia;Autobranchia;Pteriomorphia;Ostreida;Ostreoidea;Ostreidae;Crassostrea;Crassostrea virginica

UdeM00000001735 6565 552 UdeM00000001735 XP\_022288944.1 93.5 291  
19 0 2 292 127 417 4.60E-154 552 6565 cellular

organisms;Eukaryota;Opisthokonta;Metazoa;Eumetazoa;Bilateria;Protostomia;



Spiralia;Lophotrochozoa;Mollusca;Bivalvia;Autobranchia;Pteriormorphia;Ostr  
eida;Ostreoidea;Ostreidae;Crassostrea;Crassostrea virginica  
UdeM00000001736 6596 199.5 UdeM00000001736 XP\_045202610.1 53.6 168  
75 1 10 177 158 322 5.10E-48 199.5 6596 cellular  
organisms;Eukaryota;Opisthokonta;Metazoa;Eumetazoa;Bilateria;Protostomia;  
Spiralia;Lophotrochozoa;Mollusca;Bivalvia;Autobranchia;Heteroconchia;Euhe  
terodonta;Imparidentia;Venerida;Veneroidea;Veneridae;Mercenaria;Mercenari  
a mercenaria  
UdeM00000001737 6596 95.1 UdeM00000001737 XP\_045202610.1 34.6 136  
83 2 52 182 118 252 9.80E-17 95.1 6596 cellular  
organisms;Eukaryota;Opisthokonta;Metazoa;Eumetazoa;Bilateria;Protostomia;  
Spiralia;Lophotrochozoa;Mollusca;Bivalvia;Autobranchia;Heteroconchia;Euhe  
terodonta;Imparidentia;Venerida;Veneroidea;Veneridae;Mercenaria;Mercenari  
a mercenaria  
UdeM00000001738 6596 1613.2 UdeM00000001738 XP\_045200509.1 71.1  
1192 225 14 12 1102 18 1190 0.00E+00 1613.2 6596  
cellular  
organisms;Eukaryota;Opisthokonta;Metazoa;Eumetazoa;Bilateria;Protostomia;  
Spiralia;Lophotrochozoa;Mollusca;Bivalvia;Autobranchia;Heteroconchia;Euhe  
terodonta;Imparidentia;Venerida;Veneroidea;Veneridae;Mercenaria;Mercenari  
a mercenaria  
UdeM00000001739 6565 1577 UdeM00000001739 XP\_022287675.1 72.9 1107  
237 13 13 1067 158 1253 0.00E+00 1577 6565 cellular  
organisms;Eukaryota;Opisthokonta;Metazoa;Eumetazoa;Bilateria;Protostomia;  
Spiralia;Lophotrochozoa;Mollusca;Bivalvia;Autobranchia;Pteriormorphia;Ostr  
eida;Ostreoidea;Ostreidae;Crassostrea;Crassostrea virginica  
UdeM00000001740 1735272 81.6 UdeM00000001740 XP\_041350482.1 57.5  
87 21 1 1 71 1 87 4.80E-13 81.6 1735272  
cellular  
organisms;Eukaryota;Opisthokonta;Metazoa;Eumetazoa;Bilateria;Protostomia;  
Spiralia;Lophotrochozoa;Mollusca;Gastropoda;Neomphalina;Neomphaloidea;Pel  
tospiridae;Gigantopelta;Gigantopelta aegis  
UdeM00000001742 6579 77 UdeM00000001742 XP\_033761355.1 51.8 56  
27 0 12 67 174 229 1.00E-11 77 6579 cellular  
organisms;Eukaryota;Opisthokonta;Metazoa;Eumetazoa;Bilateria;Protostomia;  
Spiralia;Lophotrochozoa;Mollusca;Bivalvia;Autobranchia;Pteriormorphia;Pect  
inida;Pectinoidea;Pectinidae;Pecten;Pecten maximus  
UdeM00000001743 8049 127.5 UdeM00000001743 XP\_030224918.1 65.9 82  
28 0 1 82 78 159 8.90E-27 127.5 8049 cellular  
organisms;Eukaryota;Opisthokonta;Metazoa;Eumetazoa;Bilateria;Deuterostomi  
a;Chordata;Craniata;Vertebrata;Gnathostomata;Teleostomi;Euteleostomi;Acti  
nopterygii;Actinopteri;Neopterygii;Teleostei;Osteoglossocephalai;Clupeoce  
phala;Euteleosteomorpha;Neoteleostei;Eurypterygia;Ctenosquamata;Acanthomo  
rphata;Paracanthopterygii;Zeiogadaria;Gadariae;Gadiformes;Gadoidei;Gadida  
e;Gadus;Gadus morhua  
UdeM00000001744 8049 127.1 UdeM00000001744 XP\_030224918.1 65.9 82  
28 0 1 82 78 159 1.20E-26 127.1 8049 cellular  
organisms;Eukaryota;Opisthokonta;Metazoa;Eumetazoa;Bilateria;Deuterostomi  
a;Chordata;Craniata;Vertebrata;Gnathostomata;Teleostomi;Euteleostomi;Acti  
nopterygii;Actinopteri;Neopterygii;Teleostei;Osteoglossocephalai;Clupeoce  
phala;Euteleosteomorpha;Neoteleostei;Eurypterygia;Ctenosquamata;Acanthomo  
rphata;Paracanthopterygii;Zeiogadaria;Gadariae;Gadiformes;Gadoidei;Gadida  
e;Gadus;Gadus morhua

UdeM00000001746 6596 139 UdeM00000001746 XP\_045199390.1 64.9 111  
 37 2 1 111 1 109 3.70E-30 139 6596 cellular  
 organisms;Eukaryota;Opisthokonta;Metazoa;Eumetazoa;Bilateria;Protostomia;  
 Spiralia;Lophotrochozoa;Mollusca;Bivalvia;Autobranchia;Heteroconchia;Euhe  
 terodonta;Imparidentia;Venerida;Veneroidea;Veneridae;Mercenaria;Mercenari  
 a mercenaria  
 UdeM00000001747 6579 360.1 UdeM00000001747 XP\_033760681.1 57.8 313  
 106 3 28 315 106 417 2.80E-96 360.1 6579 cellular  
 organisms;Eukaryota;Opisthokonta;Metazoa;Eumetazoa;Bilateria;Protostomia;  
 Spiralia;Lophotrochozoa;Mollusca;Bivalvia;Autobranchia;Pteriormorphia;Pect  
 inida;Pectinoidea;Pectinidae;Pecten;Pecten maximus  
 UdeM00000001748 6565 158.3 UdeM00000001748 XP\_022328252.1 44.3 210  
 99 5 1 192 1106 1315 9.80E-36 158.3 6565 cellular  
 organisms;Eukaryota;Opisthokonta;Metazoa;Eumetazoa;Bilateria;Protostomia;  
 Spiralia;Lophotrochozoa;Mollusca;Bivalvia;Autobranchia;Pteriormorphia;Ostr  
 eida;Ostreoidea;Ostreidae;Crassostrea;Crassostrea virginica  
 UdeM00000001749 6565 325.1 UdeM00000001749 XP\_022328252.1 49.6 351  
 158 6 1 333 966 1315 1.00E-85 325.1 6565 cellular  
 organisms;Eukaryota;Opisthokonta;Metazoa;Eumetazoa;Bilateria;Protostomia;  
 Spiralia;Lophotrochozoa;Mollusca;Bivalvia;Autobranchia;Pteriormorphia;Ostr  
 eida;Ostreoidea;Ostreidae;Crassostrea;Crassostrea virginica  
 UdeM00000001750 29159 945.3 UdeM00000001750 XP\_034327974.1 44.2 1137  
 584 12 9 1120 419 1529 8.50E-272 945.3 29159 cellular  
 organisms;Eukaryota;Opisthokonta;Metazoa;Eumetazoa;Bilateria;Protostomia;  
 Spiralia;Lophotrochozoa;Mollusca;Bivalvia;Autobranchia;Pteriormorphia;Ostr  
 eida;Ostreoidea;Ostreidae;Crassostrea;Crassostrea gigas  
 UdeM00000001751 6596 800.8 UdeM00000001751 XP\_045199390.1 67.9 546  
 162 4 295 829 1127 1670 1.60E-228 800.8 6596 cellular  
 organisms;Eukaryota;Opisthokonta;Metazoa;Eumetazoa;Bilateria;Protostomia;  
 Spiralia;Lophotrochozoa;Mollusca;Bivalvia;Autobranchia;Heteroconchia;Euhe  
 terodonta;Imparidentia;Venerida;Veneroidea;Veneridae;Mercenaria;Mercenari  
 a mercenaria  
 UdeM00000001752 1735272 141.4 UdeM00000001752 XP\_041369187.1 46  
 137 74 0 1 137 1 137 9.10E-31 141.4 1735272  
 cellular  
 organisms;Eukaryota;Opisthokonta;Metazoa;Eumetazoa;Bilateria;Protostomia;  
 Spiralia;Lophotrochozoa;Mollusca;Gastropoda;Neomphalina;Neomphaloidea;Pel  
 tospiridae;Gigantopelta;Gigantopelta aegis  
 UdeM00000001753 29159 205.3 UdeM00000001753 XP\_011437085.1 52.5 179  
 84 1 9 187 6 183 7.00E-50 205.3 29159 cellular  
 organisms;Eukaryota;Opisthokonta;Metazoa;Eumetazoa;Bilateria;Protostomia;  
 Spiralia;Lophotrochozoa;Mollusca;Bivalvia;Autobranchia;Pteriormorphia;Ostr  
 eida;Ostreoidea;Ostreidae;Crassostrea;Crassostrea gigas  
 UdeM00000001754 6565 187.6 UdeM00000001754 XP\_022314845.1 48.7 189  
 94 1 1 189 1 186 1.50E-44 187.6 6565 cellular  
 organisms;Eukaryota;Opisthokonta;Metazoa;Eumetazoa;Bilateria;Protostomia;  
 Spiralia;Lophotrochozoa;Mollusca;Bivalvia;Autobranchia;Pteriormorphia;Ostr  
 eida;Ostreoidea;Ostreidae;Crassostrea;Crassostrea virginica  
 UdeM00000001755 6565 106.7 UdeM00000001755 XP\_022322655.1 44.6 112  
 62 0 66 177 334 445 3.90E-20 106.7 6565 cellular  
 organisms;Eukaryota;Opisthokonta;Metazoa;Eumetazoa;Bilateria;Protostomia;  
 Spiralia;Lophotrochozoa;Mollusca;Bivalvia;Autobranchia;Pteriormorphia;Ostr  
 eida;Ostreoidea;Ostreidae;Crassostrea;Crassostrea virginica

UdeM00000001756 29159 370.2 UdeM00000001756 XP\_034299474.1 45.7 433  
 223 6 1 427 329 755 3.60E-99 370.2 29159 cellular  
 organisms;Eukaryota;Opisthokonta;Metazoa;Eumetazoa;Bilateria;Protostomia;  
 Spiralia;Lophotrochozoa;Mollusca;Bivalvia;Autobranhia;Pteriomorpha;Ostr  
 eida;Ostreoidea;Ostreidae;Crassostrea;Crassostrea gigas  
 UdeM00000001757 29159 212.2 UdeM00000001757 XP\_034339165.1 36.6 350  
 192 9 1 347 186 508 1.00E-51 212.2 29159 cellular  
 organisms;Eukaryota;Opisthokonta;Metazoa;Eumetazoa;Bilateria;Protostomia;  
 Spiralia;Lophotrochozoa;Mollusca;Bivalvia;Autobranhia;Pteriomorpha;Ostr  
 eida;Ostreoidea;Ostreidae;Crassostrea;Crassostrea gigas  
 UdeM00000001758 29159 260.4 UdeM00000001758 XP\_034339165.1 36.7 417  
 230 11 6 418 122 508 4.00E-66 260.4 29159 cellular  
 organisms;Eukaryota;Opisthokonta;Metazoa;Eumetazoa;Bilateria;Protostomia;  
 Spiralia;Lophotrochozoa;Mollusca;Bivalvia;Autobranhia;Pteriomorpha;Ostr  
 eida;Ostreoidea;Ostreidae;Crassostrea;Crassostrea gigas  
 UdeM00000001759 29159 204.5 UdeM00000001759 XP\_011437085.1 50 192  
 88 2 1 192 1 184 1.20E-49 204.5 29159 cellular  
 organisms;Eukaryota;Opisthokonta;Metazoa;Eumetazoa;Bilateria;Protostomia;  
 Spiralia;Lophotrochozoa;Mollusca;Bivalvia;Autobranhia;Pteriomorpha;Ostr  
 eida;Ostreoidea;Ostreidae;Crassostrea;Crassostrea gigas  
 UdeM00000001760 6579 107.1 UdeM00000001760 XP\_033739131.1 50 94  
 47 0 1 94 1081 1174 1.40E-20 107.1 6579 cellular  
 organisms;Eukaryota;Opisthokonta;Metazoa;Eumetazoa;Bilateria;Protostomia;  
 Spiralia;Lophotrochozoa;Mollusca;Bivalvia;Autobranhia;Pteriomorpha;Pect  
 inida;Pectinoidea;Pectinidae;Pecten;Pecten maximus  
 UdeM00000001761 6596 1643.6 UdeM00000001761 XP\_045199760.1 51.1  
 1808 849 18 68 1850 151 1947 0.00E+00 1643.6 6596  
 cellular  
 organisms;Eukaryota;Opisthokonta;Metazoa;Eumetazoa;Bilateria;Protostomia;  
 Spiralia;Lophotrochozoa;Mollusca;Bivalvia;Autobranhia;Heteroconchia;Euhe  
 terodonta;Imparidentia;Venerida;Veneroidea;Veneridae;Mercenaria;Mercenari  
 a mercenaria  
 UdeM00000001762 6596 1682.9 UdeM00000001762 XP\_045199760.1 51.3  
 1818 848 16 65 1856 148 1953 0.00E+00 1682.9 6596  
 cellular  
 organisms;Eukaryota;Opisthokonta;Metazoa;Eumetazoa;Bilateria;Protostomia;  
 Spiralia;Lophotrochozoa;Mollusca;Bivalvia;Autobranhia;Heteroconchia;Euhe  
 terodonta;Imparidentia;Venerida;Veneroidea;Veneridae;Mercenaria;Mercenari  
 a mercenaria  
 UdeM00000001763 6565 347.4 UdeM00000001763 XP\_022329667.1 54.9 317  
 132 3 6 315 3 315 1.90E-92 347.4 6565 cellular  
 organisms;Eukaryota;Opisthokonta;Metazoa;Eumetazoa;Bilateria;Protostomia;  
 Spiralia;Lophotrochozoa;Mollusca;Bivalvia;Autobranhia;Pteriomorpha;Ostr  
 eida;Ostreoidea;Ostreidae;Crassostrea;Crassostrea virginica  
 UdeM00000001764 6596 161.4 UdeM00000001764 XP\_045199768.1 70.4 108  
 32 0 10 117 8 115 7.40E-37 161.4 6596 cellular  
 organisms;Eukaryota;Opisthokonta;Metazoa;Eumetazoa;Bilateria;Protostomia;  
 Spiralia;Lophotrochozoa;Mollusca;Bivalvia;Autobranhia;Heteroconchia;Euhe  
 terodonta;Imparidentia;Venerida;Veneroidea;Veneridae;Mercenaria;Mercenari  
 a mercenaria  
 UdeM00000001765 1735272 99 UdeM00000001765 XP\_041366048.1 47.1  
 102 51 1 6 104 7 108 5.10E-18 99 1735272  
 cellular  
 organisms;Eukaryota;Opisthokonta;Metazoa;Eumetazoa;Bilateria;Protostomia;

Spiralia; Lophotrochozoa; Mollusca; Gastropoda; Neomphalina; Neomphaloidea; Pelto-  
 tospiridae; Gigantopelta; Gigantopelta aegis

UdeM00000001766 37621 77 UdeM00000001766 XP\_014670827.1 43.6 101  
 53 2 5 104 118 215 1.70E-11 77 37621 cellular  
 organisms; Eukaryota; Opisthokonta; Metazoa; Eumetazoa; Bilateria; Protostomia;  
 Ecdysozoa; Scalidophora; Priapulida; Priapulimorpha; Priapulimorphida; Priapul-  
 idae; Priapulus; Priapulus caudatus

UdeM00000001767 37621 118.6 UdeM00000001767 XP\_014679474.1 51.9 104  
 48 1 1 102 1 104 4.90E-24 118.6 37621 cellular  
 organisms; Eukaryota; Opisthokonta; Metazoa; Eumetazoa; Bilateria; Protostomia;  
 Ecdysozoa; Scalidophora; Priapulida; Priapulimorpha; Priapulimorphida; Priapul-  
 idae; Priapulus; Priapulus caudatus

UdeM00000001768 6596 360.1 UdeM00000001768 XP\_045199768.1 50.1 387  
 184 3 5 385 117 500 3.80E-96 360.1 6596 cellular  
 organisms; Eukaryota; Opisthokonta; Metazoa; Eumetazoa; Bilateria; Protostomia;  
 Spiralia; Lophotrochozoa; Mollusca; Bivalvia; Autobranchia; Heteroconchia; Eue-  
 terodonta; Imparidentia; Venerida; Veneroidea; Veneridae; Mercenaria; Mercenari-  
 a mercenaria

UdeM00000001769 6596 336.7 UdeM00000001769 XP\_045199768.1 49.1 375  
 182 3 1 369 129 500 4.30E-89 336.7 6596 cellular  
 organisms; Eukaryota; Opisthokonta; Metazoa; Eumetazoa; Bilateria; Protostomia;  
 Spiralia; Lophotrochozoa; Mollusca; Bivalvia; Autobranchia; Heteroconchia; Eue-  
 terodonta; Imparidentia; Venerida; Veneroidea; Veneridae; Mercenaria; Mercenari-  
 a mercenaria

UdeM00000001770 6579 261.5 UdeM00000001770 XP\_033760425.1 60.4 202  
 71 3 1 200 1 195 8.70E-67 261.5 6579 cellular  
 organisms; Eukaryota; Opisthokonta; Metazoa; Eumetazoa; Bilateria; Protostomia;  
 Spiralia; Lophotrochozoa; Mollusca; Bivalvia; Autobranchia; Pteriomorpha; Pect-  
 inida; Pectinoidea; Pectinidae; Pecten; Pecten maximus

UdeM00000001771 6596 1077.8 UdeM00000001771 XP\_045199760.1 39.6  
 1918 917 30 217 2053 156 1912 0.00E+00 1077.8 6596  
 cellular  
 organisms; Eukaryota; Opisthokonta; Metazoa; Eumetazoa; Bilateria; Protostomia;  
 Spiralia; Lophotrochozoa; Mollusca; Bivalvia; Autobranchia; Heteroconchia; Eue-  
 terodonta; Imparidentia; Venerida; Veneroidea; Veneridae; Mercenaria; Mercenari-  
 a mercenaria

UdeM00000001772 6579 255 UdeM00000001772 XP\_033760071.1 33.5 466  
 287 9 347 796 81 539 3.20E-64 255 6579 cellular  
 organisms; Eukaryota; Opisthokonta; Metazoa; Eumetazoa; Bilateria; Protostomia;  
 Spiralia; Lophotrochozoa; Mollusca; Bivalvia; Autobranchia; Pteriomorpha; Pect-  
 inida; Pectinoidea; Pectinidae; Pecten; Pecten maximus

UdeM00000001773 6596 756.5 UdeM00000001773 XP\_045199760.1 39.4 1390  
 621 27 1 1325 679 1912 5.60E-215 756.5 6596 cellular  
 organisms; Eukaryota; Opisthokonta; Metazoa; Eumetazoa; Bilateria; Protostomia;  
 Spiralia; Lophotrochozoa; Mollusca; Bivalvia; Autobranchia; Heteroconchia; Eue-  
 terodonta; Imparidentia; Venerida; Veneroidea; Veneridae; Mercenaria; Mercenari-  
 a mercenaria

UdeM00000001774 6579 255 UdeM00000001774 XP\_033760071.1 33.5 466  
 287 9 347 796 81 539 3.20E-64 255 6579 cellular  
 organisms; Eukaryota; Opisthokonta; Metazoa; Eumetazoa; Bilateria; Protostomia;  
 Spiralia; Lophotrochozoa; Mollusca; Bivalvia; Autobranchia; Pteriomorpha; Pect-  
 inida; Pectinoidea; Pectinidae; Pecten; Pecten maximus

UdeM00000001775 6596 678.3 UdeM00000001775 XP\_045199760.1 38.7 1309  
 582 27 7 1250 760 1912 1.80E-191 678.3 6596 cellular

organisms;Eukaryota;Opisthokonta;Metazoa;Eumetazoa;Bilateria;Protostomia;Spiralia;Lophotrochozoa;Mollusca;Bivalvia;Autobranhia;Heteroconchia;Euherodonta;Imparidentia;Venerida;Veneroidea;Veneridae;Mercenaria;Mercenaria mercenaria

UdeM00000001776 6596 1067.4 UdeM00000001776 XP\_045199760.1 38.2  
1921 937 33 348 2182 156 1912 2.50E-308 1067.4 6596  
cellular

organisms;Eukaryota;Opisthokonta;Metazoa;Eumetazoa;Bilateria;Protostomia;Spiralia;Lophotrochozoa;Mollusca;Bivalvia;Autobranhia;Heteroconchia;Euherodonta;Imparidentia;Venerida;Veneroidea;Veneridae;Mercenaria;Mercenaria mercenaria

UdeM00000001777 6573 515.4 UdeM00000001777 XP\_021355106.1 75 328  
81 1 11 337 10 337 5.60E-143 515.4 6573 cellular

organisms;Eukaryota;Opisthokonta;Metazoa;Eumetazoa;Bilateria;Protostomia;Spiralia;Lophotrochozoa;Mollusca;Bivalvia;Autobranhia;Pteriomorphia;Pectinida;Pectinoidea;Pectinidae;Mizuhopecten;Mizuhopecten yessoensis

UdeM00000001778 6596 648.3 UdeM00000001778 XP\_045202523.1 51.2 717  
280 8 1 651 1 713 1.10E-182 648.3 6596 cellular

organisms;Eukaryota;Opisthokonta;Metazoa;Eumetazoa;Bilateria;Protostomia;Spiralia;Lophotrochozoa;Mollusca;Bivalvia;Autobranhia;Heteroconchia;Euherodonta;Imparidentia;Venerida;Veneroidea;Veneridae;Mercenaria;Mercenaria mercenaria

UdeM00000001779 6596 199.9 UdeM00000001779 XP\_045202522.1 71.7 138  
39 0 86 223 1 138 3.60E-48 199.9 6596 cellular

organisms;Eukaryota;Opisthokonta;Metazoa;Eumetazoa;Bilateria;Protostomia;Spiralia;Lophotrochozoa;Mollusca;Bivalvia;Autobranhia;Heteroconchia;Euherodonta;Imparidentia;Venerida;Veneroidea;Veneridae;Mercenaria;Mercenaria mercenaria

UdeM00000001781 6596 380.6 UdeM00000001781 XP\_045202523.1 39.7 638  
249 12 1 537 135 737 4.00E-102 380.6 6596 cellular

organisms;Eukaryota;Opisthokonta;Metazoa;Eumetazoa;Bilateria;Protostomia;Spiralia;Lophotrochozoa;Mollusca;Bivalvia;Autobranhia;Heteroconchia;Euherodonta;Imparidentia;Venerida;Veneroidea;Veneridae;Mercenaria;Mercenaria mercenaria

UdeM00000001782 6596 507.7 UdeM00000001782 XP\_045202523.1 76.6 320  
75 0 1 320 1 320 1.10E-140 507.7 6596 cellular

organisms;Eukaryota;Opisthokonta;Metazoa;Eumetazoa;Bilateria;Protostomia;Spiralia;Lophotrochozoa;Mollusca;Bivalvia;Autobranhia;Heteroconchia;Euherodonta;Imparidentia;Venerida;Veneroidea;Veneridae;Mercenaria;Mercenaria mercenaria

UdeM00000001783 6579 76.3 UdeM00000001783 XP\_033760946.1 71.2 52  
15 0 1 52 333 384 1.70E-11 76.3 6579 cellular

organisms;Eukaryota;Opisthokonta;Metazoa;Eumetazoa;Bilateria;Protostomia;Spiralia;Lophotrochozoa;Mollusca;Bivalvia;Autobranhia;Pteriomorphia;Pectinida;Pectinoidea;Pectinidae;Pecten;Pecten maximus

UdeM00000001784 6579 179.9 UdeM00000001784 XP\_033759613.1 43.4 256  
119 7 2 255 950 1181 5.70E-42 179.9 6579 cellular

organisms;Eukaryota;Opisthokonta;Metazoa;Eumetazoa;Bilateria;Protostomia;Spiralia;Lophotrochozoa;Mollusca;Bivalvia;Autobranhia;Pteriomorphia;Pectinida;Pectinoidea;Pectinidae;Pecten;Pecten maximus

UdeM00000001785 6596 757.7 UdeM00000001785 XP\_045202523.1 64.4 606  
204 3 1 596 1 604 1.40E-215 757.7 6596 cellular

organisms;Eukaryota;Opisthokonta;Metazoa;Eumetazoa;Bilateria;Protostomia;Spiralia;Lophotrochozoa;Mollusca;Bivalvia;Autobranhia;Heteroconchia;Euherodonta

terodonta;Imparidentia;Venerida;Veneroidea;Veneridae;Mercenaria;Mercenari  
 a mercenaria  
 UdeM00000001786 6596 748.4 UdeM00000001786 XP\_045202523.1 57.8 685  
 263 7 1 668 1 676 8.60E-213 748.4 6596 cellular  
 organisms;Eukaryota;Opisthokonta;Metazoa;Eumetazoa;Bilateria;Protostomia;  
 Spiralia;Lophotrochozoa;Mollusca;Bivalvia;Autobranchia;Heteroconchia;Euhe  
 terodonta;Imparidentia;Venerida;Veneroidea;Veneridae;Mercenaria;Mercenari  
 a mercenaria  
 UdeM00000001787 6596 270 UdeM00000001787 XP\_045200205.1 44.6 332  
 176 2 2 329 10 337 3.90E-69 270 6596 cellular  
 organisms;Eukaryota;Opisthokonta;Metazoa;Eumetazoa;Bilateria;Protostomia;  
 Spiralia;Lophotrochozoa;Mollusca;Bivalvia;Autobranchia;Heteroconchia;Euhe  
 terodonta;Imparidentia;Venerida;Veneroidea;Veneridae;Mercenaria;Mercenari  
 a mercenaria  
 UdeM00000001788 6500 79 UdeM00000001788 XP\_005108196.2 79.6 49  
 10 0 50 98 6 54 3.90E-12 79 6500 cellular  
 organisms;Eukaryota;Opisthokonta;Metazoa;Eumetazoa;Bilateria;Protostomia;  
 Spiralia;Lophotrochozoa;Mollusca;Gastropoda;Heterobranchia;Euthyneura;Tec  
 tipleura;Aplysiida;Aplysioidea;Aplysiidae;Aplysia;Aplysia californica  
 UdeM00000001789 46514 141 UdeM00000001789 XP\_038062328.1 34.3 242  
 157 1 9 248 135 376 2.10E-30 141 46514 cellular  
 organisms;Eukaryota;Opisthokonta;Metazoa;Eumetazoa;Bilateria;Deuterostomi  
 a;Echinodermata;Eleutherozoa;Asterozoa;Asteroidea;Valvataceae;Valvatida;As  
 terinidae;Patiria;Patiria miniata  
 UdeM00000001790 6596 207.2 UdeM00000001790 XP\_045200199.1 82.5 114  
 20 0 22 135 69 182 1.50E-50 207.2 6596 cellular  
 organisms;Eukaryota;Opisthokonta;Metazoa;Eumetazoa;Bilateria;Protostomia;  
 Spiralia;Lophotrochozoa;Mollusca;Bivalvia;Autobranchia;Heteroconchia;Euhe  
 terodonta;Imparidentia;Venerida;Veneroidea;Veneridae;Mercenaria;Mercenari  
 a mercenaria  
 UdeM00000001791 29159 184.5 UdeM00000001791 XP\_011436051.2 77.1 105  
 24 0 8 112 166 270 7.90E-44 184.5 29159 cellular  
 organisms;Eukaryota;Opisthokonta;Metazoa;Eumetazoa;Bilateria;Protostomia;  
 Spiralia;Lophotrochozoa;Mollusca;Bivalvia;Autobranchia;Pteriormorphia;Ostr  
 eida;Ostreoidea;Ostreidae;Crassostrea;Crassostrea gigas  
 UdeM00000001792 6596 73.6 UdeM00000001792 XP\_045200204.1 49.3 75  
 36 1 1 75 290 362 3.50E-10 73.6 6596 cellular  
 organisms;Eukaryota;Opisthokonta;Metazoa;Eumetazoa;Bilateria;Protostomia;  
 Spiralia;Lophotrochozoa;Mollusca;Bivalvia;Autobranchia;Heteroconchia;Euhe  
 terodonta;Imparidentia;Venerida;Veneroidea;Veneridae;Mercenaria;Mercenari  
 a mercenaria  
 UdeM00000001793 6596 1407.5 UdeM00000001793 XP\_045199760.1 46.1  
 1779 911 20 163 1920 159 1911 0.00E+00 1407.5 6596  
 cellular  
 organisms;Eukaryota;Opisthokonta;Metazoa;Eumetazoa;Bilateria;Protostomia;  
 Spiralia;Lophotrochozoa;Mollusca;Bivalvia;Autobranchia;Heteroconchia;Euhe  
 terodonta;Imparidentia;Venerida;Veneroidea;Veneridae;Mercenaria;Mercenari  
 a mercenaria  
 UdeM00000001794 6596 305.4 UdeM00000001794 XP\_045193140.1 28.5 702  
 432 12 1 639 1 695 1.80E-79 305.4 6596 cellular  
 organisms;Eukaryota;Opisthokonta;Metazoa;Eumetazoa;Bilateria;Protostomia;  
 Spiralia;Lophotrochozoa;Mollusca;Bivalvia;Autobranchia;Heteroconchia;Euhe  
 terodonta;Imparidentia;Venerida;Veneroidea;Veneridae;Mercenaria;Mercenari  
 a mercenaria

UdeM00000001795 2607531 181.4 UdeM00000001795 XP\_029634173.1 70.1  
 134 39 1 1 133 26 159 7.50E-43 181.4 2607531  
 cellular  
 organisms;Eukaryota;Opisthokonta;Metazoa;Eumetazoa;Bilateria;Protostomia;  
 Spiralia;Lophotrochozoa;Mollusca;Cephalopoda;Coleoidea;Octopodiformes;Oct  
 opoda;Incirrata;Octopodidae;Octopus;Octopus sinensis  
 UdeM00000001796 2607531 174.1 UdeM00000001796 XP\_029634172.1 70.9  
 127 36 1 1 126 26 152 1.20E-40 174.1 2607531  
 cellular  
 organisms;Eukaryota;Opisthokonta;Metazoa;Eumetazoa;Bilateria;Protostomia;  
 Spiralia;Lophotrochozoa;Mollusca;Cephalopoda;Coleoidea;Octopodiformes;Oct  
 opoda;Incirrata;Octopodidae;Octopus;Octopus sinensis  
 UdeM00000001797 6596 120.6 UdeM00000001797 XP\_045180427.1 46.9 177  
 91 2 12 186 98 273 2.40E-24 120.6 6596 cellular  
 organisms;Eukaryota;Opisthokonta;Metazoa;Eumetazoa;Bilateria;Protostomia;  
 Spiralia;Lophotrochozoa;Mollusca;Bivalvia;Autobranchia;Heteroconchia;Euhe  
 terodonta;Imparidentia;Venerida;Veneroidea;Veneridae;Mercenaria;Mercenari  
 a mercenaria  
 UdeM00000001798 6579 695.3 UdeM00000001798 XP\_033760041.1 74.5 471  
 115 3 1 466 1 471 5.40E-197 695.3 6579 cellular  
 organisms;Eukaryota;Opisthokonta;Metazoa;Eumetazoa;Bilateria;Protostomia;  
 Spiralia;Lophotrochozoa;Mollusca;Bivalvia;Autobranchia;Pteriormorphia;Pect  
 inida;Pectinoidea;Pectinidae;Pecten;Pecten maximus  
 UdeM00000001800 6596 79.7 UdeM00000001800 XP\_045210570.1 29.7 155  
 108 1 14 168 9 162 1.00E-11 79.7 6596 cellular  
 organisms;Eukaryota;Opisthokonta;Metazoa;Eumetazoa;Bilateria;Protostomia;  
 Spiralia;Lophotrochozoa;Mollusca;Bivalvia;Autobranchia;Heteroconchia;Euhe  
 terodonta;Imparidentia;Venerida;Veneroidea;Veneridae;Mercenaria;Mercenari  
 a mercenaria  
 UdeM00000001804 6573 327.8 UdeM00000001804 XP\_021349077.1 39.1 488  
 293 2 14 499 254 739 2.40E-86 327.8 6573 cellular  
 organisms;Eukaryota;Opisthokonta;Metazoa;Eumetazoa;Bilateria;Protostomia;  
 Spiralia;Lophotrochozoa;Mollusca;Bivalvia;Autobranchia;Pteriormorphia;Pect  
 inida;Pectinoidea;Pectinidae;Mizuhopecten;Mizuhopecten yessoensis  
 UdeM00000001805 6526 347.1 UdeM00000001805 XP\_013077256.1 34.3 702  
 427 8 3 679 24 716 5.30E-92 347.1 6526 cellular  
 organisms;Eukaryota;Opisthokonta;Metazoa;Eumetazoa;Bilateria;Protostomia;  
 Spiralia;Lophotrochozoa;Mollusca;Gastropoda;Heterobranchia;Euthyneura;Pan  
 pulmonata;Hygrophila;Lymnaeioidea;Planorbidae;Biomphalaria;Biomphalaria  
 glabrata  
 UdeM00000001806 6596 332.8 UdeM00000001806 XP\_045199403.1 34.8 635  
 326 13 1 635 66 612 9.70E-88 332.8 6596 cellular  
 organisms;Eukaryota;Opisthokonta;Metazoa;Eumetazoa;Bilateria;Protostomia;  
 Spiralia;Lophotrochozoa;Mollusca;Bivalvia;Autobranchia;Heteroconchia;Euhe  
 terodonta;Imparidentia;Venerida;Veneroidea;Veneridae;Mercenaria;Mercenari  
 a mercenaria  
 UdeM00000001807 6596 1059.7 UdeM00000001807 XP\_045201728.1 52  
 999 433 7 45 998 8 1004 2.60E-306 1059.7 6596  
 cellular  
 organisms;Eukaryota;Opisthokonta;Metazoa;Eumetazoa;Bilateria;Protostomia;  
 Spiralia;Lophotrochozoa;Mollusca;Bivalvia;Autobranchia;Heteroconchia;Euhe  
 terodonta;Imparidentia;Venerida;Veneroidea;Veneridae;Mercenaria;Mercenari  
 a mercenaria

UdeM00000001808 6573 1502.6 UdeM00000001808 XP\_021355114.1 54  
 1463 649 12 1 1449 1 1453 0.00E+00 1502.6 6573  
 cellular  
 organisms;Eukaryota;Opisthokonta;Metazoa;Eumetazoa;Bilateria;Protostomia;  
 Spiralia;Lophotrochozoa;Mollusca;Bivalvia;Autobranchia;Pteriomorpha;Pect  
 inida;Pectinoidea;Pectinidae;Mizuhopecten;Mizuhopecten yessoensis  
 UdeM00000001809 6573 1132.5 UdeM00000001809 XP\_021355114.1 55.6  
 1058 447 9 1 1047 408 1453 0.00E+00 1132.5 6573  
 cellular  
 organisms;Eukaryota;Opisthokonta;Metazoa;Eumetazoa;Bilateria;Protostomia;  
 Spiralia;Lophotrochozoa;Mollusca;Bivalvia;Autobranchia;Pteriomorpha;Pect  
 inida;Pectinoidea;Pectinidae;Mizuhopecten;Mizuhopecten yessoensis  
 UdeM00000001810 46514 96.7 UdeM00000001810 XP\_038070373.1 43.2 95  
 54 0 6 100 4 98 2.10E-17 96.7 46514 cellular  
 organisms;Eukaryota;Opisthokonta;Metazoa;Eumetazoa;Bilateria;Deuterostomi  
 a;Echinodermata;Eleutherozoa;Asterozoa;Asteroidea;Valvatacea;Valvatida;As  
 terinidae;Patiria;Patiria miniata  
 UdeM00000001811 6596 904 UdeM00000001811 XP\_045202519.1 64 724  
 253 2 36 757 766 1483 1.20E-259 904 6596 cellular  
 organisms;Eukaryota;Opisthokonta;Metazoa;Eumetazoa;Bilateria;Protostomia;  
 Spiralia;Lophotrochozoa;Mollusca;Bivalvia;Autobranchia;Heteroconchia;Euhe  
 terodonta;Imparidentia;Venerida;Veneroidea;Veneridae;Mercenaria;Mercenari  
 a mercenaria  
 UdeM00000001812 6596 636.7 UdeM00000001812 XP\_045202519.1 53.2 635  
 277 3 13 647 100 714 3.20E-179 636.7 6596 cellular  
 organisms;Eukaryota;Opisthokonta;Metazoa;Eumetazoa;Bilateria;Protostomia;  
 Spiralia;Lophotrochozoa;Mollusca;Bivalvia;Autobranchia;Heteroconchia;Euhe  
 terodonta;Imparidentia;Venerida;Veneroidea;Veneridae;Mercenaria;Mercenari  
 a mercenaria  
 UdeM00000001813 6565 182.2 UdeM00000001813 XP\_022286882.1 47.3 205  
 104 2 46 250 24 224 8.30E-43 182.2 6565 cellular  
 organisms;Eukaryota;Opisthokonta;Metazoa;Eumetazoa;Bilateria;Protostomia;  
 Spiralia;Lophotrochozoa;Mollusca;Bivalvia;Autobranchia;Pteriomorpha;Ostr  
 eida;Ostreoidea;Ostreidae;Crassostrea;Crassostrea virginica  
 UdeM00000001814 6596 385.6 UdeM00000001814 XP\_045200979.1 94.9 195  
 10 0 5 199 1 195 3.90E-104 385.6 6596 cellular  
 organisms;Eukaryota;Opisthokonta;Metazoa;Eumetazoa;Bilateria;Protostomia;  
 Spiralia;Lophotrochozoa;Mollusca;Bivalvia;Autobranchia;Heteroconchia;Euhe  
 terodonta;Imparidentia;Venerida;Veneroidea;Veneridae;Mercenaria;Mercenari  
 a mercenaria  
 UdeM00000001815 8177 138.7 UdeM00000001815 XP\_036965561.1 42.9 175  
 93 2 1 174 1 169 7.30E-30 138.7 8177 cellular  
 organisms;Eukaryota;Opisthokonta;Metazoa;Eumetazoa;Bilateria;Deuterostomi  
 a;Chordata;Craniata;Vertebrata;Gnathostomata;Teleostomi;Euteleostomi;Acti  
 nopterygii;Actinopteri;Neopterygii;Teleostei;Osteoglossocephalai;Clupeoce  
 phala;Euteleosteomorpha;Neoteleostei;Eurypterygia;Ctenosquamata;Acanthomo  
 rphata;Euacanthomorphacea;Percomorphaceae;Eupercaria;Spariformes;Sparidae  
 ;Acanthopagrus;Acanthopagrus latus  
 UdeM00000001816 6596 263.8 UdeM00000001816 XP\_045215232.1 46 322  
 120 4 80 348 151 471 3.30E-67 263.8 6596 cellular  
 organisms;Eukaryota;Opisthokonta;Metazoa;Eumetazoa;Bilateria;Protostomia;  
 Spiralia;Lophotrochozoa;Mollusca;Bivalvia;Autobranchia;Heteroconchia;Euhe  
 terodonta;Imparidentia;Venerida;Veneroidea;Veneridae;Mercenaria;Mercenari  
 a mercenaria



UdeM00000001817 6596 545.8 UdeM00000001817 XP\_045211214.1 40.1 738  
 418 10 6 724 5 737 8.30E-152 545.8 6596 cellular  
 organisms;Eukaryota;Opisthokonta;Metazoa;Eumetazoa;Bilateria;Protostomia;  
 Spiralia;Lophotrochozoa;Mollusca;Bivalvia;Autobranchia;Heteroconchia;Euhe  
 terodonta;Imparidentia;Venerida;Veneroidea;Veneridae;Mercenaria;Mercenari  
 a mercenaria  
 UdeM000000025363 29159 121.7 UdeM000000025363 XP\_011429041.1 76.5 81  
 19 0 85 165 94 174 1.00E-24 121.7 29159 cellular  
 organisms;Eukaryota;Opisthokonta;Metazoa;Eumetazoa;Bilateria;Protostomia;  
 Spiralia;Lophotrochozoa;Mollusca;Bivalvia;Autobranchia;Pteriormorphia;Ostr  
 eida;Ostreoidea;Ostreidae;Crassostrea;Crassostrea gigas  
 UdeM000000025364 225164 203 UdeM000000025364 XP\_009058199.1 46.1  
 232 108 3 1 232 1 215 4.80E-49 203 225164  
 cellular  
 organisms;Eukaryota;Opisthokonta;Metazoa;Eumetazoa;Bilateria;Protostomia;  
 Spiralia;Lophotrochozoa;Mollusca;Gastropoda;Patellogastropoda;Lottioidea;  
 Lottiidae;Lottia;Lottia gigantea  
 UdeM000000025365 6596 633.6 UdeM000000025365 XP\_045215001.1 64.8 466  
 163 1 1 466 1 465 1.90E-178 633.6 6596 cellular  
 organisms;Eukaryota;Opisthokonta;Metazoa;Eumetazoa;Bilateria;Protostomia;  
 Spiralia;Lophotrochozoa;Mollusca;Bivalvia;Autobranchia;Heteroconchia;Euhe  
 terodonta;Imparidentia;Venerida;Veneroidea;Veneridae;Mercenaria;Mercenari  
 a mercenaria  
 UdeM000000025367 6596 406.8 UdeM000000025367 XP\_045211715.1 45.4 432  
 232 3 18 445 19 450 3.70E-110 406.8 6596 cellular  
 organisms;Eukaryota;Opisthokonta;Metazoa;Eumetazoa;Bilateria;Protostomia;  
 Spiralia;Lophotrochozoa;Mollusca;Bivalvia;Autobranchia;Heteroconchia;Euhe  
 terodonta;Imparidentia;Venerida;Veneroidea;Veneridae;Mercenaria;Mercenari  
 a mercenaria  
 UdeM000000025368 37621 154.1 UdeM000000025368 XP\_014672562.1 76.5 85  
 20 0 40 124 7 91 1.20E-34 154.1 37621 cellular  
 organisms;Eukaryota;Opisthokonta;Metazoa;Eumetazoa;Bilateria;Protostomia;  
 Ecdysozoa;Scalidophora;Priapulida;Priapulimorpha;Priapulimorphida;Priapul  
 idae;Priapululus;Priapululus caudatus  
 UdeM000000025369 6596 204.1 UdeM000000025369 XP\_045210864.1 45.6 259  
 124 6 40 287 38 290 2.30E-49 204.1 6596 cellular  
 organisms;Eukaryota;Opisthokonta;Metazoa;Eumetazoa;Bilateria;Protostomia;  
 Spiralia;Lophotrochozoa;Mollusca;Bivalvia;Autobranchia;Heteroconchia;Euhe  
 terodonta;Imparidentia;Venerida;Veneroidea;Veneridae;Mercenaria;Mercenari  
 a mercenaria  
 UdeM000000025370 6596 413.7 UdeM000000025370 XP\_045213313.1 60.7 313  
 122 1 5 317 13 324 2.10E-112 413.7 6596 cellular  
 organisms;Eukaryota;Opisthokonta;Metazoa;Eumetazoa;Bilateria;Protostomia;  
 Spiralia;Lophotrochozoa;Mollusca;Bivalvia;Autobranchia;Heteroconchia;Euhe  
 terodonta;Imparidentia;Venerida;Veneroidea;Veneridae;Mercenaria;Mercenari  
 a mercenaria  
 UdeM000000025371 6596 714.1 UdeM000000025371 XP\_045215018.1 59.6 562  
 221 2 39 595 1 561 1.50E-202 714.1 6596 cellular  
 organisms;Eukaryota;Opisthokonta;Metazoa;Eumetazoa;Bilateria;Protostomia;  
 Spiralia;Lophotrochozoa;Mollusca;Bivalvia;Autobranchia;Heteroconchia;Euhe  
 terodonta;Imparidentia;Venerida;Veneroidea;Veneridae;Mercenaria;Mercenari  
 a mercenaria  
 UdeM000000025373 6579 335.5 UdeM000000025373 XP\_033745921.1 69.5 236  
 72 0 4 239 546 781 8.60E-89 335.5 6579 cellular

organisms;Eukaryota;Opisthokonta;Metazoa;Eumetazoa;Bilateria;Protostomia;Spiralia;Lophotrochozoa;Mollusca;Bivalvia;Autobranchia;Pteriomorphia;Pectinida;Pectinoidea;Pectinidae;Pecten;Pecten maximus

UdeM00000025374 6596 143.3 UdeM00000025374 XP\_045212553.1 34.8 270  
156 7 58 324 230 482 5.50E-31 143.3 6596 cellular

organisms;Eukaryota;Opisthokonta;Metazoa;Eumetazoa;Bilateria;Protostomia;Spiralia;Lophotrochozoa;Mollusca;Bivalvia;Autobranchia;Heteroconchia;Euheterodonta;Imparidentia;Venerida;Veneroidea;Veneridae;Mercenaria;Mercenaria mercenaria

UdeM00000025375 6596 264.6 UdeM00000025375 XP\_045212551.1 38.6 414  
231 8 74 487 65 455 2.50E-67 264.6 6596 cellular

organisms;Eukaryota;Opisthokonta;Metazoa;Eumetazoa;Bilateria;Protostomia;Spiralia;Lophotrochozoa;Mollusca;Bivalvia;Autobranchia;Heteroconchia;Euheterodonta;Imparidentia;Venerida;Veneroidea;Veneridae;Mercenaria;Mercenaria mercenaria

UdeM00000025376 7739 377.5 UdeM00000025376 XP\_035696678.1 36.7 592  
207 3 69 492 312 903 2.80E-101 377.5 7739 cellular

organisms;Eukaryota;Opisthokonta;Metazoa;Eumetazoa;Bilateria;Deuterostomia;Chordata;Cephalochordata;Leptocardii;Amphioxiformes;Branchiostomidae;Branchiostoma;Branchiostoma floridae

UdeM00000025378 6596 642.5 UdeM00000025378 XP\_045211676.1 64 461  
158 3 11 466 17 474 4.60E-181 642.5 6596 cellular

organisms;Eukaryota;Opisthokonta;Metazoa;Eumetazoa;Bilateria;Protostomia;Spiralia;Lophotrochozoa;Mollusca;Bivalvia;Autobranchia;Heteroconchia;Euheterodonta;Imparidentia;Venerida;Veneroidea;Veneridae;Mercenaria;Mercenaria mercenaria

UdeM00000025379 2607531 460.7 UdeM00000025379 XP\_029652564.1 73.8  
267 70 0 1 267 1 267 1.30E-126 460.7 2607531  
cellular

organisms;Eukaryota;Opisthokonta;Metazoa;Eumetazoa;Bilateria;Protostomia;Spiralia;Lophotrochozoa;Mollusca;Cephalopoda;Coleoidea;Octopodiformes;Octopoda;Incirrata;Octopodidae;Octopus;Octopus sinensis

UdeM00000025380 6579 382.9 UdeM00000025380 XP\_033750669.1 53.9 540  
213 17 1 511 1 533 6.80E-103 382.9 6579 cellular

organisms;Eukaryota;Opisthokonta;Metazoa;Eumetazoa;Bilateria;Protostomia;Spiralia;Lophotrochozoa;Mollusca;Bivalvia;Autobranchia;Pteriomorphia;Pectinida;Pectinoidea;Pectinidae;Pecten;Pecten maximus

UdeM00000025381 6596 117.1 UdeM00000025381 XP\_045213897.1 73.5 83  
14 3 1 76 1 82 2.10E-23 117.1 6596 cellular

organisms;Eukaryota;Opisthokonta;Metazoa;Eumetazoa;Bilateria;Protostomia;Spiralia;Lophotrochozoa;Mollusca;Bivalvia;Autobranchia;Heteroconchia;Euheterodonta;Imparidentia;Venerida;Veneroidea;Veneridae;Mercenaria;Mercenaria mercenaria

UdeM00000025384 1735272 179.9 UdeM00000025384 XP\_041362922.1 52.7  
165 77 1 11 175 11 174 2.90E-42 179.9 1735272  
cellular

organisms;Eukaryota;Opisthokonta;Metazoa;Eumetazoa;Bilateria;Protostomia;Spiralia;Lophotrochozoa;Mollusca;Gastropoda;Neomphalina;Neomphaloidea;Peltospiridae;Gigantopelta;Gigantopelta aegis

UdeM00000025385 6573 134 UdeM00000025385 XP\_021355725.1 35 214  
135 4 12 224 28 238 2.30E-28 134 6573 cellular

organisms;Eukaryota;Opisthokonta;Metazoa;Eumetazoa;Bilateria;Protostomia;Spiralia;Lophotrochozoa;Mollusca;Bivalvia;Autobranchia;Pteriomorphia;Pectinida;Pectinoidea;Pectinidae;Mizuhopecten;Mizuhopecten yessoensis

UdeM00000025386 1203425 233 UdeM00000025386 XP\_034534149.1 40.7  
334 189 8 504 828 57 390 1.40E-57 233 1203425  
cellular

organisms;Eukaryota;Opisthokonta;Metazoa;Eumetazoa;Bilateria;Deuterostomi  
a;Chordata;Craniata;Vertebrata;Gnathostomata;Teleostomi;Euteleostomi;Acti  
nopterygii;Actinopteri;Neopterygii;Teleostei;Osteoglossocephalai;Clupeoce  
phala;Euteleosteomorpha;Neoteleostei;Eurypterygia;Ctenosquamata;Acanthomo  
rphata;Euacanthomorphacea;Percomorphaceae;Eupercaria;Labriformes;Labridae  
;Notolabrus;Notolabrus celidotus

UdeM00000025388 6596 109 UdeM00000025388 XP\_045215936.1 27.8 284  
131 6 4 222 7 281 9.70E-21 109 6596 cellular

organisms;Eukaryota;Opisthokonta;Metazoa;Eumetazoa;Bilateria;Protostomia;  
Spiralia;Lophotrochozoa;Mollusca;Bivalvia;Autobranchia;Heteroconchia;Euhe  
terodonta;Imparidentia;Venerida;Veneroidea;Veneridae;Mercenaria;Mercenari  
a mercenaria

UdeM00000025390 1203425 320.9 UdeM00000025390 XP\_034551786.1 41.7  
432 242 7 1 424 119 548 2.50E-84 320.9 1203425  
cellular

organisms;Eukaryota;Opisthokonta;Metazoa;Eumetazoa;Bilateria;Deuterostomi  
a;Chordata;Craniata;Vertebrata;Gnathostomata;Teleostomi;Euteleostomi;Acti  
nopterygii;Actinopteri;Neopterygii;Teleostei;Osteoglossocephalai;Clupeoce  
phala;Euteleosteomorpha;Neoteleostei;Eurypterygia;Ctenosquamata;Acanthomo  
rphata;Euacanthomorphacea;Percomorphaceae;Eupercaria;Labriformes;Labridae  
;Notolabrus;Notolabrus celidotus

UdeM00000025392 46731 122.9 UdeM00000025392 XP\_027049317.1 39.7 189  
94 4 6 187 288 463 6.80E-25 122.9 46731 cellular

organisms;Eukaryota;Opisthokonta;Metazoa;Eumetazoa;Cnidaria;Anthozoa;Hexa  
corallia;Scleractinia;Astrocoeniina;Pocilloporidae;Pocillopora;Pocillopor  
a damicornis

UdeM00000025391 1203425 316.6 UdeM00000025391 XP\_034551786.1 41.1  
426 241 7 599 1014 123 548 1.10E-82 316.6 1203425  
cellular

organisms;Eukaryota;Opisthokonta;Metazoa;Eumetazoa;Bilateria;Deuterostomi  
a;Chordata;Craniata;Vertebrata;Gnathostomata;Teleostomi;Euteleostomi;Acti  
nopterygii;Actinopteri;Neopterygii;Teleostei;Osteoglossocephalai;Clupeoce  
phala;Euteleosteomorpha;Neoteleostei;Eurypterygia;Ctenosquamata;Acanthomo  
rphata;Euacanthomorphacea;Percomorphaceae;Eupercaria;Labriformes;Labridae  
;Notolabrus;Notolabrus celidotus

UdeM00000025393 1203425 319.7 UdeM00000025393 XP\_034551786.1 41.3  
429 242 7 6 424 120 548 5.60E-84 319.7 1203425  
cellular

organisms;Eukaryota;Opisthokonta;Metazoa;Eumetazoa;Bilateria;Deuterostomi  
a;Chordata;Craniata;Vertebrata;Gnathostomata;Teleostomi;Euteleostomi;Acti  
nopterygii;Actinopteri;Neopterygii;Teleostei;Osteoglossocephalai;Clupeoce  
phala;Euteleosteomorpha;Neoteleostei;Eurypterygia;Ctenosquamata;Acanthomo  
rphata;Euacanthomorphacea;Percomorphaceae;Eupercaria;Labriformes;Labridae  
;Notolabrus;Notolabrus celidotus

UdeM00000025394 43689 290.4 UdeM00000025394 XP\_039906508.1 38.9 427  
251 7 613 1031 27 451 8.90E-75 290.4 43689 cellular

organisms;Eukaryota;Opisthokonta;Metazoa;Eumetazoa;Bilateria;Deuterostomi  
a;Chordata;Craniata;Vertebrata;Gnathostomata;Teleostomi;Euteleostomi;Acti  
nopterygii;Actinopteri;Neopterygii;Teleostei;Osteoglossocephalai;Clupeoce  
phala;Euteleosteomorpha;Neoteleostei;Eurypterygia;Ctenosquamata;Acanthomo  
rphata;Euacanthomorphacea;Percomorphaceae;Ovalentaria;Cichlomorphae;Cichl

iformes;Cichlidae;African  
cichlids;Pseudocrenilabrinae;Tropheini;Simochromis;Simochromis diagramma  
UdeM00000025395 6596 1719.9 UdeM00000025395 XP\_045211956.1 55.8  
1790 713 17 179 1894 5 1789 0.00E+00 1719.9 6596  
cellular  
organisms;Eukaryota;Opisthokonta;Metazoa;Eumetazoa;Bilateria;Protostomia;  
Spiralia;Lophotrochozoa;Mollusca;Bivalvia;Autobranchia;Heteroconchia;Euhe  
terodonta;Imparidentia;Venerida;Veneroidea;Veneridae;Mercenaria;Mercenari  
a mercenaria  
UdeM00000025401 6573 92.4 UdeM00000025401 XP\_021365625.1 56.9 72  
31 0 7 78 34 105 6.30E-16 92.4 6573 cellular  
organisms;Eukaryota;Opisthokonta;Metazoa;Eumetazoa;Bilateria;Protostomia;  
Spiralia;Lophotrochozoa;Mollusca;Bivalvia;Autobranchia;Pteriormorphia;Pect  
inida;Pectinoidea;Pectinidae;Mizuhopecten;Mizuhopecten yessoensis  
UdeM00000025402 9031 80.1 UdeM00000025402 XP\_025006031.2 31.9 182  
104 8 30 201 1024 1195 7.70E-12 80.1 9031 cellular  
organisms;Eukaryota;Opisthokonta;Metazoa;Eumetazoa;Bilateria;Deuterostomi  
a;Chordata;Craniata;Vertebrata;Gnathostomata;Teleostomi;Euteleostomi;Sarc  
opterygii;Dipnotetrapodomorpha;Tetrapoda;Amniota;Sauropsida;Sauria;Archel  
osauria;Archosauria;Dinosauria;Saurischia;Theropoda;Coelurosauria;Aves;Ne  
ognathae;Galloanserae;Galliformes;Phasianidae;Phasianinae;Gallus;Gallus  
gallus  
UdeM00000025403 1735272 82.4 UdeM00000025403 XP\_041377589.1 50.5  
91 38 5 69 154 496 584 1.80E-12 82.4 1735272  
cellular  
organisms;Eukaryota;Opisthokonta;Metazoa;Eumetazoa;Bilateria;Protostomia;  
Spiralia;Lophotrochozoa;Mollusca;Gastropoda;Neomphalina;Neomphaloidea;Pel  
tospiridae;Gigantopelta;Gigantopelta aegis  
UdeM00000025404 6565 64.7 UdeM00000025404 XP\_022299727.1 45.2 73  
40 0 1 73 261 333 1.20E-07 64.7 6565 cellular  
organisms;Eukaryota;Opisthokonta;Metazoa;Eumetazoa;Bilateria;Protostomia;  
Spiralia;Lophotrochozoa;Mollusca;Bivalvia;Autobranchia;Pteriormorphia;Ostr  
eida;Ostreoidea;Ostreidae;Crassostrea;Crassostrea virginica  
UdeM00000025405 680683 80.9 UdeM00000025405 XP\_013188912.1 43  
93 48 2 31 123 1146 1233 3.60E-12 80.9 680683  
cellular  
organisms;Eukaryota;Opisthokonta;Metazoa;Eumetazoa;Bilateria;Protostomia;  
Ecdysozoa;Panarthropoda;Arthropoda;Mandibulata;Pancrustacea;Hexapoda;Inse  
cta;Dicondylia;Pterygota;Neoptera;Endopterygota;Amphiesmenoptera;Lepidopt  
era;Glossata;Neolepidoptera;Heteroneura;Ditrysia;Obtectomera;Pyraloidea;P  
yralidae;Phycitinae;Amyelois;Amyelois transitella  
UdeM00000025406 400727 74.7 UdeM00000025406 XP\_025087246.1 43.4  
76 41 1 32 105 140 215 8.00E-11 74.7 400727  
cellular  
organisms;Eukaryota;Opisthokonta;Metazoa;Eumetazoa;Bilateria;Protostomia;  
Spiralia;Lophotrochozoa;Mollusca;Gastropoda;Caenogastropoda;Architaeniogl  
ossa;Ampullarioidea;Ampullariidae;Pomacea;Pomacea canaliculata  
UdeM00000025407 6565 86.7 UdeM00000025407 XP\_022312573.1 31.8 258  
110 8 1092 1342 1169 1367 2.50E-13 86.7 6565 cellular  
organisms;Eukaryota;Opisthokonta;Metazoa;Eumetazoa;Bilateria;Protostomia;  
Spiralia;Lophotrochozoa;Mollusca;Bivalvia;Autobranchia;Pteriormorphia;Ostr  
eida;Ostreoidea;Ostreidae;Crassostrea;Crassostrea virginica  
UdeM00000025407 6565 59.7 UdeM00000025407 XP\_022312573.1 59.6 52  
21 0 756 807 862 913 3.30E-05 59.7 6565 cellular

organisms;Eukaryota;Opisthokonta;Metazoa;Eumetazoa;Bilateria;Protostomia;  
Spiralia;Lophotrochozoa;Mollusca;Bivalvia;Autobranchia;Pteriomorphia;Ostr  
eida;Ostreoidea;Ostreidae;Crassostrea;Crassostrea virginica  
UdeM00000025407 6565 28.5 UdeM00000025407 XP\_022312573.1 23.9 402  
259 16 306 687 303 677 8.20E+04 28.5 6565 cellular  
organisms;Eukaryota;Opisthokonta;Metazoa;Eumetazoa;Bilateria;Protostomia;  
Spiralia;Lophotrochozoa;Mollusca;Bivalvia;Autobranchia;Pteriomorphia;Ostr  
eida;Ostreoidea;Ostreidae;Crassostrea;Crassostrea virginica  
UdeM00000025408 6596 207.6 UdeM00000025408 XP\_045212854.1 63.7 168  
58 1 1 165 1 168 2.80E-50 207.6 6596 cellular  
organisms;Eukaryota;Opisthokonta;Metazoa;Eumetazoa;Bilateria;Protostomia;  
Spiralia;Lophotrochozoa;Mollusca;Bivalvia;Autobranchia;Heteroconchia;Euhe  
terodonta;Imparidentia;Venerida;Veneroidea;Veneridae;Mercenaria;Mercenari  
a mercenaria  
UdeM00000025410 6596 253.1 UdeM00000025410 XP\_045210582.1 42.3 324  
156 7 314 631 133 431 9.70E-64 253.1 6596 cellular  
organisms;Eukaryota;Opisthokonta;Metazoa;Eumetazoa;Bilateria;Protostomia;  
Spiralia;Lophotrochozoa;Mollusca;Bivalvia;Autobranchia;Heteroconchia;Euhe  
terodonta;Imparidentia;Venerida;Veneroidea;Veneridae;Mercenaria;Mercenari  
a mercenaria  
UdeM00000025411 6596 253.8 UdeM00000025411 XP\_045210582.1 41.8 335  
164 8 345 671 129 440 6.00E-64 253.8 6596 cellular  
organisms;Eukaryota;Opisthokonta;Metazoa;Eumetazoa;Bilateria;Protostomia;  
Spiralia;Lophotrochozoa;Mollusca;Bivalvia;Autobranchia;Heteroconchia;Euhe  
terodonta;Imparidentia;Venerida;Veneroidea;Veneridae;Mercenaria;Mercenari  
a mercenaria  
UdeM00000025412 6596 167.9 UdeM00000025412 XP\_045210582.1 33 349  
170 8 56 399 142 431 2.60E-38 167.9 6596 cellular  
organisms;Eukaryota;Opisthokonta;Metazoa;Eumetazoa;Bilateria;Protostomia;  
Spiralia;Lophotrochozoa;Mollusca;Bivalvia;Autobranchia;Heteroconchia;Euhe  
terodonta;Imparidentia;Venerida;Veneroidea;Veneridae;Mercenaria;Mercenari  
a mercenaria  
UdeM00000025413 6596 167.9 UdeM00000025413 XP\_045210582.1 33 349  
170 8 49 392 142 431 2.50E-38 167.9 6596 cellular  
organisms;Eukaryota;Opisthokonta;Metazoa;Eumetazoa;Bilateria;Protostomia;  
Spiralia;Lophotrochozoa;Mollusca;Bivalvia;Autobranchia;Heteroconchia;Euhe  
terodonta;Imparidentia;Venerida;Veneroidea;Veneridae;Mercenaria;Mercenari  
a mercenaria  
UdeM00000025414 6596 233.8 UdeM00000025414 XP\_045210582.1 42.1 328  
162 8 243 566 130 433 5.60E-58 233.8 6596 cellular  
organisms;Eukaryota;Opisthokonta;Metazoa;Eumetazoa;Bilateria;Protostomia;  
Spiralia;Lophotrochozoa;Mollusca;Bivalvia;Autobranchia;Heteroconchia;Euhe  
terodonta;Imparidentia;Venerida;Veneroidea;Veneridae;Mercenaria;Mercenari  
a mercenaria  
UdeM00000025415 6596 224.9 UdeM00000025415 XP\_045210582.1 40.6 335  
161 9 371 692 118 427 3.10E-55 224.9 6596 cellular  
organisms;Eukaryota;Opisthokonta;Metazoa;Eumetazoa;Bilateria;Protostomia;  
Spiralia;Lophotrochozoa;Mollusca;Bivalvia;Autobranchia;Heteroconchia;Euhe  
terodonta;Imparidentia;Venerida;Veneroidea;Veneridae;Mercenaria;Mercenari  
a mercenaria  
UdeM00000025416 6596 233.4 UdeM00000025416 XP\_045210582.1 40.5 328  
167 6 235 558 130 433 7.20E-58 233.4 6596 cellular  
organisms;Eukaryota;Opisthokonta;Metazoa;Eumetazoa;Bilateria;Protostomia;  
Spiralia;Lophotrochozoa;Mollusca;Bivalvia;Autobranchia;Heteroconchia;Euhe

terodonta;Imparidentia;Venerida;Veneroidea;Veneridae;Mercenaria;Mercenari  
 a mercenaria  
 UdeM00000025417 6596 241.9 UdeM00000025417 XP\_045210582.1 41 322  
 162 5 360 672 131 433 2.40E-60 241.9 6596 cellular  
 organisms;Eukaryota;Opisthokonta;Metazoa;Eumetazoa;Bilateria;Protostomia;  
 Spiralia;Lophotrochozoa;Mollusca;Bivalvia;Autobranhia;Heteroconchia;Euhe  
 terodonta;Imparidentia;Venerida;Veneroidea;Veneridae;Mercenaria;Mercenari  
 a mercenaria  
 UdeM00000025419 400727 891 UdeM00000025419 XP\_025115871.1 37.7  
 1336 656 30 12 1221 679 1964 1.80E-255 891 400727  
 cellular  
 organisms;Eukaryota;Opisthokonta;Metazoa;Eumetazoa;Bilateria;Protostomia;  
 Spiralia;Lophotrochozoa;Mollusca;Gastropoda;Caenogastropoda;Architaeniogl  
 ossa;Ampullarioidea;Ampullariidae;Pomacea;Pomacea canaliculata  
 UdeM00000025420 1735272 58.9 UdeM00000025420 XP\_041350990.1 43.5  
 62 35 0 61 122 461 522 5.20E-06 58.9 1735272  
 cellular  
 organisms;Eukaryota;Opisthokonta;Metazoa;Eumetazoa;Bilateria;Protostomia;  
 Spiralia;Lophotrochozoa;Mollusca;Gastropoda;Neomphalina;Neomphaloidea;Pel  
 tospiridae;Gigantopelta;Gigantopelta aegis  
 UdeM00000025421 6565 789.3 UdeM00000025421 XP\_022316064.1 39.3 1073  
 535 21 9 1056 11 992 6.20E-225 789.3 6565 cellular  
 organisms;Eukaryota;Opisthokonta;Metazoa;Eumetazoa;Bilateria;Protostomia;  
 Spiralia;Lophotrochozoa;Mollusca;Bivalvia;Autobranhia;Pteriormorphia;Ostr  
 eida;Ostreoidea;Ostreidae;Crassostrea;Crassostrea virginica  
 UdeM00000025422 6565 756.1 UdeM00000025422 XP\_022315760.1 87.4 435  
 46 5 1 435 1 426 2.40E-215 756.1 6565 cellular  
 organisms;Eukaryota;Opisthokonta;Metazoa;Eumetazoa;Bilateria;Protostomia;  
 Spiralia;Lophotrochozoa;Mollusca;Bivalvia;Autobranhia;Pteriormorphia;Ostr  
 eida;Ostreoidea;Ostreidae;Crassostrea;Crassostrea virginica  
 UdeM00000025423 6579 95.1 UdeM00000025423 XP\_033754223.1 67.9 78  
 15 1 2 79 351 418 4.20E-17 95.1 6579 cellular  
 organisms;Eukaryota;Opisthokonta;Metazoa;Eumetazoa;Bilateria;Protostomia;  
 Spiralia;Lophotrochozoa;Mollusca;Bivalvia;Autobranhia;Pteriormorphia;Pect  
 inida;Pectinoidea;Pectinidae;Pecten;Pecten maximus  
 UdeM00000025424 6573 666 UdeM00000025424 XP\_021350025.1 73.6 447  
 106 4 1 442 1 440 3.30E-188 666 6573 cellular  
 organisms;Eukaryota;Opisthokonta;Metazoa;Eumetazoa;Bilateria;Protostomia;  
 Spiralia;Lophotrochozoa;Mollusca;Bivalvia;Autobranhia;Pteriormorphia;Pect  
 inida;Pectinoidea;Pectinidae;Mizuhopecten;Mizuhopecten yessoensis  
 UdeM00000025425 6573 676.8 UdeM00000025425 XP\_021350024.1 67.5 523  
 133 9 1 507 1 502 2.20E-191 676.8 6573 cellular  
 organisms;Eukaryota;Opisthokonta;Metazoa;Eumetazoa;Bilateria;Protostomia;  
 Spiralia;Lophotrochozoa;Mollusca;Bivalvia;Autobranhia;Pteriormorphia;Pect  
 inida;Pectinoidea;Pectinidae;Mizuhopecten;Mizuhopecten yessoensis  
 UdeM00000025428 6565 62.4 UdeM00000025428 XP\_022299403.1 29.7 192  
 124 6 1 184 1 189 1.00E-06 62.4 6565 cellular  
 organisms;Eukaryota;Opisthokonta;Metazoa;Eumetazoa;Bilateria;Protostomia;  
 Spiralia;Lophotrochozoa;Mollusca;Bivalvia;Autobranhia;Pteriormorphia;Ostr  
 eida;Ostreoidea;Ostreidae;Crassostrea;Crassostrea virginica  
 UdeM00000025429 6565 60.1 UdeM00000025429 XP\_022299403.1 28.9 197  
 124 6 1 189 1 189 5.30E-06 60.1 6565 cellular  
 organisms;Eukaryota;Opisthokonta;Metazoa;Eumetazoa;Bilateria;Protostomia;

Spiralia;Lophotrochozoa;Mollusca;Bivalvia;Autobranchia;Pteriomorpha;Ostr  
eida;Ostreoidea;Ostreidae;Crassostrea;Crassostrea virginica  
UdeM00000025430 6596 228.8 UdeM00000025430 XP\_045213336.1 56.2 203  
87 1 11 213 177 377 7.60E-57 228.8 6596 cellular  
organisms;Eukaryota;Opisthokonta;Metazoa;Eumetazoa;Bilateria;Protostomia;  
Spiralia;Lophotrochozoa;Mollusca;Bivalvia;Autobranchia;Heteroconchia;Euhe  
terodonta;Imparidentia;Venerida;Veneroidea;Veneridae;Mercenaria;Mercenari  
a mercenaria  
UdeM00000025431 6596 100.5 UdeM00000025431 XP\_045213334.1 34.9 152  
92 1 7 158 110 254 2.30E-18 100.5 6596 cellular  
organisms;Eukaryota;Opisthokonta;Metazoa;Eumetazoa;Bilateria;Protostomia;  
Spiralia;Lophotrochozoa;Mollusca;Bivalvia;Autobranchia;Heteroconchia;Euhe  
terodonta;Imparidentia;Venerida;Veneroidea;Veneridae;Mercenaria;Mercenari  
a mercenaria  
UdeM00000025432 6596 231.5 UdeM00000025432 XP\_045213336.1 56.7 203  
86 1 11 213 177 377 1.10E-57 231.5 6596 cellular  
organisms;Eukaryota;Opisthokonta;Metazoa;Eumetazoa;Bilateria;Protostomia;  
Spiralia;Lophotrochozoa;Mollusca;Bivalvia;Autobranchia;Heteroconchia;Euhe  
terodonta;Imparidentia;Venerida;Veneroidea;Veneridae;Mercenaria;Mercenari  
a mercenaria  
UdeM00000025433 6596 95.9 UdeM00000025433 XP\_045211315.1 51.8 85  
40 1 27 111 151 234 5.20E-17 95.9 6596 cellular  
organisms;Eukaryota;Opisthokonta;Metazoa;Eumetazoa;Bilateria;Protostomia;  
Spiralia;Lophotrochozoa;Mollusca;Bivalvia;Autobranchia;Heteroconchia;Euhe  
terodonta;Imparidentia;Venerida;Veneroidea;Veneridae;Mercenaria;Mercenari  
a mercenaria  
UdeM00000025434 6565 111.3 UdeM00000025434 XP\_022328090.1 61.2 85  
29 2 293 376 68 149 2.70E-21 111.3 6565 cellular  
organisms;Eukaryota;Opisthokonta;Metazoa;Eumetazoa;Bilateria;Protostomia;  
Spiralia;Lophotrochozoa;Mollusca;Bivalvia;Autobranchia;Pteriomorpha;Ostr  
eida;Ostreoidea;Ostreidae;Crassostrea;Crassostrea virginica  
UdeM00000025435 6565 355.9 UdeM00000025435 XP\_022312968.1 77 204  
47 0 1 204 1 204 3.40E-95 355.9 6565 cellular  
organisms;Eukaryota;Opisthokonta;Metazoa;Eumetazoa;Bilateria;Protostomia;  
Spiralia;Lophotrochozoa;Mollusca;Bivalvia;Autobranchia;Pteriomorpha;Ostr  
eida;Ostreoidea;Ostreidae;Crassostrea;Crassostrea virginica  
UdeM00000025436 29159 416.8 UdeM00000025436 XP\_011443000.2 68.8 266  
80 1 3 268 8 270 2.10E-113 416.8 29159 cellular  
organisms;Eukaryota;Opisthokonta;Metazoa;Eumetazoa;Bilateria;Protostomia;  
Spiralia;Lophotrochozoa;Mollusca;Bivalvia;Autobranchia;Pteriomorpha;Ostr  
eida;Ostreoidea;Ostreidae;Crassostrea;Crassostrea gigas  
UdeM00000025438 6596 111.3 UdeM00000025438 XP\_045211366.1 51 96  
44 2 89 183 86 179 1.30E-21 111.3 6596 cellular  
organisms;Eukaryota;Opisthokonta;Metazoa;Eumetazoa;Bilateria;Protostomia;  
Spiralia;Lophotrochozoa;Mollusca;Bivalvia;Autobranchia;Heteroconchia;Euhe  
terodonta;Imparidentia;Venerida;Veneroidea;Veneridae;Mercenaria;Mercenari  
a mercenaria  
UdeM00000025439 6596 607.8 UdeM00000025439 XP\_045213673.1 42.2 1353  
586 37 184 1443 329 1578 3.50E-170 607.8 6596 cellular  
organisms;Eukaryota;Opisthokonta;Metazoa;Eumetazoa;Bilateria;Protostomia;  
Spiralia;Lophotrochozoa;Mollusca;Bivalvia;Autobranchia;Heteroconchia;Euhe  
terodonta;Imparidentia;Venerida;Veneroidea;Veneridae;Mercenaria;Mercenari  
a mercenaria

UdeM00000025440 6596 108.2 UdeM00000025440 XP\_045213672.1 75 64  
 16 0 1644 1707 101 164 1.10E-19 108.2 6596 cellular  
 organisms;Eukaryota;Opisthokonta;Metazoa;Eumetazoa;Bilateria;Protostomia;  
 Spiralia;Lophotrochozoa;Mollusca;Bivalvia;Autobranchia;Heteroconchia;Euhe  
 terodonta;Imparidentia;Venerida;Veneroidea;Veneridae;Mercenaria;Mercenari  
 a mercenaria  
 UdeM00000025440 6596 99.4 UdeM00000025440 XP\_045213672.1 56.6 83  
 34 1 147 229 20 100 4.90E-17 99.4 6596 cellular  
 organisms;Eukaryota;Opisthokonta;Metazoa;Eumetazoa;Bilateria;Protostomia;  
 Spiralia;Lophotrochozoa;Mollusca;Bivalvia;Autobranchia;Heteroconchia;Euhe  
 terodonta;Imparidentia;Venerida;Veneroidea;Veneridae;Mercenaria;Mercenari  
 a mercenaria  
 UdeM00000025441 29159 177.6 UdeM00000025441 XP\_034315059.1 75.5 110  
 27 0 1 110 7 116 9.70E-42 177.6 29159 cellular  
 organisms;Eukaryota;Opisthokonta;Metazoa;Eumetazoa;Bilateria;Protostomia;  
 Spiralia;Lophotrochozoa;Mollusca;Bivalvia;Autobranchia;Pteriormorphia;Ostr  
 eida;Ostreoidea;Ostreidae;Crassostrea;Crassostrea gigas  
 UdeM00000025442 6596 114.4 UdeM00000025442 XP\_045180427.1 39 177  
 105 2 69 243 98 273 2.20E-22 114.4 6596 cellular  
 organisms;Eukaryota;Opisthokonta;Metazoa;Eumetazoa;Bilateria;Protostomia;  
 Spiralia;Lophotrochozoa;Mollusca;Bivalvia;Autobranchia;Heteroconchia;Euhe  
 terodonta;Imparidentia;Venerida;Veneroidea;Veneridae;Mercenaria;Mercenari  
 a mercenaria  
 UdeM00000025443 6596 685.3 UdeM00000025443 XP\_045213681.1 79.4 412  
 85 0 2 413 174 585 5.00E-194 685.3 6596 cellular  
 organisms;Eukaryota;Opisthokonta;Metazoa;Eumetazoa;Bilateria;Protostomia;  
 Spiralia;Lophotrochozoa;Mollusca;Bivalvia;Autobranchia;Heteroconchia;Euhe  
 terodonta;Imparidentia;Venerida;Veneroidea;Veneridae;Mercenaria;Mercenari  
 a mercenaria  
 UdeM00000025444 6596 598.2 UdeM00000025444 XP\_045213666.1 77.8 747  
 147 8 60 798 1 736 1.50E-167 598.2 6596 cellular  
 organisms;Eukaryota;Opisthokonta;Metazoa;Eumetazoa;Bilateria;Protostomia;  
 Spiralia;Lophotrochozoa;Mollusca;Bivalvia;Autobranchia;Heteroconchia;Euhe  
 terodonta;Imparidentia;Venerida;Veneroidea;Veneridae;Mercenaria;Mercenari  
 a mercenaria  
 UdeM00000025445 6596 411.4 UdeM00000025445 XP\_045213633.1 67 297  
 93 3 1 297 1 292 9.90E-112 411.4 6596 cellular  
 organisms;Eukaryota;Opisthokonta;Metazoa;Eumetazoa;Bilateria;Protostomia;  
 Spiralia;Lophotrochozoa;Mollusca;Bivalvia;Autobranchia;Heteroconchia;Euhe  
 terodonta;Imparidentia;Venerida;Veneroidea;Veneridae;Mercenaria;Mercenari  
 a mercenaria  
 UdeM00000025446 6573 760.8 UdeM00000025446 XP\_021364536.1 81.4 436  
 81 0 1 436 1 436 1.10E-216 760.8 6573 cellular  
 organisms;Eukaryota;Opisthokonta;Metazoa;Eumetazoa;Bilateria;Protostomia;  
 Spiralia;Lophotrochozoa;Mollusca;Bivalvia;Autobranchia;Pteriormorphia;Pect  
 inida;Pectinoidea;Pectinidae;Mizuhopecten;Mizuhopecten yessoensis  
 UdeM00000025447 6573 769.2 UdeM00000025447 XP\_021364536.1 82.1 436  
 78 0 1 436 1 436 3.20E-219 769.2 6573 cellular  
 organisms;Eukaryota;Opisthokonta;Metazoa;Eumetazoa;Bilateria;Protostomia;  
 Spiralia;Lophotrochozoa;Mollusca;Bivalvia;Autobranchia;Pteriormorphia;Pect  
 inida;Pectinoidea;Pectinidae;Mizuhopecten;Mizuhopecten yessoensis  
 UdeM00000025448 6573 767.7 UdeM00000025448 XP\_021364536.1 82.6 432  
 75 0 1 432 1 432 9.40E-219 767.7 6573 cellular  
 organisms;Eukaryota;Opisthokonta;Metazoa;Eumetazoa;Bilateria;Protostomia;



Spiralia; Lophotrochozoa; Mollusca; Bivalvia; Autobranchia; Pteriomorpha; Pectinida; Pectinoidea; Pectinidae; Mizuhopecten; Mizuhopecten yessoensis  
UdeM00000025450 6579 201.8 UdeM00000025450 XP\_033734079.1 40.7 295  
166 4 1 286 40 334 1.10E-48 201.8 6579 cellular  
organisms; Eukaryota; Opisthokonta; Metazoa; Eumetazoa; Bilateria; Protostomia; Spiralia; Lophotrochozoa; Mollusca; Bivalvia; Autobranchia; Pteriomorpha; Pectinida; Pectinoidea; Pectinidae; Pecten; Pecten maximus  
UdeM00000025449 6579 220.3 UdeM00000025449 XP\_033734079.1 41.2 325  
181 5 11 326 11 334 3.60E-54 220.3 6579 cellular  
organisms; Eukaryota; Opisthokonta; Metazoa; Eumetazoa; Bilateria; Protostomia; Spiralia; Lophotrochozoa; Mollusca; Bivalvia; Autobranchia; Pteriomorpha; Pectinida; Pectinoidea; Pectinidae; Pecten; Pecten maximus  
UdeM00000025451 6596 181.4 UdeM00000025451 XP\_045212635.1 43 249  
114 7 4 237 8 243 1.30E-42 181.4 6596 cellular  
organisms; Eukaryota; Opisthokonta; Metazoa; Eumetazoa; Bilateria; Protostomia; Spiralia; Lophotrochozoa; Mollusca; Bivalvia; Autobranchia; Heteroconchia; Euheterodonta; Imparidentia; Venerida; Veneroidea; Veneridae; Mercenaria; Mercenaria mercenaria  
UdeM00000025452 37653 211.8 UdeM00000025452 XP\_014788569.1 29.5 623  
345 20 276 854 173 745 3.40E-51 211.8 37653 cellular  
organisms; Eukaryota; Opisthokonta; Metazoa; Eumetazoa; Bilateria; Protostomia; Spiralia; Lophotrochozoa; Mollusca; Cephalopoda; Coleoidea; Octopodiformes; Octopoda; Incirrata; Octopodidae; Octopus; Octopus bimaculoides  
UdeM00000025454 6565 79.7 UdeM00000025454 XP\_022312668.1 46.8 77  
41 0 7 83 54 130 2.20E-12 79.7 6565 cellular  
organisms; Eukaryota; Opisthokonta; Metazoa; Eumetazoa; Bilateria; Protostomia; Spiralia; Lophotrochozoa; Mollusca; Bivalvia; Autobranchia; Pteriomorpha; Ostreida; Ostreoidea; Ostreidae; Crassostrea; Crassostrea virginica  
UdeM00000025453 6565 111.7 UdeM00000025453 XP\_022312668.1 47.6 105  
54 1 28 132 27 130 8.00E-22 111.7 6565 cellular  
organisms; Eukaryota; Opisthokonta; Metazoa; Eumetazoa; Bilateria; Protostomia; Spiralia; Lophotrochozoa; Mollusca; Bivalvia; Autobranchia; Pteriomorpha; Ostreida; Ostreoidea; Ostreidae; Crassostrea; Crassostrea virginica  
UdeM00000025455 6596 382.5 UdeM00000025455 XP\_045213555.1 38 706  
370 19 20 700 6 668 1.20E-102 382.5 6596 cellular  
organisms; Eukaryota; Opisthokonta; Metazoa; Eumetazoa; Bilateria; Protostomia; Spiralia; Lophotrochozoa; Mollusca; Bivalvia; Autobranchia; Heteroconchia; Euheterodonta; Imparidentia; Venerida; Veneroidea; Veneridae; Mercenaria; Mercenaria mercenaria  
UdeM00000025457 6579 152.9 UdeM00000025457 XP\_033733670.1 27.3 447  
274 12 23 426 11 449 1.60E-33 152.9 6579 cellular  
organisms; Eukaryota; Opisthokonta; Metazoa; Eumetazoa; Bilateria; Protostomia; Spiralia; Lophotrochozoa; Mollusca; Bivalvia; Autobranchia; Pteriomorpha; Pectinida; Pectinoidea; Pectinidae; Pecten; Pecten maximus  
UdeM00000025458 225164 144.8 UdeM00000025458 XP\_009062106.1 25.7  
455 268 10 10 445 30 433 3.40E-31 144.8 225164  
cellular  
organisms; Eukaryota; Opisthokonta; Metazoa; Eumetazoa; Bilateria; Protostomia; Spiralia; Lophotrochozoa; Mollusca; Gastropoda; Patellogastropoda; Lottioidae; Lottiidae; Lottia; Lottia gigantea  
UdeM00000025459 6579 151 UdeM00000025459 XP\_033733670.1 27.1 424  
239 10 10 370 11 427 1.00E-32 151 6579 cellular  
organisms; Eukaryota; Opisthokonta; Metazoa; Eumetazoa; Bilateria; Protostomia;

Spiralia; Lophotrochozoa; Mollusca; Bivalvia; Autobranchia; Pteriomorpha; Pectinida; Pectinoidea; Pectinidae; Pecten; Pecten maximus  
UdeM00000025460 225164 145.6 UdeM00000025460 XP\_009062106.1 28.4  
444 244 12 11 419 30 434 2.10E-31 145.6 225164  
cellular  
organisms; Eukaryota; Opisthokonta; Metazoa; Eumetazoa; Bilateria; Protostomia; Spiralia; Lophotrochozoa; Mollusca; Gastropoda; Patellogastropoda; Lottioidea; Lottiidae; Lottia; Lottia gigantea  
UdeM00000025461 225164 145.6 UdeM00000025461 XP\_009062106.1 28.4  
444 244 12 11 419 30 434 2.30E-31 145.6 225164  
cellular  
organisms; Eukaryota; Opisthokonta; Metazoa; Eumetazoa; Bilateria; Protostomia; Spiralia; Lophotrochozoa; Mollusca; Gastropoda; Patellogastropoda; Lottioidea; Lottiidae; Lottia; Lottia gigantea  
UdeM00000025462 6565 157.9 UdeM00000025462 XP\_022317683.1 28.4 455  
260 14 7 423 5 431 4.10E-35 157.9 6565 cellular  
organisms; Eukaryota; Opisthokonta; Metazoa; Eumetazoa; Bilateria; Protostomia; Spiralia; Lophotrochozoa; Mollusca; Bivalvia; Autobranchia; Pteriomorpha; Ostreida; Ostreioidea; Ostreidae; Crassostrea; Crassostrea virginica  
UdeM00000025463 6565 157.9 UdeM00000025463 XP\_022317683.1 28.4 455  
260 14 7 423 5 431 4.10E-35 157.9 6565 cellular  
organisms; Eukaryota; Opisthokonta; Metazoa; Eumetazoa; Bilateria; Protostomia; Spiralia; Lophotrochozoa; Mollusca; Bivalvia; Autobranchia; Pteriomorpha; Ostreida; Ostreioidea; Ostreidae; Crassostrea; Crassostrea virginica  
UdeM00000025464 29159 111.7 UdeM00000025464 XP\_011419243.2 28 314  
209 7 53 358 78 382 2.50E-21 111.7 29159 cellular  
organisms; Eukaryota; Opisthokonta; Metazoa; Eumetazoa; Bilateria; Protostomia; Spiralia; Lophotrochozoa; Mollusca; Bivalvia; Autobranchia; Pteriomorpha; Ostreida; Ostreioidea; Ostreidae; Crassostrea; Crassostrea gigas  
UdeM00000025465 29159 111.7 UdeM00000025465 XP\_011419243.2 28 314  
209 7 53 358 78 382 2.50E-21 111.7 29159 cellular  
organisms; Eukaryota; Opisthokonta; Metazoa; Eumetazoa; Bilateria; Protostomia; Spiralia; Lophotrochozoa; Mollusca; Bivalvia; Autobranchia; Pteriomorpha; Ostreida; Ostreioidea; Ostreidae; Crassostrea; Crassostrea gigas  
UdeM00000025466 29159 106.3 UdeM00000025466 XP\_011419243.2 31.3 246  
155 4 128 365 154 393 9.90E-20 106.3 29159 cellular  
organisms; Eukaryota; Opisthokonta; Metazoa; Eumetazoa; Bilateria; Protostomia; Spiralia; Lophotrochozoa; Mollusca; Bivalvia; Autobranchia; Pteriomorpha; Ostreida; Ostreioidea; Ostreidae; Crassostrea; Crassostrea gigas  
UdeM00000025467 29159 118.6 UdeM00000025467 XP\_011419243.2 29.1 299  
203 5 53 347 78 371 2.00E-23 118.6 29159 cellular  
organisms; Eukaryota; Opisthokonta; Metazoa; Eumetazoa; Bilateria; Protostomia; Spiralia; Lophotrochozoa; Mollusca; Bivalvia; Autobranchia; Pteriomorpha; Ostreida; Ostreioidea; Ostreidae; Crassostrea; Crassostrea gigas  
UdeM00000025468 1735272 116.3 UdeM00000025468 XP\_041379324.1 26.3  
430 269 14 9 421 25 423 1.10E-22 116.3 1735272  
cellular  
organisms; Eukaryota; Opisthokonta; Metazoa; Eumetazoa; Bilateria; Protostomia; Spiralia; Lophotrochozoa; Mollusca; Gastropoda; Neomphalina; Neomphaloidea; Peltospiridae; Gigantopelta; Gigantopelta aegis  
UdeM00000025469 29159 104 UdeM00000025469 XP\_011419263.2 24.2 429  
296 12 6 424 24 433 5.40E-19 104 29159 cellular  
organisms; Eukaryota; Opisthokonta; Metazoa; Eumetazoa; Bilateria; Protostomia;

Spiralia;Lophotrochozoa;Mollusca;Bivalvia;Autobranchia;Pteriormorphia;Ostr  
eida;Ostreoidea;Ostreidae;Crassostrea;Crassostrea gigas  
UdeM00000025470 29159 112.8 UdeM00000025470 XP\_011419243.2 27.7 303  
206 7 53 351 78 371 1.20E-21 112.8 29159 cellular  
organisms;Eukaryota;Opisthokonta;Metazoa;Eumetazoa;Bilateria;Protostomia;  
Spiralia;Lophotrochozoa;Mollusca;Bivalvia;Autobranchia;Pteriormorphia;Ostr  
eida;Ostreoidea;Ostreidae;Crassostrea;Crassostrea gigas  
UdeM00000025471 125878 100.9 UdeM00000025471 XP\_018419965.1 35.4  
206 120 5 154 351 175 375 3.90E-18 100.9 125878  
cellular  
organisms;Eukaryota;Opisthokonta;Metazoa;Eumetazoa;Bilateria;Deuterostomi  
a;Chordata;Craniata;Vertebrata;Gnathostomata;Teleostomi;Euteleostomi;Sarc  
opterygii;Dipnotetrapodomorpha;Tetrapoda;Amphibia;Batrachia;Anura;Neobatr  
achia;Ranoidea;Dicroglossidae;Dicroglossinae;Nanorana;Nanorana parkeri  
UdeM00000025472 125878 101.7 UdeM00000025472 XP\_018419965.1 35.4  
206 120 5 154 351 175 375 2.00E-18 101.7 125878  
cellular  
organisms;Eukaryota;Opisthokonta;Metazoa;Eumetazoa;Bilateria;Deuterostomi  
a;Chordata;Craniata;Vertebrata;Gnathostomata;Teleostomi;Euteleostomi;Sarc  
opterygii;Dipnotetrapodomorpha;Tetrapoda;Amphibia;Batrachia;Anura;Neobatr  
achia;Ranoidea;Dicroglossidae;Dicroglossinae;Nanorana;Nanorana parkeri  
UdeM00000025473 29159 117.5 UdeM00000025473 XP\_011419299.2 25.5 478  
314 13 10 470 13 465 4.80E-23 117.5 29159 cellular  
organisms;Eukaryota;Opisthokonta;Metazoa;Eumetazoa;Bilateria;Protostomia;  
Spiralia;Lophotrochozoa;Mollusca;Bivalvia;Autobranchia;Pteriormorphia;Ostr  
eida;Ostreoidea;Ostreidae;Crassostrea;Crassostrea gigas  
UdeM00000025474 29159 129.4 UdeM00000025474 XP\_011419299.2 27.5 353  
245 7 10 354 13 362 1.20E-26 129.4 29159 cellular  
organisms;Eukaryota;Opisthokonta;Metazoa;Eumetazoa;Bilateria;Protostomia;  
Spiralia;Lophotrochozoa;Mollusca;Bivalvia;Autobranchia;Pteriormorphia;Ostr  
eida;Ostreoidea;Ostreidae;Crassostrea;Crassostrea gigas  
UdeM00000025476 29159 127.9 UdeM00000025476 XP\_011419309.2 29.2 318  
210 6 54 364 50 359 3.30E-26 127.9 29159 cellular  
organisms;Eukaryota;Opisthokonta;Metazoa;Eumetazoa;Bilateria;Protostomia;  
Spiralia;Lophotrochozoa;Mollusca;Bivalvia;Autobranchia;Pteriormorphia;Ostr  
eida;Ostreoidea;Ostreidae;Crassostrea;Crassostrea gigas  
UdeM00000025477 29159 125.9 UdeM00000025477 XP\_011419309.2 28.3 350  
233 7 54 393 50 391 1.30E-25 125.9 29159 cellular  
organisms;Eukaryota;Opisthokonta;Metazoa;Eumetazoa;Bilateria;Protostomia;  
Spiralia;Lophotrochozoa;Mollusca;Bivalvia;Autobranchia;Pteriormorphia;Ostr  
eida;Ostreoidea;Ostreidae;Crassostrea;Crassostrea gigas  
UdeM00000025478 6565 365.2 UdeM00000025478 XP\_022314681.1 64.2 293  
93 3 9 300 10 291 8.20E-98 365.2 6565 cellular  
organisms;Eukaryota;Opisthokonta;Metazoa;Eumetazoa;Bilateria;Protostomia;  
Spiralia;Lophotrochozoa;Mollusca;Bivalvia;Autobranchia;Pteriormorphia;Ostr  
eida;Ostreoidea;Ostreidae;Crassostrea;Crassostrea virginica  
UdeM00000025479 6565 375.6 UdeM00000025479 XP\_022314680.1 68.3 281  
81 3 22 297 19 296 6.00E-101 375.6 6565 cellular  
organisms;Eukaryota;Opisthokonta;Metazoa;Eumetazoa;Bilateria;Protostomia;  
Spiralia;Lophotrochozoa;Mollusca;Bivalvia;Autobranchia;Pteriormorphia;Ostr  
eida;Ostreoidea;Ostreidae;Crassostrea;Crassostrea virginica  
UdeM00000025480 6596 501.1 UdeM00000025480 XP\_045213790.1 69.6 326  
99 0 1 326 2 327 1.10E-138 501.1 6596 cellular  
organisms;Eukaryota;Opisthokonta;Metazoa;Eumetazoa;Bilateria;Protostomia;

Spiralia;Lophotrochozoa;Mollusca;Bivalvia;Autobranchia;Heteroconchia;Euherodonta;Imparidentia;Venerida;Veneroidea;Veneridae;Mercenaria;Mercenaria mercenaria

UdeM00000025481 6596 156.4 UdeM00000025481 XP\_045210603.1 31.1 605  
336 22 98 676 141 690 1.30E-34 156.4 6596 cellular

organisms;Eukaryota;Opisthokonta;Metazoa;Eumetazoa;Bilateria;Protostomia;Spiralia;Lophotrochozoa;Mollusca;Bivalvia;Autobranchia;Heteroconchia;Euherodonta;Imparidentia;Venerida;Veneroidea;Veneridae;Mercenaria;Mercenaria mercenaria

UdeM00000025482 6596 729.2 UdeM00000025482 XP\_045212185.1 70.4 766  
214 6 1 764 4 758 6.10E-207 729.2 6596 cellular

organisms;Eukaryota;Opisthokonta;Metazoa;Eumetazoa;Bilateria;Protostomia;Spiralia;Lophotrochozoa;Mollusca;Bivalvia;Autobranchia;Heteroconchia;Euherodonta;Imparidentia;Venerida;Veneroidea;Veneridae;Mercenaria;Mercenaria mercenaria

UdeM00000025483 6579 584.7 UdeM00000025483 XP\_033737612.1 66 424  
138 4 74 495 41 460 1.20E-163 584.7 6579 cellular

organisms;Eukaryota;Opisthokonta;Metazoa;Eumetazoa;Bilateria;Protostomia;Spiralia;Lophotrochozoa;Mollusca;Bivalvia;Autobranchia;Pteriomorphia;Pectinida;Pectinoidea;Pectinidae;Pecten;Pecten maximus

UdeM00000025484 6573 71.2 UdeM00000025484 XP\_021353848.1 28.1 342  
185 13 218 518 232 553 4.40E-09 71.2 6573 cellular

organisms;Eukaryota;Opisthokonta;Metazoa;Eumetazoa;Bilateria;Protostomia;Spiralia;Lophotrochozoa;Mollusca;Bivalvia;Autobranchia;Pteriomorphia;Pectinida;Pectinoidea;Pectinidae;Mizuhopecten;Mizuhopecten yessoensis

UdeM00000025485 29159 193.7 UdeM00000025485 XP\_011432333.1 75 116  
29 0 13 128 448 563 1.40E-46 193.7 29159 cellular

organisms;Eukaryota;Opisthokonta;Metazoa;Eumetazoa;Bilateria;Protostomia;Spiralia;Lophotrochozoa;Mollusca;Bivalvia;Autobranchia;Pteriomorphia;Ostreida;Ostreoidea;Ostreidae;Crassostrea;Crassostrea gigas

UdeM00000025486 1735272 266.5 UdeM00000025486 XP\_041371895.1 67.8  
180 58 0 29 208 37 216 4.50E-68 266.5 1735272

cellular

organisms;Eukaryota;Opisthokonta;Metazoa;Eumetazoa;Bilateria;Protostomia;Spiralia;Lophotrochozoa;Mollusca;Gastropoda;Neomphalina;Neomphaloidea;Peltospiridae;Gigantopelta;Gigantopelta aegis

UdeM00000025487 6579 475.3 UdeM00000025487 XP\_033737541.1 74.7 297  
75 0 10 306 2 298 5.80E-131 475.3 6579 cellular

organisms;Eukaryota;Opisthokonta;Metazoa;Eumetazoa;Bilateria;Protostomia;Spiralia;Lophotrochozoa;Mollusca;Bivalvia;Autobranchia;Pteriomorphia;Pectinida;Pectinoidea;Pectinidae;Pecten;Pecten maximus

UdeM00000025488 29159 290.8 UdeM00000025488 XP\_011444755.2 48.8 297  
147 1 12 308 15 306 2.00E-75 290.8 29159 cellular

organisms;Eukaryota;Opisthokonta;Metazoa;Eumetazoa;Bilateria;Protostomia;Spiralia;Lophotrochozoa;Mollusca;Bivalvia;Autobranchia;Pteriomorphia;Ostreida;Ostreoidea;Ostreidae;Crassostrea;Crassostrea gigas

UdeM00000025489 29159 96.7 UdeM00000025489 XP\_034312519.1 71 69  
20 0 312 380 243 311 6.90E-17 96.7 29159 cellular

organisms;Eukaryota;Opisthokonta;Metazoa;Eumetazoa;Bilateria;Protostomia;Spiralia;Lophotrochozoa;Mollusca;Bivalvia;Autobranchia;Pteriomorphia;Ostreida;Ostreoidea;Ostreidae;Crassostrea;Crassostrea gigas

UdeM00000025490 6579 429.9 UdeM00000025490 XP\_033736514.1 37.7 887  
123 6 1 882 1 462 1.10E-116 429.9 6579 cellular

organisms;Eukaryota;Opisthokonta;Metazoa;Eumetazoa;Bilateria;Protostomia;

Spiralia;Lophotrochozoa;Mollusca;Bivalvia;Autobranchia;Pteriormorphia;Pectinida;Pectinoidea;Pectinidae;Pecten;Pecten maximus  
UdeM00000025491 6596 237.3 UdeM00000025491 XP\_045180304.1 26.2 782  
448 29 10 734 9 718 6.90E-59 237.3 6596 cellular  
organisms;Eukaryota;Opisthokonta;Metazoa;Eumetazoa;Bilateria;Protostomia;  
Spiralia;Lophotrochozoa;Mollusca;Bivalvia;Autobranchia;Heteroconchia;Euherodonta;Imparidentia;Venerida;Veneroidea;Veneridae;Mercenaria;Mercenaria mercenaria  
UdeM00000044108 6945 85.1 UdeM00000044108 XP\_040065097.1 29.1 196  
107 5 59 225 85 277 1.70E-13 85.1 6945 cellular  
organisms;Eukaryota;Opisthokonta;Metazoa;Eumetazoa;Bilateria;Protostomia;  
Ecdysozoa;Panarthropoda;Arthropoda;Chelicerata;Arachnida;Acari;Parasitiformes;Ixodida;Ixodoidea;Ixodidae;Ixodinae;Ixodes;Ixodes scapularis  
UdeM00000044110 34773 82 UdeM00000044110 XP\_041958816.1 45.1 82  
44 1 133 213 234 315 1.20E-12 82 34773 cellular  
organisms;Eukaryota;Opisthokonta;Metazoa;Eumetazoa;Bilateria;Deuterostomia;Chordata;Craniata;Vertebrata;Gnathostomata;Teleostomi;Euteleostomi;Actinopterygii;Actinopteri;Neopterygii;Teleostei;Osteoglossocephalai;Clupeocephala;Otomorpha;Clupei;Clupeiformes;Clupeoidei;Clupeidae;Alosinae;Alosa;Alosa sapidissima  
UdeM00000041612 29159 107.1 UdeM00000041612 XP\_034315809.1 48.1 108  
55 1 18 124 62 169 1.70E-20 107.1 29159 cellular  
organisms;Eukaryota;Opisthokonta;Metazoa;Eumetazoa;Bilateria;Protostomia;  
Spiralia;Lophotrochozoa;Mollusca;Bivalvia;Autobranchia;Pteriormorphia;Ostreida;Ostreoidea;Ostreidae;Crassostrea;Crassostrea gigas  
UdeM00000041613 6596 297 UdeM00000041613 XP\_045201869.1 30.2 705  
455 13 12 702 11 692 6.60E-77 297 6596 cellular  
organisms;Eukaryota;Opisthokonta;Metazoa;Eumetazoa;Bilateria;Protostomia;  
Spiralia;Lophotrochozoa;Mollusca;Bivalvia;Autobranchia;Heteroconchia;Euherodonta;Imparidentia;Venerida;Veneroidea;Veneridae;Mercenaria;Mercenaria mercenaria  
UdeM00000041615 29159 175.6 UdeM00000041615 XP\_034314481.1 49.5 184  
92 1 169 352 224 406 1.40E-40 175.6 29159 cellular  
organisms;Eukaryota;Opisthokonta;Metazoa;Eumetazoa;Bilateria;Protostomia;  
Spiralia;Lophotrochozoa;Mollusca;Bivalvia;Autobranchia;Pteriormorphia;Ostreida;Ostreoidea;Ostreidae;Crassostrea;Crassostrea gigas  
UdeM00000041616 6579 84 UdeM00000041616 XP\_033726550.1 85.7 49  
7 0 168 216 100 148 2.70E-13 84 6579 cellular  
organisms;Eukaryota;Opisthokonta;Metazoa;Eumetazoa;Bilateria;Protostomia;  
Spiralia;Lophotrochozoa;Mollusca;Bivalvia;Autobranchia;Pteriormorphia;Pectinida;Pectinoidea;Pectinidae;Pecten;Pecten maximus  
UdeM00000041617 29159 269.2 UdeM00000041617 XP\_011429125.2 56 277  
120 2 14 290 148 422 6.00E-69 269.2 29159 cellular  
organisms;Eukaryota;Opisthokonta;Metazoa;Eumetazoa;Bilateria;Protostomia;  
Spiralia;Lophotrochozoa;Mollusca;Bivalvia;Autobranchia;Pteriormorphia;Ostreida;Ostreoidea;Ostreidae;Crassostrea;Crassostrea gigas  
UdeM00000041618 6596 318.2 UdeM00000041618 XP\_045180259.1 60.5 311  
117 4 18 324 38 346 1.30E-83 318.2 6596 cellular  
organisms;Eukaryota;Opisthokonta;Metazoa;Eumetazoa;Bilateria;Protostomia;  
Spiralia;Lophotrochozoa;Mollusca;Bivalvia;Autobranchia;Heteroconchia;Euherodonta;Imparidentia;Venerida;Veneroidea;Veneridae;Mercenaria;Mercenaria mercenaria  
UdeM00000041619 400727 96.7 UdeM00000041619 XP\_025089494.1 49.4  
83 42 0 4 86 406 488 1.60E-17 96.7 400727

cellular  
organisms;Eukaryota;Opisthokonta;Metazoa;Eumetazoa;Bilateria;Protostomia;  
Spiralia;Lophotrochozoa;Mollusca;Gastropoda;Caenogastropoda;Architaenioglossa;  
Ampullarioidea;Ampullariidae;Pomacea;Pomacea canaliculata  
UdeM00000041620 6596 93.6 UdeM00000041620 XP\_045166808.1 33 230  
125 14 110 319 78 298 6.10E-16 93.6 6596 cellular  
organisms;Eukaryota;Opisthokonta;Metazoa;Eumetazoa;Bilateria;Protostomia;  
Spiralia;Lophotrochozoa;Mollusca;Bivalvia;Autobranchia;Heteroconchia;Euherodonta;  
Imparidentia;Venerida;Veneroidea;Veneridae;Mercenaria;Mercenaria mercenaria  
UdeM00000041622 6596 97.4 UdeM00000041622 XP\_045171877.1 33.8 219  
120 9 64 263 26 238 5.80E-17 97.4 6596 cellular  
organisms;Eukaryota;Opisthokonta;Metazoa;Eumetazoa;Bilateria;Protostomia;  
Spiralia;Lophotrochozoa;Mollusca;Bivalvia;Autobranchia;Heteroconchia;Euherodonta;  
Imparidentia;Venerida;Veneroidea;Veneridae;Mercenaria;Mercenaria mercenaria  
UdeM00000041623 6596 69.7 UdeM00000041623 XP\_045171769.1 24.2 393  
211 13 43 362 151 529 9.10E-09 69.7 6596 cellular  
organisms;Eukaryota;Opisthokonta;Metazoa;Eumetazoa;Bilateria;Protostomia;  
Spiralia;Lophotrochozoa;Mollusca;Bivalvia;Autobranchia;Heteroconchia;Euherodonta;  
Imparidentia;Venerida;Veneroidea;Veneridae;Mercenaria;Mercenaria mercenaria  
UdeM00000041624 10224 224.2 UdeM00000041624 XP\_006813844.1 46 235  
127 0 1 235 128 362 1.80E-55 224.2 10224 cellular  
organisms;Eukaryota;Opisthokonta;Metazoa;Eumetazoa;Bilateria;Deuterostomia;  
Hemichordata;Enteropneusta;Harrimaniidae;Saccoglossus;Saccoglossus kowalevskii  
UdeM00000041625 6596 290.4 UdeM00000041625 XP\_045182881.1 63.6 261  
81 7 79 333 1701 1953 2.90E-75 290.4 6596 cellular  
organisms;Eukaryota;Opisthokonta;Metazoa;Eumetazoa;Bilateria;Protostomia;  
Spiralia;Lophotrochozoa;Mollusca;Bivalvia;Autobranchia;Heteroconchia;Euherodonta;  
Imparidentia;Venerida;Veneroidea;Veneridae;Mercenaria;Mercenaria mercenaria  
UdeM00000041626 6596 274.6 UdeM00000041626 XP\_045182879.1 65.8 219  
68 4 99 317 1756 1967 1.60E-70 274.6 6596 cellular  
organisms;Eukaryota;Opisthokonta;Metazoa;Eumetazoa;Bilateria;Protostomia;  
Spiralia;Lophotrochozoa;Mollusca;Bivalvia;Autobranchia;Heteroconchia;Euherodonta;  
Imparidentia;Venerida;Veneroidea;Veneridae;Mercenaria;Mercenaria mercenaria  
UdeM00000041628 225164 100.9 UdeM00000041628 XP\_009063967.1 45  
120 59 2 32 144 89 208 1.50E-18 100.9 225164  
cellular  
organisms;Eukaryota;Opisthokonta;Metazoa;Eumetazoa;Bilateria;Protostomia;  
Spiralia;Lophotrochozoa;Mollusca;Gastropoda;Patellogastropoda;Lottiidae;  
Lottiidae;Lottia;Lottia gigantea  
UdeM00000041629 6596 204.1 UdeM00000041629 XP\_045160375.1 57.7 149  
63 0 11 159 438 586 1.30E-49 204.1 6596 cellular  
organisms;Eukaryota;Opisthokonta;Metazoa;Eumetazoa;Bilateria;Protostomia;  
Spiralia;Lophotrochozoa;Mollusca;Bivalvia;Autobranchia;Heteroconchia;Euherodonta;  
Imparidentia;Venerida;Veneroidea;Veneridae;Mercenaria;Mercenaria mercenaria  
UdeM00000041630 6596 343.6 UdeM00000041630 XP\_045160375.1 50.9 350  
117 5 1 298 1 347 2.60E-91 343.6 6596 cellular  
organisms;Eukaryota;Opisthokonta;Metazoa;Eumetazoa;Bilateria;Protostomia;

Spiralia;Lophotrochozoa;Mollusca;Bivalvia;Autobranchia;Heteroconchia;Euherodonta;Imparidentia;Venerida;Veneroidea;Veneridae;Mercenaria;Mercenaria mercenaria

UdeM00000041631 6596 289.7 UdeM00000041631 XP\_045182881.1 63.2 261  
82 7 910 1164 1701 1953 1.70E-74 289.7 6596 cellular

organisms;Eukaryota;Opisthokonta;Metazoa;Eumetazoa;Bilateria;Protostomia;Spiralia;Lophotrochozoa;Mollusca;Bivalvia;Autobranchia;Heteroconchia;Euherodonta;Imparidentia;Venerida;Veneroidea;Veneridae;Mercenaria;Mercenaria mercenaria

UdeM00000041632 6596 275.8 UdeM00000041632 XP\_045182879.1 65.8 219  
68 4 435 653 1756 1967 1.40E-70 275.8 6596 cellular

organisms;Eukaryota;Opisthokonta;Metazoa;Eumetazoa;Bilateria;Protostomia;Spiralia;Lophotrochozoa;Mollusca;Bivalvia;Autobranchia;Heteroconchia;Euherodonta;Imparidentia;Venerida;Veneroidea;Veneridae;Mercenaria;Mercenaria mercenaria

UdeM00000017187 6596 284.3 UdeM00000017187 XP\_045171119.1 83 171  
29 0 6 176 351 521 1.10E-73 284.3 6596 cellular

organisms;Eukaryota;Opisthokonta;Metazoa;Eumetazoa;Bilateria;Protostomia;Spiralia;Lophotrochozoa;Mollusca;Bivalvia;Autobranchia;Heteroconchia;Euherodonta;Imparidentia;Venerida;Veneroidea;Veneridae;Mercenaria;Mercenaria mercenaria

UdeM00000017188 6579 125.9 UdeM00000017188 XP\_033736239.1 34.4 189  
78 2 1 145 69 255 4.10E-26 125.9 6579 cellular

organisms;Eukaryota;Opisthokonta;Metazoa;Eumetazoa;Bilateria;Protostomia;Spiralia;Lophotrochozoa;Mollusca;Bivalvia;Autobranchia;Pteriomorphia;Pectinida;Pectinoidea;Pectinidae;Pecten;Pecten maximus

UdeM00000017189 6565 134 UdeM00000017189 XP\_022299727.1 50 134  
66 1 29 162 145 277 1.90E-28 134 6565 cellular

organisms;Eukaryota;Opisthokonta;Metazoa;Eumetazoa;Bilateria;Protostomia;Spiralia;Lophotrochozoa;Mollusca;Bivalvia;Autobranchia;Pteriomorphia;Ostreida;Ostreoidea;Ostreidae;Crassostrea;Crassostrea virginica

UdeM00000017190 6579 387.1 UdeM00000017190 XP\_033736239.1 59 295  
118 2 1 295 1 292 2.00E-104 387.1 6579 cellular

organisms;Eukaryota;Opisthokonta;Metazoa;Eumetazoa;Bilateria;Protostomia;Spiralia;Lophotrochozoa;Mollusca;Bivalvia;Autobranchia;Pteriomorphia;Pectinida;Pectinoidea;Pectinidae;Pecten;Pecten maximus

UdeM00000017191 6573 391.3 UdeM00000017191 XP\_021343061.1 58.6 295  
120 2 1 295 1 293 1.10E-105 391.3 6573 cellular

organisms;Eukaryota;Opisthokonta;Metazoa;Eumetazoa;Bilateria;Protostomia;Spiralia;Lophotrochozoa;Mollusca;Bivalvia;Autobranchia;Pteriomorphia;Pectinida;Pectinoidea;Pectinidae;Mizuhopecten;Mizuhopecten yessoensis

UdeM00000017192 6579 69.3 UdeM00000017192 XP\_033744326.1 40.2 102  
59 1 4 103 8 109 3.30E-09 69.3 6579 cellular

organisms;Eukaryota;Opisthokonta;Metazoa;Eumetazoa;Bilateria;Protostomia;Spiralia;Lophotrochozoa;Mollusca;Bivalvia;Autobranchia;Pteriomorphia;Pectinida;Pectinoidea;Pectinidae;Pecten;Pecten maximus

UdeM00000017194 6579 97.4 UdeM00000017194 XP\_033730215.1 39.9 138  
79 2 4 137 325 462 1.50E-17 97.4 6579 cellular

organisms;Eukaryota;Opisthokonta;Metazoa;Eumetazoa;Bilateria;Protostomia;Spiralia;Lophotrochozoa;Mollusca;Bivalvia;Autobranchia;Pteriomorphia;Pectinida;Pectinoidea;Pectinidae;Pecten;Pecten maximus

UdeM00000017193 6579 70.5 UdeM00000017193 XP\_033745803.1 45.9 85  
43 1 4 85 325 409 1.40E-09 70.5 6579 cellular

organisms;Eukaryota;Opisthokonta;Metazoa;Eumetazoa;Bilateria;Protostomia;

Spiralia;Lophotrochozoa;Mollusca;Bivalvia;Autobranchia;Pteriormorphia;Pectinida;Pectinoidea;Pectinidae;Pecten;Pecten maximus  
UdeM00000017195 6579 433.3 UdeM00000017195 XP\_033730233.1 57.7 376  
152 2 1 369 133 508 3.00E-118 433.3 6579 cellular  
organisms;Eukaryota;Opisthokonta;Metazoa;Eumetazoa;Bilateria;Protostomia;Spiralia;Lophotrochozoa;Mollusca;Bivalvia;Autobranchia;Pteriormorphia;Pectinida;Pectinoidea;Pectinidae;Pecten;Pecten maximus  
UdeM00000017196 6579 146.7 UdeM00000017196 XP\_033745805.1 56.9 137  
52 4 1 133 1 134 2.10E-32 146.7 6579 cellular  
organisms;Eukaryota;Opisthokonta;Metazoa;Eumetazoa;Bilateria;Protostomia;Spiralia;Lophotrochozoa;Mollusca;Bivalvia;Autobranchia;Pteriormorphia;Pectinida;Pectinoidea;Pectinidae;Pecten;Pecten maximus  
UdeM00000017197 6573 379.8 UdeM00000017197 XP\_021343061.1 56.6 295  
126 2 1 295 1 293 3.20E-102 379.8 6573 cellular  
organisms;Eukaryota;Opisthokonta;Metazoa;Eumetazoa;Bilateria;Protostomia;Spiralia;Lophotrochozoa;Mollusca;Bivalvia;Autobranchia;Pteriormorphia;Pectinida;Pectinoidea;Pectinidae;Mizuhopecten;Mizuhopecten yessoensis  
UdeM00000017198 2607531 192.2 UdeM00000017198 XP\_029651222.1 73.5  
181 39 2 240 420 294 465 1.60E-45 192.2 2607531  
cellular  
organisms;Eukaryota;Opisthokonta;Metazoa;Eumetazoa;Bilateria;Protostomia;Spiralia;Lophotrochozoa;Mollusca;Cephalopoda;Coleoidea;Octopodiformes;Octopoda;Incirrata;Octopodidae;Octopus;Octopus sinensis  
UdeM00000017199 2607531 192.2 UdeM00000017199 XP\_029651222.1 73.5  
181 39 2 241 421 294 465 1.60E-45 192.2 2607531  
cellular  
organisms;Eukaryota;Opisthokonta;Metazoa;Eumetazoa;Bilateria;Protostomia;Spiralia;Lophotrochozoa;Mollusca;Cephalopoda;Coleoidea;Octopodiformes;Octopoda;Incirrata;Octopodidae;Octopus;Octopus sinensis  
UdeM00000017200 2607531 192.2 UdeM00000017200 XP\_029651222.1 73.5  
181 39 2 241 421 294 465 1.60E-45 192.2 2607531  
cellular  
organisms;Eukaryota;Opisthokonta;Metazoa;Eumetazoa;Bilateria;Protostomia;Spiralia;Lophotrochozoa;Mollusca;Cephalopoda;Coleoidea;Octopodiformes;Octopoda;Incirrata;Octopodidae;Octopus;Octopus sinensis  
UdeM00000017202 6596 381.7 UdeM00000017202 XP\_045166550.1 59 317  
129 1 1 317 200 515 9.00E-103 381.7 6596 cellular  
organisms;Eukaryota;Opisthokonta;Metazoa;Eumetazoa;Bilateria;Protostomia;Spiralia;Lophotrochozoa;Mollusca;Bivalvia;Autobranchia;Heteroconchia;Euheterodonta;Imparidentia;Venerida;Veneroidea;Veneridae;Mercenaria;Mercenaria mercenaria  
UdeM00000017201 6596 632.1 UdeM00000017201 XP\_045166550.1 59.9 509  
202 2 28 535 8 515 6.40E-178 632.1 6596 cellular  
organisms;Eukaryota;Opisthokonta;Metazoa;Eumetazoa;Bilateria;Protostomia;Spiralia;Lophotrochozoa;Mollusca;Bivalvia;Autobranchia;Heteroconchia;Euheterodonta;Imparidentia;Venerida;Veneroidea;Veneridae;Mercenaria;Mercenaria mercenaria  
UdeM00000017203 6596 599 UdeM00000017203 XP\_045166550.1 61.4 472  
180 2 24 494 43 513 5.60E-168 599 6596 cellular  
organisms;Eukaryota;Opisthokonta;Metazoa;Eumetazoa;Bilateria;Protostomia;Spiralia;Lophotrochozoa;Mollusca;Bivalvia;Autobranchia;Heteroconchia;Euheterodonta;Imparidentia;Venerida;Veneroidea;Veneridae;Mercenaria;Mercenaria mercenaria



UdeM00000017204 6596 628.6 UdeM00000017204 XP\_045166550.1 59.1 508  
 206 2 48 554 7 513 7.40E-177 628.6 6596 cellular  
 organisms;Eukaryota;Opisthokonta;Metazoa;Eumetazoa;Bilateria;Protostomia;  
 Spiralia;Lophotrochozoa;Mollusca;Bivalvia;Autobranchia;Heteroconchia;Euhe  
 terodonta;Imparidentia;Venerida;Veneroidea;Veneridae;Mercenaria;Mercenari  
 a mercenaria  
 UdeM00000017205 6579 268.5 UdeM00000017205 XP\_033746014.1 54.3 230  
 105 0 33 262 280 509 9.20E-69 268.5 6579 cellular  
 organisms;Eukaryota;Opisthokonta;Metazoa;Eumetazoa;Bilateria;Protostomia;  
 Spiralia;Lophotrochozoa;Mollusca;Bivalvia;Autobranchia;Pteriormorphia;Pect  
 inida;Pectinoidea;Pectinidae;Pecten;Pecten maximus  
 UdeM00000017206 225164 127.1 UdeM00000017206 XP\_009048985.1 73.6  
 72 19 0 1 72 195 266 9.10E-27 127.1 225164  
 cellular  
 organisms;Eukaryota;Opisthokonta;Metazoa;Eumetazoa;Bilateria;Protostomia;  
 Spiralia;Lophotrochozoa;Mollusca;Gastropoda;Patellogastropoda;Lottioidea;  
 Lottiidae;Lottia;Lottia gigantea  
 UdeM00000017207 7574 188.7 UdeM00000017207 XP\_013395128.1 61.6 138  
 53 0 6 143 16 153 5.90E-45 188.7 7574 cellular  
 organisms;Eukaryota;Opisthokonta;Metazoa;Eumetazoa;Bilateria;Protostomia;  
 Spiralia;Lophotrochozoa;Brachiopoda;Linguliformea;Lingulata;Lingulida;Lin  
 guloidea;Lingulidae;Lingula;Lingula anatina  
 UdeM00000017208 1735272 375.9 UdeM00000017208 XP\_041349794.1 66.4  
 268 89 1 19 285 74 341 4.60E-101 375.9 1735272  
 cellular  
 organisms;Eukaryota;Opisthokonta;Metazoa;Eumetazoa;Bilateria;Protostomia;  
 Spiralia;Lophotrochozoa;Mollusca;Gastropoda;Neomphalina;Neomphaloidea;Pel  
 tospiridae;Gigantopelta;Gigantopelta aegis  
 UdeM00000017209 6573 625.9 UdeM00000017209 XP\_021346284.1 59.2 502  
 201 1 6 507 11 508 4.40E-176 625.9 6573 cellular  
 organisms;Eukaryota;Opisthokonta;Metazoa;Eumetazoa;Bilateria;Protostomia;  
 Spiralia;Lophotrochozoa;Mollusca;Bivalvia;Autobranchia;Pteriormorphia;Pect  
 inida;Pectinoidea;Pectinidae;Mizuhopecten;Mizuhopecten yessoensis  
 UdeM00000017210 6596 3380.5 UdeM00000017210 XP\_045172704.1 64.4  
 2680 896 6 1 2627 1 2676 0.00E+00 3380.5 6596  
 cellular  
 organisms;Eukaryota;Opisthokonta;Metazoa;Eumetazoa;Bilateria;Protostomia;  
 Spiralia;Lophotrochozoa;Mollusca;Bivalvia;Autobranchia;Heteroconchia;Euhe  
 terodonta;Imparidentia;Venerida;Veneroidea;Veneridae;Mercenaria;Mercenari  
 a mercenaria  
 UdeM00000017212 6565 754.6 UdeM00000017212 XP\_022341054.1 77.8 491  
 89 4 1 473 1 489 7.60E-215 754.6 6565 cellular  
 organisms;Eukaryota;Opisthokonta;Metazoa;Eumetazoa;Bilateria;Protostomia;  
 Spiralia;Lophotrochozoa;Mollusca;Bivalvia;Autobranchia;Pteriormorphia;Ostr  
 eida;Ostreoidea;Ostreidae;Crassostrea;Crassostrea virginica  
 UdeM00000017211 6565 751.5 UdeM00000017211 XP\_022341054.1 80.3 468  
 85 3 1 463 1 466 6.40E-214 751.5 6565 cellular  
 organisms;Eukaryota;Opisthokonta;Metazoa;Eumetazoa;Bilateria;Protostomia;  
 Spiralia;Lophotrochozoa;Mollusca;Bivalvia;Autobranchia;Pteriormorphia;Ostr  
 eida;Ostreoidea;Ostreidae;Crassostrea;Crassostrea virginica  
 UdeM00000017213 6573 250 UdeM00000017213 XP\_021340605.1 52.9 240  
 94 3 1 227 1 234 2.90E-63 250 6573 cellular  
 organisms;Eukaryota;Opisthokonta;Metazoa;Eumetazoa;Bilateria;Protostomia;

Spiralia; Lophotrochozoa; Mollusca; Bivalvia; Autobranchia; Pteriomorpha; Pectinida; Pectinoidea; Pectinidae; Mizuhopecten; Mizuhopecten yessoensis  
UdeM00000017214 6579 391.3 UdeM00000017214 XP\_033733772.1 43 465  
241 10 3 463 75 519 2.30E-105 391.3 6579 cellular  
organisms; Eukaryota; Opisthokonta; Metazoa; Eumetazoa; Bilateria; Protostomia; Spiralia; Lophotrochozoa; Mollusca; Bivalvia; Autobranchia; Pteriomorpha; Pectinida; Pectinoidea; Pectinidae; Pecten; Pecten maximus  
UdeM00000017215 6573 382.5 UdeM00000017215 XP\_021377641.1 60.1 308  
120 2 13 317 2 309 5.50E-103 382.5 6573 cellular  
organisms; Eukaryota; Opisthokonta; Metazoa; Eumetazoa; Bilateria; Protostomia; Spiralia; Lophotrochozoa; Mollusca; Bivalvia; Autobranchia; Pteriomorpha; Pectinida; Pectinoidea; Pectinidae; Mizuhopecten; Mizuhopecten yessoensis  
UdeM00000017216 6596 532.7 UdeM00000017216 XP\_045174144.1 56.9 448  
187 3 14 458 42 486 4.60E-148 532.7 6596 cellular  
organisms; Eukaryota; Opisthokonta; Metazoa; Eumetazoa; Bilateria; Protostomia; Spiralia; Lophotrochozoa; Mollusca; Bivalvia; Autobranchia; Heteroconchia; Euheterodonta; Imparidentia; Venerida; Veneroidea; Veneridae; Mercenaria; Mercenaria mercenaria  
UdeM00000017217 6596 521.2 UdeM00000017217 XP\_045204271.1 44.5 582  
312 7 9 584 4 580 1.70E-144 521.2 6596 cellular  
organisms; Eukaryota; Opisthokonta; Metazoa; Eumetazoa; Bilateria; Protostomia; Spiralia; Lophotrochozoa; Mollusca; Bivalvia; Autobranchia; Heteroconchia; Euheterodonta; Imparidentia; Venerida; Veneroidea; Veneridae; Mercenaria; Mercenaria mercenaria  
UdeM00000017218 6596 525 UdeM00000017218 XP\_045204271.1 44.7 582  
311 7 9 584 4 580 1.20E-145 525 6596 cellular  
organisms; Eukaryota; Opisthokonta; Metazoa; Eumetazoa; Bilateria; Protostomia; Spiralia; Lophotrochozoa; Mollusca; Bivalvia; Autobranchia; Heteroconchia; Euheterodonta; Imparidentia; Venerida; Veneroidea; Veneridae; Mercenaria; Mercenaria mercenaria  
UdeM00000017219 6596 547.4 UdeM00000017219 XP\_045204274.1 48.9 583  
283 6 25 599 4 579 2.30E-152 547.4 6596 cellular  
organisms; Eukaryota; Opisthokonta; Metazoa; Eumetazoa; Bilateria; Protostomia; Spiralia; Lophotrochozoa; Mollusca; Bivalvia; Autobranchia; Heteroconchia; Euheterodonta; Imparidentia; Venerida; Veneroidea; Veneridae; Mercenaria; Mercenaria mercenaria  
UdeM00000017220 6596 534.6 UdeM00000017220 XP\_045204674.1 47.1 577  
297 5 28 602 6 576 1.60E-148 534.6 6596 cellular  
organisms; Eukaryota; Opisthokonta; Metazoa; Eumetazoa; Bilateria; Protostomia; Spiralia; Lophotrochozoa; Mollusca; Bivalvia; Autobranchia; Heteroconchia; Euheterodonta; Imparidentia; Venerida; Veneroidea; Veneridae; Mercenaria; Mercenaria mercenaria  
UdeM00000017221 6596 394.8 UdeM00000017221 XP\_045204674.1 46.5 477  
247 5 1 475 106 576 1.50E-106 394.8 6596 cellular  
organisms; Eukaryota; Opisthokonta; Metazoa; Eumetazoa; Bilateria; Protostomia; Spiralia; Lophotrochozoa; Mollusca; Bivalvia; Autobranchia; Heteroconchia; Euheterodonta; Imparidentia; Venerida; Veneroidea; Veneridae; Mercenaria; Mercenaria mercenaria  
UdeM00000017222 6596 515 UdeM00000017222 XP\_045204674.1 45.8 577  
305 5 7 581 6 576 1.20E-142 515 6596 cellular  
organisms; Eukaryota; Opisthokonta; Metazoa; Eumetazoa; Bilateria; Protostomia; Spiralia; Lophotrochozoa; Mollusca; Bivalvia; Autobranchia; Heteroconchia; Euheterodonta; Imparidentia; Venerida; Veneroidea; Veneridae; Mercenaria; Mercenaria mercenaria

UdeM00000017223 37653 148.3 UdeM00000017223 XP\_014779622.1 36.6 593  
 330 13 19 580 43 620 3.30E-32 148.3 37653 cellular  
 organisms;Eukaryota;Opisthokonta;Metazoa;Eumetazoa;Bilateria;Protostomia;  
 Spiralia;Lophotrochozoa;Mollusca;Cephalopoda;Coleoidea;Octopodiformes;Oct  
 opoda;Incirrata;Octopodidae;Octopus;Octopus bimaculoides  
 UdeM00000017224 10224 183.3 UdeM00000017224 XP\_002742221.1 40.7 246  
 133 6 354 590 1212 1453 1.00E-42 183.3 10224 cellular  
 organisms;Eukaryota;Opisthokonta;Metazoa;Eumetazoa;Bilateria;Deuterostomi  
 a;Hemichordata;Enteropneusta;Harrimaniidae;Saccoglossus;Saccoglossus  
 kowalevskii  
 UdeM00000017226 6596 571.6 UdeM00000017226 XP\_045173606.1 48.8 601  
 270 9 110 679 50 643 1.30E-159 571.6 6596 cellular  
 organisms;Eukaryota;Opisthokonta;Metazoa;Eumetazoa;Bilateria;Protostomia;  
 Spiralia;Lophotrochozoa;Mollusca;Bivalvia;Autobranchia;Heteroconchia;Euhe  
 terodonta;Imparidentia;Venerida;Veneroidea;Veneridae;Mercenaria;Mercenari  
 a mercenaria  
 UdeM00000017227 6596 808.9 UdeM00000017227 XP\_045171991.1 62.4 614  
 230 1 9 621 12 625 4.50E-231 808.9 6596 cellular  
 organisms;Eukaryota;Opisthokonta;Metazoa;Eumetazoa;Bilateria;Protostomia;  
 Spiralia;Lophotrochozoa;Mollusca;Bivalvia;Autobranchia;Heteroconchia;Euhe  
 terodonta;Imparidentia;Venerida;Veneroidea;Veneridae;Mercenaria;Mercenari  
 a mercenaria  
 UdeM00000017228 6596 699.5 UdeM00000017228 XP\_045171991.1 53.8 623  
 282 3 2 620 6 626 3.80E-198 699.5 6596 cellular  
 organisms;Eukaryota;Opisthokonta;Metazoa;Eumetazoa;Bilateria;Protostomia;  
 Spiralia;Lophotrochozoa;Mollusca;Bivalvia;Autobranchia;Heteroconchia;Euhe  
 terodonta;Imparidentia;Venerida;Veneroidea;Veneridae;Mercenaria;Mercenari  
 a mercenaria  
 UdeM00000017229 6596 684.9 UdeM00000017229 XP\_045171991.1 53.7 622  
 284 3 2 621 6 625 9.70E-194 684.9 6596 cellular  
 organisms;Eukaryota;Opisthokonta;Metazoa;Eumetazoa;Bilateria;Protostomia;  
 Spiralia;Lophotrochozoa;Mollusca;Bivalvia;Autobranchia;Heteroconchia;Euhe  
 terodonta;Imparidentia;Venerida;Veneroidea;Veneridae;Mercenaria;Mercenari  
 a mercenaria  
 UdeM00000017230 6596 611.3 UdeM00000017230 XP\_045171734.1 61 474  
 185 0 22 495 22 495 1.10E-171 611.3 6596 cellular  
 organisms;Eukaryota;Opisthokonta;Metazoa;Eumetazoa;Bilateria;Protostomia;  
 Spiralia;Lophotrochozoa;Mollusca;Bivalvia;Autobranchia;Heteroconchia;Euhe  
 terodonta;Imparidentia;Venerida;Veneroidea;Veneridae;Mercenaria;Mercenari  
 a mercenaria  
 UdeM00000017231 6596 63.9 UdeM00000017231 XP\_045156554.1 31.7 139  
 86 4 1 136 563 695 2.90E-07 63.9 6596 cellular  
 organisms;Eukaryota;Opisthokonta;Metazoa;Eumetazoa;Bilateria;Protostomia;  
 Spiralia;Lophotrochozoa;Mollusca;Bivalvia;Autobranchia;Heteroconchia;Euhe  
 terodonta;Imparidentia;Venerida;Veneroidea;Veneridae;Mercenaria;Mercenari  
 a mercenaria  
 UdeM00000017232 6565 115.5 UdeM00000017232 XP\_022297037.1 40.1 167  
 93 3 6 167 11 175 7.00E-23 115.5 6565 cellular  
 organisms;Eukaryota;Opisthokonta;Metazoa;Eumetazoa;Bilateria;Protostomia;  
 Spiralia;Lophotrochozoa;Mollusca;Bivalvia;Autobranchia;Pteriomorphia;Ostr  
 eida;Ostreoidea;Ostreidae;Crassostrea;Crassostrea virginica  
 UdeM00000017233 6596 197.6 UdeM00000017233 XP\_045172643.1 66.2 145  
 49 0 4 148 5 149 1.20E-47 197.6 6596 cellular  
 organisms;Eukaryota;Opisthokonta;Metazoa;Eumetazoa;Bilateria;Protostomia;

Spiralia;Lophotrochozoa;Mollusca;Bivalvia;Autobranchia;Heteroconchia;Euherodonta;Imparidentia;Venerida;Veneroidea;Veneridae;Mercenaria;Mercenaria mercenaria

UdeM00000017234 400727 108.6 UdeM00000017234 XP\_025089927.1 65.9  
85 28 1 119 202 69 153 9.80E-21 108.6 400727  
cellular

organisms;Eukaryota;Opisthokonta;Metazoa;Eumetazoa;Bilateria;Protostomia;Spiralia;Lophotrochozoa;Mollusca;Gastropoda;Caenogastropoda;Architaenioglossa;Ampullarioidea;Ampullariidae;Pomacea;Pomacea canaliculata

UdeM00000017235 400727 105.9 UdeM00000017235 XP\_025089927.1 53.8  
104 30 1 10 95 50 153 3.10E-20 105.9 400727  
cellular

organisms;Eukaryota;Opisthokonta;Metazoa;Eumetazoa;Bilateria;Protostomia;Spiralia;Lophotrochozoa;Mollusca;Gastropoda;Caenogastropoda;Architaenioglossa;Ampullarioidea;Ampullariidae;Pomacea;Pomacea canaliculata

UdeM00000017237 400727 523.1 UdeM00000017237 XP\_025090516.1 53.7  
529 237 3 64 584 163 691 4.90E-145 523.1 400727  
cellular

organisms;Eukaryota;Opisthokonta;Metazoa;Eumetazoa;Bilateria;Protostomia;Spiralia;Lophotrochozoa;Mollusca;Gastropoda;Caenogastropoda;Architaenioglossa;Ampullarioidea;Ampullariidae;Pomacea;Pomacea canaliculata

UdeM00000017238 6596 303.5 UdeM00000017238 XP\_045170685.1 35.8 1513  
600 39 19 1340 202 1534 1.30E-78 303.5 6596 cellular

organisms;Eukaryota;Opisthokonta;Metazoa;Eumetazoa;Bilateria;Protostomia;Spiralia;Lophotrochozoa;Mollusca;Bivalvia;Autobranchia;Heteroconchia;Euherodonta;Imparidentia;Venerida;Veneroidea;Veneridae;Mercenaria;Mercenaria mercenaria

UdeM00000017239 6596 318.9 UdeM00000017239 XP\_045170685.1 79.1 196  
40 1 10 204 9 204 4.70E-84 318.9 6596 cellular

organisms;Eukaryota;Opisthokonta;Metazoa;Eumetazoa;Bilateria;Protostomia;Spiralia;Lophotrochozoa;Mollusca;Bivalvia;Autobranchia;Heteroconchia;Euherodonta;Imparidentia;Venerida;Veneroidea;Veneridae;Mercenaria;Mercenaria mercenaria

UdeM00000017240 6573 102.8 UdeM00000017240 XP\_021371841.1 31.6 275  
168 10 62 327 402 665 8.40E-19 102.8 6573 cellular

organisms;Eukaryota;Opisthokonta;Metazoa;Eumetazoa;Bilateria;Protostomia;Spiralia;Lophotrochozoa;Mollusca;Bivalvia;Autobranchia;Pteriomorphia;Pectinida;Pectinoidea;Pectinidae;Mizuhopecten;Mizuhopecten yessoensis

UdeM00000017241 6596 76.6 UdeM00000017241 XP\_045162054.1 25.2 206  
139 5 2 198 352 551 4.00E-11 76.6 6596 cellular

organisms;Eukaryota;Opisthokonta;Metazoa;Eumetazoa;Bilateria;Protostomia;Spiralia;Lophotrochozoa;Mollusca;Bivalvia;Autobranchia;Heteroconchia;Euherodonta;Imparidentia;Venerida;Veneroidea;Veneridae;Mercenaria;Mercenaria mercenaria

UdeM00000017242 6565 194.5 UdeM00000017242 XP\_022336632.1 22.5 640  
401 13 16 576 47 670 3.80E-46 194.5 6565 cellular

organisms;Eukaryota;Opisthokonta;Metazoa;Eumetazoa;Bilateria;Protostomia;Spiralia;Lophotrochozoa;Mollusca;Bivalvia;Autobranchia;Pteriomorphia;Ostreida;Ostreoidea;Ostreidae;Crassostrea;Crassostrea virginica

UdeM00000017244 1735272 474.6 UdeM00000017244 XP\_041362472.1 34.4  
851 498 15 368 1170 3 841 3.80E-130 474.6 1735272  
cellular

organisms;Eukaryota;Opisthokonta;Metazoa;Eumetazoa;Bilateria;Protostomia;

Spiralia; Lophotrochozoa; Mollusca; Gastropoda; Neomphalina; Neomphaloidea; Pelto-  
 tospiridae; Gigantopelta; Gigantopelta aegis

UdeM00000017245 6596 601.3 UdeM00000017245 XP\_045173108.1 77.5 377  
 85 0 1 377 121 497 8.80E-169 601.3 6596 cellular  
 organisms; Eukaryota; Opisthokonta; Metazoa; Eumetazoa; Bilateria; Protostomia;  
 Spiralia; Lophotrochozoa; Mollusca; Bivalvia; Autobranchia; Heteroconchia; Eue-  
 terodonta; Imparidentia; Venerida; Veneroidea; Veneridae; Mercenaria; Mercenari-  
 a mercenaria

UdeM00000017246 6573 956.4 UdeM00000017246 XP\_021352248.1 68.1 739  
 217 5 1 736 1 723 2.00E-275 956.4 6573 cellular  
 organisms; Eukaryota; Opisthokonta; Metazoa; Eumetazoa; Bilateria; Protostomia;  
 Spiralia; Lophotrochozoa; Mollusca; Bivalvia; Autobranchia; Pteriomorphia; Pect-  
 inida; Pectinoidea; Pectinidae; Mizuhopecten; Mizuhopecten yessoensis

UdeM00000017248 6596 191.4 UdeM00000017248 XP\_045172301.1 24.8 786  
 477 27 11 770 406 1103 4.50E-45 191.4 6596 cellular  
 organisms; Eukaryota; Opisthokonta; Metazoa; Eumetazoa; Bilateria; Protostomia;  
 Spiralia; Lophotrochozoa; Mollusca; Bivalvia; Autobranchia; Heteroconchia; Eue-  
 terodonta; Imparidentia; Venerida; Veneroidea; Veneridae; Mercenaria; Mercenari-  
 a mercenaria

UdeM00000017249 7446 128.6 UdeM00000017249 XP\_035725556.1 20.9 726  
 450 17 30 686 20 690 4.00E-26 128.6 7446 cellular  
 organisms; Eukaryota; Opisthokonta; Metazoa; Eumetazoa; Bilateria; Protostomia;  
 Ecdysozoa; Panarthropoda; Arthropoda; Mandibulata; Pancrustacea; Hexapoda; Inse-  
 cta; Dicondylia; Pterygota; Neoptera; Endopterygota; Hymenoptera; Apocrita; Acul-  
 eata; Vespoidea; Vespidae; Vespinae; Vespa; Vespa mandarinia

UdeM00000017250 7446 128.6 UdeM00000017250 XP\_035725556.1 20.9 726  
 450 17 30 686 20 690 3.80E-26 128.6 7446 cellular  
 organisms; Eukaryota; Opisthokonta; Metazoa; Eumetazoa; Bilateria; Protostomia;  
 Ecdysozoa; Panarthropoda; Arthropoda; Mandibulata; Pancrustacea; Hexapoda; Inse-  
 cta; Dicondylia; Pterygota; Neoptera; Endopterygota; Hymenoptera; Apocrita; Acul-  
 eata; Vespoidea; Vespidae; Vespinae; Vespa; Vespa mandarinia

UdeM00000017251 29159 250.4 UdeM00000017251 XP\_011449804.1 52.2 245  
 116 1 2 246 18 261 2.50E-63 250.4 29159 cellular  
 organisms; Eukaryota; Opisthokonta; Metazoa; Eumetazoa; Bilateria; Protostomia;  
 Spiralia; Lophotrochozoa; Mollusca; Bivalvia; Autobranchia; Pteriomorphia; Ostr-  
 eida; Ostreidae; Crassostrea; Crassostrea gigas

UdeM00000017253 6573 156.8 UdeM00000017253 XP\_021367327.1 38 184  
 114 0 21 204 30 213 8.30E-35 156.8 6573 cellular  
 organisms; Eukaryota; Opisthokonta; Metazoa; Eumetazoa; Bilateria; Protostomia;  
 Spiralia; Lophotrochozoa; Mollusca; Bivalvia; Autobranchia; Pteriomorphia; Pect-  
 inida; Pectinoidea; Pectinidae; Mizuhopecten; Mizuhopecten yessoensis

UdeM00000017254 6596 681.4 UdeM00000017254 XP\_045171835.1 46.8 975  
 438 29 1 948 1 921 1.70E-192 681.4 6596 cellular  
 organisms; Eukaryota; Opisthokonta; Metazoa; Eumetazoa; Bilateria; Protostomia;  
 Spiralia; Lophotrochozoa; Mollusca; Bivalvia; Autobranchia; Heteroconchia; Eue-  
 terodonta; Imparidentia; Venerida; Veneroidea; Veneridae; Mercenaria; Mercenari-  
 a mercenaria

UdeM00000017257 10224 68.6 UdeM00000017257 XP\_002740205.2 28.1 185  
 120 3 52 230 54 231 2.90E-08 68.6 10224 cellular  
 organisms; Eukaryota; Opisthokonta; Metazoa; Eumetazoa; Bilateria; Deuterostomi-  
 a; Hemichordata; Enteropneusta; Harrimaniidae; Saccoglossus; Saccoglossus  
 kowalevskii

UdeM00000017258 1735272 131 UdeM00000017258 XP\_041360711.1 35.7  
 196 113 3 5 198 6 190 1.90E-27 131 1735272

cellular  
organisms;Eukaryota;Opisthokonta;Metazoa;Eumetazoa;Bilateria;Protostomia;  
Spiralia;Lophotrochozoa;Mollusca;Gastropoda;Neomphalina;Neomphaloidea;Pel  
tospiridae;Gigantopelta;Gigantopelta aegis  
UdeM00000017260 6579 462.2 UdeM00000017260 XP\_033747531.1 45.3 589  
292 6 20 606 27 587 1.00E-126 462.2 6579 cellular  
organisms;Eukaryota;Opisthokonta;Metazoa;Eumetazoa;Bilateria;Protostomia;  
Spiralia;Lophotrochozoa;Mollusca;Bivalvia;Autobranchia;Pteriormorphia;Pect  
inida;Pectinoidea;Pectinidae;Pecten;Pecten maximus  
UdeM00000017261 6596 356.3 UdeM00000017261 XP\_045172477.1 56.8 303  
125 3 10 309 351 650 3.90E-95 356.3 6596 cellular  
organisms;Eukaryota;Opisthokonta;Metazoa;Eumetazoa;Bilateria;Protostomia;  
Spiralia;Lophotrochozoa;Mollusca;Bivalvia;Autobranchia;Heteroconchia;Euhe  
terodonta;Imparidentia;Venerida;Veneroidea;Veneridae;Mercenaria;Mercenari  
a mercenaria  
UdeM00000017262 6596 199.9 UdeM00000017262 XP\_045172477.1 52.2 178  
84 1 6 183 3 179 6.80E-48 199.9 6596 cellular  
organisms;Eukaryota;Opisthokonta;Metazoa;Eumetazoa;Bilateria;Protostomia;  
Spiralia;Lophotrochozoa;Mollusca;Bivalvia;Autobranchia;Heteroconchia;Euhe  
terodonta;Imparidentia;Venerida;Veneroidea;Veneridae;Mercenaria;Mercenari  
a mercenaria  
UdeM00000017263 6596 216.1 UdeM00000017263 XP\_045172478.1 56 318  
117 10 1 301 1 312 6.20E-53 216.1 6596 cellular  
organisms;Eukaryota;Opisthokonta;Metazoa;Eumetazoa;Bilateria;Protostomia;  
Spiralia;Lophotrochozoa;Mollusca;Bivalvia;Autobranchia;Heteroconchia;Euhe  
terodonta;Imparidentia;Venerida;Veneroidea;Veneridae;Mercenaria;Mercenari  
a mercenaria  
UdeM00000017264 6573 183.7 UdeM00000017264 XP\_021369849.1 37.6 266  
158 3 1 265 1 259 3.00E-43 183.7 6573 cellular  
organisms;Eukaryota;Opisthokonta;Metazoa;Eumetazoa;Bilateria;Protostomia;  
Spiralia;Lophotrochozoa;Mollusca;Bivalvia;Autobranchia;Pteriormorphia;Pect  
inida;Pectinoidea;Pectinidae;Mizuhopecten;Mizuhopecten yessoensis  
UdeM00000017265 6596 433.7 UdeM00000017265 XP\_045201497.1 62.7 311  
116 0 1 311 1 311 2.00E-118 433.7 6596 cellular  
organisms;Eukaryota;Opisthokonta;Metazoa;Eumetazoa;Bilateria;Protostomia;  
Spiralia;Lophotrochozoa;Mollusca;Bivalvia;Autobranchia;Heteroconchia;Euhe  
terodonta;Imparidentia;Venerida;Veneroidea;Veneridae;Mercenaria;Mercenari  
a mercenaria  
UdeM00000017266 6596 412.5 UdeM00000017266 XP\_045201497.1 59.8 311  
125 0 1 311 1 311 4.70E-112 412.5 6596 cellular  
organisms;Eukaryota;Opisthokonta;Metazoa;Eumetazoa;Bilateria;Protostomia;  
Spiralia;Lophotrochozoa;Mollusca;Bivalvia;Autobranchia;Heteroconchia;Euhe  
terodonta;Imparidentia;Venerida;Veneroidea;Veneridae;Mercenaria;Mercenari  
a mercenaria  
UdeM00000017267 6565 284.3 UdeM00000017267 XP\_022346037.1 39.3 438  
232 8 32 438 78 512 3.50E-73 284.3 6565 cellular  
organisms;Eukaryota;Opisthokonta;Metazoa;Eumetazoa;Bilateria;Protostomia;  
Spiralia;Lophotrochozoa;Mollusca;Bivalvia;Autobranchia;Pteriormorphia;Ostr  
eida;Ostreoidea;Ostreidae;Crassostrea;Crassostrea virginica  
UdeM00000017268 1735272 306.6 UdeM00000017268 XP\_041348984.1 36.5  
578 227 9 12 589 92 529 6.80E-80 306.6 1735272  
cellular  
organisms;Eukaryota;Opisthokonta;Metazoa;Eumetazoa;Bilateria;Protostomia;

Spiralia;Lophotrochozoa;Mollusca;Gastropoda;Neomphalina;Neomphaloidea;Pel  
 tospiridae;Gigantopelta;Gigantopelta aegis  
 UdeM00000017269 6596 183.7 UdeM00000017269 XP\_045173133.1 80.4 107  
 20 1 1 107 32 137 1.20E-43 183.7 6596 cellular  
 organisms;Eukaryota;Opisthokonta;Metazoa;Eumetazoa;Bilateria;Protostomia;  
 Spiralia;Lophotrochozoa;Mollusca;Bivalvia;Autobranchia;Heteroconchia;Euhe  
 terodonta;Imparidentia;Venerida;Veneroidea;Veneridae;Mercenaria;Mercenari  
 a mercenaria  
 UdeM00000017270 6573 561.2 UdeM00000017270 XP\_021349895.1 72.4 409  
 95 8 1 397 126 528 1.00E-156 561.2 6573 cellular  
 organisms;Eukaryota;Opisthokonta;Metazoa;Eumetazoa;Bilateria;Protostomia;  
 Spiralia;Lophotrochozoa;Mollusca;Bivalvia;Autobranchia;Pteriormorphia;Pect  
 inida;Pectinoidea;Pectinidae;Mizuhopecten;Mizuhopecten yessoensis  
 UdeM00000017273 6579 708 UdeM00000017273 XP\_033748315.1 74.2 931  
 190 3 1 931 167 1047 1.60E-200 708 6579 cellular  
 organisms;Eukaryota;Opisthokonta;Metazoa;Eumetazoa;Bilateria;Protostomia;  
 Spiralia;Lophotrochozoa;Mollusca;Bivalvia;Autobranchia;Pteriormorphia;Pect  
 inida;Pectinoidea;Pectinidae;Pecten;Pecten maximus  
 UdeM00000017274 6579 602.8 UdeM00000017274 XP\_033748315.1 77.8 397  
 88 0 1 397 167 563 5.60E-169 602.8 6579 cellular  
 organisms;Eukaryota;Opisthokonta;Metazoa;Eumetazoa;Bilateria;Protostomia;  
 Spiralia;Lophotrochozoa;Mollusca;Bivalvia;Autobranchia;Pteriormorphia;Pect  
 inida;Pectinoidea;Pectinidae;Pecten;Pecten maximus  
 UdeM00000017275 6573 134 UdeM00000017275 XP\_021376553.1 45.2 155  
 85 0 128 282 242 396 2.90E-28 134 6573 cellular  
 organisms;Eukaryota;Opisthokonta;Metazoa;Eumetazoa;Bilateria;Protostomia;  
 Spiralia;Lophotrochozoa;Mollusca;Bivalvia;Autobranchia;Pteriormorphia;Pect  
 inida;Pectinoidea;Pectinidae;Mizuhopecten;Mizuhopecten yessoensis  
 UdeM00000017276 37653 264.2 UdeM00000017276 XP\_014785093.1 79 162  
 34 0 6 167 3 164 1.40E-67 264.2 37653 cellular  
 organisms;Eukaryota;Opisthokonta;Metazoa;Eumetazoa;Bilateria;Protostomia;  
 Spiralia;Lophotrochozoa;Mollusca;Cephalopoda;Coleoidea;Octopodiformes;Oct  
 opoda;Incirrata;Octopodidae;Octopus;Octopus bimaculoides  
 UdeM00000017277 6579 66.6 UdeM00000017277 XP\_033748320.1 32.7 211  
 125 8 1 200 1 205 5.80E-08 66.6 6579 cellular  
 organisms;Eukaryota;Opisthokonta;Metazoa;Eumetazoa;Bilateria;Protostomia;  
 Spiralia;Lophotrochozoa;Mollusca;Bivalvia;Autobranchia;Pteriormorphia;Pect  
 inida;Pectinoidea;Pectinidae;Pecten;Pecten maximus  
 UdeM00000017278 6573 215.7 UdeM00000017278 XP\_021349903.1 48.9 313  
 129 9 1 301 1 294 1.80E-52 215.7 6573 cellular  
 organisms;Eukaryota;Opisthokonta;Metazoa;Eumetazoa;Bilateria;Protostomia;  
 Spiralia;Lophotrochozoa;Mollusca;Bivalvia;Autobranchia;Pteriormorphia;Pect  
 inida;Pectinoidea;Pectinidae;Mizuhopecten;Mizuhopecten yessoensis  
 UdeM00000017279 6573 215.7 UdeM00000017279 XP\_021349903.1 48.9 313  
 129 9 1 301 1 294 8.60E-53 215.7 6573 cellular  
 organisms;Eukaryota;Opisthokonta;Metazoa;Eumetazoa;Bilateria;Protostomia;  
 Spiralia;Lophotrochozoa;Mollusca;Bivalvia;Autobranchia;Pteriormorphia;Pect  
 inida;Pectinoidea;Pectinidae;Mizuhopecten;Mizuhopecten yessoensis  
 UdeM00000017280 37653 260 UdeM00000017280 XP\_014779786.1 45.1 324  
 143 6 1 315 1 298 4.10E-66 260 37653 cellular  
 organisms;Eukaryota;Opisthokonta;Metazoa;Eumetazoa;Bilateria;Protostomia;  
 Spiralia;Lophotrochozoa;Mollusca;Cephalopoda;Coleoidea;Octopodiformes;Oct  
 opoda;Incirrata;Octopodidae;Octopus;Octopus bimaculoides

UdeM00000017281 400727 463 UdeM00000017281 XP\_025091273.1 60.9  
 394 135 6 15 401 296 677 4.00E-127 463 400727  
 cellular  
 organisms;Eukaryota;Opisthokonta;Metazoa;Eumetazoa;Bilateria;Protostomia;  
 Spiralia;Lophotrochozoa;Mollusca;Gastropoda;Caenogastropoda;Architaenioglossa;  
 Ampullarioidea;Ampullariidae;Pomacea;Pomacea canaliculata  
 UdeM00000017282 6573 443.4 UdeM00000017282 XP\_021347901.1 61.6 346  
 121 3 49 393 53 387 3.40E-121 443.4 6573 cellular  
 organisms;Eukaryota;Opisthokonta;Metazoa;Eumetazoa;Bilateria;Protostomia;  
 Spiralia;Lophotrochozoa;Mollusca;Bivalvia;Autobranchia;Pteriormorphia;Pectinida;  
 Pectinoidea;Pectinidae;Mizuhopecten;Mizuhopecten yessoensis  
 UdeM00000017283 400727 432.6 UdeM00000017283 XP\_025091273.1 67.8  
 317 99 2 46 362 30 343 8.10E-118 432.6 400727  
 cellular  
 organisms;Eukaryota;Opisthokonta;Metazoa;Eumetazoa;Bilateria;Protostomia;  
 Spiralia;Lophotrochozoa;Mollusca;Gastropoda;Caenogastropoda;Architaenioglossa;  
 Ampullarioidea;Ampullariidae;Pomacea;Pomacea canaliculata  
 UdeM00000017284 400727 381.7 UdeM00000017284 XP\_025091273.1 69  
 277 83 2 46 322 30 303 9.10E-103 381.7 400727  
 cellular  
 organisms;Eukaryota;Opisthokonta;Metazoa;Eumetazoa;Bilateria;Protostomia;  
 Spiralia;Lophotrochozoa;Mollusca;Gastropoda;Caenogastropoda;Architaenioglossa;  
 Ampullarioidea;Ampullariidae;Pomacea;Pomacea canaliculata  
 UdeM00000017285 10224 77.8 UdeM00000017285 XP\_006824625.1 33.8 136  
 81 3 66 193 60 194 1.70E-11 77.8 10224 cellular  
 organisms;Eukaryota;Opisthokonta;Metazoa;Eumetazoa;Bilateria;Deuterostomia;  
 Hemichordata;Enteropneusta;Harrimaniidae;Saccoglossus;Saccoglossus  
 kowalevskii  
 UdeM00000017286 10224 85.5 UdeM00000017286 XP\_002740528.1 37.3 142  
 59 4 2 121 106 239 5.60E-14 85.5 10224 cellular  
 organisms;Eukaryota;Opisthokonta;Metazoa;Eumetazoa;Bilateria;Deuterostomia;  
 Hemichordata;Enteropneusta;Harrimaniidae;Saccoglossus;Saccoglossus  
 kowalevskii  
 UdeM00000017287 6579 276.6 UdeM00000017287 XP\_033748770.1 28.8 819  
 524 10 661 1463 575 1350 1.90E-70 276.6 6579 cellular  
 organisms;Eukaryota;Opisthokonta;Metazoa;Eumetazoa;Bilateria;Protostomia;  
 Spiralia;Lophotrochozoa;Mollusca;Bivalvia;Autobranchia;Pteriormorphia;Pectinida;  
 Pectinoidea;Pectinidae;Pecten;Pecten maximus  
 UdeM00000017288 6573 256.9 UdeM00000017288 XP\_021373124.1 59.7 186  
 75 0 23 208 10 195 2.20E-65 256.9 6573 cellular  
 organisms;Eukaryota;Opisthokonta;Metazoa;Eumetazoa;Bilateria;Protostomia;  
 Spiralia;Lophotrochozoa;Mollusca;Bivalvia;Autobranchia;Pteriormorphia;Pectinida;  
 Pectinoidea;Pectinidae;Mizuhopecten;Mizuhopecten yessoensis  
 UdeM00000017289 1735272 310.5 UdeM00000017289 XP\_041349041.1 73.7  
 198 52 0 3 200 2 199 1.60E-81 310.5 1735272  
 cellular  
 organisms;Eukaryota;Opisthokonta;Metazoa;Eumetazoa;Bilateria;Protostomia;  
 Spiralia;Lophotrochozoa;Mollusca;Gastropoda;Neomphalina;Neomphaloidea;Peltospiridae;  
 Gigantopelta;Gigantopelta aegis  
 UdeM00000017290 6596 263.5 UdeM00000017290 XP\_045173680.1 77.4 164  
 34 2 1 162 4 166 2.60E-67 263.5 6596 cellular  
 organisms;Eukaryota;Opisthokonta;Metazoa;Eumetazoa;Bilateria;Protostomia;  
 Spiralia;Lophotrochozoa;Mollusca;Bivalvia;Autobranchia;Heteroconchia;Euhe



terodonta;Imparidentia;Venerida;Veneroidea;Veneridae;Mercenaria;Mercenari  
a mercenaria

UdeM00000017291 1735272 475.7 UdeM00000017291 XP\_041349364.1 66.1  
351 116 1 24 374 3 350 5.50E-131 475.7 1735272  
cellular

organisms;Eukaryota;Opisthokonta;Metazoa;Eumetazoa;Bilateria;Protostomia;  
Spiralia;Lophotrochozoa;Mollusca;Gastropoda;Neomphalina;Neomphaloidea;Pel  
tospiridae;Gigantopelta;Gigantopelta aegis

UdeM00000017292 6579 758.4 UdeM00000017292 XP\_033747443.1 64.7 533  
187 1 26 558 32 563 6.20E-216 758.4 6579 cellular

organisms;Eukaryota;Opisthokonta;Metazoa;Eumetazoa;Bilateria;Protostomia;  
Spiralia;Lophotrochozoa;Mollusca;Bivalvia;Autobranchia;Pteriormorphia;Pect  
inida;Pectinoidea;Pectinidae;Pecten;Pecten maximus

UdeM00000017293 29159 219.9 UdeM00000017293 XP\_011434938.2 44.9 245  
126 5 2 240 42 283 3.70E-54 219.9 29159 cellular

organisms;Eukaryota;Opisthokonta;Metazoa;Eumetazoa;Bilateria;Protostomia;  
Spiralia;Lophotrochozoa;Mollusca;Bivalvia;Autobranchia;Pteriormorphia;Ostr  
eida;Ostreoidea;Ostreidae;Crassostrea;Crassostrea gigas

UdeM00000017294 7574 223.8 UdeM00000017294 XP\_013379627.1 45.2 261  
139 2 29 285 22 282 2.90E-55 223.8 7574 cellular

organisms;Eukaryota;Opisthokonta;Metazoa;Eumetazoa;Bilateria;Protostomia;  
Spiralia;Lophotrochozoa;Brachiopoda;Linguliformea;Lingulata;Lingulida;Lin  
guloidea;Lingulidae;Lingula;Lingula anatina

UdeM00000017295 6596 184.5 UdeM00000017295 XP\_045210174.1 35.6 306  
177 6 72 369 141 434 2.60E-43 184.5 6596 cellular

organisms;Eukaryota;Opisthokonta;Metazoa;Eumetazoa;Bilateria;Protostomia;  
Spiralia;Lophotrochozoa;Mollusca;Bivalvia;Autobranchia;Heteroconchia;Euhe  
terodonta;Imparidentia;Venerida;Veneroidea;Veneridae;Mercenaria;Mercenari  
a mercenaria

UdeM00000017297 6573 1278.5 UdeM00000017297 XP\_021343874.1 40.8  
1771 954 33 1 1732 1 1715 0.00E+00 1278.5 6573  
cellular

organisms;Eukaryota;Opisthokonta;Metazoa;Eumetazoa;Bilateria;Protostomia;  
Spiralia;Lophotrochozoa;Mollusca;Bivalvia;Autobranchia;Pteriormorphia;Pect  
inida;Pectinoidea;Pectinidae;Mizuhopecten;Mizuhopecten yessoensis

UdeM00000017298 6596 579.3 UdeM00000017298 XP\_045171983.1 63.3 412  
150 1 1 412 1 411 3.80E-162 579.3 6596 cellular

organisms;Eukaryota;Opisthokonta;Metazoa;Eumetazoa;Bilateria;Protostomia;  
Spiralia;Lophotrochozoa;Mollusca;Bivalvia;Autobranchia;Heteroconchia;Euhe  
terodonta;Imparidentia;Venerida;Veneroidea;Veneridae;Mercenaria;Mercenari  
a mercenaria

UdeM00000017299 6596 633.6 UdeM00000017299 XP\_045171552.1 47.4 698  
333 13 6 685 5 686 2.80E-178 633.6 6596 cellular

organisms;Eukaryota;Opisthokonta;Metazoa;Eumetazoa;Bilateria;Protostomia;  
Spiralia;Lophotrochozoa;Mollusca;Bivalvia;Autobranchia;Heteroconchia;Euhe  
terodonta;Imparidentia;Venerida;Veneroidea;Veneridae;Mercenaria;Mercenari  
a mercenaria

UdeM00000017300 6596 619.8 UdeM00000017300 XP\_045172310.1 54.2 542  
246 2 1 541 1 541 3.30E-174 619.8 6596 cellular

organisms;Eukaryota;Opisthokonta;Metazoa;Eumetazoa;Bilateria;Protostomia;  
Spiralia;Lophotrochozoa;Mollusca;Bivalvia;Autobranchia;Heteroconchia;Euhe  
terodonta;Imparidentia;Venerida;Veneroidea;Veneridae;Mercenaria;Mercenari  
a mercenaria

UdeM00000017301 225164 1722.6 UdeM00000017301 XP\_009062767.1  
 41.2 2677 1395 73 17 2597 142 2734 0.00E+00 1722.6  
 225164 cellular  
 organisms;Eukaryota;Opisthokonta;Metazoa;Eumetazoa;Bilateria;Protostomia;  
 Spiralia;Lophotrochozoa;Mollusca;Gastropoda;Patellogastropoda;Lottioidea;  
 Lottiidae;Lottia;Lottia gigantea  
 UdeM00000017302 6596 94.7 UdeM00000017302 XP\_045170904.1 27.4 383  
 224 15 1 366 15 360 2.60E-16 94.7 6596 cellular  
 organisms;Eukaryota;Opisthokonta;Metazoa;Eumetazoa;Bilateria;Protostomia;  
 Spiralia;Lophotrochozoa;Mollusca;Bivalvia;Autobranchia;Heteroconchia;Euhe  
 terodonta;Imparidentia;Venerida;Veneroidea;Veneridae;Mercenaria;Mercenari  
 a mercenaria  
 UdeM00000017303 6565 208 UdeM00000017303 XP\_022335916.1 41.7 259  
 145 2 1 255 1 257 1.50E-50 208 6565 cellular  
 organisms;Eukaryota;Opisthokonta;Metazoa;Eumetazoa;Bilateria;Protostomia;  
 Spiralia;Lophotrochozoa;Mollusca;Bivalvia;Autobranchia;Pteriormorphia;Ostr  
 eida;Ostreoidea;Ostreidae;Crassostrea;Crassostrea virginica  
 UdeM00000017304 6596 1563.1 UdeM00000017304 XP\_045171439.1 80.8  
 908 172 1 205 1110 227 1134 0.00E+00 1563.1 6596  
 cellular  
 organisms;Eukaryota;Opisthokonta;Metazoa;Eumetazoa;Bilateria;Protostomia;  
 Spiralia;Lophotrochozoa;Mollusca;Bivalvia;Autobranchia;Heteroconchia;Euhe  
 terodonta;Imparidentia;Venerida;Veneroidea;Veneridae;Mercenaria;Mercenari  
 a mercenaria  
 UdeM00000017305 6596 622.9 UdeM00000017305 XP\_045173736.1 53.6 616  
 263 9 1 605 111 714 4.40E-175 622.9 6596 cellular  
 organisms;Eukaryota;Opisthokonta;Metazoa;Eumetazoa;Bilateria;Protostomia;  
 Spiralia;Lophotrochozoa;Mollusca;Bivalvia;Autobranchia;Heteroconchia;Euhe  
 terodonta;Imparidentia;Venerida;Veneroidea;Veneridae;Mercenaria;Mercenari  
 a mercenaria  
 UdeM00000017306 6596 760.8 UdeM00000017306 XP\_045173736.1 53.7 726  
 311 10 1 713 1 714 1.60E-216 760.8 6596 cellular  
 organisms;Eukaryota;Opisthokonta;Metazoa;Eumetazoa;Bilateria;Protostomia;  
 Spiralia;Lophotrochozoa;Mollusca;Bivalvia;Autobranchia;Heteroconchia;Euhe  
 terodonta;Imparidentia;Venerida;Veneroidea;Veneridae;Mercenaria;Mercenari  
 a mercenaria  
 UdeM00000017307 6596 1072.4 UdeM00000017307 XP\_045173731.1 63.9  
 1059 342 16 1 1027 16 1066 3.5e-310 1072.4 6596  
 cellular  
 organisms;Eukaryota;Opisthokonta;Metazoa;Eumetazoa;Bilateria;Protostomia;  
 Spiralia;Lophotrochozoa;Mollusca;Bivalvia;Autobranchia;Heteroconchia;Euhe  
 terodonta;Imparidentia;Venerida;Veneroidea;Veneridae;Mercenaria;Mercenari  
 a mercenaria  
 UdeM00000017308 6573 394.4 UdeM00000017308 XP\_021374762.1 54.5 466  
 131 11 1 429 1114 1535 1.80E-106 394.4 6573 cellular  
 organisms;Eukaryota;Opisthokonta;Metazoa;Eumetazoa;Bilateria;Protostomia;  
 Spiralia;Lophotrochozoa;Mollusca;Bivalvia;Autobranchia;Pteriormorphia;Pect  
 inida;Pectinoidea;Pectinidae;Mizuhopecten;Mizuhopecten yessoensis  
 UdeM00000017309 29159 316.6 UdeM00000017309 XP\_034337341.1 67.2 259  
 77 3 5 263 421 671 3.00E-83 316.6 29159 cellular  
 organisms;Eukaryota;Opisthokonta;Metazoa;Eumetazoa;Bilateria;Protostomia;  
 Spiralia;Lophotrochozoa;Mollusca;Bivalvia;Autobranchia;Pteriormorphia;Ostr  
 eida;Ostreoidea;Ostreidae;Crassostrea;Crassostrea gigas

UdeM00000017310 6596 327 UdeM00000017310 XP\_045171759.1 85.9 177  
 25 0 1 177 1 177 1.50E-86 327 6596 cellular  
 organisms;Eukaryota;Opisthokonta;Metazoa;Eumetazoa;Bilateria;Protostomia;  
 Spiralia;Lophotrochozoa;Mollusca;Bivalvia;Autobranchia;Heteroconchia;Euhe  
 terodonta;Imparidentia;Venerida;Veneroidea;Veneridae;Mercenaria;Mercenari  
 a mercenaria  
 UdeM00000017311 6579 471.5 UdeM00000017311 XP\_033748272.1 79.4 282  
 58 0 1 282 1 282 7.70E-130 471.5 6579 cellular  
 organisms;Eukaryota;Opisthokonta;Metazoa;Eumetazoa;Bilateria;Protostomia;  
 Spiralia;Lophotrochozoa;Mollusca;Bivalvia;Autobranchia;Pteriormorphia;Pect  
 inida;Pectinoidea;Pectinidae;Pecten;Pecten maximus  
 UdeM00000017312 6596 370.2 UdeM00000017312 XP\_045173401.1 61 593  
 209 5 1 591 16 588 5.10E-99 370.2 6596 cellular  
 organisms;Eukaryota;Opisthokonta;Metazoa;Eumetazoa;Bilateria;Protostomia;  
 Spiralia;Lophotrochozoa;Mollusca;Bivalvia;Autobranchia;Heteroconchia;Euhe  
 terodonta;Imparidentia;Venerida;Veneroidea;Veneridae;Mercenaria;Mercenari  
 a mercenaria  
 UdeM00000017313 6579 310.5 UdeM00000017313 XP\_033737835.1 47.4 342  
 166 5 82 416 266 600 3.40E-81 310.5 6579 cellular  
 organisms;Eukaryota;Opisthokonta;Metazoa;Eumetazoa;Bilateria;Protostomia;  
 Spiralia;Lophotrochozoa;Mollusca;Bivalvia;Autobranchia;Pteriormorphia;Pect  
 inida;Pectinoidea;Pectinidae;Pecten;Pecten maximus  
 UdeM00000017314 6596 1755.7 UdeM00000017314 XP\_045172338.1 87.1  
 997 129 0 1 997 1 997 0.00E+00 1755.7 6596  
 cellular  
 organisms;Eukaryota;Opisthokonta;Metazoa;Eumetazoa;Bilateria;Protostomia;  
 Spiralia;Lophotrochozoa;Mollusca;Bivalvia;Autobranchia;Heteroconchia;Euhe  
 terodonta;Imparidentia;Venerida;Veneroidea;Veneridae;Mercenaria;Mercenari  
 a mercenaria  
 UdeM00000017315 6596 873.2 UdeM00000017315 XP\_045172326.1 86.1 496  
 69 0 1 496 240 735 1.60E-250 873.2 6596 cellular  
 organisms;Eukaryota;Opisthokonta;Metazoa;Eumetazoa;Bilateria;Protostomia;  
 Spiralia;Lophotrochozoa;Mollusca;Bivalvia;Autobranchia;Heteroconchia;Euhe  
 terodonta;Imparidentia;Venerida;Veneroidea;Veneridae;Mercenaria;Mercenari  
 a mercenaria  
 UdeM00000017316 6596 329.3 UdeM00000017316 XP\_045167414.1 37.6 559  
 283 20 13 521 1 543 8.80E-87 329.3 6596 cellular  
 organisms;Eukaryota;Opisthokonta;Metazoa;Eumetazoa;Bilateria;Protostomia;  
 Spiralia;Lophotrochozoa;Mollusca;Bivalvia;Autobranchia;Heteroconchia;Euhe  
 terodonta;Imparidentia;Venerida;Veneroidea;Veneridae;Mercenaria;Mercenari  
 a mercenaria  
 UdeM00000017317 7741 146 UdeM00000017317 XP\_019636890.1 57 135  
 47 5 1 131 148 275 3.90E-32 146 7741 cellular  
 organisms;Eukaryota;Opisthokonta;Metazoa;Eumetazoa;Bilateria;Deuterostomi  
 a;Chordata;Cephalochordata;Leptocardii;Amphioxiformes;Branchiostomidae;Br  
 anchiostoma;Branchiostoma belcheri  
 UdeM00000017318 108931 201.4 UdeM00000017318 XP\_039295486.1 41.7  
 271 144 8 50 313 21 284 1.70E-48 201.4 108931  
 cellular  
 organisms;Eukaryota;Opisthokonta;Metazoa;Eumetazoa;Bilateria;Protostomia;  
 Ecdysozoa;Panarthropoda;Arthropoda;Mandibulata;Pancrustacea;Hexapoda;Inse  
 cta;Dicondylia;Pterygota;Neoptera;Paraneoptera;Hemiptera;Auchenorrhyncha;  
 Fulgoromorpha;Fulgoroidea;Delphacidae;Delphacinae;Nilaparvata;Nilaparvata  
 lugens

UdeM00000017319 6596 285 UdeM00000017319 XP\_045167414.1 38.8 485  
 228 20 4 434 74 543 1.60E-73 285 6596 cellular  
 organisms;Eukaryota;Opisthokonta;Metazoa;Eumetazoa;Bilateria;Protostomia;  
 Spiralia;Lophotrochozoa;Mollusca;Bivalvia;Autobranchia;Heteroconchia;Euhe  
 terodonta;Imparidentia;Venerida;Veneroidea;Veneridae;Mercenaria;Mercenari  
 a mercenaria

UdeM00000017320 37653 184.5 UdeM00000017320 XP\_014780002.1 41.6 267  
 140 6 5 270 3 254 1.90E-43 184.5 37653 cellular  
 organisms;Eukaryota;Opisthokonta;Metazoa;Eumetazoa;Bilateria;Protostomia;  
 Spiralia;Lophotrochozoa;Mollusca;Cephalopoda;Coleoidea;Octopodiformes;Oct  
 opoda;Incirrata;Octopodidae;Octopus;Octopus bimaculoides

UdeM00000017321 108931 178.3 UdeM00000017321 XP\_039295486.1 41  
 249 132 8 1 241 48 289 1.20E-41 178.3 108931  
 cellular  
 organisms;Eukaryota;Opisthokonta;Metazoa;Eumetazoa;Bilateria;Protostomia;  
 Ecdysozoa;Panarthropoda;Arthropoda;Mandibulata;Pancrustacea;Hexapoda;Inse  
 cta;Dicondylia;Pterygota;Neoptera;Paraneoptera;Hemiptera;Auchenorrhyncha;  
 Fulgoromorpha;Fulgoroidea;Delphacidae;Delphacinae;Nilaparvata;Nilaparvata  
 lugens

UdeM00000017322 42514 136.3 UdeM00000017322 XP\_037403362.1 51.1 135  
 58 3 9 138 72 203 3.10E-29 136.3 42514 cellular  
 organisms;Eukaryota;Opisthokonta;Metazoa;Eumetazoa;Bilateria;Deuterostomi  
 a;Chordata;Craniata;Vertebrata;Gnathostomata;Teleostomi;Euteleostomi;Acti  
 nopterygii;Actinopteri;Neopterygii;Teleostei;Osteoglossocephalai;Clupeoce  
 phala;Otomorpha;Ostariophysi;Otophysi;Characiphysae;Characiiformes;Characo  
 idei;Serrasalminae;Pygocentrus;Pygocentrus nattereri

UdeM00000044347 6596 63.9 UdeM00000044347 XP\_045172167.1 37.8 82  
 48 1 142 223 447 525 3.20E-07 63.9 6596 cellular  
 organisms;Eukaryota;Opisthokonta;Metazoa;Eumetazoa;Bilateria;Protostomia;  
 Spiralia;Lophotrochozoa;Mollusca;Bivalvia;Autobranchia;Heteroconchia;Euhe  
 terodonta;Imparidentia;Venerida;Veneroidea;Veneridae;Mercenaria;Mercenari  
 a mercenaria

UdeM00000038599 6596 226.9 UdeM00000038599 XP\_045157939.1 76.9 147  
 33 1 13 159 555 700 1.90E-56 226.9 6596 cellular  
 organisms;Eukaryota;Opisthokonta;Metazoa;Eumetazoa;Bilateria;Protostomia;  
 Spiralia;Lophotrochozoa;Mollusca;Bivalvia;Autobranchia;Heteroconchia;Euhe  
 terodonta;Imparidentia;Venerida;Veneroidea;Veneridae;Mercenaria;Mercenari  
 a mercenaria

UdeM00000038600 6573 179.1 UdeM00000038600 XP\_021359574.1 61.3 142  
 55 0 1 142 290 431 4.00E-42 179.1 6573 cellular  
 organisms;Eukaryota;Opisthokonta;Metazoa;Eumetazoa;Bilateria;Protostomia;  
 Spiralia;Lophotrochozoa;Mollusca;Bivalvia;Autobranchia;Pteriormorphia;Pect  
 inida;Pectinoidea;Pectinidae;Mizuhopecten;Mizuhopecten yessoensis

UdeM00000038601 6596 250.4 UdeM00000038601 XP\_045157939.1 76.4 165  
 38 1 758 922 537 700 9.10E-63 250.4 6596 cellular  
 organisms;Eukaryota;Opisthokonta;Metazoa;Eumetazoa;Bilateria;Protostomia;  
 Spiralia;Lophotrochozoa;Mollusca;Bivalvia;Autobranchia;Heteroconchia;Euhe  
 terodonta;Imparidentia;Venerida;Veneroidea;Veneridae;Mercenaria;Mercenari  
 a mercenaria

UdeM00000038602 6596 229.2 UdeM00000038602 XP\_045157936.1 73.3 150  
 37 1 1 150 5 151 4.20E-57 229.2 6596 cellular  
 organisms;Eukaryota;Opisthokonta;Metazoa;Eumetazoa;Bilateria;Protostomia;  
 Spiralia;Lophotrochozoa;Mollusca;Bivalvia;Autobranchia;Heteroconchia;Euhe

terodonta;Imparidentia;Venerida;Veneroidea;Veneridae;Mercenaria;Mercenari  
 a mercenaria  
 UdeM00000038603 6596 274.2 UdeM00000038603 XP\_045157167.1 57.8 270  
 95 5 4 264 9 268 4.40E-70 274.2 6596 cellular  
 organisms;Eukaryota;Opisthokonta;Metazoa;Eumetazoa;Bilateria;Protostomia;  
 Spiralia;Lophotrochozoa;Mollusca;Bivalvia;Autobranchia;Heteroconchia;Euhe  
 terodonta;Imparidentia;Venerida;Veneroidea;Veneridae;Mercenaria;Mercenari  
 a mercenaria  
 UdeM00000038604 29159 207.6 UdeM00000038604 XP\_034313177.1 51.4 183  
 89 0 4 186 769 951 1.40E-50 207.6 29159 cellular  
 organisms;Eukaryota;Opisthokonta;Metazoa;Eumetazoa;Bilateria;Protostomia;  
 Spiralia;Lophotrochozoa;Mollusca;Bivalvia;Autobranchia;Pteriormorphia;Ostr  
 eida;Ostreoidea;Ostreidae;Crassostrea;Crassostrea gigas  
 UdeM00000038607 6596 578.2 UdeM00000038607 XP\_045207041.1 71.7 396  
 104 2 4 391 132 527 1.40E-161 578.2 6596 cellular  
 organisms;Eukaryota;Opisthokonta;Metazoa;Eumetazoa;Bilateria;Protostomia;  
 Spiralia;Lophotrochozoa;Mollusca;Bivalvia;Autobranchia;Heteroconchia;Euhe  
 terodonta;Imparidentia;Venerida;Veneroidea;Veneridae;Mercenaria;Mercenari  
 a mercenaria  
 UdeM00000038606 6579 778.5 UdeM00000038606 XP\_033738301.1 70.2 561  
 132 3 1 526 1 561 8.30E-222 778.5 6579 cellular  
 organisms;Eukaryota;Opisthokonta;Metazoa;Eumetazoa;Bilateria;Protostomia;  
 Spiralia;Lophotrochozoa;Mollusca;Bivalvia;Autobranchia;Pteriormorphia;Pect  
 inida;Pectinoidea;Pectinidae;Pecten;Pecten maximus  
 UdeM00000038609 6596 679.1 UdeM00000038609 XP\_045159982.1 87 400  
 52 0 3 402 2 401 4.10E-192 679.1 6596 cellular  
 organisms;Eukaryota;Opisthokonta;Metazoa;Eumetazoa;Bilateria;Protostomia;  
 Spiralia;Lophotrochozoa;Mollusca;Bivalvia;Autobranchia;Heteroconchia;Euhe  
 terodonta;Imparidentia;Venerida;Veneroidea;Veneridae;Mercenaria;Mercenari  
 a mercenaria  
 UdeM00000038610 6596 679.1 UdeM00000038610 XP\_045159982.1 87 400  
 52 0 3 402 2 401 3.50E-192 679.1 6596 cellular  
 organisms;Eukaryota;Opisthokonta;Metazoa;Eumetazoa;Bilateria;Protostomia;  
 Spiralia;Lophotrochozoa;Mollusca;Bivalvia;Autobranchia;Heteroconchia;Euhe  
 terodonta;Imparidentia;Venerida;Veneroidea;Veneridae;Mercenaria;Mercenari  
 a mercenaria  
 UdeM00000038611 6596 269.6 UdeM00000038611 XP\_045159983.1 48.8 281  
 140 2 1 281 1 277 4.60E-69 269.6 6596 cellular  
 organisms;Eukaryota;Opisthokonta;Metazoa;Eumetazoa;Bilateria;Protostomia;  
 Spiralia;Lophotrochozoa;Mollusca;Bivalvia;Autobranchia;Heteroconchia;Euhe  
 terodonta;Imparidentia;Venerida;Veneroidea;Veneridae;Mercenaria;Mercenari  
 a mercenaria  
 UdeM00000038612 50390 181.4 UdeM00000038612 XP\_028127913.1 43.5 207  
 116 1 1 207 1 206 1.30E-42 181.4 50390 cellular  
 organisms;Eukaryota;Opisthokonta;Metazoa;Eumetazoa;Bilateria;Protostomia;  
 Ecdysozoa;Panarthropoda;Arthropoda;Mandibulata;Pancrustacea;Hexapoda;Inse  
 cta;Dicondylia;Pterygota;Neoptera;Endopterygota;Coleoptera;Polyphaga;Cucu  
 jiformia;Chrysomeloidea;Chrysomelidae;Galerucinae;Luperini;Diabroticina;D  
 iabroticites;Diabrotica;Diabrotica virgifera;Diabrotica virgifera  
 virgifera  
 UdeM00000038613 400727 296.6 UdeM00000038613 XP\_025110266.1 64.5  
 251 86 2 1 248 1 251 3.30E-77 296.6 400727  
 cellular  
 organisms;Eukaryota;Opisthokonta;Metazoa;Eumetazoa;Bilateria;Protostomia;

Spiralia;Lophotrochozoa;Mollusca;Gastropoda;Caenogastropoda;Architaenioglossa;Ampullarioidea;Ampullariidae;Pomacea;Pomacea canaliculata  
UdeM00000038614 400727 152.9 UdeM00000038614 XP\_025080621.1 48  
223 86 6 1 211 1 205 7.20E-34 152.9 400727  
cellular

organisms;Eukaryota;Opisthokonta;Metazoa;Eumetazoa;Bilateria;Protostomia;Spiralia;Lophotrochozoa;Mollusca;Gastropoda;Caenogastropoda;Architaenioglossa;Ampullarioidea;Ampullariidae;Pomacea;Pomacea canaliculata  
UdeM00000038615 6596 79.3 UdeM00000038615 XP\_045160916.1 56.9 58  
25 0 19 76 78 135 2.30E-12 79.3 6596 cellular

organisms;Eukaryota;Opisthokonta;Metazoa;Eumetazoa;Bilateria;Protostomia;Spiralia;Lophotrochozoa;Mollusca;Bivalvia;Autobranchia;Heteroconchia;Euheterodonta;Imparidentia;Venerida;Veneroidea;Veneridae;Mercenaria;Mercenaria mercenaria

UdeM00000038616 6596 282.3 UdeM00000038616 XP\_045162353.1 57.7 248  
105 0 1 248 1 248 6.00E-73 282.3 6596 cellular

organisms;Eukaryota;Opisthokonta;Metazoa;Eumetazoa;Bilateria;Protostomia;Spiralia;Lophotrochozoa;Mollusca;Bivalvia;Autobranchia;Heteroconchia;Euheterodonta;Imparidentia;Venerida;Veneroidea;Veneridae;Mercenaria;Mercenaria mercenaria

UdeM00000043498 29159 223.4 UdeM00000043498 XP\_011456886.2 46.9 258  
130 5 2 252 318 575 4.10E-55 223.4 29159 cellular

organisms;Eukaryota;Opisthokonta;Metazoa;Eumetazoa;Bilateria;Protostomia;Spiralia;Lophotrochozoa;Mollusca;Bivalvia;Autobranchia;Pteriormorphia;Ostreida;Ostreoidea;Ostreidae;Crassostrea;Crassostrea gigas

UdeM00000043499 6596 178.7 UdeM00000043499 XP\_045211867.1 37.7 297  
153 8 154 440 22 296 1.60E-41 178.7 6596 cellular

organisms;Eukaryota;Opisthokonta;Metazoa;Eumetazoa;Bilateria;Protostomia;Spiralia;Lophotrochozoa;Mollusca;Bivalvia;Autobranchia;Heteroconchia;Euheterodonta;Imparidentia;Venerida;Veneroidea;Veneridae;Mercenaria;Mercenaria mercenaria

UdeM00000044133 6565 207.2 UdeM00000044133 XP\_022335825.1 44.6 240  
129 3 20 257 550 787 8.30E-50 207.2 6565 cellular

organisms;Eukaryota;Opisthokonta;Metazoa;Eumetazoa;Bilateria;Protostomia;Spiralia;Lophotrochozoa;Mollusca;Bivalvia;Autobranchia;Pteriormorphia;Ostreida;Ostreoidea;Ostreidae;Crassostrea;Crassostrea virginica

UdeM00000044135 6596 543.1 UdeM00000044135 XP\_045190515.1 31.3 1289  
675 36 2402 3657 862 1973 2.70E-150 543.1 6596 cellular

organisms;Eukaryota;Opisthokonta;Metazoa;Eumetazoa;Bilateria;Protostomia;Spiralia;Lophotrochozoa;Mollusca;Bivalvia;Autobranchia;Heteroconchia;Euheterodonta;Imparidentia;Venerida;Veneroidea;Veneridae;Mercenaria;Mercenaria mercenaria

UdeM00000044136 6596 503.4 UdeM00000044136 XP\_045188486.1 38 852  
490 20 74 900 1712 2550 5.80E-139 503.4 6596 cellular

organisms;Eukaryota;Opisthokonta;Metazoa;Eumetazoa;Bilateria;Protostomia;Spiralia;Lophotrochozoa;Mollusca;Bivalvia;Autobranchia;Heteroconchia;Euheterodonta;Imparidentia;Venerida;Veneroidea;Veneridae;Mercenaria;Mercenaria mercenaria

UdeM00000044137 6596 124.8 UdeM00000044137 XP\_045188553.1 27.7 321  
197 9 14 306 762 1075 1.90E-25 124.8 6596 cellular

organisms;Eukaryota;Opisthokonta;Metazoa;Eumetazoa;Bilateria;Protostomia;Spiralia;Lophotrochozoa;Mollusca;Bivalvia;Autobranchia;Heteroconchia;Euheterodonta;Imparidentia;Venerida;Veneroidea;Veneridae;Mercenaria;Mercenaria mercenaria

UdeM00000044138 6596 463.4 UdeM00000044138 XP\_045188486.1 36.6 867  
 464 24 770 1605 1712 2523 1.20E-126 463.4 6596 cellular  
 organisms;Eukaryota;Opisthokonta;Metazoa;Eumetazoa;Bilateria;Protostomia;  
 Spiralia;Lophotrochozoa;Mollusca;Bivalvia;Autobranchia;Heteroconchia;Euhe  
 terodonta;Imparidentia;Venerida;Veneroidea;Veneridae;Mercenaria;Mercenari  
 a mercenaria  
 UdeM00000044140 6573 194.9 UdeM00000044140 XP\_021355423.1 27.8 669  
 348 21 122 756 1678 2245 4.00E-46 194.9 6573 cellular  
 organisms;Eukaryota;Opisthokonta;Metazoa;Eumetazoa;Bilateria;Protostomia;  
 Spiralia;Lophotrochozoa;Mollusca;Bivalvia;Autobranchia;Pteriormorphia;Pect  
 inida;Pectinoidea;Pectinidae;Mizuhopecten;Mizuhopecten yessoensis  
 UdeM00000044142 6596 204.1 UdeM00000044142 XP\_045190673.1 43.4 242  
 132 3 20 257 589 829 2.80E-49 204.1 6596 cellular  
 organisms;Eukaryota;Opisthokonta;Metazoa;Eumetazoa;Bilateria;Protostomia;  
 Spiralia;Lophotrochozoa;Mollusca;Bivalvia;Autobranchia;Heteroconchia;Euhe  
 terodonta;Imparidentia;Venerida;Veneroidea;Veneridae;Mercenaria;Mercenari  
 a mercenaria  
 UdeM00000044143 6596 89.4 UdeM00000044143 XP\_045190856.1 29.1 182  
 123 3 74 251 690 869 8.10E-15 89.4 6596 cellular  
 organisms;Eukaryota;Opisthokonta;Metazoa;Eumetazoa;Bilateria;Protostomia;  
 Spiralia;Lophotrochozoa;Mollusca;Bivalvia;Autobranchia;Heteroconchia;Euhe  
 terodonta;Imparidentia;Venerida;Veneroidea;Veneridae;Mercenaria;Mercenari  
 a mercenaria  
 UdeM00000044144 6579 171.4 UdeM00000044144 XP\_033756918.1 45.5 189  
 102 1 65 253 200 387 1.90E-39 171.4 6579 cellular  
 organisms;Eukaryota;Opisthokonta;Metazoa;Eumetazoa;Bilateria;Protostomia;  
 Spiralia;Lophotrochozoa;Mollusca;Bivalvia;Autobranchia;Pteriormorphia;Pect  
 inida;Pectinoidea;Pectinidae;Pecten;Pecten maximus  
 UdeM00000043317 6596 88.6 UdeM00000043317 XP\_045158040.1 47.1 87  
 41 1 2 88 1263 1344 4.40E-15 88.6 6596 cellular  
 organisms;Eukaryota;Opisthokonta;Metazoa;Eumetazoa;Bilateria;Protostomia;  
 Spiralia;Lophotrochozoa;Mollusca;Bivalvia;Autobranchia;Heteroconchia;Euhe  
 terodonta;Imparidentia;Venerida;Veneroidea;Veneridae;Mercenaria;Mercenari  
 a mercenaria  
 UdeM00000043319 6596 528.1 UdeM00000043319 XP\_045160710.1 44.8 589  
 313 7 128 711 723 1304 1.70E-146 528.1 6596 cellular  
 organisms;Eukaryota;Opisthokonta;Metazoa;Eumetazoa;Bilateria;Protostomia;  
 Spiralia;Lophotrochozoa;Mollusca;Bivalvia;Autobranchia;Heteroconchia;Euhe  
 terodonta;Imparidentia;Venerida;Veneroidea;Veneridae;Mercenaria;Mercenari  
 a mercenaria  
 UdeM00000043320 6565 425.6 UdeM00000043320 XP\_022315266.1 48.5 472  
 223 7 1 464 677 1136 7.90E-116 425.6 6565 cellular  
 organisms;Eukaryota;Opisthokonta;Metazoa;Eumetazoa;Bilateria;Protostomia;  
 Spiralia;Lophotrochozoa;Mollusca;Bivalvia;Autobranchia;Pteriormorphia;Ostr  
 eida;Ostreoidea;Ostreidae;Crassostrea;Crassostrea virginica  
 UdeM00000043321 7741 278.9 UdeM00000043321 XP\_019626710.1 25.9 683  
 450 21 53 732 458 1087 2.30E-71 278.9 7741 cellular  
 organisms;Eukaryota;Opisthokonta;Metazoa;Eumetazoa;Bilateria;Deuterostomi  
 a;Chordata;Cephalochordata;Leptocardii;Amphioxiformes;Branchiostomidae;Br  
 anchiostoma;Branchiostoma belcheri  
 UdeM00000043322 29159 73.6 UdeM00000043322 XP\_034317009.1 43 86  
 38 1 78 163 79 153 2.80E-10 73.6 29159 cellular  
 organisms;Eukaryota;Opisthokonta;Metazoa;Eumetazoa;Bilateria;Protostomia;

Spiralia;Lophotrochozoa;Mollusca;Bivalvia;Autobranchia;Pteriormorphia;Ostr  
eida;Ostreoidea;Ostreidae;Crassostrea;Crassostrea gigas  
UdeM00000043323 6596 89 UdeM00000043323 XP\_045158040.1 47.1 87  
41 1 23 109 1263 1344 4.20E-15 89 6596 cellular  
organisms;Eukaryota;Opisthokonta;Metazoa;Eumetazoa;Bilateria;Protostomia;  
Spiralia;Lophotrochozoa;Mollusca;Bivalvia;Autobranchia;Heteroconchia;Euhe  
terodonta;Imparidentia;Venerida;Veneroidea;Veneridae;Mercenaria;Mercenari  
a mercenaria  
UdeM00000043324 6596 134 UdeM00000043324 XP\_045158017.1 37.6 157  
98 0 15 171 1112 1268 1.80E-28 134 6596 cellular  
organisms;Eukaryota;Opisthokonta;Metazoa;Eumetazoa;Bilateria;Protostomia;  
Spiralia;Lophotrochozoa;Mollusca;Bivalvia;Autobranchia;Heteroconchia;Euhe  
terodonta;Imparidentia;Venerida;Veneroidea;Veneridae;Mercenaria;Mercenari  
a mercenaria  
UdeM00000043325 6596 484.2 UdeM00000043325 XP\_045158018.1 35.8 866  
501 20 177 1018 386 1220 4.20E-133 484.2 6596 cellular  
organisms;Eukaryota;Opisthokonta;Metazoa;Eumetazoa;Bilateria;Protostomia;  
Spiralia;Lophotrochozoa;Mollusca;Bivalvia;Autobranchia;Heteroconchia;Euhe  
terodonta;Imparidentia;Venerida;Veneroidea;Veneridae;Mercenaria;Mercenari  
a mercenaria  
UdeM00000043326 7741 80.5 UdeM00000043326 XP\_019614393.1 24.7 304  
178 10 116 394 328 605 5.60E-12 80.5 7741 cellular  
organisms;Eukaryota;Opisthokonta;Metazoa;Eumetazoa;Bilateria;Deuterostomi  
a;Chordata;Cephalochordata;Leptocardii;Amphioxiformes;Branchiostomidae;Br  
anchiostoma;Branchiostoma belcheri  
UdeM00000038553 90988 312.8 UdeM00000038553 XP\_039515048.1 39.3 438  
246 9 4 425 534 967 7.50E-82 312.8 90988 cellular  
organisms;Eukaryota;Opisthokonta;Metazoa;Eumetazoa;Bilateria;Deuterostomi  
a;Chordata;Craniata;Vertebrata;Gnathostomata;Teleostomi;Euteleostomi;Acti  
nopterygii;Actinopteri;Neopterygii;Teleostei;Osteoglossocephalai;Clupeoce  
phala;Otomorpha;Ostariophysii;Otophysi;Cypriniphysae;Cypriniiformes;Cyprino  
idei;Leuciscidae;Pogonichthyinae;Pimephales;Pimephales promelas  
UdeM00000038554 6850 103.6 UdeM00000038554 XP\_013784332.1 59.8 82  
32 1 6 86 4 85 3.60E-19 103.6 6850 cellular  
organisms;Eukaryota;Opisthokonta;Metazoa;Eumetazoa;Bilateria;Protostomia;  
Ecdysozoa;Panarthropoda;Arthropoda;Chelicerata;Merostomata;Xiphosura;Limu  
lidae;Limulus;Limulus polyphemus  
UdeM00000038555 6565 145.6 UdeM00000038555 XP\_022300575.1 38.5 244  
112 6 503 742 148 357 2.50E-31 145.6 6565 cellular  
organisms;Eukaryota;Opisthokonta;Metazoa;Eumetazoa;Bilateria;Protostomia;  
Spiralia;Lophotrochozoa;Mollusca;Bivalvia;Autobranchia;Pteriormorphia;Ostr  
eida;Ostreoidea;Ostreidae;Crassostrea;Crassostrea virginica  
UdeM00000038556 29159 401.4 UdeM00000038556 XP\_034318668.1 46.8 474  
241 5 1 467 538 1007 1.60E-108 401.4 29159 cellular  
organisms;Eukaryota;Opisthokonta;Metazoa;Eumetazoa;Bilateria;Protostomia;  
Spiralia;Lophotrochozoa;Mollusca;Bivalvia;Autobranchia;Pteriormorphia;Ostr  
eida;Ostreoidea;Ostreidae;Crassostrea;Crassostrea gigas  
UdeM00000038557 13397 127.9 UdeM00000038557 XP\_041064996.1 33 230  
128 7 72 283 57 278 3.00E-26 127.9 13397 cellular  
organisms;Eukaryota;Opisthokonta;Metazoa;Eumetazoa;Bilateria;Deuterostomi  
a;Chordata;Craniata;Vertebrata;Gnathostomata;Chondrichthyes;Elasmobranchi  
i;Selachii;Galeomorphii;Galeoidea;Lamniformes;Alopiidae;Lamninae;Carcharo  
don;Carcharodon carcharias



UdeM00000038558 36176 112.5 UdeM00000038558 XP\_043568160.1 28.3 286  
 170 9 6 268 5 278 1.20E-21 112.5 36176 cellular  
 organisms;Eukaryota;Opisthokonta;Metazoa;Eumetazoa;Bilateria;Deuterostomi  
 a;Chordata;Craniata;Vertebrata;Gnathostomata;Chondrichthyes;Elasmobranchi  
 i;Selachii;Galeomorphii;Galeoidea;Orectolobiformes;Hemiscylliidae;Chiloscyllium;Chiloscyllium plagiosum  
 UdeM00000038559 386614 110.9 UdeM00000038559 XP\_032889954.1 29.3  
 276 155 11 7 277 6 246 3.60E-21 110.9 386614  
 cellular  
 organisms;Eukaryota;Opisthokonta;Metazoa;Eumetazoa;Bilateria;Deuterostomi  
 a;Chordata;Craniata;Vertebrata;Gnathostomata;Chondrichthyes;Elasmobranchi  
 i;Batoidea;Rajiformes;Rajidae;Amblyraja;Amblyraja radiata  
 UdeM00000038560 6596 120.2 UdeM00000038560 XP\_045198315.1 38.7 222  
 94 8 22 209 29 242 3.20E-24 120.2 6596 cellular  
 organisms;Eukaryota;Opisthokonta;Metazoa;Eumetazoa;Bilateria;Protostomia;  
 Spiralia;Lophotrochozoa;Mollusca;Bivalvia;Autobranchia;Heteroconchia;Euhe  
 terodonta;Imparidentia;Venerida;Veneroidea;Veneridae;Mercenaria;Mercenari  
 a mercenaria  
 UdeM00000038561 6573 115.9 UdeM00000038561 XP\_021365717.1 27.3 319  
 210 12 55 368 46 347 1.70E-22 115.9 6573 cellular  
 organisms;Eukaryota;Opisthokonta;Metazoa;Eumetazoa;Bilateria;Protostomia;  
 Spiralia;Lophotrochozoa;Mollusca;Bivalvia;Autobranchia;Pteriormorphia;Pect  
 inida;Pectinoidea;Pectinidae;Mizuhopecten;Mizuhopecten yessoensis  
 UdeM00000038562 6596 117.5 UdeM00000038562 XP\_045198315.1 37.8 222  
 96 8 22 209 29 242 2.10E-23 117.5 6596 cellular  
 organisms;Eukaryota;Opisthokonta;Metazoa;Eumetazoa;Bilateria;Protostomia;  
 Spiralia;Lophotrochozoa;Mollusca;Bivalvia;Autobranchia;Heteroconchia;Euhe  
 terodonta;Imparidentia;Venerida;Veneroidea;Veneridae;Mercenaria;Mercenari  
 a mercenaria  
 UdeM00000038564 6596 63.2 UdeM00000038564 XP\_045206350.1 34.3 99  
 57 4 11 102 209 306 6.20E-07 63.2 6596 cellular  
 organisms;Eukaryota;Opisthokonta;Metazoa;Eumetazoa;Bilateria;Protostomia;  
 Spiralia;Lophotrochozoa;Mollusca;Bivalvia;Autobranchia;Heteroconchia;Euhe  
 terodonta;Imparidentia;Venerida;Veneroidea;Veneridae;Mercenaria;Mercenari  
 a mercenaria  
 UdeM00000038573 6596 81.6 UdeM00000038573 XP\_045206665.1 58.2 79  
 32 1 40 117 60 138 1.70E-12 81.6 6596 cellular  
 organisms;Eukaryota;Opisthokonta;Metazoa;Eumetazoa;Bilateria;Protostomia;  
 Spiralia;Lophotrochozoa;Mollusca;Bivalvia;Autobranchia;Heteroconchia;Euhe  
 terodonta;Imparidentia;Venerida;Veneroidea;Veneridae;Mercenaria;Mercenari  
 a mercenaria  
 UdeM00000038574 6526 66.2 UdeM00000038574 XP\_013073309.1 58.7 46  
 19 0 28 73 43 88 2.60E-08 66.2 6526 cellular  
 organisms;Eukaryota;Opisthokonta;Metazoa;Eumetazoa;Bilateria;Protostomia;  
 Spiralia;Lophotrochozoa;Mollusca;Gastropoda;Heterobranchia;Euthyneura;Pan  
 pulmonata;Hygrophila;Lymnaeioidea;Planorbidae;Biophalaria;Biophalaria  
 glabrata  
 UdeM00000038575 37653 248.1 UdeM00000038575 XP\_014789964.1 70 170  
 22 1 1 141 134 303 1.10E-62 248.1 37653 cellular  
 organisms;Eukaryota;Opisthokonta;Metazoa;Eumetazoa;Bilateria;Protostomia;  
 Spiralia;Lophotrochozoa;Mollusca;Cephalopoda;Coleoidea;Octopodiformes;Oct  
 opoda;Incirrata;Octopodidae;Octopus;Octopus bimaculoides  
 UdeM00000038579 6573 396.7 UdeM00000038579 XP\_021363140.1 69.3 264  
 54 3 4 241 90 352 2.10E-107 396.7 6573 cellular

organisms;Eukaryota;Opisthokonta;Metazoa;Eumetazoa;Bilateria;Protostomia;Spiralia;Lophotrochozoa;Mollusca;Bivalvia;Autobranchia;Pteriomorpha;Pectinida;Pectinoidea;Pectinidae;Mizuhopecten;Mizuhopecten yessoensis

UdeM00000038583 225164 84.3 UdeM00000038583 XP\_009056975.1 77.1  
48 11 0 34 81 93 140 7.60E-14 84.3 225164

cellular

organisms;Eukaryota;Opisthokonta;Metazoa;Eumetazoa;Bilateria;Protostomia;Spiralia;Lophotrochozoa;Mollusca;Gastropoda;Patellogastropoda;Lottioidae;Lottiidae;Lottia;Lottia gigantea

UdeM00000038584 6565 240.7 UdeM00000038584 XP\_022314936.1 56.8 220  
56 4 1 190 179 389 1.60E-60 240.7 6565 cellular

organisms;Eukaryota;Opisthokonta;Metazoa;Eumetazoa;Bilateria;Protostomia;Spiralia;Lophotrochozoa;Mollusca;Bivalvia;Autobranchia;Pteriomorpha;Ostreida;Ostreoidae;Crassostrea;Crassostrea virginica

UdeM00000038585 6579 117.9 UdeM00000038585 XP\_033743084.1 51.4 111  
53 1 1 110 1 111 8.40E-24 117.9 6579 cellular

organisms;Eukaryota;Opisthokonta;Metazoa;Eumetazoa;Bilateria;Protostomia;Spiralia;Lophotrochozoa;Mollusca;Bivalvia;Autobranchia;Pteriomorpha;Pectinida;Pectinoidea;Pectinidae;Pecten;Pecten maximus

UdeM00000038590 29159 73.9 UdeM00000038590 XP\_034307878.1 32.3 99  
67 0 1 99 92 190 3.70E-10 73.9 29159 cellular

organisms;Eukaryota;Opisthokonta;Metazoa;Eumetazoa;Bilateria;Protostomia;Spiralia;Lophotrochozoa;Mollusca;Bivalvia;Autobranchia;Pteriomorpha;Ostreida;Ostreoidae;Crassostrea;Crassostrea gigas

UdeM00000038591 29159 209.1 UdeM00000038591 XP\_034312908.1 28.2 649  
342 20 9 564 6 623 1.40E-50 209.1 29159 cellular

organisms;Eukaryota;Opisthokonta;Metazoa;Eumetazoa;Bilateria;Protostomia;Spiralia;Lophotrochozoa;Mollusca;Bivalvia;Autobranchia;Pteriomorpha;Ostreida;Ostreoidae;Crassostrea;Crassostrea gigas

UdeM00000038592 37621 122.5 UdeM00000038592 XP\_014676916.1 30.4 253  
147 4 29 255 72 321 7.90E-25 122.5 37621 cellular

organisms;Eukaryota;Opisthokonta;Metazoa;Eumetazoa;Bilateria;Protostomia;Ecdysozoa;Scalidophora;Priapulida;Priapulimorpha;Priapulimorphida;Priapulidae;Priapululus;Priapululus caudatus

UdeM00000038595 6596 173.7 UdeM00000038595 XP\_045177695.1 42.3 222  
120 4 5 219 164 384 7.40E-40 173.7 6596 cellular

organisms;Eukaryota;Opisthokonta;Metazoa;Eumetazoa;Bilateria;Protostomia;Spiralia;Lophotrochozoa;Mollusca;Bivalvia;Autobranchia;Heteroconchia;Euheterodonta;Imparidentia;Venerida;Veneroidea;Veneridae;Mercenaria;Mercenaria mercenaria

UdeM00000044458 6573 158.7 UdeM00000044458 XP\_021376346.1 78.3 106  
22 1 1 105 1 106 4.10E-36 158.7 6573 cellular

organisms;Eukaryota;Opisthokonta;Metazoa;Eumetazoa;Bilateria;Protostomia;Spiralia;Lophotrochozoa;Mollusca;Bivalvia;Autobranchia;Pteriomorpha;Pectinida;Pectinoidea;Pectinidae;Mizuhopecten;Mizuhopecten yessoensis

UdeM00000033796 6596 112.1 UdeM00000033796 XP\_045194453.1 33.3 192  
118 4 34 219 54 241 9.50E-22 112.1 6596 cellular

organisms;Eukaryota;Opisthokonta;Metazoa;Eumetazoa;Bilateria;Protostomia;Spiralia;Lophotrochozoa;Mollusca;Bivalvia;Autobranchia;Heteroconchia;Euheterodonta;Imparidentia;Venerida;Veneroidea;Veneridae;Mercenaria;Mercenaria mercenaria

UdeM00000033798 6596 140.6 UdeM00000033798 XP\_045194453.1 30.8 260  
170 4 12 265 8 263 2.90E-30 140.6 6596 cellular

organisms;Eukaryota;Opisthokonta;Metazoa;Eumetazoa;Bilateria;Protostomia;

Spiralia;Lophotrochozoa;Mollusca;Bivalvia;Autobranchia;Heteroconchia;Euherodonta;Imparidentia;Venerida;Veneroidea;Veneridae;Mercenaria;Mercenaria mercenaria

UdeM00000033800 29159 64.3 UdeM00000033800 XP\_011439465.2 22.2 248  
174 7 42 287 567 797 5.60E-07 64.3 29159 cellular

organisms;Eukaryota;Opisthokonta;Metazoa;Eumetazoa;Bilateria;Protostomia;Spiralia;Lophotrochozoa;Mollusca;Bivalvia;Autobranchia;Pteriomorphia;Ostreida;Ostreoidea;Ostreidae;Crassostrea;Crassostrea gigas

UdeM00000033804 6596 128.3 UdeM00000033804 XP\_045194453.1 34.1 214  
131 4 34 241 54 263 1.40E-26 128.3 6596 cellular

organisms;Eukaryota;Opisthokonta;Metazoa;Eumetazoa;Bilateria;Protostomia;Spiralia;Lophotrochozoa;Mollusca;Bivalvia;Autobranchia;Heteroconchia;Euherodonta;Imparidentia;Venerida;Veneroidea;Veneridae;Mercenaria;Mercenaria mercenaria

UdeM00000033803 6596 142.5 UdeM00000033803 XP\_045194453.1 33.8 240  
149 4 49 282 28 263 8.20E-31 142.5 6596 cellular

organisms;Eukaryota;Opisthokonta;Metazoa;Eumetazoa;Bilateria;Protostomia;Spiralia;Lophotrochozoa;Mollusca;Bivalvia;Autobranchia;Heteroconchia;Euherodonta;Imparidentia;Venerida;Veneroidea;Veneridae;Mercenaria;Mercenaria mercenaria

UdeM00000033806 6596 1022.3 UdeM00000033806 XP\_045160618.1 47.3  
1147 488 11 15 1064 1372 2498 4.60E-295 1022.3 6596  
cellular

organisms;Eukaryota;Opisthokonta;Metazoa;Eumetazoa;Bilateria;Protostomia;Spiralia;Lophotrochozoa;Mollusca;Bivalvia;Autobranchia;Heteroconchia;Euherodonta;Imparidentia;Venerida;Veneroidea;Veneridae;Mercenaria;Mercenaria mercenaria

UdeM00000033805 6596 1818.1 UdeM00000033805 XP\_045160618.1 47.4  
2063 789 19 223 2101 548 2498 0.00E+00 1818.1 6596  
cellular

organisms;Eukaryota;Opisthokonta;Metazoa;Eumetazoa;Bilateria;Protostomia;Spiralia;Lophotrochozoa;Mollusca;Bivalvia;Autobranchia;Heteroconchia;Euherodonta;Imparidentia;Venerida;Veneroidea;Veneridae;Mercenaria;Mercenaria mercenaria

UdeM00000033805 6596 83.2 UdeM00000033805 XP\_045160618.1 54.5 77  
35 0 20 96 9 85 4.40E-12 83.2 6596 cellular

organisms;Eukaryota;Opisthokonta;Metazoa;Eumetazoa;Bilateria;Protostomia;Spiralia;Lophotrochozoa;Mollusca;Bivalvia;Autobranchia;Heteroconchia;Euherodonta;Imparidentia;Venerida;Veneroidea;Veneridae;Mercenaria;Mercenaria mercenaria

UdeM00000033807 6596 907.5 UdeM00000033807 XP\_045178193.1 45.9 1107  
457 13 18 1086 5 1007 1.60E-260 907.5 6596 cellular

organisms;Eukaryota;Opisthokonta;Metazoa;Eumetazoa;Bilateria;Protostomia;Spiralia;Lophotrochozoa;Mollusca;Bivalvia;Autobranchia;Heteroconchia;Euherodonta;Imparidentia;Venerida;Veneroidea;Veneridae;Mercenaria;Mercenaria mercenaria

UdeM00000033808 6596 944.5 UdeM00000033808 XP\_045178193.1 49.7 1022  
457 12 18 1001 5 1007 1.10E-271 944.5 6596 cellular

organisms;Eukaryota;Opisthokonta;Metazoa;Eumetazoa;Bilateria;Protostomia;Spiralia;Lophotrochozoa;Mollusca;Bivalvia;Autobranchia;Heteroconchia;Euherodonta;Imparidentia;Venerida;Veneroidea;Veneridae;Mercenaria;Mercenaria mercenaria

UdeM00000033809 6565 310.5 UdeM00000033809 XP\_022320624.1 69.7 208  
62 1 3 209 5 212 1.80E-81 310.5 6565 cellular

organisms;Eukaryota;Opisthokonta;Metazoa;Eumetazoa;Bilateria;Protostomia;Spiralia;Lophotrochozoa;Mollusca;Bivalvia;Autobranchia;Pteriomorpha;Ostr

UdeM00000033810 6596 1803.9 UdeM00000033810 XP\_045178193.1 46.3  
2170 1011 33 117 2213 5 2093 0.00E+00 1803.9 6596  
cellular

organisms;Eukaryota;Opisthokonta;Metazoa;Eumetazoa;Bilateria;Protostomia;Spiralia;Lophotrochozoa;Mollusca;Bivalvia;Autobranchia;Heteroconchia;Euhe

UdeM00000033811 6565 310.5 UdeM00000033811 XP\_022320624.1 69.7 208  
62 1 3 209 5 212 1.80E-81 310.5 6565 cellular

organisms;Eukaryota;Opisthokonta;Metazoa;Eumetazoa;Bilateria;Protostomia;Spiralia;Lophotrochozoa;Mollusca;Bivalvia;Autobranchia;Pteriomorpha;Ostr

UdeM00000033812 6596 1704.9 UdeM00000033812 XP\_045178276.1 44.7  
2167 994 33 27 2066 5 2093 0.00E+00 1704.9 6596  
cellular

organisms;Eukaryota;Opisthokonta;Metazoa;Eumetazoa;Bilateria;Protostomia;Spiralia;Lophotrochozoa;Mollusca;Bivalvia;Autobranchia;Heteroconchia;Euhe

UdeM00000033813 6596 713.4 UdeM00000033813 XP\_045197194.1 64.2 530  
186 2 4 533 2 527 2.20E-202 713.4 6596 cellular

organisms;Eukaryota;Opisthokonta;Metazoa;Eumetazoa;Bilateria;Protostomia;Spiralia;Lophotrochozoa;Mollusca;Bivalvia;Autobranchia;Heteroconchia;Euhe

UdeM00000033814 64176 78.6 UdeM00000033814 XP\_028587905.1 63.8 58  
18 2 1 57 1 56 5.50E-12 78.6 64176 cellular

organisms;Eukaryota;Opisthokonta;Metazoa;Eumetazoa;Bilateria;Deuterostomi  
a;Chordata;Craniata;Vertebrata;Gnathostomata;Teleostomi;Euteleostomi;Sarc  
opterygii;Dipnotetrapodomorpha;Tetrapoda;Amniota;Sauropsida;Sauria;Lepido  
sauria;Squamata;Bifurcata;Unidentata;Episquamata;Laterata;Lacertibaenia;L  
acertidae;Lacertinae;Podarcis;Podarcis muralis

UdeM00000033815 6596 1785 UdeM00000033815 XP\_045178193.1 46.4 2133  
989 33 28 2085 5 2057 0.00E+00 1785 6596 cellular

organisms;Eukaryota;Opisthokonta;Metazoa;Eumetazoa;Bilateria;Protostomia;Spiralia;Lophotrochozoa;Mollusca;Bivalvia;Autobranchia;Heteroconchia;Euhe

UdeM00000033816 130825 94.7 UdeM00000033816 XP\_040842723.1 56.6  
76 33 0 1 76 450 525 6.00E-17 94.7 130825  
cellular

organisms;Eukaryota;Opisthokonta;Metazoa;Eumetazoa;Bilateria;Deuterostomi  
a;Chordata;Craniata;Vertebrata;Gnathostomata;Teleostomi;Euteleostomi;Sarc  
opterygii;Dipnotetrapodomorpha;Tetrapoda;Amniota;Mammalia;Theria;Eutheria  
;Boreoeutheria;Euarchontoglires;Glires;Lagomorpha;Ochotonidae;Ochotona;Oc  
hotona curzoniae

UdeM00000033818 6596 421.4 UdeM00000033818 XP\_045198575.1 80.5 267  
52 0 39 305 9 275 9.80E-115 421.4 6596 cellular

organisms;Eukaryota;Opisthokonta;Metazoa;Eumetazoa;Bilateria;Protostomia;Spiralia;Lophotrochozoa;Mollusca;Bivalvia;Autobranchia;Heteroconchia;Euhe

terodonta;Imparidentia;Venerida;Veneroidea;Veneridae;Mercenaria;Mercenari  
 a mercenaria  
 UdeM00000033819 6596 410.2 UdeM00000033819 XP\_045198575.1 79 262  
 55 0 15 276 14 275 2.10E-111 410.2 6596 cellular  
 organisms;Eukaryota;Opisthokonta;Metazoa;Eumetazoa;Bilateria;Protostomia;  
 Spiralia;Lophotrochozoa;Mollusca;Bivalvia;Autobranchia;Heteroconchia;Euhe  
 terodonta;Imparidentia;Venerida;Veneroidea;Veneridae;Mercenaria;Mercenari  
 a mercenaria  
 UdeM00000033820 6596 407.9 UdeM00000033820 XP\_045198569.1 78.7 268  
 57 0 46 313 8 275 1.20E-110 407.9 6596 cellular  
 organisms;Eukaryota;Opisthokonta;Metazoa;Eumetazoa;Bilateria;Protostomia;  
 Spiralia;Lophotrochozoa;Mollusca;Bivalvia;Autobranchia;Heteroconchia;Euhe  
 terodonta;Imparidentia;Venerida;Veneroidea;Veneridae;Mercenaria;Mercenari  
 a mercenaria  
 UdeM00000033821 6596 404.1 UdeM00000033821 XP\_045198569.1 78.8 264  
 56 0 3 266 6 269 1.50E-109 404.1 6596 cellular  
 organisms;Eukaryota;Opisthokonta;Metazoa;Eumetazoa;Bilateria;Protostomia;  
 Spiralia;Lophotrochozoa;Mollusca;Bivalvia;Autobranchia;Heteroconchia;Euhe  
 terodonta;Imparidentia;Venerida;Veneroidea;Veneridae;Mercenaria;Mercenari  
 a mercenaria  
 UdeM00000033822 6596 410.2 UdeM00000033822 XP\_045198569.1 79.5 264  
 54 0 30 293 6 269 2.20E-111 410.2 6596 cellular  
 organisms;Eukaryota;Opisthokonta;Metazoa;Eumetazoa;Bilateria;Protostomia;  
 Spiralia;Lophotrochozoa;Mollusca;Bivalvia;Autobranchia;Heteroconchia;Euhe  
 terodonta;Imparidentia;Venerida;Veneroidea;Veneridae;Mercenaria;Mercenari  
 a mercenaria  
 UdeM00000033824 6596 520 UdeM00000033824 XP\_045197194.1 65.1 378  
 129 1 2 379 156 530 2.50E-144 520 6596 cellular  
 organisms;Eukaryota;Opisthokonta;Metazoa;Eumetazoa;Bilateria;Protostomia;  
 Spiralia;Lophotrochozoa;Mollusca;Bivalvia;Autobranchia;Heteroconchia;Euhe  
 terodonta;Imparidentia;Venerida;Veneroidea;Veneridae;Mercenaria;Mercenari  
 a mercenaria  
 UdeM00000033823 6596 740.7 UdeM00000033823 XP\_045197194.1 65.2 532  
 182 1 4 535 2 530 1.30E-210 740.7 6596 cellular  
 organisms;Eukaryota;Opisthokonta;Metazoa;Eumetazoa;Bilateria;Protostomia;  
 Spiralia;Lophotrochozoa;Mollusca;Bivalvia;Autobranchia;Heteroconchia;Euhe  
 terodonta;Imparidentia;Venerida;Veneroidea;Veneridae;Mercenaria;Mercenari  
 a mercenaria  
 UdeM00000033825 29159 241.1 UdeM00000033825 XP\_011455803.2 28.2 766  
 407 20 91 838 5 645 5.10E-60 241.1 29159 cellular  
 organisms;Eukaryota;Opisthokonta;Metazoa;Eumetazoa;Bilateria;Protostomia;  
 Spiralia;Lophotrochozoa;Mollusca;Bivalvia;Autobranchia;Pteriomorphia;Ostr  
 eida;Ostreoidea;Ostreidae;Crassostrea;Crassostrea gigas  
 UdeM00000033826 6579 123.6 UdeM00000033826 XP\_033760957.1 60.9 92  
 34 1 10 101 1020 1109 1.50E-25 123.6 6579 cellular  
 organisms;Eukaryota;Opisthokonta;Metazoa;Eumetazoa;Bilateria;Protostomia;  
 Spiralia;Lophotrochozoa;Mollusca;Bivalvia;Autobranchia;Pteriomorphia;Pect  
 inida;Pectinoidea;Pectinidae;Pecten;Pecten maximus  
 UdeM00000033828 6565 246.9 UdeM00000033828 XP\_022321004.1 75.3 154  
 36 1 1 154 1 152 1.70E-62 246.9 6565 cellular  
 organisms;Eukaryota;Opisthokonta;Metazoa;Eumetazoa;Bilateria;Protostomia;  
 Spiralia;Lophotrochozoa;Mollusca;Bivalvia;Autobranchia;Pteriomorphia;Ostr  
 eida;Ostreoidea;Ostreidae;Crassostrea;Crassostrea virginica

UdeM00000033829 29159 244.6 UdeM00000033829 XP\_011445128.2 49.6 256  
 125 4 20 272 4 258 1.50E-61 244.6 29159 cellular  
 organisms;Eukaryota;Opisthokonta;Metazoa;Eumetazoa;Bilateria;Protostomia;  
 Spiralia;Lophotrochozoa;Mollusca;Bivalvia;Autobranhia;Pteriomorphia;Ostr  
 eida;Ostreoidea;Ostreidae;Crassostrea;Crassostrea gigas  
 UdeM00000033830 46514 84.7 UdeM00000033830 XP\_038050656.1 54.5 77  
 35 0 90 166 418 494 1.20E-13 84.7 46514 cellular  
 organisms;Eukaryota;Opisthokonta;Metazoa;Eumetazoa;Bilateria;Deuterostomi  
 a;Echinodermata;Eleutherozoa;Asterozoa;Asteroidea;Valvatacea;Valvatida;As  
 terinidae;Patiria;Patiria miniata  
 UdeM00000033831 6596 62.8 UdeM00000033831 XP\_045208636.1 26.8 142  
 85 3 19 143 108 247 4.20E-07 62.8 6596 cellular  
 organisms;Eukaryota;Opisthokonta;Metazoa;Eumetazoa;Bilateria;Protostomia;  
 Spiralia;Lophotrochozoa;Mollusca;Bivalvia;Autobranhia;Heteroconchia;Euhe  
 terodonta;Imparidentia;Venerida;Veneroidea;Veneridae;Mercenaria;Mercenari  
 a mercenaria  
 UdeM00000033833 6596 143.3 UdeM00000033833 XP\_045204665.1 31.9 342  
 194 12 211 530 176 500 9.00E-31 143.3 6596 cellular  
 organisms;Eukaryota;Opisthokonta;Metazoa;Eumetazoa;Bilateria;Protostomia;  
 Spiralia;Lophotrochozoa;Mollusca;Bivalvia;Autobranhia;Heteroconchia;Euhe  
 terodonta;Imparidentia;Venerida;Veneroidea;Veneridae;Mercenaria;Mercenari  
 a mercenaria  
 UdeM00000033834 6565 159.5 UdeM00000033834 XP\_022321863.1 35.6 281  
 150 11 247 516 275 535 1.20E-35 159.5 6565 cellular  
 organisms;Eukaryota;Opisthokonta;Metazoa;Eumetazoa;Bilateria;Protostomia;  
 Spiralia;Lophotrochozoa;Mollusca;Bivalvia;Autobranhia;Pteriomorphia;Ostr  
 eida;Ostreoidea;Ostreidae;Crassostrea;Crassostrea virginica  
 UdeM00000033835 6565 147.9 UdeM00000033835 XP\_022321863.1 34.1 279  
 158 10 201 471 275 535 3.40E-32 147.9 6565 cellular  
 organisms;Eukaryota;Opisthokonta;Metazoa;Eumetazoa;Bilateria;Protostomia;  
 Spiralia;Lophotrochozoa;Mollusca;Bivalvia;Autobranhia;Pteriomorphia;Ostr  
 eida;Ostreoidea;Ostreidae;Crassostrea;Crassostrea virginica  
 UdeM00000033836 6596 67 UdeM00000033836 XP\_045171512.1 24.6 260  
 161 12 39 289 403 636 4.70E-08 67 6596 cellular  
 organisms;Eukaryota;Opisthokonta;Metazoa;Eumetazoa;Bilateria;Protostomia;  
 Spiralia;Lophotrochozoa;Mollusca;Bivalvia;Autobranhia;Heteroconchia;Euhe  
 terodonta;Imparidentia;Venerida;Veneroidea;Veneridae;Mercenaria;Mercenari  
 a mercenaria  
 UdeM00000033837 6565 147.5 UdeM00000033837 XP\_022321863.1 34.5 281  
 154 11 60 330 275 535 3.10E-32 147.5 6565 cellular  
 organisms;Eukaryota;Opisthokonta;Metazoa;Eumetazoa;Bilateria;Protostomia;  
 Spiralia;Lophotrochozoa;Mollusca;Bivalvia;Autobranhia;Pteriomorphia;Ostr  
 eida;Ostreoidea;Ostreidae;Crassostrea;Crassostrea virginica  
 UdeM00000033838 29159 73.2 UdeM00000033838 XP\_011450276.2 37.2 113  
 70 1 93 204 334 446 4.50E-10 73.2 29159 cellular  
 organisms;Eukaryota;Opisthokonta;Metazoa;Eumetazoa;Bilateria;Protostomia;  
 Spiralia;Lophotrochozoa;Mollusca;Bivalvia;Autobranhia;Pteriomorphia;Ostr  
 eida;Ostreoidea;Ostreidae;Crassostrea;Crassostrea gigas  
 UdeM00000033840 6579 272.7 UdeM00000033840 XP\_033730706.1 50.4 278  
 133 3 19 296 45 317 1.40E-69 272.7 6579 cellular  
 organisms;Eukaryota;Opisthokonta;Metazoa;Eumetazoa;Bilateria;Protostomia;  
 Spiralia;Lophotrochozoa;Mollusca;Bivalvia;Autobranhia;Pteriomorphia;Pect  
 inida;Pectinoidea;Pectinidae;Pecten;Pecten maximus

UdeM00000033839 6579 292.4 UdeM00000033839 XP\_033730706.1 48.6 311  
 155 3 2 312 12 317 1.70E-75 292.4 6579 cellular  
 organisms;Eukaryota;Opisthokonta;Metazoa;Eumetazoa;Bilateria;Protostomia;  
 Spiralia;Lophotrochozoa;Mollusca;Bivalvia;Autobranhia;Pteriormorphia;Pect  
 inida;Pectinoidea;Pectinidae;Pecten;Pecten maximus  
 UdeM00000043471 37621 136.3 UdeM00000043471 XP\_014679849.1 57.7 97  
 40 1 2 97 394 490 2.00E-29 136.3 37621 cellular  
 organisms;Eukaryota;Opisthokonta;Metazoa;Eumetazoa;Bilateria;Protostomia;  
 Ecdysozoa;Scalidophora;Priapulida;Priapulimorpha;Priapulimorphida;Priapul  
 idae;Priapulus;Priapulus caudatus  
 UdeM00000043473 6596 79.7 UdeM00000043473 XP\_045161541.1 40 90  
 51 1 27 116 136 222 2.70E-12 79.7 6596 cellular  
 organisms;Eukaryota;Opisthokonta;Metazoa;Eumetazoa;Bilateria;Protostomia;  
 Spiralia;Lophotrochozoa;Mollusca;Bivalvia;Autobranhia;Heteroconchia;Euhe  
 terodonta;Imparidentia;Venerida;Veneroidea;Veneridae;Mercenaria;Mercenari  
 a mercenaria  
 UdeM00000043474 6596 59.3 UdeM00000043474 XP\_045208720.1 43.3 67  
 38 0 96 162 1223 1289 5.50E-06 59.3 6596 cellular  
 organisms;Eukaryota;Opisthokonta;Metazoa;Eumetazoa;Bilateria;Protostomia;  
 Spiralia;Lophotrochozoa;Mollusca;Bivalvia;Autobranhia;Heteroconchia;Euhe  
 terodonta;Imparidentia;Venerida;Veneroidea;Veneridae;Mercenaria;Mercenari  
 a mercenaria  
 UdeM00000043475 6573 68.9 UdeM00000043475 XP\_021365681.1 40 90  
 49 2 5 94 438 522 4.50E-09 68.9 6573 cellular  
 organisms;Eukaryota;Opisthokonta;Metazoa;Eumetazoa;Bilateria;Protostomia;  
 Spiralia;Lophotrochozoa;Mollusca;Bivalvia;Autobranhia;Pteriormorphia;Pect  
 inida;Pectinoidea;Pectinidae;Mizuhopecten;Mizuhopecten yessoensis  
 UdeM00000043477 6596 130.2 UdeM00000043477 XP\_045209416.1 30.7 293  
 185 7 7 293 719 999 4.90E-27 130.2 6596 cellular  
 organisms;Eukaryota;Opisthokonta;Metazoa;Eumetazoa;Bilateria;Protostomia;  
 Spiralia;Lophotrochozoa;Mollusca;Bivalvia;Autobranhia;Heteroconchia;Euhe  
 terodonta;Imparidentia;Venerida;Veneroidea;Veneridae;Mercenaria;Mercenari  
 a mercenaria  
 UdeM00000043478 6573 74.3 UdeM00000043478 XP\_021362685.1 34.7 124  
 75 3 5 128 437 554 2.10E-10 74.3 6573 cellular  
 organisms;Eukaryota;Opisthokonta;Metazoa;Eumetazoa;Bilateria;Protostomia;  
 Spiralia;Lophotrochozoa;Mollusca;Bivalvia;Autobranhia;Pteriormorphia;Pect  
 inida;Pectinoidea;Pectinidae;Mizuhopecten;Mizuhopecten yessoensis  
 UdeM00000043479 151771 422.9 UdeM00000043479 XP\_028414839.1 36  
 644 374 13 151 776 114 737 8.60E-115 422.9 151771  
 cellular  
 organisms;Eukaryota;Opisthokonta;Metazoa;Eumetazoa;Cnidaria;Anthozoa;Octo  
 corallia;Alcyonacea;Alcyoniina;Nephtheidae;Dendronephthya;Dendronephthya  
 gigantea  
 UdeM00000043480 151771 422.9 UdeM00000043480 XP\_028414839.1 36  
 644 374 13 144 769 114 737 8.50E-115 422.9 151771  
 cellular  
 organisms;Eukaryota;Opisthokonta;Metazoa;Eumetazoa;Cnidaria;Anthozoa;Octo  
 corallia;Alcyonacea;Alcyoniina;Nephtheidae;Dendronephthya;Dendronephthya  
 gigantea  
 UdeM00000043481 6412 60.8 UdeM00000043481 XP\_009012286.1 39.7 73  
 44 0 8 80 53 125 1.10E-06 60.8 6412 cellular  
 organisms;Eukaryota;Opisthokonta;Metazoa;Eumetazoa;Bilateria;Protostomia;

Spiralia; Lophotrochozoa; Annelida; Clitellata; Hirudinea; Rhynchobdellida; Glossiphoniidae; Helobdella; Helobdella robusta

UdeM00000043482 7054 149.4 UdeM00000043482 XP\_031328250.1 51.2 129  
62 1 2 130 232 359 3.50E-33 149.4 7054 cellular  
organisms; Eukaryota; Opisthokonta; Metazoa; Eumetazoa; Bilateria; Protostomia; Ecdysozoa; Panarthropoda; Arthropoda; Mandibulata; Pancrustacea; Hexapoda; Insecta; Dicondylia; Pterygota; Neoptera; Endopterygota; Coleoptera; Polyphaga; Elateriformia; Elateroidea; Lampyridae; Lampyrinae; Photinus; Photinus pyralis

UdeM00000043483 7054 137.9 UdeM00000043483 XP\_031328250.1 54.5 112  
50 1 1 112 249 359 9.20E-30 137.9 7054 cellular  
organisms; Eukaryota; Opisthokonta; Metazoa; Eumetazoa; Bilateria; Protostomia; Ecdysozoa; Panarthropoda; Arthropoda; Mandibulata; Pancrustacea; Hexapoda; Insecta; Dicondylia; Pterygota; Neoptera; Endopterygota; Coleoptera; Polyphaga; Elateriformia; Elateroidea; Lampyridae; Lampyrinae; Photinus; Photinus pyralis

UdeM00000043484 6596 124 UdeM00000043484 XP\_045208721.1 30.2 331  
215 8 7 335 719 1035 4.00E-25 124 6596 cellular  
organisms; Eukaryota; Opisthokonta; Metazoa; Eumetazoa; Bilateria; Protostomia; Spiralia; Lophotrochozoa; Mollusca; Bivalvia; Autobranchia; Heteroconchia; Euheterodonta; Imparidentia; Venerida; Veneroidea; Veneridae; Mercenaria; Mercenaria mercenaria

UdeM00000009361 6596 865.1 UdeM00000009361 XP\_045171153.1 66.2 610  
194 2 25 632 30 629 5.50E-248 865.1 6596 cellular  
organisms; Eukaryota; Opisthokonta; Metazoa; Eumetazoa; Bilateria; Protostomia; Spiralia; Lophotrochozoa; Mollusca; Bivalvia; Autobranchia; Heteroconchia; Euheterodonta; Imparidentia; Venerida; Veneroidea; Veneridae; Mercenaria; Mercenaria mercenaria

UdeM00000009362 6579 139 UdeM00000009362 XP\_033748412.1 55.2 210  
88 4 7 213 5 211 1.40E-29 139 6579 cellular  
organisms; Eukaryota; Opisthokonta; Metazoa; Eumetazoa; Bilateria; Protostomia; Spiralia; Lophotrochozoa; Mollusca; Bivalvia; Autobranchia; Pteriomorphia; Pectinida; Pectinoidea; Pectinidae; Pecten; Pecten maximus

UdeM00000009363 6579 94 UdeM00000009363 XP\_033748413.1 43.4 106  
56 2 1 105 8 110 1.60E-16 94 6579 cellular  
organisms; Eukaryota; Opisthokonta; Metazoa; Eumetazoa; Bilateria; Protostomia; Spiralia; Lophotrochozoa; Mollusca; Bivalvia; Autobranchia; Pteriomorphia; Pectinida; Pectinoidea; Pectinidae; Pecten; Pecten maximus

UdeM00000009364 307658 60.5 UdeM00000009364 XP\_036150530.1 31.1  
106 73 0 28 133 25 130 1.90E-06 60.5 307658  
cellular  
organisms; Eukaryota; Opisthokonta; Metazoa; Eumetazoa; Bilateria; Protostomia; Ecdysozoa; Panarthropoda; Arthropoda; Mandibulata; Pancrustacea; Hexapoda; Insecta; Dicondylia; Pterygota; Neoptera; Endopterygota; Hymenoptera; Apocrita; Aculeata; Formicoidea; Formicidae; Myrmicinae; Solenopsidini; Monomorium; Monomorium pharaonis

UdeM00000009365 6596 815.8 UdeM00000009365 XP\_045172244.1 61.4 625  
234 3 28 651 102 720 3.90E-233 815.8 6596 cellular  
organisms; Eukaryota; Opisthokonta; Metazoa; Eumetazoa; Bilateria; Protostomia; Spiralia; Lophotrochozoa; Mollusca; Bivalvia; Autobranchia; Heteroconchia; Euheterodonta; Imparidentia; Venerida; Veneroidea; Veneridae; Mercenaria; Mercenaria mercenaria

UdeM00000009366 6596 249.6 UdeM00000009366 XP\_045174134.1 54.4 272  
114 6 78 346 77 341 5.90E-63 249.6 6596 cellular  
organisms; Eukaryota; Opisthokonta; Metazoa; Eumetazoa; Bilateria; Protostomia; Spiralia; Lophotrochozoa; Mollusca; Bivalvia; Autobranchia; Heteroconchia; Euheterodonta; Imparidentia; Venerida; Veneroidea; Veneridae; Mercenaria; Mercenaria mercenaria



terodonta;Imparidentia;Venerida;Veneroidea;Veneridae;Mercenaria;Mercenari  
a mercenaria

|                 |      |        |     |      |                 |                |          |        |      |
|-----------------|------|--------|-----|------|-----------------|----------------|----------|--------|------|
| UdeM00000009367 | 6596 | 1723.4 |     |      | UdeM00000009367 | XP_045174134.1 | 67.8     |        |      |
| 1574            | 468  | 12     | 519 | 2078 | 333             | 1881           | 0.00E+00 | 1723.4 | 6596 |

cellular

organisms;Eukaryota;Opisthokonta;Metazoa;Eumetazoa;Bilateria;Protostomia;  
Spiralia;Lophotrochozoa;Mollusca;Bivalvia;Autobranchia;Heteroconchia;Euhe  
terodonta;Imparidentia;Venerida;Veneroidea;Veneridae;Mercenaria;Mercenari  
a mercenaria

|                 |      |        |     |      |                 |                |          |        |      |
|-----------------|------|--------|-----|------|-----------------|----------------|----------|--------|------|
| UdeM00000009368 | 6596 | 1723.4 |     |      | UdeM00000009368 | XP_045174134.1 | 67.8     |        |      |
| 1574            | 468  | 12     | 519 | 2078 | 333             | 1881           | 0.00E+00 | 1723.4 | 6596 |

cellular

organisms;Eukaryota;Opisthokonta;Metazoa;Eumetazoa;Bilateria;Protostomia;  
Spiralia;Lophotrochozoa;Mollusca;Bivalvia;Autobranchia;Heteroconchia;Euhe  
terodonta;Imparidentia;Venerida;Veneroidea;Veneridae;Mercenaria;Mercenari  
a mercenaria

|                 |        |   |     |     |                 |                |           |     |        |
|-----------------|--------|---|-----|-----|-----------------|----------------|-----------|-----|--------|
| UdeM00000009369 | 400727 |   | 844 |     | UdeM00000009369 | XP_025090101.1 | 70.6      |     |        |
| 609             | 167    | 6 | 9   | 605 | 51              | 659            | 1.20E-241 | 844 | 400727 |

cellular

organisms;Eukaryota;Opisthokonta;Metazoa;Eumetazoa;Bilateria;Protostomia;  
Spiralia;Lophotrochozoa;Mollusca;Gastropoda;Caenogastropoda;Architaeniogl  
ossa;Ampullarioidea;Ampullariidae;Pomacea;Pomacea canaliculata

|                 |      |       |     |     |                 |                |       |      |          |
|-----------------|------|-------|-----|-----|-----------------|----------------|-------|------|----------|
| UdeM00000009370 | 6579 | 152.5 |     |     | UdeM00000009370 | XP_033748759.1 | 68.5  | 108  |          |
| 34              | 0    | 20    | 127 | 308 | 415             | 3.60E-34       | 152.5 | 6579 | cellular |

organisms;Eukaryota;Opisthokonta;Metazoa;Eumetazoa;Bilateria;Protostomia;  
Spiralia;Lophotrochozoa;Mollusca;Bivalvia;Autobranchia;Pteriormorphia;Pect  
inida;Pectinoidea;Pectinidae;Pecten;Pecten maximus

|                 |        |   |       |     |                 |                |           |       |        |
|-----------------|--------|---|-------|-----|-----------------|----------------|-----------|-------|--------|
| UdeM00000009371 | 400727 |   | 973.4 |     | UdeM00000009371 | XP_025090101.1 | 74.2      |       |        |
| 659             | 159    | 5 | 4     | 652 | 2               | 659            | 1.40E-280 | 973.4 | 400727 |

cellular

organisms;Eukaryota;Opisthokonta;Metazoa;Eumetazoa;Bilateria;Protostomia;  
Spiralia;Lophotrochozoa;Mollusca;Gastropoda;Caenogastropoda;Architaeniogl  
ossa;Ampullarioidea;Ampullariidae;Pomacea;Pomacea canaliculata

|                 |      |       |     |    |                 |                |       |      |          |
|-----------------|------|-------|-----|----|-----------------|----------------|-------|------|----------|
| UdeM00000009372 | 6596 | 588.2 |     |    | UdeM00000009372 | XP_045173526.1 | 64.7  | 462  |          |
| 152             | 3    | 1     | 460 | 18 | 470             | 9.30E-165      | 588.2 | 6596 | cellular |

organisms;Eukaryota;Opisthokonta;Metazoa;Eumetazoa;Bilateria;Protostomia;  
Spiralia;Lophotrochozoa;Mollusca;Bivalvia;Autobranchia;Heteroconchia;Euhe  
terodonta;Imparidentia;Venerida;Veneroidea;Veneridae;Mercenaria;Mercenari  
a mercenaria

|                 |      |       |     |    |                 |                |       |      |          |
|-----------------|------|-------|-----|----|-----------------|----------------|-------|------|----------|
| UdeM00000009373 | 6596 | 553.1 |     |    | UdeM00000009373 | XP_045173526.1 | 64.9  | 441  |          |
| 139             | 4    | 23    | 449 | 32 | 470             | 3.20E-154      | 553.1 | 6596 | cellular |

organisms;Eukaryota;Opisthokonta;Metazoa;Eumetazoa;Bilateria;Protostomia;  
Spiralia;Lophotrochozoa;Mollusca;Bivalvia;Autobranchia;Heteroconchia;Euhe  
terodonta;Imparidentia;Venerida;Veneroidea;Veneridae;Mercenaria;Mercenari  
a mercenaria

|                 |      |       |     |   |                 |                |       |      |          |
|-----------------|------|-------|-----|---|-----------------|----------------|-------|------|----------|
| UdeM00000009374 | 6596 | 603.2 |     |   | UdeM00000009374 | XP_045172188.1 | 58.4  | 551  |          |
| 217             | 6    | 3     | 544 | 2 | 549             | 3.30E-169      | 603.2 | 6596 | cellular |

organisms;Eukaryota;Opisthokonta;Metazoa;Eumetazoa;Bilateria;Protostomia;  
Spiralia;Lophotrochozoa;Mollusca;Bivalvia;Autobranchia;Heteroconchia;Euhe  
terodonta;Imparidentia;Venerida;Veneroidea;Veneridae;Mercenaria;Mercenari  
a mercenaria

|                 |        |   |       |     |                 |                |          |       |        |
|-----------------|--------|---|-------|-----|-----------------|----------------|----------|-------|--------|
| UdeM00000009375 | 151771 |   | 256.9 |     | UdeM00000009375 | XP_028406951.1 | 30.6     |       |        |
| 555             | 227    | 7 | 1     | 404 | 119             | 666            | 4.30E-65 | 256.9 | 151771 |

cellular

organisms;Eukaryota;Opisthokonta;Metazoa;Eumetazoa;Cnidaria;Anthozoa;Octo  
corallia;Alcyonacea;Alcyoniina;Nephtheidae;Dendronephthya;Dendronephthya  
gigantea

UdeM00000009376 45264 399.8 UdeM00000009376 XP\_044165143.1 49 443  
171 5 27 418 35 473 4.30E-108 399.8 45264 cellular

organisms;Eukaryota;Opisthokonta;Metazoa;Eumetazoa;Cnidaria;Anthozoa;Hexa  
corallia;Scleractinia;Astrocoeniina;Acroporidae;Acropora;Acropora  
millepora

UdeM00000009377 1735272 625.9 UdeM00000009377 XP\_041378650.1 51.8  
626 284 8 11 621 171 793 5.60E-176 625.9 1735272  
cellular

organisms;Eukaryota;Opisthokonta;Metazoa;Eumetazoa;Bilateria;Protostomia;  
Spiralia;Lophotrochozoa;Mollusca;Gastropoda;Neomphalina;Neomphaloidea;Pel  
tospiridae;Gigantopelta;Gigantopelta aegis

UdeM00000009378 1735272 99 UdeM00000009378 XP\_041378650.1 34.7  
173 98 5 11 170 171 341 6.70E-18 99 1735272  
cellular

organisms;Eukaryota;Opisthokonta;Metazoa;Eumetazoa;Bilateria;Protostomia;  
Spiralia;Lophotrochozoa;Mollusca;Gastropoda;Neomphalina;Neomphaloidea;Pel  
tospiridae;Gigantopelta;Gigantopelta aegis

UdeM00000009380 6596 115.5 UdeM00000009380 XP\_045172955.1 46.4 125  
59 3 1 117 41 165 6.20E-23 115.5 6596 cellular

organisms;Eukaryota;Opisthokonta;Metazoa;Eumetazoa;Bilateria;Protostomia;  
Spiralia;Lophotrochozoa;Mollusca;Bivalvia;Autobranchia;Heteroconchia;Euhe  
terodonta;Imparidentia;Venerida;Veneroidea;Veneridae;Mercenaria;Mercenari  
a mercenaria

UdeM00000009379 6596 129 UdeM00000009379 XP\_045172955.1 43.1 160  
79 4 9 160 10 165 6.80E-27 129 6596 cellular

organisms;Eukaryota;Opisthokonta;Metazoa;Eumetazoa;Bilateria;Protostomia;  
Spiralia;Lophotrochozoa;Mollusca;Bivalvia;Autobranchia;Heteroconchia;Euhe  
terodonta;Imparidentia;Venerida;Veneroidea;Veneridae;Mercenaria;Mercenari  
a mercenaria

UdeM00000009381 6579 195.3 UdeM00000009381 XP\_033743771.1 72.8 125  
34 0 21 145 26 150 5.80E-47 195.3 6579 cellular

organisms;Eukaryota;Opisthokonta;Metazoa;Eumetazoa;Bilateria;Protostomia;  
Spiralia;Lophotrochozoa;Mollusca;Bivalvia;Autobranchia;Pteriomorphia;Pect  
inida;Pectinoidea;Pectinidae;Pecten;Pecten maximus

UdeM00000009382 6596 205.3 UdeM00000009382 XP\_045172543.1 67.9 137  
44 0 3 139 46 182 5.40E-50 205.3 6596 cellular

organisms;Eukaryota;Opisthokonta;Metazoa;Eumetazoa;Bilateria;Protostomia;  
Spiralia;Lophotrochozoa;Mollusca;Bivalvia;Autobranchia;Heteroconchia;Euhe  
terodonta;Imparidentia;Venerida;Veneroidea;Veneridae;Mercenaria;Mercenari  
a mercenaria

UdeM00000009383 6596 157.1 UdeM00000009383 XP\_045171622.1 37.3 335  
164 11 1 309 495 809 5.00E-35 157.1 6596 cellular

organisms;Eukaryota;Opisthokonta;Metazoa;Eumetazoa;Bilateria;Protostomia;  
Spiralia;Lophotrochozoa;Mollusca;Bivalvia;Autobranchia;Heteroconchia;Euhe  
terodonta;Imparidentia;Venerida;Veneroidea;Veneridae;Mercenaria;Mercenari  
a mercenaria

UdeM00000009384 6596 406.4 UdeM00000009384 XP\_045171622.1 64.3 311  
104 5 15 320 16 324 3.40E-110 406.4 6596 cellular

organisms;Eukaryota;Opisthokonta;Metazoa;Eumetazoa;Bilateria;Protostomia;  
Spiralia;Lophotrochozoa;Mollusca;Bivalvia;Autobranchia;Heteroconchia;Euhe

terodonta;Imparidentia;Venerida;Veneroidea;Veneridae;Mercenaria;Mercenaria mercenaria

UdeM00000009385 6565 144.1 UdeM00000009385 XP\_022297409.1 38.6 210  
122 5 1 205 82 289 2.10E-31 144.1 6565 cellular

organisms;Eukaryota;Opisthokonta;Metazoa;Eumetazoa;Bilateria;Protostomia;Spiralia;Lophotrochozoa;Mollusca;Bivalvia;Autobranhia;Pteriormorphia;Ostreida;Ostreoidea;Ostreidae;Crassostrea;Crassostrea virginica

UdeM00000009387 6573 385.2 UdeM00000009387 XP\_021367299.1 62.7 308  
69 1 33 340 34 295 8.70E-104 385.2 6573 cellular

organisms;Eukaryota;Opisthokonta;Metazoa;Eumetazoa;Bilateria;Protostomia;Spiralia;Lophotrochozoa;Mollusca;Bivalvia;Autobranhia;Pteriormorphia;Pectinida;Pectinoidea;Pectinidae;Mizuhopecten;Mizuhopecten yessoensis

UdeM00000009388 6573 406.4 UdeM00000009388 XP\_021367299.1 73.3 262  
70 0 33 294 34 295 3.20E-110 406.4 6573 cellular

organisms;Eukaryota;Opisthokonta;Metazoa;Eumetazoa;Bilateria;Protostomia;Spiralia;Lophotrochozoa;Mollusca;Bivalvia;Autobranhia;Pteriormorphia;Pectinida;Pectinoidea;Pectinidae;Mizuhopecten;Mizuhopecten yessoensis

UdeM00000009389 6596 394 UdeM00000009389 XP\_045172865.1 86.2 312  
43 0 1 312 1 312 1.70E-106 394 6596 cellular

organisms;Eukaryota;Opisthokonta;Metazoa;Eumetazoa;Bilateria;Protostomia;Spiralia;Lophotrochozoa;Mollusca;Bivalvia;Autobranhia;Heteroconchia;Euheterodonta;Imparidentia;Venerida;Veneroidea;Veneridae;Mercenaria;Mercenaria mercenaria

UdeM00000009391 2607531 179.5 UdeM00000009391 XP\_029636426.1 27.5  
535 354 14 312 825 363 884 1.80E-41 179.5 2607531  
cellular

organisms;Eukaryota;Opisthokonta;Metazoa;Eumetazoa;Bilateria;Protostomia;Spiralia;Lophotrochozoa;Mollusca;Cephalopoda;Coleoidea;Octopodiformes;Octopoda;Incirrata;Octopodidae;Octopus;Octopus sinensis

UdeM00000009392 2607531 189.9 UdeM00000009392 XP\_029636426.1 24.8  
826 553 23 33 825 94 884 1.30E-44 189.9 2607531  
cellular

organisms;Eukaryota;Opisthokonta;Metazoa;Eumetazoa;Bilateria;Protostomia;Spiralia;Lophotrochozoa;Mollusca;Cephalopoda;Coleoidea;Octopodiformes;Octopoda;Incirrata;Octopodidae;Octopus;Octopus sinensis

UdeM00000009393 6596 437.6 UdeM00000009393 XP\_045171829.1 67.9 293  
94 0 1 293 1 293 1.30E-119 437.6 6596 cellular

organisms;Eukaryota;Opisthokonta;Metazoa;Eumetazoa;Bilateria;Protostomia;Spiralia;Lophotrochozoa;Mollusca;Bivalvia;Autobranhia;Heteroconchia;Euheterodonta;Imparidentia;Venerida;Veneroidea;Veneridae;Mercenaria;Mercenaria mercenaria

UdeM00000009394 6579 438.7 UdeM00000009394 XP\_033747207.1 56.3 414  
168 8 72 481 71 475 9.40E-120 438.7 6579 cellular

organisms;Eukaryota;Opisthokonta;Metazoa;Eumetazoa;Bilateria;Protostomia;Spiralia;Lophotrochozoa;Mollusca;Bivalvia;Autobranhia;Pteriormorphia;Pectinida;Pectinoidea;Pectinidae;Pecten;Pecten maximus

UdeM00000009395 400727 309.3 UdeM00000009395 XP\_025090389.1 74.7  
198 46 2 5 198 281 478 3.60E-81 309.3 400727  
cellular

organisms;Eukaryota;Opisthokonta;Metazoa;Eumetazoa;Bilateria;Protostomia;Spiralia;Lophotrochozoa;Mollusca;Gastropoda;Caenogastropoda;Architaenioglossa;Ampullarioidea;Ampullariidae;Pomacea;Pomacea canaliculata

UdeM00000009396 6596 524.6 UdeM00000009396 XP\_045169782.1 52.8 477  
223 2 1 476 56 531 1.30E-145 524.6 6596 cellular

organisms;Eukaryota;Opisthokonta;Metazoa;Eumetazoa;Bilateria;Protostomia;Spiralia;Lophotrochozoa;Mollusca;Bivalvia;Autobranhia;Heteroconchia;Euherodonta;Imparidentia;Venerida;Veneroidea;Veneridae;Mercenaria;Mercenaria mercenaria

UdeM00000009397 6596 460.7 UdeM00000009397 XP\_045171612.1 78.1 283  
62 0 1 283 1 283 1.40E-126 460.7 6596 cellular

organisms;Eukaryota;Opisthokonta;Metazoa;Eumetazoa;Bilateria;Protostomia;Spiralia;Lophotrochozoa;Mollusca;Bivalvia;Autobranhia;Heteroconchia;Euherodonta;Imparidentia;Venerida;Veneroidea;Veneridae;Mercenaria;Mercenaria mercenaria

UdeM00000009398 29159 85.5 UdeM00000009398 XP\_034337118.1 34.6 133  
87 0 1 133 8 140 5.90E-14 85.5 29159 cellular

organisms;Eukaryota;Opisthokonta;Metazoa;Eumetazoa;Bilateria;Protostomia;Spiralia;Lophotrochozoa;Mollusca;Bivalvia;Autobranhia;Pteriomorphia;Ostracida;Ostreidae;Crassostrea;Crassostrea gigas

UdeM00000009400 6596 157.5 UdeM00000009400 XP\_045172549.1 30.9 418  
208 14 22 383 45 437 3.80E-35 157.5 6596 cellular

organisms;Eukaryota;Opisthokonta;Metazoa;Eumetazoa;Bilateria;Protostomia;Spiralia;Lophotrochozoa;Mollusca;Bivalvia;Autobranhia;Heteroconchia;Euherodonta;Imparidentia;Venerida;Veneroidea;Veneridae;Mercenaria;Mercenaria mercenaria

UdeM00000009401 6565 104.8 UdeM00000009401 XP\_022337818.1 26.3 228  
157 4 1 221 13 236 3.00E-19 104.8 6565 cellular

organisms;Eukaryota;Opisthokonta;Metazoa;Eumetazoa;Bilateria;Protostomia;Spiralia;Lophotrochozoa;Mollusca;Bivalvia;Autobranhia;Pteriomorphia;Ostracida;Ostreidae;Crassostrea;Crassostrea virginica

UdeM00000009402 6579 146 UdeM00000009402 XP\_033748511.1 55.8 113  
50 0 1 113 1 113 3.00E-32 146 6579 cellular

organisms;Eukaryota;Opisthokonta;Metazoa;Eumetazoa;Bilateria;Protostomia;Spiralia;Lophotrochozoa;Mollusca;Bivalvia;Autobranhia;Pteriomorphia;Pectinida;Pectinoidea;Pectinidae;Pecten;Pecten maximus

UdeM00000009403 6596 183 UdeM00000009403 XP\_045172312.1 55.9 177  
74 3 1 176 11 184 3.40E-43 183 6596 cellular

organisms;Eukaryota;Opisthokonta;Metazoa;Eumetazoa;Bilateria;Protostomia;Spiralia;Lophotrochozoa;Mollusca;Bivalvia;Autobranhia;Heteroconchia;Euherodonta;Imparidentia;Venerida;Veneroidea;Veneridae;Mercenaria;Mercenaria mercenaria

UdeM00000009404 6596 305.4 UdeM00000009404 XP\_045171448.1 32.6 783  
373 25 6 740 7 682 1.90E-79 305.4 6596 cellular

organisms;Eukaryota;Opisthokonta;Metazoa;Eumetazoa;Bilateria;Protostomia;Spiralia;Lophotrochozoa;Mollusca;Bivalvia;Autobranhia;Heteroconchia;Euherodonta;Imparidentia;Venerida;Veneroidea;Veneridae;Mercenaria;Mercenaria mercenaria

UdeM00000009405 400727 150.6 UdeM00000009405 XP\_025093013.1 77.2  
92 21 0 1 92 1 92 1.00E-33 150.6 400727  
cellular

organisms;Eukaryota;Opisthokonta;Metazoa;Eumetazoa;Bilateria;Protostomia;Spiralia;Lophotrochozoa;Mollusca;Gastropoda;Caenogastropoda;Architaenioglossa;Ampullarioidea;Ampullariidae;Pomacea;Pomacea canaliculata

UdeM00000009406 6565 94.4 UdeM00000009406 XP\_022302274.1 35 177  
83 3 14 159 127 302 1.50E-16 94.4 6565 cellular

organisms;Eukaryota;Opisthokonta;Metazoa;Eumetazoa;Bilateria;Protostomia;Spiralia;Lophotrochozoa;Mollusca;Bivalvia;Autobranhia;Pteriomorphia;Ostracida;Ostreidae;Crassostrea;Crassostrea virginica

UdeM00000009408 225164 279.6 UdeM00000009408 XP\_009052004.1 64.2  
 204 72 1 19 221 33 236 3.60E-72 279.6 225164  
 cellular  
 organisms;Eukaryota;Opisthokonta;Metazoa;Eumetazoa;Bilateria;Protostomia;  
 Spiralia;Lophotrochozoa;Mollusca;Gastropoda;Patellogastropoda;Lottioidea;  
 Lottiidae;Lottia;Lottia gigantea  
 UdeM00000009410 6596 1098.2 UdeM00000009410 XP\_045171753.1 59.3  
 923 370 4 14 932 55 975 0.00E+00 1098.2 6596  
 cellular  
 organisms;Eukaryota;Opisthokonta;Metazoa;Eumetazoa;Bilateria;Protostomia;  
 Spiralia;Lophotrochozoa;Mollusca;Bivalvia;Autobranchia;Heteroconchia;Euhe  
 terodonta;Imparidentia;Venerida;Veneroidea;Veneridae;Mercenaria;Mercenari  
 a mercenaria  
 UdeM00000009411 1735272 206.8 UdeM00000009411 XP\_041348293.1 72.7  
 139 37 1 56 194 1 138 2.50E-50 206.8 1735272  
 cellular  
 organisms;Eukaryota;Opisthokonta;Metazoa;Eumetazoa;Bilateria;Protostomia;  
 Spiralia;Lophotrochozoa;Mollusca;Gastropoda;Neomphalina;Neomphaloidea;Pel  
 tospiridae;Gigantopelta;Gigantopelta aegis  
 UdeM00000009413 7029 68.9 UdeM00000009413 XP\_008190135.1 42.1 76  
 44 0 83 158 3 78 6.70E-09 68.9 7029 cellular  
 organisms;Eukaryota;Opisthokonta;Metazoa;Eumetazoa;Bilateria;Protostomia;  
 Ecdysozoa;Panarthropoda;Arthropoda;Mandibulata;Pancrustacea;Hexapoda;Inse  
 cta;Dicondylia;Pterygota;Neoptera;Paraneoptera;Hemiptera;Sternorrhyncha;A  
 phidomorpha;Aphidoidea;Aphididae;Aphidinae;Macrosiphini;Acyrtosiphon;Acy  
 rtosiphon pisum  
 UdeM00000009415 6596 194.9 UdeM00000009415 XP\_045171400.1 63.6 143  
 52 0 1 143 1 143 7.20E-47 194.9 6596 cellular  
 organisms;Eukaryota;Opisthokonta;Metazoa;Eumetazoa;Bilateria;Protostomia;  
 Spiralia;Lophotrochozoa;Mollusca;Bivalvia;Autobranchia;Heteroconchia;Euhe  
 terodonta;Imparidentia;Venerida;Veneroidea;Veneridae;Mercenaria;Mercenari  
 a mercenaria  
 UdeM00000009414 6573 275.8 UdeM00000009414 XP\_021353969.1 46.4 319  
 165 3 8 321 13 330 1.10E-70 275.8 6573 cellular  
 organisms;Eukaryota;Opisthokonta;Metazoa;Eumetazoa;Bilateria;Protostomia;  
 Spiralia;Lophotrochozoa;Mollusca;Bivalvia;Autobranchia;Pteriomorphia;Pect  
 inida;Pectinoidea;Pectinidae;Mizuhopecten;Mizuhopecten yessoensis  
 UdeM00000009416 7739 62 UdeM00000009416 XP\_035697989.1 35.5 93  
 59 1 954 1045 340 432 5.20E-06 62 7739 cellular  
 organisms;Eukaryota;Opisthokonta;Metazoa;Eumetazoa;Bilateria;Deuterostomi  
 a;Chordata;Cephalochordata;Leptocardii;Amphioxiformes;Branchiostomidae;Br  
 anchiostoma;Branchiostoma floridae  
 UdeM00000009417 6579 335.5 UdeM00000009417 XP\_033751112.1 49.8 301  
 146 3 35 332 63 361 7.80E-89 335.5 6579 cellular  
 organisms;Eukaryota;Opisthokonta;Metazoa;Eumetazoa;Bilateria;Protostomia;  
 Spiralia;Lophotrochozoa;Mollusca;Bivalvia;Autobranchia;Pteriomorphia;Pect  
 inida;Pectinoidea;Pectinidae;Pecten;Pecten maximus  
 UdeM00000009418 6596 168.3 UdeM00000009418 XP\_045166798.1 37.5 256  
 154 3 57 312 42 291 1.60E-38 168.3 6596 cellular  
 organisms;Eukaryota;Opisthokonta;Metazoa;Eumetazoa;Bilateria;Protostomia;  
 Spiralia;Lophotrochozoa;Mollusca;Bivalvia;Autobranchia;Heteroconchia;Euhe  
 terodonta;Imparidentia;Venerida;Veneroidea;Veneridae;Mercenaria;Mercenari  
 a mercenaria

UdeM00000009419 6579 261.5 UdeM00000009419 XP\_033751112.1 43.6 291  
 161 2 87 377 77 364 1.60E-66 261.5 6579 cellular  
 organisms;Eukaryota;Opisthokonta;Metazoa;Eumetazoa;Bilateria;Protostomia;  
 Spiralia;Lophotrochozoa;Mollusca;Bivalvia;Autobranchia;Pteriomorpha;Pect  
 inida;Pectinoidea;Pectinidae;Pecten;Pecten maximus  
 UdeM00000009420 6526 140.6 UdeM00000009420 XP\_013086474.1 42.6 169  
 91 2 95 258 28 195 2.90E-30 140.6 6526 cellular  
 organisms;Eukaryota;Opisthokonta;Metazoa;Eumetazoa;Bilateria;Protostomia;  
 Spiralia;Lophotrochozoa;Mollusca;Gastropoda;Heterobranchia;Euthyneura;Pan  
 pulmonata;Hygrophila;Lymnaeoidea;Planorbidae;Biomphalaria;Biomphalaria  
 glabrata  
 UdeM00000009422 6565 122.9 UdeM00000009422 XP\_022337267.1 46.3 134  
 70 1 43 174 405 538 4.10E-25 122.9 6565 cellular  
 organisms;Eukaryota;Opisthokonta;Metazoa;Eumetazoa;Bilateria;Protostomia;  
 Spiralia;Lophotrochozoa;Mollusca;Bivalvia;Autobranchia;Pteriomorpha;Ostr  
 eida;Ostreoidea;Ostreidae;Crassostrea;Crassostrea virginica  
 UdeM00000009423 6565 145.2 UdeM00000009423 XP\_022337267.1 36.5 277  
 109 10 11 222 264 538 9.90E-32 145.2 6565 cellular  
 organisms;Eukaryota;Opisthokonta;Metazoa;Eumetazoa;Bilateria;Protostomia;  
 Spiralia;Lophotrochozoa;Mollusca;Bivalvia;Autobranchia;Pteriomorpha;Ostr  
 eida;Ostreoidea;Ostreidae;Crassostrea;Crassostrea virginica  
 UdeM00000009424 7574 308.5 UdeM00000009424 XP\_013390758.1 41.5 376  
 194 6 46 401 47 416 1.30E-80 308.5 7574 cellular  
 organisms;Eukaryota;Opisthokonta;Metazoa;Eumetazoa;Bilateria;Protostomia;  
 Spiralia;Lophotrochozoa;Brachiopoda;Linguliformea;Lingulata;Lingulida;Lin  
 guloidea;Lingulidae;Lingula;Lingula anatina  
 UdeM00000009425 2607531 199.5 UdeM00000009425 XP\_029641155.1 32.9  
 313 194 5 51 352 68 375 7.20E-48 199.5 2607531  
 cellular  
 organisms;Eukaryota;Opisthokonta;Metazoa;Eumetazoa;Bilateria;Protostomia;  
 Spiralia;Lophotrochozoa;Mollusca;Cephalopoda;Coleoidea;Octopodiformes;Oct  
 opoda;Incirrata;Octopodidae;Octopus;Octopus sinensis  
 UdeM00000009426 6596 197.2 UdeM00000009426 XP\_045202146.1 44.4 216  
 105 2 46 248 76 289 2.70E-47 197.2 6596 cellular  
 organisms;Eukaryota;Opisthokonta;Metazoa;Eumetazoa;Bilateria;Protostomia;  
 Spiralia;Lophotrochozoa;Mollusca;Bivalvia;Autobranchia;Heteroconchia;Euhe  
 terodonta;Imparidentia;Venerida;Veneroidea;Veneridae;Mercenaria;Mercenari  
 a mercenaria  
 UdeM00000009427 6579 257.3 UdeM00000009427 XP\_033762187.1 50.9 271  
 110 7 46 297 63 329 2.40E-65 257.3 6579 cellular  
 organisms;Eukaryota;Opisthokonta;Metazoa;Eumetazoa;Bilateria;Protostomia;  
 Spiralia;Lophotrochozoa;Mollusca;Bivalvia;Autobranchia;Pteriomorpha;Pect  
 inida;Pectinoidea;Pectinidae;Pecten;Pecten maximus  
 UdeM00000009428 6573 411.8 UdeM00000009428 XP\_021363050.1 49.2 378  
 187 3 73 446 322 698 1.20E-111 411.8 6573 cellular  
 organisms;Eukaryota;Opisthokonta;Metazoa;Eumetazoa;Bilateria;Protostomia;  
 Spiralia;Lophotrochozoa;Mollusca;Bivalvia;Autobranchia;Pteriomorpha;Pect  
 inida;Pectinoidea;Pectinidae;Mizuhopecten;Mizuhopecten yessoensis  
 UdeM00000009429 6500 287.7 UdeM00000009429 XP\_012940167.1 47.3 300  
 125 3 42 308 109 408 1.80E-74 287.7 6500 cellular  
 organisms;Eukaryota;Opisthokonta;Metazoa;Eumetazoa;Bilateria;Protostomia;  
 Spiralia;Lophotrochozoa;Mollusca;Gastropoda;Heterobranchia;Euthyneura;Tec  
 tipleura;Aplysiida;Aplysioidea;Aplysiidae;Aplysia;Aplysia californica

UdeM00000009430 6526 151.4 UdeM00000009430 XP\_013088644.1 61.1 113  
 44 0 1 113 1 113 7.40E-34 151.4 6526 cellular  
 organisms;Eukaryota;Opisthokonta;Metazoa;Eumetazoa;Bilateria;Protostomia;  
 Spiralia;Lophotrochozoa;Mollusca;Gastropoda;Heterobranchia;Euthyneura;Pan  
 pulmonata;Hygrophila;Lymnaeidae;Planorbidae;Biomphalaria;Biomphalaria  
 glabrata  
 UdeM00000037921 6573 410.2 UdeM00000037921 XP\_021355706.1 39.4 743  
 366 13 1 739 217 879 5.60E-111 410.2 6573 cellular  
 organisms;Eukaryota;Opisthokonta;Metazoa;Eumetazoa;Bilateria;Protostomia;  
 Spiralia;Lophotrochozoa;Mollusca;Bivalvia;Autobranchia;Pteriormorphia;Pect  
 inida;Pectinoidea;Pectinidae;Mizuhopecten;Mizuhopecten yessoensis  
 UdeM00000037922 6579 968.4 UdeM00000037922 XP\_033741906.1 72.2 658  
 183 0 12 669 6 663 4.80E-279 968.4 6579 cellular  
 organisms;Eukaryota;Opisthokonta;Metazoa;Eumetazoa;Bilateria;Protostomia;  
 Spiralia;Lophotrochozoa;Mollusca;Bivalvia;Autobranchia;Pteriormorphia;Pect  
 inida;Pectinoidea;Pectinidae;Pecten;Pecten maximus  
 UdeM00000037923 6596 214.5 UdeM00000037923 XP\_045198029.1 29.9 491  
 318 10 29 508 67 542 3.50E-52 214.5 6596 cellular  
 organisms;Eukaryota;Opisthokonta;Metazoa;Eumetazoa;Bilateria;Protostomia;  
 Spiralia;Lophotrochozoa;Mollusca;Bivalvia;Autobranchia;Heteroconchia;Euhe  
 terodonta;Imparidentia;Venerida;Veneroidea;Veneridae;Mercenaria;Mercenari  
 a mercenaria  
 UdeM00000037924 6596 133.7 UdeM00000037924 XP\_045170511.1 28.1 278  
 172 4 38 290 716 990 5.50E-28 133.7 6596 cellular  
 organisms;Eukaryota;Opisthokonta;Metazoa;Eumetazoa;Bilateria;Protostomia;  
 Spiralia;Lophotrochozoa;Mollusca;Bivalvia;Autobranchia;Heteroconchia;Euhe  
 terodonta;Imparidentia;Venerida;Veneroidea;Veneridae;Mercenaria;Mercenari  
 a mercenaria  
 UdeM00000037925 6596 132.9 UdeM00000037925 XP\_045170511.1 28 300  
 187 5 38 311 716 1012 9.40E-28 132.9 6596 cellular  
 organisms;Eukaryota;Opisthokonta;Metazoa;Eumetazoa;Bilateria;Protostomia;  
 Spiralia;Lophotrochozoa;Mollusca;Bivalvia;Autobranchia;Heteroconchia;Euhe  
 terodonta;Imparidentia;Venerida;Veneroidea;Veneridae;Mercenaria;Mercenari  
 a mercenaria  
 UdeM00000037927 6596 132.1 UdeM00000037927 XP\_045198029.1 27 385  
 262 8 13 388 168 542 1.90E-27 132.1 6596 cellular  
 organisms;Eukaryota;Opisthokonta;Metazoa;Eumetazoa;Bilateria;Protostomia;  
 Spiralia;Lophotrochozoa;Mollusca;Bivalvia;Autobranchia;Heteroconchia;Euhe  
 terodonta;Imparidentia;Venerida;Veneroidea;Veneridae;Mercenaria;Mercenari  
 a mercenaria  
 UdeM00000037928 6596 176.8 UdeM00000037928 XP\_045198026.1 31.2 362  
 224 7 60 407 67 417 6.10E-41 176.8 6596 cellular  
 organisms;Eukaryota;Opisthokonta;Metazoa;Eumetazoa;Bilateria;Protostomia;  
 Spiralia;Lophotrochozoa;Mollusca;Bivalvia;Autobranchia;Heteroconchia;Euhe  
 terodonta;Imparidentia;Venerida;Veneroidea;Veneridae;Mercenaria;Mercenari  
 a mercenaria  
 UdeM00000037929 6596 139 UdeM00000037929 XP\_045198029.1 26 384  
 262 9 19 392 171 542 1.60E-29 139 6596 cellular  
 organisms;Eukaryota;Opisthokonta;Metazoa;Eumetazoa;Bilateria;Protostomia;  
 Spiralia;Lophotrochozoa;Mollusca;Bivalvia;Autobranchia;Heteroconchia;Euhe  
 terodonta;Imparidentia;Venerida;Veneroidea;Veneridae;Mercenaria;Mercenari  
 a mercenaria  
 UdeM00000037931 6596 193.4 UdeM00000037931 XP\_045198029.1 30.2 540  
 330 16 1 521 34 545 8.70E-46 193.4 6596 cellular

organisms;Eukaryota;Opisthokonta;Metazoa;Eumetazoa;Bilateria;Protostomia;Spiralia;Lophotrochozoa;Mollusca;Bivalvia;Autobranhia;Heteroconchia;Euheterodonta;Imparidentia;Venerida;Veneroidea;Veneridae;Mercenaria;Mercenaria mercenaria

UdeM00000037933 29159 67 UdeM00000037933 XP\_034325073.1 37.5 72  
45 0 1 72 12 83 1.20E-08 67 29159 cellular

organisms;Eukaryota;Opisthokonta;Metazoa;Eumetazoa;Bilateria;Protostomia;Spiralia;Lophotrochozoa;Mollusca;Bivalvia;Autobranhia;Pteriormorphia;Ostreida;Ostreoidea;Ostreidae;Crassostrea;Crassostrea gigas

UdeM00000037934 6596 225.7 UdeM00000037934 XP\_045198029.1 29.6 487  
322 10 7 483 67 542 1.50E-55 225.7 6596 cellular

organisms;Eukaryota;Opisthokonta;Metazoa;Eumetazoa;Bilateria;Protostomia;Spiralia;Lophotrochozoa;Mollusca;Bivalvia;Autobranhia;Heteroconchia;Euheterodonta;Imparidentia;Venerida;Veneroidea;Veneridae;Mercenaria;Mercenaria mercenaria

UdeM00000037936 29159 145.2 UdeM00000037936 XP\_034310226.1 31.8 324  
208 7 343 663 279 592 3.00E-31 145.2 29159 cellular

organisms;Eukaryota;Opisthokonta;Metazoa;Eumetazoa;Bilateria;Protostomia;Spiralia;Lophotrochozoa;Mollusca;Bivalvia;Autobranhia;Pteriormorphia;Ostreida;Ostreoidea;Ostreidae;Crassostrea;Crassostrea gigas

UdeM00000037937 6596 104 UdeM00000037937 XP\_045179845.1 29.3 184  
126 2 93 272 1324 1507 3.10E-19 104 6596 cellular

organisms;Eukaryota;Opisthokonta;Metazoa;Eumetazoa;Bilateria;Protostomia;Spiralia;Lophotrochozoa;Mollusca;Bivalvia;Autobranhia;Heteroconchia;Euheterodonta;Imparidentia;Venerida;Veneroidea;Veneridae;Mercenaria;Mercenaria mercenaria

UdeM00000037938 6596 164.1 UdeM00000037938 XP\_045198026.1 28.2 422  
272 9 1 403 137 546 4.70E-37 164.1 6596 cellular

organisms;Eukaryota;Opisthokonta;Metazoa;Eumetazoa;Bilateria;Protostomia;Spiralia;Lophotrochozoa;Mollusca;Bivalvia;Autobranhia;Heteroconchia;Euheterodonta;Imparidentia;Venerida;Veneroidea;Veneridae;Mercenaria;Mercenaria mercenaria

UdeM00000037939 29159 144.8 UdeM00000037939 XP\_034310226.1 33.6 295  
183 7 356 647 308 592 3.90E-31 144.8 29159 cellular

organisms;Eukaryota;Opisthokonta;Metazoa;Eumetazoa;Bilateria;Protostomia;Spiralia;Lophotrochozoa;Mollusca;Bivalvia;Autobranhia;Pteriormorphia;Ostreida;Ostreoidea;Ostreidae;Crassostrea;Crassostrea gigas

UdeM00000037940 6596 195.7 UdeM00000037940 XP\_045177819.1 26.3 501  
322 11 25 522 636 1092 1.50E-46 195.7 6596 cellular

organisms;Eukaryota;Opisthokonta;Metazoa;Eumetazoa;Bilateria;Protostomia;Spiralia;Lophotrochozoa;Mollusca;Bivalvia;Autobranhia;Heteroconchia;Euheterodonta;Imparidentia;Venerida;Veneroidea;Veneridae;Mercenaria;Mercenaria mercenaria

UdeM00000037941 29159 87.8 UdeM00000037941 XP\_034307860.1 63.8 69  
25 0 1 69 1 69 1.40E-14 87.8 29159 cellular

organisms;Eukaryota;Opisthokonta;Metazoa;Eumetazoa;Bilateria;Protostomia;Spiralia;Lophotrochozoa;Mollusca;Bivalvia;Autobranhia;Pteriormorphia;Ostreida;Ostreoidea;Ostreidae;Crassostrea;Crassostrea gigas

UdeM00000037942 29159 377.9 UdeM00000037942 XP\_034307860.1 66.5 278  
93 0 1 278 1 278 1.20E-101 377.9 29159 cellular

organisms;Eukaryota;Opisthokonta;Metazoa;Eumetazoa;Bilateria;Protostomia;Spiralia;Lophotrochozoa;Mollusca;Bivalvia;Autobranhia;Pteriormorphia;Ostreida;Ostreoidea;Ostreidae;Crassostrea;Crassostrea gigas



UdeM00000037943 7574 785.4 UdeM00000037943 XP\_023931786.1 45.1 811  
 387 2 14 766 1649 2459 7.60E-224 785.4 7574 cellular  
 organisms;Eukaryota;Opisthokonta;Metazoa;Eumetazoa;Bilateria;Protostomia;  
 Spiralia;Lophotrochozoa;Brachiopoda;Linguliformea;Lingulata;Lingulida;Lin  
 guloidea;Lingulidae;Lingula;Lingula anatina  
 UdeM00000037944 6596 233.4 UdeM00000037944 XP\_045197906.1 48.9 225  
 113 2 1 223 243 467 2.80E-58 233.4 6596 cellular  
 organisms;Eukaryota;Opisthokonta;Metazoa;Eumetazoa;Bilateria;Protostomia;  
 Spiralia;Lophotrochozoa;Mollusca;Bivalvia;Autobranchia;Heteroconchia;Euhe  
 terodonta;Imparidentia;Venerida;Veneroidea;Veneridae;Mercenaria;Mercenari  
 a mercenaria  
 UdeM00000037945 6596 154.5 UdeM00000037945 XP\_045197906.1 78 91  
 20 0 1 91 62 152 8.50E-35 154.5 6596 cellular  
 organisms;Eukaryota;Opisthokonta;Metazoa;Eumetazoa;Bilateria;Protostomia;  
 Spiralia;Lophotrochozoa;Mollusca;Bivalvia;Autobranchia;Heteroconchia;Euhe  
 terodonta;Imparidentia;Venerida;Veneroidea;Veneridae;Mercenaria;Mercenari  
 a mercenaria  
 UdeM00000037946 7741 63.2 UdeM00000037946 XP\_019620661.1 27.1 166  
 106 4 67 230 29 181 6.00E-07 63.2 7741 cellular  
 organisms;Eukaryota;Opisthokonta;Metazoa;Eumetazoa;Bilateria;Deuterostomi  
 a;Chordata;Cephalochordata;Leptocardii;Amphioxiformes;Branchiostomidae;Br  
 anchiostoma;Branchiostoma belcheri  
 UdeM00000037947 6596 186.8 UdeM00000037947 XP\_045197906.1 53.7 177  
 82 0 10 186 244 420 2.50E-44 186.8 6596 cellular  
 organisms;Eukaryota;Opisthokonta;Metazoa;Eumetazoa;Bilateria;Protostomia;  
 Spiralia;Lophotrochozoa;Mollusca;Bivalvia;Autobranchia;Heteroconchia;Euhe  
 terodonta;Imparidentia;Venerida;Veneroidea;Veneridae;Mercenaria;Mercenari  
 a mercenaria  
 UdeM00000037948 6596 96.7 UdeM00000037948 XP\_045197906.1 59 78  
 31 1 16 93 23 99 1.70E-17 96.7 6596 cellular  
 organisms;Eukaryota;Opisthokonta;Metazoa;Eumetazoa;Bilateria;Protostomia;  
 Spiralia;Lophotrochozoa;Mollusca;Bivalvia;Autobranchia;Heteroconchia;Euhe  
 terodonta;Imparidentia;Venerida;Veneroidea;Veneridae;Mercenaria;Mercenari  
 a mercenaria  
 UdeM00000037949 2652724 640.6 UdeM00000037949 XP\_028512668.1 51.5  
 524 254 0 106 629 19 542 2.50E-180 640.6 2652724  
 cellular  
 organisms;Eukaryota;Opisthokonta;Metazoa;Eumetazoa;Cnidaria;Anthozoa;Hexa  
 corallia;Actiniaria;Aiptasiidae;Exaiptasia;Exaiptasia diaphana  
 UdeM00000037950 6596 256.5 UdeM00000037950 XP\_045197906.1 51 261  
 127 1 1 260 207 467 3.60E-65 256.5 6596 cellular  
 organisms;Eukaryota;Opisthokonta;Metazoa;Eumetazoa;Bilateria;Protostomia;  
 Spiralia;Lophotrochozoa;Mollusca;Bivalvia;Autobranchia;Heteroconchia;Euhe  
 terodonta;Imparidentia;Venerida;Veneroidea;Veneridae;Mercenaria;Mercenari  
 a mercenaria  
 UdeM00000037951 6596 268.1 UdeM00000037951 XP\_045197906.1 68.3 183  
 58 0 16 198 23 205 9.10E-69 268.1 6596 cellular  
 organisms;Eukaryota;Opisthokonta;Metazoa;Eumetazoa;Bilateria;Protostomia;  
 Spiralia;Lophotrochozoa;Mollusca;Bivalvia;Autobranchia;Heteroconchia;Euhe  
 terodonta;Imparidentia;Venerida;Veneroidea;Veneridae;Mercenaria;Mercenari  
 a mercenaria  
 UdeM00000037952 6579 217.6 UdeM00000037952 XP\_033741714.1 60 170  
 68 0 1 170 1 170 1.30E-53 217.6 6579 cellular  
 organisms;Eukaryota;Opisthokonta;Metazoa;Eumetazoa;Bilateria;Protostomia;

Spiralia; Lophotrochozoa; Mollusca; Bivalvia; Autobranchia; Pteriomorpha; Pectinida; Pectinoidea; Pectinidae; Pecten; Pecten maximus  
UdeM00000037953 7574 94.7 UdeM00000037953 XP\_013420843.1 39.9 153  
62 5 13 136 6 157 9.40E-17 94.7 7574 cellular  
organisms; Eukaryota; Opisthokonta; Metazoa; Eumetazoa; Bilateria; Protostomia; Spiralia; Lophotrochozoa; Brachiopoda; Linguliformea; Lingulata; Lingulida; Linguloidea; Lingulidae; Lingula; Lingula anatina  
UdeM00000037954 6565 287.7 UdeM00000037954 XP\_022294039.1 82.7 168  
29 0 1 168 1 168 9.70E-75 287.7 6565 cellular  
organisms; Eukaryota; Opisthokonta; Metazoa; Eumetazoa; Bilateria; Protostomia; Spiralia; Lophotrochozoa; Mollusca; Bivalvia; Autobranchia; Pteriomorpha; Ostracida; Ostreoidae; Ostreidae; Crassostrea; Crassostrea virginica  
UdeM00000037955 6565 281.6 UdeM00000037955 XP\_022294039.1 81 168  
32 0 1 168 1 168 7.00E-73 281.6 6565 cellular  
organisms; Eukaryota; Opisthokonta; Metazoa; Eumetazoa; Bilateria; Protostomia; Spiralia; Lophotrochozoa; Mollusca; Bivalvia; Autobranchia; Pteriomorpha; Ostracida; Ostreoidae; Ostreidae; Crassostrea; Crassostrea virginica  
UdeM00000037956 6565 281.2 UdeM00000037956 XP\_022294039.1 81 168  
32 0 1 168 1 168 9.10E-73 281.2 6565 cellular  
organisms; Eukaryota; Opisthokonta; Metazoa; Eumetazoa; Bilateria; Protostomia; Spiralia; Lophotrochozoa; Mollusca; Bivalvia; Autobranchia; Pteriomorpha; Ostracida; Ostreoidae; Ostreidae; Crassostrea; Crassostrea virginica  
UdeM00000037957 6579 262.7 UdeM00000037957 XP\_033730334.1 72.5 171  
47 0 1 171 1 171 3.30E-67 262.7 6579 cellular  
organisms; Eukaryota; Opisthokonta; Metazoa; Eumetazoa; Bilateria; Protostomia; Spiralia; Lophotrochozoa; Mollusca; Bivalvia; Autobranchia; Pteriomorpha; Pectinida; Pectinoidea; Pectinidae; Pecten; Pecten maximus  
UdeM00000037958 6596 308.9 UdeM00000037958 XP\_045197907.1 68.8 221  
69 0 6 226 18 238 5.50E-81 308.9 6596 cellular  
organisms; Eukaryota; Opisthokonta; Metazoa; Eumetazoa; Bilateria; Protostomia; Spiralia; Lophotrochozoa; Mollusca; Bivalvia; Autobranchia; Heteroconchia; Euheterodonta; Imparidentia; Venerida; Veneroidea; Veneridae; Mercenaria; Mercenaria mercenaria  
UdeM00000037959 6596 208 UdeM00000037959 XP\_045197906.1 47.3 207  
107 2 1 205 261 467 1.20E-50 208 6596 cellular  
organisms; Eukaryota; Opisthokonta; Metazoa; Eumetazoa; Bilateria; Protostomia; Spiralia; Lophotrochozoa; Mollusca; Bivalvia; Autobranchia; Heteroconchia; Euheterodonta; Imparidentia; Venerida; Veneroidea; Veneridae; Mercenaria; Mercenaria mercenaria  
UdeM00000037960 6596 493 UdeM00000037960 XP\_045197748.1 53.5 441  
195 3 24 464 21 451 4.10E-136 493 6596 cellular  
organisms; Eukaryota; Opisthokonta; Metazoa; Eumetazoa; Bilateria; Protostomia; Spiralia; Lophotrochozoa; Mollusca; Bivalvia; Autobranchia; Heteroconchia; Euheterodonta; Imparidentia; Venerida; Veneroidea; Veneridae; Mercenaria; Mercenaria mercenaria  
UdeM00000037961 37653 269.2 UdeM00000037961 XP\_014788370.1 42.2 327  
182 5 40 364 1 322 7.50E-69 269.2 37653 cellular  
organisms; Eukaryota; Opisthokonta; Metazoa; Eumetazoa; Bilateria; Protostomia; Spiralia; Lophotrochozoa; Mollusca; Cephalopoda; Coleoidea; Octopodiformes; Octopoda; Incirrata; Octopodidae; Octopus; Octopus bimaculoides  
UdeM00000037962 37653 263.8 UdeM00000037962 XP\_014788370.1 44.1 295  
159 4 14 306 32 322 2.70E-67 263.8 37653 cellular  
organisms; Eukaryota; Opisthokonta; Metazoa; Eumetazoa; Bilateria; Protostomia;

Spiralia;Lophotrochozoa;Mollusca;Cephalopoda;Coleoidea;Octopodiformes;Octopoda;Incirrata;Octopodidae;Octopus;Octopus bimaculoides  
UdeM00000037963 6596 121.7 UdeM00000037963 XP\_045206982.1 47.1 136  
59 4 1 128 1 131 7.10E-25 121.7 6596 cellular  
organisms;Eukaryota;Opisthokonta;Metazoa;Eumetazoa;Bilateria;Protostomia;  
Spiralia;Lophotrochozoa;Mollusca;Bivalvia;Autobranchia;Heteroconchia;Euherodonta;Imparidentia;Venerida;Veneroidea;Veneridae;Mercenaria;Mercenaria mercenaria  
UdeM00000037965 29159 232.6 UdeM00000037965 XP\_034332822.1 40.6 308  
169 7 98 396 109 411 8.60E-58 232.6 29159 cellular  
organisms;Eukaryota;Opisthokonta;Metazoa;Eumetazoa;Bilateria;Protostomia;  
Spiralia;Lophotrochozoa;Mollusca;Bivalvia;Autobranchia;Pteriomorpha;Ostreida;Ostreidae;Crassostrea;Crassostrea gigas  
UdeM00000037966 6596 570.5 UdeM00000037966 XP\_045197406.1 75.2 367  
88 2 1 367 1 364 2.50E-159 570.5 6596 cellular  
organisms;Eukaryota;Opisthokonta;Metazoa;Eumetazoa;Bilateria;Protostomia;  
Spiralia;Lophotrochozoa;Mollusca;Bivalvia;Autobranchia;Heteroconchia;Euherodonta;Imparidentia;Venerida;Veneroidea;Veneridae;Mercenaria;Mercenaria mercenaria  
UdeM00000037967 6596 146.7 UdeM00000037967 XP\_045169945.1 45.2 146  
80 0 24 169 24 169 2.60E-32 146.7 6596 cellular  
organisms;Eukaryota;Opisthokonta;Metazoa;Eumetazoa;Bilateria;Protostomia;  
Spiralia;Lophotrochozoa;Mollusca;Bivalvia;Autobranchia;Heteroconchia;Euherodonta;Imparidentia;Venerida;Veneroidea;Veneridae;Mercenaria;Mercenaria mercenaria  
UdeM00000037968 6565 222.2 UdeM00000037968 XP\_022294078.1 38.9 298  
173 5 145 434 143 439 1.30E-54 222.2 6565 cellular  
organisms;Eukaryota;Opisthokonta;Metazoa;Eumetazoa;Bilateria;Protostomia;  
Spiralia;Lophotrochozoa;Mollusca;Bivalvia;Autobranchia;Pteriomorpha;Ostreida;Ostreidae;Crassostrea;Crassostrea virginica  
UdeM00000037969 7757 91.7 UdeM00000037969 XP\_032835784.1 59.7 72  
29 0 2 73 3 74 6.20E-16 91.7 7757 cellular  
organisms;Eukaryota;Opisthokonta;Metazoa;Eumetazoa;Bilateria;Deuterostomia;Chordata;Craniata;Vertebrata;Cyclostomata;Hyperoartia;Petromyzontiformes;Petromyzontidae;Petromyzon;Petromyzon marinus  
UdeM00000037970 6565 226.1 UdeM00000037970 XP\_022294078.1 40.7 300  
165 6 105 394 143 439 8.00E-56 226.1 6565 cellular  
organisms;Eukaryota;Opisthokonta;Metazoa;Eumetazoa;Bilateria;Protostomia;  
Spiralia;Lophotrochozoa;Mollusca;Bivalvia;Autobranchia;Pteriomorpha;Ostreida;Ostreidae;Crassostrea;Crassostrea virginica  
UdeM00000037971 6573 192.2 UdeM00000037971 XP\_021349207.1 37.2 323  
165 9 111 399 99 417 1.30E-45 192.2 6573 cellular  
organisms;Eukaryota;Opisthokonta;Metazoa;Eumetazoa;Bilateria;Protostomia;  
Spiralia;Lophotrochozoa;Mollusca;Bivalvia;Autobranchia;Pteriomorpha;Pectinida;Pectinoidea;Pectinidae;Mizuhopecten;Mizuhopecten yessoensis  
UdeM00000037972 29159 194.9 UdeM00000037972 XP\_034317111.1 33.9 381  
180 5 1 310 650 1029 1.50E-46 194.9 29159 cellular  
organisms;Eukaryota;Opisthokonta;Metazoa;Eumetazoa;Bilateria;Protostomia;  
Spiralia;Lophotrochozoa;Mollusca;Bivalvia;Autobranchia;Pteriomorpha;Ostreida;Ostreidae;Crassostrea;Crassostrea gigas  
UdeM00000037973 29159 122.5 UdeM00000037973 XP\_034317111.1 43.7 151  
84 1 1 151 650 799 7.70E-25 122.5 29159 cellular  
organisms;Eukaryota;Opisthokonta;Metazoa;Eumetazoa;Bilateria;Protostomia;

Spiralia;Lophotrochozoa;Mollusca;Bivalvia;Autobranchia;Pteriormorphia;Ostr  
eida;Ostreoidea;Ostreidae;Crassostrea;Crassostrea gigas  
UdeM00000037974 29159 111.3 UdeM00000037974 XP\_034317111.1 49.1 106  
49 2 2 102 171 276 7.50E-22 111.3 29159 cellular  
organisms;Eukaryota;Opisthokonta;Metazoa;Eumetazoa;Bilateria;Protostomia;  
Spiralia;Lophotrochozoa;Mollusca;Bivalvia;Autobranchia;Pteriormorphia;Ostr  
eida;Ostreoidea;Ostreidae;Crassostrea;Crassostrea gigas  
UdeM00000037975 29159 194.9 UdeM00000037975 XP\_034317111.1 33.9 381  
180 5 1 310 650 1029 1.50E-46 194.9 29159 cellular  
organisms;Eukaryota;Opisthokonta;Metazoa;Eumetazoa;Bilateria;Protostomia;  
Spiralia;Lophotrochozoa;Mollusca;Bivalvia;Autobranchia;Pteriormorphia;Ostr  
eida;Ostreoidea;Ostreidae;Crassostrea;Crassostrea gigas  
UdeM00000037976 29159 122.5 UdeM00000037976 XP\_034317111.1 43.7 151  
84 1 1 151 650 799 7.70E-25 122.5 29159 cellular  
organisms;Eukaryota;Opisthokonta;Metazoa;Eumetazoa;Bilateria;Protostomia;  
Spiralia;Lophotrochozoa;Mollusca;Bivalvia;Autobranchia;Pteriormorphia;Ostr  
eida;Ostreoidea;Ostreidae;Crassostrea;Crassostrea gigas  
UdeM00000037977 29159 111.3 UdeM00000037977 XP\_034317111.1 49.1 106  
49 2 2 102 171 276 7.50E-22 111.3 29159 cellular  
organisms;Eukaryota;Opisthokonta;Metazoa;Eumetazoa;Bilateria;Protostomia;  
Spiralia;Lophotrochozoa;Mollusca;Bivalvia;Autobranchia;Pteriormorphia;Ostr  
eida;Ostreoidea;Ostreidae;Crassostrea;Crassostrea gigas  
UdeM00000037978 29159 194.9 UdeM00000037978 XP\_034317111.1 33.9 381  
180 5 1 310 650 1029 1.50E-46 194.9 29159 cellular  
organisms;Eukaryota;Opisthokonta;Metazoa;Eumetazoa;Bilateria;Protostomia;  
Spiralia;Lophotrochozoa;Mollusca;Bivalvia;Autobranchia;Pteriormorphia;Ostr  
eida;Ostreoidea;Ostreidae;Crassostrea;Crassostrea gigas  
UdeM00000037979 29159 122.5 UdeM00000037979 XP\_034317111.1 43.7 151  
84 1 1 151 650 799 7.70E-25 122.5 29159 cellular  
organisms;Eukaryota;Opisthokonta;Metazoa;Eumetazoa;Bilateria;Protostomia;  
Spiralia;Lophotrochozoa;Mollusca;Bivalvia;Autobranchia;Pteriormorphia;Ostr  
eida;Ostreoidea;Ostreidae;Crassostrea;Crassostrea gigas  
UdeM00000037980 29159 111.3 UdeM00000037980 XP\_034317111.1 49.1 106  
49 2 2 102 171 276 7.50E-22 111.3 29159 cellular  
organisms;Eukaryota;Opisthokonta;Metazoa;Eumetazoa;Bilateria;Protostomia;  
Spiralia;Lophotrochozoa;Mollusca;Bivalvia;Autobranchia;Pteriormorphia;Ostr  
eida;Ostreoidea;Ostreidae;Crassostrea;Crassostrea gigas  
UdeM00000037981 29159 203 UdeM00000037981 XP\_034317111.1 35.4 381  
222 7 1 358 650 1029 6.50E-49 203 29159 cellular  
organisms;Eukaryota;Opisthokonta;Metazoa;Eumetazoa;Bilateria;Protostomia;  
Spiralia;Lophotrochozoa;Mollusca;Bivalvia;Autobranchia;Pteriormorphia;Ostr  
eida;Ostreoidea;Ostreidae;Crassostrea;Crassostrea gigas  
UdeM00000037982 29159 122.5 UdeM00000037982 XP\_034317111.1 43 151  
85 1 1 151 650 799 7.70E-25 122.5 29159 cellular  
organisms;Eukaryota;Opisthokonta;Metazoa;Eumetazoa;Bilateria;Protostomia;  
Spiralia;Lophotrochozoa;Mollusca;Bivalvia;Autobranchia;Pteriormorphia;Ostr  
eida;Ostreoidea;Ostreidae;Crassostrea;Crassostrea gigas  
UdeM00000037983 29159 111.3 UdeM00000037983 XP\_034317111.1 49.1 106  
49 2 2 102 171 276 7.50E-22 111.3 29159 cellular  
organisms;Eukaryota;Opisthokonta;Metazoa;Eumetazoa;Bilateria;Protostomia;  
Spiralia;Lophotrochozoa;Mollusca;Bivalvia;Autobranchia;Pteriormorphia;Ostr  
eida;Ostreoidea;Ostreidae;Crassostrea;Crassostrea gigas  
UdeM00000037984 6565 224.9 UdeM00000037984 XP\_022294078.1 41.3 300  
163 7 74 363 143 439 1.60E-55 224.9 6565 cellular

organisms;Eukaryota;Opisthokonta;Metazoa;Eumetazoa;Bilateria;Protostomia;Spiralia;Lophotrochozoa;Mollusca;Bivalvia;Autobranchia;Pteriomorpha;Ostr  
eida;Ostreoidea;Ostreidae;Crassostrea;Crassostrea virginica  
UdeM00000037985 6565 224.9 UdeM00000037985 XP\_022294078.1 41.3 300  
163 7 119 408 143 439 1.80E-55 224.9 6565 cellular  
organisms;Eukaryota;Opisthokonta;Metazoa;Eumetazoa;Bilateria;Protostomia;Spiralia;Lophotrochozoa;Mollusca;Bivalvia;Autobranchia;Pteriomorpha;Ostr  
eida;Ostreoidea;Ostreidae;Crassostrea;Crassostrea virginica  
UdeM00000037986 6596 151.4 UdeM00000037986 XP\_045196667.1 80.5 82  
16 0 1 82 1 82 7.80E-34 151.4 6596 cellular  
organisms;Eukaryota;Opisthokonta;Metazoa;Eumetazoa;Bilateria;Protostomia;Spiralia;Lophotrochozoa;Mollusca;Bivalvia;Autobranchia;Heteroconchia;Euhe  
terodonta;Imparidentia;Venerida;Veneroidea;Veneridae;Mercenaria;Mercenari  
a mercenaria  
UdeM00000037988 6596 267.7 UdeM00000037988 XP\_045196667.1 45.8 251  
134 1 1 251 86 334 1.70E-68 267.7 6596 cellular  
organisms;Eukaryota;Opisthokonta;Metazoa;Eumetazoa;Bilateria;Protostomia;Spiralia;Lophotrochozoa;Mollusca;Bivalvia;Autobranchia;Heteroconchia;Euhe  
terodonta;Imparidentia;Venerida;Veneroidea;Veneridae;Mercenaria;Mercenari  
a mercenaria  
UdeM00000037989 6596 236.9 UdeM00000037989 XP\_045197480.1 81.5 151  
28 0 5 155 1 151 1.80E-59 236.9 6596 cellular  
organisms;Eukaryota;Opisthokonta;Metazoa;Eumetazoa;Bilateria;Protostomia;Spiralia;Lophotrochozoa;Mollusca;Bivalvia;Autobranchia;Heteroconchia;Euhe  
terodonta;Imparidentia;Venerida;Veneroidea;Veneridae;Mercenaria;Mercenari  
a mercenaria  
UdeM00000037990 6579 1330.5 UdeM00000037990 XP\_033739710.1 71.8  
909 245 8 1 906 1 901 0.00E+00 1330.5 6579  
cellular  
organisms;Eukaryota;Opisthokonta;Metazoa;Eumetazoa;Bilateria;Protostomia;Spiralia;Lophotrochozoa;Mollusca;Bivalvia;Autobranchia;Pteriomorpha;Pect  
inida;Pectinoidea;Pectinidae;Pecten;Pecten maximus  
UdeM00000037991 6596 1987.2 UdeM00000037991 XP\_045195099.1 41.2  
3408 1216 61 426 3809 12 2655 0.00E+00 1987.2 6596  
cellular  
organisms;Eukaryota;Opisthokonta;Metazoa;Eumetazoa;Bilateria;Protostomia;Spiralia;Lophotrochozoa;Mollusca;Bivalvia;Autobranchia;Heteroconchia;Euhe  
terodonta;Imparidentia;Venerida;Veneroidea;Veneridae;Mercenaria;Mercenari  
a mercenaria  
UdeM00000037994 6579 448 UdeM00000037994 XP\_033739407.1 72 286  
79 1 1 286 1 285 9.20E-123 448 6579 cellular  
organisms;Eukaryota;Opisthokonta;Metazoa;Eumetazoa;Bilateria;Protostomia;Spiralia;Lophotrochozoa;Mollusca;Bivalvia;Autobranchia;Pteriomorpha;Pect  
inida;Pectinoidea;Pectinidae;Pecten;Pecten maximus  
UdeM00000037992 6579 634.8 UdeM00000037992 XP\_033739407.1 56 589  
197 8 1 588 1 528 1.10E-178 634.8 6579 cellular  
organisms;Eukaryota;Opisthokonta;Metazoa;Eumetazoa;Bilateria;Protostomia;Spiralia;Lophotrochozoa;Mollusca;Bivalvia;Autobranchia;Pteriomorpha;Pect  
inida;Pectinoidea;Pectinidae;Pecten;Pecten maximus  
UdeM00000037993 6579 596.7 UdeM00000037993 XP\_033739407.1 54.5 583  
199 9 1 572 1 528 3.20E-167 596.7 6579 cellular  
organisms;Eukaryota;Opisthokonta;Metazoa;Eumetazoa;Bilateria;Protostomia;Spiralia;Lophotrochozoa;Mollusca;Bivalvia;Autobranchia;Pteriomorpha;Pect  
inida;Pectinoidea;Pectinidae;Pecten;Pecten maximus

UdeM00000037995 6579 164.9 UdeM00000037995 XP\_033739407.1 41 266  
 102 6 11 275 317 528 1.50E-37 164.9 6579 cellular  
 organisms;Eukaryota;Opisthokonta;Metazoa;Eumetazoa;Bilateria;Protostomia;  
 Spiralia;Lophotrochozoa;Mollusca;Bivalvia;Autobranchia;Pteriormorphia;Pect  
 inida;Pectinoidea;Pectinidae;Pecten;Pecten maximus  
 UdeM00000037996 6573 169.9 UdeM00000037996 XP\_021360699.1 86.2 94  
 13 0 2 95 1049 1142 1.60E-39 169.9 6573 cellular  
 organisms;Eukaryota;Opisthokonta;Metazoa;Eumetazoa;Bilateria;Protostomia;  
 Spiralia;Lophotrochozoa;Mollusca;Bivalvia;Autobranchia;Pteriormorphia;Pect  
 inida;Pectinoidea;Pectinidae;Mizuhopecten;Mizuhopecten yessoensis  
 UdeM00000037997 6596 546.2 UdeM00000037997 XP\_045195096.1 50.3 719  
 307 18 15 701 412 1112 6.30E-152 546.2 6596 cellular  
 organisms;Eukaryota;Opisthokonta;Metazoa;Eumetazoa;Bilateria;Protostomia;  
 Spiralia;Lophotrochozoa;Mollusca;Bivalvia;Autobranchia;Heteroconchia;Euhe  
 terodonta;Imparidentia;Venerida;Veneroidea;Veneridae;Mercenaria;Mercenari  
 a mercenaria  
 UdeM00000037998 1735272 202.6 UdeM00000037998 XP\_041351324.1 76.7  
 129 26 1 6 134 139 263 3.20E-49 202.6 1735272  
 cellular  
 organisms;Eukaryota;Opisthokonta;Metazoa;Eumetazoa;Bilateria;Protostomia;  
 Spiralia;Lophotrochozoa;Mollusca;Gastropoda;Neomphalina;Neomphaloidea;Pel  
 tospiridae;Gigantopelta;Gigantopelta aegis  
 UdeM00000037999 6596 168.7 UdeM00000037999 XP\_045195096.1 74.3 105  
 25 2 1 104 1 104 4.70E-39 168.7 6596 cellular  
 organisms;Eukaryota;Opisthokonta;Metazoa;Eumetazoa;Bilateria;Protostomia;  
 Spiralia;Lophotrochozoa;Mollusca;Bivalvia;Autobranchia;Heteroconchia;Euhe  
 terodonta;Imparidentia;Venerida;Veneroidea;Veneridae;Mercenaria;Mercenari  
 a mercenaria  
 UdeM00000038000 6596 176.4 UdeM00000038000 XP\_045182313.1 47.1 187  
 98 1 17 202 684 870 3.90E-41 176.4 6596 cellular  
 organisms;Eukaryota;Opisthokonta;Metazoa;Eumetazoa;Bilateria;Protostomia;  
 Spiralia;Lophotrochozoa;Mollusca;Bivalvia;Autobranchia;Heteroconchia;Euhe  
 terodonta;Imparidentia;Venerida;Veneroidea;Veneridae;Mercenaria;Mercenari  
 a mercenaria  
 UdeM00000038001 6596 174.9 UdeM00000038001 XP\_045182313.1 47.1 189  
 97 2 17 204 684 870 1.10E-40 174.9 6596 cellular  
 organisms;Eukaryota;Opisthokonta;Metazoa;Eumetazoa;Bilateria;Protostomia;  
 Spiralia;Lophotrochozoa;Mollusca;Bivalvia;Autobranchia;Heteroconchia;Euhe  
 terodonta;Imparidentia;Venerida;Veneroidea;Veneridae;Mercenaria;Mercenari  
 a mercenaria  
 UdeM00000038002 6596 179.9 UdeM00000038002 XP\_045182313.1 47.1 191  
 100 1 13 202 680 870 3.50E-42 179.9 6596 cellular  
 organisms;Eukaryota;Opisthokonta;Metazoa;Eumetazoa;Bilateria;Protostomia;  
 Spiralia;Lophotrochozoa;Mollusca;Bivalvia;Autobranchia;Heteroconchia;Euhe  
 terodonta;Imparidentia;Venerida;Veneroidea;Veneridae;Mercenaria;Mercenari  
 a mercenaria  
 UdeM00000038003 6596 178.7 UdeM00000038003 XP\_045182313.1 47.7 193  
 98 2 13 204 680 870 7.90E-42 178.7 6596 cellular  
 organisms;Eukaryota;Opisthokonta;Metazoa;Eumetazoa;Bilateria;Protostomia;  
 Spiralia;Lophotrochozoa;Mollusca;Bivalvia;Autobranchia;Heteroconchia;Euhe  
 terodonta;Imparidentia;Venerida;Veneroidea;Veneridae;Mercenaria;Mercenari  
 a mercenaria  
 UdeM00000038004 6596 181 UdeM00000038004 XP\_045182313.1 47.6 191  
 99 1 13 202 680 870 1.60E-42 181 6596 cellular

organisms;Eukaryota;Opisthokonta;Metazoa;Eumetazoa;Bilateria;Protostomia;Spiralia;Lophotrochozoa;Mollusca;Bivalvia;Autobranhia;Heteroconchia;Euherodonta;Imparidentia;Venerida;Veneroidea;Veneridae;Mercenaria;Mercenaria mercenaria

UdeM00000038005 6596 179.9 UdeM00000038005 XP\_045182313.1 48.2 193  
97 2 13 204 680 870 3.50E-42 179.9 6596 cellular

organisms;Eukaryota;Opisthokonta;Metazoa;Eumetazoa;Bilateria;Protostomia;Spiralia;Lophotrochozoa;Mollusca;Bivalvia;Autobranhia;Heteroconchia;Euherodonta;Imparidentia;Venerida;Veneroidea;Veneridae;Mercenaria;Mercenaria mercenaria

UdeM00000038006 6596 178.3 UdeM00000038006 XP\_045182313.1 47.7 193  
98 2 13 204 680 870 1.00E-41 178.3 6596 cellular

organisms;Eukaryota;Opisthokonta;Metazoa;Eumetazoa;Bilateria;Protostomia;Spiralia;Lophotrochozoa;Mollusca;Bivalvia;Autobranhia;Heteroconchia;Euherodonta;Imparidentia;Venerida;Veneroidea;Veneridae;Mercenaria;Mercenaria mercenaria

UdeM00000038007 6596 179.5 UdeM00000038007 XP\_045182313.1 47.1 191  
100 1 13 202 680 870 4.60E-42 179.5 6596 cellular

organisms;Eukaryota;Opisthokonta;Metazoa;Eumetazoa;Bilateria;Protostomia;Spiralia;Lophotrochozoa;Mollusca;Bivalvia;Autobranhia;Heteroconchia;Euherodonta;Imparidentia;Venerida;Veneroidea;Veneridae;Mercenaria;Mercenaria mercenaria

UdeM00000038008 6596 179.5 UdeM00000038008 XP\_045182313.1 47.1 191  
100 1 13 202 680 870 4.60E-42 179.5 6596 cellular

organisms;Eukaryota;Opisthokonta;Metazoa;Eumetazoa;Bilateria;Protostomia;Spiralia;Lophotrochozoa;Mollusca;Bivalvia;Autobranhia;Heteroconchia;Euherodonta;Imparidentia;Venerida;Veneroidea;Veneridae;Mercenaria;Mercenaria mercenaria

UdeM00000038009 6596 178.3 UdeM00000038009 XP\_045182313.1 47.7 193  
98 2 13 204 680 870 1.00E-41 178.3 6596 cellular

organisms;Eukaryota;Opisthokonta;Metazoa;Eumetazoa;Bilateria;Protostomia;Spiralia;Lophotrochozoa;Mollusca;Bivalvia;Autobranhia;Heteroconchia;Euherodonta;Imparidentia;Venerida;Veneroidea;Veneridae;Mercenaria;Mercenaria mercenaria

UdeM00000038010 6596 178.7 UdeM00000038010 XP\_045182313.1 47.7 193  
98 2 13 204 680 870 7.90E-42 178.7 6596 cellular

organisms;Eukaryota;Opisthokonta;Metazoa;Eumetazoa;Bilateria;Protostomia;Spiralia;Lophotrochozoa;Mollusca;Bivalvia;Autobranhia;Heteroconchia;Euherodonta;Imparidentia;Venerida;Veneroidea;Veneridae;Mercenaria;Mercenaria mercenaria

UdeM00000038011 6596 180.3 UdeM00000038011 XP\_045182313.1 47.1 191  
100 1 13 202 680 870 2.70E-42 180.3 6596 cellular

organisms;Eukaryota;Opisthokonta;Metazoa;Eumetazoa;Bilateria;Protostomia;Spiralia;Lophotrochozoa;Mollusca;Bivalvia;Autobranhia;Heteroconchia;Euherodonta;Imparidentia;Venerida;Veneroidea;Veneridae;Mercenaria;Mercenaria mercenaria

UdeM00000038012 6596 534.3 UdeM00000038012 XP\_045198046.1 51 529  
254 2 1 525 1 528 2.10E-148 534.3 6596 cellular

organisms;Eukaryota;Opisthokonta;Metazoa;Eumetazoa;Bilateria;Protostomia;Spiralia;Lophotrochozoa;Mollusca;Bivalvia;Autobranhia;Heteroconchia;Euherodonta;Imparidentia;Venerida;Veneroidea;Veneridae;Mercenaria;Mercenaria mercenaria

UdeM00000038013 6596 321.2 UdeM00000038013 XP\_045197795.1 63.7 262  
81 3 1 248 1 262 1.10E-84 321.2 6596 cellular

organisms;Eukaryota;Opisthokonta;Metazoa;Eumetazoa;Bilateria;Protostomia;Spiralia;Lophotrochozoa;Mollusca;Bivalvia;Autobranchia;Heteroconchia;Euherodonta;Imparidentia;Venerida;Veneroidea;Veneridae;Mercenaria;Mercenaria mercenaria

UdeM00000038014 6596 214.2 UdeM00000038014 XP\_045197795.1 73.4 143  
38 0 1 143 120 262 1.10E-52 214.2 6596 cellular

organisms;Eukaryota;Opisthokonta;Metazoa;Eumetazoa;Bilateria;Protostomia;Spiralia;Lophotrochozoa;Mollusca;Bivalvia;Autobranchia;Heteroconchia;Euherodonta;Imparidentia;Venerida;Veneroidea;Veneridae;Mercenaria;Mercenaria mercenaria

UdeM00000038015 6596 1013.4 UdeM00000038015 XP\_045195538.1 81.7  
597 108 1 1 596 1 597 1.10E-292 1013.4 6596  
cellular

organisms;Eukaryota;Opisthokonta;Metazoa;Eumetazoa;Bilateria;Protostomia;Spiralia;Lophotrochozoa;Mollusca;Bivalvia;Autobranchia;Heteroconchia;Euherodonta;Imparidentia;Venerida;Veneroidea;Veneridae;Mercenaria;Mercenaria mercenaria

UdeM00000038016 6596 501.5 UdeM00000038016 XP\_045199170.1 51 478  
196 6 1 476 1 442 1.20E-138 501.5 6596 cellular

organisms;Eukaryota;Opisthokonta;Metazoa;Eumetazoa;Bilateria;Protostomia;Spiralia;Lophotrochozoa;Mollusca;Bivalvia;Autobranchia;Heteroconchia;Euherodonta;Imparidentia;Venerida;Veneroidea;Veneridae;Mercenaria;Mercenaria mercenaria

UdeM00000038017 225164 110.5 UdeM00000038017 XP\_009055924.1 58.2  
79 33 0 1 79 321 399 1.10E-21 110.5 225164  
cellular

organisms;Eukaryota;Opisthokonta;Metazoa;Eumetazoa;Bilateria;Protostomia;Spiralia;Lophotrochozoa;Mollusca;Gastropoda;Patellogastropoda;Lottiidae;Lottia;Lottia gigantea

UdeM00000038018 400727 248.1 UdeM00000038018 XP\_025097357.1 61.9  
168 64 0 8 175 227 394 9.20E-63 248.1 400727  
cellular

organisms;Eukaryota;Opisthokonta;Metazoa;Eumetazoa;Bilateria;Protostomia;Spiralia;Lophotrochozoa;Mollusca;Gastropoda;Caenogastropoda;Architaenioglossa;Ampullarioidea;Ampullariidae;Pomacea;Pomacea canaliculata

UdeM00000038020 6596 313.9 UdeM00000038020 XP\_045197866.1 67.4 221  
69 2 9 229 11 228 1.70E-82 313.9 6596 cellular

organisms;Eukaryota;Opisthokonta;Metazoa;Eumetazoa;Bilateria;Protostomia;Spiralia;Lophotrochozoa;Mollusca;Bivalvia;Autobranchia;Heteroconchia;Euherodonta;Imparidentia;Venerida;Veneroidea;Veneridae;Mercenaria;Mercenaria mercenaria

UdeM00000038021 6596 231.9 UdeM00000038021 XP\_045196674.1 41.6 308  
167 8 65 366 17 317 1.30E-57 231.9 6596 cellular

organisms;Eukaryota;Opisthokonta;Metazoa;Eumetazoa;Bilateria;Protostomia;Spiralia;Lophotrochozoa;Mollusca;Bivalvia;Autobranchia;Heteroconchia;Euherodonta;Imparidentia;Venerida;Veneroidea;Veneridae;Mercenaria;Mercenaria mercenaria

UdeM00000038022 6596 111.7 UdeM00000038022 XP\_045210582.1 27.3 359  
154 6 76 390 135 430 2.10E-21 111.7 6596 cellular

organisms;Eukaryota;Opisthokonta;Metazoa;Eumetazoa;Bilateria;Protostomia;Spiralia;Lophotrochozoa;Mollusca;Bivalvia;Autobranchia;Heteroconchia;Euherodonta;Imparidentia;Venerida;Veneroidea;Veneridae;Mercenaria;Mercenaria mercenaria



UdeM00000038023 6596 78.2 UdeM00000038023 XP\_045211959.1 41.7 96  
 49 1 148 236 393 488 1.60E-11 78.2 6596 cellular  
 organisms;Eukaryota;Opisthokonta;Metazoa;Eumetazoa;Bilateria;Protostomia;  
 Spiralia;Lophotrochozoa;Mollusca;Bivalvia;Autobranchia;Heteroconchia;Euhe  
 terodonta;Imparidentia;Venerida;Veneroidea;Veneridae;Mercenaria;Mercenari  
 a mercenaria  
 UdeM00000038026 6596 106.3 UdeM00000038026 XP\_045169207.1 30.4 230  
 122 8 33 254 43 242 6.10E-20 106.3 6596 cellular  
 organisms;Eukaryota;Opisthokonta;Metazoa;Eumetazoa;Bilateria;Protostomia;  
 Spiralia;Lophotrochozoa;Mollusca;Bivalvia;Autobranchia;Heteroconchia;Euhe  
 terodonta;Imparidentia;Venerida;Veneroidea;Veneridae;Mercenaria;Mercenari  
 a mercenaria  
 UdeM00000038027 400727 125.9 UdeM00000038027 XP\_025096944.1 34.7  
 239 136 14 29 257 1884 2112 9.00E-26 125.9 400727  
 cellular  
 organisms;Eukaryota;Opisthokonta;Metazoa;Eumetazoa;Bilateria;Protostomia;  
 Spiralia;Lophotrochozoa;Mollusca;Gastropoda;Caenogastropoda;Architaeniogl  
 ossa;Ampullarioidea;Ampullariidae;Pomacea;Pomacea canaliculata  
 UdeM00000038028 27687 133.7 UdeM00000038028 XP\_028670492.1 32.1 268  
 155 15 4 259 368 620 4.30E-28 133.7 27687 cellular  
 organisms;Eukaryota;Opisthokonta;Metazoa;Eumetazoa;Bilateria;Deuterostomi  
 a;Chordata;Craniata;Vertebrata;Gnathostomata;Teleostomi;Euteleostomi;Acti  
 nopterygii;Cladistia;Polypteriformes;Polypteridae;Erpetoichthys;Erpetoich  
 thys calabaricus  
 UdeM00000038029 1735272 208 UdeM00000038029 XP\_041358957.1 38.6  
 306 159 7 3 279 72 377 1.70E-50 208 1735272  
 cellular  
 organisms;Eukaryota;Opisthokonta;Metazoa;Eumetazoa;Bilateria;Protostomia;  
 Spiralia;Lophotrochozoa;Mollusca;Gastropoda;Neomphalina;Neomphaloidea;Pel  
 tospiridae;Gigantopelta;Gigantopelta aegis  
 UdeM00000038030 1735272 333.6 UdeM00000038030 XP\_041358957.1 42  
 421 219 10 6 414 1 408 4.10E-88 333.6 1735272  
 cellular  
 organisms;Eukaryota;Opisthokonta;Metazoa;Eumetazoa;Bilateria;Protostomia;  
 Spiralia;Lophotrochozoa;Mollusca;Gastropoda;Neomphalina;Neomphaloidea;Pel  
 tospiridae;Gigantopelta;Gigantopelta aegis  
 UdeM00000038031 1735272 1608.6 UdeM00000038031 XP\_041353976.1  
 31.4 4642 2335 113 1 4523 4 3915 0.00E+00 1608.6  
 1735272 cellular  
 organisms;Eukaryota;Opisthokonta;Metazoa;Eumetazoa;Bilateria;Protostomia;  
 Spiralia;Lophotrochozoa;Mollusca;Gastropoda;Neomphalina;Neomphaloidea;Pel  
 tospiridae;Gigantopelta;Gigantopelta aegis  
 UdeM00000038032 29159 478.8 UdeM00000038032 XP\_011450164.1 38.5 969  
 402 28 1 832 168 1079 1.50E-131 478.8 29159 cellular  
 organisms;Eukaryota;Opisthokonta;Metazoa;Eumetazoa;Bilateria;Protostomia;  
 Spiralia;Lophotrochozoa;Mollusca;Bivalvia;Autobranchia;Pteriormorphia;Ostr  
 eida;Ostreoidea;Ostreidae;Crassostrea;Crassostrea gigas  
 UdeM00000038033 6573 167.5 UdeM00000038033 XP\_021373641.1 65.9 135  
 43 2 123 255 18 151 2.50E-38 167.5 6573 cellular  
 organisms;Eukaryota;Opisthokonta;Metazoa;Eumetazoa;Bilateria;Protostomia;  
 Spiralia;Lophotrochozoa;Mollusca;Bivalvia;Autobranchia;Pteriormorphia;Pect  
 inida;Pectinoidea;Pectinidae;Mizuhopecten;Mizuhopecten yessoensis  
 UdeM00000038034 6596 146.4 UdeM00000038034 XP\_045196399.1 45.4 152  
 83 0 1 152 1 152 3.50E-32 146.4 6596 cellular

organisms;Eukaryota;Opisthokonta;Metazoa;Eumetazoa;Bilateria;Protostomia;Spiralia;Lophotrochozoa;Mollusca;Bivalvia;Autobranchia;Heteroconchia;Euherodonta;Imparidentia;Venerida;Veneroidea;Veneridae;Mercenaria;Mercenaria mercenaria

UdeM00000038035 6565 216.1 UdeM00000038035 XP\_022299727.1 47.6 233  
119 2 1 231 46 277 4.80E-53 216.1 6565 cellular

organisms;Eukaryota;Opisthokonta;Metazoa;Eumetazoa;Bilateria;Protostomia;Spiralia;Lophotrochozoa;Mollusca;Bivalvia;Autobranchia;Pteriormorphia;Ostreida;Ostreoidea;Ostreidae;Crassostrea;Crassostrea virginica

UdeM00000038036 6596 98.6 UdeM00000038036 XP\_045161355.1 50.5 95  
47 0 1 95 142 236 4.60E-18 98.6 6596 cellular

organisms;Eukaryota;Opisthokonta;Metazoa;Eumetazoa;Bilateria;Protostomia;Spiralia;Lophotrochozoa;Mollusca;Bivalvia;Autobranchia;Heteroconchia;Euherodonta;Imparidentia;Venerida;Veneroidea;Veneridae;Mercenaria;Mercenaria mercenaria

UdeM00000038037 6596 124 UdeM00000038037 XP\_045177429.1 45 131  
69 2 2 131 220 348 1.40E-25 124 6596 cellular

organisms;Eukaryota;Opisthokonta;Metazoa;Eumetazoa;Bilateria;Protostomia;Spiralia;Lophotrochozoa;Mollusca;Bivalvia;Autobranchia;Heteroconchia;Euherodonta;Imparidentia;Venerida;Veneroidea;Veneridae;Mercenaria;Mercenaria mercenaria

UdeM00000038038 6596 111.7 UdeM00000038038 XP\_045187840.1 37 173  
105 1 30 202 275 443 1.20E-21 111.7 6596 cellular

organisms;Eukaryota;Opisthokonta;Metazoa;Eumetazoa;Bilateria;Protostomia;Spiralia;Lophotrochozoa;Mollusca;Bivalvia;Autobranchia;Heteroconchia;Euherodonta;Imparidentia;Venerida;Veneroidea;Veneridae;Mercenaria;Mercenaria mercenaria

UdeM00000038039 6596 233.8 UdeM00000038039 XP\_045186289.1 45.7 269  
144 2 26 293 220 487 2.90E-58 233.8 6596 cellular

organisms;Eukaryota;Opisthokonta;Metazoa;Eumetazoa;Bilateria;Protostomia;Spiralia;Lophotrochozoa;Mollusca;Bivalvia;Autobranchia;Heteroconchia;Euherodonta;Imparidentia;Venerida;Veneroidea;Veneridae;Mercenaria;Mercenaria mercenaria

UdeM00000038040 6596 99.8 UdeM00000038040 XP\_045177277.1 32.7 147  
99 0 99 245 203 349 5.30E-18 99.8 6596 cellular

organisms;Eukaryota;Opisthokonta;Metazoa;Eumetazoa;Bilateria;Protostomia;Spiralia;Lophotrochozoa;Mollusca;Bivalvia;Autobranchia;Heteroconchia;Euherodonta;Imparidentia;Venerida;Veneroidea;Veneridae;Mercenaria;Mercenaria mercenaria

UdeM00000038041 7574 295 UdeM00000038041 XP\_013381563.1 39.6 376  
208 6 30 396 22 387 1.50E-76 295 7574 cellular

organisms;Eukaryota;Opisthokonta;Metazoa;Eumetazoa;Bilateria;Protostomia;Spiralia;Lophotrochozoa;Brachiopoda;Linguliformea;Lingulata;Lingulida;Linguloidea;Lingulidae;Lingula;Lingula anatina

UdeM00000038042 7574 301.2 UdeM00000038042 XP\_013381563.1 41.7 345  
184 5 61 396 51 387 2.00E-78 301.2 7574 cellular

organisms;Eukaryota;Opisthokonta;Metazoa;Eumetazoa;Bilateria;Protostomia;Spiralia;Lophotrochozoa;Brachiopoda;Linguliformea;Lingulata;Lingulida;Linguloidea;Lingulidae;Lingula;Lingula anatina

UdeM00000038043 741275 64.3 UdeM00000038043 XP\_007380191.1 25.4  
130 97 0 99 228 10 139 2.30E-07 64.3 741275

cellular

organisms;Eukaryota;Opisthokonta;Fungi;Dikarya;Basidiomycota;Agaricomycotina;Agaricomycetes;Agaricomycetes incertae

sedis;Corticiales;Punctulariaceae;Punctularia;Punctularia  
 strigosozonata;Punctularia strigosozonata HHB-11173 SS5  
 UdeM00000038044 6596 207.2 UdeM00000038044 XP\_045161383.1 47 230  
 120 2 1 229 223 451 2.30E-50 207.2 6596 cellular  
 organisms;Eukaryota;Opisthokonta;Metazoa;Eumetazoa;Bilateria;Protostomia;  
 Spiralia;Lophotrochozoa;Mollusca;Bivalvia;Autobranchia;Heteroconchia;Euhe  
 terodonta;Imparidentia;Venerida;Veneroidea;Veneridae;Mercenaria;Mercenari  
 a mercenaria  
 UdeM00000038045 7574 301.2 UdeM00000038045 XP\_013381563.1 41.7 345  
 184 5 61 396 51 387 2.00E-78 301.2 7574 cellular  
 organisms;Eukaryota;Opisthokonta;Metazoa;Eumetazoa;Bilateria;Protostomia;  
 Spiralia;Lophotrochozoa;Brachiopoda;Linguliformea;Lingulata;Lingulida;Lin  
 guloidea;Lingulidae;Lingula;Lingula anatina  
 UdeM00000038046 7574 296.6 UdeM00000038046 XP\_013381563.1 41.2 345  
 186 5 61 396 51 387 5.00E-77 296.6 7574 cellular  
 organisms;Eukaryota;Opisthokonta;Metazoa;Eumetazoa;Bilateria;Protostomia;  
 Spiralia;Lophotrochozoa;Brachiopoda;Linguliformea;Lingulata;Lingulida;Lin  
 guloidea;Lingulidae;Lingula;Lingula anatina  
 UdeM00000038047 7574 300.8 UdeM00000038047 XP\_013381563.1 42 343  
 182 5 61 394 51 385 2.70E-78 300.8 7574 cellular  
 organisms;Eukaryota;Opisthokonta;Metazoa;Eumetazoa;Bilateria;Protostomia;  
 Spiralia;Lophotrochozoa;Brachiopoda;Linguliformea;Lingulata;Lingulida;Lin  
 guloidea;Lingulidae;Lingula;Lingula anatina  
 UdeM00000038048 10224 159.5 UdeM00000038048 XP\_006819375.1 63.7 113  
 41 0 326 438 128 240 1.00E-35 159.5 10224 cellular  
 organisms;Eukaryota;Opisthokonta;Metazoa;Eumetazoa;Bilateria;Deuterostomi  
 a;Hemichordata;Enteropneusta;Harrimaniidae;Saccoglossus;Saccoglossus  
 kowalevskii  
 UdeM00000038049 6596 114.4 UdeM00000038049 XP\_045187840.1 44 141  
 74 2 25 161 304 443 1.40E-22 114.4 6596 cellular  
 organisms;Eukaryota;Opisthokonta;Metazoa;Eumetazoa;Bilateria;Protostomia;  
 Spiralia;Lophotrochozoa;Mollusca;Bivalvia;Autobranchia;Heteroconchia;Euhe  
 terodonta;Imparidentia;Venerida;Veneroidea;Veneridae;Mercenaria;Mercenari  
 a mercenaria  
 UdeM00000038050 6579 223.4 UdeM00000038050 XP\_033754690.1 44.7 235  
 129 1 1 234 222 456 3.10E-55 223.4 6579 cellular  
 organisms;Eukaryota;Opisthokonta;Metazoa;Eumetazoa;Bilateria;Protostomia;  
 Spiralia;Lophotrochozoa;Mollusca;Bivalvia;Autobranchia;Pteriomorphia;Pect  
 inida;Pectinoidea;Pectinidae;Pecten;Pecten maximus  
 UdeM00000038051 6596 137.1 UdeM00000038051 XP\_045177429.1 53.3 122  
 56 1 2 122 220 341 1.50E-29 137.1 6596 cellular  
 organisms;Eukaryota;Opisthokonta;Metazoa;Eumetazoa;Bilateria;Protostomia;  
 Spiralia;Lophotrochozoa;Mollusca;Bivalvia;Autobranchia;Heteroconchia;Euhe  
 terodonta;Imparidentia;Venerida;Veneroidea;Veneridae;Mercenaria;Mercenari  
 a mercenaria  
 UdeM00000038052 29159 88.6 UdeM00000038052 XP\_034306898.1 47.9 94  
 49 0 3 96 140 233 4.90E-15 88.6 29159 cellular  
 organisms;Eukaryota;Opisthokonta;Metazoa;Eumetazoa;Bilateria;Protostomia;  
 Spiralia;Lophotrochozoa;Mollusca;Bivalvia;Autobranchia;Pteriomorphia;Ostr  
 eida;Ostreoidea;Ostreidae;Crassostrea;Crassostrea gigas  
 UdeM00000038053 6596 115.5 UdeM00000038053 XP\_045187840.1 43.3 141  
 75 2 25 161 304 443 6.30E-23 115.5 6596 cellular  
 organisms;Eukaryota;Opisthokonta;Metazoa;Eumetazoa;Bilateria;Protostomia;  
 Spiralia;Lophotrochozoa;Mollusca;Bivalvia;Autobranchia;Heteroconchia;Euhe

terodonta;Imparidentia;Venerida;Veneroidea;Veneridae;Mercenaria;Mercenari  
 a mercenaria  
 UdeM00000038054 6579 220.7 UdeM00000038054 XP\_033753557.1 46 235  
 126 1 1 234 61 295 2.00E-54 220.7 6579 cellular  
 organisms;Eukaryota;Opisthokonta;Metazoa;Eumetazoa;Bilateria;Protostomia;  
 Spiralia;Lophotrochozoa;Mollusca;Bivalvia;Autobranhia;Pteriomorpha;Pect  
 inida;Pectinoidea;Pectinidae;Pecten;Pecten maximus  
 UdeM00000038056 6596 111.7 UdeM00000038056 XP\_045187840.1 42 138  
 77 1 27 161 306 443 9.10E-22 111.7 6596 cellular  
 organisms;Eukaryota;Opisthokonta;Metazoa;Eumetazoa;Bilateria;Protostomia;  
 Spiralia;Lophotrochozoa;Mollusca;Bivalvia;Autobranhia;Heteroconchia;Euhe  
 terodonta;Imparidentia;Venerida;Veneroidea;Veneridae;Mercenaria;Mercenari  
 a mercenaria  
 UdeM00000038057 6579 207.2 UdeM00000038057 XP\_033753557.1 43.1 239  
 127 2 1 230 61 299 2.20E-50 207.2 6579 cellular  
 organisms;Eukaryota;Opisthokonta;Metazoa;Eumetazoa;Bilateria;Protostomia;  
 Spiralia;Lophotrochozoa;Mollusca;Bivalvia;Autobranhia;Pteriomorpha;Pect  
 inida;Pectinoidea;Pectinidae;Pecten;Pecten maximus  
 UdeM00000038058 6596 111.3 UdeM00000038058 XP\_045177265.1 41.7 139  
 78 1 90 225 302 440 1.60E-21 111.3 6596 cellular  
 organisms;Eukaryota;Opisthokonta;Metazoa;Eumetazoa;Bilateria;Protostomia;  
 Spiralia;Lophotrochozoa;Mollusca;Bivalvia;Autobranhia;Heteroconchia;Euhe  
 terodonta;Imparidentia;Venerida;Veneroidea;Veneridae;Mercenaria;Mercenari  
 a mercenaria  
 UdeM00000038059 6579 217.6 UdeM00000038059 XP\_033753557.1 43.9 239  
 133 1 1 238 61 299 1.70E-53 217.6 6579 cellular  
 organisms;Eukaryota;Opisthokonta;Metazoa;Eumetazoa;Bilateria;Protostomia;  
 Spiralia;Lophotrochozoa;Mollusca;Bivalvia;Autobranhia;Pteriomorpha;Pect  
 inida;Pectinoidea;Pectinidae;Pecten;Pecten maximus  
 UdeM00000038060 6596 115.2 UdeM00000038060 XP\_045187840.1 36.2 177  
 110 1 124 297 267 443 1.50E-22 115.2 6596 cellular  
 organisms;Eukaryota;Opisthokonta;Metazoa;Eumetazoa;Bilateria;Protostomia;  
 Spiralia;Lophotrochozoa;Mollusca;Bivalvia;Autobranhia;Heteroconchia;Euhe  
 terodonta;Imparidentia;Venerida;Veneroidea;Veneridae;Mercenaria;Mercenari  
 a mercenaria  
 UdeM00000038061 6565 296.6 UdeM00000038061 XP\_022322655.1 38.7 421  
 177 4 39 380 143 561 5.40E-77 296.6 6565 cellular  
 organisms;Eukaryota;Opisthokonta;Metazoa;Eumetazoa;Bilateria;Protostomia;  
 Spiralia;Lophotrochozoa;Mollusca;Bivalvia;Autobranhia;Pteriomorpha;Ostr  
 eida;Ostreoidea;Ostreidae;Crassostrea;Crassostrea virginica  
 UdeM00000038062 29159 221.1 UdeM00000038062 XP\_034299474.1 44.9 247  
 134 1 6 250 509 755 1.60E-54 221.1 29159 cellular  
 organisms;Eukaryota;Opisthokonta;Metazoa;Eumetazoa;Bilateria;Protostomia;  
 Spiralia;Lophotrochozoa;Mollusca;Bivalvia;Autobranhia;Pteriomorpha;Ostr  
 eida;Ostreoidea;Ostreidae;Crassostrea;Crassostrea gigas  
 UdeM00000038063 29159 360.5 UdeM00000038063 XP\_034330911.1 48.6 391  
 156 7 1 354 1 383 2.50E-96 360.5 29159 cellular  
 organisms;Eukaryota;Opisthokonta;Metazoa;Eumetazoa;Bilateria;Protostomia;  
 Spiralia;Lophotrochozoa;Mollusca;Bivalvia;Autobranhia;Pteriomorpha;Ostr  
 eida;Ostreoidea;Ostreidae;Crassostrea;Crassostrea gigas  
 UdeM00000038064 6596 1172.9 UdeM00000038064 XP\_045197464.1 70.9  
 783 207 1 1 783 1 762 0.00E+00 1172.9 6596  
 cellular  
 organisms;Eukaryota;Opisthokonta;Metazoa;Eumetazoa;Bilateria;Protostomia;

Spiralia;Lophotrochozoa;Mollusca;Bivalvia;Autobranchia;Heteroconchia;Euherodonta;Imparidentia;Venerida;Veneroidea;Veneridae;Mercenaria;Mercenaria mercenaria

|                 |      |        |                 |                |      |     |          |        |      |
|-----------------|------|--------|-----------------|----------------|------|-----|----------|--------|------|
| UdeM00000038065 | 6596 | 1180.2 | UdeM00000038065 | XP_045198011.1 | 67.2 |     |          |        |      |
| 847             | 275  | 2      | 10              | 853            | 11   | 857 | 0.00E+00 | 1180.2 | 6596 |

cellular

organisms;Eukaryota;Opisthokonta;Metazoa;Eumetazoa;Bilateria;Protostomia;Spiralia;Lophotrochozoa;Mollusca;Bivalvia;Autobranchia;Heteroconchia;Euherodonta;Imparidentia;Venerida;Veneroidea;Veneridae;Mercenaria;Mercenaria mercenaria

|                 |      |       |                 |                |      |          |       |      |          |
|-----------------|------|-------|-----------------|----------------|------|----------|-------|------|----------|
| UdeM00000038066 | 6596 | 143.3 | UdeM00000038066 | XP_045198010.1 | 36.8 | 228      |       |      |          |
| 133             | 4    | 355   | 580             | 465            | 683  | 1.00E-30 | 143.3 | 6596 | cellular |

organisms;Eukaryota;Opisthokonta;Metazoa;Eumetazoa;Bilateria;Protostomia;Spiralia;Lophotrochozoa;Mollusca;Bivalvia;Autobranchia;Heteroconchia;Euherodonta;Imparidentia;Venerida;Veneroidea;Veneridae;Mercenaria;Mercenaria mercenaria

|                 |      |       |                 |                |      |           |       |      |          |
|-----------------|------|-------|-----------------|----------------|------|-----------|-------|------|----------|
| UdeM00000038067 | 6596 | 379.4 | UdeM00000038067 | XP_045196232.1 | 36.4 | 646       |       |      |          |
| 374             | 11   | 20    | 646             | 23             | 650  | 9.10E-102 | 379.4 | 6596 | cellular |

organisms;Eukaryota;Opisthokonta;Metazoa;Eumetazoa;Bilateria;Protostomia;Spiralia;Lophotrochozoa;Mollusca;Bivalvia;Autobranchia;Heteroconchia;Euherodonta;Imparidentia;Venerida;Veneroidea;Veneridae;Mercenaria;Mercenaria mercenaria

|                 |      |      |                 |                |      |          |      |      |          |
|-----------------|------|------|-----------------|----------------|------|----------|------|------|----------|
| UdeM00000038068 | 6596 | 97.1 | UdeM00000038068 | XP_045196404.1 | 34.7 | 150      |      |      |          |
| 88              | 3    | 35   | 181             | 646            | 788  | 2.50E-17 | 97.1 | 6596 | cellular |

organisms;Eukaryota;Opisthokonta;Metazoa;Eumetazoa;Bilateria;Protostomia;Spiralia;Lophotrochozoa;Mollusca;Bivalvia;Autobranchia;Heteroconchia;Euherodonta;Imparidentia;Venerida;Veneroidea;Veneridae;Mercenaria;Mercenaria mercenaria

|                 |      |       |                 |                |      |          |       |      |          |
|-----------------|------|-------|-----------------|----------------|------|----------|-------|------|----------|
| UdeM00000038069 | 6596 | 348.2 | UdeM00000038069 | XP_045187536.1 | 55.9 | 329      |       |      |          |
| 97              | 2    | 1     | 281             | 396            | 724  | 9.80E-93 | 348.2 | 6596 | cellular |

organisms;Eukaryota;Opisthokonta;Metazoa;Eumetazoa;Bilateria;Protostomia;Spiralia;Lophotrochozoa;Mollusca;Bivalvia;Autobranchia;Heteroconchia;Euherodonta;Imparidentia;Venerida;Veneroidea;Veneridae;Mercenaria;Mercenaria mercenaria

|                 |      |       |                 |                |      |          |       |      |          |
|-----------------|------|-------|-----------------|----------------|------|----------|-------|------|----------|
| UdeM00000038070 | 6596 | 244.6 | UdeM00000038070 | XP_045187536.1 | 64.9 | 191      |       |      |          |
| 65              | 1    | 1     | 191             | 396            | 584  | 1.10E-61 | 244.6 | 6596 | cellular |

organisms;Eukaryota;Opisthokonta;Metazoa;Eumetazoa;Bilateria;Protostomia;Spiralia;Lophotrochozoa;Mollusca;Bivalvia;Autobranchia;Heteroconchia;Euherodonta;Imparidentia;Venerida;Veneroidea;Veneridae;Mercenaria;Mercenaria mercenaria

|                 |      |       |                 |                |      |          |       |      |          |
|-----------------|------|-------|-----------------|----------------|------|----------|-------|------|----------|
| UdeM00000038071 | 6565 | 172.9 | UdeM00000038071 | XP_022299727.1 | 46.5 | 187      |       |      |          |
| 98              | 1    | 1     | 185             | 46             | 232  | 3.70E-40 | 172.9 | 6565 | cellular |

organisms;Eukaryota;Opisthokonta;Metazoa;Eumetazoa;Bilateria;Protostomia;Spiralia;Lophotrochozoa;Mollusca;Bivalvia;Autobranchia;Pteriomorpha;Ostreida;Ostreoidea;Ostreidae;Crassostrea;Crassostrea virginica

|                 |      |       |                 |                |      |          |       |      |          |
|-----------------|------|-------|-----------------|----------------|------|----------|-------|------|----------|
| UdeM00000038072 | 6596 | 216.9 | UdeM00000038072 | XP_045187536.1 | 70.8 | 154      |       |      |          |
| 44              | 1    | 2     | 155             | 228            | 380  | 2.40E-53 | 216.9 | 6596 | cellular |

organisms;Eukaryota;Opisthokonta;Metazoa;Eumetazoa;Bilateria;Protostomia;Spiralia;Lophotrochozoa;Mollusca;Bivalvia;Autobranchia;Heteroconchia;Euherodonta;Imparidentia;Venerida;Veneroidea;Veneridae;Mercenaria;Mercenaria mercenaria

|                 |      |       |                 |                |      |          |       |      |          |
|-----------------|------|-------|-----------------|----------------|------|----------|-------|------|----------|
| UdeM00000038073 | 6596 | 146.7 | UdeM00000038073 | XP_045196865.1 | 64.8 | 88       |       |      |          |
| 31              | 0    | 303   | 390             | 276            | 363  | 6.60E-32 | 146.7 | 6596 | cellular |

organisms;Eukaryota;Opisthokonta;Metazoa;Eumetazoa;Bilateria;Protostomia;

Spiralia;Lophotrochozoa;Mollusca;Bivalvia;Autobranchia;Heteroconchia;Euherodonta;Imparidentia;Venerida;Veneroidea;Veneridae;Mercenaria;Mercenaria mercenaria

UdeM00000038074 6596 59.7 UdeM00000038074 XP\_045203878.1 38.7 62  
37 1 11 71 666 727 1.80E-06 59.7 6596 cellular

organisms;Eukaryota;Opisthokonta;Metazoa;Eumetazoa;Bilateria;Protostomia;Spiralia;Lophotrochozoa;Mollusca;Bivalvia;Autobranchia;Heteroconchia;Euherodonta;Imparidentia;Venerida;Veneroidea;Veneridae;Mercenaria;Mercenaria mercenaria

UdeM00000038075 6596 218.8 UdeM00000038075 XP\_045196404.1 39.1 297  
162 7 147 435 503 788 1.40E-53 218.8 6596 cellular

organisms;Eukaryota;Opisthokonta;Metazoa;Eumetazoa;Bilateria;Protostomia;Spiralia;Lophotrochozoa;Mollusca;Bivalvia;Autobranchia;Heteroconchia;Euherodonta;Imparidentia;Venerida;Veneroidea;Veneridae;Mercenaria;Mercenaria mercenaria

UdeM00000038076 6596 429.1 UdeM00000038076 XP\_045196232.1 40 638  
344 12 17 636 30 646 9.90E-117 429.1 6596 cellular

organisms;Eukaryota;Opisthokonta;Metazoa;Eumetazoa;Bilateria;Protostomia;Spiralia;Lophotrochozoa;Mollusca;Bivalvia;Autobranchia;Heteroconchia;Euherodonta;Imparidentia;Venerida;Veneroidea;Veneridae;Mercenaria;Mercenaria mercenaria

UdeM00000038077 6596 425.2 UdeM00000038077 XP\_045196232.1 40.3 635  
346 13 17 636 30 646 1.40E-115 425.2 6596 cellular

organisms;Eukaryota;Opisthokonta;Metazoa;Eumetazoa;Bilateria;Protostomia;Spiralia;Lophotrochozoa;Mollusca;Bivalvia;Autobranchia;Heteroconchia;Euherodonta;Imparidentia;Venerida;Veneroidea;Veneridae;Mercenaria;Mercenaria mercenaria

UdeM00000038078 6596 165.6 UdeM00000038078 XP\_045196404.1 35.3 238  
129 5 330 567 395 607 2.00E-37 165.6 6596 cellular

organisms;Eukaryota;Opisthokonta;Metazoa;Eumetazoa;Bilateria;Protostomia;Spiralia;Lophotrochozoa;Mollusca;Bivalvia;Autobranchia;Heteroconchia;Euherodonta;Imparidentia;Venerida;Veneroidea;Veneridae;Mercenaria;Mercenaria mercenaria

UdeM00000038080 29159 142.1 UdeM00000038080 XP\_034319278.1 52.4 143  
61 3 1 138 26 166 5.80E-31 142.1 29159 cellular

organisms;Eukaryota;Opisthokonta;Metazoa;Eumetazoa;Bilateria;Protostomia;Spiralia;Lophotrochozoa;Mollusca;Bivalvia;Autobranchia;Pteriomorphia;Ostreida;Ostreoidea;Ostreidae;Crassostrea;Crassostrea gigas

UdeM00000038082 6596 738.4 UdeM00000038082 XP\_045196997.1 66.6 563  
179 5 1 558 88 646 6.60E-210 738.4 6596 cellular

organisms;Eukaryota;Opisthokonta;Metazoa;Eumetazoa;Bilateria;Protostomia;Spiralia;Lophotrochozoa;Mollusca;Bivalvia;Autobranchia;Heteroconchia;Euherodonta;Imparidentia;Venerida;Veneroidea;Veneridae;Mercenaria;Mercenaria mercenaria

UdeM00000038081 6596 847.4 UdeM00000038081 XP\_045196997.1 65.9 651  
208 7 1 642 1 646 1.20E-242 847.4 6596 cellular

organisms;Eukaryota;Opisthokonta;Metazoa;Eumetazoa;Bilateria;Protostomia;Spiralia;Lophotrochozoa;Mollusca;Bivalvia;Autobranchia;Heteroconchia;Euherodonta;Imparidentia;Venerida;Veneroidea;Veneridae;Mercenaria;Mercenaria mercenaria

UdeM00000038083 6596 103.2 UdeM00000038083 XP\_045196997.1 69.7 66  
19 1 1 66 1 65 1.60E-19 103.2 6596 cellular

organisms;Eukaryota;Opisthokonta;Metazoa;Eumetazoa;Bilateria;Protostomia;Spiralia;Lophotrochozoa;Mollusca;Bivalvia;Autobranchia;Heteroconchia;Euherodonta;Imparidentia;Venerida;Veneroidea;Veneridae;Mercenaria;Mercenaria mercenaria

terodonta;Imparidentia;Venerida;Veneroidea;Veneridae;Mercenaria;Mercenaria mercenaria  
 UdeM00000038086 6579 72.8 UdeM00000038086 XP\_033739891.1 29.1 148  
 85 6 67 201 63 203 6.20E-10 72.8 6579 cellular  
 organisms;Eukaryota;Opisthokonta;Metazoa;Eumetazoa;Bilateria;Protostomia;Spiralia;Lophotrochozoa;Mollusca;Bivalvia;Autobranhia;Pteriomorpha;Pectinida;Pectinoidea;Pectinidae;Pecten;Pecten maximus  
 UdeM00000038087 6579 70.1 UdeM00000038087 XP\_033739891.1 31.6 114  
 64 5 96 202 97 203 4.10E-09 70.1 6579 cellular  
 organisms;Eukaryota;Opisthokonta;Metazoa;Eumetazoa;Bilateria;Protostomia;Spiralia;Lophotrochozoa;Mollusca;Bivalvia;Autobranhia;Pteriomorpha;Pectinida;Pectinoidea;Pectinidae;Pecten;Pecten maximus  
 UdeM00000038088 1735272 812.8 UdeM00000038088 XP\_041352084.1 76.4  
 517 119 2 3 517 636 1151 2.60E-232 812.8 1735272  
 cellular  
 organisms;Eukaryota;Opisthokonta;Metazoa;Eumetazoa;Bilateria;Protostomia;Spiralia;Lophotrochozoa;Mollusca;Gastropoda;Neomphalina;Neomphaloidea;Peltospiridae;Gigantopelta;Gigantopelta aegis  
 UdeM00000038089 6565 369 UdeM00000038089 XP\_022293130.1 66.4 253  
 85 0 4 256 10 262 5.40E-99 369 6565 cellular  
 organisms;Eukaryota;Opisthokonta;Metazoa;Eumetazoa;Bilateria;Protostomia;Spiralia;Lophotrochozoa;Mollusca;Bivalvia;Autobranhia;Pteriomorpha;Ostreida;Ostreoidea;Ostreidae;Crassostrea;Crassostrea virginica  
 UdeM00000038091 6596 436.8 UdeM00000038091 XP\_045196594.1 73.6 303  
 71 2 1 295 14 315 2.20E-119 436.8 6596 cellular  
 organisms;Eukaryota;Opisthokonta;Metazoa;Eumetazoa;Bilateria;Protostomia;Spiralia;Lophotrochozoa;Mollusca;Bivalvia;Autobranhia;Heteroconchia;Euheterodonta;Imparidentia;Venerida;Veneroidea;Veneridae;Mercenaria;Mercenaria mercenaria  
 UdeM00000038092 7757 201.1 UdeM00000038092 XP\_032835197.1 82.2 118  
 21 0 1 118 52 169 8.10E-49 201.1 7757 cellular  
 organisms;Eukaryota;Opisthokonta;Metazoa;Eumetazoa;Bilateria;Deuterostomia;Chordata;Craniata;Vertebrata;Cyclostomata;Hyperoartia;Petromyzontiformes;Petromyzontidae;Petromyzon;Petromyzon marinus  
 UdeM00000038093 1415580 261.2 UdeM00000038093 XP\_030075314.1 49.2  
 297 132 4 1 294 345 625 1.60E-66 261.2 1415580  
 cellular  
 organisms;Eukaryota;Opisthokonta;Metazoa;Eumetazoa;Bilateria;Deuterostomia;Chordata;Craniata;Vertebrata;Gnathostomata;Teleostomi;Euteleostomi;Sarcopterygii;Dipnotetrapodomorpha;Tetrapoda;Amphibia;Gymnophiona;Siphonopidae;Microcaecilia;Microcaecilia unicolor  
 UdeM00000038094 218467 102.4 UdeM00000038094 XP\_023242170.1 53.5  
 86 40 0 1 86 141 226 2.90E-19 102.4 218467  
 cellular  
 organisms;Eukaryota;Opisthokonta;Metazoa;Eumetazoa;Bilateria;Protostomia;Ecdysozoa;Panarthropoda;Arthropoda;Chelicerata;Arachnida;Scorpiones;Buthida;Buthoidea;Buthidae;Centruroides;Centruroides sculpturatus  
 UdeM00000038095 6596 232.3 UdeM00000038095 XP\_045203878.1 30.4 586  
 348 15 5 550 160 725 1.50E-57 232.3 6596 cellular  
 organisms;Eukaryota;Opisthokonta;Metazoa;Eumetazoa;Bilateria;Protostomia;Spiralia;Lophotrochozoa;Mollusca;Bivalvia;Autobranhia;Heteroconchia;Euheterodonta;Imparidentia;Venerida;Veneroidea;Veneridae;Mercenaria;Mercenaria mercenaria

UdeM00000038096 1735272 80.9 UdeM00000038096 XP\_041353177.1 44.3  
 79 44 0 1 79 148 226 1.40E-12 80.9 1735272  
 cellular  
 organisms;Eukaryota;Opisthokonta;Metazoa;Eumetazoa;Bilateria;Protostomia;  
 Spiralia;Lophotrochozoa;Mollusca;Gastropoda;Neomphalina;Neomphaloidea;Pel  
 tospiridae;Gigantopelta;Gigantopelta aegis  
 UdeM00000038097 29159 79.3 UdeM00000038097 XP\_034307341.1 49.3 71  
 36 0 9 79 230 300 4.00E-12 79.3 29159 cellular  
 organisms;Eukaryota;Opisthokonta;Metazoa;Eumetazoa;Bilateria;Protostomia;  
 Spiralia;Lophotrochozoa;Mollusca;Bivalvia;Autobranchia;Pteriormorphia;Ostr  
 eida;Ostreoidea;Ostreidae;Crassostrea;Crassostrea gigas  
 UdeM00000038098 6579 761.1 UdeM00000038098 XP\_033740138.1 59.2 661  
 195 12 335 989 384 975 1.80E-216 761.1 6579 cellular  
 organisms;Eukaryota;Opisthokonta;Metazoa;Eumetazoa;Bilateria;Protostomia;  
 Spiralia;Lophotrochozoa;Mollusca;Bivalvia;Autobranchia;Pteriormorphia;Pect  
 inida;Pectinoidea;Pectinidae;Pecten;Pecten maximus  
 UdeM00000038099 6579 391 UdeM00000038099 XP\_033739837.1 53.3 323  
 148 2 4 324 63 384 1.50E-105 391 6579 cellular  
 organisms;Eukaryota;Opisthokonta;Metazoa;Eumetazoa;Bilateria;Protostomia;  
 Spiralia;Lophotrochozoa;Mollusca;Bivalvia;Autobranchia;Pteriormorphia;Pect  
 inida;Pectinoidea;Pectinidae;Pecten;Pecten maximus  
 UdeM00000038100 6565 69.3 UdeM00000038100 XP\_022291906.1 29.7 155  
 98 4 51 200 153 301 2.00E-08 69.3 6565 cellular  
 organisms;Eukaryota;Opisthokonta;Metazoa;Eumetazoa;Bilateria;Protostomia;  
 Spiralia;Lophotrochozoa;Mollusca;Bivalvia;Autobranchia;Pteriormorphia;Ostr  
 eida;Ostreoidea;Ostreidae;Crassostrea;Crassostrea virginica  
 UdeM00000038101 6573 175.6 UdeM00000038101 XP\_021369328.1 35.2 253  
 158 5 49 299 32 280 1.40E-40 175.6 6573 cellular  
 organisms;Eukaryota;Opisthokonta;Metazoa;Eumetazoa;Bilateria;Protostomia;  
 Spiralia;Lophotrochozoa;Mollusca;Bivalvia;Autobranchia;Pteriormorphia;Pect  
 inida;Pectinoidea;Pectinidae;Mizuhopecten;Mizuhopecten yessoensis  
 UdeM00000038102 6565 144.8 UdeM00000038102 XP\_022344385.1 33.2 286  
 172 9 9 281 10 289 4.60E-31 144.8 6565 cellular  
 organisms;Eukaryota;Opisthokonta;Metazoa;Eumetazoa;Bilateria;Protostomia;  
 Spiralia;Lophotrochozoa;Mollusca;Bivalvia;Autobranchia;Pteriormorphia;Ostr  
 eida;Ostreoidea;Ostreidae;Crassostrea;Crassostrea virginica  
 UdeM00000038104 6573 145.6 UdeM00000038104 XP\_021369328.1 34.6 246  
 153 7 4 248 42 280 2.00E-31 145.6 6573 cellular  
 organisms;Eukaryota;Opisthokonta;Metazoa;Eumetazoa;Bilateria;Protostomia;  
 Spiralia;Lophotrochozoa;Mollusca;Bivalvia;Autobranchia;Pteriormorphia;Pect  
 inida;Pectinoidea;Pectinidae;Mizuhopecten;Mizuhopecten yessoensis  
 UdeM00000038103 6573 153.7 UdeM00000038103 XP\_021369328.1 33.2 268  
 171 7 29 296 21 280 7.80E-34 153.7 6573 cellular  
 organisms;Eukaryota;Opisthokonta;Metazoa;Eumetazoa;Bilateria;Protostomia;  
 Spiralia;Lophotrochozoa;Mollusca;Bivalvia;Autobranchia;Pteriormorphia;Pect  
 inida;Pectinoidea;Pectinidae;Mizuhopecten;Mizuhopecten yessoensis  
 UdeM00000038105 6596 124 UdeM00000038105 XP\_045196984.1 48.4 122  
 60 1 1 122 1 119 1.30E-25 124 6596 cellular  
 organisms;Eukaryota;Opisthokonta;Metazoa;Eumetazoa;Bilateria;Protostomia;  
 Spiralia;Lophotrochozoa;Mollusca;Bivalvia;Autobranchia;Heteroconchia;Euhe  
 terodonta;Imparidentia;Venerida;Veneroidea;Veneridae;Mercenaria;Mercenari  
 a mercenaria  
 UdeM00000038106 6596 867.1 UdeM00000038106 XP\_045196983.1 69.2 639  
 195 1 3 639 2 640 1.40E-248 867.1 6596 cellular



organisms;Eukaryota;Opisthokonta;Metazoa;Eumetazoa;Bilateria;Protostomia;Spiralia;Lophotrochozoa;Mollusca;Bivalvia;Autobranhia;Heteroconchia;Euherodonta;Imparidentia;Venerida;Veneroidea;Veneridae;Mercenaria;Mercenaria mercenaria

UdeM00000038110 6596 137.5 UdeM00000038110 XP\_045197765.1 38.4 198  
114 5 15 204 11 208 2.20E-29 137.5 6596 cellular

organisms;Eukaryota;Opisthokonta;Metazoa;Eumetazoa;Bilateria;Protostomia;Spiralia;Lophotrochozoa;Mollusca;Bivalvia;Autobranhia;Heteroconchia;Euherodonta;Imparidentia;Venerida;Veneroidea;Veneridae;Mercenaria;Mercenaria mercenaria

UdeM00000038111 6596 1203.7 UdeM00000038111 XP\_045197708.1 49.9  
1410 605 23 1 1335 1 1383 0.00E+00 1203.7 6596  
cellular

organisms;Eukaryota;Opisthokonta;Metazoa;Eumetazoa;Bilateria;Protostomia;Spiralia;Lophotrochozoa;Mollusca;Bivalvia;Autobranhia;Heteroconchia;Euherodonta;Imparidentia;Venerida;Veneroidea;Veneridae;Mercenaria;Mercenaria mercenaria

UdeM00000038112 7245 75.1 UdeM00000038112 XP\_015054566.1 33.3 108  
64 1 41 140 47 154 8.00E-11 75.1 7245 cellular

organisms;Eukaryota;Opisthokonta;Metazoa;Eumetazoa;Bilateria;Protostomia;Ecdysozoa;Panarthropoda;Arthropoda;Mandibulata;Pancrustacea;Hexapoda;Insecta;Dicondylia;Pterygota;Neoptera;Endopterygota;Diptera;Brachycera;Muscomorpha;Eremoneura;Cyclorrhapha;Schizophora;Acalyptratae;Ephydroidea;Drosophilidae;Drosophilinae;Drosophilini;Drosophila;Sophophora;melanogaster group;melanogaster subgroup;Drosophila yakuba

UdeM00000038115 1529436 304.3 UdeM00000038115 XP\_033103324.1 46.5  
355 178 7 8 355 9 358 2.10E-79 304.3 1529436  
cellular

organisms;Eukaryota;Opisthokonta;Metazoa;Eumetazoa;Bilateria;Deuterostomia;Echinodermata;Pelmatozoa;Crinoidea;Articulata;Comatulida;Comatulidae;Comatulinae;Anneissia;Anneissia japonica

UdeM00000038116 6596 282 UdeM00000038116 XP\_045197293.1 68 200  
60 1 1 196 12 211 6.30E-73 282 6596 cellular

organisms;Eukaryota;Opisthokonta;Metazoa;Eumetazoa;Bilateria;Protostomia;Spiralia;Lophotrochozoa;Mollusca;Bivalvia;Autobranhia;Heteroconchia;Euherodonta;Imparidentia;Venerida;Veneroidea;Veneridae;Mercenaria;Mercenaria mercenaria

UdeM00000038117 6579 207.2 UdeM00000038117 XP\_033740765.1 74 127  
31 1 1 125 1 127 1.20E-50 207.2 6579 cellular

organisms;Eukaryota;Opisthokonta;Metazoa;Eumetazoa;Bilateria;Protostomia;Spiralia;Lophotrochozoa;Mollusca;Bivalvia;Autobranhia;Pteriormorphia;Pectinida;Pectinoidea;Pectinidae;Pecten;Pecten maximus

UdeM00000038118 6596 700.3 UdeM00000038118 XP\_045197289.1 64.2 528  
178 6 1 521 1 524 1.90E-198 700.3 6596 cellular

organisms;Eukaryota;Opisthokonta;Metazoa;Eumetazoa;Bilateria;Protostomia;Spiralia;Lophotrochozoa;Mollusca;Bivalvia;Autobranhia;Heteroconchia;Euherodonta;Imparidentia;Venerida;Veneroidea;Veneridae;Mercenaria;Mercenaria mercenaria

UdeM00000038119 6596 437.6 UdeM00000038119 XP\_045197289.1 60.9 350  
130 4 2 347 178 524 1.50E-119 437.6 6596 cellular

organisms;Eukaryota;Opisthokonta;Metazoa;Eumetazoa;Bilateria;Protostomia;Spiralia;Lophotrochozoa;Mollusca;Bivalvia;Autobranhia;Heteroconchia;Euherodonta;Imparidentia;Venerida;Veneroidea;Veneridae;Mercenaria;Mercenaria mercenaria

UdeM00000038120 6596 380.6 UdeM00000038120 XP\_045197287.1 52.1 351  
 158 4 12 361 42 383 2.30E-102 380.6 6596 cellular  
 organisms;Eukaryota;Opisthokonta;Metazoa;Eumetazoa;Bilateria;Protostomia;  
 Spiralia;Lophotrochozoa;Mollusca;Bivalvia;Autobranchia;Heteroconchia;Euhe  
 terodonta;Imparidentia;Venerida;Veneroidea;Veneridae;Mercenaria;Mercenari  
 a mercenaria  
 UdeM00000038121 6596 429.5 UdeM00000038121 XP\_045197287.1 54 385  
 167 4 6 389 8 383 4.60E-117 429.5 6596 cellular  
 organisms;Eukaryota;Opisthokonta;Metazoa;Eumetazoa;Bilateria;Protostomia;  
 Spiralia;Lophotrochozoa;Mollusca;Bivalvia;Autobranchia;Heteroconchia;Euhe  
 terodonta;Imparidentia;Venerida;Veneroidea;Veneridae;Mercenaria;Mercenari  
 a mercenaria  
 UdeM00000038122 6596 669.1 UdeM00000038122 XP\_045197284.1 58 602  
 149 4 440 1040 28 526 9.20E-189 669.1 6596 cellular  
 organisms;Eukaryota;Opisthokonta;Metazoa;Eumetazoa;Bilateria;Protostomia;  
 Spiralia;Lophotrochozoa;Mollusca;Bivalvia;Autobranchia;Heteroconchia;Euhe  
 terodonta;Imparidentia;Venerida;Veneroidea;Veneridae;Mercenaria;Mercenari  
 a mercenaria  
 UdeM00000038123 114398 215.7 UdeM00000038123 XP\_015918600.1 35.2  
 429 176 11 1 407 1 349 1.10E-52 215.7 114398  
 cellular  
 organisms;Eukaryota;Opisthokonta;Metazoa;Eumetazoa;Bilateria;Protostomia;  
 Ecdysozoa;Panarthropoda;Arthropoda;Chelicerata;Arachnida;Araneae;Araneomo  
 rphae;Entelegynae;Orbiculariae;Araneoidea;Theridiidae;Parasteatoda;Parast  
 eatoda tepidariorum  
 UdeM00000038124 6596 163.3 UdeM00000038124 XP\_045195325.1 36.8 231  
 144 1 53 281 48 278 4.60E-37 163.3 6596 cellular  
 organisms;Eukaryota;Opisthokonta;Metazoa;Eumetazoa;Bilateria;Protostomia;  
 Spiralia;Lophotrochozoa;Mollusca;Bivalvia;Autobranchia;Heteroconchia;Euhe  
 terodonta;Imparidentia;Venerida;Veneroidea;Veneridae;Mercenaria;Mercenari  
 a mercenaria  
 UdeM00000038125 6596 420.6 UdeM00000038125 XP\_045195326.1 87.2 235  
 27 1 16 247 7 241 1.40E-114 420.6 6596 cellular  
 organisms;Eukaryota;Opisthokonta;Metazoa;Eumetazoa;Bilateria;Protostomia;  
 Spiralia;Lophotrochozoa;Mollusca;Bivalvia;Autobranchia;Heteroconchia;Euhe  
 terodonta;Imparidentia;Venerida;Veneroidea;Veneridae;Mercenaria;Mercenari  
 a mercenaria  
 UdeM00000038127 6565 100.1 UdeM00000038127 XP\_022327962.1 48 100  
 52 0 92 191 194 293 3.10E-18 100.1 6565 cellular  
 organisms;Eukaryota;Opisthokonta;Metazoa;Eumetazoa;Bilateria;Protostomia;  
 Spiralia;Lophotrochozoa;Mollusca;Bivalvia;Autobranchia;Pteriomorphia;Ostr  
 eida;Ostreoidea;Ostreidae;Crassostrea;Crassostrea virginica  
 UdeM00000038128 6596 161 UdeM00000038128 XP\_045196321.1 63 127  
 45 2 953 1079 361 485 8.50E-36 161 6596 cellular  
 organisms;Eukaryota;Opisthokonta;Metazoa;Eumetazoa;Bilateria;Protostomia;  
 Spiralia;Lophotrochozoa;Mollusca;Bivalvia;Autobranchia;Heteroconchia;Euhe  
 terodonta;Imparidentia;Venerida;Veneroidea;Veneridae;Mercenaria;Mercenari  
 a mercenaria  
 UdeM00000038129 6596 604 UdeM00000038129 XP\_045197626.1 81.1 350  
 66 0 1 350 1 350 1.20E-169 604 6596 cellular  
 organisms;Eukaryota;Opisthokonta;Metazoa;Eumetazoa;Bilateria;Protostomia;  
 Spiralia;Lophotrochozoa;Mollusca;Bivalvia;Autobranchia;Heteroconchia;Euhe  
 terodonta;Imparidentia;Venerida;Veneroidea;Veneridae;Mercenaria;Mercenari  
 a mercenaria

UdeM00000038130 1735272 277.7 UdeM00000038130 XP\_041353873.1 50.9  
 285 123 1 1 285 1 268 1.70E-71 277.7 1735272  
 cellular  
 organisms;Eukaryota;Opisthokonta;Metazoa;Eumetazoa;Bilateria;Protostomia;  
 Spiralia;Lophotrochozoa;Mollusca;Gastropoda;Neomphalina;Neomphaloidea;Pel  
 tospiridae;Gigantopelta;Gigantopelta aegis  
 UdeM00000038131 6596 550.8 UdeM00000038131 XP\_045198164.1 54.3 554  
 207 10 1 532 1 530 1.90E-153 550.8 6596 cellular  
 organisms;Eukaryota;Opisthokonta;Metazoa;Eumetazoa;Bilateria;Protostomia;  
 Spiralia;Lophotrochozoa;Mollusca;Bivalvia;Autobranchia;Heteroconchia;Euhe  
 terodonta;Imparidentia;Venerida;Veneroidea;Veneridae;Mercenaria;Mercenari  
 a mercenaria  
 UdeM00000038132 6579 161 UdeM00000038132 XP\_033739819.1 60 165  
 60 3 22 182 29 191 1.40E-36 161 6579 cellular  
 organisms;Eukaryota;Opisthokonta;Metazoa;Eumetazoa;Bilateria;Protostomia;  
 Spiralia;Lophotrochozoa;Mollusca;Bivalvia;Autobranchia;Pteriomorphia;Pect  
 inida;Pectinoidea;Pectinidae;Pecten;Pecten maximus  
 UdeM00000038133 6596 560.1 UdeM00000038133 XP\_045198191.1 65.6 410  
 138 2 30 437 38 446 2.60E-156 560.1 6596 cellular  
 organisms;Eukaryota;Opisthokonta;Metazoa;Eumetazoa;Bilateria;Protostomia;  
 Spiralia;Lophotrochozoa;Mollusca;Bivalvia;Autobranchia;Heteroconchia;Euhe  
 terodonta;Imparidentia;Venerida;Veneroidea;Veneridae;Mercenaria;Mercenari  
 a mercenaria  
 UdeM00000038134 6596 132.1 UdeM00000038134 XP\_045196561.1 43.3 157  
 78 5 22 169 15 169 8.10E-28 132.1 6596 cellular  
 organisms;Eukaryota;Opisthokonta;Metazoa;Eumetazoa;Bilateria;Protostomia;  
 Spiralia;Lophotrochozoa;Mollusca;Bivalvia;Autobranchia;Heteroconchia;Euhe  
 terodonta;Imparidentia;Venerida;Veneroidea;Veneridae;Mercenaria;Mercenari  
 a mercenaria  
 UdeM00000038136 6596 667.9 UdeM00000038136 XP\_045196562.1 69 496  
 149 2 1 492 1 495 9.70E-189 667.9 6596 cellular  
 organisms;Eukaryota;Opisthokonta;Metazoa;Eumetazoa;Bilateria;Protostomia;  
 Spiralia;Lophotrochozoa;Mollusca;Bivalvia;Autobranchia;Heteroconchia;Euhe  
 terodonta;Imparidentia;Venerida;Veneroidea;Veneridae;Mercenaria;Mercenari  
 a mercenaria  
 UdeM00000038139 6573 257.7 UdeM00000038139 XP\_021370858.1 46.3 259  
 136 2 4 259 6 264 1.60E-65 257.7 6573 cellular  
 organisms;Eukaryota;Opisthokonta;Metazoa;Eumetazoa;Bilateria;Protostomia;  
 Spiralia;Lophotrochozoa;Mollusca;Bivalvia;Autobranchia;Pteriomorphia;Pect  
 inida;Pectinoidea;Pectinidae;Mizuhopecten;Mizuhopecten yessoensis  
 UdeM00000038140 6596 517.3 UdeM00000038140 XP\_045215745.1 50.5 503  
 244 4 5 503 8 509 2.20E-143 517.3 6596 cellular  
 organisms;Eukaryota;Opisthokonta;Metazoa;Eumetazoa;Bilateria;Protostomia;  
 Spiralia;Lophotrochozoa;Mollusca;Bivalvia;Autobranchia;Heteroconchia;Euhe  
 terodonta;Imparidentia;Venerida;Veneroidea;Veneridae;Mercenaria;Mercenari  
 a mercenaria  
 UdeM00000038141 6596 100.1 UdeM00000038141 XP\_045198160.1 45.5 101  
 42 3 3 92 8 106 1.50E-18 100.1 6596 cellular  
 organisms;Eukaryota;Opisthokonta;Metazoa;Eumetazoa;Bilateria;Protostomia;  
 Spiralia;Lophotrochozoa;Mollusca;Bivalvia;Autobranchia;Heteroconchia;Euhe  
 terodonta;Imparidentia;Venerida;Veneroidea;Veneridae;Mercenaria;Mercenari  
 a mercenaria  
 UdeM00000038142 6565 702.2 UdeM00000038142 XP\_022293895.1 77.8 424  
 93 1 3 425 2 425 4.00E-199 702.2 6565 cellular

organisms;Eukaryota;Opisthokonta;Metazoa;Eumetazoa;Bilateria;Protostomia;  
Spiralia;Lophotrochozoa;Mollusca;Bivalvia;Autobranchia;Pteriomorpha;Ostr  
eida;Ostreoidea;Ostreidae;Crassostrea;Crassostrea virginica  
UdeM00000038143 6579 180.6 UdeM00000038143 XP\_033740251.1 52.6 192  
81 4 12 194 71 261 1.90E-42 180.6 6579 cellular  
organisms;Eukaryota;Opisthokonta;Metazoa;Eumetazoa;Bilateria;Protostomia;  
Spiralia;Lophotrochozoa;Mollusca;Bivalvia;Autobranchia;Pteriomorpha;Pect  
inida;Pectinoidea;Pectinidae;Pecten;Pecten maximus  
UdeM00000038144 400727 84 UdeM00000038144 XP\_025099713.1 63.1  
65 21 1 3 67 4 65 1.00E-13 84 400727  
cellular  
organisms;Eukaryota;Opisthokonta;Metazoa;Eumetazoa;Bilateria;Protostomia;  
Spiralia;Lophotrochozoa;Mollusca;Gastropoda;Caenogastropoda;Architaeniogl  
ossa;Ampullarioidea;Ampullariidae;Pomacea;Pomacea canaliculata  
UdeM00000038145 6596 253.4 UdeM00000038145 XP\_045185330.1 53.9 230  
106 0 10 239 9 238 2.80E-64 253.4 6596 cellular  
organisms;Eukaryota;Opisthokonta;Metazoa;Eumetazoa;Bilateria;Protostomia;  
Spiralia;Lophotrochozoa;Mollusca;Bivalvia;Autobranchia;Heteroconchia;Euhe  
terodonta;Imparidentia;Venerida;Veneroidea;Veneridae;Mercenaria;Mercenari  
a mercenaria  
UdeM00000038146 6596 161.8 UdeM00000038146 XP\_045198834.1 46.4 209  
86 5 13 205 14 212 9.50E-37 161.8 6596 cellular  
organisms;Eukaryota;Opisthokonta;Metazoa;Eumetazoa;Bilateria;Protostomia;  
Spiralia;Lophotrochozoa;Mollusca;Bivalvia;Autobranchia;Heteroconchia;Euhe  
terodonta;Imparidentia;Venerida;Veneroidea;Veneridae;Mercenaria;Mercenari  
a mercenaria  
UdeM00000038147 6596 210.7 UdeM00000038147 XP\_045195202.1 71.4 168  
33 6 2 159 3 165 2.90E-51 210.7 6596 cellular  
organisms;Eukaryota;Opisthokonta;Metazoa;Eumetazoa;Bilateria;Protostomia;  
Spiralia;Lophotrochozoa;Mollusca;Bivalvia;Autobranchia;Heteroconchia;Euhe  
terodonta;Imparidentia;Venerida;Veneroidea;Veneridae;Mercenaria;Mercenari  
a mercenaria  
UdeM00000038148 37653 115.9 UdeM00000038148 XP\_014777692.1 72.4 76  
21 0 15 90 28 103 4.50E-23 115.9 37653 cellular  
organisms;Eukaryota;Opisthokonta;Metazoa;Eumetazoa;Bilateria;Protostomia;  
Spiralia;Lophotrochozoa;Mollusca;Cephalopoda;Coleoidea;Octopodiformes;Oct  
opoda;Incirrata;Octopodidae;Octopus;Octopus bimaculoides  
UdeM00000038149 6579 654.1 UdeM00000038149 XP\_033740823.1 73.9 639  
133 8 1 628 1 616 1.90E-184 654.1 6579 cellular  
organisms;Eukaryota;Opisthokonta;Metazoa;Eumetazoa;Bilateria;Protostomia;  
Spiralia;Lophotrochozoa;Mollusca;Bivalvia;Autobranchia;Pteriomorpha;Pect  
inida;Pectinoidea;Pectinidae;Pecten;Pecten maximus  
UdeM00000038150 6573 457.6 UdeM00000038150 XP\_021377377.1 55 393  
171 3 22 414 24 410 1.70E-125 457.6 6573 cellular  
organisms;Eukaryota;Opisthokonta;Metazoa;Eumetazoa;Bilateria;Protostomia;  
Spiralia;Lophotrochozoa;Mollusca;Bivalvia;Autobranchia;Pteriomorpha;Pect  
inida;Pectinoidea;Pectinidae;Mizuhopecten;Mizuhopecten yessoensis  
UdeM00000038151 1735272 1095.1 UdeM00000038151 XP\_041355105.1  
60.5 891 344 4 2 890 259 1143 0.00E+00 1095.1  
1735272 cellular  
organisms;Eukaryota;Opisthokonta;Metazoa;Eumetazoa;Bilateria;Protostomia;  
Spiralia;Lophotrochozoa;Mollusca;Gastropoda;Neomphalina;Neomphaloidea;Pel  
tospiridae;Gigantopelta;Gigantopelta aegis

UdeM00000038152 6596 312.4 UdeM00000038152 XP\_045197696.1 80.5 195  
 38 0 11 205 53 247 4.50E-82 312.4 6596 cellular  
 organisms;Eukaryota;Opisthokonta;Metazoa;Eumetazoa;Bilateria;Protostomia;  
 Spiralia;Lophotrochozoa;Mollusca;Bivalvia;Autobranchia;Heteroconchia;Euhe  
 terodonta;Imparidentia;Venerida;Veneroidea;Veneridae;Mercenaria;Mercenari  
 a mercenaria

UdeM00000038153 400727 76.6 UdeM00000038153 XP\_025109869.1 72.3  
 47 13 0 6 52 6 52 2.20E-11 76.6 400727  
 cellular  
 organisms;Eukaryota;Opisthokonta;Metazoa;Eumetazoa;Bilateria;Protostomia;  
 Spiralia;Lophotrochozoa;Mollusca;Gastropoda;Caenogastropoda;Architaeniogl  
 ossa;Ampullarioidea;Ampullariidae;Pomacea;Pomacea canaliculata

UdeM00000038154 29159 733.4 UdeM00000038154 XP\_034331423.1 58.6 650  
 256 5 3 643 19 664 2.50E-208 733.4 29159 cellular  
 organisms;Eukaryota;Opisthokonta;Metazoa;Eumetazoa;Bilateria;Protostomia;  
 Spiralia;Lophotrochozoa;Mollusca;Bivalvia;Autobranchia;Pteriormorphia;Ostr  
 eida;Ostreoidea;Ostreidae;Crassostrea;Crassostrea gigas

UdeM00000038155 6596 402.5 UdeM00000038155 XP\_045162301.1 37.3 657  
 368 15 1 628 5 646 9.70E-109 402.5 6596 cellular  
 organisms;Eukaryota;Opisthokonta;Metazoa;Eumetazoa;Bilateria;Protostomia;  
 Spiralia;Lophotrochozoa;Mollusca;Bivalvia;Autobranchia;Heteroconchia;Euhe  
 terodonta;Imparidentia;Venerida;Veneroidea;Veneridae;Mercenaria;Mercenari  
 a mercenaria

UdeM00000038156 400727 186 UdeM00000038156 XP\_025098454.1 44.6  
 195 107 1 3 196 248 442 4.50E-44 186 400727  
 cellular  
 organisms;Eukaryota;Opisthokonta;Metazoa;Eumetazoa;Bilateria;Protostomia;  
 Spiralia;Lophotrochozoa;Mollusca;Gastropoda;Caenogastropoda;Architaeniogl  
 ossa;Ampullarioidea;Ampullariidae;Pomacea;Pomacea canaliculata

UdeM00000038157 225164 416.8 UdeM00000038157 XP\_009065179.1 45  
 440 236 3 35 470 17 454 4.00E-113 416.8 225164  
 cellular  
 organisms;Eukaryota;Opisthokonta;Metazoa;Eumetazoa;Bilateria;Protostomia;  
 Spiralia;Lophotrochozoa;Mollusca;Gastropoda;Patellogastropoda;Lottioidea;  
 Lottiidae;Lottia;Lottia gigantea

UdeM00000038158 6596 649.4 UdeM00000038158 XP\_045196119.1 77.7 417  
 85 7 26 436 18 432 3.20E-183 649.4 6596 cellular  
 organisms;Eukaryota;Opisthokonta;Metazoa;Eumetazoa;Bilateria;Protostomia;  
 Spiralia;Lophotrochozoa;Mollusca;Bivalvia;Autobranchia;Heteroconchia;Euhe  
 terodonta;Imparidentia;Venerida;Veneroidea;Veneridae;Mercenaria;Mercenari  
 a mercenaria

UdeM00000038159 6596 1010.7 UdeM00000038159 XP\_045196128.1 70.3  
 715 207 4 1 711 1 714 8.80E-292 1010.7 6596  
 cellular  
 organisms;Eukaryota;Opisthokonta;Metazoa;Eumetazoa;Bilateria;Protostomia;  
 Spiralia;Lophotrochozoa;Mollusca;Bivalvia;Autobranchia;Heteroconchia;Euhe  
 terodonta;Imparidentia;Venerida;Veneroidea;Veneridae;Mercenaria;Mercenari  
 a mercenaria

UdeM00000038160 6596 303.1 UdeM00000038160 XP\_045196104.1 49.1 379  
 134 6 1 333 154 519 4.30E-79 303.1 6596 cellular  
 organisms;Eukaryota;Opisthokonta;Metazoa;Eumetazoa;Bilateria;Protostomia;  
 Spiralia;Lophotrochozoa;Mollusca;Bivalvia;Autobranchia;Heteroconchia;Euhe  
 terodonta;Imparidentia;Venerida;Veneroidea;Veneridae;Mercenaria;Mercenari  
 a mercenaria

UdeM00000038161 6573 214.9 UdeM00000038161 XP\_021374856.1 70.9 134  
 39 0 1 134 3 136 6.20E-53 214.9 6573 cellular  
 organisms;Eukaryota;Opisthokonta;Metazoa;Eumetazoa;Bilateria;Protostomia;  
 Spiralia;Lophotrochozoa;Mollusca;Bivalvia;Autobranchia;Pteriomorpha;Pect  
 inida;Pectinoidea;Pectinidae;Mizuhopecten;Mizuhopecten yessoensis  
 UdeM00000038162 6596 180.6 UdeM00000038162 XP\_045162984.1 88.5 104  
 12 0 1 104 1 104 1.00E-42 180.6 6596 cellular  
 organisms;Eukaryota;Opisthokonta;Metazoa;Eumetazoa;Bilateria;Protostomia;  
 Spiralia;Lophotrochozoa;Mollusca;Bivalvia;Autobranchia;Heteroconchia;Euhe  
 terodonta;Imparidentia;Venerida;Veneroidea;Veneridae;Mercenaria;Mercenari  
 a mercenaria  
 UdeM00000038163 6596 1546.6 UdeM00000038163 XP\_045195843.1 44.4  
 1863 982 20 3 1833 4 1844 0.00E+00 1546.6 6596  
 cellular  
 organisms;Eukaryota;Opisthokonta;Metazoa;Eumetazoa;Bilateria;Protostomia;  
 Spiralia;Lophotrochozoa;Mollusca;Bivalvia;Autobranchia;Heteroconchia;Euhe  
 terodonta;Imparidentia;Venerida;Veneroidea;Veneridae;Mercenaria;Mercenari  
 a mercenaria  
 UdeM00000038164 6596 1467.2 UdeM00000038164 XP\_045162981.1 62.8  
 1172 407 14 1 1160 1920 3074 0.00E+00 1467.2 6596  
 cellular  
 organisms;Eukaryota;Opisthokonta;Metazoa;Eumetazoa;Bilateria;Protostomia;  
 Spiralia;Lophotrochozoa;Mollusca;Bivalvia;Autobranchia;Heteroconchia;Euhe  
 terodonta;Imparidentia;Venerida;Veneroidea;Veneridae;Mercenaria;Mercenari  
 a mercenaria  
 UdeM00000038165 6596 609.4 UdeM00000038165 XP\_045195854.1 77.5 378  
 85 0 1 378 1 378 3.20E-171 609.4 6596 cellular  
 organisms;Eukaryota;Opisthokonta;Metazoa;Eumetazoa;Bilateria;Protostomia;  
 Spiralia;Lophotrochozoa;Mollusca;Bivalvia;Autobranchia;Heteroconchia;Euhe  
 terodonta;Imparidentia;Venerida;Veneroidea;Veneridae;Mercenaria;Mercenari  
 a mercenaria  
 UdeM00000038166 6579 1170.2 UdeM00000038166 XP\_033740261.1 63.8  
 949 312 14 13 956 16 937 0.00E+00 1170.2 6579  
 cellular  
 organisms;Eukaryota;Opisthokonta;Metazoa;Eumetazoa;Bilateria;Protostomia;  
 Spiralia;Lophotrochozoa;Mollusca;Bivalvia;Autobranchia;Pteriomorpha;Pect  
 inida;Pectinoidea;Pectinidae;Pecten;Pecten maximus  
 UdeM00000038167 6596 1165.6 UdeM00000038167 XP\_045195875.1 60.5  
 990 314 12 3 937 35 1002 0.00E+00 1165.6 6596  
 cellular  
 organisms;Eukaryota;Opisthokonta;Metazoa;Eumetazoa;Bilateria;Protostomia;  
 Spiralia;Lophotrochozoa;Mollusca;Bivalvia;Autobranchia;Heteroconchia;Euhe  
 terodonta;Imparidentia;Venerida;Veneroidea;Veneridae;Mercenaria;Mercenari  
 a mercenaria  
 UdeM00000038168 29159 268.9 UdeM00000038168 XP\_019929994.2 32 1185  
 526 30 394 1536 1256 2202 4.10E-68 268.9 29159 cellular  
 organisms;Eukaryota;Opisthokonta;Metazoa;Eumetazoa;Bilateria;Protostomia;  
 Spiralia;Lophotrochozoa;Mollusca;Bivalvia;Autobranchia;Pteriomorpha;Ostr  
 eida;Ostreoidea;Ostreidae;Crassostrea;Crassostrea gigas  
 UdeM00000038169 6596 164.9 UdeM00000038169 XP\_045197195.1 38.1 289  
 158 6 13 300 6 274 1.90E-37 164.9 6596 cellular  
 organisms;Eukaryota;Opisthokonta;Metazoa;Eumetazoa;Bilateria;Protostomia;  
 Spiralia;Lophotrochozoa;Mollusca;Bivalvia;Autobranchia;Heteroconchia;Euhe

terodonta;Imparidentia;Venerida;Veneroidea;Veneridae;Mercenaria;Mercenari  
 a mercenaria  
 UdeM00000038170 6573 557 UdeM00000038170 XP\_021373623.1 51.4 654  
 229 14 1 602 59 675 3.30E-155 557 6573 cellular  
 organisms;Eukaryota;Opisthokonta;Metazoa;Eumetazoa;Bilateria;Protostomia;  
 Spiralia;Lophotrochozoa;Mollusca;Bivalvia;Autobranchia;Pteriomorpha;Pect  
 inida;Pectinoidea;Pectinidae;Mizuhopecten;Mizuhopecten yessoensis  
 UdeM00000038171 1735272 144.4 UdeM00000038171 XP\_041353958.1 39.3  
 191 112 2 12 201 14 201 1.70E-31 144.4 1735272  
 cellular  
 organisms;Eukaryota;Opisthokonta;Metazoa;Eumetazoa;Bilateria;Protostomia;  
 Spiralia;Lophotrochozoa;Mollusca;Gastropoda;Neomphalina;Neomphaloidea;Pel  
 tospiridae;Gigantopelta;Gigantopelta aegis  
 UdeM00000038172 6573 261.9 UdeM00000038172 XP\_021356409.1 49.5 301  
 146 5 20 316 15 313 1.00E-66 261.9 6573 cellular  
 organisms;Eukaryota;Opisthokonta;Metazoa;Eumetazoa;Bilateria;Protostomia;  
 Spiralia;Lophotrochozoa;Mollusca;Bivalvia;Autobranchia;Pteriomorpha;Pect  
 inida;Pectinoidea;Pectinidae;Mizuhopecten;Mizuhopecten yessoensis  
 UdeM00000038173 6596 230.3 UdeM00000038173 XP\_045197883.1 50.8 260  
 112 6 2 249 52 307 2.70E-57 230.3 6596 cellular  
 organisms;Eukaryota;Opisthokonta;Metazoa;Eumetazoa;Bilateria;Protostomia;  
 Spiralia;Lophotrochozoa;Mollusca;Bivalvia;Autobranchia;Heteroconchia;Euhe  
 terodonta;Imparidentia;Venerida;Veneroidea;Veneridae;Mercenaria;Mercenari  
 a mercenaria  
 UdeM00000038174 6596 226.9 UdeM00000038174 XP\_045197891.1 61.9 394  
 111 4 23 413 333 690 4.80E-56 226.9 6596 cellular  
 organisms;Eukaryota;Opisthokonta;Metazoa;Eumetazoa;Bilateria;Protostomia;  
 Spiralia;Lophotrochozoa;Mollusca;Bivalvia;Autobranchia;Heteroconchia;Euhe  
 terodonta;Imparidentia;Venerida;Veneroidea;Veneridae;Mercenaria;Mercenari  
 a mercenaria  
 UdeM00000038176 6565 235.7 UdeM00000038176 XP\_022292321.1 56.8 229  
 85 4 1 223 1 221 6.90E-59 235.7 6565 cellular  
 organisms;Eukaryota;Opisthokonta;Metazoa;Eumetazoa;Bilateria;Protostomia;  
 Spiralia;Lophotrochozoa;Mollusca;Bivalvia;Autobranchia;Pteriomorpha;Ostr  
 eida;Ostreoidea;Ostreidae;Crassostrea;Crassostrea virginica  
 UdeM00000038177 6596 207.6 UdeM00000038177 XP\_045196518.1 48.4 248  
 49 2 39 286 59 227 2.30E-50 207.6 6596 cellular  
 organisms;Eukaryota;Opisthokonta;Metazoa;Eumetazoa;Bilateria;Protostomia;  
 Spiralia;Lophotrochozoa;Mollusca;Bivalvia;Autobranchia;Heteroconchia;Euhe  
 terodonta;Imparidentia;Venerida;Veneroidea;Veneridae;Mercenaria;Mercenari  
 a mercenaria  
 UdeM00000038178 90988 127.1 UdeM00000038178 XP\_039535825.1 60.6 94  
 37 0 1 94 111 204 1.20E-26 127.1 90988 cellular  
 organisms;Eukaryota;Opisthokonta;Metazoa;Eumetazoa;Bilateria;Deuterostomi  
 a;Chordata;Craniata;Vertebrata;Gnathostomata;Teleostomi;Euteleostomi;Acti  
 nopterygii;Actinopteri;Neopterygii;Teleostei;Osteoglossocephalai;Clupeoce  
 phala;Otomorpha;Ostariophysi;Otophysi;Cypriniphysae;Cypriniformes;Cyprino  
 ideii;Leuciscidae;Pogonichthyinae;Pimephales;Pimephales promelas  
 UdeM00000038179 6596 958 UdeM00000038179 XP\_045196514.1 66 724  
 241 4 1 724 4 722 6.90E-276 958 6596 cellular  
 organisms;Eukaryota;Opisthokonta;Metazoa;Eumetazoa;Bilateria;Protostomia;  
 Spiralia;Lophotrochozoa;Mollusca;Bivalvia;Autobranchia;Heteroconchia;Euhe  
 terodonta;Imparidentia;Venerida;Veneroidea;Veneridae;Mercenaria;Mercenari  
 a mercenaria

UdeM00000038180 6500 336.3 UdeM00000038180 XP\_005104243.2 77.1 214  
 42 2 3 211 6 217 2.90E-89 336.3 6500 cellular  
 organisms;Eukaryota;Opisthokonta;Metazoa;Eumetazoa;Bilateria;Protostomia;  
 Spiralia;Lophotrochozoa;Mollusca;Gastropoda;Heterobranchia;Euthyneura;Tec  
 tipleura;Aplysiida;Aplysioidea;Aplysiidae;Aplysia;Aplysia californica  
 UdeM00000038181 6596 540.4 UdeM00000038181 XP\_045196506.1 58.3 518  
 209 4 1 514 4 518 2.40E-150 540.4 6596 cellular  
 organisms;Eukaryota;Opisthokonta;Metazoa;Eumetazoa;Bilateria;Protostomia;  
 Spiralia;Lophotrochozoa;Mollusca;Bivalvia;Autobranchia;Heteroconchia;Euhe  
 terodonta;Imparidentia;Venerida;Veneroidea;Veneridae;Mercenaria;Mercenari  
 a mercenaria  
 UdeM00000038182 46514 260 UdeM00000038182 XP\_038049290.1 39.4 398  
 156 4 8 405 4 316 5.00E-66 260 46514 cellular  
 organisms;Eukaryota;Opisthokonta;Metazoa;Eumetazoa;Bilateria;Deuterostomi  
 a;Echinodermata;Eleutherozoa;Asterozoa;Asteroidea;Valvatacea;Valvatida;As  
 terinidae;Patiria;Patiria miniata  
 UdeM00000038184 6596 449.9 UdeM00000038184 XP\_045196700.1 59.7 355  
 142 1 4 357 54 408 3.00E-123 449.9 6596 cellular  
 organisms;Eukaryota;Opisthokonta;Metazoa;Eumetazoa;Bilateria;Protostomia;  
 Spiralia;Lophotrochozoa;Mollusca;Bivalvia;Autobranchia;Heteroconchia;Euhe  
 terodonta;Imparidentia;Venerida;Veneroidea;Veneridae;Mercenaria;Mercenari  
 a mercenaria  
 UdeM00000038183 6596 460.7 UdeM00000038183 XP\_045196700.1 56.5 393  
 168 2 16 407 18 408 2.00E-126 460.7 6596 cellular  
 organisms;Eukaryota;Opisthokonta;Metazoa;Eumetazoa;Bilateria;Protostomia;  
 Spiralia;Lophotrochozoa;Mollusca;Bivalvia;Autobranchia;Heteroconchia;Euhe  
 terodonta;Imparidentia;Venerida;Veneroidea;Veneridae;Mercenaria;Mercenari  
 a mercenaria  
 UdeM00000038185 2607531 1625.9 UdeM00000038185 XP\_029654375.1  
 59.6 1481 545 17 1 1438 1 1470 0.00E+00 1625.9  
 2607531 cellular  
 organisms;Eukaryota;Opisthokonta;Metazoa;Eumetazoa;Bilateria;Protostomia;  
 Spiralia;Lophotrochozoa;Mollusca;Cephalopoda;Coleoidea;Octopodiformes;Oct  
 opoda;Incirrata;Octopodidae;Octopus;Octopus sinensis  
 UdeM00000038186 2607531 1619 UdeM00000038186 XP\_029654375.1 59.3  
 1486 546 18 1 1443 1 1470 0.00E+00 1619 2607531  
 cellular  
 organisms;Eukaryota;Opisthokonta;Metazoa;Eumetazoa;Bilateria;Protostomia;  
 Spiralia;Lophotrochozoa;Mollusca;Cephalopoda;Coleoidea;Octopodiformes;Oct  
 opoda;Incirrata;Octopodidae;Octopus;Octopus sinensis  
 UdeM00000038187 2607531 1625.9 UdeM00000038187 XP\_029654375.1  
 59.6 1481 545 17 1 1438 1 1470 0.00E+00 1625.9  
 2607531 cellular  
 organisms;Eukaryota;Opisthokonta;Metazoa;Eumetazoa;Bilateria;Protostomia;  
 Spiralia;Lophotrochozoa;Mollusca;Cephalopoda;Coleoidea;Octopodiformes;Oct  
 opoda;Incirrata;Octopodidae;Octopus;Octopus sinensis  
 UdeM00000038188 6565 143.7 UdeM00000038188 XP\_022286995.1 64.3 115  
 41 0 6 120 16 130 1.60E-31 143.7 6565 cellular  
 organisms;Eukaryota;Opisthokonta;Metazoa;Eumetazoa;Bilateria;Protostomia;  
 Spiralia;Lophotrochozoa;Mollusca;Bivalvia;Autobranchia;Pteriomorphia;Ostr  
 eida;Ostreoidea;Ostreidae;Crassostrea;Crassostrea virginica  
 UdeM00000038189 225164 80.1 UdeM00000038189 XP\_009058200.1 37.2  
 113 51 1 8 100 103 215 1.80E-12 80.1 225164  
 cellular



organisms;Eukaryota;Opisthokonta;Metazoa;Eumetazoa;Bilateria;Protostomia; Spiralia;Lophotrochozoa;Mollusca;Gastropoda;Patellogastropoda;Lottioidea; Lottiidae;Lottia;Lottia gigantea

UdeM00000038190 6596 847 UdeM00000038190 XP\_045197728.1 62.3 666  
243 4 20 683 23 682 1.70E-242 847 6596 cellular

organisms;Eukaryota;Opisthokonta;Metazoa;Eumetazoa;Bilateria;Protostomia; Spiralia;Lophotrochozoa;Mollusca;Bivalvia;Autobranchia;Heteroconchia;Euhe terodonta;Imparidentia;Venerida;Veneroidea;Veneridae;Mercenaria;Mercenari a mercenaria

UdeM00000038191 6087 491.1 UdeM00000038191 XP\_012555323.1 43.9 761  
298 14 1 674 1 719 2.30E-135 491.1 6087 cellular

organisms;Eukaryota;Opisthokonta;Metazoa;Eumetazoa;Cnidaria;Hydrozoa;Hydr oidolina;Anthoathecata;Aplanulata;Hydridae;Hydra;Hydra vulgaris

UdeM00000038192 6087 201.8 UdeM00000038192 XP\_012555323.1 44 364  
128 7 1 333 1 319 1.60E-48 201.8 6087 cellular

organisms;Eukaryota;Opisthokonta;Metazoa;Eumetazoa;Cnidaria;Hydrozoa;Hydr oidolina;Anthoathecata;Aplanulata;Hydridae;Hydra;Hydra vulgaris

UdeM00000038193 6596 220.7 UdeM00000038193 XP\_045166746.1 52.5 200  
92 1 1 200 419 615 1.70E-54 220.7 6596 cellular

organisms;Eukaryota;Opisthokonta;Metazoa;Eumetazoa;Bilateria;Protostomia; Spiralia;Lophotrochozoa;Mollusca;Bivalvia;Autobranchia;Heteroconchia;Euhe terodonta;Imparidentia;Venerida;Veneroidea;Veneridae;Mercenaria;Mercenari a mercenaria

UdeM00000038194 6573 82.8 UdeM00000038194 XP\_021349370.1 52.9 102  
36 2 2 91 366 467 3.20E-13 82.8 6573 cellular

organisms;Eukaryota;Opisthokonta;Metazoa;Eumetazoa;Bilateria;Protostomia; Spiralia;Lophotrochozoa;Mollusca;Bivalvia;Autobranchia;Pteriormorphia;Pect inida;Pectinoidea;Pectinidae;Mizuhopecten;Mizuhopecten yessoensis

UdeM00000038195 6087 160.2 UdeM00000038195 XP\_012555323.1 27.3 506  
175 9 1 327 228 719 4.60E-36 160.2 6087 cellular

organisms;Eukaryota;Opisthokonta;Metazoa;Eumetazoa;Cnidaria;Hydrozoa;Hydr oidolina;Anthoathecata;Aplanulata;Hydridae;Hydra;Hydra vulgaris

UdeM00000038196 6087 442.2 UdeM00000038196 XP\_012555323.1 44.3 612  
265 12 3 562 132 719 1.00E-120 442.2 6087 cellular

organisms;Eukaryota;Opisthokonta;Metazoa;Eumetazoa;Cnidaria;Hydrozoa;Hydr oidolina;Anthoathecata;Aplanulata;Hydridae;Hydra;Hydra vulgaris

UdeM00000038197 6573 422.5 UdeM00000038197 XP\_021362787.1 70.9 289  
83 1 1117 1404 170 458 2.00E-114 422.5 6573 cellular

organisms;Eukaryota;Opisthokonta;Metazoa;Eumetazoa;Bilateria;Protostomia; Spiralia;Lophotrochozoa;Mollusca;Bivalvia;Autobranchia;Pteriormorphia;Pect inida;Pectinoidea;Pectinidae;Mizuhopecten;Mizuhopecten yessoensis

UdeM00000038197 6573 275 UdeM00000038197 XP\_021362787.1 75.9 166  
40 0 3 168 4 169 5.20E-70 275 6573 cellular

organisms;Eukaryota;Opisthokonta;Metazoa;Eumetazoa;Bilateria;Protostomia; Spiralia;Lophotrochozoa;Mollusca;Bivalvia;Autobranchia;Pteriormorphia;Pect inida;Pectinoidea;Pectinidae;Mizuhopecten;Mizuhopecten yessoensis

UdeM00000038198 1529436 112.5 UdeM00000038198 XP\_033111987.1 55.7  
88 39 0 3 90 20 107 3.00E-22 112.5 1529436

cellular

organisms;Eukaryota;Opisthokonta;Metazoa;Eumetazoa;Bilateria;Deuterostomi a;Echinodermata;Pelmatozoa;Crinoidea;Articulata;Comatulida;Comatulidae;Co matulinae;Anneissia;Anneissia japonica

UdeM00000038199 6526 70.1 UdeM00000038199 XP\_013092967.1 45.1 82  
37 2 31 104 103 184 1.90E-09 70.1 6526 cellular

organisms;Eukaryota;Opisthokonta;Metazoa;Eumetazoa;Bilateria;Protostomia; Spiralia;Lophotrochozoa;Mollusca;Gastropoda;Heterobranchia;Euthyneura;Pan pulmonata;Hygrophila;Lymnaeoidea;Planorbidae;Biomphalaria;Biomphalaria glabrata

UdeM00000038200 6500 314.7 UdeM00000038200 XP\_035827656.1 90.3 175  
17 0 1 175 78 252 7.50E-83 314.7 6500 cellular

organisms;Eukaryota;Opisthokonta;Metazoa;Eumetazoa;Bilateria;Protostomia; Spiralia;Lophotrochozoa;Mollusca;Gastropoda;Heterobranchia;Euthyneura;Tectipleura;Aplysiida;Aplysioidea;Aplysiidae;Aplysia;Aplysia californica

UdeM00000038201 6596 445.3 UdeM00000038201 XP\_045198061.1 73.7 316  
77 4 1 316 175 484 6.60E-122 445.3 6596 cellular

organisms;Eukaryota;Opisthokonta;Metazoa;Eumetazoa;Bilateria;Protostomia; Spiralia;Lophotrochozoa;Mollusca;Bivalvia;Autobranchia;Heteroconchia;Euheterodonta;Imparidentia;Venerida;Veneroidea;Veneridae;Mercenaria;Mercenaria mercenaria

UdeM00000038202 400727 414.8 UdeM00000038202 XP\_025098705.1 43.8  
468 256 5 39 503 29 492 1.50E-112 414.8 400727  
cellular

organisms;Eukaryota;Opisthokonta;Metazoa;Eumetazoa;Bilateria;Protostomia; Spiralia;Lophotrochozoa;Mollusca;Gastropoda;Caenogastropoda;Architaenioglossa;Ampullarioidea;Ampullariidae;Pomacea;Pomacea canaliculata

UdeM00000038203 400727 421.4 UdeM00000038203 XP\_025098454.1 43.2  
493 274 6 1 490 8 497 1.60E-114 421.4 400727

cellular

organisms;Eukaryota;Opisthokonta;Metazoa;Eumetazoa;Bilateria;Protostomia; Spiralia;Lophotrochozoa;Mollusca;Gastropoda;Caenogastropoda;Architaenioglossa;Ampullarioidea;Ampullariidae;Pomacea;Pomacea canaliculata

UdeM00000038204 400727 418.7 UdeM00000038204 XP\_025098454.1 43.3  
496 269 7 1 490 8 497 1.00E-113 418.7 400727

cellular

organisms;Eukaryota;Opisthokonta;Metazoa;Eumetazoa;Bilateria;Protostomia; Spiralia;Lophotrochozoa;Mollusca;Gastropoda;Caenogastropoda;Architaenioglossa;Ampullarioidea;Ampullariidae;Pomacea;Pomacea canaliculata

UdeM00000038205 400727 312 UdeM00000038205 XP\_025098454.1 41.4  
389 222 6 1 386 8 393 1.20E-81 312 400727

cellular

organisms;Eukaryota;Opisthokonta;Metazoa;Eumetazoa;Bilateria;Protostomia; Spiralia;Lophotrochozoa;Mollusca;Gastropoda;Caenogastropoda;Architaenioglossa;Ampullarioidea;Ampullariidae;Pomacea;Pomacea canaliculata

UdeM00000038206 6573 189.5 UdeM00000038206 XP\_021366217.1 23.6 639  
433 18 1 624 30 628 1.30E-44 189.5 6573 cellular

organisms;Eukaryota;Opisthokonta;Metazoa;Eumetazoa;Bilateria;Protostomia; Spiralia;Lophotrochozoa;Mollusca;Bivalvia;Autobranchia;Pteriomorphia;Pectinida;Pectinoidea;Pectinidae;Mizuhopecten;Mizuhopecten yessoensis

UdeM00000038209 6596 294.3 UdeM00000038209 XP\_045199179.1 70 203  
60 1 20 222 20 221 1.30E-76 294.3 6596 cellular

organisms;Eukaryota;Opisthokonta;Metazoa;Eumetazoa;Bilateria;Protostomia; Spiralia;Lophotrochozoa;Mollusca;Bivalvia;Autobranchia;Heteroconchia;Euheterodonta;Imparidentia;Venerida;Veneroidea;Veneridae;Mercenaria;Mercenaria mercenaria

UdeM00000038208 6596 312.4 UdeM00000038208 XP\_045199179.1 69.7 218  
65 1 1 218 5 221 4.60E-82 312.4 6596 cellular

organisms;Eukaryota;Opisthokonta;Metazoa;Eumetazoa;Bilateria;Protostomia; Spiralia;Lophotrochozoa;Mollusca;Bivalvia;Autobranchia;Heteroconchia;Euheterodonta

terodonta;Imparidentia;Venerida;Veneroidea;Veneridae;Mercenaria;Mercenari  
 a mercenaria  
 UdeM00000038210 6945 118.2 UdeM00000038210 XP\_040070823.2 31.5 273  
 86 3 1 174 60 330 1.10E-23 118.2 6945 cellular  
 organisms;Eukaryota;Opisthokonta;Metazoa;Eumetazoa;Bilateria;Protostomia;  
 Ecdysozoa;Panarthropoda;Arthropoda;Chelicerata;Arachnida;Acari;Parasitifo  
 rmes;Ixodida;Ixodoidea;Ixodidae;Ixodinae;Ixodes;Ixodes scapularis  
 UdeM00000038211 6596 611.3 UdeM00000038211 XP\_045197704.1 80.8 355  
 68 0 3 357 26 380 7.80E-172 611.3 6596 cellular  
 organisms;Eukaryota;Opisthokonta;Metazoa;Eumetazoa;Bilateria;Protostomia;  
 Spiralia;Lophotrochozoa;Mollusca;Bivalvia;Autobranchia;Heteroconchia;Euhe  
 terodonta;Imparidentia;Venerida;Veneroidea;Veneridae;Mercenaria;Mercenari  
 a mercenaria  
 UdeM00000038212 6596 797.3 UdeM00000038212 XP\_045197837.1 51.1 839  
 334 23 29 814 110 925 1.80E-227 797.3 6596 cellular  
 organisms;Eukaryota;Opisthokonta;Metazoa;Eumetazoa;Bilateria;Protostomia;  
 Spiralia;Lophotrochozoa;Mollusca;Bivalvia;Autobranchia;Heteroconchia;Euhe  
 terodonta;Imparidentia;Venerida;Veneroidea;Veneridae;Mercenaria;Mercenari  
 a mercenaria  
 UdeM00000038213 1735272 84 UdeM00000038213 XP\_041354954.1 45.3  
 95 49 2 17 109 4 97 1.90E-13 84 1735272  
 cellular  
 organisms;Eukaryota;Opisthokonta;Metazoa;Eumetazoa;Bilateria;Protostomia;  
 Spiralia;Lophotrochozoa;Mollusca;Gastropoda;Neomphalina;Neomphaloidea;Pel  
 tospiridae;Gigantopelta;Gigantopelta aegis  
 UdeM00000038214 6596 203 UdeM00000038214 XP\_045198084.1 50.3 195  
 94 1 1 195 164 355 5.50E-49 203 6596 cellular  
 organisms;Eukaryota;Opisthokonta;Metazoa;Eumetazoa;Bilateria;Protostomia;  
 Spiralia;Lophotrochozoa;Mollusca;Bivalvia;Autobranchia;Heteroconchia;Euhe  
 terodonta;Imparidentia;Venerida;Veneroidea;Veneridae;Mercenaria;Mercenari  
 a mercenaria  
 UdeM00000038215 6500 162.9 UdeM00000038215 XP\_035827215.1 59.7 134  
 53 1 4 136 5 138 4.40E-37 162.9 6500 cellular  
 organisms;Eukaryota;Opisthokonta;Metazoa;Eumetazoa;Bilateria;Protostomia;  
 Spiralia;Lophotrochozoa;Mollusca;Gastropoda;Heterobranchia;Euthyneura;Tec  
 tipleura;Aplysiida;Aplysioidea;Aplysiidae;Aplysia;Aplysia californica  
 UdeM00000038216 6596 275 UdeM00000038216 XP\_045160724.1 38.3 397  
 224 7 29 418 38 420 1.80E-70 275 6596 cellular  
 organisms;Eukaryota;Opisthokonta;Metazoa;Eumetazoa;Bilateria;Protostomia;  
 Spiralia;Lophotrochozoa;Mollusca;Bivalvia;Autobranchia;Heteroconchia;Euhe  
 terodonta;Imparidentia;Venerida;Veneroidea;Veneridae;Mercenaria;Mercenari  
 a mercenaria  
 UdeM00000038217 7574 435.3 UdeM00000038217 XP\_013383630.1 47.9 413  
 208 4 6 414 2 411 9.40E-119 435.3 7574 cellular  
 organisms;Eukaryota;Opisthokonta;Metazoa;Eumetazoa;Bilateria;Protostomia;  
 Spiralia;Lophotrochozoa;Brachiopoda;Linguliformea;Lingulata;Lingulida;Lin  
 guloidea;Lingulidae;Lingula;Lingula anatina  
 UdeM00000038218 6596 575.5 UdeM00000038218 XP\_045197448.1 39.1 851  
 442 15 2 835 5 796 1.10E-160 575.5 6596 cellular  
 organisms;Eukaryota;Opisthokonta;Metazoa;Eumetazoa;Bilateria;Protostomia;  
 Spiralia;Lophotrochozoa;Mollusca;Bivalvia;Autobranchia;Heteroconchia;Euhe  
 terodonta;Imparidentia;Venerida;Veneroidea;Veneridae;Mercenaria;Mercenari  
 a mercenaria

UdeM00000038219 6596 300.8 UdeM00000038219 XP\_045197453.1 84.4 212  
 33 0 1 212 1 212 1.30E-78 300.8 6596 cellular  
 organisms;Eukaryota;Opisthokonta;Metazoa;Eumetazoa;Bilateria;Protostomia;  
 Spiralia;Lophotrochozoa;Mollusca;Bivalvia;Autobranchia;Heteroconchia;Euhe  
 terodonta;Imparidentia;Venerida;Veneroidea;Veneridae;Mercenaria;Mercenari  
 a mercenaria  
 UdeM00000038220 6596 443.7 UdeM00000038220 XP\_045197451.1 57.9 416  
 159 8 1 409 1 407 2.50E-121 443.7 6596 cellular  
 organisms;Eukaryota;Opisthokonta;Metazoa;Eumetazoa;Bilateria;Protostomia;  
 Spiralia;Lophotrochozoa;Mollusca;Bivalvia;Autobranchia;Heteroconchia;Euhe  
 terodonta;Imparidentia;Venerida;Veneroidea;Veneridae;Mercenaria;Mercenari  
 a mercenaria  
 UdeM00000038221 6596 155.2 UdeM00000038221 XP\_045196424.1 31.5 324  
 94 7 40 359 32 231 1.70E-34 155.2 6596 cellular  
 organisms;Eukaryota;Opisthokonta;Metazoa;Eumetazoa;Bilateria;Protostomia;  
 Spiralia;Lophotrochozoa;Mollusca;Bivalvia;Autobranchia;Heteroconchia;Euhe  
 terodonta;Imparidentia;Venerida;Veneroidea;Veneridae;Mercenaria;Mercenari  
 a mercenaria  
 UdeM00000038222 6596 394.8 UdeM00000038222 XP\_045196424.1 49.6 403  
 147 5 1 394 240 595 1.80E-106 394.8 6596 cellular  
 organisms;Eukaryota;Opisthokonta;Metazoa;Eumetazoa;Bilateria;Protostomia;  
 Spiralia;Lophotrochozoa;Mollusca;Bivalvia;Autobranchia;Heteroconchia;Euhe  
 terodonta;Imparidentia;Venerida;Veneroidea;Veneridae;Mercenaria;Mercenari  
 a mercenaria  
 UdeM00000038223 46731 70.9 UdeM00000038223 XP\_027046674.1 39.1 92  
 55 1 1 91 412 503 1.60E-09 70.9 46731 cellular  
 organisms;Eukaryota;Opisthokonta;Metazoa;Eumetazoa;Cnidaria;Anthozoa;Hexa  
 corallia;Scleractinia;Astrocoeniina;Pocilloporidae;Pocillopora;Pocillopor  
 a damicornis  
 UdeM00000038224 6596 620.9 UdeM00000038224 XP\_045196956.1 62.1 509  
 190 2 2 510 5 510 1.40E-174 620.9 6596 cellular  
 organisms;Eukaryota;Opisthokonta;Metazoa;Eumetazoa;Bilateria;Protostomia;  
 Spiralia;Lophotrochozoa;Mollusca;Bivalvia;Autobranchia;Heteroconchia;Euhe  
 terodonta;Imparidentia;Venerida;Veneroidea;Veneridae;Mercenaria;Mercenari  
 a mercenaria  
 UdeM00000038225 6579 460.3 UdeM00000038225 XP\_033739605.1 46.2 574  
 271 12 4 566 1 547 3.50E-126 460.3 6579 cellular  
 organisms;Eukaryota;Opisthokonta;Metazoa;Eumetazoa;Bilateria;Protostomia;  
 Spiralia;Lophotrochozoa;Mollusca;Bivalvia;Autobranchia;Pteriomorphia;Pect  
 inida;Pectinoidea;Pectinidae;Pecten;Pecten maximus  
 UdeM00000038227 29159 415.2 UdeM00000038227 XP\_011450666.1 75.4 252  
 62 0 1 252 1 252 5.80E-113 415.2 29159 cellular  
 organisms;Eukaryota;Opisthokonta;Metazoa;Eumetazoa;Bilateria;Protostomia;  
 Spiralia;Lophotrochozoa;Mollusca;Bivalvia;Autobranchia;Pteriomorphia;Ostr  
 eida;Ostreoidea;Ostreidae;Crassostrea;Crassostrea gigas  
 UdeM00000038226 29159 409.8 UdeM00000038226 XP\_011450666.1 74.6 252  
 64 0 1 252 1 252 2.40E-111 409.8 29159 cellular  
 organisms;Eukaryota;Opisthokonta;Metazoa;Eumetazoa;Bilateria;Protostomia;  
 Spiralia;Lophotrochozoa;Mollusca;Bivalvia;Autobranchia;Pteriomorphia;Ostr  
 eida;Ostreoidea;Ostreidae;Crassostrea;Crassostrea gigas  
 UdeM00000038228 29159 391 UdeM00000038228 XP\_011450666.1 62.3 305  
 62 1 1 305 1 252 1.40E-105 391 29159 cellular  
 organisms;Eukaryota;Opisthokonta;Metazoa;Eumetazoa;Bilateria;Protostomia;

Spiralia;Lophotrochozoa;Mollusca;Bivalvia;Autobranchia;Pteriormorphia;Ostr  
eida;Ostreoidea;Ostreidae;Crassostrea;Crassostrea gigas

UdeM00000038231 225164 104.8 UdeM00000038231 XP\_009048247.1 42.7  
124 65 1 20 143 106 223 9.60E-20 104.8 225164  
cellular

organisms;Eukaryota;Opisthokonta;Metazoa;Eumetazoa;Bilateria;Protostomia;  
Spiralia;Lophotrochozoa;Mollusca;Gastropoda;Patellogastropoda;Lottioidea;  
Lottiidae;Lottia;Lottia gigantea

UdeM00000038232 6573 132.1 UdeM00000038232 XP\_021369338.1 44.1 170  
76 3 2 163 84 242 8.40E-28 132.1 6573 cellular

organisms;Eukaryota;Opisthokonta;Metazoa;Eumetazoa;Bilateria;Protostomia;  
Spiralia;Lophotrochozoa;Mollusca;Bivalvia;Autobranchia;Pteriormorphia;Pect  
inida;Pectinoidea;Pectinidae;Mizuhopecten;Mizuhopecten yessoensis

UdeM00000038233 7574 130.6 UdeM00000038233 XP\_013395448.1 49.3 134  
61 1 31 164 117 243 2.00E-27 130.6 7574 cellular

organisms;Eukaryota;Opisthokonta;Metazoa;Eumetazoa;Bilateria;Protostomia;  
Spiralia;Lophotrochozoa;Brachiopoda;Linguliformea;Lingulata;Lingulida;Lin  
guloidea;Lingulidae;Lingula;Lingula anatina

UdeM00000038234 7574 117.5 UdeM00000038234 XP\_013395448.1 42.9 154  
41 1 28 181 114 220 1.80E-23 117.5 7574 cellular

organisms;Eukaryota;Opisthokonta;Metazoa;Eumetazoa;Bilateria;Protostomia;  
Spiralia;Lophotrochozoa;Brachiopoda;Linguliformea;Lingulata;Lingulida;Lin  
guloidea;Lingulidae;Lingula;Lingula anatina

UdeM00000038235 1735272 738.8 UdeM00000038235 XP\_041352529.1 65.7  
510 167 3 1 508 1 504 8.00E-210 738.8 1735272  
cellular

organisms;Eukaryota;Opisthokonta;Metazoa;Eumetazoa;Bilateria;Protostomia;  
Spiralia;Lophotrochozoa;Mollusca;Gastropoda;Neomphalina;Neomphaloidea;Pel  
tospiridae;Gigantopelta;Gigantopelta aegis

UdeM00000038236 1735272 290.8 UdeM00000038236 XP\_041350978.1 51.7  
230 111 0 2 231 148 377 1.60E-75 290.8 1735272  
cellular

organisms;Eukaryota;Opisthokonta;Metazoa;Eumetazoa;Bilateria;Protostomia;  
Spiralia;Lophotrochozoa;Mollusca;Gastropoda;Neomphalina;Neomphaloidea;Pel  
tospiridae;Gigantopelta;Gigantopelta aegis

UdeM00000038237 7725 146 UdeM00000038237 XP\_039263221.1 62.5 112  
42 0 2 113 9 120 3.90E-32 146 7725 cellular

organisms;Eukaryota;Opisthokonta;Metazoa;Eumetazoa;Bilateria;Deuterostomi  
a;Chordata;Tunicata;Ascidiacea;Stolidobranchia;Styelidae;Styela;Styela  
clava

UdeM00000038238 7725 141.4 UdeM00000038238 XP\_039263221.1 61.6 112  
43 0 2 113 9 120 9.70E-31 141.4 7725 cellular

organisms;Eukaryota;Opisthokonta;Metazoa;Eumetazoa;Bilateria;Deuterostomi  
a;Chordata;Tunicata;Ascidiacea;Stolidobranchia;Styelidae;Styela;Styela  
clava

UdeM00000038242 7668 117.1 UdeM00000038242 XP\_030832292.1 37.7 167  
92 4 2 165 257 414 2.20E-23 117.1 7668 cellular

organisms;Eukaryota;Opisthokonta;Metazoa;Eumetazoa;Bilateria;Deuterostomi  
a;Echinodermata;Eleutherozoa;Echinozoa;Echinoidea;Euechinoidea;Echinacea;  
Camarodonta;Echinidea;Strongylocentrotidae;Strongylocentrotus;Strongyloce  
ntrotus purpuratus

UdeM00000038245 218467 171.4 UdeM00000038245 XP\_023235990.1 56.8  
146 57 1 9 154 11 150 9.20E-40 171.4 218467  
cellular

organisms;Eukaryota;Opisthokonta;Metazoa;Eumetazoa;Bilateria;Protostomia;Ecdysozoa;Panarthropoda;Arthropoda;Chelicerata;Arachnida;Scorpiones;Buthida;Buthoidea;Buthidae;Centruroides;Centruroides sculpturatus

UdeM00000038247 6596 306.6 UdeM00000038247 XP\_045197413.1 84.9 166  
25 0 1 166 22 187 1.90E-80 306.6 6596 cellular

organisms;Eukaryota;Opisthokonta;Metazoa;Eumetazoa;Bilateria;Protostomia;Spiralia;Lophotrochozoa;Mollusca;Bivalvia;Autobranchia;Heteroconchia;Euheterodonta;Imparidentia;Venerida;Veneroidea;Veneridae;Mercenaria;Mercenaria mercenaria

UdeM00000038246 6596 426.4 UdeM00000038246 XP\_045197413.1 90.8 218  
20 0 1 218 22 239 2.20E-116 426.4 6596 cellular

organisms;Eukaryota;Opisthokonta;Metazoa;Eumetazoa;Bilateria;Protostomia;Spiralia;Lophotrochozoa;Mollusca;Bivalvia;Autobranchia;Heteroconchia;Euheterodonta;Imparidentia;Venerida;Veneroidea;Veneridae;Mercenaria;Mercenaria mercenaria

UdeM00000038248 2607531 233.8 UdeM00000038248 XP\_036367817.1 71.5  
165 42 3 21 181 274 437 1.70E-58 233.8 2607531  
cellular

organisms;Eukaryota;Opisthokonta;Metazoa;Eumetazoa;Bilateria;Protostomia;Spiralia;Lophotrochozoa;Mollusca;Cephalopoda;Coleoidea;Octopodiformes;Octopoda;Incirrata;Octopodidae;Octopus;Octopus sinensis

UdeM00000038249 6596 682.9 UdeM00000038249 XP\_045198660.1 69.6 480  
135 1 1 469 1 480 4.80E-193 682.9 6596 cellular

organisms;Eukaryota;Opisthokonta;Metazoa;Eumetazoa;Bilateria;Protostomia;Spiralia;Lophotrochozoa;Mollusca;Bivalvia;Autobranchia;Heteroconchia;Euheterodonta;Imparidentia;Venerida;Veneroidea;Veneridae;Mercenaria;Mercenaria mercenaria

UdeM00000038250 1735272 459.1 UdeM00000038250 XP\_041361500.1 53.6  
431 167 7 1 405 30 453 6.70E-126 459.1 1735272  
cellular

organisms;Eukaryota;Opisthokonta;Metazoa;Eumetazoa;Bilateria;Protostomia;Spiralia;Lophotrochozoa;Mollusca;Gastropoda;Neomphalina;Neomphaloidea;Peltospiridae;Gigantopelta;Gigantopelta aegis

UdeM00000038252 6596 190.7 UdeM00000038252 XP\_045197354.1 56.8 162  
66 3 1 161 342 500 1.50E-45 190.7 6596 cellular

organisms;Eukaryota;Opisthokonta;Metazoa;Eumetazoa;Bilateria;Protostomia;Spiralia;Lophotrochozoa;Mollusca;Bivalvia;Autobranchia;Heteroconchia;Euheterodonta;Imparidentia;Venerida;Veneroidea;Veneridae;Mercenaria;Mercenaria mercenaria

UdeM00000038251 1735272 433.3 UdeM00000038251 XP\_041361500.1 47  
504 184 12 1 440 1 485 3.60E-118 433.3 1735272  
cellular

organisms;Eukaryota;Opisthokonta;Metazoa;Eumetazoa;Bilateria;Protostomia;Spiralia;Lophotrochozoa;Mollusca;Gastropoda;Neomphalina;Neomphaloidea;Peltospiridae;Gigantopelta;Gigantopelta aegis

UdeM00000038253 1735272 542.3 UdeM00000038253 XP\_041361500.1 54.6  
504 203 11 7 503 1 485 6.30E-151 542.3 1735272  
cellular

organisms;Eukaryota;Opisthokonta;Metazoa;Eumetazoa;Bilateria;Protostomia;Spiralia;Lophotrochozoa;Mollusca;Gastropoda;Neomphalina;Neomphaloidea;Peltospiridae;Gigantopelta;Gigantopelta aegis

UdeM00000038254 1735272 548.1 UdeM00000038254 XP\_041361500.1 54  
504 209 9 482 981 1 485 2.20E-152 548.1 1735272  
cellular

organisms;Eukaryota;Opisthokonta;Metazoa;Eumetazoa;Bilateria;Protostomia;Spiralia;Lophotrochozoa;Mollusca;Gastropoda;Neomphalina;Neomphaloidea;Pel tospiridae;Gigantopelta;Gigantopelta aegis

UdeM00000038255 1735272 531.2 UdeM00000038255 XP\_041361500.1 52.3  
497 216 8 13 505 6 485 1.50E-147 531.2 1735272  
cellular

organisms;Eukaryota;Opisthokonta;Metazoa;Eumetazoa;Bilateria;Protostomia;Spiralia;Lophotrochozoa;Mollusca;Gastropoda;Neomphalina;Neomphaloidea;Pel tospiridae;Gigantopelta;Gigantopelta aegis

UdeM00000038256 1735272 521.2 UdeM00000038256 XP\_041361500.1 51.7  
497 218 9 14 504 5 485 1.50E-144 521.2 1735272  
cellular

organisms;Eukaryota;Opisthokonta;Metazoa;Eumetazoa;Bilateria;Protostomia;Spiralia;Lophotrochozoa;Mollusca;Gastropoda;Neomphalina;Neomphaloidea;Pel tospiridae;Gigantopelta;Gigantopelta aegis

UdeM00000038257 6596 174.9 UdeM00000038257 XP\_045195869.1 36.8 234  
146 1 188 419 4 237 2.20E-40 174.9 6596 cellular

organisms;Eukaryota;Opisthokonta;Metazoa;Eumetazoa;Bilateria;Protostomia;Spiralia;Lophotrochozoa;Mollusca;Bivalvia;Autobranchia;Heteroconchia;Euhe terodonta;Imparidentia;Venerida;Veneroidea;Veneridae;Mercenaria;Mercenari a mercenaria

UdeM00000038258 6565 99.4 UdeM00000038258 XP\_022296401.1 44 100  
55 1 9 107 22 121 4.80E-18 99.4 6565 cellular

organisms;Eukaryota;Opisthokonta;Metazoa;Eumetazoa;Bilateria;Protostomia;Spiralia;Lophotrochozoa;Mollusca;Bivalvia;Autobranchia;Pteriormorphia;Ostr eida;Ostreoidea;Ostreidae;Crassostrea;Crassostrea virginica

UdeM00000038259 6596 290 UdeM00000038259 XP\_045182575.1 49.3 298  
141 4 24 314 7 301 3.50E-75 290 6596 cellular

organisms;Eukaryota;Opisthokonta;Metazoa;Eumetazoa;Bilateria;Protostomia;Spiralia;Lophotrochozoa;Mollusca;Bivalvia;Autobranchia;Heteroconchia;Euhe terodonta;Imparidentia;Venerida;Veneroidea;Veneridae;Mercenaria;Mercenari a mercenaria

UdeM00000038260 6596 260 UdeM00000038260 XP\_045198313.1 46.2 351  
165 9 222 557 714 1055 6.90E-66 260 6596 cellular

organisms;Eukaryota;Opisthokonta;Metazoa;Eumetazoa;Bilateria;Protostomia;Spiralia;Lophotrochozoa;Mollusca;Bivalvia;Autobranchia;Heteroconchia;Euhe terodonta;Imparidentia;Venerida;Veneroidea;Veneridae;Mercenaria;Mercenari a mercenaria

UdeM00000038261 6596 610.9 UdeM00000038261 XP\_045198313.1 69.4 445  
129 5 1 441 8 449 1.30E-171 610.9 6596 cellular

organisms;Eukaryota;Opisthokonta;Metazoa;Eumetazoa;Bilateria;Protostomia;Spiralia;Lophotrochozoa;Mollusca;Bivalvia;Autobranchia;Heteroconchia;Euhe terodonta;Imparidentia;Venerida;Veneroidea;Veneridae;Mercenaria;Mercenari a mercenaria

UdeM00000038263 6596 285.8 UdeM00000038263 XP\_045196601.1 52.8 303  
123 8 3 291 4 300 6.20E-74 285.8 6596 cellular

organisms;Eukaryota;Opisthokonta;Metazoa;Eumetazoa;Bilateria;Protostomia;Spiralia;Lophotrochozoa;Mollusca;Bivalvia;Autobranchia;Heteroconchia;Euhe terodonta;Imparidentia;Venerida;Veneroidea;Veneridae;Mercenaria;Mercenari a mercenaria

UdeM00000038262 6596 578.6 UdeM00000038262 XP\_045196601.1 52.3 637  
241 15 3 584 4 632 1.10E-161 578.6 6596 cellular

organisms;Eukaryota;Opisthokonta;Metazoa;Eumetazoa;Bilateria;Protostomia;Spiralia;Lophotrochozoa;Mollusca;Bivalvia;Autobranchia;Heteroconchia;Euhe

terodonta;Imparidentia;Venerida;Veneroidea;Veneridae;Mercenaria;Mercenari  
a mercenaria

UdeM00000038264 134920 62.8 UdeM00000038264 XP\_037341796.1 46  
63 33 1 19 81 612 673 2.40E-07 62.8 134920  
cellular

organisms;Eukaryota;Opisthokonta;Metazoa;Eumetazoa;Bilateria;Deuterostomi  
a;Chordata;Craniata;Vertebrata;Gnathostomata;Teleostomi;Euteleostomi;Acti  
nopterygii;Actinopteri;Neopterygii;Teleostei;Osteoglossocephalai;Clupeoce  
phala;Euteleosteomorpha;Neoteleostei;Eurypterygia;Ctenosquamata;Acanthomo  
rphata;Euacanthomorphacea;Percomorphaceae;Eupercaria;Perciformes;Cottioid  
ei;Gasterosteales;Gasterosteidae;Pungitius;Pungitius pungitius

UdeM00000038265 6596 64.3 UdeM00000038265 XP\_045198470.1 54.7 53  
24 0 4 56 27 79 9.80E-08 64.3 6596 cellular

organisms;Eukaryota;Opisthokonta;Metazoa;Eumetazoa;Bilateria;Protostomia;  
Spiralia;Lophotrochozoa;Mollusca;Bivalvia;Autobranchia;Heteroconchia;Euhe  
terodonta;Imparidentia;Venerida;Veneroidea;Veneridae;Mercenaria;Mercenari  
a mercenaria

UdeM00000038266 6596 222.6 UdeM00000038266 XP\_045198470.1 46.2 266  
63 2 13 278 36 221 6.10E-55 222.6 6596 cellular

organisms;Eukaryota;Opisthokonta;Metazoa;Eumetazoa;Bilateria;Protostomia;  
Spiralia;Lophotrochozoa;Mollusca;Bivalvia;Autobranchia;Heteroconchia;Euhe  
terodonta;Imparidentia;Venerida;Veneroidea;Veneridae;Mercenaria;Mercenari  
a mercenaria

UdeM00000038267 6596 237.3 UdeM00000038267 XP\_045174418.1 34.6 396  
232 8 18 389 21 413 3.70E-59 237.3 6596 cellular

organisms;Eukaryota;Opisthokonta;Metazoa;Eumetazoa;Bilateria;Protostomia;  
Spiralia;Lophotrochozoa;Mollusca;Bivalvia;Autobranchia;Heteroconchia;Euhe  
terodonta;Imparidentia;Venerida;Veneroidea;Veneridae;Mercenaria;Mercenari  
a mercenaria

UdeM00000038268 1735272 389.4 UdeM00000038268 XP\_041359064.1 54.9  
346 155 1 62 407 63 407 5.50E-105 389.4 1735272  
cellular

organisms;Eukaryota;Opisthokonta;Metazoa;Eumetazoa;Bilateria;Protostomia;  
Spiralia;Lophotrochozoa;Mollusca;Gastropoda;Neomphalina;Neomphaloidea;Pel  
tospiridae;Gigantopelta;Gigantopelta aegis

UdeM00000038269 1735272 329.3 UdeM00000038269 XP\_041352576.1 65.4  
254 88 0 1 254 1 254 4.20E-87 329.3 1735272  
cellular

organisms;Eukaryota;Opisthokonta;Metazoa;Eumetazoa;Bilateria;Protostomia;  
Spiralia;Lophotrochozoa;Mollusca;Gastropoda;Neomphalina;Neomphaloidea;Pel  
tospiridae;Gigantopelta;Gigantopelta aegis

UdeM00000038280 1826170 71.6 UdeM00000038280 YP\_009254794.1 21.8  
362 254 8 3 355 497 838 4.10E-09 71.6 1826170

Viruses;Varidnaviria;Bamfordvirae;Nucleocytoviricota;Megaviricetes;  
Pimascovirales;Marseilleviridae;Marseillevirus;unclassified  
Marseillevirus;Tokyovirus A1

UdeM00000038283 1735272 169.9 UdeM00000038283 XP\_041350636.1 38.5  
330 94 5 21 246 5060 5384 4.50E-39 169.9 1735272  
cellular

organisms;Eukaryota;Opisthokonta;Metazoa;Eumetazoa;Bilateria;Protostomia;  
Spiralia;Lophotrochozoa;Mollusca;Gastropoda;Neomphalina;Neomphaloidea;Pel  
tospiridae;Gigantopelta;Gigantopelta aegis

UdeM00000038284 6500 85.9 UdeM00000038284 XP\_005099547.2 77.2 92  
21 0 297 388 2233 2324 2.60E-13 85.9 6500 cellular



organisms;Eukaryota;Opisthokonta;Metazoa;Eumetazoa;Bilateria;Protostomia;  
Spiralia;Lophotrochozoa;Mollusca;Gastropoda;Heterobranchia;Euthyneura;Tec  
tipleura;Aplysiida;Aplysioidea;Aplysiidae;Aplysia;Aplysia californica  
UdeM00000038286 1735272 398.7 UdeM00000038286 XP\_041350636.1 81.6  
244 44 1 1 244 5203 5445 5.50E-108 398.7 1735272  
cellular

organisms;Eukaryota;Opisthokonta;Metazoa;Eumetazoa;Bilateria;Protostomia;  
Spiralia;Lophotrochozoa;Mollusca;Gastropoda;Neomphalina;Neomphaloidea;Pel  
tospiridae;Gigantopelta;Gigantopelta aegis  
UdeM00000038285 6596 1816.6 UdeM00000038285 XP\_045198301.1 37.6  
3541 1600 60 15 3526 2130 5090 0.00E+00 1816.6 6596  
cellular

organisms;Eukaryota;Opisthokonta;Metazoa;Eumetazoa;Bilateria;Protostomia;  
Spiralia;Lophotrochozoa;Mollusca;Bivalvia;Autobranchia;Heteroconchia;Euhe  
terodonta;Imparidentia;Venerida;Veneroidea;Veneridae;Mercenaria;Mercenari  
a mercenaria  
UdeM00000038287 6565 173.3 UdeM00000038287 XP\_022308193.1 57.1 133  
56 1 1 133 423 554 2.10E-40 173.3 6565 cellular

organisms;Eukaryota;Opisthokonta;Metazoa;Eumetazoa;Bilateria;Protostomia;  
Spiralia;Lophotrochozoa;Mollusca;Bivalvia;Autobranchia;Pteriomorphia;Ostr  
eida;Ostreoidea;Ostreidae;Crassostrea;Crassostrea virginica  
UdeM00000038288 6596 340.5 UdeM00000038288 XP\_045195279.1 41.4 435  
208 5 11 401 8 439 2.90E-90 340.5 6596 cellular

organisms;Eukaryota;Opisthokonta;Metazoa;Eumetazoa;Bilateria;Protostomia;  
Spiralia;Lophotrochozoa;Mollusca;Bivalvia;Autobranchia;Heteroconchia;Euhe  
terodonta;Imparidentia;Venerida;Veneroidea;Veneridae;Mercenaria;Mercenari  
a mercenaria  
UdeM00000038290 6596 184.5 UdeM00000038290 XP\_045198301.1 56.9 153  
65 1 1 153 1974 2125 1.00E-43 184.5 6596 cellular

organisms;Eukaryota;Opisthokonta;Metazoa;Eumetazoa;Bilateria;Protostomia;  
Spiralia;Lophotrochozoa;Mollusca;Bivalvia;Autobranchia;Heteroconchia;Euhe  
terodonta;Imparidentia;Venerida;Veneroidea;Veneridae;Mercenaria;Mercenari  
a mercenaria  
UdeM00000038289 6596 2741.5 UdeM00000038289 XP\_045198301.1 63.9  
2146 680 20 13 2120 36 2125 0.00E+00 2741.5 6596  
cellular

organisms;Eukaryota;Opisthokonta;Metazoa;Eumetazoa;Bilateria;Protostomia;  
Spiralia;Lophotrochozoa;Mollusca;Bivalvia;Autobranchia;Heteroconchia;Euhe  
terodonta;Imparidentia;Venerida;Veneroidea;Veneridae;Mercenaria;Mercenari  
a mercenaria  
UdeM00000038291 29159 417.5 UdeM00000038291 XP\_034335340.1 64.9 387  
86 20 2 366 4 362 2.00E-113 417.5 29159 cellular

organisms;Eukaryota;Opisthokonta;Metazoa;Eumetazoa;Bilateria;Protostomia;  
Spiralia;Lophotrochozoa;Mollusca;Bivalvia;Autobranchia;Pteriomorphia;Ostr  
eida;Ostreoidea;Ostreidae;Crassostrea;Crassostrea gigas  
UdeM00000038292 6596 198.7 UdeM00000038292 XP\_045161545.1 61.3 150  
58 0 39 188 71 220 6.50E-48 198.7 6596 cellular

organisms;Eukaryota;Opisthokonta;Metazoa;Eumetazoa;Bilateria;Protostomia;  
Spiralia;Lophotrochozoa;Mollusca;Bivalvia;Autobranchia;Heteroconchia;Euhe  
terodonta;Imparidentia;Venerida;Veneroidea;Veneridae;Mercenaria;Mercenari  
a mercenaria  
UdeM00000021075 6596 533.9 UdeM00000021075 XP\_045214499.1 74.1 359  
69 1 1 335 1 359 1.50E-148 533.9 6596 cellular

organisms;Eukaryota;Opisthokonta;Metazoa;Eumetazoa;Bilateria;Protostomia;

Spiralia;Lophotrochozoa;Mollusca;Bivalvia;Autobranchia;Heteroconchia;Euherodonta;Imparidentia;Venerida;Veneroidea;Veneridae;Mercenaria;Mercenaria mercenaria

UdeM00000021076 6596 388.3 UdeM00000021076 XP\_045214502.1 64.9 291  
99 2 4 292 5 294 8.90E-105 388.3 6596 cellular

organisms;Eukaryota;Opisthokonta;Metazoa;Eumetazoa;Bilateria;Protostomia;Spiralia;Lophotrochozoa;Mollusca;Bivalvia;Autobranchia;Heteroconchia;Euherodonta;Imparidentia;Venerida;Veneroidea;Veneridae;Mercenaria;Mercenaria mercenaria

UdeM00000021077 29159 635.6 UdeM00000021077 XP\_034314576.1 53.4 650  
287 6 1 638 1 646 6.90E-179 635.6 29159 cellular

organisms;Eukaryota;Opisthokonta;Metazoa;Eumetazoa;Bilateria;Protostomia;Spiralia;Lophotrochozoa;Mollusca;Bivalvia;Autobranchia;Pteriomorphia;Ostreida;Ostreoidea;Ostreidae;Crassostrea;Crassostrea gigas

UdeM00000021078 6596 155.6 UdeM00000021078 XP\_045214176.1 71.7 92  
26 0 1 92 1 92 3.10E-35 155.6 6596 cellular

organisms;Eukaryota;Opisthokonta;Metazoa;Eumetazoa;Bilateria;Protostomia;Spiralia;Lophotrochozoa;Mollusca;Bivalvia;Autobranchia;Heteroconchia;Euherodonta;Imparidentia;Venerida;Veneroidea;Veneridae;Mercenaria;Mercenaria mercenaria

UdeM00000021079 6596 155.6 UdeM00000021079 XP\_045214176.1 71.7 92  
26 0 1 92 1 92 3.10E-35 155.6 6596 cellular

organisms;Eukaryota;Opisthokonta;Metazoa;Eumetazoa;Bilateria;Protostomia;Spiralia;Lophotrochozoa;Mollusca;Bivalvia;Autobranchia;Heteroconchia;Euherodonta;Imparidentia;Venerida;Veneroidea;Veneridae;Mercenaria;Mercenaria mercenaria

UdeM00000021080 6526 110.2 UdeM00000021080 XP\_013076949.1 65.3 72  
25 0 1 72 1 72 1.40E-21 110.2 6526 cellular

organisms;Eukaryota;Opisthokonta;Metazoa;Eumetazoa;Bilateria;Protostomia;Spiralia;Lophotrochozoa;Mollusca;Gastropoda;Heterobranchia;Euthyneura;Panpulmonata;Hygrophila;Lymnaeidae;Planorbidae;Biophalaria;Biophalaria glabrata

UdeM00000021081 6596 155.6 UdeM00000021081 XP\_045214176.1 71.7 92  
26 0 1 92 1 92 3.10E-35 155.6 6596 cellular

organisms;Eukaryota;Opisthokonta;Metazoa;Eumetazoa;Bilateria;Protostomia;Spiralia;Lophotrochozoa;Mollusca;Bivalvia;Autobranchia;Heteroconchia;Euherodonta;Imparidentia;Venerida;Veneroidea;Veneridae;Mercenaria;Mercenaria mercenaria

UdeM00000021082 6573 140.2 UdeM00000021082 XP\_021362441.1 62.7 102  
38 0 10 111 21 122 2.10E-30 140.2 6573 cellular

organisms;Eukaryota;Opisthokonta;Metazoa;Eumetazoa;Bilateria;Protostomia;Spiralia;Lophotrochozoa;Mollusca;Bivalvia;Autobranchia;Pteriomorphia;Pectinida;Pectinoidea;Pectinidae;Mizuhopecten;Mizuhopecten yessoensis

UdeM00000021083 6596 481.5 UdeM00000021083 XP\_045213349.1 64 369  
122 1 101 469 117 474 1.30E-132 481.5 6596 cellular

organisms;Eukaryota;Opisthokonta;Metazoa;Eumetazoa;Bilateria;Protostomia;Spiralia;Lophotrochozoa;Mollusca;Bivalvia;Autobranchia;Heteroconchia;Euherodonta;Imparidentia;Venerida;Veneroidea;Veneridae;Mercenaria;Mercenaria mercenaria

UdeM00000021084 6596 296.2 UdeM00000021084 XP\_045211903.1 58 262  
69 3 2 222 3 264 3.50E-77 296.2 6596 cellular

organisms;Eukaryota;Opisthokonta;Metazoa;Eumetazoa;Bilateria;Protostomia;Spiralia;Lophotrochozoa;Mollusca;Bivalvia;Autobranchia;Heteroconchia;Euherodonta

terodonta;Imparidentia;Venerida;Veneroidea;Veneridae;Mercenaria;Mercenaria mercenaria  
 UdeM00000021085 6596 242.3 UdeM00000021085 XP\_045211898.1 38.2 408  
 194 9 36 400 2 394 1.10E-60 242.3 6596 cellular  
 organisms;Eukaryota;Opisthokonta;Metazoa;Eumetazoa;Bilateria;Protostomia;  
 Spiralia;Lophotrochozoa;Mollusca;Bivalvia;Autobranhia;Heteroconchia;Euhe  
 terodonta;Imparidentia;Venerida;Veneroidea;Veneridae;Mercenaria;Mercenari  
 a mercenaria  
 UdeM00000021086 29159 233.8 UdeM00000021086 XP\_011426852.3 42.2 289  
 151 3 47 334 18 291 3.50E-58 233.8 29159 cellular  
 organisms;Eukaryota;Opisthokonta;Metazoa;Eumetazoa;Bilateria;Protostomia;  
 Spiralia;Lophotrochozoa;Mollusca;Bivalvia;Autobranhia;Pteriormorphia;Ostr  
 eida;Ostreoidea;Ostreidae;Crassostrea;Crassostrea gigas  
 UdeM00000021087 7757 163.7 UdeM00000021087 XP\_032823235.1 47.6 168  
 84 2 1 166 21 186 2.00E-37 163.7 7757 cellular  
 organisms;Eukaryota;Opisthokonta;Metazoa;Eumetazoa;Bilateria;Deuterostomi  
 a;Chordata;Craniata;Vertebrata;Cyclostomata;Hyperoartia;Petromyzontiforme  
 s;Petromyzontidae;Petromyzon;Petromyzon marinus  
 UdeM00000021088 6596 312 UdeM00000021088 XP\_045210915.1 47 385  
 183 8 1 380 1 369 1.10E-81 312 6596 cellular  
 organisms;Eukaryota;Opisthokonta;Metazoa;Eumetazoa;Bilateria;Protostomia;  
 Spiralia;Lophotrochozoa;Mollusca;Bivalvia;Autobranhia;Heteroconchia;Euhe  
 terodonta;Imparidentia;Venerida;Veneroidea;Veneridae;Mercenaria;Mercenari  
 a mercenaria  
 UdeM00000021089 6596 270.8 UdeM00000021089 XP\_045210915.1 49.8 303  
 139 5 8 310 80 369 2.20E-69 270.8 6596 cellular  
 organisms;Eukaryota;Opisthokonta;Metazoa;Eumetazoa;Bilateria;Protostomia;  
 Spiralia;Lophotrochozoa;Mollusca;Bivalvia;Autobranhia;Heteroconchia;Euhe  
 terodonta;Imparidentia;Venerida;Veneroidea;Veneridae;Mercenaria;Mercenari  
 a mercenaria  
 UdeM00000021092 6596 1257.7 UdeM00000021092 XP\_045210979.1 40.5  
 1656 920 19 1 1628 14 1631 0.00E+00 1257.7 6596  
 cellular  
 organisms;Eukaryota;Opisthokonta;Metazoa;Eumetazoa;Bilateria;Protostomia;  
 Spiralia;Lophotrochozoa;Mollusca;Bivalvia;Autobranhia;Heteroconchia;Euhe  
 terodonta;Imparidentia;Venerida;Veneroidea;Veneridae;Mercenaria;Mercenari  
 a mercenaria  
 UdeM00000021093 400727 676 UdeM00000021093 XP\_025091136.1 82.3  
 389 69 0 2 390 20 408 2.80E-191 676 400727  
 cellular  
 organisms;Eukaryota;Opisthokonta;Metazoa;Eumetazoa;Bilateria;Protostomia;  
 Spiralia;Lophotrochozoa;Mollusca;Gastropoda;Caenogastropoda;Architaeniogl  
 ossa;Ampullarioidea;Ampullariidae;Pomacea;Pomacea canaliculata  
 UdeM00000021094 77166 109.4 UdeM00000021094 XP\_019767749.1 48.8 121  
 51 3 11 130 19 129 7.10E-21 109.4 77166 cellular  
 organisms;Eukaryota;Opisthokonta;Metazoa;Eumetazoa;Bilateria;Protostomia;  
 Ecdysozoa;Panarthropoda;Arthropoda;Mandibulata;Pancrustacea;Hexapoda;Inse  
 cta;Dicondylia;Pterygota;Neoptera;Endopterygota;Coleoptera;Polyphaga;Cucu  
 jiformia;Curculionoidea;Curculionidae;Scolytinae;Dendroctonus;Dendroctonu  
 s ponderosae  
 UdeM00000021095 6579 534.3 UdeM00000021095 XP\_033752149.1 56.6 417  
 173 3 13 423 57 471 1.50E-148 534.3 6579 cellular  
 organisms;Eukaryota;Opisthokonta;Metazoa;Eumetazoa;Bilateria;Protostomia;

Spiralia; Lophotrochozoa; Mollusca; Bivalvia; Autobranchia; Pteriomorpha; Pectinida; Pectinoidea; Pectinidae; Pecten; Pecten maximus  
UdeM00000021096 6565 387.1 UdeM00000021096 XP\_022319786.1 44.9 445  
230 7 30 470 48 481 3.30E-104 387.1 6565 cellular  
organisms; Eukaryota; Opisthokonta; Metazoa; Eumetazoa; Bilateria; Protostomia; Spiralia; Lophotrochozoa; Mollusca; Bivalvia; Autobranchia; Pteriomorpha; Ostracida; Ostreidae; Crassostrea; Crassostrea virginica  
UdeM00000021097 6596 455.7 UdeM00000021097 XP\_045212491.1 62.7 381  
128 4 1 373 1 375 5.80E-125 455.7 6596 cellular  
organisms; Eukaryota; Opisthokonta; Metazoa; Eumetazoa; Bilateria; Protostomia; Spiralia; Lophotrochozoa; Mollusca; Bivalvia; Autobranchia; Heteroconchia; Euheterodonta; Imparidentia; Venerida; Veneroidea; Veneridae; Mercenaria; Mercenaria mercenaria  
UdeM00000021098 1735272 325.1 UdeM00000021098 XP\_041363526.1 92.6  
176 13 0 1 176 1 176 6.10E-86 325.1 1735272  
cellular  
organisms; Eukaryota; Opisthokonta; Metazoa; Eumetazoa; Bilateria; Protostomia; Spiralia; Lophotrochozoa; Mollusca; Gastropoda; Neomphalina; Neomphaloidea; Peltospiridae; Gigantopelta; Gigantopelta aegis  
UdeM00000021099 151771 345.5 UdeM00000021099 XP\_028408207.1 38.5  
483 255 5 37 480 125 604 1.10E-91 345.5 151771  
cellular  
organisms; Eukaryota; Opisthokonta; Metazoa; Eumetazoa; Cnidaria; Anthozoa; Octocorallia; Alcyonacea; Alcyoniina; Nephtheidae; Dendronephthya; Dendronephthya gigantea  
UdeM00000021100 6579 729.9 UdeM00000021100 XP\_033749555.1 56.3 695  
266 8 1 675 1 677 2.90E-207 729.9 6579 cellular  
organisms; Eukaryota; Opisthokonta; Metazoa; Eumetazoa; Bilateria; Protostomia; Spiralia; Lophotrochozoa; Mollusca; Bivalvia; Autobranchia; Pteriomorpha; Pectinida; Pectinoidea; Pectinidae; Pecten; Pecten maximus  
UdeM00000021101 6596 1066.6 UdeM00000021101 XP\_045214168.1 66.9  
794 247 5 4 790 2 786 0.00E+00 1066.6 6596  
cellular  
organisms; Eukaryota; Opisthokonta; Metazoa; Eumetazoa; Bilateria; Protostomia; Spiralia; Lophotrochozoa; Mollusca; Bivalvia; Autobranchia; Heteroconchia; Euheterodonta; Imparidentia; Venerida; Veneroidea; Veneridae; Mercenaria; Mercenaria mercenaria  
UdeM00000021102 400727 362.5 UdeM00000021102 XP\_025085165.1 49.7  
384 184 4 1 379 4 383 6.80E-97 362.5 400727  
cellular  
organisms; Eukaryota; Opisthokonta; Metazoa; Eumetazoa; Bilateria; Protostomia; Spiralia; Lophotrochozoa; Mollusca; Gastropoda; Caenogastropoda; Architaenioglossa; Ampullarioidea; Ampullariidae; Pomacea; Pomacea canaliculata  
UdeM00000021103 6573 628.2 UdeM00000021103 XP\_021348686.1 50.2 598  
294 3 9 604 8 603 1.00E-176 628.2 6573 cellular  
organisms; Eukaryota; Opisthokonta; Metazoa; Eumetazoa; Bilateria; Protostomia; Spiralia; Lophotrochozoa; Mollusca; Bivalvia; Autobranchia; Pteriomorpha; Pectinida; Pectinoidea; Pectinidae; Mizuhopecten; Mizuhopecten yessoensis  
UdeM00000021104 6573 93.6 UdeM00000021104 XP\_021348687.1 23.4 572  
252 13 1 571 1 387 9.00E-16 93.6 6573 cellular  
organisms; Eukaryota; Opisthokonta; Metazoa; Eumetazoa; Bilateria; Protostomia; Spiralia; Lophotrochozoa; Mollusca; Bivalvia; Autobranchia; Pteriomorpha; Pectinida; Pectinoidea; Pectinidae; Mizuhopecten; Mizuhopecten yessoensis

UdeM00000021106 400727 276.6 UdeM00000021106 XP\_025100196.1 51.4  
 243 112 3 43 279 33 275 3.60E-71 276.6 400727  
 cellular  
 organisms;Eukaryota;Opisthokonta;Metazoa;Eumetazoa;Bilateria;Protostomia;  
 Spiralia;Lophotrochozoa;Mollusca;Gastropoda;Caenogastropoda;Architaenioglossa;  
 Ampullarioidea;Ampullariidae;Pomacea;Pomacea canaliculata  
 UdeM00000021108 29159 419.1 UdeM00000021108 XP\_011454370.2 53.6 386  
 169 4 2 383 11 390 6.30E-114 419.1 29159 cellular  
 organisms;Eukaryota;Opisthokonta;Metazoa;Eumetazoa;Bilateria;Protostomia;  
 Spiralia;Lophotrochozoa;Mollusca;Bivalvia;Autobranchia;Pteriormorphia;Ostreida;  
 Ostreoidea;Ostreidae;Crassostrea;Crassostrea gigas  
 UdeM00000021109 29159 442.2 UdeM00000021109 XP\_011454370.2 54.8 385  
 168 2 3 384 10 391 6.80E-121 442.2 29159 cellular  
 organisms;Eukaryota;Opisthokonta;Metazoa;Eumetazoa;Bilateria;Protostomia;  
 Spiralia;Lophotrochozoa;Mollusca;Bivalvia;Autobranchia;Pteriormorphia;Ostreida;  
 Ostreoidea;Ostreidae;Crassostrea;Crassostrea gigas  
 UdeM00000021110 6596 92.4 UdeM00000021110 XP\_045213797.1 47.6 103  
 54 0 6 108 550 652 4.90E-16 92.4 6596 cellular  
 organisms;Eukaryota;Opisthokonta;Metazoa;Eumetazoa;Bilateria;Protostomia;  
 Spiralia;Lophotrochozoa;Mollusca;Bivalvia;Autobranchia;Heteroconchia;Euheterodonta;  
 Imparidentia;Venerida;Veneroidea;Veneridae;Mercenaria;Mercenaria mercenaria  
 UdeM00000021111 7719 85.1 UdeM00000021111 XP\_026695276.1 38.2 102  
 63 0 36 137 2 103 8.10E-14 85.1 7719 cellular  
 organisms;Eukaryota;Opisthokonta;Metazoa;Eumetazoa;Bilateria;Deuterostomia;  
 Chordata;Tunicata;Ascidiacea;Phlebobranchia;Cionidae;Ciona;Ciona intestinalis  
 UdeM00000021112 6596 92 UdeM00000021112 XP\_045213797.1 47.6 103  
 54 0 6 108 550 652 6.40E-16 92 6596 cellular  
 organisms;Eukaryota;Opisthokonta;Metazoa;Eumetazoa;Bilateria;Protostomia;  
 Spiralia;Lophotrochozoa;Mollusca;Bivalvia;Autobranchia;Heteroconchia;Euheterodonta;  
 Imparidentia;Venerida;Veneroidea;Veneridae;Mercenaria;Mercenaria mercenaria  
 UdeM00000021113 7719 85.1 UdeM00000021113 XP\_026695276.1 38.2 102  
 63 0 36 137 2 103 8.10E-14 85.1 7719 cellular  
 organisms;Eukaryota;Opisthokonta;Metazoa;Eumetazoa;Bilateria;Deuterostomia;  
 Chordata;Tunicata;Ascidiacea;Phlebobranchia;Cionidae;Ciona;Ciona intestinalis  
 UdeM00000021114 6596 90.1 UdeM00000021114 XP\_045213797.1 46.6 103  
 55 0 6 108 550 652 2.40E-15 90.1 6596 cellular  
 organisms;Eukaryota;Opisthokonta;Metazoa;Eumetazoa;Bilateria;Protostomia;  
 Spiralia;Lophotrochozoa;Mollusca;Bivalvia;Autobranchia;Heteroconchia;Euheterodonta;  
 Imparidentia;Venerida;Veneroidea;Veneridae;Mercenaria;Mercenaria mercenaria  
 UdeM00000021115 6579 282.3 UdeM00000021115 XP\_033739301.1 42.6 441  
 216 13 27 462 52 460 1.10E-72 282.3 6579 cellular  
 organisms;Eukaryota;Opisthokonta;Metazoa;Eumetazoa;Bilateria;Protostomia;  
 Spiralia;Lophotrochozoa;Mollusca;Bivalvia;Autobranchia;Pteriormorphia;Pectinida;  
 Pectinoidea;Pectinidae;Pecten;Pecten maximus  
 UdeM00000021116 6579 390.2 UdeM00000021116 XP\_033739301.1 48.9 507  
 195 19 1 480 1 470 3.80E-105 390.2 6579 cellular  
 organisms;Eukaryota;Opisthokonta;Metazoa;Eumetazoa;Bilateria;Protostomia;  
 Spiralia;Lophotrochozoa;Mollusca;Bivalvia;Autobranchia;Pteriormorphia;Pectinida;  
 Pectinoidea;Pectinidae;Pecten;Pecten maximus

UdeM00000021117 6596 417.5 UdeM00000021117 XP\_045213793.1 73.1 312  
 75 6 1 308 1 307 1.40E-113 417.5 6596 cellular  
 organisms;Eukaryota;Opisthokonta;Metazoa;Eumetazoa;Bilateria;Protostomia;  
 Spiralia;Lophotrochozoa;Mollusca;Bivalvia;Autobranchia;Heteroconchia;Euhe  
 terodonta;Imparidentia;Venerida;Veneroidea;Veneridae;Mercenaria;Mercenari  
 a mercenaria

UdeM00000021119 6596 306.2 UdeM00000021119 XP\_045214738.1 34.2 623  
 221 14 1 514 1 543 1.20E-79 306.2 6596 cellular  
 organisms;Eukaryota;Opisthokonta;Metazoa;Eumetazoa;Bilateria;Protostomia;  
 Spiralia;Lophotrochozoa;Mollusca;Bivalvia;Autobranchia;Heteroconchia;Euhe  
 terodonta;Imparidentia;Venerida;Veneroidea;Veneridae;Mercenaria;Mercenari  
 a mercenaria

UdeM00000021122 6596 120.9 UdeM00000021122 XP\_045213429.1 37.8 230  
 135 6 1 227 20 244 3.60E-24 120.9 6596 cellular  
 organisms;Eukaryota;Opisthokonta;Metazoa;Eumetazoa;Bilateria;Protostomia;  
 Spiralia;Lophotrochozoa;Mollusca;Bivalvia;Autobranchia;Heteroconchia;Euhe  
 terodonta;Imparidentia;Venerida;Veneroidea;Veneridae;Mercenaria;Mercenari  
 a mercenaria

UdeM00000021123 6596 131.7 UdeM00000021123 XP\_045213426.1 45.1 162  
 76 3 4 164 10 159 2.90E-27 131.7 6596 cellular  
 organisms;Eukaryota;Opisthokonta;Metazoa;Eumetazoa;Bilateria;Protostomia;  
 Spiralia;Lophotrochozoa;Mollusca;Bivalvia;Autobranchia;Heteroconchia;Euhe  
 terodonta;Imparidentia;Venerida;Veneroidea;Veneridae;Mercenaria;Mercenari  
 a mercenaria

UdeM00000021124 1735272 204.9 UdeM00000021124 XP\_041354738.1 41.8  
 261 105 2 5 265 2 215 1.30E-49 204.9 1735272  
 cellular  
 organisms;Eukaryota;Opisthokonta;Metazoa;Eumetazoa;Bilateria;Protostomia;  
 Spiralia;Lophotrochozoa;Mollusca;Gastropoda;Neomphalina;Neomphaloidea;Pel  
 tospiridae;Gigantopelta;Gigantopelta aegis

UdeM00000021125 6596 336.3 UdeM00000021125 XP\_045214812.1 42 455  
 237 6 35 483 205 638 6.60E-89 336.3 6596 cellular  
 organisms;Eukaryota;Opisthokonta;Metazoa;Eumetazoa;Bilateria;Protostomia;  
 Spiralia;Lophotrochozoa;Mollusca;Bivalvia;Autobranchia;Heteroconchia;Euhe  
 terodonta;Imparidentia;Venerida;Veneroidea;Veneridae;Mercenaria;Mercenari  
 a mercenaria

UdeM00000021126 6596 139 UdeM00000021126 XP\_045214777.1 52.6 114  
 51 1 1 114 7 117 3.80E-30 139 6596 cellular  
 organisms;Eukaryota;Opisthokonta;Metazoa;Eumetazoa;Bilateria;Protostomia;  
 Spiralia;Lophotrochozoa;Mollusca;Bivalvia;Autobranchia;Heteroconchia;Euhe  
 terodonta;Imparidentia;Venerida;Veneroidea;Veneridae;Mercenaria;Mercenari  
 a mercenaria

UdeM00000021127 6596 761.1 UdeM00000021127 XP\_045212675.1 67 554  
 177 3 5 556 11 560 9.50E-217 761.1 6596 cellular  
 organisms;Eukaryota;Opisthokonta;Metazoa;Eumetazoa;Bilateria;Protostomia;  
 Spiralia;Lophotrochozoa;Mollusca;Bivalvia;Autobranchia;Heteroconchia;Euhe  
 terodonta;Imparidentia;Venerida;Veneroidea;Veneridae;Mercenaria;Mercenari  
 a mercenaria

UdeM00000021128 6596 181 UdeM00000021128 XP\_045212675.1 67.2 131  
 38 2 3 132 434 560 9.70E-43 181 6596 cellular  
 organisms;Eukaryota;Opisthokonta;Metazoa;Eumetazoa;Bilateria;Protostomia;  
 Spiralia;Lophotrochozoa;Mollusca;Bivalvia;Autobranchia;Heteroconchia;Euhe  
 terodonta;Imparidentia;Venerida;Veneroidea;Veneridae;Mercenaria;Mercenari  
 a mercenaria

UdeM00000021131 6596 588.2 UdeM00000021131 XP\_045212665.1 72.7 407  
 108 1 42 445 814 1220 8.90E-165 588.2 6596 cellular  
 organisms;Eukaryota;Opisthokonta;Metazoa;Eumetazoa;Bilateria;Protostomia;  
 Spiralia;Lophotrochozoa;Mollusca;Bivalvia;Autobranchia;Heteroconchia;Euhe  
 terodonta;Imparidentia;Venerida;Veneroidea;Veneridae;Mercenaria;Mercenari  
 a mercenaria  
 UdeM00000021132 29159 129 UdeM00000021132 XP\_011431548.2 57.4 122  
 46 1 16 131 597 718 4.90E-27 129 29159 cellular  
 organisms;Eukaryota;Opisthokonta;Metazoa;Eumetazoa;Bilateria;Protostomia;  
 Spiralia;Lophotrochozoa;Mollusca;Bivalvia;Autobranchia;Pteriormorphia;Ostr  
 eida;Ostreoidea;Ostreidae;Crassostrea;Crassostrea gigas  
 UdeM00000021133 6596 368.6 UdeM00000021133 XP\_045212662.1 44.1 739  
 351 13 16 724 14 720 1.80E-98 368.6 6596 cellular  
 organisms;Eukaryota;Opisthokonta;Metazoa;Eumetazoa;Bilateria;Protostomia;  
 Spiralia;Lophotrochozoa;Mollusca;Bivalvia;Autobranchia;Heteroconchia;Euhe  
 terodonta;Imparidentia;Venerida;Veneroidea;Veneridae;Mercenaria;Mercenari  
 a mercenaria  
 UdeM00000021134 37653 264.6 UdeM00000021134 XP\_014785553.1 37.1 407  
 244 6 9 413 7 403 2.10E-67 264.6 37653 cellular  
 organisms;Eukaryota;Opisthokonta;Metazoa;Eumetazoa;Bilateria;Protostomia;  
 Spiralia;Lophotrochozoa;Mollusca;Cephalopoda;Coleoidea;Octopodiformes;Oct  
 opoda;Incirrata;Octopodidae;Octopus;Octopus bimaculoides  
 UdeM00000021135 400727 352.4 UdeM00000021135 XP\_025101079.1 64.2  
 430 112 17 46 456 1 407 8.40E-94 352.4 400727  
 cellular  
 organisms;Eukaryota;Opisthokonta;Metazoa;Eumetazoa;Bilateria;Protostomia;  
 Spiralia;Lophotrochozoa;Mollusca;Gastropoda;Caenogastropoda;Architaeniogl  
 ossa;Ampullarioidea;Ampullariidae;Pomacea;Pomacea canaliculata  
 UdeM00000021136 6596 324.7 UdeM00000021136 XP\_045212960.1 66.2 408  
 97 13 61 452 29 411 1.90E-85 324.7 6596 cellular  
 organisms;Eukaryota;Opisthokonta;Metazoa;Eumetazoa;Bilateria;Protostomia;  
 Spiralia;Lophotrochozoa;Mollusca;Bivalvia;Autobranchia;Heteroconchia;Euhe  
 terodonta;Imparidentia;Venerida;Veneroidea;Veneridae;Mercenaria;Mercenari  
 a mercenaria  
 UdeM00000021137 6596 351.3 UdeM00000021137 XP\_045212966.1 66.2 385  
 89 15 1 362 19 385 1.50E-93 351.3 6596 cellular  
 organisms;Eukaryota;Opisthokonta;Metazoa;Eumetazoa;Bilateria;Protostomia;  
 Spiralia;Lophotrochozoa;Mollusca;Bivalvia;Autobranchia;Heteroconchia;Euhe  
 terodonta;Imparidentia;Venerida;Veneroidea;Veneridae;Mercenaria;Mercenari  
 a mercenaria  
 UdeM00000021138 6596 318.9 UdeM00000021138 XP\_045210769.1 78.4 190  
 40 1 1 190 81 269 4.90E-84 318.9 6596 cellular  
 organisms;Eukaryota;Opisthokonta;Metazoa;Eumetazoa;Bilateria;Protostomia;  
 Spiralia;Lophotrochozoa;Mollusca;Bivalvia;Autobranchia;Heteroconchia;Euhe  
 terodonta;Imparidentia;Venerida;Veneroidea;Veneridae;Mercenaria;Mercenari  
 a mercenaria  
 UdeM00000021139 6596 226.9 UdeM00000021139 XP\_045213624.1 38.7 349  
 198 5 1095 1429 2351 2697 1.70E-55 226.9 6596 cellular  
 organisms;Eukaryota;Opisthokonta;Metazoa;Eumetazoa;Bilateria;Protostomia;  
 Spiralia;Lophotrochozoa;Mollusca;Bivalvia;Autobranchia;Heteroconchia;Euhe  
 terodonta;Imparidentia;Venerida;Veneroidea;Veneridae;Mercenaria;Mercenari  
 a mercenaria  
 UdeM00000021140 6579 131 UdeM00000021140 XP\_033747455.1 50.4 117  
 57 1 9 125 8 123 1.40E-27 131 6579 cellular

organisms;Eukaryota;Opisthokonta;Metazoa;Eumetazoa;Bilateria;Protostomia;Spiralia;Lophotrochozoa;Mollusca;Bivalvia;Autobranchia;Pteriormorphia;Pectinida;Pectinoidea;Pectinidae;Pecten;Pecten maximus

UdeM00000021141 6596 310.1 UdeM00000021141 XP\_045214939.1 65.2 221  
76 1 1 221 651 870 2.30E-81 310.1 6596 cellular

organisms;Eukaryota;Opisthokonta;Metazoa;Eumetazoa;Bilateria;Protostomia;Spiralia;Lophotrochozoa;Mollusca;Bivalvia;Autobranchia;Heteroconchia;Euheterodonta;Imparidentia;Venerida;Veneroidea;Veneridae;Mercenaria;Mercenaria mercenaria

UdeM00000021142 6579 560.1 UdeM00000021142 XP\_033751367.1 44.8 647  
322 7 1 621 1 638 3.60E-156 560.1 6579 cellular

organisms;Eukaryota;Opisthokonta;Metazoa;Eumetazoa;Bilateria;Protostomia;Spiralia;Lophotrochozoa;Mollusca;Bivalvia;Autobranchia;Pteriormorphia;Pectinida;Pectinoidea;Pectinidae;Pecten;Pecten maximus

UdeM00000021143 6579 118.6 UdeM00000021143 XP\_033739043.1 25.5 705  
384 23 3 653 1 618 6.70E-23 118.6 6579 cellular

organisms;Eukaryota;Opisthokonta;Metazoa;Eumetazoa;Bilateria;Protostomia;Spiralia;Lophotrochozoa;Mollusca;Bivalvia;Autobranchia;Pteriormorphia;Pectinida;Pectinoidea;Pectinidae;Pecten;Pecten maximus

UdeM00000021144 1735272 929.9 UdeM00000021144 XP\_041364413.1 47.7  
1057 464 13 675 1716 1957 2939 4.80E-267 929.9 1735272  
cellular

organisms;Eukaryota;Opisthokonta;Metazoa;Eumetazoa;Bilateria;Protostomia;Spiralia;Lophotrochozoa;Mollusca;Gastropoda;Neomphalina;Neomphaloidea;Peltospiridae;Gigantopelta;Gigantopelta aegis

UdeM00000021145 1735272 350.5 UdeM00000021145 XP\_041364413.1 44.1  
449 176 4 1 440 2557 2939 3.10E-93 350.5 1735272  
cellular

organisms;Eukaryota;Opisthokonta;Metazoa;Eumetazoa;Bilateria;Protostomia;Spiralia;Lophotrochozoa;Mollusca;Gastropoda;Neomphalina;Neomphaloidea;Peltospiridae;Gigantopelta;Gigantopelta aegis

UdeM00000021146 6596 255.4 UdeM00000021146 XP\_045195103.1 35.9 404  
246 3 28 424 44 441 1.30E-64 255.4 6596 cellular

organisms;Eukaryota;Opisthokonta;Metazoa;Eumetazoa;Bilateria;Protostomia;Spiralia;Lophotrochozoa;Mollusca;Bivalvia;Autobranchia;Heteroconchia;Euheterodonta;Imparidentia;Venerida;Veneroidea;Veneridae;Mercenaria;Mercenaria mercenaria

UdeM00000021147 6596 277.7 UdeM00000021147 XP\_045195103.1 35.8 419  
255 5 14 425 30 441 2.50E-71 277.7 6596 cellular

organisms;Eukaryota;Opisthokonta;Metazoa;Eumetazoa;Bilateria;Protostomia;Spiralia;Lophotrochozoa;Mollusca;Bivalvia;Autobranchia;Heteroconchia;Euheterodonta;Imparidentia;Venerida;Veneroidea;Veneridae;Mercenaria;Mercenaria mercenaria

UdeM00000021149 1735272 1508 UdeM00000021149 XP\_041362851.1 74.3  
981 201 4 15 994 78 1008 0.00E+00 1508 1735272  
cellular

organisms;Eukaryota;Opisthokonta;Metazoa;Eumetazoa;Bilateria;Protostomia;Spiralia;Lophotrochozoa;Mollusca;Gastropoda;Neomphalina;Neomphaloidea;Peltospiridae;Gigantopelta;Gigantopelta aegis

UdeM00000021150 1735272 1529.2 UdeM00000021150 XP\_041362851.1  
78.1 933 201 3 15 946 78 1008 0.00E+00 1529.2  
1735272 cellular

organisms;Eukaryota;Opisthokonta;Metazoa;Eumetazoa;Bilateria;Protostomia;



Spiralia; Lophotrochozoa; Mollusca; Gastropoda; Neomphalina; Neomphaloidea; Pelto-  
 tospiridae; Gigantopelta; Gigantopelta aegis

UdeM00000021151 6579 292 UdeM00000021151 XP\_033742519.1 53 281  
 127 4 1 276 1 281 8.90E-76 292 6579 cellular  
 organisms; Eukaryota; Opisthokonta; Metazoa; Eumetazoa; Bilateria; Protostomia;  
 Spiralia; Lophotrochozoa; Mollusca; Bivalvia; Autobranchia; Pteriomorpha; Pect-  
 inida; Pectinoidea; Pectinidae; Pecten; Pecten maximus

UdeM00000021152 29159 156.8 UdeM00000021152 XP\_034313464.1 46.1 206  
 95 5 12 207 315 514 3.10E-35 156.8 29159 cellular  
 organisms; Eukaryota; Opisthokonta; Metazoa; Eumetazoa; Bilateria; Protostomia;  
 Spiralia; Lophotrochozoa; Mollusca; Bivalvia; Autobranchia; Pteriomorpha; Ostr-  
 eida; Ostreidae; Crassostrea; Crassostrea gigas

UdeM00000021153 6596 283.1 UdeM00000021153 XP\_045214350.1 34.8 397  
 250 5 114 507 8 398 7.50E-73 283.1 6596 cellular  
 organisms; Eukaryota; Opisthokonta; Metazoa; Eumetazoa; Bilateria; Protostomia;  
 Spiralia; Lophotrochozoa; Mollusca; Bivalvia; Autobranchia; Heteroconchia; Eue-  
 terodonta; Imparidentia; Venerida; Veneroidea; Veneridae; Mercenaria; Mercenari-  
 a mercenaria

UdeM00000021154 29159 273.1 UdeM00000021154 XP\_011429276.2 41.5 364  
 211 2 1 363 1 363 5.20E-70 273.1 29159 cellular  
 organisms; Eukaryota; Opisthokonta; Metazoa; Eumetazoa; Bilateria; Protostomia;  
 Spiralia; Lophotrochozoa; Mollusca; Bivalvia; Autobranchia; Pteriomorpha; Ostr-  
 eida; Ostreidae; Crassostrea; Crassostrea gigas

UdeM00000021155 6573 289.3 UdeM00000021155 XP\_021361562.1 41.7 374  
 207 6 1 364 1 373 7.00E-75 289.3 6573 cellular  
 organisms; Eukaryota; Opisthokonta; Metazoa; Eumetazoa; Bilateria; Protostomia;  
 Spiralia; Lophotrochozoa; Mollusca; Bivalvia; Autobranchia; Pteriomorpha; Pect-  
 inida; Pectinoidea; Pectinidae; Mizuhopecten; Mizuhopecten yessoensis

UdeM00000021156 6596 609 UdeM00000021156 XP\_045214272.1 52.3 688  
 303 7 27 697 14 693 7.80E-171 609 6596 cellular  
 organisms; Eukaryota; Opisthokonta; Metazoa; Eumetazoa; Bilateria; Protostomia;  
 Spiralia; Lophotrochozoa; Mollusca; Bivalvia; Autobranchia; Heteroconchia; Eue-  
 terodonta; Imparidentia; Venerida; Veneroidea; Veneridae; Mercenaria; Mercenari-  
 a mercenaria

UdeM00000021158 6573 609.8 UdeM00000021158 XP\_021353909.1 56.6 825  
 355 2 7 831 4 825 5.30E-171 609.8 6573 cellular  
 organisms; Eukaryota; Opisthokonta; Metazoa; Eumetazoa; Bilateria; Protostomia;  
 Spiralia; Lophotrochozoa; Mollusca; Bivalvia; Autobranchia; Pteriomorpha; Pect-  
 inida; Pectinoidea; Pectinidae; Mizuhopecten; Mizuhopecten yessoensis

UdeM00000021157 6573 716.5 UdeM00000021157 XP\_021353909.1 52.8 1062  
 463 13 7 1054 4 1041 5.10E-203 716.5 6573 cellular  
 organisms; Eukaryota; Opisthokonta; Metazoa; Eumetazoa; Bilateria; Protostomia;  
 Spiralia; Lophotrochozoa; Mollusca; Bivalvia; Autobranchia; Pteriomorpha; Pect-  
 inida; Pectinoidea; Pectinidae; Mizuhopecten; Mizuhopecten yessoensis

UdeM00000021159 6596 159.8 UdeM00000021159 XP\_045214279.1 48.1 233  
 102 10 16 244 826 1043 4.30E-36 159.8 6596 cellular  
 organisms; Eukaryota; Opisthokonta; Metazoa; Eumetazoa; Bilateria; Protostomia;  
 Spiralia; Lophotrochozoa; Mollusca; Bivalvia; Autobranchia; Heteroconchia; Eue-  
 terodonta; Imparidentia; Venerida; Veneroidea; Veneridae; Mercenaria; Mercenari-  
 a mercenaria

UdeM00000021160 6573 186 UdeM00000021160 XP\_021353910.1 37.2 277  
 171 2 65 338 1 277 1.20E-43 186 6573 cellular  
 organisms; Eukaryota; Opisthokonta; Metazoa; Eumetazoa; Bilateria; Protostomia;

Spiralia; Lophotrochozoa; Mollusca; Bivalvia; Autobranchia; Pteriomorpha; Pectinida; Pectinoidea; Pectinidae; Mizuhopecten; Mizuhopecten yessoensis

UdeM00000021161 7897 205.7 UdeM00000021161 XP\_006010935.1 44.4 266  
142 2 1 260 1 266 7.20E-50 205.7 7897 cellular  
organisms; Eukaryota; Opisthokonta; Metazoa; Eumetazoa; Bilateria; Deuterostomia; Chordata; Craniata; Vertebrata; Gnathostomata; Teleostomi; Euteleostomi; Sarcopterygii; Coelacanthimorpha; Coelacanthiformes; Coelacanthidae; Latimeria; Latimeria chalumnae

UdeM00000021162 225164 124.8 UdeM00000021162 XP\_009050694.1 54.3  
92 42 0 24 115 54 145 7.40E-26 124.8 225164  
cellular  
organisms; Eukaryota; Opisthokonta; Metazoa; Eumetazoa; Bilateria; Protostomia; Spiralia; Lophotrochozoa; Mollusca; Gastropoda; Patellogastropoda; Lottioidea; Lottiidae; Lottia; Lottia gigantea

UdeM00000021163 6596 416.8 UdeM00000021163 XP\_045214952.1 64.8 366  
110 3 3 350 43 407 2.80E-113 416.8 6596 cellular  
organisms; Eukaryota; Opisthokonta; Metazoa; Eumetazoa; Bilateria; Protostomia; Spiralia; Lophotrochozoa; Mollusca; Bivalvia; Autobranchia; Heteroconchia; Euheterodonta; Imparidentia; Venerida; Veneroidea; Veneridae; Mercenaria; Mercenaria mercenaria

UdeM00000021164 6596 419.5 UdeM00000021164 XP\_045214953.1 64.5 372  
112 4 17 369 5 375 4.60E-114 419.5 6596 cellular  
organisms; Eukaryota; Opisthokonta; Metazoa; Eumetazoa; Bilateria; Protostomia; Spiralia; Lophotrochozoa; Mollusca; Bivalvia; Autobranchia; Heteroconchia; Euheterodonta; Imparidentia; Venerida; Veneroidea; Veneridae; Mercenaria; Mercenaria mercenaria

UdeM00000021165 6596 911 UdeM00000021165 XP\_045214957.1 44.6 1457  
573 29 7 1388 6 1303 1.90E-261 911 6596 cellular  
organisms; Eukaryota; Opisthokonta; Metazoa; Eumetazoa; Bilateria; Protostomia; Spiralia; Lophotrochozoa; Mollusca; Bivalvia; Autobranchia; Heteroconchia; Euheterodonta; Imparidentia; Venerida; Veneroidea; Veneridae; Mercenaria; Mercenaria mercenaria

UdeM00000021166 29159 131.7 UdeM00000021166 XP\_011429569.1 74.5 102  
18 4 1 97 3 101 7.10E-28 131.7 29159 cellular  
organisms; Eukaryota; Opisthokonta; Metazoa; Eumetazoa; Bilateria; Protostomia; Spiralia; Lophotrochozoa; Mollusca; Bivalvia; Autobranchia; Pteriomorpha; Ostreida; Ostreioidea; Ostreidae; Crassostrea; Crassostrea gigas

UdeM00000021167 29159 282.3 UdeM00000021167 XP\_011429574.1 51.2 342  
139 9 32 363 45 368 8.90E-73 282.3 29159 cellular  
organisms; Eukaryota; Opisthokonta; Metazoa; Eumetazoa; Bilateria; Protostomia; Spiralia; Lophotrochozoa; Mollusca; Bivalvia; Autobranchia; Pteriomorpha; Ostreida; Ostreioidea; Ostreidae; Crassostrea; Crassostrea gigas

UdeM00000021168 29159 421.8 UdeM00000021168 XP\_034314805.1 65 286  
100 0 1 286 55 340 7.50E-115 421.8 29159 cellular  
organisms; Eukaryota; Opisthokonta; Metazoa; Eumetazoa; Bilateria; Protostomia; Spiralia; Lophotrochozoa; Mollusca; Bivalvia; Autobranchia; Pteriomorpha; Ostreida; Ostreioidea; Ostreidae; Crassostrea; Crassostrea gigas

UdeM00000021169 400727 220.3 UdeM00000021169 XP\_025093039.1 73.8  
130 34 0 1 130 37 166 1.50E-54 220.3 400727  
cellular  
organisms; Eukaryota; Opisthokonta; Metazoa; Eumetazoa; Bilateria; Protostomia; Spiralia; Lophotrochozoa; Mollusca; Gastropoda; Caenogastropoda; Architaenioglossa; Ampullarioidea; Ampullariidae; Pomacea; Pomacea canaliculata

UdeM00000021170 45264 361.3 UdeM00000021170 XP\_044165143.1 45.6 443  
 175 6 27 407 35 473 1.60E-96 361.3 45264 cellular  
 organisms;Eukaryota;Opisthokonta;Metazoa;Eumetazoa;Cnidaria;Anthozoa;Hexa  
 corallia;Scleractinia;Astrocoeniina;Acroporidae;Acropora;Acropora  
 millepora  
 UdeM00000021171 45264 214.5 UdeM00000021171 XP\_044184031.1 43.5 278  
 127 7 1 252 213 486 1.50E-52 214.5 45264 cellular  
 organisms;Eukaryota;Opisthokonta;Metazoa;Eumetazoa;Cnidaria;Anthozoa;Hexa  
 corallia;Scleractinia;Astrocoeniina;Acroporidae;Acropora;Acropora  
 millepora  
 UdeM00000021172 45264 122.1 UdeM00000021172 XP\_044184709.1 46.8 126  
 67 0 42 167 16 141 1.30E-24 122.1 45264 cellular  
 organisms;Eukaryota;Opisthokonta;Metazoa;Eumetazoa;Cnidaria;Anthozoa;Hexa  
 corallia;Scleractinia;Astrocoeniina;Acroporidae;Acropora;Acropora  
 millepora  
 UdeM00000021173 6596 720.3 UdeM00000021173 XP\_045213772.1 67.4 820  
 207 14 1 802 1 778 2.70E-204 720.3 6596 cellular  
 organisms;Eukaryota;Opisthokonta;Metazoa;Eumetazoa;Bilateria;Protostomia;  
 Spiralia;Lophotrochozoa;Mollusca;Bivalvia;Autobranchia;Heteroconchia;Euhe  
 terodonta;Imparidentia;Venerida;Veneroidea;Veneridae;Mercenaria;Mercenari  
 a mercenaria  
 UdeM00000021174 6596 723.4 UdeM00000021174 XP\_045213772.1 67.5 819  
 207 13 1 801 1 778 3.20E-205 723.4 6596 cellular  
 organisms;Eukaryota;Opisthokonta;Metazoa;Eumetazoa;Bilateria;Protostomia;  
 Spiralia;Lophotrochozoa;Mollusca;Bivalvia;Autobranchia;Heteroconchia;Euhe  
 terodonta;Imparidentia;Venerida;Veneroidea;Veneridae;Mercenaria;Mercenari  
 a mercenaria  
 UdeM00000021175 6596 725.7 UdeM00000021175 XP\_045213772.1 68.4 809  
 206 14 1 790 1 778 6.30E-206 725.7 6596 cellular  
 organisms;Eukaryota;Opisthokonta;Metazoa;Eumetazoa;Bilateria;Protostomia;  
 Spiralia;Lophotrochozoa;Mollusca;Bivalvia;Autobranchia;Heteroconchia;Euhe  
 terodonta;Imparidentia;Venerida;Veneroidea;Veneridae;Mercenaria;Mercenari  
 a mercenaria  
 UdeM00000021176 6596 460.7 UdeM00000021176 XP\_045213771.1 48.1 999  
 467 15 1 970 1 977 4.70E-126 460.7 6596 cellular  
 organisms;Eukaryota;Opisthokonta;Metazoa;Eumetazoa;Bilateria;Protostomia;  
 Spiralia;Lophotrochozoa;Mollusca;Bivalvia;Autobranchia;Heteroconchia;Euhe  
 terodonta;Imparidentia;Venerida;Veneroidea;Veneridae;Mercenaria;Mercenari  
 a mercenaria  
 UdeM00000021177 1735272 366.7 UdeM00000021177 XP\_041363952.1 42.9  
 485 226 12 20 499 51 489 4.70E-98 366.7 1735272  
 cellular  
 organisms;Eukaryota;Opisthokonta;Metazoa;Eumetazoa;Bilateria;Protostomia;  
 Spiralia;Lophotrochozoa;Mollusca;Gastropoda;Neomphalina;Neomphaloidea;Pel  
 tospiridae;Gigantopelta;Gigantopelta aegis  
 UdeM00000021178 37653 325.1 UdeM00000021178 XP\_014784508.1 54.6 280  
 126 1 1 279 516 795 1.00E-85 325.1 37653 cellular  
 organisms;Eukaryota;Opisthokonta;Metazoa;Eumetazoa;Bilateria;Protostomia;  
 Spiralia;Lophotrochozoa;Mollusca;Cephalopoda;Coleoidea;Octopodiformes;Oct  
 opoda;Incirrata;Octopodidae;Octopus;Octopus bimaculoides  
 UdeM00000021179 1735272 418.3 UdeM00000021179 XP\_041363738.1 54.1  
 390 171 4 4 388 7 393 1.10E-113 418.3 1735272  
 cellular  
 organisms;Eukaryota;Opisthokonta;Metazoa;Eumetazoa;Bilateria;Protostomia;

Spiralia; Lophotrochozoa; Mollusca; Gastropoda; Neomphalina; Neomphaloidea; Pelto-  
 tospiridae; Gigantopelta; Gigantopelta aegis  
 UdeM00000021180 6579 738.4 UdeM00000021180 XP\_033743286.1 57.8 650  
 251 9 1 638 1 639 7.90E-210 738.4 6579 cellular  
 organisms; Eukaryota; Opisthokonta; Metazoa; Eumetazoa; Bilateria; Protostomia;  
 Spiralia; Lophotrochozoa; Mollusca; Bivalvia; Autobranchia; Pteriomorpha; Pect-  
 inida; Pectinoidea; Pectinidae; Pecten; Pecten maximus  
 UdeM00000021181 6565 203.8 UdeM00000021181 XP\_022317383.1 80.5 123  
 24 0 1 123 1 123 1.30E-49 203.8 6565 cellular  
 organisms; Eukaryota; Opisthokonta; Metazoa; Eumetazoa; Bilateria; Protostomia;  
 Spiralia; Lophotrochozoa; Mollusca; Bivalvia; Autobranchia; Pteriomorpha; Ostr-  
 eida; Ostreidae; Crassostrea; Crassostrea virginica  
 UdeM00000021182 6105 421.8 UdeM00000021182 XP\_031566940.1 67.6 284  
 92 0 443 726 111 394 1.80E-114 421.8 6105 cellular  
 organisms; Eukaryota; Opisthokonta; Metazoa; Eumetazoa; Cnidaria; Anthozoa; Hexa-  
 corallia; Actiniaria; Actiniidae; Actinia; Actinia tenebrosa  
 UdeM00000021183 6105 421.8 UdeM00000021183 XP\_031566940.1 67.6 284  
 92 0 446 729 111 394 1.80E-114 421.8 6105 cellular  
 organisms; Eukaryota; Opisthokonta; Metazoa; Eumetazoa; Cnidaria; Anthozoa; Hexa-  
 corallia; Actiniaria; Actiniidae; Actinia; Actinia tenebrosa  
 UdeM00000021184 6596 512.7 UdeM00000021184 XP\_045213221.1 64.5 377  
 130 2 8 380 12 388 4.00E-142 512.7 6596 cellular  
 organisms; Eukaryota; Opisthokonta; Metazoa; Eumetazoa; Bilateria; Protostomia;  
 Spiralia; Lophotrochozoa; Mollusca; Bivalvia; Autobranchia; Heteroconchia; Eue-  
 terodonta; Imparidentia; Venerida; Veneroidea; Veneridae; Mercenaria; Mercenari-  
 a mercenaria  
 UdeM00000021185 6579 665.2 UdeM00000021185 XP\_033746531.1 54.3 634  
 279 4 22 652 13 638 8.40E-188 665.2 6579 cellular  
 organisms; Eukaryota; Opisthokonta; Metazoa; Eumetazoa; Bilateria; Protostomia;  
 Spiralia; Lophotrochozoa; Mollusca; Bivalvia; Autobranchia; Pteriomorpha; Pect-  
 inida; Pectinoidea; Pectinidae; Pecten; Pecten maximus  
 UdeM00000021186 6596 146.4 UdeM00000021186 XP\_045213127.1 29.6 538  
 257 19 1 464 29 518 1.30E-31 146.4 6596 cellular  
 organisms; Eukaryota; Opisthokonta; Metazoa; Eumetazoa; Bilateria; Protostomia;  
 Spiralia; Lophotrochozoa; Mollusca; Bivalvia; Autobranchia; Heteroconchia; Eue-  
 terodonta; Imparidentia; Venerida; Veneroidea; Veneridae; Mercenaria; Mercenari-  
 a mercenaria  
 UdeM00000021187 6596 420.2 UdeM00000021187 XP\_045213134.1 43.5 614  
 219 20 21 544 849 1424 4.50E-114 420.2 6596 cellular  
 organisms; Eukaryota; Opisthokonta; Metazoa; Eumetazoa; Bilateria; Protostomia;  
 Spiralia; Lophotrochozoa; Mollusca; Bivalvia; Autobranchia; Heteroconchia; Eue-  
 terodonta; Imparidentia; Venerida; Veneroidea; Veneridae; Mercenaria; Mercenari-  
 a mercenaria  
 UdeM00000021188 6596 265.4 UdeM00000021188 XP\_045213142.1 27 1204  
 623 45 5 1147 268 1276 3.60E-67 265.4 6596 cellular  
 organisms; Eukaryota; Opisthokonta; Metazoa; Eumetazoa; Bilateria; Protostomia;  
 Spiralia; Lophotrochozoa; Mollusca; Bivalvia; Autobranchia; Heteroconchia; Eue-  
 terodonta; Imparidentia; Venerida; Veneroidea; Veneridae; Mercenaria; Mercenari-  
 a mercenaria  
 UdeM00000021189 6596 454.1 UdeM00000021189 XP\_045213114.1 54.7 561  
 200 14 39 586 1617 2136 2.60E-124 454.1 6596 cellular  
 organisms; Eukaryota; Opisthokonta; Metazoa; Eumetazoa; Bilateria; Protostomia;  
 Spiralia; Lophotrochozoa; Mollusca; Bivalvia; Autobranchia; Heteroconchia; Eue-

terodonta;Imparidentia;Venerida;Veneroidea;Veneridae;Mercenaria;Mercenaria mercenaria  
 UdeM00000021190 6579 164.5 UdeM00000021190 XP\_033749002.1 54.8 126  
 56 1 25 149 987 1112 1.10E-37 164.5 6579 cellular  
 organisms;Eukaryota;Opisthokonta;Metazoa;Eumetazoa;Bilateria;Protostomia;  
 Spiralia;Lophotrochozoa;Mollusca;Bivalvia;Autobranhia;Pteriomorphia;Pectinida;  
 Pectinoidea;Pectinidae;Pecten;Pecten maximus  
 UdeM00000021191 6596 368.2 UdeM00000021191 XP\_045213147.1 34.1 871  
 469 24 6 830 6 817 2.80E-98 368.2 6596 cellular  
 organisms;Eukaryota;Opisthokonta;Metazoa;Eumetazoa;Bilateria;Protostomia;  
 Spiralia;Lophotrochozoa;Mollusca;Bivalvia;Autobranhia;Heteroconchia;Euheterodonta;  
 Imparidentia;Venerida;Veneroidea;Veneridae;Mercenaria;Mercenaria mercenaria  
 UdeM00000021192 6596 201.4 UdeM00000021192 XP\_045214186.1 55.2 183  
 78 3 7 185 9 191 1.10E-48 201.4 6596 cellular  
 organisms;Eukaryota;Opisthokonta;Metazoa;Eumetazoa;Bilateria;Protostomia;  
 Spiralia;Lophotrochozoa;Mollusca;Bivalvia;Autobranhia;Heteroconchia;Euheterodonta;  
 Imparidentia;Venerida;Veneroidea;Veneridae;Mercenaria;Mercenaria mercenaria  
 UdeM00000021193 6596 425.6 UdeM00000021193 XP\_045214187.1 56.6 357  
 151 2 1 357 1 353 6.10E-116 425.6 6596 cellular  
 organisms;Eukaryota;Opisthokonta;Metazoa;Eumetazoa;Bilateria;Protostomia;  
 Spiralia;Lophotrochozoa;Mollusca;Bivalvia;Autobranhia;Heteroconchia;Euheterodonta;  
 Imparidentia;Venerida;Veneroidea;Veneridae;Mercenaria;Mercenaria mercenaria  
 UdeM00000021195 29159 94.7 UdeM00000021195 XP\_011419402.2 34.8 132  
 82 2 86 215 189 318 1.50E-16 94.7 29159 cellular  
 organisms;Eukaryota;Opisthokonta;Metazoa;Eumetazoa;Bilateria;Protostomia;  
 Spiralia;Lophotrochozoa;Mollusca;Bivalvia;Autobranhia;Pteriomorphia;Ostreida;  
 Ostreioidea;Ostreidae;Crassostrea;Crassostrea gigas  
 UdeM00000021196 6573 695.7 UdeM00000021196 XP\_021358783.1 36 1360  
 428 28 872 2200 643 1591 1.90E-196 695.7 6573 cellular  
 organisms;Eukaryota;Opisthokonta;Metazoa;Eumetazoa;Bilateria;Protostomia;  
 Spiralia;Lophotrochozoa;Mollusca;Bivalvia;Autobranhia;Pteriomorphia;Pectinida;  
 Pectinoidea;Pectinidae;Mizuhopecten;Mizuhopecten yessoensis  
 UdeM00000021197 45264 141 UdeM00000021197 XP\_044165535.1 40.8 174  
 98 2 153 321 351 524 2.90E-30 141 45264 cellular  
 organisms;Eukaryota;Opisthokonta;Metazoa;Eumetazoa;Cnidaria;Anthozoa;Hexacorallia;  
 Scleractinia;Astrocoeniina;Acroporidae;Acropora;Acropora millepora  
 UdeM00000021199 6565 110.2 UdeM00000021199 XP\_022299727.1 34.5 226  
 79 4 1 158 46 270 2.50E-21 110.2 6565 cellular  
 organisms;Eukaryota;Opisthokonta;Metazoa;Eumetazoa;Bilateria;Protostomia;  
 Spiralia;Lophotrochozoa;Mollusca;Bivalvia;Autobranhia;Pteriomorphia;Ostreida;  
 Ostreioidea;Ostreidae;Crassostrea;Crassostrea virginica  
 UdeM00000021200 6596 604 UdeM00000021200 XP\_045212416.1 54.7 576  
 232 7 126 679 186 754 2.40E-169 604 6596 cellular  
 organisms;Eukaryota;Opisthokonta;Metazoa;Eumetazoa;Bilateria;Protostomia;  
 Spiralia;Lophotrochozoa;Mollusca;Bivalvia;Autobranhia;Heteroconchia;Euheterodonta;  
 Imparidentia;Venerida;Veneroidea;Veneridae;Mercenaria;Mercenaria mercenaria  
 UdeM00000021201 6573 244.6 UdeM00000021201 XP\_021363754.1 76 150  
 36 0 11 160 14 163 9.60E-62 244.6 6573 cellular  
 organisms;Eukaryota;Opisthokonta;Metazoa;Eumetazoa;Bilateria;Protostomia;

Spiralia;Lophotrochozoa;Mollusca;Bivalvia;Autobranchia;Pteriomorpha;Pectinida;Pectinoidea;Pectinidae;Mizuhopecten;Mizuhopecten yessoensis  
UdeM00000021202 6596 432.6 UdeM00000021202 XP\_045212656.1 58.3 369  
152 2 1 368 1 368 5.20E-118 432.6 6596 cellular  
organisms;Eukaryota;Opisthokonta;Metazoa;Eumetazoa;Bilateria;Protostomia;  
Spiralia;Lophotrochozoa;Mollusca;Bivalvia;Autobranchia;Heteroconchia;Euherodonta;Imparidentia;Venerida;Veneroidea;Veneridae;Mercenaria;Mercenaria mercenaria  
UdeM00000021203 6596 186.4 UdeM00000021203 XP\_045212658.1 94.4 89  
5 0 1 89 42 130 1.60E-44 186.4 6596 cellular  
organisms;Eukaryota;Opisthokonta;Metazoa;Eumetazoa;Bilateria;Protostomia;  
Spiralia;Lophotrochozoa;Mollusca;Bivalvia;Autobranchia;Heteroconchia;Euherodonta;Imparidentia;Venerida;Veneroidea;Veneridae;Mercenaria;Mercenaria mercenaria  
UdeM00000021204 6579 766.5 UdeM00000021204 XP\_033739131.1 55.7 645  
244 3 1 604 726 1369 2.50E-218 766.5 6579 cellular  
organisms;Eukaryota;Opisthokonta;Metazoa;Eumetazoa;Bilateria;Protostomia;  
Spiralia;Lophotrochozoa;Mollusca;Bivalvia;Autobranchia;Pteriomorpha;Pectinida;Pectinoidea;Pectinidae;Pecten;Pecten maximus  
UdeM00000021205 37653 279.3 UdeM00000021205 XP\_014774580.1 53.8 251  
115 1 6 255 13 263 5.20E-72 279.3 37653 cellular  
organisms;Eukaryota;Opisthokonta;Metazoa;Eumetazoa;Bilateria;Protostomia;  
Spiralia;Lophotrochozoa;Mollusca;Cephalopoda;Coleoidea;Octopodiformes;Octopoda;Incirrata;Octopodidae;Octopus;Octopus bimaculoides  
UdeM00000021206 6579 339 UdeM00000021206 XP\_033746850.1 61.5 322  
110 7 1 314 1 316 6.70E-90 339 6579 cellular  
organisms;Eukaryota;Opisthokonta;Metazoa;Eumetazoa;Bilateria;Protostomia;  
Spiralia;Lophotrochozoa;Mollusca;Bivalvia;Autobranchia;Pteriomorpha;Pectinida;Pectinoidea;Pectinidae;Pecten;Pecten maximus  
UdeM00000021207 6596 458.8 UdeM00000021207 XP\_045210940.1 55.4 646  
245 15 41 668 317 937 1.20E-125 458.8 6596 cellular  
organisms;Eukaryota;Opisthokonta;Metazoa;Eumetazoa;Bilateria;Protostomia;  
Spiralia;Lophotrochozoa;Mollusca;Bivalvia;Autobranchia;Heteroconchia;Euherodonta;Imparidentia;Venerida;Veneroidea;Veneridae;Mercenaria;Mercenaria mercenaria  
UdeM00000021208 6596 313.2 UdeM00000021208 XP\_045189231.1 79.9 174  
35 0 113 286 9 182 3.60E-82 313.2 6596 cellular  
organisms;Eukaryota;Opisthokonta;Metazoa;Eumetazoa;Bilateria;Protostomia;  
Spiralia;Lophotrochozoa;Mollusca;Bivalvia;Autobranchia;Heteroconchia;Euherodonta;Imparidentia;Venerida;Veneroidea;Veneridae;Mercenaria;Mercenaria mercenaria  
UdeM00000021209 6596 90.5 UdeM00000021209 XP\_045188187.1 23.8 345  
215 6 30 354 61 377 4.70E-15 90.5 6596 cellular  
organisms;Eukaryota;Opisthokonta;Metazoa;Eumetazoa;Bilateria;Protostomia;  
Spiralia;Lophotrochozoa;Mollusca;Bivalvia;Autobranchia;Heteroconchia;Euherodonta;Imparidentia;Venerida;Veneroidea;Veneridae;Mercenaria;Mercenaria mercenaria  
UdeM00000021210 6596 88.2 UdeM00000021210 XP\_045188187.1 23.8 319  
195 5 30 302 61 377 2.00E-14 88.2 6596 cellular  
organisms;Eukaryota;Opisthokonta;Metazoa;Eumetazoa;Bilateria;Protostomia;  
Spiralia;Lophotrochozoa;Mollusca;Bivalvia;Autobranchia;Heteroconchia;Euherodonta;Imparidentia;Venerida;Veneroidea;Veneridae;Mercenaria;Mercenaria mercenaria

UdeM00000021211 6596 83.6 UdeM00000021211 XP\_045188187.1 22.7 335  
 231 6 30 354 61 377 5.70E-13 83.6 6596 cellular  
 organisms;Eukaryota;Opisthokonta;Metazoa;Eumetazoa;Bilateria;Protostomia;  
 Spiralia;Lophotrochozoa;Mollusca;Bivalvia;Autobranchia;Heteroconchia;Euhe  
 terodonta;Imparidentia;Venerida;Veneroidea;Veneridae;Mercenaria;Mercenari  
 a mercenaria

UdeM00000021212 6596 92 UdeM00000021212 XP\_045188187.1 24.1 345  
 214 6 30 354 61 377 1.60E-15 92 6596 cellular  
 organisms;Eukaryota;Opisthokonta;Metazoa;Eumetazoa;Bilateria;Protostomia;  
 Spiralia;Lophotrochozoa;Mollusca;Bivalvia;Autobranchia;Heteroconchia;Euhe  
 terodonta;Imparidentia;Venerida;Veneroidea;Veneridae;Mercenaria;Mercenari  
 a mercenaria

UdeM00000021213 6596 94 UdeM00000021213 XP\_045188187.1 24.3 345  
 213 6 30 354 61 377 4.20E-16 94 6596 cellular  
 organisms;Eukaryota;Opisthokonta;Metazoa;Eumetazoa;Bilateria;Protostomia;  
 Spiralia;Lophotrochozoa;Mollusca;Bivalvia;Autobranchia;Heteroconchia;Euhe  
 terodonta;Imparidentia;Venerida;Veneroidea;Veneridae;Mercenaria;Mercenari  
 a mercenaria

UdeM00000021214 6596 95.5 UdeM00000021214 XP\_045188187.1 23.9 343  
 230 6 23 353 54 377 1.40E-16 95.5 6596 cellular  
 organisms;Eukaryota;Opisthokonta;Metazoa;Eumetazoa;Bilateria;Protostomia;  
 Spiralia;Lophotrochozoa;Mollusca;Bivalvia;Autobranchia;Heteroconchia;Euhe  
 terodonta;Imparidentia;Venerida;Veneroidea;Veneridae;Mercenaria;Mercenari  
 a mercenaria

UdeM00000021216 6596 514.2 UdeM00000021216 XP\_045213887.1 29.9 1154  
 736 21 146 1272 2735 3842 4.70E-142 514.2 6596 cellular  
 organisms;Eukaryota;Opisthokonta;Metazoa;Eumetazoa;Bilateria;Protostomia;  
 Spiralia;Lophotrochozoa;Mollusca;Bivalvia;Autobranchia;Heteroconchia;Euhe  
 terodonta;Imparidentia;Venerida;Veneroidea;Veneridae;Mercenaria;Mercenari  
 a mercenaria

UdeM00000021217 6596 168.7 UdeM00000021217 XP\_045213887.1 23.1 875  
 483 21 2 717 1705 2548 3.00E-38 168.7 6596 cellular  
 organisms;Eukaryota;Opisthokonta;Metazoa;Eumetazoa;Bilateria;Protostomia;  
 Spiralia;Lophotrochozoa;Mollusca;Bivalvia;Autobranchia;Heteroconchia;Euhe  
 terodonta;Imparidentia;Venerida;Veneroidea;Veneridae;Mercenaria;Mercenari  
 a mercenaria

UdeM00000021218 6596 146.7 UdeM00000021218 XP\_045166258.1 46.9 160  
 80 2 2 161 103 257 2.50E-32 146.7 6596 cellular  
 organisms;Eukaryota;Opisthokonta;Metazoa;Eumetazoa;Bilateria;Protostomia;  
 Spiralia;Lophotrochozoa;Mollusca;Bivalvia;Autobranchia;Heteroconchia;Euhe  
 terodonta;Imparidentia;Venerida;Veneroidea;Veneridae;Mercenaria;Mercenari  
 a mercenaria

UdeM00000021219 6596 715.7 UdeM00000021219 XP\_045213887.1 28.9 1811  
 1133 36 559 2250 2030 3805 1.90E-202 715.7 6596 cellular  
 organisms;Eukaryota;Opisthokonta;Metazoa;Eumetazoa;Bilateria;Protostomia;  
 Spiralia;Lophotrochozoa;Mollusca;Bivalvia;Autobranchia;Heteroconchia;Euhe  
 terodonta;Imparidentia;Venerida;Veneroidea;Veneridae;Mercenaria;Mercenari  
 a mercenaria

UdeM00000021220 6596 544.7 UdeM00000021220 XP\_045210767.1 38.7 911  
 493 16 1 893 1 864 3.30E-151 544.7 6596 cellular  
 organisms;Eukaryota;Opisthokonta;Metazoa;Eumetazoa;Bilateria;Protostomia;  
 Spiralia;Lophotrochozoa;Mollusca;Bivalvia;Autobranchia;Heteroconchia;Euhe  
 terodonta;Imparidentia;Venerida;Veneroidea;Veneridae;Mercenaria;Mercenari  
 a mercenaria

UdeM00000021221 29159 496.1 UdeM00000021221 XP\_034311814.1 32.9 1148  
 682 29 27 1134 240 1339 1.20E-136 496.1 29159 cellular  
 organisms;Eukaryota;Opisthokonta;Metazoa;Eumetazoa;Bilateria;Protostomia;  
 Spiralia;Lophotrochozoa;Mollusca;Bivalvia;Autobranchia;Pteriomorpha;Ostr  
 eida;Ostreoidea;Ostreidae;Crassostrea;Crassostrea gigas  
 UdeM00000021222 6565 261.9 UdeM00000021222 XP\_022313030.1 33.1 635  
 362 18 2 607 744 1344 2.00E-66 261.9 6565 cellular  
 organisms;Eukaryota;Opisthokonta;Metazoa;Eumetazoa;Bilateria;Protostomia;  
 Spiralia;Lophotrochozoa;Mollusca;Bivalvia;Autobranchia;Pteriomorpha;Ostr  
 eida;Ostreoidea;Ostreidae;Crassostrea;Crassostrea virginica  
 UdeM00000021223 6573 376.7 UdeM00000021223 XP\_021353850.1 37.4 697  
 386 19 51 721 42 714 6.60E-101 376.7 6573 cellular  
 organisms;Eukaryota;Opisthokonta;Metazoa;Eumetazoa;Bilateria;Protostomia;  
 Spiralia;Lophotrochozoa;Mollusca;Bivalvia;Autobranchia;Pteriomorpha;Pect  
 inida;Pectinoidea;Pectinidae;Mizuhopecten;Mizuhopecten yessoensis  
 UdeM00000021224 6579 846.7 UdeM00000021224 XP\_033730834.1 33.9 1868  
 1134 44 47 1870 69 1880 5.80E-242 846.7 6579 cellular  
 organisms;Eukaryota;Opisthokonta;Metazoa;Eumetazoa;Bilateria;Protostomia;  
 Spiralia;Lophotrochozoa;Mollusca;Bivalvia;Autobranchia;Pteriomorpha;Pect  
 inida;Pectinoidea;Pectinidae;Pecten;Pecten maximus  
 UdeM00000021225 8078 63.2 UdeM00000021225 XP\_035985927.1 28.7 188  
 112 4 32 197 122 309 5.90E-07 63.2 8078 cellular  
 organisms;Eukaryota;Opisthokonta;Metazoa;Eumetazoa;Bilateria;Deuterostomi  
 a;Chordata;Craniata;Vertebrata;Gnathostomata;Teleostomi;Euteleostomi;Acti  
 nopterygii;Actinopteri;Neopterygii;Teleostei;Osteoglossocephalai;Clupeoce  
 phala;Euteleosteomorpha;Neoteleostei;Eurypterygia;Ctenosquamata;Acanthomo  
 rphata;Euacanthomorphacea;Percomorphaceae;Ovalentaria;Atherinomorphae;Cyp  
 rinodontiformes;Cyprinodontoidei;Fundulidae;Fundulus;Fundulus  
 heteroclitus  
 UdeM00000021226 6565 853.2 UdeM00000021226 XP\_022313025.1 33.5 1915  
 1166 49 31 1899 32 1885 6.30E-244 853.2 6565 cellular  
 organisms;Eukaryota;Opisthokonta;Metazoa;Eumetazoa;Bilateria;Protostomia;  
 Spiralia;Lophotrochozoa;Mollusca;Bivalvia;Autobranchia;Pteriomorpha;Ostr  
 eida;Ostreoidea;Ostreidae;Crassostrea;Crassostrea virginica  
 UdeM00000021228 29159 246.9 UdeM00000021228 XP\_019926261.2 24.5 931  
 444 17 6 684 631 1554 7.90E-62 246.9 29159 cellular  
 organisms;Eukaryota;Opisthokonta;Metazoa;Eumetazoa;Bilateria;Protostomia;  
 Spiralia;Lophotrochozoa;Mollusca;Bivalvia;Autobranchia;Pteriomorpha;Ostr  
 eida;Ostreoidea;Ostreidae;Crassostrea;Crassostrea gigas  
 UdeM00000021227 29159 246.9 UdeM00000021227 XP\_019926261.2 24.5 931  
 444 17 21 699 631 1554 8.10E-62 246.9 29159 cellular  
 organisms;Eukaryota;Opisthokonta;Metazoa;Eumetazoa;Bilateria;Protostomia;  
 Spiralia;Lophotrochozoa;Mollusca;Bivalvia;Autobranchia;Pteriomorpha;Ostr  
 eida;Ostreoidea;Ostreidae;Crassostrea;Crassostrea gigas  
 UdeM00000021229 6596 182.2 UdeM00000021229 XP\_045212957.1 36 356  
 217 7 17 367 9 358 1.30E-42 182.2 6596 cellular  
 organisms;Eukaryota;Opisthokonta;Metazoa;Eumetazoa;Bilateria;Protostomia;  
 Spiralia;Lophotrochozoa;Mollusca;Bivalvia;Autobranchia;Heteroconchia;Euhe  
 terodonta;Imparidentia;Venerida;Veneroidea;Veneridae;Mercenaria;Mercenari  
 a mercenaria  
 UdeM00000021231 6573 191.4 UdeM00000021231 XP\_021376378.1 26.1 620  
 303 16 6 480 1961 2570 2.60E-45 191.4 6573 cellular  
 organisms;Eukaryota;Opisthokonta;Metazoa;Eumetazoa;Bilateria;Protostomia;



Spiralia;Lophotrochozoa;Mollusca;Bivalvia;Autobranchia;Pteriormorphia;Pectinida;Pectinoidea;Pectinidae;Mizuhopecten;Mizuhopecten yessoensis  
UdeM00000021230 6573 191.4 UdeM00000021230 XP\_021376378.1 26.1 620  
303 16 21 495 1961 2570 2.70E-45 191.4 6573 cellular  
organisms;Eukaryota;Opisthokonta;Metazoa;Eumetazoa;Bilateria;Protostomia;  
Spiralia;Lophotrochozoa;Mollusca;Bivalvia;Autobranchia;Pteriormorphia;Pectinida;Pectinoidea;Pectinidae;Mizuhopecten;Mizuhopecten yessoensis  
UdeM00000021232 6596 182.6 UdeM00000021232 XP\_045212957.1 36 356  
217 7 17 367 9 358 1.00E-42 182.6 6596 cellular  
organisms;Eukaryota;Opisthokonta;Metazoa;Eumetazoa;Bilateria;Protostomia;  
Spiralia;Lophotrochozoa;Mollusca;Bivalvia;Autobranchia;Heteroconchia;Euheterodonta;Imparidentia;Venerida;Veneroidea;Veneridae;Mercenaria;Mercenaria mercenaria  
UdeM00000021233 29159 371.7 UdeM00000021233 XP\_019926261.2 30.3 913  
547 20 1 883 700 1553 2.70E-99 371.7 29159 cellular  
organisms;Eukaryota;Opisthokonta;Metazoa;Eumetazoa;Bilateria;Protostomia;  
Spiralia;Lophotrochozoa;Mollusca;Bivalvia;Autobranchia;Pteriormorphia;Ostreida;Ostreoidea;Ostreidae;Crassostrea;Crassostrea gigas  
UdeM00000021234 6596 297 UdeM00000021234 XP\_045213887.1 28 922  
569 29 235 1072 2030 2940 9.90E-77 297 6596 cellular  
organisms;Eukaryota;Opisthokonta;Metazoa;Eumetazoa;Bilateria;Protostomia;  
Spiralia;Lophotrochozoa;Mollusca;Bivalvia;Autobranchia;Heteroconchia;Euheterodonta;Imparidentia;Venerida;Veneroidea;Veneridae;Mercenaria;Mercenaria mercenaria  
UdeM00000021235 6596 226.1 UdeM00000021235 XP\_045211190.1 34 415  
254 7 21 429 18 418 8.60E-56 226.1 6596 cellular  
organisms;Eukaryota;Opisthokonta;Metazoa;Eumetazoa;Bilateria;Protostomia;  
Spiralia;Lophotrochozoa;Mollusca;Bivalvia;Autobranchia;Heteroconchia;Euheterodonta;Imparidentia;Venerida;Veneroidea;Veneridae;Mercenaria;Mercenaria mercenaria  
UdeM00000021236 6526 181.8 UdeM00000021236 XP\_013064169.1 34.8 362  
223 7 31 389 16 367 1.70E-42 181.8 6526 cellular  
organisms;Eukaryota;Opisthokonta;Metazoa;Eumetazoa;Bilateria;Protostomia;  
Spiralia;Lophotrochozoa;Mollusca;Gastropoda;Heterobranchia;Euthyneura;Panpulmonata;Hygrophila;Lymnaeidae;Planorbidae;Biomphalaria;Biomphalaria glabrata  
UdeM00000021237 6596 234.6 UdeM00000021237 XP\_045211193.1 33.3 433  
267 9 4 431 15 430 2.40E-58 234.6 6596 cellular  
organisms;Eukaryota;Opisthokonta;Metazoa;Eumetazoa;Bilateria;Protostomia;  
Spiralia;Lophotrochozoa;Mollusca;Bivalvia;Autobranchia;Heteroconchia;Euheterodonta;Imparidentia;Venerida;Veneroidea;Veneridae;Mercenaria;Mercenaria mercenaria  
UdeM00000021238 6596 129.4 UdeM00000021238 XP\_045212957.1 29.6 351  
179 10 22 306 14 362 8.40E-27 129.4 6596 cellular  
organisms;Eukaryota;Opisthokonta;Metazoa;Eumetazoa;Bilateria;Protostomia;  
Spiralia;Lophotrochozoa;Mollusca;Bivalvia;Autobranchia;Heteroconchia;Euheterodonta;Imparidentia;Venerida;Veneroidea;Veneridae;Mercenaria;Mercenaria mercenaria  
UdeM00000021239 6596 242.7 UdeM00000021239 XP\_045211190.1 33.3 411  
258 5 24 431 21 418 8.90E-61 242.7 6596 cellular  
organisms;Eukaryota;Opisthokonta;Metazoa;Eumetazoa;Bilateria;Protostomia;  
Spiralia;Lophotrochozoa;Mollusca;Bivalvia;Autobranchia;Heteroconchia;Euheterodonta;Imparidentia;Venerida;Veneroidea;Veneridae;Mercenaria;Mercenaria mercenaria

UdeM00000021240 6596 246.9 UdeM00000021240 XP\_045211190.1 34.1 411  
 255 6 24 431 21 418 4.70E-62 246.9 6596 cellular  
 organisms;Eukaryota;Opisthokonta;Metazoa;Eumetazoa;Bilateria;Protostomia;  
 Spiralia;Lophotrochozoa;Mollusca;Bivalvia;Autobranhia;Heteroconchia;Euhe  
 terodonta;Imparidentia;Venerida;Veneroidea;Veneridae;Mercenaria;Mercenari  
 a mercenaria  
 UdeM00000021241 29159 408.7 UdeM00000021241 XP\_034312641.1 63.5 288  
 105 0 17 304 8 295 6.60E-111 408.7 29159 cellular  
 organisms;Eukaryota;Opisthokonta;Metazoa;Eumetazoa;Bilateria;Protostomia;  
 Spiralia;Lophotrochozoa;Mollusca;Bivalvia;Autobranhia;Pteriormorphia;Ostr  
 eida;Ostreoidea;Ostreidae;Crassostrea;Crassostrea gigas  
 UdeM00000021242 6579 560.8 UdeM00000021242 XP\_033753310.1 79.6 323  
 66 0 1 323 1 323 1.10E-156 560.8 6579 cellular  
 organisms;Eukaryota;Opisthokonta;Metazoa;Eumetazoa;Bilateria;Protostomia;  
 Spiralia;Lophotrochozoa;Mollusca;Bivalvia;Autobranhia;Pteriormorphia;Pect  
 inida;Pectinoidea;Pectinidae;Pecten;Pecten maximus  
 UdeM00000021243 6596 876.7 UdeM00000021243 XP\_045211544.1 80.9 555  
 58 1 1 555 33 539 1.60E-251 876.7 6596 cellular  
 organisms;Eukaryota;Opisthokonta;Metazoa;Eumetazoa;Bilateria;Protostomia;  
 Spiralia;Lophotrochozoa;Mollusca;Bivalvia;Autobranhia;Heteroconchia;Euhe  
 terodonta;Imparidentia;Venerida;Veneroidea;Veneridae;Mercenaria;Mercenari  
 a mercenaria  
 UdeM00000021244 6596 446.4 UdeM00000021244 XP\_045212308.1 94 234  
 14 0 47 280 44 277 2.60E-122 446.4 6596 cellular  
 organisms;Eukaryota;Opisthokonta;Metazoa;Eumetazoa;Bilateria;Protostomia;  
 Spiralia;Lophotrochozoa;Mollusca;Bivalvia;Autobranhia;Heteroconchia;Euhe  
 terodonta;Imparidentia;Venerida;Veneroidea;Veneridae;Mercenaria;Mercenari  
 a mercenaria  
 UdeM00000021245 1735272 1030.4 UdeM00000021245 XP\_041363220.1  
 59 846 327 3 3 848 10 835 1.30E-297 1030.4  
 1735272 cellular  
 organisms;Eukaryota;Opisthokonta;Metazoa;Eumetazoa;Bilateria;Protostomia;  
 Spiralia;Lophotrochozoa;Mollusca;Gastropoda;Neomphalina;Neomphaloidea;Pel  
 tospiridae;Gigantopelta;Gigantopelta aegis  
 UdeM00000021246 6596 468.4 UdeM00000021246 XP\_045212310.1 65.4 364  
 115 6 1 359 19 376 8.40E-129 468.4 6596 cellular  
 organisms;Eukaryota;Opisthokonta;Metazoa;Eumetazoa;Bilateria;Protostomia;  
 Spiralia;Lophotrochozoa;Mollusca;Bivalvia;Autobranhia;Heteroconchia;Euhe  
 terodonta;Imparidentia;Venerida;Veneroidea;Veneridae;Mercenaria;Mercenari  
 a mercenaria  
 UdeM00000021247 6573 332.4 UdeM00000021247 XP\_021341851.1 54.8 281  
 124 1 39 316 846 1126 6.30E-88 332.4 6573 cellular  
 organisms;Eukaryota;Opisthokonta;Metazoa;Eumetazoa;Bilateria;Protostomia;  
 Spiralia;Lophotrochozoa;Mollusca;Bivalvia;Autobranhia;Pteriormorphia;Pect  
 inida;Pectinoidea;Pectinidae;Mizuhopecten;Mizuhopecten yessoensis  
 UdeM00000021248 6573 167.9 UdeM00000021248 XP\_021355249.1 47.3 182  
 92 1 2 183 96 273 1.20E-38 167.9 6573 cellular  
 organisms;Eukaryota;Opisthokonta;Metazoa;Eumetazoa;Bilateria;Protostomia;  
 Spiralia;Lophotrochozoa;Mollusca;Bivalvia;Autobranhia;Pteriormorphia;Pect  
 inida;Pectinoidea;Pectinidae;Mizuhopecten;Mizuhopecten yessoensis  
 UdeM00000021249 34632 292.7 UdeM00000021249 XP\_037502272.1 25.5 1048  
 676 29 114 1111 569 1561 2.10E-75 292.7 34632 cellular  
 organisms;Eukaryota;Opisthokonta;Metazoa;Eumetazoa;Bilateria;Protostomia;  
 Ecdysozoa;Panarthropoda;Arthropoda;Chelicerata;Arachnida;Acari;Parasitifo

rmes;Ixodida;Ixodoidea;Ixodidae;Rhipicephalinae;Rhipicephalus;Rhipicephalus;Rhipicephalus sanguineus group;Rhipicephalus sanguineus  
 UdeM00000021251 1735272 697.2 UdeM00000021251 XP\_041363084.1 84  
 399 64 0 10 408 9 407 1.20E-197 697.2 1735272  
 cellular  
 organisms;Eukaryota;Opisthokonta;Metazoa;Eumetazoa;Bilateria;Protostomia;Spiralia;Lophotrochozoa;Mollusca;Gastropoda;Neomphalina;Neomphaloidea;Peltospiridae;Gigantopelta;Gigantopelta aegis  
 UdeM00000021252 291302 245.4 UdeM00000021252 XP\_016051016.1 74.5  
 149 38 0 13 161 21 169 5.60E-62 245.4 291302  
 cellular  
 organisms;Eukaryota;Opisthokonta;Metazoa;Eumetazoa;Bilateria;Deuterostomia;Chordata;Craniata;Vertebrata;Gnathostomata;Teleostomi;Euteleostomi;Sarcopterygii;Dipnotetrapodomorpha;Tetrapoda;Amniota;Mammalia;Theria;Eutheria;Boreoeutheria;Laurasiatheria;Chiroptera;Microchiroptera;Vespertilionidae;Miniopterinae;Miniopterus;Miniopterus natalensis  
 UdeM00000021253 6596 276.2 UdeM00000021253 XP\_045177072.1 41.4 326  
 189 2 17 341 107 431 5.80E-71 276.2 6596 cellular  
 organisms;Eukaryota;Opisthokonta;Metazoa;Eumetazoa;Bilateria;Protostomia;Spiralia;Lophotrochozoa;Mollusca;Bivalvia;Autobranchia;Heteroconchia;Euheterodonta;Imparidentia;Venerida;Veneroidea;Veneridae;Mercenaria;Mercenaria mercenaria  
 UdeM00000021255 6573 138.3 UdeM00000021255 XP\_021375695.1 49.2 132  
 65 1 4 133 6 137 7.30E-30 138.3 6573 cellular  
 organisms;Eukaryota;Opisthokonta;Metazoa;Eumetazoa;Bilateria;Protostomia;Spiralia;Lophotrochozoa;Mollusca;Bivalvia;Autobranchia;Pteriormorphia;Pectinida;Pectinoidea;Pectinidae;Mizuhopecten;Mizuhopecten yessoensis  
 UdeM00000021254 6579 249.6 UdeM00000021254 XP\_033734624.1 54.5 220  
 98 1 4 221 5 224 4.10E-63 249.6 6579 cellular  
 organisms;Eukaryota;Opisthokonta;Metazoa;Eumetazoa;Bilateria;Protostomia;Spiralia;Lophotrochozoa;Mollusca;Bivalvia;Autobranchia;Pteriormorphia;Pectinida;Pectinoidea;Pectinidae;Pecten;Pecten maximus  
 UdeM00000021256 1735272 820.1 UdeM00000021256 XP\_041363097.1 52.9  
 762 342 4 1 753 3 756 2.40E-234 820.1 1735272  
 cellular  
 organisms;Eukaryota;Opisthokonta;Metazoa;Eumetazoa;Bilateria;Protostomia;Spiralia;Lophotrochozoa;Mollusca;Gastropoda;Neomphalina;Neomphaloidea;Peltospiridae;Gigantopelta;Gigantopelta aegis  
 UdeM00000021258 6565 74.7 UdeM00000021258 XP\_022287521.1 37.1 143  
 72 6 6 146 187 313 1.10E-10 74.7 6565 cellular  
 organisms;Eukaryota;Opisthokonta;Metazoa;Eumetazoa;Bilateria;Protostomia;Spiralia;Lophotrochozoa;Mollusca;Bivalvia;Autobranchia;Pteriormorphia;Ostreida;Ostreoidea;Ostreidae;Crassostrea;Crassostrea virginica  
 UdeM00000021257 6573 101.3 UdeM00000021257 XP\_021376724.1 36.3 193  
 80 5 6 172 153 328 1.30E-18 101.3 6573 cellular  
 organisms;Eukaryota;Opisthokonta;Metazoa;Eumetazoa;Bilateria;Protostomia;Spiralia;Lophotrochozoa;Mollusca;Bivalvia;Autobranchia;Pteriormorphia;Pectinida;Pectinoidea;Pectinidae;Mizuhopecten;Mizuhopecten yessoensis  
 UdeM00000021259 1735272 609.8 UdeM00000021259 XP\_041363097.1 55.9  
 540 221 4 58 588 225 756 3.80E-171 609.8 1735272  
 cellular  
 organisms;Eukaryota;Opisthokonta;Metazoa;Eumetazoa;Bilateria;Protostomia;Spiralia;Lophotrochozoa;Mollusca;Gastropoda;Neomphalina;Neomphaloidea;Peltospiridae;Gigantopelta;Gigantopelta aegis

UdeM00000021260 6579 310.8 UdeM00000021260 XP\_033734624.1 67.4 224  
 72 1 90 312 827 1050 1.90E-81 310.8 6579 cellular  
 organisms;Eukaryota;Opisthokonta;Metazoa;Eumetazoa;Bilateria;Protostomia;  
 Spiralia;Lophotrochozoa;Mollusca;Bivalvia;Autobranchia;Pteriormorphia;Pect  
 inida;Pectinoidea;Pectinidae;Pecten;Pecten maximus  
 UdeM00000021261 6596 536.6 UdeM00000021261 XP\_045211572.1 64.4 393  
 134 3 21 413 69 455 2.80E-149 536.6 6596 cellular  
 organisms;Eukaryota;Opisthokonta;Metazoa;Eumetazoa;Bilateria;Protostomia;  
 Spiralia;Lophotrochozoa;Mollusca;Bivalvia;Autobranchia;Heteroconchia;Euhe  
 terodonta;Imparidentia;Venerida;Veneroidea;Veneridae;Mercenaria;Mercenari  
 a mercenaria  
 UdeM00000021262 6596 292 UdeM00000021262 XP\_045212517.1 50.5 279  
 137 1 2 279 4 282 8.40E-76 292 6596 cellular  
 organisms;Eukaryota;Opisthokonta;Metazoa;Eumetazoa;Bilateria;Protostomia;  
 Spiralia;Lophotrochozoa;Mollusca;Bivalvia;Autobranchia;Heteroconchia;Euhe  
 terodonta;Imparidentia;Venerida;Veneroidea;Veneridae;Mercenaria;Mercenari  
 a mercenaria  
 UdeM00000021263 6596 518.5 UdeM00000021263 XP\_045156491.1 25.2 1862  
 1203 43 651 2377 436 2242 4.60E-143 518.5 6596 cellular  
 organisms;Eukaryota;Opisthokonta;Metazoa;Eumetazoa;Bilateria;Protostomia;  
 Spiralia;Lophotrochozoa;Mollusca;Bivalvia;Autobranchia;Heteroconchia;Euhe  
 terodonta;Imparidentia;Venerida;Veneroidea;Veneridae;Mercenaria;Mercenari  
 a mercenaria  
 UdeM00000021264 6573 160.2 UdeM00000021264 XP\_021373041.1 69.7 109  
 33 0 8 116 237 345 5.00E-36 160.2 6573 cellular  
 organisms;Eukaryota;Opisthokonta;Metazoa;Eumetazoa;Bilateria;Protostomia;  
 Spiralia;Lophotrochozoa;Mollusca;Bivalvia;Autobranchia;Pteriormorphia;Pect  
 inida;Pectinoidea;Pectinidae;Mizuhopecten;Mizuhopecten yessoensis  
 UdeM00000021266 29159 92 UdeM00000021266 XP\_034322284.1 45.2 93  
 46 4 2 92 362 451 8.90E-16 92 29159 cellular  
 organisms;Eukaryota;Opisthokonta;Metazoa;Eumetazoa;Bilateria;Protostomia;  
 Spiralia;Lophotrochozoa;Mollusca;Bivalvia;Autobranchia;Pteriormorphia;Ostr  
 eida;Ostreoidea;Ostreidae;Crassostrea;Crassostrea gigas  
 UdeM00000021268 441366 165.2 UdeM00000021268 XP\_028296753.1 38.8  
 255 146 7 6 258 32 278 1.20E-37 165.2 441366  
 cellular  
 organisms;Eukaryota;Opisthokonta;Metazoa;Eumetazoa;Bilateria;Deuterostomi  
 a;Chordata;Craniata;Vertebrata;Gnathostomata;Teleostomi;Euteleostomi;Acti  
 nopterygii;Actinopteri;Neopterygii;Teleostei;Osteoglossocephalai;Clupeoce  
 phala;Euteleosteomorpha;Neoteleostei;Eurypterygia;Ctenosquamata;Acanthomo  
 rphata;Euacanthomorphacea;Percomorphaceae;Ovalentaria;Blenniimorphae;Blen  
 niiformes;Gobiesocoiidei;Gobiesocidae;Gobiesocinae;Gouania;Gouania  
 willdenowi  
 UdeM00000021269 6596 1632.5 UdeM00000021269 XP\_045213258.1 70.4  
 1139 335 2 60 1198 2 1138 0.00E+00 1632.5 6596  
 cellular  
 organisms;Eukaryota;Opisthokonta;Metazoa;Eumetazoa;Bilateria;Protostomia;  
 Spiralia;Lophotrochozoa;Mollusca;Bivalvia;Autobranchia;Heteroconchia;Euhe  
 terodonta;Imparidentia;Venerida;Veneroidea;Veneridae;Mercenaria;Mercenari  
 a mercenaria  
 UdeM00000021270 146911 167.2 UdeM00000021270 XP\_015285221.1 78.2  
 101 22 0 1 101 1022 1122 1.10E-38 167.2 146911  
 cellular  
 organisms;Eukaryota;Opisthokonta;Metazoa;Eumetazoa;Bilateria;Deuterostomi

a;Chordata;Craniata;Vertebrata;Gnathostomata;Teleostomi;Euteleostomi;Sarcopterygii;Dipnotetrapodomorpha;Tetrapoda;Amniota;Sauropsida;Sauria;Lepidosauria;Squamata;Bifurcata;Gekkota;Gekkonidae;Gekkoninae;Gekko;Gekko japonicus

UdeM00000021271 6573 807.7 UdeM00000021271 XP\_021367473.1 66.2 780  
264 0 204 983 1158 1937 1.60E-230 807.7 6573 cellular  
organisms;Eukaryota;Opisthokonta;Metazoa;Eumetazoa;Bilateria;Protostomia;Spiralia;Lophotrochozoa;Mollusca;Bivalvia;Autobranchia;Pteriormorphia;Pectinida;Pectinoidea;Pectinidae;Mizuhopecten;Mizuhopecten yessoensis

UdeM00000021272 6573 807.7 UdeM00000021272 XP\_021367473.1 65.9 785  
268 0 204 988 1158 1942 1.60E-230 807.7 6573 cellular  
organisms;Eukaryota;Opisthokonta;Metazoa;Eumetazoa;Bilateria;Protostomia;Spiralia;Lophotrochozoa;Mollusca;Bivalvia;Autobranchia;Pteriormorphia;Pectinida;Pectinoidea;Pectinidae;Mizuhopecten;Mizuhopecten yessoensis

UdeM00000021273 29159 1408.7 UdeM00000021273 XP\_034310988.1 79.8  
886 144 5 3 880 7 865 0.00E+00 1408.7  
29159 cellular

organisms;Eukaryota;Opisthokonta;Metazoa;Eumetazoa;Bilateria;Protostomia;Spiralia;Lophotrochozoa;Mollusca;Bivalvia;Autobranchia;Pteriormorphia;Ostreida;Ostreioidea;Ostreidae;Crassostrea;Crassostrea gigas

UdeM00000021274 29159 1391.3 UdeM00000021274 XP\_034310988.1 75.9  
934 142 5 3 928 7 865 0.00E+00 1391.3  
29159 cellular

organisms;Eukaryota;Opisthokonta;Metazoa;Eumetazoa;Bilateria;Protostomia;Spiralia;Lophotrochozoa;Mollusca;Bivalvia;Autobranchia;Pteriormorphia;Ostreida;Ostreioidea;Ostreidae;Crassostrea;Crassostrea gigas

UdeM00000021275 6596 88.6 UdeM00000021275 XP\_045212260.1 38.8 85  
52 0 1 85 78 162 7.00E-15 88.6 6596 cellular  
organisms;Eukaryota;Opisthokonta;Metazoa;Eumetazoa;Bilateria;Protostomia;Spiralia;Lophotrochozoa;Mollusca;Bivalvia;Autobranchia;Heteroconchia;Euheterodonta;Imparidentia;Venerida;Veneroidea;Veneridae;Mercenaria;Mercenaria mercenaria

UdeM00000021276 29159 100.9 UdeM00000021276 XP\_034312519.1 63.1 84  
31 0 2 85 228 311 1.00E-18 100.9 29159 cellular  
organisms;Eukaryota;Opisthokonta;Metazoa;Eumetazoa;Bilateria;Protostomia;Spiralia;Lophotrochozoa;Mollusca;Bivalvia;Autobranchia;Pteriormorphia;Ostreida;Ostreioidea;Ostreidae;Crassostrea;Crassostrea gigas

UdeM00000021277 29159 103.2 UdeM00000021277 XP\_034312519.1 63.1 84  
31 0 2 85 228 311 2.00E-19 103.2 29159 cellular  
organisms;Eukaryota;Opisthokonta;Metazoa;Eumetazoa;Bilateria;Protostomia;Spiralia;Lophotrochozoa;Mollusca;Bivalvia;Autobranchia;Pteriormorphia;Ostreida;Ostreioidea;Ostreidae;Crassostrea;Crassostrea gigas

UdeM00000021278 6579 236.5 UdeM00000021278 XP\_033742354.1 33 467  
292 10 104 559 128 584 1.60E-58 236.5 6579 cellular  
organisms;Eukaryota;Opisthokonta;Metazoa;Eumetazoa;Bilateria;Protostomia;Spiralia;Lophotrochozoa;Mollusca;Bivalvia;Autobranchia;Pteriormorphia;Pectinida;Pectinoidea;Pectinidae;Pecten;Pecten maximus

UdeM00000021279 29159 1142.5 UdeM00000021279 XP\_011429418.2 73.8  
736 193 0 614 1349 654 1389 0.00E+00 1142.5  
29159 cellular

organisms;Eukaryota;Opisthokonta;Metazoa;Eumetazoa;Bilateria;Protostomia;Spiralia;Lophotrochozoa;Mollusca;Bivalvia;Autobranchia;Pteriormorphia;Ostreida;Ostreioidea;Ostreidae;Crassostrea;Crassostrea gigas

UdeM00000021280 29159 1153.7 UdeM00000021280 XP\_011429418.2 73.7  
 745 196 0 604 1348 645 1389 0.00E+00 1153.7  
 29159 cellular  
 organisms;Eukaryota;Opisthokonta;Metazoa;Eumetazoa;Bilateria;Protostomia;  
 Spiralia;Lophotrochozoa;Mollusca;Bivalvia;Autobranchia;Pteriomorpha;Ostr  
 eida;Ostreoidea;Ostreidae;Crassostrea;Crassostrea gigas  
 UdeM00000021281 29159 1137.1 UdeM00000021281 XP\_011429418.2 73.6  
 738 193 1 614 1351 654 1389 0.00E+00 1137.1  
 29159 cellular  
 organisms;Eukaryota;Opisthokonta;Metazoa;Eumetazoa;Bilateria;Protostomia;  
 Spiralia;Lophotrochozoa;Mollusca;Bivalvia;Autobranchia;Pteriomorpha;Ostr  
 eida;Ostreoidea;Ostreidae;Crassostrea;Crassostrea gigas  
 UdeM00000021282 6596 595.1 UdeM00000021282 XP\_045210639.1 32.2 1536  
 968 39 69 1564 17 1518 2.50E-166 595.1 6596 cellular  
 organisms;Eukaryota;Opisthokonta;Metazoa;Eumetazoa;Bilateria;Protostomia;  
 Spiralia;Lophotrochozoa;Mollusca;Bivalvia;Autobranchia;Heteroconchia;Euhe  
 terodonta;Imparidentia;Venerida;Veneroidea;Veneridae;Mercenaria;Mercenari  
 a mercenaria  
 UdeM00000021283 6565 630.9 UdeM00000021283 XP\_022316199.1 38.1 911  
 533 18 1675 2572 350 1242 7.80E-177 630.9 6565 cellular  
 organisms;Eukaryota;Opisthokonta;Metazoa;Eumetazoa;Bilateria;Protostomia;  
 Spiralia;Lophotrochozoa;Mollusca;Bivalvia;Autobranchia;Pteriomorpha;Ostr  
 eida;Ostreoidea;Ostreidae;Crassostrea;Crassostrea virginica  
 UdeM00000021286 6596 248.4 UdeM00000021286 XP\_045210636.1 28.8 793  
 501 24 5 759 242 1008 2.80E-62 248.4 6596 cellular  
 organisms;Eukaryota;Opisthokonta;Metazoa;Eumetazoa;Bilateria;Protostomia;  
 Spiralia;Lophotrochozoa;Mollusca;Bivalvia;Autobranchia;Heteroconchia;Euhe  
 terodonta;Imparidentia;Venerida;Veneroidea;Veneridae;Mercenaria;Mercenari  
 a mercenaria  
 UdeM00000021287 45264 641.7 UdeM00000021287 XP\_044179295.1 21.8 4288  
 2822 137 1286 5325 30 4035 1.00E-179 641.7 45264 cellular  
 organisms;Eukaryota;Opisthokonta;Metazoa;Eumetazoa;Cnidaria;Anthozoa;Hexa  
 corallia;Scleractinia;Astrocoeniina;Acroporidae;Acropora;Acropora  
 millepora  
 UdeM00000021288 45264 641.7 UdeM00000021288 XP\_044179295.1 21.8 4288  
 2822 137 1220 5259 30 4035 1.00E-179 641.7 45264 cellular  
 organisms;Eukaryota;Opisthokonta;Metazoa;Eumetazoa;Cnidaria;Anthozoa;Hexa  
 corallia;Scleractinia;Astrocoeniina;Acroporidae;Acropora;Acropora  
 millepora  
 UdeM00000021289 6573 305.1 UdeM00000021289 XP\_021359099.1 75.1 205  
 45 2 1 200 361 564 6.70E-80 305.1 6573 cellular  
 organisms;Eukaryota;Opisthokonta;Metazoa;Eumetazoa;Bilateria;Protostomia;  
 Spiralia;Lophotrochozoa;Mollusca;Bivalvia;Autobranchia;Pteriomorpha;Pect  
 inida;Pectinoidea;Pectinidae;Mizuhopecten;Mizuhopecten yessoensis  
 UdeM00000021290 6596 1132.1 UdeM00000021290 XP\_045214661.1 89.2  
 618 66 1 1 617 1 618 0.00E+00 1132.1 6596  
 cellular  
 organisms;Eukaryota;Opisthokonta;Metazoa;Eumetazoa;Bilateria;Protostomia;  
 Spiralia;Lophotrochozoa;Mollusca;Bivalvia;Autobranchia;Heteroconchia;Euhe  
 terodonta;Imparidentia;Venerida;Veneroidea;Veneridae;Mercenaria;Mercenari  
 a mercenaria  
 UdeM00000021291 1735272 682.9 UdeM00000021291 XP\_041364259.1 47.4  
 725 352 3 2 725 3 699 4.50E-193 682.9 1735272  
 cellular

organisms;Eukaryota;Opisthokonta;Metazoa;Eumetazoa;Bilateria;Protostomia;Spiralia;Lophotrochozoa;Mollusca;Gastropoda;Neomphalina;Neomphaloidea;Peltospiridae;Gigantopelta;Gigantopelta aegis

UdeM00000021293 6596 1259.2 UdeM00000021293 XP\_045213234.1 64.5  
1033 341 13 11 1035 30 1044 0.00E+00 1259.2 6596  
cellular

organisms;Eukaryota;Opisthokonta;Metazoa;Eumetazoa;Bilateria;Protostomia;Spiralia;Lophotrochozoa;Mollusca;Bivalvia;Autobranchia;Heteroconchia;Euherodonta;Imparidentia;Venerida;Veneroidea;Veneridae;Mercenaria;Mercenaria mercenaria

UdeM00000021294 6596 80.5 UdeM00000021294 XP\_045211157.1 39.2 120  
70 2 1 120 1 117 4.30E-12 80.5 6596 cellular

organisms;Eukaryota;Opisthokonta;Metazoa;Eumetazoa;Bilateria;Protostomia;Spiralia;Lophotrochozoa;Mollusca;Bivalvia;Autobranchia;Heteroconchia;Euherodonta;Imparidentia;Venerida;Veneroidea;Veneridae;Mercenaria;Mercenaria mercenaria

UdeM00000021295 6596 388.7 UdeM00000021295 XP\_045213242.1 64.4 281  
97 2 35 313 1 280 7.30E-105 388.7 6596 cellular

organisms;Eukaryota;Opisthokonta;Metazoa;Eumetazoa;Bilateria;Protostomia;Spiralia;Lophotrochozoa;Mollusca;Bivalvia;Autobranchia;Heteroconchia;Euherodonta;Imparidentia;Venerida;Veneroidea;Veneridae;Mercenaria;Mercenaria mercenaria

UdeM00000021296 6596 326.6 UdeM00000021296 XP\_045213239.1 65.2 230  
77 2 1 228 68 296 2.50E-86 326.6 6596 cellular

organisms;Eukaryota;Opisthokonta;Metazoa;Eumetazoa;Bilateria;Protostomia;Spiralia;Lophotrochozoa;Mollusca;Bivalvia;Autobranchia;Heteroconchia;Euherodonta;Imparidentia;Venerida;Veneroidea;Veneridae;Mercenaria;Mercenaria mercenaria

UdeM00000021298 6579 678.3 UdeM00000021298 XP\_033756537.1 86.2 377  
51 1 74 450 75 450 6.60E-192 678.3 6579 cellular

organisms;Eukaryota;Opisthokonta;Metazoa;Eumetazoa;Bilateria;Protostomia;Spiralia;Lophotrochozoa;Mollusca;Bivalvia;Autobranchia;Pteriomorphia;Pectinida;Pectinoidea;Pectinidae;Pecten;Pecten maximus

UdeM00000021297 6579 678.3 UdeM00000021297 XP\_033756537.1 86.2 377  
51 1 58 434 75 450 6.30E-192 678.3 6579 cellular

organisms;Eukaryota;Opisthokonta;Metazoa;Eumetazoa;Bilateria;Protostomia;Spiralia;Lophotrochozoa;Mollusca;Bivalvia;Autobranchia;Pteriomorphia;Pectinida;Pectinoidea;Pectinidae;Pecten;Pecten maximus

UdeM00000021301 6573 1333.5 UdeM00000021301 XP\_021377219.1 82.4  
784 135 2 1 784 1 781 0.00E+00 1333.5 6573  
cellular

organisms;Eukaryota;Opisthokonta;Metazoa;Eumetazoa;Bilateria;Protostomia;Spiralia;Lophotrochozoa;Mollusca;Bivalvia;Autobranchia;Pteriomorphia;Pectinida;Pectinoidea;Pectinidae;Mizuhopecten;Mizuhopecten yessoensis

UdeM00000021302 6596 561.6 UdeM00000021302 XP\_045214870.1 71.8 387  
104 2 1 385 597 980 7.70E-157 561.6 6596 cellular

organisms;Eukaryota;Opisthokonta;Metazoa;Eumetazoa;Bilateria;Protostomia;Spiralia;Lophotrochozoa;Mollusca;Bivalvia;Autobranchia;Heteroconchia;Euherodonta;Imparidentia;Venerida;Veneroidea;Veneridae;Mercenaria;Mercenaria mercenaria

UdeM00000021303 6596 1405.2 UdeM00000021303 XP\_045214872.1 71.2  
977 272 4 1 972 1 973 0.00E+00 1405.2 6596  
cellular

organisms;Eukaryota;Opisthokonta;Metazoa;Eumetazoa;Bilateria;Protostomia;

Spiralia;Lophotrochozoa;Mollusca;Bivalvia;Autobranchia;Heteroconchia;Euherodonta;Imparidentia;Venerida;Veneroidea;Veneridae;Mercenaria;Mercenaria mercenaria

UdeM00000021304 441366 146.7 UdeM00000021304 XP\_028326620.1 40.8  
218 119 5 1 217 48 256 3.30E-32 146.7 441366

cellular

organisms;Eukaryota;Opisthokonta;Metazoa;Eumetazoa;Bilateria;Deuterostomia;Chordata;Craniata;Vertebrata;Gnathostomata;Teleostomi;Euteleostomi;Actinopterygii;Actinopteri;Neopterygii;Teleostei;Osteoglossocephalai;Clupeocephala;Euteleostei;Neoteleostei;Eurypterygia;Ctenosquamata;Acanthomorpha;Euacanthomorpha;Percomorphaceae;Ovalentaria;Blenniiformes;Blenniiformes;Gobiesocidae;Gobiesocinae;Gouania;Gouania

willdenowi

UdeM00000021305 6573 474.9 UdeM00000021305 XP\_021350620.1 73.3 345  
74 5 1 327 1 345 8.00E-131 474.9 6573 cellular

organisms;Eukaryota;Opisthokonta;Metazoa;Eumetazoa;Bilateria;Protostomia;Spiralia;Lophotrochozoa;Mollusca;Bivalvia;Autobranchia;Pteriormorphia;Pectinida;Pectinoidea;Pectinidae;Mizuhopecten;Mizuhopecten yessoensis

UdeM00000021306 6573 724.2 UdeM00000021306 XP\_021375430.1 45.1 900  
407 21 7 887 6 837 2.10E-205 724.2 6573 cellular

organisms;Eukaryota;Opisthokonta;Metazoa;Eumetazoa;Bilateria;Protostomia;Spiralia;Lophotrochozoa;Mollusca;Bivalvia;Autobranchia;Pteriormorphia;Pectinida;Pectinoidea;Pectinidae;Mizuhopecten;Mizuhopecten yessoensis

UdeM00000021307 6565 334 UdeM00000021307 XP\_022313176.1 95 160  
8 0 54 213 1 160 1.50E-88 334 6565 cellular

organisms;Eukaryota;Opisthokonta;Metazoa;Eumetazoa;Bilateria;Protostomia;Spiralia;Lophotrochozoa;Mollusca;Bivalvia;Autobranchia;Pteriormorphia;Ostreida;Ostreoidea;Ostreidae;Crassostrea;Crassostrea virginica

UdeM00000021308 6596 889.4 UdeM00000021308 XP\_045214960.1 58.9 776  
291 6 1 773 1 751 3.20E-255 889.4 6596 cellular

organisms;Eukaryota;Opisthokonta;Metazoa;Eumetazoa;Bilateria;Protostomia;Spiralia;Lophotrochozoa;Mollusca;Bivalvia;Autobranchia;Heteroconchia;Euherodonta;Imparidentia;Venerida;Veneroidea;Veneridae;Mercenaria;Mercenaria mercenaria

UdeM00000021309 6596 129 UdeM00000021309 XP\_045214959.1 22.7 948  
554 28 3 901 19 836 3.00E-26 129 6596 cellular

organisms;Eukaryota;Opisthokonta;Metazoa;Eumetazoa;Bilateria;Protostomia;Spiralia;Lophotrochozoa;Mollusca;Bivalvia;Autobranchia;Heteroconchia;Euherodonta;Imparidentia;Venerida;Veneroidea;Veneridae;Mercenaria;Mercenaria mercenaria

UdeM00000021310 225164 91.7 UdeM00000021310 XP\_009065296.1 39.8  
176 91 7 594 759 613 783 4.50E-15 91.7 225164

cellular

organisms;Eukaryota;Opisthokonta;Metazoa;Eumetazoa;Bilateria;Protostomia;Spiralia;Lophotrochozoa;Mollusca;Gastropoda;Patellogastropoda;Lottiidae;Lottia;Lottia gigantea

UdeM00000021311 6596 302.8 UdeM00000021311 XP\_045180074.1 33.9 496  
305 11 17 496 75 563 8.30E-79 302.8 6596 cellular

organisms;Eukaryota;Opisthokonta;Metazoa;Eumetazoa;Bilateria;Protostomia;Spiralia;Lophotrochozoa;Mollusca;Bivalvia;Autobranchia;Heteroconchia;Euherodonta;Imparidentia;Venerida;Veneroidea;Veneridae;Mercenaria;Mercenaria mercenaria

UdeM00000021312 6596 269.2 UdeM00000021312 XP\_045180074.1 33.1 429  
269 8 14 429 140 563 8.80E-69 269.2 6596 cellular



organisms;Eukaryota;Opisthokonta;Metazoa;Eumetazoa;Bilateria;Protostomia;Spiralia;Lophotrochozoa;Mollusca;Bivalvia;Autobranchia;Heteroconchia;Euherodonta;Imparidentia;Venerida;Veneroidea;Veneridae;Mercenaria;Mercenaria mercenaria

UdeM00000021313 6596 144.8 UdeM00000021313 XP\_045214959.1 24.3 847  
548 24 4 787 20 836 4.60E-31 144.8 6596 cellular

organisms;Eukaryota;Opisthokonta;Metazoa;Eumetazoa;Bilateria;Protostomia;Spiralia;Lophotrochozoa;Mollusca;Bivalvia;Autobranchia;Heteroconchia;Euherodonta;Imparidentia;Venerida;Veneroidea;Veneridae;Mercenaria;Mercenaria mercenaria

UdeM00000021314 225164 73.9 UdeM00000021314 XP\_009065296.1 29.5  
166 106 3 632 786 618 783 1.00E-09 73.9 225164  
cellular

organisms;Eukaryota;Opisthokonta;Metazoa;Eumetazoa;Bilateria;Protostomia;Spiralia;Lophotrochozoa;Mollusca;Gastropoda;Patellogastropoda;Lottioidea;Lottiidae;Lottia;Lottia gigantea

UdeM00000021315 6596 97.4 UdeM00000021315 XP\_045214959.1 38.9 131  
79 1 8 138 19 148 1.70E-17 97.4 6596 cellular

organisms;Eukaryota;Opisthokonta;Metazoa;Eumetazoa;Bilateria;Protostomia;Spiralia;Lophotrochozoa;Mollusca;Bivalvia;Autobranchia;Heteroconchia;Euherodonta;Imparidentia;Venerida;Veneroidea;Veneridae;Mercenaria;Mercenaria mercenaria

UdeM00000021316 6565 204.9 UdeM00000021316 XP\_022318066.1 72.9 133  
36 0 1 133 1 133 6.70E-50 204.9 6565 cellular

organisms;Eukaryota;Opisthokonta;Metazoa;Eumetazoa;Bilateria;Protostomia;Spiralia;Lophotrochozoa;Mollusca;Bivalvia;Autobranchia;Pteriormorphia;Ostracida;Ostreioidea;Ostreidae;Crassostrea;Crassostrea virginica

UdeM00000021317 7574 69.7 UdeM00000021317 XP\_013383345.1 35.8 151  
85 4 1 141 1 149 3.50E-09 69.7 7574 cellular

organisms;Eukaryota;Opisthokonta;Metazoa;Eumetazoa;Bilateria;Protostomia;Spiralia;Lophotrochozoa;Brachiopoda;Linguliformea;Lingulata;Lingulida;Linguloidea;Lingulidae;Lingula;Lingula anatina

UdeM00000021318 6596 1986.1 UdeM00000021318 XP\_045213481.1 44.6  
2483 1199 41 12 2362 78 2515 0.00E+00 1986.1 6596  
cellular

organisms;Eukaryota;Opisthokonta;Metazoa;Eumetazoa;Bilateria;Protostomia;Spiralia;Lophotrochozoa;Mollusca;Bivalvia;Autobranchia;Heteroconchia;Euherodonta;Imparidentia;Venerida;Veneroidea;Veneridae;Mercenaria;Mercenaria mercenaria

UdeM00000021319 6596 212.6 UdeM00000021319 XP\_045213481.1 36.6 361  
188 11 1 328 2163 2515 7.50E-52 212.6 6596 cellular

organisms;Eukaryota;Opisthokonta;Metazoa;Eumetazoa;Bilateria;Protostomia;Spiralia;Lophotrochozoa;Mollusca;Bivalvia;Autobranchia;Heteroconchia;Euherodonta;Imparidentia;Venerida;Veneroidea;Veneridae;Mercenaria;Mercenaria mercenaria

UdeM00000021321 1735272 348.2 UdeM00000021321 XP\_041363807.1 83.3  
204 34 0 9 212 299 502 7.40E-93 348.2 1735272  
cellular

organisms;Eukaryota;Opisthokonta;Metazoa;Eumetazoa;Bilateria;Protostomia;Spiralia;Lophotrochozoa;Mollusca;Gastropoda;Neomphalina;Neomphaloidea;Peltopiridae;Gigantopelta;Gigantopelta aegis

UdeM00000021320 400727 885.2 UdeM00000021320 XP\_025112144.1 89.5  
477 50 0 1 477 10 486 3.80E-254 885.2 400727  
cellular

organisms;Eukaryota;Opisthokonta;Metazoa;Eumetazoa;Bilateria;Protostomia;Spiralia;Lophotrochozoa;Mollusca;Gastropoda;Caenogastropoda;Architaenioglossa;Ampullarioidea;Ampullariidae;Pomacea;Pomacea canaliculata

UdeM00000021322 6596 139 UdeM00000021322 XP\_045213480.1 29.6 479  
271 17 1 460 1 432 1.50E-29 139 6596 cellular

organisms;Eukaryota;Opisthokonta;Metazoa;Eumetazoa;Bilateria;Protostomia;Spiralia;Lophotrochozoa;Mollusca;Bivalvia;Autobranchia;Heteroconchia;Euheterodonta;Imparidentia;Venerida;Veneroidea;Veneridae;Mercenaria;Mercenaria mercenaria

UdeM00000021323 6596 521.9 UdeM00000021323 XP\_045213059.1 65.8 380  
128 2 13 390 24 403 6.80E-145 521.9 6596 cellular

organisms;Eukaryota;Opisthokonta;Metazoa;Eumetazoa;Bilateria;Protostomia;Spiralia;Lophotrochozoa;Mollusca;Bivalvia;Autobranchia;Heteroconchia;Euheterodonta;Imparidentia;Venerida;Veneroidea;Veneridae;Mercenaria;Mercenaria mercenaria

UdeM00000021324 6596 837 UdeM00000021324 XP\_045213057.1 68.7 584  
178 4 1 581 1 582 1.40E-239 837 6596 cellular

organisms;Eukaryota;Opisthokonta;Metazoa;Eumetazoa;Bilateria;Protostomia;Spiralia;Lophotrochozoa;Mollusca;Bivalvia;Autobranchia;Heteroconchia;Euheterodonta;Imparidentia;Venerida;Veneroidea;Veneridae;Mercenaria;Mercenaria mercenaria

UdeM00000021326 6573 77 UdeM00000021326 XP\_021372025.1 29.4 194  
89 4 1 147 212 404 2.20E-11 77 6573 cellular

organisms;Eukaryota;Opisthokonta;Metazoa;Eumetazoa;Bilateria;Protostomia;Spiralia;Lophotrochozoa;Mollusca;Bivalvia;Autobranchia;Pteriomorphia;Pectinida;Pectinoidea;Pectinidae;Mizuhopecten;Mizuhopecten yessoensis

UdeM00000021327 1735272 1154.4 UdeM00000021327 XP\_041362296.1  
60.9 1031 367 11 13 1035 4 1006 0.00E+00 1154.4  
1735272 cellular

organisms;Eukaryota;Opisthokonta;Metazoa;Eumetazoa;Bilateria;Protostomia;Spiralia;Lophotrochozoa;Mollusca;Gastropoda;Neomphalina;Neomphaloidea;Peltospiridae;Gigantopelta;Gigantopelta aegis

UdeM00000021328 6565 215.3 UdeM00000021328 XP\_022314866.1 46.3 257  
91 4 2 221 38 284 1.20E-52 215.3 6565 cellular

organisms;Eukaryota;Opisthokonta;Metazoa;Eumetazoa;Bilateria;Protostomia;Spiralia;Lophotrochozoa;Mollusca;Bivalvia;Autobranchia;Pteriomorphia;Ostreida;Ostreoidea;Ostreidae;Crassostrea;Crassostrea virginica

UdeM00000021329 6565 294.7 UdeM00000021329 XP\_022314866.1 56.8 257  
101 3 2 258 38 284 1.70E-76 294.7 6565 cellular

organisms;Eukaryota;Opisthokonta;Metazoa;Eumetazoa;Bilateria;Protostomia;Spiralia;Lophotrochozoa;Mollusca;Bivalvia;Autobranchia;Pteriomorphia;Ostreida;Ostreoidea;Ostreidae;Crassostrea;Crassostrea virginica

UdeM00000021330 1735272 149.4 UdeM00000021330 XP\_041363443.1 55.1  
118 53 0 3 120 13 130 3.20E-33 149.4 1735272  
cellular

organisms;Eukaryota;Opisthokonta;Metazoa;Eumetazoa;Bilateria;Protostomia;Spiralia;Lophotrochozoa;Mollusca;Gastropoda;Neomphalina;Neomphaloidea;Peltospiridae;Gigantopelta;Gigantopelta aegis

UdeM00000021331 1735272 247.7 UdeM00000021331 XP\_041363443.1 57.5  
193 82 0 8 200 18 210 1.30E-62 247.7 1735272  
cellular

organisms;Eukaryota;Opisthokonta;Metazoa;Eumetazoa;Bilateria;Protostomia;Spiralia;Lophotrochozoa;Mollusca;Gastropoda;Neomphalina;Neomphaloidea;Peltospiridae;Gigantopelta;Gigantopelta aegis

UdeM00000021332 6565 325.9 UdeM00000021332 XP\_022314865.1 57.5 280  
 115 3 23 300 18 295 6.00E-86 325.9 6565 cellular  
 organisms;Eukaryota;Opisthokonta;Metazoa;Eumetazoa;Bilateria;Protostomia;  
 Spiralia;Lophotrochozoa;Mollusca;Bivalvia;Autobranchia;Pteriomorphia;Ostr  
 eida;Ostreoidea;Ostreidae;Crassostrea;Crassostrea virginica  
 UdeM00000021333 6596 1805.8 UdeM00000021333 XP\_045210572.1 56.6  
 1766 583 30 1 1725 175 1797 0.00E+00 1805.8 6596  
 cellular  
 organisms;Eukaryota;Opisthokonta;Metazoa;Eumetazoa;Bilateria;Protostomia;  
 Spiralia;Lophotrochozoa;Mollusca;Bivalvia;Autobranchia;Heteroconchia;Euhe  
 terodonta;Imparidentia;Venerida;Veneroidea;Veneridae;Mercenaria;Mercenari  
 a mercenaria  
 UdeM00000021334 8175 181.8 UdeM00000021334 XP\_030292627.1 55 149  
 66 1 9 156 11 159 6.70E-43 181.8 8175 cellular  
 organisms;Eukaryota;Opisthokonta;Metazoa;Eumetazoa;Bilateria;Deuterostomi  
 a;Chordata;Craniata;Vertebrata;Gnathostomata;Teleostomi;Euteleostomi;Acti  
 nopterygii;Actinopteri;Neopterygii;Teleostei;Osteoglossocephalai;Clupeoce  
 phala;Euteleosteomorpha;Neoteleostei;Eurypterygia;Ctenosquamata;Acanthomo  
 rphata;Euacanthomorphacea;Percomorphaceae;Eupercaria;Spariformes;Sparidae  
 ;Sparus;Sparus aurata  
 UdeM00000021335 8090 103.6 UdeM00000021335 XP\_023812682.1 50.6 87  
 43 0 1 87 195 281 1.40E-19 103.6 8090 cellular  
 organisms;Eukaryota;Opisthokonta;Metazoa;Eumetazoa;Bilateria;Deuterostomi  
 a;Chordata;Craniata;Vertebrata;Gnathostomata;Teleostomi;Euteleostomi;Acti  
 nopterygii;Actinopteri;Neopterygii;Teleostei;Osteoglossocephalai;Clupeoce  
 phala;Euteleosteomorpha;Neoteleostei;Eurypterygia;Ctenosquamata;Acanthomo  
 rphata;Euacanthomorphacea;Percomorphaceae;Ovalentaria;Atherinomorphae;Bel  
 oniformes;Adrianichthyoidei;Adrianichthyidae;Oryziinae;Oryzias;Oryzias  
 latipes  
 UdeM00000021337 6596 89.4 UdeM00000021337 XP\_045214606.1 24.4 344  
 222 10 3 316 6 341 1.00E-14 89.4 6596 cellular  
 organisms;Eukaryota;Opisthokonta;Metazoa;Eumetazoa;Bilateria;Protostomia;  
 Spiralia;Lophotrochozoa;Mollusca;Bivalvia;Autobranchia;Heteroconchia;Euhe  
 terodonta;Imparidentia;Venerida;Veneroidea;Veneridae;Mercenaria;Mercenari  
 a mercenaria  
 UdeM00000021338 6596 671 UdeM00000021338 XP\_045214606.1 45.4 822  
 386 13 7 774 343 1155 1.90E-189 671 6596 cellular  
 organisms;Eukaryota;Opisthokonta;Metazoa;Eumetazoa;Bilateria;Protostomia;  
 Spiralia;Lophotrochozoa;Mollusca;Bivalvia;Autobranchia;Heteroconchia;Euhe  
 terodonta;Imparidentia;Venerida;Veneroidea;Veneridae;Mercenaria;Mercenari  
 a mercenaria  
 UdeM00000021339 6565 662.1 UdeM00000021339 XP\_022318614.1 64.9 479  
 162 3 15 492 9 482 5.30E-187 662.1 6565 cellular  
 organisms;Eukaryota;Opisthokonta;Metazoa;Eumetazoa;Bilateria;Protostomia;  
 Spiralia;Lophotrochozoa;Mollusca;Bivalvia;Autobranchia;Pteriomorphia;Ostr  
 eida;Ostreoidea;Ostreidae;Crassostrea;Crassostrea virginica  
 UdeM00000021340 225164 620.9 UdeM00000021340 XP\_009060170.1 65.5  
 432 148 1 1 431 52 483 1.20E-174 620.9 225164  
 cellular  
 organisms;Eukaryota;Opisthokonta;Metazoa;Eumetazoa;Bilateria;Protostomia;  
 Spiralia;Lophotrochozoa;Mollusca;Gastropoda;Patellogastropoda;Lottioidae;  
 Lottiidae;Lottia;Lottia gigantea  
 UdeM00000021341 400727 179.5 UdeM00000021341 XP\_025104599.1 64.8  
 122 43 0 3 124 2 123 2.70E-42 179.5 400727

cellular  
organisms;Eukaryota;Opisthokonta;Metazoa;Eumetazoa;Bilateria;Protostomia;  
Spiralia;Lophotrochozoa;Mollusca;Gastropoda;Caenogastropoda;Architaenioglossa;  
Ampullarioidea;Ampullariidae;Pomacea;Pomacea canaliculata  
UdeM00000021342 37653 395.6 UdeM00000021342 XP\_014767578.1 69.5 302  
31 1 1 302 1 241 9.00E-107 395.6 37653 cellular  
organisms;Eukaryota;Opisthokonta;Metazoa;Eumetazoa;Bilateria;Protostomia;  
Spiralia;Lophotrochozoa;Mollusca;Cephalopoda;Coleoidea;Octopodiformes;Octopoda;  
Incirrata;Octopodidae;Octopus;Octopus bimaculoides  
UdeM00000021343 37653 395.6 UdeM00000021343 XP\_014767578.1 69.5 302  
31 1 1 302 1 241 8.90E-107 395.6 37653 cellular  
organisms;Eukaryota;Opisthokonta;Metazoa;Eumetazoa;Bilateria;Protostomia;  
Spiralia;Lophotrochozoa;Mollusca;Cephalopoda;Coleoidea;Octopodiformes;Octopoda;  
Incirrata;Octopodidae;Octopus;Octopus bimaculoides  
UdeM00000021345 6596 1438.3 UdeM00000021345 XP\_045213254.1 67.2  
1062 330 9 1 1053 1 1053 0.00E+00 1438.3 6596  
cellular  
organisms;Eukaryota;Opisthokonta;Metazoa;Eumetazoa;Bilateria;Protostomia;  
Spiralia;Lophotrochozoa;Mollusca;Bivalvia;Autobranchia;Heteroconchia;Euheterodonta;  
Imparidentia;Venerida;Veneroidea;Veneridae;Mercenaria;Mercenaria mercenaria  
UdeM00000021346 6596 1500 UdeM00000021346 XP\_045213254.1 53.2 1489  
662 14 1 1475 1074 2541 0.00E+00 1500 6596 cellular  
organisms;Eukaryota;Opisthokonta;Metazoa;Eumetazoa;Bilateria;Protostomia;  
Spiralia;Lophotrochozoa;Mollusca;Bivalvia;Autobranchia;Heteroconchia;Euheterodonta;  
Imparidentia;Venerida;Veneroidea;Veneridae;Mercenaria;Mercenaria mercenaria  
UdeM00000021347 1735272 107.5 UdeM00000021347 XP\_041362937.1 58.1  
93 39 0 28 120 35 127 1.40E-20 107.5 1735272  
cellular  
organisms;Eukaryota;Opisthokonta;Metazoa;Eumetazoa;Bilateria;Protostomia;  
Spiralia;Lophotrochozoa;Mollusca;Gastropoda;Neomphalina;Neomphaloidea;Pelto-  
spiridae;Gigantopelta;Gigantopelta aegis  
UdeM00000021348 6596 469.2 UdeM00000021348 XP\_045210946.1 36.2 1055  
540 23 1 1042 501 1435 1.40E-128 469.2 6596 cellular  
organisms;Eukaryota;Opisthokonta;Metazoa;Eumetazoa;Bilateria;Protostomia;  
Spiralia;Lophotrochozoa;Mollusca;Bivalvia;Autobranchia;Heteroconchia;Euheterodonta;  
Imparidentia;Venerida;Veneroidea;Veneridae;Mercenaria;Mercenaria mercenaria  
UdeM00000021349 6596 124.4 UdeM00000021349 XP\_045210946.1 40.3 231  
127 2 64 283 270 500 3.90E-25 124.4 6596 cellular  
organisms;Eukaryota;Opisthokonta;Metazoa;Eumetazoa;Bilateria;Protostomia;  
Spiralia;Lophotrochozoa;Mollusca;Bivalvia;Autobranchia;Heteroconchia;Euheterodonta;  
Imparidentia;Venerida;Veneroidea;Veneridae;Mercenaria;Mercenaria mercenaria  
UdeM00000021350 59861 92.8 UdeM00000021350 XP\_041706895.2 62.9 70  
26 0 2 71 118 187 1.90E-16 92.8 59861 cellular  
organisms;Eukaryota;Opisthokonta;Metazoa;Eumetazoa;Bilateria;Deuterostomia;  
Chordata;Craniata;Vertebrata;Gnathostomata;Teleostomi;Euteleostomi;Actinopterygii;  
Actinopteri;Neopterygii;Teleostei;Osteoglossocephalai;Clupeocephala;Euteleostei;  
Euteleostei;Protacanthopterygii;Salmoniformes;Salmonidae;Coregoninae;Coregonus;  
Coregonus clupeaformis  
UdeM00000021351 6565 200.7 UdeM00000021351 XP\_022327962.1 34.4 424  
88 4 1 234 295 718 2.10E-48 200.7 6565 cellular

organisms;Eukaryota;Opisthokonta;Metazoa;Eumetazoa;Bilateria;Protostomia;
Spiralia;Lophotrochozoa;Mollusca;Bivalvia;Autobranchia;Pteriormorphia;Ostr
eida;Ostreoidea;Ostreidae;Crassostrea;Crassostrea virginica
UdeM00000021352 6596 219.5 UdeM00000021352 XP\_045210946.1 60 165
65 1 1 165 1 164 4.50E-54 219.5 6596 cellular
organisms;Eukaryota;Opisthokonta;Metazoa;Eumetazoa;Bilateria;Protostomia;
Spiralia;Lophotrochozoa;Mollusca;Bivalvia;Autobranchia;Heteroconchia;Euhe
terodonta;Imparidentia;Venerida;Veneroidea;Veneridae;Mercenaria;Mercenari
a mercenaria
UdeM00000021353 6596 184.5 UdeM00000021353 XP\_045202545.1 49 202
77 5 10 186 10 210 1.20E-43 184.5 6596 cellular
organisms;Eukaryota;Opisthokonta;Metazoa;Eumetazoa;Bilateria;Protostomia;
Spiralia;Lophotrochozoa;Mollusca;Bivalvia;Autobranchia;Heteroconchia;Euhe
terodonta;Imparidentia;Venerida;Veneroidea;Veneridae;Mercenaria;Mercenari
a mercenaria
UdeM00000021354 6596 647.5 UdeM00000021354 XP\_045188256.1 52.6 635
262 7 1 627 1 604 2.10E-182 647.5 6596 cellular
organisms;Eukaryota;Opisthokonta;Metazoa;Eumetazoa;Bilateria;Protostomia;
Spiralia;Lophotrochozoa;Mollusca;Bivalvia;Autobranchia;Heteroconchia;Euhe
terodonta;Imparidentia;Venerida;Veneroidea;Veneridae;Mercenaria;Mercenari
a mercenaria
UdeM00000021355 6596 93.2 UdeM00000021355 XP\_045214190.1 84 50
8 0 3 52 46 95 6.20E-16 93.2 6596 cellular
organisms;Eukaryota;Opisthokonta;Metazoa;Eumetazoa;Bilateria;Protostomia;
Spiralia;Lophotrochozoa;Mollusca;Bivalvia;Autobranchia;Heteroconchia;Euhe
terodonta;Imparidentia;Venerida;Veneroidea;Veneridae;Mercenaria;Mercenari
a mercenaria
UdeM00000021357 6596 528.9 UdeM00000021357 XP\_045214183.1 36.7 1059
537 30 1 992 1 993 1.40E-146 528.9 6596 cellular
organisms;Eukaryota;Opisthokonta;Metazoa;Eumetazoa;Bilateria;Protostomia;
Spiralia;Lophotrochozoa;Mollusca;Bivalvia;Autobranchia;Heteroconchia;Euhe
terodonta;Imparidentia;Venerida;Veneroidea;Veneridae;Mercenaria;Mercenari
a mercenaria
UdeM00000021359 6596 414.8 UdeM00000021359 XP\_045213881.1 65.1 321
109 3 16 335 84 402 1.00E-112 414.8 6596 cellular
organisms;Eukaryota;Opisthokonta;Metazoa;Eumetazoa;Bilateria;Protostomia;
Spiralia;Lophotrochozoa;Mollusca;Bivalvia;Autobranchia;Heteroconchia;Euhe
terodonta;Imparidentia;Venerida;Veneroidea;Veneridae;Mercenaria;Mercenari
a mercenaria
UdeM00000021360 143950 63.5 UdeM00000021360 XP\_025423357.1 42.7
75 41 1 19 93 75 147 1.80E-07 63.5 143950
cellular
organisms;Eukaryota;Opisthokonta;Metazoa;Eumetazoa;Bilateria;Protostomia;
Ecdysozoa;Panarthropoda;Arthropoda;Mandibulata;Pancrustacea;Hexapoda;Inse
cta;Dicondylia;Pterygota;Neoptera;Paraneoptera;Hemiptera;Sternorrhyncha;A
phidomorpha;Aphidoidea;Aphididae;Chaitophorinae;Sipha;Sipha flava
UdeM00000021361 6596 728.8 UdeM00000021361 XP\_045211977.1 59.1 562
223 3 13 569 12 571 5.40E-207 728.8 6596 cellular
organisms;Eukaryota;Opisthokonta;Metazoa;Eumetazoa;Bilateria;Protostomia;
Spiralia;Lophotrochozoa;Mollusca;Bivalvia;Autobranchia;Heteroconchia;Euhe
terodonta;Imparidentia;Venerida;Veneroidea;Veneridae;Mercenaria;Mercenari
a mercenaria
UdeM00000021363 37653 108.2 UdeM00000021363 XP\_014772743.1 56.2 80
35 0 501 580 9 88 3.60E-20 108.2 37653 cellular

organisms;Eukaryota;Opisthokonta;Metazoa;Eumetazoa;Bilateria;Protostomia; Spiralia;Lophotrochozoa;Mollusca;Cephalopoda;Coleoidea;Octopodiformes;Octopoda;Incirrata;Octopodidae;Octopus;Octopus bimaculoides

UdeM00000021364 151771 345.9 UdeM00000021364 XP\_028406951.1 36.7  
575 321 11 1 559 119 666 9.60E-92 345.9 151771

cellular

organisms;Eukaryota;Opisthokonta;Metazoa;Eumetazoa;Cnidaria;Anthozoa;Octocorallia;Alcyonacea;Alcyoniina;Nephtheidae;Dendronephthya;Dendronephthya gigantea

UdeM00000021365 45264 297 UdeM00000021365 XP\_044184028.1 39.9 444  
162 5 42 384 68 507 3.60E-77 297 45264 cellular

organisms;Eukaryota;Opisthokonta;Metazoa;Eumetazoa;Cnidaria;Anthozoa;Hexacorallia;Scleractinia;Astrocoeniina;Acroporidae;Acropora;Acropora millepora

UdeM00000021366 6596 364.8 UdeM00000021366 XP\_045213180.1 51 357  
174 1 63 418 94 450 1.50E-97 364.8 6596 cellular

organisms;Eukaryota;Opisthokonta;Metazoa;Eumetazoa;Bilateria;Protostomia; Spiralia;Lophotrochozoa;Mollusca;Bivalvia;Autobranchia;Heteroconchia;Euheterodonta;Imparidentia;Venerida;Veneroidea;Veneridae;Mercenaria;Mercenaria mercenaria

UdeM00000021367 6596 448 UdeM00000021367 XP\_045170790.1 59.7 367  
148 0 4 370 9 375 1.30E-122 448 6596 cellular

organisms;Eukaryota;Opisthokonta;Metazoa;Eumetazoa;Bilateria;Protostomia; Spiralia;Lophotrochozoa;Mollusca;Bivalvia;Autobranchia;Heteroconchia;Euheterodonta;Imparidentia;Venerida;Veneroidea;Veneridae;Mercenaria;Mercenaria mercenaria

UdeM00000021368 6596 433.7 UdeM00000021368 XP\_045212181.1 61.7 559  
158 4 1 557 1 505 3.80E-118 433.7 6596 cellular

organisms;Eukaryota;Opisthokonta;Metazoa;Eumetazoa;Bilateria;Protostomia; Spiralia;Lophotrochozoa;Mollusca;Bivalvia;Autobranchia;Heteroconchia;Euheterodonta;Imparidentia;Venerida;Veneroidea;Veneridae;Mercenaria;Mercenaria mercenaria

UdeM00000021369 29159 295 UdeM00000021369 XP\_034311209.1 60 255  
92 3 1 254 1 246 8.90E-77 295 29159 cellular

organisms;Eukaryota;Opisthokonta;Metazoa;Eumetazoa;Bilateria;Protostomia; Spiralia;Lophotrochozoa;Mollusca;Bivalvia;Autobranchia;Pteriomorphia;Ostreida;Ostreoidea;Ostreidae;Crassostrea;Crassostrea gigas

UdeM00000021370 6565 90.9 UdeM00000021370 XP\_022317338.1 31.6 193  
121 4 83 265 79 270 2.90E-15 90.9 6565 cellular

organisms;Eukaryota;Opisthokonta;Metazoa;Eumetazoa;Bilateria;Protostomia; Spiralia;Lophotrochozoa;Mollusca;Bivalvia;Autobranchia;Pteriomorphia;Ostreida;Ostreoidea;Ostreidae;Crassostrea;Crassostrea virginica

UdeM00000044410 6596 537.3 UdeM00000044410 XP\_045211214.1 40.7 738  
417 10 6 727 5 737 3.00E-149 537.3 6596 cellular

organisms;Eukaryota;Opisthokonta;Metazoa;Eumetazoa;Bilateria;Protostomia; Spiralia;Lophotrochozoa;Mollusca;Bivalvia;Autobranchia;Heteroconchia;Euheterodonta;Imparidentia;Venerida;Veneroidea;Veneridae;Mercenaria;Mercenaria mercenaria

UdeM00000044411 6565 199.5 UdeM00000044411 XP\_022297447.1 58.5 164  
67 1 52 215 204 366 4.30E-48 199.5 6565 cellular

organisms;Eukaryota;Opisthokonta;Metazoa;Eumetazoa;Bilateria;Protostomia; Spiralia;Lophotrochozoa;Mollusca;Bivalvia;Autobranchia;Pteriomorphia;Ostreida;Ostreoidea;Ostreidae;Crassostrea;Crassostrea virginica

UdeM00000044412 6596 537.3 UdeM00000044412 XP\_045211214.1 40.7 738  
 417 10 6 727 5 737 3.00E-149 537.3 6596 cellular  
 organisms;Eukaryota;Opisthokonta;Metazoa;Eumetazoa;Bilateria;Protostomia;  
 Spiralia;Lophotrochozoa;Mollusca;Bivalvia;Autobranhia;Heteroconchia;Euhe  
 terodonta;Imparidentia;Venerida;Veneroidea;Veneridae;Mercenaria;Mercenari  
 a mercenaria  
 UdeM00000044054 6596 114.4 UdeM00000044054 XP\_045191674.1 24.8 262  
 173 9 16 273 1574 1815 3.60E-22 114.4 6596 cellular  
 organisms;Eukaryota;Opisthokonta;Metazoa;Eumetazoa;Bilateria;Protostomia;  
 Spiralia;Lophotrochozoa;Mollusca;Bivalvia;Autobranhia;Heteroconchia;Euhe  
 terodonta;Imparidentia;Venerida;Veneroidea;Veneridae;Mercenaria;Mercenari  
 a mercenaria  
 UdeM00000044415 7574 239.6 UdeM00000044415 XP\_013419235.1 44.6 251  
 126 3 9 246 187 437 4.40E-60 239.6 7574 cellular  
 organisms;Eukaryota;Opisthokonta;Metazoa;Eumetazoa;Bilateria;Protostomia;  
 Spiralia;Lophotrochozoa;Brachiopoda;Linguliformea;Lingulata;Lingulida;Lin  
 guloidea;Lingulidae;Lingula;Lingula anatina  
 UdeM00000044416 6596 118.2 UdeM00000044416 XP\_045201128.1 43.3 134  
 73 2 14 147 705 835 9.40E-24 118.2 6596 cellular  
 organisms;Eukaryota;Opisthokonta;Metazoa;Eumetazoa;Bilateria;Protostomia;  
 Spiralia;Lophotrochozoa;Mollusca;Bivalvia;Autobranhia;Heteroconchia;Euhe  
 terodonta;Imparidentia;Venerida;Veneroidea;Veneridae;Mercenaria;Mercenari  
 a mercenaria  
 UdeM00000044417 29159 808.9 UdeM00000044417 XP\_011443137.1 91.4 441  
 38 0 1 441 283 723 3.20E-231 808.9 29159 cellular  
 organisms;Eukaryota;Opisthokonta;Metazoa;Eumetazoa;Bilateria;Protostomia;  
 Spiralia;Lophotrochozoa;Mollusca;Bivalvia;Autobranhia;Pteriormorphia;Ostr  
 eida;Ostreoidea;Ostreidae;Crassostrea;Crassostrea gigas  
 UdeM00000044418 7574 239.6 UdeM00000044418 XP\_013419235.1 44.6 251  
 126 3 9 246 187 437 4.40E-60 239.6 7574 cellular  
 organisms;Eukaryota;Opisthokonta;Metazoa;Eumetazoa;Bilateria;Protostomia;  
 Spiralia;Lophotrochozoa;Brachiopoda;Linguliformea;Lingulata;Lingulida;Lin  
 guloidea;Lingulidae;Lingula;Lingula anatina  
 UdeM00000044419 6596 124.8 UdeM00000044419 XP\_045201128.1 36.6 183  
 105 4 13 187 656 835 1.30E-25 124.8 6596 cellular  
 organisms;Eukaryota;Opisthokonta;Metazoa;Eumetazoa;Bilateria;Protostomia;  
 Spiralia;Lophotrochozoa;Mollusca;Bivalvia;Autobranhia;Heteroconchia;Euhe  
 terodonta;Imparidentia;Venerida;Veneroidea;Veneridae;Mercenaria;Mercenari  
 a mercenaria  
 UdeM00000042781 1735272 178.7 UdeM00000042781 XP\_041361735.1 35.6  
 264 163 5 1 262 68 326 9.70E-42 178.7 1735272  
 cellular  
 organisms;Eukaryota;Opisthokonta;Metazoa;Eumetazoa;Bilateria;Protostomia;  
 Spiralia;Lophotrochozoa;Mollusca;Gastropoda;Neomphalina;Neomphaloidea;Pel  
 tospiridae;Gigantopelta;Gigantopelta aegis  
 UdeM00000042782 6596 218 UdeM00000042782 XP\_045202146.1 45.2 239  
 116 3 49 274 77 313 1.50E-53 218 6596 cellular  
 organisms;Eukaryota;Opisthokonta;Metazoa;Eumetazoa;Bilateria;Protostomia;  
 Spiralia;Lophotrochozoa;Mollusca;Bivalvia;Autobranhia;Heteroconchia;Euhe  
 terodonta;Imparidentia;Venerida;Veneroidea;Veneridae;Mercenaria;Mercenari  
 a mercenaria  
 UdeM00000042784 7604 99.8 UdeM00000042784 XP\_033644277.1 30.2 242  
 109 6 3 188 464 701 4.20E-18 99.8 7604 cellular  
 organisms;Eukaryota;Opisthokonta;Metazoa;Eumetazoa;Bilateria;Deuterostomi

a;Echinodermata;Eleutherozoa;Asterozoa;Asteroidea;Forcipulatacea;Forcipul  
atida;Asteroidea;Asteroidea;Asterias;Asterias rubens  
UdeM00000042785 37653 260.4 UdeM00000042785 XP\_014787494.1 44.3 291  
156 3 24 308 75 365 3.00E-66 260.4 37653 cellular  
organisms;Eukaryota;Opisthokonta;Metazoa;Eumetazoa;Bilateria;Protostomia;  
Spiralia;Lophotrochozoa;Mollusca;Cephalopoda;Coleoidea;Octopodiformes;Oct  
opoda;Incirrata;Octopodidae;Octopus;Octopus bimaculoides  
UdeM00000042787 400727 112.1 UdeM00000042787 XP\_025089700.1 45.5  
112 58 2 37 146 279 389 6.20E-22 112.1 400727  
cellular  
organisms;Eukaryota;Opisthokonta;Metazoa;Eumetazoa;Bilateria;Protostomia;  
Spiralia;Lophotrochozoa;Mollusca;Gastropoda;Caenogastropoda;Architaeniogl  
ossa;Ampullarioidea;Ampullariidae;Pomacea;Pomacea canaliculata  
UdeM00000042788 6596 122.9 UdeM00000042788 XP\_045202146.1 48.4 95  
49 0 46 140 77 171 3.90E-25 122.9 6596 cellular  
organisms;Eukaryota;Opisthokonta;Metazoa;Eumetazoa;Bilateria;Protostomia;  
Spiralia;Lophotrochozoa;Mollusca;Bivalvia;Autobranchia;Heteroconchia;Euhe  
terodonta;Imparidentia;Venerida;Veneroidea;Veneridae;Mercenaria;Mercenari  
a mercenaria  
UdeM00000042789 29159 86.7 UdeM00000042789 XP\_034338206.1 45.5 101  
52 2 4 103 445 543 2.00E-14 86.7 29159 cellular  
organisms;Eukaryota;Opisthokonta;Metazoa;Eumetazoa;Bilateria;Protostomia;  
Spiralia;Lophotrochozoa;Mollusca;Bivalvia;Autobranchia;Pteriormorphia;Ostr  
eida;Ostreoidea;Ostreidae;Crassostrea;Crassostrea gigas  
UdeM00000042791 7654 197.2 UdeM00000042791 XP\_041463763.1 37.4 297  
170 6 1 284 921 1214 2.80E-47 197.2 7654 cellular  
organisms;Eukaryota;Opisthokonta;Metazoa;Eumetazoa;Bilateria;Deuterostomi  
a;Echinodermata;Eleutherozoa;Echinozoa;Echinoidea;Euechinoidea;Echinacea;  
Temnopleuroidea;Toxopneustidae;Lytechinus;Lytechinus variegatus  
UdeM00000042792 7725 212.2 UdeM00000042792 XP\_039256407.1 38.8 322  
188 6 2 318 494 811 9.40E-52 212.2 7725 cellular  
organisms;Eukaryota;Opisthokonta;Metazoa;Eumetazoa;Bilateria;Deuterostomi  
a;Chordata;Tunicata;Ascidiacea;Stolidobranchia;Styelidae;Styela;Styela  
clava  
UdeM00000042793 6579 268.9 UdeM00000042793 XP\_033742496.1 44 298  
163 2 98 391 117 414 1.10E-68 268.9 6579 cellular  
organisms;Eukaryota;Opisthokonta;Metazoa;Eumetazoa;Bilateria;Protostomia;  
Spiralia;Lophotrochozoa;Mollusca;Bivalvia;Autobranchia;Pteriormorphia;Pect  
inida;Pectinoidea;Pectinidae;Pecten;Pecten maximus  
UdeM00000042794 7668 155.2 UdeM00000042794 XP\_011661625.2 35 234  
146 3 4 234 1094 1324 1.00E-34 155.2 7668 cellular  
organisms;Eukaryota;Opisthokonta;Metazoa;Eumetazoa;Bilateria;Deuterostomi  
a;Echinodermata;Eleutherozoa;Echinozoa;Echinoidea;Euechinoidea;Echinacea;  
Camarodonta;Echinidea;Strongylocentrotidae;Strongylocentrotus;Strongyloce  
ntrotus purpuratus  
UdeM00000042796 6573 333.2 UdeM00000042796 XP\_021375058.1 57.4 277  
116 1 36 310 114 390 3.60E-88 333.2 6573 cellular  
organisms;Eukaryota;Opisthokonta;Metazoa;Eumetazoa;Bilateria;Protostomia;  
Spiralia;Lophotrochozoa;Mollusca;Bivalvia;Autobranchia;Pteriormorphia;Pect  
inida;Pectinoidea;Pectinidae;Mizuhopecten;Mizuhopecten yessoensis  
UdeM00000042797 6596 337.4 UdeM00000042797 XP\_045216896.1 50.8 297  
145 1 46 342 92 387 2.10E-89 337.4 6596 cellular  
organisms;Eukaryota;Opisthokonta;Metazoa;Eumetazoa;Bilateria;Protostomia;  
Spiralia;Lophotrochozoa;Mollusca;Bivalvia;Autobranchia;Heteroconchia;Euhe



terodonta;Imparidentia;Venerida;Veneroidea;Veneridae;Mercenaria;Mercenaria mercenaria

UdeM00000042798 400727 148.7 UdeM00000042798 XP\_025095647.1 51.2  
127 58 1 142 268 5 127 1.10E-32 148.7 400727  
cellular

organisms;Eukaryota;Opisthokonta;Metazoa;Eumetazoa;Bilateria;Protostomia;Spiralia;Lophotrochozoa;Mollusca;Gastropoda;Caenogastropoda;Architaenioglossa;Ampullarioidea;Ampullariidae;Pomacea;Pomacea canaliculata

UdeM00000042799 6565 291.2 UdeM00000042799 XP\_022287478.1 57.6 250  
104 2 5 253 1894 2142 1.30E-75 291.2 6565 cellular

organisms;Eukaryota;Opisthokonta;Metazoa;Eumetazoa;Bilateria;Protostomia;Spiralia;Lophotrochozoa;Mollusca;Bivalvia;Autobranchia;Pteriormorphia;Ostreida;Ostreoidea;Ostreidae;Crassostrea;Crassostrea virginica

UdeM00000042800 6573 290.8 UdeM00000042800 XP\_021355497.1 45.9 353  
177 5 2 350 1638 1980 2.50E-75 290.8 6573 cellular

organisms;Eukaryota;Opisthokonta;Metazoa;Eumetazoa;Bilateria;Protostomia;Spiralia;Lophotrochozoa;Mollusca;Bivalvia;Autobranchia;Pteriormorphia;Pectinida;Pectinoidea;Pectinidae;Mizuhopecten;Mizuhopecten yessoensis

UdeM00000042801 6596 513.1 UdeM00000042801 XP\_045194118.1 36.1 878  
461 12 97 890 1690 2551 8.40E-142 513.1 6596 cellular

organisms;Eukaryota;Opisthokonta;Metazoa;Eumetazoa;Bilateria;Protostomia;Spiralia;Lophotrochozoa;Mollusca;Bivalvia;Autobranchia;Heteroconchia;Euheterodonta;Imparidentia;Venerida;Veneroidea;Veneridae;Mercenaria;Mercenaria mercenaria

UdeM00000042802 6596 513.1 UdeM00000042802 XP\_045194118.1 36.1 878  
461 12 97 890 1690 2551 8.70E-142 513.1 6596 cellular

organisms;Eukaryota;Opisthokonta;Metazoa;Eumetazoa;Bilateria;Protostomia;Spiralia;Lophotrochozoa;Mollusca;Bivalvia;Autobranchia;Heteroconchia;Euheterodonta;Imparidentia;Venerida;Veneroidea;Veneridae;Mercenaria;Mercenaria mercenaria

UdeM00000042803 6596 512.7 UdeM00000042803 XP\_045194118.1 34.5 913  
503 13 146 978 1654 2551 1.20E-141 512.7 6596 cellular

organisms;Eukaryota;Opisthokonta;Metazoa;Eumetazoa;Bilateria;Protostomia;Spiralia;Lophotrochozoa;Mollusca;Bivalvia;Autobranchia;Heteroconchia;Euheterodonta;Imparidentia;Venerida;Veneroidea;Veneridae;Mercenaria;Mercenaria mercenaria

UdeM00000042804 6596 408.3 UdeM00000042804 XP\_045194118.1 31 867  
383 11 71 727 1690 2551 2.40E-110 408.3 6596 cellular

organisms;Eukaryota;Opisthokonta;Metazoa;Eumetazoa;Bilateria;Protostomia;Spiralia;Lophotrochozoa;Mollusca;Bivalvia;Autobranchia;Heteroconchia;Euheterodonta;Imparidentia;Venerida;Veneroidea;Veneridae;Mercenaria;Mercenaria mercenaria

UdeM00000042805 6596 226.9 UdeM00000042805 XP\_045194118.1 28.2 596  
251 9 1 426 1708 2296 5.00E-56 226.9 6596 cellular

organisms;Eukaryota;Opisthokonta;Metazoa;Eumetazoa;Bilateria;Protostomia;Spiralia;Lophotrochozoa;Mollusca;Bivalvia;Autobranchia;Heteroconchia;Euheterodonta;Imparidentia;Venerida;Veneroidea;Veneridae;Mercenaria;Mercenaria mercenaria

UdeM00000042807 29159 206.5 UdeM00000042807 XP\_034332822.1 42.1 252  
137 5 7 254 165 411 4.40E-50 206.5 29159 cellular

organisms;Eukaryota;Opisthokonta;Metazoa;Eumetazoa;Bilateria;Protostomia;Spiralia;Lophotrochozoa;Mollusca;Bivalvia;Autobranchia;Pteriormorphia;Ostreida;Ostreoidea;Ostreidae;Crassostrea;Crassostrea gigas

UdeM00000042806 6579 210.3 UdeM00000042806 XP\_033740522.1 37.2 323  
 184 10 44 358 113 424 4.10E-51 210.3 6579 cellular  
 organisms;Eukaryota;Opisthokonta;Metazoa;Eumetazoa;Bilateria;Protostomia;  
 Spiralia;Lophotrochozoa;Mollusca;Bivalvia;Autobranchia;Pteriomorpha;Pect  
 inida;Pectinoidea;Pectinidae;Pecten;Pecten maximus  
 UdeM00000042808 6573 327 UdeM00000042808 XP\_021363050.1 46.4 347  
 178 5 69 409 348 692 3.50E-86 327 6573 cellular  
 organisms;Eukaryota;Opisthokonta;Metazoa;Eumetazoa;Bilateria;Protostomia;  
 Spiralia;Lophotrochozoa;Mollusca;Bivalvia;Autobranchia;Pteriomorpha;Pect  
 inida;Pectinoidea;Pectinidae;Mizuhopecten;Mizuhopecten yessoensis  
 UdeM00000042809 6573 211.8 UdeM00000042809 XP\_021340121.1 42.5 240  
 122 3 45 268 287 526 1.10E-51 211.8 6573 cellular  
 organisms;Eukaryota;Opisthokonta;Metazoa;Eumetazoa;Bilateria;Protostomia;  
 Spiralia;Lophotrochozoa;Mollusca;Bivalvia;Autobranchia;Pteriomorpha;Pect  
 inida;Pectinoidea;Pectinidae;Mizuhopecten;Mizuhopecten yessoensis  
 UdeM00000042811 6573 253.1 UdeM00000042811 XP\_021363050.1 38.9 347  
 186 8 77 407 356 692 6.30E-64 253.1 6573 cellular  
 organisms;Eukaryota;Opisthokonta;Metazoa;Eumetazoa;Bilateria;Protostomia;  
 Spiralia;Lophotrochozoa;Mollusca;Bivalvia;Autobranchia;Pteriomorpha;Pect  
 inida;Pectinoidea;Pectinidae;Mizuhopecten;Mizuhopecten yessoensis  
 UdeM00000042813 7741 273.9 UdeM00000042813 XP\_019622111.1 49.8 281  
 136 4 5 283 1 278 2.40E-70 273.9 7741 cellular  
 organisms;Eukaryota;Opisthokonta;Metazoa;Eumetazoa;Bilateria;Deuterostomi  
 a;Chordata;Cephalochordata;Leptocardii;Amphioxiformes;Branchiostomidae;Br  
 anchiostoma;Branchiostoma belcheri  
 UdeM00000035103 6579 559.7 UdeM00000035103 XP\_033761495.1 77.1 336  
 77 0 36 371 24 359 3.70E-156 559.7 6579 cellular  
 organisms;Eukaryota;Opisthokonta;Metazoa;Eumetazoa;Bilateria;Protostomia;  
 Spiralia;Lophotrochozoa;Mollusca;Bivalvia;Autobranchia;Pteriomorpha;Pect  
 inida;Pectinoidea;Pectinidae;Pecten;Pecten maximus  
 UdeM00000035104 6596 295.4 UdeM00000035104 XP\_045177779.1 41 432  
 223 8 1 406 97 522 1.10E-76 295.4 6596 cellular  
 organisms;Eukaryota;Opisthokonta;Metazoa;Eumetazoa;Bilateria;Protostomia;  
 Spiralia;Lophotrochozoa;Mollusca;Bivalvia;Autobranchia;Heteroconchia;Euhe  
 terodonta;Imparidentia;Venerida;Veneroidea;Veneridae;Mercenaria;Mercenari  
 a mercenaria  
 UdeM00000035105 6596 390.6 UdeM00000035105 XP\_045177776.1 41.4 553  
 304 10 1 539 405 951 4.80E-105 390.6 6596 cellular  
 organisms;Eukaryota;Opisthokonta;Metazoa;Eumetazoa;Bilateria;Protostomia;  
 Spiralia;Lophotrochozoa;Mollusca;Bivalvia;Autobranchia;Heteroconchia;Euhe  
 terodonta;Imparidentia;Venerida;Veneroidea;Veneridae;Mercenaria;Mercenari  
 a mercenaria  
 UdeM00000035106 6596 334.3 UdeM00000035106 XP\_045177776.1 34.8 612  
 290 15 1 606 405 913 4.60E-88 334.3 6596 cellular  
 organisms;Eukaryota;Opisthokonta;Metazoa;Eumetazoa;Bilateria;Protostomia;  
 Spiralia;Lophotrochozoa;Mollusca;Bivalvia;Autobranchia;Heteroconchia;Euhe  
 terodonta;Imparidentia;Venerida;Veneroidea;Veneridae;Mercenaria;Mercenari  
 a mercenaria  
 UdeM00000035108 6596 399.1 UdeM00000035108 XP\_045177776.1 40.4 567  
 324 7 145 704 392 951 1.60E-107 399.1 6596 cellular  
 organisms;Eukaryota;Opisthokonta;Metazoa;Eumetazoa;Bilateria;Protostomia;  
 Spiralia;Lophotrochozoa;Mollusca;Bivalvia;Autobranchia;Heteroconchia;Euhe  
 terodonta;Imparidentia;Venerida;Veneroidea;Veneridae;Mercenaria;Mercenari  
 a mercenaria

UdeM00000035109 6596 392.1 UdeM00000035109 XP\_045177776.1 40.3 556  
 315 6 1 548 405 951 1.30E-105 392.1 6596 cellular  
 organisms;Eukaryota;Opisthokonta;Metazoa;Eumetazoa;Bilateria;Protostomia;  
 Spiralia;Lophotrochozoa;Mollusca;Bivalvia;Autobranchia;Heteroconchia;Euhe  
 terodonta;Imparidentia;Venerida;Veneroidea;Veneridae;Mercenaria;Mercenari  
 a mercenaria  
 UdeM00000035110 45351 87.8 UdeM00000035110 XP\_032236999.1 35.1 151  
 82 2 9 144 11 160 1.70E-14 87.8 45351 cellular  
 organisms;Eukaryota;Opisthokonta;Metazoa;Eumetazoa;Cnidaria;Anthozoa;Hexa  
 corallia;Actiniaria;Edwardsiidae;Nematostella;Nematostella vectensis  
 UdeM00000035111 6596 346.7 UdeM00000035111 XP\_045175691.1 46.9 377  
 196 4 15 387 29 405 4.10E-92 346.7 6596 cellular  
 organisms;Eukaryota;Opisthokonta;Metazoa;Eumetazoa;Bilateria;Protostomia;  
 Spiralia;Lophotrochozoa;Mollusca;Bivalvia;Autobranchia;Heteroconchia;Euhe  
 terodonta;Imparidentia;Venerida;Veneroidea;Veneridae;Mercenaria;Mercenari  
 a mercenaria  
 UdeM00000035112 6565 195.7 UdeM00000035112 XP\_022297037.1 65 143  
 50 0 1 143 183 325 4.20E-47 195.7 6565 cellular  
 organisms;Eukaryota;Opisthokonta;Metazoa;Eumetazoa;Bilateria;Protostomia;  
 Spiralia;Lophotrochozoa;Mollusca;Bivalvia;Autobranchia;Pteriormorphia;Ostr  
 eida;Ostreoidea;Ostreidae;Crassostrea;Crassostrea virginica  
 UdeM00000035113 6596 173.3 UdeM00000035113 XP\_045177782.1 36.3 289  
 156 7 1 280 90 359 4.70E-40 173.3 6596 cellular  
 organisms;Eukaryota;Opisthokonta;Metazoa;Eumetazoa;Bilateria;Protostomia;  
 Spiralia;Lophotrochozoa;Mollusca;Bivalvia;Autobranchia;Heteroconchia;Euhe  
 terodonta;Imparidentia;Venerida;Veneroidea;Veneridae;Mercenaria;Mercenari  
 a mercenaria  
 UdeM00000035114 6596 378.3 UdeM00000035114 XP\_045177776.1 38.9 576  
 313 8 1 566 405 951 2.50E-101 378.3 6596 cellular  
 organisms;Eukaryota;Opisthokonta;Metazoa;Eumetazoa;Bilateria;Protostomia;  
 Spiralia;Lophotrochozoa;Mollusca;Bivalvia;Autobranchia;Heteroconchia;Euhe  
 terodonta;Imparidentia;Venerida;Veneroidea;Veneridae;Mercenaria;Mercenari  
 a mercenaria  
 UdeM00000035115 6565 95.9 UdeM00000035115 XP\_022297037.1 51.5 97  
 44 2 12 107 80 174 3.70E-17 95.9 6565 cellular  
 organisms;Eukaryota;Opisthokonta;Metazoa;Eumetazoa;Bilateria;Protostomia;  
 Spiralia;Lophotrochozoa;Mollusca;Bivalvia;Autobranchia;Pteriormorphia;Ostr  
 eida;Ostreoidea;Ostreidae;Crassostrea;Crassostrea virginica  
 UdeM00000035117 1735272 284.6 UdeM00000035117 XP\_041375509.1 34.9  
 481 286 7 16 475 668 1142 2.20E-73 284.6 1735272  
 cellular  
 organisms;Eukaryota;Opisthokonta;Metazoa;Eumetazoa;Bilateria;Protostomia;  
 Spiralia;Lophotrochozoa;Mollusca;Gastropoda;Neomphalina;Neomphaloidea;Pel  
 tospiridae;Gigantopelta;Gigantopelta aegis  
 UdeM00000035118 7950 110.9 UdeM00000035118 XP\_042560264.1 45.1 142  
 72 3 38 176 75 213 1.70E-21 110.9 7950 cellular  
 organisms;Eukaryota;Opisthokonta;Metazoa;Eumetazoa;Bilateria;Deuterostomi  
 a;Chordata;Craniata;Vertebrata;Gnathostomata;Teleostomi;Euteleostomi;Acti  
 nopterygii;Actinopteri;Neopterygii;Teleostei;Osteoglossocephalai;Clupeoce  
 phala;Otomorpha;Clupei;Clupeiformes;Clupeoidei;Clupeidae;Clupeinae;Clupea  
 ;Clupea harengus  
 UdeM00000035119 1735272 152.9 UdeM00000035119 XP\_041365180.1 33.2  
 235 151 2 1 233 136 366 5.10E-34 152.9 1735272  
 cellular

organisms;Eukaryota;Opisthokonta;Metazoa;Eumetazoa;Bilateria;Protostomia;Spiralia;Lophotrochozoa;Mollusca;Gastropoda;Neomphalina;Neomphaloidea;Peltospiridae;Gigantopelta;Gigantopelta aegis  
UdeM00000035120 29159 92.4 UdeM00000035120 XP\_011453058.2 26.9 238  
156 9 26 248 76 310 8.60E-16 92.4 29159 cellular  
organisms;Eukaryota;Opisthokonta;Metazoa;Eumetazoa;Bilateria;Protostomia;Spiralia;Lophotrochozoa;Mollusca;Bivalvia;Autobranchia;Pteriormorphia;Ostreida;Ostreoidea;Ostreidae;Crassostrea;Crassostrea gigas  
UdeM00000035121 6596 156.8 UdeM00000035121 XP\_045200961.1 34.5 252  
143 6 1 243 30 268 3.60E-35 156.8 6596 cellular  
organisms;Eukaryota;Opisthokonta;Metazoa;Eumetazoa;Bilateria;Protostomia;Spiralia;Lophotrochozoa;Mollusca;Bivalvia;Autobranchia;Heteroconchia;Euheterodonta;Imparidentia;Venerida;Veneroidea;Veneridae;Mercenaria;Mercenaria mercenaria  
UdeM00000035122 6565 205.3 UdeM00000035122 XP\_022299727.1 46.4 235  
121 2 1 233 46 277 9.40E-50 205.3 6565 cellular  
organisms;Eukaryota;Opisthokonta;Metazoa;Eumetazoa;Bilateria;Protostomia;Spiralia;Lophotrochozoa;Mollusca;Bivalvia;Autobranchia;Pteriormorphia;Ostreida;Ostreoidea;Ostreidae;Crassostrea;Crassostrea virginica  
UdeM00000035123 6596 441.8 UdeM00000035123 XP\_045191793.1 34.7 858  
439 21 1 847 258 1005 2.30E-120 441.8 6596 cellular  
organisms;Eukaryota;Opisthokonta;Metazoa;Eumetazoa;Bilateria;Protostomia;Spiralia;Lophotrochozoa;Mollusca;Bivalvia;Autobranchia;Heteroconchia;Euheterodonta;Imparidentia;Venerida;Veneroidea;Veneridae;Mercenaria;Mercenaria mercenaria  
UdeM00000035124 6596 283.9 UdeM00000035124 XP\_045180775.1 33.7 572  
271 12 1 542 1027 1520 6.50E-73 283.9 6596 cellular  
organisms;Eukaryota;Opisthokonta;Metazoa;Eumetazoa;Bilateria;Protostomia;Spiralia;Lophotrochozoa;Mollusca;Bivalvia;Autobranchia;Heteroconchia;Euheterodonta;Imparidentia;Venerida;Veneroidea;Veneridae;Mercenaria;Mercenaria mercenaria  
UdeM00000035126 6596 307.4 UdeM00000035126 XP\_045177776.1 29.7 728  
292 15 5 718 392 913 4.90E-80 307.4 6596 cellular  
organisms;Eukaryota;Opisthokonta;Metazoa;Eumetazoa;Bilateria;Protostomia;Spiralia;Lophotrochozoa;Mollusca;Bivalvia;Autobranchia;Heteroconchia;Euheterodonta;Imparidentia;Venerida;Veneroidea;Veneridae;Mercenaria;Mercenaria mercenaria  
UdeM00000035127 6565 121.3 UdeM00000035127 XP\_022299602.1 44.7 132  
70 3 70 200 2 131 1.40E-24 121.3 6565 cellular  
organisms;Eukaryota;Opisthokonta;Metazoa;Eumetazoa;Bilateria;Protostomia;Spiralia;Lophotrochozoa;Mollusca;Bivalvia;Autobranchia;Pteriormorphia;Ostreida;Ostreoidea;Ostreidae;Crassostrea;Crassostrea virginica  
UdeM00000035128 6596 83.2 UdeM00000035128 XP\_045186033.1 28 175  
120 3 254 424 23 195 9.30E-13 83.2 6596 cellular  
organisms;Eukaryota;Opisthokonta;Metazoa;Eumetazoa;Bilateria;Protostomia;Spiralia;Lophotrochozoa;Mollusca;Bivalvia;Autobranchia;Heteroconchia;Euheterodonta;Imparidentia;Venerida;Veneroidea;Veneridae;Mercenaria;Mercenaria mercenaria  
UdeM00000035130 6596 192.6 UdeM00000035130 XP\_045177778.1 37.2 312  
172 8 1 306 405 698 8.30E-46 192.6 6596 cellular  
organisms;Eukaryota;Opisthokonta;Metazoa;Eumetazoa;Bilateria;Protostomia;Spiralia;Lophotrochozoa;Mollusca;Bivalvia;Autobranchia;Heteroconchia;Euheterodonta;Imparidentia;Venerida;Veneroidea;Veneridae;Mercenaria;Mercenaria mercenaria

UdeM00000035131 46731 320.5 UdeM00000035131 XP\_027046380.1 41.9 384  
 219 3 576 956 24 406 7.40E-84 320.5 46731 cellular  
 organisms;Eukaryota;Opisthokonta;Metazoa;Eumetazoa;Cnidaria;Anthozoa;Hexa  
 corallia;Scleractinia;Astrocoeniina;Pocilloporidae;Pocillopora;Pocillopor  
 a damicornis  
 UdeM00000035132 6579 449.9 UdeM00000035132 XP\_033727368.1 50.6 462  
 158 6 1 393 1 461 3.30E-123 449.9 6579 cellular  
 organisms;Eukaryota;Opisthokonta;Metazoa;Eumetazoa;Bilateria;Protostomia;  
 Spiralia;Lophotrochozoa;Mollusca;Bivalvia;Autobranchia;Pteriormorphia;Pect  
 inida;Pectinoidea;Pectinidae;Pecten;Pecten maximus  
 UdeM00000035133 1735272 230.7 UdeM00000035133 XP\_041361447.1 35.1  
 758 405 16 82 797 116 828 6.50E-57 230.7 1735272  
 cellular  
 organisms;Eukaryota;Opisthokonta;Metazoa;Eumetazoa;Bilateria;Protostomia;  
 Spiralia;Lophotrochozoa;Mollusca;Gastropoda;Neomphalina;Neomphaloidea;Pel  
 tospiridae;Gigantopelta;Gigantopelta aegis  
 UdeM00000035134 6596 688.3 UdeM00000035134 XP\_045180675.1 49.7 720  
 331 8 1 702 329 1035 9.90E-195 688.3 6596 cellular  
 organisms;Eukaryota;Opisthokonta;Metazoa;Eumetazoa;Bilateria;Protostomia;  
 Spiralia;Lophotrochozoa;Mollusca;Bivalvia;Autobranchia;Heteroconchia;Euhe  
 terodonta;Imparidentia;Venerida;Veneroidea;Veneridae;Mercenaria;Mercenari  
 a mercenaria  
 UdeM00000035135 29159 240.7 UdeM00000035135 XP\_019919189.2 29.4 657  
 342 12 98 750 85 623 5.90E-60 240.7 29159 cellular  
 organisms;Eukaryota;Opisthokonta;Metazoa;Eumetazoa;Bilateria;Protostomia;  
 Spiralia;Lophotrochozoa;Mollusca;Bivalvia;Autobranchia;Pteriormorphia;Ostr  
 eida;Ostreoidea;Ostreidae;Crassostrea;Crassostrea gigas  
 UdeM00000035136 6596 377.9 UdeM00000035136 XP\_045166991.1 45.2 423  
 206 5 100 522 244 640 3.90E-101 377.9 6596 cellular  
 organisms;Eukaryota;Opisthokonta;Metazoa;Eumetazoa;Bilateria;Protostomia;  
 Spiralia;Lophotrochozoa;Mollusca;Bivalvia;Autobranchia;Heteroconchia;Euhe  
 terodonta;Imparidentia;Venerida;Veneroidea;Veneridae;Mercenaria;Mercenari  
 a mercenaria  
 UdeM00000035140 400727 331.3 UdeM00000035140 XP\_025091729.1 88.3  
 197 23 0 1 197 1 197 8.70E-88 331.3 400727  
 cellular  
 organisms;Eukaryota;Opisthokonta;Metazoa;Eumetazoa;Bilateria;Protostomia;  
 Spiralia;Lophotrochozoa;Mollusca;Gastropoda;Caenogastropoda;Architaeniogl  
 ossa;Ampullarioidea;Ampullariidae;Pomacea;Pomacea canaliculata  
 UdeM00000035141 6573 648.7 UdeM00000035141 XP\_021373061.1 82.8 384  
 66 0 20 403 21 404 5.00E-183 648.7 6573 cellular  
 organisms;Eukaryota;Opisthokonta;Metazoa;Eumetazoa;Bilateria;Protostomia;  
 Spiralia;Lophotrochozoa;Mollusca;Bivalvia;Autobranchia;Pteriormorphia;Pect  
 inida;Pectinoidea;Pectinidae;Mizuhopecten;Mizuhopecten yessoensis  
 UdeM00000035142 6573 657.9 UdeM00000035142 XP\_021373065.1 76.7 412  
 95 1 9 419 405 816 8.60E-186 657.9 6573 cellular  
 organisms;Eukaryota;Opisthokonta;Metazoa;Eumetazoa;Bilateria;Protostomia;  
 Spiralia;Lophotrochozoa;Mollusca;Bivalvia;Autobranchia;Pteriormorphia;Pect  
 inida;Pectinoidea;Pectinidae;Mizuhopecten;Mizuhopecten yessoensis  
 UdeM00000035143 6573 535 UdeM00000035143 XP\_021373061.1 77 330  
 75 1 1 329 507 836 6.60E-149 535 6573 cellular  
 organisms;Eukaryota;Opisthokonta;Metazoa;Eumetazoa;Bilateria;Protostomia;  
 Spiralia;Lophotrochozoa;Mollusca;Bivalvia;Autobranchia;Pteriormorphia;Pect  
 inida;Pectinoidea;Pectinidae;Mizuhopecten;Mizuhopecten yessoensis

UdeM00000035144 6579 391.7 UdeM00000035144 XP\_033728194.1 40.1 593  
 288 14 154 699 124 696 1.90E-105 391.7 6579 cellular  
 organisms;Eukaryota;Opisthokonta;Metazoa;Eumetazoa;Bilateria;Protostomia;  
 Spiralia;Lophotrochozoa;Mollusca;Bivalvia;Autobranchia;Pteriormorphia;Pect  
 inida;Pectinoidea;Pectinidae;Pecten;Pecten maximus  
 UdeM00000035145 6596 300.4 UdeM00000035145 XP\_045180623.1 53.3 285  
 104 4 8 265 132 414 2.20E-78 300.4 6596 cellular  
 organisms;Eukaryota;Opisthokonta;Metazoa;Eumetazoa;Bilateria;Protostomia;  
 Spiralia;Lophotrochozoa;Mollusca;Bivalvia;Autobranchia;Heteroconchia;Euhe  
 terodonta;Imparidentia;Venerida;Veneroidea;Veneridae;Mercenaria;Mercenari  
 a mercenaria  
 UdeM00000035146 6596 293.9 UdeM00000035146 XP\_045180623.1 51.2 285  
 107 4 8 262 132 414 2.10E-76 293.9 6596 cellular  
 organisms;Eukaryota;Opisthokonta;Metazoa;Eumetazoa;Bilateria;Protostomia;  
 Spiralia;Lophotrochozoa;Mollusca;Bivalvia;Autobranchia;Heteroconchia;Euhe  
 terodonta;Imparidentia;Venerida;Veneroidea;Veneridae;Mercenaria;Mercenari  
 a mercenaria  
 UdeM00000035148 6596 186.4 UdeM00000035148 XP\_045181193.1 63.5 159  
 48 2 8 162 11 163 2.80E-44 186.4 6596 cellular  
 organisms;Eukaryota;Opisthokonta;Metazoa;Eumetazoa;Bilateria;Protostomia;  
 Spiralia;Lophotrochozoa;Mollusca;Bivalvia;Autobranchia;Heteroconchia;Euhe  
 terodonta;Imparidentia;Venerida;Veneroidea;Veneridae;Mercenaria;Mercenari  
 a mercenaria  
 UdeM00000035149 6596 186.4 UdeM00000035149 XP\_045181193.1 63.5 159  
 48 2 8 162 11 163 2.80E-44 186.4 6596 cellular  
 organisms;Eukaryota;Opisthokonta;Metazoa;Eumetazoa;Bilateria;Protostomia;  
 Spiralia;Lophotrochozoa;Mollusca;Bivalvia;Autobranchia;Heteroconchia;Euhe  
 terodonta;Imparidentia;Venerida;Veneroidea;Veneridae;Mercenaria;Mercenari  
 a mercenaria  
 UdeM00000035150 6596 212.6 UdeM00000035150 XP\_045181187.1 62.3 183  
 57 3 13 191 1 175 4.40E-52 212.6 6596 cellular  
 organisms;Eukaryota;Opisthokonta;Metazoa;Eumetazoa;Bilateria;Protostomia;  
 Spiralia;Lophotrochozoa;Mollusca;Bivalvia;Autobranchia;Heteroconchia;Euhe  
 terodonta;Imparidentia;Venerida;Veneroidea;Veneridae;Mercenaria;Mercenari  
 a mercenaria  
 UdeM00000035151 6596 497.7 UdeM00000035151 XP\_045182242.1 53.4 470  
 188 5 9 459 16 473 1.80E-137 497.7 6596 cellular  
 organisms;Eukaryota;Opisthokonta;Metazoa;Eumetazoa;Bilateria;Protostomia;  
 Spiralia;Lophotrochozoa;Mollusca;Bivalvia;Autobranchia;Heteroconchia;Euhe  
 terodonta;Imparidentia;Venerida;Veneroidea;Veneridae;Mercenaria;Mercenari  
 a mercenaria  
 UdeM00000035152 29159 241.5 UdeM00000035152 XP\_019919189.2 30.4 670  
 323 17 98 755 85 623 3.50E-60 241.5 29159 cellular  
 organisms;Eukaryota;Opisthokonta;Metazoa;Eumetazoa;Bilateria;Protostomia;  
 Spiralia;Lophotrochozoa;Mollusca;Bivalvia;Autobranchia;Pteriormorphia;Ostr  
 eida;Ostreoidea;Ostreidae;Crassostrea;Crassostrea gigas  
 UdeM00000035153 1735272 289.3 UdeM00000035153 XP\_041360874.1 44.1  
 367 197 6 4 364 55 419 7.00E-75 289.3 1735272  
 cellular  
 organisms;Eukaryota;Opisthokonta;Metazoa;Eumetazoa;Bilateria;Protostomia;  
 Spiralia;Lophotrochozoa;Mollusca;Gastropoda;Neomphalina;Neomphaloidea;Pel  
 tospiridae;Gigantopelta;Gigantopelta aegis  
 UdeM00000035154 2607531 234.6 UdeM00000035154 XP\_029650035.1 36.2  
 384 180 8 35 354 41 423 2.00E-58 234.6 2607531

cellular  
organisms;Eukaryota;Opisthokonta;Metazoa;Eumetazoa;Bilateria;Protostomia;  
Spiralia;Lophotrochozoa;Mollusca;Cephalopoda;Coleoidea;Octopodiformes;Oct  
opoda;Incirrata;Octopodidae;Octopus;Octopus sinensis  
UdeM00000035155 1735272 200.3 UdeM00000035155 XP\_041360871.1 45.5  
233 115 4 5 236 235 456 2.80E-48 200.3 1735272  
cellular  
organisms;Eukaryota;Opisthokonta;Metazoa;Eumetazoa;Bilateria;Protostomia;  
Spiralia;Lophotrochozoa;Mollusca;Gastropoda;Neomphalina;Neomphaloidea;Pel  
tospiridae;Gigantopelta;Gigantopelta aegis  
UdeM00000035157 400727 79.3 UdeM00000035157 XP\_025092305.1 33.2  
187 104 6 13 184 35 215 5.50E-12 79.3 400727  
cellular  
organisms;Eukaryota;Opisthokonta;Metazoa;Eumetazoa;Bilateria;Protostomia;  
Spiralia;Lophotrochozoa;Mollusca;Gastropoda;Caenogastropoda;Architaeniogl  
ossa;Ampullarioidea;Ampullariidae;Pomacea;Pomacea canaliculata  
UdeM00000035158 37653 88.6 UdeM00000035158 XP\_014779149.1 36.8 125  
79 0 5 129 116 240 6.40E-15 88.6 37653 cellular  
organisms;Eukaryota;Opisthokonta;Metazoa;Eumetazoa;Bilateria;Protostomia;  
Spiralia;Lophotrochozoa;Mollusca;Cephalopoda;Coleoidea;Octopodiformes;Oct  
opoda;Incirrata;Octopodidae;Octopus;Octopus bimaculoides  
UdeM00000035159 400727 358.2 UdeM00000035159 XP\_025092303.1 59.1  
279 110 3 2 279 193 468 9.40E-96 358.2 400727  
cellular  
organisms;Eukaryota;Opisthokonta;Metazoa;Eumetazoa;Bilateria;Protostomia;  
Spiralia;Lophotrochozoa;Mollusca;Gastropoda;Caenogastropoda;Architaeniogl  
ossa;Ampullarioidea;Ampullariidae;Pomacea;Pomacea canaliculata  
UdeM00000035160 225164 106.7 UdeM00000035160 XP\_009064040.1 41.9  
129 67 2 11 136 13 136 2.50E-20 106.7 225164  
cellular  
organisms;Eukaryota;Opisthokonta;Metazoa;Eumetazoa;Bilateria;Protostomia;  
Spiralia;Lophotrochozoa;Mollusca;Gastropoda;Patellogastropoda;Lottioidea;  
Lottiidae;Lottia;Lottia gigantea  
UdeM00000035161 6596 252.3 UdeM00000035161 XP\_045177916.1 49.4 245  
119 4 81 322 414 656 8.30E-64 252.3 6596 cellular  
organisms;Eukaryota;Opisthokonta;Metazoa;Eumetazoa;Bilateria;Protostomia;  
Spiralia;Lophotrochozoa;Mollusca;Bivalvia;Autobranchia;Heteroconchia;Euhe  
terodonta;Imparidentia;Venerida;Veneroidea;Veneridae;Mercenaria;Mercenari  
a mercenaria  
UdeM00000035162 45264 68.2 UdeM00000035162 XP\_044167811.1 52.7 74  
32 1 9 82 16 86 5.90E-09 68.2 45264 cellular  
organisms;Eukaryota;Opisthokonta;Metazoa;Eumetazoa;Cnidaria;Anthozoa;Hexa  
corallia;Scleractinia;Astrocoeniina;Acroporidae;Acropora;Acropora  
millepora  
UdeM00000035164 37621 85.5 UdeM00000035164 XP\_014675741.1 43.4 99  
56 0 1 99 43 141 4.60E-14 85.5 37621 cellular  
organisms;Eukaryota;Opisthokonta;Metazoa;Eumetazoa;Bilateria;Protostomia;  
Ecdysozoa;Scalidophora;Priapulida;Priapulimorpha;Priapulimorphida;Priapul  
idae;Priapululus;Priapululus caudatus  
UdeM00000035165 6596 287.7 UdeM00000035165 XP\_045181855.1 62.7 217  
78 2 1 214 100 316 1.20E-74 287.7 6596 cellular  
organisms;Eukaryota;Opisthokonta;Metazoa;Eumetazoa;Bilateria;Protostomia;  
Spiralia;Lophotrochozoa;Mollusca;Bivalvia;Autobranchia;Heteroconchia;Euhe

terodonta;Imparidentia;Venerida;Veneroidea;Veneridae;Mercenaria;Mercenaria mercenaria

UdeM00000035166 6573 936 UdeM00000035166 XP\_021377488.1 64.9 701  
220 10 18 697 26 721 3.00E-269 936 6573 cellular

organisms;Eukaryota;Opisthokonta;Metazoa;Eumetazoa;Bilateria;Protostomia;Spiralia;Lophotrochozoa;Mollusca;Bivalvia;Autobranchia;Pteriormorphia;Pectinida;Pectinoidea;Pectinidae;Mizuhopecten;Mizuhopecten yessoensis

UdeM00000035167 6596 230.3 UdeM00000035167 XP\_045181855.1 40.7 425  
168 19 21 426 1040 1399 4.50E-57 230.3 6596 cellular

organisms;Eukaryota;Opisthokonta;Metazoa;Eumetazoa;Bilateria;Protostomia;Spiralia;Lophotrochozoa;Mollusca;Bivalvia;Autobranchia;Heteroconchia;Euheterodonta;Imparidentia;Venerida;Veneroidea;Veneridae;Mercenaria;Mercenaria mercenaria

UdeM00000035168 6565 1013.8 UdeM00000035168 XP\_022300540.1 63.7  
923 292 9 334 1248 194 1081 1.90E-292 1013.8 6565

cellular

organisms;Eukaryota;Opisthokonta;Metazoa;Eumetazoa;Bilateria;Protostomia;Spiralia;Lophotrochozoa;Mollusca;Bivalvia;Autobranchia;Pteriormorphia;Ostreida;Ostreoidea;Ostreidae;Crassostrea;Crassostrea virginica

UdeM00000035169 6596 1097.4 UdeM00000035169 XP\_045180612.1 48.4  
1386 558 28 63 1347 86 1415 0.00E+00 1097.4 6596

cellular

organisms;Eukaryota;Opisthokonta;Metazoa;Eumetazoa;Bilateria;Protostomia;Spiralia;Lophotrochozoa;Mollusca;Bivalvia;Autobranchia;Heteroconchia;Euheterodonta;Imparidentia;Venerida;Veneroidea;Veneridae;Mercenaria;Mercenaria mercenaria

UdeM00000035170 2607531 128.3 UdeM00000035170 XP\_036366827.1 64.7  
85 30 0 167 251 99 183 1.40E-26 128.3 2607531

cellular

organisms;Eukaryota;Opisthokonta;Metazoa;Eumetazoa;Bilateria;Protostomia;Spiralia;Lophotrochozoa;Mollusca;Cephalopoda;Coleoidea;Octopodiformes;Octopoda;Incirrata;Octopodidae;Octopus;Octopus sinensis

UdeM00000035171 6596 114.4 UdeM00000035171 XP\_045168991.1 37.3 185  
99 5 1 172 37 217 2.20E-22 114.4 6596 cellular

organisms;Eukaryota;Opisthokonta;Metazoa;Eumetazoa;Bilateria;Protostomia;Spiralia;Lophotrochozoa;Mollusca;Bivalvia;Autobranchia;Heteroconchia;Euheterodonta;Imparidentia;Venerida;Veneroidea;Veneridae;Mercenaria;Mercenaria mercenaria

UdeM00000035172 6573 149.4 UdeM00000035172 XP\_021378638.1 25.4 386  
272 9 13 391 21 397 9.20E-33 149.4 6573 cellular

organisms;Eukaryota;Opisthokonta;Metazoa;Eumetazoa;Bilateria;Protostomia;Spiralia;Lophotrochozoa;Mollusca;Bivalvia;Autobranchia;Pteriormorphia;Pectinida;Pectinoidea;Pectinidae;Mizuhopecten;Mizuhopecten yessoensis

UdeM00000035173 6596 68.9 UdeM00000035173 XP\_045184205.1 37.2 78  
49 0 1 78 1 78 3.20E-09 68.9 6596 cellular

organisms;Eukaryota;Opisthokonta;Metazoa;Eumetazoa;Bilateria;Protostomia;Spiralia;Lophotrochozoa;Mollusca;Bivalvia;Autobranchia;Heteroconchia;Euheterodonta;Imparidentia;Venerida;Veneroidea;Veneridae;Mercenaria;Mercenaria mercenaria

UdeM00000035174 6596 90.1 UdeM00000035174 XP\_045206071.1 26.4 227  
157 4 2 221 181 404 3.90E-15 90.1 6596 cellular

organisms;Eukaryota;Opisthokonta;Metazoa;Eumetazoa;Bilateria;Protostomia;Spiralia;Lophotrochozoa;Mollusca;Bivalvia;Autobranchia;Heteroconchia;Euheterodonta



terodonta;Imparidentia;Venerida;Veneroidea;Veneridae;Mercenaria;Mercenaria mercenaria  
 UdeM00000035175 6579 107.1 UdeM00000035175 XP\_033731710.1 34.5 139  
 90 1 1 139 1 138 1.90E-20 107.1 6579 cellular  
 organisms;Eukaryota;Opisthokonta;Metazoa;Eumetazoa;Bilateria;Protostomia;  
 Spiralia;Lophotrochozoa;Mollusca;Bivalvia;Autobranhia;Pteriomorphia;Pectinida;  
 Pectinoidea;Pectinidae;Pecten;Pecten maximus  
 UdeM00000035176 6596 86.7 UdeM00000035176 XP\_045206071.1 27.2 250  
 166 5 2 241 181 424 4.60E-14 86.7 6596 cellular  
 organisms;Eukaryota;Opisthokonta;Metazoa;Eumetazoa;Bilateria;Protostomia;  
 Spiralia;Lophotrochozoa;Mollusca;Bivalvia;Autobranhia;Heteroconchia;Euheterodonta;  
 Imparidentia;Venerida;Veneroidea;Veneridae;Mercenaria;Mercenaria mercenaria  
 UdeM00000035177 6596 102.8 UdeM00000035177 XP\_045169960.1 26.4 216  
 150 5 1 208 395 609 5.40E-19 102.8 6596 cellular  
 organisms;Eukaryota;Opisthokonta;Metazoa;Eumetazoa;Bilateria;Protostomia;  
 Spiralia;Lophotrochozoa;Mollusca;Bivalvia;Autobranhia;Heteroconchia;Euheterodonta;  
 Imparidentia;Venerida;Veneroidea;Veneridae;Mercenaria;Mercenaria mercenaria  
 UdeM00000035178 6573 154.1 UdeM00000035178 XP\_021353442.1 31.2 253  
 167 3 9 257 5 254 4.10E-34 154.1 6573 cellular  
 organisms;Eukaryota;Opisthokonta;Metazoa;Eumetazoa;Bilateria;Protostomia;  
 Spiralia;Lophotrochozoa;Mollusca;Bivalvia;Autobranhia;Pteriomorphia;Pectinida;  
 Pectinoidea;Pectinidae;Mizuhopecten;Mizuhopecten yessoensis  
 UdeM00000035182 6573 95.9 UdeM00000035182 XP\_021377862.1 39.4 109  
 66 0 1 109 735 843 3.50E-17 95.9 6573 cellular  
 organisms;Eukaryota;Opisthokonta;Metazoa;Eumetazoa;Bilateria;Protostomia;  
 Spiralia;Lophotrochozoa;Mollusca;Bivalvia;Autobranhia;Pteriomorphia;Pectinida;  
 Pectinoidea;Pectinidae;Mizuhopecten;Mizuhopecten yessoensis  
 UdeM00000035183 6573 65.9 UdeM00000035183 XP\_021377872.1 28.4 95  
 68 0 49 143 389 483 6.40E-08 65.9 6573 cellular  
 organisms;Eukaryota;Opisthokonta;Metazoa;Eumetazoa;Bilateria;Protostomia;  
 Spiralia;Lophotrochozoa;Mollusca;Bivalvia;Autobranhia;Pteriomorphia;Pectinida;  
 Pectinoidea;Pectinidae;Mizuhopecten;Mizuhopecten yessoensis  
 UdeM00000035187 6596 63.9 UdeM00000035187 XP\_045176997.1 24.4 238  
 151 10 41 266 310 530 5.10E-07 63.9 6596 cellular  
 organisms;Eukaryota;Opisthokonta;Metazoa;Eumetazoa;Bilateria;Protostomia;  
 Spiralia;Lophotrochozoa;Mollusca;Bivalvia;Autobranhia;Heteroconchia;Euheterodonta;  
 Imparidentia;Venerida;Veneroidea;Veneridae;Mercenaria;Mercenaria mercenaria  
 UdeM00000035188 6565 106.3 UdeM00000035188 XP\_022299727.1 48.7 119  
 58 1 12 127 129 247 3.10E-20 106.3 6565 cellular  
 organisms;Eukaryota;Opisthokonta;Metazoa;Eumetazoa;Bilateria;Protostomia;  
 Spiralia;Lophotrochozoa;Mollusca;Bivalvia;Autobranhia;Pteriomorphia;Ostreida;  
 Ostreoidea;Ostreidae;Crassostrea;Crassostrea virginica  
 UdeM00000035189 6573 95.9 UdeM00000035189 XP\_021377862.1 39.4 109  
 66 0 1 109 735 843 3.50E-17 95.9 6573 cellular  
 organisms;Eukaryota;Opisthokonta;Metazoa;Eumetazoa;Bilateria;Protostomia;  
 Spiralia;Lophotrochozoa;Mollusca;Bivalvia;Autobranhia;Pteriomorphia;Pectinida;  
 Pectinoidea;Pectinidae;Mizuhopecten;Mizuhopecten yessoensis  
 UdeM00000035190 6573 65.9 UdeM00000035190 XP\_021377872.1 28.4 95  
 68 0 49 143 389 483 6.40E-08 65.9 6573 cellular  
 organisms;Eukaryota;Opisthokonta;Metazoa;Eumetazoa;Bilateria;Protostomia;

Spiralia; Lophotrochozoa; Mollusca; Bivalvia; Autobranchia; Pteriomorpha; Pectinida; Pectinoidea; Pectinidae; Mizuhopecten; Mizuhopecten yessoensis  
UdeM00000035193 6596 120.6 UdeM00000035193 XP\_045168991.1 38.4 185  
97 5 1 172 37 217 3.10E-24 120.6 6596 cellular  
organisms; Eukaryota; Opisthokonta; Metazoa; Eumetazoa; Bilateria; Protostomia; Spiralia; Lophotrochozoa; Mollusca; Bivalvia; Autobranchia; Heteroconchia; Euheterodonta; Imparidentia; Venerida; Veneroidea; Veneridae; Mercenaria; Mercenaria mercenaria  
UdeM00000035194 6565 141.7 UdeM00000035194 XP\_022297355.1 34 188  
118 3 17 204 22 203 1.10E-30 141.7 6565 cellular  
organisms; Eukaryota; Opisthokonta; Metazoa; Eumetazoa; Bilateria; Protostomia; Spiralia; Lophotrochozoa; Mollusca; Bivalvia; Autobranchia; Pteriomorpha; Ostreida; Ostreoidea; Ostreidae; Crassostrea; Crassostrea virginica  
UdeM00000035195 6573 157.5 UdeM00000035195 XP\_021359302.1 38.3 196  
113 3 17 212 12 199 1.90E-35 157.5 6573 cellular  
organisms; Eukaryota; Opisthokonta; Metazoa; Eumetazoa; Bilateria; Protostomia; Spiralia; Lophotrochozoa; Mollusca; Bivalvia; Autobranchia; Pteriomorpha; Pectinida; Pectinoidea; Pectinidae; Mizuhopecten; Mizuhopecten yessoensis  
UdeM00000035196 6565 151 UdeM00000035196 XP\_022321940.1 23.6 406  
292 3 8 395 277 682 3.20E-33 151 6565 cellular  
organisms; Eukaryota; Opisthokonta; Metazoa; Eumetazoa; Bilateria; Protostomia; Spiralia; Lophotrochozoa; Mollusca; Bivalvia; Autobranchia; Pteriomorpha; Ostreida; Ostreoidea; Ostreidae; Crassostrea; Crassostrea virginica  
UdeM00000035197 6579 260.8 UdeM00000035197 XP\_033758968.1 25 679  
479 7 6 660 7 679 4.80E-66 260.8 6579 cellular  
organisms; Eukaryota; Opisthokonta; Metazoa; Eumetazoa; Bilateria; Protostomia; Spiralia; Lophotrochozoa; Mollusca; Bivalvia; Autobranchia; Pteriomorpha; Pectinida; Pectinoidea; Pectinidae; Pecten; Pecten maximus  
UdeM00000035198 6596 178.3 UdeM00000035198 XP\_045181714.1 27.9 369  
254 5 13 378 17 376 1.90E-41 178.3 6596 cellular  
organisms; Eukaryota; Opisthokonta; Metazoa; Eumetazoa; Bilateria; Protostomia; Spiralia; Lophotrochozoa; Mollusca; Bivalvia; Autobranchia; Heteroconchia; Euheterodonta; Imparidentia; Venerida; Veneroidea; Veneridae; Mercenaria; Mercenaria mercenaria  
UdeM00000035200 6565 156.4 UdeM00000035200 XP\_022300881.1 31 252  
167 4 17 268 21 265 7.40E-35 156.4 6565 cellular  
organisms; Eukaryota; Opisthokonta; Metazoa; Eumetazoa; Bilateria; Protostomia; Spiralia; Lophotrochozoa; Mollusca; Bivalvia; Autobranchia; Pteriomorpha; Ostreida; Ostreoidea; Ostreidae; Crassostrea; Crassostrea virginica  
UdeM00000035199 6596 244.2 UdeM00000035199 XP\_045169960.1 25.5 667  
417 9 14 670 14 610 4.70E-61 244.2 6596 cellular  
organisms; Eukaryota; Opisthokonta; Metazoa; Eumetazoa; Bilateria; Protostomia; Spiralia; Lophotrochozoa; Mollusca; Bivalvia; Autobranchia; Heteroconchia; Euheterodonta; Imparidentia; Venerida; Veneroidea; Veneridae; Mercenaria; Mercenaria mercenaria  
UdeM00000035201 6579 1620.1 UdeM00000035201 XP\_033727108.1 88.2  
897 54 3 44 939 69 914 0.00E+00 1620.1 6579  
cellular  
organisms; Eukaryota; Opisthokonta; Metazoa; Eumetazoa; Bilateria; Protostomia; Spiralia; Lophotrochozoa; Mollusca; Bivalvia; Autobranchia; Pteriomorpha; Pectinida; Pectinoidea; Pectinidae; Pecten; Pecten maximus  
UdeM00000035202 6579 1633.6 UdeM00000035202 XP\_033727108.1 92.3  
856 55 3 44 898 69 914 0.00E+00 1633.6 6579  
cellular

organisms;Eukaryota;Opisthokonta;Metazoa;Eumetazoa;Bilateria;Protostomia; Spiralia;Lophotrochozoa;Mollusca;Bivalvia;Autobranchia;Pteriomorpha;Pect inida;Pectinoidea;Pectinidae;Pecten;Pecten maximus

UdeM00000035203 6579 1627.8 UdeM00000035203 XP\_033727115.1 89.5  
886 51 2 44 928 69 913 0.00E+00 1627.8 6579

cellular

organisms;Eukaryota;Opisthokonta;Metazoa;Eumetazoa;Bilateria;Protostomia; Spiralia;Lophotrochozoa;Mollusca;Bivalvia;Autobranchia;Pteriomorpha;Pect inida;Pectinoidea;Pectinidae;Pecten;Pecten maximus

UdeM00000035204 6579 591.7 UdeM00000035204 XP\_033727108.1 90.8 306  
27 1 44 348 69 374 6.30E-166 591.7 6579 cellular

organisms;Eukaryota;Opisthokonta;Metazoa;Eumetazoa;Bilateria;Protostomia; Spiralia;Lophotrochozoa;Mollusca;Bivalvia;Autobranchia;Pteriomorpha;Pect inida;Pectinoidea;Pectinidae;Pecten;Pecten maximus

UdeM00000035205 6565 75.5 UdeM00000035205 XP\_022299727.1 38 100  
60 1 1 98 46 145 6.00E-11 75.5 6565 cellular

organisms;Eukaryota;Opisthokonta;Metazoa;Eumetazoa;Bilateria;Protostomia; Spiralia;Lophotrochozoa;Mollusca;Bivalvia;Autobranchia;Pteriomorpha;Ostr eida;Ostreoidea;Ostreidae;Crassostrea;Crassostrea virginica

UdeM00000035206 7574 252.3 UdeM00000035206 XP\_013402130.1 58.7 235  
76 5 14 234 22 249 6.30E-64 252.3 7574 cellular

organisms;Eukaryota;Opisthokonta;Metazoa;Eumetazoa;Bilateria;Protostomia; Spiralia;Lophotrochozoa;Brachiopoda;Linguliformea;Lingulata;Lingulida;Lin guloidea;Lingulidae;Lingula;Lingula anatina

UdeM00000035207 6596 1040 UdeM00000035207 XP\_045180329.1 86.3 584  
80 0 1 584 1 584 1.10E-300 1040 6596 cellular

organisms;Eukaryota;Opisthokonta;Metazoa;Eumetazoa;Bilateria;Protostomia; Spiralia;Lophotrochozoa;Mollusca;Bivalvia;Autobranchia;Heteroconchia;Euhe terodonta;Imparidentia;Venerida;Veneroidea;Veneridae;Mercenaria;Mercenari a mercenaria

UdeM00000035208 6596 187.6 UdeM00000035208 XP\_045181522.1 57.1 191  
69 4 1 178 1 191 1.40E-44 187.6 6596 cellular

organisms;Eukaryota;Opisthokonta;Metazoa;Eumetazoa;Bilateria;Protostomia; Spiralia;Lophotrochozoa;Mollusca;Bivalvia;Autobranchia;Heteroconchia;Euhe terodonta;Imparidentia;Venerida;Veneroidea;Veneridae;Mercenaria;Mercenari a mercenaria

UdeM00000035209 6579 346.7 UdeM00000035209 XP\_033727375.1 48.2 587  
241 13 4 581 330 862 5.90E-92 346.7 6579 cellular

organisms;Eukaryota;Opisthokonta;Metazoa;Eumetazoa;Bilateria;Protostomia; Spiralia;Lophotrochozoa;Mollusca;Bivalvia;Autobranchia;Pteriomorpha;Pect inida;Pectinoidea;Pectinidae;Pecten;Pecten maximus

UdeM00000035210 6565 189.1 UdeM00000035210 XP\_022299138.1 68.5 130  
40 1 1 129 1 130 1.20E-44 189.1 6565 cellular

organisms;Eukaryota;Opisthokonta;Metazoa;Eumetazoa;Bilateria;Protostomia; Spiralia;Lophotrochozoa;Mollusca;Bivalvia;Autobranchia;Pteriomorpha;Ostr eida;Ostreoidea;Ostreidae;Crassostrea;Crassostrea virginica

UdeM00000035211 6596 283.9 UdeM00000035211 XP\_045182414.1 51 296  
133 4 19 311 5 291 3.40E-73 283.9 6596 cellular

organisms;Eukaryota;Opisthokonta;Metazoa;Eumetazoa;Bilateria;Protostomia; Spiralia;Lophotrochozoa;Mollusca;Bivalvia;Autobranchia;Heteroconchia;Euhe terodonta;Imparidentia;Venerida;Veneroidea;Veneridae;Mercenaria;Mercenari a mercenaria

UdeM00000035213 6565 234.6 UdeM00000035213 XP\_022327824.1 76.1 155  
37 0 2 156 3 157 8.80E-59 234.6 6565 cellular

organisms;Eukaryota;Opisthokonta;Metazoa;Eumetazoa;Bilateria;Protostomia;Spiralia;Lophotrochozoa;Mollusca;Bivalvia;Autobranchia;Pteriormorphia;Ostr

UdeM00000035212 6596 1033.1 UdeM00000035212 XP\_045182413.1 70.1  
752 222 3 1 750 1 751 1.80E-298 1033.1 6596  
cellular

organisms;Eukaryota;Opisthokonta;Metazoa;Eumetazoa;Bilateria;Protostomia;Spiralia;Lophotrochozoa;Mollusca;Bivalvia;Autobranchia;Heteroconchia;Euhe

UdeM00000035214 6579 261.2 UdeM00000035214 XP\_033758968.1 25.4 696  
476 11 13 693 11 678 3.90E-66 261.2 6579 cellular

organisms;Eukaryota;Opisthokonta;Metazoa;Eumetazoa;Bilateria;Protostomia;Spiralia;Lophotrochozoa;Mollusca;Bivalvia;Autobranchia;Pteriormorphia;Pect

UdeM00000035215 1735272 465.3 UdeM00000035215 XP\_041360874.1 57  
419 166 7 11 427 14 420 8.30E-128 465.3 1735272  
cellular

organisms;Eukaryota;Opisthokonta;Metazoa;Eumetazoa;Bilateria;Protostomia;Spiralia;Lophotrochozoa;Mollusca;Gastropoda;Neomphalina;Neomphaloidea;Pel

UdeM00000035216 1735272 464.2 UdeM00000035216 XP\_041360874.1 61.1  
383 138 6 1 381 47 420 1.70E-127 464.2 1735272  
cellular

organisms;Eukaryota;Opisthokonta;Metazoa;Eumetazoa;Bilateria;Protostomia;Spiralia;Lophotrochozoa;Mollusca;Gastropoda;Neomphalina;Neomphaloidea;Pel

UdeM00000035218 6579 388.7 UdeM00000035218 XP\_033727445.1 62.9 313  
114 2 40 350 2 314 9.40E-105 388.7 6579 cellular

organisms;Eukaryota;Opisthokonta;Metazoa;Eumetazoa;Bilateria;Protostomia;Spiralia;Lophotrochozoa;Mollusca;Bivalvia;Autobranchia;Pteriormorphia;Pect

UdeM00000035219 1735272 84 UdeM00000035219 XP\_041367219.1 29.7  
145 92 4 19 162 104 239 2.00E-13 84 1735272  
cellular

organisms;Eukaryota;Opisthokonta;Metazoa;Eumetazoa;Bilateria;Protostomia;Spiralia;Lophotrochozoa;Mollusca;Gastropoda;Neomphalina;Neomphaloidea;Pel

UdeM00000035220 6596 222.2 UdeM00000035220 XP\_045215724.1 25.8 790  
467 24 25 764 19 739 2.30E-54 222.2 6596 cellular

organisms;Eukaryota;Opisthokonta;Metazoa;Eumetazoa;Bilateria;Protostomia;Spiralia;Lophotrochozoa;Mollusca;Bivalvia;Autobranchia;Heteroconchia;Euhe

UdeM00000035221 6596 565.8 UdeM00000035221 XP\_045182178.1 56.9 501  
202 9 27 520 31 524 5.80E-158 565.8 6596 cellular

organisms;Eukaryota;Opisthokonta;Metazoa;Eumetazoa;Bilateria;Protostomia;Spiralia;Lophotrochozoa;Mollusca;Bivalvia;Autobranchia;Heteroconchia;Euhe

UdeM00000035222 6596 565.8 UdeM00000035222 XP\_045182178.1 56.9 501  
202 9 59 552 31 524 6.20E-158 565.8 6596 cellular

organisms;Eukaryota;Opisthokonta;Metazoa;Eumetazoa;Bilateria;Protostomia;Spiralia;Lophotrochozoa;Mollusca;Bivalvia;Autobranchia;Heteroconchia;Euhe

terodonta;Imparidentia;Venerida;Veneroidea;Veneridae;Mercenaria;Mercenari  
 a mercenaria  
 UdeM00000035223 6596 567.8 UdeM00000035223 XP\_045182178.1 55.4 500  
 214 6 26 521 30 524 1.60E-158 567.8 6596 cellular  
 organisms;Eukaryota;Opisthokonta;Metazoa;Eumetazoa;Bilateria;Protostomia;  
 Spiralia;Lophotrochozoa;Mollusca;Bivalvia;Autobranchia;Heteroconchia;Euhe  
 terodonta;Imparidentia;Venerida;Veneroidea;Veneridae;Mercenaria;Mercenari  
 a mercenaria  
 UdeM00000035224 6565 282 UdeM00000035224 XP\_022321940.1 24.9 672  
 492 8 13 674 14 682 2.10E-72 282 6565 cellular  
 organisms;Eukaryota;Opisthokonta;Metazoa;Eumetazoa;Bilateria;Protostomia;  
 Spiralia;Lophotrochozoa;Mollusca;Bivalvia;Autobranchia;Pteriormorphia;Ostr  
 eida;Ostreoidea;Ostreidae;Crassostrea;Crassostrea virginica  
 UdeM00000035225 6596 175.3 UdeM00000035225 XP\_045181714.1 30.6 330  
 222 3 15 344 19 341 1.40E-40 175.3 6596 cellular  
 organisms;Eukaryota;Opisthokonta;Metazoa;Eumetazoa;Bilateria;Protostomia;  
 Spiralia;Lophotrochozoa;Mollusca;Bivalvia;Autobranchia;Heteroconchia;Euhe  
 terodonta;Imparidentia;Venerida;Veneroidea;Veneridae;Mercenaria;Mercenari  
 a mercenaria  
 UdeM00000035226 6565 270.8 UdeM00000035226 XP\_022321940.1 24.5 670  
 493 8 15 674 16 682 4.80E-69 270.8 6565 cellular  
 organisms;Eukaryota;Opisthokonta;Metazoa;Eumetazoa;Bilateria;Protostomia;  
 Spiralia;Lophotrochozoa;Mollusca;Bivalvia;Autobranchia;Pteriormorphia;Ostr  
 eida;Ostreoidea;Ostreidae;Crassostrea;Crassostrea virginica  
 UdeM00000035227 6596 166.8 UdeM00000035227 XP\_045182178.1 62.1 132  
 49 1 27 158 31 161 2.30E-38 166.8 6596 cellular  
 organisms;Eukaryota;Opisthokonta;Metazoa;Eumetazoa;Bilateria;Protostomia;  
 Spiralia;Lophotrochozoa;Mollusca;Bivalvia;Autobranchia;Heteroconchia;Euhe  
 terodonta;Imparidentia;Venerida;Veneroidea;Veneridae;Mercenaria;Mercenari  
 a mercenaria  
 UdeM00000035228 29159 483.8 UdeM00000035228 XP\_034299474.1 42.8 607  
 331 8 66 665 158 755 3.50E-133 483.8 29159 cellular  
 organisms;Eukaryota;Opisthokonta;Metazoa;Eumetazoa;Bilateria;Protostomia;  
 Spiralia;Lophotrochozoa;Mollusca;Bivalvia;Autobranchia;Pteriormorphia;Ostr  
 eida;Ostreoidea;Ostreidae;Crassostrea;Crassostrea gigas  
 UdeM00000035229 6565 124.4 UdeM00000035229 XP\_022290343.1 37.1 175  
 109 1 1 175 126 299 1.50E-25 124.4 6565 cellular  
 organisms;Eukaryota;Opisthokonta;Metazoa;Eumetazoa;Bilateria;Protostomia;  
 Spiralia;Lophotrochozoa;Mollusca;Bivalvia;Autobranchia;Pteriormorphia;Ostr  
 eida;Ostreoidea;Ostreidae;Crassostrea;Crassostrea virginica  
 UdeM00000035230 6565 270.8 UdeM00000035230 XP\_022321940.1 24.6 668  
 491 8 17 674 18 682 4.80E-69 270.8 6565 cellular  
 organisms;Eukaryota;Opisthokonta;Metazoa;Eumetazoa;Bilateria;Protostomia;  
 Spiralia;Lophotrochozoa;Mollusca;Bivalvia;Autobranchia;Pteriormorphia;Ostr  
 eida;Ostreoidea;Ostreidae;Crassostrea;Crassostrea virginica  
 UdeM00000035231 6565 284.6 UdeM00000035231 XP\_022321940.1 25 672  
 491 8 13 674 14 682 3.20E-73 284.6 6565 cellular  
 organisms;Eukaryota;Opisthokonta;Metazoa;Eumetazoa;Bilateria;Protostomia;  
 Spiralia;Lophotrochozoa;Mollusca;Bivalvia;Autobranchia;Pteriormorphia;Ostr  
 eida;Ostreoidea;Ostreidae;Crassostrea;Crassostrea virginica  
 UdeM00000035232 6596 175.3 UdeM00000035232 XP\_045181714.1 30.6 330  
 222 3 15 344 19 341 1.40E-40 175.3 6596 cellular  
 organisms;Eukaryota;Opisthokonta;Metazoa;Eumetazoa;Bilateria;Protostomia;  
 Spiralia;Lophotrochozoa;Mollusca;Bivalvia;Autobranchia;Heteroconchia;Euhe

terodonta;Imparidentia;Venerida;Veneroidea;Veneridae;Mercenaria;Mercenaria mercenaria

UdeM00000035233 6565 270.8 UdeM00000035233 XP\_022321940.1 24.2 670  
495 8 15 674 16 682 4.80E-69 270.8 6565 cellular

organisms;Eukaryota;Opisthokonta;Metazoa;Eumetazoa;Bilateria;Protostomia;Spiralia;Lophotrochozoa;Mollusca;Bivalvia;Autobranchia;Pteriormorphia;Ostreida;Ostreoidea;Ostreidae;Crassostrea;Crassostrea virginica

UdeM00000035234 6565 283.5 UdeM00000035234 XP\_022321940.1 24.8 670  
491 8 15 674 16 682 7.10E-73 283.5 6565 cellular

organisms;Eukaryota;Opisthokonta;Metazoa;Eumetazoa;Bilateria;Protostomia;Spiralia;Lophotrochozoa;Mollusca;Bivalvia;Autobranchia;Pteriormorphia;Ostreida;Ostreoidea;Ostreidae;Crassostrea;Crassostrea virginica

UdeM00000035235 400727 265.8 UdeM00000035235 XP\_025090241.1 62.2  
209 74 2 1 209 1 204 4.90E-68 265.8 400727  
cellular

organisms;Eukaryota;Opisthokonta;Metazoa;Eumetazoa;Bilateria;Protostomia;Spiralia;Lophotrochozoa;Mollusca;Gastropoda;Caenogastropoda;Architaenioglossa;Ampullarioidea;Ampullariidae;Pomacea;Pomacea canaliculata

UdeM00000035236 400727 270.4 UdeM00000035236 XP\_025090241.1 63.2  
209 72 2 1 209 1 204 2.00E-69 270.4 400727  
cellular

organisms;Eukaryota;Opisthokonta;Metazoa;Eumetazoa;Bilateria;Protostomia;Spiralia;Lophotrochozoa;Mollusca;Gastropoda;Caenogastropoda;Architaenioglossa;Ampullarioidea;Ampullariidae;Pomacea;Pomacea canaliculata

UdeM00000035238 6596 956.4 UdeM00000035238 XP\_045181836.1 70.3 679  
200 1 1 679 1 677 1.90E-275 956.4 6596 cellular

organisms;Eukaryota;Opisthokonta;Metazoa;Eumetazoa;Bilateria;Protostomia;Spiralia;Lophotrochozoa;Mollusca;Bivalvia;Autobranchia;Heteroconchia;Euheterodonta;Imparidentia;Venerida;Veneroidea;Veneridae;Mercenaria;Mercenaria mercenaria

UdeM00000035237 6596 1009.2 UdeM00000035237 XP\_045181836.1 69.6  
728 217 3 1 728 1 724 3.10E-291 1009.2 6596  
cellular

organisms;Eukaryota;Opisthokonta;Metazoa;Eumetazoa;Bilateria;Protostomia;Spiralia;Lophotrochozoa;Mollusca;Bivalvia;Autobranchia;Heteroconchia;Euheterodonta;Imparidentia;Venerida;Veneroidea;Veneridae;Mercenaria;Mercenaria mercenaria

UdeM00000035239 105023 125.2 UdeM00000035239 XP\_015828284.1 40.6  
187 99 4 7 189 142 320 9.00E-26 125.2 105023  
cellular

organisms;Eukaryota;Opisthokonta;Metazoa;Eumetazoa;Bilateria;Deuterostomia;Chordata;Craniata;Vertebrata;Gnathostomata;Teleostomi;Euteleostomi;Actinopterygii;Actinopteri;Neopterygii;Teleostei;Osteoglossocephalai;Clupeocephala;Euteleosteomorpha;Neoteleostei;Eurypterygia;Ctenosquamata;Acanthomorphata;Euacanthomorphacea;Percomorphaceae;Ovalentaria;Atherinomorphae;Cypriodontiformes;Aplocheiloidei;Nothobranchiidae;Nothobranchius;Nothobranchius furzeri

UdeM00000035240 105023 187.2 UdeM00000035240 XP\_015828284.1 36  
308 182 7 4 308 25 320 3.20E-44 187.2 105023  
cellular

organisms;Eukaryota;Opisthokonta;Metazoa;Eumetazoa;Bilateria;Deuterostomia;Chordata;Craniata;Vertebrata;Gnathostomata;Teleostomi;Euteleostomi;Actinopterygii;Actinopteri;Neopterygii;Teleostei;Osteoglossocephalai;Clupeocephala;Euteleosteomorpha;Neoteleostei;Eurypterygia;Ctenosquamata;Acanthomorphata

rphata;Euacanthomorpha;Percomorphaceae;Ovalentaria;Atherinomorphae;Cyp  
rinodontiformes;Aplocheiloidei;Nothobranchiidae;Nothobranchius;Nothbranc  
hius furzeri

UdeM00000035241 6596 90.5 UdeM00000035241 XP\_045181836.1 76.5 68  
16 0 36 103 916 983 1.40E-15 90.5 6596 cellular

organisms;Eukaryota;Opisthokonta;Metazoa;Eumetazoa;Bilateria;Protostomia;  
Spiralia;Lophotrochozoa;Mollusca;Bivalvia;Autobranchia;Heteroconchia;Euhe  
terodonta;Imparidentia;Venerida;Veneroidea;Veneridae;Mercenaria;Mercenari  
a mercenaria

UdeM00000035243 6596 397.5 UdeM00000035243 XP\_045181129.1 48.9 405  
143 4 40 382 12 414 1.90E-107 397.5 6596 cellular

organisms;Eukaryota;Opisthokonta;Metazoa;Eumetazoa;Bilateria;Protostomia;  
Spiralia;Lophotrochozoa;Mollusca;Bivalvia;Autobranchia;Heteroconchia;Euhe  
terodonta;Imparidentia;Venerida;Veneroidea;Veneridae;Mercenaria;Mercenari  
a mercenaria

UdeM00000035245 2607531 77 UdeM00000035245 XP\_036366827.1 46.9  
81 25 1 1 81 121 183 1.20E-11 77 2607531

cellular

organisms;Eukaryota;Opisthokonta;Metazoa;Eumetazoa;Bilateria;Protostomia;  
Spiralia;Lophotrochozoa;Mollusca;Cephalopoda;Coleoidea;Octopodiformes;Oct  
opoda;Incirrata;Octopodidae;Octopus;Octopus sinensis

UdeM00000035246 37653 76.3 UdeM00000035246 XP\_014780685.1 43.8 89  
37 2 118 206 41 116 5.40E-11 76.3 37653 cellular

organisms;Eukaryota;Opisthokonta;Metazoa;Eumetazoa;Bilateria;Protostomia;  
Spiralia;Lophotrochozoa;Mollusca;Cephalopoda;Coleoidea;Octopodiformes;Oct  
opoda;Incirrata;Octopodidae;Octopus;Octopus bimaculoides

UdeM00000035248 6596 404.1 UdeM00000035248 XP\_045177779.1 40.2 535  
299 6 1 521 97 624 6.50E-109 404.1 6596 cellular

organisms;Eukaryota;Opisthokonta;Metazoa;Eumetazoa;Bilateria;Protostomia;  
Spiralia;Lophotrochozoa;Mollusca;Bivalvia;Autobranchia;Heteroconchia;Euhe  
terodonta;Imparidentia;Venerida;Veneroidea;Veneridae;Mercenaria;Mercenari  
a mercenaria

UdeM00000035249 6596 414.1 UdeM00000035249 XP\_045177776.1 41 541  
300 8 1 534 405 933 6.10E-112 414.1 6596 cellular

organisms;Eukaryota;Opisthokonta;Metazoa;Eumetazoa;Bilateria;Protostomia;  
Spiralia;Lophotrochozoa;Mollusca;Bivalvia;Autobranchia;Heteroconchia;Euhe  
terodonta;Imparidentia;Venerida;Veneroidea;Veneridae;Mercenaria;Mercenari  
a mercenaria

UdeM00000035250 6565 123.6 UdeM00000035250 XP\_022299602.1 48.5 132  
65 3 345 475 2 131 6.90E-25 123.6 6565 cellular

organisms;Eukaryota;Opisthokonta;Metazoa;Eumetazoa;Bilateria;Protostomia;  
Spiralia;Lophotrochozoa;Mollusca;Bivalvia;Autobranchia;Pteriomorphia;Ostr  
eida;Ostreoidea;Ostreidae;Crassostrea;Crassostrea virginica

UdeM00000035251 6565 92 UdeM00000035251 XP\_022331924.1 28.3 258  
164 8 98 352 183 422 1.60E-15 92 6565 cellular

organisms;Eukaryota;Opisthokonta;Metazoa;Eumetazoa;Bilateria;Protostomia;  
Spiralia;Lophotrochozoa;Mollusca;Bivalvia;Autobranchia;Pteriomorphia;Ostr  
eida;Ostreoidea;Ostreidae;Crassostrea;Crassostrea virginica

UdeM00000035252 6596 355.9 UdeM00000035252 XP\_045177776.1 36.4 588  
288 14 1 581 405 913 1.30E-94 355.9 6596 cellular

organisms;Eukaryota;Opisthokonta;Metazoa;Eumetazoa;Bilateria;Protostomia;  
Spiralia;Lophotrochozoa;Mollusca;Bivalvia;Autobranchia;Heteroconchia;Euhe  
terodonta;Imparidentia;Venerida;Veneroidea;Veneridae;Mercenaria;Mercenari  
a mercenaria

UdeM00000035253 151771 79.3 UdeM00000035253 XP\_028417987.1 28.2  
 220 129 8 1 208 1 203 6.40E-12 79.3 151771  
 cellular  
 organisms;Eukaryota;Opisthokonta;Metazoa;Eumetazoa;Cnidaria;Anthozoa;Octo  
 corallia;Alcyonacea;Alcyoniina;Nephtheidae;Dendronephthya;Dendronephthya  
 gigantea  
 UdeM00000035254 6596 367.9 UdeM00000035254 XP\_045177779.1 38.4 521  
 305 5 1 508 97 614 6.30E-98 367.9 6596 cellular  
 organisms;Eukaryota;Opisthokonta;Metazoa;Eumetazoa;Bilateria;Protostomia;  
 Spiralia;Lophotrochozoa;Mollusca;Bivalvia;Autobranchia;Heteroconchia;Euhe  
 terodonta;Imparidentia;Venerida;Veneroidea;Veneridae;Mercenaria;Mercenari  
 a mercenaria  
 UdeM00000035255 29159 258.8 UdeM00000035255 XP\_034319278.1 63 192  
 69 1 8 197 7 198 5.50E-66 258.8 29159 cellular  
 organisms;Eukaryota;Opisthokonta;Metazoa;Eumetazoa;Bilateria;Protostomia;  
 Spiralia;Lophotrochozoa;Mollusca;Bivalvia;Autobranchia;Pteriormorphia;Ostr  
 eida;Ostreoidea;Ostreidae;Crassostrea;Crassostrea gigas  
 UdeM00000035257 6565 193 UdeM00000035257 XP\_022334358.1 61.3 150  
 56 1 1 148 195 344 2.80E-46 193 6565 cellular  
 organisms;Eukaryota;Opisthokonta;Metazoa;Eumetazoa;Bilateria;Protostomia;  
 Spiralia;Lophotrochozoa;Mollusca;Bivalvia;Autobranchia;Pteriormorphia;Ostr  
 eida;Ostreoidea;Ostreidae;Crassostrea;Crassostrea virginica  
 UdeM00000035256 6565 403.3 UdeM00000035256 XP\_022292728.1 51.7 420  
 96 2 1 313 304 723 2.80E-109 403.3 6565 cellular  
 organisms;Eukaryota;Opisthokonta;Metazoa;Eumetazoa;Bilateria;Protostomia;  
 Spiralia;Lophotrochozoa;Mollusca;Bivalvia;Autobranchia;Pteriormorphia;Ostr  
 eida;Ostreoidea;Ostreidae;Crassostrea;Crassostrea virginica  
 UdeM00000035258 6565 193.4 UdeM00000035258 XP\_022329522.1 83.6 110  
 18 0 1 110 150 259 1.70E-46 193.4 6565 cellular  
 organisms;Eukaryota;Opisthokonta;Metazoa;Eumetazoa;Bilateria;Protostomia;  
 Spiralia;Lophotrochozoa;Mollusca;Bivalvia;Autobranchia;Pteriormorphia;Ostr  
 eida;Ostreoidea;Ostreidae;Crassostrea;Crassostrea virginica  
 UdeM00000035259 29159 202.6 UdeM00000035259 XP\_034311349.1 45.3 254  
 119 4 1 236 1 252 6.90E-49 202.6 29159 cellular  
 organisms;Eukaryota;Opisthokonta;Metazoa;Eumetazoa;Bilateria;Protostomia;  
 Spiralia;Lophotrochozoa;Mollusca;Bivalvia;Autobranchia;Pteriormorphia;Ostr  
 eida;Ostreoidea;Ostreidae;Crassostrea;Crassostrea gigas  
 UdeM00000035260 6596 354 UdeM00000035260 XP\_045177776.1 36.2 588  
 289 14 1 581 405 913 8.90E-94 354 6596 cellular  
 organisms;Eukaryota;Opisthokonta;Metazoa;Eumetazoa;Bilateria;Protostomia;  
 Spiralia;Lophotrochozoa;Mollusca;Bivalvia;Autobranchia;Heteroconchia;Euhe  
 terodonta;Imparidentia;Venerida;Veneroidea;Veneridae;Mercenaria;Mercenari  
 a mercenaria  
 UdeM00000035262 6596 253.4 UdeM00000035262 XP\_045180879.1 69.9 206  
 59 2 22 227 15 217 2.00E-63 253.4 6596 cellular  
 organisms;Eukaryota;Opisthokonta;Metazoa;Eumetazoa;Bilateria;Protostomia;  
 Spiralia;Lophotrochozoa;Mollusca;Bivalvia;Autobranchia;Heteroconchia;Euhe  
 terodonta;Imparidentia;Venerida;Veneroidea;Veneridae;Mercenaria;Mercenari  
 a mercenaria  
 UdeM00000035263 6596 253.4 UdeM00000035263 XP\_045180879.1 69.9 206  
 59 2 22 227 15 217 2.00E-63 253.4 6596 cellular  
 organisms;Eukaryota;Opisthokonta;Metazoa;Eumetazoa;Bilateria;Protostomia;  
 Spiralia;Lophotrochozoa;Mollusca;Bivalvia;Autobranchia;Heteroconchia;Euhe



terodonta;Imparidentia;Venerida;Veneroidea;Veneridae;Mercenaria;Mercenari  
a mercenaria

UdeM00000035267 400727 60.8 UdeM00000035267 XP\_025108466.1 48.6  
70 36 0 19 88 274 343 1.40E-06 60.8 400727  
cellular

organisms;Eukaryota;Opisthokonta;Metazoa;Eumetazoa;Bilateria;Protostomia;  
Spiralia;Lophotrochozoa;Mollusca;Gastropoda;Caenogastropoda;Architaeniogl  
ossa;Ampullarioidea;Ampullariidae;Pomacea;Pomacea canaliculata

UdeM00000035270 6596 374 UdeM00000035270 XP\_045180517.1 51.2 623  
260 8 1 593 2 610 3.70E-100 374 6596 cellular

organisms;Eukaryota;Opisthokonta;Metazoa;Eumetazoa;Bilateria;Protostomia;  
Spiralia;Lophotrochozoa;Mollusca;Bivalvia;Autobranchia;Heteroconchia;Euhe  
terodonta;Imparidentia;Venerida;Veneroidea;Veneridae;Mercenaria;Mercenari  
a mercenaria

UdeM00000035271 6596 369.4 UdeM00000035271 XP\_045180517.1 51 624  
261 8 1 594 2 610 9.00E-99 369.4 6596 cellular

organisms;Eukaryota;Opisthokonta;Metazoa;Eumetazoa;Bilateria;Protostomia;  
Spiralia;Lophotrochozoa;Mollusca;Bivalvia;Autobranchia;Heteroconchia;Euhe  
terodonta;Imparidentia;Venerida;Veneroidea;Veneridae;Mercenaria;Mercenari  
a mercenaria

UdeM00000035272 6573 232.6 UdeM00000035272 XP\_021355442.1 35.3 482  
259 8 10 483 7 443 1.10E-57 232.6 6573 cellular

organisms;Eukaryota;Opisthokonta;Metazoa;Eumetazoa;Bilateria;Protostomia;  
Spiralia;Lophotrochozoa;Mollusca;Bivalvia;Autobranchia;Pteriomorphia;Pect  
inida;Pectinoidea;Pectinidae;Mizuhopecten;Mizuhopecten yessoensis

UdeM00000035274 6596 143.3 UdeM00000035274 XP\_045194994.1 27.4 358  
241 7 66 408 552 905 7.00E-31 143.3 6596 cellular

organisms;Eukaryota;Opisthokonta;Metazoa;Eumetazoa;Bilateria;Protostomia;  
Spiralia;Lophotrochozoa;Mollusca;Bivalvia;Autobranchia;Heteroconchia;Euhe  
terodonta;Imparidentia;Venerida;Veneroidea;Veneridae;Mercenaria;Mercenari  
a mercenaria

UdeM00000035275 6596 143.3 UdeM00000035275 XP\_045194994.1 27.4 358  
241 7 185 527 552 905 9.00E-31 143.3 6596 cellular

organisms;Eukaryota;Opisthokonta;Metazoa;Eumetazoa;Bilateria;Protostomia;  
Spiralia;Lophotrochozoa;Mollusca;Bivalvia;Autobranchia;Heteroconchia;Euhe  
terodonta;Imparidentia;Venerida;Veneroidea;Veneridae;Mercenaria;Mercenari  
a mercenaria

UdeM00000035276 29159 233.4 UdeM00000035276 XP\_011447370.2 44.7 309  
164 3 36 340 43 348 4.50E-58 233.4 29159 cellular

organisms;Eukaryota;Opisthokonta;Metazoa;Eumetazoa;Bilateria;Protostomia;  
Spiralia;Lophotrochozoa;Mollusca;Bivalvia;Autobranchia;Pteriomorphia;Ostr  
eida;Ostreoidea;Ostreidae;Crassostrea;Crassostrea gigas

UdeM00000035277 29159 237.3 UdeM00000035277 XP\_011447370.2 44.8 315  
155 5 36 340 43 348 3.10E-59 237.3 29159 cellular

organisms;Eukaryota;Opisthokonta;Metazoa;Eumetazoa;Bilateria;Protostomia;  
Spiralia;Lophotrochozoa;Mollusca;Bivalvia;Autobranchia;Pteriomorphia;Ostr  
eida;Ostreoidea;Ostreidae;Crassostrea;Crassostrea gigas

UdeM00000035278 29159 245.7 UdeM00000035278 XP\_011447370.2 44.2 328  
161 6 22 336 23 341 9.00E-62 245.7 29159 cellular

organisms;Eukaryota;Opisthokonta;Metazoa;Eumetazoa;Bilateria;Protostomia;  
Spiralia;Lophotrochozoa;Mollusca;Bivalvia;Autobranchia;Pteriomorphia;Ostr  
eida;Ostreoidea;Ostreidae;Crassostrea;Crassostrea gigas

UdeM00000035279 6596 229.9 UdeM00000035279 XP\_045182758.1 32.9 468  
222 7 1 466 1 378 6.80E-57 229.9 6596 cellular

organisms;Eukaryota;Opisthokonta;Metazoa;Eumetazoa;Bilateria;Protostomia;Spiralia;Lophotrochozoa;Mollusca;Bivalvia;Autobranchia;Heteroconchia;Euherodonta;Imparidentia;Venerida;Veneroidea;Veneridae;Mercenaria;Mercenaria mercenaria

UdeM00000035280 6596 176 UdeM00000035280 XP\_045182758.1 32.8 400  
169 6 1 400 78 377 9.70E-41 176 6596 cellular

organisms;Eukaryota;Opisthokonta;Metazoa;Eumetazoa;Bilateria;Protostomia;Spiralia;Lophotrochozoa;Mollusca;Bivalvia;Autobranchia;Heteroconchia;Euherodonta;Imparidentia;Venerida;Veneroidea;Veneridae;Mercenaria;Mercenaria mercenaria

UdeM00000035281 6596 253.8 UdeM00000035281 XP\_045182758.1 36 475  
202 8 1 473 625 999 4.30E-64 253.8 6596 cellular

organisms;Eukaryota;Opisthokonta;Metazoa;Eumetazoa;Bilateria;Protostomia;Spiralia;Lophotrochozoa;Mollusca;Bivalvia;Autobranchia;Heteroconchia;Euherodonta;Imparidentia;Venerida;Veneroidea;Veneridae;Mercenaria;Mercenaria mercenaria

UdeM00000035282 6565 237.3 UdeM00000035282 XP\_022289238.1 37.3 496  
253 10 9 463 19 497 4.10E-59 237.3 6565 cellular

organisms;Eukaryota;Opisthokonta;Metazoa;Eumetazoa;Bilateria;Protostomia;Spiralia;Lophotrochozoa;Mollusca;Bivalvia;Autobranchia;Pteriomorphia;Ostreida;Ostreoidea;Ostreidae;Crassostrea;Crassostrea virginica

UdeM00000035284 6565 90.9 UdeM00000035284 XP\_022316806.1 40 145  
64 5 1 142 33 157 1.50E-15 90.9 6565 cellular

organisms;Eukaryota;Opisthokonta;Metazoa;Eumetazoa;Bilateria;Protostomia;Spiralia;Lophotrochozoa;Mollusca;Bivalvia;Autobranchia;Pteriomorphia;Ostreida;Ostreoidea;Ostreidae;Crassostrea;Crassostrea virginica

UdeM00000035285 51031 80.5 UdeM00000035285 XP\_013299490.1 40.9 115  
60 2 93 207 3 109 2.80E-12 80.5 51031 cellular

organisms;Eukaryota;Opisthokonta;Metazoa;Eumetazoa;Bilateria;Protostomia;Ecdysozoa;Nematoda;Chromadorea;Strongylida;Ancylostomatoidea;Ancylostomatidae;Bunostominae;Necator;Necator americanus

UdeM00000035286 6596 230.7 UdeM00000035286 XP\_045182758.1 33.5 462  
230 5 1 460 625 1011 3.90E-57 230.7 6596 cellular

organisms;Eukaryota;Opisthokonta;Metazoa;Eumetazoa;Bilateria;Protostomia;Spiralia;Lophotrochozoa;Mollusca;Bivalvia;Autobranchia;Heteroconchia;Euherodonta;Imparidentia;Venerida;Veneroidea;Veneridae;Mercenaria;Mercenaria mercenaria

UdeM00000035287 6596 202.2 UdeM00000035287 XP\_045182758.1 32.6 387  
215 2 1 341 1 387 1.10E-48 202.2 6596 cellular

organisms;Eukaryota;Opisthokonta;Metazoa;Eumetazoa;Bilateria;Protostomia;Spiralia;Lophotrochozoa;Mollusca;Bivalvia;Autobranchia;Heteroconchia;Euherodonta;Imparidentia;Venerida;Veneroidea;Veneridae;Mercenaria;Mercenaria mercenaria

UdeM00000035288 6596 240.7 UdeM00000035288 XP\_045182758.1 33.8 462  
229 6 1 460 1 387 3.70E-60 240.7 6596 cellular

organisms;Eukaryota;Opisthokonta;Metazoa;Eumetazoa;Bilateria;Protostomia;Spiralia;Lophotrochozoa;Mollusca;Bivalvia;Autobranchia;Heteroconchia;Euherodonta;Imparidentia;Venerida;Veneroidea;Veneridae;Mercenaria;Mercenaria mercenaria

UdeM00000035289 6596 237.7 UdeM00000035289 XP\_045182760.1 35 448  
215 6 1 443 375 751 3.10E-59 237.7 6596 cellular

organisms;Eukaryota;Opisthokonta;Metazoa;Eumetazoa;Bilateria;Protostomia;Spiralia;Lophotrochozoa;Mollusca;Bivalvia;Autobranchia;Heteroconchia;Euherodonta;Imparidentia;Venerida;Veneroidea;Veneridae;Mercenaria;Mercenaria mercenaria

terodonta;Imparidentia;Venerida;Veneroidea;Veneridae;Mercenaria;Mercenari  
 a mercenaria  
 UdeM00000035290 6596 178.3 UdeM00000035290 XP\_045177094.1 45.4 216  
 116 1 1 214 1 216 1.00E-41 178.3 6596 cellular  
 organisms;Eukaryota;Opisthokonta;Metazoa;Eumetazoa;Bilateria;Protostomia;  
 Spiralia;Lophotrochozoa;Mollusca;Bivalvia;Autobranchia;Heteroconchia;Euhe  
 terodonta;Imparidentia;Venerida;Veneroidea;Veneridae;Mercenaria;Mercenari  
 a mercenaria  
 UdeM00000035291 6596 73.6 UdeM00000035291 XP\_045177094.1 43.7 87  
 49 0 15 101 102 188 2.00E-10 73.6 6596 cellular  
 organisms;Eukaryota;Opisthokonta;Metazoa;Eumetazoa;Bilateria;Protostomia;  
 Spiralia;Lophotrochozoa;Mollusca;Bivalvia;Autobranchia;Heteroconchia;Euhe  
 terodonta;Imparidentia;Venerida;Veneroidea;Veneridae;Mercenaria;Mercenari  
 a mercenaria  
 UdeM00000035292 6596 234.2 UdeM00000035292 XP\_045182758.1 35.3 442  
 216 6 1 440 1 374 3.40E-58 234.2 6596 cellular  
 organisms;Eukaryota;Opisthokonta;Metazoa;Eumetazoa;Bilateria;Protostomia;  
 Spiralia;Lophotrochozoa;Mollusca;Bivalvia;Autobranchia;Heteroconchia;Euhe  
 terodonta;Imparidentia;Venerida;Veneroidea;Veneridae;Mercenaria;Mercenari  
 a mercenaria  
 UdeM00000035293 6596 226.9 UdeM00000035293 XP\_045182760.1 34.4 448  
 215 8 1 440 375 751 5.40E-56 226.9 6596 cellular  
 organisms;Eukaryota;Opisthokonta;Metazoa;Eumetazoa;Bilateria;Protostomia;  
 Spiralia;Lophotrochozoa;Mollusca;Bivalvia;Autobranchia;Heteroconchia;Euhe  
 terodonta;Imparidentia;Venerida;Veneroidea;Veneridae;Mercenaria;Mercenari  
 a mercenaria  
 UdeM00000035294 6596 233.8 UdeM00000035294 XP\_045182758.1 35.2 437  
 213 5 1 435 1 369 4.30E-58 233.8 6596 cellular  
 organisms;Eukaryota;Opisthokonta;Metazoa;Eumetazoa;Bilateria;Protostomia;  
 Spiralia;Lophotrochozoa;Mollusca;Bivalvia;Autobranchia;Heteroconchia;Euhe  
 terodonta;Imparidentia;Venerida;Veneroidea;Veneridae;Mercenaria;Mercenari  
 a mercenaria  
 UdeM00000035295 6596 232.6 UdeM00000035295 XP\_045182758.1 34.8 465  
 230 8 1 461 1 396 9.80E-58 232.6 6596 cellular  
 organisms;Eukaryota;Opisthokonta;Metazoa;Eumetazoa;Bilateria;Protostomia;  
 Spiralia;Lophotrochozoa;Mollusca;Bivalvia;Autobranchia;Heteroconchia;Euhe  
 terodonta;Imparidentia;Venerida;Veneroidea;Veneridae;Mercenaria;Mercenari  
 a mercenaria  
 UdeM00000035296 6596 60.1 UdeM00000035296 XP\_045182760.1 43.5 62  
 33 1 1 60 1 62 2.70E-06 60.1 6596 cellular  
 organisms;Eukaryota;Opisthokonta;Metazoa;Eumetazoa;Bilateria;Protostomia;  
 Spiralia;Lophotrochozoa;Mollusca;Bivalvia;Autobranchia;Heteroconchia;Euhe  
 terodonta;Imparidentia;Venerida;Veneroidea;Veneridae;Mercenaria;Mercenari  
 a mercenaria  
 UdeM00000035297 6596 245 UdeM00000035297 XP\_045182758.1 34.6 462  
 225 5 1 460 1 387 2.00E-61 245 6596 cellular  
 organisms;Eukaryota;Opisthokonta;Metazoa;Eumetazoa;Bilateria;Protostomia;  
 Spiralia;Lophotrochozoa;Mollusca;Bivalvia;Autobranchia;Heteroconchia;Euhe  
 terodonta;Imparidentia;Venerida;Veneroidea;Veneridae;Mercenaria;Mercenari  
 a mercenaria  
 UdeM00000035299 29159 149.1 UdeM00000035299 XP\_011419865.2 29.4 487  
 275 12 1 484 72 492 1.50E-32 149.1 29159 cellular  
 organisms;Eukaryota;Opisthokonta;Metazoa;Eumetazoa;Bilateria;Protostomia;

Spiralia;Lophotrochozoa;Mollusca;Bivalvia;Autobranchia;Pteriormorphia;Ostr  
 eida;Ostreoidea;Ostreidae;Crassostrea;Crassostrea gigas  
 UdeM00000035301 113540 90.5 UdeM00000035301 XP\_018619763.2 46.8  
 77 40 1 23 98 19 95 1.30E-15 90.5 113540  
 cellular

organisms;Eukaryota;Opisthokonta;Metazoa;Eumetazoa;Bilateria;Deuterostomi  
 a;Chordata;Craniata;Vertebrata;Gnathostomata;Teleostomi;Euteleostomi;Acti  
 nopterygii;Actinopteri;Neopterygii;Teleostei;Osteoglossocephalai;Osteoglo  
 ssocephala;Osteoglossomorpha;Osteoglossiformes;Osteoglossidae;Scleropages  
 ;Scleropages formosus

UdeM00000035303 29159 151.8 UdeM00000035303 XP\_034334229.1 30.8 441  
 237 13 13 432 9 402 2.70E-33 151.8 29159 cellular

organisms;Eukaryota;Opisthokonta;Metazoa;Eumetazoa;Bilateria;Protostomia;  
 Spiralia;Lophotrochozoa;Mollusca;Bivalvia;Autobranchia;Pteriormorphia;Ostr  
 eida;Ostreoidea;Ostreidae;Crassostrea;Crassostrea gigas

UdeM00000035304 29159 152.5 UdeM00000035304 XP\_034334229.1 31.3 425  
 228 13 13 414 9 392 1.30E-33 152.5 29159 cellular

organisms;Eukaryota;Opisthokonta;Metazoa;Eumetazoa;Bilateria;Protostomia;  
 Spiralia;Lophotrochozoa;Mollusca;Bivalvia;Autobranchia;Pteriormorphia;Ostr  
 eida;Ostreoidea;Ostreidae;Crassostrea;Crassostrea gigas

UdeM00000035305 72036 191.8 UdeM00000035305 XP\_040566791.1 23.8 2244  
 1341 70 52 2063 337 2442 8.80E-45 191.8 72036 cellular

organisms;Eukaryota;Opisthokonta;Metazoa;Eumetazoa;Bilateria;Protostomia;  
 Ecdysozoa;Panarthropoda;Arthropoda;Mandibulata;Pancrustacea;Crustacea;Mul  
 ticrustacea;Hexanauplia;Copepoda;Neocopepoda;Podoplea;Siphonostomatoida;C  
 aligidae;Lepeophtheirus;Lepeophtheirus salmonis

UdeM00000035306 6596 465.7 UdeM00000035306 XP\_045186281.1 62.8 352  
 131 0 5 356 45 396 5.40E-128 465.7 6596 cellular

organisms;Eukaryota;Opisthokonta;Metazoa;Eumetazoa;Bilateria;Protostomia;  
 Spiralia;Lophotrochozoa;Mollusca;Bivalvia;Autobranchia;Heteroconchia;Euhe  
 terodonta;Imparidentia;Venerida;Veneroidea;Veneridae;Mercenaria;Mercenari  
 a mercenaria

UdeM00000035307 6596 384 UdeM00000035307 XP\_045177776.1 40.6 564  
 319 9 1 557 405 959 6.10E-103 384 6596 cellular

organisms;Eukaryota;Opisthokonta;Metazoa;Eumetazoa;Bilateria;Protostomia;  
 Spiralia;Lophotrochozoa;Mollusca;Bivalvia;Autobranchia;Heteroconchia;Euhe  
 terodonta;Imparidentia;Venerida;Veneroidea;Veneridae;Mercenaria;Mercenari  
 a mercenaria

UdeM00000035308 6596 387.9 UdeM00000035308 XP\_045177779.1 41.3 526  
 282 8 1 507 97 614 4.80E-104 387.9 6596 cellular

organisms;Eukaryota;Opisthokonta;Metazoa;Eumetazoa;Bilateria;Protostomia;  
 Spiralia;Lophotrochozoa;Mollusca;Bivalvia;Autobranchia;Heteroconchia;Euhe  
 terodonta;Imparidentia;Venerida;Veneroidea;Veneridae;Mercenaria;Mercenari  
 a mercenaria

UdeM00000035309 6596 389 UdeM00000035309 XP\_045177779.1 41.3 526  
 282 8 1 507 97 614 9.10E-105 389 6596 cellular

organisms;Eukaryota;Opisthokonta;Metazoa;Eumetazoa;Bilateria;Protostomia;  
 Spiralia;Lophotrochozoa;Mollusca;Bivalvia;Autobranchia;Heteroconchia;Euhe  
 terodonta;Imparidentia;Venerida;Veneroidea;Veneridae;Mercenaria;Mercenari  
 a mercenaria

UdeM00000035310 6596 281.6 UdeM00000035310 XP\_045177778.1 37.7 486  
 262 11 187 656 392 852 3.60E-72 281.6 6596 cellular

organisms;Eukaryota;Opisthokonta;Metazoa;Eumetazoa;Bilateria;Protostomia;  
 Spiralia;Lophotrochozoa;Mollusca;Bivalvia;Autobranchia;Heteroconchia;Euhe

terodonta;Imparidentia;Venerida;Veneroidea;Veneridae;Mercenaria;Mercenari  
 a mercenaria  
 UdeM00000035311 6596 430.6 UdeM00000035311 XP\_045216578.1 61 395  
 154 0 1 395 160 554 2.10E-117 430.6 6596 cellular  
 organisms;Eukaryota;Opisthokonta;Metazoa;Eumetazoa;Bilateria;Protostomia;  
 Spiralia;Lophotrochozoa;Mollusca;Bivalvia;Autobranchia;Heteroconchia;Euhe  
 terodonta;Imparidentia;Venerida;Veneroidea;Veneridae;Mercenaria;Mercenari  
 a mercenaria  
 UdeM00000035312 6579 112.1 UdeM00000035312 XP\_033727211.1 54.7 148  
 53 5 2 138 4 148 5.90E-22 112.1 6579 cellular  
 organisms;Eukaryota;Opisthokonta;Metazoa;Eumetazoa;Bilateria;Protostomia;  
 Spiralia;Lophotrochozoa;Mollusca;Bivalvia;Autobranchia;Pteriormorphia;Pect  
 inida;Pectinoidea;Pectinidae;Pecten;Pecten maximus  
 UdeM00000035313 6565 104 UdeM00000035313 XP\_022293038.1 62.5 104  
 32 3 1 103 1 98 1.20E-19 104 6565 cellular  
 organisms;Eukaryota;Opisthokonta;Metazoa;Eumetazoa;Bilateria;Protostomia;  
 Spiralia;Lophotrochozoa;Mollusca;Bivalvia;Autobranchia;Pteriormorphia;Ostr  
 eida;Ostreoidea;Ostreidae;Crassostrea;Crassostrea virginica  
 UdeM00000035314 6579 1443.3 UdeM00000035314 XP\_033726820.1 78  
 904 185 5 12 902 7 909 0.00E+00 1443.3 6579  
 cellular  
 organisms;Eukaryota;Opisthokonta;Metazoa;Eumetazoa;Bilateria;Protostomia;  
 Spiralia;Lophotrochozoa;Mollusca;Bivalvia;Autobranchia;Pteriormorphia;Pect  
 inida;Pectinoidea;Pectinidae;Pecten;Pecten maximus  
 UdeM00000035315 37653 528.9 UdeM00000035315 XP\_014780657.1 64.3 373  
 129 3 10 382 20 388 5.50E-147 528.9 37653 cellular  
 organisms;Eukaryota;Opisthokonta;Metazoa;Eumetazoa;Bilateria;Protostomia;  
 Spiralia;Lophotrochozoa;Mollusca;Cephalopoda;Coleoidea;Octopodiformes;Oct  
 opoda;Incirrata;Octopodidae;Octopus;Octopus bimaculoides  
 UdeM00000035316 6596 78.2 UdeM00000035316 XP\_045186033.1 27.4 168  
 120 2 96 263 13 178 2.30E-11 78.2 6596 cellular  
 organisms;Eukaryota;Opisthokonta;Metazoa;Eumetazoa;Bilateria;Protostomia;  
 Spiralia;Lophotrochozoa;Mollusca;Bivalvia;Autobranchia;Heteroconchia;Euhe  
 terodonta;Imparidentia;Venerida;Veneroidea;Veneridae;Mercenaria;Mercenari  
 a mercenaria  
 UdeM00000035317 6573 188.3 UdeM00000035317 XP\_021359653.1 33.6 396  
 235 13 550 927 354 739 4.40E-44 188.3 6573 cellular  
 organisms;Eukaryota;Opisthokonta;Metazoa;Eumetazoa;Bilateria;Protostomia;  
 Spiralia;Lophotrochozoa;Mollusca;Bivalvia;Autobranchia;Pteriormorphia;Pect  
 inida;Pectinoidea;Pectinidae;Mizuhopecten;Mizuhopecten yessoensis  
 UdeM00000035321 6573 188.3 UdeM00000035321 XP\_021359653.1 33.6 396  
 235 13 177 554 354 739 2.70E-44 188.3 6573 cellular  
 organisms;Eukaryota;Opisthokonta;Metazoa;Eumetazoa;Bilateria;Protostomia;  
 Spiralia;Lophotrochozoa;Mollusca;Bivalvia;Autobranchia;Pteriormorphia;Pect  
 inida;Pectinoidea;Pectinidae;Mizuhopecten;Mizuhopecten yessoensis  
 UdeM00000035319 6565 417.9 UdeM00000035319 XP\_022298331.1 71.1 277  
 80 0 72 348 110 386 1.30E-113 417.9 6565 cellular  
 organisms;Eukaryota;Opisthokonta;Metazoa;Eumetazoa;Bilateria;Protostomia;  
 Spiralia;Lophotrochozoa;Mollusca;Bivalvia;Autobranchia;Pteriormorphia;Ostr  
 eida;Ostreoidea;Ostreidae;Crassostrea;Crassostrea virginica  
 UdeM00000035320 6565 406.4 UdeM00000035320 XP\_022298331.1 70.8 271  
 79 0 1 271 116 386 3.00E-110 406.4 6565 cellular  
 organisms;Eukaryota;Opisthokonta;Metazoa;Eumetazoa;Bilateria;Protostomia;

Spiralia;Lophotrochozoa;Mollusca;Bivalvia;Autobranchia;Pteriormorphia;Ostr  
eida;Ostreoidea;Ostreidae;Crassostrea;Crassostrea virginica  
UdeM00000035322 6596 674.1 UdeM00000035322 XP\_045164107.1 57.5 607  
197 6 2 602 2178 2729 1.70E-190 674.1 6596 cellular  
organisms;Eukaryota;Opisthokonta;Metazoa;Eumetazoa;Bilateria;Protostomia;  
Spiralia;Lophotrochozoa;Mollusca;Bivalvia;Autobranchia;Heteroconchia;Euhe  
terodonta;Imparidentia;Venerida;Veneroidea;Veneridae;Mercenaria;Mercenari  
a mercenaria  
UdeM00000035323 6596 670.2 UdeM00000035323 XP\_045164107.1 57.5 607  
190 6 2 595 2178 2729 2.40E-189 670.2 6596 cellular  
organisms;Eukaryota;Opisthokonta;Metazoa;Eumetazoa;Bilateria;Protostomia;  
Spiralia;Lophotrochozoa;Mollusca;Bivalvia;Autobranchia;Heteroconchia;Euhe  
terodonta;Imparidentia;Venerida;Veneroidea;Veneridae;Mercenaria;Mercenari  
a mercenaria  
UdeM00000035324 6596 170.2 UdeM00000035324 XP\_045164107.1 51.6 190  
74 6 15 200 1939 2114 3.30E-39 170.2 6596 cellular  
organisms;Eukaryota;Opisthokonta;Metazoa;Eumetazoa;Bilateria;Protostomia;  
Spiralia;Lophotrochozoa;Mollusca;Bivalvia;Autobranchia;Heteroconchia;Euhe  
terodonta;Imparidentia;Venerida;Veneroidea;Veneridae;Mercenaria;Mercenari  
a mercenaria  
UdeM00000035325 1735272 279.6 UdeM00000035325 XP\_041360663.1 31.8  
689 382 20 68 709 852 1499 1.10E-71 279.6 1735272  
cellular  
organisms;Eukaryota;Opisthokonta;Metazoa;Eumetazoa;Bilateria;Protostomia;  
Spiralia;Lophotrochozoa;Mollusca;Gastropoda;Neomphalina;Neomphaloidea;Pel  
tospiridae;Gigantopelta;Gigantopelta aegis  
UdeM00000035326 29159 63.2 UdeM00000035326 XP\_011453490.1 30.4 158  
94 6 157 308 272 419 7.20E-07 63.2 29159 cellular  
organisms;Eukaryota;Opisthokonta;Metazoa;Eumetazoa;Bilateria;Protostomia;  
Spiralia;Lophotrochozoa;Mollusca;Bivalvia;Autobranchia;Pteriormorphia;Ostr  
eida;Ostreoidea;Ostreidae;Crassostrea;Crassostrea gigas  
UdeM00000035327 6596 347.1 UdeM00000035327 XP\_045177779.1 35.8 581  
355 11 1 574 97 666 6.40E-92 347.1 6596 cellular  
organisms;Eukaryota;Opisthokonta;Metazoa;Eumetazoa;Bilateria;Protostomia;  
Spiralia;Lophotrochozoa;Mollusca;Bivalvia;Autobranchia;Heteroconchia;Euhe  
terodonta;Imparidentia;Venerida;Veneroidea;Veneridae;Mercenaria;Mercenari  
a mercenaria  
UdeM00000035329 6596 270.8 UdeM00000035329 XP\_045177779.1 38.8 438  
245 11 1 427 97 522 3.00E-69 270.8 6596 cellular  
organisms;Eukaryota;Opisthokonta;Metazoa;Eumetazoa;Bilateria;Protostomia;  
Spiralia;Lophotrochozoa;Mollusca;Bivalvia;Autobranchia;Heteroconchia;Euhe  
terodonta;Imparidentia;Venerida;Veneroidea;Veneridae;Mercenaria;Mercenari  
a mercenaria  
UdeM00000035330 6565 122.5 UdeM00000035330 XP\_022299602.1 45.5 132  
69 3 97 227 2 131 1.00E-24 122.5 6565 cellular  
organisms;Eukaryota;Opisthokonta;Metazoa;Eumetazoa;Bilateria;Protostomia;  
Spiralia;Lophotrochozoa;Mollusca;Bivalvia;Autobranchia;Pteriormorphia;Ostr  
eida;Ostreoidea;Ostreidae;Crassostrea;Crassostrea virginica  
UdeM00000035331 6579 97.8 UdeM00000035331 XP\_033739873.1 30.9 191  
122 7 37 224 7 190 2.20E-17 97.8 6579 cellular  
organisms;Eukaryota;Opisthokonta;Metazoa;Eumetazoa;Bilateria;Protostomia;  
Spiralia;Lophotrochozoa;Mollusca;Bivalvia;Autobranchia;Pteriormorphia;Pect  
inida;Pectinoidea;Pectinidae;Pecten;Pecten maximus

UdeM00000035332 29159 313.2 UdeM00000035332 XP\_034307480.1 41.1 406  
 224 9 1 401 187 582 5.00E-82 313.2 29159 cellular  
 organisms;Eukaryota;Opisthokonta;Metazoa;Eumetazoa;Bilateria;Protostomia;  
 Spiralia;Lophotrochozoa;Mollusca;Bivalvia;Autobranchia;Pteriomorpha;Ostr  
 eida;Ostreoidea;Ostreidae;Crassostrea;Crassostrea gigas  
 UdeM00000035336 7955 58.5 UdeM00000035336 XP\_009293989.1 45.2 62  
 34 0 45 106 1083 1144 5.90E-06 58.5 7955 cellular  
 organisms;Eukaryota;Opisthokonta;Metazoa;Eumetazoa;Bilateria;Deuterostomi  
 a;Chordata;Craniata;Vertebrata;Gnathostomata;Teleostomi;Euteleostomi;Acti  
 nopterygii;Actinopteri;Neopterygii;Teleostei;Osteoglossocephalai;Clupeoce  
 phala;Otomorpha;Ostariophysi;Otophysi;Cypriniphysae;Cypriniformes;Cyprino  
 idei;Danionidae;Danioninae;Danio;Danio rerio  
 UdeM00000035337 29159 272.3 UdeM00000035337 XP\_034339432.1 43.8 322  
 167 4 143 462 39 348 1.10E-69 272.3 29159 cellular  
 organisms;Eukaryota;Opisthokonta;Metazoa;Eumetazoa;Bilateria;Protostomia;  
 Spiralia;Lophotrochozoa;Mollusca;Bivalvia;Autobranchia;Pteriomorpha;Ostr  
 eida;Ostreoidea;Ostreidae;Crassostrea;Crassostrea gigas  
 UdeM00000035347 6579 108.2 UdeM00000035347 XP\_033747028.1 62.4 85  
 32 0 12 96 726 810 6.00E-21 108.2 6579 cellular  
 organisms;Eukaryota;Opisthokonta;Metazoa;Eumetazoa;Bilateria;Protostomia;  
 Spiralia;Lophotrochozoa;Mollusca;Bivalvia;Autobranchia;Pteriomorpha;Pect  
 inida;Pectinoidea;Pectinidae;Pecten;Pecten maximus  
 UdeM00000035348 8005 127.1 UdeM00000035348 XP\_026887342.2 47.4 116  
 57 2 92 206 303 415 2.60E-26 127.1 8005 cellular  
 organisms;Eukaryota;Opisthokonta;Metazoa;Eumetazoa;Bilateria;Deuterostomi  
 a;Chordata;Craniata;Vertebrata;Gnathostomata;Teleostomi;Euteleostomi;Acti  
 nopterygii;Actinopteri;Neopterygii;Teleostei;Osteoglossocephalai;Clupeoce  
 phala;Otomorpha;Ostariophysi;Otophysi;Characiphysae;Gymnotiiformes;Gymnoto  
 idei;Gymnotidae;Electrophorus;Electrophorus electricus  
 UdeM00000035349 8005 124.8 UdeM00000035349 XP\_026887342.2 41.9 136  
 72 2 98 232 286 415 1.50E-25 124.8 8005 cellular  
 organisms;Eukaryota;Opisthokonta;Metazoa;Eumetazoa;Bilateria;Deuterostomi  
 a;Chordata;Craniata;Vertebrata;Gnathostomata;Teleostomi;Euteleostomi;Acti  
 nopterygii;Actinopteri;Neopterygii;Teleostei;Osteoglossocephalai;Clupeoce  
 phala;Otomorpha;Ostariophysi;Otophysi;Characiphysae;Gymnotiiformes;Gymnoto  
 idei;Gymnotidae;Electrophorus;Electrophorus electricus  
 UdeM00000035350 8005 124.8 UdeM00000035350 XP\_026887342.2 41.9 136  
 72 2 81 215 286 415 1.30E-25 124.8 8005 cellular  
 organisms;Eukaryota;Opisthokonta;Metazoa;Eumetazoa;Bilateria;Deuterostomi  
 a;Chordata;Craniata;Vertebrata;Gnathostomata;Teleostomi;Euteleostomi;Acti  
 nopterygii;Actinopteri;Neopterygii;Teleostei;Osteoglossocephalai;Clupeoce  
 phala;Otomorpha;Ostariophysi;Otophysi;Characiphysae;Gymnotiiformes;Gymnoto  
 idei;Gymnotidae;Electrophorus;Electrophorus electricus  
 UdeM00000035351 8005 126.3 UdeM00000035351 XP\_026887342.2 42.6 136  
 71 2 98 232 286 415 5.00E-26 126.3 8005 cellular  
 organisms;Eukaryota;Opisthokonta;Metazoa;Eumetazoa;Bilateria;Deuterostomi  
 a;Chordata;Craniata;Vertebrata;Gnathostomata;Teleostomi;Euteleostomi;Acti  
 nopterygii;Actinopteri;Neopterygii;Teleostei;Osteoglossocephalai;Clupeoce  
 phala;Otomorpha;Ostariophysi;Otophysi;Characiphysae;Gymnotiiformes;Gymnoto  
 idei;Gymnotidae;Electrophorus;Electrophorus electricus  
 UdeM00000035352 6105 160.6 UdeM00000035352 XP\_031566978.1 47.7 174  
 85 3 1 170 151 322 1.80E-36 160.6 6105 cellular  
 organisms;Eukaryota;Opisthokonta;Metazoa;Eumetazoa;Cnidaria;Anthozoa;Hexa  
 corallia;Actiniaria;Actiniidae;Actinia;Actinia tenebrosa

UdeM00000035353 6105 139.4 UdeM00000035353 XP\_031566938.1 43.7 135  
 74 2 33 167 311 443 9.80E-30 139.4 6105 cellular  
 organisms;Eukaryota;Opisthokonta;Metazoa;Eumetazoa;Cnidaria;Anthozoa;Hexa  
 corallia;Actiniaria;Actiniidae;Actinia;Actinia tenebrosa  
 UdeM00000035354 6105 102.1 UdeM00000035354 XP\_031570619.1 37.5 152  
 89 4 52 201 25 172 8.90E-19 102.1 6105 cellular  
 organisms;Eukaryota;Opisthokonta;Metazoa;Eumetazoa;Cnidaria;Anthozoa;Hexa  
 corallia;Actiniaria;Actiniidae;Actinia;Actinia tenebrosa  
 UdeM00000035355 45264 61.2 UdeM00000035355 XP\_044176701.1 39.1 69  
 42 0 9 77 773 841 8.10E-07 61.2 45264 cellular  
 organisms;Eukaryota;Opisthokonta;Metazoa;Eumetazoa;Cnidaria;Anthozoa;Hexa  
 corallia;Scleractinia;Astrocoeniina;Acroporidae;Acropora;Acropora  
 millepora  
 UdeM00000035357 31033 114.4 UdeM00000035357 XP\_003962570.1 51.1 94  
 44 2 3 94 309 402 8.00E-23 114.4 31033 cellular  
 organisms;Eukaryota;Opisthokonta;Metazoa;Eumetazoa;Bilateria;Deuterostomi  
 a;Chordata;Craniata;Vertebrata;Gnathostomata;Teleostomi;Euteleostomi;Acti  
 nopterygii;Actinopteri;Neopterygii;Teleostei;Osteoglossocephalai;Clupeoce  
 phala;Euteleostei;Neoteleostei;Eurypterygia;Ctenosquamata;Acanthomo  
 rphata;Euacanthomorphacea;Percomorphaceae;Eupercaria;Tetraodontiformes;Te  
 traodontoidei;Tetraodontoidea;Tetraodontidae;Takifugu;Takifugu rubripes  
 UdeM00000035359 64176 115.2 UdeM00000035359 XP\_028578038.1 47.5 101  
 51 2 24 122 297 397 6.10E-23 115.2 64176 cellular  
 organisms;Eukaryota;Opisthokonta;Metazoa;Eumetazoa;Bilateria;Deuterostomi  
 a;Chordata;Craniata;Vertebrata;Gnathostomata;Teleostomi;Euteleostomi;Sarc  
 opterygii;Dipnotetrapodomorpha;Tetrapoda;Amniota;Sauropsida;Sauria;Lepido  
 sauria;Squamata;Bifurcata;Unidentata;Episquamata;Laterata;Lacertibaenia;L  
 acertidae;Lacertinae;Podarcis;Podarcis muralis  
 UdeM00000035360 1529436 438.3 UdeM00000035360 XP\_033101539.1 31.2  
 1023 514 22 38 882 13 1023 2.30E-119 438.3 1529436  
 cellular  
 organisms;Eukaryota;Opisthokonta;Metazoa;Eumetazoa;Bilateria;Deuterostomi  
 a;Echinodermata;Pelmatozoa;Crinoidea;Articulata;Comatulida;Comatulidae;Co  
 matulinae;Anneissia;Anneissia japonica  
 UdeM00000035361 6579 265 UdeM00000035361 XP\_033730606.1 43.6 358  
 185 8 1 347 1 352 1.40E-67 265 6579 cellular  
 organisms;Eukaryota;Opisthokonta;Metazoa;Eumetazoa;Bilateria;Protostomia;  
 Spiralia;Lophotrochozoa;Mollusca;Bivalvia;Autobranchia;Pteriomorphia;Pect  
 inida;Pectinoidea;Pectinidae;Pecten;Pecten maximus  
 UdeM00000035362 151771 61.6 UdeM00000035362 XP\_028417120.1 45.5  
 88 46 2 11 97 236 322 1.50E-06 61.6 151771  
 cellular  
 organisms;Eukaryota;Opisthokonta;Metazoa;Eumetazoa;Cnidaria;Anthozoa;Octo  
 corallia;Alcyonacea;Alcyoniina;Nephtheidae;Dendronephthya;Dendronephthya  
 gigantea  
 UdeM00000035366 8005 131.3 UdeM00000035366 XP\_026887342.2 46.3 134  
 64 3 101 232 288 415 1.60E-27 131.3 8005 cellular  
 organisms;Eukaryota;Opisthokonta;Metazoa;Eumetazoa;Bilateria;Deuterostomi  
 a;Chordata;Craniata;Vertebrata;Gnathostomata;Teleostomi;Euteleostomi;Acti  
 nopterygii;Actinopteri;Neopterygii;Teleostei;Osteoglossocephalai;Clupeoce  
 phala;Otomorpha;Ostariophysi;Otophysi;Characiphysae;Gymnotiformes;Gymnoto  
 idei;Gymnotidae;Electrophorus;Electrophorus electricus  
 UdeM00000035367 8005 115.9 UdeM00000035367 XP\_026887342.2 42.6 122  
 62 3 133 252 300 415 7.30E-23 115.9 8005 cellular



organisms;Eukaryota;Opisthokonta;Metazoa;Eumetazoa;Bilateria;Deuterostomi  
a;Chordata;Craniata;Vertebrata;Gnathostomata;Teleostomi;Euteleostomi;Acti  
nopterygii;Actinopteri;Neopterygii;Teleostei;Osteoglossocephalai;Clupeoce  
phala;Otomorpha;Ostariophysi;Otophysi;Characiphysae;Gymnotiformes;Gymnoto  
idei;Gymnotidae;Electrophorus;Electrophorus electricus

UdeM00000035368 8496 125.9 UdeM00000035368 XP\_006278681.1 47.1 119  
57 3 113 229 273 387 6.40E-26 125.9 8496 cellular

organisms;Eukaryota;Opisthokonta;Metazoa;Eumetazoa;Bilateria;Deuterostomi  
a;Chordata;Craniata;Vertebrata;Gnathostomata;Teleostomi;Euteleostomi;Sarc  
opterygii;Dipnotetrapodomorpha;Tetrapoda;Amniota;Sauropsida;Sauria;Archel  
osauria;Archosauria;Crocodylia;Alligatoridae;Alligatorinae;Alligator;Alli  
gator mississippiensis

UdeM00000035369 1415580 125.6 UdeM00000035369 XP\_030050849.1 36.2  
174 102 5 66 231 221 393 8.50E-26 125.6 1415580  
cellular

organisms;Eukaryota;Opisthokonta;Metazoa;Eumetazoa;Bilateria;Deuterostomi  
a;Chordata;Craniata;Vertebrata;Gnathostomata;Teleostomi;Euteleostomi;Sarc  
opterygii;Dipnotetrapodomorpha;Tetrapoda;Amphibia;Gymnophiona;Siphonopida  
e;Microcaecilia;Microcaecilia unicolor

UdeM00000035370 6579 369 UdeM00000035370 XP\_033726998.1 75.5 249  
60 1 62 310 53 300 6.00E-99 369 6579 cellular

organisms;Eukaryota;Opisthokonta;Metazoa;Eumetazoa;Bilateria;Protostomia;  
Spiralia;Lophotrochozoa;Mollusca;Bivalvia;Autobranchia;Pteriormorphia;Pect  
inida;Pectinoidea;Pectinidae;Pecten;Pecten maximus

UdeM00000035372 6596 211.1 UdeM00000035372 XP\_045181825.1 64.2 159  
57 0 1 159 1 159 1.10E-51 211.1 6596 cellular

organisms;Eukaryota;Opisthokonta;Metazoa;Eumetazoa;Bilateria;Protostomia;  
Spiralia;Lophotrochozoa;Mollusca;Bivalvia;Autobranchia;Heteroconchia;Euhe  
terodonta;Imparidentia;Venerida;Veneroidea;Veneridae;Mercenaria;Mercenari  
a mercenaria

UdeM00000035371 6596 210.7 UdeM00000035371 XP\_045181825.1 64.2 159  
57 0 1 159 1 159 1.40E-51 210.7 6596 cellular

organisms;Eukaryota;Opisthokonta;Metazoa;Eumetazoa;Bilateria;Protostomia;  
Spiralia;Lophotrochozoa;Mollusca;Bivalvia;Autobranchia;Heteroconchia;Euhe  
terodonta;Imparidentia;Venerida;Veneroidea;Veneridae;Mercenaria;Mercenari  
a mercenaria

UdeM00000035373 6596 123.6 UdeM00000035373 XP\_045181825.1 50 110  
55 0 25 134 1 110 2.10E-25 123.6 6596 cellular

organisms;Eukaryota;Opisthokonta;Metazoa;Eumetazoa;Bilateria;Protostomia;  
Spiralia;Lophotrochozoa;Mollusca;Bivalvia;Autobranchia;Heteroconchia;Euhe  
terodonta;Imparidentia;Venerida;Veneroidea;Veneridae;Mercenaria;Mercenari  
a mercenaria

UdeM00000035374 6596 115.2 UdeM00000035374 XP\_045171351.1 35 246  
119 6 1 244 248 454 1.20E-22 115.2 6596 cellular

organisms;Eukaryota;Opisthokonta;Metazoa;Eumetazoa;Bilateria;Protostomia;  
Spiralia;Lophotrochozoa;Mollusca;Bivalvia;Autobranchia;Heteroconchia;Euhe  
terodonta;Imparidentia;Venerida;Veneroidea;Veneridae;Mercenaria;Mercenari  
a mercenaria

UdeM00000035375 6596 303.5 UdeM00000035375 XP\_045177776.1 39.5 387  
227 4 2 388 657 1036 6.20E-79 303.5 6596 cellular

organisms;Eukaryota;Opisthokonta;Metazoa;Eumetazoa;Bilateria;Protostomia;  
Spiralia;Lophotrochozoa;Mollusca;Bivalvia;Autobranchia;Heteroconchia;Euhe  
terodonta;Imparidentia;Venerida;Veneroidea;Veneridae;Mercenaria;Mercenari  
a mercenaria

UdeM00000035376 6565 133.7 UdeM00000035376 XP\_022299727.1 46.4 140  
 75 0 1 140 106 245 1.90E-28 133.7 6565 cellular  
 organisms;Eukaryota;Opisthokonta;Metazoa;Eumetazoa;Bilateria;Protostomia;  
 Spiralia;Lophotrochozoa;Mollusca;Bivalvia;Autobranhia;Pteriomorphia;Ostr  
 eida;Ostreoidea;Ostreidae;Crassostrea;Crassostrea virginica  
 UdeM00000035377 6596 85.1 UdeM00000035377 XP\_045191531.1 36.8 125  
 72 2 1 120 807 929 2.00E-13 85.1 6596 cellular  
 organisms;Eukaryota;Opisthokonta;Metazoa;Eumetazoa;Bilateria;Protostomia;  
 Spiralia;Lophotrochozoa;Mollusca;Bivalvia;Autobranhia;Heteroconchia;Euhe  
 terodonta;Imparidentia;Venerida;Veneroidea;Veneridae;Mercenaria;Mercenari  
 a mercenaria  
 UdeM00000035378 29159 73.6 UdeM00000035378 XP\_034322397.1 28.2 170  
 99 4 20 189 14 160 3.40E-10 73.6 29159 cellular  
 organisms;Eukaryota;Opisthokonta;Metazoa;Eumetazoa;Bilateria;Protostomia;  
 Spiralia;Lophotrochozoa;Mollusca;Bivalvia;Autobranhia;Pteriomorphia;Ostr  
 eida;Ostreoidea;Ostreidae;Crassostrea;Crassostrea gigas  
 UdeM00000035380 46514 114.4 UdeM00000035380 XP\_038062048.1 24.6 471  
 295 17 5 446 51 490 3.80E-22 114.4 46514 cellular  
 organisms;Eukaryota;Opisthokonta;Metazoa;Eumetazoa;Bilateria;Deuterostomi  
 a;Echinodermata;Eleutherozoa;Asterozoa;Asteroidea;Valvatacea;Valvatida;As  
 terinidae;Patiria;Patiria miniata  
 UdeM00000035382 6596 387.9 UdeM00000035382 XP\_045180304.1 34.1 815  
 432 28 32 799 36 792 3.20E-104 387.9 6596 cellular  
 organisms;Eukaryota;Opisthokonta;Metazoa;Eumetazoa;Bilateria;Protostomia;  
 Spiralia;Lophotrochozoa;Mollusca;Bivalvia;Autobranhia;Heteroconchia;Euhe  
 terodonta;Imparidentia;Venerida;Veneroidea;Veneridae;Mercenaria;Mercenari  
 a mercenaria  
 UdeM00000035383 6596 136 UdeM00000035383 XP\_045182268.1 67.9 106  
 31 3 14 116 665 770 3.20E-29 136 6596 cellular  
 organisms;Eukaryota;Opisthokonta;Metazoa;Eumetazoa;Bilateria;Protostomia;  
 Spiralia;Lophotrochozoa;Mollusca;Bivalvia;Autobranhia;Heteroconchia;Euhe  
 terodonta;Imparidentia;Venerida;Veneroidea;Veneridae;Mercenaria;Mercenari  
 a mercenaria  
 UdeM00000035384 2607531 219.2 UdeM00000035384 XP\_036366810.1 48.6  
 210 102 1 109 318 26 229 7.70E-54 219.2 2607531  
 cellular  
 organisms;Eukaryota;Opisthokonta;Metazoa;Eumetazoa;Bilateria;Protostomia;  
 Spiralia;Lophotrochozoa;Mollusca;Cephalopoda;Coleoidea;Octopodiformes;Oct  
 opoda;Incirrata;Octopodidae;Octopus;Octopus sinensis  
 UdeM00000035385 6596 305.8 UdeM00000035385 XP\_045177776.1 38.9 435  
 235 5 1 422 405 821 8.30E-80 305.8 6596 cellular  
 organisms;Eukaryota;Opisthokonta;Metazoa;Eumetazoa;Bilateria;Protostomia;  
 Spiralia;Lophotrochozoa;Mollusca;Bivalvia;Autobranhia;Heteroconchia;Euhe  
 terodonta;Imparidentia;Venerida;Veneroidea;Veneridae;Mercenaria;Mercenari  
 a mercenaria  
 UdeM00000035386 6565 92.4 UdeM00000035386 XP\_022305919.1 24.9 366  
 209 11 25 346 887 1230 1.20E-15 92.4 6565 cellular  
 organisms;Eukaryota;Opisthokonta;Metazoa;Eumetazoa;Bilateria;Protostomia;  
 Spiralia;Lophotrochozoa;Mollusca;Bivalvia;Autobranhia;Pteriomorphia;Ostr  
 eida;Ostreoidea;Ostreidae;Crassostrea;Crassostrea virginica  
 UdeM00000035387 6565 89.7 UdeM00000035387 XP\_022305107.1 33.3 177  
 98 5 17 193 949 1105 4.60E-15 89.7 6565 cellular  
 organisms;Eukaryota;Opisthokonta;Metazoa;Eumetazoa;Bilateria;Protostomia;

Spiralia;Lophotrochozoa;Mollusca;Bivalvia;Autobranchia;Pteriormorphia;Ostr  
eida;Ostreoidea;Ostreidae;Crassostrea;Crassostrea virginica  
UdeM00000035388 6596 341.3 UdeM00000035388 XP\_045180304.1 30.2 921  
423 29 32 896 36 792 3.90E-90 341.3 6596 cellular  
organisms;Eukaryota;Opisthokonta;Metazoa;Eumetazoa;Bilateria;Protostomia;  
Spiralia;Lophotrochozoa;Mollusca;Bivalvia;Autobranchia;Heteroconchia;Euhe  
terodonta;Imparidentia;Venerida;Veneroidea;Veneridae;Mercenaria;Mercenari  
a mercenaria  
UdeM00000035389 6596 82.8 UdeM00000035389 XP\_045180304.1 51.6 93  
38 3 31 119 703 792 3.80E-13 82.8 6596 cellular  
organisms;Eukaryota;Opisthokonta;Metazoa;Eumetazoa;Bilateria;Protostomia;  
Spiralia;Lophotrochozoa;Mollusca;Bivalvia;Autobranchia;Heteroconchia;Euhe  
terodonta;Imparidentia;Venerida;Veneroidea;Veneridae;Mercenaria;Mercenari  
a mercenaria  
UdeM00000035390 6596 187.6 UdeM00000035390 XP\_045182268.1 42.3 284  
127 9 6 267 486 754 2.10E-44 187.6 6596 cellular  
organisms;Eukaryota;Opisthokonta;Metazoa;Eumetazoa;Bilateria;Protostomia;  
Spiralia;Lophotrochozoa;Mollusca;Bivalvia;Autobranchia;Heteroconchia;Euhe  
terodonta;Imparidentia;Venerida;Veneroidea;Veneridae;Mercenaria;Mercenari  
a mercenaria  
UdeM00000035391 6596 171 UdeM00000035391 XP\_045182268.1 42.7 262  
113 9 2 241 508 754 1.80E-39 171 6596 cellular  
organisms;Eukaryota;Opisthokonta;Metazoa;Eumetazoa;Bilateria;Protostomia;  
Spiralia;Lophotrochozoa;Mollusca;Bivalvia;Autobranchia;Heteroconchia;Euhe  
terodonta;Imparidentia;Venerida;Veneroidea;Veneridae;Mercenaria;Mercenari  
a mercenaria  
UdeM00000035392 6596 68.6 UdeM00000035392 XP\_045188640.1 61.8 55  
20 1 55 109 152 205 1.30E-08 68.6 6596 cellular  
organisms;Eukaryota;Opisthokonta;Metazoa;Eumetazoa;Bilateria;Protostomia;  
Spiralia;Lophotrochozoa;Mollusca;Bivalvia;Autobranchia;Heteroconchia;Euhe  
terodonta;Imparidentia;Venerida;Veneroidea;Veneridae;Mercenaria;Mercenari  
a mercenaria  
UdeM00000035393 6579 120.9 UdeM00000035393 XP\_033752673.1 35.7 199  
41 1 1 112 453 651 1.00E-24 120.9 6579 cellular  
organisms;Eukaryota;Opisthokonta;Metazoa;Eumetazoa;Bilateria;Protostomia;  
Spiralia;Lophotrochozoa;Mollusca;Bivalvia;Autobranchia;Pteriormorphia;Pect  
inida;Pectinoidea;Pectinidae;Pecten;Pecten maximus  
UdeM00000035394 63155 148.3 UdeM00000035394 XP\_030614866.1 49.6 117  
59 0 3 119 157 273 6.50E-33 148.3 63155 cellular  
organisms;Eukaryota;Opisthokonta;Metazoa;Eumetazoa;Bilateria;Deuterostomi  
a;Chordata;Craniata;Vertebrata;Gnathostomata;Teleostomi;Euteleostomi;Acti  
nopterygii;Actinopteri;Neopterygii;Teleostei;Osteoglossocephalai;Clupeoce  
phala;Euteleosteomorpha;Neoteleostei;Eurypterygia;Ctenosquamata;Acanthomo  
rphata;Euacanthomorphacea;Percomorphaceae;Ovalentaria;Cichlomorphae;Cichl  
iformes;Cichlidae;New World  
cichlids;Cichlasomatinae;Heroini;Archocentrus;Archocentrus centrarchus  
UdeM00000035395 6596 1263.4 UdeM00000035395 XP\_045193504.1 66.8  
925 291 5 1 917 1 917 0.00E+00 1263.4 6596  
cellular  
organisms;Eukaryota;Opisthokonta;Metazoa;Eumetazoa;Bilateria;Protostomia;  
Spiralia;Lophotrochozoa;Mollusca;Bivalvia;Autobranchia;Heteroconchia;Euhe  
terodonta;Imparidentia;Venerida;Veneroidea;Veneridae;Mercenaria;Mercenari  
a mercenaria

UdeM00000035397 6596 149.1 UdeM00000035397 XP\_045180304.1 29 438  
 236 17 4 388 377 792 1.30E-32 149.1 6596 cellular  
 organisms;Eukaryota;Opisthokonta;Metazoa;Eumetazoa;Bilateria;Protostomia;  
 Spiralia;Lophotrochozoa;Mollusca;Bivalvia;Autobranchia;Heteroconchia;Euhe  
 terodonta;Imparidentia;Venerida;Veneroidea;Veneridae;Mercenaria;Mercenari  
 a mercenaria  
 UdeM00000035398 6596 389.8 UdeM00000035398 XP\_045180304.1 34.7 807  
 438 26 32 799 36 792 8.50E-105 389.8 6596 cellular  
 organisms;Eukaryota;Opisthokonta;Metazoa;Eumetazoa;Bilateria;Protostomia;  
 Spiralia;Lophotrochozoa;Mollusca;Bivalvia;Autobranchia;Heteroconchia;Euhe  
 terodonta;Imparidentia;Venerida;Veneroidea;Veneridae;Mercenaria;Mercenari  
 a mercenaria  
 UdeM00000035399 6596 90.1 UdeM00000035399 XP\_045180304.1 31.6 225  
 125 10 13 230 323 525 5.20E-15 90.1 6596 cellular  
 organisms;Eukaryota;Opisthokonta;Metazoa;Eumetazoa;Bilateria;Protostomia;  
 Spiralia;Lophotrochozoa;Mollusca;Bivalvia;Autobranchia;Heteroconchia;Euhe  
 terodonta;Imparidentia;Venerida;Veneroidea;Veneridae;Mercenaria;Mercenari  
 a mercenaria  
 UdeM00000035401 6596 337 UdeM00000035401 XP\_045180304.1 31.8 804  
 424 26 32 758 36 792 6.20E-89 337 6596 cellular  
 organisms;Eukaryota;Opisthokonta;Metazoa;Eumetazoa;Bilateria;Protostomia;  
 Spiralia;Lophotrochozoa;Mollusca;Bivalvia;Autobranchia;Heteroconchia;Euhe  
 terodonta;Imparidentia;Venerida;Veneroidea;Veneridae;Mercenaria;Mercenari  
 a mercenaria  
 UdeM00000035402 6596 216.1 UdeM00000035402 XP\_045180304.1 28.2 621  
 362 21 10 601 9 574 1.50E-52 216.1 6596 cellular  
 organisms;Eukaryota;Opisthokonta;Metazoa;Eumetazoa;Bilateria;Protostomia;  
 Spiralia;Lophotrochozoa;Mollusca;Bivalvia;Autobranchia;Heteroconchia;Euhe  
 terodonta;Imparidentia;Venerida;Veneroidea;Veneridae;Mercenaria;Mercenari  
 a mercenaria  
 UdeM00000035404 150288 62 UdeM00000035404 XP\_020793866.1 42.5  
 80 38 2 24 103 310 381 7.40E-07 62 150288  
 cellular  
 organisms;Eukaryota;Opisthokonta;Metazoa;Eumetazoa;Bilateria;Deuterostomi  
 a;Chordata;Craniata;Vertebrata;Gnathostomata;Teleostomi;Euteleostomi;Acti  
 nopterygii;Actinopteri;Neopterygii;Teleostei;Osteoglossocephalai;Clupeoce  
 phala;Euteleosteomorpha;Neoteleostei;Eurypterygia;Ctenosquamata;Acanthomo  
 rphata;Euacanthomorphacea;Percomorphaceae;Gobiaria;Gobiiformes;Gobioidei;  
 Gobiidae;Oxudercinae;Boleophthalmus;Boleophthalmus pectinirostris  
 UdeM00000035403 1735272 70.1 UdeM00000035403 XP\_041361601.1 31.3  
 147 72 5 1 143 404 525 2.80E-09 70.1 1735272  
 cellular  
 organisms;Eukaryota;Opisthokonta;Metazoa;Eumetazoa;Bilateria;Protostomia;  
 Spiralia;Lophotrochozoa;Mollusca;Gastropoda;Neomphalina;Neomphaloidea;Pel  
 tospiridae;Gigantopelta;Gigantopelta aegis  
 UdeM00000035405 225164 408.7 UdeM00000035405 XP\_009052303.1 49.3  
 371 186 2 19 387 10 380 8.60E-111 408.7 225164  
 cellular  
 organisms;Eukaryota;Opisthokonta;Metazoa;Eumetazoa;Bilateria;Protostomia;  
 Spiralia;Lophotrochozoa;Mollusca;Gastropoda;Patellogastropoda;Lottioidae;  
 Lottiidae;Lottia;Lottia gigantea  
 UdeM00000035406 6579 125.6 UdeM00000035406 XP\_033726475.1 70.4 81  
 24 0 1 81 83 163 3.50E-26 125.6 6579 cellular  
 organisms;Eukaryota;Opisthokonta;Metazoa;Eumetazoa;Bilateria;Protostomia;

Spiralia;Lophotrochozoa;Mollusca;Bivalvia;Autobranchia;Pteriormorphia;Pectinida;Pectinoidea;Pectinidae;Pecten;Pecten maximus  
UdeM00000035407 6579 465.3 UdeM00000035407 XP\_033726475.1 63.1 363  
129 2 2 364 182 539 7.60E-128 465.3 6579 cellular  
organisms;Eukaryota;Opisthokonta;Metazoa;Eumetazoa;Bilateria;Protostomia;  
Spiralia;Lophotrochozoa;Mollusca;Bivalvia;Autobranchia;Pteriormorphia;Pectinida;Pectinoidea;Pectinidae;Pecten;Pecten maximus  
UdeM00000035408 6596 192.6 UdeM00000035408 XP\_045182596.1 51.7 178  
80 2 88 264 122 294 6.40E-46 192.6 6596 cellular  
organisms;Eukaryota;Opisthokonta;Metazoa;Eumetazoa;Bilateria;Protostomia;  
Spiralia;Lophotrochozoa;Mollusca;Bivalvia;Autobranchia;Heteroconchia;Euheterodonta;Imparidentia;Venerida;Veneroidea;Veneridae;Mercenaria;Mercenaria mercenaria  
UdeM00000035409 7906 84 UdeM00000035409 XP\_034774014.1 25.3 186  
138 1 1 186 1 185 3.50E-13 84 7906 cellular  
organisms;Eukaryota;Opisthokonta;Metazoa;Eumetazoa;Bilateria;Deuterostomia;Chordata;Craniata;Vertebrata;Gnathostomata;Teleostomi;Euteleostomi;Actinopterygii;Actinopteri;Chondrostei;Acipenseriformes;Acipenseroides;Acipenseridae;Acipenserinae;Acipenserini;Acipenser;Acipenser ruthenus  
UdeM00000035410 225164 1102.4 UdeM00000035410 XP\_009064001.1  
81.3 652 118 3 1 649 1 651 0.00E+00 1102.4  
225164 cellular  
organisms;Eukaryota;Opisthokonta;Metazoa;Eumetazoa;Bilateria;Protostomia;  
Spiralia;Lophotrochozoa;Mollusca;Gastropoda;Patellogastropoda;Lottioidea;Lottiidae;Lottia;Lottia gigantea  
UdeM00000035411 225164 1140.9 UdeM00000035411 XP\_009064001.1  
81.6 670 119 3 1 667 1 669 0.00E+00 1140.9  
225164 cellular  
organisms;Eukaryota;Opisthokonta;Metazoa;Eumetazoa;Bilateria;Protostomia;  
Spiralia;Lophotrochozoa;Mollusca;Gastropoda;Patellogastropoda;Lottioidea;Lottiidae;Lottia;Lottia gigantea  
UdeM00000035412 50390 324.3 UdeM00000035412 XP\_028150719.1 41.4 396  
216 10 17 398 140 533 2.10E-85 324.3 50390 cellular  
organisms;Eukaryota;Opisthokonta;Metazoa;Eumetazoa;Bilateria;Protostomia;  
Ecdysozoa;Panarthropoda;Arthropoda;Mandibulata;Pancrustacea;Hexapoda;Insecta;Dicondylia;Pterygota;Neoptera;Endopterygota;Coleoptera;Polyphaga;Cucujiformia;Chrysomeloidea;Chrysomelidae;Galerucinae;Luperini;Diabroticina;Diabroticites;Diabrotica;Diabrotica virgifera;Diabrotica virgifera virgifera  
UdeM00000035414 6596 121.7 UdeM00000035414 XP\_045181277.1 41.2 136  
76 2 32 164 238 372 1.00E-24 121.7 6596 cellular  
organisms;Eukaryota;Opisthokonta;Metazoa;Eumetazoa;Bilateria;Protostomia;  
Spiralia;Lophotrochozoa;Mollusca;Bivalvia;Autobranchia;Heteroconchia;Euheterodonta;Imparidentia;Venerida;Veneroidea;Veneridae;Mercenaria;Mercenaria mercenaria  
UdeM00000035415 6565 202.6 UdeM00000035415 XP\_022289238.1 30.2 490  
298 6 16 465 22 507 1.10E-48 202.6 6565 cellular  
organisms;Eukaryota;Opisthokonta;Metazoa;Eumetazoa;Bilateria;Protostomia;  
Spiralia;Lophotrochozoa;Mollusca;Bivalvia;Autobranchia;Pteriormorphia;Ostreida;Ostreoidea;Ostreidae;Crassostrea;Crassostrea virginica  
UdeM00000035417 6596 200.3 UdeM00000035417 XP\_045177779.1 40.2 326  
167 7 1 324 97 396 4.70E-48 200.3 6596 cellular  
organisms;Eukaryota;Opisthokonta;Metazoa;Eumetazoa;Bilateria;Protostomia;  
Spiralia;Lophotrochozoa;Mollusca;Bivalvia;Autobranchia;Heteroconchia;Euheterodonta

terodonta;Imparidentia;Venerida;Veneroidea;Veneridae;Mercenaria;Mercenaria mercenaria  
 UdeM00000035416 6596 330.5 UdeM00000035416 XP\_045177779.1 34.7 626  
 294 10 1 624 97 609 6.30E-87 330.5 6596 cellular  
 organisms;Eukaryota;Opisthokonta;Metazoa;Eumetazoa;Bilateria;Protostomia;  
 Spiralia;Lophotrochozoa;Mollusca;Bivalvia;Autobranchia;Heteroconchia;Euhe  
 terodonta;Imparidentia;Venerida;Veneroidea;Veneridae;Mercenaria;Mercenari  
 a mercenaria  
 UdeM00000035418 1415580 670.2 UdeM00000035418 XP\_030075314.1 53.9  
 642 276 6 1 639 1 625 2.50E-189 670.2 1415580  
 cellular  
 organisms;Eukaryota;Opisthokonta;Metazoa;Eumetazoa;Bilateria;Deuterostomi  
 a;Chordata;Craniata;Vertebrata;Gnathostomata;Teleostomi;Euteleostomi;Sarc  
 opterygii;Dipnotetrapodomorpha;Tetrapoda;Amphibia;Gymnophiona;Siphonopida  
 e;Microcaecilia;Microcaecilia unicolor  
 UdeM00000035419 6573 231.9 UdeM00000035419 XP\_021377140.1 48.9 227  
 112 2 17 243 3 225 8.80E-58 231.9 6573 cellular  
 organisms;Eukaryota;Opisthokonta;Metazoa;Eumetazoa;Bilateria;Protostomia;  
 Spiralia;Lophotrochozoa;Mollusca;Bivalvia;Autobranchia;Pteriormorphia;Pect  
 inida;Pectinoidea;Pectinidae;Mizuhopecten;Mizuhopecten yessoensis  
 UdeM00000035420 6573 224.2 UdeM00000035420 XP\_021377140.1 47.6 227  
 115 2 17 243 3 225 1.80E-55 224.2 6573 cellular  
 organisms;Eukaryota;Opisthokonta;Metazoa;Eumetazoa;Bilateria;Protostomia;  
 Spiralia;Lophotrochozoa;Mollusca;Bivalvia;Autobranchia;Pteriormorphia;Pect  
 inida;Pectinoidea;Pectinidae;Mizuhopecten;Mizuhopecten yessoensis  
 UdeM00000035421 6573 232.3 UdeM00000035421 XP\_021377140.1 48.9 227  
 112 2 17 243 3 225 6.70E-58 232.3 6573 cellular  
 organisms;Eukaryota;Opisthokonta;Metazoa;Eumetazoa;Bilateria;Protostomia;  
 Spiralia;Lophotrochozoa;Mollusca;Bivalvia;Autobranchia;Pteriormorphia;Pect  
 inida;Pectinoidea;Pectinidae;Mizuhopecten;Mizuhopecten yessoensis  
 UdeM00000035422 6573 224.2 UdeM00000035422 XP\_021377140.1 47.6 227  
 115 2 17 243 3 225 1.80E-55 224.2 6573 cellular  
 organisms;Eukaryota;Opisthokonta;Metazoa;Eumetazoa;Bilateria;Protostomia;  
 Spiralia;Lophotrochozoa;Mollusca;Bivalvia;Autobranchia;Pteriormorphia;Pect  
 inida;Pectinoidea;Pectinidae;Mizuhopecten;Mizuhopecten yessoensis  
 UdeM00000035423 6573 232.3 UdeM00000035423 XP\_021377140.1 48.9 227  
 112 2 17 243 3 225 6.70E-58 232.3 6573 cellular  
 organisms;Eukaryota;Opisthokonta;Metazoa;Eumetazoa;Bilateria;Protostomia;  
 Spiralia;Lophotrochozoa;Mollusca;Bivalvia;Autobranchia;Pteriormorphia;Pect  
 inida;Pectinoidea;Pectinidae;Mizuhopecten;Mizuhopecten yessoensis  
 UdeM00000035424 6573 234.2 UdeM00000035424 XP\_021377140.1 50.5 220  
 102 3 24 243 13 225 1.80E-58 234.2 6573 cellular  
 organisms;Eukaryota;Opisthokonta;Metazoa;Eumetazoa;Bilateria;Protostomia;  
 Spiralia;Lophotrochozoa;Mollusca;Bivalvia;Autobranchia;Pteriormorphia;Pect  
 inida;Pectinoidea;Pectinidae;Mizuhopecten;Mizuhopecten yessoensis  
 UdeM00000035426 37653 229.9 UdeM00000035426 XP\_014783624.1 66.9 154  
 51 0 1 154 1 154 2.30E-57 229.9 37653 cellular  
 organisms;Eukaryota;Opisthokonta;Metazoa;Eumetazoa;Bilateria;Protostomia;  
 Spiralia;Lophotrochozoa;Mollusca;Cephalopoda;Coleoidea;Octopodiformes;Oct  
 opoda;Incirrata;Octopodidae;Octopus;Octopus bimaculoides  
 UdeM00000035425 6596 737.3 UdeM00000035425 XP\_045182820.1 66.2 538  
 137 2 1 495 1 536 1.30E-209 737.3 6596 cellular  
 organisms;Eukaryota;Opisthokonta;Metazoa;Eumetazoa;Bilateria;Protostomia;  
 Spiralia;Lophotrochozoa;Mollusca;Bivalvia;Autobranchia;Heteroconchia;Euhe

terodonta;Imparidentia;Venerida;Veneroidea;Veneridae;Mercenaria;Mercenari  
 a mercenaria  
 UdeM00000035427 6105 73.2 UdeM00000035427 XP\_031567578.1 42.2 83  
 46 1 20 102 427 507 2.70E-10 73.2 6105 cellular  
 organisms;Eukaryota;Opisthokonta;Metazoa;Eumetazoa;Cnidaria;Anthozoa;Hexa  
 corallia;Actiniaria;Actiniidae;Actinia;Actinia tenebrosa  
 UdeM00000035428 6596 322.4 UdeM00000035428 XP\_045177779.1 32.6 650  
 290 12 1 639 97 609 1.70E-84 322.4 6596 cellular  
 organisms;Eukaryota;Opisthokonta;Metazoa;Eumetazoa;Bilateria;Protostomia;  
 Spiralia;Lophotrochozoa;Mollusca;Bivalvia;Autobranchia;Heteroconchia;Euhe  
 terodonta;Imparidentia;Venerida;Veneroidea;Veneridae;Mercenaria;Mercenari  
 a mercenaria  
 UdeM00000035429 6579 737.6 UdeM00000035429 XP\_033731430.1 74.2 457  
 118 0 1 457 1 457 9.50E-210 737.6 6579 cellular  
 organisms;Eukaryota;Opisthokonta;Metazoa;Eumetazoa;Bilateria;Protostomia;  
 Spiralia;Lophotrochozoa;Mollusca;Bivalvia;Autobranchia;Pteriormorphia;Pect  
 inida;Pectinoidea;Pectinidae;Pecten;Pecten maximus  
 UdeM00000035430 6596 62.8 UdeM00000035430 XP\_045200730.1 28.3 120  
 76 2 43 154 175 292 4.90E-07 62.8 6596 cellular  
 organisms;Eukaryota;Opisthokonta;Metazoa;Eumetazoa;Bilateria;Protostomia;  
 Spiralia;Lophotrochozoa;Mollusca;Bivalvia;Autobranchia;Heteroconchia;Euhe  
 terodonta;Imparidentia;Venerida;Veneroidea;Veneridae;Mercenaria;Mercenari  
 a mercenaria  
 UdeM00000035431 1735272 259.2 UdeM00000035431 XP\_041375509.1 36.6  
 421 247 6 7 407 722 1142 8.70E-66 259.2 1735272  
 cellular  
 organisms;Eukaryota;Opisthokonta;Metazoa;Eumetazoa;Bilateria;Protostomia;  
 Spiralia;Lophotrochozoa;Mollusca;Gastropoda;Neomphalina;Neomphaloidea;Pel  
 tospiridae;Gigantopelta;Gigantopelta aegis  
 UdeM00000035432 1735272 282.7 UdeM00000035432 XP\_041375509.1 36.1  
 462 269 7 46 487 687 1142 8.80E-73 282.7 1735272  
 cellular  
 organisms;Eukaryota;Opisthokonta;Metazoa;Eumetazoa;Bilateria;Protostomia;  
 Spiralia;Lophotrochozoa;Mollusca;Gastropoda;Neomphalina;Neomphaloidea;Pel  
 tospiridae;Gigantopelta;Gigantopelta aegis  
 UdeM00000035433 6596 318.5 UdeM00000035433 XP\_045177776.1 33.3 640  
 287 11 1 633 430 936 2.50E-83 318.5 6596 cellular  
 organisms;Eukaryota;Opisthokonta;Metazoa;Eumetazoa;Bilateria;Protostomia;  
 Spiralia;Lophotrochozoa;Mollusca;Bivalvia;Autobranchia;Heteroconchia;Euhe  
 terodonta;Imparidentia;Venerida;Veneroidea;Veneridae;Mercenaria;Mercenari  
 a mercenaria  
 UdeM00000035434 70779 97.4 UdeM00000035434 XP\_015753877.1 35.6 163  
 100 4 23 185 13 170 2.20E-17 97.4 70779 cellular  
 organisms;Eukaryota;Opisthokonta;Metazoa;Eumetazoa;Cnidaria;Anthozoa;Hexa  
 corallia;Scleractinia;Astrocoeniina;Acroporidae;Acropora;Acropora  
 digitifera  
 UdeM00000035435 6579 890.2 UdeM00000035435 XP\_033731430.1 74.1 557  
 144 0 1 557 1 557 1.40E-255 890.2 6579 cellular  
 organisms;Eukaryota;Opisthokonta;Metazoa;Eumetazoa;Bilateria;Protostomia;  
 Spiralia;Lophotrochozoa;Mollusca;Bivalvia;Autobranchia;Pteriormorphia;Pect  
 inida;Pectinoidea;Pectinidae;Pecten;Pecten maximus  
 UdeM00000035438 6596 85.9 UdeM00000035438 XP\_045180898.1 53.8 145  
 43 6 15 140 210 349 4.50E-14 85.9 6596 cellular  
 organisms;Eukaryota;Opisthokonta;Metazoa;Eumetazoa;Bilateria;Protostomia;

Spiralia;Lophotrochozoa;Mollusca;Bivalvia;Autobranchia;Heteroconchia;Euherodonta;Imparidentia;Venerida;Veneroidea;Veneridae;Mercenaria;Mercenaria mercenaria

UdeM00000035439 6596 324.3 UdeM00000035439 XP\_045180896.1 59.5 284  
108 4 1 283 17 294 1.50E-85 324.3 6596 cellular  
organisms;Eukaryota;Opisthokonta;Metazoa;Eumetazoa;Bilateria;Protostomia;Spiralia;Lophotrochozoa;Mollusca;Bivalvia;Autobranchia;Heteroconchia;Euherodonta;Imparidentia;Venerida;Veneroidea;Veneridae;Mercenaria;Mercenaria mercenaria

UdeM00000035440 6500 573.9 UdeM00000035440 XP\_012945668.1 59.5 462  
157 1 309 770 658 1089 3.00E-160 573.9 6500 cellular  
organisms;Eukaryota;Opisthokonta;Metazoa;Eumetazoa;Bilateria;Protostomia;Spiralia;Lophotrochozoa;Mollusca;Gastropoda;Heterobranchia;Euthyneura;Tectipleura;Aplysiida;Aplysioidea;Aplysiidae;Aplysia;Aplysia californica

UdeM00000035441 6573 108.6 UdeM00000035441 XP\_021341731.1 28 271  
183 5 38 302 409 673 1.50E-20 108.6 6573 cellular  
organisms;Eukaryota;Opisthokonta;Metazoa;Eumetazoa;Bilateria;Protostomia;Spiralia;Lophotrochozoa;Mollusca;Bivalvia;Autobranchia;Pteriomorphia;Pectinida;Pectinoidea;Pectinidae;Mizuhopecten;Mizuhopecten yessoensis

UdeM00000035442 6573 102.1 UdeM00000035442 XP\_021380144.1 25.1 219  
159 4 31 245 17 234 1.10E-18 102.1 6573 cellular  
organisms;Eukaryota;Opisthokonta;Metazoa;Eumetazoa;Bilateria;Protostomia;Spiralia;Lophotrochozoa;Mollusca;Bivalvia;Autobranchia;Pteriomorphia;Pectinida;Pectinoidea;Pectinidae;Mizuhopecten;Mizuhopecten yessoensis

UdeM00000035443 6579 106.3 UdeM00000035443 XP\_033758968.1 27.7 271  
183 7 46 312 417 678 7.20E-20 106.3 6579 cellular  
organisms;Eukaryota;Opisthokonta;Metazoa;Eumetazoa;Bilateria;Protostomia;Spiralia;Lophotrochozoa;Mollusca;Bivalvia;Autobranchia;Pteriomorphia;Pectinida;Pectinoidea;Pectinidae;Pecten;Pecten maximus

UdeM00000035444 6573 108.6 UdeM00000035444 XP\_021341731.1 28 271  
183 5 38 302 409 673 1.50E-20 108.6 6573 cellular  
organisms;Eukaryota;Opisthokonta;Metazoa;Eumetazoa;Bilateria;Protostomia;Spiralia;Lophotrochozoa;Mollusca;Bivalvia;Autobranchia;Pteriomorphia;Pectinida;Pectinoidea;Pectinidae;Mizuhopecten;Mizuhopecten yessoensis

UdeM00000035445 6573 106.3 UdeM00000035445 XP\_021380144.1 25.9 205  
148 3 37 238 31 234 5.50E-20 106.3 6573 cellular  
organisms;Eukaryota;Opisthokonta;Metazoa;Eumetazoa;Bilateria;Protostomia;Spiralia;Lophotrochozoa;Mollusca;Bivalvia;Autobranchia;Pteriomorphia;Pectinida;Pectinoidea;Pectinidae;Mizuhopecten;Mizuhopecten yessoensis

UdeM00000035446 6573 107.1 UdeM00000035446 XP\_021380144.1 27.8 205  
140 4 37 234 31 234 3.20E-20 107.1 6573 cellular  
organisms;Eukaryota;Opisthokonta;Metazoa;Eumetazoa;Bilateria;Protostomia;Spiralia;Lophotrochozoa;Mollusca;Bivalvia;Autobranchia;Pteriomorphia;Pectinida;Pectinoidea;Pectinidae;Mizuhopecten;Mizuhopecten yessoensis

UdeM00000035447 6573 97.4 UdeM00000035447 XP\_021341731.1 27.2 272  
186 5 38 303 409 674 3.30E-17 97.4 6573 cellular  
organisms;Eukaryota;Opisthokonta;Metazoa;Eumetazoa;Bilateria;Protostomia;Spiralia;Lophotrochozoa;Mollusca;Bivalvia;Autobranchia;Pteriomorphia;Pectinida;Pectinoidea;Pectinidae;Mizuhopecten;Mizuhopecten yessoensis

UdeM00000035448 6573 107.1 UdeM00000035448 XP\_021380144.1 28 189  
128 4 31 212 47 234 2.90E-20 107.1 6573 cellular  
organisms;Eukaryota;Opisthokonta;Metazoa;Eumetazoa;Bilateria;Protostomia;Spiralia;Lophotrochozoa;Mollusca;Bivalvia;Autobranchia;Pteriomorphia;Pectinida;Pectinoidea;Pectinidae;Mizuhopecten;Mizuhopecten yessoensis



UdeM00000035449 6596 692.2 UdeM00000035449 XP\_045160375.1 56.1 590  
 251 8 1 586 1 586 5.80E-196 692.2 6596 cellular  
 organisms;Eukaryota;Opisthokonta;Metazoa;Eumetazoa;Bilateria;Protostomia;  
 Spiralia;Lophotrochozoa;Mollusca;Bivalvia;Autobranhia;Heteroconchia;Euhe  
 terodonta;Imparidentia;Venerida;Veneroidea;Veneridae;Mercenaria;Mercenari  
 a mercenaria  
 UdeM00000035450 6596 349 UdeM00000035450 XP\_045160376.1 41.7 501  
 110 3 8 329 19 516 6.70E-93 349 6596 cellular  
 organisms;Eukaryota;Opisthokonta;Metazoa;Eumetazoa;Bilateria;Protostomia;  
 Spiralia;Lophotrochozoa;Mollusca;Bivalvia;Autobranhia;Heteroconchia;Euhe  
 terodonta;Imparidentia;Venerida;Veneroidea;Veneridae;Mercenaria;Mercenari  
 a mercenaria  
 UdeM00000035451 6573 106.3 UdeM00000035451 XP\_021380144.1 26.3 205  
 147 3 18 219 31 234 5.10E-20 106.3 6573 cellular  
 organisms;Eukaryota;Opisthokonta;Metazoa;Eumetazoa;Bilateria;Protostomia;  
 Spiralia;Lophotrochozoa;Mollusca;Bivalvia;Autobranhia;Pteriormorphia;Pect  
 inida;Pectinoidea;Pectinidae;Mizuhopecten;Mizuhopecten yessoensis  
 UdeM00000035452 6573 107.5 UdeM00000035452 XP\_021380144.1 26.9 197  
 140 3 2 195 39 234 2.00E-20 107.5 6573 cellular  
 organisms;Eukaryota;Opisthokonta;Metazoa;Eumetazoa;Bilateria;Protostomia;  
 Spiralia;Lophotrochozoa;Mollusca;Bivalvia;Autobranhia;Pteriormorphia;Pect  
 inida;Pectinoidea;Pectinidae;Mizuhopecten;Mizuhopecten yessoensis  
 UdeM00000035453 6596 164.5 UdeM00000035453 XP\_045215711.1 23.1 464  
 303 6 78 536 41 455 4.00E-37 164.5 6596 cellular  
 organisms;Eukaryota;Opisthokonta;Metazoa;Eumetazoa;Bilateria;Protostomia;  
 Spiralia;Lophotrochozoa;Mollusca;Bivalvia;Autobranhia;Heteroconchia;Euhe  
 terodonta;Imparidentia;Venerida;Veneroidea;Veneridae;Mercenaria;Mercenari  
 a mercenaria  
 UdeM00000035454 6573 104 UdeM00000035454 XP\_021341731.1 27.8 252  
 172 5 2 249 429 674 3.00E-19 104 6573 cellular  
 organisms;Eukaryota;Opisthokonta;Metazoa;Eumetazoa;Bilateria;Protostomia;  
 Spiralia;Lophotrochozoa;Mollusca;Bivalvia;Autobranhia;Pteriormorphia;Pect  
 inida;Pectinoidea;Pectinidae;Mizuhopecten;Mizuhopecten yessoensis  
 UdeM00000035456 6596 62 UdeM00000035456 XP\_045202666.1 29.8 181  
 94 7 64 230 341 502 1.10E-06 62 6596 cellular  
 organisms;Eukaryota;Opisthokonta;Metazoa;Eumetazoa;Bilateria;Protostomia;  
 Spiralia;Lophotrochozoa;Mollusca;Bivalvia;Autobranhia;Heteroconchia;Euhe  
 terodonta;Imparidentia;Venerida;Veneroidea;Veneridae;Mercenaria;Mercenari  
 a mercenaria  
 UdeM00000035457 6579 102.8 UdeM00000035457 XP\_033758968.1 25.5 278  
 197 6 31 303 400 672 8.10E-19 102.8 6579 cellular  
 organisms;Eukaryota;Opisthokonta;Metazoa;Eumetazoa;Bilateria;Protostomia;  
 Spiralia;Lophotrochozoa;Mollusca;Bivalvia;Autobranhia;Pteriormorphia;Pect  
 inida;Pectinoidea;Pectinidae;Pecten;Pecten maximus  
 UdeM00000035641 151771 235.3 UdeM00000035641 XP\_028419301.1 46  
 274 107 4 41 275 33 304 9.10E-59 235.3 151771  
 cellular  
 organisms;Eukaryota;Opisthokonta;Metazoa;Eumetazoa;Cnidaria;Anthozoa;Octo  
 corallia;Alcyonacea;Alcyoniina;Nephtheidae;Dendronephthya;Dendronephthya  
 gigantea  
 UdeM00000035642 45264 94 UdeM00000035642 XP\_044165143.1 45.8 107  
 56 2 2 106 367 473 1.40E-16 94 45264 cellular  
 organisms;Eukaryota;Opisthokonta;Metazoa;Eumetazoa;Cnidaria;Anthozoa;Hexa

corallia;Scleractinia;Astrocoeniina;Acroporidae;Acropora;Acropora  
millepora  
UdeM00000035643 45264 228.8 UdeM00000035643 XP\_044184031.1 44.2 274  
140 4 12 279 171 437 8.90E-57 228.8 45264 cellular  
organisms;Eukaryota;Opisthokonta;Metazoa;Eumetazoa;Cnidaria;Anthozoa;Hexa  
corallia;Scleractinia;Astrocoeniina;Acroporidae;Acropora;Acropora  
millepora  
UdeM00000035644 45264 149.4 UdeM00000035644 XP\_044184288.1 41.4 181  
99 2 47 224 44 220 6.70E-33 149.4 45264 cellular  
organisms;Eukaryota;Opisthokonta;Metazoa;Eumetazoa;Cnidaria;Anthozoa;Hexa  
corallia;Scleractinia;Astrocoeniina;Acroporidae;Acropora;Acropora  
millepora  
UdeM00000031178 1735272 60.8 UdeM00000031178 XP\_041350569.1 57.4  
54 21 1 95 146 346 399 2.10E-06 60.8 1735272  
cellular  
organisms;Eukaryota;Opisthokonta;Metazoa;Eumetazoa;Bilateria;Protostomia;  
Spiralia;Lophotrochozoa;Mollusca;Gastropoda;Neomphalina;Neomphaloidea;Pel  
tospiridae;Gigantopelta;Gigantopelta aegis  
UdeM00000031179 6579 99.8 UdeM00000031179 XP\_033744278.1 53.8 91  
41 1 2 92 1216 1305 2.00E-18 99.8 6579 cellular  
organisms;Eukaryota;Opisthokonta;Metazoa;Eumetazoa;Bilateria;Protostomia;  
Spiralia;Lophotrochozoa;Mollusca;Bivalvia;Autobranchia;Pteriormorphia;Pect  
inida;Pectinoidea;Pectinidae;Pecten;Pecten maximus  
UdeM00000031181 6573 202.2 UdeM00000031181 XP\_021374759.1 56.7 164  
71 0 4 167 3 166 5.30E-49 202.2 6573 cellular  
organisms;Eukaryota;Opisthokonta;Metazoa;Eumetazoa;Bilateria;Protostomia;  
Spiralia;Lophotrochozoa;Mollusca;Bivalvia;Autobranchia;Pteriormorphia;Pect  
inida;Pectinoidea;Pectinidae;Mizuhopecten;Mizuhopecten yessoensis  
UdeM00000031182 6579 156.8 UdeM00000031182 XP\_033731501.1 58.3 120  
50 0 1 120 42 161 1.90E-35 156.8 6579 cellular  
organisms;Eukaryota;Opisthokonta;Metazoa;Eumetazoa;Bilateria;Protostomia;  
Spiralia;Lophotrochozoa;Mollusca;Bivalvia;Autobranchia;Pteriormorphia;Pect  
inida;Pectinoidea;Pectinidae;Pecten;Pecten maximus  
UdeM00000031183 6596 218 UdeM00000031183 XP\_045172856.1 46.4 332  
164 3 1 330 246 565 1.80E-53 218 6596 cellular  
organisms;Eukaryota;Opisthokonta;Metazoa;Eumetazoa;Bilateria;Protostomia;  
Spiralia;Lophotrochozoa;Mollusca;Bivalvia;Autobranchia;Heteroconchia;Euhe  
terodonta;Imparidentia;Venerida;Veneroidea;Veneridae;Mercenaria;Mercenari  
a mercenaria  
UdeM00000031184 7574 339.3 UdeM00000031184 XP\_013398667.1 56.7 289  
124 1 1 289 1 288 6.50E-90 339.3 7574 cellular  
organisms;Eukaryota;Opisthokonta;Metazoa;Eumetazoa;Bilateria;Protostomia;  
Spiralia;Lophotrochozoa;Brachiopoda;Linguliformea;Lingulata;Lingulida;Lin  
guloidea;Lingulidae;Lingula;Lingula anatina  
UdeM00000031185 6596 165.6 UdeM00000031185 XP\_045172856.1 44.4 223  
123 1 10 232 18 239 7.40E-38 165.6 6596 cellular  
organisms;Eukaryota;Opisthokonta;Metazoa;Eumetazoa;Bilateria;Protostomia;  
Spiralia;Lophotrochozoa;Mollusca;Bivalvia;Autobranchia;Heteroconchia;Euhe  
terodonta;Imparidentia;Venerida;Veneroidea;Veneridae;Mercenaria;Mercenari  
a mercenaria  
UdeM00000031187 1735272 550.8 UdeM00000031187 XP\_041346638.1 53.8  
481 222 0 12 492 63 543 1.70E-153 550.8 1735272  
cellular  
organisms;Eukaryota;Opisthokonta;Metazoa;Eumetazoa;Bilateria;Protostomia;

Spiralia;Lophotrochozoa;Mollusca;Gastropoda;Neomphalina;Neomphaloidea;Pel  
tospiridae;Gigantopelta;Gigantopelta aegis  
UdeM00000031186 1735272 615.5 UdeM00000031186 XP\_041346638.1 53  
541 254 0 1 541 3 543 6.30E-173 615.5 1735272  
cellular  
organisms;Eukaryota;Opisthokonta;Metazoa;Eumetazoa;Bilateria;Protostomia;  
Spiralia;Lophotrochozoa;Mollusca;Gastropoda;Neomphalina;Neomphaloidea;Pel  
tospiridae;Gigantopelta;Gigantopelta aegis  
UdeM00000031188 6579 272.7 UdeM00000031188 XP\_033748314.1 47 285  
145 3 1 284 1 280 5.50E-70 272.7 6579 cellular  
organisms;Eukaryota;Opisthokonta;Metazoa;Eumetazoa;Bilateria;Protostomia;  
Spiralia;Lophotrochozoa;Mollusca;Bivalvia;Autobranchia;Pteriormorphia;Pect  
inida;Pectinoidea;Pectinidae;Pecten;Pecten maximus  
UdeM00000031189 37621 175.3 UdeM00000031189 XP\_014679862.1 51.4 173  
72 2 1 163 89 259 7.20E-41 175.3 37621 cellular  
organisms;Eukaryota;Opisthokonta;Metazoa;Eumetazoa;Bilateria;Protostomia;  
Ecdysozoa;Scalidophora;Priapulida;Priapulimorpha;Priapulimorphida;Priapul  
idae;Priapululus;Priapululus caudatus  
UdeM00000031190 6596 1264.6 UdeM00000031190 XP\_045172855.1 55.1  
1281 403 20 1 1131 1 1259 0.00E+00 1264.6 6596  
cellular  
organisms;Eukaryota;Opisthokonta;Metazoa;Eumetazoa;Bilateria;Protostomia;  
Spiralia;Lophotrochozoa;Mollusca;Bivalvia;Autobranchia;Heteroconchia;Euhe  
terodonta;Imparidentia;Venerida;Veneroidea;Veneridae;Mercenaria;Mercenari  
a mercenaria  
UdeM00000031191 6596 409.8 UdeM00000031191 XP\_045172855.1 74 258  
67 0 15 272 1002 1259 2.80E-111 409.8 6596 cellular  
organisms;Eukaryota;Opisthokonta;Metazoa;Eumetazoa;Bilateria;Protostomia;  
Spiralia;Lophotrochozoa;Mollusca;Bivalvia;Autobranchia;Heteroconchia;Euhe  
terodonta;Imparidentia;Venerida;Veneroidea;Veneridae;Mercenaria;Mercenari  
a mercenaria  
UdeM00000031192 6579 2060 UdeM00000031192 XP\_033747249.1 75.1 1385  
330 6 190 1570 311 1684 0.00E+00 2060 6579 cellular  
organisms;Eukaryota;Opisthokonta;Metazoa;Eumetazoa;Bilateria;Protostomia;  
Spiralia;Lophotrochozoa;Mollusca;Bivalvia;Autobranchia;Pteriormorphia;Pect  
inida;Pectinoidea;Pectinidae;Pecten;Pecten maximus  
UdeM00000031193 1735272 744.6 UdeM00000031193 XP\_041377829.1 65  
565 196 2 7 570 18 581 9.90E-212 744.6 1735272  
cellular  
organisms;Eukaryota;Opisthokonta;Metazoa;Eumetazoa;Bilateria;Protostomia;  
Spiralia;Lophotrochozoa;Mollusca;Gastropoda;Neomphalina;Neomphaloidea;Pel  
tospiridae;Gigantopelta;Gigantopelta aegis  
UdeM00000031194 6596 192.6 UdeM00000031194 XP\_045176094.1 40.3 273  
144 10 11 272 1 265 6.80E-46 192.6 6596 cellular  
organisms;Eukaryota;Opisthokonta;Metazoa;Eumetazoa;Bilateria;Protostomia;  
Spiralia;Lophotrochozoa;Mollusca;Bivalvia;Autobranchia;Heteroconchia;Euhe  
terodonta;Imparidentia;Venerida;Veneroidea;Veneridae;Mercenaria;Mercenari  
a mercenaria  
UdeM00000031195 6565 124.8 UdeM00000031195 XP\_022297447.1 51.3 115  
54 1 17 131 219 331 9.10E-26 124.8 6565 cellular  
organisms;Eukaryota;Opisthokonta;Metazoa;Eumetazoa;Bilateria;Protostomia;  
Spiralia;Lophotrochozoa;Mollusca;Bivalvia;Autobranchia;Pteriormorphia;Ostr  
eida;Ostreoidea;Ostreidae;Crassostrea;Crassostrea virginica

UdeM00000031196 6596 92.8 UdeM00000031196 XP\_045190867.1 45.4 108  
 58 1 356 463 646 752 1.30E-15 92.8 6596 cellular  
 organisms;Eukaryota;Opisthokonta;Metazoa;Eumetazoa;Bilateria;Protostomia;  
 Spiralia;Lophotrochozoa;Mollusca;Bivalvia;Autobranchia;Heteroconchia;Euhe  
 terodonta;Imparidentia;Venerida;Veneroidea;Veneridae;Mercenaria;Mercenari  
 a mercenaria  
 UdeM00000031197 6596 121.3 UdeM00000031197 XP\_045181277.1 41.5 142  
 79 3 2 142 181 319 1.10E-24 121.3 6596 cellular  
 organisms;Eukaryota;Opisthokonta;Metazoa;Eumetazoa;Bilateria;Protostomia;  
 Spiralia;Lophotrochozoa;Mollusca;Bivalvia;Autobranchia;Heteroconchia;Euhe  
 terodonta;Imparidentia;Venerida;Veneroidea;Veneridae;Mercenaria;Mercenari  
 a mercenaria  
 UdeM00000031198 307959 99.4 UdeM00000031198 XP\_016427559.1 72.2  
 72 18 1 3 72 415 486 2.00E-18 99.4 307959  
 cellular  
 organisms;Eukaryota;Opisthokonta;Metazoa;Eumetazoa;Bilateria;Deuterostomi  
 a;Chordata;Craniata;Vertebrata;Gnathostomata;Teleostomi;Euteleostomi;Acti  
 nopterygii;Actinopteri;Neopterygii;Teleostei;Osteoglossocephalai;Clupeoce  
 phala;Otomorpha;Ostariophysi;Otophysi;Cypriniphysae;Cypriniformes;Cyprino  
 idei;Cyprinidae;Cyprininae;Sinocyclocheilus;Sinocyclocheilus rhinoceros  
 UdeM00000031199 6596 269.2 UdeM00000031199 XP\_045176664.1 32.6 574  
 322 18 21 555 18 565 1.10E-68 269.2 6596 cellular  
 organisms;Eukaryota;Opisthokonta;Metazoa;Eumetazoa;Bilateria;Protostomia;  
 Spiralia;Lophotrochozoa;Mollusca;Bivalvia;Autobranchia;Heteroconchia;Euhe  
 terodonta;Imparidentia;Venerida;Veneroidea;Veneridae;Mercenaria;Mercenari  
 a mercenaria  
 UdeM00000031200 6596 272.3 UdeM00000031200 XP\_045174028.1 48.5 301  
 133 4 1 283 1 297 1.90E-69 272.3 6596 cellular  
 organisms;Eukaryota;Opisthokonta;Metazoa;Eumetazoa;Bilateria;Protostomia;  
 Spiralia;Lophotrochozoa;Mollusca;Bivalvia;Autobranchia;Heteroconchia;Euhe  
 terodonta;Imparidentia;Venerida;Veneroidea;Veneridae;Mercenaria;Mercenari  
 a mercenaria  
 UdeM00000031201 225164 533.5 UdeM00000031201 XP\_009058684.1 57.3  
 634 201 7 1 624 1 574 3.60E-148 533.5 225164  
 cellular  
 organisms;Eukaryota;Opisthokonta;Metazoa;Eumetazoa;Bilateria;Protostomia;  
 Spiralia;Lophotrochozoa;Mollusca;Gastropoda;Patellogastropoda;Lottioidea;  
 Lottiidae;Lottia;Lottia gigantea  
 UdeM00000031202 6596 92 UdeM00000031202 XP\_045172949.1 48.9 88  
 43 1 1 88 87 172 4.50E-16 92 6596 cellular  
 organisms;Eukaryota;Opisthokonta;Metazoa;Eumetazoa;Bilateria;Protostomia;  
 Spiralia;Lophotrochozoa;Mollusca;Bivalvia;Autobranchia;Heteroconchia;Euhe  
 terodonta;Imparidentia;Venerida;Veneroidea;Veneridae;Mercenaria;Mercenari  
 a mercenaria  
 UdeM00000031203 6596 71.6 UdeM00000031203 XP\_045172949.1 51.6 62  
 29 1 1 62 1 61 4.20E-10 71.6 6596 cellular  
 organisms;Eukaryota;Opisthokonta;Metazoa;Eumetazoa;Bilateria;Protostomia;  
 Spiralia;Lophotrochozoa;Mollusca;Bivalvia;Autobranchia;Heteroconchia;Euhe  
 terodonta;Imparidentia;Venerida;Veneroidea;Veneridae;Mercenaria;Mercenari  
 a mercenaria  
 UdeM00000031204 6579 285.8 UdeM00000031204 XP\_033748233.1 30.5 773  
 441 21 17 765 15 715 1.80E-73 285.8 6579 cellular  
 organisms;Eukaryota;Opisthokonta;Metazoa;Eumetazoa;Bilateria;Protostomia;

Spiralia; Lophotrochozoa; Mollusca; Bivalvia; Autobranchia; Pteriomorpha; Pectinida; Pectinoidea; Pectinidae; Pecten; Pecten maximus

UdeM00000031205 6596 236.5 UdeM00000031205 XP\_045198455.1 56.1 237  
96 3 1 237 929 1157 3.70E-59 236.5 6596 cellular  
organisms; Eukaryota; Opisthokonta; Metazoa; Eumetazoa; Bilateria; Protostomia; Spiralia; Lophotrochozoa; Mollusca; Bivalvia; Autobranchia; Heteroconchia; Euheterodonta; Imparidentia; Venerida; Veneroidea; Veneridae; Mercenaria; Mercenaria mercenaria

UdeM00000031206 29159 1038.1 UdeM00000031206 XP\_034338102.1 39  
1766 811 38 1 1701 1 1565 1.20E-299 1038.1  
29159 cellular  
organisms; Eukaryota; Opisthokonta; Metazoa; Eumetazoa; Bilateria; Protostomia; Spiralia; Lophotrochozoa; Mollusca; Bivalvia; Autobranchia; Pteriomorpha; Ostreida; Ostreidae; Crassostrea; Crassostrea gigas

UdeM00000031207 6596 709.9 UdeM00000031207 XP\_045173062.1 55.2 634  
271 6 3 629 1 628 2.90E-201 709.9 6596 cellular  
organisms; Eukaryota; Opisthokonta; Metazoa; Eumetazoa; Bilateria; Protostomia; Spiralia; Lophotrochozoa; Mollusca; Bivalvia; Autobranchia; Heteroconchia; Euheterodonta; Imparidentia; Venerida; Veneroidea; Veneridae; Mercenaria; Mercenaria mercenaria

UdeM00000031208 6596 689.5 UdeM00000031208 XP\_045173062.1 56.4 590  
249 4 12 596 42 628 3.80E-195 689.5 6596 cellular  
organisms; Eukaryota; Opisthokonta; Metazoa; Eumetazoa; Bilateria; Protostomia; Spiralia; Lophotrochozoa; Mollusca; Bivalvia; Autobranchia; Heteroconchia; Euheterodonta; Imparidentia; Venerida; Veneroidea; Veneridae; Mercenaria; Mercenaria mercenaria

UdeM00000031209 6579 67 UdeM00000031209 XP\_033756606.1 36.6 101  
44 1 1 81 1 101 1.30E-08 67 6579 cellular  
organisms; Eukaryota; Opisthokonta; Metazoa; Eumetazoa; Bilateria; Protostomia; Spiralia; Lophotrochozoa; Mollusca; Bivalvia; Autobranchia; Pteriomorpha; Pectinida; Pectinoidea; Pectinidae; Pecten; Pecten maximus

UdeM00000031210 6596 696 UdeM00000031210 XP\_045170640.1 67.2 519  
164 2 2 518 6 520 3.60E-197 696 6596 cellular  
organisms; Eukaryota; Opisthokonta; Metazoa; Eumetazoa; Bilateria; Protostomia; Spiralia; Lophotrochozoa; Mollusca; Bivalvia; Autobranchia; Heteroconchia; Euheterodonta; Imparidentia; Venerida; Veneroidea; Veneridae; Mercenaria; Mercenaria mercenaria

UdeM00000031211 6596 466.8 UdeM00000031211 XP\_045170633.1 84.8 282  
42 1 28 308 21 302 3.00E-128 466.8 6596 cellular  
organisms; Eukaryota; Opisthokonta; Metazoa; Eumetazoa; Bilateria; Protostomia; Spiralia; Lophotrochozoa; Mollusca; Bivalvia; Autobranchia; Heteroconchia; Euheterodonta; Imparidentia; Venerida; Veneroidea; Veneridae; Mercenaria; Mercenaria mercenaria

UdeM00000031212 6596 1181.4 UdeM00000031212 XP\_045170633.1 86.2  
682 87 5 9 689 302 977 0.00E+00 1181.4 6596  
cellular  
organisms; Eukaryota; Opisthokonta; Metazoa; Eumetazoa; Bilateria; Protostomia; Spiralia; Lophotrochozoa; Mollusca; Bivalvia; Autobranchia; Heteroconchia; Euheterodonta; Imparidentia; Venerida; Veneroidea; Veneridae; Mercenaria; Mercenaria mercenaria

UdeM00000031213 6596 1185.2 UdeM00000031213 XP\_045170633.1 86.5  
681 83 5 9 685 302 977 0.00E+00 1185.2 6596  
cellular  
organisms; Eukaryota; Opisthokonta; Metazoa; Eumetazoa; Bilateria; Protostomia;

Spiralia;Lophotrochozoa;Mollusca;Bivalvia;Autobranchia;Heteroconchia;Euherodonta;Imparidentia;Venerida;Veneroidea;Veneridae;Mercenaria;Mercenaria mercenaria

|                 |      |        |   |                 |                |      |          |        |      |  |
|-----------------|------|--------|---|-----------------|----------------|------|----------|--------|------|--|
| UdeM00000031214 | 6596 | 2893.6 |   | UdeM00000031214 | XP_045170635.1 | 83.8 |          |        |      |  |
| 1805            | 164  | 10     | 1 | 1680            | 977            | 2777 | 0.00E+00 | 2893.6 | 6596 |  |

cellular

organisms;Eukaryota;Opisthokonta;Metazoa;Eumetazoa;Bilateria;Protostomia;Spiralia;Lophotrochozoa;Mollusca;Bivalvia;Autobranchia;Heteroconchia;Euherodonta;Imparidentia;Venerida;Veneroidea;Veneridae;Mercenaria;Mercenaria mercenaria

|                 |      |       |     |                 |                |          |       |      |          |  |
|-----------------|------|-------|-----|-----------------|----------------|----------|-------|------|----------|--|
| UdeM00000031215 | 6596 | 198.4 |     | UdeM00000031215 | XP_045170633.1 | 84.4     | 122   |      |          |  |
| 18              | 1    | 10    | 131 | 2782            | 2902           | 6.10E-48 | 198.4 | 6596 | cellular |  |

organisms;Eukaryota;Opisthokonta;Metazoa;Eumetazoa;Bilateria;Protostomia;Spiralia;Lophotrochozoa;Mollusca;Bivalvia;Autobranchia;Heteroconchia;Euherodonta;Imparidentia;Venerida;Veneroidea;Veneridae;Mercenaria;Mercenaria mercenaria

|                 |         |   |    |                 |                |      |          |    |         |  |
|-----------------|---------|---|----|-----------------|----------------|------|----------|----|---------|--|
| UdeM00000031216 | 1735272 |   | 67 | UdeM00000031216 | XP_041362544.1 | 39.5 |          |    |         |  |
| 81              | 47      | 1 | 2  | 82              | 75             | 153  | 1.30E-08 | 67 | 1735272 |  |

cellular

organisms;Eukaryota;Opisthokonta;Metazoa;Eumetazoa;Bilateria;Protostomia;Spiralia;Lophotrochozoa;Mollusca;Gastropoda;Neomphalina;Neomphaloidea;Peltopspiridae;Gigantopelta;Gigantopelta aegis

|                 |      |       |     |                 |                |          |       |      |          |  |
|-----------------|------|-------|-----|-----------------|----------------|----------|-------|------|----------|--|
| UdeM00000031217 | 6565 | 244.6 |     | UdeM00000031217 | XP_022345336.1 | 40.2     | 356   |      |          |  |
| 202             | 4    | 1     | 356 | 1               | 345            | 1.90E-61 | 244.6 | 6565 | cellular |  |

organisms;Eukaryota;Opisthokonta;Metazoa;Eumetazoa;Bilateria;Protostomia;Spiralia;Lophotrochozoa;Mollusca;Bivalvia;Autobranchia;Pteriormorphia;Ostreida;Ostreoidea;Ostreidae;Crassostrea;Crassostrea virginica

|                 |      |       |     |                 |                |          |       |      |          |  |
|-----------------|------|-------|-----|-----------------|----------------|----------|-------|------|----------|--|
| UdeM00000031218 | 6596 | 134.4 |     | UdeM00000031218 | XP_045188485.1 | 35.7     | 199   |      |          |  |
| 122             | 2    | 200   | 397 | 23              | 216            | 4.90E-28 | 134.4 | 6596 | cellular |  |

organisms;Eukaryota;Opisthokonta;Metazoa;Eumetazoa;Bilateria;Protostomia;Spiralia;Lophotrochozoa;Mollusca;Bivalvia;Autobranchia;Heteroconchia;Euherodonta;Imparidentia;Venerida;Veneroidea;Veneridae;Mercenaria;Mercenaria mercenaria

|                 |      |       |     |                 |                |          |       |      |          |  |
|-----------------|------|-------|-----|-----------------|----------------|----------|-------|------|----------|--|
| UdeM00000031220 | 6596 | 136.7 |     | UdeM00000031220 | XP_045191331.1 | 32.7     | 257   |      |          |  |
| 160             | 5    | 11    | 265 | 51              | 296            | 9.30E-29 | 136.7 | 6596 | cellular |  |

organisms;Eukaryota;Opisthokonta;Metazoa;Eumetazoa;Bilateria;Protostomia;Spiralia;Lophotrochozoa;Mollusca;Bivalvia;Autobranchia;Heteroconchia;Euherodonta;Imparidentia;Venerida;Veneroidea;Veneridae;Mercenaria;Mercenaria mercenaria

|                 |      |       |     |                 |                |          |       |      |          |  |
|-----------------|------|-------|-----|-----------------|----------------|----------|-------|------|----------|--|
| UdeM00000031221 | 6596 | 143.7 |     | UdeM00000031221 | XP_045188485.1 | 35.6     | 250   |      |          |  |
| 141             | 6    | 147   | 393 | 23              | 255            | 1.20E-30 | 143.7 | 6596 | cellular |  |

organisms;Eukaryota;Opisthokonta;Metazoa;Eumetazoa;Bilateria;Protostomia;Spiralia;Lophotrochozoa;Mollusca;Bivalvia;Autobranchia;Heteroconchia;Euherodonta;Imparidentia;Venerida;Veneroidea;Veneridae;Mercenaria;Mercenaria mercenaria

|                 |      |       |     |                 |                |          |       |      |          |  |
|-----------------|------|-------|-----|-----------------|----------------|----------|-------|------|----------|--|
| UdeM00000031223 | 6596 | 125.6 |     | UdeM00000031223 | XP_045191331.1 | 31.2     | 247   |      |          |  |
| 158             | 7    | 110   | 353 | 51              | 288            | 3.00E-25 | 125.6 | 6596 | cellular |  |

organisms;Eukaryota;Opisthokonta;Metazoa;Eumetazoa;Bilateria;Protostomia;Spiralia;Lophotrochozoa;Mollusca;Bivalvia;Autobranchia;Heteroconchia;Euherodonta;Imparidentia;Venerida;Veneroidea;Veneridae;Mercenaria;Mercenaria mercenaria

|                 |       |       |     |                 |                |          |       |       |          |  |
|-----------------|-------|-------|-----|-----------------|----------------|----------|-------|-------|----------|--|
| UdeM00000031225 | 29159 | 354.4 |     | UdeM00000031225 | XP_034337912.1 | 63.2     | 302   |       |          |  |
| 106             | 2     | 1     | 302 | 1               | 297            | 1.60E-94 | 354.4 | 29159 | cellular |  |

organisms;Eukaryota;Opisthokonta;Metazoa;Eumetazoa;Bilateria;Protostomia;

Spiralia;Lophotrochozoa;Mollusca;Bivalvia;Autobranchia;Pteriomorphia;Ostr  
eida;Ostreoidea;Ostreidae;Crassostrea;Crassostrea gigas  
UdeM00000031226 6573 333.6 UdeM00000031226 XP\_021345406.1 68.8 247  
74 3 2 245 283 529 2.20E-88 333.6 6573 cellular  
organisms;Eukaryota;Opisthokonta;Metazoa;Eumetazoa;Bilateria;Protostomia;  
Spiralia;Lophotrochozoa;Mollusca;Bivalvia;Autobranchia;Pteriomorphia;Pect  
inida;Pectinoidea;Pectinidae;Mizuhopecten;Mizuhopecten yessoensis  
UdeM00000031227 6565 503.8 UdeM00000031227 XP\_022339168.1 39.3 1419  
596 50 34 1347 111 1369 6.60E-139 503.8 6565 cellular  
organisms;Eukaryota;Opisthokonta;Metazoa;Eumetazoa;Bilateria;Protostomia;  
Spiralia;Lophotrochozoa;Mollusca;Bivalvia;Autobranchia;Pteriomorphia;Ostr  
eida;Ostreoidea;Ostreidae;Crassostrea;Crassostrea virginica  
UdeM00000031228 400727 108.2 UdeM00000031228 XP\_025093046.1 52  
102 41 1 1 102 1 94 7.90E-21 108.2 400727  
cellular  
organisms;Eukaryota;Opisthokonta;Metazoa;Eumetazoa;Bilateria;Protostomia;  
Spiralia;Lophotrochozoa;Mollusca;Gastropoda;Caenogastropoda;Architaeniogl  
ossa;Ampullarioidea;Ampullariidae;Pomacea;Pomacea canaliculata  
UdeM00000031229 400727 662.1 UdeM00000031229 XP\_025093057.1 88.8  
366 41 0 1 366 1 366 4.00E-187 662.1 400727  
cellular  
organisms;Eukaryota;Opisthokonta;Metazoa;Eumetazoa;Bilateria;Protostomia;  
Spiralia;Lophotrochozoa;Mollusca;Gastropoda;Caenogastropoda;Architaeniogl  
ossa;Ampullarioidea;Ampullariidae;Pomacea;Pomacea canaliculata  
UdeM00000031230 6596 598.2 UdeM00000031230 XP\_045173399.1 68.8 432  
131 2 1 432 62 489 8.30E-168 598.2 6596 cellular  
organisms;Eukaryota;Opisthokonta;Metazoa;Eumetazoa;Bilateria;Protostomia;  
Spiralia;Lophotrochozoa;Mollusca;Bivalvia;Autobranchia;Heteroconchia;Euhe  
terodonta;Imparidentia;Venerida;Veneroidea;Veneridae;Mercenaria;Mercenari  
a mercenaria  
UdeM00000031231 6579 348.6 UdeM00000031231 XP\_033763033.1 45 389  
201 6 33 417 36 415 1.10E-92 348.6 6579 cellular  
organisms;Eukaryota;Opisthokonta;Metazoa;Eumetazoa;Bilateria;Protostomia;  
Spiralia;Lophotrochozoa;Mollusca;Bivalvia;Autobranchia;Pteriomorphia;Pect  
inida;Pectinoidea;Pectinidae;Pecten;Pecten maximus  
UdeM00000031232 6596 652.9 UdeM00000031232 XP\_045172508.1 59 592  
230 4 1 592 1 579 3.90E-184 652.9 6596 cellular  
organisms;Eukaryota;Opisthokonta;Metazoa;Eumetazoa;Bilateria;Protostomia;  
Spiralia;Lophotrochozoa;Mollusca;Bivalvia;Autobranchia;Heteroconchia;Euhe  
terodonta;Imparidentia;Venerida;Veneroidea;Veneridae;Mercenaria;Mercenari  
a mercenaria  
UdeM00000031233 6596 418.3 UdeM00000031233 XP\_045171535.1 48.4 455  
210 11 21 456 1 449 1.30E-113 418.3 6596 cellular  
organisms;Eukaryota;Opisthokonta;Metazoa;Eumetazoa;Bilateria;Protostomia;  
Spiralia;Lophotrochozoa;Mollusca;Bivalvia;Autobranchia;Heteroconchia;Euhe  
terodonta;Imparidentia;Venerida;Veneroidea;Veneridae;Mercenaria;Mercenari  
a mercenaria  
UdeM00000031234 6596 185.7 UdeM00000031234 XP\_045171501.1 55.2 203  
38 3 53 204 500 700 6.10E-44 185.7 6596 cellular  
organisms;Eukaryota;Opisthokonta;Metazoa;Eumetazoa;Bilateria;Protostomia;  
Spiralia;Lophotrochozoa;Mollusca;Bivalvia;Autobranchia;Heteroconchia;Euhe  
terodonta;Imparidentia;Venerida;Veneroidea;Veneridae;Mercenaria;Mercenari  
a mercenaria

UdeM00000031235 29159 327 UdeM00000031235 XP\_011450371.2 52.6 359  
 152 10 1 352 1 348 2.90E-86 327 29159 cellular  
 organisms;Eukaryota;Opisthokonta;Metazoa;Eumetazoa;Bilateria;Protostomia;  
 Spiralia;Lophotrochozoa;Mollusca;Bivalvia;Autobranchia;Pteriormorphia;Ostr  
 eida;Ostreoidea;Ostreidae;Crassostrea;Crassostrea gigas  
 UdeM00000031236 6596 297 UdeM00000031236 XP\_045173269.1 74.4 203  
 49 1 1 200 1 203 1.80E-77 297 6596 cellular  
 organisms;Eukaryota;Opisthokonta;Metazoa;Eumetazoa;Bilateria;Protostomia;  
 Spiralia;Lophotrochozoa;Mollusca;Bivalvia;Autobranchia;Heteroconchia;Euhe  
 terodonta;Imparidentia;Venerida;Veneroidea;Veneridae;Mercenaria;Mercenari  
 a mercenaria  
 UdeM00000031237 225164 421.8 UdeM00000031237 XP\_009052044.1 40.2  
 600 109 3 34 632 23 373 1.60E-114 421.8 225164  
 cellular  
 organisms;Eukaryota;Opisthokonta;Metazoa;Eumetazoa;Bilateria;Protostomia;  
 Spiralia;Lophotrochozoa;Mollusca;Gastropoda;Patellogastropoda;Lottioidea;  
 Lottiidae;Lottia;Lottia gigantea  
 UdeM00000031238 1735272 539.3 UdeM00000031238 XP\_041349197.1 35.9  
 1107 668 18 13 1113 119 1189 1.20E-149 539.3 1735272  
 cellular  
 organisms;Eukaryota;Opisthokonta;Metazoa;Eumetazoa;Bilateria;Protostomia;  
 Spiralia;Lophotrochozoa;Mollusca;Gastropoda;Neomphalina;Neomphaloidea;Pel  
 tospiridae;Gigantopelta;Gigantopelta aegis  
 UdeM00000031240 6850 129 UdeM00000031240 XP\_013774218.1 42.3 137  
 67 3 14 146 22 150 5.00E-27 129 6850 cellular  
 organisms;Eukaryota;Opisthokonta;Metazoa;Eumetazoa;Bilateria;Protostomia;  
 Ecdysozoa;Panarthropoda;Arthropoda;Chelicerata;Merostomata;Xiphosura;Limu  
 lidae;Limulus;Limulus polyphemus  
 UdeM00000031242 400727 201.4 UdeM00000031242 XP\_025088962.1 51.7  
 172 83 0 1 172 222 393 9.40E-49 201.4 400727  
 cellular  
 organisms;Eukaryota;Opisthokonta;Metazoa;Eumetazoa;Bilateria;Protostomia;  
 Spiralia;Lophotrochozoa;Mollusca;Gastropoda;Caenogastropoda;Architaeniogl  
 ossa;Ampullarioidea;Ampullariidae;Pomacea;Pomacea canaliculata  
 UdeM00000031243 400727 294.3 UdeM00000031243 XP\_025088962.1 37.2  
 400 138 1 1 287 222 621 1.70E-76 294.3 400727  
 cellular  
 organisms;Eukaryota;Opisthokonta;Metazoa;Eumetazoa;Bilateria;Protostomia;  
 Spiralia;Lophotrochozoa;Mollusca;Gastropoda;Caenogastropoda;Architaeniogl  
 ossa;Ampullarioidea;Ampullariidae;Pomacea;Pomacea canaliculata  
 UdeM00000031244 400727 123.6 UdeM00000031244 XP\_025088962.1 58.4  
 89 37 0 1 89 533 621 1.30E-25 123.6 400727  
 cellular  
 organisms;Eukaryota;Opisthokonta;Metazoa;Eumetazoa;Bilateria;Protostomia;  
 Spiralia;Lophotrochozoa;Mollusca;Gastropoda;Caenogastropoda;Architaeniogl  
 ossa;Ampullarioidea;Ampullariidae;Pomacea;Pomacea canaliculata  
 UdeM00000031245 6850 127.9 UdeM00000031245 XP\_013774218.1 41.6 149  
 74 4 3 146 10 150 1.10E-26 127.9 6850 cellular  
 organisms;Eukaryota;Opisthokonta;Metazoa;Eumetazoa;Bilateria;Protostomia;  
 Ecdysozoa;Panarthropoda;Arthropoda;Chelicerata;Merostomata;Xiphosura;Limu  
 lidae;Limulus;Limulus polyphemus  
 UdeM00000031246 6579 509.2 UdeM00000031246 XP\_033760606.1 39.8 713  
 414 8 6 711 7 711 1.00E-140 509.2 6579 cellular  
 organisms;Eukaryota;Opisthokonta;Metazoa;Eumetazoa;Bilateria;Protostomia;



Spiralia; Lophotrochozoa; Mollusca; Bivalvia; Autobranchia; Pteriomorpha; Pectinida; Pectinoidea; Pectinidae; Pecten; Pecten maximus  
UdeM00000031247 6596 278.5 UdeM00000031247 XP\_045173708.1 31.1 511  
332 9 24 521 26 529 1.80E-71 278.5 6596 cellular  
organisms; Eukaryota; Opisthokonta; Metazoa; Eumetazoa; Bilateria; Protostomia; Spiralia; Lophotrochozoa; Mollusca; Bivalvia; Autobranchia; Heteroconchia; Euheterodonta; Imparidentia; Venerida; Veneroidea; Veneridae; Mercenaria; Mercenaria mercenaria  
UdeM00000031249 6579 167.9 UdeM00000031249 XP\_033747570.1 61.8 136  
52 0 2 137 1 136 8.80E-39 167.9 6579 cellular  
organisms; Eukaryota; Opisthokonta; Metazoa; Eumetazoa; Bilateria; Protostomia; Spiralia; Lophotrochozoa; Mollusca; Bivalvia; Autobranchia; Pteriomorpha; Pectinida; Pectinoidea; Pectinidae; Pecten; Pecten maximus  
UdeM00000031248 6579 165.2 UdeM00000031248 XP\_033747570.1 59.6 136  
55 0 1 136 1 136 5.70E-38 165.2 6579 cellular  
organisms; Eukaryota; Opisthokonta; Metazoa; Eumetazoa; Bilateria; Protostomia; Spiralia; Lophotrochozoa; Mollusca; Bivalvia; Autobranchia; Pteriomorpha; Pectinida; Pectinoidea; Pectinidae; Pecten; Pecten maximus  
UdeM00000031250 400727 596.7 UdeM00000031250 XP\_025088962.1 53  
551 254 5 10 558 74 621 3.10E-167 596.7 400727  
cellular  
organisms; Eukaryota; Opisthokonta; Metazoa; Eumetazoa; Bilateria; Protostomia; Spiralia; Lophotrochozoa; Mollusca; Gastropoda; Caenogastropoda; Architaenioglossa; Ampullarioidea; Ampullariidae; Pomacea; Pomacea canaliculata  
UdeM00000031252 400727 599 UdeM00000031252 XP\_025088962.1 52.4  
567 263 5 25 589 60 621 6.70E-168 599 400727  
cellular  
organisms; Eukaryota; Opisthokonta; Metazoa; Eumetazoa; Bilateria; Protostomia; Spiralia; Lophotrochozoa; Mollusca; Gastropoda; Caenogastropoda; Architaenioglossa; Ampullarioidea; Ampullariidae; Pomacea; Pomacea canaliculata  
UdeM00000031253 225164 109 UdeM00000031253 XP\_009051954.1 46.8  
126 50 2 1 109 1 126 4.10E-21 109 225164  
cellular  
organisms; Eukaryota; Opisthokonta; Metazoa; Eumetazoa; Bilateria; Protostomia; Spiralia; Lophotrochozoa; Mollusca; Gastropoda; Patellogastropoda; Lottiidae; Lottia; Lottia gigantea  
UdeM00000031254 400727 560.5 UdeM00000031254 XP\_025088962.1 50.8  
535 259 3 1 533 89 621 2.40E-156 560.5 400727  
cellular  
organisms; Eukaryota; Opisthokonta; Metazoa; Eumetazoa; Bilateria; Protostomia; Spiralia; Lophotrochozoa; Mollusca; Gastropoda; Caenogastropoda; Architaenioglossa; Ampullarioidea; Ampullariidae; Pomacea; Pomacea canaliculata  
UdeM00000031255 400727 195.3 UdeM00000031255 XP\_025088962.1 55.2  
154 69 0 1 154 468 621 5.80E-47 195.3 400727  
cellular  
organisms; Eukaryota; Opisthokonta; Metazoa; Eumetazoa; Bilateria; Protostomia; Spiralia; Lophotrochozoa; Mollusca; Gastropoda; Caenogastropoda; Architaenioglossa; Ampullarioidea; Ampullariidae; Pomacea; Pomacea canaliculata  
UdeM00000031256 6500 386.7 UdeM00000031256 XP\_012946738.1 50.6 391  
184 4 38 426 36 419 3.70E-104 386.7 6500 cellular  
organisms; Eukaryota; Opisthokonta; Metazoa; Eumetazoa; Bilateria; Protostomia; Spiralia; Lophotrochozoa; Mollusca; Gastropoda; Heterobranchia; Euthyneura; Tectipleura; Aplysiidae; Aplysioidae; Aplysiidae; Aplysia; Aplysia californica

UdeM00000031257 6596 309.7 UdeM00000031257 XP\_045172577.1 55.6 268  
 118 1 6 273 17 283 3.70E-81 309.7 6596 cellular  
 organisms;Eukaryota;Opisthokonta;Metazoa;Eumetazoa;Bilateria;Protostomia;  
 Spiralia;Lophotrochozoa;Mollusca;Bivalvia;Autobranhia;Heteroconchia;Euhe  
 terodonta;Imparidentia;Venerida;Veneroidea;Veneridae;Mercenaria;Mercenari  
 a mercenaria  
 UdeM00000031258 6596 626.7 UdeM00000031258 XP\_045173207.1 58.5 557  
 187 5 17 531 32 586 2.70E-176 626.7 6596 cellular  
 organisms;Eukaryota;Opisthokonta;Metazoa;Eumetazoa;Bilateria;Protostomia;  
 Spiralia;Lophotrochozoa;Mollusca;Bivalvia;Autobranhia;Heteroconchia;Euhe  
 terodonta;Imparidentia;Venerida;Veneroidea;Veneridae;Mercenaria;Mercenari  
 a mercenaria  
 UdeM00000031259 6573 217.2 UdeM00000031259 XP\_021340606.1 55.1 325  
 119 9 1 302 1 321 2.90E-53 217.2 6573 cellular  
 organisms;Eukaryota;Opisthokonta;Metazoa;Eumetazoa;Bilateria;Protostomia;  
 Spiralia;Lophotrochozoa;Mollusca;Bivalvia;Autobranhia;Pteriormorphia;Pect  
 inida;Pectinoidea;Pectinidae;Mizuhopecten;Mizuhopecten yessoensis  
 UdeM00000031260 7741 71.6 UdeM00000031260 XP\_019620661.1 24.3 235  
 145 5 44 258 29 250 1.70E-09 71.6 7741 cellular  
 organisms;Eukaryota;Opisthokonta;Metazoa;Eumetazoa;Bilateria;Deuterostomi  
 a;Chordata;Cephalochordata;Leptocardii;Amphioxiformes;Branchiostomidae;Br  
 anchiostoma;Branchiostoma belcheri  
 UdeM00000031262 6596 111.3 UdeM00000031262 XP\_045196953.1 22.7 801  
 474 33 30 759 20 746 5.40E-21 111.3 6596 cellular  
 organisms;Eukaryota;Opisthokonta;Metazoa;Eumetazoa;Bilateria;Protostomia;  
 Spiralia;Lophotrochozoa;Mollusca;Bivalvia;Autobranhia;Heteroconchia;Euhe  
 terodonta;Imparidentia;Venerida;Veneroidea;Veneridae;Mercenaria;Mercenari  
 a mercenaria  
 UdeM00000031263 29159 102.8 UdeM00000031263 XP\_019926412.2 48.7 115  
 56 1 1 112 1 115 2.90E-19 102.8 29159 cellular  
 organisms;Eukaryota;Opisthokonta;Metazoa;Eumetazoa;Bilateria;Protostomia;  
 Spiralia;Lophotrochozoa;Mollusca;Bivalvia;Autobranhia;Pteriormorphia;Ostr  
 eida;Ostreoidea;Ostreidae;Crassostrea;Crassostrea gigas  
 UdeM00000031264 6596 524.6 UdeM00000031264 XP\_045167151.1 45.4 714  
 374 10 1 707 72 776 1.90E-145 524.6 6596 cellular  
 organisms;Eukaryota;Opisthokonta;Metazoa;Eumetazoa;Bilateria;Protostomia;  
 Spiralia;Lophotrochozoa;Mollusca;Bivalvia;Autobranhia;Heteroconchia;Euhe  
 terodonta;Imparidentia;Venerida;Veneroidea;Veneridae;Mercenaria;Mercenari  
 a mercenaria  
 UdeM00000031265 6596 167.2 UdeM00000031265 XP\_045177373.1 25.7 548  
 271 22 42 467 21 554 5.10E-38 167.2 6596 cellular  
 organisms;Eukaryota;Opisthokonta;Metazoa;Eumetazoa;Bilateria;Protostomia;  
 Spiralia;Lophotrochozoa;Mollusca;Bivalvia;Autobranhia;Heteroconchia;Euhe  
 terodonta;Imparidentia;Venerida;Veneroidea;Veneridae;Mercenaria;Mercenari  
 a mercenaria  
 UdeM00000031266 6596 104.4 UdeM00000031266 XP\_045172906.1 45.5 110  
 60 0 1 110 1 110 9.70E-20 104.4 6596 cellular  
 organisms;Eukaryota;Opisthokonta;Metazoa;Eumetazoa;Bilateria;Protostomia;  
 Spiralia;Lophotrochozoa;Mollusca;Bivalvia;Autobranhia;Heteroconchia;Euhe  
 terodonta;Imparidentia;Venerida;Veneroidea;Veneridae;Mercenaria;Mercenari  
 a mercenaria  
 UdeM00000031267 6596 774.6 UdeM00000031267 XP\_045171963.1 77.4 509  
 112 1 9 514 36 544 7.80E-221 774.6 6596 cellular  
 organisms;Eukaryota;Opisthokonta;Metazoa;Eumetazoa;Bilateria;Protostomia;

Spiralia;Lophotrochozoa;Mollusca;Bivalvia;Autobranchia;Heteroconchia;Euherodonta;Imparidentia;Venerida;Veneroidea;Veneridae;Mercenaria;Mercenaria mercenaria

UdeM00000031268 6596 436 UdeM00000031268 XP\_045171964.1 71.1 304  
81 4 1 298 1 303 3.80E-119 436 6596 cellular

organisms;Eukaryota;Opisthokonta;Metazoa;Eumetazoa;Bilateria;Protostomia;Spiralia;Lophotrochozoa;Mollusca;Bivalvia;Autobranchia;Heteroconchia;Euherodonta;Imparidentia;Venerida;Veneroidea;Veneridae;Mercenaria;Mercenaria mercenaria

UdeM00000031269 6596 274.2 UdeM00000031269 XP\_045171964.1 65.9 211  
67 3 1 207 94 303 1.30E-70 274.2 6596 cellular

organisms;Eukaryota;Opisthokonta;Metazoa;Eumetazoa;Bilateria;Protostomia;Spiralia;Lophotrochozoa;Mollusca;Bivalvia;Autobranchia;Heteroconchia;Euherodonta;Imparidentia;Venerida;Veneroidea;Veneridae;Mercenaria;Mercenaria mercenaria

UdeM00000031270 6565 93.6 UdeM00000031270 XP\_022337738.1 34.9 186  
88 6 535 711 578 739 1.10E-15 93.6 6565 cellular

organisms;Eukaryota;Opisthokonta;Metazoa;Eumetazoa;Bilateria;Protostomia;Spiralia;Lophotrochozoa;Mollusca;Bivalvia;Autobranchia;Pteriomorphia;Ostreida;Ostreoidea;Ostreidae;Crassostrea;Crassostrea virginica

UdeM00000031271 6596 127.5 UdeM00000031271 XP\_045192489.1 41.2 187  
97 5 13 191 12 193 1.80E-26 127.5 6596 cellular

organisms;Eukaryota;Opisthokonta;Metazoa;Eumetazoa;Bilateria;Protostomia;Spiralia;Lophotrochozoa;Mollusca;Bivalvia;Autobranchia;Heteroconchia;Euherodonta;Imparidentia;Venerida;Veneroidea;Veneridae;Mercenaria;Mercenaria mercenaria

UdeM00000031272 90988 109.8 UdeM00000031272 XP\_039535825.1 60.2 83  
33 0 1 83 111 193 1.80E-21 109.8 90988 cellular

organisms;Eukaryota;Opisthokonta;Metazoa;Eumetazoa;Bilateria;Deuterostomia;Chordata;Craniata;Vertebrata;Gnathostomata;Teleostomi;Euteleostomi;Actinopterygii;Actinopteri;Neopterygii;Teleostei;Osteoglossocephalai;Clupeocephala;Otomorpha;Ostariophysi;Otophysi;Cypriniphysae;Cypriniformes;Cyprinidae;Leuciscidae;Pogonichthyinae;Pimephales;Pimephales promelas

UdeM00000031273 6565 515 UdeM00000031273 XP\_022337711.1 48 542  
273 4 28 569 17 549 1.20E-142 515 6565 cellular

organisms;Eukaryota;Opisthokonta;Metazoa;Eumetazoa;Bilateria;Protostomia;Spiralia;Lophotrochozoa;Mollusca;Bivalvia;Autobranchia;Pteriomorphia;Ostreida;Ostreoidea;Ostreidae;Crassostrea;Crassostrea virginica

UdeM00000031274 6565 514.6 UdeM00000031274 XP\_022337711.1 48 542  
273 4 15 556 17 549 1.60E-142 514.6 6565 cellular

organisms;Eukaryota;Opisthokonta;Metazoa;Eumetazoa;Bilateria;Protostomia;Spiralia;Lophotrochozoa;Mollusca;Bivalvia;Autobranchia;Pteriomorphia;Ostreida;Ostreoidea;Ostreidae;Crassostrea;Crassostrea virginica

UdeM00000031277 151771 349.4 UdeM00000031277 XP\_028417042.1 47.2  
426 190 12 1 407 745 1154 6.40E-93 349.4 151771  
cellular

organisms;Eukaryota;Opisthokonta;Metazoa;Eumetazoa;Cnidaria;Anthozoa;Octocorallia;Alcyonacea;Alcyoniina;Nephtheidae;Dendronephthya;Dendronephthya gigantea

UdeM00000031278 6565 119.8 UdeM00000031278 XP\_022338831.1 98.4 63  
1 0 1 63 1 63 1.40E-24 119.8 6565 cellular

organisms;Eukaryota;Opisthokonta;Metazoa;Eumetazoa;Bilateria;Protostomia;Spiralia;Lophotrochozoa;Mollusca;Bivalvia;Autobranchia;Pteriomorphia;Ostreida;Ostreoidea;Ostreidae;Crassostrea;Crassostrea virginica

UdeM00000031279 6565 186 UdeM00000031279 XP\_022338833.1 84.1 107  
 17 0 26 132 86 192 3.30E-44 186 6565 cellular  
 organisms;Eukaryota;Opisthokonta;Metazoa;Eumetazoa;Bilateria;Protostomia;  
 Spiralia;Lophotrochozoa;Mollusca;Bivalvia;Autobranchia;Pteriomorphia;Ostr  
 eida;Ostreoidea;Ostreidae;Crassostrea;Crassostrea virginica  
 UdeM00000040888 6596 228 UdeM00000040888 XP\_045182316.1 29.5 671  
 328 14 2 577 370 990 3.10E-56 228 6596 cellular  
 organisms;Eukaryota;Opisthokonta;Metazoa;Eumetazoa;Bilateria;Protostomia;  
 Spiralia;Lophotrochozoa;Mollusca;Bivalvia;Autobranchia;Heteroconchia;Euhe  
 terodonta;Imparidentia;Venerida;Veneroidea;Veneridae;Mercenaria;Mercenari  
 a mercenaria  
 UdeM00000044383 6596 153.3 UdeM00000044383 XP\_045211523.1 42.5 167  
 94 2 2 167 2822 2987 2.80E-34 153.3 6596 cellular  
 organisms;Eukaryota;Opisthokonta;Metazoa;Eumetazoa;Bilateria;Protostomia;  
 Spiralia;Lophotrochozoa;Mollusca;Bivalvia;Autobranchia;Heteroconchia;Euhe  
 terodonta;Imparidentia;Venerida;Veneroidea;Veneridae;Mercenaria;Mercenari  
 a mercenaria  
 UdeM00000044384 6565 119 UdeM00000044384 XP\_022287884.1 31.9 270  
 140 8 6 244 519 775 8.40E-24 119 6565 cellular  
 organisms;Eukaryota;Opisthokonta;Metazoa;Eumetazoa;Bilateria;Protostomia;  
 Spiralia;Lophotrochozoa;Mollusca;Bivalvia;Autobranchia;Pteriomorphia;Ostr  
 eida;Ostreoidea;Ostreidae;Crassostrea;Crassostrea virginica  
 UdeM00000044385 6596 93.2 UdeM00000044385 XP\_045210503.1 41.1 124  
 65 6 4 123 299 418 2.80E-16 93.2 6596 cellular  
 organisms;Eukaryota;Opisthokonta;Metazoa;Eumetazoa;Bilateria;Protostomia;  
 Spiralia;Lophotrochozoa;Mollusca;Bivalvia;Autobranchia;Heteroconchia;Euhe  
 terodonta;Imparidentia;Venerida;Veneroidea;Veneridae;Mercenaria;Mercenari  
 a mercenaria  
 UdeM00000044386 6573 85.9 UdeM00000044386 XP\_021378781.1 26 254  
 154 7 17 260 46 275 8.70E-14 85.9 6573 cellular  
 organisms;Eukaryota;Opisthokonta;Metazoa;Eumetazoa;Bilateria;Protostomia;  
 Spiralia;Lophotrochozoa;Mollusca;Bivalvia;Autobranchia;Pteriomorphia;Pect  
 inida;Pectinoidea;Pectinidae;Mizuhopecten;Mizuhopecten yessoensis  
 UdeM00000044387 6579 206.5 UdeM00000044387 XP\_033745542.1 41.6 262  
 139 9 14 270 30 282 5.30E-50 206.5 6579 cellular  
 organisms;Eukaryota;Opisthokonta;Metazoa;Eumetazoa;Bilateria;Protostomia;  
 Spiralia;Lophotrochozoa;Mollusca;Bivalvia;Autobranchia;Pteriomorphia;Pect  
 inida;Pectinoidea;Pectinidae;Pecten;Pecten maximus  
 UdeM00000044388 6573 234.6 UdeM00000044388 XP\_021378824.1 34.3 435  
 239 12 9 420 85 495 2.30E-58 234.6 6573 cellular  
 organisms;Eukaryota;Opisthokonta;Metazoa;Eumetazoa;Bilateria;Protostomia;  
 Spiralia;Lophotrochozoa;Mollusca;Bivalvia;Autobranchia;Pteriomorphia;Pect  
 inida;Pectinoidea;Pectinidae;Mizuhopecten;Mizuhopecten yessoensis  
 UdeM00000026515 1735272 523.5 UdeM00000026515 XP\_041347753.1 76.5  
 422 99 0 1 422 1 422 2.50E-145 523.5 1735272  
 cellular  
 organisms;Eukaryota;Opisthokonta;Metazoa;Eumetazoa;Bilateria;Protostomia;  
 Spiralia;Lophotrochozoa;Mollusca;Gastropoda;Neomphalina;Neomphaloidea;Pel  
 tospiridae;Gigantopelta;Gigantopelta aegis  
 UdeM00000026516 400727 638.3 UdeM00000026516 XP\_025092428.1 98  
 307 6 0 1 307 1 307 5.20E-180 638.3 400727  
 cellular  
 organisms;Eukaryota;Opisthokonta;Metazoa;Eumetazoa;Bilateria;Protostomia;

Spiralia; Lophotrochozoa; Mollusca; Gastropoda; Caenogastropoda; Architaenioglossa; Ampullarioidea; Ampullariidae; Pomacea; Pomacea canaliculata

UdeM00000026518 6596 180.6 UdeM00000026518 XP\_045173320.1 28.9 544  
304 12 1 464 2 542 4.50E-42 180.6 6596 cellular  
organisms; Eukaryota; Opisthokonta; Metazoa; Eumetazoa; Bilateria; Protostomia; Spiralia; Lophotrochozoa; Mollusca; Bivalvia; Autobranchia; Heteroconchia; Euheterodonta; Imparidentia; Venerida; Veneroidea; Veneridae; Mercenaria; Mercenaria mercenaria

UdeM00000026519 6596 147.1 UdeM00000026519 XP\_045174001.1 53 117  
55 0 18 134 21 137 1.60E-32 147.1 6596 cellular  
organisms; Eukaryota; Opisthokonta; Metazoa; Eumetazoa; Bilateria; Protostomia; Spiralia; Lophotrochozoa; Mollusca; Bivalvia; Autobranchia; Heteroconchia; Euheterodonta; Imparidentia; Venerida; Veneroidea; Veneridae; Mercenaria; Mercenaria mercenaria

UdeM00000026521 6573 160.6 UdeM00000026521 XP\_021358159.1 33.4 302  
161 8 1 264 361 660 4.40E-36 160.6 6573 cellular  
organisms; Eukaryota; Opisthokonta; Metazoa; Eumetazoa; Bilateria; Protostomia; Spiralia; Lophotrochozoa; Mollusca; Bivalvia; Autobranchia; Pteriomorphia; Pectinida; Pectinoidea; Pectinidae; Mizuhopecten; Mizuhopecten yessoensis

UdeM00000026522 6565 148.3 UdeM00000026522 XP\_022344363.1 50.4 133  
66 0 2 134 5 137 7.10E-33 148.3 6565 cellular  
organisms; Eukaryota; Opisthokonta; Metazoa; Eumetazoa; Bilateria; Protostomia; Spiralia; Lophotrochozoa; Mollusca; Bivalvia; Autobranchia; Pteriomorphia; Ostreida; Ostreoidea; Ostreidae; Crassostrea; Crassostrea virginica

UdeM00000026523 1735272 147.9 UdeM00000026523 XP\_041347319.1 51.1  
137 65 1 1 137 3 137 9.50E-33 147.9 1735272  
cellular  
organisms; Eukaryota; Opisthokonta; Metazoa; Eumetazoa; Bilateria; Protostomia; Spiralia; Lophotrochozoa; Mollusca; Gastropoda; Neomphalina; Neomphaloidea; Peltospiridae; Gigantopelta; Gigantopelta aegis

UdeM00000026524 7574 96.3 UdeM00000026524 XP\_013401704.1 44 91  
50 1 10 100 742 831 2.50E-17 96.3 7574 cellular  
organisms; Eukaryota; Opisthokonta; Metazoa; Eumetazoa; Bilateria; Protostomia; Spiralia; Lophotrochozoa; Brachiopoda; Linguliformea; Lingulata; Lingulida; Linguloidea; Lingulidae; Lingula; Lingula anatina

UdeM00000026525 29159 796.6 UdeM00000026525 XP\_019926413.2 75.4 533  
114 4 1 522 1 527 2.00E-227 796.6 29159 cellular  
organisms; Eukaryota; Opisthokonta; Metazoa; Eumetazoa; Bilateria; Protostomia; Spiralia; Lophotrochozoa; Mollusca; Bivalvia; Autobranchia; Pteriomorphia; Ostreida; Ostreoidea; Ostreidae; Crassostrea; Crassostrea gigas

UdeM00000026526 6596 176.8 UdeM00000026526 XP\_045171871.1 53.2 203  
79 7 2 195 3 198 3.10E-41 176.8 6596 cellular  
organisms; Eukaryota; Opisthokonta; Metazoa; Eumetazoa; Bilateria; Protostomia; Spiralia; Lophotrochozoa; Mollusca; Bivalvia; Autobranchia; Heteroconchia; Euheterodonta; Imparidentia; Venerida; Veneroidea; Veneridae; Mercenaria; Mercenaria mercenaria

UdeM00000026527 6573 648.3 UdeM00000026527 XP\_021364951.1 36.8 892  
526 9 1418 2300 59 921 3.70E-182 648.3 6573 cellular  
organisms; Eukaryota; Opisthokonta; Metazoa; Eumetazoa; Bilateria; Protostomia; Spiralia; Lophotrochozoa; Mollusca; Bivalvia; Autobranchia; Pteriomorphia; Pectinida; Pectinoidea; Pectinidae; Mizuhopecten; Mizuhopecten yessoensis

UdeM00000026528 225164 309.7 UdeM00000026528 XP\_009051735.1 57.1  
259 110 1 22 280 28 285 3.80E-81 309.7 225164  
cellular

organisms;Eukaryota;Opisthokonta;Metazoa;Eumetazoa;Bilateria;Protostomia;Spiralia;Lophotrochozoa;Mollusca;Gastropoda;Patellogastropoda;Lottioidea;Lottiidae;Lottia;Lottia gigantea

UdeM00000026529 6596 349.4 UdeM00000026529 XP\_045173249.1 36.2 553  
306 11 26 561 284 806 8.70E-93 349.4 6596 cellular

organisms;Eukaryota;Opisthokonta;Metazoa;Eumetazoa;Bilateria;Protostomia;Spiralia;Lophotrochozoa;Mollusca;Bivalvia;Autobranchia;Heteroconchia;Euheterodonta;Imparidentia;Venerida;Veneroidea;Veneridae;Mercenaria;Mercenaria mercenaria

UdeM00000026531 6596 359 UdeM00000026531 XP\_045173249.1 37.7 531  
306 10 26 539 284 806 1.10E-95 359 6596 cellular

organisms;Eukaryota;Opisthokonta;Metazoa;Eumetazoa;Bilateria;Protostomia;Spiralia;Lophotrochozoa;Mollusca;Bivalvia;Autobranchia;Heteroconchia;Euheterodonta;Imparidentia;Venerida;Veneroidea;Veneridae;Mercenaria;Mercenaria mercenaria

UdeM00000026532 6565 68.9 UdeM00000026532 XP\_022311060.1 51.1 94  
37 5 16 106 107 194 9.90E-09 68.9 6565 cellular

organisms;Eukaryota;Opisthokonta;Metazoa;Eumetazoa;Bilateria;Protostomia;Spiralia;Lophotrochozoa;Mollusca;Bivalvia;Autobranchia;Pteriomorphia;Ostreida;Ostreoidea;Ostreidae;Crassostrea;Crassostrea virginica

UdeM00000026533 6596 362.8 UdeM00000026533 XP\_045173249.1 36.3 601  
348 15 45 622 218 806 8.50E-97 362.8 6596 cellular

organisms;Eukaryota;Opisthokonta;Metazoa;Eumetazoa;Bilateria;Protostomia;Spiralia;Lophotrochozoa;Mollusca;Bivalvia;Autobranchia;Heteroconchia;Euheterodonta;Imparidentia;Venerida;Veneroidea;Veneridae;Mercenaria;Mercenaria mercenaria

UdeM00000026534 6579 1568.9 UdeM00000026534 XP\_033748362.1 72.3  
1064 292 2 1 1063 5 1066 0.00E+00 1568.9 6579  
cellular

organisms;Eukaryota;Opisthokonta;Metazoa;Eumetazoa;Bilateria;Protostomia;Spiralia;Lophotrochozoa;Mollusca;Bivalvia;Autobranchia;Pteriomorphia;Pectinida;Pectinoidea;Pectinidae;Pecten;Pecten maximus

UdeM00000026535 6579 334.7 UdeM00000026535 XP\_033748053.1 36.6 607  
271 14 3 602 9 508 2.70E-88 334.7 6579 cellular

organisms;Eukaryota;Opisthokonta;Metazoa;Eumetazoa;Bilateria;Protostomia;Spiralia;Lophotrochozoa;Mollusca;Bivalvia;Autobranchia;Pteriomorphia;Pectinida;Pectinoidea;Pectinidae;Pecten;Pecten maximus

UdeM00000026536 1735272 237.3 UdeM00000026536 XP\_041347958.1 66.2  
160 53 1 19 177 533 692 1.50E-59 237.3 1735272  
cellular

organisms;Eukaryota;Opisthokonta;Metazoa;Eumetazoa;Bilateria;Protostomia;Spiralia;Lophotrochozoa;Mollusca;Gastropoda;Neomphalina;Neomphaloidea;Peltospiridae;Gigantopelta;Gigantopelta aegis

UdeM00000026537 6596 409.5 UdeM00000026537 XP\_045171112.1 40.1 649  
356 9 5 627 4 645 7.90E-111 409.5 6596 cellular

organisms;Eukaryota;Opisthokonta;Metazoa;Eumetazoa;Bilateria;Protostomia;Spiralia;Lophotrochozoa;Mollusca;Bivalvia;Autobranchia;Heteroconchia;Euheterodonta;Imparidentia;Venerida;Veneroidea;Veneridae;Mercenaria;Mercenaria mercenaria

UdeM00000026538 29159 86.7 UdeM00000026538 XP\_019920570.2 31.2 189  
124 2 1 183 1 189 3.50E-14 86.7 29159 cellular

organisms;Eukaryota;Opisthokonta;Metazoa;Eumetazoa;Bilateria;Protostomia;Spiralia;Lophotrochozoa;Mollusca;Bivalvia;Autobranchia;Pteriomorphia;Ostreida;Ostreoidea;Ostreidae;Crassostrea;Crassostrea gigas

UdeM00000026539 6573 506.9 UdeM00000026539 XP\_021364757.1 59.5 439  
 174 3 11 449 8 442 2.60E-140 506.9 6573 cellular  
 organisms;Eukaryota;Opisthokonta;Metazoa;Eumetazoa;Bilateria;Protostomia;  
 Spiralia;Lophotrochozoa;Mollusca;Bivalvia;Autobranhia;Pteriomorpha;Pect  
 inida;Pectinoidea;Pectinidae;Mizuhopecten;Mizuhopecten yessoensis  
 UdeM00000026540 6579 161 UdeM00000026540 XP\_033756313.1 41.8 194  
 109 1 18 211 285 474 1.70E-36 161 6579 cellular  
 organisms;Eukaryota;Opisthokonta;Metazoa;Eumetazoa;Bilateria;Protostomia;  
 Spiralia;Lophotrochozoa;Mollusca;Bivalvia;Autobranhia;Pteriomorpha;Pect  
 inida;Pectinoidea;Pectinidae;Pecten;Pecten maximus  
 UdeM00000026541 6596 235.7 UdeM00000026541 XP\_045164819.1 38.5 348  
 194 9 5 338 90 431 8.60E-59 235.7 6596 cellular  
 organisms;Eukaryota;Opisthokonta;Metazoa;Eumetazoa;Bilateria;Protostomia;  
 Spiralia;Lophotrochozoa;Mollusca;Bivalvia;Autobranhia;Heteroconchia;Euhe  
 terodonta;Imparidentia;Venerida;Veneroidea;Veneridae;Mercenaria;Mercenari  
 a mercenaria  
 UdeM00000026542 6596 84.3 UdeM00000026542 XP\_045200488.1 38.4 172  
 85 3 1 159 1 164 1.80E-13 84.3 6596 cellular  
 organisms;Eukaryota;Opisthokonta;Metazoa;Eumetazoa;Bilateria;Protostomia;  
 Spiralia;Lophotrochozoa;Mollusca;Bivalvia;Autobranhia;Heteroconchia;Euhe  
 terodonta;Imparidentia;Venerida;Veneroidea;Veneridae;Mercenaria;Mercenari  
 a mercenaria  
 UdeM00000026543 6596 144.8 UdeM00000026543 XP\_045200488.1 49.4 172  
 79 4 20 183 1 172 1.10E-31 144.8 6596 cellular  
 organisms;Eukaryota;Opisthokonta;Metazoa;Eumetazoa;Bilateria;Protostomia;  
 Spiralia;Lophotrochozoa;Mollusca;Bivalvia;Autobranhia;Heteroconchia;Euhe  
 terodonta;Imparidentia;Venerida;Veneroidea;Veneridae;Mercenaria;Mercenari  
 a mercenaria  
 UdeM00000026544 6579 206.5 UdeM00000026544 XP\_033739546.1 37.8 270  
 164 2 1 267 61 329 4.60E-50 206.5 6579 cellular  
 organisms;Eukaryota;Opisthokonta;Metazoa;Eumetazoa;Bilateria;Protostomia;  
 Spiralia;Lophotrochozoa;Mollusca;Bivalvia;Autobranhia;Pteriomorpha;Pect  
 inida;Pectinoidea;Pectinidae;Pecten;Pecten maximus  
 UdeM00000026545 218467 301.6 UdeM00000026545 XP\_023212519.1 53.1  
 292 136 1 15 306 6 296 1.30E-78 301.6 218467  
 cellular  
 organisms;Eukaryota;Opisthokonta;Metazoa;Eumetazoa;Bilateria;Protostomia;  
 Ecdysozoa;Panarthropoda;Arthropoda;Chelicerata;Arachnida;Scorpiones;Buthi  
 da;Buthoidea;Buthidae;Centruroides;Centruroides sculpturatus  
 UdeM00000026546 6596 307.8 UdeM00000026546 XP\_045172190.1 45.2 722  
 266 26 279 897 15 709 4.70E-80 307.8 6596 cellular  
 organisms;Eukaryota;Opisthokonta;Metazoa;Eumetazoa;Bilateria;Protostomia;  
 Spiralia;Lophotrochozoa;Mollusca;Bivalvia;Autobranhia;Heteroconchia;Euhe  
 terodonta;Imparidentia;Venerida;Veneroidea;Veneridae;Mercenaria;Mercenari  
 a mercenaria  
 UdeM00000026547 441366 218.8 UdeM00000026547 XP\_028296753.1 40.8  
 319 174 8 6 323 32 336 1.00E-53 218.8 441366  
 cellular  
 organisms;Eukaryota;Opisthokonta;Metazoa;Eumetazoa;Bilateria;Deuterostomi  
 a;Chordata;Craniata;Vertebrata;Gnathostomata;Teleostomi;Euteleostomi;Acti  
 nopterygii;Actinopteri;Neopterygii;Teleostei;Osteoglossocephalai;Clupeoce  
 phala;Euteleostei;Neoteleostei;Eurypterygia;Ctenosquamata;Acanthomo  
 rphata;Euacanthomorpha;Percomorphaceae;Ovalentaria;Blenniimorphae;Blen

niiformes;Gobiesocoidei;Gobiesocidae;Gobiesocinae;Gouania;Gouania  
 willdenowi  
 UdeM00000026548 6596 62.8 UdeM00000026548 XP\_045172191.1 46.9 96  
 35 3 24 119 181 260 4.70E-07 62.8 6596 cellular  
 organisms;Eukaryota;Opisthokonta;Metazoa;Eumetazoa;Bilateria;Protostomia;  
 Spiralia;Lophotrochozoa;Mollusca;Bivalvia;Autobranchia;Heteroconchia;Euhe  
 terodonta;Imparidentia;Venerida;Veneroidea;Veneridae;Mercenaria;Mercenari  
 a mercenaria  
 UdeM00000026550 6573 103.2 UdeM00000026550 XP\_021365625.1 49.5 105  
 53 0 95 199 22 126 5.00E-19 103.2 6573 cellular  
 organisms;Eukaryota;Opisthokonta;Metazoa;Eumetazoa;Bilateria;Protostomia;  
 Spiralia;Lophotrochozoa;Mollusca;Bivalvia;Autobranchia;Pteriormorphia;Pect  
 inida;Pectinoidea;Pectinidae;Mizuhopecten;Mizuhopecten yessoensis  
 UdeM00000026552 6573 630.2 UdeM00000026552 XP\_021364783.1 52.3 650  
 273 7 9 625 27 672 2.90E-177 630.2 6573 cellular  
 organisms;Eukaryota;Opisthokonta;Metazoa;Eumetazoa;Bilateria;Protostomia;  
 Spiralia;Lophotrochozoa;Mollusca;Bivalvia;Autobranchia;Pteriormorphia;Pect  
 inida;Pectinoidea;Pectinidae;Mizuhopecten;Mizuhopecten yessoensis  
 UdeM00000026553 6573 489.6 UdeM00000026553 XP\_021349923.1 76.5 307  
 72 0 1 307 1 307 3.00E-135 489.6 6573 cellular  
 organisms;Eukaryota;Opisthokonta;Metazoa;Eumetazoa;Bilateria;Protostomia;  
 Spiralia;Lophotrochozoa;Mollusca;Bivalvia;Autobranchia;Pteriormorphia;Pect  
 inida;Pectinoidea;Pectinidae;Mizuhopecten;Mizuhopecten yessoensis  
 UdeM00000026554 6573 268.5 UdeM00000026554 XP\_021349925.1 33.7 695  
 330 18 51 728 50 630 3.40E-68 268.5 6573 cellular  
 organisms;Eukaryota;Opisthokonta;Metazoa;Eumetazoa;Bilateria;Protostomia;  
 Spiralia;Lophotrochozoa;Mollusca;Bivalvia;Autobranchia;Pteriormorphia;Pect  
 inida;Pectinoidea;Pectinidae;Mizuhopecten;Mizuhopecten yessoensis  
 UdeM00000026555 6573 453.8 UdeM00000026555 XP\_021349930.1 77.7 256  
 57 0 49 304 35 290 2.20E-124 453.8 6573 cellular  
 organisms;Eukaryota;Opisthokonta;Metazoa;Eumetazoa;Bilateria;Protostomia;  
 Spiralia;Lophotrochozoa;Mollusca;Bivalvia;Autobranchia;Pteriormorphia;Pect  
 inida;Pectinoidea;Pectinidae;Mizuhopecten;Mizuhopecten yessoensis  
 UdeM00000026556 6596 98.2 UdeM00000026556 XP\_045171750.1 54.3 92  
 41 1 6 97 339 429 6.10E-18 98.2 6596 cellular  
 organisms;Eukaryota;Opisthokonta;Metazoa;Eumetazoa;Bilateria;Protostomia;  
 Spiralia;Lophotrochozoa;Mollusca;Bivalvia;Autobranchia;Heteroconchia;Euhe  
 terodonta;Imparidentia;Venerida;Veneroidea;Veneridae;Mercenaria;Mercenari  
 a mercenaria  
 UdeM00000026557 6596 4453.3 UdeM00000026557 XP\_045170900.1 66.7  
 3559 1025 32 8 3480 934 4417 0.00E+00 4453.3 6596  
 cellular  
 organisms;Eukaryota;Opisthokonta;Metazoa;Eumetazoa;Bilateria;Protostomia;  
 Spiralia;Lophotrochozoa;Mollusca;Bivalvia;Autobranchia;Heteroconchia;Euhe  
 terodonta;Imparidentia;Venerida;Veneroidea;Veneridae;Mercenaria;Mercenari  
 a mercenaria  
 UdeM00000026558 6596 5523.4 UdeM00000026558 XP\_045170900.1 64.8  
 4503 1371 40 1 4376 1 4417 0.00E+00 5523.4 6596  
 cellular  
 organisms;Eukaryota;Opisthokonta;Metazoa;Eumetazoa;Bilateria;Protostomia;  
 Spiralia;Lophotrochozoa;Mollusca;Bivalvia;Autobranchia;Heteroconchia;Euhe  
 terodonta;Imparidentia;Venerida;Veneroidea;Veneridae;Mercenaria;Mercenari  
 a mercenaria



UdeM00000026559 6596 407.9 UdeM00000026559 XP\_045170723.1 67.6 321  
 90 4 1 321 1 307 1.20E-110 407.9 6596 cellular  
 organisms;Eukaryota;Opisthokonta;Metazoa;Eumetazoa;Bilateria;Protostomia;  
 Spiralia;Lophotrochozoa;Mollusca;Bivalvia;Autobranchia;Heteroconchia;Euhe  
 terodonta;Imparidentia;Venerida;Veneroidea;Veneridae;Mercenaria;Mercenari  
 a mercenaria  
 UdeM00000026560 29159 422.9 UdeM00000026560 XP\_034339038.1 57.1 366  
 147 4 1 363 1 359 4.00E-115 422.9 29159 cellular  
 organisms;Eukaryota;Opisthokonta;Metazoa;Eumetazoa;Bilateria;Protostomia;  
 Spiralia;Lophotrochozoa;Mollusca;Bivalvia;Autobranchia;Pteriormorphia;Ostr  
 eida;Ostreoidea;Ostreidae;Crassostrea;Crassostrea gigas  
 UdeM00000026561 6596 409.1 UdeM00000026561 XP\_045172547.1 37.1 755  
 354 18 6 650 70 813 1.10E-110 409.1 6596 cellular  
 organisms;Eukaryota;Opisthokonta;Metazoa;Eumetazoa;Bilateria;Protostomia;  
 Spiralia;Lophotrochozoa;Mollusca;Bivalvia;Autobranchia;Heteroconchia;Euhe  
 terodonta;Imparidentia;Venerida;Veneroidea;Veneridae;Mercenaria;Mercenari  
 a mercenaria  
 UdeM00000026562 6573 858.6 UdeM00000026562 XP\_021370424.1 72.6 753  
 174 11 1 751 1 723 7.80E-246 858.6 6573 cellular  
 organisms;Eukaryota;Opisthokonta;Metazoa;Eumetazoa;Bilateria;Protostomia;  
 Spiralia;Lophotrochozoa;Mollusca;Bivalvia;Autobranchia;Pteriormorphia;Pect  
 inida;Pectinoidea;Pectinidae;Mizuhopecten;Mizuhopecten yessoensis  
 UdeM00000026563 6573 179.1 UdeM00000026563 XP\_021370423.1 79.4 107  
 20 1 1 107 1 105 3.00E-42 179.1 6573 cellular  
 organisms;Eukaryota;Opisthokonta;Metazoa;Eumetazoa;Bilateria;Protostomia;  
 Spiralia;Lophotrochozoa;Mollusca;Bivalvia;Autobranchia;Pteriormorphia;Pect  
 inida;Pectinoidea;Pectinidae;Mizuhopecten;Mizuhopecten yessoensis  
 UdeM00000026564 6579 553.5 UdeM00000026564 XP\_033748821.1 70.4 362  
 106 1 478 838 21 382 4.60E-154 553.5 6579 cellular  
 organisms;Eukaryota;Opisthokonta;Metazoa;Eumetazoa;Bilateria;Protostomia;  
 Spiralia;Lophotrochozoa;Mollusca;Bivalvia;Autobranchia;Pteriormorphia;Pect  
 inida;Pectinoidea;Pectinidae;Pecten;Pecten maximus  
 UdeM00000026566 6596 289.3 UdeM00000026566 XP\_045210985.1 49.3 296  
 142 3 2 295 1 290 6.20E-75 289.3 6596 cellular  
 organisms;Eukaryota;Opisthokonta;Metazoa;Eumetazoa;Bilateria;Protostomia;  
 Spiralia;Lophotrochozoa;Mollusca;Bivalvia;Autobranchia;Heteroconchia;Euhe  
 terodonta;Imparidentia;Venerida;Veneroidea;Veneridae;Mercenaria;Mercenari  
 a mercenaria  
 UdeM00000026567 6579 371.7 UdeM00000026567 XP\_033746863.1 67.3 281  
 88 4 6 284 77 355 8.30E-100 371.7 6579 cellular  
 organisms;Eukaryota;Opisthokonta;Metazoa;Eumetazoa;Bilateria;Protostomia;  
 Spiralia;Lophotrochozoa;Mollusca;Bivalvia;Autobranchia;Pteriormorphia;Pect  
 inida;Pectinoidea;Pectinidae;Pecten;Pecten maximus  
 UdeM00000026568 6596 85.5 UdeM00000026568 XP\_045173349.1 33.5 155  
 83 4 16 156 11 159 6.80E-14 85.5 6596 cellular  
 organisms;Eukaryota;Opisthokonta;Metazoa;Eumetazoa;Bilateria;Protostomia;  
 Spiralia;Lophotrochozoa;Mollusca;Bivalvia;Autobranchia;Heteroconchia;Euhe  
 terodonta;Imparidentia;Venerida;Veneroidea;Veneridae;Mercenaria;Mercenari  
 a mercenaria  
 UdeM00000026569 6596 342.4 UdeM00000026569 XP\_045208720.1 32.7 779  
 475 25 16 770 184 937 1.70E-90 342.4 6596 cellular  
 organisms;Eukaryota;Opisthokonta;Metazoa;Eumetazoa;Bilateria;Protostomia;  
 Spiralia;Lophotrochozoa;Mollusca;Bivalvia;Autobranchia;Heteroconchia;Euhe

terodonta;Imparidentia;Venerida;Veneroidea;Veneridae;Mercenaria;Mercenari  
 a mercenaria  
 UdeM00000026570 6596 285 UdeM00000026570 XP\_045208720.1 30 779  
 434 25 16 708 184 937 3.00E-73 285 6596 cellular  
 organisms;Eukaryota;Opisthokonta;Metazoa;Eumetazoa;Bilateria;Protostomia;  
 Spiralia;Lophotrochozoa;Mollusca;Bivalvia;Autobranchia;Heteroconchia;Euhe  
 terodonta;Imparidentia;Venerida;Veneroidea;Veneridae;Mercenaria;Mercenari  
 a mercenaria  
 UdeM00000026571 1735272 110.5 UdeM00000026571 XP\_041378712.1 46  
 100 54 0 3 102 428 527 1.50E-21 110.5 1735272  
 cellular  
 organisms;Eukaryota;Opisthokonta;Metazoa;Eumetazoa;Bilateria;Protostomia;  
 Spiralia;Lophotrochozoa;Mollusca;Gastropoda;Neomphalina;Neomphaloidea;Pel  
 tospiridae;Gigantopelta;Gigantopelta aegis  
 UdeM00000026572 6596 389 UdeM00000026572 XP\_045173349.1 30.8 919  
 570 29 21 902 61 950 1.80E-104 389 6596 cellular  
 organisms;Eukaryota;Opisthokonta;Metazoa;Eumetazoa;Bilateria;Protostomia;  
 Spiralia;Lophotrochozoa;Mollusca;Bivalvia;Autobranchia;Heteroconchia;Euhe  
 terodonta;Imparidentia;Venerida;Veneroidea;Veneridae;Mercenaria;Mercenari  
 a mercenaria  
 UdeM00000026573 6596 312.8 UdeM00000026573 XP\_045173349.1 27.6 965  
 489 27 16 795 11 950 1.40E-81 312.8 6596 cellular  
 organisms;Eukaryota;Opisthokonta;Metazoa;Eumetazoa;Bilateria;Protostomia;  
 Spiralia;Lophotrochozoa;Mollusca;Bivalvia;Autobranchia;Heteroconchia;Euhe  
 terodonta;Imparidentia;Venerida;Veneroidea;Veneridae;Mercenaria;Mercenari  
 a mercenaria  
 UdeM00000026574 6596 171.4 UdeM00000026574 XP\_045173349.1 35.5 324  
 180 11 43 346 11 325 3.40E-39 171.4 6596 cellular  
 organisms;Eukaryota;Opisthokonta;Metazoa;Eumetazoa;Bilateria;Protostomia;  
 Spiralia;Lophotrochozoa;Mollusca;Bivalvia;Autobranchia;Heteroconchia;Euhe  
 terodonta;Imparidentia;Venerida;Veneroidea;Veneridae;Mercenaria;Mercenari  
 a mercenaria  
 UdeM00000026575 6596 171.4 UdeM00000026575 XP\_045173349.1 35.5 324  
 180 11 43 346 11 325 3.60E-39 171.4 6596 cellular  
 organisms;Eukaryota;Opisthokonta;Metazoa;Eumetazoa;Bilateria;Protostomia;  
 Spiralia;Lophotrochozoa;Mollusca;Bivalvia;Autobranchia;Heteroconchia;Euhe  
 terodonta;Imparidentia;Venerida;Veneroidea;Veneridae;Mercenaria;Mercenari  
 a mercenaria  
 UdeM00000026576 6596 378.3 UdeM00000026576 XP\_045173349.1 30.2 906  
 531 27 26 851 66 950 3.00E-101 378.3 6596 cellular  
 organisms;Eukaryota;Opisthokonta;Metazoa;Eumetazoa;Bilateria;Protostomia;  
 Spiralia;Lophotrochozoa;Mollusca;Bivalvia;Autobranchia;Heteroconchia;Euhe  
 terodonta;Imparidentia;Venerida;Veneroidea;Veneridae;Mercenaria;Mercenari  
 a mercenaria  
 UdeM00000026577 6596 186 UdeM00000026577 XP\_045209522.1 27.2 569  
 339 20 61 601 26 547 1.60E-43 186 6596 cellular  
 organisms;Eukaryota;Opisthokonta;Metazoa;Eumetazoa;Bilateria;Protostomia;  
 Spiralia;Lophotrochozoa;Mollusca;Bivalvia;Autobranchia;Heteroconchia;Euhe  
 terodonta;Imparidentia;Venerida;Veneroidea;Veneridae;Mercenaria;Mercenari  
 a mercenaria  
 UdeM00000026578 6596 146 UdeM00000026578 XP\_045208720.1 38.5 257  
 143 8 26 272 191 442 7.60E-32 146 6596 cellular  
 organisms;Eukaryota;Opisthokonta;Metazoa;Eumetazoa;Bilateria;Protostomia;  
 Spiralia;Lophotrochozoa;Mollusca;Bivalvia;Autobranchia;Heteroconchia;Euhe

terodonta;Imparidentia;Venerida;Veneroidea;Veneridae;Mercenaria;Mercenari  
 a mercenaria  
 UdeM00000026579 6596 171.4 UdeM00000026579 XP\_045173349.1 32.1 417  
 265 12 7 414 638 1045 3.50E-39 171.4 6596 cellular  
 organisms;Eukaryota;Opisthokonta;Metazoa;Eumetazoa;Bilateria;Protostomia;  
 Spiralia;Lophotrochozoa;Mollusca;Bivalvia;Autobranchia;Heteroconchia;Euhe  
 terodonta;Imparidentia;Venerida;Veneroidea;Veneridae;Mercenaria;Mercenari  
 a mercenaria  
 UdeM00000026580 6596 253.4 UdeM00000026580 XP\_045208720.1 28.8 751  
 470 18 17 717 559 1294 8.30E-64 253.4 6596 cellular  
 organisms;Eukaryota;Opisthokonta;Metazoa;Eumetazoa;Bilateria;Protostomia;  
 Spiralia;Lophotrochozoa;Mollusca;Bivalvia;Autobranchia;Heteroconchia;Euhe  
 terodonta;Imparidentia;Venerida;Veneroidea;Veneridae;Mercenaria;Mercenari  
 a mercenaria  
 UdeM00000026581 6596 259.6 UdeM00000026581 XP\_045173349.1 34.1 525  
 302 16 18 516 11 517 8.70E-66 259.6 6596 cellular  
 organisms;Eukaryota;Opisthokonta;Metazoa;Eumetazoa;Bilateria;Protostomia;  
 Spiralia;Lophotrochozoa;Mollusca;Bivalvia;Autobranchia;Heteroconchia;Euhe  
 terodonta;Imparidentia;Venerida;Veneroidea;Veneridae;Mercenaria;Mercenari  
 a mercenaria  
 UdeM00000026583 6596 128.6 UdeM00000026583 XP\_045173349.1 31.5 298  
 175 9 330 622 637 910 3.40E-26 128.6 6596 cellular  
 organisms;Eukaryota;Opisthokonta;Metazoa;Eumetazoa;Bilateria;Protostomia;  
 Spiralia;Lophotrochozoa;Mollusca;Bivalvia;Autobranchia;Heteroconchia;Euhe  
 terodonta;Imparidentia;Venerida;Veneroidea;Veneridae;Mercenaria;Mercenari  
 a mercenaria  
 UdeM00000026584 6579 166.8 UdeM00000026584 XP\_033731328.1 55.3 150  
 57 2 140 279 63 212 4.00E-38 166.8 6579 cellular  
 organisms;Eukaryota;Opisthokonta;Metazoa;Eumetazoa;Bilateria;Protostomia;  
 Spiralia;Lophotrochozoa;Mollusca;Bivalvia;Autobranchia;Pteriomorphia;Pect  
 inida;Pectinoidea;Pectinidae;Pecten;Pecten maximus  
 UdeM00000026585 7654 340.5 UdeM00000026585 XP\_041460940.1 59.9 232  
 93 0 113 344 91 322 3.20E-90 340.5 7654 cellular  
 organisms;Eukaryota;Opisthokonta;Metazoa;Eumetazoa;Bilateria;Deuterostomi  
 a;Echinodermata;Eleutherozoa;Echinozoa;Echinoidea;Euechinoidea;Echinacea;  
 Temnopleuroida;Toxopneustidae;Lytechinus;Lytechinus variegatus  
 UdeM00000026586 7654 342 UdeM00000026586 XP\_041460940.1 60.1 233  
 93 0 113 345 91 323 1.10E-90 342 7654 cellular  
 organisms;Eukaryota;Opisthokonta;Metazoa;Eumetazoa;Bilateria;Deuterostomi  
 a;Echinodermata;Eleutherozoa;Echinozoa;Echinoidea;Euechinoidea;Echinacea;  
 Temnopleuroida;Toxopneustidae;Lytechinus;Lytechinus variegatus  
 UdeM00000026587 7654 176.8 UdeM00000026587 XP\_041460940.1 60.5 119  
 47 0 5 123 205 323 3.00E-41 176.8 7654 cellular  
 organisms;Eukaryota;Opisthokonta;Metazoa;Eumetazoa;Bilateria;Deuterostomi  
 a;Echinodermata;Eleutherozoa;Echinozoa;Echinoidea;Euechinoidea;Echinacea;  
 Temnopleuroida;Toxopneustidae;Lytechinus;Lytechinus variegatus  
 UdeM00000026588 6596 339 UdeM00000026588 XP\_045215232.1 53 317  
 145 3 6 320 157 471 7.60E-90 339 6596 cellular  
 organisms;Eukaryota;Opisthokonta;Metazoa;Eumetazoa;Bilateria;Protostomia;  
 Spiralia;Lophotrochozoa;Mollusca;Bivalvia;Autobranchia;Heteroconchia;Euhe  
 terodonta;Imparidentia;Venerida;Veneroidea;Veneridae;Mercenaria;Mercenari  
 a mercenaria  
 UdeM00000026589 6596 287 UdeM00000026589 XP\_045173656.1 53.3 274  
 127 1 1 273 203 476 3.20E-74 287 6596 cellular

organisms;Eukaryota;Opisthokonta;Metazoa;Eumetazoa;Bilateria;Protostomia;Spiralia;Lophotrochozoa;Mollusca;Bivalvia;Autobranchia;Heteroconchia;Euherodonta;Imparidentia;Venerida;Veneroidea;Veneridae;Mercenaria;Mercenaria mercenaria

UdeM00000026590 6596 218 UdeM00000026590 XP\_045173656.1 54.3 184  
77 2 13 196 20 196 1.20E-53 218 6596 cellular

organisms;Eukaryota;Opisthokonta;Metazoa;Eumetazoa;Bilateria;Protostomia;Spiralia;Lophotrochozoa;Mollusca;Bivalvia;Autobranchia;Heteroconchia;Euherodonta;Imparidentia;Venerida;Veneroidea;Veneridae;Mercenaria;Mercenaria mercenaria

UdeM00000026591 6596 501.9 UdeM00000026591 XP\_045173656.1 54.6 456  
206 1 24 478 21 476 9.50E-139 501.9 6596 cellular

organisms;Eukaryota;Opisthokonta;Metazoa;Eumetazoa;Bilateria;Protostomia;Spiralia;Lophotrochozoa;Mollusca;Bivalvia;Autobranchia;Heteroconchia;Euherodonta;Imparidentia;Venerida;Veneroidea;Veneridae;Mercenaria;Mercenaria mercenaria

UdeM00000026592 6596 545.4 UdeM00000026592 XP\_045173656.1 57.6 469  
191 2 5 472 12 473 8.00E-152 545.4 6596 cellular

organisms;Eukaryota;Opisthokonta;Metazoa;Eumetazoa;Bilateria;Protostomia;Spiralia;Lophotrochozoa;Mollusca;Bivalvia;Autobranchia;Heteroconchia;Euherodonta;Imparidentia;Venerida;Veneroidea;Veneridae;Mercenaria;Mercenaria mercenaria

UdeM00000026593 6596 594.3 UdeM00000026593 XP\_045173656.1 62.5 475  
171 3 1 474 5 473 1.50E-166 594.3 6596 cellular

organisms;Eukaryota;Opisthokonta;Metazoa;Eumetazoa;Bilateria;Protostomia;Spiralia;Lophotrochozoa;Mollusca;Bivalvia;Autobranchia;Heteroconchia;Euherodonta;Imparidentia;Venerida;Veneroidea;Veneridae;Mercenaria;Mercenaria mercenaria

UdeM00000026595 6579 545.8 UdeM00000026595 XP\_033748145.1 84 307  
48 1 1 306 129 435 3.50E-152 545.8 6579 cellular

organisms;Eukaryota;Opisthokonta;Metazoa;Eumetazoa;Bilateria;Protostomia;Spiralia;Lophotrochozoa;Mollusca;Bivalvia;Autobranchia;Pteriomorphia;Pectinida;Pectinoidea;Pectinidae;Pecten;Pecten maximus

UdeM00000026594 29159 761.5 UdeM00000026594 XP\_011448705.1 83 435  
74 0 1 435 4 438 5.70E-217 761.5 29159 cellular

organisms;Eukaryota;Opisthokonta;Metazoa;Eumetazoa;Bilateria;Protostomia;Spiralia;Lophotrochozoa;Mollusca;Bivalvia;Autobranchia;Pteriomorphia;Ostreida;Ostreoidea;Ostreidae;Crassostrea;Crassostrea gigas

UdeM00000026596 1735272 438.3 UdeM00000026596 XP\_041347902.1 53.5  
381 173 2 86 463 15 394 1.30E-119 438.3 1735272  
cellular

organisms;Eukaryota;Opisthokonta;Metazoa;Eumetazoa;Bilateria;Protostomia;Spiralia;Lophotrochozoa;Mollusca;Gastropoda;Neomphalina;Neomphaloidea;Peltospiridae;Gigantopelta;Gigantopelta aegis

UdeM00000026597 6596 134.8 UdeM00000026597 XP\_045193891.1 24.9 786  
478 30 18 768 19 727 4.70E-28 134.8 6596 cellular

organisms;Eukaryota;Opisthokonta;Metazoa;Eumetazoa;Bilateria;Protostomia;Spiralia;Lophotrochozoa;Mollusca;Bivalvia;Autobranchia;Heteroconchia;Euherodonta;Imparidentia;Venerida;Veneroidea;Veneridae;Mercenaria;Mercenaria mercenaria

UdeM00000026598 6596 98.6 UdeM00000026598 XP\_045193883.1 26.3 391  
237 12 204 573 178 538 3.00E-17 98.6 6596 cellular

organisms;Eukaryota;Opisthokonta;Metazoa;Eumetazoa;Bilateria;Protostomia;Spiralia;Lophotrochozoa;Mollusca;Bivalvia;Autobranchia;Heteroconchia;Euherodonta

terodonta;Imparidentia;Venerida;Veneroidea;Veneridae;Mercenaria;Mercenari  
 a mercenaria  
 UdeM00000026599 37621 204.9 UdeM00000026599 XP\_014679849.1 60.5 147  
 58 0 3 149 299 445 7.40E-50 204.9 37621 cellular  
 organisms;Eukaryota;Opisthokonta;Metazoa;Eumetazoa;Bilateria;Protostomia;  
 Ecdysozoa;Scalidophora;Priapulida;Priapulimorpha;Priapulimorphida;Priapul  
 idae;Priapulus;Priapulus caudatus  
 UdeM00000026600 37621 208.8 UdeM00000026600 XP\_014679849.1 55.4 168  
 75 0 3 170 299 466 6.30E-51 208.8 37621 cellular  
 organisms;Eukaryota;Opisthokonta;Metazoa;Eumetazoa;Bilateria;Protostomia;  
 Ecdysozoa;Scalidophora;Priapulida;Priapulimorpha;Priapulimorphida;Priapul  
 idae;Priapulus;Priapulus caudatus  
 UdeM00000026601 37621 240.7 UdeM00000026601 XP\_014679850.1 51.1 276  
 39 2 1 181 236 510 1.40E-60 240.7 37621 cellular  
 organisms;Eukaryota;Opisthokonta;Metazoa;Eumetazoa;Bilateria;Protostomia;  
 Ecdysozoa;Scalidophora;Priapulida;Priapulimorpha;Priapulimorphida;Priapul  
 idae;Priapulus;Priapulus caudatus  
 UdeM00000026603 6596 137.5 UdeM00000026603 XP\_045194130.1 26.2 557  
 339 20 174 710 253 757 6.80E-29 137.5 6596 cellular  
 organisms;Eukaryota;Opisthokonta;Metazoa;Eumetazoa;Bilateria;Protostomia;  
 Spiralia;Lophotrochozoa;Mollusca;Bivalvia;Autobranchia;Heteroconchia;Euhe  
 terodonta;Imparidentia;Venerida;Veneroidea;Veneridae;Mercenaria;Mercenari  
 a mercenaria  
 UdeM00000026602 6596 138.3 UdeM00000026602 XP\_045194130.1 23.8 790  
 484 29 18 766 45 757 4.30E-29 138.3 6596 cellular  
 organisms;Eukaryota;Opisthokonta;Metazoa;Eumetazoa;Bilateria;Protostomia;  
 Spiralia;Lophotrochozoa;Mollusca;Bivalvia;Autobranchia;Heteroconchia;Euhe  
 terodonta;Imparidentia;Venerida;Veneroidea;Veneridae;Mercenaria;Mercenari  
 a mercenaria  
 UdeM00000026604 6596 110.9 UdeM00000026604 XP\_045193883.1 25.9 482  
 308 16 307 772 267 715 7.50E-21 110.9 6596 cellular  
 organisms;Eukaryota;Opisthokonta;Metazoa;Eumetazoa;Bilateria;Protostomia;  
 Spiralia;Lophotrochozoa;Mollusca;Bivalvia;Autobranchia;Heteroconchia;Euhe  
 terodonta;Imparidentia;Venerida;Veneroidea;Veneridae;Mercenaria;Mercenari  
 a mercenaria  
 UdeM00000026605 6565 142.5 UdeM00000026605 XP\_022337731.1 43.2 206  
 109 4 98 300 9 209 8.70E-31 142.5 6565 cellular  
 organisms;Eukaryota;Opisthokonta;Metazoa;Eumetazoa;Bilateria;Protostomia;  
 Spiralia;Lophotrochozoa;Mollusca;Bivalvia;Autobranchia;Pteriomorpha;Ostr  
 eida;Ostreoidea;Ostreidae;Crassostrea;Crassostrea virginica  
 UdeM00000026606 29159 306.2 UdeM00000026606 XP\_034322429.1 41.7 393  
 193 2 4 360 1 393 5.70E-80 306.2 29159 cellular  
 organisms;Eukaryota;Opisthokonta;Metazoa;Eumetazoa;Bilateria;Protostomia;  
 Spiralia;Lophotrochozoa;Mollusca;Bivalvia;Autobranchia;Pteriomorpha;Ostr  
 eida;Ostreoidea;Ostreidae;Crassostrea;Crassostrea gigas  
 UdeM00000026607 6596 116.7 UdeM00000026607 XP\_045196953.1 23.7 801  
 498 28 24 788 20 743 1.40E-22 116.7 6596 cellular  
 organisms;Eukaryota;Opisthokonta;Metazoa;Eumetazoa;Bilateria;Protostomia;  
 Spiralia;Lophotrochozoa;Mollusca;Bivalvia;Autobranchia;Heteroconchia;Euhe  
 terodonta;Imparidentia;Venerida;Veneroidea;Veneridae;Mercenaria;Mercenari  
 a mercenaria  
 UdeM00000026608 6596 120.9 UdeM00000026608 XP\_045193883.1 25.3 526  
 312 18 280 772 249 726 7.20E-24 120.9 6596 cellular  
 organisms;Eukaryota;Opisthokonta;Metazoa;Eumetazoa;Bilateria;Protostomia;

Spiralia;Lophotrochozoa;Mollusca;Bivalvia;Autobranchia;Heteroconchia;Euherodonta;Imparidentia;Venerida;Veneroidea;Veneridae;Mercenaria;Mercenaria mercenaria

UdeM00000026609 1735272 443.4 UdeM00000026609 XP\_041347902.1 54.1  
381 171 2 21 398 15 394 3.20E-121 443.4 1735272  
cellular

organisms;Eukaryota;Opisthokonta;Metazoa;Eumetazoa;Bilateria;Protostomia;Spiralia;Lophotrochozoa;Mollusca;Gastropoda;Neomphalina;Neomphaloidea;Peltospiridae;Gigantopelta;Gigantopelta aegis

UdeM00000026610 1735272 443.4 UdeM00000026610 XP\_041347902.1 54.1  
381 171 2 87 464 15 394 3.70E-121 443.4 1735272  
cellular

organisms;Eukaryota;Opisthokonta;Metazoa;Eumetazoa;Bilateria;Protostomia;Spiralia;Lophotrochozoa;Mollusca;Gastropoda;Neomphalina;Neomphaloidea;Peltospiridae;Gigantopelta;Gigantopelta aegis

UdeM00000044256 6500 90.1 UdeM00000044256 XP\_012944080.1 40.3 139  
80 3 62 199 306 442 3.50E-15 90.1 6500 cellular

organisms;Eukaryota;Opisthokonta;Metazoa;Eumetazoa;Bilateria;Protostomia;Spiralia;Lophotrochozoa;Mollusca;Gastropoda;Heterobranchia;Euthyneura;Tectipleura;Aplysiida;Aplysioidea;Aplysiidae;Aplysia;Aplysia californica

UdeM00000000120 6579 122.5 UdeM00000000120 XP\_033737835.1 36.6 164  
90 4 92 249 272 427 7.90E-25 122.5 6579 cellular

organisms;Eukaryota;Opisthokonta;Metazoa;Eumetazoa;Bilateria;Protostomia;Spiralia;Lophotrochozoa;Mollusca;Bivalvia;Autobranchia;Pteriormorphia;Pectinida;Pectinoidea;Pectinidae;Pecten;Pecten maximus

UdeM00000000121 6596 131 UdeM00000000121 XP\_045190986.1 43.2 155  
72 7 4 147 18 167 1.30E-27 131 6596 cellular

organisms;Eukaryota;Opisthokonta;Metazoa;Eumetazoa;Bilateria;Protostomia;Spiralia;Lophotrochozoa;Mollusca;Bivalvia;Autobranchia;Heteroconchia;Euherodonta;Imparidentia;Venerida;Veneroidea;Veneridae;Mercenaria;Mercenaria mercenaria

UdeM00000000122 6596 122.1 UdeM00000000122 XP\_045207896.1 43.1 130  
72 2 18 145 19 148 6.50E-25 122.1 6596 cellular

organisms;Eukaryota;Opisthokonta;Metazoa;Eumetazoa;Bilateria;Protostomia;Spiralia;Lophotrochozoa;Mollusca;Bivalvia;Autobranchia;Heteroconchia;Euherodonta;Imparidentia;Venerida;Veneroidea;Veneridae;Mercenaria;Mercenaria mercenaria

UdeM00000000123 29159 93.2 UdeM00000000123 XP\_034323727.1 45.1 102  
49 4 1 98 44 142 2.30E-16 93.2 29159 cellular

organisms;Eukaryota;Opisthokonta;Metazoa;Eumetazoa;Bilateria;Protostomia;Spiralia;Lophotrochozoa;Mollusca;Bivalvia;Autobranchia;Pteriormorphia;Ostreida;Ostreioidea;Ostreidae;Crassostrea;Crassostrea gigas

UdeM00000000124 6596 152.1 UdeM00000000124 XP\_045190714.1 27.5 459  
312 12 257 706 21 467 2.70E-33 152.1 6596 cellular

organisms;Eukaryota;Opisthokonta;Metazoa;Eumetazoa;Bilateria;Protostomia;Spiralia;Lophotrochozoa;Mollusca;Bivalvia;Autobranchia;Heteroconchia;Euherodonta;Imparidentia;Venerida;Veneroidea;Veneridae;Mercenaria;Mercenaria mercenaria

UdeM00000000125 6565 118.2 UdeM00000000125 XP\_022341277.1 34 197  
125 2 499 695 1516 1707 4.40E-23 118.2 6565 cellular

organisms;Eukaryota;Opisthokonta;Metazoa;Eumetazoa;Bilateria;Protostomia;Spiralia;Lophotrochozoa;Mollusca;Bivalvia;Autobranchia;Pteriormorphia;Ostreida;Ostreioidea;Ostreidae;Crassostrea;Crassostrea virginica

UdeM00000000127 1735272 79.3 UdeM00000000127 XP\_041379274.1 34.4  
 122 78 2 2 122 245 365 3.90E-12 79.3 1735272  
 cellular  
 organisms;Eukaryota;Opisthokonta;Metazoa;Eumetazoa;Bilateria;Protostomia;  
 Spiralia;Lophotrochozoa;Mollusca;Gastropoda;Neomphalina;Neomphaloidea;Pel  
 tospiridae;Gigantopelta;Gigantopelta aegis  
 UdeM00000000128 29159 114.4 UdeM00000000128 XP\_034329176.1 31.5 168  
 113 1 493 660 1350 1515 6.00E-22 114.4 29159 cellular  
 organisms;Eukaryota;Opisthokonta;Metazoa;Eumetazoa;Bilateria;Protostomia;  
 Spiralia;Lophotrochozoa;Mollusca;Bivalvia;Autobranchia;Pteriormorphia;Ostr  
 eida;Ostreoidea;Ostreidae;Crassostrea;Crassostrea gigas  
 UdeM00000000129 6596 130.6 UdeM00000000129 XP\_045167210.1 23.8 509  
 329 16 223 683 1029 1526 8.30E-27 130.6 6596 cellular  
 organisms;Eukaryota;Opisthokonta;Metazoa;Eumetazoa;Bilateria;Protostomia;  
 Spiralia;Lophotrochozoa;Mollusca;Bivalvia;Autobranchia;Heteroconchia;Euhe  
 terodonta;Imparidentia;Venerida;Veneroidea;Veneridae;Mercenaria;Mercenari  
 a mercenaria  
 UdeM00000000134 400727 67.8 UdeM00000000134 XP\_025111741.1 44  
 91 49 2 35 125 1 89 1.10E-08 67.8 400727  
 cellular  
 organisms;Eukaryota;Opisthokonta;Metazoa;Eumetazoa;Bilateria;Protostomia;  
 Spiralia;Lophotrochozoa;Mollusca;Gastropoda;Caenogastropoda;Architaeniogl  
 ossa;Ampullarioidea;Ampullariidae;Pomacea;Pomacea canaliculata  
 UdeM00000000135 6596 195.7 UdeM00000000135 XP\_045177779.1 38.3 303  
 165 5 1 282 97 398 8.20E-47 195.7 6596 cellular  
 organisms;Eukaryota;Opisthokonta;Metazoa;Eumetazoa;Bilateria;Protostomia;  
 Spiralia;Lophotrochozoa;Mollusca;Bivalvia;Autobranchia;Heteroconchia;Euhe  
 terodonta;Imparidentia;Venerida;Veneroidea;Veneridae;Mercenaria;Mercenari  
 a mercenaria  
 UdeM00000000136 6596 175.6 UdeM00000000136 XP\_045179269.1 47.2 193  
 101 1 2 193 262 454 2.90E-40 175.6 6596 cellular  
 organisms;Eukaryota;Opisthokonta;Metazoa;Eumetazoa;Bilateria;Protostomia;  
 Spiralia;Lophotrochozoa;Mollusca;Bivalvia;Autobranchia;Heteroconchia;Euhe  
 terodonta;Imparidentia;Venerida;Veneroidea;Veneridae;Mercenaria;Mercenari  
 a mercenaria  
 UdeM00000000140 29159 102.1 UdeM00000000140 XP\_011434892.2 34.6 243  
 130 7 53 278 33 263 1.20E-18 102.1 29159 cellular  
 organisms;Eukaryota;Opisthokonta;Metazoa;Eumetazoa;Bilateria;Protostomia;  
 Spiralia;Lophotrochozoa;Mollusca;Bivalvia;Autobranchia;Pteriormorphia;Ostr  
 eida;Ostreoidea;Ostreidae;Crassostrea;Crassostrea gigas  
 UdeM00000000141 6596 241.5 UdeM00000000141 XP\_045188127.1 54.8 219  
 88 3 9 219 11 226 1.00E-60 241.5 6596 cellular  
 organisms;Eukaryota;Opisthokonta;Metazoa;Eumetazoa;Bilateria;Protostomia;  
 Spiralia;Lophotrochozoa;Mollusca;Bivalvia;Autobranchia;Heteroconchia;Euhe  
 terodonta;Imparidentia;Venerida;Veneroidea;Veneridae;Mercenaria;Mercenari  
 a mercenaria  
 UdeM00000000142 6596 1149.8 UdeM00000000142 XP\_045190284.1 49.1  
 1149 565 11 229 1364 28 1169 0.00E+00 1149.8 6596  
 cellular  
 organisms;Eukaryota;Opisthokonta;Metazoa;Eumetazoa;Bilateria;Protostomia;  
 Spiralia;Lophotrochozoa;Mollusca;Bivalvia;Autobranchia;Heteroconchia;Euhe  
 terodonta;Imparidentia;Venerida;Veneroidea;Veneridae;Mercenaria;Mercenari  
 a mercenaria

UdeM00000000143 6573 255 UdeM00000000143 XP\_021378673.1 43.4 286  
 161 1 447 732 533 817 2.90E-64 255 6573 cellular  
 organisms;Eukaryota;Opisthokonta;Metazoa;Eumetazoa;Bilateria;Protostomia;  
 Spiralia;Lophotrochozoa;Mollusca;Bivalvia;Autobranhia;Pteriomorphia;Pect  
 inida;Pectinoidea;Pectinidae;Mizuhopecten;Mizuhopecten yessoensis  
 UdeM00000000144 6573 66.6 UdeM00000000144 XP\_021342257.1 39.7 78  
 45 1 25 102 29 104 2.20E-08 66.6 6573 cellular  
 organisms;Eukaryota;Opisthokonta;Metazoa;Eumetazoa;Bilateria;Protostomia;  
 Spiralia;Lophotrochozoa;Mollusca;Bivalvia;Autobranhia;Pteriomorphia;Pect  
 inida;Pectinoidea;Pectinidae;Mizuhopecten;Mizuhopecten yessoensis  
 UdeM00000000145 7574 267.7 UdeM00000000145 XP\_013412988.1 63.7 204  
 72 2 759 961 564 766 5.70E-68 267.7 7574 cellular  
 organisms;Eukaryota;Opisthokonta;Metazoa;Eumetazoa;Bilateria;Protostomia;  
 Spiralia;Lophotrochozoa;Brachiopoda;Linguliformea;Lingulata;Lingulida;Lin  
 guloidea;Lingulidae;Lingula;Lingula anatina  
 UdeM00000000146 6579 610.9 UdeM00000000146 XP\_033756814.1 57 551  
 199 6 1 536 1 528 1.50E-171 610.9 6579 cellular  
 organisms;Eukaryota;Opisthokonta;Metazoa;Eumetazoa;Bilateria;Protostomia;  
 Spiralia;Lophotrochozoa;Mollusca;Bivalvia;Autobranhia;Pteriomorphia;Pect  
 inida;Pectinoidea;Pectinidae;Pecten;Pecten maximus  
 UdeM00000000148 6596 486.1 UdeM00000000148 XP\_045188600.1 61.2 415  
 141 5 1 401 6 414 4.30E-134 486.1 6596 cellular  
 organisms;Eukaryota;Opisthokonta;Metazoa;Eumetazoa;Bilateria;Protostomia;  
 Spiralia;Lophotrochozoa;Mollusca;Bivalvia;Autobranhia;Heteroconchia;Euhe  
 terodonta;Imparidentia;Venerida;Veneroidea;Veneridae;Mercenaria;Mercenari  
 a mercenaria  
 UdeM00000000149 6573 120.6 UdeM00000000149 XP\_021371061.1 38.3 206  
 101 7 2 188 33 231 2.60E-24 120.6 6573 cellular  
 organisms;Eukaryota;Opisthokonta;Metazoa;Eumetazoa;Bilateria;Protostomia;  
 Spiralia;Lophotrochozoa;Mollusca;Bivalvia;Autobranhia;Pteriomorphia;Pect  
 inida;Pectinoidea;Pectinidae;Mizuhopecten;Mizuhopecten yessoensis  
 UdeM00000000150 37621 337.8 UdeM00000000150 XP\_014679849.1 33.4 587  
 168 3 1 364 31 617 1.70E-89 337.8 37621 cellular  
 organisms;Eukaryota;Opisthokonta;Metazoa;Eumetazoa;Bilateria;Protostomia;  
 Ecdysozoa;Scalidophora;Priapulida;Priapulimorpha;Priapulimorphida;Priapul  
 idae;Priapululus;Priapululus caudatus  
 UdeM00000000151 225164 439.5 UdeM00000000151 XP\_009062715.1 75.9  
 266 64 0 1 266 496 761 3.10E-120 439.5 225164  
 cellular  
 organisms;Eukaryota;Opisthokonta;Metazoa;Eumetazoa;Bilateria;Protostomia;  
 Spiralia;Lophotrochozoa;Mollusca;Gastropoda;Patellogastropoda;Lottioidae;  
 Lottiidae;Lottia;Lottia gigantea  
 UdeM00000000152 6579 168.7 UdeM00000000152 XP\_033757235.1 72.2 108  
 30 0 1 108 770 877 4.30E-39 168.7 6579 cellular  
 organisms;Eukaryota;Opisthokonta;Metazoa;Eumetazoa;Bilateria;Protostomia;  
 Spiralia;Lophotrochozoa;Mollusca;Bivalvia;Autobranhia;Pteriomorphia;Pect  
 inida;Pectinoidea;Pectinidae;Pecten;Pecten maximus  
 UdeM00000000154 45264 124.8 UdeM00000000154 XP\_044184037.1 36.6 194  
 106 5 97 273 171 364 1.70E-25 124.8 45264 cellular  
 organisms;Eukaryota;Opisthokonta;Metazoa;Eumetazoa;Cnidaria;Anthozoa;Hexa  
 corallia;Scleractinia;Astrocoeniina;Acroporidae;Acropora;Acropora  
 millepora  
 UdeM00000000156 1735272 713.4 UdeM00000000156 XP\_041370674.1 46  
 808 312 6 5 775 6 726 3.20E-202 713.4 1735272



cellular  
organisms;Eukaryota;Opisthokonta;Metazoa;Eumetazoa;Bilateria;Protostomia;  
Spiralia;Lophotrochozoa;Mollusca;Gastropoda;Neomphalina;Neomphaloidea;Pel  
tospiridae;Gigantopelta;Gigantopelta aegis  
UdeM00000000157 6596 216.1 UdeM00000000157 XP\_045190126.1 43 256  
145 1 1 256 5 259 1.10E-52 216.1 6596 cellular  
organisms;Eukaryota;Opisthokonta;Metazoa;Eumetazoa;Bilateria;Protostomia;  
Spiralia;Lophotrochozoa;Mollusca;Bivalvia;Autobranchia;Heteroconchia;Euhe  
terodonta;Imparidentia;Venerida;Veneroidea;Veneridae;Mercenaria;Mercenari  
a mercenaria  
UdeM00000000158 6596 148.7 UdeM00000000158 XP\_045189000.1 41.3 172  
100 1 76 247 43 213 1.00E-32 148.7 6596 cellular  
organisms;Eukaryota;Opisthokonta;Metazoa;Eumetazoa;Bilateria;Protostomia;  
Spiralia;Lophotrochozoa;Mollusca;Bivalvia;Autobranchia;Heteroconchia;Euhe  
terodonta;Imparidentia;Venerida;Veneroidea;Veneridae;Mercenaria;Mercenari  
a mercenaria  
UdeM00000000159 6596 69.3 UdeM00000000159 XP\_045188126.1 26.1 268  
150 11 15 249 2 254 8.80E-09 69.3 6596 cellular  
organisms;Eukaryota;Opisthokonta;Metazoa;Eumetazoa;Bilateria;Protostomia;  
Spiralia;Lophotrochozoa;Mollusca;Bivalvia;Autobranchia;Heteroconchia;Euhe  
terodonta;Imparidentia;Venerida;Veneroidea;Veneridae;Mercenaria;Mercenari  
a mercenaria  
UdeM00000000160 6596 729.6 UdeM00000000160 XP\_045190519.1 41.4 962  
526 18 2 941 78 1023 5.30E-207 729.6 6596 cellular  
organisms;Eukaryota;Opisthokonta;Metazoa;Eumetazoa;Bilateria;Protostomia;  
Spiralia;Lophotrochozoa;Mollusca;Bivalvia;Autobranchia;Heteroconchia;Euhe  
terodonta;Imparidentia;Venerida;Veneroidea;Veneridae;Mercenaria;Mercenari  
a mercenaria  
UdeM00000000161 6573 759.2 UdeM00000000161 XP\_021374599.1 38.7 1534  
788 35 2 1414 867 2368 9.30E-216 759.2 6573 cellular  
organisms;Eukaryota;Opisthokonta;Metazoa;Eumetazoa;Bilateria;Protostomia;  
Spiralia;Lophotrochozoa;Mollusca;Bivalvia;Autobranchia;Pteriomorphia;Pect  
inida;Pectinoidea;Pectinidae;Mizuhopecten;Mizuhopecten yessoensis  
UdeM00000000162 6573 774.6 UdeM00000000162 XP\_021374599.1 39 1534  
804 35 2 1436 867 2368 2.20E-220 774.6 6573 cellular  
organisms;Eukaryota;Opisthokonta;Metazoa;Eumetazoa;Bilateria;Protostomia;  
Spiralia;Lophotrochozoa;Mollusca;Bivalvia;Autobranchia;Pteriomorphia;Pect  
inida;Pectinoidea;Pectinidae;Mizuhopecten;Mizuhopecten yessoensis  
UdeM00000000163 6573 1051.2 UdeM00000000163 XP\_021374599.1 33.6  
2438 1257 51 63 2339 132 2368 1.90E-303 1051.2 6573  
cellular  
organisms;Eukaryota;Opisthokonta;Metazoa;Eumetazoa;Bilateria;Protostomia;  
Spiralia;Lophotrochozoa;Mollusca;Bivalvia;Autobranchia;Pteriomorphia;Pect  
inida;Pectinoidea;Pectinidae;Mizuhopecten;Mizuhopecten yessoensis  
UdeM00000000164 6573 1067 UdeM00000000164 XP\_021374599.1 33.8 2438  
1273 51 63 2361 132 2368 3.50E-308 1067 6573 cellular  
organisms;Eukaryota;Opisthokonta;Metazoa;Eumetazoa;Bilateria;Protostomia;  
Spiralia;Lophotrochozoa;Mollusca;Bivalvia;Autobranchia;Pteriomorphia;Pect  
inida;Pectinoidea;Pectinidae;Mizuhopecten;Mizuhopecten yessoensis  
UdeM00000000165 6573 755.7 UdeM00000000165 XP\_021374599.1 37.9 1534  
799 33 2 1414 867 2368 1.00E-214 755.7 6573 cellular  
organisms;Eukaryota;Opisthokonta;Metazoa;Eumetazoa;Bilateria;Protostomia;  
Spiralia;Lophotrochozoa;Mollusca;Bivalvia;Autobranchia;Pteriomorphia;Pect  
inida;Pectinoidea;Pectinidae;Mizuhopecten;Mizuhopecten yessoensis

UdeM00000000166 6596 409.1 UdeM00000000166 XP\_045190519.1 39.2 536  
 309 9 2 525 78 608 1.20E-110 409.1 6596 cellular  
 organisms;Eukaryota;Opisthokonta;Metazoa;Eumetazoa;Bilateria;Protostomia;  
 Spiralia;Lophotrochozoa;Mollusca;Bivalvia;Autobranchia;Heteroconchia;Euhe  
 terodonta;Imparidentia;Venerida;Veneroidea;Veneridae;Mercenaria;Mercenari  
 a mercenaria  
 UdeM00000000167 6596 570.1 UdeM00000000167 XP\_045190522.1 42.8 766  
 360 17 62 767 10 757 4.30E-159 570.1 6596 cellular  
 organisms;Eukaryota;Opisthokonta;Metazoa;Eumetazoa;Bilateria;Protostomia;  
 Spiralia;Lophotrochozoa;Mollusca;Bivalvia;Autobranchia;Heteroconchia;Euhe  
 terodonta;Imparidentia;Venerida;Veneroidea;Veneridae;Mercenaria;Mercenari  
 a mercenaria  
 UdeM00000000168 6596 602.1 UdeM00000000168 XP\_045190522.1 44.1 776  
 358 17 62 789 10 757 1.10E-168 602.1 6596 cellular  
 organisms;Eukaryota;Opisthokonta;Metazoa;Eumetazoa;Bilateria;Protostomia;  
 Spiralia;Lophotrochozoa;Mollusca;Bivalvia;Autobranchia;Heteroconchia;Euhe  
 terodonta;Imparidentia;Venerida;Veneroidea;Veneridae;Mercenaria;Mercenari  
 a mercenaria  
 UdeM00000000169 1735272 218 UdeM00000000169 XP\_041370453.1 22.3  
 1045 681 21 3519 4501 2045 3020 2.50E-52 218 1735272  
 cellular  
 organisms;Eukaryota;Opisthokonta;Metazoa;Eumetazoa;Bilateria;Protostomia;  
 Spiralia;Lophotrochozoa;Mollusca;Gastropoda;Neomphalina;Neomphaloidea;Pel  
 tospiridae;Gigantopelta;Gigantopelta aegis  
 UdeM00000000170 6596 296.2 UdeM00000000170 XP\_045188842.1 58.8 255  
 105 0 1 255 1 255 4.00E-77 296.2 6596 cellular  
 organisms;Eukaryota;Opisthokonta;Metazoa;Eumetazoa;Bilateria;Protostomia;  
 Spiralia;Lophotrochozoa;Mollusca;Bivalvia;Autobranchia;Heteroconchia;Euhe  
 terodonta;Imparidentia;Venerida;Veneroidea;Veneridae;Mercenaria;Mercenari  
 a mercenaria  
 UdeM00000000171 6596 197.6 UdeM00000000171 XP\_045188949.1 43.5 248  
 113 8 1 233 1 236 1.80E-47 197.6 6596 cellular  
 organisms;Eukaryota;Opisthokonta;Metazoa;Eumetazoa;Bilateria;Protostomia;  
 Spiralia;Lophotrochozoa;Mollusca;Bivalvia;Autobranchia;Heteroconchia;Euhe  
 terodonta;Imparidentia;Venerida;Veneroidea;Veneridae;Mercenaria;Mercenari  
 a mercenaria  
 UdeM00000000172 6596 339.7 UdeM00000000172 XP\_045169782.1 51.6 318  
 152 2 1 317 56 372 3.90E-90 339.7 6596 cellular  
 organisms;Eukaryota;Opisthokonta;Metazoa;Eumetazoa;Bilateria;Protostomia;  
 Spiralia;Lophotrochozoa;Mollusca;Bivalvia;Autobranchia;Heteroconchia;Euhe  
 terodonta;Imparidentia;Venerida;Veneroidea;Veneridae;Mercenaria;Mercenari  
 a mercenaria  
 UdeM00000000173 6565 77.4 UdeM00000000173 XP\_022288562.1 48.1 81  
 42 0 1 81 73 153 1.40E-11 77.4 6565 cellular  
 organisms;Eukaryota;Opisthokonta;Metazoa;Eumetazoa;Bilateria;Protostomia;  
 Spiralia;Lophotrochozoa;Mollusca;Bivalvia;Autobranchia;Pteriomorphia;Ostr  
 eida;Ostreoidea;Ostreidae;Crassostrea;Crassostrea virginica  
 UdeM00000000174 6596 1745.3 UdeM00000000174 XP\_045188338.1 58.4  
 1434 469 11 19 1327 62 1492 0.00E+00 1745.3 6596  
 cellular  
 organisms;Eukaryota;Opisthokonta;Metazoa;Eumetazoa;Bilateria;Protostomia;  
 Spiralia;Lophotrochozoa;Mollusca;Bivalvia;Autobranchia;Heteroconchia;Euhe  
 terodonta;Imparidentia;Venerida;Veneroidea;Veneridae;Mercenaria;Mercenari  
 a mercenaria

UdeM00000000175 6596 1887.8 UdeM00000000175 XP\_045188338.1 61.6  
1434 495 11 19 1400 62 1492 0.00E+00 1887.8 6596  
cellular

organisms;Eukaryota;Opisthokonta;Metazoa;Eumetazoa;Bilateria;Protostomia;  
Spiralia;Lophotrochozoa;Mollusca;Bivalvia;Autobranhia;Heteroconchia;Euhe  
terodonta;Imparidentia;Venerida;Veneroidea;Veneridae;Mercenaria;Mercenari  
a mercenaria

UdeM00000000176 6596 557.8 UdeM00000000176 XP\_045190636.1 49.3 552  
276 3 1 548 1 552 1.60E-155 557.8 6596 cellular

organisms;Eukaryota;Opisthokonta;Metazoa;Eumetazoa;Bilateria;Protostomia;  
Spiralia;Lophotrochozoa;Mollusca;Bivalvia;Autobranhia;Heteroconchia;Euhe  
terodonta;Imparidentia;Venerida;Veneroidea;Veneridae;Mercenaria;Mercenari  
a mercenaria

UdeM00000000186 29159 182.2 UdeM00000000186 XP\_034315954.1 69.8 126  
37 1 1 125 1077 1202 4.20E-43 182.2 29159 cellular

organisms;Eukaryota;Opisthokonta;Metazoa;Eumetazoa;Bilateria;Protostomia;  
Spiralia;Lophotrochozoa;Mollusca;Bivalvia;Autobranhia;Pteriormorphia;Ostr  
eida;Ostreoidea;Ostreidae;Crassostrea;Crassostrea gigas

UdeM00000000187 8364 73.9 UdeM00000000187 XP\_031762633.1 23.8 181  
138 0 5 185 128 308 2.30E-10 73.9 8364 cellular

organisms;Eukaryota;Opisthokonta;Metazoa;Eumetazoa;Bilateria;Deuterostomi  
a;Chordata;Craniata;Vertebrata;Gnathostomata;Teleostomi;Euteleostomi;Sarc  
opterygii;Dipnotetrapodomorpha;Tetrapoda;Amphibia;Batrachia;Anura;Pipoide  
a;Pipidae;Xenopodinae;Xenopus;Silurana;Xenopus tropicalis

UdeM00000000188 6596 746.1 UdeM00000000188 XP\_045189718.1 56.6 663  
229 11 19 630 4 658 3.60E-212 746.1 6596 cellular

organisms;Eukaryota;Opisthokonta;Metazoa;Eumetazoa;Bilateria;Protostomia;  
Spiralia;Lophotrochozoa;Mollusca;Bivalvia;Autobranhia;Heteroconchia;Euhe  
terodonta;Imparidentia;Venerida;Veneroidea;Veneridae;Mercenaria;Mercenari  
a mercenaria

UdeM00000000189 6596 216.9 UdeM00000000189 XP\_045190074.1 42.9 252  
140 2 2 250 27 277 3.20E-53 216.9 6596 cellular

organisms;Eukaryota;Opisthokonta;Metazoa;Eumetazoa;Bilateria;Protostomia;  
Spiralia;Lophotrochozoa;Mollusca;Bivalvia;Autobranhia;Heteroconchia;Euhe  
terodonta;Imparidentia;Venerida;Veneroidea;Veneridae;Mercenaria;Mercenari  
a mercenaria

UdeM00000000190 6596 597 UdeM00000000190 XP\_045188716.1 62.6 478  
176 2 1 477 5 480 2.10E-167 597 6596 cellular

organisms;Eukaryota;Opisthokonta;Metazoa;Eumetazoa;Bilateria;Protostomia;  
Spiralia;Lophotrochozoa;Mollusca;Bivalvia;Autobranhia;Heteroconchia;Euhe  
terodonta;Imparidentia;Venerida;Veneroidea;Veneridae;Mercenaria;Mercenari  
a mercenaria

UdeM00000000191 6596 275.8 UdeM00000000191 XP\_045189335.1 70.4 189  
55 1 264 452 275 462 1.20E-70 275.8 6596 cellular

organisms;Eukaryota;Opisthokonta;Metazoa;Eumetazoa;Bilateria;Protostomia;  
Spiralia;Lophotrochozoa;Mollusca;Bivalvia;Autobranhia;Heteroconchia;Euhe  
terodonta;Imparidentia;Venerida;Veneroidea;Veneridae;Mercenaria;Mercenari  
a mercenaria

UdeM00000000192 6596 2483 UdeM00000000192 XP\_045189335.1 51.6 2541  
867 25 1 2506 563 2776 0.00E+00 2483 6596 cellular

organisms;Eukaryota;Opisthokonta;Metazoa;Eumetazoa;Bilateria;Protostomia;  
Spiralia;Lophotrochozoa;Mollusca;Bivalvia;Autobranhia;Heteroconchia;Euhe  
terodonta;Imparidentia;Venerida;Veneroidea;Veneridae;Mercenaria;Mercenari  
a mercenaria

UdeM00000000193 6596 165.2 UdeM00000000193 XP\_045189334.1 76.8 99  
 23 0 11 109 281 379 5.00E-38 165.2 6596 cellular  
 organisms;Eukaryota;Opisthokonta;Metazoa;Eumetazoa;Bilateria;Protostomia;  
 Spiralia;Lophotrochozoa;Mollusca;Bivalvia;Autobranhia;Heteroconchia;Euhe  
 terodonta;Imparidentia;Venerida;Veneroidea;Veneridae;Mercenaria;Mercenari  
 a mercenaria  
 UdeM00000000194 6573 536.6 UdeM00000000194 XP\_021375404.1 66.5 376  
 125 1 1 375 13 388 2.70E-149 536.6 6573 cellular  
 organisms;Eukaryota;Opisthokonta;Metazoa;Eumetazoa;Bilateria;Protostomia;  
 Spiralia;Lophotrochozoa;Mollusca;Bivalvia;Autobranhia;Pteriormorphia;Pect  
 inida;Pectinoidea;Pectinidae;Mizuhopecten;Mizuhopecten yessoensis  
 UdeM00000000195 6596 527.3 UdeM00000000195 XP\_045188741.1 68.6 357  
 112 0 9 365 23 379 1.50E-146 527.3 6596 cellular  
 organisms;Eukaryota;Opisthokonta;Metazoa;Eumetazoa;Bilateria;Protostomia;  
 Spiralia;Lophotrochozoa;Mollusca;Bivalvia;Autobranhia;Heteroconchia;Euhe  
 terodonta;Imparidentia;Venerida;Veneroidea;Veneridae;Mercenaria;Mercenari  
 a mercenaria  
 UdeM00000000196 6573 731.5 UdeM00000000196 XP\_021375453.1 53.9 883  
 378 9 1 865 1 872 1.30E-207 731.5 6573 cellular  
 organisms;Eukaryota;Opisthokonta;Metazoa;Eumetazoa;Bilateria;Protostomia;  
 Spiralia;Lophotrochozoa;Mollusca;Bivalvia;Autobranhia;Pteriormorphia;Pect  
 inida;Pectinoidea;Pectinidae;Mizuhopecten;Mizuhopecten yessoensis  
 UdeM00000000197 6573 737.3 UdeM00000000197 XP\_021375453.1 54 881  
 378 8 1 863 1 872 2.30E-209 737.3 6573 cellular  
 organisms;Eukaryota;Opisthokonta;Metazoa;Eumetazoa;Bilateria;Protostomia;  
 Spiralia;Lophotrochozoa;Mollusca;Bivalvia;Autobranhia;Pteriormorphia;Pect  
 inida;Pectinoidea;Pectinidae;Mizuhopecten;Mizuhopecten yessoensis  
 UdeM00000000198 6573 363.6 UdeM00000000198 XP\_021375438.1 68.7 265  
 69 4 1 251 1 265 2.00E-97 363.6 6573 cellular  
 organisms;Eukaryota;Opisthokonta;Metazoa;Eumetazoa;Bilateria;Protostomia;  
 Spiralia;Lophotrochozoa;Mollusca;Bivalvia;Autobranhia;Pteriormorphia;Pect  
 inida;Pectinoidea;Pectinidae;Mizuhopecten;Mizuhopecten yessoensis  
 UdeM00000000200 6945 61.6 UdeM00000000200 XP\_042146199.1 27.5 222  
 144 5 72 280 14 231 2.00E-06 61.6 6945 cellular  
 organisms;Eukaryota;Opisthokonta;Metazoa;Eumetazoa;Bilateria;Protostomia;  
 Ecdysozoa;Panarthropoda;Arthropoda;Chelicerata;Arachnida;Acari;Parasitifo  
 rmes;Ixodida;Ixodoidea;Ixodidae;Ixodinae;Ixodes;Ixodes scapularis  
 UdeM00000000201 6412 719.9 UdeM00000000201 XP\_009017289.1 56.8 602  
 250 5 3 597 2 600 2.60E-204 719.9 6412 cellular  
 organisms;Eukaryota;Opisthokonta;Metazoa;Eumetazoa;Bilateria;Protostomia;  
 Spiralia;Lophotrochozoa;Annelida;Clitellata;Hirudinea;Rhynchobdellida;Glo  
 ssiphoniidae;Helobdella;Helobdella robusta  
 UdeM00000000202 6596 88.6 UdeM00000000202 XP\_045186970.1 20.9 617  
 394 15 25 564 46 645 2.80E-14 88.6 6596 cellular  
 organisms;Eukaryota;Opisthokonta;Metazoa;Eumetazoa;Bilateria;Protostomia;  
 Spiralia;Lophotrochozoa;Mollusca;Bivalvia;Autobranhia;Heteroconchia;Euhe  
 terodonta;Imparidentia;Venerida;Veneroidea;Veneridae;Mercenaria;Mercenari  
 a mercenaria  
 UdeM00000000203 6573 383.3 UdeM00000000203 XP\_021357827.1 59 354  
 122 6 1 346 6 344 7.50E-103 383.3 6573 cellular  
 organisms;Eukaryota;Opisthokonta;Metazoa;Eumetazoa;Bilateria;Protostomia;  
 Spiralia;Lophotrochozoa;Mollusca;Bivalvia;Autobranhia;Pteriormorphia;Pect  
 inida;Pectinoidea;Pectinidae;Mizuhopecten;Mizuhopecten yessoensis

UdeM00000000203 6573 56.2 UdeM00000000203 XP\_021357827.1 70.3 37  
 11 0 639 675 577 613 2.10E-04 56.2 6573 cellular  
 organisms;Eukaryota;Opisthokonta;Metazoa;Eumetazoa;Bilateria;Protostomia;  
 Spiralia;Lophotrochozoa;Mollusca;Bivalvia;Autobranchia;Pteriomorpha;Pect  
 inida;Pectinoidea;Pectinidae;Mizuhopecten;Mizuhopecten yessoensis  
 UdeM00000000204 6596 769.6 UdeM00000000204 XP\_045188984.1 44.2 1039  
 538 17 1 1019 1 1017 4.90E-219 769.6 6596 cellular  
 organisms;Eukaryota;Opisthokonta;Metazoa;Eumetazoa;Bilateria;Protostomia;  
 Spiralia;Lophotrochozoa;Mollusca;Bivalvia;Autobranchia;Heteroconchia;Euhe  
 terodonta;Imparidentia;Venerida;Veneroidea;Veneridae;Mercenaria;Mercenari  
 a mercenaria  
 UdeM00000000205 6596 767.3 UdeM00000000205 XP\_045188984.1 44.3 1039  
 536 18 1 1018 1 1017 2.40E-218 767.3 6596 cellular  
 organisms;Eukaryota;Opisthokonta;Metazoa;Eumetazoa;Bilateria;Protostomia;  
 Spiralia;Lophotrochozoa;Mollusca;Bivalvia;Autobranchia;Heteroconchia;Euhe  
 terodonta;Imparidentia;Venerida;Veneroidea;Veneridae;Mercenaria;Mercenari  
 a mercenaria  
 UdeM00000000206 37653 379 UdeM00000000206 XP\_014789268.1 82 222  
 40 0 1 222 1 222 4.20E-102 379 37653 cellular  
 organisms;Eukaryota;Opisthokonta;Metazoa;Eumetazoa;Bilateria;Protostomia;  
 Spiralia;Lophotrochozoa;Mollusca;Cephalopoda;Coleoidea;Octopodiformes;Oct  
 opoda;Incirrata;Octopodidae;Octopus;Octopus bimaculoides  
 UdeM00000000212 6573 369.8 UdeM00000000212 XP\_021371859.1 42.6 479  
 241 12 212 676 366 824 8.00E-99 369.8 6573 cellular  
 organisms;Eukaryota;Opisthokonta;Metazoa;Eumetazoa;Bilateria;Protostomia;  
 Spiralia;Lophotrochozoa;Mollusca;Bivalvia;Autobranchia;Pteriomorpha;Pect  
 inida;Pectinoidea;Pectinidae;Mizuhopecten;Mizuhopecten yessoensis  
 UdeM00000000214 6596 491.9 UdeM00000000214 XP\_045190692.1 51.7 491  
 224 4 22 508 7 488 1.20E-135 491.9 6596 cellular  
 organisms;Eukaryota;Opisthokonta;Metazoa;Eumetazoa;Bilateria;Protostomia;  
 Spiralia;Lophotrochozoa;Mollusca;Bivalvia;Autobranchia;Heteroconchia;Euhe  
 terodonta;Imparidentia;Venerida;Veneroidea;Veneridae;Mercenaria;Mercenari  
 a mercenaria  
 UdeM00000000216 29159 532.3 UdeM00000000216 XP\_034322046.1 53.2 521  
 217 6 1 495 151 670 6.40E-148 532.3 29159 cellular  
 organisms;Eukaryota;Opisthokonta;Metazoa;Eumetazoa;Bilateria;Protostomia;  
 Spiralia;Lophotrochozoa;Mollusca;Bivalvia;Autobranchia;Pteriomorpha;Ostr  
 eida;Ostreoidea;Ostreidae;Crassostrea;Crassostrea gigas  
 UdeM00000000215 29159 543.1 UdeM00000000215 XP\_034322046.1 51.8 568  
 244 9 51 590 105 670 4.30E-151 543.1 29159 cellular  
 organisms;Eukaryota;Opisthokonta;Metazoa;Eumetazoa;Bilateria;Protostomia;  
 Spiralia;Lophotrochozoa;Mollusca;Bivalvia;Autobranchia;Pteriomorpha;Ostr  
 eida;Ostreoidea;Ostreidae;Crassostrea;Crassostrea gigas  
 UdeM00000000217 6596 63.2 UdeM00000000217 XP\_045190692.1 43.4 76  
 43 0 19 94 524 599 2.10E-07 63.2 6596 cellular  
 organisms;Eukaryota;Opisthokonta;Metazoa;Eumetazoa;Bilateria;Protostomia;  
 Spiralia;Lophotrochozoa;Mollusca;Bivalvia;Autobranchia;Heteroconchia;Euhe  
 terodonta;Imparidentia;Venerida;Veneroidea;Veneridae;Mercenaria;Mercenari  
 a mercenaria  
 UdeM00000000218 6596 175.6 UdeM00000000218 XP\_045189593.1 78.4 111  
 24 0 59 169 20 130 5.20E-41 175.6 6596 cellular  
 organisms;Eukaryota;Opisthokonta;Metazoa;Eumetazoa;Bilateria;Protostomia;  
 Spiralia;Lophotrochozoa;Mollusca;Bivalvia;Autobranchia;Heteroconchia;Euhe

terodonta;Imparidentia;Venerida;Veneroidea;Veneridae;Mercenaria;Mercenaria mercenaria  
 UdeM00000000219 6596 249.2 UdeM00000000219 XP\_045189593.1 54.3 254  
 95 3 1 254 115 347 5.80E-63 249.2 6596 cellular  
 organisms;Eukaryota;Opisthokonta;Metazoa;Eumetazoa;Bilateria;Protostomia;  
 Spiralia;Lophotrochozoa;Mollusca;Bivalvia;Autobranhia;Heteroconchia;Euhe  
 terodonta;Imparidentia;Venerida;Veneroidea;Veneridae;Mercenaria;Mercenari  
 a mercenaria  
 UdeM00000000220 6596 894.8 UdeM00000000220 XP\_045189593.1 77.7 588  
 117 4 1 574 365 952 5.70E-257 894.8 6596 cellular  
 organisms;Eukaryota;Opisthokonta;Metazoa;Eumetazoa;Bilateria;Protostomia;  
 Spiralia;Lophotrochozoa;Mollusca;Bivalvia;Autobranhia;Heteroconchia;Euhe  
 terodonta;Imparidentia;Venerida;Veneroidea;Veneridae;Mercenaria;Mercenari  
 a mercenaria  
 UdeM00000000221 6596 540.8 UdeM00000000221 XP\_045189586.1 75.4 345  
 85 0 1 345 1 345 1.30E-150 540.8 6596 cellular  
 organisms;Eukaryota;Opisthokonta;Metazoa;Eumetazoa;Bilateria;Protostomia;  
 Spiralia;Lophotrochozoa;Mollusca;Bivalvia;Autobranhia;Heteroconchia;Euhe  
 terodonta;Imparidentia;Venerida;Veneroidea;Veneridae;Mercenaria;Mercenari  
 a mercenaria  
 UdeM00000000222 6573 266.2 UdeM00000000222 XP\_021372969.1 72.2 176  
 49 0 227 402 221 396 7.00E-68 266.2 6573 cellular  
 organisms;Eukaryota;Opisthokonta;Metazoa;Eumetazoa;Bilateria;Protostomia;  
 Spiralia;Lophotrochozoa;Mollusca;Bivalvia;Autobranhia;Pteriormorphia;Pect  
 inida;Pectinoidea;Pectinidae;Mizuhopecten;Mizuhopecten yessoensis  
 UdeM00000000224 6565 107.1 UdeM00000000224 XP\_022338516.1 62.8 78  
 29 0 1 78 1 78 1.10E-20 107.1 6565 cellular  
 organisms;Eukaryota;Opisthokonta;Metazoa;Eumetazoa;Bilateria;Protostomia;  
 Spiralia;Lophotrochozoa;Mollusca;Bivalvia;Autobranhia;Pteriormorphia;Ostr  
 eida;Ostreoidea;Ostreidae;Crassostrea;Crassostrea virginica  
 UdeM00000000223 6596 812.4 UdeM00000000223 XP\_045189040.1 73.8 511  
 130 3 1 511 1 507 3.40E-232 812.4 6596 cellular  
 organisms;Eukaryota;Opisthokonta;Metazoa;Eumetazoa;Bilateria;Protostomia;  
 Spiralia;Lophotrochozoa;Mollusca;Bivalvia;Autobranhia;Heteroconchia;Euhe  
 terodonta;Imparidentia;Venerida;Veneroidea;Veneridae;Mercenaria;Mercenari  
 a mercenaria  
 UdeM00000000225 1735272 231.5 UdeM00000000225 XP\_041379319.1 50.2  
 215 85 3 81 275 710 922 1.30E-57 231.5 1735272  
 cellular  
 organisms;Eukaryota;Opisthokonta;Metazoa;Eumetazoa;Bilateria;Protostomia;  
 Spiralia;Lophotrochozoa;Mollusca;Gastropoda;Neomphalina;Neomphaloidea;Pel  
 tospiridae;Gigantopelta;Gigantopelta aegis  
 UdeM00000000226 6596 1245 UdeM00000000226 XP\_045189040.1 75.6 800  
 188 5 9 806 504 1298 0.00E+00 1245 6596 cellular  
 organisms;Eukaryota;Opisthokonta;Metazoa;Eumetazoa;Bilateria;Protostomia;  
 Spiralia;Lophotrochozoa;Mollusca;Bivalvia;Autobranhia;Heteroconchia;Euhe  
 terodonta;Imparidentia;Venerida;Veneroidea;Veneridae;Mercenaria;Mercenari  
 a mercenaria  
 UdeM00000000227 6573 324.3 UdeM00000000227 XP\_021361181.1 65.8 222  
 74 1 4 223 5 226 1.20E-85 324.3 6573 cellular  
 organisms;Eukaryota;Opisthokonta;Metazoa;Eumetazoa;Bilateria;Protostomia;  
 Spiralia;Lophotrochozoa;Mollusca;Bivalvia;Autobranhia;Pteriormorphia;Pect  
 inida;Pectinoidea;Pectinidae;Mizuhopecten;Mizuhopecten yessoensis

UdeM00000000228 6596 266.2 UdeM00000000228 XP\_045189478.1 57.5 221  
 94 0 1 221 1 221 3.80E-68 266.2 6596 cellular  
 organisms;Eukaryota;Opisthokonta;Metazoa;Eumetazoa;Bilateria;Protostomia;  
 Spiralia;Lophotrochozoa;Mollusca;Bivalvia;Autobranhia;Heteroconchia;Euhe  
 terodonta;Imparidentia;Venerida;Veneroidea;Veneridae;Mercenaria;Mercenari  
 a mercenaria  
 UdeM00000000230 6596 353.6 UdeM00000000230 XP\_045190232.1 46.4 414  
 168 3 92 503 12 373 4.30E-94 353.6 6596 cellular  
 organisms;Eukaryota;Opisthokonta;Metazoa;Eumetazoa;Bilateria;Protostomia;  
 Spiralia;Lophotrochozoa;Mollusca;Bivalvia;Autobranhia;Heteroconchia;Euhe  
 terodonta;Imparidentia;Venerida;Veneroidea;Veneridae;Mercenaria;Mercenari  
 a mercenaria  
 UdeM00000000231 29159 439.9 UdeM00000000231 XP\_011455096.2 81.2 250  
 47 0 1 250 1 250 2.20E-120 439.9 29159 cellular  
 organisms;Eukaryota;Opisthokonta;Metazoa;Eumetazoa;Bilateria;Protostomia;  
 Spiralia;Lophotrochozoa;Mollusca;Bivalvia;Autobranhia;Pteriormorphia;Ostr  
 eida;Ostreoidea;Ostreidae;Crassostrea;Crassostrea gigas  
 UdeM00000000232 6579 650.2 UdeM00000000232 XP\_033757668.1 49 647  
 322 5 97 737 66 710 3.30E-183 650.2 6579 cellular  
 organisms;Eukaryota;Opisthokonta;Metazoa;Eumetazoa;Bilateria;Protostomia;  
 Spiralia;Lophotrochozoa;Mollusca;Bivalvia;Autobranhia;Pteriormorphia;Pect  
 inida;Pectinoidea;Pectinidae;Pecten;Pecten maximus  
 UdeM00000000233 6596 255.8 UdeM00000000233 XP\_045182239.1 50.2 247  
 116 5 1 243 407 650 6.40E-65 255.8 6596 cellular  
 organisms;Eukaryota;Opisthokonta;Metazoa;Eumetazoa;Bilateria;Protostomia;  
 Spiralia;Lophotrochozoa;Mollusca;Bivalvia;Autobranhia;Heteroconchia;Euhe  
 terodonta;Imparidentia;Venerida;Veneroidea;Veneridae;Mercenaria;Mercenari  
 a mercenaria  
 UdeM00000000234 6596 380.9 UdeM00000000234 XP\_045183048.1 59 315  
 125 2 27 339 31 343 1.80E-102 380.9 6596 cellular  
 organisms;Eukaryota;Opisthokonta;Metazoa;Eumetazoa;Bilateria;Protostomia;  
 Spiralia;Lophotrochozoa;Mollusca;Bivalvia;Autobranhia;Heteroconchia;Euhe  
 terodonta;Imparidentia;Venerida;Veneroidea;Veneridae;Mercenaria;Mercenari  
 a mercenaria  
 UdeM00000000235 6596 787.3 UdeM00000000235 XP\_045188478.1 53.5 694  
 307 4 34 713 34 725 1.60E-224 787.3 6596 cellular  
 organisms;Eukaryota;Opisthokonta;Metazoa;Eumetazoa;Bilateria;Protostomia;  
 Spiralia;Lophotrochozoa;Mollusca;Bivalvia;Autobranhia;Heteroconchia;Euhe  
 terodonta;Imparidentia;Venerida;Veneroidea;Veneridae;Mercenaria;Mercenari  
 a mercenaria  
 UdeM00000000236 6596 647.9 UdeM00000000236 XP\_045188478.1 44.7 750  
 322 5 34 769 34 704 1.60E-182 647.9 6596 cellular  
 organisms;Eukaryota;Opisthokonta;Metazoa;Eumetazoa;Bilateria;Protostomia;  
 Spiralia;Lophotrochozoa;Mollusca;Bivalvia;Autobranhia;Heteroconchia;Euhe  
 terodonta;Imparidentia;Venerida;Veneroidea;Veneridae;Mercenaria;Mercenari  
 a mercenaria  
 UdeM00000000237 6596 796.6 UdeM00000000237 XP\_045188478.1 53.6 694  
 306 4 34 713 34 725 2.60E-227 796.6 6596 cellular  
 organisms;Eukaryota;Opisthokonta;Metazoa;Eumetazoa;Bilateria;Protostomia;  
 Spiralia;Lophotrochozoa;Mollusca;Bivalvia;Autobranhia;Heteroconchia;Euhe  
 terodonta;Imparidentia;Venerida;Veneroidea;Veneridae;Mercenaria;Mercenari  
 a mercenaria  
 UdeM00000000238 6596 176 UdeM00000000238 XP\_045188478.1 69.4 108  
 33 0 14 121 618 725 2.90E-41 176 6596 cellular

organisms;Eukaryota;Opisthokonta;Metazoa;Eumetazoa;Bilateria;Protostomia;Spiralia;Lophotrochozoa;Mollusca;Bivalvia;Autobranchia;Heteroconchia;Euherodonta;Imparidentia;Venerida;Veneroidea;Veneridae;Mercenaria;Mercenaria mercenaria

UdeM00000000239 6596 629.8 UdeM00000000239 XP\_045188478.1 68.1 417  
133 0 1 417 188 604 2.50E-177 629.8 6596 cellular

organisms;Eukaryota;Opisthokonta;Metazoa;Eumetazoa;Bilateria;Protostomia;Spiralia;Lophotrochozoa;Mollusca;Bivalvia;Autobranchia;Heteroconchia;Euherodonta;Imparidentia;Venerida;Veneroidea;Veneridae;Mercenaria;Mercenaria mercenaria

UdeM00000000240 6596 192.2 UdeM00000000240 XP\_045190811.1 56.9 167  
69 1 53 219 26 189 7.70E-46 192.2 6596 cellular

organisms;Eukaryota;Opisthokonta;Metazoa;Eumetazoa;Bilateria;Protostomia;Spiralia;Lophotrochozoa;Mollusca;Bivalvia;Autobranchia;Heteroconchia;Euherodonta;Imparidentia;Venerida;Veneroidea;Veneridae;Mercenaria;Mercenaria mercenaria

UdeM00000000242 6596 287.3 UdeM00000000242 XP\_045188575.1 80.7 218  
40 1 1 216 1 218 1.60E-74 287.3 6596 cellular

organisms;Eukaryota;Opisthokonta;Metazoa;Eumetazoa;Bilateria;Protostomia;Spiralia;Lophotrochozoa;Mollusca;Bivalvia;Autobranchia;Heteroconchia;Euherodonta;Imparidentia;Venerida;Veneroidea;Veneridae;Mercenaria;Mercenaria mercenaria

UdeM00000000243 6087 72.8 UdeM00000000243 XP\_012563759.1 32 147  
90 4 44 180 199 345 5.60E-10 72.8 6087 cellular

organisms;Eukaryota;Opisthokonta;Metazoa;Eumetazoa;Cnidaria;Hydrozoa;Hydrozoa;Anthoathecata;Aplanulata;Hydridae;Hydra;Hydra vulgaris

UdeM00000000244 6596 770.8 UdeM00000000244 XP\_045156491.1 46.2 900  
413 9 3 835 1347 2242 1.80E-219 770.8 6596 cellular

organisms;Eukaryota;Opisthokonta;Metazoa;Eumetazoa;Bilateria;Protostomia;Spiralia;Lophotrochozoa;Mollusca;Bivalvia;Autobranchia;Heteroconchia;Euherodonta;Imparidentia;Venerida;Veneroidea;Veneridae;Mercenaria;Mercenaria mercenaria

UdeM00000000245 6596 97.1 UdeM00000000245 XP\_045190849.1 25.6 293  
192 7 45 328 101 376 4.70E-17 97.1 6596 cellular

organisms;Eukaryota;Opisthokonta;Metazoa;Eumetazoa;Bilateria;Protostomia;Spiralia;Lophotrochozoa;Mollusca;Bivalvia;Autobranchia;Heteroconchia;Euherodonta;Imparidentia;Venerida;Veneroidea;Veneridae;Mercenaria;Mercenaria mercenaria

UdeM00000000246 6596 129.4 UdeM00000000246 XP\_045190849.1 25.3 360  
231 10 17 358 50 389 9.10E-27 129.4 6596 cellular

organisms;Eukaryota;Opisthokonta;Metazoa;Eumetazoa;Bilateria;Protostomia;Spiralia;Lophotrochozoa;Mollusca;Bivalvia;Autobranchia;Heteroconchia;Euherodonta;Imparidentia;Venerida;Veneroidea;Veneridae;Mercenaria;Mercenaria mercenaria

UdeM00000000247 2607531 587.8 UdeM00000000247 XP\_029645267.1 78.8  
359 75 1 1 358 15 373 1.20E-164 587.8 2607531  
cellular

organisms;Eukaryota;Opisthokonta;Metazoa;Eumetazoa;Bilateria;Protostomia;Spiralia;Lophotrochozoa;Mollusca;Cephalopoda;Coleoidea;Octopodiformes;Octopoda;Incirrata;Octopodidae;Octopus;Octopus sinensis

UdeM00000000248 6565 522.3 UdeM00000000248 XP\_022345866.1 66.3 380  
117 4 2 380 3 372 5.10E-145 522.3 6565 cellular

organisms;Eukaryota;Opisthokonta;Metazoa;Eumetazoa;Bilateria;Protostomia;



Spiralia; Lophotrochozoa; Mollusca; Bivalvia; Autobranchia; Pteriomorpha; Ostr  
eida; Ostreidae; Crassostrea; Crassostrea virginica  
UdeM00000000250 6565 322 UdeM00000000250 XP\_022345866.1 59.4 266  
98 3 2 267 3 258 7.30E-85 322 6565 cellular  
organisms; Eukaryota; Opisthokonta; Metazoa; Eumetazoa; Bilateria; Protostomia;  
Spiralia; Lophotrochozoa; Mollusca; Bivalvia; Autobranchia; Pteriomorpha; Ostr  
eida; Ostreidae; Crassostrea; Crassostrea virginica  
UdeM00000000249 6565 458.8 UdeM00000000249 XP\_022345866.1 59.2 380  
144 4 2 380 3 372 6.90E-126 458.8 6565 cellular  
organisms; Eukaryota; Opisthokonta; Metazoa; Eumetazoa; Bilateria; Protostomia;  
Spiralia; Lophotrochozoa; Mollusca; Bivalvia; Autobranchia; Pteriomorpha; Ostr  
eida; Ostreidae; Crassostrea; Crassostrea virginica  
UdeM00000000251 400727 133.7 UdeM00000000251 XP\_025095375.1 78.9  
76 16 0 10 85 315 390 1.20E-28 133.7 400727  
cellular  
organisms; Eukaryota; Opisthokonta; Metazoa; Eumetazoa; Bilateria; Protostomia;  
Spiralia; Lophotrochozoa; Mollusca; Gastropoda; Caenogastropoda; Architaeniogl  
ossa; Ampullarioidea; Ampullariidae; Pomacea; Pomacea canaliculata  
UdeM00000000252 29159 461.1 UdeM00000000252 XP\_034328205.1 62.2 362  
129 3 57 418 19 372 1.50E-126 461.1 29159 cellular  
organisms; Eukaryota; Opisthokonta; Metazoa; Eumetazoa; Bilateria; Protostomia;  
Spiralia; Lophotrochozoa; Mollusca; Bivalvia; Autobranchia; Pteriomorpha; Ostr  
eida; Ostreidae; Crassostrea; Crassostrea gigas  
UdeM00000000253 29159 458.4 UdeM00000000253 XP\_034328205.1 61.6 362  
131 3 31 392 19 372 9.30E-126 458.4 29159 cellular  
organisms; Eukaryota; Opisthokonta; Metazoa; Eumetazoa; Bilateria; Protostomia;  
Spiralia; Lophotrochozoa; Mollusca; Bivalvia; Autobranchia; Pteriomorpha; Ostr  
eida; Ostreidae; Crassostrea; Crassostrea gigas  
UdeM00000000255 1735272 361.3 UdeM00000000255 XP\_041369564.1 65.5  
293 97 3 30 319 52 343 1.40E-96 361.3 1735272  
cellular  
organisms; Eukaryota; Opisthokonta; Metazoa; Eumetazoa; Bilateria; Protostomia;  
Spiralia; Lophotrochozoa; Mollusca; Gastropoda; Neomphalina; Neomphaloidea; Pel  
tospiridae; Gigantopelta; Gigantopelta aegis  
UdeM00000000256 1735272 62.8 UdeM00000000256 XP\_041369564.1 63  
46 17 0 1 46 369 414 5.00E-07 62.8 1735272  
cellular  
organisms; Eukaryota; Opisthokonta; Metazoa; Eumetazoa; Bilateria; Protostomia;  
Spiralia; Lophotrochozoa; Mollusca; Gastropoda; Neomphalina; Neomphaloidea; Pel  
tospiridae; Gigantopelta; Gigantopelta aegis  
UdeM00000000257 6579 383.6 UdeM00000000257 XP\_033757257.1 51.7 350  
156 3 33 382 25 361 2.90E-103 383.6 6579 cellular  
organisms; Eukaryota; Opisthokonta; Metazoa; Eumetazoa; Bilateria; Protostomia;  
Spiralia; Lophotrochozoa; Mollusca; Bivalvia; Autobranchia; Pteriomorpha; Pect  
inida; Pectinoidea; Pectinidae; Pecten; Pecten maximus  
UdeM00000000258 6565 208 UdeM00000000258 XP\_022289157.1 83.5 133  
22 0 1 133 1 133 7.50E-51 208 6565 cellular  
organisms; Eukaryota; Opisthokonta; Metazoa; Eumetazoa; Bilateria; Protostomia;  
Spiralia; Lophotrochozoa; Mollusca; Bivalvia; Autobranchia; Pteriomorpha; Ostr  
eida; Ostreidae; Crassostrea; Crassostrea virginica  
UdeM00000000259 6596 298.1 UdeM00000000259 XP\_045188978.1 39.2 495  
243 11 1 453 133 611 2.80E-77 298.1 6596 cellular  
organisms; Eukaryota; Opisthokonta; Metazoa; Eumetazoa; Bilateria; Protostomia;  
Spiralia; Lophotrochozoa; Mollusca; Bivalvia; Autobranchia; Heteroconchia; Eue

terodonta;Imparidentia;Venerida;Veneroidea;Veneridae;Mercenaria;Mercenaria mercenaria  
 UdeM00000000260 6596 120.6 UdeM00000000260 XP\_045188227.1 57.4 115  
 44 2 147 256 102 216 3.00E-24 120.6 6596 cellular  
 organisms;Eukaryota;Opisthokonta;Metazoa;Eumetazoa;Bilateria;Protostomia;  
 Spiralia;Lophotrochozoa;Mollusca;Bivalvia;Autobranchia;Heteroconchia;Euheterodonta;Imparidentia;Venerida;Veneroidea;Veneridae;Mercenaria;Mercenaria mercenaria  
 UdeM00000000261 6573 214.2 UdeM00000000261 XP\_021371925.1 51.7 176  
 85 0 27 202 26 201 1.60E-52 214.2 6573 cellular  
 organisms;Eukaryota;Opisthokonta;Metazoa;Eumetazoa;Bilateria;Protostomia;  
 Spiralia;Lophotrochozoa;Mollusca;Bivalvia;Autobranchia;Pteriormorphia;Pectinida;Pectinoidea;Pectinidae;Mizuhopecten;Mizuhopecten yessoensis  
 UdeM00000000262 29159 256.1 UdeM00000000262 XP\_034328907.1 60.6 208  
 82 0 1 208 406 613 3.90E-65 256.1 29159 cellular  
 organisms;Eukaryota;Opisthokonta;Metazoa;Eumetazoa;Bilateria;Protostomia;  
 Spiralia;Lophotrochozoa;Mollusca;Bivalvia;Autobranchia;Pteriormorphia;Ostreida;Ostreoidea;Ostreidae;Crassostrea;Crassostrea gigas  
 UdeM00000000263 6565 259.2 UdeM00000000263 XP\_022288732.1 50.6 269  
 109 5 5 272 149 394 5.80E-66 259.2 6565 cellular  
 organisms;Eukaryota;Opisthokonta;Metazoa;Eumetazoa;Bilateria;Protostomia;  
 Spiralia;Lophotrochozoa;Mollusca;Bivalvia;Autobranchia;Pteriormorphia;Ostreida;Ostreoidea;Ostreidae;Crassostrea;Crassostrea virginica  
 UdeM00000000264 6565 204.9 UdeM00000000264 XP\_022288732.1 48.3 230  
 95 5 5 233 149 355 1.20E-49 204.9 6565 cellular  
 organisms;Eukaryota;Opisthokonta;Metazoa;Eumetazoa;Bilateria;Protostomia;  
 Spiralia;Lophotrochozoa;Mollusca;Bivalvia;Autobranchia;Pteriormorphia;Ostreida;Ostreoidea;Ostreidae;Crassostrea;Crassostrea virginica  
 UdeM00000000265 7574 208 UdeM00000000265 XP\_013406546.1 62.8 145  
 52 1 1 145 1 143 8.20E-51 208 7574 cellular  
 organisms;Eukaryota;Opisthokonta;Metazoa;Eumetazoa;Bilateria;Protostomia;  
 Spiralia;Lophotrochozoa;Brachiopoda;Linguliformea;Lingulata;Lingulida;Linguloidea;Lingulidae;Lingula;Lingula anatina  
 UdeM00000000266 6596 447.6 UdeM00000000266 XP\_045191015.1 65.1 350  
 118 2 33 380 27 374 1.70E-122 447.6 6596 cellular  
 organisms;Eukaryota;Opisthokonta;Metazoa;Eumetazoa;Bilateria;Protostomia;  
 Spiralia;Lophotrochozoa;Mollusca;Bivalvia;Autobranchia;Heteroconchia;Euheterodonta;Imparidentia;Venerida;Veneroidea;Veneridae;Mercenaria;Mercenaria mercenaria  
 UdeM000000033660 6596 82.4 UdeM000000033660 XP\_045188177.1 53.5 71  
 31 1 112 180 58 128 6.40E-13 82.4 6596 cellular  
 organisms;Eukaryota;Opisthokonta;Metazoa;Eumetazoa;Bilateria;Protostomia;  
 Spiralia;Lophotrochozoa;Mollusca;Bivalvia;Autobranchia;Heteroconchia;Euheterodonta;Imparidentia;Venerida;Veneroidea;Veneridae;Mercenaria;Mercenaria mercenaria  
 UdeM000000033662 50429 161 UdeM000000033662 XP\_022802642.1 71.7 99  
 28 0 1 99 1 99 8.00E-37 161 50429 cellular  
 organisms;Eukaryota;Opisthokonta;Metazoa;Eumetazoa;Cnidaria;Anthozoa;Hexacorallia;Scleractinia;Astrocoeniina;Pocilloporidae;Stylophora;Stylophora pistillata  
 UdeM000000033663 6565 93.6 UdeM000000033663 XP\_022303603.1 34.1 176  
 106 5 13 187 11 177 3.10E-16 93.6 6565 cellular  
 organisms;Eukaryota;Opisthokonta;Metazoa;Eumetazoa;Bilateria;Protostomia;

Spiralia;Lophotrochozoa;Mollusca;Bivalvia;Autobranchia;Pteriormorphia;Ostr  
 eida;Ostreoidea;Ostreidae;Crassostrea;Crassostrea virginica  
 UdeM00000033664 6596 154.8 UdeM00000033664 XP\_045189084.1 33.5 266  
 148 7 20 282 1763 2002 2.80E-34 154.8 6596 cellular  
 organisms;Eukaryota;Opisthokonta;Metazoa;Eumetazoa;Bilateria;Protostomia;  
 Spiralia;Lophotrochozoa;Mollusca;Bivalvia;Autobranchia;Heteroconchia;Euhe  
 terodonta;Imparidentia;Venerida;Veneroidea;Veneridae;Mercenaria;Mercenari  
 a mercenaria  
 UdeM00000033665 6596 83.2 UdeM00000033665 XP\_045179269.1 39 105  
 61 1 323 424 225 329 8.90E-13 83.2 6596 cellular  
 organisms;Eukaryota;Opisthokonta;Metazoa;Eumetazoa;Bilateria;Protostomia;  
 Spiralia;Lophotrochozoa;Mollusca;Bivalvia;Autobranchia;Heteroconchia;Euhe  
 terodonta;Imparidentia;Venerida;Veneroidea;Veneridae;Mercenaria;Mercenari  
 a mercenaria  
 UdeM00000033666 6596 193.7 UdeM00000033666 XP\_045177778.1 36.8 329  
 171 7 1 327 405 698 3.80E-46 193.7 6596 cellular  
 organisms;Eukaryota;Opisthokonta;Metazoa;Eumetazoa;Bilateria;Protostomia;  
 Spiralia;Lophotrochozoa;Mollusca;Bivalvia;Autobranchia;Heteroconchia;Euhe  
 terodonta;Imparidentia;Venerida;Veneroidea;Veneridae;Mercenaria;Mercenari  
 a mercenaria  
 UdeM00000033667 29159 79 UdeM00000033667 XP\_034318217.1 58.6 58  
 24 0 8 65 817 874 2.70E-12 79 29159 cellular  
 organisms;Eukaryota;Opisthokonta;Metazoa;Eumetazoa;Bilateria;Protostomia;  
 Spiralia;Lophotrochozoa;Mollusca;Bivalvia;Autobranchia;Pteriormorphia;Ostr  
 eida;Ostreoidea;Ostreidae;Crassostrea;Crassostrea gigas  
 UdeM00000033668 6596 174.1 UdeM00000033668 XP\_045216906.1 34 294  
 145 6 1 248 1 291 2.20E-40 174.1 6596 cellular  
 organisms;Eukaryota;Opisthokonta;Metazoa;Eumetazoa;Bilateria;Protostomia;  
 Spiralia;Lophotrochozoa;Mollusca;Bivalvia;Autobranchia;Heteroconchia;Euhe  
 terodonta;Imparidentia;Venerida;Veneroidea;Veneridae;Mercenaria;Mercenari  
 a mercenaria  
 UdeM00000033669 150288 210.7 UdeM00000033669 XP\_020788097.1 69.3  
 127 39 0 2 128 439 565 1.10E-51 210.7 150288  
 cellular  
 organisms;Eukaryota;Opisthokonta;Metazoa;Eumetazoa;Bilateria;Deuterostomi  
 a;Chordata;Craniata;Vertebrata;Gnathostomata;Teleostomi;Euteleostomi;Acti  
 nopterygii;Actinopteri;Neopterygii;Teleostei;Osteoglossocephalai;Clupeoce  
 phala;Euteleosteomorpha;Neoteleostei;Eurypterygia;Ctenosquamata;Acanthomo  
 rphata;Euacanthomorphacea;Percomorphaceae;Gobiaria;Gobiiformes;Gobioidei;  
 Gobiidae;Oxudercinae;Boleophthalmus;Boleophthalmus pectinirostris  
 UdeM00000033671 6565 82.8 UdeM00000033671 XP\_022305107.1 32.3 167  
 93 5 17 183 949 1095 5.60E-13 82.8 6565 cellular  
 organisms;Eukaryota;Opisthokonta;Metazoa;Eumetazoa;Bilateria;Protostomia;  
 Spiralia;Lophotrochozoa;Mollusca;Bivalvia;Autobranchia;Pteriormorphia;Ostr  
 eida;Ostreoidea;Ostreidae;Crassostrea;Crassostrea virginica  
 UdeM00000033670 6596 280.8 UdeM00000033670 XP\_045177779.1 30 646  
 277 7 1 636 97 577 5.80E-72 280.8 6596 cellular  
 organisms;Eukaryota;Opisthokonta;Metazoa;Eumetazoa;Bilateria;Protostomia;  
 Spiralia;Lophotrochozoa;Mollusca;Bivalvia;Autobranchia;Heteroconchia;Euhe  
 terodonta;Imparidentia;Venerida;Veneroidea;Veneridae;Mercenaria;Mercenari  
 a mercenaria  
 UdeM00000033672 1735272 119.4 UdeM00000033672 XP\_041375784.1 31.9  
 301 182 8 3 295 313 598 9.90E-24 119.4 1735272  
 cellular

organisms;Eukaryota;Opisthokonta;Metazoa;Eumetazoa;Bilateria;Protostomia;
Spiralia;Lophotrochozoa;Mollusca;Gastropoda;Neomphalina;Neomphaloidea;Pel
tospiridae;Gigantopelta;Gigantopelta aegis
UdeM00000033673 3914 179.5 UdeM00000033673 XP\_017411387.1 29.4 483
317 9 258 718 111 591 1.60E-41 179.5 3914 cellular
organisms;Eukaryota;Viridiplantae;Streptophyta;Streptophytina;Embryophyta
;Tracheophyta;Euphylllophyta;Spermatophyta;Magnoliopsida;Mesangiospermae;e
udicotyledons;Gunneridae;Pentapetalae;rosids;fabids;Fabales;Fabaceae;Papi
lionoideae;50 kb inversion clade;NPAAA clade;indigoferoid/millettioid
clade;Phaseoleae;Vigna;Vigna angularis
UdeM00000033674 29159 76.3 UdeM00000033674 XP\_034316771.1 29.3 167
98 3 60 226 12 158 6.30E-11 76.3 29159 cellular
organisms;Eukaryota;Opisthokonta;Metazoa;Eumetazoa;Bilateria;Protostomia;
Spiralia;Lophotrochozoa;Mollusca;Bivalvia;Autobranchia;Pteriormorphia;Ostr
eida;Ostreoidea;Ostreidae;Crassostrea;Crassostrea gigas
UdeM00000033675 6596 283.5 UdeM00000033675 XP\_045189084.1 35 517
271 8 1 513 1350 1805 5.70E-73 283.5 6596 cellular
organisms;Eukaryota;Opisthokonta;Metazoa;Eumetazoa;Bilateria;Protostomia;
Spiralia;Lophotrochozoa;Mollusca;Bivalvia;Autobranchia;Heteroconchia;Euhe
terodonta;Imparidentia;Venerida;Veneroidea;Veneridae;Mercenaria;Mercenari
a mercenaria
UdeM00000033677 202533 324.3 UdeM00000033677 XP\_035218899.1 37
468 272 8 1 447 1 466 2.40E-85 324.3 202533
cellular
organisms;Eukaryota;Opisthokonta;Metazoa;Eumetazoa;Bilateria;Protostomia;
Ecdysozoa;Panarthropoda;Arthropoda;Chelicerata;Arachnida;Araneae;Araneomo
rphae;Entelegynae;Eresoidea;Eresidae;Stegodyphus;Stegodyphus dumicola
UdeM00000033678 6596 396 UdeM00000033678 XP\_045177776.1 38.5 572
297 8 1 557 405 936 1.20E-106 396 6596 cellular
organisms;Eukaryota;Opisthokonta;Metazoa;Eumetazoa;Bilateria;Protostomia;
Spiralia;Lophotrochozoa;Mollusca;Bivalvia;Autobranchia;Heteroconchia;Euhe
terodonta;Imparidentia;Venerida;Veneroidea;Veneridae;Mercenaria;Mercenari
a mercenaria
UdeM00000033679 37653 147.5 UdeM00000033679 XP\_014782194.1 70.7 92
27 0 1 92 1 92 1.50E-32 147.5 37653 cellular
organisms;Eukaryota;Opisthokonta;Metazoa;Eumetazoa;Bilateria;Protostomia;
Spiralia;Lophotrochozoa;Mollusca;Cephalopoda;Coleoidea;Octopodiformes;Oct
opoda;Incirrata;Octopodidae;Octopus;Octopus bimaculoides
UdeM00000033680 37653 87.8 UdeM00000033680 XP\_014784938.1 54 63
29 0 1 63 300 362 6.20E-15 87.8 37653 cellular
organisms;Eukaryota;Opisthokonta;Metazoa;Eumetazoa;Bilateria;Protostomia;
Spiralia;Lophotrochozoa;Mollusca;Cephalopoda;Coleoidea;Octopodiformes;Oct
opoda;Incirrata;Octopodidae;Octopus;Octopus bimaculoides
UdeM00000033681 6596 144.4 UdeM00000033681 XP\_045181277.1 33.6 235
145 6 87 315 143 372 2.70E-31 144.4 6596 cellular
organisms;Eukaryota;Opisthokonta;Metazoa;Eumetazoa;Bilateria;Protostomia;
Spiralia;Lophotrochozoa;Mollusca;Bivalvia;Autobranchia;Heteroconchia;Euhe
terodonta;Imparidentia;Venerida;Veneroidea;Veneridae;Mercenaria;Mercenari
a mercenaria
UdeM00000033682 6579 265.4 UdeM00000033682 XP\_033730606.1 43.9 358
184 8 1 347 1 352 1.00E-67 265.4 6579 cellular
organisms;Eukaryota;Opisthokonta;Metazoa;Eumetazoa;Bilateria;Protostomia;
Spiralia;Lophotrochozoa;Mollusca;Bivalvia;Autobranchia;Pteriormorphia;Pect
inida;Pectinoidea;Pectinidae;Pecten;Pecten maximus

UdeM00000033683 6596 119.4 UdeM00000033683 XP\_045181277.1 38.7 168  
 92 4 8 171 212 372 4.90E-24 119.4 6596 cellular  
 organisms;Eukaryota;Opisthokonta;Metazoa;Eumetazoa;Bilateria;Protostomia;  
 Spiralia;Lophotrochozoa;Mollusca;Bivalvia;Autobranhia;Heteroconchia;Euhe  
 terodonta;Imparidentia;Venerida;Veneroidea;Veneridae;Mercenaria;Mercenari  
 a mercenaria  
 UdeM00000016712 6596 407.1 UdeM00000016712 XP\_045196251.1 49.9 387  
 190 2 23 407 16 400 2.70E-110 407.1 6596 cellular  
 organisms;Eukaryota;Opisthokonta;Metazoa;Eumetazoa;Bilateria;Protostomia;  
 Spiralia;Lophotrochozoa;Mollusca;Bivalvia;Autobranhia;Heteroconchia;Euhe  
 terodonta;Imparidentia;Venerida;Veneroidea;Veneridae;Mercenaria;Mercenari  
 a mercenaria  
 UdeM00000016713 6596 138.3 UdeM00000016713 XP\_045195726.1 44.4 153  
 85 0 16 168 11 163 9.20E-30 138.3 6596 cellular  
 organisms;Eukaryota;Opisthokonta;Metazoa;Eumetazoa;Bilateria;Protostomia;  
 Spiralia;Lophotrochozoa;Mollusca;Bivalvia;Autobranhia;Heteroconchia;Euhe  
 terodonta;Imparidentia;Venerida;Veneroidea;Veneridae;Mercenaria;Mercenari  
 a mercenaria  
 UdeM00000016714 6565 485 UdeM00000016714 XP\_022288637.1 75.3 291  
 72 0 6 296 7 297 7.00E-134 485 6565 cellular  
 organisms;Eukaryota;Opisthokonta;Metazoa;Eumetazoa;Bilateria;Protostomia;  
 Spiralia;Lophotrochozoa;Mollusca;Bivalvia;Autobranhia;Pteriormorphia;Ostr  
 eida;Ostreoidea;Ostreidae;Crassostrea;Crassostrea virginica  
 UdeM00000016715 6596 384 UdeM00000016715 XP\_045197517.1 67.1 511  
 134 3 5 515 3 479 3.30E-103 384 6596 cellular  
 organisms;Eukaryota;Opisthokonta;Metazoa;Eumetazoa;Bilateria;Protostomia;  
 Spiralia;Lophotrochozoa;Mollusca;Bivalvia;Autobranhia;Heteroconchia;Euhe  
 terodonta;Imparidentia;Venerida;Veneroidea;Veneridae;Mercenaria;Mercenari  
 a mercenaria  
 UdeM00000016716 6596 231.5 UdeM00000016716 XP\_045196955.1 51.3 261  
 113 5 43 291 59 317 2.90E-57 231.5 6596 cellular  
 organisms;Eukaryota;Opisthokonta;Metazoa;Eumetazoa;Bilateria;Protostomia;  
 Spiralia;Lophotrochozoa;Mollusca;Bivalvia;Autobranhia;Heteroconchia;Euhe  
 terodonta;Imparidentia;Venerida;Veneroidea;Veneridae;Mercenaria;Mercenari  
 a mercenaria  
 UdeM00000016717 400727 171.8 UdeM00000016717 XP\_025103593.1 28.5  
 330 232 4 25 352 44 371 1.60E-39 171.8 400727  
 cellular  
 organisms;Eukaryota;Opisthokonta;Metazoa;Eumetazoa;Bilateria;Protostomia;  
 Spiralia;Lophotrochozoa;Mollusca;Gastropoda;Caenogastropoda;Architaeniogl  
 ossa;Ampullarioidea;Ampullariidae;Pomacea;Pomacea canaliculata  
 UdeM00000016718 6596 307 UdeM00000016718 XP\_045165764.1 43.3 395  
 201 7 30 416 8 387 3.70E-80 307 6596 cellular  
 organisms;Eukaryota;Opisthokonta;Metazoa;Eumetazoa;Bilateria;Protostomia;  
 Spiralia;Lophotrochozoa;Mollusca;Bivalvia;Autobranhia;Heteroconchia;Euhe  
 terodonta;Imparidentia;Venerida;Veneroidea;Veneridae;Mercenaria;Mercenari  
 a mercenaria  
 UdeM00000016720 6565 89.7 UdeM00000016720 XP\_022291703.1 31.4 185  
 96 4 1275 1456 630 786 3.20E-14 89.7 6565 cellular  
 organisms;Eukaryota;Opisthokonta;Metazoa;Eumetazoa;Bilateria;Protostomia;  
 Spiralia;Lophotrochozoa;Mollusca;Bivalvia;Autobranhia;Pteriormorphia;Ostr  
 eida;Ostreoidea;Ostreidae;Crassostrea;Crassostrea virginica  
 UdeM00000016721 225164 343.6 UdeM00000016721 XP\_009045462.1 78.2  
 225 49 0 1 225 1 225 3.00E-91 343.6 225164

cellular  
organisms;Eukaryota;Opisthokonta;Metazoa;Eumetazoa;Bilateria;Protostomia;  
Spiralia;Lophotrochozoa;Mollusca;Gastropoda;Patellogastropoda;Lottioidea;  
Lottiidae;Lottia;Lottia gigantea

UdeM00000016722 6596 1789.2 UdeM00000016722 XP\_045198251.1 64.3  
1343 425 9 1 1300 2142 3473 0.00E+00 1789.2 6596

cellular  
organisms;Eukaryota;Opisthokonta;Metazoa;Eumetazoa;Bilateria;Protostomia;  
Spiralia;Lophotrochozoa;Mollusca;Bivalvia;Autobranchia;Heteroconchia;Euhe  
terodonta;Imparidentia;Venerida;Veneroidea;Veneridae;Mercenaria;Mercenari  
a mercenaria

UdeM00000016723 6596 809.3 UdeM00000016723 XP\_045198251.1 47.6 960  
455 17 1 948 1246 2169 9.20E-231 809.3 6596 cellular

organisms;Eukaryota;Opisthokonta;Metazoa;Eumetazoa;Bilateria;Protostomia;  
Spiralia;Lophotrochozoa;Mollusca;Bivalvia;Autobranchia;Heteroconchia;Euhe  
terodonta;Imparidentia;Venerida;Veneroidea;Veneridae;Mercenaria;Mercenari  
a mercenaria

UdeM00000016724 7741 288.9 UdeM00000016724 XP\_019622111.1 51.8 280  
132 3 39 317 1 278 7.90E-75 288.9 7741 cellular

organisms;Eukaryota;Opisthokonta;Metazoa;Eumetazoa;Bilateria;Deuterostomi  
a;Chordata;Cephalochordata;Leptocardii;Amphioxiformes;Branchiostomidae;Br  
anchiostoma;Branchiostoma belcheri

UdeM00000016725 6596 1513 UdeM00000016725 XP\_045198251.1 62.4 1260  
426 13 1 1242 1 1230 0.00E+00 1513 6596 cellular

organisms;Eukaryota;Opisthokonta;Metazoa;Eumetazoa;Bilateria;Protostomia;  
Spiralia;Lophotrochozoa;Mollusca;Bivalvia;Autobranchia;Heteroconchia;Euhe  
terodonta;Imparidentia;Venerida;Veneroidea;Veneridae;Mercenaria;Mercenari  
a mercenaria

UdeM00000016726 6596 1518.1 UdeM00000016726 XP\_045198251.1 63  
1246 427 12 1 1228 1 1230 0.00E+00 1518.1 6596

cellular  
organisms;Eukaryota;Opisthokonta;Metazoa;Eumetazoa;Bilateria;Protostomia;  
Spiralia;Lophotrochozoa;Mollusca;Bivalvia;Autobranchia;Heteroconchia;Euhe  
terodonta;Imparidentia;Venerida;Veneroidea;Veneridae;Mercenaria;Mercenari  
a mercenaria

UdeM00000016727 6596 422.5 UdeM00000016727 XP\_045195104.1 67.9 299  
96 0 68 366 61 359 5.30E-115 422.5 6596 cellular

organisms;Eukaryota;Opisthokonta;Metazoa;Eumetazoa;Bilateria;Protostomia;  
Spiralia;Lophotrochozoa;Mollusca;Bivalvia;Autobranchia;Heteroconchia;Euhe  
terodonta;Imparidentia;Venerida;Veneroidea;Veneridae;Mercenaria;Mercenari  
a mercenaria

UdeM00000016728 6596 131.3 UdeM00000016728 XP\_045198142.1 38 184  
108 4 7 188 249 428 1.30E-27 131.3 6596 cellular

organisms;Eukaryota;Opisthokonta;Metazoa;Eumetazoa;Bilateria;Protostomia;  
Spiralia;Lophotrochozoa;Mollusca;Bivalvia;Autobranchia;Heteroconchia;Euhe  
terodonta;Imparidentia;Venerida;Veneroidea;Veneridae;Mercenaria;Mercenari  
a mercenaria

UdeM00000016730 6579 130.2 UdeM00000016730 XP\_033743219.1 37.7 199  
107 6 26 219 34 220 3.30E-27 130.2 6579 cellular

organisms;Eukaryota;Opisthokonta;Metazoa;Eumetazoa;Bilateria;Protostomia;  
Spiralia;Lophotrochozoa;Mollusca;Bivalvia;Autobranchia;Pteriomorphia;Pect  
inida;Pectinoidea;Pectinidae;Pecten;Pecten maximus

UdeM00000016729 1735272 85.9 UdeM00000016729 XP\_041379610.1 33.3  
165 95 2 7 163 12 169 5.60E-14 85.9 1735272

cellular  
organisms;Eukaryota;Opisthokonta;Metazoa;Eumetazoa;Bilateria;Protostomia;  
Spiralia;Lophotrochozoa;Mollusca;Gastropoda;Neomphalina;Neomphaloidea;Pel  
tospiridae;Gigantopelta;Gigantopelta aegis  
UdeM00000016732 6573 926.4 UdeM00000016732 XP\_021352421.1 99.8 451  
1 0 1 451 1 451 1.40E-266 926.4 6573 cellular  
organisms;Eukaryota;Opisthokonta;Metazoa;Eumetazoa;Bilateria;Protostomia;  
Spiralia;Lophotrochozoa;Mollusca;Bivalvia;Autobranchia;Pteriormorphia;Pect  
inida;Pectinoidea;Pectinidae;Mizuhopecten;Mizuhopecten yessoensis  
UdeM00000016733 6573 94 UdeM00000016733 XP\_021365625.1 52.9 87  
41 0 17 103 40 126 2.60E-16 94 6573 cellular  
organisms;Eukaryota;Opisthokonta;Metazoa;Eumetazoa;Bilateria;Protostomia;  
Spiralia;Lophotrochozoa;Mollusca;Bivalvia;Autobranchia;Pteriormorphia;Pect  
inida;Pectinoidea;Pectinidae;Mizuhopecten;Mizuhopecten yessoensis  
UdeM00000016734 29159 145.6 UdeM00000016734 XP\_034320422.1 74.7 83  
21 0 58 140 142 224 5.20E-32 145.6 29159 cellular  
organisms;Eukaryota;Opisthokonta;Metazoa;Eumetazoa;Bilateria;Protostomia;  
Spiralia;Lophotrochozoa;Mollusca;Bivalvia;Autobranchia;Pteriormorphia;Ostr  
eida;Ostreoidea;Ostreidae;Crassostrea;Crassostrea gigas  
UdeM00000016735 6596 471.9 UdeM00000016735 XP\_045197918.1 62.4 386  
131 4 14 387 23 406 8.00E-130 471.9 6596 cellular  
organisms;Eukaryota;Opisthokonta;Metazoa;Eumetazoa;Bilateria;Protostomia;  
Spiralia;Lophotrochozoa;Mollusca;Bivalvia;Autobranchia;Heteroconchia;Euhe  
terodonta;Imparidentia;Venerida;Veneroidea;Veneridae;Mercenaria;Mercenari  
a mercenaria  
UdeM00000016736 400727 428.3 UdeM00000016736 XP\_025097674.1 86.7  
225 29 1 21 244 26 250 6.50E-117 428.3 400727  
cellular  
organisms;Eukaryota;Opisthokonta;Metazoa;Eumetazoa;Bilateria;Protostomia;  
Spiralia;Lophotrochozoa;Mollusca;Gastropoda;Caenogastropoda;Architaeniogl  
ossa;Ampullarioidea;Ampullariidae;Pomacea;Pomacea canaliculata  
UdeM00000016737 6596 210.3 UdeM00000016737 XP\_045197008.1 55.9 454  
160 8 82 514 60 494 5.80E-51 210.3 6596 cellular  
organisms;Eukaryota;Opisthokonta;Metazoa;Eumetazoa;Bilateria;Protostomia;  
Spiralia;Lophotrochozoa;Mollusca;Bivalvia;Autobranchia;Heteroconchia;Euhe  
terodonta;Imparidentia;Venerida;Veneroidea;Veneridae;Mercenaria;Mercenari  
a mercenaria  
UdeM00000016738 1735272 287.3 UdeM00000016738 XP\_041352236.1 53.9  
419 167 5 1 417 5 399 4.30E-74 287.3 1735272  
cellular  
organisms;Eukaryota;Opisthokonta;Metazoa;Eumetazoa;Bilateria;Protostomia;  
Spiralia;Lophotrochozoa;Mollusca;Gastropoda;Neomphalina;Neomphaloidea;Pel  
tospiridae;Gigantopelta;Gigantopelta aegis  
UdeM00000016739 6573 146 UdeM00000016739 XP\_021355283.1 55.7 122  
54 0 1 122 1 122 3.20E-32 146 6573 cellular  
organisms;Eukaryota;Opisthokonta;Metazoa;Eumetazoa;Bilateria;Protostomia;  
Spiralia;Lophotrochozoa;Mollusca;Bivalvia;Autobranchia;Pteriormorphia;Pect  
inida;Pectinoidea;Pectinidae;Mizuhopecten;Mizuhopecten yessoensis  
UdeM00000016740 6565 110.5 UdeM00000016740 XP\_022294427.1 54.1 146  
59 1 8 145 122 267 1.80E-21 110.5 6565 cellular  
organisms;Eukaryota;Opisthokonta;Metazoa;Eumetazoa;Bilateria;Protostomia;  
Spiralia;Lophotrochozoa;Mollusca;Bivalvia;Autobranchia;Pteriormorphia;Ostr  
eida;Ostreoidea;Ostreidae;Crassostrea;Crassostrea virginica

UdeM00000016742 6579 193.4 UdeM00000016742 XP\_033740374.1 60.1 203  
 64 2 1 203 603 788 3.10E-46 193.4 6579 cellular  
 organisms;Eukaryota;Opisthokonta;Metazoa;Eumetazoa;Bilateria;Protostomia;  
 Spiralia;Lophotrochozoa;Mollusca;Bivalvia;Autobranchia;Pteriomorpha;Pect  
 inida;Pectinoidea;Pectinidae;Pecten;Pecten maximus  
 UdeM00000016741 6573 312 UdeM00000016741 XP\_021355288.1 36.9 872  
 381 27 1 792 1 783 2.20E-81 312 6573 cellular  
 organisms;Eukaryota;Opisthokonta;Metazoa;Eumetazoa;Bilateria;Protostomia;  
 Spiralia;Lophotrochozoa;Mollusca;Bivalvia;Autobranchia;Pteriomorpha;Pect  
 inida;Pectinoidea;Pectinidae;Mizuhopecten;Mizuhopecten yessoensis  
 UdeM00000016743 6573 382.5 UdeM00000016743 XP\_021355290.1 42.3 523  
 274 7 4 516 30 534 1.00E-102 382.5 6573 cellular  
 organisms;Eukaryota;Opisthokonta;Metazoa;Eumetazoa;Bilateria;Protostomia;  
 Spiralia;Lophotrochozoa;Mollusca;Bivalvia;Autobranchia;Pteriomorpha;Pect  
 inida;Pectinoidea;Pectinidae;Mizuhopecten;Mizuhopecten yessoensis  
 UdeM00000016744 29159 927.9 UdeM00000016744 XP\_011455166.2 58.2 819  
 317 3 26 821 30 846 8.70E-267 927.9 29159 cellular  
 organisms;Eukaryota;Opisthokonta;Metazoa;Eumetazoa;Bilateria;Protostomia;  
 Spiralia;Lophotrochozoa;Mollusca;Bivalvia;Autobranchia;Pteriomorpha;Ostr  
 eida;Ostreoidea;Ostreidae;Crassostrea;Crassostrea gigas  
 UdeM00000016746 6565 269.6 UdeM00000016746 XP\_022291125.1 76.2 160  
 38 0 1 160 347 506 2.50E-69 269.6 6565 cellular  
 organisms;Eukaryota;Opisthokonta;Metazoa;Eumetazoa;Bilateria;Protostomia;  
 Spiralia;Lophotrochozoa;Mollusca;Bivalvia;Autobranchia;Pteriomorpha;Ostr  
 eida;Ostreoidea;Ostreidae;Crassostrea;Crassostrea virginica  
 UdeM00000016745 6579 659.8 UdeM00000016745 XP\_033739576.1 63.1 496  
 177 3 1 496 1 490 2.70E-186 659.8 6579 cellular  
 organisms;Eukaryota;Opisthokonta;Metazoa;Eumetazoa;Bilateria;Protostomia;  
 Spiralia;Lophotrochozoa;Mollusca;Bivalvia;Autobranchia;Pteriomorpha;Pect  
 inida;Pectinoidea;Pectinidae;Pecten;Pecten maximus  
 UdeM00000016747 6596 234.6 UdeM00000016747 XP\_045197935.1 62 208  
 53 5 1 186 1 204 1.00E-58 234.6 6596 cellular  
 organisms;Eukaryota;Opisthokonta;Metazoa;Eumetazoa;Bilateria;Protostomia;  
 Spiralia;Lophotrochozoa;Mollusca;Bivalvia;Autobranchia;Heteroconchia;Euhe  
 terodonta;Imparidentia;Venerida;Veneroidea;Veneridae;Mercenaria;Mercenari  
 a mercenaria  
 UdeM00000016748 6596 1023.5 UdeM00000016748 XP\_045197932.1 64.7  
 834 240 9 1 810 1 804 1.90E-295 1023.5 6596  
 cellular  
 organisms;Eukaryota;Opisthokonta;Metazoa;Eumetazoa;Bilateria;Protostomia;  
 Spiralia;Lophotrochozoa;Mollusca;Bivalvia;Autobranchia;Heteroconchia;Euhe  
 terodonta;Imparidentia;Venerida;Veneroidea;Veneridae;Mercenaria;Mercenari  
 a mercenaria  
 UdeM00000016749 6596 1034.2 UdeM00000016749 XP\_045197930.1 65  
 840 240 9 1 816 1 810 1.10E-298 1034.2 6596  
 cellular  
 organisms;Eukaryota;Opisthokonta;Metazoa;Eumetazoa;Bilateria;Protostomia;  
 Spiralia;Lophotrochozoa;Mollusca;Bivalvia;Autobranchia;Heteroconchia;Euhe  
 terodonta;Imparidentia;Venerida;Veneroidea;Veneridae;Mercenaria;Mercenari  
 a mercenaria  
 UdeM00000016750 6596 182.6 UdeM00000016750 XP\_045196972.1 79.2 130  
 26 1 1 130 1 129 3.30E-43 182.6 6596 cellular  
 organisms;Eukaryota;Opisthokonta;Metazoa;Eumetazoa;Bilateria;Protostomia;  
 Spiralia;Lophotrochozoa;Mollusca;Bivalvia;Autobranchia;Heteroconchia;Euhe



terodonta;Imparidentia;Venerida;Veneroidea;Veneridae;Mercenaria;Mercenari  
a mercenaria

|                 |      |        |   |                 |                |      |     |          |        |      |
|-----------------|------|--------|---|-----------------|----------------|------|-----|----------|--------|------|
| UdeM00000016751 | 6596 | 1401.7 |   | UdeM00000016751 | XP_045196668.1 | 88.7 |     |          |        |      |
|                 | 794  | 71     | 2 | 3               | 796            | 1    | 775 | 0.00E+00 | 1401.7 | 6596 |

cellular

organisms;Eukaryota;Opisthokonta;Metazoa;Eumetazoa;Bilateria;Protostomia;  
Spiralia;Lophotrochozoa;Mollusca;Bivalvia;Autobranchia;Heteroconchia;Euhe  
terodonta;Imparidentia;Venerida;Veneroidea;Veneridae;Mercenaria;Mercenari  
a mercenaria

|                 |      |       |   |                 |                |      |          |       |      |          |
|-----------------|------|-------|---|-----------------|----------------|------|----------|-------|------|----------|
| UdeM00000016753 | 6565 | 242.7 |   | UdeM00000016753 | XP_022292967.1 | 73.7 | 175      |       |      |          |
|                 | 43   | 2     | 1 | 172             | 1              | 175  | 4.10E-61 | 242.7 | 6565 | cellular |

organisms;Eukaryota;Opisthokonta;Metazoa;Eumetazoa;Bilateria;Protostomia;  
Spiralia;Lophotrochozoa;Mollusca;Bivalvia;Autobranchia;Pteriormorphia;Ostr  
eida;Ostreoidea;Ostreidae;Crassostrea;Crassostrea virginica

|                 |       |       |   |                 |                |      |          |       |       |          |
|-----------------|-------|-------|---|-----------------|----------------|------|----------|-------|-------|----------|
| UdeM00000016752 | 29159 | 276.9 |   | UdeM00000016752 | XP_034331710.1 | 77.8 | 189      |       |       |          |
|                 | 39    | 2     | 1 | 186             | 9              | 197  | 1.80E-71 | 276.9 | 29159 | cellular |

organisms;Eukaryota;Opisthokonta;Metazoa;Eumetazoa;Bilateria;Protostomia;  
Spiralia;Lophotrochozoa;Mollusca;Bivalvia;Autobranchia;Pteriormorphia;Ostr  
eida;Ostreoidea;Ostreidae;Crassostrea;Crassostrea gigas

|                 |      |     |    |                 |                |      |          |     |      |          |
|-----------------|------|-----|----|-----------------|----------------|------|----------|-----|------|----------|
| UdeM00000016754 | 6596 | 265 |    | UdeM00000016754 | XP_045195519.1 | 45.3 | 287      |     |      |          |
|                 | 145  | 4   | 45 | 325             | 11             | 291  | 1.30E-67 | 265 | 6596 | cellular |

organisms;Eukaryota;Opisthokonta;Metazoa;Eumetazoa;Bilateria;Protostomia;  
Spiralia;Lophotrochozoa;Mollusca;Bivalvia;Autobranchia;Heteroconchia;Euhe  
terodonta;Imparidentia;Venerida;Veneroidea;Veneridae;Mercenaria;Mercenari  
a mercenaria

|                 |      |       |    |                 |                |      |          |       |      |          |
|-----------------|------|-------|----|-----------------|----------------|------|----------|-------|------|----------|
| UdeM00000016755 | 6596 | 269.2 |    | UdeM00000016755 | XP_045195519.1 | 45.6 | 285      |       |      |          |
|                 | 145  | 3     | 45 | 323             | 11             | 291  | 6.60E-69 | 269.2 | 6596 | cellular |

organisms;Eukaryota;Opisthokonta;Metazoa;Eumetazoa;Bilateria;Protostomia;  
Spiralia;Lophotrochozoa;Mollusca;Bivalvia;Autobranchia;Heteroconchia;Euhe  
terodonta;Imparidentia;Venerida;Veneroidea;Veneridae;Mercenaria;Mercenari  
a mercenaria

|                 |      |     |   |                 |                |      |          |     |      |          |
|-----------------|------|-----|---|-----------------|----------------|------|----------|-----|------|----------|
| UdeM00000016756 | 6596 | 265 |   | UdeM00000016756 | XP_045195519.1 | 45.3 | 287      |     |      |          |
|                 | 145  | 4   | 6 | 286             | 11             | 291  | 1.10E-67 | 265 | 6596 | cellular |

organisms;Eukaryota;Opisthokonta;Metazoa;Eumetazoa;Bilateria;Protostomia;  
Spiralia;Lophotrochozoa;Mollusca;Bivalvia;Autobranchia;Heteroconchia;Euhe  
terodonta;Imparidentia;Venerida;Veneroidea;Veneridae;Mercenaria;Mercenari  
a mercenaria

|                 |      |       |   |                 |                |      |          |       |      |          |
|-----------------|------|-------|---|-----------------|----------------|------|----------|-------|------|----------|
| UdeM00000016759 | 6565 | 357.5 |   | UdeM00000016759 | XP_022316307.1 | 37.9 | 593      |       |      |          |
|                 | 334  | 12    | 1 | 572             | 5              | 584  | 3.40E-95 | 357.5 | 6565 | cellular |

organisms;Eukaryota;Opisthokonta;Metazoa;Eumetazoa;Bilateria;Protostomia;  
Spiralia;Lophotrochozoa;Mollusca;Bivalvia;Autobranchia;Pteriormorphia;Ostr  
eida;Ostreoidea;Ostreidae;Crassostrea;Crassostrea virginica

|                 |      |       |     |                 |                |      |          |       |      |          |
|-----------------|------|-------|-----|-----------------|----------------|------|----------|-------|------|----------|
| UdeM00000016760 | 7962 | 274.6 |     | UdeM00000016760 | XP_042617353.1 | 32.8 | 528      |       |      |          |
|                 | 331  | 9     | 176 | 695             | 11             | 522  | 3.60E-70 | 274.6 | 7962 | cellular |

organisms;Eukaryota;Opisthokonta;Metazoa;Eumetazoa;Bilateria;Deuterostomi  
a;Chordata;Craniata;Vertebrata;Gnathostomata;Teleostomi;Euteleostomi;Acti  
nopterygii;Actinopteri;Neopterygii;Teleostei;Osteoglossocephalai;Clupeoce  
phala;Otomorpha;Ostariophysi;Otophysi;Cypriniphysae;Cypriniformes;Cyprino  
idei;Cyprinidae;Cyprininae;Cyprinus;Cyprinus carpio

|                 |      |       |    |                 |                |      |          |       |      |          |
|-----------------|------|-------|----|-----------------|----------------|------|----------|-------|------|----------|
| UdeM00000016761 | 6596 | 199.9 |    | UdeM00000016761 | XP_045195520.1 | 31.3 | 390      |       |      |          |
|                 | 147  | 4     | 14 | 402             | 20             | 289  | 6.10E-48 | 199.9 | 6596 | cellular |

organisms;Eukaryota;Opisthokonta;Metazoa;Eumetazoa;Bilateria;Protostomia;  
Spiralia;Lophotrochozoa;Mollusca;Bivalvia;Autobranchia;Heteroconchia;Euhe

terodonta;Imparidentia;Venerida;Veneroidea;Veneridae;Mercenaria;Mercenari  
 a mercenaria  
 UdeM00000016762 6596 243.8 UdeM00000016762 XP\_045195519.1 45.3 278  
 138 3 15 283 20 292 2.60E-61 243.8 6596 cellular  
 organisms;Eukaryota;Opisthokonta;Metazoa;Eumetazoa;Bilateria;Protostomia;  
 Spiralia;Lophotrochozoa;Mollusca;Bivalvia;Autobranhia;Heteroconchia;Euhe  
 terodonta;Imparidentia;Venerida;Veneroidea;Veneridae;Mercenaria;Mercenari  
 a mercenaria  
 UdeM00000016763 6596 244.2 UdeM00000016763 XP\_045195519.1 45.3 278  
 138 3 5 273 20 292 1.90E-61 244.2 6596 cellular  
 organisms;Eukaryota;Opisthokonta;Metazoa;Eumetazoa;Bilateria;Protostomia;  
 Spiralia;Lophotrochozoa;Mollusca;Bivalvia;Autobranhia;Heteroconchia;Euhe  
 terodonta;Imparidentia;Venerida;Veneroidea;Veneridae;Mercenaria;Mercenari  
 a mercenaria  
 UdeM00000016764 6596 191.8 UdeM00000016764 XP\_045195519.1 37.7 276  
 140 5 127 375 20 290 1.60E-45 191.8 6596 cellular  
 organisms;Eukaryota;Opisthokonta;Metazoa;Eumetazoa;Bilateria;Protostomia;  
 Spiralia;Lophotrochozoa;Mollusca;Bivalvia;Autobranhia;Heteroconchia;Euhe  
 terodonta;Imparidentia;Venerida;Veneroidea;Veneridae;Mercenaria;Mercenari  
 a mercenaria  
 UdeM00000016765 6596 191.8 UdeM00000016765 XP\_045195519.1 37.7 276  
 140 5 109 357 20 290 1.50E-45 191.8 6596 cellular  
 organisms;Eukaryota;Opisthokonta;Metazoa;Eumetazoa;Bilateria;Protostomia;  
 Spiralia;Lophotrochozoa;Mollusca;Bivalvia;Autobranhia;Heteroconchia;Euhe  
 terodonta;Imparidentia;Venerida;Veneroidea;Veneridae;Mercenaria;Mercenari  
 a mercenaria  
 UdeM00000016766 6596 692.6 UdeM00000016766 XP\_045197137.1 49.9 787  
 336 15 19 755 813 1591 5.70E-196 692.6 6596 cellular  
 organisms;Eukaryota;Opisthokonta;Metazoa;Eumetazoa;Bilateria;Protostomia;  
 Spiralia;Lophotrochozoa;Mollusca;Bivalvia;Autobranhia;Heteroconchia;Euhe  
 terodonta;Imparidentia;Venerida;Veneroidea;Veneridae;Mercenaria;Mercenari  
 a mercenaria  
 UdeM00000016767 6579 584.7 UdeM00000016767 XP\_033741236.1 54.9 563  
 222 8 1 543 1 551 1.20E-163 584.7 6579 cellular  
 organisms;Eukaryota;Opisthokonta;Metazoa;Eumetazoa;Bilateria;Protostomia;  
 Spiralia;Lophotrochozoa;Mollusca;Bivalvia;Autobranhia;Pteriomorphia;Pect  
 inida;Pectinoidea;Pectinidae;Pecten;Pecten maximus  
 UdeM00000016768 6596 1019.6 UdeM00000016768 XP\_045197147.1 62.2  
 825 296 9 1 818 1 816 2.20E-294 1019.6 6596  
 cellular  
 organisms;Eukaryota;Opisthokonta;Metazoa;Eumetazoa;Bilateria;Protostomia;  
 Spiralia;Lophotrochozoa;Mollusca;Bivalvia;Autobranhia;Heteroconchia;Euhe  
 terodonta;Imparidentia;Venerida;Veneroidea;Veneridae;Mercenaria;Mercenari  
 a mercenaria  
 UdeM00000016769 6596 314.3 UdeM00000016769 XP\_045198905.1 49.4 352  
 166 5 49 394 52 397 2.20E-82 314.3 6596 cellular  
 organisms;Eukaryota;Opisthokonta;Metazoa;Eumetazoa;Bilateria;Protostomia;  
 Spiralia;Lophotrochozoa;Mollusca;Bivalvia;Autobranhia;Heteroconchia;Euhe  
 terodonta;Imparidentia;Venerida;Veneroidea;Veneridae;Mercenaria;Mercenari  
 a mercenaria  
 UdeM00000016770 6573 154.1 UdeM00000016770 XP\_021360738.1 62.6 107  
 40 0 1 107 85 191 1.00E-34 154.1 6573 cellular  
 organisms;Eukaryota;Opisthokonta;Metazoa;Eumetazoa;Bilateria;Protostomia;

Spiralia;Lophotrochozoa;Mollusca;Bivalvia;Autobranchia;Pteriomorpha;Pectinida;Pectinoidea;Pectinidae;Mizuhopecten;Mizuhopecten yessoensis  
UdeM00000016771 6565 93.2 UdeM00000016771 XP\_022299727.1 39.8 133  
73 2 1 131 46 173 2.60E-16 93.2 6565 cellular  
organisms;Eukaryota;Opisthokonta;Metazoa;Eumetazoa;Bilateria;Protostomia;  
Spiralia;Lophotrochozoa;Mollusca;Bivalvia;Autobranchia;Pteriomorpha;Ostr  
eida;Ostreoidea;Ostreidae;Crassostrea;Crassostrea virginica  
UdeM00000016772 6596 295.8 UdeM00000016772 XP\_045196656.1 59.3 216  
80 3 6 221 10 217 4.60E-77 295.8 6596 cellular  
organisms;Eukaryota;Opisthokonta;Metazoa;Eumetazoa;Bilateria;Protostomia;  
Spiralia;Lophotrochozoa;Mollusca;Bivalvia;Autobranchia;Heteroconchia;Euhe  
terodonta;Imparidentia;Venerida;Veneroidea;Veneridae;Mercenaria;Mercenari  
a mercenaria  
UdeM00000016775 6596 233.8 UdeM00000016775 XP\_045196597.1 50.3 435  
194 12 1 422 1 426 4.00E-58 233.8 6596 cellular  
organisms;Eukaryota;Opisthokonta;Metazoa;Eumetazoa;Bilateria;Protostomia;  
Spiralia;Lophotrochozoa;Mollusca;Bivalvia;Autobranchia;Heteroconchia;Euhe  
terodonta;Imparidentia;Venerida;Veneroidea;Veneridae;Mercenaria;Mercenari  
a mercenaria  
UdeM00000016776 1735272 486.5 UdeM00000016776 XP\_041351493.1 47.7  
648 261 11 1 640 1 578 9.10E-134 486.5 1735272  
cellular  
organisms;Eukaryota;Opisthokonta;Metazoa;Eumetazoa;Bilateria;Protostomia;  
Spiralia;Lophotrochozoa;Mollusca;Gastropoda;Neomphalina;Neomphaloidea;Pel  
tospiridae;Gigantopelta;Gigantopelta aegis  
UdeM00000016777 400727 386.3 UdeM00000016777 XP\_025099402.1 54.2  
347 156 3 31 376 26 370 4.40E-104 386.3 400727  
cellular  
organisms;Eukaryota;Opisthokonta;Metazoa;Eumetazoa;Bilateria;Protostomia;  
Spiralia;Lophotrochozoa;Mollusca;Gastropoda;Caenogastropoda;Architaeniogl  
ossa;Ampullarioidea;Ampullariidae;Pomacea;Pomacea canaliculata  
UdeM00000016778 6596 533.5 UdeM00000016778 XP\_045161016.1 36.3 970  
525 33 192 1107 769 1699 6.60E-148 533.5 6596 cellular  
organisms;Eukaryota;Opisthokonta;Metazoa;Eumetazoa;Bilateria;Protostomia;  
Spiralia;Lophotrochozoa;Mollusca;Bivalvia;Autobranchia;Heteroconchia;Euhe  
terodonta;Imparidentia;Venerida;Veneroidea;Veneridae;Mercenaria;Mercenari  
a mercenaria  
UdeM00000016780 6596 298.9 UdeM00000016780 XP\_045160383.1 31.2 666  
421 15 12 654 5 656 1.80E-77 298.9 6596 cellular  
organisms;Eukaryota;Opisthokonta;Metazoa;Eumetazoa;Bilateria;Protostomia;  
Spiralia;Lophotrochozoa;Mollusca;Bivalvia;Autobranchia;Heteroconchia;Euhe  
terodonta;Imparidentia;Venerida;Veneroidea;Veneridae;Mercenaria;Mercenari  
a mercenaria  
UdeM00000016782 27687 60.1 UdeM00000016782 XP\_028656852.1 38 79  
47 2 4 81 316 393 1.60E-06 60.1 27687 cellular  
organisms;Eukaryota;Opisthokonta;Metazoa;Eumetazoa;Bilateria;Deuterostomi  
a;Chordata;Craniata;Vertebrata;Gnathostomata;Teleostomi;Euteleostomi;Acti  
nopterygii;Cladistia;Polypteriformes;Polypteridae;Erpetoichthys;Erpetoich  
thys calabaricus  
UdeM00000016783 2607531 283.1 UdeM00000016783 XP\_029657406.1 56.8  
250 108 0 1 250 1 250 4.10E-73 283.1 2607531  
cellular  
organisms;Eukaryota;Opisthokonta;Metazoa;Eumetazoa;Bilateria;Protostomia;

Spiralia;Lophotrochozoa;Mollusca;Cephalopoda;Coleoidea;Octopodiformes;Octopoda;Incirrata;Octopodidae;Octopus;Octopus sinensis

UdeM00000016784 6596 99.8 UdeM00000016784 XP\_045161006.1 30.3 261  
144 9 24 253 1384 1637 5.90E-18 99.8 6596 cellular  
organisms;Eukaryota;Opisthokonta;Metazoa;Eumetazoa;Bilateria;Protostomia;  
Spiralia;Lophotrochozoa;Mollusca;Bivalvia;Autobranchia;Heteroconchia;Euhe  
terodonta;Imparidentia;Venerida;Veneroidea;Veneridae;Mercenaria;Mercenari  
a mercenaria

UdeM00000016785 6596 71.2 UdeM00000016785 XP\_045192251.1 43.5 85  
47 1 136 220 337 420 1.80E-09 71.2 6596 cellular  
organisms;Eukaryota;Opisthokonta;Metazoa;Eumetazoa;Bilateria;Protostomia;  
Spiralia;Lophotrochozoa;Mollusca;Bivalvia;Autobranchia;Heteroconchia;Euhe  
terodonta;Imparidentia;Venerida;Veneroidea;Veneridae;Mercenaria;Mercenari  
a mercenaria

UdeM00000016787 6596 143.7 UdeM00000016787 XP\_045167776.1 41.1 209  
109 6 17 214 1152 1357 3.30E-31 143.7 6596 cellular  
organisms;Eukaryota;Opisthokonta;Metazoa;Eumetazoa;Bilateria;Protostomia;  
Spiralia;Lophotrochozoa;Mollusca;Bivalvia;Autobranchia;Heteroconchia;Euhe  
terodonta;Imparidentia;Venerida;Veneroidea;Veneridae;Mercenaria;Mercenari  
a mercenaria

UdeM00000016786 6596 728 UdeM00000016786 XP\_045161016.1 34.9 1408  
815 46 12 1348 5 1381 2.30E-206 728 6596 cellular  
organisms;Eukaryota;Opisthokonta;Metazoa;Eumetazoa;Bilateria;Protostomia;  
Spiralia;Lophotrochozoa;Mollusca;Bivalvia;Autobranchia;Heteroconchia;Euhe  
terodonta;Imparidentia;Venerida;Veneroidea;Veneridae;Mercenaria;Mercenari  
a mercenaria

UdeM00000016789 6596 608.2 UdeM00000016789 XP\_045161016.1 34 1253  
699 41 65 1237 474 1678 2.40E-170 608.2 6596 cellular  
organisms;Eukaryota;Opisthokonta;Metazoa;Eumetazoa;Bilateria;Protostomia;  
Spiralia;Lophotrochozoa;Mollusca;Bivalvia;Autobranchia;Heteroconchia;Euhe  
terodonta;Imparidentia;Venerida;Veneroidea;Veneridae;Mercenaria;Mercenari  
a mercenaria

UdeM00000016788 6596 608.2 UdeM00000016788 XP\_045161016.1 34 1253  
699 41 65 1237 474 1678 2.40E-170 608.2 6596 cellular  
organisms;Eukaryota;Opisthokonta;Metazoa;Eumetazoa;Bilateria;Protostomia;  
Spiralia;Lophotrochozoa;Mollusca;Bivalvia;Autobranchia;Heteroconchia;Euhe  
terodonta;Imparidentia;Venerida;Veneroidea;Veneridae;Mercenaria;Mercenari  
a mercenaria

UdeM00000016790 6596 135.6 UdeM00000016790 XP\_045197717.1 37 200  
119 3 22 215 22 220 9.40E-29 135.6 6596 cellular  
organisms;Eukaryota;Opisthokonta;Metazoa;Eumetazoa;Bilateria;Protostomia;  
Spiralia;Lophotrochozoa;Mollusca;Bivalvia;Autobranchia;Heteroconchia;Euhe  
terodonta;Imparidentia;Venerida;Veneroidea;Veneridae;Mercenaria;Mercenari  
a mercenaria

UdeM00000016791 6579 353.2 UdeM00000016791 XP\_033738041.1 33.7 801  
434 16 3 780 5 731 8.50E-94 353.2 6579 cellular  
organisms;Eukaryota;Opisthokonta;Metazoa;Eumetazoa;Bilateria;Protostomia;  
Spiralia;Lophotrochozoa;Mollusca;Bivalvia;Autobranchia;Pteriomorphia;Pect  
inida;Pectinoidea;Pectinidae;Pecten;Pecten maximus

UdeM00000016792 6596 637.9 UdeM00000016792 XP\_045171965.1 59.3 513  
196 6 21 530 14 516 1.20E-179 637.9 6596 cellular  
organisms;Eukaryota;Opisthokonta;Metazoa;Eumetazoa;Bilateria;Protostomia;  
Spiralia;Lophotrochozoa;Mollusca;Bivalvia;Autobranchia;Heteroconchia;Euhe

terodonta;Imparidentia;Venerida;Veneroidea;Veneridae;Mercenaria;Mercenaria mercenaria

UdeM00000016793 6596 629.4 UdeM00000016793 XP\_045197632.1 79.8 386  
69 3 18 394 8 393 3.10E-177 629.4 6596 cellular

organisms;Eukaryota;Opisthokonta;Metazoa;Eumetazoa;Bilateria;Protostomia;Spiralia;Lophotrochozoa;Mollusca;Bivalvia;Autobranchia;Heteroconchia;Euheterodonta;Imparidentia;Venerida;Veneroidea;Veneridae;Mercenaria;Mercenaria mercenaria

UdeM00000016794 116153 82 UdeM00000016794 XP\_019873606.1 46.8  
79 42 0 1 79 27 105 2.20E-12 82 116153  
cellular

organisms;Eukaryota;Opisthokonta;Metazoa;Eumetazoa;Bilateria;Protostomia;Ecdysozoa;Panarthropoda;Arthropoda;Mandibulata;Pancrustacea;Hexapoda;Insecta;Dicondylia;Pterygota;Neoptera;Endopterygota;Coleoptera;Polyphaga;Cucujiformia;Cucujoidea;Nitidulidae;Nitidulinae;Aethina;Aethina tumida

UdeM00000016795 1735272 201.4 UdeM00000016795 XP\_041352210.1 41.8  
323 155 8 10 320 7 308 1.70E-48 201.4 1735272  
cellular

organisms;Eukaryota;Opisthokonta;Metazoa;Eumetazoa;Bilateria;Protostomia;Spiralia;Lophotrochozoa;Mollusca;Gastropoda;Neomphalina;Neomphaloidea;Peltopspiridae;Gigantopelta;Gigantopelta aegis

UdeM00000016797 6596 236.5 UdeM00000016797 XP\_045196307.1 45.6 274  
138 5 34 304 25 290 5.00E-59 236.5 6596 cellular

organisms;Eukaryota;Opisthokonta;Metazoa;Eumetazoa;Bilateria;Protostomia;Spiralia;Lophotrochozoa;Mollusca;Bivalvia;Autobranchia;Heteroconchia;Euheterodonta;Imparidentia;Venerida;Veneroidea;Veneridae;Mercenaria;Mercenaria mercenaria

UdeM00000016798 6596 173.7 UdeM00000016798 XP\_045197759.1 83.6 110  
16 1 1 108 3 112 2.10E-40 173.7 6596 cellular

organisms;Eukaryota;Opisthokonta;Metazoa;Eumetazoa;Bilateria;Protostomia;Spiralia;Lophotrochozoa;Mollusca;Bivalvia;Autobranchia;Heteroconchia;Euheterodonta;Imparidentia;Venerida;Veneroidea;Veneridae;Mercenaria;Mercenaria mercenaria

UdeM00000016799 1735272 85.5 UdeM00000016799 XP\_041352557.1 30.7  
202 122 6 108 302 79 269 1.30E-13 85.5 1735272  
cellular

organisms;Eukaryota;Opisthokonta;Metazoa;Eumetazoa;Bilateria;Protostomia;Spiralia;Lophotrochozoa;Mollusca;Gastropoda;Neomphalina;Neomphaloidea;Peltopspiridae;Gigantopelta;Gigantopelta aegis

UdeM00000016801 7574 235.7 UdeM00000016801 XP\_013387202.1 75.8 153  
37 0 1 153 776 928 3.90E-59 235.7 7574 cellular

organisms;Eukaryota;Opisthokonta;Metazoa;Eumetazoa;Bilateria;Protostomia;Spiralia;Lophotrochozoa;Brachiopoda;Linguliformea;Lingulata;Lingulida;Linguloidea;Lingulidae;Lingula;Lingula anatina

UdeM00000016800 6573 1491.5 UdeM00000016800 XP\_021369359.1 80.5  
927 181 0 4 930 3 929 0.00E+00 1491.5 6573  
cellular

organisms;Eukaryota;Opisthokonta;Metazoa;Eumetazoa;Bilateria;Protostomia;Spiralia;Lophotrochozoa;Mollusca;Bivalvia;Autobranchia;Pteriormorphia;Pectinida;Pectinoidea;Pectinidae;Mizuhopecten;Mizuhopecten yessoensis

UdeM00000016802 6596 199.9 UdeM00000016802 XP\_045213528.1 38.7 261  
140 8 146 386 288 548 5.90E-48 199.9 6596 cellular

organisms;Eukaryota;Opisthokonta;Metazoa;Eumetazoa;Bilateria;Protostomia;Spiralia;Lophotrochozoa;Mollusca;Bivalvia;Autobranchia;Heteroconchia;Euheterodonta

terodonta;Imparidentia;Venerida;Veneroidea;Veneridae;Mercenaria;Mercenari  
 a mercenaria  
 UdeM00000016804 6596 182.2 UdeM00000016804 XP\_045213528.1 38.3 269  
 138 11 141 382 281 548 1.30E-42 182.2 6596 cellular  
 organisms;Eukaryota;Opisthokonta;Metazoa;Eumetazoa;Bilateria;Protostomia;  
 Spiralia;Lophotrochozoa;Mollusca;Bivalvia;Autobranchia;Heteroconchia;Euhe  
 terodonta;Imparidentia;Venerida;Veneroidea;Veneridae;Mercenaria;Mercenari  
 a mercenaria  
 UdeM00000016805 6596 140.2 UdeM00000016805 XP\_045213528.1 33.2 265  
 146 11 149 382 117 381 5.50E-30 140.2 6596 cellular  
 organisms;Eukaryota;Opisthokonta;Metazoa;Eumetazoa;Bilateria;Protostomia;  
 Spiralia;Lophotrochozoa;Mollusca;Bivalvia;Autobranchia;Heteroconchia;Euhe  
 terodonta;Imparidentia;Venerida;Veneroidea;Veneridae;Mercenaria;Mercenari  
 a mercenaria  
 UdeM00000016806 6596 609.8 UdeM00000016806 XP\_045197797.1 53.5 550  
 217 4 12 550 33 554 3.50E-171 609.8 6596 cellular  
 organisms;Eukaryota;Opisthokonta;Metazoa;Eumetazoa;Bilateria;Protostomia;  
 Spiralia;Lophotrochozoa;Mollusca;Bivalvia;Autobranchia;Heteroconchia;Euhe  
 terodonta;Imparidentia;Venerida;Veneroidea;Veneridae;Mercenaria;Mercenari  
 a mercenaria  
 UdeM00000016807 6596 486.5 UdeM00000016807 XP\_045197797.1 52.3 449  
 176 3 12 449 33 454 3.80E-134 486.5 6596 cellular  
 organisms;Eukaryota;Opisthokonta;Metazoa;Eumetazoa;Bilateria;Protostomia;  
 Spiralia;Lophotrochozoa;Mollusca;Bivalvia;Autobranchia;Heteroconchia;Euhe  
 terodonta;Imparidentia;Venerida;Veneroidea;Veneridae;Mercenaria;Mercenari  
 a mercenaria  
 UdeM00000016808 7739 97.8 UdeM00000016808 XP\_035659817.1 42.3 104  
 60 0 75 178 86 189 1.60E-17 97.8 7739 cellular  
 organisms;Eukaryota;Opisthokonta;Metazoa;Eumetazoa;Bilateria;Deuterostomi  
 a;Chordata;Cephalochordata;Leptocardii;Amphioxiformes;Branchiostomidae;Br  
 anchiostoma;Branchiostoma floridae  
 UdeM00000016811 6596 109.4 UdeM00000016811 XP\_045197598.1 32.6 218  
 112 4 20 203 1770 1986 5.50E-21 109.4 6596 cellular  
 organisms;Eukaryota;Opisthokonta;Metazoa;Eumetazoa;Bilateria;Protostomia;  
 Spiralia;Lophotrochozoa;Mollusca;Bivalvia;Autobranchia;Heteroconchia;Euhe  
 terodonta;Imparidentia;Venerida;Veneroidea;Veneridae;Mercenaria;Mercenari  
 a mercenaria  
 UdeM00000016812 6596 354.4 UdeM00000016812 XP\_045197606.1 35.8 581  
 235 12 798 1331 1891 2380 6.40E-94 354.4 6596 cellular  
 organisms;Eukaryota;Opisthokonta;Metazoa;Eumetazoa;Bilateria;Protostomia;  
 Spiralia;Lophotrochozoa;Mollusca;Bivalvia;Autobranchia;Heteroconchia;Euhe  
 terodonta;Imparidentia;Venerida;Veneroidea;Veneridae;Mercenaria;Mercenari  
 a mercenaria  
 UdeM00000016813 6596 411.4 UdeM00000016813 XP\_045198242.1 67.5 283  
 82 2 15 293 2 278 9.80E-112 411.4 6596 cellular  
 organisms;Eukaryota;Opisthokonta;Metazoa;Eumetazoa;Bilateria;Protostomia;  
 Spiralia;Lophotrochozoa;Mollusca;Bivalvia;Autobranchia;Heteroconchia;Euhe  
 terodonta;Imparidentia;Venerida;Veneroidea;Veneridae;Mercenaria;Mercenari  
 a mercenaria  
 UdeM00000016814 6573 311.6 UdeM00000016814 XP\_021364622.1 69.6 224  
 66 1 1 224 1 222 8.30E-82 311.6 6573 cellular  
 organisms;Eukaryota;Opisthokonta;Metazoa;Eumetazoa;Bilateria;Protostomia;  
 Spiralia;Lophotrochozoa;Mollusca;Bivalvia;Autobranchia;Pteriomorphia;Pect  
 inida;Pectinoidea;Pectinidae;Mizuhopecten;Mizuhopecten yessoensis

UdeM00000016815 29159 760 UdeM00000016815 XP\_034329341.1 63.2 522  
 189 2 14 535 7 525 2.10E-216 760 29159 cellular  
 organisms;Eukaryota;Opisthokonta;Metazoa;Eumetazoa;Bilateria;Protostomia;  
 Spiralia;Lophotrochozoa;Mollusca;Bivalvia;Autobranchia;Pteriomorphia;Ostr  
 eida;Ostreoidea;Ostreidae;Crassostrea;Crassostrea gigas  
 UdeM00000016816 6596 396.7 UdeM00000016816 XP\_045196487.1 70.4 257  
 74 2 1 256 24 279 2.20E-107 396.7 6596 cellular  
 organisms;Eukaryota;Opisthokonta;Metazoa;Eumetazoa;Bilateria;Protostomia;  
 Spiralia;Lophotrochozoa;Mollusca;Bivalvia;Autobranchia;Heteroconchia;Euhe  
 terodonta;Imparidentia;Venerida;Veneroidea;Veneridae;Mercenaria;Mercenari  
 a mercenaria  
 UdeM00000016817 6596 322.8 UdeM00000016817 XP\_045196487.1 59.8 301  
 106 2 11 296 274 574 4.60E-85 322.8 6596 cellular  
 organisms;Eukaryota;Opisthokonta;Metazoa;Eumetazoa;Bilateria;Protostomia;  
 Spiralia;Lophotrochozoa;Mollusca;Bivalvia;Autobranchia;Heteroconchia;Euhe  
 terodonta;Imparidentia;Venerida;Veneroidea;Veneridae;Mercenaria;Mercenari  
 a mercenaria  
 UdeM00000016818 6596 547 UdeM00000016818 XP\_045195909.1 71.1 395  
 101 6 8 396 799 1186 2.00E-152 547 6596 cellular  
 organisms;Eukaryota;Opisthokonta;Metazoa;Eumetazoa;Bilateria;Protostomia;  
 Spiralia;Lophotrochozoa;Mollusca;Bivalvia;Autobranchia;Heteroconchia;Euhe  
 terodonta;Imparidentia;Venerida;Veneroidea;Veneridae;Mercenaria;Mercenari  
 a mercenaria  
 UdeM00000016819 6579 790.4 UdeM00000016819 XP\_033741002.1 59.7 700  
 222 9 19 707 191 841 2.70E-225 790.4 6579 cellular  
 organisms;Eukaryota;Opisthokonta;Metazoa;Eumetazoa;Bilateria;Protostomia;  
 Spiralia;Lophotrochozoa;Mollusca;Bivalvia;Autobranchia;Pteriomorphia;Pect  
 inida;Pectinoidea;Pectinidae;Pecten;Pecten maximus  
 UdeM00000016820 400727 319.7 UdeM00000016820 XP\_025098426.1 80  
 180 35 1 1 180 10 188 2.60E-84 319.7 400727  
 cellular  
 organisms;Eukaryota;Opisthokonta;Metazoa;Eumetazoa;Bilateria;Protostomia;  
 Spiralia;Lophotrochozoa;Mollusca;Gastropoda;Caenogastropoda;Architaeniogl  
 ossa;Ampullarioidea;Ampullariidae;Pomacea;Pomacea canaliculata  
 UdeM00000016821 6579 532.7 UdeM00000016821 XP\_033741006.1 72.7 337  
 91 1 38 373 49 385 3.70E-148 532.7 6579 cellular  
 organisms;Eukaryota;Opisthokonta;Metazoa;Eumetazoa;Bilateria;Protostomia;  
 Spiralia;Lophotrochozoa;Mollusca;Bivalvia;Autobranchia;Pteriomorphia;Pect  
 inida;Pectinoidea;Pectinidae;Pecten;Pecten maximus  
 UdeM00000016822 6579 58.9 UdeM00000016822 XP\_033733606.1 62.2 37  
 14 0 25 61 1074 1110 5.80E-06 58.9 6579 cellular  
 organisms;Eukaryota;Opisthokonta;Metazoa;Eumetazoa;Bilateria;Protostomia;  
 Spiralia;Lophotrochozoa;Mollusca;Bivalvia;Autobranchia;Pteriomorphia;Pect  
 inida;Pectinoidea;Pectinidae;Pecten;Pecten maximus  
 UdeM00000016824 72105 67.8 UdeM00000016824 XP\_037626220.1 73.7 38  
 10 0 80 117 313 350 1.40E-08 67.8 72105 cellular  
 organisms;Eukaryota;Opisthokonta;Metazoa;Eumetazoa;Bilateria;Deuterostomi  
 a;Chordata;Craniata;Vertebrata;Gnathostomata;Teleostomi;Euteleostomi;Acti  
 nopterygii;Actinopteri;Neopterygii;Teleostei;Osteoglossocephalai;Clupeoce  
 phala;Euteleostei;Neoteleostei;Eurypterygia;Ctenosquamata;Acanthomo  
 rphata;Euacanthomorphacea;Percomorphaceae;Eupercaria;Perciformes;Scorpaen  
 oidei;Sebastidae;Sebastinae;Sebastes;Sebastes umbrosus  
 UdeM00000016827 29159 113.2 UdeM00000016827 XP\_019926412.2 45.8 120  
 65 0 107 226 2 121 4.30E-22 113.2 29159 cellular

organisms;Eukaryota;Opisthokonta;Metazoa;Eumetazoa;Bilateria;Protostomia;Spiralia;Lophotrochozoa;Mollusca;Bivalvia;Autobranchia;Pteriormorphia;Ostreida;Ostreoidea;Ostreidae;Crassostrea;Crassostrea gigas  
UdeM00000016828 6596 97.8 UdeM00000016828 XP\_045195573.1 26 288  
175 12 146 403 25 304 5.80E-17 97.8 6596 cellular  
organisms;Eukaryota;Opisthokonta;Metazoa;Eumetazoa;Bilateria;Protostomia;Spiralia;Lophotrochozoa;Mollusca;Bivalvia;Autobranchia;Heteroconchia;Euheterodonta;Imparidentia;Venerida;Veneroidea;Veneridae;Mercenaria;Mercenaria mercenaria  
UdeM00000016830 6596 110.5 UdeM00000016830 XP\_045195573.1 27 278  
177 9 21 279 24 294 8.00E-21 110.5 6596 cellular  
organisms;Eukaryota;Opisthokonta;Metazoa;Eumetazoa;Bilateria;Protostomia;Spiralia;Lophotrochozoa;Mollusca;Bivalvia;Autobranchia;Heteroconchia;Euheterodonta;Imparidentia;Venerida;Veneroidea;Veneridae;Mercenaria;Mercenaria mercenaria  
UdeM00000016829 6596 110.5 UdeM00000016829 XP\_045195573.1 27 278  
177 9 20 278 24 294 8.00E-21 110.5 6596 cellular  
organisms;Eukaryota;Opisthokonta;Metazoa;Eumetazoa;Bilateria;Protostomia;Spiralia;Lophotrochozoa;Mollusca;Bivalvia;Autobranchia;Heteroconchia;Euheterodonta;Imparidentia;Venerida;Veneroidea;Veneridae;Mercenaria;Mercenaria mercenaria  
UdeM00000016833 29159 510.8 UdeM00000016833 XP\_034332912.1 44.6 659  
321 12 15 657 118 748 2.70E-141 510.8 29159 cellular  
organisms;Eukaryota;Opisthokonta;Metazoa;Eumetazoa;Bilateria;Protostomia;Spiralia;Lophotrochozoa;Mollusca;Bivalvia;Autobranchia;Pteriormorphia;Ostreida;Ostreoidea;Ostreidae;Crassostrea;Crassostrea gigas  
UdeM00000016834 29159 520 UdeM00000016834 XP\_034332919.1 48.7 604  
272 13 6 604 15 585 4.00E-144 520 29159 cellular  
organisms;Eukaryota;Opisthokonta;Metazoa;Eumetazoa;Bilateria;Protostomia;Spiralia;Lophotrochozoa;Mollusca;Bivalvia;Autobranchia;Pteriormorphia;Ostreida;Ostreoidea;Ostreidae;Crassostrea;Crassostrea gigas  
UdeM00000016835 29159 504.2 UdeM00000016835 XP\_034332919.1 45.6 627  
275 11 6 622 15 585 2.30E-139 504.2 29159 cellular  
organisms;Eukaryota;Opisthokonta;Metazoa;Eumetazoa;Bilateria;Protostomia;Spiralia;Lophotrochozoa;Mollusca;Bivalvia;Autobranchia;Pteriormorphia;Ostreida;Ostreoidea;Ostreidae;Crassostrea;Crassostrea gigas  
UdeM00000016836 6596 577.8 UdeM00000016836 XP\_045197951.1 59.2 497  
193 4 1 493 1 491 1.30E-161 577.8 6596 cellular  
organisms;Eukaryota;Opisthokonta;Metazoa;Eumetazoa;Bilateria;Protostomia;Spiralia;Lophotrochozoa;Mollusca;Bivalvia;Autobranchia;Heteroconchia;Euheterodonta;Imparidentia;Venerida;Veneroidea;Veneridae;Mercenaria;Mercenaria mercenaria  
UdeM00000016837 6579 916 UdeM00000016837 XP\_033741539.1 59.7 906  
307 12 7 906 7 860 3.80E-263 916 6579 cellular  
organisms;Eukaryota;Opisthokonta;Metazoa;Eumetazoa;Bilateria;Protostomia;Spiralia;Lophotrochozoa;Mollusca;Bivalvia;Autobranchia;Pteriormorphia;Pectinida;Pectinoidea;Pectinidae;Pecten;Pecten maximus  
UdeM00000016838 6565 189.9 UdeM00000016838 XP\_022337004.1 40 255  
144 4 39 285 32 285 4.50E-45 189.9 6565 cellular  
organisms;Eukaryota;Opisthokonta;Metazoa;Eumetazoa;Bilateria;Protostomia;Spiralia;Lophotrochozoa;Mollusca;Bivalvia;Autobranchia;Pteriormorphia;Ostreida;Ostreoidea;Ostreidae;Crassostrea;Crassostrea virginica  
UdeM00000016839 29159 151.4 UdeM00000016839 XP\_034304913.1 59.8 127  
47 2 1 126 890 1013 7.90E-34 151.4 29159 cellular



organisms;Eukaryota;Opisthokonta;Metazoa;Eumetazoa;Bilateria;Protostomia;
Spiralia;Lophotrochozoa;Mollusca;Bivalvia;Autobranhia;Pteriormorphia;Ostr
eida;Ostreoidea;Ostreidae;Crassostrea;Crassostrea gigas
UdeM00000016840 6573 94 UdeM00000016840 XP\_021365625.1 52.9 87
41 0 14 100 40 126 2.60E-16 94 6573 cellular
organisms;Eukaryota;Opisthokonta;Metazoa;Eumetazoa;Bilateria;Protostomia;
Spiralia;Lophotrochozoa;Mollusca;Bivalvia;Autobranhia;Pteriormorphia;Pect
inida;Pectinoidea;Pectinidae;Mizuhopecten;Mizuhopecten yessoensis
UdeM00000016841 6565 347.8 UdeM00000016841 XP\_022298755.1 30.7 953
551 21 22 934 23 906 4.30E-92 347.8 6565 cellular
organisms;Eukaryota;Opisthokonta;Metazoa;Eumetazoa;Bilateria;Protostomia;
Spiralia;Lophotrochozoa;Mollusca;Bivalvia;Autobranhia;Pteriormorphia;Ostr
eida;Ostreoidea;Ostreidae;Crassostrea;Crassostrea virginica
UdeM00000016842 6596 147.1 UdeM00000016842 XP\_045196555.1 66.3 104
33 1 29 130 201 304 1.50E-32 147.1 6596 cellular
organisms;Eukaryota;Opisthokonta;Metazoa;Eumetazoa;Bilateria;Protostomia;
Spiralia;Lophotrochozoa;Mollusca;Bivalvia;Autobranhia;Heteroconchia;Euhe
terodonta;Imparidentia;Venerida;Veneroidea;Veneridae;Mercenaria;Mercenari
a mercenaria
UdeM00000016843 6596 352.8 UdeM00000016843 XP\_045196555.1 59.3 300
114 3 141 436 9 304 6.10E-94 352.8 6596 cellular
organisms;Eukaryota;Opisthokonta;Metazoa;Eumetazoa;Bilateria;Protostomia;
Spiralia;Lophotrochozoa;Mollusca;Bivalvia;Autobranhia;Heteroconchia;Euhe
terodonta;Imparidentia;Venerida;Veneroidea;Veneridae;Mercenaria;Mercenari
a mercenaria
UdeM00000016844 6596 595.1 UdeM00000016844 XP\_045198710.1 55.6 525
228 3 237 757 227 750 1.30E-166 595.1 6596 cellular
organisms;Eukaryota;Opisthokonta;Metazoa;Eumetazoa;Bilateria;Protostomia;
Spiralia;Lophotrochozoa;Mollusca;Bivalvia;Autobranhia;Heteroconchia;Euhe
terodonta;Imparidentia;Venerida;Veneroidea;Veneridae;Mercenaria;Mercenari
a mercenaria
UdeM00000016845 29159 118.6 UdeM00000016845 XP\_011448515.2 49.4 156
76 1 1 153 808 963 7.50E-24 118.6 29159 cellular
organisms;Eukaryota;Opisthokonta;Metazoa;Eumetazoa;Bilateria;Protostomia;
Spiralia;Lophotrochozoa;Mollusca;Bivalvia;Autobranhia;Pteriormorphia;Ostr
eida;Ostreoidea;Ostreidae;Crassostrea;Crassostrea gigas
UdeM00000016846 6596 743.4 UdeM00000016846 XP\_045196736.1 66.7 576
174 8 12 578 12 578 2.10E-211 743.4 6596 cellular
organisms;Eukaryota;Opisthokonta;Metazoa;Eumetazoa;Bilateria;Protostomia;
Spiralia;Lophotrochozoa;Mollusca;Bivalvia;Autobranhia;Heteroconchia;Euhe
terodonta;Imparidentia;Venerida;Veneroidea;Veneridae;Mercenaria;Mercenari
a mercenaria
UdeM00000016849 6573 301.2 UdeM00000016849 XP\_021364653.1 47.7 421
201 7 16 421 1568 1984 2.10E-78 301.2 6573 cellular
organisms;Eukaryota;Opisthokonta;Metazoa;Eumetazoa;Bilateria;Protostomia;
Spiralia;Lophotrochozoa;Mollusca;Bivalvia;Autobranhia;Pteriormorphia;Pect
inida;Pectinoidea;Pectinidae;Mizuhopecten;Mizuhopecten yessoensis
UdeM00000016848 6573 327.8 UdeM00000016848 XP\_021364653.1 46.1 492
235 10 8 482 1506 1984 2.30E-86 327.8 6573 cellular
organisms;Eukaryota;Opisthokonta;Metazoa;Eumetazoa;Bilateria;Protostomia;
Spiralia;Lophotrochozoa;Mollusca;Bivalvia;Autobranhia;Pteriormorphia;Pect
inida;Pectinoidea;Pectinidae;Mizuhopecten;Mizuhopecten yessoensis
UdeM00000016847 6573 327.8 UdeM00000016847 XP\_021364653.1 46 493
236 10 13 488 1505 1984 2.40E-86 327.8 6573 cellular

organisms;Eukaryota;Opisthokonta;Metazoa;Eumetazoa;Bilateria;Protostomia;Spiralia;Lophotrochozoa;Mollusca;Bivalvia;Autobranhia;Pteriomorphia;Pectinida;Pectinoidea;Pectinidae;Mizuhopecten;Mizuhopecten yessoensis  
UdeM00000016850 6573 90.1 UdeM00000016850 XP\_021364653.1 25.5 400  
234 11 201 562 683 1056 1.40E-14 90.1 6573 cellular

organisms;Eukaryota;Opisthokonta;Metazoa;Eumetazoa;Bilateria;Protostomia;Spiralia;Lophotrochozoa;Mollusca;Bivalvia;Autobranhia;Pteriomorphia;Pectinida;Pectinoidea;Pectinidae;Mizuhopecten;Mizuhopecten yessoensis  
UdeM00000016851 6596 627.9 UdeM00000016851 XP\_045197155.1 46 903  
402 23 1 875 1 845 2.00E-176 627.9 6596 cellular

organisms;Eukaryota;Opisthokonta;Metazoa;Eumetazoa;Bilateria;Protostomia;Spiralia;Lophotrochozoa;Mollusca;Bivalvia;Autobranhia;Heteroconchia;Euheterodonta;Imparidentia;Venerida;Veneroidea;Veneridae;Mercenaria;Mercenaria mercenaria  
UdeM00000016852 6573 422.9 UdeM00000016852 XP\_021356474.1 62.5 501  
140 13 1 455 1 499 5.00E-115 422.9 6573 cellular

organisms;Eukaryota;Opisthokonta;Metazoa;Eumetazoa;Bilateria;Protostomia;Spiralia;Lophotrochozoa;Mollusca;Bivalvia;Autobranhia;Pteriomorphia;Pectinida;Pectinoidea;Pectinidae;Mizuhopecten;Mizuhopecten yessoensis  
UdeM00000016855 6596 1126.7 UdeM00000016855 XP\_045196227.1 67  
823 266 4 4 823 114 933 0.00E+00 1126.7 6596  
cellular

organisms;Eukaryota;Opisthokonta;Metazoa;Eumetazoa;Bilateria;Protostomia;Spiralia;Lophotrochozoa;Mollusca;Bivalvia;Autobranhia;Heteroconchia;Euheterodonta;Imparidentia;Venerida;Veneroidea;Veneridae;Mercenaria;Mercenaria mercenaria  
UdeM00000016856 1735272 513.5 UdeM00000016856 XP\_041361500.1 53.2  
468 207 7 1 466 30 487 2.90E-142 513.5 1735272  
cellular

organisms;Eukaryota;Opisthokonta;Metazoa;Eumetazoa;Bilateria;Protostomia;Spiralia;Lophotrochozoa;Mollusca;Gastropoda;Neomphalina;Neomphaloidea;Peltospiridae;Gigantopelta;Gigantopelta aegis  
UdeM00000016857 5762 97.4 UdeM00000016857 XP\_002670566.1 27.5 306  
199 9 71 364 37 331 4.30E-17 97.4 5762 cellular

organisms;Eukaryota;Discoba;Heterolobosea;Tetramitria;Eutetramitria;Vahlkampfiidae;Naegleria;Naegleria gruberi  
UdeM00000016858 5762 85.9 UdeM00000016858 XP\_002670566.1 27.5 251  
156 10 126 359 94 335 1.30E-13 85.9 5762 cellular

organisms;Eukaryota;Discoba;Heterolobosea;Tetramitria;Eutetramitria;Vahlkampfiidae;Naegleria;Naegleria gruberi  
UdeM00000016859 6596 130.2 UdeM00000016859 XP\_045196339.1 34.6 327  
178 10 10 318 7 315 5.20E-27 130.2 6596 cellular

organisms;Eukaryota;Opisthokonta;Metazoa;Eumetazoa;Bilateria;Protostomia;Spiralia;Lophotrochozoa;Mollusca;Bivalvia;Autobranhia;Heteroconchia;Euheterodonta;Imparidentia;Venerida;Veneroidea;Veneridae;Mercenaria;Mercenaria mercenaria  
UdeM00000016860 6596 270.8 UdeM00000016860 XP\_045197856.1 66.7 195  
58 3 11 204 29 217 1.40E-69 270.8 6596 cellular

organisms;Eukaryota;Opisthokonta;Metazoa;Eumetazoa;Bilateria;Protostomia;Spiralia;Lophotrochozoa;Mollusca;Bivalvia;Autobranhia;Heteroconchia;Euheterodonta;Imparidentia;Venerida;Veneroidea;Veneridae;Mercenaria;Mercenaria mercenaria  
UdeM00000016861 6596 275.4 UdeM00000016861 XP\_045197856.1 68.1 191  
58 2 11 200 29 217 5.70E-71 275.4 6596 cellular

organisms;Eukaryota;Opisthokonta;Metazoa;Eumetazoa;Bilateria;Protostomia;Spiralia;Lophotrochozoa;Mollusca;Bivalvia;Autobranchia;Heteroconchia;Euheterodonta;Imparidentia;Venerida;Veneroidea;Veneridae;Mercenaria;Mercenaria mercenaria

UdeM00000016863 6579 79 UdeM00000016863 XP\_033729790.1 26.6 263  
112 5 10 197 17 273 9.20E-12 79 6579 cellular

organisms;Eukaryota;Opisthokonta;Metazoa;Eumetazoa;Bilateria;Protostomia;Spiralia;Lophotrochozoa;Mollusca;Bivalvia;Autobranchia;Pteriormorphia;Pectinida;Pectinoidea;Pectinidae;Pecten;Pecten maximus

UdeM00000016864 6565 65.1 UdeM00000016864 XP\_022312473.1 31.7 120  
71 2 5 121 92 203 7.40E-08 65.1 6565 cellular

organisms;Eukaryota;Opisthokonta;Metazoa;Eumetazoa;Bilateria;Protostomia;Spiralia;Lophotrochozoa;Mollusca;Bivalvia;Autobranchia;Pteriormorphia;Ostreida;Ostreoidea;Ostreidae;Crassostrea;Crassostrea virginica

UdeM00000016865 27687 198.4 UdeM00000016865 XP\_028657207.1 48.2 195  
101 0 2 196 530 724 8.70E-48 198.4 27687 cellular

organisms;Eukaryota;Opisthokonta;Metazoa;Eumetazoa;Bilateria;Deuterostomia;Chordata;Craniata;Vertebrata;Gnathostomata;Teleostomi;Euteleostomi;Actinopterygii;Cladistia;Polypteriformes;Polypteridae;Erpetoichthys;Erpetoichthys calabaricus

UdeM00000016866 6573 58.9 UdeM00000016866 XP\_021355324.1 71.8 39  
11 0 5 43 7 45 4.80E-06 58.9 6573 cellular

organisms;Eukaryota;Opisthokonta;Metazoa;Eumetazoa;Bilateria;Protostomia;Spiralia;Lophotrochozoa;Mollusca;Bivalvia;Autobranchia;Pteriormorphia;Pectinida;Pectinoidea;Pectinidae;Mizuhopecten;Mizuhopecten yessoensis

UdeM00000016867 6596 271.9 UdeM00000016867 XP\_045198310.1 44.8 404  
135 8 1 397 1 323 1.30E-69 271.9 6596 cellular

organisms;Eukaryota;Opisthokonta;Metazoa;Eumetazoa;Bilateria;Protostomia;Spiralia;Lophotrochozoa;Mollusca;Bivalvia;Autobranchia;Heteroconchia;Euheterodonta;Imparidentia;Venerida;Veneroidea;Veneridae;Mercenaria;Mercenaria mercenaria

UdeM00000016868 6573 392.5 UdeM00000016868 XP\_021354035.1 54.4 397  
169 5 13 407 298 684 6.80E-106 392.5 6573 cellular

organisms;Eukaryota;Opisthokonta;Metazoa;Eumetazoa;Bilateria;Protostomia;Spiralia;Lophotrochozoa;Mollusca;Bivalvia;Autobranchia;Pteriormorphia;Pectinida;Pectinoidea;Pectinidae;Mizuhopecten;Mizuhopecten yessoensis

UdeM00000016869 70779 77 UdeM00000016869 XP\_015764363.1 27.4 226  
90 5 4 155 6 231 2.50E-11 77 70779 cellular

organisms;Eukaryota;Opisthokonta;Metazoa;Eumetazoa;Cnidaria;Anthozoa;Hexacorallia;Scleractinia;Astrocoeniina;Acroporidae;Acropora;Acropora digitifera

UdeM00000016870 1529436 166.4 UdeM00000016870 XP\_033113802.1 92.9  
84 6 0 2 85 3 86 1.60E-38 166.4 1529436  
cellular

organisms;Eukaryota;Opisthokonta;Metazoa;Eumetazoa;Bilateria;Deuterostomia;Echinodermata;Pelmatozoa;Crinoidea;Articulata;Comatulida;Comatulidae;Comatulinae;Anneissia;Anneissia japonica

UdeM00000016871 6596 430.3 UdeM00000016871 XP\_045196222.1 69.6 303  
92 0 1 303 1 303 2.30E-117 430.3 6596 cellular

organisms;Eukaryota;Opisthokonta;Metazoa;Eumetazoa;Bilateria;Protostomia;Spiralia;Lophotrochozoa;Mollusca;Bivalvia;Autobranchia;Heteroconchia;Euheterodonta;Imparidentia;Venerida;Veneroidea;Veneridae;Mercenaria;Mercenaria mercenaria

UdeM00000016872 6573 399.4 UdeM00000016872 XP\_021359218.1 60.2 314  
 121 3 1 313 445 755 4.20E-108 399.4 6573 cellular  
 organisms;Eukaryota;Opisthokonta;Metazoa;Eumetazoa;Bilateria;Protostomia;  
 Spiralia;Lophotrochozoa;Mollusca;Bivalvia;Autobranhia;Pteriomorphia;Pect  
 inida;Pectinoidea;Pectinidae;Mizuhopecten;Mizuhopecten yessoensis  
 UdeM00000016873 6565 144.4 UdeM00000016873 XP\_022293799.1 76.6 94  
 22 0 3 96 298 391 7.50E-32 144.4 6565 cellular  
 organisms;Eukaryota;Opisthokonta;Metazoa;Eumetazoa;Bilateria;Protostomia;  
 Spiralia;Lophotrochozoa;Mollusca;Bivalvia;Autobranhia;Pteriomorphia;Ostr  
 eida;Ostreoidea;Ostreidae;Crassostrea;Crassostrea virginica  
 UdeM00000016874 6596 237.7 UdeM00000016874 XP\_045197864.1 39.2 378  
 202 11 42 411 51 408 2.70E-59 237.7 6596 cellular  
 organisms;Eukaryota;Opisthokonta;Metazoa;Eumetazoa;Bilateria;Protostomia;  
 Spiralia;Lophotrochozoa;Mollusca;Bivalvia;Autobranhia;Heteroconchia;Euhe  
 terodonta;Imparidentia;Venerida;Veneroidea;Veneridae;Mercenaria;Mercenari  
 a mercenaria  
 UdeM00000016875 6596 688.7 UdeM00000016875 XP\_045197865.1 56.6 629  
 229 11 996 1602 851 1457 1.70E-194 688.7 6596 cellular  
 organisms;Eukaryota;Opisthokonta;Metazoa;Eumetazoa;Bilateria;Protostomia;  
 Spiralia;Lophotrochozoa;Mollusca;Bivalvia;Autobranhia;Heteroconchia;Euhe  
 terodonta;Imparidentia;Venerida;Veneroidea;Veneridae;Mercenaria;Mercenari  
 a mercenaria  
 UdeM00000016876 6573 764.2 UdeM00000016876 XP\_021349300.1 53.4 786  
 340 14 6 773 3768 4545 1.60E-217 764.2 6573 cellular  
 organisms;Eukaryota;Opisthokonta;Metazoa;Eumetazoa;Bilateria;Protostomia;  
 Spiralia;Lophotrochozoa;Mollusca;Bivalvia;Autobranhia;Pteriomorphia;Pect  
 inida;Pectinoidea;Pectinidae;Mizuhopecten;Mizuhopecten yessoensis  
 UdeM00000016877 10224 119.4 UdeM00000016877 XP\_006813844.1 42.8 138  
 79 0 16 153 143 280 4.20E-24 119.4 10224 cellular  
 organisms;Eukaryota;Opisthokonta;Metazoa;Eumetazoa;Bilateria;Deuterostomi  
 a;Hemichordata;Enteropneusta;Harrimaniidae;Saccoglossus;Saccoglossus  
 kowalevskii  
 UdeM00000016879 6565 131.3 UdeM00000016879 XP\_022287136.1 61.5 96  
 37 0 1 96 3516 3611 6.40E-28 131.3 6565 cellular  
 organisms;Eukaryota;Opisthokonta;Metazoa;Eumetazoa;Bilateria;Protostomia;  
 Spiralia;Lophotrochozoa;Mollusca;Bivalvia;Autobranhia;Pteriomorphia;Ostr  
 eida;Ostreoidea;Ostreidae;Crassostrea;Crassostrea virginica  
 UdeM00000016878 6596 1860.5 UdeM00000016878 XP\_045198770.1 52  
 1835 803 22 4 1797 1886 3684 0.00E+00 1860.5 6596  
 cellular  
 organisms;Eukaryota;Opisthokonta;Metazoa;Eumetazoa;Bilateria;Protostomia;  
 Spiralia;Lophotrochozoa;Mollusca;Bivalvia;Autobranhia;Heteroconchia;Euhe  
 terodonta;Imparidentia;Venerida;Veneroidea;Veneridae;Mercenaria;Mercenari  
 a mercenaria  
 UdeM00000016880 6596 868.6 UdeM00000016880 XP\_045198770.1 53.1 904  
 370 14 4 872 1886 2770 6.70E-249 868.6 6596 cellular  
 organisms;Eukaryota;Opisthokonta;Metazoa;Eumetazoa;Bilateria;Protostomia;  
 Spiralia;Lophotrochozoa;Mollusca;Bivalvia;Autobranhia;Heteroconchia;Euhe  
 terodonta;Imparidentia;Venerida;Veneroidea;Veneridae;Mercenaria;Mercenari  
 a mercenaria  
 UdeM00000016881 303518 62 UdeM00000016881 XP\_005751641.1 42.5  
 87 47 2 1 84 346 432 4.20E-07 62 303518  
 cellular  
 organisms;Eukaryota;Opisthokonta;Metazoa;Eumetazoa;Bilateria;Deuterostomi

a;Chordata;Craniata;Vertebrata;Gnathostomata;Teleostomi;Euteleostomi;Actinopterygii;Actinopteri;Neopterygii;Teleostei;Osteoglossocephalai;Clupeocephala;Euteleostei;Neoteleostei;Eurypterygia;Ctenosquamata;Acanthomorphata;Euacanthomorphacea;Percomorphaceae;Ovalentaria;Cichlomorphae;Cichliformes;Cichlidae;African cichlids;Pseudocrenilabrinae;Haplochromini;Pundamilia;Pundamilia nyererei

UdeM00000016882 6596 391.3 UdeM00000016882 XP\_045198770.1 50.4 478  
222 8 1 468 794 1266 1.70E-105 391.3 6596 cellular  
organisms;Eukaryota;Opisthokonta;Metazoa;Eumetazoa;Bilateria;Protostomia;Spiralia;Lophotrochozoa;Mollusca;Bivalvia;Autobranchia;Heteroconchia;Euheterodonta;Imparidentia;Venerida;Veneroidea;Veneridae;Mercenaria;Mercenaria mercenaria

UdeM00000016883 6579 103.2 UdeM00000016883 XP\_033756126.1 51 102  
48 1 2 103 152 251 2.20E-19 103.2 6579 cellular  
organisms;Eukaryota;Opisthokonta;Metazoa;Eumetazoa;Bilateria;Protostomia;Spiralia;Lophotrochozoa;Mollusca;Bivalvia;Autobranchia;Pteriormorphia;Pectinida;Pectinoidea;Pectinidae;Pecten;Pecten maximus

UdeM00000016884 6573 102.8 UdeM00000016884 XP\_021349300.1 55.8 86  
38 0 1 86 656 741 2.50E-19 102.8 6573 cellular  
organisms;Eukaryota;Opisthokonta;Metazoa;Eumetazoa;Bilateria;Protostomia;Spiralia;Lophotrochozoa;Mollusca;Bivalvia;Autobranchia;Pteriormorphia;Pectinida;Pectinoidea;Pectinidae;Mizuhopecten;Mizuhopecten yessoensis

UdeM00000016885 6596 128.3 UdeM00000016885 XP\_045198770.1 46.1 152  
69 3 1 152 598 736 9.00E-27 128.3 6596 cellular  
organisms;Eukaryota;Opisthokonta;Metazoa;Eumetazoa;Bilateria;Protostomia;Spiralia;Lophotrochozoa;Mollusca;Bivalvia;Autobranchia;Heteroconchia;Euheterodonta;Imparidentia;Venerida;Veneroidea;Veneridae;Mercenaria;Mercenaria mercenaria

UdeM00000016887 1735272 161 UdeM00000016887 XP\_041362472.1 33.3  
330 181 7 1 298 185 507 2.40E-36 161 1735272  
cellular  
organisms;Eukaryota;Opisthokonta;Metazoa;Eumetazoa;Bilateria;Protostomia;Spiralia;Lophotrochozoa;Mollusca;Gastropoda;Neomphalina;Neomphaloidea;Peltospiridae;Gigantopelta;Gigantopelta aegis

UdeM00000016888 1735272 81.6 UdeM00000016888 XP\_041366951.1 40  
85 51 0 40 124 159 243 8.70E-13 81.6 1735272  
cellular  
organisms;Eukaryota;Opisthokonta;Metazoa;Eumetazoa;Bilateria;Protostomia;Spiralia;Lophotrochozoa;Mollusca;Gastropoda;Neomphalina;Neomphaloidea;Peltospiridae;Gigantopelta;Gigantopelta aegis

UdeM00000016889 6579 123.2 UdeM00000016889 XP\_033740518.1 36.1 230  
124 6 17 236 334 550 4.70E-25 123.2 6579 cellular  
organisms;Eukaryota;Opisthokonta;Metazoa;Eumetazoa;Bilateria;Protostomia;Spiralia;Lophotrochozoa;Mollusca;Bivalvia;Autobranchia;Pteriormorphia;Pectinida;Pectinoidea;Pectinidae;Pecten;Pecten maximus

UdeM00000016890 6579 229.2 UdeM00000016890 XP\_033740518.1 63.1 179  
66 0 5 183 152 330 4.40E-57 229.2 6579 cellular  
organisms;Eukaryota;Opisthokonta;Metazoa;Eumetazoa;Bilateria;Protostomia;Spiralia;Lophotrochozoa;Mollusca;Bivalvia;Autobranchia;Pteriormorphia;Pectinida;Pectinoidea;Pectinidae;Pecten;Pecten maximus

UdeM00000016891 7739 332.8 UdeM00000016891 XP\_035696678.1 52.1 307  
145 1 228 532 597 903 8.50E-88 332.8 7739 cellular  
organisms;Eukaryota;Opisthokonta;Metazoa;Eumetazoa;Bilateria;Deuterostomi

a;Chordata;Cephalochordata;Leptocardii;Amphioxiformes;Branchiostomidae;Branchiostoma;Branchiostoma floridae

UdeM00000016892 6596 62.4 UdeM00000016892 XP\_045193479.1 44.9 69  
38 0 182 250 2 70 9.60E-07 62.4 6596 cellular  
organisms;Eukaryota;Opisthokonta;Metazoa;Eumetazoa;Bilateria;Protostomia;  
Spiralia;Lophotrochozoa;Mollusca;Bivalvia;Autobranchia;Heteroconchia;Euhe  
terodonta;Imparidentia;Venerida;Veneroidea;Veneridae;Mercenaria;Mercenari  
a mercenaria

UdeM00000016893 6579 271.6 UdeM00000016893 XP\_033740911.1 67.7 229  
68 2 4 232 3 225 9.60E-70 271.6 6579 cellular  
organisms;Eukaryota;Opisthokonta;Metazoa;Eumetazoa;Bilateria;Protostomia;  
Spiralia;Lophotrochozoa;Mollusca;Bivalvia;Autobranchia;Pteriormorphia;Pect  
inida;Pectinoidea;Pectinidae;Pecten;Pecten maximus

UdeM00000016894 6579 115.2 UdeM00000016894 XP\_033740911.1 60.8 120  
41 3 1 120 77 190 6.50E-23 115.2 6579 cellular  
organisms;Eukaryota;Opisthokonta;Metazoa;Eumetazoa;Bilateria;Protostomia;  
Spiralia;Lophotrochozoa;Mollusca;Bivalvia;Autobranchia;Pteriormorphia;Pect  
inida;Pectinoidea;Pectinidae;Pecten;Pecten maximus

UdeM00000016895 6596 111.7 UdeM00000016895 XP\_045196675.1 39.6 207  
69 4 23 217 28 190 1.20E-21 111.7 6596 cellular  
organisms;Eukaryota;Opisthokonta;Metazoa;Eumetazoa;Bilateria;Protostomia;  
Spiralia;Lophotrochozoa;Mollusca;Bivalvia;Autobranchia;Heteroconchia;Euhe  
terodonta;Imparidentia;Venerida;Veneroidea;Veneridae;Mercenaria;Mercenari  
a mercenaria

UdeM00000016897 6596 63.9 UdeM00000016897 XP\_045196675.1 46.4 237  
127 0 2 238 225 461 3.20E-07 63.9 6596 cellular  
organisms;Eukaryota;Opisthokonta;Metazoa;Eumetazoa;Bilateria;Protostomia;  
Spiralia;Lophotrochozoa;Mollusca;Bivalvia;Autobranchia;Heteroconchia;Euhe  
terodonta;Imparidentia;Venerida;Veneroidea;Veneridae;Mercenaria;Mercenari  
a mercenaria

UdeM00000016898 6565 143.7 UdeM00000016898 XP\_022302274.1 41.2 177  
102 2 14 190 127 301 2.50E-31 143.7 6565 cellular  
organisms;Eukaryota;Opisthokonta;Metazoa;Eumetazoa;Bilateria;Protostomia;  
Spiralia;Lophotrochozoa;Mollusca;Bivalvia;Autobranchia;Pteriormorphia;Ostr  
eida;Ostreoidea;Ostreidae;Crassostrea;Crassostrea virginica

UdeM00000016899 6573 63.2 UdeM00000016899 XP\_021369385.1 43.5 69  
39 0 64 132 682 750 8.20E-07 63.2 6573 cellular  
organisms;Eukaryota;Opisthokonta;Metazoa;Eumetazoa;Bilateria;Protostomia;  
Spiralia;Lophotrochozoa;Mollusca;Bivalvia;Autobranchia;Pteriormorphia;Pect  
inida;Pectinoidea;Pectinidae;Mizuhopecten;Mizuhopecten yessoensis

UdeM00000016900 6573 94 UdeM00000016900 XP\_021369385.1 39.3 173  
70 8 124 261 933 1105 3.10E-16 94 6573 cellular  
organisms;Eukaryota;Opisthokonta;Metazoa;Eumetazoa;Bilateria;Protostomia;  
Spiralia;Lophotrochozoa;Mollusca;Bivalvia;Autobranchia;Pteriormorphia;Pect  
inida;Pectinoidea;Pectinidae;Mizuhopecten;Mizuhopecten yessoensis

UdeM00000016902 6596 63.2 UdeM00000016902 XP\_045207454.1 50.8 63  
23 1 3 65 2 56 5.10E-07 63.2 6596 cellular  
organisms;Eukaryota;Opisthokonta;Metazoa;Eumetazoa;Bilateria;Protostomia;  
Spiralia;Lophotrochozoa;Mollusca;Bivalvia;Autobranchia;Heteroconchia;Euhe  
terodonta;Imparidentia;Venerida;Veneroidea;Veneridae;Mercenaria;Mercenari  
a mercenaria

UdeM00000016906 6526 124.8 UdeM00000016906 XP\_013080768.1 66 97  
31 1 32 128 283 377 8.90E-26 124.8 6526 cellular  
organisms;Eukaryota;Opisthokonta;Metazoa;Eumetazoa;Bilateria;Protostomia;

Spiralia;Lophotrochozoa;Mollusca;Gastropoda;Heterobranchia;Euthyneura;Panpulmonata;Hygrophila;Lymnaeidae;Planorbidae;Biophalaria;Biophalaria glabrata

UdeM00000016905 6573 841.6 UdeM00000016905 XP\_021363583.1 59 805  
277 16 32 813 288 1062 8.50E-241 841.6 6573 cellular

organisms;Eukaryota;Opisthokonta;Metazoa;Eumetazoa;Bilateria;Protostomia;Spiralia;Lophotrochozoa;Mollusca;Bivalvia;Autobranchia;Pteriomorpha;Pectinida;Pectinoidea;Pectinidae;Mizuhopecten;Mizuhopecten yessoensis

UdeM00000016907 400727 300.4 UdeM00000016907 XP\_025099190.1 77.4  
190 41 1 3 192 809 996 1.60E-78 300.4 400727  
cellular

organisms;Eukaryota;Opisthokonta;Metazoa;Eumetazoa;Bilateria;Protostomia;Spiralia;Lophotrochozoa;Mollusca;Gastropoda;Caenogastropoda;Architaenioglossa;Ampullarioidea;Ampullariidae;Pomacea;Pomacea canaliculata

UdeM00000016908 45264 75.5 UdeM00000016908 XP\_044168061.1 64.6 48  
17 0 52 99 133 180 4.30E-11 75.5 45264 cellular

organisms;Eukaryota;Opisthokonta;Metazoa;Eumetazoa;Cnidaria;Anthozoa;Hexacorallia;Scleractinia;Astrocoeniina;Acroporidae;Acropora;Acropora millepora

UdeM00000016910 6596 144.8 UdeM00000016910 XP\_045199146.1 50 114  
50 2 1 110 42 152 6.50E-32 144.8 6596 cellular

organisms;Eukaryota;Opisthokonta;Metazoa;Eumetazoa;Bilateria;Protostomia;Spiralia;Lophotrochozoa;Mollusca;Bivalvia;Autobranchia;Heteroconchia;Euheterodonta;Imparidentia;Venerida;Veneroidea;Veneridae;Mercenaria;Mercenaria mercenaria

UdeM00000016911 6596 160.2 UdeM00000016911 XP\_045199146.1 52 123  
52 2 43 161 33 152 2.20E-36 160.2 6596 cellular

organisms;Eukaryota;Opisthokonta;Metazoa;Eumetazoa;Bilateria;Protostomia;Spiralia;Lophotrochozoa;Mollusca;Bivalvia;Autobranchia;Heteroconchia;Euheterodonta;Imparidentia;Venerida;Veneroidea;Veneridae;Mercenaria;Mercenaria mercenaria

UdeM00000016912 6945 97.4 UdeM00000016912 XP\_040079247.2 57.1 77  
33 0 92 168 470 546 2.20E-17 97.4 6945 cellular

organisms;Eukaryota;Opisthokonta;Metazoa;Eumetazoa;Bilateria;Protostomia;Ecdysozoa;Panarthropoda;Arthropoda;Chelicerata;Arachnida;Acari;Parasitiformes;Ixodida;Ixodoidea;Ixodidae;Ixodinae;Ixodes;Ixodes scapularis

UdeM00000016913 6565 68.9 UdeM00000016913 XP\_022289161.1 45.2 73  
40 0 5 77 223 295 3.20E-09 68.9 6565 cellular

organisms;Eukaryota;Opisthokonta;Metazoa;Eumetazoa;Bilateria;Protostomia;Spiralia;Lophotrochozoa;Mollusca;Bivalvia;Autobranchia;Pteriomorpha;Ostreida;Ostreoidea;Ostreidae;Crassostrea;Crassostrea virginica

UdeM00000016914 6596 348.6 UdeM00000016914 XP\_045196147.1 70.4 311  
67 3 6 295 3 309 1.00E-92 348.6 6596 cellular

organisms;Eukaryota;Opisthokonta;Metazoa;Eumetazoa;Bilateria;Protostomia;Spiralia;Lophotrochozoa;Mollusca;Bivalvia;Autobranchia;Heteroconchia;Euheterodonta;Imparidentia;Venerida;Veneroidea;Veneridae;Mercenaria;Mercenaria mercenaria

UdeM00000016915 6596 344.7 UdeM00000016915 XP\_045196147.1 70.2 312  
67 4 6 296 3 309 1.50E-91 344.7 6596 cellular

organisms;Eukaryota;Opisthokonta;Metazoa;Eumetazoa;Bilateria;Protostomia;Spiralia;Lophotrochozoa;Mollusca;Bivalvia;Autobranchia;Heteroconchia;Euheterodonta;Imparidentia;Venerida;Veneroidea;Veneridae;Mercenaria;Mercenaria mercenaria

UdeM00000016917 7574 612.8 UdeM00000016917 XP\_023930232.1 62.5 568  
 206 3 1 568 1 561 4.30E-172 612.8 7574 cellular  
 organisms;Eukaryota;Opisthokonta;Metazoa;Eumetazoa;Bilateria;Protostomia;  
 Spiralia;Lophotrochozoa;Brachiopoda;Linguliformea;Lingulata;Lingulida;Lin  
 guloidea;Lingulidae;Lingula;Lingula anatina  
 UdeM00000016918 7574 845.9 UdeM00000016918 XP\_023930232.1 59.4 785  
 307 4 1 785 1 773 4.20E-242 845.9 7574 cellular  
 organisms;Eukaryota;Opisthokonta;Metazoa;Eumetazoa;Bilateria;Protostomia;  
 Spiralia;Lophotrochozoa;Brachiopoda;Linguliformea;Lingulata;Lingulida;Lin  
 guloidea;Lingulidae;Lingula;Lingula anatina  
 UdeM00000016920 29159 178.7 UdeM00000016920 XP\_034312908.1 26.3 651  
 313 19 5 523 6 621 1.90E-41 178.7 29159 cellular  
 organisms;Eukaryota;Opisthokonta;Metazoa;Eumetazoa;Bilateria;Protostomia;  
 Spiralia;Lophotrochozoa;Mollusca;Bivalvia;Autobranchia;Pteriormorphia;Ostr  
 eida;Ostreoidea;Ostreidae;Crassostrea;Crassostrea gigas  
 UdeM00000016921 6579 238.4 UdeM00000016921 XP\_033740468.1 46 367  
 157 12 13 354 5 355 1.40E-59 238.4 6579 cellular  
 organisms;Eukaryota;Opisthokonta;Metazoa;Eumetazoa;Bilateria;Protostomia;  
 Spiralia;Lophotrochozoa;Mollusca;Bivalvia;Autobranchia;Pteriormorphia;Pect  
 inida;Pectinoidea;Pectinidae;Pecten;Pecten maximus  
 UdeM00000016922 1735272 285.4 UdeM00000016922 XP\_041354832.1 53.2  
 378 154 9 3 370 2 366 1.00E-73 285.4 1735272  
 cellular  
 organisms;Eukaryota;Opisthokonta;Metazoa;Eumetazoa;Bilateria;Protostomia;  
 Spiralia;Lophotrochozoa;Mollusca;Gastropoda;Neomphalina;Neomphaloidea;Pel  
 tospiridae;Gigantopelta;Gigantopelta aegis  
 UdeM00000016923 40690 95.9 UdeM00000016923 XP\_034007610.1 34.4 183  
 98 6 3 174 29 200 6.20E-17 95.9 40690 cellular  
 organisms;Eukaryota;Opisthokonta;Metazoa;Eumetazoa;Bilateria;Deuterostomi  
 a;Chordata;Craniata;Vertebrata;Gnathostomata;Teleostomi;Euteleostomi;Acti  
 nopterygii;Actinopteri;Neopterygii;Teleostei;Osteoglossocephalai;Clupeoce  
 phala;Euteleosteomorpha;Neoteleostei;Eurypterygia;Ctenosquamata;Acanthomo  
 rphata;Euacanthomorphacea;Percomorphaceae;Eupercaria;Perciformes;Notothen  
 ioidei;Nototheniidae;Trematomus;Trematomus bernacchii  
 UdeM00000016924 2652724 179.1 UdeM00000016924 XP\_020903442.1 30.3  
 366 159 5 11 283 238 600 8.10E-42 179.1 2652724  
 cellular  
 organisms;Eukaryota;Opisthokonta;Metazoa;Eumetazoa;Cnidaria;Anthozoa;Hexa  
 corallia;Actiniaria;Aiptasiidae;Exaiptasia;Exaiptasia diaphana  
 UdeM00000016927 6573 283.5 UdeM00000016927 XP\_021349232.1 39.8 483  
 276 3 1 478 1060 1532 5.00E-73 283.5 6573 cellular  
 organisms;Eukaryota;Opisthokonta;Metazoa;Eumetazoa;Bilateria;Protostomia;  
 Spiralia;Lophotrochozoa;Mollusca;Bivalvia;Autobranchia;Pteriormorphia;Pect  
 inida;Pectinoidea;Pectinidae;Mizuhopecten;Mizuhopecten yessoensis  
 UdeM00000016928 6573 688 UdeM00000016928 XP\_021349235.1 42.1 1395  
 711 24 167 1521 188 1525 2.80E-194 688 6573 cellular  
 organisms;Eukaryota;Opisthokonta;Metazoa;Eumetazoa;Bilateria;Protostomia;  
 Spiralia;Lophotrochozoa;Mollusca;Bivalvia;Autobranchia;Pteriormorphia;Pect  
 inida;Pectinoidea;Pectinidae;Mizuhopecten;Mizuhopecten yessoensis  
 UdeM00000016929 6596 388.3 UdeM00000016929 XP\_045198591.1 62.1 330  
 112 5 650 978 719 1036 3.00E-104 388.3 6596 cellular  
 organisms;Eukaryota;Opisthokonta;Metazoa;Eumetazoa;Bilateria;Protostomia;  
 Spiralia;Lophotrochozoa;Mollusca;Bivalvia;Autobranchia;Heteroconchia;Euhe



terodonta;Imparidentia;Venerida;Veneroidea;Veneridae;Mercenaria;Mercenari  
 a mercenaria  
 UdeM00000016930 6579 157.9 UdeM00000016930 XP\_033741629.1 78.9 90  
 19 0 1 90 976 1065 6.00E-36 157.9 6579 cellular  
 organisms;Eukaryota;Opisthokonta;Metazoa;Eumetazoa;Bilateria;Protostomia;  
 Spiralia;Lophotrochozoa;Mollusca;Bivalvia;Autobranhia;Pteriormorphia;Pect  
 inida;Pectinoidea;Pectinidae;Pecten;Pecten maximus  
 UdeM00000016931 6596 352.8 UdeM00000016931 XP\_045197080.1 49 592  
 271 15 1 581 1 572 8.20E-94 352.8 6596 cellular  
 organisms;Eukaryota;Opisthokonta;Metazoa;Eumetazoa;Bilateria;Protostomia;  
 Spiralia;Lophotrochozoa;Mollusca;Bivalvia;Autobranhia;Heteroconchia;Euhe  
 terodonta;Imparidentia;Venerida;Veneroidea;Veneridae;Mercenaria;Mercenari  
 a mercenaria  
 UdeM00000016932 6579 979.2 UdeM00000016932 XP\_033741628.1 78.5 571  
 123 0 1 571 1 571 2.30E-282 979.2 6579 cellular  
 organisms;Eukaryota;Opisthokonta;Metazoa;Eumetazoa;Bilateria;Protostomia;  
 Spiralia;Lophotrochozoa;Mollusca;Bivalvia;Autobranhia;Pteriormorphia;Pect  
 inida;Pectinoidea;Pectinidae;Pecten;Pecten maximus  
 UdeM00000016933 29159 235 UdeM00000016933 XP\_034331919.1 41.4 338  
 171 11 1 323 1 326 1.40E-58 235 29159 cellular  
 organisms;Eukaryota;Opisthokonta;Metazoa;Eumetazoa;Bilateria;Protostomia;  
 Spiralia;Lophotrochozoa;Mollusca;Bivalvia;Autobranhia;Pteriormorphia;Ostr  
 eida;Ostreoidea;Ostreidae;Crassostrea;Crassostrea gigas  
 UdeM00000016934 29159 193 UdeM00000016934 XP\_011433433.2 37.4 372  
 163 12 6 307 195 566 7.30E-46 193 29159 cellular  
 organisms;Eukaryota;Opisthokonta;Metazoa;Eumetazoa;Bilateria;Protostomia;  
 Spiralia;Lophotrochozoa;Mollusca;Bivalvia;Autobranhia;Pteriormorphia;Ostr  
 eida;Ostreoidea;Ostreidae;Crassostrea;Crassostrea gigas  
 UdeM00000016935 742174 132.9 UdeM00000016935 XP\_025193607.1 41.3  
 155 86 2 2 151 308 462 3.50E-28 132.9 742174  
 cellular  
 organisms;Eukaryota;Opisthokonta;Metazoa;Eumetazoa;Bilateria;Protostomia;  
 Ecdysozoa;Panarthropoda;Arthropoda;Mandibulata;Pancrustacea;Hexapoda;Inse  
 cta;Dicondylia;Pterygota;Neoptera;Paraneoptera;Hemiptera;Sternorrhyncha;A  
 phidomorpha;Aphidoidea;Aphididae;Aphidinae;Aphidini;Melanaphis;Melanaphis  
 sacchari  
 UdeM00000016936 7574 213.8 UdeM00000016936 XP\_013403275.1 61.5 174  
 59 3 9 180 26 193 1.80E-52 213.8 7574 cellular  
 organisms;Eukaryota;Opisthokonta;Metazoa;Eumetazoa;Bilateria;Protostomia;  
 Spiralia;Lophotrochozoa;Brachiopoda;Linguliformea;Lingulata;Lingulida;Lin  
 guloidea;Lingulidae;Lingula;Lingula anatina  
 UdeM00000016937 6596 474.6 UdeM00000016937 XP\_045196447.1 85.1 262  
 39 0 1 262 1 262 8.40E-131 474.6 6596 cellular  
 organisms;Eukaryota;Opisthokonta;Metazoa;Eumetazoa;Bilateria;Protostomia;  
 Spiralia;Lophotrochozoa;Mollusca;Bivalvia;Autobranhia;Heteroconchia;Euhe  
 terodonta;Imparidentia;Venerida;Veneroidea;Veneridae;Mercenaria;Mercenari  
 a mercenaria  
 UdeM00000016938 6596 212.6 UdeM00000016938 XP\_045195817.1 38.9 324  
 169 5 80 392 253 558 8.90E-52 212.6 6596 cellular  
 organisms;Eukaryota;Opisthokonta;Metazoa;Eumetazoa;Bilateria;Protostomia;  
 Spiralia;Lophotrochozoa;Mollusca;Bivalvia;Autobranhia;Heteroconchia;Euhe  
 terodonta;Imparidentia;Venerida;Veneroidea;Veneridae;Mercenaria;Mercenari  
 a mercenaria

UdeM00000016939 6596 768.1 UdeM00000016939 XP\_045195815.1 55.5 712  
 301 9 4 707 19 722 9.90E-219 768.1 6596 cellular  
 organisms;Eukaryota;Opisthokonta;Metazoa;Eumetazoa;Bilateria;Protostomia;  
 Spiralia;Lophotrochozoa;Mollusca;Bivalvia;Autobranhia;Heteroconchia;Euhe  
 terodonta;Imparidentia;Venerida;Veneroidea;Veneridae;Mercenaria;Mercenari  
 a mercenaria  
 UdeM00000016940 6596 219.2 UdeM00000016940 XP\_045197700.1 60.7 168  
 66 0 1 168 1 168 4.10E-54 219.2 6596 cellular  
 organisms;Eukaryota;Opisthokonta;Metazoa;Eumetazoa;Bilateria;Protostomia;  
 Spiralia;Lophotrochozoa;Mollusca;Bivalvia;Autobranhia;Heteroconchia;Euhe  
 terodonta;Imparidentia;Venerida;Veneroidea;Veneridae;Mercenaria;Mercenari  
 a mercenaria  
 UdeM00000016941 6573 126.7 UdeM00000016941 XP\_021366838.1 63.9 504  
 162 8 111 603 121 615 1.20E-25 126.7 6573 cellular  
 organisms;Eukaryota;Opisthokonta;Metazoa;Eumetazoa;Bilateria;Protostomia;  
 Spiralia;Lophotrochozoa;Mollusca;Bivalvia;Autobranhia;Pteriormorphia;Pect  
 inida;Pectinoidea;Pectinidae;Mizuhopecten;Mizuhopecten yessoensis  
 UdeM00000016942 6565 146.4 UdeM00000016942 XP\_022293676.1 60.9 115  
 43 1 1 115 1 113 8.40E-32 146.4 6565 cellular  
 organisms;Eukaryota;Opisthokonta;Metazoa;Eumetazoa;Bilateria;Protostomia;  
 Spiralia;Lophotrochozoa;Mollusca;Bivalvia;Autobranhia;Pteriormorphia;Ostr  
 eida;Ostreoidea;Ostreidae;Crassostrea;Crassostrea virginica  
 UdeM00000016944 6596 941.4 UdeM00000016944 XP\_045196476.1 52.4 1068  
 427 18 5 1038 6 1026 9.60E-271 941.4 6596 cellular  
 organisms;Eukaryota;Opisthokonta;Metazoa;Eumetazoa;Bilateria;Protostomia;  
 Spiralia;Lophotrochozoa;Mollusca;Bivalvia;Autobranhia;Heteroconchia;Euhe  
 terodonta;Imparidentia;Venerida;Veneroidea;Veneridae;Mercenaria;Mercenari  
 a mercenaria  
 UdeM00000016945 6596 94.4 UdeM00000016945 XP\_045198984.1 26.5 230  
 153 6 40 263 30 249 6.10E-16 94.4 6596 cellular  
 organisms;Eukaryota;Opisthokonta;Metazoa;Eumetazoa;Bilateria;Protostomia;  
 Spiralia;Lophotrochozoa;Mollusca;Bivalvia;Autobranhia;Heteroconchia;Euhe  
 terodonta;Imparidentia;Venerida;Veneroidea;Veneridae;Mercenaria;Mercenari  
 a mercenaria  
 UdeM00000016946 6579 612.5 UdeM00000016946 XP\_033741776.1 32.9 1554  
 701 36 16 1548 1 1233 1.50E-171 612.5 6579 cellular  
 organisms;Eukaryota;Opisthokonta;Metazoa;Eumetazoa;Bilateria;Protostomia;  
 Spiralia;Lophotrochozoa;Mollusca;Bivalvia;Autobranhia;Pteriormorphia;Pect  
 inida;Pectinoidea;Pectinidae;Pecten;Pecten maximus  
 UdeM00000016947 6596 980.3 UdeM00000016947 XP\_045197661.1 71.1 658  
 189 1 2 658 6 663 1.20E-282 980.3 6596 cellular  
 organisms;Eukaryota;Opisthokonta;Metazoa;Eumetazoa;Bilateria;Protostomia;  
 Spiralia;Lophotrochozoa;Mollusca;Bivalvia;Autobranhia;Heteroconchia;Euhe  
 terodonta;Imparidentia;Venerida;Veneroidea;Veneridae;Mercenaria;Mercenari  
 a mercenaria  
 UdeM00000016948 6596 606.3 UdeM00000016948 XP\_045198131.1 86.1 294  
 41 0 24 317 325 618 2.20E-170 606.3 6596 cellular  
 organisms;Eukaryota;Opisthokonta;Metazoa;Eumetazoa;Bilateria;Protostomia;  
 Spiralia;Lophotrochozoa;Mollusca;Bivalvia;Autobranhia;Heteroconchia;Euhe  
 terodonta;Imparidentia;Venerida;Veneroidea;Veneridae;Mercenaria;Mercenari  
 a mercenaria  
 UdeM00000016949 6596 402.1 UdeM00000016949 XP\_045198131.1 74.3 237  
 61 0 14 250 89 325 5.40E-109 402.1 6596 cellular  
 organisms;Eukaryota;Opisthokonta;Metazoa;Eumetazoa;Bilateria;Protostomia;

Spiralia;Lophotrochozoa;Mollusca;Bivalvia;Autobranchia;Heteroconchia;Euherodonta;Imparidentia;Venerida;Veneroidea;Veneridae;Mercenaria;Mercenaria mercenaria

UdeM00000016950 6596 508.1 UdeM00000016950 XP\_045196261.1 50.4 607  
242 22 6 600 130 689 1.60E-140 508.1 6596 cellular

organisms;Eukaryota;Opisthokonta;Metazoa;Eumetazoa;Bilateria;Protostomia;Spiralia;Lophotrochozoa;Mollusca;Bivalvia;Autobranchia;Heteroconchia;Euherodonta;Imparidentia;Venerida;Veneroidea;Veneridae;Mercenaria;Mercenaria mercenaria

UdeM00000016951 6579 262.3 UdeM00000016951 XP\_033741736.1 55.7 228  
99 1 1 226 614 841 5.90E-67 262.3 6579 cellular

organisms;Eukaryota;Opisthokonta;Metazoa;Eumetazoa;Bilateria;Protostomia;Spiralia;Lophotrochozoa;Mollusca;Bivalvia;Autobranchia;Pteriormorphia;Pectinida;Pectinoidea;Pectinidae;Pecten;Pecten maximus

UdeM00000016952 29159 664.1 UdeM00000016952 XP\_034305523.1 54.3 597  
266 6 2 596 345 936 1.70E-187 664.1 29159 cellular

organisms;Eukaryota;Opisthokonta;Metazoa;Eumetazoa;Bilateria;Protostomia;Spiralia;Lophotrochozoa;Mollusca;Bivalvia;Autobranchia;Pteriormorphia;Ostreida;Ostreoidea;Ostreidae;Crassostrea;Crassostrea gigas

UdeM00000016953 6573 334.3 UdeM00000016953 XP\_021359413.1 57.3 368  
148 2 18 376 24 391 2.00E-88 334.3 6573 cellular

organisms;Eukaryota;Opisthokonta;Metazoa;Eumetazoa;Bilateria;Protostomia;Spiralia;Lophotrochozoa;Mollusca;Bivalvia;Autobranchia;Pteriormorphia;Pectinida;Pectinoidea;Pectinidae;Mizuhopecten;Mizuhopecten yessoensis

UdeM00000016954 218467 191 UdeM00000016954 XP\_023243020.1 77.9  
113 25 0 1 113 1 113 8.60E-46 191 218467

cellular

organisms;Eukaryota;Opisthokonta;Metazoa;Eumetazoa;Bilateria;Protostomia;Ecdysozoa;Panarthropoda;Arthropoda;Chelicerata;Arachnida;Scorpiones;Buthida;Buthoidea;Buthidae;Centruroides;Centruroides sculpturatus

UdeM00000016955 6596 322 UdeM00000016955 XP\_045198932.1 56.5 292  
121 2 3 292 26 313 7.80E-85 322 6596 cellular

organisms;Eukaryota;Opisthokonta;Metazoa;Eumetazoa;Bilateria;Protostomia;Spiralia;Lophotrochozoa;Mollusca;Bivalvia;Autobranchia;Heteroconchia;Euherodonta;Imparidentia;Venerida;Veneroidea;Veneridae;Mercenaria;Mercenaria mercenaria

UdeM00000016957 6596 268.9 UdeM00000016957 XP\_045198401.1 58.8 245  
78 3 16 257 1163 1387 6.90E-69 268.9 6596 cellular

organisms;Eukaryota;Opisthokonta;Metazoa;Eumetazoa;Bilateria;Protostomia;Spiralia;Lophotrochozoa;Mollusca;Bivalvia;Autobranchia;Heteroconchia;Euherodonta;Imparidentia;Venerida;Veneroidea;Veneridae;Mercenaria;Mercenaria mercenaria

UdeM00000016958 6596 142.1 UdeM00000016958 XP\_045198401.1 32.9 468  
215 16 4 448 685 1076 1.80E-30 142.1 6596 cellular

organisms;Eukaryota;Opisthokonta;Metazoa;Eumetazoa;Bilateria;Protostomia;Spiralia;Lophotrochozoa;Mollusca;Bivalvia;Autobranchia;Heteroconchia;Euherodonta;Imparidentia;Venerida;Veneroidea;Veneridae;Mercenaria;Mercenaria mercenaria

UdeM00000016959 6596 150.2 UdeM00000016959 XP\_045198401.1 34.9 439  
216 16 4 419 685 1076 6.30E-33 150.2 6596 cellular

organisms;Eukaryota;Opisthokonta;Metazoa;Eumetazoa;Bilateria;Protostomia;Spiralia;Lophotrochozoa;Mollusca;Bivalvia;Autobranchia;Heteroconchia;Euherodonta;Imparidentia;Venerida;Veneroidea;Veneridae;Mercenaria;Mercenaria mercenaria

UdeM00000016960 6596 250 UdeM00000016960 XP\_045198401.1 32.5 736  
 271 22 159 836 115 682 3.10E-62 250 6596 cellular  
 organisms;Eukaryota;Opisthokonta;Metazoa;Eumetazoa;Bilateria;Protostomia;  
 Spiralia;Lophotrochozoa;Mollusca;Bivalvia;Autobranchia;Heteroconchia;Euhe  
 terodonta;Imparidentia;Venerida;Veneroidea;Veneridae;Mercenaria;Mercenari  
 a mercenaria  
 UdeM00000016961 6596 590.9 UdeM00000016961 XP\_045196679.1 71.1 384  
 111 0 1 384 1 384 2.20E-165 590.9 6596 cellular  
 organisms;Eukaryota;Opisthokonta;Metazoa;Eumetazoa;Bilateria;Protostomia;  
 Spiralia;Lophotrochozoa;Mollusca;Bivalvia;Autobranchia;Heteroconchia;Euhe  
 terodonta;Imparidentia;Venerida;Veneroidea;Veneridae;Mercenaria;Mercenari  
 a mercenaria  
 UdeM00000016962 6565 71.2 UdeM00000016962 XP\_022289723.1 40.8 71  
 37 1 24 89 35 105 7.30E-10 71.2 6565 cellular  
 organisms;Eukaryota;Opisthokonta;Metazoa;Eumetazoa;Bilateria;Protostomia;  
 Spiralia;Lophotrochozoa;Mollusca;Bivalvia;Autobranchia;Pteriormorphia;Ostr  
 eida;Ostreoidea;Ostreidae;Crassostrea;Crassostrea virginica  
 UdeM00000016963 29159 205.7 UdeM00000016963 XP\_034318948.1 64.6 147  
 52 0 1 147 481 627 4.70E-50 205.7 29159 cellular  
 organisms;Eukaryota;Opisthokonta;Metazoa;Eumetazoa;Bilateria;Protostomia;  
 Spiralia;Lophotrochozoa;Mollusca;Bivalvia;Autobranchia;Pteriormorphia;Ostr  
 eida;Ostreoidea;Ostreidae;Crassostrea;Crassostrea gigas  
 UdeM00000016965 6579 85.5 UdeM00000016965 XP\_033736887.1 47.1 85  
 45 0 13 97 229 313 4.30E-14 85.5 6579 cellular  
 organisms;Eukaryota;Opisthokonta;Metazoa;Eumetazoa;Bilateria;Protostomia;  
 Spiralia;Lophotrochozoa;Mollusca;Bivalvia;Autobranchia;Pteriormorphia;Pect  
 inida;Pectinoidea;Pectinidae;Pecten;Pecten maximus  
 UdeM00000016966 6596 444.5 UdeM00000016966 XP\_045196299.1 65.5 316  
 105 3 541 856 4 315 3.00E-121 444.5 6596 cellular  
 organisms;Eukaryota;Opisthokonta;Metazoa;Eumetazoa;Bilateria;Protostomia;  
 Spiralia;Lophotrochozoa;Mollusca;Bivalvia;Autobranchia;Heteroconchia;Euhe  
 terodonta;Imparidentia;Venerida;Veneroidea;Veneridae;Mercenaria;Mercenari  
 a mercenaria  
 UdeM00000016967 6596 141.7 UdeM00000016967 XP\_045196151.1 44.1 179  
 96 3 4 181 32 207 9.70E-31 141.7 6596 cellular  
 organisms;Eukaryota;Opisthokonta;Metazoa;Eumetazoa;Bilateria;Protostomia;  
 Spiralia;Lophotrochozoa;Mollusca;Bivalvia;Autobranchia;Heteroconchia;Euhe  
 terodonta;Imparidentia;Venerida;Veneroidea;Veneridae;Mercenaria;Mercenari  
 a mercenaria  
 UdeM00000016968 6596 121.7 UdeM00000016968 XP\_045196151.1 37.7 167  
 101 2 3 166 25 191 9.70E-25 121.7 6596 cellular  
 organisms;Eukaryota;Opisthokonta;Metazoa;Eumetazoa;Bilateria;Protostomia;  
 Spiralia;Lophotrochozoa;Mollusca;Bivalvia;Autobranchia;Heteroconchia;Euhe  
 terodonta;Imparidentia;Venerida;Veneroidea;Veneridae;Mercenaria;Mercenari  
 a mercenaria  
 UdeM00000016969 6579 594.7 UdeM00000016969 XP\_033764274.1 49.2 541  
 267 4 1 536 57 594 1.10E-166 594.7 6579 cellular  
 organisms;Eukaryota;Opisthokonta;Metazoa;Eumetazoa;Bilateria;Protostomia;  
 Spiralia;Lophotrochozoa;Mollusca;Bivalvia;Autobranchia;Pteriormorphia;Pect  
 inida;Pectinoidea;Pectinidae;Pecten;Pecten maximus  
 UdeM00000016970 6579 552.7 UdeM00000016970 XP\_033764274.1 48.7 511  
 254 4 1 506 87 594 4.70E-154 552.7 6579 cellular  
 organisms;Eukaryota;Opisthokonta;Metazoa;Eumetazoa;Bilateria;Protostomia;

Spiralia;Lophotrochozoa;Mollusca;Bivalvia;Autobranchia;Pteriormorphia;Pectinida;Pectinoidea;Pectinidae;Pecten;Pecten maximus

UdeM00000016971 1735272 503.1 UdeM00000016971 XP\_041374187.1 53.9  
488 197 9 1 480 1 468 4.00E-139 503.1 1735272  
cellular

organisms;Eukaryota;Opisthokonta;Metazoa;Eumetazoa;Bilateria;Protostomia;Spiralia;Lophotrochozoa;Mollusca;Gastropoda;Neomphalina;Neomphaloidea;Peltospiridae;Gigantopelta;Gigantopelta aegis

UdeM00000016972 6596 222.6 UdeM00000016972 XP\_045195156.1 29.4 669  
376 23 77 728 45 634 1.60E-54 222.6 6596 cellular

organisms;Eukaryota;Opisthokonta;Metazoa;Eumetazoa;Bilateria;Protostomia;Spiralia;Lophotrochozoa;Mollusca;Bivalvia;Autobranchia;Heteroconchia;Euheroterodonta;Imparidentia;Venerida;Veneroidea;Veneridae;Mercenaria;Mercenaria mercenaria

UdeM00000016975 6596 253.4 UdeM00000016975 XP\_045195697.1 38.6 458  
213 13 24 446 15 439 5.30E-64 253.4 6596 cellular

organisms;Eukaryota;Opisthokonta;Metazoa;Eumetazoa;Bilateria;Protostomia;Spiralia;Lophotrochozoa;Mollusca;Bivalvia;Autobranchia;Heteroconchia;Euheroterodonta;Imparidentia;Venerida;Veneroidea;Veneridae;Mercenaria;Mercenaria mercenaria

UdeM00000016976 6596 385.2 UdeM00000016976 XP\_045198369.1 41.8 541  
282 7 45 557 252 787 1.60E-103 385.2 6596 cellular

organisms;Eukaryota;Opisthokonta;Metazoa;Eumetazoa;Bilateria;Protostomia;Spiralia;Lophotrochozoa;Mollusca;Bivalvia;Autobranchia;Heteroconchia;Euheroterodonta;Imparidentia;Venerida;Veneroidea;Veneridae;Mercenaria;Mercenaria mercenaria

UdeM00000016977 6596 342 UdeM00000016977 XP\_045197897.1 67.4 227  
73 1 1 227 1 226 5.70E-91 342 6596 cellular

organisms;Eukaryota;Opisthokonta;Metazoa;Eumetazoa;Bilateria;Protostomia;Spiralia;Lophotrochozoa;Mollusca;Bivalvia;Autobranchia;Heteroconchia;Euheroterodonta;Imparidentia;Venerida;Veneroidea;Veneridae;Mercenaria;Mercenaria mercenaria

UdeM00000016978 6579 266.2 UdeM00000016978 XP\_033740537.1 67 203  
65 1 19 219 1 203 3.80E-68 266.2 6579 cellular

organisms;Eukaryota;Opisthokonta;Metazoa;Eumetazoa;Bilateria;Protostomia;Spiralia;Lophotrochozoa;Mollusca;Bivalvia;Autobranchia;Pteriormorphia;Pectinida;Pectinoidea;Pectinidae;Pecten;Pecten maximus

UdeM00000016979 6579 265.4 UdeM00000016979 XP\_033740537.1 68.9 196  
59 1 5 198 8 203 5.90E-68 265.4 6579 cellular

organisms;Eukaryota;Opisthokonta;Metazoa;Eumetazoa;Bilateria;Protostomia;Spiralia;Lophotrochozoa;Mollusca;Bivalvia;Autobranchia;Pteriormorphia;Pectinida;Pectinoidea;Pectinidae;Pecten;Pecten maximus

UdeM00000016980 6596 134.8 UdeM00000016980 XP\_045198865.1 40.6 207  
94 6 26 218 6 197 1.30E-28 134.8 6596 cellular

organisms;Eukaryota;Opisthokonta;Metazoa;Eumetazoa;Bilateria;Protostomia;Spiralia;Lophotrochozoa;Mollusca;Bivalvia;Autobranchia;Heteroconchia;Euheroterodonta;Imparidentia;Venerida;Veneroidea;Veneridae;Mercenaria;Mercenaria mercenaria

UdeM00000016981 6596 134.4 UdeM00000016981 XP\_045198865.1 40.6 207  
94 6 16 208 6 197 1.70E-28 134.4 6596 cellular

organisms;Eukaryota;Opisthokonta;Metazoa;Eumetazoa;Bilateria;Protostomia;Spiralia;Lophotrochozoa;Mollusca;Bivalvia;Autobranchia;Heteroconchia;Euheroterodonta;Imparidentia;Venerida;Veneroidea;Veneridae;Mercenaria;Mercenaria mercenaria

UdeM00000016982 1415580 139 UdeM00000016982 XP\_030075314.1 73.6  
 91 24 0 2 92 535 625 3.00E-30 139 1415580  
 cellular  
 organisms;Eukaryota;Opisthokonta;Metazoa;Eumetazoa;Bilateria;Deuterostomi  
 a;Chordata;Craniata;Vertebrata;Gnathostomata;Teleostomi;Euteleostomi;Sarc  
 opterygii;Dipnotetrapodomorpha;Tetrapoda;Amphibia;Gymnophiona;Siphonopida  
 e;Microcaecilia;Microcaecilia unicolor  
 UdeM00000016983 7757 498.8 UdeM00000016983 XP\_032835197.1 81.2 308  
 55 2 1 306 52 358 6.20E-138 498.8 7757 cellular  
 organisms;Eukaryota;Opisthokonta;Metazoa;Eumetazoa;Bilateria;Deuterostomi  
 a;Chordata;Craniata;Vertebrata;Cyclostomata;Hyperoartia;Petromyzontiforme  
 s;Petromyzontidae;Petromyzon;Petromyzon marinus  
 UdeM00000016984 260995 80.5 UdeM00000016984 XP\_033812940.1 51.4  
 74 35 1 1 74 1 73 1.30E-12 80.5 260995  
 cellular  
 organisms;Eukaryota;Opisthokonta;Metazoa;Eumetazoa;Bilateria;Deuterostomi  
 a;Chordata;Craniata;Vertebrata;Gnathostomata;Teleostomi;Euteleostomi;Sarc  
 opterygii;Dipnotetrapodomorpha;Tetrapoda;Amphibia;Gymnophiona;Dermophiida  
 e;Geotrypetes;Geotrypetes seraphini  
 UdeM00000016985 6596 1173.3 UdeM00000016985 XP\_045196382.1 68.3  
 833 253 7 1 829 1 826 0.00E+00 1173.3 6596  
 cellular  
 organisms;Eukaryota;Opisthokonta;Metazoa;Eumetazoa;Bilateria;Protostomia;  
 Spiralia;Lophotrochozoa;Mollusca;Bivalvia;Autobranchia;Heteroconchia;Euhe  
 terodonta;Imparidentia;Venerida;Veneroidea;Veneridae;Mercenaria;Mercenari  
 a mercenaria  
 UdeM00000016986 6565 290.8 UdeM00000016986 XP\_022291556.1 83.9 224  
 31 2 1 223 3 222 1.50E-75 290.8 6565 cellular  
 organisms;Eukaryota;Opisthokonta;Metazoa;Eumetazoa;Bilateria;Protostomia;  
 Spiralia;Lophotrochozoa;Mollusca;Bivalvia;Autobranchia;Pteriomorpha;Ostr  
 eida;Ostreoidea;Ostreidae;Crassostrea;Crassostrea virginica  
 UdeM00000016987 218467 86.3 UdeM00000016987 XP\_023232316.1 31.8  
 170 104 4 23 181 17 185 5.50E-14 86.3 218467  
 cellular  
 organisms;Eukaryota;Opisthokonta;Metazoa;Eumetazoa;Bilateria;Protostomia;  
 Ecdysozoa;Panarthropoda;Arthropoda;Chelicerata;Arachnida;Scorpiones;Buthi  
 da;Buthoidea;Buthidae;Centruroides;Centruroides sculpturatus  
 UdeM00000016988 1735272 655.6 UdeM00000016988 XP\_041354259.1 46.9  
 918 386 17 56 939 62 912 1.00E-184 655.6 1735272  
 cellular  
 organisms;Eukaryota;Opisthokonta;Metazoa;Eumetazoa;Bilateria;Protostomia;  
 Spiralia;Lophotrochozoa;Mollusca;Gastropoda;Neomphalina;Neomphaloidea;Pel  
 tospiridae;Gigantopelta;Gigantopelta aegis  
 UdeM00000016989 1735272 655.2 UdeM00000016989 XP\_041354259.1 47.1  
 916 385 17 56 936 62 912 1.30E-184 655.2 1735272  
 cellular  
 organisms;Eukaryota;Opisthokonta;Metazoa;Eumetazoa;Bilateria;Protostomia;  
 Spiralia;Lophotrochozoa;Mollusca;Gastropoda;Neomphalina;Neomphaloidea;Pel  
 tospiridae;Gigantopelta;Gigantopelta aegis  
 UdeM00000016990 6579 169.1 UdeM00000016990 XP\_033741044.1 68.4 114  
 36 0 57 170 323 436 4.90E-39 169.1 6579 cellular  
 organisms;Eukaryota;Opisthokonta;Metazoa;Eumetazoa;Bilateria;Protostomia;  
 Spiralia;Lophotrochozoa;Mollusca;Bivalvia;Autobranchia;Pteriomorpha;Pect  
 inida;Pectinoidea;Pectinidae;Pecten;Pecten maximus

UdeM00000016991 6596 129.4 UdeM00000016991 XP\_045198294.1 58.2 110  
 45 1 1 109 1 110 3.70E-27 129.4 6596 cellular  
 organisms;Eukaryota;Opisthokonta;Metazoa;Eumetazoa;Bilateria;Protostomia;  
 Spiralia;Lophotrochozoa;Mollusca;Bivalvia;Autobranhia;Heteroconchia;Euhe  
 terodonta;Imparidentia;Venerida;Veneroidea;Veneridae;Mercenaria;Mercenari  
 a mercenaria  
 UdeM00000016992 6596 311.2 UdeM00000016992 XP\_045195208.1 46.3 369  
 160 4 8 346 6 366 1.70E-81 311.2 6596 cellular  
 organisms;Eukaryota;Opisthokonta;Metazoa;Eumetazoa;Bilateria;Protostomia;  
 Spiralia;Lophotrochozoa;Mollusca;Bivalvia;Autobranhia;Heteroconchia;Euhe  
 terodonta;Imparidentia;Venerida;Veneroidea;Veneridae;Mercenaria;Mercenari  
 a mercenaria  
 UdeM00000016993 6596 459.5 UdeM00000016993 XP\_045195208.1 47.6 494  
 259 0 112 605 472 965 6.50E-126 459.5 6596 cellular  
 organisms;Eukaryota;Opisthokonta;Metazoa;Eumetazoa;Bilateria;Protostomia;  
 Spiralia;Lophotrochozoa;Mollusca;Bivalvia;Autobranhia;Heteroconchia;Euhe  
 terodonta;Imparidentia;Venerida;Veneroidea;Veneridae;Mercenaria;Mercenari  
 a mercenaria  
 UdeM00000016994 6579 291.2 UdeM00000016994 XP\_033740459.1 69.5 243  
 73 1 7 248 14 256 1.20E-75 291.2 6579 cellular  
 organisms;Eukaryota;Opisthokonta;Metazoa;Eumetazoa;Bilateria;Protostomia;  
 Spiralia;Lophotrochozoa;Mollusca;Bivalvia;Autobranhia;Pteriormorphia;Pect  
 inida;Pectinoidea;Pectinidae;Pecten;Pecten maximus  
 UdeM00000016995 29159 354 UdeM00000016995 XP\_034331232.1 56.6 318  
 131 5 38 352 47 360 2.20E-94 354 29159 cellular  
 organisms;Eukaryota;Opisthokonta;Metazoa;Eumetazoa;Bilateria;Protostomia;  
 Spiralia;Lophotrochozoa;Mollusca;Bivalvia;Autobranhia;Pteriormorphia;Ostr  
 eida;Ostreoidea;Ostreidae;Crassostrea;Crassostrea gigas  
 UdeM00000016996 29159 360.1 UdeM00000016996 XP\_034331240.1 56.9 318  
 130 5 38 352 47 360 3.10E-96 360.1 29159 cellular  
 organisms;Eukaryota;Opisthokonta;Metazoa;Eumetazoa;Bilateria;Protostomia;  
 Spiralia;Lophotrochozoa;Mollusca;Bivalvia;Autobranhia;Pteriormorphia;Ostr  
 eida;Ostreoidea;Ostreidae;Crassostrea;Crassostrea gigas  
 UdeM00000016997 29159 372.5 UdeM00000016997 XP\_034331232.1 57.6 316  
 128 5 38 349 47 360 6.00E-100 372.5 29159 cellular  
 organisms;Eukaryota;Opisthokonta;Metazoa;Eumetazoa;Bilateria;Protostomia;  
 Spiralia;Lophotrochozoa;Mollusca;Bivalvia;Autobranhia;Pteriormorphia;Ostr  
 eida;Ostreoidea;Ostreidae;Crassostrea;Crassostrea gigas  
 UdeM00000016998 29159 366.3 UdeM00000016998 XP\_034331232.1 54.3 339  
 141 6 23 349 23 359 4.30E-98 366.3 29159 cellular  
 organisms;Eukaryota;Opisthokonta;Metazoa;Eumetazoa;Bilateria;Protostomia;  
 Spiralia;Lophotrochozoa;Mollusca;Bivalvia;Autobranhia;Pteriormorphia;Ostr  
 eida;Ostreoidea;Ostreidae;Crassostrea;Crassostrea gigas  
 UdeM00000016999 29159 422.9 UdeM00000016999 XP\_034331235.1 59.5 341  
 120 4 25 350 23 360 3.90E-115 422.9 29159 cellular  
 organisms;Eukaryota;Opisthokonta;Metazoa;Eumetazoa;Bilateria;Protostomia;  
 Spiralia;Lophotrochozoa;Mollusca;Bivalvia;Autobranhia;Pteriormorphia;Ostr  
 eida;Ostreoidea;Ostreidae;Crassostrea;Crassostrea gigas  
 UdeM00000017000 225164 310.5 UdeM00000017000 XP\_009063479.1 50.5  
 309 109 4 15 281 71 377 2.30E-81 310.5 225164  
 cellular  
 organisms;Eukaryota;Opisthokonta;Metazoa;Eumetazoa;Bilateria;Protostomia;  
 Spiralia;Lophotrochozoa;Mollusca;Gastropoda;Patellogastropoda;Lottioidea;  
 Lottiidae;Lottia;Lottia gigantea

UdeM00000017001 29159 320.9 UdeM00000017001 XP\_034331235.1 49.3 339  
 101 5 27 297 25 360 1.80E-84 320.9 29159 cellular  
 organisms;Eukaryota;Opisthokonta;Metazoa;Eumetazoa;Bilateria;Protostomia;  
 Spiralia;Lophotrochozoa;Mollusca;Bivalvia;Autobranchia;Pteriomorphia;Ostr  
 eida;Ostreoidea;Ostreidae;Crassostrea;Crassostrea gigas  
 UdeM00000017002 1735272 405.6 UdeM00000017002 XP\_041354926.1 62.7  
 308 114 1 42 349 57 363 6.40E-110 405.6 1735272  
 cellular  
 organisms;Eukaryota;Opisthokonta;Metazoa;Eumetazoa;Bilateria;Protostomia;  
 Spiralia;Lophotrochozoa;Mollusca;Gastropoda;Neomphalina;Neomphaloidea;Pel  
 tospiridae;Gigantopelta;Gigantopelta aegis  
 UdeM00000017003 29159 367.1 UdeM00000017003 XP\_034331235.1 64.8 267  
 89 4 44 308 97 360 2.20E-98 367.1 29159 cellular  
 organisms;Eukaryota;Opisthokonta;Metazoa;Eumetazoa;Bilateria;Protostomia;  
 Spiralia;Lophotrochozoa;Mollusca;Bivalvia;Autobranchia;Pteriomorphia;Ostr  
 eida;Ostreoidea;Ostreidae;Crassostrea;Crassostrea gigas  
 UdeM00000017004 29159 407.9 UdeM00000017004 XP\_034331235.1 56.7 363  
 139 5 1 348 1 360 1.30E-110 407.9 29159 cellular  
 organisms;Eukaryota;Opisthokonta;Metazoa;Eumetazoa;Bilateria;Protostomia;  
 Spiralia;Lophotrochozoa;Mollusca;Bivalvia;Autobranchia;Pteriomorphia;Ostr  
 eida;Ostreoidea;Ostreidae;Crassostrea;Crassostrea gigas  
 UdeM00000017005 29159 363.6 UdeM00000017005 XP\_034331235.1 65.3 265  
 87 4 53 315 99 360 2.50E-97 363.6 29159 cellular  
 organisms;Eukaryota;Opisthokonta;Metazoa;Eumetazoa;Bilateria;Protostomia;  
 Spiralia;Lophotrochozoa;Mollusca;Bivalvia;Autobranchia;Pteriomorphia;Ostr  
 eida;Ostreoidea;Ostreidae;Crassostrea;Crassostrea gigas  
 UdeM00000017006 29159 409.1 UdeM00000017006 XP\_034331235.1 56.7 363  
 139 5 1 348 1 360 5.80E-111 409.1 29159 cellular  
 organisms;Eukaryota;Opisthokonta;Metazoa;Eumetazoa;Bilateria;Protostomia;  
 Spiralia;Lophotrochozoa;Mollusca;Bivalvia;Autobranchia;Pteriomorphia;Ostr  
 eida;Ostreoidea;Ostreidae;Crassostrea;Crassostrea gigas  
 UdeM00000017007 29159 392.1 UdeM00000017007 XP\_034331235.1 56.9 341  
 127 5 25 348 23 360 7.30E-106 392.1 29159 cellular  
 organisms;Eukaryota;Opisthokonta;Metazoa;Eumetazoa;Bilateria;Protostomia;  
 Spiralia;Lophotrochozoa;Mollusca;Bivalvia;Autobranchia;Pteriomorphia;Ostr  
 eida;Ostreoidea;Ostreidae;Crassostrea;Crassostrea gigas  
 UdeM00000017009 29159 378.3 UdeM00000017009 XP\_034331235.1 52.6 365  
 153 6 1 350 1 360 1.10E-101 378.3 29159 cellular  
 organisms;Eukaryota;Opisthokonta;Metazoa;Eumetazoa;Bilateria;Protostomia;  
 Spiralia;Lophotrochozoa;Mollusca;Bivalvia;Autobranchia;Pteriomorphia;Ostr  
 eida;Ostreoidea;Ostreidae;Crassostrea;Crassostrea gigas  
 UdeM00000017010 225164 337.4 UdeM00000017010 XP\_009063479.1 51.5  
 326 145 4 6 320 24 347 2.30E-89 337.4 225164  
 cellular  
 organisms;Eukaryota;Opisthokonta;Metazoa;Eumetazoa;Bilateria;Protostomia;  
 Spiralia;Lophotrochozoa;Mollusca;Gastropoda;Patellogastropoda;Lottioidae;  
 Lottiidae;Lottia;Lottia gigantea  
 UdeM00000017011 6596 151.8 UdeM00000017011 XP\_045197025.1 18.8 1163  
 384 20 37 654 154 1301 3.40E-33 151.8 6596 cellular  
 organisms;Eukaryota;Opisthokonta;Metazoa;Eumetazoa;Bilateria;Protostomia;  
 Spiralia;Lophotrochozoa;Mollusca;Bivalvia;Autobranchia;Heteroconchia;Euhe  
 terodonta;Imparidentia;Venerida;Veneroidea;Veneridae;Mercenaria;Mercenari  
 a mercenaria



UdeM00000017012 29159 116.3 UdeM00000017012 XP\_034326606.1 27.2 323  
 110 6 147 352 647 961 1.00E-22 116.3 29159 cellular  
 organisms;Eukaryota;Opisthokonta;Metazoa;Eumetazoa;Bilateria;Protostomia;  
 Spiralia;Lophotrochozoa;Mollusca;Bivalvia;Autobranchia;Pteriomorpha;Ostr  
 eida;Ostreoidea;Ostreidae;Crassostrea;Crassostrea gigas  
 UdeM00000017013 6596 150.6 UdeM00000017013 XP\_045197025.1 34.2 263  
 164 5 8 266 1080 1337 2.90E-33 150.6 6596 cellular  
 organisms;Eukaryota;Opisthokonta;Metazoa;Eumetazoa;Bilateria;Protostomia;  
 Spiralia;Lophotrochozoa;Mollusca;Bivalvia;Autobranchia;Heteroconchia;Euhe  
 terodonta;Imparidentia;Venerida;Veneroidea;Veneridae;Mercenaria;Mercenari  
 a mercenaria  
 UdeM00000017014 6596 547.7 UdeM00000017014 XP\_045198153.1 62.8 435  
 159 3 5 437 3 436 1.30E-152 547.7 6596 cellular  
 organisms;Eukaryota;Opisthokonta;Metazoa;Eumetazoa;Bilateria;Protostomia;  
 Spiralia;Lophotrochozoa;Mollusca;Bivalvia;Autobranchia;Heteroconchia;Euhe  
 terodonta;Imparidentia;Venerida;Veneroidea;Veneridae;Mercenaria;Mercenari  
 a mercenaria  
 UdeM00000017015 1735272 463.8 UdeM00000017015 XP\_041354275.1 52.2  
 441 205 3 5 444 24 459 2.50E-127 463.8 1735272  
 cellular  
 organisms;Eukaryota;Opisthokonta;Metazoa;Eumetazoa;Bilateria;Protostomia;  
 Spiralia;Lophotrochozoa;Mollusca;Gastropoda;Neomphalina;Neomphaloidea;Pel  
 tospiridae;Gigantopelta;Gigantopelta aegis  
 UdeM00000017016 1735272 413.7 UdeM00000017016 XP\_041354275.1 53.2  
 374 169 3 1 373 91 459 2.50E-112 413.7 1735272  
 cellular  
 organisms;Eukaryota;Opisthokonta;Metazoa;Eumetazoa;Bilateria;Protostomia;  
 Spiralia;Lophotrochozoa;Mollusca;Gastropoda;Neomphalina;Neomphaloidea;Pel  
 tospiridae;Gigantopelta;Gigantopelta aegis  
 UdeM00000017017 29159 406.4 UdeM00000017017 XP\_011418877.3 37.8 651  
 339 14 1 632 2 605 7.40E-110 406.4 29159 cellular  
 organisms;Eukaryota;Opisthokonta;Metazoa;Eumetazoa;Bilateria;Protostomia;  
 Spiralia;Lophotrochozoa;Mollusca;Bivalvia;Autobranchia;Pteriomorpha;Ostr  
 eida;Ostreoidea;Ostreidae;Crassostrea;Crassostrea gigas  
 UdeM00000017018 29159 485.3 UdeM00000017018 XP\_011437261.2 71.9 331  
 93 0 1 331 1 331 6.00E-134 485.3 29159 cellular  
 organisms;Eukaryota;Opisthokonta;Metazoa;Eumetazoa;Bilateria;Protostomia;  
 Spiralia;Lophotrochozoa;Mollusca;Bivalvia;Autobranchia;Pteriomorpha;Ostr  
 eida;Ostreoidea;Ostreidae;Crassostrea;Crassostrea gigas  
 UdeM00000017019 6565 659.8 UdeM00000017019 XP\_022293675.1 74.5 396  
 101 0 1 396 2 397 2.10E-186 659.8 6565 cellular  
 organisms;Eukaryota;Opisthokonta;Metazoa;Eumetazoa;Bilateria;Protostomia;  
 Spiralia;Lophotrochozoa;Mollusca;Bivalvia;Autobranchia;Pteriomorpha;Ostr  
 eida;Ostreoidea;Ostreidae;Crassostrea;Crassostrea virginica  
 UdeM00000017020 29159 74.3 UdeM00000017020 XP\_034318944.1 58.7 63  
 25 1 5 66 422 484 7.40E-11 74.3 29159 cellular  
 organisms;Eukaryota;Opisthokonta;Metazoa;Eumetazoa;Bilateria;Protostomia;  
 Spiralia;Lophotrochozoa;Mollusca;Bivalvia;Autobranchia;Pteriomorpha;Ostr  
 eida;Ostreoidea;Ostreidae;Crassostrea;Crassostrea gigas  
 UdeM00000017021 6573 248.4 UdeM00000017021 XP\_021369387.1 78.2 156  
 30 2 1 156 1 152 5.90E-63 248.4 6573 cellular  
 organisms;Eukaryota;Opisthokonta;Metazoa;Eumetazoa;Bilateria;Protostomia;  
 Spiralia;Lophotrochozoa;Mollusca;Bivalvia;Autobranchia;Pteriomorpha;Pect  
 inida;Pectinoidea;Pectinidae;Mizuhopecten;Mizuhopecten yessoensis

UdeM00000017022 6596 99.4 UdeM00000017022 XP\_045216876.1 72.2 72  
 20 0 25 96 20 91 3.00E-18 99.4 6596 cellular  
 organisms;Eukaryota;Opisthokonta;Metazoa;Eumetazoa;Bilateria;Protostomia;  
 Spiralia;Lophotrochozoa;Mollusca;Bivalvia;Autobranhia;Heteroconchia;Euhe  
 terodonta;Imparidentia;Venerida;Veneroidea;Veneridae;Mercenaria;Mercenari  
 a mercenaria  
 UdeM00000017023 6596 551.2 UdeM00000017023 XP\_045216876.1 70 420  
 116 3 1 410 103 522 1.20E-153 551.2 6596 cellular  
 organisms;Eukaryota;Opisthokonta;Metazoa;Eumetazoa;Bilateria;Protostomia;  
 Spiralia;Lophotrochozoa;Mollusca;Bivalvia;Autobranhia;Heteroconchia;Euhe  
 terodonta;Imparidentia;Venerida;Veneroidea;Veneridae;Mercenaria;Mercenari  
 a mercenaria  
 UdeM00000017024 6596 664.8 UdeM00000017024 XP\_045216876.1 68.5 530  
 152 5 3 529 20 537 9.00E-188 664.8 6596 cellular  
 organisms;Eukaryota;Opisthokonta;Metazoa;Eumetazoa;Bilateria;Protostomia;  
 Spiralia;Lophotrochozoa;Mollusca;Bivalvia;Autobranhia;Heteroconchia;Euhe  
 terodonta;Imparidentia;Venerida;Veneroidea;Veneridae;Mercenaria;Mercenari  
 a mercenaria  
 UdeM00000017025 6573 194.5 UdeM00000017025 XP\_021360747.1 34 359  
 213 9 32 379 37 382 3.50E-46 194.5 6573 cellular  
 organisms;Eukaryota;Opisthokonta;Metazoa;Eumetazoa;Bilateria;Protostomia;  
 Spiralia;Lophotrochozoa;Mollusca;Bivalvia;Autobranhia;Pteriormorphia;Pect  
 inida;Pectinoidea;Pectinidae;Mizuhopecten;Mizuhopecten yessoensis  
 UdeM00000017026 6596 1276.9 UdeM00000017026 XP\_045195365.1 60.3  
 1109 418 10 1 1102 17 1110 0.00E+00 1276.9 6596  
 cellular  
 organisms;Eukaryota;Opisthokonta;Metazoa;Eumetazoa;Bilateria;Protostomia;  
 Spiralia;Lophotrochozoa;Mollusca;Bivalvia;Autobranhia;Heteroconchia;Euhe  
 terodonta;Imparidentia;Venerida;Veneroidea;Veneridae;Mercenaria;Mercenari  
 a mercenaria  
 UdeM00000017027 6573 279.3 UdeM00000017027 XP\_021355391.1 81.1 164  
 31 0 16 179 58 221 3.60E-72 279.3 6573 cellular  
 organisms;Eukaryota;Opisthokonta;Metazoa;Eumetazoa;Bilateria;Protostomia;  
 Spiralia;Lophotrochozoa;Mollusca;Bivalvia;Autobranhia;Pteriormorphia;Pect  
 inida;Pectinoidea;Pectinidae;Mizuhopecten;Mizuhopecten yessoensis  
 UdeM00000017028 6565 166.4 UdeM00000017028 XP\_022327962.1 49.4 166  
 78 2 2 163 555 718 3.20E-38 166.4 6565 cellular  
 organisms;Eukaryota;Opisthokonta;Metazoa;Eumetazoa;Bilateria;Protostomia;  
 Spiralia;Lophotrochozoa;Mollusca;Bivalvia;Autobranhia;Pteriormorphia;Ostr  
 eida;Ostreoidea;Ostreidae;Crassostrea;Crassostrea virginica  
 UdeM00000017029 6596 945.3 UdeM00000017029 XP\_045195367.1 75.2 624  
 154 1 83 705 82 705 4.60E-272 945.3 6596 cellular  
 organisms;Eukaryota;Opisthokonta;Metazoa;Eumetazoa;Bilateria;Protostomia;  
 Spiralia;Lophotrochozoa;Mollusca;Bivalvia;Autobranhia;Heteroconchia;Euhe  
 terodonta;Imparidentia;Venerida;Veneroidea;Veneridae;Mercenaria;Mercenari  
 a mercenaria  
 UdeM00000017030 6596 372.1 UdeM00000017030 XP\_045202688.1 47 421  
 211 6 3 417 2 416 9.40E-100 372.1 6596 cellular  
 organisms;Eukaryota;Opisthokonta;Metazoa;Eumetazoa;Bilateria;Protostomia;  
 Spiralia;Lophotrochozoa;Mollusca;Bivalvia;Autobranhia;Heteroconchia;Euhe  
 terodonta;Imparidentia;Venerida;Veneroidea;Veneridae;Mercenaria;Mercenari  
 a mercenaria  
 UdeM00000017033 6573 288.1 UdeM00000017033 XP\_021350221.1 77.6 165  
 30 1 1 165 1 158 7.30E-75 288.1 6573 cellular

organisms;Eukaryota;Opisthokonta;Metazoa;Eumetazoa;Bilateria;Protostomia;Spiralia;Lophotrochozoa;Mollusca;Bivalvia;Autobranhia;Pteriormorphia;Pectinida;Pectinoidea;Pectinidae;Mizuhopecten;Mizuhopecten yessoensis  
UdeM00000017034 6573 287 UdeM00000017034 XP\_021344408.1 55.3 266  
115 4 1 263 334 598 2.60E-74 287 6573 cellular

organisms;Eukaryota;Opisthokonta;Metazoa;Eumetazoa;Bilateria;Protostomia;Spiralia;Lophotrochozoa;Mollusca;Bivalvia;Autobranhia;Pteriormorphia;Pectinida;Pectinoidea;Pectinidae;Mizuhopecten;Mizuhopecten yessoensis  
UdeM00000017035 29159 137.5 UdeM00000017035 XP\_034330947.1 48.8 160  
77 2 12 166 103 262 1.60E-28 137.5 29159 cellular

organisms;Eukaryota;Opisthokonta;Metazoa;Eumetazoa;Bilateria;Protostomia;Spiralia;Lophotrochozoa;Mollusca;Bivalvia;Autobranhia;Pteriormorphia;Ostreida;Ostreoidea;Ostreidae;Crassostrea;Crassostrea gigas  
UdeM00000017036 6573 142.5 UdeM00000017036 XP\_021359465.1 37.9 198  
117 1 24 221 299 490 6.40E-31 142.5 6573 cellular

organisms;Eukaryota;Opisthokonta;Metazoa;Eumetazoa;Bilateria;Protostomia;Spiralia;Lophotrochozoa;Mollusca;Bivalvia;Autobranhia;Pteriormorphia;Pectinida;Pectinoidea;Pectinidae;Mizuhopecten;Mizuhopecten yessoensis  
UdeM00000017037 6579 407.1 UdeM00000017037 XP\_033740157.1 63.2 288  
106 0 1 288 1 288 1.90E-110 407.1 6579 cellular

organisms;Eukaryota;Opisthokonta;Metazoa;Eumetazoa;Bilateria;Protostomia;Spiralia;Lophotrochozoa;Mollusca;Bivalvia;Autobranhia;Pteriormorphia;Pectinida;Pectinoidea;Pectinidae;Pecten;Pecten maximus  
UdeM00000017038 6596 2289.6 UdeM00000017038 XP\_045195673.1 60  
2469 794 22 1 2376 1 2368 0.00E+00 2289.6 6596  
cellular

organisms;Eukaryota;Opisthokonta;Metazoa;Eumetazoa;Bilateria;Protostomia;Spiralia;Lophotrochozoa;Mollusca;Bivalvia;Autobranhia;Heteroconchia;Euheterodonta;Imparidentia;Venerida;Veneroidea;Veneridae;Mercenaria;Mercenaria mercenaria  
UdeM00000017039 6596 468.8 UdeM00000017039 XP\_045195674.1 65.7 347  
118 1 29 375 29 374 6.70E-129 468.8 6596 cellular

organisms;Eukaryota;Opisthokonta;Metazoa;Eumetazoa;Bilateria;Protostomia;Spiralia;Lophotrochozoa;Mollusca;Bivalvia;Autobranhia;Heteroconchia;Euheterodonta;Imparidentia;Venerida;Veneroidea;Veneridae;Mercenaria;Mercenaria mercenaria  
UdeM00000017040 6596 510.4 UdeM00000017040 XP\_045195678.1 70.5 376  
105 4 1 373 1 373 2.00E-141 510.4 6596 cellular

organisms;Eukaryota;Opisthokonta;Metazoa;Eumetazoa;Bilateria;Protostomia;Spiralia;Lophotrochozoa;Mollusca;Bivalvia;Autobranhia;Heteroconchia;Euheterodonta;Imparidentia;Venerida;Veneroidea;Veneridae;Mercenaria;Mercenaria mercenaria  
UdeM00000017041 6565 529.3 UdeM00000017041 XP\_022293629.1 55.1 441  
195 3 36 474 36 475 5.20E-147 529.3 6565 cellular

organisms;Eukaryota;Opisthokonta;Metazoa;Eumetazoa;Bilateria;Protostomia;Spiralia;Lophotrochozoa;Mollusca;Bivalvia;Autobranhia;Pteriormorphia;Ostreida;Ostreoidea;Ostreidae;Crassostrea;Crassostrea virginica  
UdeM00000017042 6596 261.2 UdeM00000017042 XP\_045195306.1 23.5 1040  
657 29 5 978 8 974 6.40E-66 261.2 6596 cellular

organisms;Eukaryota;Opisthokonta;Metazoa;Eumetazoa;Bilateria;Protostomia;Spiralia;Lophotrochozoa;Mollusca;Bivalvia;Autobranhia;Heteroconchia;Euheterodonta;Imparidentia;Venerida;Veneroidea;Veneridae;Mercenaria;Mercenaria mercenaria

UdeM00000017043 29159 454.9 UdeM00000017043 XP\_011439711.1 78.5 284  
 54 2 1 282 1 279 7.50E-125 454.9 29159 cellular  
 organisms;Eukaryota;Opisthokonta;Metazoa;Eumetazoa;Bilateria;Protostomia;  
 Spiralia;Lophotrochozoa;Mollusca;Bivalvia;Autobranchia;Pteriormorphia;Ostr  
 eida;Ostreoidea;Ostreidae;Crassostrea;Crassostrea gigas  
 UdeM00000017044 6596 209.5 UdeM00000017044 XP\_045195188.1 36.6 331  
 191 7 40 367 25 339 1.60E-50 209.5 6596 cellular  
 organisms;Eukaryota;Opisthokonta;Metazoa;Eumetazoa;Bilateria;Protostomia;  
 Spiralia;Lophotrochozoa;Mollusca;Bivalvia;Autobranchia;Heteroconchia;Euhe  
 terodonta;Imparidentia;Venerida;Veneroidea;Veneridae;Mercenaria;Mercenari  
 a mercenaria  
 UdeM00000017045 6596 390.2 UdeM00000017045 XP\_045197202.1 36.7 569  
 337 6 29 590 27 579 4.90E-105 390.2 6596 cellular  
 organisms;Eukaryota;Opisthokonta;Metazoa;Eumetazoa;Bilateria;Protostomia;  
 Spiralia;Lophotrochozoa;Mollusca;Bivalvia;Autobranchia;Heteroconchia;Euhe  
 terodonta;Imparidentia;Venerida;Veneroidea;Veneridae;Mercenaria;Mercenari  
 a mercenaria  
 UdeM00000017046 6579 540 UdeM00000017046 XP\_033740002.1 65.6 392  
 134 1 8 398 4 395 2.50E-150 540 6579 cellular  
 organisms;Eukaryota;Opisthokonta;Metazoa;Eumetazoa;Bilateria;Protostomia;  
 Spiralia;Lophotrochozoa;Mollusca;Bivalvia;Autobranchia;Pteriormorphia;Pect  
 inida;Pectinoidea;Pectinidae;Pecten;Pecten maximus  
 UdeM00000017047 1735272 426.8 UdeM00000017047 XP\_041354939.1 45.7  
 541 253 10 7 511 6 541 3.90E-116 426.8 1735272  
 cellular  
 organisms;Eukaryota;Opisthokonta;Metazoa;Eumetazoa;Bilateria;Protostomia;  
 Spiralia;Lophotrochozoa;Mollusca;Gastropoda;Neomphalina;Neomphaloidea;Pel  
 tospiridae;Gigantopelta;Gigantopelta aegis  
 UdeM00000017048 6579 267.7 UdeM00000017048 XP\_033743002.1 49 263  
 129 1 144 406 61 318 2.40E-68 267.7 6579 cellular  
 organisms;Eukaryota;Opisthokonta;Metazoa;Eumetazoa;Bilateria;Protostomia;  
 Spiralia;Lophotrochozoa;Mollusca;Bivalvia;Autobranchia;Pteriormorphia;Pect  
 inida;Pectinoidea;Pectinidae;Pecten;Pecten maximus  
 UdeM00000017049 1735272 406.8 UdeM00000017049 XP\_041354939.1 44.1  
 555 257 11 6 525 5 541 4.30E-110 406.8 1735272  
 cellular  
 organisms;Eukaryota;Opisthokonta;Metazoa;Eumetazoa;Bilateria;Protostomia;  
 Spiralia;Lophotrochozoa;Mollusca;Gastropoda;Neomphalina;Neomphaloidea;Pel  
 tospiridae;Gigantopelta;Gigantopelta aegis  
 UdeM00000017051 29159 390.6 UdeM00000017051 XP\_034332764.1 58.8 308  
 126 1 191 498 126 432 3.10E-105 390.6 29159 cellular  
 organisms;Eukaryota;Opisthokonta;Metazoa;Eumetazoa;Bilateria;Protostomia;  
 Spiralia;Lophotrochozoa;Mollusca;Bivalvia;Autobranchia;Pteriormorphia;Ostr  
 eida;Ostreoidea;Ostreidae;Crassostrea;Crassostrea gigas  
 UdeM00000017052 6596 365.9 UdeM00000017052 XP\_045195187.1 45.5 440  
 220 6 65 501 111 533 8.10E-98 365.9 6596 cellular  
 organisms;Eukaryota;Opisthokonta;Metazoa;Eumetazoa;Bilateria;Protostomia;  
 Spiralia;Lophotrochozoa;Mollusca;Bivalvia;Autobranchia;Heteroconchia;Euhe  
 terodonta;Imparidentia;Venerida;Veneroidea;Veneridae;Mercenaria;Mercenari  
 a mercenaria  
 UdeM00000017053 1735272 402.9 UdeM00000017053 XP\_041354939.1 61.6  
 305 116 1 184 488 232 535 5.80E-109 402.9 1735272  
 cellular  
 organisms;Eukaryota;Opisthokonta;Metazoa;Eumetazoa;Bilateria;Protostomia;

Spiralia; Lophotrochozoa; Mollusca; Gastropoda; Neomphalina; Neomphaloidea; Pelto-  
 tospiridae; Gigantopelta; Gigantopelta aegis

UdeM00000017054 29159 158.3 UdeM00000017054 XP\_011422055.1 59.4 106  
 43 0 6 111 15 120 5.70E-36 158.3 29159 cellular  
 organisms; Eukaryota; Opisthokonta; Metazoa; Eumetazoa; Bilateria; Protostomia;  
 Spiralia; Lophotrochozoa; Mollusca; Bivalvia; Autobranchia; Pteriomorpha; Ostr-  
 eida; Ostreidae; Crassostrea; Crassostrea gigas

UdeM00000017055 6596 224.2 UdeM00000017055 XP\_045196210.1 44.9 363  
 163 12 1 333 15 370 2.50E-55 224.2 6596 cellular  
 organisms; Eukaryota; Opisthokonta; Metazoa; Eumetazoa; Bilateria; Protostomia;  
 Spiralia; Lophotrochozoa; Mollusca; Bivalvia; Autobranchia; Heteroconchia; Eue-  
 terodonta; Imparidentia; Venerida; Veneroidea; Veneridae; Mercenaria; Mercenari-  
 a mercenaria

UdeM00000017056 6596 987.3 UdeM00000017056 XP\_045196213.1 78 596  
 113 2 14 609 373 950 9.00E-285 987.3 6596 cellular  
 organisms; Eukaryota; Opisthokonta; Metazoa; Eumetazoa; Bilateria; Protostomia;  
 Spiralia; Lophotrochozoa; Mollusca; Bivalvia; Autobranchia; Heteroconchia; Eue-  
 terodonta; Imparidentia; Venerida; Veneroidea; Veneridae; Mercenaria; Mercenari-  
 a mercenaria

UdeM00000017057 6596 231.5 UdeM00000017057 XP\_045196215.1 71.3 171  
 45 2 1 167 970 1140 8.40E-58 231.5 6596 cellular  
 organisms; Eukaryota; Opisthokonta; Metazoa; Eumetazoa; Bilateria; Protostomia;  
 Spiralia; Lophotrochozoa; Mollusca; Bivalvia; Autobranchia; Heteroconchia; Eue-  
 terodonta; Imparidentia; Venerida; Veneroidea; Veneridae; Mercenaria; Mercenari-  
 a mercenaria

UdeM00000017058 6596 249.6 UdeM00000017058 XP\_045196218.1 71.1 180  
 50 2 577 755 1153 1331 1.30E-62 249.6 6596 cellular  
 organisms; Eukaryota; Opisthokonta; Metazoa; Eumetazoa; Bilateria; Protostomia;  
 Spiralia; Lophotrochozoa; Mollusca; Bivalvia; Autobranchia; Heteroconchia; Eue-  
 terodonta; Imparidentia; Venerida; Veneroidea; Veneridae; Mercenaria; Mercenari-  
 a mercenaria

UdeM00000017059 6596 623.6 UdeM00000017059 XP\_045198094.1 64.2 494  
 161 5 1 493 1 479 3.00E-175 623.6 6596 cellular  
 organisms; Eukaryota; Opisthokonta; Metazoa; Eumetazoa; Bilateria; Protostomia;  
 Spiralia; Lophotrochozoa; Mollusca; Bivalvia; Autobranchia; Heteroconchia; Eue-  
 terodonta; Imparidentia; Venerida; Veneroidea; Veneridae; Mercenaria; Mercenari-  
 a mercenaria

UdeM00000017060 6565 124 UdeM00000017060 XP\_022327962.1 52.2 115  
 53 1 3 115 604 718 1.20E-25 124 6565 cellular  
 organisms; Eukaryota; Opisthokonta; Metazoa; Eumetazoa; Bilateria; Protostomia;  
 Spiralia; Lophotrochozoa; Mollusca; Bivalvia; Autobranchia; Pteriomorpha; Ostr-  
 eida; Ostreidae; Crassostrea; Crassostrea virginica

UdeM00000017062 6579 74.3 UdeM00000017062 XP\_033739891.1 24.8 218  
 124 9 8 201 2 203 2.10E-10 74.3 6579 cellular  
 organisms; Eukaryota; Opisthokonta; Metazoa; Eumetazoa; Bilateria; Protostomia;  
 Spiralia; Lophotrochozoa; Mollusca; Bivalvia; Autobranchia; Pteriomorpha; Pect-  
 inida; Pectinoidea; Pectinidae; Pecten; Pecten maximus

UdeM00000017064 6565 73.2 UdeM00000017064 XP\_022344606.1 31.5 111  
 66 4 93 201 157 259 4.70E-10 73.2 6565 cellular  
 organisms; Eukaryota; Opisthokonta; Metazoa; Eumetazoa; Bilateria; Protostomia;  
 Spiralia; Lophotrochozoa; Mollusca; Bivalvia; Autobranchia; Pteriomorpha; Ostr-  
 eida; Ostreidae; Crassostrea; Crassostrea virginica

UdeM00000017067 6565 72.4 UdeM00000017067 XP\_022344606.1 31.5 111  
 66 4 93 201 157 259 8.10E-10 72.4 6565 cellular

organisms;Eukaryota;Opisthokonta;Metazoa;Eumetazoa;Bilateria;Protostomia;Spiralia;Lophotrochozoa;Mollusca;Bivalvia;Autobranhia;Pteriomorphia;Ostr  
eida;Ostreoidea;Ostreidae;Crassostrea;Crassostrea virginica  
UdeM00000017068 6573 615.9 UdeM00000017068 XP\_021359238.1 56.1 512  
224 1 1 512 89 599 4.60E-173 615.9 6573 cellular  
organisms;Eukaryota;Opisthokonta;Metazoa;Eumetazoa;Bilateria;Protostomia;Spiralia;Lophotrochozoa;Mollusca;Bivalvia;Autobranhia;Pteriomorphia;Pect  
inida;Pectinoidea;Pectinidae;Mizuhopecten;Mizuhopecten yessoensis  
UdeM00000017069 6596 655.6 UdeM00000017069 XP\_045195352.1 67.9 468  
150 0 1 468 1 468 4.80E-185 655.6 6596 cellular  
organisms;Eukaryota;Opisthokonta;Metazoa;Eumetazoa;Bilateria;Protostomia;Spiralia;Lophotrochozoa;Mollusca;Bivalvia;Autobranhia;Heteroconchia;Euhe  
terodonta;Imparidentia;Venerida;Veneroidea;Veneridae;Mercenaria;Mercenari  
a mercenaria  
UdeM00000017070 6596 225.3 UdeM00000017070 XP\_045197716.1 38.7 385  
173 11 7 351 13 374 1.20E-55 225.3 6596 cellular  
organisms;Eukaryota;Opisthokonta;Metazoa;Eumetazoa;Bilateria;Protostomia;Spiralia;Lophotrochozoa;Mollusca;Bivalvia;Autobranhia;Heteroconchia;Euhe  
terodonta;Imparidentia;Venerida;Veneroidea;Veneridae;Mercenaria;Mercenari  
a mercenaria  
UdeM00000017071 6596 225.3 UdeM00000017071 XP\_045197716.1 38.7 385  
173 11 18 362 13 374 1.30E-55 225.3 6596 cellular  
organisms;Eukaryota;Opisthokonta;Metazoa;Eumetazoa;Bilateria;Protostomia;Spiralia;Lophotrochozoa;Mollusca;Bivalvia;Autobranhia;Heteroconchia;Euhe  
terodonta;Imparidentia;Venerida;Veneroidea;Veneridae;Mercenaria;Mercenari  
a mercenaria  
UdeM00000017072 6579 335.1 UdeM00000017072 XP\_033739936.1 76.3 334  
74 1 4 337 3 331 1.00E-88 335.1 6579 cellular  
organisms;Eukaryota;Opisthokonta;Metazoa;Eumetazoa;Bilateria;Protostomia;Spiralia;Lophotrochozoa;Mollusca;Bivalvia;Autobranhia;Pteriomorphia;Pect  
inida;Pectinoidea;Pectinidae;Pecten;Pecten maximus  
UdeM00000017073 29159 408.3 UdeM00000017073 XP\_034332456.1 44.7 470  
224 8 3 462 51 494 1.30E-110 408.3 29159 cellular  
organisms;Eukaryota;Opisthokonta;Metazoa;Eumetazoa;Bilateria;Protostomia;Spiralia;Lophotrochozoa;Mollusca;Bivalvia;Autobranhia;Pteriomorphia;Ostr  
eida;Ostreoidea;Ostreidae;Crassostrea;Crassostrea gigas  
UdeM00000017074 29159 85.5 UdeM00000017074 XP\_034331441.1 45.1 91  
48 2 1 90 722 811 4.00E-14 85.5 29159 cellular  
organisms;Eukaryota;Opisthokonta;Metazoa;Eumetazoa;Bilateria;Protostomia;Spiralia;Lophotrochozoa;Mollusca;Bivalvia;Autobranhia;Pteriomorphia;Ostr  
eida;Ostreoidea;Ostreidae;Crassostrea;Crassostrea gigas  
UdeM00000017075 6565 117.5 UdeM00000017075 XP\_022297409.1 35.7 185  
115 3 29 210 226 409 2.10E-23 117.5 6565 cellular  
organisms;Eukaryota;Opisthokonta;Metazoa;Eumetazoa;Bilateria;Protostomia;Spiralia;Lophotrochozoa;Mollusca;Bivalvia;Autobranhia;Pteriomorphia;Ostr  
eida;Ostreoidea;Ostreidae;Crassostrea;Crassostrea virginica  
UdeM00000017077 6596 178.3 UdeM00000017077 XP\_045196225.1 54.1 159  
72 1 6 164 43 200 7.90E-42 178.3 6596 cellular  
organisms;Eukaryota;Opisthokonta;Metazoa;Eumetazoa;Bilateria;Protostomia;Spiralia;Lophotrochozoa;Mollusca;Bivalvia;Autobranhia;Heteroconchia;Euhe  
terodonta;Imparidentia;Venerida;Veneroidea;Veneridae;Mercenaria;Mercenari  
a mercenaria  
UdeM00000017078 6596 936 UdeM00000017078 XP\_045196225.1 69.9 670  
179 6 1 648 184 852 2.50E-269 936 6596 cellular

organisms;Eukaryota;Opisthokonta;Metazoa;Eumetazoa;Bilateria;Protostomia; Spiralia;Lophotrochozoa;Mollusca;Bivalvia;Autobranchia;Heteroconchia;Euherodonta;Imparidentia;Venerida;Veneroidea;Veneridae;Mercenaria;Mercenaria mercenaria

UdeM00000017079 6596 1001.9 UdeM00000017079 XP\_045196225.1 66  
773 234 11 1 748 184 952 4.30E-289 1001.9 6596  
cellular

organisms;Eukaryota;Opisthokonta;Metazoa;Eumetazoa;Bilateria;Protostomia; Spiralia;Lophotrochozoa;Mollusca;Bivalvia;Autobranchia;Heteroconchia;Euherodonta;Imparidentia;Venerida;Veneroidea;Veneridae;Mercenaria;Mercenaria mercenaria

UdeM00000017080 6596 454.9 UdeM00000017080 XP\_045197740.1 69.4 366  
55 7 1 362 1 313 9.90E-125 454.9 6596 cellular

organisms;Eukaryota;Opisthokonta;Metazoa;Eumetazoa;Bilateria;Protostomia; Spiralia;Lophotrochozoa;Mollusca;Bivalvia;Autobranchia;Heteroconchia;Euherodonta;Imparidentia;Venerida;Veneroidea;Veneridae;Mercenaria;Mercenaria mercenaria

UdeM00000017081 29159 437.6 UdeM00000017081 XP\_034335586.1 68.3 357  
86 10 1 351 1 336 1.60E-119 437.6 29159 cellular

organisms;Eukaryota;Opisthokonta;Metazoa;Eumetazoa;Bilateria;Protostomia; Spiralia;Lophotrochozoa;Mollusca;Bivalvia;Autobranchia;Pteriomorphia;Ostreida;Ostreoidea;Ostreidae;Crassostrea;Crassostrea gigas

UdeM00000017082 6596 860.5 UdeM00000017082 XP\_045197729.1 82.6 523  
86 2 163 680 55 577 1.40E-246 860.5 6596 cellular

organisms;Eukaryota;Opisthokonta;Metazoa;Eumetazoa;Bilateria;Protostomia; Spiralia;Lophotrochozoa;Mollusca;Bivalvia;Autobranchia;Heteroconchia;Euherodonta;Imparidentia;Venerida;Veneroidea;Veneridae;Mercenaria;Mercenaria mercenaria

UdeM00000017083 7574 196.1 UdeM00000017083 XP\_013408030.1 38.9 365  
180 8 1 363 1 324 8.00E-47 196.1 7574 cellular

organisms;Eukaryota;Opisthokonta;Metazoa;Eumetazoa;Bilateria;Protostomia; Spiralia;Lophotrochozoa;Brachiopoda;Linguliformea;Lingulata;Lingulida;Linguloidea;Lingulidae;Lingula;Lingula anatina

UdeM00000017084 6565 463.4 UdeM00000017084 XP\_022291730.1 54 400  
184 0 1 400 1 400 3.00E-127 463.4 6565 cellular

organisms;Eukaryota;Opisthokonta;Metazoa;Eumetazoa;Bilateria;Protostomia; Spiralia;Lophotrochozoa;Mollusca;Bivalvia;Autobranchia;Pteriomorphia;Ostreida;Ostreoidea;Ostreidae;Crassostrea;Crassostrea virginica

UdeM00000017085 6565 738.8 UdeM00000017085 XP\_022292838.1 56.2 802  
300 14 1 776 36 812 7.20E-210 738.8 6565 cellular

organisms;Eukaryota;Opisthokonta;Metazoa;Eumetazoa;Bilateria;Protostomia; Spiralia;Lophotrochozoa;Mollusca;Bivalvia;Autobranchia;Pteriomorphia;Ostreida;Ostreoidea;Ostreidae;Crassostrea;Crassostrea virginica

UdeM00000017086 6579 157.9 UdeM00000017086 XP\_033741811.1 40.8 211  
112 6 48 248 25 232 1.70E-35 157.9 6579 cellular

organisms;Eukaryota;Opisthokonta;Metazoa;Eumetazoa;Bilateria;Protostomia; Spiralia;Lophotrochozoa;Mollusca;Bivalvia;Autobranchia;Pteriomorphia;Pectinida;Pectinoidea;Pectinidae;Pecten;Pecten maximus

UdeM00000017087 6579 1446.8 UdeM00000017087 XP\_033739131.1 54.1  
1306 583 8 97 1399 78 1370 0.00E+00 1446.8 6579  
cellular

organisms;Eukaryota;Opisthokonta;Metazoa;Eumetazoa;Bilateria;Protostomia; Spiralia;Lophotrochozoa;Mollusca;Bivalvia;Autobranchia;Pteriomorphia;Pectinida;Pectinoidea;Pectinidae;Pecten;Pecten maximus

UdeM00000017088 29159 77.4 UdeM00000017088 XP\_034310118.1 50.7 75  
 36 1 522 596 497 570 7.10E-11 77.4 29159 cellular  
 organisms;Eukaryota;Opisthokonta;Metazoa;Eumetazoa;Bilateria;Protostomia;  
 Spiralia;Lophotrochozoa;Mollusca;Bivalvia;Autobranhia;Pteriormorphia;Ostr  
 eida;Ostreoidea;Ostreidae;Crassostrea;Crassostrea gigas  
 UdeM00000017089 29159 77.4 UdeM00000017089 XP\_034310118.1 50.7 75  
 36 1 537 611 497 570 7.20E-11 77.4 29159 cellular  
 organisms;Eukaryota;Opisthokonta;Metazoa;Eumetazoa;Bilateria;Protostomia;  
 Spiralia;Lophotrochozoa;Mollusca;Bivalvia;Autobranhia;Pteriormorphia;Ostr  
 eida;Ostreoidea;Ostreidae;Crassostrea;Crassostrea gigas  
 UdeM00000017090 6565 77 UdeM00000017090 XP\_022299013.1 53.6 69  
 32 0 577 645 146 214 9.90E-11 77 6565 cellular  
 organisms;Eukaryota;Opisthokonta;Metazoa;Eumetazoa;Bilateria;Protostomia;  
 Spiralia;Lophotrochozoa;Mollusca;Bivalvia;Autobranhia;Pteriormorphia;Ostr  
 eida;Ostreoidea;Ostreidae;Crassostrea;Crassostrea virginica  
 UdeM00000017091 6579 162.5 UdeM00000017091 XP\_033741811.1 43.8 210  
 101 8 46 243 23 227 6.90E-37 162.5 6579 cellular  
 organisms;Eukaryota;Opisthokonta;Metazoa;Eumetazoa;Bilateria;Protostomia;  
 Spiralia;Lophotrochozoa;Mollusca;Bivalvia;Autobranhia;Pteriormorphia;Pect  
 inida;Pectinoidea;Pectinidae;Pecten;Pecten maximus  
 UdeM00000017092 6596 903.7 UdeM00000017092 XP\_045196242.1 70.7 608  
 177 1 1 608 1 607 1.30E-259 903.7 6596 cellular  
 organisms;Eukaryota;Opisthokonta;Metazoa;Eumetazoa;Bilateria;Protostomia;  
 Spiralia;Lophotrochozoa;Mollusca;Bivalvia;Autobranhia;Heteroconchia;Euhe  
 terodonta;Imparidentia;Venerida;Veneroidea;Veneridae;Mercenaria;Mercenari  
 a mercenaria  
 UdeM00000017093 6573 112.1 UdeM00000017093 XP\_021373603.1 26.5 306  
 184 11 16 296 10 299 1.90E-21 112.1 6573 cellular  
 organisms;Eukaryota;Opisthokonta;Metazoa;Eumetazoa;Bilateria;Protostomia;  
 Spiralia;Lophotrochozoa;Mollusca;Bivalvia;Autobranhia;Pteriormorphia;Pect  
 inida;Pectinoidea;Pectinidae;Mizuhopecten;Mizuhopecten yessoensis  
 UdeM00000017094 29159 60.5 UdeM00000017094 XP\_011416417.2 24.8 270  
 169 13 54 308 39 289 7.00E-06 60.5 29159 cellular  
 organisms;Eukaryota;Opisthokonta;Metazoa;Eumetazoa;Bilateria;Protostomia;  
 Spiralia;Lophotrochozoa;Mollusca;Bivalvia;Autobranhia;Pteriormorphia;Ostr  
 eida;Ostreoidea;Ostreidae;Crassostrea;Crassostrea gigas  
 UdeM00000017095 6596 114.8 UdeM00000017095 XP\_045198205.1 32 247  
 145 13 64 298 1 236 5.00E-22 114.8 6596 cellular  
 organisms;Eukaryota;Opisthokonta;Metazoa;Eumetazoa;Bilateria;Protostomia;  
 Spiralia;Lophotrochozoa;Mollusca;Bivalvia;Autobranhia;Heteroconchia;Euhe  
 terodonta;Imparidentia;Venerida;Veneroidea;Veneridae;Mercenaria;Mercenari  
 a mercenaria  
 UdeM00000017097 6565 384.4 UdeM00000017097 XP\_022297037.1 55.6 360  
 138 3 1 358 183 522 1.60E-103 384.4 6565 cellular  
 organisms;Eukaryota;Opisthokonta;Metazoa;Eumetazoa;Bilateria;Protostomia;  
 Spiralia;Lophotrochozoa;Mollusca;Bivalvia;Autobranhia;Pteriormorphia;Ostr  
 eida;Ostreoidea;Ostreidae;Crassostrea;Crassostrea virginica  
 UdeM00000017098 6565 73.9 UdeM00000017098 XP\_022291589.1 30.4 125  
 80 5 1 122 158 278 5.20E-10 73.9 6565 cellular  
 organisms;Eukaryota;Opisthokonta;Metazoa;Eumetazoa;Bilateria;Protostomia;  
 Spiralia;Lophotrochozoa;Mollusca;Bivalvia;Autobranhia;Pteriormorphia;Ostr  
 eida;Ostreoidea;Ostreidae;Crassostrea;Crassostrea virginica  
 UdeM00000017099 6565 85.1 UdeM00000017099 XP\_022291589.1 28.9 173  
 111 8 1 170 132 295 2.20E-13 85.1 6565 cellular



organisms;Eukaryota;Opisthokonta;Metazoa;Eumetazoa;Bilateria;Protostomia;Spiralia;Lophotrochozoa;Mollusca;Bivalvia;Autobranhia;Pteriormorphia;Ostr eida;Ostreoidea;Ostreidae;Crassostrea;Crassostrea virginica  
UdeM00000017100 6565 66.2 UdeM00000017100 XP\_022291589.1 27.2 125  
84 5 1 122 158 278 7.90E-08 66.2 6565 cellular  
organisms;Eukaryota;Opisthokonta;Metazoa;Eumetazoa;Bilateria;Protostomia;Spiralia;Lophotrochozoa;Mollusca;Bivalvia;Autobranhia;Pteriormorphia;Ostr eida;Ostreoidea;Ostreidae;Crassostrea;Crassostrea virginica  
UdeM00000017101 6565 82.4 UdeM00000017101 XP\_022291589.1 29.2 154  
99 7 1 151 132 278 1.50E-12 82.4 6565 cellular  
organisms;Eukaryota;Opisthokonta;Metazoa;Eumetazoa;Bilateria;Protostomia;Spiralia;Lophotrochozoa;Mollusca;Bivalvia;Autobranhia;Pteriormorphia;Ostr eida;Ostreoidea;Ostreidae;Crassostrea;Crassostrea virginica  
UdeM00000017102 6573 113.6 UdeM00000017102 XP\_021355412.1 29.2 267  
169 10 27 279 32 292 8.60E-22 113.6 6573 cellular  
organisms;Eukaryota;Opisthokonta;Metazoa;Eumetazoa;Bilateria;Protostomia;Spiralia;Lophotrochozoa;Mollusca;Bivalvia;Autobranhia;Pteriormorphia;Pect inida;Pectinoidea;Pectinidae;Mizuhopecten;Mizuhopecten yessoensis  
UdeM00000017103 29159 238.4 UdeM00000017103 XP\_034299385.1 40.3 313  
166 6 647 940 32 342 2.20E-58 238.4 29159 cellular  
organisms;Eukaryota;Opisthokonta;Metazoa;Eumetazoa;Bilateria;Protostomia;Spiralia;Lophotrochozoa;Mollusca;Bivalvia;Autobranhia;Pteriormorphia;Ostr eida;Ostreoidea;Ostreidae;Crassostrea;Crassostrea gigas  
UdeM00000017110 29159 206.8 UdeM00000017110 XP\_011416417.2 40.5 269  
158 2 26 293 35 302 4.70E-50 206.8 29159 cellular  
organisms;Eukaryota;Opisthokonta;Metazoa;Eumetazoa;Bilateria;Protostomia;Spiralia;Lophotrochozoa;Mollusca;Bivalvia;Autobranhia;Pteriormorphia;Ostr eida;Ostreoidea;Ostreidae;Crassostrea;Crassostrea gigas  
UdeM00000017114 29159 228.4 UdeM00000017114 XP\_011416417.2 43.1 269  
151 2 213 480 35 302 2.30E-56 228.4 29159 cellular  
organisms;Eukaryota;Opisthokonta;Metazoa;Eumetazoa;Bilateria;Protostomia;Spiralia;Lophotrochozoa;Mollusca;Bivalvia;Autobranhia;Pteriormorphia;Ostr eida;Ostreoidea;Ostreidae;Crassostrea;Crassostrea gigas  
UdeM00000017115 29159 164.1 UdeM00000017115 XP\_011440298.1 47.5 198  
95 4 1 192 1 195 1.80E-37 164.1 29159 cellular  
organisms;Eukaryota;Opisthokonta;Metazoa;Eumetazoa;Bilateria;Protostomia;Spiralia;Lophotrochozoa;Mollusca;Bivalvia;Autobranhia;Pteriormorphia;Ostr eida;Ostreoidea;Ostreidae;Crassostrea;Crassostrea gigas  
UdeM00000017116 6579 793.9 UdeM00000017116 XP\_033740527.1 60.1 865  
248 8 13 871 10 783 2.30E-226 793.9 6579 cellular  
organisms;Eukaryota;Opisthokonta;Metazoa;Eumetazoa;Bilateria;Protostomia;Spiralia;Lophotrochozoa;Mollusca;Bivalvia;Autobranhia;Pteriormorphia;Pect inida;Pectinoidea;Pectinidae;Pecten;Pecten maximus  
UdeM00000017117 29159 307.8 UdeM00000017117 XP\_034331263.1 60.2 249  
99 0 1 249 1 249 1.30E-80 307.8 29159 cellular  
organisms;Eukaryota;Opisthokonta;Metazoa;Eumetazoa;Bilateria;Protostomia;Spiralia;Lophotrochozoa;Mollusca;Bivalvia;Autobranhia;Pteriormorphia;Ostr eida;Ostreoidea;Ostreidae;Crassostrea;Crassostrea gigas  
UdeM00000017118 6596 82.4 UdeM00000017118 XP\_045195917.1 54.1 74  
34 0 40 113 246 319 4.20E-13 82.4 6596 cellular  
organisms;Eukaryota;Opisthokonta;Metazoa;Eumetazoa;Bilateria;Protostomia;Spiralia;Lophotrochozoa;Mollusca;Bivalvia;Autobranhia;Heteroconchia;Euhe terodonta;Imparidentia;Venerida;Veneroidea;Veneridae;Mercenaria;Mercenari a mercenaria

UdeM00000017119 6500 281.6 UdeM00000017119 XP\_005109678.1 45.8 332  
 120 2 9 298 5 318 1.20E-72 281.6 6500 cellular  
 organisms;Eukaryota;Opisthokonta;Metazoa;Eumetazoa;Bilateria;Protostomia;  
 Spiralia;Lophotrochozoa;Mollusca;Gastropoda;Heterobranchia;Euthyneura;Tec  
 tipleura;Aplysiida;Aplysioidea;Aplysiidae;Aplysia;Aplysia californica  
 UdeM00000017121 6596 250 UdeM00000017121 XP\_045198849.1 47.9 313  
 141 9 1 296 1 308 3.90E-63 250 6596 cellular  
 organisms;Eukaryota;Opisthokonta;Metazoa;Eumetazoa;Bilateria;Protostomia;  
 Spiralia;Lophotrochozoa;Mollusca;Bivalvia;Autobranchia;Heteroconchia;Euhe  
 terodonta;Imparidentia;Venerida;Veneroidea;Veneridae;Mercenaria;Mercenari  
 a mercenaria  
 UdeM00000017122 6596 235 UdeM00000017122 XP\_045197921.1 87.5 144  
 17 1 1 143 1 144 6.10E-59 235 6596 cellular  
 organisms;Eukaryota;Opisthokonta;Metazoa;Eumetazoa;Bilateria;Protostomia;  
 Spiralia;Lophotrochozoa;Mollusca;Bivalvia;Autobranchia;Heteroconchia;Euhe  
 terodonta;Imparidentia;Venerida;Veneroidea;Veneridae;Mercenaria;Mercenari  
 a mercenaria  
 UdeM00000017123 7574 69.3 UdeM00000017123 XP\_013381308.1 38.3 94  
 57 1 18 110 92 185 3.50E-09 69.3 7574 cellular  
 organisms;Eukaryota;Opisthokonta;Metazoa;Eumetazoa;Bilateria;Protostomia;  
 Spiralia;Lophotrochozoa;Brachiopoda;Linguliformea;Lingulata;Lingulida;Lin  
 guloidea;Lingulidae;Lingula;Lingula anatina  
 UdeM00000017127 6596 131.7 UdeM00000017127 XP\_045198315.1 42.6 223  
 84 7 22 209 29 242 1.10E-27 131.7 6596 cellular  
 organisms;Eukaryota;Opisthokonta;Metazoa;Eumetazoa;Bilateria;Protostomia;  
 Spiralia;Lophotrochozoa;Mollusca;Bivalvia;Autobranchia;Heteroconchia;Euhe  
 terodonta;Imparidentia;Venerida;Veneroidea;Veneridae;Mercenaria;Mercenari  
 a mercenaria  
 UdeM00000041716 6596 272.7 UdeM00000041716 XP\_045179599.1 57 230  
 93 2 40 263 49 278 4.90E-70 272.7 6596 cellular  
 organisms;Eukaryota;Opisthokonta;Metazoa;Eumetazoa;Bilateria;Protostomia;  
 Spiralia;Lophotrochozoa;Mollusca;Bivalvia;Autobranchia;Heteroconchia;Euhe  
 terodonta;Imparidentia;Venerida;Veneroidea;Veneridae;Mercenaria;Mercenari  
 a mercenaria  
 UdeM00000041717 6596 342.4 UdeM00000041717 XP\_045216133.1 56.3 293  
 126 2 18 308 58 350 5.90E-91 342.4 6596 cellular  
 organisms;Eukaryota;Opisthokonta;Metazoa;Eumetazoa;Bilateria;Protostomia;  
 Spiralia;Lophotrochozoa;Mollusca;Bivalvia;Autobranchia;Heteroconchia;Euhe  
 terodonta;Imparidentia;Venerida;Veneroidea;Veneridae;Mercenaria;Mercenari  
 a mercenaria  
 UdeM00000041718 6573 163.3 UdeM00000041718 XP\_021375025.1 34.8 267  
 160 7 1 263 204 460 4.20E-37 163.3 6573 cellular  
 organisms;Eukaryota;Opisthokonta;Metazoa;Eumetazoa;Bilateria;Protostomia;  
 Spiralia;Lophotrochozoa;Mollusca;Bivalvia;Autobranchia;Pteriormorphia;Pect  
 inida;Pectinoidea;Pectinidae;Mizuhopecten;Mizuhopecten yessoensis  
 UdeM00000041721 6596 233 UdeM00000041721 XP\_045204261.1 42.4 276  
 147 7 81 351 39 307 5.80E-58 233 6596 cellular  
 organisms;Eukaryota;Opisthokonta;Metazoa;Eumetazoa;Bilateria;Protostomia;  
 Spiralia;Lophotrochozoa;Mollusca;Bivalvia;Autobranchia;Heteroconchia;Euhe  
 terodonta;Imparidentia;Venerida;Veneroidea;Veneridae;Mercenaria;Mercenari  
 a mercenaria  
 UdeM00000041722 6596 338.6 UdeM00000041722 XP\_045216896.1 51.9 297  
 142 1 46 342 92 387 9.60E-90 338.6 6596 cellular  
 organisms;Eukaryota;Opisthokonta;Metazoa;Eumetazoa;Bilateria;Protostomia;

Spiralia;Lophotrochozoa;Mollusca;Bivalvia;Autobranchia;Heteroconchia;Euherodonta;Imparidentia;Venerida;Veneroidea;Veneridae;Mercenaria;Mercenaria mercenaria

UdeM00000018485 6596 186.4 UdeM00000018485 XP\_045170933.1 24.3 752  
490 21 46 759 25 735 1.30E-43 186.4 6596 cellular

organisms;Eukaryota;Opisthokonta;Metazoa;Eumetazoa;Bilateria;Protostomia;Spiralia;Lophotrochozoa;Mollusca;Bivalvia;Autobranchia;Heteroconchia;Euherodonta;Imparidentia;Venerida;Veneroidea;Veneridae;Mercenaria;Mercenaria mercenaria

UdeM00000018486 6596 97.1 UdeM00000018486 XP\_045201917.1 26.1 230  
144 4 33 256 76 285 5.60E-17 97.1 6596 cellular

organisms;Eukaryota;Opisthokonta;Metazoa;Eumetazoa;Bilateria;Protostomia;Spiralia;Lophotrochozoa;Mollusca;Bivalvia;Autobranchia;Heteroconchia;Euherodonta;Imparidentia;Venerida;Veneroidea;Veneridae;Mercenaria;Mercenaria mercenaria

UdeM00000018487 6579 270.4 UdeM00000018487 XP\_033756890.1 59.2 213  
86 1 1 213 1 212 2.00E-69 270.4 6579 cellular

organisms;Eukaryota;Opisthokonta;Metazoa;Eumetazoa;Bilateria;Protostomia;Spiralia;Lophotrochozoa;Mollusca;Bivalvia;Autobranchia;Pteriomorphia;Pectinida;Pectinoidea;Pectinidae;Pecten;Pecten maximus

UdeM00000018488 74926 627.5 UdeM00000018488 XP\_044867028.1 28.1 1642  
1073 36 19 1619 843 2418 4.80E-176 627.5 74926 cellular

organisms;Eukaryota;Opisthokonta;Metazoa;Eumetazoa;Bilateria;Deuterostomia;Chordata;Craniata;Vertebrata;Gnathostomata;Teleostomi;Euteleostomi;Sarcopterygii;Dipnotetrapodomorpha;Tetrapoda;Amniota;Sauropsida;Sauria;Archelosauria;Testudinata;Testudines;Cryptodira;Durocryptodira;Testudinoidea;Geoemydidae;Geoemydinae;Mauremys;Mauremys mutica

UdeM00000018489 6596 111.7 UdeM00000018489 XP\_045209409.1 54.5 112  
23 1 9 92 351 462 5.10E-22 111.7 6596 cellular

organisms;Eukaryota;Opisthokonta;Metazoa;Eumetazoa;Bilateria;Protostomia;Spiralia;Lophotrochozoa;Mollusca;Bivalvia;Autobranchia;Heteroconchia;Euherodonta;Imparidentia;Venerida;Veneroidea;Veneridae;Mercenaria;Mercenaria mercenaria

UdeM00000018490 6596 637.9 UdeM00000018490 XP\_045209409.1 72.8 416  
113 0 8 423 47 462 9.30E-180 637.9 6596 cellular

organisms;Eukaryota;Opisthokonta;Metazoa;Eumetazoa;Bilateria;Protostomia;Spiralia;Lophotrochozoa;Mollusca;Bivalvia;Autobranchia;Heteroconchia;Euherodonta;Imparidentia;Venerida;Veneroidea;Veneridae;Mercenaria;Mercenaria mercenaria

UdeM00000018491 6596 618.2 UdeM00000018491 XP\_045180147.1 72.2 395  
105 3 20 413 599 989 7.40E-174 618.2 6596 cellular

organisms;Eukaryota;Opisthokonta;Metazoa;Eumetazoa;Bilateria;Protostomia;Spiralia;Lophotrochozoa;Mollusca;Bivalvia;Autobranchia;Heteroconchia;Euherodonta;Imparidentia;Venerida;Veneroidea;Veneridae;Mercenaria;Mercenaria mercenaria

UdeM00000018492 6573 177.2 UdeM00000018492 XP\_021376049.1 47.1 225  
108 5 13 230 382 602 2.80E-41 177.2 6573 cellular

organisms;Eukaryota;Opisthokonta;Metazoa;Eumetazoa;Bilateria;Protostomia;Spiralia;Lophotrochozoa;Mollusca;Bivalvia;Autobranchia;Pteriomorphia;Pectinida;Pectinoidea;Pectinidae;Mizuhopecten;Mizuhopecten yessoensis

UdeM00000018493 6596 323.9 UdeM00000018493 XP\_045180147.1 52.8 301  
141 1 40 340 1 300 2.40E-85 323.9 6596 cellular

organisms;Eukaryota;Opisthokonta;Metazoa;Eumetazoa;Bilateria;Protostomia;Spiralia;Lophotrochozoa;Mollusca;Bivalvia;Autobranchia;Heteroconchia;Euherodonta

terodonta;Imparidentia;Venerida;Veneroidea;Veneridae;Mercenaria;Mercenari  
 a mercenaria  
 UdeM00000018494 6596 503.8 UdeM00000018494 XP\_045180369.1 59.5 449  
 177 2 3 446 2 450 2.20E-139 503.8 6596 cellular  
 organisms;Eukaryota;Opisthokonta;Metazoa;Eumetazoa;Bilateria;Protostomia;  
 Spiralia;Lophotrochozoa;Mollusca;Bivalvia;Autobranchia;Heteroconchia;Euhe  
 terodonta;Imparidentia;Venerida;Veneroidea;Veneridae;Mercenaria;Mercenari  
 a mercenaria  
 UdeM00000018495 6596 123.2 UdeM00000018495 XP\_045181372.1 53 115  
 52 2 87 199 180 294 4.10E-25 123.2 6596 cellular  
 organisms;Eukaryota;Opisthokonta;Metazoa;Eumetazoa;Bilateria;Protostomia;  
 Spiralia;Lophotrochozoa;Mollusca;Bivalvia;Autobranchia;Heteroconchia;Euhe  
 terodonta;Imparidentia;Venerida;Veneroidea;Veneridae;Mercenaria;Mercenari  
 a mercenaria  
 UdeM00000018496 6596 618.6 UdeM00000018496 XP\_045181372.1 70.7 399  
 117 0 13 411 296 694 5.80E-174 618.6 6596 cellular  
 organisms;Eukaryota;Opisthokonta;Metazoa;Eumetazoa;Bilateria;Protostomia;  
 Spiralia;Lophotrochozoa;Mollusca;Bivalvia;Autobranchia;Heteroconchia;Euhe  
 terodonta;Imparidentia;Venerida;Veneroidea;Veneridae;Mercenaria;Mercenari  
 a mercenaria  
 UdeM00000018497 6596 128.6 UdeM00000018497 XP\_045168144.1 29.3 324  
 219 6 4 323 586 903 1.40E-26 128.6 6596 cellular  
 organisms;Eukaryota;Opisthokonta;Metazoa;Eumetazoa;Bilateria;Protostomia;  
 Spiralia;Lophotrochozoa;Mollusca;Bivalvia;Autobranchia;Heteroconchia;Euhe  
 terodonta;Imparidentia;Venerida;Veneroidea;Veneridae;Mercenaria;Mercenari  
 a mercenaria  
 UdeM00000018499 29159 562.8 UdeM00000018499 XP\_011447726.2 54.8 516  
 219 6 18 521 28 541 5.00E-157 562.8 29159 cellular  
 organisms;Eukaryota;Opisthokonta;Metazoa;Eumetazoa;Bilateria;Protostomia;  
 Spiralia;Lophotrochozoa;Mollusca;Bivalvia;Autobranchia;Pteriomorphia;Ostr  
 eida;Ostreoidea;Ostreidae;Crassostrea;Crassostrea gigas  
 UdeM00000018500 6596 869.4 UdeM00000018500 XP\_045182881.1 40.3 1993  
 894 55 2 1792 54 1953 8.00E-249 869.4 6596 cellular  
 organisms;Eukaryota;Opisthokonta;Metazoa;Eumetazoa;Bilateria;Protostomia;  
 Spiralia;Lophotrochozoa;Mollusca;Bivalvia;Autobranchia;Heteroconchia;Euhe  
 terodonta;Imparidentia;Venerida;Veneroidea;Veneridae;Mercenaria;Mercenari  
 a mercenaria  
 UdeM00000018501 6596 839 UdeM00000018501 XP\_045182881.1 39.1 1986  
 890 54 2 1754 54 1953 1.10E-239 839 6596 cellular  
 organisms;Eukaryota;Opisthokonta;Metazoa;Eumetazoa;Bilateria;Protostomia;  
 Spiralia;Lophotrochozoa;Mollusca;Bivalvia;Autobranchia;Heteroconchia;Euhe  
 terodonta;Imparidentia;Venerida;Veneroidea;Veneridae;Mercenaria;Mercenari  
 a mercenaria  
 UdeM00000018503 6526 228 UdeM00000018503 XP\_013062148.1 69.4 160  
 48 1 391 550 2550 2708 2.90E-56 228 6526 cellular  
 organisms;Eukaryota;Opisthokonta;Metazoa;Eumetazoa;Bilateria;Protostomia;  
 Spiralia;Lophotrochozoa;Mollusca;Gastropoda;Heterobranchia;Euthyneura;Pan  
 pulmonata;Hygrophila;Lymnaeidae;Planorbidae;Biophalaria;Biophalaria  
 glabrata  
 UdeM00000018505 29159 141 UdeM00000018505 XP\_011447722.2 65.3 95  
 33 0 156 250 1695 1789 2.10E-30 141 29159 cellular  
 organisms;Eukaryota;Opisthokonta;Metazoa;Eumetazoa;Bilateria;Protostomia;  
 Spiralia;Lophotrochozoa;Mollusca;Bivalvia;Autobranchia;Pteriomorphia;Ostr  
 eida;Ostreoidea;Ostreidae;Crassostrea;Crassostrea gigas

UdeM00000018506 6526 222.2 UdeM00000018506 XP\_013062148.1 60.2 196  
 72 3 169 362 2517 2708 1.00E-54 222.2 6526 cellular  
 organisms;Eukaryota;Opisthokonta;Metazoa;Eumetazoa;Bilateria;Protostomia;  
 Spiralia;Lophotrochozoa;Mollusca;Gastropoda;Heterobranchia;Euthyneura;Pan  
 pulmonata;Hygrophila;Lymnaeoidea;Planorbidae;Biomphalaria;Biomphalaria  
 glabrata  
 UdeM00000018507 400727 425.6 UdeM00000018507 XP\_025108466.1 45.7  
 499 256 5 29 527 59 542 9.30E-116 425.6 400727  
 cellular  
 organisms;Eukaryota;Opisthokonta;Metazoa;Eumetazoa;Bilateria;Protostomia;  
 Spiralia;Lophotrochozoa;Mollusca;Gastropoda;Caenogastropoda;Architaeniogl  
 ossa;Ampullarioidea;Ampullariidae;Pomacea;Pomacea canaliculata  
 UdeM00000018508 1720526 65.5 UdeM00000018508 YP\_009310399.1 23.2  
 298 201 7 3 293 492 768 1.40E-07 65.5 1720526  
 Viruses;Varidnaviria;Bamfordvirae;Nucleocytoviricota;Megaviricetes;  
 Pimascovirales;Marseilleviridae;Marseillevirus;unclassified  
 Marseillevirus;Golden Marseillevirus  
 UdeM00000018510 6596 274.6 UdeM00000018510 XP\_045182879.1 67.5 212  
 63 4 106 317 1762 1967 1.60E-70 274.6 6596 cellular  
 organisms;Eukaryota;Opisthokonta;Metazoa;Eumetazoa;Bilateria;Protostomia;  
 Spiralia;Lophotrochozoa;Mollusca;Bivalvia;Autobranchia;Heteroconchia;Euhe  
 terodonta;Imparidentia;Venerida;Veneroidea;Veneridae;Mercenaria;Mercenari  
 a mercenaria  
 UdeM00000018511 6596 288.5 UdeM00000018511 XP\_045182881.1 62.8 261  
 83 7 79 333 1701 1953 1.10E-74 288.5 6596 cellular  
 organisms;Eukaryota;Opisthokonta;Metazoa;Eumetazoa;Bilateria;Protostomia;  
 Spiralia;Lophotrochozoa;Mollusca;Bivalvia;Autobranchia;Heteroconchia;Euhe  
 terodonta;Imparidentia;Venerida;Veneroidea;Veneridae;Mercenaria;Mercenari  
 a mercenaria  
 UdeM00000018513 6596 257.7 UdeM00000018513 XP\_045182879.1 67 194  
 60 3 47 240 1778 1967 1.50E-65 257.7 6596 cellular  
 organisms;Eukaryota;Opisthokonta;Metazoa;Eumetazoa;Bilateria;Protostomia;  
 Spiralia;Lophotrochozoa;Mollusca;Bivalvia;Autobranchia;Heteroconchia;Euhe  
 terodonta;Imparidentia;Venerida;Veneroidea;Veneridae;Mercenaria;Mercenari  
 a mercenaria  
 UdeM00000018514 6596 161.4 UdeM00000018514 XP\_045160375.1 57.1 126  
 51 3 1 124 1 125 7.50E-37 161.4 6596 cellular  
 organisms;Eukaryota;Opisthokonta;Metazoa;Eumetazoa;Bilateria;Protostomia;  
 Spiralia;Lophotrochozoa;Mollusca;Bivalvia;Autobranchia;Heteroconchia;Euhe  
 terodonta;Imparidentia;Venerida;Veneroidea;Veneridae;Mercenaria;Mercenari  
 a mercenaria  
 UdeM00000018516 6596 201.4 UdeM00000018516 XP\_045160375.1 57 149  
 64 0 11 159 438 586 8.50E-49 201.4 6596 cellular  
 organisms;Eukaryota;Opisthokonta;Metazoa;Eumetazoa;Bilateria;Protostomia;  
 Spiralia;Lophotrochozoa;Mollusca;Bivalvia;Autobranchia;Heteroconchia;Euhe  
 terodonta;Imparidentia;Venerida;Veneroidea;Veneridae;Mercenaria;Mercenari  
 a mercenaria  
 UdeM00000018517 225164 197.2 UdeM00000018517 XP\_009063967.1 54.1  
 172 72 2 1 165 37 208 1.70E-47 197.2 225164  
 cellular  
 organisms;Eukaryota;Opisthokonta;Metazoa;Eumetazoa;Bilateria;Protostomia;  
 Spiralia;Lophotrochozoa;Mollusca;Gastropoda;Patellogastropoda;Lottioidae;  
 Lottiidae;Lottia;Lottia gigantea

UdeM00000018518 6596 277.3 UdeM00000018518 XP\_045182883.1 63.8 240  
 74 6 180 412 1701 1934 3.10E-71 277.3 6596 cellular  
 organisms;Eukaryota;Opisthokonta;Metazoa;Eumetazoa;Bilateria;Protostomia;  
 Spiralia;Lophotrochozoa;Mollusca;Bivalvia;Autobranchia;Heteroconchia;Euhe  
 terodonta;Imparidentia;Venerida;Veneroidea;Veneridae;Mercenaria;Mercenari  
 a mercenaria

UdeM00000018520 6526 228.4 UdeM00000018520 XP\_013062148.1 68.8 160  
 49 1 112 271 2550 2708 1.10E-56 228.4 6526 cellular  
 organisms;Eukaryota;Opisthokonta;Metazoa;Eumetazoa;Bilateria;Protostomia;  
 Spiralia;Lophotrochozoa;Mollusca;Gastropoda;Heterobranchia;Euthyneura;Pan  
 pulmonata;Hygrophila;Lymnaeioidea;Planorbidae;Biomphalaria;Biomphalaria  
 glabrata

UdeM00000018521 6596 336.7 UdeM00000018521 XP\_045160375.1 50.9 344  
 114 5 1 292 7 347 3.10E-89 336.7 6596 cellular  
 organisms;Eukaryota;Opisthokonta;Metazoa;Eumetazoa;Bilateria;Protostomia;  
 Spiralia;Lophotrochozoa;Mollusca;Bivalvia;Autobranchia;Heteroconchia;Euhe  
 terodonta;Imparidentia;Venerida;Veneroidea;Veneridae;Mercenaria;Mercenari  
 a mercenaria

UdeM00000018522 6596 199.9 UdeM00000018522 XP\_045160375.1 57.7 149  
 62 1 11 158 438 586 2.40E-48 199.9 6596 cellular  
 organisms;Eukaryota;Opisthokonta;Metazoa;Eumetazoa;Bilateria;Protostomia;  
 Spiralia;Lophotrochozoa;Mollusca;Bivalvia;Autobranchia;Heteroconchia;Euhe  
 terodonta;Imparidentia;Venerida;Veneroidea;Veneridae;Mercenaria;Mercenari  
 a mercenaria

UdeM00000018523 6596 280.4 UdeM00000018523 XP\_045160376.1 41.4 440  
 92 3 32 308 80 516 2.70E-72 280.4 6596 cellular  
 organisms;Eukaryota;Opisthokonta;Metazoa;Eumetazoa;Bilateria;Protostomia;  
 Spiralia;Lophotrochozoa;Mollusca;Bivalvia;Autobranchia;Heteroconchia;Euhe  
 terodonta;Imparidentia;Venerida;Veneroidea;Veneridae;Mercenaria;Mercenari  
 a mercenaria

UdeM00000018524 6596 251.1 UdeM00000018524 XP\_045182878.1 69.7 178  
 52 2 72 249 1796 1971 1.40E-63 251.1 6596 cellular  
 organisms;Eukaryota;Opisthokonta;Metazoa;Eumetazoa;Bilateria;Protostomia;  
 Spiralia;Lophotrochozoa;Mollusca;Bivalvia;Autobranchia;Heteroconchia;Euhe  
 terodonta;Imparidentia;Venerida;Veneroidea;Veneridae;Mercenaria;Mercenari  
 a mercenaria

UdeM00000018525 6596 823.2 UdeM00000018525 XP\_045182881.1 38.5 2048  
 867 57 11 1813 53 1953 6.70E-235 823.2 6596 cellular  
 organisms;Eukaryota;Opisthokonta;Metazoa;Eumetazoa;Bilateria;Protostomia;  
 Spiralia;Lophotrochozoa;Mollusca;Bivalvia;Autobranchia;Heteroconchia;Euhe  
 terodonta;Imparidentia;Venerida;Veneroidea;Veneridae;Mercenaria;Mercenari  
 a mercenaria

UdeM00000018526 6596 241.1 UdeM00000018526 XP\_045182878.1 62.2 196  
 70 3 9 204 1780 1971 1.20E-60 241.1 6596 cellular  
 organisms;Eukaryota;Opisthokonta;Metazoa;Eumetazoa;Bilateria;Protostomia;  
 Spiralia;Lophotrochozoa;Mollusca;Bivalvia;Autobranchia;Heteroconchia;Euhe  
 terodonta;Imparidentia;Venerida;Veneroidea;Veneridae;Mercenaria;Mercenari  
 a mercenaria

UdeM00000018527 29159 147.5 UdeM00000018527 XP\_011447722.2 66.7 99  
 33 0 44 142 1691 1789 1.30E-32 147.5 29159 cellular  
 organisms;Eukaryota;Opisthokonta;Metazoa;Eumetazoa;Bilateria;Protostomia;  
 Spiralia;Lophotrochozoa;Mollusca;Bivalvia;Autobranchia;Pteriomorphia;Ostr  
 eida;Ostreoidea;Ostreidae;Crassostrea;Crassostrea gigas

UdeM00000018528 6596 540.4 UdeM00000018528 XP\_045160375.1 47.1 590  
 202 9 1 484 1 586 2.30E-150 540.4 6596 cellular  
 organisms;Eukaryota;Opisthokonta;Metazoa;Eumetazoa;Bilateria;Protostomia;  
 Spiralia;Lophotrochozoa;Mollusca;Bivalvia;Autobranhia;Heteroconchia;Euhe  
 terodonta;Imparidentia;Venerida;Veneroidea;Veneridae;Mercenaria;Mercenari  
 a mercenaria  
 UdeM00000018529 6596 303.9 UdeM00000018529 XP\_045160376.1 80.1 186  
 37 0 2 187 331 516 1.40E-79 303.9 6596 cellular  
 organisms;Eukaryota;Opisthokonta;Metazoa;Eumetazoa;Bilateria;Protostomia;  
 Spiralia;Lophotrochozoa;Mollusca;Bivalvia;Autobranhia;Heteroconchia;Euhe  
 terodonta;Imparidentia;Venerida;Veneroidea;Veneridae;Mercenaria;Mercenari  
 a mercenaria  
 UdeM00000018530 6596 161.8 UdeM00000018530 XP\_045160376.1 47.4 192  
 92 3 32 220 80 265 1.10E-36 161.8 6596 cellular  
 organisms;Eukaryota;Opisthokonta;Metazoa;Eumetazoa;Bilateria;Protostomia;  
 Spiralia;Lophotrochozoa;Mollusca;Bivalvia;Autobranhia;Heteroconchia;Euhe  
 terodonta;Imparidentia;Venerida;Veneroidea;Veneridae;Mercenaria;Mercenari  
 a mercenaria  
 UdeM00000018531 6579 369.4 UdeM00000018531 XP\_033726512.1 34.9 1509  
 758 47 9 1326 481 1955 1.90E-98 369.4 6579 cellular  
 organisms;Eukaryota;Opisthokonta;Metazoa;Eumetazoa;Bilateria;Protostomia;  
 Spiralia;Lophotrochozoa;Mollusca;Bivalvia;Autobranhia;Pteriormorphia;Pect  
 inida;Pectinoidea;Pectinidae;Pecten;Pecten maximus  
 UdeM00000042869 6596 476.5 UdeM00000042869 XP\_045182316.1 38 842  
 400 17 5 771 361 1155 6.50E-131 476.5 6596 cellular  
 organisms;Eukaryota;Opisthokonta;Metazoa;Eumetazoa;Bilateria;Protostomia;  
 Spiralia;Lophotrochozoa;Mollusca;Bivalvia;Autobranhia;Heteroconchia;Euhe  
 terodonta;Imparidentia;Venerida;Veneroidea;Veneridae;Mercenaria;Mercenari  
 a mercenaria  
 UdeM00000042870 7054 85.5 UdeM00000042870 XP\_031356742.1 44 84  
 47 0 23 106 344 427 5.10E-14 85.5 7054 cellular  
 organisms;Eukaryota;Opisthokonta;Metazoa;Eumetazoa;Bilateria;Protostomia;  
 Ecdysozoa;Panarthropoda;Arthropoda;Mandibulata;Pancrustacea;Hexapoda;Inse  
 cta;Dicondylia;Pterygota;Neoptera;Endopterygota;Coleoptera;Polyphaga;Elat  
 eriformia;Elateroidea;Lampyridae;Lampyrinae;Photinus;Photinus pyralis  
 UdeM00000042871 6565 82 UdeM00000042871 XP\_022322206.1 42.4 92  
 52 1 6 96 106 197 7.30E-13 82 6565 cellular  
 organisms;Eukaryota;Opisthokonta;Metazoa;Eumetazoa;Bilateria;Protostomia;  
 Spiralia;Lophotrochozoa;Mollusca;Bivalvia;Autobranhia;Pteriormorphia;Ostr  
 eida;Ostreoidea;Ostreidae;Crassostrea;Crassostrea virginica  
 UdeM00000042872 1735272 59.7 UdeM00000042872 XP\_041379277.1 24.5  
 237 139 7 43 245 25 255 6.30E-06 59.7 1735272  
 cellular  
 organisms;Eukaryota;Opisthokonta;Metazoa;Eumetazoa;Bilateria;Protostomia;  
 Spiralia;Lophotrochozoa;Mollusca;Gastropoda;Neomphalina;Neomphaloidea;Pel  
 tospiridae;Gigantopelta;Gigantopelta aegis  
 UdeM00000042873 1735272 253.1 UdeM00000042873 XP\_041347279.1 34.6  
 439 244 11 1 406 1 429 6.20E-64 253.1 1735272  
 cellular  
 organisms;Eukaryota;Opisthokonta;Metazoa;Eumetazoa;Bilateria;Protostomia;  
 Spiralia;Lophotrochozoa;Mollusca;Gastropoda;Neomphalina;Neomphaloidea;Pel  
 tospiridae;Gigantopelta;Gigantopelta aegis  
 UdeM00000042874 1735272 224.9 UdeM00000042874 XP\_041347279.1 29.7  
 505 230 12 1 390 1 495 1.70E-55 224.9 1735272

cellular  
organisms;Eukaryota;Opisthokonta;Metazoa;Eumetazoa;Bilateria;Protostomia;  
Spiralia;Lophotrochozoa;Mollusca;Gastropoda;Neomphalina;Neomphaloidea;Pel  
tospiridae;Gigantopelta;Gigantopelta aegis

UdeM00000042875 1735272 261.9 UdeM00000042875 XP\_041347279.1 32.5  
505 246 12 1 420 1 495 1.40E-66 261.9 1735272

cellular  
organisms;Eukaryota;Opisthokonta;Metazoa;Eumetazoa;Bilateria;Protostomia;  
Spiralia;Lophotrochozoa;Mollusca;Gastropoda;Neomphalina;Neomphaloidea;Pel  
tospiridae;Gigantopelta;Gigantopelta aegis

UdeM00000042877 6596 290.8 UdeM00000042877 XP\_045181000.1 64.5 245  
33 1 97 287 1333 1577 2.00E-75 290.8 6596 cellular

organisms;Eukaryota;Opisthokonta;Metazoa;Eumetazoa;Bilateria;Protostomia;  
Spiralia;Lophotrochozoa;Mollusca;Bivalvia;Autobranchia;Heteroconchia;Euhe  
terodonta;Imparidentia;Venerida;Veneroidea;Veneridae;Mercenaria;Mercenari  
a mercenaria

UdeM00000043574 6596 439.1 UdeM00000043574 XP\_045167939.1 50.1 407  
198 3 31 435 29 432 9.30E-120 439.1 6596 cellular

organisms;Eukaryota;Opisthokonta;Metazoa;Eumetazoa;Bilateria;Protostomia;  
Spiralia;Lophotrochozoa;Mollusca;Bivalvia;Autobranchia;Heteroconchia;Euhe  
terodonta;Imparidentia;Venerida;Veneroidea;Veneridae;Mercenaria;Mercenari  
a mercenaria

UdeM00000043575 6596 438.7 UdeM00000043575 XP\_045167939.1 50.1 407  
198 3 9 413 29 432 1.20E-119 438.7 6596 cellular

organisms;Eukaryota;Opisthokonta;Metazoa;Eumetazoa;Bilateria;Protostomia;  
Spiralia;Lophotrochozoa;Mollusca;Bivalvia;Autobranchia;Heteroconchia;Euhe  
terodonta;Imparidentia;Venerida;Veneroidea;Veneridae;Mercenaria;Mercenari  
a mercenaria

UdeM00000043576 6596 445.7 UdeM00000043576 XP\_045167939.1 50.1 405  
197 2 34 436 31 432 9.90E-122 445.7 6596 cellular

organisms;Eukaryota;Opisthokonta;Metazoa;Eumetazoa;Bilateria;Protostomia;  
Spiralia;Lophotrochozoa;Mollusca;Bivalvia;Autobranchia;Heteroconchia;Euhe  
terodonta;Imparidentia;Venerida;Veneroidea;Veneridae;Mercenaria;Mercenari  
a mercenaria

UdeM00000043577 6596 419.1 UdeM00000043577 XP\_045167939.1 44.1 460  
197 3 34 491 31 432 1.10E-113 419.1 6596 cellular

organisms;Eukaryota;Opisthokonta;Metazoa;Eumetazoa;Bilateria;Protostomia;  
Spiralia;Lophotrochozoa;Mollusca;Bivalvia;Autobranchia;Heteroconchia;Euhe  
terodonta;Imparidentia;Venerida;Veneroidea;Veneridae;Mercenaria;Mercenari  
a mercenaria

UdeM00000043578 6596 744.2 UdeM00000043578 XP\_045169387.1 61.1 610  
210 3 1 584 1 609 1.30E-211 744.2 6596 cellular

organisms;Eukaryota;Opisthokonta;Metazoa;Eumetazoa;Bilateria;Protostomia;  
Spiralia;Lophotrochozoa;Mollusca;Bivalvia;Autobranchia;Heteroconchia;Euhe  
terodonta;Imparidentia;Venerida;Veneroidea;Veneridae;Mercenaria;Mercenari  
a mercenaria

UdeM00000043579 6596 221.9 UdeM00000043579 XP\_045168020.1 34.1 346  
159 4 106 450 416 693 1.70E-54 221.9 6596 cellular

organisms;Eukaryota;Opisthokonta;Metazoa;Eumetazoa;Bilateria;Protostomia;  
Spiralia;Lophotrochozoa;Mollusca;Bivalvia;Autobranchia;Heteroconchia;Euhe  
terodonta;Imparidentia;Venerida;Veneroidea;Veneridae;Mercenaria;Mercenari  
a mercenaria

UdeM00000043580 6579 195.3 UdeM00000043580 XP\_033762787.1 31.1 486  
271 10 4 462 2 450 1.70E-46 195.3 6579 cellular



organisms;Eukaryota;Opisthokonta;Metazoa;Eumetazoa;Bilateria;Protostomia;Spiralia;Lophotrochozoa;Mollusca;Bivalvia;Autobranhia;Pteriomorphia;Pectinida;Pectinoidea;Pectinidae;Pecten;Pecten maximus

UdeM00000043581 6596 98.6 UdeM00000043581 XP\_045170292.1 62.3 77  
29 0 2 78 1 77 3.90E-18 98.6 6596 cellular

organisms;Eukaryota;Opisthokonta;Metazoa;Eumetazoa;Bilateria;Protostomia;Spiralia;Lophotrochozoa;Mollusca;Bivalvia;Autobranhia;Heteroconchia;Euherodonta;Imparidentia;Venerida;Veneroidea;Veneridae;Mercenaria;Mercenaria mercenaria

UdeM00000043582 6596 182.6 UdeM00000043582 XP\_045170292.1 58.2 194  
69 2 8 192 75 265 5.10E-43 182.6 6596 cellular

organisms;Eukaryota;Opisthokonta;Metazoa;Eumetazoa;Bilateria;Protostomia;Spiralia;Lophotrochozoa;Mollusca;Bivalvia;Autobranhia;Heteroconchia;Euherodonta;Imparidentia;Venerida;Veneroidea;Veneridae;Mercenaria;Mercenaria mercenaria

UdeM00000043584 6596 585.1 UdeM00000043584 XP\_045168403.1 67.8 425  
132 2 1 422 1 423 7.20E-164 585.1 6596 cellular

organisms;Eukaryota;Opisthokonta;Metazoa;Eumetazoa;Bilateria;Protostomia;Spiralia;Lophotrochozoa;Mollusca;Bivalvia;Autobranhia;Heteroconchia;Euherodonta;Imparidentia;Venerida;Veneroidea;Veneridae;Mercenaria;Mercenaria mercenaria

UdeM00000043585 6573 275 UdeM00000043585 XP\_021342948.1 37 467  
126 9 1 304 1 462 1.10E-70 275 6573 cellular

organisms;Eukaryota;Opisthokonta;Metazoa;Eumetazoa;Bilateria;Protostomia;Spiralia;Lophotrochozoa;Mollusca;Bivalvia;Autobranhia;Pteriomorphia;Pectinida;Pectinoidea;Pectinidae;Mizuhopecten;Mizuhopecten yessoensis

UdeM00000043587 6579 104.8 UdeM00000043587 XP\_033747958.1 59.2 71  
29 0 1 71 87 157 6.50E-20 104.8 6579 cellular

organisms;Eukaryota;Opisthokonta;Metazoa;Eumetazoa;Bilateria;Protostomia;Spiralia;Lophotrochozoa;Mollusca;Bivalvia;Autobranhia;Pteriomorphia;Pectinida;Pectinoidea;Pectinidae;Pecten;Pecten maximus

UdeM00000043586 6579 145.2 UdeM00000043586 XP\_033747958.1 57.4 101  
43 0 1 101 57 157 5.60E-32 145.2 6579 cellular

organisms;Eukaryota;Opisthokonta;Metazoa;Eumetazoa;Bilateria;Protostomia;Spiralia;Lophotrochozoa;Mollusca;Bivalvia;Autobranhia;Pteriomorphia;Pectinida;Pectinoidea;Pectinidae;Pecten;Pecten maximus

UdeM00000043589 400727 865.1 UdeM00000043589 XP\_025096976.1 57  
847 300 15 1 812 1 818 6.80E-248 865.1 400727  
cellular

organisms;Eukaryota;Opisthokonta;Metazoa;Eumetazoa;Bilateria;Protostomia;Spiralia;Lophotrochozoa;Mollusca;Gastropoda;Caenogastropoda;Architaenioglossa;Ampullarioidea;Ampullariidae;Pomacea;Pomacea canaliculata

UdeM00000043590 6596 337.8 UdeM00000043590 XP\_045167398.1 49.4 348  
150 4 13 357 12 336 1.70E-89 337.8 6596 cellular

organisms;Eukaryota;Opisthokonta;Metazoa;Eumetazoa;Bilateria;Protostomia;Spiralia;Lophotrochozoa;Mollusca;Bivalvia;Autobranhia;Heteroconchia;Euherodonta;Imparidentia;Venerida;Veneroidea;Veneridae;Mercenaria;Mercenaria mercenaria

UdeM00000043591 6596 90.5 UdeM00000043591 XP\_045179287.1 49.4 85  
43 0 3 87 24 108 1.50E-15 90.5 6596 cellular

organisms;Eukaryota;Opisthokonta;Metazoa;Eumetazoa;Bilateria;Protostomia;Spiralia;Lophotrochozoa;Mollusca;Bivalvia;Autobranhia;Heteroconchia;Euherodonta;Imparidentia;Venerida;Veneroidea;Veneridae;Mercenaria;Mercenaria mercenaria

UdeM00000043592 400727 120.9 UdeM00000043592 XP\_025091396.1 59.8  
 97 37 1 1 97 1 95 1.00E-24 120.9 400727  
 cellular  
 organisms;Eukaryota;Opisthokonta;Metazoa;Eumetazoa;Bilateria;Protostomia;  
 Spiralia;Lophotrochozoa;Mollusca;Gastropoda;Caenogastropoda;Architaenioglossa;  
 Ampullarioidea;Ampullariidae;Pomacea;Pomacea canaliculata  
 UdeM00000043593 6596 357.5 UdeM00000043593 XP\_045167398.1 53.9 330  
 144 3 13 339 12 336 2.00E-95 357.5 6596 cellular  
 organisms;Eukaryota;Opisthokonta;Metazoa;Eumetazoa;Bilateria;Protostomia;  
 Spiralia;Lophotrochozoa;Mollusca;Bivalvia;Autobranchia;Heteroconchia;Euheterodonta;  
 Imparidentia;Venerida;Veneroidea;Veneridae;Mercenaria;Mercenaria mercenaria  
 UdeM00000043594 6565 1320.4 UdeM00000043594 XP\_022308017.1 38.2  
 1896 948 40 3 1734 4 1840 0.00E+00 1320.4 6565  
 cellular  
 organisms;Eukaryota;Opisthokonta;Metazoa;Eumetazoa;Bilateria;Protostomia;  
 Spiralia;Lophotrochozoa;Mollusca;Bivalvia;Autobranchia;Pteriormorphia;Ostreida;  
 Ostreioidea;Ostreidae;Crassostrea;Crassostrea virginica  
 UdeM00000043595 6565 144.1 UdeM00000043595 XP\_022308647.1 57.4 115  
 49 0 43 157 29 143 1.60E-31 144.1 6565 cellular  
 organisms;Eukaryota;Opisthokonta;Metazoa;Eumetazoa;Bilateria;Protostomia;  
 Spiralia;Lophotrochozoa;Mollusca;Bivalvia;Autobranchia;Pteriormorphia;Ostreida;  
 Ostreioidea;Ostreidae;Crassostrea;Crassostrea virginica  
 UdeM00000043596 29159 560.8 UdeM00000043596 XP\_034330259.1 41.7 731  
 378 13 245 960 2 699 3.40E-156 560.8 29159 cellular  
 organisms;Eukaryota;Opisthokonta;Metazoa;Eumetazoa;Bilateria;Protostomia;  
 Spiralia;Lophotrochozoa;Mollusca;Bivalvia;Autobranchia;Pteriormorphia;Ostreida;  
 Ostreioidea;Ostreidae;Crassostrea;Crassostrea gigas  
 UdeM00000043597 6596 357.1 UdeM00000043597 XP\_045167398.1 53.6 330  
 145 3 281 607 12 336 4.60E-95 357.1 6596 cellular  
 organisms;Eukaryota;Opisthokonta;Metazoa;Eumetazoa;Bilateria;Protostomia;  
 Spiralia;Lophotrochozoa;Mollusca;Bivalvia;Autobranchia;Heteroconchia;Euheterodonta;  
 Imparidentia;Venerida;Veneroidea;Veneridae;Mercenaria;Mercenaria mercenaria  
 UdeM00000043598 29159 1176.8 UdeM00000043598 XP\_034308495.1 38.7  
 1607 816 34 8 1506 175 1720 0.00E+00 1176.8  
 29159 cellular  
 organisms;Eukaryota;Opisthokonta;Metazoa;Eumetazoa;Bilateria;Protostomia;  
 Spiralia;Lophotrochozoa;Mollusca;Bivalvia;Autobranchia;Pteriormorphia;Ostreida;  
 Ostreioidea;Ostreidae;Crassostrea;Crassostrea gigas  
 UdeM00000043599 6565 144.1 UdeM00000043599 XP\_022308647.1 57.4 115  
 49 0 43 157 29 143 1.60E-31 144.1 6565 cellular  
 organisms;Eukaryota;Opisthokonta;Metazoa;Eumetazoa;Bilateria;Protostomia;  
 Spiralia;Lophotrochozoa;Mollusca;Bivalvia;Autobranchia;Pteriormorphia;Ostreida;  
 Ostreioidea;Ostreidae;Crassostrea;Crassostrea virginica  
 UdeM00000043600 6579 327.4 UdeM00000043600 XP\_033762681.1 46.6 337  
 168 3 14 338 336 672 2.10E-86 327.4 6579 cellular  
 organisms;Eukaryota;Opisthokonta;Metazoa;Eumetazoa;Bilateria;Protostomia;  
 Spiralia;Lophotrochozoa;Mollusca;Bivalvia;Autobranchia;Pteriormorphia;Pectinida;  
 Pectinoidea;Pectinidae;Pecten;Pecten maximus  
 UdeM00000043601 6579 394.4 UdeM00000043601 XP\_033731739.1 61.8 280  
 107 0 1 280 99 378 1.20E-106 394.4 6579 cellular  
 organisms;Eukaryota;Opisthokonta;Metazoa;Eumetazoa;Bilateria;Protostomia;

Spiralia;Lophotrochozoa;Mollusca;Bivalvia;Autobranchia;Pteriormorphia;Pectinida;Pectinoidea;Pectinidae;Pecten;Pecten maximus  
UdeM00000043602 6596 1060.1 UdeM00000043602 XP\_045167596.1 65.1  
1064 325 20 7 1045 27 1069 1.90E-306 1060.1 6596  
cellular

organisms;Eukaryota;Opisthokonta;Metazoa;Eumetazoa;Bilateria;Protostomia;Spiralia;Lophotrochozoa;Mollusca;Bivalvia;Autobranchia;Heteroconchia;Euherodonta;Imparidentia;Venerida;Veneroidea;Veneridae;Mercenaria;Mercenaria mercenaria

UdeM00000043604 6596 399.8 UdeM00000043604 XP\_045167596.1 73.6 265  
70 0 4 268 805 1069 2.70E-108 399.8 6596 cellular

organisms;Eukaryota;Opisthokonta;Metazoa;Eumetazoa;Bilateria;Protostomia;Spiralia;Lophotrochozoa;Mollusca;Bivalvia;Autobranchia;Heteroconchia;Euherodonta;Imparidentia;Venerida;Veneroidea;Veneridae;Mercenaria;Mercenaria mercenaria

UdeM00000043605 6596 482.6 UdeM00000043605 XP\_045167596.1 78.2 294  
64 0 53 346 776 1069 4.10E-133 482.6 6596 cellular

organisms;Eukaryota;Opisthokonta;Metazoa;Eumetazoa;Bilateria;Protostomia;Spiralia;Lophotrochozoa;Mollusca;Bivalvia;Autobranchia;Heteroconchia;Euherodonta;Imparidentia;Venerida;Veneroidea;Veneridae;Mercenaria;Mercenaria mercenaria

UdeM00000043606 6596 482.6 UdeM00000043606 XP\_045167596.1 78.2 294  
64 0 53 346 776 1069 4.10E-133 482.6 6596 cellular

organisms;Eukaryota;Opisthokonta;Metazoa;Eumetazoa;Bilateria;Protostomia;Spiralia;Lophotrochozoa;Mollusca;Bivalvia;Autobranchia;Heteroconchia;Euherodonta;Imparidentia;Venerida;Veneroidea;Veneridae;Mercenaria;Mercenaria mercenaria

UdeM00000043607 6596 482.6 UdeM00000043607 XP\_045167596.1 78.2 294  
64 0 53 346 776 1069 4.10E-133 482.6 6596 cellular

organisms;Eukaryota;Opisthokonta;Metazoa;Eumetazoa;Bilateria;Protostomia;Spiralia;Lophotrochozoa;Mollusca;Bivalvia;Autobranchia;Heteroconchia;Euherodonta;Imparidentia;Venerida;Veneroidea;Veneridae;Mercenaria;Mercenaria mercenaria

UdeM00000043608 6596 483 UdeM00000043608 XP\_045167596.1 78.2 294  
64 0 17 310 776 1069 2.80E-133 483 6596 cellular

organisms;Eukaryota;Opisthokonta;Metazoa;Eumetazoa;Bilateria;Protostomia;Spiralia;Lophotrochozoa;Mollusca;Bivalvia;Autobranchia;Heteroconchia;Euherodonta;Imparidentia;Venerida;Veneroidea;Veneridae;Mercenaria;Mercenaria mercenaria

UdeM00000043609 6596 482.6 UdeM00000043609 XP\_045167596.1 78.2 294  
64 0 53 346 776 1069 4.10E-133 482.6 6596 cellular

organisms;Eukaryota;Opisthokonta;Metazoa;Eumetazoa;Bilateria;Protostomia;Spiralia;Lophotrochozoa;Mollusca;Bivalvia;Autobranchia;Heteroconchia;Euherodonta;Imparidentia;Venerida;Veneroidea;Veneridae;Mercenaria;Mercenaria mercenaria

UdeM00000043610 6596 482.6 UdeM00000043610 XP\_045167596.1 78.2 294  
64 0 53 346 776 1069 4.10E-133 482.6 6596 cellular

organisms;Eukaryota;Opisthokonta;Metazoa;Eumetazoa;Bilateria;Protostomia;Spiralia;Lophotrochozoa;Mollusca;Bivalvia;Autobranchia;Heteroconchia;Euherodonta;Imparidentia;Venerida;Veneroidea;Veneridae;Mercenaria;Mercenaria mercenaria

UdeM00000043611 6596 482.6 UdeM00000043611 XP\_045167596.1 78.2 294  
64 0 53 346 776 1069 4.10E-133 482.6 6596 cellular

organisms;Eukaryota;Opisthokonta;Metazoa;Eumetazoa;Bilateria;Protostomia;

Spiralia;Lophotrochozoa;Mollusca;Bivalvia;Autobranchia;Heteroconchia;Euherodonta;Imparidentia;Venerida;Veneroidea;Veneridae;Mercenaria;Mercenaria mercenaria

UdeM00000044379 83332 511.5 UdeM00000044379 NP\_215134.1 74.2 360 93  
0 1 360 1 360 8.50E-142 511.5 83332 cellular

organisms;Bacteria;Terrabacteria

group;Actinobacteria;Actinomycetia;Corynebacteriales;Mycobacteriaceae;Mycobacterium;Mycobacterium tuberculosis complex;Mycobacterium tuberculosis;Mycobacterium tuberculosis H37Rv

UdeM00000043268 6596 73.9 UdeM00000043268 XP\_045188177.1 42.9 98  
49 2 79 172 26 120 5.40E-10 73.9 6596 cellular

organisms;Eukaryota;Opisthokonta;Metazoa;Eumetazoa;Bilateria;Protostomia;Spiralia;Lophotrochozoa;Mollusca;Bivalvia;Autobranchia;Heteroconchia;Euherodonta;Imparidentia;Venerida;Veneroidea;Veneridae;Mercenaria;Mercenaria mercenaria

UdeM00000043269 6596 73.9 UdeM00000043269 XP\_045188177.1 42.9 98  
49 2 71 164 26 120 5.30E-10 73.9 6596 cellular

organisms;Eukaryota;Opisthokonta;Metazoa;Eumetazoa;Bilateria;Protostomia;Spiralia;Lophotrochozoa;Mollusca;Bivalvia;Autobranchia;Heteroconchia;Euherodonta;Imparidentia;Venerida;Veneroidea;Veneridae;Mercenaria;Mercenaria mercenaria

UdeM00000043271 6596 168.7 UdeM00000043271 XP\_045189084.1 40.5 232  
118 3 3 234 1640 1851 1.70E-38 168.7 6596 cellular

organisms;Eukaryota;Opisthokonta;Metazoa;Eumetazoa;Bilateria;Protostomia;Spiralia;Lophotrochozoa;Mollusca;Bivalvia;Autobranchia;Heteroconchia;Euherodonta;Imparidentia;Venerida;Veneroidea;Veneridae;Mercenaria;Mercenaria mercenaria

UdeM00000043272 6596 190.3 UdeM00000043272 XP\_045177778.1 36.4 321  
172 6 1 316 405 698 3.90E-45 190.3 6596 cellular

organisms;Eukaryota;Opisthokonta;Metazoa;Eumetazoa;Bilateria;Protostomia;Spiralia;Lophotrochozoa;Mollusca;Bivalvia;Autobranchia;Heteroconchia;Euherodonta;Imparidentia;Venerida;Veneroidea;Veneridae;Mercenaria;Mercenaria mercenaria

UdeM00000043274 390379 170.2 UdeM00000043274 XP\_034030131.1 48.8  
164 83 1 4 167 95 257 2.30E-39 170.2 390379  
cellular

organisms;Eukaryota;Opisthokonta;Metazoa;Eumetazoa;Bilateria;Deuterostomia;Chordata;Craniata;Vertebrata;Gnathostomata;Teleostomi;Euteleostomi;Actinopterygii;Actinopteri;Neopterygii;Teleostei;Osteoglossocephalai;Clupeocephala;Euteleostei;Neoteleostei;Eurypterygia;Ctenosquamata;Acanthopterygii;Euacanthopterygii;Percomorphaceae;Batrachoidaria;Batrachoidiformes;Batrachoididae;Thalassophyrinae;Thalassophryne;Thalassophryne amazonica

UdeM00000043273 2652724 97.4 UdeM00000043273 XP\_028515960.1 47.8  
90 47 0 1 90 99 188 2.20E-17 97.4 2652724  
cellular

organisms;Eukaryota;Opisthokonta;Metazoa;Eumetazoa;Cnidaria;Anthozoa;Hexacorallia;Actiniaria;Aiptasiidae;Exaiptasia;Exaiptasia diaphana

UdeM00000043275 37621 101.7 UdeM00000043275 XP\_014678535.1 36.4 162  
95 4 9 170 281 434 9.90E-19 101.7 37621 cellular

organisms;Eukaryota;Opisthokonta;Metazoa;Eumetazoa;Bilateria;Protostomia;Ecdysozoa;Scalidophora;Priapulida;Priapulimorpha;Priapulimorphida;Priapulidae;Priapulus;Priapulus caudatus

UdeM00000043277 29159 75.5 UdeM00000043277 XP\_034322397.1 28 168  
 98 3 59 226 10 154 1.10E-10 75.5 29159 cellular  
 organisms;Eukaryota;Opisthokonta;Metazoa;Eumetazoa;Bilateria;Protostomia;  
 Spiralia;Lophotrochozoa;Mollusca;Bivalvia;Autobranhia;Pteriomorphia;Ostr  
 eida;Ostreoidea;Ostreidae;Crassostrea;Crassostrea gigas  
 UdeM00000043278 6596 284.3 UdeM00000043278 XP\_045189084.1 35 517  
 271 8 1 513 1350 1805 3.40E-73 284.3 6596 cellular  
 organisms;Eukaryota;Opisthokonta;Metazoa;Eumetazoa;Bilateria;Protostomia;  
 Spiralia;Lophotrochozoa;Mollusca;Bivalvia;Autobranhia;Heteroconchia;Euhe  
 terodonta;Imparidentia;Venerida;Veneroidea;Veneridae;Mercenaria;Mercenari  
 a mercenaria  
 UdeM00000043279 6596 81.3 UdeM00000043279 XP\_045188177.1 41.8 110  
 51 3 84 180 19 128 1.40E-12 81.3 6596 cellular  
 organisms;Eukaryota;Opisthokonta;Metazoa;Eumetazoa;Bilateria;Protostomia;  
 Spiralia;Lophotrochozoa;Mollusca;Bivalvia;Autobranhia;Heteroconchia;Euhe  
 terodonta;Imparidentia;Venerida;Veneroidea;Veneridae;Mercenaria;Mercenari  
 a mercenaria  
 UdeM00000043281 2652724 94 UdeM00000043281 XP\_020911241.1 31.7  
 183 116 4 13 195 8 181 2.40E-16 94 2652724  
 cellular  
 organisms;Eukaryota;Opisthokonta;Metazoa;Eumetazoa;Cnidaria;Anthozoa;Hexa  
 corallia;Actiniaria;Aiptasiidae;Exaiptasia;Exaiptasia diaphana  
 UdeM00000043280 6596 186.8 UdeM00000043280 XP\_045177776.1 36.6 265  
 150 2 2 266 685 931 6.50E-44 186.8 6596 cellular  
 organisms;Eukaryota;Opisthokonta;Metazoa;Eumetazoa;Bilateria;Protostomia;  
 Spiralia;Lophotrochozoa;Mollusca;Bivalvia;Autobranhia;Heteroconchia;Euhe  
 terodonta;Imparidentia;Venerida;Veneroidea;Veneridae;Mercenaria;Mercenari  
 a mercenaria  
 UdeM00000043282 6596 174.9 UdeM00000043282 XP\_045191793.1 33.8 328  
 169 5 1 326 258 539 2.50E-40 174.9 6596 cellular  
 organisms;Eukaryota;Opisthokonta;Metazoa;Eumetazoa;Bilateria;Protostomia;  
 Spiralia;Lophotrochozoa;Mollusca;Bivalvia;Autobranhia;Heteroconchia;Euhe  
 terodonta;Imparidentia;Venerida;Veneroidea;Veneridae;Mercenaria;Mercenari  
 a mercenaria  
 UdeM00000043283 37621 84.7 UdeM00000043283 XP\_014676916.1 34.9 189  
 101 3 7 174 64 251 1.20E-13 84.7 37621 cellular  
 organisms;Eukaryota;Opisthokonta;Metazoa;Eumetazoa;Bilateria;Protostomia;  
 Ecdysozoa;Scalidophora;Priapulida;Priapulimorpha;Priapulimorphida;Priapul  
 idae;Priapulid;Priapulid caudatus  
 UdeM00000043284 1735272 106.3 UdeM00000043284 XP\_041364761.1 47.5  
 99 52 0 1 99 87 185 3.00E-20 106.3 1735272  
 cellular  
 organisms;Eukaryota;Opisthokonta;Metazoa;Eumetazoa;Bilateria;Protostomia;  
 Spiralia;Lophotrochozoa;Mollusca;Gastropoda;Neomphalina;Neomphaloidea;Pel  
 tospiridae;Gigantopelta;Gigantopelta aegis  
 UdeM00000039159 6573 63.9 UdeM00000039159 XP\_021355916.1 40.7 86  
 50 1 4 89 499 583 1.20E-07 63.9 6573 cellular  
 organisms;Eukaryota;Opisthokonta;Metazoa;Eumetazoa;Bilateria;Protostomia;  
 Spiralia;Lophotrochozoa;Mollusca;Bivalvia;Autobranhia;Pteriomorphia;Pect  
 inida;Pectinoidea;Pectinidae;Mizuhopecten;Mizuhopecten yessoensis  
 UdeM00000039160 6596 350.5 UdeM00000039160 XP\_045204176.1 53.5 318  
 140 3 1 313 1 315 2.20E-93 350.5 6596 cellular  
 organisms;Eukaryota;Opisthokonta;Metazoa;Eumetazoa;Bilateria;Protostomia;  
 Spiralia;Lophotrochozoa;Mollusca;Bivalvia;Autobranhia;Heteroconchia;Euhe

terodonta;Imparidentia;Venerida;Veneroidea;Veneridae;Mercenaria;Mercenari  
 a mercenaria  
 UdeM00000039161 6596 181.8 UdeM00000039161 XP\_045203144.1 48.7 193  
 95 2 1 192 399 588 8.40E-43 181.8 6596 cellular  
 organisms;Eukaryota;Opisthokonta;Metazoa;Eumetazoa;Bilateria;Protostomia;  
 Spiralia;Lophotrochozoa;Mollusca;Bivalvia;Autobranhia;Heteroconchia;Euhe  
 terodonta;Imparidentia;Venerida;Veneroidea;Veneridae;Mercenaria;Mercenari  
 a mercenaria  
 UdeM00000039162 6573 261.2 UdeM00000039162 XP\_021347189.1 46.2 266  
 140 2 135 400 143 405 2.20E-66 261.2 6573 cellular  
 organisms;Eukaryota;Opisthokonta;Metazoa;Eumetazoa;Bilateria;Protostomia;  
 Spiralia;Lophotrochozoa;Mollusca;Bivalvia;Autobranhia;Pteriormorphia;Pect  
 inida;Pectinoidea;Pectinidae;Mizuhopecten;Mizuhopecten yessoensis  
 UdeM00000039163 7668 87.8 UdeM00000039163 XP\_030832292.1 35.7 154  
 84 5 2 148 257 402 1.30E-14 87.8 7668 cellular  
 organisms;Eukaryota;Opisthokonta;Metazoa;Eumetazoa;Bilateria;Deuterostomi  
 a;Echinodermata;Eleutherozoa;Echinozoa;Echinoidea;Euechinoidea;Echinacea;  
 Camarodonta;Echinidea;Strongylocentrotidae;Strongylocentrotus;Strongyloce  
 ntrotus purpuratus  
 UdeM00000039164 37653 222.2 UdeM00000039164 XP\_014782122.1 40.4 267  
 156 2 115 380 128 392 1.10E-54 222.2 37653 cellular  
 organisms;Eukaryota;Opisthokonta;Metazoa;Eumetazoa;Bilateria;Protostomia;  
 Spiralia;Lophotrochozoa;Mollusca;Cephalopoda;Coleoidea;Octopodiformes;Oct  
 opoda;Incirrata;Octopodidae;Octopus;Octopus bimaculoides  
 UdeM00000039165 6596 198 UdeM00000039165 XP\_045184460.1 43.7 197  
 110 1 13 209 218 413 1.20E-47 198 6596 cellular  
 organisms;Eukaryota;Opisthokonta;Metazoa;Eumetazoa;Bilateria;Protostomia;  
 Spiralia;Lophotrochozoa;Mollusca;Bivalvia;Autobranhia;Heteroconchia;Euhe  
 terodonta;Imparidentia;Venerida;Veneroidea;Veneridae;Mercenaria;Mercenari  
 a mercenaria  
 UdeM00000039166 6573 224.9 UdeM00000039166 XP\_021347189.1 39.2 288  
 170 3 119 406 123 405 1.80E-55 224.9 6573 cellular  
 organisms;Eukaryota;Opisthokonta;Metazoa;Eumetazoa;Bilateria;Protostomia;  
 Spiralia;Lophotrochozoa;Mollusca;Bivalvia;Autobranhia;Pteriormorphia;Pect  
 inida;Pectinoidea;Pectinidae;Mizuhopecten;Mizuhopecten yessoensis  
 UdeM00000039167 6573 231.5 UdeM00000039167 XP\_021347189.1 41.3 281  
 161 3 120 400 129 405 1.90E-57 231.5 6573 cellular  
 organisms;Eukaryota;Opisthokonta;Metazoa;Eumetazoa;Bilateria;Protostomia;  
 Spiralia;Lophotrochozoa;Mollusca;Bivalvia;Autobranhia;Pteriormorphia;Pect  
 inida;Pectinoidea;Pectinidae;Mizuhopecten;Mizuhopecten yessoensis  
 UdeM00000039168 225164 224.6 UdeM00000039168 XP\_009064246.1 41.4  
 266 149 4 143 406 40 300 2.40E-55 224.6 225164  
 cellular  
 organisms;Eukaryota;Opisthokonta;Metazoa;Eumetazoa;Bilateria;Protostomia;  
 Spiralia;Lophotrochozoa;Mollusca;Gastropoda;Patellogastropoda;Lottioidea;  
 Lottiidae;Lottia;Lottia gigantea  
 UdeM00000039169 6596 229.6 UdeM00000039169 XP\_045184460.1 42.9 254  
 144 1 98 351 161 413 6.30E-57 229.6 6596 cellular  
 organisms;Eukaryota;Opisthokonta;Metazoa;Eumetazoa;Bilateria;Protostomia;  
 Spiralia;Lophotrochozoa;Mollusca;Bivalvia;Autobranhia;Heteroconchia;Euhe  
 terodonta;Imparidentia;Venerida;Veneroidea;Veneridae;Mercenaria;Mercenari  
 a mercenaria  
 UdeM00000039170 6596 464.9 UdeM00000039170 XP\_045172620.1 43.9 583  
 282 8 6 548 2 579 1.40E-127 464.9 6596 cellular

organisms;Eukaryota;Opisthokonta;Metazoa;Eumetazoa;Bilateria;Protostomia;Spiralia;Lophotrochozoa;Mollusca;Bivalvia;Autobranhia;Heteroconchia;Euherodonta;Imparidentia;Venerida;Veneroidea;Veneridae;Mercenaria;Mercenaria mercenaria

UdeM00000039171 6596 83.2 UdeM00000039171 XP\_045173396.1 55.6 72  
29 1 6 77 2 70 1.60E-13 83.2 6596 cellular

organisms;Eukaryota;Opisthokonta;Metazoa;Eumetazoa;Bilateria;Protostomia;Spiralia;Lophotrochozoa;Mollusca;Bivalvia;Autobranhia;Heteroconchia;Euherodonta;Imparidentia;Venerida;Veneroidea;Veneridae;Mercenaria;Mercenaria mercenaria

UdeM00000039172 6596 412.9 UdeM00000039172 XP\_045172620.1 45.7 490  
249 8 1 475 92 579 5.50E-112 412.9 6596 cellular

organisms;Eukaryota;Opisthokonta;Metazoa;Eumetazoa;Bilateria;Protostomia;Spiralia;Lophotrochozoa;Mollusca;Bivalvia;Autobranhia;Heteroconchia;Euherodonta;Imparidentia;Venerida;Veneroidea;Veneridae;Mercenaria;Mercenaria mercenaria

UdeM00000039173 6596 500.4 UdeM00000039173 XP\_045172620.1 47 583  
286 10 14 578 2 579 3.20E-138 500.4 6596 cellular

organisms;Eukaryota;Opisthokonta;Metazoa;Eumetazoa;Bilateria;Protostomia;Spiralia;Lophotrochozoa;Mollusca;Bivalvia;Autobranhia;Heteroconchia;Euherodonta;Imparidentia;Venerida;Veneroidea;Veneridae;Mercenaria;Mercenaria mercenaria

UdeM00000039176 6596 251.9 UdeM00000039176 XP\_045161350.1 35.1 456  
169 5 2 456 107 436 1.50E-63 251.9 6596 cellular

organisms;Eukaryota;Opisthokonta;Metazoa;Eumetazoa;Bilateria;Protostomia;Spiralia;Lophotrochozoa;Mollusca;Bivalvia;Autobranhia;Heteroconchia;Euherodonta;Imparidentia;Venerida;Veneroidea;Veneridae;Mercenaria;Mercenaria mercenaria

UdeM00000039177 6573 63.9 UdeM00000039177 XP\_021355916.1 40.7 86  
50 1 4 89 499 583 1.20E-07 63.9 6573 cellular

organisms;Eukaryota;Opisthokonta;Metazoa;Eumetazoa;Bilateria;Protostomia;Spiralia;Lophotrochozoa;Mollusca;Bivalvia;Autobranhia;Pteriomorphia;Pectinida;Pectinoidea;Pectinidae;Mizuhopecten;Mizuhopecten yessoensis

UdeM00000039178 6596 351.3 UdeM00000039178 XP\_045172573.1 49.1 342  
169 3 1 337 1 342 1.80E-93 351.3 6596 cellular

organisms;Eukaryota;Opisthokonta;Metazoa;Eumetazoa;Bilateria;Protostomia;Spiralia;Lophotrochozoa;Mollusca;Bivalvia;Autobranhia;Heteroconchia;Euherodonta;Imparidentia;Venerida;Veneroidea;Veneridae;Mercenaria;Mercenaria mercenaria

UdeM00000039179 6596 183 UdeM00000039179 XP\_045203144.1 49.2 193  
94 2 1 192 399 588 3.80E-43 183 6596 cellular

organisms;Eukaryota;Opisthokonta;Metazoa;Eumetazoa;Bilateria;Protostomia;Spiralia;Lophotrochozoa;Mollusca;Bivalvia;Autobranhia;Heteroconchia;Euherodonta;Imparidentia;Venerida;Veneroidea;Veneridae;Mercenaria;Mercenaria mercenaria

UdeM00000039180 6573 261.9 UdeM00000039180 XP\_021347189.1 45.9 268  
142 2 133 400 141 405 1.30E-66 261.9 6573 cellular

organisms;Eukaryota;Opisthokonta;Metazoa;Eumetazoa;Bilateria;Protostomia;Spiralia;Lophotrochozoa;Mollusca;Bivalvia;Autobranhia;Pteriomorphia;Pectinida;Pectinoidea;Pectinidae;Mizuhopecten;Mizuhopecten yessoensis

UdeM00000039181 6573 166 UdeM00000039181 XP\_021347189.1 33.9 286  
128 3 119 346 123 405 8.50E-38 166 6573 cellular

organisms;Eukaryota;Opisthokonta;Metazoa;Eumetazoa;Bilateria;Protostomia;

Spiralia; Lophotrochozoa; Mollusca; Bivalvia; Autobranchia; Pteriomorpha; Pectinida; Pectinoidea; Pectinidae; Mizuhopecten; Mizuhopecten yessoensis

UdeM00000039184 6596 203.4 UdeM00000039184 XP\_045216087.1 43.4 212  
116 2 1 210 144 353 2.90E-49 203.4 6596 cellular  
organisms; Eukaryota; Opisthokonta; Metazoa; Eumetazoa; Bilateria; Protostomia; Spiralia; Lophotrochozoa; Mollusca; Bivalvia; Autobranchia; Heteroconchia; Euheterodonta; Imparidentia; Venerida; Veneroidea; Veneridae; Mercenaria; Mercenaria mercenaria

UdeM00000039185 225164 228 UdeM00000039185 XP\_009064246.1 42.5  
266 146 5 143 406 40 300 2.10E-56 228 225164  
cellular  
organisms; Eukaryota; Opisthokonta; Metazoa; Eumetazoa; Bilateria; Protostomia; Spiralia; Lophotrochozoa; Mollusca; Gastropoda; Patellogastropoda; Lottioidea; Lottiidae; Lottia; Lottia gigantea

UdeM00000039186 6573 232.3 UdeM00000039186 XP\_021347189.1 40.4 282  
162 4 120 400 129 405 1.10E-57 232.3 6573 cellular  
organisms; Eukaryota; Opisthokonta; Metazoa; Eumetazoa; Bilateria; Protostomia; Spiralia; Lophotrochozoa; Mollusca; Bivalvia; Autobranchia; Pteriomorpha; Pectinida; Pectinoidea; Pectinidae; Mizuhopecten; Mizuhopecten yessoensis

UdeM00000039187 225164 219.2 UdeM00000039187 XP\_009064246.1 41.7  
266 148 5 143 406 40 300 9.90E-54 219.2 225164  
cellular  
organisms; Eukaryota; Opisthokonta; Metazoa; Eumetazoa; Bilateria; Protostomia; Spiralia; Lophotrochozoa; Mollusca; Gastropoda; Patellogastropoda; Lottioidea; Lottiidae; Lottia; Lottia gigantea

UdeM00000039188 6596 126.7 UdeM00000039188 XP\_045216087.1 57 86  
35 1 75 160 269 352 2.70E-26 126.7 6596 cellular  
organisms; Eukaryota; Opisthokonta; Metazoa; Eumetazoa; Bilateria; Protostomia; Spiralia; Lophotrochozoa; Mollusca; Bivalvia; Autobranchia; Heteroconchia; Euheterodonta; Imparidentia; Venerida; Veneroidea; Veneridae; Mercenaria; Mercenaria mercenaria

UdeM00000039189 6573 231.1 UdeM00000039189 XP\_021347189.1 41.3 288  
161 4 117 400 122 405 2.50E-57 231.1 6573 cellular  
organisms; Eukaryota; Opisthokonta; Metazoa; Eumetazoa; Bilateria; Protostomia; Spiralia; Lophotrochozoa; Mollusca; Bivalvia; Autobranchia; Pteriomorpha; Pectinida; Pectinoidea; Pectinidae; Mizuhopecten; Mizuhopecten yessoensis

UdeM00000039190 225164 226.1 UdeM00000039190 XP\_009064246.1 41.7  
266 148 4 143 406 40 300 8.10E-56 226.1 225164  
cellular  
organisms; Eukaryota; Opisthokonta; Metazoa; Eumetazoa; Bilateria; Protostomia; Spiralia; Lophotrochozoa; Mollusca; Gastropoda; Patellogastropoda; Lottioidea; Lottiidae; Lottia; Lottia gigantea

UdeM00000039191 6596 220.3 UdeM00000039191 XP\_045216087.1 40 265  
154 3 145 406 90 352 4.40E-54 220.3 6596 cellular  
organisms; Eukaryota; Opisthokonta; Metazoa; Eumetazoa; Bilateria; Protostomia; Spiralia; Lophotrochozoa; Mollusca; Bivalvia; Autobranchia; Heteroconchia; Euheterodonta; Imparidentia; Venerida; Veneroidea; Veneridae; Mercenaria; Mercenaria mercenaria

UdeM00000039192 225164 217.2 UdeM00000039192 XP\_009064246.1 40.6  
266 151 4 99 362 40 300 3.40E-53 217.2 225164  
cellular  
organisms; Eukaryota; Opisthokonta; Metazoa; Eumetazoa; Bilateria; Protostomia; Spiralia; Lophotrochozoa; Mollusca; Gastropoda; Patellogastropoda; Lottioidea; Lottiidae; Lottia; Lottia gigantea



UdeM00000039193 37653 231.1 UdeM00000039193 XP\_014782122.1 40.4 280  
 164 2 74 352 115 392 2.20E-57 231.1 37653 cellular  
 organisms;Eukaryota;Opisthokonta;Metazoa;Eumetazoa;Bilateria;Protostomia;  
 Spiralia;Lophotrochozoa;Mollusca;Cephalopoda;Coleoidea;Octopodiformes;Oct  
 opoda;Incirrata;Octopodidae;Octopus;Octopus bimaculoides  
 UdeM00000039194 6596 501.1 UdeM00000039194 XP\_045172620.1 46.7 583  
 294 9 6 576 2 579 1.90E-138 501.1 6596 cellular  
 organisms;Eukaryota;Opisthokonta;Metazoa;Eumetazoa;Bilateria;Protostomia;  
 Spiralia;Lophotrochozoa;Mollusca;Bivalvia;Autobranchia;Heteroconchia;Euhe  
 terodonta;Imparidentia;Venerida;Veneroidea;Veneridae;Mercenaria;Mercenari  
 a mercenaria  
 UdeM00000039195 6596 512.3 UdeM00000039195 XP\_045172620.1 46.7 583  
 293 9 39 608 2 579 8.50E-142 512.3 6596 cellular  
 organisms;Eukaryota;Opisthokonta;Metazoa;Eumetazoa;Bilateria;Protostomia;  
 Spiralia;Lophotrochozoa;Mollusca;Bivalvia;Autobranchia;Heteroconchia;Euhe  
 terodonta;Imparidentia;Venerida;Veneroidea;Veneridae;Mercenaria;Mercenari  
 a mercenaria  
 UdeM00000039196 6596 502.3 UdeM00000039196 XP\_045172620.1 45.5 585  
 304 9 9 584 1 579 8.40E-139 502.3 6596 cellular  
 organisms;Eukaryota;Opisthokonta;Metazoa;Eumetazoa;Bilateria;Protostomia;  
 Spiralia;Lophotrochozoa;Mollusca;Bivalvia;Autobranchia;Heteroconchia;Euhe  
 terodonta;Imparidentia;Venerida;Veneroidea;Veneridae;Mercenaria;Mercenari  
 a mercenaria  
 UdeM00000039197 6596 329.7 UdeM00000039197 XP\_045203146.1 38.9 471  
 203 6 3 390 110 578 5.00E-87 329.7 6596 cellular  
 organisms;Eukaryota;Opisthokonta;Metazoa;Eumetazoa;Bilateria;Protostomia;  
 Spiralia;Lophotrochozoa;Mollusca;Bivalvia;Autobranchia;Heteroconchia;Euhe  
 terodonta;Imparidentia;Venerida;Veneroidea;Veneridae;Mercenaria;Mercenari  
 a mercenaria  
 UdeM00000039198 6596 514.2 UdeM00000039198 XP\_045172620.1 47.3 581  
 295 8 72 644 2 579 2.40E-142 514.2 6596 cellular  
 organisms;Eukaryota;Opisthokonta;Metazoa;Eumetazoa;Bilateria;Protostomia;  
 Spiralia;Lophotrochozoa;Mollusca;Bivalvia;Autobranchia;Heteroconchia;Euhe  
 terodonta;Imparidentia;Venerida;Veneroidea;Veneridae;Mercenaria;Mercenari  
 a mercenaria  
 UdeM00000039199 6596 511.9 UdeM00000039199 XP\_045172620.1 47.4 578  
 293 8 1 570 5 579 1.00E-141 511.9 6596 cellular  
 organisms;Eukaryota;Opisthokonta;Metazoa;Eumetazoa;Bilateria;Protostomia;  
 Spiralia;Lophotrochozoa;Mollusca;Bivalvia;Autobranchia;Heteroconchia;Euhe  
 terodonta;Imparidentia;Venerida;Veneroidea;Veneridae;Mercenaria;Mercenari  
 a mercenaria  
 UdeM00000039202 225164 117.1 UdeM00000039202 XP\_009058200.1 47.2  
 108 57 0 4 111 108 215 1.50E-23 117.1 225164  
 cellular  
 organisms;Eukaryota;Opisthokonta;Metazoa;Eumetazoa;Bilateria;Protostomia;  
 Spiralia;Lophotrochozoa;Mollusca;Gastropoda;Patellogastropoda;Lottioidae;  
 Lottiidae;Lottia;Lottia gigantea  
 UdeM00000039203 7604 137.5 UdeM00000039203 XP\_033641066.1 66.3 92  
 31 0 1 92 155 246 8.70E-30 137.5 7604 cellular  
 organisms;Eukaryota;Opisthokonta;Metazoa;Eumetazoa;Bilateria;Deuterostomi  
 a;Echinodermata;Eleutherozoa;Asterozoa;Asteroidea;Forcipulatacea;Forcipul  
 atida;Asteroidea;Asteroidea;Asteroidea;Asteroidea;Forcipulatacea;Forcipul  
 atida;Asteroidea;Asteroidea;Asteroidea;Asteroidea;Asteroidea;Asteroidea  
 UdeM00000039205 6579 70.9 UdeM00000039205 XP\_033731073.1 34.5 110  
 67 1 8 112 2 111 6.90E-09 70.9 6579 cellular

organisms;Eukaryota;Opisthokonta;Metazoa;Eumetazoa;Bilateria;Protostomia;Spiralia;Lophotrochozoa;Mollusca;Bivalvia;Autobranchia;Pteriomorpha;Pectinida;Pectinoidea;Pectinidae;Pecten;Pecten maximus

UdeM00000039206 1047088 122.5 UdeM00000039206 XP\_038172679.1 27  
311 179 6 5 287 23 313 2.50E-24 122.5 1047088

cellular

organisms;Eukaryota;Opisthokonta;Metazoa;Eumetazoa;Bilateria;Deuterostomia;Chordata;Craniata;Vertebrata;Gnathostomata;Teleostomi;Euteleostomi;Sarcopterygii;Dipnotetrapodomorpha;Tetrapoda;Amniota;Mammalia;Theria;Eutheria;Boreoeutheria;Euarchontoglires;Glires;Rodentia;Myomorpha;Muroidea;Cricetidae;Arvicolinae;Arvicola;Arvicola amphibius

UdeM00000039207 1735272 142.9 UdeM00000039207 XP\_041356959.1 60.7  
117 45 1 165 281 116 231 6.20E-31 142.9 1735272

cellular

organisms;Eukaryota;Opisthokonta;Metazoa;Eumetazoa;Bilateria;Protostomia;Spiralia;Lophotrochozoa;Mollusca;Gastropoda;Neomphalina;Neomphaloidea;Peltospiridae;Gigantopelta;Gigantopelta aegis

UdeM00000029462 6579 175.6 UdeM00000029462 XP\_033734523.1 38.7 411  
191 14 33 422 214 584 1.30E-40 175.6 6579 cellular

organisms;Eukaryota;Opisthokonta;Metazoa;Eumetazoa;Bilateria;Protostomia;Spiralia;Lophotrochozoa;Mollusca;Bivalvia;Autobranchia;Pteriomorpha;Pectinida;Pectinoidea;Pectinidae;Pecten;Pecten maximus

UdeM00000029463 6579 209.1 UdeM00000029463 XP\_033734523.1 53.8 225  
86 6 4 225 5 214 6.00E-51 209.1 6579 cellular

organisms;Eukaryota;Opisthokonta;Metazoa;Eumetazoa;Bilateria;Protostomia;Spiralia;Lophotrochozoa;Mollusca;Bivalvia;Autobranchia;Pteriomorpha;Pectinida;Pectinoidea;Pectinidae;Pecten;Pecten maximus

UdeM00000029464 6596 115.9 UdeM00000029464 XP\_045187942.1 32.6 261  
141 7 6 244 33 280 7.10E-23 115.9 6596 cellular

organisms;Eukaryota;Opisthokonta;Metazoa;Eumetazoa;Bilateria;Protostomia;Spiralia;Lophotrochozoa;Mollusca;Bivalvia;Autobranchia;Heteroconchia;Euheterodonta;Imparidentia;Venerida;Veneroidea;Veneridae;Mercenaria;Mercenaria mercenaria

UdeM00000029465 6596 663.3 UdeM00000029465 XP\_045175109.1 54.7 645  
247 7 34 636 28 669 3.70E-187 663.3 6596 cellular

organisms;Eukaryota;Opisthokonta;Metazoa;Eumetazoa;Bilateria;Protostomia;Spiralia;Lophotrochozoa;Mollusca;Bivalvia;Autobranchia;Heteroconchia;Euheterodonta;Imparidentia;Venerida;Veneroidea;Veneridae;Mercenaria;Mercenaria mercenaria

UdeM00000029467 6565 165.6 UdeM00000029467 XP\_022330718.1 38.7 212  
107 6 1 191 410 619 1.00E-37 165.6 6565 cellular

organisms;Eukaryota;Opisthokonta;Metazoa;Eumetazoa;Bilateria;Protostomia;Spiralia;Lophotrochozoa;Mollusca;Bivalvia;Autobranchia;Pteriomorpha;Ostreida;Ostreoidea;Ostreidae;Crassostrea;Crassostrea virginica

UdeM00000029466 6565 295.4 UdeM00000029466 XP\_022330718.1 29.2 583  
243 9 37 454 42 619 1.50E-76 295.4 6565 cellular

organisms;Eukaryota;Opisthokonta;Metazoa;Eumetazoa;Bilateria;Protostomia;Spiralia;Lophotrochozoa;Mollusca;Bivalvia;Autobranchia;Pteriomorpha;Ostreida;Ostreoidea;Ostreidae;Crassostrea;Crassostrea virginica

UdeM00000029468 6596 292.4 UdeM00000029468 XP\_045168098.1 49.8 313  
144 5 243 548 301 607 1.30E-75 292.4 6596 cellular

organisms;Eukaryota;Opisthokonta;Metazoa;Eumetazoa;Bilateria;Protostomia;Spiralia;Lophotrochozoa;Mollusca;Bivalvia;Autobranchia;Heteroconchia;Euheterodonta

terodonta;Imparidentia;Venerida;Veneroidea;Veneridae;Mercenaria;Mercenari  
 a mercenaria  
 UdeM00000029470 45264 424.1 UdeM00000029470 XP\_044165535.1 46.8 457  
 235 4 1 452 158 611 3.10E-115 424.1 45264 cellular  
 organisms;Eukaryota;Opisthokonta;Metazoa;Eumetazoa;Cnidaria;Anthozoa;Hexa  
 corallia;Scleractinia;Astrocoeniina;Acroporidae;Acropora;Acropora  
 millepora  
 UdeM00000029471 6596 1632.1 UdeM00000029471 XP\_045168122.1 65.3  
 1278 414 11 7 1274 7 1265 0.00E+00 1632.1 6596  
 cellular  
 organisms;Eukaryota;Opisthokonta;Metazoa;Eumetazoa;Bilateria;Protostomia;  
 Spiralia;Lophotrochozoa;Mollusca;Bivalvia;Autobranchia;Heteroconchia;Euhe  
 terodonta;Imparidentia;Venerida;Veneroidea;Veneridae;Mercenaria;Mercenari  
 a mercenaria  
 UdeM00000029472 29159 357.8 UdeM00000029472 XP\_011428416.3 36.5 586  
 350 12 4 581 1 572 2.50E-95 357.8 29159 cellular  
 organisms;Eukaryota;Opisthokonta;Metazoa;Eumetazoa;Bilateria;Protostomia;  
 Spiralia;Lophotrochozoa;Mollusca;Bivalvia;Autobranchia;Pteriormorphia;Ostr  
 eida;Ostreoidea;Ostreidae;Crassostrea;Crassostrea gigas  
 UdeM00000029473 29159 364.4 UdeM00000029473 XP\_011428416.3 33.5 704  
 434 14 4 690 1 687 3.70E-97 364.4 29159 cellular  
 organisms;Eukaryota;Opisthokonta;Metazoa;Eumetazoa;Bilateria;Protostomia;  
 Spiralia;Lophotrochozoa;Mollusca;Bivalvia;Autobranchia;Pteriormorphia;Ostr  
 eida;Ostreoidea;Ostreidae;Crassostrea;Crassostrea gigas  
 UdeM00000029474 6596 332 UdeM00000029474 XP\_045166082.1 36.7 561  
 334 11 23 575 17 564 1.50E-87 332 6596 cellular  
 organisms;Eukaryota;Opisthokonta;Metazoa;Eumetazoa;Bilateria;Protostomia;  
 Spiralia;Lophotrochozoa;Mollusca;Bivalvia;Autobranchia;Heteroconchia;Euhe  
 terodonta;Imparidentia;Venerida;Veneroidea;Veneridae;Mercenaria;Mercenari  
 a mercenaria  
 UdeM00000029475 6579 979.5 UdeM00000029475 XP\_033736185.1 69.2 694  
 213 1 63 756 1 693 2.30E-282 979.5 6579 cellular  
 organisms;Eukaryota;Opisthokonta;Metazoa;Eumetazoa;Bilateria;Protostomia;  
 Spiralia;Lophotrochozoa;Mollusca;Bivalvia;Autobranchia;Pteriormorphia;Pect  
 inida;Pectinoidea;Pectinidae;Pecten;Pecten maximus  
 UdeM00000029476 6579 185.7 UdeM00000029476 XP\_033733981.1 49 192  
 91 3 4 195 1 185 5.90E-44 185.7 6579 cellular  
 organisms;Eukaryota;Opisthokonta;Metazoa;Eumetazoa;Bilateria;Protostomia;  
 Spiralia;Lophotrochozoa;Mollusca;Bivalvia;Autobranchia;Pteriormorphia;Pect  
 inida;Pectinoidea;Pectinidae;Pecten;Pecten maximus  
 UdeM00000029477 6565 131.3 UdeM00000029477 XP\_022329142.1 51.3 115  
 53 1 23 137 18 129 1.00E-27 131.3 6565 cellular  
 organisms;Eukaryota;Opisthokonta;Metazoa;Eumetazoa;Bilateria;Protostomia;  
 Spiralia;Lophotrochozoa;Mollusca;Bivalvia;Autobranchia;Pteriormorphia;Ostr  
 eida;Ostreoidea;Ostreidae;Crassostrea;Crassostrea virginica  
 UdeM00000029478 6565 354.8 UdeM00000029478 XP\_022332825.1 63.9 249  
 90 0 8 256 71 319 9.50E-95 354.8 6565 cellular  
 organisms;Eukaryota;Opisthokonta;Metazoa;Eumetazoa;Bilateria;Protostomia;  
 Spiralia;Lophotrochozoa;Mollusca;Bivalvia;Autobranchia;Pteriormorphia;Ostr  
 eida;Ostreoidea;Ostreidae;Crassostrea;Crassostrea virginica  
 UdeM00000029479 6596 77 UdeM00000029479 XP\_045170000.1 46.5 71  
 38 0 1 71 1 71 1.40E-11 77 6596 cellular  
 organisms;Eukaryota;Opisthokonta;Metazoa;Eumetazoa;Bilateria;Protostomia;  
 Spiralia;Lophotrochozoa;Mollusca;Bivalvia;Autobranchia;Heteroconchia;Euhe

terodonta;Imparidentia;Venerida;Veneroidea;Veneridae;Mercenaria;Mercenaria mercenaria

UdeM00000029480 6565 426 UdeM00000029480 XP\_022332824.1 62 316  
120 0 6 321 4 319 4.20E-116 426 6565 cellular

organisms;Eukaryota;Opisthokonta;Metazoa;Eumetazoa;Bilateria;Protostomia;Spiralia;Lophotrochozoa;Mollusca;Bivalvia;Autobranchia;Pteriormorphia;Ostreida;Ostreoidea;Ostreidae;Crassostrea;Crassostrea virginica

UdeM00000029482 6596 921 UdeM00000029482 XP\_045169384.1 58.3 784  
307 7 17 791 15 787 1.00E-264 921 6596 cellular

organisms;Eukaryota;Opisthokonta;Metazoa;Eumetazoa;Bilateria;Protostomia;Spiralia;Lophotrochozoa;Mollusca;Bivalvia;Autobranchia;Heteroconchia;Euheterodonta;Imparidentia;Venerida;Veneroidea;Veneridae;Mercenaria;Mercenaria mercenaria

UdeM00000029484 4432 115.5 UdeM00000029484 XP\_010279286.1 40.8 142  
78 2 6 142 5 145 5.60E-23 115.5 4432 cellular

organisms;Eukaryota;Viridiplantae;Streptophyta;Streptophytina;Embryophyta;Tracheophyta;Euphyllophyta;Spermatophyta;Magnoliopsida;Mesangiospermae;Pteroteales;Nelumbonaceae;Nelumbo;Nelumbo nucifera

UdeM00000029487 6596 82.8 UdeM00000029487 XP\_045175906.1 66.1 59  
19 1 5 62 21 79 2.20E-13 82.8 6596 cellular

organisms;Eukaryota;Opisthokonta;Metazoa;Eumetazoa;Bilateria;Protostomia;Spiralia;Lophotrochozoa;Mollusca;Bivalvia;Autobranchia;Heteroconchia;Euheterodonta;Imparidentia;Venerida;Veneroidea;Veneridae;Mercenaria;Mercenaria mercenaria

UdeM00000029486 6596 79.7 UdeM00000029486 XP\_045175906.1 65.5 58  
19 1 5 61 21 78 2.00E-12 79.7 6596 cellular

organisms;Eukaryota;Opisthokonta;Metazoa;Eumetazoa;Bilateria;Protostomia;Spiralia;Lophotrochozoa;Mollusca;Bivalvia;Autobranchia;Heteroconchia;Euheterodonta;Imparidentia;Venerida;Veneroidea;Veneridae;Mercenaria;Mercenaria mercenaria

UdeM00000029488 6596 107.8 UdeM00000029488 XP\_045180427.1 38.4 177  
106 2 76 250 98 273 2.10E-20 107.8 6596 cellular

organisms;Eukaryota;Opisthokonta;Metazoa;Eumetazoa;Bilateria;Protostomia;Spiralia;Lophotrochozoa;Mollusca;Bivalvia;Autobranchia;Heteroconchia;Euheterodonta;Imparidentia;Venerida;Veneroidea;Veneridae;Mercenaria;Mercenaria mercenaria

UdeM00000029492 6087 172.9 UdeM00000029492 XP\_012565456.1 61.4 127  
49 0 4 130 890 1016 2.70E-40 172.9 6087 cellular

organisms;Eukaryota;Opisthokonta;Metazoa;Eumetazoa;Cnidaria;Hydrozoa;Hydrozooidolina;Anthoathecata;Aplanulata;Hydridae;Hydra;Hydra vulgaris

UdeM00000029493 1735272 84 UdeM00000029493 XP\_041379274.1 35.2  
122 77 2 2 122 245 365 1.60E-13 84 1735272

cellular

organisms;Eukaryota;Opisthokonta;Metazoa;Eumetazoa;Bilateria;Protostomia;Spiralia;Lophotrochozoa;Mollusca;Gastropoda;Neomphalina;Neomphaloidea;Peltospiridae;Gigantopelta;Gigantopelta aegis

UdeM00000029494 27687 111.7 UdeM00000029494 XP\_028656852.1 41.5 135  
76 3 4 136 316 449 7.50E-22 111.7 27687 cellular

organisms;Eukaryota;Opisthokonta;Metazoa;Eumetazoa;Bilateria;Deuterostomia;Chordata;Craniata;Vertebrata;Gnathostomata;Teleostomi;Euteleostomi;Actinopterygii;Cladistia;Polypteriformes;Polypteridae;Erpetoichthys;Erpetoichthys calabaricus

UdeM00000029495 109376 112.1 UdeM00000029495 XP\_013625994.1 37.7  
146 85 2 44 184 5 149 7.90E-22 112.1 109376

cellular  
organisms;Eukaryota;Viridiplantae;Streptophyta;Streptophytina;Embryophyta  
;Tracheophyta;Euphyllophyta;Spermatophyta;Magnoliopsida;Mesangiospermae;e  
udicotyledons;Gunneridae;Pentapetalae;rosids;malvids;Brassicales;Brassica  
ceae;Brassicaceae;Brassica;Brassica oleracea;Brassica oleracea var.  
oleracea  
UdeM00000029496 27687 110.2 UdeM00000029496 XP\_028656852.1 41.5 135  
76 3 4 136 316 449 2.20E-21 110.2 27687 cellular  
organisms;Eukaryota;Opisthokonta;Metazoa;Eumetazoa;Bilateria;Deuterostomi  
a;Chordata;Craniata;Vertebrata;Gnathostomata;Teleostomi;Euteleostomi;Acti  
nopterygii;Cladistia;Polypteriformes;Polypteridae;Erpetoichthys;Erpetoich  
thys calabaricus  
UdeM00000029497 6596 122.1 UdeM00000029497 XP\_045175906.1 57.8 102  
43 0 32 133 81 182 5.40E-25 122.1 6596 cellular  
organisms;Eukaryota;Opisthokonta;Metazoa;Eumetazoa;Bilateria;Protostomia;  
Spiralia;Lophotrochozoa;Mollusca;Bivalvia;Autobranchia;Heteroconchia;Euhe  
terodonta;Imparidentia;Venerida;Veneroidea;Veneridae;Mercenaria;Mercenari  
a mercenaria  
UdeM00000029498 6596 195.7 UdeM00000029498 XP\_045175906.1 58.9 168  
68 1 15 181 15 182 5.20E-47 195.7 6596 cellular  
organisms;Eukaryota;Opisthokonta;Metazoa;Eumetazoa;Bilateria;Protostomia;  
Spiralia;Lophotrochozoa;Mollusca;Bivalvia;Autobranchia;Heteroconchia;Euhe  
terodonta;Imparidentia;Venerida;Veneroidea;Veneridae;Mercenaria;Mercenari  
a mercenaria  
UdeM00000029499 6565 129 UdeM00000029499 XP\_022287605.1 43.1 137  
76 2 5 141 102 236 4.70E-27 129 6565 cellular  
organisms;Eukaryota;Opisthokonta;Metazoa;Eumetazoa;Bilateria;Protostomia;  
Spiralia;Lophotrochozoa;Mollusca;Bivalvia;Autobranchia;Pteriormorphia;Ostr  
eida;Ostreoidea;Ostreidae;Crassostrea;Crassostrea virginica  
UdeM00000029500 225164 156 UdeM00000029500 XP\_009043885.1 58.1  
136 57 0 35 170 85 220 6.60E-35 156 225164  
cellular  
organisms;Eukaryota;Opisthokonta;Metazoa;Eumetazoa;Bilateria;Protostomia;  
Spiralia;Lophotrochozoa;Mollusca;Gastropoda;Patellogastropoda;Lottioidea;  
Lottiidae;Lottia;Lottia gigantea  
UdeM00000029501 6579 604 UdeM00000029501 XP\_033735640.1 47.8 613  
296 9 160 764 49 645 2.70E-169 604 6579 cellular  
organisms;Eukaryota;Opisthokonta;Metazoa;Eumetazoa;Bilateria;Protostomia;  
Spiralia;Lophotrochozoa;Mollusca;Bivalvia;Autobranchia;Pteriormorphia;Pect  
inida;Pectinoidea;Pectinidae;Pecten;Pecten maximus  
UdeM00000029502 6579 65.9 UdeM00000029502 XP\_033735640.1 29.5 146  
86 4 22 155 83 223 5.30E-08 65.9 6579 cellular  
organisms;Eukaryota;Opisthokonta;Metazoa;Eumetazoa;Bilateria;Protostomia;  
Spiralia;Lophotrochozoa;Mollusca;Bivalvia;Autobranchia;Pteriormorphia;Pect  
inida;Pectinoidea;Pectinidae;Pecten;Pecten maximus  
UdeM00000029503 6579 144.4 UdeM00000029503 XP\_033735640.1 67.4 95  
30 1 1 94 551 645 7.60E-32 144.4 6579 cellular  
organisms;Eukaryota;Opisthokonta;Metazoa;Eumetazoa;Bilateria;Protostomia;  
Spiralia;Lophotrochozoa;Mollusca;Bivalvia;Autobranchia;Pteriormorphia;Pect  
inida;Pectinoidea;Pectinidae;Pecten;Pecten maximus  
UdeM00000029504 29159 852.4 UdeM00000029504 XP\_011416344.2 50.1 844  
406 7 5 847 5 834 4.80E-244 852.4 29159 cellular  
organisms;Eukaryota;Opisthokonta;Metazoa;Eumetazoa;Bilateria;Protostomia;

Spiralia;Lophotrochozoa;Mollusca;Bivalvia;Autobranchia;Pteriormorphia;Ostr  
eida;Ostreoidea;Ostreidae;Crassostrea;Crassostrea gigas  
UdeM00000029505 6579 161.8 UdeM00000029505 XP\_033735524.1 45.5 209  
109 4 7 215 7 210 1.00E-36 161.8 6579 cellular  
organisms;Eukaryota;Opisthokonta;Metazoa;Eumetazoa;Bilateria;Protostomia;  
Spiralia;Lophotrochozoa;Mollusca;Bivalvia;Autobranchia;Pteriormorphia;Pect  
inida;Pectinoidea;Pectinidae;Pecten;Pecten maximus  
UdeM00000029506 6596 567.4 UdeM00000029506 XP\_045174877.1 61.1 429  
167 0 5 433 6 434 1.60E-158 567.4 6596 cellular  
organisms;Eukaryota;Opisthokonta;Metazoa;Eumetazoa;Bilateria;Protostomia;  
Spiralia;Lophotrochozoa;Mollusca;Bivalvia;Autobranchia;Heteroconchia;Euhe  
terodonta;Imparidentia;Venerida;Veneroidea;Veneridae;Mercenaria;Mercenari  
a mercenaria  
UdeM00000029507 6596 333.2 UdeM00000029507 XP\_045166330.1 43.2 694  
317 14 3 645 21 688 8.60E-88 333.2 6596 cellular  
organisms;Eukaryota;Opisthokonta;Metazoa;Eumetazoa;Bilateria;Protostomia;  
Spiralia;Lophotrochozoa;Mollusca;Bivalvia;Autobranchia;Heteroconchia;Euhe  
terodonta;Imparidentia;Venerida;Veneroidea;Veneridae;Mercenaria;Mercenari  
a mercenaria  
UdeM00000029508 6596 1298.1 UdeM00000029508 XP\_045162839.1 64.6  
1114 338 19 3 1094 3835 4914 0.00E+00 1298.1 6596  
cellular  
organisms;Eukaryota;Opisthokonta;Metazoa;Eumetazoa;Bilateria;Protostomia;  
Spiralia;Lophotrochozoa;Mollusca;Bivalvia;Autobranchia;Heteroconchia;Euhe  
terodonta;Imparidentia;Venerida;Veneroidea;Veneridae;Mercenaria;Mercenari  
a mercenaria  
UdeM00000029509 6596 2003.4 UdeM00000029509 XP\_045162839.1 56.6  
1993 770 29 7 1959 1841 3779 0.00E+00 2003.4 6596  
cellular  
organisms;Eukaryota;Opisthokonta;Metazoa;Eumetazoa;Bilateria;Protostomia;  
Spiralia;Lophotrochozoa;Mollusca;Bivalvia;Autobranchia;Heteroconchia;Euhe  
terodonta;Imparidentia;Venerida;Veneroidea;Veneridae;Mercenaria;Mercenari  
a mercenaria  
UdeM00000029510 7574 87 UdeM00000029510 XP\_013391670.2 37.2 164  
97 2 73 236 1 158 3.40E-14 87 7574 cellular  
organisms;Eukaryota;Opisthokonta;Metazoa;Eumetazoa;Bilateria;Protostomia;  
Spiralia;Lophotrochozoa;Brachiopoda;Linguliformea;Lingulata;Lingulida;Lin  
guloidea;Lingulidae;Lingula;Lingula anatina  
UdeM00000029511 6596 1737.2 UdeM00000029511 XP\_045162839.1 51.3  
1938 797 33 5 1899 7 1840 0.00E+00 1737.2 6596  
cellular  
organisms;Eukaryota;Opisthokonta;Metazoa;Eumetazoa;Bilateria;Protostomia;  
Spiralia;Lophotrochozoa;Mollusca;Bivalvia;Autobranchia;Heteroconchia;Euhe  
terodonta;Imparidentia;Venerida;Veneroidea;Veneridae;Mercenaria;Mercenari  
a mercenaria  
UdeM00000029512 6573 132.5 UdeM00000029512 XP\_021363254.1 71.9 89  
25 0 1 89 1 89 2.80E-28 132.5 6573 cellular  
organisms;Eukaryota;Opisthokonta;Metazoa;Eumetazoa;Bilateria;Protostomia;  
Spiralia;Lophotrochozoa;Mollusca;Bivalvia;Autobranchia;Pteriormorphia;Pect  
inida;Pectinoidea;Pectinidae;Mizuhopecten;Mizuhopecten yessoensis  
UdeM00000029513 45264 394.4 UdeM00000029513 XP\_044165535.1 49.7 368  
181 1 1 364 158 525 2.20E-106 394.4 45264 cellular  
organisms;Eukaryota;Opisthokonta;Metazoa;Eumetazoa;Cnidaria;Anthozoa;Hexa

corallia;Scleractinia;Astrocoeniina;Acroporidae;Acropora;Acropora  
millepora  
UdeM00000029514 6573 192.2 UdeM00000029514 XP\_021339443.1 34.8 419  
204 12 1 397 1 372 1.30E-45 192.2 6573 cellular  
organisms;Eukaryota;Opisthokonta;Metazoa;Eumetazoa;Bilateria;Protostomia;  
Spiralia;Lophotrochozoa;Mollusca;Bivalvia;Autobranchia;Pteriormorphia;Pect  
inida;Pectinoidea;Pectinidae;Mizuhopecten;Mizuhopecten yessoensis  
UdeM00000029515 6596 452.2 UdeM00000029515 XP\_045171232.1 48.5 581  
261 9 98 654 26 592 2.60E-123 452.2 6596 cellular  
organisms;Eukaryota;Opisthokonta;Metazoa;Eumetazoa;Bilateria;Protostomia;  
Spiralia;Lophotrochozoa;Mollusca;Bivalvia;Autobranchia;Heteroconchia;Euhe  
terodonta;Imparidentia;Venerida;Veneroidea;Veneridae;Mercenaria;Mercenari  
a mercenaria  
UdeM00000029516 6579 1008.8 UdeM00000029516 XP\_033735819.1 63.7  
876 246 7 1 847 1 833 4.00E-291 1008.8 6579  
cellular  
organisms;Eukaryota;Opisthokonta;Metazoa;Eumetazoa;Bilateria;Protostomia;  
Spiralia;Lophotrochozoa;Mollusca;Bivalvia;Autobranchia;Pteriormorphia;Pect  
inida;Pectinoidea;Pectinidae;Pecten;Pecten maximus  
UdeM00000029517 7574 255.8 UdeM00000029517 XP\_013391269.1 57.6 257  
94 5 1 245 845 1098 7.10E-65 255.8 7574 cellular  
organisms;Eukaryota;Opisthokonta;Metazoa;Eumetazoa;Bilateria;Protostomia;  
Spiralia;Lophotrochozoa;Brachiopoda;Linguliformea;Lingulata;Lingulida;Lin  
guloidea;Lingulidae;Lingula;Lingula anatina  
UdeM00000029518 2607531 1190.3 UdeM00000029518 XP\_036357504.1  
60.8 1097 389 13 1 1065 13 1100 0.00E+00 1190.3  
2607531 cellular  
organisms;Eukaryota;Opisthokonta;Metazoa;Eumetazoa;Bilateria;Protostomia;  
Spiralia;Lophotrochozoa;Mollusca;Cephalopoda;Coleoidea;Octopodiformes;Oct  
opoda;Incirrata;Octopodidae;Octopus;Octopus sinensis  
UdeM00000029522 27687 109.8 UdeM00000029522 XP\_028656852.1 41.5 135  
76 3 4 136 316 449 2.90E-21 109.8 27687 cellular  
organisms;Eukaryota;Opisthokonta;Metazoa;Eumetazoa;Bilateria;Deuterostomi  
a;Chordata;Craniata;Vertebrata;Gnathostomata;Teleostomi;Euteleostomi;Acti  
nopterygii;Cladistia;Polypteriformes;Polypteridae;Erpetoichthys;Erpetoich  
thys calabaricus  
UdeM00000029524 6596 652.5 UdeM00000029524 XP\_045164097.1 56.9 594  
221 6 7 596 39 601 5.30E-184 652.5 6596 cellular  
organisms;Eukaryota;Opisthokonta;Metazoa;Eumetazoa;Bilateria;Protostomia;  
Spiralia;Lophotrochozoa;Mollusca;Bivalvia;Autobranchia;Heteroconchia;Euhe  
terodonta;Imparidentia;Venerida;Veneroidea;Veneridae;Mercenaria;Mercenari  
a mercenaria  
UdeM00000029525 6596 651.7 UdeM00000029525 XP\_045209505.1 30.6 1593  
985 33 11 1548 54 1580 2.30E-183 651.7 6596 cellular  
organisms;Eukaryota;Opisthokonta;Metazoa;Eumetazoa;Bilateria;Protostomia;  
Spiralia;Lophotrochozoa;Mollusca;Bivalvia;Autobranchia;Heteroconchia;Euhe  
terodonta;Imparidentia;Venerida;Veneroidea;Veneridae;Mercenaria;Mercenari  
a mercenaria  
UdeM00000029527 6596 146 UdeM00000029527 XP\_045163187.1 64.3 258  
78 4 63 310 59 312 8.50E-32 146 6596 cellular  
organisms;Eukaryota;Opisthokonta;Metazoa;Eumetazoa;Bilateria;Protostomia;  
Spiralia;Lophotrochozoa;Mollusca;Bivalvia;Autobranchia;Heteroconchia;Euhe  
terodonta;Imparidentia;Venerida;Veneroidea;Veneridae;Mercenaria;Mercenari  
a mercenaria

UdeM00000029528 6596 662.5 UdeM00000029528 XP\_045163187.1 71.1 571  
 148 6 63 623 59 622 5.20E-187 662.5 6596 cellular  
 organisms;Eukaryota;Opisthokonta;Metazoa;Eumetazoa;Bilateria;Protostomia;  
 Spiralia;Lophotrochozoa;Mollusca;Bivalvia;Autobranchia;Heteroconchia;Euhe  
 terodonta;Imparidentia;Venerida;Veneroidea;Veneridae;Mercenaria;Mercenari  
 a mercenaria  
 UdeM00000029531 6596 1108.6 UdeM00000029531 XP\_045161958.1 64.2  
 852 279 4 11 861 27 853 0.00E+00 1108.6 6596  
 cellular  
 organisms;Eukaryota;Opisthokonta;Metazoa;Eumetazoa;Bilateria;Protostomia;  
 Spiralia;Lophotrochozoa;Mollusca;Bivalvia;Autobranchia;Heteroconchia;Euhe  
 terodonta;Imparidentia;Venerida;Veneroidea;Veneridae;Mercenaria;Mercenari  
 a mercenaria  
 UdeM00000029533 1735272 907.1 UdeM00000029533 XP\_041351374.1 76.4  
 607 130 2 5 600 970 1574 1.20E-260 907.1 1735272  
 cellular  
 organisms;Eukaryota;Opisthokonta;Metazoa;Eumetazoa;Bilateria;Protostomia;  
 Spiralia;Lophotrochozoa;Mollusca;Gastropoda;Neomphalina;Neomphaloidea;Pel  
 tospiridae;Gigantopelta;Gigantopelta aegis  
 UdeM00000029535 6596 345.5 UdeM00000029535 XP\_045187747.1 45.2 418  
 229 0 1 418 59 476 9.80E-92 345.5 6596 cellular  
 organisms;Eukaryota;Opisthokonta;Metazoa;Eumetazoa;Bilateria;Protostomia;  
 Spiralia;Lophotrochozoa;Mollusca;Bivalvia;Autobranchia;Heteroconchia;Euhe  
 terodonta;Imparidentia;Venerida;Veneroidea;Veneridae;Mercenaria;Mercenari  
 a mercenaria  
 UdeM00000029536 6573 658.3 UdeM00000029536 XP\_021379661.1 84 406  
 64 1 22 426 2 407 6.70E-186 658.3 6573 cellular  
 organisms;Eukaryota;Opisthokonta;Metazoa;Eumetazoa;Bilateria;Protostomia;  
 Spiralia;Lophotrochozoa;Mollusca;Bivalvia;Autobranchia;Pteriomorphia;Pect  
 inida;Pectinoidea;Pectinidae;Mizuhopecten;Mizuhopecten yessoensis  
 UdeM00000029537 6573 449.5 UdeM00000029537 XP\_021379654.1 42.8 745  
 426 0 1 745 38 782 9.00E-123 449.5 6573 cellular  
 organisms;Eukaryota;Opisthokonta;Metazoa;Eumetazoa;Bilateria;Protostomia;  
 Spiralia;Lophotrochozoa;Mollusca;Bivalvia;Autobranchia;Pteriomorphia;Pect  
 inida;Pectinoidea;Pectinidae;Mizuhopecten;Mizuhopecten yessoensis  
 UdeM00000029538 6573 450.3 UdeM00000029538 XP\_021379654.1 42.3 770  
 440 2 1 766 38 807 5.00E-123 450.3 6573 cellular  
 organisms;Eukaryota;Opisthokonta;Metazoa;Eumetazoa;Bilateria;Protostomia;  
 Spiralia;Lophotrochozoa;Mollusca;Bivalvia;Autobranchia;Pteriomorphia;Pect  
 inida;Pectinoidea;Pectinidae;Mizuhopecten;Mizuhopecten yessoensis  
 UdeM00000029539 6579 344.4 UdeM00000029539 XP\_033734959.1 56.8 375  
 132 6 25 380 14 377 3.30E-91 344.4 6579 cellular  
 organisms;Eukaryota;Opisthokonta;Metazoa;Eumetazoa;Bilateria;Protostomia;  
 Spiralia;Lophotrochozoa;Mollusca;Bivalvia;Autobranchia;Pteriomorphia;Pect  
 inida;Pectinoidea;Pectinidae;Pecten;Pecten maximus  
 UdeM00000029540 6596 310.8 UdeM00000029540 XP\_045213047.1 27.1 882  
 513 29 117 892 848 1705 5.90E-81 310.8 6596 cellular  
 organisms;Eukaryota;Opisthokonta;Metazoa;Eumetazoa;Bilateria;Protostomia;  
 Spiralia;Lophotrochozoa;Mollusca;Bivalvia;Autobranchia;Heteroconchia;Euhe  
 terodonta;Imparidentia;Venerida;Veneroidea;Veneridae;Mercenaria;Mercenari  
 a mercenaria  
 UdeM00000029541 6596 264.6 UdeM00000029541 XP\_045198257.1 33.7 404  
 249 5 2 390 6 405 2.00E-67 264.6 6596 cellular  
 organisms;Eukaryota;Opisthokonta;Metazoa;Eumetazoa;Bilateria;Protostomia;



Spiralia;Lophotrochozoa;Mollusca;Bivalvia;Autobranchia;Heteroconchia;Euherodonta;Imparidentia;Venerida;Veneroidea;Veneridae;Mercenaria;Mercenaria mercenaria

UdeM00000029542 6596 86.7 UdeM00000029542 XP\_045198257.1 35.8 134  
83 2 2 134 6 137 2.90E-14 86.7 6596 cellular

organisms;Eukaryota;Opisthokonta;Metazoa;Eumetazoa;Bilateria;Protostomia;Spiralia;Lophotrochozoa;Mollusca;Bivalvia;Autobranchia;Heteroconchia;Euherodonta;Imparidentia;Venerida;Veneroidea;Veneridae;Mercenaria;Mercenaria mercenaria

UdeM00000029543 6596 81.3 UdeM00000029543 XP\_045187749.1 37.7 154  
65 6 13 155 8 141 1.40E-12 81.3 6596 cellular

organisms;Eukaryota;Opisthokonta;Metazoa;Eumetazoa;Bilateria;Protostomia;Spiralia;Lophotrochozoa;Mollusca;Bivalvia;Autobranchia;Heteroconchia;Euherodonta;Imparidentia;Venerida;Veneroidea;Veneridae;Mercenaria;Mercenaria mercenaria

UdeM00000029544 6573 63.2 UdeM00000029544 XP\_021342073.1 40 105  
60 2 32 135 27 129 3.80E-07 63.2 6573 cellular

organisms;Eukaryota;Opisthokonta;Metazoa;Eumetazoa;Bilateria;Protostomia;Spiralia;Lophotrochozoa;Mollusca;Bivalvia;Autobranchia;Pteriomorphia;Pectinida;Pectinoidea;Pectinidae;Mizuhopecten;Mizuhopecten yessoensis

UdeM00000029545 6573 1221.1 UdeM00000029545 XP\_021352832.1 33.5  
2956 1520 75 49 2837 1 2676 0.00E+00 1221.1 6573  
cellular

organisms;Eukaryota;Opisthokonta;Metazoa;Eumetazoa;Bilateria;Protostomia;Spiralia;Lophotrochozoa;Mollusca;Bivalvia;Autobranchia;Pteriomorphia;Pectinida;Pectinoidea;Pectinidae;Mizuhopecten;Mizuhopecten yessoensis

UdeM00000029546 6596 659.4 UdeM00000029546 XP\_045171575.1 46.6 1029  
483 28 1 999 1 992 7.00E-186 659.4 6596 cellular

organisms;Eukaryota;Opisthokonta;Metazoa;Eumetazoa;Bilateria;Protostomia;Spiralia;Lophotrochozoa;Mollusca;Bivalvia;Autobranchia;Heteroconchia;Euherodonta;Imparidentia;Venerida;Veneroidea;Veneridae;Mercenaria;Mercenaria mercenaria

UdeM00000029547 6596 218.4 UdeM00000029547 XP\_045171563.1 63.9 183  
45 2 72 233 301 483 9.70E-54 218.4 6596 cellular

organisms;Eukaryota;Opisthokonta;Metazoa;Eumetazoa;Bilateria;Protostomia;Spiralia;Lophotrochozoa;Mollusca;Bivalvia;Autobranchia;Heteroconchia;Euherodonta;Imparidentia;Venerida;Veneroidea;Veneridae;Mercenaria;Mercenaria mercenaria

UdeM00000029548 1735272 117.9 UdeM00000029548 XP\_041350852.1 42.4  
158 56 2 12 161 806 936 1.20E-23 117.9 1735272  
cellular

organisms;Eukaryota;Opisthokonta;Metazoa;Eumetazoa;Bilateria;Protostomia;Spiralia;Lophotrochozoa;Mollusca;Gastropoda;Neomphalina;Neomphaloidea;Peltospiridae;Gigantopelta;Gigantopelta aegis

UdeM00000029550 6596 275.4 UdeM00000029550 XP\_045198257.1 33.3 417  
259 5 2 403 6 418 1.20E-70 275.4 6596 cellular

organisms;Eukaryota;Opisthokonta;Metazoa;Eumetazoa;Bilateria;Protostomia;Spiralia;Lophotrochozoa;Mollusca;Bivalvia;Autobranchia;Heteroconchia;Euherodonta;Imparidentia;Venerida;Veneroidea;Veneridae;Mercenaria;Mercenaria mercenaria

UdeM00000029551 6596 59.7 UdeM00000029551 XP\_045198256.1 38.6 83  
49 2 44 125 348 429 4.90E-06 59.7 6596 cellular

organisms;Eukaryota;Opisthokonta;Metazoa;Eumetazoa;Bilateria;Protostomia;Spiralia;Lophotrochozoa;Mollusca;Bivalvia;Autobranchia;Heteroconchia;Euherodonta;Imparidentia;Venerida;Veneroidea;Veneridae;Mercenaria;Mercenaria mercenaria

terodonta;Imparidentia;Venerida;Veneroidea;Veneridae;Mercenaria;Mercenari  
 a mercenaria  
 UdeM00000029552 6596 385.6 UdeM00000029552 XP\_045213047.1 28.6 934  
 570 30 145 1012 877 1779 2.00E-103 385.6 6596 cellular  
 organisms;Eukaryota;Opisthokonta;Metazoa;Eumetazoa;Bilateria;Protostomia;  
 Spiralia;Lophotrochozoa;Mollusca;Bivalvia;Autobranchia;Heteroconchia;Euhe  
 terodonta;Imparidentia;Venerida;Veneroidea;Veneridae;Mercenaria;Mercenari  
 a mercenaria  
 UdeM00000029553 6596 100.5 UdeM00000029553 XP\_045198582.1 35.6 174  
 97 6 84 255 240 400 3.30E-18 100.5 6596 cellular  
 organisms;Eukaryota;Opisthokonta;Metazoa;Eumetazoa;Bilateria;Protostomia;  
 Spiralia;Lophotrochozoa;Mollusca;Bivalvia;Autobranchia;Heteroconchia;Euhe  
 terodonta;Imparidentia;Venerida;Veneroidea;Veneridae;Mercenaria;Mercenari  
 a mercenaria  
 UdeM00000029554 225164 568.9 UdeM00000029554 XP\_009055936.1 40.3  
 784 430 11 6 769 464 1229 9.70E-159 568.9 225164  
 cellular  
 organisms;Eukaryota;Opisthokonta;Metazoa;Eumetazoa;Bilateria;Protostomia;  
 Spiralia;Lophotrochozoa;Mollusca;Gastropoda;Patellogastropoda;Lottioidea;  
 Lottiidae;Lottia;Lottia gigantea  
 UdeM00000029555 6579 246.9 UdeM00000029555 XP\_033734882.1 86.7 128  
 17 0 24 151 28 155 1.70E-62 246.9 6579 cellular  
 organisms;Eukaryota;Opisthokonta;Metazoa;Eumetazoa;Bilateria;Protostomia;  
 Spiralia;Lophotrochozoa;Mollusca;Bivalvia;Autobranchia;Pteriormorphia;Pect  
 inida;Pectinoidea;Pectinidae;Pecten;Pecten maximus  
 UdeM00000029556 6579 222.6 UdeM00000029556 XP\_033734883.1 64.4 275  
 89 6 1 272 1 269 1.30E-54 222.6 6579 cellular  
 organisms;Eukaryota;Opisthokonta;Metazoa;Eumetazoa;Bilateria;Protostomia;  
 Spiralia;Lophotrochozoa;Mollusca;Bivalvia;Autobranchia;Pteriormorphia;Pect  
 inida;Pectinoidea;Pectinidae;Pecten;Pecten maximus  
 UdeM00000029557 1735272 185.7 UdeM00000029557 XP\_041354360.1 40.1  
 272 139 7 52 319 57 308 9.60E-44 185.7 1735272  
 cellular  
 organisms;Eukaryota;Opisthokonta;Metazoa;Eumetazoa;Bilateria;Protostomia;  
 Spiralia;Lophotrochozoa;Mollusca;Gastropoda;Neomphalina;Neomphaloidea;Pel  
 tospiridae;Gigantopelta;Gigantopelta aegis  
 UdeM00000029558 6596 1280 UdeM00000029558 XP\_045187194.1 85.5 733  
 106 0 1 733 1 733 0.00E+00 1280 6596 cellular  
 organisms;Eukaryota;Opisthokonta;Metazoa;Eumetazoa;Bilateria;Protostomia;  
 Spiralia;Lophotrochozoa;Mollusca;Bivalvia;Autobranchia;Heteroconchia;Euhe  
 terodonta;Imparidentia;Venerida;Veneroidea;Veneridae;Mercenaria;Mercenari  
 a mercenaria  
 UdeM00000029559 6596 454.5 UdeM00000029559 XP\_045158742.1 54.4 406  
 169 2 5 396 4 407 1.40E-124 454.5 6596 cellular  
 organisms;Eukaryota;Opisthokonta;Metazoa;Eumetazoa;Bilateria;Protostomia;  
 Spiralia;Lophotrochozoa;Mollusca;Bivalvia;Autobranchia;Heteroconchia;Euhe  
 terodonta;Imparidentia;Venerida;Veneroidea;Veneridae;Mercenaria;Mercenari  
 a mercenaria  
 UdeM00000029560 37344 57.8 UdeM00000029560 XP\_020710539.1 46.3 67  
 34 1 1 67 1 65 6.90E-06 57.8 37344 cellular  
 organisms;Eukaryota;Opisthokonta;Metazoa;Eumetazoa;Bilateria;Protostomia;  
 Ecdysozoa;Panarthropoda;Arthropoda;Mandibulata;Pancrustacea;Hexapoda;Inse  
 cta;Dicondylia;Pterygota;Neoptera;Endopterygota;Hymenoptera;Tenthredinoid  
 ea;Tenthredinidae;Allantinae;Athalia;Athalia rosae

|                                                                                                                                                                                                                                       |       |        |     |                 |                |           |          |        |          |  |
|---------------------------------------------------------------------------------------------------------------------------------------------------------------------------------------------------------------------------------------|-------|--------|-----|-----------------|----------------|-----------|----------|--------|----------|--|
| UdeM00000029561                                                                                                                                                                                                                       | 6596  | 1073.9 |     | UdeM00000029561 | XP_045174537.1 | 67.3      |          |        |          |  |
| 838                                                                                                                                                                                                                                   | 258   | 9      | 1   | 833             | 1              | 827       | 9.5e-311 | 1073.9 | 6596     |  |
| cellular                                                                                                                                                                                                                              |       |        |     |                 |                |           |          |        |          |  |
| organisms;Eukaryota;Opisthokonta;Metazoa;Eumetazoa;Bilateria;Protostomia;Spiralia;Lophotrochozoa;Mollusca;Bivalvia;Autobranchia;Heteroconchia;Euherodonta;Imparidentia;Venerida;Veneroidea;Veneridae;Mercenaria;Mercenaria mercenaria |       |        |     |                 |                |           |          |        |          |  |
| UdeM00000029562                                                                                                                                                                                                                       | 7574  | 294.3  |     | UdeM00000029562 | XP_013381517.1 | 100       | 149      |        |          |  |
| 0                                                                                                                                                                                                                                     | 0     | 1      | 149 | 1               | 149            | 8.90E-77  | 294.3    | 7574   | cellular |  |
| organisms;Eukaryota;Opisthokonta;Metazoa;Eumetazoa;Bilateria;Protostomia;Spiralia;Lophotrochozoa;Brachiopoda;Linguliformea;Lingulata;Lingulida;Linguloidea;Lingulidae;Lingula;Lingula anatina                                         |       |        |     |                 |                |           |          |        |          |  |
| UdeM00000029563                                                                                                                                                                                                                       | 6573  | 433.3  |     | UdeM00000029563 | XP_021375107.1 | 49.5      | 475      |        |          |  |
| 188                                                                                                                                                                                                                                   | 4     | 359    | 784 | 191             | 662            | 6.50E-118 | 433.3    | 6573   | cellular |  |
| organisms;Eukaryota;Opisthokonta;Metazoa;Eumetazoa;Bilateria;Protostomia;Spiralia;Lophotrochozoa;Mollusca;Bivalvia;Autobranchia;Pteriormorphia;Pectinida;Pectinoidea;Pectinidae;Mizuhopecten;Mizuhopecten yessoensis                  |       |        |     |                 |                |           |          |        |          |  |
| UdeM00000029564                                                                                                                                                                                                                       | 6596  | 548.9  |     | UdeM00000029564 | XP_045165762.1 | 43.8      | 664      |        |          |  |
| 282                                                                                                                                                                                                                                   | 7     | 45     | 619 | 85              | 746            | 8.40E-153 | 548.9    | 6596   | cellular |  |
| organisms;Eukaryota;Opisthokonta;Metazoa;Eumetazoa;Bilateria;Protostomia;Spiralia;Lophotrochozoa;Mollusca;Bivalvia;Autobranchia;Heteroconchia;Euherodonta;Imparidentia;Venerida;Veneroidea;Veneridae;Mercenaria;Mercenaria mercenaria |       |        |     |                 |                |           |          |        |          |  |
| UdeM00000029566                                                                                                                                                                                                                       | 7654  | 72.4   |     | UdeM00000029566 | XP_041469566.1 | 45.8      | 83       |        |          |  |
| 45                                                                                                                                                                                                                                    | 0     | 10     | 92  | 5               | 87             | 8.80E-10  | 72.4     | 7654   | cellular |  |
| organisms;Eukaryota;Opisthokonta;Metazoa;Eumetazoa;Bilateria;Deuterostomia;Echinodermata;Eleutherozoa;Echinozoa;Echinoidea;Euechinoidea;Echinacea;Temnopleuroidea;Toxopneustidae;Lytechinus;Lytechinus variegatus                     |       |        |     |                 |                |           |          |        |          |  |
| UdeM00000029567                                                                                                                                                                                                                       | 7654  | 72.8   |     | UdeM00000029567 | XP_041469566.1 | 44.8      | 87       |        |          |  |
| 48                                                                                                                                                                                                                                    | 0     | 1      | 87  | 1               | 87             | 6.60E-10  | 72.8     | 7654   | cellular |  |
| organisms;Eukaryota;Opisthokonta;Metazoa;Eumetazoa;Bilateria;Deuterostomia;Echinodermata;Eleutherozoa;Echinozoa;Echinoidea;Euechinoidea;Echinacea;Temnopleuroidea;Toxopneustidae;Lytechinus;Lytechinus variegatus                     |       |        |     |                 |                |           |          |        |          |  |
| UdeM00000029565                                                                                                                                                                                                                       | 7654  | 72     |     | UdeM00000029565 | XP_041469566.1 | 44.8      | 87       |        |          |  |
| 48                                                                                                                                                                                                                                    | 0     | 57     | 143 | 1               | 87             | 1.40E-09  | 72       | 7654   | cellular |  |
| organisms;Eukaryota;Opisthokonta;Metazoa;Eumetazoa;Bilateria;Deuterostomia;Echinodermata;Eleutherozoa;Echinozoa;Echinoidea;Euechinoidea;Echinacea;Temnopleuroidea;Toxopneustidae;Lytechinus;Lytechinus variegatus                     |       |        |     |                 |                |           |          |        |          |  |
| UdeM00000029568                                                                                                                                                                                                                       | 6596  | 74.7   |     | UdeM00000029568 | XP_045181060.1 | 28.1      | 153      |        |          |  |
| 104                                                                                                                                                                                                                                   | 1     | 361    | 513 | 328             | 474            | 3.90E-10  | 74.7     | 6596   | cellular |  |
| organisms;Eukaryota;Opisthokonta;Metazoa;Eumetazoa;Bilateria;Protostomia;Spiralia;Lophotrochozoa;Mollusca;Bivalvia;Autobranchia;Heteroconchia;Euherodonta;Imparidentia;Venerida;Veneroidea;Veneridae;Mercenaria;Mercenaria mercenaria |       |        |     |                 |                |           |          |        |          |  |
| UdeM00000029569                                                                                                                                                                                                                       | 29159 | 363.2  |     | UdeM00000029569 | XP_011415154.2 | 44.9      | 452      |        |          |  |
| 228                                                                                                                                                                                                                                   | 5     | 8      | 458 | 19              | 450            | 4.80E-97  | 363.2    | 29159  | cellular |  |
| organisms;Eukaryota;Opisthokonta;Metazoa;Eumetazoa;Bilateria;Protostomia;Spiralia;Lophotrochozoa;Mollusca;Bivalvia;Autobranchia;Pteriormorphia;Ostreida;Ostreoidea;Ostreidae;Crassostrea;Crassostrea gigas                            |       |        |     |                 |                |           |          |        |          |  |
| UdeM00000029570                                                                                                                                                                                                                       | 29159 | 381.7  |     | UdeM00000029570 | XP_019929119.1 | 65.7      | 321      |        |          |  |
| 98                                                                                                                                                                                                                                    | 3     | 367    | 685 | 133             | 443            | 1.90E-102 | 381.7    | 29159  | cellular |  |
| organisms;Eukaryota;Opisthokonta;Metazoa;Eumetazoa;Bilateria;Protostomia;Spiralia;Lophotrochozoa;Mollusca;Bivalvia;Autobranchia;Pteriormorphia;Ostreida;Ostreoidea;Ostreidae;Crassostrea;Crassostrea gigas                            |       |        |     |                 |                |           |          |        |          |  |

UdeM00000029570 29159 107.5 UdeM00000029570 XP\_019929119.1 74.6 63  
 16 0 14 76 61 123 7.10E-20 107.5 29159 cellular  
 organisms;Eukaryota;Opisthokonta;Metazoa;Eumetazoa;Bilateria;Protostomia;  
 Spiralia;Lophotrochozoa;Mollusca;Bivalvia;Autobranchia;Pteriomorpha;Ostr  
 eida;Ostreoidea;Ostreidae;Crassostrea;Crassostrea gigas  
 UdeM00000029571 6596 677.9 UdeM00000029571 XP\_045185288.1 72.9 457  
 119 3 16 470 1 454 9.00E-192 677.9 6596 cellular  
 organisms;Eukaryota;Opisthokonta;Metazoa;Eumetazoa;Bilateria;Protostomia;  
 Spiralia;Lophotrochozoa;Mollusca;Bivalvia;Autobranchia;Heteroconchia;Euhe  
 terodonta;Imparidentia;Venerida;Veneroidea;Veneridae;Mercenaria;Mercenari  
 a mercenaria  
 UdeM00000029572 6579 1080.1 UdeM00000029572 XP\_033736173.1 67.5  
 819 219 6 1 817 1 774 0.00E+00 1080.1 6579  
 cellular  
 organisms;Eukaryota;Opisthokonta;Metazoa;Eumetazoa;Bilateria;Protostomia;  
 Spiralia;Lophotrochozoa;Mollusca;Bivalvia;Autobranchia;Pteriomorpha;Pect  
 inida;Pectinoidea;Pectinidae;Pecten;Pecten maximus  
 UdeM00000029573 6596 229.9 UdeM00000029573 XP\_045185340.1 72.9 140  
 38 0 1 140 52 191 2.00E-57 229.9 6596 cellular  
 organisms;Eukaryota;Opisthokonta;Metazoa;Eumetazoa;Bilateria;Protostomia;  
 Spiralia;Lophotrochozoa;Mollusca;Bivalvia;Autobranchia;Heteroconchia;Euhe  
 terodonta;Imparidentia;Venerida;Veneroidea;Veneridae;Mercenaria;Mercenari  
 a mercenaria  
 UdeM00000029574 6596 234.2 UdeM00000029574 XP\_045185340.1 74.3 140  
 36 0 1 140 52 191 1.00E-58 234.2 6596 cellular  
 organisms;Eukaryota;Opisthokonta;Metazoa;Eumetazoa;Bilateria;Protostomia;  
 Spiralia;Lophotrochozoa;Mollusca;Bivalvia;Autobranchia;Heteroconchia;Euhe  
 terodonta;Imparidentia;Venerida;Veneroidea;Veneridae;Mercenaria;Mercenari  
 a mercenaria  
 UdeM00000029576 6565 406.8 UdeM00000029576 XP\_022345479.1 39.7 700  
 391 17 29 711 165 850 6.40E-110 406.8 6565 cellular  
 organisms;Eukaryota;Opisthokonta;Metazoa;Eumetazoa;Bilateria;Protostomia;  
 Spiralia;Lophotrochozoa;Mollusca;Bivalvia;Autobranchia;Pteriomorpha;Ostr  
 eida;Ostreoidea;Ostreidae;Crassostrea;Crassostrea virginica  
 UdeM00000029577 6565 417.5 UdeM00000029577 XP\_022337291.1 38.4 763  
 429 20 15 757 108 849 3.90E-113 417.5 6565 cellular  
 organisms;Eukaryota;Opisthokonta;Metazoa;Eumetazoa;Bilateria;Protostomia;  
 Spiralia;Lophotrochozoa;Mollusca;Bivalvia;Autobranchia;Pteriomorpha;Ostr  
 eida;Ostreoidea;Ostreidae;Crassostrea;Crassostrea virginica  
 UdeM00000029578 151771 209.5 UdeM00000029578 XP\_028396414.1 46  
 248 122 6 50 293 648 887 5.70E-51 209.5 151771  
 cellular  
 organisms;Eukaryota;Opisthokonta;Metazoa;Eumetazoa;Cnidaria;Anthozoa;Octo  
 corallia;Alcyonacea;Alcyoniina;Nephtheidae;Dendronephthya;Dendronephthya  
 gigantea  
 UdeM00000029579 6579 1303.1 UdeM00000029579 XP\_033736194.1 67.1  
 908 294 2 17 924 17 919 0.00E+00 1303.1 6579  
 cellular  
 organisms;Eukaryota;Opisthokonta;Metazoa;Eumetazoa;Bilateria;Protostomia;  
 Spiralia;Lophotrochozoa;Mollusca;Bivalvia;Autobranchia;Pteriomorpha;Pect  
 inida;Pectinoidea;Pectinidae;Pecten;Pecten maximus  
 UdeM00000029580 6596 168.7 UdeM00000029580 XP\_045215193.1 52.2 161  
 73 2 1 161 215 371 6.10E-39 168.7 6596 cellular  
 organisms;Eukaryota;Opisthokonta;Metazoa;Eumetazoa;Bilateria;Protostomia;

Spiralia;Lophotrochozoa;Mollusca;Bivalvia;Autobranchia;Heteroconchia;Euherodonta;Imparidentia;Venerida;Veneroidea;Veneridae;Mercenaria;Mercenaria mercenaria

UdeM00000029581 400727 917.5 UdeM00000029581 XP\_025104305.1 64.4  
711 235 6 1 705 1 699 1.00E-263 917.5 400727  
cellular

organisms;Eukaryota;Opisthokonta;Metazoa;Eumetazoa;Bilateria;Protostomia;Spiralia;Lophotrochozoa;Mollusca;Gastropoda;Caenogastropoda;Architaenioglossa;Ampullarioidea;Ampullariidae;Pomacea;Pomacea canaliculata

UdeM00000029582 6579 626.7 UdeM00000029582 XP\_033736188.1 86.5 392  
52 1 1 391 1 392 8.80E-176 626.7 6579 cellular

organisms;Eukaryota;Opisthokonta;Metazoa;Eumetazoa;Bilateria;Protostomia;Spiralia;Lophotrochozoa;Mollusca;Bivalvia;Autobranchia;Pteriormorphia;Pectinida;Pectinoidea;Pectinidae;Pecten;Pecten maximus

UdeM00000029582 6579 213.8 UdeM00000029582 XP\_033736188.1 91.7 109  
9 0 1635 1743 391 499 1.80E-51 213.8 6579 cellular

organisms;Eukaryota;Opisthokonta;Metazoa;Eumetazoa;Bilateria;Protostomia;Spiralia;Lophotrochozoa;Mollusca;Bivalvia;Autobranchia;Pteriormorphia;Pectinida;Pectinoidea;Pectinidae;Pecten;Pecten maximus

UdeM00000029583 6596 155.2 UdeM00000029583 XP\_045186936.1 71.8 354  
88 1 1 342 1 354 1.60E-34 155.2 6596 cellular

organisms;Eukaryota;Opisthokonta;Metazoa;Eumetazoa;Bilateria;Protostomia;Spiralia;Lophotrochozoa;Mollusca;Bivalvia;Autobranchia;Heteroconchia;Euherodonta;Imparidentia;Venerida;Veneroidea;Veneridae;Mercenaria;Mercenaria mercenaria

UdeM00000029584 6596 695.7 UdeM00000029584 XP\_045186950.1 64.9 848  
260 8 1 819 1 839 7.20E-197 695.7 6596 cellular

organisms;Eukaryota;Opisthokonta;Metazoa;Eumetazoa;Bilateria;Protostomia;Spiralia;Lophotrochozoa;Mollusca;Bivalvia;Autobranchia;Heteroconchia;Euherodonta;Imparidentia;Venerida;Veneroidea;Veneridae;Mercenaria;Mercenaria mercenaria

UdeM00000029585 6596 91.3 UdeM00000029585 XP\_045186926.1 52.1 94  
42 2 1 91 762 855 7.00E-16 91.3 6596 cellular

organisms;Eukaryota;Opisthokonta;Metazoa;Eumetazoa;Bilateria;Protostomia;Spiralia;Lophotrochozoa;Mollusca;Bivalvia;Autobranchia;Heteroconchia;Euherodonta;Imparidentia;Venerida;Veneroidea;Veneridae;Mercenaria;Mercenaria mercenaria

UdeM00000029586 7888 59.3 UdeM00000029586 XP\_043912551.1 30.8 107  
70 1 5 107 61 167 4.50E-06 59.3 7888 cellular

organisms;Eukaryota;Opisthokonta;Metazoa;Eumetazoa;Bilateria;Deuterostomia;Chordata;Craniata;Vertebrata;Gnathostomata;Teleostomi;Euteleostomi;Sarcopterygii;Dipnotetrapodomorpha;Dipnomorpha;Ceratodontae;Ceratodontiformes;Lepidosirenoidei;Protopterygidae;Protopterygus;Protopterygus annectens

UdeM00000039996 6579 374.4 UdeM00000039996 XP\_033731191.1 52.9 333  
157 0 5 337 174 506 1.50E-100 374.4 6579 cellular

organisms;Eukaryota;Opisthokonta;Metazoa;Eumetazoa;Bilateria;Protostomia;Spiralia;Lophotrochozoa;Mollusca;Bivalvia;Autobranchia;Pteriormorphia;Pectinida;Pectinoidea;Pectinidae;Pecten;Pecten maximus

UdeM00000039997 6596 478.8 UdeM00000039997 XP\_045212274.1 59.4 397  
159 2 1 395 131 527 6.70E-132 478.8 6596 cellular

organisms;Eukaryota;Opisthokonta;Metazoa;Eumetazoa;Bilateria;Protostomia;Spiralia;Lophotrochozoa;Mollusca;Bivalvia;Autobranchia;Heteroconchia;Euherodonta;Imparidentia;Venerida;Veneroidea;Veneridae;Mercenaria;Mercenaria mercenaria

UdeM00000039998 6573 650.2 UdeM00000039998 XP\_021367882.1 39.8 1837  
 776 25 22 1823 14 1555 7.80E-183 650.2 6573 cellular  
 organisms;Eukaryota;Opisthokonta;Metazoa;Eumetazoa;Bilateria;Protostomia;  
 Spiralia;Lophotrochozoa;Mollusca;Bivalvia;Autobranchia;Pteriormorphia;Pect  
 inida;Pectinoidea;Pectinidae;Mizuhopecten;Mizuhopecten yessoensis  
 UdeM00000039999 6596 1698.3 UdeM00000039999 XP\_045162309.1 70  
 1202 348 4 16 1206 43 1243 0.00E+00 1698.3 6596  
 cellular  
 organisms;Eukaryota;Opisthokonta;Metazoa;Eumetazoa;Bilateria;Protostomia;  
 Spiralia;Lophotrochozoa;Mollusca;Bivalvia;Autobranchia;Heteroconchia;Euhe  
 terodonta;Imparidentia;Venerida;Veneroidea;Veneridae;Mercenaria;Mercenari  
 a mercenaria  
 UdeM00000040001 6596 617.5 UdeM00000040001 XP\_045161545.1 56.6 516  
 218 4 9 521 7 519 1.60E-173 617.5 6596 cellular  
 organisms;Eukaryota;Opisthokonta;Metazoa;Eumetazoa;Bilateria;Protostomia;  
 Spiralia;Lophotrochozoa;Mollusca;Bivalvia;Autobranchia;Heteroconchia;Euhe  
 terodonta;Imparidentia;Venerida;Veneroidea;Veneridae;Mercenaria;Mercenari  
 a mercenaria  
 UdeM00000040002 6596 667.9 UdeM00000040002 XP\_045161545.1 59.4 515  
 205 3 9 521 7 519 1.00E-188 667.9 6596 cellular  
 organisms;Eukaryota;Opisthokonta;Metazoa;Eumetazoa;Bilateria;Protostomia;  
 Spiralia;Lophotrochozoa;Mollusca;Bivalvia;Autobranchia;Heteroconchia;Euhe  
 terodonta;Imparidentia;Venerida;Veneroidea;Veneridae;Mercenaria;Mercenari  
 a mercenaria  
 UdeM00000040003 6596 416 UdeM00000040003 XP\_045161545.1 61.9 318  
 112 3 3 314 205 519 4.30E-113 416 6596 cellular  
 organisms;Eukaryota;Opisthokonta;Metazoa;Eumetazoa;Bilateria;Protostomia;  
 Spiralia;Lophotrochozoa;Mollusca;Bivalvia;Autobranchia;Heteroconchia;Euhe  
 terodonta;Imparidentia;Venerida;Veneroidea;Veneridae;Mercenaria;Mercenari  
 a mercenaria  
 UdeM00000040004 6596 203.4 UdeM00000040004 XP\_045161545.1 52.2 180  
 84 2 9 187 7 185 2.60E-49 203.4 6596 cellular  
 organisms;Eukaryota;Opisthokonta;Metazoa;Eumetazoa;Bilateria;Protostomia;  
 Spiralia;Lophotrochozoa;Mollusca;Bivalvia;Autobranchia;Heteroconchia;Euhe  
 terodonta;Imparidentia;Venerida;Veneroidea;Veneridae;Mercenaria;Mercenari  
 a mercenaria  
 UdeM00000040005 6596 378.6 UdeM00000040005 XP\_045161545.1 61.6 279  
 105 1 8 286 243 519 6.90E-102 378.6 6596 cellular  
 organisms;Eukaryota;Opisthokonta;Metazoa;Eumetazoa;Bilateria;Protostomia;  
 Spiralia;Lophotrochozoa;Mollusca;Bivalvia;Autobranchia;Heteroconchia;Euhe  
 terodonta;Imparidentia;Venerida;Veneroidea;Veneridae;Mercenaria;Mercenari  
 a mercenaria  
 UdeM00000040006 6596 279.3 UdeM00000040006 XP\_045161545.1 60.2 216  
 83 1 31 246 73 285 5.10E-72 279.3 6596 cellular  
 organisms;Eukaryota;Opisthokonta;Metazoa;Eumetazoa;Bilateria;Protostomia;  
 Spiralia;Lophotrochozoa;Mollusca;Bivalvia;Autobranchia;Heteroconchia;Euhe  
 terodonta;Imparidentia;Venerida;Veneroidea;Veneridae;Mercenaria;Mercenari  
 a mercenaria  
 UdeM00000040007 1735272 94 UdeM00000040007 XP\_041377582.1 72.1  
 61 17 0 1 61 304 364 7.80E-17 94 1735272  
 cellular  
 organisms;Eukaryota;Opisthokonta;Metazoa;Eumetazoa;Bilateria;Protostomia;  
 Spiralia;Lophotrochozoa;Mollusca;Gastropoda;Neomphalina;Neomphaloidea;Pel  
 tospiridae;Gigantopelta;Gigantopelta aegis

UdeM00000043189 6596 82 UdeM00000043189 XP\_045208259.1 45.3 86  
 47 0 32 117 239 324 5.70E-13 82 6596 cellular  
 organisms;Eukaryota;Opisthokonta;Metazoa;Eumetazoa;Bilateria;Protostomia;  
 Spiralia;Lophotrochozoa;Mollusca;Bivalvia;Autobranchia;Heteroconchia;Euhe  
 terodonta;Imparidentia;Venerida;Veneroidea;Veneridae;Mercenaria;Mercenari  
 a mercenaria  
 UdeM00000043188 6596 89 UdeM00000043188 XP\_045208259.1 27.6 250  
 77 2 32 178 239 487 6.90E-15 89 6596 cellular  
 organisms;Eukaryota;Opisthokonta;Metazoa;Eumetazoa;Bilateria;Protostomia;  
 Spiralia;Lophotrochozoa;Mollusca;Bivalvia;Autobranchia;Heteroconchia;Euhe  
 terodonta;Imparidentia;Venerida;Veneroidea;Veneridae;Mercenaria;Mercenari  
 a mercenaria  
 UdeM00000043190 6596 88.2 UdeM00000043190 XP\_045208259.1 41.4 140  
 77 3 22 161 401 535 1.10E-14 88.2 6596 cellular  
 organisms;Eukaryota;Opisthokonta;Metazoa;Eumetazoa;Bilateria;Protostomia;  
 Spiralia;Lophotrochozoa;Mollusca;Bivalvia;Autobranchia;Heteroconchia;Euhe  
 terodonta;Imparidentia;Venerida;Veneroidea;Veneridae;Mercenaria;Mercenari  
 a mercenaria  
 UdeM00000043191 6596 85.1 UdeM00000043191 XP\_045185384.1 51.1 88  
 42 1 4 91 70 156 6.10E-14 85.1 6596 cellular  
 organisms;Eukaryota;Opisthokonta;Metazoa;Eumetazoa;Bilateria;Protostomia;  
 Spiralia;Lophotrochozoa;Mollusca;Bivalvia;Autobranchia;Heteroconchia;Euhe  
 terodonta;Imparidentia;Venerida;Veneroidea;Veneridae;Mercenaria;Mercenari  
 a mercenaria  
 UdeM00000034660 6596 397.1 UdeM00000034660 XP\_045183941.1 50.3 370  
 182 2 312 681 367 734 4.40E-107 397.1 6596 cellular  
 organisms;Eukaryota;Opisthokonta;Metazoa;Eumetazoa;Bilateria;Protostomia;  
 Spiralia;Lophotrochozoa;Mollusca;Bivalvia;Autobranchia;Heteroconchia;Euhe  
 terodonta;Imparidentia;Venerida;Veneroidea;Veneridae;Mercenaria;Mercenari  
 a mercenaria  
 UdeM00000034661 6596 263.5 UdeM00000034661 XP\_045171298.1 44.5 310  
 161 3 1 299 60 369 3.40E-67 263.5 6596 cellular  
 organisms;Eukaryota;Opisthokonta;Metazoa;Eumetazoa;Bilateria;Protostomia;  
 Spiralia;Lophotrochozoa;Mollusca;Bivalvia;Autobranchia;Heteroconchia;Euhe  
 terodonta;Imparidentia;Venerida;Veneroidea;Veneridae;Mercenaria;Mercenari  
 a mercenaria  
 UdeM00000034662 6565 298.1 UdeM00000034662 XP\_022303849.1 74.4 199  
 51 0 1 199 1 199 8.20E-78 298.1 6565 cellular  
 organisms;Eukaryota;Opisthokonta;Metazoa;Eumetazoa;Bilateria;Protostomia;  
 Spiralia;Lophotrochozoa;Mollusca;Bivalvia;Autobranchia;Pteriomorphia;Ostr  
 eida;Ostreoidea;Ostreidae;Crassostrea;Crassostrea virginica  
 UdeM00000034663 6596 297 UdeM00000034663 XP\_045184482.1 38.5 524  
 250 13 568 1071 47 518 9.90E-77 297 6596 cellular  
 organisms;Eukaryota;Opisthokonta;Metazoa;Eumetazoa;Bilateria;Protostomia;  
 Spiralia;Lophotrochozoa;Mollusca;Bivalvia;Autobranchia;Heteroconchia;Euhe  
 terodonta;Imparidentia;Venerida;Veneroidea;Veneridae;Mercenaria;Mercenari  
 a mercenaria  
 UdeM00000034664 6596 307 UdeM00000034664 XP\_045184482.1 38.9 543  
 248 15 568 1097 47 518 9.80E-80 307 6596 cellular  
 organisms;Eukaryota;Opisthokonta;Metazoa;Eumetazoa;Bilateria;Protostomia;  
 Spiralia;Lophotrochozoa;Mollusca;Bivalvia;Autobranchia;Heteroconchia;Euhe  
 terodonta;Imparidentia;Venerida;Veneroidea;Veneridae;Mercenaria;Mercenari  
 a mercenaria

UdeM00000034665 6596 164.1 UdeM00000034665 XP\_045184020.1 37.2 312  
 146 10 82 351 90 393 3.30E-37 164.1 6596 cellular  
 organisms;Eukaryota;Opisthokonta;Metazoa;Eumetazoa;Bilateria;Protostomia;  
 Spiralia;Lophotrochozoa;Mollusca;Bivalvia;Autobranchia;Heteroconchia;Euhe  
 terodonta;Imparidentia;Venerida;Veneroidea;Veneridae;Mercenaria;Mercenari  
 a mercenaria  
 UdeM00000034666 225164 211.5 UdeM00000034666 XP\_009058199.1 52.4  
 208 92 2 1 208 1 201 1.20E-51 211.5 225164  
 cellular  
 organisms;Eukaryota;Opisthokonta;Metazoa;Eumetazoa;Bilateria;Protostomia;  
 Spiralia;Lophotrochozoa;Mollusca;Gastropoda;Patellogastropoda;Lottioidea;  
 Lottiidae;Lottia;Lottia gigantea  
 UdeM00000034667 6579 642.1 UdeM00000034667 XP\_033752673.1 50.5 689  
 295 10 1 680 1 652 7.90E-181 642.1 6579 cellular  
 organisms;Eukaryota;Opisthokonta;Metazoa;Eumetazoa;Bilateria;Protostomia;  
 Spiralia;Lophotrochozoa;Mollusca;Bivalvia;Autobranchia;Pteriormorphia;Pect  
 inida;Pectinoidea;Pectinidae;Pecten;Pecten maximus  
 UdeM00000034668 6579 461.8 UdeM00000034668 XP\_033752673.1 58.8 388  
 150 3 21 406 273 652 8.70E-127 461.8 6579 cellular  
 organisms;Eukaryota;Opisthokonta;Metazoa;Eumetazoa;Bilateria;Protostomia;  
 Spiralia;Lophotrochozoa;Mollusca;Bivalvia;Autobranchia;Pteriormorphia;Pect  
 inida;Pectinoidea;Pectinidae;Pecten;Pecten maximus  
 UdeM00000034669 7604 456.4 UdeM00000034669 XP\_033641066.1 55.8 378  
 167 0 4 381 3 380 3.50E-125 456.4 7604 cellular  
 organisms;Eukaryota;Opisthokonta;Metazoa;Eumetazoa;Bilateria;Deuterostomi  
 a;Echinodermata;Eleutherozoa;Asterozoa;Asteroidea;Forcipulatacea;Forcipul  
 atida;Asteroidea;Asteroidea;Asteroidea;Asteroidea;Asteroidea;Asteroidea  
 UdeM00000034670 6596 149.8 UdeM00000034670 XP\_045184020.1 33.4 326  
 158 10 31 310 80 392 5.60E-33 149.8 6596 cellular  
 organisms;Eukaryota;Opisthokonta;Metazoa;Eumetazoa;Bilateria;Protostomia;  
 Spiralia;Lophotrochozoa;Mollusca;Bivalvia;Autobranchia;Heteroconchia;Euhe  
 terodonta;Imparidentia;Venerida;Veneroidea;Veneridae;Mercenaria;Mercenari  
 a mercenaria  
 UdeM00000034672 400727 178.3 UdeM00000034672 XP\_025082932.1 45.2  
 199 107 1 122 320 28 224 1.70E-41 178.3 400727  
 cellular  
 organisms;Eukaryota;Opisthokonta;Metazoa;Eumetazoa;Bilateria;Protostomia;  
 Spiralia;Lophotrochozoa;Mollusca;Gastropoda;Caenogastropoda;Architaeniogl  
 ossa;Ampullarioidea;Ampullariidae;Pomacea;Pomacea canaliculata  
 UdeM00000034671 400727 178.3 UdeM00000034671 XP\_025082932.1 45.2  
 199 107 1 57 255 28 224 1.40E-41 178.3 400727  
 cellular  
 organisms;Eukaryota;Opisthokonta;Metazoa;Eumetazoa;Bilateria;Protostomia;  
 Spiralia;Lophotrochozoa;Mollusca;Gastropoda;Caenogastropoda;Architaeniogl  
 ossa;Ampullarioidea;Ampullariidae;Pomacea;Pomacea canaliculata  
 UdeM00000034673 6573 312 UdeM00000034673 XP\_021370769.1 59.4 261  
 103 2 4 261 11 271 7.20E-82 312 6573 cellular  
 organisms;Eukaryota;Opisthokonta;Metazoa;Eumetazoa;Bilateria;Protostomia;  
 Spiralia;Lophotrochozoa;Mollusca;Bivalvia;Autobranchia;Pteriormorphia;Pect  
 inida;Pectinoidea;Pectinidae;Mizuhopecten;Mizuhopecten yessoensis  
 UdeM00000034677 10224 86.3 UdeM00000034677 XP\_002740528.1 46.5 99  
 45 2 2 100 106 196 2.90E-14 86.3 10224 cellular  
 organisms;Eukaryota;Opisthokonta;Metazoa;Eumetazoa;Bilateria;Deuterostomi



a; Hemichordata; Enteropneusta; Harrimaniidae; Saccoglossus; Saccoglossus kowalevskii

UdeM00000034678 6596 916 UdeM00000034678 XP\_045183995.1 80.4 546  
107 0 28 573 89 634 2.40E-263 916 6596 cellular  
organisms; Eukaryota; Opisthokonta; Metazoa; Eumetazoa; Bilateria; Protostomia; Spiralia; Lophotrochozoa; Mollusca; Bivalvia; Autobranchia; Heteroconchia; Euheterodonta; Imparidentia; Venerida; Veneroidea; Veneridae; Mercenaria; Mercenaria mercenaria

UdeM00000034679 6565 120.6 UdeM00000034679 XP\_022311724.1 59.6 99  
40 0 1 99 501 599 1.20E-24 120.6 6565 cellular  
organisms; Eukaryota; Opisthokonta; Metazoa; Eumetazoa; Bilateria; Protostomia; Spiralia; Lophotrochozoa; Mollusca; Bivalvia; Autobranchia; Pteriomorpha; Ostreida; Ostreidae; Crassostrea; Crassostrea virginica

UdeM00000034680 6596 228.8 UdeM00000034680 XP\_045183925.1 74.5 153  
39 0 1 153 1 153 8.60E-57 228.8 6596 cellular  
organisms; Eukaryota; Opisthokonta; Metazoa; Eumetazoa; Bilateria; Protostomia; Spiralia; Lophotrochozoa; Mollusca; Bivalvia; Autobranchia; Heteroconchia; Euheterodonta; Imparidentia; Venerida; Veneroidea; Veneridae; Mercenaria; Mercenaria mercenaria

UdeM00000034681 29159 228.4 UdeM00000034681 XP\_034321866.1 76.3 152  
36 0 1 152 3 154 1.10E-56 228.4 29159 cellular  
organisms; Eukaryota; Opisthokonta; Metazoa; Eumetazoa; Bilateria; Protostomia; Spiralia; Lophotrochozoa; Mollusca; Bivalvia; Autobranchia; Pteriomorpha; Ostreida; Ostreidae; Crassostrea; Crassostrea gigas

UdeM00000034682 225164 64.7 UdeM00000034682 XP\_009058946.1 66.7  
42 14 0 75 116 41 82 9.00E-08 64.7 225164  
cellular  
organisms; Eukaryota; Opisthokonta; Metazoa; Eumetazoa; Bilateria; Protostomia; Spiralia; Lophotrochozoa; Mollusca; Gastropoda; Patellogastropoda; Lottiidae; Lottia; Lottia gigantea

UdeM00000034684 6596 896.7 UdeM00000034684 XP\_045183793.1 66.1 638  
206 4 1 634 1 632 1.70E-257 896.7 6596 cellular  
organisms; Eukaryota; Opisthokonta; Metazoa; Eumetazoa; Bilateria; Protostomia; Spiralia; Lophotrochozoa; Mollusca; Bivalvia; Autobranchia; Heteroconchia; Euheterodonta; Imparidentia; Venerida; Veneroidea; Veneridae; Mercenaria; Mercenaria mercenaria

UdeM00000034685 6596 276.6 UdeM00000034685 XP\_045183890.1 55 222  
98 2 5 225 9 229 1.20E-70 276.6 6596 cellular  
organisms; Eukaryota; Opisthokonta; Metazoa; Eumetazoa; Bilateria; Protostomia; Spiralia; Lophotrochozoa; Mollusca; Bivalvia; Autobranchia; Heteroconchia; Euheterodonta; Imparidentia; Venerida; Veneroidea; Veneridae; Mercenaria; Mercenaria mercenaria

UdeM00000034688 29159 180.3 UdeM00000034688 XP\_011429462.2 51.2 170  
69 4 3 167 23 183 2.80E-42 180.3 29159 cellular  
organisms; Eukaryota; Opisthokonta; Metazoa; Eumetazoa; Bilateria; Protostomia; Spiralia; Lophotrochozoa; Mollusca; Bivalvia; Autobranchia; Pteriomorpha; Ostreida; Ostreidae; Crassostrea; Crassostrea gigas

UdeM00000034687 6565 187.2 UdeM00000034687 XP\_022335450.1 47.2 195  
88 5 17 205 1 186 2.70E-44 187.2 6565 cellular  
organisms; Eukaryota; Opisthokonta; Metazoa; Eumetazoa; Bilateria; Protostomia; Spiralia; Lophotrochozoa; Mollusca; Bivalvia; Autobranchia; Pteriomorpha; Ostreida; Ostreidae; Crassostrea; Crassostrea virginica

UdeM00000034695 6573 359.8 UdeM00000034695 XP\_021354533.1 43.1 599  
306 10 24 596 35 624 6.90E-96 359.8 6573 cellular

organisms;Eukaryota;Opisthokonta;Metazoa;Eumetazoa;Bilateria;Protostomia;Spiralia;Lophotrochozoa;Mollusca;Bivalvia;Autobranchia;Pteriomorpha;Pectinida;Pectinoidea;Pectinidae;Mizuhopecten;Mizuhopecten yessoensis

UdeM00000034696 6596 469.2 UdeM00000034696 XP\_045185177.1 61.7 371  
140 1 46 416 70 438 5.60E-129 469.2 6596 cellular

organisms;Eukaryota;Opisthokonta;Metazoa;Eumetazoa;Bilateria;Protostomia;Spiralia;Lophotrochozoa;Mollusca;Bivalvia;Autobranchia;Heteroconchia;Euheterodonta;Imparidentia;Venerida;Veneroidea;Veneridae;Mercenaria;Mercenaria mercenaria

UdeM00000034697 6596 285.8 UdeM00000034697 XP\_045176455.1 62.4 205  
77 0 1 205 1 205 6.30E-74 285.8 6596 cellular

organisms;Eukaryota;Opisthokonta;Metazoa;Eumetazoa;Bilateria;Protostomia;Spiralia;Lophotrochozoa;Mollusca;Bivalvia;Autobranchia;Heteroconchia;Euheterodonta;Imparidentia;Venerida;Veneroidea;Veneridae;Mercenaria;Mercenaria mercenaria

UdeM00000034699 6596 163.7 UdeM00000034699 XP\_045185008.1 53 181  
64 6 452 628 14 177 7.60E-37 163.7 6596 cellular

organisms;Eukaryota;Opisthokonta;Metazoa;Eumetazoa;Bilateria;Protostomia;Spiralia;Lophotrochozoa;Mollusca;Bivalvia;Autobranchia;Heteroconchia;Euheterodonta;Imparidentia;Venerida;Veneroidea;Veneridae;Mercenaria;Mercenaria mercenaria

UdeM00000034701 7741 186.4 UdeM00000034701 XP\_019622327.1 56.4 165  
72 0 1 165 799 963 3.20E-44 186.4 7741 cellular

organisms;Eukaryota;Opisthokonta;Metazoa;Eumetazoa;Bilateria;Deuterostomia;Chordata;Cephalochordata;Leptocardii;Amphioxiformes;Branchiostomidae;Branchiostoma;Branchiostoma belcheri

UdeM00000034700 7574 304.7 UdeM00000034700 XP\_013411634.1 39 454  
266 5 468 917 10 456 4.00E-79 304.7 7574 cellular

organisms;Eukaryota;Opisthokonta;Metazoa;Eumetazoa;Bilateria;Protostomia;Spiralia;Lophotrochozoa;Brachiopoda;Linguliformea;Lingulata;Lingulida;Linguloidea;Lingulidae;Lingula;Lingula anatina

UdeM00000034702 2652724 129 UdeM00000034702 XP\_020899142.1 24.1  
721 463 20 8 688 188 864 2.40E-26 129 2652724

cellular

organisms;Eukaryota;Opisthokonta;Metazoa;Eumetazoa;Cnidaria;Anthozoa;Hexacorallia;Actiniaria;Aiptasiidae;Exaiptasia;Exaiptasia diaphana

UdeM00000034703 6596 77 UdeM00000034703 XP\_045196182.1 44.3 97  
54 0 91 187 95 191 3.00E-11 77 6596 cellular

organisms;Eukaryota;Opisthokonta;Metazoa;Eumetazoa;Bilateria;Protostomia;Spiralia;Lophotrochozoa;Mollusca;Bivalvia;Autobranchia;Heteroconchia;Euheterodonta;Imparidentia;Venerida;Veneroidea;Veneridae;Mercenaria;Mercenaria mercenaria

UdeM00000034704 6596 143.3 UdeM00000034704 XP\_045184299.1 46.2 184  
97 2 6 189 5 186 3.30E-31 143.3 6596 cellular

organisms;Eukaryota;Opisthokonta;Metazoa;Eumetazoa;Bilateria;Protostomia;Spiralia;Lophotrochozoa;Mollusca;Bivalvia;Autobranchia;Heteroconchia;Euheterodonta;Imparidentia;Venerida;Veneroidea;Veneridae;Mercenaria;Mercenaria mercenaria

UdeM00000034705 6596 603.6 UdeM00000034705 XP\_045184800.1 86.8 340  
45 0 12 351 14 353 1.60E-169 603.6 6596 cellular

organisms;Eukaryota;Opisthokonta;Metazoa;Eumetazoa;Bilateria;Protostomia;Spiralia;Lophotrochozoa;Mollusca;Bivalvia;Autobranchia;Heteroconchia;Euheterodonta;Imparidentia;Venerida;Veneroidea;Veneridae;Mercenaria;Mercenaria mercenaria

UdeM00000034706 29159 275.4 UdeM00000034706 XP\_019926412.2 49.7 304  
 108 5 1 267 1 296 1.00E-70 275.4 29159 cellular  
 organisms;Eukaryota;Opisthokonta;Metazoa;Eumetazoa;Bilateria;Protostomia;  
 Spiralia;Lophotrochozoa;Mollusca;Bivalvia;Autobranchia;Pteriomorphia;Ostr  
 eida;Ostreoidea;Ostreidae;Crassostrea;Crassostrea gigas  
 UdeM00000034708 1735272 398.7 UdeM00000034708 XP\_041356179.1 62.9  
 353 101 9 1 323 1 353 7.30E-108 398.7 1735272  
 cellular  
 organisms;Eukaryota;Opisthokonta;Metazoa;Eumetazoa;Bilateria;Protostomia;  
 Spiralia;Lophotrochozoa;Mollusca;Gastropoda;Neomphalina;Neomphaloidea;Pel  
 tospiridae;Gigantopelta;Gigantopelta aegis  
 UdeM00000034709 6596 780.4 UdeM00000034709 XP\_045184924.1 42.3 1815  
 729 39 7 1525 11 1802 4.20E-222 780.4 6596 cellular  
 organisms;Eukaryota;Opisthokonta;Metazoa;Eumetazoa;Bilateria;Protostomia;  
 Spiralia;Lophotrochozoa;Mollusca;Bivalvia;Autobranchia;Heteroconchia;Euhe  
 terodonta;Imparidentia;Venerida;Veneroidea;Veneridae;Mercenaria;Mercenari  
 a mercenaria  
 UdeM00000034710 6573 203.8 UdeM00000034710 XP\_021366333.1 67.5 203  
 64 2 1 203 1 201 2.30E-49 203.8 6573 cellular  
 organisms;Eukaryota;Opisthokonta;Metazoa;Eumetazoa;Bilateria;Protostomia;  
 Spiralia;Lophotrochozoa;Mollusca;Bivalvia;Autobranchia;Pteriomorphia;Pect  
 inida;Pectinoidea;Pectinidae;Mizuhopecten;Mizuhopecten yessoensis  
 UdeM00000034711 6596 1320.1 UdeM00000034711 XP\_045183486.1 60.4  
 1251 392 24 31 1251 192 1369 0.00E+00 1320.1 6596  
 cellular  
 organisms;Eukaryota;Opisthokonta;Metazoa;Eumetazoa;Bilateria;Protostomia;  
 Spiralia;Lophotrochozoa;Mollusca;Bivalvia;Autobranchia;Heteroconchia;Euhe  
 terodonta;Imparidentia;Venerida;Veneroidea;Veneridae;Mercenaria;Mercenari  
 a mercenaria  
 UdeM00000034712 6596 349.4 UdeM00000034712 XP\_045183486.1 56.7 358  
 125 11 112 446 1372 1722 6.90E-93 349.4 6596 cellular  
 organisms;Eukaryota;Opisthokonta;Metazoa;Eumetazoa;Bilateria;Protostomia;  
 Spiralia;Lophotrochozoa;Mollusca;Bivalvia;Autobranchia;Heteroconchia;Euhe  
 terodonta;Imparidentia;Venerida;Veneroidea;Veneridae;Mercenaria;Mercenari  
 a mercenaria  
 UdeM00000034713 6565 332 UdeM00000034713 XP\_022309566.1 37.2 449  
 222 7 438 869 521 926 2.30E-87 332 6565 cellular  
 organisms;Eukaryota;Opisthokonta;Metazoa;Eumetazoa;Bilateria;Protostomia;  
 Spiralia;Lophotrochozoa;Mollusca;Bivalvia;Autobranchia;Pteriomorphia;Ostr  
 eida;Ostreoidea;Ostreidae;Crassostrea;Crassostrea virginica  
 UdeM00000034714 6573 327 UdeM00000034714 XP\_021375378.1 40.5 373  
 200 7 592 960 12 366 9.30E-86 327 6573 cellular  
 organisms;Eukaryota;Opisthokonta;Metazoa;Eumetazoa;Bilateria;Protostomia;  
 Spiralia;Lophotrochozoa;Mollusca;Bivalvia;Autobranchia;Pteriomorphia;Pect  
 inida;Pectinoidea;Pectinidae;Mizuhopecten;Mizuhopecten yessoensis  
 UdeM00000034715 6579 517.7 UdeM00000034715 XP\_033762317.1 50.4 544  
 260 4 1 538 1 540 1.80E-143 517.7 6579 cellular  
 organisms;Eukaryota;Opisthokonta;Metazoa;Eumetazoa;Bilateria;Protostomia;  
 Spiralia;Lophotrochozoa;Mollusca;Bivalvia;Autobranchia;Pteriomorphia;Pect  
 inida;Pectinoidea;Pectinidae;Pecten;Pecten maximus  
 UdeM00000034716 6596 493 UdeM00000034716 XP\_045185031.1 68.5 337  
 102 1 19 355 190 522 3.10E-136 493 6596 cellular  
 organisms;Eukaryota;Opisthokonta;Metazoa;Eumetazoa;Bilateria;Protostomia;  
 Spiralia;Lophotrochozoa;Mollusca;Bivalvia;Autobranchia;Heteroconchia;Euhe

terodonta;Imparidentia;Venerida;Veneroidea;Veneridae;Mercenaria;Mercenaria mercenaria

UdeM00000034717 6579 293.9 UdeM00000034717 XP\_033726294.1 35.9 496  
298 7 1 480 1 492 3.80E-76 293.9 6579 cellular

organisms;Eukaryota;Opisthokonta;Metazoa;Eumetazoa;Bilateria;Protostomia;Spiralia;Lophotrochozoa;Mollusca;Bivalvia;Autobranchia;Pteriormorphia;Pectinida;Pectinoidea;Pectinidae;Pecten;Pecten maximus

UdeM00000034718 6596 440.3 UdeM00000034718 XP\_045183837.1 40.8 576  
299 7 112 661 57 616 4.40E-120 440.3 6596 cellular

organisms;Eukaryota;Opisthokonta;Metazoa;Eumetazoa;Bilateria;Protostomia;Spiralia;Lophotrochozoa;Mollusca;Bivalvia;Autobranchia;Heteroconchia;Euheterodonta;Imparidentia;Venerida;Veneroidea;Veneridae;Mercenaria;Mercenaria mercenaria

UdeM00000034719 2607531 159.1 UdeM00000034719 XP\_029646065.1 62.9  
116 41 1 653 766 845 960 2.30E-35 159.1 2607531

cellular

organisms;Eukaryota;Opisthokonta;Metazoa;Eumetazoa;Bilateria;Protostomia;Spiralia;Lophotrochozoa;Mollusca;Cephalopoda;Coleoidea;Octopodiformes;Octopoda;Incirrata;Octopodidae;Octopus;Octopus sinensis

UdeM00000034720 6596 459.9 UdeM00000034720 XP\_045178768.1 69.8 318  
96 0 5 322 43 360 2.60E-126 459.9 6596 cellular

organisms;Eukaryota;Opisthokonta;Metazoa;Eumetazoa;Bilateria;Protostomia;Spiralia;Lophotrochozoa;Mollusca;Bivalvia;Autobranchia;Heteroconchia;Euheterodonta;Imparidentia;Venerida;Veneroidea;Veneridae;Mercenaria;Mercenaria mercenaria

UdeM00000034721 6596 1493.8 UdeM00000034721 XP\_045173057.1 51.8  
1700 496 28 8 1414 3 1671 0.00E+00 1493.8 6596

cellular

organisms;Eukaryota;Opisthokonta;Metazoa;Eumetazoa;Bilateria;Protostomia;Spiralia;Lophotrochozoa;Mollusca;Bivalvia;Autobranchia;Heteroconchia;Euheterodonta;Imparidentia;Venerida;Veneroidea;Veneridae;Mercenaria;Mercenaria mercenaria

UdeM00000034722 1735272 228 UdeM00000034722 XP\_041356548.1 47.5  
236 121 2 3 237 6 239 1.30E-56 228 1735272

cellular

organisms;Eukaryota;Opisthokonta;Metazoa;Eumetazoa;Bilateria;Protostomia;Spiralia;Lophotrochozoa;Mollusca;Gastropoda;Neomphalina;Neomphaloidea;Peltospiridae;Gigantopelta;Gigantopelta aegis

UdeM00000039323 6596 1217.2 UdeM00000039323 XP\_045192283.1 74.3  
805 203 1 7 807 161 965 0.00E+00 1217.2 6596

cellular

organisms;Eukaryota;Opisthokonta;Metazoa;Eumetazoa;Bilateria;Protostomia;Spiralia;Lophotrochozoa;Mollusca;Bivalvia;Autobranchia;Heteroconchia;Euheterodonta;Imparidentia;Venerida;Veneroidea;Veneridae;Mercenaria;Mercenaria mercenaria

UdeM00000039324 6596 557 UdeM00000039324 XP\_045192922.1 41.6 649  
354 6 49 673 41 688 3.30E-155 557 6596 cellular

organisms;Eukaryota;Opisthokonta;Metazoa;Eumetazoa;Bilateria;Protostomia;Spiralia;Lophotrochozoa;Mollusca;Bivalvia;Autobranchia;Heteroconchia;Euheterodonta;Imparidentia;Venerida;Veneroidea;Veneridae;Mercenaria;Mercenaria mercenaria

UdeM00000039325 7719 199.5 UdeM00000039325 XP\_004227365.1 54 161  
74 0 6 166 2 162 3.30E-48 199.5 7719 cellular

organisms;Eukaryota;Opisthokonta;Metazoa;Eumetazoa;Bilateria;Deuterostomi

a;Chordata;Tunicata;Ascidiacea;Phlebobranchia;Cionidae;Ciona;Ciona intestinalis

UdeM00000039326 6596 510.4 UdeM00000039326 XP\_045192922.1 38.6 696  
377 6 28 721 41 688 3.80E-141 510.4 6596 cellular  
organisms;Eukaryota;Opisthokonta;Metazoa;Eumetazoa;Bilateria;Protostomia;  
Spiralia;Lophotrochozoa;Mollusca;Bivalvia;Autobranchia;Heteroconchia;Euhe  
terodonta;Imparidentia;Venerida;Veneroidea;Veneridae;Mercenaria;Mercenari  
a mercenaria

UdeM00000039327 29159 517.7 UdeM00000039327 XP\_011417304.2 47.3 512  
261 7 1 508 61 567 1.70E-143 517.7 29159 cellular  
organisms;Eukaryota;Opisthokonta;Metazoa;Eumetazoa;Bilateria;Protostomia;  
Spiralia;Lophotrochozoa;Mollusca;Bivalvia;Autobranchia;Pteriormorphia;Ostr  
eida;Ostreoidea;Ostreidae;Crassostrea;Crassostrea gigas

UdeM00000039328 6596 275.8 UdeM00000039328 XP\_045192921.1 30 593  
320 8 22 520 22 613 1.10E-70 275.8 6596 cellular  
organisms;Eukaryota;Opisthokonta;Metazoa;Eumetazoa;Bilateria;Protostomia;  
Spiralia;Lophotrochozoa;Mollusca;Bivalvia;Autobranchia;Heteroconchia;Euhe  
terodonta;Imparidentia;Venerida;Veneroidea;Veneridae;Mercenaria;Mercenari  
a mercenaria

UdeM00000039329 6596 71.6 UdeM00000039329 XP\_045192920.1 25.7 136  
101 0 1 136 513 648 8.90E-10 71.6 6596 cellular  
organisms;Eukaryota;Opisthokonta;Metazoa;Eumetazoa;Bilateria;Protostomia;  
Spiralia;Lophotrochozoa;Mollusca;Bivalvia;Autobranchia;Heteroconchia;Euhe  
terodonta;Imparidentia;Venerida;Veneroidea;Veneridae;Mercenaria;Mercenari  
a mercenaria

UdeM00000039330 6565 141.4 UdeM00000039330 XP\_022287605.1 30.5 302  
182 7 5 304 102 377 2.50E-30 141.4 6565 cellular  
organisms;Eukaryota;Opisthokonta;Metazoa;Eumetazoa;Bilateria;Protostomia;  
Spiralia;Lophotrochozoa;Mollusca;Bivalvia;Autobranchia;Pteriormorphia;Ostr  
eida;Ostreoidea;Ostreidae;Crassostrea;Crassostrea virginica

UdeM00000039331 6565 141.4 UdeM00000039331 XP\_022287605.1 30.5 302  
182 7 5 304 102 377 2.40E-30 141.4 6565 cellular  
organisms;Eukaryota;Opisthokonta;Metazoa;Eumetazoa;Bilateria;Protostomia;  
Spiralia;Lophotrochozoa;Mollusca;Bivalvia;Autobranchia;Pteriormorphia;Ostr  
eida;Ostreoidea;Ostreidae;Crassostrea;Crassostrea virginica

UdeM00000039332 29159 125.9 UdeM00000039332 XP\_019926412.2 43.4 152  
83 1 1 149 1 152 4.90E-26 125.9 29159 cellular  
organisms;Eukaryota;Opisthokonta;Metazoa;Eumetazoa;Bilateria;Protostomia;  
Spiralia;Lophotrochozoa;Mollusca;Bivalvia;Autobranchia;Pteriormorphia;Ostr  
eida;Ostreoidea;Ostreidae;Crassostrea;Crassostrea gigas

UdeM00000039333 6596 1098.2 UdeM00000039333 XP\_045192313.1 72.3  
707 193 1 456 1159 372 1078 0.00E+00 1098.2 6596  
cellular  
organisms;Eukaryota;Opisthokonta;Metazoa;Eumetazoa;Bilateria;Protostomia;  
Spiralia;Lophotrochozoa;Mollusca;Bivalvia;Autobranchia;Heteroconchia;Euhe  
terodonta;Imparidentia;Venerida;Veneroidea;Veneridae;Mercenaria;Mercenari  
a mercenaria

UdeM00000039334 6579 377.5 UdeM00000039334 XP\_033755247.1 79.3 213  
42 1 1 211 590 802 1.20E-101 377.5 6579 cellular  
organisms;Eukaryota;Opisthokonta;Metazoa;Eumetazoa;Bilateria;Protostomia;  
Spiralia;Lophotrochozoa;Mollusca;Bivalvia;Autobranchia;Pteriormorphia;Pect  
inida;Pectinoidea;Pectinidae;Pecten;Pecten maximus

UdeM00000039335 6596 193 UdeM00000039335 XP\_045194313.1 45.7 234  
126 1 19 252 297 529 5.20E-46 193 6596 cellular

organisms;Eukaryota;Opisthokonta;Metazoa;Eumetazoa;Bilateria;Protostomia;Spiralia;Lophotrochozoa;Mollusca;Bivalvia;Autobranchia;Heteroconchia;Euherodonta;Imparidentia;Venerida;Veneroidea;Veneridae;Mercenaria;Mercenaria mercenaria

UdeM00000039336 1735272 385.6 UdeM00000039336 XP\_041376268.1 75  
236 59 0 3 238 2 237 4.70E-104 385.6 1735272  
cellular

organisms;Eukaryota;Opisthokonta;Metazoa;Eumetazoa;Bilateria;Protostomia;Spiralia;Lophotrochozoa;Mollusca;Gastropoda;Neomphalina;Neomphaloidea;Peltospiridae;Gigantopelta;Gigantopelta aegis

UdeM00000039337 1735272 205.7 UdeM00000039337 XP\_041376616.1 59.1  
171 68 2 133 301 135 305 8.40E-50 205.7 1735272  
cellular

organisms;Eukaryota;Opisthokonta;Metazoa;Eumetazoa;Bilateria;Protostomia;Spiralia;Lophotrochozoa;Mollusca;Gastropoda;Neomphalina;Neomphaloidea;Peltospiridae;Gigantopelta;Gigantopelta aegis

UdeM00000039338 6596 341.3 UdeM00000039338 XP\_045194676.1 48.8 381  
155 8 4 355 42 411 1.50E-90 341.3 6596 cellular

organisms;Eukaryota;Opisthokonta;Metazoa;Eumetazoa;Bilateria;Protostomia;Spiralia;Lophotrochozoa;Mollusca;Bivalvia;Autobranchia;Heteroconchia;Euherodonta;Imparidentia;Venerida;Veneroidea;Veneridae;Mercenaria;Mercenaria mercenaria

UdeM00000039339 6596 348.6 UdeM00000039339 XP\_045194676.1 47.2 426  
169 11 1 385 1 411 1.00E-92 348.6 6596 cellular

organisms;Eukaryota;Opisthokonta;Metazoa;Eumetazoa;Bilateria;Protostomia;Spiralia;Lophotrochozoa;Mollusca;Bivalvia;Autobranchia;Heteroconchia;Euherodonta;Imparidentia;Venerida;Veneroidea;Veneridae;Mercenaria;Mercenaria mercenaria

UdeM00000039340 6105 112.8 UdeM00000039340 XP\_031560524.1 51 102  
50 0 5 106 39 140 5.60E-22 112.8 6105 cellular

organisms;Eukaryota;Opisthokonta;Metazoa;Eumetazoa;Cnidaria;Anthozoa;Hexacorallia;Actiniaria;Actiniidae;Actinia;Actinia tenebrosa

UdeM00000039342 6596 292.7 UdeM00000039342 XP\_045191757.1 94 150  
9 0 1 150 146 295 2.90E-76 292.7 6596 cellular

organisms;Eukaryota;Opisthokonta;Metazoa;Eumetazoa;Bilateria;Protostomia;Spiralia;Lophotrochozoa;Mollusca;Bivalvia;Autobranchia;Heteroconchia;Euherodonta;Imparidentia;Venerida;Veneroidea;Veneridae;Mercenaria;Mercenaria mercenaria

UdeM00000039341 29159 623.6 UdeM00000039341 XP\_011442485.2 87.8 335  
41 0 1 335 1 335 1.40E-175 623.6 29159 cellular

organisms;Eukaryota;Opisthokonta;Metazoa;Eumetazoa;Bilateria;Protostomia;Spiralia;Lophotrochozoa;Mollusca;Bivalvia;Autobranchia;Pteriomorpha;Ostreida;Ostreoidea;Ostreidae;Crassostrea;Crassostrea gigas

UdeM00000039343 1735272 388.3 UdeM00000039343 XP\_041376259.1 51  
396 185 4 29 417 20 413 1.30E-104 388.3 1735272  
cellular

organisms;Eukaryota;Opisthokonta;Metazoa;Eumetazoa;Bilateria;Protostomia;Spiralia;Lophotrochozoa;Mollusca;Gastropoda;Neomphalina;Neomphaloidea;Peltospiridae;Gigantopelta;Gigantopelta aegis

UdeM00000039344 747089 79.3 UdeM00000039344 XP\_025182220.1 30  
253 154 10 18 251 445 693 2.00E-11 79.3 747089

cellular organisms;Eukaryota;Opisthokonta;Fungi;Fungi incertae sedis;Mucoromycota;Glomeromycotina;Glomeromycetes;Glomerales;Glomeraceae;

Rhizophagus;Rhizophagus irregularis;Rhizophagus irregularis DAOM  
181602=DAOM 197198  
UdeM00000039345 747089 79.3 UdeM00000039345 XP\_025182220.1 30  
253 154 10 18 251 445 693 2.00E-11 79.3 747089  
cellular organisms;Eukaryota;Opisthokonta;Fungi;Fungi incertae  
sedis;Mucoromycota;Glomeromycotina;Glomeromycetes;Glomerales;Glomeraceae;  
Rhizophagus;Rhizophagus irregularis;Rhizophagus irregularis DAOM  
181602=DAOM 197198  
UdeM00000039346 45264 176.4 UdeM00000039346 XP\_044165143.1 34.7 317  
85 3 2 196 157 473 9.00E-41 176.4 45264 cellular  
organisms;Eukaryota;Opisthokonta;Metazoa;Eumetazoa;Cnidaria;Anthozoa;Hexa  
corallia;Scleractinia;Astrocoeniina;Acroporidae;Acropora;Acropora  
millepora  
UdeM00000039347 50390 233.8 UdeM00000039347 XP\_028142380.1 54.7 170  
77 0 2 171 201 370 1.60E-58 233.8 50390 cellular  
organisms;Eukaryota;Opisthokonta;Metazoa;Eumetazoa;Bilateria;Protostomia;  
Ecdysozoa;Panarthropoda;Arthropoda;Mandibulata;Pancrustacea;Hexapoda;Inse  
cta;Dicondylia;Pterygota;Neoptera;Endopterygota;Coleoptera;Polyphaga;Cucu  
jiformia;Chrysomeloidea;Chrysomelidae;Galerucinae;Luperini;Diabroticina;D  
iabroticites;Diabrotica;Diabrotica virgifera;Diabrotica virgifera  
virgifera  
UdeM00000039348 6596 614.8 UdeM00000039348 XP\_045191785.1 65.5 536  
145 15 1 519 1 513 1.00E-172 614.8 6596 cellular  
organisms;Eukaryota;Opisthokonta;Metazoa;Eumetazoa;Bilateria;Protostomia;  
Spiralia;Lophotrochozoa;Mollusca;Bivalvia;Autobranchia;Heteroconchia;Euhe  
terodonta;Imparidentia;Venerida;Veneroidea;Veneridae;Mercenaria;Mercenari  
a mercenaria  
UdeM00000039349 6596 618.6 UdeM00000039349 XP\_045191786.1 65.8 529  
142 14 18 530 5 510 7.30E-174 618.6 6596 cellular  
organisms;Eukaryota;Opisthokonta;Metazoa;Eumetazoa;Bilateria;Protostomia;  
Spiralia;Lophotrochozoa;Mollusca;Bivalvia;Autobranchia;Heteroconchia;Euhe  
terodonta;Imparidentia;Venerida;Veneroidea;Veneridae;Mercenaria;Mercenari  
a mercenaria  
UdeM00000039350 6596 696.8 UdeM00000039350 XP\_045192665.1 67 482  
155 2 24 504 43 521 2.20E-197 696.8 6596 cellular  
organisms;Eukaryota;Opisthokonta;Metazoa;Eumetazoa;Bilateria;Protostomia;  
Spiralia;Lophotrochozoa;Mollusca;Bivalvia;Autobranchia;Heteroconchia;Euhe  
terodonta;Imparidentia;Venerida;Veneroidea;Veneridae;Mercenaria;Mercenari  
a mercenaria  
UdeM00000039351 6565 242.3 UdeM00000039351 XP\_022286317.1 29.8 806  
407 31 8 758 16 717 2.00E-60 242.3 6565 cellular  
organisms;Eukaryota;Opisthokonta;Metazoa;Eumetazoa;Bilateria;Protostomia;  
Spiralia;Lophotrochozoa;Mollusca;Bivalvia;Autobranchia;Pteriomorphia;Ostr  
eida;Ostreoidea;Ostreidae;Crassostrea;Crassostrea virginica  
UdeM00000039352 6565 238.8 UdeM00000039352 XP\_022286312.1 30.1 765  
382 29 8 723 16 676 2.20E-59 238.8 6565 cellular  
organisms;Eukaryota;Opisthokonta;Metazoa;Eumetazoa;Bilateria;Protostomia;  
Spiralia;Lophotrochozoa;Mollusca;Bivalvia;Autobranchia;Pteriomorphia;Ostr  
eida;Ostreoidea;Ostreidae;Crassostrea;Crassostrea virginica  
UdeM00000039353 6579 1210.3 UdeM00000039353 XP\_033754375.1 76.2  
827 173 9 1 817 37 849 0.00E+00 1210.3 6579  
cellular  
organisms;Eukaryota;Opisthokonta;Metazoa;Eumetazoa;Bilateria;Protostomia;

Spiralia; Lophotrochozoa; Mollusca; Bivalvia; Autobranchia; Pteriomorpha; Pectinida; Pectinoidea; Pectinidae; Pecten; Pecten maximus  
UdeM00000039354 6579 1221.8 UdeM00000039354 XP\_033754375.1 77.2  
817 172 8 1 807 37 849 0.00E+00 1221.8 6579  
cellular  
organisms; Eukaryota; Opisthokonta; Metazoa; Eumetazoa; Bilateria; Protostomia; Spiralia; Lophotrochozoa; Mollusca; Bivalvia; Autobranchia; Pteriomorpha; Pectinida; Pectinoidea; Pectinidae; Pecten; Pecten maximus  
UdeM00000039355 6579 654.8 UdeM00000039355 XP\_033753848.1 54 626  
280 6 1 625 14 632 1.10E-184 654.8 6579 cellular  
organisms; Eukaryota; Opisthokonta; Metazoa; Eumetazoa; Bilateria; Protostomia; Spiralia; Lophotrochozoa; Mollusca; Bivalvia; Autobranchia; Pteriomorpha; Pectinida; Pectinoidea; Pectinidae; Pecten; Pecten maximus  
UdeM00000039356 46514 81.3 UdeM00000039356 XP\_038062873.1 55.4 74  
33 0 1 74 20 93 6.30E-13 81.3 46514 cellular  
organisms; Eukaryota; Opisthokonta; Metazoa; Eumetazoa; Bilateria; Deuterostomia; Echinodermata; Eleutherozoa; Asterozoa; Asteroidea; Valvatacea; Valvatida; Asterinidae; Patiria; Patiria miniata  
UdeM00000039357 400727 271.6 UdeM00000039357 XP\_025115981.1 64.1  
198 69 1 1 196 1 198 8.10E-70 271.6 400727  
cellular  
organisms; Eukaryota; Opisthokonta; Metazoa; Eumetazoa; Bilateria; Protostomia; Spiralia; Lophotrochozoa; Mollusca; Gastropoda; Caenogastropoda; Architaenioglossa; Ampullarioidea; Ampullariidae; Pomacea; Pomacea canaliculata  
UdeM00000039358 1529436 118.6 UdeM00000039358 XP\_033095325.1 47.4  
116 59 1 1 114 102 217 5.10E-24 118.6 1529436  
cellular  
organisms; Eukaryota; Opisthokonta; Metazoa; Eumetazoa; Bilateria; Deuterostomia; Echinodermata; Pelmatozoa; Crinoidea; Articulata; Comatulida; Comatulidae; Comatulinae; Anneissia; Anneissia japonica  
UdeM00000039359 1529436 86.7 UdeM00000039359 XP\_033095325.1 46.8  
79 42 0 1 79 102 180 2.20E-14 86.7 1529436  
cellular  
organisms; Eukaryota; Opisthokonta; Metazoa; Eumetazoa; Bilateria; Deuterostomia; Echinodermata; Pelmatozoa; Crinoidea; Articulata; Comatulida; Comatulidae; Comatulinae; Anneissia; Anneissia japonica  
UdeM00000039360 45264 68.6 UdeM00000039360 XP\_044165143.1 48.3 60  
31 0 68 127 371 430 7.50E-09 68.6 45264 cellular  
organisms; Eukaryota; Opisthokonta; Metazoa; Eumetazoa; Cnidaria; Anthozoa; Hexacorallia; Scleractinia; Astrocoeniina; Acroporidae; Acropora; Acropora millepora  
UdeM00000039361 6565 477.2 UdeM00000039361 XP\_022343188.1 61.7 376  
134 4 6 374 2 374 2.10E-131 477.2 6565 cellular  
organisms; Eukaryota; Opisthokonta; Metazoa; Eumetazoa; Bilateria; Protostomia; Spiralia; Lophotrochozoa; Mollusca; Bivalvia; Autobranchia; Pteriomorpha; Ostreida; Ostreoidea; Ostreidae; Crassostrea; Crassostrea virginica  
UdeM00000039362 29159 87 UdeM00000039362 XP\_034334856.1 33.2 190  
57 4 1 128 1 182 1.90E-14 87 29159 cellular  
organisms; Eukaryota; Opisthokonta; Metazoa; Eumetazoa; Bilateria; Protostomia; Spiralia; Lophotrochozoa; Mollusca; Bivalvia; Autobranchia; Pteriomorpha; Ostreida; Ostreoidea; Ostreidae; Crassostrea; Crassostrea gigas  
UdeM00000039363 6596 285 UdeM00000039363 XP\_045211715.1 34.1 419  
268 5 26 437 28 445 1.60E-73 285 6596 cellular  
organisms; Eukaryota; Opisthokonta; Metazoa; Eumetazoa; Bilateria; Protostomia;



Spiralia;Lophotrochozoa;Mollusca;Bivalvia;Autobranchia;Heteroconchia;Euherodonta;Imparidentia;Venerida;Veneroidea;Veneridae;Mercenaria;Mercenaria mercenaria

UdeM00000039364 1735272 178.3 UdeM00000039364 XP\_041376251.1 58.6  
162 60 3 98 259 116 270 1.30E-41 178.3 1735272  
cellular

organisms;Eukaryota;Opisthokonta;Metazoa;Eumetazoa;Bilateria;Protostomia;Spiralia;Lophotrochozoa;Mollusca;Gastropoda;Neomphalina;Neomphaloidea;Peltospiridae;Gigantopelta;Gigantopelta aegis

UdeM00000039365 1735272 178.3 UdeM00000039365 XP\_041376251.1 58.6  
162 60 3 41 202 116 270 1.00E-41 178.3 1735272  
cellular

organisms;Eukaryota;Opisthokonta;Metazoa;Eumetazoa;Bilateria;Protostomia;Spiralia;Lophotrochozoa;Mollusca;Gastropoda;Neomphalina;Neomphaloidea;Peltospiridae;Gigantopelta;Gigantopelta aegis

UdeM00000039366 6596 780.8 UdeM00000039366 XP\_045193488.1 53.4 693  
298 8 1 683 1 678 1.40E-222 780.8 6596 cellular

organisms;Eukaryota;Opisthokonta;Metazoa;Eumetazoa;Bilateria;Protostomia;Spiralia;Lophotrochozoa;Mollusca;Bivalvia;Autobranchia;Heteroconchia;Euherodonta;Imparidentia;Venerida;Veneroidea;Veneridae;Mercenaria;Mercenaria mercenaria

UdeM00000039367 37653 103.2 UdeM00000039367 XP\_014786621.1 65 80  
27 1 1 79 1 80 1.70E-19 103.2 37653 cellular

organisms;Eukaryota;Opisthokonta;Metazoa;Eumetazoa;Bilateria;Protostomia;Spiralia;Lophotrochozoa;Mollusca;Cephalopoda;Coleoidea;Octopodiformes;Octopoda;Incirrata;Octopodidae;Octopus;Octopus bimaculoides

UdeM00000039369 6596 228.4 UdeM00000039369 XP\_045187052.1 51.8 220  
101 3 2 220 145 360 1.20E-56 228.4 6596 cellular

organisms;Eukaryota;Opisthokonta;Metazoa;Eumetazoa;Bilateria;Protostomia;Spiralia;Lophotrochozoa;Mollusca;Bivalvia;Autobranchia;Heteroconchia;Euherodonta;Imparidentia;Venerida;Veneroidea;Veneridae;Mercenaria;Mercenaria mercenaria

UdeM00000039370 1735272 107.5 UdeM00000039370 XP\_041375536.1 73.4  
64 17 0 9 72 81 144 7.50E-21 107.5 1735272  
cellular

organisms;Eukaryota;Opisthokonta;Metazoa;Eumetazoa;Bilateria;Protostomia;Spiralia;Lophotrochozoa;Mollusca;Gastropoda;Neomphalina;Neomphaloidea;Peltospiridae;Gigantopelta;Gigantopelta aegis

UdeM00000039371 6573 104 UdeM00000039371 XP\_021354651.1 34 215  
122 2 2 216 45 239 2.60E-19 104 6573 cellular

organisms;Eukaryota;Opisthokonta;Metazoa;Eumetazoa;Bilateria;Protostomia;Spiralia;Lophotrochozoa;Mollusca;Bivalvia;Autobranchia;Pteriomorphia;Pectinida;Pectinoidea;Pectinidae;Mizuhopecten;Mizuhopecten yessoensis

UdeM00000039372 6573 121.3 UdeM00000039372 XP\_021370895.1 60.4 111  
39 2 19 125 5 114 8.90E-25 121.3 6573 cellular

organisms;Eukaryota;Opisthokonta;Metazoa;Eumetazoa;Bilateria;Protostomia;Spiralia;Lophotrochozoa;Mollusca;Bivalvia;Autobranchia;Pteriomorphia;Pectinida;Pectinoidea;Pectinidae;Mizuhopecten;Mizuhopecten yessoensis

UdeM00000039374 400727 385.6 UdeM00000039374 XP\_025116001.1 50.4  
397 188 6 13 405 14 405 8.00E-104 385.6 400727  
cellular

organisms;Eukaryota;Opisthokonta;Metazoa;Eumetazoa;Bilateria;Protostomia;Spiralia;Lophotrochozoa;Mollusca;Gastropoda;Caenogastropoda;Architaenioglossa;Ampullarioidea;Ampullariidae;Pomacea;Pomacea canaliculata

UdeM00000039375 6579 85.5 UdeM00000039375 XP\_033754822.1 50.8 128  
 54 3 1 123 1 124 5.50E-14 85.5 6579 cellular  
 organisms;Eukaryota;Opisthokonta;Metazoa;Eumetazoa;Bilateria;Protostomia;  
 Spiralia;Lophotrochozoa;Mollusca;Bivalvia;Autobranchia;Pteriormorphia;Pect  
 inida;Pectinoidea;Pectinidae;Pecten;Pecten maximus  
 UdeM00000039376 6596 168.3 UdeM00000039376 XP\_045192696.1 43.2 287  
 140 8 1 274 1 277 1.30E-38 168.3 6596 cellular  
 organisms;Eukaryota;Opisthokonta;Metazoa;Eumetazoa;Bilateria;Protostomia;  
 Spiralia;Lophotrochozoa;Mollusca;Bivalvia;Autobranchia;Heteroconchia;Euhe  
 terodonta;Imparidentia;Venerida;Veneroidea;Veneridae;Mercenaria;Mercenari  
 a mercenaria  
 UdeM00000039378 6596 64.7 UdeM00000039378 XP\_045191451.1 55.3 47  
 21 0 3 49 5 51 6.80E-08 64.7 6596 cellular  
 organisms;Eukaryota;Opisthokonta;Metazoa;Eumetazoa;Bilateria;Protostomia;  
 Spiralia;Lophotrochozoa;Mollusca;Bivalvia;Autobranchia;Heteroconchia;Euhe  
 terodonta;Imparidentia;Venerida;Veneroidea;Veneridae;Mercenaria;Mercenari  
 a mercenaria  
 UdeM00000039379 6596 345.5 UdeM00000039379 XP\_045191451.1 50.6 314  
 153 2 3 316 5 316 7.10E-92 345.5 6596 cellular  
 organisms;Eukaryota;Opisthokonta;Metazoa;Eumetazoa;Bilateria;Protostomia;  
 Spiralia;Lophotrochozoa;Mollusca;Bivalvia;Autobranchia;Heteroconchia;Euhe  
 terodonta;Imparidentia;Venerida;Veneroidea;Veneridae;Mercenaria;Mercenari  
 a mercenaria  
 UdeM00000039380 6596 342 UdeM00000039380 XP\_045191451.1 50.6 314  
 153 2 3 316 5 316 7.90E-91 342 6596 cellular  
 organisms;Eukaryota;Opisthokonta;Metazoa;Eumetazoa;Bilateria;Protostomia;  
 Spiralia;Lophotrochozoa;Mollusca;Bivalvia;Autobranchia;Heteroconchia;Euhe  
 terodonta;Imparidentia;Venerida;Veneroidea;Veneridae;Mercenaria;Mercenari  
 a mercenaria  
 UdeM00000039381 6596 350.9 UdeM00000039381 XP\_045191451.1 51.6 314  
 150 2 22 335 5 316 1.80E-93 350.9 6596 cellular  
 organisms;Eukaryota;Opisthokonta;Metazoa;Eumetazoa;Bilateria;Protostomia;  
 Spiralia;Lophotrochozoa;Mollusca;Bivalvia;Autobranchia;Heteroconchia;Euhe  
 terodonta;Imparidentia;Venerida;Veneroidea;Veneridae;Mercenaria;Mercenari  
 a mercenaria  
 UdeM00000039382 6596 251.1 UdeM00000039382 XP\_045191451.1 47.7 266  
 135 3 2 266 54 316 1.50E-63 251.1 6596 cellular  
 organisms;Eukaryota;Opisthokonta;Metazoa;Eumetazoa;Bilateria;Protostomia;  
 Spiralia;Lophotrochozoa;Mollusca;Bivalvia;Autobranchia;Heteroconchia;Euhe  
 terodonta;Imparidentia;Venerida;Veneroidea;Veneridae;Mercenaria;Mercenari  
 a mercenaria  
 UdeM00000039383 6596 333.6 UdeM00000039383 XP\_045191451.1 49.5 315  
 157 2 3 317 5 317 2.80E-88 333.6 6596 cellular  
 organisms;Eukaryota;Opisthokonta;Metazoa;Eumetazoa;Bilateria;Protostomia;  
 Spiralia;Lophotrochozoa;Mollusca;Bivalvia;Autobranchia;Heteroconchia;Euhe  
 terodonta;Imparidentia;Venerida;Veneroidea;Veneridae;Mercenaria;Mercenari  
 a mercenaria  
 UdeM00000039384 6596 258.5 UdeM00000039384 XP\_045191451.1 48.5 268  
 134 3 9 275 52 316 1.00E-65 258.5 6596 cellular  
 organisms;Eukaryota;Opisthokonta;Metazoa;Eumetazoa;Bilateria;Protostomia;  
 Spiralia;Lophotrochozoa;Mollusca;Bivalvia;Autobranchia;Heteroconchia;Euhe  
 terodonta;Imparidentia;Venerida;Veneroidea;Veneridae;Mercenaria;Mercenari  
 a mercenaria

UdeM00000039387 6412 150.6 UdeM00000039387 XP\_009015452.1 42.5 186  
 104 1 1 183 1 186 2.00E-33 150.6 6412 cellular  
 organisms;Eukaryota;Opisthokonta;Metazoa;Eumetazoa;Bilateria;Protostomia;  
 Spiralia;Lophotrochozoa;Annelida;Clitellata;Hirudinea;Rhynchobdellida;Glo  
 ssisphoniidae;Helobdella;Helobdella robusta  
 UdeM00000039386 6412 147.1 UdeM00000039386 XP\_009015452.1 45 160  
 88 0 1 160 1 160 1.90E-32 147.1 6412 cellular  
 organisms;Eukaryota;Opisthokonta;Metazoa;Eumetazoa;Bilateria;Protostomia;  
 Spiralia;Lophotrochozoa;Annelida;Clitellata;Hirudinea;Rhynchobdellida;Glo  
 ssisphoniidae;Helobdella;Helobdella robusta  
 UdeM00000039385 6412 166 UdeM00000039385 XP\_009016697.1 38 245  
 107 1 1 200 1 245 4.90E-38 166 6412 cellular  
 organisms;Eukaryota;Opisthokonta;Metazoa;Eumetazoa;Bilateria;Protostomia;  
 Spiralia;Lophotrochozoa;Annelida;Clitellata;Hirudinea;Rhynchobdellida;Glo  
 ssisphoniidae;Helobdella;Helobdella robusta  
 UdeM00000039388 143948 77 UdeM00000039388 XP\_015376875.1 44.3  
 97 46 3 1 93 301 393 1.40E-11 77 143948  
 cellular  
 organisms;Eukaryota;Opisthokonta;Metazoa;Eumetazoa;Bilateria;Protostomia;  
 Ecdysozoa;Panarthropoda;Arthropoda;Mandibulata;Pancrustacea;Hexapoda;Inse  
 cta;Dicondylia;Pterygota;Neoptera;Paraneoptera;Hemiptera;Sternorrhyncha;A  
 phidomorpha;Aphidoidea;Aphididae;Aphidinae;Macrosiphini;Diuraphis;Diuraph  
 is noxia  
 UdeM00000039389 6596 283.1 UdeM00000039389 XP\_045191451.1 45.3 316  
 170 3 3 318 4 316 4.40E-73 283.1 6596 cellular  
 organisms;Eukaryota;Opisthokonta;Metazoa;Eumetazoa;Bilateria;Protostomia;  
 Spiralia;Lophotrochozoa;Mollusca;Bivalvia;Autobranchia;Heteroconchia;Euhe  
 terodonta;Imparidentia;Venerida;Veneroidea;Veneridae;Mercenaria;Mercenari  
 a mercenaria  
 UdeM00000039391 6579 377.1 UdeM00000039391 XP\_033755744.1 50.6 514  
 219 15 1 490 1 503 3.40E-101 377.1 6579 cellular  
 organisms;Eukaryota;Opisthokonta;Metazoa;Eumetazoa;Bilateria;Protostomia;  
 Spiralia;Lophotrochozoa;Mollusca;Bivalvia;Autobranchia;Pteriomorphia;Pect  
 inida;Pectinoidea;Pectinidae;Pecten;Pecten maximus  
 UdeM00000039392 6596 916 UdeM00000039392 XP\_045191892.1 69.7 719  
 213 4 1 719 1 714 3.00E-263 916 6596 cellular  
 organisms;Eukaryota;Opisthokonta;Metazoa;Eumetazoa;Bilateria;Protostomia;  
 Spiralia;Lophotrochozoa;Mollusca;Bivalvia;Autobranchia;Heteroconchia;Euhe  
 terodonta;Imparidentia;Venerida;Veneroidea;Veneridae;Mercenaria;Mercenari  
 a mercenaria  
 UdeM00000039393 6596 827.4 UdeM00000039393 XP\_045191897.1 72.3 628  
 151 3 1 605 1 628 1.20E-236 827.4 6596 cellular  
 organisms;Eukaryota;Opisthokonta;Metazoa;Eumetazoa;Bilateria;Protostomia;  
 Spiralia;Lophotrochozoa;Mollusca;Bivalvia;Autobranchia;Heteroconchia;Euhe  
 terodonta;Imparidentia;Venerida;Veneroidea;Veneridae;Mercenaria;Mercenari  
 a mercenaria  
 UdeM00000039394 6596 172.9 UdeM00000039394 XP\_045191897.1 77.7 103  
 23 0 1 103 1 103 2.30E-40 172.9 6596 cellular  
 organisms;Eukaryota;Opisthokonta;Metazoa;Eumetazoa;Bilateria;Protostomia;  
 Spiralia;Lophotrochozoa;Mollusca;Bivalvia;Autobranchia;Heteroconchia;Euhe  
 terodonta;Imparidentia;Venerida;Veneroidea;Veneridae;Mercenaria;Mercenari  
 a mercenaria  
 UdeM00000039395 6596 717.2 UdeM00000039395 XP\_045191874.1 48.8 850  
 230 10 1 834 1 661 2.40E-203 717.2 6596 cellular

organisms;Eukaryota;Opisthokonta;Metazoa;Eumetazoa;Bilateria;Protostomia;Spiralia;Lophotrochozoa;Mollusca;Bivalvia;Autobranchia;Heteroconchia;Euheterodonta;Imparidentia;Venerida;Veneroidea;Veneridae;Mercenaria;Mercenaria mercenaria

UdeM00000039396 6579 116.3 UdeM00000039396 XP\_033753775.1 37.5 128  
78 2 215 341 153 279 7.60E-23 116.3 6579 cellular

organisms;Eukaryota;Opisthokonta;Metazoa;Eumetazoa;Bilateria;Protostomia;Spiralia;Lophotrochozoa;Mollusca;Bivalvia;Autobranchia;Pteriormorphia;Pectinida;Pectinoidea;Pectinidae;Pecten;Pecten maximus

UdeM00000039397 29159 1215.7 UdeM00000039397 XP\_019928989.1 77.2  
838 183 3 1 838 37 866 0.00E+00 1215.7  
29159 cellular

organisms;Eukaryota;Opisthokonta;Metazoa;Eumetazoa;Bilateria;Protostomia;Spiralia;Lophotrochozoa;Mollusca;Bivalvia;Autobranchia;Pteriormorphia;Ostreida;Ostreoidea;Ostreidae;Crassostrea;Crassostrea gigas

UdeM00000039398 6596 578.2 UdeM00000039398 XP\_045198138.1 47.2 769  
291 19 113 864 2 672 1.80E-161 578.2 6596 cellular

organisms;Eukaryota;Opisthokonta;Metazoa;Eumetazoa;Bilateria;Protostomia;Spiralia;Lophotrochozoa;Mollusca;Bivalvia;Autobranchia;Heteroconchia;Euheterodonta;Imparidentia;Venerida;Veneroidea;Veneridae;Mercenaria;Mercenaria mercenaria

UdeM00000039399 6573 454.5 UdeM00000039399 XP\_021379230.1 59.9 484  
160 4 3 485 6 456 1.70E-124 454.5 6573 cellular

organisms;Eukaryota;Opisthokonta;Metazoa;Eumetazoa;Bilateria;Protostomia;Spiralia;Lophotrochozoa;Mollusca;Bivalvia;Autobranchia;Pteriormorphia;Pectinida;Pectinoidea;Pectinidae;Mizuhopecten;Mizuhopecten yessoensis

UdeM00000039400 6596 102.4 UdeM00000039400 XP\_045193355.1 27.2 607  
347 27 189 748 542 1100 2.50E-18 102.4 6596 cellular

organisms;Eukaryota;Opisthokonta;Metazoa;Eumetazoa;Bilateria;Protostomia;Spiralia;Lophotrochozoa;Mollusca;Bivalvia;Autobranchia;Heteroconchia;Euheterodonta;Imparidentia;Venerida;Veneroidea;Veneridae;Mercenaria;Mercenaria mercenaria

UdeM00000039401 6579 84.7 UdeM00000039401 XP\_033754391.1 39.5 124  
70 3 31 154 197 315 1.60E-13 84.7 6579 cellular

organisms;Eukaryota;Opisthokonta;Metazoa;Eumetazoa;Bilateria;Protostomia;Spiralia;Lophotrochozoa;Mollusca;Bivalvia;Autobranchia;Pteriormorphia;Pectinida;Pectinoidea;Pectinidae;Pecten;Pecten maximus

UdeM00000039403 6596 104 UdeM00000039403 XP\_045193357.1 79.2 96  
20 0 1 96 1 96 1.10E-19 104 6596 cellular

organisms;Eukaryota;Opisthokonta;Metazoa;Eumetazoa;Bilateria;Protostomia;Spiralia;Lophotrochozoa;Mollusca;Bivalvia;Autobranchia;Heteroconchia;Euheterodonta;Imparidentia;Venerida;Veneroidea;Veneridae;Mercenaria;Mercenaria mercenaria

UdeM00000039402 6596 243.4 UdeM00000039402 XP\_045193357.1 78 173  
38 0 1 173 1 173 2.10E-61 243.4 6596 cellular

organisms;Eukaryota;Opisthokonta;Metazoa;Eumetazoa;Bilateria;Protostomia;Spiralia;Lophotrochozoa;Mollusca;Bivalvia;Autobranchia;Heteroconchia;Euheterodonta;Imparidentia;Venerida;Veneroidea;Veneridae;Mercenaria;Mercenaria mercenaria

UdeM00000039404 6573 224.6 UdeM00000039404 XP\_021379331.1 66.7 144  
48 0 1 144 187 330 1.00E-55 224.6 6573 cellular

organisms;Eukaryota;Opisthokonta;Metazoa;Eumetazoa;Bilateria;Protostomia;Spiralia;Lophotrochozoa;Mollusca;Bivalvia;Autobranchia;Pteriormorphia;Pectinida;Pectinoidea;Pectinidae;Mizuhopecten;Mizuhopecten yessoensis

UdeM00000039405 1735272 396.7 UdeM00000039405 XP\_041375577.1 55.2  
 429 175 4 1 425 187 602 3.70E-107 396.7 1735272  
 cellular  
 organisms;Eukaryota;Opisthokonta;Metazoa;Eumetazoa;Bilateria;Protostomia;  
 Spiralia;Lophotrochozoa;Mollusca;Gastropoda;Neomphalina;Neomphaloidea;Pel  
 tospiridae;Gigantopelta;Gigantopelta aegis  
 UdeM00000039406 1735272 175.3 UdeM00000039406 XP\_041375577.1 57.3  
 218 87 3 35 248 387 602 1.00E-40 175.3 1735272  
 cellular  
 organisms;Eukaryota;Opisthokonta;Metazoa;Eumetazoa;Bilateria;Protostomia;  
 Spiralia;Lophotrochozoa;Mollusca;Gastropoda;Neomphalina;Neomphaloidea;Pel  
 tospiridae;Gigantopelta;Gigantopelta aegis  
 UdeM00000039407 6579 464.5 UdeM00000039407 XP\_033755392.1 64.6 404  
 129 7 1 399 397 791 1.30E-127 464.5 6579 cellular  
 organisms;Eukaryota;Opisthokonta;Metazoa;Eumetazoa;Bilateria;Protostomia;  
 Spiralia;Lophotrochozoa;Mollusca;Bivalvia;Autobranchia;Pteriormorphia;Pect  
 inida;Pectinoidea;Pectinidae;Pecten;Pecten maximus  
 UdeM00000039408 6596 464.2 UdeM00000039408 XP\_045192473.1 93.4 258  
 17 0 1 258 147 404 1.10E-127 464.2 6596 cellular  
 organisms;Eukaryota;Opisthokonta;Metazoa;Eumetazoa;Bilateria;Protostomia;  
 Spiralia;Lophotrochozoa;Mollusca;Bivalvia;Autobranchia;Heteroconchia;Euhe  
 terodonta;Imparidentia;Venerida;Veneroidea;Veneridae;Mercenaria;Mercenari  
 a mercenaria  
 UdeM00000039409 29159 275 UdeM00000039409 XP\_011446545.1 77.2 162  
 24 1 1 162 1 149 8.10E-71 275 29159 cellular  
 organisms;Eukaryota;Opisthokonta;Metazoa;Eumetazoa;Bilateria;Protostomia;  
 Spiralia;Lophotrochozoa;Mollusca;Bivalvia;Autobranchia;Pteriormorphia;Ostr  
 eida;Ostreoidea;Ostreidae;Crassostrea;Crassostrea gigas  
 UdeM00000039410 6573 278.5 UdeM00000039410 XP\_021343331.1 40.3 419  
 194 8 1 416 1 366 1.40E-71 278.5 6573 cellular  
 organisms;Eukaryota;Opisthokonta;Metazoa;Eumetazoa;Bilateria;Protostomia;  
 Spiralia;Lophotrochozoa;Mollusca;Bivalvia;Autobranchia;Pteriormorphia;Pect  
 inida;Pectinoidea;Pectinidae;Mizuhopecten;Mizuhopecten yessoensis  
 UdeM00000039412 6573 1034.2 UdeM00000039412 XP\_021343463.1 42.1  
 1482 800 18 18 1468 12 1466 1.50E-298 1034.2 6573  
 cellular  
 organisms;Eukaryota;Opisthokonta;Metazoa;Eumetazoa;Bilateria;Protostomia;  
 Spiralia;Lophotrochozoa;Mollusca;Bivalvia;Autobranchia;Pteriormorphia;Pect  
 inida;Pectinoidea;Pectinidae;Mizuhopecten;Mizuhopecten yessoensis  
 UdeM00000039413 6596 318.5 UdeM00000039413 XP\_045193973.1 31.6 627  
 385 8 5 587 10 636 1.80E-83 318.5 6596 cellular  
 organisms;Eukaryota;Opisthokonta;Metazoa;Eumetazoa;Bilateria;Protostomia;  
 Spiralia;Lophotrochozoa;Mollusca;Bivalvia;Autobranchia;Heteroconchia;Euhe  
 terodonta;Imparidentia;Venerida;Veneroidea;Veneridae;Mercenaria;Mercenari  
 a mercenaria  
 UdeM00000039415 45264 282.7 UdeM00000039415 XP\_044171434.1 43.5 347  
 189 4 5 346 580 924 8.30E-73 282.7 45264 cellular  
 organisms;Eukaryota;Opisthokonta;Metazoa;Eumetazoa;Cnidaria;Anthozoa;Hexa  
 corallia;Scleractinia;Astrocoeniina;Acroporidae;Acropora;Acropora  
 millepora  
 UdeM00000039418 6596 623.2 UdeM00000039418 XP\_045192046.1 45.8 673  
 330 5 30 669 27 697 3.70E-175 623.2 6596 cellular  
 organisms;Eukaryota;Opisthokonta;Metazoa;Eumetazoa;Bilateria;Protostomia;  
 Spiralia;Lophotrochozoa;Mollusca;Bivalvia;Autobranchia;Heteroconchia;Euhe

terodonta;Imparidentia;Venerida;Veneroidea;Veneridae;Mercenaria;Mercenaria mercenaria

UdeM00000039419 400727 113.2 UdeM00000039419 XP\_025093775.1 57.1  
105 24 1 1 84 309 413 1.60E-22 113.2 400727  
cellular

organisms;Eukaryota;Opisthokonta;Metazoa;Eumetazoa;Bilateria;Protostomia;Spiralia;Lophotrochozoa;Mollusca;Gastropoda;Caenogastropoda;Architaenioglossa;Ampullarioidea;Ampullariidae;Pomacea;Pomacea canaliculata

UdeM00000039420 6596 314.7 UdeM00000039420 XP\_045192047.1 73.1 201  
54 0 1 201 1 201 8.60E-83 314.7 6596 cellular

organisms;Eukaryota;Opisthokonta;Metazoa;Eumetazoa;Bilateria;Protostomia;Spiralia;Lophotrochozoa;Mollusca;Bivalvia;Autobranchia;Heteroconchia;Euheterodonta;Imparidentia;Venerida;Veneroidea;Veneridae;Mercenaria;Mercenaria mercenaria

UdeM00000039422 6573 403.3 UdeM00000039422 XP\_021371297.1 52.9 397  
173 4 4 390 8 400 3.50E-109 403.3 6573 cellular

organisms;Eukaryota;Opisthokonta;Metazoa;Eumetazoa;Bilateria;Protostomia;Spiralia;Lophotrochozoa;Mollusca;Bivalvia;Autobranchia;Pteriomorphia;Pectinida;Pectinoidea;Pectinidae;Mizuhopecten;Mizuhopecten yessoensis

UdeM00000039423 6596 1105.1 UdeM00000039423 XP\_045192171.1 78.6  
659 140 1 1 658 1 659 0.00E+00 1105.1 6596  
cellular

organisms;Eukaryota;Opisthokonta;Metazoa;Eumetazoa;Bilateria;Protostomia;Spiralia;Lophotrochozoa;Mollusca;Bivalvia;Autobranchia;Heteroconchia;Euheterodonta;Imparidentia;Venerida;Veneroidea;Veneridae;Mercenaria;Mercenaria mercenaria

UdeM00000039424 6573 767.3 UdeM00000039424 XP\_021379318.1 57.5 657  
234 7 7 660 2 616 1.60E-218 767.3 6573 cellular

organisms;Eukaryota;Opisthokonta;Metazoa;Eumetazoa;Bilateria;Protostomia;Spiralia;Lophotrochozoa;Mollusca;Bivalvia;Autobranchia;Pteriomorphia;Pectinida;Pectinoidea;Pectinidae;Mizuhopecten;Mizuhopecten yessoensis

UdeM00000039425 6596 361.7 UdeM00000039425 XP\_045192773.1 47 436  
210 8 18 436 41 472 1.30E-96 361.7 6596 cellular

organisms;Eukaryota;Opisthokonta;Metazoa;Eumetazoa;Bilateria;Protostomia;Spiralia;Lophotrochozoa;Mollusca;Bivalvia;Autobranchia;Heteroconchia;Euheterodonta;Imparidentia;Venerida;Veneroidea;Veneridae;Mercenaria;Mercenaria mercenaria

UdeM00000039426 7654 112.8 UdeM00000039426 XP\_041453148.1 53.8 106  
47 1 1 104 482 587 3.00E-22 112.8 7654 cellular

organisms;Eukaryota;Opisthokonta;Metazoa;Eumetazoa;Bilateria;Deuterostomia;Echinodermata;Eleutherozoa;Echinozoa;Echinoidea;Euechinoidea;Echinacea;Temnopleuroidea;Toxopneustidae;Lytechinus;Lytechinus variegatus

UdeM00000039427 6596 766.1 UdeM00000039427 XP\_045192142.1 71.8 525  
145 1 1 522 1 525 2.80E-218 766.1 6596 cellular

organisms;Eukaryota;Opisthokonta;Metazoa;Eumetazoa;Bilateria;Protostomia;Spiralia;Lophotrochozoa;Mollusca;Bivalvia;Autobranchia;Heteroconchia;Euheterodonta;Imparidentia;Venerida;Veneroidea;Veneridae;Mercenaria;Mercenaria mercenaria

UdeM00000039428 6596 224.2 UdeM00000039428 XP\_045191839.1 84.3 134  
21 0 1 134 1 134 1.00E-55 224.2 6596 cellular

organisms;Eukaryota;Opisthokonta;Metazoa;Eumetazoa;Bilateria;Protostomia;Spiralia;Lophotrochozoa;Mollusca;Bivalvia;Autobranchia;Heteroconchia;Euheterodonta;Imparidentia;Venerida;Veneroidea;Veneridae;Mercenaria;Mercenaria mercenaria

UdeM00000039429 1735272 187.6 UdeM00000039429 XP\_041376415.1 55.8  
 163 70 2 74 235 104 265 1.90E-44 187.6 1735272  
 cellular  
 organisms;Eukaryota;Opisthokonta;Metazoa;Eumetazoa;Bilateria;Protostomia;  
 Spiralia;Lophotrochozoa;Mollusca;Gastropoda;Neomphalina;Neomphaloidea;Pel  
 tospiridae;Gigantopelta;Gigantopelta aegis  
 UdeM00000039430 6596 316.6 UdeM00000039430 XP\_045193421.1 39.8 561  
 311 9 176 715 28 582 1.30E-82 316.6 6596 cellular  
 organisms;Eukaryota;Opisthokonta;Metazoa;Eumetazoa;Bilateria;Protostomia;  
 Spiralia;Lophotrochozoa;Mollusca;Bivalvia;Autobranchia;Heteroconchia;Euhe  
 terodonta;Imparidentia;Venerida;Veneroidea;Veneridae;Mercenaria;Mercenari  
 a mercenaria  
 UdeM00000039431 6596 286.6 UdeM00000039431 XP\_045193421.1 38.3 561  
 291 9 176 687 28 582 1.40E-73 286.6 6596 cellular  
 organisms;Eukaryota;Opisthokonta;Metazoa;Eumetazoa;Bilateria;Protostomia;  
 Spiralia;Lophotrochozoa;Mollusca;Bivalvia;Autobranchia;Heteroconchia;Euhe  
 terodonta;Imparidentia;Venerida;Veneroidea;Veneridae;Mercenaria;Mercenari  
 a mercenaria  
 UdeM00000039432 6596 662.1 UdeM00000039432 XP\_045192872.1 57.7 555  
 219 7 8 550 11 561 6.00E-187 662.1 6596 cellular  
 organisms;Eukaryota;Opisthokonta;Metazoa;Eumetazoa;Bilateria;Protostomia;  
 Spiralia;Lophotrochozoa;Mollusca;Bivalvia;Autobranchia;Heteroconchia;Euhe  
 terodonta;Imparidentia;Venerida;Veneroidea;Veneridae;Mercenaria;Mercenari  
 a mercenaria  
 UdeM00000039433 6596 472.2 UdeM00000039433 XP\_045193457.1 58.2 368  
 152 2 2 367 325 692 5.90E-130 472.2 6596 cellular  
 organisms;Eukaryota;Opisthokonta;Metazoa;Eumetazoa;Bilateria;Protostomia;  
 Spiralia;Lophotrochozoa;Mollusca;Bivalvia;Autobranchia;Heteroconchia;Euhe  
 terodonta;Imparidentia;Venerida;Veneroidea;Veneridae;Mercenaria;Mercenari  
 a mercenaria  
 UdeM00000039434 6596 386.3 UdeM00000039434 XP\_045193457.1 57.7 317  
 122 3 4 308 3 319 3.90E-104 386.3 6596 cellular  
 organisms;Eukaryota;Opisthokonta;Metazoa;Eumetazoa;Bilateria;Protostomia;  
 Spiralia;Lophotrochozoa;Mollusca;Bivalvia;Autobranchia;Heteroconchia;Euhe  
 terodonta;Imparidentia;Venerida;Veneroidea;Veneridae;Mercenaria;Mercenari  
 a mercenaria  
 UdeM00000039435 29159 443.7 UdeM00000039435 XP\_011423358.3 65.2 325  
 110 1 234 558 10 331 3.50E-121 443.7 29159 cellular  
 organisms;Eukaryota;Opisthokonta;Metazoa;Eumetazoa;Bilateria;Protostomia;  
 Spiralia;Lophotrochozoa;Mollusca;Bivalvia;Autobranchia;Pteriomorphia;Ostr  
 eida;Ostreoidea;Ostreidae;Crassostrea;Crassostrea gigas  
 UdeM00000039437 10224 67.4 UdeM00000039437 XP\_006820181.1 33 115  
 70 2 11 118 421 535 1.40E-08 67.4 10224 cellular  
 organisms;Eukaryota;Opisthokonta;Metazoa;Eumetazoa;Bilateria;Deuterostomi  
 a;Hemichordata;Enteropneusta;Harrimaniidae;Saccoglossus;Saccoglossus  
 kowalevskii  
 UdeM00000039438 29159 338.2 UdeM00000039438 XP\_011423358.3 61.7 261  
 100 0 49 309 329 589 1.10E-89 338.2 29159 cellular  
 organisms;Eukaryota;Opisthokonta;Metazoa;Eumetazoa;Bilateria;Protostomia;  
 Spiralia;Lophotrochozoa;Mollusca;Bivalvia;Autobranchia;Pteriomorphia;Ostr  
 eida;Ostreoidea;Ostreidae;Crassostrea;Crassostrea gigas  
 UdeM00000039439 1735272 275.8 UdeM00000039439 XP\_041376038.1 71.4  
 192 54 1 3 193 2 193 4.30E-71 275.8 1735272  
 cellular

organisms;Eukaryota;Opisthokonta;Metazoa;Eumetazoa;Bilateria;Protostomia;Spiralia;Lophotrochozoa;Mollusca;Gastropoda;Neomphalina;Neomphaloidea;Peltospiridae;Gigantopelta;Gigantopelta aegis

UdeM00000039440 29159 547 UdeM00000039440 XP\_011423358.3 68 372  
119 0 16 387 218 589 2.00E-152 547 29159 cellular

organisms;Eukaryota;Opisthokonta;Metazoa;Eumetazoa;Bilateria;Protostomia;Spiralia;Lophotrochozoa;Mollusca;Bivalvia;Autobranchia;Pteriormorphia;Ostreida;Ostreoidea;Ostreidae;Crassostrea;Crassostrea gigas

UdeM00000039441 6596 134 UdeM00000039441 XP\_045193352.1 32.8 332  
185 12 23 334 34 347 3.40E-28 134 6596 cellular

organisms;Eukaryota;Opisthokonta;Metazoa;Eumetazoa;Bilateria;Protostomia;Spiralia;Lophotrochozoa;Mollusca;Bivalvia;Autobranchia;Heteroconchia;Euheterodonta;Imparidentia;Venerida;Veneroidea;Veneridae;Mercenaria;Mercenaria mercenaria

UdeM00000039442 6596 132.5 UdeM00000039442 XP\_045193352.1 32.9 331  
185 11 27 338 34 346 1.00E-27 132.5 6596 cellular

organisms;Eukaryota;Opisthokonta;Metazoa;Eumetazoa;Bilateria;Protostomia;Spiralia;Lophotrochozoa;Mollusca;Bivalvia;Autobranchia;Heteroconchia;Euheterodonta;Imparidentia;Venerida;Veneroidea;Veneridae;Mercenaria;Mercenaria mercenaria

UdeM00000039443 6596 110.5 UdeM00000039443 XP\_045171683.1 34.3 178  
111 3 1 176 28 201 3.80E-21 110.5 6596 cellular

organisms;Eukaryota;Opisthokonta;Metazoa;Eumetazoa;Bilateria;Protostomia;Spiralia;Lophotrochozoa;Mollusca;Bivalvia;Autobranchia;Heteroconchia;Euheterodonta;Imparidentia;Venerida;Veneroidea;Veneridae;Mercenaria;Mercenaria mercenaria

UdeM00000039444 6596 96.7 UdeM00000039444 XP\_045171683.1 33.5 197  
116 7 16 208 13 198 5.90E-17 96.7 6596 cellular

organisms;Eukaryota;Opisthokonta;Metazoa;Eumetazoa;Bilateria;Protostomia;Spiralia;Lophotrochozoa;Mollusca;Bivalvia;Autobranchia;Heteroconchia;Euheterodonta;Imparidentia;Venerida;Veneroidea;Veneridae;Mercenaria;Mercenaria mercenaria

UdeM00000039445 6596 390.2 UdeM00000039445 XP\_045192751.1 63.8 304  
104 5 19 319 12 312 2.50E-105 390.2 6596 cellular

organisms;Eukaryota;Opisthokonta;Metazoa;Eumetazoa;Bilateria;Protostomia;Spiralia;Lophotrochozoa;Mollusca;Bivalvia;Autobranchia;Heteroconchia;Euheterodonta;Imparidentia;Venerida;Veneroidea;Veneridae;Mercenaria;Mercenaria mercenaria

UdeM00000039446 6596 264.2 UdeM00000039446 XP\_045194436.1 45.8 295  
150 3 375 666 445 732 4.40E-67 264.2 6596 cellular

organisms;Eukaryota;Opisthokonta;Metazoa;Eumetazoa;Bilateria;Protostomia;Spiralia;Lophotrochozoa;Mollusca;Bivalvia;Autobranchia;Heteroconchia;Euheterodonta;Imparidentia;Venerida;Veneroidea;Veneridae;Mercenaria;Mercenaria mercenaria

UdeM00000039447 6596 396.7 UdeM00000039447 XP\_045192078.1 49 386  
194 3 1 385 25 408 3.50E-107 396.7 6596 cellular

organisms;Eukaryota;Opisthokonta;Metazoa;Eumetazoa;Bilateria;Protostomia;Spiralia;Lophotrochozoa;Mollusca;Bivalvia;Autobranchia;Heteroconchia;Euheterodonta;Imparidentia;Venerida;Veneroidea;Veneridae;Mercenaria;Mercenaria mercenaria

UdeM00000039448 6596 295.8 UdeM00000039448 XP\_045192078.1 50.5 277  
135 2 6 281 133 408 6.20E-77 295.8 6596 cellular

organisms;Eukaryota;Opisthokonta;Metazoa;Eumetazoa;Bilateria;Protostomia;Spiralia;Lophotrochozoa;Mollusca;Bivalvia;Autobranchia;Heteroconchia;Euheterodonta;Imparidentia;Venerida;Veneroidea;Veneridae;Mercenaria;Mercenaria mercenaria



terodonta;Imparidentia;Venerida;Veneroidea;Veneridae;Mercenaria;Mercenari  
 a mercenaria  
 UdeM00000039449 29159 501.1 UdeM00000039449 XP\_011423220.2 53.2 477  
 216 3 5 475 5 480 1.60E-138 501.1 29159 cellular  
 organisms;Eukaryota;Opisthokonta;Metazoa;Eumetazoa;Bilateria;Protostomia;  
 Spiralia;Lophotrochozoa;Mollusca;Bivalvia;Autobranchia;Pteriormorphia;Ostr  
 eida;Ostreoidea;Ostreidae;Crassostrea;Crassostrea gigas  
 UdeM00000039450 6596 180.3 UdeM00000039450 XP\_045193476.1 39.3 252  
 142 4 139 383 99 346 4.80E-42 180.3 6596 cellular  
 organisms;Eukaryota;Opisthokonta;Metazoa;Eumetazoa;Bilateria;Protostomia;  
 Spiralia;Lophotrochozoa;Mollusca;Bivalvia;Autobranchia;Heteroconchia;Euhe  
 terodonta;Imparidentia;Venerida;Veneroidea;Veneridae;Mercenaria;Mercenari  
 a mercenaria  
 UdeM00000039451 6596 1258.4 UdeM00000039451 XP\_045191557.1 67.7  
 976 294 10 11 971 43 1012 0.00E+00 1258.4 6596  
 cellular  
 organisms;Eukaryota;Opisthokonta;Metazoa;Eumetazoa;Bilateria;Protostomia;  
 Spiralia;Lophotrochozoa;Mollusca;Bivalvia;Autobranchia;Heteroconchia;Euhe  
 terodonta;Imparidentia;Venerida;Veneroidea;Veneridae;Mercenaria;Mercenari  
 a mercenaria  
 UdeM00000039452 6596 937.6 UdeM00000039452 XP\_045191556.1 57 881  
 359 6 2 863 55 934 1.20E-269 937.6 6596 cellular  
 organisms;Eukaryota;Opisthokonta;Metazoa;Eumetazoa;Bilateria;Protostomia;  
 Spiralia;Lophotrochozoa;Mollusca;Bivalvia;Autobranchia;Heteroconchia;Euhe  
 terodonta;Imparidentia;Venerida;Veneroidea;Veneridae;Mercenaria;Mercenari  
 a mercenaria  
 UdeM00000039453 6596 581.6 UdeM00000039453 XP\_045191556.1 61.7 491  
 184 2 2 489 55 544 1.00E-162 581.6 6596 cellular  
 organisms;Eukaryota;Opisthokonta;Metazoa;Eumetazoa;Bilateria;Protostomia;  
 Spiralia;Lophotrochozoa;Mollusca;Bivalvia;Autobranchia;Heteroconchia;Euhe  
 terodonta;Imparidentia;Venerida;Veneroidea;Veneridae;Mercenaria;Mercenari  
 a mercenaria  
 UdeM00000039454 6596 969.9 UdeM00000039454 XP\_045191556.1 58.5 882  
 355 5 2 874 55 934 2.20E-279 969.9 6596 cellular  
 organisms;Eukaryota;Opisthokonta;Metazoa;Eumetazoa;Bilateria;Protostomia;  
 Spiralia;Lophotrochozoa;Mollusca;Bivalvia;Autobranchia;Heteroconchia;Euhe  
 terodonta;Imparidentia;Venerida;Veneroidea;Veneridae;Mercenaria;Mercenari  
 a mercenaria  
 UdeM00000039455 6596 609.8 UdeM00000039455 XP\_045191559.1 57.5 560  
 221 7 9 552 27 585 3.50E-171 609.8 6596 cellular  
 organisms;Eukaryota;Opisthokonta;Metazoa;Eumetazoa;Bilateria;Protostomia;  
 Spiralia;Lophotrochozoa;Mollusca;Bivalvia;Autobranchia;Heteroconchia;Euhe  
 terodonta;Imparidentia;Venerida;Veneroidea;Veneridae;Mercenaria;Mercenari  
 a mercenaria  
 UdeM00000039456 6573 110.9 UdeM00000039456 XP\_021370058.1 23.8 429  
 255 11 238 652 211 581 6.10E-21 110.9 6573 cellular  
 organisms;Eukaryota;Opisthokonta;Metazoa;Eumetazoa;Bilateria;Protostomia;  
 Spiralia;Lophotrochozoa;Mollusca;Bivalvia;Autobranchia;Pteriormorphia;Pect  
 inida;Pectinoidea;Pectinidae;Mizuhopecten;Mizuhopecten yessoensis  
 UdeM00000039458 6596 527.3 UdeM00000039458 XP\_045191562.1 65.8 400  
 137 0 1 400 63 462 1.70E-146 527.3 6596 cellular  
 organisms;Eukaryota;Opisthokonta;Metazoa;Eumetazoa;Bilateria;Protostomia;  
 Spiralia;Lophotrochozoa;Mollusca;Bivalvia;Autobranchia;Heteroconchia;Euhe

terodonta;Imparidentia;Venerida;Veneroidea;Veneridae;Mercenaria;Mercenari  
 a mercenaria  
 UdeM00000039459 6596 620.9 UdeM00000039459 XP\_045191562.1 67.3 462  
 151 0 33 494 21 482 1.40E-174 620.9 6596 cellular  
 organisms;Eukaryota;Opisthokonta;Metazoa;Eumetazoa;Bilateria;Protostomia;  
 Spiralia;Lophotrochozoa;Mollusca;Bivalvia;Autobranchia;Heteroconchia;Euhe  
 terodonta;Imparidentia;Venerida;Veneroidea;Veneridae;Mercenaria;Mercenari  
 a mercenaria  
 UdeM00000039461 6573 628.2 UdeM00000039461 XP\_021354654.1 65.3 499  
 161 1 17 515 12 498 9.00E-177 628.2 6573 cellular  
 organisms;Eukaryota;Opisthokonta;Metazoa;Eumetazoa;Bilateria;Protostomia;  
 Spiralia;Lophotrochozoa;Mollusca;Bivalvia;Autobranchia;Pteriormorphia;Pect  
 inida;Pectinoidea;Pectinidae;Mizuhopecten;Mizuhopecten yessoensis  
 UdeM00000039462 6596 360.9 UdeM00000039462 XP\_045193465.1 57.4 291  
 124 0 17 307 15 305 1.60E-96 360.9 6596 cellular  
 organisms;Eukaryota;Opisthokonta;Metazoa;Eumetazoa;Bilateria;Protostomia;  
 Spiralia;Lophotrochozoa;Mollusca;Bivalvia;Autobranchia;Heteroconchia;Euhe  
 terodonta;Imparidentia;Venerida;Veneroidea;Veneridae;Mercenaria;Mercenari  
 a mercenaria  
 UdeM00000039463 6596 815.1 UdeM00000039463 XP\_045193470.1 66.9 580  
 185 3 19 594 14 590 5.90E-233 815.1 6596 cellular  
 organisms;Eukaryota;Opisthokonta;Metazoa;Eumetazoa;Bilateria;Protostomia;  
 Spiralia;Lophotrochozoa;Mollusca;Bivalvia;Autobranchia;Heteroconchia;Euhe  
 terodonta;Imparidentia;Venerida;Veneroidea;Veneridae;Mercenaria;Mercenari  
 a mercenaria  
 UdeM00000039464 6596 850.5 UdeM00000039464 XP\_045193467.1 68.9 589  
 177 2 19 604 14 599 1.30E-243 850.5 6596 cellular  
 organisms;Eukaryota;Opisthokonta;Metazoa;Eumetazoa;Bilateria;Protostomia;  
 Spiralia;Lophotrochozoa;Mollusca;Bivalvia;Autobranchia;Heteroconchia;Euhe  
 terodonta;Imparidentia;Venerida;Veneroidea;Veneridae;Mercenaria;Mercenari  
 a mercenaria  
 UdeM00000039465 6596 1434.5 UdeM00000039465 XP\_045191846.1 47.3  
 1933 810 44 217 2003 286 2155 0.00E+00 1434.5 6596  
 cellular  
 organisms;Eukaryota;Opisthokonta;Metazoa;Eumetazoa;Bilateria;Protostomia;  
 Spiralia;Lophotrochozoa;Mollusca;Bivalvia;Autobranchia;Heteroconchia;Euhe  
 terodonta;Imparidentia;Venerida;Veneroidea;Veneridae;Mercenaria;Mercenari  
 a mercenaria  
 UdeM00000039466 6573 246.9 UdeM00000039466 XP\_021343814.1 66.7 189  
 49 2 51 225 10 198 2.50E-62 246.9 6573 cellular  
 organisms;Eukaryota;Opisthokonta;Metazoa;Eumetazoa;Bilateria;Protostomia;  
 Spiralia;Lophotrochozoa;Mollusca;Bivalvia;Autobranchia;Pteriormorphia;Pect  
 inida;Pectinoidea;Pectinidae;Mizuhopecten;Mizuhopecten yessoensis  
 UdeM00000039467 6596 145.6 UdeM00000039467 XP\_045187536.1 63 127  
 44 2 2 128 228 351 5.20E-32 145.6 6596 cellular  
 organisms;Eukaryota;Opisthokonta;Metazoa;Eumetazoa;Bilateria;Protostomia;  
 Spiralia;Lophotrochozoa;Mollusca;Bivalvia;Autobranchia;Heteroconchia;Euhe  
 terodonta;Imparidentia;Venerida;Veneroidea;Veneridae;Mercenaria;Mercenari  
 a mercenaria  
 UdeM00000039468 6579 193.7 UdeM00000039468 XP\_033741736.1 43.6 259  
 138 4 1 255 647 901 2.80E-46 193.7 6579 cellular  
 organisms;Eukaryota;Opisthokonta;Metazoa;Eumetazoa;Bilateria;Protostomia;  
 Spiralia;Lophotrochozoa;Mollusca;Bivalvia;Autobranchia;Pteriormorphia;Pect  
 inida;Pectinoidea;Pectinidae;Pecten;Pecten maximus

UdeM00000039469 6596 296.2 UdeM00000039469 XP\_045192227.1 48.4 304  
 141 3 39 342 132 419 5.70E-77 296.2 6596 cellular  
 organisms;Eukaryota;Opisthokonta;Metazoa;Eumetazoa;Bilateria;Protostomia;  
 Spiralia;Lophotrochozoa;Mollusca;Bivalvia;Autobranhia;Heteroconchia;Euhe  
 terodonta;Imparidentia;Venerida;Veneroidea;Veneridae;Mercenaria;Mercenari  
 a mercenaria

UdeM00000039470 6596 353.6 UdeM00000039470 XP\_045192227.1 44.1 440  
 207 7 12 450 38 439 3.70E-94 353.6 6596 cellular  
 organisms;Eukaryota;Opisthokonta;Metazoa;Eumetazoa;Bilateria;Protostomia;  
 Spiralia;Lophotrochozoa;Mollusca;Bivalvia;Autobranhia;Heteroconchia;Euhe  
 terodonta;Imparidentia;Venerida;Veneroidea;Veneridae;Mercenaria;Mercenari  
 a mercenaria

UdeM00000039471 6596 335.5 UdeM00000039471 XP\_045192227.1 41.3 458  
 213 8 3 453 31 439 1.10E-88 335.5 6596 cellular  
 organisms;Eukaryota;Opisthokonta;Metazoa;Eumetazoa;Bilateria;Protostomia;  
 Spiralia;Lophotrochozoa;Mollusca;Bivalvia;Autobranhia;Heteroconchia;Euhe  
 terodonta;Imparidentia;Venerida;Veneroidea;Veneridae;Mercenaria;Mercenari  
 a mercenaria

UdeM00000039473 6596 169.9 UdeM00000039473 XP\_045192227.1 57.2 138  
 59 0 3 140 302 439 2.40E-39 169.9 6596 cellular  
 organisms;Eukaryota;Opisthokonta;Metazoa;Eumetazoa;Bilateria;Protostomia;  
 Spiralia;Lophotrochozoa;Mollusca;Bivalvia;Autobranhia;Heteroconchia;Euhe  
 terodonta;Imparidentia;Venerida;Veneroidea;Veneridae;Mercenaria;Mercenari  
 a mercenaria

UdeM00000039474 6596 316.6 UdeM00000039474 XP\_045192227.1 40.1 434  
 205 5 44 475 59 439 5.30E-83 316.6 6596 cellular  
 organisms;Eukaryota;Opisthokonta;Metazoa;Eumetazoa;Bilateria;Protostomia;  
 Spiralia;Lophotrochozoa;Mollusca;Bivalvia;Autobranhia;Heteroconchia;Euhe  
 terodonta;Imparidentia;Venerida;Veneroidea;Veneridae;Mercenaria;Mercenari  
 a mercenaria

UdeM00000039475 6596 330.9 UdeM00000039475 XP\_045192227.1 42.2 448  
 208 11 5 443 34 439 2.50E-87 330.9 6596 cellular  
 organisms;Eukaryota;Opisthokonta;Metazoa;Eumetazoa;Bilateria;Protostomia;  
 Spiralia;Lophotrochozoa;Mollusca;Bivalvia;Autobranhia;Heteroconchia;Euhe  
 terodonta;Imparidentia;Venerida;Veneroidea;Veneridae;Mercenaria;Mercenari  
 a mercenaria

UdeM00000039476 6596 338.2 UdeM00000039476 XP\_045192227.1 43.5 414  
 198 6 36 447 60 439 1.60E-89 338.2 6596 cellular  
 organisms;Eukaryota;Opisthokonta;Metazoa;Eumetazoa;Bilateria;Protostomia;  
 Spiralia;Lophotrochozoa;Mollusca;Bivalvia;Autobranhia;Heteroconchia;Euhe  
 terodonta;Imparidentia;Venerida;Veneroidea;Veneridae;Mercenaria;Mercenari  
 a mercenaria

UdeM00000039477 6596 425.2 UdeM00000039477 XP\_045192227.1 55.3 380  
 161 5 9 380 53 431 8.70E-116 425.2 6596 cellular  
 organisms;Eukaryota;Opisthokonta;Metazoa;Eumetazoa;Bilateria;Protostomia;  
 Spiralia;Lophotrochozoa;Mollusca;Bivalvia;Autobranhia;Heteroconchia;Euhe  
 terodonta;Imparidentia;Venerida;Veneroidea;Veneridae;Mercenaria;Mercenari  
 a mercenaria

UdeM00000039478 6596 819.7 UdeM00000039478 XP\_045192225.1 75.3 490  
 121 0 19 508 30 519 2.10E-234 819.7 6596 cellular  
 organisms;Eukaryota;Opisthokonta;Metazoa;Eumetazoa;Bilateria;Protostomia;  
 Spiralia;Lophotrochozoa;Mollusca;Bivalvia;Autobranhia;Heteroconchia;Euhe  
 terodonta;Imparidentia;Venerida;Veneroidea;Veneridae;Mercenaria;Mercenari  
 a mercenaria

UdeM00000039479 1735272 285.4 UdeM00000039479 XP\_041375637.1 69.4  
 180 55 0 1 180 333 512 5.00E-74 285.4 1735272  
 cellular  
 organisms;Eukaryota;Opisthokonta;Metazoa;Eumetazoa;Bilateria;Protostomia;  
 Spiralia;Lophotrochozoa;Mollusca;Gastropoda;Neomphalina;Neomphaloidea;Pel  
 tospiridae;Gigantopelta;Gigantopelta aegis  
 UdeM00000039480 6565 216.5 UdeM00000039480 XP\_022338571.1 60.2 171  
 68 0 11 181 3 173 2.90E-53 216.5 6565 cellular  
 organisms;Eukaryota;Opisthokonta;Metazoa;Eumetazoa;Bilateria;Protostomia;  
 Spiralia;Lophotrochozoa;Mollusca;Bivalvia;Autobranchia;Pteriormorphia;Ostr  
 eida;Ostreoidea;Ostreidae;Crassostrea;Crassostrea virginica  
 UdeM00000039481 6579 585.5 UdeM00000039481 XP\_033753912.1 68.5 394  
 124 0 1 394 1 394 5.10E-164 585.5 6579 cellular  
 organisms;Eukaryota;Opisthokonta;Metazoa;Eumetazoa;Bilateria;Protostomia;  
 Spiralia;Lophotrochozoa;Mollusca;Bivalvia;Autobranchia;Pteriormorphia;Pect  
 inida;Pectinoidea;Pectinidae;Pecten;Pecten maximus  
 UdeM00000039482 6579 1211.1 UdeM00000039482 XP\_033755799.1 71.1  
 809 194 7 1 772 1 806 0.00E+00 1211.1 6579  
 cellular  
 organisms;Eukaryota;Opisthokonta;Metazoa;Eumetazoa;Bilateria;Protostomia;  
 Spiralia;Lophotrochozoa;Mollusca;Bivalvia;Autobranchia;Pteriormorphia;Pect  
 inida;Pectinoidea;Pectinidae;Pecten;Pecten maximus  
 UdeM00000039483 6596 866.7 UdeM00000039483 XP\_045192204.1 70.6 636  
 159 9 21 628 78 713 1.80E-248 866.7 6596 cellular  
 organisms;Eukaryota;Opisthokonta;Metazoa;Eumetazoa;Bilateria;Protostomia;  
 Spiralia;Lophotrochozoa;Mollusca;Bivalvia;Autobranchia;Heteroconchia;Euhe  
 terodonta;Imparidentia;Venerida;Veneroidea;Veneridae;Mercenaria;Mercenari  
 a mercenaria  
 UdeM00000039484 6596 971.8 UdeM00000039484 XP\_045192204.1 69.8 728  
 172 10 20 719 6 713 4.60E-280 971.8 6596 cellular  
 organisms;Eukaryota;Opisthokonta;Metazoa;Eumetazoa;Bilateria;Protostomia;  
 Spiralia;Lophotrochozoa;Mollusca;Bivalvia;Autobranchia;Heteroconchia;Euhe  
 terodonta;Imparidentia;Venerida;Veneroidea;Veneridae;Mercenaria;Mercenari  
 a mercenaria  
 UdeM00000039485 6596 121.3 UdeM00000039485 XP\_045192198.1 81.9 72  
 13 0 20 91 6 77 9.40E-25 121.3 6596 cellular  
 organisms;Eukaryota;Opisthokonta;Metazoa;Eumetazoa;Bilateria;Protostomia;  
 Spiralia;Lophotrochozoa;Mollusca;Bivalvia;Autobranchia;Heteroconchia;Euhe  
 terodonta;Imparidentia;Venerida;Veneroidea;Veneridae;Mercenaria;Mercenari  
 a mercenaria  
 UdeM00000039486 6579 268.9 UdeM00000039486 XP\_033754940.1 77.2 171  
 38 1 1 171 329 498 4.60E-69 268.9 6579 cellular  
 organisms;Eukaryota;Opisthokonta;Metazoa;Eumetazoa;Bilateria;Protostomia;  
 Spiralia;Lophotrochozoa;Mollusca;Bivalvia;Autobranchia;Pteriormorphia;Pect  
 inida;Pectinoidea;Pectinidae;Pecten;Pecten maximus  
 UdeM00000039487 6565 785 UdeM00000039487 XP\_022338052.1 72.2 518  
 120 2 6 523 6 499 5.80E-224 785 6565 cellular  
 organisms;Eukaryota;Opisthokonta;Metazoa;Eumetazoa;Bilateria;Protostomia;  
 Spiralia;Lophotrochozoa;Mollusca;Bivalvia;Autobranchia;Pteriormorphia;Ostr  
 eida;Ostreoidea;Ostreidae;Crassostrea;Crassostrea virginica  
 UdeM00000039488 6596 445.3 UdeM00000039488 XP\_045193960.1 53.8 396  
 170 5 1 391 1 388 8.10E-122 445.3 6596 cellular  
 organisms;Eukaryota;Opisthokonta;Metazoa;Eumetazoa;Bilateria;Protostomia;  
 Spiralia;Lophotrochozoa;Mollusca;Bivalvia;Autobranchia;Heteroconchia;Euhe

terodonta;Imparidentia;Venerida;Veneroidea;Veneridae;Mercenaria;Mercenari  
 a mercenaria  
 UdeM00000039489 6596 495.4 UdeM00000039489 XP\_045193310.1 43 721  
 376 14 3 714 2 696 1.30E-136 495.4 6596 cellular  
 organisms;Eukaryota;Opisthokonta;Metazoa;Eumetazoa;Bilateria;Protostomia;  
 Spiralia;Lophotrochozoa;Mollusca;Bivalvia;Autobranhia;Heteroconchia;Euhe  
 terodonta;Imparidentia;Venerida;Veneroidea;Veneridae;Mercenaria;Mercenari  
 a mercenaria  
 UdeM00000039490 6596 690.3 UdeM00000039490 XP\_045191414.1 57.9 687  
 199 8 1 627 1 657 2.30E-195 690.3 6596 cellular  
 organisms;Eukaryota;Opisthokonta;Metazoa;Eumetazoa;Bilateria;Protostomia;  
 Spiralia;Lophotrochozoa;Mollusca;Bivalvia;Autobranhia;Heteroconchia;Euhe  
 terodonta;Imparidentia;Venerida;Veneroidea;Veneridae;Mercenaria;Mercenari  
 a mercenaria  
 UdeM00000039491 6573 79.7 UdeM00000039491 XP\_021354289.1 28.8 184  
 127 3 1 183 5 185 5.70E-12 79.7 6573 cellular  
 organisms;Eukaryota;Opisthokonta;Metazoa;Eumetazoa;Bilateria;Protostomia;  
 Spiralia;Lophotrochozoa;Mollusca;Bivalvia;Autobranhia;Pteriormorphia;Pect  
 inida;Pectinoidea;Pectinidae;Mizuhopecten;Mizuhopecten yessoensis  
 UdeM00000039492 6596 521.2 UdeM00000039492 XP\_045194003.1 51.9 721  
 325 10 24 738 70 774 2.60E-144 521.2 6596 cellular  
 organisms;Eukaryota;Opisthokonta;Metazoa;Eumetazoa;Bilateria;Protostomia;  
 Spiralia;Lophotrochozoa;Mollusca;Bivalvia;Autobranhia;Heteroconchia;Euhe  
 terodonta;Imparidentia;Venerida;Veneroidea;Veneridae;Mercenaria;Mercenari  
 a mercenaria  
 UdeM00000039493 6596 518.5 UdeM00000039493 XP\_045194003.1 51.7 721  
 325 10 24 737 70 774 1.70E-143 518.5 6596 cellular  
 organisms;Eukaryota;Opisthokonta;Metazoa;Eumetazoa;Bilateria;Protostomia;  
 Spiralia;Lophotrochozoa;Mollusca;Bivalvia;Autobranhia;Heteroconchia;Euhe  
 terodonta;Imparidentia;Venerida;Veneroidea;Veneridae;Mercenaria;Mercenari  
 a mercenaria  
 UdeM00000039494 400727 107.1 UdeM00000039494 XP\_025115082.1 71.4  
 70 20 0 1 70 1 70 1.10E-20 107.1 400727  
 cellular  
 organisms;Eukaryota;Opisthokonta;Metazoa;Eumetazoa;Bilateria;Protostomia;  
 Spiralia;Lophotrochozoa;Mollusca;Gastropoda;Caenogastropoda;Architaeniogl  
 ossa;Ampullarioidea;Ampullariidae;Pomacea;Pomacea canaliculata  
 UdeM00000039499 6596 594.7 UdeM00000039499 XP\_045191455.1 59.2 520  
 189 5 35 551 3 502 1.20E-166 594.7 6596 cellular  
 organisms;Eukaryota;Opisthokonta;Metazoa;Eumetazoa;Bilateria;Protostomia;  
 Spiralia;Lophotrochozoa;Mollusca;Bivalvia;Autobranhia;Heteroconchia;Euhe  
 terodonta;Imparidentia;Venerida;Veneroidea;Veneridae;Mercenaria;Mercenari  
 a mercenaria  
 UdeM00000039500 6596 594.7 UdeM00000039500 XP\_045191455.1 59.2 520  
 189 5 27 543 3 502 1.20E-166 594.7 6596 cellular  
 organisms;Eukaryota;Opisthokonta;Metazoa;Eumetazoa;Bilateria;Protostomia;  
 Spiralia;Lophotrochozoa;Mollusca;Bivalvia;Autobranhia;Heteroconchia;Euhe  
 terodonta;Imparidentia;Venerida;Veneroidea;Veneridae;Mercenaria;Mercenari  
 a mercenaria  
 UdeM00000039502 6596 640.6 UdeM00000039502 XP\_045192077.1 44.2 712  
 372 8 1 697 74 775 2.40E-180 640.6 6596 cellular  
 organisms;Eukaryota;Opisthokonta;Metazoa;Eumetazoa;Bilateria;Protostomia;  
 Spiralia;Lophotrochozoa;Mollusca;Bivalvia;Autobranhia;Heteroconchia;Euhe

terodonta;Imparidentia;Venerida;Veneroidea;Veneridae;Mercenaria;Mercenari  
 a mercenaria  
 UdeM00000039503 6596 282 UdeM00000039503 XP\_045192626.1 49.3 272  
 132 3 1 272 1 266 1.20E-72 282 6596 cellular  
 organisms;Eukaryota;Opisthokonta;Metazoa;Eumetazoa;Bilateria;Protostomia;  
 Spiralia;Lophotrochozoa;Mollusca;Bivalvia;Autobranchia;Heteroconchia;Euhe  
 terodonta;Imparidentia;Venerida;Veneroidea;Veneridae;Mercenaria;Mercenari  
 a mercenaria  
 UdeM00000039504 6596 799.7 UdeM00000039504 XP\_045192166.1 50.6 832  
 306 10 2 734 12 837 3.40E-228 799.7 6596 cellular  
 organisms;Eukaryota;Opisthokonta;Metazoa;Eumetazoa;Bilateria;Protostomia;  
 Spiralia;Lophotrochozoa;Mollusca;Bivalvia;Autobranchia;Heteroconchia;Euhe  
 terodonta;Imparidentia;Venerida;Veneroidea;Veneridae;Mercenaria;Mercenari  
 a mercenaria  
 UdeM00000039505 6596 797.3 UdeM00000039505 XP\_045192166.1 51 830  
 305 9 2 733 12 837 1.70E-227 797.3 6596 cellular  
 organisms;Eukaryota;Opisthokonta;Metazoa;Eumetazoa;Bilateria;Protostomia;  
 Spiralia;Lophotrochozoa;Mollusca;Bivalvia;Autobranchia;Heteroconchia;Euhe  
 terodonta;Imparidentia;Venerida;Veneroidea;Veneridae;Mercenaria;Mercenari  
 a mercenaria  
 UdeM00000039506 6565 127.9 UdeM00000039506 XP\_022339689.1 79.5 73  
 15 0 6 78 118 190 5.80E-27 127.9 6565 cellular  
 organisms;Eukaryota;Opisthokonta;Metazoa;Eumetazoa;Bilateria;Protostomia;  
 Spiralia;Lophotrochozoa;Mollusca;Bivalvia;Autobranchia;Pteriormorphia;Ostr  
 eida;Ostreoidea;Ostreidae;Crassostrea;Crassostrea virginica  
 UdeM00000039507 10224 300.4 UdeM00000039507 XP\_006820181.1 42.6 406  
 214 6 3 397 306 703 3.30E-78 300.4 10224 cellular  
 organisms;Eukaryota;Opisthokonta;Metazoa;Eumetazoa;Bilateria;Deuterostomi  
 a;Hemichordata;Enteropneusta;Harrimaniidae;Saccoglossus;Saccoglossus  
 kowalevskii  
 UdeM00000039508 70779 294.7 UdeM00000039508 XP\_015760831.1 41.4 396  
 222 4 1 388 328 721 1.80E-76 294.7 70779 cellular  
 organisms;Eukaryota;Opisthokonta;Metazoa;Eumetazoa;Cnidaria;Anthozoa;Hexa  
 corallia;Scleractinia;Astrocoeniina;Acroporidae;Acropora;Acropora  
 digitifera  
 UdeM00000039509 6105 214.5 UdeM00000039509 XP\_031559686.1 80.8 120  
 22 1 1 120 1 119 8.20E-53 214.5 6105 cellular  
 organisms;Eukaryota;Opisthokonta;Metazoa;Eumetazoa;Cnidaria;Anthozoa;Hexa  
 corallia;Actiniaria;Actiniidae;Actinia;Actinia tenebrosa  
 UdeM00000039510 6105 199.1 UdeM00000039510 XP\_031559686.1 62.7 158  
 20 2 1 158 1 119 4.50E-48 199.1 6105 cellular  
 organisms;Eukaryota;Opisthokonta;Metazoa;Eumetazoa;Cnidaria;Anthozoa;Hexa  
 corallia;Actiniaria;Actiniidae;Actinia;Actinia tenebrosa  
 UdeM00000039511 29159 339.7 UdeM00000039511 XP\_011445668.2 77.6 201  
 45 0 447 647 374 574 8.00E-90 339.7 29159 cellular  
 organisms;Eukaryota;Opisthokonta;Metazoa;Eumetazoa;Bilateria;Protostomia;  
 Spiralia;Lophotrochozoa;Mollusca;Bivalvia;Autobranchia;Pteriormorphia;Ostr  
 eida;Ostreoidea;Ostreidae;Crassostrea;Crassostrea gigas  
 UdeM00000039512 6573 275 UdeM00000039512 XP\_021348116.1 78.8 193  
 41 0 1 193 733 925 7.20E-71 275 6573 cellular  
 organisms;Eukaryota;Opisthokonta;Metazoa;Eumetazoa;Bilateria;Protostomia;  
 Spiralia;Lophotrochozoa;Mollusca;Bivalvia;Autobranchia;Pteriormorphia;Pect  
 inida;Pectinoidea;Pectinidae;Mizuhopecten;Mizuhopecten yessoensis

UdeM00000039515 1735272 65.9 UdeM00000039515 XP\_041352226.1 63.4  
 41 15 0 106 146 35 75 9.90E-08 65.9 1735272  
 cellular  
 organisms;Eukaryota;Opisthokonta;Metazoa;Eumetazoa;Bilateria;Protostomia;  
 Spiralia;Lophotrochozoa;Mollusca;Gastropoda;Neomphalina;Neomphaloidea;Pel  
 tospiridae;Gigantopelta;Gigantopelta aegis  
 UdeM00000039516 1735272 65.9 UdeM00000039516 XP\_041352226.1 63.4  
 41 15 0 106 146 35 75 8.90E-08 65.9 1735272  
 cellular  
 organisms;Eukaryota;Opisthokonta;Metazoa;Eumetazoa;Bilateria;Protostomia;  
 Spiralia;Lophotrochozoa;Mollusca;Gastropoda;Neomphalina;Neomphaloidea;Pel  
 tospiridae;Gigantopelta;Gigantopelta aegis  
 UdeM00000039517 6565 354 UdeM00000039517 XP\_022316307.1 37.8 593  
 335 12 1 572 5 584 3.80E-94 354 6565 cellular  
 organisms;Eukaryota;Opisthokonta;Metazoa;Eumetazoa;Bilateria;Protostomia;  
 Spiralia;Lophotrochozoa;Mollusca;Bivalvia;Autobranchia;Pteriormorphia;Ostr  
 eida;Ostreoidea;Ostreidae;Crassostrea;Crassostrea virginica  
 UdeM00000039518 7962 261.2 UdeM00000039518 XP\_042578941.1 32.6 531  
 314 12 89 584 59 580 3.50E-66 261.2 7962 cellular  
 organisms;Eukaryota;Opisthokonta;Metazoa;Eumetazoa;Bilateria;Deuterostomi  
 a;Chordata;Craniata;Vertebrata;Gnathostomata;Teleostomi;Euteleostomi;Acti  
 nopterygii;Actinopteri;Neopterygii;Teleostei;Osteoglossocephalai;Clupeoce  
 phala;Otomorpha;Ostariophysi;Otophysi;Cypriniphysae;Cypriniiformes;Cyprino  
 ideii;Cyprinidae;Cyprininae;Cyprinus;Cyprinus carpio  
 UdeM00000039519 9715 506.9 UdeM00000039519 XP\_034862209.1 64.1 376  
 128 3 14 383 136 510 2.40E-140 506.9 9715 cellular  
 organisms;Eukaryota;Opisthokonta;Metazoa;Eumetazoa;Bilateria;Deuterostomi  
 a;Chordata;Craniata;Vertebrata;Gnathostomata;Teleostomi;Euteleostomi;Sarc  
 opterygii;Dipnotetrapodomorpha;Tetrapoda;Amniota;Mammalia;Theria;Eutheria  
 ;Boreoeutheria;Laurasiatheria;Carnivora;Caniformia;Phocidae;Mirounga;Miro  
 unga leonina  
 UdeM00000039520 37653 158.3 UdeM00000039520 XP\_014781973.1 45.6 193  
 44 2 1 132 708 900 7.00E-36 158.3 37653 cellular  
 organisms;Eukaryota;Opisthokonta;Metazoa;Eumetazoa;Bilateria;Protostomia;  
 Spiralia;Lophotrochozoa;Mollusca;Cephalopoda;Coleoidea;Octopodiformes;Oct  
 opoda;Incirrata;Octopodidae;Octopus;Octopus bimaculoides  
 UdeM00000039521 6565 277.7 UdeM00000039521 XP\_022343054.1 75.6 180  
 43 1 1 179 1 180 1.00E-71 277.7 6565 cellular  
 organisms;Eukaryota;Opisthokonta;Metazoa;Eumetazoa;Bilateria;Protostomia;  
 Spiralia;Lophotrochozoa;Mollusca;Bivalvia;Autobranchia;Pteriormorphia;Ostr  
 eida;Ostreoidea;Ostreidae;Crassostrea;Crassostrea virginica  
 UdeM00000039522 6573 209.1 UdeM00000039522 XP\_021368914.1 63.6 176  
 63 1 70 244 68 243 6.20E-51 209.1 6573 cellular  
 organisms;Eukaryota;Opisthokonta;Metazoa;Eumetazoa;Bilateria;Protostomia;  
 Spiralia;Lophotrochozoa;Mollusca;Bivalvia;Autobranchia;Pteriormorphia;Pect  
 inida;Pectinoidea;Pectinidae;Mizuhopecten;Mizuhopecten yessoensis  
 UdeM00000039523 1735272 186 UdeM00000039523 XP\_041357953.1 46.2  
 223 86 5 1 213 1 199 8.70E-44 186 1735272  
 cellular  
 organisms;Eukaryota;Opisthokonta;Metazoa;Eumetazoa;Bilateria;Protostomia;  
 Spiralia;Lophotrochozoa;Mollusca;Gastropoda;Neomphalina;Neomphaloidea;Pel  
 tospiridae;Gigantopelta;Gigantopelta aegis  
 UdeM00000039524 1735272 186 UdeM00000039524 XP\_041357953.1 46.2  
 223 86 5 1 213 1 199 8.70E-44 186 1735272

cellular

organisms;Eukaryota;Opisthokonta;Metazoa;Eumetazoa;Bilateria;Protostomia;Spiralia;Lophotrochozoa;Mollusca;Gastropoda;Neomphalina;Neomphaloidea;Peltospiridae;Gigantopelta;Gigantopelta aegis

UdeM00000039525 29159 251.1 UdeM00000039525 XP\_034301623.1 36.6 464  
213 10 1 417 1 430 2.40E-63 251.1 29159 cellular

organisms;Eukaryota;Opisthokonta;Metazoa;Eumetazoa;Bilateria;Protostomia;Spiralia;Lophotrochozoa;Mollusca;Bivalvia;Autobranchia;Pteriomorpha;Ostreida;Ostreioidea;Ostreidae;Crassostrea;Crassostrea gigas

UdeM00000039526 29159 277.7 UdeM00000039526 XP\_034301623.1 36.8 465  
248 8 1 453 1 431 2.60E-71 277.7 29159 cellular

organisms;Eukaryota;Opisthokonta;Metazoa;Eumetazoa;Bilateria;Protostomia;Spiralia;Lophotrochozoa;Mollusca;Bivalvia;Autobranchia;Pteriomorpha;Ostreida;Ostreioidea;Ostreidae;Crassostrea;Crassostrea gigas

UdeM00000039527 29159 268.5 UdeM00000039527 XP\_034301623.1 38.8 464  
240 9 1 453 1 431 1.60E-68 268.5 29159 cellular

organisms;Eukaryota;Opisthokonta;Metazoa;Eumetazoa;Bilateria;Protostomia;Spiralia;Lophotrochozoa;Mollusca;Bivalvia;Autobranchia;Pteriomorpha;Ostreida;Ostreioidea;Ostreidae;Crassostrea;Crassostrea gigas

UdeM00000039528 29159 231.9 UdeM00000039528 XP\_034301623.1 35.3 428  
238 6 1 389 1 428 1.40E-57 231.9 29159 cellular

organisms;Eukaryota;Opisthokonta;Metazoa;Eumetazoa;Bilateria;Protostomia;Spiralia;Lophotrochozoa;Mollusca;Bivalvia;Autobranchia;Pteriomorpha;Ostreida;Ostreioidea;Ostreidae;Crassostrea;Crassostrea gigas

UdeM00000039529 29159 219.5 UdeM00000039529 XP\_034301623.1 41.4 297  
136 7 1 277 1 279 6.90E-54 219.5 29159 cellular

organisms;Eukaryota;Opisthokonta;Metazoa;Eumetazoa;Bilateria;Protostomia;Spiralia;Lophotrochozoa;Mollusca;Bivalvia;Autobranchia;Pteriomorpha;Ostreida;Ostreioidea;Ostreidae;Crassostrea;Crassostrea gigas

UdeM00000039530 29159 219.5 UdeM00000039530 XP\_034301623.1 41.4 297  
136 7 1 277 1 279 7.10E-54 219.5 29159 cellular

organisms;Eukaryota;Opisthokonta;Metazoa;Eumetazoa;Bilateria;Protostomia;Spiralia;Lophotrochozoa;Mollusca;Bivalvia;Autobranchia;Pteriomorpha;Ostreida;Ostreioidea;Ostreidae;Crassostrea;Crassostrea gigas

UdeM00000039531 6596 754.2 UdeM00000039531 XP\_045193581.1 50.5 705  
340 5 8 705 18 720 1.50E-214 754.2 6596 cellular

organisms;Eukaryota;Opisthokonta;Metazoa;Eumetazoa;Bilateria;Protostomia;Spiralia;Lophotrochozoa;Mollusca;Bivalvia;Autobranchia;Heteroconchia;Euheterodonta;Imparidentia;Venerida;Veneroidea;Veneridae;Mercenaria;Mercenaria mercenaria

UdeM00000039532 7574 172.9 UdeM00000039532 XP\_013388573.1 36.1 263  
159 5 12 270 556 813 5.80E-40 172.9 7574 cellular

organisms;Eukaryota;Opisthokonta;Metazoa;Eumetazoa;Bilateria;Protostomia;Spiralia;Lophotrochozoa;Brachiopoda;Linguliformea;Lingulata;Lingulida;Linguloidea;Lingulidae;Lingula;Lingula anatina

UdeM00000039533 6500 196.4 UdeM00000039533 XP\_012944231.1 69.4 134  
41 0 179 312 20 153 5.40E-46 196.4 6500 cellular

organisms;Eukaryota;Opisthokonta;Metazoa;Eumetazoa;Bilateria;Protostomia;Spiralia;Lophotrochozoa;Mollusca;Gastropoda;Heterobranchia;Euthyneura;Teptipleura;Aplysiida;Aplysioidea;Aplysiidae;Aplysia;Aplysia californica

UdeM00000039534 6596 759.6 UdeM00000039534 XP\_045194118.1 43.6 1126  
590 11 314 1411 1445 2553 9.50E-216 759.6 6596 cellular

organisms;Eukaryota;Opisthokonta;Metazoa;Eumetazoa;Bilateria;Protostomia;Spiralia;Lophotrochozoa;Mollusca;Bivalvia;Autobranchia;Heteroconchia;Euheteroconchia



terodonta;Imparidentia;Venerida;Veneroidea;Veneridae;Mercenaria;Mercenaria mercenaria  
 UdeM00000039535 6596 760.4 UdeM00000039535 XP\_045193581.1 51.1 705  
 337 4 8 706 18 720 2.10E-216 760.4 6596 cellular  
 organisms;Eukaryota;Opisthokonta;Metazoa;Eumetazoa;Bilateria;Protostomia;  
 Spiralia;Lophotrochozoa;Mollusca;Bivalvia;Autobranchia;Heteroconchia;Euhe  
 terodonta;Imparidentia;Venerida;Veneroidea;Veneridae;Mercenaria;Mercenari  
 a mercenaria  
 UdeM00000039537 6565 566.6 UdeM00000039537 XP\_022322655.1 46.3 683  
 327 15 1 667 1 659 4.20E-158 566.6 6565 cellular  
 organisms;Eukaryota;Opisthokonta;Metazoa;Eumetazoa;Bilateria;Protostomia;  
 Spiralia;Lophotrochozoa;Mollusca;Bivalvia;Autobranchia;Pteriormorphia;Ostr  
 eida;Ostreoidea;Ostreidae;Crassostrea;Crassostrea virginica  
 UdeM00000039538 6565 543.5 UdeM00000039538 XP\_022322655.1 45.2 683  
 320 16 1 653 1 659 3.70E-151 543.5 6565 cellular  
 organisms;Eukaryota;Opisthokonta;Metazoa;Eumetazoa;Bilateria;Protostomia;  
 Spiralia;Lophotrochozoa;Mollusca;Bivalvia;Autobranchia;Pteriormorphia;Ostr  
 eida;Ostreoidea;Ostreidae;Crassostrea;Crassostrea virginica  
 UdeM00000039539 6565 124.8 UdeM00000039539 XP\_022322655.1 50 120  
 60 0 1 120 629 748 7.50E-26 124.8 6565 cellular  
 organisms;Eukaryota;Opisthokonta;Metazoa;Eumetazoa;Bilateria;Protostomia;  
 Spiralia;Lophotrochozoa;Mollusca;Bivalvia;Autobranchia;Pteriormorphia;Ostr  
 eida;Ostreoidea;Ostreidae;Crassostrea;Crassostrea virginica  
 UdeM00000039540 29159 289.3 UdeM00000039540 XP\_034330911.1 56.4 241  
 101 1 2 242 136 372 4.60E-75 289.3 29159 cellular  
 organisms;Eukaryota;Opisthokonta;Metazoa;Eumetazoa;Bilateria;Protostomia;  
 Spiralia;Lophotrochozoa;Mollusca;Bivalvia;Autobranchia;Pteriormorphia;Ostr  
 eida;Ostreoidea;Ostreidae;Crassostrea;Crassostrea gigas  
 UdeM00000039541 7574 87.8 UdeM00000039541 XP\_013408896.1 44 100  
 55 1 8 107 216 314 1.00E-14 87.8 7574 cellular  
 organisms;Eukaryota;Opisthokonta;Metazoa;Eumetazoa;Bilateria;Protostomia;  
 Spiralia;Lophotrochozoa;Brachiopoda;Linguliformea;Lingulata;Lingulida;Lin  
 guloidea;Lingulidae;Lingula;Lingula anatina  
 UdeM00000039543 6596 657.5 UdeM00000039543 XP\_045194118.1 44.3 836  
 386 6 1 757 1719 2553 3.30E-185 657.5 6596 cellular  
 organisms;Eukaryota;Opisthokonta;Metazoa;Eumetazoa;Bilateria;Protostomia;  
 Spiralia;Lophotrochozoa;Mollusca;Bivalvia;Autobranchia;Heteroconchia;Euhe  
 terodonta;Imparidentia;Venerida;Veneroidea;Veneridae;Mercenaria;Mercenari  
 a mercenaria  
 UdeM00000039544 225164 255.8 UdeM00000039544 XP\_009054274.1 48.1  
 262 135 1 15 275 208 469 7.00E-65 255.8 225164  
 cellular  
 organisms;Eukaryota;Opisthokonta;Metazoa;Eumetazoa;Bilateria;Protostomia;  
 Spiralia;Lophotrochozoa;Mollusca;Gastropoda;Patellogastropoda;Lottioidea;  
 Lottiidae;Lottia;Lottia gigantea  
 UdeM00000039545 6596 111.7 UdeM00000039545 XP\_045193581.1 47.6 124  
 64 1 18 141 28 150 7.70E-22 111.7 6596 cellular  
 organisms;Eukaryota;Opisthokonta;Metazoa;Eumetazoa;Bilateria;Protostomia;  
 Spiralia;Lophotrochozoa;Mollusca;Bivalvia;Autobranchia;Heteroconchia;Euhe  
 terodonta;Imparidentia;Venerida;Veneroidea;Veneridae;Mercenaria;Mercenari  
 a mercenaria  
 UdeM00000039547 6596 563.9 UdeM00000039547 XP\_045193581.1 48.5 538  
 255 3 4 520 184 720 2.10E-157 563.9 6596 cellular  
 organisms;Eukaryota;Opisthokonta;Metazoa;Eumetazoa;Bilateria;Protostomia;

Spiralia;Lophotrochozoa;Mollusca;Bivalvia;Autobranchia;Heteroconchia;Euherodonta;Imparidentia;Venerida;Veneroidea;Veneridae;Mercenaria;Mercenaria mercenaria

UdeM00000039548 6596 330.9 UdeM00000039548 XP\_045194118.1 41.6 406  
235 2 45 448 2142 2547 6.50E-87 330.9 6596 cellular

organisms;Eukaryota;Opisthokonta;Metazoa;Eumetazoa;Bilateria;Protostomia;Spiralia;Lophotrochozoa;Mollusca;Bivalvia;Autobranchia;Heteroconchia;Euherodonta;Imparidentia;Venerida;Veneroidea;Veneridae;Mercenaria;Mercenaria mercenaria

UdeM00000039549 6596 72.4 UdeM00000039549 XP\_045194118.1 39.1 92  
55 1 1 91 2456 2547 2.90E-09 72.4 6596 cellular

organisms;Eukaryota;Opisthokonta;Metazoa;Eumetazoa;Bilateria;Protostomia;Spiralia;Lophotrochozoa;Mollusca;Bivalvia;Autobranchia;Heteroconchia;Euherodonta;Imparidentia;Venerida;Veneroidea;Veneridae;Mercenaria;Mercenaria mercenaria

UdeM00000039550 6596 361.7 UdeM00000039550 XP\_045194118.1 46 480  
229 6 23 487 1507 1971 1.70E-96 361.7 6596 cellular

organisms;Eukaryota;Opisthokonta;Metazoa;Eumetazoa;Bilateria;Protostomia;Spiralia;Lophotrochozoa;Mollusca;Bivalvia;Autobranchia;Heteroconchia;Euherodonta;Imparidentia;Venerida;Veneroidea;Veneridae;Mercenaria;Mercenaria mercenaria

UdeM00000039551 1735272 72.4 UdeM00000039551 XP\_041367412.1 40.2  
97 39 3 1 85 301 390 3.20E-10 72.4 1735272

cellular

organisms;Eukaryota;Opisthokonta;Metazoa;Eumetazoa;Bilateria;Protostomia;Spiralia;Lophotrochozoa;Mollusca;Gastropoda;Neomphalina;Neomphaloidea;Peltospiridae;Gigantopelta;Gigantopelta aegis

UdeM00000039552 6579 345.9 UdeM00000039552 XP\_033755158.1 55.4 312  
125 3 23 332 2 301 9.60E-92 345.9 6579 cellular

organisms;Eukaryota;Opisthokonta;Metazoa;Eumetazoa;Bilateria;Protostomia;Spiralia;Lophotrochozoa;Mollusca;Bivalvia;Autobranchia;Pteriomorphia;Pectinida;Pectinoidea;Pectinidae;Pecten;Pecten maximus

UdeM00000039553 400727 609.8 UdeM00000039553 XP\_025115184.1 80.9  
356 68 0 2 357 3 358 2.30E-171 609.8 400727

cellular

organisms;Eukaryota;Opisthokonta;Metazoa;Eumetazoa;Bilateria;Protostomia;Spiralia;Lophotrochozoa;Mollusca;Gastropoda;Caenogastropoda;Architaenioglossa;Ampullarioidea;Ampullariidae;Pomacea;Pomacea canaliculata

UdeM00000039554 400727 609.8 UdeM00000039554 XP\_025115184.1 81.9  
348 63 0 3 350 11 358 2.20E-171 609.8 400727

cellular

organisms;Eukaryota;Opisthokonta;Metazoa;Eumetazoa;Bilateria;Protostomia;Spiralia;Lophotrochozoa;Mollusca;Gastropoda;Caenogastropoda;Architaenioglossa;Ampullarioidea;Ampullariidae;Pomacea;Pomacea canaliculata

UdeM00000039555 29159 510.8 UdeM00000039555 XP\_011417587.2 82.6 293  
51 0 1 293 66 358 1.20E-141 510.8 29159 cellular

organisms;Eukaryota;Opisthokonta;Metazoa;Eumetazoa;Bilateria;Protostomia;Spiralia;Lophotrochozoa;Mollusca;Bivalvia;Autobranchia;Pteriomorphia;Ostreida;Ostreoidea;Ostreidae;Crassostrea;Crassostrea gigas

UdeM00000039556 6573 96.7 UdeM00000039556 XP\_021343009.1 43.1 123  
57 3 126 238 267 386 4.30E-17 96.7 6573 cellular

organisms;Eukaryota;Opisthokonta;Metazoa;Eumetazoa;Bilateria;Protostomia;Spiralia;Lophotrochozoa;Mollusca;Bivalvia;Autobranchia;Pteriomorphia;Pectinida;Pectinoidea;Pectinidae;Mizuhopecten;Mizuhopecten yessoensis

UdeM00000039557 6596 592.8 UdeM00000039557 XP\_045192774.1 79 420  
 70 5 1 403 1 419 3.30E-166 592.8 6596 cellular  
 organisms;Eukaryota;Opisthokonta;Metazoa;Eumetazoa;Bilateria;Protostomia;  
 Spiralia;Lophotrochozoa;Mollusca;Bivalvia;Autobranhia;Heteroconchia;Euhe  
 terodonta;Imparidentia;Venerida;Veneroidea;Veneridae;Mercenaria;Mercenari  
 a mercenaria  
 UdeM00000039560 6850 63.5 UdeM00000039560 XP\_013785780.1 50 64  
 30 1 28 91 120 181 1.90E-07 63.5 6850 cellular  
 organisms;Eukaryota;Opisthokonta;Metazoa;Eumetazoa;Bilateria;Protostomia;  
 Ecdysozoa;Panarthropoda;Arthropoda;Chelicerata;Merostomata;Xiphosura;Limu  
 lidae;Limulus;Limulus polyphemus  
 UdeM00000039561 29159 789.6 UdeM00000039561 XP\_011418967.2 70 590  
 172 3 172 760 155 740 3.40E-225 789.6 29159 cellular  
 organisms;Eukaryota;Opisthokonta;Metazoa;Eumetazoa;Bilateria;Protostomia;  
 Spiralia;Lophotrochozoa;Mollusca;Bivalvia;Autobranhia;Pteriormorphia;Ostr  
 eida;Ostreoidea;Ostreidae;Crassostrea;Crassostrea gigas  
 UdeM00000039562 6579 170.2 UdeM00000039562 XP\_033755039.1 26.1 743  
 463 24 21 735 92 776 1.10E-38 170.2 6579 cellular  
 organisms;Eukaryota;Opisthokonta;Metazoa;Eumetazoa;Bilateria;Protostomia;  
 Spiralia;Lophotrochozoa;Mollusca;Bivalvia;Autobranhia;Pteriormorphia;Pect  
 inida;Pectinoidea;Pectinidae;Pecten;Pecten maximus  
 UdeM00000039563 6596 476.5 UdeM00000039563 XP\_045191330.1 43.8 568  
 307 8 10 571 7 568 4.90E-131 476.5 6596 cellular  
 organisms;Eukaryota;Opisthokonta;Metazoa;Eumetazoa;Bilateria;Protostomia;  
 Spiralia;Lophotrochozoa;Mollusca;Bivalvia;Autobranhia;Heteroconchia;Euhe  
 terodonta;Imparidentia;Venerida;Veneroidea;Veneridae;Mercenaria;Mercenari  
 a mercenaria  
 UdeM00000039564 6596 474.9 UdeM00000039564 XP\_045191330.1 44.5 560  
 299 8 10 563 7 560 1.40E-130 474.9 6596 cellular  
 organisms;Eukaryota;Opisthokonta;Metazoa;Eumetazoa;Bilateria;Protostomia;  
 Spiralia;Lophotrochozoa;Mollusca;Bivalvia;Autobranhia;Heteroconchia;Euhe  
 terodonta;Imparidentia;Venerida;Veneroidea;Veneridae;Mercenaria;Mercenari  
 a mercenaria  
 UdeM00000022137 6579 253.1 UdeM00000022137 XP\_033731739.1 59.2 191  
 78 0 1 191 188 378 2.90E-64 253.1 6579 cellular  
 organisms;Eukaryota;Opisthokonta;Metazoa;Eumetazoa;Bilateria;Protostomia;  
 Spiralia;Lophotrochozoa;Mollusca;Bivalvia;Autobranhia;Pteriormorphia;Pect  
 inida;Pectinoidea;Pectinidae;Pecten;Pecten maximus  
 UdeM00000022136 6579 395.6 UdeM00000022136 XP\_033731739.1 61.8 280  
 107 0 1 280 99 378 5.30E-107 395.6 6579 cellular  
 organisms;Eukaryota;Opisthokonta;Metazoa;Eumetazoa;Bilateria;Protostomia;  
 Spiralia;Lophotrochozoa;Mollusca;Bivalvia;Autobranhia;Pteriormorphia;Pect  
 inida;Pectinoidea;Pectinidae;Pecten;Pecten maximus  
 UdeM00000022138 6596 111.3 UdeM00000022138 XP\_045157887.1 24 388  
 255 12 182 542 631 1005 3.90E-21 111.3 6596 cellular  
 organisms;Eukaryota;Opisthokonta;Metazoa;Eumetazoa;Bilateria;Protostomia;  
 Spiralia;Lophotrochozoa;Mollusca;Bivalvia;Autobranhia;Heteroconchia;Euhe  
 terodonta;Imparidentia;Venerida;Veneroidea;Veneridae;Mercenaria;Mercenari  
 a mercenaria  
 UdeM00000022139 7739 165.6 UdeM00000022139 XP\_035666883.1 27.8 371  
 247 8 2 355 21 387 1.20E-37 165.6 7739 cellular  
 organisms;Eukaryota;Opisthokonta;Metazoa;Eumetazoa;Bilateria;Deuterostomi  
 a;Chordata;Cephalochordata;Leptocardii;Amphioxiformes;Branchiostomidae;Br  
 anchiostoma;Branchiostoma floridae

UdeM00000022140 8049 83.2 UdeM00000022140 XP\_030200251.1 23.1 238  
 86 2 4 144 171 408 3.00E-13 83.2 8049 cellular  
 organisms;Eukaryota;Opisthokonta;Metazoa;Eumetazoa;Bilateria;Deuterostomi  
 a;Chordata;Craniata;Vertebrata;Gnathostomata;Teleostomi;Euteleostomi;Acti  
 nopterygii;Actinopteri;Neopterygii;Teleostei;Osteoglossocephalai;Clupeoce  
 phala;Euteleosteomorpha;Neoteleostei;Eurypterygia;Ctenosquamata;Acanthomo  
 rphata;Paracanthopterygii;Zeiogadaria;Gadariae;Gadiformes;Gadoidei;Gadida  
 e;Gadus;Gadus morhua

UdeM00000022141 6596 82.8 UdeM00000022141 XP\_045181558.1 36 136  
 84 2 21 153 4 139 4.90E-13 82.8 6596 cellular  
 organisms;Eukaryota;Opisthokonta;Metazoa;Eumetazoa;Bilateria;Protostomia;  
 Spiralia;Lophotrochozoa;Mollusca;Bivalvia;Autobranchia;Heteroconchia;Euhe  
 terodonta;Imparidentia;Venerida;Veneroidea;Veneridae;Mercenaria;Mercenari  
 a mercenaria

UdeM00000022142 6596 206.1 UdeM00000022142 XP\_045187175.1 88.4 112  
 13 0 1 112 176 287 2.50E-50 206.1 6596 cellular  
 organisms;Eukaryota;Opisthokonta;Metazoa;Eumetazoa;Bilateria;Protostomia;  
 Spiralia;Lophotrochozoa;Mollusca;Bivalvia;Autobranchia;Heteroconchia;Euhe  
 terodonta;Imparidentia;Venerida;Veneroidea;Veneridae;Mercenaria;Mercenari  
 a mercenaria

UdeM00000022143 10224 94.4 UdeM00000022143 XP\_006813734.1 24.3 288  
 198 6 1 269 254 540 4.30E-16 94.4 10224 cellular  
 organisms;Eukaryota;Opisthokonta;Metazoa;Eumetazoa;Bilateria;Deuterostomi  
 a;Hemichordata;Enteropneusta;Harrimaniidae;Saccoglossus;Saccoglossus  
 kowalevskii

UdeM00000022146 6596 212.2 UdeM00000022146 XP\_045187175.1 89.4 113  
 12 0 1 113 176 288 3.50E-52 212.2 6596 cellular  
 organisms;Eukaryota;Opisthokonta;Metazoa;Eumetazoa;Bilateria;Protostomia;  
 Spiralia;Lophotrochozoa;Mollusca;Bivalvia;Autobranchia;Heteroconchia;Euhe  
 terodonta;Imparidentia;Venerida;Veneroidea;Veneridae;Mercenaria;Mercenari  
 a mercenaria

UdeM00000022147 6596 229.9 UdeM00000022147 XP\_045187176.1 88.1 126  
 15 0 14 139 158 283 2.00E-57 229.9 6596 cellular  
 organisms;Eukaryota;Opisthokonta;Metazoa;Eumetazoa;Bilateria;Protostomia;  
 Spiralia;Lophotrochozoa;Mollusca;Bivalvia;Autobranchia;Heteroconchia;Euhe  
 terodonta;Imparidentia;Venerida;Veneroidea;Veneridae;Mercenaria;Mercenari  
 a mercenaria

UdeM00000022148 37653 122.1 UdeM00000022148 XP\_014790215.1 22.7 510  
 316 11 37 478 17 516 2.80E-24 122.1 37653 cellular  
 organisms;Eukaryota;Opisthokonta;Metazoa;Eumetazoa;Bilateria;Protostomia;  
 Spiralia;Lophotrochozoa;Mollusca;Cephalopoda;Coleoidea;Octopodiformes;Oct  
 opoda;Incirrata;Octopodidae;Octopus;Octopus bimaculoides

UdeM00000022149 7741 246.9 UdeM00000022149 XP\_019640989.1 24.6 905  
 592 30 106 936 110 998 1.00E-61 246.9 7741 cellular  
 organisms;Eukaryota;Opisthokonta;Metazoa;Eumetazoa;Bilateria;Deuterostomi  
 a;Chordata;Cephalochordata;Leptocardii;Amphioxiformes;Branchiostomidae;Br  
 anchiostoma;Branchiostoma belcheri

UdeM00000022151 6596 152.9 UdeM00000022151 XP\_045160376.1 75.5 94  
 23 0 137 230 359 452 4.90E-34 152.9 6596 cellular  
 organisms;Eukaryota;Opisthokonta;Metazoa;Eumetazoa;Bilateria;Protostomia;  
 Spiralia;Lophotrochozoa;Mollusca;Bivalvia;Autobranchia;Heteroconchia;Euhe  
 terodonta;Imparidentia;Venerida;Veneroidea;Veneridae;Mercenaria;Mercenari  
 a mercenaria

UdeM00000022151 6596 65.9 UdeM00000022151 XP\_045160376.1 42.7 103  
 52 4 40 138 98 197 7.90E-08 65.9 6596 cellular  
 organisms;Eukaryota;Opisthokonta;Metazoa;Eumetazoa;Bilateria;Protostomia;  
 Spiralia;Lophotrochozoa;Mollusca;Bivalvia;Autobranhia;Heteroconchia;Euhe  
 terodonta;Imparidentia;Venerida;Veneroidea;Veneridae;Mercenaria;Mercenari  
 a mercenaria

UdeM00000022152 6596 94.4 UdeM00000022152 XP\_045160375.1 57.3 75  
 20 1 1 75 1 63 7.10E-17 94.4 6596 cellular  
 organisms;Eukaryota;Opisthokonta;Metazoa;Eumetazoa;Bilateria;Protostomia;  
 Spiralia;Lophotrochozoa;Mollusca;Bivalvia;Autobranhia;Heteroconchia;Euhe  
 terodonta;Imparidentia;Venerida;Veneroidea;Veneridae;Mercenaria;Mercenari  
 a mercenaria

UdeM00000022153 6596 69.7 UdeM00000022153 XP\_045181558.1 33.8 136  
 87 2 21 153 4 139 4.30E-09 69.7 6596 cellular  
 organisms;Eukaryota;Opisthokonta;Metazoa;Eumetazoa;Bilateria;Protostomia;  
 Spiralia;Lophotrochozoa;Mollusca;Bivalvia;Autobranhia;Heteroconchia;Euhe  
 terodonta;Imparidentia;Venerida;Veneroidea;Veneridae;Mercenaria;Mercenari  
 a mercenaria

UdeM00000022154 6596 471.5 UdeM00000022154 XP\_045164557.1 68.8 343  
 104 1 1 340 1 343 9.30E-130 471.5 6596 cellular  
 organisms;Eukaryota;Opisthokonta;Metazoa;Eumetazoa;Bilateria;Protostomia;  
 Spiralia;Lophotrochozoa;Mollusca;Bivalvia;Autobranhia;Heteroconchia;Euhe  
 terodonta;Imparidentia;Venerida;Veneroidea;Veneridae;Mercenaria;Mercenari  
 a mercenaria

UdeM00000022155 29159 182.2 UdeM00000022155 XP\_011412349.1 80.7 109  
 21 0 1 109 1 109 3.60E-43 182.2 29159 cellular  
 organisms;Eukaryota;Opisthokonta;Metazoa;Eumetazoa;Bilateria;Protostomia;  
 Spiralia;Lophotrochozoa;Mollusca;Bivalvia;Autobranhia;Pteriormorphia;Ostr  
 eida;Ostreoidea;Ostreidae;Crassostrea;Crassostrea gigas

UdeM00000022156 6596 1054.7 UdeM00000022156 XP\_045185682.1 82.8  
 644 107 2 57 700 227 866 5.30E-305 1054.7 6596  
 cellular  
 organisms;Eukaryota;Opisthokonta;Metazoa;Eumetazoa;Bilateria;Protostomia;  
 Spiralia;Lophotrochozoa;Mollusca;Bivalvia;Autobranhia;Heteroconchia;Euhe  
 terodonta;Imparidentia;Venerida;Veneroidea;Veneridae;Mercenaria;Mercenari  
 a mercenaria

UdeM00000022157 6596 157.1 UdeM00000022157 XP\_045185676.1 78.3 92  
 20 0 1 92 97 188 1.60E-35 157.1 6596 cellular  
 organisms;Eukaryota;Opisthokonta;Metazoa;Eumetazoa;Bilateria;Protostomia;  
 Spiralia;Lophotrochozoa;Mollusca;Bivalvia;Autobranhia;Heteroconchia;Euhe  
 terodonta;Imparidentia;Venerida;Veneroidea;Veneridae;Mercenaria;Mercenari  
 a mercenaria

UdeM00000022158 6596 209.1 UdeM00000022158 XP\_045187972.1 73.2 138  
 37 0 1 138 4 141 3.50E-51 209.1 6596 cellular  
 organisms;Eukaryota;Opisthokonta;Metazoa;Eumetazoa;Bilateria;Protostomia;  
 Spiralia;Lophotrochozoa;Mollusca;Bivalvia;Autobranhia;Heteroconchia;Euhe  
 terodonta;Imparidentia;Venerida;Veneroidea;Veneridae;Mercenaria;Mercenari  
 a mercenaria

UdeM00000022159 6596 1324.3 UdeM00000022159 XP\_045187024.1 52.7  
 1310 318 3 110 1419 325 1332 0.00E+00 1324.3 6596  
 cellular  
 organisms;Eukaryota;Opisthokonta;Metazoa;Eumetazoa;Bilateria;Protostomia;  
 Spiralia;Lophotrochozoa;Mollusca;Bivalvia;Autobranhia;Heteroconchia;Euhe

terodonta;Imparidentia;Venerida;Veneroidea;Veneridae;Mercenaria;Mercenaria mercenaria  
 UdeM00000022160 7370 166 UdeM00000022160 XP\_005183562.1 51.3 158  
 70 1 1 151 184 341 4.20E-38 166 7370 cellular  
 organisms;Eukaryota;Opisthokonta;Metazoa;Eumetazoa;Bilateria;Protostomia;  
 Ecdysozoa;Panarthropoda;Arthropoda;Mandibulata;Pancrustacea;Hexapoda;Insecta;  
 Dicondylia;Pterygota;Neoptera;Endopterygota;Diptera;Brachycera;Muscomorpha;  
 Eremoneura;Cyclorrhapha;Schizophora;Calyptratae;Muscoidea;Muscidae;  
 Muscinae;Muscini;Musca;Musca;Musca domestica  
 UdeM00000022162 6579 334.3 UdeM00000022162 XP\_033736370.1 78.9 194  
 41 0 328 521 1172 1365 2.70E-88 334.3 6579 cellular  
 organisms;Eukaryota;Opisthokonta;Metazoa;Eumetazoa;Bilateria;Protostomia;  
 Spiralia;Lophotrochozoa;Mollusca;Bivalvia;Autobranhia;Pteriormorphia;Pectinida;  
 Pectinoidea;Pectinidae;Pecten;Pecten maximus  
 UdeM00000022163 7741 93.2 UdeM00000022163 XP\_019620893.1 36.8 125  
 77 2 106 230 102 224 4.70E-16 93.2 7741 cellular  
 organisms;Eukaryota;Opisthokonta;Metazoa;Eumetazoa;Bilateria;Deuterostomia;  
 Chordata;Cephalochordata;Leptocardii;Amphioxiformes;Branchiostomidae;Branchiostoma;  
 Branchiostoma belcheri  
 UdeM00000022164 1735272 116.3 UdeM00000022164 XP\_041364761.1 48.5  
 99 51 0 1 99 87 185 2.90E-23 116.3 1735272  
 cellular  
 organisms;Eukaryota;Opisthokonta;Metazoa;Eumetazoa;Bilateria;Protostomia;  
 Spiralia;Lophotrochozoa;Mollusca;Gastropoda;Neomphalina;Neomphaloidea;Peltospiridae;  
 Gigantopelta;Gigantopelta aegis  
 UdeM00000022165 6596 986.1 UdeM00000022165 XP\_045187024.1 66 708  
 239 2 6 712 349 1055 2.40E-284 986.1 6596 cellular  
 organisms;Eukaryota;Opisthokonta;Metazoa;Eumetazoa;Bilateria;Protostomia;  
 Spiralia;Lophotrochozoa;Mollusca;Bivalvia;Autobranhia;Heteroconchia;Euheterodonta;  
 Imparidentia;Venerida;Veneroidea;Veneridae;Mercenaria;Mercenaria mercenaria  
 UdeM00000022166 6596 359.4 UdeM00000022166 XP\_045187023.1 67.8 255  
 81 1 6 260 349 602 9.70E-96 359.4 6596 cellular  
 organisms;Eukaryota;Opisthokonta;Metazoa;Eumetazoa;Bilateria;Protostomia;  
 Spiralia;Lophotrochozoa;Mollusca;Bivalvia;Autobranhia;Heteroconchia;Euheterodonta;  
 Imparidentia;Venerida;Veneroidea;Veneridae;Mercenaria;Mercenaria mercenaria  
 UdeM00000022167 10224 85.1 UdeM00000022167 XP\_002740528.1 46.5 99  
 45 2 2 100 106 196 6.70E-14 85.1 10224 cellular  
 organisms;Eukaryota;Opisthokonta;Metazoa;Eumetazoa;Bilateria;Deuterostomia;  
 Hemichordata;Enteropneusta;Harrimaniidae;Saccoglossus;Saccoglossus kowalevskii  
 UdeM00000022169 29159 339.7 UdeM00000022169 XP\_034325031.1 68.6 236  
 71 2 1 234 84 318 3.00E-90 339.7 29159 cellular  
 organisms;Eukaryota;Opisthokonta;Metazoa;Eumetazoa;Bilateria;Protostomia;  
 Spiralia;Lophotrochozoa;Mollusca;Bivalvia;Autobranhia;Pteriormorphia;Ostreida;  
 Ostreoidea;Ostreidae;Crassostrea;Crassostrea gigas  
 UdeM00000022170 30611 113.6 UdeM00000022170 XP\_023367592.1 77.6 67  
 15 0 15 81 16 82 1.20E-22 113.6 30611 cellular  
 organisms;Eukaryota;Opisthokonta;Metazoa;Eumetazoa;Bilateria;Deuterostomia;  
 Chordata;Craniata;Vertebrata;Gnathostomata;Teleostomi;Euteleostomi;Sarcopterygii;  
 Dipnotetrapodomorpha;Tetrapoda;Amniota;Mammalia;Theria;Eutheria;Boreoeutheria;  
 Euarchontoglires;Primates;Strepsirrhini;Lorisiformes;Galagidae;Otolemur;  
 Otolemur garnettii

UdeM00000022171 6596 558.5 UdeM00000022171 XP\_045187025.1 65.2 462  
 125 5 6 464 7 435 8.30E-156 558.5 6596 cellular  
 organisms;Eukaryota;Opisthokonta;Metazoa;Eumetazoa;Bilateria;Protostomia;  
 Spiralia;Lophotrochozoa;Mollusca;Bivalvia;Autobranchia;Heteroconchia;Euhe  
 terodonta;Imparidentia;Venerida;Veneroidea;Veneridae;Mercenaria;Mercenari  
 a mercenaria  
 UdeM00000022172 6596 149.4 UdeM00000022172 XP\_045187021.1 41.4 278  
 131 13 1 253 17 287 8.90E-33 149.4 6596 cellular  
 organisms;Eukaryota;Opisthokonta;Metazoa;Eumetazoa;Bilateria;Protostomia;  
 Spiralia;Lophotrochozoa;Mollusca;Bivalvia;Autobranchia;Heteroconchia;Euhe  
 terodonta;Imparidentia;Venerida;Veneroidea;Veneridae;Mercenaria;Mercenari  
 a mercenaria  
 UdeM00000022173 6579 1471.4 UdeM00000022173 XP\_033733728.1 59.1  
 1323 477 18 107 1397 140 1430 0.00E+00 1471.4 6579  
 cellular  
 organisms;Eukaryota;Opisthokonta;Metazoa;Eumetazoa;Bilateria;Protostomia;  
 Spiralia;Lophotrochozoa;Mollusca;Bivalvia;Autobranchia;Pteriormorphia;Pect  
 inida;Pectinoidea;Pectinidae;Pecten;Pecten maximus  
 UdeM00000022174 6596 198.4 UdeM00000022174 XP\_045157974.1 31.4 560  
 323 10 278 797 311 849 3.50E-47 198.4 6596 cellular  
 organisms;Eukaryota;Opisthokonta;Metazoa;Eumetazoa;Bilateria;Protostomia;  
 Spiralia;Lophotrochozoa;Mollusca;Bivalvia;Autobranchia;Heteroconchia;Euhe  
 terodonta;Imparidentia;Venerida;Veneroidea;Veneridae;Mercenaria;Mercenari  
 a mercenaria  
 UdeM00000022175 6596 667.2 UdeM00000022175 XP\_045157974.1 55.9 716  
 265 12 15 699 849 1544 2.40E-188 667.2 6596 cellular  
 organisms;Eukaryota;Opisthokonta;Metazoa;Eumetazoa;Bilateria;Protostomia;  
 Spiralia;Lophotrochozoa;Mollusca;Bivalvia;Autobranchia;Heteroconchia;Euhe  
 terodonta;Imparidentia;Venerida;Veneroidea;Veneridae;Mercenaria;Mercenari  
 a mercenaria  
 UdeM00000022176 37653 132.5 UdeM00000022176 XP\_014771385.1 43.6 156  
 73 3 46 188 51 204 5.70E-28 132.5 37653 cellular  
 organisms;Eukaryota;Opisthokonta;Metazoa;Eumetazoa;Bilateria;Protostomia;  
 Spiralia;Lophotrochozoa;Mollusca;Cephalopoda;Coleoidea;Octopodiformes;Oct  
 opoda;Incirrata;Octopodidae;Octopus;Octopus bimaculoides  
 UdeM00000022177 29159 81.3 UdeM00000022177 XP\_011448349.2 52.2 69  
 30 1 21 86 10 78 8.70E-13 81.3 29159 cellular  
 organisms;Eukaryota;Opisthokonta;Metazoa;Eumetazoa;Bilateria;Protostomia;  
 Spiralia;Lophotrochozoa;Mollusca;Bivalvia;Autobranchia;Pteriormorphia;Ostr  
 eida;Ostreoidea;Ostreidae;Crassostrea;Crassostrea gigas  
 UdeM00000022179 32473 64.7 UdeM00000022179 XP\_027860025.1 52.7 55  
 23 1 25 76 40 94 5.90E-08 64.7 32473 cellular  
 organisms;Eukaryota;Opisthokonta;Metazoa;Eumetazoa;Bilateria;Deuterostomi  
 a;Chordata;Craniata;Vertebrata;Gnathostomata;Teleostomi;Euteleostomi;Acti  
 nopterygii;Actinopteri;Neopterygii;Teleostei;Osteoglossocephalai;Clupeoce  
 phala;Euteleosteomorpha;Neoteleostei;Eurypterygia;Ctenosquamata;Acanthomo  
 rphata;Euacanthomorphacea;Percomorphaceae;Ovalentaria;Atherinomorphae;Cyp  
 rinodontiformes;Cyprinodontoides;Poeciliidae;Poeciliinae;Xiphophorus;Xiph  
 ophorus couchianus  
 UdeM00000022180 215358 122.9 UdeM00000022180 XP\_027132200.1 33.8  
 213 127 4 14 221 78 281 5.40E-25 122.9 215358  
 cellular  
 organisms;Eukaryota;Opisthokonta;Metazoa;Eumetazoa;Bilateria;Deuterostomi  
 a;Chordata;Craniata;Vertebrata;Gnathostomata;Teleostomi;Euteleostomi;Acti

nopterygii;Actinopteri;Neopterygii;Teleostei;Osteoglossocephalai;Clupeocephala;Euteleostei;Neoteleostei;Eurypterygia;Ctenosquamata;Acanthomorphata;Euacanthomorphacea;Percomorphaceae;Eupercaria;Eupercaria incertae sedis;Sciaenidae;Larimichthys;Larimichthys crocea

UdeM00000022181 8236 121.3 UdeM00000022181 XP\_044216249.1 39 177  
102 2 31 207 100 270 1.50E-24 121.3 8236 cellular

organisms;Eukaryota;Opisthokonta;Metazoa;Eumetazoa;Bilateria;Deuterostomia;Chordata;Craniata;Vertebrata;Gnathostomata;Teleostomi;Euteleostomi;Actinopterygii;Actinopteri;Neopterygii;Teleostei;Osteoglossocephalai;Clupeocephala;Euteleostei;Neoteleostei;Eurypterygia;Ctenosquamata;Acanthomorphata;Euacanthomorphacea;Percomorphaceae;Pelagiaria;Scombriformes;Scombridae;Scombrinae;Thunnini;Thunnus;Thunnus albacares

UdeM00000022182 30732 185.3 UdeM00000022182 XP\_024118320.1 44.2 208  
114 2 14 221 409 614 8.60E-44 185.3 30732 cellular

organisms;Eukaryota;Opisthokonta;Metazoa;Eumetazoa;Bilateria;Deuterostomia;Chordata;Craniata;Vertebrata;Gnathostomata;Teleostomi;Euteleostomi;Actinopterygii;Actinopteri;Neopterygii;Teleostei;Osteoglossocephalai;Clupeocephala;Euteleostei;Neoteleostei;Eurypterygia;Ctenosquamata;Acanthomorphata;Euacanthomorphacea;Percomorphaceae;Ovalentaria;Atherinomorphae;Beloniformes;Adrianichthyoidei;Adrianichthyidae;Oryziinae;Oryzias;Oryzias melastigma

UdeM00000022183 7604 284.6 UdeM00000022183 XP\_033641066.1 58.9 209  
86 0 1 209 79 287 9.90E-74 284.6 7604 cellular

organisms;Eukaryota;Opisthokonta;Metazoa;Eumetazoa;Bilateria;Deuterostomia;Echinodermata;Eleutherozoa;Asterozoa;Asteroidea;Forcipulatacea;Forcipulatacida;Asteroidea;Asteroidea;Asteroidea rubens

UdeM00000022184 6596 380.9 UdeM00000022184 XP\_045186145.1 72.3 260  
60 2 1 251 1 257 1.20E-102 380.9 6596 cellular

organisms;Eukaryota;Opisthokonta;Metazoa;Eumetazoa;Bilateria;Protostomia;Spiralia;Lophotrochozoa;Mollusca;Bivalvia;Autobranchia;Heteroconchia;Euheterodonta;Imparidentia;Venerida;Veneroidea;Veneridae;Mercenaria;Mercenaria mercenaria

UdeM00000022185 218467 295 UdeM00000022185 XP\_023220759.1 48.8  
326 149 4 1 309 76 400 1.20E-76 295 218467  
cellular

organisms;Eukaryota;Opisthokonta;Metazoa;Eumetazoa;Bilateria;Protostomia;Ecdysozoa;Panarthropoda;Arthropoda;Chelicerata;Arachnida;Scorpiones;Buthida;Buthoidea;Buthidae;Centruroides;Centruroides sculpturatus

UdeM00000022188 6596 229.6 UdeM00000022188 XP\_045170003.1 45.4 249  
111 4 31 255 38 285 4.60E-57 229.6 6596 cellular

organisms;Eukaryota;Opisthokonta;Metazoa;Eumetazoa;Bilateria;Protostomia;Spiralia;Lophotrochozoa;Mollusca;Bivalvia;Autobranchia;Heteroconchia;Euheterodonta;Imparidentia;Venerida;Veneroidea;Veneridae;Mercenaria;Mercenaria mercenaria

UdeM00000022189 6596 225.7 UdeM00000022189 XP\_045169994.1 57.1 184  
75 3 133 313 102 284 8.10E-56 225.7 6596 cellular

organisms;Eukaryota;Opisthokonta;Metazoa;Eumetazoa;Bilateria;Protostomia;Spiralia;Lophotrochozoa;Mollusca;Bivalvia;Autobranchia;Heteroconchia;Euheterodonta;Imparidentia;Venerida;Veneroidea;Veneridae;Mercenaria;Mercenaria mercenaria

UdeM00000022190 6596 228 UdeM00000022190 XP\_045169995.1 54.8 199  
85 4 120 314 87 284 1.60E-56 228 6596 cellular

organisms;Eukaryota;Opisthokonta;Metazoa;Eumetazoa;Bilateria;Protostomia;Spiralia;Lophotrochozoa;Mollusca;Bivalvia;Autobranchia;Heteroconchia;Euheterodonta;Imparidentia;Venerida;Veneroidea;Veneridae;Mercenaria;Mercenaria mercenaria



terodonta;Imparidentia;Venerida;Veneroidea;Veneridae;Mercenaria;Mercenari  
a mercenaria

UdeM00000022191 1735272 91.7 UdeM00000022191 XP\_041354643.1 37.7  
146 86 2 27 170 11 153 1.00E-15 91.7 1735272  
cellular

organisms;Eukaryota;Opisthokonta;Metazoa;Eumetazoa;Bilateria;Protostomia;  
Spiralia;Lophotrochozoa;Mollusca;Gastropoda;Neomphalina;Neomphaloidea;Pel  
tospiridae;Gigantopelta;Gigantopelta aegis

UdeM00000022192 6596 247.7 UdeM00000022192 XP\_045162544.1 46.5 245  
117 4 32 267 87 326 1.70E-62 247.7 6596 cellular

organisms;Eukaryota;Opisthokonta;Metazoa;Eumetazoa;Bilateria;Protostomia;  
Spiralia;Lophotrochozoa;Mollusca;Bivalvia;Autobranchia;Heteroconchia;Euhe  
terodonta;Imparidentia;Venerida;Veneroidea;Veneridae;Mercenaria;Mercenari  
a mercenaria

UdeM00000022193 6596 125.9 UdeM00000022193 XP\_045157209.1 52.6 97  
46 0 1 97 140 236 2.80E-26 125.9 6596 cellular

organisms;Eukaryota;Opisthokonta;Metazoa;Eumetazoa;Bilateria;Protostomia;  
Spiralia;Lophotrochozoa;Mollusca;Bivalvia;Autobranchia;Heteroconchia;Euhe  
terodonta;Imparidentia;Venerida;Veneroidea;Veneridae;Mercenaria;Mercenari  
a mercenaria

UdeM00000022194 6596 105.1 UdeM00000022194 XP\_045170022.1 40.3 134  
68 3 14 135 17 150 6.90E-20 105.1 6596 cellular

organisms;Eukaryota;Opisthokonta;Metazoa;Eumetazoa;Bilateria;Protostomia;  
Spiralia;Lophotrochozoa;Mollusca;Bivalvia;Autobranchia;Heteroconchia;Euhe  
terodonta;Imparidentia;Venerida;Veneroidea;Veneridae;Mercenaria;Mercenari  
a mercenaria

UdeM00000022195 6573 435.6 UdeM00000022195 XP\_021340974.1 57.1 361  
144 3 2 354 162 519 5.90E-119 435.6 6573 cellular

organisms;Eukaryota;Opisthokonta;Metazoa;Eumetazoa;Bilateria;Protostomia;  
Spiralia;Lophotrochozoa;Mollusca;Bivalvia;Autobranchia;Pteriomorphia;Pect  
inida;Pectinoidea;Pectinidae;Mizuhopecten;Mizuhopecten yessoensis

UdeM00000022196 6596 439.1 UdeM00000022196 XP\_045172329.1 51.9 482  
182 8 1 469 1 445 8.50E-120 439.1 6596 cellular

organisms;Eukaryota;Opisthokonta;Metazoa;Eumetazoa;Bilateria;Protostomia;  
Spiralia;Lophotrochozoa;Mollusca;Bivalvia;Autobranchia;Heteroconchia;Euhe  
terodonta;Imparidentia;Venerida;Veneroidea;Veneridae;Mercenaria;Mercenari  
a mercenaria

UdeM00000022197 6573 301.2 UdeM00000022197 XP\_021367619.1 86.4 162  
22 0 11 172 23 184 8.40E-79 301.2 6573 cellular

organisms;Eukaryota;Opisthokonta;Metazoa;Eumetazoa;Bilateria;Protostomia;  
Spiralia;Lophotrochozoa;Mollusca;Bivalvia;Autobranchia;Pteriomorphia;Pect  
inida;Pectinoidea;Pectinidae;Mizuhopecten;Mizuhopecten yessoensis

UdeM00000022198 1735272 336.3 UdeM00000022198 XP\_041353691.1 53.4  
290 134 1 5 294 70 358 4.00E-89 336.3 1735272  
cellular

organisms;Eukaryota;Opisthokonta;Metazoa;Eumetazoa;Bilateria;Protostomia;  
Spiralia;Lophotrochozoa;Mollusca;Gastropoda;Neomphalina;Neomphaloidea;Pel  
tospiridae;Gigantopelta;Gigantopelta aegis

UdeM00000022199 1735272 376.7 UdeM00000022199 XP\_041353691.1 51.6  
349 160 3 4 350 17 358 3.20E-101 376.7 1735272  
cellular

organisms;Eukaryota;Opisthokonta;Metazoa;Eumetazoa;Bilateria;Protostomia;  
Spiralia;Lophotrochozoa;Mollusca;Gastropoda;Neomphalina;Neomphaloidea;Pel  
tospiridae;Gigantopelta;Gigantopelta aegis

UdeM00000022200 6565 148.3 UdeM00000022200 XP\_022328615.1 33.2 280  
 162 7 415 690 281 539 3.60E-32 148.3 6565 cellular  
 organisms;Eukaryota;Opisthokonta;Metazoa;Eumetazoa;Bilateria;Protostomia;  
 Spiralia;Lophotrochozoa;Mollusca;Bivalvia;Autobranchia;Pteriormorphia;Ostr  
 eida;Ostreoidea;Ostreidae;Crassostrea;Crassostrea virginica  
 UdeM00000022201 6596 89.4 UdeM00000022201 XP\_045171877.1 28 225  
 136 9 30 242 26 236 1.10E-14 89.4 6596 cellular  
 organisms;Eukaryota;Opisthokonta;Metazoa;Eumetazoa;Bilateria;Protostomia;  
 Spiralia;Lophotrochozoa;Mollusca;Bivalvia;Autobranchia;Heteroconchia;Euhe  
 terodonta;Imparidentia;Venerida;Veneroidea;Veneridae;Mercenaria;Mercenari  
 a mercenaria  
 UdeM00000022202 6596 90.5 UdeM00000022202 XP\_045171877.1 32.8 229  
 131 13 7 220 1 221 4.50E-15 90.5 6596 cellular  
 organisms;Eukaryota;Opisthokonta;Metazoa;Eumetazoa;Bilateria;Protostomia;  
 Spiralia;Lophotrochozoa;Mollusca;Bivalvia;Autobranchia;Heteroconchia;Euhe  
 terodonta;Imparidentia;Venerida;Veneroidea;Veneridae;Mercenaria;Mercenari  
 a mercenaria  
 UdeM00000022203 400727 423.3 UdeM00000022203 XP\_025108466.1 45.7  
 495 254 5 26 520 63 542 5.60E-115 423.3 400727  
 cellular  
 organisms;Eukaryota;Opisthokonta;Metazoa;Eumetazoa;Bilateria;Protostomia;  
 Spiralia;Lophotrochozoa;Mollusca;Gastropoda;Caenogastropoda;Architaeniogl  
 ossa;Ampullarioidea;Ampullariidae;Pomacea;Pomacea canaliculata  
 UdeM00000022204 29159 79.3 UdeM00000022204 XP\_011430997.2 27.7 195  
 122 9 44 229 41 225 1.50E-11 79.3 29159 cellular  
 organisms;Eukaryota;Opisthokonta;Metazoa;Eumetazoa;Bilateria;Protostomia;  
 Spiralia;Lophotrochozoa;Mollusca;Bivalvia;Autobranchia;Pteriormorphia;Ostr  
 eida;Ostreoidea;Ostreidae;Crassostrea;Crassostrea gigas  
 UdeM00000022205 29159 301.2 UdeM00000022205 XP\_011447604.2 45 358  
 146 3 31 339 26 381 1.80E-78 301.2 29159 cellular  
 organisms;Eukaryota;Opisthokonta;Metazoa;Eumetazoa;Bilateria;Protostomia;  
 Spiralia;Lophotrochozoa;Mollusca;Bivalvia;Autobranchia;Pteriormorphia;Ostr  
 eida;Ostreoidea;Ostreidae;Crassostrea;Crassostrea gigas  
 UdeM00000041033 1735272 177.9 UdeM00000041033 XP\_041375172.1 35.9  
 298 144 8 1 259 1 290 1.80E-41 177.9 1735272  
 cellular  
 organisms;Eukaryota;Opisthokonta;Metazoa;Eumetazoa;Bilateria;Protostomia;  
 Spiralia;Lophotrochozoa;Mollusca;Gastropoda;Neomphalina;Neomphaloidea;Pel  
 tospiridae;Gigantopelta;Gigantopelta aegis  
 UdeM00000041036 1735272 315.1 UdeM00000041036 XP\_041375172.1 37.7  
 472 259 10 6 462 28 479 1.50E-82 315.1 1735272  
 cellular  
 organisms;Eukaryota;Opisthokonta;Metazoa;Eumetazoa;Bilateria;Protostomia;  
 Spiralia;Lophotrochozoa;Mollusca;Gastropoda;Neomphalina;Neomphaloidea;Pel  
 tospiridae;Gigantopelta;Gigantopelta aegis  
 UdeM00000041035 1735272 315.1 UdeM00000041035 XP\_041375172.1 37.7  
 472 259 10 50 506 28 479 1.70E-82 315.1 1735272  
 cellular  
 organisms;Eukaryota;Opisthokonta;Metazoa;Eumetazoa;Bilateria;Protostomia;  
 Spiralia;Lophotrochozoa;Mollusca;Gastropoda;Neomphalina;Neomphaloidea;Pel  
 tospiridae;Gigantopelta;Gigantopelta aegis  
 UdeM00000041037 6596 316.2 UdeM00000041037 XP\_045193716.1 41.7 410  
 217 10 98 500 79 473 7.50E-83 316.2 6596 cellular  
 organisms;Eukaryota;Opisthokonta;Metazoa;Eumetazoa;Bilateria;Protostomia;

Spiralia;Lophotrochozoa;Mollusca;Bivalvia;Autobranchia;Heteroconchia;Euherodonta;Imparidentia;Venerida;Veneroidea;Veneridae;Mercenaria;Mercenaria mercenaria

UdeM00000041038 6596 314.7 UdeM00000041038 XP\_045193716.1 40.4 436  
229 13 33 455 56 473 2.00E-82 314.7 6596 cellular

organisms;Eukaryota;Opisthokonta;Metazoa;Eumetazoa;Bilateria;Protostomia;Spiralia;Lophotrochozoa;Mollusca;Bivalvia;Autobranchia;Heteroconchia;Euherodonta;Imparidentia;Venerida;Veneroidea;Veneridae;Mercenaria;Mercenaria mercenaria

UdeM00000041039 6596 314.7 UdeM00000041039 XP\_045193716.1 40.4 436  
229 13 77 499 56 473 2.20E-82 314.7 6596 cellular

organisms;Eukaryota;Opisthokonta;Metazoa;Eumetazoa;Bilateria;Protostomia;Spiralia;Lophotrochozoa;Mollusca;Bivalvia;Autobranchia;Heteroconchia;Euherodonta;Imparidentia;Venerida;Veneroidea;Veneridae;Mercenaria;Mercenaria mercenaria

UdeM00000041040 6596 316.2 UdeM00000041040 XP\_045193716.1 41.7 410  
217 10 98 500 79 473 7.50E-83 316.2 6596 cellular

organisms;Eukaryota;Opisthokonta;Metazoa;Eumetazoa;Bilateria;Protostomia;Spiralia;Lophotrochozoa;Mollusca;Bivalvia;Autobranchia;Heteroconchia;Euherodonta;Imparidentia;Venerida;Veneroidea;Veneridae;Mercenaria;Mercenaria mercenaria

UdeM00000041041 6596 362.5 UdeM00000041041 XP\_045193840.1 73.5 238  
63 0 14 251 9 246 4.50E-97 362.5 6596 cellular

organisms;Eukaryota;Opisthokonta;Metazoa;Eumetazoa;Bilateria;Protostomia;Spiralia;Lophotrochozoa;Mollusca;Bivalvia;Autobranchia;Heteroconchia;Euherodonta;Imparidentia;Venerida;Veneroidea;Veneridae;Mercenaria;Mercenaria mercenaria

UdeM00000041043 6596 769.2 UdeM00000041043 XP\_045191737.1 74.9 494  
116 4 1 487 1 493 3.10E-219 769.2 6596 cellular

organisms;Eukaryota;Opisthokonta;Metazoa;Eumetazoa;Bilateria;Protostomia;Spiralia;Lophotrochozoa;Mollusca;Bivalvia;Autobranchia;Heteroconchia;Euherodonta;Imparidentia;Venerida;Veneroidea;Veneridae;Mercenaria;Mercenaria mercenaria

UdeM00000041044 1735272 97.4 UdeM00000041044 XP\_041376918.1 55.8  
86 34 2 18 100 63 147 1.20E-17 97.4 1735272

cellular

organisms;Eukaryota;Opisthokonta;Metazoa;Eumetazoa;Bilateria;Protostomia;Spiralia;Lophotrochozoa;Mollusca;Gastropoda;Neomphalina;Neomphaloidea;Peltospiridae;Gigantopelta;Gigantopelta aegis

UdeM00000041045 6573 193 UdeM00000041045 XP\_021343888.1 50.8 197  
95 2 36 230 25 221 4.30E-46 193 6573 cellular

organisms;Eukaryota;Opisthokonta;Metazoa;Eumetazoa;Bilateria;Protostomia;Spiralia;Lophotrochozoa;Mollusca;Bivalvia;Autobranchia;Pteriomorphia;Pectinida;Pectinoidea;Pectinidae;Mizuhopecten;Mizuhopecten yessoensis

UdeM00000041046 1676925 286.2 UdeM00000041046 XP\_023671416.1 59.9  
217 87 0 17 233 115 331 4.10E-74 286.2 1676925

cellular

organisms;Eukaryota;Opisthokonta;Metazoa;Eumetazoa;Bilateria;Deuterostomia;Chordata;Craniata;Vertebrata;Gnathostomata;Teleostomi;Euteleostomi;Actinopterygii;Actinopteri;Neopterygii;Teleostei;Osteoglossoccephalai;Osteoglossoccephala;Osteoglossomorpha;Osteoglossiformes;Mormyridae;Paramormyrops;Paramormyrops kingsleyae

UdeM00000041047 29159 84.3 UdeM00000041047 NP\_001292290.1 58.7 75  
31 0 16 90 10 84 8.60E-14 84.3 29159 cellular

organisms;Eukaryota;Opisthokonta;Metazoa;Eumetazoa;Bilateria;Protostomia;  
Spiralia;Lophotrochozoa;Mollusca;Bivalvia;Autobranchia;Pteriomorpha;Ostr  
eida;Ostreoidea;Ostreidae;Crassostrea;Crassostrea gigas  
UdeM00000041048 6565 158.3 UdeM00000041048 XP\_022322229.1 43.2 220  
63 4 5 162 40 259 9.20E-36 158.3 6565 cellular  
organisms;Eukaryota;Opisthokonta;Metazoa;Eumetazoa;Bilateria;Protostomia;  
Spiralia;Lophotrochozoa;Mollusca;Bivalvia;Autobranchia;Pteriomorpha;Ostr  
eida;Ostreoidea;Ostreidae;Crassostrea;Crassostrea virginica  
UdeM00000041049 6596 204.9 UdeM00000041049 XP\_045193504.1 60.9 192  
67 3 69 260 735 918 1.20E-49 204.9 6596 cellular  
organisms;Eukaryota;Opisthokonta;Metazoa;Eumetazoa;Bilateria;Protostomia;  
Spiralia;Lophotrochozoa;Mollusca;Bivalvia;Autobranchia;Heteroconchia;Euhe  
terodonta;Imparidentia;Venerida;Veneroidea;Veneridae;Mercenaria;Mercenari  
a mercenaria  
UdeM00000041050 6596 1005 UdeM00000041050 XP\_045193504.1 71.1 658  
187 1 30 687 93 747 4.80E-290 1005 6596 cellular  
organisms;Eukaryota;Opisthokonta;Metazoa;Eumetazoa;Bilateria;Protostomia;  
Spiralia;Lophotrochozoa;Mollusca;Bivalvia;Autobranchia;Heteroconchia;Euhe  
terodonta;Imparidentia;Venerida;Veneroidea;Veneridae;Mercenaria;Mercenari  
a mercenaria  
UdeM00000041051 6565 369.8 UdeM00000041051 XP\_022321191.1 58.3 309  
121 2 32 340 8 308 3.80E-99 369.8 6565 cellular  
organisms;Eukaryota;Opisthokonta;Metazoa;Eumetazoa;Bilateria;Protostomia;  
Spiralia;Lophotrochozoa;Mollusca;Bivalvia;Autobranchia;Pteriomorpha;Ostr  
eida;Ostreoidea;Ostreidae;Crassostrea;Crassostrea virginica  
UdeM00000041052 6565 306.2 UdeM00000041052 XP\_022321191.1 58.3 259  
100 2 2 260 58 308 4.00E-80 306.2 6565 cellular  
organisms;Eukaryota;Opisthokonta;Metazoa;Eumetazoa;Bilateria;Protostomia;  
Spiralia;Lophotrochozoa;Mollusca;Bivalvia;Autobranchia;Pteriomorpha;Ostr  
eida;Ostreoidea;Ostreidae;Crassostrea;Crassostrea virginica  
UdeM00000041053 6596 331.3 UdeM00000041053 XP\_045156247.1 36 570  
269 10 9 489 193 755 2.10E-87 331.3 6596 cellular  
organisms;Eukaryota;Opisthokonta;Metazoa;Eumetazoa;Bilateria;Protostomia;  
Spiralia;Lophotrochozoa;Mollusca;Bivalvia;Autobranchia;Heteroconchia;Euhe  
terodonta;Imparidentia;Venerida;Veneroidea;Veneridae;Mercenaria;Mercenari  
a mercenaria  
UdeM00000041054 6579 217.2 UdeM00000041054 XP\_033754538.1 70.9 141  
41 0 26 166 37 177 1.50E-53 217.2 6579 cellular  
organisms;Eukaryota;Opisthokonta;Metazoa;Eumetazoa;Bilateria;Protostomia;  
Spiralia;Lophotrochozoa;Mollusca;Bivalvia;Autobranchia;Pteriomorpha;Pect  
inida;Pectinoidea;Pectinidae;Pecten;Pecten maximus  
UdeM00000041055 6596 303.1 UdeM00000041055 XP\_045192648.1 58.3 252  
104 1 5 256 29 279 3.30E-79 303.1 6596 cellular  
organisms;Eukaryota;Opisthokonta;Metazoa;Eumetazoa;Bilateria;Protostomia;  
Spiralia;Lophotrochozoa;Mollusca;Bivalvia;Autobranchia;Heteroconchia;Euhe  
terodonta;Imparidentia;Venerida;Veneroidea;Veneridae;Mercenaria;Mercenari  
a mercenaria  
UdeM00000041056 6596 347.4 UdeM00000041056 XP\_045192648.1 68.1 251  
79 1 3 253 30 279 1.50E-92 347.4 6596 cellular  
organisms;Eukaryota;Opisthokonta;Metazoa;Eumetazoa;Bilateria;Protostomia;  
Spiralia;Lophotrochozoa;Mollusca;Bivalvia;Autobranchia;Heteroconchia;Euhe  
terodonta;Imparidentia;Venerida;Veneroidea;Veneridae;Mercenaria;Mercenari  
a mercenaria

UdeM00000041057 6596 347.4 UdeM00000041057 XP\_045192648.1 68.1 251  
 79 1 3 253 30 279 1.50E-92 347.4 6596 cellular  
 organisms;Eukaryota;Opisthokonta;Metazoa;Eumetazoa;Bilateria;Protostomia;  
 Spiralia;Lophotrochozoa;Mollusca;Bivalvia;Autobranchia;Heteroconchia;Euhe  
 terodonta;Imparidentia;Venerida;Veneroidea;Veneridae;Mercenaria;Mercenari  
 a mercenaria

UdeM00000041059 6596 909.4 UdeM00000041059 XP\_045194881.1 36.7 1723  
 783 40 3 1612 22 1549 6.30E-261 909.4 6596 cellular  
 organisms;Eukaryota;Opisthokonta;Metazoa;Eumetazoa;Bilateria;Protostomia;  
 Spiralia;Lophotrochozoa;Mollusca;Bivalvia;Autobranchia;Heteroconchia;Euhe  
 terodonta;Imparidentia;Venerida;Veneroidea;Veneridae;Mercenaria;Mercenari  
 a mercenaria

UdeM00000041060 225164 186.8 UdeM00000041060 XP\_009061444.1 79.6  
 113 23 0 1 113 1 113 1.50E-44 186.8 225164  
 cellular  
 organisms;Eukaryota;Opisthokonta;Metazoa;Eumetazoa;Bilateria;Protostomia;  
 Spiralia;Lophotrochozoa;Mollusca;Gastropoda;Patellogastropoda;Lottioidea;  
 Lottiidae;Lottia;Lottia gigantea

UdeM00000041061 6596 115.9 UdeM00000041061 XP\_045193048.1 66.3 83  
 28 0 15 97 86 168 6.30E-23 115.9 6596 cellular  
 organisms;Eukaryota;Opisthokonta;Metazoa;Eumetazoa;Bilateria;Protostomia;  
 Spiralia;Lophotrochozoa;Mollusca;Bivalvia;Autobranchia;Heteroconchia;Euhe  
 terodonta;Imparidentia;Venerida;Veneroidea;Veneridae;Mercenaria;Mercenari  
 a mercenaria

UdeM00000041063 6596 914.4 UdeM00000041063 XP\_045194210.1 57.9 756  
 314 2 5 760 4 755 9.80E-263 914.4 6596 cellular  
 organisms;Eukaryota;Opisthokonta;Metazoa;Eumetazoa;Bilateria;Protostomia;  
 Spiralia;Lophotrochozoa;Mollusca;Bivalvia;Autobranchia;Heteroconchia;Euhe  
 terodonta;Imparidentia;Venerida;Veneroidea;Veneridae;Mercenaria;Mercenari  
 a mercenaria

UdeM00000041065 6596 536.2 UdeM00000041065 XP\_045192969.1 59.4 416  
 169 0 2 417 27 442 4.10E-149 536.2 6596 cellular  
 organisms;Eukaryota;Opisthokonta;Metazoa;Eumetazoa;Bilateria;Protostomia;  
 Spiralia;Lophotrochozoa;Mollusca;Bivalvia;Autobranchia;Heteroconchia;Euhe  
 terodonta;Imparidentia;Venerida;Veneroidea;Veneridae;Mercenaria;Mercenari  
 a mercenaria

UdeM00000041064 6596 569.7 UdeM00000041064 XP\_045192969.1 60 442  
 177 0 1 442 1 442 3.50E-159 569.7 6596 cellular  
 organisms;Eukaryota;Opisthokonta;Metazoa;Eumetazoa;Bilateria;Protostomia;  
 Spiralia;Lophotrochozoa;Mollusca;Bivalvia;Autobranchia;Heteroconchia;Euhe  
 terodonta;Imparidentia;Venerida;Veneroidea;Veneridae;Mercenaria;Mercenari  
 a mercenaria

UdeM00000041066 6579 1244.6 UdeM00000041066 XP\_033755661.1 80.5  
 844 151 4 1 841 73 905 0.00E+00 1244.6 6579  
 cellular  
 organisms;Eukaryota;Opisthokonta;Metazoa;Eumetazoa;Bilateria;Protostomia;  
 Spiralia;Lophotrochozoa;Mollusca;Bivalvia;Autobranchia;Pteriomorphia;Pect  
 inida;Pectinoidea;Pectinidae;Pecten;Pecten maximus

UdeM00000041067 6596 517.3 UdeM00000041067 XP\_045192267.1 60.3 380  
 151 0 6 385 2 381 1.70E-143 517.3 6596 cellular  
 organisms;Eukaryota;Opisthokonta;Metazoa;Eumetazoa;Bilateria;Protostomia;  
 Spiralia;Lophotrochozoa;Mollusca;Bivalvia;Autobranchia;Heteroconchia;Euhe  
 terodonta;Imparidentia;Venerida;Veneroidea;Veneridae;Mercenaria;Mercenari  
 a mercenaria

UdeM00000041068 6596 322.4 UdeM00000041068 XP\_045192111.1 58.2 280  
 102 5 53 319 64 341 6.50E-85 322.4 6596 cellular  
 organisms;Eukaryota;Opisthokonta;Metazoa;Eumetazoa;Bilateria;Protostomia;  
 Spiralia;Lophotrochozoa;Mollusca;Bivalvia;Autobranhia;Heteroconchia;Euhe  
 terodonta;Imparidentia;Venerida;Veneroidea;Veneridae;Mercenaria;Mercenari  
 a mercenaria  
 UdeM00000041069 6596 317 UdeM00000041069 XP\_045193107.1 90.1 171  
 17 0 181 351 150 320 3.00E-83 317 6596 cellular  
 organisms;Eukaryota;Opisthokonta;Metazoa;Eumetazoa;Bilateria;Protostomia;  
 Spiralia;Lophotrochozoa;Mollusca;Bivalvia;Autobranhia;Heteroconchia;Euhe  
 terodonta;Imparidentia;Venerida;Veneroidea;Veneridae;Mercenaria;Mercenari  
 a mercenaria  
 UdeM00000041070 6565 407.1 UdeM00000041070 XP\_022342402.1 42.2 528  
 223 11 7 463 36 552 4.40E-110 407.1 6565 cellular  
 organisms;Eukaryota;Opisthokonta;Metazoa;Eumetazoa;Bilateria;Protostomia;  
 Spiralia;Lophotrochozoa;Mollusca;Bivalvia;Autobranhia;Pteriomorphia;Ostr  
 eida;Ostreoidea;Ostreidae;Crassostrea;Crassostrea virginica  
 UdeM00000041071 6596 336.3 UdeM00000041071 XP\_045193145.1 41.5 530  
 270 11 1 494 7 532 6.80E-89 336.3 6596 cellular  
 organisms;Eukaryota;Opisthokonta;Metazoa;Eumetazoa;Bilateria;Protostomia;  
 Spiralia;Lophotrochozoa;Mollusca;Bivalvia;Autobranhia;Heteroconchia;Euhe  
 terodonta;Imparidentia;Venerida;Veneroidea;Veneridae;Mercenaria;Mercenari  
 a mercenaria  
 UdeM00000041072 6573 451.8 UdeM00000041072 XP\_021364443.1 51.2 502  
 202 13 201 696 391 855 2.10E-123 451.8 6573 cellular  
 organisms;Eukaryota;Opisthokonta;Metazoa;Eumetazoa;Bilateria;Protostomia;  
 Spiralia;Lophotrochozoa;Mollusca;Bivalvia;Autobranhia;Pteriomorphia;Pect  
 inida;Pectinoidea;Pectinidae;Mizuhopecten;Mizuhopecten yessoensis  
 UdeM00000041073 6573 451.8 UdeM00000041073 XP\_021364443.1 51.2 502  
 202 13 201 696 391 855 2.10E-123 451.8 6573 cellular  
 organisms;Eukaryota;Opisthokonta;Metazoa;Eumetazoa;Bilateria;Protostomia;  
 Spiralia;Lophotrochozoa;Mollusca;Bivalvia;Autobranhia;Pteriomorphia;Pect  
 inida;Pectinoidea;Pectinidae;Mizuhopecten;Mizuhopecten yessoensis  
 UdeM00000041074 6596 211.1 UdeM00000041074 XP\_045191469.1 50.7 221  
 103 3 3 219 10 228 1.50E-51 211.1 6596 cellular  
 organisms;Eukaryota;Opisthokonta;Metazoa;Eumetazoa;Bilateria;Protostomia;  
 Spiralia;Lophotrochozoa;Mollusca;Bivalvia;Autobranhia;Heteroconchia;Euhe  
 terodonta;Imparidentia;Venerida;Veneroidea;Veneridae;Mercenaria;Mercenari  
 a mercenaria  
 UdeM00000041075 6565 113.2 UdeM00000041075 XP\_022295767.1 41.9 160  
 89 4 1 157 370 528 3.50E-22 113.2 6565 cellular  
 organisms;Eukaryota;Opisthokonta;Metazoa;Eumetazoa;Bilateria;Protostomia;  
 Spiralia;Lophotrochozoa;Mollusca;Bivalvia;Autobranhia;Pteriomorphia;Ostr  
 eida;Ostreoidea;Ostreidae;Crassostrea;Crassostrea virginica  
 UdeM00000041077 1735272 129.8 UdeM00000041077 XP\_041360711.1 36.5  
 192 113 4 5 194 6 190 4.40E-27 129.8 1735272  
 cellular  
 organisms;Eukaryota;Opisthokonta;Metazoa;Eumetazoa;Bilateria;Protostomia;  
 Spiralia;Lophotrochozoa;Mollusca;Gastropoda;Neomphalina;Neomphaloidea;Pel  
 tospiridae;Gigantopelta;Gigantopelta aegis  
 UdeM00000041080 45264 246.9 UdeM00000041080 XP\_044184031.1 43.1 320  
 152 7 130 423 171 486 4.60E-62 246.9 45264 cellular  
 organisms;Eukaryota;Opisthokonta;Metazoa;Eumetazoa;Cnidaria;Anthozoa;Hexa

corallia;Scleractinia;Astrocoeniina;Acroporidae;Acropora;Acropora  
 millepora  
 UdeM00000041081 45264 246.9 UdeM00000041081 XP\_044184031.1 43.1 320  
 152 7 84 377 171 486 4.10E-62 246.9 45264 cellular  
 organisms;Eukaryota;Opisthokonta;Metazoa;Eumetazoa;Cnidaria;Anthozoa;Hexa  
 corallia;Scleractinia;Astrocoeniina;Acroporidae;Acropora;Acropora  
 millepora  
 UdeM00000041082 151771 97.1 UdeM00000041082 XP\_028405874.1 43.2  
 125 70 1 10 133 69 193 1.90E-17 97.1 151771  
 cellular  
 organisms;Eukaryota;Opisthokonta;Metazoa;Eumetazoa;Cnidaria;Anthozoa;Octo  
 corallia;Alcyonacea;Alcyoniina;Nephtheidae;Dendronephthya;Dendronephthya  
 gigantea  
 UdeM00000041083 45264 99.8 UdeM00000041083 XP\_044165143.1 31.3 249  
 78 3 27 186 35 279 4.00E-18 99.8 45264 cellular  
 organisms;Eukaryota;Opisthokonta;Metazoa;Eumetazoa;Cnidaria;Anthozoa;Hexa  
 corallia;Scleractinia;Astrocoeniina;Acroporidae;Acropora;Acropora  
 millepora  
 UdeM00000041084 6596 533.9 UdeM00000041084 XP\_045191472.1 55.9 528  
 194 12 34 530 9 528 2.40E-148 533.9 6596 cellular  
 organisms;Eukaryota;Opisthokonta;Metazoa;Eumetazoa;Bilateria;Protostomia;  
 Spiralia;Lophotrochozoa;Mollusca;Bivalvia;Autobranchia;Heteroconchia;Euhe  
 terodonta;Imparidentia;Venerida;Veneroidea;Veneridae;Mercenaria;Mercenari  
 a mercenaria  
 UdeM00000041085 6596 164.1 UdeM00000041085 XP\_045191481.1 69.2 104  
 31 1 25 128 21 123 1.20E-37 164.1 6596 cellular  
 organisms;Eukaryota;Opisthokonta;Metazoa;Eumetazoa;Bilateria;Protostomia;  
 Spiralia;Lophotrochozoa;Mollusca;Bivalvia;Autobranchia;Heteroconchia;Euhe  
 terodonta;Imparidentia;Venerida;Veneroidea;Veneridae;Mercenaria;Mercenari  
 a mercenaria  
 UdeM00000041087 1529436 112.5 UdeM00000041087 XP\_033113122.1 58.2  
 79 33 0 52 130 18 96 4.30E-22 112.5 1529436  
 cellular  
 organisms;Eukaryota;Opisthokonta;Metazoa;Eumetazoa;Bilateria;Deuterostomi  
 a;Echinodermata;Pelmatozoa;Crinoidea;Articulata;Comatulida;Comatulidae;Co  
 matulinae;Anneissia;Anneissia japonica  
 UdeM00000041088 29159 449.5 UdeM00000041088 XP\_011453759.1 72.7 300  
 79 1 6 302 7 306 3.40E-123 449.5 29159 cellular  
 organisms;Eukaryota;Opisthokonta;Metazoa;Eumetazoa;Bilateria;Protostomia;  
 Spiralia;Lophotrochozoa;Mollusca;Bivalvia;Autobranchia;Pteriormorphia;Ostr  
 eida;Ostreoidea;Ostreidae;Crassostrea;Crassostrea gigas  
 UdeM00000041089 6579 113.6 UdeM00000041089 XP\_033753907.1 34.4 209  
 106 6 120 297 166 374 4.60E-22 113.6 6579 cellular  
 organisms;Eukaryota;Opisthokonta;Metazoa;Eumetazoa;Bilateria;Protostomia;  
 Spiralia;Lophotrochozoa;Mollusca;Bivalvia;Autobranchia;Pteriormorphia;Pect  
 inida;Pectinoidea;Pectinidae;Pecten;Pecten maximus  
 UdeM00000041090 6596 783.1 UdeM00000041090 XP\_045191639.1 66 570  
 183 4 17 580 8 572 2.60E-223 783.1 6596 cellular  
 organisms;Eukaryota;Opisthokonta;Metazoa;Eumetazoa;Bilateria;Protostomia;  
 Spiralia;Lophotrochozoa;Mollusca;Bivalvia;Autobranchia;Heteroconchia;Euhe  
 terodonta;Imparidentia;Venerida;Veneroidea;Veneridae;Mercenaria;Mercenari  
 a mercenaria  
 UdeM00000041091 6596 878.6 UdeM00000041091 XP\_045191655.1 44 1208  
 547 21 9 1167 14 1140 9.30E-252 878.6 6596 cellular

organisms;Eukaryota;Opisthokonta;Metazoa;Eumetazoa;Bilateria;Protostomia;Spiralia;Lophotrochozoa;Mollusca;Bivalvia;Autobranchia;Heteroconchia;Euheterodonta;Imparidentia;Venerida;Veneroidea;Veneridae;Mercenaria;Mercenaria mercenaria

UdeM00000041092 6596 486.9 UdeM00000041092 XP\_045193317.1 40.3 680  
344 10 2 626 159 831 4.10E-134 486.9 6596 cellular

organisms;Eukaryota;Opisthokonta;Metazoa;Eumetazoa;Bilateria;Protostomia;Spiralia;Lophotrochozoa;Mollusca;Bivalvia;Autobranchia;Heteroconchia;Euheterodonta;Imparidentia;Venerida;Veneroidea;Veneridae;Mercenaria;Mercenaria mercenaria

UdeM00000041093 6596 928.3 UdeM00000041093 XP\_045194976.1 43.2 1241  
636 20 1 1191 1 1222 9.70E-267 928.3 6596 cellular

organisms;Eukaryota;Opisthokonta;Metazoa;Eumetazoa;Bilateria;Protostomia;Spiralia;Lophotrochozoa;Mollusca;Bivalvia;Autobranchia;Heteroconchia;Euheterodonta;Imparidentia;Venerida;Veneroidea;Veneridae;Mercenaria;Mercenaria mercenaria

UdeM00000041094 29159 308.5 UdeM00000041094 XP\_034299116.1 41.1 411  
212 12 87 494 75 458 1.50E-80 308.5 29159 cellular

organisms;Eukaryota;Opisthokonta;Metazoa;Eumetazoa;Bilateria;Protostomia;Spiralia;Lophotrochozoa;Mollusca;Bivalvia;Autobranchia;Pteriomorphia;Ostreida;Ostreoidea;Ostreidae;Crassostrea;Crassostrea gigas

UdeM00000041095 6565 276.2 UdeM00000041095 XP\_022341974.1 49.8 281  
120 6 14 293 198 458 5.00E-71 276.2 6565 cellular

organisms;Eukaryota;Opisthokonta;Metazoa;Eumetazoa;Bilateria;Protostomia;Spiralia;Lophotrochozoa;Mollusca;Bivalvia;Autobranchia;Pteriomorphia;Ostreida;Ostreoidea;Ostreidae;Crassostrea;Crassostrea virginica

UdeM00000041096 6565 271.9 UdeM00000041096 XP\_022341974.1 49.8 281  
120 6 14 293 198 458 9.40E-70 271.9 6565 cellular

organisms;Eukaryota;Opisthokonta;Metazoa;Eumetazoa;Bilateria;Protostomia;Spiralia;Lophotrochozoa;Mollusca;Bivalvia;Autobranchia;Pteriomorphia;Ostreida;Ostreoidea;Ostreidae;Crassostrea;Crassostrea virginica

UdeM00000041097 6596 278.1 UdeM00000041097 XP\_045175116.1 35.1 373  
238 2 18 388 25 395 1.70E-71 278.1 6596 cellular

organisms;Eukaryota;Opisthokonta;Metazoa;Eumetazoa;Bilateria;Protostomia;Spiralia;Lophotrochozoa;Mollusca;Bivalvia;Autobranchia;Heteroconchia;Euheterodonta;Imparidentia;Venerida;Veneroidea;Veneridae;Mercenaria;Mercenaria mercenaria

UdeM00000041098 6596 312.4 UdeM00000041098 XP\_045212714.1 30.5 696  
452 11 2 670 3 693 1.40E-81 312.4 6596 cellular

organisms;Eukaryota;Opisthokonta;Metazoa;Eumetazoa;Bilateria;Protostomia;Spiralia;Lophotrochozoa;Mollusca;Bivalvia;Autobranchia;Heteroconchia;Euheterodonta;Imparidentia;Venerida;Veneroidea;Veneridae;Mercenaria;Mercenaria mercenaria

UdeM00000041099 6105 190.3 UdeM00000041099 XP\_031552933.1 42.9 247  
124 7 10 253 186 418 3.30E-45 190.3 6105 cellular

organisms;Eukaryota;Opisthokonta;Metazoa;Eumetazoa;Cnidaria;Anthozoa;Hexacorallia;Actiniaria;Actiniidae;Actinia;Actinia tenebrosa

UdeM00000041101 6105 287.7 UdeM00000041101 XP\_031557194.1 40 448  
224 9 7 451 4 409 2.60E-74 287.7 6105 cellular

organisms;Eukaryota;Opisthokonta;Metazoa;Eumetazoa;Cnidaria;Anthozoa;Hexacorallia;Actiniaria;Actiniidae;Actinia;Actinia tenebrosa

UdeM00000041102 6573 359 UdeM00000041102 XP\_021358036.1 79.6 206  
42 0 1 206 1 206 4.10E-96 359 6573 cellular

organisms;Eukaryota;Opisthokonta;Metazoa;Eumetazoa;Bilateria;Protostomia;



Spiralia;Lophotrochozoa;Mollusca;Bivalvia;Autobranchia;Pteriormorphia;Pectinida;Pectinoidea;Pectinidae;Mizuhopecten;Mizuhopecten yessoensis  
UdeM00000041103 1735272 256.1 UdeM00000041103 XP\_041376080.1 58  
250 99 2 15 264 69 312 4.80E-65 256.1 1735272  
cellular  
organisms;Eukaryota;Opisthokonta;Metazoa;Eumetazoa;Bilateria;Protostomia;  
Spiralia;Lophotrochozoa;Mollusca;Gastropoda;Neomphalina;Neomphaloidea;Pel  
tospiridae;Gigantopelta;Gigantopelta aegis  
UdeM00000041104 6500 278.5 UdeM00000041104 XP\_005101801.1 51.9 318  
119 5 17 327 52 342 1.10E-71 278.5 6500 cellular  
organisms;Eukaryota;Opisthokonta;Metazoa;Eumetazoa;Bilateria;Protostomia;  
Spiralia;Lophotrochozoa;Mollusca;Gastropoda;Heterobranchia;Euthyneura;Tec  
tipleura;Aplysiida;Aplysiioidea;Aplysiidae;Aplysia;Aplysia californica  
UdeM00000041105 6596 498 UdeM00000041105 XP\_045192822.1 86.4 273  
37 0 1 273 1 273 7.40E-138 498 6596 cellular  
organisms;Eukaryota;Opisthokonta;Metazoa;Eumetazoa;Bilateria;Protostomia;  
Spiralia;Lophotrochozoa;Mollusca;Bivalvia;Autobranchia;Heteroconchia;Euhe  
terodonta;Imparidentia;Venerida;Veneroidea;Veneridae;Mercenaria;Mercenari  
a mercenaria  
UdeM00000041106 6596 260.4 UdeM00000041106 XP\_045192822.1 82.3 147  
26 0 23 169 127 273 1.60E-66 260.4 6596 cellular  
organisms;Eukaryota;Opisthokonta;Metazoa;Eumetazoa;Bilateria;Protostomia;  
Spiralia;Lophotrochozoa;Mollusca;Bivalvia;Autobranchia;Heteroconchia;Euhe  
terodonta;Imparidentia;Venerida;Veneroidea;Veneridae;Mercenaria;Mercenari  
a mercenaria  
UdeM00000042580 6596 266.9 UdeM00000042580 XP\_045169179.1 40.5 494  
157 7 3 494 1 359 5.00E-68 266.9 6596 cellular  
organisms;Eukaryota;Opisthokonta;Metazoa;Eumetazoa;Bilateria;Protostomia;  
Spiralia;Lophotrochozoa;Mollusca;Bivalvia;Autobranchia;Heteroconchia;Euhe  
terodonta;Imparidentia;Venerida;Veneroidea;Veneridae;Mercenaria;Mercenari  
a mercenaria  
UdeM00000042581 400727 264.2 UdeM00000042581 XP\_025082762.1 34.3  
469 291 10 35 498 72 528 5.10E-67 264.2 400727  
cellular  
organisms;Eukaryota;Opisthokonta;Metazoa;Eumetazoa;Bilateria;Protostomia;  
Spiralia;Lophotrochozoa;Mollusca;Gastropoda;Caenogastropoda;Architaeniogl  
ossa;Ampullarioidea;Ampullariidae;Pomacea;Pomacea canaliculata  
UdeM00000042582 29159 721.1 UdeM00000042582 XP\_034299215.1 58 669  
259 9 6 667 410 1063 1.30E-204 721.1 29159 cellular  
organisms;Eukaryota;Opisthokonta;Metazoa;Eumetazoa;Bilateria;Protostomia;  
Spiralia;Lophotrochozoa;Mollusca;Bivalvia;Autobranchia;Pteriormorphia;Ostr  
eida;Ostreoidea;Ostreidae;Crassostrea;Crassostrea gigas  
UdeM00000042584 6596 710.7 UdeM00000042584 XP\_045210461.1 53.7 721  
264 11 106 768 99 807 2.00E-201 710.7 6596 cellular  
organisms;Eukaryota;Opisthokonta;Metazoa;Eumetazoa;Bilateria;Protostomia;  
Spiralia;Lophotrochozoa;Mollusca;Bivalvia;Autobranchia;Heteroconchia;Euhe  
terodonta;Imparidentia;Venerida;Veneroidea;Veneridae;Mercenaria;Mercenari  
a mercenaria  
UdeM00000042585 29159 237.7 UdeM00000042585 XP\_034302577.1 44.7 322  
140 10 1 299 515 821 2.00E-59 237.7 29159 cellular  
organisms;Eukaryota;Opisthokonta;Metazoa;Eumetazoa;Bilateria;Protostomia;  
Spiralia;Lophotrochozoa;Mollusca;Bivalvia;Autobranchia;Pteriormorphia;Ostr  
eida;Ostreoidea;Ostreidae;Crassostrea;Crassostrea gigas

UdeM00000042586 6596 172.2 UdeM00000042586 XP\_045208242.1 41.3 196  
 107 5 25 215 37 229 8.00E-40 172.2 6596 cellular  
 organisms;Eukaryota;Opisthokonta;Metazoa;Eumetazoa;Bilateria;Protostomia;  
 Spiralia;Lophotrochozoa;Mollusca;Bivalvia;Autobranhia;Heteroconchia;Euhe  
 terodonta;Imparidentia;Venerida;Veneroidea;Veneridae;Mercenaria;Mercenari  
 a mercenaria  
 UdeM00000042587 6596 215.3 UdeM00000042587 XP\_045208242.1 50 198  
 91 5 25 217 40 234 8.90E-53 215.3 6596 cellular  
 organisms;Eukaryota;Opisthokonta;Metazoa;Eumetazoa;Bilateria;Protostomia;  
 Spiralia;Lophotrochozoa;Mollusca;Bivalvia;Autobranhia;Heteroconchia;Euhe  
 terodonta;Imparidentia;Venerida;Veneroidea;Veneridae;Mercenaria;Mercenari  
 a mercenaria  
 UdeM00000042588 6565 1162.1 UdeM00000042588 XP\_022337673.1 42.2  
 1739 833 37 2 1664 3 1645 0.00E+00 1162.1 6565  
 cellular  
 organisms;Eukaryota;Opisthokonta;Metazoa;Eumetazoa;Bilateria;Protostomia;  
 Spiralia;Lophotrochozoa;Mollusca;Bivalvia;Autobranhia;Pteriormorphia;Ostr  
 eida;Ostreoidea;Ostreidae;Crassostrea;Crassostrea virginica  
 UdeM00000042589 6573 321.6 UdeM00000042589 XP\_021373995.1 50.4 585  
 205 12 1 535 1 550 2.10E-84 321.6 6573 cellular  
 organisms;Eukaryota;Opisthokonta;Metazoa;Eumetazoa;Bilateria;Protostomia;  
 Spiralia;Lophotrochozoa;Mollusca;Bivalvia;Autobranhia;Pteriormorphia;Pect  
 inida;Pectinoidea;Pectinidae;Mizuhopecten;Mizuhopecten yessoensis  
 UdeM00000042590 6573 363.2 UdeM00000042590 XP\_021373995.1 51.5 608  
 210 12 1 558 1 573 6.80E-97 363.2 6573 cellular  
 organisms;Eukaryota;Opisthokonta;Metazoa;Eumetazoa;Bilateria;Protostomia;  
 Spiralia;Lophotrochozoa;Mollusca;Bivalvia;Autobranhia;Pteriormorphia;Pect  
 inida;Pectinoidea;Pectinidae;Mizuhopecten;Mizuhopecten yessoensis  
 UdeM00000042591 6573 358.2 UdeM00000042591 XP\_021373995.1 50 608  
 210 10 1 549 1 573 2.20E-95 358.2 6573 cellular  
 organisms;Eukaryota;Opisthokonta;Metazoa;Eumetazoa;Bilateria;Protostomia;  
 Spiralia;Lophotrochozoa;Mollusca;Bivalvia;Autobranhia;Pteriormorphia;Pect  
 inida;Pectinoidea;Pectinidae;Mizuhopecten;Mizuhopecten yessoensis  
 UdeM00000042592 1314785 154.1 UdeM00000042592 XP\_040760614.1 51.7  
 145 70 0 23 167 5 149 1.60E-34 154.1 1314785  
 cellular  
 organisms;Eukaryota;Opisthokonta;Fungi;Dikarya;Basidiomycota;Agaricomycot  
 ina;Agaricomycetes;Agaricomycetes incertae  
 sedis;Polyporales;Laetiporaceae;Laetiporus;Laetiporus  
 sulphureus;Laetiporus sulphureus 93-53  
 UdeM00000042593 6573 445.3 UdeM00000042593 XP\_021377083.1 93.2 235  
 16 0 1 235 1 235 4.90E-122 445.3 6573 cellular  
 organisms;Eukaryota;Opisthokonta;Metazoa;Eumetazoa;Bilateria;Protostomia;  
 Spiralia;Lophotrochozoa;Mollusca;Bivalvia;Autobranhia;Pteriormorphia;Pect  
 inida;Pectinoidea;Pectinidae;Mizuhopecten;Mizuhopecten yessoensis  
 UdeM00000042594 1735272 143.7 UdeM00000042594 XP\_041371744.1 50.3  
 143 70 1 57 198 44 186 2.60E-31 143.7 1735272  
 cellular  
 organisms;Eukaryota;Opisthokonta;Metazoa;Eumetazoa;Bilateria;Protostomia;  
 Spiralia;Lophotrochozoa;Mollusca;Gastropoda;Neomphalina;Neomphaloidea;Pel  
 tospiridae;Gigantopelta;Gigantopelta aegis  
 UdeM00000042595 45264 193.7 UdeM00000042595 XP\_044165535.1 42.7 246  
 125 4 19 259 339 573 3.50E-46 193.7 45264 cellular  
 organisms;Eukaryota;Opisthokonta;Metazoa;Eumetazoa;Cnidaria;Anthozoa;Hexa

corallia;Scleractinia;Astrocoeniina;Acroporidae;Acropora;Acropora  
 millepora  
 UdeM00000042596 6596 927.9 UdeM00000042596 XP\_045209006.1 57.4 761  
 300 10 10 758 44 792 1.30E-266 927.9 6596 cellular  
 organisms;Eukaryota;Opisthokonta;Metazoa;Eumetazoa;Bilateria;Protostomia;  
 Spiralia;Lophotrochozoa;Mollusca;Bivalvia;Autobranchia;Heteroconchia;Euhe  
 terodonta;Imparidentia;Venerida;Veneroidea;Veneridae;Mercenaria;Mercenari  
 a mercenaria  
 UdeM00000042597 400727 73.9 UdeM00000042597 XP\_025108636.1 32.1  
 196 114 6 6 190 47 234 4.40E-10 73.9 400727  
 cellular  
 organisms;Eukaryota;Opisthokonta;Metazoa;Eumetazoa;Bilateria;Protostomia;  
 Spiralia;Lophotrochozoa;Mollusca;Gastropoda;Caenogastropoda;Architaeniogl  
 ossa;Ampullarioidea;Ampullariidae;Pomacea;Pomacea canaliculata  
 UdeM00000042598 400727 79.3 UdeM00000042598 XP\_025108636.1 32.9  
 216 121 8 149 350 29 234 1.50E-11 79.3 400727  
 cellular  
 organisms;Eukaryota;Opisthokonta;Metazoa;Eumetazoa;Bilateria;Protostomia;  
 Spiralia;Lophotrochozoa;Mollusca;Gastropoda;Caenogastropoda;Architaeniogl  
 ossa;Ampullarioidea;Ampullariidae;Pomacea;Pomacea canaliculata  
 UdeM00000042599 6596 85.5 UdeM00000042599 XP\_045209795.1 30.6 186  
 114 4 6 184 1071 1248 8.30E-14 85.5 6596 cellular  
 organisms;Eukaryota;Opisthokonta;Metazoa;Eumetazoa;Bilateria;Protostomia;  
 Spiralia;Lophotrochozoa;Mollusca;Bivalvia;Autobranchia;Heteroconchia;Euhe  
 terodonta;Imparidentia;Venerida;Veneroidea;Veneridae;Mercenaria;Mercenari  
 a mercenaria  
 UdeM00000042600 6565 60.8 UdeM00000042600 XP\_022306521.1 50 46  
 20 1 21 63 396 441 2.70E-06 60.8 6565 cellular  
 organisms;Eukaryota;Opisthokonta;Metazoa;Eumetazoa;Bilateria;Protostomia;  
 Spiralia;Lophotrochozoa;Mollusca;Bivalvia;Autobranchia;Pteriomorphia;Ostr  
 eida;Ostreoidea;Ostreidae;Crassostrea;Crassostrea virginica  
 UdeM00000037648 6596 74.3 UdeM00000037648 XP\_045194453.1 31.1 135  
 89 3 20 152 131 263 1.50E-10 74.3 6596 cellular  
 organisms;Eukaryota;Opisthokonta;Metazoa;Eumetazoa;Bilateria;Protostomia;  
 Spiralia;Lophotrochozoa;Mollusca;Bivalvia;Autobranchia;Heteroconchia;Euhe  
 terodonta;Imparidentia;Venerida;Veneroidea;Veneridae;Mercenaria;Mercenari  
 a mercenaria  
 UdeM00000037649 6596 125.6 UdeM00000037649 XP\_045208321.1 31.1 244  
 142 7 26 261 14 239 9.70E-26 125.6 6596 cellular  
 organisms;Eukaryota;Opisthokonta;Metazoa;Eumetazoa;Bilateria;Protostomia;  
 Spiralia;Lophotrochozoa;Mollusca;Bivalvia;Autobranchia;Heteroconchia;Euhe  
 terodonta;Imparidentia;Venerida;Veneroidea;Veneridae;Mercenaria;Mercenari  
 a mercenaria  
 UdeM00000037650 6565 223 UdeM00000037650 XP\_022297447.1 50.5 220  
 107 2 101 318 145 364 5.40E-55 223 6565 cellular  
 organisms;Eukaryota;Opisthokonta;Metazoa;Eumetazoa;Bilateria;Protostomia;  
 Spiralia;Lophotrochozoa;Mollusca;Bivalvia;Autobranchia;Pteriomorphia;Ostr  
 eida;Ostreoidea;Ostreidae;Crassostrea;Crassostrea virginica  
 UdeM00000037651 6596 185.7 UdeM00000037651 XP\_045173138.1 26.5 683  
 452 18 33 682 35 700 2.30E-43 185.7 6596 cellular  
 organisms;Eukaryota;Opisthokonta;Metazoa;Eumetazoa;Bilateria;Protostomia;  
 Spiralia;Lophotrochozoa;Mollusca;Bivalvia;Autobranchia;Heteroconchia;Euhe  
 terodonta;Imparidentia;Venerida;Veneroidea;Veneridae;Mercenaria;Mercenari  
 a mercenaria

UdeM00000037652 6596 138.3 UdeM00000037652 XP\_045173138.1 28.2 401  
 262 8 17 395 19 415 2.20E-29 138.3 6596 cellular  
 organisms;Eukaryota;Opisthokonta;Metazoa;Eumetazoa;Bilateria;Protostomia;  
 Spiralia;Lophotrochozoa;Mollusca;Bivalvia;Autobranchia;Heteroconchia;Euhe  
 terodonta;Imparidentia;Venerida;Veneroidea;Veneridae;Mercenaria;Mercenari  
 a mercenaria  
 UdeM00000037654 6596 177.2 UdeM00000037654 XP\_045206913.1 25.5 644  
 437 15 12 630 7 632 7.80E-41 177.2 6596 cellular  
 organisms;Eukaryota;Opisthokonta;Metazoa;Eumetazoa;Bilateria;Protostomia;  
 Spiralia;Lophotrochozoa;Mollusca;Bivalvia;Autobranchia;Heteroconchia;Euhe  
 terodonta;Imparidentia;Venerida;Veneroidea;Veneridae;Mercenaria;Mercenari  
 a mercenaria  
 UdeM00000037655 6596 218.4 UdeM00000037655 XP\_045191091.1 34.4 419  
 217 6 10 372 1 417 1.60E-53 218.4 6596 cellular  
 organisms;Eukaryota;Opisthokonta;Metazoa;Eumetazoa;Bilateria;Protostomia;  
 Spiralia;Lophotrochozoa;Mollusca;Bivalvia;Autobranchia;Heteroconchia;Euhe  
 terodonta;Imparidentia;Venerida;Veneroidea;Veneridae;Mercenaria;Mercenari  
 a mercenaria  
 UdeM00000037656 6596 208.8 UdeM00000037656 XP\_045189535.1 33.2 397  
 240 5 3 374 6 402 1.30E-50 208.8 6596 cellular  
 organisms;Eukaryota;Opisthokonta;Metazoa;Eumetazoa;Bilateria;Protostomia;  
 Spiralia;Lophotrochozoa;Mollusca;Bivalvia;Autobranchia;Heteroconchia;Euhe  
 terodonta;Imparidentia;Venerida;Veneroidea;Veneridae;Mercenaria;Mercenari  
 a mercenaria  
 UdeM00000037657 400727 660.6 UdeM00000037657 XP\_025114320.1 70.5  
 437 125 3 80 515 65 498 1.70E-186 660.6 400727  
 cellular  
 organisms;Eukaryota;Opisthokonta;Metazoa;Eumetazoa;Bilateria;Protostomia;  
 Spiralia;Lophotrochozoa;Mollusca;Gastropoda;Caenogastropoda;Architaeniogl  
 ossa;Ampullarioidea;Ampullariidae;Pomacea;Pomacea canaliculata  
 UdeM00000037658 133434 138.3 UdeM00000037658 XP\_022094913.1 45.3  
 150 70 3 60 198 63 211 1.10E-29 138.3 133434  
 cellular  
 organisms;Eukaryota;Opisthokonta;Metazoa;Eumetazoa;Bilateria;Deuterostomi  
 a;Echinodermata;Eleutherozoa;Asterozoa;Asteroidea;Valvatacea;Valvatida;Ac  
 anthasteridae;Acanthaster;Acanthaster planci  
 UdeM00000037659 6596 573.5 UdeM00000037659 XP\_045204164.1 94.9 276  
 14 0 1 276 28 303 1.40E-160 573.5 6596 cellular  
 organisms;Eukaryota;Opisthokonta;Metazoa;Eumetazoa;Bilateria;Protostomia;  
 Spiralia;Lophotrochozoa;Mollusca;Bivalvia;Autobranchia;Heteroconchia;Euhe  
 terodonta;Imparidentia;Venerida;Veneroidea;Veneridae;Mercenaria;Mercenari  
 a mercenaria  
 UdeM00000037660 6596 443.7 UdeM00000037660 XP\_045202617.1 66.8 307  
 99 1 1 307 1 304 1.90E-121 443.7 6596 cellular  
 organisms;Eukaryota;Opisthokonta;Metazoa;Eumetazoa;Bilateria;Protostomia;  
 Spiralia;Lophotrochozoa;Mollusca;Bivalvia;Autobranchia;Heteroconchia;Euhe  
 terodonta;Imparidentia;Venerida;Veneroidea;Veneridae;Mercenaria;Mercenari  
 a mercenaria  
 UdeM00000037661 6596 1084.7 UdeM00000037661 XP\_045202587.1 73  
 738 181 2 1 720 1 738 0.00E+00 1084.7 6596  
 cellular  
 organisms;Eukaryota;Opisthokonta;Metazoa;Eumetazoa;Bilateria;Protostomia;  
 Spiralia;Lophotrochozoa;Mollusca;Bivalvia;Autobranchia;Heteroconchia;Euhe

terodonta;Imparidentia;Venerida;Veneroidea;Veneridae;Mercenaria;Mercenaria mercenaria  
 UdeM00000037662 6596 197.6 UdeM00000037662 XP\_045202587.1 77.2 123  
 28 0 1 123 1 123 1.00E-47 197.6 6596 cellular  
 organisms;Eukaryota;Opisthokonta;Metazoa;Eumetazoa;Bilateria;Protostomia;  
 Spiralia;Lophotrochozoa;Mollusca;Bivalvia;Autobranchia;Heteroconchia;Euhe  
 terodonta;Imparidentia;Venerida;Veneroidea;Veneridae;Mercenaria;Mercenari  
 a mercenaria  
 UdeM00000037663 6596 927.9 UdeM00000037663 XP\_045202587.1 66.4 743  
 169 4 19 755 123 790 8.00E-267 927.9 6596 cellular  
 organisms;Eukaryota;Opisthokonta;Metazoa;Eumetazoa;Bilateria;Protostomia;  
 Spiralia;Lophotrochozoa;Mollusca;Bivalvia;Autobranchia;Heteroconchia;Euhe  
 terodonta;Imparidentia;Venerida;Veneroidea;Veneridae;Mercenaria;Mercenari  
 a mercenaria  
 UdeM00000037664 400727 63.5 UdeM00000037664 XP\_025108210.1 28.5  
 137 95 3 26 162 107 240 2.80E-07 63.5 400727  
 cellular  
 organisms;Eukaryota;Opisthokonta;Metazoa;Eumetazoa;Bilateria;Protostomia;  
 Spiralia;Lophotrochozoa;Mollusca;Gastropoda;Caenogastropoda;Architaeniogl  
 ossa;Ampullarioidea;Ampullariidae;Pomacea;Pomacea canaliculata  
 UdeM00000037665 42514 72.4 UdeM00000037665 XP\_017549368.1 91.7 36  
 3 0 1 36 535 570 3.40E-10 72.4 42514 cellular  
 organisms;Eukaryota;Opisthokonta;Metazoa;Eumetazoa;Bilateria;Deuterostomi  
 a;Chordata;Craniata;Vertebrata;Gnathostomata;Teleostomi;Euteleostomi;Acti  
 nopterygii;Actinopteri;Neopterygii;Teleostei;Osteoglossocephalai;Clupeoce  
 phala;Otomorpha;Ostariophysi;Otophysi;Characiphysae;Characiformes;Characo  
 idei;Serrasalminae;Pygocentrus;Pygocentrus nattereri  
 UdeM00000037667 7725 65.5 UdeM00000037667 XP\_039269390.1 30 110  
 77 0 24 133 81 190 6.10E-08 65.5 7725 cellular  
 organisms;Eukaryota;Opisthokonta;Metazoa;Eumetazoa;Bilateria;Deuterostomi  
 a;Chordata;Tunicata;Ascidiacea;Stolidobranchia;Styelidae;Styela;Styela  
 clava  
 UdeM00000037668 29159 128.3 UdeM00000037668 XP\_034307878.1 31 242  
 154 4 1 233 1 238 1.60E-26 128.3 29159 cellular  
 organisms;Eukaryota;Opisthokonta;Metazoa;Eumetazoa;Bilateria;Protostomia;  
 Spiralia;Lophotrochozoa;Mollusca;Bivalvia;Autobranchia;Pteriormorphia;Ostr  
 eida;Ostreoidea;Ostreidae;Crassostrea;Crassostrea gigas  
 UdeM00000037669 6565 129.4 UdeM00000037669 XP\_022287605.1 45.5 123  
 65 2 5 127 102 222 4.20E-27 129.4 6565 cellular  
 organisms;Eukaryota;Opisthokonta;Metazoa;Eumetazoa;Bilateria;Protostomia;  
 Spiralia;Lophotrochozoa;Mollusca;Bivalvia;Autobranchia;Pteriormorphia;Ostr  
 eida;Ostreoidea;Ostreidae;Crassostrea;Crassostrea virginica  
 UdeM00000037671 6573 684.5 UdeM00000037671 XP\_021340854.1 46.3 868  
 371 19 11 859 16 807 1.80E-193 684.5 6573 cellular  
 organisms;Eukaryota;Opisthokonta;Metazoa;Eumetazoa;Bilateria;Protostomia;  
 Spiralia;Lophotrochozoa;Mollusca;Bivalvia;Autobranchia;Pteriormorphia;Pect  
 inida;Pectinoidea;Pectinidae;Mizuhopecten;Mizuhopecten yessoensis  
 UdeM00000037672 34773 295.8 UdeM00000037672 XP\_041966593.1 35.7 504  
 305 13 100 595 143 635 1.30E-76 295.8 34773 cellular  
 organisms;Eukaryota;Opisthokonta;Metazoa;Eumetazoa;Bilateria;Deuterostomi  
 a;Chordata;Craniata;Vertebrata;Gnathostomata;Teleostomi;Euteleostomi;Acti  
 nopterygii;Actinopteri;Neopterygii;Teleostei;Osteoglossocephalai;Clupeoce  
 phala;Otomorpha;Clupei;Clupeiformes;Clupeoidei;Clupeidae;Alosinae;Alosa;A  
 losa sapidissima

UdeM00000037673 6596 142.5 UdeM00000037673 XP\_045171063.1 33.7 255  
 154 6 2 245 41 291 1.10E-30 142.5 6596 cellular  
 organisms;Eukaryota;Opisthokonta;Metazoa;Eumetazoa;Bilateria;Protostomia;  
 Spiralia;Lophotrochozoa;Mollusca;Bivalvia;Autobranhia;Heteroconchia;Euhe  
 terodonta;Imparidentia;Venerida;Veneroidea;Veneridae;Mercenaria;Mercenari  
 a mercenaria  
 UdeM00000037674 6565 287 UdeM00000037674 XP\_022305442.1 37.8 407  
 244 8 13 416 110 510 4.00E-74 287 6565 cellular  
 organisms;Eukaryota;Opisthokonta;Metazoa;Eumetazoa;Bilateria;Protostomia;  
 Spiralia;Lophotrochozoa;Mollusca;Bivalvia;Autobranhia;Pteriormorphia;Ostr  
 eida;Ostreoidea;Ostreidae;Crassostrea;Crassostrea virginica  
 UdeM00000037675 6573 564.3 UdeM00000037675 XP\_021340947.1 44 671  
 346 12 2 668 12 656 2.10E-157 564.3 6573 cellular  
 organisms;Eukaryota;Opisthokonta;Metazoa;Eumetazoa;Bilateria;Protostomia;  
 Spiralia;Lophotrochozoa;Mollusca;Bivalvia;Autobranhia;Pteriormorphia;Pect  
 inida;Pectinoidea;Pectinidae;Mizuhopecten;Mizuhopecten yessoensis  
 UdeM00000037676 1735272 707.6 UdeM00000037676 XP\_041369964.1 66  
 529 174 4 1 524 1 528 1.20E-200 707.6 1735272  
 cellular  
 organisms;Eukaryota;Opisthokonta;Metazoa;Eumetazoa;Bilateria;Protostomia;  
 Spiralia;Lophotrochozoa;Mollusca;Gastropoda;Neomphalina;Neomphaloidea;Pel  
 tospiridae;Gigantopelta;Gigantopelta aegis  
 UdeM00000037677 6596 662.5 UdeM00000037677 XP\_045201661.1 52.2 678  
 307 8 4 677 11 675 5.60E-187 662.5 6596 cellular  
 organisms;Eukaryota;Opisthokonta;Metazoa;Eumetazoa;Bilateria;Protostomia;  
 Spiralia;Lophotrochozoa;Mollusca;Bivalvia;Autobranhia;Heteroconchia;Euhe  
 terodonta;Imparidentia;Venerida;Veneroidea;Veneridae;Mercenaria;Mercenari  
 a mercenaria  
 UdeM00000037678 6573 747.3 UdeM00000037678 XP\_021349019.1 74.5 478  
 118 3 1 476 1 476 1.20E-212 747.3 6573 cellular  
 organisms;Eukaryota;Opisthokonta;Metazoa;Eumetazoa;Bilateria;Protostomia;  
 Spiralia;Lophotrochozoa;Mollusca;Bivalvia;Autobranhia;Pteriormorphia;Pect  
 inida;Pectinoidea;Pectinidae;Mizuhopecten;Mizuhopecten yessoensis  
 UdeM00000037679 6500 139.8 UdeM00000037679 XP\_035826768.1 74.2 97  
 25 0 11 107 2 98 2.30E-30 139.8 6500 cellular  
 organisms;Eukaryota;Opisthokonta;Metazoa;Eumetazoa;Bilateria;Protostomia;  
 Spiralia;Lophotrochozoa;Mollusca;Gastropoda;Heterobranhia;Euthyneura;Tec  
 tipleura;Aplysiida;Aplysioidea;Aplysiidae;Aplysia;Aplysia californica  
 UdeM00000037680 6565 158.7 UdeM00000037680 XP\_022323275.1 39.8 241  
 92 6 452 640 39 278 4.50E-35 158.7 6565 cellular  
 organisms;Eukaryota;Opisthokonta;Metazoa;Eumetazoa;Bilateria;Protostomia;  
 Spiralia;Lophotrochozoa;Mollusca;Bivalvia;Autobranhia;Pteriormorphia;Ostr  
 eida;Ostreoidea;Ostreidae;Crassostrea;Crassostrea virginica  
 UdeM00000037681 6565 761.5 UdeM00000037681 XP\_022323271.1 55.3 720  
 252 7 1 706 1 664 9.30E-217 761.5 6565 cellular  
 organisms;Eukaryota;Opisthokonta;Metazoa;Eumetazoa;Bilateria;Protostomia;  
 Spiralia;Lophotrochozoa;Mollusca;Bivalvia;Autobranhia;Pteriormorphia;Ostr  
 eida;Ostreoidea;Ostreidae;Crassostrea;Crassostrea virginica  
 UdeM00000037682 6596 827 UdeM00000037682 XP\_045203336.1 70.3 582  
 164 5 1 574 1 581 1.50E-236 827 6596 cellular  
 organisms;Eukaryota;Opisthokonta;Metazoa;Eumetazoa;Bilateria;Protostomia;  
 Spiralia;Lophotrochozoa;Mollusca;Bivalvia;Autobranhia;Heteroconchia;Euhe  
 terodonta;Imparidentia;Venerida;Veneroidea;Veneridae;Mercenaria;Mercenari  
 a mercenaria

UdeM00000037683 6500 201.1 UdeM00000037683 XP\_005098867.1 60.1 168  
 67 0 2 169 84 251 1.20E-48 201.1 6500 cellular  
 organisms;Eukaryota;Opisthokonta;Metazoa;Eumetazoa;Bilateria;Protostomia;  
 Spiralia;Lophotrochozoa;Mollusca;Gastropoda;Heterobranchia;Euthyneura;Tec  
 tipleura;Aplysiida;Aplysioidea;Aplysiidae;Aplysia;Aplysia californica  
 UdeM00000037684 133434 119.4 UdeM00000037684 XP\_022088996.1 74.6  
 71 18 0 1 71 1 71 2.20E-24 119.4 133434  
 cellular  
 organisms;Eukaryota;Opisthokonta;Metazoa;Eumetazoa;Bilateria;Deuterostomi  
 a;Echinodermata;Eleutherozoa;Asterozoa;Asteroidea;Valvataceae;Valvatida;Ac  
 anthasteridae;Acanthaster;Acanthaster planci  
 UdeM00000037687 6565 107.1 UdeM00000037687 XP\_022337731.1 56.2 96  
 40 2 2 96 115 209 1.30E-20 107.1 6565 cellular  
 organisms;Eukaryota;Opisthokonta;Metazoa;Eumetazoa;Bilateria;Protostomia;  
 Spiralia;Lophotrochozoa;Mollusca;Bivalvia;Autobranchia;Pteriormorphia;Ostr  
 eida;Ostreioidea;Ostreidae;Crassostrea;Crassostrea virginica  
 UdeM00000037688 29159 122.1 UdeM00000037688 XP\_034307860.1 51.4 109  
 53 0 1 109 1 109 4.80E-25 122.1 29159 cellular  
 organisms;Eukaryota;Opisthokonta;Metazoa;Eumetazoa;Bilateria;Protostomia;  
 Spiralia;Lophotrochozoa;Mollusca;Bivalvia;Autobranchia;Pteriormorphia;Ostr  
 eida;Ostreioidea;Ostreidae;Crassostrea;Crassostrea gigas  
 UdeM00000037689 37621 119.4 UdeM00000037689 XP\_014673981.1 46.9 143  
 42 3 1 109 76 218 3.30E-24 119.4 37621 cellular  
 organisms;Eukaryota;Opisthokonta;Metazoa;Eumetazoa;Bilateria;Protostomia;  
 Ecdysozoa;Scalidophora;Priapulida;Priapulimorpha;Priapulimorphida;Priapul  
 idae;Priapulul;Priapulul caudatus  
 UdeM00000037690 37621 187.6 UdeM00000037690 XP\_014678940.1 51.6 186  
 86 3 3 185 771 955 1.60E-44 187.6 37621 cellular  
 organisms;Eukaryota;Opisthokonta;Metazoa;Eumetazoa;Bilateria;Protostomia;  
 Ecdysozoa;Scalidophora;Priapulida;Priapulimorpha;Priapulimorphida;Priapul  
 idae;Priapulul;Priapulul caudatus  
 UdeM00000037691 29159 59.3 UdeM00000037691 XP\_034307860.1 53.7 54  
 25 0 1 54 1 54 2.20E-06 59.3 29159 cellular  
 organisms;Eukaryota;Opisthokonta;Metazoa;Eumetazoa;Bilateria;Protostomia;  
 Spiralia;Lophotrochozoa;Mollusca;Bivalvia;Autobranchia;Pteriormorphia;Ostr  
 eida;Ostreioidea;Ostreidae;Crassostrea;Crassostrea gigas  
 UdeM00000037693 6596 188.7 UdeM00000037693 XP\_045199084.1 46.1 206  
 107 1 26 227 41 246 8.20E-45 188.7 6596 cellular  
 organisms;Eukaryota;Opisthokonta;Metazoa;Eumetazoa;Bilateria;Protostomia;  
 Spiralia;Lophotrochozoa;Mollusca;Bivalvia;Autobranchia;Heteroconchia;Euhe  
 terodonta;Imparidentia;Venerida;Veneroidea;Veneridae;Mercenaria;Mercenari  
 a mercenaria  
 UdeM00000037694 6596 186.4 UdeM00000037694 XP\_045199084.1 46.3 190  
 98 1 46 231 61 250 4.10E-44 186.4 6596 cellular  
 organisms;Eukaryota;Opisthokonta;Metazoa;Eumetazoa;Bilateria;Protostomia;  
 Spiralia;Lophotrochozoa;Mollusca;Bivalvia;Autobranchia;Heteroconchia;Euhe  
 terodonta;Imparidentia;Venerida;Veneroidea;Veneridae;Mercenaria;Mercenari  
 a mercenaria  
 UdeM00000037695 6596 590.1 UdeM00000037695 XP\_045202104.1 47.9 595  
 291 6 85 668 85 671 3.90E-165 590.1 6596 cellular  
 organisms;Eukaryota;Opisthokonta;Metazoa;Eumetazoa;Bilateria;Protostomia;  
 Spiralia;Lophotrochozoa;Mollusca;Bivalvia;Autobranchia;Heteroconchia;Euhe  
 terodonta;Imparidentia;Venerida;Veneroidea;Veneridae;Mercenaria;Mercenari  
 a mercenaria

UdeM00000037696 6579 203 UdeM00000037696 XP\_033728194.1 35.2 366  
 224 5 1 357 282 643 6.50E-49 203 6579 cellular  
 organisms;Eukaryota;Opisthokonta;Metazoa;Eumetazoa;Bilateria;Protostomia;  
 Spiralia;Lophotrochozoa;Mollusca;Bivalvia;Autobranchia;Pteriormorphia;Pect  
 inida;Pectinoidea;Pectinidae;Pecten;Pecten maximus  
 UdeM00000037697 6596 645.2 UdeM00000037697 XP\_045202104.1 47.7 682  
 298 7 80 704 80 759 9.60E-182 645.2 6596 cellular  
 organisms;Eukaryota;Opisthokonta;Metazoa;Eumetazoa;Bilateria;Protostomia;  
 Spiralia;Lophotrochozoa;Mollusca;Bivalvia;Autobranchia;Heteroconchia;Euhe  
 terodonta;Imparidentia;Venerida;Veneroidea;Veneridae;Mercenaria;Mercenari  
 a mercenaria  
 UdeM00000037698 6596 383.6 UdeM00000037698 XP\_045202104.1 37.4 597  
 231 7 80 537 80 672 5.30E-103 383.6 6596 cellular  
 organisms;Eukaryota;Opisthokonta;Metazoa;Eumetazoa;Bilateria;Protostomia;  
 Spiralia;Lophotrochozoa;Mollusca;Bivalvia;Autobranchia;Heteroconchia;Euhe  
 terodonta;Imparidentia;Venerida;Veneroidea;Veneridae;Mercenaria;Mercenari  
 a mercenaria  
 UdeM00000037699 6596 693.7 UdeM00000037699 XP\_045202104.1 50.8 679  
 314 7 85 747 85 759 2.50E-196 693.7 6596 cellular  
 organisms;Eukaryota;Opisthokonta;Metazoa;Eumetazoa;Bilateria;Protostomia;  
 Spiralia;Lophotrochozoa;Mollusca;Bivalvia;Autobranchia;Heteroconchia;Euhe  
 terodonta;Imparidentia;Venerida;Veneroidea;Veneridae;Mercenaria;Mercenari  
 a mercenaria  
 UdeM00000037700 6596 549.7 UdeM00000037700 XP\_045202104.1 43.9 681  
 231 8 18 550 80 757 4.30E-153 549.7 6596 cellular  
 organisms;Eukaryota;Opisthokonta;Metazoa;Eumetazoa;Bilateria;Protostomia;  
 Spiralia;Lophotrochozoa;Mollusca;Bivalvia;Autobranchia;Heteroconchia;Euhe  
 terodonta;Imparidentia;Venerida;Veneroidea;Veneridae;Mercenaria;Mercenari  
 a mercenaria  
 UdeM00000037701 6596 702.2 UdeM00000037701 XP\_045202104.1 51.2 682  
 316 7 85 756 85 759 7.10E-199 702.2 6596 cellular  
 organisms;Eukaryota;Opisthokonta;Metazoa;Eumetazoa;Bilateria;Protostomia;  
 Spiralia;Lophotrochozoa;Mollusca;Bivalvia;Autobranchia;Heteroconchia;Euhe  
 terodonta;Imparidentia;Venerida;Veneroidea;Veneridae;Mercenaria;Mercenari  
 a mercenaria  
 UdeM00000037702 6596 218.4 UdeM00000037702 XP\_045170262.1 39.2 319  
 169 8 39 354 60 356 1.60E-53 218.4 6596 cellular  
 organisms;Eukaryota;Opisthokonta;Metazoa;Eumetazoa;Bilateria;Protostomia;  
 Spiralia;Lophotrochozoa;Mollusca;Bivalvia;Autobranchia;Heteroconchia;Euhe  
 terodonta;Imparidentia;Venerida;Veneroidea;Veneridae;Mercenaria;Mercenari  
 a mercenaria  
 UdeM00000037703 6596 217.2 UdeM00000037703 XP\_045170262.1 42.1 273  
 147 6 29 301 95 356 3.10E-53 217.2 6596 cellular  
 organisms;Eukaryota;Opisthokonta;Metazoa;Eumetazoa;Bilateria;Protostomia;  
 Spiralia;Lophotrochozoa;Mollusca;Bivalvia;Autobranchia;Heteroconchia;Euhe  
 terodonta;Imparidentia;Venerida;Veneroidea;Veneridae;Mercenaria;Mercenari  
 a mercenaria  
 UdeM00000037704 6596 568.9 UdeM00000037704 XP\_045202111.1 50.8 575  
 257 7 100 668 94 648 8.30E-159 568.9 6596 cellular  
 organisms;Eukaryota;Opisthokonta;Metazoa;Eumetazoa;Bilateria;Protostomia;  
 Spiralia;Lophotrochozoa;Mollusca;Bivalvia;Autobranchia;Heteroconchia;Euhe  
 terodonta;Imparidentia;Venerida;Veneroidea;Veneridae;Mercenaria;Mercenari  
 a mercenaria



UdeM00000037706 6596 427.9 UdeM00000037706 XP\_045189007.1 41 575  
 300 14 3 550 38 600 1.90E-116 427.9 6596 cellular  
 organisms;Eukaryota;Opisthokonta;Metazoa;Eumetazoa;Bilateria;Protostomia;  
 Spiralia;Lophotrochozoa;Mollusca;Bivalvia;Autobranhia;Heteroconchia;Euhe  
 terodonta;Imparidentia;Venerida;Veneroidea;Veneridae;Mercenaria;Mercenari  
 a mercenaria  
 UdeM00000037707 6573 387.5 UdeM00000037707 XP\_021375269.1 94.1 205  
 12 0 1 205 1 205 1.10E-104 387.5 6573 cellular  
 organisms;Eukaryota;Opisthokonta;Metazoa;Eumetazoa;Bilateria;Protostomia;  
 Spiralia;Lophotrochozoa;Mollusca;Bivalvia;Autobranhia;Pteriormorphia;Pect  
 inida;Pectinoidea;Pectinidae;Mizuhopecten;Mizuhopecten yessoensis  
 UdeM00000037708 6596 306.2 UdeM00000037708 XP\_045200835.1 52.9 280  
 131 1 29 308 21 299 5.00E-80 306.2 6596 cellular  
 organisms;Eukaryota;Opisthokonta;Metazoa;Eumetazoa;Bilateria;Protostomia;  
 Spiralia;Lophotrochozoa;Mollusca;Bivalvia;Autobranhia;Heteroconchia;Euhe  
 terodonta;Imparidentia;Venerida;Veneroidea;Veneridae;Mercenaria;Mercenari  
 a mercenaria  
 UdeM00000037709 45264 393.3 UdeM00000037709 XP\_044165535.1 48.3 377  
 191 1 1 373 158 534 4.10E-106 393.3 45264 cellular  
 organisms;Eukaryota;Opisthokonta;Metazoa;Eumetazoa;Cnidaria;Anthozoa;Hexa  
 corallia;Scleractinia;Astrocoeniina;Acroporidae;Acropora;Acropora  
 millepora  
 UdeM00000037710 6579 369.4 UdeM00000037710 XP\_033732019.1 79.6 221  
 45 0 3 223 2 222 3.40E-99 369.4 6579 cellular  
 organisms;Eukaryota;Opisthokonta;Metazoa;Eumetazoa;Bilateria;Protostomia;  
 Spiralia;Lophotrochozoa;Mollusca;Bivalvia;Autobranhia;Pteriormorphia;Pect  
 inida;Pectinoidea;Pectinidae;Pecten;Pecten maximus  
 UdeM00000037711 29159 143.7 UdeM00000037711 XP\_034316161.1 42.9 163  
 92 1 1 162 718 880 2.10E-31 143.7 29159 cellular  
 organisms;Eukaryota;Opisthokonta;Metazoa;Eumetazoa;Bilateria;Protostomia;  
 Spiralia;Lophotrochozoa;Mollusca;Bivalvia;Autobranhia;Pteriormorphia;Ostr  
 eida;Ostreoidea;Ostreidae;Crassostrea;Crassostrea gigas  
 UdeM00000037712 400727 85.1 UdeM00000037712 XP\_025112734.1 45.1  
 82 44 1 6 87 21 101 5.40E-14 85.1 400727  
 cellular  
 organisms;Eukaryota;Opisthokonta;Metazoa;Eumetazoa;Bilateria;Protostomia;  
 Spiralia;Lophotrochozoa;Mollusca;Gastropoda;Caenogastropoda;Architaeniogl  
 ossa;Ampullarioidea;Ampullariidae;Pomacea;Pomacea canaliculata  
 UdeM00000037713 46514 76.6 UdeM00000037713 XP\_038046081.1 30.5 177  
 111 3 166 331 177 352 7.50E-11 76.6 46514 cellular  
 organisms;Eukaryota;Opisthokonta;Metazoa;Eumetazoa;Bilateria;Deuterostomi  
 a;Echinodermata;Eleutherozoa;Asterozoa;Asteroidea;Valvatacea;Valvatida;As  
 terinidae;Patiria;Patiria miniata  
 UdeM00000037714 46514 75.1 UdeM00000037714 XP\_038046724.1 31.4 175  
 110 5 176 344 117 287 2.50E-10 75.1 46514 cellular  
 organisms;Eukaryota;Opisthokonta;Metazoa;Eumetazoa;Bilateria;Deuterostomi  
 a;Echinodermata;Eleutherozoa;Asterozoa;Asteroidea;Valvatacea;Valvatida;As  
 terinidae;Patiria;Patiria miniata  
 UdeM00000037715 6596 549.7 UdeM00000037715 XP\_045198944.1 46.7 644  
 288 12 4 619 14 630 5.00E-153 549.7 6596 cellular  
 organisms;Eukaryota;Opisthokonta;Metazoa;Eumetazoa;Bilateria;Protostomia;  
 Spiralia;Lophotrochozoa;Mollusca;Bivalvia;Autobranhia;Heteroconchia;Euhe  
 terodonta;Imparidentia;Venerida;Veneroidea;Veneridae;Mercenaria;Mercenari  
 a mercenaria

UdeM00000037716 116153 186 UdeM00000037716 XP\_019873496.1 60.4  
 144 57 0 5 148 625 768 3.80E-44 186 116153  
 cellular  
 organisms;Eukaryota;Opisthokonta;Metazoa;Eumetazoa;Bilateria;Protostomia;  
 Ecdysozoa;Panarthropoda;Arthropoda;Mandibulata;Pancrustacea;Hexapoda;Inse  
 cta;Dicondylia;Pterygota;Neoptera;Endopterygota;Coleoptera;Polyphaga;Cucu  
 jiformia;Cucujoidea;Nitidulidae;Nitidulinae;Aethina;Aethina tumida  
 UdeM00000037717 6565 1127.9 UdeM00000037717 XP\_022325520.1 62  
 981 343 7 30 993 23 990 0.00E+00 1127.9 6565  
 cellular  
 organisms;Eukaryota;Opisthokonta;Metazoa;Eumetazoa;Bilateria;Protostomia;  
 Spiralia;Lophotrochozoa;Mollusca;Bivalvia;Autobranchia;Pteriomorpha;Ostr  
 eida;Ostreoidea;Ostreidae;Crassostrea;Crassostrea virginica  
 UdeM00000037718 6565 1157.1 UdeM00000037718 XP\_022325520.1 62.8  
 983 351 6 30 1012 23 990 0.00E+00 1157.1 6565  
 cellular  
 organisms;Eukaryota;Opisthokonta;Metazoa;Eumetazoa;Bilateria;Protostomia;  
 Spiralia;Lophotrochozoa;Mollusca;Bivalvia;Autobranchia;Pteriomorpha;Ostr  
 eida;Ostreoidea;Ostreidae;Crassostrea;Crassostrea virginica  
 UdeM00000037719 6596 720.3 UdeM00000037719 XP\_045212932.1 75.9 468  
 112 1 38 505 26 492 1.70E-204 720.3 6596 cellular  
 organisms;Eukaryota;Opisthokonta;Metazoa;Eumetazoa;Bilateria;Protostomia;  
 Spiralia;Lophotrochozoa;Mollusca;Bivalvia;Autobranchia;Heteroconchia;Euhe  
 terodonta;Imparidentia;Venerida;Veneroidea;Veneridae;Mercenaria;Mercenari  
 a mercenaria  
 UdeM00000037720 29159 164.9 UdeM00000037720 XP\_011426275.2 50.7 146  
 72 0 8 153 11 156 1.40E-37 164.9 29159 cellular  
 organisms;Eukaryota;Opisthokonta;Metazoa;Eumetazoa;Bilateria;Protostomia;  
 Spiralia;Lophotrochozoa;Mollusca;Bivalvia;Autobranchia;Pteriomorpha;Ostr  
 eida;Ostreoidea;Ostreidae;Crassostrea;Crassostrea gigas  
 UdeM00000037721 29159 164.9 UdeM00000037721 XP\_011426275.2 50.7 146  
 72 0 8 153 11 156 1.40E-37 164.9 29159 cellular  
 organisms;Eukaryota;Opisthokonta;Metazoa;Eumetazoa;Bilateria;Protostomia;  
 Spiralia;Lophotrochozoa;Mollusca;Bivalvia;Autobranchia;Pteriomorpha;Ostr  
 eida;Ostreoidea;Ostreidae;Crassostrea;Crassostrea gigas  
 UdeM00000037722 6579 324.3 UdeM00000037722 XP\_033731291.1 67.8 245  
 78 1 1 244 7 251 1.30E-85 324.3 6579 cellular  
 organisms;Eukaryota;Opisthokonta;Metazoa;Eumetazoa;Bilateria;Protostomia;  
 Spiralia;Lophotrochozoa;Mollusca;Bivalvia;Autobranchia;Pteriomorpha;Pect  
 inida;Pectinoidea;Pectinidae;Pecten;Pecten maximus  
 UdeM00000037723 6596 197.2 UdeM00000037723 XP\_045188232.1 47.9 188  
 98 0 33 220 61 248 2.30E-47 197.2 6596 cellular  
 organisms;Eukaryota;Opisthokonta;Metazoa;Eumetazoa;Bilateria;Protostomia;  
 Spiralia;Lophotrochozoa;Mollusca;Bivalvia;Autobranchia;Heteroconchia;Euhe  
 terodonta;Imparidentia;Venerida;Veneroidea;Veneridae;Mercenaria;Mercenari  
 a mercenaria  
 UdeM00000037725 6573 210.7 UdeM00000037725 XP\_021357351.1 43.5 262  
 138 6 89 349 77 329 3.20E-51 210.7 6573 cellular  
 organisms;Eukaryota;Opisthokonta;Metazoa;Eumetazoa;Bilateria;Protostomia;  
 Spiralia;Lophotrochozoa;Mollusca;Bivalvia;Autobranchia;Pteriomorpha;Pect  
 inida;Pectinoidea;Pectinidae;Mizuhopecten;Mizuhopecten yessoensis  
 UdeM00000037726 6579 316.2 UdeM00000037726 XP\_033729894.1 55.4 289  
 114 4 4 290 10 285 4.30E-83 316.2 6579 cellular  
 organisms;Eukaryota;Opisthokonta;Metazoa;Eumetazoa;Bilateria;Protostomia;

Spiralia; Lophotrochozoa; Mollusca; Bivalvia; Autobranchia; Pteriomorpha; Pectinida; Pectinoidea; Pectinidae; Pecten; Pecten maximus  
UdeM00000037727 6579 647.9 UdeM00000037727 XP\_033762841.1 61.1 519  
196 4 6 519 9 526 1.10E-182 647.9 6579 cellular  
organisms; Eukaryota; Opisthokonta; Metazoa; Eumetazoa; Bilateria; Protostomia; Spiralia; Lophotrochozoa; Mollusca; Bivalvia; Autobranchia; Pteriomorpha; Pectinida; Pectinoidea; Pectinidae; Pecten; Pecten maximus  
UdeM00000037728 6579 624.8 UdeM00000037728 XP\_033762841.1 61.7 488  
182 3 1 483 39 526 9.30E-176 624.8 6579 cellular  
organisms; Eukaryota; Opisthokonta; Metazoa; Eumetazoa; Bilateria; Protostomia; Spiralia; Lophotrochozoa; Mollusca; Bivalvia; Autobranchia; Pteriomorpha; Pectinida; Pectinoidea; Pectinidae; Pecten; Pecten maximus  
UdeM00000037729 6565 92 UdeM00000037729 XP\_022325946.1 33.6 211  
119 5 603 807 905 1100 3.70E-15 92 6565 cellular  
organisms; Eukaryota; Opisthokonta; Metazoa; Eumetazoa; Bilateria; Protostomia; Spiralia; Lophotrochozoa; Mollusca; Bivalvia; Autobranchia; Pteriomorpha; Ostracoda; Ostreidae; Crassostrea; Crassostrea virginica  
UdeM00000037731 6596 516.5 UdeM00000037731 XP\_045202533.1 80.8 317  
61 0 1 317 1 317 2.60E-143 516.5 6596 cellular  
organisms; Eukaryota; Opisthokonta; Metazoa; Eumetazoa; Bilateria; Protostomia; Spiralia; Lophotrochozoa; Mollusca; Bivalvia; Autobranchia; Heteroconchia; Euheterodonta; Imparidentia; Venerida; Veneroidea; Veneridae; Mercenaria; Mercenaria mercenaria  
UdeM00000037732 6596 548.9 UdeM00000037732 XP\_045202553.1 72.3 354  
84 2 2 355 340 679 4.80E-153 548.9 6596 cellular  
organisms; Eukaryota; Opisthokonta; Metazoa; Eumetazoa; Bilateria; Protostomia; Spiralia; Lophotrochozoa; Mollusca; Bivalvia; Autobranchia; Heteroconchia; Euheterodonta; Imparidentia; Venerida; Veneroidea; Veneridae; Mercenaria; Mercenaria mercenaria  
UdeM00000037734 1735272 97.1 UdeM00000037734 XP\_041369472.1 32.7  
202 116 4 1 191 712 904 2.80E-17 97.1 1735272  
cellular  
organisms; Eukaryota; Opisthokonta; Metazoa; Eumetazoa; Bilateria; Protostomia; Spiralia; Lophotrochozoa; Mollusca; Gastropoda; Neomphalina; Neomphaloidea; Peltopspiridae; Gigantopelta; Gigantopelta aegis  
UdeM00000037733 1735272 496.5 UdeM00000037733 XP\_041369472.1 39.3  
731 412 8 31 747 192 904 6.00E-137 496.5 1735272  
cellular  
organisms; Eukaryota; Opisthokonta; Metazoa; Eumetazoa; Bilateria; Protostomia; Spiralia; Lophotrochozoa; Mollusca; Gastropoda; Neomphalina; Neomphaloidea; Peltopspiridae; Gigantopelta; Gigantopelta aegis  
UdeM00000037735 6573 183.7 UdeM00000037735 XP\_021355307.1 48.1 185  
96 0 1 185 1 185 2.20E-43 183.7 6573 cellular  
organisms; Eukaryota; Opisthokonta; Metazoa; Eumetazoa; Bilateria; Protostomia; Spiralia; Lophotrochozoa; Mollusca; Bivalvia; Autobranchia; Pteriomorpha; Pectinida; Pectinoidea; Pectinidae; Mizuhopecten; Mizuhopecten yessoensis  
UdeM00000037736 1529436 195.7 UdeM00000037736 XP\_033117385.1 32  
447 258 13 17 445 126 544 1.40E-46 195.7 1529436  
cellular  
organisms; Eukaryota; Opisthokonta; Metazoa; Eumetazoa; Bilateria; Deuterostomia; Echinodermata; Pelmatozoa; Crinoidea; Articulata; Comatulida; Comatulidae; Comatulinae; Anneissia; Anneissia japonica  
UdeM00000037737 70779 79.7 UdeM00000037737 XP\_015777172.1 38 92  
57 0 12 103 46 137 2.60E-12 79.7 70779 cellular

organisms;Eukaryota;Opisthokonta;Metazoa;Eumetazoa;Cnidaria;Anthozoa;Hexa  
corallia;Scleractinia;Astrocoeniina;Acroporidae;Acropora;Acropora  
digitifera

|                 |      |        |    |                 |                |      |      |          |        |      |
|-----------------|------|--------|----|-----------------|----------------|------|------|----------|--------|------|
| UdeM00000037738 | 6565 | 1838.5 |    | UdeM00000037738 | XP_022322197.1 | 61.8 |      |          |        |      |
|                 | 1587 | 466    | 10 | 40              | 1571           | 13   | 1513 | 0.00E+00 | 1838.5 | 6565 |

cellular

organisms;Eukaryota;Opisthokonta;Metazoa;Eumetazoa;Bilateria;Protostomia;  
Spiralia;Lophotrochozoa;Mollusca;Bivalvia;Autobranchia;Pteriomorpha;Ostr  
eida;Ostreoidea;Ostreidae;Crassostrea;Crassostrea virginica

|                 |      |        |   |                 |                |      |      |          |        |      |
|-----------------|------|--------|---|-----------------|----------------|------|------|----------|--------|------|
| UdeM00000037739 | 6565 | 1936.4 |   | UdeM00000037739 | XP_022322197.1 | 63.8 |      |          |        |      |
|                 | 1587 | 489    | 9 | 40              | 1626           | 13   | 1513 | 0.00E+00 | 1936.4 | 6565 |

cellular

organisms;Eukaryota;Opisthokonta;Metazoa;Eumetazoa;Bilateria;Protostomia;  
Spiralia;Lophotrochozoa;Mollusca;Bivalvia;Autobranchia;Pteriomorpha;Ostr  
eida;Ostreoidea;Ostreidae;Crassostrea;Crassostrea virginica

|                 |      |        |    |                 |                |      |      |          |        |      |
|-----------------|------|--------|----|-----------------|----------------|------|------|----------|--------|------|
| UdeM00000037740 | 6565 | 1928.3 |    | UdeM00000037740 | XP_022322197.1 | 63.6 |      |          |        |      |
|                 | 1587 | 489    | 10 | 40              | 1624           | 13   | 1513 | 0.00E+00 | 1928.3 | 6565 |

cellular

organisms;Eukaryota;Opisthokonta;Metazoa;Eumetazoa;Bilateria;Protostomia;  
Spiralia;Lophotrochozoa;Mollusca;Bivalvia;Autobranchia;Pteriomorpha;Ostr  
eida;Ostreoidea;Ostreidae;Crassostrea;Crassostrea virginica

|                 |      |       |   |                 |                |      |          |       |      |          |
|-----------------|------|-------|---|-----------------|----------------|------|----------|-------|------|----------|
| UdeM00000037741 | 6596 | 107.1 |   | UdeM00000037741 | XP_045203537.1 | 32.9 | 161      |       |      |          |
|                 | 108  | 0     | 1 | 161             | 1              | 161  | 5.40E-20 | 107.1 | 6596 | cellular |

organisms;Eukaryota;Opisthokonta;Metazoa;Eumetazoa;Bilateria;Protostomia;  
Spiralia;Lophotrochozoa;Mollusca;Bivalvia;Autobranchia;Heteroconchia;Euhe  
terodonta;Imparidentia;Venerida;Veneroidea;Veneridae;Mercenaria;Mercenari  
a mercenaria

|                 |         |     |   |       |                 |                |     |          |       |         |
|-----------------|---------|-----|---|-------|-----------------|----------------|-----|----------|-------|---------|
| UdeM00000037742 | 1735272 |     |   | 152.1 | UdeM00000037742 | XP_041367923.1 | 36  |          |       |         |
|                 | 242     | 114 | 6 | 5     | 212             | 123            | 357 | 7.80E-34 | 152.1 | 1735272 |

cellular

organisms;Eukaryota;Opisthokonta;Metazoa;Eumetazoa;Bilateria;Protostomia;  
Spiralia;Lophotrochozoa;Mollusca;Gastropoda;Neomphalina;Neomphaloidea;Pel  
tospiridae;Gigantopelta;Gigantopelta aegis

|                 |        |     |   |       |                 |                |      |           |       |        |
|-----------------|--------|-----|---|-------|-----------------|----------------|------|-----------|-------|--------|
| UdeM00000037743 | 400727 |     |   | 613.2 | UdeM00000037743 | XP_025114034.1 | 62.7 |           |       |        |
|                 | 456    | 166 | 2 | 28    | 480             | 52             | 506  | 2.80E-172 | 613.2 | 400727 |

cellular

organisms;Eukaryota;Opisthokonta;Metazoa;Eumetazoa;Bilateria;Protostomia;  
Spiralia;Lophotrochozoa;Mollusca;Gastropoda;Caenogastropoda;Architaeniogl  
ossa;Ampullarioidea;Ampullariidae;Pomacea;Pomacea canaliculata

|                 |      |       |   |                 |                |      |          |       |      |          |
|-----------------|------|-------|---|-----------------|----------------|------|----------|-------|------|----------|
| UdeM00000037744 | 6596 | 316.6 |   | UdeM00000037744 | XP_045201815.1 | 32.7 | 732      |       |      |          |
|                 | 416  | 21    | 1 | 686             | 4              | 704  | 8.70E-83 | 316.6 | 6596 | cellular |

organisms;Eukaryota;Opisthokonta;Metazoa;Eumetazoa;Bilateria;Protostomia;  
Spiralia;Lophotrochozoa;Mollusca;Bivalvia;Autobranchia;Heteroconchia;Euhe  
terodonta;Imparidentia;Venerida;Veneroidea;Veneridae;Mercenaria;Mercenari  
a mercenaria

|                 |      |    |    |                 |                |      |          |    |      |          |
|-----------------|------|----|----|-----------------|----------------|------|----------|----|------|----------|
| UdeM00000037745 | 6596 | 87 |    | UdeM00000037745 | XP_045202210.1 | 32.2 | 214      |    |      |          |
|                 | 130  | 5  | 82 | 285             | 33             | 241  | 4.20E-14 | 87 | 6596 | cellular |

organisms;Eukaryota;Opisthokonta;Metazoa;Eumetazoa;Bilateria;Protostomia;  
Spiralia;Lophotrochozoa;Mollusca;Bivalvia;Autobranchia;Heteroconchia;Euhe  
terodonta;Imparidentia;Venerida;Veneroidea;Veneridae;Mercenaria;Mercenari  
a mercenaria

|                 |      |       |     |                 |                |      |           |       |      |          |
|-----------------|------|-------|-----|-----------------|----------------|------|-----------|-------|------|----------|
| UdeM00000037746 | 6596 | 406.8 |     | UdeM00000037746 | XP_045177776.1 | 34.8 | 840       |       |      |          |
|                 | 487  | 18    | 296 | 1122            | 394            | 1185 | 1.00E-109 | 406.8 | 6596 | cellular |

organisms;Eukaryota;Opisthokonta;Metazoa;Eumetazoa;Bilateria;Protostomia;

Spiralia;Lophotrochozoa;Mollusca;Bivalvia;Autobranchia;Heteroconchia;Euherodonta;Imparidentia;Venerida;Veneroidea;Veneridae;Mercenaria;Mercenaria mercenaria

UdeM00000037747 6596 489.6 UdeM00000037747 XP\_045177776.1 37.6 744  
428 8 296 1035 394 1105 1.40E-134 489.6 6596 cellular  
organisms;Eukaryota;Opisthokonta;Metazoa;Eumetazoa;Bilateria;Protostomia;Spiralia;Lophotrochozoa;Mollusca;Bivalvia;Autobranchia;Heteroconchia;Euherodonta;Imparidentia;Venerida;Veneroidea;Veneridae;Mercenaria;Mercenaria mercenaria

UdeM00000037747 6596 62 UdeM00000037747 XP\_045177776.1 38.8 80  
49 0 1225 1304 1106 1185 7.00E-06 62 6596 cellular  
organisms;Eukaryota;Opisthokonta;Metazoa;Eumetazoa;Bilateria;Protostomia;Spiralia;Lophotrochozoa;Mollusca;Bivalvia;Autobranchia;Heteroconchia;Euherodonta;Imparidentia;Venerida;Veneroidea;Veneridae;Mercenaria;Mercenaria mercenaria

UdeM00000037748 6596 101.3 UdeM00000037748 XP\_045175285.1 52.6 97  
44 2 79 174 650 745 2.10E-18 101.3 6596 cellular  
organisms;Eukaryota;Opisthokonta;Metazoa;Eumetazoa;Bilateria;Protostomia;Spiralia;Lophotrochozoa;Mollusca;Bivalvia;Autobranchia;Heteroconchia;Euherodonta;Imparidentia;Venerida;Veneroidea;Veneridae;Mercenaria;Mercenaria mercenaria

UdeM00000037749 6596 308.5 UdeM00000037749 XP\_045207279.1 80.4 184  
36 0 1 184 120 303 5.60E-81 308.5 6596 cellular  
organisms;Eukaryota;Opisthokonta;Metazoa;Eumetazoa;Bilateria;Protostomia;Spiralia;Lophotrochozoa;Mollusca;Bivalvia;Autobranchia;Heteroconchia;Euherodonta;Imparidentia;Venerida;Veneroidea;Veneridae;Mercenaria;Mercenaria mercenaria

UdeM00000037750 6579 194.1 UdeM00000037750 XP\_033730557.1 85.3 102  
15 0 32 133 332 433 1.10E-46 194.1 6579 cellular  
organisms;Eukaryota;Opisthokonta;Metazoa;Eumetazoa;Bilateria;Protostomia;Spiralia;Lophotrochozoa;Mollusca;Bivalvia;Autobranchia;Pteriomorpha;Pectinida;Pectinoidea;Pectinidae;Pecten;Pecten maximus

UdeM00000040942 6596 70.9 UdeM00000040942 XP\_045209908.1 30.4 257  
151 6 6 259 291 522 3.40E-09 70.9 6596 cellular  
organisms;Eukaryota;Opisthokonta;Metazoa;Eumetazoa;Bilateria;Protostomia;Spiralia;Lophotrochozoa;Mollusca;Bivalvia;Autobranchia;Heteroconchia;Euherodonta;Imparidentia;Venerida;Veneroidea;Veneridae;Mercenaria;Mercenaria mercenaria

UdeM00000040943 6596 86.3 UdeM00000040943 XP\_045209908.1 36.1 191  
84 9 1 164 11 190 4.10E-14 86.3 6596 cellular  
organisms;Eukaryota;Opisthokonta;Metazoa;Eumetazoa;Bilateria;Protostomia;Spiralia;Lophotrochozoa;Mollusca;Bivalvia;Autobranchia;Heteroconchia;Euherodonta;Imparidentia;Venerida;Veneroidea;Veneridae;Mercenaria;Mercenaria mercenaria

UdeM00000040945 7574 76.3 UdeM00000040945 XP\_013388751.1 50.5 99  
42 2 3 98 2 96 3.00E-11 76.3 7574 cellular  
organisms;Eukaryota;Opisthokonta;Metazoa;Eumetazoa;Bilateria;Protostomia;Spiralia;Lophotrochozoa;Brachiopoda;Linguliformea;Lingulata;Lingulida;Linguloidea;Lingulidae;Lingula;Lingula anatina

UdeM00000040946 6500 87.8 UdeM00000040946 XP\_005107661.1 31.2 170  
104 4 1 170 1 157 1.50E-14 87.8 6500 cellular  
organisms;Eukaryota;Opisthokonta;Metazoa;Eumetazoa;Bilateria;Protostomia;Spiralia;Lophotrochozoa;Mollusca;Gastropoda;Heterobranchia;Euthyneura;Tectipleura;Aplysiida;Aplysioidea;Aplysiidae;Aplysia;Aplysia californica

UdeM00000040947 1735272 317 UdeM00000040947 XP\_041370966.1 32.4  
 667 403 16 67 709 11 653 6.10E-83 317 1735272  
 cellular  
 organisms;Eukaryota;Opisthokonta;Metazoa;Eumetazoa;Bilateria;Protostomia;  
 Spiralia;Lophotrochozoa;Mollusca;Gastropoda;Neomphalina;Neomphaloidea;Pel  
 tospiridae;Gigantopelta;Gigantopelta aegis  
 UdeM00000040948 48498 186.8 UdeM00000040948 XP\_020632024.1 38.4 242  
 112 5 2 242 3 208 3.20E-44 186.8 48498 cellular  
 organisms;Eukaryota;Opisthokonta;Metazoa;Eumetazoa;Cnidaria;Anthozoa;Hexa  
 corallia;Scleractinia;Faviina;Merulinidae;Orbicella;Orbicella faveolata  
 UdeM00000040949 6596 171.4 UdeM00000040949 XP\_045166630.1 40 220  
 94 7 1 202 1 200 1.30E-39 171.4 6596 cellular  
 organisms;Eukaryota;Opisthokonta;Metazoa;Eumetazoa;Bilateria;Protostomia;  
 Spiralia;Lophotrochozoa;Mollusca;Bivalvia;Autobranchia;Heteroconchia;Euhe  
 terodonta;Imparidentia;Venerida;Veneroidea;Veneridae;Mercenaria;Mercenari  
 a mercenaria  
 UdeM00000040950 6579 416 UdeM00000040950 XP\_033758692.1 72.7 264  
 69 2 1 261 1 264 3.60E-113 416 6579 cellular  
 organisms;Eukaryota;Opisthokonta;Metazoa;Eumetazoa;Bilateria;Protostomia;  
 Spiralia;Lophotrochozoa;Mollusca;Bivalvia;Autobranchia;Pteriormorphia;Pect  
 inida;Pectinoidea;Pectinidae;Pecten;Pecten maximus  
 UdeM00000040957 6579 201.8 UdeM00000040957 XP\_033728274.1 40.9 301  
 137 7 1 283 1 278 1.40E-48 201.8 6579 cellular  
 organisms;Eukaryota;Opisthokonta;Metazoa;Eumetazoa;Bilateria;Protostomia;  
 Spiralia;Lophotrochozoa;Mollusca;Bivalvia;Autobranchia;Pteriormorphia;Pect  
 inida;Pectinoidea;Pectinidae;Pecten;Pecten maximus  
 UdeM00000040958 6579 170.2 UdeM00000040958 XP\_033756770.1 73 111  
 30 0 9 119 2 112 1.50E-39 170.2 6579 cellular  
 organisms;Eukaryota;Opisthokonta;Metazoa;Eumetazoa;Bilateria;Protostomia;  
 Spiralia;Lophotrochozoa;Mollusca;Bivalvia;Autobranchia;Pteriormorphia;Pect  
 inida;Pectinoidea;Pectinidae;Pecten;Pecten maximus  
 UdeM00000040959 6579 329.3 UdeM00000040959 XP\_033756770.1 64.4 253  
 88 2 1 252 130 381 4.20E-87 329.3 6579 cellular  
 organisms;Eukaryota;Opisthokonta;Metazoa;Eumetazoa;Bilateria;Protostomia;  
 Spiralia;Lophotrochozoa;Mollusca;Bivalvia;Autobranchia;Pteriormorphia;Pect  
 inida;Pectinoidea;Pectinidae;Pecten;Pecten maximus  
 UdeM00000044194 6579 141.7 UdeM00000044194 XP\_033758019.1 57.6 132  
 52 2 11 141 710 838 9.00E-31 141.7 6579 cellular  
 organisms;Eukaryota;Opisthokonta;Metazoa;Eumetazoa;Bilateria;Protostomia;  
 Spiralia;Lophotrochozoa;Mollusca;Bivalvia;Autobranchia;Pteriormorphia;Pect  
 inida;Pectinoidea;Pectinidae;Pecten;Pecten maximus  
 UdeM00000044195 6573 320.5 UdeM00000044195 XP\_021354829.1 59.4 266  
 74 4 1 236 178 439 3.80E-84 320.5 6573 cellular  
 organisms;Eukaryota;Opisthokonta;Metazoa;Eumetazoa;Bilateria;Protostomia;  
 Spiralia;Lophotrochozoa;Mollusca;Bivalvia;Autobranchia;Pteriormorphia;Pect  
 inida;Pectinoidea;Pectinidae;Mizuhopecten;Mizuhopecten yessoensis  
 UdeM00000044196 6573 320.5 UdeM00000044196 XP\_021354829.1 59.4 266  
 74 4 1 236 178 439 3.50E-84 320.5 6573 cellular  
 organisms;Eukaryota;Opisthokonta;Metazoa;Eumetazoa;Bilateria;Protostomia;  
 Spiralia;Lophotrochozoa;Mollusca;Bivalvia;Autobranchia;Pteriormorphia;Pect  
 inida;Pectinoidea;Pectinidae;Mizuhopecten;Mizuhopecten yessoensis  
 UdeM00000044197 6565 181 UdeM00000044197 XP\_022318089.1 74.2 120  
 30 1 1 119 1 120 9.50E-43 181 6565 cellular  
 organisms;Eukaryota;Opisthokonta;Metazoa;Eumetazoa;Bilateria;Protostomia;

Spiralia;Lophotrochozoa;Mollusca;Bivalvia;Autobranchia;Pteriormorphia;Ostr  
eida;Ostreoidea;Ostreidae;Crassostrea;Crassostrea virginica  
UdeM00000044198 7741 474.9 UdeM00000044198 XP\_019618826.1 50.1 515  
173 4 20 450 5 519 1.70E-130 474.9 7741 cellular  
organisms;Eukaryota;Opisthokonta;Metazoa;Eumetazoa;Bilateria;Deuterostomi  
a;Chordata;Cephalochordata;Leptocardii;Amphioxiformes;Branchiostomidae;Br  
anchiostoma;Branchiostoma belcheri  
UdeM00000044199 1735272 677.2 UdeM00000044199 XP\_041363084.1 83.4  
391 64 1 5 394 17 407 1.30E-191 677.2 1735272  
cellular  
organisms;Eukaryota;Opisthokonta;Metazoa;Eumetazoa;Bilateria;Protostomia;  
Spiralia;Lophotrochozoa;Mollusca;Gastropoda;Neomphalina;Neomphaloidea;Pel  
tospiridae;Gigantopelta;Gigantopelta aegis  
UdeM00000044200 1735272 535.4 UdeM00000044200 XP\_041363084.1 69.1  
391 59 2 5 333 17 407 5.10E-149 535.4 1735272  
cellular  
organisms;Eukaryota;Opisthokonta;Metazoa;Eumetazoa;Bilateria;Protostomia;  
Spiralia;Lophotrochozoa;Mollusca;Gastropoda;Neomphalina;Neomphaloidea;Pel  
tospiridae;Gigantopelta;Gigantopelta aegis  
UdeM00000044214 1735272 113.6 UdeM00000044214 XP\_041374221.1 37.8  
193 102 3 16 208 18 192 3.10E-22 113.6 1735272  
cellular  
organisms;Eukaryota;Opisthokonta;Metazoa;Eumetazoa;Bilateria;Protostomia;  
Spiralia;Lophotrochozoa;Mollusca;Gastropoda;Neomphalina;Neomphaloidea;Pel  
tospiridae;Gigantopelta;Gigantopelta aegis  
UdeM00000044215 6596 107.1 UdeM00000044215 XP\_045209482.1 47.4 116  
61 0 8 123 14 129 2.80E-20 107.1 6596 cellular  
organisms;Eukaryota;Opisthokonta;Metazoa;Eumetazoa;Bilateria;Protostomia;  
Spiralia;Lophotrochozoa;Mollusca;Bivalvia;Autobranchia;Heteroconchia;Euhe  
terodonta;Imparidentia;Venerida;Veneroidea;Veneridae;Mercenaria;Mercenari  
a mercenaria  
UdeM00000044216 1735272 125.2 UdeM00000044216 XP\_041374221.1 35.9  
223 125 2 16 238 18 222 2.00E-25 125.2 1735272  
cellular  
organisms;Eukaryota;Opisthokonta;Metazoa;Eumetazoa;Bilateria;Protostomia;  
Spiralia;Lophotrochozoa;Mollusca;Gastropoda;Neomphalina;Neomphaloidea;Pel  
tospiridae;Gigantopelta;Gigantopelta aegis  
UdeM00000044217 6596 103.6 UdeM00000044217 XP\_045209482.1 39.4 170  
91 2 6 175 5 162 3.20E-19 103.6 6596 cellular  
organisms;Eukaryota;Opisthokonta;Metazoa;Eumetazoa;Bilateria;Protostomia;  
Spiralia;Lophotrochozoa;Mollusca;Bivalvia;Autobranchia;Heteroconchia;Euhe  
terodonta;Imparidentia;Venerida;Veneroidea;Veneridae;Mercenaria;Mercenari  
a mercenaria  
UdeM00000044218 1735272 120.9 UdeM00000044218 XP\_041374221.1 37.3  
193 103 2 16 208 18 192 1.90E-24 120.9 1735272  
cellular  
organisms;Eukaryota;Opisthokonta;Metazoa;Eumetazoa;Bilateria;Protostomia;  
Spiralia;Lophotrochozoa;Mollusca;Gastropoda;Neomphalina;Neomphaloidea;Pel  
tospiridae;Gigantopelta;Gigantopelta aegis  
UdeM00000044219 6596 288.1 UdeM00000044219 XP\_045195540.1 48.2 278  
141 2 4 279 45 321 1.20E-74 288.1 6596 cellular  
organisms;Eukaryota;Opisthokonta;Metazoa;Eumetazoa;Bilateria;Protostomia;  
Spiralia;Lophotrochozoa;Mollusca;Bivalvia;Autobranchia;Heteroconchia;Euhe

terodonta;Imparidentia;Venerida;Veneroidea;Veneridae;Mercenaria;Mercenari  
 a mercenaria  
 UdeM00000044220 6565 109.4 UdeM00000044220 XP\_022301673.1 31.6 206  
 137 2 33 238 6 207 6.50E-21 109.4 6565 cellular  
 organisms;Eukaryota;Opisthokonta;Metazoa;Eumetazoa;Bilateria;Protostomia;  
 Spiralia;Lophotrochozoa;Mollusca;Bivalvia;Autobranhia;Pteriomorphia;Ostr  
 eida;Ostreoidea;Ostreidae;Crassostrea;Crassostrea virginica  
 UdeM00000044221 6565 109.4 UdeM00000044221 XP\_022301673.1 31.6 206  
 137 2 35 240 6 207 6.50E-21 109.4 6565 cellular  
 organisms;Eukaryota;Opisthokonta;Metazoa;Eumetazoa;Bilateria;Protostomia;  
 Spiralia;Lophotrochozoa;Mollusca;Bivalvia;Autobranhia;Pteriomorphia;Ostr  
 eida;Ostreoidea;Ostreidae;Crassostrea;Crassostrea virginica  
 UdeM00000044222 6596 96.7 UdeM00000044222 XP\_045209482.1 46.2 117  
 58 2 3 114 1 117 2.10E-17 96.7 6596 cellular  
 organisms;Eukaryota;Opisthokonta;Metazoa;Eumetazoa;Bilateria;Protostomia;  
 Spiralia;Lophotrochozoa;Mollusca;Bivalvia;Autobranhia;Heteroconchia;Euhe  
 terodonta;Imparidentia;Venerida;Veneroidea;Veneridae;Mercenaria;Mercenari  
 a mercenaria  
 UdeM00000044223 6596 287 UdeM00000044223 XP\_045195540.1 48.4 277  
 140 2 5 279 46 321 2.70E-74 287 6596 cellular  
 organisms;Eukaryota;Opisthokonta;Metazoa;Eumetazoa;Bilateria;Protostomia;  
 Spiralia;Lophotrochozoa;Mollusca;Bivalvia;Autobranhia;Heteroconchia;Euhe  
 terodonta;Imparidentia;Venerida;Veneroidea;Veneridae;Mercenaria;Mercenari  
 a mercenaria  
 UdeM00000044224 1735272 111.7 UdeM00000044224 XP\_041374221.1 33.8  
 216 122 3 25 240 25 219 2.30E-21 111.7 1735272  
 cellular  
 organisms;Eukaryota;Opisthokonta;Metazoa;Eumetazoa;Bilateria;Protostomia;  
 Spiralia;Lophotrochozoa;Mollusca;Gastropoda;Neomphalina;Neomphaloidea;Pel  
 tospiridae;Gigantopelta;Gigantopelta aegis  
 UdeM00000044225 6596 291.2 UdeM00000044225 XP\_045195540.1 48.7 277  
 139 2 5 279 46 321 1.40E-75 291.2 6596 cellular  
 organisms;Eukaryota;Opisthokonta;Metazoa;Eumetazoa;Bilateria;Protostomia;  
 Spiralia;Lophotrochozoa;Mollusca;Bivalvia;Autobranhia;Heteroconchia;Euhe  
 terodonta;Imparidentia;Venerida;Veneroidea;Veneridae;Mercenaria;Mercenari  
 a mercenaria  
 UdeM00000044227 6596 69.7 UdeM00000044227 XP\_045196982.1 30.2 205  
 114 7 325 512 262 454 1.30E-08 69.7 6596 cellular  
 organisms;Eukaryota;Opisthokonta;Metazoa;Eumetazoa;Bilateria;Protostomia;  
 Spiralia;Lophotrochozoa;Mollusca;Bivalvia;Autobranhia;Heteroconchia;Euhe  
 terodonta;Imparidentia;Venerida;Veneroidea;Veneridae;Mercenaria;Mercenari  
 a mercenaria  
 UdeM00000044228 6596 628.6 UdeM00000044228 XP\_045196981.1 56.5 612  
 174 9 13 534 100 709 7.80E-177 628.6 6596 cellular  
 organisms;Eukaryota;Opisthokonta;Metazoa;Eumetazoa;Bilateria;Protostomia;  
 Spiralia;Lophotrochozoa;Mollusca;Bivalvia;Autobranhia;Heteroconchia;Euhe  
 terodonta;Imparidentia;Venerida;Veneroidea;Veneridae;Mercenaria;Mercenari  
 a mercenaria  
 UdeM00000006566 6596 70.5 UdeM00000006566 XP\_045183821.1 44 75  
 40 2 107 179 146 220 2.90E-09 70.5 6596 cellular  
 organisms;Eukaryota;Opisthokonta;Metazoa;Eumetazoa;Bilateria;Protostomia;  
 Spiralia;Lophotrochozoa;Mollusca;Bivalvia;Autobranhia;Heteroconchia;Euhe  
 terodonta;Imparidentia;Venerida;Veneroidea;Veneridae;Mercenaria;Mercenari  
 a mercenaria



UdeM00000006569 400727 272.3 UdeM00000006569 XP\_025081813.1 80.4  
163 32 0 18 180 335 497 4.70E-70 272.3 400727  
cellular

organisms;Eukaryota;Opisthokonta;Metazoa;Eumetazoa;Bilateria;Protostomia;  
Spiralia;Lophotrochozoa;Mollusca;Gastropoda;Caenogastropoda;Architaenioglossa;  
Ampullarioidea;Ampullariidae;Pomacea;Pomacea canaliculata

UdeM00000006570 37003 142.9 UdeM00000006570 XP\_017295549.1 64.4 118  
40 2 1 116 466 583 4.20E-31 142.9 37003 cellular

organisms;Eukaryota;Opisthokonta;Metazoa;Eumetazoa;Bilateria;Deuterostomia;  
Chordata;Craniata;Vertebrata;Gnathostomata;Teleostomi;Euteleostomi;Actinopterygii;  
Actinopteri;Neopterygii;Teleostei;Osteoglossocephalai;Clupeocephala;  
Euteleostei;Neoteleostei;Eurypterygia;Ctenosquamata;Acanthomorpha;  
Euacanthomorpha;Percomorphaceae;Ovalentaria;Atherinomorpha;Cypripinodontiformes;  
Aplocheiloidei;Rivulidae;Kryptolebias;Kryptolebias marmoratus

UdeM00000006571 6596 114.8 UdeM00000006571 XP\_045180427.1 39 177  
105 2 76 250 98 273 1.70E-22 114.8 6596 cellular

organisms;Eukaryota;Opisthokonta;Metazoa;Eumetazoa;Bilateria;Protostomia;  
Spiralia;Lophotrochozoa;Mollusca;Bivalvia;Autobranchia;Heteroconchia;Euheterodonta;  
Imparidentia;Venerida;Veneroidea;Veneridae;Mercenaria;Mercenaria mercenaria

UdeM00000006572 6526 72.4 UdeM00000006572 XP\_013065713.1 26.6 222  
120 7 40 254 1085 1270 1.50E-09 72.4 6526 cellular

organisms;Eukaryota;Opisthokonta;Metazoa;Eumetazoa;Bilateria;Protostomia;  
Spiralia;Lophotrochozoa;Mollusca;Gastropoda;Heterobranchia;Euthyneura;Panpulmonata;  
Hygrophila;Lymnaeidae;Planorbidae;Biomphalaria;Biomphalaria glabrata

UdeM00000006573 46731 83.2 UdeM00000006573 XP\_027054866.1 24.1 323  
211 10 83 374 2045 2364 1.10E-12 83.2 46731 cellular

organisms;Eukaryota;Opisthokonta;Metazoa;Eumetazoa;Cnidaria;Anthozoa;Hexacorallia;  
Scleractinia;Astrocoeniina;Pocilloporidae;Pocillopora;Pocillopora damicornis

UdeM00000006574 6573 70.9 UdeM00000006574 XP\_021371356.1 39.8 113  
57 5 56 161 3231 3339 1.80E-09 70.9 6573 cellular

organisms;Eukaryota;Opisthokonta;Metazoa;Eumetazoa;Bilateria;Protostomia;  
Spiralia;Lophotrochozoa;Mollusca;Bivalvia;Autobranchia;Pteriomorpha;Pectinida;  
Pectinoidea;Pectinidae;Mizuhopecten;Mizuhopecten yessoensis

UdeM00000006577 29159 124.8 UdeM00000006577 XP\_034301566.1 41.8 182  
88 4 46 214 5294 5470 2.00E-25 124.8 29159 cellular

organisms;Eukaryota;Opisthokonta;Metazoa;Eumetazoa;Bilateria;Protostomia;  
Spiralia;Lophotrochozoa;Mollusca;Bivalvia;Autobranchia;Pteriomorpha;Ostreida;  
Ostreidae;Crassostrea;Crassostrea gigas

UdeM00000006578 6596 69.3 UdeM00000006578 XP\_045183821.1 44 75  
40 2 107 179 146 220 6.50E-09 69.3 6596 cellular

organisms;Eukaryota;Opisthokonta;Metazoa;Eumetazoa;Bilateria;Protostomia;  
Spiralia;Lophotrochozoa;Mollusca;Bivalvia;Autobranchia;Heteroconchia;Euheterodonta;  
Imparidentia;Venerida;Veneroidea;Veneridae;Mercenaria;Mercenaria mercenaria

UdeM00000006579 6596 69.3 UdeM00000006579 XP\_045183821.1 44 75  
40 2 93 165 146 220 6.00E-09 69.3 6596 cellular

organisms;Eukaryota;Opisthokonta;Metazoa;Eumetazoa;Bilateria;Protostomia;  
Spiralia;Lophotrochozoa;Mollusca;Bivalvia;Autobranchia;Heteroconchia;Euheterodonta;  
Imparidentia;Venerida;Veneroidea;Veneridae;Mercenaria;Mercenaria mercenaria

UdeM00000006588 6565 102.1 UdeM00000006588 XP\_022303788.1 42.6 108  
 61 1 62 169 298 404 7.40E-19 102.1 6565 cellular  
 organisms;Eukaryota;Opisthokonta;Metazoa;Eumetazoa;Bilateria;Protostomia;  
 Spiralia;Lophotrochozoa;Mollusca;Bivalvia;Autobranchia;Pteriomorpha;Ostr  
 eida;Ostreoidea;Ostreidae;Crassostrea;Crassostrea virginica  
 UdeM00000006593 6565 108.2 UdeM00000006593 XP\_022303788.1 44.4 108  
 59 1 181 288 298 404 1.80E-20 108.2 6565 cellular  
 organisms;Eukaryota;Opisthokonta;Metazoa;Eumetazoa;Bilateria;Protostomia;  
 Spiralia;Lophotrochozoa;Mollusca;Bivalvia;Autobranchia;Pteriomorpha;Ostr  
 eida;Ostreoidea;Ostreidae;Crassostrea;Crassostrea virginica  
 UdeM00000006594 225164 557 UdeM00000006594 XP\_009051252.1 72.5  
 363 100 0 52 414 13 375 2.10E-155 557 225164  
 cellular  
 organisms;Eukaryota;Opisthokonta;Metazoa;Eumetazoa;Bilateria;Protostomia;  
 Spiralia;Lophotrochozoa;Mollusca;Gastropoda;Patellogastropoda;Lottioidea;  
 Lottiidae;Lottia;Lottia gigantea  
 UdeM00000006595 6579 346.7 UdeM00000006595 XP\_033756141.1 60.9 274  
 101 3 36 306 34 304 4.40E-92 346.7 6579 cellular  
 organisms;Eukaryota;Opisthokonta;Metazoa;Eumetazoa;Bilateria;Protostomia;  
 Spiralia;Lophotrochozoa;Mollusca;Bivalvia;Autobranchia;Pteriomorpha;Pect  
 inida;Pectinoidea;Pectinidae;Pecten;Pecten maximus  
 UdeM00000006596 6579 307.8 UdeM00000006596 XP\_033756141.1 53.7 285  
 126 3 30 311 28 309 2.20E-80 307.8 6579 cellular  
 organisms;Eukaryota;Opisthokonta;Metazoa;Eumetazoa;Bilateria;Protostomia;  
 Spiralia;Lophotrochozoa;Mollusca;Bivalvia;Autobranchia;Pteriomorpha;Pect  
 inida;Pectinoidea;Pectinidae;Pecten;Pecten maximus  
 UdeM00000006597 6579 440.3 UdeM00000006597 XP\_033725090.1 28.3 2159  
 1027 66 43 2030 70 1878 1.40E-119 440.3 6579 cellular  
 organisms;Eukaryota;Opisthokonta;Metazoa;Eumetazoa;Bilateria;Protostomia;  
 Spiralia;Lophotrochozoa;Mollusca;Bivalvia;Autobranchia;Pteriomorpha;Pect  
 inida;Pectinoidea;Pectinidae;Pecten;Pecten maximus  
 UdeM00000006598 29159 112.8 UdeM00000006598 XP\_034320172.1 64.1 103  
 28 1 2 95 15 117 2.50E-22 112.8 29159 cellular  
 organisms;Eukaryota;Opisthokonta;Metazoa;Eumetazoa;Bilateria;Protostomia;  
 Spiralia;Lophotrochozoa;Mollusca;Bivalvia;Autobranchia;Pteriomorpha;Ostr  
 eida;Ostreoidea;Ostreidae;Crassostrea;Crassostrea gigas  
 UdeM00000006599 6565 413.7 UdeM00000006599 XP\_022311964.1 63.5 408  
 132 3 2 393 14 420 2.60E-112 413.7 6565 cellular  
 organisms;Eukaryota;Opisthokonta;Metazoa;Eumetazoa;Bilateria;Protostomia;  
 Spiralia;Lophotrochozoa;Mollusca;Bivalvia;Autobranchia;Pteriomorpha;Ostr  
 eida;Ostreoidea;Ostreidae;Crassostrea;Crassostrea virginica  
 UdeM00000006600 6596 337 UdeM00000006600 XP\_045184087.1 70.4 267  
 75 2 16 282 149 411 2.30E-89 337 6596 cellular  
 organisms;Eukaryota;Opisthokonta;Metazoa;Eumetazoa;Bilateria;Protostomia;  
 Spiralia;Lophotrochozoa;Mollusca;Bivalvia;Autobranchia;Heteroconchia;Euhe  
 terodonta;Imparidentia;Venerida;Veneroidea;Veneridae;Mercenaria;Mercenari  
 a mercenaria  
 UdeM00000006602 1735272 470.7 UdeM00000006602 XP\_041356035.1 73.4  
 308 82 0 19 326 31 338 1.50E-129 470.7 1735272  
 cellular  
 organisms;Eukaryota;Opisthokonta;Metazoa;Eumetazoa;Bilateria;Protostomia;  
 Spiralia;Lophotrochozoa;Mollusca;Gastropoda;Neomphalina;Neomphaloidea;Pel  
 tospiridae;Gigantopelta;Gigantopelta aegis

UdeM00000006603 6596 620.2 UdeM00000006603 XP\_045180917.1 33.2 1146  
 732 14 40 1165 21 1153 5.70E-174 620.2 6596 cellular  
 organisms;Eukaryota;Opisthokonta;Metazoa;Eumetazoa;Bilateria;Protostomia;  
 Spiralia;Lophotrochozoa;Mollusca;Bivalvia;Autobranchia;Heteroconchia;Euhe  
 terodonta;Imparidentia;Venerida;Veneroidea;Veneridae;Mercenaria;Mercenari  
 a mercenaria

UdeM00000006604 6596 1416 UdeM00000006604 XP\_045183478.1 51.4 1552  
 561 26 27 1412 39 1562 0.00E+00 1416 6596 cellular  
 organisms;Eukaryota;Opisthokonta;Metazoa;Eumetazoa;Bilateria;Protostomia;  
 Spiralia;Lophotrochozoa;Mollusca;Bivalvia;Autobranchia;Heteroconchia;Euhe  
 terodonta;Imparidentia;Venerida;Veneroidea;Veneridae;Mercenaria;Mercenari  
 a mercenaria

UdeM00000006605 6596 1463 UdeM00000006605 XP\_045183478.1 52.7 1565  
 598 30 27 1489 39 1562 0.00E+00 1463 6596 cellular  
 organisms;Eukaryota;Opisthokonta;Metazoa;Eumetazoa;Bilateria;Protostomia;  
 Spiralia;Lophotrochozoa;Mollusca;Bivalvia;Autobranchia;Heteroconchia;Euhe  
 terodonta;Imparidentia;Venerida;Veneroidea;Veneridae;Mercenaria;Mercenari  
 a mercenaria

UdeM00000006606 6565 251.1 UdeM00000006606 XP\_022297447.1 51 243  
 103 2 63 289 122 364 1.70E-63 251.1 6565 cellular  
 organisms;Eukaryota;Opisthokonta;Metazoa;Eumetazoa;Bilateria;Protostomia;  
 Spiralia;Lophotrochozoa;Mollusca;Bivalvia;Autobranchia;Pteriormorphia;Ostr  
 eida;Ostreoidea;Ostreidae;Crassostrea;Crassostrea virginica

UdeM00000006607 45264 124 UdeM00000006607 XP\_044166166.1 31.7 246  
 94 4 1 178 549 788 2.00E-25 124 45264 cellular  
 organisms;Eukaryota;Opisthokonta;Metazoa;Eumetazoa;Cnidaria;Anthozoa;Hexa  
 corallia;Scleractinia;Astrocoeniina;Acroporidae;Acropora;Acropora  
 millepora

UdeM00000006608 6565 94.4 UdeM00000006608 XP\_022308193.1 42.1 126  
 69 2 10 133 6 129 1.30E-16 94.4 6565 cellular  
 organisms;Eukaryota;Opisthokonta;Metazoa;Eumetazoa;Bilateria;Protostomia;  
 Spiralia;Lophotrochozoa;Mollusca;Bivalvia;Autobranchia;Pteriormorphia;Ostr  
 eida;Ostreoidea;Ostreidae;Crassostrea;Crassostrea virginica

UdeM00000006609 6565 342.4 UdeM00000006609 XP\_022308193.1 43.8 413  
 119 4 1 309 153 556 5.90E-91 342.4 6565 cellular  
 organisms;Eukaryota;Opisthokonta;Metazoa;Eumetazoa;Bilateria;Protostomia;  
 Spiralia;Lophotrochozoa;Mollusca;Bivalvia;Autobranchia;Pteriormorphia;Ostr  
 eida;Ostreoidea;Ostreidae;Crassostrea;Crassostrea virginica

UdeM00000006610 6596 328.6 UdeM00000006610 XP\_045192577.1 32 851  
 464 40 135 918 136 938 2.60E-86 328.6 6596 cellular  
 organisms;Eukaryota;Opisthokonta;Metazoa;Eumetazoa;Bilateria;Protostomia;  
 Spiralia;Lophotrochozoa;Mollusca;Bivalvia;Autobranchia;Heteroconchia;Euhe  
 terodonta;Imparidentia;Venerida;Veneroidea;Veneridae;Mercenaria;Mercenari  
 a mercenaria

UdeM00000006611 27405 66.2 UdeM00000006611 XP\_042878588.1 43.5 85  
 36 5 111 192 1811 1886 5.40E-08 66.2 27405 cellular  
 organisms;Eukaryota;Opisthokonta;Metazoa;Eumetazoa;Bilateria;Protostomia;  
 Ecdysozoa;Panarthropoda;Arthropoda;Mandibulata;Pancrustacea;Crustacea;Mul  
 ticrustacea;Malacostraca;Eumalacostraca;Eucarida;Decapoda;Dendrobranchiat  
 a;Penaeoidea;Penaeidae;Penaeus;Penaeus japonicus

UdeM00000006612 6596 112.5 UdeM00000006612 XP\_045192577.1 40.2 179  
 90 7 460 630 769 938 2.00E-21 112.5 6596 cellular  
 organisms;Eukaryota;Opisthokonta;Metazoa;Eumetazoa;Bilateria;Protostomia;  
 Spiralia;Lophotrochozoa;Mollusca;Bivalvia;Autobranchia;Heteroconchia;Euhe

terodonta;Imparidentia;Venerida;Veneroidea;Veneridae;Mercenaria;Mercenari  
 a mercenaria  
 UdeM00000006613 6596 160.6 UdeM00000006613 XP\_045192661.1 35.6 284  
 164 10 739 1011 555 830 1.00E-35 160.6 6596 cellular  
 organisms;Eukaryota;Opisthokonta;Metazoa;Eumetazoa;Bilateria;Protostomia;  
 Spiralia;Lophotrochozoa;Mollusca;Bivalvia;Autobranchia;Heteroconchia;Euhe  
 terodonta;Imparidentia;Venerida;Veneroidea;Veneridae;Mercenaria;Mercenari  
 a mercenaria  
 UdeM00000006614 6596 74.7 UdeM00000006614 XP\_045211613.1 28.8 170  
 115 3 540 708 1003 1167 5.50E-10 74.7 6596 cellular  
 organisms;Eukaryota;Opisthokonta;Metazoa;Eumetazoa;Bilateria;Protostomia;  
 Spiralia;Lophotrochozoa;Mollusca;Bivalvia;Autobranchia;Heteroconchia;Euhe  
 terodonta;Imparidentia;Venerida;Veneroidea;Veneridae;Mercenaria;Mercenari  
 a mercenaria  
 UdeM00000006617 6596 159.8 UdeM00000006617 XP\_045192661.1 32.6 356  
 193 17 775 1111 503 830 1.90E-35 159.8 6596 cellular  
 organisms;Eukaryota;Opisthokonta;Metazoa;Eumetazoa;Bilateria;Protostomia;  
 Spiralia;Lophotrochozoa;Mollusca;Bivalvia;Autobranchia;Heteroconchia;Euhe  
 terodonta;Imparidentia;Venerida;Veneroidea;Veneridae;Mercenaria;Mercenari  
 a mercenaria  
 UdeM00000006618 6596 73.9 UdeM00000006618 XP\_045211613.1 28.7 164  
 109 3 1181 1341 992 1150 1.70E-09 73.9 6596 cellular  
 organisms;Eukaryota;Opisthokonta;Metazoa;Eumetazoa;Bilateria;Protostomia;  
 Spiralia;Lophotrochozoa;Mollusca;Bivalvia;Autobranchia;Heteroconchia;Euhe  
 terodonta;Imparidentia;Venerida;Veneroidea;Veneridae;Mercenaria;Mercenari  
 a mercenaria  
 UdeM00000006619 6596 96.7 UdeM00000006619 XP\_045184781.1 43.4 106  
 51 1 259 364 1213 1309 6.90E-17 96.7 6596 cellular  
 organisms;Eukaryota;Opisthokonta;Metazoa;Eumetazoa;Bilateria;Protostomia;  
 Spiralia;Lophotrochozoa;Mollusca;Bivalvia;Autobranchia;Heteroconchia;Euhe  
 terodonta;Imparidentia;Venerida;Veneroidea;Veneridae;Mercenaria;Mercenari  
 a mercenaria  
 UdeM00000006620 6596 153.3 UdeM00000006620 XP\_045185209.1 26.2 442  
 249 18 19 397 10 437 6.50E-34 153.3 6596 cellular  
 organisms;Eukaryota;Opisthokonta;Metazoa;Eumetazoa;Bilateria;Protostomia;  
 Spiralia;Lophotrochozoa;Mollusca;Bivalvia;Autobranchia;Heteroconchia;Euhe  
 terodonta;Imparidentia;Venerida;Veneroidea;Veneridae;Mercenaria;Mercenari  
 a mercenaria  
 UdeM00000006621 6596 79.3 UdeM00000006621 XP\_045185209.1 26.5 245  
 139 9 5 218 203 437 6.70E-12 79.3 6596 cellular  
 organisms;Eukaryota;Opisthokonta;Metazoa;Eumetazoa;Bilateria;Protostomia;  
 Spiralia;Lophotrochozoa;Mollusca;Bivalvia;Autobranchia;Heteroconchia;Euhe  
 terodonta;Imparidentia;Venerida;Veneroidea;Veneridae;Mercenaria;Mercenari  
 a mercenaria  
 UdeM00000006622 6596 99 UdeM00000006622 XP\_045185209.1 32.8 180  
 101 5 105 269 257 431 1.00E-17 99 6596 cellular  
 organisms;Eukaryota;Opisthokonta;Metazoa;Eumetazoa;Bilateria;Protostomia;  
 Spiralia;Lophotrochozoa;Mollusca;Bivalvia;Autobranchia;Heteroconchia;Euhe  
 terodonta;Imparidentia;Venerida;Veneroidea;Veneridae;Mercenaria;Mercenari  
 a mercenaria  
 UdeM00000006623 6596 95.9 UdeM00000006623 XP\_045169361.1 26.4 261  
 163 11 6 245 4 256 9.30E-17 95.9 6596 cellular  
 organisms;Eukaryota;Opisthokonta;Metazoa;Eumetazoa;Bilateria;Protostomia;  
 Spiralia;Lophotrochozoa;Mollusca;Bivalvia;Autobranchia;Heteroconchia;Euhe

terodonta;Imparidentia;Venerida;Veneroidea;Veneridae;Mercenaria;Mercenari  
 a mercenaria  
 UdeM00000006624 9209 64.3 UdeM00000006624 XP\_009503568.1 28.9 135  
 92 2 11 142 1688 1821 1.50E-07 64.3 9209 cellular  
 organisms;Eukaryota;Opisthokonta;Metazoa;Eumetazoa;Bilateria;Deuterostomi  
 a;Chordata;Craniata;Vertebrata;Gnathostomata;Teleostomi;Euteleostomi;Sarc  
 opterygii;Dipnotetrapodomorpha;Tetrapoda;Amniota;Sauropsida;Sauria;Archel  
 osauria;Archosauria;Dinosauria;Saurischia;Theropoda;Coelurosauria;Aves;Ne  
 ognathae;Pelecaniformes;Phalacrocoracidae;Phalacrocorax;Phalacrocorax  
 carbo  
 UdeM00000006625 6596 99 UdeM00000006625 XP\_045185209.1 32.8 180  
 101 5 105 269 257 431 1.00E-17 99 6596 cellular  
 organisms;Eukaryota;Opisthokonta;Metazoa;Eumetazoa;Bilateria;Protostomia;  
 Spiralia;Lophotrochozoa;Mollusca;Bivalvia;Autobranchia;Heteroconchia;Euhe  
 terodonta;Imparidentia;Venerida;Veneroidea;Veneridae;Mercenaria;Mercenari  
 a mercenaria  
 UdeM00000006626 6596 151 UdeM00000006626 XP\_045185209.1 26.7 442  
 247 18 11 389 10 437 3.20E-33 151 6596 cellular  
 organisms;Eukaryota;Opisthokonta;Metazoa;Eumetazoa;Bilateria;Protostomia;  
 Spiralia;Lophotrochozoa;Mollusca;Bivalvia;Autobranchia;Heteroconchia;Euhe  
 terodonta;Imparidentia;Venerida;Veneroidea;Veneridae;Mercenaria;Mercenari  
 a mercenaria  
 UdeM00000006627 6596 95.1 UdeM00000006627 XP\_045184309.1 34.4 189  
 103 7 252 424 253 436 2.30E-16 95.1 6596 cellular  
 organisms;Eukaryota;Opisthokonta;Metazoa;Eumetazoa;Bilateria;Protostomia;  
 Spiralia;Lophotrochozoa;Mollusca;Bivalvia;Autobranchia;Heteroconchia;Euhe  
 terodonta;Imparidentia;Venerida;Veneroidea;Veneridae;Mercenaria;Mercenari  
 a mercenaria  
 UdeM00000006628 6596 73.6 UdeM00000006628 XP\_045184309.1 37.9 132  
 73 4 44 171 310 436 3.00E-10 73.6 6596 cellular  
 organisms;Eukaryota;Opisthokonta;Metazoa;Eumetazoa;Bilateria;Protostomia;  
 Spiralia;Lophotrochozoa;Mollusca;Bivalvia;Autobranchia;Heteroconchia;Euhe  
 terodonta;Imparidentia;Venerida;Veneroidea;Veneridae;Mercenaria;Mercenari  
 a mercenaria  
 UdeM00000006629 6579 705.7 UdeM00000006629 XP\_033728194.1 51.2 693  
 325 5 1 684 282 970 5.90E-200 705.7 6579 cellular  
 organisms;Eukaryota;Opisthokonta;Metazoa;Eumetazoa;Bilateria;Protostomia;  
 Spiralia;Lophotrochozoa;Mollusca;Bivalvia;Autobranchia;Pteriomorpha;Pect  
 inida;Pectinoidea;Pectinidae;Pecten;Pecten maximus  
 UdeM00000006630 7574 234.6 UdeM00000006630 XP\_013382110.1 43.7 279  
 118 4 1 252 37 303 1.40E-58 234.6 7574 cellular  
 organisms;Eukaryota;Opisthokonta;Metazoa;Eumetazoa;Bilateria;Protostomia;  
 Spiralia;Lophotrochozoa;Brachiopoda;Linguliformea;Lingulata;Lingulida;Lin  
 guloidea;Lingulidae;Lingula;Lingula anatina  
 UdeM00000006631 7574 172.9 UdeM00000006631 XP\_013384628.1 55.3 161  
 63 2 1 161 33 184 3.70E-40 172.9 7574 cellular  
 organisms;Eukaryota;Opisthokonta;Metazoa;Eumetazoa;Bilateria;Protostomia;  
 Spiralia;Lophotrochozoa;Brachiopoda;Linguliformea;Lingulata;Lingulida;Lin  
 guloidea;Lingulidae;Lingula;Lingula anatina  
 UdeM00000006632 6596 86.7 UdeM00000006632 XP\_045184309.1 34.9 166  
 89 5 10 161 276 436 3.20E-14 86.7 6596 cellular  
 organisms;Eukaryota;Opisthokonta;Metazoa;Eumetazoa;Bilateria;Protostomia;  
 Spiralia;Lophotrochozoa;Mollusca;Bivalvia;Autobranchia;Heteroconchia;Euhe

terodonta;Imparidentia;Venerida;Veneroidea;Veneridae;Mercenaria;Mercenari  
 a mercenaria  
 UdeM00000006633 6596 131 UdeM00000006633 XP\_045184309.1 31.3 329  
 182 16 25 332 131 436 3.00E-27 131 6596 cellular  
 organisms;Eukaryota;Opisthokonta;Metazoa;Eumetazoa;Bilateria;Protostomia;  
 Spiralia;Lophotrochozoa;Mollusca;Bivalvia;Autobranhia;Heteroconchia;Euhe  
 terodonta;Imparidentia;Venerida;Veneroidea;Veneridae;Mercenaria;Mercenari  
 a mercenaria  
 UdeM00000006636 400727 79.3 UdeM00000006636 XP\_025081995.1 39.5  
 114 60 3 10 118 6 115 6.50E-12 79.3 400727  
 cellular  
 organisms;Eukaryota;Opisthokonta;Metazoa;Eumetazoa;Bilateria;Protostomia;  
 Spiralia;Lophotrochozoa;Mollusca;Gastropoda;Caenogastropoda;Architaeniogl  
 ossa;Ampullarioidea;Ampullariidae;Pomacea;Pomacea canaliculata  
 UdeM00000006637 400727 75.1 UdeM00000006637 XP\_025081996.1 36.5  
 104 61 2 13 113 7 108 1.20E-10 75.1 400727  
 cellular  
 organisms;Eukaryota;Opisthokonta;Metazoa;Eumetazoa;Bilateria;Protostomia;  
 Spiralia;Lophotrochozoa;Mollusca;Gastropoda;Caenogastropoda;Architaeniogl  
 ossa;Ampullarioidea;Ampullariidae;Pomacea;Pomacea canaliculata  
 UdeM00000006638 400727 68.6 UdeM00000006638 XP\_025081995.1 33.3  
 105 65 2 1 102 7 109 1.10E-08 68.6 400727  
 cellular  
 organisms;Eukaryota;Opisthokonta;Metazoa;Eumetazoa;Bilateria;Protostomia;  
 Spiralia;Lophotrochozoa;Mollusca;Gastropoda;Caenogastropoda;Architaeniogl  
 ossa;Ampullarioidea;Ampullariidae;Pomacea;Pomacea canaliculata  
 UdeM00000006640 6596 824.3 UdeM00000006640 XP\_045183699.1 45.9 1138  
 514 23 10 1097 1 1086 1.80E-235 824.3 6596 cellular  
 organisms;Eukaryota;Opisthokonta;Metazoa;Eumetazoa;Bilateria;Protostomia;  
 Spiralia;Lophotrochozoa;Mollusca;Bivalvia;Autobranhia;Heteroconchia;Euhe  
 terodonta;Imparidentia;Venerida;Veneroidea;Veneridae;Mercenaria;Mercenari  
 a mercenaria  
 UdeM00000006642 6596 148.7 UdeM00000006642 XP\_045167150.1 26.8 529  
 316 11 113 576 249 771 2.40E-32 148.7 6596 cellular  
 organisms;Eukaryota;Opisthokonta;Metazoa;Eumetazoa;Bilateria;Protostomia;  
 Spiralia;Lophotrochozoa;Mollusca;Bivalvia;Autobranhia;Heteroconchia;Euhe  
 terodonta;Imparidentia;Venerida;Veneroidea;Veneridae;Mercenaria;Mercenari  
 a mercenaria  
 UdeM00000006644 6596 190.3 UdeM00000006644 XP\_045184309.1 30.7 424  
 248 16 27 417 27 437 5.10E-45 190.3 6596 cellular  
 organisms;Eukaryota;Opisthokonta;Metazoa;Eumetazoa;Bilateria;Protostomia;  
 Spiralia;Lophotrochozoa;Mollusca;Bivalvia;Autobranhia;Heteroconchia;Euhe  
 terodonta;Imparidentia;Venerida;Veneroidea;Veneridae;Mercenaria;Mercenari  
 a mercenaria  
 UdeM00000006645 6573 366.7 UdeM00000006645 XP\_021375729.1 48.6 366  
 164 5 4 352 276 634 3.40E-98 366.7 6573 cellular  
 organisms;Eukaryota;Opisthokonta;Metazoa;Eumetazoa;Bilateria;Protostomia;  
 Spiralia;Lophotrochozoa;Mollusca;Bivalvia;Autobranhia;Pteriomorphia;Pect  
 inida;Pectinoidea;Pectinidae;Mizuhopecten;Mizuhopecten yessoensis  
 UdeM00000006646 6579 201.4 UdeM00000006646 XP\_033731619.1 55.8 163  
 72 0 15 177 64 226 1.10E-48 201.4 6579 cellular  
 organisms;Eukaryota;Opisthokonta;Metazoa;Eumetazoa;Bilateria;Protostomia;  
 Spiralia;Lophotrochozoa;Mollusca;Bivalvia;Autobranhia;Pteriomorphia;Pect  
 inida;Pectinoidea;Pectinidae;Pecten;Pecten maximus

UdeM00000006647 6596 136.3 UdeM00000006647 XP\_045196183.1 43.8 176  
 88 4 3 174 13 181 4.30E-29 136.3 6596 cellular  
 organisms;Eukaryota;Opisthokonta;Metazoa;Eumetazoa;Bilateria;Protostomia;  
 Spiralia;Lophotrochozoa;Mollusca;Bivalvia;Autobranchia;Heteroconchia;Euhe  
 terodonta;Imparidentia;Venerida;Veneroidea;Veneridae;Mercenaria;Mercenari  
 a mercenaria

UdeM00000006648 6596 406.4 UdeM00000006648 XP\_045198465.1 36 652  
 384 16 1 641 181 810 6.90E-110 406.4 6596 cellular  
 organisms;Eukaryota;Opisthokonta;Metazoa;Eumetazoa;Bilateria;Protostomia;  
 Spiralia;Lophotrochozoa;Mollusca;Bivalvia;Autobranchia;Heteroconchia;Euhe  
 terodonta;Imparidentia;Venerida;Veneroidea;Veneridae;Mercenaria;Mercenari  
 a mercenaria

UdeM00000006649 6596 137.1 UdeM00000006649 XP\_045181024.1 37.5 224  
 133 3 4 220 858 1081 3.10E-29 137.1 6596 cellular  
 organisms;Eukaryota;Opisthokonta;Metazoa;Eumetazoa;Bilateria;Protostomia;  
 Spiralia;Lophotrochozoa;Mollusca;Bivalvia;Autobranchia;Heteroconchia;Euhe  
 terodonta;Imparidentia;Venerida;Veneroidea;Veneridae;Mercenaria;Mercenari  
 a mercenaria

UdeM00000006650 6596 75.9 UdeM00000006650 XP\_045196183.1 38.7 106  
 63 2 3 106 13 118 3.80E-11 75.9 6596 cellular  
 organisms;Eukaryota;Opisthokonta;Metazoa;Eumetazoa;Bilateria;Protostomia;  
 Spiralia;Lophotrochozoa;Mollusca;Bivalvia;Autobranchia;Heteroconchia;Euhe  
 terodonta;Imparidentia;Venerida;Veneroidea;Veneridae;Mercenaria;Mercenari  
 a mercenaria

UdeM00000006651 6596 222.2 UdeM00000006651 XP\_045198465.1 33.3 457  
 248 13 3 416 13 455 1.20E-54 222.2 6596 cellular  
 organisms;Eukaryota;Opisthokonta;Metazoa;Eumetazoa;Bilateria;Protostomia;  
 Spiralia;Lophotrochozoa;Mollusca;Bivalvia;Autobranchia;Heteroconchia;Euhe  
 terodonta;Imparidentia;Venerida;Veneroidea;Veneridae;Mercenaria;Mercenari  
 a mercenaria

UdeM00000006652 6596 344.7 UdeM00000006652 XP\_045198465.1 39.7 479  
 268 9 2 475 547 1009 1.90E-91 344.7 6596 cellular  
 organisms;Eukaryota;Opisthokonta;Metazoa;Eumetazoa;Bilateria;Protostomia;  
 Spiralia;Lophotrochozoa;Mollusca;Bivalvia;Autobranchia;Heteroconchia;Euhe  
 terodonta;Imparidentia;Venerida;Veneroidea;Veneridae;Mercenaria;Mercenari  
 a mercenaria

UdeM00000006654 6596 661.8 UdeM00000006654 XP\_045181024.1 35.8 1071  
 648 18 31 1077 29 1083 1.60E-186 661.8 6596 cellular  
 organisms;Eukaryota;Opisthokonta;Metazoa;Eumetazoa;Bilateria;Protostomia;  
 Spiralia;Lophotrochozoa;Mollusca;Bivalvia;Autobranchia;Heteroconchia;Euhe  
 terodonta;Imparidentia;Venerida;Veneroidea;Veneridae;Mercenaria;Mercenari  
 a mercenaria

UdeM00000006655 6596 665.6 UdeM00000006655 XP\_045181024.1 35.9 1071  
 651 17 31 1081 29 1083 1.10E-187 665.6 6596 cellular  
 organisms;Eukaryota;Opisthokonta;Metazoa;Eumetazoa;Bilateria;Protostomia;  
 Spiralia;Lophotrochozoa;Mollusca;Bivalvia;Autobranchia;Heteroconchia;Euhe  
 terodonta;Imparidentia;Venerida;Veneroidea;Veneridae;Mercenaria;Mercenari  
 a mercenaria

UdeM00000006656 46514 58.2 UdeM00000006656 XP\_038062873.1 49.2 59  
 27 1 23 81 51 106 5.90E-06 58.2 46514 cellular  
 organisms;Eukaryota;Opisthokonta;Metazoa;Eumetazoa;Bilateria;Deuterostomi  
 a;Echinodermata;Eleutherozoa;Asterozoa;Asteroidea;Valvatacea;Valvatida;As  
 terinidae;Patiria;Patiria miniata

UdeM00000006657 29159 394 UdeM00000006657 XP\_034303860.1 44.1 499  
 224 9 5 464 21 503 2.60E-106 394 29159 cellular  
 organisms;Eukaryota;Opisthokonta;Metazoa;Eumetazoa;Bilateria;Protostomia;  
 Spiralia;Lophotrochozoa;Mollusca;Bivalvia;Autobranhia;Pteriormorphia;Ostr  
 eida;Ostreoidea;Ostreidae;Crassostrea;Crassostrea gigas  
 UdeM00000006658 29159 98.6 UdeM00000006658 XP\_034317101.1 37.6 125  
 75 1 4 125 182 306 6.00E-18 98.6 29159 cellular  
 organisms;Eukaryota;Opisthokonta;Metazoa;Eumetazoa;Bilateria;Protostomia;  
 Spiralia;Lophotrochozoa;Mollusca;Bivalvia;Autobranhia;Pteriormorphia;Ostr  
 eida;Ostreoidea;Ostreidae;Crassostrea;Crassostrea gigas  
 UdeM00000006660 29159 119.8 UdeM00000006660 XP\_011456129.2 35.5 169  
 55 2 160 274 79 247 5.50E-24 119.8 29159 cellular  
 organisms;Eukaryota;Opisthokonta;Metazoa;Eumetazoa;Bilateria;Protostomia;  
 Spiralia;Lophotrochozoa;Mollusca;Bivalvia;Autobranhia;Pteriormorphia;Ostr  
 eida;Ostreoidea;Ostreidae;Crassostrea;Crassostrea gigas  
 UdeM00000006659 29159 119.8 UdeM00000006659 XP\_011456129.2 35.5 169  
 55 2 119 233 79 247 4.70E-24 119.8 29159 cellular  
 organisms;Eukaryota;Opisthokonta;Metazoa;Eumetazoa;Bilateria;Protostomia;  
 Spiralia;Lophotrochozoa;Mollusca;Bivalvia;Autobranhia;Pteriormorphia;Ostr  
 eida;Ostreoidea;Ostreidae;Crassostrea;Crassostrea gigas  
 UdeM00000006661 6596 657.1 UdeM00000006661 XP\_045198465.1 37.7 1023  
 578 27 2 1007 30 1010 3.80E-185 657.1 6596 cellular  
 organisms;Eukaryota;Opisthokonta;Metazoa;Eumetazoa;Bilateria;Protostomia;  
 Spiralia;Lophotrochozoa;Mollusca;Bivalvia;Autobranhia;Heteroconchia;Euhe  
 terodonta;Imparidentia;Venerida;Veneroidea;Veneridae;Mercenaria;Mercenari  
 a mercenaria  
 UdeM00000006662 6565 190.3 UdeM00000006662 XP\_022312414.1 47 215  
 109 4 4 217 190 400 2.70E-45 190.3 6565 cellular  
 organisms;Eukaryota;Opisthokonta;Metazoa;Eumetazoa;Bilateria;Protostomia;  
 Spiralia;Lophotrochozoa;Mollusca;Bivalvia;Autobranhia;Pteriormorphia;Ostr  
 eida;Ostreoidea;Ostreidae;Crassostrea;Crassostrea virginica  
 UdeM00000006664 6596 662.9 UdeM00000006664 XP\_045181024.1 35.8 1113  
 660 19 7 1095 2 1083 7.20E-187 662.9 6596 cellular  
 organisms;Eukaryota;Opisthokonta;Metazoa;Eumetazoa;Bilateria;Protostomia;  
 Spiralia;Lophotrochozoa;Mollusca;Bivalvia;Autobranhia;Heteroconchia;Euhe  
 terodonta;Imparidentia;Venerida;Veneroidea;Veneridae;Mercenaria;Mercenari  
 a mercenaria  
 UdeM00000006665 6596 647.5 UdeM00000006665 XP\_045181024.1 36.5 1038  
 621 18 4 1021 64 1083 2.90E-182 647.5 6596 cellular  
 organisms;Eukaryota;Opisthokonta;Metazoa;Eumetazoa;Bilateria;Protostomia;  
 Spiralia;Lophotrochozoa;Mollusca;Bivalvia;Autobranhia;Heteroconchia;Euhe  
 terodonta;Imparidentia;Venerida;Veneroidea;Veneridae;Mercenaria;Mercenari  
 a mercenaria  
 UdeM00000006666 6596 145.6 UdeM00000006666 XP\_045198465.1 42.5 181  
 96 3 5 182 14 189 6.30E-32 145.6 6596 cellular  
 organisms;Eukaryota;Opisthokonta;Metazoa;Eumetazoa;Bilateria;Protostomia;  
 Spiralia;Lophotrochozoa;Mollusca;Bivalvia;Autobranhia;Heteroconchia;Euhe  
 terodonta;Imparidentia;Venerida;Veneroidea;Veneridae;Mercenaria;Mercenari  
 a mercenaria  
 UdeM00000006667 6596 528.1 UdeM00000006667 XP\_045198465.1 36.3 854  
 493 22 1 838 181 999 2.30E-146 528.1 6596 cellular  
 organisms;Eukaryota;Opisthokonta;Metazoa;Eumetazoa;Bilateria;Protostomia;  
 Spiralia;Lophotrochozoa;Mollusca;Bivalvia;Autobranhia;Heteroconchia;Euhe



terodonta;Imparidentia;Venerida;Veneroidea;Veneridae;Mercenaria;Mercenari  
 a mercenaria  
 UdeM00000006668 6596 528.1 UdeM00000006668 XP\_045198465.1 36.3 854  
 493 22 1 838 181 999 2.30E-146 528.1 6596 cellular  
 organisms;Eukaryota;Opisthokonta;Metazoa;Eumetazoa;Bilateria;Protostomia;  
 Spiralia;Lophotrochozoa;Mollusca;Bivalvia;Autobranchia;Heteroconchia;Euhe  
 terodonta;Imparidentia;Venerida;Veneroidea;Veneridae;Mercenaria;Mercenari  
 a mercenaria  
 UdeM00000006669 46514 87.8 UdeM00000006669 XP\_038062873.1 53.3 90  
 41 1 1 90 20 108 7.80E-15 87.8 46514 cellular  
 organisms;Eukaryota;Opisthokonta;Metazoa;Eumetazoa;Bilateria;Deuterostomi  
 a;Echinodermata;Eleutherozoa;Asterozoa;Asteroidea;Valvatacea;Valvatida;As  
 terinidae;Patiria;Patiria miniata  
 UdeM00000006670 6596 661 UdeM00000006670 XP\_045198465.1 37.8 1029  
 581 27 14 1024 12 999 2.70E-186 661 6596 cellular  
 organisms;Eukaryota;Opisthokonta;Metazoa;Eumetazoa;Bilateria;Protostomia;  
 Spiralia;Lophotrochozoa;Mollusca;Bivalvia;Autobranchia;Heteroconchia;Euhe  
 terodonta;Imparidentia;Venerida;Veneroidea;Veneridae;Mercenaria;Mercenari  
 a mercenaria  
 UdeM00000006671 6596 661 UdeM00000006671 XP\_045198465.1 37.8 1029  
 581 27 14 1024 12 999 2.70E-186 661 6596 cellular  
 organisms;Eukaryota;Opisthokonta;Metazoa;Eumetazoa;Bilateria;Protostomia;  
 Spiralia;Lophotrochozoa;Mollusca;Bivalvia;Autobranchia;Heteroconchia;Euhe  
 terodonta;Imparidentia;Venerida;Veneroidea;Veneridae;Mercenaria;Mercenari  
 a mercenaria  
 UdeM00000006672 6596 543.9 UdeM00000006672 XP\_045198465.1 36.2 865  
 501 21 1 849 181 1010 4.00E-151 543.9 6596 cellular  
 organisms;Eukaryota;Opisthokonta;Metazoa;Eumetazoa;Bilateria;Protostomia;  
 Spiralia;Lophotrochozoa;Mollusca;Bivalvia;Autobranchia;Heteroconchia;Euhe  
 terodonta;Imparidentia;Venerida;Veneroidea;Veneridae;Mercenaria;Mercenari  
 a mercenaria  
 UdeM00000006673 6596 184.9 UdeM00000006673 XP\_045210680.1 41.5 224  
 122 3 61 277 28 249 1.50E-43 184.9 6596 cellular  
 organisms;Eukaryota;Opisthokonta;Metazoa;Eumetazoa;Bilateria;Protostomia;  
 Spiralia;Lophotrochozoa;Mollusca;Bivalvia;Autobranchia;Heteroconchia;Euhe  
 terodonta;Imparidentia;Venerida;Veneroidea;Veneridae;Mercenaria;Mercenari  
 a mercenaria  
 UdeM00000006674 6579 1346.6 UdeM00000006674 XP\_033725870.1 46.9  
 1430 730 16 3 1421 321 1732 0.00E+00 1346.6 6579  
 cellular  
 organisms;Eukaryota;Opisthokonta;Metazoa;Eumetazoa;Bilateria;Protostomia;  
 Spiralia;Lophotrochozoa;Mollusca;Bivalvia;Autobranchia;Pteriomorphia;Pect  
 inida;Pectinoidea;Pectinidae;Pecten;Pecten maximus  
 UdeM00000006675 6596 1468.8 UdeM00000006675 XP\_045210680.1 43.6  
 1737 910 28 33 1741 28 1723 0.00E+00 1468.8 6596  
 cellular  
 organisms;Eukaryota;Opisthokonta;Metazoa;Eumetazoa;Bilateria;Protostomia;  
 Spiralia;Lophotrochozoa;Mollusca;Bivalvia;Autobranchia;Heteroconchia;Euhe  
 terodonta;Imparidentia;Venerida;Veneroidea;Veneridae;Mercenaria;Mercenari  
 a mercenaria  
 UdeM00000006676 6596 263.5 UdeM00000006676 XP\_045216733.1 40.8 355  
 199 7 32 385 169 513 4.40E-67 263.5 6596 cellular  
 organisms;Eukaryota;Opisthokonta;Metazoa;Eumetazoa;Bilateria;Protostomia;  
 Spiralia;Lophotrochozoa;Mollusca;Bivalvia;Autobranchia;Heteroconchia;Euhe

terodonta;Imparidentia;Venerida;Veneroidea;Veneridae;Mercenaria;Mercenari  
 a mercenaria  
 UdeM00000006677 6596 270.4 UdeM00000006677 XP\_045216733.1 43.5 315  
 169 5 139 449 204 513 4.20E-69 270.4 6596 cellular  
 organisms;Eukaryota;Opisthokonta;Metazoa;Eumetazoa;Bilateria;Protostomia;  
 Spiralia;Lophotrochozoa;Mollusca;Bivalvia;Autobranchia;Heteroconchia;Euhe  
 terodonta;Imparidentia;Venerida;Veneroidea;Veneridae;Mercenaria;Mercenari  
 a mercenaria  
 UdeM00000006678 6596 258.8 UdeM00000006678 XP\_045216733.1 46 272  
 144 3 39 309 244 513 8.70E-66 258.8 6596 cellular  
 organisms;Eukaryota;Opisthokonta;Metazoa;Eumetazoa;Bilateria;Protostomia;  
 Spiralia;Lophotrochozoa;Mollusca;Bivalvia;Autobranchia;Heteroconchia;Euhe  
 terodonta;Imparidentia;Venerida;Veneroidea;Veneridae;Mercenaria;Mercenari  
 a mercenaria  
 UdeM00000006679 6596 477.6 UdeM00000006679 XP\_045173292.1 49.5 519  
 234 6 54 545 5 522 2.20E-131 477.6 6596 cellular  
 organisms;Eukaryota;Opisthokonta;Metazoa;Eumetazoa;Bilateria;Protostomia;  
 Spiralia;Lophotrochozoa;Mollusca;Bivalvia;Autobranchia;Heteroconchia;Euhe  
 terodonta;Imparidentia;Venerida;Veneroidea;Veneridae;Mercenaria;Mercenari  
 a mercenaria  
 UdeM00000006680 6596 475.7 UdeM00000006680 XP\_045173292.1 49.9 513  
 229 6 54 539 5 516 8.10E-131 475.7 6596 cellular  
 organisms;Eukaryota;Opisthokonta;Metazoa;Eumetazoa;Bilateria;Protostomia;  
 Spiralia;Lophotrochozoa;Mollusca;Bivalvia;Autobranchia;Heteroconchia;Euhe  
 terodonta;Imparidentia;Venerida;Veneroidea;Veneridae;Mercenaria;Mercenari  
 a mercenaria  
 UdeM00000006681 1735272 111.7 UdeM00000006681 XP\_041364761.1 45.1  
 113 62 0 95 207 35 147 1.40E-21 111.7 1735272  
 cellular  
 organisms;Eukaryota;Opisthokonta;Metazoa;Eumetazoa;Bilateria;Protostomia;  
 Spiralia;Lophotrochozoa;Mollusca;Gastropoda;Neomphalina;Neomphaloidea;Pel  
 tospiridae;Gigantopelta;Gigantopelta aegis  
 UdeM00000006682 400727 524.6 UdeM00000006682 XP\_025089507.1 43.5  
 648 328 6 14 625 28 673 1.70E-145 524.6 400727  
 cellular  
 organisms;Eukaryota;Opisthokonta;Metazoa;Eumetazoa;Bilateria;Protostomia;  
 Spiralia;Lophotrochozoa;Mollusca;Gastropoda;Caenogastropoda;Architaeniogl  
 ossa;Ampullarioidea;Ampullariidae;Pomacea;Pomacea canaliculata  
 UdeM00000006683 7574 81.3 UdeM00000006683 XP\_013388751.1 52.5 99  
 41 3 5 103 4 96 1.90E-12 81.3 7574 cellular  
 organisms;Eukaryota;Opisthokonta;Metazoa;Eumetazoa;Bilateria;Protostomia;  
 Spiralia;Lophotrochozoa;Brachiopoda;Linguliformea;Lingulata;Lingulida;Lin  
 guloidea;Lingulidae;Lingula;Lingula anatina  
 UdeM00000006684 7574 86.3 UdeM00000006684 XP\_013388751.1 54.1 98  
 40 2 5 102 4 96 6.00E-14 86.3 7574 cellular  
 organisms;Eukaryota;Opisthokonta;Metazoa;Eumetazoa;Bilateria;Protostomia;  
 Spiralia;Lophotrochozoa;Brachiopoda;Linguliformea;Lingulata;Lingulida;Lin  
 guloidea;Lingulidae;Lingula;Lingula anatina  
 UdeM00000006685 7574 147.5 UdeM00000006685 XP\_013396733.1 39.7 229  
 135 3 74 300 22 249 2.70E-32 147.5 7574 cellular  
 organisms;Eukaryota;Opisthokonta;Metazoa;Eumetazoa;Bilateria;Protostomia;  
 Spiralia;Lophotrochozoa;Brachiopoda;Linguliformea;Lingulata;Lingulida;Lin  
 guloidea;Lingulidae;Lingula;Lingula anatina

UdeM00000006686 7574 146.4 UdeM00000006686 XP\_013396733.1 39.7 229  
 135 3 74 300 22 249 6.00E-32 146.4 7574 cellular  
 organisms;Eukaryota;Opisthokonta;Metazoa;Eumetazoa;Bilateria;Protostomia;  
 Spiralia;Lophotrochozoa;Brachiopoda;Linguliformea;Lingulata;Lingulida;Lin  
 guloidea;Lingulidae;Lingula;Lingula anatina  
 UdeM00000006687 7574 148.7 UdeM00000006687 XP\_013396733.1 40 245  
 142 4 37 279 7 248 1.10E-32 148.7 7574 cellular  
 organisms;Eukaryota;Opisthokonta;Metazoa;Eumetazoa;Bilateria;Protostomia;  
 Spiralia;Lophotrochozoa;Brachiopoda;Linguliformea;Lingulata;Lingulida;Lin  
 guloidea;Lingulidae;Lingula;Lingula anatina  
 UdeM00000006688 7574 147.9 UdeM00000006688 XP\_013396733.1 40.8 228  
 132 3 51 276 22 248 1.90E-32 147.9 7574 cellular  
 organisms;Eukaryota;Opisthokonta;Metazoa;Eumetazoa;Bilateria;Protostomia;  
 Spiralia;Lophotrochozoa;Brachiopoda;Linguliformea;Lingulata;Lingulida;Lin  
 guloidea;Lingulidae;Lingula;Lingula anatina  
 UdeM00000006689 6596 60.5 UdeM00000006689 XP\_045199277.1 32 100  
 66 1 13 110 32 131 1.60E-06 60.5 6596 cellular  
 organisms;Eukaryota;Opisthokonta;Metazoa;Eumetazoa;Bilateria;Protostomia;  
 Spiralia;Lophotrochozoa;Mollusca;Bivalvia;Autobranchia;Heteroconchia;Euhe  
 terodonta;Imparidentia;Venerida;Veneroidea;Veneridae;Mercenaria;Mercenari  
 a mercenaria  
 UdeM00000006690 225164 60.8 UdeM00000006690 XP\_009058784.1 34.2  
 76 50 0 17 92 641 716 1.20E-06 60.8 225164  
 cellular  
 organisms;Eukaryota;Opisthokonta;Metazoa;Eumetazoa;Bilateria;Protostomia;  
 Spiralia;Lophotrochozoa;Mollusca;Gastropoda;Patellogastropoda;Lottioidea;  
 Lottiidae;Lottia;Lottia gigantea  
 UdeM00000006691 225164 60.8 UdeM00000006691 XP\_009058784.1 34.2  
 76 50 0 17 92 641 716 1.20E-06 60.8 225164  
 cellular  
 organisms;Eukaryota;Opisthokonta;Metazoa;Eumetazoa;Bilateria;Protostomia;  
 Spiralia;Lophotrochozoa;Mollusca;Gastropoda;Patellogastropoda;Lottioidea;  
 Lottiidae;Lottia;Lottia gigantea  
 UdeM00000006692 225164 60.8 UdeM00000006692 XP\_009058784.1 34.2  
 76 50 0 17 92 641 716 1.20E-06 60.8 225164  
 cellular  
 organisms;Eukaryota;Opisthokonta;Metazoa;Eumetazoa;Bilateria;Protostomia;  
 Spiralia;Lophotrochozoa;Mollusca;Gastropoda;Patellogastropoda;Lottioidea;  
 Lottiidae;Lottia;Lottia gigantea  
 UdeM00000006693 225164 60.8 UdeM00000006693 XP\_009058784.1 34.2  
 76 50 0 17 92 641 716 1.20E-06 60.8 225164  
 cellular  
 organisms;Eukaryota;Opisthokonta;Metazoa;Eumetazoa;Bilateria;Protostomia;  
 Spiralia;Lophotrochozoa;Mollusca;Gastropoda;Patellogastropoda;Lottioidea;  
 Lottiidae;Lottia;Lottia gigantea  
 UdeM00000006694 225164 63.5 UdeM00000006694 XP\_009058784.1 35.9  
 78 50 0 15 92 639 716 1.90E-07 63.5 225164  
 cellular  
 organisms;Eukaryota;Opisthokonta;Metazoa;Eumetazoa;Bilateria;Protostomia;  
 Spiralia;Lophotrochozoa;Mollusca;Gastropoda;Patellogastropoda;Lottioidea;  
 Lottiidae;Lottia;Lottia gigantea  
 UdeM00000006695 6596 367.1 UdeM00000006695 XP\_045215420.1 59.5 294  
 114 2 28 321 28 316 2.30E-98 367.1 6596 cellular  
 organisms;Eukaryota;Opisthokonta;Metazoa;Eumetazoa;Bilateria;Protostomia;

Spiralia;Lophotrochozoa;Mollusca;Bivalvia;Autobranchia;Heteroconchia;Euherodonta;Imparidentia;Venerida;Veneroidea;Veneridae;Mercenaria;Mercenaria mercenaria

UdeM00000006696 29159 193.7 UdeM00000006696 XP\_011429550.1 52.6 156  
74 0 3 158 36 191 2.00E-46 193.7 29159 cellular

organisms;Eukaryota;Opisthokonta;Metazoa;Eumetazoa;Bilateria;Protostomia;Spiralia;Lophotrochozoa;Mollusca;Bivalvia;Autobranchia;Pteriomorphia;Ostreida;Ostreoidea;Ostreidae;Crassostrea;Crassostrea gigas

UdeM00000006697 6105 117.9 UdeM00000006697 XP\_031574328.1 39.1 151  
76 4 21 159 103 249 1.30E-23 117.9 6105 cellular

organisms;Eukaryota;Opisthokonta;Metazoa;Eumetazoa;Cnidaria;Anthozoa;Hexacorallia;Actiniaria;Actiniidae;Actinia;Actinia tenebrosa

UdeM00000006698 225164 59.3 UdeM00000006698 XP\_009058784.1 34.2  
76 50 0 17 92 641 716 3.60E-06 59.3 225164

cellular

organisms;Eukaryota;Opisthokonta;Metazoa;Eumetazoa;Bilateria;Protostomia;Spiralia;Lophotrochozoa;Mollusca;Gastropoda;Patellogastropoda;Lottioidea;Lottiidae;Lottia;Lottia gigantea

UdeM00000006703 6596 368.2 UdeM00000006703 XP\_045215420.1 59.9 294  
113 2 28 321 28 316 1.00E-98 368.2 6596 cellular

organisms;Eukaryota;Opisthokonta;Metazoa;Eumetazoa;Bilateria;Protostomia;Spiralia;Lophotrochozoa;Mollusca;Bivalvia;Autobranchia;Heteroconchia;Euherodonta;Imparidentia;Venerida;Veneroidea;Veneridae;Mercenaria;Mercenaria mercenaria

UdeM00000006704 225164 59.7 UdeM00000006704 XP\_009058784.1 31.3  
83 57 0 17 99 641 723 2.70E-06 59.7 225164

cellular

organisms;Eukaryota;Opisthokonta;Metazoa;Eumetazoa;Bilateria;Protostomia;Spiralia;Lophotrochozoa;Mollusca;Gastropoda;Patellogastropoda;Lottioidea;Lottiidae;Lottia;Lottia gigantea

UdeM00000006705 225164 67 UdeM00000006705 XP\_009058784.1 34.9  
83 54 0 17 99 641 723 1.70E-08 67 225164

cellular

organisms;Eukaryota;Opisthokonta;Metazoa;Eumetazoa;Bilateria;Protostomia;Spiralia;Lophotrochozoa;Mollusca;Gastropoda;Patellogastropoda;Lottioidea;Lottiidae;Lottia;Lottia gigantea

UdeM00000006706 225164 62.8 UdeM00000006706 XP\_009058784.1 31.8  
85 58 0 15 99 639 723 3.20E-07 62.8 225164

cellular

organisms;Eukaryota;Opisthokonta;Metazoa;Eumetazoa;Bilateria;Protostomia;Spiralia;Lophotrochozoa;Mollusca;Gastropoda;Patellogastropoda;Lottioidea;Lottiidae;Lottia;Lottia gigantea

UdeM00000006707 225164 61.6 UdeM00000006707 XP\_009058784.1 32.2  
90 59 1 15 102 639 728 7.20E-07 61.6 225164

cellular

organisms;Eukaryota;Opisthokonta;Metazoa;Eumetazoa;Bilateria;Protostomia;Spiralia;Lophotrochozoa;Mollusca;Gastropoda;Patellogastropoda;Lottioidea;Lottiidae;Lottia;Lottia gigantea

UdeM00000006708 225164 62.8 UdeM00000006708 XP\_009058784.1 31.8  
85 58 0 15 99 639 723 3.20E-07 62.8 225164

cellular

organisms;Eukaryota;Opisthokonta;Metazoa;Eumetazoa;Bilateria;Protostomia;Spiralia;Lophotrochozoa;Mollusca;Gastropoda;Patellogastropoda;Lottioidea;Lottiidae;Lottia;Lottia gigantea

UdeM00000006709 225164 63.9 UdeM00000006709 XP\_009058784.1 33.3  
 90 58 1 15 102 639 728 1.40E-07 63.9 225164  
 cellular  
 organisms;Eukaryota;Opisthokonta;Metazoa;Eumetazoa;Bilateria;Protostomia;  
 Spiralia;Lophotrochozoa;Mollusca;Gastropoda;Patellogastropoda;Lottioidea;  
 Lottiidae;Lottia;Lottia gigantea  
 UdeM00000006710 225164 64.3 UdeM00000006710 XP\_009058784.1 36  
 75 48 0 15 89 639 713 1.10E-07 64.3 225164  
 cellular  
 organisms;Eukaryota;Opisthokonta;Metazoa;Eumetazoa;Bilateria;Protostomia;  
 Spiralia;Lophotrochozoa;Mollusca;Gastropoda;Patellogastropoda;Lottioidea;  
 Lottiidae;Lottia;Lottia gigantea  
 UdeM00000006711 225164 65.9 UdeM00000006711 XP\_009058784.1 32.9  
 85 57 0 15 99 639 723 3.80E-08 65.9 225164  
 cellular  
 organisms;Eukaryota;Opisthokonta;Metazoa;Eumetazoa;Bilateria;Protostomia;  
 Spiralia;Lophotrochozoa;Mollusca;Gastropoda;Patellogastropoda;Lottioidea;  
 Lottiidae;Lottia;Lottia gigantea  
 UdeM00000006712 225164 65.5 UdeM00000006712 XP\_009058784.1 32.9  
 85 57 0 15 99 639 723 5.00E-08 65.5 225164  
 cellular  
 organisms;Eukaryota;Opisthokonta;Metazoa;Eumetazoa;Bilateria;Protostomia;  
 Spiralia;Lophotrochozoa;Mollusca;Gastropoda;Patellogastropoda;Lottioidea;  
 Lottiidae;Lottia;Lottia gigantea  
 UdeM00000006713 225164 63.5 UdeM00000006713 XP\_009058784.1 34.6  
 78 51 0 15 92 639 716 1.90E-07 63.5 225164  
 cellular  
 organisms;Eukaryota;Opisthokonta;Metazoa;Eumetazoa;Bilateria;Protostomia;  
 Spiralia;Lophotrochozoa;Mollusca;Gastropoda;Patellogastropoda;Lottioidea;  
 Lottiidae;Lottia;Lottia gigantea  
 UdeM00000006714 6579 609.4 UdeM00000006714 XP\_033725858.1 65.9 461  
 151 3 15 473 29 485 4.00E-171 609.4 6579 cellular  
 organisms;Eukaryota;Opisthokonta;Metazoa;Eumetazoa;Bilateria;Protostomia;  
 Spiralia;Lophotrochozoa;Mollusca;Bivalvia;Autobranchia;Pteriomorphia;Pect  
 inida;Pectinoidea;Pectinidae;Pecten;Pecten maximus  
 UdeM00000006715 29159 100.9 UdeM00000006715 XP\_034304939.1 57.5 87  
 37 0 1 87 2040 2126 8.60E-19 100.9 29159 cellular  
 organisms;Eukaryota;Opisthokonta;Metazoa;Eumetazoa;Bilateria;Protostomia;  
 Spiralia;Lophotrochozoa;Mollusca;Bivalvia;Autobranchia;Pteriomorphia;Ostr  
 eida;Ostreoidea;Ostreidae;Crassostrea;Crassostrea gigas  
 UdeM00000006716 6596 338.6 UdeM00000006716 XP\_045184149.1 52.3 298  
 142 0 3 300 7 304 8.40E-90 338.6 6596 cellular  
 organisms;Eukaryota;Opisthokonta;Metazoa;Eumetazoa;Bilateria;Protostomia;  
 Spiralia;Lophotrochozoa;Mollusca;Bivalvia;Autobranchia;Heteroconchia;Euhe  
 terodonta;Imparidentia;Venerida;Veneroidea;Veneridae;Mercenaria;Mercenari  
 a mercenaria  
 UdeM00000006717 6596 761.1 UdeM00000006717 XP\_045197699.1 48.3 924  
 425 11 24 937 261 1141 1.60E-216 761.1 6596 cellular  
 organisms;Eukaryota;Opisthokonta;Metazoa;Eumetazoa;Bilateria;Protostomia;  
 Spiralia;Lophotrochozoa;Mollusca;Bivalvia;Autobranchia;Heteroconchia;Euhe  
 terodonta;Imparidentia;Venerida;Veneroidea;Veneridae;Mercenaria;Mercenari  
 a mercenaria  
 UdeM000000044229 6579 255.4 UdeM000000044229 XP\_033762187.1 50 274  
 114 7 43 297 60 329 9.30E-65 255.4 6579 cellular

organisms;Eukaryota;Opisthokonta;Metazoa;Eumetazoa;Bilateria;Protostomia;Spiralia;Lophotrochozoa;Mollusca;Bivalvia;Autobranchia;Pteriormorphia;Pectinida;Pectinoidea;Pectinidae;Pecten;Pecten maximus

UdeM00000044230 400727 66.6 UdeM00000044230 XP\_025082049.1 37.2  
78 45 1 1 78 208 281 3.50E-08 66.6 400727

cellular

organisms;Eukaryota;Opisthokonta;Metazoa;Eumetazoa;Bilateria;Protostomia;Spiralia;Lophotrochozoa;Mollusca;Gastropoda;Caenogastropoda;Architaenioglossa;Ampullarioidea;Ampullariidae;Pomacea;Pomacea canaliculata

UdeM00000044231 6596 208.4 UdeM00000044231 XP\_045202146.1 45.2 217  
104 2 58 261 76 290 1.20E-50 208.4 6596 cellular

organisms;Eukaryota;Opisthokonta;Metazoa;Eumetazoa;Bilateria;Protostomia;Spiralia;Lophotrochozoa;Mollusca;Bivalvia;Autobranchia;Heteroconchia;Euheterodonta;Imparidentia;Venerida;Veneroidea;Veneridae;Mercenaria;Mercenaria mercenaria

UdeM00000044232 7574 147.1 UdeM00000044232 XP\_013408419.1 32.8 268  
154 4 44 286 129 395 3.40E-32 147.1 7574 cellular

organisms;Eukaryota;Opisthokonta;Metazoa;Eumetazoa;Bilateria;Protostomia;Spiralia;Lophotrochozoa;Brachiopoda;Linguliformea;Lingulata;Lingulida;Linguloidea;Lingulidae;Lingula;Lingula anatina

UdeM00000036035 6596 630.9 UdeM00000036035 XP\_045187267.1 55.3 541  
233 4 2 539 24 558 1.40E-177 630.9 6596 cellular

organisms;Eukaryota;Opisthokonta;Metazoa;Eumetazoa;Bilateria;Protostomia;Spiralia;Lophotrochozoa;Mollusca;Bivalvia;Autobranchia;Heteroconchia;Euheterodonta;Imparidentia;Venerida;Veneroidea;Veneridae;Mercenaria;Mercenaria mercenaria

UdeM00000036038 6596 790 UdeM00000036038 XP\_045190315.1 61.7 622  
238 0 3 624 1 622 2.20E-225 790 6596 cellular

organisms;Eukaryota;Opisthokonta;Metazoa;Eumetazoa;Bilateria;Protostomia;Spiralia;Lophotrochozoa;Mollusca;Bivalvia;Autobranchia;Heteroconchia;Euheterodonta;Imparidentia;Venerida;Veneroidea;Veneridae;Mercenaria;Mercenaria mercenaria

UdeM00000036039 6596 788.5 UdeM00000036039 XP\_045190315.1 61.1 622  
242 0 3 624 1 622 6.40E-225 788.5 6596 cellular

organisms;Eukaryota;Opisthokonta;Metazoa;Eumetazoa;Bilateria;Protostomia;Spiralia;Lophotrochozoa;Mollusca;Bivalvia;Autobranchia;Heteroconchia;Euheterodonta;Imparidentia;Venerida;Veneroidea;Veneridae;Mercenaria;Mercenaria mercenaria

UdeM00000036040 6596 837.4 UdeM00000036040 XP\_045190594.1 45 983  
515 4 34 991 17 998 2.80E-239 837.4 6596 cellular

organisms;Eukaryota;Opisthokonta;Metazoa;Eumetazoa;Bilateria;Protostomia;Spiralia;Lophotrochozoa;Mollusca;Bivalvia;Autobranchia;Heteroconchia;Euheterodonta;Imparidentia;Venerida;Veneroidea;Veneridae;Mercenaria;Mercenaria mercenaria

UdeM00000036041 6573 195.7 UdeM00000036041 XP\_021350804.1 42.1 235  
129 4 7 237 1 232 9.00E-47 195.7 6573 cellular

organisms;Eukaryota;Opisthokonta;Metazoa;Eumetazoa;Bilateria;Protostomia;Spiralia;Lophotrochozoa;Mollusca;Bivalvia;Autobranchia;Pteriormorphia;Pectinida;Pectinoidea;Pectinidae;Mizuhopecten;Mizuhopecten yessoensis

UdeM00000036042 29159 351.3 UdeM00000036042 XP\_034329485.1 29.1 924  
480 18 8 792 361 1248 3.30E-93 351.3 29159 cellular

organisms;Eukaryota;Opisthokonta;Metazoa;Eumetazoa;Bilateria;Protostomia;Spiralia;Lophotrochozoa;Mollusca;Bivalvia;Autobranchia;Pteriormorphia;Ostracida;Ostreoida;Ostreidae;Crassostrea;Crassostrea gigas

UdeM00000036043 225164 994.6 UdeM00000036043 XP\_009048879.1 68.5  
 727 229 0 71 797 47 773 7.60E-287 994.6 225164  
 cellular  
 organisms;Eukaryota;Opisthokonta;Metazoa;Eumetazoa;Bilateria;Protostomia;  
 Spiralia;Lophotrochozoa;Mollusca;Gastropoda;Patellogastropoda;Lottioidea;  
 Lottiidae;Lottia;Lottia gigantea  
 UdeM00000036044 6565 107.5 UdeM00000036044 XP\_022297447.1 51.4 105  
 36 1 1 90 117 221 1.20E-20 107.5 6565 cellular  
 organisms;Eukaryota;Opisthokonta;Metazoa;Eumetazoa;Bilateria;Protostomia;  
 Spiralia;Lophotrochozoa;Mollusca;Bivalvia;Autobranchia;Pteriormorphia;Ostr  
 eida;Ostreoidea;Ostreidae;Crassostrea;Crassostrea virginica  
 UdeM00000036045 7668 75.5 UdeM00000036045 XP\_030841875.1 51.6 64  
 30 1 3 66 71 133 6.80E-11 75.5 7668 cellular  
 organisms;Eukaryota;Opisthokonta;Metazoa;Eumetazoa;Bilateria;Deuterostomi  
 a;Echinodermata;Eleutherozoa;Echinozoa;Echinoidea;Euechinoidea;Echinacea;  
 Camarodonta;Echinidea;Strongylocentrotidae;Strongylocentrotus;Strongyloce  
 ntrotus purpuratus  
 UdeM00000036046 6596 535 UdeM00000036046 XP\_045188797.1 68.3 379  
 117 2 3 381 1 376 7.80E-149 535 6596 cellular  
 organisms;Eukaryota;Opisthokonta;Metazoa;Eumetazoa;Bilateria;Protostomia;  
 Spiralia;Lophotrochozoa;Mollusca;Bivalvia;Autobranchia;Heteroconchia;Euhe  
 terodonta;Imparidentia;Venerida;Veneroidea;Veneridae;Mercenaria;Mercenari  
 a mercenaria  
 UdeM00000036047 29159 255.8 UdeM00000036047 XP\_011447223.2 36.2 500  
 129 5 16 507 405 722 1.20E-64 255.8 29159 cellular  
 organisms;Eukaryota;Opisthokonta;Metazoa;Eumetazoa;Bilateria;Protostomia;  
 Spiralia;Lophotrochozoa;Mollusca;Bivalvia;Autobranchia;Pteriormorphia;Ostr  
 eida;Ostreoidea;Ostreidae;Crassostrea;Crassostrea gigas  
 UdeM00000036048 6596 953.4 UdeM00000036048 XP\_045189107.1 58.9 769  
 306 7 4 767 5 768 1.80E-274 953.4 6596 cellular  
 organisms;Eukaryota;Opisthokonta;Metazoa;Eumetazoa;Bilateria;Protostomia;  
 Spiralia;Lophotrochozoa;Mollusca;Bivalvia;Autobranchia;Heteroconchia;Euhe  
 terodonta;Imparidentia;Venerida;Veneroidea;Veneridae;Mercenaria;Mercenari  
 a mercenaria  
 UdeM00000036049 6596 497.3 UdeM00000036049 XP\_045191210.1 56.5 494  
 170 5 12 505 70 518 2.40E-137 497.3 6596 cellular  
 organisms;Eukaryota;Opisthokonta;Metazoa;Eumetazoa;Bilateria;Protostomia;  
 Spiralia;Lophotrochozoa;Mollusca;Bivalvia;Autobranchia;Heteroconchia;Euhe  
 terodonta;Imparidentia;Venerida;Veneroidea;Veneridae;Mercenaria;Mercenari  
 a mercenaria  
 UdeM00000036050 6596 933.3 UdeM00000036050 XP\_045189772.1 43.3 1156  
 546 18 6 1138 1 1070 3.10E-268 933.3 6596 cellular  
 organisms;Eukaryota;Opisthokonta;Metazoa;Eumetazoa;Bilateria;Protostomia;  
 Spiralia;Lophotrochozoa;Mollusca;Bivalvia;Autobranchia;Heteroconchia;Euhe  
 terodonta;Imparidentia;Venerida;Veneroidea;Veneridae;Mercenaria;Mercenari  
 a mercenaria  
 UdeM00000036051 7574 260 UdeM00000036051 XP\_013402087.1 92.3 143  
 11 0 1 143 1 143 1.80E-66 260 7574 cellular  
 organisms;Eukaryota;Opisthokonta;Metazoa;Eumetazoa;Bilateria;Protostomia;  
 Spiralia;Lophotrochozoa;Brachiopoda;Linguliformea;Lingulata;Lingulida;Lin  
 guloidea;Lingulidae;Lingula;Lingula anatina  
 UdeM00000036052 6596 995 UdeM00000036052 XP\_045190747.1 65 778  
 214 6 6 774 5 733 5.90E-287 995 6596 cellular  
 organisms;Eukaryota;Opisthokonta;Metazoa;Eumetazoa;Bilateria;Protostomia;

Spiralia;Lophotrochozoa;Mollusca;Bivalvia;Autobranchia;Heteroconchia;Euherodonta;Imparidentia;Venerida;Veneroidea;Veneridae;Mercenaria;Mercenaria mercenaria

UdeM00000036053 6596 988.8 UdeM00000036053 XP\_045190747.1 63.7 788  
212 5 6 778 5 733 4.20E-285 988.8 6596 cellular

organisms;Eukaryota;Opisthokonta;Metazoa;Eumetazoa;Bilateria;Protostomia;Spiralia;Lophotrochozoa;Mollusca;Bivalvia;Autobranchia;Heteroconchia;Euherodonta;Imparidentia;Venerida;Veneroidea;Veneridae;Mercenaria;Mercenaria mercenaria

UdeM00000036054 6596 976.5 UdeM00000036054 XP\_045190747.1 61.2 829  
208 6 6 819 5 734 2.30E-281 976.5 6596 cellular

organisms;Eukaryota;Opisthokonta;Metazoa;Eumetazoa;Bilateria;Protostomia;Spiralia;Lophotrochozoa;Mollusca;Bivalvia;Autobranchia;Heteroconchia;Euherodonta;Imparidentia;Venerida;Veneroidea;Veneridae;Mercenaria;Mercenaria mercenaria

UdeM00000036055 6579 739.2 UdeM00000036055 XP\_033757119.1 49.6 848  
389 10 1 839 1 819 5.90E-210 739.2 6579 cellular

organisms;Eukaryota;Opisthokonta;Metazoa;Eumetazoa;Bilateria;Protostomia;Spiralia;Lophotrochozoa;Mollusca;Bivalvia;Autobranchia;Pteriomorpha;Pectinida;Pectinoidea;Pectinidae;Pecten;Pecten maximus

UdeM00000036056 43150 432.6 UdeM00000036056 XP\_039945092.1 74.5 274  
70 0 1 274 8 281 3.80E-118 432.6 43150 cellular

organisms;Eukaryota;Opisthokonta;Metazoa;Eumetazoa;Bilateria;Deuterostomia;Chordata;Craniata;Vertebrata;Gnathostomata;Teleostomi;Euteleostomi;Sarcopterygii;Dipnotetrapodomorpha;Tetrapoda;Amniota;Sauropsida;Sauria;Archelosauria;Archosauria;Dinosauria;Saurischia;Theropoda;Coelurosauria;Aves;Neognathae;Passeriformes;Sylvioidea;Hirundinidae;Hirundo;Hirundo rustica

UdeM00000036057 6573 478.8 UdeM00000036057 XP\_021378645.1 49.6 474  
237 2 44 516 51 523 9.00E-132 478.8 6573 cellular

organisms;Eukaryota;Opisthokonta;Metazoa;Eumetazoa;Bilateria;Protostomia;Spiralia;Lophotrochozoa;Mollusca;Bivalvia;Autobranchia;Pteriomorpha;Pectinida;Pectinoidea;Pectinidae;Mizuhopecten;Mizuhopecten yessoensis

UdeM00000036058 6596 1116.7 UdeM00000036058 XP\_045189673.1 62.8  
914 333 2 1 907 1 914 0.00E+00 1116.7 6596  
cellular

organisms;Eukaryota;Opisthokonta;Metazoa;Eumetazoa;Bilateria;Protostomia;Spiralia;Lophotrochozoa;Mollusca;Bivalvia;Autobranchia;Heteroconchia;Euherodonta;Imparidentia;Venerida;Veneroidea;Veneridae;Mercenaria;Mercenaria mercenaria

UdeM00000036059 2607531 77.8 UdeM00000036059 XP\_029645104.1 55  
80 36 0 1 80 1 80 7.30E-12 77.8 2607531  
cellular

organisms;Eukaryota;Opisthokonta;Metazoa;Eumetazoa;Bilateria;Protostomia;Spiralia;Lophotrochozoa;Mollusca;Cephalopoda;Coleoidea;Octopodiformes;Octopoda;Incirrata;Octopodidae;Octopus;Octopus sinensis

UdeM00000036061 2607531 64.3 UdeM00000036061 XP\_029645104.1 55.6  
63 28 0 12 74 18 80 7.80E-08 64.3 2607531  
cellular

organisms;Eukaryota;Opisthokonta;Metazoa;Eumetazoa;Bilateria;Protostomia;Spiralia;Lophotrochozoa;Mollusca;Cephalopoda;Coleoidea;Octopodiformes;Octopoda;Incirrata;Octopodidae;Octopus;Octopus sinensis

UdeM00000036062 6596 571.6 UdeM00000036062 XP\_045189156.1 62.6 462  
142 5 36 480 25 472 9.30E-160 571.6 6596 cellular

organisms;Eukaryota;Opisthokonta;Metazoa;Eumetazoa;Bilateria;Protostomia;



Spiralia;Lophotrochozoa;Mollusca;Bivalvia;Autobranchia;Heteroconchia;Euherodonta;Imparidentia;Venerida;Veneroidea;Veneridae;Mercenaria;Mercenaria mercenaria

UdeM00000036063 6596 924.5 UdeM00000036063 XP\_045189159.1 71 618  
176 2 1 616 1 617 7.20E-266 924.5 6596 cellular

organisms;Eukaryota;Opisthokonta;Metazoa;Eumetazoa;Bilateria;Protostomia;Spiralia;Lophotrochozoa;Mollusca;Bivalvia;Autobranchia;Heteroconchia;Euherodonta;Imparidentia;Venerida;Veneroidea;Veneridae;Mercenaria;Mercenaria mercenaria

UdeM00000036067 6596 188.3 UdeM00000036067 XP\_045190761.1 58.6 145  
60 0 16 160 14 158 7.50E-45 188.3 6596 cellular

organisms;Eukaryota;Opisthokonta;Metazoa;Eumetazoa;Bilateria;Protostomia;Spiralia;Lophotrochozoa;Mollusca;Bivalvia;Autobranchia;Heteroconchia;Euherodonta;Imparidentia;Venerida;Veneroidea;Veneridae;Mercenaria;Mercenaria mercenaria

UdeM00000036066 6596 236.1 UdeM00000036066 XP\_045190761.1 61 182  
71 0 16 197 14 195 3.80E-59 236.1 6596 cellular

organisms;Eukaryota;Opisthokonta;Metazoa;Eumetazoa;Bilateria;Protostomia;Spiralia;Lophotrochozoa;Mollusca;Bivalvia;Autobranchia;Heteroconchia;Euherodonta;Imparidentia;Venerida;Veneroidea;Veneridae;Mercenaria;Mercenaria mercenaria

UdeM00000036068 7574 592 UdeM00000036068 XP\_013420563.1 89.2 306  
31 2 137 441 376 680 6.10E-166 592 7574 cellular

organisms;Eukaryota;Opisthokonta;Metazoa;Eumetazoa;Bilateria;Protostomia;Spiralia;Lophotrochozoa;Brachiopoda;Linguliformea;Lingulata;Lingulida;Linguloidea;Lingulidae;Lingula;Lingula anatina

UdeM00000036069 6596 248.4 UdeM00000036069 XP\_045190759.1 48.7 314  
136 13 1 309 1 294 1.20E-62 248.4 6596 cellular

organisms;Eukaryota;Opisthokonta;Metazoa;Eumetazoa;Bilateria;Protostomia;Spiralia;Lophotrochozoa;Mollusca;Bivalvia;Autobranchia;Heteroconchia;Euherodonta;Imparidentia;Venerida;Veneroidea;Veneridae;Mercenaria;Mercenaria mercenaria

UdeM00000036070 1735272 486.5 UdeM00000036070 XP\_041369060.1 80.4  
281 55 0 1 281 10 290 2.30E-134 486.5 1735272  
cellular

organisms;Eukaryota;Opisthokonta;Metazoa;Eumetazoa;Bilateria;Protostomia;Spiralia;Lophotrochozoa;Mollusca;Gastropoda;Neomphalina;Neomphaloidea;Peltospiridae;Gigantopelta;Gigantopelta aegis

UdeM00000036071 6596 325.5 UdeM00000036071 XP\_045189484.1 64.9 245  
84 2 44 286 35 279 6.90E-86 325.5 6596 cellular

organisms;Eukaryota;Opisthokonta;Metazoa;Eumetazoa;Bilateria;Protostomia;Spiralia;Lophotrochozoa;Mollusca;Bivalvia;Autobranchia;Heteroconchia;Euherodonta;Imparidentia;Venerida;Veneroidea;Veneridae;Mercenaria;Mercenaria mercenaria

UdeM00000036073 6596 168.7 UdeM00000036073 XP\_045188248.1 65 223  
72 3 16 233 138 359 8.80E-39 168.7 6596 cellular

organisms;Eukaryota;Opisthokonta;Metazoa;Eumetazoa;Bilateria;Protostomia;Spiralia;Lophotrochozoa;Mollusca;Bivalvia;Autobranchia;Heteroconchia;Euherodonta;Imparidentia;Venerida;Veneroidea;Veneridae;Mercenaria;Mercenaria mercenaria

UdeM00000036074 6596 353.6 UdeM00000036074 XP\_045189501.1 44.7 445  
217 9 77 505 21 452 4.30E-94 353.6 6596 cellular

organisms;Eukaryota;Opisthokonta;Metazoa;Eumetazoa;Bilateria;Protostomia;Spiralia;Lophotrochozoa;Mollusca;Bivalvia;Autobranchia;Heteroconchia;Euherodonta;Imparidentia;Venerida;Veneroidea;Veneridae;Mercenaria;Mercenaria mercenaria

terodonta;Imparidentia;Venerida;Veneroidea;Veneridae;Mercenaria;Mercenari  
 a mercenaria  
 UdeM00000036075 6573 412.9 UdeM00000036075 XP\_021351632.1 52.5 484  
 198 9 1 461 1 475 5.30E-112 412.9 6573 cellular  
 organisms;Eukaryota;Opisthokonta;Metazoa;Eumetazoa;Bilateria;Protostomia;  
 Spiralia;Lophotrochozoa;Mollusca;Bivalvia;Autobranchia;Pteriomorpha;Pect  
 inida;Pectinoidea;Pectinidae;Mizuhopecten;Mizuhopecten yessoensis  
 UdeM00000036076 6573 222.6 UdeM00000036076 XP\_021351632.1 58.5 229  
 87 3 2 224 249 475 4.90E-55 222.6 6573 cellular  
 organisms;Eukaryota;Opisthokonta;Metazoa;Eumetazoa;Bilateria;Protostomia;  
 Spiralia;Lophotrochozoa;Mollusca;Bivalvia;Autobranchia;Pteriomorpha;Pect  
 inida;Pectinoidea;Pectinidae;Mizuhopecten;Mizuhopecten yessoensis  
 UdeM00000036078 6596 593.6 UdeM00000036078 XP\_045189878.1 73.9 426  
 96 6 46 466 73 488 2.20E-166 593.6 6596 cellular  
 organisms;Eukaryota;Opisthokonta;Metazoa;Eumetazoa;Bilateria;Protostomia;  
 Spiralia;Lophotrochozoa;Mollusca;Bivalvia;Autobranchia;Heteroconchia;Euhe  
 terodonta;Imparidentia;Venerida;Veneroidea;Veneridae;Mercenaria;Mercenari  
 a mercenaria  
 UdeM00000036079 6596 986.9 UdeM00000036079 XP\_045190054.1 55 1010  
 393 17 308 1264 189 1189 2.40E-284 986.9 6596 cellular  
 organisms;Eukaryota;Opisthokonta;Metazoa;Eumetazoa;Bilateria;Protostomia;  
 Spiralia;Lophotrochozoa;Mollusca;Bivalvia;Autobranchia;Heteroconchia;Euhe  
 terodonta;Imparidentia;Venerida;Veneroidea;Veneridae;Mercenaria;Mercenari  
 a mercenaria  
 UdeM00000036080 6596 986.1 UdeM00000036080 XP\_045190054.1 54.8 1010  
 394 16 308 1263 189 1189 4.10E-284 986.1 6596 cellular  
 organisms;Eukaryota;Opisthokonta;Metazoa;Eumetazoa;Bilateria;Protostomia;  
 Spiralia;Lophotrochozoa;Mollusca;Bivalvia;Autobranchia;Heteroconchia;Euhe  
 terodonta;Imparidentia;Venerida;Veneroidea;Veneridae;Mercenaria;Mercenari  
 a mercenaria  
 UdeM00000036081 6596 678.7 UdeM00000036081 XP\_045189868.1 45.8 997  
 397 14 247 1196 359 1259 1.50E-191 678.7 6596 cellular  
 organisms;Eukaryota;Opisthokonta;Metazoa;Eumetazoa;Bilateria;Protostomia;  
 Spiralia;Lophotrochozoa;Mollusca;Bivalvia;Autobranchia;Heteroconchia;Euhe  
 terodonta;Imparidentia;Venerida;Veneroidea;Veneridae;Mercenaria;Mercenari  
 a mercenaria  
 UdeM00000036082 6565 518.5 UdeM00000036082 XP\_022288335.1 23.5 2274  
 1396 56 15 2229 7 1996 4.40E-143 518.5 6565 cellular  
 organisms;Eukaryota;Opisthokonta;Metazoa;Eumetazoa;Bilateria;Protostomia;  
 Spiralia;Lophotrochozoa;Mollusca;Bivalvia;Autobranchia;Pteriomorpha;Ostr  
 eida;Ostreoidea;Ostreidae;Crassostrea;Crassostrea virginica  
 UdeM00000036083 6565 519.6 UdeM00000036083 XP\_022288335.1 23.6 2299  
 1415 57 15 2253 7 2023 2.00E-143 519.6 6565 cellular  
 organisms;Eukaryota;Opisthokonta;Metazoa;Eumetazoa;Bilateria;Protostomia;  
 Spiralia;Lophotrochozoa;Mollusca;Bivalvia;Autobranchia;Pteriomorpha;Ostr  
 eida;Ostreoidea;Ostreidae;Crassostrea;Crassostrea virginica  
 UdeM00000036084 6565 519.6 UdeM00000036084 XP\_022288335.1 23.5 2329  
 1410 58 15 2284 7 2023 2.00E-143 519.6 6565 cellular  
 organisms;Eukaryota;Opisthokonta;Metazoa;Eumetazoa;Bilateria;Protostomia;  
 Spiralia;Lophotrochozoa;Mollusca;Bivalvia;Autobranchia;Pteriomorpha;Ostr  
 eida;Ostreoidea;Ostreidae;Crassostrea;Crassostrea virginica  
 UdeM00000036085 6596 155.6 UdeM00000036085 XP\_045188362.1 25.1 438  
 293 5 819 1248 49 459 4.10E-34 155.6 6596 cellular  
 organisms;Eukaryota;Opisthokonta;Metazoa;Eumetazoa;Bilateria;Protostomia;

Spiralia;Lophotrochozoa;Mollusca;Bivalvia;Autobranchia;Heteroconchia;Euherodonta;Imparidentia;Venerida;Veneroidea;Veneridae;Mercenaria;Mercenaria mercenaria

UdeM00000036087 6596 1109 UdeM00000036087 XP\_045190526.1 58.9 961  
370 11 1 941 1 956 0.00E+00 1109 6596 cellular

organisms;Eukaryota;Opisthokonta;Metazoa;Eumetazoa;Bilateria;Protostomia;Spiralia;Lophotrochozoa;Mollusca;Bivalvia;Autobranchia;Heteroconchia;Euherodonta;Imparidentia;Venerida;Veneroidea;Veneridae;Mercenaria;Mercenaria mercenaria

UdeM00000036088 6596 486.9 UdeM00000036088 XP\_045188772.1 32.1 1273  
690 28 1 1137 1 1234 7.10E-134 486.9 6596 cellular

organisms;Eukaryota;Opisthokonta;Metazoa;Eumetazoa;Bilateria;Protostomia;Spiralia;Lophotrochozoa;Mollusca;Bivalvia;Autobranchia;Heteroconchia;Euherodonta;Imparidentia;Venerida;Veneroidea;Veneridae;Mercenaria;Mercenaria mercenaria

UdeM00000036090 6573 450.3 UdeM00000036090 XP\_021348633.1 75.2 282  
68 1 1 280 158 439 1.80E-123 450.3 6573 cellular

organisms;Eukaryota;Opisthokonta;Metazoa;Eumetazoa;Bilateria;Protostomia;Spiralia;Lophotrochozoa;Mollusca;Bivalvia;Autobranchia;Pteriomorphia;Pectinida;Pectinoidea;Pectinidae;Mizuhopecten;Mizuhopecten yessoensis

UdeM00000036089 6500 573.2 UdeM00000036089 XP\_005093477.1 66.7 418  
134 3 16 430 6 421 2.80E-160 573.2 6500 cellular

organisms;Eukaryota;Opisthokonta;Metazoa;Eumetazoa;Bilateria;Protostomia;Spiralia;Lophotrochozoa;Mollusca;Gastropoda;Heterobranchia;Euthyneura;Tectipleura;Aplysiida;Aplysioidea;Aplysiidae;Aplysia;Aplysia californica

UdeM00000036091 6500 575.1 UdeM00000036091 XP\_005093477.1 66.6 419  
135 2 16 432 6 421 7.50E-161 575.1 6500 cellular

organisms;Eukaryota;Opisthokonta;Metazoa;Eumetazoa;Bilateria;Protostomia;Spiralia;Lophotrochozoa;Mollusca;Gastropoda;Heterobranchia;Euthyneura;Tectipleura;Aplysiida;Aplysioidea;Aplysiidae;Aplysia;Aplysia californica

UdeM00000036092 6579 384.4 UdeM00000036092 XP\_033756749.1 36.1 699  
274 11 554 1087 209 899 4.70E-103 384.4 6579 cellular

organisms;Eukaryota;Opisthokonta;Metazoa;Eumetazoa;Bilateria;Protostomia;Spiralia;Lophotrochozoa;Mollusca;Bivalvia;Autobranchia;Pteriomorphia;Pectinida;Pectinoidea;Pectinidae;Pecten;Pecten maximus

UdeM00000036093 6596 321.6 UdeM00000036093 XP\_045189044.1 60 280  
107 3 3 277 33 312 1.00E-84 321.6 6596 cellular

organisms;Eukaryota;Opisthokonta;Metazoa;Eumetazoa;Bilateria;Protostomia;Spiralia;Lophotrochozoa;Mollusca;Bivalvia;Autobranchia;Heteroconchia;Euherodonta;Imparidentia;Venerida;Veneroidea;Veneridae;Mercenaria;Mercenaria mercenaria

UdeM00000036094 7574 163.7 UdeM00000036094 XP\_013390298.1 61.4 132  
51 0 1 132 1 132 1.90E-36 163.7 7574 cellular

organisms;Eukaryota;Opisthokonta;Metazoa;Eumetazoa;Bilateria;Protostomia;Spiralia;Lophotrochozoa;Brachiopoda;Linguliformea;Lingulata;Lingulida;Linguloidea;Lingulidae;Lingula;Lingula anatina

UdeM00000036095 6573 650.2 UdeM00000036095 XP\_021369664.1 56.4 585  
240 4 31 601 65 648 2.60E-183 650.2 6573 cellular

organisms;Eukaryota;Opisthokonta;Metazoa;Eumetazoa;Bilateria;Protostomia;Spiralia;Lophotrochozoa;Mollusca;Bivalvia;Autobranchia;Pteriomorphia;Pectinida;Pectinoidea;Pectinidae;Mizuhopecten;Mizuhopecten yessoensis

UdeM00000036096 7574 728 UdeM00000036096 XP\_023933273.1 44.2 1076  
503 24 1 1039 40 1055 1.70E-206 728 7574 cellular

organisms;Eukaryota;Opisthokonta;Metazoa;Eumetazoa;Bilateria;Protostomia;

Spiralia;Lophotrochozoa;Brachiopoda;Linguliformea;Lingulata;Lingulida;Linguloidea;Lingulidae;Lingula;Lingula anatina

UdeM00000036097 6596 308.5 UdeM00000036097 XP\_045190602.1 33.2 677  
332 15 1 631 1 603 2.00E-80 308.5 6596 cellular  
organisms;Eukaryota;Opisthokonta;Metazoa;Eumetazoa;Bilateria;Protostomia;  
Spiralia;Lophotrochozoa;Mollusca;Bivalvia;Autobranchia;Heteroconchia;Euhe  
terodonta;Imparidentia;Venerida;Veneroidea;Veneridae;Mercenaria;Mercenari  
a mercenaria

UdeM00000036098 225164 308.5 UdeM00000036098 XP\_009058992.1 59  
227 93 0 51 277 730 956 2.90E-80 308.5 225164  
cellular  
organisms;Eukaryota;Opisthokonta;Metazoa;Eumetazoa;Bilateria;Protostomia;  
Spiralia;Lophotrochozoa;Mollusca;Gastropoda;Patellogastropoda;Lottioidea;  
Lottiidae;Lottia;Lottia gigantea

UdeM00000036099 6596 673.7 UdeM00000036099 XP\_045188260.1 55.4 744  
266 12 4 683 5 746 2.50E-190 673.7 6596 cellular  
organisms;Eukaryota;Opisthokonta;Metazoa;Eumetazoa;Bilateria;Protostomia;  
Spiralia;Lophotrochozoa;Mollusca;Bivalvia;Autobranchia;Heteroconchia;Euhe  
terodonta;Imparidentia;Venerida;Veneroidea;Veneridae;Mercenaria;Mercenari  
a mercenaria

UdeM00000036100 6596 180.3 UdeM00000036100 XP\_045191325.1 44.2 278  
137 6 14 275 4 279 4.20E-42 180.3 6596 cellular  
organisms;Eukaryota;Opisthokonta;Metazoa;Eumetazoa;Bilateria;Protostomia;  
Spiralia;Lophotrochozoa;Mollusca;Bivalvia;Autobranchia;Heteroconchia;Euhe  
terodonta;Imparidentia;Venerida;Veneroidea;Veneridae;Mercenaria;Mercenari  
a mercenaria

UdeM00000036101 6596 179.9 UdeM00000036101 XP\_045191325.1 45.7 256  
124 4 7 249 26 279 5.10E-42 179.9 6596 cellular  
organisms;Eukaryota;Opisthokonta;Metazoa;Eumetazoa;Bilateria;Protostomia;  
Spiralia;Lophotrochozoa;Mollusca;Bivalvia;Autobranchia;Heteroconchia;Euhe  
terodonta;Imparidentia;Venerida;Veneroidea;Veneridae;Mercenaria;Mercenari  
a mercenaria

UdeM00000036103 1415580 544.3 UdeM00000036103 XP\_030075314.1 53.8  
517 220 4 1 514 125 625 1.70E-151 544.3 1415580  
cellular  
organisms;Eukaryota;Opisthokonta;Metazoa;Eumetazoa;Bilateria;Deuterostomi  
a;Chordata;Craniata;Vertebrata;Gnathostomata;Teleostomi;Euteleostomi;Sarc  
opterygii;Dipnotetrapodomorpha;Tetrapoda;Amphibia;Gymnophiona;Siphonopida  
e;Microcaecilia;Microcaecilia unicolor

UdeM00000036104 260995 82.4 UdeM00000036104 XP\_033812940.1 51.4  
74 35 1 1 74 1 73 2.70E-13 82.4 260995  
cellular  
organisms;Eukaryota;Opisthokonta;Metazoa;Eumetazoa;Bilateria;Deuterostomi  
a;Chordata;Craniata;Vertebrata;Gnathostomata;Teleostomi;Euteleostomi;Sarc  
opterygii;Dipnotetrapodomorpha;Tetrapoda;Amphibia;Gymnophiona;Dermophiida  
e;Geotrypetes;Geotrypetes seraphini

UdeM00000036105 260995 77.4 UdeM00000036105 XP\_033812940.1 48.6  
74 37 1 1 74 1 73 1.10E-11 77.4 260995  
cellular  
organisms;Eukaryota;Opisthokonta;Metazoa;Eumetazoa;Bilateria;Deuterostomi  
a;Chordata;Craniata;Vertebrata;Gnathostomata;Teleostomi;Euteleostomi;Sarc  
opterygii;Dipnotetrapodomorpha;Tetrapoda;Amphibia;Gymnophiona;Dermophiida  
e;Geotrypetes;Geotrypetes seraphini

UdeM00000036106 1415580 548.1 UdeM00000036106 XP\_030075314.1 54.7  
 517 215 4 1 514 125 625 1.20E-152 548.1 1415580  
 cellular  
 organisms;Eukaryota;Opisthokonta;Metazoa;Eumetazoa;Bilateria;Deuterostomi  
 a;Chordata;Craniata;Vertebrata;Gnathostomata;Teleostomi;Euteleostomi;Sarc  
 opterygii;Dipnotetrapodomorpha;Tetrapoda;Amphibia;Gymnophiona;Siphonopida  
 e;Microcaecilia;Microcaecilia unicolor  
 UdeM00000036109 7897 71.6 UdeM00000036109 XP\_014347369.1 45.6 79  
 43 0 6 84 311 389 5.40E-10 71.6 7897 cellular  
 organisms;Eukaryota;Opisthokonta;Metazoa;Eumetazoa;Bilateria;Deuterostomi  
 a;Chordata;Craniata;Vertebrata;Gnathostomata;Teleostomi;Euteleostomi;Sarc  
 opterygii;Coelacanthimorpha;Coelacanthiformes;Coelacanthidae;Latimeria;La  
 timeria chalumnae  
 UdeM00000036110 6565 88.6 UdeM00000036110 XP\_022288562.1 49.4 89  
 45 0 1 89 73 161 5.00E-15 88.6 6565 cellular  
 organisms;Eukaryota;Opisthokonta;Metazoa;Eumetazoa;Bilateria;Protostomia;  
 Spiralia;Lophotrochozoa;Mollusca;Bivalvia;Autobranchia;Pteriormorpha;Ostr  
 eida;Ostreoidea;Ostreidae;Crassostrea;Crassostrea virginica  
 UdeM00000036111 29159 242.3 UdeM00000036111 XP\_034307861.1 57.9 190  
 79 1 11 200 3 191 8.20E-61 242.3 29159 cellular  
 organisms;Eukaryota;Opisthokonta;Metazoa;Eumetazoa;Bilateria;Protostomia;  
 Spiralia;Lophotrochozoa;Mollusca;Bivalvia;Autobranchia;Pteriormorpha;Ostr  
 eida;Ostreoidea;Ostreidae;Crassostrea;Crassostrea gigas  
 UdeM00000036113 6565 108.6 UdeM00000036113 XP\_022288562.1 46.1 115  
 62 0 1 115 73 187 7.40E-21 108.6 6565 cellular  
 organisms;Eukaryota;Opisthokonta;Metazoa;Eumetazoa;Bilateria;Protostomia;  
 Spiralia;Lophotrochozoa;Mollusca;Bivalvia;Autobranchia;Pteriormorpha;Ostr  
 eida;Ostreoidea;Ostreidae;Crassostrea;Crassostrea virginica  
 UdeM00000036116 6596 323.2 UdeM00000036116 XP\_045183440.1 48.3 350  
 162 3 32 363 32 380 5.60E-85 323.2 6596 cellular  
 organisms;Eukaryota;Opisthokonta;Metazoa;Eumetazoa;Bilateria;Protostomia;  
 Spiralia;Lophotrochozoa;Mollusca;Bivalvia;Autobranchia;Heteroconchia;Euhe  
 terodonta;Imparidentia;Venerida;Veneroidea;Veneridae;Mercenaria;Mercenari  
 a mercenaria  
 UdeM00000036118 6565 151 UdeM00000036118 XP\_022302274.1 44.9 178  
 96 2 14 191 127 302 1.60E-33 151 6565 cellular  
 organisms;Eukaryota;Opisthokonta;Metazoa;Eumetazoa;Bilateria;Protostomia;  
 Spiralia;Lophotrochozoa;Mollusca;Bivalvia;Autobranchia;Pteriormorpha;Ostr  
 eida;Ostreoidea;Ostreidae;Crassostrea;Crassostrea virginica  
 UdeM00000036119 6596 188 UdeM00000036119 XP\_045191218.1 74.6 126  
 32 0 155 280 188 313 1.70E-44 188 6596 cellular  
 organisms;Eukaryota;Opisthokonta;Metazoa;Eumetazoa;Bilateria;Protostomia;  
 Spiralia;Lophotrochozoa;Mollusca;Bivalvia;Autobranchia;Heteroconchia;Euhe  
 terodonta;Imparidentia;Venerida;Veneroidea;Veneridae;Mercenaria;Mercenari  
 a mercenaria  
 UdeM00000036120 6596 341.3 UdeM00000036120 XP\_045191220.1 65.6 273  
 75 3 16 273 17 285 1.20E-90 341.3 6596 cellular  
 organisms;Eukaryota;Opisthokonta;Metazoa;Eumetazoa;Bilateria;Protostomia;  
 Spiralia;Lophotrochozoa;Mollusca;Bivalvia;Autobranchia;Heteroconchia;Euhe  
 terodonta;Imparidentia;Venerida;Veneroidea;Veneridae;Mercenaria;Mercenari  
 a mercenaria  
 UdeM00000036121 6596 111.3 UdeM00000036121 XP\_045188249.1 53.4 88  
 34 1 3 90 46 126 2.60E-21 111.3 6596 cellular  
 organisms;Eukaryota;Opisthokonta;Metazoa;Eumetazoa;Bilateria;Protostomia;

Spiralia;Lophotrochozoa;Mollusca;Bivalvia;Autobranchia;Heteroconchia;Euherodonta;Imparidentia;Venerida;Veneroidea;Veneridae;Mercenaria;Mercenaria mercenaria

UdeM00000036122 29159 147.1 UdeM00000036122 XP\_011415541.1 39.3 382  
197 9 3 365 62 427 4.30E-32 147.1 29159 cellular  
organisms;Eukaryota;Opisthokonta;Metazoa;Eumetazoa;Bilateria;Protostomia;Spiralia;Lophotrochozoa;Mollusca;Bivalvia;Autobranchia;Pteriomorphia;Ostreida;Ostreoidea;Ostreidae;Crassostrea;Crassostrea gigas

UdeM00000036123 6596 335.9 UdeM00000036123 XP\_045189702.1 51.7 315  
143 5 3 314 5 313 1.10E-88 335.9 6596 cellular  
organisms;Eukaryota;Opisthokonta;Metazoa;Eumetazoa;Bilateria;Protostomia;Spiralia;Lophotrochozoa;Mollusca;Bivalvia;Autobranchia;Heteroconchia;Euherodonta;Imparidentia;Venerida;Veneroidea;Veneridae;Mercenaria;Mercenaria mercenaria

UdeM00000036124 6596 889.4 UdeM00000036124 XP\_045189703.1 55.6 739  
321 4 1 738 351 1083 4.30E-255 889.4 6596 cellular  
organisms;Eukaryota;Opisthokonta;Metazoa;Eumetazoa;Bilateria;Protostomia;Spiralia;Lophotrochozoa;Mollusca;Bivalvia;Autobranchia;Heteroconchia;Euherodonta;Imparidentia;Venerida;Veneroidea;Veneridae;Mercenaria;Mercenaria mercenaria

UdeM00000036125 29159 108.2 UdeM00000036125 XP\_034318217.1 44 109  
60 1 9 116 419 527 8.30E-21 108.2 29159 cellular  
organisms;Eukaryota;Opisthokonta;Metazoa;Eumetazoa;Bilateria;Protostomia;Spiralia;Lophotrochozoa;Mollusca;Bivalvia;Autobranchia;Pteriomorphia;Ostreida;Ostreoidea;Ostreidae;Crassostrea;Crassostrea gigas

UdeM00000036126 6596 297.7 UdeM00000036126 XP\_045216906.1 47.4 306  
151 6 1 299 154 456 1.60E-77 297.7 6596 cellular  
organisms;Eukaryota;Opisthokonta;Metazoa;Eumetazoa;Bilateria;Protostomia;Spiralia;Lophotrochozoa;Mollusca;Bivalvia;Autobranchia;Heteroconchia;Euherodonta;Imparidentia;Venerida;Veneroidea;Veneridae;Mercenaria;Mercenaria mercenaria

UdeM00000036127 7906 84.7 UdeM00000036127 XP\_034777329.1 26.5 238  
149 10 7 221 23 257 1.70E-13 84.7 7906 cellular  
organisms;Eukaryota;Opisthokonta;Metazoa;Eumetazoa;Bilateria;Deuterostomia;Chordata;Craniata;Vertebrata;Gnathostomata;Teleostomi;Euteleostomi;Actinopterygii;Actinopteri;Chondrostei;Acipenseriformes;Acipenseridae;Acipenserinae;Acipenserini;Acipenser;Acipenser ruthenus

UdeM00000036128 6579 193 UdeM00000036128 XP\_033728272.1 30.9 450  
102 6 2 243 129 577 4.90E-46 193 6579 cellular  
organisms;Eukaryota;Opisthokonta;Metazoa;Eumetazoa;Bilateria;Protostomia;Spiralia;Lophotrochozoa;Mollusca;Bivalvia;Autobranchia;Pteriomorphia;Pectinida;Pectinoidea;Pectinidae;Pecten;Pecten maximus

UdeM00000036129 29159 257.7 UdeM00000036129 XP\_034318677.1 49.3 300  
128 8 5 294 13 298 1.80E-65 257.7 29159 cellular  
organisms;Eukaryota;Opisthokonta;Metazoa;Eumetazoa;Bilateria;Protostomia;Spiralia;Lophotrochozoa;Mollusca;Bivalvia;Autobranchia;Pteriomorphia;Ostreida;Ostreoidea;Ostreidae;Crassostrea;Crassostrea gigas

UdeM00000036130 6596 88.6 UdeM00000036130 XP\_045204208.1 32.5 280  
160 9 2 269 2521 2783 1.30E-14 88.6 6596 cellular  
organisms;Eukaryota;Opisthokonta;Metazoa;Eumetazoa;Bilateria;Protostomia;Spiralia;Lophotrochozoa;Mollusca;Bivalvia;Autobranchia;Heteroconchia;Euherodonta;Imparidentia;Venerida;Veneroidea;Veneridae;Mercenaria;Mercenaria mercenaria

UdeM00000036131 29159 173.3 UdeM00000036131 XP\_011413671.2 75.7 107  
 26 0 1 107 125 231 5.00E-40 173.3 29159 cellular  
 organisms;Eukaryota;Opisthokonta;Metazoa;Eumetazoa;Bilateria;Protostomia;  
 Spiralia;Lophotrochozoa;Mollusca;Bivalvia;Autobranhia;Pteriomorphia;Ostr  
 eida;Ostreoidea;Ostreidae;Crassostrea;Crassostrea gigas  
 UdeM00000036132 29159 256.9 UdeM00000036132 XP\_011453863.2 52.5 299  
 112 7 1 294 28 301 3.20E-65 256.9 29159 cellular  
 organisms;Eukaryota;Opisthokonta;Metazoa;Eumetazoa;Bilateria;Protostomia;  
 Spiralia;Lophotrochozoa;Mollusca;Bivalvia;Autobranhia;Pteriomorphia;Ostr  
 eida;Ostreoidea;Ostreidae;Crassostrea;Crassostrea gigas  
 UdeM00000036133 6596 121.7 UdeM00000036133 XP\_045189555.1 93.4 61  
 4 0 1 61 1 61 3.50E-25 121.7 6596 cellular  
 organisms;Eukaryota;Opisthokonta;Metazoa;Eumetazoa;Bilateria;Protostomia;  
 Spiralia;Lophotrochozoa;Mollusca;Bivalvia;Autobranhia;Heteroconchia;Euhe  
 terodonta;Imparidentia;Venerida;Veneroidea;Veneridae;Mercenaria;Mercenari  
 a mercenaria  
 UdeM00000036135 1735272 251.9 UdeM00000036135 XP\_041362472.1 39.5  
 349 196 7 1 341 185 526 1.30E-63 251.9 1735272  
 cellular  
 organisms;Eukaryota;Opisthokonta;Metazoa;Eumetazoa;Bilateria;Protostomia;  
 Spiralia;Lophotrochozoa;Mollusca;Gastropoda;Neomphalina;Neomphaloidea;Pel  
 tospiridae;Gigantopelta;Gigantopelta aegis  
 UdeM00000036137 6579 464.2 UdeM00000036137 XP\_033757488.1 64.9 325  
 110 3 1 323 1 323 1.40E-127 464.2 6579 cellular  
 organisms;Eukaryota;Opisthokonta;Metazoa;Eumetazoa;Bilateria;Protostomia;  
 Spiralia;Lophotrochozoa;Mollusca;Bivalvia;Autobranhia;Pteriomorphia;Pect  
 inida;Pectinoidea;Pectinidae;Pecten;Pecten maximus  
 UdeM00000036138 6579 427.6 UdeM00000036138 XP\_033757488.1 66.9 281  
 92 1 51 331 44 323 1.50E-116 427.6 6579 cellular  
 organisms;Eukaryota;Opisthokonta;Metazoa;Eumetazoa;Bilateria;Protostomia;  
 Spiralia;Lophotrochozoa;Mollusca;Bivalvia;Autobranhia;Pteriomorphia;Pect  
 inida;Pectinoidea;Pectinidae;Pecten;Pecten maximus  
 UdeM00000036139 1735272 238.4 UdeM00000036139 XP\_041374913.1 47.2  
 252 123 2 324 565 424 675 2.20E-59 238.4 1735272  
 cellular  
 organisms;Eukaryota;Opisthokonta;Metazoa;Eumetazoa;Bilateria;Protostomia;  
 Spiralia;Lophotrochozoa;Mollusca;Gastropoda;Neomphalina;Neomphaloidea;Pel  
 tospiridae;Gigantopelta;Gigantopelta aegis  
 UdeM00000036140 6573 94.4 UdeM00000036140 XP\_021351683.1 48.9 92  
 47 0 7 98 668 759 8.90E-17 94.4 6573 cellular  
 organisms;Eukaryota;Opisthokonta;Metazoa;Eumetazoa;Bilateria;Protostomia;  
 Spiralia;Lophotrochozoa;Mollusca;Bivalvia;Autobranhia;Pteriomorphia;Pect  
 inida;Pectinoidea;Pectinidae;Mizuhopecten;Mizuhopecten yessoensis  
 UdeM00000036141 6596 284.3 UdeM00000036141 XP\_045208337.1 44.6 334  
 176 3 1 325 329 662 2.10E-73 284.3 6596 cellular  
 organisms;Eukaryota;Opisthokonta;Metazoa;Eumetazoa;Bilateria;Protostomia;  
 Spiralia;Lophotrochozoa;Mollusca;Bivalvia;Autobranhia;Heteroconchia;Euhe  
 terodonta;Imparidentia;Venerida;Veneroidea;Veneridae;Mercenaria;Mercenari  
 a mercenaria  
 UdeM00000036142 6596 187.2 UdeM00000036142 XP\_045189280.1 42.3 220  
 124 3 185 403 355 572 6.40E-44 187.2 6596 cellular  
 organisms;Eukaryota;Opisthokonta;Metazoa;Eumetazoa;Bilateria;Protostomia;  
 Spiralia;Lophotrochozoa;Mollusca;Bivalvia;Autobranhia;Heteroconchia;Euhe

terodonta;Imparidentia;Venerida;Veneroidea;Veneridae;Mercenaria;Mercenari  
 a mercenaria  
 UdeM00000036143 6596 187.2 UdeM00000036143 XP\_045189280.1 42.3 220  
 124 3 185 403 355 572 6.50E-44 187.2 6596 cellular  
 organisms;Eukaryota;Opisthokonta;Metazoa;Eumetazoa;Bilateria;Protostomia;  
 Spiralia;Lophotrochozoa;Mollusca;Bivalvia;Autobranchia;Heteroconchia;Euhe  
 terodonta;Imparidentia;Venerida;Veneroidea;Veneridae;Mercenaria;Mercenari  
 a mercenaria  
 UdeM00000044357 83332 917.1 UdeM00000044357 NP\_217913.1 90.4 513 47  
 1 7 519 15 525 9.70E-264 917.1 83332 cellular  
 organisms;Bacteria;Terrabacteria  
 group;Actinobacteria;Actinomycetia;Corynebacteriales;Mycobacteriaceae;Myc  
 obacterium;Mycobacterium tuberculosis complex;Mycobacterium  
 tuberculosis;Mycobacterium tuberculosis H37Rv  
 UdeM00000038701 6596 492.3 UdeM00000038701 XP\_045209006.1 59.1 364  
 148 1 1 364 479 841 5.40E-136 492.3 6596 cellular  
 organisms;Eukaryota;Opisthokonta;Metazoa;Eumetazoa;Bilateria;Protostomia;  
 Spiralia;Lophotrochozoa;Mollusca;Bivalvia;Autobranchia;Heteroconchia;Euhe  
 terodonta;Imparidentia;Venerida;Veneroidea;Veneridae;Mercenaria;Mercenari  
 a mercenaria  
 UdeM00000038702 6596 84.7 UdeM00000038702 XP\_045209006.1 37.9 116  
 69 2 66 179 908 1022 1.80E-13 84.7 6596 cellular  
 organisms;Eukaryota;Opisthokonta;Metazoa;Eumetazoa;Bilateria;Protostomia;  
 Spiralia;Lophotrochozoa;Mollusca;Bivalvia;Autobranchia;Heteroconchia;Euhe  
 terodonta;Imparidentia;Venerida;Veneroidea;Veneridae;Mercenaria;Mercenari  
 a mercenaria  
 UdeM00000038703 6596 73.9 UdeM00000038703 XP\_045209006.1 37.5 96  
 58 1 1 94 927 1022 2.00E-10 73.9 6596 cellular  
 organisms;Eukaryota;Opisthokonta;Metazoa;Eumetazoa;Bilateria;Protostomia;  
 Spiralia;Lophotrochozoa;Mollusca;Bivalvia;Autobranchia;Heteroconchia;Euhe  
 terodonta;Imparidentia;Venerida;Veneroidea;Veneridae;Mercenaria;Mercenari  
 a mercenaria  
 UdeM00000038704 6565 151.8 UdeM00000038704 XP\_022310266.1 33.4 353  
 192 10 1 337 1 326 1.60E-33 151.8 6565 cellular  
 organisms;Eukaryota;Opisthokonta;Metazoa;Eumetazoa;Bilateria;Protostomia;  
 Spiralia;Lophotrochozoa;Mollusca;Bivalvia;Autobranchia;Pteriomorphia;Ostr  
 eida;Ostreoidea;Ostreidae;Crassostrea;Crassostrea virginica  
 UdeM00000038705 6596 106.7 UdeM00000038705 XP\_045208069.1 45 140  
 67 4 77 206 362 501 3.70E-20 106.7 6596 cellular  
 organisms;Eukaryota;Opisthokonta;Metazoa;Eumetazoa;Bilateria;Protostomia;  
 Spiralia;Lophotrochozoa;Mollusca;Bivalvia;Autobranchia;Heteroconchia;Euhe  
 terodonta;Imparidentia;Venerida;Veneroidea;Veneridae;Mercenaria;Mercenari  
 a mercenaria  
 UdeM00000038706 400727 73.9 UdeM00000038706 XP\_025108636.1 32.1  
 196 114 6 6 190 47 234 4.40E-10 73.9 400727  
 cellular  
 organisms;Eukaryota;Opisthokonta;Metazoa;Eumetazoa;Bilateria;Protostomia;  
 Spiralia;Lophotrochozoa;Mollusca;Gastropoda;Caenogastropoda;Architaeniogl  
 ossa;Ampullarioidea;Ampullariidae;Pomacea;Pomacea canaliculata  
 UdeM00000038707 6596 85.5 UdeM00000038707 XP\_045209795.1 30.6 186  
 114 4 6 184 1071 1248 8.30E-14 85.5 6596 cellular  
 organisms;Eukaryota;Opisthokonta;Metazoa;Eumetazoa;Bilateria;Protostomia;  
 Spiralia;Lophotrochozoa;Mollusca;Bivalvia;Autobranchia;Heteroconchia;Euhe



terodonta;Imparidentia;Venerida;Veneroidea;Veneridae;Mercenaria;Mercenaria mercenaria

UdeM00000038708 6596 89.4 UdeM00000038708 XP\_045209795.1 33.7 178  
114 3 291 464 1071 1248 1.90E-14 89.4 6596 cellular

organisms;Eukaryota;Opisthokonta;Metazoa;Eumetazoa;Bilateria;Protostomia;Spiralia;Lophotrochozoa;Mollusca;Bivalvia;Autobranhia;Heteroconchia;Euheterodonta;Imparidentia;Venerida;Veneroidea;Veneridae;Mercenaria;Mercenaria mercenaria

UdeM00000038709 400727 84.7 UdeM00000038709 XP\_025108636.1 33.5  
197 110 5 32 216 47 234 4.40E-13 84.7 400727  
cellular

organisms;Eukaryota;Opisthokonta;Metazoa;Eumetazoa;Bilateria;Protostomia;Spiralia;Lophotrochozoa;Mollusca;Gastropoda;Caenogastropoda;Architaenioglossa;Ampullarioidea;Ampullariidae;Pomacea;Pomacea canaliculata

UdeM00000038711 400727 117.9 UdeM00000038711 XP\_025081606.1 46.4  
151 74 4 1 150 81 225 2.90E-23 117.9 400727  
cellular

organisms;Eukaryota;Opisthokonta;Metazoa;Eumetazoa;Bilateria;Protostomia;Spiralia;Lophotrochozoa;Mollusca;Gastropoda;Caenogastropoda;Architaenioglossa;Ampullarioidea;Ampullariidae;Pomacea;Pomacea canaliculata

UdeM00000038710 1735272 208.4 UdeM00000038710 XP\_041372329.1 34  
582 271 14 1 551 1 500 2.50E-50 208.4 1735272  
cellular

organisms;Eukaryota;Opisthokonta;Metazoa;Eumetazoa;Bilateria;Protostomia;Spiralia;Lophotrochozoa;Mollusca;Gastropoda;Neomphalina;Neomphaloidea;Peltospiridae;Gigantopelta;Gigantopelta aegis

UdeM00000038712 6573 1036.9 UdeM00000038712 XP\_021347534.1 53.4  
1754 643 24 562 2258 512 2148 3.70E-299 1036.9 6573  
cellular

organisms;Eukaryota;Opisthokonta;Metazoa;Eumetazoa;Bilateria;Protostomia;Spiralia;Lophotrochozoa;Mollusca;Bivalvia;Autobranhia;Pteriomorphia;Pectinida;Pectinoidea;Pectinidae;Mizuhopecten;Mizuhopecten yessoensis

UdeM00000038713 6573 189.1 UdeM00000038713 XP\_021347537.1 31.1 492  
290 10 1 479 1 456 1.30E-44 189.1 6573 cellular

organisms;Eukaryota;Opisthokonta;Metazoa;Eumetazoa;Bilateria;Protostomia;Spiralia;Lophotrochozoa;Mollusca;Bivalvia;Autobranhia;Pteriomorphia;Pectinida;Pectinoidea;Pectinidae;Mizuhopecten;Mizuhopecten yessoensis

UdeM00000038714 6596 204.9 UdeM00000038714 XP\_045207453.1 83.6 122  
20 0 1 122 5 126 5.80E-50 204.9 6596 cellular

organisms;Eukaryota;Opisthokonta;Metazoa;Eumetazoa;Bilateria;Protostomia;Spiralia;Lophotrochozoa;Mollusca;Bivalvia;Autobranhia;Heteroconchia;Euheterodonta;Imparidentia;Venerida;Veneroidea;Veneridae;Mercenaria;Mercenaria mercenaria

UdeM00000038716 143995 91.7 UdeM00000038716 XP\_012144133.1 49.6  
113 32 1 4 116 39 126 6.90E-16 91.7 143995  
cellular

organisms;Eukaryota;Opisthokonta;Metazoa;Eumetazoa;Bilateria;Protostomia;Ecdysozoa;Panarthropoda;Arthropoda;Mandibulata;Pancrustacea;Hexapoda;Insecta;Dicondylia;Pterygota;Neoptera;Endopterygota;Hymenoptera;Apocrita;Aculeata;Apoidea;Megachilidae;Megachilinae;Megachilini;Megachile;Megachile rotundata

UdeM00000038717 684658 105.1 UdeM00000038717 XP\_044002566.1 77.1  
70 16 0 2 71 62 131 4.40E-20 105.1 684658  
cellular

organisms;Eukaryota;Opisthokonta;Metazoa;Eumetazoa;Bilateria;Protostomia;  
Ecdysozoa;Panarthropoda;Arthropoda;Mandibulata;Pancrustacea;Hexapoda;Inse  
cta;Dicondylia;Pterygota;Neoptera;Endopterygota;Hymenoptera;Apocrita;Para  
sitoida;Ichneumonoidea;Braconidae;Aphidiinae;Aphidius;Aphidius gifuensis  
UdeM00000038718 6596 327.4 UdeM00000038718 XP\_045175949.1 61.9 268  
96 1 6 273 2 263 1.70E-86 327.4 6596 cellular  
organisms;Eukaryota;Opisthokonta;Metazoa;Eumetazoa;Bilateria;Protostomia;  
Spiralia;Lophotrochozoa;Mollusca;Bivalvia;Autobranchia;Heteroconchia;Euhe  
terodonta;Imparidentia;Venerida;Veneroidea;Veneridae;Mercenaria;Mercenari  
a mercenaria  
UdeM00000038719 7574 96.3 UdeM00000038719 XP\_013393211.1 34.7 176  
99 5 22 182 1140 1314 6.90E-17 96.3 7574 cellular  
organisms;Eukaryota;Opisthokonta;Metazoa;Eumetazoa;Bilateria;Protostomia;  
Spiralia;Lophotrochozoa;Brachiopoda;Linguliformea;Lingulata;Lingulida;Lin  
guloidea;Lingulidae;Lingula;Lingula anatina  
UdeM00000038720 2652724 72.4 UdeM00000038720 XP\_020912927.2 43.6  
78 41 2 24 99 815 891 4.80E-10 72.4 2652724  
cellular  
organisms;Eukaryota;Opisthokonta;Metazoa;Eumetazoa;Cnidaria;Anthozoa;Hexa  
corallia;Actiniaria;Aiptasiidae;Exaiptasia;Exaiptasia diaphana  
UdeM00000038722 225164 96.7 UdeM00000038722 XP\_009051710.1 32.5  
163 97 3 22 171 3736 3898 7.20E-17 96.7 225164  
cellular  
organisms;Eukaryota;Opisthokonta;Metazoa;Eumetazoa;Bilateria;Protostomia;  
Spiralia;Lophotrochozoa;Mollusca;Gastropoda;Patellogastropoda;Lottioidea;  
Lottiidae;Lottia;Lottia gigantea  
UdeM00000038723 6565 95.1 UdeM00000038723 XP\_022286845.1 28.6 248  
148 9 1 220 293 539 2.40E-16 95.1 6565 cellular  
organisms;Eukaryota;Opisthokonta;Metazoa;Eumetazoa;Bilateria;Protostomia;  
Spiralia;Lophotrochozoa;Mollusca;Bivalvia;Autobranchia;Pteriormorphia;Ostr  
eida;Ostreoidea;Ostreidae;Crassostrea;Crassostrea virginica  
UdeM00000038724 7574 235.3 UdeM00000038724 XP\_013397768.1 28 522  
300 15 19 484 21 522 2.00E-58 235.3 7574 cellular  
organisms;Eukaryota;Opisthokonta;Metazoa;Eumetazoa;Bilateria;Protostomia;  
Spiralia;Lophotrochozoa;Brachiopoda;Linguliformea;Lingulata;Lingulida;Lin  
guloidea;Lingulidae;Lingula;Lingula anatina  
UdeM00000038725 6596 461.1 UdeM00000038725 XP\_045156839.1 31.9 941  
514 12 4 935 101 923 3.40E-126 461.1 6596 cellular  
organisms;Eukaryota;Opisthokonta;Metazoa;Eumetazoa;Bilateria;Protostomia;  
Spiralia;Lophotrochozoa;Mollusca;Bivalvia;Autobranchia;Heteroconchia;Euhe  
terodonta;Imparidentia;Venerida;Veneroidea;Veneridae;Mercenaria;Mercenari  
a mercenaria  
UdeM00000038726 6596 102.1 UdeM00000038726 XP\_045156839.1 43.3 120  
68 0 11 130 803 922 5.80E-19 102.1 6596 cellular  
organisms;Eukaryota;Opisthokonta;Metazoa;Eumetazoa;Bilateria;Protostomia;  
Spiralia;Lophotrochozoa;Mollusca;Bivalvia;Autobranchia;Heteroconchia;Euhe  
terodonta;Imparidentia;Venerida;Veneroidea;Veneridae;Mercenaria;Mercenari  
a mercenaria  
UdeM00000038727 6596 189.5 UdeM00000038727 XP\_045156839.1 33 370  
230 6 10 366 48 412 1.30E-44 189.5 6596 cellular  
organisms;Eukaryota;Opisthokonta;Metazoa;Eumetazoa;Bilateria;Protostomia;  
Spiralia;Lophotrochozoa;Mollusca;Bivalvia;Autobranchia;Heteroconchia;Euhe  
terodonta;Imparidentia;Venerida;Veneroidea;Veneridae;Mercenaria;Mercenari  
a mercenaria

UdeM00000038728 6596 475.3 UdeM00000038728 XP\_045156839.1 33.9 919  
 526 10 35 944 76 922 1.80E-130 475.3 6596 cellular  
 organisms;Eukaryota;Opisthokonta;Metazoa;Eumetazoa;Bilateria;Protostomia;  
 Spiralia;Lophotrochozoa;Mollusca;Bivalvia;Autobranchia;Heteroconchia;Euhe  
 terodonta;Imparidentia;Venerida;Veneroidea;Veneridae;Mercenaria;Mercenari  
 a mercenaria  
 UdeM00000038729 6596 472.6 UdeM00000038729 XP\_045156839.1 34.1 919  
 525 10 35 944 76 922 1.20E-129 472.6 6596 cellular  
 organisms;Eukaryota;Opisthokonta;Metazoa;Eumetazoa;Bilateria;Protostomia;  
 Spiralia;Lophotrochozoa;Mollusca;Bivalvia;Autobranchia;Heteroconchia;Euhe  
 terodonta;Imparidentia;Venerida;Veneroidea;Veneridae;Mercenaria;Mercenari  
 a mercenaria  
 UdeM00000038730 29159 81.3 UdeM00000038730 XP\_034321834.1 26.5 189  
 124 2 223 398 4 190 4.20E-12 81.3 29159 cellular  
 organisms;Eukaryota;Opisthokonta;Metazoa;Eumetazoa;Bilateria;Protostomia;  
 Spiralia;Lophotrochozoa;Mollusca;Bivalvia;Autobranchia;Pteriormorphia;Ostr  
 eida;Ostreoidea;Ostreidae;Crassostrea;Crassostrea gigas  
 UdeM00000038732 63155 85.9 UdeM00000038732 XP\_030585845.1 56.3 71  
 31 0 114 184 264 334 6.50E-14 85.9 63155 cellular  
 organisms;Eukaryota;Opisthokonta;Metazoa;Eumetazoa;Bilateria;Deuterostomi  
 a;Chordata;Craniata;Vertebrata;Gnathostomata;Teleostomi;Euteleostomi;Acti  
 nopterygii;Actinopteri;Neopterygii;Teleostei;Osteoglossocephalai;Clupeoce  
 phala;Euteleosteomorpha;Neoteleostei;Eurypterygia;Ctenosquamata;Acanthomo  
 rphata;Euacanthomorphacea;Percomorphaceae;Ovalentaria;Cichlomorphae;Cichl  
 iformes;Cichlidae;New World  
 cichlids;Cichlasomatinae;Heroini;Archocentrus;Archocentrus centrarchus  
 UdeM00000038733 6596 346.7 UdeM00000038733 XP\_045208271.1 60.7 272  
 97 3 30 294 32 300 5.10E-92 346.7 6596 cellular  
 organisms;Eukaryota;Opisthokonta;Metazoa;Eumetazoa;Bilateria;Protostomia;  
 Spiralia;Lophotrochozoa;Mollusca;Bivalvia;Autobranchia;Heteroconchia;Euhe  
 terodonta;Imparidentia;Venerida;Veneroidea;Veneridae;Mercenaria;Mercenari  
 a mercenaria  
 UdeM00000038734 6596 337.8 UdeM00000038734 XP\_045208268.1 52.1 353  
 143 7 1621 1953 1624 1970 9.80E-89 337.8 6596 cellular  
 organisms;Eukaryota;Opisthokonta;Metazoa;Eumetazoa;Bilateria;Protostomia;  
 Spiralia;Lophotrochozoa;Mollusca;Bivalvia;Autobranchia;Heteroconchia;Euhe  
 terodonta;Imparidentia;Venerida;Veneroidea;Veneridae;Mercenaria;Mercenari  
 a mercenaria  
 UdeM00000038735 6565 78.2 UdeM00000038735 XP\_022297447.1 51.9 81  
 28 1 69 138 286 366 9.30E-12 78.2 6565 cellular  
 organisms;Eukaryota;Opisthokonta;Metazoa;Eumetazoa;Bilateria;Protostomia;  
 Spiralia;Lophotrochozoa;Mollusca;Bivalvia;Autobranchia;Pteriormorphia;Ostr  
 eida;Ostreoidea;Ostreidae;Crassostrea;Crassostrea virginica  
 UdeM00000038736 6579 315.8 UdeM00000038736 XP\_033726634.1 46.2 418  
 194 11 6 403 1 407 1.70E-82 315.8 6579 cellular  
 organisms;Eukaryota;Opisthokonta;Metazoa;Eumetazoa;Bilateria;Protostomia;  
 Spiralia;Lophotrochozoa;Mollusca;Bivalvia;Autobranchia;Pteriormorphia;Pect  
 inida;Pectinoidea;Pectinidae;Pecten;Pecten maximus  
 UdeM00000038737 225164 215.7 UdeM00000038737 XP\_009055149.1 57  
 172 74 0 1 172 34 205 4.80E-53 215.7 225164  
 cellular  
 organisms;Eukaryota;Opisthokonta;Metazoa;Eumetazoa;Bilateria;Protostomia;  
 Spiralia;Lophotrochozoa;Mollusca;Gastropoda;Patellogastropoda;Lottioidea;  
 Lottiidae;Lottia;Lottia gigantea

UdeM00000038738 6596 393.3 UdeM00000038738 XP\_045207408.1 73.4 248  
 66 0 28 275 15 262 2.60E-106 393.3 6596 cellular  
 organisms;Eukaryota;Opisthokonta;Metazoa;Eumetazoa;Bilateria;Protostomia;  
 Spiralia;Lophotrochozoa;Mollusca;Bivalvia;Autobranchia;Heteroconchia;Euhe  
 terodonta;Imparidentia;Venerida;Veneroidea;Veneridae;Mercenaria;Mercenari  
 a mercenaria

UdeM00000038739 7888 272.3 UdeM00000038739 XP\_043944824.1 31.9 618  
 358 12 57 617 611 1222 1.90E-69 272.3 7888 cellular  
 organisms;Eukaryota;Opisthokonta;Metazoa;Eumetazoa;Bilateria;Deuterostomi  
 a;Chordata;Craniata;Vertebrata;Gnathostomata;Teleostomi;Euteleostomi;Sarc  
 opterygii;Dipnotetrapodomorpha;Dipnomorpha;Ceratodontae;Ceratodontiformes  
 ;Lepidosirenoidei;Protopteridae;Protopterus;Protopterus annectens

UdeM00000038741 6573 136.7 UdeM00000038741 XP\_021343092.1 28.2 376  
 230 13 37 396 37 388 6.30E-29 136.7 6573 cellular  
 organisms;Eukaryota;Opisthokonta;Metazoa;Eumetazoa;Bilateria;Protostomia;  
 Spiralia;Lophotrochozoa;Mollusca;Bivalvia;Autobranchia;Pteriomorpha;Pect  
 inida;Pectinoidea;Pectinidae;Mizuhopecten;Mizuhopecten yessoensis

UdeM00000038743 6596 102.1 UdeM00000038743 XP\_045207408.1 82.5 57  
 10 0 60 116 15 71 5.30E-19 102.1 6596 cellular  
 organisms;Eukaryota;Opisthokonta;Metazoa;Eumetazoa;Bilateria;Protostomia;  
 Spiralia;Lophotrochozoa;Mollusca;Bivalvia;Autobranchia;Heteroconchia;Euhe  
 terodonta;Imparidentia;Venerida;Veneroidea;Veneridae;Mercenaria;Mercenari  
 a mercenaria

UdeM00000038744 6579 114.8 UdeM00000038744 XP\_033740424.1 26.1 322  
 208 10 14 325 20 321 2.70E-22 114.8 6579 cellular  
 organisms;Eukaryota;Opisthokonta;Metazoa;Eumetazoa;Bilateria;Protostomia;  
 Spiralia;Lophotrochozoa;Mollusca;Bivalvia;Autobranchia;Pteriomorpha;Pect  
 inida;Pectinoidea;Pectinidae;Pecten;Pecten maximus

UdeM00000038746 6596 254.2 UdeM00000038746 XP\_045209127.1 71.6 183  
 51 1 5 186 2 184 1.30E-64 254.2 6596 cellular  
 organisms;Eukaryota;Opisthokonta;Metazoa;Eumetazoa;Bilateria;Protostomia;  
 Spiralia;Lophotrochozoa;Mollusca;Bivalvia;Autobranchia;Heteroconchia;Euhe  
 terodonta;Imparidentia;Venerida;Veneroidea;Veneridae;Mercenaria;Mercenari  
 a mercenaria

UdeM00000038745 1735272 603.2 UdeM00000038745 XP\_041371969.1 65.1  
 484 164 3 1 483 1 480 3.00E-169 603.2 1735272  
 cellular  
 organisms;Eukaryota;Opisthokonta;Metazoa;Eumetazoa;Bilateria;Protostomia;  
 Spiralia;Lophotrochozoa;Mollusca;Gastropoda;Neomphalina;Neomphaloidea;Pel  
 tospiridae;Gigantopelta;Gigantopelta aegis

UdeM00000038748 260615 280 UdeM00000038748 XP\_039383630.1 80.6  
 180 35 0 1 180 160 339 2.10E-72 280 260615  
 cellular  
 organisms;Eukaryota;Opisthokonta;Metazoa;Eumetazoa;Bilateria;Deuterostomi  
 a;Chordata;Craniata;Vertebrata;Gnathostomata;Teleostomi;Euteleostomi;Sarc  
 opterygii;Dipnotetrapodomorpha;Tetrapoda;Amniota;Sauropsida;Sauria;Archel  
 osauria;Testudinata;Testudines;Cryptodira;Durocryptodira;Testudinoidea;Ge  
 oemydidae;Geoemydinae;Mauremys;Mauremys reevesii

UdeM00000038749 6596 895.2 UdeM00000038749 XP\_045209130.1 47.6 1120  
 483 29 16 1092 159 1217 8.30E-257 895.2 6596 cellular  
 organisms;Eukaryota;Opisthokonta;Metazoa;Eumetazoa;Bilateria;Protostomia;  
 Spiralia;Lophotrochozoa;Mollusca;Bivalvia;Autobranchia;Heteroconchia;Euhe  
 terodonta;Imparidentia;Venerida;Veneroidea;Veneridae;Mercenaria;Mercenari  
 a mercenaria

UdeM00000038750 6596 901.4 UdeM00000038750 XP\_045209130.1 47.8 1116  
 483 28 16 1088 159 1217 1.20E-258 901.4 6596 cellular  
 organisms;Eukaryota;Opisthokonta;Metazoa;Eumetazoa;Bilateria;Protostomia;  
 Spiralia;Lophotrochozoa;Mollusca;Bivalvia;Autobranchia;Heteroconchia;Euhe  
 terodonta;Imparidentia;Venerida;Veneroidea;Veneridae;Mercenaria;Mercenari  
 a mercenaria  
 UdeM00000038751 400727 586.3 UdeM00000038751 XP\_025078594.1 79.6  
 357 72 1 1 356 1 357 3.00E-164 586.3 400727  
 cellular  
 organisms;Eukaryota;Opisthokonta;Metazoa;Eumetazoa;Bilateria;Protostomia;  
 Spiralia;Lophotrochozoa;Mollusca;Gastropoda;Caenogastropoda;Architaeniogl  
 ossa;Ampullarioidea;Ampullariidae;Pomacea;Pomacea canaliculata  
 UdeM00000038752 6596 299.3 UdeM00000038752 XP\_045208279.1 78 182  
 40 0 1 182 1 182 3.40E-78 299.3 6596 cellular  
 organisms;Eukaryota;Opisthokonta;Metazoa;Eumetazoa;Bilateria;Protostomia;  
 Spiralia;Lophotrochozoa;Mollusca;Bivalvia;Autobranchia;Heteroconchia;Euhe  
 terodonta;Imparidentia;Venerida;Veneroidea;Veneridae;Mercenaria;Mercenari  
 a mercenaria  
 UdeM00000038753 6596 144.8 UdeM00000038753 XP\_045208055.1 61.1 95  
 37 0 5 99 31 125 7.50E-32 144.8 6596 cellular  
 organisms;Eukaryota;Opisthokonta;Metazoa;Eumetazoa;Bilateria;Protostomia;  
 Spiralia;Lophotrochozoa;Mollusca;Bivalvia;Autobranchia;Heteroconchia;Euhe  
 terodonta;Imparidentia;Venerida;Veneroidea;Veneridae;Mercenaria;Mercenari  
 a mercenaria  
 UdeM00000038757 6565 341.3 UdeM00000038757 XP\_022328252.1 50.5 364  
 161 6 1 346 953 1315 1.50E-90 341.3 6565 cellular  
 organisms;Eukaryota;Opisthokonta;Metazoa;Eumetazoa;Bilateria;Protostomia;  
 Spiralia;Lophotrochozoa;Mollusca;Bivalvia;Autobranchia;Pteriomorphia;Ostr  
 eida;Ostreoidea;Ostreidae;Crassostrea;Crassostrea virginica  
 UdeM00000038758 6565 106.3 UdeM00000038758 XP\_022314409.1 39 177  
 90 5 1 159 1139 1315 3.70E-20 106.3 6565 cellular  
 organisms;Eukaryota;Opisthokonta;Metazoa;Eumetazoa;Bilateria;Protostomia;  
 Spiralia;Lophotrochozoa;Mollusca;Bivalvia;Autobranchia;Pteriomorphia;Ostr  
 eida;Ostreoidea;Ostreidae;Crassostrea;Crassostrea virginica  
 UdeM00000038759 6573 324.3 UdeM00000038759 XP\_021379592.1 76 225  
 53 1 25 248 17 241 1.30E-85 324.3 6573 cellular  
 organisms;Eukaryota;Opisthokonta;Metazoa;Eumetazoa;Bilateria;Protostomia;  
 Spiralia;Lophotrochozoa;Mollusca;Bivalvia;Autobranchia;Pteriomorphia;Pect  
 inida;Pectinoidea;Pectinidae;Mizuhopecten;Mizuhopecten yessoensis  
 UdeM00000038760 6596 308.1 UdeM00000038760 XP\_045201815.1 31.5 727  
 427 16 55 740 64 760 3.10E-80 308.1 6596 cellular  
 organisms;Eukaryota;Opisthokonta;Metazoa;Eumetazoa;Bilateria;Protostomia;  
 Spiralia;Lophotrochozoa;Mollusca;Bivalvia;Autobranchia;Heteroconchia;Euhe  
 terodonta;Imparidentia;Venerida;Veneroidea;Veneridae;Mercenaria;Mercenari  
 a mercenaria  
 UdeM00000038761 6596 71.2 UdeM00000038761 XP\_045169064.1 32.3 198  
 100 6 150 323 637 824 2.70E-09 71.2 6596 cellular  
 organisms;Eukaryota;Opisthokonta;Metazoa;Eumetazoa;Bilateria;Protostomia;  
 Spiralia;Lophotrochozoa;Mollusca;Bivalvia;Autobranchia;Heteroconchia;Euhe  
 terodonta;Imparidentia;Venerida;Veneroidea;Veneridae;Mercenaria;Mercenari  
 a mercenaria  
 UdeM00000038763 6596 314.3 UdeM00000038763 XP\_045201815.1 32.3 741  
 421 16 66 769 64 760 4.40E-82 314.3 6596 cellular  
 organisms;Eukaryota;Opisthokonta;Metazoa;Eumetazoa;Bilateria;Protostomia;

Spiralia;Lophotrochozoa;Mollusca;Bivalvia;Autobranchia;Heteroconchia;Euherodonta;Imparidentia;Venerida;Veneroidea;Veneridae;Mercenaria;Mercenaria mercenaria

UdeM00000038764 6573 116.3 UdeM00000038764 XP\_021379592.1 77 74  
17 0 67 140 168 241 3.10E-23 116.3 6573 cellular

organisms;Eukaryota;Opisthokonta;Metazoa;Eumetazoa;Bilateria;Protostomia;Spiralia;Lophotrochozoa;Mollusca;Bivalvia;Autobranchia;Pteriormorphia;Pectinida;Pectinoidea;Pectinidae;Mizuhopecten;Mizuhopecten yessoensis

UdeM00000038765 6596 308.9 UdeM00000038765 XP\_045201815.1 32.1 748  
416 18 77 787 64 756 1.90E-80 308.9 6596 cellular

organisms;Eukaryota;Opisthokonta;Metazoa;Eumetazoa;Bilateria;Protostomia;Spiralia;Lophotrochozoa;Mollusca;Bivalvia;Autobranchia;Heteroconchia;Euherodonta;Imparidentia;Venerida;Veneroidea;Veneridae;Mercenaria;Mercenaria mercenaria

UdeM00000038768 6596 134 UdeM00000038768 XP\_045201815.1 31.5 327  
180 8 1 314 4 299 3.20E-28 134 6596 cellular

organisms;Eukaryota;Opisthokonta;Metazoa;Eumetazoa;Bilateria;Protostomia;Spiralia;Lophotrochozoa;Mollusca;Bivalvia;Autobranchia;Heteroconchia;Euherodonta;Imparidentia;Venerida;Veneroidea;Veneridae;Mercenaria;Mercenaria mercenaria

UdeM00000038769 6596 122.9 UdeM00000038769 XP\_045192805.1 47 115  
61 0 6 120 45 159 2.90E-25 122.9 6596 cellular

organisms;Eukaryota;Opisthokonta;Metazoa;Eumetazoa;Bilateria;Protostomia;Spiralia;Lophotrochozoa;Mollusca;Bivalvia;Autobranchia;Heteroconchia;Euherodonta;Imparidentia;Venerida;Veneroidea;Veneridae;Mercenaria;Mercenaria mercenaria

UdeM00000038770 6596 298.5 UdeM00000038770 XP\_045201815.1 30.3 796  
479 17 1 759 4 760 2.50E-77 298.5 6596 cellular

organisms;Eukaryota;Opisthokonta;Metazoa;Eumetazoa;Bilateria;Protostomia;Spiralia;Lophotrochozoa;Mollusca;Bivalvia;Autobranchia;Heteroconchia;Euherodonta;Imparidentia;Venerida;Veneroidea;Veneridae;Mercenaria;Mercenaria mercenaria

UdeM00000038771 6596 224.6 UdeM00000038771 XP\_045192805.1 50.7 217  
106 1 6 222 45 260 1.30E-55 224.6 6596 cellular

organisms;Eukaryota;Opisthokonta;Metazoa;Eumetazoa;Bilateria;Protostomia;Spiralia;Lophotrochozoa;Mollusca;Bivalvia;Autobranchia;Heteroconchia;Euherodonta;Imparidentia;Venerida;Veneroidea;Veneridae;Mercenaria;Mercenaria mercenaria

UdeM00000004306 1735272 366.7 UdeM00000004306 XP\_041356356.1 49.1  
381 173 8 6 381 52 416 3.80E-98 366.7 1735272

cellular

organisms;Eukaryota;Opisthokonta;Metazoa;Eumetazoa;Bilateria;Protostomia;Spiralia;Lophotrochozoa;Mollusca;Gastropoda;Neomphalina;Neomphaloidea;Peltospiridae;Gigantopelta;Gigantopelta aegis

UdeM00000004307 6596 128.3 UdeM00000004307 XP\_045214067.1 37.4 163  
99 2 1 161 262 423 1.10E-26 128.3 6596 cellular

organisms;Eukaryota;Opisthokonta;Metazoa;Eumetazoa;Bilateria;Protostomia;Spiralia;Lophotrochozoa;Mollusca;Bivalvia;Autobranchia;Heteroconchia;Euherodonta;Imparidentia;Venerida;Veneroidea;Veneridae;Mercenaria;Mercenaria mercenaria

UdeM00000004308 6596 181 UdeM00000004308 XP\_045214067.1 33.9 304  
191 6 82 378 138 438 2.80E-42 181 6596 cellular

organisms;Eukaryota;Opisthokonta;Metazoa;Eumetazoa;Bilateria;Protostomia;Spiralia;Lophotrochozoa;Mollusca;Bivalvia;Autobranchia;Heteroconchia;Euherodonta

terodonta;Imparidentia;Venerida;Veneroidea;Veneridae;Mercenaria;Mercenari  
 a mercenaria  
 UdeM00000004309 6596 178.7 UdeM00000004309 XP\_045214067.1 33.6 286  
 181 5 85 363 140 423 1.40E-41 178.7 6596 cellular  
 organisms;Eukaryota;Opisthokonta;Metazoa;Eumetazoa;Bilateria;Protostomia;  
 Spiralia;Lophotrochozoa;Mollusca;Bivalvia;Autobranchia;Heteroconchia;Euhe  
 terodonta;Imparidentia;Venerida;Veneroidea;Veneridae;Mercenaria;Mercenari  
 a mercenaria  
 UdeM00000004310 1735272 363.6 UdeM00000004310 XP\_041356356.1 49.3  
 381 172 9 6 381 52 416 3.10E-97 363.6 1735272  
 cellular  
 organisms;Eukaryota;Opisthokonta;Metazoa;Eumetazoa;Bilateria;Protostomia;  
 Spiralia;Lophotrochozoa;Mollusca;Gastropoda;Neomphalina;Neomphaloidea;Pel  
 tospiridae;Gigantopelta;Gigantopelta aegis  
 UdeM00000004311 6579 185.3 UdeM00000004311 XP\_033743776.1 33.2 286  
 185 3 91 371 122 406 1.50E-43 185.3 6579 cellular  
 organisms;Eukaryota;Opisthokonta;Metazoa;Eumetazoa;Bilateria;Protostomia;  
 Spiralia;Lophotrochozoa;Mollusca;Bivalvia;Autobranchia;Pteriormorphia;Pect  
 inida;Pectinoidea;Pectinidae;Pecten;Pecten maximus  
 UdeM00000004312 6596 71.2 UdeM00000004312 XP\_045179104.1 32.3 127  
 78 3 219 337 222 348 2.80E-09 71.2 6596 cellular  
 organisms;Eukaryota;Opisthokonta;Metazoa;Eumetazoa;Bilateria;Protostomia;  
 Spiralia;Lophotrochozoa;Mollusca;Bivalvia;Autobranchia;Heteroconchia;Euhe  
 terodonta;Imparidentia;Venerida;Veneroidea;Veneridae;Mercenaria;Mercenari  
 a mercenaria  
 UdeM00000004313 6596 79.7 UdeM00000004313 XP\_045179108.1 35.9 131  
 74 4 216 337 17 146 7.80E-12 79.7 6596 cellular  
 organisms;Eukaryota;Opisthokonta;Metazoa;Eumetazoa;Bilateria;Protostomia;  
 Spiralia;Lophotrochozoa;Mollusca;Bivalvia;Autobranchia;Heteroconchia;Euhe  
 terodonta;Imparidentia;Venerida;Veneroidea;Veneridae;Mercenaria;Mercenari  
 a mercenaria  
 UdeM00000004314 6573 220.3 UdeM00000004314 XP\_021377091.1 73.6 159  
 37 2 4 160 1 156 1.80E-54 220.3 6573 cellular  
 organisms;Eukaryota;Opisthokonta;Metazoa;Eumetazoa;Bilateria;Protostomia;  
 Spiralia;Lophotrochozoa;Mollusca;Bivalvia;Autobranchia;Pteriormorphia;Pect  
 inida;Pectinoidea;Pectinidae;Mizuhopecten;Mizuhopecten yessoensis  
 UdeM00000004315 6573 220.3 UdeM00000004315 XP\_021377091.1 73.6 159  
 37 2 1 157 1 156 1.70E-54 220.3 6573 cellular  
 organisms;Eukaryota;Opisthokonta;Metazoa;Eumetazoa;Bilateria;Protostomia;  
 Spiralia;Lophotrochozoa;Mollusca;Bivalvia;Autobranchia;Pteriormorphia;Pect  
 inida;Pectinoidea;Pectinidae;Mizuhopecten;Mizuhopecten yessoensis  
 UdeM00000004316 6579 198.4 UdeM00000004316 XP\_033736448.1 39 272  
 155 5 5 267 10 279 2.20E-47 198.4 6579 cellular  
 organisms;Eukaryota;Opisthokonta;Metazoa;Eumetazoa;Bilateria;Protostomia;  
 Spiralia;Lophotrochozoa;Mollusca;Bivalvia;Autobranchia;Pteriormorphia;Pect  
 inida;Pectinoidea;Pectinidae;Pecten;Pecten maximus  
 UdeM00000004317 29159 468 UdeM00000004317 XP\_034311318.1 40.3 680  
 358 18 157 804 1 664 2.60E-128 468 29159 cellular  
 organisms;Eukaryota;Opisthokonta;Metazoa;Eumetazoa;Bilateria;Protostomia;  
 Spiralia;Lophotrochozoa;Mollusca;Bivalvia;Autobranchia;Pteriormorphia;Ostr  
 eida;Ostreoidea;Ostreidae;Crassostrea;Crassostrea gigas  
 UdeM00000004318 40690 79.3 UdeM00000004318 XP\_034003333.1 27.9 154  
 96 4 67 217 90 231 6.60E-12 79.3 40690 cellular  
 organisms;Eukaryota;Opisthokonta;Metazoa;Eumetazoa;Bilateria;Deuterostomi

a;Chordata;Craniata;Vertebrata;Gnathostomata;Teleostomi;Euteleostomi;Actinopterygii;Actinopteri;Neopterygii;Teleostei;Osteoglossocephalai;Clupeocephala;Euteleostei;Neoteleostei;Eurypterygia;Ctenosquamata;Acanthomorphata;Euacanthomorphacea;Percomorphaceae;Eupercaria;Perciformes;Notothenioidei;Nototheniidae;Trematomus;Trematomus bernacchii

UdeM00000004319 40690 84 UdeM00000004319 XP\_034003328.1 32.7 153  
90 4 88 239 96 236 3.00E-13 84 40690 cellular  
organisms;Eukaryota;Opisthokonta;Metazoa;Eumetazoa;Bilateria;Deuterostomia;Chordata;Craniata;Vertebrata;Gnathostomata;Teleostomi;Euteleostomi;Actinopterygii;Actinopteri;Neopterygii;Teleostei;Osteoglossocephalai;Clupeocephala;Euteleostei;Neoteleostei;Eurypterygia;Ctenosquamata;Acanthomorphata;Euacanthomorphacea;Percomorphaceae;Eupercaria;Perciformes;Notothenioidei;Nototheniidae;Trematomus;Trematomus bernacchii

UdeM00000004320 40690 86.7 UdeM00000004320 XP\_034003328.1 31.4 153  
92 4 88 239 96 236 4.60E-14 86.7 40690 cellular  
organisms;Eukaryota;Opisthokonta;Metazoa;Eumetazoa;Bilateria;Deuterostomia;Chordata;Craniata;Vertebrata;Gnathostomata;Teleostomi;Euteleostomi;Actinopterygii;Actinopteri;Neopterygii;Teleostei;Osteoglossocephalai;Clupeocephala;Euteleostei;Neoteleostei;Eurypterygia;Ctenosquamata;Acanthomorphata;Euacanthomorphacea;Percomorphaceae;Eupercaria;Perciformes;Notothenioidei;Nototheniidae;Trematomus;Trematomus bernacchii

UdeM00000004321 6596 63.2 UdeM00000004321 XP\_045179108.1 30 120  
80 2 254 369 21 140 8.40E-07 63.2 6596 cellular  
organisms;Eukaryota;Opisthokonta;Metazoa;Eumetazoa;Bilateria;Protostomia;Spiralia;Lophotrochozoa;Mollusca;Bivalvia;Autobranchia;Heteroconchia;Euheterodonta;Imparidentia;Venerida;Veneroidea;Veneridae;Mercenaria;Mercenaria mercenaria

UdeM00000004322 6596 498.4 UdeM00000004322 XP\_045210013.1 72.5 371  
63 5 1 334 7 375 6.90E-138 498.4 6596 cellular  
organisms;Eukaryota;Opisthokonta;Metazoa;Eumetazoa;Bilateria;Protostomia;Spiralia;Lophotrochozoa;Mollusca;Bivalvia;Autobranchia;Heteroconchia;Euheterodonta;Imparidentia;Venerida;Veneroidea;Veneridae;Mercenaria;Mercenaria mercenaria

UdeM00000004324 6573 328.9 UdeM00000004324 XP\_021345149.1 54.5 308  
120 3 9 308 26 321 7.00E-87 328.9 6573 cellular  
organisms;Eukaryota;Opisthokonta;Metazoa;Eumetazoa;Bilateria;Protostomia;Spiralia;Lophotrochozoa;Mollusca;Bivalvia;Autobranchia;Pteriomorphia;Pectinida;Pectinoidea;Pectinidae;Mizuhopecten;Mizuhopecten yessoensis

UdeM00000004325 6596 583.2 UdeM00000004325 XP\_045209996.1 50.5 636  
266 10 99 725 349 944 4.60E-163 583.2 6596 cellular  
organisms;Eukaryota;Opisthokonta;Metazoa;Eumetazoa;Bilateria;Protostomia;Spiralia;Lophotrochozoa;Mollusca;Bivalvia;Autobranchia;Heteroconchia;Euheterodonta;Imparidentia;Venerida;Veneroidea;Veneridae;Mercenaria;Mercenaria mercenaria

UdeM00000004326 29159 366.3 UdeM00000004326 XP\_034333379.1 76.5 221  
47 1 3 223 56 271 2.70E-98 366.3 29159 cellular  
organisms;Eukaryota;Opisthokonta;Metazoa;Eumetazoa;Bilateria;Protostomia;Spiralia;Lophotrochozoa;Mollusca;Bivalvia;Autobranchia;Pteriomorphia;Ostreida;Ostreoidea;Ostreidae;Crassostrea;Crassostrea gigas

UdeM00000004327 29159 369.8 UdeM00000004327 XP\_034333379.1 76.9 221  
46 1 3 223 56 271 2.50E-99 369.8 29159 cellular  
organisms;Eukaryota;Opisthokonta;Metazoa;Eumetazoa;Bilateria;Protostomia;Spiralia;Lophotrochozoa;Mollusca;Bivalvia;Autobranchia;Pteriomorphia;Ostreida;Ostreoidea;Ostreidae;Crassostrea;Crassostrea gigas



UdeM00000004329 29159 350.1 UdeM00000004329 XP\_034333379.1 78.3 203  
 39 1 1 203 74 271 1.90E-93 350.1 29159 cellular  
 organisms;Eukaryota;Opisthokonta;Metazoa;Eumetazoa;Bilateria;Protostomia;  
 Spiralia;Lophotrochozoa;Mollusca;Bivalvia;Autobranchia;Pteriormorphia;Ostr  
 eida;Ostreoidea;Ostreidae;Crassostrea;Crassostrea gigas  
 UdeM00000004328 29159 379.8 UdeM00000004328 XP\_034333379.1 73.4 244  
 59 2 47 289 33 271 3.10E-102 379.8 29159 cellular  
 organisms;Eukaryota;Opisthokonta;Metazoa;Eumetazoa;Bilateria;Protostomia;  
 Spiralia;Lophotrochozoa;Mollusca;Bivalvia;Autobranchia;Pteriormorphia;Ostr  
 eida;Ostreoidea;Ostreidae;Crassostrea;Crassostrea gigas  
 UdeM00000004330 29159 358.2 UdeM00000004330 XP\_034333379.1 78.4 208  
 40 1 7 214 69 271 7.20E-96 358.2 29159 cellular  
 organisms;Eukaryota;Opisthokonta;Metazoa;Eumetazoa;Bilateria;Protostomia;  
 Spiralia;Lophotrochozoa;Mollusca;Bivalvia;Autobranchia;Pteriormorphia;Ostr  
 eida;Ostreoidea;Ostreidae;Crassostrea;Crassostrea gigas  
 UdeM00000004331 29159 350.1 UdeM00000004331 XP\_034333379.1 78.3 203  
 39 1 1 203 74 271 1.90E-93 350.1 29159 cellular  
 organisms;Eukaryota;Opisthokonta;Metazoa;Eumetazoa;Bilateria;Protostomia;  
 Spiralia;Lophotrochozoa;Mollusca;Bivalvia;Autobranchia;Pteriormorphia;Ostr  
 eida;Ostreoidea;Ostreidae;Crassostrea;Crassostrea gigas  
 UdeM00000004332 29159 379.4 UdeM00000004332 XP\_011434068.2 73.4 244  
 59 2 29 271 14 252 3.80E-102 379.4 29159 cellular  
 organisms;Eukaryota;Opisthokonta;Metazoa;Eumetazoa;Bilateria;Protostomia;  
 Spiralia;Lophotrochozoa;Mollusca;Bivalvia;Autobranchia;Pteriormorphia;Ostr  
 eida;Ostreoidea;Ostreidae;Crassostrea;Crassostrea gigas  
 UdeM00000004333 400727 120.6 UdeM00000004333 XP\_025084529.1 54.3  
 105 42 1 9 107 6 110 1.30E-24 120.6 400727  
 cellular  
 organisms;Eukaryota;Opisthokonta;Metazoa;Eumetazoa;Bilateria;Protostomia;  
 Spiralia;Lophotrochozoa;Mollusca;Gastropoda;Caenogastropoda;Architaeniogl  
 ossa;Ampullarioidea;Ampullariidae;Pomacea;Pomacea canaliculata  
 UdeM00000004334 6573 131.3 UdeM00000004334 XP\_021368854.1 44.9 147  
 74 2 1 140 1 147 1.30E-27 131.3 6573 cellular  
 organisms;Eukaryota;Opisthokonta;Metazoa;Eumetazoa;Bilateria;Protostomia;  
 Spiralia;Lophotrochozoa;Mollusca;Bivalvia;Autobranchia;Pteriormorphia;Pect  
 inida;Pectinoidea;Pectinidae;Mizuhopecten;Mizuhopecten yessoensis  
 UdeM00000004335 6596 180.6 UdeM00000004335 XP\_045214067.1 31.3 329  
 215 6 44 364 98 423 3.70E-42 180.6 6596 cellular  
 organisms;Eukaryota;Opisthokonta;Metazoa;Eumetazoa;Bilateria;Protostomia;  
 Spiralia;Lophotrochozoa;Mollusca;Bivalvia;Autobranchia;Heteroconchia;Euhe  
 terodonta;Imparidentia;Venerida;Veneroidea;Veneridae;Mercenaria;Mercenari  
 a mercenaria  
 UdeM00000004336 6573 60.1 UdeM00000004336 XP\_021372715.1 36.6 71  
 42 1 101 168 122 192 3.60E-06 60.1 6573 cellular  
 organisms;Eukaryota;Opisthokonta;Metazoa;Eumetazoa;Bilateria;Protostomia;  
 Spiralia;Lophotrochozoa;Mollusca;Bivalvia;Autobranchia;Pteriormorphia;Pect  
 inida;Pectinoidea;Pectinidae;Mizuhopecten;Mizuhopecten yessoensis  
 UdeM00000004337 6596 183 UdeM00000004337 XP\_045179870.1 33.3 306  
 192 7 69 366 176 477 7.50E-43 183 6596 cellular  
 organisms;Eukaryota;Opisthokonta;Metazoa;Eumetazoa;Bilateria;Protostomia;  
 Spiralia;Lophotrochozoa;Mollusca;Bivalvia;Autobranchia;Heteroconchia;Euhe  
 terodonta;Imparidentia;Venerida;Veneroidea;Veneridae;Mercenaria;Mercenari  
 a mercenaria

UdeM00000004338 6596 179.1 UdeM00000004338 XP\_045189481.1 32.4 278  
 180 4 102 373 164 439 1.10E-41 179.1 6596 cellular  
 organisms;Eukaryota;Opisthokonta;Metazoa;Eumetazoa;Bilateria;Protostomia;  
 Spiralia;Lophotrochozoa;Mollusca;Bivalvia;Autobranchia;Heteroconchia;Euhe  
 terodonta;Imparidentia;Venerida;Veneroidea;Veneridae;Mercenaria;Mercenari  
 a mercenaria

UdeM00000004339 6596 157.1 UdeM00000004339 XP\_045176094.1 41.1 197  
 108 4 129 321 76 268 3.70E-35 157.1 6596 cellular  
 organisms;Eukaryota;Opisthokonta;Metazoa;Eumetazoa;Bilateria;Protostomia;  
 Spiralia;Lophotrochozoa;Mollusca;Bivalvia;Autobranchia;Heteroconchia;Euhe  
 terodonta;Imparidentia;Venerida;Veneroidea;Veneridae;Mercenaria;Mercenari  
 a mercenaria

UdeM00000004340 6573 90.1 UdeM00000004340 XP\_021380332.1 44.9 98  
 53 1 1 97 6 103 1.90E-15 90.1 6573 cellular  
 organisms;Eukaryota;Opisthokonta;Metazoa;Eumetazoa;Bilateria;Protostomia;  
 Spiralia;Lophotrochozoa;Mollusca;Bivalvia;Autobranchia;Pteriormorphia;Pect  
 inida;Pectinoidea;Pectinidae;Mizuhopecten;Mizuhopecten yessoensis

UdeM00000004341 6596 256.9 UdeM00000004341 XP\_045170176.1 52.7 243  
 114 1 1 243 1 242 2.60E-65 256.9 6596 cellular  
 organisms;Eukaryota;Opisthokonta;Metazoa;Eumetazoa;Bilateria;Protostomia;  
 Spiralia;Lophotrochozoa;Mollusca;Bivalvia;Autobranchia;Heteroconchia;Euhe  
 terodonta;Imparidentia;Venerida;Veneroidea;Veneridae;Mercenaria;Mercenari  
 a mercenaria

UdeM00000004342 6596 511.1 UdeM00000004342 XP\_045207430.1 50.4 566  
 235 5 6 528 8 570 1.60E-141 511.1 6596 cellular  
 organisms;Eukaryota;Opisthokonta;Metazoa;Eumetazoa;Bilateria;Protostomia;  
 Spiralia;Lophotrochozoa;Mollusca;Bivalvia;Autobranchia;Heteroconchia;Euhe  
 terodonta;Imparidentia;Venerida;Veneroidea;Veneridae;Mercenaria;Mercenari  
 a mercenaria

UdeM00000004343 29159 391 UdeM00000004343 XP\_011421646.2 47.9 459  
 205 12 204 639 231 678 3.00E-105 391 29159 cellular  
 organisms;Eukaryota;Opisthokonta;Metazoa;Eumetazoa;Bilateria;Protostomia;  
 Spiralia;Lophotrochozoa;Mollusca;Bivalvia;Autobranchia;Pteriormorphia;Ostr  
 eida;Ostreoidea;Ostreidae;Crassostrea;Crassostrea gigas

UdeM00000004344 225164 154.8 UdeM00000004344 XP\_009052867.1 41.5  
 188 109 1 96 282 19 206 1.90E-34 154.8 225164  
 cellular  
 organisms;Eukaryota;Opisthokonta;Metazoa;Eumetazoa;Bilateria;Protostomia;  
 Spiralia;Lophotrochozoa;Mollusca;Gastropoda;Patellogastropoda;Lottioidea;  
 Lottiidae;Lottia;Lottia gigantea

UdeM00000004345 225164 154.8 UdeM00000004345 XP\_009052867.1 41.5  
 188 109 1 107 293 19 206 2.00E-34 154.8 225164  
 cellular  
 organisms;Eukaryota;Opisthokonta;Metazoa;Eumetazoa;Bilateria;Protostomia;  
 Spiralia;Lophotrochozoa;Mollusca;Gastropoda;Patellogastropoda;Lottioidea;  
 Lottiidae;Lottia;Lottia gigantea

UdeM00000004346 6526 734.6 UdeM00000004346 XP\_013062505.1 75.1 469  
 117 0 21 489 21 489 8.40E-209 734.6 6526 cellular  
 organisms;Eukaryota;Opisthokonta;Metazoa;Eumetazoa;Bilateria;Protostomia;  
 Spiralia;Lophotrochozoa;Mollusca;Gastropoda;Heterobranchia;Euthyneura;Pan  
 pulmonata;Hygrophila;Lymnaeioidea;Planorbidae;Biophalaria;Biophalaria  
 glabrata

UdeM00000004347 6596 626.7 UdeM00000004347 XP\_045208509.1 57.3 611  
 238 8 54 653 1 599 3.30E-176 626.7 6596 cellular

organisms;Eukaryota;Opisthokonta;Metazoa;Eumetazoa;Bilateria;Protostomia;Spiralia;Lophotrochozoa;Mollusca;Bivalvia;Autobranhia;Heteroconchia;Euherodonta;Imparidentia;Venerida;Veneroidea;Veneridae;Mercenaria;Mercenaria mercenaria

UdeM00000004348 6573 60.1 UdeM00000004348 XP\_021341725.1 56 50  
22 0 78 127 1 50 2.40E-06 60.1 6573 cellular

organisms;Eukaryota;Opisthokonta;Metazoa;Eumetazoa;Bilateria;Protostomia;Spiralia;Lophotrochozoa;Mollusca;Bivalvia;Autobranhia;Pteriormorphia;Pectinida;Pectinoidea;Pectinidae;Mizuhopecten;Mizuhopecten yessoensis

UdeM00000004349 6579 391.3 UdeM00000004349 XP\_033731739.1 61.4 280  
108 0 1 280 99 378 1.00E-105 391.3 6579 cellular

organisms;Eukaryota;Opisthokonta;Metazoa;Eumetazoa;Bilateria;Protostomia;Spiralia;Lophotrochozoa;Mollusca;Bivalvia;Autobranhia;Pteriormorphia;Pectinida;Pectinoidea;Pectinidae;Pecten;Pecten maximus

UdeM00000004350 6596 271.6 UdeM00000004350 XP\_045186396.1 42.4 288  
165 1 195 482 30 316 2.00E-69 271.6 6596 cellular

organisms;Eukaryota;Opisthokonta;Metazoa;Eumetazoa;Bilateria;Protostomia;Spiralia;Lophotrochozoa;Mollusca;Bivalvia;Autobranhia;Heteroconchia;Euherodonta;Imparidentia;Venerida;Veneroidea;Veneridae;Mercenaria;Mercenaria mercenaria

UdeM00000004352 6596 337 UdeM00000004352 XP\_045208772.1 50.5 317  
151 2 146 461 71 382 3.70E-89 337 6596 cellular

organisms;Eukaryota;Opisthokonta;Metazoa;Eumetazoa;Bilateria;Protostomia;Spiralia;Lophotrochozoa;Mollusca;Bivalvia;Autobranhia;Heteroconchia;Euherodonta;Imparidentia;Venerida;Veneroidea;Veneridae;Mercenaria;Mercenaria mercenaria

UdeM00000004353 6596 342.4 UdeM00000004353 XP\_045208772.1 51.4 317  
148 2 47 362 71 382 6.90E-91 342.4 6596 cellular

organisms;Eukaryota;Opisthokonta;Metazoa;Eumetazoa;Bilateria;Protostomia;Spiralia;Lophotrochozoa;Mollusca;Bivalvia;Autobranhia;Heteroconchia;Euherodonta;Imparidentia;Venerida;Veneroidea;Veneridae;Mercenaria;Mercenaria mercenaria

UdeM00000004354 6596 199.9 UdeM00000004354 XP\_045209667.1 61 164  
58 3 1 163 355 513 2.50E-48 199.9 6596 cellular

organisms;Eukaryota;Opisthokonta;Metazoa;Eumetazoa;Bilateria;Protostomia;Spiralia;Lophotrochozoa;Mollusca;Bivalvia;Autobranhia;Heteroconchia;Euherodonta;Imparidentia;Venerida;Veneroidea;Veneridae;Mercenaria;Mercenaria mercenaria

UdeM00000004355 6596 346.3 UdeM00000004355 XP\_045208772.1 51.1 317  
149 2 16 331 71 382 4.50E-92 346.3 6596 cellular

organisms;Eukaryota;Opisthokonta;Metazoa;Eumetazoa;Bilateria;Protostomia;Spiralia;Lophotrochozoa;Mollusca;Bivalvia;Autobranhia;Heteroconchia;Euherodonta;Imparidentia;Venerida;Veneroidea;Veneridae;Mercenaria;Mercenaria mercenaria

UdeM00000004356 1735272 422.9 UdeM00000004356 XP\_041371898.1 39.7  
612 339 12 43 644 79 670 7.20E-115 422.9 1735272  
cellular

organisms;Eukaryota;Opisthokonta;Metazoa;Eumetazoa;Bilateria;Protostomia;Spiralia;Lophotrochozoa;Mollusca;Gastropoda;Neomphalina;Neomphaloidea;Peltospiridae;Gigantopelta;Gigantopelta aegis

UdeM00000004357 1735272 399.8 UdeM00000004357 XP\_041371898.1 39.1  
585 326 12 2 576 106 670 5.80E-108 399.8 1735272  
cellular

organisms;Eukaryota;Opisthokonta;Metazoa;Eumetazoa;Bilateria;Protostomia;

Spiralia;Lophotrochozoa;Mollusca;Gastropoda;Neomphalina;Neomphaloidea;Pel  
 tospiridae;Gigantopelta;Gigantopelta aegis

UdeM00000004358 6596 807.4 UdeM00000004358 XP\_045207305.1 70.8 631  
 163 6 1 627 1 614 1.30E-230 807.4 6596 cellular  
 organisms;Eukaryota;Opisthokonta;Metazoa;Eumetazoa;Bilateria;Protostomia;  
 Spiralia;Lophotrochozoa;Mollusca;Bivalvia;Autobranchia;Heteroconchia;Euhe  
 terodonta;Imparidentia;Venerida;Veneroidea;Veneridae;Mercenaria;Mercenari  
 a mercenaria

UdeM00000004359 6565 562.4 UdeM00000004359 XP\_022311618.1 75.7 358  
 87 0 5 362 37 394 4.20E-157 562.4 6565 cellular  
 organisms;Eukaryota;Opisthokonta;Metazoa;Eumetazoa;Bilateria;Protostomia;  
 Spiralia;Lophotrochozoa;Mollusca;Bivalvia;Autobranchia;Pteriormorphia;Ostr  
 eida;Ostreoidea;Ostreidae;Crassostrea;Crassostrea virginica

UdeM00000004360 6565 579.3 UdeM00000004360 XP\_022311627.1 74 381  
 97 1 15 393 2 382 3.60E-162 579.3 6565 cellular  
 organisms;Eukaryota;Opisthokonta;Metazoa;Eumetazoa;Bilateria;Protostomia;  
 Spiralia;Lophotrochozoa;Mollusca;Bivalvia;Autobranchia;Pteriormorphia;Ostr  
 eida;Ostreoidea;Ostreidae;Crassostrea;Crassostrea virginica

UdeM00000004361 6596 361.7 UdeM00000004361 XP\_045209920.1 57.8 308  
 128 1 1 308 1 306 9.40E-97 361.7 6596 cellular  
 organisms;Eukaryota;Opisthokonta;Metazoa;Eumetazoa;Bilateria;Protostomia;  
 Spiralia;Lophotrochozoa;Mollusca;Bivalvia;Autobranchia;Heteroconchia;Euhe  
 terodonta;Imparidentia;Venerida;Veneroidea;Veneridae;Mercenaria;Mercenari  
 a mercenaria

UdeM00000004362 6596 489.2 UdeM00000004362 XP\_045207273.1 53.4 537  
 207 15 38 554 27 540 7.00E-135 489.2 6596 cellular  
 organisms;Eukaryota;Opisthokonta;Metazoa;Eumetazoa;Bilateria;Protostomia;  
 Spiralia;Lophotrochozoa;Mollusca;Bivalvia;Autobranchia;Heteroconchia;Euhe  
 terodonta;Imparidentia;Venerida;Veneroidea;Veneridae;Mercenaria;Mercenari  
 a mercenaria

UdeM00000004363 6596 964.5 UdeM00000004363 XP\_045207277.1 84.1 547  
 84 2 24 569 342 886 5.80E-278 964.5 6596 cellular  
 organisms;Eukaryota;Opisthokonta;Metazoa;Eumetazoa;Bilateria;Protostomia;  
 Spiralia;Lophotrochozoa;Mollusca;Bivalvia;Autobranchia;Heteroconchia;Euhe  
 terodonta;Imparidentia;Venerida;Veneroidea;Veneridae;Mercenaria;Mercenari  
 a mercenaria

UdeM00000004365 6596 243.4 UdeM00000004365 XP\_045207274.1 79.9 149  
 28 1 14 162 195 341 2.00E-61 243.4 6596 cellular  
 organisms;Eukaryota;Opisthokonta;Metazoa;Eumetazoa;Bilateria;Protostomia;  
 Spiralia;Lophotrochozoa;Mollusca;Bivalvia;Autobranchia;Heteroconchia;Euhe  
 terodonta;Imparidentia;Venerida;Veneroidea;Veneridae;Mercenaria;Mercenari  
 a mercenaria

UdeM00000004366 1735272 188.3 UdeM00000004366 XP\_041371911.1 66.8  
 220 64 5 3 217 2 217 1.00E-44 188.3 1735272  
 cellular  
 organisms;Eukaryota;Opisthokonta;Metazoa;Eumetazoa;Bilateria;Protostomia;  
 Spiralia;Lophotrochozoa;Mollusca;Gastropoda;Neomphalina;Neomphaloidea;Pel  
 tospiridae;Gigantopelta;Gigantopelta aegis

UdeM00000004367 6596 1265.4 UdeM00000004367 XP\_045209979.1 73.9  
 824 215 0 3 826 2 825 0.00E+00 1265.4 6596  
 cellular  
 organisms;Eukaryota;Opisthokonta;Metazoa;Eumetazoa;Bilateria;Protostomia;  
 Spiralia;Lophotrochozoa;Mollusca;Bivalvia;Autobranchia;Heteroconchia;Euhe

terodonta;Imparidentia;Venerida;Veneroidea;Veneridae;Mercenaria;Mercenari  
 a mercenaria  
 UdeM00000004368 6596 318.9 UdeM00000004368 XP\_045210107.1 64.5 259  
 85 4 1 255 1 256 5.80E-84 318.9 6596 cellular  
 organisms;Eukaryota;Opisthokonta;Metazoa;Eumetazoa;Bilateria;Protostomia;  
 Spiralia;Lophotrochozoa;Mollusca;Bivalvia;Autobranchia;Heteroconchia;Euhe  
 terodonta;Imparidentia;Venerida;Veneroidea;Veneridae;Mercenaria;Mercenari  
 a mercenaria  
 UdeM00000004369 6596 200.3 UdeM00000004369 XP\_045179676.1 23.5 758  
 489 18 190 905 500 1208 1.10E-47 200.3 6596 cellular  
 organisms;Eukaryota;Opisthokonta;Metazoa;Eumetazoa;Bilateria;Protostomia;  
 Spiralia;Lophotrochozoa;Mollusca;Bivalvia;Autobranchia;Heteroconchia;Euhe  
 terodonta;Imparidentia;Venerida;Veneroidea;Veneridae;Mercenaria;Mercenari  
 a mercenaria  
 UdeM00000004370 90988 137.1 UdeM00000004370 XP\_039529189.1 61.5 109  
 40 2 1 107 213 321 1.30E-29 137.1 90988 cellular  
 organisms;Eukaryota;Opisthokonta;Metazoa;Eumetazoa;Bilateria;Deuterostomi  
 a;Chordata;Craniata;Vertebrata;Gnathostomata;Teleostomi;Euteleostomi;Acti  
 nopterygii;Actinopteri;Neopterygii;Teleostei;Osteoglossocephalai;Clupeoce  
 phala;Otomorpha;Ostariophysi;Otophysi;Cypriniphysae;Cypriniiformes;Cyprino  
 ideii;Leuciscidae;Pogonichthyinae;Pimephales;Pimephales promelas  
 UdeM00000004371 6596 191.4 UdeM00000004371 XP\_045179676.1 24 692  
 454 18 117 785 501 1143 4.60E-45 191.4 6596 cellular  
 organisms;Eukaryota;Opisthokonta;Metazoa;Eumetazoa;Bilateria;Protostomia;  
 Spiralia;Lophotrochozoa;Mollusca;Bivalvia;Autobranchia;Heteroconchia;Euhe  
 terodonta;Imparidentia;Venerida;Veneroidea;Veneridae;Mercenaria;Mercenari  
 a mercenaria  
 UdeM00000004372 6579 674.9 UdeM00000004372 XP\_033761425.1 27.9 2584  
 1437 81 1 2413 1 2329 3.90E-190 674.9 6579 cellular  
 organisms;Eukaryota;Opisthokonta;Metazoa;Eumetazoa;Bilateria;Protostomia;  
 Spiralia;Lophotrochozoa;Mollusca;Bivalvia;Autobranchia;Pteriormorphia;Pect  
 inida;Pectinoidea;Pectinidae;Pecten;Pecten maximus  
 UdeM00000004373 6596 364.8 UdeM00000004373 XP\_045208046.1 67.7 279  
 74 3 154 422 21 293 1.70E-97 364.8 6596 cellular  
 organisms;Eukaryota;Opisthokonta;Metazoa;Eumetazoa;Bilateria;Protostomia;  
 Spiralia;Lophotrochozoa;Mollusca;Bivalvia;Autobranchia;Heteroconchia;Euhe  
 terodonta;Imparidentia;Venerida;Veneroidea;Veneridae;Mercenaria;Mercenari  
 a mercenaria  
 UdeM00000004374 6573 193.7 UdeM00000004374 XP\_021373998.1 46 261  
 126 4 31 289 46 293 3.20E-46 193.7 6573 cellular  
 organisms;Eukaryota;Opisthokonta;Metazoa;Eumetazoa;Bilateria;Protostomia;  
 Spiralia;Lophotrochozoa;Mollusca;Bivalvia;Autobranchia;Pteriormorphia;Pect  
 inida;Pectinoidea;Pectinidae;Mizuhopecten;Mizuhopecten yessoensis  
 UdeM00000004375 7741 74.7 UdeM00000004375 XP\_019616361.1 31 142  
 81 5 1 136 1 131 1.00E-10 74.7 7741 cellular  
 organisms;Eukaryota;Opisthokonta;Metazoa;Eumetazoa;Bilateria;Deuterostomi  
 a;Chordata;Cephalochordata;Leptocardii;Amphioxiformes;Branchiostomidae;Br  
 anchiostoma;Branchiostoma belcheri  
 UdeM00000004376 7741 73.6 UdeM00000004376 XP\_019616361.1 30.1 143  
 82 5 1 137 1 131 2.30E-10 73.6 7741 cellular  
 organisms;Eukaryota;Opisthokonta;Metazoa;Eumetazoa;Bilateria;Deuterostomi  
 a;Chordata;Cephalochordata;Leptocardii;Amphioxiformes;Branchiostomidae;Br  
 anchiostoma;Branchiostoma belcheri

UdeM00000004377 6596 1814.7 UdeM00000004377 XP\_045209959.1 64.7  
 1498 460 21 52 1506 686 2157 0.00E+00 1814.7 6596  
 cellular  
 organisms;Eukaryota;Opisthokonta;Metazoa;Eumetazoa;Bilateria;Protostomia;  
 Spiralia;Lophotrochozoa;Mollusca;Bivalvia;Autobranchia;Heteroconchia;Euhe  
 terodonta;Imparidentia;Venerida;Veneroidea;Veneridae;Mercenaria;Mercenari  
 a mercenaria  
 UdeM00000004378 6596 325.5 UdeM00000004378 XP\_045209959.1 44.9 682  
 274 14 1 601 1 661 1.50E-85 325.5 6596 cellular  
 organisms;Eukaryota;Opisthokonta;Metazoa;Eumetazoa;Bilateria;Protostomia;  
 Spiralia;Lophotrochozoa;Mollusca;Bivalvia;Autobranchia;Heteroconchia;Euhe  
 terodonta;Imparidentia;Venerida;Veneroidea;Veneridae;Mercenaria;Mercenari  
 a mercenaria  
 UdeM00000004381 151771 209.5 UdeM00000004381 XP\_028415423.1 34.6  
 419 203 9 4 357 7 419 7.80E-51 209.5 151771  
 cellular  
 organisms;Eukaryota;Opisthokonta;Metazoa;Eumetazoa;Cnidaria;Anthozoa;Octo  
 corallia;Alcyonacea;Alcyoniina;Nephtheidae;Dendronephthya;Dendronephthya  
 gigantea  
 UdeM00000004383 6596 4563.1 UdeM00000004383 XP\_045208906.1 59.2  
 3697 1323 15 13 3607 36 3649 0.00E+00 4563.1 6596  
 cellular  
 organisms;Eukaryota;Opisthokonta;Metazoa;Eumetazoa;Bilateria;Protostomia;  
 Spiralia;Lophotrochozoa;Mollusca;Bivalvia;Autobranchia;Heteroconchia;Euhe  
 terodonta;Imparidentia;Venerida;Veneroidea;Veneridae;Mercenaria;Mercenari  
 a mercenaria  
 UdeM00000004384 1735272 193.4 UdeM00000004384 XP\_041371390.1 51.4  
 142 69 0 3 144 341 482 2.20E-46 193.4 1735272  
 cellular  
 organisms;Eukaryota;Opisthokonta;Metazoa;Eumetazoa;Bilateria;Protostomia;  
 Spiralia;Lophotrochozoa;Mollusca;Gastropoda;Neomphalina;Neomphaloidea;Pel  
 tospiridae;Gigantopelta;Gigantopelta aegis  
 UdeM00000004386 6596 204.9 UdeM00000004386 XP\_045208880.1 51 206  
 82 2 50 237 43 247 1.10E-49 204.9 6596 cellular  
 organisms;Eukaryota;Opisthokonta;Metazoa;Eumetazoa;Bilateria;Protostomia;  
 Spiralia;Lophotrochozoa;Mollusca;Bivalvia;Autobranchia;Heteroconchia;Euhe  
 terodonta;Imparidentia;Venerida;Veneroidea;Veneridae;Mercenaria;Mercenari  
 a mercenaria  
 UdeM00000004387 6596 182.2 UdeM00000004387 XP\_045208880.1 55.9 161  
 53 1 50 192 43 203 6.70E-43 182.2 6596 cellular  
 organisms;Eukaryota;Opisthokonta;Metazoa;Eumetazoa;Bilateria;Protostomia;  
 Spiralia;Lophotrochozoa;Mollusca;Bivalvia;Autobranchia;Heteroconchia;Euhe  
 terodonta;Imparidentia;Venerida;Veneroidea;Veneridae;Mercenaria;Mercenari  
 a mercenaria  
 UdeM00000004388 29159 344.4 UdeM00000004388 XP\_011423981.1 33.6 871  
 446 25 78 927 39 798 4.60E-91 344.4 29159 cellular  
 organisms;Eukaryota;Opisthokonta;Metazoa;Eumetazoa;Bilateria;Protostomia;  
 Spiralia;Lophotrochozoa;Mollusca;Bivalvia;Autobranchia;Pteriomorphia;Ostr  
 eida;Ostreoidea;Ostreidae;Crassostrea;Crassostrea gigas  
 UdeM00000004389 6596 889.8 UdeM00000004389 XP\_045207420.1 72.2 580  
 144 6 20 596 12 577 1.90E-25 889.8 6596 cellular  
 organisms;Eukaryota;Opisthokonta;Metazoa;Eumetazoa;Bilateria;Protostomia;  
 Spiralia;Lophotrochozoa;Mollusca;Bivalvia;Autobranchia;Heteroconchia;Euhe

terodonta;Imparidentia;Venerida;Veneroidea;Veneridae;Mercenaria;Mercenaria mercenaria  
 UdeM00000004390 6579 222.6 UdeM00000004390 XP\_033724821.1 35.6 410  
 220 7 18 414 959 1337 9.30E-55 222.6 6579 cellular  
 organisms;Eukaryota;Opisthokonta;Metazoa;Eumetazoa;Bilateria;Protostomia;  
 Spiralia;Lophotrochozoa;Mollusca;Bivalvia;Autobranchia;Pteriomorpha;Pectinida;  
 Pectinoidea;Pectinidae;Pecten;Pecten maximus  
 UdeM00000004391 6579 368.6 UdeM00000004391 XP\_033724844.1 35.7 638  
 359 9 76 677 642 1264 1.70E-98 368.6 6579 cellular  
 organisms;Eukaryota;Opisthokonta;Metazoa;Eumetazoa;Bilateria;Protostomia;  
 Spiralia;Lophotrochozoa;Mollusca;Bivalvia;Autobranchia;Pteriomorpha;Pectinida;  
 Pectinoidea;Pectinidae;Pecten;Pecten maximus  
 UdeM00000004392 6596 220.3 UdeM00000004392 XP\_045208968.1 43.1 318  
 145 10 2 292 258 566 3.20E-54 220.3 6596 cellular  
 organisms;Eukaryota;Opisthokonta;Metazoa;Eumetazoa;Bilateria;Protostomia;  
 Spiralia;Lophotrochozoa;Mollusca;Bivalvia;Autobranchia;Heteroconchia;Euheterodonta;  
 Imparidentia;Venerida;Veneroidea;Veneridae;Mercenaria;Mercenaria mercenaria  
 UdeM00000004393 6565 61.2 UdeM00000004393 XP\_022299727.1 50.8 61  
 30 0 1 61 261 321 6.30E-07 61.2 6565 cellular  
 organisms;Eukaryota;Opisthokonta;Metazoa;Eumetazoa;Bilateria;Protostomia;  
 Spiralia;Lophotrochozoa;Mollusca;Bivalvia;Autobranchia;Pteriomorpha;Ostreida;  
 Ostreidae;Crassostrea;Crassostrea virginica  
 UdeM00000004394 6596 451.4 UdeM00000004394 XP\_045207418.1 64.5 335  
 106 4 31 364 296 618 1.10E-123 451.4 6596 cellular  
 organisms;Eukaryota;Opisthokonta;Metazoa;Eumetazoa;Bilateria;Protostomia;  
 Spiralia;Lophotrochozoa;Mollusca;Bivalvia;Autobranchia;Heteroconchia;Euheterodonta;  
 Imparidentia;Venerida;Veneroidea;Veneridae;Mercenaria;Mercenaria mercenaria  
 UdeM00000004395 6596 449.1 UdeM00000004395 XP\_045207418.1 64.4 334  
 106 4 1 333 297 618 4.80E-123 449.1 6596 cellular  
 organisms;Eukaryota;Opisthokonta;Metazoa;Eumetazoa;Bilateria;Protostomia;  
 Spiralia;Lophotrochozoa;Mollusca;Bivalvia;Autobranchia;Heteroconchia;Euheterodonta;  
 Imparidentia;Venerida;Veneroidea;Veneridae;Mercenaria;Mercenaria mercenaria  
 UdeM00000004396 400727 356.7 UdeM00000004396 XP\_025081227.1 36.8  
 579 300 8 85 603 640 1212 6.50E-95 356.7 400727  
 cellular  
 organisms;Eukaryota;Opisthokonta;Metazoa;Eumetazoa;Bilateria;Protostomia;  
 Spiralia;Lophotrochozoa;Mollusca;Gastropoda;Caenogastropoda;Architaenioglossa;  
 Ampullarioidea;Ampullariidae;Pomacea;Pomacea canaliculata  
 UdeM00000004397 6596 238.4 UdeM00000004397 XP\_045208968.1 42.7 335  
 170 11 65 386 247 572 1.50E-59 238.4 6596 cellular  
 organisms;Eukaryota;Opisthokonta;Metazoa;Eumetazoa;Bilateria;Protostomia;  
 Spiralia;Lophotrochozoa;Mollusca;Bivalvia;Autobranchia;Heteroconchia;Euheterodonta;  
 Imparidentia;Venerida;Veneroidea;Veneridae;Mercenaria;Mercenaria mercenaria  
 UdeM00000004398 6596 664.1 UdeM00000004398 XP\_045207418.1 69.2 455  
 127 6 1 454 176 618 1.30E-187 664.1 6596 cellular  
 organisms;Eukaryota;Opisthokonta;Metazoa;Eumetazoa;Bilateria;Protostomia;  
 Spiralia;Lophotrochozoa;Mollusca;Bivalvia;Autobranchia;Heteroconchia;Euheterodonta;  
 Imparidentia;Venerida;Veneroidea;Veneridae;Mercenaria;Mercenaria mercenaria

UdeM00000004399 6579 619.4 UdeM00000004399 XP\_033724844.1 35.7 1203  
 665 30 15 1153 109 1266 9.40E-174 619.4 6579 cellular  
 organisms;Eukaryota;Opisthokonta;Metazoa;Eumetazoa;Bilateria;Protostomia;  
 Spiralia;Lophotrochozoa;Mollusca;Bivalvia;Autobranhia;Pteriomorphia;Pect  
 inida;Pectinoidea;Pectinidae;Pecten;Pecten maximus  
 UdeM00000004400 6596 174.1 UdeM00000004400 XP\_045207418.1 39.9 253  
 61 4 21 183 367 618 1.60E-40 174.1 6596 cellular  
 organisms;Eukaryota;Opisthokonta;Metazoa;Eumetazoa;Bilateria;Protostomia;  
 Spiralia;Lophotrochozoa;Mollusca;Bivalvia;Autobranhia;Heteroconchia;Euhe  
 terodonta;Imparidentia;Venerida;Veneroidea;Veneridae;Mercenaria;Mercenari  
 a mercenaria  
 UdeM00000004401 6565 922.5 UdeM00000004401 XP\_022344660.1 86.5 535  
 72 0 5 539 3 537 2.40E-265 922.5 6565 cellular  
 organisms;Eukaryota;Opisthokonta;Metazoa;Eumetazoa;Bilateria;Protostomia;  
 Spiralia;Lophotrochozoa;Mollusca;Bivalvia;Autobranhia;Pteriomorphia;Ostr  
 eida;Ostreoidea;Ostreidae;Crassostrea;Crassostrea virginica  
 UdeM00000004402 6565 235.7 UdeM00000004402 XP\_022344698.1 73.6 144  
 38 0 1 144 1 144 3.60E-59 235.7 6565 cellular  
 organisms;Eukaryota;Opisthokonta;Metazoa;Eumetazoa;Bilateria;Protostomia;  
 Spiralia;Lophotrochozoa;Mollusca;Bivalvia;Autobranhia;Pteriomorphia;Ostr  
 eida;Ostreoidea;Ostreidae;Crassostrea;Crassostrea virginica  
 UdeM00000004403 6596 138.7 UdeM00000004403 XP\_045208469.1 32.5 379  
 221 10 5 373 2 355 1.60E-29 138.7 6596 cellular  
 organisms;Eukaryota;Opisthokonta;Metazoa;Eumetazoa;Bilateria;Protostomia;  
 Spiralia;Lophotrochozoa;Mollusca;Bivalvia;Autobranhia;Heteroconchia;Euhe  
 terodonta;Imparidentia;Venerida;Veneroidea;Veneridae;Mercenaria;Mercenari  
 a mercenaria  
 UdeM00000004404 6596 958.4 UdeM00000004404 XP\_045209471.1 58.5 850  
 302 11 1 821 1 828 6.00E-276 958.4 6596 cellular  
 organisms;Eukaryota;Opisthokonta;Metazoa;Eumetazoa;Bilateria;Protostomia;  
 Spiralia;Lophotrochozoa;Mollusca;Bivalvia;Autobranhia;Heteroconchia;Euhe  
 terodonta;Imparidentia;Venerida;Veneroidea;Veneridae;Mercenaria;Mercenari  
 a mercenaria  
 UdeM00000004405 6579 263.1 UdeM00000004405 XP\_033732076.1 35.7 557  
 271 20 3 515 4 517 7.50E-67 263.1 6579 cellular  
 organisms;Eukaryota;Opisthokonta;Metazoa;Eumetazoa;Bilateria;Protostomia;  
 Spiralia;Lophotrochozoa;Mollusca;Bivalvia;Autobranhia;Pteriomorphia;Pect  
 inida;Pectinoidea;Pectinidae;Pecten;Pecten maximus  
 UdeM00000004406 210409 142.1 UdeM00000004406 XP\_045108702.1 44.3  
 158 73 3 6 159 7 153 6.50E-31 142.1 210409  
 cellular  
 organisms;Eukaryota;Opisthokonta;Metazoa;Eumetazoa;Bilateria;Protostomia;  
 Ecdysozoa;Panarthropoda;Arthropoda;Mandibulata;Pancrustacea;Crustacea;Mul  
 ticrustacea;Malacostraca;Eumalacostraca;Eucarida;Decapoda;Pleocyemata;Bra  
 chyura;Eubranchyura;Heterotremata;Portunoidea;Portunidae;Portunus;Portunus  
 trituberculatus  
 UdeM00000004407 6596 141.4 UdeM00000004407 XP\_045157176.1 42 212  
 108 6 4 209 6 208 1.40E-30 141.4 6596 cellular  
 organisms;Eukaryota;Opisthokonta;Metazoa;Eumetazoa;Bilateria;Protostomia;  
 Spiralia;Lophotrochozoa;Mollusca;Bivalvia;Autobranhia;Heteroconchia;Euhe  
 terodonta;Imparidentia;Venerida;Veneroidea;Veneridae;Mercenaria;Mercenari  
 a mercenaria  
 UdeM00000004408 6596 135.2 UdeM00000004408 XP\_045157176.1 42.1 216  
 110 6 8 221 6 208 1.00E-28 135.2 6596 cellular



organisms;Eukaryota;Opisthokonta;Metazoa;Eumetazoa;Bilateria;Protostomia; Spiralia;Lophotrochozoa;Mollusca;Bivalvia;Autobranchia;Heteroconchia;Euherodonta;Imparidentia;Venerida;Veneroidea;Veneridae;Mercenaria;Mercenaria mercenaria

|                 |        |       |                 |                |      |     |          |       |        |
|-----------------|--------|-------|-----------------|----------------|------|-----|----------|-------|--------|
| UdeM00000004409 | 210409 | 139.8 | UdeM00000004409 | XP_045108702.1 | 44.3 |     |          |       |        |
| 158             | 73     | 3     | 6               | 159            | 7    | 153 | 3.20E-30 | 139.8 | 210409 |
| cellular        |        |       |                 |                |      |     |          |       |        |

organisms;Eukaryota;Opisthokonta;Metazoa;Eumetazoa;Bilateria;Protostomia; Ecdysozoa;Panarthropoda;Arthropoda;Mandibulata;Pancrustacea;Crustacea;Multicrustacea;Malacostraca;Eumalacostraca;Eucarida;Decapoda;Pleocyemata;Brachyura;Eubrachyura;Heterotremata;Portunoidea;Portunidae;Portunus;Portunus trituberculatus

|                 |      |       |                 |                |      |           |       |      |          |
|-----------------|------|-------|-----------------|----------------|------|-----------|-------|------|----------|
| UdeM00000004410 | 6579 | 735.3 | UdeM00000004410 | XP_033764393.1 | 45.7 | 1038      |       |      |          |
| 425             | 26   | 149   | 1103            | 146            | 1127 | 1.10E-208 | 735.3 | 6579 | cellular |

organisms;Eukaryota;Opisthokonta;Metazoa;Eumetazoa;Bilateria;Protostomia; Spiralia;Lophotrochozoa;Mollusca;Bivalvia;Autobranchia;Pteriomorphia;Pectinida;Pectinoidea;Pectinidae;Pecten;Pecten maximus

|                 |      |       |                 |                |      |           |       |      |          |
|-----------------|------|-------|-----------------|----------------|------|-----------|-------|------|----------|
| UdeM00000004411 | 6579 | 739.6 | UdeM00000004411 | XP_033764382.1 | 45.7 | 1042      |       |      |          |
| 427             | 26   | 149   | 1107            | 146            | 1131 | 5.90E-210 | 739.6 | 6579 | cellular |

organisms;Eukaryota;Opisthokonta;Metazoa;Eumetazoa;Bilateria;Protostomia; Spiralia;Lophotrochozoa;Mollusca;Bivalvia;Autobranchia;Pteriomorphia;Pectinida;Pectinoidea;Pectinidae;Pecten;Pecten maximus

|                 |      |       |                 |                |      |          |       |      |          |
|-----------------|------|-------|-----------------|----------------|------|----------|-------|------|----------|
| UdeM00000004412 | 6596 | 293.9 | UdeM00000004412 | XP_045207192.1 | 30.1 | 1064     |       |      |          |
| 545             | 38   | 578   | 1602            | 443            | 1346 | 1.20E-75 | 293.9 | 6596 | cellular |

organisms;Eukaryota;Opisthokonta;Metazoa;Eumetazoa;Bilateria;Protostomia; Spiralia;Lophotrochozoa;Mollusca;Bivalvia;Autobranchia;Heteroconchia;Euherodonta;Imparidentia;Venerida;Veneroidea;Veneridae;Mercenaria;Mercenaria mercenaria

|                 |      |      |                 |                |     |          |      |      |          |
|-----------------|------|------|-----------------|----------------|-----|----------|------|------|----------|
| UdeM00000004414 | 7604 | 90.9 | UdeM00000004414 | XP_033641066.1 | 65  | 60       |      |      |          |
| 21              | 0    | 1    | 60              | 155            | 214 | 8.90E-16 | 90.9 | 7604 | cellular |

organisms;Eukaryota;Opisthokonta;Metazoa;Eumetazoa;Bilateria;Deuterostomia;Echinodermata;Eleutherozoa;Asterozoa;Asteroidea;Forcipulatacea;Forcipulatacida;Asteroidea;Asteroidea;Asterias;Asterias rubens

|                 |      |       |                 |                |      |          |       |      |          |
|-----------------|------|-------|-----------------|----------------|------|----------|-------|------|----------|
| UdeM00000004415 | 6579 | 171.4 | UdeM00000004415 | XP_033752673.1 | 57.5 | 134      |       |      |          |
| 57              | 0    | 28    | 161             | 328            | 461  | 1.10E-39 | 171.4 | 6579 | cellular |

organisms;Eukaryota;Opisthokonta;Metazoa;Eumetazoa;Bilateria;Protostomia; Spiralia;Lophotrochozoa;Mollusca;Bivalvia;Autobranchia;Pteriomorphia;Pectinida;Pectinoidea;Pectinidae;Pecten;Pecten maximus

|                 |      |       |                 |                |      |           |       |      |          |
|-----------------|------|-------|-----------------|----------------|------|-----------|-------|------|----------|
| UdeM00000004418 | 6573 | 822.4 | UdeM00000004418 | XP_021351177.1 | 57.9 | 670       |       |      |          |
| 263             | 7    | 69    | 734             | 73             | 727  | 4.60E-235 | 822.4 | 6573 | cellular |

organisms;Eukaryota;Opisthokonta;Metazoa;Eumetazoa;Bilateria;Protostomia; Spiralia;Lophotrochozoa;Mollusca;Bivalvia;Autobranchia;Pteriomorphia;Pectinida;Pectinoidea;Pectinidae;Mizuhopecten;Mizuhopecten yessoensis

|                 |      |       |                 |                |      |           |       |      |          |
|-----------------|------|-------|-----------------|----------------|------|-----------|-------|------|----------|
| UdeM00000004419 | 6596 | 625.9 | UdeM00000004419 | XP_045210083.1 | 68.5 | 463       |       |      |          |
| 135             | 7    | 2     | 462             | 22             | 475  | 4.00E-176 | 625.9 | 6596 | cellular |

organisms;Eukaryota;Opisthokonta;Metazoa;Eumetazoa;Bilateria;Protostomia; Spiralia;Lophotrochozoa;Mollusca;Bivalvia;Autobranchia;Heteroconchia;Euherodonta;Imparidentia;Venerida;Veneroidea;Veneridae;Mercenaria;Mercenaria mercenaria

|                 |      |       |                 |                |      |           |       |      |          |
|-----------------|------|-------|-----------------|----------------|------|-----------|-------|------|----------|
| UdeM00000004420 | 6596 | 625.5 | UdeM00000004420 | XP_045210083.1 | 68.3 | 464       |       |      |          |
| 135             | 7    | 2     | 463             | 22             | 475  | 5.20E-176 | 625.5 | 6596 | cellular |

organisms;Eukaryota;Opisthokonta;Metazoa;Eumetazoa;Bilateria;Protostomia; Spiralia;Lophotrochozoa;Mollusca;Bivalvia;Autobranchia;Heteroconchia;Euherodonta;Imparidentia;Venerida;Veneroidea;Veneridae;Mercenaria;Mercenaria mercenaria

terodonta;Imparidentia;Venerida;Veneroidea;Veneridae;Mercenaria;Mercenari  
 a mercenaria  
 UdeM00000004421 6596 624 UdeM00000004421 XP\_045210083.1 68 463  
 137 7 2 462 22 475 1.50E-175 624 6596 cellular  
 organisms;Eukaryota;Opisthokonta;Metazoa;Eumetazoa;Bilateria;Protostomia;  
 Spiralia;Lophotrochozoa;Mollusca;Bivalvia;Autobranchia;Heteroconchia;Euhe  
 terodonta;Imparidentia;Venerida;Veneroidea;Veneridae;Mercenaria;Mercenari  
 a mercenaria  
 UdeM00000004422 6565 846.3 UdeM00000004422 XP\_022330663.1 68.3 621  
 194 2 20 639 168 786 2.60E-242 846.3 6565 cellular  
 organisms;Eukaryota;Opisthokonta;Metazoa;Eumetazoa;Bilateria;Protostomia;  
 Spiralia;Lophotrochozoa;Mollusca;Bivalvia;Autobranchia;Pteriormorphia;Ostr  
 eida;Ostreoidea;Ostreidae;Crassostrea;Crassostrea virginica  
 UdeM00000004423 6596 108.2 UdeM00000004423 XP\_045210079.1 55 100  
 42 1 72 168 119 218 1.20E-20 108.2 6596 cellular  
 organisms;Eukaryota;Opisthokonta;Metazoa;Eumetazoa;Bilateria;Protostomia;  
 Spiralia;Lophotrochozoa;Mollusca;Bivalvia;Autobranchia;Heteroconchia;Euhe  
 terodonta;Imparidentia;Venerida;Veneroidea;Veneridae;Mercenaria;Mercenari  
 a mercenaria  
 UdeM00000004424 6565 206.1 UdeM00000004424 XP\_022313441.1 59.6 151  
 61 0 3 153 6 156 3.40E-50 206.1 6565 cellular  
 organisms;Eukaryota;Opisthokonta;Metazoa;Eumetazoa;Bilateria;Protostomia;  
 Spiralia;Lophotrochozoa;Mollusca;Bivalvia;Autobranchia;Pteriormorphia;Ostr  
 eida;Ostreoidea;Ostreidae;Crassostrea;Crassostrea virginica  
 UdeM00000004426 6596 78.6 UdeM00000004426 XP\_045209778.1 39.8 98  
 58 1 38 135 25 121 8.30E-12 78.6 6596 cellular  
 organisms;Eukaryota;Opisthokonta;Metazoa;Eumetazoa;Bilateria;Protostomia;  
 Spiralia;Lophotrochozoa;Mollusca;Bivalvia;Autobranchia;Heteroconchia;Euhe  
 terodonta;Imparidentia;Venerida;Veneroidea;Veneridae;Mercenaria;Mercenari  
 a mercenaria  
 UdeM00000004427 6596 81.3 UdeM00000004427 XP\_045209778.1 37.5 112  
 69 1 15 126 11 121 1.20E-12 81.3 6596 cellular  
 organisms;Eukaryota;Opisthokonta;Metazoa;Eumetazoa;Bilateria;Protostomia;  
 Spiralia;Lophotrochozoa;Mollusca;Bivalvia;Autobranchia;Heteroconchia;Euhe  
 terodonta;Imparidentia;Venerida;Veneroidea;Veneridae;Mercenaria;Mercenari  
 a mercenaria  
 UdeM00000004428 6596 81.3 UdeM00000004428 XP\_045209778.1 37.5 112  
 69 1 15 126 11 121 2.40E-12 81.3 6596 cellular  
 organisms;Eukaryota;Opisthokonta;Metazoa;Eumetazoa;Bilateria;Protostomia;  
 Spiralia;Lophotrochozoa;Mollusca;Bivalvia;Autobranchia;Heteroconchia;Euhe  
 terodonta;Imparidentia;Venerida;Veneroidea;Veneridae;Mercenaria;Mercenari  
 a mercenaria  
 UdeM00000004429 6596 80.5 UdeM00000004429 XP\_045209778.1 36.6 112  
 70 1 15 126 11 121 2.40E-12 80.5 6596 cellular  
 organisms;Eukaryota;Opisthokonta;Metazoa;Eumetazoa;Bilateria;Protostomia;  
 Spiralia;Lophotrochozoa;Mollusca;Bivalvia;Autobranchia;Heteroconchia;Euhe  
 terodonta;Imparidentia;Venerida;Veneroidea;Veneridae;Mercenaria;Mercenari  
 a mercenaria  
 UdeM00000004430 6596 81.6 UdeM00000004430 XP\_045209778.1 40.5 111  
 62 2 29 138 25 132 1.00E-12 81.6 6596 cellular  
 organisms;Eukaryota;Opisthokonta;Metazoa;Eumetazoa;Bilateria;Protostomia;  
 Spiralia;Lophotrochozoa;Mollusca;Bivalvia;Autobranchia;Heteroconchia;Euhe  
 terodonta;Imparidentia;Venerida;Veneroidea;Veneridae;Mercenaria;Mercenari  
 a mercenaria

UdeM00000004432 6500 301.2 UdeM00000004432 XP\_005112773.1 69.2 221  
 68 0 1 221 1 221 1.10E-78 301.2 6500 cellular  
 organisms;Eukaryota;Opisthokonta;Metazoa;Eumetazoa;Bilateria;Protostomia;  
 Spiralia;Lophotrochozoa;Mollusca;Gastropoda;Heterobranchia;Euthyneura;Tec  
 tipleura;Aplysiida;Aplysioidea;Aplysiidae;Aplysia;Aplysia californica  
 UdeM00000004439 6579 62.4 UdeM00000004439 XP\_033758755.1 48.3 58  
 30 0 37 94 5 62 5.60E-07 62.4 6579 cellular  
 organisms;Eukaryota;Opisthokonta;Metazoa;Eumetazoa;Bilateria;Protostomia;  
 Spiralia;Lophotrochozoa;Mollusca;Bivalvia;Autobranchia;Pteriormorphia;Pect  
 inida;Pectinoidea;Pectinidae;Pecten;Pecten maximus  
 UdeM00000004440 6596 240 UdeM00000004440 XP\_045210053.1 70.5 156  
 46 0 6 161 8 163 2.20E-60 240 6596 cellular  
 organisms;Eukaryota;Opisthokonta;Metazoa;Eumetazoa;Bilateria;Protostomia;  
 Spiralia;Lophotrochozoa;Mollusca;Bivalvia;Autobranchia;Heteroconchia;Euhe  
 terodonta;Imparidentia;Venerida;Veneroidea;Veneridae;Mercenaria;Mercenari  
 a mercenaria  
 UdeM00000004441 6579 175.6 UdeM00000004441 XP\_033741736.1 52.6 171  
 79 1 1 169 671 841 5.60E-41 175.6 6579 cellular  
 organisms;Eukaryota;Opisthokonta;Metazoa;Eumetazoa;Bilateria;Protostomia;  
 Spiralia;Lophotrochozoa;Mollusca;Bivalvia;Autobranchia;Pteriormorphia;Pect  
 inida;Pectinoidea;Pectinidae;Pecten;Pecten maximus  
 UdeM00000004442 6596 191 UdeM00000004442 XP\_045208124.1 57.7 189  
 72 4 1091 1273 978 1164 9.00E-45 191 6596 cellular  
 organisms;Eukaryota;Opisthokonta;Metazoa;Eumetazoa;Bilateria;Protostomia;  
 Spiralia;Lophotrochozoa;Mollusca;Bivalvia;Autobranchia;Heteroconchia;Euhe  
 terodonta;Imparidentia;Venerida;Veneroidea;Veneridae;Mercenaria;Mercenari  
 a mercenaria  
 UdeM00000004444 29159 1251.5 UdeM00000004444 XP\_011414451.2 82.3  
 774 133 2 1 774 1 770 0.00E+00 1251.5  
 29159 cellular  
 organisms;Eukaryota;Opisthokonta;Metazoa;Eumetazoa;Bilateria;Protostomia;  
 Spiralia;Lophotrochozoa;Mollusca;Bivalvia;Autobranchia;Pteriormorphia;Ostr  
 eida;Ostreoidea;Ostreidae;Crassostrea;Crassostrea gigas  
 UdeM00000004445 6565 426 UdeM00000004445 XP\_022311340.1 38.5 1011  
 516 17 18 1005 8 935 1.30E-115 426 6565 cellular  
 organisms;Eukaryota;Opisthokonta;Metazoa;Eumetazoa;Bilateria;Protostomia;  
 Spiralia;Lophotrochozoa;Mollusca;Bivalvia;Autobranchia;Pteriormorphia;Ostr  
 eida;Ostreoidea;Ostreidae;Crassostrea;Crassostrea virginica  
 UdeM00000004446 6579 266.5 UdeM00000004446 XP\_033733000.1 47.9 265  
 136 2 150 414 130 392 5.50E-68 266.5 6579 cellular  
 organisms;Eukaryota;Opisthokonta;Metazoa;Eumetazoa;Bilateria;Protostomia;  
 Spiralia;Lophotrochozoa;Mollusca;Bivalvia;Autobranchia;Pteriormorphia;Pect  
 inida;Pectinoidea;Pectinidae;Pecten;Pecten maximus  
 UdeM00000004447 6579 266.5 UdeM00000004447 XP\_033733000.1 47.9 265  
 136 2 113 377 130 392 5.10E-68 266.5 6579 cellular  
 organisms;Eukaryota;Opisthokonta;Metazoa;Eumetazoa;Bilateria;Protostomia;  
 Spiralia;Lophotrochozoa;Mollusca;Bivalvia;Autobranchia;Pteriormorphia;Pect  
 inida;Pectinoidea;Pectinidae;Pecten;Pecten maximus  
 UdeM00000004449 6596 334.3 UdeM00000004449 XP\_045207828.1 63.7 273  
 85 6 1 264 1 268 1.40E-88 334.3 6596 cellular  
 organisms;Eukaryota;Opisthokonta;Metazoa;Eumetazoa;Bilateria;Protostomia;  
 Spiralia;Lophotrochozoa;Mollusca;Bivalvia;Autobranchia;Heteroconchia;Euhe  
 terodonta;Imparidentia;Venerida;Veneroidea;Veneridae;Mercenaria;Mercenari  
 a mercenaria

UdeM00000004450 6596 455.7 UdeM00000004450 XP\_045207824.1 63.5 348  
 122 2 5 348 1 347 5.80E-125 455.7 6596 cellular  
 organisms;Eukaryota;Opisthokonta;Metazoa;Eumetazoa;Bilateria;Protostomia;  
 Spiralia;Lophotrochozoa;Mollusca;Bivalvia;Autobranchia;Heteroconchia;Euhe  
 terodonta;Imparidentia;Venerida;Veneroidea;Veneridae;Mercenaria;Mercenari  
 a mercenaria  
 UdeM00000004452 6579 290 UdeM00000004452 XP\_033732072.1 53.6 332  
 133 10 27 341 8 335 3.80E-75 290 6579 cellular  
 organisms;Eukaryota;Opisthokonta;Metazoa;Eumetazoa;Bilateria;Protostomia;  
 Spiralia;Lophotrochozoa;Mollusca;Bivalvia;Autobranchia;Pteriormorphia;Pect  
 inida;Pectinoidea;Pectinidae;Pecten;Pecten maximus  
 UdeM00000004453 29159 201.4 UdeM00000004453 XP\_011426639.2 57.3 211  
 84 5 93 300 64 271 1.70E-48 201.4 29159 cellular  
 organisms;Eukaryota;Opisthokonta;Metazoa;Eumetazoa;Bilateria;Protostomia;  
 Spiralia;Lophotrochozoa;Mollusca;Bivalvia;Autobranchia;Pteriormorphia;Ostr  
 eida;Ostreoidea;Ostreidae;Crassostrea;Crassostrea gigas  
 UdeM00000004454 6596 143.3 UdeM00000004454 XP\_045170511.1 34 188  
 122 2 31 218 744 929 6.50E-31 143.3 6596 cellular  
 organisms;Eukaryota;Opisthokonta;Metazoa;Eumetazoa;Bilateria;Protostomia;  
 Spiralia;Lophotrochozoa;Mollusca;Bivalvia;Autobranchia;Heteroconchia;Euhe  
 terodonta;Imparidentia;Venerida;Veneroidea;Veneridae;Mercenaria;Mercenari  
 a mercenaria  
 UdeM00000004455 29159 79.7 UdeM00000004455 XP\_034330592.1 27.3 209  
 133 6 20 211 481 687 4.90E-12 79.7 29159 cellular  
 organisms;Eukaryota;Opisthokonta;Metazoa;Eumetazoa;Bilateria;Protostomia;  
 Spiralia;Lophotrochozoa;Mollusca;Bivalvia;Autobranchia;Pteriormorphia;Ostr  
 eida;Ostreoidea;Ostreidae;Crassostrea;Crassostrea gigas  
 UdeM00000004457 6596 371.3 UdeM00000004457 XP\_045170511.1 29 870  
 515 26 650 1447 91 929 6.20E-99 371.3 6596 cellular  
 organisms;Eukaryota;Opisthokonta;Metazoa;Eumetazoa;Bilateria;Protostomia;  
 Spiralia;Lophotrochozoa;Mollusca;Bivalvia;Autobranchia;Heteroconchia;Euhe  
 terodonta;Imparidentia;Venerida;Veneroidea;Veneridae;Mercenaria;Mercenari  
 a mercenaria  
 UdeM00000004458 6596 265.4 UdeM00000004458 XP\_045170511.1 30.7 548  
 325 15 14 522 398 929 2.00E-67 265.4 6596 cellular  
 organisms;Eukaryota;Opisthokonta;Metazoa;Eumetazoa;Bilateria;Protostomia;  
 Spiralia;Lophotrochozoa;Mollusca;Bivalvia;Autobranchia;Heteroconchia;Euhe  
 terodonta;Imparidentia;Venerida;Veneroidea;Veneridae;Mercenaria;Mercenari  
 a mercenaria  
 UdeM00000004459 6596 176 UdeM00000004459 XP\_045182925.1 31 393  
 249 12 6 388 72 452 1.70E-40 176 6596 cellular  
 organisms;Eukaryota;Opisthokonta;Metazoa;Eumetazoa;Bilateria;Protostomia;  
 Spiralia;Lophotrochozoa;Mollusca;Bivalvia;Autobranchia;Heteroconchia;Euhe  
 terodonta;Imparidentia;Venerida;Veneroidea;Veneridae;Mercenaria;Mercenari  
 a mercenaria  
 UdeM00000004460 6596 607.4 UdeM00000004460 XP\_045214460.1 72.5 418  
 109 2 1 412 145 562 1.30E-170 607.4 6596 cellular  
 organisms;Eukaryota;Opisthokonta;Metazoa;Eumetazoa;Bilateria;Protostomia;  
 Spiralia;Lophotrochozoa;Mollusca;Bivalvia;Autobranchia;Heteroconchia;Euhe  
 terodonta;Imparidentia;Venerida;Veneroidea;Veneridae;Mercenaria;Mercenari  
 a mercenaria  
 UdeM00000004461 6596 652.5 UdeM00000004461 XP\_045214460.1 72.8 449  
 116 2 1 443 145 593 6.10E-184 652.5 6596 cellular  
 organisms;Eukaryota;Opisthokonta;Metazoa;Eumetazoa;Bilateria;Protostomia;

Spiralia;Lophotrochozoa;Mollusca;Bivalvia;Autobranchia;Heteroconchia;Euherodonta;Imparidentia;Venerida;Veneroidea;Veneridae;Mercenaria;Mercenaria mercenaria

UdeM00000004464 6596 499.2 UdeM00000004464 XP\_045209701.1 60 427  
164 5 1 423 1 424 5.10E-138 499.2 6596 cellular  
organisms;Eukaryota;Opisthokonta;Metazoa;Eumetazoa;Bilateria;Protostomia;Spiralia;Lophotrochozoa;Mollusca;Bivalvia;Autobranchia;Heteroconchia;Euherodonta;Imparidentia;Venerida;Veneroidea;Veneridae;Mercenaria;Mercenaria mercenaria

UdeM00000004465 6596 700.3 UdeM00000004465 XP\_045210159.1 45.3 1063  
455 13 15 964 18 1067 3.50E-198 700.3 6596 cellular  
organisms;Eukaryota;Opisthokonta;Metazoa;Eumetazoa;Bilateria;Protostomia;Spiralia;Lophotrochozoa;Mollusca;Bivalvia;Autobranchia;Heteroconchia;Euherodonta;Imparidentia;Venerida;Veneroidea;Veneridae;Mercenaria;Mercenaria mercenaria

UdeM00000004466 37653 214.2 UdeM00000004466 XP\_014788842.1 78.7 127  
27 0 5 131 468 594 1.10E-52 214.2 37653 cellular  
organisms;Eukaryota;Opisthokonta;Metazoa;Eumetazoa;Bilateria;Protostomia;Spiralia;Lophotrochozoa;Mollusca;Cephalopoda;Coleoidea;Octopodiformes;Octopoda;Incirrata;Octopodidae;Octopus;Octopus bimaculoides

UdeM00000004467 6565 161.8 UdeM00000004467 XP\_022299727.1 39.9 233  
95 3 1 189 46 277 9.90E-37 161.8 6565 cellular  
organisms;Eukaryota;Opisthokonta;Metazoa;Eumetazoa;Bilateria;Protostomia;Spiralia;Lophotrochozoa;Mollusca;Bivalvia;Autobranchia;Pteriormorphia;Ostracida;Ostreoidea;Ostreidae;Crassostrea;Crassostrea virginica

UdeM00000004468 6596 731.9 UdeM00000004468 XP\_045210160.1 79.3 440  
91 0 1 440 1 440 4.90E-208 731.9 6596 cellular  
organisms;Eukaryota;Opisthokonta;Metazoa;Eumetazoa;Bilateria;Protostomia;Spiralia;Lophotrochozoa;Mollusca;Bivalvia;Autobranchia;Heteroconchia;Euherodonta;Imparidentia;Venerida;Veneroidea;Veneridae;Mercenaria;Mercenaria mercenaria

UdeM00000004469 6596 195.3 UdeM00000004469 XP\_045210161.1 55.9 161  
67 2 28 186 28 186 7.00E-47 195.3 6596 cellular  
organisms;Eukaryota;Opisthokonta;Metazoa;Eumetazoa;Bilateria;Protostomia;Spiralia;Lophotrochozoa;Mollusca;Bivalvia;Autobranchia;Heteroconchia;Euherodonta;Imparidentia;Venerida;Veneroidea;Veneridae;Mercenaria;Mercenaria mercenaria

UdeM00000004472 6579 219.5 UdeM00000004472 XP\_033733348.1 79.6 137  
27 1 1 136 1 137 2.80E-54 219.5 6579 cellular  
organisms;Eukaryota;Opisthokonta;Metazoa;Eumetazoa;Bilateria;Protostomia;Spiralia;Lophotrochozoa;Mollusca;Bivalvia;Autobranchia;Pteriormorphia;Pectinida;Pectinoidea;Pectinidae;Pecten;Pecten maximus

UdeM00000004473 6573 404.8 UdeM00000004473 XP\_021361943.1 60.4 338  
126 3 7 336 135 472 1.10E-109 404.8 6573 cellular  
organisms;Eukaryota;Opisthokonta;Metazoa;Eumetazoa;Bilateria;Protostomia;Spiralia;Lophotrochozoa;Mollusca;Bivalvia;Autobranchia;Pteriormorphia;Pectinida;Pectinoidea;Pectinidae;Mizuhopecten;Mizuhopecten yessoensis

UdeM00000004474 6596 457.6 UdeM00000004474 XP\_045209893.1 42.3 652  
334 10 1 621 10 650 2.50E-125 457.6 6596 cellular  
organisms;Eukaryota;Opisthokonta;Metazoa;Eumetazoa;Bilateria;Protostomia;Spiralia;Lophotrochozoa;Mollusca;Bivalvia;Autobranchia;Heteroconchia;Euherodonta;Imparidentia;Venerida;Veneroidea;Veneridae;Mercenaria;Mercenaria mercenaria

UdeM00000004475 6596 144.1 UdeM00000004475 XP\_045209892.1 50 146  
 62 3 2 139 537 679 1.40E-31 144.1 6596 cellular  
 organisms;Eukaryota;Opisthokonta;Metazoa;Eumetazoa;Bilateria;Protostomia;  
 Spiralia;Lophotrochozoa;Mollusca;Bivalvia;Autobranhia;Heteroconchia;Euhe  
 terodonta;Imparidentia;Venerida;Veneroidea;Veneridae;Mercenaria;Mercenari  
 a mercenaria  
 UdeM00000004476 46514 184.5 UdeM00000004476 XP\_038073561.1 53.7 147  
 68 0 5 151 4 150 1.00E-43 184.5 46514 cellular  
 organisms;Eukaryota;Opisthokonta;Metazoa;Eumetazoa;Bilateria;Deuterostomi  
 a;Echinodermata;Eleutherozoa;Asterozoa;Asteroidea;Valvatacea;Valvatida;As  
 terinidae;Patiria;Patiria miniata  
 UdeM00000004477 29159 2340.1 UdeM00000004477 XP\_011437301.2 44  
 2661 1391 44 81 2711 27 2619 0.00E+00 2340.1  
 29159 cellular  
 organisms;Eukaryota;Opisthokonta;Metazoa;Eumetazoa;Bilateria;Protostomia;  
 Spiralia;Lophotrochozoa;Mollusca;Bivalvia;Autobranhia;Pteriormorphia;Ostr  
 eida;Ostreoidea;Ostreidae;Crassostrea;Crassostrea gigas  
 UdeM00000004478 6596 125.9 UdeM00000004478 XP\_045184412.1 26.6 421  
 280 14 350 756 1582 1987 2.30E-25 125.9 6596 cellular  
 organisms;Eukaryota;Opisthokonta;Metazoa;Eumetazoa;Bilateria;Protostomia;  
 Spiralia;Lophotrochozoa;Mollusca;Bivalvia;Autobranhia;Heteroconchia;Euhe  
 terodonta;Imparidentia;Venerida;Veneroidea;Veneridae;Mercenaria;Mercenari  
 a mercenaria  
 UdeM00000004479 48498 104 UdeM00000004479 XP\_020610409.1 36.7 147  
 90 1 1 147 474 617 2.30E-19 104 48498 cellular  
 organisms;Eukaryota;Opisthokonta;Metazoa;Eumetazoa;Cnidaria;Anthozoa;Hexa  
 corallia;Scleractinia;Faviina;Merulinidae;Orbicella;Orbicella faveolata  
 UdeM00000004480 6579 425.6 UdeM00000004480 XP\_033732834.1 51.1 1112  
 409 23 1 1004 1 1085 2.30E-115 425.6 6579 cellular  
 organisms;Eukaryota;Opisthokonta;Metazoa;Eumetazoa;Bilateria;Protostomia;  
 Spiralia;Lophotrochozoa;Mollusca;Bivalvia;Autobranhia;Pteriormorphia;Pect  
 inida;Pectinoidea;Pectinidae;Pecten;Pecten maximus  
 UdeM00000004481 6596 652.5 UdeM00000004481 XP\_045209565.1 57.6 582  
 187 9 7 579 19 549 5.00E-184 652.5 6596 cellular  
 organisms;Eukaryota;Opisthokonta;Metazoa;Eumetazoa;Bilateria;Protostomia;  
 Spiralia;Lophotrochozoa;Mollusca;Bivalvia;Autobranhia;Heteroconchia;Euhe  
 terodonta;Imparidentia;Venerida;Veneroidea;Veneridae;Mercenaria;Mercenari  
 a mercenaria  
 UdeM00000004482 6596 131.7 UdeM00000004482 XP\_045210120.1 40.5 299  
 135 10 24 288 27 316 1.50E-27 131.7 6596 cellular  
 organisms;Eukaryota;Opisthokonta;Metazoa;Eumetazoa;Bilateria;Protostomia;  
 Spiralia;Lophotrochozoa;Mollusca;Bivalvia;Autobranhia;Heteroconchia;Euhe  
 terodonta;Imparidentia;Venerida;Veneroidea;Veneridae;Mercenaria;Mercenari  
 a mercenaria  
 UdeM00000004483 1735272 100.9 UdeM00000004483 XP\_041372346.1 43.1  
 195 76 5 110 304 48 207 3.70E-18 100.9 1735272  
 cellular  
 organisms;Eukaryota;Opisthokonta;Metazoa;Eumetazoa;Bilateria;Protostomia;  
 Spiralia;Lophotrochozoa;Mollusca;Gastropoda;Neomphalina;Neomphaloidea;Pel  
 tospiridae;Gigantopelta;Gigantopelta aegis  
 UdeM00000004484 1735272 100.1 UdeM00000004484 XP\_041372346.1 42.9  
 196 76 5 110 305 48 207 6.30E-18 100.1 1735272  
 cellular  
 organisms;Eukaryota;Opisthokonta;Metazoa;Eumetazoa;Bilateria;Protostomia;

Spiralia;Lophotrochozoa;Mollusca;Gastropoda;Neomphalina;Neomphaloidea;Pel  
 tospiridae;Gigantopelta;Gigantopelta aegis

UdeM00000004485 6596 1099 UdeM00000004485 XP\_045209078.1 24.4 3597  
 1376 81 8 2338 7 3525 0.00E+00 1099 6596 cellular  
 organisms;Eukaryota;Opisthokonta;Metazoa;Eumetazoa;Bilateria;Protostomia;  
 Spiralia;Lophotrochozoa;Mollusca;Bivalvia;Autobranchia;Heteroconchia;Euhe  
 terodonta;Imparidentia;Venerida;Veneroidea;Veneridae;Mercenaria;Mercenari  
 a mercenaria

UdeM00000004487 46731 72 UdeM00000004487 XP\_027044268.1 58.8 51  
 21 0 41 91 27 77 2.10E-09 72 46731 cellular  
 organisms;Eukaryota;Opisthokonta;Metazoa;Eumetazoa;Cnidaria;Anthozoa;Hexa  
 corallia;Scleractinia;Astrocoeniina;Pocilloporidae;Pocillopora;Pocillopor  
 a damicornis

UdeM00000004488 6596 430.6 UdeM00000004488 XP\_045207314.1 56.7 393  
 159 3 21 411 25 408 2.20E-117 430.6 6596 cellular  
 organisms;Eukaryota;Opisthokonta;Metazoa;Eumetazoa;Bilateria;Protostomia;  
 Spiralia;Lophotrochozoa;Mollusca;Bivalvia;Autobranchia;Heteroconchia;Euhe  
 terodonta;Imparidentia;Venerida;Veneroidea;Veneridae;Mercenaria;Mercenari  
 a mercenaria

UdeM00000004489 6596 106.7 UdeM00000004489 XP\_045187536.1 67.1 79  
 25 1 1 79 327 404 2.00E-20 106.7 6596 cellular  
 organisms;Eukaryota;Opisthokonta;Metazoa;Eumetazoa;Bilateria;Protostomia;  
 Spiralia;Lophotrochozoa;Mollusca;Bivalvia;Autobranchia;Heteroconchia;Euhe  
 terodonta;Imparidentia;Venerida;Veneroidea;Veneridae;Mercenaria;Mercenari  
 a mercenaria

UdeM00000004491 6596 161.8 UdeM00000004491 XP\_045210336.1 73.6 110  
 20 2 15 115 208 317 5.30E-37 161.8 6596 cellular  
 organisms;Eukaryota;Opisthokonta;Metazoa;Eumetazoa;Bilateria;Protostomia;  
 Spiralia;Lophotrochozoa;Mollusca;Bivalvia;Autobranchia;Heteroconchia;Euhe  
 terodonta;Imparidentia;Venerida;Veneroidea;Veneridae;Mercenaria;Mercenari  
 a mercenaria

UdeM00000004492 6596 171 UdeM00000004492 XP\_045210334.1 48.8 201  
 99 3 1 198 2 201 1.60E-39 171 6596 cellular  
 organisms;Eukaryota;Opisthokonta;Metazoa;Eumetazoa;Bilateria;Protostomia;  
 Spiralia;Lophotrochozoa;Mollusca;Bivalvia;Autobranchia;Heteroconchia;Euhe  
 terodonta;Imparidentia;Venerida;Veneroidea;Veneridae;Mercenaria;Mercenari  
 a mercenaria

UdeM00000004493 6565 211.1 UdeM00000004493 XP\_022289925.1 52.6 251  
 92 6 1 230 3 247 4.70E-51 211.1 6565 cellular  
 organisms;Eukaryota;Opisthokonta;Metazoa;Eumetazoa;Bilateria;Protostomia;  
 Spiralia;Lophotrochozoa;Mollusca;Bivalvia;Autobranchia;Pteriomorphia;Ostr  
 eida;Ostreoidea;Ostreidae;Crassostrea;Crassostrea virginica

UdeM00000004495 6596 259.6 UdeM00000004495 XP\_045210339.1 45.1 461  
 221 14 1 439 1 451 7.10E-66 259.6 6596 cellular  
 organisms;Eukaryota;Opisthokonta;Metazoa;Eumetazoa;Bilateria;Protostomia;  
 Spiralia;Lophotrochozoa;Mollusca;Bivalvia;Autobranchia;Heteroconchia;Euhe  
 terodonta;Imparidentia;Venerida;Veneroidea;Veneridae;Mercenaria;Mercenari  
 a mercenaria

UdeM00000004496 6579 250 UdeM00000004496 XP\_033732161.1 55.6 286  
 98 9 1 281 1 262 3.60E-63 250 6579 cellular  
 organisms;Eukaryota;Opisthokonta;Metazoa;Eumetazoa;Bilateria;Protostomia;  
 Spiralia;Lophotrochozoa;Mollusca;Bivalvia;Autobranchia;Pteriomorphia;Pect  
 inida;Pectinoidea;Pectinidae;Pecten;Pecten maximus

UdeM00000004497 6596 364 UdeM00000004497 XP\_045210341.1 74.3 288  
 57 5 1 274 1 285 1.80E-97 364 6596 cellular  
 organisms;Eukaryota;Opisthokonta;Metazoa;Eumetazoa;Bilateria;Protostomia;  
 Spiralia;Lophotrochozoa;Mollusca;Bivalvia;Autobranhia;Heteroconchia;Euhe  
 terodonta;Imparidentia;Venerida;Veneroidea;Veneridae;Mercenaria;Mercenari  
 a mercenaria  
 UdeM00000004498 6596 223.4 UdeM00000004498 XP\_045210344.1 45.5 356  
 133 13 1 336 1 315 4.30E-55 223.4 6596 cellular  
 organisms;Eukaryota;Opisthokonta;Metazoa;Eumetazoa;Bilateria;Protostomia;  
 Spiralia;Lophotrochozoa;Mollusca;Bivalvia;Autobranhia;Heteroconchia;Euhe  
 terodonta;Imparidentia;Venerida;Veneroidea;Veneridae;Mercenaria;Mercenari  
 a mercenaria  
 UdeM00000004499 6573 149.1 UdeM00000004499 XP\_021345173.1 64.3 115  
 35 1 131 245 135 243 8.00E-33 149.1 6573 cellular  
 organisms;Eukaryota;Opisthokonta;Metazoa;Eumetazoa;Bilateria;Protostomia;  
 Spiralia;Lophotrochozoa;Mollusca;Bivalvia;Autobranhia;Pteriormorphia;Pect  
 inida;Pectinoidea;Pectinidae;Mizuhopecten;Mizuhopecten yessoensis  
 UdeM00000004500 6596 319.7 UdeM00000004500 XP\_045210346.1 63.6 286  
 78 11 1 271 1 275 3.60E-84 319.7 6596 cellular  
 organisms;Eukaryota;Opisthokonta;Metazoa;Eumetazoa;Bilateria;Protostomia;  
 Spiralia;Lophotrochozoa;Mollusca;Bivalvia;Autobranhia;Heteroconchia;Euhe  
 terodonta;Imparidentia;Venerida;Veneroidea;Veneridae;Mercenaria;Mercenari  
 a mercenaria  
 UdeM00000004501 6596 325.1 UdeM00000004501 XP\_045210348.1 78.4 218  
 39 5 1 215 21 233 7.60E-86 325.1 6596 cellular  
 organisms;Eukaryota;Opisthokonta;Metazoa;Eumetazoa;Bilateria;Protostomia;  
 Spiralia;Lophotrochozoa;Mollusca;Bivalvia;Autobranhia;Heteroconchia;Euhe  
 terodonta;Imparidentia;Venerida;Veneroidea;Veneridae;Mercenaria;Mercenari  
 a mercenaria  
 UdeM00000004502 6596 235.3 UdeM00000004502 XP\_045210349.1 72 168  
 42 4 1 167 1 164 5.60E-59 235.3 6596 cellular  
 organisms;Eukaryota;Opisthokonta;Metazoa;Eumetazoa;Bilateria;Protostomia;  
 Spiralia;Lophotrochozoa;Mollusca;Bivalvia;Autobranhia;Heteroconchia;Euhe  
 terodonta;Imparidentia;Venerida;Veneroidea;Veneridae;Mercenaria;Mercenari  
 a mercenaria  
 UdeM000000040731 6596 266.9 UdeM000000040731 XP\_045179599.1 57 230  
 93 2 40 263 49 278 2.70E-68 266.9 6596 cellular  
 organisms;Eukaryota;Opisthokonta;Metazoa;Eumetazoa;Bilateria;Protostomia;  
 Spiralia;Lophotrochozoa;Mollusca;Bivalvia;Autobranhia;Heteroconchia;Euhe  
 terodonta;Imparidentia;Venerida;Veneroidea;Veneridae;Mercenaria;Mercenari  
 a mercenaria  
 UdeM000000040732 1735272 177.2 UdeM000000040732 XP\_041361735.1 35.6  
 264 163 5 1 262 68 326 2.80E-41 177.2 1735272  
 cellular  
 organisms;Eukaryota;Opisthokonta;Metazoa;Eumetazoa;Bilateria;Protostomia;  
 Spiralia;Lophotrochozoa;Mollusca;Gastropoda;Neomphalina;Neomphaloidea;Pel  
 tospiridae;Gigantopelta;Gigantopelta aegis  
 UdeM000000040734 6596 191.4 UdeM000000040734 XP\_045202146.1 50.9 167  
 80 1 46 212 77 241 1.20E-45 191.4 6596 cellular  
 organisms;Eukaryota;Opisthokonta;Metazoa;Eumetazoa;Bilateria;Protostomia;  
 Spiralia;Lophotrochozoa;Mollusca;Bivalvia;Autobranhia;Heteroconchia;Euhe  
 terodonta;Imparidentia;Venerida;Veneroidea;Veneridae;Mercenaria;Mercenari  
 a mercenaria



UdeM00000040733 6573 258.8 UdeM00000040733 XP\_021352111.1 44.1 286  
 156 3 320 601 135 420 1.70E-65 258.8 6573 cellular  
 organisms;Eukaryota;Opisthokonta;Metazoa;Eumetazoa;Bilateria;Protostomia;  
 Spiralia;Lophotrochozoa;Mollusca;Bivalvia;Autobranchia;Pteriormorphia;Pect  
 inida;Pectinoidea;Pectinidae;Mizuhopecten;Mizuhopecten yessoensis  
 UdeM00000040735 7719 141.4 UdeM00000040735 XP\_004227365.1 55.3 103  
 46 0 1 103 60 162 6.70E-31 141.4 7719 cellular  
 organisms;Eukaryota;Opisthokonta;Metazoa;Eumetazoa;Bilateria;Deuterostomi  
 a;Chordata;Tunicata;Ascidiacea;Phlebobranchia;Cionidae;Ciona;Ciona  
 intestinalis  
 UdeM00000040736 7054 101.3 UdeM00000040736 XP\_031328250.1 64.4 73  
 26 0 8 80 152 224 6.80E-19 101.3 7054 cellular  
 organisms;Eukaryota;Opisthokonta;Metazoa;Eumetazoa;Bilateria;Protostomia;  
 Ecdysozoa;Panarthropoda;Arthropoda;Mandibulata;Pancrustacea;Hexapoda;Inse  
 cta;Dicondylia;Pterygota;Neoptera;Endopterygota;Coleoptera;Polyphaga;Elat  
 eriformia;Elateroidea;Lampyridae;Lampyrinae;Photinus;Photinus pyralis  
 UdeM00000040737 6412 122.5 UdeM00000040737 XP\_009015452.1 46.4 125  
 67 0 1 125 1 125 4.00E-25 122.5 6412 cellular  
 organisms;Eukaryota;Opisthokonta;Metazoa;Eumetazoa;Bilateria;Protostomia;  
 Spiralia;Lophotrochozoa;Annelida;Clitellata;Hirudinea;Rhynchobdellida;Glo  
 ssiphoniidae;Helobdella;Helobdella robusta  
 UdeM00000040738 2607531 72 UdeM00000040738 XP\_029648199.1 30.3  
 119 61 3 6 106 208 322 5.20E-10 72 2607531  
 cellular  
 organisms;Eukaryota;Opisthokonta;Metazoa;Eumetazoa;Bilateria;Protostomia;  
 Spiralia;Lophotrochozoa;Mollusca;Cephalopoda;Coleoidea;Octopodiformes;Oct  
 opoda;Incirrata;Octopodidae;Octopus;Octopus sinensis  
 UdeM00000040740 6596 65.1 UdeM00000040740 XP\_045204261.1 46.7 60  
 32 0 6 65 39 98 5.70E-08 65.1 6596 cellular  
 organisms;Eukaryota;Opisthokonta;Metazoa;Eumetazoa;Bilateria;Protostomia;  
 Spiralia;Lophotrochozoa;Mollusca;Bivalvia;Autobranchia;Heteroconchia;Euhe  
 terodonta;Imparidentia;Venerida;Veneroidea;Veneridae;Mercenaria;Mercenari  
 a mercenaria  
 UdeM00000040741 6596 104.8 UdeM00000040741 XP\_045204261.1 40.5 126  
 74 1 6 131 39 163 1.10E-19 104.8 6596 cellular  
 organisms;Eukaryota;Opisthokonta;Metazoa;Eumetazoa;Bilateria;Protostomia;  
 Spiralia;Lophotrochozoa;Mollusca;Bivalvia;Autobranchia;Heteroconchia;Euhe  
 terodonta;Imparidentia;Venerida;Veneroidea;Veneridae;Mercenaria;Mercenari  
 a mercenaria  
 UdeM00000040742 7719 191 UdeM00000040742 XP\_026690485.1 36.8 340  
 148 9 6 287 6 336 2.10E-45 191 7719 cellular  
 organisms;Eukaryota;Opisthokonta;Metazoa;Eumetazoa;Bilateria;Deuterostomi  
 a;Chordata;Tunicata;Ascidiacea;Phlebobranchia;Cionidae;Ciona;Ciona  
 intestinalis  
 UdeM00000040743 400727 62.8 UdeM00000040743 XP\_025084054.1 41.1  
 73 43 0 1 73 42 114 2.40E-07 62.8 400727  
 cellular  
 organisms;Eukaryota;Opisthokonta;Metazoa;Eumetazoa;Bilateria;Protostomia;  
 Spiralia;Lophotrochozoa;Mollusca;Gastropoda;Caenogastropoda;Architaeniogl  
 ossa;Ampullarioidea;Ampullariidae;Pomacea;Pomacea canaliculata  
 UdeM00000040744 6573 326.2 UdeM00000040744 XP\_021375058.1 56.9 274  
 116 1 39 310 117 390 4.40E-86 326.2 6573 cellular  
 organisms;Eukaryota;Opisthokonta;Metazoa;Eumetazoa;Bilateria;Protostomia;

Spiralia;Lophotrochozoa;Mollusca;Bivalvia;Autobranchia;Pteriomorphia;Pectinida;Pectinoidea;Pectinidae;Mizuhopecten;Mizuhopecten yessoensis  
UdeM00000040745 1735272 187.2 UdeM00000040745 XP\_041361735.1 36.1  
274 148 6 1 262 68 326 2.70E-44 187.2 1735272  
cellular  
organisms;Eukaryota;Opisthokonta;Metazoa;Eumetazoa;Bilateria;Protostomia;  
Spiralia;Lophotrochozoa;Mollusca;Gastropoda;Neomphalina;Neomphaloidea;Pel  
tospiridae;Gigantopelta;Gigantopelta aegis  
UdeM00000040746 1735272 253.4 UdeM00000040746 XP\_041362195.1 39  
310 182 5 94 397 62 370 4.70E-64 253.4 1735272  
cellular  
organisms;Eukaryota;Opisthokonta;Metazoa;Eumetazoa;Bilateria;Protostomia;  
Spiralia;Lophotrochozoa;Mollusca;Gastropoda;Neomphalina;Neomphaloidea;Pel  
tospiridae;Gigantopelta;Gigantopelta aegis  
UdeM00000040749 6596 327.8 UdeM00000040749 XP\_045161465.1 54.8 272  
122 1 67 337 46 317 1.60E-86 327.8 6596 cellular  
organisms;Eukaryota;Opisthokonta;Metazoa;Eumetazoa;Bilateria;Protostomia;  
Spiralia;Lophotrochozoa;Mollusca;Bivalvia;Autobranchia;Heteroconchia;Euhe  
terodonta;Imparidentia;Venerida;Veneroidea;Veneridae;Mercenaria;Mercenari  
a mercenaria  
UdeM00000040751 6596 263.8 UdeM00000040751 XP\_045179599.1 55.7 230  
96 2 40 263 49 278 2.30E-67 263.8 6596 cellular  
organisms;Eukaryota;Opisthokonta;Metazoa;Eumetazoa;Bilateria;Protostomia;  
Spiralia;Lophotrochozoa;Mollusca;Bivalvia;Autobranchia;Heteroconchia;Euhe  
terodonta;Imparidentia;Venerida;Veneroidea;Veneridae;Mercenaria;Mercenari  
a mercenaria  
UdeM00000040752 1735272 172.6 UdeM00000040752 XP\_041361735.1 34.8  
264 165 5 1 262 68 326 6.90E-40 172.6 1735272  
cellular  
organisms;Eukaryota;Opisthokonta;Metazoa;Eumetazoa;Bilateria;Protostomia;  
Spiralia;Lophotrochozoa;Mollusca;Gastropoda;Neomphalina;Neomphaloidea;Pel  
tospiridae;Gigantopelta;Gigantopelta aegis  
UdeM00000040753 6596 230.3 UdeM00000040753 XP\_045202146.1 46.4 239  
113 3 66 291 77 313 3.20E-57 230.3 6596 cellular  
organisms;Eukaryota;Opisthokonta;Metazoa;Eumetazoa;Bilateria;Protostomia;  
Spiralia;Lophotrochozoa;Mollusca;Bivalvia;Autobranchia;Heteroconchia;Euhe  
terodonta;Imparidentia;Venerida;Veneroidea;Veneridae;Mercenaria;Mercenari  
a mercenaria  
UdeM00000040754 6573 261.5 UdeM00000040754 XP\_021352111.1 44.1 286  
156 3 110 391 135 420 1.70E-66 261.5 6573 cellular  
organisms;Eukaryota;Opisthokonta;Metazoa;Eumetazoa;Bilateria;Protostomia;  
Spiralia;Lophotrochozoa;Mollusca;Bivalvia;Autobranchia;Pteriomorphia;Pect  
inida;Pectinoidea;Pectinidae;Mizuhopecten;Mizuhopecten yessoensis  
UdeM00000044321 1735272 160.6 UdeM00000044321 XP\_041379275.1 32.6  
279 167 4 1 260 1 277 2.90E-36 160.6 1735272  
cellular  
organisms;Eukaryota;Opisthokonta;Metazoa;Eumetazoa;Bilateria;Protostomia;  
Spiralia;Lophotrochozoa;Mollusca;Gastropoda;Neomphalina;Neomphaloidea;Pel  
tospiridae;Gigantopelta;Gigantopelta aegis  
UdeM00000044322 1735272 431.4 UdeM00000044322 XP\_041347204.1 48.7  
435 216 4 2 429 80 514 1.30E-117 431.4 1735272  
cellular  
organisms;Eukaryota;Opisthokonta;Metazoa;Eumetazoa;Bilateria;Protostomia;

Spiralia;Lophotrochozoa;Mollusca;Gastropoda;Neomphalina;Neomphaloidea;Pel  
tospiridae;Gigantopelta;Gigantopelta aegis

UdeM00000044323 310915 81.3 UdeM00000044323 XP\_026776737.1 37.1  
132 71 3 15 145 65 185 1.90E-12 81.3 310915  
cellular

organisms;Eukaryota;Opisthokonta;Metazoa;Eumetazoa;Bilateria;Deuterostomi  
a;Chordata;Craniata;Vertebrata;Gnathostomata;Teleostomi;Euteleostomi;Acti  
nopterygii;Actinopteri;Neopterygii;Teleostei;Osteoglossocephalai;Clupeoce  
phala;Otomorpha;Ostariophysi;Otophysi;Characiphysae;Siluriformes;Siluroid  
ei;Pangasiidae;Pangasianodon;Pangasianodon hypophthalmus

UdeM00000001025 29159 309.7 UdeM00000001025 XP\_034327140.1 53.8 301  
129 3 3 295 460 758 4.00E-81 309.7 29159 cellular

organisms;Eukaryota;Opisthokonta;Metazoa;Eumetazoa;Bilateria;Protostomia;  
Spiralia;Lophotrochozoa;Mollusca;Bivalvia;Autobranchia;Pteriormorphia;Ostr  
eida;Ostreoidea;Ostreidae;Crassostrea;Crassostrea gigas

UdeM00000001026 6596 458.4 UdeM00000001026 XP\_045190611.1 58.2 390  
159 4 1 389 14 400 9.60E-126 458.4 6596 cellular

organisms;Eukaryota;Opisthokonta;Metazoa;Eumetazoa;Bilateria;Protostomia;  
Spiralia;Lophotrochozoa;Mollusca;Bivalvia;Autobranchia;Heteroconchia;Euhe  
terodonta;Imparidentia;Venerida;Veneroidea;Veneridae;Mercenaria;Mercenari  
a mercenaria

UdeM00000001027 29159 419.5 UdeM00000001027 XP\_034327427.1 52.2 423  
172 5 35 454 69 464 5.60E-114 419.5 29159 cellular

organisms;Eukaryota;Opisthokonta;Metazoa;Eumetazoa;Bilateria;Protostomia;  
Spiralia;Lophotrochozoa;Mollusca;Bivalvia;Autobranchia;Pteriormorphia;Ostr  
eida;Ostreoidea;Ostreidae;Crassostrea;Crassostrea gigas

UdeM00000001028 6596 202.6 UdeM00000001028 XP\_045188555.1 43.3 275  
145 4 1 266 1 273 6.50E-49 202.6 6596 cellular

organisms;Eukaryota;Opisthokonta;Metazoa;Eumetazoa;Bilateria;Protostomia;  
Spiralia;Lophotrochozoa;Mollusca;Bivalvia;Autobranchia;Heteroconchia;Euhe  
terodonta;Imparidentia;Venerida;Veneroidea;Veneridae;Mercenaria;Mercenari  
a mercenaria

UdeM00000001029 6565 874 UdeM00000001029 XP\_022339440.1 80.4 514  
101 0 8 521 3 516 9.50E-251 874 6565 cellular

organisms;Eukaryota;Opisthokonta;Metazoa;Eumetazoa;Bilateria;Protostomia;  
Spiralia;Lophotrochozoa;Mollusca;Bivalvia;Autobranchia;Pteriormorphia;Ostr  
eida;Ostreoidea;Ostreidae;Crassostrea;Crassostrea virginica

UdeM00000001030 6596 78.2 UdeM00000001030 XP\_045189389.1 48.6 109  
44 4 8 112 9 109 9.20E-12 78.2 6596 cellular

organisms;Eukaryota;Opisthokonta;Metazoa;Eumetazoa;Bilateria;Protostomia;  
Spiralia;Lophotrochozoa;Mollusca;Bivalvia;Autobranchia;Heteroconchia;Euhe  
terodonta;Imparidentia;Venerida;Veneroidea;Veneridae;Mercenaria;Mercenari  
a mercenaria

UdeM00000001031 6565 255.4 UdeM00000001031 XP\_022339444.1 59.2 245  
86 5 32 267 99 338 9.50E-65 255.4 6565 cellular

organisms;Eukaryota;Opisthokonta;Metazoa;Eumetazoa;Bilateria;Protostomia;  
Spiralia;Lophotrochozoa;Mollusca;Bivalvia;Autobranchia;Pteriormorphia;Ostr  
eida;Ostreoidea;Ostreidae;Crassostrea;Crassostrea virginica

UdeM00000001032 6596 342 UdeM00000001032 XP\_045188661.1 52.4 288  
127 5 21 303 37 319 7.80E-91 342 6596 cellular

organisms;Eukaryota;Opisthokonta;Metazoa;Eumetazoa;Bilateria;Protostomia;  
Spiralia;Lophotrochozoa;Mollusca;Bivalvia;Autobranchia;Heteroconchia;Euhe  
terodonta;Imparidentia;Venerida;Veneroidea;Veneridae;Mercenaria;Mercenari  
a mercenaria

UdeM00000001033 6573 248.8 UdeM00000001033 XP\_021346189.1 58.1 210  
 82 2 51 258 1 206 7.50E-63 248.8 6573 cellular  
 organisms;Eukaryota;Opisthokonta;Metazoa;Eumetazoa;Bilateria;Protostomia;  
 Spiralia;Lophotrochozoa;Mollusca;Bivalvia;Autobranchia;Pteriomorpha;Pect  
 inida;Pectinoidea;Pectinidae;Mizuhopecten;Mizuhopecten yessoensis  
 UdeM00000001035 46514 152.5 UdeM00000001035 XP\_038058673.1 32.6 261  
 158 4 2 258 528 774 7.30E-34 152.5 46514 cellular  
 organisms;Eukaryota;Opisthokonta;Metazoa;Eumetazoa;Bilateria;Deuterostomi  
 a;Echinodermata;Eleutherozoa;Asterozoa;Asteroidea;Valvatacea;Valvatida;As  
 terinidae;Patiria;Patiria miniata  
 UdeM00000001034 7668 120.6 UdeM00000001034 XP\_030845845.1 46.8 111  
 59 0 71 181 29 139 2.20E-24 120.6 7668 cellular  
 organisms;Eukaryota;Opisthokonta;Metazoa;Eumetazoa;Bilateria;Deuterostomi  
 a;Echinodermata;Eleutherozoa;Echinozoa;Echinoidea;Euechinoidea;Echinacea;  
 Camarodonta;Echinidea;Strongylocentrotidae;Strongylocentrotus;Strongyloce  
 ntrotus purpuratus  
 UdeM00000001036 6596 309.7 UdeM00000001036 XP\_045188661.1 50.9 287  
 135 3 14 296 320 604 4.40E-81 309.7 6596 cellular  
 organisms;Eukaryota;Opisthokonta;Metazoa;Eumetazoa;Bilateria;Protostomia;  
 Spiralia;Lophotrochozoa;Mollusca;Bivalvia;Autobranchia;Heteroconchia;Euhe  
 terodonta;Imparidentia;Venerida;Veneroidea;Veneridae;Mercenaria;Mercenari  
 a mercenaria  
 UdeM00000001037 6596 261.9 UdeM00000001037 XP\_045188660.1 40.7 349  
 178 7 23 351 184 523 1.20E-66 261.9 6596 cellular  
 organisms;Eukaryota;Opisthokonta;Metazoa;Eumetazoa;Bilateria;Protostomia;  
 Spiralia;Lophotrochozoa;Mollusca;Bivalvia;Autobranchia;Heteroconchia;Euhe  
 terodonta;Imparidentia;Venerida;Veneroidea;Veneridae;Mercenaria;Mercenari  
 a mercenaria  
 UdeM00000001039 6579 262.3 UdeM00000001039 XP\_033756415.1 42.5 308  
 170 5 3 309 306 607 7.90E-67 262.3 6579 cellular  
 organisms;Eukaryota;Opisthokonta;Metazoa;Eumetazoa;Bilateria;Protostomia;  
 Spiralia;Lophotrochozoa;Mollusca;Bivalvia;Autobranchia;Pteriomorpha;Pect  
 inida;Pectinoidea;Pectinidae;Pecten;Pecten maximus  
 UdeM00000001040 6596 285.4 UdeM00000001040 XP\_045188656.1 44.1 286  
 154 3 30 312 23 305 8.70E-74 285.4 6596 cellular  
 organisms;Eukaryota;Opisthokonta;Metazoa;Eumetazoa;Bilateria;Protostomia;  
 Spiralia;Lophotrochozoa;Mollusca;Bivalvia;Autobranchia;Heteroconchia;Euhe  
 terodonta;Imparidentia;Venerida;Veneroidea;Veneridae;Mercenaria;Mercenari  
 a mercenaria  
 UdeM00000001041 6596 278.9 UdeM00000001041 XP\_045188656.1 43.9 287  
 152 5 30 311 23 305 8.10E-72 278.9 6596 cellular  
 organisms;Eukaryota;Opisthokonta;Metazoa;Eumetazoa;Bilateria;Protostomia;  
 Spiralia;Lophotrochozoa;Mollusca;Bivalvia;Autobranchia;Heteroconchia;Euhe  
 terodonta;Imparidentia;Venerida;Veneroidea;Veneridae;Mercenaria;Mercenari  
 a mercenaria  
 UdeM00000001042 9823 73.6 UdeM00000001042 XP\_020923035.1 45.9 85  
 36 4 35 112 340 421 2.00E-10 73.6 9823 cellular  
 organisms;Eukaryota;Opisthokonta;Metazoa;Eumetazoa;Bilateria;Deuterostomi  
 a;Chordata;Craniata;Vertebrata;Gnathostomata;Teleostomi;Euteleostomi;Sarc  
 opterygii;Dipnotetrapodomorpha;Tetrapoda;Amniota;Mammalia;Theria;Eutheria  
 ;Boreoeutheria;Laurasiatheria;Artiodactyla;Suina;Suidae;Sus;Sus scrofa  
 UdeM00000001043 6596 84.7 UdeM00000001043 XP\_045190241.1 75 56  
 14 0 655 710 1145 1200 6.90E-13 84.7 6596 cellular  
 organisms;Eukaryota;Opisthokonta;Metazoa;Eumetazoa;Bilateria;Protostomia;

Spiralia;Lophotrochozoa;Mollusca;Bivalvia;Autobranchia;Heteroconchia;Euherodonta;Imparidentia;Venerida;Veneroidea;Veneridae;Mercenaria;Mercenaria mercenaria

|                 |      |        |                 |                |      |      |          |        |      |
|-----------------|------|--------|-----------------|----------------|------|------|----------|--------|------|
| UdeM00000001044 | 6596 | 1272.3 | UdeM00000001044 | XP_045190241.1 | 55.4 |      |          |        |      |
| 1250            | 477  | 18     | 14              | 1245           | 14   | 1200 | 0.00E+00 | 1272.3 | 6596 |

cellular

organisms;Eukaryota;Opisthokonta;Metazoa;Eumetazoa;Bilateria;Protostomia;Spiralia;Lophotrochozoa;Mollusca;Bivalvia;Autobranchia;Heteroconchia;Euherodonta;Imparidentia;Venerida;Veneroidea;Veneridae;Mercenaria;Mercenaria mercenaria

|                 |      |       |                 |                |      |          |       |      |          |
|-----------------|------|-------|-----------------|----------------|------|----------|-------|------|----------|
| UdeM00000001045 | 6596 | 212.2 | UdeM00000001045 | XP_045188784.1 | 42.4 | 394      |       |      |          |
| 156             | 18   | 1     | 339             | 1              | 378  | 1.00E-51 | 212.2 | 6596 | cellular |

organisms;Eukaryota;Opisthokonta;Metazoa;Eumetazoa;Bilateria;Protostomia;Spiralia;Lophotrochozoa;Mollusca;Bivalvia;Autobranchia;Heteroconchia;Euherodonta;Imparidentia;Venerida;Veneroidea;Veneridae;Mercenaria;Mercenaria mercenaria

|                 |         |       |                 |                |      |     |          |       |         |
|-----------------|---------|-------|-----------------|----------------|------|-----|----------|-------|---------|
| UdeM00000001046 | 1735272 | 257.3 | UdeM00000001046 | XP_041369330.1 | 44.6 |     |          |       |         |
| 296             | 162     | 2     | 74              | 369            | 1    | 294 | 3.00E-65 | 257.3 | 1735272 |

cellular

organisms;Eukaryota;Opisthokonta;Metazoa;Eumetazoa;Bilateria;Protostomia;Spiralia;Lophotrochozoa;Mollusca;Gastropoda;Neomphalina;Neomphaloidea;Peltospiridae;Gigantopelta;Gigantopelta aegis

|                 |      |       |                 |                |      |           |       |      |          |
|-----------------|------|-------|-----------------|----------------|------|-----------|-------|------|----------|
| UdeM00000001047 | 6596 | 635.2 | UdeM00000001047 | XP_045188530.1 | 71.1 | 402       |       |      |          |
| 116             | 0    | 3     | 404             | 95             | 496  | 5.70E-179 | 635.2 | 6596 | cellular |

organisms;Eukaryota;Opisthokonta;Metazoa;Eumetazoa;Bilateria;Protostomia;Spiralia;Lophotrochozoa;Mollusca;Bivalvia;Autobranchia;Heteroconchia;Euherodonta;Imparidentia;Venerida;Veneroidea;Veneridae;Mercenaria;Mercenaria mercenaria

|                 |         |       |                 |                |      |     |          |       |         |
|-----------------|---------|-------|-----------------|----------------|------|-----|----------|-------|---------|
| UdeM00000001048 | 1735272 | 306.6 | UdeM00000001048 | XP_041371139.1 | 41.6 |     |          |       |         |
| 404             | 214     | 8     | 27              | 420            | 29   | 420 | 4.90E-80 | 306.6 | 1735272 |

cellular

organisms;Eukaryota;Opisthokonta;Metazoa;Eumetazoa;Bilateria;Protostomia;Spiralia;Lophotrochozoa;Mollusca;Gastropoda;Neomphalina;Neomphaloidea;Peltospiridae;Gigantopelta;Gigantopelta aegis

|                 |      |       |                 |                |      |          |       |      |          |
|-----------------|------|-------|-----------------|----------------|------|----------|-------|------|----------|
| UdeM00000001052 | 6850 | 356.7 | UdeM00000001052 | XP_013785216.1 | 64.8 | 264      |       |      |          |
| 93              | 0    | 5     | 268             | 20             | 283  | 2.70E-95 | 356.7 | 6850 | cellular |

organisms;Eukaryota;Opisthokonta;Metazoa;Eumetazoa;Bilateria;Protostomia;Ecdysozoa;Panarthropoda;Arthropoda;Chelicerata;Merostomata;Xiphosura;Limulidae;Limulus;Limulus polyphemus

|                 |      |       |                 |                |      |           |       |      |          |
|-----------------|------|-------|-----------------|----------------|------|-----------|-------|------|----------|
| UdeM00000001053 | 6596 | 481.1 | UdeM00000001053 | XP_045190552.1 | 59.2 | 404       |       |      |          |
| 118             | 5    | 8     | 401             | 22             | 388  | 1.40E-132 | 481.1 | 6596 | cellular |

organisms;Eukaryota;Opisthokonta;Metazoa;Eumetazoa;Bilateria;Protostomia;Spiralia;Lophotrochozoa;Mollusca;Bivalvia;Autobranchia;Heteroconchia;Euherodonta;Imparidentia;Venerida;Veneroidea;Veneridae;Mercenaria;Mercenaria mercenaria

|                 |      |      |                 |                |      |          |      |      |          |
|-----------------|------|------|-----------------|----------------|------|----------|------|------|----------|
| UdeM00000001054 | 6596 | 67.4 | UdeM00000001054 | XP_045180324.1 | 38.5 | 104      |      |      |          |
| 42              | 2    | 2    | 83              | 16             | 119  | 1.80E-08 | 67.4 | 6596 | cellular |

organisms;Eukaryota;Opisthokonta;Metazoa;Eumetazoa;Bilateria;Protostomia;Spiralia;Lophotrochozoa;Mollusca;Bivalvia;Autobranchia;Heteroconchia;Euherodonta;Imparidentia;Venerida;Veneroidea;Veneridae;Mercenaria;Mercenaria mercenaria

|                 |      |     |                 |                |      |           |     |      |          |
|-----------------|------|-----|-----------------|----------------|------|-----------|-----|------|----------|
| UdeM00000001055 | 6596 | 807 | UdeM00000001055 | XP_045190601.1 | 51.6 | 822       |     |      |          |
| 371             | 8    | 1   | 801             | 1              | 816  | 2.20E-230 | 807 | 6596 | cellular |

organisms;Eukaryota;Opisthokonta;Metazoa;Eumetazoa;Bilateria;Protostomia;

Spiralia;Lophotrochozoa;Mollusca;Bivalvia;Autobranchia;Heteroconchia;Euherodonta;Imparidentia;Venerida;Veneroidea;Veneridae;Mercenaria;Mercenaria mercenaria

UdeM00000001057 6596 171 UdeM00000001057 XP\_045189876.1 63.8 138  
48 2 1 137 381 517 1.10E-39 171 6596 cellular

organisms;Eukaryota;Opisthokonta;Metazoa;Eumetazoa;Bilateria;Protostomia;Spiralia;Lophotrochozoa;Mollusca;Bivalvia;Autobranchia;Heteroconchia;Euherodonta;Imparidentia;Venerida;Veneroidea;Veneridae;Mercenaria;Mercenaria mercenaria

UdeM00000001058 260615 159.5 UdeM00000001058 XP\_039383630.1 90.4  
94 9 0 1 94 246 339 2.20E-36 159.5 260615  
cellular

organisms;Eukaryota;Opisthokonta;Metazoa;Eumetazoa;Bilateria;Deuterostomia;Chordata;Craniata;Vertebrata;Gnathostomata;Teleostomi;Euteleostomi;Sarcopterygii;Dipnotetrapodomorpha;Tetrapoda;Amniota;Sauropsida;Sauria;Archelosauria;Testudinata;Testudines;Cryptodira;Durocryptodira;Testudinoidea;Geoemydidae;Geoemydinae;Mauremys;Mauremys reevesii

UdeM00000001059 6596 489.6 UdeM00000001059 XP\_045189875.1 64.1 365  
127 1 72 436 20 380 4.50E-135 489.6 6596 cellular

organisms;Eukaryota;Opisthokonta;Metazoa;Eumetazoa;Bilateria;Protostomia;Spiralia;Lophotrochozoa;Mollusca;Bivalvia;Autobranchia;Heteroconchia;Euherodonta;Imparidentia;Venerida;Veneroidea;Veneridae;Mercenaria;Mercenaria mercenaria

UdeM00000001060 6596 126.7 UdeM00000001060 XP\_045158901.1 48.4 124  
63 1 1 123 10 133 2.10E-26 126.7 6596 cellular

organisms;Eukaryota;Opisthokonta;Metazoa;Eumetazoa;Bilateria;Protostomia;Spiralia;Lophotrochozoa;Mollusca;Bivalvia;Autobranchia;Heteroconchia;Euherodonta;Imparidentia;Venerida;Veneroidea;Veneridae;Mercenaria;Mercenaria mercenaria

UdeM00000001061 6596 249.2 UdeM00000001061 XP\_045179569.1 40.4 376  
122 3 1 275 1 375 6.10E-63 249.2 6596 cellular

organisms;Eukaryota;Opisthokonta;Metazoa;Eumetazoa;Bilateria;Protostomia;Spiralia;Lophotrochozoa;Mollusca;Bivalvia;Autobranchia;Heteroconchia;Euherodonta;Imparidentia;Venerida;Veneroidea;Veneridae;Mercenaria;Mercenaria mercenaria

UdeM00000001062 6596 175.3 UdeM00000001062 XP\_045189876.1 65.9 138  
45 2 1 137 381 517 6.20E-41 175.3 6596 cellular

organisms;Eukaryota;Opisthokonta;Metazoa;Eumetazoa;Bilateria;Protostomia;Spiralia;Lophotrochozoa;Mollusca;Bivalvia;Autobranchia;Heteroconchia;Euherodonta;Imparidentia;Venerida;Veneroidea;Veneridae;Mercenaria;Mercenaria mercenaria

UdeM00000001063 260615 275.4 UdeM00000001063 XP\_039385216.1 82.8  
180 14 1 1 163 347 526 4.70E-71 275.4 260615  
cellular

organisms;Eukaryota;Opisthokonta;Metazoa;Eumetazoa;Bilateria;Deuterostomia;Chordata;Craniata;Vertebrata;Gnathostomata;Teleostomi;Euteleostomi;Sarcopterygii;Dipnotetrapodomorpha;Tetrapoda;Amniota;Sauropsida;Sauria;Archelosauria;Testudinata;Testudines;Cryptodira;Durocryptodira;Testudinoidea;Geoemydidae;Geoemydinae;Mauremys;Mauremys reevesii

UdeM00000001064 6596 323.2 UdeM00000001064 XP\_045189875.1 62.3 244  
89 1 1 244 49 289 3.30E-85 323.2 6596 cellular

organisms;Eukaryota;Opisthokonta;Metazoa;Eumetazoa;Bilateria;Protostomia;Spiralia;Lophotrochozoa;Mollusca;Bivalvia;Autobranchia;Heteroconchia;Euherodonta;Imparidentia;Venerida;Veneroidea;Veneridae;Mercenaria;Mercenaria mercenaria

terodonta;Imparidentia;Venerida;Veneroidea;Veneridae;Mercenaria;Mercenaria mercenaria  
 UdeM00000001065 6596 175.6 UdeM00000001065 XP\_045189876.1 64.1 142  
 49 2 1 141 381 521 4.80E-41 175.6 6596 cellular  
 organisms;Eukaryota;Opisthokonta;Metazoa;Eumetazoa;Bilateria;Protostomia;Spiralia;Lophotrochozoa;Mollusca;Bivalvia;Autobranchia;Heteroconchia;Euheterodonta;Imparidentia;Venerida;Veneroidea;Veneridae;Mercenaria;Mercenaria mercenaria  
 UdeM00000001066 260615 234.2 UdeM00000001066 XP\_039385216.1 81.9  
 160 12 1 1 143 367 526 1.00E-58 234.2 260615  
 cellular  
 organisms;Eukaryota;Opisthokonta;Metazoa;Eumetazoa;Bilateria;Deuterostomia;Chordata;Craniata;Vertebrata;Gnathostomata;Teleostomi;Euteleostomi;Sarcopterygii;Dipnotetrapodomorpha;Tetrapoda;Amniota;Sauropsida;Sauria;Archelosauria;Testudinata;Testudines;Cryptodira;Durocryptodira;Testudinoidea;Geoemydidae;Geoemydinae;Mauremys;Mauremys reevesii  
 UdeM00000001067 260615 188.3 UdeM00000001067 XP\_039385216.1 82.3  
 130 6 1 4 116 397 526 5.40E-45 188.3 260615  
 cellular  
 organisms;Eukaryota;Opisthokonta;Metazoa;Eumetazoa;Bilateria;Deuterostomia;Chordata;Craniata;Vertebrata;Gnathostomata;Teleostomi;Euteleostomi;Sarcopterygii;Dipnotetrapodomorpha;Tetrapoda;Amniota;Sauropsida;Sauria;Archelosauria;Testudinata;Testudines;Cryptodira;Durocryptodira;Testudinoidea;Geoemydidae;Geoemydinae;Mauremys;Mauremys reevesii  
 UdeM00000001068 6579 321.2 UdeM00000001068 XP\_033757483.1 66.7 228  
 75 1 1 228 51 277 1.10E-84 321.2 6579 cellular  
 organisms;Eukaryota;Opisthokonta;Metazoa;Eumetazoa;Bilateria;Protostomia;Spiralia;Lophotrochozoa;Mollusca;Bivalvia;Autobranchia;Pteriomorpha;Pectinida;Pectinoidea;Pectinidae;Pecten;Pecten maximus  
 UdeM00000001069 10224 87 UdeM00000001069 XP\_002734884.1 54 87  
 39 1 3 89 310 395 1.30E-14 87 10224 cellular  
 organisms;Eukaryota;Opisthokonta;Metazoa;Eumetazoa;Bilateria;Deuterostomia;Hemichordata;Enteropneusta;Harrimaniidae;Saccoglossus;Saccoglossus kowalevskii  
 UdeM00000001070 6596 429.5 UdeM00000001070 XP\_045188704.1 45.5 466  
 241 5 44 506 51 506 6.10E-117 429.5 6596 cellular  
 organisms;Eukaryota;Opisthokonta;Metazoa;Eumetazoa;Bilateria;Protostomia;Spiralia;Lophotrochozoa;Mollusca;Bivalvia;Autobranchia;Heteroconchia;Euheterodonta;Imparidentia;Venerida;Veneroidea;Veneridae;Mercenaria;Mercenaria mercenaria  
 UdeM00000001071 6596 80.1 UdeM00000001071 XP\_045188704.1 40.4 104  
 61 1 7 109 296 399 2.30E-12 80.1 6596 cellular  
 organisms;Eukaryota;Opisthokonta;Metazoa;Eumetazoa;Bilateria;Protostomia;Spiralia;Lophotrochozoa;Mollusca;Bivalvia;Autobranchia;Heteroconchia;Euheterodonta;Imparidentia;Venerida;Veneroidea;Veneridae;Mercenaria;Mercenaria mercenaria  
 UdeM00000001072 6500 165.6 UdeM00000001072 XP\_012937416.2 39.9 291  
 141 7 1502 1764 1084 1368 8.00E-37 165.6 6500 cellular  
 organisms;Eukaryota;Opisthokonta;Metazoa;Eumetazoa;Bilateria;Protostomia;Spiralia;Lophotrochozoa;Mollusca;Gastropoda;Heterobranchia;Euthyneura;Teptipleura;Aplysiida;Aplysiioidea;Aplysiidae;Aplysia;Aplysia californica  
 UdeM00000001072 6500 83.6 UdeM00000001072 XP\_012937416.2 59.6 57  
 23 0 2 58 12 68 4.00E-12 83.6 6500 cellular  
 organisms;Eukaryota;Opisthokonta;Metazoa;Eumetazoa;Bilateria;Protostomia;

Spiralia;Lophotrochozoa;Mollusca;Gastropoda;Heterobranchia;Euthyneura;Tectipleura;Aplysiida;Aplysioidea;Aplysiidae;Aplysia;Aplysia californica

UdeM00000001073 6596 67.4 UdeM00000001073 XP\_045188710.1 39.7 136  
58 6 7 140 2 115 8.90E-08 67.4 6596 cellular  
organisms;Eukaryota;Opisthokonta;Metazoa;Eumetazoa;Bilateria;Protostomia;  
Spiralia;Lophotrochozoa;Mollusca;Bivalvia;Autobranchia;Heteroconchia;Euherodonta;Imparidentia;Venerida;Veneroidea;Veneridae;Mercenaria;Mercenaria mercenaria

UdeM00000001074 6596 68.6 UdeM00000001074 XP\_045188710.1 43.5 115  
42 5 6 119 23 115 3.90E-08 68.6 6596 cellular  
organisms;Eukaryota;Opisthokonta;Metazoa;Eumetazoa;Bilateria;Protostomia;  
Spiralia;Lophotrochozoa;Mollusca;Bivalvia;Autobranchia;Heteroconchia;Euherodonta;Imparidentia;Venerida;Veneroidea;Veneridae;Mercenaria;Mercenaria mercenaria

UdeM00000001075 6596 542.7 UdeM00000001075 XP\_045188713.1 39.8 890  
355 26 255 996 45 901 9.60E-151 542.7 6596 cellular  
organisms;Eukaryota;Opisthokonta;Metazoa;Eumetazoa;Bilateria;Protostomia;  
Spiralia;Lophotrochozoa;Mollusca;Bivalvia;Autobranchia;Heteroconchia;Euherodonta;Imparidentia;Venerida;Veneroidea;Veneridae;Mercenaria;Mercenaria mercenaria

UdeM00000001076 6596 589 UdeM00000001076 XP\_045188715.1 64.6 443  
152 2 3 440 185 627 5.20E-165 589 6596 cellular  
organisms;Eukaryota;Opisthokonta;Metazoa;Eumetazoa;Bilateria;Protostomia;  
Spiralia;Lophotrochozoa;Mollusca;Bivalvia;Autobranchia;Heteroconchia;Euherodonta;Imparidentia;Venerida;Veneroidea;Veneridae;Mercenaria;Mercenaria mercenaria

UdeM00000001078 2607531 310.5 UdeM00000001078 XP\_029657462.1 56.9  
276 119 0 92 367 7 282 2.90E-81 310.5 2607531  
cellular  
organisms;Eukaryota;Opisthokonta;Metazoa;Eumetazoa;Bilateria;Protostomia;  
Spiralia;Lophotrochozoa;Mollusca;Cephalopoda;Coleoidea;Octopodiformes;Octopoda;Incirrata;Octopodidae;Octopus;Octopus sinensis

UdeM00000001079 7725 142.9 UdeM00000001079 XP\_039263221.1 60.7 112  
44 0 48 159 9 120 4.30E-31 142.9 7725 cellular  
organisms;Eukaryota;Opisthokonta;Metazoa;Eumetazoa;Bilateria;Deuterostomia;Chordata;Tunicata;Ascidiacea;Stolidobranchia;Styelidae;Styela;Styela clava

UdeM00000001080 6596 490.3 UdeM00000001080 XP\_045190667.1 49.4 635  
278 18 1 605 1 622 3.40E-135 490.3 6596 cellular  
organisms;Eukaryota;Opisthokonta;Metazoa;Eumetazoa;Bilateria;Protostomia;  
Spiralia;Lophotrochozoa;Mollusca;Bivalvia;Autobranchia;Heteroconchia;Euherodonta;Imparidentia;Venerida;Veneroidea;Veneridae;Mercenaria;Mercenaria mercenaria

UdeM00000001082 6596 362.8 UdeM00000001082 XP\_045190665.1 57.5 299  
115 2 331 619 358 654 8.40E-97 362.8 6596 cellular  
organisms;Eukaryota;Opisthokonta;Metazoa;Eumetazoa;Bilateria;Protostomia;  
Spiralia;Lophotrochozoa;Mollusca;Bivalvia;Autobranchia;Heteroconchia;Euherodonta;Imparidentia;Venerida;Veneroidea;Veneridae;Mercenaria;Mercenaria mercenaria

UdeM00000001083 6596 138.7 UdeM00000001083 XP\_045190657.1 48.6 142  
63 3 70 211 60 191 8.90E-30 138.7 6596 cellular  
organisms;Eukaryota;Opisthokonta;Metazoa;Eumetazoa;Bilateria;Protostomia;  
Spiralia;Lophotrochozoa;Mollusca;Bivalvia;Autobranchia;Heteroconchia;Euherodonta;Imparidentia;Venerida;Veneroidea;Veneridae;Mercenaria;Mercenaria mercenaria



terodonta;Imparidentia;Venerida;Veneroidea;Veneridae;Mercenaria;Mercenaria mercenaria  
 UdeM00000001084 6579 247.7 UdeM00000001084 XP\_033739239.1 48.9 268  
 118 5 125 373 79 346 2.60E-62 247.7 6579 cellular  
 organisms;Eukaryota;Opisthokonta;Metazoa;Eumetazoa;Bilateria;Protostomia;  
 Spiralia;Lophotrochozoa;Mollusca;Bivalvia;Autobranhia;Pteriomorpha;Pectinida;  
 Pectinoidea;Pectinidae;Pecten;Pecten maximus  
 UdeM00000001086 6579 705.3 UdeM00000001086 XP\_033728194.1 51.2 693  
 325 5 1 684 282 970 7.70E-200 705.3 6579 cellular  
 organisms;Eukaryota;Opisthokonta;Metazoa;Eumetazoa;Bilateria;Protostomia;  
 Spiralia;Lophotrochozoa;Mollusca;Bivalvia;Autobranhia;Pteriomorpha;Pectinida;  
 Pectinoidea;Pectinidae;Pecten;Pecten maximus  
 UdeM00000001089 6573 176.4 UdeM00000001089 XP\_021355605.1 48.6 183  
 91 1 15 194 14 196 4.10E-41 176.4 6573 cellular  
 organisms;Eukaryota;Opisthokonta;Metazoa;Eumetazoa;Bilateria;Protostomia;  
 Spiralia;Lophotrochozoa;Mollusca;Bivalvia;Autobranhia;Pteriomorpha;Pectinida;  
 Pectinoidea;Pectinidae;Mizuhopecten;Mizuhopecten yessoensis  
 UdeM00000001090 6565 556.2 UdeM00000001090 XP\_022337008.1 74.1 352  
 86 3 28 379 218 564 3.20E-155 556.2 6565 cellular  
 organisms;Eukaryota;Opisthokonta;Metazoa;Eumetazoa;Bilateria;Protostomia;  
 Spiralia;Lophotrochozoa;Mollusca;Bivalvia;Autobranhia;Pteriomorpha;Ostreida;  
 Ostreoidea;Ostreidae;Crassostrea;Crassostrea virginica  
 UdeM00000001091 6579 72.8 UdeM00000001091 XP\_033749319.1 45.5 77  
 35 2 1 71 159 234 3.30E-10 72.8 6579 cellular  
 organisms;Eukaryota;Opisthokonta;Metazoa;Eumetazoa;Bilateria;Protostomia;  
 Spiralia;Lophotrochozoa;Mollusca;Bivalvia;Autobranhia;Pteriomorpha;Pectinida;  
 Pectinoidea;Pectinidae;Pecten;Pecten maximus  
 UdeM00000001092 6573 249.6 UdeM00000001092 XP\_021361242.1 34 409  
 261 4 60 460 108 515 7.80E-63 249.6 6573 cellular  
 organisms;Eukaryota;Opisthokonta;Metazoa;Eumetazoa;Bilateria;Protostomia;  
 Spiralia;Lophotrochozoa;Mollusca;Bivalvia;Autobranhia;Pteriomorpha;Pectinida;  
 Pectinoidea;Pectinidae;Mizuhopecten;Mizuhopecten yessoensis  
 UdeM00000001093 6596 921 UdeM00000001093 XP\_045188884.1 55.7 836  
 329 13 1 817 2 815 1.10E-264 921 6596 cellular  
 organisms;Eukaryota;Opisthokonta;Metazoa;Eumetazoa;Bilateria;Protostomia;  
 Spiralia;Lophotrochozoa;Mollusca;Bivalvia;Autobranhia;Heteroconchia;Euheterodonta;  
 Imparidentia;Venerida;Veneroidea;Veneridae;Mercenaria;Mercenaria mercenaria  
 UdeM00000001094 6596 672.2 UdeM00000001094 XP\_045188890.1 67.1 501  
 115 6 1 467 88 572 5.20E-190 672.2 6596 cellular  
 organisms;Eukaryota;Opisthokonta;Metazoa;Eumetazoa;Bilateria;Protostomia;  
 Spiralia;Lophotrochozoa;Mollusca;Bivalvia;Autobranhia;Heteroconchia;Euheterodonta;  
 Imparidentia;Venerida;Veneroidea;Veneridae;Mercenaria;Mercenaria mercenaria  
 UdeM00000001096 6596 342.8 UdeM00000001096 XP\_045190539.1 46.8 442  
 206 8 11 430 16 450 6.30E-91 342.8 6596 cellular  
 organisms;Eukaryota;Opisthokonta;Metazoa;Eumetazoa;Bilateria;Protostomia;  
 Spiralia;Lophotrochozoa;Mollusca;Bivalvia;Autobranhia;Heteroconchia;Euheterodonta;  
 Imparidentia;Venerida;Veneroidea;Veneridae;Mercenaria;Mercenaria mercenaria  
 UdeM00000001097 6579 62.4 UdeM00000001097 XP\_033757468.1 53.6 56  
 21 3 73 127 79 130 1.70E-06 62.4 6579 cellular  
 organisms;Eukaryota;Opisthokonta;Metazoa;Eumetazoa;Bilateria;Protostomia;

Spiralia; Lophotrochozoa; Mollusca; Bivalvia; Autobranchia; Pteriomorpha; Pectinida; Pectinoidea; Pectinidae; Pecten; Pecten maximus  
UdeM00000001099 6596 95.5 UdeM00000001099 XP\_045189425.1 42.7 171  
81 6 30 190 29 192 8.10E-17 95.5 6596 cellular  
organisms; Eukaryota; Opisthokonta; Metazoa; Eumetazoa; Bilateria; Protostomia; Spiralia; Lophotrochozoa; Mollusca; Bivalvia; Autobranchia; Heteroconchia; Euheterodonta; Imparidentia; Venerida; Veneroidea; Veneridae; Mercenaria; Mercenaria mercenaria

UdeM00000001102 6596 268.9 UdeM00000001102 XP\_045189431.1 51.1 278  
134 2 66 343 36 311 9.20E-69 268.9 6596 cellular  
organisms; Eukaryota; Opisthokonta; Metazoa; Eumetazoa; Bilateria; Protostomia; Spiralia; Lophotrochozoa; Mollusca; Bivalvia; Autobranchia; Heteroconchia; Euheterodonta; Imparidentia; Venerida; Veneroidea; Veneridae; Mercenaria; Mercenaria mercenaria

UdeM00000001103 8384 313.2 UdeM00000001103 XP\_040270317.1 60.5 243  
96 0 6 248 9 251 3.30E-82 313.2 8384 cellular  
organisms; Eukaryota; Opisthokonta; Metazoa; Eumetazoa; Bilateria; Deuterostomia; Chordata; Craniata; Vertebrata; Gnathostomata; Teleostomi; Euteleostomi; Sarcopterygii; Dipnotetrapodomorpha; Tetrapoda; Amphibia; Batrachia; Anura; Neobatrachia; Hyloidea; Bufonidae; Bufo; Bufo bufo

UdeM00000001104 6573 291.2 UdeM00000001104 XP\_021362094.1 71.9 228  
58 2 1 225 4 228 1.50E-75 291.2 6573 cellular  
organisms; Eukaryota; Opisthokonta; Metazoa; Eumetazoa; Bilateria; Protostomia; Spiralia; Lophotrochozoa; Mollusca; Bivalvia; Autobranchia; Pteriomorpha; Pectinida; Pectinoidea; Pectinidae; Mizuhopecten; Mizuhopecten yessoensis

UdeM00000001105 6565 145.6 UdeM00000001105 XP\_022335397.1 43 223  
98 5 89 297 37 244 1.00E-31 145.6 6565 cellular  
organisms; Eukaryota; Opisthokonta; Metazoa; Eumetazoa; Bilateria; Protostomia; Spiralia; Lophotrochozoa; Mollusca; Bivalvia; Autobranchia; Pteriomorpha; Ostreida; Ostreoidea; Ostreidae; Crassostrea; Crassostrea virginica

UdeM00000001106 37653 225.3 UdeM00000001106 XP\_014778988.1 61.2 170  
65 1 1 169 1 170 6.10E-56 225.3 37653 cellular  
organisms; Eukaryota; Opisthokonta; Metazoa; Eumetazoa; Bilateria; Protostomia; Spiralia; Lophotrochozoa; Mollusca; Cephalopoda; Coleoidea; Octopodiformes; Octopoda; Incirrata; Octopodidae; Octopus; Octopus bimaculoides

UdeM00000001107 6596 478.4 UdeM00000001107 XP\_045189937.1 67.6 361  
112 3 31 388 41 399 9.00E-132 478.4 6596 cellular  
organisms; Eukaryota; Opisthokonta; Metazoa; Eumetazoa; Bilateria; Protostomia; Spiralia; Lophotrochozoa; Mollusca; Bivalvia; Autobranchia; Heteroconchia; Euheterodonta; Imparidentia; Venerida; Veneroidea; Veneridae; Mercenaria; Mercenaria mercenaria

UdeM00000001108 1735272 829.3 UdeM00000001108 XP\_041370384.1 91.4  
442 38 0 1 442 1 442 2.30E-237 829.3 1735272  
cellular  
organisms; Eukaryota; Opisthokonta; Metazoa; Eumetazoa; Bilateria; Protostomia; Spiralia; Lophotrochozoa; Mollusca; Gastropoda; Neomphalina; Neomphaloidea; Peltospiridae; Gigantopelta; Gigantopelta aegis

UdeM00000001109 6596 336.7 UdeM00000001109 XP\_045189285.1 24.8 1373  
836 43 1708 2919 227 1564 3.10E-88 336.7 6596 cellular  
organisms; Eukaryota; Opisthokonta; Metazoa; Eumetazoa; Bilateria; Protostomia; Spiralia; Lophotrochozoa; Mollusca; Bivalvia; Autobranchia; Heteroconchia; Euheterodonta; Imparidentia; Venerida; Veneroidea; Veneridae; Mercenaria; Mercenaria mercenaria

UdeM00000001110 6596 142.5 UdeM00000001110 XP\_045189460.1 36 367  
 204 7 1 346 1 357 1.00E-30 142.5 6596 cellular  
 organisms;Eukaryota;Opisthokonta;Metazoa;Eumetazoa;Bilateria;Protostomia;  
 Spiralia;Lophotrochozoa;Mollusca;Bivalvia;Autobranchia;Heteroconchia;Euhe  
 terodonta;Imparidentia;Venerida;Veneroidea;Veneridae;Mercenaria;Mercenari  
 a mercenaria  
 UdeM00000001111 6596 142.5 UdeM00000001111 XP\_045189460.1 36.2 367  
 204 7 1 347 1 357 1.00E-30 142.5 6596 cellular  
 organisms;Eukaryota;Opisthokonta;Metazoa;Eumetazoa;Bilateria;Protostomia;  
 Spiralia;Lophotrochozoa;Mollusca;Bivalvia;Autobranchia;Heteroconchia;Euhe  
 terodonta;Imparidentia;Venerida;Veneroidea;Veneridae;Mercenaria;Mercenari  
 a mercenaria  
 UdeM00000001112 6565 278.9 UdeM00000001112 XP\_022335825.1 38.9 386  
 226 5 341 722 458 837 1.90E-71 278.9 6565 cellular  
 organisms;Eukaryota;Opisthokonta;Metazoa;Eumetazoa;Bilateria;Protostomia;  
 Spiralia;Lophotrochozoa;Mollusca;Bivalvia;Autobranchia;Pteriormorphia;Ostr  
 eida;Ostreoidea;Ostreidae;Crassostrea;Crassostrea virginica  
 UdeM00000001113 6565 988.8 UdeM00000001113 XP\_022339594.1 34.4 1740  
 1071 27 26 1724 470 2180 8.70E-285 988.8 6565 cellular  
 organisms;Eukaryota;Opisthokonta;Metazoa;Eumetazoa;Bilateria;Protostomia;  
 Spiralia;Lophotrochozoa;Mollusca;Bivalvia;Autobranchia;Pteriormorphia;Ostr  
 eida;Ostreoidea;Ostreidae;Crassostrea;Crassostrea virginica  
 UdeM00000001114 6596 474.9 UdeM00000001114 XP\_045189742.1 67.5 329  
 107 0 1 329 1 329 8.10E-131 474.9 6596 cellular  
 organisms;Eukaryota;Opisthokonta;Metazoa;Eumetazoa;Bilateria;Protostomia;  
 Spiralia;Lophotrochozoa;Mollusca;Bivalvia;Autobranchia;Heteroconchia;Euhe  
 terodonta;Imparidentia;Venerida;Veneroidea;Veneridae;Mercenaria;Mercenari  
 a mercenaria  
 UdeM00000001115 6596 90.1 UdeM00000001115 XP\_045189403.1 29.3 191  
 119 5 26 203 1133 1320 3.50E-15 90.1 6596 cellular  
 organisms;Eukaryota;Opisthokonta;Metazoa;Eumetazoa;Bilateria;Protostomia;  
 Spiralia;Lophotrochozoa;Mollusca;Bivalvia;Autobranchia;Heteroconchia;Euhe  
 terodonta;Imparidentia;Venerida;Veneroidea;Veneridae;Mercenaria;Mercenari  
 a mercenaria  
 UdeM00000001116 6596 219.5 UdeM00000001116 XP\_045189403.1 27 1076  
 678 20 3 1011 93 1128 2.30E-53 219.5 6596 cellular  
 organisms;Eukaryota;Opisthokonta;Metazoa;Eumetazoa;Bilateria;Protostomia;  
 Spiralia;Lophotrochozoa;Mollusca;Bivalvia;Autobranchia;Heteroconchia;Euhe  
 terodonta;Imparidentia;Venerida;Veneroidea;Veneridae;Mercenaria;Mercenari  
 a mercenaria  
 UdeM00000001118 6565 92.4 UdeM00000001118 XP\_022343386.1 45.8 83  
 45 0 14 96 104 186 3.40E-16 92.4 6565 cellular  
 organisms;Eukaryota;Opisthokonta;Metazoa;Eumetazoa;Bilateria;Protostomia;  
 Spiralia;Lophotrochozoa;Mollusca;Bivalvia;Autobranchia;Pteriormorphia;Ostr  
 eida;Ostreoidea;Ostreidae;Crassostrea;Crassostrea virginica  
 UdeM00000001131 10224 98.6 UdeM00000001131 XP\_002737779.1 60.3 73  
 29 0 1 73 448 520 4.20E-18 98.6 10224 cellular  
 organisms;Eukaryota;Opisthokonta;Metazoa;Eumetazoa;Bilateria;Deuterostomi  
 a;Hemichordata;Enteropneusta;Harrimaniidae;Saccoglossus;Saccoglossus  
 kowalevskii  
 UdeM00000001133 6579 622.9 UdeM00000001133 XP\_033757276.1 47.2 862  
 438 4 1 859 107 954 7.20E-175 622.9 6579 cellular  
 organisms;Eukaryota;Opisthokonta;Metazoa;Eumetazoa;Bilateria;Protostomia;

Spiralia;Lophotrochozoa;Mollusca;Bivalvia;Autobranchia;Pteriormorphia;Pectinida;Pectinoidea;Pectinidae;Pecten;Pecten maximus

UdeM00000001134 1735272 349 UdeM00000001134 XP\_041368743.1 48.6  
360 168 6 1 348 1 355 7.80E-93 349 1735272  
cellular

organisms;Eukaryota;Opisthokonta;Metazoa;Eumetazoa;Bilateria;Protostomia;Spiralia;Lophotrochozoa;Mollusca;Gastropoda;Neomphalina;Neomphaloidea;Peltospiridae;Gigantopelta;Gigantopelta aegis

UdeM00000001135 6596 364 UdeM00000001135 XP\_045190385.1 61.5 278  
104 3 1 276 1 277 1.70E-97 364 6596 cellular

organisms;Eukaryota;Opisthokonta;Metazoa;Eumetazoa;Bilateria;Protostomia;Spiralia;Lophotrochozoa;Mollusca;Bivalvia;Autobranchia;Heteroconchia;Euheterodonta;Imparidentia;Venerida;Veneroidea;Veneridae;Mercenaria;Mercenaria mercenaria

UdeM00000001136 6596 1822.4 UdeM00000001136 XP\_045190393.1 57.1  
1750 701 15 1 1715 1 1735 0.00E+00 1822.4 6596  
cellular

organisms;Eukaryota;Opisthokonta;Metazoa;Eumetazoa;Bilateria;Protostomia;Spiralia;Lophotrochozoa;Mollusca;Bivalvia;Autobranchia;Heteroconchia;Euheterodonta;Imparidentia;Venerida;Veneroidea;Veneridae;Mercenaria;Mercenaria mercenaria

UdeM00000001139 6596 356.7 UdeM00000001139 XP\_045199418.1 29.7 900  
511 21 1 804 1 874 8.70E-95 356.7 6596 cellular

organisms;Eukaryota;Opisthokonta;Metazoa;Eumetazoa;Bilateria;Protostomia;Spiralia;Lophotrochozoa;Mollusca;Bivalvia;Autobranchia;Heteroconchia;Euheterodonta;Imparidentia;Venerida;Veneroidea;Veneridae;Mercenaria;Mercenaria mercenaria

UdeM00000001140 6596 366.3 UdeM00000001140 XP\_045189090.1 41.7 530  
296 6 20 544 494 1015 6.70E-98 366.3 6596 cellular

organisms;Eukaryota;Opisthokonta;Metazoa;Eumetazoa;Bilateria;Protostomia;Spiralia;Lophotrochozoa;Mollusca;Bivalvia;Autobranchia;Heteroconchia;Euheterodonta;Imparidentia;Venerida;Veneroidea;Veneridae;Mercenaria;Mercenaria mercenaria

UdeM00000001142 6596 347.1 UdeM00000001142 XP\_045189090.1 37.8 609  
318 13 24 620 23 582 4.80E-92 347.1 6596 cellular

organisms;Eukaryota;Opisthokonta;Metazoa;Eumetazoa;Bilateria;Protostomia;Spiralia;Lophotrochozoa;Mollusca;Bivalvia;Autobranchia;Heteroconchia;Euheterodonta;Imparidentia;Venerida;Veneroidea;Veneridae;Mercenaria;Mercenaria mercenaria

UdeM00000001143 6596 259.2 UdeM00000001143 XP\_045189090.1 44.8 308  
167 2 9 316 711 1015 6.70E-66 259.2 6596 cellular

organisms;Eukaryota;Opisthokonta;Metazoa;Eumetazoa;Bilateria;Protostomia;Spiralia;Lophotrochozoa;Mollusca;Bivalvia;Autobranchia;Heteroconchia;Euheterodonta;Imparidentia;Venerida;Veneroidea;Veneridae;Mercenaria;Mercenaria mercenaria

UdeM00000001144 1735272 86.3 UdeM00000001144 XP\_041370901.1 46.2  
91 48 1 7 96 401 491 2.70E-14 86.3 1735272  
cellular

organisms;Eukaryota;Opisthokonta;Metazoa;Eumetazoa;Bilateria;Protostomia;Spiralia;Lophotrochozoa;Mollusca;Gastropoda;Neomphalina;Neomphaloidea;Peltospiridae;Gigantopelta;Gigantopelta aegis

UdeM00000001145 6596 699.9 UdeM00000001145 XP\_045189090.1 40 1045  
566 16 24 1059 23 1015 5.00E-198 699.9 6596 cellular

organisms;Eukaryota;Opisthokonta;Metazoa;Eumetazoa;Bilateria;Protostomia;

Spiralia;Lophotrochozoa;Mollusca;Bivalvia;Autobranchia;Heteroconchia;Euherodonta;Imparidentia;Venerida;Veneroidea;Veneridae;Mercenaria;Mercenaria mercenaria

UdeM00000001146 6596 583.9 UdeM00000001146 XP\_045189090.1 36.3 1075  
598 18 3 1065 4 1003 4.00E-163 583.9 6596 cellular

organisms;Eukaryota;Opisthokonta;Metazoa;Eumetazoa;Bilateria;Protostomia;Spiralia;Lophotrochozoa;Mollusca;Bivalvia;Autobranchia;Heteroconchia;Euherodonta;Imparidentia;Venerida;Veneroidea;Veneridae;Mercenaria;Mercenaria mercenaria

UdeM00000001147 6596 580.5 UdeM00000001147 XP\_045189190.1 70.2 413  
115 3 1 406 1 412 1.70E-162 580.5 6596 cellular

organisms;Eukaryota;Opisthokonta;Metazoa;Eumetazoa;Bilateria;Protostomia;Spiralia;Lophotrochozoa;Mollusca;Bivalvia;Autobranchia;Heteroconchia;Euherodonta;Imparidentia;Venerida;Veneroidea;Veneridae;Mercenaria;Mercenaria mercenaria

UdeM00000001148 6596 567 UdeM00000001148 XP\_045189190.1 66.2 438  
115 4 1 431 1 412 2.10E-158 567 6596 cellular

organisms;Eukaryota;Opisthokonta;Metazoa;Eumetazoa;Bilateria;Protostomia;Spiralia;Lophotrochozoa;Mollusca;Bivalvia;Autobranchia;Heteroconchia;Euherodonta;Imparidentia;Venerida;Veneroidea;Veneridae;Mercenaria;Mercenaria mercenaria

UdeM00000001149 6596 286.6 UdeM00000001149 XP\_045189200.1 56.9 283  
99 6 1 262 1 281 8.10E-74 286.6 6596 cellular

organisms;Eukaryota;Opisthokonta;Metazoa;Eumetazoa;Bilateria;Protostomia;Spiralia;Lophotrochozoa;Mollusca;Bivalvia;Autobranchia;Heteroconchia;Euherodonta;Imparidentia;Venerida;Veneroidea;Veneridae;Mercenaria;Mercenaria mercenaria

UdeM00000001150 6596 358.6 UdeM00000001150 XP\_045189197.1 56.6 369  
136 6 52 411 241 594 1.10E-95 358.6 6596 cellular

organisms;Eukaryota;Opisthokonta;Metazoa;Eumetazoa;Bilateria;Protostomia;Spiralia;Lophotrochozoa;Mollusca;Bivalvia;Autobranchia;Heteroconchia;Euherodonta;Imparidentia;Venerida;Veneroidea;Veneridae;Mercenaria;Mercenaria mercenaria

UdeM00000001151 6596 947.6 UdeM00000001151 XP\_045190315.1 70 674  
189 3 1 663 1 672 8.70E-273 947.6 6596 cellular

organisms;Eukaryota;Opisthokonta;Metazoa;Eumetazoa;Bilateria;Protostomia;Spiralia;Lophotrochozoa;Mollusca;Bivalvia;Autobranchia;Heteroconchia;Euherodonta;Imparidentia;Venerida;Veneroidea;Veneridae;Mercenaria;Mercenaria mercenaria

UdeM00000001153 6596 948.3 UdeM00000001153 XP\_045190315.1 70.7 665  
185 2 1 655 1 665 5.10E-273 948.3 6596 cellular

organisms;Eukaryota;Opisthokonta;Metazoa;Eumetazoa;Bilateria;Protostomia;Spiralia;Lophotrochozoa;Mollusca;Bivalvia;Autobranchia;Heteroconchia;Euherodonta;Imparidentia;Venerida;Veneroidea;Veneridae;Mercenaria;Mercenaria mercenaria

UdeM00000001154 6579 91.7 UdeM00000001154 XP\_033752673.1 62.9 62  
23 0 17 78 347 408 4.60E-16 91.7 6579 cellular

organisms;Eukaryota;Opisthokonta;Metazoa;Eumetazoa;Bilateria;Protostomia;Spiralia;Lophotrochozoa;Mollusca;Bivalvia;Autobranchia;Pteriomorphia;Pectinida;Pectinoidea;Pectinidae;Pecten;Pecten maximus

UdeM00000001156 6596 106.7 UdeM00000001156 XP\_045190315.1 59.5 84  
34 0 1 84 1 84 1.50E-20 106.7 6596 cellular

organisms;Eukaryota;Opisthokonta;Metazoa;Eumetazoa;Bilateria;Protostomia;Spiralia;Lophotrochozoa;Mollusca;Bivalvia;Autobranchia;Heteroconchia;Euherodonta

terodonta;Imparidentia;Venerida;Veneroidea;Veneridae;Mercenaria;Mercenaria mercenaria  
 UdeM00000001157 6596 93.6 UdeM00000001157 XP\_045190315.1 51.8 83  
 39 1 1 83 104 185 1.30E-16 93.6 6596 cellular  
 organisms;Eukaryota;Opisthokonta;Metazoa;Eumetazoa;Bilateria;Protostomia;Spiralia;Lophotrochozoa;Mollusca;Bivalvia;Autobranchia;Heteroconchia;Euheterodonta;Imparidentia;Venerida;Veneroidea;Veneridae;Mercenaria;Mercenaria mercenaria  
 UdeM00000001158 37653 152.1 UdeM00000001158 XP\_014787870.1 77.8 90  
 20 0 1 90 106 195 4.70E-34 152.1 37653 cellular  
 organisms;Eukaryota;Opisthokonta;Metazoa;Eumetazoa;Bilateria;Protostomia;Spiralia;Lophotrochozoa;Mollusca;Cephalopoda;Coleoidea;Octopodiformes;Octopoda;Incirrata;Octopodidae;Octopus;Octopus bimaculoides  
 UdeM00000001159 2489341 74.7 UdeM00000001159 XP\_030331411.1 40  
 100 54 3 424 521 148 243 3.90E-10 74.7 2489341  
 cellular  
 organisms;Eukaryota;Opisthokonta;Metazoa;Eumetazoa;Bilateria;Deuterostomia;Chordata;Craniata;Vertebrata;Gnathostomata;Teleostomi;Euteleostomi;Sarcopterygii;Dipnotetrapodomorpha;Tetrapoda;Amniota;Sauropsida;Sauria;Archelosauria;Archosauria;Dinosauria;Saurischia;Theropoda;Coelurosauria;Aves;Neognathae;Psittaciformes;Psittacidae;Strigops;Strigops habroptila  
 UdeM00000001160 299321 76.6 UdeM00000001160 XP\_028830852.1 38.7  
 106 61 2 337 442 147 248 8.70E-11 76.6 299321  
 cellular  
 organisms;Eukaryota;Opisthokonta;Metazoa;Eumetazoa;Bilateria;Deuterostomia;Chordata;Craniata;Vertebrata;Gnathostomata;Teleostomi;Euteleostomi;Actinopterygii;Actinopteri;Neopterygii;Teleostei;Osteoglossocephalai;Clupeocephala;Otomorpha;Clupei;Clupeiformes;Denticipitoidei;Denticipitidae;Denticeps;Denticeps clupeoides  
 UdeM00000001161 2489341 74.7 UdeM00000001161 XP\_030331411.1 40  
 100 54 3 416 513 148 243 3.90E-10 74.7 2489341  
 cellular  
 organisms;Eukaryota;Opisthokonta;Metazoa;Eumetazoa;Bilateria;Deuterostomia;Chordata;Craniata;Vertebrata;Gnathostomata;Teleostomi;Euteleostomi;Sarcopterygii;Dipnotetrapodomorpha;Tetrapoda;Amniota;Sauropsida;Sauria;Archelosauria;Archosauria;Dinosauria;Saurischia;Theropoda;Coelurosauria;Aves;Neognathae;Psittaciformes;Psittacidae;Strigops;Strigops habroptila  
 UdeM00000001164 6596 845.9 UdeM00000001164 XP\_045190315.1 65.2 638  
 221 1 1 637 1 638 3.50E-242 845.9 6596 cellular  
 organisms;Eukaryota;Opisthokonta;Metazoa;Eumetazoa;Bilateria;Protostomia;Spiralia;Lophotrochozoa;Mollusca;Bivalvia;Autobranchia;Heteroconchia;Euheterodonta;Imparidentia;Venerida;Veneroidea;Veneridae;Mercenaria;Mercenaria mercenaria  
 UdeM00000001165 6579 238.8 UdeM00000001165 XP\_033755502.1 33.4 467  
 236 8 26 487 2546 2942 1.50E-59 238.8 6579 cellular  
 organisms;Eukaryota;Opisthokonta;Metazoa;Eumetazoa;Bilateria;Protostomia;Spiralia;Lophotrochozoa;Mollusca;Bivalvia;Autobranchia;Pteriomorpha;Pectinida;Pectinoidea;Pectinidae;Pecten;Pecten maximus  
 UdeM00000001166 6573 609.8 UdeM00000001166 XP\_021379779.1 35.9 1083  
 627 23 697 1725 1226 2295 1.20E-170 609.8 6573 cellular  
 organisms;Eukaryota;Opisthokonta;Metazoa;Eumetazoa;Bilateria;Protostomia;Spiralia;Lophotrochozoa;Mollusca;Bivalvia;Autobranchia;Pteriomorpha;Pectinida;Pectinoidea;Pectinidae;Mizuhopecten;Mizuhopecten yessoensis

UdeM00000001167 6596 137.5 UdeM00000001167 XP\_045191751.1 35.5 414  
 179 17 13 349 19 421 3.40E-29 137.5 6596 cellular  
 organisms;Eukaryota;Opisthokonta;Metazoa;Eumetazoa;Bilateria;Protostomia;  
 Spiralia;Lophotrochozoa;Mollusca;Bivalvia;Autobranhia;Heteroconchia;Euhe  
 terodonta;Imparidentia;Venerida;Veneroidea;Veneridae;Mercenaria;Mercenari  
 a mercenaria  
 UdeM00000001169 6596 269.6 UdeM00000001169 XP\_045190602.1 37.9 391  
 214 7 166 551 236 602 1.20E-68 269.6 6596 cellular  
 organisms;Eukaryota;Opisthokonta;Metazoa;Eumetazoa;Bilateria;Protostomia;  
 Spiralia;Lophotrochozoa;Mollusca;Bivalvia;Autobranhia;Heteroconchia;Euhe  
 terodonta;Imparidentia;Venerida;Veneroidea;Veneridae;Mercenaria;Mercenari  
 a mercenaria  
 UdeM00000001173 6596 414.5 UdeM00000001173 XP\_045190538.1 44.8 507  
 255 9 37 537 13 500 2.10E-112 414.5 6596 cellular  
 organisms;Eukaryota;Opisthokonta;Metazoa;Eumetazoa;Bilateria;Protostomia;  
 Spiralia;Lophotrochozoa;Mollusca;Bivalvia;Autobranhia;Heteroconchia;Euhe  
 terodonta;Imparidentia;Venerida;Veneroidea;Veneridae;Mercenaria;Mercenari  
 a mercenaria  
 UdeM00000001174 6596 355.5 UdeM00000001174 XP\_045216113.1 37.2 508  
 303 6 60 552 62 568 1.20E-94 355.5 6596 cellular  
 organisms;Eukaryota;Opisthokonta;Metazoa;Eumetazoa;Bilateria;Protostomia;  
 Spiralia;Lophotrochozoa;Mollusca;Bivalvia;Autobranhia;Heteroconchia;Euhe  
 terodonta;Imparidentia;Venerida;Veneroidea;Veneridae;Mercenaria;Mercenari  
 a mercenaria  
 UdeM00000001175 6596 155.6 UdeM00000001175 XP\_045165760.1 37.1 224  
 134 3 60 276 62 285 9.80E-35 155.6 6596 cellular  
 organisms;Eukaryota;Opisthokonta;Metazoa;Eumetazoa;Bilateria;Protostomia;  
 Spiralia;Lophotrochozoa;Mollusca;Bivalvia;Autobranhia;Heteroconchia;Euhe  
 terodonta;Imparidentia;Venerida;Veneroidea;Veneridae;Mercenaria;Mercenari  
 a mercenaria  
 UdeM00000001176 6596 751.1 UdeM00000001176 XP\_045188668.1 64.4 568  
 197 3 4 570 89 652 1.10E-213 751.1 6596 cellular  
 organisms;Eukaryota;Opisthokonta;Metazoa;Eumetazoa;Bilateria;Protostomia;  
 Spiralia;Lophotrochozoa;Mollusca;Bivalvia;Autobranhia;Heteroconchia;Euhe  
 terodonta;Imparidentia;Venerida;Veneroidea;Veneridae;Mercenaria;Mercenari  
 a mercenaria  
 UdeM00000001177 6596 638.3 UdeM00000001177 XP\_045190076.1 57.2 584  
 237 3 26 608 40 611 1.00E-179 638.3 6596 cellular  
 organisms;Eukaryota;Opisthokonta;Metazoa;Eumetazoa;Bilateria;Protostomia;  
 Spiralia;Lophotrochozoa;Mollusca;Bivalvia;Autobranhia;Heteroconchia;Euhe  
 terodonta;Imparidentia;Venerida;Veneroidea;Veneridae;Mercenaria;Mercenari  
 a mercenaria  
 UdeM00000001178 6596 158.7 UdeM00000001178 XP\_045202433.1 20.6 1067  
 602 29 10 1034 27 890 9.60E-35 158.7 6596 cellular  
 organisms;Eukaryota;Opisthokonta;Metazoa;Eumetazoa;Bilateria;Protostomia;  
 Spiralia;Lophotrochozoa;Mollusca;Bivalvia;Autobranhia;Heteroconchia;Euhe  
 terodonta;Imparidentia;Venerida;Veneroidea;Veneridae;Mercenaria;Mercenari  
 a mercenaria  
 UdeM00000044234 37621 140.6 UdeM00000044234 XP\_014679100.1 37.2 234  
 133 7 329 557 78 302 6.10E-30 140.6 37621 cellular  
 organisms;Eukaryota;Opisthokonta;Metazoa;Eumetazoa;Bilateria;Protostomia;  
 Ecdysozoa;Scalidophora;Priapulida;Priapulimorpha;Priapulimorphida;Priapul  
 idae;Priapulus;Priapulus caudatus

UdeM00000038620 6596 350.9 UdeM00000038620 XP\_045163069.1 56.5 315  
 125 2 1 314 1 304 1.70E-93 350.9 6596 cellular  
 organisms;Eukaryota;Opisthokonta;Metazoa;Eumetazoa;Bilateria;Protostomia;  
 Spiralia;Lophotrochozoa;Mollusca;Bivalvia;Autobranchia;Heteroconchia;Euhe  
 terodonta;Imparidentia;Venerida;Veneroidea;Veneridae;Mercenaria;Mercenari  
 a mercenaria

UdeM00000038621 35525 154.8 UdeM00000038621 XP\_032792630.2 40.8 211  
 89 6 4 195 25 218 1.90E-34 154.8 35525 cellular  
 organisms;Eukaryota;Opisthokonta;Metazoa;Eumetazoa;Bilateria;Protostomia;  
 Ecdysozoa;Panarthropoda;Arthropoda;Mandibulata;Pancrustacea;Crustacea;Bra  
 nchiopoda;Phyllozoa;Diplostraca;Cladocera;Anomopoda;Daphniidae;Daphnia;D  
 aphnia magna

UdeM00000038622 6596 367.9 UdeM00000038622 XP\_045182313.1 47.5 413  
 198 4 3 414 479 873 2.40E-98 367.9 6596 cellular  
 organisms;Eukaryota;Opisthokonta;Metazoa;Eumetazoa;Bilateria;Protostomia;  
 Spiralia;Lophotrochozoa;Mollusca;Bivalvia;Autobranchia;Heteroconchia;Euhe  
 terodonta;Imparidentia;Venerida;Veneroidea;Veneridae;Mercenaria;Mercenari  
 a mercenaria

UdeM00000038623 6596 95.9 UdeM00000038623 XP\_045182313.1 45 111  
 61 0 29 139 564 674 5.50E-17 95.9 6596 cellular  
 organisms;Eukaryota;Opisthokonta;Metazoa;Eumetazoa;Bilateria;Protostomia;  
 Spiralia;Lophotrochozoa;Mollusca;Bivalvia;Autobranchia;Heteroconchia;Euhe  
 terodonta;Imparidentia;Venerida;Veneroidea;Veneridae;Mercenaria;Mercenari  
 a mercenaria

UdeM00000038624 6596 86.3 UdeM00000038624 XP\_045182313.1 49.4 79  
 40 0 20 98 492 570 2.40E-14 86.3 6596 cellular  
 organisms;Eukaryota;Opisthokonta;Metazoa;Eumetazoa;Bilateria;Protostomia;  
 Spiralia;Lophotrochozoa;Mollusca;Bivalvia;Autobranchia;Heteroconchia;Euhe  
 terodonta;Imparidentia;Venerida;Veneroidea;Veneridae;Mercenaria;Mercenari  
 a mercenaria

UdeM00000038625 35525 155.6 UdeM00000038625 XP\_032792630.2 41.2 211  
 88 6 4 195 25 218 1.10E-34 155.6 35525 cellular  
 organisms;Eukaryota;Opisthokonta;Metazoa;Eumetazoa;Bilateria;Protostomia;  
 Ecdysozoa;Panarthropoda;Arthropoda;Mandibulata;Pancrustacea;Crustacea;Bra  
 nchiopoda;Phyllozoa;Diplostraca;Cladocera;Anomopoda;Daphniidae;Daphnia;D  
 aphnia magna

UdeM00000038629 6596 1071.2 UdeM00000038629 XP\_045163115.1 49  
 1269 588 21 17 1261 33 1266 0.00E+00 1071.2 6596  
 cellular  
 organisms;Eukaryota;Opisthokonta;Metazoa;Eumetazoa;Bilateria;Protostomia;  
 Spiralia;Lophotrochozoa;Mollusca;Bivalvia;Autobranchia;Heteroconchia;Euhe  
 terodonta;Imparidentia;Venerida;Veneroidea;Veneridae;Mercenaria;Mercenari  
 a mercenaria

UdeM00000038630 29159 1567.7 UdeM00000038630 XP\_034336081.1 51.8  
 1798 675 28 1 1756 1 1649 0.00E+00 1567.7  
 29159 cellular  
 organisms;Eukaryota;Opisthokonta;Metazoa;Eumetazoa;Bilateria;Protostomia;  
 Spiralia;Lophotrochozoa;Mollusca;Bivalvia;Autobranchia;Pteriomorpha;Ostr  
 eida;Ostreidae;Crassostrea;Crassostrea gigas

UdeM00000038632 6596 68.2 UdeM00000038632 XP\_045188256.1 35 160  
 83 5 3 160 122 262 1.20E-08 68.2 6596 cellular  
 organisms;Eukaryota;Opisthokonta;Metazoa;Eumetazoa;Bilateria;Protostomia;  
 Spiralia;Lophotrochozoa;Mollusca;Bivalvia;Autobranchia;Heteroconchia;Euhe



terodonta;Imparidentia;Venerida;Veneroidea;Veneridae;Mercenaria;Mercenaria mercenaria

UdeM00000038633 29159 453.8 UdeM00000038633 XP\_011443560.2 54.3 396  
179 2 1 394 323 718 2.40E-124 453.8 29159 cellular

organisms;Eukaryota;Opisthokonta;Metazoa;Eumetazoa;Bilateria;Protostomia;Spiralia;Lophotrochozoa;Mollusca;Bivalvia;Autobranchia;Pteriormorphia;Ostreida;Ostreoidea;Ostreidae;Crassostrea;Crassostrea gigas

UdeM00000038635 29159 177.6 UdeM00000038635 XP\_011443561.2 58.2 134  
55 1 32 164 48 181 1.30E-41 177.6 29159 cellular

organisms;Eukaryota;Opisthokonta;Metazoa;Eumetazoa;Bilateria;Protostomia;Spiralia;Lophotrochozoa;Mollusca;Bivalvia;Autobranchia;Pteriormorphia;Ostreida;Ostreoidea;Ostreidae;Crassostrea;Crassostrea gigas

UdeM00000038634 6596 184.5 UdeM00000038634 XP\_045202545.1 49 202  
77 5 10 186 10 210 1.20E-43 184.5 6596 cellular

organisms;Eukaryota;Opisthokonta;Metazoa;Eumetazoa;Bilateria;Protostomia;Spiralia;Lophotrochozoa;Mollusca;Bivalvia;Autobranchia;Heteroconchia;Euheterodonta;Imparidentia;Venerida;Veneroidea;Veneridae;Mercenaria;Mercenaria mercenaria

UdeM00000038636 6596 3724.9 UdeM00000038636 XP\_045162193.1 60.7  
2970 974 17 3709 6663 1628 4418 0.00E+00 3724.9 6596  
cellular

organisms;Eukaryota;Opisthokonta;Metazoa;Eumetazoa;Bilateria;Protostomia;Spiralia;Lophotrochozoa;Mollusca;Bivalvia;Autobranchia;Heteroconchia;Euheterodonta;Imparidentia;Venerida;Veneroidea;Veneridae;Mercenaria;Mercenaria mercenaria

UdeM00000038636 6596 590.1 UdeM00000038636 XP\_045162193.1 43.3 1639  
691 28 13 1435 9 1624 3.50E-164 590.1 6596 cellular

organisms;Eukaryota;Opisthokonta;Metazoa;Eumetazoa;Bilateria;Protostomia;Spiralia;Lophotrochozoa;Mollusca;Bivalvia;Autobranchia;Heteroconchia;Euheterodonta;Imparidentia;Venerida;Veneroidea;Veneridae;Mercenaria;Mercenaria mercenaria

UdeM00000038637 6596 297.7 UdeM00000038637 XP\_045163028.1 48.4 349  
172 4 35 381 46 388 2.20E-77 297.7 6596 cellular

organisms;Eukaryota;Opisthokonta;Metazoa;Eumetazoa;Bilateria;Protostomia;Spiralia;Lophotrochozoa;Mollusca;Bivalvia;Autobranchia;Heteroconchia;Euheterodonta;Imparidentia;Venerida;Veneroidea;Veneridae;Mercenaria;Mercenaria mercenaria

UdeM00000038638 215358 79.7 UdeM00000038638 XP\_027138606.1 34.3  
137 87 2 1 137 596 729 3.20E-12 79.7 215358  
cellular

organisms;Eukaryota;Opisthokonta;Metazoa;Eumetazoa;Bilateria;Deuterostomia;Chordata;Craniata;Vertebrata;Gnathostomata;Teleostomi;Euteleostomi;Actinopterygii;Actinopteri;Neopterygii;Teleostei;Osteoglossocephalai;Clupeocephala;Euteleostei;Neoteleostei;Eurypterygia;Ctenosquamata;Acanthopterygii;Euacanthopterygii;Percomorphaceae;Eupercaria;Eupercaria incertae sedis;Sciaenidae;Larimichthys;Larimichthys crocea

UdeM00000038641 6565 124.8 UdeM00000038641 XP\_022299405.1 40.2 164  
97 1 16 178 193 356 2.20E-25 124.8 6565 cellular

organisms;Eukaryota;Opisthokonta;Metazoa;Eumetazoa;Bilateria;Protostomia;Spiralia;Lophotrochozoa;Mollusca;Bivalvia;Autobranchia;Pteriormorphia;Ostreida;Ostreoidea;Ostreidae;Crassostrea;Crassostrea virginica

UdeM00000038642 6565 152.1 UdeM00000038642 XP\_022299405.1 38.8 219  
131 2 20 237 140 356 1.50E-33 152.1 6565 cellular

organisms;Eukaryota;Opisthokonta;Metazoa;Eumetazoa;Bilateria;Protostomia;

Spiralia; Lophotrochozoa; Mollusca; Bivalvia; Autobranchia; Pteriomorpha; Ostr  
eida; Ostreidae; Crassostrea; Crassostrea virginica  
UdeM00000038643 6579 63.2 UdeM00000038643 XP\_033746637.1 27.6 203  
97 4 3 156 136 337 3.50E-07 63.2 6579 cellular  
organisms; Eukaryota; Opisthokonta; Metazoa; Eumetazoa; Bilateria; Protostomia;  
Spiralia; Lophotrochozoa; Mollusca; Bivalvia; Autobranchia; Pteriomorpha; Pect  
inida; Pectinoidea; Pectinidae; Pecten; Pecten maximus  
UdeM00000038644 9337 71.6 UdeM00000038644 XP\_036615298.1 45.5 88  
47 1 5 92 2 88 5.80E-10 71.6 9337 cellular  
organisms; Eukaryota; Opisthokonta; Metazoa; Eumetazoa; Bilateria; Deuterostomi  
a; Chordata; Craniata; Vertebrata; Gnathostomata; Teleostomi; Euteleostomi; Sarc  
opterygii; Dipnotetrapodomorpha; Tetrapoda; Amniota; Mammalia; Theria; Metather  
ia; Diprotodontia; Phalangeridae; Trichosurus; Trichosurus vulpecula  
UdeM00000038645 6596 67.8 UdeM00000038645 XP\_045189070.1 46.2 78  
42 0 49 126 87 164 1.30E-08 67.8 6596 cellular  
organisms; Eukaryota; Opisthokonta; Metazoa; Eumetazoa; Bilateria; Protostomia;  
Spiralia; Lophotrochozoa; Mollusca; Bivalvia; Autobranchia; Heteroconchia; Eue  
terodonta; Imparidentia; Venerida; Veneroidea; Veneridae; Mercenaria; Mercenari  
a mercenaria  
UdeM00000038647 6565 68.6 UdeM00000038647 XP\_022304950.1 49.2 65  
32 1 2 66 100 163 3.80E-09 68.6 6565 cellular  
organisms; Eukaryota; Opisthokonta; Metazoa; Eumetazoa; Bilateria; Protostomia;  
Spiralia; Lophotrochozoa; Mollusca; Bivalvia; Autobranchia; Pteriomorpha; Ostr  
eida; Ostreidae; Crassostrea; Crassostrea virginica  
UdeM00000038650 9337 115.5 UdeM00000038650 XP\_036614956.1 29.2 264  
137 5 39 254 87 348 1.40E-22 115.5 9337 cellular  
organisms; Eukaryota; Opisthokonta; Metazoa; Eumetazoa; Bilateria; Deuterostomi  
a; Chordata; Craniata; Vertebrata; Gnathostomata; Teleostomi; Euteleostomi; Sarc  
opterygii; Dipnotetrapodomorpha; Tetrapoda; Amniota; Mammalia; Theria; Metather  
ia; Diprotodontia; Phalangeridae; Trichosurus; Trichosurus vulpecula  
UdeM00000038651 6579 154.8 UdeM00000038651 XP\_033745967.1 37.5 224  
136 4 144 366 204 424 3.00E-34 154.8 6579 cellular  
organisms; Eukaryota; Opisthokonta; Metazoa; Eumetazoa; Bilateria; Protostomia;  
Spiralia; Lophotrochozoa; Mollusca; Bivalvia; Autobranchia; Pteriomorpha; Pect  
inida; Pectinoidea; Pectinidae; Pecten; Pecten maximus  
UdeM00000038652 29159 120.6 UdeM00000038652 XP\_034305965.1 35.9 198  
110 5 6 202 6 187 2.40E-24 120.6 29159 cellular  
organisms; Eukaryota; Opisthokonta; Metazoa; Eumetazoa; Bilateria; Protostomia;  
Spiralia; Lophotrochozoa; Mollusca; Bivalvia; Autobranchia; Pteriomorpha; Ostr  
eida; Ostreidae; Crassostrea; Crassostrea gigas  
UdeM00000038653 29159 96.7 UdeM00000038653 XP\_034311318.1 44.1 118  
55 5 11 121 113 226 2.20E-17 96.7 29159 cellular  
organisms; Eukaryota; Opisthokonta; Metazoa; Eumetazoa; Bilateria; Protostomia;  
Spiralia; Lophotrochozoa; Mollusca; Bivalvia; Autobranchia; Pteriomorpha; Ostr  
eida; Ostreidae; Crassostrea; Crassostrea gigas  
UdeM00000038656 7739 79 UdeM00000038656 XP\_035699508.1 32.4 182  
103 5 6 172 657 833 1.00E-11 79 7739 cellular  
organisms; Eukaryota; Opisthokonta; Metazoa; Eumetazoa; Bilateria; Deuterostomi  
a; Chordata; Cephalochordata; Leptocardii; Amphioxiformes; Branchiostomidae; Br  
anchiostoma; Branchiostoma floridae  
UdeM00000038659 6565 122.5 UdeM00000038659 XP\_022299405.1 42.1 152  
87 1 3 153 180 331 1.10E-24 122.5 6565 cellular  
organisms; Eukaryota; Opisthokonta; Metazoa; Eumetazoa; Bilateria; Protostomia;

Spiralia;Lophotrochozoa;Mollusca;Bivalvia;Autobranchia;Pteriormorphia;Ostr  
eida;Ostreoidea;Ostreidae;Crassostrea;Crassostrea virginica  
UdeM00000038660 6565 134.4 UdeM00000038660 XP\_022299405.1 38.1 202  
122 2 19 219 139 338 3.20E-28 134.4 6565 cellular  
organisms;Eukaryota;Opisthokonta;Metazoa;Eumetazoa;Bilateria;Protostomia;  
Spiralia;Lophotrochozoa;Mollusca;Bivalvia;Autobranchia;Pteriormorphia;Ostr  
eida;Ostreoidea;Ostreidae;Crassostrea;Crassostrea virginica  
UdeM00000038661 225164 594 UdeM00000038661 XP\_009056593.1 73.5  
373 99 0 6 378 7 379 1.40E-166 594 225164  
cellular  
organisms;Eukaryota;Opisthokonta;Metazoa;Eumetazoa;Bilateria;Protostomia;  
Spiralia;Lophotrochozoa;Mollusca;Gastropoda;Patellogastropoda;Lottioidea;  
Lottiidae;Lottia;Lottia gigantea  
UdeM00000038662 29159 172.6 UdeM00000038662 XP\_011426737.2 38.7 282  
109 6 1 274 1 226 7.60E-40 172.6 29159 cellular  
organisms;Eukaryota;Opisthokonta;Metazoa;Eumetazoa;Bilateria;Protostomia;  
Spiralia;Lophotrochozoa;Mollusca;Bivalvia;Autobranchia;Pteriormorphia;Ostr  
eida;Ostreoidea;Ostreidae;Crassostrea;Crassostrea gigas  
UdeM00000038663 29159 210.3 UdeM00000038663 XP\_011426737.2 50 250  
105 7 1 242 1 238 2.70E-51 210.3 29159 cellular  
organisms;Eukaryota;Opisthokonta;Metazoa;Eumetazoa;Bilateria;Protostomia;  
Spiralia;Lophotrochozoa;Mollusca;Bivalvia;Autobranchia;Pteriormorphia;Ostr  
eida;Ostreoidea;Ostreidae;Crassostrea;Crassostrea gigas  
UdeM00000038664 6596 135.2 UdeM00000038664 XP\_045161472.1 69.6 92  
28 0 1 92 1 92 4.30E-29 135.2 6596 cellular  
organisms;Eukaryota;Opisthokonta;Metazoa;Eumetazoa;Bilateria;Protostomia;  
Spiralia;Lophotrochozoa;Mollusca;Bivalvia;Autobranchia;Heteroconchia;Euhe  
terodonta;Imparidentia;Venerida;Veneroidea;Veneridae;Mercenaria;Mercenari  
a mercenaria  
UdeM00000038665 6596 133.3 UdeM00000038665 XP\_045171063.1 39.9 173  
100 4 15 186 7 176 3.40E-28 133.3 6596 cellular  
organisms;Eukaryota;Opisthokonta;Metazoa;Eumetazoa;Bilateria;Protostomia;  
Spiralia;Lophotrochozoa;Mollusca;Bivalvia;Autobranchia;Heteroconchia;Euhe  
terodonta;Imparidentia;Venerida;Veneroidea;Veneridae;Mercenaria;Mercenari  
a mercenaria  
UdeM00000038666 6573 187.2 UdeM00000038666 XP\_021353474.1 57.4 162  
61 2 6 167 8 161 1.70E-44 187.2 6573 cellular  
organisms;Eukaryota;Opisthokonta;Metazoa;Eumetazoa;Bilateria;Protostomia;  
Spiralia;Lophotrochozoa;Mollusca;Bivalvia;Autobranchia;Pteriormorphia;Pect  
inida;Pectinoidea;Pectinidae;Mizuhopecten;Mizuhopecten yessoensis  
UdeM00000038668 400727 111.7 UdeM00000038668 XP\_025081661.1 36.9  
176 105 5 2 173 116 289 1.20E-21 111.7 400727  
cellular  
organisms;Eukaryota;Opisthokonta;Metazoa;Eumetazoa;Bilateria;Protostomia;  
Spiralia;Lophotrochozoa;Mollusca;Gastropoda;Caenogastropoda;Architaeniogl  
ossa;Ampullarioidea;Ampullariidae;Pomacea;Pomacea canaliculata  
UdeM00000038669 400727 176.4 UdeM00000038669 XP\_025081661.1 39  
282 157 8 15 290 17 289 6.00E-41 176.4 400727  
cellular  
organisms;Eukaryota;Opisthokonta;Metazoa;Eumetazoa;Bilateria;Protostomia;  
Spiralia;Lophotrochozoa;Mollusca;Gastropoda;Caenogastropoda;Architaeniogl  
ossa;Ampullarioidea;Ampullariidae;Pomacea;Pomacea canaliculata  
UdeM00000038667 400727 194.9 UdeM00000038667 XP\_025081661.1 39.9  
296 163 8 2 291 3 289 1.60E-46 194.9 400727

cellular  
organisms;Eukaryota;Opisthokonta;Metazoa;Eumetazoa;Bilateria;Protostomia;  
Spiralia;Lophotrochozoa;Mollusca;Gastropoda;Caenogastropoda;Architaenioglossa;  
Ampullarioidea;Ampullariidae;Pomacea;Pomacea canaliculata  
UdeM00000038670 6596 142.1 UdeM00000038670 XP\_045187600.1 34.6 289  
160 10 167 434 232 512 1.70E-30 142.1 6596 cellular  
organisms;Eukaryota;Opisthokonta;Metazoa;Eumetazoa;Bilateria;Protostomia;  
Spiralia;Lophotrochozoa;Mollusca;Bivalvia;Autobranchia;Heteroconchia;Euherodonta;  
Imparidentia;Venerida;Veneroidea;Veneridae;Mercenaria;Mercenaria mercenaria  
UdeM00000038671 6596 104 UdeM00000038671 XP\_045175391.1 30.4 289  
161 13 34 298 115 387 3.50E-19 104 6596 cellular  
organisms;Eukaryota;Opisthokonta;Metazoa;Eumetazoa;Bilateria;Protostomia;  
Spiralia;Lophotrochozoa;Mollusca;Bivalvia;Autobranchia;Heteroconchia;Euherodonta;  
Imparidentia;Venerida;Veneroidea;Veneridae;Mercenaria;Mercenaria mercenaria  
UdeM00000038672 6596 104 UdeM00000038672 XP\_045175391.1 30.4 289  
161 13 34 298 115 387 3.50E-19 104 6596 cellular  
organisms;Eukaryota;Opisthokonta;Metazoa;Eumetazoa;Bilateria;Protostomia;  
Spiralia;Lophotrochozoa;Mollusca;Bivalvia;Autobranchia;Heteroconchia;Euherodonta;  
Imparidentia;Venerida;Veneroidea;Veneridae;Mercenaria;Mercenaria mercenaria  
UdeM00000038674 6573 203 UdeM00000038674 XP\_021341195.1 65 137  
48 0 1 137 376 512 2.50E-49 203 6573 cellular  
organisms;Eukaryota;Opisthokonta;Metazoa;Eumetazoa;Bilateria;Protostomia;  
Spiralia;Lophotrochozoa;Mollusca;Bivalvia;Autobranchia;Pteriomorphia;Pectinida;  
Pectinoidea;Pectinidae;Mizuhopecten;Mizuhopecten yessoensis  
UdeM00000038673 6573 268.9 UdeM00000038673 XP\_021341195.1 64.1 192  
69 0 25 216 321 512 5.80E-69 268.9 6573 cellular  
organisms;Eukaryota;Opisthokonta;Metazoa;Eumetazoa;Bilateria;Protostomia;  
Spiralia;Lophotrochozoa;Mollusca;Bivalvia;Autobranchia;Pteriomorphia;Pectinida;  
Pectinoidea;Pectinidae;Mizuhopecten;Mizuhopecten yessoensis  
UdeM00000038675 6579 386 UdeM00000038675 XP\_033745790.1 59 322  
120 3 19 340 13 322 5.10E-104 386 6579 cellular  
organisms;Eukaryota;Opisthokonta;Metazoa;Eumetazoa;Bilateria;Protostomia;  
Spiralia;Lophotrochozoa;Mollusca;Bivalvia;Autobranchia;Pteriomorphia;Pectinida;  
Pectinoidea;Pectinidae;Pecten;Pecten maximus  
UdeM00000038676 6596 273.9 UdeM00000038676 XP\_045163647.1 66.5 185  
61 1 5 188 5 189 1.60E-70 273.9 6596 cellular  
organisms;Eukaryota;Opisthokonta;Metazoa;Eumetazoa;Bilateria;Protostomia;  
Spiralia;Lophotrochozoa;Mollusca;Bivalvia;Autobranchia;Heteroconchia;Euherodonta;  
Imparidentia;Venerida;Veneroidea;Veneridae;Mercenaria;Mercenaria mercenaria  
UdeM00000038677 6596 304.3 UdeM00000038677 XP\_045163647.1 72 189  
53 0 1 189 1 189 1.10E-79 304.3 6596 cellular  
organisms;Eukaryota;Opisthokonta;Metazoa;Eumetazoa;Bilateria;Protostomia;  
Spiralia;Lophotrochozoa;Mollusca;Bivalvia;Autobranchia;Heteroconchia;Euherodonta;  
Imparidentia;Venerida;Veneroidea;Veneridae;Mercenaria;Mercenaria mercenaria  
UdeM00000038678 29159 253.1 UdeM00000038678 XP\_019928839.2 73.2 164  
39 1 37 200 30 188 3.10E-64 253.1 29159 cellular  
organisms;Eukaryota;Opisthokonta;Metazoa;Eumetazoa;Bilateria;Protostomia;  
Spiralia;Lophotrochozoa;Mollusca;Bivalvia;Autobranchia;Pteriomorphia;Ostreida;  
Ostreoidea;Ostreidae;Crassostrea;Crassostrea gigas

UdeM00000038679 6596 90.1 UdeM00000038679 XP\_045162920.1 69.4 62  
 19 0 9 70 238 299 1.20E-15 90.1 6596 cellular  
 organisms;Eukaryota;Opisthokonta;Metazoa;Eumetazoa;Bilateria;Protostomia;  
 Spiralia;Lophotrochozoa;Mollusca;Bivalvia;Autobranchia;Heteroconchia;Euhe  
 terodonta;Imparidentia;Venerida;Veneroidea;Veneridae;Mercenaria;Mercenari  
 a mercenaria  
 UdeM00000038680 110193 349 UdeM00000038680 XP\_017770884.1 75.7  
 235 57 0 4 238 5 239 5.00E-93 349 110193  
 cellular  
 organisms;Eukaryota;Opisthokonta;Metazoa;Eumetazoa;Bilateria;Protostomia;  
 Ecdysozoa;Panarthropoda;Arthropoda;Mandibulata;Pancrustacea;Hexapoda;Inse  
 cta;Dicondylia;Pterygota;Neoptera;Endopterygota;Coleoptera;Polyphaga;Stap  
 hyliniformia;Staphylinioida;Silphidae;Nicrophorinae;Nicrophorus;Nicrophor  
 us vespilloides  
 UdeM00000038681 400727 204.1 UdeM00000038681 XP\_025081379.1 53.1  
 226 94 5 4 220 12 234 1.90E-49 204.1 400727  
 cellular  
 organisms;Eukaryota;Opisthokonta;Metazoa;Eumetazoa;Bilateria;Protostomia;  
 Spiralia;Lophotrochozoa;Mollusca;Gastropoda;Caenogastropoda;Architaeniogl  
 ossa;Ampullarioidea;Ampullariidae;Pomacea;Pomacea canaliculata  
 UdeM00000038682 6565 217.6 UdeM00000038682 XP\_022324535.1 39.9 276  
 161 4 38 308 84 359 2.30E-53 217.6 6565 cellular  
 organisms;Eukaryota;Opisthokonta;Metazoa;Eumetazoa;Bilateria;Protostomia;  
 Spiralia;Lophotrochozoa;Mollusca;Bivalvia;Autobranchia;Pteriormorphia;Ostr  
 eida;Ostreoidea;Ostreidae;Crassostrea;Crassostrea virginica  
 UdeM00000038683 6565 216.1 UdeM00000038683 XP\_022324535.1 39.9 276  
 161 4 38 308 84 359 6.70E-53 216.1 6565 cellular  
 organisms;Eukaryota;Opisthokonta;Metazoa;Eumetazoa;Bilateria;Protostomia;  
 Spiralia;Lophotrochozoa;Mollusca;Bivalvia;Autobranchia;Pteriormorphia;Ostr  
 eida;Ostreoidea;Ostreidae;Crassostrea;Crassostrea virginica  
 UdeM00000038684 6596 188.7 UdeM00000038684 XP\_045198758.1 40.8 262  
 124 6 12 271 43 275 9.90E-45 188.7 6596 cellular  
 organisms;Eukaryota;Opisthokonta;Metazoa;Eumetazoa;Bilateria;Protostomia;  
 Spiralia;Lophotrochozoa;Mollusca;Bivalvia;Autobranchia;Heteroconchia;Euhe  
 terodonta;Imparidentia;Venerida;Veneroidea;Veneridae;Mercenaria;Mercenari  
 a mercenaria  
 UdeM00000038685 6596 278.1 UdeM00000038685 XP\_045198758.1 52.2 270  
 122 3 11 280 342 604 1.20E-71 278.1 6596 cellular  
 organisms;Eukaryota;Opisthokonta;Metazoa;Eumetazoa;Bilateria;Protostomia;  
 Spiralia;Lophotrochozoa;Mollusca;Bivalvia;Autobranchia;Heteroconchia;Euhe  
 terodonta;Imparidentia;Venerida;Veneroidea;Veneridae;Mercenaria;Mercenari  
 a mercenaria  
 UdeM00000038686 6579 228.8 UdeM00000038686 XP\_033731739.1 57.1 177  
 76 0 1 177 202 378 5.40E-57 228.8 6579 cellular  
 organisms;Eukaryota;Opisthokonta;Metazoa;Eumetazoa;Bilateria;Protostomia;  
 Spiralia;Lophotrochozoa;Mollusca;Bivalvia;Autobranchia;Pteriormorphia;Pect  
 inida;Pectinoidea;Pectinidae;Pecten;Pecten maximus  
 UdeM00000038687 6596 441.8 UdeM00000038687 XP\_045162326.1 62.7 389  
 142 2 18 406 12 397 9.40E-121 441.8 6596 cellular  
 organisms;Eukaryota;Opisthokonta;Metazoa;Eumetazoa;Bilateria;Protostomia;  
 Spiralia;Lophotrochozoa;Mollusca;Bivalvia;Autobranchia;Heteroconchia;Euhe  
 terodonta;Imparidentia;Venerida;Veneroidea;Veneridae;Mercenaria;Mercenari  
 a mercenaria

UdeM00000038689 6596 614.4 UdeM00000038689 XP\_045161487.1 63 500  
 177 5 38 532 33 529 1.40E-172 614.4 6596 cellular  
 organisms;Eukaryota;Opisthokonta;Metazoa;Eumetazoa;Bilateria;Protostomia;  
 Spiralia;Lophotrochozoa;Mollusca;Bivalvia;Autobranchia;Heteroconchia;Euhe  
 terodonta;Imparidentia;Venerida;Veneroidea;Veneridae;Mercenaria;Mercenari  
 a mercenaria

UdeM00000038690 6596 288.9 UdeM00000038690 XP\_045163244.1 39.2 538  
 302 10 7 529 6 533 1.30E-74 288.9 6596 cellular  
 organisms;Eukaryota;Opisthokonta;Metazoa;Eumetazoa;Bilateria;Protostomia;  
 Spiralia;Lophotrochozoa;Mollusca;Bivalvia;Autobranchia;Heteroconchia;Euhe  
 terodonta;Imparidentia;Venerida;Veneroidea;Veneridae;Mercenaria;Mercenari  
 a mercenaria

UdeM00000038691 6596 743.4 UdeM00000038691 XP\_045161234.1 60.4 591  
 219 8 1 582 11 595 2.20E-211 743.4 6596 cellular  
 organisms;Eukaryota;Opisthokonta;Metazoa;Eumetazoa;Bilateria;Protostomia;  
 Spiralia;Lophotrochozoa;Mollusca;Bivalvia;Autobranchia;Heteroconchia;Euhe  
 terodonta;Imparidentia;Venerida;Veneroidea;Veneridae;Mercenaria;Mercenari  
 a mercenaria

UdeM00000038692 6596 656.8 UdeM00000038692 XP\_045161234.1 53.5 591  
 258 6 1 580 11 595 2.60E-185 656.8 6596 cellular  
 organisms;Eukaryota;Opisthokonta;Metazoa;Eumetazoa;Bilateria;Protostomia;  
 Spiralia;Lophotrochozoa;Mollusca;Bivalvia;Autobranchia;Heteroconchia;Euhe  
 terodonta;Imparidentia;Venerida;Veneroidea;Veneridae;Mercenaria;Mercenari  
 a mercenaria

UdeM00000038693 6596 142.9 UdeM00000038693 XP\_045162814.1 41.7 144  
 84 0 27 170 30 173 4.00E-31 142.9 6596 cellular  
 organisms;Eukaryota;Opisthokonta;Metazoa;Eumetazoa;Bilateria;Protostomia;  
 Spiralia;Lophotrochozoa;Mollusca;Bivalvia;Autobranchia;Heteroconchia;Euhe  
 terodonta;Imparidentia;Venerida;Veneroidea;Veneridae;Mercenaria;Mercenari  
 a mercenaria

UdeM00000038694 6579 547 UdeM00000038694 XP\_033764057.1 61.2 436  
 118 4 1 436 50 434 2.20E-152 547 6579 cellular  
 organisms;Eukaryota;Opisthokonta;Metazoa;Eumetazoa;Bilateria;Protostomia;  
 Spiralia;Lophotrochozoa;Mollusca;Bivalvia;Autobranchia;Pteriomorphia;Pect  
 inida;Pectinoidea;Pectinidae;Pecten;Pecten maximus

UdeM00000038695 225164 123.6 UdeM00000038695 XP\_009066736.1 69.4  
 72 22 0 20 91 314 385 1.40E-25 123.6 225164  
 cellular  
 organisms;Eukaryota;Opisthokonta;Metazoa;Eumetazoa;Bilateria;Protostomia;  
 Spiralia;Lophotrochozoa;Mollusca;Gastropoda;Patellogastropoda;Lottioidea;  
 Lottiidae;Lottia;Lottia gigantea

UdeM00000038697 6579 417.9 UdeM00000038697 XP\_033764057.1 68.4 294  
 87 2 4 291 12 305 1.00E-113 417.9 6579 cellular  
 organisms;Eukaryota;Opisthokonta;Metazoa;Eumetazoa;Bilateria;Protostomia;  
 Spiralia;Lophotrochozoa;Mollusca;Bivalvia;Autobranchia;Pteriomorphia;Pect  
 inida;Pectinoidea;Pectinidae;Pecten;Pecten maximus

UdeM00000038696 6579 417.9 UdeM00000038696 XP\_033764057.1 68.4 294  
 87 2 8 295 12 305 1.10E-113 417.9 6579 cellular  
 organisms;Eukaryota;Opisthokonta;Metazoa;Eumetazoa;Bilateria;Protostomia;  
 Spiralia;Lophotrochozoa;Mollusca;Bivalvia;Autobranchia;Pteriomorphia;Pect  
 inida;Pectinoidea;Pectinidae;Pecten;Pecten maximus

UdeM00000038698 6565 123.6 UdeM00000038698 XP\_022336943.1 43.8 176  
 85 5 48 211 95 268 3.20E-25 123.6 6565 cellular  
 organisms;Eukaryota;Opisthokonta;Metazoa;Eumetazoa;Bilateria;Protostomia;

Spiralia;Lophotrochozoa;Mollusca;Bivalvia;Autobranchia;Pteriormorphia;Ostr  
eida;Ostreoidea;Ostreidae;Crassostrea;Crassostrea virginica  
UdeM00000038699 6596 236.5 UdeM00000038699 XP\_045162516.1 54.1 209  
94 1 3 209 2 210 3.10E-59 236.5 6596 cellular  
organisms;Eukaryota;Opisthokonta;Metazoa;Eumetazoa;Bilateria;Protostomia;  
Spiralia;Lophotrochozoa;Mollusca;Bivalvia;Autobranchia;Heteroconchia;Euhe  
terodonta;Imparidentia;Venerida;Veneroidea;Veneridae;Mercenaria;Mercenari  
a mercenaria  
UdeM00000038700 1735272 119 UdeM00000038700 XP\_041379021.1 44.5  
128 67 1 147 270 33 160 9.90E-24 119 1735272  
cellular  
organisms;Eukaryota;Opisthokonta;Metazoa;Eumetazoa;Bilateria;Protostomia;  
Spiralia;Lophotrochozoa;Mollusca;Gastropoda;Neomphalina;Neomphaloidea;Pel  
tospiridae;Gigantopelta;Gigantopelta aegis  
UdeM00000044309 6579 1187.9 UdeM00000044309 XP\_033726714.1 49.3  
1247 579 11 145 1344 103 1343 0.00E+00 1187.9 6579  
cellular  
organisms;Eukaryota;Opisthokonta;Metazoa;Eumetazoa;Bilateria;Protostomia;  
Spiralia;Lophotrochozoa;Mollusca;Bivalvia;Autobranchia;Pteriormorphia;Pect  
inida;Pectinoidea;Pectinidae;Pecten;Pecten maximus  
UdeM00000044312 6596 172.6 UdeM00000044312 XP\_045164901.1 34.8 287  
165 10 27 305 5 277 8.90E-40 172.6 6596 cellular  
organisms;Eukaryota;Opisthokonta;Metazoa;Eumetazoa;Bilateria;Protostomia;  
Spiralia;Lophotrochozoa;Mollusca;Bivalvia;Autobranchia;Heteroconchia;Euhe  
terodonta;Imparidentia;Venerida;Veneroidea;Veneridae;Mercenaria;Mercenari  
a mercenaria  
UdeM00000044314 6596 168.3 UdeM00000044314 XP\_045199652.1 33.4 290  
170 8 9 293 23 294 1.80E-38 168.3 6596 cellular  
organisms;Eukaryota;Opisthokonta;Metazoa;Eumetazoa;Bilateria;Protostomia;  
Spiralia;Lophotrochozoa;Mollusca;Bivalvia;Autobranchia;Heteroconchia;Euhe  
terodonta;Imparidentia;Venerida;Veneroidea;Veneridae;Mercenaria;Mercenari  
a mercenaria  
UdeM00000044315 6596 169.9 UdeM00000044315 XP\_045199652.1 31.7 319  
191 8 9 315 23 326 6.20E-39 169.9 6596 cellular  
organisms;Eukaryota;Opisthokonta;Metazoa;Eumetazoa;Bilateria;Protostomia;  
Spiralia;Lophotrochozoa;Mollusca;Bivalvia;Autobranchia;Heteroconchia;Euhe  
terodonta;Imparidentia;Venerida;Veneroidea;Veneridae;Mercenaria;Mercenari  
a mercenaria  
UdeM00000039927 6596 205.3 UdeM00000039927 XP\_045185473.1 21.7 1310  
859 38 513 1770 4 1198 1.10E-48 205.3 6596 cellular  
organisms;Eukaryota;Opisthokonta;Metazoa;Eumetazoa;Bilateria;Protostomia;  
Spiralia;Lophotrochozoa;Mollusca;Bivalvia;Autobranchia;Heteroconchia;Euhe  
terodonta;Imparidentia;Venerida;Veneroidea;Veneridae;Mercenaria;Mercenari  
a mercenaria  
UdeM00000039928 6596 280.8 UdeM00000039928 XP\_045207280.1 42.2 365  
161 4 1 316 28 391 2.30E-72 280.8 6596 cellular  
organisms;Eukaryota;Opisthokonta;Metazoa;Eumetazoa;Bilateria;Protostomia;  
Spiralia;Lophotrochozoa;Mollusca;Bivalvia;Autobranchia;Heteroconchia;Euhe  
terodonta;Imparidentia;Venerida;Veneroidea;Veneridae;Mercenaria;Mercenari  
a mercenaria  
UdeM00000039929 6596 263.8 UdeM00000039929 XP\_045208936.1 65.3 190  
65 1 20 208 32 221 1.90E-67 263.8 6596 cellular  
organisms;Eukaryota;Opisthokonta;Metazoa;Eumetazoa;Bilateria;Protostomia;  
Spiralia;Lophotrochozoa;Mollusca;Bivalvia;Autobranchia;Heteroconchia;Euhe

terodonta;Imparidentia;Venerida;Veneroidea;Veneridae;Mercenaria;Mercenari  
 a mercenaria  
 UdeM00000039930 6596 755.4 UdeM00000039930 XP\_045208936.1 54 700  
 293 9 9 684 233 927 6.50E-215 755.4 6596 cellular  
 organisms;Eukaryota;Opisthokonta;Metazoa;Eumetazoa;Bilateria;Protostomia;  
 Spiralia;Lophotrochozoa;Mollusca;Bivalvia;Autobranhia;Heteroconchia;Euhe  
 terodonta;Imparidentia;Venerida;Veneroidea;Veneridae;Mercenaria;Mercenari  
 a mercenaria  
 UdeM00000039931 29159 868.6 UdeM00000039931 XP\_019924043.2 74.6 535  
 136 0 79 613 1000 1534 4.70E-249 868.6 29159 cellular  
 organisms;Eukaryota;Opisthokonta;Metazoa;Eumetazoa;Bilateria;Protostomia;  
 Spiralia;Lophotrochozoa;Mollusca;Bivalvia;Autobranhia;Pteriormorphia;Ostr  
 eida;Ostreoidea;Ostreidae;Crassostrea;Crassostrea gigas  
 UdeM00000039932 6596 165.2 UdeM00000039932 XP\_045176664.1 27.1 451  
 291 10 43 471 33 467 2.00E-37 165.2 6596 cellular  
 organisms;Eukaryota;Opisthokonta;Metazoa;Eumetazoa;Bilateria;Protostomia;  
 Spiralia;Lophotrochozoa;Mollusca;Bivalvia;Autobranhia;Heteroconchia;Euhe  
 terodonta;Imparidentia;Venerida;Veneroidea;Veneridae;Mercenaria;Mercenari  
 a mercenaria  
 UdeM00000039933 6596 174.5 UdeM00000039933 XP\_045181277.1 39.3 270  
 141 8 216 467 155 419 3.20E-40 174.5 6596 cellular  
 organisms;Eukaryota;Opisthokonta;Metazoa;Eumetazoa;Bilateria;Protostomia;  
 Spiralia;Lophotrochozoa;Mollusca;Bivalvia;Autobranhia;Heteroconchia;Euhe  
 terodonta;Imparidentia;Venerida;Veneroidea;Veneridae;Mercenaria;Mercenari  
 a mercenaria  
 UdeM00000039934 6596 168.7 UdeM00000039934 XP\_045181277.1 44.7 206  
 102 6 342 539 218 419 2.00E-38 168.7 6596 cellular  
 organisms;Eukaryota;Opisthokonta;Metazoa;Eumetazoa;Bilateria;Protostomia;  
 Spiralia;Lophotrochozoa;Mollusca;Bivalvia;Autobranhia;Heteroconchia;Euhe  
 terodonta;Imparidentia;Venerida;Veneroidea;Veneridae;Mercenaria;Mercenari  
 a mercenaria  
 UdeM00000039935 6596 144.4 UdeM00000039935 XP\_045181277.1 36 225  
 135 6 168 386 139 360 5.20E-31 144.4 6596 cellular  
 organisms;Eukaryota;Opisthokonta;Metazoa;Eumetazoa;Bilateria;Protostomia;  
 Spiralia;Lophotrochozoa;Mollusca;Bivalvia;Autobranhia;Heteroconchia;Euhe  
 terodonta;Imparidentia;Venerida;Veneroidea;Veneridae;Mercenaria;Mercenari  
 a mercenaria  
 UdeM00000039936 6596 211.8 UdeM00000039936 XP\_045177373.1 29.5 516  
 303 14 5 466 33 541 2.40E-51 211.8 6596 cellular  
 organisms;Eukaryota;Opisthokonta;Metazoa;Eumetazoa;Bilateria;Protostomia;  
 Spiralia;Lophotrochozoa;Mollusca;Bivalvia;Autobranhia;Heteroconchia;Euhe  
 terodonta;Imparidentia;Venerida;Veneroidea;Veneridae;Mercenaria;Mercenari  
 a mercenaria  
 UdeM00000039937 6596 185.3 UdeM00000039937 XP\_045177373.1 28.4 472  
 263 15 43 458 3 455 1.90E-43 185.3 6596 cellular  
 organisms;Eukaryota;Opisthokonta;Metazoa;Eumetazoa;Bilateria;Protostomia;  
 Spiralia;Lophotrochozoa;Mollusca;Bivalvia;Autobranhia;Heteroconchia;Euhe  
 terodonta;Imparidentia;Venerida;Veneroidea;Veneridae;Mercenaria;Mercenari  
 a mercenaria  
 UdeM00000039938 6596 117.1 UdeM00000039938 XP\_045176664.1 25.2 441  
 228 12 10 352 31 467 5.40E-23 117.1 6596 cellular  
 organisms;Eukaryota;Opisthokonta;Metazoa;Eumetazoa;Bilateria;Protostomia;  
 Spiralia;Lophotrochozoa;Mollusca;Bivalvia;Autobranhia;Heteroconchia;Euhe



terodonta;Imparidentia;Venerida;Veneroidea;Veneridae;Mercenaria;Mercenaria mercenaria

UdeM00000039939 400727 492.7 UdeM00000039939 XP\_025082157.1 71.1  
336 95 2 22 357 20 353 4.10E-136 492.7 400727  
cellular

organisms;Eukaryota;Opisthokonta;Metazoa;Eumetazoa;Bilateria;Protostomia;Spiralia;Lophotrochozoa;Mollusca;Gastropoda;Caenogastropoda;Architaenioglossa;Ampullarioidea;Ampullariidae;Pomacea;Pomacea canaliculata

UdeM00000039940 6579 839.3 UdeM00000039940 XP\_033731862.1 65.7 731  
217 17 112 827 449 1160 7.80E-240 839.3 6579 cellular

organisms;Eukaryota;Opisthokonta;Metazoa;Eumetazoa;Bilateria;Protostomia;Spiralia;Lophotrochozoa;Mollusca;Bivalvia;Autobranchia;Pteriormorphia;Pectinida;Pectinoidea;Pectinidae;Pecten;Pecten maximus

UdeM00000039941 6579 340.1 UdeM00000039941 XP\_033731867.1 62.4 322  
82 9 272 584 44 335 5.50E-90 340.1 6579 cellular

organisms;Eukaryota;Opisthokonta;Metazoa;Eumetazoa;Bilateria;Protostomia;Spiralia;Lophotrochozoa;Mollusca;Bivalvia;Autobranchia;Pteriormorphia;Pectinida;Pectinoidea;Pectinidae;Pecten;Pecten maximus

UdeM00000039942 6579 333.2 UdeM00000039942 XP\_033731867.1 61.5 327  
82 10 272 589 44 335 6.80E-88 333.2 6579 cellular

organisms;Eukaryota;Opisthokonta;Metazoa;Eumetazoa;Bilateria;Protostomia;Spiralia;Lophotrochozoa;Mollusca;Bivalvia;Autobranchia;Pteriormorphia;Pectinida;Pectinoidea;Pectinidae;Pecten;Pecten maximus

UdeM00000039943 6596 879.4 UdeM00000039943 XP\_045209528.1 58.4 865  
304 16 1 832 4 845 3.60E-252 879.4 6596 cellular

organisms;Eukaryota;Opisthokonta;Metazoa;Eumetazoa;Bilateria;Protostomia;Spiralia;Lophotrochozoa;Mollusca;Bivalvia;Autobranchia;Heteroconchia;Euheterodonta;Imparidentia;Venerida;Veneroidea;Veneridae;Mercenaria;Mercenaria mercenaria

UdeM00000039944 6573 739.6 UdeM00000039944 XP\_021349019.1 72.2 479  
131 2 1 478 1 478 2.60E-210 739.6 6573 cellular

organisms;Eukaryota;Opisthokonta;Metazoa;Eumetazoa;Bilateria;Protostomia;Spiralia;Lophotrochozoa;Mollusca;Bivalvia;Autobranchia;Pteriormorphia;Pectinida;Pectinoidea;Pectinidae;Mizuhopecten;Mizuhopecten yessoensis

UdeM00000039945 1735272 414.5 UdeM00000039945 XP\_041372411.1 64  
314 113 0 29 342 55 368 1.40E-112 414.5 1735272

cellular

organisms;Eukaryota;Opisthokonta;Metazoa;Eumetazoa;Bilateria;Protostomia;Spiralia;Lophotrochozoa;Mollusca;Gastropoda;Neomphalina;Neomphaloidea;Peltospiridae;Gigantopelta;Gigantopelta aegis

UdeM00000039946 6596 438.3 UdeM00000039946 XP\_045208267.1 52 552  
199 8 105 622 83 602 1.60E-119 438.3 6596 cellular

organisms;Eukaryota;Opisthokonta;Metazoa;Eumetazoa;Bilateria;Protostomia;Spiralia;Lophotrochozoa;Mollusca;Bivalvia;Autobranchia;Heteroconchia;Euheterodonta;Imparidentia;Venerida;Veneroidea;Veneridae;Mercenaria;Mercenaria mercenaria

UdeM00000039947 13397 285.8 UdeM00000039947 XP\_041069267.1 54.8 228  
101 1 7 234 3 228 5.00E-74 285.8 13397 cellular

organisms;Eukaryota;Opisthokonta;Metazoa;Eumetazoa;Bilateria;Deuterostomia;Chordata;Craniata;Vertebrata;Gnathostomata;Chondrichthyes;Elasmobranchii;Selachii;Galeomorphii;Galeoidea;Lamniformes;Alopiidae;Lamninae;Carcharodon;Carcharodon carcharias

UdeM00000039948 50390 273.5 UdeM00000039948 XP\_028148951.1 50.7 227  
112 0 6 232 555 781 2.50E-70 273.5 50390 cellular

organisms;Eukaryota;Opisthokonta;Metazoa;Eumetazoa;Bilateria;Protostomia;Ecdysozoa;Panarthropoda;Arthropoda;Mandibulata;Pancrustacea;Hexapoda;Insecta;Dicondylia;Pterygota;Neoptera;Endopterygota;Coleoptera;Polyphaga;Cucujiformia;Chrysomeloidea;Chrysomelidae;Galerucinae;Luperini;Diabroticina;Diabroticites;Diabrotica;Diabrotica virgifera;Diabrotica virgifera virgifera

UdeM00000039949 50390 277.7 UdeM00000039949 XP\_028148951.1 52.4 227  
108 0 6 232 555 781 1.30E-71 277.7 50390 cellular

organisms;Eukaryota;Opisthokonta;Metazoa;Eumetazoa;Bilateria;Protostomia;Ecdysozoa;Panarthropoda;Arthropoda;Mandibulata;Pancrustacea;Hexapoda;Insecta;Dicondylia;Pterygota;Neoptera;Endopterygota;Coleoptera;Polyphaga;Cucujiformia;Chrysomeloidea;Chrysomelidae;Galerucinae;Luperini;Diabroticina;Diabroticites;Diabrotica;Diabrotica virgifera;Diabrotica virgifera virgifera

UdeM00000039950 7830 284.3 UdeM00000039950 XP\_038673199.1 54.6 227  
103 0 6 232 245 471 1.40E-73 284.3 7830 cellular

organisms;Eukaryota;Opisthokonta;Metazoa;Eumetazoa;Bilateria;Deuterostomia;Chordata;Craniata;Vertebrata;Gnathostomata;Chondrichthyes;Elasmobranchii;Selachii;Galeomorphii;Galeoidea;Carcharhiniformes;Scyliorhinidae;Scyliorhinus;Scyliorhinus canicula

UdeM00000039951 50390 310.1 UdeM00000039951 XP\_028154228.1 52.2 255  
122 0 6 260 215 469 2.70E-81 310.1 50390 cellular

organisms;Eukaryota;Opisthokonta;Metazoa;Eumetazoa;Bilateria;Protostomia;Ecdysozoa;Panarthropoda;Arthropoda;Mandibulata;Pancrustacea;Hexapoda;Insecta;Dicondylia;Pterygota;Neoptera;Endopterygota;Coleoptera;Polyphaga;Cucujiformia;Chrysomeloidea;Chrysomelidae;Galerucinae;Luperini;Diabroticina;Diabroticites;Diabrotica;Diabrotica virgifera;Diabrotica virgifera virgifera

UdeM00000039952 50390 198.7 UdeM00000039952 XP\_028147518.1 49.1 173  
86 1 6 178 77 247 6.10E-48 198.7 50390 cellular

organisms;Eukaryota;Opisthokonta;Metazoa;Eumetazoa;Bilateria;Protostomia;Ecdysozoa;Panarthropoda;Arthropoda;Mandibulata;Pancrustacea;Hexapoda;Insecta;Dicondylia;Pterygota;Neoptera;Endopterygota;Coleoptera;Polyphaga;Cucujiformia;Chrysomeloidea;Chrysomelidae;Galerucinae;Luperini;Diabroticina;Diabroticites;Diabrotica;Diabrotica virgifera;Diabrotica virgifera virgifera

UdeM00000039953 259920 305.1 UdeM00000039953 XP\_020376696.1 54.3  
256 115 1 7 262 218 471 8.90E-80 305.1 259920  
cellular

organisms;Eukaryota;Opisthokonta;Metazoa;Eumetazoa;Bilateria;Deuterostomia;Chordata;Craniata;Vertebrata;Gnathostomata;Chondrichthyes;Elasmobranchii;Selachii;Galeomorphii;Galeoidea;Orectolobiformes;Rhincodontidae;Rhincodon;Rhincodon typus

UdeM00000039954 50390 311.2 UdeM00000039954 XP\_028154228.1 54.9 233  
105 0 6 238 159 391 1.10E-81 311.2 50390 cellular

organisms;Eukaryota;Opisthokonta;Metazoa;Eumetazoa;Bilateria;Protostomia;Ecdysozoa;Panarthropoda;Arthropoda;Mandibulata;Pancrustacea;Hexapoda;Insecta;Dicondylia;Pterygota;Neoptera;Endopterygota;Coleoptera;Polyphaga;Cucujiformia;Chrysomeloidea;Chrysomelidae;Galerucinae;Luperini;Diabroticina;Diabroticites;Diabrotica;Diabrotica virgifera;Diabrotica virgifera virgifera

UdeM00000039955 1529436 172.6 UdeM00000039955 XP\_033114971.1 29.2  
400 174 8 1 299 1 392 8.30E-40 172.6 1529436  
cellular

organisms;Eukaryota;Opisthokonta;Metazoa;Eumetazoa;Bilateria;Deuterostomi  
a;Echinodermata;Pelmatozoa;Crinoidea;Articulata;Comatulida;Comatulidae;Co  
matulinae;Anneissia;Anneissia japonica

UdeM00000039956 54343 62 UdeM00000039956 XP\_032365425.1 48.3 58  
30 0 21 78 410 467 7.10E-07 62 54343 cellular

organisms;Eukaryota;Opisthokonta;Metazoa;Eumetazoa;Bilateria;Deuterostomi  
a;Chordata;Craniata;Vertebrata;Gnathostomata;Teleostomi;Euteleostomi;Acti  
nopterygii;Actinopteri;Neopterygii;Teleostei;Osteoglossocephalai;Clupeoce  
phala;Euteleosteomorpha;Neoteleostei;Eurypterygia;Ctenosquamata;Acanthomo  
rphata;Euacanthomorphacea;Percomorphaceae;Eupercaria;Perciformes;Percoide  
i;Percidae;Etheostomatinae;Etheostoma;Oligocephalus;Etheostoma spectabile

UdeM00000039957 8078 232.3 UdeM00000039957 XP\_035994542.1 42.1 311  
156 7 13 303 8 314 8.90E-58 232.3 8078 cellular

organisms;Eukaryota;Opisthokonta;Metazoa;Eumetazoa;Bilateria;Deuterostomi  
a;Chordata;Craniata;Vertebrata;Gnathostomata;Teleostomi;Euteleostomi;Acti  
nopterygii;Actinopteri;Neopterygii;Teleostei;Osteoglossocephalai;Clupeoce  
phala;Euteleosteomorpha;Neoteleostei;Eurypterygia;Ctenosquamata;Acanthomo  
rphata;Euacanthomorphacea;Percomorphaceae;Ovalentaria;Atherinomorphae;Cyp  
rinodontiformes;Cyprinodontoidei;Fundulidae;Fundulus;Fundulus

heteroclitus

UdeM00000039958 114398 419.9 UdeM00000039958 XP\_042903861.1 38.4  
609 364 6 1 605 1 602 5.70E-114 419.9 114398  
cellular

organisms;Eukaryota;Opisthokonta;Metazoa;Eumetazoa;Bilateria;Protostomia;  
Ecdysozoa;Panarthropoda;Arthropoda;Chelicerata;Arachnida;Araneae;Araneomo  
rphae;Entelegynae;Orbiculariae;Araneoidea;Theridiidae;Parasteatoda;Parast  
eatoda tepidariorum

UdeM00000039960 50390 261.2 UdeM00000039960 XP\_028154228.1 55.1 196  
88 0 6 201 103 298 1.10E-66 261.2 50390 cellular

organisms;Eukaryota;Opisthokonta;Metazoa;Eumetazoa;Bilateria;Protostomia;  
Ecdysozoa;Panarthropoda;Arthropoda;Mandibulata;Pancrustacea;Hexapoda;Inse  
cta;Dicondylia;Pterygota;Neoptera;Endopterygota;Coleoptera;Polyphaga;Cucu  
jiformia;Chrysomeloidea;Chrysomelidae;Galerucinae;Luperini;Diabroticina;D  
iabroticites;Diabrotica;Diabrotica virgifera;Diabrotica virgifera

UdeM00000039961 7950 261.2 UdeM00000039961 XP\_042563449.1 34.2 480  
269 11 6 473 37 481 3.00E-66 261.2 7950 cellular

organisms;Eukaryota;Opisthokonta;Metazoa;Eumetazoa;Bilateria;Deuterostomi  
a;Chordata;Craniata;Vertebrata;Gnathostomata;Teleostomi;Euteleostomi;Acti  
nopterygii;Actinopteri;Neopterygii;Teleostei;Osteoglossocephalai;Clupeoce  
phala;Otomorpha;Clupei;Clupeiformes;Clupeoidei;Clupeidae;Clupeinae;Clupea  
;Clupea harengus

UdeM00000039963 29144 76.3 UdeM00000039963 XP\_030641137.1 31.5 146  
83 4 247 385 144 279 9.80E-11 76.3 29144 cellular

organisms;Eukaryota;Opisthokonta;Metazoa;Eumetazoa;Bilateria;Deuterostomi  
a;Chordata;Craniata;Vertebrata;Gnathostomata;Teleostomi;Euteleostomi;Acti  
nopterygii;Actinopteri;Neopterygii;Teleostei;Osteoglossocephalai;Clupeoce  
phala;Otomorpha;Ostariophysi;Anotophysii;Gonorynchiformes;Chanoidei;Chanid  
ae;Chanos;Chanos chanos

UdeM00000039964 30732 63.9 UdeM00000039964 XP\_024146633.1 33.3 108  
56 2 22 113 87 194 1.60E-07 63.9 30732 cellular

organisms;Eukaryota;Opisthokonta;Metazoa;Eumetazoa;Bilateria;Deuterostomi  
a;Chordata;Craniata;Vertebrata;Gnathostomata;Teleostomi;Euteleostomi;Acti  
nopterygii;Actinopteri;Neopterygii;Teleostei;Osteoglossocephalai;Clupeoce

phala;Euteleosteomorpha;Neoteleostei;Eurypterygia;Ctenosquamata;Acanthomorphata;Euacanthomorphacea;Percomorphaceae;Ovalentaria;Atherinomorphae;Beloniformes;Adrianichthyoidei;Adrianichthyidae;Oryziinae;Oryzias;Oryzias melastigma

UdeM00000039965 244447 76.3 UdeM00000039965 XP\_008318068.1 33.6  
137 78 5 183 311 110 241 8.10E-11 76.3 244447  
cellular

organisms;Eukaryota;Opisthokonta;Metazoa;Eumetazoa;Bilateria;Deuterostomia;Chordata;Craniata;Vertebrata;Gnathostomata;Teleostomi;Euteleostomi;Actinopterygii;Actinopteri;Neopterygii;Teleostei;Osteoglossocephalai;Clupeocephala;Euteleosteomorpha;Neoteleostei;Eurypterygia;Ctenosquamata;Acanthomorphata;Euacanthomorphacea;Percomorphaceae;Carangaria;Pleuronectiformes;Pleuronectoidei;Cynoglossidae;Cynoglossinae;Cynoglossus;Cynoglossus semilaevis

UdeM00000039966 8032 72 UdeM00000039966 XP\_029590128.1 32.6 138  
82 4 243 375 67 198 1.80E-09 72 8032 cellular

organisms;Eukaryota;Opisthokonta;Metazoa;Eumetazoa;Bilateria;Deuterostomia;Chordata;Craniata;Vertebrata;Gnathostomata;Teleostomi;Euteleostomi;Actinopterygii;Actinopteri;Neopterygii;Teleostei;Osteoglossocephalai;Clupeocephala;Euteleosteomorpha;Protacanthopterygii;Salmoniformes;Salmonidae;Salmoninae;Salmo;Salmo trutta

UdeM00000039967 6579 68.9 UdeM00000039967 XP\_033725748.1 32.1 134  
81 5 154 285 189 314 1.30E-08 68.9 6579 cellular

organisms;Eukaryota;Opisthokonta;Metazoa;Eumetazoa;Bilateria;Protostomia;Spiralia;Lophotrochozoa;Mollusca;Bivalvia;Autobranchia;Pteriormorphia;Pectinida;Pectinoidea;Pectinidae;Pecten;Pecten maximus

UdeM00000039969 6579 397.5 UdeM00000039969 XP\_033730682.1 56 491  
157 12 10 467 2 466 2.30E-107 397.5 6579 cellular

organisms;Eukaryota;Opisthokonta;Metazoa;Eumetazoa;Bilateria;Protostomia;Spiralia;Lophotrochozoa;Mollusca;Bivalvia;Autobranchia;Pteriormorphia;Pectinida;Pectinoidea;Pectinidae;Pecten;Pecten maximus

UdeM00000039970 37653 726.9 UdeM00000039970 XP\_014787773.1 96 374  
15 0 46 419 1 374 1.50E-206 726.9 37653 cellular

organisms;Eukaryota;Opisthokonta;Metazoa;Eumetazoa;Bilateria;Protostomia;Spiralia;Lophotrochozoa;Mollusca;Cephalopoda;Coleoidea;Octopodiformes;Octopoda;Incirrata;Octopodidae;Octopus;Octopus bimaculoides

UdeM00000039971 29159 272.7 UdeM00000039971 XP\_011422874.1 74.5 184  
46 1 1 183 1 184 3.40E-70 272.7 29159 cellular

organisms;Eukaryota;Opisthokonta;Metazoa;Eumetazoa;Bilateria;Protostomia;Spiralia;Lophotrochozoa;Mollusca;Bivalvia;Autobranchia;Pteriormorphia;Ostreida;Ostreioidea;Ostreidae;Crassostrea;Crassostrea gigas

UdeM00000039972 29159 267.7 UdeM00000039972 XP\_011422874.1 73.3 187  
46 2 1 186 1 184 1.10E-68 267.7 29159 cellular

organisms;Eukaryota;Opisthokonta;Metazoa;Eumetazoa;Bilateria;Protostomia;Spiralia;Lophotrochozoa;Mollusca;Bivalvia;Autobranchia;Pteriormorphia;Ostreida;Ostreioidea;Ostreidae;Crassostrea;Crassostrea gigas

UdeM00000039973 1735272 147.9 UdeM00000039973 XP\_041371677.1 47.5  
200 84 5 81 260 78 276 1.90E-32 147.9 1735272  
cellular

organisms;Eukaryota;Opisthokonta;Metazoa;Eumetazoa;Bilateria;Protostomia;Spiralia;Lophotrochozoa;Mollusca;Gastropoda;Neomphalina;Neomphaloidea;Peltopspiridae;Gigantopelta;Gigantopelta aegis

UdeM00000039974 6596 1058.5 UdeM00000039974 XP\_045207837.1 73.3  
723 192 1 1 723 1 722 4.60E-306 1058.5 6596

cellular  
organisms;Eukaryota;Opisthokonta;Metazoa;Eumetazoa;Bilateria;Protostomia;  
Spiralia;Lophotrochozoa;Mollusca;Bivalvia;Autobranhia;Heteroconchia;Euhe  
terodonta;Imparidentia;Venerida;Veneroidea;Veneridae;Mercenaria;Mercenari  
a mercenaria

UdeM00000039975 6596 1058.5 UdeM00000039975 XP\_045207837.1 73.3  
723 192 1 1 723 1 722 4.60E-306 1058.5 6596

cellular  
organisms;Eukaryota;Opisthokonta;Metazoa;Eumetazoa;Bilateria;Protostomia;  
Spiralia;Lophotrochozoa;Mollusca;Bivalvia;Autobranhia;Heteroconchia;Euhe  
terodonta;Imparidentia;Venerida;Veneroidea;Veneridae;Mercenaria;Mercenari  
a mercenaria

UdeM00000039977 6596 305.8 UdeM00000039977 XP\_045183440.1 46.9 350  
160 4 45 369 32 380 9.30E-80 305.8 6596 cellular

organisms;Eukaryota;Opisthokonta;Metazoa;Eumetazoa;Bilateria;Protostomia;  
Spiralia;Lophotrochozoa;Mollusca;Bivalvia;Autobranhia;Heteroconchia;Euhe  
terodonta;Imparidentia;Venerida;Veneroidea;Veneridae;Mercenaria;Mercenari  
a mercenaria

UdeM00000039982 29159 99 UdeM00000039982 XP\_034315421.1 55.6 108  
42 3 3 106 364 469 4.20E-18 99 29159 cellular

organisms;Eukaryota;Opisthokonta;Metazoa;Eumetazoa;Bilateria;Protostomia;  
Spiralia;Lophotrochozoa;Mollusca;Bivalvia;Autobranhia;Pteriormorphia;Ostr  
eida;Ostreioidea;Ostreidae;Crassostrea;Crassostrea gigas

UdeM00000039983 29159 70.1 UdeM00000039983 XP\_034316230.1 32.5 154  
97 3 61 208 31 183 3.80E-09 70.1 29159 cellular

organisms;Eukaryota;Opisthokonta;Metazoa;Eumetazoa;Bilateria;Protostomia;  
Spiralia;Lophotrochozoa;Mollusca;Bivalvia;Autobranhia;Pteriormorphia;Ostr  
eida;Ostreioidea;Ostreidae;Crassostrea;Crassostrea gigas

UdeM00000039984 29159 92.4 UdeM00000039984 XP\_034318948.1 32 194  
32 1 1 94 374 567 4.10E-16 92.4 29159 cellular

organisms;Eukaryota;Opisthokonta;Metazoa;Eumetazoa;Bilateria;Protostomia;  
Spiralia;Lophotrochozoa;Mollusca;Bivalvia;Autobranhia;Pteriormorphia;Ostr  
eida;Ostreioidea;Ostreidae;Crassostrea;Crassostrea gigas

UdeM00000039985 29159 244.2 UdeM00000039985 XP\_034318948.1 44.4 268  
147 1 1 266 686 953 1.90E-61 244.2 29159 cellular

organisms;Eukaryota;Opisthokonta;Metazoa;Eumetazoa;Bilateria;Protostomia;  
Spiralia;Lophotrochozoa;Mollusca;Bivalvia;Autobranhia;Pteriormorphia;Ostr  
eida;Ostreioidea;Ostreidae;Crassostrea;Crassostrea gigas

UdeM00000039987 1735272 287.3 UdeM00000039987 XP\_041369837.1 52  
256 122 1 1 256 1897 2151 1.90E-74 287.3 1735272

cellular  
organisms;Eukaryota;Opisthokonta;Metazoa;Eumetazoa;Bilateria;Protostomia;  
Spiralia;Lophotrochozoa;Mollusca;Gastropoda;Neomphalina;Neomphaloidea;Pel  
tospiridae;Gigantopelta;Gigantopelta aegis

UdeM00000042258 6565 686 UdeM00000042258 XP\_022313078.1 32.5 1500  
813 38 32 1516 181 1495 1.10E-193 686 6565 cellular

organisms;Eukaryota;Opisthokonta;Metazoa;Eumetazoa;Bilateria;Protostomia;  
Spiralia;Lophotrochozoa;Mollusca;Bivalvia;Autobranhia;Pteriormorphia;Ostr  
eida;Ostreioidea;Ostreidae;Crassostrea;Crassostrea virginica

UdeM00000042260 6596 105.1 UdeM00000042260 XP\_045158017.1 34.8 161  
77 1 1 133 1104 1264 6.80E-20 105.1 6596 cellular

organisms;Eukaryota;Opisthokonta;Metazoa;Eumetazoa;Bilateria;Protostomia;  
Spiralia;Lophotrochozoa;Mollusca;Bivalvia;Autobranhia;Heteroconchia;Euhe

terodonta;Imparidentia;Venerida;Veneroidea;Veneridae;Mercenaria;Mercenaria mercenaria  
 UdeM00000042261 7741 111.7 UdeM00000042261 XP\_019633208.1 27.3 238  
 151 5 8 245 2632 2847 1.40E-21 111.7 7741 cellular  
 organisms;Eukaryota;Opisthokonta;Metazoa;Eumetazoa;Bilateria;Deuterostomia;Chordata;Cephalochordata;Leptocardii;Amphioxiformes;Branchiostomidae;Branchiostoma;Branchiostoma belcheri  
 UdeM00000042262 6596 183.3 UdeM00000042262 XP\_045198504.1 31.7 357  
 209 11 2 343 236 572 5.80E-43 183.3 6596 cellular  
 organisms;Eukaryota;Opisthokonta;Metazoa;Eumetazoa;Bilateria;Protostomia;Spiralia;Lophotrochozoa;Mollusca;Bivalvia;Autobranchia;Heteroconchia;Euheterodonta;Imparidentia;Venerida;Veneroidea;Veneridae;Mercenaria;Mercenaria mercenaria  
 UdeM00000042264 7739 171 UdeM00000042264 XP\_035699678.1 29.2 359  
 225 12 10 368 2228 2557 3.00E-39 171 7739 cellular  
 organisms;Eukaryota;Opisthokonta;Metazoa;Eumetazoa;Bilateria;Deuterostomia;Chordata;Cephalochordata;Leptocardii;Amphioxiformes;Branchiostomidae;Branchiostoma;Branchiostoma floridae  
 UdeM00000042263 6596 178.3 UdeM00000042263 XP\_045198504.1 32.7 327  
 196 9 27 349 268 574 1.70E-41 178.3 6596 cellular  
 organisms;Eukaryota;Opisthokonta;Metazoa;Eumetazoa;Bilateria;Protostomia;Spiralia;Lophotrochozoa;Mollusca;Bivalvia;Autobranchia;Heteroconchia;Euheterodonta;Imparidentia;Venerida;Veneroidea;Veneridae;Mercenaria;Mercenaria mercenaria  
 UdeM00000042265 29159 209.1 UdeM00000042265 XP\_034330341.1 39.4 221  
 127 1 263 483 12 225 1.30E-50 209.1 29159 cellular  
 organisms;Eukaryota;Opisthokonta;Metazoa;Eumetazoa;Bilateria;Protostomia;Spiralia;Lophotrochozoa;Mollusca;Bivalvia;Autobranchia;Pteriomorphia;Ostreida;Ostreoidea;Ostreidae;Crassostrea;Crassostrea gigas  
 UdeM00000011934 6596 222.2 UdeM00000011934 XP\_045209416.1 28.3 540  
 358 19 171 693 371 898 2.40E-54 222.2 6596 cellular  
 organisms;Eukaryota;Opisthokonta;Metazoa;Eumetazoa;Bilateria;Protostomia;Spiralia;Lophotrochozoa;Mollusca;Bivalvia;Autobranchia;Heteroconchia;Euheterodonta;Imparidentia;Venerida;Veneroidea;Veneridae;Mercenaria;Mercenaria mercenaria  
 UdeM00000011935 29159 105.9 UdeM00000011935 XP\_034315421.1 32 228  
 80 3 71 224 248 474 7.40E-20 105.9 29159 cellular  
 organisms;Eukaryota;Opisthokonta;Metazoa;Eumetazoa;Bilateria;Protostomia;Spiralia;Lophotrochozoa;Mollusca;Bivalvia;Autobranchia;Pteriomorphia;Ostreida;Ostreoidea;Ostreidae;Crassostrea;Crassostrea gigas  
 UdeM00000011938 6565 280.8 UdeM00000011938 XP\_022306954.1 63.6 198  
 72 0 1 198 367 564 1.80E-72 280.8 6565 cellular  
 organisms;Eukaryota;Opisthokonta;Metazoa;Eumetazoa;Bilateria;Protostomia;Spiralia;Lophotrochozoa;Mollusca;Bivalvia;Autobranchia;Pteriomorphia;Ostreida;Ostreoidea;Ostreidae;Crassostrea;Crassostrea virginica  
 UdeM00000011938 6565 66.2 UdeM00000011938 XP\_022306954.1 49.2 59  
 30 0 203 261 890 948 6.90E-08 66.2 6565 cellular  
 organisms;Eukaryota;Opisthokonta;Metazoa;Eumetazoa;Bilateria;Protostomia;Spiralia;Lophotrochozoa;Mollusca;Bivalvia;Autobranchia;Pteriomorphia;Ostreida;Ostreoidea;Ostreidae;Crassostrea;Crassostrea virginica  
 UdeM00000011939 29159 418.7 UdeM00000011939 XP\_034330911.1 54 376  
 166 3 5 379 1 370 8.20E-114 418.7 29159 cellular  
 organisms;Eukaryota;Opisthokonta;Metazoa;Eumetazoa;Bilateria;Protostomia;

Spiralia; Lophotrochozoa; Mollusca; Bivalvia; Autobranchia; Pteriomorpha; Ostr  
 eida; Ostreidae; Crassostrea; Crassostrea gigas  
 UdeM00000011940 29159 289.7 UdeM00000011940 XP\_034299474.1 41.8 354  
 190 3 1 351 415 755 5.10E-75 289.7 29159 cellular  
 organisms; Eukaryota; Opisthokonta; Metazoa; Eumetazoa; Bilateria; Protostomia;  
 Spiralia; Lophotrochozoa; Mollusca; Bivalvia; Autobranchia; Pteriomorpha; Ostr  
 eida; Ostreidae; Crassostrea; Crassostrea gigas  
 UdeM00000011941 29159 312 UdeM00000011941 XP\_034299474.1 42.8 369  
 195 3 1 366 400 755 1.00E-81 312 29159 cellular  
 organisms; Eukaryota; Opisthokonta; Metazoa; Eumetazoa; Bilateria; Protostomia;  
 Spiralia; Lophotrochozoa; Mollusca; Bivalvia; Autobranchia; Pteriomorpha; Ostr  
 eida; Ostreidae; Crassostrea; Crassostrea gigas  
 UdeM00000011942 6565 391.7 UdeM00000011942 XP\_022322655.1 42.7 553  
 218 16 1 458 1 549 1.30E-105 391.7 6565 cellular  
 organisms; Eukaryota; Opisthokonta; Metazoa; Eumetazoa; Bilateria; Protostomia;  
 Spiralia; Lophotrochozoa; Mollusca; Bivalvia; Autobranchia; Pteriomorpha; Ostr  
 eida; Ostreidae; Crassostrea; Crassostrea virginica  
 UdeM00000011943 6565 349.7 UdeM00000011943 XP\_022322655.1 39.3 552  
 161 8 1 381 1 549 4.50E-93 349.7 6565 cellular  
 organisms; Eukaryota; Opisthokonta; Metazoa; Eumetazoa; Bilateria; Protostomia;  
 Spiralia; Lophotrochozoa; Mollusca; Bivalvia; Autobranchia; Pteriomorpha; Ostr  
 eida; Ostreidae; Crassostrea; Crassostrea virginica  
 UdeM00000011944 6565 414.8 UdeM00000011944 XP\_022322655.1 43.9 553  
 225 15 1 472 1 549 1.40E-112 414.8 6565 cellular  
 organisms; Eukaryota; Opisthokonta; Metazoa; Eumetazoa; Bilateria; Protostomia;  
 Spiralia; Lophotrochozoa; Mollusca; Bivalvia; Autobranchia; Pteriomorpha; Ostr  
 eida; Ostreidae; Crassostrea; Crassostrea virginica  
 UdeM00000011946 7604 676.8 UdeM00000011946 XP\_033632832.1 54.2 576  
 261 3 143 717 273 846 3.00E-191 676.8 7604 cellular  
 organisms; Eukaryota; Opisthokonta; Metazoa; Eumetazoa; Bilateria; Deuterostomi  
 a; Echinodermata; Eleutherozoa; Asterozoa; Asterozoa; Asterozoa; Forcipulatacea; Forcipul  
 atida; Asterozoa; Asterozoa; Asterias; Asterias rubens  
 UdeM00000011947 7574 115.5 UdeM00000011947 XP\_013410728.1 32.1 296  
 155 7 228 487 56 341 1.90E-22 115.5 7574 cellular  
 organisms; Eukaryota; Opisthokonta; Metazoa; Eumetazoa; Bilateria; Protostomia;  
 Spiralia; Lophotrochozoa; Brachiopoda; Linguliformea; Lingulata; Lingulida; Lin  
 guloidea; Lingulidae; Lingula; Lingula anatina  
 UdeM00000011949 29159 98.2 UdeM00000011949 XP\_034303860.1 46.7 120  
 61 2 5 121 21 140 8.40E-18 98.2 29159 cellular  
 organisms; Eukaryota; Opisthokonta; Metazoa; Eumetazoa; Bilateria; Protostomia;  
 Spiralia; Lophotrochozoa; Mollusca; Bivalvia; Autobranchia; Pteriomorpha; Ostr  
 eida; Ostreidae; Crassostrea; Crassostrea gigas  
 UdeM00000011950 6579 204.9 UdeM00000011950 XP\_033758269.1 28.3 718  
 443 25 304 993 4 677 5.00E-49 204.9 6579 cellular  
 organisms; Eukaryota; Opisthokonta; Metazoa; Eumetazoa; Bilateria; Protostomia;  
 Spiralia; Lophotrochozoa; Mollusca; Bivalvia; Autobranchia; Pteriomorpha; Pect  
 inida; Pectinoidea; Pectinidae; Pecten; Pecten maximus  
 UdeM00000011951 6500 62 UdeM00000011951 XP\_035828412.1 29.4 126  
 78 3 9 128 14 134 1.20E-06 62 6500 cellular  
 organisms; Eukaryota; Opisthokonta; Metazoa; Eumetazoa; Bilateria; Protostomia;  
 Spiralia; Lophotrochozoa; Mollusca; Gastropoda; Heterobranchia; Euthyneura; Tec  
 tipleura; Aplysiida; Aplysiidae; Aplysia; Aplysia californica  
 UdeM00000011955 50429 253.4 UdeM00000011955 XP\_022799197.1 28.5 592  
 379 12 1 561 14 592 6.60E-64 253.4 50429 cellular

organisms;Eukaryota;Opisthokonta;Metazoa;Eumetazoa;Cnidaria;Anthozoa;Hexa  
corallia;Scleractinia;Astrocoeniina;Pocilloporidae;Stylophora;Stylophora  
pistillata

UdeM00000011956 50429 256.1 UdeM00000011956 XP\_022799197.1 28.8 601  
382 13 4 571 5 592 1.00E-64 256.1 50429 cellular

organisms;Eukaryota;Opisthokonta;Metazoa;Eumetazoa;Cnidaria;Anthozoa;Hexa  
corallia;Scleractinia;Astrocoeniina;Pocilloporidae;Stylophora;Stylophora  
pistillata

UdeM00000011957 1735272 96.3 UdeM00000011957 XP\_041355798.1 35.4  
144 91 2 20 163 52 193 3.90E-17 96.3 1735272  
cellular

organisms;Eukaryota;Opisthokonta;Metazoa;Eumetazoa;Bilateria;Protostomia;  
Spiralia;Lophotrochozoa;Mollusca;Gastropoda;Neomphalina;Neomphaloidea;Pel  
tospiridae;Gigantopelta;Gigantopelta aegis

UdeM00000011958 1735272 62.8 UdeM00000011958 XP\_041355798.1 32.4  
105 70 1 20 124 52 155 5.00E-07 62.8 1735272  
cellular

organisms;Eukaryota;Opisthokonta;Metazoa;Eumetazoa;Bilateria;Protostomia;  
Spiralia;Lophotrochozoa;Mollusca;Gastropoda;Neomphalina;Neomphaloidea;Pel  
tospiridae;Gigantopelta;Gigantopelta aegis

UdeM00000011959 50429 264.6 UdeM00000011959 XP\_022799197.1 29.6 595  
376 14 11 579 14 591 3.00E-67 264.6 50429 cellular

organisms;Eukaryota;Opisthokonta;Metazoa;Eumetazoa;Cnidaria;Anthozoa;Hexa  
corallia;Scleractinia;Astrocoeniina;Pocilloporidae;Stylophora;Stylophora  
pistillata

UdeM00000011960 6850 92.8 UdeM00000011960 XP\_022246982.1 29.4 245  
155 4 2 228 108 352 6.60E-16 92.8 6850 cellular

organisms;Eukaryota;Opisthokonta;Metazoa;Eumetazoa;Bilateria;Protostomia;  
Ecdysozoa;Panarthropoda;Arthropoda;Chelicerata;Merostomata;Xiphosura;Limu  
lidae;Limulus;Limulus polyphemus

UdeM00000011961 29159 99.8 UdeM00000011961 XP\_034316161.1 45.7 105  
57 0 2 106 904 1008 8.10E-18 99.8 29159 cellular

organisms;Eukaryota;Opisthokonta;Metazoa;Eumetazoa;Bilateria;Protostomia;  
Spiralia;Lophotrochozoa;Mollusca;Bivalvia;Autobranchia;Pteriomorphia;Ostr  
eida;Ostreoidea;Ostreidae;Crassostrea;Crassostrea gigas

UdeM00000011962 29159 123.6 UdeM00000011962 XP\_034316161.1 53.6 97  
45 0 1 97 718 814 2.00E-25 123.6 29159 cellular

organisms;Eukaryota;Opisthokonta;Metazoa;Eumetazoa;Bilateria;Protostomia;  
Spiralia;Lophotrochozoa;Mollusca;Bivalvia;Autobranchia;Pteriomorphia;Ostr  
eida;Ostreoidea;Ostreidae;Crassostrea;Crassostrea gigas

UdeM00000011968 6565 99 UdeM00000011968 XP\_022310266.1 60.8 79  
31 0 208 286 197 275 1.10E-17 99 6565 cellular

organisms;Eukaryota;Opisthokonta;Metazoa;Eumetazoa;Bilateria;Protostomia;  
Spiralia;Lophotrochozoa;Mollusca;Bivalvia;Autobranchia;Pteriomorphia;Ostr  
eida;Ostreoidea;Ostreidae;Crassostrea;Crassostrea virginica

UdeM00000011969 6565 93.2 UdeM00000011969 XP\_022310266.1 42.3 130  
57 1 152 263 197 326 5.50E-16 93.2 6565 cellular

organisms;Eukaryota;Opisthokonta;Metazoa;Eumetazoa;Bilateria;Protostomia;  
Spiralia;Lophotrochozoa;Mollusca;Bivalvia;Autobranchia;Pteriomorphia;Ostr  
eida;Ostreoidea;Ostreidae;Crassostrea;Crassostrea virginica

UdeM00000011970 6565 93.2 UdeM00000011970 XP\_022310266.1 42.3 130  
57 1 123 234 197 326 4.90E-16 93.2 6565 cellular

organisms;Eukaryota;Opisthokonta;Metazoa;Eumetazoa;Bilateria;Protostomia;



Spiralia;Lophotrochozoa;Mollusca;Bivalvia;Autobranchia;Pteriormorphia;Ostr  
eida;Ostreoidea;Ostreidae;Crassostrea;Crassostrea virginica  
UdeM00000011971 6596 83.6 UdeM00000011971 XP\_045208696.1 30.1 382  
194 13 13 343 31 390 5.50E-13 83.6 6596 cellular  
organisms;Eukaryota;Opisthokonta;Metazoa;Eumetazoa;Bilateria;Protostomia;  
Spiralia;Lophotrochozoa;Mollusca;Bivalvia;Autobranchia;Heteroconchia;Euhe  
terodonta;Imparidentia;Venerida;Veneroidea;Veneridae;Mercenaria;Mercenari  
a mercenaria  
UdeM00000011972 6573 570.9 UdeM00000011972 XP\_021354853.1 51.5 542  
257 3 144 680 276 816 2.40E-159 570.9 6573 cellular  
organisms;Eukaryota;Opisthokonta;Metazoa;Eumetazoa;Bilateria;Protostomia;  
Spiralia;Lophotrochozoa;Mollusca;Bivalvia;Autobranchia;Pteriormorphia;Pect  
inida;Pectinoidea;Pectinidae;Mizuhopecten;Mizuhopecten yessoensis  
UdeM00000011973 29159 149.4 UdeM00000011973 XP\_034313077.1 72.2 97  
27 0 8 104 137 233 4.60E-33 149.4 29159 cellular  
organisms;Eukaryota;Opisthokonta;Metazoa;Eumetazoa;Bilateria;Protostomia;  
Spiralia;Lophotrochozoa;Mollusca;Bivalvia;Autobranchia;Pteriormorphia;Ostr  
eida;Ostreoidea;Ostreidae;Crassostrea;Crassostrea gigas  
UdeM00000011974 6596 379 UdeM00000011974 XP\_045208720.1 33 786  
464 23 2 769 190 930 1.50E-101 379 6596 cellular  
organisms;Eukaryota;Opisthokonta;Metazoa;Eumetazoa;Bilateria;Protostomia;  
Spiralia;Lophotrochozoa;Mollusca;Bivalvia;Autobranchia;Heteroconchia;Euhe  
terodonta;Imparidentia;Venerida;Veneroidea;Veneridae;Mercenaria;Mercenari  
a mercenaria  
UdeM00000011975 6579 187.2 UdeM00000011975 XP\_033739209.1 53.3 169  
79 0 9 177 2 170 2.10E-44 187.2 6579 cellular  
organisms;Eukaryota;Opisthokonta;Metazoa;Eumetazoa;Bilateria;Protostomia;  
Spiralia;Lophotrochozoa;Mollusca;Bivalvia;Autobranchia;Pteriormorphia;Pect  
inida;Pectinoidea;Pectinidae;Pecten;Pecten maximus  
UdeM00000011976 6565 126.7 UdeM00000011976 XP\_022344917.1 37 189  
111 3 108 294 83 265 5.00E-26 126.7 6565 cellular  
organisms;Eukaryota;Opisthokonta;Metazoa;Eumetazoa;Bilateria;Protostomia;  
Spiralia;Lophotrochozoa;Mollusca;Bivalvia;Autobranchia;Pteriormorphia;Ostr  
eida;Ostreoidea;Ostreidae;Crassostrea;Crassostrea virginica  
UdeM00000011977 6565 144.4 UdeM00000011977 XP\_022297447.1 54.5 121  
54 1 3 123 142 261 9.40E-32 144.4 6565 cellular  
organisms;Eukaryota;Opisthokonta;Metazoa;Eumetazoa;Bilateria;Protostomia;  
Spiralia;Lophotrochozoa;Mollusca;Bivalvia;Autobranchia;Pteriormorphia;Ostr  
eida;Ostreoidea;Ostreidae;Crassostrea;Crassostrea virginica  
UdeM00000011978 1735272 80.5 UdeM00000011978 XP\_041349588.1 45.6  
79 43 0 1 79 1 79 1.10E-12 80.5 1735272  
cellular  
organisms;Eukaryota;Opisthokonta;Metazoa;Eumetazoa;Bilateria;Protostomia;  
Spiralia;Lophotrochozoa;Mollusca;Gastropoda;Neomphalina;Neomphaloidea;Pel  
tospiridae;Gigantopelta;Gigantopelta aegis  
UdeM00000011979 6573 72.4 UdeM00000011979 XP\_021347372.1 34.8 138  
84 3 4 136 324 460 6.30E-10 72.4 6573 cellular  
organisms;Eukaryota;Opisthokonta;Metazoa;Eumetazoa;Bilateria;Protostomia;  
Spiralia;Lophotrochozoa;Mollusca;Bivalvia;Autobranchia;Pteriormorphia;Pect  
inida;Pectinoidea;Pectinidae;Mizuhopecten;Mizuhopecten yessoensis  
UdeM00000011980 6596 58.5 UdeM00000011980 XP\_045208720.1 34.1 85  
53 2 13 97 138 219 5.40E-06 58.5 6596 cellular  
organisms;Eukaryota;Opisthokonta;Metazoa;Eumetazoa;Bilateria;Protostomia;  
Spiralia;Lophotrochozoa;Mollusca;Bivalvia;Autobranchia;Heteroconchia;Euhe

terodonta;Imparidentia;Venerida;Veneroidea;Veneridae;Mercenaria;Mercenaria mercenaria  
 UdeM00000011981 7070 226.1 UdeM00000011981 XP\_015838855.1 66.9 166  
 53 1 2 167 289 452 3.30E-56 226.1 7070 cellular  
 organisms;Eukaryota;Opisthokonta;Metazoa;Eumetazoa;Bilateria;Protostomia;  
 Ecdysozoa;Panarthropoda;Arthropoda;Mandibulata;Pancrustacea;Hexapoda;Insecta;  
 Dicondylia;Pterygota;Neoptera;Endopterygota;Coleoptera;Polyphaga;Cucujiformia;  
 Tenebrionoidea;Tenebrionidae;Tenebrionidae incertae sedis;Tribolium;Tribolium castaneum  
 UdeM00000011982 400727 508.1 UdeM00000011982 XP\_025113942.1 69.4  
 366 97 2 5 370 5 355 9.70E-141 508.1 400727  
 cellular  
 organisms;Eukaryota;Opisthokonta;Metazoa;Eumetazoa;Bilateria;Protostomia;  
 Spiralia;Lophotrochozoa;Mollusca;Gastropoda;Caenogastropoda;Architaenioglossa;  
 Ampullarioidea;Ampullariidae;Pomacea;Pomacea canaliculata  
 UdeM00000011983 6596 154.1 UdeM00000011983 XP\_045185656.1 47.9 165  
 86 0 1 165 1 165 1.60E-34 154.1 6596 cellular  
 organisms;Eukaryota;Opisthokonta;Metazoa;Eumetazoa;Bilateria;Protostomia;  
 Spiralia;Lophotrochozoa;Mollusca;Bivalvia;Autobranchia;Heteroconchia;Euheterodonta;  
 Imparidentia;Venerida;Veneroidea;Veneridae;Mercenaria;Mercenaria mercenaria  
 UdeM00000011985 6596 295 UdeM00000011985 XP\_045185656.1 51.8 274  
 132 0 1 274 1 274 1.40E-76 295 6596 cellular  
 organisms;Eukaryota;Opisthokonta;Metazoa;Eumetazoa;Bilateria;Protostomia;  
 Spiralia;Lophotrochozoa;Mollusca;Bivalvia;Autobranchia;Heteroconchia;Euheterodonta;  
 Imparidentia;Venerida;Veneroidea;Veneridae;Mercenaria;Mercenaria mercenaria  
 UdeM00000011987 29159 63.2 UdeM00000011987 XP\_034303531.1 47.5 59  
 30 1 20 77 116 174 1.80E-07 63.2 29159 cellular  
 organisms;Eukaryota;Opisthokonta;Metazoa;Eumetazoa;Bilateria;Protostomia;  
 Spiralia;Lophotrochozoa;Mollusca;Bivalvia;Autobranchia;Pteriormorphia;Ostreida;  
 Ostreioidea;Ostreidae;Crassostrea;Crassostrea gigas  
 UdeM00000011988 7913 102.4 UdeM00000011988 XP\_041112883.1 40.6 138  
 52 2 1 108 625 762 3.70E-19 102.4 7913 cellular  
 organisms;Eukaryota;Opisthokonta;Metazoa;Eumetazoa;Bilateria;Deuterostomia;  
 Chordata;Craniata;Vertebrata;Gnathostomata;Teleostomi;Euteleostomi;Actinopterygii;  
 Actinopteri;Chondrostei;Acipenseriformes;Acipenseridae;Polyodontidae;  
 Polyodontinae;Polyodontini;Polyodon;Polyodon spathula  
 UdeM00000011989 6596 119.4 UdeM00000011989 XP\_045208721.1 28.2 319  
 214 9 1 316 700 1006 1.20E-23 119.4 6596 cellular  
 organisms;Eukaryota;Opisthokonta;Metazoa;Eumetazoa;Bilateria;Protostomia;  
 Spiralia;Lophotrochozoa;Mollusca;Bivalvia;Autobranchia;Heteroconchia;Euheterodonta;  
 Imparidentia;Venerida;Veneroidea;Veneridae;Mercenaria;Mercenaria mercenaria  
 UdeM00000011990 6596 149.4 UdeM00000011990 XP\_045208720.1 33.2 274  
 173 6 1 267 461 731 6.80E-33 149.4 6596 cellular  
 organisms;Eukaryota;Opisthokonta;Metazoa;Eumetazoa;Bilateria;Protostomia;  
 Spiralia;Lophotrochozoa;Mollusca;Bivalvia;Autobranchia;Heteroconchia;Euheterodonta;  
 Imparidentia;Venerida;Veneroidea;Veneridae;Mercenaria;Mercenaria mercenaria  
 UdeM00000011991 6573 195.7 UdeM00000011991 XP\_021354853.1 32.1 361  
 145 3 99 359 147 507 1.00E-46 195.7 6573 cellular  
 organisms;Eukaryota;Opisthokonta;Metazoa;Eumetazoa;Bilateria;Protostomia;

Spiralia;Lophotrochozoa;Mollusca;Bivalvia;Autobranchia;Pteriomorpha;Pectinida;Pectinoidea;Pectinidae;Mizuhopecten;Mizuhopecten yessoensis  
UdeM00000011992 6573 122.9 UdeM00000011992 XP\_021372025.1 35.3 207  
126 4 1 201 200 404 4.80E-25 122.9 6573 cellular  
organisms;Eukaryota;Opisthokonta;Metazoa;Eumetazoa;Bilateria;Protostomia;  
Spiralia;Lophotrochozoa;Mollusca;Bivalvia;Autobranchia;Pteriomorpha;Pectinida;Pectinoidea;Pectinidae;Mizuhopecten;Mizuhopecten yessoensis  
UdeM00000011993 6596 208.8 UdeM00000011993 XP\_045208720.1 34.2 445  
239 18 33 465 39 441 1.50E-50 208.8 6596 cellular  
organisms;Eukaryota;Opisthokonta;Metazoa;Eumetazoa;Bilateria;Protostomia;  
Spiralia;Lophotrochozoa;Mollusca;Bivalvia;Autobranchia;Heteroconchia;Euherodonta;Imparidentia;Venerida;Veneroidea;Veneridae;Mercenaria;Mercenaria mercenaria  
UdeM00000011994 6596 95.9 UdeM00000011994 XP\_045209522.1 28.2 241  
157 7 25 258 37 268 8.30E-17 95.9 6596 cellular  
organisms;Eukaryota;Opisthokonta;Metazoa;Eumetazoa;Bilateria;Protostomia;  
Spiralia;Lophotrochozoa;Mollusca;Bivalvia;Autobranchia;Heteroconchia;Euherodonta;Imparidentia;Venerida;Veneroidea;Veneridae;Mercenaria;Mercenaria mercenaria  
UdeM00000011996 6596 201.4 UdeM00000011996 XP\_045208720.1 25.6 1022  
518 36 22 825 127 1124 4.40E-48 201.4 6596 cellular  
organisms;Eukaryota;Opisthokonta;Metazoa;Eumetazoa;Bilateria;Protostomia;  
Spiralia;Lophotrochozoa;Mollusca;Bivalvia;Autobranchia;Heteroconchia;Euherodonta;Imparidentia;Venerida;Veneroidea;Veneridae;Mercenaria;Mercenaria mercenaria  
UdeM00000011997 6596 114.8 UdeM00000011997 XP\_045158584.1 45.1 142  
68 3 33 171 200 334 1.20E-22 114.8 6596 cellular  
organisms;Eukaryota;Opisthokonta;Metazoa;Eumetazoa;Bilateria;Protostomia;  
Spiralia;Lophotrochozoa;Mollusca;Bivalvia;Autobranchia;Heteroconchia;Euherodonta;Imparidentia;Venerida;Veneroidea;Veneridae;Mercenaria;Mercenaria mercenaria  
UdeM00000012000 202533 242.7 UdeM00000012000 XP\_035218899.1 31.6  
468 257 8 2 408 3 468 8.40E-61 242.7 202533  
cellular  
organisms;Eukaryota;Opisthokonta;Metazoa;Eumetazoa;Bilateria;Protostomia;  
Ecdysozoa;Panarthropoda;Arthropoda;Chelicerata;Arachnida;Araneae;Araneomorphae;Entelegynae;Eresoidea;Eresidae;Stegodyphus;Stegodyphus dumicola  
UdeM00000012002 6596 215.3 UdeM00000012002 XP\_045173349.1 32.3 495  
300 17 6 483 528 1004 2.30E-52 215.3 6596 cellular  
organisms;Eukaryota;Opisthokonta;Metazoa;Eumetazoa;Bilateria;Protostomia;  
Spiralia;Lophotrochozoa;Mollusca;Bivalvia;Autobranchia;Heteroconchia;Euherodonta;Imparidentia;Venerida;Veneroidea;Veneridae;Mercenaria;Mercenaria mercenaria  
UdeM00000012003 6596 94.4 UdeM00000012003 XP\_045209522.1 29.1 213  
132 7 21 224 34 236 2.40E-16 94.4 6596 cellular  
organisms;Eukaryota;Opisthokonta;Metazoa;Eumetazoa;Bilateria;Protostomia;  
Spiralia;Lophotrochozoa;Mollusca;Bivalvia;Autobranchia;Heteroconchia;Euherodonta;Imparidentia;Venerida;Veneroidea;Veneridae;Mercenaria;Mercenaria mercenaria  
UdeM00000012004 7574 63.5 UdeM00000012004 XP\_013407625.2 45.1 71  
38 1 35 105 261 330 2.50E-07 63.5 7574 cellular  
organisms;Eukaryota;Opisthokonta;Metazoa;Eumetazoa;Bilateria;Protostomia;  
Spiralia;Lophotrochozoa;Brachiopoda;Linguliformea;Lingulata;Lingulida;Linguloidea;Lingulidae;Lingula;Lingula anatina

UdeM00000012005 6565 313.5 UdeM00000012005 XP\_022287155.1 53.6 306  
 137 2 322 622 284 589 6.10E-82 313.5 6565 cellular  
 organisms;Eukaryota;Opisthokonta;Metazoa;Eumetazoa;Bilateria;Protostomia;  
 Spiralia;Lophotrochozoa;Mollusca;Bivalvia;Autobranchia;Pteriomorpha;Ostr  
 eida;Ostreoidea;Ostreidae;Crassostrea;Crassostrea virginica  
 UdeM00000012007 6565 95.9 UdeM00000012007 XP\_022322825.1 42.3 111  
 63 1 3 112 342 452 3.80E-17 95.9 6565 cellular  
 organisms;Eukaryota;Opisthokonta;Metazoa;Eumetazoa;Bilateria;Protostomia;  
 Spiralia;Lophotrochozoa;Mollusca;Bivalvia;Autobranchia;Pteriomorpha;Ostr  
 eida;Ostreoidea;Ostreidae;Crassostrea;Crassostrea virginica  
 UdeM00000012010 6573 120.9 UdeM00000012010 XP\_021352054.1 49.3 136  
 62 3 1 132 1 133 1.20E-24 120.9 6573 cellular  
 organisms;Eukaryota;Opisthokonta;Metazoa;Eumetazoa;Bilateria;Protostomia;  
 Spiralia;Lophotrochozoa;Mollusca;Bivalvia;Autobranchia;Pteriomorpha;Pect  
 inida;Pectinoidea;Pectinidae;Mizuhopecten;Mizuhopecten yessoensis  
 UdeM00000012011 6565 300.1 UdeM00000012011 XP\_022295545.1 45.6 287  
 142 5 1 280 137 416 3.00E-78 300.1 6565 cellular  
 organisms;Eukaryota;Opisthokonta;Metazoa;Eumetazoa;Bilateria;Protostomia;  
 Spiralia;Lophotrochozoa;Mollusca;Bivalvia;Autobranchia;Pteriomorpha;Ostr  
 eida;Ostreoidea;Ostreidae;Crassostrea;Crassostrea virginica  
 UdeM00000012013 6579 114.8 UdeM00000012013 XP\_033730093.1 30.2 268  
 178 6 1 266 416 676 2.40E-22 114.8 6579 cellular  
 organisms;Eukaryota;Opisthokonta;Metazoa;Eumetazoa;Bilateria;Protostomia;  
 Spiralia;Lophotrochozoa;Mollusca;Bivalvia;Autobranchia;Pteriomorpha;Pect  
 inida;Pectinoidea;Pectinidae;Pecten;Pecten maximus  
 UdeM00000012014 7574 146 UdeM00000012014 XP\_013396733.1 39.9 228  
 134 3 74 299 22 248 7.80E-32 146 7574 cellular  
 organisms;Eukaryota;Opisthokonta;Metazoa;Eumetazoa;Bilateria;Protostomia;  
 Spiralia;Lophotrochozoa;Brachiopoda;Linguliformea;Lingulata;Lingulida;Lin  
 guloidea;Lingulidae;Lingula;Lingula anatina  
 UdeM00000012017 6596 232.6 UdeM00000012017 XP\_045173349.1 28.7 693  
 427 24 35 707 480 1125 1.80E-57 232.6 6596 cellular  
 organisms;Eukaryota;Opisthokonta;Metazoa;Eumetazoa;Bilateria;Protostomia;  
 Spiralia;Lophotrochozoa;Mollusca;Bivalvia;Autobranchia;Heteroconchia;Euhe  
 terodonta;Imparidentia;Venerida;Veneroidea;Veneridae;Mercenaria;Mercenari  
 a mercenaria  
 UdeM00000012019 6596 160.6 UdeM00000012019 XP\_045208720.1 27.4 577  
 327 24 109 652 40 557 8.10E-36 160.6 6596 cellular  
 organisms;Eukaryota;Opisthokonta;Metazoa;Eumetazoa;Bilateria;Protostomia;  
 Spiralia;Lophotrochozoa;Mollusca;Bivalvia;Autobranchia;Heteroconchia;Euhe  
 terodonta;Imparidentia;Venerida;Veneroidea;Veneridae;Mercenaria;Mercenari  
 a mercenaria  
 UdeM00000012020 6596 141.7 UdeM00000012020 XP\_045208720.1 28.8 382  
 217 15 109 465 40 391 3.40E-30 141.7 6596 cellular  
 organisms;Eukaryota;Opisthokonta;Metazoa;Eumetazoa;Bilateria;Protostomia;  
 Spiralia;Lophotrochozoa;Mollusca;Bivalvia;Autobranchia;Heteroconchia;Euhe  
 terodonta;Imparidentia;Venerida;Veneroidea;Veneridae;Mercenaria;Mercenari  
 a mercenaria  
 UdeM00000012023 6596 110.9 UdeM00000012023 XP\_045208720.1 29.5 305  
 154 13 307 559 101 396 5.50E-21 110.9 6596 cellular  
 organisms;Eukaryota;Opisthokonta;Metazoa;Eumetazoa;Bilateria;Protostomia;  
 Spiralia;Lophotrochozoa;Mollusca;Bivalvia;Autobranchia;Heteroconchia;Euhe  
 terodonta;Imparidentia;Venerida;Veneroidea;Veneridae;Mercenaria;Mercenari  
 a mercenaria

UdeM00000012024 6596 168.3 UdeM00000012024 XP\_045173349.1 32.8 345  
 210 9 291 618 408 747 3.10E-38 168.3 6596 cellular  
 organisms;Eukaryota;Opisthokonta;Metazoa;Eumetazoa;Bilateria;Protostomia;  
 Spiralia;Lophotrochozoa;Mollusca;Bivalvia;Autobranchia;Heteroconchia;Euhe  
 terodonta;Imparidentia;Venerida;Veneroidea;Veneridae;Mercenaria;Mercenari  
 a mercenaria

UdeM00000012025 6596 79 UdeM00000012025 XP\_045209446.1 27.5 167  
 112 2 2 168 392 549 7.20E-12 79 6596 cellular  
 organisms;Eukaryota;Opisthokonta;Metazoa;Eumetazoa;Bilateria;Protostomia;  
 Spiralia;Lophotrochozoa;Mollusca;Bivalvia;Autobranchia;Heteroconchia;Euhe  
 terodonta;Imparidentia;Venerida;Veneroidea;Veneridae;Mercenaria;Mercenari  
 a mercenaria

UdeM00000012026 1735272 194.9 UdeM00000012026 XP\_041362472.1 41.2  
 228 129 3 1 223 185 412 1.10E-46 194.9 1735272  
 cellular  
 organisms;Eukaryota;Opisthokonta;Metazoa;Eumetazoa;Bilateria;Protostomia;  
 Spiralia;Lophotrochozoa;Mollusca;Gastropoda;Neomphalina;Neomphaloidea;Pel  
 tospiridae;Gigantopelta;Gigantopelta aegis

UdeM00000012027 1735272 85.5 UdeM00000012027 XP\_041366951.1 43.9  
 82 46 0 40 121 159 240 6.00E-14 85.5 1735272  
 cellular  
 organisms;Eukaryota;Opisthokonta;Metazoa;Eumetazoa;Bilateria;Protostomia;  
 Spiralia;Lophotrochozoa;Mollusca;Gastropoda;Neomphalina;Neomphaloidea;Pel  
 tospiridae;Gigantopelta;Gigantopelta aegis

UdeM00000012028 1735272 85.5 UdeM00000012028 XP\_041366951.1 43.9  
 82 46 0 40 121 159 240 6.00E-14 85.5 1735272  
 cellular  
 organisms;Eukaryota;Opisthokonta;Metazoa;Eumetazoa;Bilateria;Protostomia;  
 Spiralia;Lophotrochozoa;Mollusca;Gastropoda;Neomphalina;Neomphaloidea;Pel  
 tospiridae;Gigantopelta;Gigantopelta aegis

UdeM00000012029 1735272 194.9 UdeM00000012029 XP\_041362472.1 41.2  
 228 129 3 1 223 185 412 1.10E-46 194.9 1735272  
 cellular  
 organisms;Eukaryota;Opisthokonta;Metazoa;Eumetazoa;Bilateria;Protostomia;  
 Spiralia;Lophotrochozoa;Mollusca;Gastropoda;Neomphalina;Neomphaloidea;Pel  
 tospiridae;Gigantopelta;Gigantopelta aegis

UdeM00000012030 1735272 194.9 UdeM00000012030 XP\_041362472.1 41.2  
 228 129 3 1 223 185 412 1.10E-46 194.9 1735272  
 cellular  
 organisms;Eukaryota;Opisthokonta;Metazoa;Eumetazoa;Bilateria;Protostomia;  
 Spiralia;Lophotrochozoa;Mollusca;Gastropoda;Neomphalina;Neomphaloidea;Pel  
 tospiridae;Gigantopelta;Gigantopelta aegis

UdeM00000012031 1735272 85.5 UdeM00000012031 XP\_041366951.1 43.9  
 82 46 0 40 121 159 240 6.00E-14 85.5 1735272  
 cellular  
 organisms;Eukaryota;Opisthokonta;Metazoa;Eumetazoa;Bilateria;Protostomia;  
 Spiralia;Lophotrochozoa;Mollusca;Gastropoda;Neomphalina;Neomphaloidea;Pel  
 tospiridae;Gigantopelta;Gigantopelta aegis

UdeM00000019665 6596 280 UdeM00000019665 XP\_045191742.1 30.1 714  
 460 15 13 703 10 707 8.20E-72 280 6596 cellular  
 organisms;Eukaryota;Opisthokonta;Metazoa;Eumetazoa;Bilateria;Protostomia;  
 Spiralia;Lophotrochozoa;Mollusca;Bivalvia;Autobranchia;Heteroconchia;Euhe  
 terodonta;Imparidentia;Venerida;Veneroidea;Veneridae;Mercenaria;Mercenari  
 a mercenaria

UdeM00000019666 6596 1321.6 UdeM00000019666 XP\_045207732.1 56.5  
1284 542 10 1 1278 39 1311 0.00E+00 1321.6 6596  
cellular

organisms;Eukaryota;Opisthokonta;Metazoa;Eumetazoa;Bilateria;Protostomia;  
Spiralia;Lophotrochozoa;Mollusca;Bivalvia;Autobranhia;Heteroconchia;Euhe  
terodonta;Imparidentia;Venerida;Veneroidea;Veneridae;Mercenaria;Mercenari  
a mercenaria

UdeM00000019667 6596 300.4 UdeM00000019667 XP\_045202427.1 31.3 721  
443 15 13 699 11 713 5.80E-78 300.4 6596 cellular

organisms;Eukaryota;Opisthokonta;Metazoa;Eumetazoa;Bilateria;Protostomia;  
Spiralia;Lophotrochozoa;Mollusca;Bivalvia;Autobranhia;Heteroconchia;Euhe  
terodonta;Imparidentia;Venerida;Veneroidea;Veneridae;Mercenaria;Mercenari  
a mercenaria

UdeM00000019668 6596 77 UdeM00000019668 XP\_045183569.1 34.8 138  
87 2 13 148 11 147 2.30E-11 77 6596 cellular

organisms;Eukaryota;Opisthokonta;Metazoa;Eumetazoa;Bilateria;Protostomia;  
Spiralia;Lophotrochozoa;Mollusca;Bivalvia;Autobranhia;Heteroconchia;Euhe  
terodonta;Imparidentia;Venerida;Veneroidea;Veneridae;Mercenaria;Mercenari  
a mercenaria

UdeM00000019669 6573 61.6 UdeM00000019669 XP\_021371966.1 38.9 72  
38 1 2 73 319 384 4.80E-07 61.6 6573 cellular

organisms;Eukaryota;Opisthokonta;Metazoa;Eumetazoa;Bilateria;Protostomia;  
Spiralia;Lophotrochozoa;Mollusca;Bivalvia;Autobranhia;Pteriormorphia;Pect  
inida;Pectinoidea;Pectinidae;Mizuhopecten;Mizuhopecten yessoensis

UdeM00000019671 6596 81.6 UdeM00000019671 XP\_045207732.1 40.7 145  
61 6 11 137 1174 1311 8.30E-13 81.6 6596 cellular

organisms;Eukaryota;Opisthokonta;Metazoa;Eumetazoa;Bilateria;Protostomia;  
Spiralia;Lophotrochozoa;Mollusca;Bivalvia;Autobranhia;Heteroconchia;Euhe  
terodonta;Imparidentia;Venerida;Veneroidea;Veneridae;Mercenaria;Mercenari  
a mercenaria

UdeM00000019672 6596 180.6 UdeM00000019672 XP\_045215628.1 61.5 130  
50 0 66 195 41 170 1.90E-42 180.6 6596 cellular

organisms;Eukaryota;Opisthokonta;Metazoa;Eumetazoa;Bilateria;Protostomia;  
Spiralia;Lophotrochozoa;Mollusca;Bivalvia;Autobranhia;Heteroconchia;Euhe  
terodonta;Imparidentia;Venerida;Veneroidea;Veneridae;Mercenaria;Mercenari  
a mercenaria

UdeM00000019673 6596 86.3 UdeM00000019673 XP\_045202427.1 31.7 167  
111 2 21 185 150 315 5.10E-14 86.3 6596 cellular

organisms;Eukaryota;Opisthokonta;Metazoa;Eumetazoa;Bilateria;Protostomia;  
Spiralia;Lophotrochozoa;Mollusca;Bivalvia;Autobranhia;Heteroconchia;Euhe  
terodonta;Imparidentia;Venerida;Veneroidea;Veneridae;Mercenaria;Mercenari  
a mercenaria

UdeM00000019674 6596 264.2 UdeM00000019674 XP\_045202427.1 30.2 686  
429 14 13 665 11 679 4.40E-67 264.2 6596 cellular

organisms;Eukaryota;Opisthokonta;Metazoa;Eumetazoa;Bilateria;Protostomia;  
Spiralia;Lophotrochozoa;Mollusca;Bivalvia;Autobranhia;Heteroconchia;Euhe  
terodonta;Imparidentia;Venerida;Veneroidea;Veneridae;Mercenaria;Mercenari  
a mercenaria

UdeM00000019675 6596 673.3 UdeM00000019675 XP\_045207732.1 54.3 751  
327 8 73 818 572 1311 4.30E-190 673.3 6596 cellular

organisms;Eukaryota;Opisthokonta;Metazoa;Eumetazoa;Bilateria;Protostomia;  
Spiralia;Lophotrochozoa;Mollusca;Bivalvia;Autobranhia;Heteroconchia;Euhe  
terodonta;Imparidentia;Venerida;Veneroidea;Veneridae;Mercenaria;Mercenari  
a mercenaria

UdeM00000019676 6596 714.9 UdeM00000019676 XP\_045207732.1 52.2 837  
 362 9 69 878 486 1311 1.40E-202 714.9 6596 cellular  
 organisms;Eukaryota;Opisthokonta;Metazoa;Eumetazoa;Bilateria;Protostomia;  
 Spiralia;Lophotrochozoa;Mollusca;Bivalvia;Autobranhia;Heteroconchia;Euhe  
 terodonta;Imparidentia;Venerida;Veneroidea;Veneridae;Mercenaria;Mercenari  
 a mercenaria  
 UdeM00000019679 6596 288.9 UdeM00000019679 XP\_045156925.1 31.5 705  
 443 17 14 698 12 696 1.80E-74 288.9 6596 cellular  
 organisms;Eukaryota;Opisthokonta;Metazoa;Eumetazoa;Bilateria;Protostomia;  
 Spiralia;Lophotrochozoa;Mollusca;Bivalvia;Autobranhia;Heteroconchia;Euhe  
 terodonta;Imparidentia;Venerida;Veneroidea;Veneridae;Mercenaria;Mercenari  
 a mercenaria  
 UdeM00000019680 6596 1258.8 UdeM00000019680 XP\_045207736.1 53.2  
 1324 543 12 1 1300 39 1310 0.00E+00 1258.8 6596  
 cellular  
 organisms;Eukaryota;Opisthokonta;Metazoa;Eumetazoa;Bilateria;Protostomia;  
 Spiralia;Lophotrochozoa;Mollusca;Bivalvia;Autobranhia;Heteroconchia;Euhe  
 terodonta;Imparidentia;Venerida;Veneroidea;Veneridae;Mercenaria;Mercenari  
 a mercenaria  
 UdeM00000019681 6596 69.3 UdeM00000019681 XP\_045191318.1 33.6 107  
 69 2 13 118 11 116 5.60E-09 69.3 6596 cellular  
 organisms;Eukaryota;Opisthokonta;Metazoa;Eumetazoa;Bilateria;Protostomia;  
 Spiralia;Lophotrochozoa;Mollusca;Bivalvia;Autobranhia;Heteroconchia;Euhe  
 terodonta;Imparidentia;Venerida;Veneroidea;Veneridae;Mercenaria;Mercenari  
 a mercenaria  
 UdeM00000019682 6596 136.7 UdeM00000019682 XP\_045157494.1 31.5 352  
 208 10 4 339 337 671 5.40E-29 136.7 6596 cellular  
 organisms;Eukaryota;Opisthokonta;Metazoa;Eumetazoa;Bilateria;Protostomia;  
 Spiralia;Lophotrochozoa;Mollusca;Bivalvia;Autobranhia;Heteroconchia;Euhe  
 terodonta;Imparidentia;Venerida;Veneroidea;Veneridae;Mercenaria;Mercenari  
 a mercenaria  
 UdeM00000019683 6596 287.7 UdeM00000019683 XP\_045202427.1 30.5 719  
 460 13 13 703 11 717 3.90E-74 287.7 6596 cellular  
 organisms;Eukaryota;Opisthokonta;Metazoa;Eumetazoa;Bilateria;Protostomia;  
 Spiralia;Lophotrochozoa;Mollusca;Bivalvia;Autobranhia;Heteroconchia;Euhe  
 terodonta;Imparidentia;Venerida;Veneroidea;Veneridae;Mercenaria;Mercenari  
 a mercenaria  
 UdeM00000019685 6573 59.7 UdeM00000019685 XP\_021374999.1 44.6 65  
 35 1 2 66 314 377 5.80E-06 59.7 6573 cellular  
 organisms;Eukaryota;Opisthokonta;Metazoa;Eumetazoa;Bilateria;Protostomia;  
 Spiralia;Lophotrochozoa;Mollusca;Bivalvia;Autobranhia;Pteriormorphia;Pect  
 inida;Pectinoidea;Pectinidae;Mizuhopecten;Mizuhopecten yessoensis  
 UdeM00000019686 6596 199.9 UdeM00000019686 XP\_045207732.1 51.1 229  
 103 5 19 245 1090 1311 3.70E-48 199.9 6596 cellular  
 organisms;Eukaryota;Opisthokonta;Metazoa;Eumetazoa;Bilateria;Protostomia;  
 Spiralia;Lophotrochozoa;Mollusca;Bivalvia;Autobranhia;Heteroconchia;Euhe  
 terodonta;Imparidentia;Venerida;Veneroidea;Veneridae;Mercenaria;Mercenari  
 a mercenaria  
 UdeM00000019687 6596 88.2 UdeM00000019687 XP\_045183569.1 35.5 166  
 97 3 13 174 11 170 1.30E-14 88.2 6596 cellular  
 organisms;Eukaryota;Opisthokonta;Metazoa;Eumetazoa;Bilateria;Protostomia;  
 Spiralia;Lophotrochozoa;Mollusca;Bivalvia;Autobranhia;Heteroconchia;Euhe  
 terodonta;Imparidentia;Venerida;Veneroidea;Veneridae;Mercenaria;Mercenari  
 a mercenaria

UdeM00000019688 6573 60.5 UdeM00000019688 XP\_021371966.1 48.1 52  
 27 0 2 53 319 370 1.20E-06 60.5 6573 cellular  
 organisms;Eukaryota;Opisthokonta;Metazoa;Eumetazoa;Bilateria;Protostomia;  
 Spiralia;Lophotrochozoa;Mollusca;Bivalvia;Autobranhia;Pteriomorpha;Pect  
 inida;Pectinoidea;Pectinidae;Mizuhopecten;Mizuhopecten yessoensis  
 UdeM00000019689 6596 93.2 UdeM00000019689 XP\_045211560.1 31.7 224  
 120 5 7 199 430 651 4.10E-16 93.2 6596 cellular  
 organisms;Eukaryota;Opisthokonta;Metazoa;Eumetazoa;Bilateria;Protostomia;  
 Spiralia;Lophotrochozoa;Mollusca;Bivalvia;Autobranhia;Heteroconchia;Euhe  
 terodonta;Imparidentia;Venerida;Veneroidea;Veneridae;Mercenaria;Mercenari  
 a mercenaria  
 UdeM00000019690 6579 80.9 UdeM00000019690 XP\_033730094.1 39.3 112  
 63 3 326 435 9 117 6.60E-12 80.9 6579 cellular  
 organisms;Eukaryota;Opisthokonta;Metazoa;Eumetazoa;Bilateria;Protostomia;  
 Spiralia;Lophotrochozoa;Mollusca;Bivalvia;Autobranhia;Pteriomorpha;Pect  
 inida;Pectinoidea;Pectinidae;Pecten;Pecten maximus  
 UdeM00000019691 1735272 516.5 UdeM00000019691 XP\_041347279.1 35.8  
 907 513 29 59 925 1 878 6.80E-143 516.5 1735272  
 cellular  
 organisms;Eukaryota;Opisthokonta;Metazoa;Eumetazoa;Bilateria;Protostomia;  
 Spiralia;Lophotrochozoa;Mollusca;Gastropoda;Neomphalina;Neomphaloidea;Pel  
 tospiridae;Gigantopelta;Gigantopelta aegis  
 UdeM00000019692 6596 601.3 UdeM00000019692 XP\_045207732.1 49.3 744  
 321 11 109 800 572 1311 1.80E-168 601.3 6596 cellular  
 organisms;Eukaryota;Opisthokonta;Metazoa;Eumetazoa;Bilateria;Protostomia;  
 Spiralia;Lophotrochozoa;Mollusca;Bivalvia;Autobranhia;Heteroconchia;Euhe  
 terodonta;Imparidentia;Venerida;Veneroidea;Veneridae;Mercenaria;Mercenari  
 a mercenaria  
 UdeM00000019693 6596 144.1 UdeM00000019693 XP\_045167321.1 23.5 706  
 309 15 10 498 8 699 5.00E-31 144.1 6596 cellular  
 organisms;Eukaryota;Opisthokonta;Metazoa;Eumetazoa;Bilateria;Protostomia;  
 Spiralia;Lophotrochozoa;Mollusca;Bivalvia;Autobranhia;Heteroconchia;Euhe  
 terodonta;Imparidentia;Venerida;Veneroidea;Veneridae;Mercenaria;Mercenari  
 a mercenaria  
 UdeM00000019694 6596 1330.5 UdeM00000019694 XP\_045207736.1 56  
 1283 547 10 1 1277 39 1310 0.00E+00 1330.5 6596  
 cellular  
 organisms;Eukaryota;Opisthokonta;Metazoa;Eumetazoa;Bilateria;Protostomia;  
 Spiralia;Lophotrochozoa;Mollusca;Bivalvia;Autobranhia;Heteroconchia;Euhe  
 terodonta;Imparidentia;Venerida;Veneroidea;Veneridae;Mercenaria;Mercenari  
 a mercenaria  
 UdeM00000019695 6596 604 UdeM00000019695 XP\_045209234.1 48.4 659  
 244 8 10 666 22 586 2.70E-169 604 6596 cellular  
 organisms;Eukaryota;Opisthokonta;Metazoa;Eumetazoa;Bilateria;Protostomia;  
 Spiralia;Lophotrochozoa;Mollusca;Bivalvia;Autobranhia;Heteroconchia;Euhe  
 terodonta;Imparidentia;Venerida;Veneroidea;Veneridae;Mercenaria;Mercenari  
 a mercenaria  
 UdeM00000019697 6596 172.2 UdeM00000019697 XP\_045208197.1 60.3 131  
 47 2 1 126 1 131 4.70E-40 172.2 6596 cellular  
 organisms;Eukaryota;Opisthokonta;Metazoa;Eumetazoa;Bilateria;Protostomia;  
 Spiralia;Lophotrochozoa;Mollusca;Bivalvia;Autobranhia;Heteroconchia;Euhe  
 terodonta;Imparidentia;Venerida;Veneroidea;Veneridae;Mercenaria;Mercenari  
 a mercenaria



UdeM00000019698 6596 529.6 UdeM00000019698 XP\_045208197.1 49.2 718  
 262 15 4 706 132 761 5.90E-147 529.6 6596 cellular  
 organisms;Eukaryota;Opisthokonta;Metazoa;Eumetazoa;Bilateria;Protostomia;  
 Spiralia;Lophotrochozoa;Mollusca;Bivalvia;Autobranchia;Heteroconchia;Euhe  
 terodonta;Imparidentia;Venerida;Veneroidea;Veneridae;Mercenaria;Mercenari  
 a mercenaria

UdeM00000019699 225164 107.8 UdeM00000019699 XP\_009059891.1 30.6  
 402 204 12 55 424 2719 3077 3.70E-20 107.8 225164  
 cellular  
 organisms;Eukaryota;Opisthokonta;Metazoa;Eumetazoa;Bilateria;Protostomia;  
 Spiralia;Lophotrochozoa;Mollusca;Gastropoda;Patellogastropoda;Lottioidea;  
 Lottiidae;Lottia;Lottia gigantea

UdeM00000019700 29159 1555 UdeM00000019700 XP\_034300567.1 37.1 2202  
 1297 41 39 2189 612 2777 0.00E+00 1555 29159 cellular  
 organisms;Eukaryota;Opisthokonta;Metazoa;Eumetazoa;Bilateria;Protostomia;  
 Spiralia;Lophotrochozoa;Mollusca;Bivalvia;Autobranchia;Pteriormorphia;Ostr  
 eida;Ostreoidea;Ostreidae;Crassostrea;Crassostrea gigas

UdeM00000019701 6565 151.8 UdeM00000019701 XP\_022325864.1 27.6 362  
 144 4 1 244 143 504 1.20E-33 151.8 6565 cellular  
 organisms;Eukaryota;Opisthokonta;Metazoa;Eumetazoa;Bilateria;Protostomia;  
 Spiralia;Lophotrochozoa;Mollusca;Bivalvia;Autobranchia;Pteriormorphia;Ostr  
 eida;Ostreoidea;Ostreidae;Crassostrea;Crassostrea virginica

UdeM00000019702 6596 77 UdeM00000019702 XP\_045208498.1 31.3 195  
 89 6 21 210 1 155 4.60E-11 77 6596 cellular  
 organisms;Eukaryota;Opisthokonta;Metazoa;Eumetazoa;Bilateria;Protostomia;  
 Spiralia;Lophotrochozoa;Mollusca;Bivalvia;Autobranchia;Heteroconchia;Euhe  
 terodonta;Imparidentia;Venerida;Veneroidea;Veneridae;Mercenaria;Mercenari  
 a mercenaria

UdeM00000019703 1735272 237.3 UdeM00000019703 XP\_041373713.1 79.6  
 142 28 1 1 141 1 142 1.30E-59 237.3 1735272  
 cellular  
 organisms;Eukaryota;Opisthokonta;Metazoa;Eumetazoa;Bilateria;Protostomia;  
 Spiralia;Lophotrochozoa;Mollusca;Gastropoda;Neomphalina;Neomphaloidea;Pel  
 tospiridae;Gigantopelta;Gigantopelta aegis

UdeM00000019704 6596 1090.9 UdeM00000019704 XP\_045210473.1 55.8  
 1002 384 13 1 959 9 994 0.00E+00 1090.9 6596  
 cellular  
 organisms;Eukaryota;Opisthokonta;Metazoa;Eumetazoa;Bilateria;Protostomia;  
 Spiralia;Lophotrochozoa;Mollusca;Bivalvia;Autobranchia;Heteroconchia;Euhe  
 terodonta;Imparidentia;Venerida;Veneroidea;Veneridae;Mercenaria;Mercenari  
 a mercenaria

UdeM00000019705 63436 73.6 UdeM00000019705 XP\_043469606.1 38.7 119  
 64 3 27 137 375 492 2.60E-10 73.6 63436 cellular  
 organisms;Eukaryota;Opisthokonta;Metazoa;Eumetazoa;Bilateria;Protostomia;  
 Ecdysozoa;Panarthropoda;Arthropoda;Mandibulata;Pancrustacea;Hexapoda;Inse  
 cta;Dicondylia;Pterygota;Neoptera;Endopterygota;Hymenoptera;Apocrita;Para  
 sitoida;Cynipoidea;Figitidae;Eucoilinae;Leptopilina;Leptopilina  
 heterotoma

UdeM00000019706 6573 223.8 UdeM00000019706 XP\_021364972.1 66 147  
 50 0 1 147 259 405 2.80E-55 223.8 6573 cellular  
 organisms;Eukaryota;Opisthokonta;Metazoa;Eumetazoa;Bilateria;Protostomia;  
 Spiralia;Lophotrochozoa;Mollusca;Bivalvia;Autobranchia;Pteriormorphia;Pect  
 inida;Pectinoidea;Pectinidae;Mizuhopecten;Mizuhopecten yessoensis

UdeM00000019707 6596 450.3 UdeM00000019707 XP\_045207545.1 57.9 361  
 152 0 49 409 38 398 2.70E-123 450.3 6596 cellular  
 organisms;Eukaryota;Opisthokonta;Metazoa;Eumetazoa;Bilateria;Protostomia;  
 Spiralia;Lophotrochozoa;Mollusca;Bivalvia;Autobranchia;Heteroconchia;Euhe  
 terodonta;Imparidentia;Venerida;Veneroidea;Veneridae;Mercenaria;Mercenari  
 a mercenaria  
 UdeM00000019708 6596 441 UdeM00000019708 XP\_045207545.1 62.7 324  
 121 0 6 329 75 398 1.30E-120 441 6596 cellular  
 organisms;Eukaryota;Opisthokonta;Metazoa;Eumetazoa;Bilateria;Protostomia;  
 Spiralia;Lophotrochozoa;Mollusca;Bivalvia;Autobranchia;Heteroconchia;Euhe  
 terodonta;Imparidentia;Venerida;Veneroidea;Veneridae;Mercenaria;Mercenari  
 a mercenaria  
 UdeM00000019709 37653 198 UdeM00000019709 XP\_014775923.1 51.5 169  
 81 1 1 168 1 169 1.10E-47 198 37653 cellular  
 organisms;Eukaryota;Opisthokonta;Metazoa;Eumetazoa;Bilateria;Protostomia;  
 Spiralia;Lophotrochozoa;Mollusca;Cephalopoda;Coleoidea;Octopodiformes;Oct  
 opoda;Incirrata;Octopodidae;Octopus;Octopus bimaculoides  
 UdeM00000019710 37621 213.4 UdeM00000019710 XP\_014672567.1 52.3 174  
 83 0 10 183 345 518 2.90E-52 213.4 37621 cellular  
 organisms;Eukaryota;Opisthokonta;Metazoa;Eumetazoa;Bilateria;Protostomia;  
 Ecdysozoa;Scalidophora;Priapulida;Priapulimorpha;Priapulimorphida;Priapul  
 idae;Priapululus;Priapululus caudatus  
 UdeM00000019711 37621 147.5 UdeM00000019711 XP\_014673981.1 47.4 171  
 56 3 29 165 48 218 1.60E-32 147.5 37621 cellular  
 organisms;Eukaryota;Opisthokonta;Metazoa;Eumetazoa;Bilateria;Protostomia;  
 Ecdysozoa;Scalidophora;Priapulida;Priapulimorpha;Priapulimorphida;Priapul  
 idae;Priapululus;Priapululus caudatus  
 UdeM00000019712 29159 506.9 UdeM00000019712 XP\_034304363.1 56.5 526  
 201 9 5 529 60 558 3.10E-140 506.9 29159 cellular  
 organisms;Eukaryota;Opisthokonta;Metazoa;Eumetazoa;Bilateria;Protostomia;  
 Spiralia;Lophotrochozoa;Mollusca;Bivalvia;Autobranchia;Pteriormorphia;Ostr  
 eida;Ostreoidea;Ostreidae;Crassostrea;Crassostrea gigas  
 UdeM00000019713 6573 240.4 UdeM00000019713 XP\_021357351.1 46.9 273  
 142 2 64 336 37 306 3.70E-60 240.4 6573 cellular  
 organisms;Eukaryota;Opisthokonta;Metazoa;Eumetazoa;Bilateria;Protostomia;  
 Spiralia;Lophotrochozoa;Mollusca;Bivalvia;Autobranchia;Pteriormorphia;Pect  
 inida;Pectinoidea;Pectinidae;Mizuhopecten;Mizuhopecten yessoensis  
 UdeM00000019714 6573 136.3 UdeM00000019714 XP\_021357351.1 50 124  
 55 1 11 127 140 263 3.00E-29 136.3 6573 cellular  
 organisms;Eukaryota;Opisthokonta;Metazoa;Eumetazoa;Bilateria;Protostomia;  
 Spiralia;Lophotrochozoa;Mollusca;Bivalvia;Autobranchia;Pteriormorphia;Pect  
 inida;Pectinoidea;Pectinidae;Mizuhopecten;Mizuhopecten yessoensis  
 UdeM00000019715 6596 228.8 UdeM00000019715 XP\_045193707.1 31.3 451  
 282 11 12 447 22 459 1.40E-56 228.8 6596 cellular  
 organisms;Eukaryota;Opisthokonta;Metazoa;Eumetazoa;Bilateria;Protostomia;  
 Spiralia;Lophotrochozoa;Mollusca;Bivalvia;Autobranchia;Heteroconchia;Euhe  
 terodonta;Imparidentia;Venerida;Veneroidea;Veneridae;Mercenaria;Mercenari  
 a mercenaria  
 UdeM00000019716 6573 244.6 UdeM00000019716 XP\_021357351.1 48.8 248  
 125 2 4 251 82 327 1.40E-61 244.6 6573 cellular  
 organisms;Eukaryota;Opisthokonta;Metazoa;Eumetazoa;Bilateria;Protostomia;  
 Spiralia;Lophotrochozoa;Mollusca;Bivalvia;Autobranchia;Pteriormorphia;Pect  
 inida;Pectinoidea;Pectinidae;Mizuhopecten;Mizuhopecten yessoensis

UdeM00000019717 6573 334 UdeM00000019717 XP\_021370367.1 53.9 323  
 146 3 1 323 1 320 2.30E-88 334 6573 cellular  
 organisms;Eukaryota;Opisthokonta;Metazoa;Eumetazoa;Bilateria;Protostomia;  
 Spiralia;Lophotrochozoa;Mollusca;Bivalvia;Autobranchia;Pteriomorpha;Pect  
 inida;Pectinoidea;Pectinidae;Mizuhopecten;Mizuhopecten yessoensis  
 UdeM00000019718 1735272 154.5 UdeM00000019718 XP\_041373778.1 84.5  
 116 16 1 1 114 1 116 8.70E-35 154.5 1735272  
 cellular  
 organisms;Eukaryota;Opisthokonta;Metazoa;Eumetazoa;Bilateria;Protostomia;  
 Spiralia;Lophotrochozoa;Mollusca;Gastropoda;Neomphalina;Neomphaloidea;Pel  
 tospiridae;Gigantopelta;Gigantopelta aegis  
 UdeM00000019720 133434 131.7 UdeM00000019720 XP\_022088701.1 38.3  
 201 110 5 23 216 109 302 1.20E-27 131.7 133434  
 cellular  
 organisms;Eukaryota;Opisthokonta;Metazoa;Eumetazoa;Bilateria;Deuterostomi  
 a;Echinodermata;Eleutherozoa;Asterozoa;Asteroidea;Valvatacea;Valvatida;Ac  
 anthasteridae;Acanthaster;Acanthaster planci  
 UdeM00000019721 400682 178.3 UdeM00000019721 XP\_019849765.1 35.6  
 284 149 8 200 450 163 445 2.20E-41 178.3 400682  
 cellular  
 organisms;Eukaryota;Opisthokonta;Metazoa;Porifera;Demospongiae;Heteroscle  
 romorpha;Haplosclerida;Niphatidae;Amphimedon;Amphimedon queenslandica  
 UdeM00000019723 6573 65.1 UdeM00000019723 XP\_021370009.1 45.6 68  
 34 1 2 69 111 175 4.20E-08 65.1 6573 cellular  
 organisms;Eukaryota;Opisthokonta;Metazoa;Eumetazoa;Bilateria;Protostomia;  
 Spiralia;Lophotrochozoa;Mollusca;Bivalvia;Autobranchia;Pteriomorpha;Pect  
 inida;Pectinoidea;Pectinidae;Mizuhopecten;Mizuhopecten yessoensis  
 UdeM00000019726 6579 533.9 UdeM00000019726 XP\_033758669.1 57.9 454  
 185 4 1 449 1 453 2.10E-148 533.9 6579 cellular  
 organisms;Eukaryota;Opisthokonta;Metazoa;Eumetazoa;Bilateria;Protostomia;  
 Spiralia;Lophotrochozoa;Mollusca;Bivalvia;Autobranchia;Pteriomorpha;Pect  
 inida;Pectinoidea;Pectinidae;Pecten;Pecten maximus  
 UdeM00000019727 45264 716.5 UdeM00000019727 XP\_029192633.2 39.9 1043  
 547 13 12 983 13 1046 4.80E-203 716.5 45264 cellular  
 organisms;Eukaryota;Opisthokonta;Metazoa;Eumetazoa;Cnidaria;Anthozoa;Hexa  
 corallia;Scleractinia;Astrocoeniina;Acroporidae;Acropora;Acropora  
 millepora  
 UdeM00000019728 6596 912.1 UdeM00000019728 XP\_045210321.1 74.8 731  
 133 12 1 724 61 747 4.40E-262 912.1 6596 cellular  
 organisms;Eukaryota;Opisthokonta;Metazoa;Eumetazoa;Bilateria;Protostomia;  
 Spiralia;Lophotrochozoa;Mollusca;Bivalvia;Autobranchia;Heteroconchia;Euhe  
 terodonta;Imparidentia;Venerida;Veneroidea;Veneridae;Mercenaria;Mercenari  
 a mercenaria  
 UdeM00000019729 1676925 125.6 UdeM00000019729 XP\_023657625.1 37.4  
 190 88 2 2 160 99 288 6.10E-26 125.6 1676925  
 cellular  
 organisms;Eukaryota;Opisthokonta;Metazoa;Eumetazoa;Bilateria;Deuterostomi  
 a;Chordata;Craniata;Vertebrata;Gnathostomata;Teleostomi;Euteleostomi;Acti  
 nopterygii;Actinopteri;Neopterygii;Teleostei;Osteoglossoccephalai;Osteoglo  
 ssocephala;Osteoglossomorpha;Osteoglossiformes;Mormyridae;Paramormyrops;P  
 aramormyrops kingsleyae  
 UdeM00000019731 6596 213 UdeM00000019731 XP\_045207055.1 35.9 306  
 189 3 90 395 70 368 6.90E-52 213 6596 cellular  
 organisms;Eukaryota;Opisthokonta;Metazoa;Eumetazoa;Bilateria;Protostomia;

Spiralia;Lophotrochozoa;Mollusca;Bivalvia;Autobranchia;Heteroconchia;Euherodonta;Imparidentia;Venerida;Veneroidea;Veneridae;Mercenaria;Mercenaria mercenaria

UdeM00000019732 6596 61.6 UdeM00000019732 XP\_045160713.1 41.9 93  
51 2 59 148 284 376 9.60E-07 61.6 6596 cellular

organisms;Eukaryota;Opisthokonta;Metazoa;Eumetazoa;Bilateria;Protostomia;Spiralia;Lophotrochozoa;Mollusca;Bivalvia;Autobranchia;Heteroconchia;Euherodonta;Imparidentia;Venerida;Veneroidea;Veneridae;Mercenaria;Mercenaria mercenaria

UdeM00000019733 6565 82.8 UdeM00000019733 XP\_022293466.1 42.7 103  
36 2 1 83 1 100 2.30E-13 82.8 6565 cellular

organisms;Eukaryota;Opisthokonta;Metazoa;Eumetazoa;Bilateria;Protostomia;Spiralia;Lophotrochozoa;Mollusca;Bivalvia;Autobranchia;Pteriomorpha;Ostreida;Ostreoidea;Ostreidae;Crassostrea;Crassostrea virginica

UdeM00000019736 29159 74.7 UdeM00000019736 XP\_034319534.1 36.5 85  
53 1 42 125 98 182 9.40E-11 74.7 29159 cellular

organisms;Eukaryota;Opisthokonta;Metazoa;Eumetazoa;Bilateria;Protostomia;Spiralia;Lophotrochozoa;Mollusca;Bivalvia;Autobranchia;Pteriomorpha;Ostreida;Ostreoidea;Ostreidae;Crassostrea;Crassostrea gigas

UdeM00000019737 29159 760 UdeM00000019737 XP\_034300360.1 74.6 493  
125 0 1 493 1 493 2.20E-216 760 29159 cellular

organisms;Eukaryota;Opisthokonta;Metazoa;Eumetazoa;Bilateria;Protostomia;Spiralia;Lophotrochozoa;Mollusca;Bivalvia;Autobranchia;Pteriomorpha;Ostreida;Ostreoidea;Ostreidae;Crassostrea;Crassostrea gigas

UdeM00000019739 400727 1014.6 UdeM00000019739 XP\_025101259.1  
88.1 581 69 0 5 585 14 594 5.10E-293 1014.6  
400727 cellular

organisms;Eukaryota;Opisthokonta;Metazoa;Eumetazoa;Bilateria;Protostomia;Spiralia;Lophotrochozoa;Mollusca;Gastropoda;Caenogastropoda;Architaenioglossa;Ampullarioidea;Ampullariidae;Pomacea;Pomacea canaliculata

UdeM00000019738 400727 1015.8 UdeM00000019738 XP\_025101259.1  
88.3 581 68 0 5 585 14 594 2.30E-293 1015.8  
400727 cellular

organisms;Eukaryota;Opisthokonta;Metazoa;Eumetazoa;Bilateria;Protostomia;Spiralia;Lophotrochozoa;Mollusca;Gastropoda;Caenogastropoda;Architaenioglossa;Ampullarioidea;Ampullariidae;Pomacea;Pomacea canaliculata

UdeM00000019740 400727 795.8 UdeM00000019740 XP\_025100751.1 81.2  
468 82 3 1 467 1 463 2.90E-227 795.8 400727  
cellular

organisms;Eukaryota;Opisthokonta;Metazoa;Eumetazoa;Bilateria;Protostomia;Spiralia;Lophotrochozoa;Mollusca;Gastropoda;Caenogastropoda;Architaenioglossa;Ampullarioidea;Ampullariidae;Pomacea;Pomacea canaliculata

UdeM00000019741 6596 183.7 UdeM00000019741 XP\_045209421.1 35.4 302  
184 5 6 296 26 327 3.40E-43 183.7 6596 cellular

organisms;Eukaryota;Opisthokonta;Metazoa;Eumetazoa;Bilateria;Protostomia;Spiralia;Lophotrochozoa;Mollusca;Bivalvia;Autobranchia;Heteroconchia;Euherodonta;Imparidentia;Venerida;Veneroidea;Veneridae;Mercenaria;Mercenaria mercenaria

UdeM00000019743 70779 168.3 UdeM00000019743 XP\_015755124.1 44.3 194  
92 1 134 311 223 416 1.60E-38 168.3 70779 cellular

organisms;Eukaryota;Opisthokonta;Metazoa;Eumetazoa;Cnidaria;Anthozoa;Hexacorallia;Scleractinia;Astrocoeniina;Acroporidae;Acropora;Acropora digitifera

UdeM00000019744 747089 65.1 UdeM00000019744 XP\_025164949.1 31.3  
 131 44 3 36 157 410 503 9.60E-08 65.1 747089  
 cellular organisms;Eukaryota;Opisthokonta;Fungi;Fungi incertae  
 sedis;Mucoromycota;Glomeromycotina;Glomeromycetes;Glomerales;Glomeraceae;  
 Rhizophagus;Rhizophagus irregularis;Rhizophagus irregularis DAOM  
 181602=DAOM 197198

UdeM00000019745 747089 69.7 UdeM00000019745 XP\_025164949.1 26.8  
 194 51 4 2 104 803 996 2.50E-09 69.7 747089  
 cellular organisms;Eukaryota;Opisthokonta;Fungi;Fungi incertae  
 sedis;Mucoromycota;Glomeromycotina;Glomeromycetes;Glomerales;Glomeraceae;  
 Rhizophagus;Rhizophagus irregularis;Rhizophagus irregularis DAOM  
 181602=DAOM 197198

UdeM00000019746 6105 114 UdeM00000019746 XP\_031561239.1 57.1 105  
 40 2 11 110 166 270 1.20E-22 114 6105 cellular  
 organisms;Eukaryota;Opisthokonta;Metazoa;Eumetazoa;Cnidaria;Anthozoa;Hexa  
 corallia;Actiniaria;Actiniidae;Actinia;Actinia tenebrosa

UdeM00000019747 6565 700.3 UdeM00000019747 XP\_022326686.1 63.3 526  
 186 5 51 570 53 577 2.10E-198 700.3 6565 cellular  
 organisms;Eukaryota;Opisthokonta;Metazoa;Eumetazoa;Bilateria;Protostomia;  
 Spiralia;Lophotrochozoa;Mollusca;Bivalvia;Autobranchia;Pteriormorphia;Ostr  
 eida;Ostreoidea;Ostreidae;Crassostrea;Crassostrea virginica

UdeM00000019748 6579 500.4 UdeM00000019748 XP\_033758518.1 40.1 756  
 400 13 33 752 28 766 4.10E-138 500.4 6579 cellular  
 organisms;Eukaryota;Opisthokonta;Metazoa;Eumetazoa;Bilateria;Protostomia;  
 Spiralia;Lophotrochozoa;Mollusca;Bivalvia;Autobranchia;Pteriormorphia;Pect  
 inida;Pectinoidea;Pectinidae;Pecten;Pecten maximus

UdeM00000019749 6596 354.4 UdeM00000019749 XP\_045216133.1 57.1 287  
 122 1 124 409 66 352 2.00E-94 354.4 6596 cellular  
 organisms;Eukaryota;Opisthokonta;Metazoa;Eumetazoa;Bilateria;Protostomia;  
 Spiralia;Lophotrochozoa;Mollusca;Bivalvia;Autobranchia;Heteroconchia;Euhe  
 terodonta;Imparidentia;Venerida;Veneroidea;Veneridae;Mercenaria;Mercenari  
 a mercenaria

UdeM00000019750 6596 357.8 UdeM00000019750 XP\_045173378.1 56.1 312  
 132 2 72 382 59 366 1.70E-95 357.8 6596 cellular  
 organisms;Eukaryota;Opisthokonta;Metazoa;Eumetazoa;Bilateria;Protostomia;  
 Spiralia;Lophotrochozoa;Mollusca;Bivalvia;Autobranchia;Heteroconchia;Euhe  
 terodonta;Imparidentia;Venerida;Veneroidea;Veneridae;Mercenaria;Mercenari  
 a mercenaria

UdeM00000019751 6596 360.5 UdeM00000019751 XP\_045173378.1 56.8 292  
 125 1 92 382 75 366 2.60E-96 360.5 6596 cellular  
 organisms;Eukaryota;Opisthokonta;Metazoa;Eumetazoa;Bilateria;Protostomia;  
 Spiralia;Lophotrochozoa;Mollusca;Bivalvia;Autobranchia;Heteroconchia;Euhe  
 terodonta;Imparidentia;Venerida;Veneroidea;Veneridae;Mercenaria;Mercenari  
 a mercenaria

UdeM00000019752 6596 357.5 UdeM00000019752 XP\_045173378.1 49.6 365  
 162 4 19 382 23 366 2.20E-95 357.5 6596 cellular  
 organisms;Eukaryota;Opisthokonta;Metazoa;Eumetazoa;Bilateria;Protostomia;  
 Spiralia;Lophotrochozoa;Mollusca;Bivalvia;Autobranchia;Heteroconchia;Euhe  
 terodonta;Imparidentia;Venerida;Veneroidea;Veneridae;Mercenaria;Mercenari  
 a mercenaria

UdeM00000019753 6596 357.8 UdeM00000019753 XP\_045173378.1 56.8 292  
 125 1 56 346 75 366 1.50E-95 357.8 6596 cellular  
 organisms;Eukaryota;Opisthokonta;Metazoa;Eumetazoa;Bilateria;Protostomia;  
 Spiralia;Lophotrochozoa;Mollusca;Bivalvia;Autobranchia;Heteroconchia;Euhe

terodonta;Imparidentia;Venerida;Veneroidea;Veneridae;Mercenaria;Mercenari  
 a mercenaria  
 UdeM00000019754 6596 353.6 UdeM00000019754 XP\_045216133.1 55.7 309  
 134 2 74 379 42 350 3.20E-94 353.6 6596 cellular  
 organisms;Eukaryota;Opisthokonta;Metazoa;Eumetazoa;Bilateria;Protostomia;  
 Spiralia;Lophotrochozoa;Mollusca;Bivalvia;Autobranhia;Heteroconchia;Euhe  
 terodonta;Imparidentia;Venerida;Veneroidea;Veneridae;Mercenaria;Mercenari  
 a mercenaria  
 UdeM00000019755 6596 362.8 UdeM00000019755 XP\_045216133.1 52 321  
 149 3 58 374 31 350 5.10E-97 362.8 6596 cellular  
 organisms;Eukaryota;Opisthokonta;Metazoa;Eumetazoa;Bilateria;Protostomia;  
 Spiralia;Lophotrochozoa;Mollusca;Bivalvia;Autobranhia;Heteroconchia;Euhe  
 terodonta;Imparidentia;Venerida;Veneroidea;Veneridae;Mercenaria;Mercenari  
 a mercenaria  
 UdeM00000019757 6596 176.8 UdeM00000019757 XP\_045173378.1 50.3 167  
 62 2 1 146 199 365 2.00E-41 176.8 6596 cellular  
 organisms;Eukaryota;Opisthokonta;Metazoa;Eumetazoa;Bilateria;Protostomia;  
 Spiralia;Lophotrochozoa;Mollusca;Bivalvia;Autobranhia;Heteroconchia;Euhe  
 terodonta;Imparidentia;Venerida;Veneroidea;Veneridae;Mercenaria;Mercenari  
 a mercenaria  
 UdeM00000019758 6596 350.9 UdeM00000019758 XP\_045173378.1 56.6 286  
 122 2 81 364 80 365 1.90E-93 350.9 6596 cellular  
 organisms;Eukaryota;Opisthokonta;Metazoa;Eumetazoa;Bilateria;Protostomia;  
 Spiralia;Lophotrochozoa;Mollusca;Bivalvia;Autobranhia;Heteroconchia;Euhe  
 terodonta;Imparidentia;Venerida;Veneroidea;Veneridae;Mercenaria;Mercenari  
 a mercenaria  
 UdeM00000019759 6596 342.8 UdeM00000019759 XP\_045173378.1 55.6 286  
 125 2 95 378 80 365 5.50E-91 342.8 6596 cellular  
 organisms;Eukaryota;Opisthokonta;Metazoa;Eumetazoa;Bilateria;Protostomia;  
 Spiralia;Lophotrochozoa;Mollusca;Bivalvia;Autobranhia;Heteroconchia;Euhe  
 terodonta;Imparidentia;Venerida;Veneroidea;Veneridae;Mercenaria;Mercenari  
 a mercenaria  
 UdeM00000019760 6596 276.2 UdeM00000019760 XP\_045207451.1 79.4 165  
 34 0 1 165 29 193 2.80E-71 276.2 6596 cellular  
 organisms;Eukaryota;Opisthokonta;Metazoa;Eumetazoa;Bilateria;Protostomia;  
 Spiralia;Lophotrochozoa;Mollusca;Bivalvia;Autobranhia;Heteroconchia;Euhe  
 terodonta;Imparidentia;Venerida;Veneroidea;Veneridae;Mercenaria;Mercenari  
 a mercenaria  
 UdeM00000019761 6596 291.6 UdeM00000019761 XP\_045207451.1 75.1 185  
 46 0 14 198 9 193 7.60E-76 291.6 6596 cellular  
 organisms;Eukaryota;Opisthokonta;Metazoa;Eumetazoa;Bilateria;Protostomia;  
 Spiralia;Lophotrochozoa;Mollusca;Bivalvia;Autobranhia;Heteroconchia;Euhe  
 terodonta;Imparidentia;Venerida;Veneroidea;Veneridae;Mercenaria;Mercenari  
 a mercenaria  
 UdeM00000019762 225164 328.6 UdeM00000019762 XP\_009055477.1 45.3  
 386 198 4 42 417 7 389 1.20E-86 328.6 225164  
 cellular  
 organisms;Eukaryota;Opisthokonta;Metazoa;Eumetazoa;Bilateria;Protostomia;  
 Spiralia;Lophotrochozoa;Mollusca;Gastropoda;Patellogastropoda;Lottioidae;  
 Lottiidae;Lottia;Lottia gigantea  
 UdeM00000019763 6579 181.4 UdeM00000019763 XP\_033736448.1 39.1 253  
 143 5 1 244 29 279 2.60E-42 181.4 6579 cellular  
 organisms;Eukaryota;Opisthokonta;Metazoa;Eumetazoa;Bilateria;Protostomia;

Spiralia; Lophotrochozoa; Mollusca; Bivalvia; Autobranchia; Pteriomorpha; Pectinida; Pectinoidea; Pectinidae; Pecten; Pecten maximus  
UdeM00000019764 29159 470.7 UdeM00000019764 XP\_034311318.1 39.9 684  
374 17 157 823 1 664 4.20E-129 470.7 29159 cellular  
organisms; Eukaryota; Opisthokonta; Metazoa; Eumetazoa; Bilateria; Protostomia;  
Spiralia; Lophotrochozoa; Mollusca; Bivalvia; Autobranchia; Pteriomorpha; Ostr  
eida; Ostreidae; Crassostrea; Crassostrea gigas  
UdeM00000019765 29159 132.5 UdeM00000019765 XP\_034312908.1 24.7 587  
283 14 158 620 70 621 1.90E-27 132.5 29159 cellular  
organisms; Eukaryota; Opisthokonta; Metazoa; Eumetazoa; Bilateria; Protostomia;  
Spiralia; Lophotrochozoa; Mollusca; Bivalvia; Autobranchia; Pteriomorpha; Ostr  
eida; Ostreidae; Crassostrea; Crassostrea gigas  
UdeM00000038785 1735272 380.2 UdeM00000038785 XP\_041375207.1 43.2  
509 262 10 14 502 14 515 5.00E-102 380.2 1735272  
cellular  
organisms; Eukaryota; Opisthokonta; Metazoa; Eumetazoa; Bilateria; Protostomia;  
Spiralia; Lophotrochozoa; Mollusca; Gastropoda; Neomphalina; Neomphaloidea; Pel  
tospiridae; Gigantopelta; Gigantopelta aegis  
UdeM00000038786 6087 101.3 UdeM00000038786 XP\_012565456.1 56 84  
37 0 74 157 930 1013 1.20E-18 101.3 6087 cellular  
organisms; Eukaryota; Opisthokonta; Metazoa; Eumetazoa; Cnidaria; Hydrozoa; Hydr  
oidolina; Anthoathecata; Aplanulata; Hydridae; Hydra; Hydra vulgaris  
UdeM00000038787 6596 665.6 UdeM00000038787 XP\_045192066.1 66.5 487  
160 2 1 486 29 513 4.80E-188 665.6 6596 cellular  
organisms; Eukaryota; Opisthokonta; Metazoa; Eumetazoa; Bilateria; Protostomia;  
Spiralia; Lophotrochozoa; Mollusca; Bivalvia; Autobranchia; Heteroconchia; Eue  
terodonta; Imparidentia; Venerida; Veneroidea; Veneridae; Mercenaria; Mercenari  
a mercenaria  
UdeM00000038788 6596 171 UdeM00000038788 XP\_045193265.1 63.5 137  
48 1 29 165 33 167 1.30E-39 171 6596 cellular  
organisms; Eukaryota; Opisthokonta; Metazoa; Eumetazoa; Bilateria; Protostomia;  
Spiralia; Lophotrochozoa; Mollusca; Bivalvia; Autobranchia; Heteroconchia; Eue  
terodonta; Imparidentia; Venerida; Veneroidea; Veneridae; Mercenaria; Mercenari  
a mercenaria  
UdeM00000038789 6596 234.6 UdeM00000038789 XP\_045193559.1 35.8 391  
216 10 9 385 23 392 2.20E-58 234.6 6596 cellular  
organisms; Eukaryota; Opisthokonta; Metazoa; Eumetazoa; Bilateria; Protostomia;  
Spiralia; Lophotrochozoa; Mollusca; Bivalvia; Autobranchia; Heteroconchia; Eue  
terodonta; Imparidentia; Venerida; Veneroidea; Veneridae; Mercenaria; Mercenari  
a mercenaria  
UdeM00000038790 6573 101.7 UdeM00000038790 XP\_021367845.1 35.7 230  
131 7 1 220 10 232 1.90E-18 101.7 6573 cellular  
organisms; Eukaryota; Opisthokonta; Metazoa; Eumetazoa; Bilateria; Protostomia;  
Spiralia; Lophotrochozoa; Mollusca; Bivalvia; Autobranchia; Pteriomorpha; Pect  
inida; Pectinoidea; Pectinidae; Mizuhopecten; Mizuhopecten yessoensis  
UdeM00000038791 225164 64.7 UdeM00000038791 XP\_009058200.1 50  
72 36 0 1 72 1 72 7.50E-08 64.7 225164  
cellular  
organisms; Eukaryota; Opisthokonta; Metazoa; Eumetazoa; Bilateria; Protostomia;  
Spiralia; Lophotrochozoa; Mollusca; Gastropoda; Patellogastropoda; Lottiidae;  
Lottia; Lottia gigantea  
UdeM00000038793 6596 266.9 UdeM00000038793 XP\_045156247.1 34.7 495  
196 9 43 415 266 755 4.20E-68 266.9 6596 cellular  
organisms; Eukaryota; Opisthokonta; Metazoa; Eumetazoa; Bilateria; Protostomia;

Spiralia;Lophotrochozoa;Mollusca;Bivalvia;Autobranchia;Heteroconchia;Euherodonta;Imparidentia;Venerida;Veneroidea;Veneridae;Mercenaria;Mercenaria mercenaria

UdeM00000038794 6596 300.4 UdeM00000038794 XP\_045156248.1 33 600  
268 12 4 475 7 600 3.90E-78 300.4 6596 cellular

organisms;Eukaryota;Opisthokonta;Metazoa;Eumetazoa;Bilateria;Protostomia;Spiralia;Lophotrochozoa;Mollusca;Bivalvia;Autobranchia;Heteroconchia;Euherodonta;Imparidentia;Venerida;Veneroidea;Veneridae;Mercenaria;Mercenaria mercenaria

UdeM00000038795 6105 268.1 UdeM00000038795 XP\_031549460.1 63.5 200  
72 1 5 203 3 202 9.40E-69 268.1 6105 cellular

organisms;Eukaryota;Opisthokonta;Metazoa;Eumetazoa;Cnidaria;Anthozoa;Hexacorallia;Actiniaria;Actiniidae;Actinia;Actinia tenebrosa

UdeM00000038796 6596 639 UdeM00000038796 XP\_045194772.1 48 783  
309 8 40 803 30 733 8.30E-180 639 6596 cellular

organisms;Eukaryota;Opisthokonta;Metazoa;Eumetazoa;Bilateria;Protostomia;Spiralia;Lophotrochozoa;Mollusca;Bivalvia;Autobranchia;Heteroconchia;Euherodonta;Imparidentia;Venerida;Veneroidea;Veneridae;Mercenaria;Mercenaria mercenaria

UdeM00000038797 6596 632.9 UdeM00000038797 XP\_045194962.1 56.3 558  
234 3 1 553 476 1028 3.90E-178 632.9 6596 cellular

organisms;Eukaryota;Opisthokonta;Metazoa;Eumetazoa;Bilateria;Protostomia;Spiralia;Lophotrochozoa;Mollusca;Bivalvia;Autobranchia;Heteroconchia;Euherodonta;Imparidentia;Venerida;Veneroidea;Veneridae;Mercenaria;Mercenaria mercenaria

UdeM00000038798 6596 392.1 UdeM00000038798 XP\_045194962.1 62.3 292  
109 1 1 291 154 445 6.70E-106 392.1 6596 cellular

organisms;Eukaryota;Opisthokonta;Metazoa;Eumetazoa;Bilateria;Protostomia;Spiralia;Lophotrochozoa;Mollusca;Bivalvia;Autobranchia;Heteroconchia;Euherodonta;Imparidentia;Venerida;Veneroidea;Veneridae;Mercenaria;Mercenaria mercenaria

UdeM00000038799 6596 163.3 UdeM00000038799 XP\_045194962.1 61.3 119  
46 0 1 119 33 151 2.30E-37 163.3 6596 cellular

organisms;Eukaryota;Opisthokonta;Metazoa;Eumetazoa;Bilateria;Protostomia;Spiralia;Lophotrochozoa;Mollusca;Bivalvia;Autobranchia;Heteroconchia;Euherodonta;Imparidentia;Venerida;Veneroidea;Veneridae;Mercenaria;Mercenaria mercenaria

UdeM00000038801 6573 142.1 UdeM00000038801 XP\_021372370.1 85.5 83  
12 0 16 98 10 92 3.80E-31 142.1 6573 cellular

organisms;Eukaryota;Opisthokonta;Metazoa;Eumetazoa;Bilateria;Protostomia;Spiralia;Lophotrochozoa;Mollusca;Bivalvia;Autobranchia;Pteriomorpha;Pectinida;Pectinoidea;Pectinidae;Mizuhopecten;Mizuhopecten yessoensis

UdeM00000038800 6579 736.9 UdeM00000038800 XP\_033754067.1 58.5 651  
264 5 16 664 10 656 2.30E-209 736.9 6579 cellular

organisms;Eukaryota;Opisthokonta;Metazoa;Eumetazoa;Bilateria;Protostomia;Spiralia;Lophotrochozoa;Mollusca;Bivalvia;Autobranchia;Pteriomorpha;Pectinida;Pectinoidea;Pectinidae;Pecten;Pecten maximus

UdeM00000038802 1735272 327.4 UdeM00000038802 XP\_041377114.1 34.7  
606 348 12 8 601 7 576 3.80E-86 327.4 1735272

cellular organisms;Eukaryota;Opisthokonta;Metazoa;Eumetazoa;Bilateria;Protostomia;Spiralia;Lophotrochozoa;Mollusca;Gastropoda;Neomphalina;Neomphaloidea;Peltopiridae;Gigantopelta;Gigantopelta aegis



UdeM00000038803 6579 630.2 UdeM00000038803 XP\_033754244.1 86.3 351  
 48 0 1 351 1 351 1.60E-177 630.2 6579 cellular  
 organisms;Eukaryota;Opisthokonta;Metazoa;Eumetazoa;Bilateria;Protostomia;  
 Spiralia;Lophotrochozoa;Mollusca;Bivalvia;Autobranchia;Pteriomorpha;Pect  
 inida;Pectinoidea;Pectinidae;Pecten;Pecten maximus  
 UdeM00000038804 6579 1944.9 UdeM00000038804 XP\_033755315.1 50.1  
 2470 955 15 14 2421 13 2266 0.00E+00 1944.9 6579  
 cellular  
 organisms;Eukaryota;Opisthokonta;Metazoa;Eumetazoa;Bilateria;Protostomia;  
 Spiralia;Lophotrochozoa;Mollusca;Bivalvia;Autobranchia;Pteriomorpha;Pect  
 inida;Pectinoidea;Pectinidae;Pecten;Pecten maximus  
 UdeM00000038805 6579 1955.6 UdeM00000038805 XP\_033755315.1 50.2  
 2464 969 13 14 2428 13 2266 0.00E+00 1955.6 6579  
 cellular  
 organisms;Eukaryota;Opisthokonta;Metazoa;Eumetazoa;Bilateria;Protostomia;  
 Spiralia;Lophotrochozoa;Mollusca;Bivalvia;Autobranchia;Pteriomorpha;Pect  
 inida;Pectinoidea;Pectinidae;Pecten;Pecten maximus  
 UdeM00000038806 6596 137.5 UdeM00000038806 XP\_045194878.1 72 107  
 29 1 1 107 1 106 1.20E-29 137.5 6596 cellular  
 organisms;Eukaryota;Opisthokonta;Metazoa;Eumetazoa;Bilateria;Protostomia;  
 Spiralia;Lophotrochozoa;Mollusca;Bivalvia;Autobranchia;Heteroconchia;Euhe  
 terodonta;Imparidentia;Venerida;Veneroidea;Veneridae;Mercenaria;Mercenari  
 a mercenaria  
 UdeM00000038807 6596 92.4 UdeM00000038807 XP\_045164819.1 48.3 87  
 44 1 66 152 87 172 5.30E-16 92.4 6596 cellular  
 organisms;Eukaryota;Opisthokonta;Metazoa;Eumetazoa;Bilateria;Protostomia;  
 Spiralia;Lophotrochozoa;Mollusca;Bivalvia;Autobranchia;Heteroconchia;Euhe  
 terodonta;Imparidentia;Venerida;Veneroidea;Veneridae;Mercenaria;Mercenari  
 a mercenaria  
 UdeM00000038808 7668 83.2 UdeM00000038808 XP\_030853469.1 53.5 71  
 31 2 52 121 114 183 2.60E-13 83.2 7668 cellular  
 organisms;Eukaryota;Opisthokonta;Metazoa;Eumetazoa;Bilateria;Deuterostomi  
 a;Echinodermata;Eleutherozoa;Echinozoa;Echinoidea;Euechinoidea;Echinacea;  
 Camarodonta;Echinidea;Strongylocentrotidae;Strongylocentrotus;Strongyloce  
 ntrotus purpuratus  
 UdeM00000038809 6565 124.8 UdeM00000038809 XP\_022340583.1 56.6 106  
 46 0 1 106 35 140 6.80E-26 124.8 6565 cellular  
 organisms;Eukaryota;Opisthokonta;Metazoa;Eumetazoa;Bilateria;Protostomia;  
 Spiralia;Lophotrochozoa;Mollusca;Bivalvia;Autobranchia;Pteriomorpha;Ostr  
 eida;Ostreoidea;Ostreidae;Crassostrea;Crassostrea virginica  
 UdeM00000038810 6565 169.1 UdeM00000038810 XP\_022340583.1 58.3 139  
 58 0 3 141 2 140 4.10E-39 169.1 6565 cellular  
 organisms;Eukaryota;Opisthokonta;Metazoa;Eumetazoa;Bilateria;Protostomia;  
 Spiralia;Lophotrochozoa;Mollusca;Bivalvia;Autobranchia;Pteriomorpha;Ostr  
 eida;Ostreoidea;Ostreidae;Crassostrea;Crassostrea virginica  
 UdeM00000038811 6565 93.2 UdeM00000038811 XP\_022299727.1 41.9 105  
 59 1 1 103 46 150 2.30E-16 93.2 6565 cellular  
 organisms;Eukaryota;Opisthokonta;Metazoa;Eumetazoa;Bilateria;Protostomia;  
 Spiralia;Lophotrochozoa;Mollusca;Bivalvia;Autobranchia;Pteriomorpha;Ostr  
 eida;Ostreoidea;Ostreidae;Crassostrea;Crassostrea virginica  
 UdeM00000038813 6596 515.8 UdeM00000038813 XP\_045208070.1 40.7 658  
 356 10 22 656 4 650 8.20E-143 515.8 6596 cellular  
 organisms;Eukaryota;Opisthokonta;Metazoa;Eumetazoa;Bilateria;Protostomia;  
 Spiralia;Lophotrochozoa;Mollusca;Bivalvia;Autobranchia;Heteroconchia;Euhe

terodonta;Imparidentia;Venerida;Veneroidea;Veneridae;Mercenaria;Mercenari  
 a mercenaria  
 UdeM00000038814 6596 425.2 UdeM00000038814 XP\_045208070.1 42.2 521  
 279 9 7 522 2 505 1.20E-115 425.2 6596 cellular  
 organisms;Eukaryota;Opisthokonta;Metazoa;Eumetazoa;Bilateria;Protostomia;  
 Spiralia;Lophotrochozoa;Mollusca;Bivalvia;Autobranchia;Heteroconchia;Euhe  
 terodonta;Imparidentia;Venerida;Veneroidea;Veneridae;Mercenaria;Mercenari  
 a mercenaria  
 UdeM00000038815 6596 419.1 UdeM00000038815 XP\_045191760.1 43.4 458  
 252 4 58 511 23 477 8.30E-114 419.1 6596 cellular  
 organisms;Eukaryota;Opisthokonta;Metazoa;Eumetazoa;Bilateria;Protostomia;  
 Spiralia;Lophotrochozoa;Mollusca;Bivalvia;Autobranchia;Heteroconchia;Euhe  
 terodonta;Imparidentia;Venerida;Veneroidea;Veneridae;Mercenaria;Mercenari  
 a mercenaria  
 UdeM00000038816 29159 330.5 UdeM00000038816 XP\_034323882.1 44 348  
 189 2 37 381 35 379 2.90E-87 330.5 29159 cellular  
 organisms;Eukaryota;Opisthokonta;Metazoa;Eumetazoa;Bilateria;Protostomia;  
 Spiralia;Lophotrochozoa;Mollusca;Bivalvia;Autobranchia;Pteriormorphia;Ostr  
 eida;Ostreoidea;Ostreidae;Crassostrea;Crassostrea gigas  
 UdeM00000038817 29159 96.7 UdeM00000038817 XP\_034334787.1 38.3 180  
 82 4 4 162 34 205 3.10E-17 96.7 29159 cellular  
 organisms;Eukaryota;Opisthokonta;Metazoa;Eumetazoa;Bilateria;Protostomia;  
 Spiralia;Lophotrochozoa;Mollusca;Bivalvia;Autobranchia;Pteriormorphia;Ostr  
 eida;Ostreoidea;Ostreidae;Crassostrea;Crassostrea gigas  
 UdeM00000038818 6596 510 UdeM00000038818 XP\_045208070.1 41.1 645  
 358 9 30 656 10 650 4.50E-141 510 6596 cellular  
 organisms;Eukaryota;Opisthokonta;Metazoa;Eumetazoa;Bilateria;Protostomia;  
 Spiralia;Lophotrochozoa;Mollusca;Bivalvia;Autobranchia;Heteroconchia;Euhe  
 terodonta;Imparidentia;Venerida;Veneroidea;Veneridae;Mercenaria;Mercenari  
 a mercenaria  
 UdeM00000038819 225164 163.3 UdeM00000038819 XP\_009052399.1 36.4  
 242 124 3 36 247 145 386 6.10E-37 163.3 225164  
 cellular  
 organisms;Eukaryota;Opisthokonta;Metazoa;Eumetazoa;Bilateria;Protostomia;  
 Spiralia;Lophotrochozoa;Mollusca;Gastropoda;Patellogastropoda;Lottioidea;  
 Lottiidae;Lottia;Lottia gigantea  
 UdeM00000038820 6596 495 UdeM00000038820 XP\_045191760.1 51.6 463  
 215 5 23 481 21 478 1.10E-136 495 6596 cellular  
 organisms;Eukaryota;Opisthokonta;Metazoa;Eumetazoa;Bilateria;Protostomia;  
 Spiralia;Lophotrochozoa;Mollusca;Bivalvia;Autobranchia;Heteroconchia;Euhe  
 terodonta;Imparidentia;Venerida;Veneroidea;Veneridae;Mercenaria;Mercenari  
 a mercenaria  
 UdeM00000038821 29159 299.3 UdeM00000038821 XP\_034319142.1 43.5 354  
 178 7 20 365 511 850 6.80E-78 299.3 29159 cellular  
 organisms;Eukaryota;Opisthokonta;Metazoa;Eumetazoa;Bilateria;Protostomia;  
 Spiralia;Lophotrochozoa;Mollusca;Bivalvia;Autobranchia;Pteriormorphia;Ostr  
 eida;Ostreoidea;Ostreidae;Crassostrea;Crassostrea gigas  
 UdeM00000038822 6596 338.6 UdeM00000038822 XP\_045191760.1 50.2 319  
 151 4 37 352 18 331 9.90E-90 338.6 6596 cellular  
 organisms;Eukaryota;Opisthokonta;Metazoa;Eumetazoa;Bilateria;Protostomia;  
 Spiralia;Lophotrochozoa;Mollusca;Bivalvia;Autobranchia;Heteroconchia;Euhe  
 terodonta;Imparidentia;Venerida;Veneroidea;Veneridae;Mercenaria;Mercenari  
 a mercenaria

UdeM00000038825 6596 64.3 UdeM00000038825 XP\_045159059.1 43.2 74  
 37 2 312 384 527 596 3.90E-07 64.3 6596 cellular  
 organisms;Eukaryota;Opisthokonta;Metazoa;Eumetazoa;Bilateria;Protostomia;  
 Spiralia;Lophotrochozoa;Mollusca;Bivalvia;Autobranhia;Heteroconchia;Euhe  
 terodonta;Imparidentia;Venerida;Veneroidea;Veneridae;Mercenaria;Mercenari  
 a mercenaria  
 UdeM00000038826 6596 83.6 UdeM00000038826 XP\_045195634.1 23.5 684  
 410 33 34 681 12 618 1.10E-12 83.6 6596 cellular  
 organisms;Eukaryota;Opisthokonta;Metazoa;Eumetazoa;Bilateria;Protostomia;  
 Spiralia;Lophotrochozoa;Mollusca;Bivalvia;Autobranhia;Heteroconchia;Euhe  
 terodonta;Imparidentia;Venerida;Veneroidea;Veneridae;Mercenaria;Mercenari  
 a mercenaria  
 UdeM00000038827 6596 92.8 UdeM00000038827 XP\_045159333.1 27.1 247  
 170 5 86 324 23 267 1.60E-15 92.8 6596 cellular  
 organisms;Eukaryota;Opisthokonta;Metazoa;Eumetazoa;Bilateria;Protostomia;  
 Spiralia;Lophotrochozoa;Mollusca;Bivalvia;Autobranhia;Heteroconchia;Euhe  
 terodonta;Imparidentia;Venerida;Veneroidea;Veneridae;Mercenaria;Mercenari  
 a mercenaria  
 UdeM00000038830 6573 68.9 UdeM00000038830 XP\_021341077.1 36.5 104  
 61 1 599 697 586 689 2.90E-08 68.9 6573 cellular  
 organisms;Eukaryota;Opisthokonta;Metazoa;Eumetazoa;Bilateria;Protostomia;  
 Spiralia;Lophotrochozoa;Mollusca;Bivalvia;Autobranhia;Pteriormorphia;Pect  
 inida;Pectinoidea;Pectinidae;Mizuhopecten;Mizuhopecten yessoensis  
 UdeM00000038831 6596 88.2 UdeM00000038831 XP\_045195636.1 44.3 88  
 46 1 453 537 642 729 3.50E-14 88.2 6596 cellular  
 organisms;Eukaryota;Opisthokonta;Metazoa;Eumetazoa;Bilateria;Protostomia;  
 Spiralia;Lophotrochozoa;Mollusca;Bivalvia;Autobranhia;Heteroconchia;Euhe  
 terodonta;Imparidentia;Venerida;Veneroidea;Veneridae;Mercenaria;Mercenari  
 a mercenaria  
 UdeM00000038832 37653 704.5 UdeM00000038832 XP\_014768217.1 79 442  
 87 2 18 456 262 700 8.90E-200 704.5 37653 cellular  
 organisms;Eukaryota;Opisthokonta;Metazoa;Eumetazoa;Bilateria;Protostomia;  
 Spiralia;Lophotrochozoa;Mollusca;Cephalopoda;Coleoidea;Octopodiformes;Oct  
 opoda;Incirrata;Octopodidae;Octopus;Octopus bimaculoides  
 UdeM00000038833 37653 704.5 UdeM00000038833 XP\_014768217.1 79 442  
 87 2 49 487 262 700 9.40E-200 704.5 37653 cellular  
 organisms;Eukaryota;Opisthokonta;Metazoa;Eumetazoa;Bilateria;Protostomia;  
 Spiralia;Lophotrochozoa;Mollusca;Cephalopoda;Coleoidea;Octopodiformes;Oct  
 opoda;Incirrata;Octopodidae;Octopus;Octopus bimaculoides  
 UdeM00000038834 6573 129.8 UdeM00000038834 XP\_021374503.1 90 70  
 7 0 188 257 245 314 5.00E-27 129.8 6573 cellular  
 organisms;Eukaryota;Opisthokonta;Metazoa;Eumetazoa;Bilateria;Protostomia;  
 Spiralia;Lophotrochozoa;Mollusca;Bivalvia;Autobranhia;Pteriormorphia;Pect  
 inida;Pectinoidea;Pectinidae;Mizuhopecten;Mizuhopecten yessoensis  
 UdeM00000038835 6596 69.3 UdeM00000038835 XP\_045160373.1 58.3 72  
 17 2 55 124 63 123 4.70E-09 69.3 6596 cellular  
 organisms;Eukaryota;Opisthokonta;Metazoa;Eumetazoa;Bilateria;Protostomia;  
 Spiralia;Lophotrochozoa;Mollusca;Bivalvia;Autobranhia;Heteroconchia;Euhe  
 terodonta;Imparidentia;Venerida;Veneroidea;Veneridae;Mercenaria;Mercenari  
 a mercenaria  
 UdeM00000038836 6596 100.1 UdeM00000038836 XP\_045160365.1 77.9 68  
 13 2 107 174 14 79 2.90E-18 100.1 6596 cellular  
 organisms;Eukaryota;Opisthokonta;Metazoa;Eumetazoa;Bilateria;Protostomia;  
 Spiralia;Lophotrochozoa;Mollusca;Bivalvia;Autobranhia;Heteroconchia;Euhe

terodonta;Imparidentia;Venerida;Veneroidea;Veneridae;Mercenaria;Mercenari  
 a mercenaria  
 UdeM00000038837 6596 61.2 UdeM00000038837 XP\_045160013.1 27 178  
 119 3 9 176 7 183 2.30E-06 61.2 6596 cellular  
 organisms;Eukaryota;Opisthokonta;Metazoa;Eumetazoa;Bilateria;Protostomia;  
 Spiralia;Lophotrochozoa;Mollusca;Bivalvia;Autobranhia;Heteroconchia;Euhe  
 terodonta;Imparidentia;Venerida;Veneroidea;Veneridae;Mercenaria;Mercenari  
 a mercenaria  
 UdeM00000038838 6579 824.7 UdeM00000038838 XP\_033736765.1 65.4 673  
 220 6 1 669 1 664 8.40E-236 824.7 6579 cellular  
 organisms;Eukaryota;Opisthokonta;Metazoa;Eumetazoa;Bilateria;Protostomia;  
 Spiralia;Lophotrochozoa;Mollusca;Bivalvia;Autobranhia;Pteriormorphia;Pect  
 inida;Pectinoidea;Pectinidae;Pecten;Pecten maximus  
 UdeM00000038839 1735272 263.1 UdeM00000038839 XP\_041359112.1 69.4  
 170 52 0 2 171 26 195 3.70E-67 263.1 1735272  
 cellular  
 organisms;Eukaryota;Opisthokonta;Metazoa;Eumetazoa;Bilateria;Protostomia;  
 Spiralia;Lophotrochozoa;Mollusca;Gastropoda;Neomphalina;Neomphaloidea;Pel  
 tospiridae;Gigantopelta;Gigantopelta aegis  
 UdeM00000038840 1735272 279.6 UdeM00000038840 XP\_041359113.1 69.8  
 182 55 0 1 182 1 182 4.00E-72 279.6 1735272  
 cellular  
 organisms;Eukaryota;Opisthokonta;Metazoa;Eumetazoa;Bilateria;Protostomia;  
 Spiralia;Lophotrochozoa;Mollusca;Gastropoda;Neomphalina;Neomphaloidea;Pel  
 tospiridae;Gigantopelta;Gigantopelta aegis  
 UdeM00000038841 29159 112.8 UdeM00000038841 XP\_019926412.2 59.1 88  
 36 0 97 184 68 155 4.50E-22 112.8 29159 cellular  
 organisms;Eukaryota;Opisthokonta;Metazoa;Eumetazoa;Bilateria;Protostomia;  
 Spiralia;Lophotrochozoa;Mollusca;Bivalvia;Autobranhia;Pteriormorphia;Ostr  
 eida;Ostreoidea;Ostreidae;Crassostrea;Crassostrea gigas  
 UdeM00000038842 1735272 106.7 UdeM00000038842 XP\_041360198.1 30.3  
 254 162 11 61 310 11 253 1.90E-19 106.7 1735272  
 cellular  
 organisms;Eukaryota;Opisthokonta;Metazoa;Eumetazoa;Bilateria;Protostomia;  
 Spiralia;Lophotrochozoa;Mollusca;Gastropoda;Neomphalina;Neomphaloidea;Pel  
 tospiridae;Gigantopelta;Gigantopelta aegis  
 UdeM00000038843 6579 176 UdeM00000038843 XP\_033741736.1 52.6 171  
 79 1 1 169 671 841 4.30E-41 176 6579 cellular  
 organisms;Eukaryota;Opisthokonta;Metazoa;Eumetazoa;Bilateria;Protostomia;  
 Spiralia;Lophotrochozoa;Mollusca;Bivalvia;Autobranhia;Pteriormorphia;Pect  
 inida;Pectinoidea;Pectinidae;Pecten;Pecten maximus  
 UdeM00000038844 6579 788.5 UdeM00000038844 XP\_033739131.1 58.5 622  
 255 2 1 619 749 1370 6.20E-225 788.5 6579 cellular  
 organisms;Eukaryota;Opisthokonta;Metazoa;Eumetazoa;Bilateria;Protostomia;  
 Spiralia;Lophotrochozoa;Mollusca;Bivalvia;Autobranhia;Pteriormorphia;Pect  
 inida;Pectinoidea;Pectinidae;Pecten;Pecten maximus  
 UdeM00000038845 6596 92.8 UdeM00000038845 XP\_045159694.1 39.7 136  
 73 3 14 149 18 144 3.90E-16 92.8 6596 cellular  
 organisms;Eukaryota;Opisthokonta;Metazoa;Eumetazoa;Bilateria;Protostomia;  
 Spiralia;Lophotrochozoa;Mollusca;Bivalvia;Autobranhia;Heteroconchia;Euhe  
 terodonta;Imparidentia;Venerida;Veneroidea;Veneridae;Mercenaria;Mercenari  
 a mercenaria  
 UdeM00000038847 29159 298.9 UdeM00000038847 XP\_011437081.2 53.6 276  
 126 2 22 295 416 691 7.20E-78 298.9 29159 cellular

organisms;Eukaryota;Opisthokonta;Metazoa;Eumetazoa;Bilateria;Protostomia;  
Spiralia;Lophotrochozoa;Mollusca;Bivalvia;Autobranhia;Pteriormphia;Ostr  
eida;Ostreoidea;Ostreidae;Crassostrea;Crassostrea gigas  
UdeM00000038848 6579 438 UdeM00000038848 XP\_033736815.1 73.2 395  
105 1 31 424 34 428 1.40E-119 438 6579 cellular  
organisms;Eukaryota;Opisthokonta;Metazoa;Eumetazoa;Bilateria;Protostomia;  
Spiralia;Lophotrochozoa;Mollusca;Bivalvia;Autobranhia;Pteriormphia;Pect  
inida;Pectinoidea;Pectinidae;Pecten;Pecten maximus  
UdeM00000038849 6596 350.1 UdeM00000038849 XP\_045158031.1 36.1 596  
317 11 12 550 2 590 7.30E-93 350.1 6596 cellular  
organisms;Eukaryota;Opisthokonta;Metazoa;Eumetazoa;Bilateria;Protostomia;  
Spiralia;Lophotrochozoa;Mollusca;Bivalvia;Autobranhia;Heteroconchia;Euhe  
terodonta;Imparidentia;Venerida;Veneroidea;Veneridae;Mercenaria;Mercenari  
a mercenaria  
UdeM00000038850 6565 112.1 UdeM00000038850 XP\_022344917.1 36.6 175  
104 2 10 183 97 265 8.10E-22 112.1 6565 cellular  
organisms;Eukaryota;Opisthokonta;Metazoa;Eumetazoa;Bilateria;Protostomia;  
Spiralia;Lophotrochozoa;Mollusca;Bivalvia;Autobranhia;Pteriormphia;Ostr  
eida;Ostreoidea;Ostreidae;Crassostrea;Crassostrea virginica  
UdeM00000038851 6596 225.3 UdeM00000038851 XP\_045195108.1 34 406  
181 5 77 401 13 412 1.70E-55 225.3 6596 cellular  
organisms;Eukaryota;Opisthokonta;Metazoa;Eumetazoa;Bilateria;Protostomia;  
Spiralia;Lophotrochozoa;Mollusca;Bivalvia;Autobranhia;Heteroconchia;Euhe  
terodonta;Imparidentia;Venerida;Veneroidea;Veneridae;Mercenaria;Mercenari  
a mercenaria  
UdeM00000038852 6596 316.6 UdeM00000038852 XP\_045195108.1 52.9 333  
134 7 755 1084 782 1094 1.20E-82 316.6 6596 cellular  
organisms;Eukaryota;Opisthokonta;Metazoa;Eumetazoa;Bilateria;Protostomia;  
Spiralia;Lophotrochozoa;Mollusca;Bivalvia;Autobranhia;Heteroconchia;Euhe  
terodonta;Imparidentia;Venerida;Veneroidea;Veneridae;Mercenaria;Mercenari  
a mercenaria  
UdeM00000038852 6596 82.4 UdeM00000038852 XP\_045195108.1 53.1 81  
34 1 68 148 388 464 3.80E-12 82.4 6596 cellular  
organisms;Eukaryota;Opisthokonta;Metazoa;Eumetazoa;Bilateria;Protostomia;  
Spiralia;Lophotrochozoa;Mollusca;Bivalvia;Autobranhia;Heteroconchia;Euhe  
terodonta;Imparidentia;Venerida;Veneroidea;Veneridae;Mercenaria;Mercenari  
a mercenaria  
UdeM00000038853 29159 60.5 UdeM00000038853 XP\_034322772.1 34.5 113  
70 1 1 109 1 113 2.60E-06 60.5 29159 cellular  
organisms;Eukaryota;Opisthokonta;Metazoa;Eumetazoa;Bilateria;Protostomia;  
Spiralia;Lophotrochozoa;Mollusca;Bivalvia;Autobranhia;Pteriormphia;Ostr  
eida;Ostreoidea;Ostreidae;Crassostrea;Crassostrea gigas  
UdeM00000038854 6573 330.5 UdeM00000038854 XP\_021378849.1 79.5 200  
38 2 1 199 1 198 1.50E-87 330.5 6573 cellular  
organisms;Eukaryota;Opisthokonta;Metazoa;Eumetazoa;Bilateria;Protostomia;  
Spiralia;Lophotrochozoa;Mollusca;Bivalvia;Autobranhia;Pteriormphia;Pect  
inida;Pectinoidea;Pectinidae;Mizuhopecten;Mizuhopecten yessoensis  
UdeM00000038855 6573 493.4 UdeM00000038855 XP\_021378849.1 69.3 362  
103 4 1 361 1 355 2.40E-136 493.4 6573 cellular  
organisms;Eukaryota;Opisthokonta;Metazoa;Eumetazoa;Bilateria;Protostomia;  
Spiralia;Lophotrochozoa;Mollusca;Bivalvia;Autobranhia;Pteriormphia;Pect  
inida;Pectinoidea;Pectinidae;Mizuhopecten;Mizuhopecten yessoensis  
UdeM00000038856 6573 369 UdeM00000038856 XP\_021345313.1 56.1 344  
139 3 12 344 52 394 7.00E-99 369 6573 cellular

organisms;Eukaryota;Opisthokonta;Metazoa;Eumetazoa;Bilateria;Protostomia;  
Spiralia;Lophotrochozoa;Mollusca;Bivalvia;Autobranchia;Pteriomorpha;Pect  
inida;Pectinoidea;Pectinidae;Mizuhopecten;Mizuhopecten yessoensis  
UdeM00000038857 29159 285.8 UdeM00000038857 XP\_011446328.2 55.7 316  
121 7 184 481 65 379 1.00E-73 285.8 29159 cellular  
organisms;Eukaryota;Opisthokonta;Metazoa;Eumetazoa;Bilateria;Protostomia;  
Spiralia;Lophotrochozoa;Mollusca;Bivalvia;Autobranchia;Pteriomorpha;Ostr  
eida;Ostreoidea;Ostreidae;Crassostrea;Crassostrea gigas  
UdeM00000038859 133434 149.8 UdeM00000038859 XP\_022110399.1 64  
114 38 1 12 125 16 126 2.30E-33 149.8 133434  
cellular  
organisms;Eukaryota;Opisthokonta;Metazoa;Eumetazoa;Bilateria;Deuterostomi  
a;Echinodermata;Eleutherozoa;Asterozoa;Asteroidea;Valvataceae;Valvatida;Ac  
anthasteridae;Acanthaster;Acanthaster planci  
UdeM00000038860 7574 184.5 UdeM00000038860 XP\_013409419.1 60.1 153  
60 1 4 155 3 155 2.00E-43 184.5 7574 cellular  
organisms;Eukaryota;Opisthokonta;Metazoa;Eumetazoa;Bilateria;Protostomia;  
Spiralia;Lophotrochozoa;Brachiopoda;Linguliformea;Lingulata;Lingulida;Lin  
guloidea;Lingulidae;Lingula;Lingula anatina  
UdeM00000038861 6565 238.8 UdeM00000038861 XP\_022316459.1 81.2 138  
22 1 1 134 1 138 4.00E-60 238.8 6565 cellular  
organisms;Eukaryota;Opisthokonta;Metazoa;Eumetazoa;Bilateria;Protostomia;  
Spiralia;Lophotrochozoa;Mollusca;Bivalvia;Autobranchia;Pteriomorpha;Ostr  
eida;Ostreoidea;Ostreidae;Crassostrea;Crassostrea virginica  
UdeM00000038862 6596 899 UdeM00000038862 XP\_045160440.1 89.9 486  
46 2 1 486 1 483 2.60E-258 899 6596 cellular  
organisms;Eukaryota;Opisthokonta;Metazoa;Eumetazoa;Bilateria;Protostomia;  
Spiralia;Lophotrochozoa;Mollusca;Bivalvia;Autobranchia;Heteroconchia;Euhe  
terodonta;Imparidentia;Venerida;Veneroidea;Veneridae;Mercenaria;Mercenari  
a mercenaria  
UdeM00000038863 6573 152.9 UdeM00000038863 XP\_021365931.1 60.6 127  
48 2 29 155 123 247 5.40E-34 152.9 6573 cellular  
organisms;Eukaryota;Opisthokonta;Metazoa;Eumetazoa;Bilateria;Protostomia;  
Spiralia;Lophotrochozoa;Mollusca;Bivalvia;Autobranchia;Pteriomorpha;Pect  
inida;Pectinoidea;Pectinidae;Mizuhopecten;Mizuhopecten yessoensis  
UdeM00000038864 6596 282.3 UdeM00000038864 XP\_045162353.1 57.7 248  
105 0 1 248 1 248 6.00E-73 282.3 6596 cellular  
organisms;Eukaryota;Opisthokonta;Metazoa;Eumetazoa;Bilateria;Protostomia;  
Spiralia;Lophotrochozoa;Mollusca;Bivalvia;Autobranchia;Heteroconchia;Euhe  
terodonta;Imparidentia;Venerida;Veneroidea;Veneridae;Mercenaria;Mercenari  
a mercenaria  
UdeM00000041119 6596 113.2 UdeM00000041119 XP\_045179939.1 41.8 134  
75 2 6 136 247 380 2.60E-22 113.2 6596 cellular  
organisms;Eukaryota;Opisthokonta;Metazoa;Eumetazoa;Bilateria;Protostomia;  
Spiralia;Lophotrochozoa;Mollusca;Bivalvia;Autobranchia;Heteroconchia;Euhe  
terodonta;Imparidentia;Venerida;Veneroidea;Veneridae;Mercenaria;Mercenari  
a mercenaria  
UdeM00000041120 6596 114.4 UdeM00000041120 XP\_045179939.1 40.1 147  
83 3 100 242 234 379 2.10E-22 114.4 6596 cellular  
organisms;Eukaryota;Opisthokonta;Metazoa;Eumetazoa;Bilateria;Protostomia;  
Spiralia;Lophotrochozoa;Mollusca;Bivalvia;Autobranchia;Heteroconchia;Euhe  
terodonta;Imparidentia;Venerida;Veneroidea;Veneridae;Mercenaria;Mercenari  
a mercenaria

UdeM00000041121 6596 134.8 UdeM00000041121 XP\_045177449.1 31.4 293  
 135 9 47 322 253 496 2.00E-28 134.8 6596 cellular  
 organisms;Eukaryota;Opisthokonta;Metazoa;Eumetazoa;Bilateria;Protostomia;  
 Spiralia;Lophotrochozoa;Mollusca;Bivalvia;Autobranhia;Heteroconchia;Euhe  
 terodonta;Imparidentia;Venerida;Veneroidea;Veneridae;Mercenaria;Mercenari  
 a mercenaria  
 UdeM00000041122 6596 143.7 UdeM00000041122 XP\_045177449.1 30.9 382  
 174 18 24 347 147 496 4.50E-31 143.7 6596 cellular  
 organisms;Eukaryota;Opisthokonta;Metazoa;Eumetazoa;Bilateria;Protostomia;  
 Spiralia;Lophotrochozoa;Mollusca;Bivalvia;Autobranhia;Heteroconchia;Euhe  
 terodonta;Imparidentia;Venerida;Veneroidea;Veneridae;Mercenaria;Mercenari  
 a mercenaria  
 UdeM00000041123 6596 114.8 UdeM00000041123 XP\_045179937.1 46.2 130  
 66 2 12 139 302 429 9.10E-23 114.8 6596 cellular  
 organisms;Eukaryota;Opisthokonta;Metazoa;Eumetazoa;Bilateria;Protostomia;  
 Spiralia;Lophotrochozoa;Mollusca;Bivalvia;Autobranhia;Heteroconchia;Euhe  
 terodonta;Imparidentia;Venerida;Veneroidea;Veneridae;Mercenaria;Mercenari  
 a mercenaria  
 UdeM00000041124 6596 113.2 UdeM00000041124 XP\_045177449.1 31 303  
 120 14 44 290 198 467 5.50E-22 113.2 6596 cellular  
 organisms;Eukaryota;Opisthokonta;Metazoa;Eumetazoa;Bilateria;Protostomia;  
 Spiralia;Lophotrochozoa;Mollusca;Bivalvia;Autobranhia;Heteroconchia;Euhe  
 terodonta;Imparidentia;Venerida;Veneroidea;Veneridae;Mercenaria;Mercenari  
 a mercenaria  
 UdeM00000041125 6596 110.5 UdeM00000041125 XP\_045178867.1 38 142  
 88 0 3 144 15 156 1.80E-21 110.5 6596 cellular  
 organisms;Eukaryota;Opisthokonta;Metazoa;Eumetazoa;Bilateria;Protostomia;  
 Spiralia;Lophotrochozoa;Mollusca;Bivalvia;Autobranhia;Heteroconchia;Euhe  
 terodonta;Imparidentia;Venerida;Veneroidea;Veneridae;Mercenaria;Mercenari  
 a mercenaria  
 UdeM00000041126 6596 155.6 UdeM00000041126 XP\_045178867.1 37 208  
 128 1 8 212 15 222 7.20E-35 155.6 6596 cellular  
 organisms;Eukaryota;Opisthokonta;Metazoa;Eumetazoa;Bilateria;Protostomia;  
 Spiralia;Lophotrochozoa;Mollusca;Bivalvia;Autobranhia;Heteroconchia;Euhe  
 terodonta;Imparidentia;Venerida;Veneroidea;Veneridae;Mercenaria;Mercenari  
 a mercenaria  
 UdeM00000041127 6596 464.5 UdeM00000041127 XP\_045178484.1 69 319  
 93 3 1 319 1 313 1.10E-127 464.5 6596 cellular  
 organisms;Eukaryota;Opisthokonta;Metazoa;Eumetazoa;Bilateria;Protostomia;  
 Spiralia;Lophotrochozoa;Mollusca;Bivalvia;Autobranhia;Heteroconchia;Euhe  
 terodonta;Imparidentia;Venerida;Veneroidea;Veneridae;Mercenaria;Mercenari  
 a mercenaria  
 UdeM00000041128 6500 334.3 UdeM00000041128 XP\_005111764.1 69.3 218  
 62 1 13 225 12 229 1.20E-88 334.3 6500 cellular  
 organisms;Eukaryota;Opisthokonta;Metazoa;Eumetazoa;Bilateria;Protostomia;  
 Spiralia;Lophotrochozoa;Mollusca;Gastropoda;Heterobranhia;Euthyneura;Tec  
 tipleura;Aplysiida;Aplysioidea;Aplysiidae;Aplysia;Aplysia californica  
 UdeM00000041129 6596 305.4 UdeM00000041129 XP\_045177724.1 61.2 240  
 91 1 1 240 5 242 6.40E-80 305.4 6596 cellular  
 organisms;Eukaryota;Opisthokonta;Metazoa;Eumetazoa;Bilateria;Protostomia;  
 Spiralia;Lophotrochozoa;Mollusca;Bivalvia;Autobranhia;Heteroconchia;Euhe  
 terodonta;Imparidentia;Venerida;Veneroidea;Veneridae;Mercenaria;Mercenari  
 a mercenaria

UdeM00000041130 6596 407.9 UdeM00000041130 XP\_045197990.1 36.9 653  
 366 17 39 663 97 731 2.60E-110 407.9 6596 cellular  
 organisms;Eukaryota;Opisthokonta;Metazoa;Eumetazoa;Bilateria;Protostomia;  
 Spiralia;Lophotrochozoa;Mollusca;Bivalvia;Autobranhia;Heteroconchia;Euhe  
 terodonta;Imparidentia;Venerida;Veneroidea;Veneridae;Mercenaria;Mercenari  
 a mercenaria  
 UdeM00000041131 6596 379 UdeM00000041131 XP\_045197929.1 41.3 523  
 288 13 15 527 212 725 1.00E-101 379 6596 cellular  
 organisms;Eukaryota;Opisthokonta;Metazoa;Eumetazoa;Bilateria;Protostomia;  
 Spiralia;Lophotrochozoa;Mollusca;Bivalvia;Autobranhia;Heteroconchia;Euhe  
 terodonta;Imparidentia;Venerida;Veneroidea;Veneridae;Mercenaria;Mercenari  
 a mercenaria  
 UdeM00000041132 6596 205.3 UdeM00000041132 XP\_045167151.1 47.1 257  
 131 4 8 262 541 794 1.20E-49 205.3 6596 cellular  
 organisms;Eukaryota;Opisthokonta;Metazoa;Eumetazoa;Bilateria;Protostomia;  
 Spiralia;Lophotrochozoa;Mollusca;Bivalvia;Autobranhia;Heteroconchia;Euhe  
 terodonta;Imparidentia;Venerida;Veneroidea;Veneridae;Mercenaria;Mercenari  
 a mercenaria  
 UdeM00000041133 6596 131.7 UdeM00000041133 XP\_045167151.1 32.6 316  
 142 6 19 267 99 410 1.70E-27 131.7 6596 cellular  
 organisms;Eukaryota;Opisthokonta;Metazoa;Eumetazoa;Bilateria;Protostomia;  
 Spiralia;Lophotrochozoa;Mollusca;Bivalvia;Autobranhia;Heteroconchia;Euhe  
 terodonta;Imparidentia;Venerida;Veneroidea;Veneridae;Mercenaria;Mercenari  
 a mercenaria  
 UdeM00000041134 6596 68.2 UdeM00000041134 XP\_045197929.1 35.7 126  
 74 5 12 133 210 332 1.10E-08 68.2 6596 cellular  
 organisms;Eukaryota;Opisthokonta;Metazoa;Eumetazoa;Bilateria;Protostomia;  
 Spiralia;Lophotrochozoa;Mollusca;Bivalvia;Autobranhia;Heteroconchia;Euhe  
 terodonta;Imparidentia;Venerida;Veneroidea;Veneridae;Mercenaria;Mercenari  
 a mercenaria  
 UdeM00000041135 6596 1142.5 UdeM00000041135 XP\_045179676.1 49.8  
 1179 557 13 61 1226 142 1298 0.00E+00 1142.5 6596  
 cellular  
 organisms;Eukaryota;Opisthokonta;Metazoa;Eumetazoa;Bilateria;Protostomia;  
 Spiralia;Lophotrochozoa;Mollusca;Bivalvia;Autobranhia;Heteroconchia;Euhe  
 terodonta;Imparidentia;Venerida;Veneroidea;Veneridae;Mercenaria;Mercenari  
 a mercenaria  
 UdeM00000041136 6565 73.6 UdeM00000041136 XP\_022322655.1 27.9 197  
 52 2 1 108 417 612 2.40E-10 73.6 6565 cellular  
 organisms;Eukaryota;Opisthokonta;Metazoa;Eumetazoa;Bilateria;Protostomia;  
 Spiralia;Lophotrochozoa;Mollusca;Bivalvia;Autobranhia;Pteriomorphia;Ostr  
 eida;Ostreoidea;Ostreidae;Crassostrea;Crassostrea virginica  
 UdeM00000041137 7574 379 UdeM00000041137 XP\_013381129.1 37.2 611  
 323 13 4 606 1 558 1.10E-101 379 7574 cellular  
 organisms;Eukaryota;Opisthokonta;Metazoa;Eumetazoa;Bilateria;Protostomia;  
 Spiralia;Lophotrochozoa;Brachiopoda;Linguliformea;Lingulata;Lingulida;Lin  
 guloidea;Lingulidae;Lingula;Lingula anatina  
 UdeM00000041138 1735272 307.8 UdeM00000041138 XP\_041374913.1 30.7  
 737 395 14 30 736 22 672 3.80E-80 307.8 1735272  
 cellular  
 organisms;Eukaryota;Opisthokonta;Metazoa;Eumetazoa;Bilateria;Protostomia;  
 Spiralia;Lophotrochozoa;Mollusca;Gastropoda;Neomphalina;Neomphaloidea;Pel  
 tospiridae;Gigantopelta;Gigantopelta aegis



UdeM00000041139 1735272 325.5 UdeM00000041139 XP\_041374913.1 32.1  
 704 395 13 30 703 22 672 1.70E-85 325.5 1735272  
 cellular  
 organisms;Eukaryota;Opisthokonta;Metazoa;Eumetazoa;Bilateria;Protostomia;  
 Spiralia;Lophotrochozoa;Mollusca;Gastropoda;Neomphalina;Neomphaloidea;Pel  
 tospiridae;Gigantopelta;Gigantopelta aegis  
 UdeM00000041140 6596 188.7 UdeM00000041140 XP\_045176664.1 28.8 468  
 263 10 62 465 90 551 1.90E-44 188.7 6596 cellular  
 organisms;Eukaryota;Opisthokonta;Metazoa;Eumetazoa;Bilateria;Protostomia;  
 Spiralia;Lophotrochozoa;Mollusca;Bivalvia;Autobranchia;Heteroconchia;Euhe  
 terodonta;Imparidentia;Venerida;Veneroidea;Veneridae;Mercenaria;Mercenari  
 a mercenaria  
 UdeM00000041141 6596 186.4 UdeM00000041141 XP\_045176664.1 28.3 466  
 277 10 8 438 88 531 7.80E-44 186.4 6596 cellular  
 organisms;Eukaryota;Opisthokonta;Metazoa;Eumetazoa;Bilateria;Protostomia;  
 Spiralia;Lophotrochozoa;Mollusca;Bivalvia;Autobranchia;Heteroconchia;Euhe  
 terodonta;Imparidentia;Venerida;Veneroidea;Veneridae;Mercenaria;Mercenari  
 a mercenaria  
 UdeM00000041142 6596 147.9 UdeM00000041142 XP\_045177373.1 25.9 425  
 255 12 12 380 98 518 2.70E-32 147.9 6596 cellular  
 organisms;Eukaryota;Opisthokonta;Metazoa;Eumetazoa;Bilateria;Protostomia;  
 Spiralia;Lophotrochozoa;Mollusca;Bivalvia;Autobranchia;Heteroconchia;Euhe  
 terodonta;Imparidentia;Venerida;Veneroidea;Veneridae;Mercenaria;Mercenari  
 a mercenaria  
 UdeM00000041143 6596 119.8 UdeM00000041143 XP\_045177053.1 42.8 138  
 75 2 131 265 243 379 6.00E-24 119.8 6596 cellular  
 organisms;Eukaryota;Opisthokonta;Metazoa;Eumetazoa;Bilateria;Protostomia;  
 Spiralia;Lophotrochozoa;Mollusca;Bivalvia;Autobranchia;Heteroconchia;Euhe  
 terodonta;Imparidentia;Venerida;Veneroidea;Veneridae;Mercenaria;Mercenari  
 a mercenaria  
 UdeM00000041144 7725 65.1 UdeM00000041144 XP\_039258759.1 39.3 84  
 46 1 4 82 793 876 5.40E-08 65.1 7725 cellular  
 organisms;Eukaryota;Opisthokonta;Metazoa;Eumetazoa;Bilateria;Deuterostomi  
 a;Chordata;Tunicata;Ascidiacea;Stolidobranchia;Styelidae;Styela;Styela  
 clava  
 UdeM00000041146 6573 123.6 UdeM00000041146 XP\_021356039.1 46.8 111  
 59 0 12 122 11 121 1.90E-25 123.6 6573 cellular  
 organisms;Eukaryota;Opisthokonta;Metazoa;Eumetazoa;Bilateria;Protostomia;  
 Spiralia;Lophotrochozoa;Mollusca;Bivalvia;Autobranchia;Pteriomorphia;Pect  
 inida;Pectinoidea;Pectinidae;Mizuhopecten;Mizuhopecten yessoensis  
 UdeM00000041147 29159 1199.5 UdeM00000041147 XP\_034322339.1 51.6  
 1182 527 14 1 1144 142 1316 0.00E+00 1199.5  
 29159 cellular  
 organisms;Eukaryota;Opisthokonta;Metazoa;Eumetazoa;Bilateria;Protostomia;  
 Spiralia;Lophotrochozoa;Mollusca;Bivalvia;Autobranchia;Pteriomorphia;Ostr  
 eida;Ostreoidea;Ostreidae;Crassostrea;Crassostrea gigas  
 UdeM00000041148 6850 145.2 UdeM00000041148 XP\_013776698.1 37.4 222  
 127 3 1 216 73 288 1.00E-31 145.2 6850 cellular  
 organisms;Eukaryota;Opisthokonta;Metazoa;Eumetazoa;Bilateria;Protostomia;  
 Ecdysozoa;Panarthropoda;Arthropoda;Chelicerata;Merostomata;Xiphosura;Limu  
 lidae;Limulus;Limulus polyphemus  
 UdeM00000041149 6573 340.1 UdeM00000041149 XP\_021363550.1 63.5 260  
 90 1 5 264 26 280 3.10E-90 340.1 6573 cellular  
 organisms;Eukaryota;Opisthokonta;Metazoa;Eumetazoa;Bilateria;Protostomia;

Spiralia;Lophotrochozoa;Mollusca;Bivalvia;Autobranchia;Pteriormorphia;Pectinida;Pectinoidea;Pectinidae;Mizuhopecten;Mizuhopecten yessoensis  
UdeM00000041150 6596 2088.2 UdeM00000041150 XP\_045180068.1 71.2  
1394 367 3 335 1695 292 1684 0.00E+00 2088.2 6596  
cellular

organisms;Eukaryota;Opisthokonta;Metazoa;Eumetazoa;Bilateria;Protostomia;Spiralia;Lophotrochozoa;Mollusca;Bivalvia;Autobranchia;Heteroconchia;Euheterodonta;Imparidentia;Venerida;Veneroidea;Veneridae;Mercenaria;Mercenaria mercenaria

UdeM000000000001 6596 311.6 UdeM000000000001 XP\_045178182.1 80 175  
35 0 16 190 463 637 6.90E-82 311.6 6596 cellular

organisms;Eukaryota;Opisthokonta;Metazoa;Eumetazoa;Bilateria;Protostomia;Spiralia;Lophotrochozoa;Mollusca;Bivalvia;Autobranchia;Heteroconchia;Euheterodonta;Imparidentia;Venerida;Veneroidea;Veneridae;Mercenaria;Mercenaria mercenaria

UdeM000000000002 6579 135.2 UdeM000000000002 XP\_033728493.1 63.5 96  
35 0 8 103 392 487 4.80E-29 135.2 6579 cellular

organisms;Eukaryota;Opisthokonta;Metazoa;Eumetazoa;Bilateria;Protostomia;Spiralia;Lophotrochozoa;Mollusca;Bivalvia;Autobranchia;Pteriormorphia;Pectinida;Pectinoidea;Pectinidae;Pecten;Pecten maximus

UdeM000000000003 45351 82.8 UdeM000000000003 XP\_001623471.2 31.9 188  
101 4 10 181 12 188 5.90E-13 82.8 45351 cellular

organisms;Eukaryota;Opisthokonta;Metazoa;Eumetazoa;Cnidaria;Anthozoa;Hexacorallia;Actiniaria;Edwardsiidae;Nematostella;Nematostella vectensis

UdeM000000000004 6596 84.3 UdeM000000000004 XP\_045177776.1 46.5 101  
51 2 14 114 826 923 1.50E-13 84.3 6596 cellular

organisms;Eukaryota;Opisthokonta;Metazoa;Eumetazoa;Bilateria;Protostomia;Spiralia;Lophotrochozoa;Mollusca;Bivalvia;Autobranchia;Heteroconchia;Euheterodonta;Imparidentia;Venerida;Veneroidea;Veneridae;Mercenaria;Mercenaria mercenaria

UdeM000000000005 1735272 183.3 UdeM000000000005 XP\_041378840.1 45  
200 84 2 1 200 303 476 3.00E-43 183.3 1735272  
cellular

organisms;Eukaryota;Opisthokonta;Metazoa;Eumetazoa;Bilateria;Protostomia;Spiralia;Lophotrochozoa;Mollusca;Gastropoda;Neomphalina;Neomphaloidea;Peltospiridae;Gigantopelta;Gigantopelta aegis

UdeM000000000006 1735272 446.4 UdeM000000000006 XP\_041347065.1 52.6  
464 165 3 411 819 27 490 7.70E-122 446.4 1735272  
cellular

organisms;Eukaryota;Opisthokonta;Metazoa;Eumetazoa;Bilateria;Protostomia;Spiralia;Lophotrochozoa;Mollusca;Gastropoda;Neomphalina;Neomphaloidea;Peltospiridae;Gigantopelta;Gigantopelta aegis

UdeM000000000008 45351 85.1 UdeM000000000008 XP\_001623471.2 30.7 205  
111 5 10 194 12 205 1.10E-13 85.1 45351 cellular

organisms;Eukaryota;Opisthokonta;Metazoa;Eumetazoa;Cnidaria;Anthozoa;Hexacorallia;Actiniaria;Edwardsiidae;Nematostella;Nematostella vectensis

UdeM000000000009 6596 109 UdeM000000000009 XP\_045177695.1 45.7 129  
68 2 5 132 253 380 6.80E-21 109 6596 cellular

organisms;Eukaryota;Opisthokonta;Metazoa;Eumetazoa;Bilateria;Protostomia;Spiralia;Lophotrochozoa;Mollusca;Bivalvia;Autobranchia;Heteroconchia;Euheterodonta;Imparidentia;Venerida;Veneroidea;Veneridae;Mercenaria;Mercenaria mercenaria

UdeM000000000010 6596 199.5 UdeM000000000010 XP\_045177778.1 40.5 316  
158 10 127 429 397 695 1.10E-47 199.5 6596 cellular

organisms;Eukaryota;Opisthokonta;Metazoa;Eumetazoa;Bilateria;Protostomia;Spiralia;Lophotrochozoa;Mollusca;Bivalvia;Autobranchia;Heteroconchia;Euheterodonta;Imparidentia;Venerida;Veneroidea;Veneridae;Mercenaria;Mercenaria mercenaria

UdeM00000000012 70779 109.8 UdeM00000000012 XP\_015749432.1 42.2 161  
82 1 2 162 306 455 1.50E-20 109.8 70779 cellular

organisms;Eukaryota;Opisthokonta;Metazoa;Eumetazoa;Cnidaria;Anthozoa;Hexacorallia;Scleractinia;Astrocoeniina;Acroporidae;Acropora;Acropora digitifera

UdeM00000000013 160734 139.4 UdeM00000000013 XP\_042343012.1 37.5  
200 117 3 34 233 33 224 9.10E-30 139.4 160734  
cellular

organisms;Eukaryota;Opisthokonta;Metazoa;Eumetazoa;Bilateria;Deuterostomia;Chordata;Craniata;Vertebrata;Gnathostomata;Teleostomi;Euteleostomi;Actinopterygii;Actinopteri;Neopterygii;Teleostei;Osteoglossocephalai;Clupeocephala;Euteleosteomorpha;Neoteleostei;Eurypterygia;Ctenosquamata;Acanthomorpha;Euacanthomorpha;Percomorphaceae;Eupercaria;Perciformes;Serranoidae;Serranidae;Epinephelinae;Epinephelini;Plectropomus;Plectropomus leopardus

UdeM00000000014 6596 128.3 UdeM00000000014 XP\_045175693.1 43.3 164  
84 5 1 159 1004 1163 9.30E-27 128.3 6596 cellular

organisms;Eukaryota;Opisthokonta;Metazoa;Eumetazoa;Bilateria;Protostomia;Spiralia;Lophotrochozoa;Mollusca;Bivalvia;Autobranchia;Heteroconchia;Euheterodonta;Imparidentia;Venerida;Veneroidea;Veneridae;Mercenaria;Mercenaria mercenaria

UdeM00000000015 59861 133.7 UdeM00000000015 XP\_045075958.1 41.6 178  
101 2 5 181 17 192 3.80E-28 133.7 59861 cellular

organisms;Eukaryota;Opisthokonta;Metazoa;Eumetazoa;Bilateria;Deuterostomia;Chordata;Craniata;Vertebrata;Gnathostomata;Teleostomi;Euteleostomi;Actinopterygii;Actinopteri;Neopterygii;Teleostei;Osteoglossocephalai;Clupeocephala;Euteleosteomorpha;Protacanthopterygii;Salmoniformes;Salmonidae;Coregoninae;Coregonus;Coregonus clupeaformis

UdeM00000000016 5762 97.1 UdeM00000000016 XP\_002670566.1 31.2 256  
157 8 9 247 80 333 4.00E-17 97.1 5762 cellular

organisms;Eukaryota;Discoba;Heterolobosea;Tetramitida;Eutetramitida;Vahlkampfiidae;Naegleria;Naegleria gruberi

UdeM00000000018 7957 85.5 UdeM00000000018 XP\_026100705.1 38.2 152  
76 5 2 152 4 138 6.40E-14 85.5 7957 cellular

organisms;Eukaryota;Opisthokonta;Metazoa;Eumetazoa;Bilateria;Deuterostomia;Chordata;Craniata;Vertebrata;Gnathostomata;Teleostomi;Euteleostomi;Actinopterygii;Actinopteri;Neopterygii;Teleostei;Osteoglossocephalai;Clupeocephala;Otomorpha;Ostariophysi;Otophysi;Cypriniphysae;Cypriniformes;Cyprinidae;Cyprininae;Carassius;Carassius auratus

UdeM00000000019 6565 221.9 UdeM00000000019 XP\_022333382.1 55.6 178  
78 1 1 178 189 365 6.70E-55 221.9 6565 cellular

organisms;Eukaryota;Opisthokonta;Metazoa;Eumetazoa;Bilateria;Protostomia;Spiralia;Lophotrochozoa;Mollusca;Bivalvia;Autobranchia;Pteriomorpha;Ostreida;Ostreoidea;Ostreidae;Crassostrea;Crassostrea virginica

UdeM00000000020 45351 85.1 UdeM00000000020 XP\_001623471.2 30.7 205  
111 5 10 194 12 205 1.10E-13 85.1 45351 cellular

organisms;Eukaryota;Opisthokonta;Metazoa;Eumetazoa;Cnidaria;Anthozoa;Hexacorallia;Actiniaria;Edwardsiidae;Nematostella;Nematostella vectensis

UdeM00000000021 6596 342.8 UdeM00000000021 XP\_045177776.1 35.9 621  
272 12 1 607 405 913 8.90E-91 342.8 6596 cellular

organisms;Eukaryota;Opisthokonta;Metazoa;Eumetazoa;Bilateria;Protostomia; Spiralia;Lophotrochozoa;Mollusca;Bivalvia;Autobranchia;Heteroconchia;Euherodonta;Imparidentia;Venerida;Veneroidea;Veneridae;Mercenaria;Mercenaria mercenaria

UdeM00000000022 307959 138.3 UdeM00000000022 XP\_016405011.1 36.1  
205 124 3 30 233 270 468 2.00E-29 138.3 307959  
cellular

organisms;Eukaryota;Opisthokonta;Metazoa;Eumetazoa;Bilateria;Deuterostomia;Chordata;Craniata;Vertebrata;Gnathostomata;Teleostomi;Euteleostomi;Actinopterygii;Actinopteri;Neopterygii;Teleostei;Osteoglossocephalai;Clupeocephala;Otomorpha;Ostariophysi;Otophysi;Cypriniphysae;Cypriniformes;Cyprinidae;Cyprininae;Sinocyclocheilus;Sinocyclocheilus rhinoceros

UdeM00000000023 225164 94.4 UdeM00000000023 XP\_009059347.1 42.2  
128 66 4 576 703 125 244 6.40E-16 94.4 225164  
cellular

organisms;Eukaryota;Opisthokonta;Metazoa;Eumetazoa;Bilateria;Protostomia; Spiralia;Lophotrochozoa;Mollusca;Gastropoda;Patellogastropoda;Lottioidea;Lottiidae;Lottia;Lottia gigantea

UdeM00000000024 7574 136.3 UdeM00000000024 XP\_013398822.1 54.6 108  
49 0 36 143 56 163 3.60E-29 136.3 7574 cellular

organisms;Eukaryota;Opisthokonta;Metazoa;Eumetazoa;Bilateria;Protostomia; Spiralia;Lophotrochozoa;Brachiopoda;Linguliformea;Lingulata;Lingulida;Linguloidea;Lingulidae;Lingula;Lingula anatina

UdeM00000000025 46731 89 UdeM00000000025 XP\_027057405.1 30.8 211  
115 6 2 194 6 203 8.20E-15 89 46731 cellular

organisms;Eukaryota;Opisthokonta;Metazoa;Eumetazoa;Cnidaria;Anthozoa;Hexacorallia;Scleractinia;Astrocoeniina;Pocilloporidae;Pocillopora;Pocillopora damicornis

UdeM00000000027 40690 211.1 UdeM00000000027 XP\_034006674.1 38.8 325  
188 6 2 323 4 320 2.20E-51 211.1 40690 cellular

organisms;Eukaryota;Opisthokonta;Metazoa;Eumetazoa;Bilateria;Deuterostomia;Chordata;Craniata;Vertebrata;Gnathostomata;Teleostomi;Euteleostomi;Actinopterygii;Actinopteri;Neopterygii;Teleostei;Osteoglossocephalai;Clupeocephala;Euteleosteomorpha;Neoteleostei;Eurypterygia;Ctenosquamata;Acanthomorpha;Euacanthomorpha;Percomorphaceae;Eupercaria;Perciformes;Nototheniidae;Nototheniidae;Trematomus;Trematomus bernacchii

UdeM00000000028 6596 148.7 UdeM00000000028 XP\_045177695.1 50 154  
75 2 3 155 195 347 6.60E-33 148.7 6596 cellular

organisms;Eukaryota;Opisthokonta;Metazoa;Eumetazoa;Bilateria;Protostomia; Spiralia;Lophotrochozoa;Mollusca;Bivalvia;Autobranchia;Heteroconchia;Euherodonta;Imparidentia;Venerida;Veneroidea;Veneridae;Mercenaria;Mercenaria mercenaria

UdeM00000000029 6596 160.2 UdeM00000000029 XP\_045177776.1 38.4 263  
144 5 1 252 405 660 3.40E-36 160.2 6596 cellular

organisms;Eukaryota;Opisthokonta;Metazoa;Eumetazoa;Bilateria;Protostomia; Spiralia;Lophotrochozoa;Mollusca;Bivalvia;Autobranchia;Heteroconchia;Euherodonta;Imparidentia;Venerida;Veneroidea;Veneridae;Mercenaria;Mercenaria mercenaria

UdeM00000000032 6596 89.7 UdeM00000000032 XP\_045177533.1 40.3 119  
68 1 2 117 342 460 1.60E-14 89.7 6596 cellular

organisms;Eukaryota;Opisthokonta;Metazoa;Eumetazoa;Bilateria;Protostomia; Spiralia;Lophotrochozoa;Mollusca;Bivalvia;Autobranchia;Heteroconchia;Euherodonta;Imparidentia;Venerida;Veneroidea;Veneridae;Mercenaria;Mercenaria mercenaria

UdeM000000000033 160734 139.4 UdeM000000000033 XP\_042343012.1 37.5  
200 117 3 34 233 33 224 9.10E-30 139.4 160734  
cellular

organisms;Eukaryota;Opisthokonta;Metazoa;Eumetazoa;Bilateria;Deuterostomi  
a;Chordata;Craniata;Vertebrata;Gnathostomata;Teleostomi;Euteleostomi;Acti  
nopterygii;Actinopteri;Neopterygii;Teleostei;Osteoglossocephalai;Clupeoce  
phala;Euteleosteomorpha;Neoteleostei;Eurypterygia;Ctenosquamata;Acanthomo  
rphata;Euacanthomorphacea;Percomorphaceae;Eupercaria;Perciformes;Serranoi  
dei;Serranidae;Epinephelinae;Epinephelini;Plectropomus;Plectropomus  
leopardus

UdeM000000000035 7574 136 UdeM000000000035 XP\_013398822.1 54.6 108  
49 0 36 143 56 163 4.70E-29 136 7574 cellular

organisms;Eukaryota;Opisthokonta;Metazoa;Eumetazoa;Bilateria;Protostomia;  
Spiralia;Lophotrochozoa;Brachiopoda;Linguliformea;Lingulata;Lingulida;Lin  
guloidea;Lingulidae;Lingula;Lingula anatina

UdeM000000000036 6596 614 UdeM000000000036 XP\_045178182.1 73.8 382  
94 2 8 388 345 721 1.30E-172 614 6596 cellular

organisms;Eukaryota;Opisthokonta;Metazoa;Eumetazoa;Bilateria;Protostomia;  
Spiralia;Lophotrochozoa;Mollusca;Bivalvia;Autobranchia;Heteroconchia;Euhe  
terodonta;Imparidentia;Venerida;Veneroidea;Veneridae;Mercenaria;Mercenari  
a mercenaria

UdeM000000000037 6596 999.2 UdeM000000000037 XP\_045178182.1 73.1 636  
161 3 11 645 95 721 2.40E-288 999.2 6596 cellular

organisms;Eukaryota;Opisthokonta;Metazoa;Eumetazoa;Bilateria;Protostomia;  
Spiralia;Lophotrochozoa;Mollusca;Bivalvia;Autobranchia;Heteroconchia;Euhe  
terodonta;Imparidentia;Venerida;Veneroidea;Veneridae;Mercenaria;Mercenari  
a mercenaria

UdeM000000000038 6579 148.3 UdeM000000000038 XP\_033732676.1 34.7 265  
154 9 74 330 153 406 1.70E-32 148.3 6579 cellular

organisms;Eukaryota;Opisthokonta;Metazoa;Eumetazoa;Bilateria;Protostomia;  
Spiralia;Lophotrochozoa;Mollusca;Bivalvia;Autobranchia;Pteriormorphia;Pect  
inida;Pectinoidea;Pectinidae;Pecten;Pecten maximus

UdeM000000000039 6596 267.7 UdeM000000000039 XP\_045177778.1 40.4 403  
220 7 61 451 397 791 2.70E-68 267.7 6596 cellular

organisms;Eukaryota;Opisthokonta;Metazoa;Eumetazoa;Bilateria;Protostomia;  
Spiralia;Lophotrochozoa;Mollusca;Bivalvia;Autobranchia;Heteroconchia;Euhe  
terodonta;Imparidentia;Venerida;Veneroidea;Veneridae;Mercenaria;Mercenari  
a mercenaria

UdeM000000000041 160734 140.2 UdeM000000000041 XP\_042343012.1 37.1  
197 119 2 34 230 33 224 5.20E-30 140.2 160734

cellular

organisms;Eukaryota;Opisthokonta;Metazoa;Eumetazoa;Bilateria;Deuterostomi  
a;Chordata;Craniata;Vertebrata;Gnathostomata;Teleostomi;Euteleostomi;Acti  
nopterygii;Actinopteri;Neopterygii;Teleostei;Osteoglossocephalai;Clupeoce  
phala;Euteleosteomorpha;Neoteleostei;Eurypterygia;Ctenosquamata;Acanthomo  
rphata;Euacanthomorphacea;Percomorphaceae;Eupercaria;Perciformes;Serranoi  
dei;Serranidae;Epinephelinae;Epinephelini;Plectropomus;Plectropomus  
leopardus

UdeM000000000042 225164 98.2 UdeM000000000042 XP\_009059347.1 43  
128 65 4 576 703 125 244 4.40E-17 98.2 225164

cellular

organisms;Eukaryota;Opisthokonta;Metazoa;Eumetazoa;Bilateria;Protostomia;  
Spiralia;Lophotrochozoa;Mollusca;Gastropoda;Patellogastropoda;Lottioidae;  
Lottiidae;Lottia;Lottia gigantea

UdeM00000000043 7574 136.3 UdeM00000000043 XP\_013398822.1 54.6 108  
 49 0 36 143 56 163 3.60E-29 136.3 7574 cellular  
 organisms;Eukaryota;Opisthokonta;Metazoa;Eumetazoa;Bilateria;Protostomia;  
 Spiralia;Lophotrochozoa;Brachiopoda;Linguliformea;Lingulata;Lingulida;Lin  
 guloidea;Lingulidae;Lingula;Lingula anatina  
 UdeM00000000044 46731 89 UdeM00000000044 XP\_027057405.1 30.8 211  
 115 6 2 194 6 203 8.20E-15 89 46731 cellular  
 organisms;Eukaryota;Opisthokonta;Metazoa;Eumetazoa;Cnidaria;Anthozoa;Hexa  
 corallia;Scleractinia;Astrocoeniina;Pocilloporidae;Pocillopora;Pocillopor  
 a damicornis  
 UdeM00000000045 6596 381.7 UdeM00000000045 XP\_045177776.1 41.1 530  
 290 8 1 518 405 924 1.60E-102 381.7 6596 cellular  
 organisms;Eukaryota;Opisthokonta;Metazoa;Eumetazoa;Bilateria;Protostomia;  
 Spiralia;Lophotrochozoa;Mollusca;Bivalvia;Autobranchia;Heteroconchia;Euhe  
 terodonta;Imparidentia;Venerida;Veneroidea;Veneridae;Mercenaria;Mercenari  
 a mercenaria  
 UdeM00000000047 160734 140.2 UdeM00000000047 XP\_042343012.1 37.1  
 197 119 2 34 230 33 224 5.20E-30 140.2 160734  
 cellular  
 organisms;Eukaryota;Opisthokonta;Metazoa;Eumetazoa;Bilateria;Deuterostomi  
 a;Chordata;Craniata;Vertebrata;Gnathostomata;Teleostomi;Euteleostomi;Acti  
 nopterygii;Actinopteri;Neopterygii;Teleostei;Osteoglossocephalai;Clupeoce  
 phala;Euteleosteomorpha;Neoteleostei;Eurypterygia;Ctenosquamata;Acanthomo  
 rphata;Euacanthomorphacea;Percomorphaceae;Eupercaria;Perciformes;Serranoi  
 dei;Serranidae;Epinephelinae;Epinephelini;Plectropomus;Plectropomus  
 leopardus  
 UdeM00000000049 225164 99 UdeM00000000049 XP\_009059347.1 43  
 128 65 4 230 357 125 244 1.30E-17 99 225164  
 cellular  
 organisms;Eukaryota;Opisthokonta;Metazoa;Eumetazoa;Bilateria;Protostomia;  
 Spiralia;Lophotrochozoa;Mollusca;Gastropoda;Patellogastropoda;Lottioidea;  
 Lottiidae;Lottia;Lottia gigantea  
 UdeM00000000050 7574 134 UdeM00000000050 XP\_013398822.1 53.7 108  
 50 0 36 143 56 163 1.80E-28 134 7574 cellular  
 organisms;Eukaryota;Opisthokonta;Metazoa;Eumetazoa;Bilateria;Protostomia;  
 Spiralia;Lophotrochozoa;Brachiopoda;Linguliformea;Lingulata;Lingulida;Lin  
 guloidea;Lingulidae;Lingula;Lingula anatina  
 UdeM00000000051 6596 866.7 UdeM00000000051 XP\_045178182.1 74.6 544  
 128 3 2 544 187 721 1.60E-248 866.7 6596 cellular  
 organisms;Eukaryota;Opisthokonta;Metazoa;Eumetazoa;Bilateria;Protostomia;  
 Spiralia;Lophotrochozoa;Mollusca;Bivalvia;Autobranchia;Heteroconchia;Euhe  
 terodonta;Imparidentia;Venerida;Veneroidea;Veneridae;Mercenaria;Mercenari  
 a mercenaria  
 UdeM00000000052 6596 866.3 UdeM00000000052 XP\_045178182.1 74.6 544  
 128 3 2 544 187 721 2.10E-248 866.3 6596 cellular  
 organisms;Eukaryota;Opisthokonta;Metazoa;Eumetazoa;Bilateria;Protostomia;  
 Spiralia;Lophotrochozoa;Mollusca;Bivalvia;Autobranchia;Heteroconchia;Euhe  
 terodonta;Imparidentia;Venerida;Veneroidea;Veneridae;Mercenaria;Mercenari  
 a mercenaria  
 UdeM00000000053 6573 205.3 UdeM00000000053 XP\_021366122.1 54.2 201  
 67 4 6 191 6 196 7.00E-50 205.3 6573 cellular  
 organisms;Eukaryota;Opisthokonta;Metazoa;Eumetazoa;Bilateria;Protostomia;  
 Spiralia;Lophotrochozoa;Mollusca;Bivalvia;Autobranchia;Pteriomorphia;Pect  
 inida;Pectinoidea;Pectinidae;Mizuhopecten;Mizuhopecten yessoensis

UdeM000000000054 6579 470.3 UdeM000000000054 XP\_033728575.1 45.9 547  
 248 7 2 544 189 691 3.40E-129 470.3 6579 cellular  
 organisms;Eukaryota;Opisthokonta;Metazoa;Eumetazoa;Bilateria;Protostomia;  
 Spiralia;Lophotrochozoa;Mollusca;Bivalvia;Autobranchia;Pteriomorpha;Pect  
 inida;Pectinoidea;Pectinidae;Pecten;Pecten maximus  
 UdeM000000000055 1735272 189.5 UdeM000000000055 XP\_041355741.1 65.4  
 133 46 0 1 133 1 133 2.90E-45 189.5 1735272  
 cellular  
 organisms;Eukaryota;Opisthokonta;Metazoa;Eumetazoa;Bilateria;Protostomia;  
 Spiralia;Lophotrochozoa;Mollusca;Gastropoda;Neomphalina;Neomphaloidea;Pel  
 tospiridae;Gigantopelta;Gigantopelta aegis  
 UdeM000000000056 6596 211.1 UdeM000000000056 XP\_045179421.1 38.5 325  
 162 7 37 324 94 417 2.40E-51 211.1 6596 cellular  
 organisms;Eukaryota;Opisthokonta;Metazoa;Eumetazoa;Bilateria;Protostomia;  
 Spiralia;Lophotrochozoa;Mollusca;Bivalvia;Autobranchia;Heteroconchia;Euhe  
 terodonta;Imparidentia;Venerida;Veneroidea;Veneridae;Mercenaria;Mercenari  
 a mercenaria  
 UdeM000000000057 6573 355.5 UdeM000000000057 XP\_021369175.1 48.6 348  
 159 5 80 407 331 678 1.00E-94 355.5 6573 cellular  
 organisms;Eukaryota;Opisthokonta;Metazoa;Eumetazoa;Bilateria;Protostomia;  
 Spiralia;Lophotrochozoa;Mollusca;Bivalvia;Autobranchia;Pteriomorpha;Pect  
 inida;Pectinoidea;Pectinidae;Mizuhopecten;Mizuhopecten yessoensis  
 UdeM000000000058 6579 181.8 UdeM000000000058 XP\_033744293.1 32.3 334  
 211 9 87 415 79 402 1.90E-42 181.8 6579 cellular  
 organisms;Eukaryota;Opisthokonta;Metazoa;Eumetazoa;Bilateria;Protostomia;  
 Spiralia;Lophotrochozoa;Mollusca;Bivalvia;Autobranchia;Pteriomorpha;Pect  
 inida;Pectinoidea;Pectinidae;Pecten;Pecten maximus  
 UdeM000000000059 6596 139.4 UdeM000000000059 XP\_045182313.1 43.9 157  
 84 2 15 170 713 866 4.50E-30 139.4 6596 cellular  
 organisms;Eukaryota;Opisthokonta;Metazoa;Eumetazoa;Bilateria;Protostomia;  
 Spiralia;Lophotrochozoa;Mollusca;Bivalvia;Autobranchia;Heteroconchia;Euhe  
 terodonta;Imparidentia;Venerida;Veneroidea;Veneridae;Mercenaria;Mercenari  
 a mercenaria  
 UdeM000000000060 6565 723 UdeM000000000060 XP\_022334994.1 47.6 808  
 401 12 36 827 4 805 4.30E-205 723 6565 cellular  
 organisms;Eukaryota;Opisthokonta;Metazoa;Eumetazoa;Bilateria;Protostomia;  
 Spiralia;Lophotrochozoa;Mollusca;Bivalvia;Autobranchia;Pteriomorpha;Ostr  
 eida;Ostreoidea;Ostreidae;Crassostrea;Crassostrea virginica  
 UdeM000000000061 6565 104 UdeM000000000061 XP\_022287303.1 29.8 178  
 102 3 2 157 518 694 2.00E-19 104 6565 cellular  
 organisms;Eukaryota;Opisthokonta;Metazoa;Eumetazoa;Bilateria;Protostomia;  
 Spiralia;Lophotrochozoa;Mollusca;Bivalvia;Autobranchia;Pteriomorpha;Ostr  
 eida;Ostreoidea;Ostreidae;Crassostrea;Crassostrea virginica  
 UdeM000000000062 6579 814.3 UdeM000000000062 XP\_033728194.1 49 890  
 394 13 173 1019 124 996 1.80E-232 814.3 6579 cellular  
 organisms;Eukaryota;Opisthokonta;Metazoa;Eumetazoa;Bilateria;Protostomia;  
 Spiralia;Lophotrochozoa;Mollusca;Bivalvia;Autobranchia;Pteriomorpha;Pect  
 inida;Pectinoidea;Pectinidae;Pecten;Pecten maximus  
 UdeM000000000063 6596 81.3 UdeM000000000063 XP\_045177564.1 24.1 344  
 196 12 2 299 187 511 2.40E-12 81.3 6596 cellular  
 organisms;Eukaryota;Opisthokonta;Metazoa;Eumetazoa;Bilateria;Protostomia;  
 Spiralia;Lophotrochozoa;Mollusca;Bivalvia;Autobranchia;Heteroconchia;Euhe  
 terodonta;Imparidentia;Venerida;Veneroidea;Veneridae;Mercenaria;Mercenari  
 a mercenaria

UdeM00000000064 7741 341.7 UdeM00000000064 XP\_019618826.1 55.2 306  
 136 1 14 318 176 481 1.80E-90 341.7 7741 cellular  
 organisms;Eukaryota;Opisthokonta;Metazoa;Eumetazoa;Bilateria;Deuterostomi  
 a;Chordata;Cephalochordata;Leptocardii;Amphioxiformes;Branchiostomidae;Br  
 anchiostoma;Branchiostoma belcheri  
 UdeM00000000065 6573 529.3 UdeM00000000065 XP\_021370179.1 55.1 499  
 183 8 33 523 54 519 5.80E-147 529.3 6573 cellular  
 organisms;Eukaryota;Opisthokonta;Metazoa;Eumetazoa;Bilateria;Protostomia;  
 Spiralia;Lophotrochozoa;Mollusca;Bivalvia;Autobranhia;Pteriormorphia;Pect  
 inida;Pectinoidea;Pectinidae;Mizuhopecten;Mizuhopecten yessoensis  
 UdeM00000000066 6596 110.5 UdeM00000000066 XP\_045177988.1 48.4 95  
 49 0 63 157 57 151 3.80E-21 110.5 6596 cellular  
 organisms;Eukaryota;Opisthokonta;Metazoa;Eumetazoa;Bilateria;Protostomia;  
 Spiralia;Lophotrochozoa;Mollusca;Bivalvia;Autobranhia;Heteroconchia;Euhe  
 terodonta;Imparidentia;Venerida;Veneroidea;Veneridae;Mercenaria;Mercenari  
 a mercenaria  
 UdeM00000000067 6596 255.8 UdeM00000000067 XP\_045177778.1 37 470  
 257 14 21 472 397 845 1.20E-64 255.8 6596 cellular  
 organisms;Eukaryota;Opisthokonta;Metazoa;Eumetazoa;Bilateria;Protostomia;  
 Spiralia;Lophotrochozoa;Mollusca;Bivalvia;Autobranhia;Heteroconchia;Euhe  
 terodonta;Imparidentia;Venerida;Veneroidea;Veneridae;Mercenaria;Mercenari  
 a mercenaria  
 UdeM00000000068 45351 84.7 UdeM00000000068 XP\_001623471.2 35.3 150  
 79 3 10 143 12 159 1.50E-13 84.7 45351 cellular  
 organisms;Eukaryota;Opisthokonta;Metazoa;Eumetazoa;Cnidaria;Anthozoa;Hexa  
 corallia;Actiniaria;Edwardsiidae;Nematostella;Nematostella vectensis  
 UdeM00000000069 6573 230.3 UdeM00000000069 XP\_021342563.1 52.8 267  
 81 10 1 237 1056 1307 2.70E-57 230.3 6573 cellular  
 organisms;Eukaryota;Opisthokonta;Metazoa;Eumetazoa;Bilateria;Protostomia;  
 Spiralia;Lophotrochozoa;Mollusca;Bivalvia;Autobranhia;Pteriormorphia;Pect  
 inida;Pectinoidea;Pectinidae;Mizuhopecten;Mizuhopecten yessoensis  
 UdeM00000000070 6573 254.2 UdeM00000000070 XP\_021342564.1 63.5 219  
 56 6 1 197 1056 1272 1.50E-64 254.2 6573 cellular  
 organisms;Eukaryota;Opisthokonta;Metazoa;Eumetazoa;Bilateria;Protostomia;  
 Spiralia;Lophotrochozoa;Mollusca;Bivalvia;Autobranhia;Pteriormorphia;Pect  
 inida;Pectinoidea;Pectinidae;Mizuhopecten;Mizuhopecten yessoensis  
 UdeM00000000071 6596 110.2 UdeM00000000071 XP\_045177988.1 48.4 95  
 49 0 50 144 57 151 5.00E-21 110.2 6596 cellular  
 organisms;Eukaryota;Opisthokonta;Metazoa;Eumetazoa;Bilateria;Protostomia;  
 Spiralia;Lophotrochozoa;Mollusca;Bivalvia;Autobranhia;Heteroconchia;Euhe  
 terodonta;Imparidentia;Venerida;Veneroidea;Veneridae;Mercenaria;Mercenari  
 a mercenaria  
 UdeM00000000072 6596 323.6 UdeM00000000072 XP\_045177776.1 39.8 493  
 252 10 25 486 397 875 4.50E-85 323.6 6596 cellular  
 organisms;Eukaryota;Opisthokonta;Metazoa;Eumetazoa;Bilateria;Protostomia;  
 Spiralia;Lophotrochozoa;Mollusca;Bivalvia;Autobranhia;Heteroconchia;Euhe  
 terodonta;Imparidentia;Venerida;Veneroidea;Veneridae;Mercenaria;Mercenari  
 a mercenaria  
 UdeM00000000073 45351 85.5 UdeM00000000073 XP\_001623471.2 35.3 150  
 79 3 10 143 12 159 8.90E-14 85.5 45351 cellular  
 organisms;Eukaryota;Opisthokonta;Metazoa;Eumetazoa;Cnidaria;Anthozoa;Hexa  
 corallia;Actiniaria;Edwardsiidae;Nematostella;Nematostella vectensis  
 UdeM00000000074 6596 110.9 UdeM00000000074 XP\_045177988.1 48.4 95  
 49 0 147 241 57 151 3.20E-21 110.9 6596 cellular



organisms;Eukaryota;Opisthokonta;Metazoa;Eumetazoa;Bilateria;Protostomia;Spiralia;Lophotrochozoa;Mollusca;Bivalvia;Autobranhia;Heteroconchia;Euheterodonta;Imparidentia;Venerida;Veneroidea;Veneridae;Mercenaria;Mercenaria mercenaria

UdeM000000000075 6596 322.4 UdeM000000000075 XP\_045177776.1 39.9 494  
250 11 22 483 397 875 1.00E-84 322.4 6596 cellular

organisms;Eukaryota;Opisthokonta;Metazoa;Eumetazoa;Bilateria;Protostomia;Spiralia;Lophotrochozoa;Mollusca;Bivalvia;Autobranhia;Heteroconchia;Euheterodonta;Imparidentia;Venerida;Veneroidea;Veneridae;Mercenaria;Mercenaria mercenaria

UdeM000000000076 45351 87 UdeM000000000076 XP\_001623471.2 36 150  
78 3 10 143 12 159 2.50E-14 87 45351 cellular

organisms;Eukaryota;Opisthokonta;Metazoa;Eumetazoa;Cnidaria;Anthozoa;Hexacorallia;Actiniaria;Edwardsiidae;Nematostella;Nematostella vectensis

UdeM000000000077 6573 105.5 UdeM000000000077 XP\_021342563.1 46.6 148  
68 4 6 152 1245 1382 6.40E-20 105.5 6573 cellular

organisms;Eukaryota;Opisthokonta;Metazoa;Eumetazoa;Bilateria;Protostomia;Spiralia;Lophotrochozoa;Mollusca;Bivalvia;Autobranhia;Pteriormorphia;Pectinida;Pectinoidea;Pectinidae;Mizuhopecten;Mizuhopecten yessoensis

UdeM000000000078 6573 282.7 UdeM000000000078 XP\_021366296.1 28.9 679  
384 11 1 593 329 994 1.50E-72 282.7 6573 cellular

organisms;Eukaryota;Opisthokonta;Metazoa;Eumetazoa;Bilateria;Protostomia;Spiralia;Lophotrochozoa;Mollusca;Bivalvia;Autobranhia;Pteriormorphia;Pectinida;Pectinoidea;Pectinidae;Mizuhopecten;Mizuhopecten yessoensis

UdeM000000000079 6579 192.6 UdeM000000000079 XP\_033761570.1 33.5 328  
193 6 1 321 383 692 1.30E-45 192.6 6579 cellular

organisms;Eukaryota;Opisthokonta;Metazoa;Eumetazoa;Bilateria;Protostomia;Spiralia;Lophotrochozoa;Mollusca;Bivalvia;Autobranhia;Pteriormorphia;Pectinida;Pectinoidea;Pectinidae;Pecten;Pecten maximus

UdeM000000000080 6596 78.6 UdeM000000000080 XP\_045177776.1 41.7 96  
53 2 1 93 405 500 7.20E-12 78.6 6596 cellular

organisms;Eukaryota;Opisthokonta;Metazoa;Eumetazoa;Bilateria;Protostomia;Spiralia;Lophotrochozoa;Mollusca;Bivalvia;Autobranhia;Heteroconchia;Euheterodonta;Imparidentia;Venerida;Veneroidea;Veneridae;Mercenaria;Mercenaria mercenaria

UdeM000000000081 6596 115.2 UdeM000000000081 XP\_045177988.1 49.5 95  
48 0 47 141 57 151 1.00E-22 115.2 6596 cellular

organisms;Eukaryota;Opisthokonta;Metazoa;Eumetazoa;Bilateria;Protostomia;Spiralia;Lophotrochozoa;Mollusca;Bivalvia;Autobranhia;Heteroconchia;Euheterodonta;Imparidentia;Venerida;Veneroidea;Veneridae;Mercenaria;Mercenaria mercenaria

UdeM000000000082 6573 186.4 UdeM000000000082 XP\_021358159.1 36 303  
181 7 1 293 361 660 5.50E-44 186.4 6573 cellular

organisms;Eukaryota;Opisthokonta;Metazoa;Eumetazoa;Bilateria;Protostomia;Spiralia;Lophotrochozoa;Mollusca;Bivalvia;Autobranhia;Pteriormorphia;Pectinida;Pectinoidea;Pectinidae;Mizuhopecten;Mizuhopecten yessoensis

UdeM000000000086 29159 257.3 UdeM000000000086 XP\_034319278.1 63.5 192  
67 2 8 196 7 198 1.60E-65 257.3 29159 cellular

organisms;Eukaryota;Opisthokonta;Metazoa;Eumetazoa;Bilateria;Protostomia;Spiralia;Lophotrochozoa;Mollusca;Bivalvia;Autobranhia;Pteriormorphia;Ostreida;Ostreioidea;Ostreidae;Crassostrea;Crassostrea gigas

UdeM000000000087 29159 117.1 UdeM000000000087 XP\_011451530.1 49.5 105  
52 1 5 108 90 194 1.40E-23 117.1 29159 cellular

organisms;Eukaryota;Opisthokonta;Metazoa;Eumetazoa;Bilateria;Protostomia;

Spiralia; Lophotrochozoa; Mollusca; Bivalvia; Autobranchia; Pteriomorphia; Ostr  
eida; Ostreioidea; Ostreidae; Crassostrea; Crassostrea gigas  
UdeM000000000088 6565 332.4 UdeM000000000088 XP\_022287521.1 41.3 482  
201 5 32 435 10 487 8.70E-88 332.4 6565 cellular  
organisms; Eukaryota; Opisthokonta; Metazoa; Eumetazoa; Bilateria; Protostomia;  
Spiralia; Lophotrochozoa; Mollusca; Bivalvia; Autobranchia; Pteriomorphia; Ostr  
eida; Ostreioidea; Ostreidae; Crassostrea; Crassostrea virginica  
UdeM000000000089 6573 63.2 UdeM000000000089 XP\_021376724.1 36.2 94  
45 1 14 92 490 583 5.50E-07 63.2 6573 cellular  
organisms; Eukaryota; Opisthokonta; Metazoa; Eumetazoa; Bilateria; Protostomia;  
Spiralia; Lophotrochozoa; Mollusca; Bivalvia; Autobranchia; Pteriomorphia; Pect  
inida; Pectinoidea; Pectinidae; Mizuhopecten; Mizuhopecten yessoensis  
UdeM000000000090 6596 173.7 UdeM000000000090 XP\_045185723.1 50.3 165  
81 1 8 172 456 619 2.10E-40 173.7 6596 cellular  
organisms; Eukaryota; Opisthokonta; Metazoa; Eumetazoa; Bilateria; Protostomia;  
Spiralia; Lophotrochozoa; Mollusca; Bivalvia; Autobranchia; Heteroconchia; Eue  
terodonta; Imparidentia; Venerida; Veneroidea; Veneridae; Mercenaria; Mercenari  
a mercenaria  
UdeM000000000094 6596 217.6 UdeM000000000094 XP\_045185723.1 47.2 231  
120 2 7 237 455 683 3.30E-53 217.6 6596 cellular  
organisms; Eukaryota; Opisthokonta; Metazoa; Eumetazoa; Bilateria; Protostomia;  
Spiralia; Lophotrochozoa; Mollusca; Bivalvia; Autobranchia; Heteroconchia; Eue  
terodonta; Imparidentia; Venerida; Veneroidea; Veneridae; Mercenaria; Mercenari  
a mercenaria  
UdeM000000000095 29159 83.2 UdeM000000000095 XP\_011434746.2 44 100  
52 3 13 111 197 293 2.30E-13 83.2 29159 cellular  
organisms; Eukaryota; Opisthokonta; Metazoa; Eumetazoa; Bilateria; Protostomia;  
Spiralia; Lophotrochozoa; Mollusca; Bivalvia; Autobranchia; Pteriomorphia; Ostr  
eida; Ostreioidea; Ostreidae; Crassostrea; Crassostrea gigas  
UdeM000000000096 29159 84.7 UdeM000000000096 XP\_011434746.2 45 100  
51 3 54 152 197 293 1.10E-13 84.7 29159 cellular  
organisms; Eukaryota; Opisthokonta; Metazoa; Eumetazoa; Bilateria; Protostomia;  
Spiralia; Lophotrochozoa; Mollusca; Bivalvia; Autobranchia; Pteriomorphia; Ostr  
eida; Ostreioidea; Ostreidae; Crassostrea; Crassostrea gigas  
UdeM000000000097 6565 90.9 UdeM000000000097 XP\_022287645.1 36.4 132  
82 1 22 151 209 340 1.70E-15 90.9 6565 cellular  
organisms; Eukaryota; Opisthokonta; Metazoa; Eumetazoa; Bilateria; Protostomia;  
Spiralia; Lophotrochozoa; Mollusca; Bivalvia; Autobranchia; Pteriomorphia; Ostr  
eida; Ostreioidea; Ostreidae; Crassostrea; Crassostrea virginica  
UdeM000000000098 6596 290.8 UdeM000000000098 XP\_045161133.1 58 243  
44 2 1 185 1 243 1.30E-75 290.8 6596 cellular  
organisms; Eukaryota; Opisthokonta; Metazoa; Eumetazoa; Bilateria; Protostomia;  
Spiralia; Lophotrochozoa; Mollusca; Bivalvia; Autobranchia; Heteroconchia; Eue  
terodonta; Imparidentia; Venerida; Veneroidea; Veneridae; Mercenaria; Mercenari  
a mercenaria  
UdeM000000000102 6596 311.6 UdeM000000000102 XP\_045161133.1 67.1 225  
67 2 1 218 26 250 8.40E-82 311.6 6596 cellular  
organisms; Eukaryota; Opisthokonta; Metazoa; Eumetazoa; Bilateria; Protostomia;  
Spiralia; Lophotrochozoa; Mollusca; Bivalvia; Autobranchia; Heteroconchia; Eue  
terodonta; Imparidentia; Venerida; Veneroidea; Veneridae; Mercenaria; Mercenari  
a mercenaria  
UdeM000000000103 6596 389.8 UdeM000000000103 XP\_045163375.1 72.9 240  
65 0 8 247 338 577 2.60E-105 389.8 6596 cellular  
organisms; Eukaryota; Opisthokonta; Metazoa; Eumetazoa; Bilateria; Protostomia;

Spiralia;Lophotrochozoa;Mollusca;Bivalvia;Autobranchia;Heteroconchia;Euherodonta;Imparidentia;Venerida;Veneroidea;Veneridae;Mercenaria;Mercenaria mercenaria

UdeM00000000104 29159 132.9 UdeM00000000104 XP\_034303860.1 43.5 200  
96 7 5 199 21 208 5.50E-28 132.9 29159 cellular

organisms;Eukaryota;Opisthokonta;Metazoa;Eumetazoa;Bilateria;Protostomia;Spiralia;Lophotrochozoa;Mollusca;Bivalvia;Autobranchia;Pteriormorphia;Ostreida;Ostreioidea;Ostreidae;Crassostrea;Crassostrea gigas

UdeM00000000105 29159 324.7 UdeM00000000105 XP\_034303860.1 45.6 338  
115 2 1 270 293 629 1.20E-85 324.7 29159 cellular

organisms;Eukaryota;Opisthokonta;Metazoa;Eumetazoa;Bilateria;Protostomia;Spiralia;Lophotrochozoa;Mollusca;Bivalvia;Autobranchia;Pteriormorphia;Ostreida;Ostreioidea;Ostreidae;Crassostrea;Crassostrea gigas

UdeM00000000106 29159 232.6 UdeM00000000106 XP\_011451530.1 54.8 188  
84 1 70 256 78 265 5.50E-58 232.6 29159 cellular

organisms;Eukaryota;Opisthokonta;Metazoa;Eumetazoa;Bilateria;Protostomia;Spiralia;Lophotrochozoa;Mollusca;Bivalvia;Autobranchia;Pteriormorphia;Ostreida;Ostreioidea;Ostreidae;Crassostrea;Crassostrea gigas

UdeM00000000109 10224 90.5 UdeM00000000109 XP\_002737779.1 61.9 63  
24 0 51 113 404 466 1.90E-15 90.5 10224 cellular

organisms;Eukaryota;Opisthokonta;Metazoa;Eumetazoa;Bilateria;Deuterostomia;Hemichordata;Enteropneusta;Harrimaniidae;Saccoglossus;Saccoglossus kowalevskii

UdeM00000000110 6579 82.8 UdeM00000000110 XP\_033754691.1 38.9 126  
68 3 15 136 243 363 3.90E-13 82.8 6579 cellular

organisms;Eukaryota;Opisthokonta;Metazoa;Eumetazoa;Bilateria;Protostomia;Spiralia;Lophotrochozoa;Mollusca;Bivalvia;Autobranchia;Pteriormorphia;Pectinida;Pectinoidea;Pectinidae;Pecten;Pecten maximus

UdeM00000000111 6565 109.8 UdeM00000000111 XP\_022320668.1 51.4 109  
47 1 1 103 682 790 2.20E-21 109.8 6565 cellular

organisms;Eukaryota;Opisthokonta;Metazoa;Eumetazoa;Bilateria;Protostomia;Spiralia;Lophotrochozoa;Mollusca;Bivalvia;Autobranchia;Pteriormorphia;Ostreida;Ostreioidea;Ostreidae;Crassostrea;Crassostrea virginica

UdeM00000000113 6573 250.8 UdeM00000000113 XP\_021356047.1 43.9 337  
158 7 48 368 2 323 2.80E-63 250.8 6573 cellular

organisms;Eukaryota;Opisthokonta;Metazoa;Eumetazoa;Bilateria;Protostomia;Spiralia;Lophotrochozoa;Mollusca;Bivalvia;Autobranchia;Pteriormorphia;Pectinida;Pectinoidea;Pectinidae;Mizuhopecten;Mizuhopecten yessoensis

UdeM00000000114 6573 492.7 UdeM00000000114 XP\_021356043.1 36.8 1019  
425 29 3 857 168 1131 9.80E-136 492.7 6573 cellular

organisms;Eukaryota;Opisthokonta;Metazoa;Eumetazoa;Bilateria;Protostomia;Spiralia;Lophotrochozoa;Mollusca;Bivalvia;Autobranchia;Pteriormorphia;Pectinida;Pectinoidea;Pectinidae;Mizuhopecten;Mizuhopecten yessoensis

UdeM00000000115 6579 66.6 UdeM00000000115 XP\_033725145.1 43.9 82  
43 1 1 82 1 79 1.70E-08 66.6 6579 cellular

organisms;Eukaryota;Opisthokonta;Metazoa;Eumetazoa;Bilateria;Protostomia;Spiralia;Lophotrochozoa;Mollusca;Bivalvia;Autobranchia;Pteriormorphia;Pectinida;Pectinoidea;Pectinidae;Pecten;Pecten maximus

UdeM00000000116 400727 238 UdeM00000000116 XP\_025108466.1 38.3  
426 206 10 1 392 140 542 2.00E-59 238 400727

cellular

organisms;Eukaryota;Opisthokonta;Metazoa;Eumetazoa;Bilateria;Protostomia;Spiralia;Lophotrochozoa;Mollusca;Gastropoda;Caenogastropoda;Architaenioglossa;Ampullarioidea;Ampullariidae;Pomacea;Pomacea canaliculata

UdeM00000000118 37621 93.2 UdeM00000000118 XP\_014670482.1 47.3 91  
 41 2 1 88 64 150 2.10E-16 93.2 37621 cellular  
 organisms;Eukaryota;Opisthokonta;Metazoa;Eumetazoa;Bilateria;Protostomia;  
 Ecdysozoa;Scalidophora;Priapulida;Priapulimorpha;Priapulimorphida;Priapul  
 idae;Priapululus;Priapululus caudatus  
 UdeM00000000119 400727 842 UdeM00000000119 XP\_025090650.1 71.5  
 571 137 3 19 585 66 614 4.50E-241 842 400727  
 cellular  
 organisms;Eukaryota;Opisthokonta;Metazoa;Eumetazoa;Bilateria;Protostomia;  
 Spiralia;Lophotrochozoa;Mollusca;Gastropoda;Caenogastropoda;Architaeniogl  
 ossa;Ampullarioidea;Ampullariidae;Pomacea;Pomacea canaliculata  
 UdeM00000041110 6596 110.5 UdeM00000041110 XP\_045179939.1 42.3 130  
 72 2 21 147 251 380 1.80E-21 110.5 6596 cellular  
 organisms;Eukaryota;Opisthokonta;Metazoa;Eumetazoa;Bilateria;Protostomia;  
 Spiralia;Lophotrochozoa;Mollusca;Bivalvia;Autobranchia;Heteroconchia;Euhe  
 terodonta;Imparidentia;Venerida;Veneroidea;Veneridae;Mercenaria;Mercenari  
 a mercenaria  
 UdeM00000041111 29159 194.1 UdeM00000041111 XP\_034315421.1 51.9 206  
 93 3 94 295 271 474 2.50E-46 194.1 29159 cellular  
 organisms;Eukaryota;Opisthokonta;Metazoa;Eumetazoa;Bilateria;Protostomia;  
 Spiralia;Lophotrochozoa;Mollusca;Bivalvia;Autobranchia;Pteriormorphia;Ostr  
 eida;Ostreoidea;Ostreidae;Crassostrea;Crassostrea gigas  
 UdeM00000041113 29159 259.6 UdeM00000041113 XP\_034318948.1 46.3 268  
 142 1 1 266 686 953 4.30E-66 259.6 29159 cellular  
 organisms;Eukaryota;Opisthokonta;Metazoa;Eumetazoa;Bilateria;Protostomia;  
 Spiralia;Lophotrochozoa;Mollusca;Bivalvia;Autobranchia;Pteriormorphia;Ostr  
 eida;Ostreoidea;Ostreidae;Crassostrea;Crassostrea gigas  
 UdeM00000041114 6596 123.2 UdeM00000041114 XP\_045179939.1 46.2 130  
 67 2 69 195 251 380 3.60E-25 123.2 6596 cellular  
 organisms;Eukaryota;Opisthokonta;Metazoa;Eumetazoa;Bilateria;Protostomia;  
 Spiralia;Lophotrochozoa;Mollusca;Bivalvia;Autobranchia;Heteroconchia;Euhe  
 terodonta;Imparidentia;Venerida;Veneroidea;Veneridae;Mercenaria;Mercenari  
 a mercenaria  
 UdeM00000044336 1735272 104 UdeM00000044336 XP\_041350837.1 28.5  
 284 185 8 9 291 184 450 3.50E-19 104 1735272  
 cellular  
 organisms;Eukaryota;Opisthokonta;Metazoa;Eumetazoa;Bilateria;Protostomia;  
 Spiralia;Lophotrochozoa;Mollusca;Gastropoda;Neomphalina;Neomphaloidea;Pel  
 tospiridae;Gigantopelta;Gigantopelta aegis  
 UdeM00000020680 6579 454.1 UdeM00000020680 XP\_033728292.1 40.2 567  
 331 5 18 580 23 585 2.60E-124 454.1 6579 cellular  
 organisms;Eukaryota;Opisthokonta;Metazoa;Eumetazoa;Bilateria;Protostomia;  
 Spiralia;Lophotrochozoa;Mollusca;Bivalvia;Autobranchia;Pteriormorphia;Pect  
 inida;Pectinoidea;Pectinidae;Pecten;Pecten maximus  
 UdeM00000020682 6596 320.1 UdeM00000020682 XP\_045181515.1 52.9 308  
 138 4 10 315 7 309 3.30E-84 320.1 6596 cellular  
 organisms;Eukaryota;Opisthokonta;Metazoa;Eumetazoa;Bilateria;Protostomia;  
 Spiralia;Lophotrochozoa;Mollusca;Bivalvia;Autobranchia;Heteroconchia;Euhe  
 terodonta;Imparidentia;Venerida;Veneroidea;Veneridae;Mercenaria;Mercenari  
 a mercenaria  
 UdeM00000020683 6596 470.7 UdeM00000020683 XP\_045181515.1 75.9 299  
 67 2 17 313 15 310 1.50E-129 470.7 6596 cellular  
 organisms;Eukaryota;Opisthokonta;Metazoa;Eumetazoa;Bilateria;Protostomia;  
 Spiralia;Lophotrochozoa;Mollusca;Bivalvia;Autobranchia;Heteroconchia;Euhe

terodonta;Imparidentia;Venerida;Veneroidea;Veneridae;Mercenaria;Mercenari  
 a mercenaria  
 UdeM00000020684 6596 129 UdeM00000020684 XP\_045180345.1 33.9 186  
 122 1 110 294 37 222 9.80E-27 129 6596 cellular  
 organisms;Eukaryota;Opisthokonta;Metazoa;Eumetazoa;Bilateria;Protostomia;  
 Spiralia;Lophotrochozoa;Mollusca;Bivalvia;Autobranchia;Heteroconchia;Euhe  
 terodonta;Imparidentia;Venerida;Veneroidea;Veneridae;Mercenaria;Mercenari  
 a mercenaria  
 UdeM00000020685 6573 184.1 UdeM00000020685 XP\_021353045.1 50 172  
 81 1 1 167 53 224 1.50E-43 184.1 6573 cellular  
 organisms;Eukaryota;Opisthokonta;Metazoa;Eumetazoa;Bilateria;Protostomia;  
 Spiralia;Lophotrochozoa;Mollusca;Bivalvia;Autobranchia;Pteriormorphia;Pect  
 inida;Pectinoidea;Pectinidae;Mizuhopecten;Mizuhopecten yessoensis  
 UdeM00000020686 6573 238.4 UdeM00000020686 XP\_021339366.1 45.1 266  
 138 1 14 271 34 299 1.10E-59 238.4 6573 cellular  
 organisms;Eukaryota;Opisthokonta;Metazoa;Eumetazoa;Bilateria;Protostomia;  
 Spiralia;Lophotrochozoa;Mollusca;Bivalvia;Autobranchia;Pteriormorphia;Pect  
 inida;Pectinoidea;Pectinidae;Mizuhopecten;Mizuhopecten yessoensis  
 UdeM00000020687 6573 258.1 UdeM00000020687 XP\_021339366.1 46.2 266  
 135 1 14 271 34 299 1.30E-65 258.1 6573 cellular  
 organisms;Eukaryota;Opisthokonta;Metazoa;Eumetazoa;Bilateria;Protostomia;  
 Spiralia;Lophotrochozoa;Mollusca;Bivalvia;Autobranchia;Pteriormorphia;Pect  
 inida;Pectinoidea;Pectinidae;Mizuhopecten;Mizuhopecten yessoensis  
 UdeM00000020688 6573 255 UdeM00000020688 XP\_021339366.1 46.7 261  
 131 1 5 257 39 299 1.10E-64 255 6573 cellular  
 organisms;Eukaryota;Opisthokonta;Metazoa;Eumetazoa;Bilateria;Protostomia;  
 Spiralia;Lophotrochozoa;Mollusca;Bivalvia;Autobranchia;Pteriormorphia;Pect  
 inida;Pectinoidea;Pectinidae;Mizuhopecten;Mizuhopecten yessoensis  
 UdeM00000020689 6579 250 UdeM00000020689 XP\_033735965.1 46.8 267  
 141 1 7 273 3 268 3.60E-63 250 6579 cellular  
 organisms;Eukaryota;Opisthokonta;Metazoa;Eumetazoa;Bilateria;Protostomia;  
 Spiralia;Lophotrochozoa;Mollusca;Bivalvia;Autobranchia;Pteriormorphia;Pect  
 inida;Pectinoidea;Pectinidae;Pecten;Pecten maximus  
 UdeM00000020691 6573 260.8 UdeM00000020691 XP\_021339366.1 47.7 266  
 129 2 1 257 35 299 1.90E-66 260.8 6573 cellular  
 organisms;Eukaryota;Opisthokonta;Metazoa;Eumetazoa;Bilateria;Protostomia;  
 Spiralia;Lophotrochozoa;Mollusca;Bivalvia;Autobranchia;Pteriormorphia;Pect  
 inida;Pectinoidea;Pectinidae;Mizuhopecten;Mizuhopecten yessoensis  
 UdeM00000020690 6573 263.5 UdeM00000020690 XP\_021339366.1 47.9 267  
 129 2 14 271 34 299 3.10E-67 263.5 6573 cellular  
 organisms;Eukaryota;Opisthokonta;Metazoa;Eumetazoa;Bilateria;Protostomia;  
 Spiralia;Lophotrochozoa;Mollusca;Bivalvia;Autobranchia;Pteriormorphia;Pect  
 inida;Pectinoidea;Pectinidae;Mizuhopecten;Mizuhopecten yessoensis  
 UdeM00000020692 6573 58.2 UdeM00000020692 XP\_021364275.1 43.3 60  
 31 1 1 57 303 362 7.40E-06 58.2 6573 cellular  
 organisms;Eukaryota;Opisthokonta;Metazoa;Eumetazoa;Bilateria;Protostomia;  
 Spiralia;Lophotrochozoa;Mollusca;Bivalvia;Autobranchia;Pteriormorphia;Pect  
 inida;Pectinoidea;Pectinidae;Mizuhopecten;Mizuhopecten yessoensis  
 UdeM00000020693 6579 58.5 UdeM00000020693 XP\_033727426.1 30.9 149  
 60 3 48 153 56 204 8.90E-06 58.5 6579 cellular  
 organisms;Eukaryota;Opisthokonta;Metazoa;Eumetazoa;Bilateria;Protostomia;  
 Spiralia;Lophotrochozoa;Mollusca;Bivalvia;Autobranchia;Pteriormorphia;Pect  
 inida;Pectinoidea;Pectinidae;Pecten;Pecten maximus

UdeM00000020694 6596 387.5 UdeM00000020694 XP\_045167481.1 51.1 354  
 159 5 11 358 75 420 1.90E-104 387.5 6596 cellular  
 organisms;Eukaryota;Opisthokonta;Metazoa;Eumetazoa;Bilateria;Protostomia;  
 Spiralia;Lophotrochozoa;Mollusca;Bivalvia;Autobranchia;Heteroconchia;Euhe  
 terodonta;Imparidentia;Venerida;Veneroidea;Veneridae;Mercenaria;Mercenari  
 a mercenaria  
 UdeM00000020695 6596 360.9 UdeM00000020695 XP\_045181236.1 49 445  
 202 8 13 447 16 445 2.30E-96 360.9 6596 cellular  
 organisms;Eukaryota;Opisthokonta;Metazoa;Eumetazoa;Bilateria;Protostomia;  
 Spiralia;Lophotrochozoa;Mollusca;Bivalvia;Autobranchia;Heteroconchia;Euhe  
 terodonta;Imparidentia;Venerida;Veneroidea;Veneridae;Mercenaria;Mercenari  
 a mercenaria  
 UdeM00000020696 6596 548.1 UdeM00000020696 XP\_045181059.1 70.7 441  
 128 1 6 446 7 446 1.00E-152 548.1 6596 cellular  
 organisms;Eukaryota;Opisthokonta;Metazoa;Eumetazoa;Bilateria;Protostomia;  
 Spiralia;Lophotrochozoa;Mollusca;Bivalvia;Autobranchia;Heteroconchia;Euhe  
 terodonta;Imparidentia;Venerida;Veneroidea;Veneridae;Mercenaria;Mercenari  
 a mercenaria  
 UdeM00000020697 6596 93.2 UdeM00000020697 XP\_045182091.1 32.8 186  
 106 4 1 183 1 170 5.10E-16 93.2 6596 cellular  
 organisms;Eukaryota;Opisthokonta;Metazoa;Eumetazoa;Bilateria;Protostomia;  
 Spiralia;Lophotrochozoa;Mollusca;Bivalvia;Autobranchia;Heteroconchia;Euhe  
 terodonta;Imparidentia;Venerida;Veneroidea;Veneridae;Mercenaria;Mercenari  
 a mercenaria  
 UdeM00000020698 6596 149.1 UdeM00000020698 XP\_045194988.1 35.2 230  
 128 5 461 685 626 839 2.20E-32 149.1 6596 cellular  
 organisms;Eukaryota;Opisthokonta;Metazoa;Eumetazoa;Bilateria;Protostomia;  
 Spiralia;Lophotrochozoa;Mollusca;Bivalvia;Autobranchia;Heteroconchia;Euhe  
 terodonta;Imparidentia;Venerida;Veneroidea;Veneridae;Mercenaria;Mercenari  
 a mercenaria  
 UdeM00000020700 29159 282.3 UdeM00000020700 XP\_034313418.1 38.3 446  
 247 14 60 496 5012 5438 1.20E-72 282.3 29159 cellular  
 organisms;Eukaryota;Opisthokonta;Metazoa;Eumetazoa;Bilateria;Protostomia;  
 Spiralia;Lophotrochozoa;Mollusca;Bivalvia;Autobranchia;Pteriormorphia;Ostr  
 eida;Ostreoidea;Ostreidae;Crassostrea;Crassostrea gigas  
 UdeM00000020701 6596 234.2 UdeM00000020701 XP\_045194988.1 26.4 702  
 370 16 113 701 626 1293 5.10E-58 234.2 6596 cellular  
 organisms;Eukaryota;Opisthokonta;Metazoa;Eumetazoa;Bilateria;Protostomia;  
 Spiralia;Lophotrochozoa;Mollusca;Bivalvia;Autobranchia;Heteroconchia;Euhe  
 terodonta;Imparidentia;Venerida;Veneroidea;Veneridae;Mercenaria;Mercenari  
 a mercenaria  
 UdeM00000020702 6573 84 UdeM00000020702 XP\_021356201.1 45.1 91  
 49 1 155 244 4508 4598 3.10E-13 84 6573 cellular  
 organisms;Eukaryota;Opisthokonta;Metazoa;Eumetazoa;Bilateria;Protostomia;  
 Spiralia;Lophotrochozoa;Mollusca;Bivalvia;Autobranchia;Pteriormorphia;Pect  
 inida;Pectinoidea;Pectinidae;Mizuhopecten;Mizuhopecten yessoensis  
 UdeM00000020703 6573 84 UdeM00000020703 XP\_021356201.1 45.1 91  
 49 1 11 100 4508 4598 1.40E-13 84 6573 cellular  
 organisms;Eukaryota;Opisthokonta;Metazoa;Eumetazoa;Bilateria;Protostomia;  
 Spiralia;Lophotrochozoa;Mollusca;Bivalvia;Autobranchia;Pteriormorphia;Pect  
 inida;Pectinoidea;Pectinidae;Mizuhopecten;Mizuhopecten yessoensis  
 UdeM00000020705 6596 209.1 UdeM00000020705 XP\_045206084.1 30.7 466  
 301 15 4 455 221 678 1.20E-50 209.1 6596 cellular  
 organisms;Eukaryota;Opisthokonta;Metazoa;Eumetazoa;Bilateria;Protostomia;

Spiralia;Lophotrochozoa;Mollusca;Bivalvia;Autobranchia;Heteroconchia;Euherodonta;Imparidentia;Venerida;Veneroidea;Veneridae;Mercenaria;Mercenaria mercenaria

UdeM00000020706 6596 86.7 UdeM00000020706 XP\_045206084.1 40 125  
70 3 71 194 59 179 3.70E-14 86.7 6596 cellular

organisms;Eukaryota;Opisthokonta;Metazoa;Eumetazoa;Bilateria;Protostomia;Spiralia;Lophotrochozoa;Mollusca;Bivalvia;Autobranchia;Heteroconchia;Euherodonta;Imparidentia;Venerida;Veneroidea;Veneridae;Mercenaria;Mercenaria mercenaria

UdeM00000020707 6596 156 UdeM00000020707 XP\_045206084.1 33.2 277  
176 7 66 338 42 313 1.40E-34 156 6596 cellular

organisms;Eukaryota;Opisthokonta;Metazoa;Eumetazoa;Bilateria;Protostomia;Spiralia;Lophotrochozoa;Mollusca;Bivalvia;Autobranchia;Heteroconchia;Euherodonta;Imparidentia;Venerida;Veneroidea;Veneridae;Mercenaria;Mercenaria mercenaria

UdeM00000020708 6573 156.8 UdeM00000020708 XP\_021380250.1 26.6 413  
275 13 3 395 226 630 6.00E-35 156.8 6573 cellular

organisms;Eukaryota;Opisthokonta;Metazoa;Eumetazoa;Bilateria;Protostomia;Spiralia;Lophotrochozoa;Mollusca;Bivalvia;Autobranchia;Pteriomorphia;Pectinida;Pectinoidea;Pectinidae;Mizuhopecten;Mizuhopecten yessoensis

UdeM00000020709 6596 165.2 UdeM00000020709 XP\_045177112.1 28.5 484  
260 18 8 439 243 692 1.90E-37 165.2 6596 cellular

organisms;Eukaryota;Opisthokonta;Metazoa;Eumetazoa;Bilateria;Protostomia;Spiralia;Lophotrochozoa;Mollusca;Bivalvia;Autobranchia;Heteroconchia;Euherodonta;Imparidentia;Venerida;Veneroidea;Veneridae;Mercenaria;Mercenaria mercenaria

UdeM00000020710 6596 357.1 UdeM00000020710 XP\_045206084.1 31.9 683  
416 17 93 747 79 740 6.70E-95 357.1 6596 cellular

organisms;Eukaryota;Opisthokonta;Metazoa;Eumetazoa;Bilateria;Protostomia;Spiralia;Lophotrochozoa;Mollusca;Bivalvia;Autobranchia;Heteroconchia;Euherodonta;Imparidentia;Venerida;Veneroidea;Veneridae;Mercenaria;Mercenaria mercenaria

UdeM00000020711 6596 270.4 UdeM00000020711 XP\_045206084.1 27.3 725  
426 19 93 752 79 767 7.30E-69 270.4 6596 cellular

organisms;Eukaryota;Opisthokonta;Metazoa;Eumetazoa;Bilateria;Protostomia;Spiralia;Lophotrochozoa;Mollusca;Bivalvia;Autobranchia;Heteroconchia;Euherodonta;Imparidentia;Venerida;Veneroidea;Veneridae;Mercenaria;Mercenaria mercenaria

UdeM00000020714 29159 76.3 UdeM00000020714 XP\_034305887.1 27.6 192  
113 5 28 209 34 209 5.90E-11 76.3 29159 cellular

organisms;Eukaryota;Opisthokonta;Metazoa;Eumetazoa;Bilateria;Protostomia;Spiralia;Lophotrochozoa;Mollusca;Bivalvia;Autobranchia;Pteriomorphia;Ostreida;Ostreoidea;Ostreidae;Crassostrea;Crassostrea gigas

UdeM00000020715 1735272 73.2 UdeM00000020715 XP\_041360231.1 30.9  
136 90 2 31 162 21 156 5.00E-10 73.2 1735272  
cellular

organisms;Eukaryota;Opisthokonta;Metazoa;Eumetazoa;Bilateria;Protostomia;Spiralia;Lophotrochozoa;Mollusca;Gastropoda;Neomphalina;Neomphaloidea;Peltospiridae;Gigantopelta;Gigantopelta aegis

UdeM00000020716 6596 73.2 UdeM00000020716 XP\_045178426.1 27.3 183  
117 5 31 200 14 193 5.00E-10 73.2 6596 cellular

organisms;Eukaryota;Opisthokonta;Metazoa;Eumetazoa;Bilateria;Protostomia;Spiralia;Lophotrochozoa;Mollusca;Bivalvia;Autobranchia;Heteroconchia;Euherodonta

terodonta;Imparidentia;Venerida;Veneroidea;Veneridae;Mercenaria;Mercenari  
a mercenaria

UdeM00000020717 1735272 70.9 UdeM00000020717 XP\_041360231.1 30.9  
136 90 2 31 162 21 156 2.50E-09 70.9 1735272  
cellular

organisms;Eukaryota;Opisthokonta;Metazoa;Eumetazoa;Bilateria;Protostomia;  
Spiralia;Lophotrochozoa;Mollusca;Gastropoda;Neomphalina;Neomphaloidea;Pel  
tospiridae;Gigantopelta;Gigantopelta aegis

UdeM00000020718 6596 72.4 UdeM00000020718 XP\_045178426.1 27.3 183  
117 5 31 200 14 193 8.60E-10 72.4 6596 cellular

organisms;Eukaryota;Opisthokonta;Metazoa;Eumetazoa;Bilateria;Protostomia;  
Spiralia;Lophotrochozoa;Mollusca;Bivalvia;Autobranchia;Heteroconchia;Euhe  
terodonta;Imparidentia;Venerida;Veneroidea;Veneridae;Mercenaria;Mercenari  
a mercenaria

UdeM00000020719 6596 756.5 UdeM00000020719 XP\_045206307.1 50.4 809  
292 8 1 711 1 798 3.00E-215 756.5 6596 cellular

organisms;Eukaryota;Opisthokonta;Metazoa;Eumetazoa;Bilateria;Protostomia;  
Spiralia;Lophotrochozoa;Mollusca;Bivalvia;Autobranchia;Heteroconchia;Euhe  
terodonta;Imparidentia;Venerida;Veneroidea;Veneridae;Mercenaria;Mercenari  
a mercenaria

UdeM00000020720 1735272 73.2 UdeM00000020720 XP\_041360231.1 27.3  
187 123 4 30 211 14 192 5.00E-10 73.2 1735272  
cellular

organisms;Eukaryota;Opisthokonta;Metazoa;Eumetazoa;Bilateria;Protostomia;  
Spiralia;Lophotrochozoa;Mollusca;Gastropoda;Neomphalina;Neomphaloidea;Pel  
tospiridae;Gigantopelta;Gigantopelta aegis

UdeM00000020721 1735272 72.8 UdeM00000020721 XP\_041360231.1 27.2  
191 126 4 19 204 10 192 6.30E-10 72.8 1735272  
cellular

organisms;Eukaryota;Opisthokonta;Metazoa;Eumetazoa;Bilateria;Protostomia;  
Spiralia;Lophotrochozoa;Mollusca;Gastropoda;Neomphalina;Neomphaloidea;Pel  
tospiridae;Gigantopelta;Gigantopelta aegis

UdeM00000020722 6596 327 UdeM00000020722 XP\_045189153.1 52.6 329  
147 3 2 324 31 356 3.40E-86 327 6596 cellular

organisms;Eukaryota;Opisthokonta;Metazoa;Eumetazoa;Bilateria;Protostomia;  
Spiralia;Lophotrochozoa;Mollusca;Bivalvia;Autobranchia;Heteroconchia;Euhe  
terodonta;Imparidentia;Venerida;Veneroidea;Veneridae;Mercenaria;Mercenari  
a mercenaria

UdeM00000020723 6596 369.4 UdeM00000020723 XP\_045192157.1 68.3 271  
82 3 1 268 1 270 3.90E-99 369.4 6596 cellular

organisms;Eukaryota;Opisthokonta;Metazoa;Eumetazoa;Bilateria;Protostomia;  
Spiralia;Lophotrochozoa;Mollusca;Bivalvia;Autobranchia;Heteroconchia;Euhe  
terodonta;Imparidentia;Venerida;Veneroidea;Veneridae;Mercenaria;Mercenari  
a mercenaria

UdeM00000020724 6596 158.7 UdeM00000020724 XP\_045181462.1 48.7 152  
77 1 17 167 29 180 6.70E-36 158.7 6596 cellular

organisms;Eukaryota;Opisthokonta;Metazoa;Eumetazoa;Bilateria;Protostomia;  
Spiralia;Lophotrochozoa;Mollusca;Bivalvia;Autobranchia;Heteroconchia;Euhe  
terodonta;Imparidentia;Venerida;Veneroidea;Veneridae;Mercenaria;Mercenari  
a mercenaria

UdeM00000020725 6596 162.9 UdeM00000020725 XP\_045206055.1 26.8 526  
300 20 127 622 77 547 1.70E-36 162.9 6596 cellular

organisms;Eukaryota;Opisthokonta;Metazoa;Eumetazoa;Bilateria;Protostomia;  
Spiralia;Lophotrochozoa;Mollusca;Bivalvia;Autobranchia;Heteroconchia;Euhe



terodonta;Imparidentia;Venerida;Veneroidea;Veneridae;Mercenaria;Mercenari  
 a mercenaria  
 UdeM00000020726 29159 400.2 UdeM00000020726 XP\_034317562.1 22.3 2021  
 1144 66 262 2138 26 1763 1.70E-107 400.2 29159 cellular  
 organisms;Eukaryota;Opisthokonta;Metazoa;Eumetazoa;Bilateria;Protostomia;  
 Spiralia;Lophotrochozoa;Mollusca;Bivalvia;Autobranchia;Pteriormorphia;Ostr  
 eida;Ostreoidea;Ostreidae;Crassostrea;Crassostrea gigas  
 UdeM00000020727 6596 326.6 UdeM00000020727 XP\_045206084.1 30.1 801  
 414 21 306 973 78 865 2.50E-85 326.6 6596 cellular  
 organisms;Eukaryota;Opisthokonta;Metazoa;Eumetazoa;Bilateria;Protostomia;  
 Spiralia;Lophotrochozoa;Mollusca;Bivalvia;Autobranchia;Heteroconchia;Euhe  
 terodonta;Imparidentia;Venerida;Veneroidea;Veneridae;Mercenaria;Mercenari  
 a mercenaria  
 UdeM00000020728 7741 320.5 UdeM00000020728 XP\_019618826.1 46.1 382  
 164 4 2 343 153 532 4.00E-84 320.5 7741 cellular  
 organisms;Eukaryota;Opisthokonta;Metazoa;Eumetazoa;Bilateria;Deuterostomi  
 a;Chordata;Cephalochordata;Leptocardii;Amphioxiformes;Branchiostomidae;Br  
 anchiostoma;Branchiostoma belcheri  
 UdeM00000020729 6596 431.8 UdeM00000020729 XP\_045206084.1 31.8 929  
 591 26 859 1763 79 988 4.20E-117 431.8 6596 cellular  
 organisms;Eukaryota;Opisthokonta;Metazoa;Eumetazoa;Bilateria;Protostomia;  
 Spiralia;Lophotrochozoa;Mollusca;Bivalvia;Autobranchia;Heteroconchia;Euhe  
 terodonta;Imparidentia;Venerida;Veneroidea;Veneridae;Mercenaria;Mercenari  
 a mercenaria  
 UdeM00000020730 6596 431.8 UdeM00000020730 XP\_045206084.1 31.8 929  
 591 26 770 1674 79 988 4.00E-117 431.8 6596 cellular  
 organisms;Eukaryota;Opisthokonta;Metazoa;Eumetazoa;Bilateria;Protostomia;  
 Spiralia;Lophotrochozoa;Mollusca;Bivalvia;Autobranchia;Heteroconchia;Euhe  
 terodonta;Imparidentia;Venerida;Veneroidea;Veneridae;Mercenaria;Mercenari  
 a mercenaria  
 UdeM00000020731 6596 253.1 UdeM00000020731 XP\_045206084.1 31 549  
 356 14 2 535 197 737 8.50E-64 253.1 6596 cellular  
 organisms;Eukaryota;Opisthokonta;Metazoa;Eumetazoa;Bilateria;Protostomia;  
 Spiralia;Lophotrochozoa;Mollusca;Bivalvia;Autobranchia;Heteroconchia;Euhe  
 terodonta;Imparidentia;Venerida;Veneroidea;Veneridae;Mercenaria;Mercenari  
 a mercenaria  
 UdeM00000020732 7654 103.2 UdeM00000020732 XP\_041463763.1 45.1 153  
 66 5 2 136 882 1034 4.70E-19 103.2 7654 cellular  
 organisms;Eukaryota;Opisthokonta;Metazoa;Eumetazoa;Bilateria;Deuterostomi  
 a;Echinodermata;Eleutherozoa;Echinozoa;Echinoidea;Euechinoidea;Echinacea;  
 Temnopleuroidea;Toxopneustidae;Lytechinus;Lytechinus variegatus  
 UdeM00000020733 1735272 91.7 UdeM00000020733 XP\_041355514.1 31.4  
 153 94 4 166 309 716 866 1.80E-15 91.7 1735272  
 cellular  
 organisms;Eukaryota;Opisthokonta;Metazoa;Eumetazoa;Bilateria;Protostomia;  
 Spiralia;Lophotrochozoa;Mollusca;Gastropoda;Neomphalina;Neomphaloidea;Pel  
 tospiridae;Gigantopelta;Gigantopelta aegis  
 UdeM00000020734 6596 115.9 UdeM00000020734 XP\_045206084.1 31.8 255  
 162 8 1 245 270 522 7.60E-23 115.9 6596 cellular  
 organisms;Eukaryota;Opisthokonta;Metazoa;Eumetazoa;Bilateria;Protostomia;  
 Spiralia;Lophotrochozoa;Mollusca;Bivalvia;Autobranchia;Heteroconchia;Euhe  
 terodonta;Imparidentia;Venerida;Veneroidea;Veneridae;Mercenaria;Mercenari  
 a mercenaria

UdeM00000020735 29159 108.6 UdeM00000020735 XP\_011430016.2 24.3 503  
 274 19 25 505 70 487 2.30E-20 108.6 29159 cellular  
 organisms;Eukaryota;Opisthokonta;Metazoa;Eumetazoa;Bilateria;Protostomia;  
 Spiralia;Lophotrochozoa;Mollusca;Bivalvia;Autobranchia;Pteriormorphia;Ostr  
 eida;Ostreoidea;Ostreidae;Crassostrea;Crassostrea gigas  
 UdeM00000020737 6596 423.3 UdeM00000020737 XP\_045206084.1 30.1 891  
 581 20 1 869 118 988 7.50E-115 423.3 6596 cellular  
 organisms;Eukaryota;Opisthokonta;Metazoa;Eumetazoa;Bilateria;Protostomia;  
 Spiralia;Lophotrochozoa;Mollusca;Bivalvia;Autobranchia;Heteroconchia;Euhe  
 terodonta;Imparidentia;Venerida;Veneroidea;Veneridae;Mercenaria;Mercenari  
 a mercenaria  
 UdeM00000020736 6596 439.1 UdeM00000020736 XP\_045206084.1 30.1 930  
 607 21 126 1032 79 988 1.60E-119 439.1 6596 cellular  
 organisms;Eukaryota;Opisthokonta;Metazoa;Eumetazoa;Bilateria;Protostomia;  
 Spiralia;Lophotrochozoa;Mollusca;Bivalvia;Autobranchia;Heteroconchia;Euhe  
 terodonta;Imparidentia;Venerida;Veneroidea;Veneridae;Mercenaria;Mercenari  
 a mercenaria  
 UdeM00000020738 6596 178.7 UdeM00000020738 XP\_045206084.1 30.7 361  
 234 8 28 377 179 534 1.40E-41 178.7 6596 cellular  
 organisms;Eukaryota;Opisthokonta;Metazoa;Eumetazoa;Bilateria;Protostomia;  
 Spiralia;Lophotrochozoa;Mollusca;Bivalvia;Autobranchia;Heteroconchia;Euhe  
 terodonta;Imparidentia;Venerida;Veneroidea;Veneridae;Mercenaria;Mercenari  
 a mercenaria  
 UdeM00000020739 29159 136 UdeM00000020739 XP\_034317567.1 29.7 310  
 194 6 1 301 645 939 1.20E-28 136 29159 cellular  
 organisms;Eukaryota;Opisthokonta;Metazoa;Eumetazoa;Bilateria;Protostomia;  
 Spiralia;Lophotrochozoa;Mollusca;Bivalvia;Autobranchia;Pteriormorphia;Ostr  
 eida;Ostreoidea;Ostreidae;Crassostrea;Crassostrea gigas  
 UdeM00000020740 6596 271.9 UdeM00000020740 XP\_045206084.1 30.9 517  
 337 11 13 516 160 669 1.60E-69 271.9 6596 cellular  
 organisms;Eukaryota;Opisthokonta;Metazoa;Eumetazoa;Bilateria;Protostomia;  
 Spiralia;Lophotrochozoa;Mollusca;Bivalvia;Autobranchia;Heteroconchia;Euhe  
 terodonta;Imparidentia;Venerida;Veneroidea;Veneridae;Mercenaria;Mercenari  
 a mercenaria  
 UdeM00000020741 6565 463 UdeM00000020741 XP\_022325426.1 23.3 1749  
 1079 45 80 1788 109 1634 2.70E-126 463 6565 cellular  
 organisms;Eukaryota;Opisthokonta;Metazoa;Eumetazoa;Bilateria;Protostomia;  
 Spiralia;Lophotrochozoa;Mollusca;Bivalvia;Autobranchia;Pteriormorphia;Ostr  
 eida;Ostreoidea;Ostreidae;Crassostrea;Crassostrea virginica  
 UdeM00000020742 6596 447.2 UdeM00000020742 XP\_045206084.1 31.8 931  
 583 22 41 940 79 988 1.00E-121 447.2 6596 cellular  
 organisms;Eukaryota;Opisthokonta;Metazoa;Eumetazoa;Bilateria;Protostomia;  
 Spiralia;Lophotrochozoa;Mollusca;Bivalvia;Autobranchia;Heteroconchia;Euhe  
 terodonta;Imparidentia;Venerida;Veneroidea;Veneridae;Mercenaria;Mercenari  
 a mercenaria  
 UdeM00000020743 6596 426 UdeM00000020743 XP\_045206084.1 30.7 929  
 559 21 41 905 79 986 2.30E-115 426 6596 cellular  
 organisms;Eukaryota;Opisthokonta;Metazoa;Eumetazoa;Bilateria;Protostomia;  
 Spiralia;Lophotrochozoa;Mollusca;Bivalvia;Autobranchia;Heteroconchia;Euhe  
 terodonta;Imparidentia;Venerida;Veneroidea;Veneridae;Mercenaria;Mercenari  
 a mercenaria  
 UdeM00000020744 6596 84 UdeM00000020744 XP\_045175289.1 50.7 67  
 33 0 147 213 662 728 3.20E-13 84 6596 cellular  
 organisms;Eukaryota;Opisthokonta;Metazoa;Eumetazoa;Bilateria;Protostomia;

Spiralia;Lophotrochozoa;Mollusca;Bivalvia;Autobranchia;Heteroconchia;Euherodonta;Imparidentia;Venerida;Veneroidea;Veneridae;Mercenaria;Mercenaria mercenaria

UdeM00000020745 29159 460.3 UdeM00000020745 XP\_034301372.1 46.9 499  
236 5 11 509 25 494 3.40E-126 460.3 29159 cellular

organisms;Eukaryota;Opisthokonta;Metazoa;Eumetazoa;Bilateria;Protostomia;Spiralia;Lophotrochozoa;Mollusca;Bivalvia;Autobranchia;Pteriomorphia;Ostreida;Ostreoidea;Ostreidae;Crassostrea;Crassostrea gigas

UdeM00000020746 260995 458.8 UdeM00000020746 XP\_033816253.1 43.7  
467 261 2 345 810 422 887 1.50E-125 458.8 260995  
cellular

organisms;Eukaryota;Opisthokonta;Metazoa;Eumetazoa;Bilateria;Deuterostomia;Chordata;Craniata;Vertebrata;Gnathostomata;Teleostomi;Euteleostomi;Sarcopterygii;Dipnotetrapodomorpha;Tetrapoda;Amphibia;Gymnophiona;Dermophiidae;Geotrypetes;Geotrypetes seraphini

UdeM00000020747 6596 108.6 UdeM00000020747 XP\_045182045.1 67.4 89  
29 0 1 89 32 120 5.50E-21 108.6 6596 cellular

organisms;Eukaryota;Opisthokonta;Metazoa;Eumetazoa;Bilateria;Protostomia;Spiralia;Lophotrochozoa;Mollusca;Bivalvia;Autobranchia;Heteroconchia;Euherodonta;Imparidentia;Venerida;Veneroidea;Veneridae;Mercenaria;Mercenaria mercenaria

UdeM00000020748 6596 176.8 UdeM00000020748 XP\_045182157.1 46.7 195  
104 0 19 213 29 223 3.10E-41 176.8 6596 cellular

organisms;Eukaryota;Opisthokonta;Metazoa;Eumetazoa;Bilateria;Protostomia;Spiralia;Lophotrochozoa;Mollusca;Bivalvia;Autobranchia;Heteroconchia;Euherodonta;Imparidentia;Venerida;Veneroidea;Veneridae;Mercenaria;Mercenaria mercenaria

UdeM00000020750 6573 239.2 UdeM00000020750 XP\_021371940.1 36.8 424  
178 7 53 392 115 532 9.00E-60 239.2 6573 cellular

organisms;Eukaryota;Opisthokonta;Metazoa;Eumetazoa;Bilateria;Protostomia;Spiralia;Lophotrochozoa;Mollusca;Bivalvia;Autobranchia;Pteriomorphia;Pectinida;Pectinoidea;Pectinidae;Mizuhopecten;Mizuhopecten yessoensis

UdeM00000020751 6596 308.5 UdeM00000020751 XP\_045189153.1 43.5 439  
148 7 1 343 20 454 1.20E-80 308.5 6596 cellular

organisms;Eukaryota;Opisthokonta;Metazoa;Eumetazoa;Bilateria;Protostomia;Spiralia;Lophotrochozoa;Mollusca;Bivalvia;Autobranchia;Heteroconchia;Euherodonta;Imparidentia;Venerida;Veneroidea;Veneridae;Mercenaria;Mercenaria mercenaria

UdeM00000020753 6596 171 UdeM00000020753 XP\_045182057.1 54.1 148  
68 0 11 158 16 163 1.20E-39 171 6596 cellular

organisms;Eukaryota;Opisthokonta;Metazoa;Eumetazoa;Bilateria;Protostomia;Spiralia;Lophotrochozoa;Mollusca;Bivalvia;Autobranchia;Heteroconchia;Euherodonta;Imparidentia;Venerida;Veneroidea;Veneridae;Mercenaria;Mercenaria mercenaria

UdeM00000020755 6573 67 UdeM00000020755 XP\_021346189.1 56.1 57  
25 0 1 57 22 78 1.80E-08 67 6573 cellular

organisms;Eukaryota;Opisthokonta;Metazoa;Eumetazoa;Bilateria;Protostomia;Spiralia;Lophotrochozoa;Mollusca;Bivalvia;Autobranchia;Pteriomorphia;Pectinida;Pectinoidea;Pectinidae;Mizuhopecten;Mizuhopecten yessoensis

UdeM00000020756 6573 216.5 UdeM00000020756 XP\_021346189.1 55.6 189  
78 2 1 187 22 206 3.00E-53 216.5 6573 cellular

organisms;Eukaryota;Opisthokonta;Metazoa;Eumetazoa;Bilateria;Protostomia;Spiralia;Lophotrochozoa;Mollusca;Bivalvia;Autobranchia;Pteriomorphia;Pectinida;Pectinoidea;Pectinidae;Mizuhopecten;Mizuhopecten yessoensis

UdeM00000020757 6573 216.5 UdeM00000020757 XP\_021346189.1 55.6 189  
 78 2 1 187 22 206 3.00E-53 216.5 6573 cellular  
 organisms;Eukaryota;Opisthokonta;Metazoa;Eumetazoa;Bilateria;Protostomia;  
 Spiralia;Lophotrochozoa;Mollusca;Bivalvia;Autobranchia;Pteriomorpha;Pect  
 inida;Pectinoidea;Pectinidae;Mizuhopecten;Mizuhopecten yessoensis  
 UdeM00000020758 6573 69.7 UdeM00000020758 XP\_021346189.1 57.9 57  
 24 0 1 57 22 78 2.80E-09 69.7 6573 cellular  
 organisms;Eukaryota;Opisthokonta;Metazoa;Eumetazoa;Bilateria;Protostomia;  
 Spiralia;Lophotrochozoa;Mollusca;Bivalvia;Autobranchia;Pteriomorpha;Pect  
 inida;Pectinoidea;Pectinidae;Mizuhopecten;Mizuhopecten yessoensis  
 UdeM00000020759 6579 144.1 UdeM00000020759 XP\_033757725.1 50 152  
 47 2 2 124 51 202 1.40E-31 144.1 6579 cellular  
 organisms;Eukaryota;Opisthokonta;Metazoa;Eumetazoa;Bilateria;Protostomia;  
 Spiralia;Lophotrochozoa;Mollusca;Bivalvia;Autobranchia;Pteriomorpha;Pect  
 inida;Pectinoidea;Pectinidae;Pecten;Pecten maximus  
 UdeM00000020760 6596 77.4 UdeM00000020760 XP\_045189153.1 39.8 128  
 70 3 1 128 250 370 1.60E-11 77.4 6596 cellular  
 organisms;Eukaryota;Opisthokonta;Metazoa;Eumetazoa;Bilateria;Protostomia;  
 Spiralia;Lophotrochozoa;Mollusca;Bivalvia;Autobranchia;Heteroconchia;Euhe  
 terodonta;Imparidentia;Venerida;Veneroidea;Veneridae;Mercenaria;Mercenari  
 a mercenaria  
 UdeM00000020762 1735272 80.5 UdeM00000020762 XP\_041368912.1 40.4  
 114 60 2 1 112 236 343 1.70E-12 80.5 1735272  
 cellular  
 organisms;Eukaryota;Opisthokonta;Metazoa;Eumetazoa;Bilateria;Protostomia;  
 Spiralia;Lophotrochozoa;Mollusca;Gastropoda;Neomphalina;Neomphaloidea;Pel  
 tospiridae;Gigantopelta;Gigantopelta aegis  
 UdeM00000020761 6596 77.4 UdeM00000020761 XP\_045189153.1 39.8 128  
 70 3 1 128 250 370 1.60E-11 77.4 6596 cellular  
 organisms;Eukaryota;Opisthokonta;Metazoa;Eumetazoa;Bilateria;Protostomia;  
 Spiralia;Lophotrochozoa;Mollusca;Bivalvia;Autobranchia;Heteroconchia;Euhe  
 terodonta;Imparidentia;Venerida;Veneroidea;Veneridae;Mercenaria;Mercenari  
 a mercenaria  
 UdeM00000020763 6596 92.8 UdeM00000020763 XP\_045201099.1 30.8 227  
 74 6 1 144 1 227 4.20E-16 92.8 6596 cellular  
 organisms;Eukaryota;Opisthokonta;Metazoa;Eumetazoa;Bilateria;Protostomia;  
 Spiralia;Lophotrochozoa;Mollusca;Bivalvia;Autobranchia;Heteroconchia;Euhe  
 terodonta;Imparidentia;Venerida;Veneroidea;Veneridae;Mercenaria;Mercenari  
 a mercenaria  
 UdeM00000020765 6596 111.3 UdeM00000020765 XP\_045189153.1 57 93  
 40 0 9 101 204 296 1.80E-21 111.3 6596 cellular  
 organisms;Eukaryota;Opisthokonta;Metazoa;Eumetazoa;Bilateria;Protostomia;  
 Spiralia;Lophotrochozoa;Mollusca;Bivalvia;Autobranchia;Heteroconchia;Euhe  
 terodonta;Imparidentia;Venerida;Veneroidea;Veneridae;Mercenaria;Mercenari  
 a mercenaria  
 UdeM00000020766 1735272 379 UdeM00000020766 XP\_041361132.1 59.2  
 299 122 0 14 312 12 310 6.20E-102 379 1735272  
 cellular  
 organisms;Eukaryota;Opisthokonta;Metazoa;Eumetazoa;Bilateria;Protostomia;  
 Spiralia;Lophotrochozoa;Mollusca;Gastropoda;Neomphalina;Neomphaloidea;Pel  
 tospiridae;Gigantopelta;Gigantopelta aegis  
 UdeM00000020767 6573 365.2 UdeM00000020767 XP\_021354397.1 75.8 240  
 58 0 4 243 6 245 6.70E-98 365.2 6573 cellular  
 organisms;Eukaryota;Opisthokonta;Metazoa;Eumetazoa;Bilateria;Protostomia;

Spiralia;Lophotrochozoa;Mollusca;Bivalvia;Autobranchia;Pteriomorpha;Pectinida;Pectinoidea;Pectinidae;Mizuhopecten;Mizuhopecten yessoensis  
UdeM00000020768 6596 398.3 UdeM00000020768 XP\_045181195.1 41.8 553  
251 11 59 608 88 572 1.80E-107 398.3 6596 cellular  
organisms;Eukaryota;Opisthokonta;Metazoa;Eumetazoa;Bilateria;Protostomia;  
Spiralia;Lophotrochozoa;Mollusca;Bivalvia;Autobranchia;Heteroconchia;Euherodonta;Imparidentia;Venerida;Veneroidea;Veneridae;Mercenaria;Mercenaria mercenaria  
UdeM00000020769 6596 275 UdeM00000020769 XP\_045206084.1 30.8 603  
362 16 740 1297 78 670 4.80E-70 275 6596 cellular  
organisms;Eukaryota;Opisthokonta;Metazoa;Eumetazoa;Bilateria;Protostomia;  
Spiralia;Lophotrochozoa;Mollusca;Bivalvia;Autobranchia;Heteroconchia;Euherodonta;Imparidentia;Venerida;Veneroidea;Veneridae;Mercenaria;Mercenaria mercenaria  
UdeM00000020770 6596 315.8 UdeM00000020770 XP\_045206084.1 31.3 675  
403 18 740 1365 78 740 2.60E-82 315.8 6596 cellular  
organisms;Eukaryota;Opisthokonta;Metazoa;Eumetazoa;Bilateria;Protostomia;  
Spiralia;Lophotrochozoa;Mollusca;Bivalvia;Autobranchia;Heteroconchia;Euherodonta;Imparidentia;Venerida;Veneroidea;Veneridae;Mercenaria;Mercenaria mercenaria  
UdeM00000044429 6596 107.8 UdeM00000044429 XP\_045184054.1 31.1 228  
148 5 77 299 78 301 2.40E-20 107.8 6596 cellular  
organisms;Eukaryota;Opisthokonta;Metazoa;Eumetazoa;Bilateria;Protostomia;  
Spiralia;Lophotrochozoa;Mollusca;Bivalvia;Autobranchia;Heteroconchia;Euherodonta;Imparidentia;Venerida;Veneroidea;Veneridae;Mercenaria;Mercenaria mercenaria  
UdeM00000044430 6579 225.3 UdeM00000044430 XP\_033746771.1 38.6 311  
169 6 1 295 561 865 1.00E-55 225.3 6579 cellular  
organisms;Eukaryota;Opisthokonta;Metazoa;Eumetazoa;Bilateria;Protostomia;  
Spiralia;Lophotrochozoa;Mollusca;Bivalvia;Autobranchia;Pteriomorpha;Pectinida;Pectinoidea;Pectinidae;Pecten;Pecten maximus  
UdeM00000044389 6596 331.6 UdeM00000044389 XP\_045157311.1 32.1 691  
420 14 6 656 5 686 2.20E-87 331.6 6596 cellular  
organisms;Eukaryota;Opisthokonta;Metazoa;Eumetazoa;Bilateria;Protostomia;  
Spiralia;Lophotrochozoa;Mollusca;Bivalvia;Autobranchia;Heteroconchia;Euherodonta;Imparidentia;Venerida;Veneroidea;Veneridae;Mercenaria;Mercenaria mercenaria  
UdeM00000044390 6596 83.2 UdeM00000044390 XP\_045173729.1 41.2 97  
54 2 8 104 84 177 2.50E-13 83.2 6596 cellular  
organisms;Eukaryota;Opisthokonta;Metazoa;Eumetazoa;Bilateria;Protostomia;  
Spiralia;Lophotrochozoa;Mollusca;Bivalvia;Autobranchia;Heteroconchia;Euherodonta;Imparidentia;Venerida;Veneroidea;Veneridae;Mercenaria;Mercenaria mercenaria  
UdeM00000029587 7741 280.4 UdeM00000029587 XP\_019622111.1 50.7 280  
135 3 39 317 1 278 2.80E-72 280.4 7741 cellular  
organisms;Eukaryota;Opisthokonta;Metazoa;Eumetazoa;Bilateria;Deuterostomia;Chordata;Cephalochordata;Leptocardii;Amphioxiformes;Branchiostomidae;Branchiostoma;Branchiostoma belcheri  
UdeM00000029588 6573 203.4 UdeM00000029588 XP\_021372813.1 54.2 225  
98 4 9 228 31 255 3.20E-49 203.4 6573 cellular  
organisms;Eukaryota;Opisthokonta;Metazoa;Eumetazoa;Bilateria;Protostomia;  
Spiralia;Lophotrochozoa;Mollusca;Bivalvia;Autobranchia;Pteriomorpha;Pectinida;Pectinoidea;Pectinidae;Mizuhopecten;Mizuhopecten yessoensis

UdeM00000029589 1735272 140.2 UdeM00000029589 XP\_041371965.1 45.7  
 184 91 3 46 220 61 244 3.50E-30 140.2 1735272  
 cellular  
 organisms;Eukaryota;Opisthokonta;Metazoa;Eumetazoa;Bilateria;Protostomia;  
 Spiralia;Lophotrochozoa;Mollusca;Gastropoda;Neomphalina;Neomphaloidea;Pel  
 tospiridae;Gigantopelta;Gigantopelta aegis  
 UdeM00000029590 6573 246.1 UdeM00000029590 XP\_021362498.1 39.1 343  
 155 3 1 336 104 399 6.30E-62 246.1 6573 cellular  
 organisms;Eukaryota;Opisthokonta;Metazoa;Eumetazoa;Bilateria;Protostomia;  
 Spiralia;Lophotrochozoa;Mollusca;Bivalvia;Autobranchia;Pteriormorphia;Pect  
 inida;Pectinoidea;Pectinidae;Mizuhopecten;Mizuhopecten yessoensis  
 UdeM00000029591 6579 147.1 UdeM00000029591 XP\_033724821.1 36.5 266  
 105 5 6 209 437 700 2.70E-32 147.1 6579 cellular  
 organisms;Eukaryota;Opisthokonta;Metazoa;Eumetazoa;Bilateria;Protostomia;  
 Spiralia;Lophotrochozoa;Mollusca;Bivalvia;Autobranchia;Pteriormorphia;Pect  
 inida;Pectinoidea;Pectinidae;Pecten;Pecten maximus  
 UdeM00000029592 6579 149.4 UdeM00000029592 XP\_033724860.1 27.6 399  
 160 6 3 312 723 1081 8.40E-33 149.4 6579 cellular  
 organisms;Eukaryota;Opisthokonta;Metazoa;Eumetazoa;Bilateria;Protostomia;  
 Spiralia;Lophotrochozoa;Mollusca;Bivalvia;Autobranchia;Pteriormorphia;Pect  
 inida;Pectinoidea;Pectinidae;Pecten;Pecten maximus  
 UdeM00000029593 6579 476.1 UdeM00000029593 XP\_033724854.1 38.5 722  
 373 11 37 695 61 774 7.80E-131 476.1 6579 cellular  
 organisms;Eukaryota;Opisthokonta;Metazoa;Eumetazoa;Bilateria;Protostomia;  
 Spiralia;Lophotrochozoa;Mollusca;Bivalvia;Autobranchia;Pteriormorphia;Pect  
 inida;Pectinoidea;Pectinidae;Pecten;Pecten maximus  
 UdeM00000029594 6579 474.6 UdeM00000029594 XP\_033724854.1 38.5 722  
 374 11 37 696 61 774 2.30E-130 474.6 6579 cellular  
 organisms;Eukaryota;Opisthokonta;Metazoa;Eumetazoa;Bilateria;Protostomia;  
 Spiralia;Lophotrochozoa;Mollusca;Bivalvia;Autobranchia;Pteriormorphia;Pect  
 inida;Pectinoidea;Pectinidae;Pecten;Pecten maximus  
 UdeM00000029595 6579 307 UdeM00000029595 XP\_033724844.1 42.1 442  
 225 7 64 478 883 1320 4.30E-80 307 6579 cellular  
 organisms;Eukaryota;Opisthokonta;Metazoa;Eumetazoa;Bilateria;Protostomia;  
 Spiralia;Lophotrochozoa;Mollusca;Bivalvia;Autobranchia;Pteriormorphia;Pect  
 inida;Pectinoidea;Pectinidae;Pecten;Pecten maximus  
 UdeM00000029596 6596 184.1 UdeM00000029596 XP\_045214067.1 31.8 308  
 201 5 55 355 118 423 3.30E-43 184.1 6596 cellular  
 organisms;Eukaryota;Opisthokonta;Metazoa;Eumetazoa;Bilateria;Protostomia;  
 Spiralia;Lophotrochozoa;Mollusca;Bivalvia;Autobranchia;Heteroconchia;Euhe  
 terodonta;Imparidentia;Venerida;Veneroidea;Veneridae;Mercenaria;Mercenari  
 a mercenaria  
 UdeM00000029597 6596 429.5 UdeM00000029597 XP\_045194243.1 34.4 768  
 353 17 36 658 8 769 7.80E-117 429.5 6596 cellular  
 organisms;Eukaryota;Opisthokonta;Metazoa;Eumetazoa;Bilateria;Protostomia;  
 Spiralia;Lophotrochozoa;Mollusca;Bivalvia;Autobranchia;Heteroconchia;Euhe  
 terodonta;Imparidentia;Venerida;Veneroidea;Veneridae;Mercenaria;Mercenari  
 a mercenaria  
 UdeM00000029598 6596 186.8 UdeM00000029598 XP\_045214067.1 32.5 308  
 199 5 17 317 118 423 4.60E-44 186.8 6596 cellular  
 organisms;Eukaryota;Opisthokonta;Metazoa;Eumetazoa;Bilateria;Protostomia;  
 Spiralia;Lophotrochozoa;Mollusca;Bivalvia;Autobranchia;Heteroconchia;Euhe  
 terodonta;Imparidentia;Venerida;Veneroidea;Veneridae;Mercenaria;Mercenari  
 a mercenaria

UdeM00000029599 1437191 132.5 UdeM00000029599 XP\_029054816.1 44  
 134 74 1 5 137 330 463 4.10E-28 132.5 1437191  
 cellular  
 organisms;Eukaryota;Opisthokonta;Metazoa;Eumetazoa;Bilateria;Protostomia;  
 Ecdysozoa;Panarthropoda;Arthropoda;Mandibulata;Pancrustacea;Hexapoda;Inse  
 cta;Dicondylia;Pterygota;Neoptera;Endopterygota;Hymenoptera;Apocrita;Acul  
 eata;Apoidea;Megachilidae;Megachilinae;Osmiini;Osmia;Osmia bicornis;Osmia  
 bicornis bicornis  
 UdeM00000029600 6596 187.6 UdeM00000029600 XP\_045214067.1 32.1 308  
 200 5 55 355 118 423 3.00E-44 187.6 6596 cellular  
 organisms;Eukaryota;Opisthokonta;Metazoa;Eumetazoa;Bilateria;Protostomia;  
 Spiralia;Lophotrochozoa;Mollusca;Bivalvia;Autobranchia;Heteroconchia;Euhe  
 terodonta;Imparidentia;Venerida;Veneroidea;Veneridae;Mercenaria;Mercenari  
 a mercenaria  
 UdeM00000029602 1735272 78.2 UdeM00000029602 XP\_041371698.1 48.2  
 83 42 1 2 83 34 116 6.10E-12 78.2 1735272  
 cellular  
 organisms;Eukaryota;Opisthokonta;Metazoa;Eumetazoa;Bilateria;Protostomia;  
 Spiralia;Lophotrochozoa;Mollusca;Gastropoda;Neomphalina;Neomphaloidea;Pel  
 tospiridae;Gigantopelta;Gigantopelta aegis  
 UdeM00000029603 6526 1126.3 UdeM00000029603 XP\_013082114.1 86.9  
 657 78 1 1 657 1 649 0.00E+00 1126.3 6526  
 cellular  
 organisms;Eukaryota;Opisthokonta;Metazoa;Eumetazoa;Bilateria;Protostomia;  
 Spiralia;Lophotrochozoa;Mollusca;Gastropoda;Heterobranchia;Euthyneura;Pan  
 pulmonata;Hygrophila;Lymnaeidae;Planorbidae;Biomphalaria;Biomphalaria  
 glabrata  
 UdeM00000029605 29159 92 UdeM00000029605 XP\_034307341.1 33.7 166  
 95 3 52 203 59 223 1.40E-15 92 29159 cellular  
 organisms;Eukaryota;Opisthokonta;Metazoa;Eumetazoa;Bilateria;Protostomia;  
 Spiralia;Lophotrochozoa;Mollusca;Bivalvia;Autobranchia;Pteriormorphia;Ostr  
 eida;Ostreidae;Crassostrea;Crassostrea gigas  
 UdeM00000029606 6573 1376.3 UdeM00000029606 XP\_021360010.1 86.2  
 819 94 4 1 812 1 807 0.00E+00 1376.3 6573  
 cellular  
 organisms;Eukaryota;Opisthokonta;Metazoa;Eumetazoa;Bilateria;Protostomia;  
 Spiralia;Lophotrochozoa;Mollusca;Bivalvia;Autobranchia;Pteriormorphia;Pect  
 inida;Pectinoidea;Pectinidae;Mizuhopecten;Mizuhopecten yessoensis  
 UdeM00000029607 6573 79 UdeM00000029607 XP\_021340996.1 45.1 82  
 43 1 20 101 888 967 4.50E-12 79 6573 cellular  
 organisms;Eukaryota;Opisthokonta;Metazoa;Eumetazoa;Bilateria;Protostomia;  
 Spiralia;Lophotrochozoa;Mollusca;Bivalvia;Autobranchia;Pteriormorphia;Pect  
 inida;Pectinoidea;Pectinidae;Mizuhopecten;Mizuhopecten yessoensis  
 UdeM00000029608 6573 254.6 UdeM00000029608 XP\_021373930.1 71.7 191  
 53 1 1 191 1 190 1.00E-64 254.6 6573 cellular  
 organisms;Eukaryota;Opisthokonta;Metazoa;Eumetazoa;Bilateria;Protostomia;  
 Spiralia;Lophotrochozoa;Mollusca;Bivalvia;Autobranchia;Pteriormorphia;Pect  
 inida;Pectinoidea;Pectinidae;Mizuhopecten;Mizuhopecten yessoensis  
 UdeM00000029609 6579 230.3 UdeM00000029609 XP\_033732899.1 56.2 242  
 51 2 1 242 1 187 2.60E-57 230.3 6579 cellular  
 organisms;Eukaryota;Opisthokonta;Metazoa;Eumetazoa;Bilateria;Protostomia;  
 Spiralia;Lophotrochozoa;Mollusca;Bivalvia;Autobranchia;Pteriormorphia;Pect  
 inida;Pectinoidea;Pectinidae;Pecten;Pecten maximus

UdeM00000029610 6596 201.1 UdeM00000029610 XP\_045207459.1 37 441  
 214 14 1 430 66 453 3.20E-48 201.1 6596 cellular  
 organisms;Eukaryota;Opisthokonta;Metazoa;Eumetazoa;Bilateria;Protostomia;  
 Spiralia;Lophotrochozoa;Mollusca;Bivalvia;Autobranhia;Heteroconchia;Euhe  
 terodonta;Imparidentia;Venerida;Veneroidea;Veneridae;Mercenaria;Mercenari  
 a mercenaria  
 UdeM00000029611 6573 228.8 UdeM00000029611 XP\_021345096.1 45 502  
 231 9 17 493 73 554 1.50E-56 228.8 6573 cellular  
 organisms;Eukaryota;Opisthokonta;Metazoa;Eumetazoa;Bilateria;Protostomia;  
 Spiralia;Lophotrochozoa;Mollusca;Bivalvia;Autobranhia;Pteriormorphia;Pect  
 inida;Pectinoidea;Pectinidae;Mizuhopecten;Mizuhopecten yessoensis  
 UdeM00000029613 6565 282.7 UdeM00000029613 XP\_022308193.1 47.3 298  
 146 4 10 305 6 294 5.60E-73 282.7 6565 cellular  
 organisms;Eukaryota;Opisthokonta;Metazoa;Eumetazoa;Bilateria;Protostomia;  
 Spiralia;Lophotrochozoa;Mollusca;Bivalvia;Autobranhia;Pteriormorphia;Ostr  
 eida;Ostreoidea;Ostreidae;Crassostrea;Crassostrea virginica  
 UdeM00000029614 6565 302 UdeM00000029614 XP\_022308193.1 59.7 231  
 90 2 1 231 329 556 6.70E-79 302 6565 cellular  
 organisms;Eukaryota;Opisthokonta;Metazoa;Eumetazoa;Bilateria;Protostomia;  
 Spiralia;Lophotrochozoa;Mollusca;Bivalvia;Autobranhia;Pteriormorphia;Ostr  
 eida;Ostreoidea;Ostreidae;Crassostrea;Crassostrea virginica  
 UdeM00000029615 6596 959.9 UdeM00000029615 XP\_045208192.1 76 653  
 133 2 1 629 1 653 1.60E-276 959.9 6596 cellular  
 organisms;Eukaryota;Opisthokonta;Metazoa;Eumetazoa;Bilateria;Protostomia;  
 Spiralia;Lophotrochozoa;Mollusca;Bivalvia;Autobranhia;Heteroconchia;Euhe  
 terodonta;Imparidentia;Venerida;Veneroidea;Veneridae;Mercenaria;Mercenari  
 a mercenaria  
 UdeM00000029616 6596 384.4 UdeM00000029616 XP\_045208194.1 33.5 792  
 452 14 23 761 27 796 3.30E-103 384.4 6596 cellular  
 organisms;Eukaryota;Opisthokonta;Metazoa;Eumetazoa;Bilateria;Protostomia;  
 Spiralia;Lophotrochozoa;Mollusca;Bivalvia;Autobranhia;Heteroconchia;Euhe  
 terodonta;Imparidentia;Venerida;Veneroidea;Veneridae;Mercenaria;Mercenari  
 a mercenaria  
 UdeM00000029617 6596 498.8 UdeM00000029617 XP\_045208192.1 60.1 486  
 189 4 20 504 654 1135 1.30E-137 498.8 6596 cellular  
 organisms;Eukaryota;Opisthokonta;Metazoa;Eumetazoa;Bilateria;Protostomia;  
 Spiralia;Lophotrochozoa;Mollusca;Bivalvia;Autobranhia;Heteroconchia;Euhe  
 terodonta;Imparidentia;Venerida;Veneroidea;Veneridae;Mercenaria;Mercenari  
 a mercenaria  
 UdeM00000029618 6573 611.7 UdeM00000029618 XP\_021341683.1 66.3 427  
 144 0 3 429 9 435 7.40E-172 611.7 6573 cellular  
 organisms;Eukaryota;Opisthokonta;Metazoa;Eumetazoa;Bilateria;Protostomia;  
 Spiralia;Lophotrochozoa;Mollusca;Bivalvia;Autobranhia;Pteriormorphia;Pect  
 inida;Pectinoidea;Pectinidae;Mizuhopecten;Mizuhopecten yessoensis  
 UdeM00000029619 6565 1164.1 UdeM00000029619 XP\_022323498.1 63.5  
 936 330 7 1 930 30 959 0.00E+00 1164.1 6565  
 cellular  
 organisms;Eukaryota;Opisthokonta;Metazoa;Eumetazoa;Bilateria;Protostomia;  
 Spiralia;Lophotrochozoa;Mollusca;Bivalvia;Autobranhia;Pteriormorphia;Ostr  
 eida;Ostreoidea;Ostreidae;Crassostrea;Crassostrea virginica  
 UdeM00000029620 1735272 260.4 UdeM00000029620 XP\_041371786.1 44.7  
 264 146 0 41 304 32 295 2.90E-66 260.4 1735272  
 cellular  
 organisms;Eukaryota;Opisthokonta;Metazoa;Eumetazoa;Bilateria;Protostomia;



Spiralia; Lophotrochozoa; Mollusca; Gastropoda; Neomphalina; Neomphaloidea; Pelto-  
 tospiridae; Gigantopelta; Gigantopelta aegis

|                 |      |       |                 |                |      |          |
|-----------------|------|-------|-----------------|----------------|------|----------|
| UdeM00000029621 | 8005 | 191.8 | UdeM00000029621 | XP_026877702.2 | 51.4 | 175      |
| 82              | 2    | 1     | 172             | 307            | 481  | 7.20E-46 |

191.8 8005 cellular organisms; Eukaryota; Opisthokonta; Metazoa; Eumetazoa; Bilateria; Deuterostomi-  
 a; Chordata; Craniata; Vertebrata; Gnathostomata; Teleostomi; Euteleostomi; Acti-  
 nopterygii; Actinopteri; Neopterygii; Teleostei; Osteoglossocephalai; Clupeoce-  
 phala; Otomorpha; Ostariophysi; Otophysi; Characiphysae; Gymnotiformes; Gymnoto-  
 idei; Gymnotidae; Electrophorus; Electrophorus electricus

|                 |      |       |                 |                |      |          |
|-----------------|------|-------|-----------------|----------------|------|----------|
| UdeM00000029622 | 6596 | 143.3 | UdeM00000029622 | XP_045208835.1 | 46.9 | 143      |
| 61              | 3    | 31    | 160             | 1627           | 1767 | 2.80E-31 |

143.3 6596 cellular organisms; Eukaryota; Opisthokonta; Metazoa; Eumetazoa; Bilateria; Protostomia;  
 Spiralia; Lophotrochozoa; Mollusca; Bivalvia; Autobranchia; Heteroconchia; Euhe-  
 terodonta; Imparidentia; Venerida; Veneroidea; Veneridae; Mercenaria; Mercenari-  
 a mercenaria

|                 |      |        |                 |                |      |               |
|-----------------|------|--------|-----------------|----------------|------|---------------|
| UdeM00000029623 | 6596 | 1330.5 | UdeM00000029623 | XP_045157300.1 | 39.6 |               |
| 1838            | 983  | 39     | 573             | 2355           | 8    | 1773 0.00E+00 |

1330.5 6596 cellular organisms; Eukaryota; Opisthokonta; Metazoa; Eumetazoa; Bilateria; Protostomia;  
 Spiralia; Lophotrochozoa; Mollusca; Bivalvia; Autobranchia; Heteroconchia; Euhe-  
 terodonta; Imparidentia; Venerida; Veneroidea; Veneridae; Mercenaria; Mercenari-  
 a mercenaria

|                 |      |        |                 |                |      |               |
|-----------------|------|--------|-----------------|----------------|------|---------------|
| UdeM00000029624 | 6596 | 1116.7 | UdeM00000029624 | XP_045207645.1 | 31.4 |               |
| 2259            | 1130 | 45     | 621             | 2505           | 1    | 2214 0.00E+00 |

1116.7 6596 cellular organisms; Eukaryota; Opisthokonta; Metazoa; Eumetazoa; Bilateria; Protostomia;  
 Spiralia; Lophotrochozoa; Mollusca; Bivalvia; Autobranchia; Heteroconchia; Euhe-  
 terodonta; Imparidentia; Venerida; Veneroidea; Veneridae; Mercenaria; Mercenari-  
 a mercenaria

|                 |      |        |                 |                |     |               |
|-----------------|------|--------|-----------------|----------------|-----|---------------|
| UdeM00000029625 | 6596 | 1164.4 | UdeM00000029625 | XP_045189898.1 | 34  |               |
| 1983            | 1024 | 40     | 55              | 1830           | 285 | 2190 0.00E+00 |

1164.4 6596 cellular organisms; Eukaryota; Opisthokonta; Metazoa; Eumetazoa; Bilateria; Protostomia;  
 Spiralia; Lophotrochozoa; Mollusca; Bivalvia; Autobranchia; Heteroconchia; Euhe-  
 terodonta; Imparidentia; Venerida; Veneroidea; Veneridae; Mercenaria; Mercenari-  
 a mercenaria

|                 |      |      |                 |                |      |          |
|-----------------|------|------|-----------------|----------------|------|----------|
| UdeM00000029626 | 6596 | 72.4 | UdeM00000029626 | XP_045207642.1 | 25   | 288      |
| 205             | 4    | 5    | 284             | 731            | 1015 | 1.10E-09 |

72.4 6596 cellular organisms; Eukaryota; Opisthokonta; Metazoa; Eumetazoa; Bilateria; Protostomia;  
 Spiralia; Lophotrochozoa; Mollusca; Bivalvia; Autobranchia; Heteroconchia; Euhe-  
 terodonta; Imparidentia; Venerida; Veneroidea; Veneridae; Mercenaria; Mercenari-  
 a mercenaria

|                 |      |      |                 |                |      |          |
|-----------------|------|------|-----------------|----------------|------|----------|
| UdeM00000029627 | 6596 | 81.6 | UdeM00000029627 | XP_045209928.1 | 29.6 | 169      |
| 112             | 4    | 1    | 167             | 1              | 164  | 1.10E-12 |

81.6 6596 cellular organisms; Eukaryota; Opisthokonta; Metazoa; Eumetazoa; Bilateria; Protostomia;  
 Spiralia; Lophotrochozoa; Mollusca; Bivalvia; Autobranchia; Heteroconchia; Euhe-  
 terodonta; Imparidentia; Venerida; Veneroidea; Veneridae; Mercenaria; Mercenari-  
 a mercenaria

|                 |      |       |                 |                |     |           |
|-----------------|------|-------|-----------------|----------------|-----|-----------|
| UdeM00000029628 | 6596 | 424.1 | UdeM00000029628 | XP_045207788.1 | 76  | 283       |
| 66              | 1    | 18    | 298             | 571            | 853 | 1.50E-115 |

424.1 6596 cellular organisms; Eukaryota; Opisthokonta; Metazoa; Eumetazoa; Bilateria; Protostomia;  
 Spiralia; Lophotrochozoa; Mollusca; Bivalvia; Autobranchia; Heteroconchia; Euhe-  
 terodonta; Imparidentia; Venerida; Veneroidea; Veneridae; Mercenaria; Mercenari-  
 a mercenaria

UdeM00000029629 6596 337 UdeM00000029629 XP\_045207787.1 43 449  
 237 4 1 441 1 438 3.60E-89 337 6596 cellular  
 organisms;Eukaryota;Opisthokonta;Metazoa;Eumetazoa;Bilateria;Protostomia;  
 Spiralia;Lophotrochozoa;Mollusca;Bivalvia;Autobranchia;Heteroconchia;Euhe  
 terodonta;Imparidentia;Venerida;Veneroidea;Veneridae;Mercenaria;Mercenari  
 a mercenaria

UdeM00000029630 6579 332 UdeM00000029630 XP\_033725828.1 56 284  
 123 1 1 282 1 284 8.80E-88 332 6579 cellular  
 organisms;Eukaryota;Opisthokonta;Metazoa;Eumetazoa;Bilateria;Protostomia;  
 Spiralia;Lophotrochozoa;Mollusca;Bivalvia;Autobranchia;Pteriormorphia;Pect  
 inida;Pectinoidea;Pectinidae;Pecten;Pecten maximus

UdeM00000029631 6573 243 UdeM00000029631 XP\_021342710.1 44 293  
 146 4 1 289 1 279 5.50E-61 243 6573 cellular  
 organisms;Eukaryota;Opisthokonta;Metazoa;Eumetazoa;Bilateria;Protostomia;  
 Spiralia;Lophotrochozoa;Mollusca;Bivalvia;Autobranchia;Pteriormorphia;Pect  
 inida;Pectinoidea;Pectinidae;Mizuhopecten;Mizuhopecten yessoensis

UdeM00000029632 6573 99.8 UdeM00000029632 XP\_021377039.1 53.2 139  
 64 1 1 139 1 138 3.10E-18 99.8 6573 cellular  
 organisms;Eukaryota;Opisthokonta;Metazoa;Eumetazoa;Bilateria;Protostomia;  
 Spiralia;Lophotrochozoa;Mollusca;Bivalvia;Autobranchia;Pteriormorphia;Pect  
 inida;Pectinoidea;Pectinidae;Mizuhopecten;Mizuhopecten yessoensis

UdeM00000029633 6573 838.6 UdeM00000029633 XP\_021377069.1 67.8 646  
 174 6 1 645 1 613 5.40E-240 838.6 6573 cellular  
 organisms;Eukaryota;Opisthokonta;Metazoa;Eumetazoa;Bilateria;Protostomia;  
 Spiralia;Lophotrochozoa;Mollusca;Bivalvia;Autobranchia;Pteriormorphia;Pect  
 inida;Pectinoidea;Pectinidae;Mizuhopecten;Mizuhopecten yessoensis

UdeM00000029634 6573 841.3 UdeM00000029634 XP\_021377060.1 67.5 662  
 175 9 1 655 1 629 8.50E-241 841.3 6573 cellular  
 organisms;Eukaryota;Opisthokonta;Metazoa;Eumetazoa;Bilateria;Protostomia;  
 Spiralia;Lophotrochozoa;Mollusca;Bivalvia;Autobranchia;Pteriormorphia;Pect  
 inida;Pectinoidea;Pectinidae;Mizuhopecten;Mizuhopecten yessoensis

UdeM00000029635 6596 1080.9 UdeM00000029635 XP\_045209059.1 77.3  
 749 162 4 1 749 1 741 0.00E+00 1080.9 6596  
 cellular  
 organisms;Eukaryota;Opisthokonta;Metazoa;Eumetazoa;Bilateria;Protostomia;  
 Spiralia;Lophotrochozoa;Mollusca;Bivalvia;Autobranchia;Heteroconchia;Euhe  
 terodonta;Imparidentia;Venerida;Veneroidea;Veneridae;Mercenaria;Mercenari  
 a mercenaria

UdeM00000029636 6500 184.9 UdeM00000029636 XP\_005101692.1 68.2 157  
 44 3 1 154 1 154 7.80E-44 184.9 6500 cellular  
 organisms;Eukaryota;Opisthokonta;Metazoa;Eumetazoa;Bilateria;Protostomia;  
 Spiralia;Lophotrochozoa;Mollusca;Gastropoda;Heterobranchia;Euthyneura;Tec  
 tipleura;Aplysiida;Aplysiioidea;Aplysiidae;Aplysia;Aplysia californica

UdeM00000029637 400727 273.1 UdeM00000029637 XP\_025083308.1 63.5  
 211 74 2 1 210 1 209 4.40E-70 273.1 400727  
 cellular  
 organisms;Eukaryota;Opisthokonta;Metazoa;Eumetazoa;Bilateria;Protostomia;  
 Spiralia;Lophotrochozoa;Mollusca;Gastropoda;Caenogastropoda;Architaeniogl  
 ossa;Ampullarioidea;Ampullariidae;Pomacea;Pomacea canaliculata

UdeM00000029638 6596 312 UdeM00000029638 XP\_045177776.1 36.3 542  
 326 9 1 534 405 935 1.90E-81 312 6596 cellular  
 organisms;Eukaryota;Opisthokonta;Metazoa;Eumetazoa;Bilateria;Protostomia;  
 Spiralia;Lophotrochozoa;Mollusca;Bivalvia;Autobranchia;Heteroconchia;Euhe

terodonta;Imparidentia;Venerida;Veneroidea;Veneridae;Mercenaria;Mercenari  
a mercenaria

|                 |      |        |                 |                |      |      |          |        |      |
|-----------------|------|--------|-----------------|----------------|------|------|----------|--------|------|
| UdeM00000029639 | 6596 | 1291.6 | UdeM00000029639 | XP_045157300.1 | 37.6 |      |          |        |      |
| 1893            | 1019 | 39     | 25              | 1882           | 8    | 1773 | 0.00E+00 | 1291.6 | 6596 |

cellular

organisms;Eukaryota;Opisthokonta;Metazoa;Eumetazoa;Bilateria;Protostomia;  
Spiralia;Lophotrochozoa;Mollusca;Bivalvia;Autobranhia;Heteroconchia;Euhe  
terodonta;Imparidentia;Venerida;Veneroidea;Veneridae;Mercenaria;Mercenari  
a mercenaria

|                 |      |        |                 |                |      |      |          |        |      |
|-----------------|------|--------|-----------------|----------------|------|------|----------|--------|------|
| UdeM00000029640 | 6596 | 1313.5 | UdeM00000029640 | XP_045157300.1 | 37.5 |      |          |        |      |
| 1893            | 1026 | 38     | 277             | 2139           | 8    | 1773 | 0.00E+00 | 1313.5 | 6596 |

cellular

organisms;Eukaryota;Opisthokonta;Metazoa;Eumetazoa;Bilateria;Protostomia;  
Spiralia;Lophotrochozoa;Mollusca;Bivalvia;Autobranhia;Heteroconchia;Euhe  
terodonta;Imparidentia;Venerida;Veneroidea;Veneridae;Mercenaria;Mercenari  
a mercenaria

|                 |       |       |                 |                |     |          |       |       |          |
|-----------------|-------|-------|-----------------|----------------|-----|----------|-------|-------|----------|
| UdeM00000029642 | 29159 | 220.7 | UdeM00000029642 | XP_034339165.1 | 38  | 334      |       |       |          |
| 193             | 8     | 1     | 331             | 186            | 508 | 2.80E-54 | 220.7 | 29159 | cellular |

organisms;Eukaryota;Opisthokonta;Metazoa;Eumetazoa;Bilateria;Protostomia;  
Spiralia;Lophotrochozoa;Mollusca;Bivalvia;Autobranhia;Pteriormorphia;Ostr  
eida;Ostreoidea;Ostreidae;Crassostrea;Crassostrea gigas

|                 |       |       |                 |                |      |           |       |       |          |
|-----------------|-------|-------|-----------------|----------------|------|-----------|-------|-------|----------|
| UdeM00000029643 | 29159 | 496.1 | UdeM00000029643 | XP_034299474.1 | 42.5 | 635       |       |       |          |
| 347             | 9     | 37    | 664             | 132            | 755  | 6.80E-137 | 496.1 | 29159 | cellular |

organisms;Eukaryota;Opisthokonta;Metazoa;Eumetazoa;Bilateria;Protostomia;  
Spiralia;Lophotrochozoa;Mollusca;Bivalvia;Autobranhia;Pteriormorphia;Ostr  
eida;Ostreoidea;Ostreidae;Crassostrea;Crassostrea gigas

|                 |       |       |                 |                |     |          |       |       |          |
|-----------------|-------|-------|-----------------|----------------|-----|----------|-------|-------|----------|
| UdeM00000029644 | 29159 | 220.7 | UdeM00000029644 | XP_034339165.1 | 38  | 334      |       |       |          |
| 193             | 8     | 1     | 331             | 186            | 508 | 2.80E-54 | 220.7 | 29159 | cellular |

organisms;Eukaryota;Opisthokonta;Metazoa;Eumetazoa;Bilateria;Protostomia;  
Spiralia;Lophotrochozoa;Mollusca;Bivalvia;Autobranhia;Pteriormorphia;Ostr  
eida;Ostreoidea;Ostreidae;Crassostrea;Crassostrea gigas

|                 |       |       |                 |                |      |           |       |       |          |
|-----------------|-------|-------|-----------------|----------------|------|-----------|-------|-------|----------|
| UdeM00000029645 | 29159 | 499.6 | UdeM00000029645 | XP_034299474.1 | 43.4 | 610       |       |       |          |
| 329             | 8     | 94    | 696             | 155            | 755  | 6.50E-138 | 499.6 | 29159 | cellular |

organisms;Eukaryota;Opisthokonta;Metazoa;Eumetazoa;Bilateria;Protostomia;  
Spiralia;Lophotrochozoa;Mollusca;Bivalvia;Autobranhia;Pteriormorphia;Ostr  
eida;Ostreoidea;Ostreidae;Crassostrea;Crassostrea gigas

|                 |      |        |                 |                |      |      |          |        |      |
|-----------------|------|--------|-----------------|----------------|------|------|----------|--------|------|
| UdeM00000029646 | 6596 | 1358.6 | UdeM00000029646 | XP_045207645.1 | 37.4 |      |          |        |      |
| 2261            | 1326 | 47     | 4379            | 6600           | 6    | 2215 | 0.00E+00 | 1358.6 | 6596 |

cellular

organisms;Eukaryota;Opisthokonta;Metazoa;Eumetazoa;Bilateria;Protostomia;  
Spiralia;Lophotrochozoa;Mollusca;Bivalvia;Autobranhia;Heteroconchia;Euhe  
terodonta;Imparidentia;Venerida;Veneroidea;Veneridae;Mercenaria;Mercenari  
a mercenaria

|                 |      |        |                 |                |      |      |          |        |      |
|-----------------|------|--------|-----------------|----------------|------|------|----------|--------|------|
| UdeM00000029647 | 6596 | 1358.6 | UdeM00000029647 | XP_045207645.1 | 37.4 |      |          |        |      |
| 2261            | 1326 | 47     | 4401            | 6622           | 6    | 2215 | 0.00E+00 | 1358.6 | 6596 |

cellular

organisms;Eukaryota;Opisthokonta;Metazoa;Eumetazoa;Bilateria;Protostomia;  
Spiralia;Lophotrochozoa;Mollusca;Bivalvia;Autobranhia;Heteroconchia;Euhe  
terodonta;Imparidentia;Venerida;Veneroidea;Veneridae;Mercenaria;Mercenari  
a mercenaria

|                 |      |        |                 |                |      |      |           |        |      |
|-----------------|------|--------|-----------------|----------------|------|------|-----------|--------|------|
| UdeM00000029648 | 6596 | 1002.7 | UdeM00000029648 | XP_045193379.1 | 35.1 |      |           |        |      |
| 2004            | 1170 | 58     | 11930           | 13855          | 20   | 1971 | 4.70E-288 | 1002.7 | 6596 |

cellular

organisms;Eukaryota;Opisthokonta;Metazoa;Eumetazoa;Bilateria;Protostomia;

Spiralia;Lophotrochozoa;Mollusca;Bivalvia;Autobranchia;Heteroconchia;Euherodonta;Imparidentia;Venerida;Veneroidea;Veneridae;Mercenaria;Mercenaria mercenaria

UdeM00000029649 6596 270 UdeM00000029649 XP\_045208412.1 41.2 340  
191 4 8 340 11 348 4.10E-69 270 6596 cellular

organisms;Eukaryota;Opisthokonta;Metazoa;Eumetazoa;Bilateria;Protostomia;Spiralia;Lophotrochozoa;Mollusca;Bivalvia;Autobranchia;Heteroconchia;Euherodonta;Imparidentia;Venerida;Veneroidea;Veneridae;Mercenaria;Mercenaria mercenaria

UdeM00000029650 6596 279.3 UdeM00000029650 XP\_045208040.1 57.1 287  
92 7 8 271 14 292 6.10E-72 279.3 6596 cellular

organisms;Eukaryota;Opisthokonta;Metazoa;Eumetazoa;Bilateria;Protostomia;Spiralia;Lophotrochozoa;Mollusca;Bivalvia;Autobranchia;Heteroconchia;Euherodonta;Imparidentia;Venerida;Veneroidea;Veneridae;Mercenaria;Mercenaria mercenaria

UdeM00000029651 6596 282.3 UdeM00000029651 XP\_045208040.1 56.8 287  
95 6 8 273 14 292 7.30E-73 282.3 6596 cellular

organisms;Eukaryota;Opisthokonta;Metazoa;Eumetazoa;Bilateria;Protostomia;Spiralia;Lophotrochozoa;Mollusca;Bivalvia;Autobranchia;Heteroconchia;Euherodonta;Imparidentia;Venerida;Veneroidea;Veneridae;Mercenaria;Mercenaria mercenaria

UdeM00000029652 6596 155.2 UdeM00000029652 XP\_045208666.1 40.5 262  
127 7 1 243 1 252 1.20E-34 155.2 6596 cellular

organisms;Eukaryota;Opisthokonta;Metazoa;Eumetazoa;Bilateria;Protostomia;Spiralia;Lophotrochozoa;Mollusca;Bivalvia;Autobranchia;Heteroconchia;Euherodonta;Imparidentia;Venerida;Veneroidea;Veneridae;Mercenaria;Mercenaria mercenaria

UdeM00000029654 400727 60.1 UdeM00000029654 XP\_025084899.1 30.7  
137 85 5 118 245 59 194 7.40E-06 60.1 400727  
cellular

organisms;Eukaryota;Opisthokonta;Metazoa;Eumetazoa;Bilateria;Protostomia;Spiralia;Lophotrochozoa;Mollusca;Gastropoda;Caenogastropoda;Architaenioglossa;Ampullarioidea;Ampullariidae;Pomacea;Pomacea canaliculata

UdeM00000029655 6565 66.6 UdeM00000029655 XP\_022286845.1 25.7 245  
139 11 9 215 1854 2093 1.10E-07 66.6 6565 cellular

organisms;Eukaryota;Opisthokonta;Metazoa;Eumetazoa;Bilateria;Protostomia;Spiralia;Lophotrochozoa;Mollusca;Bivalvia;Autobranchia;Pteriomorphia;Ostreida;Ostreoidea;Ostreidae;Crassostrea;Crassostrea virginica

UdeM00000029657 6105 69.7 UdeM00000029657 XP\_031561609.1 29 155  
100 5 111 259 1513 1663 6.70E-09 69.7 6105 cellular

organisms;Eukaryota;Opisthokonta;Metazoa;Eumetazoa;Cnidaria;Anthozoa;Hexacorallia;Actiniaria;Actiniidae;Actinia;Actinia tenebrosa

UdeM00000029658 400727 71.2 UdeM00000029658 XP\_025084899.1 29.3  
150 93 4 15 151 59 208 1.30E-09 71.2 400727  
cellular

organisms;Eukaryota;Opisthokonta;Metazoa;Eumetazoa;Bilateria;Protostomia;Spiralia;Lophotrochozoa;Mollusca;Gastropoda;Caenogastropoda;Architaenioglossa;Ampullarioidea;Ampullariidae;Pomacea;Pomacea canaliculata

UdeM00000029659 400727 70.1 UdeM00000029659 XP\_025084899.1 28  
186 117 7 34 205 59 241 7.70E-09 70.1 400727  
cellular

organisms;Eukaryota;Opisthokonta;Metazoa;Eumetazoa;Bilateria;Protostomia;Spiralia;Lophotrochozoa;Mollusca;Gastropoda;Caenogastropoda;Architaenioglossa;Ampullarioidea;Ampullariidae;Pomacea;Pomacea canaliculata

UdeM00000029660 29159 67 UdeM00000029660 XP\_034333290.1 24.1 291  
 166 11 14 255 1873 2157 6.20E-08 67 29159 cellular  
 organisms;Eukaryota;Opisthokonta;Metazoa;Eumetazoa;Bilateria;Protostomia;  
 Spiralia;Lophotrochozoa;Mollusca;Bivalvia;Autobranchia;Pteriomorphia;Ostr  
 eida;Ostreoidea;Ostreidae;Crassostrea;Crassostrea gigas  
 UdeM00000029666 6596 70.1 UdeM00000029666 XP\_045198564.1 27 189  
 123 6 5 189 72 249 7.80E-09 70.1 6596 cellular  
 organisms;Eukaryota;Opisthokonta;Metazoa;Eumetazoa;Bilateria;Protostomia;  
 Spiralia;Lophotrochozoa;Mollusca;Bivalvia;Autobranchia;Heteroconchia;Euhe  
 terodonta;Imparidentia;Venerida;Veneroidea;Veneridae;Mercenaria;Mercenari  
 a mercenaria  
 UdeM00000029668 6596 398.3 UdeM00000029668 XP\_045208418.1 58.6 331  
 135 2 62 391 91 420 1.10E-107 398.3 6596 cellular  
 organisms;Eukaryota;Opisthokonta;Metazoa;Eumetazoa;Bilateria;Protostomia;  
 Spiralia;Lophotrochozoa;Mollusca;Bivalvia;Autobranchia;Heteroconchia;Euhe  
 terodonta;Imparidentia;Venerida;Veneroidea;Veneridae;Mercenaria;Mercenari  
 a mercenaria  
 UdeM00000029669 6596 367.5 UdeM00000029669 XP\_045200044.1 50.4 343  
 169 1 95 436 57 399 2.40E-98 367.5 6596 cellular  
 organisms;Eukaryota;Opisthokonta;Metazoa;Eumetazoa;Bilateria;Protostomia;  
 Spiralia;Lophotrochozoa;Mollusca;Bivalvia;Autobranchia;Heteroconchia;Euhe  
 terodonta;Imparidentia;Venerida;Veneroidea;Veneridae;Mercenaria;Mercenari  
 a mercenaria  
 UdeM00000029670 6596 385.6 UdeM00000029670 XP\_045200044.1 51.9 343  
 164 1 46 387 57 399 7.60E-104 385.6 6596 cellular  
 organisms;Eukaryota;Opisthokonta;Metazoa;Eumetazoa;Bilateria;Protostomia;  
 Spiralia;Lophotrochozoa;Mollusca;Bivalvia;Autobranchia;Heteroconchia;Euhe  
 terodonta;Imparidentia;Venerida;Veneroidea;Veneridae;Mercenaria;Mercenari  
 a mercenaria  
 UdeM00000029671 6596 333.6 UdeM00000029671 XP\_045207921.1 42.3 371  
 207 5 105 470 101 469 4.30E-88 333.6 6596 cellular  
 organisms;Eukaryota;Opisthokonta;Metazoa;Eumetazoa;Bilateria;Protostomia;  
 Spiralia;Lophotrochozoa;Mollusca;Bivalvia;Autobranchia;Heteroconchia;Euhe  
 terodonta;Imparidentia;Venerida;Veneroidea;Veneridae;Mercenaria;Mercenari  
 a mercenaria  
 UdeM00000029672 6596 345.1 UdeM00000029672 XP\_045209815.1 29.4 1221  
 657 33 11 1168 21 1099 3.40E-91 345.1 6596 cellular  
 organisms;Eukaryota;Opisthokonta;Metazoa;Eumetazoa;Bilateria;Protostomia;  
 Spiralia;Lophotrochozoa;Mollusca;Bivalvia;Autobranchia;Heteroconchia;Euhe  
 terodonta;Imparidentia;Venerida;Veneroidea;Veneridae;Mercenaria;Mercenari  
 a mercenaria  
 UdeM00000029673 29159 322 UdeM00000029673 XP\_034329602.1 69.4 242  
 68 2 14 254 1 237 6.80E-85 322 29159 cellular  
 organisms;Eukaryota;Opisthokonta;Metazoa;Eumetazoa;Bilateria;Protostomia;  
 Spiralia;Lophotrochozoa;Mollusca;Bivalvia;Autobranchia;Pteriomorphia;Ostr  
 eida;Ostreoidea;Ostreidae;Crassostrea;Crassostrea gigas  
 UdeM00000029674 29159 322 UdeM00000029674 XP\_034329602.1 69.4 242  
 68 2 13 253 1 237 6.70E-85 322 29159 cellular  
 organisms;Eukaryota;Opisthokonta;Metazoa;Eumetazoa;Bilateria;Protostomia;  
 Spiralia;Lophotrochozoa;Mollusca;Bivalvia;Autobranchia;Pteriomorphia;Ostr  
 eida;Ostreoidea;Ostreidae;Crassostrea;Crassostrea gigas  
 UdeM00000029675 6573 567.4 UdeM00000029675 XP\_021347556.1 30.6 1674  
 890 44 1 1555 24 1545 5.70E-158 567.4 6573 cellular  
 organisms;Eukaryota;Opisthokonta;Metazoa;Eumetazoa;Bilateria;Protostomia;

Spiralia; Lophotrochozoa; Mollusca; Bivalvia; Autobranchia; Pteriomorpha; Pectinida; Pectinoidea; Pectinidae; Mizuhopecten; Mizuhopecten yessoensis  
UdeM00000029676 1735272 159.8 UdeM00000029676 XP\_041371878.1 51.8  
141 68 0 18 158 8 148 2.80E-36 159.8 1735272  
cellular

organisms; Eukaryota; Opisthokonta; Metazoa; Eumetazoa; Bilateria; Protostomia; Spiralia; Lophotrochozoa; Mollusca; Gastropoda; Neomphalina; Neomphaloidea; Peltospiridae; Gigantopelta; Gigantopelta aegis  
UdeM00000029677 6573 160.2 UdeM00000029677 XP\_021373576.1 50.7 150  
73 1 1 149 1 150 2.00E-36 160.2 6573 cellular

organisms; Eukaryota; Opisthokonta; Metazoa; Eumetazoa; Bilateria; Protostomia; Spiralia; Lophotrochozoa; Mollusca; Bivalvia; Autobranchia; Pteriomorpha; Pectinida; Pectinoidea; Pectinidae; Mizuhopecten; Mizuhopecten yessoensis  
UdeM00000029678 29159 469.2 UdeM00000029678 XP\_034337896.1 61.1 360  
139 1 5 364 19 377 6.00E-129 469.2 29159 cellular

organisms; Eukaryota; Opisthokonta; Metazoa; Eumetazoa; Bilateria; Protostomia; Spiralia; Lophotrochozoa; Mollusca; Bivalvia; Autobranchia; Pteriomorpha; Ostreida; Ostreoidea; Ostreidae; Crassostrea; Crassostrea gigas  
UdeM00000029679 6573 655.6 UdeM00000029679 XP\_021342009.1 36.2 1269  
532 31 119 1319 316 1374 1.30E-184 655.6 6573 cellular

organisms; Eukaryota; Opisthokonta; Metazoa; Eumetazoa; Bilateria; Protostomia; Spiralia; Lophotrochozoa; Mollusca; Bivalvia; Autobranchia; Pteriomorpha; Pectinida; Pectinoidea; Pectinidae; Mizuhopecten; Mizuhopecten yessoensis  
UdeM00000029680 29159 761.9 UdeM00000029680 XP\_011413945.2 74.1 521  
134 1 9 528 9 529 5.30E-217 761.9 29159 cellular

organisms; Eukaryota; Opisthokonta; Metazoa; Eumetazoa; Bilateria; Protostomia; Spiralia; Lophotrochozoa; Mollusca; Bivalvia; Autobranchia; Pteriomorpha; Ostreida; Ostreoidea; Ostreidae; Crassostrea; Crassostrea gigas  
UdeM00000029681 77115 362.8 UdeM00000029681 XP\_038133904.1 61.4 272  
103 1 9 280 11 280 3.80E-97 362.8 77115 cellular

organisms; Eukaryota; Opisthokonta; Metazoa; Eumetazoa; Bilateria; Deuterostomia; Chordata; Craniata; Vertebrata; Gnathostomata; Teleostomi; Euteleostomi; Actinopterygii; Actinopteri; Neopterygii; Teleostei; Osteoglossocephalai; Clupeccephala; Euteleosteomorpha; Neoteleostei; Eurypterygia; Ctenosquamata; Acanthomorphata; Euacanthomorphacea; Percomorphaceae; Ovalentaria; Atherinomorphae; Cyprinodontiformes; Cyprinodontoides; Cyprinodontidae; Cyprinodontinae; Cyprinodontini; Cyprinodon; Cyprinodon tularosa  
UdeM00000029682 1250792 95.9 UdeM00000029682 XP\_041861569.1 57.5  
73 31 0 2 74 595 667 2.30E-17 95.9 1250792  
cellular

organisms; Eukaryota; Opisthokonta; Metazoa; Eumetazoa; Bilateria; Deuterostomia; Chordata; Craniata; Vertebrata; Gnathostomata; Teleostomi; Euteleostomi; Actinopterygii; Actinopteri; Neopterygii; Teleostei; Osteoglossocephalai; Clupeccephala; Euteleosteomorpha; Neoteleostei; Eurypterygia; Ctenosquamata; Acanthomorphata; Euacanthomorphacea; Percomorphaceae; Ovalentaria; Atherinomorphae; Atheriniformes; Melanotaeniidae; Melanotaenia; Melanotaenia boesemani  
UdeM00000029683 1676925 183.3 UdeM00000029683 XP\_023656880.1 40.2  
234 129 3 32 262 272 497 4.00E-43 183.3 1676925  
cellular

organisms; Eukaryota; Opisthokonta; Metazoa; Eumetazoa; Bilateria; Deuterostomia; Chordata; Craniata; Vertebrata; Gnathostomata; Teleostomi; Euteleostomi; Actinopterygii; Actinopteri; Neopterygii; Teleostei; Osteoglossocephalai; Osteoglossocephala; Osteoglossomorpha; Osteoglossiformes; Mormyridae; Paramormyrops; Paramormyrops kingsleyae

UdeM00000029684 6596 171 UdeM00000029684 XP\_045208508.1 37.7 276  
 148 8 1 268 102 361 2.60E-39 171 6596 cellular  
 organisms;Eukaryota;Opisthokonta;Metazoa;Eumetazoa;Bilateria;Protostomia;  
 Spiralia;Lophotrochozoa;Mollusca;Bivalvia;Autobranchia;Heteroconchia;Euhe  
 terodonta;Imparidentia;Venerida;Veneroidea;Veneridae;Mercenaria;Mercenari  
 a mercenaria

UdeM00000029685 6573 363.6 UdeM00000029685 XP\_021367265.1 55.7 316  
 135 2 16 331 100 410 2.60E-97 363.6 6573 cellular  
 organisms;Eukaryota;Opisthokonta;Metazoa;Eumetazoa;Bilateria;Protostomia;  
 Spiralia;Lophotrochozoa;Mollusca;Bivalvia;Autobranchia;Pteriormorphia;Pect  
 inida;Pectinoidea;Pectinidae;Mizuhopecten;Mizuhopecten yessoensis

UdeM00000029687 1415580 91.3 UdeM00000029687 XP\_030064917.1 62.2  
 74 27 1 6 78 361 434 6.00E-16 91.3 1415580  
 cellular  
 organisms;Eukaryota;Opisthokonta;Metazoa;Eumetazoa;Bilateria;Deuterostomi  
 a;Chordata;Craniata;Vertebrata;Gnathostomata;Teleostomi;Euteleostomi;Sarc  
 opterygii;Dipnotetrapodomorpha;Tetrapoda;Amphibia;Gymnophiona;Siphonopida  
 e;Microcaecilia;Microcaecilia unicolor

UdeM00000029688 7936 69.3 UdeM00000029688 XP\_035253181.1 32.2 174  
 63 2 1 119 236 409 3.90E-09 69.3 7936 cellular  
 organisms;Eukaryota;Opisthokonta;Metazoa;Eumetazoa;Bilateria;Deuterostomi  
 a;Chordata;Craniata;Vertebrata;Gnathostomata;Teleostomi;Euteleostomi;Acti  
 nopterygii;Actinopteri;Neopterygii;Teleostei;Elopocephalai;Elopocephala;E  
 lopomorpha;Anguilliformes;Anguillidae;Anguilla;Anguilla anguilla

UdeM00000029689 6596 477.6 UdeM00000029689 XP\_045189051.1 65.6 381  
 127 2 18 398 3 379 2.00E-131 477.6 6596 cellular  
 organisms;Eukaryota;Opisthokonta;Metazoa;Eumetazoa;Bilateria;Protostomia;  
 Spiralia;Lophotrochozoa;Mollusca;Bivalvia;Autobranchia;Heteroconchia;Euhe  
 terodonta;Imparidentia;Venerida;Veneroidea;Veneridae;Mercenaria;Mercenari  
 a mercenaria

UdeM00000029690 6579 380.2 UdeM00000029690 XP\_033731871.1 79.7 232  
 47 0 1 232 1 232 1.90E-102 380.2 6579 cellular  
 organisms;Eukaryota;Opisthokonta;Metazoa;Eumetazoa;Bilateria;Protostomia;  
 Spiralia;Lophotrochozoa;Mollusca;Bivalvia;Autobranchia;Pteriormorphia;Pect  
 inida;Pectinoidea;Pectinidae;Pecten;Pecten maximus

UdeM00000029691 6596 2083.1 UdeM00000029691 XP\_045209582.1 78  
 1315 287 2 7 1319 9 1323 0.00E+00 2083.1 6596  
 cellular  
 organisms;Eukaryota;Opisthokonta;Metazoa;Eumetazoa;Bilateria;Protostomia;  
 Spiralia;Lophotrochozoa;Mollusca;Bivalvia;Autobranchia;Heteroconchia;Euhe  
 terodonta;Imparidentia;Venerida;Veneroidea;Veneridae;Mercenaria;Mercenari  
 a mercenaria

UdeM00000029692 6596 139 UdeM00000029692 XP\_045208758.1 34 335  
 203 10 249 575 546 870 1.80E-29 139 6596 cellular  
 organisms;Eukaryota;Opisthokonta;Metazoa;Eumetazoa;Bilateria;Protostomia;  
 Spiralia;Lophotrochozoa;Mollusca;Bivalvia;Autobranchia;Heteroconchia;Euhe  
 terodonta;Imparidentia;Venerida;Veneroidea;Veneridae;Mercenaria;Mercenari  
 a mercenaria

UdeM00000029698 151771 110.9 UdeM00000029698 XP\_028419060.1 43.6  
 133 68 2 107 232 23 155 2.20E-21 110.9 151771  
 cellular  
 organisms;Eukaryota;Opisthokonta;Metazoa;Eumetazoa;Cnidaria;Anthozoa;Octo  
 corallia;Alcyonacea;Alcyoniina;Nephtheidae;Dendronephthya;Dendronephthya  
 gigantea

UdeM00000029699 151771 106.7 UdeM00000029699 XP\_028406397.1 50.9  
 108 51 2 250 356 27 133 6.30E-20 106.7 151771  
 cellular  
 organisms;Eukaryota;Opisthokonta;Metazoa;Eumetazoa;Cnidaria;Anthozoa;Octo  
 corallia;Alcyonacea;Alcyoniina;Nephtheidae;Dendronephthya;Dendronephthya  
 gigantea  
 UdeM00000029700 151771 102.4 UdeM00000029700 XP\_028406397.1 48.1  
 108 54 2 231 337 27 133 1.10E-18 102.4 151771  
 cellular  
 organisms;Eukaryota;Opisthokonta;Metazoa;Eumetazoa;Cnidaria;Anthozoa;Octo  
 corallia;Alcyonacea;Alcyoniina;Nephtheidae;Dendronephthya;Dendronephthya  
 gigantea  
 UdeM00000029701 151771 66.2 UdeM00000029701 XP\_028393191.1 35.8  
 109 49 3 248 335 23 131 8.90E-08 66.2 151771  
 cellular  
 organisms;Eukaryota;Opisthokonta;Metazoa;Eumetazoa;Cnidaria;Anthozoa;Octo  
 corallia;Alcyonacea;Alcyoniina;Nephtheidae;Dendronephthya;Dendronephthya  
 gigantea  
 UdeM00000029702 151771 90.1 UdeM00000029702 XP\_028393191.1 43.9  
 98 55 0 1 98 34 131 1.70E-15 90.1 151771  
 cellular  
 organisms;Eukaryota;Opisthokonta;Metazoa;Eumetazoa;Cnidaria;Anthozoa;Octo  
 corallia;Alcyonacea;Alcyoniina;Nephtheidae;Dendronephthya;Dendronephthya  
 gigantea  
 UdeM00000029703 151771 75.1 UdeM00000029703 XP\_028406402.1 45.6  
 90 48 1 224 312 36 125 1.80E-10 75.1 151771  
 cellular  
 organisms;Eukaryota;Opisthokonta;Metazoa;Eumetazoa;Cnidaria;Anthozoa;Octo  
 corallia;Alcyonacea;Alcyoniina;Nephtheidae;Dendronephthya;Dendronephthya  
 gigantea  
 UdeM00000029704 151771 104.4 UdeM00000029704 XP\_028406397.1 49.1  
 108 53 2 250 356 27 133 3.10E-19 104.4 151771  
 cellular  
 organisms;Eukaryota;Opisthokonta;Metazoa;Eumetazoa;Cnidaria;Anthozoa;Octo  
 corallia;Alcyonacea;Alcyoniina;Nephtheidae;Dendronephthya;Dendronephthya  
 gigantea  
 UdeM00000029707 181472 112.1 UdeM00000029707 XP\_029958384.1 55.8  
 86 38 0 32 117 97 182 5.10E-22 112.1 181472  
 cellular  
 organisms;Eukaryota;Opisthokonta;Metazoa;Eumetazoa;Bilateria;Deuterostomi  
 a;Chordata;Craniata;Vertebrata;Gnathostomata;Teleostomi;Euteleostomi;Acti  
 nopterygii;Actinopteri;Neopterygii;Teleostei;Osteoglossocephalai;Clupeoce  
 phala;Euteleosteomorpha;Neoteleostei;Eurypterygia;Ctenosquamata;Acanthomo  
 rphata;Euacanthomorphacea;Percomorphaceae;Ovalentaria;Blenniiformes;Blen  
 niiformes;Blennioidei;Blenniidae;Salariinae;Salaris;Salaris fasciatus  
 UdeM00000029708 151771 100.9 UdeM00000029708 XP\_028406387.1 51.4  
 109 51 2 256 363 25 132 3.50E-18 100.9 151771  
 cellular  
 organisms;Eukaryota;Opisthokonta;Metazoa;Eumetazoa;Cnidaria;Anthozoa;Octo  
 corallia;Alcyonacea;Alcyoniina;Nephtheidae;Dendronephthya;Dendronephthya  
 gigantea  
 UdeM00000029709 225164 161 UdeM00000029709 XP\_009052867.1 38.2  
 217 123 1 67 283 17 222 2.30E-36 161 225164  
 cellular



organisms;Eukaryota;Opisthokonta;Metazoa;Eumetazoa;Bilateria;Protostomia;Spiralia;Lophotrochozoa;Mollusca;Gastropoda;Patellogastropoda;Lottioidea;Lottiidae;Lottia;Lottia gigantea

UdeM00000029710 6596 873.2 UdeM00000029710 XP\_045207986.1 66.3 646  
214 4 1 644 18 661 2.00E-250 873.2 6596 cellular

organisms;Eukaryota;Opisthokonta;Metazoa;Eumetazoa;Bilateria;Protostomia;Spiralia;Lophotrochozoa;Mollusca;Bivalvia;Autobranchia;Heteroconchia;Euheterodonta;Imparidentia;Venerida;Veneroidea;Veneridae;Mercenaria;Mercenaria mercenaria

UdeM00000029711 6596 583.2 UdeM00000029711 XP\_045210182.1 59 527  
203 7 53 577 3 518 3.70E-163 583.2 6596 cellular

organisms;Eukaryota;Opisthokonta;Metazoa;Eumetazoa;Bilateria;Protostomia;Spiralia;Lophotrochozoa;Mollusca;Bivalvia;Autobranchia;Heteroconchia;Euheterodonta;Imparidentia;Venerida;Veneroidea;Veneridae;Mercenaria;Mercenaria mercenaria

UdeM00000029712 6579 166 UdeM00000029712 XP\_033733350.1 58.2 153  
62 1 18 168 372 524 4.10E-38 166 6579 cellular

organisms;Eukaryota;Opisthokonta;Metazoa;Eumetazoa;Bilateria;Protostomia;Spiralia;Lophotrochozoa;Mollusca;Bivalvia;Autobranchia;Pteriormorphia;Pectinida;Pectinoidea;Pectinidae;Pecten;Pecten maximus

UdeM00000036946 6573 649.4 UdeM00000036946 XP\_021349258.1 48.9 964  
484 6 719 1677 747 1706 1.20E-182 649.4 6573 cellular

organisms;Eukaryota;Opisthokonta;Metazoa;Eumetazoa;Bilateria;Protostomia;Spiralia;Lophotrochozoa;Mollusca;Bivalvia;Autobranchia;Pteriormorphia;Pectinida;Pectinoidea;Pectinidae;Mizuhopecten;Mizuhopecten yessoensis

UdeM00000036947 6596 136.7 UdeM00000036947 XP\_045199138.1 47 132  
68 1 3 132 28 159 2.50E-29 136.7 6596 cellular

organisms;Eukaryota;Opisthokonta;Metazoa;Eumetazoa;Bilateria;Protostomia;Spiralia;Lophotrochozoa;Mollusca;Bivalvia;Autobranchia;Heteroconchia;Euheterodonta;Imparidentia;Venerida;Veneroidea;Veneridae;Mercenaria;Mercenaria mercenaria

UdeM00000036948 6565 99 UdeM00000036948 XP\_022295634.1 25.5 420  
249 10 1 405 28 398 1.60E-17 99 6565 cellular

organisms;Eukaryota;Opisthokonta;Metazoa;Eumetazoa;Bilateria;Protostomia;Spiralia;Lophotrochozoa;Mollusca;Bivalvia;Autobranchia;Pteriormorphia;Ostreida;Ostreioidea;Ostreidae;Crassostrea;Crassostrea virginica

UdeM00000036949 7574 101.3 UdeM00000036949 XP\_013401097.1 52.8 89  
42 0 1 89 726 814 8.60E-19 101.3 7574 cellular

organisms;Eukaryota;Opisthokonta;Metazoa;Eumetazoa;Bilateria;Protostomia;Spiralia;Lophotrochozoa;Brachiopoda;Linguliformea;Lingulata;Lingulida;Linguloidea;Lingulidae;Lingula;Lingula anatina

UdeM00000036950 6565 76.6 UdeM00000036950 XP\_022288562.1 46.4 84  
45 0 1 84 73 156 1.80E-11 76.6 6565 cellular

organisms;Eukaryota;Opisthokonta;Metazoa;Eumetazoa;Bilateria;Protostomia;Spiralia;Lophotrochozoa;Mollusca;Bivalvia;Autobranchia;Pteriormorphia;Ostreida;Ostreioidea;Ostreidae;Crassostrea;Crassostrea virginica

UdeM00000036951 6573 346.7 UdeM00000036951 XP\_021349259.1 44 495  
211 11 1 433 1 491 4.40E-92 346.7 6573 cellular

organisms;Eukaryota;Opisthokonta;Metazoa;Eumetazoa;Bilateria;Protostomia;Spiralia;Lophotrochozoa;Mollusca;Bivalvia;Autobranchia;Pteriormorphia;Pectinida;Pectinoidea;Pectinidae;Mizuhopecten;Mizuhopecten yessoensis

UdeM00000036952 6596 506.1 UdeM00000036952 XP\_045161383.1 53.1 475  
215 4 1 470 1 472 4.70E-140 506.1 6596 cellular

organisms;Eukaryota;Opisthokonta;Metazoa;Eumetazoa;Bilateria;Protostomia;

Spiralia;Lophotrochozoa;Mollusca;Bivalvia;Autobranchia;Heteroconchia;Euherodonta;Imparidentia;Venerida;Veneroidea;Veneridae;Mercenaria;Mercenaria mercenaria

UdeM00000036953 6596 361.3 UdeM00000036953 XP\_045198179.1 33.5 660  
387 11 40 657 429 1078 2.60E-96 361.3 6596 cellular

organisms;Eukaryota;Opisthokonta;Metazoa;Eumetazoa;Bilateria;Protostomia;Spiralia;Lophotrochozoa;Mollusca;Bivalvia;Autobranchia;Heteroconchia;Euherodonta;Imparidentia;Venerida;Veneroidea;Veneridae;Mercenaria;Mercenaria mercenaria

UdeM00000036954 6596 359.8 UdeM00000036954 XP\_045156280.1 55.7 325  
140 3 1 324 389 710 3.80E-96 359.8 6596 cellular

organisms;Eukaryota;Opisthokonta;Metazoa;Eumetazoa;Bilateria;Protostomia;Spiralia;Lophotrochozoa;Mollusca;Bivalvia;Autobranchia;Heteroconchia;Euherodonta;Imparidentia;Venerida;Veneroidea;Veneridae;Mercenaria;Mercenaria mercenaria

UdeM00000036955 6573 361.7 UdeM00000036955 XP\_021349151.1 52.9 333  
154 2 2 334 30 359 1.00E-96 361.7 6573 cellular

organisms;Eukaryota;Opisthokonta;Metazoa;Eumetazoa;Bilateria;Protostomia;Spiralia;Lophotrochozoa;Mollusca;Bivalvia;Autobranchia;Pteriomorphia;Pectinida;Pectinoidea;Pectinidae;Mizuhopecten;Mizuhopecten yessoensis

UdeM00000036956 6573 391.7 UdeM00000036956 XP\_021349151.1 52.6 361  
168 2 5 365 2 359 1.00E-105 391.7 6573 cellular

organisms;Eukaryota;Opisthokonta;Metazoa;Eumetazoa;Bilateria;Protostomia;Spiralia;Lophotrochozoa;Mollusca;Bivalvia;Autobranchia;Pteriomorphia;Pectinida;Pectinoidea;Pectinidae;Mizuhopecten;Mizuhopecten yessoensis

UdeM00000036961 6573 329.7 UdeM00000036961 XP\_021349259.1 43.2 484  
209 11 12 433 12 491 5.60E-87 329.7 6573 cellular

organisms;Eukaryota;Opisthokonta;Metazoa;Eumetazoa;Bilateria;Protostomia;Spiralia;Lophotrochozoa;Mollusca;Bivalvia;Autobranchia;Pteriomorphia;Pectinida;Pectinoidea;Pectinidae;Mizuhopecten;Mizuhopecten yessoensis

UdeM00000036962 6596 525 UdeM00000036962 XP\_045161383.1 55.2 475  
207 4 1 472 1 472 9.80E-146 525 6596 cellular

organisms;Eukaryota;Opisthokonta;Metazoa;Eumetazoa;Bilateria;Protostomia;Spiralia;Lophotrochozoa;Mollusca;Bivalvia;Autobranchia;Heteroconchia;Euherodonta;Imparidentia;Venerida;Veneroidea;Veneridae;Mercenaria;Mercenaria mercenaria

UdeM00000036963 6596 360.1 UdeM00000036963 XP\_045198179.1 33.5 660  
387 11 40 657 429 1078 5.80E-96 360.1 6596 cellular

organisms;Eukaryota;Opisthokonta;Metazoa;Eumetazoa;Bilateria;Protostomia;Spiralia;Lophotrochozoa;Mollusca;Bivalvia;Autobranchia;Heteroconchia;Euherodonta;Imparidentia;Venerida;Veneroidea;Veneridae;Mercenaria;Mercenaria mercenaria

UdeM00000036964 6596 434.5 UdeM00000036964 XP\_045156280.1 54.5 411  
181 5 1 408 389 796 1.50E-118 434.5 6596 cellular

organisms;Eukaryota;Opisthokonta;Metazoa;Eumetazoa;Bilateria;Protostomia;Spiralia;Lophotrochozoa;Mollusca;Bivalvia;Autobranchia;Heteroconchia;Euherodonta;Imparidentia;Venerida;Veneroidea;Veneridae;Mercenaria;Mercenaria mercenaria

UdeM00000036965 6573 361.7 UdeM00000036965 XP\_021349151.1 52.9 333  
154 2 2 334 30 359 1.00E-96 361.7 6573 cellular

organisms;Eukaryota;Opisthokonta;Metazoa;Eumetazoa;Bilateria;Protostomia;Spiralia;Lophotrochozoa;Mollusca;Bivalvia;Autobranchia;Pteriomorphia;Pectinida;Pectinoidea;Pectinidae;Mizuhopecten;Mizuhopecten yessoensis

UdeM00000036966 6573 391.7 UdeM00000036966 XP\_021349151.1 52.6 361  
 168 2 5 365 2 359 1.00E-105 391.7 6573 cellular  
 organisms;Eukaryota;Opisthokonta;Metazoa;Eumetazoa;Bilateria;Protostomia;  
 Spiralia;Lophotrochozoa;Mollusca;Bivalvia;Autobranhia;Pteriomorpha;Pect  
 inida;Pectinoidea;Pectinidae;Mizuhopecten;Mizuhopecten yessoensis  
 UdeM00000036970 6573 329.7 UdeM00000036970 XP\_021349259.1 43.2 484  
 209 11 12 433 12 491 5.60E-87 329.7 6573 cellular  
 organisms;Eukaryota;Opisthokonta;Metazoa;Eumetazoa;Bilateria;Protostomia;  
 Spiralia;Lophotrochozoa;Mollusca;Bivalvia;Autobranhia;Pteriomorpha;Pect  
 inida;Pectinoidea;Pectinidae;Mizuhopecten;Mizuhopecten yessoensis  
 UdeM00000036971 6596 506.9 UdeM00000036971 XP\_045161383.1 53.3 475  
 214 4 1 470 1 472 2.70E-140 506.9 6596 cellular  
 organisms;Eukaryota;Opisthokonta;Metazoa;Eumetazoa;Bilateria;Protostomia;  
 Spiralia;Lophotrochozoa;Mollusca;Bivalvia;Autobranhia;Heteroconchia;Euhe  
 terodonta;Imparidentia;Venerida;Veneroidea;Veneridae;Mercenaria;Mercenari  
 a mercenaria  
 UdeM00000036974 6573 628.2 UdeM00000036974 XP\_021355379.1 69.3 453  
 133 4 69 516 68 519 9.00E-177 628.2 6573 cellular  
 organisms;Eukaryota;Opisthokonta;Metazoa;Eumetazoa;Bilateria;Protostomia;  
 Spiralia;Lophotrochozoa;Mollusca;Bivalvia;Autobranhia;Pteriomorpha;Pect  
 inida;Pectinoidea;Pectinidae;Mizuhopecten;Mizuhopecten yessoensis  
 UdeM00000036975 6565 2061.6 UdeM00000036975 XP\_022292711.1 72.3  
 1968 514 11 42 1984 22 1982 0.00E+00 2061.6 6565  
 cellular  
 organisms;Eukaryota;Opisthokonta;Metazoa;Eumetazoa;Bilateria;Protostomia;  
 Spiralia;Lophotrochozoa;Mollusca;Bivalvia;Autobranhia;Pteriomorpha;Ostr  
 eida;Ostreoidea;Ostreidae;Crassostrea;Crassostrea virginica  
 UdeM00000036976 6565 2057.3 UdeM00000036976 XP\_022292711.1 72.7  
 1979 515 11 42 2012 22 1982 0.00E+00 2057.3 6565  
 cellular  
 organisms;Eukaryota;Opisthokonta;Metazoa;Eumetazoa;Bilateria;Protostomia;  
 Spiralia;Lophotrochozoa;Mollusca;Bivalvia;Autobranhia;Pteriomorpha;Ostr  
 eida;Ostreoidea;Ostreidae;Crassostrea;Crassostrea virginica  
 UdeM00000036977 6596 811.6 UdeM00000036977 XP\_045197415.1 69.4 571  
 162 7 1 563 38 603 6.20E-232 811.6 6596 cellular  
 organisms;Eukaryota;Opisthokonta;Metazoa;Eumetazoa;Bilateria;Protostomia;  
 Spiralia;Lophotrochozoa;Mollusca;Bivalvia;Autobranhia;Heteroconchia;Euhe  
 terodonta;Imparidentia;Venerida;Veneroidea;Veneridae;Mercenaria;Mercenari  
 a mercenaria  
 UdeM00000036978 29159 73.9 UdeM00000036978 XP\_034335595.1 28.9 166  
 109 4 2 166 421 578 2.10E-10 73.9 29159 cellular  
 organisms;Eukaryota;Opisthokonta;Metazoa;Eumetazoa;Bilateria;Protostomia;  
 Spiralia;Lophotrochozoa;Mollusca;Bivalvia;Autobranhia;Pteriomorpha;Ostr  
 eida;Ostreoidea;Ostreidae;Crassostrea;Crassostrea gigas  
 UdeM00000036979 6596 117.1 UdeM00000036979 XP\_045186528.1 52.8 106  
 46 1 2 107 414 515 1.90E-23 117.1 6596 cellular  
 organisms;Eukaryota;Opisthokonta;Metazoa;Eumetazoa;Bilateria;Protostomia;  
 Spiralia;Lophotrochozoa;Mollusca;Bivalvia;Autobranhia;Heteroconchia;Euhe  
 terodonta;Imparidentia;Venerida;Veneroidea;Veneridae;Mercenaria;Mercenari  
 a mercenaria  
 UdeM00000036980 6596 201.1 UdeM00000036980 XP\_045196404.1 29.7 424  
 243 8 5 411 403 788 2.80E-48 201.1 6596 cellular  
 organisms;Eukaryota;Opisthokonta;Metazoa;Eumetazoa;Bilateria;Protostomia;  
 Spiralia;Lophotrochozoa;Mollusca;Bivalvia;Autobranhia;Heteroconchia;Euhe

terodonta;Imparidentia;Venerida;Veneroidea;Veneridae;Mercenaria;Mercenari  
 a mercenaria  
 UdeM00000036981 6596 196.8 UdeM00000036981 XP\_045196404.1 31.6 377  
 233 8 96 458 402 767 5.90E-47 196.8 6596 cellular  
 organisms;Eukaryota;Opisthokonta;Metazoa;Eumetazoa;Bilateria;Protostomia;  
 Spiralia;Lophotrochozoa;Mollusca;Bivalvia;Autobranchia;Heteroconchia;Euhe  
 terodonta;Imparidentia;Venerida;Veneroidea;Veneridae;Mercenaria;Mercenari  
 a mercenaria  
 UdeM00000036982 6596 213.8 UdeM00000036982 XP\_045196404.1 31.7 398  
 247 8 96 479 402 788 4.90E-52 213.8 6596 cellular  
 organisms;Eukaryota;Opisthokonta;Metazoa;Eumetazoa;Bilateria;Protostomia;  
 Spiralia;Lophotrochozoa;Mollusca;Bivalvia;Autobranchia;Heteroconchia;Euhe  
 terodonta;Imparidentia;Venerida;Veneroidea;Veneridae;Mercenaria;Mercenari  
 a mercenaria  
 UdeM00000036983 6596 153.3 UdeM00000036983 XP\_045196868.1 32.7 315  
 189 7 14 324 165 460 5.30E-34 153.3 6596 cellular  
 organisms;Eukaryota;Opisthokonta;Metazoa;Eumetazoa;Bilateria;Protostomia;  
 Spiralia;Lophotrochozoa;Mollusca;Bivalvia;Autobranchia;Heteroconchia;Euhe  
 terodonta;Imparidentia;Venerida;Veneroidea;Veneridae;Mercenaria;Mercenari  
 a mercenaria  
 UdeM00000036985 6596 200.7 UdeM00000036985 XP\_045196868.1 31.2 439  
 219 10 130 561 159 521 5.00E-48 200.7 6596 cellular  
 organisms;Eukaryota;Opisthokonta;Metazoa;Eumetazoa;Bilateria;Protostomia;  
 Spiralia;Lophotrochozoa;Mollusca;Bivalvia;Autobranchia;Heteroconchia;Euhe  
 terodonta;Imparidentia;Venerida;Veneroidea;Veneridae;Mercenaria;Mercenari  
 a mercenaria  
 UdeM00000036986 6596 201.1 UdeM00000036986 XP\_045196868.1 31 439  
 222 9 130 563 159 521 3.90E-48 201.1 6596 cellular  
 organisms;Eukaryota;Opisthokonta;Metazoa;Eumetazoa;Bilateria;Protostomia;  
 Spiralia;Lophotrochozoa;Mollusca;Bivalvia;Autobranchia;Heteroconchia;Euhe  
 terodonta;Imparidentia;Venerida;Veneroidea;Veneridae;Mercenaria;Mercenari  
 a mercenaria  
 UdeM00000036987 6596 168.7 UdeM00000036987 XP\_045196865.1 33.4 347  
 205 9 198 537 126 453 2.10E-38 168.7 6596 cellular  
 organisms;Eukaryota;Opisthokonta;Metazoa;Eumetazoa;Bilateria;Protostomia;  
 Spiralia;Lophotrochozoa;Mollusca;Bivalvia;Autobranchia;Heteroconchia;Euhe  
 terodonta;Imparidentia;Venerida;Veneroidea;Veneridae;Mercenaria;Mercenari  
 a mercenaria  
 UdeM00000036990 29159 275 UdeM00000036990 XP\_034317976.1 55.3 237  
 102 3 113 345 425 661 1.30E-70 275 29159 cellular  
 organisms;Eukaryota;Opisthokonta;Metazoa;Eumetazoa;Bilateria;Protostomia;  
 Spiralia;Lophotrochozoa;Mollusca;Bivalvia;Autobranchia;Pteriomorphia;Ostr  
 eida;Ostreoidea;Ostreidae;Crassostrea;Crassostrea gigas  
 UdeM00000036990 29159 68.9 UdeM00000036990 XP\_034317976.1 39.2 120  
 62 4 2 113 10 126 1.40E-08 68.9 29159 cellular  
 organisms;Eukaryota;Opisthokonta;Metazoa;Eumetazoa;Bilateria;Protostomia;  
 Spiralia;Lophotrochozoa;Mollusca;Bivalvia;Autobranchia;Pteriomorphia;Ostr  
 eida;Ostreoidea;Ostreidae;Crassostrea;Crassostrea gigas  
 UdeM00000036991 6596 151 UdeM00000036991 XP\_045196865.1 31.1 312  
 161 5 3 312 266 525 2.50E-33 151 6596 cellular  
 organisms;Eukaryota;Opisthokonta;Metazoa;Eumetazoa;Bilateria;Protostomia;  
 Spiralia;Lophotrochozoa;Mollusca;Bivalvia;Autobranchia;Heteroconchia;Euhe  
 terodonta;Imparidentia;Venerida;Veneroidea;Veneridae;Mercenaria;Mercenari  
 a mercenaria

UdeM00000036992 29159 98.2 UdeM00000036992 XP\_019930846.2 46.1 102  
 53 1 25 126 384 483 7.90E-18 98.2 29159 cellular  
 organisms;Eukaryota;Opisthokonta;Metazoa;Eumetazoa;Bilateria;Protostomia;  
 Spiralia;Lophotrochozoa;Mollusca;Bivalvia;Autobranchia;Pteriomorpha;Ostr  
 eida;Ostreoidea;Ostreidae;Crassostrea;Crassostrea gigas  
 UdeM00000036993 29159 101.7 UdeM00000036993 XP\_034304667.1 38.2 136  
 82 1 5 138 4 139 8.10E-19 101.7 29159 cellular  
 organisms;Eukaryota;Opisthokonta;Metazoa;Eumetazoa;Bilateria;Protostomia;  
 Spiralia;Lophotrochozoa;Mollusca;Bivalvia;Autobranchia;Pteriomorpha;Ostr  
 eida;Ostreoidea;Ostreidae;Crassostrea;Crassostrea gigas  
 UdeM00000036994 6596 105.5 UdeM00000036994 XP\_045196865.1 47.1 104  
 52 1 6 109 266 366 4.80E-20 105.5 6596 cellular  
 organisms;Eukaryota;Opisthokonta;Metazoa;Eumetazoa;Bilateria;Protostomia;  
 Spiralia;Lophotrochozoa;Mollusca;Bivalvia;Autobranchia;Heteroconchia;Euhe  
 terodonta;Imparidentia;Venerida;Veneroidea;Veneridae;Mercenaria;Mercenari  
 a mercenaria  
 UdeM00000036995 29159 160.2 UdeM00000036995 XP\_034317976.1 46.1 178  
 61 2 1 143 484 661 2.00E-36 160.2 29159 cellular  
 organisms;Eukaryota;Opisthokonta;Metazoa;Eumetazoa;Bilateria;Protostomia;  
 Spiralia;Lophotrochozoa;Mollusca;Bivalvia;Autobranchia;Pteriomorpha;Ostr  
 eida;Ostreoidea;Ostreidae;Crassostrea;Crassostrea gigas  
 UdeM00000036996 29159 99.8 UdeM00000036996 XP\_019930846.2 47.1 102  
 52 1 25 126 384 483 2.70E-18 99.8 29159 cellular  
 organisms;Eukaryota;Opisthokonta;Metazoa;Eumetazoa;Bilateria;Protostomia;  
 Spiralia;Lophotrochozoa;Mollusca;Bivalvia;Autobranchia;Pteriomorpha;Ostr  
 eida;Ostreoidea;Ostreidae;Crassostrea;Crassostrea gigas  
 UdeM00000036997 29159 104.8 UdeM00000036997 XP\_034304667.1 39 136  
 81 1 5 138 4 139 9.50E-20 104.8 29159 cellular  
 organisms;Eukaryota;Opisthokonta;Metazoa;Eumetazoa;Bilateria;Protostomia;  
 Spiralia;Lophotrochozoa;Mollusca;Bivalvia;Autobranchia;Pteriomorpha;Ostr  
 eida;Ostreoidea;Ostreidae;Crassostrea;Crassostrea gigas  
 UdeM00000036998 6596 139 UdeM00000036998 XP\_045196865.1 30.1 296  
 156 4 4 297 279 525 9.50E-30 139 6596 cellular  
 organisms;Eukaryota;Opisthokonta;Metazoa;Eumetazoa;Bilateria;Protostomia;  
 Spiralia;Lophotrochozoa;Mollusca;Bivalvia;Autobranchia;Heteroconchia;Euhe  
 terodonta;Imparidentia;Venerida;Veneroidea;Veneridae;Mercenaria;Mercenari  
 a mercenaria  
 UdeM00000036999 29159 140.2 UdeM00000036999 XP\_034315725.1 47.3 167  
 49 2 1 130 502 666 2.50E-30 140.2 29159 cellular  
 organisms;Eukaryota;Opisthokonta;Metazoa;Eumetazoa;Bilateria;Protostomia;  
 Spiralia;Lophotrochozoa;Mollusca;Bivalvia;Autobranchia;Pteriomorpha;Ostr  
 eida;Ostreoidea;Ostreidae;Crassostrea;Crassostrea gigas  
 UdeM00000037000 6596 147.5 UdeM00000037000 XP\_045196865.1 31.5 298  
 151 4 18 312 278 525 2.80E-32 147.5 6596 cellular  
 organisms;Eukaryota;Opisthokonta;Metazoa;Eumetazoa;Bilateria;Protostomia;  
 Spiralia;Lophotrochozoa;Mollusca;Bivalvia;Autobranchia;Heteroconchia;Euhe  
 terodonta;Imparidentia;Venerida;Veneroidea;Veneridae;Mercenaria;Mercenari  
 a mercenaria  
 UdeM00000037001 6596 380.9 UdeM00000037001 XP\_045205205.1 40 470  
 272 2 8 477 10 469 2.60E-102 380.9 6596 cellular  
 organisms;Eukaryota;Opisthokonta;Metazoa;Eumetazoa;Bilateria;Protostomia;  
 Spiralia;Lophotrochozoa;Mollusca;Bivalvia;Autobranchia;Heteroconchia;Euhe  
 terodonta;Imparidentia;Venerida;Veneroidea;Veneridae;Mercenaria;Mercenari  
 a mercenaria

UdeM00000037002 6596 156 UdeM00000037002 XP\_045205205.1 25.6 449  
 175 4 5 299 26 469 9.00E-35 156 6596 cellular  
 organisms;Eukaryota;Opisthokonta;Metazoa;Eumetazoa;Bilateria;Protostomia;  
 Spiralia;Lophotrochozoa;Mollusca;Bivalvia;Autobranchia;Heteroconchia;Euhe  
 terodonta;Imparidentia;Venerida;Veneroidea;Veneridae;Mercenaria;Mercenari  
 a mercenaria  
 UdeM00000037004 6596 382.9 UdeM00000037004 XP\_045205205.1 40 470  
 272 2 8 477 10 469 6.90E-103 382.9 6596 cellular  
 organisms;Eukaryota;Opisthokonta;Metazoa;Eumetazoa;Bilateria;Protostomia;  
 Spiralia;Lophotrochozoa;Mollusca;Bivalvia;Autobranchia;Heteroconchia;Euhe  
 terodonta;Imparidentia;Venerida;Veneroidea;Veneridae;Mercenaria;Mercenari  
 a mercenaria  
 UdeM00000037005 7741 352.1 UdeM00000037005 XP\_019628322.1 38.7 507  
 294 11 34 535 25 519 1.30E-93 352.1 7741 cellular  
 organisms;Eukaryota;Opisthokonta;Metazoa;Eumetazoa;Bilateria;Deuterostomi  
 a;Chordata;Cephalochordata;Leptocardii;Amphioxiformes;Branchiostomidae;Br  
 anchiostoma;Branchiostoma belcheri  
 UdeM00000037007 6596 380.2 UdeM00000037007 XP\_045205205.1 39.9 469  
 277 1 5 473 7 470 4.40E-102 380.2 6596 cellular  
 organisms;Eukaryota;Opisthokonta;Metazoa;Eumetazoa;Bilateria;Protostomia;  
 Spiralia;Lophotrochozoa;Mollusca;Bivalvia;Autobranchia;Heteroconchia;Euhe  
 terodonta;Imparidentia;Venerida;Veneroidea;Veneridae;Mercenaria;Mercenari  
 a mercenaria  
 UdeM00000037008 6596 204.1 UdeM00000037008 XP\_045196404.1 31.2 410  
 233 7 243 642 413 783 5.70E-49 204.1 6596 cellular  
 organisms;Eukaryota;Opisthokonta;Metazoa;Eumetazoa;Bilateria;Protostomia;  
 Spiralia;Lophotrochozoa;Mollusca;Bivalvia;Autobranchia;Heteroconchia;Euhe  
 terodonta;Imparidentia;Venerida;Veneroidea;Veneridae;Mercenaria;Mercenari  
 a mercenaria  
 UdeM00000037009 6596 157.5 UdeM00000037009 XP\_045196404.1 29.1 385  
 221 8 243 617 413 755 5.40E-35 157.5 6596 cellular  
 organisms;Eukaryota;Opisthokonta;Metazoa;Eumetazoa;Bilateria;Protostomia;  
 Spiralia;Lophotrochozoa;Mollusca;Bivalvia;Autobranchia;Heteroconchia;Euhe  
 terodonta;Imparidentia;Venerida;Veneroidea;Veneridae;Mercenaria;Mercenari  
 a mercenaria  
 UdeM00000037010 6596 160.6 UdeM00000037010 XP\_045196404.1 32 300  
 162 4 243 535 413 677 5.90E-36 160.6 6596 cellular  
 organisms;Eukaryota;Opisthokonta;Metazoa;Eumetazoa;Bilateria;Protostomia;  
 Spiralia;Lophotrochozoa;Mollusca;Bivalvia;Autobranchia;Heteroconchia;Euhe  
 terodonta;Imparidentia;Venerida;Veneroidea;Veneridae;Mercenaria;Mercenari  
 a mercenaria  
 UdeM00000037011 72036 67.4 UdeM00000037011 XP\_040576246.1 30.9 149  
 74 2 1 120 1 149 1.80E-08 67.4 72036 cellular  
 organisms;Eukaryota;Opisthokonta;Metazoa;Eumetazoa;Bilateria;Protostomia;  
 Ecdysozoa;Panarthropoda;Arthropoda;Mandibulata;Pancrustacea;Crustacea;Mul  
 ticrustacea;Hexanauplia;Copepoda;Neocopepoda;Podoplea;Siphonostomatoida;C  
 aligidae;Lepeophtheirus;Lepeophtheirus salmonis  
 UdeM00000037013 6596 195.3 UdeM00000037013 XP\_045196404.1 29.4 428  
 240 7 228 634 403 789 2.40E-46 195.3 6596 cellular  
 organisms;Eukaryota;Opisthokonta;Metazoa;Eumetazoa;Bilateria;Protostomia;  
 Spiralia;Lophotrochozoa;Mollusca;Bivalvia;Autobranchia;Heteroconchia;Euhe  
 terodonta;Imparidentia;Venerida;Veneroidea;Veneridae;Mercenaria;Mercenari  
 a mercenaria

UdeM00000037014 6596 124 UdeM00000037014 XP\_045195117.1 47.1 172  
 85 3 8 176 591 759 1.90E-25 124 6596 cellular  
 organisms;Eukaryota;Opisthokonta;Metazoa;Eumetazoa;Bilateria;Protostomia;  
 Spiralia;Lophotrochozoa;Mollusca;Bivalvia;Autobranhia;Heteroconchia;Euhe  
 terodonta;Imparidentia;Venerida;Veneroidea;Veneridae;Mercenaria;Mercenari  
 a mercenaria

UdeM00000037015 6596 139 UdeM00000037015 XP\_045195117.1 42.2 232  
 111 4 1 212 531 759 6.90E-30 139 6596 cellular  
 organisms;Eukaryota;Opisthokonta;Metazoa;Eumetazoa;Bilateria;Protostomia;  
 Spiralia;Lophotrochozoa;Mollusca;Bivalvia;Autobranhia;Heteroconchia;Euhe  
 terodonta;Imparidentia;Venerida;Veneroidea;Veneridae;Mercenaria;Mercenari  
 a mercenaria

UdeM00000037016 6596 327.4 UdeM00000037016 XP\_045195117.1 59.4 318  
 128 1 33 350 150 466 2.40E-86 327.4 6596 cellular  
 organisms;Eukaryota;Opisthokonta;Metazoa;Eumetazoa;Bilateria;Protostomia;  
 Spiralia;Lophotrochozoa;Mollusca;Bivalvia;Autobranhia;Heteroconchia;Euhe  
 terodonta;Imparidentia;Venerida;Veneroidea;Veneridae;Mercenaria;Mercenari  
 a mercenaria

UdeM00000037017 6596 123.6 UdeM00000037017 XP\_045195117.1 49.7 149  
 72 3 1 147 1 148 2.10E-25 123.6 6596 cellular  
 organisms;Eukaryota;Opisthokonta;Metazoa;Eumetazoa;Bilateria;Protostomia;  
 Spiralia;Lophotrochozoa;Mollusca;Bivalvia;Autobranhia;Heteroconchia;Euhe  
 terodonta;Imparidentia;Venerida;Veneroidea;Veneridae;Mercenaria;Mercenari  
 a mercenaria

UdeM00000037019 6596 210.3 UdeM00000037019 XP\_045180489.1 32 425  
 236 12 212 631 252 628 7.10E-51 210.3 6596 cellular  
 organisms;Eukaryota;Opisthokonta;Metazoa;Eumetazoa;Bilateria;Protostomia;  
 Spiralia;Lophotrochozoa;Mollusca;Bivalvia;Autobranhia;Heteroconchia;Euhe  
 terodonta;Imparidentia;Venerida;Veneroidea;Veneridae;Mercenaria;Mercenari  
 a mercenaria

UdeM00000037021 6596 593.6 UdeM00000037021 XP\_045195117.1 49.9 768  
 371 9 38 800 1 759 3.80E-166 593.6 6596 cellular  
 organisms;Eukaryota;Opisthokonta;Metazoa;Eumetazoa;Bilateria;Protostomia;  
 Spiralia;Lophotrochozoa;Mollusca;Bivalvia;Autobranhia;Heteroconchia;Euhe  
 terodonta;Imparidentia;Venerida;Veneroidea;Veneridae;Mercenaria;Mercenari  
 a mercenaria

UdeM00000037022 6596 362.1 UdeM00000037022 XP\_045195118.1 54.9 306  
 138 0 1 306 2 307 7.10E-97 362.1 6596 cellular  
 organisms;Eukaryota;Opisthokonta;Metazoa;Eumetazoa;Bilateria;Protostomia;  
 Spiralia;Lophotrochozoa;Mollusca;Bivalvia;Autobranhia;Heteroconchia;Euhe  
 terodonta;Imparidentia;Venerida;Veneroidea;Veneridae;Mercenaria;Mercenari  
 a mercenaria

UdeM00000037023 6596 1302.3 UdeM00000037023 XP\_045198263.1 68.7  
 973 283 8 2 961 2882 3845 0.00E+00 1302.3 6596  
 cellular  
 organisms;Eukaryota;Opisthokonta;Metazoa;Eumetazoa;Bilateria;Protostomia;  
 Spiralia;Lophotrochozoa;Mollusca;Bivalvia;Autobranhia;Heteroconchia;Euhe  
 terodonta;Imparidentia;Venerida;Veneroidea;Veneridae;Mercenaria;Mercenari  
 a mercenaria

UdeM00000037024 6596 672.2 UdeM00000037024 XP\_045198263.1 54.4 664  
 251 7 6 630 2232 2882 6.60E-190 672.2 6596 cellular  
 organisms;Eukaryota;Opisthokonta;Metazoa;Eumetazoa;Bilateria;Protostomia;  
 Spiralia;Lophotrochozoa;Mollusca;Bivalvia;Autobranhia;Heteroconchia;Euhe

terodonta;Imparidentia;Venerida;Veneroidea;Veneridae;Mercenaria;Mercenari  
 a mercenaria  
 UdeM00000037025 6596 114 UdeM00000037025 XP\_045198263.1 35.6 202  
 120 4 58 249 2032 2233 2.70E-22 114 6596 cellular  
 organisms;Eukaryota;Opisthokonta;Metazoa;Eumetazoa;Bilateria;Protostomia;  
 Spiralia;Lophotrochozoa;Mollusca;Bivalvia;Autobranchia;Heteroconchia;Euhe  
 terodonta;Imparidentia;Venerida;Veneroidea;Veneridae;Mercenaria;Mercenari  
 a mercenaria  
 UdeM00000037026 6596 942.6 UdeM00000037026 XP\_045198263.1 49.4 1067  
 437 8 4 1043 998 1988 4.70E-271 942.6 6596 cellular  
 organisms;Eukaryota;Opisthokonta;Metazoa;Eumetazoa;Bilateria;Protostomia;  
 Spiralia;Lophotrochozoa;Mollusca;Bivalvia;Autobranchia;Heteroconchia;Euhe  
 terodonta;Imparidentia;Venerida;Veneroidea;Veneridae;Mercenaria;Mercenari  
 a mercenaria  
 UdeM00000037027 1735272 652.9 UdeM00000037027 XP\_041352152.1 59  
 586 238 2 22 606 319 903 4.20E-184 652.9 1735272  
 cellular  
 organisms;Eukaryota;Opisthokonta;Metazoa;Eumetazoa;Bilateria;Protostomia;  
 Spiralia;Lophotrochozoa;Mollusca;Gastropoda;Neomphalina;Neomphaloidea;Pel  
 tospiridae;Gigantopelta;Gigantopelta aegis  
 UdeM00000037028 6596 283.5 UdeM00000037028 XP\_045198263.1 80.4 168  
 32 1 31 197 208 375 2.40E-73 283.5 6596 cellular  
 organisms;Eukaryota;Opisthokonta;Metazoa;Eumetazoa;Bilateria;Protostomia;  
 Spiralia;Lophotrochozoa;Mollusca;Bivalvia;Autobranchia;Heteroconchia;Euhe  
 terodonta;Imparidentia;Venerida;Veneroidea;Veneridae;Mercenaria;Mercenari  
 a mercenaria  
 UdeM00000037029 6596 91.3 UdeM00000037029 XP\_045198263.1 74.2 62  
 12 1 21 78 118 179 6.80E-16 91.3 6596 cellular  
 organisms;Eukaryota;Opisthokonta;Metazoa;Eumetazoa;Bilateria;Protostomia;  
 Spiralia;Lophotrochozoa;Mollusca;Bivalvia;Autobranchia;Heteroconchia;Euhe  
 terodonta;Imparidentia;Venerida;Veneroidea;Veneridae;Mercenaria;Mercenari  
 a mercenaria  
 UdeM00000037030 61621 327.8 UdeM00000037030 XP\_017733777.1 92.8 180  
 10 1 1 177 1 180 8.70E-87 327.8 61621 cellular  
 organisms;Eukaryota;Opisthokonta;Metazoa;Eumetazoa;Bilateria;Deuterostomi  
 a;Chordata;Craniata;Vertebrata;Gnathostomata;Teleostomi;Euteleostomi;Sarc  
 opterygii;Dipnotetrapodomorpha;Tetrapoda;Amniota;Mammalia;Theria;Eutheria  
 ;Boreoeutheria;Euarchontoglires;Primates;Haplorrhini;Simiiformes;Cattarri  
 ni;Cercopithecoidea;Cercopithecidae;Colobinae;Rhinopithecus;Rhinopithecus  
 bieti  
 UdeM00000037031 10224 92.8 UdeM00000037031 XP\_006813844.1 47.8 90  
 46 1 13 101 265 354 3.00E-16 92.8 10224 cellular  
 organisms;Eukaryota;Opisthokonta;Metazoa;Eumetazoa;Bilateria;Deuterostomi  
 a;Hemichordata;Enteropneusta;Harrimaniidae;Saccoglossus;Saccoglossus  
 kowalevskii  
 UdeM00000037035 218467 86.3 UdeM00000037035 XP\_023232316.1 37.7  
 122 75 1 26 146 64 185 6.90E-14 86.3 218467  
 cellular  
 organisms;Eukaryota;Opisthokonta;Metazoa;Eumetazoa;Bilateria;Protostomia;  
 Ecdysozoa;Panarthropoda;Arthropoda;Chelicerata;Arachnida;Scorpiones;Buthi  
 da;Buthoidea;Buthidae;Centruroides;Centruroides sculpturatus  
 UdeM00000037036 10224 137.5 UdeM00000037036 XP\_006821756.1 72.6 84  
 23 0 30 113 114 197 1.10E-29 137.5 10224 cellular  
 organisms;Eukaryota;Opisthokonta;Metazoa;Eumetazoa;Bilateria;Deuterostomi



a; Hemichordata; Enteropneusta; Harrimaniidae; Saccoglossus; Saccoglossus kowalevskii

UdeM00000037037 6579 103.2 UdeM00000037037 XP\_033727551.1 30.3 231  
138 6 3 215 36 261 6.20E-19 103.2 6579 cellular  
organisms; Eukaryota; Opisthokonta; Metazoa; Eumetazoa; Bilateria; Protostomia; Spiralia; Lophotrochozoa; Mollusca; Bivalvia; Autobranchia; Pteriomorpha; Pectinida; Pectinoidea; Pectinidae; Pecten; Pecten maximus

UdeM00000037038 37653 220.3 UdeM00000037038 XP\_014775946.1 100 104  
0 0 1 104 1 104 1.30E-54 220.3 37653 cellular  
organisms; Eukaryota; Opisthokonta; Metazoa; Eumetazoa; Bilateria; Protostomia; Spiralia; Lophotrochozoa; Mollusca; Cephalopoda; Coleoidea; Octopodiformes; Octopoda; Incirrata; Octopodidae; Octopus; Octopus bimaculoides

UdeM00000037039 6579 103.2 UdeM00000037039 XP\_033727551.1 31.5 241  
136 8 3 225 36 265 6.20E-19 103.2 6579 cellular  
organisms; Eukaryota; Opisthokonta; Metazoa; Eumetazoa; Bilateria; Protostomia; Spiralia; Lophotrochozoa; Mollusca; Bivalvia; Autobranchia; Pteriomorpha; Pectinida; Pectinoidea; Pectinidae; Pecten; Pecten maximus

UdeM00000037040 37653 220.3 UdeM00000037040 XP\_014775946.1 100 104  
0 0 1 104 1 104 1.30E-54 220.3 37653 cellular  
organisms; Eukaryota; Opisthokonta; Metazoa; Eumetazoa; Bilateria; Protostomia; Spiralia; Lophotrochozoa; Mollusca; Cephalopoda; Coleoidea; Octopodiformes; Octopoda; Incirrata; Octopodidae; Octopus; Octopus bimaculoides

UdeM00000037041 6579 103.2 UdeM00000037041 XP\_033727551.1 31.5 241  
136 8 3 225 36 265 6.20E-19 103.2 6579 cellular  
organisms; Eukaryota; Opisthokonta; Metazoa; Eumetazoa; Bilateria; Protostomia; Spiralia; Lophotrochozoa; Mollusca; Bivalvia; Autobranchia; Pteriomorpha; Pectinida; Pectinoidea; Pectinidae; Pecten; Pecten maximus

UdeM00000037042 6945 84.3 UdeM00000037042 XP\_040065097.1 28.5 193  
112 4 59 225 85 277 2.90E-13 84.3 6945 cellular  
organisms; Eukaryota; Opisthokonta; Metazoa; Eumetazoa; Bilateria; Protostomia; Ecdysozoa; Panarthropoda; Arthropoda; Chelicerata; Arachnida; Acari; Parasitiformes; Ixodida; Ixodoidea; Ixodidae; Ixodinae; Ixodes; Ixodes scapularis

UdeM00000037043 37653 220.3 UdeM00000037043 XP\_014775946.1 100 104  
0 0 1 104 1 104 1.30E-54 220.3 37653 cellular  
organisms; Eukaryota; Opisthokonta; Metazoa; Eumetazoa; Bilateria; Protostomia; Spiralia; Lophotrochozoa; Mollusca; Cephalopoda; Coleoidea; Octopodiformes; Octopoda; Incirrata; Octopodidae; Octopus; Octopus bimaculoides

UdeM00000037044 6579 103.2 UdeM00000037044 XP\_033727551.1 31.5 241  
136 8 3 225 36 265 6.20E-19 103.2 6579 cellular  
organisms; Eukaryota; Opisthokonta; Metazoa; Eumetazoa; Bilateria; Protostomia; Spiralia; Lophotrochozoa; Mollusca; Bivalvia; Autobranchia; Pteriomorpha; Pectinida; Pectinoidea; Pectinidae; Pecten; Pecten maximus

UdeM00000037045 6945 84.3 UdeM00000037045 XP\_040065097.1 28.5 193  
112 4 59 225 85 277 2.90E-13 84.3 6945 cellular  
organisms; Eukaryota; Opisthokonta; Metazoa; Eumetazoa; Bilateria; Protostomia; Ecdysozoa; Panarthropoda; Arthropoda; Chelicerata; Arachnida; Acari; Parasitiformes; Ixodida; Ixodoidea; Ixodidae; Ixodinae; Ixodes; Ixodes scapularis

UdeM00000037046 37653 220.3 UdeM00000037046 XP\_014775946.1 100 104  
0 0 1 104 1 104 1.30E-54 220.3 37653 cellular  
organisms; Eukaryota; Opisthokonta; Metazoa; Eumetazoa; Bilateria; Protostomia; Spiralia; Lophotrochozoa; Mollusca; Cephalopoda; Coleoidea; Octopodiformes; Octopoda; Incirrata; Octopodidae; Octopus; Octopus bimaculoides

UdeM00000037047 6579 103.2 UdeM00000037047 XP\_033727551.1 31.5 241  
136 8 3 225 36 265 6.20E-19 103.2 6579 cellular

organisms;Eukaryota;Opisthokonta;Metazoa;Eumetazoa;Bilateria;Protostomia;Spiralia;Lophotrochozoa;Mollusca;Bivalvia;Autobranchia;Pteriormorphia;Pectinida;Pectinoidea;Pectinidae;Pecten;Pecten maximus

UdeM00000037048 6945 84.3 UdeM00000037048 XP\_040065097.1 28.5 193  
112 4 59 225 85 277 2.90E-13 84.3 6945 cellular

organisms;Eukaryota;Opisthokonta;Metazoa;Eumetazoa;Bilateria;Protostomia;Ecdysozoa;Panarthropoda;Arthropoda;Chelicerata;Arachnida;Acari;Parasitiformes;Ixodida;Ixodoidea;Ixodidae;Ixodinae;Ixodes;Ixodes scapularis

UdeM00000037049 37653 220.3 UdeM00000037049 XP\_014775946.1 100 104  
0 0 1 104 1 104 1.30E-54 220.3 37653 cellular

organisms;Eukaryota;Opisthokonta;Metazoa;Eumetazoa;Bilateria;Protostomia;Spiralia;Lophotrochozoa;Mollusca;Cephalopoda;Coleoidea;Octopodiformes;Octopoda;Incirrata;Octopodidae;Octopus;Octopus bimaculoides

UdeM00000037050 6579 103.2 UdeM00000037050 XP\_033727551.1 31.5 241  
136 8 3 225 36 265 6.20E-19 103.2 6579 cellular

organisms;Eukaryota;Opisthokonta;Metazoa;Eumetazoa;Bilateria;Protostomia;Spiralia;Lophotrochozoa;Mollusca;Bivalvia;Autobranchia;Pteriormorphia;Pectinida;Pectinoidea;Pectinidae;Pecten;Pecten maximus

UdeM00000037051 6945 84.3 UdeM00000037051 XP\_040065097.1 28.5 193  
112 4 59 225 85 277 2.90E-13 84.3 6945 cellular

organisms;Eukaryota;Opisthokonta;Metazoa;Eumetazoa;Bilateria;Protostomia;Ecdysozoa;Panarthropoda;Arthropoda;Chelicerata;Arachnida;Acari;Parasitiformes;Ixodida;Ixodoidea;Ixodidae;Ixodinae;Ixodes;Ixodes scapularis

UdeM00000037052 6596 1072 UdeM00000037052 XP\_045195120.1 75.7 802  
189 5 1 799 1 799 3.6e-310 1072 6596 cellular

organisms;Eukaryota;Opisthokonta;Metazoa;Eumetazoa;Bilateria;Protostomia;Spiralia;Lophotrochozoa;Mollusca;Bivalvia;Autobranchia;Heteroconchia;Euheterodonta;Imparidentia;Venerida;Veneroidea;Veneridae;Mercenaria;Mercenaria mercenaria

UdeM00000037053 6579 171.8 UdeM00000037053 XP\_033740369.1 26.9 788  
443 22 1 715 1 728 3.20E-39 171.8 6579 cellular

organisms;Eukaryota;Opisthokonta;Metazoa;Eumetazoa;Bilateria;Protostomia;Spiralia;Lophotrochozoa;Mollusca;Bivalvia;Autobranchia;Pteriormorphia;Pectinida;Pectinoidea;Pectinidae;Pecten;Pecten maximus

UdeM00000037054 6596 251.1 UdeM00000037054 XP\_045195120.1 80.9 157  
30 0 1 157 643 799 9.30E-64 251.1 6596 cellular

organisms;Eukaryota;Opisthokonta;Metazoa;Eumetazoa;Bilateria;Protostomia;Spiralia;Lophotrochozoa;Mollusca;Bivalvia;Autobranchia;Heteroconchia;Euheterodonta;Imparidentia;Venerida;Veneroidea;Veneridae;Mercenaria;Mercenaria mercenaria

UdeM00000037055 6579 171.8 UdeM00000037055 XP\_033740369.1 26.9 788  
443 22 1 715 1 728 3.20E-39 171.8 6579 cellular

organisms;Eukaryota;Opisthokonta;Metazoa;Eumetazoa;Bilateria;Protostomia;Spiralia;Lophotrochozoa;Mollusca;Bivalvia;Autobranchia;Pteriormorphia;Pectinida;Pectinoidea;Pectinidae;Pecten;Pecten maximus

UdeM00000037056 260615 180.6 UdeM00000037056 XP\_039383630.1 93.1  
101 7 0 24 124 239 339 1.20E-42 180.6 260615

cellular

organisms;Eukaryota;Opisthokonta;Metazoa;Eumetazoa;Bilateria;Deuterostomia;Chordata;Craniata;Vertebrata;Gnathostomata;Teleostomi;Euteleostomi;Sarcopterygii;Dipnotetrapodomorpha;Tetrapoda;Amniota;Sauropsida;Sauria;Archelosauria;Testudinata;Testudines;Cryptodira;Durocryptodira;Testudinoidea;Geoemydidae;Geoemydinae;Mauremys;Mauremys reevesii

UdeM00000037057 6573 151.4 UdeM00000037057 XP\_021366867.1 53.8 160  
 67 4 267 423 254 409 7.60E-33 151.4 6573 cellular  
 organisms;Eukaryota;Opisthokonta;Metazoa;Eumetazoa;Bilateria;Protostomia;  
 Spiralia;Lophotrochozoa;Mollusca;Bivalvia;Autobranchia;Pteriomorpha;Pect  
 inida;Pectinoidea;Pectinidae;Mizuhopecten;Mizuhopecten yessoensis  
 UdeM00000037058 6573 84.3 UdeM00000037058 XP\_021366763.1 53 66  
 31 0 72 137 79 144 1.30E-13 84.3 6573 cellular  
 organisms;Eukaryota;Opisthokonta;Metazoa;Eumetazoa;Bilateria;Protostomia;  
 Spiralia;Lophotrochozoa;Mollusca;Bivalvia;Autobranchia;Pteriomorpha;Pect  
 inida;Pectinoidea;Pectinidae;Mizuhopecten;Mizuhopecten yessoensis  
 UdeM00000037059 6565 709.5 UdeM00000037059 XP\_022293133.1 76.1 548  
 116 5 1 536 1 545 3.20E-20 709.5 6565 cellular  
 organisms;Eukaryota;Opisthokonta;Metazoa;Eumetazoa;Bilateria;Protostomia;  
 Spiralia;Lophotrochozoa;Mollusca;Bivalvia;Autobranchia;Pteriomorpha;Ostr  
 eida;Ostreoidea;Ostreidae;Crassostrea;Crassostrea virginica  
 UdeM00000037060 29159 268.1 UdeM00000037060 XP\_034335595.1 34.8 509  
 271 11 1 491 113 578 2.20E-68 268.1 29159 cellular  
 organisms;Eukaryota;Opisthokonta;Metazoa;Eumetazoa;Bilateria;Protostomia;  
 Spiralia;Lophotrochozoa;Mollusca;Bivalvia;Autobranchia;Pteriomorpha;Ostr  
 eida;Ostreoidea;Ostreidae;Crassostrea;Crassostrea gigas  
 UdeM00000037061 7955 134.8 UdeM00000037061 XP\_009297123.1 36.7 207  
 119 3 106 307 19 218 2.20E-28 134.8 7955 cellular  
 organisms;Eukaryota;Opisthokonta;Metazoa;Eumetazoa;Bilateria;Deuterostomi  
 a;Chordata;Craniata;Vertebrata;Gnathostomata;Teleostomi;Euteleostomi;Acti  
 nopterygii;Actinopteri;Neopterygii;Teleostei;Osteoglossocephalai;Clupeoce  
 phala;Otomorpha;Ostariophysi;Otophysi;Cypriniphysae;Cypriniiformes;Cyprino  
 ideii;Danionidae;Danioninae;Danio;Danio rerio  
 UdeM00000037062 6573 141 UdeM00000037062 XP\_021365597.1 41.1 207  
 115 5 23 225 118 321 2.60E-30 141 6573 cellular  
 organisms;Eukaryota;Opisthokonta;Metazoa;Eumetazoa;Bilateria;Protostomia;  
 Spiralia;Lophotrochozoa;Mollusca;Bivalvia;Autobranchia;Pteriomorpha;Pect  
 inida;Pectinoidea;Pectinidae;Mizuhopecten;Mizuhopecten yessoensis  
 UdeM00000037063 7998 493.8 UdeM00000037063 XP\_017334791.1 65.1 361  
 126 0 1 361 62 422 2.20E-136 493.8 7998 cellular  
 organisms;Eukaryota;Opisthokonta;Metazoa;Eumetazoa;Bilateria;Deuterostomi  
 a;Chordata;Craniata;Vertebrata;Gnathostomata;Teleostomi;Euteleostomi;Acti  
 nopterygii;Actinopteri;Neopterygii;Teleostei;Osteoglossocephalai;Clupeoce  
 phala;Otomorpha;Ostariophysi;Otophysi;Characiphysae;Siluriformes;Siluroid  
 ei;Ictaluridae;Ictalurus;Ictalurus punctatus  
 UdeM00000037064 7741 288.5 UdeM00000037064 XP\_019622111.1 51.8 280  
 132 3 33 311 1 278 1.00E-74 288.5 7741 cellular  
 organisms;Eukaryota;Opisthokonta;Metazoa;Eumetazoa;Bilateria;Deuterostomi  
 a;Chordata;Cephalochordata;Leptocardii;Amphioxiformes;Branchiostomidae;Br  
 anchiostoma;Branchiostoma belcheri  
 UdeM00000037065 6579 142.9 UdeM00000037065 XP\_033757393.1 36.6 213  
 129 3 22 230 223 433 6.20E-31 142.9 6579 cellular  
 organisms;Eukaryota;Opisthokonta;Metazoa;Eumetazoa;Bilateria;Protostomia;  
 Spiralia;Lophotrochozoa;Mollusca;Bivalvia;Autobranchia;Pteriomorpha;Pect  
 inida;Pectinoidea;Pectinidae;Pecten;Pecten maximus  
 UdeM00000037066 2607531 112.8 UdeM00000037066 XP\_036358365.1 60.9  
 87 34 0 1 87 570 656 2.40E-22 112.8 2607531  
 cellular  
 organisms;Eukaryota;Opisthokonta;Metazoa;Eumetazoa;Bilateria;Protostomia;

Spiralia;Lophotrochozoa;Mollusca;Cephalopoda;Coleoidea;Octopodiformes;Octopoda;Incirrata;Octopodidae;Octopus;Octopus sinensis

UdeM00000037067 6596 272.7 UdeM00000037067 XP\_045195796.1 33.8 476  
291 9 144 612 4 462 1.10E-69 272.7 6596 cellular  
organisms;Eukaryota;Opisthokonta;Metazoa;Eumetazoa;Bilateria;Protostomia;  
Spiralia;Lophotrochozoa;Mollusca;Bivalvia;Autobranchia;Heteroconchia;Euhe  
terodonta;Imparidentia;Venerida;Veneroidea;Veneridae;Mercenaria;Mercenari  
a mercenaria

UdeM00000037068 6565 286.6 UdeM00000037068 XP\_022288931.1 33.3 534  
309 11 39 572 104 590 7.10E-74 286.6 6565 cellular  
organisms;Eukaryota;Opisthokonta;Metazoa;Eumetazoa;Bilateria;Protostomia;  
Spiralia;Lophotrochozoa;Mollusca;Bivalvia;Autobranchia;Pteriormorphia;Ostr  
eida;Ostreoidea;Ostreidae;Crassostrea;Crassostrea virginica

UdeM00000037069 6596 270 UdeM00000037069 XP\_045195796.1 33.8 491  
275 11 146 618 4 462 7.40E-69 270 6596 cellular  
organisms;Eukaryota;Opisthokonta;Metazoa;Eumetazoa;Bilateria;Protostomia;  
Spiralia;Lophotrochozoa;Mollusca;Bivalvia;Autobranchia;Heteroconchia;Euhe  
terodonta;Imparidentia;Venerida;Veneroidea;Veneridae;Mercenaria;Mercenari  
a mercenaria

UdeM00000037070 6596 270 UdeM00000037070 XP\_045195796.1 33.8 491  
275 11 135 607 4 462 7.30E-69 270 6596 cellular  
organisms;Eukaryota;Opisthokonta;Metazoa;Eumetazoa;Bilateria;Protostomia;  
Spiralia;Lophotrochozoa;Mollusca;Bivalvia;Autobranchia;Heteroconchia;Euhe  
terodonta;Imparidentia;Venerida;Veneroidea;Veneridae;Mercenaria;Mercenari  
a mercenaria

UdeM00000037071 6565 211.1 UdeM00000037071 XP\_022288100.1 31 436  
233 10 39 464 322 699 3.80E-51 211.1 6565 cellular  
organisms;Eukaryota;Opisthokonta;Metazoa;Eumetazoa;Bilateria;Protostomia;  
Spiralia;Lophotrochozoa;Mollusca;Bivalvia;Autobranchia;Pteriormorphia;Ostr  
eida;Ostreoidea;Ostreidae;Crassostrea;Crassostrea virginica

UdeM00000037072 34773 131.3 UdeM00000037072 XP\_041946954.1 44.8 134  
66 2 31 159 222 352 1.30E-27 131.3 34773 cellular  
organisms;Eukaryota;Opisthokonta;Metazoa;Eumetazoa;Bilateria;Deuterostomi  
a;Chordata;Craniata;Vertebrata;Gnathostomata;Teleostomi;Euteleostomi;Acti  
nopterygii;Actinopteri;Neopterygii;Teleostei;Osteoglossocephalai;Clupeoce  
phala;Otomorpha;Clupei;Clupeiformes;Clupeoidei;Clupeidae;Alosinae;Alosa;A  
losa sapidissima

UdeM00000037073 6565 212.2 UdeM00000037073 XP\_022288749.1 33 437  
251 11 52 481 195 596 1.40E-51 212.2 6565 cellular  
organisms;Eukaryota;Opisthokonta;Metazoa;Eumetazoa;Bilateria;Protostomia;  
Spiralia;Lophotrochozoa;Mollusca;Bivalvia;Autobranchia;Pteriormorphia;Ostr  
eida;Ostreoidea;Ostreidae;Crassostrea;Crassostrea virginica

UdeM00000037074 7574 187.2 UdeM00000037074 XP\_013384628.1 67.7 133  
41 1 1 133 33 163 1.50E-44 187.2 7574 cellular  
organisms;Eukaryota;Opisthokonta;Metazoa;Eumetazoa;Bilateria;Protostomia;  
Spiralia;Lophotrochozoa;Brachiopoda;Linguliformea;Lingulata;Lingulida;Lin  
guloidea;Lingulidae;Lingula;Lingula anatina

UdeM00000037075 7574 189.9 UdeM00000037075 XP\_013384628.1 60.2 161  
55 3 1 161 33 184 2.90E-45 189.9 7574 cellular  
organisms;Eukaryota;Opisthokonta;Metazoa;Eumetazoa;Bilateria;Protostomia;  
Spiralia;Lophotrochozoa;Brachiopoda;Linguliformea;Lingulata;Lingulida;Lin  
guloidea;Lingulidae;Lingula;Lingula anatina

UdeM00000037076 6565 280.4 UdeM00000037076 XP\_022290205.1 33.2 575  
310 12 12 565 67 588 5.00E-72 280.4 6565 cellular

organisms;Eukaryota;Opisthokonta;Metazoa;Eumetazoa;Bilateria;Protostomia;Spiralia;Lophotrochozoa;Mollusca;Bivalvia;Autobranhia;Pteriormorphia;Ostr eida;Ostreoidea;Ostreidae;Crassostrea;Crassostrea virginica  
UdeM00000037077 6565 277.7 UdeM00000037077 XP\_022290205.1 34 541  
292 10 1 529 101 588 3.00E-71 277.7 6565 cellular  
organisms;Eukaryota;Opisthokonta;Metazoa;Eumetazoa;Bilateria;Protostomia;Spiralia;Lophotrochozoa;Mollusca;Bivalvia;Autobranhia;Pteriormorphia;Ostr eida;Ostreoidea;Ostreidae;Crassostrea;Crassostrea virginica  
UdeM00000037079 6565 224.6 UdeM00000037079 XP\_022288100.1 32.8 436  
247 10 39 471 322 714 3.40E-55 224.6 6565 cellular  
organisms;Eukaryota;Opisthokonta;Metazoa;Eumetazoa;Bilateria;Protostomia;Spiralia;Lophotrochozoa;Mollusca;Bivalvia;Autobranhia;Pteriormorphia;Ostr eida;Ostreoidea;Ostreidae;Crassostrea;Crassostrea virginica  
UdeM00000037080 29159 274.2 UdeM00000037080 XP\_034335621.1 34.7 518  
285 12 8 524 113 578 3.30E-70 274.2 29159 cellular  
organisms;Eukaryota;Opisthokonta;Metazoa;Eumetazoa;Bilateria;Protostomia;Spiralia;Lophotrochozoa;Mollusca;Bivalvia;Autobranhia;Pteriormorphia;Ostr eida;Ostreoidea;Ostreidae;Crassostrea;Crassostrea gigas  
UdeM00000037082 6596 96.3 UdeM00000037082 XP\_045206084.1 45.6 103  
53 2 99 200 78 178 4.80E-17 96.3 6596 cellular  
organisms;Eukaryota;Opisthokonta;Metazoa;Eumetazoa;Bilateria;Protostomia;Spiralia;Lophotrochozoa;Mollusca;Bivalvia;Autobranhia;Heteroconchia;Euhe terodonta;Imparidentia;Venerida;Veneroidea;Veneridae;Mercenaria;Mercenari a mercenaria  
UdeM00000037083 6596 204.1 UdeM00000037083 XP\_045177112.1 34 382  
211 11 17 360 187 565 3.00E-49 204.1 6596 cellular  
organisms;Eukaryota;Opisthokonta;Metazoa;Eumetazoa;Bilateria;Protostomia;Spiralia;Lophotrochozoa;Mollusca;Bivalvia;Autobranhia;Heteroconchia;Euhe terodonta;Imparidentia;Venerida;Veneroidea;Veneridae;Mercenaria;Mercenari a mercenaria  
UdeM00000037084 6596 266.5 UdeM00000037084 XP\_045202728.1 33 539  
291 13 8 522 15 507 6.90E-68 266.5 6596 cellular  
organisms;Eukaryota;Opisthokonta;Metazoa;Eumetazoa;Bilateria;Protostomia;Spiralia;Lophotrochozoa;Mollusca;Bivalvia;Autobranhia;Heteroconchia;Euhe terodonta;Imparidentia;Venerida;Veneroidea;Veneridae;Mercenaria;Mercenari a mercenaria  
UdeM00000037085 6596 308.9 UdeM00000037085 XP\_045197454.1 53.4 326  
128 6 1 305 1 323 7.10E-81 308.9 6596 cellular  
organisms;Eukaryota;Opisthokonta;Metazoa;Eumetazoa;Bilateria;Protostomia;Spiralia;Lophotrochozoa;Mollusca;Bivalvia;Autobranhia;Heteroconchia;Euhe terodonta;Imparidentia;Venerida;Veneroidea;Veneridae;Mercenaria;Mercenari a mercenaria  
UdeM00000037086 6596 531.2 UdeM00000037086 XP\_045198848.1 64.6 390  
137 1 28 416 37 426 1.20E-147 531.2 6596 cellular  
organisms;Eukaryota;Opisthokonta;Metazoa;Eumetazoa;Bilateria;Protostomia;Spiralia;Lophotrochozoa;Mollusca;Bivalvia;Autobranhia;Heteroconchia;Euhe terodonta;Imparidentia;Venerida;Veneroidea;Veneridae;Mercenaria;Mercenari a mercenaria  
UdeM00000037087 6596 2568.1 UdeM00000037087 XP\_045195259.1 64.4  
2038 698 14 18 2045 10 2030 0.00E+00 2568.1 6596  
cellular  
organisms;Eukaryota;Opisthokonta;Metazoa;Eumetazoa;Bilateria;Protostomia;Spiralia;Lophotrochozoa;Mollusca;Bivalvia;Autobranhia;Heteroconchia;Euhe

terodonta;Imparidentia;Venerida;Veneroidea;Veneridae;Mercenaria;Mercenaria mercenaria

UdeM00000037090 6596 61.6 UdeM00000037090 XP\_045189070.1 42.5 87  
48 2 2 87 1 86 5.90E-07 61.6 6596 cellular

organisms;Eukaryota;Opisthokonta;Metazoa;Eumetazoa;Bilateria;Protostomia;Spiralia;Lophotrochozoa;Mollusca;Bivalvia;Autobranchia;Heteroconchia;Euherodonta;Imparidentia;Venerida;Veneroidea;Veneridae;Mercenaria;Mercenaria mercenaria

UdeM00000037091 6596 107.5 UdeM00000037091 XP\_045195617.1 44.9 136  
64 2 5 129 26 161 8.70E-20 107.5 6596 cellular

organisms;Eukaryota;Opisthokonta;Metazoa;Eumetazoa;Bilateria;Protostomia;Spiralia;Lophotrochozoa;Mollusca;Bivalvia;Autobranchia;Heteroconchia;Euherodonta;Imparidentia;Venerida;Veneroidea;Veneridae;Mercenaria;Mercenaria mercenaria

UdeM00000037092 6596 188.7 UdeM00000037092 XP\_045199209.1 36.5 304  
160 6 103 381 1 296 1.30E-44 188.7 6596 cellular

organisms;Eukaryota;Opisthokonta;Metazoa;Eumetazoa;Bilateria;Protostomia;Spiralia;Lophotrochozoa;Mollusca;Bivalvia;Autobranchia;Heteroconchia;Euherodonta;Imparidentia;Venerida;Veneroidea;Veneridae;Mercenaria;Mercenaria mercenaria

UdeM00000037096 6596 157.1 UdeM00000037096 XP\_045196295.1 60.5 147  
24 4 1 113 1 147 1.60E-35 157.1 6596 cellular

organisms;Eukaryota;Opisthokonta;Metazoa;Eumetazoa;Bilateria;Protostomia;Spiralia;Lophotrochozoa;Mollusca;Bivalvia;Autobranchia;Heteroconchia;Euherodonta;Imparidentia;Venerida;Veneroidea;Veneridae;Mercenaria;Mercenaria mercenaria

UdeM00000037097 6596 389.8 UdeM00000037097 XP\_045196296.1 67.1 304  
56 7 1 270 1 294 2.80E-105 389.8 6596 cellular

organisms;Eukaryota;Opisthokonta;Metazoa;Eumetazoa;Bilateria;Protostomia;Spiralia;Lophotrochozoa;Mollusca;Bivalvia;Autobranchia;Heteroconchia;Euherodonta;Imparidentia;Venerida;Veneroidea;Veneridae;Mercenaria;Mercenaria mercenaria

UdeM00000037098 2652724 131 UdeM00000037098 XP\_020905078.2 39.4  
160 82 2 13 171 448 593 1.60E-27 131 2652724  
cellular

organisms;Eukaryota;Opisthokonta;Metazoa;Eumetazoa;Cnidaria;Anthozoa;Hexacorallia;Actiniaria;Aiptasiidae;Exaiptasia;Exaiptasia diaphana

UdeM00000037100 225164 101.7 UdeM00000037100 XP\_009043758.1 36.7  
120 75 1 2 121 21 139 7.40E-19 101.7 225164  
cellular

organisms;Eukaryota;Opisthokonta;Metazoa;Eumetazoa;Bilateria;Protostomia;Spiralia;Lophotrochozoa;Mollusca;Gastropoda;Patellogastropoda;Lottiidae;Lottia;Lottia gigantea

UdeM00000037101 29159 98.6 UdeM00000037101 XP\_034307341.1 43.6 110  
52 1 9 108 230 339 8.70E-18 98.6 29159 cellular

organisms;Eukaryota;Opisthokonta;Metazoa;Eumetazoa;Bilateria;Protostomia;Spiralia;Lophotrochozoa;Mollusca;Bivalvia;Autobranchia;Pteriomorpha;Ostreidae;Ostreidae;Crassostrea;Crassostrea gigas

UdeM00000037102 6596 75.9 UdeM00000037102 XP\_045196411.1 35.5 141  
81 4 16 150 12 148 7.60E-11 75.9 6596 cellular

organisms;Eukaryota;Opisthokonta;Metazoa;Eumetazoa;Bilateria;Protostomia;Spiralia;Lophotrochozoa;Mollusca;Bivalvia;Autobranchia;Heteroconchia;Euherodonta;Imparidentia;Venerida;Veneroidea;Veneridae;Mercenaria;Mercenaria mercenaria

UdeM00000037103 125878 889 UdeM00000037103 XP\_018425791.1 94  
 451 27 0 1 451 1 451 2.50E-255 889 125878  
 cellular  
 organisms;Eukaryota;Opisthokonta;Metazoa;Eumetazoa;Bilateria;Deuterostomi  
 a;Chordata;Craniata;Vertebrata;Gnathostomata;Teleostomi;Euteleostomi;Sarc  
 opterygii;Dipnotetrapodomorpha;Tetrapoda;Amphibia;Batrachia;Anura;Neobatr  
 achia;Ranoidea;Dicroglossidae;Dicroglossinae;Nanorana;Nanorana parkeri  
 UdeM00000037104 225164 919.5 UdeM00000037104 XP\_009045201.1 97.3  
 452 12 0 1 452 1 452 1.70E-264 919.5 225164  
 cellular  
 organisms;Eukaryota;Opisthokonta;Metazoa;Eumetazoa;Bilateria;Protostomia;  
 Spiralia;Lophotrochozoa;Mollusca;Gastropoda;Patellogastropoda;Lottioidea;  
 Lottiidae;Lottia;Lottia gigantea  
 UdeM00000037105 225164 918.7 UdeM00000037105 XP\_009053229.1 98  
 452 9 0 1 452 1 452 2.90E-264 918.7 225164  
 cellular  
 organisms;Eukaryota;Opisthokonta;Metazoa;Eumetazoa;Bilateria;Protostomia;  
 Spiralia;Lophotrochozoa;Mollusca;Gastropoda;Patellogastropoda;Lottioidea;  
 Lottiidae;Lottia;Lottia gigantea  
 UdeM00000037106 225164 917.9 UdeM00000037106 XP\_009053229.1 98  
 452 9 0 1 452 1 452 5.00E-264 917.9 225164  
 cellular  
 organisms;Eukaryota;Opisthokonta;Metazoa;Eumetazoa;Bilateria;Protostomia;  
 Spiralia;Lophotrochozoa;Mollusca;Gastropoda;Patellogastropoda;Lottioidea;  
 Lottiidae;Lottia;Lottia gigantea  
 UdeM00000037107 6596 407.1 UdeM00000037107 XP\_045196251.1 49.9 387  
 190 2 23 407 16 400 2.70E-110 407.1 6596 cellular  
 organisms;Eukaryota;Opisthokonta;Metazoa;Eumetazoa;Bilateria;Protostomia;  
 Spiralia;Lophotrochozoa;Mollusca;Bivalvia;Autobranchia;Heteroconchia;Euhe  
 terodonta;Imparidentia;Venerida;Veneroidea;Veneridae;Mercenaria;Mercenari  
 a mercenaria  
 UdeM00000037108 6596 400.6 UdeM00000037108 XP\_045196251.1 52.6 344  
 161 1 6 347 57 400 2.10E-108 400.6 6596 cellular  
 organisms;Eukaryota;Opisthokonta;Metazoa;Eumetazoa;Bilateria;Protostomia;  
 Spiralia;Lophotrochozoa;Mollusca;Bivalvia;Autobranchia;Heteroconchia;Euhe  
 terodonta;Imparidentia;Venerida;Veneroidea;Veneridae;Mercenaria;Mercenari  
 a mercenaria  
 UdeM00000037109 6596 138.3 UdeM00000037109 XP\_045195726.1 44.4 153  
 85 0 16 168 11 163 9.20E-30 138.3 6596 cellular  
 organisms;Eukaryota;Opisthokonta;Metazoa;Eumetazoa;Bilateria;Protostomia;  
 Spiralia;Lophotrochozoa;Mollusca;Bivalvia;Autobranchia;Heteroconchia;Euhe  
 terodonta;Imparidentia;Venerida;Veneroidea;Veneridae;Mercenaria;Mercenari  
 a mercenaria  
 UdeM00000037110 6565 483.8 UdeM00000037110 XP\_022288637.1 75.3 291  
 72 0 6 296 7 297 1.60E-133 483.8 6565 cellular  
 organisms;Eukaryota;Opisthokonta;Metazoa;Eumetazoa;Bilateria;Protostomia;  
 Spiralia;Lophotrochozoa;Mollusca;Bivalvia;Autobranchia;Pteriomorpha;Ostr  
 eida;Ostreoidea;Ostreidae;Crassostrea;Crassostrea virginica  
 UdeM00000030853 7574 282 UdeM00000030853 XP\_013404713.1 35.8 439  
 265 9 10 440 6 435 1.70E-72 282 7574 cellular  
 organisms;Eukaryota;Opisthokonta;Metazoa;Eumetazoa;Bilateria;Protostomia;  
 Spiralia;Lophotrochozoa;Brachiopoda;Linguliformea;Lingulata;Lingulida;Lin  
 guloidea;Lingulidae;Lingula;Lingula anatina

UdeM00000030854 6596 608.2 UdeM00000030854 XP\_045159889.1 63.6 459  
 160 3 1 454 1 457 8.50E-171 608.2 6596 cellular  
 organisms;Eukaryota;Opisthokonta;Metazoa;Eumetazoa;Bilateria;Protostomia;  
 Spiralia;Lophotrochozoa;Mollusca;Bivalvia;Autobranhia;Heteroconchia;Euhe  
 terodonta;Imparidentia;Venerida;Veneroidea;Veneridae;Mercenaria;Mercenari  
 a mercenaria  
 UdeM00000030855 6596 240.4 UdeM00000030855 XP\_045159892.1 73.1 145  
 39 0 5 149 3 147 1.50E-60 240.4 6596 cellular  
 organisms;Eukaryota;Opisthokonta;Metazoa;Eumetazoa;Bilateria;Protostomia;  
 Spiralia;Lophotrochozoa;Mollusca;Bivalvia;Autobranhia;Heteroconchia;Euhe  
 terodonta;Imparidentia;Venerida;Veneroidea;Veneridae;Mercenaria;Mercenari  
 a mercenaria  
 UdeM00000030856 286706 514.2 UdeM00000030856 XP\_014276973.1 60.2  
 417 148 4 1 400 1 416 1.50E-142 514.2 286706  
 cellular  
 organisms;Eukaryota;Opisthokonta;Metazoa;Eumetazoa;Bilateria;Protostomia;  
 Ecdysozoa;Panarthropoda;Arthropoda;Mandibulata;Pancrustacea;Hexapoda;Inse  
 cta;Dicondylia;Pterygota;Neoptera;Paraneoptera;Hemiptera;Prosorrhyncha;He  
 teroptera;Euheteroptera;Neoheteroptera;Panheteroptera;Pentatomomorpha;Pen  
 tatomoidea;Pentatomidae;Pentatominae;Halyomorpha;Halyomorpha halys  
 UdeM00000030857 6596 156 UdeM00000030857 XP\_045159786.1 38.1 260  
 136 11 69 318 34 278 9.80E-35 156 6596 cellular  
 organisms;Eukaryota;Opisthokonta;Metazoa;Eumetazoa;Bilateria;Protostomia;  
 Spiralia;Lophotrochozoa;Mollusca;Bivalvia;Autobranhia;Heteroconchia;Euhe  
 terodonta;Imparidentia;Venerida;Veneroidea;Veneridae;Mercenaria;Mercenari  
 a mercenaria  
 UdeM00000030858 6596 635.2 UdeM00000030858 XP\_045159786.1 36.4 1166  
 572 24 287 1349 714 1813 1.90E-178 635.2 6596 cellular  
 organisms;Eukaryota;Opisthokonta;Metazoa;Eumetazoa;Bilateria;Protostomia;  
 Spiralia;Lophotrochozoa;Mollusca;Bivalvia;Autobranhia;Heteroconchia;Euhe  
 terodonta;Imparidentia;Venerida;Veneroidea;Veneridae;Mercenaria;Mercenari  
 a mercenaria  
 UdeM00000030859 6596 633.3 UdeM00000030859 XP\_045172017.1 70.7 396  
 116 0 9 404 3 398 2.30E-178 633.3 6596 cellular  
 organisms;Eukaryota;Opisthokonta;Metazoa;Eumetazoa;Bilateria;Protostomia;  
 Spiralia;Lophotrochozoa;Mollusca;Bivalvia;Autobranhia;Heteroconchia;Euhe  
 terodonta;Imparidentia;Venerida;Veneroidea;Veneridae;Mercenaria;Mercenari  
 a mercenaria  
 UdeM00000030860 6596 1700.3 UdeM00000030860 XP\_045157858.1 82.3  
 1031 178 2 4 1032 5 1033 0.00E+00 1700.3 6596  
 cellular  
 organisms;Eukaryota;Opisthokonta;Metazoa;Eumetazoa;Bilateria;Protostomia;  
 Spiralia;Lophotrochozoa;Mollusca;Bivalvia;Autobranhia;Heteroconchia;Euhe  
 terodonta;Imparidentia;Venerida;Veneroidea;Veneridae;Mercenaria;Mercenari  
 a mercenaria  
 UdeM00000030861 10224 183.7 UdeM00000030861 XP\_002739467.1 65.2 135  
 42 2 9 138 8 142 1.90E-43 183.7 10224 cellular  
 organisms;Eukaryota;Opisthokonta;Metazoa;Eumetazoa;Bilateria;Deuterostomi  
 a;Hemichordata;Enteropneusta;Harrimaniidae;Saccoglossus;Saccoglossus  
 kowalevskii  
 UdeM00000030862 10224 183.7 UdeM00000030862 XP\_002739467.1 65.2 135  
 42 2 9 138 8 142 2.00E-43 183.7 10224 cellular  
 organisms;Eukaryota;Opisthokonta;Metazoa;Eumetazoa;Bilateria;Deuterostomi



a; Hemichordata; Enteropneusta; Harrimaniidae; Saccoglossus; Saccoglossus kowalevskii

UdeM00000030864 6579 867.5 UdeM00000030864 XP\_033739131.1 61.4 645  
247 2 1 644 726 1369 1.10E-248 867.5 6579 cellular  
organisms; Eukaryota; Opisthokonta; Metazoa; Eumetazoa; Bilateria; Protostomia; Spiralia; Lophotrochozoa; Mollusca; Bivalvia; Autobranchia; Pteriomorpha; Pectinida; Pectinoidea; Pectinidae; Pecten; Pecten maximus

UdeM00000030863 6579 1179.9 UdeM00000030863 XP\_033739131.1 57.1  
993 394 5 1 992 408 1369 0.00E+00 1179.9 6579  
cellular  
organisms; Eukaryota; Opisthokonta; Metazoa; Eumetazoa; Bilateria; Protostomia; Spiralia; Lophotrochozoa; Mollusca; Bivalvia; Autobranchia; Pteriomorpha; Pectinida; Pectinoidea; Pectinidae; Pecten; Pecten maximus

UdeM00000030865 6579 232.3 UdeM00000030865 XP\_033738407.1 57.1 203  
80 3 1 197 1 202 5.50E-58 232.3 6579 cellular  
organisms; Eukaryota; Opisthokonta; Metazoa; Eumetazoa; Bilateria; Protostomia; Spiralia; Lophotrochozoa; Mollusca; Bivalvia; Autobranchia; Pteriomorpha; Pectinida; Pectinoidea; Pectinidae; Pecten; Pecten maximus

UdeM00000030867 6500 121.7 UdeM00000030867 XP\_012943190.1 44.7 159  
80 5 1 152 1 158 8.40E-25 121.7 6500 cellular  
organisms; Eukaryota; Opisthokonta; Metazoa; Eumetazoa; Bilateria; Protostomia; Spiralia; Lophotrochozoa; Mollusca; Gastropoda; Heterobranchia; Euthyneura; Teptipleura; Aplysiida; Aplysioidea; Aplysiidae; Aplysia; Aplysia californica

UdeM00000030868 6573 1004.2 UdeM00000030868 XP\_021362269.1 64.8  
968 301 14 12 972 315 1249 1.10E-289 1004.2 6573  
cellular  
organisms; Eukaryota; Opisthokonta; Metazoa; Eumetazoa; Bilateria; Protostomia; Spiralia; Lophotrochozoa; Mollusca; Bivalvia; Autobranchia; Pteriomorpha; Pectinida; Pectinoidea; Pectinidae; Mizuhopecten; Mizuhopecten yessoensis

UdeM00000030869 6526 487.6 UdeM00000030869 XP\_013083697.1 91 268  
24 0 1 268 1 268 1.10E-134 487.6 6526 cellular  
organisms; Eukaryota; Opisthokonta; Metazoa; Eumetazoa; Bilateria; Protostomia; Spiralia; Lophotrochozoa; Mollusca; Gastropoda; Heterobranchia; Euthyneura; Panpulmonata; Hygrophila; Lymnaeioidea; Planorbidae; Biomphalaria; Biomphalaria glabrata

UdeM00000030870 6596 242.3 UdeM00000030870 XP\_045159795.1 60 185  
74 0 1 185 1 185 6.30E-61 242.3 6596 cellular  
organisms; Eukaryota; Opisthokonta; Metazoa; Eumetazoa; Bilateria; Protostomia; Spiralia; Lophotrochozoa; Mollusca; Bivalvia; Autobranchia; Heteroconchia; Eutherozonta; Imparidentia; Venerida; Veneroidea; Veneridae; Mercenaria; Mercenaria mercenaria

UdeM00000030871 1735272 468.8 UdeM00000030871 XP\_041358977.1 74.2  
330 84 1 1 329 1 330 5.80E-129 468.8 1735272  
cellular  
organisms; Eukaryota; Opisthokonta; Metazoa; Eumetazoa; Bilateria; Protostomia; Spiralia; Lophotrochozoa; Mollusca; Gastropoda; Neomphalina; Neomphaloidea; Peltospiridae; Gigantopelta; Gigantopelta aegis

UdeM00000030872 6596 359 UdeM00000030872 XP\_045157576.1 72.2 216  
60 0 13 228 15 230 4.50E-96 359 6596 cellular  
organisms; Eukaryota; Opisthokonta; Metazoa; Eumetazoa; Bilateria; Protostomia; Spiralia; Lophotrochozoa; Mollusca; Bivalvia; Autobranchia; Heteroconchia; Eutherozonta; Imparidentia; Venerida; Veneroidea; Veneridae; Mercenaria; Mercenaria mercenaria

UdeM00000030873 6596 374 UdeM00000030873 XP\_045157576.1 71.4 224  
 64 0 5 228 7 230 1.40E-100 374 6596 cellular  
 organisms;Eukaryota;Opisthokonta;Metazoa;Eumetazoa;Bilateria;Protostomia;  
 Spiralia;Lophotrochozoa;Mollusca;Bivalvia;Autobranchia;Heteroconchia;Euhe  
 terodonta;Imparidentia;Venerida;Veneroidea;Veneridae;Mercenaria;Mercenari  
 a mercenaria

UdeM00000030874 6596 283.5 UdeM00000030874 XP\_045210491.1 44.7 380  
 168 9 23 370 16 385 3.90E-73 283.5 6596 cellular  
 organisms;Eukaryota;Opisthokonta;Metazoa;Eumetazoa;Bilateria;Protostomia;  
 Spiralia;Lophotrochozoa;Mollusca;Bivalvia;Autobranchia;Heteroconchia;Euhe  
 terodonta;Imparidentia;Venerida;Veneroidea;Veneridae;Mercenaria;Mercenari  
 a mercenaria

UdeM00000030875 2557582 63.9 UdeM00000030875 YP\_009844920.1 26.1  
 253 152 11 122 366 434 659 5.80E-07 63.9 2557582  
 Viruses;Duplodnaviria;Heunggongvirae;Uroviricota;Caudoviricetes;Cau  
 dovirales;Siphoviridae;Ravarandavirus;Nodularia virus kac68v161;Nodularia  
 phage vB\_NspS-kac68v161

UdeM00000030877 1735272 177.6 UdeM00000030877 XP\_041358003.1 50.6  
 178 81 4 9 183 25 198 1.50E-41 177.6 1735272  
 cellular  
 organisms;Eukaryota;Opisthokonta;Metazoa;Eumetazoa;Bilateria;Protostomia;  
 Spiralia;Lophotrochozoa;Mollusca;Gastropoda;Neomphalina;Neomphaloidea;Pel  
 tospiridae;Gigantopelta;Gigantopelta aegis

UdeM00000030876 400727 301.6 UdeM00000030876 XP\_025109507.1 58.9  
 258 102 2 9 266 5 258 1.00E-78 301.6 400727  
 cellular  
 organisms;Eukaryota;Opisthokonta;Metazoa;Eumetazoa;Bilateria;Protostomia;  
 Spiralia;Lophotrochozoa;Mollusca;Gastropoda;Caenogastropoda;Architaeniogl  
 ossa;Ampullarioidea;Ampullariidae;Pomacea;Pomacea canaliculata

UdeM00000030878 6596 251.1 UdeM00000030878 XP\_045159780.1 60.4 207  
 79 1 43 249 21 224 1.50E-63 251.1 6596 cellular  
 organisms;Eukaryota;Opisthokonta;Metazoa;Eumetazoa;Bilateria;Protostomia;  
 Spiralia;Lophotrochozoa;Mollusca;Bivalvia;Autobranchia;Heteroconchia;Euhe  
 terodonta;Imparidentia;Venerida;Veneroidea;Veneridae;Mercenaria;Mercenari  
 a mercenaria

UdeM00000030879 6596 419.5 UdeM00000030879 XP\_045159782.1 72.9 258  
 63 2 21 271 224 481 3.40E-114 419.5 6596 cellular  
 organisms;Eukaryota;Opisthokonta;Metazoa;Eumetazoa;Bilateria;Protostomia;  
 Spiralia;Lophotrochozoa;Mollusca;Bivalvia;Autobranchia;Heteroconchia;Euhe  
 terodonta;Imparidentia;Venerida;Veneroidea;Veneridae;Mercenaria;Mercenari  
 a mercenaria

UdeM00000030880 6596 832 UdeM00000030880 XP\_045159780.1 54.2 684  
 311 2 26 707 492 1175 5.70E-238 832 6596 cellular  
 organisms;Eukaryota;Opisthokonta;Metazoa;Eumetazoa;Bilateria;Protostomia;  
 Spiralia;Lophotrochozoa;Mollusca;Bivalvia;Autobranchia;Heteroconchia;Euhe  
 terodonta;Imparidentia;Venerida;Veneroidea;Veneridae;Mercenaria;Mercenari  
 a mercenaria

UdeM00000030881 6596 282.3 UdeM00000030881 XP\_045159780.1 37.1 369  
 227 4 1 365 1163 1530 8.60E-73 282.3 6596 cellular  
 organisms;Eukaryota;Opisthokonta;Metazoa;Eumetazoa;Bilateria;Protostomia;  
 Spiralia;Lophotrochozoa;Mollusca;Bivalvia;Autobranchia;Heteroconchia;Euhe  
 terodonta;Imparidentia;Venerida;Veneroidea;Veneridae;Mercenaria;Mercenari  
 a mercenaria

UdeM00000030882 6596 374.4 UdeM00000030882 XP\_045159780.1 49.5 400  
 176 2 3 400 1586 1961 1.80E-100 374.4 6596 cellular  
 organisms;Eukaryota;Opisthokonta;Metazoa;Eumetazoa;Bilateria;Protostomia;  
 Spiralia;Lophotrochozoa;Mollusca;Bivalvia;Autobranchia;Heteroconchia;Euhe  
 terodonta;Imparidentia;Venerida;Veneroidea;Veneridae;Mercenaria;Mercenari  
 a mercenaria  
 UdeM00000030883 6596 366.3 UdeM00000030883 XP\_045159780.1 37.5 579  
 348 4 1 569 1973 2547 7.00E-98 366.3 6596 cellular  
 organisms;Eukaryota;Opisthokonta;Metazoa;Eumetazoa;Bilateria;Protostomia;  
 Spiralia;Lophotrochozoa;Mollusca;Bivalvia;Autobranchia;Heteroconchia;Euhe  
 terodonta;Imparidentia;Venerida;Veneroidea;Veneridae;Mercenaria;Mercenari  
 a mercenaria  
 UdeM00000030884 6596 126.7 UdeM00000030884 XP\_045159780.1 51.4 105  
 51 0 16 120 2548 2652 2.10E-26 126.7 6596 cellular  
 organisms;Eukaryota;Opisthokonta;Metazoa;Eumetazoa;Bilateria;Protostomia;  
 Spiralia;Lophotrochozoa;Mollusca;Bivalvia;Autobranchia;Heteroconchia;Euhe  
 terodonta;Imparidentia;Venerida;Veneroidea;Veneridae;Mercenaria;Mercenari  
 a mercenaria  
 UdeM00000030885 6596 528.9 UdeM00000030885 XP\_045159780.1 40.8 719  
 380 14 1 687 2654 3358 9.80E-147 528.9 6596 cellular  
 organisms;Eukaryota;Opisthokonta;Metazoa;Eumetazoa;Bilateria;Protostomia;  
 Spiralia;Lophotrochozoa;Mollusca;Bivalvia;Autobranchia;Heteroconchia;Euhe  
 terodonta;Imparidentia;Venerida;Veneroidea;Veneridae;Mercenaria;Mercenari  
 a mercenaria  
 UdeM00000030886 7741 70.5 UdeM00000030886 XP\_019617161.1 23.1 295  
 197 6 355 634 13 292 9.30E-09 70.5 7741 cellular  
 organisms;Eukaryota;Opisthokonta;Metazoa;Eumetazoa;Bilateria;Deuterostomi  
 a;Chordata;Cephalochordata;Leptocardii;Amphioxiformes;Branchiostomidae;Br  
 anchiostoma;Branchiostoma belcheri  
 UdeM00000030887 7574 90.9 UdeM00000030887 XP\_013397031.1 44.6 92  
 49 1 54 143 3059 3150 1.40E-15 90.9 7574 cellular  
 organisms;Eukaryota;Opisthokonta;Metazoa;Eumetazoa;Bilateria;Protostomia;  
 Spiralia;Lophotrochozoa;Brachiopoda;Linguliformea;Lingulata;Lingulida;Lin  
 guloidea;Lingulidae;Lingula;Lingula anatina  
 UdeM00000030888 7741 70.5 UdeM00000030888 XP\_019617161.1 23.1 295  
 197 6 355 634 13 292 9.30E-09 70.5 7741 cellular  
 organisms;Eukaryota;Opisthokonta;Metazoa;Eumetazoa;Bilateria;Deuterostomi  
 a;Chordata;Cephalochordata;Leptocardii;Amphioxiformes;Branchiostomidae;Br  
 anchiostoma;Branchiostoma belcheri  
 UdeM00000030889 7574 90.9 UdeM00000030889 XP\_013397031.1 44.6 92  
 49 1 54 143 3059 3150 1.40E-15 90.9 7574 cellular  
 organisms;Eukaryota;Opisthokonta;Metazoa;Eumetazoa;Bilateria;Protostomia;  
 Spiralia;Lophotrochozoa;Brachiopoda;Linguliformea;Lingulata;Lingulida;Lin  
 guloidea;Lingulidae;Lingula;Lingula anatina  
 UdeM00000030890 7741 76.6 UdeM00000030890 XP\_019617161.1 23.4 295  
 196 6 353 632 13 292 1.30E-10 76.6 7741 cellular  
 organisms;Eukaryota;Opisthokonta;Metazoa;Eumetazoa;Bilateria;Deuterostomi  
 a;Chordata;Cephalochordata;Leptocardii;Amphioxiformes;Branchiostomidae;Br  
 anchiostoma;Branchiostoma belcheri  
 UdeM00000030891 2607531 75.1 UdeM00000030891 XP\_029643184.1 35  
 137 77 3 1 134 1 128 2.50E-10 75.1 2607531  
 cellular  
 organisms;Eukaryota;Opisthokonta;Metazoa;Eumetazoa;Bilateria;Protostomia;

Spiralia;Lophotrochozoa;Mollusca;Cephalopoda;Coleoidea;Octopodiformes;Octopoda;Incirrata;Octopodidae;Octopus;Octopus sinensis

UdeM00000030892 7741 80.9 UdeM00000030892 XP\_019617161.1 26 269  
183 7 393 654 25 284 7.20E-12 80.9 7741 cellular  
organisms;Eukaryota;Opisthokonta;Metazoa;Eumetazoa;Bilateria;Deuterostomia;Chordata;Cephalochordata;Leptocardii;Amphioxiformes;Branchiostomidae;Branchiostoma;Branchiostoma belcheri

UdeM00000030893 6596 292.7 UdeM00000030893 XP\_045160602.1 53.2 265  
109 1 16 265 411 675 4.90E-76 292.7 6596 cellular  
organisms;Eukaryota;Opisthokonta;Metazoa;Eumetazoa;Bilateria;Protostomia;Spiralia;Lophotrochozoa;Mollusca;Bivalvia;Autobranchia;Heteroconchia;Euheterodonta;Imparidentia;Venerida;Veneroidea;Veneridae;Mercenaria;Mercenaria mercenaria

UdeM00000030894 6596 228.4 UdeM00000030894 XP\_045160602.1 49 210  
106 1 67 275 70 279 1.10E-56 228.4 6596 cellular  
organisms;Eukaryota;Opisthokonta;Metazoa;Eumetazoa;Bilateria;Protostomia;Spiralia;Lophotrochozoa;Mollusca;Bivalvia;Autobranchia;Heteroconchia;Euheterodonta;Imparidentia;Venerida;Veneroidea;Veneridae;Mercenaria;Mercenaria mercenaria

UdeM00000030895 6596 80.5 UdeM00000030895 XP\_045162351.1 22.4 808  
500 31 1 691 1 798 9.40E-12 80.5 6596 cellular  
organisms;Eukaryota;Opisthokonta;Metazoa;Eumetazoa;Bilateria;Protostomia;Spiralia;Lophotrochozoa;Mollusca;Bivalvia;Autobranchia;Heteroconchia;Euheterodonta;Imparidentia;Venerida;Veneroidea;Veneridae;Mercenaria;Mercenaria mercenaria

UdeM00000030896 6596 721.1 UdeM00000030896 XP\_045160602.1 54.3 606  
261 2 47 636 70 675 1.30E-204 721.1 6596 cellular  
organisms;Eukaryota;Opisthokonta;Metazoa;Eumetazoa;Bilateria;Protostomia;Spiralia;Lophotrochozoa;Mollusca;Bivalvia;Autobranchia;Heteroconchia;Euheterodonta;Imparidentia;Venerida;Veneroidea;Veneridae;Mercenaria;Mercenaria mercenaria

UdeM00000030897 400727 569.7 UdeM00000030897 XP\_025109315.1 68.2  
387 122 1 1 386 1 387 2.80E-159 569.7 400727  
cellular  
organisms;Eukaryota;Opisthokonta;Metazoa;Eumetazoa;Bilateria;Protostomia;Spiralia;Lophotrochozoa;Mollusca;Gastropoda;Caenogastropoda;Architaenioglossa;Ampullarioidea;Ampullariidae;Pomacea;Pomacea canaliculata

UdeM00000030898 6565 412.1 UdeM00000030898 XP\_022318243.1 68.8 279  
85 2 12 289 8 285 5.70E-112 412.1 6565 cellular  
organisms;Eukaryota;Opisthokonta;Metazoa;Eumetazoa;Bilateria;Protostomia;Spiralia;Lophotrochozoa;Mollusca;Bivalvia;Autobranchia;Pteriormorphia;Ostreida;Ostreoidea;Ostreidae;Crassostrea;Crassostrea virginica

UdeM00000030899 6596 317 UdeM00000030899 XP\_045180934.1 39.5 466  
258 10 1 455 188 640 3.90E-83 317 6596 cellular  
organisms;Eukaryota;Opisthokonta;Metazoa;Eumetazoa;Bilateria;Protostomia;Spiralia;Lophotrochozoa;Mollusca;Bivalvia;Autobranchia;Heteroconchia;Euheterodonta;Imparidentia;Venerida;Veneroidea;Veneridae;Mercenaria;Mercenaria mercenaria

UdeM00000030900 29159 257.3 UdeM00000030900 XP\_011431624.2 35.6 427  
237 7 7 429 113 505 3.50E-65 257.3 29159 cellular  
organisms;Eukaryota;Opisthokonta;Metazoa;Eumetazoa;Bilateria;Protostomia;Spiralia;Lophotrochozoa;Mollusca;Bivalvia;Autobranchia;Pteriormorphia;Ostreida;Ostreoidea;Ostreidae;Crassostrea;Crassostrea gigas

UdeM00000030901 6596 310.1 UdeM00000030901 XP\_045180934.1 38.2 466  
 234 12 33 457 188 640 4.80E-81 310.1 6596 cellular  
 organisms;Eukaryota;Opisthokonta;Metazoa;Eumetazoa;Bilateria;Protostomia;  
 Spiralia;Lophotrochozoa;Mollusca;Bivalvia;Autobranchia;Heteroconchia;Euhe  
 terodonta;Imparidentia;Venerida;Veneroidea;Veneridae;Mercenaria;Mercenari  
 a mercenaria  
 UdeM00000030907 29159 496.9 UdeM00000030907 XP\_034312507.1 78.9 294  
 62 0 29 322 3 296 2.00E-137 496.9 29159 cellular  
 organisms;Eukaryota;Opisthokonta;Metazoa;Eumetazoa;Bilateria;Protostomia;  
 Spiralia;Lophotrochozoa;Mollusca;Bivalvia;Autobranchia;Pteriormorphia;Ostr  
 eida;Ostreoidea;Ostreidae;Crassostrea;Crassostrea gigas  
 UdeM00000030908 6596 302 UdeM00000030908 XP\_045158998.1 29.9 766  
 380 20 55 747 767 1448 2.20E-78 302 6596 cellular  
 organisms;Eukaryota;Opisthokonta;Metazoa;Eumetazoa;Bilateria;Protostomia;  
 Spiralia;Lophotrochozoa;Mollusca;Bivalvia;Autobranchia;Heteroconchia;Euhe  
 terodonta;Imparidentia;Venerida;Veneroidea;Veneridae;Mercenaria;Mercenari  
 a mercenaria  
 UdeM00000030909 29159 90.5 UdeM00000030909 XP\_019928419.2 31.3 246  
 108 6 137 325 107 348 4.50E-15 90.5 29159 cellular  
 organisms;Eukaryota;Opisthokonta;Metazoa;Eumetazoa;Bilateria;Protostomia;  
 Spiralia;Lophotrochozoa;Mollusca;Bivalvia;Autobranchia;Pteriormorphia;Ostr  
 eida;Ostreoidea;Ostreidae;Crassostrea;Crassostrea gigas  
 UdeM00000030910 6596 371.3 UdeM00000030910 XP\_045157766.1 96 198  
 8 0 1 198 1 198 7.90E-100 371.3 6596 cellular  
 organisms;Eukaryota;Opisthokonta;Metazoa;Eumetazoa;Bilateria;Protostomia;  
 Spiralia;Lophotrochozoa;Mollusca;Bivalvia;Autobranchia;Heteroconchia;Euhe  
 terodonta;Imparidentia;Venerida;Veneroidea;Veneridae;Mercenaria;Mercenari  
 a mercenaria  
 UdeM00000030911 6565 1276.9 UdeM00000030911 XP\_022317729.1 73.7  
 1207 313 2 1 1203 1 1206 0.00E+00 1276.9 6565  
 cellular  
 organisms;Eukaryota;Opisthokonta;Metazoa;Eumetazoa;Bilateria;Protostomia;  
 Spiralia;Lophotrochozoa;Mollusca;Bivalvia;Autobranchia;Pteriormorphia;Ostr  
 eida;Ostreoidea;Ostreidae;Crassostrea;Crassostrea virginica  
 UdeM00000030912 6412 71.2 UdeM00000030912 XP\_009012353.1 47.7 65  
 34 0 13 77 5 69 6.40E-10 71.2 6412 cellular  
 organisms;Eukaryota;Opisthokonta;Metazoa;Eumetazoa;Bilateria;Protostomia;  
 Spiralia;Lophotrochozoa;Annelida;Clitellata;Hirudinea;Rhynchobdellida;Glo  
 ssisphoniidae;Helobdella;Helobdella robusta  
 UdeM00000030913 37653 113.2 UdeM00000030913 XP\_014791310.1 75.3 73  
 18 0 5 77 11 83 1.50E-22 113.2 37653 cellular  
 organisms;Eukaryota;Opisthokonta;Metazoa;Eumetazoa;Bilateria;Protostomia;  
 Spiralia;Lophotrochozoa;Mollusca;Cephalopoda;Coleoidea;Octopodiformes;Oct  
 opoda;Incirrata;Octopodidae;Octopus;Octopus bimaculoides  
 UdeM00000030914 29159 157.9 UdeM00000030914 XP\_019926413.2 25.6 614  
 103 5 124 390 1 607 2.90E-35 157.9 29159 cellular  
 organisms;Eukaryota;Opisthokonta;Metazoa;Eumetazoa;Bilateria;Protostomia;  
 Spiralia;Lophotrochozoa;Mollusca;Bivalvia;Autobranchia;Pteriormorphia;Ostr  
 eida;Ostreoidea;Ostreidae;Crassostrea;Crassostrea gigas  
 UdeM00000030917 1735272 774.2 UdeM00000030917 XP\_041358750.1 44.9  
 1147 460 20 1 1101 289 1309 2.20E-220 774.2 1735272  
 cellular  
 organisms;Eukaryota;Opisthokonta;Metazoa;Eumetazoa;Bilateria;Protostomia;

Spiralia;Lophotrochozoa;Mollusca;Gastropoda;Neomphalina;Neomphaloidea;Pel  
 tospiridae;Gigantopelta;Gigantopelta aegis

UdeM00000030919 6596 141.7 UdeM00000030919 XP\_045179569.1 65.4 104  
 35 1 1 104 1 103 5.40E-31 141.7 6596 cellular  
 organisms;Eukaryota;Opisthokonta;Metazoa;Eumetazoa;Bilateria;Protostomia;  
 Spiralia;Lophotrochozoa;Mollusca;Bivalvia;Autobranchia;Heteroconchia;Euhe  
 terodonta;Imparidentia;Venerida;Veneroidea;Veneridae;Mercenaria;Mercenari  
 a mercenaria

UdeM00000030920 6596 465.3 UdeM00000030920 XP\_045160118.1 77.7 287  
 63 1 1 286 1 287 6.30E-128 465.3 6596 cellular  
 organisms;Eukaryota;Opisthokonta;Metazoa;Eumetazoa;Bilateria;Protostomia;  
 Spiralia;Lophotrochozoa;Mollusca;Bivalvia;Autobranchia;Heteroconchia;Euhe  
 terodonta;Imparidentia;Venerida;Veneroidea;Veneridae;Mercenaria;Mercenari  
 a mercenaria

UdeM00000030921 6596 93.2 UdeM00000030921 XP\_045160975.1 67.8 59  
 19 0 16 74 12 70 1.70E-16 93.2 6596 cellular  
 organisms;Eukaryota;Opisthokonta;Metazoa;Eumetazoa;Bilateria;Protostomia;  
 Spiralia;Lophotrochozoa;Mollusca;Bivalvia;Autobranchia;Heteroconchia;Euhe  
 terodonta;Imparidentia;Venerida;Veneroidea;Veneridae;Mercenaria;Mercenari  
 a mercenaria

UdeM00000030922 10224 342.4 UdeM00000030922 XP\_002736880.1 58 283  
 117 2 32 312 35 317 7.20E-91 342.4 10224 cellular  
 organisms;Eukaryota;Opisthokonta;Metazoa;Eumetazoa;Bilateria;Deuterostomi  
 a;Hemichordata;Enteropneusta;Harrimaniidae;Saccoglossus;Saccoglossus  
 kowalevskii

UdeM00000030924 6596 344.4 UdeM00000030924 XP\_045160975.1 56.3 492  
 180 5 26 494 68 547 2.50E-91 344.4 6596 cellular  
 organisms;Eukaryota;Opisthokonta;Metazoa;Eumetazoa;Bilateria;Protostomia;  
 Spiralia;Lophotrochozoa;Mollusca;Bivalvia;Autobranchia;Heteroconchia;Euhe  
 terodonta;Imparidentia;Venerida;Veneroidea;Veneridae;Mercenaria;Mercenari  
 a mercenaria

UdeM00000030925 400727 310.5 UdeM00000030925 XP\_025110823.1 47  
 508 188 4 26 524 67 502 4.20E-81 310.5 400727  
 cellular  
 organisms;Eukaryota;Opisthokonta;Metazoa;Eumetazoa;Bilateria;Protostomia;  
 Spiralia;Lophotrochozoa;Mollusca;Gastropoda;Caenogastropoda;Architaeniogl  
 ossa;Ampullarioidea;Ampullariidae;Pomacea;Pomacea canaliculata

UdeM00000030926 6596 235.7 UdeM00000030926 XP\_045160109.1 67.3 162  
 53 0 2 163 702 863 6.70E-59 235.7 6596 cellular  
 organisms;Eukaryota;Opisthokonta;Metazoa;Eumetazoa;Bilateria;Protostomia;  
 Spiralia;Lophotrochozoa;Mollusca;Bivalvia;Autobranchia;Heteroconchia;Euhe  
 terodonta;Imparidentia;Venerida;Veneroidea;Veneridae;Mercenaria;Mercenari  
 a mercenaria

UdeM00000030927 6596 257.7 UdeM00000030927 XP\_045160108.1 73.5 162  
 43 0 2 163 702 863 1.60E-65 257.7 6596 cellular  
 organisms;Eukaryota;Opisthokonta;Metazoa;Eumetazoa;Bilateria;Protostomia;  
 Spiralia;Lophotrochozoa;Mollusca;Bivalvia;Autobranchia;Heteroconchia;Euhe  
 terodonta;Imparidentia;Venerida;Veneroidea;Veneridae;Mercenaria;Mercenari  
 a mercenaria

UdeM00000030928 6596 931.4 UdeM00000030928 XP\_045160111.1 70.1 662  
 140 3 3 662 84 689 6.70E-268 931.4 6596 cellular  
 organisms;Eukaryota;Opisthokonta;Metazoa;Eumetazoa;Bilateria;Protostomia;  
 Spiralia;Lophotrochozoa;Mollusca;Bivalvia;Autobranchia;Heteroconchia;Euhe

terodonta;Imparidentia;Venerida;Veneroidea;Veneridae;Mercenaria;Mercenari  
a mercenaria

UdeM00000030929 1735272 104.8 UdeM00000030929 XP\_041360206.1 29.6  
199 103 6 25 222 48 210 1.50E-19 104.8 1735272  
cellular

organisms;Eukaryota;Opisthokonta;Metazoa;Eumetazoa;Bilateria;Protostomia;  
Spiralia;Lophotrochozoa;Mollusca;Gastropoda;Neomphalina;Neomphaloidea;Pel  
tospiridae;Gigantopelta;Gigantopelta aegis

UdeM00000030930 6596 502.3 UdeM00000030930 XP\_045160231.1 72.7 337  
84 6 3 337 2 332 4.80E-139 502.3 6596 cellular

organisms;Eukaryota;Opisthokonta;Metazoa;Eumetazoa;Bilateria;Protostomia;  
Spiralia;Lophotrochozoa;Mollusca;Bivalvia;Autobranchia;Heteroconchia;Euhe  
terodonta;Imparidentia;Venerida;Veneroidea;Veneridae;Mercenaria;Mercenari

a mercenaria  
UdeM00000030931 6596 129.8 UdeM00000030931 XP\_045160138.1 79 81  
16 1 10 90 35 114 2.30E-27 129.8 6596 cellular

organisms;Eukaryota;Opisthokonta;Metazoa;Eumetazoa;Bilateria;Protostomia;  
Spiralia;Lophotrochozoa;Mollusca;Bivalvia;Autobranchia;Heteroconchia;Euhe  
terodonta;Imparidentia;Venerida;Veneroidea;Veneridae;Mercenaria;Mercenari

a mercenaria  
UdeM00000030932 6596 444.9 UdeM00000030932 XP\_045160138.1 61.6 404  
127 8 11 402 190 577 1.10E-121 444.9 6596 cellular

organisms;Eukaryota;Opisthokonta;Metazoa;Eumetazoa;Bilateria;Protostomia;  
Spiralia;Lophotrochozoa;Mollusca;Bivalvia;Autobranchia;Heteroconchia;Euhe  
terodonta;Imparidentia;Venerida;Veneroidea;Veneridae;Mercenaria;Mercenari

a mercenaria  
UdeM00000030933 6596 85.5 UdeM00000030933 XP\_045160355.1 41 117  
68 1 6 122 4 119 5.60E-13 85.5 6596 cellular

organisms;Eukaryota;Opisthokonta;Metazoa;Eumetazoa;Bilateria;Protostomia;  
Spiralia;Lophotrochozoa;Mollusca;Bivalvia;Autobranchia;Heteroconchia;Euhe  
terodonta;Imparidentia;Venerida;Veneroidea;Veneridae;Mercenaria;Mercenari

a mercenaria  
UdeM00000030933 6596 67.4 UdeM00000030933 XP\_045160355.1 34 100  
60 1 596 689 1304 1403 1.60E-07 67.4 6596 cellular

organisms;Eukaryota;Opisthokonta;Metazoa;Eumetazoa;Bilateria;Protostomia;  
Spiralia;Lophotrochozoa;Mollusca;Bivalvia;Autobranchia;Heteroconchia;Euhe  
terodonta;Imparidentia;Venerida;Veneroidea;Veneridae;Mercenaria;Mercenari

a mercenaria  
UdeM00000030933 6596 60.1 UdeM00000030933 XP\_045160355.1 30.9 175  
102 5 957 1113 1528 1701 2.50E-05 60.1 6596 cellular

organisms;Eukaryota;Opisthokonta;Metazoa;Eumetazoa;Bilateria;Protostomia;  
Spiralia;Lophotrochozoa;Mollusca;Bivalvia;Autobranchia;Heteroconchia;Euhe  
terodonta;Imparidentia;Venerida;Veneroidea;Veneridae;Mercenaria;Mercenari

a mercenaria  
UdeM00000030934 400727 200.3 UdeM00000030934 XP\_025109484.1 39.2  
222 135 0 11 232 3 224 2.70E-48 200.3 400727

cellular  
organisms;Eukaryota;Opisthokonta;Metazoa;Eumetazoa;Bilateria;Protostomia;  
Spiralia;Lophotrochozoa;Mollusca;Gastropoda;Caenogastropoda;Architaeniogl

ossa;Ampullarioidea;Ampullariidae;Pomacea;Pomacea canaliculata  
UdeM00000030935 6596 291.2 UdeM00000030935 XP\_045160351.1 71.6 194  
54 1 1 194 1 193 9.80E-76 291.2 6596 cellular

organisms;Eukaryota;Opisthokonta;Metazoa;Eumetazoa;Bilateria;Protostomia;  
Spiralia;Lophotrochozoa;Mollusca;Bivalvia;Autobranchia;Heteroconchia;Euhe

terodonta;Imparidentia;Venerida;Veneroidea;Veneridae;Mercenaria;Mercenari

a mercenaria

organisms;Eukaryota;Opisthokonta;Metazoa;Eumetazoa;Bilateria;Protostomia;  
Spiralia;Lophotrochozoa;Mollusca;Bivalvia;Autobranchia;Heteroconchia;Euhe

terodonta;Imparidentia;Venerida;Veneroidea;Veneridae;Mercenaria;Mercenari

a mercenaria

terodonta;Imparidentia;Venerida;Veneroidea;Veneridae;Mercenaria;Mercenaria mercenaria  
 UdeM00000030936 6596 307.8 UdeM00000030936 XP\_045160351.1 75.3 194  
 47 1 1 194 1 193 1.00E-80 307.8 6596 cellular  
 organisms;Eukaryota;Opisthokonta;Metazoa;Eumetazoa;Bilateria;Protostomia;Spiralia;Lophotrochozoa;Mollusca;Bivalvia;Autobranchia;Heteroconchia;Euherodonta;Imparidentia;Venerida;Veneroidea;Veneridae;Mercenaria;Mercenaria mercenaria  
 UdeM00000030937 6596 791.2 UdeM00000030937 XP\_045159963.1 40.3 1498  
 736 31 39 1475 74 1474 2.30E-225 791.2 6596 cellular  
 organisms;Eukaryota;Opisthokonta;Metazoa;Eumetazoa;Bilateria;Protostomia;Spiralia;Lophotrochozoa;Mollusca;Bivalvia;Autobranchia;Heteroconchia;Euherodonta;Imparidentia;Venerida;Veneroidea;Veneridae;Mercenaria;Mercenaria mercenaria  
 UdeM00000030938 6596 282 UdeM00000030938 XP\_045159961.1 36.6 677  
 343 27 1 629 1 639 1.90E-72 282 6596 cellular  
 organisms;Eukaryota;Opisthokonta;Metazoa;Eumetazoa;Bilateria;Protostomia;Spiralia;Lophotrochozoa;Mollusca;Bivalvia;Autobranchia;Heteroconchia;Euherodonta;Imparidentia;Venerida;Veneroidea;Veneridae;Mercenaria;Mercenaria mercenaria  
 UdeM00000030939 6596 265.4 UdeM00000030939 XP\_045159962.1 61.2 240  
 80 5 4 236 5 238 7.50E-68 265.4 6596 cellular  
 organisms;Eukaryota;Opisthokonta;Metazoa;Eumetazoa;Bilateria;Protostomia;Spiralia;Lophotrochozoa;Mollusca;Bivalvia;Autobranchia;Heteroconchia;Euherodonta;Imparidentia;Venerida;Veneroidea;Veneridae;Mercenaria;Mercenaria mercenaria  
 UdeM00000030940 29159 563.9 UdeM00000030940 XP\_034330259.1 41.8 730  
 377 13 245 959 2 698 3.90E-157 563.9 29159 cellular  
 organisms;Eukaryota;Opisthokonta;Metazoa;Eumetazoa;Bilateria;Protostomia;Spiralia;Lophotrochozoa;Mollusca;Bivalvia;Autobranchia;Pteriomorpha;Ostreida;Ostreoidea;Ostreidae;Crassostrea;Crassostrea gigas  
 UdeM00000030941 1735272 193 UdeM00000030941 XP\_041356797.1 54  
 211 97 0 170 380 245 455 7.10E-46 193 1735272  
 cellular  
 organisms;Eukaryota;Opisthokonta;Metazoa;Eumetazoa;Bilateria;Protostomia;Spiralia;Lophotrochozoa;Mollusca;Gastropoda;Neomphalina;Neomphaloidea;Pectinidae;Gigantopelta;Gigantopelta aegis  
 UdeM00000030942 151771 378.6 UdeM00000030942 XP\_028419301.1 53  
 355 163 3 11 363 1 353 8.70E-102 378.6 151771  
 cellular  
 organisms;Eukaryota;Opisthokonta;Metazoa;Eumetazoa;Cnidaria;Anthozoa;Octocorallia;Alcyonacea;Alcyoniina;Nephtheidae;Dendronephthya;Dendronephthya gigantea  
 UdeM00000030943 70779 96.7 UdeM00000030943 XP\_015747352.1 44.4 108  
 58 1 2 107 297 404 2.10E-17 96.7 70779 cellular  
 organisms;Eukaryota;Opisthokonta;Metazoa;Eumetazoa;Cnidaria;Anthozoa;Hexacorallia;Scleractinia;Astrocoeniina;Acroporidae;Acropora;Acropora digitifera  
 UdeM00000030944 6579 828.2 UdeM00000030944 XP\_033737207.1 26.8 2377  
 1554 45 14 2311 22 2292 2.60E-236 828.2 6579 cellular  
 organisms;Eukaryota;Opisthokonta;Metazoa;Eumetazoa;Bilateria;Protostomia;Spiralia;Lophotrochozoa;Mollusca;Bivalvia;Autobranchia;Pteriomorpha;Pectinida;Pectinoidea;Pectinidae;Pecten;Pecten maximus



UdeM00000030945 225164 112.1 UdeM00000030945 XP\_009048830.1 52.4  
 105 50 0 138 242 33 137 1.00E-21 112.1 225164  
 cellular  
 organisms;Eukaryota;Opisthokonta;Metazoa;Eumetazoa;Bilateria;Protostomia;  
 Spiralia;Lophotrochozoa;Mollusca;Gastropoda;Patellogastropoda;Lottioidea;  
 Lottiidae;Lottia;Lottia gigantea  
 UdeM00000030947 6565 72 UdeM00000030947 XP\_022293466.1 49.3 75  
 38 0 42 116 437 511 5.60E-10 72 6565 cellular  
 organisms;Eukaryota;Opisthokonta;Metazoa;Eumetazoa;Bilateria;Protostomia;  
 Spiralia;Lophotrochozoa;Mollusca;Bivalvia;Autobranchia;Pteriormorphia;Ostr  
 eida;Ostreoidea;Ostreidae;Crassostrea;Crassostrea virginica  
 UdeM00000030948 6526 68.2 UdeM00000030948 XP\_013077233.1 31.4 118  
 63 3 1 117 80 180 8.20E-09 68.2 6526 cellular  
 organisms;Eukaryota;Opisthokonta;Metazoa;Eumetazoa;Bilateria;Protostomia;  
 Spiralia;Lophotrochozoa;Mollusca;Gastropoda;Heterobranchia;Euthyneura;Pan  
 pulmonata;Hygrophila;Lymnaeoidea;Planorbidae;Biomphalaria;Biomphalaria  
 glabrata  
 UdeM00000030949 6596 988 UdeM00000030949 XP\_045158286.1 60.5 800  
 306 4 2 801 21 810 6.90E-285 988 6596 cellular  
 organisms;Eukaryota;Opisthokonta;Metazoa;Eumetazoa;Bilateria;Protostomia;  
 Spiralia;Lophotrochozoa;Mollusca;Bivalvia;Autobranchia;Heteroconchia;Euhe  
 terodonta;Imparidentia;Venerida;Veneroidea;Veneridae;Mercenaria;Mercenari  
 a mercenaria  
 UdeM00000030950 6596 784.6 UdeM00000030950 XP\_045160567.1 64.6 610  
 212 4 1 610 1 606 8.90E-224 784.6 6596 cellular  
 organisms;Eukaryota;Opisthokonta;Metazoa;Eumetazoa;Bilateria;Protostomia;  
 Spiralia;Lophotrochozoa;Mollusca;Bivalvia;Autobranchia;Heteroconchia;Euhe  
 terodonta;Imparidentia;Venerida;Veneroidea;Veneridae;Mercenaria;Mercenari  
 a mercenaria  
 UdeM00000030951 29159 228.8 UdeM00000030951 NP\_001295834.1 41.3 385  
 188 10 10 387 2 355 1.20E-56 228.8 29159 cellular  
 organisms;Eukaryota;Opisthokonta;Metazoa;Eumetazoa;Bilateria;Protostomia;  
 Spiralia;Lophotrochozoa;Mollusca;Bivalvia;Autobranchia;Pteriormorphia;Ostr  
 eida;Ostreoidea;Ostreidae;Crassostrea;Crassostrea gigas  
 UdeM00000030952 29159 228.4 UdeM00000030952 NP\_001295834.1 41.3 385  
 188 10 3 380 2 355 1.60E-56 228.4 29159 cellular  
 organisms;Eukaryota;Opisthokonta;Metazoa;Eumetazoa;Bilateria;Protostomia;  
 Spiralia;Lophotrochozoa;Mollusca;Bivalvia;Autobranchia;Pteriormorphia;Ostr  
 eida;Ostreoidea;Ostreidae;Crassostrea;Crassostrea gigas  
 UdeM00000030953 6596 724.9 UdeM00000030953 XP\_045159638.1 49.6 887  
 362 28 14 865 6 842 1.20E-205 724.9 6596 cellular  
 organisms;Eukaryota;Opisthokonta;Metazoa;Eumetazoa;Bilateria;Protostomia;  
 Spiralia;Lophotrochozoa;Mollusca;Bivalvia;Autobranchia;Heteroconchia;Euhe  
 terodonta;Imparidentia;Venerida;Veneroidea;Veneridae;Mercenaria;Mercenari  
 a mercenaria  
 UdeM00000030955 6596 283.1 UdeM00000030955 XP\_045159639.1 46.4 358  
 167 7 1 356 172 506 5.00E-73 283.1 6596 cellular  
 organisms;Eukaryota;Opisthokonta;Metazoa;Eumetazoa;Bilateria;Protostomia;  
 Spiralia;Lophotrochozoa;Mollusca;Bivalvia;Autobranchia;Heteroconchia;Euhe  
 terodonta;Imparidentia;Venerida;Veneroidea;Veneridae;Mercenaria;Mercenari  
 a mercenaria  
 UdeM00000030954 6596 483.4 UdeM00000030954 XP\_045159639.1 49.1 523  
 241 7 13 533 7 506 3.70E-133 483.4 6596 cellular  
 organisms;Eukaryota;Opisthokonta;Metazoa;Eumetazoa;Bilateria;Protostomia;

Spiralia;Lophotrochozoa;Mollusca;Bivalvia;Autobranchia;Heteroconchia;Euherodonta;Imparidentia;Venerida;Veneroidea;Veneridae;Mercenaria;Mercenaria mercenaria

UdeM00000030956 29159 270 UdeM00000030956 XP\_019930556.2 70 417  
93 4 1 416 1 386 5.00E-69 270 29159 cellular

organisms;Eukaryota;Opisthokonta;Metazoa;Eumetazoa;Bilateria;Protostomia;Spiralia;Lophotrochozoa;Mollusca;Bivalvia;Autobranchia;Pteriormorphia;Ostreida;Ostreoidea;Ostreidae;Crassostrea;Crassostrea gigas

UdeM00000030957 400727 153.3 UdeM00000030957 XP\_025110415.1 46.5  
172 78 3 57 224 79 240 3.70E-34 153.3 400727  
cellular

organisms;Eukaryota;Opisthokonta;Metazoa;Eumetazoa;Bilateria;Protostomia;Spiralia;Lophotrochozoa;Mollusca;Gastropoda;Caenogastropoda;Architaenioglossa;Ampullarioidea;Ampullariidae;Pomacea;Pomacea canaliculata

UdeM00000030958 6596 205.7 UdeM00000030958 XP\_045159306.1 58.1 301  
112 8 1 299 1 289 8.50E-50 205.7 6596 cellular

organisms;Eukaryota;Opisthokonta;Metazoa;Eumetazoa;Bilateria;Protostomia;Spiralia;Lophotrochozoa;Mollusca;Bivalvia;Autobranchia;Heteroconchia;Euherodonta;Imparidentia;Venerida;Veneroidea;Veneridae;Mercenaria;Mercenaria mercenaria

UdeM00000030959 6596 957.2 UdeM00000030959 XP\_045159308.1 59.9 1009  
375 12 1 1007 1 981 1.60E-275 957.2 6596 cellular

organisms;Eukaryota;Opisthokonta;Metazoa;Eumetazoa;Bilateria;Protostomia;Spiralia;Lophotrochozoa;Mollusca;Bivalvia;Autobranchia;Heteroconchia;Euherodonta;Imparidentia;Venerida;Veneroidea;Veneridae;Mercenaria;Mercenaria mercenaria

UdeM00000030961 6596 245.7 UdeM00000030961 XP\_045159305.1 56.7 201  
85 2 25 224 27 226 6.30E-62 245.7 6596 cellular

organisms;Eukaryota;Opisthokonta;Metazoa;Eumetazoa;Bilateria;Protostomia;Spiralia;Lophotrochozoa;Mollusca;Bivalvia;Autobranchia;Heteroconchia;Euherodonta;Imparidentia;Venerida;Veneroidea;Veneridae;Mercenaria;Mercenaria mercenaria

UdeM00000030962 6596 208.8 UdeM00000030962 XP\_045160315.1 66.7 153  
49 1 1 151 1 153 5.00E-51 208.8 6596 cellular

organisms;Eukaryota;Opisthokonta;Metazoa;Eumetazoa;Bilateria;Protostomia;Spiralia;Lophotrochozoa;Mollusca;Bivalvia;Autobranchia;Heteroconchia;Euherodonta;Imparidentia;Venerida;Veneroidea;Veneridae;Mercenaria;Mercenaria mercenaria

UdeM00000030963 6596 499.2 UdeM00000030963 XP\_045160404.1 65.1 390  
134 2 312 700 338 726 8.60E-138 499.2 6596 cellular

organisms;Eukaryota;Opisthokonta;Metazoa;Eumetazoa;Bilateria;Protostomia;Spiralia;Lophotrochozoa;Mollusca;Bivalvia;Autobranchia;Heteroconchia;Euherodonta;Imparidentia;Venerida;Veneroidea;Veneridae;Mercenaria;Mercenaria mercenaria

UdeM00000030964 6596 398.3 UdeM00000030964 XP\_045190945.1 72.8 250  
67 1 8 256 11 260 7.50E-108 398.3 6596 cellular

organisms;Eukaryota;Opisthokonta;Metazoa;Eumetazoa;Bilateria;Protostomia;Spiralia;Lophotrochozoa;Mollusca;Bivalvia;Autobranchia;Heteroconchia;Euherodonta;Imparidentia;Venerida;Veneroidea;Veneridae;Mercenaria;Mercenaria mercenaria

UdeM00000030965 6596 182.2 UdeM00000030965 XP\_045160494.1 56.8 183  
69 3 1 183 1 173 6.00E-43 182.2 6596 cellular

organisms;Eukaryota;Opisthokonta;Metazoa;Eumetazoa;Bilateria;Protostomia;Spiralia;Lophotrochozoa;Mollusca;Bivalvia;Autobranchia;Heteroconchia;Euherodonta;Imparidentia;Venerida;Veneroidea;Veneridae;Mercenaria;Mercenaria mercenaria

terodonta;Imparidentia;Venerida;Veneroidea;Veneridae;Mercenaria;Mercenari  
 a mercenaria  
 UdeM00000030967 6596 518.1 UdeM00000030967 XP\_045158610.1 75.5 318  
 78 0 16 333 42 359 8.80E-144 518.1 6596 cellular  
 organisms;Eukaryota;Opisthokonta;Metazoa;Eumetazoa;Bilateria;Protostomia;  
 Spiralia;Lophotrochozoa;Mollusca;Bivalvia;Autobranhia;Heteroconchia;Euhe  
 terodonta;Imparidentia;Venerida;Veneroidea;Veneridae;Mercenaria;Mercenari  
 a mercenaria  
 UdeM00000030966 6596 518.5 UdeM00000030966 XP\_045158610.1 75.5 318  
 78 0 47 364 42 359 7.30E-144 518.5 6596 cellular  
 organisms;Eukaryota;Opisthokonta;Metazoa;Eumetazoa;Bilateria;Protostomia;  
 Spiralia;Lophotrochozoa;Mollusca;Bivalvia;Autobranhia;Heteroconchia;Euhe  
 terodonta;Imparidentia;Venerida;Veneroidea;Veneridae;Mercenaria;Mercenari  
 a mercenaria  
 UdeM00000030968 6573 628.2 UdeM00000030968 XP\_021343710.1 65.1 479  
 163 2 3 480 428 903 9.10E-177 628.2 6573 cellular  
 organisms;Eukaryota;Opisthokonta;Metazoa;Eumetazoa;Bilateria;Protostomia;  
 Spiralia;Lophotrochozoa;Mollusca;Bivalvia;Autobranhia;Pteriomorphia;Pect  
 inida;Pectinoidea;Pectinidae;Mizuhopecten;Mizuhopecten yessoensis  
 UdeM00000030970 6596 548.1 UdeM00000030970 XP\_045158165.1 34.6 1196  
 505 20 1 954 84 1244 2.20E-152 548.1 6596 cellular  
 organisms;Eukaryota;Opisthokonta;Metazoa;Eumetazoa;Bilateria;Protostomia;  
 Spiralia;Lophotrochozoa;Mollusca;Bivalvia;Autobranhia;Heteroconchia;Euhe  
 terodonta;Imparidentia;Venerida;Veneroidea;Veneridae;Mercenaria;Mercenari  
 a mercenaria  
 UdeM00000030971 6573 68.2 UdeM00000030971 XP\_021341077.1 46.6 73  
 38 1 318 390 618 689 2.80E-08 68.2 6573 cellular  
 organisms;Eukaryota;Opisthokonta;Metazoa;Eumetazoa;Bilateria;Protostomia;  
 Spiralia;Lophotrochozoa;Mollusca;Bivalvia;Autobranhia;Pteriomorphia;Pect  
 inida;Pectinoidea;Pectinidae;Mizuhopecten;Mizuhopecten yessoensis  
 UdeM00000030972 6579 68.6 UdeM00000030972 XP\_033738460.1 48.6 72  
 36 1 276 347 614 684 1.90E-08 68.6 6579 cellular  
 organisms;Eukaryota;Opisthokonta;Metazoa;Eumetazoa;Bilateria;Protostomia;  
 Spiralia;Lophotrochozoa;Mollusca;Bivalvia;Autobranhia;Pteriomorphia;Pect  
 inida;Pectinoidea;Pectinidae;Pecten;Pecten maximus  
 UdeM00000030973 6579 75.5 UdeM00000030973 XP\_033738460.1 43.4 99  
 51 2 468 562 587 684 2.50E-10 75.5 6579 cellular  
 organisms;Eukaryota;Opisthokonta;Metazoa;Eumetazoa;Bilateria;Protostomia;  
 Spiralia;Lophotrochozoa;Mollusca;Bivalvia;Autobranhia;Pteriomorphia;Pect  
 inida;Pectinoidea;Pectinidae;Pecten;Pecten maximus  
 UdeM00000030974 6596 688.3 UdeM00000030974 XP\_045159953.1 71.4 490  
 129 5 1 484 1 485 6.90E-195 688.3 6596 cellular  
 organisms;Eukaryota;Opisthokonta;Metazoa;Eumetazoa;Bilateria;Protostomia;  
 Spiralia;Lophotrochozoa;Mollusca;Bivalvia;Autobranhia;Heteroconchia;Euhe  
 terodonta;Imparidentia;Venerida;Veneroidea;Veneridae;Mercenaria;Mercenari  
 a mercenaria  
 UdeM00000030975 6573 389.8 UdeM00000030975 XP\_021345332.1 60.9 1096  
 232 5 1 1054 1 941 1.10E-104 389.8 6573 cellular  
 organisms;Eukaryota;Opisthokonta;Metazoa;Eumetazoa;Bilateria;Protostomia;  
 Spiralia;Lophotrochozoa;Mollusca;Bivalvia;Autobranhia;Pteriomorphia;Pect  
 inida;Pectinoidea;Pectinidae;Mizuhopecten;Mizuhopecten yessoensis  
 UdeM00000030976 6573 65.5 UdeM00000030976 XP\_021345332.1 67.4 46  
 15 0 169 214 187 232 9.90E-08 65.5 6573 cellular  
 organisms;Eukaryota;Opisthokonta;Metazoa;Eumetazoa;Bilateria;Protostomia;

Spiralia; Lophotrochozoa; Mollusca; Bivalvia; Autobranchia; Pteriomorpha; Pectinida; Pectinoidea; Pectinidae; Mizuhopecten; Mizuhopecten yessoensis  
UdeM00000030977 6596 322.4 UdeM00000030977 XP\_045159954.1 49.7 310  
149 3 241 546 7 313 1.20E-84 322.4 6596 cellular  
organisms; Eukaryota; Opisthokonta; Metazoa; Eumetazoa; Bilateria; Protostomia; Spiralia; Lophotrochozoa; Mollusca; Bivalvia; Autobranchia; Heteroconchia; Euheterodonta; Imparidentia; Venerida; Veneroidea; Veneridae; Mercenaria; Mercenaria mercenaria  
UdeM00000030978 400727 65.5 UdeM00000030978 XP\_025109594.1 25.8  
275 170 10 45 306 120 373 1.40E-07 65.5 400727  
cellular  
organisms; Eukaryota; Opisthokonta; Metazoa; Eumetazoa; Bilateria; Protostomia; Spiralia; Lophotrochozoa; Mollusca; Gastropoda; Caenogastropoda; Architaenioglossa; Ampullarioidea; Ampullariidae; Pomacea; Pomacea canaliculata  
UdeM00000030979 225164 89.7 UdeM00000030979 XP\_009062547.1 40.2  
122 69 3 25 143 25 145 3.30E-15 89.7 225164  
cellular  
organisms; Eukaryota; Opisthokonta; Metazoa; Eumetazoa; Bilateria; Protostomia; Spiralia; Lophotrochozoa; Mollusca; Gastropoda; Patellogastropoda; Lottioidea; Lottiidae; Lottia; Lottia gigantea  
UdeM00000030980 29159 88.2 UdeM00000030980 XP\_034336577.1 34.8 138  
85 1 5 142 4 136 9.50E-15 88.2 29159 cellular  
organisms; Eukaryota; Opisthokonta; Metazoa; Eumetazoa; Bilateria; Protostomia; Spiralia; Lophotrochozoa; Mollusca; Bivalvia; Autobranchia; Pteriomorpha; Ostreida; Ostreoidea; Ostreidae; Crassostrea; Crassostrea gigas  
UdeM00000030981 225164 78.6 UdeM00000030981 XP\_009062547.1 38.8  
116 67 3 1 113 31 145 6.10E-12 78.6 225164  
cellular  
organisms; Eukaryota; Opisthokonta; Metazoa; Eumetazoa; Bilateria; Protostomia; Spiralia; Lophotrochozoa; Mollusca; Gastropoda; Patellogastropoda; Lottioidea; Lottiidae; Lottia; Lottia gigantea  
UdeM00000030982 6596 242.7 UdeM00000030982 XP\_045159423.1 56.1 255  
106 3 1 249 24 278 5.20E-61 242.7 6596 cellular  
organisms; Eukaryota; Opisthokonta; Metazoa; Eumetazoa; Bilateria; Protostomia; Spiralia; Lophotrochozoa; Mollusca; Bivalvia; Autobranchia; Heteroconchia; Euheterodonta; Imparidentia; Venerida; Veneroidea; Veneridae; Mercenaria; Mercenaria mercenaria  
UdeM00000030983 6596 268.1 UdeM00000030983 XP\_045159423.1 56.7 277  
111 4 3 273 5 278 1.30E-68 268.1 6596 cellular  
organisms; Eukaryota; Opisthokonta; Metazoa; Eumetazoa; Bilateria; Protostomia; Spiralia; Lophotrochozoa; Mollusca; Bivalvia; Autobranchia; Heteroconchia; Euheterodonta; Imparidentia; Venerida; Veneroidea; Veneridae; Mercenaria; Mercenaria mercenaria  
UdeM00000030984 29159 1357 UdeM00000030984 XP\_034313924.1 56.1 1262  
437 17 1 1223 1 1184 0.00E+00 1357 29159 cellular  
organisms; Eukaryota; Opisthokonta; Metazoa; Eumetazoa; Bilateria; Protostomia; Spiralia; Lophotrochozoa; Mollusca; Bivalvia; Autobranchia; Pteriomorpha; Ostreida; Ostreoidea; Ostreidae; Crassostrea; Crassostrea gigas  
UdeM00000030985 29159 1359 UdeM00000030985 XP\_034313924.1 56.2 1260  
438 16 1 1222 1 1184 0.00E+00 1359 29159 cellular  
organisms; Eukaryota; Opisthokonta; Metazoa; Eumetazoa; Bilateria; Protostomia; Spiralia; Lophotrochozoa; Mollusca; Bivalvia; Autobranchia; Pteriomorpha; Ostreida; Ostreoidea; Ostreidae; Crassostrea; Crassostrea gigas

UdeM00000030986 29159 447.2 UdeM00000030986 XP\_011412925.2 52.5 408  
 192 2 24 431 11 416 2.40E-122 447.2 29159 cellular  
 organisms;Eukaryota;Opisthokonta;Metazoa;Eumetazoa;Bilateria;Protostomia;  
 Spiralia;Lophotrochozoa;Mollusca;Bivalvia;Autobranhia;Pteriomorphia;Ostr  
 eida;Ostreoidea;Ostreidae;Crassostrea;Crassostrea gigas  
 UdeM00000030987 6596 466.8 UdeM00000030987 XP\_045160980.1 54 404  
 168 7 1 390 146 545 2.80E-128 466.8 6596 cellular  
 organisms;Eukaryota;Opisthokonta;Metazoa;Eumetazoa;Bilateria;Protostomia;  
 Spiralia;Lophotrochozoa;Mollusca;Bivalvia;Autobranhia;Heteroconchia;Euhe  
 terodonta;Imparidentia;Venerida;Veneroidea;Veneridae;Mercenaria;Mercenari  
 a mercenaria  
 UdeM00000030988 6596 640.2 UdeM00000030988 XP\_045160980.1 54.3 541  
 221 9 5 524 10 545 2.50E-180 640.2 6596 cellular  
 organisms;Eukaryota;Opisthokonta;Metazoa;Eumetazoa;Bilateria;Protostomia;  
 Spiralia;Lophotrochozoa;Mollusca;Bivalvia;Autobranhia;Heteroconchia;Euhe  
 terodonta;Imparidentia;Venerida;Veneroidea;Veneridae;Mercenaria;Mercenari  
 a mercenaria  
 UdeM00000025858 7574 116.7 UdeM00000025858 XP\_013410728.1 51.1 131  
 58 2 351 476 215 344 8.10E-23 116.7 7574 cellular  
 organisms;Eukaryota;Opisthokonta;Metazoa;Eumetazoa;Bilateria;Protostomia;  
 Spiralia;Lophotrochozoa;Brachiopoda;Linguliformea;Lingulata;Lingulida;Lin  
 guloidea;Lingulidae;Lingula;Lingula anatina  
 UdeM00000025859 7574 116.7 UdeM00000025859 XP\_013410728.1 51.1 131  
 58 2 353 478 215 344 8.10E-23 116.7 7574 cellular  
 organisms;Eukaryota;Opisthokonta;Metazoa;Eumetazoa;Bilateria;Protostomia;  
 Spiralia;Lophotrochozoa;Brachiopoda;Linguliformea;Lingulata;Lingulida;Lin  
 guloidea;Lingulidae;Lingula;Lingula anatina  
 UdeM00000025860 6573 580.1 UdeM00000025860 XP\_021344066.1 60.5 440  
 172 1 140 579 150 587 3.20E-162 580.1 6573 cellular  
 organisms;Eukaryota;Opisthokonta;Metazoa;Eumetazoa;Bilateria;Protostomia;  
 Spiralia;Lophotrochozoa;Mollusca;Bivalvia;Autobranhia;Pteriomorphia;Pect  
 inida;Pectinoidea;Pectinidae;Mizuhopecten;Mizuhopecten yessoensis  
 UdeM00000025861 6596 1258.8 UdeM00000025861 XP\_045166080.1 64.7  
 1134 347 13 14 1118 10 1119 0.00E+00 1258.8 6596  
 cellular  
 organisms;Eukaryota;Opisthokonta;Metazoa;Eumetazoa;Bilateria;Protostomia;  
 Spiralia;Lophotrochozoa;Mollusca;Bivalvia;Autobranhia;Heteroconchia;Euhe  
 terodonta;Imparidentia;Venerida;Veneroidea;Veneridae;Mercenaria;Mercenari  
 a mercenaria  
 UdeM00000025862 6596 1221.1 UdeM00000025862 XP\_045166080.1 64  
 1126 351 14 6 1101 18 1119 0.00E+00 1221.1 6596  
 cellular  
 organisms;Eukaryota;Opisthokonta;Metazoa;Eumetazoa;Bilateria;Protostomia;  
 Spiralia;Lophotrochozoa;Mollusca;Bivalvia;Autobranhia;Heteroconchia;Euhe  
 terodonta;Imparidentia;Venerida;Veneroidea;Veneridae;Mercenaria;Mercenari  
 a mercenaria  
 UdeM00000025866 6596 260 UdeM00000025866 XP\_045164275.1 41.4 553  
 297 13 11 546 453 995 9.10E-66 260 6596 cellular  
 organisms;Eukaryota;Opisthokonta;Metazoa;Eumetazoa;Bilateria;Protostomia;  
 Spiralia;Lophotrochozoa;Mollusca;Bivalvia;Autobranhia;Heteroconchia;Euhe  
 terodonta;Imparidentia;Venerida;Veneroidea;Veneridae;Mercenaria;Mercenari  
 a mercenaria  
 UdeM00000025869 29159 71.2 UdeM00000025869 XP\_011416222.2 39.4 104  
 50 3 1 91 1 104 1.10E-09 71.2 29159 cellular

organisms;Eukaryota;Opisthokonta;Metazoa;Eumetazoa;Bilateria;Protostomia;Spiralia;Lophotrochozoa;Mollusca;Bivalvia;Autobranchia;Pteriormorphia;Ostreida;Ostreoidea;Ostreidae;Crassostrea;Crassostrea gigas  
UdeM00000025870 6596 227.3 UdeM00000025870 XP\_045165625.1 36.7 499  
267 15 47 532 413 875 5.70E-56 227.3 6596 cellular

organisms;Eukaryota;Opisthokonta;Metazoa;Eumetazoa;Bilateria;Protostomia;Spiralia;Lophotrochozoa;Mollusca;Bivalvia;Autobranchia;Heteroconchia;Euheterodonta;Imparidentia;Venerida;Veneroidea;Veneridae;Mercenaria;Mercenaria mercenaria  
UdeM00000025871 29159 527.3 UdeM00000025871 XP\_011450657.1 54.9 570  
184 10 1 557 1 510 2.50E-146 527.3 29159 cellular

organisms;Eukaryota;Opisthokonta;Metazoa;Eumetazoa;Bilateria;Protostomia;Spiralia;Lophotrochozoa;Mollusca;Bivalvia;Autobranchia;Pteriormorphia;Ostreida;Ostreoidea;Ostreidae;Crassostrea;Crassostrea gigas  
UdeM00000025872 29159 553.9 UdeM00000025872 XP\_011450657.1 60.8 515  
184 9 1 502 1 510 2.30E-154 553.9 29159 cellular

organisms;Eukaryota;Opisthokonta;Metazoa;Eumetazoa;Bilateria;Protostomia;Spiralia;Lophotrochozoa;Mollusca;Bivalvia;Autobranchia;Pteriormorphia;Ostreida;Ostreoidea;Ostreidae;Crassostrea;Crassostrea gigas  
UdeM00000025873 1735272 409.1 UdeM00000025873 XP\_041349784.1 96.6  
205 7 0 1 205 1 205 3.40E-111 409.1 1735272  
cellular

organisms;Eukaryota;Opisthokonta;Metazoa;Eumetazoa;Bilateria;Protostomia;Spiralia;Lophotrochozoa;Mollusca;Gastropoda;Neomphalina;Neomphaloidea;Peltospiridae;Gigantopelta;Gigantopelta aegis  
UdeM00000025874 6596 270.8 UdeM00000025874 XP\_045164692.1 54.1 242  
90 1 6 247 10 230 1.70E-69 270.8 6596 cellular

organisms;Eukaryota;Opisthokonta;Metazoa;Eumetazoa;Bilateria;Protostomia;Spiralia;Lophotrochozoa;Mollusca;Bivalvia;Autobranchia;Heteroconchia;Euheterodonta;Imparidentia;Venerida;Veneroidea;Veneridae;Mercenaria;Mercenaria mercenaria  
UdeM00000025875 6596 282.3 UdeM00000025875 XP\_045164692.1 59.3 221  
90 0 6 226 10 230 5.30E-73 282.3 6596 cellular

organisms;Eukaryota;Opisthokonta;Metazoa;Eumetazoa;Bilateria;Protostomia;Spiralia;Lophotrochozoa;Mollusca;Bivalvia;Autobranchia;Heteroconchia;Euheterodonta;Imparidentia;Venerida;Veneroidea;Veneridae;Mercenaria;Mercenaria mercenaria  
UdeM00000025876 2607531 680.2 UdeM00000025876 XP\_029638272.1 61.9  
585 194 7 36 596 241 820 3.00E-192 680.2 2607531  
cellular

organisms;Eukaryota;Opisthokonta;Metazoa;Eumetazoa;Bilateria;Protostomia;Spiralia;Lophotrochozoa;Mollusca;Cephalopoda;Coleoidea;Octopodiformes;Octopoda;Incirrata;Octopodidae;Octopus;Octopus sinensis  
UdeM00000025877 7739 130.2 UdeM00000025877 XP\_035689955.1 32.9 301  
158 7 1 265 1 293 4.50E-27 130.2 7739 cellular

organisms;Eukaryota;Opisthokonta;Metazoa;Eumetazoa;Bilateria;Deuterostomia;Chordata;Cephalochordata;Leptocardii;Amphioxiformes;Branchiostomidae;Branchiostoma;Branchiostoma floridae  
UdeM00000025878 29159 91.3 UdeM00000025878 XP\_034326035.1 35.1 148  
92 1 1 148 26 169 1.20E-15 91.3 29159 cellular

organisms;Eukaryota;Opisthokonta;Metazoa;Eumetazoa;Bilateria;Protostomia;Spiralia;Lophotrochozoa;Mollusca;Bivalvia;Autobranchia;Pteriormorphia;Ostreida;Ostreoidea;Ostreidae;Crassostrea;Crassostrea gigas

UdeM00000025879 225164 431 UdeM00000025879 XP\_009066991.1 77.3  
 242 55 0 1 242 1 242 1.10E-117 431 225164  
 cellular  
 organisms;Eukaryota;Opisthokonta;Metazoa;Eumetazoa;Bilateria;Protostomia;  
 Spiralia;Lophotrochozoa;Mollusca;Gastropoda;Patellogastropoda;Lottioidea;  
 Lottiidae;Lottia;Lottia gigantea  
 UdeM00000025880 29159 790 UdeM00000025880 XP\_011424818.2 81.4 451  
 84 0 1 451 107 557 1.60E-225 790 29159 cellular  
 organisms;Eukaryota;Opisthokonta;Metazoa;Eumetazoa;Bilateria;Protostomia;  
 Spiralia;Lophotrochozoa;Mollusca;Bivalvia;Autobranchia;Pteriomorpha;Ostr  
 eida;Ostreoidea;Ostreidae;Crassostrea;Crassostrea gigas  
 UdeM00000025881 6596 363.2 UdeM00000025881 XP\_045166683.1 37.4 589  
 334 9 19 597 11 574 6.20E-97 363.2 6596 cellular  
 organisms;Eukaryota;Opisthokonta;Metazoa;Eumetazoa;Bilateria;Protostomia;  
 Spiralia;Lophotrochozoa;Mollusca;Bivalvia;Autobranchia;Heteroconchia;Euhe  
 terodonta;Imparidentia;Venerida;Veneroidea;Veneridae;Mercenaria;Mercenari  
 a mercenaria  
 UdeM00000025882 6565 1073.9 UdeM00000025882 XP\_022299733.1 50  
 1110 456 12 1 1040 1 1081 1.2e-310 1073.9 6565  
 cellular  
 organisms;Eukaryota;Opisthokonta;Metazoa;Eumetazoa;Bilateria;Protostomia;  
 Spiralia;Lophotrochozoa;Mollusca;Bivalvia;Autobranchia;Pteriomorpha;Ostr  
 eida;Ostreoidea;Ostreidae;Crassostrea;Crassostrea virginica  
 UdeM00000025883 6565 499.2 UdeM00000025883 XP\_022299761.1 68.4 339  
 107 0 14 352 8 346 4.30E-138 499.2 6565 cellular  
 organisms;Eukaryota;Opisthokonta;Metazoa;Eumetazoa;Bilateria;Protostomia;  
 Spiralia;Lophotrochozoa;Mollusca;Bivalvia;Autobranchia;Pteriomorpha;Ostr  
 eida;Ostreoidea;Ostreidae;Crassostrea;Crassostrea virginica  
 UdeM00000025884 6596 483.8 UdeM00000025884 XP\_045176004.1 64.1 351  
 126 0 1 351 1 351 1.90E-133 483.8 6596 cellular  
 organisms;Eukaryota;Opisthokonta;Metazoa;Eumetazoa;Bilateria;Protostomia;  
 Spiralia;Lophotrochozoa;Mollusca;Bivalvia;Autobranchia;Heteroconchia;Euhe  
 terodonta;Imparidentia;Venerida;Veneroidea;Veneridae;Mercenaria;Mercenari  
 a mercenaria  
 UdeM00000025885 6596 572.8 UdeM00000025885 XP\_045172017.1 65.6 393  
 135 0 12 404 6 398 3.60E-160 572.8 6596 cellular  
 organisms;Eukaryota;Opisthokonta;Metazoa;Eumetazoa;Bilateria;Protostomia;  
 Spiralia;Lophotrochozoa;Mollusca;Bivalvia;Autobranchia;Heteroconchia;Euhe  
 terodonta;Imparidentia;Venerida;Veneroidea;Veneridae;Mercenaria;Mercenari  
 a mercenaria  
 UdeM00000025892 6596 392.9 UdeM00000025892 XP\_045165531.1 49.9 771  
 343 5 11 768 329 1069 9.60E-106 392.9 6596 cellular  
 organisms;Eukaryota;Opisthokonta;Metazoa;Eumetazoa;Bilateria;Protostomia;  
 Spiralia;Lophotrochozoa;Mollusca;Bivalvia;Autobranchia;Heteroconchia;Euhe  
 terodonta;Imparidentia;Venerida;Veneroidea;Veneridae;Mercenaria;Mercenari  
 a mercenaria  
 UdeM00000025893 6596 280.8 UdeM00000025893 XP\_045165531.1 56.9 348  
 118 10 1 335 1 329 2.50E-72 280.8 6596 cellular  
 organisms;Eukaryota;Opisthokonta;Metazoa;Eumetazoa;Bilateria;Protostomia;  
 Spiralia;Lophotrochozoa;Mollusca;Bivalvia;Autobranchia;Heteroconchia;Euhe  
 terodonta;Imparidentia;Venerida;Veneroidea;Veneridae;Mercenaria;Mercenari  
 a mercenaria  
 UdeM00000025894 6596 332.4 UdeM00000025894 XP\_045165518.1 47.7 415  
 207 7 4 416 7 413 1.10E-87 332.4 6596 cellular

organisms;Eukaryota;Opisthokonta;Metazoa;Eumetazoa;Bilateria;Protostomia;Spiralia;Lophotrochozoa;Mollusca;Bivalvia;Autobranhia;Heteroconchia;Euherodonta;Imparidentia;Venerida;Veneroidea;Veneridae;Mercenaria;Mercenaria mercenaria

UdeM00000025895 6596 332.4 UdeM00000025895 XP\_045165518.1 47.7 415  
207 7 4 416 7 413 1.10E-87 332.4 6596 cellular

organisms;Eukaryota;Opisthokonta;Metazoa;Eumetazoa;Bilateria;Protostomia;Spiralia;Lophotrochozoa;Mollusca;Bivalvia;Autobranhia;Heteroconchia;Euherodonta;Imparidentia;Venerida;Veneroidea;Veneridae;Mercenaria;Mercenaria mercenaria

UdeM00000025896 29159 919.5 UdeM00000025896 XP\_034304901.1 49.8 869  
362 11 10 869 11 814 3.30E-264 919.5 29159 cellular

organisms;Eukaryota;Opisthokonta;Metazoa;Eumetazoa;Bilateria;Protostomia;Spiralia;Lophotrochozoa;Mollusca;Bivalvia;Autobranhia;Pteriormorphia;Ostreida;Ostreoidea;Ostreidae;Crassostrea;Crassostrea gigas

UdeM00000025897 6573 117.9 UdeM00000025897 XP\_021357392.1 40.6 143  
85 0 11 153 727 869 1.20E-23 117.9 6573 cellular

organisms;Eukaryota;Opisthokonta;Metazoa;Eumetazoa;Bilateria;Protostomia;Spiralia;Lophotrochozoa;Mollusca;Bivalvia;Autobranhia;Pteriormorphia;Pectinida;Pectinoidea;Pectinidae;Mizuhopecten;Mizuhopecten yessoensis

UdeM00000025898 6596 294.7 UdeM00000025898 XP\_045165537.1 65.2 224  
77 1 3 226 4 226 1.30E-76 294.7 6596 cellular

organisms;Eukaryota;Opisthokonta;Metazoa;Eumetazoa;Bilateria;Protostomia;Spiralia;Lophotrochozoa;Mollusca;Bivalvia;Autobranhia;Heteroconchia;Euherodonta;Imparidentia;Venerida;Veneroidea;Veneridae;Mercenaria;Mercenaria mercenaria

UdeM00000025899 6579 193.7 UdeM00000025899 XP\_033746090.1 62.7 158  
55 2 2 155 1020 1177 1.70E-46 193.7 6579 cellular

organisms;Eukaryota;Opisthokonta;Metazoa;Eumetazoa;Bilateria;Protostomia;Spiralia;Lophotrochozoa;Mollusca;Bivalvia;Autobranhia;Pteriormorphia;Pectinida;Pectinoidea;Pectinidae;Pecten;Pecten maximus

UdeM00000025900 6579 958.7 UdeM00000025900 XP\_033746090.1 63.7 713  
248 8 513 1220 306 1012 6.90E-276 958.7 6579 cellular

organisms;Eukaryota;Opisthokonta;Metazoa;Eumetazoa;Bilateria;Protostomia;Spiralia;Lophotrochozoa;Mollusca;Bivalvia;Autobranhia;Pteriormorphia;Pectinida;Pectinoidea;Pectinidae;Pecten;Pecten maximus

UdeM00000025901 6596 397.5 UdeM00000025901 XP\_045164353.1 73.7 266  
66 3 24 287 30 293 1.40E-107 397.5 6596 cellular

organisms;Eukaryota;Opisthokonta;Metazoa;Eumetazoa;Bilateria;Protostomia;Spiralia;Lophotrochozoa;Mollusca;Bivalvia;Autobranhia;Heteroconchia;Euherodonta;Imparidentia;Venerida;Veneroidea;Veneridae;Mercenaria;Mercenaria mercenaria

UdeM00000025902 6596 213.8 UdeM00000025902 XP\_045174332.1 34.6 451  
277 3 26 471 154 591 4.80E-52 213.8 6596 cellular

organisms;Eukaryota;Opisthokonta;Metazoa;Eumetazoa;Bilateria;Protostomia;Spiralia;Lophotrochozoa;Mollusca;Bivalvia;Autobranhia;Heteroconchia;Euherodonta;Imparidentia;Venerida;Veneroidea;Veneridae;Mercenaria;Mercenaria mercenaria

UdeM00000025903 225164 107.5 UdeM00000025903 XP\_009059366.1 43.2  
199 90 6 18 214 9 186 5.50E-20 107.5 225164  
cellular

organisms;Eukaryota;Opisthokonta;Metazoa;Eumetazoa;Bilateria;Protostomia;Spiralia;Lophotrochozoa;Mollusca;Gastropoda;Patellogastropoda;Lottioida;Lottiidae;Lottia;Lottia gigantea



UdeM00000025906 6596 763.1 UdeM00000025906 XP\_045167331.1 68.5 527  
 164 1 165 691 59 583 3.10E-217 763.1 6596 cellular  
 organisms;Eukaryota;Opisthokonta;Metazoa;Eumetazoa;Bilateria;Protostomia;  
 Spiralia;Lophotrochozoa;Mollusca;Bivalvia;Autobranchia;Heteroconchia;Euhe  
 terodonta;Imparidentia;Venerida;Veneroidea;Veneridae;Mercenaria;Mercenari  
 a mercenaria

UdeM00000025907 6579 634 UdeM00000025907 XP\_033746789.1 56 687  
 237 16 145 818 451 1085 2.60E-178 634 6579 cellular  
 organisms;Eukaryota;Opisthokonta;Metazoa;Eumetazoa;Bilateria;Protostomia;  
 Spiralia;Lophotrochozoa;Mollusca;Bivalvia;Autobranchia;Pteriormorphia;Pect  
 inida;Pectinoidea;Pectinidae;Pecten;Pecten maximus

UdeM00000025908 225164 144.1 UdeM00000025908 XP\_009059360.1 34.7  
 222 102 2 1 179 1 222 2.10E-31 144.1 225164  
 cellular  
 organisms;Eukaryota;Opisthokonta;Metazoa;Eumetazoa;Bilateria;Protostomia;  
 Spiralia;Lophotrochozoa;Mollusca;Gastropoda;Patellogastropoda;Lottioidea;  
 Lottiidae;Lottia;Lottia gigantea

UdeM00000025909 6945 84.3 UdeM00000025909 XP\_040065097.1 28.5 193  
 112 4 59 225 85 277 2.90E-13 84.3 6945 cellular  
 organisms;Eukaryota;Opisthokonta;Metazoa;Eumetazoa;Bilateria;Protostomia;  
 Ecdysozoa;Panarthropoda;Arthropoda;Chelicerata;Arachnida;Acari;Parasitifo  
 rmes;Ixodida;Ixodoidea;Ixodidae;Ixodinae;Ixodes;Ixodes scapularis

UdeM00000025910 6596 1229.9 UdeM00000025910 XP\_045164194.1 48.6  
 1311 605 17 2 1251 1 1303 0.00E+00 1229.9 6596  
 cellular  
 organisms;Eukaryota;Opisthokonta;Metazoa;Eumetazoa;Bilateria;Protostomia;  
 Spiralia;Lophotrochozoa;Mollusca;Bivalvia;Autobranchia;Heteroconchia;Euhe  
 terodonta;Imparidentia;Venerida;Veneroidea;Veneridae;Mercenaria;Mercenari  
 a mercenaria

UdeM00000025911 400727 153.7 UdeM00000025911 XP\_025106557.1 68  
 125 38 2 95 219 126 248 3.30E-34 153.7 400727  
 cellular  
 organisms;Eukaryota;Opisthokonta;Metazoa;Eumetazoa;Bilateria;Protostomia;  
 Spiralia;Lophotrochozoa;Mollusca;Gastropoda;Caenogastropoda;Architaeniogl  
 ossa;Ampullarioidea;Ampullariidae;Pomacea;Pomacea canaliculata

UdeM00000025912 1735272 564.7 UdeM00000025912 XP\_041350161.1 75  
 372 88 3 1 369 192 561 8.80E-158 564.7 1735272  
 cellular  
 organisms;Eukaryota;Opisthokonta;Metazoa;Eumetazoa;Bilateria;Protostomia;  
 Spiralia;Lophotrochozoa;Mollusca;Gastropoda;Neomphalina;Neomphaloidea;Pel  
 tospiridae;Gigantopelta;Gigantopelta aegis

UdeM00000025913 1735272 107.8 UdeM00000025913 XP\_041350161.1 63.6  
 88 25 1 8 88 594 681 6.00E-20 107.8 1735272  
 cellular  
 organisms;Eukaryota;Opisthokonta;Metazoa;Eumetazoa;Bilateria;Protostomia;  
 Spiralia;Lophotrochozoa;Mollusca;Gastropoda;Neomphalina;Neomphaloidea;Pel  
 tospiridae;Gigantopelta;Gigantopelta aegis

UdeM00000025914 1735272 112.5 UdeM00000025914 XP\_041350162.1 41.9  
 155 77 4 1 142 1 155 4.70E-22 112.5 1735272  
 cellular  
 organisms;Eukaryota;Opisthokonta;Metazoa;Eumetazoa;Bilateria;Protostomia;  
 Spiralia;Lophotrochozoa;Mollusca;Gastropoda;Neomphalina;Neomphaloidea;Pel  
 tospiridae;Gigantopelta;Gigantopelta aegis

UdeM00000025917 6579 448.4 UdeM00000025917 XP\_033744585.1 55.5 465  
 174 14 1 453 22 465 1.10E-122 448.4 6579 cellular  
 organisms;Eukaryota;Opisthokonta;Metazoa;Eumetazoa;Bilateria;Protostomia;  
 Spiralia;Lophotrochozoa;Mollusca;Bivalvia;Autobranchia;Pteriomorphia;Pect  
 inida;Pectinoidea;Pectinidae;Pecten;Pecten maximus  
 UdeM00000025918 6596 168.7 UdeM00000025918 XP\_045165056.1 48.8 172  
 88 0 1 172 7 178 6.50E-39 168.7 6596 cellular  
 organisms;Eukaryota;Opisthokonta;Metazoa;Eumetazoa;Bilateria;Protostomia;  
 Spiralia;Lophotrochozoa;Mollusca;Bivalvia;Autobranchia;Heteroconchia;Euhe  
 terodonta;Imparidentia;Venerida;Veneroidea;Veneridae;Mercenaria;Mercenari  
 a mercenaria  
 UdeM00000025919 6596 162.2 UdeM00000025919 XP\_045165151.1 45.7 162  
 86 1 1 162 5 164 5.90E-37 162.2 6596 cellular  
 organisms;Eukaryota;Opisthokonta;Metazoa;Eumetazoa;Bilateria;Protostomia;  
 Spiralia;Lophotrochozoa;Mollusca;Bivalvia;Autobranchia;Heteroconchia;Euhe  
 terodonta;Imparidentia;Venerida;Veneroidea;Veneridae;Mercenaria;Mercenari  
 a mercenaria  
 UdeM00000025920 6596 781.6 UdeM00000025920 XP\_045165425.1 58.5 661  
 266 3 1 654 1 660 8.00E-223 781.6 6596 cellular  
 organisms;Eukaryota;Opisthokonta;Metazoa;Eumetazoa;Bilateria;Protostomia;  
 Spiralia;Lophotrochozoa;Mollusca;Bivalvia;Autobranchia;Heteroconchia;Euhe  
 terodonta;Imparidentia;Venerida;Veneroidea;Veneridae;Mercenaria;Mercenari  
 a mercenaria  
 UdeM00000025921 400727 392.1 UdeM00000025921 XP\_025107489.1 63.1  
 320 112 3 59 376 125 440 7.90E-106 392.1 400727  
 cellular  
 organisms;Eukaryota;Opisthokonta;Metazoa;Eumetazoa;Bilateria;Protostomia;  
 Spiralia;Lophotrochozoa;Mollusca;Gastropoda;Caenogastropoda;Architaeniogl  
 ossa;Ampullarioidea;Ampullariidae;Pomacea;Pomacea canaliculata  
 UdeM00000025923 29159 230.7 UdeM00000025923 XP\_011432372.2 25.5 800  
 537 24 1 766 178 952 6.20E-57 230.7 29159 cellular  
 organisms;Eukaryota;Opisthokonta;Metazoa;Eumetazoa;Bilateria;Protostomia;  
 Spiralia;Lophotrochozoa;Mollusca;Bivalvia;Autobranchia;Pteriomorphia;Ostr  
 eida;Ostreoidea;Ostreidae;Crassostrea;Crassostrea gigas  
 UdeM00000025925 6596 149.8 UdeM00000025925 XP\_045166693.1 24.9 774  
 489 30 12 739 38 765 1.70E-32 149.8 6596 cellular  
 organisms;Eukaryota;Opisthokonta;Metazoa;Eumetazoa;Bilateria;Protostomia;  
 Spiralia;Lophotrochozoa;Mollusca;Bivalvia;Autobranchia;Heteroconchia;Euhe  
 terodonta;Imparidentia;Venerida;Veneroidea;Veneridae;Mercenaria;Mercenari  
 a mercenaria  
 UdeM00000025924 6596 149.8 UdeM00000025924 XP\_045166693.1 24.9 774  
 489 30 12 739 38 765 1.80E-32 149.8 6596 cellular  
 organisms;Eukaryota;Opisthokonta;Metazoa;Eumetazoa;Bilateria;Protostomia;  
 Spiralia;Lophotrochozoa;Mollusca;Bivalvia;Autobranchia;Heteroconchia;Euhe  
 terodonta;Imparidentia;Venerida;Veneroidea;Veneridae;Mercenaria;Mercenari  
 a mercenaria  
 UdeM00000025927 6565 75.1 UdeM00000025927 XP\_022298967.1 29.2 233  
 139 8 7 226 73 292 1.70E-10 75.1 6565 cellular  
 organisms;Eukaryota;Opisthokonta;Metazoa;Eumetazoa;Bilateria;Protostomia;  
 Spiralia;Lophotrochozoa;Mollusca;Bivalvia;Autobranchia;Pteriomorphia;Ostr  
 eida;Ostreoidea;Ostreidae;Crassostrea;Crassostrea virginica  
 UdeM00000025928 29159 129.8 UdeM00000025928 XP\_011432372.2 24.8 513  
 355 17 59 556 457 953 1.10E-26 129.8 29159 cellular  
 organisms;Eukaryota;Opisthokonta;Metazoa;Eumetazoa;Bilateria;Protostomia;

Spiralia;Lophotrochozoa;Mollusca;Bivalvia;Autobranchia;Pteriomorphia;Ostr  
eida;Ostreoidea;Ostreidae;Crassostrea;Crassostrea gigas  
UdeM00000025929 6596 170.6 UdeM00000025929 XP\_045165073.1 34.4 311  
190 6 295 601 133 433 7.40E-39 170.6 6596 cellular  
organisms;Eukaryota;Opisthokonta;Metazoa;Eumetazoa;Bilateria;Protostomia;  
Spiralia;Lophotrochozoa;Mollusca;Bivalvia;Autobranchia;Heteroconchia;Euhe  
terodonta;Imparidentia;Venerida;Veneroidea;Veneridae;Mercenaria;Mercenari  
a mercenaria  
UdeM00000025930 6596 170.6 UdeM00000025930 XP\_045165073.1 34.4 311  
190 6 295 601 133 433 7.40E-39 170.6 6596 cellular  
organisms;Eukaryota;Opisthokonta;Metazoa;Eumetazoa;Bilateria;Protostomia;  
Spiralia;Lophotrochozoa;Mollusca;Bivalvia;Autobranchia;Heteroconchia;Euhe  
terodonta;Imparidentia;Venerida;Veneroidea;Veneridae;Mercenaria;Mercenari  
a mercenaria  
UdeM00000025931 6596 585.5 UdeM00000025931 XP\_045165366.1 46.5 984  
439 15 21 968 20 952 2.00E-163 585.5 6596 cellular  
organisms;Eukaryota;Opisthokonta;Metazoa;Eumetazoa;Bilateria;Protostomia;  
Spiralia;Lophotrochozoa;Mollusca;Bivalvia;Autobranchia;Heteroconchia;Euhe  
terodonta;Imparidentia;Venerida;Veneroidea;Veneridae;Mercenaria;Mercenari  
a mercenaria  
UdeM00000025932 37653 350.9 UdeM00000025932 XP\_014788267.1 71.8 241  
64 2 1 237 1 241 2.40E-93 350.9 37653 cellular  
organisms;Eukaryota;Opisthokonta;Metazoa;Eumetazoa;Bilateria;Protostomia;  
Spiralia;Lophotrochozoa;Mollusca;Cephalopoda;Coleoidea;Octopodiformes;Oct  
opoda;Incirrata;Octopodidae;Octopus;Octopus bimaculoides  
UdeM00000025934 6573 531.2 UdeM00000025934 XP\_021369259.1 66.5 400  
131 3 26 424 5 402 1.20E-147 531.2 6573 cellular  
organisms;Eukaryota;Opisthokonta;Metazoa;Eumetazoa;Bilateria;Protostomia;  
Spiralia;Lophotrochozoa;Mollusca;Bivalvia;Autobranchia;Pteriomorphia;Pect  
inida;Pectinoidea;Pectinidae;Mizuhopecten;Mizuhopecten yessoensis  
UdeM00000025935 6573 127.9 UdeM00000025935 XP\_021369258.1 65.6 90  
31 0 26 115 5 94 9.30E-27 127.9 6573 cellular  
organisms;Eukaryota;Opisthokonta;Metazoa;Eumetazoa;Bilateria;Protostomia;  
Spiralia;Lophotrochozoa;Mollusca;Bivalvia;Autobranchia;Pteriomorphia;Pect  
inida;Pectinoidea;Pectinidae;Mizuhopecten;Mizuhopecten yessoensis  
UdeM00000025936 225164 240.4 UdeM00000025936 XP\_009055553.1 34.6  
344 209 6 82 415 54 391 4.40E-60 240.4 225164  
cellular  
organisms;Eukaryota;Opisthokonta;Metazoa;Eumetazoa;Bilateria;Protostomia;  
Spiralia;Lophotrochozoa;Mollusca;Gastropoda;Patellogastropoda;Lottioida;  
Lottiidae;Lottia;Lottia gigantea  
UdeM00000025937 6596 169.1 UdeM00000025937 XP\_045164911.1 54.5 143  
63 1 3 145 579 719 7.30E-39 169.1 6596 cellular  
organisms;Eukaryota;Opisthokonta;Metazoa;Eumetazoa;Bilateria;Protostomia;  
Spiralia;Lophotrochozoa;Mollusca;Bivalvia;Autobranchia;Heteroconchia;Euhe  
terodonta;Imparidentia;Venerida;Veneroidea;Veneridae;Mercenaria;Mercenari  
a mercenaria  
UdeM00000025938 400727 221.5 UdeM00000025938 XP\_025107098.1 51  
249 108 6 1 246 1 238 1.20E-54 221.5 400727  
cellular  
organisms;Eukaryota;Opisthokonta;Metazoa;Eumetazoa;Bilateria;Protostomia;  
Spiralia;Lophotrochozoa;Mollusca;Gastropoda;Caenogastropoda;Architaeniogl  
ossa;Ampullarioidea;Ampullariidae;Pomacea;Pomacea canaliculata



UdeM00000025951 6596 515.4 UdeM00000025951 XP\_045165725.1 49.9 613  
 252 18 1 592 61 639 9.70E-143 515.4 6596 cellular  
 organisms;Eukaryota;Opisthokonta;Metazoa;Eumetazoa;Bilateria;Protostomia;  
 Spiralia;Lophotrochozoa;Mollusca;Bivalvia;Autobranchia;Heteroconchia;Euhe  
 terodonta;Imparidentia;Venerida;Veneroidea;Veneridae;Mercenaria;Mercenari  
 a mercenaria  
 UdeM00000025952 6565 238.8 UdeM00000025952 XP\_022327023.1 28.1 648  
 409 16 19 648 14 622 2.00E-59 238.8 6565 cellular  
 organisms;Eukaryota;Opisthokonta;Metazoa;Eumetazoa;Bilateria;Protostomia;  
 Spiralia;Lophotrochozoa;Mollusca;Bivalvia;Autobranchia;Pteriormorphia;Ostr  
 eida;Ostreoidea;Ostreidae;Crassostrea;Crassostrea virginica  
 UdeM00000025953 6596 176 UdeM00000025953 XP\_045167330.1 47.2 180  
 92 2 33 211 23 200 5.10E-41 176 6596 cellular  
 organisms;Eukaryota;Opisthokonta;Metazoa;Eumetazoa;Bilateria;Protostomia;  
 Spiralia;Lophotrochozoa;Mollusca;Bivalvia;Autobranchia;Heteroconchia;Euhe  
 terodonta;Imparidentia;Venerida;Veneroidea;Veneridae;Mercenaria;Mercenari  
 a mercenaria  
 UdeM00000025954 6596 105.9 UdeM00000025954 XP\_045165712.1 32.7 211  
 126 6 16 222 5 203 6.70E-20 105.9 6596 cellular  
 organisms;Eukaryota;Opisthokonta;Metazoa;Eumetazoa;Bilateria;Protostomia;  
 Spiralia;Lophotrochozoa;Mollusca;Bivalvia;Autobranchia;Heteroconchia;Euhe  
 terodonta;Imparidentia;Venerida;Veneroidea;Veneridae;Mercenaria;Mercenari  
 a mercenaria  
 UdeM00000025955 6596 193.7 UdeM00000025955 XP\_045165712.1 52.2 182  
 87 0 24 205 22 203 2.20E-46 193.7 6596 cellular  
 organisms;Eukaryota;Opisthokonta;Metazoa;Eumetazoa;Bilateria;Protostomia;  
 Spiralia;Lophotrochozoa;Mollusca;Bivalvia;Autobranchia;Heteroconchia;Euhe  
 terodonta;Imparidentia;Venerida;Veneroidea;Veneridae;Mercenaria;Mercenari  
 a mercenaria  
 UdeM00000025956 6596 245 UdeM00000025956 XP\_045166072.1 56.8 213  
 85 3 1 212 1 207 8.80E-62 245 6596 cellular  
 organisms;Eukaryota;Opisthokonta;Metazoa;Eumetazoa;Bilateria;Protostomia;  
 Spiralia;Lophotrochozoa;Mollusca;Bivalvia;Autobranchia;Heteroconchia;Euhe  
 terodonta;Imparidentia;Venerida;Veneroidea;Veneridae;Mercenaria;Mercenari  
 a mercenaria  
 UdeM00000025958 29159 73.2 UdeM00000025958 XP\_034307878.1 32.3 99  
 67 0 1 99 92 190 5.50E-10 73.2 29159 cellular  
 organisms;Eukaryota;Opisthokonta;Metazoa;Eumetazoa;Bilateria;Protostomia;  
 Spiralia;Lophotrochozoa;Mollusca;Bivalvia;Autobranchia;Pteriormorphia;Ostr  
 eida;Ostreoidea;Ostreidae;Crassostrea;Crassostrea gigas  
 UdeM00000025959 29159 66.6 UdeM00000025959 XP\_034312908.1 48.3 58  
 26 1 9 62 6 63 2.50E-08 66.6 29159 cellular  
 organisms;Eukaryota;Opisthokonta;Metazoa;Eumetazoa;Bilateria;Protostomia;  
 Spiralia;Lophotrochozoa;Mollusca;Bivalvia;Autobranchia;Pteriormorphia;Ostr  
 eida;Ostreoidea;Ostreidae;Crassostrea;Crassostrea gigas  
 UdeM00000025961 29159 118.6 UdeM00000025961 XP\_034312908.1 37.2 183  
 109 3 46 224 443 623 1.00E-23 118.6 29159 cellular  
 organisms;Eukaryota;Opisthokonta;Metazoa;Eumetazoa;Bilateria;Protostomia;  
 Spiralia;Lophotrochozoa;Mollusca;Bivalvia;Autobranchia;Pteriormorphia;Ostr  
 eida;Ostreoidea;Ostreidae;Crassostrea;Crassostrea gigas  
 UdeM00000025962 29159 58.5 UdeM00000025962 XP\_034312908.1 38.6 88  
 52 1 17 104 538 623 5.90E-06 58.5 29159 cellular  
 organisms;Eukaryota;Opisthokonta;Metazoa;Eumetazoa;Bilateria;Protostomia;

Spiralia;Lophotrochozoa;Mollusca;Bivalvia;Autobranchia;Pteriormorphia;Ostr  
eida;Ostreoidea;Ostreidae;Crassostrea;Crassostrea gigas  
UdeM00000025963 6596 145.6 UdeM00000025963 XP\_045166152.1 42.1 178  
102 1 32 208 34 211 7.30E-32 145.6 6596 cellular  
organisms;Eukaryota;Opisthokonta;Metazoa;Eumetazoa;Bilateria;Protostomia;  
Spiralia;Lophotrochozoa;Mollusca;Bivalvia;Autobranchia;Heteroconchia;Euhe  
terodonta;Imparidentia;Venerida;Veneroidea;Veneridae;Mercenaria;Mercenari  
a mercenaria  
UdeM00000025964 6596 170.2 UdeM00000025964 XP\_045167330.1 45.6 180  
95 2 33 211 23 200 2.80E-39 170.2 6596 cellular  
organisms;Eukaryota;Opisthokonta;Metazoa;Eumetazoa;Bilateria;Protostomia;  
Spiralia;Lophotrochozoa;Mollusca;Bivalvia;Autobranchia;Heteroconchia;Euhe  
terodonta;Imparidentia;Venerida;Veneroidea;Veneridae;Mercenaria;Mercenari  
a mercenaria  
UdeM00000025965 6596 169.9 UdeM00000025965 XP\_045167330.1 47.5 177  
91 1 41 217 27 201 3.70E-39 169.9 6596 cellular  
organisms;Eukaryota;Opisthokonta;Metazoa;Eumetazoa;Bilateria;Protostomia;  
Spiralia;Lophotrochozoa;Mollusca;Bivalvia;Autobranchia;Heteroconchia;Euhe  
terodonta;Imparidentia;Venerida;Veneroidea;Veneridae;Mercenaria;Mercenari  
a mercenaria  
UdeM00000025966 6596 197.2 UdeM00000025966 XP\_045167330.1 51.3 195  
95 0 11 205 7 201 2.00E-47 197.2 6596 cellular  
organisms;Eukaryota;Opisthokonta;Metazoa;Eumetazoa;Bilateria;Protostomia;  
Spiralia;Lophotrochozoa;Mollusca;Bivalvia;Autobranchia;Heteroconchia;Euhe  
terodonta;Imparidentia;Venerida;Veneroidea;Veneridae;Mercenaria;Mercenari  
a mercenaria  
UdeM00000025967 8049 252.3 UdeM00000025967 XP\_030193753.1 35.2 383  
225 5 134 511 17 381 1.30E-63 252.3 8049 cellular  
organisms;Eukaryota;Opisthokonta;Metazoa;Eumetazoa;Bilateria;Deuterostomi  
a;Chordata;Craniata;Vertebrata;Gnathostomata;Teleostomi;Euteleostomi;Acti  
nopterygii;Actinopteri;Neopterygii;Teleostei;Osteoglossocephalai;Clupeoce  
phala;Euteleosteomorpha;Neoteleostei;Eurypterygia;Ctenosquamata;Acanthomo  
rphata;Paracanthopterygii;Zeiogadaria;Gadariae;Gadiformes;Gadoidei;Gadida  
e;Gadus;Gadus morhua  
UdeM00000025968 6596 99.8 UdeM00000025968 XP\_045165712.1 30.1 209  
134 6 16 222 5 203 4.80E-18 99.8 6596 cellular  
organisms;Eukaryota;Opisthokonta;Metazoa;Eumetazoa;Bilateria;Protostomia;  
Spiralia;Lophotrochozoa;Mollusca;Bivalvia;Autobranchia;Heteroconchia;Euhe  
terodonta;Imparidentia;Venerida;Veneroidea;Veneridae;Mercenaria;Mercenari  
a mercenaria  
UdeM00000025969 6596 82.8 UdeM00000025969 XP\_045166072.1 49.3 73  
37 0 1 73 135 207 2.00E-13 82.8 6596 cellular  
organisms;Eukaryota;Opisthokonta;Metazoa;Eumetazoa;Bilateria;Protostomia;  
Spiralia;Lophotrochozoa;Mollusca;Bivalvia;Autobranchia;Heteroconchia;Euhe  
terodonta;Imparidentia;Venerida;Veneroidea;Veneridae;Mercenaria;Mercenari  
a mercenaria  
UdeM00000025970 6596 143.7 UdeM00000025970 XP\_045166152.1 38.2 207  
122 3 4 208 9 211 2.80E-31 143.7 6596 cellular  
organisms;Eukaryota;Opisthokonta;Metazoa;Eumetazoa;Bilateria;Protostomia;  
Spiralia;Lophotrochozoa;Mollusca;Bivalvia;Autobranchia;Heteroconchia;Euhe  
terodonta;Imparidentia;Venerida;Veneroidea;Veneridae;Mercenaria;Mercenari  
a mercenaria  
UdeM00000025972 29159 450.3 UdeM00000025972 XP\_011429948.1 57 356  
152 1 243 597 104 459 3.90E-123 450.3 29159 cellular

organisms;Eukaryota;Opisthokonta;Metazoa;Eumetazoa;Bilateria;Protostomia;  
Spiralia;Lophotrochozoa;Mollusca;Bivalvia;Autobranhia;Pteriormphia;Ostr  
eida;Ostreoidea;Ostreidae;Crassostrea;Crassostrea gigas  
UdeM00000025973 29159 313.9 UdeM00000025973 XP\_011429743.1 67.7 220  
71 0 220 439 35 254 3.20E-82 313.9 29159 cellular  
organisms;Eukaryota;Opisthokonta;Metazoa;Eumetazoa;Bilateria;Protostomia;  
Spiralia;Lophotrochozoa;Mollusca;Bivalvia;Autobranhia;Pteriormphia;Ostr  
eida;Ostreoidea;Ostreidae;Crassostrea;Crassostrea gigas  
UdeM00000025974 6579 944.9 UdeM00000025974 XP\_033744654.1 89.3 506  
54 0 1 506 1 506 4.20E-272 944.9 6579 cellular  
organisms;Eukaryota;Opisthokonta;Metazoa;Eumetazoa;Bilateria;Protostomia;  
Spiralia;Lophotrochozoa;Mollusca;Bivalvia;Autobranhia;Pteriormphia;Pect  
inida;Pectinoidea;Pectinidae;Pecten;Pecten maximus  
UdeM00000025975 29159 647.5 UdeM00000025975 XP\_011443120.2 53.8 606  
267 7 12 611 269 867 1.70E-182 647.5 29159 cellular  
organisms;Eukaryota;Opisthokonta;Metazoa;Eumetazoa;Bilateria;Protostomia;  
Spiralia;Lophotrochozoa;Mollusca;Bivalvia;Autobranhia;Pteriormphia;Ostr  
eida;Ostreoidea;Ostreidae;Crassostrea;Crassostrea gigas  
UdeM00000025976 6579 89 UdeM00000025976 XP\_033746808.1 47.9 117  
51 4 28 144 45 151 6.80E-15 89 6579 cellular  
organisms;Eukaryota;Opisthokonta;Metazoa;Eumetazoa;Bilateria;Protostomia;  
Spiralia;Lophotrochozoa;Mollusca;Bivalvia;Autobranhia;Pteriormphia;Pect  
inida;Pectinoidea;Pectinidae;Pecten;Pecten maximus  
UdeM00000025977 6596 636.7 UdeM00000025977 XP\_045164637.1 71.3 456  
126 4 70 521 111 565 2.60E-179 636.7 6596 cellular  
organisms;Eukaryota;Opisthokonta;Metazoa;Eumetazoa;Bilateria;Protostomia;  
Spiralia;Lophotrochozoa;Mollusca;Bivalvia;Autobranhia;Heteroconchia;Euhe  
terodonta;Imparidentia;Venerida;Veneroidea;Veneridae;Mercenaria;Mercenari  
a mercenaria  
UdeM00000025979 6596 204.5 UdeM00000025979 XP\_045166338.1 46.4 248  
124 5 1 243 5 248 1.60E-49 204.5 6596 cellular  
organisms;Eukaryota;Opisthokonta;Metazoa;Eumetazoa;Bilateria;Protostomia;  
Spiralia;Lophotrochozoa;Mollusca;Bivalvia;Autobranhia;Heteroconchia;Euhe  
terodonta;Imparidentia;Venerida;Veneroidea;Veneridae;Mercenaria;Mercenari  
a mercenaria  
UdeM00000025981 6596 393.7 UdeM00000025981 XP\_045164303.1 42.7 532  
260 6 4 519 2 504 3.70E-106 393.7 6596 cellular  
organisms;Eukaryota;Opisthokonta;Metazoa;Eumetazoa;Bilateria;Protostomia;  
Spiralia;Lophotrochozoa;Mollusca;Bivalvia;Autobranhia;Heteroconchia;Euhe  
terodonta;Imparidentia;Venerida;Veneroidea;Veneridae;Mercenaria;Mercenari  
a mercenaria  
UdeM00000025982 1735272 681 UdeM00000025982 XP\_041350390.1 46.7  
719 358 7 12 719 10 714 1.80E-192 681 1735272  
cellular  
organisms;Eukaryota;Opisthokonta;Metazoa;Eumetazoa;Bilateria;Protostomia;  
Spiralia;Lophotrochozoa;Mollusca;Gastropoda;Neomphalina;Neomphaloidea;Pel  
tospiridae;Gigantopelta;Gigantopelta aegis  
UdeM00000025984 1735272 715.3 UdeM00000025984 XP\_041350390.1 52.4  
689 310 8 3 684 37 714 8.20E-203 715.3 1735272  
cellular  
organisms;Eukaryota;Opisthokonta;Metazoa;Eumetazoa;Bilateria;Protostomia;  
Spiralia;Lophotrochozoa;Mollusca;Gastropoda;Neomphalina;Neomphaloidea;Pel  
tospiridae;Gigantopelta;Gigantopelta aegis

UdeM00000025983 1735272 743.8 UdeM00000025983 XP\_041350390.1 52.3  
 721 326 8 7 720 5 714 2.30E-211 743.8 1735272  
 cellular  
 organisms;Eukaryota;Opisthokonta;Metazoa;Eumetazoa;Bilateria;Protostomia;  
 Spiralia;Lophotrochozoa;Mollusca;Gastropoda;Neomphalina;Neomphaloidea;Pel  
 tospiridae;Gigantopelta;Gigantopelta aegis  
 UdeM00000025985 6596 668.7 UdeM00000025985 XP\_045164911.1 47.6 736  
 347 15 10 734 12 719 9.60E-189 668.7 6596 cellular  
 organisms;Eukaryota;Opisthokonta;Metazoa;Eumetazoa;Bilateria;Protostomia;  
 Spiralia;Lophotrochozoa;Mollusca;Bivalvia;Autobranchia;Heteroconchia;Euhe  
 terodonta;Imparidentia;Venerida;Veneroidea;Veneridae;Mercenaria;Mercenari  
 a mercenaria  
 UdeM00000025987 6596 75.9 UdeM00000025987 XP\_045166843.1 26.6 278  
 162 8 3 238 20 297 8.20E-11 75.9 6596 cellular  
 organisms;Eukaryota;Opisthokonta;Metazoa;Eumetazoa;Bilateria;Protostomia;  
 Spiralia;Lophotrochozoa;Mollusca;Bivalvia;Autobranchia;Heteroconchia;Euhe  
 terodonta;Imparidentia;Venerida;Veneroidea;Veneridae;Mercenaria;Mercenari  
 a mercenaria  
 UdeM00000025989 1735272 479.6 UdeM00000025989 XP\_041350390.1 44.8  
 536 267 9 10 538 8 521 5.40E-132 479.6 1735272  
 cellular  
 organisms;Eukaryota;Opisthokonta;Metazoa;Eumetazoa;Bilateria;Protostomia;  
 Spiralia;Lophotrochozoa;Mollusca;Gastropoda;Neomphalina;Neomphaloidea;Pel  
 tospiridae;Gigantopelta;Gigantopelta aegis  
 UdeM00000025988 6596 691 UdeM00000025988 XP\_045164911.1 48.3 735  
 342 14 10 733 12 719 1.90E-195 691 6596 cellular  
 organisms;Eukaryota;Opisthokonta;Metazoa;Eumetazoa;Bilateria;Protostomia;  
 Spiralia;Lophotrochozoa;Mollusca;Bivalvia;Autobranchia;Heteroconchia;Euhe  
 terodonta;Imparidentia;Venerida;Veneroidea;Veneridae;Mercenaria;Mercenari  
 a mercenaria  
 UdeM00000025990 225164 238 UdeM00000025990 XP\_009055553.1 37.3  
 295 174 5 131 415 98 391 2.20E-59 238 225164  
 cellular  
 organisms;Eukaryota;Opisthokonta;Metazoa;Eumetazoa;Bilateria;Protostomia;  
 Spiralia;Lophotrochozoa;Mollusca;Gastropoda;Patellogastropoda;Lottioidea;  
 Lottiidae;Lottia;Lottia gigantea  
 UdeM00000025991 6596 98.6 UdeM00000025991 XP\_045178892.1 43 114  
 58 4 28 138 205 314 6.80E-18 98.6 6596 cellular  
 organisms;Eukaryota;Opisthokonta;Metazoa;Eumetazoa;Bilateria;Protostomia;  
 Spiralia;Lophotrochozoa;Mollusca;Bivalvia;Autobranchia;Heteroconchia;Euhe  
 terodonta;Imparidentia;Venerida;Veneroidea;Veneridae;Mercenaria;Mercenari  
 a mercenaria  
 UdeM00000025992 6596 139.4 UdeM00000025992 XP\_045170888.1 45.4 152  
 80 1 39 187 119 270 4.60E-30 139.4 6596 cellular  
 organisms;Eukaryota;Opisthokonta;Metazoa;Eumetazoa;Bilateria;Protostomia;  
 Spiralia;Lophotrochozoa;Mollusca;Bivalvia;Autobranchia;Heteroconchia;Euhe  
 terodonta;Imparidentia;Venerida;Veneroidea;Veneridae;Mercenaria;Mercenari  
 a mercenaria  
 UdeM00000025993 6579 644.4 UdeM00000025993 XP\_033746231.1 47.1 792  
 347 14 1 740 1 772 3.40E-181 644.4 6579 cellular  
 organisms;Eukaryota;Opisthokonta;Metazoa;Eumetazoa;Bilateria;Protostomia;  
 Spiralia;Lophotrochozoa;Mollusca;Bivalvia;Autobranchia;Pteriomorpha;Pect  
 inida;Pectinoidea;Pectinidae;Pecten;Pecten maximus



UdeM00000025993 6579 79.7 UdeM00000025993 XP\_033746231.1 52 75  
 35 1 1392 1466 1119 1192 3.40E-11 79.7 6579 cellular  
 organisms;Eukaryota;Opisthokonta;Metazoa;Eumetazoa;Bilateria;Protostomia;  
 Spiralia;Lophotrochozoa;Mollusca;Bivalvia;Autobranhia;Pteriormorphia;Pect  
 inida;Pectinoidea;Pectinidae;Pecten;Pecten maximus  
 UdeM00000025994 6573 209.5 UdeM00000025994 XP\_021367843.1 48.5 237  
 116 4 1 234 1 234 4.90E-51 209.5 6573 cellular  
 organisms;Eukaryota;Opisthokonta;Metazoa;Eumetazoa;Bilateria;Protostomia;  
 Spiralia;Lophotrochozoa;Mollusca;Bivalvia;Autobranhia;Pteriormorphia;Pect  
 inida;Pectinoidea;Pectinidae;Mizuhopecten;Mizuhopecten yessoensis  
 UdeM00000025995 6573 201.8 UdeM00000025995 XP\_021367843.1 48.1 237  
 114 5 1 231 1 234 1.00E-48 201.8 6573 cellular  
 organisms;Eukaryota;Opisthokonta;Metazoa;Eumetazoa;Bilateria;Protostomia;  
 Spiralia;Lophotrochozoa;Mollusca;Bivalvia;Autobranhia;Pteriormorphia;Pect  
 inida;Pectinoidea;Pectinidae;Mizuhopecten;Mizuhopecten yessoensis  
 UdeM00000025996 6579 276.2 UdeM00000025996 XP\_033752673.1 66 197  
 67 0 15 211 456 652 3.50E-71 276.2 6579 cellular  
 organisms;Eukaryota;Opisthokonta;Metazoa;Eumetazoa;Bilateria;Protostomia;  
 Spiralia;Lophotrochozoa;Mollusca;Bivalvia;Autobranhia;Pteriormorphia;Pect  
 inida;Pectinoidea;Pectinidae;Pecten;Pecten maximus  
 UdeM00000025997 6596 557.4 UdeM00000025997 XP\_045170315.1 35.2 967  
 567 20 1 927 1 947 3.50E-155 557.4 6596 cellular  
 organisms;Eukaryota;Opisthokonta;Metazoa;Eumetazoa;Bilateria;Protostomia;  
 Spiralia;Lophotrochozoa;Mollusca;Bivalvia;Autobranhia;Heteroconchia;Euhe  
 terodonta;Imparidentia;Venerida;Veneroidea;Veneridae;Mercenaria;Mercenari  
 a mercenaria  
 UdeM00000025998 6596 641 UdeM00000025998 XP\_045164491.1 63.3 570  
 188 9 2 564 21 576 1.50E-180 641 6596 cellular  
 organisms;Eukaryota;Opisthokonta;Metazoa;Eumetazoa;Bilateria;Protostomia;  
 Spiralia;Lophotrochozoa;Mollusca;Bivalvia;Autobranhia;Heteroconchia;Euhe  
 terodonta;Imparidentia;Venerida;Veneroidea;Veneridae;Mercenaria;Mercenari  
 a mercenaria  
 UdeM00000025999 6596 156.8 UdeM00000025999 XP\_045170888.1 34.8 264  
 160 4 29 281 8 270 4.20E-35 156.8 6596 cellular  
 organisms;Eukaryota;Opisthokonta;Metazoa;Eumetazoa;Bilateria;Protostomia;  
 Spiralia;Lophotrochozoa;Mollusca;Bivalvia;Autobranhia;Heteroconchia;Euhe  
 terodonta;Imparidentia;Venerida;Veneroidea;Veneridae;Mercenaria;Mercenari  
 a mercenaria  
 UdeM00000026000 6596 104.4 UdeM00000026000 XP\_045178891.1 43.9 114  
 57 4 28 138 87 196 1.20E-19 104.4 6596 cellular  
 organisms;Eukaryota;Opisthokonta;Metazoa;Eumetazoa;Bilateria;Protostomia;  
 Spiralia;Lophotrochozoa;Mollusca;Bivalvia;Autobranhia;Heteroconchia;Euhe  
 terodonta;Imparidentia;Venerida;Veneroidea;Veneridae;Mercenaria;Mercenari  
 a mercenaria  
 UdeM00000026001 29159 93.2 UdeM00000026001 XP\_034307571.1 43.4 99  
 53 1 4 99 523 621 2.00E-16 93.2 29159 cellular  
 organisms;Eukaryota;Opisthokonta;Metazoa;Eumetazoa;Bilateria;Protostomia;  
 Spiralia;Lophotrochozoa;Mollusca;Bivalvia;Autobranhia;Pteriormorphia;Ostr  
 eida;Ostreoidea;Ostreidae;Crassostrea;Crassostrea gigas  
 UdeM00000026003 6596 65.5 UdeM00000026003 XP\_045164898.1 53.1 64  
 23 1 40 103 1265 1321 5.00E-08 65.5 6596 cellular  
 organisms;Eukaryota;Opisthokonta;Metazoa;Eumetazoa;Bilateria;Protostomia;  
 Spiralia;Lophotrochozoa;Mollusca;Bivalvia;Autobranhia;Heteroconchia;Euhe

terodonta;Imparidentia;Venerida;Veneroidea;Veneridae;Mercenaria;Mercenari  
 a mercenaria  
 UdeM00000026004 6596 416 UdeM00000026004 XP\_045164556.1 48.8 426  
 200 4 30 443 52 471 6.00E-113 416 6596 cellular  
 organisms;Eukaryota;Opisthokonta;Metazoa;Eumetazoa;Bilateria;Protostomia;  
 Spiralia;Lophotrochozoa;Mollusca;Bivalvia;Autobranhia;Heteroconchia;Euhe  
 terodonta;Imparidentia;Venerida;Veneroidea;Veneridae;Mercenaria;Mercenari  
 a mercenaria  
 UdeM00000026005 6579 240.4 UdeM00000026005 XP\_033746771.1 39 305  
 176 4 1 295 561 865 3.00E-60 240.4 6579 cellular  
 organisms;Eukaryota;Opisthokonta;Metazoa;Eumetazoa;Bilateria;Protostomia;  
 Spiralia;Lophotrochozoa;Mollusca;Bivalvia;Autobranhia;Pteriormorphia;Pect  
 inida;Pectinoidea;Pectinidae;Pecten;Pecten maximus  
 UdeM00000026006 6596 104.4 UdeM00000026006 XP\_045184054.1 33.2 193  
 122 3 76 264 78 267 2.30E-19 104.4 6596 cellular  
 organisms;Eukaryota;Opisthokonta;Metazoa;Eumetazoa;Bilateria;Protostomia;  
 Spiralia;Lophotrochozoa;Mollusca;Bivalvia;Autobranhia;Heteroconchia;Euhe  
 terodonta;Imparidentia;Venerida;Veneroidea;Veneridae;Mercenaria;Mercenari  
 a mercenaria  
 UdeM00000026007 6573 393.7 UdeM00000026007 XP\_021352792.1 30.7 794  
 506 16 84 855 103 874 6.10E-106 393.7 6573 cellular  
 organisms;Eukaryota;Opisthokonta;Metazoa;Eumetazoa;Bilateria;Protostomia;  
 Spiralia;Lophotrochozoa;Mollusca;Bivalvia;Autobranhia;Pteriormorphia;Pect  
 inida;Pectinoidea;Pectinidae;Mizuhopecten;Mizuhopecten yessoensis  
 UdeM00000026008 6596 69.3 UdeM00000026008 XP\_045165159.1 26.4 231  
 132 7 47 243 36 262 8.20E-09 69.3 6596 cellular  
 organisms;Eukaryota;Opisthokonta;Metazoa;Eumetazoa;Bilateria;Protostomia;  
 Spiralia;Lophotrochozoa;Mollusca;Bivalvia;Autobranhia;Heteroconchia;Euhe  
 terodonta;Imparidentia;Venerida;Veneroidea;Veneridae;Mercenaria;Mercenari  
 a mercenaria  
 UdeM00000026009 6579 288.1 UdeM00000026009 XP\_033758119.1 36.8 424  
 250 8 3 410 128 549 1.70E-74 288.1 6579 cellular  
 organisms;Eukaryota;Opisthokonta;Metazoa;Eumetazoa;Bilateria;Protostomia;  
 Spiralia;Lophotrochozoa;Mollusca;Bivalvia;Autobranhia;Pteriormorphia;Pect  
 inida;Pectinoidea;Pectinidae;Pecten;Pecten maximus  
 UdeM00000026010 29159 189.1 UdeM00000026010 XP\_034334268.1 45.4 194  
 103 1 1 194 160 350 5.20E-45 189.1 29159 cellular  
 organisms;Eukaryota;Opisthokonta;Metazoa;Eumetazoa;Bilateria;Protostomia;  
 Spiralia;Lophotrochozoa;Mollusca;Bivalvia;Autobranhia;Pteriormorphia;Ostr  
 eida;Ostreoidea;Ostreidae;Crassostrea;Crassostrea gigas  
 UdeM00000026011 6596 102.4 UdeM00000026011 XP\_045184054.1 30.8 227  
 150 3 77 299 78 301 9.90E-19 102.4 6596 cellular  
 organisms;Eukaryota;Opisthokonta;Metazoa;Eumetazoa;Bilateria;Protostomia;  
 Spiralia;Lophotrochozoa;Mollusca;Bivalvia;Autobranhia;Heteroconchia;Euhe  
 terodonta;Imparidentia;Venerida;Veneroidea;Veneridae;Mercenaria;Mercenari  
 a mercenaria  
 UdeM00000026012 6565 103.6 UdeM00000026012 XP\_022334875.1 44.3 115  
 61 2 3 115 603 716 1.70E-19 103.6 6565 cellular  
 organisms;Eukaryota;Opisthokonta;Metazoa;Eumetazoa;Bilateria;Protostomia;  
 Spiralia;Lophotrochozoa;Mollusca;Bivalvia;Autobranhia;Pteriormorphia;Ostr  
 eida;Ostreoidea;Ostreidae;Crassostrea;Crassostrea virginica  
 UdeM00000026013 6573 394.8 UdeM00000026013 XP\_021352792.1 30.5 812  
 501 16 66 855 104 874 2.80E-106 394.8 6573 cellular  
 organisms;Eukaryota;Opisthokonta;Metazoa;Eumetazoa;Bilateria;Protostomia;

Spiralia;Lophotrochozoa;Mollusca;Bivalvia;Autobranchia;Pteriormorphia;Pectinida;Pectinoidea;Pectinidae;Mizuhopecten;Mizuhopecten yessoensis  
 UdeM00000026014 6596 107.8 UdeM00000026014 XP\_045184054.1 31.1 228  
 148 5 77 299 78 301 2.40E-20 107.8 6596 cellular  
 organisms;Eukaryota;Opisthokonta;Metazoa;Eumetazoa;Bilateria;Protostomia;Spiralia;Lophotrochozoa;Mollusca;Bivalvia;Autobranchia;Heteroconchia;Euherodonta;Imparidentia;Venerida;Veneroidea;Veneridae;Mercenaria;Mercenaria mercenaria  
 UdeM00000026015 6579 225.3 UdeM00000026015 XP\_033746771.1 38.6 311  
 169 6 1 295 561 865 1.00E-55 225.3 6579 cellular  
 organisms;Eukaryota;Opisthokonta;Metazoa;Eumetazoa;Bilateria;Protostomia;Spiralia;Lophotrochozoa;Mollusca;Bivalvia;Autobranchia;Pteriormorphia;Pectinida;Pectinoidea;Pectinidae;Pecten;Pecten maximus  
 UdeM00000026016 6573 392.5 UdeM00000026016 XP\_021352792.1 30.3 809  
 511 14 64 855 102 874 1.40E-105 392.5 6573 cellular  
 organisms;Eukaryota;Opisthokonta;Metazoa;Eumetazoa;Bilateria;Protostomia;Spiralia;Lophotrochozoa;Mollusca;Bivalvia;Autobranchia;Pteriormorphia;Pectinida;Pectinoidea;Pectinidae;Mizuhopecten;Mizuhopecten yessoensis  
 UdeM00000026017 1735272 146.4 UdeM00000026017 XP\_041362996.1 31.5  
 355 216 11 17 362 27 363 1.20E-31 146.4 1735272  
 cellular  
 organisms;Eukaryota;Opisthokonta;Metazoa;Eumetazoa;Bilateria;Protostomia;Spiralia;Lophotrochozoa;Mollusca;Gastropoda;Neomphalina;Neomphaloidea;Peltospiridae;Gigantopelta;Gigantopelta aegis  
 UdeM00000026018 6573 167.2 UdeM00000026018 XP\_021352792.1 33.3 258  
 144 5 19 248 617 874 2.70E-38 167.2 6573 cellular  
 organisms;Eukaryota;Opisthokonta;Metazoa;Eumetazoa;Bilateria;Protostomia;Spiralia;Lophotrochozoa;Mollusca;Bivalvia;Autobranchia;Pteriormorphia;Pectinida;Pectinoidea;Pectinidae;Mizuhopecten;Mizuhopecten yessoensis  
 UdeM00000026019 6573 394.8 UdeM00000026019 XP\_021352792.1 31.1 794  
 503 16 84 855 103 874 2.80E-106 394.8 6573 cellular  
 organisms;Eukaryota;Opisthokonta;Metazoa;Eumetazoa;Bilateria;Protostomia;Spiralia;Lophotrochozoa;Mollusca;Bivalvia;Autobranchia;Pteriormorphia;Pectinida;Pectinoidea;Pectinidae;Mizuhopecten;Mizuhopecten yessoensis  
 UdeM00000026020 6573 266.5 UdeM00000026020 XP\_021352792.1 27.9 673  
 393 17 75 697 244 874 9.20E-68 266.5 6573 cellular  
 organisms;Eukaryota;Opisthokonta;Metazoa;Eumetazoa;Bilateria;Protostomia;Spiralia;Lophotrochozoa;Mollusca;Bivalvia;Autobranchia;Pteriormorphia;Pectinida;Pectinoidea;Pectinidae;Mizuhopecten;Mizuhopecten yessoensis  
 UdeM00000026021 29159 189.1 UdeM00000026021 XP\_034334268.1 45.4 194  
 103 1 1 194 160 350 5.20E-45 189.1 29159 cellular  
 organisms;Eukaryota;Opisthokonta;Metazoa;Eumetazoa;Bilateria;Protostomia;Spiralia;Lophotrochozoa;Mollusca;Bivalvia;Autobranchia;Pteriormorphia;Ostreida;Ostreoidea;Ostreidae;Crassostrea;Crassostrea gigas  
 UdeM00000026022 6596 102.8 UdeM00000026022 XP\_045184054.1 30.8 227  
 150 3 77 299 78 301 7.60E-19 102.8 6596 cellular  
 organisms;Eukaryota;Opisthokonta;Metazoa;Eumetazoa;Bilateria;Protostomia;Spiralia;Lophotrochozoa;Mollusca;Bivalvia;Autobranchia;Heteroconchia;Euherodonta;Imparidentia;Venerida;Veneroidea;Veneridae;Mercenaria;Mercenaria mercenaria  
 UdeM00000026023 6565 103.6 UdeM00000026023 XP\_022334875.1 44.3 115  
 61 2 3 115 603 716 1.70E-19 103.6 6565 cellular  
 organisms;Eukaryota;Opisthokonta;Metazoa;Eumetazoa;Bilateria;Protostomia;

Spiralia;Lophotrochozoa;Mollusca;Bivalvia;Autobranchia;Pteriormorphia;Ostr  
eida;Ostreoidea;Ostreidae;Crassostrea;Crassostrea virginica  
UdeM00000026024 6573 392.9 UdeM00000026024 XP\_021352792.1 30.3 814  
504 16 64 855 102 874 1.00E-105 392.9 6573 cellular  
organisms;Eukaryota;Opisthokonta;Metazoa;Eumetazoa;Bilateria;Protostomia;  
Spiralia;Lophotrochozoa;Mollusca;Bivalvia;Autobranchia;Pteriormorphia;Pect  
inida;Pectinoidea;Pectinidae;Mizuhopecten;Mizuhopecten yessoensis  
UdeM00000026025 400727 379.4 UdeM00000026025 XP\_025088349.1 30.2  
825 508 15 39 812 746 1553 1.10E-101 379.4 400727  
cellular  
organisms;Eukaryota;Opisthokonta;Metazoa;Eumetazoa;Bilateria;Protostomia;  
Spiralia;Lophotrochozoa;Mollusca;Gastropoda;Caenogastropoda;Architaeniogl  
ossa;Ampullarioidea;Ampullariidae;Pomacea;Pomacea canaliculata  
UdeM00000026026 1735272 402.9 UdeM00000026026 XP\_041362996.1 32.2  
852 519 19 48 854 51 888 1.00E-108 402.9 1735272  
cellular  
organisms;Eukaryota;Opisthokonta;Metazoa;Eumetazoa;Bilateria;Protostomia;  
Spiralia;Lophotrochozoa;Mollusca;Gastropoda;Neomphalina;Neomphaloidea;Pel  
tospiridae;Gigantopelta;Gigantopelta aegis  
UdeM00000026027 400727 189.1 UdeM00000026027 XP\_025088349.1 30.2  
420 261 6 8 399 882 1297 1.10E-44 189.1 400727  
cellular  
organisms;Eukaryota;Opisthokonta;Metazoa;Eumetazoa;Bilateria;Protostomia;  
Spiralia;Lophotrochozoa;Mollusca;Gastropoda;Caenogastropoda;Architaeniogl  
ossa;Ampullarioidea;Ampullariidae;Pomacea;Pomacea canaliculata  
UdeM00000026028 6579 145.6 UdeM00000026028 XP\_033746771.1 37.2 207  
99 3 13 188 659 865 6.50E-32 145.6 6579 cellular  
organisms;Eukaryota;Opisthokonta;Metazoa;Eumetazoa;Bilateria;Protostomia;  
Spiralia;Lophotrochozoa;Mollusca;Bivalvia;Autobranchia;Pteriormorphia;Pect  
inida;Pectinoidea;Pectinidae;Pecten;Pecten maximus  
UdeM00000026029 6596 104 UdeM00000026029 XP\_045184054.1 30.3 228  
150 4 77 299 78 301 3.40E-19 104 6596 cellular  
organisms;Eukaryota;Opisthokonta;Metazoa;Eumetazoa;Bilateria;Protostomia;  
Spiralia;Lophotrochozoa;Mollusca;Bivalvia;Autobranchia;Heteroconchia;Euhe  
terodonta;Imparidentia;Venerida;Veneroidea;Veneridae;Mercenaria;Mercenari  
a mercenaria  
UdeM00000026030 400727 386.3 UdeM00000026030 XP\_025088349.1 30.9  
822 512 16 51 827 743 1553 9.50E-104 386.3 400727  
cellular  
organisms;Eukaryota;Opisthokonta;Metazoa;Eumetazoa;Bilateria;Protostomia;  
Spiralia;Lophotrochozoa;Mollusca;Gastropoda;Caenogastropoda;Architaeniogl  
ossa;Ampullarioidea;Ampullariidae;Pomacea;Pomacea canaliculata  
UdeM00000026031 6596 248.1 UdeM00000026031 XP\_045189093.1 25.3 875  
436 24 54 725 71 930 3.50E-62 248.1 6596 cellular  
organisms;Eukaryota;Opisthokonta;Metazoa;Eumetazoa;Bilateria;Protostomia;  
Spiralia;Lophotrochozoa;Mollusca;Bivalvia;Autobranchia;Heteroconchia;Euhe  
terodonta;Imparidentia;Venerida;Veneroidea;Veneridae;Mercenaria;Mercenari  
a mercenaria  
UdeM00000026032 1735272 116.7 UdeM00000026032 XP\_041347857.1 35.3  
235 140 6 101 334 68 291 5.70E-23 116.7 1735272  
cellular  
organisms;Eukaryota;Opisthokonta;Metazoa;Eumetazoa;Bilateria;Protostomia;  
Spiralia;Lophotrochozoa;Mollusca;Gastropoda;Neomphalina;Neomphaloidea;Pel  
tospiridae;Gigantopelta;Gigantopelta aegis

UdeM00000026033 6596 433 UdeM00000026033 XP\_045166791.1 48.3 511  
 217 7 17 489 16 517 5.20E-118 433 6596 cellular  
 organisms;Eukaryota;Opisthokonta;Metazoa;Eumetazoa;Bilateria;Protostomia;  
 Spiralia;Lophotrochozoa;Mollusca;Bivalvia;Autobranchia;Heteroconchia;Euhe  
 terodonta;Imparidentia;Venerida;Veneroidea;Veneridae;Mercenaria;Mercenari  
 a mercenaria  
 UdeM00000026034 6596 441.8 UdeM00000026034 XP\_045166791.1 49.3 511  
 212 7 7 479 16 517 1.10E-120 441.8 6596 cellular  
 organisms;Eukaryota;Opisthokonta;Metazoa;Eumetazoa;Bilateria;Protostomia;  
 Spiralia;Lophotrochozoa;Mollusca;Bivalvia;Autobranchia;Heteroconchia;Euhe  
 terodonta;Imparidentia;Venerida;Veneroidea;Veneridae;Mercenaria;Mercenari  
 a mercenaria  
 UdeM00000026035 400727 84.7 UdeM00000026035 XP\_025108479.1 63.8  
 58 21 0 68 125 461 518 9.10E-14 84.7 400727  
 cellular  
 organisms;Eukaryota;Opisthokonta;Metazoa;Eumetazoa;Bilateria;Protostomia;  
 Spiralia;Lophotrochozoa;Mollusca;Gastropoda;Caenogastropoda;Architaeniogl  
 ossa;Ampullarioidea;Ampullariidae;Pomacea;Pomacea canaliculata  
 UdeM00000026036 6596 507.3 UdeM00000026036 XP\_045165618.1 64.4 354  
 118 1 1 346 371 724 1.50E-140 507.3 6596 cellular  
 organisms;Eukaryota;Opisthokonta;Metazoa;Eumetazoa;Bilateria;Protostomia;  
 Spiralia;Lophotrochozoa;Mollusca;Bivalvia;Autobranchia;Heteroconchia;Euhe  
 terodonta;Imparidentia;Venerida;Veneroidea;Veneridae;Mercenaria;Mercenari  
 a mercenaria  
 UdeM00000026037 6579 334.3 UdeM00000026037 XP\_033746771.1 31.7 751  
 461 14 8 723 132 865 3.80E-88 334.3 6579 cellular  
 organisms;Eukaryota;Opisthokonta;Metazoa;Eumetazoa;Bilateria;Protostomia;  
 Spiralia;Lophotrochozoa;Mollusca;Bivalvia;Autobranchia;Pteriormorphia;Pect  
 inida;Pectinoidea;Pectinidae;Pecten;Pecten maximus  
 UdeM00000026038 6596 1163.7 UdeM00000026038 XP\_045164145.1 60.3  
 918 329 4 1 903 1 898 0.00E+00 1163.7 6596  
 cellular  
 organisms;Eukaryota;Opisthokonta;Metazoa;Eumetazoa;Bilateria;Protostomia;  
 Spiralia;Lophotrochozoa;Mollusca;Bivalvia;Autobranchia;Heteroconchia;Euhe  
 terodonta;Imparidentia;Venerida;Veneroidea;Veneridae;Mercenaria;Mercenari  
 a mercenaria  
 UdeM00000042681 6565 127.5 UdeM00000042681 XP\_022322144.1 42.4 184  
 88 4 34 204 6880 7058 6.60E-26 127.5 6565 cellular  
 organisms;Eukaryota;Opisthokonta;Metazoa;Eumetazoa;Bilateria;Protostomia;  
 Spiralia;Lophotrochozoa;Mollusca;Bivalvia;Autobranchia;Pteriormorphia;Ostr  
 eida;Ostreoidea;Ostreidae;Crassostrea;Crassostrea virginica  
 UdeM00000042682 6565 127.5 UdeM00000042682 XP\_022322144.1 42.4 184  
 88 4 34 204 6880 7058 6.80E-26 127.5 6565 cellular  
 organisms;Eukaryota;Opisthokonta;Metazoa;Eumetazoa;Bilateria;Protostomia;  
 Spiralia;Lophotrochozoa;Mollusca;Bivalvia;Autobranchia;Pteriormorphia;Ostr  
 eida;Ostreoidea;Ostreidae;Crassostrea;Crassostrea virginica  
 UdeM00000042683 29159 123.6 UdeM00000042683 XP\_034301566.1 41.6 185  
 90 4 34 205 5291 5470 5.20E-25 123.6 29159 cellular  
 organisms;Eukaryota;Opisthokonta;Metazoa;Eumetazoa;Bilateria;Protostomia;  
 Spiralia;Lophotrochozoa;Mollusca;Bivalvia;Autobranchia;Pteriormorphia;Ostr  
 eida;Ostreoidea;Ostreidae;Crassostrea;Crassostrea gigas  
 UdeM00000042685 6596 416 UdeM00000042685 XP\_045171571.1 77.1 279  
 62 2 400 677 386 663 1.00E-112 416 6596 cellular  
 organisms;Eukaryota;Opisthokonta;Metazoa;Eumetazoa;Bilateria;Protostomia;

Spiralia;Lophotrochozoa;Mollusca;Bivalvia;Autobranchia;Heteroconchia;Euherodonta;Imparidentia;Venerida;Veneroidea;Veneridae;Mercenaria;Mercenaria mercenaria

UdeM00000042686 1735272 397.9 UdeM00000042686 XP\_041371313.1 41.5  
506 176 6 1 386 1 506 1.50E-107 397.9 1735272  
cellular

organisms;Eukaryota;Opisthokonta;Metazoa;Eumetazoa;Bilateria;Protostomia;Spiralia;Lophotrochozoa;Mollusca;Gastropoda;Neomphalina;Neomphaloidea;Peltospiridae;Gigantopelta;Gigantopelta aegis

UdeM00000042687 6596 135.6 UdeM00000042687 XP\_045194227.1 47.8 136  
68 2 1 133 1 136 6.60E-29 135.6 6596 cellular

organisms;Eukaryota;Opisthokonta;Metazoa;Eumetazoa;Bilateria;Protostomia;Spiralia;Lophotrochozoa;Mollusca;Bivalvia;Autobranchia;Heteroconchia;Euherodonta;Imparidentia;Venerida;Veneroidea;Veneridae;Mercenaria;Mercenaria mercenaria

UdeM00000042688 6596 135.6 UdeM00000042688 XP\_045194227.1 47.8 136  
68 2 1 133 1 136 6.10E-29 135.6 6596 cellular

organisms;Eukaryota;Opisthokonta;Metazoa;Eumetazoa;Bilateria;Protostomia;Spiralia;Lophotrochozoa;Mollusca;Bivalvia;Autobranchia;Heteroconchia;Euherodonta;Imparidentia;Venerida;Veneroidea;Veneridae;Mercenaria;Mercenaria mercenaria

UdeM00000042689 37621 229.6 UdeM00000042689 XP\_014679850.1 53.6 222  
95 2 2 215 33 254 4.00E-57 229.6 37621 cellular

organisms;Eukaryota;Opisthokonta;Metazoa;Eumetazoa;Bilateria;Protostomia;Ecdysozoa;Scalidophora;Priapulida;Priapulimorpha;Priapulimorphida;Priapulidae;Priapululus;Priapululus caudatus

UdeM00000042690 37621 230.3 UdeM00000042690 XP\_014679849.1 54.5 191  
80 3 2 185 433 623 2.00E-57 230.3 37621 cellular

organisms;Eukaryota;Opisthokonta;Metazoa;Eumetazoa;Bilateria;Protostomia;Ecdysozoa;Scalidophora;Priapulida;Priapulimorpha;Priapulimorphida;Priapulidae;Priapululus;Priapululus caudatus

UdeM00000042691 37621 317 UdeM00000042691 XP\_014679849.1 61.6 258  
98 1 8 264 150 407 2.30E-83 317 37621 cellular

organisms;Eukaryota;Opisthokonta;Metazoa;Eumetazoa;Bilateria;Protostomia;Ecdysozoa;Scalidophora;Priapulida;Priapulimorpha;Priapulimorphida;Priapulidae;Priapululus;Priapululus caudatus

UdeM00000042692 34632 88.6 UdeM00000042692 XP\_037501252.1 47.3 91  
46 1 1 89 29 119 6.50E-15 88.6 34632 cellular

organisms;Eukaryota;Opisthokonta;Metazoa;Eumetazoa;Bilateria;Protostomia;Ecdysozoa;Panarthropoda;Arthropoda;Chelicerata;Arachnida;Acari;Parasitiformes;Ixodida;Ixodoidea;Ixodidae;Rhipicephalinae;Rhipicephalus;Rhipicephalus sanguineus group;Rhipicephalus sanguineus

UdeM00000042693 29159 62.4 UdeM00000042693 XP\_034315424.1 36.1 108  
60 3 12 116 213 314 6.60E-07 62.4 29159 cellular

organisms;Eukaryota;Opisthokonta;Metazoa;Eumetazoa;Bilateria;Protostomia;Spiralia;Lophotrochozoa;Mollusca;Bivalvia;Autobranchia;Pteriomorphia;Ostreida;Ostreoidea;Ostreidae;Crassostrea;Crassostrea gigas

UdeM00000042695 6579 95.5 UdeM00000042695 XP\_033740007.1 48.3 118  
53 4 1 117 267 377 4.80E-17 95.5 6579 cellular

organisms;Eukaryota;Opisthokonta;Metazoa;Eumetazoa;Bilateria;Protostomia;Spiralia;Lophotrochozoa;Mollusca;Bivalvia;Autobranchia;Pteriomorphia;Pectinida;Pectinoidea;Pectinidae;Pecten;Pecten maximus

UdeM00000042696 6596 110.5 UdeM00000042696 XP\_045180324.1 33.3 222  
115 5 2 222 16 205 3.10E-21 110.5 6596 cellular

organisms;Eukaryota;Opisthokonta;Metazoa;Eumetazoa;Bilateria;Protostomia;Spiralia;Lophotrochozoa;Mollusca;Bivalvia;Autobranhia;Heteroconchia;Euherodonta;Imparidentia;Venerida;Veneroidea;Veneridae;Mercenaria;Mercenaria mercenaria

UdeM00000042697 6596 134.4 UdeM00000042697 XP\_045202653.1 47.3 186  
84 4 13 193 89 265 1.60E-28 134.4 6596 cellular

organisms;Eukaryota;Opisthokonta;Metazoa;Eumetazoa;Bilateria;Protostomia;Spiralia;Lophotrochozoa;Mollusca;Bivalvia;Autobranhia;Heteroconchia;Euherodonta;Imparidentia;Venerida;Veneroidea;Veneridae;Mercenaria;Mercenaria mercenaria

UdeM00000042698 6565 411.8 UdeM00000042698 XP\_022321305.1 60.7 305  
117 3 12 316 12 313 8.10E-112 411.8 6565 cellular

organisms;Eukaryota;Opisthokonta;Metazoa;Eumetazoa;Bilateria;Protostomia;Spiralia;Lophotrochozoa;Mollusca;Bivalvia;Autobranhia;Pteriomorphia;Ostreida;Ostreoidea;Ostreidae;Crassostrea;Crassostrea virginica

UdeM00000042699 6573 428.7 UdeM00000042699 XP\_021375943.1 62.6 310  
113 3 6 315 5 311 6.40E-117 428.7 6573 cellular

organisms;Eukaryota;Opisthokonta;Metazoa;Eumetazoa;Bilateria;Protostomia;Spiralia;Lophotrochozoa;Mollusca;Bivalvia;Autobranhia;Pteriomorphia;Pectinida;Pectinoidea;Pectinidae;Mizuhopecten;Mizuhopecten yessoensis

UdeM00000042700 6596 111.7 UdeM00000042700 XP\_045193481.1 42.2 225  
110 3 6 215 109 328 1.20E-21 111.7 6596 cellular

organisms;Eukaryota;Opisthokonta;Metazoa;Eumetazoa;Bilateria;Protostomia;Spiralia;Lophotrochozoa;Mollusca;Bivalvia;Autobranhia;Heteroconchia;Euherodonta;Imparidentia;Venerida;Veneroidea;Veneridae;Mercenaria;Mercenaria mercenaria

UdeM00000042701 6573 501.5 UdeM00000042701 XP\_021375943.1 71.7 311  
86 2 4 314 3 311 7.70E-139 501.5 6573 cellular

organisms;Eukaryota;Opisthokonta;Metazoa;Eumetazoa;Bilateria;Protostomia;Spiralia;Lophotrochozoa;Mollusca;Bivalvia;Autobranhia;Pteriomorphia;Pectinida;Pectinoidea;Pectinidae;Mizuhopecten;Mizuhopecten yessoensis

UdeM00000042702 45264 109 UdeM00000042702 XP\_044175116.1 28.2 341  
191 16 204 501 1710 2039 2.10E-20 109 45264 cellular

organisms;Eukaryota;Opisthokonta;Metazoa;Eumetazoa;Cnidaria;Anthozoa;Hexacorallia;Scleractinia;Astrocoeniina;Acroporidae;Acropora;Acropora millepora

UdeM00000042703 6596 103.2 UdeM00000042703 XP\_045208431.1 33.5 167  
101 4 35 194 173 336 6.90E-19 103.2 6596 cellular

organisms;Eukaryota;Opisthokonta;Metazoa;Eumetazoa;Bilateria;Protostomia;Spiralia;Lophotrochozoa;Mollusca;Bivalvia;Autobranhia;Heteroconchia;Euherodonta;Imparidentia;Venerida;Veneroidea;Veneridae;Mercenaria;Mercenaria mercenaria

UdeM00000042704 6565 269.6 UdeM00000042704 XP\_022312087.1 31.6 427  
283 4 33 455 35 456 9.60E-69 269.6 6565 cellular

organisms;Eukaryota;Opisthokonta;Metazoa;Eumetazoa;Bilateria;Protostomia;Spiralia;Lophotrochozoa;Mollusca;Bivalvia;Autobranhia;Pteriomorphia;Ostreida;Ostreoidea;Ostreidae;Crassostrea;Crassostrea virginica

UdeM00000042705 6596 107.8 UdeM00000042705 XP\_045208432.1 38.7 173  
90 7 34 194 235 403 2.40E-20 107.8 6596 cellular

organisms;Eukaryota;Opisthokonta;Metazoa;Eumetazoa;Bilateria;Protostomia;Spiralia;Lophotrochozoa;Mollusca;Bivalvia;Autobranhia;Heteroconchia;Euherodonta;Imparidentia;Venerida;Veneroidea;Veneridae;Mercenaria;Mercenaria mercenaria

UdeM00000042706 7741 545.4 UdeM00000042706 XP\_019633472.1 36.4 720  
 428 14 195 907 206 902 1.60E-151 545.4 7741 cellular  
 organisms;Eukaryota;Opisthokonta;Metazoa;Eumetazoa;Bilateria;Deuterostomi  
 a;Chordata;Cephalochordata;Leptocardii;Amphioxiformes;Branchiostomidae;Br  
 anchiostoma;Branchiostoma belcheri

UdeM00000042707 6596 186 UdeM00000042707 XP\_045169700.1 29 434  
 250 18 21 426 19 422 1.30E-43 186 6596 cellular  
 organisms;Eukaryota;Opisthokonta;Metazoa;Eumetazoa;Bilateria;Protostomia;  
 Spiralia;Lophotrochozoa;Mollusca;Bivalvia;Autobranchia;Heteroconchia;Euhe  
 terodonta;Imparidentia;Venerida;Veneroidea;Veneridae;Mercenaria;Mercenari  
 a mercenaria

UdeM00000042708 6596 122.9 UdeM00000042708 XP\_045213958.1 29.7 310  
 164 14 162 427 444 743 1.00E-24 122.9 6596 cellular  
 organisms;Eukaryota;Opisthokonta;Metazoa;Eumetazoa;Bilateria;Protostomia;  
 Spiralia;Lophotrochozoa;Mollusca;Bivalvia;Autobranchia;Heteroconchia;Euhe  
 terodonta;Imparidentia;Venerida;Veneroidea;Veneridae;Mercenaria;Mercenari  
 a mercenaria

UdeM00000042709 1529436 64.3 UdeM00000042709 XP\_033121815.1 24  
 208 122 6 62 233 137 344 5.00E-07 64.3 1529436  
 cellular  
 organisms;Eukaryota;Opisthokonta;Metazoa;Eumetazoa;Bilateria;Deuterostomi  
 a;Echinodermata;Pelmatozoa;Crinoidea;Articulata;Comatulida;Comatulidae;Co  
 matulinae;Anneissia;Anneissia japonica

UdeM00000042710 1529436 64.3 UdeM00000042710 XP\_033121815.1 24  
 208 122 6 62 233 137 344 3.00E-07 64.3 1529436  
 cellular  
 organisms;Eukaryota;Opisthokonta;Metazoa;Eumetazoa;Bilateria;Deuterostomi  
 a;Echinodermata;Pelmatozoa;Crinoidea;Articulata;Comatulida;Comatulidae;Co  
 matulinae;Anneissia;Anneissia japonica

UdeM00000042711 29159 126.3 UdeM00000042711 XP\_011417772.2 39.5 200  
 100 7 283 471 142 331 1.10E-25 126.3 29159 cellular  
 organisms;Eukaryota;Opisthokonta;Metazoa;Eumetazoa;Bilateria;Protostomia;  
 Spiralia;Lophotrochozoa;Mollusca;Bivalvia;Autobranchia;Pteriomorphia;Ostr  
 eida;Ostreoidea;Ostreidae;Crassostrea;Crassostrea gigas

UdeM00000042712 6579 750.4 UdeM00000042712 XP\_033744592.1 56.9 615  
 256 5 4 617 6 612 1.90E-213 750.4 6579 cellular  
 organisms;Eukaryota;Opisthokonta;Metazoa;Eumetazoa;Bilateria;Protostomia;  
 Spiralia;Lophotrochozoa;Mollusca;Bivalvia;Autobranchia;Pteriomorphia;Pect  
 inida;Pectinoidea;Pectinidae;Pecten;Pecten maximus

UdeM00000042713 6596 87.8 UdeM00000042713 XP\_045209173.1 54.1 74  
 29 1 43 111 94 167 9.40E-15 87.8 6596 cellular  
 organisms;Eukaryota;Opisthokonta;Metazoa;Eumetazoa;Bilateria;Protostomia;  
 Spiralia;Lophotrochozoa;Mollusca;Bivalvia;Autobranchia;Heteroconchia;Euhe  
 terodonta;Imparidentia;Venerida;Veneroidea;Veneridae;Mercenaria;Mercenari  
 a mercenaria

UdeM00000042714 6579 745.7 UdeM00000042714 XP\_033744592.1 56.9 615  
 256 5 4 617 6 612 4.60E-212 745.7 6579 cellular  
 organisms;Eukaryota;Opisthokonta;Metazoa;Eumetazoa;Bilateria;Protostomia;  
 Spiralia;Lophotrochozoa;Mollusca;Bivalvia;Autobranchia;Pteriomorphia;Pect  
 inida;Pectinoidea;Pectinidae;Pecten;Pecten maximus

UdeM00000042715 6596 85.1 UdeM00000042715 XP\_045209173.1 52.7 74  
 30 1 43 111 94 167 6.30E-14 85.1 6596 cellular  
 organisms;Eukaryota;Opisthokonta;Metazoa;Eumetazoa;Bilateria;Protostomia;  
 Spiralia;Lophotrochozoa;Mollusca;Bivalvia;Autobranchia;Heteroconchia;Euhe



terodonta;Imparidentia;Venerida;Veneroidea;Veneridae;Mercenaria;Mercenaria mercenaria

UdeM00000042716 6596 167.9 UdeM00000042716 XP\_045186732.1 38.3 240  
132 3 5 235 1228 1460 1.50E-38 167.9 6596 cellular

organisms;Eukaryota;Opisthokonta;Metazoa;Eumetazoa;Bilateria;Protostomia;Spiralia;Lophotrochozoa;Mollusca;Bivalvia;Autobranchia;Heteroconchia;Euherodonta;Imparidentia;Venerida;Veneroidea;Veneridae;Mercenaria;Mercenaria mercenaria

UdeM00000042717 1735272 470.7 UdeM00000042717 XP\_041373332.1 59.9  
369 142 2 5 367 1 369 1.70E-129 470.7 1735272  
cellular

organisms;Eukaryota;Opisthokonta;Metazoa;Eumetazoa;Bilateria;Protostomia;Spiralia;Lophotrochozoa;Mollusca;Gastropoda;Neomphalina;Neomphaloidea;Peltospiridae;Gigantopelta;Gigantopelta aegis

UdeM00000042718 6596 112.8 UdeM00000042718 XP\_045193481.1 53.5 155  
69 1 6 157 109 263 5.70E-22 112.8 6596 cellular

organisms;Eukaryota;Opisthokonta;Metazoa;Eumetazoa;Bilateria;Protostomia;Spiralia;Lophotrochozoa;Mollusca;Bivalvia;Autobranchia;Heteroconchia;Euherodonta;Imparidentia;Venerida;Veneroidea;Veneridae;Mercenaria;Mercenaria mercenaria

UdeM00000042719 6596 79.3 UdeM00000042719 XP\_045193481.1 63.5 96  
35 0 6 101 109 204 5.50E-12 79.3 6596 cellular

organisms;Eukaryota;Opisthokonta;Metazoa;Eumetazoa;Bilateria;Protostomia;Spiralia;Lophotrochozoa;Mollusca;Bivalvia;Autobranchia;Heteroconchia;Euherodonta;Imparidentia;Venerida;Veneroidea;Veneridae;Mercenaria;Mercenaria mercenaria

UdeM00000042720 218467 218 UdeM00000042720 XP\_023242170.1 51.5  
206 100 0 1 206 88 293 1.70E-53 218 218467  
cellular

organisms;Eukaryota;Opisthokonta;Metazoa;Eumetazoa;Bilateria;Protostomia;Ecdysozoa;Panarthropoda;Arthropoda;Chelicerata;Arachnida;Scorpiones;Buthida;Buthoidea;Buthidae;Centruroides;Centruroides sculpturatus

UdeM00000042722 6596 213 UdeM00000042722 XP\_045207406.1 70.2 141  
41 1 1 140 1 141 6.60E-52 213 6596 cellular

organisms;Eukaryota;Opisthokonta;Metazoa;Eumetazoa;Bilateria;Protostomia;Spiralia;Lophotrochozoa;Mollusca;Bivalvia;Autobranchia;Heteroconchia;Euherodonta;Imparidentia;Venerida;Veneroidea;Veneridae;Mercenaria;Mercenaria mercenaria

UdeM00000042723 29159 193.4 UdeM00000042723 XP\_011419849.2 65.4 133  
46 0 1 133 1 133 2.30E-46 193.4 29159 cellular

organisms;Eukaryota;Opisthokonta;Metazoa;Eumetazoa;Bilateria;Protostomia;Spiralia;Lophotrochozoa;Mollusca;Bivalvia;Autobranchia;Pteriomorphia;Ostreida;Ostreoidea;Ostreidae;Crassostrea;Crassostrea gigas

UdeM00000042724 6579 397.1 UdeM00000042724 XP\_033733242.1 59.4 308  
124 1 1 307 136 443 2.00E-107 397.1 6579 cellular

organisms;Eukaryota;Opisthokonta;Metazoa;Eumetazoa;Bilateria;Protostomia;Spiralia;Lophotrochozoa;Mollusca;Bivalvia;Autobranchia;Pteriomorphia;Pectinida;Pectinoidea;Pectinidae;Pecten;Pecten maximus

UdeM00000042726 6596 492.7 UdeM00000042726 XP\_045185175.1 64.7 377  
130 2 45 420 64 438 4.80E-136 492.7 6596 cellular

organisms;Eukaryota;Opisthokonta;Metazoa;Eumetazoa;Bilateria;Protostomia;Spiralia;Lophotrochozoa;Mollusca;Bivalvia;Autobranchia;Heteroconchia;Euherodonta;Imparidentia;Venerida;Veneroidea;Veneridae;Mercenaria;Mercenaria mercenaria

UdeM00000042727 6596 651.4 UdeM00000042727 XP\_045207143.1 53.7 670  
 246 8 20 638 1104 1760 1.30E-183 651.4 6596 cellular  
 organisms;Eukaryota;Opisthokonta;Metazoa;Eumetazoa;Bilateria;Protostomia;  
 Spiralia;Lophotrochozoa;Mollusca;Bivalvia;Autobranhia;Heteroconchia;Euhe  
 terodonta;Imparidentia;Venerida;Veneroidea;Veneridae;Mercenaria;Mercenari  
 a mercenaria

UdeM00000042728 6596 826.2 UdeM00000042728 XP\_045207145.1 44.8 1200  
 488 26 15 1151 7 1095 5.00E-236 826.2 6596 cellular  
 organisms;Eukaryota;Opisthokonta;Metazoa;Eumetazoa;Bilateria;Protostomia;  
 Spiralia;Lophotrochozoa;Mollusca;Bivalvia;Autobranhia;Heteroconchia;Euhe  
 terodonta;Imparidentia;Venerida;Veneroidea;Veneridae;Mercenaria;Mercenari  
 a mercenaria

UdeM00000042729 6596 112.8 UdeM00000042729 XP\_045180427.1 39 177  
 105 2 76 250 98 273 6.50E-22 112.8 6596 cellular  
 organisms;Eukaryota;Opisthokonta;Metazoa;Eumetazoa;Bilateria;Protostomia;  
 Spiralia;Lophotrochozoa;Mollusca;Bivalvia;Autobranhia;Heteroconchia;Euhe  
 terodonta;Imparidentia;Venerida;Veneroidea;Veneridae;Mercenaria;Mercenari  
 a mercenaria

UdeM00000042730 6596 616.7 UdeM00000042730 XP\_045208029.1 43.9 982  
 328 14 9 778 2 972 4.10E-173 616.7 6596 cellular  
 organisms;Eukaryota;Opisthokonta;Metazoa;Eumetazoa;Bilateria;Protostomia;  
 Spiralia;Lophotrochozoa;Mollusca;Bivalvia;Autobranhia;Heteroconchia;Euhe  
 terodonta;Imparidentia;Venerida;Veneroidea;Veneridae;Mercenaria;Mercenari  
 a mercenaria

UdeM00000042731 6596 658.3 UdeM00000042731 XP\_045208029.1 42.7 1089  
 377 18 9 881 2 1059 1.40E-185 658.3 6596 cellular  
 organisms;Eukaryota;Opisthokonta;Metazoa;Eumetazoa;Bilateria;Protostomia;  
 Spiralia;Lophotrochozoa;Mollusca;Bivalvia;Autobranhia;Heteroconchia;Euhe  
 terodonta;Imparidentia;Venerida;Veneroidea;Veneridae;Mercenaria;Mercenari  
 a mercenaria

UdeM00000042732 6596 224.2 UdeM00000042732 XP\_045210219.1 47.6 267  
 134 4 316 579 240 503 4.40E-55 224.2 6596 cellular  
 organisms;Eukaryota;Opisthokonta;Metazoa;Eumetazoa;Bilateria;Protostomia;  
 Spiralia;Lophotrochozoa;Mollusca;Bivalvia;Autobranhia;Heteroconchia;Euhe  
 terodonta;Imparidentia;Venerida;Veneroidea;Veneridae;Mercenaria;Mercenari  
 a mercenaria

UdeM00000042733 1735272 595.5 UdeM00000042733 XP\_041373425.1 64.9  
 538 155 12 12 541 187 698 6.80E-167 595.5 1735272  
 cellular  
 organisms;Eukaryota;Opisthokonta;Metazoa;Eumetazoa;Bilateria;Protostomia;  
 Spiralia;Lophotrochozoa;Mollusca;Gastropoda;Neomphalina;Neomphaloidea;Pel  
 tospiridae;Gigantopelta;Gigantopelta aegis

UdeM00000042734 6579 318.2 UdeM00000042734 XP\_033757865.1 87.1 171  
 22 0 6 176 7 177 6.80E-84 318.2 6579 cellular  
 organisms;Eukaryota;Opisthokonta;Metazoa;Eumetazoa;Bilateria;Protostomia;  
 Spiralia;Lophotrochozoa;Mollusca;Bivalvia;Autobranhia;Pteriomorphia;Pect  
 inida;Pectinoidea;Pectinidae;Pecten;Pecten maximus

UdeM00000042735 6596 945.3 UdeM00000042735 XP\_045207764.1 70.4 672  
 197 2 11 681 11 681 4.40E-272 945.3 6596 cellular  
 organisms;Eukaryota;Opisthokonta;Metazoa;Eumetazoa;Bilateria;Protostomia;  
 Spiralia;Lophotrochozoa;Mollusca;Bivalvia;Autobranhia;Heteroconchia;Euhe  
 terodonta;Imparidentia;Venerida;Veneroidea;Veneridae;Mercenaria;Mercenari  
 a mercenaria

UdeM00000042736 6596 938.7 UdeM00000042736 XP\_045207764.1 70 676  
 197 3 11 685 11 681 4.10E-270 938.7 6596 cellular  
 organisms;Eukaryota;Opisthokonta;Metazoa;Eumetazoa;Bilateria;Protostomia;  
 Spiralia;Lophotrochozoa;Mollusca;Bivalvia;Autobranhia;Heteroconchia;Euhe  
 terodonta;Imparidentia;Venerida;Veneroidea;Veneridae;Mercenaria;Mercenari  
 a mercenaria

UdeM00000042737 6596 82.4 UdeM00000042737 XP\_045185209.1 26.1 180  
 113 4 167 331 257 431 1.20E-12 82.4 6596 cellular  
 organisms;Eukaryota;Opisthokonta;Metazoa;Eumetazoa;Bilateria;Protostomia;  
 Spiralia;Lophotrochozoa;Mollusca;Bivalvia;Autobranhia;Heteroconchia;Euhe  
 terodonta;Imparidentia;Venerida;Veneroidea;Veneridae;Mercenaria;Mercenari  
 a mercenaria

UdeM00000042738 6596 82 UdeM00000042738 XP\_045185209.1 26.7 180  
 112 4 155 319 257 431 1.50E-12 82 6596 cellular  
 organisms;Eukaryota;Opisthokonta;Metazoa;Eumetazoa;Bilateria;Protostomia;  
 Spiralia;Lophotrochozoa;Mollusca;Bivalvia;Autobranhia;Heteroconchia;Euhe  
 terodonta;Imparidentia;Venerida;Veneroidea;Veneridae;Mercenaria;Mercenari  
 a mercenaria

UdeM00000042739 6596 82 UdeM00000042739 XP\_045185209.1 26.7 180  
 112 4 175 339 257 431 1.60E-12 82 6596 cellular  
 organisms;Eukaryota;Opisthokonta;Metazoa;Eumetazoa;Bilateria;Protostomia;  
 Spiralia;Lophotrochozoa;Mollusca;Bivalvia;Autobranhia;Heteroconchia;Euhe  
 terodonta;Imparidentia;Venerida;Veneroidea;Veneridae;Mercenaria;Mercenari  
 a mercenaria

UdeM00000042740 133434 230.7 UdeM00000042740 XP\_022107440.1 48.9  
 225 109 3 44 265 61 282 2.20E-57 230.7 133434  
 cellular  
 organisms;Eukaryota;Opisthokonta;Metazoa;Eumetazoa;Bilateria;Deuterostomi  
 a;Echinodermata;Eleutherozoa;Asterozoa;Asteroidea;Valvatacea;Valvatida;Ac  
 anthasteridae;Acanthaster;Acanthaster planci

UdeM00000042741 6596 70.5 UdeM00000042741 XP\_045184309.1 31.3 195  
 124 4 36 225 247 436 3.30E-09 70.5 6596 cellular  
 organisms;Eukaryota;Opisthokonta;Metazoa;Eumetazoa;Bilateria;Protostomia;  
 Spiralia;Lophotrochozoa;Mollusca;Bivalvia;Autobranhia;Heteroconchia;Euhe  
 terodonta;Imparidentia;Venerida;Veneroidea;Veneridae;Mercenaria;Mercenari  
 a mercenaria

UdeM00000042742 133434 235.7 UdeM00000042742 XP\_022107440.1 49.1  
 226 109 2 43 265 60 282 6.70E-59 235.7 133434  
 cellular  
 organisms;Eukaryota;Opisthokonta;Metazoa;Eumetazoa;Bilateria;Deuterostomi  
 a;Echinodermata;Eleutherozoa;Asterozoa;Asteroidea;Valvatacea;Valvatida;Ac  
 anthasteridae;Acanthaster;Acanthaster planci

UdeM00000042743 6596 223.4 UdeM00000042743 XP\_045176242.1 52.2 209  
 96 4 48 255 75 280 3.30E-55 223.4 6596 cellular  
 organisms;Eukaryota;Opisthokonta;Metazoa;Eumetazoa;Bilateria;Protostomia;  
 Spiralia;Lophotrochozoa;Mollusca;Bivalvia;Autobranhia;Heteroconchia;Euhe  
 terodonta;Imparidentia;Venerida;Veneroidea;Veneridae;Mercenaria;Mercenari  
 a mercenaria

UdeM00000042744 6596 79.3 UdeM00000042744 XP\_045185209.1 25.6 180  
 114 4 119 283 257 431 8.70E-12 79.3 6596 cellular  
 organisms;Eukaryota;Opisthokonta;Metazoa;Eumetazoa;Bilateria;Protostomia;  
 Spiralia;Lophotrochozoa;Mollusca;Bivalvia;Autobranhia;Heteroconchia;Euhe  
 terodonta;Imparidentia;Venerida;Veneroidea;Veneridae;Mercenaria;Mercenari  
 a mercenaria

UdeM00000042745 6596 228.8 UdeM00000042745 XP\_045185790.1 51.9 208  
 98 2 54 261 103 308 8.30E-57 228.8 6596 cellular  
 organisms;Eukaryota;Opisthokonta;Metazoa;Eumetazoa;Bilateria;Protostomia;  
 Spiralia;Lophotrochozoa;Mollusca;Bivalvia;Autobranchia;Heteroconchia;Euhe  
 terodonta;Imparidentia;Venerida;Veneroidea;Veneridae;Mercenaria;Mercenari  
 a mercenaria  
 UdeM00000042747 6596 231.5 UdeM00000042747 XP\_045185790.1 52.4 208  
 97 2 48 255 103 308 1.20E-57 231.5 6596 cellular  
 organisms;Eukaryota;Opisthokonta;Metazoa;Eumetazoa;Bilateria;Protostomia;  
 Spiralia;Lophotrochozoa;Mollusca;Bivalvia;Autobranchia;Heteroconchia;Euhe  
 terodonta;Imparidentia;Venerida;Veneroidea;Veneridae;Mercenaria;Mercenari  
 a mercenaria  
 UdeM00000042748 6596 213.8 UdeM00000042748 XP\_045186150.1 48.2 197  
 101 1 3 199 100 295 2.10E-52 213.8 6596 cellular  
 organisms;Eukaryota;Opisthokonta;Metazoa;Eumetazoa;Bilateria;Protostomia;  
 Spiralia;Lophotrochozoa;Mollusca;Bivalvia;Autobranchia;Heteroconchia;Euhe  
 terodonta;Imparidentia;Venerida;Veneroidea;Veneridae;Mercenaria;Mercenari  
 a mercenaria  
 UdeM00000042749 6596 83.6 UdeM00000042749 XP\_045185209.1 25.7 171  
 107 4 46 201 266 431 3.30E-13 83.6 6596 cellular  
 organisms;Eukaryota;Opisthokonta;Metazoa;Eumetazoa;Bilateria;Protostomia;  
 Spiralia;Lophotrochozoa;Mollusca;Bivalvia;Autobranchia;Heteroconchia;Euhe  
 terodonta;Imparidentia;Venerida;Veneroidea;Veneridae;Mercenaria;Mercenari  
 a mercenaria  
 UdeM00000042750 133434 159.5 UdeM00000042750 XP\_022107440.1 51.3  
 152 71 2 4 152 131 282 3.50E-36 159.5 133434  
 cellular  
 organisms;Eukaryota;Opisthokonta;Metazoa;Eumetazoa;Bilateria;Deuterostomi  
 a;Echinodermata;Eleutherozoa;Asterozoa;Asteroidea;Valvatacea;Valvatida;Ac  
 anthasteridae;Acanthaster;Acanthaster planci  
 UdeM00000042751 6596 84 UdeM00000042751 XP\_045185209.1 26.7 180  
 112 4 84 248 257 431 3.10E-13 84 6596 cellular  
 organisms;Eukaryota;Opisthokonta;Metazoa;Eumetazoa;Bilateria;Protostomia;  
 Spiralia;Lophotrochozoa;Mollusca;Bivalvia;Autobranchia;Heteroconchia;Euhe  
 terodonta;Imparidentia;Venerida;Veneroidea;Veneridae;Mercenaria;Mercenari  
 a mercenaria  
 UdeM00000042752 6596 73.2 UdeM00000042752 XP\_045184309.1 32.1 156  
 85 6 150 290 287 436 6.40E-10 73.2 6596 cellular  
 organisms;Eukaryota;Opisthokonta;Metazoa;Eumetazoa;Bilateria;Protostomia;  
 Spiralia;Lophotrochozoa;Mollusca;Bivalvia;Autobranchia;Heteroconchia;Euhe  
 terodonta;Imparidentia;Venerida;Veneroidea;Veneridae;Mercenaria;Mercenari  
 a mercenaria  
 UdeM00000040212 48498 170.2 UdeM00000040212 XP\_020627207.1 34.3 303  
 135 6 199 500 570 809 6.60E-39 170.2 48498 cellular  
 organisms;Eukaryota;Opisthokonta;Metazoa;Eumetazoa;Cnidaria;Anthozoa;Hexa  
 corallia;Scleractinia;Faviina;Merulinidae;Orbicella;Orbicella faveolata  
 UdeM00000040215 10228 65.1 UdeM00000040215 XP\_002118407.1 33.1 121  
 73 4 19 132 376 495 9.60E-08 65.1 10228 cellular  
 organisms;Eukaryota;Opisthokonta;Metazoa;Eumetazoa;Placozoa;Trichoplacida  
 e;Trichoplax;Trichoplax adhaerens  
 UdeM00000040217 6565 64.3 UdeM00000040217 XP\_022290516.1 40 75  
 43 2 2 76 284 356 7.90E-08 64.3 6565 cellular  
 organisms;Eukaryota;Opisthokonta;Metazoa;Eumetazoa;Bilateria;Protostomia;

Spiralia; Lophotrochozoa; Mollusca; Bivalvia; Autobranchia; Pteriomorpha; Ostr  
 eida; Ostreoida; Ostreidae; Crassostrea; Crassostrea virginica  
 UdeM00000040220 6573 231.9 UdeM00000040220 XP\_021365681.1 33.5 496  
 285 20 133 610 937 1405 2.30E-57 231.9 6573 cellular  
 organisms; Eukaryota; Opisthokonta; Metazoa; Eumetazoa; Bilateria; Protostomia;  
 Spiralia; Lophotrochozoa; Mollusca; Bivalvia; Autobranchia; Pteriomorpha; Pect  
 inida; Pectinoidea; Pectinidae; Mizuhopecten; Mizuhopecten yessoensis  
 UdeM00000040221 37653 60.8 UdeM00000040221 XP\_014782194.1 67.6 34  
 11 0 5 38 5 38 8.30E-07 60.8 37653 cellular  
 organisms; Eukaryota; Opisthokonta; Metazoa; Eumetazoa; Bilateria; Protostomia;  
 Spiralia; Lophotrochozoa; Mollusca; Cephalopoda; Coleoidea; Octopodiformes; Oct  
 opoda; Incirrata; Octopodidae; Octopus; Octopus bimaculoides  
 UdeM00000040222 6565 211.8 UdeM00000040222 XP\_022307464.1 73.9 138  
 36 0 1 138 229 366 5.50E-52 211.8 6565 cellular  
 organisms; Eukaryota; Opisthokonta; Metazoa; Eumetazoa; Bilateria; Protostomia;  
 Spiralia; Lophotrochozoa; Mollusca; Bivalvia; Autobranchia; Pteriomorpha; Ostr  
 eida; Ostreoida; Ostreidae; Crassostrea; Crassostrea virginica  
 UdeM00000040223 6579 259.6 UdeM00000040223 XP\_033728272.1 57.3 218  
 90 1 3 217 9 226 4.50E-66 259.6 6579 cellular  
 organisms; Eukaryota; Opisthokonta; Metazoa; Eumetazoa; Bilateria; Protostomia;  
 Spiralia; Lophotrochozoa; Mollusca; Bivalvia; Autobranchia; Pteriomorpha; Pect  
 inida; Pectinoidea; Pectinidae; Pecten; Pecten maximus  
 UdeM00000040226 2607531 89.4 UdeM00000040226 XP\_029633614.1 46.4  
 84 45 0 1 84 16 99 2.80E-15 89.4 2607531  
 cellular  
 organisms; Eukaryota; Opisthokonta; Metazoa; Eumetazoa; Bilateria; Protostomia;  
 Spiralia; Lophotrochozoa; Mollusca; Cephalopoda; Coleoidea; Octopodiformes; Oct  
 opoda; Incirrata; Octopodidae; Octopus; Octopus sinensis  
 UdeM00000040229 7574 602.1 UdeM00000040229 XP\_013382110.1 48.3 603  
 287 8 1 602 37 615 8.00E-169 602.1 7574 cellular  
 organisms; Eukaryota; Opisthokonta; Metazoa; Eumetazoa; Bilateria; Protostomia;  
 Spiralia; Lophotrochozoa; Brachiopoda; Linguliformea; Lingulata; Lingulida; Lin  
 guloidea; Lingulidae; Lingula; Lingula anatina  
 UdeM00000040230 7574 620.9 UdeM00000040230 XP\_013384628.1 60 525  
 184 4 1 509 33 547 1.50E-174 620.9 7574 cellular  
 organisms; Eukaryota; Opisthokonta; Metazoa; Eumetazoa; Bilateria; Protostomia;  
 Spiralia; Lophotrochozoa; Brachiopoda; Linguliformea; Lingulata; Lingulida; Lin  
 guloidea; Lingulidae; Lingula; Lingula anatina  
 UdeM00000040231 1735272 122.9 UdeM00000040231 XP\_041373507.1 32.9  
 255 158 8 18 265 66 314 1.00E-24 122.9 1735272  
 cellular  
 organisms; Eukaryota; Opisthokonta; Metazoa; Eumetazoa; Bilateria; Protostomia;  
 Spiralia; Lophotrochozoa; Mollusca; Gastropoda; Neomphalina; Neomphaloidea; Pel  
 tospiridae; Gigantopelta; Gigantopelta aegis  
 UdeM00000040234 1735272 248.8 UdeM00000040234 XP\_041372788.1 31.8  
 584 359 21 195 759 767 1330 2.70E-62 248.8 1735272  
 cellular  
 organisms; Eukaryota; Opisthokonta; Metazoa; Eumetazoa; Bilateria; Protostomia;  
 Spiralia; Lophotrochozoa; Mollusca; Gastropoda; Neomphalina; Neomphaloidea; Pel  
 tospiridae; Gigantopelta; Gigantopelta aegis  
 UdeM00000040237 6579 136 UdeM00000040237 XP\_033725289.1 50.4 127  
 62 1 7 133 380 505 3.60E-29 136 6579 cellular  
 organisms; Eukaryota; Opisthokonta; Metazoa; Eumetazoa; Bilateria; Protostomia;

Spiralia;Lophotrochozoa;Mollusca;Bivalvia;Autobranchia;Pteriormorphia;Pectinida;Pectinoidea;Pectinidae;Pecten;Pecten maximus  
UdeM00000040239 6579 132.1 UdeM00000040239 XP\_033725289.1 50.8 122  
59 1 2 123 385 505 4.80E-28 132.1 6579 cellular  
organisms;Eukaryota;Opisthokonta;Metazoa;Eumetazoa;Bilateria;Protostomia;Spiralia;Lophotrochozoa;Mollusca;Bivalvia;Autobranchia;Pteriormorphia;Pectinida;Pectinoidea;Pectinidae;Pecten;Pecten maximus  
UdeM00000040238 6579 82.8 UdeM00000040238 XP\_033725289.1 50 70  
35 0 2 71 385 454 2.10E-13 82.8 6579 cellular  
organisms;Eukaryota;Opisthokonta;Metazoa;Eumetazoa;Bilateria;Protostomia;Spiralia;Lophotrochozoa;Mollusca;Bivalvia;Autobranchia;Pteriormorphia;Pectinida;Pectinoidea;Pectinidae;Pecten;Pecten maximus  
UdeM00000040245 6579 132.1 UdeM00000040245 XP\_033725289.1 50.8 122  
59 1 2 123 385 505 4.80E-28 132.1 6579 cellular  
organisms;Eukaryota;Opisthokonta;Metazoa;Eumetazoa;Bilateria;Protostomia;Spiralia;Lophotrochozoa;Mollusca;Bivalvia;Autobranchia;Pteriormorphia;Pectinida;Pectinoidea;Pectinidae;Pecten;Pecten maximus  
UdeM00000040246 6579 82.8 UdeM00000040246 XP\_033725289.1 50 70  
35 0 2 71 385 454 2.10E-13 82.8 6579 cellular  
organisms;Eukaryota;Opisthokonta;Metazoa;Eumetazoa;Bilateria;Protostomia;Spiralia;Lophotrochozoa;Mollusca;Bivalvia;Autobranchia;Pteriormorphia;Pectinida;Pectinoidea;Pectinidae;Pecten;Pecten maximus  
UdeM00000043678 83332 391.7 UdeM00000043678 NP\_216444.1 76.5 255 60  
0 1 255 1 255 7.00E-106 391.7 83332 cellular  
organisms;Bacteria;Terrabacteria  
group;Actinobacteria;Actinomycetia;Corynebacteriales;Mycobacteriaceae;Mycobacterium;Mycobacterium tuberculosis complex;Mycobacterium tuberculosis;Mycobacterium tuberculosis H37Rv  
UdeM00000043679 83332 235 UdeM00000043679 NP\_216413.1 82.4 142 25  
0 1 142 1 142 6.10E-59 235 83332 cellular  
organisms;Bacteria;Terrabacteria  
group;Actinobacteria;Actinomycetia;Corynebacteriales;Mycobacteriaceae;Mycobacterium;Mycobacterium tuberculosis complex;Mycobacterium tuberculosis;Mycobacterium tuberculosis H37Rv  
UdeM00000043671 6596 214.9 UdeM00000043671 XP\_045173349.1 36.7 379  
224 12 50 422 54 422 3.10E-52 214.9 6596 cellular  
organisms;Eukaryota;Opisthokonta;Metazoa;Eumetazoa;Bilateria;Protostomia;Spiralia;Lophotrochozoa;Mollusca;Bivalvia;Autobranchia;Heteroconchia;Euherodonta;Imparidentia;Venerida;Veneroidea;Veneridae;Mercenaria;Mercenaria mercenaria  
UdeM00000043672 6596 122.5 UdeM00000043672 XP\_045180427.1 34.7 274  
146 5 1 242 1 273 8.00E-25 122.5 6596 cellular  
organisms;Eukaryota;Opisthokonta;Metazoa;Eumetazoa;Bilateria;Protostomia;Spiralia;Lophotrochozoa;Mollusca;Bivalvia;Autobranchia;Heteroconchia;Euherodonta;Imparidentia;Venerida;Veneroidea;Veneridae;Mercenaria;Mercenaria mercenaria  
UdeM00000043675 48498 154.5 UdeM00000043675 XP\_020608168.1 27.4 486  
269 20 32 483 100 535 4.90E-34 154.5 48498 cellular  
organisms;Eukaryota;Opisthokonta;Metazoa;Eumetazoa;Cnidaria;Anthozoa;Hexacorallia;Scleractinia;Faviina;Merulinidae;Orbicella;Orbicella faveolata  
UdeM00000043676 7739 589.3 UdeM00000043676 XP\_035696678.1 58 479  
198 1 4 479 425 903 4.50E-165 589.3 7739 cellular  
organisms;Eukaryota;Opisthokonta;Metazoa;Eumetazoa;Bilateria;Deuterostomi

a;Chordata;Cephalochordata;Leptocardii;Amphioxiformes;Branchiostomidae;Branchiostoma;Branchiostoma floridae

UdeM00000042945 6565 122.1 UdeM00000042945 XP\_022299602.1 46.2 132  
68 3 53 183 2 131 2.80E-24 122.1 6565 cellular  
organisms;Eukaryota;Opisthokonta;Metazoa;Eumetazoa;Bilateria;Protostomia;Spiralia;Lophotrochozoa;Mollusca;Bivalvia;Autobranchia;Pteriormorphia;Ostreida;Ostreoidea;Ostreidae;Crassostrea;Crassostrea virginica

UdeM00000042946 105023 260.4 UdeM00000042946 XP\_015828284.1 37.1  
391 224 6 6 382 151 533 3.60E-66 260.4 105023  
cellular  
organisms;Eukaryota;Opisthokonta;Metazoa;Eumetazoa;Bilateria;Deuterostomia;Chordata;Craniata;Vertebrata;Gnathostomata;Teleostomi;Euteleostomi;Actinopterygii;Actinopteri;Neopterygii;Teleostei;Osteoglossocephalai;Clupeocephala;Euteleostei;Neoteleostei;Eurypterygia;Ctenosquamata;Acanthomorphata;Euacanthomorphacea;Percomorphaceae;Ovalentaria;Atherinomorphae;Cypriodontiformes;Aplocheiloidei;Nothobranchiidae;Nothobranchius;Nothobranchius furzeri

UdeM00000042947 6596 115.2 UdeM00000042947 XP\_045191793.1 36.1 191  
107 6 3 187 785 966 1.40E-22 115.2 6596 cellular  
organisms;Eukaryota;Opisthokonta;Metazoa;Eumetazoa;Bilateria;Protostomia;Spiralia;Lophotrochozoa;Mollusca;Bivalvia;Autobranchia;Heteroconchia;Euheterodonta;Imparidentia;Venerida;Veneroidea;Veneridae;Mercenaria;Mercenaria mercenaria

UdeM00000042948 6596 339.7 UdeM00000042948 XP\_045177776.1 34.8 586  
300 11 1 581 405 913 7.20E-90 339.7 6596 cellular  
organisms;Eukaryota;Opisthokonta;Metazoa;Eumetazoa;Bilateria;Protostomia;Spiralia;Lophotrochozoa;Mollusca;Bivalvia;Autobranchia;Heteroconchia;Euheterodonta;Imparidentia;Venerida;Veneroidea;Veneridae;Mercenaria;Mercenaria mercenaria

UdeM00000042949 6596 75.9 UdeM00000042949 XP\_045180710.1 42.9 112  
55 3 14 124 321 424 7.30E-11 75.9 6596 cellular  
organisms;Eukaryota;Opisthokonta;Metazoa;Eumetazoa;Bilateria;Protostomia;Spiralia;Lophotrochozoa;Mollusca;Bivalvia;Autobranchia;Heteroconchia;Euheterodonta;Imparidentia;Venerida;Veneroidea;Veneridae;Mercenaria;Mercenaria mercenaria

UdeM00000042950 6573 154.5 UdeM00000042950 XP\_021368347.1 24.3 667  
441 21 26 665 26 655 4.90E-34 154.5 6573 cellular  
organisms;Eukaryota;Opisthokonta;Metazoa;Eumetazoa;Bilateria;Protostomia;Spiralia;Lophotrochozoa;Mollusca;Bivalvia;Autobranchia;Pteriormorphia;Pectinida;Pectinoidea;Pectinidae;Mizuhopecten;Mizuhopecten yessoensis

UdeM00000042951 6573 117.9 UdeM00000042951 XP\_021341731.1 20.6 500  
359 9 31 502 190 679 3.90E-23 117.9 6573 cellular  
organisms;Eukaryota;Opisthokonta;Metazoa;Eumetazoa;Bilateria;Protostomia;Spiralia;Lophotrochozoa;Mollusca;Bivalvia;Autobranchia;Pteriormorphia;Pectinida;Pectinoidea;Pectinidae;Mizuhopecten;Mizuhopecten yessoensis

UdeM00000042952 6596 110.9 UdeM00000042952 XP\_045163810.1 34.5 223  
117 8 104 304 112 327 2.90E-21 110.9 6596 cellular  
organisms;Eukaryota;Opisthokonta;Metazoa;Eumetazoa;Bilateria;Protostomia;Spiralia;Lophotrochozoa;Mollusca;Bivalvia;Autobranchia;Heteroconchia;Euheterodonta;Imparidentia;Venerida;Veneroidea;Veneridae;Mercenaria;Mercenaria mercenaria

UdeM00000042953 6596 110.5 UdeM00000042953 XP\_045163871.1 32.8 268  
154 11 26 276 39 297 3.40E-21 110.5 6596 cellular  
organisms;Eukaryota;Opisthokonta;Metazoa;Eumetazoa;Bilateria;Protostomia;

Spiralia;Lophotrochozoa;Mollusca;Bivalvia;Autobranchia;Heteroconchia;Euherodonta;Imparidentia;Venerida;Veneroidea;Veneridae;Mercenaria;Mercenaria mercenaria

UdeM00000042954 6596 110.5 UdeM00000042954 XP\_045163871.1 32.8 268  
154 11 26 276 39 297 3.40E-21 110.5 6596 cellular

organisms;Eukaryota;Opisthokonta;Metazoa;Eumetazoa;Bilateria;Protostomia;Spiralia;Lophotrochozoa;Mollusca;Bivalvia;Autobranchia;Heteroconchia;Euherodonta;Imparidentia;Venerida;Veneroidea;Veneridae;Mercenaria;Mercenaria mercenaria

UdeM00000042955 29159 94 UdeM00000042955 XP\_034316342.1 33.3 156  
94 4 2 157 20 165 2.10E-16 94 29159 cellular

organisms;Eukaryota;Opisthokonta;Metazoa;Eumetazoa;Bilateria;Protostomia;Spiralia;Lophotrochozoa;Mollusca;Bivalvia;Autobranchia;Pteriomorpha;Ostreida;Ostreoidea;Ostreidae;Crassostrea;Crassostrea gigas

UdeM00000042957 6565 115.9 UdeM00000042957 XP\_022299602.1 40.6 143  
82 3 143 284 2 142 1.60E-22 115.9 6565 cellular

organisms;Eukaryota;Opisthokonta;Metazoa;Eumetazoa;Bilateria;Protostomia;Spiralia;Lophotrochozoa;Mollusca;Bivalvia;Autobranchia;Pteriomorpha;Ostreida;Ostreoidea;Ostreidae;Crassostrea;Crassostrea virginica

UdeM00000042958 6565 292.7 UdeM00000042958 XP\_022295545.1 45.3 287  
143 5 1 280 137 416 4.90E-76 292.7 6565 cellular

organisms;Eukaryota;Opisthokonta;Metazoa;Eumetazoa;Bilateria;Protostomia;Spiralia;Lophotrochozoa;Mollusca;Bivalvia;Autobranchia;Pteriomorpha;Ostreida;Ostreoidea;Ostreidae;Crassostrea;Crassostrea virginica

UdeM00000042959 6596 335.5 UdeM00000042959 XP\_045177779.1 40.5 486  
257 8 1 460 97 576 1.40E-88 335.5 6596 cellular

organisms;Eukaryota;Opisthokonta;Metazoa;Eumetazoa;Bilateria;Protostomia;Spiralia;Lophotrochozoa;Mollusca;Bivalvia;Autobranchia;Heteroconchia;Euherodonta;Imparidentia;Venerida;Veneroidea;Veneridae;Mercenaria;Mercenaria mercenaria

UdeM00000042960 6596 335.5 UdeM00000042960 XP\_045177779.1 40.5 486  
257 8 1 460 97 576 1.20E-88 335.5 6596 cellular

organisms;Eukaryota;Opisthokonta;Metazoa;Eumetazoa;Bilateria;Protostomia;Spiralia;Lophotrochozoa;Mollusca;Bivalvia;Autobranchia;Heteroconchia;Euherodonta;Imparidentia;Venerida;Veneroidea;Veneridae;Mercenaria;Mercenaria mercenaria

UdeM00000042961 7888 81.6 UdeM00000042961 XP\_043943985.1 82.7 52  
9 0 37 88 1142 1193 5.90E-13 81.6 7888 cellular

organisms;Eukaryota;Opisthokonta;Metazoa;Eumetazoa;Bilateria;Deuterostomia;Chordata;Craniata;Vertebrata;Gnathostomata;Teleostomi;Euteleostomi;Sarcopterygii;Dipnotetrapodomorpha;Dipnomorpha;Ceratodontae;Ceratodontiformes;Lepidosirenoidei;Protopterygidae;Protopterygus;Protopterygus annectens

UdeM00000042963 6596 97.8 UdeM00000042963 XP\_045171351.1 44.6 121  
64 2 1 118 248 368 1.30E-17 97.8 6596 cellular

organisms;Eukaryota;Opisthokonta;Metazoa;Eumetazoa;Bilateria;Protostomia;Spiralia;Lophotrochozoa;Mollusca;Bivalvia;Autobranchia;Heteroconchia;Euherodonta;Imparidentia;Venerida;Veneroidea;Veneridae;Mercenaria;Mercenaria mercenaria

UdeM00000042964 6596 106.7 UdeM00000042964 XP\_045188177.1 44.8 125  
46 2 20 135 46 156 3.10E-20 106.7 6596 cellular

organisms;Eukaryota;Opisthokonta;Metazoa;Eumetazoa;Bilateria;Protostomia;Spiralia;Lophotrochozoa;Mollusca;Bivalvia;Autobranchia;Heteroconchia;Euherodonta;Imparidentia;Venerida;Veneroidea;Veneridae;Mercenaria;Mercenaria mercenaria



UdeM00000042965 6596 185.7 UdeM00000042965 XP\_045177776.1 39.1 253  
 127 3 3 255 711 936 1.40E-43 185.7 6596 cellular  
 organisms;Eukaryota;Opisthokonta;Metazoa;Eumetazoa;Bilateria;Protostomia;  
 Spiralia;Lophotrochozoa;Mollusca;Bivalvia;Autobranhia;Heteroconchia;Euhe  
 terodonta;Imparidentia;Venerida;Veneroidea;Veneridae;Mercenaria;Mercenari  
 a mercenaria  
 UdeM00000042966 6573 128.3 UdeM00000042966 XP\_021365351.1 65.9 88  
 26 1 1 88 1 84 5.00E-27 128.3 6573 cellular  
 organisms;Eukaryota;Opisthokonta;Metazoa;Eumetazoa;Bilateria;Protostomia;  
 Spiralia;Lophotrochozoa;Mollusca;Bivalvia;Autobranhia;Pteriormorphia;Pect  
 inida;Pectinoidea;Pectinidae;Mizuhopecten;Mizuhopecten yessoensis  
 UdeM00000042968 6579 99.4 UdeM00000042968 XP\_033750136.1 30.4 168  
 108 4 18 184 55 214 5.20E-18 99.4 6579 cellular  
 organisms;Eukaryota;Opisthokonta;Metazoa;Eumetazoa;Bilateria;Protostomia;  
 Spiralia;Lophotrochozoa;Mollusca;Bivalvia;Autobranhia;Pteriormorphia;Pect  
 inida;Pectinoidea;Pectinidae;Pecten;Pecten maximus  
 UdeM00000042967 6596 202.6 UdeM00000042967 XP\_045177776.1 41.2 243  
 137 4 3 243 695 933 1.20E-48 202.6 6596 cellular  
 organisms;Eukaryota;Opisthokonta;Metazoa;Eumetazoa;Bilateria;Protostomia;  
 Spiralia;Lophotrochozoa;Mollusca;Bivalvia;Autobranhia;Heteroconchia;Euhe  
 terodonta;Imparidentia;Venerida;Veneroidea;Veneridae;Mercenaria;Mercenari  
 a mercenaria  
 UdeM00000042969 6596 203.8 UdeM00000042969 XP\_045191793.1 39.5 334  
 167 8 1 331 258 559 3.60E-49 203.8 6596 cellular  
 organisms;Eukaryota;Opisthokonta;Metazoa;Eumetazoa;Bilateria;Protostomia;  
 Spiralia;Lophotrochozoa;Mollusca;Bivalvia;Autobranhia;Heteroconchia;Euhe  
 terodonta;Imparidentia;Venerida;Veneroidea;Veneridae;Mercenaria;Mercenari  
 a mercenaria  
 UdeM00000042970 6596 199.5 UdeM00000042970 XP\_045191793.1 39.6 308  
 159 7 1 305 258 541 6.30E-48 199.5 6596 cellular  
 organisms;Eukaryota;Opisthokonta;Metazoa;Eumetazoa;Bilateria;Protostomia;  
 Spiralia;Lophotrochozoa;Mollusca;Bivalvia;Autobranhia;Heteroconchia;Euhe  
 terodonta;Imparidentia;Venerida;Veneroidea;Veneridae;Mercenaria;Mercenari  
 a mercenaria  
 UdeM00000042971 29159 72.8 UdeM00000042971 XP\_019928965.2 43.3 127  
 61 3 41 162 293 413 8.50E-10 72.8 29159 cellular  
 organisms;Eukaryota;Opisthokonta;Metazoa;Eumetazoa;Bilateria;Protostomia;  
 Spiralia;Lophotrochozoa;Mollusca;Bivalvia;Autobranhia;Pteriormorphia;Ostr  
 eida;Ostreoidea;Ostreidae;Crassostrea;Crassostrea gigas  
 UdeM00000042972 6596 355.5 UdeM00000042972 XP\_045177776.1 35.8 601  
 298 14 1 595 405 923 1.80E-94 355.5 6596 cellular  
 organisms;Eukaryota;Opisthokonta;Metazoa;Eumetazoa;Bilateria;Protostomia;  
 Spiralia;Lophotrochozoa;Mollusca;Bivalvia;Autobranhia;Heteroconchia;Euhe  
 terodonta;Imparidentia;Venerida;Veneroidea;Veneridae;Mercenaria;Mercenari  
 a mercenaria  
 UdeM00000042975 6565 122.1 UdeM00000042975 XP\_022299602.1 46.2 132  
 68 3 53 183 2 131 2.80E-24 122.1 6565 cellular  
 organisms;Eukaryota;Opisthokonta;Metazoa;Eumetazoa;Bilateria;Protostomia;  
 Spiralia;Lophotrochozoa;Mollusca;Bivalvia;Autobranhia;Pteriormorphia;Ostr  
 eida;Ostreoidea;Ostreidae;Crassostrea;Crassostrea virginica  
 UdeM00000042976 105023 250 UdeM00000042976 XP\_015828284.1 36.8  
 391 225 6 6 382 151 533 4.90E-63 250 105023  
 cellular  
 organisms;Eukaryota;Opisthokonta;Metazoa;Eumetazoa;Bilateria;Deuterostomi

a;Chordata;Craniata;Vertebrata;Gnathostomata;Teleostomi;Euteleostomi;Actinopterygii;Actinopteri;Neopterygii;Teleostei;Osteoglossocephalai;Clupeocephala;Euteleostei;Neoteleostei;Eurypterygia;Ctenosquamata;Acanthomorphata;Euacanthomorphacea;Percomorphaceae;Ovalentaria;Atherinomorphae;Cypripinodontiformes;Aplocheiloidei;Nothobranchiidae;Nothobranchius;Nothobranchius furzeri

UdeM00000042977 6596 109.8 UdeM00000042977 XP\_045191793.1 30.8 237  
142 7 3 233 785 1005 5.90E-21 109.8 6596 cellular

organisms;Eukaryota;Opisthokonta;Metazoa;Eumetazoa;Bilateria;Protostomia;Spiralia;Lophotrochozoa;Mollusca;Bivalvia;Autobranchia;Heteroconchia;Euheterodonta;Imparidentia;Venerida;Veneroidea;Veneridae;Mercenaria;Mercenaria mercenaria

UdeM00000042978 6596 375.9 UdeM00000042978 XP\_045177776.1 40 525  
291 10 1 517 405 913 1.00E-100 375.9 6596 cellular

organisms;Eukaryota;Opisthokonta;Metazoa;Eumetazoa;Bilateria;Protostomia;Spiralia;Lophotrochozoa;Mollusca;Bivalvia;Autobranchia;Heteroconchia;Euheterodonta;Imparidentia;Venerida;Veneroidea;Veneridae;Mercenaria;Mercenaria mercenaria

UdeM00000042979 6596 376.3 UdeM00000042979 XP\_045177776.1 40 525  
291 10 1 517 405 913 6.20E-101 376.3 6596 cellular

organisms;Eukaryota;Opisthokonta;Metazoa;Eumetazoa;Bilateria;Protostomia;Spiralia;Lophotrochozoa;Mollusca;Bivalvia;Autobranchia;Heteroconchia;Euheterodonta;Imparidentia;Venerida;Veneroidea;Veneridae;Mercenaria;Mercenaria mercenaria

UdeM00000042980 6565 350.1 UdeM00000042980 XP\_022345813.1 57.8 322  
129 4 115 432 174 492 5.50E-93 350.1 6565 cellular

organisms;Eukaryota;Opisthokonta;Metazoa;Eumetazoa;Bilateria;Protostomia;Spiralia;Lophotrochozoa;Mollusca;Bivalvia;Autobranchia;Pteriomorphia;Ostreida;Ostreoidea;Ostreidae;Crassostrea;Crassostrea virginica

UdeM00000042981 6565 340.9 UdeM00000042981 XP\_022345813.1 58.2 311  
123 4 1 307 185 492 2.70E-90 340.9 6565 cellular

organisms;Eukaryota;Opisthokonta;Metazoa;Eumetazoa;Bilateria;Protostomia;Spiralia;Lophotrochozoa;Mollusca;Bivalvia;Autobranchia;Pteriomorphia;Ostreida;Ostreoidea;Ostreidae;Crassostrea;Crassostrea virginica

UdeM00000042982 6579 207.2 UdeM00000042982 XP\_033761983.1 35.5 355  
221 5 29 381 221 569 3.60E-50 207.2 6579 cellular

organisms;Eukaryota;Opisthokonta;Metazoa;Eumetazoa;Bilateria;Protostomia;Spiralia;Lophotrochozoa;Mollusca;Bivalvia;Autobranchia;Pteriomorphia;Pectinida;Pectinoidea;Pectinidae;Pecten;Pecten maximus

UdeM00000042983 6579 206.5 UdeM00000042983 XP\_033761983.1 36.1 341  
211 4 5 344 235 569 5.60E-50 206.5 6579 cellular

organisms;Eukaryota;Opisthokonta;Metazoa;Eumetazoa;Bilateria;Protostomia;Spiralia;Lophotrochozoa;Mollusca;Bivalvia;Autobranchia;Pteriomorphia;Pectinida;Pectinoidea;Pectinidae;Pecten;Pecten maximus

UdeM00000042984 74926 149.4 UdeM00000042984 XP\_044862561.1 58.2 122  
49 2 61 181 173 293 4.30E-33 149.4 74926 cellular

organisms;Eukaryota;Opisthokonta;Metazoa;Eumetazoa;Bilateria;Deuterostomia;Chordata;Craniata;Vertebrata;Gnathostomata;Teleostomi;Euteleostomi;Sarcopterygii;Dipnotetrapodomorpha;Tetrapoda;Amniota;Sauropsida;Sauria;Archelosauria;Testudinata;Testudines;Cryptodira;Durocryptodira;Testudinoidea;Geoemydidae;Geoemydinae;Mauremys;Mauremys mutica

UdeM00000042985 6596 256.5 UdeM00000042985 XP\_045180761.1 87.2 148  
17 1 2 149 61 206 2.10E-65 256.5 6596 cellular

organisms;Eukaryota;Opisthokonta;Metazoa;Eumetazoa;Bilateria;Protostomia;

Spiralia;Lophotrochozoa;Mollusca;Bivalvia;Autobranchia;Heteroconchia;Euherodonta;Imparidentia;Venerida;Veneroidea;Veneridae;Mercenaria;Mercenaria mercenaria

UdeM00000042986 1735272 412.9 UdeM00000042986 XP\_041372570.1 52  
356 168 1 8 363 28 380 4.20E-112 412.9 1735272  
cellular

organisms;Eukaryota;Opisthokonta;Metazoa;Eumetazoa;Bilateria;Protostomia;Spiralia;Lophotrochozoa;Mollusca;Gastropoda;Neomphalina;Neomphaloidea;Peltospiridae;Gigantopelta;Gigantopelta aegis

UdeM00000042987 6565 837.8 UdeM00000042987 XP\_022345813.1 76.5 639  
136 7 2 629 5 640 9.20E-240 837.8 6565 cellular

organisms;Eukaryota;Opisthokonta;Metazoa;Eumetazoa;Bilateria;Protostomia;Spiralia;Lophotrochozoa;Mollusca;Bivalvia;Autobranchia;Pteriormorphia;Ostreida;Ostreoidea;Ostreidae;Crassostrea;Crassostrea virginica

UdeM00000042988 6565 819.3 UdeM00000042988 XP\_022345813.1 75.6 640  
139 8 2 628 5 640 3.40E-234 819.3 6565 cellular

organisms;Eukaryota;Opisthokonta;Metazoa;Eumetazoa;Bilateria;Protostomia;Spiralia;Lophotrochozoa;Mollusca;Bivalvia;Autobranchia;Pteriormorphia;Ostreida;Ostreoidea;Ostreidae;Crassostrea;Crassostrea virginica

UdeM00000042989 29159 347.4 UdeM00000042989 XP\_034300904.1 76.3 354  
71 6 178 522 291 640 3.20E-92 347.4 29159 cellular

organisms;Eukaryota;Opisthokonta;Metazoa;Eumetazoa;Bilateria;Protostomia;Spiralia;Lophotrochozoa;Mollusca;Bivalvia;Autobranchia;Pteriormorphia;Ostreida;Ostreoidea;Ostreidae;Crassostrea;Crassostrea gigas

UdeM00000042990 29159 336.3 UdeM00000042990 XP\_034300904.1 74.4 355  
80 5 314 659 288 640 9.10E-89 336.3 29159 cellular

organisms;Eukaryota;Opisthokonta;Metazoa;Eumetazoa;Bilateria;Protostomia;Spiralia;Lophotrochozoa;Mollusca;Bivalvia;Autobranchia;Pteriormorphia;Ostreida;Ostreoidea;Ostreidae;Crassostrea;Crassostrea gigas

UdeM00000042991 7054 151.4 UdeM00000042991 XP\_031339438.1 89.7 87  
9 0 93 179 535 621 1.20E-33 151.4 7054 cellular

organisms;Eukaryota;Opisthokonta;Metazoa;Eumetazoa;Bilateria;Protostomia;Ecdysozoa;Panarthropoda;Arthropoda;Mandibulata;Pancrustacea;Hexapoda;Insecta;Dicondylia;Pterygota;Neoptera;Endopterygota;Coleoptera;Polyphaga;Elaterriformia;Elateroidea;Lampyridae;Lampyrinae;Photinus;Photinus pyralis

UdeM00000042992 105785 165.2 UdeM00000042992 XP\_023711973.1 52.1  
217 86 7 262 470 420 626 2.00E-37 165.2 105785

cellular

organisms;Eukaryota;Opisthokonta;Metazoa;Eumetazoa;Bilateria;Protostomia;Ecdysozoa;Panarthropoda;Arthropoda;Mandibulata;Pancrustacea;Hexapoda;Insecta;Dicondylia;Pterygota;Neoptera;Polyneoptera;Dictyoptera;Blattodea;Blattoidea;Termitoidea;Kalotermitidae;Cryptotermitinae;Cryptotermitidae;Cryptotermitidae secundus

UdeM00000042993 105785 166 UdeM00000042993 XP\_023711973.1 52.1  
217 87 7 262 471 420 626 1.20E-37 166 105785

cellular

organisms;Eukaryota;Opisthokonta;Metazoa;Eumetazoa;Bilateria;Protostomia;Ecdysozoa;Panarthropoda;Arthropoda;Mandibulata;Pancrustacea;Hexapoda;Insecta;Dicondylia;Pterygota;Neoptera;Polyneoptera;Dictyoptera;Blattodea;Blattoidea;Termitoidea;Kalotermitidae;Cryptotermitinae;Cryptotermitidae;Cryptotermitidae secundus

UdeM00000042994 105785 151.4 UdeM00000042994 XP\_023712647.1 46.7  
227 110 5 384 608 408 625 3.90E-33 151.4 105785

cellular

organisms;Eukaryota;Opisthokonta;Metazoa;Eumetazoa;Bilateria;Protostomia;Ecdysozoa;Panarthropoda;Arthropoda;Mandibulata;Pancrustacea;Hexapoda;Insecta;Dicondylia;Pterygota;Neoptera;Polyneoptera;Dictyoptera;Blattodea;Blattoidea;Termitoidea;Kalotermitidae;Cryptotermitinae;Cryptotermes;Cryptotermes secundus

UdeM00000042995 6565 150.2 UdeM00000042995 XP\_022345813.1 56.6 244  
98 3 369 607 400 640 8.60E-33 150.2 6565 cellular

organisms;Eukaryota;Opisthokonta;Metazoa;Eumetazoa;Bilateria;Protostomia;Spiralia;Lophotrochozoa;Mollusca;Bivalvia;Autobranchia;Pteriormorphia;Ostreida;Ostreoidea;Ostreidae;Crassostrea;Crassostrea virginica

UdeM00000042996 7054 141.4 UdeM00000042996 XP\_031339438.1 86.2 87  
12 0 520 606 533 619 4.00E-30 141.4 7054 cellular

organisms;Eukaryota;Opisthokonta;Metazoa;Eumetazoa;Bilateria;Protostomia;Ecdysozoa;Panarthropoda;Arthropoda;Mandibulata;Pancrustacea;Hexapoda;Insecta;Dicondylia;Pterygota;Neoptera;Endopterygota;Coleoptera;Polyphaga;Elat eriformia;Elateroidea;Lampyridae;Lampyrinae;Photinus;Photinus pyralis

UdeM00000042997 7054 141.4 UdeM00000042997 XP\_031339438.1 86.2 87  
12 0 521 607 533 619 4.00E-30 141.4 7054 cellular

organisms;Eukaryota;Opisthokonta;Metazoa;Eumetazoa;Bilateria;Protostomia;Ecdysozoa;Panarthropoda;Arthropoda;Mandibulata;Pancrustacea;Hexapoda;Insecta;Dicondylia;Pterygota;Neoptera;Endopterygota;Coleoptera;Polyphaga;Elat eriformia;Elateroidea;Lampyridae;Lampyrinae;Photinus;Photinus pyralis

UdeM00000042998 7054 141.4 UdeM00000042998 XP\_031339438.1 86.2 87  
12 0 521 607 533 619 4.00E-30 141.4 7054 cellular

organisms;Eukaryota;Opisthokonta;Metazoa;Eumetazoa;Bilateria;Protostomia;Ecdysozoa;Panarthropoda;Arthropoda;Mandibulata;Pancrustacea;Hexapoda;Insecta;Dicondylia;Pterygota;Neoptera;Endopterygota;Coleoptera;Polyphaga;Elat eriformia;Elateroidea;Lampyridae;Lampyrinae;Photinus;Photinus pyralis

UdeM00000042999 7054 141.4 UdeM00000042999 XP\_031339438.1 86.2 87  
12 0 520 606 533 619 4.00E-30 141.4 7054 cellular

organisms;Eukaryota;Opisthokonta;Metazoa;Eumetazoa;Bilateria;Protostomia;Ecdysozoa;Panarthropoda;Arthropoda;Mandibulata;Pancrustacea;Hexapoda;Insecta;Dicondylia;Pterygota;Neoptera;Endopterygota;Coleoptera;Polyphaga;Elat eriformia;Elateroidea;Lampyridae;Lampyrinae;Photinus;Photinus pyralis

UdeM00000043000 6565 124.4 UdeM00000043000 XP\_022302504.1 27.5 309  
203 8 13 315 4 297 2.70E-25 124.4 6565 cellular

organisms;Eukaryota;Opisthokonta;Metazoa;Eumetazoa;Bilateria;Protostomia;Spiralia;Lophotrochozoa;Mollusca;Bivalvia;Autobranchia;Pteriormorphia;Ostreida;Ostreoidea;Ostreidae;Crassostrea;Crassostrea virginica

UdeM00000043001 6565 154.5 UdeM00000043001 XP\_022345813.1 62.6 139  
43 3 1 131 332 469 1.30E-34 154.5 6565 cellular

organisms;Eukaryota;Opisthokonta;Metazoa;Eumetazoa;Bilateria;Protostomia;Spiralia;Lophotrochozoa;Mollusca;Bivalvia;Autobranchia;Pteriormorphia;Ostreida;Ostreoidea;Ostreidae;Crassostrea;Crassostrea virginica

UdeM00000043002 7054 150.6 UdeM00000043002 XP\_031339438.1 91.8 85  
7 0 91 175 535 619 2.00E-33 150.6 7054 cellular

organisms;Eukaryota;Opisthokonta;Metazoa;Eumetazoa;Bilateria;Protostomia;Ecdysozoa;Panarthropoda;Arthropoda;Mandibulata;Pancrustacea;Hexapoda;Insecta;Dicondylia;Pterygota;Neoptera;Endopterygota;Coleoptera;Polyphaga;Elat eriformia;Elateroidea;Lampyridae;Lampyrinae;Photinus;Photinus pyralis

UdeM00000043003 29159 169.9 UdeM00000043003 XP\_011449844.1 23 699  
481 18 9 665 1 684 1.10E-38 169.9 29159 cellular

organisms;Eukaryota;Opisthokonta;Metazoa;Eumetazoa;Bilateria;Protostomia;

Spiralia;Lophotrochozoa;Mollusca;Bivalvia;Autobranchia;Pteriormorphia;Ostr  
eida;Ostreoidea;Ostreidae;Crassostrea;Crassostrea gigas

UdeM00000043004 6596 1634.8 UdeM00000043004 XP\_045209328.1 34.3  
2898 1660 50 1 2774 40 2818 0.00E+00 1634.8 6596  
cellular

organisms;Eukaryota;Opisthokonta;Metazoa;Eumetazoa;Bilateria;Protostomia;  
Spiralia;Lophotrochozoa;Mollusca;Bivalvia;Autobranchia;Heteroconchia;Euhe  
terodonta;Imparidentia;Venerida;Veneroidea;Veneridae;Mercenaria;Mercenari  
a mercenaria

UdeM00000043005 1415580 129.8 UdeM00000043005 XP\_030075314.1 48.9  
135 68 1 1 135 1 134 2.60E-27 129.8 1415580  
cellular

organisms;Eukaryota;Opisthokonta;Metazoa;Eumetazoa;Bilateria;Deuterostomi  
a;Chordata;Craniata;Vertebrata;Gnathostomata;Teleostomi;Euteleostomi;Sarc  
opterygii;Dipnotetrapodomorpha;Tetrapoda;Amphibia;Gymnophiona;Siphonopida  
e;Microcaecilia;Microcaecilia unicolor

UdeM00000043006 7757 325.1 UdeM00000043006 XP\_032835197.1 77.3 211  
47 1 2 212 149 358 1.00E-85 325.1 7757 cellular

organisms;Eukaryota;Opisthokonta;Metazoa;Eumetazoa;Bilateria;Deuterostomi  
a;Chordata;Craniata;Vertebrata;Cyclostomata;Hyperoartia;Petromyzontiforme  
s;Petromyzontidae;Petromyzon;Petromyzon marinus

UdeM00000043007 1415580 103.2 UdeM00000043007 XP\_030075314.1 70.8  
72 21 0 2 73 554 625 1.40E-19 103.2 1415580  
cellular

organisms;Eukaryota;Opisthokonta;Metazoa;Eumetazoa;Bilateria;Deuterostomi  
a;Chordata;Craniata;Vertebrata;Gnathostomata;Teleostomi;Euteleostomi;Sarc  
opterygii;Dipnotetrapodomorpha;Tetrapoda;Amphibia;Gymnophiona;Siphonopida  
e;Microcaecilia;Microcaecilia unicolor

UdeM00000043008 29159 102.1 UdeM00000043008 XP\_034316161.1 44 134  
67 3 3 132 853 982 1.00E-18 102.1 29159 cellular

organisms;Eukaryota;Opisthokonta;Metazoa;Eumetazoa;Bilateria;Protostomia;  
Spiralia;Lophotrochozoa;Mollusca;Bivalvia;Autobranchia;Pteriormorphia;Ostr  
eida;Ostreoidea;Ostreidae;Crassostrea;Crassostrea gigas

UdeM00000043009 1250792 159.5 UdeM00000043009 XP\_041861569.1 43  
200 110 3 12 210 460 656 4.80E-36 159.5 1250792  
cellular

organisms;Eukaryota;Opisthokonta;Metazoa;Eumetazoa;Bilateria;Deuterostomi  
a;Chordata;Craniata;Vertebrata;Gnathostomata;Teleostomi;Euteleostomi;Acti  
nopterygii;Actinopteri;Neopterygii;Teleostei;Osteoglossocephalai;Clupeoce  
phala;Euteleosteomorpha;Neoteleostei;Eurypterygia;Ctenosquamata;Acanthomo  
rphata;Euacanthomorphacea;Percomorphaceae;Ovalentaria;Atherinomorphae;Ath  
eriniformes;Melanotaeniidae;Melanotaenia;Melanotaenia boesemani

UdeM00000043010 1250792 159.5 UdeM00000043010 XP\_041861569.1 43  
200 110 3 12 210 460 656 4.80E-36 159.5 1250792  
cellular

organisms;Eukaryota;Opisthokonta;Metazoa;Eumetazoa;Bilateria;Deuterostomi  
a;Chordata;Craniata;Vertebrata;Gnathostomata;Teleostomi;Euteleostomi;Acti  
nopterygii;Actinopteri;Neopterygii;Teleostei;Osteoglossocephalai;Clupeoce  
phala;Euteleosteomorpha;Neoteleostei;Eurypterygia;Ctenosquamata;Acanthomo  
rphata;Euacanthomorphacea;Percomorphaceae;Ovalentaria;Atherinomorphae;Ath  
eriniformes;Melanotaeniidae;Melanotaenia;Melanotaenia boesemani

UdeM00000043011 8240 136.3 UdeM00000043011 XP\_042277598.1 43.2 176  
81 5 1 165 1 168 3.50E-29 136.3 8240 cellular

organisms;Eukaryota;Opisthokonta;Metazoa;Eumetazoa;Bilateria;Deuterostomi

a;Chordata;Craniata;Vertebrata;Gnathostomata;Teleostomi;Euteleostomi;Acti  
 nopterygii;Actinopteri;Neopterygii;Teleostei;Osteoglossocephalai;Clupeoce  
 phala;Euteleostomorpha;Neoteleostei;Eurypterygia;Ctenosquamata;Acanthomo  
 rphata;Euacanthomorpha;Percomorphaceae;Pelagiaria;Scombriformes;Scombr  
 idae;Scombrinae;Thunnini;Thunnus;Thunnus maccoyii  
 UdeM00000043012 6573 78.2 UdeM00000043012 XP\_021380144.1 25.4 177  
 123 4 96 267 29 201 2.00E-11 78.2 6573 cellular  
 organisms;Eukaryota;Opisthokonta;Metazoa;Eumetazoa;Bilateria;Protostomia;  
 Spiralia;Lophotrochozoa;Mollusca;Bivalvia;Autobranchia;Pteriormorphia;Pect  
 inida;Pectinoidea;Pectinidae;Mizuhopecten;Mizuhopecten yessoensis  
 UdeM00000043013 6573 69.7 UdeM00000043013 XP\_021380144.1 29.4 136  
 87 4 61 192 31 161 4.90E-09 69.7 6573 cellular  
 organisms;Eukaryota;Opisthokonta;Metazoa;Eumetazoa;Bilateria;Protostomia;  
 Spiralia;Lophotrochozoa;Mollusca;Bivalvia;Autobranchia;Pteriormorphia;Pect  
 inida;Pectinoidea;Pectinidae;Mizuhopecten;Mizuhopecten yessoensis  
 UdeM00000043015 7574 245.7 UdeM00000043015 XP\_013384663.1 47.9 238  
 123 1 1 237 224 461 5.90E-62 245.7 7574 cellular  
 organisms;Eukaryota;Opisthokonta;Metazoa;Eumetazoa;Bilateria;Protostomia;  
 Spiralia;Lophotrochozoa;Brachiopoda;Linguliformea;Lingulata;Lingulida;Lin  
 guloidea;Lingulidae;Lingula;Lingula anatina  
 UdeM00000043014 7574 457.6 UdeM00000043014 XP\_013418391.1 47.9 457  
 232 3 3 454 5 460 1.90E-125 457.6 7574 cellular  
 organisms;Eukaryota;Opisthokonta;Metazoa;Eumetazoa;Bilateria;Protostomia;  
 Spiralia;Lophotrochozoa;Brachiopoda;Linguliformea;Lingulata;Lingulida;Lin  
 guloidea;Lingulidae;Lingula;Lingula anatina  
 UdeM00000043016 6573 229.9 UdeM00000043016 XP\_021354380.1 59.4 224  
 69 7 1 216 314 523 3.00E-57 229.9 6573 cellular  
 organisms;Eukaryota;Opisthokonta;Metazoa;Eumetazoa;Bilateria;Protostomia;  
 Spiralia;Lophotrochozoa;Mollusca;Bivalvia;Autobranchia;Pteriormorphia;Pect  
 inida;Pectinoidea;Pectinidae;Mizuhopecten;Mizuhopecten yessoensis  
 UdeM00000043017 6565 276.6 UdeM00000043017 XP\_022322164.1 54.6 295  
 111 7 1 289 1 278 4.00E-71 276.6 6565 cellular  
 organisms;Eukaryota;Opisthokonta;Metazoa;Eumetazoa;Bilateria;Protostomia;  
 Spiralia;Lophotrochozoa;Mollusca;Bivalvia;Autobranchia;Pteriormorphia;Ostr  
 eida;Ostreoidea;Ostreidae;Crassostrea;Crassostrea virginica  
 UdeM00000043018 7741 168.7 UdeM00000043018 XP\_019632855.1 53.9 141  
 64 1 35 174 35 175 6.60E-39 168.7 7741 cellular  
 organisms;Eukaryota;Opisthokonta;Metazoa;Eumetazoa;Bilateria;Deuterostomi  
 a;Chordata;Cephalochordata;Leptocardii;Amphioxiformes;Branchiostomidae;Br  
 anchiostoma;Branchiostoma belcheri  
 UdeM00000043019 6596 973.4 UdeM00000043019 XP\_045180972.1 73.3 643  
 169 3 1 642 1 641 1.40E-280 973.4 6596 cellular  
 organisms;Eukaryota;Opisthokonta;Metazoa;Eumetazoa;Bilateria;Protostomia;  
 Spiralia;Lophotrochozoa;Mollusca;Bivalvia;Autobranchia;Heteroconchia;Euhe  
 terodonta;Imparidentia;Venerida;Veneroidea;Veneridae;Mercenaria;Mercenari  
 a mercenaria  
 UdeM00000043021 6596 266.5 UdeM00000043021 XP\_045181639.1 60.7 196  
 76 1 31 226 16 210 3.00E-68 266.5 6596 cellular  
 organisms;Eukaryota;Opisthokonta;Metazoa;Eumetazoa;Bilateria;Protostomia;  
 Spiralia;Lophotrochozoa;Mollusca;Bivalvia;Autobranchia;Heteroconchia;Euhe  
 terodonta;Imparidentia;Venerida;Veneroidea;Veneridae;Mercenaria;Mercenari  
 a mercenaria  
 UdeM00000043022 7574 295.4 UdeM00000043022 XP\_013400769.1 66.1 224  
 72 3 6 227 36 257 6.10E-77 295.4 7574 cellular

organisms;Eukaryota;Opisthokonta;Metazoa;Eumetazoa;Bilateria;Protostomia;Spiralia;Lophotrochozoa;Brachiopoda;Linguliformea;Lingulata;Lingulida;Linguloidea;Lingulidae;Lingula;Lingula anatina

UdeM00000043023 6579 279.3 UdeM00000043023 XP\_033752861.1 35.1 425  
238 6 4 394 36 456 7.80E-72 279.3 6579 cellular

organisms;Eukaryota;Opisthokonta;Metazoa;Eumetazoa;Bilateria;Protostomia;Spiralia;Lophotrochozoa;Mollusca;Bivalvia;Autobranchia;Pteriormorphia;Pectinida;Pectinoidea;Pectinidae;Pecten;Pecten maximus

UdeM00000043024 6596 288.9 UdeM00000043024 XP\_045191172.1 51.8 280  
127 4 16 291 15 290 7.30E-75 288.9 6596 cellular

organisms;Eukaryota;Opisthokonta;Metazoa;Eumetazoa;Bilateria;Protostomia;Spiralia;Lophotrochozoa;Mollusca;Bivalvia;Autobranchia;Heteroconchia;Euheterodonta;Imparidentia;Venerida;Veneroidea;Veneridae;Mercenaria;Mercenaria mercenaria

UdeM00000043025 6596 287 UdeM00000043025 XP\_045191172.1 54.7 258  
113 3 7 260 33 290 2.50E-74 287 6596 cellular

organisms;Eukaryota;Opisthokonta;Metazoa;Eumetazoa;Bilateria;Protostomia;Spiralia;Lophotrochozoa;Mollusca;Bivalvia;Autobranchia;Heteroconchia;Euheterodonta;Imparidentia;Venerida;Veneroidea;Veneridae;Mercenaria;Mercenaria mercenaria

UdeM00000043026 6565 93.2 UdeM00000043026 XP\_022317300.1 37.4 171  
91 4 21 185 252 412 3.80E-16 93.2 6565 cellular

organisms;Eukaryota;Opisthokonta;Metazoa;Eumetazoa;Bilateria;Protostomia;Spiralia;Lophotrochozoa;Mollusca;Bivalvia;Autobranchia;Pteriormorphia;Ostreida;Ostreoidea;Ostreidae;Crassostrea;Crassostrea virginica

UdeM00000043027 6596 85.1 UdeM00000043027 XP\_045174639.1 47.9 71  
37 0 1 71 69 139 4.00E-14 85.1 6596 cellular

organisms;Eukaryota;Opisthokonta;Metazoa;Eumetazoa;Bilateria;Protostomia;Spiralia;Lophotrochozoa;Mollusca;Bivalvia;Autobranchia;Heteroconchia;Euheterodonta;Imparidentia;Venerida;Veneroidea;Veneridae;Mercenaria;Mercenaria mercenaria

UdeM00000043028 225164 105.1 UdeM00000043028 XP\_009058199.1 52.3  
107 44 2 1 107 1 100 5.50E-20 105.1 225164

cellular

organisms;Eukaryota;Opisthokonta;Metazoa;Eumetazoa;Bilateria;Protostomia;Spiralia;Lophotrochozoa;Mollusca;Gastropoda;Patellogastropoda;Lottiioidea;Lottiidae;Lottia;Lottia gigantea

UdeM00000043029 6579 141.7 UdeM00000043029 XP\_033752673.1 71.8 85  
24 0 4 88 568 652 4.40E-31 141.7 6579 cellular

organisms;Eukaryota;Opisthokonta;Metazoa;Eumetazoa;Bilateria;Protostomia;Spiralia;Lophotrochozoa;Mollusca;Bivalvia;Autobranchia;Pteriormorphia;Pectinida;Pectinoidea;Pectinidae;Pecten;Pecten maximus

UdeM00000043030 7604 418.3 UdeM00000043030 XP\_033641066.1 53.2 378  
154 1 4 358 3 380 9.90E-114 418.3 7604 cellular

organisms;Eukaryota;Opisthokonta;Metazoa;Eumetazoa;Bilateria;Deuterostomia;Echinodermata;Eleutherozoa;Asterozoa;Asteroidea;Forcipulatacea;Forcipulataida;Asteroiidae;Asterias;Asterias rubens

UdeM00000043031 7604 404.1 UdeM00000043031 XP\_033641066.1 57.2 327  
140 0 4 330 3 329 1.80E-109 404.1 7604 cellular

organisms;Eukaryota;Opisthokonta;Metazoa;Eumetazoa;Bilateria;Deuterostomia;Echinodermata;Eleutherozoa;Asterozoa;Asteroidea;Forcipulatacea;Forcipulataida;Asteroiidae;Asterias;Asterias rubens

UdeM00000043032 6596 365.9 UdeM00000043032 XP\_045177776.1 37 613  
294 12 9 619 398 920 1.30E-97 365.9 6596 cellular

organisms; Eukaryota; Opisthokonta; Metazoa; Eumetazoa; Bilateria; Protostomia; Spiralia; Lophotrochozoa; Mollusca; Bivalvia; Autobranchia; Heteroconchia; Euherterodonta; Imparidentia; Venerida; Veneroidea; Veneridae; Mercenaria; Mercenaria mercenaria  
UdeM00000043033 29159 142.5 UdeM00000043033 XP\_034331610.1 48.3 149  
76 1 108 256 836 983 7.40E-31 142.5 29159 cellular  
organisms; Eukaryota; Opisthokonta; Metazoa; Eumetazoa; Bilateria; Protostomia; Spiralia; Lophotrochozoa; Mollusca; Bivalvia; Autobranchia; Pteriormorphia; Ostreida; Ostreoidea; Ostreidae; Crassostrea; Crassostrea gigas  
UdeM00000043034 6596 285.4 UdeM00000043034 XP\_045191172.1 51.4 280  
128 4 16 291 15 290 8.10E-74 285.4 6596 cellular  
organisms; Eukaryota; Opisthokonta; Metazoa; Eumetazoa; Bilateria; Protostomia; Spiralia; Lophotrochozoa; Mollusca; Bivalvia; Autobranchia; Heteroconchia; Euherterodonta; Imparidentia; Venerida; Veneroidea; Veneridae; Mercenaria; Mercenaria mercenaria  
UdeM00000043036 6596 138.7 UdeM00000043036 XP\_045174364.1 38.2 246  
135 6 27 262 174 412 1.10E-29 138.7 6596 cellular  
organisms; Eukaryota; Opisthokonta; Metazoa; Eumetazoa; Bilateria; Protostomia; Spiralia; Lophotrochozoa; Mollusca; Bivalvia; Autobranchia; Heteroconchia; Euherterodonta; Imparidentia; Venerida; Veneroidea; Veneridae; Mercenaria; Mercenaria mercenaria  
UdeM00000043035 6596 94.4 UdeM00000043035 XP\_045174364.1 38.4 164  
93 5 22 184 256 412 1.70E-16 94.4 6596 cellular  
organisms; Eukaryota; Opisthokonta; Metazoa; Eumetazoa; Bilateria; Protostomia; Spiralia; Lophotrochozoa; Mollusca; Bivalvia; Autobranchia; Heteroconchia; Euherterodonta; Imparidentia; Venerida; Veneroidea; Veneridae; Mercenaria; Mercenaria mercenaria  
UdeM00000043037 29159 67 UdeM00000043037 XP\_034316142.1 50.7 69  
29 1 121 189 180 243 3.00E-08 67 29159 cellular  
organisms; Eukaryota; Opisthokonta; Metazoa; Eumetazoa; Bilateria; Protostomia; Spiralia; Lophotrochozoa; Mollusca; Bivalvia; Autobranchia; Pteriormorphia; Ostreida; Ostreoidea; Ostreidae; Crassostrea; Crassostrea gigas  
UdeM00000043038 225164 109.4 UdeM00000043038 XP\_009058199.1 50  
118 51 3 1 117 1 111 3.30E-21 109.4 225164  
cellular  
organisms; Eukaryota; Opisthokonta; Metazoa; Eumetazoa; Bilateria; Protostomia; Spiralia; Lophotrochozoa; Mollusca; Gastropoda; Patellogastropoda; Lottiioidea; Lottiidae; Lottia; Lottia gigantea  
UdeM00000043039 6579 194.9 UdeM00000043039 XP\_033752673.1 39.8 256  
56 1 23 180 397 652 8.90E-47 194.9 6579 cellular  
organisms; Eukaryota; Opisthokonta; Metazoa; Eumetazoa; Bilateria; Protostomia; Spiralia; Lophotrochozoa; Mollusca; Bivalvia; Autobranchia; Pteriormorphia; Pectinida; Pectinoidea; Pectinidae; Pecten; Pecten maximus  
UdeM00000043040 225164 140.2 UdeM00000043040 XP\_009058199.1 67.4  
92 30 0 14 105 574 665 1.50E-30 140.2 225164  
cellular  
organisms; Eukaryota; Opisthokonta; Metazoa; Eumetazoa; Bilateria; Protostomia; Spiralia; Lophotrochozoa; Mollusca; Gastropoda; Patellogastropoda; Lottiioidea; Lottiidae; Lottia; Lottia gigantea  
UdeM00000043041 7604 406 UdeM00000043041 XP\_033641066.1 58.1 327  
136 1 4 329 3 329 4.70E-110 406 7604 cellular  
organisms; Eukaryota; Opisthokonta; Metazoa; Eumetazoa; Bilateria; Deuterostomia; Echinodermata; Eleutherozoa; Asterozoa; Asteroidea; Forcipulatacea; Forcipulatacida; Asteroiidae; Asterias; Asterias rubens



UdeM00000043042 6596 193 UdeM00000043042 XP\_045179269.1 41.8 244  
 120 2 86 329 258 479 1.00E-45 193 6596 cellular  
 organisms;Eukaryota;Opisthokonta;Metazoa;Eumetazoa;Bilateria;Protostomia;  
 Spiralia;Lophotrochozoa;Mollusca;Bivalvia;Autobranchia;Heteroconchia;Euhe  
 terodonta;Imparidentia;Venerida;Veneroidea;Veneridae;Mercenaria;Mercenari  
 a mercenaria  
 UdeM00000043043 151771 253.1 UdeM00000043043 XP\_028395849.1 29.5  
 643 390 20 1 613 3 612 9.40E-64 253.1 151771  
 cellular  
 organisms;Eukaryota;Opisthokonta;Metazoa;Eumetazoa;Cnidaria;Anthozoa;Octo  
 corallia;Alcyonacea;Alcyoniina;Nephtheidae;Dendronephthya;Dendronephthya  
 gigantea  
 UdeM00000043044 6596 167.2 UdeM00000043044 XP\_045191793.1 35.6 337  
 161 8 1 331 258 544 4.00E-38 167.2 6596 cellular  
 organisms;Eukaryota;Opisthokonta;Metazoa;Eumetazoa;Bilateria;Protostomia;  
 Spiralia;Lophotrochozoa;Mollusca;Bivalvia;Autobranchia;Heteroconchia;Euhe  
 terodonta;Imparidentia;Venerida;Veneroidea;Veneridae;Mercenaria;Mercenari  
 a mercenaria  
 UdeM00000043045 6565 94.7 UdeM00000043045 XP\_022299727.1 39.8 133  
 73 2 1 131 46 173 9.10E-17 94.7 6565 cellular  
 organisms;Eukaryota;Opisthokonta;Metazoa;Eumetazoa;Bilateria;Protostomia;  
 Spiralia;Lophotrochozoa;Mollusca;Bivalvia;Autobranchia;Pteriormorphia;Ostr  
 eida;Ostreoidea;Ostreidae;Crassostrea;Crassostrea virginica  
 UdeM00000043046 400727 1438.3 UdeM00000043046 XP\_025091816.1  
 80 893 161 6 29 905 52 942 0.00E+00 1438.3  
 400727 cellular  
 organisms;Eukaryota;Opisthokonta;Metazoa;Eumetazoa;Bilateria;Protostomia;  
 Spiralia;Lophotrochozoa;Mollusca;Gastropoda;Caenogastropoda;Architaeniogl  
 ossa;Ampullarioidea;Ampullariidae;Pomacea;Pomacea canaliculata  
 UdeM00000043047 6596 323.2 UdeM00000043047 XP\_045181110.1 34.5 609  
 352 17 29 596 32 634 8.40E-85 323.2 6596 cellular  
 organisms;Eukaryota;Opisthokonta;Metazoa;Eumetazoa;Bilateria;Protostomia;  
 Spiralia;Lophotrochozoa;Mollusca;Bivalvia;Autobranchia;Heteroconchia;Euhe  
 terodonta;Imparidentia;Venerida;Veneroidea;Veneridae;Mercenaria;Mercenari  
 a mercenaria  
 UdeM00000043048 6596 149.4 UdeM00000043048 XP\_045206702.1 25.8 399  
 243 7 7 399 385 736 1.00E-32 149.4 6596 cellular  
 organisms;Eukaryota;Opisthokonta;Metazoa;Eumetazoa;Bilateria;Protostomia;  
 Spiralia;Lophotrochozoa;Mollusca;Bivalvia;Autobranchia;Heteroconchia;Euhe  
 terodonta;Imparidentia;Venerida;Veneroidea;Veneridae;Mercenaria;Mercenari  
 a mercenaria  
 UdeM00000043049 6596 312.4 UdeM00000043049 XP\_045181110.1 32.7 682  
 413 18 29 673 32 704 1.50E-81 312.4 6596 cellular  
 organisms;Eukaryota;Opisthokonta;Metazoa;Eumetazoa;Bilateria;Protostomia;  
 Spiralia;Lophotrochozoa;Mollusca;Bivalvia;Autobranchia;Heteroconchia;Euhe  
 terodonta;Imparidentia;Venerida;Veneroidea;Veneridae;Mercenaria;Mercenari  
 a mercenaria  
 UdeM00000043051 45264 358.6 UdeM00000043051 XP\_044171434.1 31.1 874  
 526 16 6 819 4 861 2.10E-95 358.6 45264 cellular  
 organisms;Eukaryota;Opisthokonta;Metazoa;Eumetazoa;Cnidaria;Anthozoa;Hexa  
 corallia;Scleractinia;Astrocoeniina;Acroporidae;Acropora;Acropora  
 millepora  
 UdeM00000043052 6596 158.7 UdeM00000043052 XP\_045160701.1 31.3 329  
 212 4 31 356 65 382 1.70E-35 158.7 6596 cellular

organisms;Eukaryota;Opisthokonta;Metazoa;Eumetazoa;Bilateria;Protostomia;Spiralia;Lophotrochozoa;Mollusca;Bivalvia;Autobranchia;Heteroconchia;Euheterodonta;Imparidentia;Venerida;Veneroidea;Veneridae;Mercenaria;Mercenaria mercenaria

UdeM00000043053 7668 108.6 UdeM00000043053 XP\_786433.3 43.6 140 50  
4 6 145 33 143 1.10E-20 108.6 7668 cellular

organisms;Eukaryota;Opisthokonta;Metazoa;Eumetazoa;Bilateria;Deuterostomia;Echinodermata;Eleutherozoa;Echinozoa;Echinoidea;Euechinoidea;Echinacea;Camarodonta;Echinidea;Strongylocentrotidae;Strongylocentrotus;Strongylocentrotus purpuratus

UdeM00000043054 6579 310.8 UdeM00000043054 XP\_033727553.1 43.7 426  
195 9 68 464 94 503 2.90E-81 310.8 6579 cellular

organisms;Eukaryota;Opisthokonta;Metazoa;Eumetazoa;Bilateria;Protostomia;Spiralia;Lophotrochozoa;Mollusca;Bivalvia;Autobranchia;Pteriormorphia;Pectinida;Pectinoidea;Pectinidae;Pecten;Pecten maximus

UdeM00000043055 6596 142.5 UdeM00000043055 XP\_045180506.1 42 226  
120 6 6 226 4 223 6.50E-31 142.5 6596 cellular

organisms;Eukaryota;Opisthokonta;Metazoa;Eumetazoa;Bilateria;Protostomia;Spiralia;Lophotrochozoa;Mollusca;Bivalvia;Autobranchia;Heteroconchia;Euheterodonta;Imparidentia;Venerida;Veneroidea;Veneridae;Mercenaria;Mercenaria mercenaria

UdeM00000043056 1735272 265.8 UdeM00000043056 XP\_041361764.1 39.9  
346 183 9 347 681 1329 1660 3.50E-67 265.8 1735272  
cellular

organisms;Eukaryota;Opisthokonta;Metazoa;Eumetazoa;Bilateria;Protostomia;Spiralia;Lophotrochozoa;Mollusca;Gastropoda;Neomphalina;Neomphaloidea;Peltospiridae;Gigantopelta;Gigantopelta aegis

UdeM00000043057 42526 119 UdeM00000043057 XP\_036444721.1 25.9 320  
189 12 84 387 432 719 1.30E-23 119 42526 cellular

organisms;Eukaryota;Opisthokonta;Metazoa;Eumetazoa;Bilateria;Deuterostomia;Chordata;Craniata;Vertebrata;Gnathostomata;Teleostomi;Euteleostomi;Actinopterygii;Actinopteri;Neopterygii;Teleostei;Osteoglossocephalai;Clupeocephala;Otomorpha;Ostariophysi;Otophysi;Characiphysae;Characiformes;Characidae;Serrasalminidae;Colossoma;Colossoma macropomum

UdeM00000043058 29159 345.1 UdeM00000043058 XP\_034333813.1 51.3 267  
127 1 1 267 630 893 7.90E-92 345.1 29159 cellular

organisms;Eukaryota;Opisthokonta;Metazoa;Eumetazoa;Bilateria;Protostomia;Spiralia;Lophotrochozoa;Mollusca;Bivalvia;Autobranchia;Pteriormorphia;Ostreida;Ostreoidea;Ostreidae;Crassostrea;Crassostrea gigas

UdeM00000043060 6596 350.9 UdeM00000043060 XP\_045189084.1 30.5 774  
395 15 1 769 1350 1985 5.30E-93 350.9 6596 cellular

organisms;Eukaryota;Opisthokonta;Metazoa;Eumetazoa;Bilateria;Protostomia;Spiralia;Lophotrochozoa;Mollusca;Bivalvia;Autobranchia;Heteroconchia;Euheterodonta;Imparidentia;Venerida;Veneroidea;Veneridae;Mercenaria;Mercenaria mercenaria

UdeM00000043061 6573 100.5 UdeM00000043061 XP\_021380144.1 26.3 228  
160 5 16 240 12 234 3.10E-18 100.5 6573 cellular

organisms;Eukaryota;Opisthokonta;Metazoa;Eumetazoa;Bilateria;Protostomia;Spiralia;Lophotrochozoa;Mollusca;Bivalvia;Autobranchia;Pteriormorphia;Pectinida;Pectinoidea;Pectinidae;Mizuhopecten;Mizuhopecten yessoensis

UdeM00000043062 6573 92.8 UdeM00000043062 XP\_021380144.1 24.6 236  
167 5 6 233 2 234 6.20E-16 92.8 6573 cellular

organisms;Eukaryota;Opisthokonta;Metazoa;Eumetazoa;Bilateria;Protostomia;

Spiralia;Lophotrochozoa;Mollusca;Bivalvia;Autobranchia;Pteriomorpha;Pectinida;Pectinoidea;Pectinidae;Mizuhopecten;Mizuhopecten yessoensis  
 UdeM00000043063 6573 103.2 UdeM00000043063 XP\_021380144.1 26.1 207  
 147 4 36 239 31 234 4.70E-19 103.2 6573 cellular  
 organisms;Eukaryota;Opisthokonta;Metazoa;Eumetazoa;Bilateria;Protostomia;Spiralia;Lophotrochozoa;Mollusca;Bivalvia;Autobranchia;Pteriomorpha;Pectinida;Pectinoidea;Pectinidae;Mizuhopecten;Mizuhopecten yessoensis  
 UdeM00000043065 6573 100.5 UdeM00000043065 XP\_021380144.1 26.4 208  
 145 5 5 208 31 234 2.70E-18 100.5 6573 cellular  
 organisms;Eukaryota;Opisthokonta;Metazoa;Eumetazoa;Bilateria;Protostomia;Spiralia;Lophotrochozoa;Mollusca;Bivalvia;Autobranchia;Pteriomorpha;Pectinida;Pectinoidea;Pectinidae;Mizuhopecten;Mizuhopecten yessoensis  
 UdeM00000043064 6573 100.9 UdeM00000043064 XP\_021380144.1 26.4 208  
 145 5 36 239 31 234 2.30E-18 100.9 6573 cellular  
 organisms;Eukaryota;Opisthokonta;Metazoa;Eumetazoa;Bilateria;Protostomia;Spiralia;Lophotrochozoa;Mollusca;Bivalvia;Autobranchia;Pteriomorpha;Pectinida;Pectinoidea;Pectinidae;Mizuhopecten;Mizuhopecten yessoensis  
 UdeM00000043066 6596 355.9 UdeM00000043066 XP\_045180939.1 54.3 381  
 141 13 195 574 282 630 1.10E-94 355.9 6596 cellular  
 organisms;Eukaryota;Opisthokonta;Metazoa;Eumetazoa;Bilateria;Protostomia;Spiralia;Lophotrochozoa;Mollusca;Bivalvia;Autobranchia;Heteroconchia;Euheterodonta;Imparidentia;Venerida;Veneroidea;Veneridae;Mercenaria;Mercenaria mercenaria  
 UdeM00000043067 6565 83.2 UdeM00000043067 XP\_022328742.1 49.8 225  
 81 6 1 218 467 666 4.60E-13 83.2 6565 cellular  
 organisms;Eukaryota;Opisthokonta;Metazoa;Eumetazoa;Bilateria;Protostomia;Spiralia;Lophotrochozoa;Mollusca;Bivalvia;Autobranchia;Pteriomorpha;Ostreida;Ostreoidea;Ostreidae;Crassostrea;Crassostrea virginica  
 UdeM00000043068 6596 64.7 UdeM00000043068 XP\_045180939.1 30.6 186  
 85 3 1 143 679 863 1.10E-07 64.7 6596 cellular  
 organisms;Eukaryota;Opisthokonta;Metazoa;Eumetazoa;Bilateria;Protostomia;Spiralia;Lophotrochozoa;Mollusca;Bivalvia;Autobranchia;Heteroconchia;Euheterodonta;Imparidentia;Venerida;Veneroidea;Veneridae;Mercenaria;Mercenaria mercenaria  
 UdeM00000043069 6596 483.4 UdeM00000043069 XP\_045180845.1 36.9 1214  
 534 41 18 1045 12 1179 1.10E-132 483.4 6596 cellular  
 organisms;Eukaryota;Opisthokonta;Metazoa;Eumetazoa;Bilateria;Protostomia;Spiralia;Lophotrochozoa;Mollusca;Bivalvia;Autobranchia;Heteroconchia;Euheterodonta;Imparidentia;Venerida;Veneroidea;Veneridae;Mercenaria;Mercenaria mercenaria  
 UdeM00000043070 6579 269.6 UdeM00000043070 XP\_033726589.1 60 220  
 86 1 15 232 9 228 3.60E-69 269.6 6579 cellular  
 organisms;Eukaryota;Opisthokonta;Metazoa;Eumetazoa;Bilateria;Protostomia;Spiralia;Lophotrochozoa;Mollusca;Bivalvia;Autobranchia;Pteriomorpha;Pectinida;Pectinoidea;Pectinidae;Pecten;Pecten maximus  
 UdeM00000043071 6596 334.7 UdeM00000043071 XP\_045180350.1 77.4 212  
 48 0 1 212 1 212 8.40E-89 334.7 6596 cellular  
 organisms;Eukaryota;Opisthokonta;Metazoa;Eumetazoa;Bilateria;Protostomia;Spiralia;Lophotrochozoa;Mollusca;Bivalvia;Autobranchia;Heteroconchia;Euheterodonta;Imparidentia;Venerida;Veneroidea;Veneridae;Mercenaria;Mercenaria mercenaria  
 UdeM00000043072 6596 247.7 UdeM00000043072 XP\_045180349.1 32.9 516  
 279 11 4 461 5 511 3.20E-62 247.7 6596 cellular  
 organisms;Eukaryota;Opisthokonta;Metazoa;Eumetazoa;Bilateria;Protostomia;

Spiralia;Lophotrochozoa;Mollusca;Bivalvia;Autobranchia;Heteroconchia;Euherodonta;Imparidentia;Venerida;Veneroidea;Veneridae;Mercenaria;Mercenaria mercenaria

UdeM00000043073 6565 181 UdeM00000043073 XP\_022304980.1 36 328  
167 6 6 291 6 332 2.50E-42 181 6565 cellular

organisms;Eukaryota;Opisthokonta;Metazoa;Eumetazoa;Bilateria;Protostomia;Spiralia;Lophotrochozoa;Mollusca;Bivalvia;Autobranchia;Pteriomorphia;Ostreida;Ostreoidea;Ostreidae;Crassostrea;Crassostrea virginica

UdeM00000043074 6596 153.3 UdeM00000043074 XP\_045191172.1 51.1 135  
63 2 19 150 129 263 2.70E-34 153.3 6596 cellular

organisms;Eukaryota;Opisthokonta;Metazoa;Eumetazoa;Bilateria;Protostomia;Spiralia;Lophotrochozoa;Mollusca;Bivalvia;Autobranchia;Heteroconchia;Euherodonta;Imparidentia;Venerida;Veneroidea;Veneridae;Mercenaria;Mercenaria mercenaria

UdeM00000043075 6596 300.1 UdeM00000043075 XP\_045191172.1 54.8 261  
114 3 26 282 30 290 3.10E-78 300.1 6596 cellular

organisms;Eukaryota;Opisthokonta;Metazoa;Eumetazoa;Bilateria;Protostomia;Spiralia;Lophotrochozoa;Mollusca;Bivalvia;Autobranchia;Heteroconchia;Euherodonta;Imparidentia;Venerida;Veneroidea;Veneridae;Mercenaria;Mercenaria mercenaria

UdeM00000043076 6596 266.5 UdeM00000043076 XP\_045191172.1 51 261  
114 3 16 262 30 290 3.50E-68 266.5 6596 cellular

organisms;Eukaryota;Opisthokonta;Metazoa;Eumetazoa;Bilateria;Protostomia;Spiralia;Lophotrochozoa;Mollusca;Bivalvia;Autobranchia;Heteroconchia;Euherodonta;Imparidentia;Venerida;Veneroidea;Veneridae;Mercenaria;Mercenaria mercenaria

UdeM00000043077 6596 301.6 UdeM00000043077 XP\_045191172.1 54.8 261  
114 3 49 305 30 290 1.20E-78 301.6 6596 cellular

organisms;Eukaryota;Opisthokonta;Metazoa;Eumetazoa;Bilateria;Protostomia;Spiralia;Lophotrochozoa;Mollusca;Bivalvia;Autobranchia;Heteroconchia;Euherodonta;Imparidentia;Venerida;Veneroidea;Veneridae;Mercenaria;Mercenaria mercenaria

UdeM00000043078 6596 378.6 UdeM00000043078 XP\_045177776.1 40.2 565  
280 10 9 569 398 908 1.80E-101 378.6 6596 cellular

organisms;Eukaryota;Opisthokonta;Metazoa;Eumetazoa;Bilateria;Protostomia;Spiralia;Lophotrochozoa;Mollusca;Bivalvia;Autobranchia;Heteroconchia;Euherodonta;Imparidentia;Venerida;Veneroidea;Veneridae;Mercenaria;Mercenaria mercenaria

UdeM00000043079 29159 101.7 UdeM00000043079 XP\_034307807.1 35.7 171  
99 5 2 171 21 181 1.00E-18 101.7 29159 cellular

organisms;Eukaryota;Opisthokonta;Metazoa;Eumetazoa;Bilateria;Protostomia;Spiralia;Lophotrochozoa;Mollusca;Bivalvia;Autobranchia;Pteriomorphia;Ostreida;Ostreoidea;Ostreidae;Crassostrea;Crassostrea gigas

UdeM00000043081 2607531 300.8 UdeM00000043081 XP\_029657462.1 56.3  
277 121 0 92 368 7 283 2.80E-78 300.8 2607531

cellular  
organisms;Eukaryota;Opisthokonta;Metazoa;Eumetazoa;Bilateria;Protostomia;Spiralia;Lophotrochozoa;Mollusca;Cephalopoda;Coleoidea;Octopodiformes;Octopoda;Incirrata;Octopodidae;Octopus;Octopus sinensis

UdeM00000043082 29159 101.7 UdeM00000043082 XP\_034307807.1 35.7 171  
99 5 2 171 21 181 1.00E-18 101.7 29159 cellular

organisms;Eukaryota;Opisthokonta;Metazoa;Eumetazoa;Bilateria;Protostomia;Spiralia;Lophotrochozoa;Mollusca;Bivalvia;Autobranchia;Pteriomorphia;Ostreida;Ostreoidea;Ostreidae;Crassostrea;Crassostrea gigas

UdeM00000043083 2607531 303.9 UdeM00000043083 XP\_029657462.1 56.3  
 277 121 0 92 368 7 283 3.30E-79 303.9 2607531  
 cellular  
 organisms;Eukaryota;Opisthokonta;Metazoa;Eumetazoa;Bilateria;Protostomia;  
 Spiralia;Lophotrochozoa;Mollusca;Cephalopoda;Coleoidea;Octopodiformes;Oct  
 opoda;Incirrata;Octopodidae;Octopus;Octopus sinensis  
 UdeM00000043084 6596 358.6 UdeM00000043084 XP\_045177776.1 35.2 660  
 306 11 117 775 398 936 2.00E-95 358.6 6596 cellular  
 organisms;Eukaryota;Opisthokonta;Metazoa;Eumetazoa;Bilateria;Protostomia;  
 Spiralia;Lophotrochozoa;Mollusca;Bivalvia;Autobranchia;Heteroconchia;Euhe  
 terodonta;Imparidentia;Venerida;Veneroidea;Veneridae;Mercenaria;Mercenari  
 a mercenaria  
 UdeM00000043085 7725 94 UdeM00000043085 XP\_039265772.1 40.4 109  
 64 1 5 113 143 250 1.60E-16 94 7725 cellular  
 organisms;Eukaryota;Opisthokonta;Metazoa;Eumetazoa;Bilateria;Deuterostomi  
 a;Chordata;Tunicata;Ascidiacea;Stolidobranchia;Styelidae;Styela;Styela  
 clava  
 UdeM00000043087 6565 86.7 UdeM00000043087 XP\_022307899.1 34.7 167  
 89 5 17 183 11 157 3.90E-14 86.7 6565 cellular  
 organisms;Eukaryota;Opisthokonta;Metazoa;Eumetazoa;Bilateria;Protostomia;  
 Spiralia;Lophotrochozoa;Mollusca;Bivalvia;Autobranchia;Pteriormorphia;Ostr  
 eida;Ostreoidea;Ostreidae;Crassostrea;Crassostrea virginica  
 UdeM00000043086 6596 377.5 UdeM00000043086 XP\_045177776.1 38.8 564  
 287 8 84 638 398 912 4.70E-101 377.5 6596 cellular  
 organisms;Eukaryota;Opisthokonta;Metazoa;Eumetazoa;Bilateria;Protostomia;  
 Spiralia;Lophotrochozoa;Mollusca;Bivalvia;Autobranchia;Heteroconchia;Euhe  
 terodonta;Imparidentia;Venerida;Veneroidea;Veneridae;Mercenaria;Mercenari  
 a mercenaria  
 UdeM00000043088 6596 377.9 UdeM00000043088 XP\_045177776.1 38.8 564  
 287 8 84 638 398 912 2.60E-101 377.9 6596 cellular  
 organisms;Eukaryota;Opisthokonta;Metazoa;Eumetazoa;Bilateria;Protostomia;  
 Spiralia;Lophotrochozoa;Mollusca;Bivalvia;Autobranchia;Heteroconchia;Euhe  
 terodonta;Imparidentia;Venerida;Veneroidea;Veneridae;Mercenaria;Mercenari  
 a mercenaria  
 UdeM00000043089 6565 101.3 UdeM00000043089 XP\_022308598.1 38.1 168  
 94 5 2 168 21 179 1.30E-18 101.3 6565 cellular  
 organisms;Eukaryota;Opisthokonta;Metazoa;Eumetazoa;Bilateria;Protostomia;  
 Spiralia;Lophotrochozoa;Mollusca;Bivalvia;Autobranchia;Pteriormorphia;Ostr  
 eida;Ostreoidea;Ostreidae;Crassostrea;Crassostrea virginica  
 UdeM00000043090 6596 151.4 UdeM00000043090 XP\_045177776.1 43.4 182  
 86 1 171 352 711 875 2.20E-33 151.4 6596 cellular  
 organisms;Eukaryota;Opisthokonta;Metazoa;Eumetazoa;Bilateria;Protostomia;  
 Spiralia;Lophotrochozoa;Mollusca;Bivalvia;Autobranchia;Heteroconchia;Euhe  
 terodonta;Imparidentia;Venerida;Veneroidea;Veneridae;Mercenaria;Mercenari  
 a mercenaria  
 UdeM00000043091 6596 188.7 UdeM00000043091 XP\_045177778.1 37.3 332  
 173 7 1 331 405 702 1.30E-44 188.7 6596 cellular  
 organisms;Eukaryota;Opisthokonta;Metazoa;Eumetazoa;Bilateria;Protostomia;  
 Spiralia;Lophotrochozoa;Mollusca;Bivalvia;Autobranchia;Heteroconchia;Euhe  
 terodonta;Imparidentia;Venerida;Veneroidea;Veneridae;Mercenaria;Mercenari  
 a mercenaria  
 UdeM00000043093 6573 133.7 UdeM00000043093 XP\_021371428.1 52.9 119  
 56 0 11 129 85 203 1.80E-28 133.7 6573 cellular  
 organisms;Eukaryota;Opisthokonta;Metazoa;Eumetazoa;Bilateria;Protostomia;

Spiralia;Lophotrochozoa;Mollusca;Bivalvia;Autobranchia;Pteriormorphia;Pectinida;Pectinoidea;Pectinidae;Mizuhopecten;Mizuhopecten yessoensis  
UdeM00000043094 6565 59.3 UdeM00000043094 XP\_022337642.1 46.9 64  
33 1 2 65 201 263 2.40E-06 59.3 6565 cellular  
organisms;Eukaryota;Opisthokonta;Metazoa;Eumetazoa;Bilateria;Protostomia;  
Spiralia;Lophotrochozoa;Mollusca;Bivalvia;Autobranchia;Pteriormorphia;Ostr  
eida;Ostreoidea;Ostreidae;Crassostrea;Crassostrea virginica  
UdeM00000043096 37653 119.4 UdeM00000043096 XP\_014767494.1 76.1 71  
17 0 62 132 931 1001 3.80E-24 119.4 37653 cellular  
organisms;Eukaryota;Opisthokonta;Metazoa;Eumetazoa;Bilateria;Protostomia;  
Spiralia;Lophotrochozoa;Mollusca;Cephalopoda;Coleoidea;Octopodiformes;Oct  
opoda;Incirrata;Octopodidae;Octopus;Octopus bimaculoides  
UdeM00000043096 37653 82 UdeM00000043096 XP\_014767494.1 73.5 49  
13 0 2 50 539 587 6.70E-13 82 37653 cellular  
organisms;Eukaryota;Opisthokonta;Metazoa;Eumetazoa;Bilateria;Protostomia;  
Spiralia;Lophotrochozoa;Mollusca;Cephalopoda;Coleoidea;Octopodiformes;Oct  
opoda;Incirrata;Octopodidae;Octopus;Octopus bimaculoides  
UdeM00000043097 6596 321.6 UdeM00000043097 XP\_045177779.1 33.1 622  
332 11 1 619 97 637 2.80E-84 321.6 6596 cellular  
organisms;Eukaryota;Opisthokonta;Metazoa;Eumetazoa;Bilateria;Protostomia;  
Spiralia;Lophotrochozoa;Mollusca;Bivalvia;Autobranchia;Heteroconchia;Euhe  
terodonta;Imparidentia;Venerida;Veneroidea;Veneridae;Mercenaria;Mercenari  
a mercenaria  
UdeM00000043099 29159 162.5 UdeM00000043099 XP\_034317111.1 55.6 133  
59 0 1 133 1 133 4.10E-37 162.5 29159 cellular  
organisms;Eukaryota;Opisthokonta;Metazoa;Eumetazoa;Bilateria;Protostomia;  
Spiralia;Lophotrochozoa;Mollusca;Bivalvia;Autobranchia;Pteriormorphia;Ostr  
eida;Ostreoidea;Ostreidae;Crassostrea;Crassostrea gigas  
UdeM00000043100 6596 347.8 UdeM00000043100 XP\_045177776.1 35.3 652  
301 11 1 651 405 936 3.90E-92 347.8 6596 cellular  
organisms;Eukaryota;Opisthokonta;Metazoa;Eumetazoa;Bilateria;Protostomia;  
Spiralia;Lophotrochozoa;Mollusca;Bivalvia;Autobranchia;Heteroconchia;Euhe  
terodonta;Imparidentia;Venerida;Veneroidea;Veneridae;Mercenaria;Mercenari  
a mercenaria  
UdeM00000043101 7739 92.4 UdeM00000043101 XP\_035659254.1 52.9 85  
37 1 31 112 728 812 4.10E-16 92.4 7739 cellular  
organisms;Eukaryota;Opisthokonta;Metazoa;Eumetazoa;Bilateria;Deuterostomi  
a;Chordata;Cephalochordata;Leptocardii;Amphioxiformes;Branchiostomidae;Br  
anchiostoma;Branchiostoma floridae  
UdeM00000043103 6596 192.6 UdeM00000043103 XP\_045177778.1 37.4 313  
170 6 1 306 405 698 7.50E-46 192.6 6596 cellular  
organisms;Eukaryota;Opisthokonta;Metazoa;Eumetazoa;Bilateria;Protostomia;  
Spiralia;Lophotrochozoa;Mollusca;Bivalvia;Autobranchia;Heteroconchia;Euhe  
terodonta;Imparidentia;Venerida;Veneroidea;Veneridae;Mercenaria;Mercenari  
a mercenaria  
UdeM00000043104 29159 101.7 UdeM00000043104 XP\_034307807.1 35.7 171  
99 5 2 171 21 181 1.00E-18 101.7 29159 cellular  
organisms;Eukaryota;Opisthokonta;Metazoa;Eumetazoa;Bilateria;Protostomia;  
Spiralia;Lophotrochozoa;Mollusca;Bivalvia;Autobranchia;Pteriormorphia;Ostr  
eida;Ostreoidea;Ostreidae;Crassostrea;Crassostrea gigas  
UdeM00000043106 6596 65.9 UdeM00000043106 XP\_045189084.1 42.9 77  
44 0 1 77 1717 1793 4.80E-08 65.9 6596 cellular  
organisms;Eukaryota;Opisthokonta;Metazoa;Eumetazoa;Bilateria;Protostomia;  
Spiralia;Lophotrochozoa;Mollusca;Bivalvia;Autobranchia;Heteroconchia;Euhe

terodonta;Imparidentia;Venerida;Veneroidea;Veneridae;Mercenaria;Mercenari  
 a mercenaria  
 UdeM00000043107 6596 339.3 UdeM00000043107 XP\_045177779.1 35.3 612  
 294 12 9 610 90 609 1.30E-89 339.3 6596 cellular  
 organisms;Eukaryota;Opisthokonta;Metazoa;Eumetazoa;Bilateria;Protostomia;  
 Spiralia;Lophotrochozoa;Mollusca;Bivalvia;Autobranhia;Heteroconchia;Euhe  
 terodonta;Imparidentia;Venerida;Veneroidea;Veneridae;Mercenaria;Mercenari  
 a mercenaria  
 UdeM00000043110 29159 72 UdeM00000043110 XP\_034307878.1 29 131  
 91 2 1 131 92 220 1.40E-09 72 29159 cellular  
 organisms;Eukaryota;Opisthokonta;Metazoa;Eumetazoa;Bilateria;Protostomia;  
 Spiralia;Lophotrochozoa;Mollusca;Bivalvia;Autobranhia;Pteriormorphia;Ostr  
 eida;Ostreioidea;Ostreidae;Crassostrea;Crassostrea gigas  
 UdeM00000043111 29159 213.8 UdeM00000043111 XP\_034312908.1 28.2 650  
 341 21 9 564 6 623 5.80E-52 213.8 29159 cellular  
 organisms;Eukaryota;Opisthokonta;Metazoa;Eumetazoa;Bilateria;Protostomia;  
 Spiralia;Lophotrochozoa;Mollusca;Bivalvia;Autobranhia;Pteriormorphia;Ostr  
 eida;Ostreioidea;Ostreidae;Crassostrea;Crassostrea gigas  
 UdeM00000043112 6596 411.8 UdeM00000043112 XP\_045182638.1 60.3 378  
 67 3 31 325 794 1171 8.30E-112 411.8 6596 cellular  
 organisms;Eukaryota;Opisthokonta;Metazoa;Eumetazoa;Bilateria;Protostomia;  
 Spiralia;Lophotrochozoa;Mollusca;Bivalvia;Autobranhia;Heteroconchia;Euhe  
 terodonta;Imparidentia;Venerida;Veneroidea;Veneridae;Mercenaria;Mercenari  
 a mercenaria  
 UdeM00000043115 29159 99.8 UdeM00000043115 XP\_034307807.1 35.1 171  
 100 5 2 171 21 181 3.90E-18 99.8 29159 cellular  
 organisms;Eukaryota;Opisthokonta;Metazoa;Eumetazoa;Bilateria;Protostomia;  
 Spiralia;Lophotrochozoa;Mollusca;Bivalvia;Autobranhia;Pteriormorphia;Ostr  
 eida;Ostreioidea;Ostreidae;Crassostrea;Crassostrea gigas  
 UdeM00000043117 6596 182.2 UdeM00000043117 XP\_045177776.1 32.9 362  
 181 6 13 364 685 994 1.20E-42 182.2 6596 cellular  
 organisms;Eukaryota;Opisthokonta;Metazoa;Eumetazoa;Bilateria;Protostomia;  
 Spiralia;Lophotrochozoa;Mollusca;Bivalvia;Autobranhia;Heteroconchia;Euhe  
 terodonta;Imparidentia;Venerida;Veneroidea;Veneridae;Mercenaria;Mercenari  
 a mercenaria  
 UdeM00000043118 6596 173.3 UdeM00000043118 XP\_045180775.1 36.2 345  
 173 9 1 326 1027 1343 5.80E-40 173.3 6596 cellular  
 organisms;Eukaryota;Opisthokonta;Metazoa;Eumetazoa;Bilateria;Protostomia;  
 Spiralia;Lophotrochozoa;Mollusca;Bivalvia;Autobranhia;Heteroconchia;Euhe  
 terodonta;Imparidentia;Venerida;Veneroidea;Veneridae;Mercenaria;Mercenari  
 a mercenaria  
 UdeM00000043119 29159 100.9 UdeM00000043119 XP\_034307582.1 34.3 169  
 95 6 4 171 16 169 1.70E-18 100.9 29159 cellular  
 organisms;Eukaryota;Opisthokonta;Metazoa;Eumetazoa;Bilateria;Protostomia;  
 Spiralia;Lophotrochozoa;Mollusca;Bivalvia;Autobranhia;Pteriormorphia;Ostr  
 eida;Ostreioidea;Ostreidae;Crassostrea;Crassostrea gigas  
 UdeM00000043120 6596 146.7 UdeM00000043120 XP\_045177695.1 42.2 180  
 87 1 29 208 185 347 3.40E-32 146.7 6596 cellular  
 organisms;Eukaryota;Opisthokonta;Metazoa;Eumetazoa;Bilateria;Protostomia;  
 Spiralia;Lophotrochozoa;Mollusca;Bivalvia;Autobranhia;Heteroconchia;Euhe  
 terodonta;Imparidentia;Venerida;Veneroidea;Veneridae;Mercenaria;Mercenari  
 a mercenaria  
 UdeM00000043121 6596 191.8 UdeM00000043121 XP\_045177778.1 38 329  
 167 7 1 327 405 698 1.40E-45 191.8 6596 cellular

organisms;Eukaryota;Opisthokonta;Metazoa;Eumetazoa;Bilateria;Protostomia;Spiralia;Lophotrochozoa;Mollusca;Bivalvia;Autobranchia;Heteroconchia;Euheterodonta;Imparidentia;Venerida;Veneroidea;Veneridae;Mercenaria;Mercenaria mercenaria

UdeM00000043122 29159 134.8 UdeM00000043122 XP\_034339171.1 43.6 165  
89 2 27 187 16 180 1.20E-28 134.8 29159 cellular

organisms;Eukaryota;Opisthokonta;Metazoa;Eumetazoa;Bilateria;Protostomia;Spiralia;Lophotrochozoa;Mollusca;Bivalvia;Autobranchia;Pteriormorphia;Ostreida;Ostreoidea;Ostreidae;Crassostrea;Crassostrea gigas

UdeM00000043123 6596 350.9 UdeM00000043123 XP\_045177779.1 36.6 634  
296 16 1 621 97 637 4.40E-93 350.9 6596 cellular

organisms;Eukaryota;Opisthokonta;Metazoa;Eumetazoa;Bilateria;Protostomia;Spiralia;Lophotrochozoa;Mollusca;Bivalvia;Autobranchia;Heteroconchia;Euheterodonta;Imparidentia;Venerida;Veneroidea;Veneridae;Mercenaria;Mercenaria mercenaria

UdeM00000043124 6565 101.3 UdeM00000043124 XP\_022308598.1 38.1 168  
94 5 2 168 21 179 1.30E-18 101.3 6565 cellular

organisms;Eukaryota;Opisthokonta;Metazoa;Eumetazoa;Bilateria;Protostomia;Spiralia;Lophotrochozoa;Mollusca;Bivalvia;Autobranchia;Pteriormorphia;Ostreida;Ostreoidea;Ostreidae;Crassostrea;Crassostrea virginica

UdeM00000043125 6596 183.3 UdeM00000043125 XP\_045177776.1 43.7 215  
104 1 212 426 711 908 6.40E-43 183.3 6596 cellular

organisms;Eukaryota;Opisthokonta;Metazoa;Eumetazoa;Bilateria;Protostomia;Spiralia;Lophotrochozoa;Mollusca;Bivalvia;Autobranchia;Heteroconchia;Euheterodonta;Imparidentia;Venerida;Veneroidea;Veneridae;Mercenaria;Mercenaria mercenaria

UdeM00000043126 1735272 158.3 UdeM00000043126 XP\_041356266.1 52.8  
142 59 1 9 142 81 222 7.30E-36 158.3 1735272  
cellular

organisms;Eukaryota;Opisthokonta;Metazoa;Eumetazoa;Bilateria;Protostomia;Spiralia;Lophotrochozoa;Mollusca;Gastropoda;Neomphalina;Neomphaloidea;Peltospiridae;Gigantopelta;Gigantopelta aegis

UdeM00000043127 6596 188 UdeM00000043127 XP\_045177778.1 37 332  
174 7 1 331 405 702 2.20E-44 188 6596 cellular

organisms;Eukaryota;Opisthokonta;Metazoa;Eumetazoa;Bilateria;Protostomia;Spiralia;Lophotrochozoa;Mollusca;Bivalvia;Autobranchia;Heteroconchia;Euheterodonta;Imparidentia;Venerida;Veneroidea;Veneridae;Mercenaria;Mercenaria mercenaria

UdeM00000043129 6573 133.7 UdeM00000043129 XP\_021371428.1 52.9 119  
56 0 11 129 85 203 1.80E-28 133.7 6573 cellular

organisms;Eukaryota;Opisthokonta;Metazoa;Eumetazoa;Bilateria;Protostomia;Spiralia;Lophotrochozoa;Mollusca;Bivalvia;Autobranchia;Pteriormorphia;Pectinida;Pectinoidea;Pectinidae;Mizuhopecten;Mizuhopecten yessoensis

UdeM00000043130 6565 59.3 UdeM00000043130 XP\_022337642.1 46.9 64  
33 1 2 65 201 263 2.40E-06 59.3 6565 cellular

organisms;Eukaryota;Opisthokonta;Metazoa;Eumetazoa;Bilateria;Protostomia;Spiralia;Lophotrochozoa;Mollusca;Bivalvia;Autobranchia;Pteriormorphia;Ostreida;Ostreoidea;Ostreidae;Crassostrea;Crassostrea virginica

UdeM00000043132 1735272 122.5 UdeM00000043132 XP\_041360629.1 82.9  
70 12 0 37 106 520 589 5.90E-25 122.5 1735272  
cellular

organisms;Eukaryota;Opisthokonta;Metazoa;Eumetazoa;Bilateria;Protostomia;Spiralia;Lophotrochozoa;Mollusca;Gastropoda;Neomphalina;Neomphaloidea;Peltospiridae;Gigantopelta;Gigantopelta aegis



UdeM00000043133 63155 139 UdeM00000043133 XP\_030575909.1 33.4 299  
 52 4 37 188 524 822 6.40E-30 139 63155 cellular  
 organisms;Eukaryota;Opisthokonta;Metazoa;Eumetazoa;Bilateria;Deuterostomi  
 a;Chordata;Craniata;Vertebrata;Gnathostomata;Teleostomi;Euteleostomi;Acti  
 nopterygii;Actinopteri;Neopterygii;Teleostei;Osteoglossocephalai;Clupeoce  
 phala;Euteleosteomorpha;Neoteleostei;Eurypterygia;Ctenosquamata;Acanthomo  
 rphata;Euacanthomorphacea;Percomorphaceae;Ovalentaria;Cichlomorphae;Cichl  
 iformes;Cichlidae;New World  
 cichlids;Cichlasomatinae;Heroini;Archocentrus;Archocentrus centrarchus  
 UdeM00000043134 37653 119.8 UdeM00000043134 XP\_014767494.1 76.1 71  
 17 0 5 75 931 1001 1.80E-24 119.8 37653 cellular  
 organisms;Eukaryota;Opisthokonta;Metazoa;Eumetazoa;Bilateria;Protostomia;  
 Spiralia;Lophotrochozoa;Mollusca;Cephalopoda;Coleoidea;Octopodiformes;Oct  
 opoda;Incirrata;Octopodidae;Octopus;Octopus bimaculoides  
 UdeM00000043135 6596 318.9 UdeM00000043135 XP\_045177779.1 33.1 622  
 332 11 1 619 97 637 1.90E-83 318.9 6596 cellular  
 organisms;Eukaryota;Opisthokonta;Metazoa;Eumetazoa;Bilateria;Protostomia;  
 Spiralia;Lophotrochozoa;Mollusca;Bivalvia;Autobranchia;Heteroconchia;Euhe  
 terodonta;Imparidentia;Venerida;Veneroidea;Veneridae;Mercenaria;Mercenari  
 a mercenaria  
 UdeM00000043137 29159 162.5 UdeM00000043137 XP\_034317111.1 55.6 133  
 59 0 1 133 1 133 4.10E-37 162.5 29159 cellular  
 organisms;Eukaryota;Opisthokonta;Metazoa;Eumetazoa;Bilateria;Protostomia;  
 Spiralia;Lophotrochozoa;Mollusca;Bivalvia;Autobranchia;Pteriormorphia;Ostr  
 eida;Ostreoidea;Ostreidae;Crassostrea;Crassostrea gigas  
 UdeM00000043138 6596 185.3 UdeM00000043138 XP\_045177776.1 37.7 268  
 125 4 171 438 711 936 2.60E-43 185.3 6596 cellular  
 organisms;Eukaryota;Opisthokonta;Metazoa;Eumetazoa;Bilateria;Protostomia;  
 Spiralia;Lophotrochozoa;Mollusca;Bivalvia;Autobranchia;Heteroconchia;Euhe  
 terodonta;Imparidentia;Venerida;Veneroidea;Veneridae;Mercenaria;Mercenari  
 a mercenaria  
 UdeM00000043139 6596 186.4 UdeM00000043139 XP\_045177778.1 37.3 330  
 170 8 1 328 405 699 6.40E-44 186.4 6596 cellular  
 organisms;Eukaryota;Opisthokonta;Metazoa;Eumetazoa;Bilateria;Protostomia;  
 Spiralia;Lophotrochozoa;Mollusca;Bivalvia;Autobranchia;Heteroconchia;Euhe  
 terodonta;Imparidentia;Venerida;Veneroidea;Veneridae;Mercenaria;Mercenari  
 a mercenaria  
 UdeM00000043140 29159 72.4 UdeM00000043140 XP\_034339171.1 53.8 65  
 30 0 10 74 106 170 3.30E-10 72.4 29159 cellular  
 organisms;Eukaryota;Opisthokonta;Metazoa;Eumetazoa;Bilateria;Protostomia;  
 Spiralia;Lophotrochozoa;Mollusca;Bivalvia;Autobranchia;Pteriormorphia;Ostr  
 eida;Ostreoidea;Ostreidae;Crassostrea;Crassostrea gigas  
 UdeM00000043141 6565 154.8 UdeM00000043141 XP\_022337642.1 37.9 264  
 122 6 2 263 201 424 1.60E-34 154.8 6565 cellular  
 organisms;Eukaryota;Opisthokonta;Metazoa;Eumetazoa;Bilateria;Protostomia;  
 Spiralia;Lophotrochozoa;Mollusca;Bivalvia;Autobranchia;Pteriormorphia;Ostr  
 eida;Ostreoidea;Ostreidae;Crassostrea;Crassostrea virginica  
 UdeM00000043142 6596 354 UdeM00000043142 XP\_045181788.1 33.8 692  
 314 16 82 667 341 994 4.20E-94 354 6596 cellular  
 organisms;Eukaryota;Opisthokonta;Metazoa;Eumetazoa;Bilateria;Protostomia;  
 Spiralia;Lophotrochozoa;Mollusca;Bivalvia;Autobranchia;Heteroconchia;Euhe  
 terodonta;Imparidentia;Venerida;Veneroidea;Veneridae;Mercenaria;Mercenari  
 a mercenaria

UdeM00000043143 6596 1198 UdeM00000043143 XP\_045181276.1 77 709  
 163 0 1 709 1 709 0.00E+00 1198 6596 cellular  
 organisms;Eukaryota;Opisthokonta;Metazoa;Eumetazoa;Bilateria;Protostomia;  
 Spiralia;Lophotrochozoa;Mollusca;Bivalvia;Autobranchia;Heteroconchia;Euhe  
 terodonta;Imparidentia;Venerida;Veneroidea;Veneridae;Mercenaria;Mercenari  
 a mercenaria

UdeM00000043144 6596 351.7 UdeM00000043144 XP\_045212788.1 32.4 623  
 394 7 22 624 10 625 2.80E-93 351.7 6596 cellular  
 organisms;Eukaryota;Opisthokonta;Metazoa;Eumetazoa;Bilateria;Protostomia;  
 Spiralia;Lophotrochozoa;Mollusca;Bivalvia;Autobranchia;Heteroconchia;Euhe  
 terodonta;Imparidentia;Venerida;Veneroidea;Veneridae;Mercenaria;Mercenari  
 a mercenaria

UdeM00000043145 6596 172.2 UdeM00000043145 XP\_045181714.1 24.1 646  
 449 17 25 654 19 639 2.30E-39 172.2 6596 cellular  
 organisms;Eukaryota;Opisthokonta;Metazoa;Eumetazoa;Bilateria;Protostomia;  
 Spiralia;Lophotrochozoa;Mollusca;Bivalvia;Autobranchia;Heteroconchia;Euhe  
 terodonta;Imparidentia;Venerida;Veneroidea;Veneridae;Mercenaria;Mercenari  
 a mercenaria

UdeM00000043146 6565 60.1 UdeM00000043146 XP\_022316782.1 57.1 42  
 18 0 16 57 6 47 1.70E-06 60.1 6565 cellular  
 organisms;Eukaryota;Opisthokonta;Metazoa;Eumetazoa;Bilateria;Protostomia;  
 Spiralia;Lophotrochozoa;Mollusca;Bivalvia;Autobranchia;Pteriormorphia;Ostr  
 eida;Ostreoidea;Ostreidae;Crassostrea;Crassostrea virginica

UdeM00000043147 29159 165.6 UdeM00000043147 XP\_011420009.2 23.5 685  
 457 17 16 667 4 654 2.10E-37 165.6 29159 cellular  
 organisms;Eukaryota;Opisthokonta;Metazoa;Eumetazoa;Bilateria;Protostomia;  
 Spiralia;Lophotrochozoa;Mollusca;Bivalvia;Autobranchia;Pteriormorphia;Ostr  
 eida;Ostreoidea;Ostreidae;Crassostrea;Crassostrea gigas

UdeM00000043149 6579 78.6 UdeM00000043149 XP\_033726925.1 37.9 103  
 61 1 4 103 290 392 1.40E-11 78.6 6579 cellular  
 organisms;Eukaryota;Opisthokonta;Metazoa;Eumetazoa;Bilateria;Protostomia;  
 Spiralia;Lophotrochozoa;Mollusca;Bivalvia;Autobranchia;Pteriormorphia;Pect  
 inida;Pectinoidea;Pectinidae;Pecten;Pecten maximus

UdeM00000043150 6596 87 UdeM00000043150 XP\_045210735.1 28 200  
 129 2 19 203 411 610 6.80E-14 87 6596 cellular  
 organisms;Eukaryota;Opisthokonta;Metazoa;Eumetazoa;Bilateria;Protostomia;  
 Spiralia;Lophotrochozoa;Mollusca;Bivalvia;Autobranchia;Heteroconchia;Euhe  
 terodonta;Imparidentia;Venerida;Veneroidea;Veneridae;Mercenaria;Mercenari  
 a mercenaria

UdeM00000043151 6565 194.1 UdeM00000043151 XP\_022321940.1 25 675  
 444 17 25 655 16 672 5.60E-46 194.1 6565 cellular  
 organisms;Eukaryota;Opisthokonta;Metazoa;Eumetazoa;Bilateria;Protostomia;  
 Spiralia;Lophotrochozoa;Mollusca;Bivalvia;Autobranchia;Pteriormorphia;Ostr  
 eida;Ostreoidea;Ostreidae;Crassostrea;Crassostrea virginica

UdeM00000043152 6573 284.6 UdeM00000043152 XP\_021365969.1 48 321  
 148 7 70 376 81 396 4.80E-73 284.6 6573 cellular  
 organisms;Eukaryota;Opisthokonta;Metazoa;Eumetazoa;Bilateria;Protostomia;  
 Spiralia;Lophotrochozoa;Mollusca;Bivalvia;Autobranchia;Pteriormorphia;Pect  
 inida;Pectinoidea;Pectinidae;Mizuhopecten;Mizuhopecten yessoensis

UdeM00000043153 6596 191.8 UdeM00000043153 XP\_045181714.1 25.2 644  
 445 19 25 654 19 639 2.80E-45 191.8 6596 cellular  
 organisms;Eukaryota;Opisthokonta;Metazoa;Eumetazoa;Bilateria;Protostomia;  
 Spiralia;Lophotrochozoa;Mollusca;Bivalvia;Autobranchia;Heteroconchia;Euhe

terodonta;Imparidentia;Venerida;Veneroidea;Veneridae;Mercenaria;Mercenari  
a mercenaria

UdeM00000043154 7574 349.7 UdeM00000043154 XP\_013383453.1 72.5 229  
63 0 1 229 1 229 3.20E-93 349.7 7574 cellular

organisms;Eukaryota;Opisthokonta;Metazoa;Eumetazoa;Bilateria;Protostomia;  
Spiralia;Lophotrochozoa;Brachiopoda;Linguliformea;Lingulata;Lingulida;Lin  
guloidea;Lingulidae;Lingula;Lingula anatina

UdeM00000043155 50390 349.7 UdeM00000043155 XP\_028152069.1 75.6 246  
59 1 11 256 3 247 3.10E-93 349.7 50390 cellular

organisms;Eukaryota;Opisthokonta;Metazoa;Eumetazoa;Bilateria;Protostomia;  
Ecdysozoa;Panarthropoda;Arthropoda;Mandibulata;Pancrustacea;Hexapoda;Inse  
cta;Dicondylia;Pterygota;Neoptera;Endopterygota;Coleoptera;Polyphaga;Cucu  
jiformia;Chrysomeloidea;Chrysomelidae;Galerucinae;Luperini;Diabroticina;D  
iabroticites;Diabrotica;Diabrotica virgifera;Diabrotica virgifera  
virgifera

UdeM00000043156 6596 2275.7 UdeM00000043156 XP\_045164107.1 39.9  
3494 1633 56 6 3164 659 4019 0.00E+00 2275.7 6596

cellular

organisms;Eukaryota;Opisthokonta;Metazoa;Eumetazoa;Bilateria;Protostomia;  
Spiralia;Lophotrochozoa;Mollusca;Bivalvia;Autobranchia;Heteroconchia;Euhe  
terodonta;Imparidentia;Venerida;Veneroidea;Veneridae;Mercenaria;Mercenari  
a mercenaria

UdeM00000043157 6596 2264.2 UdeM00000043157 XP\_045164107.1 39.6  
3514 1633 57 6 3184 659 4019 0.00E+00 2264.2 6596

cellular

organisms;Eukaryota;Opisthokonta;Metazoa;Eumetazoa;Bilateria;Protostomia;  
Spiralia;Lophotrochozoa;Mollusca;Bivalvia;Autobranchia;Heteroconchia;Euhe  
terodonta;Imparidentia;Venerida;Veneroidea;Veneridae;Mercenaria;Mercenari  
a mercenaria

UdeM00000043158 6596 74.7 UdeM00000043158 XP\_045164107.1 34.7 124  
80 1 2 124 536 659 1.20E-10 74.7 6596 cellular

organisms;Eukaryota;Opisthokonta;Metazoa;Eumetazoa;Bilateria;Protostomia;  
Spiralia;Lophotrochozoa;Mollusca;Bivalvia;Autobranchia;Heteroconchia;Euhe  
terodonta;Imparidentia;Venerida;Veneroidea;Veneridae;Mercenaria;Mercenari  
a mercenaria

UdeM00000043159 29159 265 UdeM00000043159 XP\_034304924.1 35.4 393  
247 5 2 393 110 496 1.50E-67 265 29159 cellular

organisms;Eukaryota;Opisthokonta;Metazoa;Eumetazoa;Bilateria;Protostomia;  
Spiralia;Lophotrochozoa;Mollusca;Bivalvia;Autobranchia;Pteriomorphia;Ostr  
eida;Ostreoidea;Ostreidae;Crassostrea;Crassostrea gigas

UdeM00000043161 6596 1299.6 UdeM00000043161 XP\_045164107.1 40.4  
2058 840 37 72 1845 1006 2960 0.00E+00 1299.6 6596

cellular

organisms;Eukaryota;Opisthokonta;Metazoa;Eumetazoa;Bilateria;Protostomia;  
Spiralia;Lophotrochozoa;Mollusca;Bivalvia;Autobranchia;Heteroconchia;Euhe  
terodonta;Imparidentia;Venerida;Veneroidea;Veneridae;Mercenaria;Mercenari  
a mercenaria

UdeM00000043162 29159 106.7 UdeM00000043162 XP\_034305547.1 31.9 204  
128 6 25 226 21 215 4.20E-20 106.7 29159 cellular

organisms;Eukaryota;Opisthokonta;Metazoa;Eumetazoa;Bilateria;Protostomia;  
Spiralia;Lophotrochozoa;Mollusca;Bivalvia;Autobranchia;Pteriomorphia;Ostr  
eida;Ostreoidea;Ostreidae;Crassostrea;Crassostrea gigas

UdeM00000043163 6565 232.3 UdeM00000043163 XP\_022327931.1 36.8 342  
204 5 38 374 26 360 1.10E-57 232.3 6565 cellular

organisms;Eukaryota;Opisthokonta;Metazoa;Eumetazoa;Bilateria;Protostomia;Spiralia;Lophotrochozoa;Mollusca;Bivalvia;Autobranchia;Pteriormorphia;Ostreida;Ostreoidea;Ostreidae;Crassostrea;Crassostrea virginica  
UdeM00000043164 7739 235.3 UdeM00000043164 XP\_035696678.1 28.5 613  
151 2 7 332 299 911 1.20E-58 235.3 7739 cellular  
organisms;Eukaryota;Opisthokonta;Metazoa;Eumetazoa;Bilateria;Deuterostomia;Chordata;Cephalochordata;Leptocardii;Amphioxiformes;Branchiostomidae;Branchiostoma;Branchiostoma floridae  
UdeM00000043166 6596 229.6 UdeM00000043166 XP\_045164107.1 39.4 320  
186 4 32 348 750 1064 7.50E-57 229.6 6596 cellular  
organisms;Eukaryota;Opisthokonta;Metazoa;Eumetazoa;Bilateria;Protostomia;Spiralia;Lophotrochozoa;Mollusca;Bivalvia;Autobranchia;Heteroconchia;Euheterodonta;Imparidentia;Venerida;Veneroidea;Veneridae;Mercenaria;Mercenaria mercenaria  
UdeM00000043165 6596 2082 UdeM00000043165 XP\_045164107.1 40.7 3136  
1428 43 32 2818 750 3802 0.00E+00 2082 6596 cellular  
organisms;Eukaryota;Opisthokonta;Metazoa;Eumetazoa;Bilateria;Protostomia;Spiralia;Lophotrochozoa;Mollusca;Bivalvia;Autobranchia;Heteroconchia;Euheterodonta;Imparidentia;Venerida;Veneroidea;Veneridae;Mercenaria;Mercenaria mercenaria  
UdeM00000043169 6596 1175.6 UdeM00000043169 XP\_045164107.1 40.4  
1934 747 31 13 1608 1055 2920 0.00E+00 1175.6 6596  
cellular  
organisms;Eukaryota;Opisthokonta;Metazoa;Eumetazoa;Bilateria;Protostomia;Spiralia;Lophotrochozoa;Mollusca;Bivalvia;Autobranchia;Heteroconchia;Euheterodonta;Imparidentia;Venerida;Veneroidea;Veneridae;Mercenaria;Mercenaria mercenaria  
UdeM00000043170 6596 351.3 UdeM00000043170 XP\_045177776.1 37.3 560  
305 14 1 552 405 926 3.30E-93 351.3 6596 cellular  
organisms;Eukaryota;Opisthokonta;Metazoa;Eumetazoa;Bilateria;Protostomia;Spiralia;Lophotrochozoa;Mollusca;Bivalvia;Autobranchia;Heteroconchia;Euheterodonta;Imparidentia;Venerida;Veneroidea;Veneridae;Mercenaria;Mercenaria mercenaria  
UdeM00000043171 6596 1275.8 UdeM00000043171 XP\_045164107.1 46  
1547 764 18 136 1655 2301 3802 0.00E+00 1275.8 6596  
cellular  
organisms;Eukaryota;Opisthokonta;Metazoa;Eumetazoa;Bilateria;Protostomia;Spiralia;Lophotrochozoa;Mollusca;Bivalvia;Autobranchia;Heteroconchia;Euheterodonta;Imparidentia;Venerida;Veneroidea;Veneridae;Mercenaria;Mercenaria mercenaria  
UdeM00000043173 1735272 462.2 UdeM00000043173 XP\_041360663.1 36.5  
897 462 25 76 908 852 1704 1.50E-126 462.2 1735272  
cellular  
organisms;Eukaryota;Opisthokonta;Metazoa;Eumetazoa;Bilateria;Protostomia;Spiralia;Lophotrochozoa;Mollusca;Gastropoda;Neomphalina;Neomphaloidea;Peltospiridae;Gigantopelta;Gigantopelta aegis  
UdeM00000043174 6596 215.3 UdeM00000043174 XP\_045164107.1 44.4 261  
89 3 18 274 2159 2367 9.60E-53 215.3 6596 cellular  
organisms;Eukaryota;Opisthokonta;Metazoa;Eumetazoa;Bilateria;Protostomia;Spiralia;Lophotrochozoa;Mollusca;Bivalvia;Autobranchia;Heteroconchia;Euheterodonta;Imparidentia;Venerida;Veneroidea;Veneridae;Mercenaria;Mercenaria mercenaria  
UdeM00000043175 6596 614.8 UdeM00000043175 XP\_045164107.1 56.9 562  
227 5 5 563 2416 2965 1.10E-172 614.8 6596 cellular

organisms;Eukaryota;Opisthokonta;Metazoa;Eumetazoa;Bilateria;Protostomia;Spiralia;Lophotrochozoa;Mollusca;Bivalvia;Autobranchia;Heteroconchia;Euheterodonta;Imparidentia;Venerida;Veneroidea;Veneridae;Mercenaria;Mercenaria mercenaria

UdeM00000043176 29159 112.1 UdeM00000043176 XP\_034305547.1 30.9 223  
137 6 31 241 21 238 1.00E-21 112.1 29159 cellular

organisms;Eukaryota;Opisthokonta;Metazoa;Eumetazoa;Bilateria;Protostomia;Spiralia;Lophotrochozoa;Mollusca;Bivalvia;Autobranchia;Pteriormorphia;Ostreida;Ostreoidea;Ostreidae;Crassostrea;Crassostrea gigas

UdeM00000043177 6596 335.1 UdeM00000043177 XP\_045177776.1 33.6 642  
295 15 1 631 405 926 2.60E-88 335.1 6596 cellular

organisms;Eukaryota;Opisthokonta;Metazoa;Eumetazoa;Bilateria;Protostomia;Spiralia;Lophotrochozoa;Mollusca;Bivalvia;Autobranchia;Heteroconchia;Euheterodonta;Imparidentia;Venerida;Veneroidea;Veneridae;Mercenaria;Mercenaria mercenaria

UdeM00000043178 6573 86.7 UdeM00000043178 XP\_021354477.1 23.1 316  
211 7 10 309 2877 3176 5.90E-14 86.7 6573 cellular

organisms;Eukaryota;Opisthokonta;Metazoa;Eumetazoa;Bilateria;Protostomia;Spiralia;Lophotrochozoa;Mollusca;Bivalvia;Autobranchia;Pteriormorphia;Pectinida;Pectinoidea;Pectinidae;Mizuhopecten;Mizuhopecten yessoensis

UdeM00000043179 6596 2079.7 UdeM00000043179 XP\_045164107.1 44.7  
2649 1106 32 11 2371 391 2969 0.00E+00 2079.7 6596  
cellular

organisms;Eukaryota;Opisthokonta;Metazoa;Eumetazoa;Bilateria;Protostomia;Spiralia;Lophotrochozoa;Mollusca;Bivalvia;Autobranchia;Heteroconchia;Euheterodonta;Imparidentia;Venerida;Veneroidea;Veneridae;Mercenaria;Mercenaria mercenaria

UdeM00000043180 6565 233 UdeM00000043180 XP\_022327931.1 36.8 342  
204 5 38 374 26 360 6.30E-58 233 6565 cellular

organisms;Eukaryota;Opisthokonta;Metazoa;Eumetazoa;Bilateria;Protostomia;Spiralia;Lophotrochozoa;Mollusca;Bivalvia;Autobranchia;Pteriormorphia;Ostreida;Ostreoidea;Ostreidae;Crassostrea;Crassostrea virginica

UdeM00000043181 29159 294.7 UdeM00000043181 XP\_011423826.2 70 210  
58 2 5 209 853 1062 9.60E-77 294.7 29159 cellular

organisms;Eukaryota;Opisthokonta;Metazoa;Eumetazoa;Bilateria;Protostomia;Spiralia;Lophotrochozoa;Mollusca;Bivalvia;Autobranchia;Pteriormorphia;Ostreida;Ostreoidea;Ostreidae;Crassostrea;Crassostrea gigas

UdeM00000043182 6596 332.8 UdeM00000043182 XP\_045177779.1 35.6 584  
301 11 1 581 97 608 1.20E-87 332.8 6596 cellular

organisms;Eukaryota;Opisthokonta;Metazoa;Eumetazoa;Bilateria;Protostomia;Spiralia;Lophotrochozoa;Mollusca;Bivalvia;Autobranchia;Heteroconchia;Euheterodonta;Imparidentia;Venerida;Veneroidea;Veneridae;Mercenaria;Mercenaria mercenaria

UdeM00000043183 37653 184.5 UdeM00000043183 XP\_014767494.1 66.4 149  
24 2 34 156 939 1087 1.00E-43 184.5 37653 cellular

organisms;Eukaryota;Opisthokonta;Metazoa;Eumetazoa;Bilateria;Protostomia;Spiralia;Lophotrochozoa;Mollusca;Cephalopoda;Coleoidea;Octopodiformes;Octopoda;Incirrata;Octopodidae;Octopus;Octopus bimaculoides

UdeM00000043184 6596 1688.3 UdeM00000043184 XP\_045164107.1 44.3  
2245 1050 36 9 2161 1883 4019 0.00E+00 1688.3 6596  
cellular

organisms;Eukaryota;Opisthokonta;Metazoa;Eumetazoa;Bilateria;Protostomia;Spiralia;Lophotrochozoa;Mollusca;Bivalvia;Autobranchia;Heteroconchia;Euheterodonta;Imparidentia;Venerida;Veneroidea;Veneridae;Mercenaria;Mercenaria mercenaria

terodonta;Imparidentia;Venerida;Veneroidea;Veneridae;Mercenaria;Mercenari  
 a mercenaria  
 UdeM00000043185 6596 368.6 UdeM00000043185 XP\_045164107.1 34.4 654  
 389 9 671 1308 2929 3558 4.00E-98 368.6 6596 cellular  
 organisms;Eukaryota;Opisthokonta;Metazoa;Eumetazoa;Bilateria;Protostomia;  
 Spiralia;Lophotrochozoa;Mollusca;Bivalvia;Autobranhia;Heteroconchia;Euhe  
 terodonta;Imparidentia;Venerida;Veneroidea;Veneridae;Mercenaria;Mercenari  
 a mercenaria  
 UdeM00000043186 1735272 464.9 UdeM00000043186 XP\_041360663.1 36.9  
 837 439 21 186 966 901 1704 2.60E-127 464.9 1735272  
 cellular  
 organisms;Eukaryota;Opisthokonta;Metazoa;Eumetazoa;Bilateria;Protostomia;  
 Spiralia;Lophotrochozoa;Mollusca;Gastropoda;Neomphalina;Neomphaloidea;Pel  
 tospiridae;Gigantopelta;Gigantopelta aegis  
 UdeM00000036313 6573 82.8 UdeM00000036313 XP\_021375905.1 38.6 101  
 62 0 667 767 508 608 2.60E-12 82.8 6573 cellular  
 organisms;Eukaryota;Opisthokonta;Metazoa;Eumetazoa;Bilateria;Protostomia;  
 Spiralia;Lophotrochozoa;Mollusca;Bivalvia;Autobranhia;Pteriormorphia;Pect  
 inida;Pectinoidea;Pectinidae;Mizuhopecten;Mizuhopecten yessoensis  
 UdeM00000036314 45264 113.6 UdeM00000036314 XP\_044184343.1 35.4 195  
 113 5 4 189 6 196 2.80E-22 113.6 45264 cellular  
 organisms;Eukaryota;Opisthokonta;Metazoa;Eumetazoa;Cnidaria;Anthozoa;Hexa  
 corallia;Scleractinia;Astrocoeniina;Acroporidae;Acropora;Acropora  
 millepora  
 UdeM00000036315 37621 135.2 UdeM00000036315 XP\_014676916.1 31.2 330  
 177 8 4 298 11 325 1.50E-28 135.2 37621 cellular  
 organisms;Eukaryota;Opisthokonta;Metazoa;Eumetazoa;Bilateria;Protostomia;  
 Ecdysozoa;Scalidophora;Priapulida;Priapulimorpha;Priapulimorphida;Priapul  
 idae;Priapulul;Priapulul caudatus  
 UdeM00000036316 37621 134 UdeM00000036316 XP\_014676916.1 30.6 314  
 176 6 27 303 17 325 3.40E-28 134 37621 cellular  
 organisms;Eukaryota;Opisthokonta;Metazoa;Eumetazoa;Bilateria;Protostomia;  
 Ecdysozoa;Scalidophora;Priapulida;Priapulimorpha;Priapulimorphida;Priapul  
 idae;Priapulul;Priapulul caudatus  
 UdeM00000036317 6596 1840.9 UdeM00000036317 XP\_045192273.1 67.1  
 1324 420 7 31 1344 34 1351 0.00E+00 1840.9 6596  
 cellular  
 organisms;Eukaryota;Opisthokonta;Metazoa;Eumetazoa;Bilateria;Protostomia;  
 Spiralia;Lophotrochozoa;Mollusca;Bivalvia;Autobranhia;Heteroconchia;Euhe  
 terodonta;Imparidentia;Venerida;Veneroidea;Veneridae;Mercenaria;Mercenari  
 a mercenaria  
 UdeM00000036318 6596 867.8 UdeM00000036318 XP\_045192268.1 62.7 740  
 266 2 15 754 11 740 9.80E-249 867.8 6596 cellular  
 organisms;Eukaryota;Opisthokonta;Metazoa;Eumetazoa;Bilateria;Protostomia;  
 Spiralia;Lophotrochozoa;Mollusca;Bivalvia;Autobranhia;Heteroconchia;Euhe  
 terodonta;Imparidentia;Venerida;Veneroidea;Veneridae;Mercenaria;Mercenari  
 a mercenaria  
 UdeM00000036319 1735272 108.6 UdeM00000036319 XP\_041361447.1 37.6  
 178 103 3 158 334 105 275 2.00E-20 108.6 1735272  
 cellular  
 organisms;Eukaryota;Opisthokonta;Metazoa;Eumetazoa;Bilateria;Protostomia;  
 Spiralia;Lophotrochozoa;Mollusca;Gastropoda;Neomphalina;Neomphaloidea;Pel  
 tospiridae;Gigantopelta;Gigantopelta aegis

UdeM00000036320 225164 107.5 UdeM00000036320 XP\_009054168.1 33.9  
 168 111 0 42 209 37 204 2.70E-20 107.5 225164  
 cellular  
 organisms;Eukaryota;Opisthokonta;Metazoa;Eumetazoa;Bilateria;Protostomia;  
 Spiralia;Lophotrochozoa;Mollusca;Gastropoda;Patellogastropoda;Lottioidea;  
 Lottiidae;Lottia;Lottia gigantea  
 UdeM00000036321 225164 82.4 UdeM00000036321 XP\_009054168.1 37.3  
 126 79 0 42 167 37 162 1.10E-12 82.4 225164  
 cellular  
 organisms;Eukaryota;Opisthokonta;Metazoa;Eumetazoa;Bilateria;Protostomia;  
 Spiralia;Lophotrochozoa;Mollusca;Gastropoda;Patellogastropoda;Lottioidea;  
 Lottiidae;Lottia;Lottia gigantea  
 UdeM00000036322 260615 194.9 UdeM00000036322 XP\_039398742.1 90  
 110 11 0 11 120 316 425 5.90E-47 194.9 260615  
 cellular  
 organisms;Eukaryota;Opisthokonta;Metazoa;Eumetazoa;Bilateria;Deuterostomi  
 a;Chordata;Craniata;Vertebrata;Gnathostomata;Teleostomi;Euteleostomi;Sarc  
 opterygii;Dipnotetrapodomorpha;Tetrapoda;Amniota;Sauropsida;Sauria;Archel  
 osauria;Testudinata;Testudines;Cryptodira;Durocryptodira;Testudinoidea;Ge  
 oemydidae;Geoemydinae;Mauremys;Mauremys reevesii  
 UdeM00000036323 6565 121.7 UdeM00000036323 XP\_022339035.1 26.2 389  
 254 7 1 376 1 369 2.90E-24 121.7 6565 cellular  
 organisms;Eukaryota;Opisthokonta;Metazoa;Eumetazoa;Bilateria;Protostomia;  
 Spiralia;Lophotrochozoa;Mollusca;Bivalvia;Autobranchia;Pteriormorphia;Ostr  
 eida;Ostreoidea;Ostreidae;Crassostrea;Crassostrea virginica  
 UdeM00000036324 6573 127.1 UdeM00000036324 XP\_021354240.1 24.5 694  
 394 17 1 679 1 579 8.50E-26 127.1 6573 cellular  
 organisms;Eukaryota;Opisthokonta;Metazoa;Eumetazoa;Bilateria;Protostomia;  
 Spiralia;Lophotrochozoa;Mollusca;Bivalvia;Autobranchia;Pteriormorphia;Pect  
 inida;Pectinoidea;Pectinidae;Mizuhopecten;Mizuhopecten yessoensis  
 UdeM00000036325 6573 759.2 UdeM00000036325 XP\_021371326.1 47.2 954  
 380 23 19 916 15 900 6.40E-216 759.2 6573 cellular  
 organisms;Eukaryota;Opisthokonta;Metazoa;Eumetazoa;Bilateria;Protostomia;  
 Spiralia;Lophotrochozoa;Mollusca;Bivalvia;Autobranchia;Pteriormorphia;Pect  
 inida;Pectinoidea;Pectinidae;Mizuhopecten;Mizuhopecten yessoensis  
 UdeM00000036330 7574 81.6 UdeM00000036330 XP\_013384628.1 41.5 94  
 37 1 1 76 33 126 5.60E-13 81.6 7574 cellular  
 organisms;Eukaryota;Opisthokonta;Metazoa;Eumetazoa;Bilateria;Protostomia;  
 Spiralia;Lophotrochozoa;Brachiopoda;Linguliformea;Lingulata;Lingulida;Lin  
 guloidea;Lingulidae;Lingula;Lingula anatina  
 UdeM00000036331 7574 132.1 UdeM00000036331 XP\_013382110.1 64.1 92  
 33 0 1 92 146 237 5.10E-28 132.1 7574 cellular  
 organisms;Eukaryota;Opisthokonta;Metazoa;Eumetazoa;Bilateria;Protostomia;  
 Spiralia;Lophotrochozoa;Brachiopoda;Linguliformea;Lingulata;Lingulida;Lin  
 guloidea;Lingulidae;Lingula;Lingula anatina  
 UdeM00000036332 50429 113.6 UdeM00000036332 XP\_022794541.1 30.1 249  
 150 6 1 236 1 238 1.00E-21 113.6 50429 cellular  
 organisms;Eukaryota;Opisthokonta;Metazoa;Eumetazoa;Cnidaria;Anthozoa;Hexa  
 corallia;Scleractinia;Astrocoeniina;Pocilloporidae;Stylophora;Stylophora  
 pistillata  
 UdeM00000036333 6596 295.8 UdeM00000036333 XP\_045187150.1 38.5 447  
 177 4 1 354 135 576 7.30E-77 295.8 6596 cellular  
 organisms;Eukaryota;Opisthokonta;Metazoa;Eumetazoa;Bilateria;Protostomia;  
 Spiralia;Lophotrochozoa;Mollusca;Bivalvia;Autobranchia;Heteroconchia;Euhe

terodonta;Imparidentia;Venerida;Veneroidea;Veneridae;Mercenaria;Mercenari  
 a mercenaria  
 UdeM00000036334 6596 99.8 UdeM00000036334 XP\_045158901.1 47.4 95  
 49 1 1 94 10 104 2.00E-18 99.8 6596 cellular  
 organisms;Eukaryota;Opisthokonta;Metazoa;Eumetazoa;Bilateria;Protostomia;  
 Spiralia;Lophotrochozoa;Mollusca;Bivalvia;Autobranchia;Heteroconchia;Euhe  
 terodonta;Imparidentia;Venerida;Veneroidea;Veneridae;Mercenaria;Mercenari  
 a mercenaria  
 UdeM00000036336 32536 60.5 UdeM00000036336 XP\_014925952.2 30.7 101  
 70 0 39 139 180 280 2.00E-06 60.5 32536 cellular  
 organisms;Eukaryota;Opisthokonta;Metazoa;Eumetazoa;Bilateria;Deuterostomi  
 a;Chordata;Craniata;Vertebrata;Gnathostomata;Teleostomi;Euteleostomi;Sarc  
 opterygii;Dipnotetrapodomorpha;Tetrapoda;Amniota;Mammalia;Theria;Eutheria  
 ;Boreoeutheria;Laurasiatheria;Carnivora;Feliformia;Felidae;Acinonychinae;  
 Acinonyx;Acinonyx jubatus  
 UdeM00000036337 6565 59.7 UdeM00000036337 XP\_022339059.1 33.9 127  
 67 3 41 167 79 188 5.00E-06 59.7 6565 cellular  
 organisms;Eukaryota;Opisthokonta;Metazoa;Eumetazoa;Bilateria;Protostomia;  
 Spiralia;Lophotrochozoa;Mollusca;Bivalvia;Autobranchia;Pteriormorphia;Ostr  
 eida;Ostreoidea;Ostreidae;Crassostrea;Crassostrea virginica  
 UdeM00000036339 6596 970.3 UdeM00000036339 XP\_045191773.1 69.9 678  
 175 6 1 649 199 876 1.20E-279 970.3 6596 cellular  
 organisms;Eukaryota;Opisthokonta;Metazoa;Eumetazoa;Bilateria;Protostomia;  
 Spiralia;Lophotrochozoa;Mollusca;Bivalvia;Autobranchia;Heteroconchia;Euhe  
 terodonta;Imparidentia;Venerida;Veneroidea;Veneridae;Mercenaria;Mercenari  
 a mercenaria  
 UdeM00000036340 6596 217.6 UdeM00000036340 XP\_045192358.1 46.2 266  
 134 3 1 264 1 259 2.50E-53 217.6 6596 cellular  
 organisms;Eukaryota;Opisthokonta;Metazoa;Eumetazoa;Bilateria;Protostomia;  
 Spiralia;Lophotrochozoa;Mollusca;Bivalvia;Autobranchia;Heteroconchia;Euhe  
 terodonta;Imparidentia;Venerida;Veneroidea;Veneridae;Mercenaria;Mercenari  
 a mercenaria  
 UdeM00000036341 225164 276.9 UdeM00000036341 XP\_009058289.1 39.9  
 398 216 8 2 386 6 393 3.80E-71 276.9 225164  
 cellular  
 organisms;Eukaryota;Opisthokonta;Metazoa;Eumetazoa;Bilateria;Protostomia;  
 Spiralia;Lophotrochozoa;Mollusca;Gastropoda;Patellogastropoda;Lottioidea;  
 Lottiidae;Lottia;Lottia gigantea  
 UdeM00000036342 6565 401.7 UdeM00000036342 XP\_022343105.1 78.2 243  
 53 0 4 246 22 264 6.50E-109 401.7 6565 cellular  
 organisms;Eukaryota;Opisthokonta;Metazoa;Eumetazoa;Bilateria;Protostomia;  
 Spiralia;Lophotrochozoa;Mollusca;Bivalvia;Autobranchia;Pteriormorphia;Ostr  
 eida;Ostreoidea;Ostreidae;Crassostrea;Crassostrea virginica  
 UdeM00000036343 29159 537.3 UdeM00000036343 XP\_011413833.2 60.2 500  
 157 8 6 498 3 467 2.00E-149 537.3 29159 cellular  
 organisms;Eukaryota;Opisthokonta;Metazoa;Eumetazoa;Bilateria;Protostomia;  
 Spiralia;Lophotrochozoa;Mollusca;Bivalvia;Autobranchia;Pteriormorphia;Ostr  
 eida;Ostreoidea;Ostreidae;Crassostrea;Crassostrea gigas  
 UdeM00000036344 6565 539.7 UdeM00000036344 XP\_022343102.1 61.1 494  
 154 8 6 491 3 466 4.00E-150 539.7 6565 cellular  
 organisms;Eukaryota;Opisthokonta;Metazoa;Eumetazoa;Bilateria;Protostomia;  
 Spiralia;Lophotrochozoa;Mollusca;Bivalvia;Autobranchia;Pteriormorphia;Ostr  
 eida;Ostreoidea;Ostreidae;Crassostrea;Crassostrea virginica



UdeM00000036345 6579 1788.5 UdeM00000036345 XP\_033754342.1 54.9  
 2370 911 51 62 2365 1112 3389 0.00E+00 1788.5 6579  
 cellular  
 organisms;Eukaryota;Opisthokonta;Metazoa;Eumetazoa;Bilateria;Protostomia;  
 Spiralia;Lophotrochozoa;Mollusca;Bivalvia;Autobranchia;Pteriomorpha;Pect  
 inida;Pectinoidea;Pectinidae;Pecten;Pecten maximus  
 UdeM00000036346 6573 1003.8 UdeM00000036346 XP\_021358263.1 55.3  
 988 363 16 153 1098 119 1069 1.70E-289 1003.8 6573  
 cellular  
 organisms;Eukaryota;Opisthokonta;Metazoa;Eumetazoa;Bilateria;Protostomia;  
 Spiralia;Lophotrochozoa;Mollusca;Bivalvia;Autobranchia;Pteriomorpha;Pect  
 inida;Pectinoidea;Pectinidae;Mizuhopecten;Mizuhopecten yessoensis  
 UdeM00000036347 6579 136 UdeM00000036347 XP\_033753925.1 29.3 485  
 294 14 529 984 100 564 2.70E-28 136 6579 cellular  
 organisms;Eukaryota;Opisthokonta;Metazoa;Eumetazoa;Bilateria;Protostomia;  
 Spiralia;Lophotrochozoa;Mollusca;Bivalvia;Autobranchia;Pteriomorpha;Pect  
 inida;Pectinoidea;Pectinidae;Pecten;Pecten maximus  
 UdeM00000036348 6596 340.1 UdeM00000036348 XP\_045194746.1 54.8 332  
 145 4 232 562 86 413 5.30E-90 340.1 6596 cellular  
 organisms;Eukaryota;Opisthokonta;Metazoa;Eumetazoa;Bilateria;Protostomia;  
 Spiralia;Lophotrochozoa;Mollusca;Bivalvia;Autobranchia;Heteroconchia;Euhe  
 terodonta;Imparidentia;Venerida;Veneroidea;Veneridae;Mercenaria;Mercenari  
 a mercenaria  
 UdeM00000036349 37621 76.3 UdeM00000036349 XP\_014676916.1 40.6 101  
 59 1 11 111 186 285 2.80E-11 76.3 37621 cellular  
 organisms;Eukaryota;Opisthokonta;Metazoa;Eumetazoa;Bilateria;Protostomia;  
 Ecdysozoa;Scalidophora;Priapulida;Priapulimorpha;Priapulimorphida;Priapul  
 idae;Priapulul;Priapulul caudatus  
 UdeM00000036351 6596 261.2 UdeM00000036351 XP\_045170038.1 50.2 265  
 124 3 26 283 20 283 1.60E-66 261.2 6596 cellular  
 organisms;Eukaryota;Opisthokonta;Metazoa;Eumetazoa;Bilateria;Protostomia;  
 Spiralia;Lophotrochozoa;Mollusca;Bivalvia;Autobranchia;Heteroconchia;Euhe  
 terodonta;Imparidentia;Venerida;Veneroidea;Veneridae;Mercenaria;Mercenari  
 a mercenaria  
 UdeM00000036352 6596 213.8 UdeM00000036352 XP\_045170038.1 50.7 213  
 97 3 26 231 20 231 3.80E-52 213.8 6596 cellular  
 organisms;Eukaryota;Opisthokonta;Metazoa;Eumetazoa;Bilateria;Protostomia;  
 Spiralia;Lophotrochozoa;Mollusca;Bivalvia;Autobranchia;Heteroconchia;Euhe  
 terodonta;Imparidentia;Venerida;Veneroidea;Veneridae;Mercenaria;Mercenari  
 a mercenaria  
 UdeM00000036353 7741 231.5 UdeM00000036353 XP\_019614136.1 70.9 148  
 43 0 7 154 248 395 7.30E-58 231.5 7741 cellular  
 organisms;Eukaryota;Opisthokonta;Metazoa;Eumetazoa;Bilateria;Deuterostomi  
 a;Chordata;Cephalochordata;Leptocardii;Amphioxiformes;Branchiostomidae;Br  
 anchiostoma;Branchiostoma belcheri  
 UdeM00000036354 225164 175.3 UdeM00000036354 XP\_009059381.1 44.5  
 211 96 4 23 225 86 283 9.10E-41 175.3 225164  
 cellular  
 organisms;Eukaryota;Opisthokonta;Metazoa;Eumetazoa;Bilateria;Protostomia;  
 Spiralia;Lophotrochozoa;Mollusca;Gastropoda;Patellogastropoda;Lottioidae;  
 Lottiidae;Lottia;Lottia gigantea  
 UdeM00000036355 6579 204.5 UdeM00000036355 XP\_033754595.1 40.5 262  
 151 3 1 258 17 277 1.70E-49 204.5 6579 cellular  
 organisms;Eukaryota;Opisthokonta;Metazoa;Eumetazoa;Bilateria;Protostomia;

Spiralia;Lophotrochozoa;Mollusca;Bivalvia;Autobranchia;Pteriomorpha;Pectinida;Pectinoidea;Pectinidae;Pecten;Pecten maximus  
UdeM00000036356 6596 618.2 UdeM00000036356 XP\_045192514.1 41.8 1007  
443 26 4 937 5 941 1.70E-173 618.2 6596 cellular  
organisms;Eukaryota;Opisthokonta;Metazoa;Eumetazoa;Bilateria;Protostomia;  
Spiralia;Lophotrochozoa;Mollusca;Bivalvia;Autobranchia;Heteroconchia;Euherodonta;Imparidentia;Venerida;Veneroidea;Veneridae;Mercenaria;Mercenaria mercenaria  
UdeM00000036357 6596 466.5 UdeM00000036357 XP\_045197025.1 28.1 1262  
565 32 52 1020 126 1337 8.90E-128 466.5 6596 cellular  
organisms;Eukaryota;Opisthokonta;Metazoa;Eumetazoa;Bilateria;Protostomia;  
Spiralia;Lophotrochozoa;Mollusca;Bivalvia;Autobranchia;Heteroconchia;Euherodonta;Imparidentia;Venerida;Veneroidea;Veneridae;Mercenaria;Mercenaria mercenaria  
UdeM00000036358 6596 332.4 UdeM00000036358 XP\_045181767.1 50.8 307  
134 5 109 409 121 416 8.10E-88 332.4 6596 cellular  
organisms;Eukaryota;Opisthokonta;Metazoa;Eumetazoa;Bilateria;Protostomia;  
Spiralia;Lophotrochozoa;Mollusca;Bivalvia;Autobranchia;Heteroconchia;Euherodonta;Imparidentia;Venerida;Veneroidea;Veneridae;Mercenaria;Mercenaria mercenaria  
UdeM00000036359 6565 341.7 UdeM00000036359 XP\_022335607.1 47.3 355  
175 5 20 373 29 372 1.20E-90 341.7 6565 cellular  
organisms;Eukaryota;Opisthokonta;Metazoa;Eumetazoa;Bilateria;Protostomia;  
Spiralia;Lophotrochozoa;Mollusca;Bivalvia;Autobranchia;Pteriomorpha;Ostreida;Ostreoidea;Ostreidae;Crassostrea;Crassostrea virginica  
UdeM00000036360 6565 337.8 UdeM00000036360 XP\_022335607.1 46.8 355  
177 5 20 373 29 372 1.80E-89 337.8 6565 cellular  
organisms;Eukaryota;Opisthokonta;Metazoa;Eumetazoa;Bilateria;Protostomia;  
Spiralia;Lophotrochozoa;Mollusca;Bivalvia;Autobranchia;Pteriomorpha;Ostreida;Ostreoidea;Ostreidae;Crassostrea;Crassostrea virginica  
UdeM00000036361 29159 68.2 UdeM00000036361 XP\_034301186.1 22.4 407  
285 10 75 477 327 706 4.60E-08 68.2 29159 cellular  
organisms;Eukaryota;Opisthokonta;Metazoa;Eumetazoa;Bilateria;Protostomia;  
Spiralia;Lophotrochozoa;Mollusca;Bivalvia;Autobranchia;Pteriomorpha;Ostreida;Ostreoidea;Ostreidae;Crassostrea;Crassostrea gigas  
UdeM00000036364 6596 339 UdeM00000036364 XP\_045192239.1 52.1 349  
143 6 1 333 1 341 7.10E-90 339 6596 cellular  
organisms;Eukaryota;Opisthokonta;Metazoa;Eumetazoa;Bilateria;Protostomia;  
Spiralia;Lophotrochozoa;Mollusca;Bivalvia;Autobranchia;Heteroconchia;Euherodonta;Imparidentia;Venerida;Veneroidea;Veneridae;Mercenaria;Mercenaria mercenaria  
UdeM00000036365 6596 363.6 UdeM00000036365 XP\_045193105.1 80.6 196  
38 0 1 196 474 669 1.60E-97 363.6 6596 cellular  
organisms;Eukaryota;Opisthokonta;Metazoa;Eumetazoa;Bilateria;Protostomia;  
Spiralia;Lophotrochozoa;Mollusca;Bivalvia;Autobranchia;Heteroconchia;Euherodonta;Imparidentia;Venerida;Veneroidea;Veneridae;Mercenaria;Mercenaria mercenaria  
UdeM00000036366 6596 553.1 UdeM00000036366 XP\_045193105.1 70.3 381  
106 5 94 469 65 443 3.50E-154 553.1 6596 cellular  
organisms;Eukaryota;Opisthokonta;Metazoa;Eumetazoa;Bilateria;Protostomia;  
Spiralia;Lophotrochozoa;Mollusca;Bivalvia;Autobranchia;Heteroconchia;Euherodonta;Imparidentia;Venerida;Veneroidea;Veneridae;Mercenaria;Mercenaria mercenaria

UdeM00000036367 6596 124 UdeM00000036367 XP\_045201862.1 32 269  
 163 6 26 282 438 698 3.10E-25 124 6596 cellular  
 organisms;Eukaryota;Opisthokonta;Metazoa;Eumetazoa;Bilateria;Protostomia;  
 Spiralia;Lophotrochozoa;Mollusca;Bivalvia;Autobranhia;Heteroconchia;Euhe  
 terodonta;Imparidentia;Venerida;Veneroidea;Veneridae;Mercenaria;Mercenari  
 a mercenaria

UdeM00000036368 6596 211.8 UdeM00000036368 XP\_045201862.1 37.4 337  
 197 4 3 332 4 333 1.30E-51 211.8 6596 cellular  
 organisms;Eukaryota;Opisthokonta;Metazoa;Eumetazoa;Bilateria;Protostomia;  
 Spiralia;Lophotrochozoa;Mollusca;Bivalvia;Autobranhia;Heteroconchia;Euhe  
 terodonta;Imparidentia;Venerida;Veneroidea;Veneridae;Mercenaria;Mercenari  
 a mercenaria

UdeM00000036369 6596 318.2 UdeM00000036369 XP\_045201862.1 31.5 709  
 441 12 3 680 4 698 2.60E-83 318.2 6596 cellular  
 organisms;Eukaryota;Opisthokonta;Metazoa;Eumetazoa;Bilateria;Protostomia;  
 Spiralia;Lophotrochozoa;Mollusca;Bivalvia;Autobranhia;Heteroconchia;Euhe  
 terodonta;Imparidentia;Venerida;Veneroidea;Veneridae;Mercenaria;Mercenari  
 a mercenaria

UdeM00000036371 6596 89.4 UdeM00000036371 XP\_045207652.1 29.5 264  
 131 8 13 243 1710 1951 7.50E-15 89.4 6596 cellular  
 organisms;Eukaryota;Opisthokonta;Metazoa;Eumetazoa;Bilateria;Protostomia;  
 Spiralia;Lophotrochozoa;Mollusca;Bivalvia;Autobranhia;Heteroconchia;Euhe  
 terodonta;Imparidentia;Venerida;Veneroidea;Veneridae;Mercenaria;Mercenari  
 a mercenaria

UdeM00000036372 6596 143.7 UdeM00000036372 XP\_045170739.1 33.3 264  
 152 3 2 241 3 266 3.10E-31 143.7 6596 cellular  
 organisms;Eukaryota;Opisthokonta;Metazoa;Eumetazoa;Bilateria;Protostomia;  
 Spiralia;Lophotrochozoa;Mollusca;Bivalvia;Autobranhia;Heteroconchia;Euhe  
 terodonta;Imparidentia;Venerida;Veneroidea;Veneridae;Mercenaria;Mercenari  
 a mercenaria

UdeM00000036374 6596 216.1 UdeM00000036374 XP\_045202244.1 34.6 373  
 236 3 3 368 37 408 7.70E-53 216.1 6596 cellular  
 organisms;Eukaryota;Opisthokonta;Metazoa;Eumetazoa;Bilateria;Protostomia;  
 Spiralia;Lophotrochozoa;Mollusca;Bivalvia;Autobranhia;Heteroconchia;Euhe  
 terodonta;Imparidentia;Venerida;Veneroidea;Veneridae;Mercenaria;Mercenari  
 a mercenaria

UdeM00000036376 6596 75.5 UdeM00000036376 XP\_045207652.1 32.2 152  
 90 3 40 184 1806 1951 8.70E-11 75.5 6596 cellular  
 organisms;Eukaryota;Opisthokonta;Metazoa;Eumetazoa;Bilateria;Protostomia;  
 Spiralia;Lophotrochozoa;Mollusca;Bivalvia;Autobranhia;Heteroconchia;Euhe  
 terodonta;Imparidentia;Venerida;Veneroidea;Veneridae;Mercenaria;Mercenari  
 a mercenaria

UdeM00000036377 6596 101.3 UdeM00000036377 XP\_045170739.1 30.5 203  
 137 2 2 200 3 205 1.50E-18 101.3 6596 cellular  
 organisms;Eukaryota;Opisthokonta;Metazoa;Eumetazoa;Bilateria;Protostomia;  
 Spiralia;Lophotrochozoa;Mollusca;Bivalvia;Autobranhia;Heteroconchia;Euhe  
 terodonta;Imparidentia;Venerida;Veneroidea;Veneridae;Mercenaria;Mercenari  
 a mercenaria

UdeM00000036378 6596 311.2 UdeM00000036378 XP\_045201862.1 31.2 708  
 442 13 3 678 4 698 3.20E-81 311.2 6596 cellular  
 organisms;Eukaryota;Opisthokonta;Metazoa;Eumetazoa;Bilateria;Protostomia;  
 Spiralia;Lophotrochozoa;Mollusca;Bivalvia;Autobranhia;Heteroconchia;Euhe  
 terodonta;Imparidentia;Venerida;Veneroidea;Veneridae;Mercenaria;Mercenari  
 a mercenaria

UdeM00000036379 6596 302.8 UdeM00000036379 XP\_045201862.1 31.1 711  
 439 14 3 678 4 698 1.10E-78 302.8 6596 cellular  
 organisms;Eukaryota;Opisthokonta;Metazoa;Eumetazoa;Bilateria;Protostomia;  
 Spiralia;Lophotrochozoa;Mollusca;Bivalvia;Autobranhia;Heteroconchia;Euhe  
 terodonta;Imparidentia;Venerida;Veneroidea;Veneridae;Mercenaria;Mercenari  
 a mercenaria  
 UdeM00000036380 6596 125.9 UdeM00000036380 XP\_045207652.1 30.3 346  
 200 11 2 321 1729 2059 9.30E-26 125.9 6596 cellular  
 organisms;Eukaryota;Opisthokonta;Metazoa;Eumetazoa;Bilateria;Protostomia;  
 Spiralia;Lophotrochozoa;Mollusca;Bivalvia;Autobranhia;Heteroconchia;Euhe  
 terodonta;Imparidentia;Venerida;Veneroidea;Veneridae;Mercenaria;Mercenari  
 a mercenaria  
 UdeM00000036381 6596 97.8 UdeM00000036381 XP\_045173969.1 41.8 122  
 69 1 4 123 5 126 1.40E-17 97.8 6596 cellular  
 organisms;Eukaryota;Opisthokonta;Metazoa;Eumetazoa;Bilateria;Protostomia;  
 Spiralia;Lophotrochozoa;Mollusca;Bivalvia;Autobranhia;Heteroconchia;Euhe  
 terodonta;Imparidentia;Venerida;Veneroidea;Veneridae;Mercenaria;Mercenari  
 a mercenaria  
 UdeM00000036382 6579 106.3 UdeM00000036382 XP\_033753933.1 69.9 73  
 22 0 247 319 239 311 7.30E-20 106.3 6579 cellular  
 organisms;Eukaryota;Opisthokonta;Metazoa;Eumetazoa;Bilateria;Protostomia;  
 Spiralia;Lophotrochozoa;Mollusca;Bivalvia;Autobranhia;Pteriormorphia;Pect  
 inida;Pectinoidea;Pectinidae;Pecten;Pecten maximus  
 UdeM00000036383 6596 498 UdeM00000036383 XP\_045191367.1 55.8 489  
 205 5 1 487 1 480 1.40E-137 498 6596 cellular  
 organisms;Eukaryota;Opisthokonta;Metazoa;Eumetazoa;Bilateria;Protostomia;  
 Spiralia;Lophotrochozoa;Mollusca;Bivalvia;Autobranhia;Heteroconchia;Euhe  
 terodonta;Imparidentia;Venerida;Veneroidea;Veneridae;Mercenaria;Mercenari  
 a mercenaria  
 UdeM00000036384 6596 335.5 UdeM00000036384 XP\_045192137.1 56.7 261  
 113 0 74 334 73 333 7.80E-89 335.5 6596 cellular  
 organisms;Eukaryota;Opisthokonta;Metazoa;Eumetazoa;Bilateria;Protostomia;  
 Spiralia;Lophotrochozoa;Mollusca;Bivalvia;Autobranhia;Heteroconchia;Euhe  
 terodonta;Imparidentia;Venerida;Veneroidea;Veneridae;Mercenaria;Mercenari  
 a mercenaria  
 UdeM00000036385 6565 504.6 UdeM00000036385 XP\_022336671.1 73.8 343  
 88 1 16 356 12 354 1.10E-139 504.6 6565 cellular  
 organisms;Eukaryota;Opisthokonta;Metazoa;Eumetazoa;Bilateria;Protostomia;  
 Spiralia;Lophotrochozoa;Mollusca;Bivalvia;Autobranhia;Pteriormorphia;Ostr  
 eida;Ostreoidea;Ostreidae;Crassostrea;Crassostrea virginica  
 UdeM00000036388 6565 149.4 UdeM00000036388 XP\_022335990.1 54.3 140  
 27 1 1 103 432 571 2.50E-33 149.4 6565 cellular  
 organisms;Eukaryota;Opisthokonta;Metazoa;Eumetazoa;Bilateria;Protostomia;  
 Spiralia;Lophotrochozoa;Mollusca;Bivalvia;Autobranhia;Pteriormorphia;Ostr  
 eida;Ostreoidea;Ostreidae;Crassostrea;Crassostrea virginica  
 UdeM00000036389 6565 159.1 UdeM00000036389 XP\_022345797.1 58.8 131  
 50 2 1 127 1 131 4.20E-36 159.1 6565 cellular  
 organisms;Eukaryota;Opisthokonta;Metazoa;Eumetazoa;Bilateria;Protostomia;  
 Spiralia;Lophotrochozoa;Mollusca;Bivalvia;Autobranhia;Pteriormorphia;Ostr  
 eida;Ostreoidea;Ostreidae;Crassostrea;Crassostrea virginica  
 UdeM00000036390 6596 406.4 UdeM00000036390 XP\_045192280.1 77.2 246  
 56 0 8 253 351 596 2.80E-110 406.4 6596 cellular  
 organisms;Eukaryota;Opisthokonta;Metazoa;Eumetazoa;Bilateria;Protostomia;  
 Spiralia;Lophotrochozoa;Mollusca;Bivalvia;Autobranhia;Heteroconchia;Euhe

terodonta;Imparidentia;Venerida;Veneroidea;Veneridae;Mercenaria;Mercenari  
 a mercenaria  
 UdeM00000036391 6596 476.1 UdeM00000036391 XP\_045192279.1 60.7 428  
 148 8 27 440 5 426 4.90E-131 476.1 6596 cellular  
 organisms;Eukaryota;Opisthokonta;Metazoa;Eumetazoa;Bilateria;Protostomia;  
 Spiralia;Lophotrochozoa;Mollusca;Bivalvia;Autobranhia;Heteroconchia;Euhe  
 terodonta;Imparidentia;Venerida;Veneroidea;Veneridae;Mercenaria;Mercenari  
 a mercenaria  
 UdeM00000036392 6579 73.9 UdeM00000036392 XP\_033739209.1 58.5 53  
 22 0 9 61 2 54 8.60E-11 73.9 6579 cellular  
 organisms;Eukaryota;Opisthokonta;Metazoa;Eumetazoa;Bilateria;Protostomia;  
 Spiralia;Lophotrochozoa;Mollusca;Bivalvia;Autobranhia;Pteriormorphia;Pect  
 inida;Pectinoidea;Pectinidae;Pecten;Pecten maximus  
 UdeM00000036393 6573 465.3 UdeM00000036393 XP\_021346496.1 40.2 602  
 313 4 586 1153 103 691 2.20E-127 465.3 6573 cellular  
 organisms;Eukaryota;Opisthokonta;Metazoa;Eumetazoa;Bilateria;Protostomia;  
 Spiralia;Lophotrochozoa;Mollusca;Bivalvia;Autobranhia;Pteriormorphia;Pect  
 inida;Pectinoidea;Pectinidae;Mizuhopecten;Mizuhopecten yessoensis  
 UdeM00000036394 6596 106.7 UdeM00000036394 XP\_045188277.1 28.9 225  
 155 4 146 366 1 224 7.10E-20 106.7 6596 cellular  
 organisms;Eukaryota;Opisthokonta;Metazoa;Eumetazoa;Bilateria;Protostomia;  
 Spiralia;Lophotrochozoa;Mollusca;Bivalvia;Autobranhia;Heteroconchia;Euhe  
 terodonta;Imparidentia;Venerida;Veneroidea;Veneridae;Mercenaria;Mercenari  
 a mercenaria  
 UdeM00000036395 6565 176 UdeM00000036395 XP\_022305704.1 34.5 290  
 150 3 1 290 208 457 6.90E-41 176 6565 cellular  
 organisms;Eukaryota;Opisthokonta;Metazoa;Eumetazoa;Bilateria;Protostomia;  
 Spiralia;Lophotrochozoa;Mollusca;Bivalvia;Autobranhia;Pteriormorphia;Ostr  
 eida;Ostreoidea;Ostreidae;Crassostrea;Crassostrea virginica  
 UdeM00000036396 6579 169.9 UdeM00000036396 XP\_033754252.1 73.3 105  
 28 0 3 107 593 697 1.80E-39 169.9 6579 cellular  
 organisms;Eukaryota;Opisthokonta;Metazoa;Eumetazoa;Bilateria;Protostomia;  
 Spiralia;Lophotrochozoa;Mollusca;Bivalvia;Autobranhia;Pteriormorphia;Pect  
 inida;Pectinoidea;Pectinidae;Pecten;Pecten maximus  
 UdeM00000036397 6596 1008.4 UdeM00000036397 XP\_045193080.1 71  
 710 165 6 1 702 1 677 4.60E-291 1008.4 6596  
 cellular  
 organisms;Eukaryota;Opisthokonta;Metazoa;Eumetazoa;Bilateria;Protostomia;  
 Spiralia;Lophotrochozoa;Mollusca;Bivalvia;Autobranhia;Heteroconchia;Euhe  
 terodonta;Imparidentia;Venerida;Veneroidea;Veneridae;Mercenaria;Mercenari  
 a mercenaria  
 UdeM00000036398 6579 141 UdeM00000036398 XP\_033754439.1 47.9 144  
 74 1 8 150 686 829 1.30E-30 141 6579 cellular  
 organisms;Eukaryota;Opisthokonta;Metazoa;Eumetazoa;Bilateria;Protostomia;  
 Spiralia;Lophotrochozoa;Mollusca;Bivalvia;Autobranhia;Pteriormorphia;Pect  
 inida;Pectinoidea;Pectinidae;Pecten;Pecten maximus  
 UdeM00000036399 6596 894.8 UdeM00000036399 XP\_045193080.1 68.1 621  
 190 3 2 618 811 1427 6.10E-257 894.8 6596 cellular  
 organisms;Eukaryota;Opisthokonta;Metazoa;Eumetazoa;Bilateria;Protostomia;  
 Spiralia;Lophotrochozoa;Mollusca;Bivalvia;Autobranhia;Heteroconchia;Euhe  
 terodonta;Imparidentia;Venerida;Veneroidea;Veneridae;Mercenaria;Mercenari  
 a mercenaria  
 UdeM00000036400 6565 313.2 UdeM00000036400 XP\_022337363.1 49.8 295  
 144 3 11 302 15 308 3.80E-82 313.2 6565 cellular

organisms;Eukaryota;Opisthokonta;Metazoa;Eumetazoa;Bilateria;Protostomia;Spiralia;Lophotrochozoa;Mollusca;Bivalvia;Autobranchia;Pteriomorpha;Ostr  
eida;Ostreoidea;Ostreidae;Crassostrea;Crassostrea virginica  
UdeM00000036401 6565 316.2 UdeM00000036401 XP\_022337363.1 49.3 294  
145 3 18 308 15 307 4.60E-83 316.2 6565 cellular  
organisms;Eukaryota;Opisthokonta;Metazoa;Eumetazoa;Bilateria;Protostomia;Spiralia;Lophotrochozoa;Mollusca;Bivalvia;Autobranchia;Pteriomorpha;Ostr  
eida;Ostreoidea;Ostreidae;Crassostrea;Crassostrea virginica  
UdeM00000036402 6579 216.9 UdeM00000036402 XP\_033763653.1 54.2 177  
80 1 1 177 140 315 2.10E-53 216.9 6579 cellular  
organisms;Eukaryota;Opisthokonta;Metazoa;Eumetazoa;Bilateria;Protostomia;Spiralia;Lophotrochozoa;Mollusca;Bivalvia;Autobranchia;Pteriomorpha;Pect  
inida;Pectinoidea;Pectinidae;Pecten;Pecten maximus  
UdeM00000036404 6596 275 UdeM00000036404 XP\_045191913.1 79.3 174  
34 1 10 181 11 184 7.70E-71 275 6596 cellular  
organisms;Eukaryota;Opisthokonta;Metazoa;Eumetazoa;Bilateria;Protostomia;Spiralia;Lophotrochozoa;Mollusca;Bivalvia;Autobranchia;Heteroconchia;Euhe  
terodonta;Imparidentia;Venerida;Veneroidea;Veneridae;Mercenaria;Mercenari  
a mercenaria  
UdeM00000036405 6579 339.3 UdeM00000036405 XP\_033754389.1 60.9 253  
99 0 2 254 1 253 4.20E-90 339.3 6579 cellular  
organisms;Eukaryota;Opisthokonta;Metazoa;Eumetazoa;Bilateria;Protostomia;Spiralia;Lophotrochozoa;Mollusca;Bivalvia;Autobranchia;Pteriomorpha;Pect  
inida;Pectinoidea;Pectinidae;Pecten;Pecten maximus  
UdeM00000036406 29159 692.2 UdeM00000036406 XP\_011420047.2 63.7 502  
181 1 14 514 251 752 5.00E-196 692.2 29159 cellular  
organisms;Eukaryota;Opisthokonta;Metazoa;Eumetazoa;Bilateria;Protostomia;Spiralia;Lophotrochozoa;Mollusca;Bivalvia;Autobranchia;Pteriomorpha;Ostr  
eida;Ostreoidea;Ostreidae;Crassostrea;Crassostrea gigas  
UdeM00000036407 6579 988 UdeM00000036407 XP\_033730449.1 38.9 1749  
982 34 209 1907 121 1832 1.80E-284 988 6579 cellular  
organisms;Eukaryota;Opisthokonta;Metazoa;Eumetazoa;Bilateria;Protostomia;Spiralia;Lophotrochozoa;Mollusca;Bivalvia;Autobranchia;Pteriomorpha;Pect  
inida;Pectinoidea;Pectinidae;Pecten;Pecten maximus  
UdeM00000036408 6579 1001.5 UdeM00000036408 XP\_033730449.1 39.8  
1732 950 36 228 1908 142 1832 1.50E-288 1001.5 6579  
cellular  
organisms;Eukaryota;Opisthokonta;Metazoa;Eumetazoa;Bilateria;Protostomia;Spiralia;Lophotrochozoa;Mollusca;Bivalvia;Autobranchia;Pteriomorpha;Pect  
inida;Pectinoidea;Pectinidae;Pecten;Pecten maximus  
UdeM00000036410 6596 626.3 UdeM00000036410 XP\_045193645.1 44 1172  
600 21 1 1154 404 1537 8.00E-176 626.3 6596 cellular  
organisms;Eukaryota;Opisthokonta;Metazoa;Eumetazoa;Bilateria;Protostomia;Spiralia;Lophotrochozoa;Mollusca;Bivalvia;Autobranchia;Heteroconchia;Euhe  
terodonta;Imparidentia;Venerida;Veneroidea;Veneridae;Mercenaria;Mercenari  
a mercenaria  
UdeM00000036409 6573 1078.5 UdeM00000036409 XP\_021379511.1 41.8  
1458 769 28 242 1657 158 1577 0.00E+00 1078.5 6573  
cellular  
organisms;Eukaryota;Opisthokonta;Metazoa;Eumetazoa;Bilateria;Protostomia;Spiralia;Lophotrochozoa;Mollusca;Bivalvia;Autobranchia;Pteriomorpha;Pect  
inida;Pectinoidea;Pectinidae;Mizuhopecten;Mizuhopecten yessoensis  
UdeM00000036411 6596 1067.8 UdeM00000036411 XP\_045193645.1 46.5  
1588 768 25 433 1992 3 1537 0.00E+00 1067.8 6596

cellular  
organisms;Eukaryota;Opisthokonta;Metazoa;Eumetazoa;Bilateria;Protostomia;  
Spiralia;Lophotrochozoa;Mollusca;Bivalvia;Autobranchia;Heteroconchia;Euhe  
terodonta;Imparidentia;Venerida;Veneroidea;Veneridae;Mercenaria;Mercenari  
a mercenaria  
UdeM00000036412 6596 712.6 UdeM00000036412 XP\_045192406.1 59.6 591  
222 4 20 596 242 829 4.20E-202 712.6 6596 cellular  
organisms;Eukaryota;Opisthokonta;Metazoa;Eumetazoa;Bilateria;Protostomia;  
Spiralia;Lophotrochozoa;Mollusca;Bivalvia;Autobranchia;Heteroconchia;Euhe  
terodonta;Imparidentia;Venerida;Veneroidea;Veneridae;Mercenaria;Mercenari  
a mercenaria  
UdeM00000036413 6573 69.7 UdeM00000036413 XP\_021379263.1 50 60  
29 1 4 63 11 69 6.40E-09 69.7 6573 cellular  
organisms;Eukaryota;Opisthokonta;Metazoa;Eumetazoa;Bilateria;Protostomia;  
Spiralia;Lophotrochozoa;Mollusca;Bivalvia;Autobranchia;Pteriormorphia;Pect  
inida;Pectinoidea;Pectinidae;Mizuhopecten;Mizuhopecten yessoensis  
UdeM00000036414 34816 61.2 UdeM00000036414 XP\_035509052.1 63.2 38  
14 0 8 45 37 74 2.10E-06 61.2 34816 cellular  
organisms;Eukaryota;Opisthokonta;Metazoa;Eumetazoa;Bilateria;Deuterostomi  
a;Chordata;Craniata;Vertebrata;Gnathostomata;Teleostomi;Euteleostomi;Acti  
nopterygii;Actinopteri;Neopterygii;Teleostei;Osteoglossocephalai;Clupeoce  
phala;Euteleosteoromorpha;Neoteleostei;Eurypterygia;Ctenosquamata;Acanthomo  
rphata;Euacanthomorphacea;Percomorphaceae;Eupercaria;Eupercaria incertae  
sedis;Moronidae;Morone;Morone saxatilis  
UdeM00000036415 6565 148.7 UdeM00000036415 XP\_022286280.1 55.8 120  
53 0 9 128 8 127 7.40E-33 148.7 6565 cellular  
organisms;Eukaryota;Opisthokonta;Metazoa;Eumetazoa;Bilateria;Protostomia;  
Spiralia;Lophotrochozoa;Mollusca;Bivalvia;Autobranchia;Pteriormorphia;Ostr  
eida;Ostreoidea;Ostreidae;Crassostrea;Crassostrea virginica  
UdeM00000036416 6579 146.4 UdeM00000036416 XP\_033755905.1 62.3 114  
43 0 4 117 147 260 2.40E-32 146.4 6579 cellular  
organisms;Eukaryota;Opisthokonta;Metazoa;Eumetazoa;Bilateria;Protostomia;  
Spiralia;Lophotrochozoa;Mollusca;Bivalvia;Autobranchia;Pteriormorphia;Pect  
inida;Pectinoidea;Pectinidae;Pecten;Pecten maximus  
UdeM00000036417 29159 848.2 UdeM00000036417 XP\_011414220.2 28.1 2161  
950 33 19 2155 254 1835 2.30E-242 848.2 29159 cellular  
organisms;Eukaryota;Opisthokonta;Metazoa;Eumetazoa;Bilateria;Protostomia;  
Spiralia;Lophotrochozoa;Mollusca;Bivalvia;Autobranchia;Pteriormorphia;Ostr  
eida;Ostreoidea;Ostreidae;Crassostrea;Crassostrea gigas  
UdeM00000036418 6596 1010.4 UdeM00000036418 XP\_045193282.1 56.7  
935 368 8 29 929 55 986 1.50E-291 1010.4 6596  
cellular  
organisms;Eukaryota;Opisthokonta;Metazoa;Eumetazoa;Bilateria;Protostomia;  
Spiralia;Lophotrochozoa;Mollusca;Bivalvia;Autobranchia;Heteroconchia;Euhe  
terodonta;Imparidentia;Venerida;Veneroidea;Veneridae;Mercenaria;Mercenari  
a mercenaria  
UdeM00000036419 6596 1012.7 UdeM00000036419 XP\_045193282.1 56.9  
935 369 9 29 932 55 986 3.00E-292 1012.7 6596  
cellular  
organisms;Eukaryota;Opisthokonta;Metazoa;Eumetazoa;Bilateria;Protostomia;  
Spiralia;Lophotrochozoa;Mollusca;Bivalvia;Autobranchia;Heteroconchia;Euhe  
terodonta;Imparidentia;Venerida;Veneroidea;Veneridae;Mercenaria;Mercenari  
a mercenaria

UdeM00000036420 6596 506.5 UdeM00000036420 XP\_045192766.1 41.2 776  
 401 15 98 856 84 821 6.50E-140 506.5 6596 cellular  
 organisms;Eukaryota;Opisthokonta;Metazoa;Eumetazoa;Bilateria;Protostomia;  
 Spiralia;Lophotrochozoa;Mollusca;Bivalvia;Autobranchia;Heteroconchia;Euhe  
 terodonta;Imparidentia;Venerida;Veneroidea;Veneridae;Mercenaria;Mercenari  
 a mercenaria

UdeM00000036421 6596 504.6 UdeM00000036421 XP\_045192766.1 41.4 776  
 397 16 98 853 84 821 2.50E-139 504.6 6596 cellular  
 organisms;Eukaryota;Opisthokonta;Metazoa;Eumetazoa;Bilateria;Protostomia;  
 Spiralia;Lophotrochozoa;Mollusca;Bivalvia;Autobranchia;Heteroconchia;Euhe  
 terodonta;Imparidentia;Venerida;Veneroidea;Veneridae;Mercenaria;Mercenari  
 a mercenaria

UdeM00000036422 6565 391 UdeM00000036422 XP\_022335611.1 73.2 284  
 70 3 1 283 1 279 1.40E-105 391 6565 cellular  
 organisms;Eukaryota;Opisthokonta;Metazoa;Eumetazoa;Bilateria;Protostomia;  
 Spiralia;Lophotrochozoa;Mollusca;Bivalvia;Autobranchia;Pteriormorphia;Ostr  
 eida;Ostreoidea;Ostreidae;Crassostrea;Crassostrea virginica

UdeM00000036423 13686 213 UdeM00000036423 XP\_011170408.3 45.5 235  
 119 4 10 235 283 517 4.20E-52 213 13686 cellular  
 organisms;Eukaryota;Opisthokonta;Metazoa;Eumetazoa;Bilateria;Protostomia;  
 Ecdysozoa;Panarthropoda;Arthropoda;Mandibulata;Pancrustacea;Hexapoda;Inse  
 cta;Dicondylia;Pterygota;Neoptera;Endopterygota;Hymenoptera;Apocrita;Acul  
 eata;Formicoidea;Formicidae;Myrmicinae;Solenopsidini;Solenopsis;Solenopsi  
 s invicta

UdeM00000036425 400727 238 UdeM00000036425 XP\_025114872.1 64.1  
 184 53 3 1 183 1 172 1.10E-59 238 400727  
 cellular  
 organisms;Eukaryota;Opisthokonta;Metazoa;Eumetazoa;Bilateria;Protostomia;  
 Spiralia;Lophotrochozoa;Mollusca;Gastropoda;Caenogastropoda;Architaeniogl  
 ossa;Ampullarioidea;Ampullariidae;Pomacea;Pomacea canaliculata

UdeM00000036426 6579 95.5 UdeM00000036426 XP\_033727573.1 31.5 219  
 126 6 13 208 45 262 1.30E-16 95.5 6579 cellular  
 organisms;Eukaryota;Opisthokonta;Metazoa;Eumetazoa;Bilateria;Protostomia;  
 Spiralia;Lophotrochozoa;Mollusca;Bivalvia;Autobranchia;Pteriormorphia;Pect  
 inida;Pectinoidea;Pectinidae;Pecten;Pecten maximus

UdeM00000036429 1529436 61.6 UdeM00000036429 XP\_033095325.1 36  
 75 47 1 1 75 139 212 4.90E-07 61.6 1529436  
 cellular  
 organisms;Eukaryota;Opisthokonta;Metazoa;Eumetazoa;Bilateria;Deuterostomi  
 a;Echinodermata;Pelmatozoa;Crinoidea;Articulata;Comatulida;Comatulidae;Co  
 matulinae;Anneissia;Anneissia japonica

UdeM00000036430 151771 152.5 UdeM00000036430 XP\_028406951.1 34.6  
 283 157 7 3 265 148 422 7.50E-34 152.5 151771  
 cellular  
 organisms;Eukaryota;Opisthokonta;Metazoa;Eumetazoa;Cnidaria;Anthozoa;Octo  
 corallia;Alcyonacea;Alcyoniina;Nephtheidae;Dendronephthya;Dendronephthya  
 gigantea

UdeM00000036431 29159 211.1 UdeM00000036431 XP\_011441989.1 52.7 184  
 76 3 1 180 1 177 1.20E-51 211.1 29159 cellular  
 organisms;Eukaryota;Opisthokonta;Metazoa;Eumetazoa;Bilateria;Protostomia;  
 Spiralia;Lophotrochozoa;Mollusca;Bivalvia;Autobranchia;Pteriormorphia;Ostr  
 eida;Ostreoidea;Ostreidae;Crassostrea;Crassostrea gigas

UdeM00000036432 1735272 364 UdeM00000036432 XP\_041375090.1 47.5  
 396 193 6 1 389 1 388 2.40E-97 364 1735272



cellular  
organisms;Eukaryota;Opisthokonta;Metazoa;Eumetazoa;Bilateria;Protostomia;  
Spiralia;Lophotrochozoa;Mollusca;Gastropoda;Neomphalina;Neomphaloidea;Pel  
tospiridae;Gigantopelta;Gigantopelta aegis  
UdeM00000036433 33528 83.6 UdeM00000036433 XP\_043964086.1 50.6 81  
40 0 5 85 28 108 1.80E-13 83.6 33528 cellular  
organisms;Eukaryota;Opisthokonta;Metazoa;Eumetazoa;Bilateria;Deuterostomi  
a;Chordata;Craniata;Vertebrata;Gnathostomata;Teleostomi;Euteleostomi;Acti  
nopterygii;Actinopteri;Neopterygii;Teleostei;Osteoglossocephalai;Clupeoce  
phala;Euteleosteomorpha;Neoteleostei;Eurypterygia;Ctenosquamata;Acanthomo  
rphata;Euacanthomorphacea;Percomorphaceae;Ovalentaria;Atherinomorphae;Cyp  
rinodontiformes;Cyprinodontoidei;Poeciliidae;Poeciliinae;Gambusia;Gambusi  
a affinis  
UdeM00000036434 6596 262.3 UdeM00000036434 XP\_045191754.1 38 434  
235 8 26 439 1 420 1.10E-66 262.3 6596 cellular  
organisms;Eukaryota;Opisthokonta;Metazoa;Eumetazoa;Bilateria;Protostomia;  
Spiralia;Lophotrochozoa;Mollusca;Bivalvia;Autobranchia;Heteroconchia;Euhe  
terodonta;Imparidentia;Venerida;Veneroidea;Veneridae;Mercenaria;Mercenari  
a mercenaria  
UdeM00000036435 29159 282 UdeM00000036435 XP\_011445184.1 52.3 258  
123 0 1 258 1 258 7.90E-73 282 29159 cellular  
organisms;Eukaryota;Opisthokonta;Metazoa;Eumetazoa;Bilateria;Protostomia;  
Spiralia;Lophotrochozoa;Mollusca;Bivalvia;Autobranchia;Pteriormorphia;Ostr  
eida;Ostreoidea;Ostreidae;Crassostrea;Crassostrea gigas  
UdeM00000036436 1735272 60.1 UdeM00000036436 XP\_041350990.1 43.5  
62 35 0 53 114 461 522 2.20E-06 60.1 1735272  
cellular  
organisms;Eukaryota;Opisthokonta;Metazoa;Eumetazoa;Bilateria;Protostomia;  
Spiralia;Lophotrochozoa;Mollusca;Gastropoda;Neomphalina;Neomphaloidea;Pel  
tospiridae;Gigantopelta;Gigantopelta aegis  
UdeM00000036437 6565 70.9 UdeM00000036437 XP\_022305631.1 60.7 56  
22 0 18 73 72 127 9.50E-10 70.9 6565 cellular  
organisms;Eukaryota;Opisthokonta;Metazoa;Eumetazoa;Bilateria;Protostomia;  
Spiralia;Lophotrochozoa;Mollusca;Bivalvia;Autobranchia;Pteriormorphia;Ostr  
eida;Ostreoidea;Ostreidae;Crassostrea;Crassostrea virginica  
UdeM00000036438 6596 468 UdeM00000036438 XP\_045192178.1 54.8 465  
193 6 2 465 49 497 1.40E-128 468 6596 cellular  
organisms;Eukaryota;Opisthokonta;Metazoa;Eumetazoa;Bilateria;Protostomia;  
Spiralia;Lophotrochozoa;Mollusca;Bivalvia;Autobranchia;Heteroconchia;Euhe  
terodonta;Imparidentia;Venerida;Veneroidea;Veneridae;Mercenaria;Mercenari  
a mercenaria  
UdeM00000036444 6596 593.2 UdeM00000036444 XP\_045207431.1 55.6 518  
224 5 20 536 19 531 3.30E-166 593.2 6596 cellular  
organisms;Eukaryota;Opisthokonta;Metazoa;Eumetazoa;Bilateria;Protostomia;  
Spiralia;Lophotrochozoa;Mollusca;Bivalvia;Autobranchia;Heteroconchia;Euhe  
terodonta;Imparidentia;Venerida;Veneroidea;Veneridae;Mercenaria;Mercenari  
a mercenaria  
UdeM00000036445 6596 589.7 UdeM00000036445 XP\_045207431.1 54.5 534  
234 6 7 536 3 531 3.70E-165 589.7 6596 cellular  
organisms;Eukaryota;Opisthokonta;Metazoa;Eumetazoa;Bilateria;Protostomia;  
Spiralia;Lophotrochozoa;Mollusca;Bivalvia;Autobranchia;Heteroconchia;Euhe  
terodonta;Imparidentia;Venerida;Veneroidea;Veneridae;Mercenaria;Mercenari  
a mercenaria

UdeM00000036446 6573 640.6 UdeM00000036446 XP\_021366200.1 53.4 579  
 266 4 53 629 6 582 2.10E-180 640.6 6573 cellular  
 organisms;Eukaryota;Opisthokonta;Metazoa;Eumetazoa;Bilateria;Protostomia;  
 Spiralia;Lophotrochozoa;Mollusca;Bivalvia;Autobranhia;Pteriormorphia;Pect  
 inida;Pectinoidea;Pectinidae;Mizuhopecten;Mizuhopecten yessoensis  
 UdeM00000036448 29159 187.6 UdeM00000036448 XP\_034335896.1 47.3 226  
 96 4 20 244 45 248 2.00E-44 187.6 29159 cellular  
 organisms;Eukaryota;Opisthokonta;Metazoa;Eumetazoa;Bilateria;Protostomia;  
 Spiralia;Lophotrochozoa;Mollusca;Bivalvia;Autobranhia;Pteriormorphia;Ostr  
 eida;Ostreoidea;Ostreidae;Crassostrea;Crassostrea gigas  
 UdeM00000036449 29159 184.5 UdeM00000036449 XP\_034335896.1 45.3 236  
 96 4 20 254 45 248 1.70E-43 184.5 29159 cellular  
 organisms;Eukaryota;Opisthokonta;Metazoa;Eumetazoa;Bilateria;Protostomia;  
 Spiralia;Lophotrochozoa;Mollusca;Bivalvia;Autobranhia;Pteriormorphia;Ostr  
 eida;Ostreoidea;Ostreidae;Crassostrea;Crassostrea gigas  
 UdeM00000036450 6596 79 UdeM00000036450 XP\_045190183.1 23.9 289  
 198 6 137 419 425 697 1.80E-11 79 6596 cellular  
 organisms;Eukaryota;Opisthokonta;Metazoa;Eumetazoa;Bilateria;Protostomia;  
 Spiralia;Lophotrochozoa;Mollusca;Bivalvia;Autobranhia;Heteroconchia;Euhe  
 terodonta;Imparidentia;Venerida;Veneroidea;Veneridae;Mercenaria;Mercenari  
 a mercenaria  
 UdeM00000036451 7159 184.5 UdeM00000036451 XP\_021695055.1 28.9 408  
 271 6 264 658 1357 1758 4.50E-43 184.5 7159 cellular  
 organisms;Eukaryota;Opisthokonta;Metazoa;Eumetazoa;Bilateria;Protostomia;  
 Ecdysozoa;Panarthropoda;Arthropoda;Mandibulata;Pancrustacea;Hexapoda;Inse  
 cta;Dicondylia;Pterygota;Neoptera;Endopterygota;Diptera;Nematocera;Culico  
 morpha;Culicoidea;Culicidae;Culicinae;Aedini;Aedes;Stegomyia;Aedes  
 aegypti  
 UdeM00000036452 6596 7607.3 UdeM00000036452 XP\_045191436.1 81.8  
 4681 783 9 17 4672 101 4736 0.00E+00 7607.3 6596  
 cellular  
 organisms;Eukaryota;Opisthokonta;Metazoa;Eumetazoa;Bilateria;Protostomia;  
 Spiralia;Lophotrochozoa;Mollusca;Bivalvia;Autobranhia;Heteroconchia;Euhe  
 terodonta;Imparidentia;Venerida;Veneroidea;Veneridae;Mercenaria;Mercenari  
 a mercenaria  
 UdeM00000036453 7604 110.9 UdeM00000036453 XP\_033640623.1 50 110  
 55 0 1 110 1 110 1.10E-21 110.9 7604 cellular  
 organisms;Eukaryota;Opisthokonta;Metazoa;Eumetazoa;Bilateria;Deuterostomi  
 a;Echinodermata;Eleutherozoa;Asterozoa;Asteroidea;Forcipulatacea;Forcipul  
 atida;Asteroidea;Asteroidea;Asterias;Asterias rubens  
 UdeM00000036454 7741 270.4 UdeM00000036454 XP\_019640655.1 49.3 272  
 136 2 5 275 1 271 3.70E-69 270.4 7741 cellular  
 organisms;Eukaryota;Opisthokonta;Metazoa;Eumetazoa;Bilateria;Deuterostomi  
 a;Chordata;Cephalochordata;Leptocardii;Amphioxiformes;Branchiostomidae;Br  
 anchiostoma;Branchiostoma belcheri  
 UdeM00000036455 6596 798.1 UdeM00000036455 XP\_045193293.1 65.4 592  
 196 4 1 585 19 608 7.40E-228 798.1 6596 cellular  
 organisms;Eukaryota;Opisthokonta;Metazoa;Eumetazoa;Bilateria;Protostomia;  
 Spiralia;Lophotrochozoa;Mollusca;Bivalvia;Autobranhia;Heteroconchia;Euhe  
 terodonta;Imparidentia;Venerida;Veneroidea;Veneridae;Mercenaria;Mercenari  
 a mercenaria  
 UdeM00000036456 29159 577.4 UdeM00000036456 XP\_011417584.2 59.9 509  
 176 4 139 623 132 636 2.30E-161 577.4 29159 cellular  
 organisms;Eukaryota;Opisthokonta;Metazoa;Eumetazoa;Bilateria;Protostomia;

Spiralia;Lophotrochozoa;Mollusca;Bivalvia;Autobranchia;Pteriormorphia;Ostr  
eida;Ostreoidea;Ostreidae;Crassostrea;Crassostrea gigas  
UdeM000000036457 6565 136.3 UdeM000000036457 XP\_022287303.1 31.7 262  
147 7 34 273 443 694 5.80E-29 136.3 6565 cellular  
organisms;Eukaryota;Opisthokonta;Metazoa;Eumetazoa;Bilateria;Protostomia;  
Spiralia;Lophotrochozoa;Mollusca;Bivalvia;Autobranchia;Pteriormorphia;Ostr  
eida;Ostreoidea;Ostreidae;Crassostrea;Crassostrea virginica  
UdeM000000036458 6565 136.3 UdeM000000036458 XP\_022287303.1 31.7 262  
147 7 34 273 443 694 5.80E-29 136.3 6565 cellular  
organisms;Eukaryota;Opisthokonta;Metazoa;Eumetazoa;Bilateria;Protostomia;  
Spiralia;Lophotrochozoa;Mollusca;Bivalvia;Autobranchia;Pteriormorphia;Ostr  
eida;Ostreoidea;Ostreidae;Crassostrea;Crassostrea virginica  
UdeM000000006989 6596 884 UdeM000000006989 XP\_045180229.1 79 581  
102 8 87 656 122 693 1.20E-253 884 6596 cellular  
organisms;Eukaryota;Opisthokonta;Metazoa;Eumetazoa;Bilateria;Protostomia;  
Spiralia;Lophotrochozoa;Mollusca;Bivalvia;Autobranchia;Heteroconchia;Euhe  
terodonta;Imparidentia;Venerida;Veneroidea;Veneridae;Mercenaria;Mercenari  
a mercenaria  
UdeM000000006991 1735272 723 UdeM000000006991 XP\_041360731.1 74.3  
443 114 0 1 443 1 443 2.30E-205 723 1735272  
cellular  
organisms;Eukaryota;Opisthokonta;Metazoa;Eumetazoa;Bilateria;Protostomia;  
Spiralia;Lophotrochozoa;Mollusca;Gastropoda;Neomphalina;Neomphaloidea;Pel  
tospiridae;Gigantopelta;Gigantopelta aegis  
UdeM000000006992 6579 1156.4 UdeM000000006992 XP\_033727838.1 81.8  
845 137 2 1 840 1 833 0.00E+00 1156.4 6579  
cellular  
organisms;Eukaryota;Opisthokonta;Metazoa;Eumetazoa;Bilateria;Protostomia;  
Spiralia;Lophotrochozoa;Mollusca;Bivalvia;Autobranchia;Pteriormorphia;Pect  
inida;Pectinoidea;Pectinidae;Pecten;Pecten maximus  
UdeM000000006993 1735272 290 UdeM000000006993 XP\_041361172.1 51.9  
289 138 1 2 290 1 288 3.30E-75 290 1735272  
cellular  
organisms;Eukaryota;Opisthokonta;Metazoa;Eumetazoa;Bilateria;Protostomia;  
Spiralia;Lophotrochozoa;Mollusca;Gastropoda;Neomphalina;Neomphaloidea;Pel  
tospiridae;Gigantopelta;Gigantopelta aegis  
UdeM000000006994 6596 79.7 UdeM000000006994 XP\_045208523.1 36.9 168  
90 4 4 167 1 156 3.90E-12 79.7 6596 cellular  
organisms;Eukaryota;Opisthokonta;Metazoa;Eumetazoa;Bilateria;Protostomia;  
Spiralia;Lophotrochozoa;Mollusca;Bivalvia;Autobranchia;Heteroconchia;Euhe  
terodonta;Imparidentia;Venerida;Veneroidea;Veneridae;Mercenaria;Mercenari  
a mercenaria  
UdeM000000006995 6596 97.4 UdeM000000006995 XP\_045208571.1 41.6 161  
86 3 4 162 1 155 1.80E-17 97.4 6596 cellular  
organisms;Eukaryota;Opisthokonta;Metazoa;Eumetazoa;Bilateria;Protostomia;  
Spiralia;Lophotrochozoa;Mollusca;Bivalvia;Autobranchia;Heteroconchia;Euhe  
terodonta;Imparidentia;Venerida;Veneroidea;Veneridae;Mercenaria;Mercenari  
a mercenaria  
UdeM000000006996 218467 153.3 UdeM000000006996 XP\_023216565.1 30.1  
329 214 7 47 372 136 451 6.10E-34 153.3 218467  
cellular  
organisms;Eukaryota;Opisthokonta;Metazoa;Eumetazoa;Bilateria;Protostomia;  
Ecdysozoa;Panarthropoda;Arthropoda;Chelicerata;Arachnida;Scorpiones;Buthi  
da;Buthoidea;Buthidae;Centruroides;Centruroides sculpturatus

UdeM00000006997 218467 154.8 UdeM00000006997 XP\_023216565.1 30.1  
 329 214 7 31 356 136 451 2.00E-34 154.8 218467  
 cellular  
 organisms;Eukaryota;Opisthokonta;Metazoa;Eumetazoa;Bilateria;Protostomia;  
 Ecdysozoa;Panarthropoda;Arthropoda;Chelicerata;Arachnida;Scorpiones;Buthi  
 da;Buthoidea;Buthidae;Centruroides;Centruroides sculpturatus  
 UdeM00000006998 6573 469.9 UdeM00000006998 XP\_021343391.1 40.4 653  
 344 10 2 641 21 641 5.10E-129 469.9 6573 cellular  
 organisms;Eukaryota;Opisthokonta;Metazoa;Eumetazoa;Bilateria;Protostomia;  
 Spiralia;Lophotrochozoa;Mollusca;Bivalvia;Autobranchia;Pteriomorpha;Pect  
 inida;Pectinoidea;Pectinidae;Mizuhopecten;Mizuhopecten yessoensis  
 UdeM00000006999 400727 263.1 UdeM00000006999 XP\_025107741.1 65.3  
 199 67 1 2 198 107 305 3.10E-67 263.1 400727  
 cellular  
 organisms;Eukaryota;Opisthokonta;Metazoa;Eumetazoa;Bilateria;Protostomia;  
 Spiralia;Lophotrochozoa;Mollusca;Gastropoda;Caenogastropoda;Architaeniogl  
 ossa;Ampullarioidea;Ampullariidae;Pomacea;Pomacea canaliculata  
 UdeM00000007012 6573 130.2 UdeM00000007012 XP\_021355936.1 36.9 206  
 123 3 14 212 7 212 3.20E-27 130.2 6573 cellular  
 organisms;Eukaryota;Opisthokonta;Metazoa;Eumetazoa;Bilateria;Protostomia;  
 Spiralia;Lophotrochozoa;Mollusca;Bivalvia;Autobranchia;Pteriomorpha;Pect  
 inida;Pectinoidea;Pectinidae;Mizuhopecten;Mizuhopecten yessoensis  
 UdeM00000007013 6573 124.8 UdeM00000007013 XP\_021355936.1 35.2 216  
 126 3 14 225 7 212 1.40E-25 124.8 6573 cellular  
 organisms;Eukaryota;Opisthokonta;Metazoa;Eumetazoa;Bilateria;Protostomia;  
 Spiralia;Lophotrochozoa;Mollusca;Bivalvia;Autobranchia;Pteriomorpha;Pect  
 inida;Pectinoidea;Pectinidae;Mizuhopecten;Mizuhopecten yessoensis  
 UdeM00000007014 37653 194.5 UdeM00000007014 XP\_014781205.1 46.5 213  
 104 4 13 222 19 224 1.40E-46 194.5 37653 cellular  
 organisms;Eukaryota;Opisthokonta;Metazoa;Eumetazoa;Bilateria;Protostomia;  
 Spiralia;Lophotrochozoa;Mollusca;Cephalopoda;Coleoidea;Octopodiformes;Oct  
 opoda;Incirrata;Octopodidae;Octopus;Octopus bimaculoides  
 UdeM00000007015 6596 808.9 UdeM00000007015 XP\_045180485.1 75.1 507  
 125 1 234 739 1 507 5.30E-231 808.9 6596 cellular  
 organisms;Eukaryota;Opisthokonta;Metazoa;Eumetazoa;Bilateria;Protostomia;  
 Spiralia;Lophotrochozoa;Mollusca;Bivalvia;Autobranchia;Heteroconchia;Euhe  
 terodonta;Imparidentia;Venerida;Veneroidea;Veneridae;Mercenaria;Mercenari  
 a mercenaria  
 UdeM00000007016 6596 450.7 UdeM00000007016 XP\_045180881.1 50.1 451  
 202 4 2 446 11 444 2.20E-123 450.7 6596 cellular  
 organisms;Eukaryota;Opisthokonta;Metazoa;Eumetazoa;Bilateria;Protostomia;  
 Spiralia;Lophotrochozoa;Mollusca;Bivalvia;Autobranchia;Heteroconchia;Euhe  
 terodonta;Imparidentia;Venerida;Veneroidea;Veneridae;Mercenaria;Mercenari  
 a mercenaria  
 UdeM00000007017 6565 159.1 UdeM00000007017 XP\_022327962.1 35.6 264  
 111 4 14 218 455 718 6.50E-36 159.1 6565 cellular  
 organisms;Eukaryota;Opisthokonta;Metazoa;Eumetazoa;Bilateria;Protostomia;  
 Spiralia;Lophotrochozoa;Mollusca;Bivalvia;Autobranchia;Pteriomorpha;Ostr  
 eida;Ostreoidea;Ostreidae;Crassostrea;Crassostrea virginica  
 UdeM00000007018 6596 435.3 UdeM00000007018 XP\_045180890.1 59.3 354  
 135 3 1 354 1 345 7.70E-119 435.3 6596 cellular  
 organisms;Eukaryota;Opisthokonta;Metazoa;Eumetazoa;Bilateria;Protostomia;  
 Spiralia;Lophotrochozoa;Mollusca;Bivalvia;Autobranchia;Heteroconchia;Euhe

terodonta;Imparidentia;Venerida;Veneroidea;Veneridae;Mercenaria;Mercenari  
 a mercenaria  
 UdeM00000007019 6596 326.2 UdeM00000007019 XP\_045180890.1 58 257  
 107 1 12 268 85 340 3.80E-86 326.2 6596 cellular  
 organisms;Eukaryota;Opisthokonta;Metazoa;Eumetazoa;Bilateria;Protostomia;  
 Spiralia;Lophotrochozoa;Mollusca;Bivalvia;Autobranchia;Heteroconchia;Euhe  
 terodonta;Imparidentia;Venerida;Veneroidea;Veneridae;Mercenaria;Mercenari  
 a mercenaria  
 UdeM00000007020 6596 284.6 UdeM00000007020 XP\_045180890.1 52.5 265  
 120 2 38 302 83 341 1.40E-73 284.6 6596 cellular  
 organisms;Eukaryota;Opisthokonta;Metazoa;Eumetazoa;Bilateria;Protostomia;  
 Spiralia;Lophotrochozoa;Mollusca;Bivalvia;Autobranchia;Heteroconchia;Euhe  
 terodonta;Imparidentia;Venerida;Veneroidea;Veneridae;Mercenaria;Mercenari  
 a mercenaria  
 UdeM00000007021 6596 121.3 UdeM00000007021 XP\_045206982.1 51.9 104  
 50 0 4 107 80 183 8.80E-25 121.3 6596 cellular  
 organisms;Eukaryota;Opisthokonta;Metazoa;Eumetazoa;Bilateria;Protostomia;  
 Spiralia;Lophotrochozoa;Mollusca;Bivalvia;Autobranchia;Heteroconchia;Euhe  
 terodonta;Imparidentia;Venerida;Veneroidea;Veneridae;Mercenaria;Mercenari  
 a mercenaria  
 UdeM00000007022 6596 242.3 UdeM00000007022 XP\_045185723.1 43.1 304  
 155 5 7 308 455 742 1.20E-60 242.3 6596 cellular  
 organisms;Eukaryota;Opisthokonta;Metazoa;Eumetazoa;Bilateria;Protostomia;  
 Spiralia;Lophotrochozoa;Mollusca;Bivalvia;Autobranchia;Heteroconchia;Euhe  
 terodonta;Imparidentia;Venerida;Veneroidea;Veneridae;Mercenaria;Mercenari  
 a mercenaria  
 UdeM00000007025 6596 369.4 UdeM00000007025 XP\_045180890.1 49.2 386  
 143 5 9 394 11 343 5.70E-99 369.4 6596 cellular  
 organisms;Eukaryota;Opisthokonta;Metazoa;Eumetazoa;Bilateria;Protostomia;  
 Spiralia;Lophotrochozoa;Mollusca;Bivalvia;Autobranchia;Heteroconchia;Euhe  
 terodonta;Imparidentia;Venerida;Veneroidea;Veneridae;Mercenaria;Mercenari  
 a mercenaria  
 UdeM00000007026 6596 567 UdeM00000007026 XP\_045180483.1 62.5 451  
 163 4 2 449 5 452 2.20E-158 567 6596 cellular  
 organisms;Eukaryota;Opisthokonta;Metazoa;Eumetazoa;Bilateria;Protostomia;  
 Spiralia;Lophotrochozoa;Mollusca;Bivalvia;Autobranchia;Heteroconchia;Euhe  
 terodonta;Imparidentia;Venerida;Veneroidea;Veneridae;Mercenaria;Mercenari  
 a mercenaria  
 UdeM00000007027 6596 120.6 UdeM00000007027 XP\_045170381.1 40.3 201  
 107 5 4 199 3 195 3.90E-24 120.6 6596 cellular  
 organisms;Eukaryota;Opisthokonta;Metazoa;Eumetazoa;Bilateria;Protostomia;  
 Spiralia;Lophotrochozoa;Mollusca;Bivalvia;Autobranchia;Heteroconchia;Euhe  
 terodonta;Imparidentia;Venerida;Veneroidea;Veneridae;Mercenaria;Mercenari  
 a mercenaria  
 UdeM00000007028 6596 62 UdeM00000007028 XP\_045206778.1 55.6 54  
 24 0 4 57 3 56 9.50E-07 62 6596 cellular  
 organisms;Eukaryota;Opisthokonta;Metazoa;Eumetazoa;Bilateria;Protostomia;  
 Spiralia;Lophotrochozoa;Mollusca;Bivalvia;Autobranchia;Heteroconchia;Euhe  
 terodonta;Imparidentia;Venerida;Veneroidea;Veneridae;Mercenaria;Mercenari  
 a mercenaria  
 UdeM00000007030 6596 127.1 UdeM00000007030 XP\_045170381.1 52.1 121  
 53 2 6 126 3 118 1.70E-26 127.1 6596 cellular  
 organisms;Eukaryota;Opisthokonta;Metazoa;Eumetazoa;Bilateria;Protostomia;  
 Spiralia;Lophotrochozoa;Mollusca;Bivalvia;Autobranchia;Heteroconchia;Euhe

terodonta;Imparidentia;Venerida;Veneroidea;Veneridae;Mercenaria;Mercenari  
 a mercenaria  
 UdeM00000007031 6596 132.1 UdeM00000007031 XP\_045203565.1 52.1 119  
 54 2 6 124 3 118 5.00E-28 132.1 6596 cellular  
 organisms;Eukaryota;Opisthokonta;Metazoa;Eumetazoa;Bilateria;Protostomia;  
 Spiralia;Lophotrochozoa;Mollusca;Bivalvia;Autobranchia;Heteroconchia;Euhe  
 terodonta;Imparidentia;Venerida;Veneroidea;Veneridae;Mercenaria;Mercenari  
 a mercenaria  
 UdeM00000007032 400727 642.1 UdeM00000007032 XP\_025091095.1 71.6  
 419 119 0 1 419 49 467 4.90E-181 642.1 400727  
 cellular  
 organisms;Eukaryota;Opisthokonta;Metazoa;Eumetazoa;Bilateria;Protostomia;  
 Spiralia;Lophotrochozoa;Mollusca;Gastropoda;Caenogastropoda;Architaeniogl  
 ossa;Ampullarioidea;Ampullariidae;Pomacea;Pomacea canaliculata  
 UdeM00000007033 1735272 164.5 UdeM00000007033 XP\_041368077.1 41.3  
 225 92 4 1 188 45 266 3.90E-37 164.5 1735272  
 cellular  
 organisms;Eukaryota;Opisthokonta;Metazoa;Eumetazoa;Bilateria;Protostomia;  
 Spiralia;Lophotrochozoa;Mollusca;Gastropoda;Neomphalina;Neomphaloidea;Pel  
 tospiridae;Gigantopelta;Gigantopelta aegis  
 UdeM00000007034 6596 961.8 UdeM00000007034 XP\_045181172.1 69 639  
 198 0 10 648 5 643 4.30E-277 961.8 6596 cellular  
 organisms;Eukaryota;Opisthokonta;Metazoa;Eumetazoa;Bilateria;Protostomia;  
 Spiralia;Lophotrochozoa;Mollusca;Bivalvia;Autobranchia;Heteroconchia;Euhe  
 terodonta;Imparidentia;Venerida;Veneroidea;Veneridae;Mercenaria;Mercenari  
 a mercenaria  
 UdeM00000007035 1735272 761.5 UdeM00000007035 XP\_041360515.1 53.7  
 812 332 10 12 811 15 794 1.50E-216 761.5 1735272  
 cellular  
 organisms;Eukaryota;Opisthokonta;Metazoa;Eumetazoa;Bilateria;Protostomia;  
 Spiralia;Lophotrochozoa;Mollusca;Gastropoda;Neomphalina;Neomphaloidea;Pel  
 tospiridae;Gigantopelta;Gigantopelta aegis  
 UdeM00000007036 6573 250 UdeM00000007036 XP\_021377560.1 54.5 202  
 91 1 9 209 8 209 2.80E-63 250 6573 cellular  
 organisms;Eukaryota;Opisthokonta;Metazoa;Eumetazoa;Bilateria;Protostomia;  
 Spiralia;Lophotrochozoa;Mollusca;Bivalvia;Autobranchia;Pteriomorphia;Pect  
 inida;Pectinoidea;Pectinidae;Mizuhopecten;Mizuhopecten yessoensis  
 UdeM00000007037 6596 198.4 UdeM00000007037 XP\_045181118.1 55.9 177  
 76 2 2 176 629 805 7.80E-48 198.4 6596 cellular  
 organisms;Eukaryota;Opisthokonta;Metazoa;Eumetazoa;Bilateria;Protostomia;  
 Spiralia;Lophotrochozoa;Mollusca;Bivalvia;Autobranchia;Heteroconchia;Euhe  
 terodonta;Imparidentia;Venerida;Veneroidea;Veneridae;Mercenaria;Mercenari  
 a mercenaria  
 UdeM00000007038 6579 69.3 UdeM00000007038 XP\_033727405.1 27.7 278  
 152 8 15 271 306 555 8.60E-09 69.3 6579 cellular  
 organisms;Eukaryota;Opisthokonta;Metazoa;Eumetazoa;Bilateria;Protostomia;  
 Spiralia;Lophotrochozoa;Mollusca;Bivalvia;Autobranchia;Pteriomorphia;Pect  
 inida;Pectinoidea;Pectinidae;Pecten;Pecten maximus  
 UdeM00000007039 6579 92.4 UdeM00000007039 XP\_033727405.1 29.4 197  
 123 2 4 188 3 195 9.50E-16 92.4 6579 cellular  
 organisms;Eukaryota;Opisthokonta;Metazoa;Eumetazoa;Bilateria;Protostomia;  
 Spiralia;Lophotrochozoa;Mollusca;Bivalvia;Autobranchia;Pteriomorphia;Pect  
 inida;Pectinoidea;Pectinidae;Pecten;Pecten maximus

UdeM00000007041 6579 500 UdeM00000007041 XP\_033727079.1 70.5 346  
 95 2 8 353 6 344 2.50E-138 500 6579 cellular  
 organisms;Eukaryota;Opisthokonta;Metazoa;Eumetazoa;Bilateria;Protostomia;  
 Spiralia;Lophotrochozoa;Mollusca;Bivalvia;Autobranhia;Pteriomorphia;Pect  
 inida;Pectinoidea;Pectinidae;Pecten;Pecten maximus  
 UdeM00000007040 6596 496.1 UdeM00000007040 XP\_045180258.1 68.7 355  
 97 2 11 355 8 358 3.70E-137 496.1 6596 cellular  
 organisms;Eukaryota;Opisthokonta;Metazoa;Eumetazoa;Bilateria;Protostomia;  
 Spiralia;Lophotrochozoa;Mollusca;Bivalvia;Autobranhia;Heteroconchia;Euhe  
 terodonta;Imparidentia;Venerida;Veneroidea;Veneridae;Mercenaria;Mercenari  
 a mercenaria  
 UdeM00000007042 6596 197.6 UdeM00000007042 XP\_045182246.1 68.7 134  
 42 0 77 210 21 154 1.70E-47 197.6 6596 cellular  
 organisms;Eukaryota;Opisthokonta;Metazoa;Eumetazoa;Bilateria;Protostomia;  
 Spiralia;Lophotrochozoa;Mollusca;Bivalvia;Autobranhia;Heteroconchia;Euhe  
 terodonta;Imparidentia;Venerida;Veneroidea;Veneridae;Mercenaria;Mercenari  
 a mercenaria  
 UdeM00000007043 6579 630.6 UdeM00000007043 XP\_033739131.1 60.8 475  
 186 0 11 485 896 1370 1.70E-177 630.6 6579 cellular  
 organisms;Eukaryota;Opisthokonta;Metazoa;Eumetazoa;Bilateria;Protostomia;  
 Spiralia;Lophotrochozoa;Mollusca;Bivalvia;Autobranhia;Pteriomorphia;Pect  
 inida;Pectinoidea;Pectinidae;Pecten;Pecten maximus  
 UdeM00000007045 6565 788.1 UdeM00000007045 XP\_022295152.1 48.9 947  
 409 22 27 940 67 971 1.20E-224 788.1 6565 cellular  
 organisms;Eukaryota;Opisthokonta;Metazoa;Eumetazoa;Bilateria;Protostomia;  
 Spiralia;Lophotrochozoa;Mollusca;Bivalvia;Autobranhia;Pteriomorphia;Ostr  
 eida;Ostreoidea;Ostreidae;Crassostrea;Crassostrea virginica  
 UdeM00000007046 6596 246.5 UdeM00000007046 XP\_045187622.1 31.8 559  
 208 6 28 572 4 403 8.10E-62 246.5 6596 cellular  
 organisms;Eukaryota;Opisthokonta;Metazoa;Eumetazoa;Bilateria;Protostomia;  
 Spiralia;Lophotrochozoa;Mollusca;Bivalvia;Autobranhia;Heteroconchia;Euhe  
 terodonta;Imparidentia;Venerida;Veneroidea;Veneridae;Mercenaria;Mercenari  
 a mercenaria  
 UdeM00000007047 6573 270.8 UdeM00000007047 XP\_021364277.1 56.5 223  
 96 1 9 231 6 227 1.70E-69 270.8 6573 cellular  
 organisms;Eukaryota;Opisthokonta;Metazoa;Eumetazoa;Bilateria;Protostomia;  
 Spiralia;Lophotrochozoa;Mollusca;Bivalvia;Autobranhia;Pteriomorphia;Pect  
 inida;Pectinoidea;Pectinidae;Mizuhopecten;Mizuhopecten yessoensis  
 UdeM00000007048 6565 270 UdeM00000007048 XP\_022325667.1 55.4 224  
 97 2 10 233 9 229 2.80E-69 270 6565 cellular  
 organisms;Eukaryota;Opisthokonta;Metazoa;Eumetazoa;Bilateria;Protostomia;  
 Spiralia;Lophotrochozoa;Mollusca;Bivalvia;Autobranhia;Pteriomorphia;Ostr  
 eida;Ostreoidea;Ostreidae;Crassostrea;Crassostrea virginica  
 UdeM00000007049 6565 270.8 UdeM00000007049 XP\_022325667.1 55.3 228  
 99 2 8 235 5 229 1.70E-69 270.8 6565 cellular  
 organisms;Eukaryota;Opisthokonta;Metazoa;Eumetazoa;Bilateria;Protostomia;  
 Spiralia;Lophotrochozoa;Mollusca;Bivalvia;Autobranhia;Pteriomorphia;Ostr  
 eida;Ostreoidea;Ostreidae;Crassostrea;Crassostrea virginica  
 UdeM00000007050 6596 199.9 UdeM00000007050 XP\_045180961.1 27.4 584  
 327 13 452 969 67 619 1.50E-47 199.9 6596 cellular  
 organisms;Eukaryota;Opisthokonta;Metazoa;Eumetazoa;Bilateria;Protostomia;  
 Spiralia;Lophotrochozoa;Mollusca;Bivalvia;Autobranhia;Heteroconchia;Euhe  
 terodonta;Imparidentia;Venerida;Veneroidea;Veneridae;Mercenaria;Mercenari  
 a mercenaria

UdeM00000007051 6596 212.6 UdeM00000007051 XP\_045180961.1 28.6 570  
 338 13 1 518 67 619 1.20E-51 212.6 6596 cellular  
 organisms;Eukaryota;Opisthokonta;Metazoa;Eumetazoa;Bilateria;Protostomia;  
 Spiralia;Lophotrochozoa;Mollusca;Bivalvia;Autobranchia;Heteroconchia;Euhe  
 terodonta;Imparidentia;Venerida;Veneroidea;Veneridae;Mercenaria;Mercenari  
 a mercenaria  
 UdeM00000007052 6596 141.7 UdeM00000007052 XP\_045180961.1 27.1 443  
 257 10 3 394 192 619 1.90E-30 141.7 6596 cellular  
 organisms;Eukaryota;Opisthokonta;Metazoa;Eumetazoa;Bilateria;Protostomia;  
 Spiralia;Lophotrochozoa;Mollusca;Bivalvia;Autobranchia;Heteroconchia;Euhe  
 terodonta;Imparidentia;Venerida;Veneroidea;Veneridae;Mercenaria;Mercenari  
 a mercenaria  
 UdeM00000007053 6596 212.6 UdeM00000007053 XP\_045180961.1 28.6 570  
 338 13 1 518 67 619 1.20E-51 212.6 6596 cellular  
 organisms;Eukaryota;Opisthokonta;Metazoa;Eumetazoa;Bilateria;Protostomia;  
 Spiralia;Lophotrochozoa;Mollusca;Bivalvia;Autobranchia;Heteroconchia;Euhe  
 terodonta;Imparidentia;Venerida;Veneroidea;Veneridae;Mercenaria;Mercenari  
 a mercenaria  
 UdeM00000007054 6596 124.8 UdeM00000007054 XP\_045180962.1 32.4 210  
 137 2 2 208 72 279 3.10E-25 124.8 6596 cellular  
 organisms;Eukaryota;Opisthokonta;Metazoa;Eumetazoa;Bilateria;Protostomia;  
 Spiralia;Lophotrochozoa;Mollusca;Bivalvia;Autobranchia;Heteroconchia;Euhe  
 terodonta;Imparidentia;Venerida;Veneroidea;Veneridae;Mercenaria;Mercenari  
 a mercenaria  
 UdeM00000007055 29159 73.2 UdeM00000007055 XP\_011428043.2 55.1 69  
 30 1 438 506 359 426 1.10E-09 73.2 29159 cellular  
 organisms;Eukaryota;Opisthokonta;Metazoa;Eumetazoa;Bilateria;Protostomia;  
 Spiralia;Lophotrochozoa;Mollusca;Bivalvia;Autobranchia;Pteriormorphia;Ostr  
 eida;Ostreoidea;Ostreidae;Crassostrea;Crassostrea gigas  
 UdeM00000007057 225164 176.8 UdeM00000007057 XP\_009063338.1 51.2  
 170 82 1 19 187 55 224 2.60E-41 176.8 225164  
 cellular  
 organisms;Eukaryota;Opisthokonta;Metazoa;Eumetazoa;Bilateria;Protostomia;  
 Spiralia;Lophotrochozoa;Mollusca;Gastropoda;Patellogastropoda;Lottioidea;  
 Lottiidae;Lottia;Lottia gigantea  
 UdeM00000007058 6596 73.6 UdeM00000007058 XP\_045172246.1 32.2 121  
 78 2 325 441 59 179 9.00E-10 73.6 6596 cellular  
 organisms;Eukaryota;Opisthokonta;Metazoa;Eumetazoa;Bilateria;Protostomia;  
 Spiralia;Lophotrochozoa;Mollusca;Bivalvia;Autobranchia;Heteroconchia;Euhe  
 terodonta;Imparidentia;Venerida;Veneroidea;Veneridae;Mercenaria;Mercenari  
 a mercenaria  
 UdeM00000007059 6596 73.6 UdeM00000007059 XP\_045172246.1 32.2 121  
 78 2 320 436 59 179 8.90E-10 73.6 6596 cellular  
 organisms;Eukaryota;Opisthokonta;Metazoa;Eumetazoa;Bilateria;Protostomia;  
 Spiralia;Lophotrochozoa;Mollusca;Bivalvia;Autobranchia;Heteroconchia;Euhe  
 terodonta;Imparidentia;Venerida;Veneroidea;Veneridae;Mercenaria;Mercenari  
 a mercenaria  
 UdeM00000007061 29159 480.7 UdeM00000007061 XP\_034312388.1 70.3 316  
 89 3 1 314 64 376 1.40E-13 480.7 29159 cellular  
 organisms;Eukaryota;Opisthokonta;Metazoa;Eumetazoa;Bilateria;Protostomia;  
 Spiralia;Lophotrochozoa;Mollusca;Bivalvia;Autobranchia;Pteriormorphia;Ostr  
 eida;Ostreoidea;Ostreidae;Crassostrea;Crassostrea gigas  
 UdeM00000007062 29159 203 UdeM00000007062 XP\_034312388.1 69.4 134  
 40 1 14 147 149 281 3.20E-49 203 29159 cellular



organisms;Eukaryota;Opisthokonta;Metazoa;Eumetazoa;Bilateria;Protostomia;  
Spiralia;Lophotrochozoa;Mollusca;Bivalvia;Autobranchia;Pteriomorphia;Ostr  
eida;Ostreoidea;Ostreidae;Crassostrea;Crassostrea gigas  
UdeM00000007063 6596 271.2 UdeM00000007063 XP\_045181882.1 65.2 187  
64 1 111 297 612 797 1.60E-69 271.2 6596 cellular  
organisms;Eukaryota;Opisthokonta;Metazoa;Eumetazoa;Bilateria;Protostomia;  
Spiralia;Lophotrochozoa;Mollusca;Bivalvia;Autobranchia;Heteroconchia;Euhe  
terodonta;Imparidentia;Venerida;Veneroidea;Veneridae;Mercenaria;Mercenari  
a mercenaria  
UdeM00000007064 6579 223.8 UdeM00000007064 XP\_033727062.1 45.7 269  
126 4 367 621 580 842 6.40E-55 223.8 6579 cellular  
organisms;Eukaryota;Opisthokonta;Metazoa;Eumetazoa;Bilateria;Protostomia;  
Spiralia;Lophotrochozoa;Mollusca;Bivalvia;Autobranchia;Pteriomorphia;Pect  
inida;Pectinoidea;Pectinidae;Pecten;Pecten maximus  
UdeM00000007065 6596 63.9 UdeM00000007065 XP\_045179872.1 27.8 126  
70 2 6 126 39 148 1.80E-07 63.9 6596 cellular  
organisms;Eukaryota;Opisthokonta;Metazoa;Eumetazoa;Bilateria;Protostomia;  
Spiralia;Lophotrochozoa;Mollusca;Bivalvia;Autobranchia;Heteroconchia;Euhe  
terodonta;Imparidentia;Venerida;Veneroidea;Veneridae;Mercenaria;Mercenari  
a mercenaria  
UdeM00000007066 6596 182.2 UdeM00000007066 XP\_045180962.1 27 534  
333 13 1 526 72 556 1.70E-42 182.2 6596 cellular  
organisms;Eukaryota;Opisthokonta;Metazoa;Eumetazoa;Bilateria;Protostomia;  
Spiralia;Lophotrochozoa;Mollusca;Bivalvia;Autobranchia;Heteroconchia;Euhe  
terodonta;Imparidentia;Venerida;Veneroidea;Veneridae;Mercenaria;Mercenari  
a mercenaria  
UdeM00000007067 6596 185.7 UdeM00000007067 XP\_045180962.1 28.7 501  
291 10 1 451 72 556 1.30E-43 185.7 6596 cellular  
organisms;Eukaryota;Opisthokonta;Metazoa;Eumetazoa;Bilateria;Protostomia;  
Spiralia;Lophotrochozoa;Mollusca;Bivalvia;Autobranchia;Heteroconchia;Euhe  
terodonta;Imparidentia;Venerida;Veneroidea;Veneridae;Mercenaria;Mercenari  
a mercenaria  
UdeM00000007068 29159 593.6 UdeM00000007068 XP\_011429048.1 94.9 311  
16 0 1 311 1 311 1.50E-166 593.6 29159 cellular  
organisms;Eukaryota;Opisthokonta;Metazoa;Eumetazoa;Bilateria;Protostomia;  
Spiralia;Lophotrochozoa;Mollusca;Bivalvia;Autobranchia;Pteriomorphia;Ostr  
eida;Ostreoidea;Ostreidae;Crassostrea;Crassostrea gigas  
UdeM00000007069 6596 189.9 UdeM00000007069 XP\_045180961.1 28.9 598  
373 19 1 591 67 619 9.30E-45 189.9 6596 cellular  
organisms;Eukaryota;Opisthokonta;Metazoa;Eumetazoa;Bilateria;Protostomia;  
Spiralia;Lophotrochozoa;Mollusca;Bivalvia;Autobranchia;Heteroconchia;Euhe  
terodonta;Imparidentia;Venerida;Veneroidea;Veneridae;Mercenaria;Mercenari  
a mercenaria  
UdeM00000007070 29159 176 UdeM00000007070 XP\_011434520.1 52.5 162  
67 6 8 164 11 167 3.90E-41 176 29159 cellular  
organisms;Eukaryota;Opisthokonta;Metazoa;Eumetazoa;Bilateria;Protostomia;  
Spiralia;Lophotrochozoa;Mollusca;Bivalvia;Autobranchia;Pteriomorphia;Ostr  
eida;Ostreoidea;Ostreidae;Crassostrea;Crassostrea gigas  
UdeM00000007071 6573 113.2 UdeM00000007071 XP\_021378198.1 55.8 104  
40 4 19 121 26 124 2.30E-22 113.2 6573 cellular  
organisms;Eukaryota;Opisthokonta;Metazoa;Eumetazoa;Bilateria;Protostomia;  
Spiralia;Lophotrochozoa;Mollusca;Bivalvia;Autobranchia;Pteriomorphia;Pect  
inida;Pectinoidea;Pectinidae;Mizuhopecten;Mizuhopecten yessoensis

UdeM00000007072 6596 153.3 UdeM00000007072 XP\_045181726.1 32.9 767  
 398 23 107 793 10 739 1.70E-33 153.3 6596 cellular  
 organisms;Eukaryota;Opisthokonta;Metazoa;Eumetazoa;Bilateria;Protostomia;  
 Spiralia;Lophotrochozoa;Mollusca;Bivalvia;Autobranchia;Heteroconchia;Euhe  
 terodonta;Imparidentia;Venerida;Veneroidea;Veneridae;Mercenaria;Mercenari  
 a mercenaria  
 UdeM00000007074 6596 412.1 UdeM00000007074 XP\_045183062.1 50.4 399  
 194 4 8 406 844 1238 7.90E-112 412.1 6596 cellular  
 organisms;Eukaryota;Opisthokonta;Metazoa;Eumetazoa;Bilateria;Protostomia;  
 Spiralia;Lophotrochozoa;Mollusca;Bivalvia;Autobranchia;Heteroconchia;Euhe  
 terodonta;Imparidentia;Venerida;Veneroidea;Veneridae;Mercenaria;Mercenari  
 a mercenaria  
 UdeM00000007075 6579 643.3 UdeM00000007075 XP\_033726966.1 48.2 765  
 302 10 1 749 1 687 3.90E-181 643.3 6579 cellular  
 organisms;Eukaryota;Opisthokonta;Metazoa;Eumetazoa;Bilateria;Protostomia;  
 Spiralia;Lophotrochozoa;Mollusca;Bivalvia;Autobranchia;Pteriormorphia;Pect  
 inida;Pectinoidea;Pectinidae;Pecten;Pecten maximus  
 UdeM00000007076 6596 218.8 UdeM00000007076 XP\_045165713.1 53.5 187  
 87 0 12 198 6 192 2.00E-53 218.8 6596 cellular  
 organisms;Eukaryota;Opisthokonta;Metazoa;Eumetazoa;Bilateria;Protostomia;  
 Spiralia;Lophotrochozoa;Mollusca;Bivalvia;Autobranchia;Heteroconchia;Euhe  
 terodonta;Imparidentia;Venerida;Veneroidea;Veneridae;Mercenaria;Mercenari  
 a mercenaria  
 UdeM00000007076 6596 82.8 UdeM00000007076 XP\_045165713.1 47.4 76  
 40 0 542 617 314 389 1.70E-12 82.8 6596 cellular  
 organisms;Eukaryota;Opisthokonta;Metazoa;Eumetazoa;Bilateria;Protostomia;  
 Spiralia;Lophotrochozoa;Mollusca;Bivalvia;Autobranchia;Heteroconchia;Euhe  
 terodonta;Imparidentia;Venerida;Veneroidea;Veneridae;Mercenaria;Mercenari  
 a mercenaria  
 UdeM00000007077 6596 260.4 UdeM00000007077 XP\_045182210.1 37.8 426  
 246 7 24 442 2 415 4.30E-66 260.4 6596 cellular  
 organisms;Eukaryota;Opisthokonta;Metazoa;Eumetazoa;Bilateria;Protostomia;  
 Spiralia;Lophotrochozoa;Mollusca;Bivalvia;Autobranchia;Heteroconchia;Euhe  
 terodonta;Imparidentia;Venerida;Veneroidea;Veneridae;Mercenaria;Mercenari  
 a mercenaria  
 UdeM00000007078 6596 310.8 UdeM00000007078 XP\_045187622.1 45.6 410  
 199 6 32 435 4 395 2.70E-81 310.8 6596 cellular  
 organisms;Eukaryota;Opisthokonta;Metazoa;Eumetazoa;Bilateria;Protostomia;  
 Spiralia;Lophotrochozoa;Mollusca;Bivalvia;Autobranchia;Heteroconchia;Euhe  
 terodonta;Imparidentia;Venerida;Veneroidea;Veneridae;Mercenaria;Mercenari  
 a mercenaria  
 UdeM00000007080 6579 320.9 UdeM00000007080 XP\_033743128.1 46.1 410  
 206 2 27 436 25 419 2.60E-84 320.9 6579 cellular  
 organisms;Eukaryota;Opisthokonta;Metazoa;Eumetazoa;Bilateria;Protostomia;  
 Spiralia;Lophotrochozoa;Mollusca;Bivalvia;Autobranchia;Pteriormorphia;Pect  
 inida;Pectinoidea;Pectinidae;Pecten;Pecten maximus  
 UdeM00000007081 6573 411 UdeM00000007081 XP\_021364254.1 62.6 340  
 123 3 83 420 2 339 1.90E-111 411 6573 cellular  
 organisms;Eukaryota;Opisthokonta;Metazoa;Eumetazoa;Bilateria;Protostomia;  
 Spiralia;Lophotrochozoa;Mollusca;Bivalvia;Autobranchia;Pteriormorphia;Pect  
 inida;Pectinoidea;Pectinidae;Mizuhopecten;Mizuhopecten yessoensis  
 UdeM00000007083 6565 59.3 UdeM00000007083 XP\_022287821.1 35.7 84  
 46 2 7 88 9 86 3.00E-06 59.3 6565 cellular  
 organisms;Eukaryota;Opisthokonta;Metazoa;Eumetazoa;Bilateria;Protostomia;

Spiralia; Lophotrochozoa; Mollusca; Bivalvia; Autobranchia; Pteriomorpha; Ostr  
 eida; Ostreoida; Ostreidae; Crassostrea; Crassostrea virginica  
 UdeM00000007085 7918 115.2 UdeM00000007085 XP\_015205498.1 32.4 250  
 138 6 1 233 1 236 2.50E-22 115.2 7918 cellular  
 organisms; Eukaryota; Opisthokonta; Metazoa; Eumetazoa; Bilateria; Deuterostomi  
 a; Chordata; Craniata; Vertebrata; Gnathostomata; Teleostomi; Euteleostomi; Acti  
 nopterygii; Actinopteri; Neopterygii; Holostei; Semionotiformes; Lepisosteidae  
 ; Lepisosteus; Lepisosteus oculatus  
 UdeM00000007086 29159 186.4 UdeM00000007086 XP\_019926412.2 42.7 239  
 127 6 15 253 257 485 4.50E-44 186.4 29159 cellular  
 organisms; Eukaryota; Opisthokonta; Metazoa; Eumetazoa; Bilateria; Protostomia;  
 Spiralia; Lophotrochozoa; Mollusca; Bivalvia; Autobranchia; Pteriomorpha; Ostr  
 eida; Ostreoida; Ostreidae; Crassostrea; Crassostrea gigas  
 UdeM00000007087 29159 183.3 UdeM00000007087 XP\_019926412.2 43.1 239  
 123 7 15 250 257 485 3.80E-43 183.3 29159 cellular  
 organisms; Eukaryota; Opisthokonta; Metazoa; Eumetazoa; Bilateria; Protostomia;  
 Spiralia; Lophotrochozoa; Mollusca; Bivalvia; Autobranchia; Pteriomorpha; Ostr  
 eida; Ostreoida; Ostreidae; Crassostrea; Crassostrea gigas  
 UdeM00000007088 6596 189.5 UdeM00000007088 XP\_045180946.1 51.7 201  
 96 1 46 245 1 201 6.10E-45 189.5 6596 cellular  
 organisms; Eukaryota; Opisthokonta; Metazoa; Eumetazoa; Bilateria; Protostomia;  
 Spiralia; Lophotrochozoa; Mollusca; Bivalvia; Autobranchia; Heteroconchia; Eue  
 terodonta; Imparidentia; Venerida; Veneroidea; Veneridae; Mercenaria; Mercenari  
 a mercenaria  
 UdeM00000007089 6573 303.5 UdeM00000007089 XP\_021343514.1 91.9 161  
 13 0 1 161 1 161 1.90E-79 303.5 6573 cellular  
 organisms; Eukaryota; Opisthokonta; Metazoa; Eumetazoa; Bilateria; Protostomia;  
 Spiralia; Lophotrochozoa; Mollusca; Bivalvia; Autobranchia; Pteriomorpha; Pect  
 inida; Pectinoidea; Pectinidae; Mizuhopecten; Mizuhopecten yessoensis  
 UdeM00000007090 6573 79 UdeM00000007090 XP\_021376553.1 40.2 107  
 63 1 158 263 263 369 1.00E-11 79 6573 cellular  
 organisms; Eukaryota; Opisthokonta; Metazoa; Eumetazoa; Bilateria; Protostomia;  
 Spiralia; Lophotrochozoa; Mollusca; Bivalvia; Autobranchia; Pteriomorpha; Pect  
 inida; Pectinoidea; Pectinidae; Mizuhopecten; Mizuhopecten yessoensis  
 UdeM00000007092 1735272 325.1 UdeM00000007092 XP\_041360630.1 47.4  
 580 262 14 117 667 317 882 2.10E-85 325.1 1735272  
 cellular  
 organisms; Eukaryota; Opisthokonta; Metazoa; Eumetazoa; Bilateria; Protostomia;  
 Spiralia; Lophotrochozoa; Mollusca; Gastropoda; Neomphalina; Neomphaloidea; Pel  
 tospiridae; Gigantopelta; Gigantopelta aegis  
 UdeM00000007093 6596 1550.4 UdeM00000007093 XP\_045181330.1 59.2  
 1325 494 10 26 1323 216 1520 0.00E+00 1550.4 6596  
 cellular  
 organisms; Eukaryota; Opisthokonta; Metazoa; Eumetazoa; Bilateria; Protostomia;  
 Spiralia; Lophotrochozoa; Mollusca; Bivalvia; Autobranchia; Heteroconchia; Eue  
 terodonta; Imparidentia; Venerida; Veneroidea; Veneridae; Mercenaria; Mercenari  
 a mercenaria  
 UdeM00000007094 6565 325.9 UdeM00000007094 XP\_022312581.1 34.8 581  
 206 10 60 469 75 653 1.10E-85 325.9 6565 cellular  
 organisms; Eukaryota; Opisthokonta; Metazoa; Eumetazoa; Bilateria; Protostomia;  
 Spiralia; Lophotrochozoa; Mollusca; Bivalvia; Autobranchia; Pteriomorpha; Ostr  
 eida; Ostreoida; Ostreidae; Crassostrea; Crassostrea virginica  
 UdeM00000007095 6596 1453.3 UdeM00000007095 XP\_045181330.1 56.6  
 1341 525 15 5 1328 206 1506 0.00E+00 1453.3 6596

cellular  
organisms;Eukaryota;Opisthokonta;Metazoa;Eumetazoa;Bilateria;Protostomia;  
Spiralia;Lophotrochozoa;Mollusca;Bivalvia;Autobranchia;Heteroconchia;Euhe  
terodonta;Imparidentia;Venerida;Veneroidea;Veneridae;Mercenaria;Mercenari  
a mercenaria  
UdeM00000007096 6596 257.7 UdeM00000007096 XP\_045180460.1 72.2 169  
47 0 95 263 73 241 1.60E-65 257.7 6596 cellular  
organisms;Eukaryota;Opisthokonta;Metazoa;Eumetazoa;Bilateria;Protostomia;  
Spiralia;Lophotrochozoa;Mollusca;Bivalvia;Autobranchia;Heteroconchia;Euhe  
terodonta;Imparidentia;Venerida;Veneroidea;Veneridae;Mercenaria;Mercenari  
a mercenaria  
UdeM00000007097 6596 303.1 UdeM00000007097 XP\_045181126.1 67.2 262  
67 8 1 249 3 258 3.20E-79 303.1 6596 cellular  
organisms;Eukaryota;Opisthokonta;Metazoa;Eumetazoa;Bilateria;Protostomia;  
Spiralia;Lophotrochozoa;Mollusca;Bivalvia;Autobranchia;Heteroconchia;Euhe  
terodonta;Imparidentia;Venerida;Veneroidea;Veneridae;Mercenaria;Mercenari  
a mercenaria  
UdeM00000007098 6596 207.2 UdeM00000007098 XP\_045181126.1 68.4 171  
44 3 5 168 257 424 1.60E-50 207.2 6596 cellular  
organisms;Eukaryota;Opisthokonta;Metazoa;Eumetazoa;Bilateria;Protostomia;  
Spiralia;Lophotrochozoa;Mollusca;Bivalvia;Autobranchia;Heteroconchia;Euhe  
terodonta;Imparidentia;Venerida;Veneroidea;Veneridae;Mercenaria;Mercenari  
a mercenaria  
UdeM00000007102 6579 199.9 UdeM00000007102 XP\_033726919.1 56.3 174  
72 1 11 184 28 197 2.90E-48 199.9 6579 cellular  
organisms;Eukaryota;Opisthokonta;Metazoa;Eumetazoa;Bilateria;Protostomia;  
Spiralia;Lophotrochozoa;Mollusca;Bivalvia;Autobranchia;Pteriormorphia;Pect  
inida;Pectinoidea;Pectinidae;Pecten;Pecten maximus  
UdeM00000007103 6596 96.7 UdeM00000007103 XP\_045188028.1 34 144  
93 2 2 144 3 145 2.70E-17 96.7 6596 cellular  
organisms;Eukaryota;Opisthokonta;Metazoa;Eumetazoa;Bilateria;Protostomia;  
Spiralia;Lophotrochozoa;Mollusca;Bivalvia;Autobranchia;Heteroconchia;Euhe  
terodonta;Imparidentia;Venerida;Veneroidea;Veneridae;Mercenaria;Mercenari  
a mercenaria  
UdeM00000007104 8090 66.6 UdeM00000007104 XP\_023807339.1 32.5 117  
75 4 6 119 8 123 2.80E-08 66.6 8090 cellular  
organisms;Eukaryota;Opisthokonta;Metazoa;Eumetazoa;Bilateria;Deuterostomi  
a;Chordata;Craniata;Vertebrata;Gnathostomata;Teleostomi;Euteleostomi;Acti  
nopterygii;Actinopteri;Neopterygii;Teleostei;Osteoglossocephalai;Clupeoce  
phala;Euteleosteomorpha;Neoteleostei;Eurypterygia;Ctenosquamata;Acanthomo  
rphata;Euacanthomorphacea;Percomorphaceae;Ovalentaria;Atherinomorphae;Bel  
oniformes;Adrianichthyoidei;Adrianichthyidae;Oryziinae;Oryzias;Oryzias  
latipes  
UdeM00000007105 7574 66.6 UdeM00000007105 XP\_013414043.1 27.3 172  
102 4 58 212 59 224 4.90E-08 66.6 7574 cellular  
organisms;Eukaryota;Opisthokonta;Metazoa;Eumetazoa;Bilateria;Protostomia;  
Spiralia;Lophotrochozoa;Brachiopoda;Linguliformea;Lingulata;Lingulida;Lin  
guloidea;Lingulidae;Lingula;Lingula anatina  
UdeM00000007106 7574 73.9 UdeM00000007106 XP\_013389723.1 29.4 177  
102 5 58 217 59 229 2.90E-10 73.9 7574 cellular  
organisms;Eukaryota;Opisthokonta;Metazoa;Eumetazoa;Bilateria;Protostomia;  
Spiralia;Lophotrochozoa;Brachiopoda;Linguliformea;Lingulata;Lingulida;Lin  
guloidea;Lingulidae;Lingula;Lingula anatina

UdeM00000007108 7574 73.9 UdeM00000007108 XP\_013414043.1 31.2 176  
 98 5 55 213 59 228 3.00E-10 73.9 7574 cellular  
 organisms;Eukaryota;Opisthokonta;Metazoa;Eumetazoa;Bilateria;Protostomia;  
 Spiralia;Lophotrochozoa;Brachiopoda;Linguliformea;Lingulata;Lingulida;Lin  
 guloidea;Lingulidae;Lingula;Lingula anatina  
 UdeM00000007109 27706 68.9 UdeM00000007109 XP\_038585162.1 32 125  
 78 4 22 140 24 147 5.90E-09 68.9 27706 cellular  
 organisms;Eukaryota;Opisthokonta;Metazoa;Eumetazoa;Bilateria;Deuterostomi  
 a;Chordata;Craniata;Vertebrata;Gnathostomata;Teleostomi;Euteleostomi;Acti  
 nopterygii;Actinopteri;Neopterygii;Teleostei;Osteoglossocephalai;Clupeoce  
 phala;Euteleosteomorpha;Neoteleostei;Eurypterygia;Ctenosquamata;Acanthomo  
 rphata;Euacanthomorphacea;Percomorphaceae;Eupercaria;Centrarchiformes;Cen  
 trarchoidei;Centrarchidae;Micropterus;Micropterus salmoides  
 UdeM00000007110 7574 66.2 UdeM00000007110 XP\_013414043.1 28 157  
 97 3 58 204 59 209 6.30E-08 66.2 7574 cellular  
 organisms;Eukaryota;Opisthokonta;Metazoa;Eumetazoa;Bilateria;Protostomia;  
 Spiralia;Lophotrochozoa;Brachiopoda;Linguliformea;Lingulata;Lingulida;Lin  
 guloidea;Lingulidae;Lingula;Lingula anatina  
 UdeM00000007111 7574 72.4 UdeM00000007111 XP\_013414043.1 30.3 178  
 100 6 58 218 59 229 8.80E-10 72.4 7574 cellular  
 organisms;Eukaryota;Opisthokonta;Metazoa;Eumetazoa;Bilateria;Protostomia;  
 Spiralia;Lophotrochozoa;Brachiopoda;Linguliformea;Lingulata;Lingulida;Lin  
 guloidea;Lingulidae;Lingula;Lingula anatina  
 UdeM00000007113 1735272 98.2 UdeM00000007113 XP\_041379412.1 44.2  
 120 62 3 28 146 11 126 1.10E-17 98.2 1735272  
 cellular  
 organisms;Eukaryota;Opisthokonta;Metazoa;Eumetazoa;Bilateria;Protostomia;  
 Spiralia;Lophotrochozoa;Mollusca;Gastropoda;Neomphalina;Neomphaloidea;Pel  
 tospiridae;Gigantopelta;Gigantopelta aegis  
 UdeM00000007114 6596 74.7 UdeM00000007114 XP\_045215263.1 39.5 114  
 67 2 107 219 730 842 1.60E-10 74.7 6596 cellular  
 organisms;Eukaryota;Opisthokonta;Metazoa;Eumetazoa;Bilateria;Protostomia;  
 Spiralia;Lophotrochozoa;Mollusca;Bivalvia;Autobranchia;Heteroconchia;Euhe  
 terodonta;Imparidentia;Venerida;Veneroidea;Veneridae;Mercenaria;Mercenari  
 a mercenaria  
 UdeM00000007120 6579 293.5 UdeM00000007120 XP\_033743128.1 40.7 405  
 225 3 31 430 25 419 4.40E-76 293.5 6579 cellular  
 organisms;Eukaryota;Opisthokonta;Metazoa;Eumetazoa;Bilateria;Protostomia;  
 Spiralia;Lophotrochozoa;Mollusca;Bivalvia;Autobranchia;Pteriormorphia;Pect  
 inida;Pectinoidea;Pectinidae;Pecten;Pecten maximus  
 UdeM00000007121 1735272 103.2 UdeM00000007121 XP\_041364761.1 43.3  
 97 55 0 20 116 44 140 2.30E-19 103.2 1735272  
 cellular  
 organisms;Eukaryota;Opisthokonta;Metazoa;Eumetazoa;Bilateria;Protostomia;  
 Spiralia;Lophotrochozoa;Mollusca;Gastropoda;Neomphalina;Neomphaloidea;Pel  
 tospiridae;Gigantopelta;Gigantopelta aegis  
 UdeM00000007122 6596 70.5 UdeM00000007122 XP\_045182382.1 48.4 62  
 32 0 57 118 328 389 1.80E-09 70.5 6596 cellular  
 organisms;Eukaryota;Opisthokonta;Metazoa;Eumetazoa;Bilateria;Protostomia;  
 Spiralia;Lophotrochozoa;Mollusca;Bivalvia;Autobranchia;Heteroconchia;Euhe  
 terodonta;Imparidentia;Venerida;Veneroidea;Veneridae;Mercenaria;Mercenari  
 a mercenaria  
 UdeM00000007123 6596 80.5 UdeM00000007123 XP\_045208523.1 36.9 149  
 88 1 10 158 11 153 2.30E-12 80.5 6596 cellular

organisms;Eukaryota;Opisthokonta;Metazoa;Eumetazoa;Bilateria;Protostomia;Spiralia;Lophotrochozoa;Mollusca;Bivalvia;Autobranchia;Heteroconchia;Euherodonta;Imparidentia;Venerida;Veneroidea;Veneridae;Mercenaria;Mercenaria mercenaria

UdeM00000007124 6596 63.5 UdeM00000007124 XP\_045208523.1 33.6 143  
83 1 10 140 11 153 2.60E-07 63.5 6596 cellular

organisms;Eukaryota;Opisthokonta;Metazoa;Eumetazoa;Bilateria;Protostomia;Spiralia;Lophotrochozoa;Mollusca;Bivalvia;Autobranchia;Heteroconchia;Euherodonta;Imparidentia;Venerida;Veneroidea;Veneridae;Mercenaria;Mercenaria mercenaria

UdeM00000007125 6596 72.4 UdeM00000007125 XP\_045208523.1 38.4 125  
71 1 11 135 35 153 5.50E-10 72.4 6596 cellular

organisms;Eukaryota;Opisthokonta;Metazoa;Eumetazoa;Bilateria;Protostomia;Spiralia;Lophotrochozoa;Mollusca;Bivalvia;Autobranchia;Heteroconchia;Euherodonta;Imparidentia;Venerida;Veneroidea;Veneridae;Mercenaria;Mercenaria mercenaria

UdeM00000007126 6596 84.7 UdeM00000007126 XP\_045177053.1 32.6 135  
87 2 7 138 243 376 1.20E-13 84.7 6596 cellular

organisms;Eukaryota;Opisthokonta;Metazoa;Eumetazoa;Bilateria;Protostomia;Spiralia;Lophotrochozoa;Mollusca;Bivalvia;Autobranchia;Heteroconchia;Euherodonta;Imparidentia;Venerida;Veneroidea;Veneridae;Mercenaria;Mercenaria mercenaria

UdeM00000007127 6105 260 UdeM00000007127 XP\_031549116.1 58.3 228  
89 3 1 223 8 234 3.30E-66 260 6105 cellular

organisms;Eukaryota;Opisthokonta;Metazoa;Eumetazoa;Cnidaria;Anthozoa;Hexacorallia;Actiniaria;Actiniidae;Actinia;Actinia tenebrosa

UdeM00000007128 747089 348.2 UdeM00000007128 XP\_025164949.1 31.3  
758 336 21 16 692 349 1002 2.40E-92 348.2 747089

cellular organisms;Eukaryota;Opisthokonta;Fungi;Fungi incertae sedis;Mucoromycota;Glomeromycotina;Glomeromycetes;Glomerales;Glomeraceae;Rhizophagus;Rhizophagus irregularis;Rhizophagus irregularis DAOM 181602=DAOM 197198

UdeM00000007129 6105 95.5 UdeM00000007129 XP\_031566938.1 41.4 128  
70 3 40 165 58 182 6.80E-17 95.5 6105 cellular

organisms;Eukaryota;Opisthokonta;Metazoa;Eumetazoa;Cnidaria;Anthozoa;Hexacorallia;Actiniaria;Actiniidae;Actinia;Actinia tenebrosa

UdeM00000007130 6596 74.7 UdeM00000007130 XP\_045177053.1 28.3 166  
99 5 1 152 71 230 1.30E-10 74.7 6596 cellular

organisms;Eukaryota;Opisthokonta;Metazoa;Eumetazoa;Bilateria;Protostomia;Spiralia;Lophotrochozoa;Mollusca;Bivalvia;Autobranchia;Heteroconchia;Euherodonta;Imparidentia;Venerida;Veneroidea;Veneridae;Mercenaria;Mercenaria mercenaria

UdeM00000007131 6596 136.3 UdeM00000007131 XP\_045176664.1 38.9 190  
109 4 22 207 381 567 4.40E-29 136.3 6596 cellular

organisms;Eukaryota;Opisthokonta;Metazoa;Eumetazoa;Bilateria;Protostomia;Spiralia;Lophotrochozoa;Mollusca;Bivalvia;Autobranchia;Heteroconchia;Euherodonta;Imparidentia;Venerida;Veneroidea;Veneridae;Mercenaria;Mercenaria mercenaria

UdeM00000007132 6596 74.3 UdeM00000007132 XP\_045207417.1 31.1 167  
108 4 1 165 2 163 1.70E-10 74.3 6596 cellular

organisms;Eukaryota;Opisthokonta;Metazoa;Eumetazoa;Bilateria;Protostomia;Spiralia;Lophotrochozoa;Mollusca;Bivalvia;Autobranchia;Heteroconchia;Euherodonta;Imparidentia;Venerida;Veneroidea;Veneridae;Mercenaria;Mercenaria mercenaria

UdeM00000007135 6579 243.4 UdeM00000007135 XP\_033743128.1 37.4 423  
 243 3 25 447 16 416 5.40E-61 243.4 6579 cellular  
 organisms;Eukaryota;Opisthokonta;Metazoa;Eumetazoa;Bilateria;Protostomia;  
 Spiralia;Lophotrochozoa;Mollusca;Bivalvia;Autobranhia;Pteriormorphia;Pect  
 inida;Pectinoidea;Pectinidae;Pecten;Pecten maximus  
 UdeM00000007136 6596 374.4 UdeM00000007136 XP\_045214844.1 36 645  
 394 14 48 679 61 699 3.10E-100 374.4 6596 cellular  
 organisms;Eukaryota;Opisthokonta;Metazoa;Eumetazoa;Bilateria;Protostomia;  
 Spiralia;Lophotrochozoa;Mollusca;Bivalvia;Autobranhia;Heteroconchia;Euhe  
 terodonta;Imparidentia;Venerida;Veneroidea;Veneridae;Mercenaria;Mercenari  
 a mercenaria  
 UdeM00000007137 6596 377.9 UdeM00000007137 XP\_045214844.1 35.5 668  
 414 14 25 679 36 699 2.80E-101 377.9 6596 cellular  
 organisms;Eukaryota;Opisthokonta;Metazoa;Eumetazoa;Bilateria;Protostomia;  
 Spiralia;Lophotrochozoa;Mollusca;Bivalvia;Autobranhia;Heteroconchia;Euhe  
 terodonta;Imparidentia;Venerida;Veneroidea;Veneridae;Mercenaria;Mercenari  
 a mercenaria  
 UdeM00000007138 6596 275.8 UdeM00000007138 XP\_045204134.1 48.6 319  
 150 4 27 345 36 340 7.90E-71 275.8 6596 cellular  
 organisms;Eukaryota;Opisthokonta;Metazoa;Eumetazoa;Bilateria;Protostomia;  
 Spiralia;Lophotrochozoa;Mollusca;Bivalvia;Autobranhia;Heteroconchia;Euhe  
 terodonta;Imparidentia;Venerida;Veneroidea;Veneridae;Mercenaria;Mercenari  
 a mercenaria  
 UdeM00000007139 6596 275.4 UdeM00000007139 XP\_045204134.1 48.6 319  
 150 4 27 345 36 340 1.10E-70 275.4 6596 cellular  
 organisms;Eukaryota;Opisthokonta;Metazoa;Eumetazoa;Bilateria;Protostomia;  
 Spiralia;Lophotrochozoa;Mollusca;Bivalvia;Autobranhia;Heteroconchia;Euhe  
 terodonta;Imparidentia;Venerida;Veneroidea;Veneridae;Mercenaria;Mercenari  
 a mercenaria  
 UdeM00000007140 516756 109 UdeM00000007140 XP\_017761321.1 89.7  
 58 6 0 32 89 1766 1823 3.20E-21 109 516756  
 cellular  
 organisms;Eukaryota;Opisthokonta;Metazoa;Eumetazoa;Bilateria;Protostomia;  
 Ecdysozoa;Panarthropoda;Arthropoda;Mandibulata;Pancrustacea;Hexapoda;Inse  
 cta;Dicondylia;Pterygota;Neoptera;Endopterygota;Hymenoptera;Apocrita;Acul  
 eata;Apoidea;Apidae;Apinae;Euglossini;Eufriesea;Eufriesea mexicana  
 UdeM00000007141 6596 177.6 UdeM00000007141 XP\_045183440.1 55.4 168  
 71 2 3 170 217 380 2.20E-41 177.6 6596 cellular  
 organisms;Eukaryota;Opisthokonta;Metazoa;Eumetazoa;Bilateria;Protostomia;  
 Spiralia;Lophotrochozoa;Mollusca;Bivalvia;Autobranhia;Heteroconchia;Euhe  
 terodonta;Imparidentia;Venerida;Veneroidea;Veneridae;Mercenaria;Mercenari  
 a mercenaria  
 UdeM00000007142 6596 86.3 UdeM00000007142 XP\_045202346.1 39.3 117  
 67 2 6 121 16 129 3.20E-14 86.3 6596 cellular  
 organisms;Eukaryota;Opisthokonta;Metazoa;Eumetazoa;Bilateria;Protostomia;  
 Spiralia;Lophotrochozoa;Mollusca;Bivalvia;Autobranhia;Heteroconchia;Euhe  
 terodonta;Imparidentia;Venerida;Veneroidea;Veneridae;Mercenaria;Mercenari  
 a mercenaria  
 UdeM00000007143 6573 139.4 UdeM00000007143 XP\_021352386.1 49 145  
 70 2 28 172 258 398 5.30E-30 139.4 6573 cellular  
 organisms;Eukaryota;Opisthokonta;Metazoa;Eumetazoa;Bilateria;Protostomia;  
 Spiralia;Lophotrochozoa;Mollusca;Bivalvia;Autobranhia;Pteriormorphia;Pect  
 inida;Pectinoidea;Pectinidae;Mizuhopecten;Mizuhopecten yessoensis

|                                                                                                                                                                                                                                         |       |        |     |                 |                |                               |
|-----------------------------------------------------------------------------------------------------------------------------------------------------------------------------------------------------------------------------------------|-------|--------|-----|-----------------|----------------|-------------------------------|
| UdeM00000007145                                                                                                                                                                                                                         | 6596  | 1664.4 |     | UdeM00000007145 | XP_045163829.1 | 51.9                          |
| 1646                                                                                                                                                                                                                                    | 722   | 18     | 5   | 1627            | 7              | 1606 0.00E+00 1664.4 6596     |
| cellular                                                                                                                                                                                                                                |       |        |     |                 |                |                               |
| organisms;Eukaryota;Opisthokonta;Metazoa;Eumetazoa;Bilateria;Protostomia;Spiralia;Lophotrochozoa;Mollusca;Bivalvia;Autobranchia;Heteroconchia;Euheterodonta;Imparidentia;Venerida;Veneroidea;Veneridae;Mercenaria;Mercenaria mercenaria |       |        |     |                 |                |                               |
| UdeM00000007146                                                                                                                                                                                                                         | 6573  | 124.8  |     | UdeM00000007146 | XP_021347516.1 | 22.2 526                      |
| 370                                                                                                                                                                                                                                     | 12    | 7      | 514 | 149             | 653            | 3.30E-25 124.8 6573 cellular  |
| organisms;Eukaryota;Opisthokonta;Metazoa;Eumetazoa;Bilateria;Protostomia;Spiralia;Lophotrochozoa;Mollusca;Bivalvia;Autobranchia;Pteriomorpha;Pectinida;Pectinoidea;Pectinidae;Mizuhopecten;Mizuhopecten yessoensis                      |       |        |     |                 |                |                               |
| UdeM00000007147                                                                                                                                                                                                                         | 6500  | 219.5  |     | UdeM00000007147 | XP_005096520.1 | 70.6 136                      |
| 40                                                                                                                                                                                                                                      | 0     | 6      | 141 | 8               | 143            | 2.70E-54 219.5 6500 cellular  |
| organisms;Eukaryota;Opisthokonta;Metazoa;Eumetazoa;Bilateria;Protostomia;Spiralia;Lophotrochozoa;Mollusca;Gastropoda;Heterobranchia;Euthyneura;Tectipleura;Aplysiida;Aplysioidea;Aplysiidae;Aplysia;Aplysia californica                 |       |        |     |                 |                |                               |
| UdeM00000007148                                                                                                                                                                                                                         | 29159 | 312.4  |     | UdeM00000007148 | XP_011420249.2 | 58.6 268                      |
| 97                                                                                                                                                                                                                                      | 5     | 87     | 344 | 51              | 314            | 7.40E-82 312.4 29159 cellular |
| organisms;Eukaryota;Opisthokonta;Metazoa;Eumetazoa;Bilateria;Protostomia;Spiralia;Lophotrochozoa;Mollusca;Bivalvia;Autobranchia;Pteriomorpha;Ostreida;Ostreoidea;Ostreidae;Crassostrea;Crassostrea gigas                                |       |        |     |                 |                |                               |
| UdeM00000007149                                                                                                                                                                                                                         | 7719  | 222.2  |     | UdeM00000007149 | XP_004227216.1 | 72.1 136                      |
| 38                                                                                                                                                                                                                                      | 0     | 6      | 141 | 8               | 143            | 4.10E-55 222.2 7719 cellular  |
| organisms;Eukaryota;Opisthokonta;Metazoa;Eumetazoa;Bilateria;Deuterostomia;Chordata;Tunicata;Ascidiacea;Phlebobranchia;Cionidae;Ciona;Ciona intestinalis                                                                                |       |        |     |                 |                |                               |
| UdeM00000007150                                                                                                                                                                                                                         | 6573  | 413.3  |     | UdeM00000007150 | XP_021378217.1 | 72.4 286                      |
| 78                                                                                                                                                                                                                                      | 1     | 3      | 287 | 1               | 286            | 2.50E-112 413.3 6573 cellular |
| organisms;Eukaryota;Opisthokonta;Metazoa;Eumetazoa;Bilateria;Protostomia;Spiralia;Lophotrochozoa;Mollusca;Bivalvia;Autobranchia;Pteriomorpha;Pectinida;Pectinoidea;Pectinidae;Mizuhopecten;Mizuhopecten yessoensis                      |       |        |     |                 |                |                               |
| UdeM00000007151                                                                                                                                                                                                                         | 6579  | 356.3  |     | UdeM00000007151 | XP_033727675.1 | 38.9 656                      |
| 327                                                                                                                                                                                                                                     | 13    | 32     | 621 | 572             | 1219           | 9.00E-95 356.3 6579 cellular  |
| organisms;Eukaryota;Opisthokonta;Metazoa;Eumetazoa;Bilateria;Protostomia;Spiralia;Lophotrochozoa;Mollusca;Bivalvia;Autobranchia;Pteriomorpha;Pectinida;Pectinoidea;Pectinidae;Pecten;Pecten maximus                                     |       |        |     |                 |                |                               |
| UdeM00000007152                                                                                                                                                                                                                         | 6579  | 102.8  |     | UdeM00000007152 | XP_033727478.1 | 37.1 140                      |
| 86                                                                                                                                                                                                                                      | 1     | 9      | 146 | 11              | 150            | 3.70E-19 102.8 6579 cellular  |
| organisms;Eukaryota;Opisthokonta;Metazoa;Eumetazoa;Bilateria;Protostomia;Spiralia;Lophotrochozoa;Mollusca;Bivalvia;Autobranchia;Pteriomorpha;Pectinida;Pectinoidea;Pectinidae;Pecten;Pecten maximus                                     |       |        |     |                 |                |                               |
| UdeM00000007154                                                                                                                                                                                                                         | 6579  | 303.1  |     | UdeM00000007154 | XP_033727478.1 | 47.3 370                      |
| 185                                                                                                                                                                                                                                     | 5     | 9      | 374 | 175             | 538            | 6.50E-79 303.1 6579 cellular  |
| organisms;Eukaryota;Opisthokonta;Metazoa;Eumetazoa;Bilateria;Protostomia;Spiralia;Lophotrochozoa;Mollusca;Bivalvia;Autobranchia;Pteriomorpha;Pectinida;Pectinoidea;Pectinidae;Pecten;Pecten maximus                                     |       |        |     |                 |                |                               |
| UdeM00000007153                                                                                                                                                                                                                         | 6579  | 303.1  |     | UdeM00000007153 | XP_033727478.1 | 47.3 370                      |
| 185                                                                                                                                                                                                                                     | 5     | 9      | 374 | 175             | 538            | 7.00E-79 303.1 6579 cellular  |
| organisms;Eukaryota;Opisthokonta;Metazoa;Eumetazoa;Bilateria;Protostomia;Spiralia;Lophotrochozoa;Mollusca;Bivalvia;Autobranchia;Pteriomorpha;Pectinida;Pectinoidea;Pectinidae;Pecten;Pecten maximus                                     |       |        |     |                 |                |                               |
| UdeM00000007155                                                                                                                                                                                                                         | 6573  | 386.3  |     | UdeM00000007155 | XP_021378217.1 | 66.8 286                      |
| 95                                                                                                                                                                                                                                      | 0     | 3      | 288 | 1               | 286            | 3.30E-104 386.3 6573 cellular |



organisms;Eukaryota;Opisthokonta;Metazoa;Eumetazoa;Bilateria;Protostomia;Spiralia;Lophotrochozoa;Mollusca;Bivalvia;Autobranhia;Pteriormorphia;Pectinida;Pectinoidea;Pectinidae;Mizuhopecten;Mizuhopecten yessoensis  
UdeM00000007156 6565 60.5 UdeM00000007156 XP\_022288893.1 34.9 109  
68 1 32 140 323 428 2.00E-06 60.5 6565 cellular

organisms;Eukaryota;Opisthokonta;Metazoa;Eumetazoa;Bilateria;Protostomia;Spiralia;Lophotrochozoa;Mollusca;Bivalvia;Autobranhia;Pteriormorphia;Ostreida;Ostreoidea;Ostreidae;Crassostrea;Crassostrea virginica  
UdeM00000007157 6573 320.1 UdeM00000007157 XP\_021378219.1 39 593  
326 15 5 579 700 1274 5.90E-84 320.1 6573 cellular

organisms;Eukaryota;Opisthokonta;Metazoa;Eumetazoa;Bilateria;Protostomia;Spiralia;Lophotrochozoa;Mollusca;Bivalvia;Autobranhia;Pteriormorphia;Pectinida;Pectinoidea;Pectinidae;Mizuhopecten;Mizuhopecten yessoensis  
UdeM00000007158 6579 279.6 UdeM00000007158 XP\_033727675.1 36.3 512  
308 10 32 530 572 1078 8.00E-72 279.6 6579 cellular

organisms;Eukaryota;Opisthokonta;Metazoa;Eumetazoa;Bilateria;Protostomia;Spiralia;Lophotrochozoa;Mollusca;Bivalvia;Autobranhia;Pteriormorphia;Pectinida;Pectinoidea;Pectinidae;Pecten;Pecten maximus  
UdeM00000007159 7998 165.6 UdeM00000007159 XP\_017312698.1 52.7 165  
68 1 34 188 44 208 6.00E-38 165.6 7998 cellular

organisms;Eukaryota;Opisthokonta;Metazoa;Eumetazoa;Bilateria;Deuterostomia;Chordata;Craniata;Vertebrata;Gnathostomata;Teleostomi;Euteleostomi;Actinopterygii;Actinopteri;Neopterygii;Teleostei;Osteoglossocephalai;Clupeocephala;Otomorpha;Ostariophysi;Otophysi;Characiphysae;Siluriformes;Siluroidae;Ictaluridae;Ictalurus;Ictalurus punctatus  
UdeM00000007160 6573 106.7 UdeM00000007160 XP\_021378219.1 50.4 115  
55 2 42 156 1049 1161 4.80E-20 106.7 6573 cellular

organisms;Eukaryota;Opisthokonta;Metazoa;Eumetazoa;Bilateria;Protostomia;Spiralia;Lophotrochozoa;Mollusca;Bivalvia;Autobranhia;Pteriormorphia;Pectinida;Pectinoidea;Pectinidae;Mizuhopecten;Mizuhopecten yessoensis  
UdeM00000007161 6573 375.2 UdeM00000007161 XP\_021378204.1 43.9 510  
272 7 13 516 10 511 1.80E-100 375.2 6573 cellular

organisms;Eukaryota;Opisthokonta;Metazoa;Eumetazoa;Bilateria;Protostomia;Spiralia;Lophotrochozoa;Mollusca;Bivalvia;Autobranhia;Pteriormorphia;Pectinida;Pectinoidea;Pectinidae;Mizuhopecten;Mizuhopecten yessoensis  
UdeM00000007162 6596 122.5 UdeM00000007162 XP\_045181138.1 39.2 158  
94 1 2 157 33 190 5.10E-25 122.5 6596 cellular

organisms;Eukaryota;Opisthokonta;Metazoa;Eumetazoa;Bilateria;Protostomia;Spiralia;Lophotrochozoa;Mollusca;Bivalvia;Autobranhia;Heteroconchia;Euheterodonta;Imparidentia;Venerida;Veneroidea;Veneridae;Mercenaria;Mercenaria mercenaria  
UdeM00000007163 400727 631.7 UdeM00000007163 XP\_025089652.1 44.2  
855 379 18 1202 2026 1005 1791 4.80E-177 631.7 400727  
cellular

organisms;Eukaryota;Opisthokonta;Metazoa;Eumetazoa;Bilateria;Protostomia;Spiralia;Lophotrochozoa;Mollusca;Gastropoda;Caenogastropoda;Architaenioglossa;Ampullarioidea;Ampullariidae;Pomacea;Pomacea canaliculata  
UdeM00000007164 400727 631.7 UdeM00000007164 XP\_025089652.1 44.2  
855 379 18 1176 2000 1005 1791 4.80E-177 631.7 400727  
cellular

organisms;Eukaryota;Opisthokonta;Metazoa;Eumetazoa;Bilateria;Protostomia;Spiralia;Lophotrochozoa;Mollusca;Gastropoda;Caenogastropoda;Architaenioglossa;Ampullarioidea;Ampullariidae;Pomacea;Pomacea canaliculata

UdeM00000007165 6596 114.8 UdeM00000007165 XP\_045181870.1 29.2 322  
 186 10 5 320 7 292 2.40E-22 114.8 6596 cellular  
 organisms;Eukaryota;Opisthokonta;Metazoa;Eumetazoa;Bilateria;Protostomia;  
 Spiralia;Lophotrochozoa;Mollusca;Bivalvia;Autobranhia;Heteroconchia;Euhe  
 terodonta;Imparidentia;Venerida;Veneroidea;Veneridae;Mercenaria;Mercenari  
 a mercenaria  
 UdeM00000007166 6596 153.7 UdeM00000007166 XP\_045182135.1 43 223  
 118 4 2669 2883 417 638 3.60E-33 153.7 6596 cellular  
 organisms;Eukaryota;Opisthokonta;Metazoa;Eumetazoa;Bilateria;Protostomia;  
 Spiralia;Lophotrochozoa;Mollusca;Bivalvia;Autobranhia;Heteroconchia;Euhe  
 terodonta;Imparidentia;Venerida;Veneroidea;Veneridae;Mercenaria;Mercenari  
 a mercenaria  
 UdeM00000007167 6596 153.7 UdeM00000007167 XP\_045182135.1 43 223  
 118 4 2617 2831 417 638 3.60E-33 153.7 6596 cellular  
 organisms;Eukaryota;Opisthokonta;Metazoa;Eumetazoa;Bilateria;Protostomia;  
 Spiralia;Lophotrochozoa;Mollusca;Bivalvia;Autobranhia;Heteroconchia;Euhe  
 terodonta;Imparidentia;Venerida;Veneroidea;Veneridae;Mercenaria;Mercenari  
 a mercenaria  
 UdeM00000007168 6596 300.8 UdeM00000007168 XP\_045180379.1 81.8 170  
 31 0 1 170 6 175 1.10E-78 300.8 6596 cellular  
 organisms;Eukaryota;Opisthokonta;Metazoa;Eumetazoa;Bilateria;Protostomia;  
 Spiralia;Lophotrochozoa;Mollusca;Bivalvia;Autobranhia;Heteroconchia;Euhe  
 terodonta;Imparidentia;Venerida;Veneroidea;Veneridae;Mercenaria;Mercenari  
 a mercenaria  
 UdeM00000007170 6596 426.4 UdeM00000007170 XP\_045181098.1 58.8 337  
 121 4 29 364 39 358 3.70E-116 426.4 6596 cellular  
 organisms;Eukaryota;Opisthokonta;Metazoa;Eumetazoa;Bilateria;Protostomia;  
 Spiralia;Lophotrochozoa;Mollusca;Bivalvia;Autobranhia;Heteroconchia;Euhe  
 terodonta;Imparidentia;Venerida;Veneroidea;Veneridae;Mercenaria;Mercenari  
 a mercenaria  
 UdeM00000007171 6596 180.3 UdeM00000007171 XP\_045159631.1 69.1 123  
 37 1 1 122 1 123 2.20E-42 180.3 6596 cellular  
 organisms;Eukaryota;Opisthokonta;Metazoa;Eumetazoa;Bilateria;Protostomia;  
 Spiralia;Lophotrochozoa;Mollusca;Bivalvia;Autobranhia;Heteroconchia;Euhe  
 terodonta;Imparidentia;Venerida;Veneroidea;Veneridae;Mercenaria;Mercenari  
 a mercenaria  
 UdeM00000007172 6596 305.4 UdeM00000007172 XP\_045159631.1 65.2 256  
 88 1 1 255 1 256 6.80E-80 305.4 6596 cellular  
 organisms;Eukaryota;Opisthokonta;Metazoa;Eumetazoa;Bilateria;Protostomia;  
 Spiralia;Lophotrochozoa;Mollusca;Bivalvia;Autobranhia;Heteroconchia;Euhe  
 terodonta;Imparidentia;Venerida;Veneroidea;Veneridae;Mercenaria;Mercenari  
 a mercenaria  
 UdeM00000007173 80765 216.5 UdeM00000007173 XP\_027852883.1 54.7 172  
 78 0 9 180 154 325 6.40E-53 216.5 80765 cellular  
 organisms;Eukaryota;Opisthokonta;Metazoa;Eumetazoa;Bilateria;Protostomia;  
 Ecdysozoa;Panarthropoda;Arthropoda;Mandibulata;Pancrustacea;Hexapoda;Inse  
 cta;Dicondylia;Pterygota;Neoptera;Paraneoptera;Hemiptera;Sternorrhyncha;A  
 phidomorpha;Aphidoidea;Aphididae;Aphidinae;Aphidini;Aphis;Aphis;Aphis  
 gossypii  
 UdeM00000007174 114398 60.1 UdeM00000007174 XP\_042907613.1 31.6  
 98 66 1 56 152 87 184 3.20E-06 60.1 114398  
 cellular  
 organisms;Eukaryota;Opisthokonta;Metazoa;Eumetazoa;Bilateria;Protostomia;  
 Ecdysozoa;Panarthropoda;Arthropoda;Chelicerata;Arachnida;Araneae;Araneomo

rphae;Entelegynae;Orbiculariae;Araneoidea;Theridiidae;Parasteatoda;Parasteatoda tepidariorum

UdeM00000007175 6579 248.8 UdeM00000007175 XP\_033743128.1 43.8 404  
220 3 35 438 26 422 1.30E-62 248.8 6579 cellular

organisms;Eukaryota;Opisthokonta;Metazoa;Eumetazoa;Bilateria;Protostomia;Spiralia;Lophotrochozoa;Mollusca;Bivalvia;Autobranhia;Pteriormorphia;Pectinida;Pectinoidea;Pectinidae;Pecten;Pecten maximus

UdeM00000007176 6596 270 UdeM00000007176 XP\_045182382.1 38.1 438  
215 4 73 510 8 389 6.30E-69 270 6596 cellular

organisms;Eukaryota;Opisthokonta;Metazoa;Eumetazoa;Bilateria;Protostomia;Spiralia;Lophotrochozoa;Mollusca;Bivalvia;Autobranhia;Heteroconchia;Euheterodonta;Imparidentia;Venerida;Veneroidea;Veneridae;Mercenaria;Mercenaria mercenaria

UdeM00000007177 6596 104.8 UdeM00000007177 XP\_045208523.1 40.9 164  
85 2 4 163 1 156 1.10E-19 104.8 6596 cellular

organisms;Eukaryota;Opisthokonta;Metazoa;Eumetazoa;Bilateria;Protostomia;Spiralia;Lophotrochozoa;Mollusca;Bivalvia;Autobranhia;Heteroconchia;Euheterodonta;Imparidentia;Venerida;Veneroidea;Veneridae;Mercenaria;Mercenaria mercenaria

UdeM00000007178 6596 102.4 UdeM00000007178 XP\_045208523.1 38.6 158  
85 2 22 175 7 156 5.90E-19 102.4 6596 cellular

organisms;Eukaryota;Opisthokonta;Metazoa;Eumetazoa;Bilateria;Protostomia;Spiralia;Lophotrochozoa;Mollusca;Bivalvia;Autobranhia;Heteroconchia;Euheterodonta;Imparidentia;Venerida;Veneroidea;Veneridae;Mercenaria;Mercenaria mercenaria

UdeM00000007179 6596 93.2 UdeM00000007179 XP\_045208523.1 37.8 164  
90 2 4 163 1 156 3.30E-16 93.2 6596 cellular

organisms;Eukaryota;Opisthokonta;Metazoa;Eumetazoa;Bilateria;Protostomia;Spiralia;Lophotrochozoa;Mollusca;Bivalvia;Autobranhia;Heteroconchia;Euheterodonta;Imparidentia;Venerida;Veneroidea;Veneridae;Mercenaria;Mercenaria mercenaria

UdeM00000007180 6579 183.3 UdeM00000007180 XP\_033730552.1 67.2 119  
39 0 1 119 80 198 1.90E-43 183.3 6579 cellular

organisms;Eukaryota;Opisthokonta;Metazoa;Eumetazoa;Bilateria;Protostomia;Spiralia;Lophotrochozoa;Mollusca;Bivalvia;Autobranhia;Pteriormorphia;Pectinida;Pectinoidea;Pectinidae;Pecten;Pecten maximus

UdeM00000007181 6596 110.2 UdeM00000007181 XP\_045189683.1 37.4 179  
105 4 16 188 8 185 4.00E-21 110.2 6596 cellular

organisms;Eukaryota;Opisthokonta;Metazoa;Eumetazoa;Bilateria;Protostomia;Spiralia;Lophotrochozoa;Mollusca;Bivalvia;Autobranhia;Heteroconchia;Euheterodonta;Imparidentia;Venerida;Veneroidea;Veneridae;Mercenaria;Mercenaria mercenaria

UdeM00000007183 6565 251.1 UdeM00000007183 XP\_022334993.1 39.7 390  
93 6 1 249 481 869 1.40E-63 251.1 6565 cellular

organisms;Eukaryota;Opisthokonta;Metazoa;Eumetazoa;Bilateria;Protostomia;Spiralia;Lophotrochozoa;Mollusca;Bivalvia;Autobranhia;Pteriormorphia;Ostreida;Ostreoidea;Ostreidae;Crassostrea;Crassostrea virginica

UdeM00000007184 1735272 110.5 UdeM00000007184 XP\_041368607.1 37.2  
148 90 1 6 150 10 157 2.20E-21 110.5 1735272

cellular

organisms;Eukaryota;Opisthokonta;Metazoa;Eumetazoa;Bilateria;Protostomia;Spiralia;Lophotrochozoa;Mollusca;Gastropoda;Neomphalina;Neomphaloidea;Peltopiridae;Gigantopelta;Gigantopelta aegis

UdeM00000007185 6573 482.6 UdeM00000007185 XP\_021378217.1 71.5 354  
 91 3 3 346 1 354 4.10E-133 482.6 6573 cellular  
 organisms;Eukaryota;Opisthokonta;Metazoa;Eumetazoa;Bilateria;Protostomia;  
 Spiralia;Lophotrochozoa;Mollusca;Bivalvia;Autobranchia;Pteriomorpha;Pect  
 inida;Pectinoidea;Pectinidae;Mizuhopecten;Mizuhopecten yessoensis  
 UdeM00000007186 6573 461.1 UdeM00000007186 XP\_021378217.1 75.2 307  
 76 0 3 309 1 307 1.30E-126 461.1 6573 cellular  
 organisms;Eukaryota;Opisthokonta;Metazoa;Eumetazoa;Bilateria;Protostomia;  
 Spiralia;Lophotrochozoa;Mollusca;Bivalvia;Autobranchia;Pteriomorpha;Pect  
 inida;Pectinoidea;Pectinidae;Mizuhopecten;Mizuhopecten yessoensis  
 UdeM00000007187 6596 418.7 UdeM00000007187 XP\_045182550.1 65.4 309  
 106 1 1 308 15 323 6.60E-114 418.7 6596 cellular  
 organisms;Eukaryota;Opisthokonta;Metazoa;Eumetazoa;Bilateria;Protostomia;  
 Spiralia;Lophotrochozoa;Mollusca;Bivalvia;Autobranchia;Heteroconchia;Euhe  
 terodonta;Imparidentia;Venerida;Veneroidea;Veneridae;Mercenaria;Mercenari  
 a mercenaria  
 UdeM00000007188 225164 136.3 UdeM00000007188 XP\_009045940.1 46.9  
 145 67 3 8 149 4 141 3.20E-29 136.3 225164  
 cellular  
 organisms;Eukaryota;Opisthokonta;Metazoa;Eumetazoa;Bilateria;Protostomia;  
 Spiralia;Lophotrochozoa;Mollusca;Gastropoda;Patellogastropoda;Lottioidea;  
 Lottiidae;Lottia;Lottia gigantea  
 UdeM00000007189 6596 540.4 UdeM00000007189 XP\_045181752.1 73.9 345  
 60 1 3 317 1 345 1.50E-150 540.4 6596 cellular  
 organisms;Eukaryota;Opisthokonta;Metazoa;Eumetazoa;Bilateria;Protostomia;  
 Spiralia;Lophotrochozoa;Mollusca;Bivalvia;Autobranchia;Heteroconchia;Euhe  
 terodonta;Imparidentia;Venerida;Veneroidea;Veneridae;Mercenaria;Mercenari  
 a mercenaria  
 UdeM00000007191 6596 79.3 UdeM00000007191 XP\_045182373.1 33 109  
 64 2 13 112 11 119 3.40E-12 79.3 6596 cellular  
 organisms;Eukaryota;Opisthokonta;Metazoa;Eumetazoa;Bilateria;Protostomia;  
 Spiralia;Lophotrochozoa;Mollusca;Bivalvia;Autobranchia;Heteroconchia;Euhe  
 terodonta;Imparidentia;Venerida;Veneroidea;Veneridae;Mercenaria;Mercenari  
 a mercenaria  
 UdeM00000007192 6596 203.8 UdeM00000007192 XP\_045182371.1 66.9 139  
 46 0 1 139 96 234 1.50E-49 203.8 6596 cellular  
 organisms;Eukaryota;Opisthokonta;Metazoa;Eumetazoa;Bilateria;Protostomia;  
 Spiralia;Lophotrochozoa;Mollusca;Bivalvia;Autobranchia;Heteroconchia;Euhe  
 terodonta;Imparidentia;Venerida;Veneroidea;Veneridae;Mercenaria;Mercenari  
 a mercenaria  
 UdeM00000007193 6596 340.9 UdeM00000007193 XP\_045182371.1 61.6 276  
 101 1 2 277 16 286 1.50E-90 340.9 6596 cellular  
 organisms;Eukaryota;Opisthokonta;Metazoa;Eumetazoa;Bilateria;Protostomia;  
 Spiralia;Lophotrochozoa;Mollusca;Bivalvia;Autobranchia;Heteroconchia;Euhe  
 terodonta;Imparidentia;Venerida;Veneroidea;Veneridae;Mercenaria;Mercenari  
 a mercenaria  
 UdeM00000007194 326968 315.8 UdeM00000007194 XP\_015896626.1 39.1  
 517 257 15 27 500 15 516 1.00E-82 315.8 326968  
 cellular  
 organisms;Eukaryota;Viridiplantae;Streptophyta;Streptophytina;Embryophyta  
 ;Tracheophyta;Euphyllophyta;Spermatophyta;Magnoliopsida;Mesangiospermae;e  
 udicotyledons;Gunneridae;Pentapetalae;rosids;fabids;Rosales;Rhamnaceae;Pa  
 liureae;Ziziphus;Ziziphus jujuba

UdeM00000007195 326968 315.1 UdeM00000007195 XP\_015896626.1 38.7  
 517 249 14 27 490 15 516 1.70E-82 315.1 326968  
 cellular  
 organisms;Eukaryota;Viridiplantae;Streptophyta;Streptophytina;Embryophyta  
 ;Tracheophyta;Euphyllophyta;Spermatophyta;Magnoliopsida;Mesangiospermae;e  
 udicotyledons;Gunneridae;Pentapetalae;rosids;fabids;Rosales;Rhamnaceae;Pa  
 liureae;Ziziphus;Ziziphus jujuba  
 UdeM00000007196 6573 274.6 UdeM00000007196 XP\_021356482.1 55.2 250  
 81 1 26 244 69 318 1.20E-70 274.6 6573 cellular  
 organisms;Eukaryota;Opisthokonta;Metazoa;Eumetazoa;Bilateria;Protostomia;  
 Spiralia;Lophotrochozoa;Mollusca;Bivalvia;Autobranhia;Pteriormorphia;Pect  
 inida;Pectinoidea;Pectinidae;Mizuhopecten;Mizuhopecten yessoensis  
 UdeM00000007197 6565 171 UdeM00000007197 XP\_022322717.1 64 125  
 45 0 1 125 191 315 9.60E-40 171 6565 cellular  
 organisms;Eukaryota;Opisthokonta;Metazoa;Eumetazoa;Bilateria;Protostomia;  
 Spiralia;Lophotrochozoa;Mollusca;Bivalvia;Autobranhia;Pteriormorphia;Ostr  
 eida;Ostreoidea;Ostreidae;Crassostrea;Crassostrea virginica  
 UdeM00000007198 6596 199.9 UdeM00000007198 XP\_045182371.1 62.6 147  
 55 0 22 168 138 284 2.60E-48 199.9 6596 cellular  
 organisms;Eukaryota;Opisthokonta;Metazoa;Eumetazoa;Bilateria;Protostomia;  
 Spiralia;Lophotrochozoa;Mollusca;Bivalvia;Autobranhia;Heteroconchia;Euhe  
 terodonta;Imparidentia;Venerida;Veneroidea;Veneridae;Mercenaria;Mercenari  
 a mercenaria  
 UdeM00000007199 6579 198 UdeM00000007199 XP\_033724744.1 51.5 202  
 71 3 16 192 118 317 2.10E-47 198 6579 cellular  
 organisms;Eukaryota;Opisthokonta;Metazoa;Eumetazoa;Bilateria;Protostomia;  
 Spiralia;Lophotrochozoa;Mollusca;Bivalvia;Autobranhia;Pteriormorphia;Pect  
 inida;Pectinoidea;Pectinidae;Pecten;Pecten maximus  
 UdeM00000007200 6573 324.3 UdeM00000007200 XP\_021356482.1 62.4 250  
 94 0 26 275 69 318 1.50E-85 324.3 6573 cellular  
 organisms;Eukaryota;Opisthokonta;Metazoa;Eumetazoa;Bilateria;Protostomia;  
 Spiralia;Lophotrochozoa;Mollusca;Bivalvia;Autobranhia;Pteriormorphia;Pect  
 inida;Pectinoidea;Pectinidae;Mizuhopecten;Mizuhopecten yessoensis  
 UdeM00000007201 326968 320.9 UdeM00000007201 XP\_015896626.1 39.1  
 517 261 14 27 504 15 516 4.00E-84 320.9 326968  
 cellular  
 organisms;Eukaryota;Viridiplantae;Streptophyta;Streptophytina;Embryophyta  
 ;Tracheophyta;Euphyllophyta;Spermatophyta;Magnoliopsida;Mesangiospermae;e  
 udicotyledons;Gunneridae;Pentapetalae;rosids;fabids;Rosales;Rhamnaceae;Pa  
 liureae;Ziziphus;Ziziphus jujuba  
 UdeM00000007202 6596 325.9 UdeM00000007202 XP\_045182371.1 61.2 268  
 99 1 2 269 16 278 5.10E-86 325.9 6596 cellular  
 organisms;Eukaryota;Opisthokonta;Metazoa;Eumetazoa;Bilateria;Protostomia;  
 Spiralia;Lophotrochozoa;Mollusca;Bivalvia;Autobranhia;Heteroconchia;Euhe  
 terodonta;Imparidentia;Venerida;Veneroidea;Veneridae;Mercenaria;Mercenari  
 a mercenaria  
 UdeM00000007203 6573 329.7 UdeM00000007203 XP\_021356482.1 62.4 250  
 94 0 26 275 69 318 3.50E-87 329.7 6573 cellular  
 organisms;Eukaryota;Opisthokonta;Metazoa;Eumetazoa;Bilateria;Protostomia;  
 Spiralia;Lophotrochozoa;Mollusca;Bivalvia;Autobranhia;Pteriormorphia;Pect  
 inida;Pectinoidea;Pectinidae;Mizuhopecten;Mizuhopecten yessoensis  
 UdeM00000007204 29159 347.8 UdeM00000007204 XP\_011420249.2 61.7 264  
 95 1 13 270 51 314 1.20E-92 347.8 29159 cellular  
 organisms;Eukaryota;Opisthokonta;Metazoa;Eumetazoa;Bilateria;Protostomia;

Spiralia;Lophotrochozoa;Mollusca;Bivalvia;Autobranchia;Pteriormorphia;Ostr  
eida;Ostreoidea;Ostreidae;Crassostrea;Crassostrea gigas  
UdeM00000007205 6565 308.9 UdeM00000007205 XP\_022321077.1 79.4 175  
36 0 1 175 1 175 4.10E-81 308.9 6565 cellular  
organisms;Eukaryota;Opisthokonta;Metazoa;Eumetazoa;Bilateria;Protostomia;  
Spiralia;Lophotrochozoa;Mollusca;Bivalvia;Autobranchia;Pteriormorphia;Ostr  
eida;Ostreoidea;Ostreidae;Crassostrea;Crassostrea virginica  
UdeM00000007206 29159 248.4 UdeM00000007206 XP\_034303626.1 64.6 175  
60 2 2 175 219 392 6.70E-63 248.4 29159 cellular  
organisms;Eukaryota;Opisthokonta;Metazoa;Eumetazoa;Bilateria;Protostomia;  
Spiralia;Lophotrochozoa;Mollusca;Bivalvia;Autobranchia;Pteriormorphia;Ostr  
eida;Ostreoidea;Ostreidae;Crassostrea;Crassostrea gigas  
UdeM00000007207 29159 329.7 UdeM00000007207 XP\_011420248.2 63.6 242  
88 0 39 280 73 314 3.60E-87 329.7 29159 cellular  
organisms;Eukaryota;Opisthokonta;Metazoa;Eumetazoa;Bilateria;Protostomia;  
Spiralia;Lophotrochozoa;Mollusca;Bivalvia;Autobranchia;Pteriormorphia;Ostr  
eida;Ostreoidea;Ostreidae;Crassostrea;Crassostrea gigas  
UdeM00000007208 6596 337.8 UdeM00000007208 XP\_045182371.1 65.2 244  
84 1 31 274 43 285 1.30E-89 337.8 6596 cellular  
organisms;Eukaryota;Opisthokonta;Metazoa;Eumetazoa;Bilateria;Protostomia;  
Spiralia;Lophotrochozoa;Mollusca;Bivalvia;Autobranchia;Heteroconchia;Euhe  
terodonta;Imparidentia;Venerida;Veneroidea;Veneridae;Mercenaria;Mercenari  
a mercenaria  
UdeM00000007209 6596 332.4 UdeM00000007209 XP\_045181020.1 63.2 250  
91 1 25 274 7 255 5.40E-88 332.4 6596 cellular  
organisms;Eukaryota;Opisthokonta;Metazoa;Eumetazoa;Bilateria;Protostomia;  
Spiralia;Lophotrochozoa;Mollusca;Bivalvia;Autobranchia;Heteroconchia;Euhe  
terodonta;Imparidentia;Venerida;Veneroidea;Veneridae;Mercenaria;Mercenari  
a mercenaria  
UdeM00000007210 6596 204.9 UdeM00000007210 XP\_045181020.1 69.4 147  
44 1 2 148 111 256 7.10E-50 204.9 6596 cellular  
organisms;Eukaryota;Opisthokonta;Metazoa;Eumetazoa;Bilateria;Protostomia;  
Spiralia;Lophotrochozoa;Mollusca;Bivalvia;Autobranchia;Heteroconchia;Euhe  
terodonta;Imparidentia;Venerida;Veneroidea;Veneridae;Mercenaria;Mercenari  
a mercenaria  
UdeM00000007211 6565 345.1 UdeM00000007211 XP\_022322717.1 66.9 242  
80 0 31 272 74 315 8.00E-92 345.1 6565 cellular  
organisms;Eukaryota;Opisthokonta;Metazoa;Eumetazoa;Bilateria;Protostomia;  
Spiralia;Lophotrochozoa;Mollusca;Bivalvia;Autobranchia;Pteriormorphia;Ostr  
eida;Ostreoidea;Ostreidae;Crassostrea;Crassostrea virginica  
UdeM00000007212 6565 226.1 UdeM00000007212 XP\_022300548.1 54.9 182  
82 0 1 182 225 406 3.60E-56 226.1 6565 cellular  
organisms;Eukaryota;Opisthokonta;Metazoa;Eumetazoa;Bilateria;Protostomia;  
Spiralia;Lophotrochozoa;Mollusca;Bivalvia;Autobranchia;Pteriormorphia;Ostr  
eida;Ostreoidea;Ostreidae;Crassostrea;Crassostrea virginica  
UdeM00000007213 6596 258.8 UdeM00000007213 XP\_045211611.1 54.2 253  
90 4 28 262 32 276 7.40E-66 258.8 6596 cellular  
organisms;Eukaryota;Opisthokonta;Metazoa;Eumetazoa;Bilateria;Protostomia;  
Spiralia;Lophotrochozoa;Mollusca;Bivalvia;Autobranchia;Heteroconchia;Euhe  
terodonta;Imparidentia;Venerida;Veneroidea;Veneridae;Mercenaria;Mercenari  
a mercenaria  
UdeM00000007214 6596 345.5 UdeM00000007214 XP\_045181020.1 64.1 256  
91 1 1 256 1 255 5.80E-92 345.5 6596 cellular  
organisms;Eukaryota;Opisthokonta;Metazoa;Eumetazoa;Bilateria;Protostomia;

Spiralia;Lophotrochozoa;Mollusca;Bivalvia;Autobranchia;Heteroconchia;Euherodonta;Imparidentia;Venerida;Veneroidea;Veneridae;Mercenaria;Mercenaria mercenaria

UdeM00000007215 6596 345.9 UdeM00000007215 XP\_045181020.1 64.1 256  
91 1 19 274 1 255 4.80E-92 345.9 6596 cellular

organisms;Eukaryota;Opisthokonta;Metazoa;Eumetazoa;Bilateria;Protostomia;Spiralia;Lophotrochozoa;Mollusca;Bivalvia;Autobranchia;Heteroconchia;Euherodonta;Imparidentia;Venerida;Veneroidea;Veneridae;Mercenaria;Mercenaria mercenaria

UdeM00000007216 6596 265.4 UdeM00000007216 XP\_045181020.1 54.2 251  
89 2 25 250 7 256 7.50E-68 265.4 6596 cellular

organisms;Eukaryota;Opisthokonta;Metazoa;Eumetazoa;Bilateria;Protostomia;Spiralia;Lophotrochozoa;Mollusca;Bivalvia;Autobranchia;Heteroconchia;Euherodonta;Imparidentia;Venerida;Veneroidea;Veneridae;Mercenaria;Mercenaria mercenaria

UdeM00000007217 45264 433 UdeM00000007217 XP\_044179186.1 53.7 397  
181 2 28 424 87 480 4.60E-118 433 45264 cellular

organisms;Eukaryota;Opisthokonta;Metazoa;Eumetazoa;Cnidaria;Anthozoa;Hexacorallia;Scleractinia;Astrocoeniina;Acroporidae;Acropora;Acropora millepora

UdeM00000007218 481459 125.2 UdeM00000007218 XP\_040031014.1 32  
200 99 3 2 166 198 395 8.30E-26 125.2 481459  
cellular

organisms;Eukaryota;Opisthokonta;Metazoa;Eumetazoa;Bilateria;Deuterostomia;Chordata;Craniata;Vertebrata;Gnathostomata;Teleostomi;Euteleostomi;Actinopterygii;Actinopteri;Neopterygii;Teleostei;Osteoglossocephalai;Clupeocephala;Euteleostei;Neoteleostei;Eurypterygia;Ctenosquamata;Acanthomorphata;Euacanthomorphacea;Percomorphaceae;Eupercaria;Perciformes;Cottioidei;Gasterosteales;Gasterosteidae;Gasterosteus;Gasterosteus aculeatus;Gasterosteus aculeatus aculeatus

UdeM00000007219 6596 335.1 UdeM00000007219 XP\_045181020.1 62.7 252  
91 3 25 275 7 256 8.40E-89 335.1 6596 cellular

organisms;Eukaryota;Opisthokonta;Metazoa;Eumetazoa;Bilateria;Protostomia;Spiralia;Lophotrochozoa;Mollusca;Bivalvia;Autobranchia;Heteroconchia;Euherodonta;Imparidentia;Venerida;Veneroidea;Veneridae;Mercenaria;Mercenaria mercenaria

UdeM00000007220 6596 278.5 UdeM00000007220 XP\_045181020.1 56 252  
76 3 25 242 7 257 8.20E-72 278.5 6596 cellular

organisms;Eukaryota;Opisthokonta;Metazoa;Eumetazoa;Bilateria;Protostomia;Spiralia;Lophotrochozoa;Mollusca;Bivalvia;Autobranchia;Heteroconchia;Euherodonta;Imparidentia;Venerida;Veneroidea;Veneridae;Mercenaria;Mercenaria mercenaria

UdeM00000007221 29159 342.8 UdeM00000007221 XP\_011420248.2 64 242  
87 0 53 294 73 314 4.30E-91 342.8 29159 cellular

organisms;Eukaryota;Opisthokonta;Metazoa;Eumetazoa;Bilateria;Protostomia;Spiralia;Lophotrochozoa;Mollusca;Bivalvia;Autobranchia;Pteriomorphia;Ostreida;Ostreioidea;Ostreidae;Crassostrea;Crassostrea gigas

UdeM00000007222 29159 490.3 UdeM00000007222 XP\_034303626.1 68.8 321  
98 2 27 346 73 392 2.00E-135 490.3 29159 cellular

organisms;Eukaryota;Opisthokonta;Metazoa;Eumetazoa;Bilateria;Protostomia;Spiralia;Lophotrochozoa;Mollusca;Bivalvia;Autobranchia;Pteriomorphia;Ostreida;Ostreioidea;Ostreidae;Crassostrea;Crassostrea gigas

UdeM00000007223 6565 134 UdeM00000007223 XP\_022322717.1 66.7 90  
30 0 39 128 74 163 1.40E-28 134 6565 cellular

organisms;Eukaryota;Opisthokonta;Metazoa;Eumetazoa;Bilateria;Protostomia;Spiralia;Lophotrochozoa;Mollusca;Bivalvia;Autobranchia;Pteriomorpha;Ostr  
eida;Ostreoidea;Ostreidae;Crassostrea;Crassostrea virginica  
UdeM00000007224 6596 195.7 UdeM00000007224 XP\_045211611.1 63.4 142  
52 0 2 143 135 276 4.20E-47 195.7 6596 cellular  
organisms;Eukaryota;Opisthokonta;Metazoa;Eumetazoa;Bilateria;Protostomia;Spiralia;Lophotrochozoa;Mollusca;Bivalvia;Autobranchia;Heteroconchia;Euhe  
terodonta;Imparidentia;Venerida;Veneroidea;Veneridae;Mercenaria;Mercenari  
a mercenaria  
UdeM00000007225 6596 337.8 UdeM00000007225 XP\_045182371.1 65.2 244  
84 1 31 274 43 285 1.30E-89 337.8 6596 cellular  
organisms;Eukaryota;Opisthokonta;Metazoa;Eumetazoa;Bilateria;Protostomia;Spiralia;Lophotrochozoa;Mollusca;Bivalvia;Autobranchia;Heteroconchia;Euhe  
terodonta;Imparidentia;Venerida;Veneroidea;Veneridae;Mercenaria;Mercenari  
a mercenaria  
UdeM00000007226 6596 332.4 UdeM00000007226 XP\_045181020.1 63.2 250  
91 1 25 274 7 255 5.40E-88 332.4 6596 cellular  
organisms;Eukaryota;Opisthokonta;Metazoa;Eumetazoa;Bilateria;Protostomia;Spiralia;Lophotrochozoa;Mollusca;Bivalvia;Autobranchia;Heteroconchia;Euhe  
terodonta;Imparidentia;Venerida;Veneroidea;Veneridae;Mercenaria;Mercenari  
a mercenaria  
UdeM00000007227 6596 204.9 UdeM00000007227 XP\_045181020.1 69.4 147  
44 1 2 148 111 256 7.10E-50 204.9 6596 cellular  
organisms;Eukaryota;Opisthokonta;Metazoa;Eumetazoa;Bilateria;Protostomia;Spiralia;Lophotrochozoa;Mollusca;Bivalvia;Autobranchia;Heteroconchia;Euhe  
terodonta;Imparidentia;Venerida;Veneroidea;Veneridae;Mercenaria;Mercenari  
a mercenaria  
UdeM00000007228 6565 346.7 UdeM00000007228 XP\_022322717.1 67.4 242  
79 0 31 272 74 315 2.80E-92 346.7 6565 cellular  
organisms;Eukaryota;Opisthokonta;Metazoa;Eumetazoa;Bilateria;Protostomia;Spiralia;Lophotrochozoa;Mollusca;Bivalvia;Autobranchia;Pteriomorpha;Ostr  
eida;Ostreoidea;Ostreidae;Crassostrea;Crassostrea virginica  
UdeM00000007229 6579 222.2 UdeM00000007229 XP\_033754677.1 57.7 182  
77 0 1 182 223 404 5.20E-55 222.2 6579 cellular  
organisms;Eukaryota;Opisthokonta;Metazoa;Eumetazoa;Bilateria;Protostomia;Spiralia;Lophotrochozoa;Mollusca;Bivalvia;Autobranchia;Pteriomorpha;Pect  
inida;Pectinoidea;Pectinidae;Pecten;Pecten maximus  
UdeM00000007230 6579 251.5 UdeM00000007230 XP\_033724742.1 66.5 185  
61 1 2 186 135 318 8.40E-64 251.5 6579 cellular  
organisms;Eukaryota;Opisthokonta;Metazoa;Eumetazoa;Bilateria;Protostomia;Spiralia;Lophotrochozoa;Mollusca;Bivalvia;Autobranchia;Pteriomorpha;Pect  
inida;Pectinoidea;Pectinidae;Pecten;Pecten maximus  
UdeM00000007231 6596 67 UdeM00000007231 XP\_045182371.1 60.8 51  
18 1 31 81 43 91 1.60E-08 67 6596 cellular  
organisms;Eukaryota;Opisthokonta;Metazoa;Eumetazoa;Bilateria;Protostomia;Spiralia;Lophotrochozoa;Mollusca;Bivalvia;Autobranchia;Heteroconchia;Euhe  
terodonta;Imparidentia;Venerida;Veneroidea;Veneridae;Mercenaria;Mercenari  
a mercenaria  
UdeM00000007233 6596 238.8 UdeM00000007233 XP\_045181020.1 68.6 169  
52 1 1 169 88 255 5.10E-60 238.8 6596 cellular  
organisms;Eukaryota;Opisthokonta;Metazoa;Eumetazoa;Bilateria;Protostomia;Spiralia;Lophotrochozoa;Mollusca;Bivalvia;Autobranchia;Heteroconchia;Euhe  
terodonta;Imparidentia;Venerida;Veneroidea;Veneridae;Mercenaria;Mercenari  
a mercenaria



UdeM00000007232 6596 293.1 UdeM00000007232 XP\_045211611.1 67.3 208  
 67 1 2 209 70 276 2.80E-76 293.1 6596 cellular  
 organisms;Eukaryota;Opisthokonta;Metazoa;Eumetazoa;Bilateria;Protostomia;  
 Spiralia;Lophotrochozoa;Mollusca;Bivalvia;Autobranchia;Heteroconchia;Euhe  
 terodonta;Imparidentia;Venerida;Veneroidea;Veneridae;Mercenaria;Mercenari  
 a mercenaria  
 UdeM00000007234 6596 211.1 UdeM00000007234 XP\_045181020.1 55.8 172  
 75 1 25 195 7 178 1.40E-51 211.1 6596 cellular  
 organisms;Eukaryota;Opisthokonta;Metazoa;Eumetazoa;Bilateria;Protostomia;  
 Spiralia;Lophotrochozoa;Mollusca;Bivalvia;Autobranchia;Heteroconchia;Euhe  
 terodonta;Imparidentia;Venerida;Veneroidea;Veneridae;Mercenaria;Mercenari  
 a mercenaria  
 UdeM00000007235 6596 85.9 UdeM00000007235 XP\_045181020.1 54.5 66  
 29 1 25 89 7 72 3.60E-14 85.9 6596 cellular  
 organisms;Eukaryota;Opisthokonta;Metazoa;Eumetazoa;Bilateria;Protostomia;  
 Spiralia;Lophotrochozoa;Mollusca;Bivalvia;Autobranchia;Heteroconchia;Euhe  
 terodonta;Imparidentia;Venerida;Veneroidea;Veneridae;Mercenaria;Mercenari  
 a mercenaria  
 UdeM00000007236 6596 335.5 UdeM00000007236 XP\_045182371.1 65.8 243  
 82 1 31 273 43 284 6.40E-89 335.5 6596 cellular  
 organisms;Eukaryota;Opisthokonta;Metazoa;Eumetazoa;Bilateria;Protostomia;  
 Spiralia;Lophotrochozoa;Mollusca;Bivalvia;Autobranchia;Heteroconchia;Euhe  
 terodonta;Imparidentia;Venerida;Veneroidea;Veneridae;Mercenaria;Mercenari  
 a mercenaria  
 UdeM00000007237 45264 432.6 UdeM00000007237 XP\_044179186.1 53.7 397  
 181 2 28 424 87 480 6.00E-118 432.6 45264 cellular  
 organisms;Eukaryota;Opisthokonta;Metazoa;Eumetazoa;Cnidaria;Anthozoa;Hexa  
 corallia;Scleractinia;Astrocoeniina;Acroporidae;Acropora;Acropora  
 millepora  
 UdeM00000007238 134920 105.1 UdeM00000007238 XP\_037326711.1 43.3  
 120 59 2 1 120 25 135 6.30E-20 105.1 134920  
 cellular  
 organisms;Eukaryota;Opisthokonta;Metazoa;Eumetazoa;Bilateria;Deuterostomi  
 a;Chordata;Craniata;Vertebrata;Gnathostomata;Teleostomi;Euteleostomi;Acti  
 nopterygii;Actinopteri;Neopterygii;Teleostei;Osteoglossocephalai;Clupeoce  
 phala;Euteleosteomorpha;Neoteleostei;Eurypterygia;Ctenosquamata;Acanthomo  
 rphata;Euacanthomorphacea;Percomorphaceae;Eupercaria;Perciformes;Cottioid  
 ei;Gasterosteales;Gasterosteidae;Pungitius;Pungitius pungitius  
 UdeM00000007239 10117 67.8 UdeM00000007239 XP\_032763600.1 34 94  
 50 1 67 160 438 519 1.50E-08 67.8 10117 cellular  
 organisms;Eukaryota;Opisthokonta;Metazoa;Eumetazoa;Bilateria;Deuterostomi  
 a;Chordata;Craniata;Vertebrata;Gnathostomata;Teleostomi;Euteleostomi;Sarc  
 opterygii;Dipnotetrapodomorpha;Tetrapoda;Amniota;Mammalia;Theria;Eutheria  
 ;Boreoeutheria;Euarchontoglires;Glires;Rodentia;Myomorpha;Muroidea;Murida  
 e;Murinae;Rattus;Rattus rattus  
 UdeM00000007240 6596 336.7 UdeM00000007240 XP\_045181020.1 63.1 252  
 90 3 25 275 7 256 2.90E-89 336.7 6596 cellular  
 organisms;Eukaryota;Opisthokonta;Metazoa;Eumetazoa;Bilateria;Protostomia;  
 Spiralia;Lophotrochozoa;Mollusca;Bivalvia;Autobranchia;Heteroconchia;Euhe  
 terodonta;Imparidentia;Venerida;Veneroidea;Veneridae;Mercenaria;Mercenari  
 a mercenaria  
 UdeM00000007241 6596 332.4 UdeM00000007241 XP\_045181020.1 63.3 251  
 90 2 25 274 7 256 5.40E-88 332.4 6596 cellular  
 organisms;Eukaryota;Opisthokonta;Metazoa;Eumetazoa;Bilateria;Protostomia;

Spiralia;Lophotrochozoa;Mollusca;Bivalvia;Autobranchia;Heteroconchia;Euherodonta;Imparidentia;Venerida;Veneroidea;Veneridae;Mercenaria;Mercenaria mercenaria

UdeM00000007242 45264 376.7 UdeM00000007242 XP\_044179186.1 59 312  
127 1 28 339 87 397 3.10E-101 376.7 45264 cellular

organisms;Eukaryota;Opisthokonta;Metazoa;Eumetazoa;Cnidaria;Anthozoa;Hexacorallia;Scleractinia;Astrocoeniina;Acroporidae;Acropora;Acropora millepora

UdeM00000007243 50429 66.6 UdeM00000007243 XP\_022807755.1 49.2 63  
32 0 1 63 113 175 1.40E-08 66.6 50429 cellular

organisms;Eukaryota;Opisthokonta;Metazoa;Eumetazoa;Cnidaria;Anthozoa;Hexacorallia;Scleractinia;Astrocoeniina;Pocilloporidae;Stylophora;Stylophora pistillata

UdeM00000007244 481459 135.2 UdeM00000007244 XP\_040031014.1 40.5  
153 82 2 71 223 296 439 1.00E-28 135.2 481459

cellular

organisms;Eukaryota;Opisthokonta;Metazoa;Eumetazoa;Bilateria;Deuterostomia;Chordata;Craniata;Vertebrata;Gnathostomata;Teleostomi;Euteleostomi;Actinopterygii;Actinopteri;Neopterygii;Teleostei;Osteoglossocephalai;Clupeocephala;Euteleostomorpha;Neoteleostei;Eurypterygia;Ctenosquamata;Acanthomorphata;Euacanthomorphacea;Percomorphaceae;Eupercaria;Perciformes;Cottioidei;Gasterosteales;Gasterosteidae;Gasterosteus;Gasterosteus aculeatus;Gasterosteus aculeatus aculeatus

UdeM00000007245 6565 329.7 UdeM00000007245 XP\_022322717.1 62.7 249  
86 2 31 279 74 315 3.60E-87 329.7 6565 cellular

organisms;Eukaryota;Opisthokonta;Metazoa;Eumetazoa;Bilateria;Protostomia;Spiralia;Lophotrochozoa;Mollusca;Bivalvia;Autobranchia;Pteriormorphia;Ostreida;Ostreoidea;Ostreidae;Crassostrea;Crassostrea virginica

UdeM00000007246 6596 341.3 UdeM00000007246 XP\_045181020.1 65.7 245  
83 1 28 272 13 256 1.20E-90 341.3 6596 cellular

organisms;Eukaryota;Opisthokonta;Metazoa;Eumetazoa;Bilateria;Protostomia;Spiralia;Lophotrochozoa;Mollusca;Bivalvia;Autobranchia;Heteroconchia;Euherodonta;Imparidentia;Venerida;Veneroidea;Veneridae;Mercenaria;Mercenaria mercenaria

UdeM00000007247 29159 808.9 UdeM00000007247 XP\_034323362.1 51.3 829  
340 13 22 832 58 840 6.10E-231 808.9 29159 cellular

organisms;Eukaryota;Opisthokonta;Metazoa;Eumetazoa;Bilateria;Protostomia;Spiralia;Lophotrochozoa;Mollusca;Bivalvia;Autobranchia;Pteriormorphia;Ostreida;Ostreoidea;Ostreidae;Crassostrea;Crassostrea gigas

UdeM00000007248 6596 481.1 UdeM00000007248 XP\_045180392.1 55.8 434  
186 3 91 520 88 519 1.80E-132 481.1 6596 cellular

organisms;Eukaryota;Opisthokonta;Metazoa;Eumetazoa;Bilateria;Protostomia;Spiralia;Lophotrochozoa;Mollusca;Bivalvia;Autobranchia;Heteroconchia;Euherodonta;Imparidentia;Venerida;Veneroidea;Veneridae;Mercenaria;Mercenaria mercenaria

UdeM00000007252 6579 605.5 UdeM00000007252 XP\_033726686.1 27 3031  
1253 77 85 2898 120 2406 3.50E-169 605.5 6579 cellular

organisms;Eukaryota;Opisthokonta;Metazoa;Eumetazoa;Bilateria;Protostomia;Spiralia;Lophotrochozoa;Mollusca;Bivalvia;Autobranchia;Pteriormorphia;Pectinida;Pectinoidea;Pectinidae;Pecten;Pecten maximus

UdeM00000007253 260995 73.6 UdeM00000007253 XP\_033803390.1 49.4  
77 38 1 1 77 301 376 1.40E-10 73.6 260995

cellular

organisms;Eukaryota;Opisthokonta;Metazoa;Eumetazoa;Bilateria;Deuterostomia

a;Chordata;Craniata;Vertebrata;Gnathostomata;Teleostomi;Euteleostomi;Sarcopterygii;Dipnotetrapodomorpha;Tetrapoda;Amphibia;Gymnophiona;Dermophiidae;Geotrypetes;Geotrypetes seraphini

UdeM00000007254 6596 301.2 UdeM00000007254 XP\_045181478.1 56.7 231  
82 5 14 230 5 231 1.10E-78 301.2 6596 cellular

organisms;Eukaryota;Opisthokonta;Metazoa;Eumetazoa;Bilateria;Protostomia;Spiralia;Lophotrochozoa;Mollusca;Bivalvia;Autobranchia;Heteroconchia;Euherodonta;Imparidentia;Venerida;Veneroidea;Veneridae;Mercenaria;Mercenaria mercenaria

UdeM00000007255 6579 212.2 UdeM00000007255 XP\_033727452.1 45.9 307  
149 4 724 1014 439 744 3.10E-51 212.2 6579 cellular

organisms;Eukaryota;Opisthokonta;Metazoa;Eumetazoa;Bilateria;Protostomia;Spiralia;Lophotrochozoa;Mollusca;Bivalvia;Autobranchia;Pteriormorphia;Pectinida;Pectinoidea;Pectinidae;Pecten;Pecten maximus

UdeM00000007256 6579 248.8 UdeM00000007256 XP\_033739209.1 49.8 259  
114 2 9 262 2 249 7.70E-63 248.8 6579 cellular

organisms;Eukaryota;Opisthokonta;Metazoa;Eumetazoa;Bilateria;Protostomia;Spiralia;Lophotrochozoa;Mollusca;Bivalvia;Autobranchia;Pteriormorphia;Pectinida;Pectinoidea;Pectinidae;Pecten;Pecten maximus

UdeM00000007258 6596 882.9 UdeM00000007258 XP\_045180255.1 41 1937  
917 36 45 1832 2 1862 7.50E-253 882.9 6596 cellular

organisms;Eukaryota;Opisthokonta;Metazoa;Eumetazoa;Bilateria;Protostomia;Spiralia;Lophotrochozoa;Mollusca;Bivalvia;Autobranchia;Heteroconchia;Euherodonta;Imparidentia;Venerida;Veneroidea;Veneridae;Mercenaria;Mercenaria mercenaria

UdeM00000007259 6596 748.4 UdeM00000007259 XP\_045180419.1 58.4 634  
214 4 153 743 68 694 9.00E-213 748.4 6596 cellular

organisms;Eukaryota;Opisthokonta;Metazoa;Eumetazoa;Bilateria;Protostomia;Spiralia;Lophotrochozoa;Mollusca;Bivalvia;Autobranchia;Heteroconchia;Euherodonta;Imparidentia;Venerida;Veneroidea;Veneridae;Mercenaria;Mercenaria mercenaria

UdeM00000007260 6596 498.8 UdeM00000007260 XP\_045180416.1 62.2 442  
150 7 24 450 861 1300 7.30E-138 498.8 6596 cellular

organisms;Eukaryota;Opisthokonta;Metazoa;Eumetazoa;Bilateria;Protostomia;Spiralia;Lophotrochozoa;Mollusca;Bivalvia;Autobranchia;Heteroconchia;Euherodonta;Imparidentia;Venerida;Veneroidea;Veneridae;Mercenaria;Mercenaria mercenaria

UdeM00000007261 6579 109.4 UdeM00000007261 XP\_033745797.1 30.2 275  
165 11 43 302 39 301 8.40E-21 109.4 6579 cellular

organisms;Eukaryota;Opisthokonta;Metazoa;Eumetazoa;Bilateria;Protostomia;Spiralia;Lophotrochozoa;Mollusca;Bivalvia;Autobranchia;Pteriormorphia;Pectinida;Pectinoidea;Pectinidae;Pecten;Pecten maximus

UdeM00000007262 6596 338.6 UdeM00000007262 XP\_045180416.1 65.8 284  
81 6 1 270 1015 1296 7.80E-90 338.6 6596 cellular

organisms;Eukaryota;Opisthokonta;Metazoa;Eumetazoa;Bilateria;Protostomia;Spiralia;Lophotrochozoa;Mollusca;Bivalvia;Autobranchia;Heteroconchia;Euherodonta;Imparidentia;Venerida;Veneroidea;Veneridae;Mercenaria;Mercenaria mercenaria

UdeM00000007263 6596 562.8 UdeM00000007263 XP\_045180422.1 60.8 520  
142 8 1 461 674 1190 4.20E-157 562.8 6596 cellular

organisms;Eukaryota;Opisthokonta;Metazoa;Eumetazoa;Bilateria;Protostomia;Spiralia;Lophotrochozoa;Mollusca;Bivalvia;Autobranchia;Heteroconchia;Euherodonta;Imparidentia;Venerida;Veneroidea;Veneridae;Mercenaria;Mercenaria mercenaria

UdeM00000007264 6596 345.1 UdeM00000007264 XP\_045180422.1 56.9 339  
 98 4 1 293 674 1010 9.30E-92 345.1 6596 cellular  
 organisms;Eukaryota;Opisthokonta;Metazoa;Eumetazoa;Bilateria;Protostomia;  
 Spiralia;Lophotrochozoa;Mollusca;Bivalvia;Autobranchia;Heteroconchia;Euhe  
 terodonta;Imparidentia;Venerida;Veneroidea;Veneridae;Mercenaria;Mercenari  
 a mercenaria  
 UdeM00000007265 6596 814.3 UdeM00000007265 XP\_045180419.1 68.1 577  
 164 2 59 616 75 650 1.10E-232 814.3 6596 cellular  
 organisms;Eukaryota;Opisthokonta;Metazoa;Eumetazoa;Bilateria;Protostomia;  
 Spiralia;Lophotrochozoa;Mollusca;Bivalvia;Autobranchia;Heteroconchia;Euhe  
 terodonta;Imparidentia;Venerida;Veneroidea;Veneridae;Mercenaria;Mercenari  
 a mercenaria  
 UdeM00000007266 6596 808.1 UdeM00000007266 XP\_045180419.1 67.4 583  
 164 3 59 622 75 650 7.80E-231 808.1 6596 cellular  
 organisms;Eukaryota;Opisthokonta;Metazoa;Eumetazoa;Bilateria;Protostomia;  
 Spiralia;Lophotrochozoa;Mollusca;Bivalvia;Autobranchia;Heteroconchia;Euhe  
 terodonta;Imparidentia;Venerida;Veneroidea;Veneridae;Mercenaria;Mercenari  
 a mercenaria  
 UdeM00000007267 6565 288.5 UdeM00000007267 XP\_022327962.1 56.6 256  
 110 1 44 298 159 414 9.80E-75 288.5 6565 cellular  
 organisms;Eukaryota;Opisthokonta;Metazoa;Eumetazoa;Bilateria;Protostomia;  
 Spiralia;Lophotrochozoa;Mollusca;Bivalvia;Autobranchia;Pteriormorphia;Ostr  
 eida;Ostreoidea;Ostreidae;Crassostrea;Crassostrea virginica  
 UdeM00000007270 6596 190.7 UdeM00000007270 XP\_045156361.1 25.1 802  
 497 27 10 767 7 748 1.70E-44 190.7 6596 cellular  
 organisms;Eukaryota;Opisthokonta;Metazoa;Eumetazoa;Bilateria;Protostomia;  
 Spiralia;Lophotrochozoa;Mollusca;Bivalvia;Autobranchia;Heteroconchia;Euhe  
 terodonta;Imparidentia;Venerida;Veneroidea;Veneridae;Mercenaria;Mercenari  
 a mercenaria  
 UdeM00000007271 6596 63.9 UdeM00000007271 XP\_045182368.1 38 71  
 43 1 77 146 83 153 1.90E-07 63.9 6596 cellular  
 organisms;Eukaryota;Opisthokonta;Metazoa;Eumetazoa;Bilateria;Protostomia;  
 Spiralia;Lophotrochozoa;Mollusca;Bivalvia;Autobranchia;Heteroconchia;Euhe  
 terodonta;Imparidentia;Venerida;Veneroidea;Veneridae;Mercenaria;Mercenari  
 a mercenaria  
 UdeM00000007272 6596 87.8 UdeM00000007272 XP\_045180537.1 28.3 244  
 164 6 4 242 66 303 2.20E-14 87.8 6596 cellular  
 organisms;Eukaryota;Opisthokonta;Metazoa;Eumetazoa;Bilateria;Protostomia;  
 Spiralia;Lophotrochozoa;Mollusca;Bivalvia;Autobranchia;Heteroconchia;Euhe  
 terodonta;Imparidentia;Venerida;Veneroidea;Veneridae;Mercenaria;Mercenari  
 a mercenaria  
 UdeM00000007273 10224 104 UdeM00000007273 XP\_002740205.2 37.7 159  
 84 3 4 162 48 191 2.00E-19 104 10224 cellular  
 organisms;Eukaryota;Opisthokonta;Metazoa;Eumetazoa;Bilateria;Deuterostomi  
 a;Hemichordata;Enteropneusta;Harrimaniidae;Saccoglossus;Saccoglossus  
 kowalevskii  
 UdeM00000007274 6596 124.4 UdeM00000007274 XP\_045188603.1 22.8 1037  
 625 37 186 1116 383 1349 1.10E-24 124.4 6596 cellular  
 organisms;Eukaryota;Opisthokonta;Metazoa;Eumetazoa;Bilateria;Protostomia;  
 Spiralia;Lophotrochozoa;Mollusca;Bivalvia;Autobranchia;Heteroconchia;Euhe  
 terodonta;Imparidentia;Venerida;Veneroidea;Veneridae;Mercenaria;Mercenari  
 a mercenaria  
 UdeM00000007275 6596 62 UdeM00000007275 XP\_045182368.1 36.6 71  
 44 1 114 183 83 153 9.20E-07 62 6596 cellular

organisms;Eukaryota;Opisthokonta;Metazoa;Eumetazoa;Bilateria;Protostomia;Spiralia;Lophotrochozoa;Mollusca;Bivalvia;Autobranchia;Heteroconchia;Euheterodonta;Imparidentia;Venerida;Veneroidea;Veneridae;Mercenaria;Mercenaria mercenaria

UdeM00000007276 6596 349.7 UdeM00000007276 XP\_045182087.1 31.8 877  
503 17 324 1138 1 844 1.40E-92 349.7 6596 cellular

organisms;Eukaryota;Opisthokonta;Metazoa;Eumetazoa;Bilateria;Protostomia;Spiralia;Lophotrochozoa;Mollusca;Bivalvia;Autobranchia;Heteroconchia;Euheterodonta;Imparidentia;Venerida;Veneroidea;Veneridae;Mercenaria;Mercenaria mercenaria

UdeM00000007277 29159 163.3 UdeM00000007277 XP\_011421663.2 44.2 197  
108 2 1 196 21 216 3.50E-37 163.3 29159 cellular

organisms;Eukaryota;Opisthokonta;Metazoa;Eumetazoa;Bilateria;Protostomia;Spiralia;Lophotrochozoa;Mollusca;Bivalvia;Autobranchia;Pteriomorpha;Ostreida;Ostreoidea;Ostreidae;Crassostrea;Crassostrea gigas

UdeM00000007280 31138 90.5 UdeM00000007280 XP\_034636193.1 31.6 133  
70 1 17 128 96 228 2.30E-15 90.5 31138 cellular

organisms;Eukaryota;Opisthokonta;Metazoa;Eumetazoa;Bilateria;Deuterostomia;Chordata;Craniata;Vertebrata;Gnathostomata;Teleostomi;Euteleostomi;Sarcopterygii;Dipnotetrapodomorpha;Tetrapoda;Amniota;Sauropsida;Sauria;Archelosauria;Testudinata;Testudines;Cryptodira;Durocryptodira;Testudinoidea;Emydidae;Trachemys;Trachemys scripta;Trachemys scripta elegans

UdeM00000007282 6565 211.8 UdeM00000007282 XP\_022327987.1 44.5 218  
119 1 2 217 34 251 9.80E-52 211.8 6565 cellular

organisms;Eukaryota;Opisthokonta;Metazoa;Eumetazoa;Bilateria;Protostomia;Spiralia;Lophotrochozoa;Mollusca;Bivalvia;Autobranchia;Pteriomorpha;Ostreida;Ostreoidea;Ostreidae;Crassostrea;Crassostrea virginica

UdeM00000007283 6565 214.5 UdeM00000007283 XP\_022327987.1 44.5 218  
119 1 2 217 34 251 1.50E-52 214.5 6565 cellular

organisms;Eukaryota;Opisthokonta;Metazoa;Eumetazoa;Bilateria;Protostomia;Spiralia;Lophotrochozoa;Mollusca;Bivalvia;Autobranchia;Pteriomorpha;Ostreida;Ostreoidea;Ostreidae;Crassostrea;Crassostrea virginica

UdeM00000007284 6596 334.3 UdeM00000007284 XP\_045183440.1 50.4 337  
162 3 45 380 32 364 2.40E-88 334.3 6596 cellular

organisms;Eukaryota;Opisthokonta;Metazoa;Eumetazoa;Bilateria;Protostomia;Spiralia;Lophotrochozoa;Mollusca;Bivalvia;Autobranchia;Heteroconchia;Euheterodonta;Imparidentia;Venerida;Veneroidea;Veneridae;Mercenaria;Mercenaria mercenaria

UdeM00000007285 6565 82.8 UdeM00000007285 XP\_022330482.1 26.7 225  
142 7 7 227 433 638 6.30E-13 82.8 6565 cellular

organisms;Eukaryota;Opisthokonta;Metazoa;Eumetazoa;Bilateria;Protostomia;Spiralia;Lophotrochozoa;Mollusca;Bivalvia;Autobranchia;Pteriomorpha;Ostreida;Ostreoidea;Ostreidae;Crassostrea;Crassostrea virginica

UdeM00000007286 72036 112.1 UdeM00000007286 XP\_040576246.1 41.3 179  
80 5 1 158 1 175 6.60E-22 112.1 72036 cellular

organisms;Eukaryota;Opisthokonta;Metazoa;Eumetazoa;Bilateria;Protostomia;Ecdysozoa;Panarthropoda;Arthropoda;Mandibulata;Pancrustacea;Crustacea;Multicrustacea;Hexanauplia;Copepoda;Neocopepoda;Podoplea;Siphonostomatoida;Caligidae;Lepeophtheirus;Lepeophtheirus salmonis

UdeM00000007287 6706 154.8 UdeM00000007287 XP\_042235765.1 44.8 154  
85 0 4 157 4 157 9.00E-35 154.8 6706 cellular

organisms;Eukaryota;Opisthokonta;Metazoa;Eumetazoa;Bilateria;Protostomia;Ecdysozoa;Panarthropoda;Arthropoda;Mandibulata;Pancrustacea;Crustacea;Mul

ticrustacea;Malacostraca;Eumalacostraca;Eucarida;Decapoda;Pleocyemata;Ast  
 acidea;Nephropoidea;Nephropidae;Homarus;Homarus americanus  
 UdeM00000007288 29159 206.8 UdeM00000007288 XP\_011417567.2 47 200  
 104 1 95 292 37 236 4.00E-50 206.8 29159 cellular  
 organisms;Eukaryota;Opisthokonta;Metazoa;Eumetazoa;Bilateria;Protostomia;  
 Spiralia;Lophotrochozoa;Mollusca;Bivalvia;Autobranchia;Pteriormorphia;Ostr  
 eida;Ostreoidea;Ostreidae;Crassostrea;Crassostrea gigas  
 UdeM000000035492 29159 73.2 UdeM000000035492 XP\_034307860.1 53.6 69  
 32 0 1 69 1 69 3.20E-10 73.2 29159 cellular  
 organisms;Eukaryota;Opisthokonta;Metazoa;Eumetazoa;Bilateria;Protostomia;  
 Spiralia;Lophotrochozoa;Mollusca;Bivalvia;Autobranchia;Pteriormorphia;Ostr  
 eida;Ostreoidea;Ostreidae;Crassostrea;Crassostrea gigas  
 UdeM000000035494 1735272 466.5 UdeM000000035494 XP\_041370876.1 42.3  
 603 303 9 68 660 140 707 5.90E-128 466.5 1735272  
 cellular  
 organisms;Eukaryota;Opisthokonta;Metazoa;Eumetazoa;Bilateria;Protostomia;  
 Spiralia;Lophotrochozoa;Mollusca;Gastropoda;Neomphalina;Neomphaloidea;Pel  
 tospiridae;Gigantopelta;Gigantopelta aegis  
 UdeM000000035495 6596 458 UdeM000000035495 XP\_045187947.1 70.8 322  
 94 0 2 323 4 325 1.00E-125 458 6596 cellular  
 organisms;Eukaryota;Opisthokonta;Metazoa;Eumetazoa;Bilateria;Protostomia;  
 Spiralia;Lophotrochozoa;Mollusca;Bivalvia;Autobranchia;Heteroconchia;Euhe  
 terodonta;Imparidentia;Venerida;Veneroidea;Veneridae;Mercenaria;Mercenari  
 a mercenaria  
 UdeM000000035497 7574 304.7 UdeM000000035497 XP\_023933278.1 55.4 260  
 111 3 39 293 142 401 1.30E-79 304.7 7574 cellular  
 organisms;Eukaryota;Opisthokonta;Metazoa;Eumetazoa;Bilateria;Protostomia;  
 Spiralia;Lophotrochozoa;Brachiopoda;Linguliformea;Lingulata;Lingulida;Lin  
 guloidea;Lingulidae;Lingula;Lingula anatina  
 UdeM000000035496 7574 471.9 UdeM000000035496 XP\_023933510.1 51.5 429  
 198 7 37 456 246 673 9.50E-130 471.9 7574 cellular  
 organisms;Eukaryota;Opisthokonta;Metazoa;Eumetazoa;Bilateria;Protostomia;  
 Spiralia;Lophotrochozoa;Brachiopoda;Linguliformea;Lingulata;Lingulida;Lin  
 guloidea;Lingulidae;Lingula;Lingula anatina  
 UdeM000000035500 6596 146 UdeM000000035500 XP\_045176264.1 26.6 493  
 309 12 1 447 15 500 1.20E-31 146 6596 cellular  
 organisms;Eukaryota;Opisthokonta;Metazoa;Eumetazoa;Bilateria;Protostomia;  
 Spiralia;Lophotrochozoa;Mollusca;Bivalvia;Autobranchia;Heteroconchia;Euhe  
 terodonta;Imparidentia;Venerida;Veneroidea;Veneridae;Mercenaria;Mercenari  
 a mercenaria  
 UdeM000000035499 6596 149.4 UdeM000000035499 XP\_045176264.1 26.7 499  
 313 12 4 456 9 500 1.10E-32 149.4 6596 cellular  
 organisms;Eukaryota;Opisthokonta;Metazoa;Eumetazoa;Bilateria;Protostomia;  
 Spiralia;Lophotrochozoa;Mollusca;Bivalvia;Autobranchia;Heteroconchia;Euhe  
 terodonta;Imparidentia;Venerida;Veneroidea;Veneridae;Mercenaria;Mercenari  
 a mercenaria  
 UdeM000000035501 6579 345.5 UdeM000000035501 XP\_033728519.1 48.6 358  
 176 7 11 364 3 356 8.20E-92 345.5 6579 cellular  
 organisms;Eukaryota;Opisthokonta;Metazoa;Eumetazoa;Bilateria;Protostomia;  
 Spiralia;Lophotrochozoa;Mollusca;Bivalvia;Autobranchia;Pteriormorphia;Pect  
 inida;Pectinoidea;Pectinidae;Pecten;Pecten maximus  
 UdeM000000035502 6596 410.2 UdeM000000035502 XP\_045193548.1 72.1 283  
 70 2 2 284 5 278 2.10E-111 410.2 6596 cellular  
 organisms;Eukaryota;Opisthokonta;Metazoa;Eumetazoa;Bilateria;Protostomia;

Spiralia;Lophotrochozoa;Mollusca;Bivalvia;Autobranchia;Heteroconchia;Euherodonta;Imparidentia;Venerida;Veneroidea;Veneridae;Mercenaria;Mercenaria mercenaria

UdeM00000035503 6596 296.2 UdeM00000035503 XP\_045193548.1 72 200  
55 1 2 201 5 203 3.40E-77 296.2 6596 cellular

organisms;Eukaryota;Opisthokonta;Metazoa;Eumetazoa;Bilateria;Protostomia;Spiralia;Lophotrochozoa;Mollusca;Bivalvia;Autobranchia;Heteroconchia;Euherodonta;Imparidentia;Venerida;Veneroidea;Veneridae;Mercenaria;Mercenaria mercenaria

UdeM00000035504 2607531 621.7 UdeM00000035504 XP\_036358231.1 54.5  
527 232 6 21 541 20 544 9.30E-175 621.7 2607531  
cellular

organisms;Eukaryota;Opisthokonta;Metazoa;Eumetazoa;Bilateria;Protostomia;Spiralia;Lophotrochozoa;Mollusca;Cephalopoda;Coleoidea;Octopodiformes;Octopoda;Incirrata;Octopodidae;Octopus;Octopus sinensis

UdeM00000035505 2607531 237.3 UdeM00000035505 XP\_036358231.1 46.4  
263 124 5 21 278 20 270 2.40E-59 237.3 2607531  
cellular

organisms;Eukaryota;Opisthokonta;Metazoa;Eumetazoa;Bilateria;Protostomia;Spiralia;Lophotrochozoa;Mollusca;Cephalopoda;Coleoidea;Octopodiformes;Octopoda;Incirrata;Octopodidae;Octopus;Octopus sinensis

UdeM00000035506 6596 528.1 UdeM00000035506 XP\_045162619.1 66.7 424  
121 4 18 434 145 555 1.10E-146 528.1 6596 cellular

organisms;Eukaryota;Opisthokonta;Metazoa;Eumetazoa;Bilateria;Protostomia;Spiralia;Lophotrochozoa;Mollusca;Bivalvia;Autobranchia;Heteroconchia;Euherodonta;Imparidentia;Venerida;Veneroidea;Veneridae;Mercenaria;Mercenaria mercenaria

UdeM00000035507 29159 313.9 UdeM00000035507 XP\_011440171.2 89.8 167  
17 0 1 167 10 176 1.20E-82 313.9 29159 cellular

organisms;Eukaryota;Opisthokonta;Metazoa;Eumetazoa;Bilateria;Protostomia;Spiralia;Lophotrochozoa;Mollusca;Bivalvia;Autobranchia;Pteriomorphia;Ostreida;Ostreoidea;Ostreidae;Crassostrea;Crassostrea gigas

UdeM00000035508 6596 1459.5 UdeM00000035508 XP\_045203954.1 83.4  
851 135 5 1 849 13 859 0.00E+00 1459.5 6596  
cellular

organisms;Eukaryota;Opisthokonta;Metazoa;Eumetazoa;Bilateria;Protostomia;Spiralia;Lophotrochozoa;Mollusca;Bivalvia;Autobranchia;Heteroconchia;Euherodonta;Imparidentia;Venerida;Veneroidea;Veneridae;Mercenaria;Mercenaria mercenaria

UdeM00000035509 6579 258.8 UdeM00000035509 XP\_033732611.1 69.6 181  
52 2 15 195 12 189 5.50E-66 258.8 6579 cellular

organisms;Eukaryota;Opisthokonta;Metazoa;Eumetazoa;Bilateria;Protostomia;Spiralia;Lophotrochozoa;Mollusca;Bivalvia;Autobranchia;Pteriomorphia;Pectinida;Pectinoidea;Pectinidae;Pecten;Pecten maximus

UdeM00000035510 6596 1968.7 UdeM00000035510 XP\_045201002.1 53.3  
1940 800 27 99 1973 2 1900 0.00E+00 1968.7 6596  
cellular

organisms;Eukaryota;Opisthokonta;Metazoa;Eumetazoa;Bilateria;Protostomia;Spiralia;Lophotrochozoa;Mollusca;Bivalvia;Autobranchia;Heteroconchia;Euherodonta;Imparidentia;Venerida;Veneroidea;Veneridae;Mercenaria;Mercenaria mercenaria

UdeM00000035511 6565 384.4 UdeM00000035511 XP\_022322171.1 66.5 239  
78 2 11 247 246 484 1.20E-103 384.4 6565 cellular

organisms;Eukaryota;Opisthokonta;Metazoa;Eumetazoa;Bilateria;Protostomia;

Spiralia; Lophotrochozoa; Mollusca; Bivalvia; Autobranchia; Pteriomorphia; Ostr  
eida; Ostreoidae; Ostreidae; Crassostrea; Crassostrea virginica  
UdeM00000035512 6565 196.1 UdeM00000035512 XP\_022322171.1 50.3 161  
77 2 7 165 46 205 3.60E-47 196.1 6565 cellular  
organisms; Eukaryota; Opisthokonta; Metazoa; Eumetazoa; Bilateria; Protostomia;  
Spiralia; Lophotrochozoa; Mollusca; Bivalvia; Autobranchia; Pteriomorphia; Ostr  
eida; Ostreoidae; Ostreidae; Crassostrea; Crassostrea virginica  
UdeM00000035513 7574 323.6 UdeM00000035513 XP\_013400175.1 86.3 182  
25 0 1 182 1 182 1.70E-85 323.6 7574 cellular  
organisms; Eukaryota; Opisthokonta; Metazoa; Eumetazoa; Bilateria; Protostomia;  
Spiralia; Lophotrochozoa; Brachiopoda; Linguliformea; Lingulata; Lingulida; Lin  
guloidea; Lingulidae; Lingula; Lingula anatina  
UdeM00000035517 6500 275 UdeM00000035517 XP\_005093825.1 57.6 243  
100 2 1 243 1 240 9.20E-71 275 6500 cellular  
organisms; Eukaryota; Opisthokonta; Metazoa; Eumetazoa; Bilateria; Protostomia;  
Spiralia; Lophotrochozoa; Mollusca; Gastropoda; Heterobranchia; Euthyneura; Tec  
tipleura; Aplysiida; Aplysioidea; Aplysiidae; Aplysia; Aplysia californica  
UdeM00000035518 7741 266.9 UdeM00000035518 XP\_019642604.1 58.1 248  
100 3 1 248 1 244 2.50E-68 266.9 7741 cellular  
organisms; Eukaryota; Opisthokonta; Metazoa; Eumetazoa; Bilateria; Deuterostomi  
a; Chordata; Cephalochordata; Leptocardii; Amphioxiformes; Branchiostomidae; Br  
anchiostoma; Branchiostoma belcheri  
UdeM00000035519 7739 264.2 UdeM00000035519 XP\_035695458.1 58.9 246  
96 4 1 246 1 241 1.60E-67 264.2 7739 cellular  
organisms; Eukaryota; Opisthokonta; Metazoa; Eumetazoa; Bilateria; Deuterostomi  
a; Chordata; Cephalochordata; Leptocardii; Amphioxiformes; Branchiostomidae; Br  
anchiostoma; Branchiostoma floridae  
UdeM00000035520 6596 113.6 UdeM00000035520 XP\_045212011.1 60 100  
35 1 1 95 1 100 1.40E-22 113.6 6596 cellular  
organisms; Eukaryota; Opisthokonta; Metazoa; Eumetazoa; Bilateria; Protostomia;  
Spiralia; Lophotrochozoa; Mollusca; Bivalvia; Autobranchia; Heteroconchia; Eue  
terodonta; Imparidentia; Venerida; Veneroidea; Veneridae; Mercenaria; Mercenari  
a mercenaria  
UdeM00000035521 400727 248.8 UdeM00000035521 XP\_025098528.1 53.1  
245 99 2 1 230 1 244 6.60E-63 248.8 400727  
cellular  
organisms; Eukaryota; Opisthokonta; Metazoa; Eumetazoa; Bilateria; Protostomia;  
Spiralia; Lophotrochozoa; Mollusca; Gastropoda; Caenogastropoda; Architaeniogl  
ossa; Ampullarioidea; Ampullariidae; Pomacea; Pomacea canaliculata  
UdeM00000035525 6596 154.5 UdeM00000035525 XP\_045185048.1 35 260  
129 5 7 250 8 243 2.10E-34 154.5 6596 cellular  
organisms; Eukaryota; Opisthokonta; Metazoa; Eumetazoa; Bilateria; Protostomia;  
Spiralia; Lophotrochozoa; Mollusca; Bivalvia; Autobranchia; Heteroconchia; Eue  
terodonta; Imparidentia; Venerida; Veneroidea; Veneridae; Mercenaria; Mercenari  
a mercenaria  
UdeM00000035526 1735272 425.6 UdeM00000035526 XP\_041356266.1 51.4  
407 188 4 51 454 209 608 7.80E-116 425.6 1735272  
cellular  
organisms; Eukaryota; Opisthokonta; Metazoa; Eumetazoa; Bilateria; Protostomia;  
Spiralia; Lophotrochozoa; Mollusca; Gastropoda; Neomphalina; Neomphaloidea; Pel  
tospiridae; Gigantopelta; Gigantopelta aegis  
UdeM00000035527 6579 153.7 UdeM00000035527 XP\_033760891.1 66.1 112  
37 1 1 112 1 111 1.40E-34 153.7 6579 cellular  
organisms; Eukaryota; Opisthokonta; Metazoa; Eumetazoa; Bilateria; Protostomia;



Spiralia;Lophotrochozoa;Mollusca;Bivalvia;Autobranchia;Pteriormorphia;Pectinida;Pectinoidea;Pectinidae;Pecten;Pecten maximus

UdeM00000035528 1735272 343.2 UdeM00000035528 XP\_041368747.1 72.9  
207 56 0 12 218 155 361 2.40E-91 343.2 1735272  
cellular

organisms;Eukaryota;Opisthokonta;Metazoa;Eumetazoa;Bilateria;Protostomia;Spiralia;Lophotrochozoa;Mollusca;Gastropoda;Neomphalina;Neomphaloidea;Peltospiridae;Gigantopelta;Gigantopelta aegis

UdeM00000035529 6596 641.7 UdeM00000035529 XP\_045202046.1 56.3 575  
227 3 20 573 52 623 8.70E-181 641.7 6596 cellular

organisms;Eukaryota;Opisthokonta;Metazoa;Eumetazoa;Bilateria;Protostomia;Spiralia;Lophotrochozoa;Mollusca;Bivalvia;Autobranchia;Heteroconchia;Euheterodonta;Imparidentia;Venerida;Veneroidea;Veneridae;Mercenaria;Mercenaria mercenaria

UdeM00000035530 6596 1226.5 UdeM00000035530 XP\_045202046.1 58.6  
1115 429 12 54 1145 624 1728 0.00E+00 1226.5 6596  
cellular

organisms;Eukaryota;Opisthokonta;Metazoa;Eumetazoa;Bilateria;Protostomia;Spiralia;Lophotrochozoa;Mollusca;Bivalvia;Autobranchia;Heteroconchia;Euheterodonta;Imparidentia;Venerida;Veneroidea;Veneridae;Mercenaria;Mercenaria mercenaria

UdeM00000035531 29159 709.1 UdeM00000035531 XP\_011429872.1 78.1 547  
120 0 1 547 1 547 4.20E-201 709.1 29159 cellular

organisms;Eukaryota;Opisthokonta;Metazoa;Eumetazoa;Bilateria;Protostomia;Spiralia;Lophotrochozoa;Mollusca;Bivalvia;Autobranchia;Pteriormorphia;Ostreida;Ostreoidea;Ostreidae;Crassostrea;Crassostrea gigas

UdeM00000035532 6596 414.1 UdeM00000035532 XP\_045206510.1 31 942  
565 16 1 923 1 876 4.80E-112 414.1 6596 cellular

organisms;Eukaryota;Opisthokonta;Metazoa;Eumetazoa;Bilateria;Protostomia;Spiralia;Lophotrochozoa;Mollusca;Bivalvia;Autobranchia;Heteroconchia;Euheterodonta;Imparidentia;Venerida;Veneroidea;Veneridae;Mercenaria;Mercenaria mercenaria

UdeM00000035533 37653 222.6 UdeM00000035533 XP\_014771836.1 85.2 128  
19 0 1 128 3 130 3.80E-55 222.6 37653 cellular

organisms;Eukaryota;Opisthokonta;Metazoa;Eumetazoa;Bilateria;Protostomia;Spiralia;Lophotrochozoa;Mollusca;Cephalopoda;Coleoidea;Octopodiformes;Octopoda;Incirrata;Octopodidae;Octopus;Octopus bimaculoides

UdeM00000035534 6579 298.1 UdeM00000035534 XP\_033763153.1 65.9 208  
64 1 35 235 26 233 9.70E-78 298.1 6579 cellular

organisms;Eukaryota;Opisthokonta;Metazoa;Eumetazoa;Bilateria;Protostomia;Spiralia;Lophotrochozoa;Mollusca;Bivalvia;Autobranchia;Pteriormorphia;Pectinida;Pectinoidea;Pectinidae;Pecten;Pecten maximus

UdeM00000035535 6596 470.7 UdeM00000035535 XP\_045208557.1 54.5 446  
176 6 514 939 44 482 5.20E-129 470.7 6596 cellular

organisms;Eukaryota;Opisthokonta;Metazoa;Eumetazoa;Bilateria;Protostomia;Spiralia;Lophotrochozoa;Mollusca;Bivalvia;Autobranchia;Heteroconchia;Euheterodonta;Imparidentia;Venerida;Veneroidea;Veneridae;Mercenaria;Mercenaria mercenaria

UdeM00000035536 6596 153.3 UdeM00000035536 XP\_045195116.1 29.1 354  
192 7 48 357 98 436 5.90E-34 153.3 6596 cellular

organisms;Eukaryota;Opisthokonta;Metazoa;Eumetazoa;Bilateria;Protostomia;Spiralia;Lophotrochozoa;Mollusca;Bivalvia;Autobranchia;Heteroconchia;Euheterodonta;Imparidentia;Venerida;Veneroidea;Veneridae;Mercenaria;Mercenaria mercenaria

UdeM00000035537 6596 124 UdeM00000035537 XP\_045206689.1 50.5 111  
 55 0 1 111 1 111 2.90E-25 124 6596 cellular  
 organisms;Eukaryota;Opisthokonta;Metazoa;Eumetazoa;Bilateria;Protostomia;  
 Spiralia;Lophotrochozoa;Mollusca;Bivalvia;Autobranhia;Heteroconchia;Euhe  
 terodonta;Imparidentia;Venerida;Veneroidea;Veneridae;Mercenaria;Mercenari  
 a mercenaria  
 UdeM00000035538 6596 1321.6 UdeM00000035538 XP\_045206689.1 45  
 1487 725 34 1 1422 110 1568 0.00E+00 1321.6 6596  
 cellular  
 organisms;Eukaryota;Opisthokonta;Metazoa;Eumetazoa;Bilateria;Protostomia;  
 Spiralia;Lophotrochozoa;Mollusca;Bivalvia;Autobranhia;Heteroconchia;Euhe  
 terodonta;Imparidentia;Venerida;Veneroidea;Veneridae;Mercenaria;Mercenari  
 a mercenaria  
 UdeM00000035539 6573 1048.5 UdeM00000035539 XP\_021364986.1 44.5  
 1292 644 21 16 1290 1573 2808 6.90E-303 1048.5 6573  
 cellular  
 organisms;Eukaryota;Opisthokonta;Metazoa;Eumetazoa;Bilateria;Protostomia;  
 Spiralia;Lophotrochozoa;Mollusca;Bivalvia;Autobranhia;Pteriormorphia;Pect  
 inida;Pectinoidea;Pectinidae;Mizuhopecten;Mizuhopecten yessoensis  
 UdeM00000023648 6596 619.4 UdeM00000023648 XP\_045160980.1 51.3 577  
 237 14 12 554 12 578 4.50E-174 619.4 6596 cellular  
 organisms;Eukaryota;Opisthokonta;Metazoa;Eumetazoa;Bilateria;Protostomia;  
 Spiralia;Lophotrochozoa;Mollusca;Bivalvia;Autobranhia;Heteroconchia;Euhe  
 terodonta;Imparidentia;Venerida;Veneroidea;Veneridae;Mercenaria;Mercenari  
 a mercenaria  
 UdeM00000023650 400727 186.4 UdeM00000023650 XP\_025111216.1 50.8  
 195 84 1 35 217 9 203 3.90E-44 186.4 400727  
 cellular  
 organisms;Eukaryota;Opisthokonta;Metazoa;Eumetazoa;Bilateria;Protostomia;  
 Spiralia;Lophotrochozoa;Mollusca;Gastropoda;Caenogastropoda;Architaeniogl  
 ossa;Ampullarioidea;Ampullariidae;Pomacea;Pomacea canaliculata  
 UdeM00000023651 151771 181.8 UdeM00000023651 XP\_028391651.1 54.8  
 157 71 0 213 369 8 164 1.70E-42 181.8 151771  
 cellular  
 organisms;Eukaryota;Opisthokonta;Metazoa;Eumetazoa;Cnidaria;Anthozoa;Octo  
 corallia;Alcyonacea;Alcyoniina;Nephtheidae;Dendronephthya;Dendronephthya  
 gigantea  
 UdeM00000023652 400682 192.2 UdeM00000023652 XP\_019853895.1 56.1  
 171 70 1 84 254 10 175 8.80E-46 192.2 400682  
 cellular  
 organisms;Eukaryota;Opisthokonta;Metazoa;Porifera;Demospongiae;Heteroscle  
 romorpha;Haplosclerida;Niphatidae;Amphimedon;Amphimedon queenslandica  
 UdeM00000023653 151771 179.5 UdeM00000023653 XP\_028391651.1 55.6  
 153 68 0 193 345 8 160 8.00E-42 179.5 151771  
 cellular  
 organisms;Eukaryota;Opisthokonta;Metazoa;Eumetazoa;Cnidaria;Anthozoa;Octo  
 corallia;Alcyonacea;Alcyoniina;Nephtheidae;Dendronephthya;Dendronephthya  
 gigantea  
 UdeM00000023654 6573 495.7 UdeM00000023654 XP\_021343751.1 52.4 454  
 211 3 11 461 16 467 6.20E-137 495.7 6573 cellular  
 organisms;Eukaryota;Opisthokonta;Metazoa;Eumetazoa;Bilateria;Protostomia;  
 Spiralia;Lophotrochozoa;Mollusca;Bivalvia;Autobranhia;Pteriormorphia;Pect  
 inida;Pectinoidea;Pectinidae;Mizuhopecten;Mizuhopecten yessoensis

UdeM00000023655 6573 497.3 UdeM00000023655 XP\_021343750.1 52.4 454  
 211 3 29 479 26 477 2.20E-137 497.3 6573 cellular  
 organisms;Eukaryota;Opisthokonta;Metazoa;Eumetazoa;Bilateria;Protostomia;  
 Spiralia;Lophotrochozoa;Mollusca;Bivalvia;Autobranchia;Pteriormorphia;Pect  
 inida;Pectinoidea;Pectinidae;Mizuhopecten;Mizuhopecten yessoensis  
 UdeM00000023656 6596 66.2 UdeM00000023656 XP\_045160012.1 34.3 99  
 64 1 164 261 186 284 7.20E-08 66.2 6596 cellular  
 organisms;Eukaryota;Opisthokonta;Metazoa;Eumetazoa;Bilateria;Protostomia;  
 Spiralia;Lophotrochozoa;Mollusca;Bivalvia;Autobranchia;Heteroconchia;Euhe  
 terodonta;Imparidentia;Venerida;Veneroidea;Veneridae;Mercenaria;Mercenari  
 a mercenaria  
 UdeM00000023657 6596 70.1 UdeM00000023657 XP\_045160012.1 36.4 99  
 62 1 65 162 186 284 3.20E-09 70.1 6596 cellular  
 organisms;Eukaryota;Opisthokonta;Metazoa;Eumetazoa;Bilateria;Protostomia;  
 Spiralia;Lophotrochozoa;Mollusca;Bivalvia;Autobranchia;Heteroconchia;Euhe  
 terodonta;Imparidentia;Venerida;Veneroidea;Veneridae;Mercenaria;Mercenari  
 a mercenaria  
 UdeM00000023658 6596 66.6 UdeM00000023658 XP\_045160012.1 35.4 99  
 63 1 164 261 186 284 5.50E-08 66.6 6596 cellular  
 organisms;Eukaryota;Opisthokonta;Metazoa;Eumetazoa;Bilateria;Protostomia;  
 Spiralia;Lophotrochozoa;Mollusca;Bivalvia;Autobranchia;Heteroconchia;Euhe  
 terodonta;Imparidentia;Venerida;Veneroidea;Veneridae;Mercenaria;Mercenari  
 a mercenaria  
 UdeM00000023659 10224 306.6 UdeM00000023659 XP\_002730583.1 49.1 330  
 140 4 1 330 1 302 6.30E-80 306.6 10224 cellular  
 organisms;Eukaryota;Opisthokonta;Metazoa;Eumetazoa;Bilateria;Deuterostomi  
 a;Hemichordata;Enteropneusta;Harrimaniidae;Saccoglossus;Saccoglossus  
 kowalevskii  
 UdeM00000023660 6579 117.5 UdeM00000023660 XP\_033737493.1 68.3 82  
 26 0 28 109 449 530 1.10E-23 117.5 6579 cellular  
 organisms;Eukaryota;Opisthokonta;Metazoa;Eumetazoa;Bilateria;Protostomia;  
 Spiralia;Lophotrochozoa;Mollusca;Bivalvia;Autobranchia;Pteriormorphia;Pect  
 inida;Pectinoidea;Pectinidae;Pecten;Pecten maximus  
 UdeM00000023661 6579 438.7 UdeM00000023661 XP\_033737494.1 49.7 479  
 207 8 1 460 1 464 9.10E-120 438.7 6579 cellular  
 organisms;Eukaryota;Opisthokonta;Metazoa;Eumetazoa;Bilateria;Protostomia;  
 Spiralia;Lophotrochozoa;Mollusca;Bivalvia;Autobranchia;Pteriormorphia;Pect  
 inida;Pectinoidea;Pectinidae;Pecten;Pecten maximus  
 UdeM00000023662 6596 1580.8 UdeM00000023662 XP\_045171466.1 53.1  
 1506 518 15 10 1335 13 1510 0.00E+00 1580.8 6596  
 cellular  
 organisms;Eukaryota;Opisthokonta;Metazoa;Eumetazoa;Bilateria;Protostomia;  
 Spiralia;Lophotrochozoa;Mollusca;Bivalvia;Autobranchia;Heteroconchia;Euhe  
 terodonta;Imparidentia;Venerida;Veneroidea;Veneridae;Mercenaria;Mercenari  
 a mercenaria  
 UdeM00000023663 6596 939.5 UdeM00000023663 XP\_045171466.1 57 821  
 324 9 1 808 706 1510 2.90E-270 939.5 6596 cellular  
 organisms;Eukaryota;Opisthokonta;Metazoa;Eumetazoa;Bilateria;Protostomia;  
 Spiralia;Lophotrochozoa;Mollusca;Bivalvia;Autobranchia;Heteroconchia;Euhe  
 terodonta;Imparidentia;Venerida;Veneroidea;Veneridae;Mercenaria;Mercenari  
 a mercenaria  
 UdeM00000023664 6579 385.6 UdeM00000023664 XP\_033748269.1 58.1 327  
 118 3 93 401 297 622 7.90E-104 385.6 6579 cellular  
 organisms;Eukaryota;Opisthokonta;Metazoa;Eumetazoa;Bilateria;Protostomia;

Spiralia; Lophotrochozoa; Mollusca; Bivalvia; Autobranchia; Pteriomorpha; Pectinida; Pectinoidea; Pectinidae; Pecten; Pecten maximus  
UdeM00000023666 6596 194.1 UdeM00000023666 XP\_045164955.1 42.7 246  
125 5 30 270 66 300 2.30E-46 194.1 6596 cellular  
organisms; Eukaryota; Opisthokonta; Metazoa; Eumetazoa; Bilateria; Protostomia; Spiralia; Lophotrochozoa; Mollusca; Bivalvia; Autobranchia; Heteroconchia; Euheterodonta; Imparidentia; Venerida; Veneroidea; Veneridae; Mercenaria; Mercenaria mercenaria  
UdeM00000023667 29159 301.6 UdeM00000023667 XP\_011436647.1 86.5 207  
28 0 2 208 1 207 7.80E-79 301.6 29159 cellular  
organisms; Eukaryota; Opisthokonta; Metazoa; Eumetazoa; Bilateria; Protostomia; Spiralia; Lophotrochozoa; Mollusca; Bivalvia; Autobranchia; Pteriomorpha; Ostreida; Ostreidae; Crassostrea; Crassostrea gigas  
UdeM00000023668 6596 617.8 UdeM00000023668 XP\_045158579.1 63.7 433  
153 2 277 706 227 658 1.70E-173 617.8 6596 cellular  
organisms; Eukaryota; Opisthokonta; Metazoa; Eumetazoa; Bilateria; Protostomia; Spiralia; Lophotrochozoa; Mollusca; Bivalvia; Autobranchia; Heteroconchia; Euheterodonta; Imparidentia; Venerida; Veneroidea; Veneridae; Mercenaria; Mercenaria mercenaria  
UdeM00000023670 7070 382.1 UdeM00000023670 XP\_015840160.1 65.8 292  
80 1 5 276 4 295 6.10E-103 382.1 7070 cellular  
organisms; Eukaryota; Opisthokonta; Metazoa; Eumetazoa; Bilateria; Protostomia; Ecdysozoa; Panarthropoda; Arthropoda; Mandibulata; Pancrustacea; Hexapoda; Insecta; Dicondylia; Pterygota; Neoptera; Endopterygota; Coleoptera; Polyphaga; Cucujiformia; Tenebrionoidea; Tenebrionidae; Tenebrionidae incertae sedis; Tribolium; Tribolium castaneum  
UdeM00000023671 6579 233.8 UdeM00000023671 XP\_033738997.1 53.9 245  
101 6 1 236 114 355 2.70E-58 233.8 6579 cellular  
organisms; Eukaryota; Opisthokonta; Metazoa; Eumetazoa; Bilateria; Protostomia; Spiralia; Lophotrochozoa; Mollusca; Bivalvia; Autobranchia; Pteriomorpha; Pectinida; Pectinoidea; Pectinidae; Pecten; Pecten maximus  
UdeM00000023673 1735272 290.4 UdeM00000023673 XP\_041360226.1 72.2  
194 54 0 1 194 1 194 1.80E-75 290.4 1735272  
cellular  
organisms; Eukaryota; Opisthokonta; Metazoa; Eumetazoa; Bilateria; Protostomia; Spiralia; Lophotrochozoa; Mollusca; Gastropoda; Neomphalina; Neomphaloidea; Peltospiridae; Gigantopelta; Gigantopelta aegis  
UdeM00000023674 6565 852.8 UdeM00000023674 XP\_022318994.1 75.7 575  
126 6 10 575 1 570 2.50E-244 852.8 6565 cellular  
organisms; Eukaryota; Opisthokonta; Metazoa; Eumetazoa; Bilateria; Protostomia; Spiralia; Lophotrochozoa; Mollusca; Bivalvia; Autobranchia; Pteriomorpha; Ostreida; Ostreidae; Crassostrea; Crassostrea virginica  
UdeM00000023675 1735272 2468.3 UdeM00000023675 XP\_041360358.1  
66.5 1826 586 9 18 1824 216 2035 0.00E+00 2468.3  
1735272 cellular  
organisms; Eukaryota; Opisthokonta; Metazoa; Eumetazoa; Bilateria; Protostomia; Spiralia; Lophotrochozoa; Mollusca; Gastropoda; Neomphalina; Neomphaloidea; Peltospiridae; Gigantopelta; Gigantopelta aegis  
UdeM00000023676 6579 241.5 UdeM00000023676 XP\_033737511.1 58.4 202  
78 4 15 211 43 243 1.00E-60 241.5 6579 cellular  
organisms; Eukaryota; Opisthokonta; Metazoa; Eumetazoa; Bilateria; Protostomia; Spiralia; Lophotrochozoa; Mollusca; Bivalvia; Autobranchia; Pteriomorpha; Pectinida; Pectinoidea; Pectinidae; Pecten; Pecten maximus

UdeM00000023677 1735272 173.3 UdeM00000023677 XP\_041357473.1 38.6  
 241 134 4 35 261 208 448 4.10E-40 173.3 1735272  
 cellular  
 organisms;Eukaryota;Opisthokonta;Metazoa;Eumetazoa;Bilateria;Protostomia;  
 Spiralia;Lophotrochozoa;Mollusca;Gastropoda;Neomphalina;Neomphaloidea;Pel  
 tospiridae;Gigantopelta;Gigantopelta aegis  
 UdeM00000023678 37653 141.7 UdeM00000023678 XP\_014770615.1 56.1 123  
 54 0 36 158 28 150 7.80E-31 141.7 37653 cellular  
 organisms;Eukaryota;Opisthokonta;Metazoa;Eumetazoa;Bilateria;Protostomia;  
 Spiralia;Lophotrochozoa;Mollusca;Cephalopoda;Coleoidea;Octopodiformes;Oct  
 opoda;Incirrata;Octopodidae;Octopus;Octopus bimaculoides  
 UdeM00000023679 6579 434.1 UdeM00000023679 XP\_033738102.1 36.7 713  
 219 11 36 739 8 497 3.50E-118 434.1 6579 cellular  
 organisms;Eukaryota;Opisthokonta;Metazoa;Eumetazoa;Bilateria;Protostomia;  
 Spiralia;Lophotrochozoa;Mollusca;Bivalvia;Autobranchia;Pteriormorphia;Pect  
 inida;Pectinoidea;Pectinidae;Pecten;Pecten maximus  
 UdeM00000023680 6573 1789.2 UdeM00000023680 XP\_021378909.1 45.7  
 2188 1127 22 1 2163 1 2152 0.00E+00 1789.2 6573  
 cellular  
 organisms;Eukaryota;Opisthokonta;Metazoa;Eumetazoa;Bilateria;Protostomia;  
 Spiralia;Lophotrochozoa;Mollusca;Bivalvia;Autobranchia;Pteriormorphia;Pect  
 inida;Pectinoidea;Pectinidae;Mizuhopecten;Mizuhopecten yessoensis  
 UdeM00000023681 6596 169.5 UdeM00000023681 XP\_045159656.1 50 152  
 73 1 33 181 34 185 4.00E-39 169.5 6596 cellular  
 organisms;Eukaryota;Opisthokonta;Metazoa;Eumetazoa;Bilateria;Protostomia;  
 Spiralia;Lophotrochozoa;Mollusca;Bivalvia;Autobranchia;Heteroconchia;Euhe  
 terodonta;Imparidentia;Venerida;Veneroidea;Veneridae;Mercenaria;Mercenari  
 a mercenaria  
 UdeM00000023682 6596 658.7 UdeM00000023682 XP\_045159656.1 54.6 652  
 282 7 366 1010 474 1118 1.20E-185 658.7 6596 cellular  
 organisms;Eukaryota;Opisthokonta;Metazoa;Eumetazoa;Bilateria;Protostomia;  
 Spiralia;Lophotrochozoa;Mollusca;Bivalvia;Autobranchia;Heteroconchia;Euhe  
 terodonta;Imparidentia;Venerida;Veneroidea;Veneridae;Mercenaria;Mercenari  
 a mercenaria  
 UdeM00000023683 6596 670.6 UdeM00000023683 XP\_045159657.1 45.1 930  
 403 17 21 856 188 1103 2.60E-189 670.6 6596 cellular  
 organisms;Eukaryota;Opisthokonta;Metazoa;Eumetazoa;Bilateria;Protostomia;  
 Spiralia;Lophotrochozoa;Mollusca;Bivalvia;Autobranchia;Heteroconchia;Euhe  
 terodonta;Imparidentia;Venerida;Veneroidea;Veneridae;Mercenaria;Mercenari  
 a mercenaria  
 UdeM00000023684 6500 227.6 UdeM00000023684 XP\_005099284.1 40.5 343  
 155 7 3 330 26 334 3.20E-56 227.6 6500 cellular  
 organisms;Eukaryota;Opisthokonta;Metazoa;Eumetazoa;Bilateria;Protostomia;  
 Spiralia;Lophotrochozoa;Mollusca;Gastropoda;Heterobranchia;Euthyneura;Tec  
 tipleura;Aplysiida;Aplysioidea;Aplysiidae;Aplysia;Aplysia californica  
 UdeM00000023685 76193 157.9 UdeM00000023685 XP\_014360361.1 37.1 291  
 137 7 1 277 1 259 1.90E-35 157.9 76193 cellular  
 organisms;Eukaryota;Opisthokonta;Metazoa;Eumetazoa;Bilateria;Protostomia;  
 Ecdysozoa;Panarthropoda;Arthropoda;Mandibulata;Pancrustacea;Hexapoda;Inse  
 cta;Dicondylia;Pterygota;Neoptera;Endopterygota;Amphiesmenoptera;Lepidopt  
 era;Glossata;Neolepidoptera;Heteroneura;Ditrysia;Obtectomera;Papilionoide  
 a;Papilionidae;Papilioninae;Papilionini;Papilio;Papilio machaon  
 UdeM00000023686 7574 352.4 UdeM00000023686 XP\_013399327.1 92.7 193  
 14 0 1 193 2 194 3.60E-94 352.4 7574 cellular

organisms;Eukaryota;Opisthokonta;Metazoa;Eumetazoa;Bilateria;Protostomia;Spiralia;Lophotrochozoa;Brachiopoda;Linguliformea;Lingulata;Lingulida;Linguloidea;Lingulidae;Lingula;Lingula anatina

UdeM00000023687 37653 107.8 UdeM00000023687 XP\_014789406.1 50.4 117  
52 2 1 117 1 111 9.40E-21 107.8 37653 cellular

organisms;Eukaryota;Opisthokonta;Metazoa;Eumetazoa;Bilateria;Protostomia;Spiralia;Lophotrochozoa;Mollusca;Cephalopoda;Coleoidea;Octopodiformes;Octopoda;Incirrata;Octopodidae;Octopus;Octopus bimaculoides

UdeM00000023688 29159 490 UdeM00000023688 XP\_034314219.1 66.5 337  
113 0 5 341 3 339 2.50E-135 490 29159 cellular

organisms;Eukaryota;Opisthokonta;Metazoa;Eumetazoa;Bilateria;Protostomia;Spiralia;Lophotrochozoa;Mollusca;Bivalvia;Autobranchia;Pteriormorphia;Ostreida;Ostreoidea;Ostreidae;Crassostrea;Crassostrea gigas

UdeM00000023689 6579 377.1 UdeM00000023689 XP\_033738239.1 46.7 478  
197 5 170 604 339 801 5.50E-101 377.1 6579 cellular

organisms;Eukaryota;Opisthokonta;Metazoa;Eumetazoa;Bilateria;Protostomia;Spiralia;Lophotrochozoa;Mollusca;Bivalvia;Autobranchia;Pteriormorphia;Pectinida;Pectinoidea;Pectinidae;Pecten;Pecten maximus

UdeM00000023691 6573 380.9 UdeM00000023691 XP\_021353978.1 89.4 217  
23 0 38 254 8 224 1.20E-102 380.9 6573 cellular

organisms;Eukaryota;Opisthokonta;Metazoa;Eumetazoa;Bilateria;Protostomia;Spiralia;Lophotrochozoa;Mollusca;Bivalvia;Autobranchia;Pteriormorphia;Pectinida;Pectinoidea;Pectinidae;Mizuhopecten;Mizuhopecten yessoensis

UdeM00000023692 6596 1547.3 UdeM00000023692 XP\_045160995.1 40.7  
1852 538 9 10 1359 10 1802 0.00E+00 1547.3 6596  
cellular

organisms;Eukaryota;Opisthokonta;Metazoa;Eumetazoa;Bilateria;Protostomia;Spiralia;Lophotrochozoa;Mollusca;Bivalvia;Autobranchia;Heteroconchia;Euheterodonta;Imparidentia;Venerida;Veneroidea;Veneridae;Mercenaria;Mercenaria mercenaria

UdeM00000023693 6596 1554.3 UdeM00000023693 XP\_045160995.1 40.8  
1854 537 9 10 1361 10 1804 0.00E+00 1554.3 6596  
cellular

organisms;Eukaryota;Opisthokonta;Metazoa;Eumetazoa;Bilateria;Protostomia;Spiralia;Lophotrochozoa;Mollusca;Bivalvia;Autobranchia;Heteroconchia;Euheterodonta;Imparidentia;Venerida;Veneroidea;Veneridae;Mercenaria;Mercenaria mercenaria

UdeM00000023694 6573 288.5 UdeM00000023694 XP\_021343700.1 55.8 206  
91 0 101 306 1167 1372 1.40E-74 288.5 6573 cellular

organisms;Eukaryota;Opisthokonta;Metazoa;Eumetazoa;Bilateria;Protostomia;Spiralia;Lophotrochozoa;Mollusca;Bivalvia;Autobranchia;Pteriormorphia;Pectinida;Pectinoidea;Pectinidae;Mizuhopecten;Mizuhopecten yessoensis

UdeM00000023695 1529436 77 UdeM00000023695 XP\_033101539.1 31  
168 107 4 90 250 398 563 3.80E-11 77 1529436  
cellular

organisms;Eukaryota;Opisthokonta;Metazoa;Eumetazoa;Bilateria;Deuterostomia;Echinodermata;Pelmatozoa;Crinoidea;Articulata;Comatulida;Comatulidae;Comatulinae;Anneissia;Anneissia japonica

UdeM00000023696 7668 76.6 UdeM00000023696 XP\_030841303.1 33.8 145  
88 3 1 145 924 1060 3.10E-11 76.6 7668 cellular

organisms;Eukaryota;Opisthokonta;Metazoa;Eumetazoa;Bilateria;Deuterostomia;Echinodermata;Eleutherozoa;Echinozoa;Echinoidea;Euechinoidea;Echinacea;Camarodonta;Echinidea;Strongylocentrotidae;Strongylocentrotus;Strongylocentrotus purpuratus

UdeM00000023697 77115 476.9 UdeM00000023697 XP\_038133904.1 57.6 377  
 158 1 9 385 11 385 2.50E-131 476.9 77115 cellular  
 organisms;Eukaryota;Opisthokonta;Metazoa;Eumetazoa;Bilateria;Deuterostomi  
 a;Chordata;Craniata;Vertebrata;Gnathostomata;Teleostomi;Euteleostomi;Acti  
 nopterygii;Actinopteri;Neopterygii;Teleostei;Osteoglossocephalai;Clupeoce  
 phala;Euteleosteomorpha;Neoteleostei;Eurypterygia;Ctenosquamata;Acanthomo  
 rphata;Euacanthomorphacea;Percomorphaceae;Ovalentaria;Atherinomorphae;Cyp  
 rinodontiformes;Cyprinodontoidei;Cyprinodontidae;Cyprinodontinae;Cyprinod  
 ontini;Cyprinodon;Cyprinodon tularosa  
 UdeM00000023698 8218 166.4 UdeM00000023698 XP\_034095767.1 25.4 633  
 244 16 5 430 3 614 8.00E-38 166.4 8218 cellular  
 organisms;Eukaryota;Opisthokonta;Metazoa;Eumetazoa;Bilateria;Deuterostomi  
 a;Chordata;Craniata;Vertebrata;Gnathostomata;Teleostomi;Euteleostomi;Acti  
 nopterygii;Actinopteri;Neopterygii;Teleostei;Osteoglossocephalai;Clupeoce  
 phala;Euteleosteomorpha;Neoteleostei;Eurypterygia;Ctenosquamata;Acanthomo  
 rphata;Euacanthomorphacea;Percomorphaceae;Eupercaria;Perciformes;Notothen  
 ioidei;Bathydraconidae;Gymnodraco;Gymnodraco acuticeps  
 UdeM00000023699 6579 744.2 UdeM00000023699 XP\_033736664.1 65.6 521  
 178 1 23 543 23 542 1.20E-211 744.2 6579 cellular  
 organisms;Eukaryota;Opisthokonta;Metazoa;Eumetazoa;Bilateria;Protostomia;  
 Spiralia;Lophotrochozoa;Mollusca;Bivalvia;Autobranhia;Pteriormorphia;Pect  
 inida;Pectinoidea;Pectinidae;Pecten;Pecten maximus  
 UdeM00000023700 6596 1230.7 UdeM00000023700 XP\_045158888.1 61.8  
 1071 406 3 30 1098 52 1121 0.00E+00 1230.7 6596  
 cellular  
 organisms;Eukaryota;Opisthokonta;Metazoa;Eumetazoa;Bilateria;Protostomia;  
 Spiralia;Lophotrochozoa;Mollusca;Bivalvia;Autobranhia;Heteroconchia;Euhe  
 terodonta;Imparidentia;Venerida;Veneroidea;Veneridae;Mercenaria;Mercenari  
 a mercenaria  
 UdeM00000023701 6596 478.8 UdeM00000023701 XP\_045158884.1 64.4 368  
 69 2 1 368 1 306 6.30E-132 478.8 6596 cellular  
 organisms;Eukaryota;Opisthokonta;Metazoa;Eumetazoa;Bilateria;Protostomia;  
 Spiralia;Lophotrochozoa;Mollusca;Bivalvia;Autobranhia;Heteroconchia;Euhe  
 terodonta;Imparidentia;Venerida;Veneroidea;Veneridae;Mercenaria;Mercenari  
 a mercenaria  
 UdeM00000023702 6596 381.3 UdeM00000023702 XP\_045159992.1 59.1 330  
 122 4 32 352 1 326 1.30E-102 381.3 6596 cellular  
 organisms;Eukaryota;Opisthokonta;Metazoa;Eumetazoa;Bilateria;Protostomia;  
 Spiralia;Lophotrochozoa;Mollusca;Bivalvia;Autobranhia;Heteroconchia;Euhe  
 terodonta;Imparidentia;Venerida;Veneroidea;Veneridae;Mercenaria;Mercenari  
 a mercenaria  
 UdeM00000023703 6596 467.6 UdeM00000023703 XP\_045160468.1 48.4 589  
 265 15 41 600 667 1245 2.40E-128 467.6 6596 cellular  
 organisms;Eukaryota;Opisthokonta;Metazoa;Eumetazoa;Bilateria;Protostomia;  
 Spiralia;Lophotrochozoa;Mollusca;Bivalvia;Autobranhia;Heteroconchia;Euhe  
 terodonta;Imparidentia;Venerida;Veneroidea;Veneridae;Mercenaria;Mercenari  
 a mercenaria  
 UdeM00000023704 6596 679.1 UdeM00000023704 XP\_045160468.1 58.6 544  
 219 4 3 544 130 669 4.70E-192 679.1 6596 cellular  
 organisms;Eukaryota;Opisthokonta;Metazoa;Eumetazoa;Bilateria;Protostomia;  
 Spiralia;Lophotrochozoa;Mollusca;Bivalvia;Autobranhia;Heteroconchia;Euhe  
 terodonta;Imparidentia;Venerida;Veneroidea;Veneridae;Mercenaria;Mercenari  
 a mercenaria

UdeM00000023705 6596 84 UdeM00000023705 XP\_045160468.1 38.8 103  
 63 0 19 121 21 123 2.00E-13 84 6596 cellular  
 organisms;Eukaryota;Opisthokonta;Metazoa;Eumetazoa;Bilateria;Protostomia;  
 Spiralia;Lophotrochozoa;Mollusca;Bivalvia;Autobranchia;Heteroconchia;Euhe  
 terodonta;Imparidentia;Venerida;Veneroidea;Veneridae;Mercenaria;Mercenari  
 a mercenaria  
 UdeM00000023707 6500 393.3 UdeM00000023707 XP\_005097943.1 57.2 339  
 142 2 4 340 3 340 3.40E-106 393.3 6500 cellular  
 organisms;Eukaryota;Opisthokonta;Metazoa;Eumetazoa;Bilateria;Protostomia;  
 Spiralia;Lophotrochozoa;Mollusca;Gastropoda;Heterobranchia;Euthyneura;Tec  
 tipleura;Aplysiida;Aplysioidea;Aplysiidae;Aplysia;Aplysia californica  
 UdeM00000023706 6500 443.7 UdeM00000023706 XP\_005097943.1 56 393  
 170 2 4 394 3 394 2.40E-121 443.7 6500 cellular  
 organisms;Eukaryota;Opisthokonta;Metazoa;Eumetazoa;Bilateria;Protostomia;  
 Spiralia;Lophotrochozoa;Mollusca;Gastropoda;Heterobranchia;Euthyneura;Tec  
 tipleura;Aplysiida;Aplysioidea;Aplysiidae;Aplysia;Aplysia californica  
 UdeM00000023708 6596 150.6 UdeM00000023708 XP\_045159332.1 26.1 587  
 377 16 4 543 463 1039 5.90E-33 150.6 6596 cellular  
 organisms;Eukaryota;Opisthokonta;Metazoa;Eumetazoa;Bilateria;Protostomia;  
 Spiralia;Lophotrochozoa;Mollusca;Bivalvia;Autobranchia;Heteroconchia;Euhe  
 terodonta;Imparidentia;Venerida;Veneroidea;Veneridae;Mercenaria;Mercenari  
 a mercenaria  
 UdeM00000023709 2607531 190.3 UdeM00000023709 XP\_029653565.1 30.3  
 356 210 7 44 389 9 336 4.70E-45 190.3 2607531  
 cellular  
 organisms;Eukaryota;Opisthokonta;Metazoa;Eumetazoa;Bilateria;Protostomia;  
 Spiralia;Lophotrochozoa;Mollusca;Cephalopoda;Coleoidea;Octopodiformes;Oct  
 opoda;Incirrata;Octopodidae;Octopus;Octopus sinensis  
 UdeM00000023711 225164 187.6 UdeM00000023711 XP\_009067151.1 45.7  
 210 111 2 1 210 341 547 1.70E-44 187.6 225164  
 cellular  
 organisms;Eukaryota;Opisthokonta;Metazoa;Eumetazoa;Bilateria;Protostomia;  
 Spiralia;Lophotrochozoa;Mollusca;Gastropoda;Patellogastropoda;Lottioidea;  
 Lottiidae;Lottia;Lottia gigantea  
 UdeM00000023710 400727 609.4 UdeM00000023710 XP\_025079086.1 55.3  
 552 239 3 30 578 25 571 4.80E-171 609.4 400727  
 cellular  
 organisms;Eukaryota;Opisthokonta;Metazoa;Eumetazoa;Bilateria;Protostomia;  
 Spiralia;Lophotrochozoa;Mollusca;Gastropoda;Caenogastropoda;Architaeniogl  
 ossa;Ampullarioidea;Ampullariidae;Pomacea;Pomacea canaliculata  
 UdeM00000023712 6596 248.4 UdeM00000023712 XP\_045160701.1 39.6 399  
 227 5 26 421 58 445 1.60E-62 248.4 6596 cellular  
 organisms;Eukaryota;Opisthokonta;Metazoa;Eumetazoa;Bilateria;Protostomia;  
 Spiralia;Lophotrochozoa;Mollusca;Bivalvia;Autobranchia;Heteroconchia;Euhe  
 terodonta;Imparidentia;Venerida;Veneroidea;Veneridae;Mercenaria;Mercenari  
 a mercenaria  
 UdeM00000023713 29159 639.4 UdeM00000023713 XP\_011446037.2 63.5 504  
 179 3 32 535 30 528 4.00E-180 639.4 29159 cellular  
 organisms;Eukaryota;Opisthokonta;Metazoa;Eumetazoa;Bilateria;Protostomia;  
 Spiralia;Lophotrochozoa;Mollusca;Bivalvia;Autobranchia;Pteriomorphia;Ostr  
 eida;Ostreoidea;Ostreidae;Crassostrea;Crassostrea gigas  
 UdeM00000023714 6596 622.1 UdeM00000023714 XP\_045160696.1 36.2 1089  
 620 23 1 1049 256 1309 1.50E-174 622.1 6596 cellular  
 organisms;Eukaryota;Opisthokonta;Metazoa;Eumetazoa;Bilateria;Protostomia;



Spiralia; Lophotrochozoa; Mollusca; Bivalvia; Autobranchia; Heteroconchia; Euheterodonta; Imparidentia; Venerida; Veneroidea; Veneridae; Mercenaria; Mercenaria mercenaria

UdeM00000023715 6596 275.8 UdeM00000023715 XP\_045160696.1 58.5 205  
82 2 22 223 23 227 4.90E-71 275.8 6596 cellular

organisms; Eukaryota; Opisthokonta; Metazoa; Eumetazoa; Bilateria; Protostomia; Spiralia; Lophotrochozoa; Mollusca; Bivalvia; Autobranchia; Heteroconchia; Euheterodonta; Imparidentia; Venerida; Veneroidea; Veneridae; Mercenaria; Mercenaria mercenaria

UdeM00000023716 6579 481.9 UdeM00000023716 XP\_033737570.1 63.2 364  
134 0 1 364 31 394 7.30E-133 481.9 6579 cellular

organisms; Eukaryota; Opisthokonta; Metazoa; Eumetazoa; Bilateria; Protostomia; Spiralia; Lophotrochozoa; Mollusca; Bivalvia; Autobranchia; Pteriomorpha; Pectinida; Pectinoidea; Pectinidae; Pecten; Pecten maximus

UdeM00000023717 6596 223.8 UdeM00000023717 XP\_045160545.1 82.3 130  
23 0 1 130 1 130 1.30E-55 223.8 6596 cellular

organisms; Eukaryota; Opisthokonta; Metazoa; Eumetazoa; Bilateria; Protostomia; Spiralia; Lophotrochozoa; Mollusca; Bivalvia; Autobranchia; Heteroconchia; Euheterodonta; Imparidentia; Venerida; Veneroidea; Veneridae; Mercenaria; Mercenaria mercenaria

UdeM00000023718 6596 360.1 UdeM00000023718 XP\_045160632.1 72.2 234  
65 0 4 237 6 239 2.10E-96 360.1 6596 cellular

organisms; Eukaryota; Opisthokonta; Metazoa; Eumetazoa; Bilateria; Protostomia; Spiralia; Lophotrochozoa; Mollusca; Bivalvia; Autobranchia; Heteroconchia; Euheterodonta; Imparidentia; Venerida; Veneroidea; Veneridae; Mercenaria; Mercenaria mercenaria

UdeM00000023719 6596 277.7 UdeM00000023719 XP\_045160632.1 77.3 163  
37 0 4 166 6 168 9.60E-72 277.7 6596 cellular

organisms; Eukaryota; Opisthokonta; Metazoa; Eumetazoa; Bilateria; Protostomia; Spiralia; Lophotrochozoa; Mollusca; Bivalvia; Autobranchia; Heteroconchia; Euheterodonta; Imparidentia; Venerida; Veneroidea; Veneridae; Mercenaria; Mercenaria mercenaria

UdeM00000023720 6596 848.6 UdeM00000023720 XP\_045160628.1 72.8 581  
153 4 1 577 1 580 4.80E-243 848.6 6596 cellular

organisms; Eukaryota; Opisthokonta; Metazoa; Eumetazoa; Bilateria; Protostomia; Spiralia; Lophotrochozoa; Mollusca; Bivalvia; Autobranchia; Heteroconchia; Euheterodonta; Imparidentia; Venerida; Veneroidea; Veneridae; Mercenaria; Mercenaria mercenaria

UdeM00000023721 6596 844 UdeM00000023721 XP\_045160628.1 72.6 583  
153 5 1 579 1 580 1.20E-241 844 6596 cellular

organisms; Eukaryota; Opisthokonta; Metazoa; Eumetazoa; Bilateria; Protostomia; Spiralia; Lophotrochozoa; Mollusca; Bivalvia; Autobranchia; Heteroconchia; Euheterodonta; Imparidentia; Venerida; Veneroidea; Veneridae; Mercenaria; Mercenaria mercenaria

UdeM00000023722 6526 73.6 UdeM00000023722 XP\_013071333.1 60 65  
20 2 38 101 188 247 3.50E-10 73.6 6526 cellular

organisms; Eukaryota; Opisthokonta; Metazoa; Eumetazoa; Bilateria; Protostomia; Spiralia; Lophotrochozoa; Mollusca; Gastropoda; Heterobranchia; Euthyneura; Panpulmonata; Hygrophila; Lymnaeidae; Planorbidae; Biomphalaria; Biomphalaria glabrata

UdeM00000023723 6526 70.5 UdeM00000023723 XP\_013071333.1 58.7 63  
20 2 13 74 190 247 2.60E-09 70.5 6526 cellular

organisms; Eukaryota; Opisthokonta; Metazoa; Eumetazoa; Bilateria; Protostomia; Spiralia; Lophotrochozoa; Mollusca; Gastropoda; Heterobranchia; Euthyneura; Pan

pulmonata;Hygrophila;Lymnaeidae;Planorbidae;Biomphalaria;Biomphalaria glabrata

|                                                                                                                                                                                                                                        |         |       |                 |                |      |                        |
|----------------------------------------------------------------------------------------------------------------------------------------------------------------------------------------------------------------------------------------|---------|-------|-----------------|----------------|------|------------------------|
| UdeM00000023724                                                                                                                                                                                                                        | 6565    | 335.5 | UdeM00000023724 | XP_022319940.1 | 74.3 | 284                    |
| 60                                                                                                                                                                                                                                     | 3       | 251   | 521             | 196            | 479  | 1.30E-88               |
|                                                                                                                                                                                                                                        |         |       |                 |                |      | 335.5 6565 cellular    |
| organisms;Eukaryota;Opisthokonta;Metazoa;Eumetazoa;Bilateria;Protostomia;Spiralia;Lophotrochozoa;Mollusca;Bivalvia;Autobranhia;Pteriomorphia;Ostreida;Ostreidae;Crassostrea;Crassostrea virginica                                      |         |       |                 |                |      |                        |
| UdeM00000023724                                                                                                                                                                                                                        | 6565    | 52.8  | UdeM00000023724 | XP_022319940.1 | 60   | 40                     |
| 16                                                                                                                                                                                                                                     | 0       | 1     | 40              | 1              | 40   | 1.60E-03               |
|                                                                                                                                                                                                                                        |         |       |                 |                |      | 52.8 6565 cellular     |
| organisms;Eukaryota;Opisthokonta;Metazoa;Eumetazoa;Bilateria;Protostomia;Spiralia;Lophotrochozoa;Mollusca;Bivalvia;Autobranhia;Pteriomorphia;Ostreida;Ostreidae;Crassostrea;Crassostrea virginica                                      |         |       |                 |                |      |                        |
| UdeM00000023725                                                                                                                                                                                                                        | 6573    | 192.2 | UdeM00000023725 | XP_021370728.1 | 38   | 271                    |
| 159                                                                                                                                                                                                                                    | 3       | 1     | 269             | 4              | 267  | 8.70E-46               |
|                                                                                                                                                                                                                                        |         |       |                 |                |      | 192.2 6573 cellular    |
| organisms;Eukaryota;Opisthokonta;Metazoa;Eumetazoa;Bilateria;Protostomia;Spiralia;Lophotrochozoa;Mollusca;Bivalvia;Autobranhia;Pteriomorphia;Pectinida;Pectinoidea;Pectinidae;Mizuhopecten;Mizuhopecten yessoensis                     |         |       |                 |                |      |                        |
| UdeM00000023727                                                                                                                                                                                                                        | 6596    | 195.7 | UdeM00000023727 | XP_045157160.1 | 37   | 300                    |
| 187                                                                                                                                                                                                                                    | 2       | 3     | 300             | 6              | 305  | 9.00E-47               |
|                                                                                                                                                                                                                                        |         |       |                 |                |      | 195.7 6596 cellular    |
| organisms;Eukaryota;Opisthokonta;Metazoa;Eumetazoa;Bilateria;Protostomia;Spiralia;Lophotrochozoa;Mollusca;Bivalvia;Autobranhia;Heteroconchia;Euheterodonta;Imparidentia;Venerida;Veneroidea;Veneridae;Mercenaria;Mercenaria mercenaria |         |       |                 |                |      |                        |
| UdeM00000023726                                                                                                                                                                                                                        | 6596    | 196.4 | UdeM00000023726 | XP_045157160.1 | 37   | 300                    |
| 187                                                                                                                                                                                                                                    | 2       | 3     | 300             | 6              | 305  | 5.30E-47               |
|                                                                                                                                                                                                                                        |         |       |                 |                |      | 196.4 6596 cellular    |
| organisms;Eukaryota;Opisthokonta;Metazoa;Eumetazoa;Bilateria;Protostomia;Spiralia;Lophotrochozoa;Mollusca;Bivalvia;Autobranhia;Heteroconchia;Euheterodonta;Imparidentia;Venerida;Veneroidea;Veneridae;Mercenaria;Mercenaria mercenaria |         |       |                 |                |      |                        |
| UdeM00000023728                                                                                                                                                                                                                        | 29159   | 120.9 | UdeM00000023728 | XP_034312516.1 | 42.9 | 133                    |
| 71                                                                                                                                                                                                                                     | 3       | 57    | 184             | 48             | 180  | 1.70E-24               |
|                                                                                                                                                                                                                                        |         |       |                 |                |      | 120.9 29159 cellular   |
| organisms;Eukaryota;Opisthokonta;Metazoa;Eumetazoa;Bilateria;Protostomia;Spiralia;Lophotrochozoa;Mollusca;Bivalvia;Autobranhia;Pteriomorphia;Ostreida;Ostreidae;Crassostrea;Crassostrea gigas                                          |         |       |                 |                |      |                        |
| UdeM00000023729                                                                                                                                                                                                                        | 1735272 | 204.9 | UdeM00000023729 | XP_041359436.1 | 39.4 |                        |
| 388                                                                                                                                                                                                                                    | 176     | 13    | 66              | 420            | 69   | 430                    |
|                                                                                                                                                                                                                                        |         |       |                 |                |      | 2.60E-49               |
|                                                                                                                                                                                                                                        |         |       |                 |                |      | 204.9 1735272 cellular |
| organisms;Eukaryota;Opisthokonta;Metazoa;Eumetazoa;Bilateria;Protostomia;Spiralia;Lophotrochozoa;Mollusca;Gastropoda;Neomphalina;Neomphaloidea;Peltospiridae;Gigantopelta;Gigantopelta aegis                                           |         |       |                 |                |      |                        |
| UdeM00000023730                                                                                                                                                                                                                        | 6596    | 570.1 | UdeM00000023730 | XP_045159835.1 | 65.8 | 527                    |
| 170                                                                                                                                                                                                                                    | 2       | 66    | 591             | 69             | 586  | 3.30E-159              |
|                                                                                                                                                                                                                                        |         |       |                 |                |      | 570.1 6596 cellular    |
| organisms;Eukaryota;Opisthokonta;Metazoa;Eumetazoa;Bilateria;Protostomia;Spiralia;Lophotrochozoa;Mollusca;Bivalvia;Autobranhia;Heteroconchia;Euheterodonta;Imparidentia;Venerida;Veneroidea;Veneridae;Mercenaria;Mercenaria mercenaria |         |       |                 |                |      |                        |
| UdeM00000023731                                                                                                                                                                                                                        | 6596    | 585.9 | UdeM00000023731 | XP_045158962.1 | 75.6 | 369                    |
| 89                                                                                                                                                                                                                                     | 1       | 23    | 390             | 17             | 385  | 3.90E-164              |
|                                                                                                                                                                                                                                        |         |       |                 |                |      | 585.9 6596 cellular    |
| organisms;Eukaryota;Opisthokonta;Metazoa;Eumetazoa;Bilateria;Protostomia;Spiralia;Lophotrochozoa;Mollusca;Bivalvia;Autobranhia;Heteroconchia;Euheterodonta;Imparidentia;Venerida;Veneroidea;Veneridae;Mercenaria;Mercenaria mercenaria |         |       |                 |                |      |                        |
| UdeM00000023732                                                                                                                                                                                                                        | 6596    | 667.9 | UdeM00000023732 | XP_045158961.1 | 55   | 562                    |
| 249                                                                                                                                                                                                                                    | 2       | 1     | 558             | 33             | 594  | 1.10E-188              |
|                                                                                                                                                                                                                                        |         |       |                 |                |      | 667.9 6596 cellular    |

organisms;Eukaryota;Opisthokonta;Metazoa;Eumetazoa;Bilateria;Protostomia; Spiralia;Lophotrochozoa;Mollusca;Bivalvia;Autobranchia;Heteroconchia;Euherodonta;Imparidentia;Venerida;Veneroidea;Veneridae;Mercenaria;Mercenaria mercenaria

UdeM00000023733 29159 64.3 UdeM00000023733 XP\_034307341.1 53.8 52  
24 0 23 74 145 196 2.10E-07 64.3 29159 cellular

organisms;Eukaryota;Opisthokonta;Metazoa;Eumetazoa;Bilateria;Protostomia; Spiralia;Lophotrochozoa;Mollusca;Bivalvia;Autobranchia;Pteriormorphia;Ostreida;Ostreoidea;Ostreidae;Crassostrea;Crassostrea gigas

UdeM00000023734 1735272 65.1 UdeM00000023734 XP\_041353177.1 37.3  
83 52 0 1 83 1 83 7.00E-08 65.1 1735272  
cellular

organisms;Eukaryota;Opisthokonta;Metazoa;Eumetazoa;Bilateria;Protostomia; Spiralia;Lophotrochozoa;Mollusca;Gastropoda;Neomphalina;Neomphaloidea;Peltospiridae;Gigantopelta;Gigantopelta aegis

UdeM00000023736 29159 248.8 UdeM00000023736 XP\_011437092.2 42.2 329  
177 9 208 530 120 441 1.50E-62 248.8 29159 cellular

organisms;Eukaryota;Opisthokonta;Metazoa;Eumetazoa;Bilateria;Protostomia; Spiralia;Lophotrochozoa;Mollusca;Bivalvia;Autobranchia;Pteriormorphia;Ostreida;Ostreoidea;Ostreidae;Crassostrea;Crassostrea gigas

UdeM00000023737 37653 137.1 UdeM00000023737 XP\_014772067.1 70.8 106  
26 1 1 106 1 101 1.30E-29 137.1 37653 cellular

organisms;Eukaryota;Opisthokonta;Metazoa;Eumetazoa;Bilateria;Protostomia; Spiralia;Lophotrochozoa;Mollusca;Cephalopoda;Coleoidea;Octopodiformes;Octopoda;Incirrata;Octopodidae;Octopus;Octopus bimaculoides

UdeM00000023738 6579 741.9 UdeM00000023738 XP\_033739131.1 58.6 590  
239 3 1 587 783 1370 6.30E-211 741.9 6579 cellular

organisms;Eukaryota;Opisthokonta;Metazoa;Eumetazoa;Bilateria;Protostomia; Spiralia;Lophotrochozoa;Mollusca;Bivalvia;Autobranchia;Pteriormorphia;Pectinida;Pectinoidea;Pectinidae;Pecten;Pecten maximus

UdeM00000023739 6579 194.5 UdeM00000023739 XP\_033741736.1 52.9 189  
85 2 1 187 671 857 1.30E-46 194.5 6579 cellular

organisms;Eukaryota;Opisthokonta;Metazoa;Eumetazoa;Bilateria;Protostomia; Spiralia;Lophotrochozoa;Mollusca;Bivalvia;Autobranchia;Pteriormorphia;Pectinida;Pectinoidea;Pectinidae;Pecten;Pecten maximus

UdeM00000023740 6573 896 UdeM00000023740 XP\_021369046.1 61.8 663  
248 4 173 834 194 852 3.70E-257 896 6573 cellular

organisms;Eukaryota;Opisthokonta;Metazoa;Eumetazoa;Bilateria;Protostomia; Spiralia;Lophotrochozoa;Mollusca;Bivalvia;Autobranchia;Pteriormorphia;Pectinida;Pectinoidea;Pectinidae;Mizuhopecten;Mizuhopecten yessoensis

UdeM00000023741 6579 157.5 UdeM00000023741 XP\_033743219.1 40.1 217  
113 6 26 237 34 238 2.10E-35 157.5 6579 cellular

organisms;Eukaryota;Opisthokonta;Metazoa;Eumetazoa;Bilateria;Protostomia; Spiralia;Lophotrochozoa;Mollusca;Bivalvia;Autobranchia;Pteriormorphia;Pectinida;Pectinoidea;Pectinidae;Pecten;Pecten maximus

UdeM00000023742 6596 726.9 UdeM00000023742 XP\_045158667.1 60.4 581  
223 5 5 584 40 614 2.10E-206 726.9 6596 cellular

organisms;Eukaryota;Opisthokonta;Metazoa;Eumetazoa;Bilateria;Protostomia; Spiralia;Lophotrochozoa;Mollusca;Bivalvia;Autobranchia;Heteroconchia;Euherodonta;Imparidentia;Venerida;Veneroidea;Veneridae;Mercenaria;Mercenaria mercenaria

UdeM00000023744 6596 740.3 UdeM00000023744 XP\_045160033.1 75.6 501  
115 4 1 497 1 498 1.60E-210 740.3 6596 cellular

organisms;Eukaryota;Opisthokonta;Metazoa;Eumetazoa;Bilateria;Protostomia;

Spiralia;Lophotrochozoa;Mollusca;Bivalvia;Autobranchia;Heteroconchia;Euherodonta;Imparidentia;Venerida;Veneroidea;Veneridae;Mercenaria;Mercenaria mercenaria

UdeM00000023750 6596 495 UdeM00000023750 XP\_045160273.1 46.1 547  
272 5 63 604 17 545 1.50E-136 495 6596 cellular

organisms;Eukaryota;Opisthokonta;Metazoa;Eumetazoa;Bilateria;Protostomia;Spiralia;Lophotrochozoa;Mollusca;Bivalvia;Autobranchia;Heteroconchia;Euherodonta;Imparidentia;Venerida;Veneroidea;Veneridae;Mercenaria;Mercenaria mercenaria

UdeM00000023751 6596 495.4 UdeM00000023751 XP\_045160273.1 44.6 579  
265 5 63 635 17 545 1.20E-136 495.4 6596 cellular

organisms;Eukaryota;Opisthokonta;Metazoa;Eumetazoa;Bilateria;Protostomia;Spiralia;Lophotrochozoa;Mollusca;Bivalvia;Autobranchia;Heteroconchia;Euherodonta;Imparidentia;Venerida;Veneroidea;Veneridae;Mercenaria;Mercenaria mercenaria

UdeM00000023752 6579 219.5 UdeM00000023752 XP\_033739233.1 36.3 325  
192 6 27 343 76 393 6.40E-54 219.5 6579 cellular

organisms;Eukaryota;Opisthokonta;Metazoa;Eumetazoa;Bilateria;Protostomia;Spiralia;Lophotrochozoa;Mollusca;Bivalvia;Autobranchia;Pteriomorphia;Pectinida;Pectinoidea;Pectinidae;Pecten;Pecten maximus

UdeM00000023753 6573 248.4 UdeM00000023753 XP\_021367798.1 39.6 331  
188 5 17 336 22 351 2.50E-62 248.4 6573 cellular

organisms;Eukaryota;Opisthokonta;Metazoa;Eumetazoa;Bilateria;Protostomia;Spiralia;Lophotrochozoa;Mollusca;Bivalvia;Autobranchia;Pteriomorphia;Pectinida;Pectinoidea;Pectinidae;Mizuhopecten;Mizuhopecten yessoensis

UdeM00000023754 6596 402.9 UdeM00000023754 XP\_045160980.1 41.5 467  
245 9 31 474 92 553 6.00E-109 402.9 6596 cellular

organisms;Eukaryota;Opisthokonta;Metazoa;Eumetazoa;Bilateria;Protostomia;Spiralia;Lophotrochozoa;Mollusca;Bivalvia;Autobranchia;Heteroconchia;Euherodonta;Imparidentia;Venerida;Veneroidea;Veneridae;Mercenaria;Mercenaria mercenaria

UdeM00000023755 6596 92 UdeM00000023755 XP\_045159326.1 39.8 123  
74 0 97 219 12 134 1.30E-15 92 6596 cellular

organisms;Eukaryota;Opisthokonta;Metazoa;Eumetazoa;Bilateria;Protostomia;Spiralia;Lophotrochozoa;Mollusca;Bivalvia;Autobranchia;Heteroconchia;Euherodonta;Imparidentia;Venerida;Veneroidea;Veneridae;Mercenaria;Mercenaria mercenaria

UdeM00000023756 6596 664.8 UdeM00000023756 XP\_045160245.1 48.8 680  
332 7 1 676 1 668 1.10E-187 664.8 6596 cellular

organisms;Eukaryota;Opisthokonta;Metazoa;Eumetazoa;Bilateria;Protostomia;Spiralia;Lophotrochozoa;Mollusca;Bivalvia;Autobranchia;Heteroconchia;Euherodonta;Imparidentia;Venerida;Veneroidea;Veneridae;Mercenaria;Mercenaria mercenaria

UdeM00000023757 6573 225.3 UdeM00000023757 XP\_021343705.1 36.8 378  
205 10 4 366 6 364 7.60E-55 225.3 6573 cellular

organisms;Eukaryota;Opisthokonta;Metazoa;Eumetazoa;Bilateria;Protostomia;Spiralia;Lophotrochozoa;Mollusca;Bivalvia;Autobranchia;Pteriomorphia;Pectinida;Pectinoidea;Pectinidae;Mizuhopecten;Mizuhopecten yessoensis

UdeM00000023758 1735272 450.3 UdeM00000023758 XP\_041356936.1 65.7  
303 104 0 1 303 5 307 2.00E-123 450.3 1735272  
cellular

organisms;Eukaryota;Opisthokonta;Metazoa;Eumetazoa;Bilateria;Protostomia;Spiralia;Lophotrochozoa;Mollusca;Gastropoda;Neomphalina;Neomphaloidea;Peltopiridae;Gigantopelta;Gigantopelta aegis

UdeM00000023759 6573 1565.4 UdeM00000023759 XP\_021370763.1 88.2  
 867 96 2 1 861 4 870 0.00E+00 1565.4 6573  
 cellular  
 organisms;Eukaryota;Opisthokonta;Metazoa;Eumetazoa;Bilateria;Protostomia;  
 Spiralia;Lophotrochozoa;Mollusca;Bivalvia;Autobranhia;Pteriomorpha;Pect  
 inida;Pectinoidea;Pectinidae;Mizuhopecten;Mizuhopecten yessoensis  
 UdeM00000023760 29159 479.2 UdeM00000023760 XP\_011427272.2 51.6 407  
 195 1 32 438 22 426 5.70E-132 479.2 29159 cellular  
 organisms;Eukaryota;Opisthokonta;Metazoa;Eumetazoa;Bilateria;Protostomia;  
 Spiralia;Lophotrochozoa;Mollusca;Bivalvia;Autobranhia;Pteriomorpha;Ostr  
 eida;Ostreoidea;Ostreidae;Crassostrea;Crassostrea gigas  
 UdeM00000023761 1735272 386.7 UdeM00000023761 XP\_041357117.1 48.4  
 397 198 4 82 473 59 453 4.20E-104 386.7 1735272  
 cellular  
 organisms;Eukaryota;Opisthokonta;Metazoa;Eumetazoa;Bilateria;Protostomia;  
 Spiralia;Lophotrochozoa;Mollusca;Gastropoda;Neomphalina;Neomphaloidea;Pel  
 tospiridae;Gigantopelta;Gigantopelta aegis  
 UdeM00000023766 6579 205.7 UdeM00000023766 XP\_033729790.1 39.8 274  
 160 2 10 283 17 285 1.00E-49 205.7 6579 cellular  
 organisms;Eukaryota;Opisthokonta;Metazoa;Eumetazoa;Bilateria;Protostomia;  
 Spiralia;Lophotrochozoa;Mollusca;Bivalvia;Autobranhia;Pteriomorpha;Pect  
 inida;Pectinoidea;Pectinidae;Pecten;Pecten maximus  
 UdeM00000023767 6596 392.1 UdeM00000023767 XP\_045157900.1 64.1 357  
 117 6 1 352 45 395 7.40E-106 392.1 6596 cellular  
 organisms;Eukaryota;Opisthokonta;Metazoa;Eumetazoa;Bilateria;Protostomia;  
 Spiralia;Lophotrochozoa;Mollusca;Bivalvia;Autobranhia;Heteroconchia;Euhe  
 terodonta;Imparidentia;Venerida;Veneroidea;Veneridae;Mercenaria;Mercenari  
 a mercenaria  
 UdeM00000023768 29159 126.3 UdeM00000023768 XP\_011418260.1 50.7 152  
 67 3 1 145 251 401 3.20E-26 126.3 29159 cellular  
 organisms;Eukaryota;Opisthokonta;Metazoa;Eumetazoa;Bilateria;Protostomia;  
 Spiralia;Lophotrochozoa;Mollusca;Bivalvia;Autobranhia;Pteriomorpha;Ostr  
 eida;Ostreoidea;Ostreidae;Crassostrea;Crassostrea gigas  
 UdeM00000023769 6573 113.6 UdeM00000023769 XP\_021353866.1 30 230  
 138 3 1 210 1 227 4.30E-22 113.6 6573 cellular  
 organisms;Eukaryota;Opisthokonta;Metazoa;Eumetazoa;Bilateria;Protostomia;  
 Spiralia;Lophotrochozoa;Mollusca;Bivalvia;Autobranhia;Pteriomorpha;Pect  
 inida;Pectinoidea;Pectinidae;Mizuhopecten;Mizuhopecten yessoensis  
 UdeM00000023771 6565 116.3 UdeM00000023771 XP\_022313060.1 34.1 167  
 109 1 8 173 8 174 6.60E-23 116.3 6565 cellular  
 organisms;Eukaryota;Opisthokonta;Metazoa;Eumetazoa;Bilateria;Protostomia;  
 Spiralia;Lophotrochozoa;Mollusca;Bivalvia;Autobranhia;Pteriomorpha;Ostr  
 eida;Ostreoidea;Ostreidae;Crassostrea;Crassostrea virginica  
 UdeM00000023772 6565 116.3 UdeM00000023772 XP\_022313060.1 34.1 167  
 109 1 7 172 8 174 6.60E-23 116.3 6565 cellular  
 organisms;Eukaryota;Opisthokonta;Metazoa;Eumetazoa;Bilateria;Protostomia;  
 Spiralia;Lophotrochozoa;Mollusca;Bivalvia;Autobranhia;Pteriomorpha;Ostr  
 eida;Ostreoidea;Ostreidae;Crassostrea;Crassostrea virginica  
 UdeM00000023773 1735272 291.2 UdeM00000023773 XP\_041358084.1 47.9  
 284 146 2 2 284 3 285 1.60E-75 291.2 1735272  
 cellular  
 organisms;Eukaryota;Opisthokonta;Metazoa;Eumetazoa;Bilateria;Protostomia;  
 Spiralia;Lophotrochozoa;Mollusca;Gastropoda;Neomphalina;Neomphaloidea;Pel  
 tospiridae;Gigantopelta;Gigantopelta aegis

UdeM00000023774 6596 79.7 UdeM00000023774 XP\_045197645.1 52.2 67  
 31 1 1 66 46 112 1.60E-12 79.7 6596 cellular  
 organisms;Eukaryota;Opisthokonta;Metazoa;Eumetazoa;Bilateria;Protostomia;  
 Spiralia;Lophotrochozoa;Mollusca;Bivalvia;Autobranchia;Heteroconchia;Euhe  
 terodonta;Imparidentia;Venerida;Veneroidea;Veneridae;Mercenaria;Mercenari  
 a mercenaria  
 UdeM00000023775 6573 88.6 UdeM00000023775 XP\_021356803.1 31.4 283  
 168 10 15 273 27 307 2.50E-14 88.6 6573 cellular  
 organisms;Eukaryota;Opisthokonta;Metazoa;Eumetazoa;Bilateria;Protostomia;  
 Spiralia;Lophotrochozoa;Mollusca;Bivalvia;Autobranchia;Pteriormorphia;Pect  
 inida;Pectinoidea;Pectinidae;Mizuhopecten;Mizuhopecten yessoensis  
 UdeM00000023777 1735272 659.4 UdeM00000023777 XP\_041360400.1 65.9  
 498 98 2 14 511 7 432 3.60E-186 659.4 1735272  
 cellular  
 organisms;Eukaryota;Opisthokonta;Metazoa;Eumetazoa;Bilateria;Protostomia;  
 Spiralia;Lophotrochozoa;Mollusca;Gastropoda;Neomphalina;Neomphaloidea;Pel  
 tospiridae;Gigantopelta;Gigantopelta aegis  
 UdeM00000023778 6596 65.5 UdeM00000023778 XP\_045159302.1 30.3 195  
 111 5 1 171 1 194 9.50E-08 65.5 6596 cellular  
 organisms;Eukaryota;Opisthokonta;Metazoa;Eumetazoa;Bilateria;Protostomia;  
 Spiralia;Lophotrochozoa;Mollusca;Bivalvia;Autobranchia;Heteroconchia;Euhe  
 terodonta;Imparidentia;Venerida;Veneroidea;Veneridae;Mercenaria;Mercenari  
 a mercenaria  
 UdeM00000023779 6596 318.5 UdeM00000023779 XP\_045159304.1 75.3 215  
 47 3 1 209 1 215 6.20E-84 318.5 6596 cellular  
 organisms;Eukaryota;Opisthokonta;Metazoa;Eumetazoa;Bilateria;Protostomia;  
 Spiralia;Lophotrochozoa;Mollusca;Bivalvia;Autobranchia;Heteroconchia;Euhe  
 terodonta;Imparidentia;Venerida;Veneroidea;Veneridae;Mercenaria;Mercenari  
 a mercenaria  
 UdeM00000023781 6596 1386.3 UdeM00000023781 XP\_045159987.1 76.6  
 852 196 3 114 962 3 854 0.00E+00 1386.3 6596  
 cellular  
 organisms;Eukaryota;Opisthokonta;Metazoa;Eumetazoa;Bilateria;Protostomia;  
 Spiralia;Lophotrochozoa;Mollusca;Bivalvia;Autobranchia;Heteroconchia;Euhe  
 terodonta;Imparidentia;Venerida;Veneroidea;Veneridae;Mercenaria;Mercenari  
 a mercenaria  
 UdeM00000023782 6579 513.8 UdeM00000023782 XP\_033738307.1 62.6 428  
 144 6 1 423 145 561 2.00E-142 513.8 6579 cellular  
 organisms;Eukaryota;Opisthokonta;Metazoa;Eumetazoa;Bilateria;Protostomia;  
 Spiralia;Lophotrochozoa;Mollusca;Bivalvia;Autobranchia;Pteriormorphia;Pect  
 inida;Pectinoidea;Pectinidae;Pecten;Pecten maximus  
 UdeM00000023784 6573 248.8 UdeM00000023784 XP\_021342262.1 56.1 246  
 99 5 1 245 10 247 1.00E-62 248.8 6573 cellular  
 organisms;Eukaryota;Opisthokonta;Metazoa;Eumetazoa;Bilateria;Protostomia;  
 Spiralia;Lophotrochozoa;Mollusca;Bivalvia;Autobranchia;Pteriormorphia;Pect  
 inida;Pectinoidea;Pectinidae;Mizuhopecten;Mizuhopecten yessoensis  
 UdeM00000023785 6573 245.7 UdeM00000023785 XP\_021342262.1 59.2 218  
 86 3 9 225 32 247 8.20E-62 245.7 6573 cellular  
 organisms;Eukaryota;Opisthokonta;Metazoa;Eumetazoa;Bilateria;Protostomia;  
 Spiralia;Lophotrochozoa;Mollusca;Bivalvia;Autobranchia;Pteriormorphia;Pect  
 inida;Pectinoidea;Pectinidae;Mizuhopecten;Mizuhopecten yessoensis  
 UdeM00000023787 6573 313.2 UdeM00000023787 XP\_021376834.1 38.9 396  
 232 2 1 395 1 387 5.00E-82 313.2 6573 cellular  
 organisms;Eukaryota;Opisthokonta;Metazoa;Eumetazoa;Bilateria;Protostomia;

Spiralia;Lophotrochozoa;Mollusca;Bivalvia;Autobranchia;Pteriomorpha;Pectinida;Pectinoidea;Pectinidae;Mizuhopecten;Mizuhopecten yessoensis  
UdeM00000023790 6596 1417.1 UdeM00000023790 XP\_045159796.1 68.2  
1020 304 5 31 1042 83 1090 0.00E+00 1417.1 6596  
cellular

organisms;Eukaryota;Opisthokonta;Metazoa;Eumetazoa;Bilateria;Protostomia;  
Spiralia;Lophotrochozoa;Mollusca;Bivalvia;Autobranchia;Heteroconchia;Euherodonta;Imparidentia;Venerida;Veneroidea;Veneridae;Mercenaria;Mercenaria mercenaria

UdeM00000023791 6596 879 UdeM00000023791 XP\_045159797.1 49.8 835  
411 4 3 831 64 896 4.70E-252 879 6596 cellular

organisms;Eukaryota;Opisthokonta;Metazoa;Eumetazoa;Bilateria;Protostomia;  
Spiralia;Lophotrochozoa;Mollusca;Bivalvia;Autobranchia;Heteroconchia;Euherodonta;Imparidentia;Venerida;Veneroidea;Veneridae;Mercenaria;Mercenaria mercenaria

UdeM00000023792 225164 868.6 UdeM00000023792 XP\_009066261.1 95.2  
433 21 0 1 433 1 433 3.40E-249 868.6 225164  
cellular

organisms;Eukaryota;Opisthokonta;Metazoa;Eumetazoa;Bilateria;Protostomia;  
Spiralia;Lophotrochozoa;Mollusca;Gastropoda;Patellogastropoda;Lottioidae;  
Lottiidae;Lottia;Lottia gigantea

UdeM00000023793 6596 290.8 UdeM00000023793 XP\_045157464.1 38.9 494  
221 11 1 444 321 783 3.40E-75 290.8 6596 cellular

organisms;Eukaryota;Opisthokonta;Metazoa;Eumetazoa;Bilateria;Protostomia;  
Spiralia;Lophotrochozoa;Mollusca;Bivalvia;Autobranchia;Heteroconchia;Euherodonta;Imparidentia;Venerida;Veneroidea;Veneridae;Mercenaria;Mercenaria mercenaria

UdeM00000023794 6596 129.4 UdeM00000023794 XP\_045157464.1 28.7 268  
170 7 55 316 40 292 8.30E-27 129.4 6596 cellular

organisms;Eukaryota;Opisthokonta;Metazoa;Eumetazoa;Bilateria;Protostomia;  
Spiralia;Lophotrochozoa;Mollusca;Bivalvia;Autobranchia;Heteroconchia;Euherodonta;Imparidentia;Venerida;Veneroidea;Veneridae;Mercenaria;Mercenaria mercenaria

UdeM00000023795 6596 159.5 UdeM00000023795 XP\_045157465.1 35.3 365  
194 11 17 370 72 405 8.50E-36 159.5 6596 cellular

organisms;Eukaryota;Opisthokonta;Metazoa;Eumetazoa;Bilateria;Protostomia;  
Spiralia;Lophotrochozoa;Mollusca;Bivalvia;Autobranchia;Heteroconchia;Euherodonta;Imparidentia;Venerida;Veneroidea;Veneridae;Mercenaria;Mercenaria mercenaria

UdeM00000023796 6565 144.1 UdeM00000023796 XP\_022316449.1 36 480  
256 14 56 506 51 508 5.80E-31 144.1 6565 cellular

organisms;Eukaryota;Opisthokonta;Metazoa;Eumetazoa;Bilateria;Protostomia;  
Spiralia;Lophotrochozoa;Mollusca;Bivalvia;Autobranchia;Pteriomorpha;Ostreida;Ostreoidae;Ostreidae;Crassostrea;Crassostrea virginica

UdeM00000023797 6596 800.8 UdeM00000023797 XP\_045158377.1 37.1 1142  
673 9 21 1120 54 1192 2.30E-228 800.8 6596 cellular

organisms;Eukaryota;Opisthokonta;Metazoa;Eumetazoa;Bilateria;Protostomia;  
Spiralia;Lophotrochozoa;Mollusca;Bivalvia;Autobranchia;Heteroconchia;Euherodonta;Imparidentia;Venerida;Veneroidea;Veneridae;Mercenaria;Mercenaria mercenaria

UdeM00000023799 6596 743.8 UdeM00000023799 XP\_045158377.1 35.7 1140  
643 11 2 1066 68 1192 3.20E-211 743.8 6596 cellular

organisms;Eukaryota;Opisthokonta;Metazoa;Eumetazoa;Bilateria;Protostomia;  
Spiralia;Lophotrochozoa;Mollusca;Bivalvia;Autobranchia;Heteroconchia;Euherodonta;Imparidentia;Venerida;Veneroidea;Veneridae;Mercenaria;Mercenaria mercenaria

terodonta;Imparidentia;Venerida;Veneroidea;Veneridae;Mercenaria;Mercenaria mercenaria  
 UdeM00000023800 1735272 283.5 UdeM00000023800 XP\_041374201.1 45.7  
 324 169 3 4 321 13 335 3.70E-73 283.5 1735272  
 cellular  
 organisms;Eukaryota;Opisthokonta;Metazoa;Eumetazoa;Bilateria;Protostomia;Spiralia;Lophotrochozoa;Mollusca;Gastropoda;Neomphalina;Neomphaloidea;Peltospiridae;Gigantopelta;Gigantopelta aegis  
 UdeM00000023801 1735272 279.6 UdeM00000023801 XP\_041374211.1 46  
 324 168 3 6 323 16 338 5.30E-72 279.6 1735272  
 cellular  
 organisms;Eukaryota;Opisthokonta;Metazoa;Eumetazoa;Bilateria;Protostomia;Spiralia;Lophotrochozoa;Mollusca;Gastropoda;Neomphalina;Neomphaloidea;Peltospiridae;Gigantopelta;Gigantopelta aegis  
 UdeM00000023802 1415580 552.7 UdeM00000023802 XP\_030075314.1 56.4  
 502 213 4 1 497 125 625 4.60E-154 552.7 1415580  
 cellular  
 organisms;Eukaryota;Opisthokonta;Metazoa;Eumetazoa;Bilateria;Deuterostomia;Chordata;Craniata;Vertebrata;Gnathostomata;Teleostomi;Euteleostomi;Sarcopterygii;Dipnotetrapodomorpha;Tetrapoda;Amphibia;Gymnophiona;Siphonopidae;Microcaecilia;Microcaecilia unicolor  
 UdeM00000023803 6596 344.7 UdeM00000023803 XP\_045158388.1 40.8 463  
 256 5 2 453 1 456 3.50E-91 344.7 6596 cellular  
 organisms;Eukaryota;Opisthokonta;Metazoa;Eumetazoa;Bilateria;Protostomia;Spiralia;Lophotrochozoa;Mollusca;Bivalvia;Autobranchia;Heteroconchia;Euheterodonta;Imparidentia;Venerida;Veneroidea;Veneridae;Mercenaria;Mercenaria mercenaria  
 UdeM00000023804 6596 273.9 UdeM00000023804 XP\_045158949.1 32.6 629  
 334 20 9 575 5 605 4.80E-70 273.9 6596 cellular  
 organisms;Eukaryota;Opisthokonta;Metazoa;Eumetazoa;Bilateria;Protostomia;Spiralia;Lophotrochozoa;Mollusca;Bivalvia;Autobranchia;Heteroconchia;Euheterodonta;Imparidentia;Venerida;Veneroidea;Veneridae;Mercenaria;Mercenaria mercenaria  
 UdeM00000023808 6573 224.2 UdeM00000023808 XP\_021343555.1 58.8 177  
 69 2 1 173 624 800 1.40E-55 224.2 6573 cellular  
 organisms;Eukaryota;Opisthokonta;Metazoa;Eumetazoa;Bilateria;Protostomia;Spiralia;Lophotrochozoa;Mollusca;Bivalvia;Autobranchia;Pteriomorphia;Pectinida;Pectinoidea;Pectinidae;Mizuhopecten;Mizuhopecten yessoensis  
 UdeM00000023805 6579 427.6 UdeM00000023805 XP\_033738050.1 59 339  
 136 3 25 360 452 790 1.70E-116 427.6 6579 cellular  
 organisms;Eukaryota;Opisthokonta;Metazoa;Eumetazoa;Bilateria;Protostomia;Spiralia;Lophotrochozoa;Mollusca;Bivalvia;Autobranchia;Pteriomorphia;Pectinida;Pectinoidea;Pectinidae;Pecten;Pecten maximus  
 UdeM00000023806 6579 637.1 UdeM00000023806 XP\_033738050.1 43.7 771  
 353 14 40 752 43 790 2.90E-179 637.1 6579 cellular  
 organisms;Eukaryota;Opisthokonta;Metazoa;Eumetazoa;Bilateria;Protostomia;Spiralia;Lophotrochozoa;Mollusca;Bivalvia;Autobranchia;Pteriomorphia;Pectinida;Pectinoidea;Pectinidae;Pecten;Pecten maximus  
 UdeM00000023807 6579 638.3 UdeM00000023807 XP\_033738050.1 43.3 794  
 366 15 19 754 23 790 1.30E-179 638.3 6579 cellular  
 organisms;Eukaryota;Opisthokonta;Metazoa;Eumetazoa;Bilateria;Protostomia;Spiralia;Lophotrochozoa;Mollusca;Bivalvia;Autobranchia;Pteriomorphia;Pectinida;Pectinoidea;Pectinidae;Pecten;Pecten maximus



UdeM00000023809 6579 201.1 UdeM00000023809 XP\_033738049.1 62.5 144  
 54 0 1 144 646 789 1.40E-48 201.1 6579 cellular  
 organisms;Eukaryota;Opisthokonta;Metazoa;Eumetazoa;Bilateria;Protostomia;  
 Spiralia;Lophotrochozoa;Mollusca;Bivalvia;Autobranhia;Pteriomorphia;Pect  
 inida;Pectinoidea;Pectinidae;Pecten;Pecten maximus  
 UdeM00000023810 6579 427.2 UdeM00000023810 XP\_033738049.1 38.4 623  
 303 13 40 604 43 642 3.50E-116 427.2 6579 cellular  
 organisms;Eukaryota;Opisthokonta;Metazoa;Eumetazoa;Bilateria;Protostomia;  
 Spiralia;Lophotrochozoa;Mollusca;Bivalvia;Autobranhia;Pteriomorphia;Pect  
 inida;Pectinoidea;Pectinidae;Pecten;Pecten maximus  
 UdeM00000023811 6579 221.5 UdeM00000023811 XP\_033738049.1 32.5 422  
 208 10 40 406 43 442 2.20E-54 221.5 6579 cellular  
 organisms;Eukaryota;Opisthokonta;Metazoa;Eumetazoa;Bilateria;Protostomia;  
 Spiralia;Lophotrochozoa;Mollusca;Bivalvia;Autobranhia;Pteriomorphia;Pect  
 inida;Pectinoidea;Pectinidae;Pecten;Pecten maximus  
 UdeM00000023813 6565 147.9 UdeM00000023813 XP\_022313745.1 42 181  
 99 3 10 187 7 184 1.40E-32 147.9 6565 cellular  
 organisms;Eukaryota;Opisthokonta;Metazoa;Eumetazoa;Bilateria;Protostomia;  
 Spiralia;Lophotrochozoa;Mollusca;Bivalvia;Autobranhia;Pteriomorphia;Ostr  
 eida;Ostreoidea;Ostreidae;Crassostrea;Crassostrea virginica  
 UdeM00000023814 6596 961.4 UdeM00000023814 XP\_045160377.1 70.5 675  
 170 7 1 670 1 651 5.80E-277 961.4 6596 cellular  
 organisms;Eukaryota;Opisthokonta;Metazoa;Eumetazoa;Bilateria;Protostomia;  
 Spiralia;Lophotrochozoa;Mollusca;Bivalvia;Autobranhia;Heteroconchia;Euhe  
 terodonta;Imparidentia;Venerida;Veneroidea;Veneridae;Mercenaria;Mercenari  
 a mercenaria  
 UdeM00000023815 1735272 199.5 UdeM00000023815 XP\_041359390.1 50.5  
 186 91 1 9 193 5 190 3.90E-48 199.5 1735272  
 cellular  
 organisms;Eukaryota;Opisthokonta;Metazoa;Eumetazoa;Bilateria;Protostomia;  
 Spiralia;Lophotrochozoa;Mollusca;Gastropoda;Neomphalina;Neomphaloidea;Pel  
 tospiridae;Gigantopelta;Gigantopelta aegis  
 UdeM00000023818 6596 157.1 UdeM00000023818 XP\_045157534.1 50.5 200  
 84 4 31 218 5 201 2.50E-35 157.1 6596 cellular  
 organisms;Eukaryota;Opisthokonta;Metazoa;Eumetazoa;Bilateria;Protostomia;  
 Spiralia;Lophotrochozoa;Mollusca;Bivalvia;Autobranhia;Heteroconchia;Euhe  
 terodonta;Imparidentia;Venerida;Veneroidea;Veneridae;Mercenaria;Mercenari  
 a mercenaria  
 UdeM00000023819 6565 99.8 UdeM00000023819 XP\_022319521.1 59 100  
 39 2 13 110 8 107 2.50E-18 99.8 6565 cellular  
 organisms;Eukaryota;Opisthokonta;Metazoa;Eumetazoa;Bilateria;Protostomia;  
 Spiralia;Lophotrochozoa;Mollusca;Bivalvia;Autobranhia;Pteriomorphia;Ostr  
 eida;Ostreoidea;Ostreidae;Crassostrea;Crassostrea virginica  
 UdeM00000023820 400727 260 UdeM00000023820 XP\_025083028.1 60.5  
 352 123 7 1 339 1 349 4.30E-66 260 400727  
 cellular  
 organisms;Eukaryota;Opisthokonta;Metazoa;Eumetazoa;Bilateria;Protostomia;  
 Spiralia;Lophotrochozoa;Mollusca;Gastropoda;Caenogastropoda;Architaeniogl  
 ossa;Ampullarioidea;Ampullariidae;Pomacea;Pomacea canaliculata  
 UdeM00000023821 6565 589.7 UdeM00000023821 XP\_022315900.1 72.4 406  
 64 3 5 363 7 411 2.60E-165 589.7 6565 cellular  
 organisms;Eukaryota;Opisthokonta;Metazoa;Eumetazoa;Bilateria;Protostomia;  
 Spiralia;Lophotrochozoa;Mollusca;Bivalvia;Autobranhia;Pteriomorphia;Ostr  
 eida;Ostreoidea;Ostreidae;Crassostrea;Crassostrea virginica

UdeM00000023822 6596 335.1 UdeM00000023822 XP\_045160627.1 64.6 274  
 89 5 1 273 1 267 8.30E-89 335.1 6596 cellular  
 organisms;Eukaryota;Opisthokonta;Metazoa;Eumetazoa;Bilateria;Protostomia;  
 Spiralia;Lophotrochozoa;Mollusca;Bivalvia;Autobranchia;Heteroconchia;Euhe  
 terodonta;Imparidentia;Venerida;Veneroidea;Veneridae;Mercenaria;Mercenari  
 a mercenaria  
 UdeM00000023823 6596 518.8 UdeM00000023823 XP\_045160297.1 61.7 399  
 149 3 7 403 6 402 6.00E-144 518.8 6596 cellular  
 organisms;Eukaryota;Opisthokonta;Metazoa;Eumetazoa;Bilateria;Protostomia;  
 Spiralia;Lophotrochozoa;Mollusca;Bivalvia;Autobranchia;Heteroconchia;Euhe  
 terodonta;Imparidentia;Venerida;Veneroidea;Veneridae;Mercenaria;Mercenari  
 a mercenaria  
 UdeM00000023824 6596 474.9 UdeM00000023824 XP\_045160296.1 54.6 401  
 180 2 6 406 4 402 1.00E-130 474.9 6596 cellular  
 organisms;Eukaryota;Opisthokonta;Metazoa;Eumetazoa;Bilateria;Protostomia;  
 Spiralia;Lophotrochozoa;Mollusca;Bivalvia;Autobranchia;Heteroconchia;Euhe  
 terodonta;Imparidentia;Venerida;Veneroidea;Veneridae;Mercenaria;Mercenari  
 a mercenaria  
 UdeM00000023825 6579 708 UdeM00000023825 XP\_033737802.1 52.8 902  
 353 19 53 906 4 880 1.60E-200 708 6579 cellular  
 organisms;Eukaryota;Opisthokonta;Metazoa;Eumetazoa;Bilateria;Protostomia;  
 Spiralia;Lophotrochozoa;Mollusca;Bivalvia;Autobranchia;Pteriormorphia;Pect  
 inida;Pectinoidea;Pectinidae;Pecten;Pecten maximus  
 UdeM00000023827 6579 98.6 UdeM00000023827 XP\_033737041.1 41.2 131  
 71 3 1 130 1 126 8.30E-18 98.6 6579 cellular  
 organisms;Eukaryota;Opisthokonta;Metazoa;Eumetazoa;Bilateria;Protostomia;  
 Spiralia;Lophotrochozoa;Mollusca;Bivalvia;Autobranchia;Pteriormorphia;Pect  
 inida;Pectinoidea;Pectinidae;Pecten;Pecten maximus  
 UdeM00000023828 6579 107.8 UdeM00000023828 XP\_033737040.1 45 140  
 65 3 1 139 1 129 1.30E-20 107.8 6579 cellular  
 organisms;Eukaryota;Opisthokonta;Metazoa;Eumetazoa;Bilateria;Protostomia;  
 Spiralia;Lophotrochozoa;Mollusca;Bivalvia;Autobranchia;Pteriormorphia;Pect  
 inida;Pectinoidea;Pectinidae;Pecten;Pecten maximus  
 UdeM00000023831 6565 320.5 UdeM00000023831 XP\_022320668.1 63.7 226  
 82 0 2 227 406 631 1.80E-84 320.5 6565 cellular  
 organisms;Eukaryota;Opisthokonta;Metazoa;Eumetazoa;Bilateria;Protostomia;  
 Spiralia;Lophotrochozoa;Mollusca;Bivalvia;Autobranchia;Pteriormorphia;Ostr  
 eida;Ostreoidea;Ostreidae;Crassostrea;Crassostrea virginica  
 UdeM00000023832 1735272 115.2 UdeM00000023832 XP\_041359694.1 40.5  
 173 91 5 1 163 1 171 8.20E-23 115.2 1735272  
 cellular  
 organisms;Eukaryota;Opisthokonta;Metazoa;Eumetazoa;Bilateria;Protostomia;  
 Spiralia;Lophotrochozoa;Mollusca;Gastropoda;Neomphalina;Neomphaloidea;Pel  
 tospiridae;Gigantopelta;Gigantopelta aegis  
 UdeM00000023833 6579 104.8 UdeM00000023833 XP\_033737040.1 40.5 168  
 84 5 1 163 1 157 1.20E-19 104.8 6579 cellular  
 organisms;Eukaryota;Opisthokonta;Metazoa;Eumetazoa;Bilateria;Protostomia;  
 Spiralia;Lophotrochozoa;Mollusca;Bivalvia;Autobranchia;Pteriormorphia;Pect  
 inida;Pectinoidea;Pectinidae;Pecten;Pecten maximus  
 UdeM00000023834 1735272 125.6 UdeM00000023834 XP\_041359694.1 42.8  
 173 87 5 1 163 1 171 6.10E-26 125.6 1735272  
 cellular  
 organisms;Eukaryota;Opisthokonta;Metazoa;Eumetazoa;Bilateria;Protostomia;

Spiralia;Lophotrochozoa;Mollusca;Gastropoda;Neomphalina;Neomphaloidea;Pel  
tospiridae;Gigantopelta;Gigantopelta aegis  
UdeM00000023835 225164 89.4 UdeM00000023835 XP\_009061016.1 34.8  
112 72 1 7 117 1 112 4.30E-15 89.4 225164  
cellular

organisms;Eukaryota;Opisthokonta;Metazoa;Eumetazoa;Bilateria;Protostomia;  
Spiralia;Lophotrochozoa;Mollusca;Gastropoda;Patellogastropoda;Lottioidea;  
Lottiidae;Lottia;Lottia gigantea

UdeM00000023836 6573 80.1 UdeM00000023836 XP\_021356730.1 46.7 105  
52 3 7 108 3 106 2.60E-12 80.1 6573 cellular

organisms;Eukaryota;Opisthokonta;Metazoa;Eumetazoa;Bilateria;Protostomia;  
Spiralia;Lophotrochozoa;Mollusca;Bivalvia;Autobranchia;Pteriormorphia;Pect  
inida;Pectinoidea;Pectinidae;Mizuhopecten;Mizuhopecten yessoensis

UdeM00000023837 225164 82.8 UdeM00000023837 XP\_009061017.1 51.3  
76 37 0 31 106 25 100 4.10E-13 82.8 225164

cellular

organisms;Eukaryota;Opisthokonta;Metazoa;Eumetazoa;Bilateria;Protostomia;  
Spiralia;Lophotrochozoa;Mollusca;Gastropoda;Patellogastropoda;Lottioidea;  
Lottiidae;Lottia;Lottia gigantea

UdeM00000023838 6596 172.9 UdeM00000023838 XP\_045158926.1 53.2 156  
69 2 1 153 1 155 3.10E-40 172.9 6596 cellular

organisms;Eukaryota;Opisthokonta;Metazoa;Eumetazoa;Bilateria;Protostomia;  
Spiralia;Lophotrochozoa;Mollusca;Bivalvia;Autobranchia;Heteroconchia;Euhe  
terodonta;Imparidentia;Venerida;Veneroidea;Veneridae;Mercenaria;Mercenari  
a mercenaria

UdeM00000023839 6596 171.4 UdeM00000023839 XP\_045158927.1 54.6 141  
64 0 1 141 3 143 8.30E-40 171.4 6596 cellular

organisms;Eukaryota;Opisthokonta;Metazoa;Eumetazoa;Bilateria;Protostomia;  
Spiralia;Lophotrochozoa;Mollusca;Bivalvia;Autobranchia;Heteroconchia;Euhe  
terodonta;Imparidentia;Venerida;Veneroidea;Veneridae;Mercenaria;Mercenari  
a mercenaria

UdeM00000023840 6596 109.4 UdeM00000023840 XP\_045159831.1 44.7 132  
72 1 6 137 7 137 4.90E-21 109.4 6596 cellular

organisms;Eukaryota;Opisthokonta;Metazoa;Eumetazoa;Bilateria;Protostomia;  
Spiralia;Lophotrochozoa;Mollusca;Bivalvia;Autobranchia;Heteroconchia;Euhe  
terodonta;Imparidentia;Venerida;Veneroidea;Veneridae;Mercenaria;Mercenari  
a mercenaria

UdeM00000023841 6596 106.7 UdeM00000023841 XP\_045159831.1 42.1 145  
75 2 11 154 10 146 3.30E-20 106.7 6596 cellular

organisms;Eukaryota;Opisthokonta;Metazoa;Eumetazoa;Bilateria;Protostomia;  
Spiralia;Lophotrochozoa;Mollusca;Bivalvia;Autobranchia;Heteroconchia;Euhe  
terodonta;Imparidentia;Venerida;Veneroidea;Veneridae;Mercenaria;Mercenari  
a mercenaria

UdeM00000023842 6579 1042 UdeM00000023842 XP\_033732322.1 66.1 778  
259 5 1 776 1 775 3.90E-301 1042 6579 cellular

organisms;Eukaryota;Opisthokonta;Metazoa;Eumetazoa;Bilateria;Protostomia;  
Spiralia;Lophotrochozoa;Mollusca;Bivalvia;Autobranchia;Pteriormorphia;Pect  
inida;Pectinoidea;Pectinidae;Pecten;Pecten maximus

UdeM00000023843 6596 739.6 UdeM00000023843 XP\_045160982.1 55.6 648  
275 6 1 638 711 1355 3.40E-210 739.6 6596 cellular

organisms;Eukaryota;Opisthokonta;Metazoa;Eumetazoa;Bilateria;Protostomia;  
Spiralia;Lophotrochozoa;Mollusca;Bivalvia;Autobranchia;Heteroconchia;Euhe  
terodonta;Imparidentia;Venerida;Veneroidea;Veneridae;Mercenaria;Mercenari  
a mercenaria

UdeM00000023844 280463 136.7 UdeM00000023844 XP\_005768395.1 58.7  
 104 43 0 2 105 153 256 1.70E-29 136.7 280463  
 cellular  
 organisms;Eukaryota;Haptista;Haptophyta;Prymnesiophyceae;Isochrysidales;N  
 oelaerhabdaceae;Emiliana;Emiliana huxleyi;Emiliana huxleyi CCMP1516  
 UdeM00000023845 7906 144.8 UdeM00000023845 XP\_034774084.1 60.4 106  
 40 1 1 106 1 104 6.30E-32 144.8 7906 cellular  
 organisms;Eukaryota;Opisthokonta;Metazoa;Eumetazoa;Bilateria;Deuterostomi  
 a;Chordata;Craniata;Vertebrata;Gnathostomata;Teleostomi;Euteleostomi;Acti  
 nopterygii;Actinopteri;Chondrostei;Acipenseriformes;Acipenseroides;Acipen  
 seridae;Acipenserinae;Acipenserini;Acipenser;Acipenser ruthenus  
 UdeM00000023846 55291 96.3 UdeM00000023846 XP\_039615325.1 51 98  
 48 0 1 98 1 98 2.50E-17 96.3 55291 cellular  
 organisms;Eukaryota;Opisthokonta;Metazoa;Eumetazoa;Bilateria;Deuterostomi  
 a;Chordata;Craniata;Vertebrata;Gnathostomata;Teleostomi;Euteleostomi;Acti  
 nopterygii;Cladistia;Polypteriformes;Polypteridae;Polypterus;Polypterus  
 senegalus  
 UdeM00000023848 6596 502.7 UdeM00000023848 XP\_045158208.1 57.9 534  
 187 17 22 530 1 521 6.10E-139 502.7 6596 cellular  
 organisms;Eukaryota;Opisthokonta;Metazoa;Eumetazoa;Bilateria;Protostomia;  
 Spiralia;Lophotrochozoa;Mollusca;Bivalvia;Autobranchia;Heteroconchia;Euhe  
 terodonta;Imparidentia;Venerida;Veneroidea;Veneridae;Mercenaria;Mercenari  
 a mercenaria  
 UdeM00000023849 6596 691.8 UdeM00000023849 XP\_045158208.1 67 531  
 163 6 20 540 515 1043 7.00E-196 691.8 6596 cellular  
 organisms;Eukaryota;Opisthokonta;Metazoa;Eumetazoa;Bilateria;Protostomia;  
 Spiralia;Lophotrochozoa;Mollusca;Bivalvia;Autobranchia;Heteroconchia;Euhe  
 terodonta;Imparidentia;Venerida;Veneroidea;Veneridae;Mercenaria;Mercenari  
 a mercenaria  
 UdeM00000023850 6596 658.3 UdeM00000023850 XP\_045193857.1 54.8 595  
 250 6 6 586 3 592 9.30E-186 658.3 6596 cellular  
 organisms;Eukaryota;Opisthokonta;Metazoa;Eumetazoa;Bilateria;Protostomia;  
 Spiralia;Lophotrochozoa;Mollusca;Bivalvia;Autobranchia;Heteroconchia;Euhe  
 terodonta;Imparidentia;Venerida;Veneroidea;Veneridae;Mercenaria;Mercenari  
 a mercenaria  
 UdeM00000023851 6596 588.6 UdeM00000023851 XP\_045193857.1 48.2 600  
 287 7 3 586 2 593 9.00E-165 588.6 6596 cellular  
 organisms;Eukaryota;Opisthokonta;Metazoa;Eumetazoa;Bilateria;Protostomia;  
 Spiralia;Lophotrochozoa;Mollusca;Bivalvia;Autobranchia;Heteroconchia;Euhe  
 terodonta;Imparidentia;Venerida;Veneroidea;Veneridae;Mercenaria;Mercenari  
 a mercenaria  
 UdeM00000023852 6596 266.2 UdeM00000023852 XP\_045193857.1 39.9 338  
 192 4 1 334 145 475 6.40E-68 266.2 6596 cellular  
 organisms;Eukaryota;Opisthokonta;Metazoa;Eumetazoa;Bilateria;Protostomia;  
 Spiralia;Lophotrochozoa;Mollusca;Bivalvia;Autobranchia;Heteroconchia;Euhe  
 terodonta;Imparidentia;Venerida;Veneroidea;Veneridae;Mercenaria;Mercenari  
 a mercenaria  
 UdeM00000023853 6596 128.3 UdeM00000023853 XP\_045193857.1 63.6 99  
 34 2 3 100 2 99 5.70E-27 128.3 6596 cellular  
 organisms;Eukaryota;Opisthokonta;Metazoa;Eumetazoa;Bilateria;Protostomia;  
 Spiralia;Lophotrochozoa;Mollusca;Bivalvia;Autobranchia;Heteroconchia;Euhe  
 terodonta;Imparidentia;Venerida;Veneroidea;Veneridae;Mercenaria;Mercenari  
 a mercenaria

UdeM00000023854 6596 592 UdeM00000023854 XP\_045193857.1 50.3 599  
 277 10 3 587 2 593 8.20E-166 592 6596 cellular  
 organisms;Eukaryota;Opisthokonta;Metazoa;Eumetazoa;Bilateria;Protostomia;  
 Spiralia;Lophotrochozoa;Mollusca;Bivalvia;Autobranchia;Heteroconchia;Euhe  
 terodonta;Imparidentia;Venerida;Veneroidea;Veneridae;Mercenaria;Mercenari  
 a mercenaria  
 UdeM00000023855 37653 509.2 UdeM00000023855 XP\_014784610.1 60.5 408  
 147 4 1 395 1 407 4.70E-141 509.2 37653 cellular  
 organisms;Eukaryota;Opisthokonta;Metazoa;Eumetazoa;Bilateria;Protostomia;  
 Spiralia;Lophotrochozoa;Mollusca;Cephalopoda;Coleoidea;Octopodiformes;Oct  
 opoda;Incirrata;Octopodidae;Octopus;Octopus bimaculoides  
 UdeM00000023856 37653 499.6 UdeM00000023856 XP\_014784610.1 60 408  
 149 4 1 395 1 407 3.70E-138 499.6 37653 cellular  
 organisms;Eukaryota;Opisthokonta;Metazoa;Eumetazoa;Bilateria;Protostomia;  
 Spiralia;Lophotrochozoa;Mollusca;Cephalopoda;Coleoidea;Octopodiformes;Oct  
 opoda;Incirrata;Octopodidae;Octopus;Octopus bimaculoides  
 UdeM00000023857 6596 354.4 UdeM00000023857 XP\_045158209.1 62 271  
 103 0 1 271 18 288 1.30E-94 354.4 6596 cellular  
 organisms;Eukaryota;Opisthokonta;Metazoa;Eumetazoa;Bilateria;Protostomia;  
 Spiralia;Lophotrochozoa;Mollusca;Bivalvia;Autobranchia;Heteroconchia;Euhe  
 terodonta;Imparidentia;Venerida;Veneroidea;Veneridae;Mercenaria;Mercenari  
 a mercenaria  
 UdeM00000023858 37653 362.8 UdeM00000023858 XP\_014776781.1 45.7 363  
 196 1 23 385 19 380 5.30E-97 362.8 37653 cellular  
 organisms;Eukaryota;Opisthokonta;Metazoa;Eumetazoa;Bilateria;Protostomia;  
 Spiralia;Lophotrochozoa;Mollusca;Cephalopoda;Coleoidea;Octopodiformes;Oct  
 opoda;Incirrata;Octopodidae;Octopus;Octopus bimaculoides  
 UdeM00000023859 6596 370.2 UdeM00000023859 XP\_045158212.1 78.8 222  
 47 0 1 222 1 222 1.90E-99 370.2 6596 cellular  
 organisms;Eukaryota;Opisthokonta;Metazoa;Eumetazoa;Bilateria;Protostomia;  
 Spiralia;Lophotrochozoa;Mollusca;Bivalvia;Autobranchia;Heteroconchia;Euhe  
 terodonta;Imparidentia;Venerida;Veneroidea;Veneridae;Mercenaria;Mercenari  
 a mercenaria  
 UdeM00000023860 6579 746.9 UdeM00000023860 XP\_033737990.1 48.8 849  
 324 9 2 813 31 805 2.70E-212 746.9 6579 cellular  
 organisms;Eukaryota;Opisthokonta;Metazoa;Eumetazoa;Bilateria;Protostomia;  
 Spiralia;Lophotrochozoa;Mollusca;Bivalvia;Autobranchia;Pteriomorphia;Pect  
 inida;Pectinoidea;Pectinidae;Pecten;Pecten maximus  
 UdeM00000023861 6596 434.5 UdeM00000023861 XP\_045158209.1 71.6 289  
 81 1 1 288 1 289 1.10E-118 434.5 6596 cellular  
 organisms;Eukaryota;Opisthokonta;Metazoa;Eumetazoa;Bilateria;Protostomia;  
 Spiralia;Lophotrochozoa;Mollusca;Bivalvia;Autobranchia;Heteroconchia;Euhe  
 terodonta;Imparidentia;Venerida;Veneroidea;Veneridae;Mercenaria;Mercenari  
 a mercenaria  
 UdeM00000023862 6596 2583.5 UdeM00000023862 XP\_045158188.1 57  
 2400 856 35 7 2276 104 2457 0.00E+00 2583.5 6596  
 cellular  
 organisms;Eukaryota;Opisthokonta;Metazoa;Eumetazoa;Bilateria;Protostomia;  
 Spiralia;Lophotrochozoa;Mollusca;Bivalvia;Autobranchia;Heteroconchia;Euhe  
 terodonta;Imparidentia;Venerida;Veneroidea;Veneridae;Mercenaria;Mercenari  
 a mercenaria  
 UdeM00000023863 6596 230.3 UdeM00000023863 XP\_045158869.1 57.9 178  
 74 1 1 178 3 179 1.90E-57 230.3 6596 cellular  
 organisms;Eukaryota;Opisthokonta;Metazoa;Eumetazoa;Bilateria;Protostomia;

Spiralia;Lophotrochozoa;Mollusca;Bivalvia;Autobranchia;Heteroconchia;Euherodonta;Imparidentia;Venerida;Veneroidea;Veneridae;Mercenaria;Mercenaria mercenaria

UdeM00000023864 400727 84 UdeM00000023864 XP\_025110405.1 51.9  
77 37 0 5 81 10 86 2.50E-13 84 400727

cellular

organisms;Eukaryota;Opisthokonta;Metazoa;Eumetazoa;Bilateria;Protostomia;Spiralia;Lophotrochozoa;Mollusca;Gastropoda;Caenogastropoda;Architaenioglossa;Ampullarioidea;Ampullariidae;Pomacea;Pomacea canaliculata

UdeM00000023865 6412 75.5 UdeM00000023865 XP\_009013141.1 44.3 88  
40 2 1 79 1 88 5.90E-11 75.5 6412 cellular

organisms;Eukaryota;Opisthokonta;Metazoa;Eumetazoa;Bilateria;Protostomia;Spiralia;Lophotrochozoa;Annelida;Clitellata;Hirudinea;Rhynchobdellida;Glossosiphoniidae;Helobdella;Helobdella robusta

UdeM00000023866 6412 81.3 UdeM00000023866 XP\_009013141.1 66.1 56  
19 0 1 56 109 164 5.40E-13 81.3 6412 cellular

organisms;Eukaryota;Opisthokonta;Metazoa;Eumetazoa;Bilateria;Protostomia;Spiralia;Lophotrochozoa;Annelida;Clitellata;Hirudinea;Rhynchobdellida;Glossosiphoniidae;Helobdella;Helobdella robusta

UdeM00000023868 29159 176.4 UdeM00000023868 XP\_011453722.2 55.4 202  
71 5 1 200 142 326 3.60E-41 176.4 29159 cellular

organisms;Eukaryota;Opisthokonta;Metazoa;Eumetazoa;Bilateria;Protostomia;Spiralia;Lophotrochozoa;Mollusca;Bivalvia;Autobranchia;Pteriormorphia;Ostreida;Ostreioidea;Ostreidae;Crassostrea;Crassostrea gigas

UdeM00000023867 29159 308.1 UdeM00000023867 XP\_011453722.2 61.2 286  
92 5 1 284 58 326 1.10E-80 308.1 29159 cellular

organisms;Eukaryota;Opisthokonta;Metazoa;Eumetazoa;Bilateria;Protostomia;Spiralia;Lophotrochozoa;Mollusca;Bivalvia;Autobranchia;Pteriormorphia;Ostreida;Ostreioidea;Ostreidae;Crassostrea;Crassostrea gigas

UdeM00000023869 6596 338.6 UdeM00000023869 XP\_045158934.1 80.9 199  
38 0 1 199 1 199 5.50E-90 338.6 6596 cellular

organisms;Eukaryota;Opisthokonta;Metazoa;Eumetazoa;Bilateria;Protostomia;Spiralia;Lophotrochozoa;Mollusca;Bivalvia;Autobranchia;Heteroconchia;Euherodonta;Imparidentia;Venerida;Veneroidea;Veneridae;Mercenaria;Mercenaria mercenaria

UdeM00000023870 225164 223 UdeM00000023870 XP\_009054793.1 33.9  
401 240 7 82 478 66 445 8.30E-55 223 225164

cellular

organisms;Eukaryota;Opisthokonta;Metazoa;Eumetazoa;Bilateria;Protostomia;Spiralia;Lophotrochozoa;Mollusca;Gastropoda;Patellogastropoda;Lottioidea;Lottiidae;Lottia;Lottia gigantea

UdeM00000023871 225164 208 UdeM00000023871 XP\_009054793.1 32.4  
401 246 7 82 478 66 445 2.70E-50 208 225164

cellular

organisms;Eukaryota;Opisthokonta;Metazoa;Eumetazoa;Bilateria;Protostomia;Spiralia;Lophotrochozoa;Mollusca;Gastropoda;Patellogastropoda;Lottioidea;Lottiidae;Lottia;Lottia gigantea

UdeM00000023872 1529436 60.8 UdeM00000023872 XP\_033095325.1 52.5  
59 24 2 80 137 180 235 1.60E-06 60.8 1529436

cellular

organisms;Eukaryota;Opisthokonta;Metazoa;Eumetazoa;Bilateria;Deuterostomia;Echinodermata;Pelmatozoa;Crinoidea;Articulata;Comatulida;Comatulidae;Comatulinae;Anneissia;Anneissia japonica

UdeM00000023873 151771 220.7 UdeM00000023873 XP\_028403234.1 53.9  
 204 93 1 1 203 1 204 1.70E-54 220.7 151771  
 cellular  
 organisms;Eukaryota;Opisthokonta;Metazoa;Eumetazoa;Cnidaria;Anthozoa;Octo  
 corallia;Alcyonacea;Alcyoniina;Nephtheidae;Dendronephthya;Dendronephthya  
 gigantea  
 UdeM00000023874 45264 146.4 UdeM00000023874 XP\_044184028.1 48.3 176  
 86 3 42 216 68 239 5.10E-32 146.4 45264 cellular  
 organisms;Eukaryota;Opisthokonta;Metazoa;Eumetazoa;Cnidaria;Anthozoa;Hexa  
 corallia;Scleractinia;Astrocoeniina;Acroporidae;Acropora;Acropora  
 millepora  
 UdeM00000023876 29159 213 UdeM00000023876 XP\_034339350.1 31.4 452  
 280 8 39 478 22 455 8.50E-52 213 29159 cellular  
 organisms;Eukaryota;Opisthokonta;Metazoa;Eumetazoa;Bilateria;Protostomia;  
 Spiralia;Lophotrochozoa;Mollusca;Bivalvia;Autobranchia;Pteriormorphia;Ostr  
 eida;Ostreoidea;Ostreidae;Crassostrea;Crassostrea gigas  
 UdeM00000023877 6596 446.4 UdeM00000023877 XP\_045158619.1 54 737  
 274 12 1 723 1 686 6.80E-122 446.4 6596 cellular  
 organisms;Eukaryota;Opisthokonta;Metazoa;Eumetazoa;Bilateria;Protostomia;  
 Spiralia;Lophotrochozoa;Mollusca;Bivalvia;Autobranchia;Heteroconchia;Euhe  
 terodonta;Imparidentia;Venerida;Veneroidea;Veneridae;Mercenaria;Mercenari  
 a mercenaria  
 UdeM00000023878 6579 243.4 UdeM00000023878 XP\_033737273.1 59.4 202  
 79 1 5 206 4 202 2.50E-61 243.4 6579 cellular  
 organisms;Eukaryota;Opisthokonta;Metazoa;Eumetazoa;Bilateria;Protostomia;  
 Spiralia;Lophotrochozoa;Mollusca;Bivalvia;Autobranchia;Pteriormorphia;Pect  
 inida;Pectinoidea;Pectinidae;Pecten;Pecten maximus  
 UdeM00000023879 6573 381.3 UdeM00000023879 XP\_021359581.1 59.5 284  
 115 0 1 284 202 485 1.10E-102 381.3 6573 cellular  
 organisms;Eukaryota;Opisthokonta;Metazoa;Eumetazoa;Bilateria;Protostomia;  
 Spiralia;Lophotrochozoa;Mollusca;Bivalvia;Autobranchia;Pteriormorphia;Pect  
 inida;Pectinoidea;Pectinidae;Mizuhopecten;Mizuhopecten yessoensis  
 UdeM00000023880 6573 302 UdeM00000023880 XP\_021375388.1 64.7 255  
 49 4 1 252 1 217 7.20E-79 302 6573 cellular  
 organisms;Eukaryota;Opisthokonta;Metazoa;Eumetazoa;Bilateria;Protostomia;  
 Spiralia;Lophotrochozoa;Mollusca;Bivalvia;Autobranchia;Pteriormorphia;Pect  
 inida;Pectinoidea;Pectinidae;Mizuhopecten;Mizuhopecten yessoensis  
 UdeM00000023881 1735272 303.1 UdeM00000023881 XP\_041358520.1 66  
 253 38 5 3 250 5 214 3.20E-79 303.1 1735272  
 cellular  
 organisms;Eukaryota;Opisthokonta;Metazoa;Eumetazoa;Bilateria;Protostomia;  
 Spiralia;Lophotrochozoa;Mollusca;Gastropoda;Neomphalina;Neomphaloidea;Pel  
 tospiridae;Gigantopelta;Gigantopelta aegis  
 UdeM00000023882 6579 623.6 UdeM00000023882 XP\_033738954.1 40.5 1048  
 456 30 7 939 19 1013 4.00E-175 623.6 6579 cellular  
 organisms;Eukaryota;Opisthokonta;Metazoa;Eumetazoa;Bilateria;Protostomia;  
 Spiralia;Lophotrochozoa;Mollusca;Bivalvia;Autobranchia;Pteriormorphia;Pect  
 inida;Pectinoidea;Pectinidae;Pecten;Pecten maximus  
 UdeM00000023888 6596 83.2 UdeM00000023888 XP\_045160677.1 22.4 277  
 196 8 108 372 46 315 1.00E-12 83.2 6596 cellular  
 organisms;Eukaryota;Opisthokonta;Metazoa;Eumetazoa;Bilateria;Protostomia;  
 Spiralia;Lophotrochozoa;Mollusca;Bivalvia;Autobranchia;Heteroconchia;Euhe  
 terodonta;Imparidentia;Venerida;Veneroidea;Veneridae;Mercenaria;Mercenari  
 a mercenaria

UdeM00000023889 6596 1058.9 UdeM00000023889 XP\_045160969.1 67.8  
 914 261 12 1 887 1 908 3.50E-306 1058.9 6596  
 cellular  
 organisms;Eukaryota;Opisthokonta;Metazoa;Eumetazoa;Bilateria;Protostomia;  
 Spiralia;Lophotrochozoa;Mollusca;Bivalvia;Autobranchia;Heteroconchia;Euhe  
 terodonta;Imparidentia;Venerida;Veneroidea;Veneridae;Mercenaria;Mercenari  
 a mercenaria  
 UdeM00000023891 260995 76.3 UdeM00000023891 XP\_033812940.1 43.6  
 78 43 1 1 78 1 77 2.60E-11 76.3 260995  
 cellular  
 organisms;Eukaryota;Opisthokonta;Metazoa;Eumetazoa;Bilateria;Deuterostomi  
 a;Chordata;Craniata;Vertebrata;Gnathostomata;Teleostomi;Euteleostomi;Sarc  
 opterygii;Dipnotetrapodomorpha;Tetrapoda;Amphibia;Gymnophiona;Dermophiida  
 e;Geotrypetes;Geotrypetes seraphini  
 UdeM00000023893 260995 76.3 UdeM00000023893 XP\_033812940.1 43.6  
 78 43 1 1 78 1 77 2.60E-11 76.3 260995  
 cellular  
 organisms;Eukaryota;Opisthokonta;Metazoa;Eumetazoa;Bilateria;Deuterostomi  
 a;Chordata;Craniata;Vertebrata;Gnathostomata;Teleostomi;Euteleostomi;Sarc  
 opterygii;Dipnotetrapodomorpha;Tetrapoda;Amphibia;Gymnophiona;Dermophiida  
 e;Geotrypetes;Geotrypetes seraphini  
 UdeM00000023894 6596 1163.7 UdeM00000023894 XP\_045160053.1 63.3  
 1342 435 19 1 1298 8 1335 0.00E+00 1163.7 6596  
 cellular  
 organisms;Eukaryota;Opisthokonta;Metazoa;Eumetazoa;Bilateria;Protostomia;  
 Spiralia;Lophotrochozoa;Mollusca;Bivalvia;Autobranchia;Heteroconchia;Euhe  
 terodonta;Imparidentia;Venerida;Veneroidea;Veneridae;Mercenaria;Mercenari  
 a mercenaria  
 UdeM00000023895 6596 224.6 UdeM00000023895 XP\_045158207.1 94.9 117  
 6 0 1 117 1 117 6.80E-56 224.6 6596 cellular  
 organisms;Eukaryota;Opisthokonta;Metazoa;Eumetazoa;Bilateria;Protostomia;  
 Spiralia;Lophotrochozoa;Mollusca;Bivalvia;Autobranchia;Heteroconchia;Euhe  
 terodonta;Imparidentia;Venerida;Veneroidea;Veneridae;Mercenaria;Mercenari  
 a mercenaria  
 UdeM00000023896 6565 417.2 UdeM00000023896 XP\_022317535.1 88.8 258  
 28 1 2 258 370 627 1.60E-113 417.2 6565 cellular  
 organisms;Eukaryota;Opisthokonta;Metazoa;Eumetazoa;Bilateria;Protostomia;  
 Spiralia;Lophotrochozoa;Mollusca;Bivalvia;Autobranchia;Pteriomorphia;Ostr  
 eida;Ostreoidea;Ostreidae;Crassostrea;Crassostrea virginica  
 UdeM00000023897 6596 293.9 UdeM00000023897 XP\_045158202.1 37.6 426  
 215 4 43 417 54 479 3.30E-76 293.9 6596 cellular  
 organisms;Eukaryota;Opisthokonta;Metazoa;Eumetazoa;Bilateria;Protostomia;  
 Spiralia;Lophotrochozoa;Mollusca;Bivalvia;Autobranchia;Heteroconchia;Euhe  
 terodonta;Imparidentia;Venerida;Veneroidea;Veneridae;Mercenaria;Mercenari  
 a mercenaria  
 UdeM00000023898 6573 174.9 UdeM00000023898 XP\_021360127.1 38.2 249  
 132 5 4 247 9 240 1.30E-40 174.9 6573 cellular  
 organisms;Eukaryota;Opisthokonta;Metazoa;Eumetazoa;Bilateria;Protostomia;  
 Spiralia;Lophotrochozoa;Mollusca;Bivalvia;Autobranchia;Pteriomorphia;Pect  
 inida;Pectinoidea;Pectinidae;Mizuhopecten;Mizuhopecten yessoensis  
 UdeM00000023899 6579 172.6 UdeM00000023899 XP\_033736540.1 40.2 239  
 115 7 18 248 3 221 6.70E-40 172.6 6579 cellular  
 organisms;Eukaryota;Opisthokonta;Metazoa;Eumetazoa;Bilateria;Protostomia;



Spiralia; Lophotrochozoa; Mollusca; Bivalvia; Autobranchia; Pteriomorpha; Pectinida; Pectinoidea; Pectinidae; Pecten; Pecten maximus

UdeM00000023900 37653 523.5 UdeM00000023900 XP\_014784610.1 62.5 411  
140 4 1 398 1 410 2.40E-145 523.5 37653 cellular  
organisms; Eukaryota; Opisthokonta; Metazoa; Eumetazoa; Bilateria; Protostomia; Spiralia; Lophotrochozoa; Mollusca; Cephalopoda; Coleoidea; Octopodiformes; Octopoda; Incirrata; Octopodidae; Octopus; Octopus bimaculoides

UdeM00000023901 1529436 155.2 UdeM00000023901 XP\_033095325.1 47.1  
153 81 0 83 235 48 200 1.10E-34 155.2 1529436  
cellular  
organisms; Eukaryota; Opisthokonta; Metazoa; Eumetazoa; Bilateria; Deuterostomia; Echinodermata; Pelmatozoa; Crinoidea; Articulata; Comatulida; Comatulidae; Comatulinae; Anneissia; Anneissia japonica

UdeM00000023903 6945 81.3 UdeM00000023903 XP\_040069682.2 26.7 180  
128 2 6 181 37 216 2.40E-12 81.3 6945 cellular  
organisms; Eukaryota; Opisthokonta; Metazoa; Eumetazoa; Bilateria; Protostomia; Ecdysozoa; Panarthropoda; Arthropoda; Chelicerata; Arachnida; Acari; Parasitiformes; Ixodida; Ixodoidea; Ixodidae; Ixodinae; Ixodes; Ixodes scapularis

UdeM00000023904 37653 112.8 UdeM00000023904 XP\_014784610.1 57.8 102  
40 2 1 100 1 101 2.50E-22 112.8 37653 cellular  
organisms; Eukaryota; Opisthokonta; Metazoa; Eumetazoa; Bilateria; Protostomia; Spiralia; Lophotrochozoa; Mollusca; Cephalopoda; Coleoidea; Octopodiformes; Octopoda; Incirrata; Octopodidae; Octopus; Octopus bimaculoides

UdeM00000023905 400727 391 UdeM00000023905 XP\_025096893.1 65.8  
278 92 1 1 275 137 414 1.30E-105 391 400727  
cellular  
organisms; Eukaryota; Opisthokonta; Metazoa; Eumetazoa; Bilateria; Protostomia; Spiralia; Lophotrochozoa; Mollusca; Gastropoda; Caenogastropoda; Architaenioglossa; Ampullarioidea; Ampullariidae; Pomacea; Pomacea canaliculata

UdeM00000023906 6596 517.7 UdeM00000023906 XP\_045159097.1 71.1 350  
101 0 1 350 1 350 1.20E-143 517.7 6596 cellular  
organisms; Eukaryota; Opisthokonta; Metazoa; Eumetazoa; Bilateria; Protostomia; Spiralia; Lophotrochozoa; Mollusca; Bivalvia; Autobranchia; Heteroconchia; Euheterodonta; Imparidentia; Venerida; Veneroidea; Veneridae; Mercenaria; Mercenaria mercenaria

UdeM00000023907 6579 98.2 UdeM00000023907 XP\_033738204.1 40.5 126  
73 1 1 126 61 184 8.00E-18 98.2 6579 cellular  
organisms; Eukaryota; Opisthokonta; Metazoa; Eumetazoa; Bilateria; Protostomia; Spiralia; Lophotrochozoa; Mollusca; Bivalvia; Autobranchia; Pteriomorpha; Pectinida; Pectinoidea; Pectinidae; Pecten; Pecten maximus

UdeM00000023908 6596 585.9 UdeM00000023908 XP\_045159098.1 39.2 852  
492 6 1 829 61 909 8.20E-164 585.9 6596 cellular  
organisms; Eukaryota; Opisthokonta; Metazoa; Eumetazoa; Bilateria; Protostomia; Spiralia; Lophotrochozoa; Mollusca; Bivalvia; Autobranchia; Heteroconchia; Euheterodonta; Imparidentia; Venerida; Veneroidea; Veneridae; Mercenaria; Mercenaria mercenaria

UdeM00000023909 6565 349.4 UdeM00000023909 XP\_022315185.1 52.8 409  
164 6 16 404 1 400 1.40E-92 349.4 6565 cellular  
organisms; Eukaryota; Opisthokonta; Metazoa; Eumetazoa; Bilateria; Protostomia; Spiralia; Lophotrochozoa; Mollusca; Bivalvia; Autobranchia; Pteriomorpha; Ostreida; Ostreidae; Crassostrea; Crassostrea virginica

UdeM00000023910 6596 91.7 UdeM00000023910 XP\_045157391.1 58.2 91  
31 2 2 88 166 253 6.40E-16 91.7 6596 cellular  
organisms; Eukaryota; Opisthokonta; Metazoa; Eumetazoa; Bilateria; Protostomia;

Spiralia;Lophotrochozoa;Mollusca;Bivalvia;Autobranchia;Heteroconchia;Euherodonta;Imparidentia;Venerida;Veneroidea;Veneridae;Mercenaria;Mercenaria mercenaria

UdeM00000023913 6596 246.1 UdeM00000023913 XP\_045157391.1 76 150  
36 0 2 151 1421 1570 2.80E-62 246.1 6596 cellular

organisms;Eukaryota;Opisthokonta;Metazoa;Eumetazoa;Bilateria;Protostomia;Spiralia;Lophotrochozoa;Mollusca;Bivalvia;Autobranchia;Heteroconchia;Euherodonta;Imparidentia;Venerida;Veneroidea;Veneridae;Mercenaria;Mercenaria mercenaria

UdeM00000023914 29159 664.5 UdeM00000023914 XP\_011441194.1 70.9 478  
124 5 1 465 1 476 1.00E-187 664.5 29159 cellular

organisms;Eukaryota;Opisthokonta;Metazoa;Eumetazoa;Bilateria;Protostomia;Spiralia;Lophotrochozoa;Mollusca;Bivalvia;Autobranchia;Pteriormorphia;Ostreida;Ostreoidea;Ostreidae;Crassostrea;Crassostrea gigas

UdeM00000023915 400727 184.9 UdeM00000023915 XP\_025109077.1 38.8  
209 125 2 19 224 33 241 3.00E-43 184.9 400727  
cellular

organisms;Eukaryota;Opisthokonta;Metazoa;Eumetazoa;Bilateria;Protostomia;Spiralia;Lophotrochozoa;Mollusca;Gastropoda;Caenogastropoda;Architaenioglossa;Ampullarioidea;Ampullariidae;Pomacea;Pomacea canaliculata

UdeM00000023916 6596 83.2 UdeM00000023916 XP\_045216974.1 22.3 484  
312 16 263 718 314 761 2.50E-12 83.2 6596 cellular

organisms;Eukaryota;Opisthokonta;Metazoa;Eumetazoa;Bilateria;Protostomia;Spiralia;Lophotrochozoa;Mollusca;Bivalvia;Autobranchia;Heteroconchia;Euherodonta;Imparidentia;Venerida;Veneroidea;Veneridae;Mercenaria;Mercenaria mercenaria

UdeM00000023917 1735272 210.3 UdeM00000023917 XP\_041366050.1 45.3  
267 118 6 9 256 15 272 2.90E-51 210.3 1735272  
cellular

organisms;Eukaryota;Opisthokonta;Metazoa;Eumetazoa;Bilateria;Protostomia;Spiralia;Lophotrochozoa;Mollusca;Gastropoda;Neomphalina;Neomphaloidea;Peltospiridae;Gigantopelta;Gigantopelta aegis

UdeM00000023918 1735272 160.2 UdeM00000023918 XP\_041366048.1 48.5  
167 83 2 3 167 320 485 2.20E-36 160.2 1735272  
cellular

organisms;Eukaryota;Opisthokonta;Metazoa;Eumetazoa;Bilateria;Protostomia;Spiralia;Lophotrochozoa;Mollusca;Gastropoda;Neomphalina;Neomphaloidea;Peltospiridae;Gigantopelta;Gigantopelta aegis

UdeM00000023919 6596 280 UdeM00000023919 XP\_045159443.1 43.8 411  
196 10 1 393 71 464 4.80E-72 280 6596 cellular

organisms;Eukaryota;Opisthokonta;Metazoa;Eumetazoa;Bilateria;Protostomia;Spiralia;Lophotrochozoa;Mollusca;Bivalvia;Autobranchia;Heteroconchia;Euherodonta;Imparidentia;Venerida;Veneroidea;Veneridae;Mercenaria;Mercenaria mercenaria

UdeM00000023920 6596 307.4 UdeM00000023920 XP\_045188426.1 38.7 506  
279 12 39 530 3 491 3.60E-80 307.4 6596 cellular

organisms;Eukaryota;Opisthokonta;Metazoa;Eumetazoa;Bilateria;Protostomia;Spiralia;Lophotrochozoa;Mollusca;Bivalvia;Autobranchia;Heteroconchia;Euherodonta;Imparidentia;Venerida;Veneroidea;Veneridae;Mercenaria;Mercenaria mercenaria

UdeM00000011811 6500 87.8 UdeM00000011811 XP\_012944080.1 39.6 139  
81 3 62 199 306 442 1.80E-14 87.8 6500 cellular

organisms;Eukaryota;Opisthokonta;Metazoa;Eumetazoa;Bilateria;Protostomia;

Spiralia; Lophotrochozoa; Mollusca; Gastropoda; Heterobranchia; Euthyneura; Tectipleura; Aplysiida; Aplysioidea; Aplysiidae; Aplysia; Aplysia californica

UdeM00000011812 6596 701 UdeM00000011812 XP\_045157816.1 75.2 432  
104 1 5 436 15 443 9.20E-199 701 6596 cellular  
organisms; Eukaryota; Opisthokonta; Metazoa; Eumetazoa; Bilateria; Protostomia; Spiralia; Lophotrochozoa; Mollusca; Bivalvia; Autobranchia; Heteroconchia; Euheterodonta; Imparidentia; Venerida; Veneroidea; Veneridae; Mercenaria; Mercenaria mercenaria

UdeM00000011813 6565 328.2 UdeM00000011813 XP\_022318483.1 75.1 201  
50 0 1 201 1 201 7.50E-87 328.2 6565 cellular  
organisms; Eukaryota; Opisthokonta; Metazoa; Eumetazoa; Bilateria; Protostomia; Spiralia; Lophotrochozoa; Mollusca; Bivalvia; Autobranchia; Pteriomorpha; Ostreida; Ostreioidea; Ostreidae; Crassostrea; Crassostrea virginica

UdeM00000011814 6596 289.3 UdeM00000011814 XP\_045157813.1 82.2 185  
31 2 1 184 1 184 3.50E-75 289.3 6596 cellular  
organisms; Eukaryota; Opisthokonta; Metazoa; Eumetazoa; Bilateria; Protostomia; Spiralia; Lophotrochozoa; Mollusca; Bivalvia; Autobranchia; Heteroconchia; Euheterodonta; Imparidentia; Venerida; Veneroidea; Veneridae; Mercenaria; Mercenaria mercenaria

UdeM00000011816 6579 76.6 UdeM00000011816 XP\_033758553.1 31.1 132  
87 1 221 348 124 255 1.00E-10 76.6 6579 cellular  
organisms; Eukaryota; Opisthokonta; Metazoa; Eumetazoa; Bilateria; Protostomia; Spiralia; Lophotrochozoa; Mollusca; Bivalvia; Autobranchia; Pteriomorpha; Pectinida; Pectinoidea; Pectinidae; Pecten; Pecten maximus

UdeM00000011817 6596 359 UdeM00000011817 XP\_045157812.1 81.3 214  
40 0 57 270 7 220 5.30E-96 359 6596 cellular  
organisms; Eukaryota; Opisthokonta; Metazoa; Eumetazoa; Bilateria; Protostomia; Spiralia; Lophotrochozoa; Mollusca; Bivalvia; Autobranchia; Heteroconchia; Euheterodonta; Imparidentia; Venerida; Veneroidea; Veneridae; Mercenaria; Mercenaria mercenaria

UdeM00000011818 6596 354 UdeM00000011818 XP\_045157812.1 81.9 210  
38 0 3 212 11 220 1.30E-94 354 6596 cellular  
organisms; Eukaryota; Opisthokonta; Metazoa; Eumetazoa; Bilateria; Protostomia; Spiralia; Lophotrochozoa; Mollusca; Bivalvia; Autobranchia; Heteroconchia; Euheterodonta; Imparidentia; Venerida; Veneroidea; Veneridae; Mercenaria; Mercenaria mercenaria

UdeM00000011819 6565 65.9 UdeM00000011819 XP\_022317641.1 41.3 121  
55 7 464 572 575 691 2.00E-07 65.9 6565 cellular  
organisms; Eukaryota; Opisthokonta; Metazoa; Eumetazoa; Bilateria; Protostomia; Spiralia; Lophotrochozoa; Mollusca; Bivalvia; Autobranchia; Pteriomorpha; Ostreida; Ostreioidea; Ostreidae; Crassostrea; Crassostrea virginica

UdeM00000011820 29159 241.1 UdeM00000011820 XP\_034314851.1 92.2 129  
10 0 1 129 450 578 7.90E-61 241.1 29159 cellular  
organisms; Eukaryota; Opisthokonta; Metazoa; Eumetazoa; Bilateria; Protostomia; Spiralia; Lophotrochozoa; Mollusca; Bivalvia; Autobranchia; Pteriomorpha; Ostreida; Ostreioidea; Ostreidae; Crassostrea; Crassostrea gigas

UdeM00000011821 29159 430.6 UdeM00000011821 XP\_011456266.2 84.7 255  
36 2 78 331 288 540 1.80E-117 430.6 29159 cellular  
organisms; Eukaryota; Opisthokonta; Metazoa; Eumetazoa; Bilateria; Protostomia; Spiralia; Lophotrochozoa; Mollusca; Bivalvia; Autobranchia; Pteriomorpha; Ostreida; Ostreioidea; Ostreidae; Crassostrea; Crassostrea gigas

UdeM00000011822 6579 373.2 UdeM00000011822 XP\_033736949.1 84.3 216  
34 0 90 305 66 281 3.10E-100 373.2 6579 cellular  
organisms; Eukaryota; Opisthokonta; Metazoa; Eumetazoa; Bilateria; Protostomia;

Spiralia;Lophotrochozoa;Mollusca;Bivalvia;Autobranchia;Pteriormorphia;Pectinida;Pectinoidea;Pectinidae;Pecten;Pecten maximus

UdeM00000011824 6596 1380.5 UdeM00000011824 XP\_045160983.1 55  
1406 529 24 75 1449 51 1384 0.00E+00 1380.5 6596  
cellular

organisms;Eukaryota;Opisthokonta;Metazoa;Eumetazoa;Bilateria;Protostomia;Spiralia;Lophotrochozoa;Mollusca;Bivalvia;Autobranchia;Heteroconchia;Euherodonta;Imparidentia;Venerida;Veneroidea;Veneridae;Mercenaria;Mercenaria mercenaria

UdeM00000011825 6596 1380.5 UdeM00000011825 XP\_045160983.1 55  
1406 529 24 75 1449 51 1384 0.00E+00 1380.5 6596  
cellular

organisms;Eukaryota;Opisthokonta;Metazoa;Eumetazoa;Bilateria;Protostomia;Spiralia;Lophotrochozoa;Mollusca;Bivalvia;Autobranchia;Heteroconchia;Euherodonta;Imparidentia;Venerida;Veneroidea;Veneridae;Mercenaria;Mercenaria mercenaria

UdeM00000011826 6596 231.1 UdeM00000011826 XP\_045159643.1 55 202  
88 2 2 201 53 253 1.30E-57 231.1 6596 cellular

organisms;Eukaryota;Opisthokonta;Metazoa;Eumetazoa;Bilateria;Protostomia;Spiralia;Lophotrochozoa;Mollusca;Bivalvia;Autobranchia;Heteroconchia;Euherodonta;Imparidentia;Venerida;Veneroidea;Veneridae;Mercenaria;Mercenaria mercenaria

UdeM00000011827 6596 256.5 UdeM00000011827 XP\_045159643.1 51.4 251  
118 3 5 252 4 253 3.50E-65 256.5 6596 cellular

organisms;Eukaryota;Opisthokonta;Metazoa;Eumetazoa;Bilateria;Protostomia;Spiralia;Lophotrochozoa;Mollusca;Bivalvia;Autobranchia;Heteroconchia;Euherodonta;Imparidentia;Venerida;Veneroidea;Veneridae;Mercenaria;Mercenaria mercenaria

UdeM00000011828 400727 255.8 UdeM00000011828 XP\_025110934.1 61.8  
207 74 2 50 251 56 262 6.00E-65 255.8 400727  
cellular

organisms;Eukaryota;Opisthokonta;Metazoa;Eumetazoa;Bilateria;Protostomia;Spiralia;Lophotrochozoa;Mollusca;Gastropoda;Caenogastropoda;Architaenioglossa;Ampullarioidea;Ampullariidae;Pomacea;Pomacea canaliculata

UdeM00000011829 6596 244.2 UdeM00000011829 XP\_045159645.1 54.1 220  
89 4 4 223 7 214 1.60E-61 244.2 6596 cellular

organisms;Eukaryota;Opisthokonta;Metazoa;Eumetazoa;Bilateria;Protostomia;Spiralia;Lophotrochozoa;Mollusca;Bivalvia;Autobranchia;Heteroconchia;Euherodonta;Imparidentia;Venerida;Veneroidea;Veneridae;Mercenaria;Mercenaria mercenaria

UdeM00000011830 6573 346.3 UdeM00000011830 XP\_021363904.1 42.6 399  
216 5 23 417 26 415 5.60E-92 346.3 6573 cellular

organisms;Eukaryota;Opisthokonta;Metazoa;Eumetazoa;Bilateria;Protostomia;Spiralia;Lophotrochozoa;Mollusca;Bivalvia;Autobranchia;Pteriormorphia;Pectinida;Pectinoidea;Pectinidae;Mizuhopecten;Mizuhopecten yessoensis

UdeM00000011831 7998 89.4 UdeM00000011831 XP\_017332455.1 62.7 75  
25 2 1 73 81 154 4.50E-15 89.4 7998 cellular

organisms;Eukaryota;Opisthokonta;Metazoa;Eumetazoa;Bilateria;Deuterostomia;Chordata;Craniata;Vertebrata;Gnathostomata;Teleostomi;Euteleostomi;Actinopterygii;Actinopteri;Neopterygii;Teleostei;Osteoglossocephalai;Clupeocephala;Otomorpha;Ostariophysi;Otophysi;Characiphysae;Siluriformes;Siluridae;Ictaluridae;Ictalurus;Ictalurus punctatus

UdeM00000011832 6573 347.8 UdeM00000011832 XP\_021363904.1 42.6 399  
216 5 23 417 26 415 1.90E-92 347.8 6573 cellular

organisms;Eukaryota;Opisthokonta;Metazoa;Eumetazoa;Bilateria;Protostomia;  
Spiralia;Lophotrochozoa;Mollusca;Bivalvia;Autobranchia;Pteriomorpha;Pect  
inida;Pectinoidea;Pectinidae;Mizuhopecten;Mizuhopecten yessoensis  
UdeM00000011833 6573 348.6 UdeM00000011833 XP\_021363837.1 43.2 410  
219 5 13 417 15 415 1.10E-92 348.6 6573 cellular  
organisms;Eukaryota;Opisthokonta;Metazoa;Eumetazoa;Bilateria;Protostomia;  
Spiralia;Lophotrochozoa;Mollusca;Bivalvia;Autobranchia;Pteriomorpha;Pect  
inida;Pectinoidea;Pectinidae;Mizuhopecten;Mizuhopecten yessoensis  
UdeM00000011834 6573 348.6 UdeM00000011834 XP\_021363837.1 43.2 410  
219 5 13 417 15 415 1.10E-92 348.6 6573 cellular  
organisms;Eukaryota;Opisthokonta;Metazoa;Eumetazoa;Bilateria;Protostomia;  
Spiralia;Lophotrochozoa;Mollusca;Bivalvia;Autobranchia;Pteriomorpha;Pect  
inida;Pectinoidea;Pectinidae;Mizuhopecten;Mizuhopecten yessoensis  
UdeM00000011835 6573 346.3 UdeM00000011835 XP\_021363837.1 42.9 410  
220 5 13 417 15 415 5.60E-92 346.3 6573 cellular  
organisms;Eukaryota;Opisthokonta;Metazoa;Eumetazoa;Bilateria;Protostomia;  
Spiralia;Lophotrochozoa;Mollusca;Bivalvia;Autobranchia;Pteriomorpha;Pect  
inida;Pectinoidea;Pectinidae;Mizuhopecten;Mizuhopecten yessoensis  
UdeM00000011836 6573 348.6 UdeM00000011836 XP\_021363837.1 42.9 410  
220 5 13 417 15 415 1.10E-92 348.6 6573 cellular  
organisms;Eukaryota;Opisthokonta;Metazoa;Eumetazoa;Bilateria;Protostomia;  
Spiralia;Lophotrochozoa;Mollusca;Bivalvia;Autobranchia;Pteriomorpha;Pect  
inida;Pectinoidea;Pectinidae;Mizuhopecten;Mizuhopecten yessoensis  
UdeM00000011837 6573 350.9 UdeM00000011837 XP\_021363904.1 42.9 399  
215 5 23 417 26 415 2.30E-93 350.9 6573 cellular  
organisms;Eukaryota;Opisthokonta;Metazoa;Eumetazoa;Bilateria;Protostomia;  
Spiralia;Lophotrochozoa;Mollusca;Bivalvia;Autobranchia;Pteriomorpha;Pect  
inida;Pectinoidea;Pectinidae;Mizuhopecten;Mizuhopecten yessoensis  
UdeM00000011838 6596 622.1 UdeM00000011838 XP\_045157827.1 69.4 594  
180 2 35 627 1 593 7.80E-175 622.1 6596 cellular  
organisms;Eukaryota;Opisthokonta;Metazoa;Eumetazoa;Bilateria;Protostomia;  
Spiralia;Lophotrochozoa;Mollusca;Bivalvia;Autobranchia;Heteroconchia;Euhe  
terodonta;Imparidentia;Venerida;Veneroidea;Veneridae;Mercenaria;Mercenari  
a mercenaria  
UdeM00000011839 400727 147.5 UdeM00000011839 XP\_025110511.1 54.6  
238 78 6 191 418 196 413 3.80E-32 147.5 400727  
cellular  
organisms;Eukaryota;Opisthokonta;Metazoa;Eumetazoa;Bilateria;Protostomia;  
Spiralia;Lophotrochozoa;Mollusca;Gastropoda;Caenogastropoda;Architaeniogl  
ossa;Ampullarioidea;Ampullariidae;Pomacea;Pomacea canaliculata  
UdeM00000011840 1735272 257.3 UdeM00000011840 XP\_041359183.1 53.1  
245 106 4 1 237 1 244 1.90E-65 257.3 1735272  
cellular  
organisms;Eukaryota;Opisthokonta;Metazoa;Eumetazoa;Bilateria;Protostomia;  
Spiralia;Lophotrochozoa;Mollusca;Gastropoda;Neomphalina;Neomphaloidea;Pel  
tospiridae;Gigantopelta;Gigantopelta aegis  
UdeM00000011841 1735272 562.4 UdeM00000011841 XP\_041359982.1 78.8  
354 75 0 1 354 1 354 4.10E-157 562.4 1735272  
cellular  
organisms;Eukaryota;Opisthokonta;Metazoa;Eumetazoa;Bilateria;Protostomia;  
Spiralia;Lophotrochozoa;Mollusca;Gastropoda;Neomphalina;Neomphaloidea;Pel  
tospiridae;Gigantopelta;Gigantopelta aegis  
UdeM00000011842 6596 568.9 UdeM00000011842 XP\_045159723.1 67.2 433  
104 2 13 407 2 434 5.10E-159 568.9 6596 cellular

organisms;Eukaryota;Opisthokonta;Metazoa;Eumetazoa;Bilateria;Protostomia;Spiralia;Lophotrochozoa;Mollusca;Bivalvia;Autobranhia;Heteroconchia;Euherodonta;Imparidentia;Venerida;Veneroidea;Veneridae;Mercenaria;Mercenaria mercenaria

UdeM00000011843 6596 654.4 UdeM00000011843 XP\_045159723.1 75.1 433  
107 1 13 444 2 434 1.00E-184 654.4 6596 cellular

organisms;Eukaryota;Opisthokonta;Metazoa;Eumetazoa;Bilateria;Protostomia;Spiralia;Lophotrochozoa;Mollusca;Bivalvia;Autobranhia;Heteroconchia;Euherodonta;Imparidentia;Venerida;Veneroidea;Veneridae;Mercenaria;Mercenaria mercenaria

UdeM00000011844 6596 488 UdeM00000011844 XP\_045160551.1 44.5 557  
299 3 3 550 3072 3627 1.50E-134 488 6596 cellular

organisms;Eukaryota;Opisthokonta;Metazoa;Eumetazoa;Bilateria;Protostomia;Spiralia;Lophotrochozoa;Mollusca;Bivalvia;Autobranhia;Heteroconchia;Euherodonta;Imparidentia;Venerida;Veneroidea;Veneridae;Mercenaria;Mercenaria mercenaria

UdeM00000011845 6596 3264.2 UdeM00000011845 XP\_045160551.1 55  
2957 1314 15 1 2946 137 3088 0.00E+00 3264.2 6596  
cellular

organisms;Eukaryota;Opisthokonta;Metazoa;Eumetazoa;Bilateria;Protostomia;Spiralia;Lophotrochozoa;Mollusca;Bivalvia;Autobranhia;Heteroconchia;Euherodonta;Imparidentia;Venerida;Veneroidea;Veneridae;Mercenaria;Mercenaria mercenaria

UdeM00000011846 6596 144.8 UdeM00000011846 XP\_045160551.1 54.8 124  
53 2 10 133 10 130 1.10E-31 144.8 6596 cellular

organisms;Eukaryota;Opisthokonta;Metazoa;Eumetazoa;Bilateria;Protostomia;Spiralia;Lophotrochozoa;Mollusca;Bivalvia;Autobranhia;Heteroconchia;Euherodonta;Imparidentia;Venerida;Veneroidea;Veneridae;Mercenaria;Mercenaria mercenaria

UdeM00000011848 6565 114 UdeM00000011848 XP\_022318496.1 46.4 112  
56 4 4 111 86 197 8.30E-22 114 6565 cellular

organisms;Eukaryota;Opisthokonta;Metazoa;Eumetazoa;Bilateria;Protostomia;Spiralia;Lophotrochozoa;Mollusca;Bivalvia;Autobranhia;Pteriomorphia;Ostreida;Ostreoidea;Ostreidae;Crassostrea;Crassostrea virginica

UdeM00000011856 6596 274.2 UdeM00000011856 XP\_045208502.1 54.5 213  
95 1 2 214 20 230 1.50E-70 274.2 6596 cellular

organisms;Eukaryota;Opisthokonta;Metazoa;Eumetazoa;Bilateria;Protostomia;Spiralia;Lophotrochozoa;Mollusca;Bivalvia;Autobranhia;Heteroconchia;Euherodonta;Imparidentia;Venerida;Veneroidea;Veneridae;Mercenaria;Mercenaria mercenaria

UdeM00000011857 29159 72.4 UdeM00000011857 XP\_034334787.1 31.5 162  
83 3 1 134 150 311 5.60E-10 72.4 29159 cellular

organisms;Eukaryota;Opisthokonta;Metazoa;Eumetazoa;Bilateria;Protostomia;Spiralia;Lophotrochozoa;Mollusca;Bivalvia;Autobranhia;Pteriomorphia;Ostreida;Ostreoidea;Ostreidae;Crassostrea;Crassostrea gigas

UdeM00000011859 6596 72.8 UdeM00000011859 XP\_045210360.1 57.4 47  
20 0 1 47 91 137 1.70E-10 72.8 6596 cellular

organisms;Eukaryota;Opisthokonta;Metazoa;Eumetazoa;Bilateria;Protostomia;Spiralia;Lophotrochozoa;Mollusca;Bivalvia;Autobranhia;Heteroconchia;Euherodonta;Imparidentia;Venerida;Veneroidea;Veneridae;Mercenaria;Mercenaria mercenaria

UdeM00000011860 6596 73.9 UdeM00000011860 XP\_045208502.1 42.3 78  
43 1 121 198 24 99 2.60E-10 73.9 6596 cellular

organisms;Eukaryota;Opisthokonta;Metazoa;Eumetazoa;Bilateria;Protostomia;

Spiralia;Lophotrochozoa;Mollusca;Bivalvia;Autobranchia;Heteroconchia;Euherodonta;Imparidentia;Venerida;Veneroidea;Veneridae;Mercenaria;Mercenaria mercenaria

UdeM00000011862 225164 191.8 UdeM00000011862 XP\_009050887.1 62.2  
135 51 0 4 138 39 173 6.80E-46 191.8 225164  
cellular

organisms;Eukaryota;Opisthokonta;Metazoa;Eumetazoa;Bilateria;Protostomia;Spiralia;Lophotrochozoa;Mollusca;Gastropoda;Patellogastropoda;Lottioidea;Lottiidae;Lottia;Lottia gigantea

UdeM00000011861 225164 191.8 UdeM00000011861 XP\_009050887.1 62.2  
135 51 0 13 147 39 173 7.10E-46 191.8 225164  
cellular

organisms;Eukaryota;Opisthokonta;Metazoa;Eumetazoa;Bilateria;Protostomia;Spiralia;Lophotrochozoa;Mollusca;Gastropoda;Patellogastropoda;Lottioidea;Lottiidae;Lottia;Lottia gigantea

UdeM00000011863 7539 68.9 UdeM00000011863 XP\_023026073.1 24.2 298  
204 8 69 358 643 926 1.50E-08 68.9 7539 cellular

organisms;Eukaryota;Opisthokonta;Metazoa;Eumetazoa;Bilateria;Protostomia;Ecdysozoa;Panarthropoda;Arthropoda;Mandibulata;Pancrustacea;Hexapoda;Insecta;Dicondylia;Pterygota;Neoptera;Endopterygota;Coleoptera;Polyphaga;Cucujiformia;Chrysomeloidea;Chrysomelidae;Chrysomelinae;Doryphorini;Leptinotarsa;Leptinotarsa decemlineata

UdeM00000011864 225164 137.5 UdeM00000011864 XP\_009050887.1 59.6  
99 40 0 1 99 66 164 1.10E-29 137.5 225164  
cellular

organisms;Eukaryota;Opisthokonta;Metazoa;Eumetazoa;Bilateria;Protostomia;Spiralia;Lophotrochozoa;Mollusca;Gastropoda;Patellogastropoda;Lottioidea;Lottiidae;Lottia;Lottia gigantea

UdeM00000011865 6596 79.7 UdeM00000011865 XP\_045208502.1 40.7 86  
49 1 28 113 18 101 2.70E-12 79.7 6596 cellular

organisms;Eukaryota;Opisthokonta;Metazoa;Eumetazoa;Bilateria;Protostomia;Spiralia;Lophotrochozoa;Mollusca;Bivalvia;Autobranchia;Heteroconchia;Euherodonta;Imparidentia;Venerida;Veneroidea;Veneridae;Mercenaria;Mercenaria mercenaria

UdeM00000011866 210409 62 UdeM00000011866 XP\_045111676.1 22.2  
378 238 15 6 358 831 1177 1.80E-06 62 210409  
cellular

organisms;Eukaryota;Opisthokonta;Metazoa;Eumetazoa;Bilateria;Protostomia;Ecdysozoa;Panarthropoda;Arthropoda;Mandibulata;Pancrustacea;Crustacea;Multicrustacea;Malacostraca;Eumalacostraca;Eucarida;Decapoda;Pleocyemata;Brachyura;Eubrachyura;Heterotremata;Portunoidea;Portunidae;Portunus;Portunus trituberculatus

UdeM00000011867 6579 59.3 UdeM00000011867 XP\_033730472.1 36.6 71  
45 0 30 100 185 255 3.30E-06 59.3 6579 cellular

organisms;Eukaryota;Opisthokonta;Metazoa;Eumetazoa;Bilateria;Protostomia;Spiralia;Lophotrochozoa;Mollusca;Bivalvia;Autobranchia;Pteriormorphia;Pectinida;Pectinoidea;Pectinidae;Pecten;Pecten maximus

UdeM00000011868 7539 67.8 UdeM00000011868 XP\_023026073.1 23.8 336  
226 9 40 358 604 926 3.30E-08 67.8 7539 cellular

organisms;Eukaryota;Opisthokonta;Metazoa;Eumetazoa;Bilateria;Protostomia;Ecdysozoa;Panarthropoda;Arthropoda;Mandibulata;Pancrustacea;Hexapoda;Insecta;Dicondylia;Pterygota;Neoptera;Endopterygota;Coleoptera;Polyphaga;Cucujiformia;Chrysomeloidea;Chrysomelidae;Chrysomelinae;Doryphorini;Leptinotarsa;Leptinotarsa decemlineata

UdeM00000011869 114398 67.4 UdeM00000011869 XP\_015922483.1 24.7  
 299 188 11 67 353 459 732 4.30E-08 67.4 114398  
 cellular  
 organisms;Eukaryota;Opisthokonta;Metazoa;Eumetazoa;Bilateria;Protostomia;  
 Ecdysozoa;Panarthropoda;Arthropoda;Chelicerata;Arachnida;Araneae;Araneomorphae;  
 Entelegynae;Orbiculariae;Araneoidea;Theridiidae;Parasteatoda;Parasteatoda  
 tepidariorum  
 UdeM00000011870 6579 544.7 UdeM00000011870 XP\_033761334.1 68.6 382  
 113 3 64 440 62 441 1.10E-151 544.7 6579 cellular  
 organisms;Eukaryota;Opisthokonta;Metazoa;Eumetazoa;Bilateria;Protostomia;  
 Spiralia;Lophotrochozoa;Mollusca;Bivalvia;Autobranhia;Pteriomorphia;Pectinida;  
 Pectinoidea;Pectinidae;Pecten;Pecten maximus  
 UdeM00000011871 6579 581.6 UdeM00000011871 XP\_033761334.1 69.2 409  
 120 4 36 442 44 448 8.50E-163 581.6 6579 cellular  
 organisms;Eukaryota;Opisthokonta;Metazoa;Eumetazoa;Bilateria;Protostomia;  
 Spiralia;Lophotrochozoa;Mollusca;Bivalvia;Autobranhia;Pteriomorphia;Pectinida;  
 Pectinoidea;Pectinidae;Pecten;Pecten maximus  
 UdeM00000011872 37653 368.2 UdeM00000011872 XP\_014784607.1 62.5 264  
 96 1 1 261 171 434 8.70E-99 368.2 37653 cellular  
 organisms;Eukaryota;Opisthokonta;Metazoa;Eumetazoa;Bilateria;Protostomia;  
 Spiralia;Lophotrochozoa;Mollusca;Cephalopoda;Coleoidea;Octopodiformes;Octopoda;  
 Incirrata;Octopodidae;Octopus;Octopus bimaculoides  
 UdeM00000011873 6596 506.5 UdeM00000011873 XP\_045167636.1 63.3 381  
 129 4 78 448 64 443 3.40E-140 506.5 6596 cellular  
 organisms;Eukaryota;Opisthokonta;Metazoa;Eumetazoa;Bilateria;Protostomia;  
 Spiralia;Lophotrochozoa;Mollusca;Bivalvia;Autobranhia;Heteroconchia;Euheterodonta;  
 Imparidentia;Venerida;Veneroidea;Veneridae;Mercenaria;Mercenaria mercenaria  
 UdeM00000011874 6596 242.7 UdeM00000011874 XP\_045167636.1 69.4 160  
 47 1 17 174 64 223 3.60E-61 242.7 6596 cellular  
 organisms;Eukaryota;Opisthokonta;Metazoa;Eumetazoa;Bilateria;Protostomia;  
 Spiralia;Lophotrochozoa;Mollusca;Bivalvia;Autobranhia;Heteroconchia;Euheterodonta;  
 Imparidentia;Venerida;Veneroidea;Veneridae;Mercenaria;Mercenaria mercenaria  
 UdeM00000011875 6579 521.5 UdeM00000011875 XP\_033761334.1 59.7 449  
 165 5 9 453 13 449 1.10E-144 521.5 6579 cellular  
 organisms;Eukaryota;Opisthokonta;Metazoa;Eumetazoa;Bilateria;Protostomia;  
 Spiralia;Lophotrochozoa;Mollusca;Bivalvia;Autobranhia;Pteriomorphia;Pectinida;  
 Pectinoidea;Pectinidae;Pecten;Pecten maximus  
 UdeM00000011876 6596 754.2 UdeM00000011876 XP\_045168353.1 49 1002  
 421 19 4 975 8 949 2.10E-214 754.2 6596 cellular  
 organisms;Eukaryota;Opisthokonta;Metazoa;Eumetazoa;Bilateria;Protostomia;  
 Spiralia;Lophotrochozoa;Mollusca;Bivalvia;Autobranhia;Heteroconchia;Euheterodonta;  
 Imparidentia;Venerida;Veneroidea;Veneridae;Mercenaria;Mercenaria mercenaria  
 UdeM00000011877 6596 672.2 UdeM00000011877 XP\_045168353.1 47.3 833  
 363 16 66 882 177 949 9.30E-190 672.2 6596 cellular  
 organisms;Eukaryota;Opisthokonta;Metazoa;Eumetazoa;Bilateria;Protostomia;  
 Spiralia;Lophotrochozoa;Mollusca;Bivalvia;Autobranhia;Heteroconchia;Euheterodonta;  
 Imparidentia;Venerida;Veneroidea;Veneridae;Mercenaria;Mercenaria mercenaria  
 UdeM00000011879 6596 349.7 UdeM00000011879 XP\_045167720.1 37.5 827  
 441 18 3 793 2 788 1.00E-92 349.7 6596 cellular  
 organisms;Eukaryota;Opisthokonta;Metazoa;Eumetazoa;Bilateria;Protostomia;



Spiralia;Lophotrochozoa;Mollusca;Bivalvia;Autobranchia;Heteroconchia;Euherodonta;Imparidentia;Venerida;Veneroidea;Veneridae;Mercenaria;Mercenaria mercenaria

UdeM00000011880 6596 529.3 UdeM00000011880 XP\_045168265.1 49.4 611  
277 6 1 584 1 606 6.40E-147 529.3 6596 cellular

organisms;Eukaryota;Opisthokonta;Metazoa;Eumetazoa;Bilateria;Protostomia;Spiralia;Lophotrochozoa;Mollusca;Bivalvia;Autobranchia;Heteroconchia;Euherodonta;Imparidentia;Venerida;Veneroidea;Veneridae;Mercenaria;Mercenaria mercenaria

UdeM00000011881 45264 355.1 UdeM00000011881 XP\_044165535.1 48.8 336  
168 1 2 333 194 529 9.60E-95 355.1 45264 cellular

organisms;Eukaryota;Opisthokonta;Metazoa;Eumetazoa;Cnidaria;Anthozoa;Hexacorallia;Scleractinia;Astrocoeniina;Acroporidae;Acropora;Acropora millepora

UdeM00000011882 1735272 343.2 UdeM00000011882 XP\_041365242.1 91.6  
179 15 0 1 179 2 180 2.00E-91 343.2 1735272  
cellular

organisms;Eukaryota;Opisthokonta;Metazoa;Eumetazoa;Bilateria;Protostomia;Spiralia;Lophotrochozoa;Mollusca;Gastropoda;Neomphalina;Neomphaloidea;Peltoispiridae;Gigantopelta;Gigantopelta aegis

UdeM00000011883 6565 120.9 UdeM00000011883 XP\_022307097.1 68.7 83  
26 0 9 91 4 86 8.40E-25 120.9 6565 cellular

organisms;Eukaryota;Opisthokonta;Metazoa;Eumetazoa;Bilateria;Protostomia;Spiralia;Lophotrochozoa;Mollusca;Bivalvia;Autobranchia;Pteriomorphia;Ostreida;Ostreoidea;Ostreidae;Crassostrea;Crassostrea virginica

UdeM00000011884 6565 270.4 UdeM00000011884 XP\_022308602.1 46.3 287  
120 3 13 293 357 615 2.80E-69 270.4 6565 cellular

organisms;Eukaryota;Opisthokonta;Metazoa;Eumetazoa;Bilateria;Protostomia;Spiralia;Lophotrochozoa;Mollusca;Bivalvia;Autobranchia;Pteriomorphia;Ostreida;Ostreoidea;Ostreidae;Crassostrea;Crassostrea virginica

UdeM00000011885 6596 355.5 UdeM00000011885 XP\_045167924.1 67.2 244  
79 1 408 651 120 362 1.40E-94 355.5 6596 cellular

organisms;Eukaryota;Opisthokonta;Metazoa;Eumetazoa;Bilateria;Protostomia;Spiralia;Lophotrochozoa;Mollusca;Bivalvia;Autobranchia;Heteroconchia;Euherodonta;Imparidentia;Venerida;Veneroidea;Veneridae;Mercenaria;Mercenaria mercenaria

UdeM00000011886 6596 188.3 UdeM00000011886 XP\_045169637.1 59.6 208  
59 10 1 200 121 311 9.50E-45 188.3 6596 cellular

organisms;Eukaryota;Opisthokonta;Metazoa;Eumetazoa;Bilateria;Protostomia;Spiralia;Lophotrochozoa;Mollusca;Bivalvia;Autobranchia;Heteroconchia;Euherodonta;Imparidentia;Venerida;Veneroidea;Veneridae;Mercenaria;Mercenaria mercenaria

UdeM00000011887 6596 717.6 UdeM00000011887 XP\_045169637.1 68.8 581  
150 15 1 570 121 681 1.30E-203 717.6 6596 cellular

organisms;Eukaryota;Opisthokonta;Metazoa;Eumetazoa;Bilateria;Protostomia;Spiralia;Lophotrochozoa;Mollusca;Bivalvia;Autobranchia;Heteroconchia;Euherodonta;Imparidentia;Venerida;Veneroidea;Veneridae;Mercenaria;Mercenaria mercenaria

UdeM00000011888 6596 542.7 UdeM00000011888 XP\_045169637.1 73.9 375  
93 4 8 380 310 681 3.70E-151 542.7 6596 cellular

organisms;Eukaryota;Opisthokonta;Metazoa;Eumetazoa;Bilateria;Protostomia;Spiralia;Lophotrochozoa;Mollusca;Bivalvia;Autobranchia;Heteroconchia;Euherodonta;Imparidentia;Venerida;Veneroidea;Veneridae;Mercenaria;Mercenaria mercenaria

UdeM00000011889 6596 540.4 UdeM00000011889 XP\_045169637.1 73.5 374  
 94 4 13 384 311 681 1.90E-150 540.4 6596 cellular  
 organisms;Eukaryota;Opisthokonta;Metazoa;Eumetazoa;Bilateria;Protostomia;  
 Spiralia;Lophotrochozoa;Mollusca;Bivalvia;Autobranchia;Heteroconchia;Euhe  
 terodonta;Imparidentia;Venerida;Veneroidea;Veneridae;Mercenaria;Mercenari  
 a mercenaria  
 UdeM00000011890 6565 334.7 UdeM00000011890 XP\_022309345.1 23.4 1361  
 847 37 4 1282 1 1248 5.10E-88 334.7 6565 cellular  
 organisms;Eukaryota;Opisthokonta;Metazoa;Eumetazoa;Bilateria;Protostomia;  
 Spiralia;Lophotrochozoa;Mollusca;Bivalvia;Autobranchia;Pteriormorphia;Ostr  
 eida;Ostreoidea;Ostreidae;Crassostrea;Crassostrea virginica  
 UdeM00000011891 6573 612.1 UdeM00000011891 XP\_021366493.1 33.3 1131  
 671 31 5 1090 778 1870 1.40E-171 612.1 6573 cellular  
 organisms;Eukaryota;Opisthokonta;Metazoa;Eumetazoa;Bilateria;Protostomia;  
 Spiralia;Lophotrochozoa;Mollusca;Bivalvia;Autobranchia;Pteriormorphia;Pect  
 inida;Pectinoidea;Pectinidae;Mizuhopecten;Mizuhopecten yessoensis  
 UdeM00000011892 6579 792.3 UdeM00000011892 XP\_033762069.1 58.5 615  
 255 0 2 616 10 624 4.30E-226 792.3 6579 cellular  
 organisms;Eukaryota;Opisthokonta;Metazoa;Eumetazoa;Bilateria;Protostomia;  
 Spiralia;Lophotrochozoa;Mollusca;Bivalvia;Autobranchia;Pteriormorphia;Pect  
 inida;Pectinoidea;Pectinidae;Pecten;Pecten maximus  
 UdeM00000011893 6579 352.8 UdeM00000011893 XP\_033763008.1 66.1 257  
 78 3 1 251 1 254 3.50E-94 352.8 6579 cellular  
 organisms;Eukaryota;Opisthokonta;Metazoa;Eumetazoa;Bilateria;Protostomia;  
 Spiralia;Lophotrochozoa;Mollusca;Bivalvia;Autobranchia;Pteriormorphia;Pect  
 inida;Pectinoidea;Pectinidae;Pecten;Pecten maximus  
 UdeM00000011894 6565 1030 UdeM00000011894 XP\_022309724.1 57 926  
 363 9 308 1232 239 1130 2.40E-297 1030 6565 cellular  
 organisms;Eukaryota;Opisthokonta;Metazoa;Eumetazoa;Bilateria;Protostomia;  
 Spiralia;Lophotrochozoa;Mollusca;Bivalvia;Autobranchia;Pteriormorphia;Ostr  
 eida;Ostreoidea;Ostreidae;Crassostrea;Crassostrea virginica  
 UdeM00000011895 6596 441.4 UdeM00000011895 XP\_045168897.1 46.5 557  
 286 3 21 567 32 586 1.80E-120 441.4 6596 cellular  
 organisms;Eukaryota;Opisthokonta;Metazoa;Eumetazoa;Bilateria;Protostomia;  
 Spiralia;Lophotrochozoa;Mollusca;Bivalvia;Autobranchia;Heteroconchia;Euhe  
 terodonta;Imparidentia;Venerida;Veneroidea;Veneridae;Mercenaria;Mercenari  
 a mercenaria  
 UdeM00000011896 7654 205.3 UdeM00000011896 XP\_041457251.1 50 200  
 88 5 31 227 35 225 1.80E-49 205.3 7654 cellular  
 organisms;Eukaryota;Opisthokonta;Metazoa;Eumetazoa;Bilateria;Deuterostomi  
 a;Echinodermata;Eleutherozoa;Echinozoa;Echinoidea;Euechinoidea;Echinacea;  
 Temnopleuroidea;Toxopneustidae;Lytechinus;Lytechinus variegatus  
 UdeM00000011897 7654 203.4 UdeM00000011897 XP\_041457255.1 54.1 181  
 74 4 7 185 52 225 1.20E-48 203.4 7654 cellular  
 organisms;Eukaryota;Opisthokonta;Metazoa;Eumetazoa;Bilateria;Deuterostomi  
 a;Echinodermata;Eleutherozoa;Echinozoa;Echinoidea;Euechinoidea;Echinacea;  
 Temnopleuroidea;Toxopneustidae;Lytechinus;Lytechinus variegatus  
 UdeM00000011898 7654 207.2 UdeM00000011898 XP\_041457255.1 55.2 181  
 72 4 49 227 52 225 7.40E-50 207.2 7654 cellular  
 organisms;Eukaryota;Opisthokonta;Metazoa;Eumetazoa;Bilateria;Deuterostomi  
 a;Echinodermata;Eleutherozoa;Echinozoa;Echinoidea;Euechinoidea;Echinacea;  
 Temnopleuroidea;Toxopneustidae;Lytechinus;Lytechinus variegatus  
 UdeM00000011899 6596 188.3 UdeM00000011899 XP\_045215936.1 41.4 251  
 133 7 4 250 7 247 1.20E-44 188.3 6596 cellular

organisms;Eukaryota;Opisthokonta;Metazoa;Eumetazoa;Bilateria;Protostomia;Spiralia;Lophotrochozoa;Mollusca;Bivalvia;Autobranhia;Heteroconchia;Euherodonta;Imparidentia;Venerida;Veneroidea;Veneridae;Mercenaria;Mercenaria mercenaria

UdeM00000011900 6573 465.3 UdeM00000011900 XP\_021355706.1 42.5 969  
458 14 312 1276 264 1137 2.50E-127 465.3 6573 cellular

organisms;Eukaryota;Opisthokonta;Metazoa;Eumetazoa;Bilateria;Protostomia;Spiralia;Lophotrochozoa;Mollusca;Bivalvia;Autobranhia;Pteriormorphia;Pectinida;Pectinoidea;Pectinidae;Mizuhopecten;Mizuhopecten yessoensis

UdeM00000011900 6573 67.8 UdeM00000011900 XP\_021355706.1 72.3 47  
13 0 1 47 217 263 1.20E-07 67.8 6573 cellular

organisms;Eukaryota;Opisthokonta;Metazoa;Eumetazoa;Bilateria;Protostomia;Spiralia;Lophotrochozoa;Mollusca;Bivalvia;Autobranhia;Pteriormorphia;Pectinida;Pectinoidea;Pectinidae;Mizuhopecten;Mizuhopecten yessoensis

UdeM00000011901 6579 172.9 UdeM00000011901 XP\_033761832.1 51.9 183  
72 4 1 170 1 180 4.10E-40 172.9 6579 cellular

organisms;Eukaryota;Opisthokonta;Metazoa;Eumetazoa;Bilateria;Protostomia;Spiralia;Lophotrochozoa;Mollusca;Bivalvia;Autobranhia;Pteriormorphia;Pectinida;Pectinoidea;Pectinidae;Pecten;Pecten maximus

UdeM00000011903 6596 448.7 UdeM00000011903 XP\_045182804.1 85.1 261  
39 0 96 356 126 386 6.80E-123 448.7 6596 cellular

organisms;Eukaryota;Opisthokonta;Metazoa;Eumetazoa;Bilateria;Protostomia;Spiralia;Lophotrochozoa;Mollusca;Bivalvia;Autobranhia;Heteroconchia;Euherodonta;Imparidentia;Venerida;Veneroidea;Veneridae;Mercenaria;Mercenaria mercenaria

UdeM00000011902 6596 904.8 UdeM00000011902 XP\_045182804.1 63.2 772  
266 10 96 861 126 885 8.30E-260 904.8 6596 cellular

organisms;Eukaryota;Opisthokonta;Metazoa;Eumetazoa;Bilateria;Protostomia;Spiralia;Lophotrochozoa;Mollusca;Bivalvia;Autobranhia;Heteroconchia;Euherodonta;Imparidentia;Venerida;Veneroidea;Veneridae;Mercenaria;Mercenaria mercenaria

UdeM00000011904 6573 1121.3 UdeM00000011904 XP\_021355704.1 73  
745 199 2 1 743 1 745 0.00E+00 1121.3 6573  
cellular

organisms;Eukaryota;Opisthokonta;Metazoa;Eumetazoa;Bilateria;Protostomia;Spiralia;Lophotrochozoa;Mollusca;Bivalvia;Autobranhia;Pteriormorphia;Pectinida;Pectinoidea;Pectinidae;Mizuhopecten;Mizuhopecten yessoensis

UdeM00000011905 6596 909.4 UdeM00000011905 XP\_045168903.1 59.7 914  
309 20 22 905 51 935 5.40E-261 909.4 6596 cellular

organisms;Eukaryota;Opisthokonta;Metazoa;Eumetazoa;Bilateria;Protostomia;Spiralia;Lophotrochozoa;Mollusca;Bivalvia;Autobranhia;Heteroconchia;Euherodonta;Imparidentia;Venerida;Veneroidea;Veneridae;Mercenaria;Mercenaria mercenaria

UdeM00000011907 6596 821.2 UdeM00000011907 XP\_045168477.1 69.8 590  
162 5 10 585 31 618 9.50E-235 821.2 6596 cellular

organisms;Eukaryota;Opisthokonta;Metazoa;Eumetazoa;Bilateria;Protostomia;Spiralia;Lophotrochozoa;Mollusca;Bivalvia;Autobranhia;Heteroconchia;Euherodonta;Imparidentia;Venerida;Veneroidea;Veneridae;Mercenaria;Mercenaria mercenaria

UdeM00000011908 6596 1453.7 UdeM00000011908 XP\_045170513.1 77.3  
930 209 1 3 932 2 929 0.00E+00 1453.7 6596  
cellular

organisms;Eukaryota;Opisthokonta;Metazoa;Eumetazoa;Bilateria;Protostomia;Spiralia;Lophotrochozoa;Mollusca;Bivalvia;Autobranhia;Heteroconchia;Euherodonta

terodonta;Imparidentia;Venerida;Veneroidea;Veneridae;Mercenaria;Mercenari  
 a mercenaria  
 UdeM00000011909 6596 112.1 UdeM00000011909 XP\_045170513.1 68.2 85  
 25 1 3 87 2 84 4.40E-22 112.1 6596 cellular  
 organisms;Eukaryota;Opisthokonta;Metazoa;Eumetazoa;Bilateria;Protostomia;  
 Spiralia;Lophotrochozoa;Mollusca;Bivalvia;Autobranhia;Heteroconchia;Euhe  
 terodonta;Imparidentia;Venerida;Veneroidea;Veneridae;Mercenaria;Mercenari  
 a mercenaria  
 UdeM00000011910 6579 127.1 UdeM00000011910 XP\_033762530.1 33.8 237  
 149 1 7 235 5 241 3.00E-26 127.1 6579 cellular  
 organisms;Eukaryota;Opisthokonta;Metazoa;Eumetazoa;Bilateria;Protostomia;  
 Spiralia;Lophotrochozoa;Mollusca;Bivalvia;Autobranhia;Pteriormorphia;Pect  
 inida;Pectinoidea;Pectinidae;Pecten;Pecten maximus  
 UdeM00000011911 6596 347.4 UdeM00000011911 XP\_045168835.1 85.4 205  
 29 1 1 204 1 205 1.20E-92 347.4 6596 cellular  
 organisms;Eukaryota;Opisthokonta;Metazoa;Eumetazoa;Bilateria;Protostomia;  
 Spiralia;Lophotrochozoa;Mollusca;Bivalvia;Autobranhia;Heteroconchia;Euhe  
 terodonta;Imparidentia;Venerida;Veneroidea;Veneridae;Mercenaria;Mercenari  
 a mercenaria  
 UdeM00000011912 41117 189.5 UdeM00000011912 XP\_037086006.1 82.7 110  
 17 1 50 159 1 108 3.30E-45 189.5 41117 cellular  
 organisms;Eukaryota;Opisthokonta;Metazoa;Eumetazoa;Bilateria;Protostomia;  
 Ecdysozoa;Panarthropoda;Arthropoda;Mandibulata;Pancrustacea;Crustacea;Mul  
 ticrustacea;Hexanauplia;Thecostraca;Cirripedia;Thoracica;Pedunculata;Scal  
 pellomorpha;Pollicipedidae;Pollicipes;Pollicipes pollicipes  
 UdeM00000011913 1735272 139.4 UdeM00000011913 XP\_041367314.1 53.3  
 122 57 0 5 126 5 126 3.50E-30 139.4 1735272  
 cellular  
 organisms;Eukaryota;Opisthokonta;Metazoa;Eumetazoa;Bilateria;Protostomia;  
 Spiralia;Lophotrochozoa;Mollusca;Gastropoda;Neomphalina;Neomphaloidea;Pel  
 tospiridae;Gigantopelta;Gigantopelta aegis  
 UdeM00000011914 6596 191.4 UdeM00000011914 XP\_045167900.1 51.7 172  
 81 2 63 232 122 293 1.30E-45 191.4 6596 cellular  
 organisms;Eukaryota;Opisthokonta;Metazoa;Eumetazoa;Bilateria;Protostomia;  
 Spiralia;Lophotrochozoa;Mollusca;Bivalvia;Autobranhia;Heteroconchia;Euhe  
 terodonta;Imparidentia;Venerida;Veneroidea;Veneridae;Mercenaria;Mercenari  
 a mercenaria  
 UdeM00000011915 6596 1030 UdeM00000011915 XP\_045167900.1 51.9 1177  
 424 24 17 1149 293 1371 2.30E-297 1030 6596 cellular  
 organisms;Eukaryota;Opisthokonta;Metazoa;Eumetazoa;Bilateria;Protostomia;  
 Spiralia;Lophotrochozoa;Mollusca;Bivalvia;Autobranhia;Heteroconchia;Euhe  
 terodonta;Imparidentia;Venerida;Veneroidea;Veneridae;Mercenaria;Mercenari  
 a mercenaria  
 UdeM00000011916 6596 574.3 UdeM00000011916 XP\_045170464.1 65 420  
 147 0 1 420 1 420 1.30E-160 574.3 6596 cellular  
 organisms;Eukaryota;Opisthokonta;Metazoa;Eumetazoa;Bilateria;Protostomia;  
 Spiralia;Lophotrochozoa;Mollusca;Bivalvia;Autobranhia;Heteroconchia;Euhe  
 terodonta;Imparidentia;Venerida;Veneroidea;Veneridae;Mercenaria;Mercenari  
 a mercenaria  
 UdeM00000011917 6573 246.1 UdeM00000011917 XP\_021369928.1 36.6 454  
 264 9 176 621 421 858 1.20E-61 246.1 6573 cellular  
 organisms;Eukaryota;Opisthokonta;Metazoa;Eumetazoa;Bilateria;Protostomia;  
 Spiralia;Lophotrochozoa;Mollusca;Bivalvia;Autobranhia;Pteriormorphia;Pect  
 inida;Pectinoidea;Pectinidae;Mizuhopecten;Mizuhopecten yessoensis

UdeM00000011918 6596 218.4 UdeM00000011918 XP\_045168839.1 35.4 398  
 216 11 225 614 20 384 2.90E-53 218.4 6596 cellular  
 organisms;Eukaryota;Opisthokonta;Metazoa;Eumetazoa;Bilateria;Protostomia;  
 Spiralia;Lophotrochozoa;Mollusca;Bivalvia;Autobranchia;Heteroconchia;Euhe  
 terodonta;Imparidentia;Venerida;Veneroidea;Veneridae;Mercenaria;Mercenari  
 a mercenaria  
 UdeM00000011919 6596 219.5 UdeM00000011919 XP\_045168839.1 35.1 396  
 218 9 256 644 20 383 1.40E-53 219.5 6596 cellular  
 organisms;Eukaryota;Opisthokonta;Metazoa;Eumetazoa;Bilateria;Protostomia;  
 Spiralia;Lophotrochozoa;Mollusca;Bivalvia;Autobranchia;Heteroconchia;Euhe  
 terodonta;Imparidentia;Venerida;Veneroidea;Veneridae;Mercenaria;Mercenari  
 a mercenaria  
 UdeM00000011920 29159 141.4 UdeM00000011920 XP\_034317111.1 61.1 108  
 42 0 1 108 110 217 7.30E-31 141.4 29159 cellular  
 organisms;Eukaryota;Opisthokonta;Metazoa;Eumetazoa;Bilateria;Protostomia;  
 Spiralia;Lophotrochozoa;Mollusca;Bivalvia;Autobranchia;Pteriormorphia;Ostr  
 eida;Ostreoidea;Ostreidae;Crassostrea;Crassostrea gigas  
 UdeM00000011921 7962 66.2 UdeM00000011921 XP\_042616783.1 40.5 111  
 57 3 32 142 492 593 3.90E-08 66.2 7962 cellular  
 organisms;Eukaryota;Opisthokonta;Metazoa;Eumetazoa;Bilateria;Deuterostomi  
 a;Chordata;Craniata;Vertebrata;Gnathostomata;Teleostomi;Euteleostomi;Acti  
 nopterygii;Actinopteri;Neopterygii;Teleostei;Osteoglossocephalai;Clupeoce  
 phala;Otomorpha;Ostariophysi;Otophysi;Cypriniphysae;Cypriniformes;Cyprino  
 idei;Cyprinidae;Cyprininae;Cyprinus;Cyprinus carpio  
 UdeM00000011922 7719 68.2 UdeM00000011922 NP\_001122373.1 56 50  
 22 0 1 50 111 160 5.80E-09 68.2 7719 cellular  
 organisms;Eukaryota;Opisthokonta;Metazoa;Eumetazoa;Bilateria;Deuterostomi  
 a;Chordata;Tunicata;Ascidiacea;Phlebobranchia;Cionidae;Ciona;Ciona  
 intestinalis  
 UdeM00000011923 6596 193.7 UdeM00000011923 XP\_045168839.1 37.2 301  
 170 7 343 633 22 313 8.50E-46 193.7 6596 cellular  
 organisms;Eukaryota;Opisthokonta;Metazoa;Eumetazoa;Bilateria;Protostomia;  
 Spiralia;Lophotrochozoa;Mollusca;Bivalvia;Autobranchia;Heteroconchia;Euhe  
 terodonta;Imparidentia;Venerida;Veneroidea;Veneridae;Mercenaria;Mercenari  
 a mercenaria  
 UdeM00000011924 6596 157.1 UdeM00000011924 XP\_045168839.1 40.5 210  
 117 4 16 217 104 313 4.10E-35 157.1 6596 cellular  
 organisms;Eukaryota;Opisthokonta;Metazoa;Eumetazoa;Bilateria;Protostomia;  
 Spiralia;Lophotrochozoa;Mollusca;Bivalvia;Autobranchia;Heteroconchia;Euhe  
 terodonta;Imparidentia;Venerida;Veneroidea;Veneridae;Mercenaria;Mercenari  
 a mercenaria  
 UdeM00000011925 6596 207.2 UdeM00000011925 XP\_045168839.1 40.5 289  
 159 6 373 654 20 302 6.30E-50 207.2 6596 cellular  
 organisms;Eukaryota;Opisthokonta;Metazoa;Eumetazoa;Bilateria;Protostomia;  
 Spiralia;Lophotrochozoa;Mollusca;Bivalvia;Autobranchia;Heteroconchia;Euhe  
 terodonta;Imparidentia;Venerida;Veneroidea;Veneridae;Mercenaria;Mercenari  
 a mercenaria  
 UdeM00000011926 6596 213.8 UdeM00000011926 XP\_045168839.1 34.3 397  
 221 9 373 762 20 383 8.80E-52 213.8 6596 cellular  
 organisms;Eukaryota;Opisthokonta;Metazoa;Eumetazoa;Bilateria;Protostomia;  
 Spiralia;Lophotrochozoa;Mollusca;Bivalvia;Autobranchia;Heteroconchia;Euhe  
 terodonta;Imparidentia;Venerida;Veneroidea;Veneridae;Mercenaria;Mercenari  
 a mercenaria

UdeM00000011927 6573 103.6 UdeM00000011927 XP\_021352044.1 72.3 65  
 18 0 10 74 156 220 1.10E-19 103.6 6573 cellular  
 organisms;Eukaryota;Opisthokonta;Metazoa;Eumetazoa;Bilateria;Protostomia;  
 Spiralia;Lophotrochozoa;Mollusca;Bivalvia;Autobranchia;Pteriomorpha;Pect  
 inida;Pectinoidea;Pectinidae;Mizuhopecten;Mizuhopecten yessoensis  
 UdeM00000011928 6579 180.6 UdeM00000011928 XP\_033731739.1 51.9 154  
 74 0 1 154 225 378 1.50E-42 180.6 6579 cellular  
 organisms;Eukaryota;Opisthokonta;Metazoa;Eumetazoa;Bilateria;Protostomia;  
 Spiralia;Lophotrochozoa;Mollusca;Bivalvia;Autobranchia;Pteriomorpha;Pect  
 inida;Pectinoidea;Pectinidae;Pecten;Pecten maximus  
 UdeM00000011930 6596 185.3 UdeM00000011930 XP\_045168839.1 35.8 296  
 175 7 320 608 28 315 2.60E-43 185.3 6596 cellular  
 organisms;Eukaryota;Opisthokonta;Metazoa;Eumetazoa;Bilateria;Protostomia;  
 Spiralia;Lophotrochozoa;Mollusca;Bivalvia;Autobranchia;Heteroconchia;Euhe  
 terodonta;Imparidentia;Venerida;Veneroidea;Veneridae;Mercenaria;Mercenari  
 a mercenaria  
 UdeM00000011931 6596 398.7 UdeM00000011931 XP\_045168314.1 65 274  
 96 0 14 287 12 285 6.50E-108 398.7 6596 cellular  
 organisms;Eukaryota;Opisthokonta;Metazoa;Eumetazoa;Bilateria;Protostomia;  
 Spiralia;Lophotrochozoa;Mollusca;Bivalvia;Autobranchia;Heteroconchia;Euhe  
 terodonta;Imparidentia;Venerida;Veneroidea;Veneridae;Mercenaria;Mercenari  
 a mercenaria  
 UdeM00000011932 6573 337 UdeM00000011932 XP\_021355667.1 68.3 249  
 77 2 12 258 19 267 2.10E-89 337 6573 cellular  
 organisms;Eukaryota;Opisthokonta;Metazoa;Eumetazoa;Bilateria;Protostomia;  
 Spiralia;Lophotrochozoa;Mollusca;Bivalvia;Autobranchia;Pteriomorpha;Pect  
 inida;Pectinoidea;Pectinidae;Mizuhopecten;Mizuhopecten yessoensis  
 UdeM00000020771 6579 127.1 UdeM00000020771 XP\_033738432.1 69.9 146  
 44 0 1 146 1 146 3.90E-26 127.1 6579 cellular  
 organisms;Eukaryota;Opisthokonta;Metazoa;Eumetazoa;Bilateria;Protostomia;  
 Spiralia;Lophotrochozoa;Mollusca;Bivalvia;Autobranchia;Pteriomorpha;Pect  
 inida;Pectinoidea;Pectinidae;Pecten;Pecten maximus  
 UdeM00000020772 6596 808.9 UdeM00000020772 XP\_045158051.1 46.7 1419  
 568 39 1 1304 1 1345 9.30E-231 808.9 6596 cellular  
 organisms;Eukaryota;Opisthokonta;Metazoa;Eumetazoa;Bilateria;Protostomia;  
 Spiralia;Lophotrochozoa;Mollusca;Bivalvia;Autobranchia;Heteroconchia;Euhe  
 terodonta;Imparidentia;Venerida;Veneroidea;Veneridae;Mercenaria;Mercenari  
 a mercenaria  
 UdeM00000020773 6596 261.2 UdeM00000020773 XP\_045156978.1 45.9 296  
 131 3 34 312 63 346 1.70E-66 261.2 6596 cellular  
 organisms;Eukaryota;Opisthokonta;Metazoa;Eumetazoa;Bilateria;Protostomia;  
 Spiralia;Lophotrochozoa;Mollusca;Bivalvia;Autobranchia;Heteroconchia;Euhe  
 terodonta;Imparidentia;Venerida;Veneroidea;Veneridae;Mercenaria;Mercenari  
 a mercenaria  
 UdeM00000020775 29159 115.5 UdeM00000020775 XP\_034312519.1 52.5 139  
 55 3 11 139 188 325 5.50E-23 115.5 29159 cellular  
 organisms;Eukaryota;Opisthokonta;Metazoa;Eumetazoa;Bilateria;Protostomia;  
 Spiralia;Lophotrochozoa;Mollusca;Bivalvia;Autobranchia;Pteriomorpha;Ostr  
 eida;Ostreoidea;Ostreidae;Crassostrea;Crassostrea gigas  
 UdeM00000020777 6573 154.5 UdeM00000020777 XP\_021373453.1 64.5 110  
 39 0 1 110 55 164 8.10E-35 154.5 6573 cellular  
 organisms;Eukaryota;Opisthokonta;Metazoa;Eumetazoa;Bilateria;Protostomia;  
 Spiralia;Lophotrochozoa;Mollusca;Bivalvia;Autobranchia;Pteriomorpha;Pect  
 inida;Pectinoidea;Pectinidae;Mizuhopecten;Mizuhopecten yessoensis

UdeM00000020778 6596 283.5 UdeM00000020778 XP\_045188742.1 27.4 864  
 283 15 159 679 85 947 7.10E-73 283.5 6596 cellular  
 organisms;Eukaryota;Opisthokonta;Metazoa;Eumetazoa;Bilateria;Protostomia;  
 Spiralia;Lophotrochozoa;Mollusca;Bivalvia;Autobranhia;Heteroconchia;Euhe  
 terodonta;Imparidentia;Venerida;Veneroidea;Veneridae;Mercenaria;Mercenari  
 a mercenaria  
 UdeM00000020779 6596 250.8 UdeM00000020779 XP\_045157787.1 62 250  
 90 2 566 815 187 431 6.10E-63 250.8 6596 cellular  
 organisms;Eukaryota;Opisthokonta;Metazoa;Eumetazoa;Bilateria;Protostomia;  
 Spiralia;Lophotrochozoa;Mollusca;Bivalvia;Autobranhia;Heteroconchia;Euhe  
 terodonta;Imparidentia;Venerida;Veneroidea;Veneridae;Mercenaria;Mercenari  
 a mercenaria  
 UdeM00000020780 6596 617.8 UdeM00000020780 XP\_045159751.1 60.1 469  
 177 4 1017 1482 261 722 4.00E-173 617.8 6596 cellular  
 organisms;Eukaryota;Opisthokonta;Metazoa;Eumetazoa;Bilateria;Protostomia;  
 Spiralia;Lophotrochozoa;Mollusca;Bivalvia;Autobranhia;Heteroconchia;Euhe  
 terodonta;Imparidentia;Venerida;Veneroidea;Veneridae;Mercenaria;Mercenari  
 a mercenaria  
 UdeM00000020781 6573 149.8 UdeM00000020781 XP\_021376748.1 68.8 93  
 29 0 5 97 173 265 1.30E-32 149.8 6573 cellular  
 organisms;Eukaryota;Opisthokonta;Metazoa;Eumetazoa;Bilateria;Protostomia;  
 Spiralia;Lophotrochozoa;Mollusca;Bivalvia;Autobranhia;Pteriormorphia;Pect  
 inida;Pectinoidea;Pectinidae;Mizuhopecten;Mizuhopecten yessoensis  
 UdeM00000020782 6596 74.3 UdeM00000020782 XP\_045159748.1 67.2 58  
 18 1 1 58 69 125 2.00E-10 74.3 6596 cellular  
 organisms;Eukaryota;Opisthokonta;Metazoa;Eumetazoa;Bilateria;Protostomia;  
 Spiralia;Lophotrochozoa;Mollusca;Bivalvia;Autobranhia;Heteroconchia;Euhe  
 terodonta;Imparidentia;Venerida;Veneroidea;Veneridae;Mercenaria;Mercenari  
 a mercenaria  
 UdeM00000020783 6596 722.6 UdeM00000020783 XP\_045157935.1 66.3 534  
 167 6 17 538 20 552 3.60E-205 722.6 6596 cellular  
 organisms;Eukaryota;Opisthokonta;Metazoa;Eumetazoa;Bilateria;Protostomia;  
 Spiralia;Lophotrochozoa;Mollusca;Bivalvia;Autobranhia;Heteroconchia;Euhe  
 terodonta;Imparidentia;Venerida;Veneroidea;Veneridae;Mercenaria;Mercenari  
 a mercenaria  
 UdeM00000020784 6579 223 UdeM00000020784 XP\_033738253.1 32.6 513  
 216 10 1 489 112 518 8.90E-55 223 6579 cellular  
 organisms;Eukaryota;Opisthokonta;Metazoa;Eumetazoa;Bilateria;Protostomia;  
 Spiralia;Lophotrochozoa;Mollusca;Bivalvia;Autobranhia;Pteriormorphia;Pect  
 inida;Pectinoidea;Pectinidae;Pecten;Pecten maximus  
 UdeM00000020785 6596 432.6 UdeM00000020785 XP\_045158698.1 52.9 367  
 173 0 1 367 1 367 5.10E-118 432.6 6596 cellular  
 organisms;Eukaryota;Opisthokonta;Metazoa;Eumetazoa;Bilateria;Protostomia;  
 Spiralia;Lophotrochozoa;Mollusca;Bivalvia;Autobranhia;Heteroconchia;Euhe  
 terodonta;Imparidentia;Venerida;Veneroidea;Veneridae;Mercenaria;Mercenari  
 a mercenaria  
 UdeM00000020786 6596 266.5 UdeM00000020786 XP\_045158990.1 51.7 302  
 132 4 68 355 35 336 4.70E-68 266.5 6596 cellular  
 organisms;Eukaryota;Opisthokonta;Metazoa;Eumetazoa;Bilateria;Protostomia;  
 Spiralia;Lophotrochozoa;Mollusca;Bivalvia;Autobranhia;Heteroconchia;Euhe  
 terodonta;Imparidentia;Venerida;Veneroidea;Veneridae;Mercenaria;Mercenari  
 a mercenaria  
 UdeM00000020787 6596 786.6 UdeM00000020787 XP\_045158989.1 88.6 439  
 50 0 1 439 15 453 1.70E-224 786.6 6596 cellular

organisms;Eukaryota;Opisthokonta;Metazoa;Eumetazoa;Bilateria;Protostomia; Spiralia;Lophotrochozoa;Mollusca;Bivalvia;Autobranchia;Heteroconchia;Euherodonta;Imparidentia;Venerida;Veneroidea;Veneridae;Mercenaria;Mercenaria mercenaria

UdeM00000020788 6579 266.2 UdeM00000020788 XP\_033738260.1 60.7 173  
68 0 28 200 38 210 4.90E-68 266.2 6579 cellular

organisms;Eukaryota;Opisthokonta;Metazoa;Eumetazoa;Bilateria;Protostomia; Spiralia;Lophotrochozoa;Mollusca;Bivalvia;Autobranchia;Pteriomorphia;Pectinida;Pectinoidea;Pectinidae;Pecten;Pecten maximus

UdeM00000020789 1735272 188.3 UdeM00000020789 XP\_041356067.1 31.9  
373 239 5 27 392 618 982 3.40E-44 188.3 1735272  
cellular

organisms;Eukaryota;Opisthokonta;Metazoa;Eumetazoa;Bilateria;Protostomia; Spiralia;Lophotrochozoa;Mollusca;Gastropoda;Neomphalina;Neomphaloidea;Peltospiridae;Gigantopelta;Gigantopelta aegis

UdeM00000020790 6596 263.5 UdeM00000020790 XP\_045157079.1 54.8 208  
93 1 19 226 23 229 2.50E-67 263.5 6596 cellular

organisms;Eukaryota;Opisthokonta;Metazoa;Eumetazoa;Bilateria;Protostomia; Spiralia;Lophotrochozoa;Mollusca;Bivalvia;Autobranchia;Heteroconchia;Euherodonta;Imparidentia;Venerida;Veneroidea;Veneridae;Mercenaria;Mercenaria mercenaria

UdeM00000020791 29159 64.7 UdeM00000020791 XP\_011428032.2 66 47  
16 0 1 47 1 47 9.90E-08 64.7 29159 cellular

organisms;Eukaryota;Opisthokonta;Metazoa;Eumetazoa;Bilateria;Protostomia; Spiralia;Lophotrochozoa;Mollusca;Bivalvia;Autobranchia;Pteriomorphia;Ostreida;Ostreoidea;Ostreidae;Crassostrea;Crassostrea gigas

UdeM00000020792 6565 746.9 UdeM00000020792 XP\_022313939.1 70.6 494  
145 0 1 494 1 494 1.70E-212 746.9 6565 cellular

organisms;Eukaryota;Opisthokonta;Metazoa;Eumetazoa;Bilateria;Protostomia; Spiralia;Lophotrochozoa;Mollusca;Bivalvia;Autobranchia;Pteriomorphia;Ostreida;Ostreoidea;Ostreidae;Crassostrea;Crassostrea virginica

UdeM00000020793 6565 736.5 UdeM00000020793 XP\_022313939.1 71.1 494  
143 0 1 494 1 494 2.20E-209 736.5 6565 cellular

organisms;Eukaryota;Opisthokonta;Metazoa;Eumetazoa;Bilateria;Protostomia; Spiralia;Lophotrochozoa;Mollusca;Bivalvia;Autobranchia;Pteriomorphia;Ostreida;Ostreoidea;Ostreidae;Crassostrea;Crassostrea virginica

UdeM00000020794 6596 127.1 UdeM00000020794 XP\_045189072.1 37 211  
78 2 17 172 248 458 2.20E-26 127.1 6596 cellular

organisms;Eukaryota;Opisthokonta;Metazoa;Eumetazoa;Bilateria;Protostomia; Spiralia;Lophotrochozoa;Mollusca;Bivalvia;Autobranchia;Heteroconchia;Euherodonta;Imparidentia;Venerida;Veneroidea;Veneridae;Mercenaria;Mercenaria mercenaria

UdeM00000020795 6596 367.1 UdeM00000020795 XP\_045189070.1 39.1 557  
248 8 2 547 1 477 4.00E-98 367.1 6596 cellular

organisms;Eukaryota;Opisthokonta;Metazoa;Eumetazoa;Bilateria;Protostomia; Spiralia;Lophotrochozoa;Mollusca;Bivalvia;Autobranchia;Heteroconchia;Euherodonta;Imparidentia;Venerida;Veneroidea;Veneridae;Mercenaria;Mercenaria mercenaria

UdeM00000020796 6596 2328.5 UdeM00000020796 XP\_045160832.1 52.1  
2166 932 28 100 2250 139 2214 0.00E+00 2328.5 6596  
cellular

organisms;Eukaryota;Opisthokonta;Metazoa;Eumetazoa;Bilateria;Protostomia; Spiralia;Lophotrochozoa;Mollusca;Bivalvia;Autobranchia;Heteroconchia;Euherodonta;Imparidentia;Venerida;Veneroidea;Veneridae;Mercenaria;Mercenaria mercenaria



terodonta;Imparidentia;Venerida;Veneroidea;Veneridae;Mercenaria;Mercenaria mercenaria  
 UdeM00000020797 7574 295.4 UdeM00000020797 XP\_013396672.1 95.9 148  
 6 0 1 148 1 148 4.00E-77 295.4 7574 cellular  
 organisms;Eukaryota;Opisthokonta;Metazoa;Eumetazoa;Bilateria;Protostomia;Spiralia;Lophotrochozoa;Brachiopoda;Linguliformea;Lingulata;Lingulida;Linguloidea;Lingulidae;Lingula;Lingula anatina  
 UdeM00000020799 1735272 440.7 UdeM00000020799 XP\_041358017.1 77.9  
 258 57 0 1 258 1 258 1.50E-120 440.7 1735272  
 cellular  
 organisms;Eukaryota;Opisthokonta;Metazoa;Eumetazoa;Bilateria;Protostomia;Spiralia;Lophotrochozoa;Mollusca;Gastropoda;Neomphalina;Neomphaloidea;Peltospiridae;Gigantopelta;Gigantopelta aegis  
 UdeM00000020798 1735272 490.3 UdeM00000020798 XP\_041358017.1 73.4  
 305 81 0 1 305 1 305 1.70E-135 490.3 1735272  
 cellular  
 organisms;Eukaryota;Opisthokonta;Metazoa;Eumetazoa;Bilateria;Protostomia;Spiralia;Lophotrochozoa;Mollusca;Gastropoda;Neomphalina;Neomphaloidea;Peltospiridae;Gigantopelta;Gigantopelta aegis  
 UdeM00000020800 1735272 891.7 UdeM00000020800 XP\_041359156.1 52.8  
 862 370 16 6 843 11 859 7.10E-256 891.7 1735272  
 cellular  
 organisms;Eukaryota;Opisthokonta;Metazoa;Eumetazoa;Bilateria;Protostomia;Spiralia;Lophotrochozoa;Mollusca;Gastropoda;Neomphalina;Neomphaloidea;Peltospiridae;Gigantopelta;Gigantopelta aegis  
 UdeM00000020801 6596 125.2 UdeM00000020801 XP\_045159577.1 50.4 119  
 59 0 11 129 12 130 6.30E-26 125.2 6596 cellular  
 organisms;Eukaryota;Opisthokonta;Metazoa;Eumetazoa;Bilateria;Protostomia;Spiralia;Lophotrochozoa;Mollusca;Bivalvia;Autobranchia;Heteroconchia;Euterodonta;Imparidentia;Venerida;Veneroidea;Veneridae;Mercenaria;Mercenaria mercenaria  
 UdeM00000020803 7957 86.7 UdeM00000020803 XP\_026093557.1 71.9 57  
 16 0 3 59 5 61 1.20E-14 86.7 7957 cellular  
 organisms;Eukaryota;Opisthokonta;Metazoa;Eumetazoa;Bilateria;Deuterostomia;Chordata;Craniata;Vertebrata;Gnathostomata;Teleostomi;Euteleostomi;Actinopterygii;Actinopteri;Neopterygii;Teleostei;Osteoglossocephalai;Clupeocephala;Otomorpha;Ostariophysi;Otophysi;Cypriniphysae;Cypriniformes;Cyprinidae;Cyprininae;Carassius;Carassius auratus  
 UdeM00000020802 400727 137.5 UdeM00000020802 XP\_025110867.1 69  
 100 31 0 3 102 4 103 9.50E-30 137.5 400727  
 cellular  
 organisms;Eukaryota;Opisthokonta;Metazoa;Eumetazoa;Bilateria;Protostomia;Spiralia;Lophotrochozoa;Mollusca;Gastropoda;Caenogastropoda;Architaenioglossa;Ampullarioidea;Ampullariidae;Pomacea;Pomacea canaliculata  
 UdeM00000020804 6573 364.4 UdeM00000020804 XP\_021362539.1 53.6 306  
 138 1 1 302 1 306 2.00E-97 364.4 6573 cellular  
 organisms;Eukaryota;Opisthokonta;Metazoa;Eumetazoa;Bilateria;Protostomia;Spiralia;Lophotrochozoa;Mollusca;Bivalvia;Autobranchia;Pteriomorphia;Pectinida;Pectinoidea;Pectinidae;Mizuhopecten;Mizuhopecten yessoensis  
 UdeM00000020805 6579 175.6 UdeM00000020805 XP\_033737166.1 58.9 124  
 51 0 1 124 6 129 3.80E-41 175.6 6579 cellular  
 organisms;Eukaryota;Opisthokonta;Metazoa;Eumetazoa;Bilateria;Protostomia;Spiralia;Lophotrochozoa;Mollusca;Bivalvia;Autobranchia;Pteriomorphia;Pectinida;Pectinoidea;Pectinidae;Pecten;Pecten maximus

UdeM00000020806 6596 589.7 UdeM00000020806 XP\_045158771.1 67 424  
 133 2 20 443 1 417 3.10E-165 589.7 6596 cellular  
 organisms;Eukaryota;Opisthokonta;Metazoa;Eumetazoa;Bilateria;Protostomia;  
 Spiralia;Lophotrochozoa;Mollusca;Bivalvia;Autobranhia;Heteroconchia;Euhe  
 terodonta;Imparidentia;Venerida;Veneroidea;Veneridae;Mercenaria;Mercenari  
 a mercenaria  
 UdeM00000020810 6596 196.8 UdeM00000020810 XP\_045158767.1 59.6 156  
 57 2 1 152 1 154 2.00E-47 196.8 6596 cellular  
 organisms;Eukaryota;Opisthokonta;Metazoa;Eumetazoa;Bilateria;Protostomia;  
 Spiralia;Lophotrochozoa;Mollusca;Bivalvia;Autobranhia;Heteroconchia;Euhe  
 terodonta;Imparidentia;Venerida;Veneroidea;Veneridae;Mercenaria;Mercenari  
 a mercenaria  
 UdeM00000020809 6579 441.4 UdeM00000020809 XP\_033737559.1 50 504  
 218 12 1 484 1 490 1.50E-120 441.4 6579 cellular  
 organisms;Eukaryota;Opisthokonta;Metazoa;Eumetazoa;Bilateria;Protostomia;  
 Spiralia;Lophotrochozoa;Mollusca;Bivalvia;Autobranhia;Pteriormorphia;Pect  
 inida;Pectinoidea;Pectinidae;Pecten;Pecten maximus  
 UdeM00000020811 6579 260.4 UdeM00000020811 XP\_033737559.1 46.9 343  
 159 8 10 343 162 490 3.30E-66 260.4 6579 cellular  
 organisms;Eukaryota;Opisthokonta;Metazoa;Eumetazoa;Bilateria;Protostomia;  
 Spiralia;Lophotrochozoa;Mollusca;Bivalvia;Autobranhia;Pteriormorphia;Pect  
 inida;Pectinoidea;Pectinidae;Pecten;Pecten maximus  
 UdeM00000020812 6596 233.4 UdeM00000020812 XP\_045158763.1 40.8 360  
 189 9 9 354 15 364 4.70E-58 233.4 6596 cellular  
 organisms;Eukaryota;Opisthokonta;Metazoa;Eumetazoa;Bilateria;Protostomia;  
 Spiralia;Lophotrochozoa;Mollusca;Bivalvia;Autobranhia;Heteroconchia;Euhe  
 terodonta;Imparidentia;Venerida;Veneroidea;Veneridae;Mercenaria;Mercenari  
 a mercenaria  
 UdeM00000020813 6596 757.7 UdeM00000020813 XP\_045158762.1 60 582  
 226 3 8 583 7 587 1.10E-215 757.7 6596 cellular  
 organisms;Eukaryota;Opisthokonta;Metazoa;Eumetazoa;Bilateria;Protostomia;  
 Spiralia;Lophotrochozoa;Mollusca;Bivalvia;Autobranhia;Heteroconchia;Euhe  
 terodonta;Imparidentia;Venerida;Veneroidea;Veneridae;Mercenaria;Mercenari  
 a mercenaria  
 UdeM00000020814 6565 106.3 UdeM00000020814 XP\_022318278.1 38.9 180  
 71 5 7 173 29 182 5.40E-20 106.3 6565 cellular  
 organisms;Eukaryota;Opisthokonta;Metazoa;Eumetazoa;Bilateria;Protostomia;  
 Spiralia;Lophotrochozoa;Mollusca;Bivalvia;Autobranhia;Pteriormorphia;Ostr  
 eida;Ostreoidea;Ostreidae;Crassostrea;Crassostrea virginica  
 UdeM00000020815 400727 89.7 UdeM00000020815 XP\_025100004.1 30.7  
 228 138 8 3 218 220 439 5.00E-15 89.7 400727  
 cellular  
 organisms;Eukaryota;Opisthokonta;Metazoa;Eumetazoa;Bilateria;Protostomia;  
 Spiralia;Lophotrochozoa;Mollusca;Gastropoda;Caenogastropoda;Architaeniogl  
 ossa;Ampullarioidea;Ampullariidae;Pomacea;Pomacea canaliculata  
 UdeM00000020819 1735272 108.6 UdeM00000020819 XP\_041361861.1 30.8  
 214 53 2 1 119 1 214 5.50E-21 108.6 1735272  
 cellular  
 organisms;Eukaryota;Opisthokonta;Metazoa;Eumetazoa;Bilateria;Protostomia;  
 Spiralia;Lophotrochozoa;Mollusca;Gastropoda;Neomphalina;Neomphaloidea;Pel  
 tospiridae;Gigantopelta;Gigantopelta aegis  
 UdeM00000020820 8078 335.5 UdeM00000020820 XP\_035994673.1 56.7 284  
 120 1 12 295 104 384 6.90E-89 335.5 8078 cellular  
 organisms;Eukaryota;Opisthokonta;Metazoa;Eumetazoa;Bilateria;Deuterostomi

a;Chordata;Craniata;Vertebrata;Gnathostomata;Teleostomi;Euteleostomi;Actinopterygii;Actinopteri;Neopterygii;Teleostei;Osteoglossocephalai;Clupeocephala;Euteleostomorpha;Neoteleostei;Eurypterygia;Ctenosquamata;Acanthomorpha;Euacanthomorpha;Percomorphaceae;Ovalentaria;Atherinomorphae;Cyprinodontiformes;Cyprinodontoidei;Fundulidae;Fundulus;Fundulus

heteroclitus

UdeM00000020821 7998 73.2 UdeM00000020821 XP\_017325546.1 45.2 62  
34 0 2 63 28 89 1.50E-10 73.2 7998 cellular

organisms;Eukaryota;Opisthokonta;Metazoa;Eumetazoa;Bilateria;Deuterostomia;Chordata;Craniata;Vertebrata;Gnathostomata;Teleostomi;Euteleostomi;Actinopterygii;Actinopteri;Neopterygii;Teleostei;Osteoglossocephalai;Clupeocephala;Otomorpha;Ostariophysi;Otophysi;Characiphysae;Siluriformes;Siluridae;Ictaluridae;Ictalurus;Ictalurus punctatus

UdeM00000020822 6596 88.6 UdeM00000020822 XP\_045209241.1 31.4 185  
112 8 41 215 334 513 1.90E-14 88.6 6596 cellular

organisms;Eukaryota;Opisthokonta;Metazoa;Eumetazoa;Bilateria;Protostomia;Spiralia;Lophotrochozoa;Mollusca;Bivalvia;Autobranchia;Heteroconchia;Euheterodonta;Imparidentia;Venerida;Veneroidea;Veneridae;Mercenaria;Mercenaria mercenaria

UdeM00000020823 6579 423.3 UdeM00000020823 XP\_033738240.1 63.4 347  
117 3 1 337 1 347 2.90E-115 423.3 6579 cellular

organisms;Eukaryota;Opisthokonta;Metazoa;Eumetazoa;Bilateria;Protostomia;Spiralia;Lophotrochozoa;Mollusca;Bivalvia;Autobranchia;Pteriomorpha;Pectinida;Pectinoidea;Pectinidae;Pecten;Pecten maximus

UdeM00000020824 29159 67 UdeM00000020824 XP\_034313077.1 55.7 61  
26 1 15 74 156 216 1.90E-08 67 29159 cellular

organisms;Eukaryota;Opisthokonta;Metazoa;Eumetazoa;Bilateria;Protostomia;Spiralia;Lophotrochozoa;Mollusca;Bivalvia;Autobranchia;Pteriomorpha;Ostreida;Ostreoidea;Ostreidae;Crassostrea;Crassostrea gigas

UdeM00000020828 6596 600.5 UdeM00000020828 XP\_045158525.1 51 600  
262 5 82 658 57 647 2.60E-168 600.5 6596 cellular

organisms;Eukaryota;Opisthokonta;Metazoa;Eumetazoa;Bilateria;Protostomia;Spiralia;Lophotrochozoa;Mollusca;Bivalvia;Autobranchia;Heteroconchia;Euheterodonta;Imparidentia;Venerida;Veneroidea;Veneridae;Mercenaria;Mercenaria mercenaria

UdeM00000020829 6596 600.5 UdeM00000020829 XP\_045158525.1 51 600  
262 5 95 671 57 647 2.60E-168 600.5 6596 cellular

organisms;Eukaryota;Opisthokonta;Metazoa;Eumetazoa;Bilateria;Protostomia;Spiralia;Lophotrochozoa;Mollusca;Bivalvia;Autobranchia;Heteroconchia;Euheterodonta;Imparidentia;Venerida;Veneroidea;Veneridae;Mercenaria;Mercenaria mercenaria

UdeM00000020830 6596 2163.3 UdeM00000020830 XP\_045160471.1 62.3  
1748 631 10 1 1737 99 1829 0.00E+00 2163.3 6596  
cellular

organisms;Eukaryota;Opisthokonta;Metazoa;Eumetazoa;Bilateria;Protostomia;Spiralia;Lophotrochozoa;Mollusca;Bivalvia;Autobranchia;Heteroconchia;Euheterodonta;Imparidentia;Venerida;Veneroidea;Veneridae;Mercenaria;Mercenaria mercenaria

UdeM00000020831 1735272 141 UdeM00000020831 XP\_041357221.1 79.8  
89 18 0 2 90 6 94 8.20E-31 141 1735272  
cellular

organisms;Eukaryota;Opisthokonta;Metazoa;Eumetazoa;Bilateria;Protostomia;Spiralia;Lophotrochozoa;Mollusca;Gastropoda;Neomphalina;Neomphaloidea;Peltopiridae;Gigantopelta;Gigantopelta aegis

UdeM00000020832 6596 483.4 UdeM00000020832 XP\_045159329.1 48.1 551  
 273 7 1 547 1 542 3.80E-133 483.4 6596 cellular  
 organisms;Eukaryota;Opisthokonta;Metazoa;Eumetazoa;Bilateria;Protostomia;  
 Spiralia;Lophotrochozoa;Mollusca;Bivalvia;Autobranhia;Heteroconchia;Euhe  
 terodonta;Imparidentia;Venerida;Veneroidea;Veneridae;Mercenaria;Mercenari  
 a mercenaria

UdeM00000020833 6596 148.7 UdeM00000020833 XP\_045158176.1 47.5 198  
 92 6 1 188 1 196 7.60E-33 148.7 6596 cellular  
 organisms;Eukaryota;Opisthokonta;Metazoa;Eumetazoa;Bilateria;Protostomia;  
 Spiralia;Lophotrochozoa;Mollusca;Bivalvia;Autobranhia;Heteroconchia;Euhe  
 terodonta;Imparidentia;Venerida;Veneroidea;Veneridae;Mercenaria;Mercenari  
 a mercenaria

UdeM00000020834 6596 220.7 UdeM00000020834 XP\_045160287.1 29.6 678  
 392 26 39 659 35 684 9.50E-54 220.7 6596 cellular  
 organisms;Eukaryota;Opisthokonta;Metazoa;Eumetazoa;Bilateria;Protostomia;  
 Spiralia;Lophotrochozoa;Mollusca;Bivalvia;Autobranhia;Heteroconchia;Euhe  
 terodonta;Imparidentia;Venerida;Veneroidea;Veneridae;Mercenaria;Mercenari  
 a mercenaria

UdeM00000020835 6596 579.3 UdeM00000020835 XP\_045157885.1 61.4 578  
 153 11 25 542 1 568 5.10E-162 579.3 6596 cellular  
 organisms;Eukaryota;Opisthokonta;Metazoa;Eumetazoa;Bilateria;Protostomia;  
 Spiralia;Lophotrochozoa;Mollusca;Bivalvia;Autobranhia;Heteroconchia;Euhe  
 terodonta;Imparidentia;Venerida;Veneroidea;Veneridae;Mercenaria;Mercenari  
 a mercenaria

UdeM00000020836 6596 580.9 UdeM00000020836 XP\_045157885.1 61.6 578  
 152 11 1 518 1 568 1.70E-162 580.9 6596 cellular  
 organisms;Eukaryota;Opisthokonta;Metazoa;Eumetazoa;Bilateria;Protostomia;  
 Spiralia;Lophotrochozoa;Mollusca;Bivalvia;Autobranhia;Heteroconchia;Euhe  
 terodonta;Imparidentia;Venerida;Veneroidea;Veneridae;Mercenaria;Mercenari  
 a mercenaria

UdeM00000020837 6596 1122.8 UdeM00000020837 XP\_045157884.1 68.8  
 850 231 13 4 831 8 845 0.00E+00 1122.8 6596  
 cellular  
 organisms;Eukaryota;Opisthokonta;Metazoa;Eumetazoa;Bilateria;Protostomia;  
 Spiralia;Lophotrochozoa;Mollusca;Bivalvia;Autobranhia;Heteroconchia;Euhe  
 terodonta;Imparidentia;Venerida;Veneroidea;Veneridae;Mercenaria;Mercenari  
 a mercenaria

UdeM00000020838 6596 119 UdeM00000020838 XP\_045157573.1 40.4 141  
 77 1 14 147 5 145 5.70E-24 119 6596 cellular  
 organisms;Eukaryota;Opisthokonta;Metazoa;Eumetazoa;Bilateria;Protostomia;  
 Spiralia;Lophotrochozoa;Mollusca;Bivalvia;Autobranhia;Heteroconchia;Euhe  
 terodonta;Imparidentia;Venerida;Veneroidea;Veneridae;Mercenaria;Mercenari  
 a mercenaria

UdeM00000020839 6596 394 UdeM00000020839 XP\_045159794.1 67.1 246  
 79 1 7 252 18 261 1.40E-106 394 6596 cellular  
 organisms;Eukaryota;Opisthokonta;Metazoa;Eumetazoa;Bilateria;Protostomia;  
 Spiralia;Lophotrochozoa;Mollusca;Bivalvia;Autobranhia;Heteroconchia;Euhe  
 terodonta;Imparidentia;Venerida;Veneroidea;Veneridae;Mercenaria;Mercenari  
 a mercenaria

UdeM00000020840 1437191 131 UdeM00000020840 XP\_029054816.1 45.3  
 128 69 1 1 127 335 462 1.10E-27 131 1437191  
 cellular  
 organisms;Eukaryota;Opisthokonta;Metazoa;Eumetazoa;Bilateria;Protostomia;  
 Ecdysozoa;Panarthropoda;Arthropoda;Mandibulata;Pancrustacea;Hexapoda;Inse

cta;Dicondylia;Pterygota;Neoptera;Endopterygota;Hymenoptera;Apocrita;Aculeata;Apoidea;Megachilidae;Megachilinae;Osmiini;Osmia;Osmia bicornis;Osmia bicornis bicornis

UdeM00000020841 225164 416 UdeM00000020841 XP\_009061055.1 70  
280 80 1 1 280 1 276 3.80E-113 416 225164  
cellular

organisms;Eukaryota;Opisthokonta;Metazoa;Eumetazoa;Bilateria;Protostomia;Spiralia;Lophotrochozoa;Mollusca;Gastropoda;Patellogastropoda;Lottioidea;Lottiidae;Lottia;Lottia gigantea

UdeM00000020842 6596 790.8 UdeM00000020842 XP\_045160957.1 52.7 792  
297 4 18 732 58 848 1.60E-225 790.8 6596 cellular

organisms;Eukaryota;Opisthokonta;Metazoa;Eumetazoa;Bilateria;Protostomia;Spiralia;Lophotrochozoa;Mollusca;Bivalvia;Autobranchia;Heteroconchia;Euheterodonta;Imparidentia;Venerida;Veneroidea;Veneridae;Mercenaria;Mercenaria mercenaria

UdeM00000020843 6596 196.4 UdeM00000020843 XP\_045157929.1 51.7 174  
84 0 1 174 1 174 2.90E-47 196.4 6596 cellular

organisms;Eukaryota;Opisthokonta;Metazoa;Eumetazoa;Bilateria;Protostomia;Spiralia;Lophotrochozoa;Mollusca;Bivalvia;Autobranchia;Heteroconchia;Euheterodonta;Imparidentia;Venerida;Veneroidea;Veneridae;Mercenaria;Mercenaria mercenaria

UdeM00000020845 6573 380.9 UdeM00000020845 XP\_021351248.1 34.5 731  
386 22 1 663 1 706 3.40E-102 380.9 6573 cellular

organisms;Eukaryota;Opisthokonta;Metazoa;Eumetazoa;Bilateria;Protostomia;Spiralia;Lophotrochozoa;Mollusca;Bivalvia;Autobranchia;Pteriormorphia;Pectinida;Pectinoidea;Pectinidae;Mizuhopecten;Mizuhopecten yessoensis

UdeM00000020847 6596 259.6 UdeM00000020847 XP\_045160209.1 38.3 379  
199 3 78 422 1160 1537 6.90E-66 259.6 6596 cellular

organisms;Eukaryota;Opisthokonta;Metazoa;Eumetazoa;Bilateria;Protostomia;Spiralia;Lophotrochozoa;Mollusca;Bivalvia;Autobranchia;Heteroconchia;Euheterodonta;Imparidentia;Venerida;Veneroidea;Veneridae;Mercenaria;Mercenaria mercenaria

UdeM00000020848 1735272 105.5 UdeM00000020848 XP\_041357255.1 49.5  
95 48 0 20 114 23 117 4.50E-20 105.5 1735272  
cellular

organisms;Eukaryota;Opisthokonta;Metazoa;Eumetazoa;Bilateria;Protostomia;Spiralia;Lophotrochozoa;Mollusca;Gastropoda;Neomphalina;Neomphaloidea;Peltospiridae;Gigantopelta;Gigantopelta aegis

UdeM00000020849 400727 462.2 UdeM00000020849 XP\_025108889.1 63.8  
362 129 2 23 384 14 373 6.50E-127 462.2 400727  
cellular

organisms;Eukaryota;Opisthokonta;Metazoa;Eumetazoa;Bilateria;Protostomia;Spiralia;Lophotrochozoa;Mollusca;Gastropoda;Caenogastropoda;Architaenioglossa;Ampullarioidea;Ampullariidae;Pomacea;Pomacea canaliculata

UdeM00000020850 6579 972.2 UdeM00000020850 XP\_033736963.1 64.4 846  
210 15 1 831 1 770 4.10E-280 972.2 6579 cellular

organisms;Eukaryota;Opisthokonta;Metazoa;Eumetazoa;Bilateria;Protostomia;Spiralia;Lophotrochozoa;Mollusca;Bivalvia;Autobranchia;Pteriormorphia;Pectinida;Pectinoidea;Pectinidae;Pecten;Pecten maximus

UdeM00000020851 6579 1029.6 UdeM00000020851 XP\_033736960.1 66.6  
854 199 14 1 848 1 774 2.20E-297 1029.6 6579  
cellular

organisms;Eukaryota;Opisthokonta;Metazoa;Eumetazoa;Bilateria;Protostomia;

Spiralia; Lophotrochozoa; Mollusca; Bivalvia; Autobranchia; Pteriomorpha; Pectinida; Pectinoidea; Pectinidae; Pecten; Pecten maximus  
UdeM00000020852 6579 965.7 UdeM00000020852 XP\_033736962.1 63.8 846  
213 14 1 828 1 771 3.80E-278 965.7 6579 cellular  
organisms; Eukaryota; Opisthokonta; Metazoa; Eumetazoa; Bilateria; Protostomia; Spiralia; Lophotrochozoa; Mollusca; Bivalvia; Autobranchia; Pteriomorpha; Pectinida; Pectinoidea; Pectinidae; Pecten; Pecten maximus  
UdeM00000020854 6565 123.2 UdeM00000020854 XP\_022287605.1 29.2 295  
149 9 5 258 102 377 8.60E-25 123.2 6565 cellular  
organisms; Eukaryota; Opisthokonta; Metazoa; Eumetazoa; Bilateria; Protostomia; Spiralia; Lophotrochozoa; Mollusca; Bivalvia; Autobranchia; Pteriomorpha; Ostracida; Ostreidae; Crassostrea; Crassostrea virginica  
UdeM00000020855 6579 641.3 UdeM00000020855 XP\_033732430.1 45.5 708  
368 11 52 748 95 795 1.50E-180 641.3 6579 cellular  
organisms; Eukaryota; Opisthokonta; Metazoa; Eumetazoa; Bilateria; Protostomia; Spiralia; Lophotrochozoa; Mollusca; Bivalvia; Autobranchia; Pteriomorpha; Pectinida; Pectinoidea; Pectinidae; Pecten; Pecten maximus  
UdeM00000020856 6596 582.8 UdeM00000020856 XP\_045161036.1 51.6 580  
248 3 1 579 1 548 4.80E-163 582.8 6596 cellular  
organisms; Eukaryota; Opisthokonta; Metazoa; Eumetazoa; Bilateria; Protostomia; Spiralia; Lophotrochozoa; Mollusca; Bivalvia; Autobranchia; Heteroconchia; Euheterodonta; Imparidentia; Venerida; Veneroidea; Veneridae; Mercenaria; Mercenaria mercenaria  
UdeM00000020857 37653 261.5 UdeM00000020857 XP\_014772392.1 81.7 153  
25 2 4 154 1 152 6.60E-67 261.5 37653 cellular  
organisms; Eukaryota; Opisthokonta; Metazoa; Eumetazoa; Bilateria; Protostomia; Spiralia; Lophotrochozoa; Mollusca; Cephalopoda; Coleoidea; Octopodiformes; Octopoda; Incirrata; Octopodidae; Octopus; Octopus bimaculoides  
UdeM00000020860 6596 297.7 UdeM00000020860 XP\_045160612.1 50.1 359  
142 13 4 358 590 915 1.90E-77 297.7 6596 cellular  
organisms; Eukaryota; Opisthokonta; Metazoa; Eumetazoa; Bilateria; Protostomia; Spiralia; Lophotrochozoa; Mollusca; Bivalvia; Autobranchia; Heteroconchia; Euheterodonta; Imparidentia; Venerida; Veneroidea; Veneridae; Mercenaria; Mercenaria mercenaria  
UdeM00000020861 400682 74.3 UdeM00000020861 XP\_019852302.1 36.9  
141 73 5 15 139 71 211 1.30E-10 74.3 400682  
cellular  
organisms; Eukaryota; Opisthokonta; Metazoa; Porifera; Demospongiae; Heteroscleromorpha; Haplosclerida; Niphatidae; Amphimedon; Amphimedon queenslandica  
UdeM00000020862 6565 196.8 UdeM00000020862 XP\_022314289.1 67.1 140  
45 1 1 140 1 139 1.80E-47 196.8 6565 cellular  
organisms; Eukaryota; Opisthokonta; Metazoa; Eumetazoa; Bilateria; Protostomia; Spiralia; Lophotrochozoa; Mollusca; Bivalvia; Autobranchia; Pteriomorpha; Ostracida; Ostreidae; Crassostrea; Crassostrea virginica  
UdeM00000020863 46514 91.7 UdeM00000020863 XP\_038075667.1 32.7 168  
97 3 2 162 340 498 2.80E-15 91.7 46514 cellular  
organisms; Eukaryota; Opisthokonta; Metazoa; Eumetazoa; Bilateria; Deuterostomia; Echinodermata; Eleutherozoa; Asterozoa; Asteroidea; Valvatacea; Valvatida; Asterinidae; Patiria; Patiria miniata  
UdeM00000020864 6573 852.4 UdeM00000020864 XP\_021364536.1 94.1 423  
25 0 1 423 1 423 3.00E-244 852.4 6573 cellular  
organisms; Eukaryota; Opisthokonta; Metazoa; Eumetazoa; Bilateria; Protostomia; Spiralia; Lophotrochozoa; Mollusca; Bivalvia; Autobranchia; Pteriomorpha; Pectinida; Pectinoidea; Pectinidae; Mizuhopecten; Mizuhopecten yessoensis

UdeM00000020865 6596 286.6 UdeM00000020865 XP\_045161037.1 50.6 261  
 126 3 1 259 92 351 3.70E-74 286.6 6596 cellular  
 organisms;Eukaryota;Opisthokonta;Metazoa;Eumetazoa;Bilateria;Protostomia;  
 Spiralia;Lophotrochozoa;Mollusca;Bivalvia;Autobranhia;Heteroconchia;Euhe  
 terodonta;Imparidentia;Venerida;Veneroidea;Veneridae;Mercenaria;Mercenari  
 a mercenaria  
 UdeM00000020866 6596 1063.1 UdeM00000020866 XP\_045161037.1 45.2  
 1196 489 14 9 1170 410 1473 2.80E-307 1063.1 6596  
 cellular  
 organisms;Eukaryota;Opisthokonta;Metazoa;Eumetazoa;Bilateria;Protostomia;  
 Spiralia;Lophotrochozoa;Mollusca;Bivalvia;Autobranhia;Heteroconchia;Euhe  
 terodonta;Imparidentia;Venerida;Veneroidea;Veneridae;Mercenaria;Mercenari  
 a mercenaria  
 UdeM00000020867 64793 60.1 UdeM00000020867 XP\_011690608.1 35 100  
 58 1 260 359 1965 2057 6.80E-06 60.1 64793 cellular  
 organisms;Eukaryota;Opisthokonta;Metazoa;Eumetazoa;Bilateria;Protostomia;  
 Ecdysozoa;Panarthropoda;Arthropoda;Mandibulata;Pancrustacea;Hexapoda;Inse  
 cta;Dicondylia;Pterygota;Neoptera;Endopterygota;Hymenoptera;Apocrita;Acul  
 eata;Formicoidea;Formicidae;Myrmicinae;Blepharidattini;Wasmannia;Wasmanni  
 a auropunctata  
 UdeM00000020868 6596 90.5 UdeM00000020868 XP\_045161037.1 40.7 216  
 106 6 14 208 1484 1698 2.70E-15 90.5 6596 cellular  
 organisms;Eukaryota;Opisthokonta;Metazoa;Eumetazoa;Bilateria;Protostomia;  
 Spiralia;Lophotrochozoa;Mollusca;Bivalvia;Autobranhia;Heteroconchia;Euhe  
 terodonta;Imparidentia;Venerida;Veneroidea;Veneridae;Mercenaria;Mercenari  
 a mercenaria  
 UdeM00000020869 6596 95.9 UdeM00000020869 XP\_045161037.1 43.2 213  
 99 7 1 192 1487 1698 6.00E-17 95.9 6596 cellular  
 organisms;Eukaryota;Opisthokonta;Metazoa;Eumetazoa;Bilateria;Protostomia;  
 Spiralia;Lophotrochozoa;Mollusca;Bivalvia;Autobranhia;Heteroconchia;Euhe  
 terodonta;Imparidentia;Venerida;Veneroidea;Veneridae;Mercenaria;Mercenari  
 a mercenaria  
 UdeM00000020871 6596 1810.8 UdeM00000020871 XP\_045160616.1 65.1  
 2017 590 15 1 1958 1 1963 0.00E+00 1810.8 6596  
 cellular  
 organisms;Eukaryota;Opisthokonta;Metazoa;Eumetazoa;Bilateria;Protostomia;  
 Spiralia;Lophotrochozoa;Mollusca;Bivalvia;Autobranhia;Heteroconchia;Euhe  
 terodonta;Imparidentia;Venerida;Veneroidea;Veneridae;Mercenaria;Mercenari  
 a mercenaria  
 UdeM00000020872 6579 812 UdeM00000020872 XP\_033737645.1 69.3 615  
 189 0 1 615 1 615 5.90E-232 812 6579 cellular  
 organisms;Eukaryota;Opisthokonta;Metazoa;Eumetazoa;Bilateria;Protostomia;  
 Spiralia;Lophotrochozoa;Mollusca;Bivalvia;Autobranhia;Pteriormorphia;Pect  
 inida;Pectinoidea;Pectinidae;Pecten;Pecten maximus  
 UdeM00000020873 6596 639.4 UdeM00000020873 XP\_045160603.1 53.6 642  
 253 8 1 614 7 631 4.60E-180 639.4 6596 cellular  
 organisms;Eukaryota;Opisthokonta;Metazoa;Eumetazoa;Bilateria;Protostomia;  
 Spiralia;Lophotrochozoa;Mollusca;Bivalvia;Autobranhia;Heteroconchia;Euhe  
 terodonta;Imparidentia;Venerida;Veneroidea;Veneridae;Mercenaria;Mercenari  
 a mercenaria  
 UdeM00000020874 1735272 2157.5 UdeM00000020874 XP\_041357905.1  
 74.7 1401 335 6 2 1397 3 1388 0.00E+00 2157.5  
 1735272 cellular  
 organisms;Eukaryota;Opisthokonta;Metazoa;Eumetazoa;Bilateria;Protostomia;

Spiralia; Lophotrochozoa; Mollusca; Gastropoda; Neomphalina; Neomphaloidea; Peltospiridae; Gigantopelta; Gigantopelta aegis  
UdeM00000020875 1735272 2167.5 UdeM00000020875 XP\_041357905.1  
75.3 1389 335 5 2 1385 3 1388 0.00E+00 2167.5  
1735272 cellular  
organisms; Eukaryota; Opisthokonta; Metazoa; Eumetazoa; Bilateria; Protostomia; Spiralia; Lophotrochozoa; Mollusca; Gastropoda; Neomphalina; Neomphaloidea; Peltospiridae; Gigantopelta; Gigantopelta aegis  
UdeM00000020876 6565 730.7 UdeM00000020876 XP\_022318292.1 81.4 429  
79 1 1 429 510 937 1.10E-207 730.7 6565 cellular  
organisms; Eukaryota; Opisthokonta; Metazoa; Eumetazoa; Bilateria; Protostomia; Spiralia; Lophotrochozoa; Mollusca; Bivalvia; Autobranchia; Pteriomorpha; Ostracoda; Ostreidae; Crassostrea; Crassostrea virginica  
UdeM00000020877 210409 238 UdeM00000020877 XP\_045137492.1 51.5  
202 98 0 4 205 102 303 1.00E-59 238 210409  
cellular  
organisms; Eukaryota; Opisthokonta; Metazoa; Eumetazoa; Bilateria; Protostomia; Ecdysozoa; Panarthropoda; Arthropoda; Mandibulata; Pancrustacea; Crustacea; Multicrustacea; Malacostraca; Eumalacostraca; Eucarida; Decapoda; Pleocyemata; Brachyura; Eubranchyura; Heterotremata; Portunoidea; Portunidae; Portunus; Portunus trituberculatus  
UdeM00000020878 29159 452.6 UdeM00000020878 XP\_034312499.1 54.4 399  
176 3 97 493 512 906 6.40E-124 452.6 29159 cellular  
organisms; Eukaryota; Opisthokonta; Metazoa; Eumetazoa; Bilateria; Protostomia; Spiralia; Lophotrochozoa; Mollusca; Bivalvia; Autobranchia; Pteriomorpha; Ostracoda; Ostreidae; Crassostrea; Crassostrea gigas  
UdeM00000020879 343691 163.3 UdeM00000020879 XP\_037904525.1 22  
1010 624 40 24 968 818 1728 1.60E-36 163.3 343691  
cellular  
organisms; Eukaryota; Opisthokonta; Metazoa; Eumetazoa; Bilateria; Protostomia; Ecdysozoa; Panarthropoda; Arthropoda; Mandibulata; Pancrustacea; Hexapoda; Insecta; Dicondylia; Pterygota; Neoptera; Endopterygota; Diptera; Brachycera; Stratiomyomorpha; Stratiomyidae; Hermetiinae; Hermetia; Hermetia illucens  
UdeM00000020881 1735272 88.6 UdeM00000020881 XP\_041351736.1 38  
100 62 0 2 101 97 196 9.40E-15 88.6 1735272  
cellular  
organisms; Eukaryota; Opisthokonta; Metazoa; Eumetazoa; Bilateria; Protostomia; Spiralia; Lophotrochozoa; Mollusca; Gastropoda; Neomphalina; Neomphaloidea; Peltospiridae; Gigantopelta; Gigantopelta aegis  
UdeM00000020882 37653 659.8 UdeM00000020882 XP\_014784610.1 74.6 418  
99 3 1 413 1 416 2.20E-186 659.8 37653 cellular  
organisms; Eukaryota; Opisthokonta; Metazoa; Eumetazoa; Bilateria; Protostomia; Spiralia; Lophotrochozoa; Mollusca; Cephalopoda; Coleoidea; Octopodiformes; Octopoda; Incirrata; Octopodidae; Octopus; Octopus bimaculoides  
UdeM00000020883 6596 882.5 UdeM00000020883 XP\_045159991.1 76.7 562  
126 1 3 559 2 563 2.90E-253 882.5 6596 cellular  
organisms; Eukaryota; Opisthokonta; Metazoa; Eumetazoa; Bilateria; Protostomia; Spiralia; Lophotrochozoa; Mollusca; Bivalvia; Autobranchia; Heteroconchia; Euheterodonta; Imparidentia; Venerida; Veneroidea; Veneridae; Mercenaria; Mercenaria mercenaria  
UdeM00000020884 6596 131.7 UdeM00000020884 XP\_045159860.1 53.6 125  
58 0 1 125 59 183 1.40E-27 131.7 6596 cellular  
organisms; Eukaryota; Opisthokonta; Metazoa; Eumetazoa; Bilateria; Protostomia; Spiralia; Lophotrochozoa; Mollusca; Bivalvia; Autobranchia; Heteroconchia; Euheterodonta



terodonta;Imparidentia;Venerida;Veneroidea;Veneridae;Mercenaria;Mercenaria mercenaria  
 UdeM00000020888 7741 127.1 UdeM00000020888 XP\_019614946.1 28.8 392  
 226 18 26 374 274 655 9.50E-26 127.1 7741 cellular  
 organisms;Eukaryota;Opisthokonta;Metazoa;Eumetazoa;Bilateria;Deuterostomia;Chordata;Cephalochordata;Leptocardii;Amphioxiformes;Branchiostomidae;Branchiostoma;Branchiostoma belcheri  
 UdeM00000020889 7224 73.2 UdeM00000020889 XP\_023170157.2 36.1 108  
 65 3 1230 1336 596 700 2.90E-09 73.2 7224 cellular  
 organisms;Eukaryota;Opisthokonta;Metazoa;Eumetazoa;Bilateria;Protostomia;Ecdysozoa;Panarthropoda;Arthropoda;Mandibulata;Pancrustacea;Hexapoda;Insecta;Dicondylia;Pterygota;Neoptera;Endopterygota;Diptera;Brachycera;Muscomorpha;Eremoneura;Cyclorrhapha;Schizophora;Acalyptratae;Ephydroidea;Drosophilidae;Drosophilinae;Drosophilini;Drosophila;Drosophila;repleta group;hydei subgroup;Drosophila hydei  
 UdeM00000020890 7240 80.1 UdeM00000020890 XP\_016031520.1 22.9 468  
 290 17 10 445 189 617 7.90E-12 80.1 7240 cellular  
 organisms;Eukaryota;Opisthokonta;Metazoa;Eumetazoa;Bilateria;Protostomia;Ecdysozoa;Panarthropoda;Arthropoda;Mandibulata;Pancrustacea;Hexapoda;Insecta;Dicondylia;Pterygota;Neoptera;Endopterygota;Diptera;Brachycera;Muscomorpha;Eremoneura;Cyclorrhapha;Schizophora;Acalyptratae;Ephydroidea;Drosophilidae;Drosophilinae;Drosophilini;Drosophila;Sophophora;melanogaster group;melanogaster subgroup;Drosophila simulans  
 UdeM00000020891 6596 385.6 UdeM00000020891 XP\_045160658.1 52 352  
 165 3 3 352 5 354 7.00E-104 385.6 6596 cellular  
 organisms;Eukaryota;Opisthokonta;Metazoa;Eumetazoa;Bilateria;Protostomia;Spiralia;Lophotrochozoa;Mollusca;Bivalvia;Autobranchia;Heteroconchia;Euterodonta;Imparidentia;Venerida;Veneroidea;Veneridae;Mercenaria;Mercenaria mercenaria  
 UdeM00000020895 6565 235 UdeM00000020895 XP\_022288562.1 58.8 187  
 76 1 1 186 1 187 9.20E-59 235 6565 cellular  
 organisms;Eukaryota;Opisthokonta;Metazoa;Eumetazoa;Bilateria;Protostomia;Spiralia;Lophotrochozoa;Mollusca;Bivalvia;Autobranchia;Pteriormorphia;Ostreida;Ostreoidea;Ostreidae;Crassostrea;Crassostrea virginica  
 UdeM00000020896 7739 462.2 UdeM00000020896 XP\_035699340.1 75.4 281  
 69 0 1 281 1 281 4.60E-127 462.2 7739 cellular  
 organisms;Eukaryota;Opisthokonta;Metazoa;Eumetazoa;Bilateria;Deuterostomia;Chordata;Cephalochordata;Leptocardii;Amphioxiformes;Branchiostomidae;Branchiostoma;Branchiostoma floridae  
 UdeM00000020897 1735272 296.2 UdeM00000020897 XP\_041360299.1 27.2  
 1974 1098 46 3 1688 2 1923 2.60E-76 296.2 1735272  
 cellular  
 organisms;Eukaryota;Opisthokonta;Metazoa;Eumetazoa;Bilateria;Protostomia;Spiralia;Lophotrochozoa;Mollusca;Gastropoda;Neomphalina;Neomphaloidea;Peltospiridae;Gigantopelta;Gigantopelta aegis  
 UdeM00000020898 37653 668.7 UdeM00000020898 XP\_014784610.1 75.4 418  
 96 3 1 413 1 416 4.80E-189 668.7 37653 cellular  
 organisms;Eukaryota;Opisthokonta;Metazoa;Eumetazoa;Bilateria;Protostomia;Spiralia;Lophotrochozoa;Mollusca;Cephalopoda;Coleoidea;Octopodiformes;Octopoda;Incirrata;Octopodidae;Octopus;Octopus bimaculoides  
 UdeM00000020900 29159 306.2 UdeM00000020900 XP\_034317111.1 54.4 283  
 128 1 2 283 171 453 4.40E-80 306.2 29159 cellular  
 organisms;Eukaryota;Opisthokonta;Metazoa;Eumetazoa;Bilateria;Protostomia;

Spiralia; Lophotrochozoa; Mollusca; Bivalvia; Autobranchia; Pteriomorphia; Ostr  
eida; Ostreoidea; Ostreidae; Crassostrea; Crassostrea gigas  
UdeM00000020901 37653 640.2 UdeM00000020901 XP\_014784610.1 73.1 412  
104 3 1 406 1 411 1.80E-180 640.2 37653 cellular  
organisms; Eukaryota; Opisthokonta; Metazoa; Eumetazoa; Bilateria; Protostomia;  
Spiralia; Lophotrochozoa; Mollusca; Cephalopoda; Coleoidea; Octopodiformes; Oct  
opoda; Incirrata; Octopodidae; Octopus; Octopus bimaculoides  
UdeM00000020902 37653 649 UdeM00000020902 XP\_014784610.1 73.4 417  
107 2 1 414 1 416 3.90E-183 649 37653 cellular  
organisms; Eukaryota; Opisthokonta; Metazoa; Eumetazoa; Bilateria; Protostomia;  
Spiralia; Lophotrochozoa; Mollusca; Cephalopoda; Coleoidea; Octopodiformes; Oct  
opoda; Incirrata; Octopodidae; Octopus; Octopus bimaculoides  
UdeM00000020903 36176 171.4 UdeM00000020903 XP\_043532984.1 70.4 108  
32 0 1 108 1 108 6.30E-40 171.4 36176 cellular  
organisms; Eukaryota; Opisthokonta; Metazoa; Eumetazoa; Bilateria; Deuterostomi  
a; Chordata; Craniata; Vertebrata; Gnathostomata; Chondrichthyes; Elasmobranchi  
i; Selachii; Galeomorphii; Galeoidea; Orectolobiformes; Hemiscylliidae; Chilosc  
yllium; Chiloscyllium plagiosum  
UdeM00000020904 6565 471.9 UdeM00000020904 XP\_022313987.1 36.6 650  
399 5 1 642 23 667 1.30E-129 471.9 6565 cellular  
organisms; Eukaryota; Opisthokonta; Metazoa; Eumetazoa; Bilateria; Protostomia;  
Spiralia; Lophotrochozoa; Mollusca; Bivalvia; Autobranchia; Pteriomorphia; Ostr  
eida; Ostreoidea; Ostreidae; Crassostrea; Crassostrea virginica  
UdeM00000020905 48498 243 UdeM00000020905 XP\_020613056.1 33.8 390  
178 4 47 362 31 414 6.40E-61 243 48498 cellular  
organisms; Eukaryota; Opisthokonta; Metazoa; Eumetazoa; Cnidaria; Anthozoa; Hexa  
corallia; Scleractinia; Faviina; Merulinidae; Orbicella; Orbicella faveolata  
UdeM00000020906 6573 302.8 UdeM00000020906 XP\_021376931.1 46.6 350  
163 6 1 349 1 327 6.10E-79 302.8 6573 cellular  
organisms; Eukaryota; Opisthokonta; Metazoa; Eumetazoa; Bilateria; Protostomia;  
Spiralia; Lophotrochozoa; Mollusca; Bivalvia; Autobranchia; Pteriomorphia; Pect  
inida; Pectinoidea; Pectinidae; Mizuhopecten; Mizuhopecten yessoensis  
UdeM00000020907 6579 317.8 UdeM00000020907 XP\_033737652.1 49.1 346  
146 7 24 365 24 343 1.80E-83 317.8 6579 cellular  
organisms; Eukaryota; Opisthokonta; Metazoa; Eumetazoa; Bilateria; Protostomia;  
Spiralia; Lophotrochozoa; Mollusca; Bivalvia; Autobranchia; Pteriomorphia; Pect  
inida; Pectinoidea; Pectinidae; Pecten; Pecten maximus  
UdeM00000020908 6596 1264.6 UdeM00000020908 XP\_045159646.1 71.6  
890 224 7 1 888 1 863 0.00E+00 1264.6 6596  
cellular  
organisms; Eukaryota; Opisthokonta; Metazoa; Eumetazoa; Bilateria; Protostomia;  
Spiralia; Lophotrochozoa; Mollusca; Bivalvia; Autobranchia; Heteroconchia; Eue  
terodonta; Imparidentia; Venerida; Veneroidea; Veneridae; Mercenaria; Mercenari  
a mercenaria  
UdeM00000020909 1735272 448.4 UdeM00000020909 XP\_041359608.1 74.6  
284 72 0 1 284 1 284 7.00E-123 448.4 1735272  
cellular  
organisms; Eukaryota; Opisthokonta; Metazoa; Eumetazoa; Bilateria; Protostomia;  
Spiralia; Lophotrochozoa; Mollusca; Gastropoda; Neomphalina; Neomphaloidea; Pel  
tospiridae; Gigantopelta; Gigantopelta aegis  
UdeM00000020910 45264 337 UdeM00000020910 XP\_044165143.1 61.4 264  
99 3 2 262 210 473 2.20E-89 337 45264 cellular  
organisms; Eukaryota; Opisthokonta; Metazoa; Eumetazoa; Cnidaria; Anthozoa; Hexa

corallia;Scleractinia;Astrocoeniina;Acroporidae;Acropora;Acropora  
millepora  
UdeM00000020911 29159 82.4 UdeM00000020911 XP\_034317004.1 42.1 121  
51 4 3 108 216 332 3.90E-13 82.4 29159 cellular  
organisms;Eukaryota;Opisthokonta;Metazoa;Eumetazoa;Bilateria;Protostomia;  
Spiralia;Lophotrochozoa;Mollusca;Bivalvia;Autobranhia;Pteriormorphia;Ostr  
eida;Ostreioidea;Ostreidae;Crassostrea;Crassostrea gigas  
UdeM00000020912 6596 159.8 UdeM00000020912 XP\_045159651.1 85.5 83  
12 0 1 83 1 83 1.50E-36 159.8 6596 cellular  
organisms;Eukaryota;Opisthokonta;Metazoa;Eumetazoa;Bilateria;Protostomia;  
Spiralia;Lophotrochozoa;Mollusca;Bivalvia;Autobranhia;Heteroconchia;Euhe  
terodonta;Imparidentia;Venerida;Veneroidea;Veneridae;Mercenaria;Mercenari  
a mercenaria  
UdeM00000020913 6596 508.8 UdeM00000020913 XP\_045159482.1 86.4 301  
41 0 1 301 1 301 5.00E-141 508.8 6596 cellular  
organisms;Eukaryota;Opisthokonta;Metazoa;Eumetazoa;Bilateria;Protostomia;  
Spiralia;Lophotrochozoa;Mollusca;Bivalvia;Autobranhia;Heteroconchia;Euhe  
terodonta;Imparidentia;Venerida;Veneroidea;Veneridae;Mercenaria;Mercenari  
a mercenaria  
UdeM00000020914 6596 177.9 UdeM00000020914 XP\_045159067.1 35.7 347  
84 8 2 209 46 392 1.30E-41 177.9 6596 cellular  
organisms;Eukaryota;Opisthokonta;Metazoa;Eumetazoa;Bilateria;Protostomia;  
Spiralia;Lophotrochozoa;Mollusca;Bivalvia;Autobranhia;Heteroconchia;Euhe  
terodonta;Imparidentia;Venerida;Veneroidea;Veneridae;Mercenaria;Mercenari  
a mercenaria  
UdeM00000020915 29159 686.8 UdeM00000020915 XP\_011418526.2 81.3 418  
76 2 19 434 21 438 1.80E-194 686.8 29159 cellular  
organisms;Eukaryota;Opisthokonta;Metazoa;Eumetazoa;Bilateria;Protostomia;  
Spiralia;Lophotrochozoa;Mollusca;Bivalvia;Autobranhia;Pteriormorphia;Ostr  
eida;Ostreioidea;Ostreidae;Crassostrea;Crassostrea gigas  
UdeM00000020916 6596 193 UdeM00000020916 XP\_045160262.1 47.9 211  
101 3 2 209 5 209 3.90E-46 193 6596 cellular  
organisms;Eukaryota;Opisthokonta;Metazoa;Eumetazoa;Bilateria;Protostomia;  
Spiralia;Lophotrochozoa;Mollusca;Bivalvia;Autobranhia;Heteroconchia;Euhe  
terodonta;Imparidentia;Venerida;Veneroidea;Veneridae;Mercenaria;Mercenari  
a mercenaria  
UdeM00000020917 6573 321.6 UdeM00000020917 XP\_021359799.1 74.7 198  
49 1 17 214 15 211 7.50E-85 321.6 6573 cellular  
organisms;Eukaryota;Opisthokonta;Metazoa;Eumetazoa;Bilateria;Protostomia;  
Spiralia;Lophotrochozoa;Mollusca;Bivalvia;Autobranhia;Pteriormorphia;Pect  
inida;Pectinoidea;Pectinidae;Mizuhopecten;Mizuhopecten yessoensis  
UdeM00000020918 6565 176 UdeM00000020918 XP\_022303441.1 30.2 463  
266 10 1 417 1 452 9.80E-41 176 6565 cellular  
organisms;Eukaryota;Opisthokonta;Metazoa;Eumetazoa;Bilateria;Protostomia;  
Spiralia;Lophotrochozoa;Mollusca;Bivalvia;Autobranhia;Pteriormorphia;Ostr  
eida;Ostreioidea;Ostreidae;Crassostrea;Crassostrea virginica  
UdeM00000020920 151771 189.5 UdeM00000020920 XP\_028406951.1 34.6  
341 190 7 3 316 148 482 6.50E-45 189.5 151771  
cellular  
organisms;Eukaryota;Opisthokonta;Metazoa;Eumetazoa;Cnidaria;Anthozoa;Octo  
corallia;Alcyonacea;Alcyoniina;Nephtheidae;Dendronephthya;Dendronephthya  
gigantea  
UdeM00000020921 6573 375.9 UdeM00000020921 XP\_021359794.1 53.1 356  
152 6 6 352 9 358 5.50E-101 375.9 6573 cellular

organisms;Eukaryota;Opisthokonta;Metazoa;Eumetazoa;Bilateria;Protostomia;  
Spiralia;Lophotrochozoa;Mollusca;Bivalvia;Autobranchia;Pteriomorpha;Pect  
inida;Pectinoidea;Pectinidae;Mizuhopecten;Mizuhopecten yessoensis  
UdeM00000020922 6579 421 UdeM00000020922 XP\_033736678.1 69.9 276  
83 0 3 278 2 277 1.20E-114 421 6579 cellular  
organisms;Eukaryota;Opisthokonta;Metazoa;Eumetazoa;Bilateria;Protostomia;  
Spiralia;Lophotrochozoa;Mollusca;Bivalvia;Autobranchia;Pteriomorpha;Pect  
inida;Pectinoidea;Pectinidae;Pecten;Pecten maximus  
UdeM00000020924 6573 187.2 UdeM00000020924 XP\_021350780.1 56.5 154  
67 0 7 160 4 157 1.90E-44 187.2 6573 cellular  
organisms;Eukaryota;Opisthokonta;Metazoa;Eumetazoa;Bilateria;Protostomia;  
Spiralia;Lophotrochozoa;Mollusca;Bivalvia;Autobranchia;Pteriomorpha;Pect  
inida;Pectinoidea;Pectinidae;Mizuhopecten;Mizuhopecten yessoensis  
UdeM00000020923 6573 187.2 UdeM00000020923 XP\_021350780.1 56.5 154  
67 0 7 160 4 157 1.80E-44 187.2 6573 cellular  
organisms;Eukaryota;Opisthokonta;Metazoa;Eumetazoa;Bilateria;Protostomia;  
Spiralia;Lophotrochozoa;Mollusca;Bivalvia;Autobranchia;Pteriomorpha;Pect  
inida;Pectinoidea;Pectinidae;Mizuhopecten;Mizuhopecten yessoensis  
UdeM00000020925 6579 421 UdeM00000020925 XP\_033736678.1 69.9 276  
83 0 3 278 2 277 1.20E-114 421 6579 cellular  
organisms;Eukaryota;Opisthokonta;Metazoa;Eumetazoa;Bilateria;Protostomia;  
Spiralia;Lophotrochozoa;Mollusca;Bivalvia;Autobranchia;Pteriomorpha;Pect  
inida;Pectinoidea;Pectinidae;Pecten;Pecten maximus  
UdeM00000020926 6579 1786.2 UdeM00000020926 XP\_033736783.1 54.9  
1729 734 20 7 1719 4 1703 0.00E+00 1786.2 6579  
cellular  
organisms;Eukaryota;Opisthokonta;Metazoa;Eumetazoa;Bilateria;Protostomia;  
Spiralia;Lophotrochozoa;Mollusca;Bivalvia;Autobranchia;Pteriomorpha;Pect  
inida;Pectinoidea;Pectinidae;Pecten;Pecten maximus  
UdeM00000020927 6596 275.8 UdeM00000020927 XP\_045196620.1 67.5 200  
65 0 1 200 788 987 4.40E-71 275.8 6596 cellular  
organisms;Eukaryota;Opisthokonta;Metazoa;Eumetazoa;Bilateria;Protostomia;  
Spiralia;Lophotrochozoa;Mollusca;Bivalvia;Autobranchia;Heteroconchia;Euhe  
terodonta;Imparidentia;Venerida;Veneroidea;Veneridae;Mercenaria;Mercenari  
a mercenaria  
UdeM00000020928 1529436 138.3 UdeM00000020928 XP\_033108240.1 35.6  
216 130 4 45 258 164 372 1.90E-29 138.3 1529436  
cellular  
organisms;Eukaryota;Opisthokonta;Metazoa;Eumetazoa;Bilateria;Deuterostomi  
a;Echinodermata;Pelmatozoa;Crinoidea;Articulata;Comatulida;Comatulidae;Co  
matulinae;Anneissia;Anneissia japonica  
UdeM00000020929 6565 96.7 UdeM00000020929 XP\_022310564.1 31.3 198  
116 10 19 209 60 244 3.80E-17 96.7 6565 cellular  
organisms;Eukaryota;Opisthokonta;Metazoa;Eumetazoa;Bilateria;Protostomia;  
Spiralia;Lophotrochozoa;Mollusca;Bivalvia;Autobranchia;Pteriomorpha;Ostr  
eida;Ostreoidea;Ostreidae;Crassostrea;Crassostrea virginica  
UdeM00000020930 6596 155.2 UdeM00000020930 XP\_045157785.1 35.6 267  
164 6 450 712 530 792 3.10E-34 155.2 6596 cellular  
organisms;Eukaryota;Opisthokonta;Metazoa;Eumetazoa;Bilateria;Protostomia;  
Spiralia;Lophotrochozoa;Mollusca;Bivalvia;Autobranchia;Heteroconchia;Euhe  
terodonta;Imparidentia;Venerida;Veneroidea;Veneridae;Mercenaria;Mercenari  
a mercenaria  
UdeM00000020931 6596 456.1 UdeM00000020931 XP\_045158465.1 71.2 313  
87 2 1 310 113 425 3.70E-125 456.1 6596 cellular

organisms;Eukaryota;Opisthokonta;Metazoa;Eumetazoa;Bilateria;Protostomia;Spiralia;Lophotrochozoa;Mollusca;Bivalvia;Autobranchia;Heteroconchia;Euheterodonta;Imparidentia;Venerida;Veneroidea;Veneridae;Mercenaria;Mercenaria mercenaria

UdeM00000020932 6565 99 UdeM00000020932 XP\_022316337.1 76.2 63  
15 0 30 92 21 83 4.60E-18 99 6565 cellular

organisms;Eukaryota;Opisthokonta;Metazoa;Eumetazoa;Bilateria;Protostomia;Spiralia;Lophotrochozoa;Mollusca;Bivalvia;Autobranchia;Pteriormorphia;Ostreida;Ostreoidea;Ostreidae;Crassostrea;Crassostrea virginica

UdeM00000020933 6596 488 UdeM00000020933 XP\_045159549.1 62.4 346  
129 1 21 365 30 375 1.00E-134 488 6596 cellular

organisms;Eukaryota;Opisthokonta;Metazoa;Eumetazoa;Bilateria;Protostomia;Spiralia;Lophotrochozoa;Mollusca;Bivalvia;Autobranchia;Heteroconchia;Euheterodonta;Imparidentia;Venerida;Veneroidea;Veneridae;Mercenaria;Mercenaria mercenaria

UdeM00000020934 1735272 397.1 UdeM00000020934 XP\_041359542.1 61.9  
286 106 1 7 289 23 308 2.20E-107 397.1 1735272  
cellular

organisms;Eukaryota;Opisthokonta;Metazoa;Eumetazoa;Bilateria;Protostomia;Spiralia;Lophotrochozoa;Mollusca;Gastropoda;Neomphalina;Neomphaloidea;Peltospiridae;Gigantopelta;Gigantopelta aegis

UdeM00000020935 6596 141.7 UdeM00000020935 XP\_045157846.1 54.7 106  
48 0 1 106 1 106 5.30E-31 141.7 6596 cellular

organisms;Eukaryota;Opisthokonta;Metazoa;Eumetazoa;Bilateria;Protostomia;Spiralia;Lophotrochozoa;Mollusca;Bivalvia;Autobranchia;Heteroconchia;Euheterodonta;Imparidentia;Venerida;Veneroidea;Veneridae;Mercenaria;Mercenaria mercenaria

UdeM00000020936 6596 367.5 UdeM00000020936 XP\_045159088.1 92.1 191  
15 0 1 191 1 191 1.10E-98 367.5 6596 cellular

organisms;Eukaryota;Opisthokonta;Metazoa;Eumetazoa;Bilateria;Protostomia;Spiralia;Lophotrochozoa;Mollusca;Bivalvia;Autobranchia;Heteroconchia;Euheterodonta;Imparidentia;Venerida;Veneroidea;Veneridae;Mercenaria;Mercenaria mercenaria

UdeM00000020937 6573 433.7 UdeM00000020937 XP\_021356240.1 66 303  
100 3 1 302 2 302 1.90E-118 433.7 6573 cellular

organisms;Eukaryota;Opisthokonta;Metazoa;Eumetazoa;Bilateria;Protostomia;Spiralia;Lophotrochozoa;Mollusca;Bivalvia;Autobranchia;Pteriormorphia;Pectinida;Pectinoidea;Pectinidae;Mizuhopecten;Mizuhopecten yessoensis

UdeM00000020938 1735272 671.4 UdeM00000020938 XP\_041359883.1 81.9  
371 66 1 1 371 1 370 6.60E-190 671.4 1735272  
cellular

organisms;Eukaryota;Opisthokonta;Metazoa;Eumetazoa;Bilateria;Protostomia;Spiralia;Lophotrochozoa;Mollusca;Gastropoda;Neomphalina;Neomphaloidea;Peltospiridae;Gigantopelta;Gigantopelta aegis

UdeM00000020939 27405 80.1 UdeM00000020939 XP\_042880355.1 35 140  
76 6 14 152 32 157 2.80E-12 80.1 27405 cellular

organisms;Eukaryota;Opisthokonta;Metazoa;Eumetazoa;Bilateria;Protostomia;Ecdysozoa;Panarthropoda;Arthropoda;Mandibulata;Pancrustacea;Crustacea;Multicrustacea;Malacostraca;Eumalacostraca;Eucarida;Decapoda;Dendrobranchiata;Penaeoidea;Penaeidae;Penaeus;Penaeus japonicus

UdeM00000020940 6596 216.5 UdeM00000020940 XP\_045216699.1 67.3 153  
50 0 29 181 4 156 1.30E-52 216.5 6596 cellular

organisms;Eukaryota;Opisthokonta;Metazoa;Eumetazoa;Bilateria;Protostomia;Spiralia;Lophotrochozoa;Mollusca;Bivalvia;Autobranchia;Heteroconchia;Euheterodonta

terodonta;Imparidentia;Venerida;Veneroidea;Veneridae;Mercenaria;Mercenari  
 a mercenaria  
 UdeM00000020942 6596 211.1 UdeM00000020942 XP\_045198456.1 70.2 131  
 39 0 35 165 14 144 1.60E-51 211.1 6596 cellular  
 organisms;Eukaryota;Opisthokonta;Metazoa;Eumetazoa;Bilateria;Protostomia;  
 Spiralia;Lophotrochozoa;Mollusca;Bivalvia;Autobranchia;Heteroconchia;Euhe  
 terodonta;Imparidentia;Venerida;Veneroidea;Veneridae;Mercenaria;Mercenari  
 a mercenaria  
 UdeM00000020941 6596 224.6 UdeM00000020941 XP\_045198456.1 68.5 143  
 45 0 3 145 2 144 1.30E-55 224.6 6596 cellular  
 organisms;Eukaryota;Opisthokonta;Metazoa;Eumetazoa;Bilateria;Protostomia;  
 Spiralia;Lophotrochozoa;Mollusca;Bivalvia;Autobranchia;Heteroconchia;Euhe  
 terodonta;Imparidentia;Venerida;Veneroidea;Veneridae;Mercenaria;Mercenari  
 a mercenaria  
 UdeM00000020943 6596 324.7 UdeM00000020943 XP\_045157478.1 32 881  
 480 18 1 784 1 859 3.20E-85 324.7 6596 cellular  
 organisms;Eukaryota;Opisthokonta;Metazoa;Eumetazoa;Bilateria;Protostomia;  
 Spiralia;Lophotrochozoa;Mollusca;Bivalvia;Autobranchia;Heteroconchia;Euhe  
 terodonta;Imparidentia;Venerida;Veneroidea;Veneridae;Mercenaria;Mercenari  
 a mercenaria  
 UdeM00000020944 6596 994.6 UdeM00000020944 XP\_045159087.1 74.1 611  
 158 0 9 619 4 614 5.70E-287 994.6 6596 cellular  
 organisms;Eukaryota;Opisthokonta;Metazoa;Eumetazoa;Bilateria;Protostomia;  
 Spiralia;Lophotrochozoa;Mollusca;Bivalvia;Autobranchia;Heteroconchia;Euhe  
 terodonta;Imparidentia;Venerida;Veneroidea;Veneridae;Mercenaria;Mercenari  
 a mercenaria  
 UdeM00000020945 6596 92.4 UdeM00000020945 XP\_045160701.1 36.1 144  
 92 0 37 180 71 214 6.40E-16 92.4 6596 cellular  
 organisms;Eukaryota;Opisthokonta;Metazoa;Eumetazoa;Bilateria;Protostomia;  
 Spiralia;Lophotrochozoa;Mollusca;Bivalvia;Autobranchia;Heteroconchia;Euhe  
 terodonta;Imparidentia;Venerida;Veneroidea;Veneridae;Mercenaria;Mercenari  
 a mercenaria  
 UdeM00000020946 6579 288.1 UdeM00000020946 XP\_033752276.1 48.1 312  
 151 7 100 404 11 318 1.70E-74 288.1 6579 cellular  
 organisms;Eukaryota;Opisthokonta;Metazoa;Eumetazoa;Bilateria;Protostomia;  
 Spiralia;Lophotrochozoa;Mollusca;Bivalvia;Autobranchia;Pteriomorphia;Pect  
 inida;Pectinoidea;Pectinidae;Pecten;Pecten maximus  
 UdeM00000020947 6596 169.5 UdeM00000020947 XP\_045160701.1 33.4 326  
 208 4 31 355 65 382 9.30E-39 169.5 6596 cellular  
 organisms;Eukaryota;Opisthokonta;Metazoa;Eumetazoa;Bilateria;Protostomia;  
 Spiralia;Lophotrochozoa;Mollusca;Bivalvia;Autobranchia;Heteroconchia;Euhe  
 terodonta;Imparidentia;Venerida;Veneroidea;Veneridae;Mercenaria;Mercenari  
 a mercenaria  
 UdeM00000033729 6573 198 UdeM00000033729 XP\_021343768.1 60.6 142  
 56 0 1 142 47 188 8.80E-48 198 6573 cellular  
 organisms;Eukaryota;Opisthokonta;Metazoa;Eumetazoa;Bilateria;Protostomia;  
 Spiralia;Lophotrochozoa;Mollusca;Bivalvia;Autobranchia;Pteriomorphia;Pect  
 inida;Pectinoidea;Pectinidae;Mizuhopecten;Mizuhopecten yessoensis  
 UdeM00000033730 6596 321.6 UdeM00000033730 XP\_045160324.1 77.3 194  
 44 0 1 194 1 194 6.80E-85 321.6 6596 cellular  
 organisms;Eukaryota;Opisthokonta;Metazoa;Eumetazoa;Bilateria;Protostomia;  
 Spiralia;Lophotrochozoa;Mollusca;Bivalvia;Autobranchia;Heteroconchia;Euhe  
 terodonta;Imparidentia;Venerida;Veneroidea;Veneridae;Mercenaria;Mercenari  
 a mercenaria

UdeM00000033731 6596 192.2 UdeM00000033731 XP\_045160917.1 53.2 188  
 59 3 102 289 149 307 9.20E-46 192.2 6596 cellular  
 organisms;Eukaryota;Opisthokonta;Metazoa;Eumetazoa;Bilateria;Protostomia;  
 Spiralia;Lophotrochozoa;Mollusca;Bivalvia;Autobranhia;Heteroconchia;Euhe  
 terodonta;Imparidentia;Venerida;Veneroidea;Veneridae;Mercenaria;Mercenari  
 a mercenaria  
 UdeM00000033734 6573 1006.5 UdeM00000033734 XP\_021379776.1 64.4  
 745 246 11 1 741 76 805 2.10E-290 1006.5 6573  
 cellular  
 organisms;Eukaryota;Opisthokonta;Metazoa;Eumetazoa;Bilateria;Protostomia;  
 Spiralia;Lophotrochozoa;Mollusca;Bivalvia;Autobranhia;Pteriormorphia;Pect  
 inida;Pectinoidea;Pectinidae;Mizuhopecten;Mizuhopecten yessoensis  
 UdeM00000033732 6573 1007.3 UdeM00000033732 XP\_021379776.1 64  
 752 248 11 1 748 73 805 1.30E-290 1007.3 6573  
 cellular  
 organisms;Eukaryota;Opisthokonta;Metazoa;Eumetazoa;Bilateria;Protostomia;  
 Spiralia;Lophotrochozoa;Mollusca;Bivalvia;Autobranhia;Pteriormorphia;Pect  
 inida;Pectinoidea;Pectinidae;Mizuhopecten;Mizuhopecten yessoensis  
 UdeM00000033733 6596 1020 UdeM00000033733 XP\_045160298.1 64.4 763  
 248 10 7 759 97 845 1.90E-294 1020 6596 cellular  
 organisms;Eukaryota;Opisthokonta;Metazoa;Eumetazoa;Bilateria;Protostomia;  
 Spiralia;Lophotrochozoa;Mollusca;Bivalvia;Autobranhia;Heteroconchia;Euhe  
 terodonta;Imparidentia;Venerida;Veneroidea;Veneridae;Mercenaria;Mercenari  
 a mercenaria  
 UdeM00000033735 6596 78.2 UdeM00000033735 XP\_045159064.1 42.7 96  
 55 0 16 111 44 139 1.80E-11 78.2 6596 cellular  
 organisms;Eukaryota;Opisthokonta;Metazoa;Eumetazoa;Bilateria;Protostomia;  
 Spiralia;Lophotrochozoa;Mollusca;Bivalvia;Autobranhia;Heteroconchia;Euhe  
 terodonta;Imparidentia;Venerida;Veneroidea;Veneridae;Mercenaria;Mercenari  
 a mercenaria  
 UdeM00000033736 6596 171.4 UdeM00000033736 XP\_045160701.1 33.8 320  
 203 4 37 355 71 382 2.40E-39 171.4 6596 cellular  
 organisms;Eukaryota;Opisthokonta;Metazoa;Eumetazoa;Bilateria;Protostomia;  
 Spiralia;Lophotrochozoa;Mollusca;Bivalvia;Autobranhia;Heteroconchia;Euhe  
 terodonta;Imparidentia;Venerida;Veneroidea;Veneridae;Mercenaria;Mercenari  
 a mercenaria  
 UdeM00000043195 6596 181.8 UdeM00000043195 XP\_045177779.1 38.9 247  
 145 3 130 374 398 640 2.20E-42 181.8 6596 cellular  
 organisms;Eukaryota;Opisthokonta;Metazoa;Eumetazoa;Bilateria;Protostomia;  
 Spiralia;Lophotrochozoa;Mollusca;Bivalvia;Autobranhia;Heteroconchia;Euhe  
 terodonta;Imparidentia;Venerida;Veneroidea;Veneridae;Mercenaria;Mercenari  
 a mercenaria  
 UdeM00000043196 6706 148.7 UdeM00000043196 XP\_042235765.1 44.9 158  
 86 1 1 158 1 157 6.50E-33 148.7 6706 cellular  
 organisms;Eukaryota;Opisthokonta;Metazoa;Eumetazoa;Bilateria;Protostomia;  
 Ecdysozoa;Panarthropoda;Arthropoda;Mandibulata;Pancrustacea;Crustacea;Mul  
 ticrustacea;Malacostraca;Eumalacostraca;Eucarida;Decapoda;Pleocyemata;Ast  
 acidea;Nephropoidea;Nephropidae;Homarus;Homarus americanus  
 UdeM00000043197 6596 114 UdeM00000043197 XP\_045189229.1 47.5 120  
 60 1 124 240 156 275 3.50E-22 114 6596 cellular  
 organisms;Eukaryota;Opisthokonta;Metazoa;Eumetazoa;Bilateria;Protostomia;  
 Spiralia;Lophotrochozoa;Mollusca;Bivalvia;Autobranhia;Heteroconchia;Euhe  
 terodonta;Imparidentia;Venerida;Veneroidea;Veneridae;Mercenaria;Mercenari  
 a mercenaria

UdeM00000043198 6596 105.5 UdeM00000043198 XP\_045177782.1 61.5 78  
 30 0 9 86 83 160 3.50E-20 105.5 6596 cellular  
 organisms;Eukaryota;Opisthokonta;Metazoa;Eumetazoa;Bilateria;Protostomia;  
 Spiralia;Lophotrochozoa;Mollusca;Bivalvia;Autobranchia;Heteroconchia;Euhe  
 terodonta;Imparidentia;Venerida;Veneroidea;Veneridae;Mercenaria;Mercenari  
 a mercenaria

UdeM00000043199 29159 150.2 UdeM00000043199 XP\_034318217.1 55.8 120  
 52 1 1 119 755 874 1.70E-33 150.2 29159 cellular  
 organisms;Eukaryota;Opisthokonta;Metazoa;Eumetazoa;Bilateria;Protostomia;  
 Spiralia;Lophotrochozoa;Mollusca;Bivalvia;Autobranchia;Pteriormorphia;Ostr  
 eida;Ostreoidea;Ostreidae;Crassostrea;Crassostrea gigas

UdeM00000043200 6596 103.6 UdeM00000043200 XP\_045216906.1 34.5 171  
 68 2 1 127 1 171 2.00E-19 103.6 6596 cellular  
 organisms;Eukaryota;Opisthokonta;Metazoa;Eumetazoa;Bilateria;Protostomia;  
 Spiralia;Lophotrochozoa;Mollusca;Bivalvia;Autobranchia;Heteroconchia;Euhe  
 terodonta;Imparidentia;Venerida;Veneroidea;Veneridae;Mercenaria;Mercenari  
 a mercenaria

UdeM00000043202 441366 279.3 UdeM00000043202 XP\_028309531.1 63.3  
 199 72 1 3 201 252 449 4.00E-72 279.3 441366  
 cellular  
 organisms;Eukaryota;Opisthokonta;Metazoa;Eumetazoa;Bilateria;Deuterostomi  
 a;Chordata;Craniata;Vertebrata;Gnathostomata;Teleostomi;Euteleostomi;Acti  
 nopterygii;Actinopteri;Neopterygii;Teleostei;Osteoglossocephalai;Clupeoce  
 phala;Euteleosteomorpha;Neoteleostei;Eurypterygia;Ctenosquamata;Acanthomo  
 rphata;Euacanthomorphacea;Percomorphaceae;Ovalentaria;Blenniimorphae;Blen  
 niiformes;Gobiesocoidei;Gobiesocidae;Gobiesocinae;Gouania;Gouania  
 willdenowi

UdeM00000043203 441366 218.4 UdeM00000043203 XP\_028318216.1 62.4  
 149 55 1 1 149 158 305 6.20E-54 218.4 441366  
 cellular  
 organisms;Eukaryota;Opisthokonta;Metazoa;Eumetazoa;Bilateria;Deuterostomi  
 a;Chordata;Craniata;Vertebrata;Gnathostomata;Teleostomi;Euteleostomi;Acti  
 nopterygii;Actinopteri;Neopterygii;Teleostei;Osteoglossocephalai;Clupeoce  
 phala;Euteleosteomorpha;Neoteleostei;Eurypterygia;Ctenosquamata;Acanthomo  
 rphata;Euacanthomorphacea;Percomorphaceae;Ovalentaria;Blenniimorphae;Blen  
 niiformes;Gobiesocoidei;Gobiesocidae;Gobiesocinae;Gouania;Gouania  
 willdenowi

UdeM00000043204 441366 184.5 UdeM00000043204 XP\_028309531.1 67.2  
 122 39 1 1 121 218 339 8.10E-44 184.5 441366  
 cellular  
 organisms;Eukaryota;Opisthokonta;Metazoa;Eumetazoa;Bilateria;Deuterostomi  
 a;Chordata;Craniata;Vertebrata;Gnathostomata;Teleostomi;Euteleostomi;Acti  
 nopterygii;Actinopteri;Neopterygii;Teleostei;Osteoglossocephalai;Clupeoce  
 phala;Euteleosteomorpha;Neoteleostei;Eurypterygia;Ctenosquamata;Acanthomo  
 rphata;Euacanthomorphacea;Percomorphaceae;Ovalentaria;Blenniimorphae;Blen  
 niiformes;Gobiesocoidei;Gobiesocidae;Gobiesocinae;Gouania;Gouania  
 willdenowi

UdeM00000043205 6596 318.5 UdeM00000043205 XP\_045189084.1 33.8 618  
 312 11 1 606 1350 1882 2.40E-83 318.5 6596 cellular  
 organisms;Eukaryota;Opisthokonta;Metazoa;Eumetazoa;Bilateria;Protostomia;  
 Spiralia;Lophotrochozoa;Mollusca;Bivalvia;Autobranchia;Heteroconchia;Euhe  
 terodonta;Imparidentia;Venerida;Veneroidea;Veneridae;Mercenaria;Mercenari  
 a mercenaria



UdeM00000043206 1735272 70.5 UdeM00000043206 XP\_041375784.1 33.6  
 110 72 1 3 111 313 422 2.00E-09 70.5 1735272  
 cellular  
 organisms;Eukaryota;Opisthokonta;Metazoa;Eumetazoa;Bilateria;Protostomia;  
 Spiralia;Lophotrochozoa;Mollusca;Gastropoda;Neomphalina;Neomphaloidea;Pel  
 tospiridae;Gigantopelta;Gigantopelta aegis  
 UdeM00000043207 6596 60.8 UdeM00000043207 XP\_045194157.1 33.7 104  
 68 1 2 105 56 158 2.40E-06 60.8 6596 cellular  
 organisms;Eukaryota;Opisthokonta;Metazoa;Eumetazoa;Bilateria;Protostomia;  
 Spiralia;Lophotrochozoa;Mollusca;Bivalvia;Autobranchia;Heteroconchia;Euhe  
 terodonta;Imparidentia;Venerida;Veneroidea;Veneridae;Mercenaria;Mercenari  
 a mercenaria  
 UdeM00000043208 7574 129.8 UdeM00000043208 XP\_013408959.1 67 88  
 29 0 40 127 8 95 2.90E-27 129.8 7574 cellular  
 organisms;Eukaryota;Opisthokonta;Metazoa;Eumetazoa;Bilateria;Protostomia;  
 Spiralia;Lophotrochozoa;Brachiopoda;Linguliformea;Lingulata;Lingulida;Lin  
 guloidea;Lingulidae;Lingula;Lingula anatina  
 UdeM00000043209 6596 476.1 UdeM00000043209 XP\_045181294.1 64.6 373  
 131 1 15 386 559 931 4.40E-131 476.1 6596 cellular  
 organisms;Eukaryota;Opisthokonta;Metazoa;Eumetazoa;Bilateria;Protostomia;  
 Spiralia;Lophotrochozoa;Mollusca;Bivalvia;Autobranchia;Heteroconchia;Euhe  
 terodonta;Imparidentia;Venerida;Veneroidea;Veneridae;Mercenaria;Mercenari  
 a mercenaria  
 UdeM00000043210 6596 339 UdeM00000043210 XP\_045177776.1 32.6 706  
 284 11 1 688 405 936 1.90E-89 339 6596 cellular  
 organisms;Eukaryota;Opisthokonta;Metazoa;Eumetazoa;Bilateria;Protostomia;  
 Spiralia;Lophotrochozoa;Mollusca;Bivalvia;Autobranchia;Heteroconchia;Euhe  
 terodonta;Imparidentia;Venerida;Veneroidea;Veneridae;Mercenaria;Mercenari  
 a mercenaria  
 UdeM00000031046 6596 246.1 UdeM00000031046 XP\_045174332.1 36.6 388  
 233 6 27 404 154 538 1.20E-61 246.1 6596 cellular  
 organisms;Eukaryota;Opisthokonta;Metazoa;Eumetazoa;Bilateria;Protostomia;  
 Spiralia;Lophotrochozoa;Mollusca;Bivalvia;Autobranchia;Heteroconchia;Euhe  
 terodonta;Imparidentia;Venerida;Veneroidea;Veneridae;Mercenaria;Mercenari  
 a mercenaria  
 UdeM00000031047 6596 68.6 UdeM00000031047 XP\_045174332.1 39.5 86  
 52 0 11 96 515 600 6.00E-09 68.6 6596 cellular  
 organisms;Eukaryota;Opisthokonta;Metazoa;Eumetazoa;Bilateria;Protostomia;  
 Spiralia;Lophotrochozoa;Mollusca;Bivalvia;Autobranchia;Heteroconchia;Euhe  
 terodonta;Imparidentia;Venerida;Veneroidea;Veneridae;Mercenaria;Mercenari  
 a mercenaria  
 UdeM00000031051 6579 251.1 UdeM00000031051 XP\_033731739.1 58.6 191  
 79 0 1 191 188 378 1.10E-63 251.1 6579 cellular  
 organisms;Eukaryota;Opisthokonta;Metazoa;Eumetazoa;Bilateria;Protostomia;  
 Spiralia;Lophotrochozoa;Mollusca;Bivalvia;Autobranchia;Pteriomorphia;Pect  
 inida;Pectinoidea;Pectinidae;Pecten;Pecten maximus  
 UdeM00000031050 6579 390.2 UdeM00000031050 XP\_033731739.1 61.4 280  
 108 0 1 280 99 378 2.20E-105 390.2 6579 cellular  
 organisms;Eukaryota;Opisthokonta;Metazoa;Eumetazoa;Bilateria;Protostomia;  
 Spiralia;Lophotrochozoa;Mollusca;Bivalvia;Autobranchia;Pteriomorphia;Pect  
 inida;Pectinoidea;Pectinidae;Pecten;Pecten maximus  
 UdeM00000031053 6596 247.3 UdeM00000031053 XP\_045174332.1 36.8 391  
 228 6 27 404 154 538 3.50E-62 247.3 6596 cellular  
 organisms;Eukaryota;Opisthokonta;Metazoa;Eumetazoa;Bilateria;Protostomia;

Spiralia;Lophotrochozoa;Mollusca;Bivalvia;Autobranchia;Heteroconchia;Euherodonta;Imparidentia;Venerida;Veneroidea;Veneridae;Mercenaria;Mercenaria mercenaria

UdeM00000031052 6596 290 UdeM00000031052 XP\_045174332.1 36.9 453  
267 6 27 466 154 600 5.40E-75 290 6596 cellular

organisms;Eukaryota;Opisthokonta;Metazoa;Eumetazoa;Bilateria;Protostomia;Spiralia;Lophotrochozoa;Mollusca;Bivalvia;Autobranchia;Heteroconchia;Euherodonta;Imparidentia;Venerida;Veneroidea;Veneridae;Mercenaria;Mercenaria mercenaria

UdeM00000031054 6596 68.9 UdeM00000031054 XP\_045208792.1 35.9 145  
85 3 1 139 1 143 1.30E-08 68.9 6596 cellular

organisms;Eukaryota;Opisthokonta;Metazoa;Eumetazoa;Bilateria;Protostomia;Spiralia;Lophotrochozoa;Mollusca;Bivalvia;Autobranchia;Heteroconchia;Euherodonta;Imparidentia;Venerida;Veneroidea;Veneridae;Mercenaria;Mercenaria mercenaria

UdeM00000031055 6596 120.2 UdeM00000031055 XP\_045165680.1 49.6 117  
57 2 4 118 15 131 1.80E-24 120.2 6596 cellular

organisms;Eukaryota;Opisthokonta;Metazoa;Eumetazoa;Bilateria;Protostomia;Spiralia;Lophotrochozoa;Mollusca;Bivalvia;Autobranchia;Heteroconchia;Euherodonta;Imparidentia;Venerida;Veneroidea;Veneridae;Mercenaria;Mercenaria mercenaria

UdeM00000031056 6565 135.2 UdeM00000031056 XP\_022302017.1 52.1 121  
54 3 1 120 1 118 5.70E-29 135.2 6565 cellular

organisms;Eukaryota;Opisthokonta;Metazoa;Eumetazoa;Bilateria;Protostomia;Spiralia;Lophotrochozoa;Mollusca;Bivalvia;Autobranchia;Pteriomorphia;Ostreida;Ostreoidea;Ostreidae;Crassostrea;Crassostrea virginica

UdeM00000031057 1735272 418.7 UdeM00000031057 XP\_041350204.1 46.4  
550 246 13 31 545 24 559 1.10E-113 418.7 1735272  
cellular

organisms;Eukaryota;Opisthokonta;Metazoa;Eumetazoa;Bilateria;Protostomia;Spiralia;Lophotrochozoa;Mollusca;Gastropoda;Neomphalina;Neomphaloidea;Peltospiridae;Gigantopelta;Gigantopelta aegis

UdeM00000031058 6573 657.5 UdeM00000031058 XP\_021370346.1 60 602  
174 7 1 598 1 539 1.60E-185 657.5 6573 cellular

organisms;Eukaryota;Opisthokonta;Metazoa;Eumetazoa;Bilateria;Protostomia;Spiralia;Lophotrochozoa;Mollusca;Bivalvia;Autobranchia;Pteriomorphia;Pectinida;Pectinoidea;Pectinidae;Mizuhopecten;Mizuhopecten yessoensis

UdeM00000031059 6596 218.4 UdeM00000031059 XP\_045164288.1 52.2 485  
151 9 2 407 3 485 1.70E-53 218.4 6596 cellular

organisms;Eukaryota;Opisthokonta;Metazoa;Eumetazoa;Bilateria;Protostomia;Spiralia;Lophotrochozoa;Mollusca;Bivalvia;Autobranchia;Heteroconchia;Euherodonta;Imparidentia;Venerida;Veneroidea;Veneridae;Mercenaria;Mercenaria mercenaria

UdeM00000031060 1735272 73.2 UdeM00000031060 XP\_041367923.1 54.7  
64 29 0 3 66 157 220 1.80E-10 73.2 1735272  
cellular

organisms;Eukaryota;Opisthokonta;Metazoa;Eumetazoa;Bilateria;Protostomia;Spiralia;Lophotrochozoa;Mollusca;Gastropoda;Neomphalina;Neomphaloidea;Peltospiridae;Gigantopelta;Gigantopelta aegis

UdeM00000031062 6596 133.7 UdeM00000031062 XP\_045164946.1 43.3 164  
89 3 16 177 11 172 3.70E-28 133.7 6596 cellular

organisms;Eukaryota;Opisthokonta;Metazoa;Eumetazoa;Bilateria;Protostomia;Spiralia;Lophotrochozoa;Mollusca;Bivalvia;Autobranchia;Heteroconchia;Euherodonta;Imparidentia;Venerida;Veneroidea;Veneridae;Mercenaria;Mercenaria mercenaria

terodonta;Imparidentia;Venerida;Veneroidea;Veneridae;Mercenaria;Mercenaria mercenaria

UdeM00000031063 6573 70.5 UdeM00000031063 XP\_021367610.1 47.1 153  
71 4 2 146 123 273 2.10E-09 70.5 6573 cellular

organisms;Eukaryota;Opisthokonta;Metazoa;Eumetazoa;Bilateria;Protostomia;Spiralia;Lophotrochozoa;Mollusca;Bivalvia;Autobranhia;Pteriormorphia;Pectinida;Pectinoidea;Pectinidae;Mizuhopecten;Mizuhopecten yessoensis

UdeM00000031064 6596 223 UdeM00000031064 XP\_045166951.1 53.9 232  
96 2 140 371 208 428 6.50E-55 223 6596 cellular

organisms;Eukaryota;Opisthokonta;Metazoa;Eumetazoa;Bilateria;Protostomia;Spiralia;Lophotrochozoa;Mollusca;Bivalvia;Autobranhia;Heteroconchia;Euheterodonta;Imparidentia;Venerida;Veneroidea;Veneridae;Mercenaria;Mercenaria mercenaria

UdeM00000031065 6573 139 UdeM00000031065 XP\_021346482.1 64 114  
40 1 8 120 245 358 4.60E-30 139 6573 cellular

organisms;Eukaryota;Opisthokonta;Metazoa;Eumetazoa;Bilateria;Protostomia;Spiralia;Lophotrochozoa;Mollusca;Bivalvia;Autobranhia;Pteriormorphia;Pectinida;Pectinoidea;Pectinidae;Mizuhopecten;Mizuhopecten yessoensis

UdeM00000031066 29159 94.7 UdeM00000031066 XP\_011428998.1 79.6 54  
11 0 20 73 6 59 7.10E-17 94.7 29159 cellular

organisms;Eukaryota;Opisthokonta;Metazoa;Eumetazoa;Bilateria;Protostomia;Spiralia;Lophotrochozoa;Mollusca;Bivalvia;Autobranhia;Pteriormorphia;Ostreida;Ostreoidea;Ostreidae;Crassostrea;Crassostrea gigas

UdeM00000031067 6596 558.5 UdeM00000031067 XP\_045165652.1 47.4 658  
304 10 59 694 115 752 1.20E-155 558.5 6596 cellular

organisms;Eukaryota;Opisthokonta;Metazoa;Eumetazoa;Bilateria;Protostomia;Spiralia;Lophotrochozoa;Mollusca;Bivalvia;Autobranhia;Heteroconchia;Euheterodonta;Imparidentia;Venerida;Veneroidea;Veneridae;Mercenaria;Mercenaria mercenaria

UdeM00000031068 1735272 126.3 UdeM00000031068 XP\_041378637.1 44.1  
143 77 2 1 142 1 141 3.30E-26 126.3 1735272

cellular

organisms;Eukaryota;Opisthokonta;Metazoa;Eumetazoa;Bilateria;Protostomia;Spiralia;Lophotrochozoa;Mollusca;Gastropoda;Neomphalina;Neomphaloidea;Peltospiridae;Gigantopelta;Gigantopelta aegis

UdeM00000031069 6596 320.5 UdeM00000031069 XP\_045164650.1 68.6 220  
67 1 3 220 1 220 1.70E-84 320.5 6596 cellular

organisms;Eukaryota;Opisthokonta;Metazoa;Eumetazoa;Bilateria;Protostomia;Spiralia;Lophotrochozoa;Mollusca;Bivalvia;Autobranhia;Heteroconchia;Euheterodonta;Imparidentia;Venerida;Veneroidea;Veneridae;Mercenaria;Mercenaria mercenaria

UdeM00000031070 6565 65.5 UdeM00000031070 XP\_022343600.1 24.4 209  
138 8 9 199 35 241 1.10E-07 65.5 6565 cellular

organisms;Eukaryota;Opisthokonta;Metazoa;Eumetazoa;Bilateria;Protostomia;Spiralia;Lophotrochozoa;Mollusca;Bivalvia;Autobranhia;Pteriormorphia;Ostreida;Ostreoidea;Ostreidae;Crassostrea;Crassostrea virginica

UdeM00000031072 218467 232.6 UdeM00000031072 XP\_023212519.1 55.6  
216 95 1 1 216 1 215 5.10E-58 232.6 218467

cellular

organisms;Eukaryota;Opisthokonta;Metazoa;Eumetazoa;Bilateria;Protostomia;Ecdysozoa;Panarthropoda;Arthropoda;Chelicerata;Arachnida;Scorpiones;Buthida;Buthoidea;Buthidae;Centruroides;Centruroides sculpturatus

UdeM00000031074 6596 81.6 UdeM00000031074 XP\_045165271.1 26.4 273  
167 8 9 250 10 279 1.60E-12 81.6 6596 cellular

organisms;Eukaryota;Opisthokonta;Metazoa;Eumetazoa;Bilateria;Protostomia;Spiralia;Lophotrochozoa;Mollusca;Bivalvia;Autobranchia;Heteroconchia;Euherodonta;Imparidentia;Venerida;Veneroidea;Veneridae;Mercenaria;Mercenaria mercenaria

UdeM00000031075 225164 86.3 UdeM00000031075 XP\_009051287.1 45.1  
102 56 0 2 103 184 285 8.80E-14 86.3 225164  
cellular

organisms;Eukaryota;Opisthokonta;Metazoa;Eumetazoa;Bilateria;Protostomia;Spiralia;Lophotrochozoa;Mollusca;Gastropoda;Patellogastropoda;Lottioidea;Lottiidae;Lottia;Lottia gigantea

UdeM00000031076 6573 70.9 UdeM00000031076 XP\_021370966.1 28.8 153  
97 3 146 287 70 221 3.10E-09 70.9 6573 cellular

organisms;Eukaryota;Opisthokonta;Metazoa;Eumetazoa;Bilateria;Protostomia;Spiralia;Lophotrochozoa;Mollusca;Bivalvia;Autobranchia;Pteriormorphia;Pectinida;Pectinoidea;Pectinidae;Mizuhopecten;Mizuhopecten yessoensis

UdeM00000031077 6596 138.7 UdeM00000031077 XP\_045165271.1 33.8 293  
164 8 20 294 13 293 1.50E-29 138.7 6596 cellular

organisms;Eukaryota;Opisthokonta;Metazoa;Eumetazoa;Bilateria;Protostomia;Spiralia;Lophotrochozoa;Mollusca;Bivalvia;Autobranchia;Heteroconchia;Euherodonta;Imparidentia;Venerida;Veneroidea;Veneridae;Mercenaria;Mercenaria mercenaria

UdeM00000031078 6596 138.7 UdeM00000031078 XP\_045165271.1 33.8 293  
164 8 40 314 13 293 1.60E-29 138.7 6596 cellular

organisms;Eukaryota;Opisthokonta;Metazoa;Eumetazoa;Bilateria;Protostomia;Spiralia;Lophotrochozoa;Mollusca;Bivalvia;Autobranchia;Heteroconchia;Euherodonta;Imparidentia;Venerida;Veneroidea;Veneridae;Mercenaria;Mercenaria mercenaria

UdeM00000031080 6596 482.6 UdeM00000031080 XP\_045166371.1 57.8 446  
153 13 1 434 8 430 5.10E-133 482.6 6596 cellular

organisms;Eukaryota;Opisthokonta;Metazoa;Eumetazoa;Bilateria;Protostomia;Spiralia;Lophotrochozoa;Mollusca;Bivalvia;Autobranchia;Heteroconchia;Euherodonta;Imparidentia;Venerida;Veneroidea;Veneridae;Mercenaria;Mercenaria mercenaria

UdeM00000031081 6573 415.2 UdeM00000031081 XP\_021363304.1 52.4 534  
230 8 207 738 376 887 1.90E-112 415.2 6573 cellular

organisms;Eukaryota;Opisthokonta;Metazoa;Eumetazoa;Bilateria;Protostomia;Spiralia;Lophotrochozoa;Mollusca;Bivalvia;Autobranchia;Pteriormorphia;Pectinida;Pectinoidea;Pectinidae;Mizuhopecten;Mizuhopecten yessoensis

UdeM00000031082 6573 415.2 UdeM00000031082 XP\_021363304.1 52.4 534  
230 8 206 737 376 887 1.90E-112 415.2 6573 cellular

organisms;Eukaryota;Opisthokonta;Metazoa;Eumetazoa;Bilateria;Protostomia;Spiralia;Lophotrochozoa;Mollusca;Bivalvia;Autobranchia;Pteriormorphia;Pectinida;Pectinoidea;Pectinidae;Mizuhopecten;Mizuhopecten yessoensis

UdeM00000031083 6573 410.2 UdeM00000031083 XP\_021363304.1 52.2 536  
230 9 207 740 376 887 6.30E-111 410.2 6573 cellular

organisms;Eukaryota;Opisthokonta;Metazoa;Eumetazoa;Bilateria;Protostomia;Spiralia;Lophotrochozoa;Mollusca;Bivalvia;Autobranchia;Pteriormorphia;Pectinida;Pectinoidea;Pectinidae;Mizuhopecten;Mizuhopecten yessoensis

UdeM00000031085 6596 129.8 UdeM00000031085 XP\_045166153.1 53.2 126  
53 2 3 122 18 143 2.90E-27 129.8 6596 cellular

organisms;Eukaryota;Opisthokonta;Metazoa;Eumetazoa;Bilateria;Protostomia;Spiralia;Lophotrochozoa;Mollusca;Bivalvia;Autobranchia;Heteroconchia;Euherodonta;Imparidentia;Venerida;Veneroidea;Veneridae;Mercenaria;Mercenaria mercenaria

UdeM00000031086 2607531 399.8 UdeM00000031086 XP\_029635812.1 55.9  
 365 145 7 12 369 20 375 3.80E-108 399.8 2607531  
 cellular  
 organisms;Eukaryota;Opisthokonta;Metazoa;Eumetazoa;Bilateria;Protostomia;  
 Spiralia;Lophotrochozoa;Mollusca;Cephalopoda;Coleoidea;Octopodiformes;Oct  
 opoda;Incirrata;Octopodidae;Octopus;Octopus sinensis  
 UdeM00000031089 6573 129.8 UdeM00000031089 XP\_021362496.1 73.8 80  
 19 1 1 80 1 78 2.20E-27 129.8 6573 cellular  
 organisms;Eukaryota;Opisthokonta;Metazoa;Eumetazoa;Bilateria;Protostomia;  
 Spiralia;Lophotrochozoa;Mollusca;Bivalvia;Autobranchia;Pteriormorphia;Pect  
 inida;Pectinoidea;Pectinidae;Mizuhopecten;Mizuhopecten yessoensis  
 UdeM00000031091 6579 322.8 UdeM00000031091 XP\_033745114.1 52.1 305  
 142 3 79 379 52 356 5.90E-85 322.8 6579 cellular  
 organisms;Eukaryota;Opisthokonta;Metazoa;Eumetazoa;Bilateria;Protostomia;  
 Spiralia;Lophotrochozoa;Mollusca;Bivalvia;Autobranchia;Pteriormorphia;Pect  
 inida;Pectinoidea;Pectinidae;Pecten;Pecten maximus  
 UdeM00000031093 6596 302 UdeM00000031093 XP\_045165146.1 48.7 353  
 159 9 262 598 263 609 1.70E-78 302 6596 cellular  
 organisms;Eukaryota;Opisthokonta;Metazoa;Eumetazoa;Bilateria;Protostomia;  
 Spiralia;Lophotrochozoa;Mollusca;Bivalvia;Autobranchia;Heteroconchia;Euhe  
 terodonta;Imparidentia;Venerida;Veneroidea;Veneridae;Mercenaria;Mercenari  
 a mercenaria  
 UdeM00000031094 400727 309.7 UdeM00000031094 XP\_025108752.1 89.8  
 166 17 0 1 166 1 166 2.80E-81 309.7 400727  
 cellular  
 organisms;Eukaryota;Opisthokonta;Metazoa;Eumetazoa;Bilateria;Protostomia;  
 Spiralia;Lophotrochozoa;Mollusca;Gastropoda;Caenogastropoda;Architaeniogl  
 ossa;Ampullarioidea;Ampullariidae;Pomacea;Pomacea canaliculata  
 UdeM00000031096 6573 752.3 UdeM00000031096 XP\_021342854.1 59.3 829  
 293 8 1 820 1 794 6.50E-214 752.3 6573 cellular  
 organisms;Eukaryota;Opisthokonta;Metazoa;Eumetazoa;Bilateria;Protostomia;  
 Spiralia;Lophotrochozoa;Mollusca;Bivalvia;Autobranchia;Pteriormorphia;Pect  
 inida;Pectinoidea;Pectinidae;Mizuhopecten;Mizuhopecten yessoensis  
 UdeM00000031099 6596 154.5 UdeM00000031099 XP\_045166217.1 35.4 263  
 157 8 7 261 1 258 1.90E-34 154.5 6596 cellular  
 organisms;Eukaryota;Opisthokonta;Metazoa;Eumetazoa;Bilateria;Protostomia;  
 Spiralia;Lophotrochozoa;Mollusca;Bivalvia;Autobranchia;Heteroconchia;Euhe  
 terodonta;Imparidentia;Venerida;Veneroidea;Veneridae;Mercenaria;Mercenari  
 a mercenaria  
 UdeM00000031100 6596 131 UdeM00000031100 XP\_045166218.1 53.4 131  
 58 3 6 136 2 129 1.20E-27 131 6596 cellular  
 organisms;Eukaryota;Opisthokonta;Metazoa;Eumetazoa;Bilateria;Protostomia;  
 Spiralia;Lophotrochozoa;Mollusca;Bivalvia;Autobranchia;Heteroconchia;Euhe  
 terodonta;Imparidentia;Venerida;Veneroidea;Veneridae;Mercenaria;Mercenari  
 a mercenaria  
 UdeM00000031101 6573 141.7 UdeM00000031101 XP\_021343346.1 30.4 253  
 164 5 63 308 90 337 1.60E-30 141.7 6573 cellular  
 organisms;Eukaryota;Opisthokonta;Metazoa;Eumetazoa;Bilateria;Protostomia;  
 Spiralia;Lophotrochozoa;Mollusca;Bivalvia;Autobranchia;Pteriormorphia;Pect  
 inida;Pectinoidea;Pectinidae;Mizuhopecten;Mizuhopecten yessoensis  
 UdeM00000031102 6596 81.6 UdeM00000031102 XP\_045167147.1 28.1 349  
 177 9 4 346 184 464 2.20E-12 81.6 6596 cellular  
 organisms;Eukaryota;Opisthokonta;Metazoa;Eumetazoa;Bilateria;Protostomia;  
 Spiralia;Lophotrochozoa;Mollusca;Bivalvia;Autobranchia;Heteroconchia;Euhe

terodonta;Imparidentia;Venerida;Veneroidea;Veneridae;Mercenaria;Mercenaria mercenaria  
 UdeM00000031103 6596 274.2 UdeM00000031103 XP\_045165279.1 71.8 170  
 48 0 1 170 1 170 1.10E-70 274.2 6596 cellular  
 organisms;Eukaryota;Opisthokonta;Metazoa;Eumetazoa;Bilateria;Protostomia;Spiralia;Lophotrochozoa;Mollusca;Bivalvia;Autobranchia;Heteroconchia;Euherodonta;Imparidentia;Venerida;Veneroidea;Veneridae;Mercenaria;Mercenaria mercenaria  
 UdeM00000031104 6596 273.9 UdeM00000031104 XP\_045165279.1 71.8 170  
 48 0 17 186 1 170 1.50E-70 273.9 6596 cellular  
 organisms;Eukaryota;Opisthokonta;Metazoa;Eumetazoa;Bilateria;Protostomia;Spiralia;Lophotrochozoa;Mollusca;Bivalvia;Autobranchia;Heteroconchia;Euherodonta;Imparidentia;Venerida;Veneroidea;Veneridae;Mercenaria;Mercenaria mercenaria  
 UdeM00000031105 400727 439.1 UdeM00000031105 XP\_025106179.1 47.4  
 420 197 8 13 424 28 431 6.40E-120 439.1 400727  
 cellular  
 organisms;Eukaryota;Opisthokonta;Metazoa;Eumetazoa;Bilateria;Protostomia;Spiralia;Lophotrochozoa;Mollusca;Gastropoda;Caenogastropoda;Architaenioglossa;Ampullarioidea;Ampullariidae;Pomacea;Pomacea canaliculata  
 UdeM00000031106 6596 272.7 UdeM00000031106 XP\_045164871.1 45.7 276  
 144 4 37 311 423 693 6.10E-70 272.7 6596 cellular  
 organisms;Eukaryota;Opisthokonta;Metazoa;Eumetazoa;Bilateria;Protostomia;Spiralia;Lophotrochozoa;Mollusca;Bivalvia;Autobranchia;Heteroconchia;Euherodonta;Imparidentia;Venerida;Veneroidea;Veneridae;Mercenaria;Mercenaria mercenaria  
 UdeM00000031107 1735272 302.8 UdeM00000031107 XP\_041348505.1 50  
 276 126 4 2 274 730 996 4.60E-79 302.8 1735272  
 cellular  
 organisms;Eukaryota;Opisthokonta;Metazoa;Eumetazoa;Bilateria;Protostomia;Spiralia;Lophotrochozoa;Mollusca;Gastropoda;Neomphalina;Neomphaloidea;Peltospiridae;Gigantopelta;Gigantopelta aegis  
 UdeM00000031109 118141 202.2 UdeM00000031109 XP\_036390142.1 49.5  
 210 104 2 1 210 19 226 6.90E-49 202.2 118141  
 cellular  
 organisms;Eukaryota;Opisthokonta;Metazoa;Eumetazoa;Bilateria;Deuterostomia;Chordata;Craniata;Vertebrata;Gnathostomata;Teleostomi;Euteleostomi;Actinopterygii;Actinopteri;Neopterygii;Teleostei;Elopocephalai;Elopocephala;Elopocephala;Elopocephala;Elopocephala  
 UdeM00000031108 6573 266.5 UdeM00000031108 XP\_021360335.1 41.2 323  
 187 2 71 393 10 329 5.40E-68 266.5 6573 cellular  
 organisms;Eukaryota;Opisthokonta;Metazoa;Eumetazoa;Bilateria;Protostomia;Spiralia;Lophotrochozoa;Mollusca;Bivalvia;Autobranchia;Pteriomorpha;Pectinida;Pectinoidea;Pectinidae;Mizuhopecten;Mizuhopecten yessoensis  
 UdeM00000031110 37653 81.6 UdeM00000031110 XP\_014783345.1 44.3 106  
 55 2 34 136 40 144 8.50E-13 81.6 37653 cellular  
 organisms;Eukaryota;Opisthokonta;Metazoa;Eumetazoa;Bilateria;Protostomia;Spiralia;Lophotrochozoa;Mollusca;Cephalopoda;Coleoidea;Octopodiformes;Octopoda;Incirrata;Octopodidae;Octopus;Octopus bimaculoides  
 UdeM00000031112 6573 1637.5 UdeM00000031112 XP\_021364147.1 54.5  
 1644 595 31 1 1620 1 1515 0.00E+00 1637.5 6573  
 cellular  
 organisms;Eukaryota;Opisthokonta;Metazoa;Eumetazoa;Bilateria;Protostomia;

Spiralia; Lophotrochozoa; Mollusca; Bivalvia; Autobranchia; Pteriomorpha; Pectinida; Pectinoidea; Pectinidae; Mizuhopecten; Mizuhopecten yessoensis  
UdeM00000031113 6573 1644 UdeM00000031113 XP\_021364147.1 54.7 1639  
595 30 1 1615 1 1515 0.00E+00 1644 6573 cellular  
organisms; Eukaryota; Opisthokonta; Metazoa; Eumetazoa; Bilateria; Protostomia; Spiralia; Lophotrochozoa; Mollusca; Bivalvia; Autobranchia; Pteriomorpha; Pectinida; Pectinoidea; Pectinidae; Mizuhopecten; Mizuhopecten yessoensis  
UdeM00000031114 6596 132.5 UdeM00000031114 XP\_045164421.1 76.3 76  
18 0 1 76 1 76 2.60E-28 132.5 6596 cellular  
organisms; Eukaryota; Opisthokonta; Metazoa; Eumetazoa; Bilateria; Protostomia; Spiralia; Lophotrochozoa; Mollusca; Bivalvia; Autobranchia; Heteroconchia; Euheterodonta; Imparidentia; Venerida; Veneroidea; Veneridae; Mercenaria; Mercenaria mercenaria  
UdeM00000031115 6596 257.3 UdeM00000031115 XP\_045164421.1 49.7 294  
144 2 1 294 1 290 2.40E-65 257.3 6596 cellular  
organisms; Eukaryota; Opisthokonta; Metazoa; Eumetazoa; Bilateria; Protostomia; Spiralia; Lophotrochozoa; Mollusca; Bivalvia; Autobranchia; Heteroconchia; Euheterodonta; Imparidentia; Venerida; Veneroidea; Veneridae; Mercenaria; Mercenaria mercenaria  
UdeM00000031116 218467 160.2 UdeM00000031116 XP\_023218812.1 40.1  
217 125 4 35 247 769 984 3.70E-36 160.2 218467  
cellular  
organisms; Eukaryota; Opisthokonta; Metazoa; Eumetazoa; Bilateria; Protostomia; Ecdysozoa; Panarthropoda; Arthropoda; Chelicerata; Arachnida; Scorpiones; Buthida; Buthoidea; Buthidae; Centruroides; Centruroides sculpturatus  
UdeM00000031117 7654 562 UdeM00000031117 XP\_041470181.1 50 572  
240 8 135 706 129 654 1.50E-156 562 7654 cellular  
organisms; Eukaryota; Opisthokonta; Metazoa; Eumetazoa; Bilateria; Deuterostomia; Echinodermata; Eleutherozoa; Echinozoa; Echinoidea; Euechinoidea; Echinacea; Temnopleuroidea; Toxopneustidae; Lytechinus; Lytechinus variegatus  
UdeM00000031118 6573 459.9 UdeM00000031118 XP\_021351979.1 50.6 1040  
416 21 1 965 1 1017 1.60E-125 459.9 6573 cellular  
organisms; Eukaryota; Opisthokonta; Metazoa; Eumetazoa; Bilateria; Protostomia; Spiralia; Lophotrochozoa; Mollusca; Bivalvia; Autobranchia; Pteriomorpha; Pectinida; Pectinoidea; Pectinidae; Mizuhopecten; Mizuhopecten yessoensis  
UdeM00000031119 6573 459.9 UdeM00000031119 XP\_021351979.1 50.6 1040  
416 21 1 965 1 1017 1.60E-125 459.9 6573 cellular  
organisms; Eukaryota; Opisthokonta; Metazoa; Eumetazoa; Bilateria; Protostomia; Spiralia; Lophotrochozoa; Mollusca; Bivalvia; Autobranchia; Pteriomorpha; Pectinida; Pectinoidea; Pectinidae; Mizuhopecten; Mizuhopecten yessoensis  
UdeM00000031121 29159 600.5 UdeM00000031121 XP\_034305609.1 57.1 494  
207 1 1 494 1 489 1.90E-168 600.5 29159 cellular  
organisms; Eukaryota; Opisthokonta; Metazoa; Eumetazoa; Bilateria; Protostomia; Spiralia; Lophotrochozoa; Mollusca; Bivalvia; Autobranchia; Pteriomorpha; Ostreida; Ostreidae; Crassostrea; Crassostrea gigas  
UdeM00000031122 6500 157.5 UdeM00000031122 XP\_005092264.1 54.2 168  
58 3 1 167 1 150 1.50E-35 157.5 6500 cellular  
organisms; Eukaryota; Opisthokonta; Metazoa; Eumetazoa; Bilateria; Protostomia; Spiralia; Lophotrochozoa; Mollusca; Gastropoda; Heterobranchia; Euthyneura; Teptipleura; Aplysiida; Aplysioidea; Aplysiidae; Aplysia; Aplysia californica  
UdeM00000031124 8407 103.2 UdeM00000031124 XP\_040198332.1 50 94  
42 2 31 119 181 274 2.30E-19 103.2 8407 cellular  
organisms; Eukaryota; Opisthokonta; Metazoa; Eumetazoa; Bilateria; Deuterostomia; Chordata; Craniata; Vertebrata; Gnathostomata; Teleostomi; Euteleostomi; Sarc

opterygii;Dipnotetrapodomorpha;Tetrapoda;Amphibia;Batrachia;Anura;Neobatr  
 achia;Ranoidea;Ranidae;Rana;Rana;Rana temporaria  
 UdeM00000031125 1735272 222.2 UdeM00000031125 XP\_041377704.1 50  
 244 114 3 31 268 28 269 7.70E-55 222.2 1735272  
 cellular  
 organisms;Eukaryota;Opisthokonta;Metazoa;Eumetazoa;Bilateria;Protostomia;  
 Spiralia;Lophotrochozoa;Mollusca;Gastropoda;Neomphalina;Neomphaloidea;Pel  
 tospiridae;Gigantopelta;Gigantopelta aegis  
 UdeM00000031126 6596 404.4 UdeM00000031126 XP\_045165225.1 46.3 561  
 279 5 1 557 1 543 2.30E-109 404.4 6596 cellular  
 organisms;Eukaryota;Opisthokonta;Metazoa;Eumetazoa;Bilateria;Protostomia;  
 Spiralia;Lophotrochozoa;Mollusca;Bivalvia;Autobranchia;Heteroconchia;Euhe  
 terodonta;Imparidentia;Venerida;Veneroidea;Veneridae;Mercenaria;Mercenari  
 a mercenaria  
 UdeM00000031127 6579 233.8 UdeM00000031127 XP\_033744840.1 70.6 153  
 45 0 13 165 11 163 1.60E-58 233.8 6579 cellular  
 organisms;Eukaryota;Opisthokonta;Metazoa;Eumetazoa;Bilateria;Protostomia;  
 Spiralia;Lophotrochozoa;Mollusca;Bivalvia;Autobranchia;Pteriormorphia;Pect  
 inida;Pectinoidea;Pectinidae;Pecten;Pecten maximus  
 UdeM00000031128 6565 564.7 UdeM00000031128 XP\_022298888.1 83.1 308  
 52 0 219 526 92 399 1.20E-157 564.7 6565 cellular  
 organisms;Eukaryota;Opisthokonta;Metazoa;Eumetazoa;Bilateria;Protostomia;  
 Spiralia;Lophotrochozoa;Mollusca;Bivalvia;Autobranchia;Pteriormorphia;Ostr  
 eida;Ostreoidea;Ostreidae;Crassostrea;Crassostrea virginica  
 UdeM00000031129 6596 208 UdeM00000031129 XP\_045164345.1 68.4 133  
 42 0 44 176 26 158 9.90E-51 208 6596 cellular  
 organisms;Eukaryota;Opisthokonta;Metazoa;Eumetazoa;Bilateria;Protostomia;  
 Spiralia;Lophotrochozoa;Mollusca;Bivalvia;Autobranchia;Heteroconchia;Euhe  
 terodonta;Imparidentia;Venerida;Veneroidea;Veneridae;Mercenaria;Mercenari  
 a mercenaria  
 UdeM00000031130 6596 141.7 UdeM00000031130 XP\_045166841.1 44.6 148  
 79 2 13 158 11 157 7.90E-31 141.7 6596 cellular  
 organisms;Eukaryota;Opisthokonta;Metazoa;Eumetazoa;Bilateria;Protostomia;  
 Spiralia;Lophotrochozoa;Mollusca;Bivalvia;Autobranchia;Heteroconchia;Euhe  
 terodonta;Imparidentia;Venerida;Veneroidea;Veneridae;Mercenaria;Mercenari  
 a mercenaria  
 UdeM00000031131 6579 75.1 UdeM00000031131 XP\_033744687.1 32.1 240  
 114 8 82 288 84 307 1.90E-10 75.1 6579 cellular  
 organisms;Eukaryota;Opisthokonta;Metazoa;Eumetazoa;Bilateria;Protostomia;  
 Spiralia;Lophotrochozoa;Mollusca;Bivalvia;Autobranchia;Pteriormorphia;Pect  
 inida;Pectinoidea;Pectinidae;Pecten;Pecten maximus  
 UdeM00000031132 9669 283.5 UdeM00000031132 XP\_012906247.2 90.6 149  
 14 0 5 153 3 151 1.70E-73 283.5 9669 cellular  
 organisms;Eukaryota;Opisthokonta;Metazoa;Eumetazoa;Bilateria;Deuterostomi  
 a;Chordata;Craniata;Vertebrata;Gnathostomata;Teleostomi;Euteleostomi;Sarc  
 opterygii;Dipnotetrapodomorpha;Tetrapoda;Amniota;Mammalia;Theria;Eutheria  
 ;Boreoeutheria;Laurasiatheria;Carnivora;Caniformia;Mustelidae;Mustelinae;  
 Mustela;Mustela putorius;Mustela putorius furo  
 UdeM00000031133 6573 454.1 UdeM00000031133 XP\_021362423.1 62.8 411  
 112 10 76 471 98 482 2.30E-124 454.1 6573 cellular  
 organisms;Eukaryota;Opisthokonta;Metazoa;Eumetazoa;Bilateria;Protostomia;  
 Spiralia;Lophotrochozoa;Mollusca;Bivalvia;Autobranchia;Pteriormorphia;Pect  
 inida;Pectinoidea;Pectinidae;Mizuhopecten;Mizuhopecten yessoensis



UdeM00000031134 6596 461.5 UdeM00000031134 XP\_045164678.1 57.9 375  
 154 3 4 377 54 425 1.10E-126 461.5 6596 cellular  
 organisms;Eukaryota;Opisthokonta;Metazoa;Eumetazoa;Bilateria;Protostomia;  
 Spiralia;Lophotrochozoa;Mollusca;Bivalvia;Autobranhia;Heteroconchia;Euhe  
 terodonta;Imparidentia;Venerida;Veneroidea;Veneridae;Mercenaria;Mercenari  
 a mercenaria  
 UdeM00000031135 6596 866.3 UdeM00000031135 XP\_045165637.1 93.4 452  
 28 2 1 451 1 451 1.70E-248 866.3 6596 cellular  
 organisms;Eukaryota;Opisthokonta;Metazoa;Eumetazoa;Bilateria;Protostomia;  
 Spiralia;Lophotrochozoa;Mollusca;Bivalvia;Autobranhia;Heteroconchia;Euhe  
 terodonta;Imparidentia;Venerida;Veneroidea;Veneridae;Mercenaria;Mercenari  
 a mercenaria  
 UdeM00000031136 6596 672.2 UdeM00000031136 XP\_045165638.1 54.5 745  
 223 15 12 718 34 700 7.50E-190 672.2 6596 cellular  
 organisms;Eukaryota;Opisthokonta;Metazoa;Eumetazoa;Bilateria;Protostomia;  
 Spiralia;Lophotrochozoa;Mollusca;Bivalvia;Autobranhia;Heteroconchia;Euhe  
 terodonta;Imparidentia;Venerida;Veneroidea;Veneridae;Mercenaria;Mercenari  
 a mercenaria  
 UdeM00000031137 6579 490 UdeM00000031137 XP\_033745660.1 54.2 421  
 191 2 1 419 119 539 3.10E-135 490 6579 cellular  
 organisms;Eukaryota;Opisthokonta;Metazoa;Eumetazoa;Bilateria;Protostomia;  
 Spiralia;Lophotrochozoa;Mollusca;Bivalvia;Autobranhia;Pteriormorphia;Pect  
 inida;Pectinoidea;Pectinidae;Pecten;Pecten maximus  
 UdeM00000031138 6579 719.5 UdeM00000031138 XP\_033745660.1 62.3 525  
 190 2 39 563 26 542 3.20E-204 719.5 6579 cellular  
 organisms;Eukaryota;Opisthokonta;Metazoa;Eumetazoa;Bilateria;Protostomia;  
 Spiralia;Lophotrochozoa;Mollusca;Bivalvia;Autobranhia;Pteriormorphia;Pect  
 inida;Pectinoidea;Pectinidae;Pecten;Pecten maximus  
 UdeM00000031139 6579 637.9 UdeM00000031139 XP\_033745660.1 67.7 430  
 136 1 15 444 116 542 9.70E-180 637.9 6579 cellular  
 organisms;Eukaryota;Opisthokonta;Metazoa;Eumetazoa;Bilateria;Protostomia;  
 Spiralia;Lophotrochozoa;Mollusca;Bivalvia;Autobranhia;Pteriormorphia;Pect  
 inida;Pectinoidea;Pectinidae;Pecten;Pecten maximus  
 UdeM00000031140 6596 261.5 UdeM00000031140 XP\_045175042.1 30.5 817  
 470 34 17 764 21 808 3.30E-66 261.5 6596 cellular  
 organisms;Eukaryota;Opisthokonta;Metazoa;Eumetazoa;Bilateria;Protostomia;  
 Spiralia;Lophotrochozoa;Mollusca;Bivalvia;Autobranhia;Heteroconchia;Euhe  
 terodonta;Imparidentia;Venerida;Veneroidea;Veneridae;Mercenaria;Mercenari  
 a mercenaria  
 UdeM00000031141 6596 235 UdeM00000031141 XP\_045175042.1 32.5 631  
 355 24 2 580 197 808 2.50E-58 235 6596 cellular  
 organisms;Eukaryota;Opisthokonta;Metazoa;Eumetazoa;Bilateria;Protostomia;  
 Spiralia;Lophotrochozoa;Mollusca;Bivalvia;Autobranhia;Heteroconchia;Euhe  
 terodonta;Imparidentia;Venerida;Veneroidea;Veneridae;Mercenaria;Mercenari  
 a mercenaria  
 UdeM00000031142 29159 66.6 UdeM00000031142 XP\_034307290.1 24.1 291  
 194 10 22 286 36 325 1.10E-07 66.6 29159 cellular  
 organisms;Eukaryota;Opisthokonta;Metazoa;Eumetazoa;Bilateria;Protostomia;  
 Spiralia;Lophotrochozoa;Mollusca;Bivalvia;Autobranhia;Pteriormorphia;Ostr  
 eida;Ostreoidea;Ostreidae;Crassostrea;Crassostrea gigas  
 UdeM00000031145 29159 414.5 UdeM00000031145 XP\_011444543.1 82.8 238  
 41 0 24 261 99 336 1.00E-112 414.5 29159 cellular  
 organisms;Eukaryota;Opisthokonta;Metazoa;Eumetazoa;Bilateria;Protostomia;

Spiralia;Lophotrochozoa;Mollusca;Bivalvia;Autobranchia;Pteriormorphia;Ostr  
eida;Ostreoidea;Ostreidae;Crassostrea;Crassostrea gigas  
UdeM00000031146 6565 122.9 UdeM00000031146 XP\_022299595.1 74 77  
20 0 1 77 1 77 1.80E-25 122.9 6565 cellular  
organisms;Eukaryota;Opisthokonta;Metazoa;Eumetazoa;Bilateria;Protostomia;  
Spiralia;Lophotrochozoa;Mollusca;Bivalvia;Autobranchia;Pteriormorphia;Ostr  
eida;Ostreoidea;Ostreidae;Crassostrea;Crassostrea virginica  
UdeM00000031148 6573 378.6 UdeM00000031148 XP\_021339985.1 31.7 861  
520 18 41 870 60 883 2.10E-101 378.6 6573 cellular  
organisms;Eukaryota;Opisthokonta;Metazoa;Eumetazoa;Bilateria;Protostomia;  
Spiralia;Lophotrochozoa;Mollusca;Bivalvia;Autobranchia;Pteriormorphia;Pect  
inida;Pectinoidea;Pectinidae;Mizuhopecten;Mizuhopecten yessoensis  
UdeM00000031150 6579 386.3 UdeM00000031150 XP\_033757991.1 31.9 836  
513 18 65 869 74 884 1.00E-103 386.3 6579 cellular  
organisms;Eukaryota;Opisthokonta;Metazoa;Eumetazoa;Bilateria;Protostomia;  
Spiralia;Lophotrochozoa;Mollusca;Bivalvia;Autobranchia;Pteriormorphia;Pect  
inida;Pectinoidea;Pectinidae;Pecten;Pecten maximus  
UdeM00000031151 8496 220.7 UdeM00000031151 XP\_014459819.1 48.8 217  
95 2 6 221 87 288 1.80E-54 220.7 8496 cellular  
organisms;Eukaryota;Opisthokonta;Metazoa;Eumetazoa;Bilateria;Deuterostomi  
a;Chordata;Craniata;Vertebrata;Gnathostomata;Teleostomi;Euteleostomi;Sarc  
opterygii;Dipnotetrapodomorpha;Tetrapoda;Amniota;Sauropsida;Sauria;Archel  
osauria;Archosauria;Crocodylia;Alligatoridae;Alligatorinae;Alligator;Alli  
gator mississippiensis  
UdeM00000031152 6579 79.3 UdeM00000031152 XP\_033761526.1 53.1 64  
30 0 70 133 360 423 4.60E-12 79.3 6579 cellular  
organisms;Eukaryota;Opisthokonta;Metazoa;Eumetazoa;Bilateria;Protostomia;  
Spiralia;Lophotrochozoa;Mollusca;Bivalvia;Autobranchia;Pteriormorphia;Pect  
inida;Pectinoidea;Pectinidae;Pecten;Pecten maximus  
UdeM00000031153 29159 89.4 UdeM00000031153 XP\_011426209.1 40.7 91  
54 0 1 91 1 91 2.90E-15 89.4 29159 cellular  
organisms;Eukaryota;Opisthokonta;Metazoa;Eumetazoa;Bilateria;Protostomia;  
Spiralia;Lophotrochozoa;Mollusca;Bivalvia;Autobranchia;Pteriormorphia;Ostr  
eida;Ostreoidea;Ostreidae;Crassostrea;Crassostrea gigas  
UdeM00000031155 9258 61.6 UdeM00000031155 XP\_028934161.1 38.1 97  
60 0 1 97 7 103 6.50E-07 61.6 9258 cellular  
organisms;Eukaryota;Opisthokonta;Metazoa;Eumetazoa;Bilateria;Deuterostomi  
a;Chordata;Craniata;Vertebrata;Gnathostomata;Teleostomi;Euteleostomi;Sarc  
opterygii;Dipnotetrapodomorpha;Tetrapoda;Amniota;Mammalia;Prototheria;Mon  
otremata;Ornithorhynchidae;Ornithorhynchus;Ornithorhynchus anatinus  
UdeM00000031156 6596 238.8 UdeM00000031156 XP\_045172655.1 48.9 233  
115 2 25 257 22 250 7.60E-60 238.8 6596 cellular  
organisms;Eukaryota;Opisthokonta;Metazoa;Eumetazoa;Bilateria;Protostomia;  
Spiralia;Lophotrochozoa;Mollusca;Bivalvia;Autobranchia;Heteroconchia;Euhe  
terodonta;Imparidentia;Venerida;Veneroidea;Veneridae;Mercenaria;Mercenari  
a mercenaria  
UdeM00000031157 37621 318.2 UdeM00000031157 XP\_014666614.1 52.4 307  
105 3 5 281 233 528 1.10E-83 318.2 37621 cellular  
organisms;Eukaryota;Opisthokonta;Metazoa;Eumetazoa;Bilateria;Protostomia;  
Ecdysozoa;Scalidophora;Priapulida;Priapulimorpha;Priapulimorphida;Priapul  
idae;Priapululus;Priapululus caudatus  
UdeM00000031159 6596 412.9 UdeM00000031159 XP\_045156248.1 37.5 626  
295 9 4 565 7 600 6.50E-112 412.9 6596 cellular  
organisms;Eukaryota;Opisthokonta;Metazoa;Eumetazoa;Bilateria;Protostomia;

Spiralia;Lophotrochozoa;Mollusca;Bivalvia;Autobranchia;Heteroconchia;Euherodonta;Imparidentia;Venerida;Veneroidea;Veneridae;Mercenaria;Mercenaria mercenaria

UdeM00000031160 29159 79.7 UdeM00000031160 XP\_011426209.1 40.7 91  
54 0 1 91 1 91 2.50E-12 79.7 29159 cellular  
organisms;Eukaryota;Opisthokonta;Metazoa;Eumetazoa;Bilateria;Protostomia;  
Spiralia;Lophotrochozoa;Mollusca;Bivalvia;Autobranchia;Pteriomorphia;Ostr  
eida;Ostreoidea;Ostreidae;Crassostrea;Crassostrea gigas

UdeM00000031161 29159 90.5 UdeM00000031161 XP\_011426209.1 44 91  
51 0 1 91 1 91 1.30E-15 90.5 29159 cellular  
organisms;Eukaryota;Opisthokonta;Metazoa;Eumetazoa;Bilateria;Protostomia;  
Spiralia;Lophotrochozoa;Mollusca;Bivalvia;Autobranchia;Pteriomorphia;Ostr  
eida;Ostreoidea;Ostreidae;Crassostrea;Crassostrea gigas

UdeM00000031162 29159 72.4 UdeM00000031162 XP\_034320501.1 36.5 96  
57 1 10 105 319 410 4.10E-10 72.4 29159 cellular  
organisms;Eukaryota;Opisthokonta;Metazoa;Eumetazoa;Bilateria;Protostomia;  
Spiralia;Lophotrochozoa;Mollusca;Bivalvia;Autobranchia;Pteriomorphia;Ostr  
eida;Ostreoidea;Ostreidae;Crassostrea;Crassostrea gigas

UdeM00000031163 29159 72 UdeM00000031163 XP\_034320501.1 36.5 96  
57 1 57 152 319 410 7.70E-10 72 29159 cellular  
organisms;Eukaryota;Opisthokonta;Metazoa;Eumetazoa;Bilateria;Protostomia;  
Spiralia;Lophotrochozoa;Mollusca;Bivalvia;Autobranchia;Pteriomorphia;Ostr  
eida;Ostreoidea;Ostreidae;Crassostrea;Crassostrea gigas

UdeM00000031164 6579 901 UdeM00000031164 XP\_033745031.1 83.8 531  
83 2 1 531 1 528 7.50E-259 901 6579 cellular  
organisms;Eukaryota;Opisthokonta;Metazoa;Eumetazoa;Bilateria;Protostomia;  
Spiralia;Lophotrochozoa;Mollusca;Bivalvia;Autobranchia;Pteriomorphia;Pect  
inida;Pectinoidea;Pectinidae;Pecten;Pecten maximus

UdeM00000031165 6596 87.8 UdeM00000031165 XP\_045165959.1 25.9 274  
184 6 14 277 9 273 3.30E-14 87.8 6596 cellular  
organisms;Eukaryota;Opisthokonta;Metazoa;Eumetazoa;Bilateria;Protostomia;  
Spiralia;Lophotrochozoa;Mollusca;Bivalvia;Autobranchia;Heteroconchia;Euher  
odonta;Imparidentia;Venerida;Veneroidea;Veneridae;Mercenaria;Mercenari  
a mercenaria

UdeM00000031166 6596 77.8 UdeM00000031166 XP\_045165959.1 29.4 211  
138 4 29 230 11 219 4.70E-11 77.8 6596 cellular  
organisms;Eukaryota;Opisthokonta;Metazoa;Eumetazoa;Bilateria;Protostomia;  
Spiralia;Lophotrochozoa;Mollusca;Bivalvia;Autobranchia;Heteroconchia;Euher  
odonta;Imparidentia;Venerida;Veneroidea;Veneridae;Mercenaria;Mercenari  
a mercenaria

UdeM00000031167 6573 219.2 UdeM00000031167 XP\_021362715.1 37.3 300  
188 0 24 323 28 327 8.10E-54 219.2 6573 cellular  
organisms;Eukaryota;Opisthokonta;Metazoa;Eumetazoa;Bilateria;Protostomia;  
Spiralia;Lophotrochozoa;Mollusca;Bivalvia;Autobranchia;Pteriomorphia;Pect  
inida;Pectinoidea;Pectinidae;Mizuhopecten;Mizuhopecten yessoensis

UdeM00000031168 6573 227.3 UdeM00000031168 XP\_021362715.1 39.6 280  
162 2 1 274 48 326 2.60E-56 227.3 6573 cellular  
organisms;Eukaryota;Opisthokonta;Metazoa;Eumetazoa;Bilateria;Protostomia;  
Spiralia;Lophotrochozoa;Mollusca;Bivalvia;Autobranchia;Pteriomorphia;Pect  
inida;Pectinoidea;Pectinidae;Mizuhopecten;Mizuhopecten yessoensis

UdeM00000031169 6573 229.2 UdeM00000031169 XP\_021362715.1 37.7 302  
181 2 22 317 26 326 7.80E-57 229.2 6573 cellular  
organisms;Eukaryota;Opisthokonta;Metazoa;Eumetazoa;Bilateria;Protostomia;

Spiralia;Lophotrochozoa;Mollusca;Bivalvia;Autobranchia;Pteriomorpha;Pectinida;Pectinoidea;Pectinidae;Mizuhopecten;Mizuhopecten yessoensis  
UdeM00000031170 6596 71.2 UdeM00000031170 XP\_045165959.1 23.5 255  
170 5 261 506 7 245 6.60E-09 71.2 6596 cellular  
organisms;Eukaryota;Opisthokonta;Metazoa;Eumetazoa;Bilateria;Protostomia;  
Spiralia;Lophotrochozoa;Mollusca;Bivalvia;Autobranchia;Heteroconchia;Euherodonta;Imparidentia;Venerida;Veneroidea;Veneridae;Mercenaria;Mercenaria mercenaria  
UdeM00000031171 6596 64.3 UdeM00000031171 XP\_045165959.1 22.4 286  
169 11 170 432 11 266 5.00E-07 64.3 6596 cellular  
organisms;Eukaryota;Opisthokonta;Metazoa;Eumetazoa;Bilateria;Protostomia;  
Spiralia;Lophotrochozoa;Mollusca;Bivalvia;Autobranchia;Heteroconchia;Euherodonta;Imparidentia;Venerida;Veneroidea;Veneridae;Mercenaria;Mercenaria mercenaria  
UdeM00000031172 6573 254.6 UdeM00000031172 XP\_021346943.1 42.5 315  
178 2 22 333 41 355 2.00E-64 254.6 6573 cellular  
organisms;Eukaryota;Opisthokonta;Metazoa;Eumetazoa;Bilateria;Protostomia;  
Spiralia;Lophotrochozoa;Mollusca;Bivalvia;Autobranchia;Pteriomorpha;Pectinida;Pectinoidea;Pectinidae;Mizuhopecten;Mizuhopecten yessoensis  
UdeM00000031173 6596 585.1 UdeM00000031173 XP\_045166697.1 85 314  
47 0 1 314 1 314 5.30E-164 585.1 6596 cellular  
organisms;Eukaryota;Opisthokonta;Metazoa;Eumetazoa;Bilateria;Protostomia;  
Spiralia;Lophotrochozoa;Mollusca;Bivalvia;Autobranchia;Heteroconchia;Euherodonta;Imparidentia;Venerida;Veneroidea;Veneridae;Mercenaria;Mercenaria mercenaria  
UdeM00000031174 6579 606.7 UdeM00000031174 XP\_033745122.1 79.9 374  
70 4 1 373 899 1268 2.10E-170 606.7 6579 cellular  
organisms;Eukaryota;Opisthokonta;Metazoa;Eumetazoa;Bilateria;Protostomia;  
Spiralia;Lophotrochozoa;Mollusca;Bivalvia;Autobranchia;Pteriomorpha;Pectinida;Pectinoidea;Pectinidae;Pecten;Pecten maximus  
UdeM00000031175 1735272 1426.8 UdeM00000031175 XP\_041348327.1  
75 1012 103 6 1 1009 1 865 0.00E+00 1426.8  
1735272 cellular  
organisms;Eukaryota;Opisthokonta;Metazoa;Eumetazoa;Bilateria;Protostomia;  
Spiralia;Lophotrochozoa;Mollusca;Gastropoda;Neomphalina;Neomphaloidea;Peltospiridae;Gigantopelta;Gigantopelta aegis  
UdeM00000031176 6579 3975.2 UdeM00000031176 XP\_033746252.1 58  
3639 1296 38 1 3508 1 3536 0.00E+00 3975.2 6579  
cellular  
organisms;Eukaryota;Opisthokonta;Metazoa;Eumetazoa;Bilateria;Protostomia;  
Spiralia;Lophotrochozoa;Mollusca;Bivalvia;Autobranchia;Pteriomorpha;Pectinida;Pectinoidea;Pectinidae;Pecten;Pecten maximus  
UdeM00000031177 7574 102.8 UdeM00000031177 XP\_013413001.1 41.3 121  
65 2 1 115 32 152 3.00E-19 102.8 7574 cellular  
organisms;Eukaryota;Opisthokonta;Metazoa;Eumetazoa;Bilateria;Protostomia;  
Spiralia;Lophotrochozoa;Brachiopoda;Linguliformea;Lingulata;Lingulida;Linguloidea;Lingulidae;Lingula;Lingula anatina  
UdeM00000044464 6526 111.3 UdeM00000044464 XP\_013074346.1 43 149  
65 2 1 129 131 279 9.90E-22 111.3 6526 cellular  
organisms;Eukaryota;Opisthokonta;Metazoa;Eumetazoa;Bilateria;Protostomia;  
Spiralia;Lophotrochozoa;Mollusca;Gastropoda;Heterobranchia;Euthyneura;Pulmonata;Hygrophila;Lymnaeidae;Planorbidae;Biomphalaria;Biomphalaria glabrata

UdeM00000044465 118797 172.6 UdeM00000044465 XP\_007453495.1 40.1  
379 179 4 1 338 1 372 8.80E-40 172.6 118797  
cellular

organisms;Eukaryota;Opisthokonta;Metazoa;Eumetazoa;Bilateria;Deuterostomi  
a;Chordata;Craniata;Vertebrata;Gnathostomata;Teleostomi;Euteleostomi;Sarc  
opterygii;Dipnotetrapodomorpha;Tetrapoda;Amniota;Mammalia;Theria;Eutheria  
;Boreoeutheria;Laurasiatheria;Artiodactyla;Whippomorpha;Cetacea;Odontocet  
i;Lipotidae;Lipotes;Lipotes vexillifer

UdeM00000040889 6579 230.3 UdeM00000040889 XP\_033756725.1 71.8 142  
40 0 1 142 1 142 1.50E-57 230.3 6579 cellular

organisms;Eukaryota;Opisthokonta;Metazoa;Eumetazoa;Bilateria;Protostomia;  
Spiralia;Lophotrochozoa;Mollusca;Bivalvia;Autobranchia;Pteriomorpha;Pect  
inida;Pectinoidea;Pectinidae;Pecten;Pecten maximus

UdeM00000040890 6596 457.6 UdeM00000040890 XP\_045189666.1 45.9 728  
308 21 6 670 32 736 2.70E-125 457.6 6596 cellular

organisms;Eukaryota;Opisthokonta;Metazoa;Eumetazoa;Bilateria;Protostomia;  
Spiralia;Lophotrochozoa;Mollusca;Bivalvia;Autobranchia;Heteroconchia;Euhe  
terodonta;Imparidentia;Venerida;Veneroidea;Veneridae;Mercenaria;Mercenari  
a mercenaria

UdeM00000040891 6596 190.7 UdeM00000040891 XP\_045190501.1 44.7 217  
119 1 36 252 10 225 2.50E-45 190.7 6596 cellular

organisms;Eukaryota;Opisthokonta;Metazoa;Eumetazoa;Bilateria;Protostomia;  
Spiralia;Lophotrochozoa;Mollusca;Bivalvia;Autobranchia;Heteroconchia;Euhe  
terodonta;Imparidentia;Venerida;Veneroidea;Veneridae;Mercenaria;Mercenari  
a mercenaria

UdeM00000040893 6596 852 UdeM00000040893 XP\_045190503.1 60.6 695  
245 12 1 678 1 683 5.00E-244 852 6596 cellular

organisms;Eukaryota;Opisthokonta;Metazoa;Eumetazoa;Bilateria;Protostomia;  
Spiralia;Lophotrochozoa;Mollusca;Bivalvia;Autobranchia;Heteroconchia;Euhe  
terodonta;Imparidentia;Venerida;Veneroidea;Veneridae;Mercenaria;Mercenari  
a mercenaria

UdeM00000040894 6596 323.6 UdeM00000040894 XP\_045189769.1 70.3 212  
63 0 3 214 5 216 2.00E-85 323.6 6596 cellular

organisms;Eukaryota;Opisthokonta;Metazoa;Eumetazoa;Bilateria;Protostomia;  
Spiralia;Lophotrochozoa;Mollusca;Bivalvia;Autobranchia;Heteroconchia;Euhe  
terodonta;Imparidentia;Venerida;Veneroidea;Veneridae;Mercenaria;Mercenari  
a mercenaria

UdeM00000040895 6596 340.1 UdeM00000040895 XP\_045189769.1 74.2 213  
55 0 1 213 5 217 2.00E-90 340.1 6596 cellular

organisms;Eukaryota;Opisthokonta;Metazoa;Eumetazoa;Bilateria;Protostomia;  
Spiralia;Lophotrochozoa;Mollusca;Bivalvia;Autobranchia;Heteroconchia;Euhe  
terodonta;Imparidentia;Venerida;Veneroidea;Veneridae;Mercenaria;Mercenari  
a mercenaria

UdeM00000040897 1735272 357.8 UdeM00000040897 XP\_041370285.1 38.1  
559 334 6 350 900 2366 2920 4.10E-95 357.8 1735272  
cellular

organisms;Eukaryota;Opisthokonta;Metazoa;Eumetazoa;Bilateria;Protostomia;  
Spiralia;Lophotrochozoa;Mollusca;Gastropoda;Neomphalina;Neomphaloidea;Pel  
tospiridae;Gigantopelta;Gigantopelta aegis

UdeM00000040898 6596 946 UdeM00000040898 XP\_045188382.1 32.8 1881  
1046 34 164 1859 13 1860 7.00E-272 946 6596 cellular

organisms;Eukaryota;Opisthokonta;Metazoa;Eumetazoa;Bilateria;Protostomia;  
Spiralia;Lophotrochozoa;Mollusca;Bivalvia;Autobranchia;Heteroconchia;Euhe

terodonta;Imparidentia;Venerida;Veneroidea;Veneridae;Mercenaria;Mercenari  
a mercenaria

UdeM00000040899 6565 218 UdeM00000040899 XP\_022335825.1 29.5 437  
248 7 153 542 364 787 3.00E-53 218 6565 cellular

organisms;Eukaryota;Opisthokonta;Metazoa;Eumetazoa;Bilateria;Protostomia;  
Spiralia;Lophotrochozoa;Mollusca;Bivalvia;Autobranchia;Pteriormorphia;Ostr  
eida;Ostreoidea;Ostreidae;Crassostrea;Crassostrea virginica

UdeM00000040900 6596 1060.1 UdeM00000040900 XP\_045188379.1 34.8  
1903 1012 27 313 2186 697 2400 3.90E-306 1060.1 6596  
cellular

organisms;Eukaryota;Opisthokonta;Metazoa;Eumetazoa;Bilateria;Protostomia;  
Spiralia;Lophotrochozoa;Mollusca;Bivalvia;Autobranchia;Heteroconchia;Euhe  
terodonta;Imparidentia;Venerida;Veneroidea;Veneridae;Mercenaria;Mercenari  
a mercenaria

UdeM00000040900 6596 85.5 UdeM00000040900 XP\_045188379.1 31.2 234  
141 6 36 259 32 255 9.10E-13 85.5 6596 cellular

organisms;Eukaryota;Opisthokonta;Metazoa;Eumetazoa;Bilateria;Protostomia;  
Spiralia;Lophotrochozoa;Mollusca;Bivalvia;Autobranchia;Heteroconchia;Euhe  
terodonta;Imparidentia;Venerida;Veneroidea;Veneridae;Mercenaria;Mercenari  
a mercenaria

UdeM00000040902 6596 270 UdeM00000040902 XP\_045190602.1 37.6 380  
212 7 373 745 243 604 8.90E-69 270 6596 cellular

organisms;Eukaryota;Opisthokonta;Metazoa;Eumetazoa;Bilateria;Protostomia;  
Spiralia;Lophotrochozoa;Mollusca;Bivalvia;Autobranchia;Heteroconchia;Euhe  
terodonta;Imparidentia;Venerida;Veneroidea;Veneridae;Mercenaria;Mercenari  
a mercenaria

UdeM00000040901 6596 270 UdeM00000040901 XP\_045190602.1 37.6 380  
212 7 415 787 243 604 9.40E-69 270 6596 cellular

organisms;Eukaryota;Opisthokonta;Metazoa;Eumetazoa;Bilateria;Protostomia;  
Spiralia;Lophotrochozoa;Mollusca;Bivalvia;Autobranchia;Heteroconchia;Euhe  
terodonta;Imparidentia;Venerida;Veneroidea;Veneridae;Mercenaria;Mercenari  
a mercenaria

UdeM00000040904 6596 273.9 UdeM00000040904 XP\_045190602.1 39.8 367  
182 9 345 690 256 604 5.70E-70 273.9 6596 cellular

organisms;Eukaryota;Opisthokonta;Metazoa;Eumetazoa;Bilateria;Protostomia;  
Spiralia;Lophotrochozoa;Mollusca;Bivalvia;Autobranchia;Heteroconchia;Euhe  
terodonta;Imparidentia;Venerida;Veneroidea;Veneridae;Mercenaria;Mercenari  
a mercenaria

UdeM00000040905 6579 411.4 UdeM00000040905 XP\_033757375.1 59.1 345  
126 3 37 381 16 345 1.30E-111 411.4 6579 cellular

organisms;Eukaryota;Opisthokonta;Metazoa;Eumetazoa;Bilateria;Protostomia;  
Spiralia;Lophotrochozoa;Mollusca;Bivalvia;Autobranchia;Pteriormorphia;Pect  
inida;Pectinoidea;Pectinidae;Pecten;Pecten maximus

UdeM00000040908 6596 271.2 UdeM00000040908 XP\_045192074.1 48.5 301  
146 4 20 314 2123 2420 2.80E-69 271.2 6596 cellular

organisms;Eukaryota;Opisthokonta;Metazoa;Eumetazoa;Bilateria;Protostomia;  
Spiralia;Lophotrochozoa;Mollusca;Bivalvia;Autobranchia;Heteroconchia;Euhe  
terodonta;Imparidentia;Venerida;Veneroidea;Veneridae;Mercenaria;Mercenari  
a mercenaria

UdeM00000040909 7719 68.6 UdeM00000040909 XP\_009858662.1 39.7 78  
47 0 138 215 30 107 1.20E-08 68.6 7719 cellular

organisms;Eukaryota;Opisthokonta;Metazoa;Eumetazoa;Bilateria;Deuterostomi  
a;Chordata;Tunicata;Ascidiacea;Phlebobranchia;Cionidae;Ciona;Ciona  
intestinalis

UdeM00000040910 7719 68.6 UdeM00000040910 XP\_009858662.1 39.7 78  
 47 0 138 215 30 107 1.20E-08 68.6 7719 cellular  
 organisms;Eukaryota;Opisthokonta;Metazoa;Eumetazoa;Bilateria;Deuterostomi  
 a;Chordata;Tunicata;Ascidiacea;Phlebobranchia;Cionidae;Ciona;Ciona  
 intestinalis  
 UdeM00000040911 151771 418.3 UdeM00000040911 XP\_028390790.1 30.4  
 902 553 24 133 1005 131 986 3.00E-113 418.3 151771  
 cellular  
 organisms;Eukaryota;Opisthokonta;Metazoa;Eumetazoa;Cnidaria;Anthozoa;Octo  
 corallia;Alcyonacea;Alcyoniina;Nephtheidae;Dendronephthya;Dendronephthya  
 gigantea  
 UdeM00000040913 6596 259.2 UdeM00000040913 XP\_045170871.1 53.1 239  
 100 4 121 356 65 294 7.60E-66 259.2 6596 cellular  
 organisms;Eukaryota;Opisthokonta;Metazoa;Eumetazoa;Bilateria;Protostomia;  
 Spiralia;Lophotrochozoa;Mollusca;Bivalvia;Autobranchia;Heteroconchia;Euhe  
 terodonta;Imparidentia;Venerida;Veneroidea;Veneridae;Mercenaria;Mercenari  
 a mercenaria  
 UdeM00000040914 6596 267.7 UdeM00000040914 XP\_045170871.1 50.8 258  
 115 4 103 357 46 294 2.20E-68 267.7 6596 cellular  
 organisms;Eukaryota;Opisthokonta;Metazoa;Eumetazoa;Bilateria;Protostomia;  
 Spiralia;Lophotrochozoa;Mollusca;Bivalvia;Autobranchia;Heteroconchia;Euhe  
 terodonta;Imparidentia;Venerida;Veneroidea;Veneridae;Mercenaria;Mercenari  
 a mercenaria  
 UdeM00000040915 6596 389.8 UdeM00000040915 XP\_045189006.1 59 322  
 129 2 1 322 1 319 3.40E-105 389.8 6596 cellular  
 organisms;Eukaryota;Opisthokonta;Metazoa;Eumetazoa;Bilateria;Protostomia;  
 Spiralia;Lophotrochozoa;Mollusca;Bivalvia;Autobranchia;Heteroconchia;Euhe  
 terodonta;Imparidentia;Venerida;Veneroidea;Veneridae;Mercenaria;Mercenari  
 a mercenaria  
 UdeM00000040916 6596 70.1 UdeM00000040916 XP\_045194471.1 34.7 98  
 60 2 45 142 48 141 2.60E-09 70.1 6596 cellular  
 organisms;Eukaryota;Opisthokonta;Metazoa;Eumetazoa;Bilateria;Protostomia;  
 Spiralia;Lophotrochozoa;Mollusca;Bivalvia;Autobranchia;Heteroconchia;Euhe  
 terodonta;Imparidentia;Venerida;Veneroidea;Veneridae;Mercenaria;Mercenari  
 a mercenaria  
 UdeM00000040917 225164 89 UdeM00000040917 XP\_009062547.1 35.7  
 140 82 4 7 141 9 145 5.60E-15 89 225164  
 cellular  
 organisms;Eukaryota;Opisthokonta;Metazoa;Eumetazoa;Bilateria;Protostomia;  
 Spiralia;Lophotrochozoa;Mollusca;Gastropoda;Patellogastropoda;Lottioidea;  
 Lottiidae;Lottia;Lottia gigantea  
 UdeM00000040918 6579 84.3 UdeM00000040918 XP\_033756564.1 38.5 135  
 61 2 1 135 1 113 1.30E-13 84.3 6579 cellular  
 organisms;Eukaryota;Opisthokonta;Metazoa;Eumetazoa;Bilateria;Protostomia;  
 Spiralia;Lophotrochozoa;Mollusca;Bivalvia;Autobranchia;Pteriomorphia;Pect  
 inida;Pectinoidea;Pectinidae;Pecten;Pecten maximus  
 UdeM00000040919 6596 390.6 UdeM00000040919 XP\_045189006.1 56.4 351  
 146 4 1 348 1 347 2.30E-105 390.6 6596 cellular  
 organisms;Eukaryota;Opisthokonta;Metazoa;Eumetazoa;Bilateria;Protostomia;  
 Spiralia;Lophotrochozoa;Mollusca;Bivalvia;Autobranchia;Heteroconchia;Euhe  
 terodonta;Imparidentia;Venerida;Veneroidea;Veneridae;Mercenaria;Mercenari  
 a mercenaria  
 UdeM00000040920 6596 392.1 UdeM00000040920 XP\_045189006.1 57 351  
 144 4 1 348 1 347 7.90E-106 392.1 6596 cellular

organisms;Eukaryota;Opisthokonta;Metazoa;Eumetazoa;Bilateria;Protostomia;Spiralia;Lophotrochozoa;Mollusca;Bivalvia;Autobranchia;Heteroconchia;Euherodonta;Imparidentia;Venerida;Veneroidea;Veneridae;Mercenaria;Mercenaria mercenaria

UdeM00000040921 6596 413.3 UdeM00000040921 XP\_045190806.1 44.5 589  
246 10 1 517 1 580 4.50E-112 413.3 6596 cellular

organisms;Eukaryota;Opisthokonta;Metazoa;Eumetazoa;Bilateria;Protostomia;Spiralia;Lophotrochozoa;Mollusca;Bivalvia;Autobranchia;Heteroconchia;Euherodonta;Imparidentia;Venerida;Veneroidea;Veneridae;Mercenaria;Mercenaria mercenaria

UdeM00000040922 7574 112.5 UdeM00000040922 XP\_013393256.1 50 98  
46 1 1 98 1 95 1.90E-21 112.5 7574 cellular

organisms;Eukaryota;Opisthokonta;Metazoa;Eumetazoa;Bilateria;Protostomia;Spiralia;Lophotrochozoa;Brachiopoda;Linguliformea;Lingulata;Lingulida;Linguloidea;Lingulidae;Lingula;Lingula anatina

UdeM00000040923 6596 927.2 UdeM00000040923 XP\_045188124.1 46 1152  
496 27 1 1077 1 1101 2.00E-266 927.2 6596 cellular

organisms;Eukaryota;Opisthokonta;Metazoa;Eumetazoa;Bilateria;Protostomia;Spiralia;Lophotrochozoa;Mollusca;Bivalvia;Autobranchia;Heteroconchia;Euherodonta;Imparidentia;Venerida;Veneroidea;Veneridae;Mercenaria;Mercenaria mercenaria

UdeM00000040924 6596 117.1 UdeM00000040924 XP\_045190306.1 35 217  
126 4 24 239 27 229 5.70E-23 117.1 6596 cellular

organisms;Eukaryota;Opisthokonta;Metazoa;Eumetazoa;Bilateria;Protostomia;Spiralia;Lophotrochozoa;Mollusca;Bivalvia;Autobranchia;Heteroconchia;Euherodonta;Imparidentia;Venerida;Veneroidea;Veneridae;Mercenaria;Mercenaria mercenaria

UdeM00000040926 6596 292.7 UdeM00000040926 XP\_045188124.1 53.4 262  
116 4 1 257 108 368 6.20E-76 292.7 6596 cellular

organisms;Eukaryota;Opisthokonta;Metazoa;Eumetazoa;Bilateria;Protostomia;Spiralia;Lophotrochozoa;Mollusca;Bivalvia;Autobranchia;Heteroconchia;Euherodonta;Imparidentia;Venerida;Veneroidea;Veneridae;Mercenaria;Mercenaria mercenaria

UdeM00000040928 6596 473.8 UdeM00000040928 XP\_045189650.1 68 362  
105 6 43 397 53 410 2.20E-130 473.8 6596 cellular

organisms;Eukaryota;Opisthokonta;Metazoa;Eumetazoa;Bilateria;Protostomia;Spiralia;Lophotrochozoa;Mollusca;Bivalvia;Autobranchia;Heteroconchia;Euherodonta;Imparidentia;Venerida;Veneroidea;Veneridae;Mercenaria;Mercenaria mercenaria

UdeM00000040929 6596 271.2 UdeM00000040929 XP\_045188782.1 47.9 286  
139 3 1 286 77 352 1.60E-69 271.2 6596 cellular

organisms;Eukaryota;Opisthokonta;Metazoa;Eumetazoa;Bilateria;Protostomia;Spiralia;Lophotrochozoa;Mollusca;Bivalvia;Autobranchia;Heteroconchia;Euherodonta;Imparidentia;Venerida;Veneroidea;Veneridae;Mercenaria;Mercenaria mercenaria

UdeM00000040930 6596 70.9 UdeM00000040930 XP\_045190936.1 47.3 74  
39 0 76 149 1 74 1.70E-09 70.9 6596 cellular

organisms;Eukaryota;Opisthokonta;Metazoa;Eumetazoa;Bilateria;Protostomia;Spiralia;Lophotrochozoa;Mollusca;Bivalvia;Autobranchia;Heteroconchia;Euherodonta;Imparidentia;Venerida;Veneroidea;Veneridae;Mercenaria;Mercenaria mercenaria

UdeM00000040931 6596 476.9 UdeM00000040931 XP\_045188775.1 38.8 1040  
509 27 1 951 1 1002 6.20E-131 476.9 6596 cellular

organisms;Eukaryota;Opisthokonta;Metazoa;Eumetazoa;Bilateria;Protostomia;



Spiralia;Lophotrochozoa;Mollusca;Bivalvia;Autobranchia;Heteroconchia;Euherodonta;Imparidentia;Venerida;Veneroidea;Veneridae;Mercenaria;Mercenaria mercenaria

UdeM00000040932 6596 475.3 UdeM00000040932 XP\_045188775.1 39.2 1038  
541 24 1 984 1 1002 1.90E-130 475.3 6596 cellular

organisms;Eukaryota;Opisthokonta;Metazoa;Eumetazoa;Bilateria;Protostomia;Spiralia;Lophotrochozoa;Mollusca;Bivalvia;Autobranchia;Heteroconchia;Euherodonta;Imparidentia;Venerida;Veneroidea;Veneridae;Mercenaria;Mercenaria mercenaria

UdeM00000040933 119488 89.4 UdeM00000040933 XP\_044041676.1 39.8  
133 74 4 10 142 153 279 6.30E-15 89.4 119488  
cellular

organisms;Eukaryota;Opisthokonta;Metazoa;Eumetazoa;Bilateria;Deuterostomia;Chordata;Craniata;Vertebrata;Gnathostomata;Teleostomi;Euteleostomi;Actinopterygii;Actinopteri;Neopterygii;Teleostei;Osteoglossocephalai;Clupeocephala;Euteleostei;Neoteleostei;Eurypterygia;Ctenosquamata;Acanthomorpha;Euacanthomorpha;Percomorphaceae;Eupercaria;Centrarchiformes;Centrarchoidei;Siniperca;Siniperca chuatsi

UdeM00000040934 7741 101.7 UdeM00000040934 XP\_019629791.1 31.6 244  
103 8 220 461 133 314 4.10E-18 101.7 7741 cellular

organisms;Eukaryota;Opisthokonta;Metazoa;Eumetazoa;Bilateria;Deuterostomia;Chordata;Cephalochordata;Leptocardii;Amphioxiformes;Branchiostomidae;Branchiostoma;Branchiostoma belcheri

UdeM00000040935 6579 72 UdeM00000040935 XP\_033760751.1 56.1 66  
28 1 1 65 61 126 3.30E-10 72 6579 cellular

organisms;Eukaryota;Opisthokonta;Metazoa;Eumetazoa;Bilateria;Protostomia;Spiralia;Lophotrochozoa;Mollusca;Bivalvia;Autobranchia;Pteriormorphia;Pectinida;Pectinoidea;Pectinidae;Pecten;Pecten maximus

UdeM00000040936 32391 107.8 UdeM00000040936 XP\_044583413.1 33.3 246  
138 8 9 250 7 230 5.60E-20 107.8 32391 cellular

organisms;Eukaryota;Opisthokonta;Metazoa;Eumetazoa;Bilateria;Protostomia;Ecdysozoa;Panarthropoda;Arthropoda;Mandibulata;Pancrustacea;Hexapoda;Insecta;Dicondylia;Pterygota;Neoptera;Endopterygota;Hymenoptera;Apocrita;Parasitoida;Ichneumonoidea;Braconidae;Microgastrinae;Cotesia;Cotesia glomerata

UdeM00000040937 37653 921 UdeM00000040937 XP\_014777272.1 74.3 642  
145 1 6 627 4 645 8.10E-265 921 37653 cellular

organisms;Eukaryota;Opisthokonta;Metazoa;Eumetazoa;Bilateria;Protostomia;Spiralia;Lophotrochozoa;Mollusca;Cephalopoda;Coleoidea;Octopodiformes;Octopoda;Incirrata;Octopodidae;Octopus;Octopus bimaculoides

UdeM00000040938 6596 68.6 UdeM00000040938 XP\_045190602.1 23.9 452  
263 17 1 371 1 452 2.00E-08 68.6 6596 cellular

organisms;Eukaryota;Opisthokonta;Metazoa;Eumetazoa;Bilateria;Protostomia;Spiralia;Lophotrochozoa;Mollusca;Bivalvia;Autobranchia;Heteroconchia;Euherodonta;Imparidentia;Venerida;Veneroidea;Veneridae;Mercenaria;Mercenaria mercenaria

UdeM00000040939 29159 161.8 UdeM00000040939 XP\_034331441.1 33.7 246  
151 2 266 507 391 628 2.40E-36 161.8 29159 cellular

organisms;Eukaryota;Opisthokonta;Metazoa;Eumetazoa;Bilateria;Protostomia;Spiralia;Lophotrochozoa;Mollusca;Bivalvia;Autobranchia;Pteriormorphia;Ostreida;Ostreoidea;Ostreidae;Crassostrea;Crassostrea gigas

UdeM00000040940 6596 235.7 UdeM00000040940 XP\_045204261.1 41.6 274  
152 5 53 323 39 307 8.20E-59 235.7 6596 cellular

organisms;Eukaryota;Opisthokonta;Metazoa;Eumetazoa;Bilateria;Protostomia;

Spiralia;Lophotrochozoa;Mollusca;Bivalvia;Autobranchia;Heteroconchia;Euherodonta;Imparidentia;Venerida;Veneroidea;Veneridae;Mercenaria;Mercenaria mercenaria

UdeM00000040941 6596 97.1 UdeM00000040941 XP\_045189266.1 30.9 194  
119 5 11 198 280 464 5.60E-17 97.1 6596 cellular  
organisms;Eukaryota;Opisthokonta;Metazoa;Eumetazoa;Bilateria;Protostomia;Spiralia;Lophotrochozoa;Mollusca;Bivalvia;Autobranchia;Heteroconchia;Euherodonta;Imparidentia;Venerida;Veneroidea;Veneridae;Mercenaria;Mercenaria mercenaria

UdeM00000044205 83332 147.9 UdeM00000044205 NP\_217195.1 36.7 248 154  
3 15 262 22 266 1.80E-32 147.9 83332 cellular  
organisms;Bacteria;Terrabacteria group;Actinobacteria;Actinomycetia;Corynebacteriales;Mycobacteriaceae;Mycobacterium;Mycobacterium tuberculosis complex;Mycobacterium tuberculosis;Mycobacterium tuberculosis H37Rv

UdeM00000044206 3055 118.2 UdeM00000044206 XP\_001699466.1 32.7 278  
165 7 5 263 47 321 1.50E-23 118.2 3055 cellular  
organisms;Eukaryota;Viridiplantae;Chlorophyta;core chlorophytes;Chlorophyceae;CS clade;Chlamydomonadales;Chlamydomonadaceae;Chlamydomonas;Chlamydomonas reinhardtii

UdeM00000044207 83332 435.3 UdeM00000044207 NP\_215401.1 46.3 553 272  
7 1 533 1 548 1.20E-118 435.3 83332 cellular  
organisms;Bacteria;Terrabacteria group;Actinobacteria;Actinomycetia;Corynebacteriales;Mycobacteriaceae;Mycobacterium;Mycobacterium tuberculosis complex;Mycobacterium tuberculosis;Mycobacterium tuberculosis H37Rv

UdeM00000044295 6596 77 UdeM00000044295 XP\_045186033.1 30.4 158  
108 2 215 372 23 178 6.10E-11 77 6596 cellular  
organisms;Eukaryota;Opisthokonta;Metazoa;Eumetazoa;Bilateria;Protostomia;Spiralia;Lophotrochozoa;Mollusca;Bivalvia;Autobranchia;Heteroconchia;Euherodonta;Imparidentia;Venerida;Veneroidea;Veneridae;Mercenaria;Mercenaria mercenaria

UdeM00000044296 8355 131.7 UdeM00000044296 XP\_041441910.1 27.3 355  
247 6 1 350 273 621 2.90E-27 131.7 8355 cellular  
organisms;Eukaryota;Opisthokonta;Metazoa;Eumetazoa;Bilateria;Deuterostomia;Chordata;Craniata;Vertebrata;Gnathostomata;Teleostomi;Euteleostomi;Sarcopterygii;Dipnotetrapodomorpha;Tetrapoda;Amphibia;Batrachia;Anura;Pipoidea;Pipidae;Xenopodinae;Xenopus;Xenopus;Xenopus laevis

UdeM00000044408 6579 94 UdeM00000044408 XP\_033729305.1 38.6 153  
90 3 22 170 59 211 2.10E-16 94 6579 cellular  
organisms;Eukaryota;Opisthokonta;Metazoa;Eumetazoa;Bilateria;Protostomia;Spiralia;Lophotrochozoa;Mollusca;Bivalvia;Autobranchia;Pteriormorphia;Pectinida;Pectinoidea;Pectinidae;Pecten;Pecten maximus

UdeM00000041593 6596 529.3 UdeM00000041593 XP\_045162781.1 57.6 495  
202 4 7 496 18 509 6.30E-147 529.3 6596 cellular  
organisms;Eukaryota;Opisthokonta;Metazoa;Eumetazoa;Bilateria;Protostomia;Spiralia;Lophotrochozoa;Mollusca;Bivalvia;Autobranchia;Heteroconchia;Euherodonta;Imparidentia;Venerida;Veneroidea;Veneridae;Mercenaria;Mercenaria mercenaria

UdeM00000041594 6579 950.7 UdeM00000041594 XP\_033763050.1 65.4 769  
248 10 1 760 1 760 1.20E-273 950.7 6579 cellular  
organisms;Eukaryota;Opisthokonta;Metazoa;Eumetazoa;Bilateria;Protostomia;

Spiralia; Lophotrochozoa; Mollusca; Bivalvia; Autobranchia; Pteriomorpha; Pectinida; Pectinoidea; Pectinidae; Pecten; Pecten maximus  
UdeM00000041595 6573 172.9 UdeM00000041595 XP\_021372846.1 64.9 114  
40 0 95 208 138 251 1.10E-39 172.9 6573 cellular  
organisms; Eukaryota; Opisthokonta; Metazoa; Eumetazoa; Bilateria; Protostomia; Spiralia; Lophotrochozoa; Mollusca; Bivalvia; Autobranchia; Pteriomorpha; Pectinida; Pectinoidea; Pectinidae; Mizuhopecten; Mizuhopecten yessoensis  
UdeM00000041596 6596 403.3 UdeM00000041596 XP\_045162780.1 71.3 286  
75 3 1 280 1 285 2.50E-109 403.3 6596 cellular  
organisms; Eukaryota; Opisthokonta; Metazoa; Eumetazoa; Bilateria; Protostomia; Spiralia; Lophotrochozoa; Mollusca; Bivalvia; Autobranchia; Heteroconchia; Euheterodonta; Imparidentia; Venerida; Veneroidea; Veneridae; Mercenaria; Mercenaria mercenaria  
UdeM00000041597 6596 471.5 UdeM00000041597 XP\_045162780.1 58.2 438  
175 4 7 439 18 452 1.20E-129 471.5 6596 cellular  
organisms; Eukaryota; Opisthokonta; Metazoa; Eumetazoa; Bilateria; Protostomia; Spiralia; Lophotrochozoa; Mollusca; Bivalvia; Autobranchia; Heteroconchia; Euheterodonta; Imparidentia; Venerida; Veneroidea; Veneridae; Mercenaria; Mercenaria mercenaria  
UdeM00000041600 6596 471.9 UdeM00000041600 XP\_045162780.1 59.7 427  
164 4 7 428 18 441 9.00E-130 471.9 6596 cellular  
organisms; Eukaryota; Opisthokonta; Metazoa; Eumetazoa; Bilateria; Protostomia; Spiralia; Lophotrochozoa; Mollusca; Bivalvia; Autobranchia; Heteroconchia; Euheterodonta; Imparidentia; Venerida; Veneroidea; Veneridae; Mercenaria; Mercenaria mercenaria  
UdeM00000002806 6706 149.4 UdeM00000002806 XP\_042235765.1 43.3 157  
89 0 1 157 1 157 3.80E-33 149.4 6706 cellular  
organisms; Eukaryota; Opisthokonta; Metazoa; Eumetazoa; Bilateria; Protostomia; Ecdysozoa; Panarthropoda; Arthropoda; Mandibulata; Pancrustacea; Crustacea; Multicrustacea; Malacostraca; Eumalacostraca; Eucarida; Decapoda; Pleocyemata; Astacidea; Nephropoidea; Nephropidae; Homarus; Homarus americanus  
UdeM00000002807 151771 103.2 UdeM00000002807 XP\_028409260.1 37.2  
164 99 2 58 218 56 218 5.40E-19 103.2 151771  
cellular  
organisms; Eukaryota; Opisthokonta; Metazoa; Eumetazoa; Cnidaria; Anthozoa; Octocorallia; Alcyonacea; Alcyoniina; Nephtheidae; Dendronephthya; Dendronephthya gigantea  
UdeM00000002808 6596 71.2 UdeM00000002808 XP\_045215232.1 50 56  
27 1 4 59 7 61 6.90E-10 71.2 6596 cellular  
organisms; Eukaryota; Opisthokonta; Metazoa; Eumetazoa; Bilateria; Protostomia; Spiralia; Lophotrochozoa; Mollusca; Bivalvia; Autobranchia; Heteroconchia; Euheterodonta; Imparidentia; Venerida; Veneroidea; Veneridae; Mercenaria; Mercenaria mercenaria  
UdeM00000002809 6596 68.9 UdeM00000002809 XP\_045208259.1 50.7 67  
30 1 8 71 239 305 3.80E-09 68.9 6596 cellular  
organisms; Eukaryota; Opisthokonta; Metazoa; Eumetazoa; Bilateria; Protostomia; Spiralia; Lophotrochozoa; Mollusca; Bivalvia; Autobranchia; Heteroconchia; Euheterodonta; Imparidentia; Venerida; Veneroidea; Veneridae; Mercenaria; Mercenaria mercenaria  
UdeM00000002811 29159 76.3 UdeM00000002811 XP\_034307860.1 57.1 63  
27 0 1 63 1 63 2.60E-11 76.3 29159 cellular  
organisms; Eukaryota; Opisthokonta; Metazoa; Eumetazoa; Bilateria; Protostomia; Spiralia; Lophotrochozoa; Mollusca; Bivalvia; Autobranchia; Pteriomorpha; Ostreida; Ostreoidea; Ostreidae; Crassostrea; Crassostrea gigas

UdeM00000002813 6565 243.8 UdeM00000002813 XP\_022297447.1 53.8 225  
 83 3 30 235 44 266 7.90E-61 243.8 6565 cellular  
 organisms;Eukaryota;Opisthokonta;Metazoa;Eumetazoa;Bilateria;Protostomia;  
 Spiralia;Lophotrochozoa;Mollusca;Bivalvia;Autobranchia;Pteriormorphia;Ostr  
 eida;Ostreoidea;Ostreidae;Crassostrea;Crassostrea virginica  
 UdeM00000002816 6596 323.6 UdeM00000002816 XP\_045181000.1 60.6 442  
 106 4 24 411 1150 1577 3.90E-85 323.6 6596 cellular  
 organisms;Eukaryota;Opisthokonta;Metazoa;Eumetazoa;Bilateria;Protostomia;  
 Spiralia;Lophotrochozoa;Mollusca;Bivalvia;Autobranchia;Heteroconchia;Euhe  
 terodonta;Imparidentia;Venerida;Veneroidea;Veneridae;Mercenaria;Mercenari  
 a mercenaria  
 UdeM00000002817 6596 61.2 UdeM00000002817 XP\_045197645.1 34.2 114  
 44 3 87 169 30 143 1.50E-06 61.2 6596 cellular  
 organisms;Eukaryota;Opisthokonta;Metazoa;Eumetazoa;Bilateria;Protostomia;  
 Spiralia;Lophotrochozoa;Mollusca;Bivalvia;Autobranchia;Heteroconchia;Euhe  
 terodonta;Imparidentia;Venerida;Veneroidea;Veneridae;Mercenaria;Mercenari  
 a mercenaria  
 UdeM00000002818 1735272 135.2 UdeM00000002818 XP\_041346684.1 36.8  
 231 136 6 23 245 598 826 1.20E-28 135.2 1735272  
 cellular  
 organisms;Eukaryota;Opisthokonta;Metazoa;Eumetazoa;Bilateria;Protostomia;  
 Spiralia;Lophotrochozoa;Mollusca;Gastropoda;Neomphalina;Neomphaloidea;Pel  
 tospiridae;Gigantopelta;Gigantopelta aegis  
 UdeM00000002820 6573 94 UdeM00000002820 XP\_021365625.1 52.9 87  
 41 0 63 149 40 126 3.20E-16 94 6573 cellular  
 organisms;Eukaryota;Opisthokonta;Metazoa;Eumetazoa;Bilateria;Protostomia;  
 Spiralia;Lophotrochozoa;Mollusca;Bivalvia;Autobranchia;Pteriormorphia;Pect  
 inida;Pectinoidea;Pectinidae;Mizuhopecten;Mizuhopecten yessoensis  
 UdeM00000020948 6596 251.9 UdeM00000020948 XP\_045168245.1 66.3 193  
 61 2 3 195 220 408 7.60E-64 251.9 6596 cellular  
 organisms;Eukaryota;Opisthokonta;Metazoa;Eumetazoa;Bilateria;Protostomia;  
 Spiralia;Lophotrochozoa;Mollusca;Bivalvia;Autobranchia;Heteroconchia;Euhe  
 terodonta;Imparidentia;Venerida;Veneroidea;Veneridae;Mercenaria;Mercenari  
 a mercenaria  
 UdeM00000020949 1735272 120.9 UdeM00000020949 XP\_041361004.1 44  
 134 72 1 1 131 76 209 1.20E-24 120.9 1735272  
 cellular  
 organisms;Eukaryota;Opisthokonta;Metazoa;Eumetazoa;Bilateria;Protostomia;  
 Spiralia;Lophotrochozoa;Mollusca;Gastropoda;Neomphalina;Neomphaloidea;Pel  
 tospiridae;Gigantopelta;Gigantopelta aegis  
 UdeM00000020950 6596 180.6 UdeM00000020950 XP\_045168245.1 63.8 141  
 50 1 1 141 33 172 2.60E-42 180.6 6596 cellular  
 organisms;Eukaryota;Opisthokonta;Metazoa;Eumetazoa;Bilateria;Protostomia;  
 Spiralia;Lophotrochozoa;Mollusca;Bivalvia;Autobranchia;Heteroconchia;Euhe  
 terodonta;Imparidentia;Venerida;Veneroidea;Veneridae;Mercenaria;Mercenari  
 a mercenaria  
 UdeM00000020951 6596 134.4 UdeM00000020951 XP\_045168569.1 43 265  
 113 15 60 297 237 490 2.30E-28 134.4 6596 cellular  
 organisms;Eukaryota;Opisthokonta;Metazoa;Eumetazoa;Bilateria;Protostomia;  
 Spiralia;Lophotrochozoa;Mollusca;Bivalvia;Autobranchia;Heteroconchia;Euhe  
 terodonta;Imparidentia;Venerida;Veneroidea;Veneridae;Mercenaria;Mercenari  
 a mercenaria  
 UdeM00000020952 6596 338.6 UdeM00000020952 XP\_045168569.1 43.8 498  
 239 17 5 474 6 490 1.30E-89 338.6 6596 cellular

organisms;Eukaryota;Opisthokonta;Metazoa;Eumetazoa;Bilateria;Protostomia;Spiralia;Lophotrochozoa;Mollusca;Bivalvia;Autobranhia;Heteroconchia;Euherodonta;Imparidentia;Venerida;Veneroidea;Veneridae;Mercenaria;Mercenaria mercenaria

UdeM00000020954 6596 172.9 UdeM00000020954 XP\_045170500.1 90.1 91  
9 0 15 105 2 92 2.10E-40 172.9 6596 cellular

organisms;Eukaryota;Opisthokonta;Metazoa;Eumetazoa;Bilateria;Protostomia;Spiralia;Lophotrochozoa;Mollusca;Bivalvia;Autobranhia;Heteroconchia;Euherodonta;Imparidentia;Venerida;Veneroidea;Veneridae;Mercenaria;Mercenaria mercenaria

UdeM00000020955 6596 174.9 UdeM00000020955 XP\_045170500.1 90.2 92  
9 0 1 92 1 92 4.90E-41 174.9 6596 cellular

organisms;Eukaryota;Opisthokonta;Metazoa;Eumetazoa;Bilateria;Protostomia;Spiralia;Lophotrochozoa;Mollusca;Bivalvia;Autobranhia;Heteroconchia;Euherodonta;Imparidentia;Venerida;Veneroidea;Veneridae;Mercenaria;Mercenaria mercenaria

UdeM00000020956 6573 454.9 UdeM00000020956 XP\_021377115.1 53.7 436  
165 6 1 411 1 424 1.10E-124 454.9 6573 cellular

organisms;Eukaryota;Opisthokonta;Metazoa;Eumetazoa;Bilateria;Protostomia;Spiralia;Lophotrochozoa;Mollusca;Bivalvia;Autobranhia;Pteriomorphia;Pectinida;Pectinoidea;Pectinidae;Mizuhopecten;Mizuhopecten yessoensis

UdeM00000020957 6596 657.9 UdeM00000020957 XP\_045168447.1 75.3 442  
109 0 1 442 37 478 9.10E-186 657.9 6596 cellular

organisms;Eukaryota;Opisthokonta;Metazoa;Eumetazoa;Bilateria;Protostomia;Spiralia;Lophotrochozoa;Mollusca;Bivalvia;Autobranhia;Heteroconchia;Euherodonta;Imparidentia;Venerida;Veneroidea;Veneridae;Mercenaria;Mercenaria mercenaria

UdeM00000020960 6573 61.2 UdeM00000020960 XP\_021346173.1 37.1 62  
39 0 283 344 150 211 5.90E-06 61.2 6573 cellular

organisms;Eukaryota;Opisthokonta;Metazoa;Eumetazoa;Bilateria;Protostomia;Spiralia;Lophotrochozoa;Mollusca;Bivalvia;Autobranhia;Pteriomorphia;Pectinida;Pectinoidea;Pectinidae;Mizuhopecten;Mizuhopecten yessoensis

UdeM00000020961 6579 84 UdeM00000020961 XP\_033731763.1 59.1 66  
24 1 2 64 3 68 1.40E-13 84 6579 cellular

organisms;Eukaryota;Opisthokonta;Metazoa;Eumetazoa;Bilateria;Protostomia;Spiralia;Lophotrochozoa;Mollusca;Bivalvia;Autobranhia;Pteriomorphia;Pectinida;Pectinoidea;Pectinidae;Pecten;Pecten maximus

UdeM00000020963 45264 175.6 UdeM00000020963 XP\_044165535.1 45 189  
100 1 989 1173 359 547 5.10E-40 175.6 45264 cellular

organisms;Eukaryota;Opisthokonta;Metazoa;Eumetazoa;Cnidaria;Anthozoa;Hexacorallia;Scleractinia;Astrocoeniina;Acroporidae;Acropora;Acropora millepora

UdeM00000020964 6596 248.1 UdeM00000020964 XP\_045167675.1 70.2 191  
56 1 227 416 438 628 2.00E-62 248.1 6596 cellular

organisms;Eukaryota;Opisthokonta;Metazoa;Eumetazoa;Bilateria;Protostomia;Spiralia;Lophotrochozoa;Mollusca;Bivalvia;Autobranhia;Heteroconchia;Euherodonta;Imparidentia;Venerida;Veneroidea;Veneridae;Mercenaria;Mercenaria mercenaria

UdeM00000020965 29159 406 UdeM00000020965 XP\_011412008.1 57 377  
124 2 1 377 22 360 6.80E-110 406 29159 cellular

organisms;Eukaryota;Opisthokonta;Metazoa;Eumetazoa;Bilateria;Protostomia;Spiralia;Lophotrochozoa;Mollusca;Bivalvia;Autobranhia;Pteriomorphia;Ostreida;Ostreoidea;Ostreidae;Crassostrea;Crassostrea gigas

UdeM00000020966 29159 401.4 UdeM00000020966 XP\_011412008.1 56.9 378  
 124 3 1 378 22 360 1.70E-108 401.4 29159 cellular  
 organisms;Eukaryota;Opisthokonta;Metazoa;Eumetazoa;Bilateria;Protostomia;  
 Spiralia;Lophotrochozoa;Mollusca;Bivalvia;Autobranchia;Pteriormorphia;Ostr  
 eida;Ostreoidea;Ostreidae;Crassostrea;Crassostrea gigas  
 UdeM00000020967 225164 369 UdeM00000020967 XP\_009057092.1 56.8  
 292 124 2 1 290 239 530 7.40E-99 369 225164  
 cellular  
 organisms;Eukaryota;Opisthokonta;Metazoa;Eumetazoa;Bilateria;Protostomia;  
 Spiralia;Lophotrochozoa;Mollusca;Gastropoda;Patellogastropoda;Lottioidea;  
 Lottiidae;Lottia;Lottia gigantea  
 UdeM00000020968 1735272 1717.6 UdeM00000020968 XP\_041366443.1  
 87.5 979 115 1 1 979 1 972 0.00E+00 1717.6  
 1735272 cellular  
 organisms;Eukaryota;Opisthokonta;Metazoa;Eumetazoa;Bilateria;Protostomia;  
 Spiralia;Lophotrochozoa;Mollusca;Gastropoda;Neomphalina;Neomphaloidea;Pel  
 tospiridae;Gigantopelta;Gigantopelta aegis  
 UdeM00000020969 6500 308.9 UdeM00000020969 XP\_035826340.1 67.3 217  
 68 1 2 215 30 246 5.10E-81 308.9 6500 cellular  
 organisms;Eukaryota;Opisthokonta;Metazoa;Eumetazoa;Bilateria;Protostomia;  
 Spiralia;Lophotrochozoa;Mollusca;Gastropoda;Heterobranchia;Euthyneura;Tec  
 tipleura;Aplysiida;Aplysioidea;Aplysiidae;Aplysia;Aplysia californica  
 UdeM00000020970 6596 1426.4 UdeM00000020970 XP\_045167471.1 60  
 1214 443 13 18 1212 514 1704 0.00E+00 1426.4 6596  
 cellular  
 organisms;Eukaryota;Opisthokonta;Metazoa;Eumetazoa;Bilateria;Protostomia;  
 Spiralia;Lophotrochozoa;Mollusca;Bivalvia;Autobranchia;Heteroconchia;Euhe  
 terodonta;Imparidentia;Venerida;Veneroidea;Veneridae;Mercenaria;Mercenari  
 a mercenaria  
 UdeM00000020971 6573 413.7 UdeM00000020971 XP\_021361346.1 60.1 336  
 128 3 1 330 172 507 4.30E-112 413.7 6573 cellular  
 organisms;Eukaryota;Opisthokonta;Metazoa;Eumetazoa;Bilateria;Protostomia;  
 Spiralia;Lophotrochozoa;Mollusca;Bivalvia;Autobranchia;Pteriormorphia;Pect  
 inida;Pectinoidea;Pectinidae;Mizuhopecten;Mizuhopecten yessoensis  
 UdeM00000020972 6596 252.7 UdeM00000020972 XP\_045167471.1 81.2 154  
 29 0 9 162 7 160 3.50E-64 252.7 6596 cellular  
 organisms;Eukaryota;Opisthokonta;Metazoa;Eumetazoa;Bilateria;Protostomia;  
 Spiralia;Lophotrochozoa;Mollusca;Bivalvia;Autobranchia;Heteroconchia;Euhe  
 terodonta;Imparidentia;Venerida;Veneroidea;Veneridae;Mercenaria;Mercenari  
 a mercenaria  
 UdeM00000020973 6596 137.9 UdeM00000020973 XP\_045196674.1 31.9 288  
 174 9 372 645 18 297 4.70E-29 137.9 6596 cellular  
 organisms;Eukaryota;Opisthokonta;Metazoa;Eumetazoa;Bilateria;Protostomia;  
 Spiralia;Lophotrochozoa;Mollusca;Bivalvia;Autobranchia;Heteroconchia;Euhe  
 terodonta;Imparidentia;Venerida;Veneroidea;Veneridae;Mercenaria;Mercenari  
 a mercenaria  
 UdeM00000020974 6596 124 UdeM00000020974 XP\_045196674.1 37.3 193  
 111 4 653 840 79 266 9.30E-25 124 6596 cellular  
 organisms;Eukaryota;Opisthokonta;Metazoa;Eumetazoa;Bilateria;Protostomia;  
 Spiralia;Lophotrochozoa;Mollusca;Bivalvia;Autobranchia;Heteroconchia;Euhe  
 terodonta;Imparidentia;Venerida;Veneroidea;Veneridae;Mercenaria;Mercenari  
 a mercenaria  
 UdeM00000020975 6596 124 UdeM00000020975 XP\_045196674.1 37.3 193  
 111 4 378 565 79 266 6.40E-25 124 6596 cellular

organisms;Eukaryota;Opisthokonta;Metazoa;Eumetazoa;Bilateria;Protostomia;Spiralia;Lophotrochozoa;Mollusca;Bivalvia;Autobranhia;Heteroconchia;Euherodonta;Imparidentia;Venerida;Veneroidea;Veneridae;Mercenaria;Mercenaria mercenaria

UdeM00000020976 6596 694.9 UdeM00000020976 XP\_045168271.1 33.9 1269  
663 29 929 2050 315 1554 3.10E-196 694.9 6596 cellular

organisms;Eukaryota;Opisthokonta;Metazoa;Eumetazoa;Bilateria;Protostomia;Spiralia;Lophotrochozoa;Mollusca;Bivalvia;Autobranhia;Heteroconchia;Euherodonta;Imparidentia;Venerida;Veneroidea;Veneridae;Mercenaria;Mercenaria mercenaria

UdeM00000020978 6596 164.9 UdeM00000020978 XP\_045196149.1 55.4 148  
62 3 48 192 29 175 2.70E-37 164.9 6596 cellular

organisms;Eukaryota;Opisthokonta;Metazoa;Eumetazoa;Bilateria;Protostomia;Spiralia;Lophotrochozoa;Mollusca;Bivalvia;Autobranhia;Heteroconchia;Euherodonta;Imparidentia;Venerida;Veneroidea;Veneridae;Mercenaria;Mercenaria mercenaria

UdeM00000020979 6596 165.2 UdeM00000020979 XP\_045196149.1 55.4 148  
62 3 16 160 29 175 1.90E-37 165.2 6596 cellular

organisms;Eukaryota;Opisthokonta;Metazoa;Eumetazoa;Bilateria;Protostomia;Spiralia;Lophotrochozoa;Mollusca;Bivalvia;Autobranhia;Heteroconchia;Euherodonta;Imparidentia;Venerida;Veneroidea;Veneridae;Mercenaria;Mercenaria mercenaria

UdeM00000020980 6596 426 UdeM00000020980 XP\_045164813.1 52.5 385  
179 2 12 392 155 539 6.10E-116 426 6596 cellular

organisms;Eukaryota;Opisthokonta;Metazoa;Eumetazoa;Bilateria;Protostomia;Spiralia;Lophotrochozoa;Mollusca;Bivalvia;Autobranhia;Heteroconchia;Euherodonta;Imparidentia;Venerida;Veneroidea;Veneridae;Mercenaria;Mercenaria mercenaria

UdeM00000020981 6596 427.6 UdeM00000020981 XP\_045164813.1 51.9 389  
183 2 6 390 151 539 2.10E-116 427.6 6596 cellular

organisms;Eukaryota;Opisthokonta;Metazoa;Eumetazoa;Bilateria;Protostomia;Spiralia;Lophotrochozoa;Mollusca;Bivalvia;Autobranhia;Heteroconchia;Euherodonta;Imparidentia;Venerida;Veneroidea;Veneridae;Mercenaria;Mercenaria mercenaria

UdeM00000020982 6596 194.1 UdeM00000020982 XP\_045165409.1 48.5 202  
101 3 15 213 10 211 2.00E-46 194.1 6596 cellular

organisms;Eukaryota;Opisthokonta;Metazoa;Eumetazoa;Bilateria;Protostomia;Spiralia;Lophotrochozoa;Mollusca;Bivalvia;Autobranhia;Heteroconchia;Euherodonta;Imparidentia;Venerida;Veneroidea;Veneridae;Mercenaria;Mercenaria mercenaria

UdeM00000020983 6596 230.3 UdeM00000020983 XP\_045165057.1 49.8 217  
105 2 1 214 264 479 2.30E-57 230.3 6596 cellular

organisms;Eukaryota;Opisthokonta;Metazoa;Eumetazoa;Bilateria;Protostomia;Spiralia;Lophotrochozoa;Mollusca;Bivalvia;Autobranhia;Heteroconchia;Euherodonta;Imparidentia;Venerida;Veneroidea;Veneridae;Mercenaria;Mercenaria mercenaria

UdeM00000020984 6596 165.6 UdeM00000020984 XP\_045166944.1 55 151  
64 3 145 292 31 180 9.30E-38 165.6 6596 cellular

organisms;Eukaryota;Opisthokonta;Metazoa;Eumetazoa;Bilateria;Protostomia;Spiralia;Lophotrochozoa;Mollusca;Bivalvia;Autobranhia;Heteroconchia;Euherodonta;Imparidentia;Venerida;Veneroidea;Veneridae;Mercenaria;Mercenaria mercenaria

UdeM00000020986 6596 286.2 UdeM00000020986 XP\_045164813.1 52.5 259  
120 1 2 257 180 438 4.20E-74 286.2 6596 cellular

organisms;Eukaryota;Opisthokonta;Metazoa;Eumetazoa;Bilateria;Protostomia;Spiralia;Lophotrochozoa;Mollusca;Bivalvia;Autobranhia;Heteroconchia;Euherodonta;Imparidentia;Venerida;Veneroidea;Veneridae;Mercenaria;Mercenaria mercenaria

UdeM00000020985 6596 301.2 UdeM00000020985 XP\_045164813.1 43.3 360  
131 2 2 288 180 539 1.70E-78 301.2 6596 cellular

organisms;Eukaryota;Opisthokonta;Metazoa;Eumetazoa;Bilateria;Protostomia;Spiralia;Lophotrochozoa;Mollusca;Bivalvia;Autobranhia;Heteroconchia;Euherodonta;Imparidentia;Venerida;Veneroidea;Veneridae;Mercenaria;Mercenaria mercenaria

UdeM00000020987 6596 568.2 UdeM00000020987 XP\_045164813.1 51.6 546  
249 7 1 538 1 539 1.20E-158 568.2 6596 cellular

organisms;Eukaryota;Opisthokonta;Metazoa;Eumetazoa;Bilateria;Protostomia;Spiralia;Lophotrochozoa;Mollusca;Bivalvia;Autobranhia;Heteroconchia;Euherodonta;Imparidentia;Venerida;Veneroidea;Veneridae;Mercenaria;Mercenaria mercenaria

UdeM00000020988 6596 566.2 UdeM00000020988 XP\_045164813.1 51.9 541  
245 7 37 569 6 539 4.90E-158 566.2 6596 cellular

organisms;Eukaryota;Opisthokonta;Metazoa;Eumetazoa;Bilateria;Protostomia;Spiralia;Lophotrochozoa;Mollusca;Bivalvia;Autobranhia;Heteroconchia;Euherodonta;Imparidentia;Venerida;Veneroidea;Veneridae;Mercenaria;Mercenaria mercenaria

UdeM00000020990 6596 280.4 UdeM00000020990 XP\_045164813.1 53 253  
116 1 1 250 287 539 2.40E-72 280.4 6596 cellular

organisms;Eukaryota;Opisthokonta;Metazoa;Eumetazoa;Bilateria;Protostomia;Spiralia;Lophotrochozoa;Mollusca;Bivalvia;Autobranhia;Heteroconchia;Euherodonta;Imparidentia;Venerida;Veneroidea;Veneridae;Mercenaria;Mercenaria mercenaria

UdeM00000020991 6596 551.2 UdeM00000020991 XP\_045165057.1 50.9 542  
246 9 15 545 7 539 1.60E-153 551.2 6596 cellular

organisms;Eukaryota;Opisthokonta;Metazoa;Eumetazoa;Bilateria;Protostomia;Spiralia;Lophotrochozoa;Mollusca;Bivalvia;Autobranhia;Heteroconchia;Euherodonta;Imparidentia;Venerida;Veneroidea;Veneridae;Mercenaria;Mercenaria mercenaria

UdeM00000020992 6596 557.4 UdeM00000020992 XP\_045164813.1 51.5 518  
242 4 6 514 22 539 2.40E-155 557.4 6596 cellular

organisms;Eukaryota;Opisthokonta;Metazoa;Eumetazoa;Bilateria;Protostomia;Spiralia;Lophotrochozoa;Mollusca;Bivalvia;Autobranhia;Heteroconchia;Euherodonta;Imparidentia;Venerida;Veneroidea;Veneridae;Mercenaria;Mercenaria mercenaria

UdeM00000020993 6596 208 UdeM00000020993 XP\_045181453.1 53.8 184  
81 3 44 224 11 193 1.30E-50 208 6596 cellular

organisms;Eukaryota;Opisthokonta;Metazoa;Eumetazoa;Bilateria;Protostomia;Spiralia;Lophotrochozoa;Mollusca;Bivalvia;Autobranhia;Heteroconchia;Euherodonta;Imparidentia;Venerida;Veneroidea;Veneridae;Mercenaria;Mercenaria mercenaria

UdeM00000020994 6596 141 UdeM00000020994 XP\_045196149.1 51.4 142  
65 3 13 151 29 169 1.40E-30 141 6596 cellular

organisms;Eukaryota;Opisthokonta;Metazoa;Eumetazoa;Bilateria;Protostomia;Spiralia;Lophotrochozoa;Mollusca;Bivalvia;Autobranhia;Heteroconchia;Euherodonta;Imparidentia;Venerida;Veneroidea;Veneridae;Mercenaria;Mercenaria mercenaria

UdeM00000020995 6596 305.1 UdeM00000020995 XP\_045164813.1 52.9 276  
127 1 1 273 264 539 1.20E-79 305.1 6596 cellular



organisms;Eukaryota;Opisthokonta;Metazoa;Eumetazoa;Bilateria;Protostomia;Spiralia;Lophotrochozoa;Mollusca;Bivalvia;Autobranchia;Heteroconchia;Euherodonta;Imparidentia;Venerida;Veneroidea;Veneridae;Mercenaria;Mercenaria mercenaria

UdeM00000020996 6596 585.9 UdeM00000020996 XP\_045181453.1 53.1 531  
241 5 45 569 11 539 5.70E-164 585.9 6596 cellular

organisms;Eukaryota;Opisthokonta;Metazoa;Eumetazoa;Bilateria;Protostomia;Spiralia;Lophotrochozoa;Mollusca;Bivalvia;Autobranchia;Heteroconchia;Euherodonta;Imparidentia;Venerida;Veneroidea;Veneridae;Mercenaria;Mercenaria mercenaria

UdeM00000020997 6596 1544.3 UdeM00000020997 XP\_045168315.1 52.1  
1979 672 54 1 1790 80 1972 0.00E+00 1544.3 6596  
cellular

organisms;Eukaryota;Opisthokonta;Metazoa;Eumetazoa;Bilateria;Protostomia;Spiralia;Lophotrochozoa;Mollusca;Bivalvia;Autobranchia;Heteroconchia;Euherodonta;Imparidentia;Venerida;Veneroidea;Veneridae;Mercenaria;Mercenaria mercenaria

UdeM00000020998 6500 171.8 UdeM00000020998 XP\_005097388.1 80.2 101  
20 0 1 101 1 101 4.50E-40 171.8 6500 cellular

organisms;Eukaryota;Opisthokonta;Metazoa;Eumetazoa;Bilateria;Protostomia;Spiralia;Lophotrochozoa;Mollusca;Gastropoda;Heterobranchia;Euthyneura;Tectipleura;Aplysiida;Aplysioidea;Aplysiidae;Aplysia;Aplysia californica

UdeM00000020999 6596 884.8 UdeM00000020999 XP\_045170352.1 80.9 555  
106 0 1 555 1 555 5.80E-254 884.8 6596 cellular

organisms;Eukaryota;Opisthokonta;Metazoa;Eumetazoa;Bilateria;Protostomia;Spiralia;Lophotrochozoa;Mollusca;Bivalvia;Autobranchia;Heteroconchia;Euherodonta;Imparidentia;Venerida;Veneroidea;Veneridae;Mercenaria;Mercenaria mercenaria

UdeM00000021000 6500 186 UdeM00000021000 XP\_012934589.1 28.3 487  
309 16 528 988 569 1041 2.40E-43 186 6500 cellular

organisms;Eukaryota;Opisthokonta;Metazoa;Eumetazoa;Bilateria;Protostomia;Spiralia;Lophotrochozoa;Mollusca;Gastropoda;Heterobranchia;Euthyneura;Tectipleura;Aplysiida;Aplysioidea;Aplysiidae;Aplysia;Aplysia californica

UdeM00000021001 6500 192.6 UdeM00000021001 XP\_012934589.1 28.3 484  
311 13 535 993 569 1041 2.70E-45 192.6 6500 cellular

organisms;Eukaryota;Opisthokonta;Metazoa;Eumetazoa;Bilateria;Protostomia;Spiralia;Lophotrochozoa;Mollusca;Gastropoda;Heterobranchia;Euthyneura;Tectipleura;Aplysiida;Aplysioidea;Aplysiidae;Aplysia;Aplysia californica

UdeM00000021003 6596 104 UdeM00000021003 XP\_045167970.1 37.2 137  
77 3 59 195 48 175 2.30E-19 104 6596 cellular

organisms;Eukaryota;Opisthokonta;Metazoa;Eumetazoa;Bilateria;Protostomia;Spiralia;Lophotrochozoa;Mollusca;Bivalvia;Autobranchia;Heteroconchia;Euherodonta;Imparidentia;Venerida;Veneroidea;Veneridae;Mercenaria;Mercenaria mercenaria

UdeM00000021004 6565 451.4 UdeM00000021004 XP\_022291254.1 65.1 350  
120 1 1 350 200 547 1.50E-123 451.4 6565 cellular

organisms;Eukaryota;Opisthokonta;Metazoa;Eumetazoa;Bilateria;Protostomia;Spiralia;Lophotrochozoa;Mollusca;Bivalvia;Autobranchia;Pteriomorpha;Ostreida;Ostreioidea;Ostreidae;Crassostrea;Crassostrea virginica

UdeM00000021005 6596 586.3 UdeM00000021005 XP\_045179332.1 54.3 536  
231 4 5 535 3 529 5.50E-164 586.3 6596 cellular

organisms;Eukaryota;Opisthokonta;Metazoa;Eumetazoa;Bilateria;Protostomia;Spiralia;Lophotrochozoa;Mollusca;Bivalvia;Autobranchia;Heteroconchia;Euherodonta

terodonta;Imparidentia;Venerida;Veneroidea;Veneridae;Mercenaria;Mercenari  
 a mercenaria  
 UdeM00000021006 6596 111.7 UdeM00000021006 XP\_045211142.1 30.6 304  
 168 8 1 263 1 302 1.40E-21 111.7 6596 cellular  
 organisms;Eukaryota;Opisthokonta;Metazoa;Eumetazoa;Bilateria;Protostomia;  
 Spiralia;Lophotrochozoa;Mollusca;Bivalvia;Autobranchia;Heteroconchia;Euhe  
 terodonta;Imparidentia;Venerida;Veneroidea;Veneridae;Mercenaria;Mercenari  
 a mercenaria  
 UdeM00000021009 6596 111.7 UdeM00000021009 XP\_045211142.1 30 307  
 167 9 1 264 1 302 1.50E-21 111.7 6596 cellular  
 organisms;Eukaryota;Opisthokonta;Metazoa;Eumetazoa;Bilateria;Protostomia;  
 Spiralia;Lophotrochozoa;Mollusca;Bivalvia;Autobranchia;Heteroconchia;Euhe  
 terodonta;Imparidentia;Venerida;Veneroidea;Veneridae;Mercenaria;Mercenari  
 a mercenaria  
 UdeM00000021010 1735272 506.1 UdeM00000021010 XP\_041349194.1 39.8  
 762 417 12 3 736 799 1546 7.30E-140 506.1 1735272  
 cellular  
 organisms;Eukaryota;Opisthokonta;Metazoa;Eumetazoa;Bilateria;Protostomia;  
 Spiralia;Lophotrochozoa;Mollusca;Gastropoda;Neomphalina;Neomphaloidea;Pel  
 tospiridae;Gigantopelta;Gigantopelta aegis  
 UdeM00000021011 1735272 433 UdeM00000021011 XP\_041349194.1 35.9  
 754 427 12 77 789 799 1537 8.60E-118 433 1735272  
 cellular  
 organisms;Eukaryota;Opisthokonta;Metazoa;Eumetazoa;Bilateria;Protostomia;  
 Spiralia;Lophotrochozoa;Mollusca;Gastropoda;Neomphalina;Neomphaloidea;Pel  
 tospiridae;Gigantopelta;Gigantopelta aegis  
 UdeM00000021012 6596 100.1 UdeM00000021012 XP\_045187660.1 29 252  
 142 5 25 268 18 240 4.50E-18 100.1 6596 cellular  
 organisms;Eukaryota;Opisthokonta;Metazoa;Eumetazoa;Bilateria;Protostomia;  
 Spiralia;Lophotrochozoa;Mollusca;Bivalvia;Autobranchia;Heteroconchia;Euhe  
 terodonta;Imparidentia;Venerida;Veneroidea;Veneridae;Mercenaria;Mercenari  
 a mercenaria  
 UdeM00000021013 6596 107.1 UdeM00000021013 XP\_045163871.1 45.2 135  
 67 4 101 230 165 297 3.10E-20 107.1 6596 cellular  
 organisms;Eukaryota;Opisthokonta;Metazoa;Eumetazoa;Bilateria;Protostomia;  
 Spiralia;Lophotrochozoa;Mollusca;Bivalvia;Autobranchia;Heteroconchia;Euhe  
 terodonta;Imparidentia;Venerida;Veneroidea;Veneridae;Mercenaria;Mercenari  
 a mercenaria  
 UdeM00000021014 6596 100.1 UdeM00000021014 XP\_045187660.1 29 252  
 142 5 25 268 18 240 4.50E-18 100.1 6596 cellular  
 organisms;Eukaryota;Opisthokonta;Metazoa;Eumetazoa;Bilateria;Protostomia;  
 Spiralia;Lophotrochozoa;Mollusca;Bivalvia;Autobranchia;Heteroconchia;Euhe  
 terodonta;Imparidentia;Venerida;Veneroidea;Veneridae;Mercenaria;Mercenari  
 a mercenaria  
 UdeM00000021015 6596 107.1 UdeM00000021015 XP\_045163871.1 45.2 135  
 67 4 101 230 165 297 3.10E-20 107.1 6596 cellular  
 organisms;Eukaryota;Opisthokonta;Metazoa;Eumetazoa;Bilateria;Protostomia;  
 Spiralia;Lophotrochozoa;Mollusca;Bivalvia;Autobranchia;Heteroconchia;Euhe  
 terodonta;Imparidentia;Venerida;Veneroidea;Veneridae;Mercenaria;Mercenari  
 a mercenaria  
 UdeM00000021016 6596 213.8 UdeM00000021016 XP\_045168684.1 68.1 138  
 44 0 1 138 126 263 1.40E-52 213.8 6596 cellular  
 organisms;Eukaryota;Opisthokonta;Metazoa;Eumetazoa;Bilateria;Protostomia;  
 Spiralia;Lophotrochozoa;Mollusca;Bivalvia;Autobranchia;Heteroconchia;Euhe

terodonta;Imparidentia;Venerida;Veneroidea;Veneridae;Mercenaria;Mercenaria mercenaria  
 UdeM00000021017 6565 149.8 UdeM00000021017 XP\_022327962.1 48.7 156  
 79 1 1 155 445 600 2.90E-33 149.8 6565 cellular  
 organisms;Eukaryota;Opisthokonta;Metazoa;Eumetazoa;Bilateria;Protostomia;  
 Spiralia;Lophotrochozoa;Mollusca;Bivalvia;Autobranchia;Pteriormorphia;Ostr  
 eida;Ostreoidea;Ostreidae;Crassostrea;Crassostrea virginica  
 UdeM00000021018 6565 317.8 UdeM00000021018 XP\_022327962.1 61.9 257  
 97 1 115 370 181 437 1.90E-83 317.8 6565 cellular  
 organisms;Eukaryota;Opisthokonta;Metazoa;Eumetazoa;Bilateria;Protostomia;  
 Spiralia;Lophotrochozoa;Mollusca;Bivalvia;Autobranchia;Pteriormorphia;Ostr  
 eida;Ostreoidea;Ostreidae;Crassostrea;Crassostrea virginica  
 UdeM00000021019 29159 426.8 UdeM00000021019 XP\_011422577.1 79.2 260  
 54 0 9 268 50 309 5.90E-116 426.8 29159 cellular  
 organisms;Eukaryota;Opisthokonta;Metazoa;Eumetazoa;Bilateria;Protostomia;  
 Spiralia;Lophotrochozoa;Mollusca;Bivalvia;Autobranchia;Pteriormorphia;Ostr  
 eida;Ostreoidea;Ostreidae;Crassostrea;Crassostrea gigas  
 UdeM00000021020 400727 255.4 UdeM00000021020 XP\_025094281.1 52.7  
 300 125 3 19 318 51 333 1.30E-64 255.4 400727  
 cellular  
 organisms;Eukaryota;Opisthokonta;Metazoa;Eumetazoa;Bilateria;Protostomia;  
 Spiralia;Lophotrochozoa;Mollusca;Gastropoda;Caenogastropoda;Architaeniogl  
 ossa;Ampullarioidea;Ampullariidae;Pomacea;Pomacea canaliculata  
 UdeM00000021021 400727 144.8 UdeM00000021021 XP\_025093379.1 59.6  
 109 43 1 1 108 1 109 6.30E-32 144.8 400727  
 cellular  
 organisms;Eukaryota;Opisthokonta;Metazoa;Eumetazoa;Bilateria;Protostomia;  
 Spiralia;Lophotrochozoa;Mollusca;Gastropoda;Caenogastropoda;Architaeniogl  
 ossa;Ampullarioidea;Ampullariidae;Pomacea;Pomacea canaliculata  
 UdeM00000021022 29159 201.1 UdeM00000021022 XP\_034310203.1 60.1 153  
 60 1 1 152 1 153 1.00E-48 201.1 29159 cellular  
 organisms;Eukaryota;Opisthokonta;Metazoa;Eumetazoa;Bilateria;Protostomia;  
 Spiralia;Lophotrochozoa;Mollusca;Bivalvia;Autobranchia;Pteriormorphia;Ostr  
 eida;Ostreoidea;Ostreidae;Crassostrea;Crassostrea gigas  
 UdeM00000021023 6596 217.2 UdeM00000021023 XP\_045192074.1 46.1 258  
 133 2 1 252 2120 2377 2.60E-53 217.2 6596 cellular  
 organisms;Eukaryota;Opisthokonta;Metazoa;Eumetazoa;Bilateria;Protostomia;  
 Spiralia;Lophotrochozoa;Mollusca;Bivalvia;Autobranchia;Heteroconchia;Euhe  
 terodonta;Imparidentia;Venerida;Veneroidea;Veneridae;Mercenaria;Mercenari  
 a mercenaria  
 UdeM00000021024 6596 361.3 UdeM00000021024 XP\_045168969.1 54.4 401  
 130 13 1 374 8 382 1.50E-96 361.3 6596 cellular  
 organisms;Eukaryota;Opisthokonta;Metazoa;Eumetazoa;Bilateria;Protostomia;  
 Spiralia;Lophotrochozoa;Mollusca;Bivalvia;Autobranchia;Heteroconchia;Euhe  
 terodonta;Imparidentia;Venerida;Veneroidea;Veneridae;Mercenaria;Mercenari  
 a mercenaria  
 UdeM00000021026 6596 1535.8 UdeM00000021026 XP\_045169017.1 70.5  
 1081 223 7 14 1071 20 1027 0.00E+00 1535.8 6596  
 cellular  
 organisms;Eukaryota;Opisthokonta;Metazoa;Eumetazoa;Bilateria;Protostomia;  
 Spiralia;Lophotrochozoa;Mollusca;Bivalvia;Autobranchia;Heteroconchia;Euhe  
 terodonta;Imparidentia;Venerida;Veneroidea;Veneridae;Mercenaria;Mercenari  
 a mercenaria

UdeM00000021027 6596 532.7 UdeM00000021027 XP\_045170166.1 46 563  
 291 5 1 562 61 611 5.60E-148 532.7 6596 cellular  
 organisms;Eukaryota;Opisthokonta;Metazoa;Eumetazoa;Bilateria;Protostomia;  
 Spiralia;Lophotrochozoa;Mollusca;Bivalvia;Autobranchia;Heteroconchia;Euhe  
 terodonta;Imparidentia;Venerida;Veneroidea;Veneridae;Mercenaria;Mercenari  
 a mercenaria

UdeM00000021028 6596 449.1 UdeM00000021028 XP\_045159972.1 36.9 672  
 403 8 138 801 71 729 1.20E-122 449.1 6596 cellular  
 organisms;Eukaryota;Opisthokonta;Metazoa;Eumetazoa;Bilateria;Protostomia;  
 Spiralia;Lophotrochozoa;Mollusca;Bivalvia;Autobranchia;Heteroconchia;Euhe  
 terodonta;Imparidentia;Venerida;Veneroidea;Veneridae;Mercenaria;Mercenari  
 a mercenaria

UdeM00000021030 6596 298.5 UdeM00000021030 XP\_045210101.1 33.4 632  
 370 13 117 717 6 617 2.40E-77 298.5 6596 cellular  
 organisms;Eukaryota;Opisthokonta;Metazoa;Eumetazoa;Bilateria;Protostomia;  
 Spiralia;Lophotrochozoa;Mollusca;Bivalvia;Autobranchia;Heteroconchia;Euhe  
 terodonta;Imparidentia;Venerida;Veneroidea;Veneridae;Mercenaria;Mercenari  
 a mercenaria

UdeM00000021032 6596 156.4 UdeM00000021032 XP\_045210099.1 31.8 352  
 216 6 17 359 16 352 7.30E-35 156.4 6596 cellular  
 organisms;Eukaryota;Opisthokonta;Metazoa;Eumetazoa;Bilateria;Protostomia;  
 Spiralia;Lophotrochozoa;Mollusca;Bivalvia;Autobranchia;Heteroconchia;Euhe  
 terodonta;Imparidentia;Venerida;Veneroidea;Veneridae;Mercenaria;Mercenari  
 a mercenaria

UdeM00000021033 6596 444.5 UdeM00000021033 XP\_045159972.1 37.3 670  
 405 8 136 798 68 729 2.80E-121 444.5 6596 cellular  
 organisms;Eukaryota;Opisthokonta;Metazoa;Eumetazoa;Bilateria;Protostomia;  
 Spiralia;Lophotrochozoa;Mollusca;Bivalvia;Autobranchia;Heteroconchia;Euhe  
 terodonta;Imparidentia;Venerida;Veneroidea;Veneridae;Mercenaria;Mercenari  
 a mercenaria

UdeM00000021035 6573 285.4 UdeM00000021035 XP\_021352442.1 40.1 369  
 216 3 2 366 592 959 1.00E-73 285.4 6573 cellular  
 organisms;Eukaryota;Opisthokonta;Metazoa;Eumetazoa;Bilateria;Protostomia;  
 Spiralia;Lophotrochozoa;Mollusca;Bivalvia;Autobranchia;Pteriomorphia;Pect  
 inida;Pectinoidea;Pectinidae;Mizuhopecten;Mizuhopecten yessoensis

UdeM00000021034 6573 492.7 UdeM00000021034 XP\_021352442.1 32.8 1022  
 552 16 5 960 7 959 1.10E-135 492.7 6573 cellular  
 organisms;Eukaryota;Opisthokonta;Metazoa;Eumetazoa;Bilateria;Protostomia;  
 Spiralia;Lophotrochozoa;Mollusca;Bivalvia;Autobranchia;Pteriomorphia;Pect  
 inida;Pectinoidea;Pectinidae;Mizuhopecten;Mizuhopecten yessoensis

UdeM00000021036 6596 435.3 UdeM00000021036 XP\_045159972.1 35.3 671  
 414 6 144 804 69 729 1.70E-118 435.3 6596 cellular  
 organisms;Eukaryota;Opisthokonta;Metazoa;Eumetazoa;Bilateria;Protostomia;  
 Spiralia;Lophotrochozoa;Mollusca;Bivalvia;Autobranchia;Heteroconchia;Euhe  
 terodonta;Imparidentia;Venerida;Veneroidea;Veneridae;Mercenaria;Mercenari  
 a mercenaria

UdeM00000021037 6596 156.8 UdeM00000021037 XP\_045210101.1 30.4 388  
 220 8 5 367 3 365 5.70E-35 156.8 6596 cellular  
 organisms;Eukaryota;Opisthokonta;Metazoa;Eumetazoa;Bilateria;Protostomia;  
 Spiralia;Lophotrochozoa;Mollusca;Bivalvia;Autobranchia;Heteroconchia;Euhe  
 terodonta;Imparidentia;Venerida;Veneroidea;Veneridae;Mercenaria;Mercenari  
 a mercenaria

UdeM00000021038 6596 443.4 UdeM00000021038 XP\_045159972.1 36.3 670  
 411 7 140 802 69 729 6.30E-121 443.4 6596 cellular

organisms;Eukaryota;Opisthokonta;Metazoa;Eumetazoa;Bilateria;Protostomia;Spiralia;Lophotrochozoa;Mollusca;Bivalvia;Autobranhia;Heteroconchia;Euheterodonta;Imparidentia;Venerida;Veneroidea;Veneridae;Mercenaria;Mercenaria mercenaria

UdeM00000021040 6579 272.3 UdeM00000021040 XP\_033762676.1 40 492  
240 8 1 487 3507 3948 1.30E-69 272.3 6579 cellular

organisms;Eukaryota;Opisthokonta;Metazoa;Eumetazoa;Bilateria;Protostomia;Spiralia;Lophotrochozoa;Mollusca;Bivalvia;Autobranhia;Pteriormorphia;Pectinida;Pectinoidea;Pectinidae;Pecten;Pecten maximus

UdeM00000021039 6579 1489.2 UdeM00000021039 XP\_033762676.1 43.7  
2054 1016 30 5 2020 1998 3948 0.00E+00 1489.2 6579  
cellular

organisms;Eukaryota;Opisthokonta;Metazoa;Eumetazoa;Bilateria;Protostomia;Spiralia;Lophotrochozoa;Mollusca;Bivalvia;Autobranhia;Pteriormorphia;Pectinida;Pectinoidea;Pectinidae;Pecten;Pecten maximus

UdeM00000021041 1735272 907.5 UdeM00000021041 XP\_041366877.1 31.4  
1981 1201 43 9 1895 307 2224 2.80E-260 907.5 1735272  
cellular

organisms;Eukaryota;Opisthokonta;Metazoa;Eumetazoa;Bilateria;Protostomia;Spiralia;Lophotrochozoa;Mollusca;Gastropoda;Neomphalina;Neomphaloidea;Peltospiridae;Gigantopelta;Gigantopelta aegis

UdeM00000021042 6573 71.6 UdeM00000021042 XP\_021343132.1 29.1 148  
99 3 10 154 80 224 1.20E-09 71.6 6573 cellular

organisms;Eukaryota;Opisthokonta;Metazoa;Eumetazoa;Bilateria;Protostomia;Spiralia;Lophotrochozoa;Mollusca;Bivalvia;Autobranhia;Pteriormorphia;Pectinida;Pectinoidea;Pectinidae;Mizuhopecten;Mizuhopecten yessoensis

UdeM00000021044 6596 324.7 UdeM00000021044 XP\_045168047.1 72 236  
60 3 68 299 93 326 1.20E-85 324.7 6596 cellular

organisms;Eukaryota;Opisthokonta;Metazoa;Eumetazoa;Bilateria;Protostomia;Spiralia;Lophotrochozoa;Mollusca;Bivalvia;Autobranhia;Heteroconchia;Euheterodonta;Imparidentia;Venerida;Veneroidea;Veneridae;Mercenaria;Mercenaria mercenaria

UdeM00000021045 80966 245.7 UdeM00000021045 XP\_022077561.1 46.7 274  
129 2 15 287 14 271 7.00E-62 245.7 80966 cellular

organisms;Eukaryota;Opisthokonta;Metazoa;Eumetazoa;Bilateria;Deuterostomia;Chordata;Craniata;Vertebrata;Gnathostomata;Teleostomi;Euteleostomi;Actinopterygii;Actinopteri;Neopterygii;Teleostei;Osteoglossocephalai;Clupeocephala;Euteleostei;Neoteleostei;Eurypterygia;Ctenosquamata;Acanthomorphata;Euacanthomorphacea;Percomorphaceae;Ovalentaria;Ovalentaria incertae sedis;Pomacentridae;Acanthochromis;Acanthochromis polyacanthus

UdeM00000021046 400727 107.5 UdeM00000021046 XP\_025095522.1 73.4  
64 16 1 1 63 1 64 1.30E-20 107.5 400727  
cellular

organisms;Eukaryota;Opisthokonta;Metazoa;Eumetazoa;Bilateria;Protostomia;Spiralia;Lophotrochozoa;Mollusca;Gastropoda;Caenogastropoda;Architaenioglossa;Ampullarioidea;Ampullariidae;Pomacea;Pomacea canaliculata

UdeM00000021047 6596 1213.4 UdeM00000021047 XP\_045168582.1 81  
763 135 5 41 798 49 806 0.00E+00 1213.4 6596  
cellular

organisms;Eukaryota;Opisthokonta;Metazoa;Eumetazoa;Bilateria;Protostomia;Spiralia;Lophotrochozoa;Mollusca;Bivalvia;Autobranhia;Heteroconchia;Euheterodonta;Imparidentia;Venerida;Veneroidea;Veneridae;Mercenaria;Mercenaria mercenaria

UdeM00000021048 1735272 495.7 UdeM00000021048 XP\_041366419.1 57.6  
 425 170 4 39 461 32 448 6.20E-137 495.7 1735272  
 cellular  
 organisms;Eukaryota;Opisthokonta;Metazoa;Eumetazoa;Bilateria;Protostomia;  
 Spiralia;Lophotrochozoa;Mollusca;Gastropoda;Neomphalina;Neomphaloidea;Pel  
 tospiridae;Gigantopelta;Gigantopelta aegis  
 UdeM00000021049 6596 861.7 UdeM00000021049 XP\_045159576.1 74.1 555  
 140 3 1 551 1 555 6.50E-247 861.7 6596 cellular  
 organisms;Eukaryota;Opisthokonta;Metazoa;Eumetazoa;Bilateria;Protostomia;  
 Spiralia;Lophotrochozoa;Mollusca;Bivalvia;Autobranchia;Heteroconchia;Euhe  
 terodonta;Imparidentia;Venerida;Veneroidea;Veneridae;Mercenaria;Mercenari  
 a mercenaria  
 UdeM00000021050 1735272 348.2 UdeM00000021050 XP\_041366073.1 49.3  
 367 174 8 37 401 38 394 1.40E-92 348.2 1735272  
 cellular  
 organisms;Eukaryota;Opisthokonta;Metazoa;Eumetazoa;Bilateria;Protostomia;  
 Spiralia;Lophotrochozoa;Mollusca;Gastropoda;Neomphalina;Neomphaloidea;Pel  
 tospiridae;Gigantopelta;Gigantopelta aegis  
 UdeM00000021051 6596 398.7 UdeM00000021051 XP\_045169737.1 46.4 433  
 207 9 47 477 120 529 1.10E-107 398.7 6596 cellular  
 organisms;Eukaryota;Opisthokonta;Metazoa;Eumetazoa;Bilateria;Protostomia;  
 Spiralia;Lophotrochozoa;Mollusca;Bivalvia;Autobranchia;Heteroconchia;Euhe  
 terodonta;Imparidentia;Venerida;Veneroidea;Veneridae;Mercenaria;Mercenari  
 a mercenaria  
 UdeM00000021052 29159 187.6 UdeM00000021052 XP\_011439882.2 52.8 161  
 75 1 32 191 13 173 1.70E-44 187.6 29159 cellular  
 organisms;Eukaryota;Opisthokonta;Metazoa;Eumetazoa;Bilateria;Protostomia;  
 Spiralia;Lophotrochozoa;Mollusca;Bivalvia;Autobranchia;Pteriormorphia;Ostr  
 eida;Ostreoidea;Ostreidae;Crassostrea;Crassostrea gigas  
 UdeM00000021053 6596 2413.3 UdeM00000021053 XP\_045168784.1 73.6  
 1562 407 3 3 1560 210 1770 0.00E+00 2413.3 6596  
 cellular  
 organisms;Eukaryota;Opisthokonta;Metazoa;Eumetazoa;Bilateria;Protostomia;  
 Spiralia;Lophotrochozoa;Mollusca;Bivalvia;Autobranchia;Heteroconchia;Euhe  
 terodonta;Imparidentia;Venerida;Veneroidea;Veneridae;Mercenaria;Mercenari  
 a mercenaria  
 UdeM00000021054 6579 194.5 UdeM00000021054 XP\_033762068.1 78.7 127  
 17 1 3 129 15 131 8.70E-47 194.5 6579 cellular  
 organisms;Eukaryota;Opisthokonta;Metazoa;Eumetazoa;Bilateria;Protostomia;  
 Spiralia;Lophotrochozoa;Mollusca;Bivalvia;Autobranchia;Pteriormorphia;Pect  
 inida;Pectinoidea;Pectinidae;Pecten;Pecten maximus  
 UdeM00000021059 6596 420.2 UdeM00000021059 XP\_045169196.1 48.3 544  
 229 4 7 550 26 517 4.00E-114 420.2 6596 cellular  
 organisms;Eukaryota;Opisthokonta;Metazoa;Eumetazoa;Bilateria;Protostomia;  
 Spiralia;Lophotrochozoa;Mollusca;Bivalvia;Autobranchia;Heteroconchia;Euhe  
 terodonta;Imparidentia;Venerida;Veneroidea;Veneridae;Mercenaria;Mercenari  
 a mercenaria  
 UdeM00000021060 29159 91.3 UdeM00000021060 XP\_011428243.2 37.4 131  
 66 3 27 144 48 175 1.10E-15 91.3 29159 cellular  
 organisms;Eukaryota;Opisthokonta;Metazoa;Eumetazoa;Bilateria;Protostomia;  
 Spiralia;Lophotrochozoa;Mollusca;Bivalvia;Autobranchia;Pteriormorphia;Ostr  
 eida;Ostreoidea;Ostreidae;Crassostrea;Crassostrea gigas  
 UdeM00000021061 6596 195.3 UdeM00000021061 XP\_045169838.1 58.6 191  
 65 4 2 182 4 190 7.10E-47 195.3 6596 cellular

organisms;Eukaryota;Opisthokonta;Metazoa;Eumetazoa;Bilateria;Protostomia;Spiralia;Lophotrochozoa;Mollusca;Bivalvia;Autobranhia;Heteroconchia;Euherodonta;Imparidentia;Venerida;Veneroidea;Veneridae;Mercenaria;Mercenaria mercenaria

UdeM00000021062 6596 1051.2 UdeM00000021062 XP\_045169673.1 60.6  
812 311 4 1 807 1 808 7.00E-304 1051.2 6596  
cellular

organisms;Eukaryota;Opisthokonta;Metazoa;Eumetazoa;Bilateria;Protostomia;Spiralia;Lophotrochozoa;Mollusca;Bivalvia;Autobranhia;Heteroconchia;Euherodonta;Imparidentia;Venerida;Veneroidea;Veneridae;Mercenaria;Mercenaria mercenaria

UdeM00000021063 6596 1338.6 UdeM00000021063 XP\_045168774.1 50.1  
1907 739 49 1 1801 256 2056 0.00E+00 1338.6 6596  
cellular

organisms;Eukaryota;Opisthokonta;Metazoa;Eumetazoa;Bilateria;Protostomia;Spiralia;Lophotrochozoa;Mollusca;Bivalvia;Autobranhia;Heteroconchia;Euherodonta;Imparidentia;Venerida;Veneroidea;Veneridae;Mercenaria;Mercenaria mercenaria

UdeM00000021064 6596 1338.9 UdeM00000021064 XP\_045168774.1 50.3  
1901 734 49 1 1790 256 2056 0.00E+00 1338.9 6596  
cellular

organisms;Eukaryota;Opisthokonta;Metazoa;Eumetazoa;Bilateria;Protostomia;Spiralia;Lophotrochozoa;Mollusca;Bivalvia;Autobranhia;Heteroconchia;Euherodonta;Imparidentia;Venerida;Veneroidea;Veneridae;Mercenaria;Mercenaria mercenaria

UdeM00000021065 6596 180.6 UdeM00000021065 XP\_045168771.1 56.1 157  
65 2 8 161 10 165 1.70E-42 180.6 6596 cellular

organisms;Eukaryota;Opisthokonta;Metazoa;Eumetazoa;Bilateria;Protostomia;Spiralia;Lophotrochozoa;Mollusca;Bivalvia;Autobranhia;Heteroconchia;Euherodonta;Imparidentia;Venerida;Veneroidea;Veneridae;Mercenaria;Mercenaria mercenaria

UdeM00000021066 6573 511.5 UdeM00000021066 XP\_021373784.1 40.3 801  
414 15 1 772 1 766 1.80E-141 511.5 6573 cellular

organisms;Eukaryota;Opisthokonta;Metazoa;Eumetazoa;Bilateria;Protostomia;Spiralia;Lophotrochozoa;Mollusca;Bivalvia;Autobranhia;Pteriomorphia;Pectinida;Pectinoidea;Pectinidae;Mizuhopecten;Mizuhopecten yessoensis

UdeM00000021067 1735272 299.3 UdeM00000021067 XP\_041366646.1 31.6  
732 416 14 4 729 27 679 1.40E-77 299.3 1735272  
cellular

organisms;Eukaryota;Opisthokonta;Metazoa;Eumetazoa;Bilateria;Protostomia;Spiralia;Lophotrochozoa;Mollusca;Gastropoda;Neomphalina;Neomphaloidea;Peltospiridae;Gigantopelta;Gigantopelta aegis

UdeM00000021068 1735272 1176 UdeM00000021068 XP\_041365925.1 73  
933 237 4 15 932 4 936 0.00E+00 1176 1735272  
cellular

organisms;Eukaryota;Opisthokonta;Metazoa;Eumetazoa;Bilateria;Protostomia;Spiralia;Lophotrochozoa;Mollusca;Gastropoda;Neomphalina;Neomphaloidea;Peltospiridae;Gigantopelta;Gigantopelta aegis

UdeM00000021069 6596 102.1 UdeM00000021069 XP\_045167702.1 53.8 78  
36 0 134 211 31 108 1.30E-18 102.1 6596 cellular

organisms;Eukaryota;Opisthokonta;Metazoa;Eumetazoa;Bilateria;Protostomia;Spiralia;Lophotrochozoa;Mollusca;Bivalvia;Autobranhia;Heteroconchia;Euherodonta;Imparidentia;Venerida;Veneroidea;Veneridae;Mercenaria;Mercenaria mercenaria

UdeM00000021070 6596 87.8 UdeM00000021070 XP\_045167703.1 31.5 260  
 128 9 678 911 1084 1319 7.70E-14 87.8 6596 cellular  
 organisms;Eukaryota;Opisthokonta;Metazoa;Eumetazoa;Bilateria;Protostomia;  
 Spiralia;Lophotrochozoa;Mollusca;Bivalvia;Autobranhia;Heteroconchia;Euhe  
 terodonta;Imparidentia;Venerida;Veneroidea;Veneridae;Mercenaria;Mercenari  
 a mercenaria  
 UdeM00000021071 6596 261.5 UdeM00000021071 XP\_045169052.1 49.8 261  
 130 1 1 261 5 264 1.10E-66 261.5 6596 cellular  
 organisms;Eukaryota;Opisthokonta;Metazoa;Eumetazoa;Bilateria;Protostomia;  
 Spiralia;Lophotrochozoa;Mollusca;Bivalvia;Autobranhia;Heteroconchia;Euhe  
 terodonta;Imparidentia;Venerida;Veneroidea;Veneridae;Mercenaria;Mercenari  
 a mercenaria  
 UdeM00000021072 6596 1032.7 UdeM00000021072 XP\_045168068.1 66.5  
 893 208 16 31 879 357 1202 3.00E-298 1032.7 6596  
 cellular  
 organisms;Eukaryota;Opisthokonta;Metazoa;Eumetazoa;Bilateria;Protostomia;  
 Spiralia;Lophotrochozoa;Mollusca;Bivalvia;Autobranhia;Heteroconchia;Euhe  
 terodonta;Imparidentia;Venerida;Veneroidea;Veneridae;Mercenaria;Mercenari  
 a mercenaria  
 UdeM00000021073 6596 147.5 UdeM00000021073 XP\_045168067.1 41.5 265  
 120 10 1 235 124 383 3.00E-32 147.5 6596 cellular  
 organisms;Eukaryota;Opisthokonta;Metazoa;Eumetazoa;Bilateria;Protostomia;  
 Spiralia;Lophotrochozoa;Mollusca;Bivalvia;Autobranhia;Heteroconchia;Euhe  
 terodonta;Imparidentia;Venerida;Veneroidea;Veneridae;Mercenaria;Mercenari  
 a mercenaria  
 UdeM00000021074 6579 190.7 UdeM00000021074 XP\_033761641.1 83.8 105  
 17 0 17 121 1 105 1.70E-45 190.7 6579 cellular  
 organisms;Eukaryota;Opisthokonta;Metazoa;Eumetazoa;Bilateria;Protostomia;  
 Spiralia;Lophotrochozoa;Mollusca;Bivalvia;Autobranhia;Pteriormorphia;Pect  
 inida;Pectinoidea;Pectinidae;Pecten;Pecten maximus  
 UdeM00000029341 6596 344.4 UdeM00000029341 XP\_045199866.1 51.8 313  
 150 1 26 338 1817 2128 3.20E-91 344.4 6596 cellular  
 organisms;Eukaryota;Opisthokonta;Metazoa;Eumetazoa;Bilateria;Protostomia;  
 Spiralia;Lophotrochozoa;Mollusca;Bivalvia;Autobranhia;Heteroconchia;Euhe  
 terodonta;Imparidentia;Venerida;Veneroidea;Veneridae;Mercenaria;Mercenari  
 a mercenaria  
 UdeM00000029342 6596 75.1 UdeM00000029342 XP\_045202576.1 57.1 70  
 23 1 25 87 145 214 1.00E-10 75.1 6596 cellular  
 organisms;Eukaryota;Opisthokonta;Metazoa;Eumetazoa;Bilateria;Protostomia;  
 Spiralia;Lophotrochozoa;Mollusca;Bivalvia;Autobranhia;Heteroconchia;Euhe  
 terodonta;Imparidentia;Venerida;Veneroidea;Veneridae;Mercenaria;Mercenari  
 a mercenaria  
 UdeM00000029343 6596 180.3 UdeM00000029343 XP\_045206316.1 46.5 202  
 107 1 28 228 66 267 2.90E-42 180.3 6596 cellular  
 organisms;Eukaryota;Opisthokonta;Metazoa;Eumetazoa;Bilateria;Protostomia;  
 Spiralia;Lophotrochozoa;Mollusca;Bivalvia;Autobranhia;Heteroconchia;Euhe  
 terodonta;Imparidentia;Venerida;Veneroidea;Veneridae;Mercenaria;Mercenari  
 a mercenaria  
 UdeM00000029345 70779 162.9 UdeM00000029345 XP\_015755124.1 37.7 252  
 130 3 99 323 219 470 7.40E-37 162.9 70779 cellular  
 organisms;Eukaryota;Opisthokonta;Metazoa;Eumetazoa;Cnidaria;Anthozoa;Hexa  
 corallia;Scleractinia;Astrocoeniina;Acroporidae;Acropora;Acropora  
 digitifera



UdeM00000029346 29159 198.7 UdeM00000029346 XP\_011433270.2 25.1 802  
 415 20 65 730 137 888 2.50E-47 198.7 29159 cellular  
 organisms;Eukaryota;Opisthokonta;Metazoa;Eumetazoa;Bilateria;Protostomia;  
 Spiralia;Lophotrochozoa;Mollusca;Bivalvia;Autobranhia;Pteriormorphia;Ostr  
 eida;Ostreoidea;Ostreidae;Crassostrea;Crassostrea gigas  
 UdeM00000029347 6596 242.3 UdeM00000029347 XP\_045208968.1 56.1 212  
 93 0 1 212 1255 1466 7.80E-61 242.3 6596 cellular  
 organisms;Eukaryota;Opisthokonta;Metazoa;Eumetazoa;Bilateria;Protostomia;  
 Spiralia;Lophotrochozoa;Mollusca;Bivalvia;Autobranhia;Heteroconchia;Euhe  
 terodonta;Imparidentia;Venerida;Veneroidea;Veneridae;Mercenaria;Mercenari  
 a mercenaria  
 UdeM00000029351 6573 662.9 UdeM00000029351 XP\_021362502.1 36.4 1203  
 579 29 53 1110 40 1201 7.40E-187 662.9 6573 cellular  
 organisms;Eukaryota;Opisthokonta;Metazoa;Eumetazoa;Bilateria;Protostomia;  
 Spiralia;Lophotrochozoa;Mollusca;Bivalvia;Autobranhia;Pteriormorphia;Pect  
 inida;Pectinoidea;Pectinidae;Mizuhopecten;Mizuhopecten yessoensis  
 UdeM00000029352 6573 514.2 UdeM00000029352 XP\_021362500.1 32.6 1172  
 583 29 75 1100 139 1249 4.00E-142 514.2 6573 cellular  
 organisms;Eukaryota;Opisthokonta;Metazoa;Eumetazoa;Bilateria;Protostomia;  
 Spiralia;Lophotrochozoa;Mollusca;Bivalvia;Autobranhia;Pteriormorphia;Pect  
 inida;Pectinoidea;Pectinidae;Mizuhopecten;Mizuhopecten yessoensis  
 UdeM00000029354 6573 180.6 UdeM00000029354 XP\_021358159.1 36.2 298  
 177 7 185 472 366 660 6.10E-42 180.6 6573 cellular  
 organisms;Eukaryota;Opisthokonta;Metazoa;Eumetazoa;Bilateria;Protostomia;  
 Spiralia;Lophotrochozoa;Mollusca;Bivalvia;Autobranhia;Pteriormorphia;Pect  
 inida;Pectinoidea;Pectinidae;Mizuhopecten;Mizuhopecten yessoensis  
 UdeM00000029355 6596 328.9 UdeM00000029355 XP\_045199866.1 51.6 304  
 145 2 1 304 1838 2139 1.20E-86 328.9 6596 cellular  
 organisms;Eukaryota;Opisthokonta;Metazoa;Eumetazoa;Bilateria;Protostomia;  
 Spiralia;Lophotrochozoa;Mollusca;Bivalvia;Autobranhia;Heteroconchia;Euhe  
 terodonta;Imparidentia;Venerida;Veneroidea;Veneridae;Mercenaria;Mercenari  
 a mercenaria  
 UdeM00000029357 7957 234.6 UdeM00000029357 XP\_026125748.1 39.2 337  
 184 5 7 341 2 319 1.90E-58 234.6 7957 cellular  
 organisms;Eukaryota;Opisthokonta;Metazoa;Eumetazoa;Bilateria;Deuterostomi  
 a;Chordata;Craniata;Vertebrata;Gnathostomata;Teleostomi;Euteleostomi;Acti  
 nopterygii;Actinopteri;Neopterygii;Teleostei;Osteoglossocephalai;Clupeoce  
 phala;Otomorpha;Ostariophysi;Otophysi;Cypriniphysae;Cypriniformes;Cyprino  
 idei;Cyprinidae;Cyprininae;Carassius;Carassius auratus  
 UdeM00000029359 6573 96.7 UdeM00000029359 XP\_021365625.1 49 104  
 52 1 33 135 23 126 4.60E-17 96.7 6573 cellular  
 organisms;Eukaryota;Opisthokonta;Metazoa;Eumetazoa;Bilateria;Protostomia;  
 Spiralia;Lophotrochozoa;Mollusca;Bivalvia;Autobranhia;Pteriormorphia;Pect  
 inida;Pectinoidea;Pectinidae;Mizuhopecten;Mizuhopecten yessoensis  
 UdeM00000029360 6573 654.8 UdeM00000029360 XP\_021362502.1 36.2 1258  
 622 33 10 1117 10 1236 1.90E-184 654.8 6573 cellular  
 organisms;Eukaryota;Opisthokonta;Metazoa;Eumetazoa;Bilateria;Protostomia;  
 Spiralia;Lophotrochozoa;Mollusca;Bivalvia;Autobranhia;Pteriormorphia;Pect  
 inida;Pectinoidea;Pectinidae;Mizuhopecten;Mizuhopecten yessoensis  
 UdeM00000029361 6573 320.5 UdeM00000029361 XP\_021362500.1 26.7 1168  
 531 31 27 926 139 1249 7.70E-84 320.5 6573 cellular  
 organisms;Eukaryota;Opisthokonta;Metazoa;Eumetazoa;Bilateria;Protostomia;  
 Spiralia;Lophotrochozoa;Mollusca;Bivalvia;Autobranhia;Pteriormorphia;Pect  
 inida;Pectinoidea;Pectinidae;Mizuhopecten;Mizuhopecten yessoensis

UdeM00000029362 6579 179.9 UdeM00000029362 XP\_033724854.1 36.7 319  
 161 9 53 336 47 359 5.60E-42 179.9 6579 cellular  
 organisms;Eukaryota;Opisthokonta;Metazoa;Eumetazoa;Bilateria;Protostomia;  
 Spiralia;Lophotrochozoa;Mollusca;Bivalvia;Autobranchia;Pteriormorphia;Pect  
 inida;Pectinoidea;Pectinidae;Pecten;Pecten maximus  
 UdeM00000029363 6579 372.1 UdeM00000029363 XP\_033724860.1 34.7 712  
 291 11 7 549 479 1185 1.30E-99 372.1 6579 cellular  
 organisms;Eukaryota;Opisthokonta;Metazoa;Eumetazoa;Bilateria;Protostomia;  
 Spiralia;Lophotrochozoa;Mollusca;Bivalvia;Autobranchia;Pteriormorphia;Pect  
 inida;Pectinoidea;Pectinidae;Pecten;Pecten maximus  
 UdeM00000029364 6526 151.4 UdeM00000029364 XP\_013063620.1 37.6 271  
 138 8 26 266 14 283 1.80E-33 151.4 6526 cellular  
 organisms;Eukaryota;Opisthokonta;Metazoa;Eumetazoa;Bilateria;Protostomia;  
 Spiralia;Lophotrochozoa;Mollusca;Gastropoda;Heterobranchia;Euthyneura;Pan  
 pulmonata;Hygrophila;Lymnaeoidea;Planorbidae;Biomphalaria;Biomphalaria  
 glabrata  
 UdeM00000029366 6573 511.9 UdeM00000029366 XP\_021362500.1 36.8 905  
 423 19 4 777 328 1214 1.50E-141 511.9 6573 cellular  
 organisms;Eukaryota;Opisthokonta;Metazoa;Eumetazoa;Bilateria;Protostomia;  
 Spiralia;Lophotrochozoa;Mollusca;Bivalvia;Autobranchia;Pteriormorphia;Pect  
 inida;Pectinoidea;Pectinidae;Mizuhopecten;Mizuhopecten yessoensis  
 UdeM00000029367 7739 90.9 UdeM00000029367 XP\_035700323.1 34.4 163  
 84 4 17 156 205 367 2.50E-15 90.9 7739 cellular  
 organisms;Eukaryota;Opisthokonta;Metazoa;Eumetazoa;Bilateria;Deuterostomi  
 a;Chordata;Cephalochordata;Leptocardii;Amphioxiformes;Branchiostomidae;Br  
 anchiostoma;Branchiostoma floridae  
 UdeM00000029368 7739 134.4 UdeM00000029368 XP\_035700323.1 25 713  
 337 24 3 548 8 689 4.40E-28 134.4 7739 cellular  
 organisms;Eukaryota;Opisthokonta;Metazoa;Eumetazoa;Bilateria;Deuterostomi  
 a;Chordata;Cephalochordata;Leptocardii;Amphioxiformes;Branchiostomidae;Br  
 anchiostoma;Branchiostoma floridae  
 UdeM00000029369 6573 476.9 UdeM00000029369 XP\_021362500.1 32.1 1154  
 572 30 98 1082 139 1249 7.00E-131 476.9 6573 cellular  
 organisms;Eukaryota;Opisthokonta;Metazoa;Eumetazoa;Bilateria;Protostomia;  
 Spiralia;Lophotrochozoa;Mollusca;Bivalvia;Autobranchia;Pteriormorphia;Pect  
 inida;Pectinoidea;Pectinidae;Mizuhopecten;Mizuhopecten yessoensis  
 UdeM00000029370 6596 336.7 UdeM00000029370 XP\_045208968.1 33.7 765  
 356 18 42 664 232 987 7.00E-89 336.7 6596 cellular  
 organisms;Eukaryota;Opisthokonta;Metazoa;Eumetazoa;Bilateria;Protostomia;  
 Spiralia;Lophotrochozoa;Mollusca;Bivalvia;Autobranchia;Heteroconchia;Euhe  
 terodonta;Imparidentia;Venerida;Veneroidea;Veneridae;Mercenaria;Mercenari  
 a mercenaria  
 UdeM00000029371 6579 65.9 UdeM00000029371 XP\_033748450.1 43.2 81  
 44 1 61 139 205 285 9.20E-08 65.9 6579 cellular  
 organisms;Eukaryota;Opisthokonta;Metazoa;Eumetazoa;Bilateria;Protostomia;  
 Spiralia;Lophotrochozoa;Mollusca;Bivalvia;Autobranchia;Pteriormorphia;Pect  
 inida;Pectinoidea;Pectinidae;Pecten;Pecten maximus  
 UdeM00000029372 6573 138.7 UdeM00000029372 XP\_021362500.1 36.4 239  
 82 2 1 169 895 1133 7.70E-30 138.7 6573 cellular  
 organisms;Eukaryota;Opisthokonta;Metazoa;Eumetazoa;Bilateria;Protostomia;  
 Spiralia;Lophotrochozoa;Mollusca;Bivalvia;Autobranchia;Pteriormorphia;Pect  
 inida;Pectinoidea;Pectinidae;Mizuhopecten;Mizuhopecten yessoensis  
 UdeM00000029373 225164 165.6 UdeM00000029373 XP\_009055754.1 27  
 730 376 25 42 664 75 754 2.20E-37 165.6 225164

cellular  
organisms;Eukaryota;Opisthokonta;Metazoa;Eumetazoa;Bilateria;Protostomia;  
Spiralia;Lophotrochozoa;Mollusca;Gastropoda;Patellogastropoda;Lottioidea;  
Lottiidae;Lottia;Lottia gigantea

UdeM00000029374 133434 72.8 UdeM00000029374 XP\_022084599.1 31.2  
138 90 2 6 142 1047 1180 5.90E-10 72.8 133434

cellular  
organisms;Eukaryota;Opisthokonta;Metazoa;Eumetazoa;Bilateria;Deuterostomi  
a;Echinodermata;Eleutherozoa;Asterozoa;Asteroidea;Valvatacea;Valvatida;Ac  
anthasteridae;Acanthaster;Acanthaster planci

UdeM00000029375 6573 585.5 UdeM00000029375 XP\_021362500.1 36.7 1075  
523 29 71 1007 139 1193 1.30E-163 585.5 6573 cellular

organisms;Eukaryota;Opisthokonta;Metazoa;Eumetazoa;Bilateria;Protostomia;  
Spiralia;Lophotrochozoa;Mollusca;Bivalvia;Autobranchia;Pteriormorphia;Pect  
inida;Pectinoidea;Pectinidae;Mizuhopecten;Mizuhopecten yessoensis

UdeM00000029377 6596 180.6 UdeM00000029377 XP\_045179676.1 25.7 686  
439 20 268 931 498 1134 9.00E-42 180.6 6596 cellular

organisms;Eukaryota;Opisthokonta;Metazoa;Eumetazoa;Bilateria;Protostomia;  
Spiralia;Lophotrochozoa;Mollusca;Bivalvia;Autobranchia;Heteroconchia;Euhe  
terodonta;Imparidentia;Venerida;Veneroidea;Veneridae;Mercenaria;Mercenari  
a mercenaria

UdeM00000029378 8078 66.2 UdeM00000029378 XP\_035990535.1 49.2 59  
28 1 7 65 2 58 2.70E-08 66.2 8078 cellular

organisms;Eukaryota;Opisthokonta;Metazoa;Eumetazoa;Bilateria;Deuterostomi  
a;Chordata;Craniata;Vertebrata;Gnathostomata;Teleostomi;Euteleostomi;Acti  
nopterygii;Actinopteri;Neopterygii;Teleostei;Osteoglossocephalai;Clupeoce  
phala;Euteleosteomorpha;Neoteleostei;Eurypterygia;Ctenosquamata;Acanthomo  
rphata;Euacanthomorphacea;Percomorphaceae;Ovalentaria;Atherinomorphae;Cyp  
rinodontiformes;Cyprinodontoidei;Fundulidae;Fundulus;Fundulus

heteroclitus

UdeM00000029379 158441 122.9 UdeM00000029379 XP\_021948043.1 42.2  
135 78 0 1 135 160 294 3.30E-25 122.9 158441

cellular  
organisms;Eukaryota;Opisthokonta;Metazoa;Eumetazoa;Bilateria;Protostomia;  
Ecdysozoa;Panarthropoda;Arthropoda;Mandibulata;Pancrustacea;Hexapoda;Coll  
embola;Entomobryomorpha;Isotomoidea;Isotomidae;Proisotominae;Folsomia;Fol  
somia candida

UdeM00000029380 400682 105.1 UdeM00000029380 XP\_003390251.1 33.2  
211 103 4 12 193 432 633 9.90E-20 105.1 400682

cellular

organisms;Eukaryota;Opisthokonta;Metazoa;Porifera;Demospongiae;Heteroscle  
romorpha;Haplosclerida;Niphatidae;Amphimedon;Amphimedon queenslandica

UdeM00000029381 6596 183 UdeM00000029381 XP\_045179676.1 25.9 669  
431 18 249 896 498 1122 1.80E-42 183 6596 cellular

organisms;Eukaryota;Opisthokonta;Metazoa;Eumetazoa;Bilateria;Protostomia;  
Spiralia;Lophotrochozoa;Mollusca;Bivalvia;Autobranchia;Heteroconchia;Euhe  
terodonta;Imparidentia;Venerida;Veneroidea;Veneridae;Mercenaria;Mercenari  
a mercenaria

UdeM00000029385 6596 142.5 UdeM00000029385 XP\_045207526.1 49 198  
80 8 1 181 1 194 5.60E-31 142.5 6596 cellular

organisms;Eukaryota;Opisthokonta;Metazoa;Eumetazoa;Bilateria;Protostomia;  
Spiralia;Lophotrochozoa;Mollusca;Bivalvia;Autobranchia;Heteroconchia;Euhe  
terodonta;Imparidentia;Venerida;Veneroidea;Veneridae;Mercenaria;Mercenari  
a mercenaria

UdeM00000029386 400727 136.7 UdeM00000029386 XP\_025080355.1 88.5  
 78 9 0 1 78 257 334 3.00E-29 136.7 400727  
 cellular  
 organisms;Eukaryota;Opisthokonta;Metazoa;Eumetazoa;Bilateria;Protostomia;  
 Spiralia;Lophotrochozoa;Mollusca;Gastropoda;Caenogastropoda;Architaenioglossa;  
 Ampullarioidea;Ampullariidae;Pomacea;Pomacea canaliculata  
 UdeM00000029387 6596 169.1 UdeM00000029387 XP\_045208142.1 80 105  
 21 0 1 105 1 105 3.10E-39 169.1 6596 cellular  
 organisms;Eukaryota;Opisthokonta;Metazoa;Eumetazoa;Bilateria;Protostomia;  
 Spiralia;Lophotrochozoa;Mollusca;Bivalvia;Autobranchia;Heteroconchia;Euheterodonta;  
 Imparidentia;Venerida;Veneroidea;Veneridae;Mercenaria;Mercenaria mercenaria  
 UdeM00000029389 6579 885.9 UdeM00000029389 XP\_033725675.1 80.7 514  
 92 3 523 1031 105 616 4.80E-254 885.9 6579 cellular  
 organisms;Eukaryota;Opisthokonta;Metazoa;Eumetazoa;Bilateria;Protostomia;  
 Spiralia;Lophotrochozoa;Mollusca;Bivalvia;Autobranchia;Pteriormorphia;Pectinida;  
 Pectinoidea;Pectinidae;Pecten;Pecten maximus  
 UdeM00000029390 1735272 369.8 UdeM00000029390 XP\_041371428.1 47.2  
 398 190 4 13 409 5 383 6.80E-99 369.8 1735272  
 cellular  
 organisms;Eukaryota;Opisthokonta;Metazoa;Eumetazoa;Bilateria;Protostomia;  
 Spiralia;Lophotrochozoa;Mollusca;Gastropoda;Neomphalina;Neomphaloidea;Peltospiridae;  
 Gigantopelta;Gigantopelta aegis  
 UdeM00000029391 6565 190.3 UdeM00000029391 XP\_022289339.1 48.7 195  
 93 2 206 393 78 272 5.60E-45 190.3 6565 cellular  
 organisms;Eukaryota;Opisthokonta;Metazoa;Eumetazoa;Bilateria;Protostomia;  
 Spiralia;Lophotrochozoa;Mollusca;Bivalvia;Autobranchia;Pteriormorphia;Ostreida;  
 Ostreoidea;Ostreidae;Crassostrea;Crassostrea virginica  
 UdeM00000029392 6596 355.1 UdeM00000029392 XP\_045207280.1 42.6 432  
 217 6 1 408 28 452 1.30E-94 355.1 6596 cellular  
 organisms;Eukaryota;Opisthokonta;Metazoa;Eumetazoa;Bilateria;Protostomia;  
 Spiralia;Lophotrochozoa;Mollusca;Bivalvia;Autobranchia;Heteroconchia;Euheterodonta;  
 Imparidentia;Venerida;Veneroidea;Veneridae;Mercenaria;Mercenaria mercenaria  
 UdeM00000029393 114398 426.8 UdeM00000029393 XP\_042903861.1 38.9  
 609 361 6 1 605 1 602 4.60E-116 426.8 114398  
 cellular  
 organisms;Eukaryota;Opisthokonta;Metazoa;Eumetazoa;Bilateria;Protostomia;  
 Ecdysozoa;Panarthropoda;Arthropoda;Chelicerata;Arachnida;Araneae;Araneomorphae;  
 Entelegynae;Orbiculariae;Araneoidea;Theridiidae;Parasteatoda;Parasteatoda tepidariorum  
 UdeM00000029394 6596 387.9 UdeM00000029394 XP\_045207280.1 47.1 442  
 213 7 1 423 28 467 1.90E-104 387.9 6596 cellular  
 organisms;Eukaryota;Opisthokonta;Metazoa;Eumetazoa;Bilateria;Protostomia;  
 Spiralia;Lophotrochozoa;Mollusca;Bivalvia;Autobranchia;Heteroconchia;Euheterodonta;  
 Imparidentia;Venerida;Veneroidea;Veneridae;Mercenaria;Mercenaria mercenaria  
 UdeM00000029395 1735272 88.2 UdeM00000029395 XP\_041347065.1 38.3  
 154 83 4 17 158 75 228 1.20E-14 88.2 1735272  
 cellular  
 organisms;Eukaryota;Opisthokonta;Metazoa;Eumetazoa;Bilateria;Protostomia;  
 Spiralia;Lophotrochozoa;Mollusca;Gastropoda;Neomphalina;Neomphaloidea;Peltospiridae;  
 Gigantopelta;Gigantopelta aegis

UdeM00000029396 6596 2035.4 UdeM00000029396 XP\_045208936.1 64.3  
 1552 513 10 20 1532 32 1581 0.00E+00 2035.4 6596  
 cellular  
 organisms;Eukaryota;Opisthokonta;Metazoa;Eumetazoa;Bilateria;Protostomia;  
 Spiralia;Lophotrochozoa;Mollusca;Bivalvia;Autobranchia;Heteroconchia;Euhe  
 terodonta;Imparidentia;Venerida;Veneroidea;Veneridae;Mercenaria;Mercenari  
 a mercenaria  
 UdeM00000029397 6596 506.9 UdeM00000029397 XP\_045208471.1 54.7 481  
 185 5 1 448 3 483 2.70E-140 506.9 6596 cellular  
 organisms;Eukaryota;Opisthokonta;Metazoa;Eumetazoa;Bilateria;Protostomia;  
 Spiralia;Lophotrochozoa;Mollusca;Bivalvia;Autobranchia;Heteroconchia;Euhe  
 terodonta;Imparidentia;Venerida;Veneroidea;Veneridae;Mercenaria;Mercenari  
 a mercenaria  
 UdeM00000029398 6596 478.8 UdeM00000029398 XP\_045208471.1 53.6 476  
 186 4 1 441 3 478 7.70E-132 478.8 6596 cellular  
 organisms;Eukaryota;Opisthokonta;Metazoa;Eumetazoa;Bilateria;Protostomia;  
 Spiralia;Lophotrochozoa;Mollusca;Bivalvia;Autobranchia;Heteroconchia;Euhe  
 terodonta;Imparidentia;Venerida;Veneroidea;Veneridae;Mercenaria;Mercenari  
 a mercenaria  
 UdeM00000029399 6596 409.1 UdeM00000029399 XP\_045208471.1 52.1 426  
 169 4 1 391 53 478 6.70E-111 409.1 6596 cellular  
 organisms;Eukaryota;Opisthokonta;Metazoa;Eumetazoa;Bilateria;Protostomia;  
 Spiralia;Lophotrochozoa;Mollusca;Bivalvia;Autobranchia;Heteroconchia;Euhe  
 terodonta;Imparidentia;Venerida;Veneroidea;Veneridae;Mercenaria;Mercenari  
 a mercenaria  
 UdeM00000029400 6596 187.2 UdeM00000029400 XP\_045207280.1 47.4 190  
 81 1 1 171 28 217 1.80E-44 187.2 6596 cellular  
 organisms;Eukaryota;Opisthokonta;Metazoa;Eumetazoa;Bilateria;Protostomia;  
 Spiralia;Lophotrochozoa;Mollusca;Bivalvia;Autobranchia;Heteroconchia;Euhe  
 terodonta;Imparidentia;Venerida;Veneroidea;Veneridae;Mercenaria;Mercenari  
 a mercenaria  
 UdeM00000029402 1735272 266.2 UdeM00000029402 XP\_041370954.1 69.5  
 177 54 0 46 222 1 177 4.30E-68 266.2 1735272  
 cellular  
 organisms;Eukaryota;Opisthokonta;Metazoa;Eumetazoa;Bilateria;Protostomia;  
 Spiralia;Lophotrochozoa;Mollusca;Gastropoda;Neomphalina;Neomphaloidea;Pel  
 tospiridae;Gigantopelta;Gigantopelta aegis  
 UdeM00000029405 6596 287.7 UdeM00000029405 XP\_045209904.1 63.3 218  
 74 1 1 218 292 503 1.30E-74 287.7 6596 cellular  
 organisms;Eukaryota;Opisthokonta;Metazoa;Eumetazoa;Bilateria;Protostomia;  
 Spiralia;Lophotrochozoa;Mollusca;Bivalvia;Autobranchia;Heteroconchia;Euhe  
 terodonta;Imparidentia;Venerida;Veneroidea;Veneridae;Mercenaria;Mercenari  
 a mercenaria  
 UdeM00000029406 29159 223 UdeM00000029406 XP\_034303351.1 58.8 177  
 72 1 22 198 33 208 6.20E-55 223 29159 cellular  
 organisms;Eukaryota;Opisthokonta;Metazoa;Eumetazoa;Bilateria;Protostomia;  
 Spiralia;Lophotrochozoa;Mollusca;Bivalvia;Autobranchia;Pteriomorphia;Ostr  
 eida;Ostreoidea;Ostreidae;Crassostrea;Crassostrea gigas  
 UdeM00000029407 6579 84.7 UdeM00000029407 XP\_033732520.1 28.5 172  
 116 3 13 181 155 322 2.40E-13 84.7 6579 cellular  
 organisms;Eukaryota;Opisthokonta;Metazoa;Eumetazoa;Bilateria;Protostomia;  
 Spiralia;Lophotrochozoa;Mollusca;Bivalvia;Autobranchia;Pteriomorphia;Pect  
 inida;Pectinoidea;Pectinidae;Pecten;Pecten maximus

UdeM00000029408 6579 80.5 UdeM00000029408 XP\_033732520.1 28.5 172  
 116 3 13 181 155 322 4.60E-12 80.5 6579 cellular  
 organisms;Eukaryota;Opisthokonta;Metazoa;Eumetazoa;Bilateria;Protostomia;  
 Spiralia;Lophotrochozoa;Mollusca;Bivalvia;Autobranchia;Pteriormorphia;Pect  
 inida;Pectinoidea;Pectinidae;Pecten;Pecten maximus  
 UdeM00000029409 29159 240 UdeM00000029409 XP\_034303977.1 43.2 352  
 97 2 2 250 383 734 3.40E-60 240 29159 cellular  
 organisms;Eukaryota;Opisthokonta;Metazoa;Eumetazoa;Bilateria;Protostomia;  
 Spiralia;Lophotrochozoa;Mollusca;Bivalvia;Autobranchia;Pteriormorphia;Ostr  
 eida;Ostreoidea;Ostreidae;Crassostrea;Crassostrea gigas  
 UdeM00000029410 29159 72 UdeM00000029410 XP\_011453081.2 23.9 142  
 107 1 14 155 194 334 1.60E-09 72 29159 cellular  
 organisms;Eukaryota;Opisthokonta;Metazoa;Eumetazoa;Bilateria;Protostomia;  
 Spiralia;Lophotrochozoa;Mollusca;Bivalvia;Autobranchia;Pteriormorphia;Ostr  
 eida;Ostreoidea;Ostreidae;Crassostrea;Crassostrea gigas  
 UdeM00000029411 6573 134 UdeM00000029411 XP\_021358174.1 27.3 362  
 214 6 11 327 14 371 4.70E-28 134 6573 cellular  
 organisms;Eukaryota;Opisthokonta;Metazoa;Eumetazoa;Bilateria;Protostomia;  
 Spiralia;Lophotrochozoa;Mollusca;Bivalvia;Autobranchia;Pteriormorphia;Pect  
 inida;Pectinoidea;Pectinidae;Mizuhopecten;Mizuhopecten yessoensis  
 UdeM00000029412 1735272 2266.5 UdeM00000029412 XP\_041371786.1  
 58.3 1809 741 8 21 1821 1201 3004 0.00E+00 2266.5  
 1735272 cellular  
 organisms;Eukaryota;Opisthokonta;Metazoa;Eumetazoa;Bilateria;Protostomia;  
 Spiralia;Lophotrochozoa;Mollusca;Gastropoda;Neomphalina;Neomphaloidea;Pel  
 tospiridae;Gigantopelta;Gigantopelta aegis  
 UdeM00000029413 6596 785.4 UdeM00000029413 XP\_045208831.1 60.5 593  
 231 2 37 628 1273 1863 5.60E-224 785.4 6596 cellular  
 organisms;Eukaryota;Opisthokonta;Metazoa;Eumetazoa;Bilateria;Protostomia;  
 Spiralia;Lophotrochozoa;Mollusca;Bivalvia;Autobranchia;Heteroconchia;Euhe  
 terodonta;Imparidentia;Venerida;Veneroidea;Veneridae;Mercenaria;Mercenari  
 a mercenaria  
 UdeM00000029414 6596 649.8 UdeM00000029414 XP\_045208831.1 58.1 504  
 208 2 61 563 2004 2505 3.30E-183 649.8 6596 cellular  
 organisms;Eukaryota;Opisthokonta;Metazoa;Eumetazoa;Bilateria;Protostomia;  
 Spiralia;Lophotrochozoa;Mollusca;Bivalvia;Autobranchia;Heteroconchia;Euhe  
 terodonta;Imparidentia;Venerida;Veneroidea;Veneridae;Mercenaria;Mercenari  
 a mercenaria  
 UdeM00000029415 29159 681 UdeM00000029415 NP\_001292237.1 70.3 492  
 144 2 29 518 27 518 1.20E-192 681 29159 cellular  
 organisms;Eukaryota;Opisthokonta;Metazoa;Eumetazoa;Bilateria;Protostomia;  
 Spiralia;Lophotrochozoa;Mollusca;Bivalvia;Autobranchia;Pteriormorphia;Ostr  
 eida;Ostreoidea;Ostreidae;Crassostrea;Crassostrea gigas  
 UdeM00000029416 29159 689.1 UdeM00000029416 NP\_001292237.1 70.9 494  
 141 2 36 528 27 518 4.40E-195 689.1 29159 cellular  
 organisms;Eukaryota;Opisthokonta;Metazoa;Eumetazoa;Bilateria;Protostomia;  
 Spiralia;Lophotrochozoa;Mollusca;Bivalvia;Autobranchia;Pteriormorphia;Ostr  
 eida;Ostreoidea;Ostreidae;Crassostrea;Crassostrea gigas  
 UdeM00000029417 29159 648.3 UdeM00000029417 NP\_001292237.1 66.1 505  
 161 3 25 528 23 518 8.70E-183 648.3 29159 cellular  
 organisms;Eukaryota;Opisthokonta;Metazoa;Eumetazoa;Bilateria;Protostomia;  
 Spiralia;Lophotrochozoa;Mollusca;Bivalvia;Autobranchia;Pteriormorphia;Ostr  
 eida;Ostreoidea;Ostreidae;Crassostrea;Crassostrea gigas

|                 |      |        |   |                 |                |          |
|-----------------|------|--------|---|-----------------|----------------|----------|
| UdeM00000029418 | 6579 | 1459.1 |   | UdeM00000029418 | XP_033724854.1 | 48       |
| 1666            | 791  | 22     | 4 | 1629            | 10             | 1640     |
|                 |      |        |   |                 |                | 0.00E+00 |
|                 |      |        |   |                 |                | 1459.1   |
|                 |      |        |   |                 |                | 6579     |

cellular  
organisms;Eukaryota;Opisthokonta;Metazoa;Eumetazoa;Bilateria;Protostomia;Spiralia;Lophotrochozoa;Mollusca;Bivalvia;Autobranchia;Pteriomorpha;Pectinida;Pectinoidea;Pectinidae;Pecten;Pecten maximus

|                 |      |       |     |                 |                |           |          |
|-----------------|------|-------|-----|-----------------|----------------|-----------|----------|
| UdeM00000029419 | 8023 | 376.3 |     | UdeM00000029419 | XP_029487480.1 | 40.3      | 466      |
| 276             | 2    | 10    | 474 | 9               | 473            | 7.20E-101 | 376.3    |
|                 |      |       |     |                 |                |           | 8023     |
|                 |      |       |     |                 |                |           | cellular |

organisms;Eukaryota;Opisthokonta;Metazoa;Eumetazoa;Bilateria;Deuterostomia;Chordata;Craniata;Vertebrata;Gnathostomata;Teleostomi;Euteleostomi;Actinopterygii;Actinopteri;Neopterygii;Teleostei;Osteoglossocephalai;Clupeocephala;Euteleostei;Protacanthopterygii;Salmoniformes;Salmonidae;Salmoninae;Oncorhynchus;Oncorhynchus nerka

|                 |      |      |    |                 |                |          |          |
|-----------------|------|------|----|-----------------|----------------|----------|----------|
| UdeM00000029420 | 6596 | 73.9 |    | UdeM00000029420 | XP_045209802.1 | 37.9     | 95       |
| 50              | 4    | 6    | 92 | 544             | 637            | 8.80E-10 | 73.9     |
|                 |      |      |    |                 |                |          | 6596     |
|                 |      |      |    |                 |                |          | cellular |

organisms;Eukaryota;Opisthokonta;Metazoa;Eumetazoa;Bilateria;Protostomia;Spiralia;Lophotrochozoa;Mollusca;Bivalvia;Autobranchia;Heteroconchia;Euheterodonta;Imparidentia;Venerida;Veneroidea;Veneridae;Mercenaria;Mercenaria mercenaria

|                 |      |     |     |                 |                |          |          |
|-----------------|------|-----|-----|-----------------|----------------|----------|----------|
| UdeM00000029421 | 6596 | 270 |     | UdeM00000029421 | XP_045170511.1 | 30.3     | 548      |
| 329             | 15   | 14  | 524 | 398             | 929            | 8.20E-69 | 270      |
|                 |      |     |     |                 |                |          | 6596     |
|                 |      |     |     |                 |                |          | cellular |

organisms;Eukaryota;Opisthokonta;Metazoa;Eumetazoa;Bilateria;Protostomia;Spiralia;Lophotrochozoa;Mollusca;Bivalvia;Autobranchia;Heteroconchia;Euheterodonta;Imparidentia;Venerida;Veneroidea;Veneridae;Mercenaria;Mercenaria mercenaria

|                 |      |       |     |                 |                |          |          |
|-----------------|------|-------|-----|-----------------|----------------|----------|----------|
| UdeM00000029422 | 6596 | 280.8 |     | UdeM00000029422 | XP_045208619.1 | 41.4     | 362      |
| 206             | 3    | 46    | 402 | 28              | 388            | 2.90E-72 | 280.8    |
|                 |      |       |     |                 |                |          | 6596     |
|                 |      |       |     |                 |                |          | cellular |

organisms;Eukaryota;Opisthokonta;Metazoa;Eumetazoa;Bilateria;Protostomia;Spiralia;Lophotrochozoa;Mollusca;Bivalvia;Autobranchia;Heteroconchia;Euheterodonta;Imparidentia;Venerida;Veneroidea;Veneridae;Mercenaria;Mercenaria mercenaria

|                 |      |       |     |                 |                |           |          |
|-----------------|------|-------|-----|-----------------|----------------|-----------|----------|
| UdeM00000029423 | 6596 | 908.3 |     | UdeM00000029423 | XP_045209497.1 | 60.7      | 794      |
| 108             | 1    | 19    | 812 | 4               | 593            | 7.00E-261 | 908.3    |
|                 |      |       |     |                 |                |           | 6596     |
|                 |      |       |     |                 |                |           | cellular |

organisms;Eukaryota;Opisthokonta;Metazoa;Eumetazoa;Bilateria;Protostomia;Spiralia;Lophotrochozoa;Mollusca;Bivalvia;Autobranchia;Heteroconchia;Euheterodonta;Imparidentia;Venerida;Veneroidea;Veneridae;Mercenaria;Mercenaria mercenaria

|                 |      |       |     |                 |                |           |          |
|-----------------|------|-------|-----|-----------------|----------------|-----------|----------|
| UdeM00000029424 | 6596 | 442.6 |     | UdeM00000029424 | XP_045207933.1 | 72.4      | 293      |
| 80              | 1    | 6     | 297 | 7               | 299            | 4.10E-121 | 442.6    |
|                 |      |       |     |                 |                |           | 6596     |
|                 |      |       |     |                 |                |           | cellular |

organisms;Eukaryota;Opisthokonta;Metazoa;Eumetazoa;Bilateria;Protostomia;Spiralia;Lophotrochozoa;Mollusca;Bivalvia;Autobranchia;Heteroconchia;Euheterodonta;Imparidentia;Venerida;Veneroidea;Veneridae;Mercenaria;Mercenaria mercenaria

|                 |      |       |     |                 |                |           |          |
|-----------------|------|-------|-----|-----------------|----------------|-----------|----------|
| UdeM00000029425 | 6596 | 692.6 |     | UdeM00000029425 | XP_045207933.1 | 73.7      | 452      |
| 118             | 1    | 6     | 456 | 7               | 458            | 3.40E-196 | 692.6    |
|                 |      |       |     |                 |                |           | 6596     |
|                 |      |       |     |                 |                |           | cellular |

organisms;Eukaryota;Opisthokonta;Metazoa;Eumetazoa;Bilateria;Protostomia;Spiralia;Lophotrochozoa;Mollusca;Bivalvia;Autobranchia;Heteroconchia;Euheterodonta;Imparidentia;Venerida;Veneroidea;Veneridae;Mercenaria;Mercenaria mercenaria

|                 |      |       |     |                 |                |           |          |
|-----------------|------|-------|-----|-----------------|----------------|-----------|----------|
| UdeM00000029426 | 6596 | 405.2 |     | UdeM00000029426 | XP_045209008.1 | 57.2      | 341      |
| 134             | 4    | 3     | 340 | 6               | 337            | 1.10E-109 | 405.2    |
|                 |      |       |     |                 |                |           | 6596     |
|                 |      |       |     |                 |                |           | cellular |

organisms;Eukaryota;Opisthokonta;Metazoa;Eumetazoa;Bilateria;Protostomia;Spiralia;Lophotrochozoa;Mollusca;Bivalvia;Autobranchia;Heteroconchia;Euheterodonta;Imparidentia;Venerida;Veneroidea;Veneridae;Mercenaria;Mercenaria mercenaria

terodonta;Imparidentia;Venerida;Veneroidea;Veneridae;Mercenaria;Mercenaria mercenaria  
 UdeM00000029427 6596 190.7 UdeM00000029427 XP\_045209573.1 38.8 242  
 146 2 53 294 3 242 2.90E-45 190.7 6596 cellular  
 organisms;Eukaryota;Opisthokonta;Metazoa;Eumetazoa;Bilateria;Protostomia;Spiralia;Lophotrochozoa;Mollusca;Bivalvia;Autobranhia;Heteroconchia;Euheterodonta;Imparidentia;Venerida;Veneroidea;Veneridae;Mercenaria;Mercenaria mercenaria  
 UdeM00000029428 6596 196.1 UdeM00000029428 XP\_045209573.1 40.1 242  
 143 2 53 294 3 242 6.80E-47 196.1 6596 cellular  
 organisms;Eukaryota;Opisthokonta;Metazoa;Eumetazoa;Bilateria;Protostomia;Spiralia;Lophotrochozoa;Mollusca;Bivalvia;Autobranhia;Heteroconchia;Euheterodonta;Imparidentia;Venerida;Veneroidea;Veneridae;Mercenaria;Mercenaria mercenaria  
 UdeM00000029429 6596 189.1 UdeM00000029429 XP\_045183440.1 57.1 168  
 68 2 3 170 217 380 7.30E-45 189.1 6596 cellular  
 organisms;Eukaryota;Opisthokonta;Metazoa;Eumetazoa;Bilateria;Protostomia;Spiralia;Lophotrochozoa;Mollusca;Bivalvia;Autobranhia;Heteroconchia;Euheterodonta;Imparidentia;Venerida;Veneroidea;Veneridae;Mercenaria;Mercenaria mercenaria  
 UdeM00000029431 6573 65.5 UdeM00000029431 XP\_021364002.1 25.3 253  
 172 4 49 296 78 318 1.40E-07 65.5 6573 cellular  
 organisms;Eukaryota;Opisthokonta;Metazoa;Eumetazoa;Bilateria;Protostomia;Spiralia;Lophotrochozoa;Mollusca;Bivalvia;Autobranhia;Pteriomorpha;Pectinida;Pectinoidea;Pectinidae;Mizuhopecten;Mizuhopecten yessoensis  
 UdeM00000029433 1735272 68.2 UdeM00000029433 XP\_041371665.1 59.3  
 59 23 1 66 124 92 149 8.60E-09 68.2 1735272  
 cellular  
 organisms;Eukaryota;Opisthokonta;Metazoa;Eumetazoa;Bilateria;Protostomia;Spiralia;Lophotrochozoa;Mollusca;Gastropoda;Neomphalina;Neomphaloidea;Peltospiridae;Gigantopelta;Gigantopelta aegis  
 UdeM00000029432 29159 346.7 UdeM00000029432 XP\_011419097.2 74.9 235  
 58 1 62 296 85 318 3.00E-92 346.7 29159 cellular  
 organisms;Eukaryota;Opisthokonta;Metazoa;Eumetazoa;Bilateria;Protostomia;Spiralia;Lophotrochozoa;Mollusca;Bivalvia;Autobranhia;Pteriomorpha;Ostreida;Ostreoidea;Ostreidae;Crassostrea;Crassostrea gigas  
 UdeM00000029434 6565 228 UdeM00000029434 XP\_022291329.1 82.9 140  
 24 0 1 140 189 328 7.40E-57 228 6565 cellular  
 organisms;Eukaryota;Opisthokonta;Metazoa;Eumetazoa;Bilateria;Protostomia;Spiralia;Lophotrochozoa;Mollusca;Bivalvia;Autobranhia;Pteriomorpha;Ostreida;Ostreoidea;Ostreidae;Crassostrea;Crassostrea virginica  
 UdeM00000029436 1735272 69.3 UdeM00000029436 XP\_041371665.1 59.3  
 59 23 1 61 119 92 149 3.70E-09 69.3 1735272  
 cellular  
 organisms;Eukaryota;Opisthokonta;Metazoa;Eumetazoa;Bilateria;Protostomia;Spiralia;Lophotrochozoa;Mollusca;Gastropoda;Neomphalina;Neomphaloidea;Peltospiridae;Gigantopelta;Gigantopelta aegis  
 UdeM00000029437 114398 436.4 UdeM00000029437 XP\_042903861.1 39.6  
 609 357 6 1 605 1 602 5.90E-119 436.4 114398  
 cellular  
 organisms;Eukaryota;Opisthokonta;Metazoa;Eumetazoa;Bilateria;Protostomia;Ecdysozoa;Panarthropoda;Arthropoda;Chelicerata;Arachnida;Araneae;Araneomorphae;Entelegynae;Orbiculariae;Araneoidea;Theridiidae;Parasteatoda;Parasteatoda tepidariorum



UdeM00000029438 29159 187.2 UdeM00000029438 XP\_011419097.2 71.5 130  
 37 0 28 157 189 318 1.60E-44 187.2 29159 cellular  
 organisms;Eukaryota;Opisthokonta;Metazoa;Eumetazoa;Bilateria;Protostomia;  
 Spiralia;Lophotrochozoa;Mollusca;Bivalvia;Autobranhia;Pteriormorphia;Ostr  
 eida;Ostreioidea;Ostreidae;Crassostrea;Crassostrea gigas  
 UdeM00000029439 29159 170.2 UdeM00000029439 XP\_011419974.2 65 137  
 42 2 125 255 79 215 3.30E-39 170.2 29159 cellular  
 organisms;Eukaryota;Opisthokonta;Metazoa;Eumetazoa;Bilateria;Protostomia;  
 Spiralia;Lophotrochozoa;Mollusca;Bivalvia;Autobranhia;Pteriormorphia;Ostr  
 eida;Ostreioidea;Ostreidae;Crassostrea;Crassostrea gigas  
 UdeM00000029452 29159 730.3 UdeM00000029452 XP\_011424767.2 60.2 640  
 237 4 1 630 155 786 2.10E-207 730.3 29159 cellular  
 organisms;Eukaryota;Opisthokonta;Metazoa;Eumetazoa;Bilateria;Protostomia;  
 Spiralia;Lophotrochozoa;Mollusca;Bivalvia;Autobranhia;Pteriormorphia;Ostr  
 eida;Ostreioidea;Ostreidae;Crassostrea;Crassostrea gigas  
 UdeM00000029453 6596 374 UdeM00000029453 XP\_045170511.1 29.5 867  
 507 27 225 1021 95 927 7.10E-100 374 6596 cellular  
 organisms;Eukaryota;Opisthokonta;Metazoa;Eumetazoa;Bilateria;Protostomia;  
 Spiralia;Lophotrochozoa;Mollusca;Bivalvia;Autobranhia;Heteroconchia;Euhe  
 terodonta;Imparidentia;Venerida;Veneroidea;Veneridae;Mercenaria;Mercenari  
 a mercenaria  
 UdeM00000029454 6596 375.6 UdeM00000029454 XP\_045170511.1 29.7 872  
 507 28 1507 2308 95 930 5.00E-100 375.6 6596 cellular  
 organisms;Eukaryota;Opisthokonta;Metazoa;Eumetazoa;Bilateria;Protostomia;  
 Spiralia;Lophotrochozoa;Mollusca;Bivalvia;Autobranhia;Heteroconchia;Euhe  
 terodonta;Imparidentia;Venerida;Veneroidea;Veneridae;Mercenaria;Mercenari  
 a mercenaria  
 UdeM00000029455 6596 183.3 UdeM00000029455 XP\_045182925.1 30.8 396  
 250 13 9 393 45 427 6.20E-43 183.3 6596 cellular  
 organisms;Eukaryota;Opisthokonta;Metazoa;Eumetazoa;Bilateria;Protostomia;  
 Spiralia;Lophotrochozoa;Mollusca;Bivalvia;Autobranhia;Heteroconchia;Euhe  
 terodonta;Imparidentia;Venerida;Veneroidea;Veneridae;Mercenaria;Mercenari  
 a mercenaria  
 UdeM00000029456 6565 436.4 UdeM00000029456 XP\_022340968.1 67.8 307  
 99 0 59 365 39 345 3.50E-119 436.4 6565 cellular  
 organisms;Eukaryota;Opisthokonta;Metazoa;Eumetazoa;Bilateria;Protostomia;  
 Spiralia;Lophotrochozoa;Mollusca;Bivalvia;Autobranhia;Pteriormorphia;Ostr  
 eida;Ostreioidea;Ostreidae;Crassostrea;Crassostrea virginica  
 UdeM00000029458 6596 654.1 UdeM00000029458 XP\_045210496.1 72.9 428  
 116 0 3 430 4 431 1.30E-184 654.1 6596 cellular  
 organisms;Eukaryota;Opisthokonta;Metazoa;Eumetazoa;Bilateria;Protostomia;  
 Spiralia;Lophotrochozoa;Mollusca;Bivalvia;Autobranhia;Heteroconchia;Euhe  
 terodonta;Imparidentia;Venerida;Veneroidea;Veneridae;Mercenaria;Mercenari  
 a mercenaria  
 UdeM00000029459 6596 121.3 UdeM00000029459 XP\_045210496.1 68.1 91  
 29 0 11 101 326 416 7.50E-25 121.3 6596 cellular  
 organisms;Eukaryota;Opisthokonta;Metazoa;Eumetazoa;Bilateria;Protostomia;  
 Spiralia;Lophotrochozoa;Mollusca;Bivalvia;Autobranhia;Heteroconchia;Euhe  
 terodonta;Imparidentia;Venerida;Veneroidea;Veneridae;Mercenaria;Mercenari  
 a mercenaria  
 UdeM00000029460 1735272 228 UdeM00000029460 XP\_041372070.1 60.2  
 181 72 0 37 217 34 214 1.20E-56 228 1735272  
 cellular  
 organisms;Eukaryota;Opisthokonta;Metazoa;Eumetazoa;Bilateria;Protostomia;

Spiralia; Lophotrochozoa; Mollusca; Gastropoda; Neomphalina; Neomphaloidea; Peltospiridae; Gigantopelta; Gigantopelta aegis

UdeM00000029461 6596 503.8 UdeM00000029461 XP\_045208671.1 47.1 614  
280 11 211 816 258 834 4.00E-139 503.8 6596 cellular  
organisms; Eukaryota; Opisthokonta; Metazoa; Eumetazoa; Bilateria; Protostomia; Spiralia; Lophotrochozoa; Mollusca; Bivalvia; Autobranchia; Heteroconchia; Euheterodonta; Imparidentia; Venerida; Veneroidea; Veneridae; Mercenaria; Mercenaria mercenaria

UdeM00000043533 7741 134.8 UdeM00000043533 XP\_019646227.1 51.5 130  
59 2 24 153 68 193 9.30E-29 134.8 7741 cellular  
organisms; Eukaryota; Opisthokonta; Metazoa; Eumetazoa; Bilateria; Deuterostomia; Chordata; Cephalochordata; Leptocardii; Amphioxiformes; Branchiostomidae; Branchiostoma; Branchiostoma belcheri

UdeM00000043534 6579 265.8 UdeM00000043534 XP\_033756999.1 44.9 283  
150 3 1 282 1 278 6.40E-68 265.8 6579 cellular  
organisms; Eukaryota; Opisthokonta; Metazoa; Eumetazoa; Bilateria; Protostomia; Spiralia; Lophotrochozoa; Mollusca; Bivalvia; Autobranchia; Pteriomorphia; Pectinida; Pectinoidea; Pectinidae; Pecten; Pecten maximus

UdeM00000043535 6565 105.9 UdeM00000043535 XP\_022298867.1 32.3 254  
143 11 17 247 31 278 1.20E-19 105.9 6565 cellular  
organisms; Eukaryota; Opisthokonta; Metazoa; Eumetazoa; Bilateria; Protostomia; Spiralia; Lophotrochozoa; Mollusca; Bivalvia; Autobranchia; Pteriomorphia; Ostreida; Ostreoidea; Ostreidae; Crassostrea; Crassostrea virginica

UdeM00000043536 6596 477.2 UdeM00000043536 XP\_045161521.1 35.9 896  
505 26 1 860 1 863 4.90E-131 477.2 6596 cellular  
organisms; Eukaryota; Opisthokonta; Metazoa; Eumetazoa; Bilateria; Protostomia; Spiralia; Lophotrochozoa; Mollusca; Bivalvia; Autobranchia; Heteroconchia; Euheterodonta; Imparidentia; Venerida; Veneroidea; Veneridae; Mercenaria; Mercenaria mercenaria

UdeM00000043288 42526 70.9 UdeM00000043288 XP\_036431265.1 47.8 67  
34 1 13 79 87 152 1.10E-09 70.9 42526 cellular  
organisms; Eukaryota; Opisthokonta; Metazoa; Eumetazoa; Bilateria; Deuterostomia; Chordata; Craniata; Vertebrata; Gnathostomata; Teleostomi; Euteleostomi; Actinopterygii; Actinopteri; Neopterygii; Teleostei; Osteoglossocephalai; Clupeocephala; Otomorpha; Ostariophysi; Otophysi; Characiphysae; Characiformes; Characidae; Serrasalminae; Colossoma; Colossoma macropomum

UdeM00000043293 42526 70.9 UdeM00000043293 XP\_036431265.1 47.8 67  
34 1 13 79 87 152 1.10E-09 70.9 42526 cellular  
organisms; Eukaryota; Opisthokonta; Metazoa; Eumetazoa; Bilateria; Deuterostomia; Chordata; Craniata; Vertebrata; Gnathostomata; Teleostomi; Euteleostomi; Actinopterygii; Actinopteri; Neopterygii; Teleostei; Osteoglossocephalai; Clupeocephala; Otomorpha; Ostariophysi; Otophysi; Characiphysae; Characiformes; Characidae; Serrasalminae; Colossoma; Colossoma macropomum

UdeM00000044112 1735272 233 UdeM00000044112 XP\_041347279.1 33.9  
436 227 10 1 382 1 429 6.30E-58 233 1735272  
cellular  
organisms; Eukaryota; Opisthokonta; Metazoa; Eumetazoa; Bilateria; Protostomia; Spiralia; Lophotrochozoa; Mollusca; Gastropoda; Neomphalina; Neomphaloidea; Peltospiridae; Gigantopelta; Gigantopelta aegis

UdeM00000044113 6596 234.6 UdeM00000044113 XP\_045181000.1 45.1 375  
85 10 2 274 868 1223 2.30E-58 234.6 6596 cellular  
organisms; Eukaryota; Opisthokonta; Metazoa; Eumetazoa; Bilateria; Protostomia; Spiralia; Lophotrochozoa; Mollusca; Bivalvia; Autobranchia; Heteroconchia; Euheterodonta

terodonta;Imparidentia;Venerida;Veneroidea;Veneridae;Mercenaria;Mercenaria mercenaria  
 UdeM00000044114 6596 461.1 UdeM00000044114 XP\_045181000.1 78.6 309  
 65 1 1 309 1309 1616 1.10E-126 461.1 6596 cellular  
 organisms;Eukaryota;Opisthokonta;Metazoa;Eumetazoa;Bilateria;Protostomia;  
 Spiralia;Lophotrochozoa;Mollusca;Bivalvia;Autobranhia;Heteroconchia;Euhe  
 terodonta;Imparidentia;Venerida;Veneroidea;Veneridae;Mercenaria;Mercenari  
 a mercenaria  
 UdeM00000044115 6573 463.8 UdeM00000044115 XP\_021342792.1 59.2 387  
 154 3 1 383 80 466 2.20E-127 463.8 6573 cellular  
 organisms;Eukaryota;Opisthokonta;Metazoa;Eumetazoa;Bilateria;Protostomia;  
 Spiralia;Lophotrochozoa;Mollusca;Bivalvia;Autobranhia;Pteriormorphia;Pect  
 inida;Pectinoidea;Pectinidae;Mizuhopecten;Mizuhopecten yessoensis  
 UdeM00000044116 6565 275.4 UdeM00000044116 XP\_022287574.1 74.4 176  
 39 1 1 170 27 202 4.90E-71 275.4 6565 cellular  
 organisms;Eukaryota;Opisthokonta;Metazoa;Eumetazoa;Bilateria;Protostomia;  
 Spiralia;Lophotrochozoa;Mollusca;Bivalvia;Autobranhia;Pteriormorphia;Ostr  
 eida;Ostreoidea;Ostreidae;Crassostrea;Crassostrea virginica  
 UdeM00000044117 218467 130.2 UdeM00000044117 XP\_023212120.1 42  
 150 87 0 100 249 4 153 3.90E-27 130.2 218467  
 cellular  
 organisms;Eukaryota;Opisthokonta;Metazoa;Eumetazoa;Bilateria;Protostomia;  
 Ecdysozoa;Panarthropoda;Arthropoda;Chelicerata;Arachnida;Scorpiones;Buti  
 da;Buthoidea;Buthidae;Centruroides;Centruroides sculpturatus  
 UdeM00000043486 29159 282 UdeM00000043486 XP\_034317111.1 41 402  
 179 5 2 348 171 569 1.10E-72 282 29159 cellular  
 organisms;Eukaryota;Opisthokonta;Metazoa;Eumetazoa;Bilateria;Protostomia;  
 Spiralia;Lophotrochozoa;Mollusca;Bivalvia;Autobranhia;Pteriormorphia;Ostr  
 eida;Ostreoidea;Ostreidae;Crassostrea;Crassostrea gigas  
 UdeM00000022704 6596 422.2 UdeM00000022704 XP\_045181000.1 71.2 316  
 63 2 24 312 1302 1616 6.00E-115 422.2 6596 cellular  
 organisms;Eukaryota;Opisthokonta;Metazoa;Eumetazoa;Bilateria;Protostomia;  
 Spiralia;Lophotrochozoa;Mollusca;Bivalvia;Autobranhia;Heteroconchia;Euhe  
 terodonta;Imparidentia;Venerida;Veneroidea;Veneridae;Mercenaria;Mercenari  
 a mercenaria  
 UdeM00000022708 6596 172.6 UdeM00000022708 XP\_045177112.1 35 234  
 151 1 9 241 160 393 7.40E-40 172.6 6596 cellular  
 organisms;Eukaryota;Opisthokonta;Metazoa;Eumetazoa;Bilateria;Protostomia;  
 Spiralia;Lophotrochozoa;Mollusca;Bivalvia;Autobranhia;Heteroconchia;Euhe  
 terodonta;Imparidentia;Venerida;Veneroidea;Veneridae;Mercenaria;Mercenari  
 a mercenaria  
 UdeM00000022709 6573 194.5 UdeM00000022709 XP\_021380250.1 26.4 530  
 335 14 3 492 434 948 3.20E-46 194.5 6573 cellular  
 organisms;Eukaryota;Opisthokonta;Metazoa;Eumetazoa;Bilateria;Protostomia;  
 Spiralia;Lophotrochozoa;Mollusca;Bivalvia;Autobranhia;Pteriormorphia;Pect  
 inida;Pectinoidea;Pectinidae;Mizuhopecten;Mizuhopecten yessoensis  
 UdeM00000022710 6596 461.8 UdeM00000022710 XP\_045206065.1 31.6 977  
 576 30 87 1021 60 986 2.20E-126 461.8 6596 cellular  
 organisms;Eukaryota;Opisthokonta;Metazoa;Eumetazoa;Bilateria;Protostomia;  
 Spiralia;Lophotrochozoa;Mollusca;Bivalvia;Autobranhia;Heteroconchia;Euhe  
 terodonta;Imparidentia;Venerida;Veneroidea;Veneridae;Mercenaria;Mercenari  
 a mercenaria  
 UdeM00000022711 6596 293.9 UdeM00000022711 XP\_045206084.1 29 663  
 424 16 10 655 157 789 5.40E-76 293.9 6596 cellular

organisms;Eukaryota;Opisthokonta;Metazoa;Eumetazoa;Bilateria;Protostomia;Spiralia;Lophotrochozoa;Mollusca;Bivalvia;Autobranhia;Heteroconchia;Euherodonta;Imparidentia;Venerida;Veneroidea;Veneridae;Mercenaria;Mercenaria mercenaria

UdeM00000022712 6573 127.1 UdeM00000022712 XP\_021361221.1 53.6 97  
43 1 2 98 94 188 1.30E-26 127.1 6573 cellular

organisms;Eukaryota;Opisthokonta;Metazoa;Eumetazoa;Bilateria;Protostomia;Spiralia;Lophotrochozoa;Mollusca;Bivalvia;Autobranhia;Pteriormorphia;Pectinida;Pectinoidea;Pectinidae;Mizuhopecten;Mizuhopecten yessoensis

UdeM00000022713 6596 65.1 UdeM00000022713 XP\_045206055.1 38 100  
59 2 8 106 80 177 6.50E-08 65.1 6596 cellular

organisms;Eukaryota;Opisthokonta;Metazoa;Eumetazoa;Bilateria;Protostomia;Spiralia;Lophotrochozoa;Mollusca;Bivalvia;Autobranhia;Heteroconchia;Euherodonta;Imparidentia;Venerida;Veneroidea;Veneridae;Mercenaria;Mercenaria mercenaria

UdeM00000022716 6596 355.1 UdeM00000022716 XP\_045156247.1 40.4 495  
224 7 61 489 266 755 1.40E-94 355.1 6596 cellular

organisms;Eukaryota;Opisthokonta;Metazoa;Eumetazoa;Bilateria;Protostomia;Spiralia;Lophotrochozoa;Mollusca;Bivalvia;Autobranhia;Heteroconchia;Euherodonta;Imparidentia;Venerida;Veneroidea;Veneridae;Mercenaria;Mercenaria mercenaria

UdeM00000022718 6565 144.4 UdeM00000022718 XP\_022312385.1 67.3 101  
33 0 1 101 191 291 7.70E-32 144.4 6565 cellular

organisms;Eukaryota;Opisthokonta;Metazoa;Eumetazoa;Bilateria;Protostomia;Spiralia;Lophotrochozoa;Mollusca;Bivalvia;Autobranhia;Pteriormorphia;Ostreida;Ostreoidea;Ostreidae;Crassostrea;Crassostrea virginica

UdeM00000022722 6596 318.9 UdeM00000022722 XP\_045206055.1 32.1 617  
390 12 29 629 79 682 1.60E-83 318.9 6596 cellular

organisms;Eukaryota;Opisthokonta;Metazoa;Eumetazoa;Bilateria;Protostomia;Spiralia;Lophotrochozoa;Mollusca;Bivalvia;Autobranhia;Heteroconchia;Euherodonta;Imparidentia;Venerida;Veneroidea;Veneridae;Mercenaria;Mercenaria mercenaria

UdeM00000022723 6596 437.6 UdeM00000022723 XP\_045206065.1 30.7 965  
607 26 56 986 52 988 4.90E-119 437.6 6596 cellular

organisms;Eukaryota;Opisthokonta;Metazoa;Eumetazoa;Bilateria;Protostomia;Spiralia;Lophotrochozoa;Mollusca;Bivalvia;Autobranhia;Heteroconchia;Euherodonta;Imparidentia;Venerida;Veneroidea;Veneridae;Mercenaria;Mercenaria mercenaria

UdeM00000022724 161013 70.5 UdeM00000022724 XP\_034252136.1 28.3  
127 89 1 1 125 486 612 2.20E-09 70.5 161013

cellular

organisms;Eukaryota;Opisthokonta;Metazoa;Eumetazoa;Bilateria;Protostomia;Ecdysozoa;Panarthropoda;Arthropoda;Mandibulata;Pancrustacea;Hexapoda;Insecta;Dicondylia;Pterygota;Neoptera;Paraneoptera;Thysanoptera;Terebrantia;Thripidae;Thripidae;Thripinae;Thrips;Thrips palmi

UdeM00000022726 6596 350.9 UdeM00000022726 XP\_045206065.1 27.8 970  
524 26 7 833 49 985 4.60E-93 350.9 6596 cellular

organisms;Eukaryota;Opisthokonta;Metazoa;Eumetazoa;Bilateria;Protostomia;Spiralia;Lophotrochozoa;Mollusca;Bivalvia;Autobranhia;Heteroconchia;Euherodonta;Imparidentia;Venerida;Veneroidea;Veneridae;Mercenaria;Mercenaria mercenaria

UdeM00000022727 6596 172.6 UdeM00000022727 XP\_045206084.1 29.9 354  
220 6 6 333 183 534 8.70E-40 172.6 6596 cellular

organisms;Eukaryota;Opisthokonta;Metazoa;Eumetazoa;Bilateria;Protostomia;

Spiralia;Lophotrochozoa;Mollusca;Bivalvia;Autobranchia;Heteroconchia;Euherodonta;Imparidentia;Venerida;Veneroidea;Veneridae;Mercenaria;Mercenaria mercenaria

UdeM00000022728 6596 265.4 UdeM00000022728 XP\_045177112.1 30.1 535  
312 14 109 594 81 602 2.00E-67 265.4 6596 cellular

organisms;Eukaryota;Opisthokonta;Metazoa;Eumetazoa;Bilateria;Protostomia;Spiralia;Lophotrochozoa;Mollusca;Bivalvia;Autobranchia;Heteroconchia;Euherodonta;Imparidentia;Venerida;Veneroidea;Veneridae;Mercenaria;Mercenaria mercenaria

UdeM00000022729 6596 265.4 UdeM00000022729 XP\_045177112.1 30.1 535  
312 14 39 524 81 602 1.80E-67 265.4 6596 cellular

organisms;Eukaryota;Opisthokonta;Metazoa;Eumetazoa;Bilateria;Protostomia;Spiralia;Lophotrochozoa;Mollusca;Bivalvia;Autobranchia;Heteroconchia;Euherodonta;Imparidentia;Venerida;Veneroidea;Veneridae;Mercenaria;Mercenaria mercenaria

UdeM00000022731 8175 463.8 UdeM00000022731 XP\_030282862.1 38 710  
403 10 9 706 3 687 6.00E-127 463.8 8175 cellular

organisms;Eukaryota;Opisthokonta;Metazoa;Eumetazoa;Bilateria;Deuterostomia;Chordata;Craniata;Vertebrata;Gnathostomata;Teleostomi;Euteleostomi;Actinopterygii;Actinopteri;Neopterygii;Teleostei;Osteoglossocephalai;Clupeocephala;Euteleostei;Neoteleostei;Eurypterygia;Ctenosquamata;Acanthomorphata;Euacanthomorphacea;Percomorphaceae;Eupercaria;Spariformes;Sparidae;Sparus;Sparus aurata

UdeM00000022732 7741 276.6 UdeM00000022732 XP\_019622111.1 50.5 281  
134 4 5 283 1 278 3.60E-71 276.6 7741 cellular

organisms;Eukaryota;Opisthokonta;Metazoa;Eumetazoa;Bilateria;Deuterostomia;Chordata;Cephalochordata;Leptocardii;Amphioxiformes;Branchiostomidae;Branchiostoma;Branchiostoma belcheri

UdeM00000022733 29159 443.4 UdeM00000022733 XP\_011430016.2 30.4 933  
594 22 107 1021 75 970 8.20E-121 443.4 29159 cellular

organisms;Eukaryota;Opisthokonta;Metazoa;Eumetazoa;Bilateria;Protostomia;Spiralia;Lophotrochozoa;Mollusca;Bivalvia;Autobranchia;Pteriormorphia;Ostreida;Ostreoidea;Ostreidae;Crassostrea;Crassostrea gigas

UdeM00000022734 6596 127.9 UdeM00000022734 XP\_045177112.1 30.8 237  
128 4 9 212 160 393 1.90E-26 127.9 6596 cellular

organisms;Eukaryota;Opisthokonta;Metazoa;Eumetazoa;Bilateria;Protostomia;Spiralia;Lophotrochozoa;Mollusca;Bivalvia;Autobranchia;Heteroconchia;Euherodonta;Imparidentia;Venerida;Veneroidea;Veneridae;Mercenaria;Mercenaria mercenaria

UdeM00000022736 46514 67 UdeM00000022736 XP\_038075930.1 30.8 143  
69 3 31 144 20 161 2.40E-08 67 46514 cellular

organisms;Eukaryota;Opisthokonta;Metazoa;Eumetazoa;Bilateria;Deuterostomia;Echinodermata;Eleutherozoa;Asterozoa;Asteroidea;Valvatacea;Valvatida;Asterinidae;Patiria;Patiria miniata

UdeM00000022737 1735272 240 UdeM00000022737 XP\_041372570.1 62.5  
176 64 2 4 177 41 216 2.40E-60 240 1735272  
cellular

organisms;Eukaryota;Opisthokonta;Metazoa;Eumetazoa;Bilateria;Protostomia;Spiralia;Lophotrochozoa;Mollusca;Gastropoda;Neomphalina;Neomphaloidea;Peltospiridae;Gigantopelta;Gigantopelta aegis

UdeM00000022738 1735272 419.1 UdeM00000022738 XP\_041372570.1 56.3  
332 145 0 2 333 56 387 5.30E-114 419.1 1735272

cellular  
organisms;Eukaryota;Opisthokonta;Metazoa;Eumetazoa;Bilateria;Protostomia;

Spiralia; Lophotrochozoa; Mollusca; Gastropoda; Neomphalina; Neomphaloidea; Pelto-  
spiridae; Gigantopelta; Gigantopelta aegis

UdeM00000022739 150288 220.3 UdeM00000022739 XP\_020788097.1 59.9  
152 61 0 45 196 389 540 2.20E-54 220.3 150288  
cellular

organisms; Eukaryota; Opisthokonta; Metazoa; Eumetazoa; Bilateria; Deuterostomi-  
a; Chordata; Craniata; Vertebrata; Gnathostomata; Teleostomi; Euteleostomi; Acti-  
nopterygii; Actinopteri; Neopterygii; Teleostei; Osteoglossocephalai; Clupeoce-  
phala; Euteleostomorpha; Neoteleostei; Eurypterygia; Ctenosquamata; Acanthomo-  
rphata; Euacanthomorpha; Percomorphaceae; Gobiaria; Gobiiformes; Gobioidi-  
e; Gobiidae; Oxudercinae; Boleophthalmus; Boleophthalmus pectinirostris

UdeM00000022740 400727 427.9 UdeM00000022740 XP\_025108466.1 45.9  
499 255 5 51 549 59 542 1.90E-116 427.9 400727  
cellular

organisms; Eukaryota; Opisthokonta; Metazoa; Eumetazoa; Bilateria; Protostomia;  
Spiralia; Lophotrochozoa; Mollusca; Gastropoda; Caenogastropoda; Architaeniogl-  
ossa; Ampullarioidea; Ampullariidae; Pomacea; Pomacea canaliculata

UdeM00000022741 6596 98.2 UdeM00000022741 XP\_045211033.1 53.1 81  
35 1 82 159 1278 1358 1.00E-17 98.2 6596 cellular

organisms; Eukaryota; Opisthokonta; Metazoa; Eumetazoa; Bilateria; Protostomia;  
Spiralia; Lophotrochozoa; Mollusca; Bivalvia; Autobranchia; Heteroconchia; Eue-  
terodonta; Imparidentia; Venerida; Veneroidea; Veneridae; Mercenaria; Mercenari-  
a mercenaria

UdeM00000022742 6596 104 UdeM00000022742 XP\_045211033.1 54.3 81  
34 1 65 142 1278 1358 1.70E-19 104 6596 cellular

organisms; Eukaryota; Opisthokonta; Metazoa; Eumetazoa; Bilateria; Protostomia;  
Spiralia; Lophotrochozoa; Mollusca; Bivalvia; Autobranchia; Heteroconchia; Eue-  
terodonta; Imparidentia; Venerida; Veneroidea; Veneridae; Mercenaria; Mercenari-  
a mercenaria

UdeM00000022743 6596 310.8 UdeM00000022743 XP\_045163858.1 41 363  
190 4 68 425 48 391 2.70E-81 310.8 6596 cellular

organisms; Eukaryota; Opisthokonta; Metazoa; Eumetazoa; Bilateria; Protostomia;  
Spiralia; Lophotrochozoa; Mollusca; Bivalvia; Autobranchia; Heteroconchia; Eue-  
terodonta; Imparidentia; Venerida; Veneroidea; Veneridae; Mercenaria; Mercenari-  
a mercenaria

UdeM00000022744 6596 302.8 UdeM00000022744 XP\_045182150.1 35.9 518  
306 7 17 528 18 515 8.80E-79 302.8 6596 cellular

organisms; Eukaryota; Opisthokonta; Metazoa; Eumetazoa; Bilateria; Protostomia;  
Spiralia; Lophotrochozoa; Mollusca; Bivalvia; Autobranchia; Heteroconchia; Eue-  
terodonta; Imparidentia; Venerida; Veneroidea; Veneridae; Mercenaria; Mercenari-  
a mercenaria

UdeM00000022745 1437191 130.2 UdeM00000022745 XP\_029054816.1 45  
129 70 1 1 128 335 463 1.90E-27 130.2 1437191  
cellular

organisms; Eukaryota; Opisthokonta; Metazoa; Eumetazoa; Bilateria; Protostomia;  
Ecdysozoa; Panarthropoda; Arthropoda; Mandibulata; Pancrustacea; Hexapoda; Inse-  
cta; Dicondylia; Pterygota; Neoptera; Endopterygota; Hymenoptera; Apocrita; Acul-  
eata; Apoidea; Megachilidae; Megachilinae; Osmiini; Osmia; Osmia bicornis; Osmia  
bicornis bicornis

UdeM00000022746 45264 459.1 UdeM00000022746 XP\_044165535.1 49.3 444  
219 2 240 679 128 569 1.10E-125 459.1 45264 cellular

organisms; Eukaryota; Opisthokonta; Metazoa; Eumetazoa; Cnidaria; Anthozoa; Hexa-  
corallia; Scleractinia; Astrocoeniina; Acroporidae; Acropora; Acropora  
millepora

UdeM00000022747 6596 382.1 UdeM00000022747 XP\_045181099.1 55.1 323  
 141 3 27 347 15 335 7.50E-103 382.1 6596 cellular  
 organisms;Eukaryota;Opisthokonta;Metazoa;Eumetazoa;Bilateria;Protostomia;  
 Spiralia;Lophotrochozoa;Mollusca;Bivalvia;Autobranhia;Heteroconchia;Euhe  
 terodonta;Imparidentia;Venerida;Veneroidea;Veneridae;Mercenaria;Mercenari  
 a mercenaria

UdeM00000022749 29159 580.5 UdeM00000022749 XP\_034303860.1 59.4 443  
 178 2 12 454 308 748 1.90E-162 580.5 29159 cellular  
 organisms;Eukaryota;Opisthokonta;Metazoa;Eumetazoa;Bilateria;Protostomia;  
 Spiralia;Lophotrochozoa;Mollusca;Bivalvia;Autobranhia;Pteriormorphia;Ostr  
 eida;Ostreoidea;Ostreidae;Crassostrea;Crassostrea gigas

UdeM00000022750 6596 277.7 UdeM00000022750 XP\_045182180.1 50.4 252  
 124 1 49 299 86 337 1.80E-71 277.7 6596 cellular  
 organisms;Eukaryota;Opisthokonta;Metazoa;Eumetazoa;Bilateria;Protostomia;  
 Spiralia;Lophotrochozoa;Mollusca;Bivalvia;Autobranhia;Heteroconchia;Euhe  
 terodonta;Imparidentia;Venerida;Veneroidea;Veneridae;Mercenaria;Mercenari  
 a mercenaria

UdeM00000022751 6596 267.7 UdeM00000022751 XP\_045181225.1 51.7 236  
 113 1 5 239 118 353 1.50E-68 267.7 6596 cellular  
 organisms;Eukaryota;Opisthokonta;Metazoa;Eumetazoa;Bilateria;Protostomia;  
 Spiralia;Lophotrochozoa;Mollusca;Bivalvia;Autobranhia;Heteroconchia;Euhe  
 terodonta;Imparidentia;Venerida;Veneroidea;Veneridae;Mercenaria;Mercenari  
 a mercenaria

UdeM00000022752 6596 548.5 UdeM00000022752 XP\_045180240.1 59.5 407  
 162 2 3 407 63 468 7.50E-153 548.5 6596 cellular  
 organisms;Eukaryota;Opisthokonta;Metazoa;Eumetazoa;Bilateria;Protostomia;  
 Spiralia;Lophotrochozoa;Mollusca;Bivalvia;Autobranhia;Heteroconchia;Euhe  
 terodonta;Imparidentia;Venerida;Veneroidea;Veneridae;Mercenaria;Mercenari  
 a mercenaria

UdeM00000022753 6573 142.1 UdeM00000022753 XP\_021354401.1 33.5 397  
 182 15 451 780 498 879 3.20E-30 142.1 6573 cellular  
 organisms;Eukaryota;Opisthokonta;Metazoa;Eumetazoa;Bilateria;Protostomia;  
 Spiralia;Lophotrochozoa;Mollusca;Bivalvia;Autobranhia;Pteriormorphia;Pect  
 inida;Pectinoidea;Pectinidae;Mizuhopecten;Mizuhopecten yessoensis

UdeM00000022754 6573 231.5 UdeM00000022754 XP\_021374944.1 63.3 210  
 55 3 19 227 13 201 1.10E-57 231.5 6573 cellular  
 organisms;Eukaryota;Opisthokonta;Metazoa;Eumetazoa;Bilateria;Protostomia;  
 Spiralia;Lophotrochozoa;Mollusca;Bivalvia;Autobranhia;Pteriormorphia;Pect  
 inida;Pectinoidea;Pectinidae;Mizuhopecten;Mizuhopecten yessoensis

UdeM00000022755 6579 1048.9 UdeM00000022755 XP\_033726579.1 61.2  
 1018 270 26 53 1027 87 1022 4.20E-303 1048.9 6579  
 cellular  
 organisms;Eukaryota;Opisthokonta;Metazoa;Eumetazoa;Bilateria;Protostomia;  
 Spiralia;Lophotrochozoa;Mollusca;Bivalvia;Autobranhia;Pteriormorphia;Pect  
 inida;Pectinoidea;Pectinidae;Pecten;Pecten maximus

UdeM00000022756 6596 543.9 UdeM00000022756 XP\_045182090.1 63 441  
 160 2 7 445 4 443 2.10E-151 543.9 6596 cellular  
 organisms;Eukaryota;Opisthokonta;Metazoa;Eumetazoa;Bilateria;Protostomia;  
 Spiralia;Lophotrochozoa;Mollusca;Bivalvia;Autobranhia;Heteroconchia;Euhe  
 terodonta;Imparidentia;Venerida;Veneroidea;Veneridae;Mercenaria;Mercenari  
 a mercenaria

UdeM00000022757 6596 76.6 UdeM00000022757 XP\_045182089.1 47.6 84  
 41 2 1 81 376 459 2.30E-11 76.6 6596 cellular  
 organisms;Eukaryota;Opisthokonta;Metazoa;Eumetazoa;Bilateria;Protostomia;

Spiralia;Lophotrochozoa;Mollusca;Bivalvia;Autobranchia;Heteroconchia;Euherodonta;Imparidentia;Venerida;Veneroidea;Veneridae;Mercenaria;Mercenaria mercenaria

UdeM00000022758 6596 424.1 UdeM00000022758 XP\_045182090.1 62.6 345  
126 2 7 348 4 348 3.20E-115 424.1 6596 cellular

organisms;Eukaryota;Opisthokonta;Metazoa;Eumetazoa;Bilateria;Protostomia;Spiralia;Lophotrochozoa;Mollusca;Bivalvia;Autobranchia;Heteroconchia;Euherodonta;Imparidentia;Venerida;Veneroidea;Veneridae;Mercenaria;Mercenaria mercenaria

UdeM00000022759 29159 440.7 UdeM00000022759 XP\_011450727.1 51.7 482  
188 10 1 455 18 481 2.40E-120 440.7 29159 cellular

organisms;Eukaryota;Opisthokonta;Metazoa;Eumetazoa;Bilateria;Protostomia;Spiralia;Lophotrochozoa;Mollusca;Bivalvia;Autobranchia;Pteriormorphia;Ostreida;Ostreoidea;Ostreidae;Crassostrea;Crassostrea gigas

UdeM00000022760 6596 1064.3 UdeM00000022760 XP\_045181056.1 70.5  
775 226 1 1 775 1 772 7.40E-308 1064.3 6596  
cellular

organisms;Eukaryota;Opisthokonta;Metazoa;Eumetazoa;Bilateria;Protostomia;Spiralia;Lophotrochozoa;Mollusca;Bivalvia;Autobranchia;Heteroconchia;Euherodonta;Imparidentia;Venerida;Veneroidea;Veneridae;Mercenaria;Mercenaria mercenaria

UdeM00000022761 1735272 847.4 UdeM00000022761 XP\_041361484.1 67.1  
629 206 1 3 631 8 635 1.10E-242 847.4 1735272

cellular

organisms;Eukaryota;Opisthokonta;Metazoa;Eumetazoa;Bilateria;Protostomia;Spiralia;Lophotrochozoa;Mollusca;Gastropoda;Neomphalina;Neomphaloidea;Peltospiridae;Gigantopelta;Gigantopelta aegis

UdeM00000022762 6596 298.1 UdeM00000022762 XP\_045195774.1 39 385  
219 5 201 572 19 400 2.70E-77 298.1 6596 cellular

organisms;Eukaryota;Opisthokonta;Metazoa;Eumetazoa;Bilateria;Protostomia;Spiralia;Lophotrochozoa;Mollusca;Bivalvia;Autobranchia;Heteroconchia;Euherodonta;Imparidentia;Venerida;Veneroidea;Veneridae;Mercenaria;Mercenaria mercenaria

UdeM00000022763 6596 244.6 UdeM00000022763 XP\_045181141.1 94.3 123  
7 0 1 123 1 123 6.90E-62 244.6 6596 cellular

organisms;Eukaryota;Opisthokonta;Metazoa;Eumetazoa;Bilateria;Protostomia;Spiralia;Lophotrochozoa;Mollusca;Bivalvia;Autobranchia;Heteroconchia;Euherodonta;Imparidentia;Venerida;Veneroidea;Veneridae;Mercenaria;Mercenaria mercenaria

UdeM00000022764 29159 250 UdeM00000022764 XP\_011419687.2 36.2 378  
186 8 113 440 103 475 5.70E-63 250 29159 cellular

organisms;Eukaryota;Opisthokonta;Metazoa;Eumetazoa;Bilateria;Protostomia;Spiralia;Lophotrochozoa;Mollusca;Bivalvia;Autobranchia;Pteriormorphia;Ostreida;Ostreoidea;Ostreidae;Crassostrea;Crassostrea gigas

UdeM00000022765 6573 156.8 UdeM00000022765 XP\_021372453.1 36.7 229  
142 2 12 237 118 346 3.70E-35 156.8 6573 cellular

organisms;Eukaryota;Opisthokonta;Metazoa;Eumetazoa;Bilateria;Protostomia;Spiralia;Lophotrochozoa;Mollusca;Bivalvia;Autobranchia;Pteriormorphia;Pectinida;Pectinoidea;Pectinidae;Mizuhopecten;Mizuhopecten yessoensis

UdeM00000022767 6596 221.9 UdeM00000022767 XP\_045182729.1 46 276  
139 5 1 274 1 268 1.00E-54 221.9 6596 cellular

organisms;Eukaryota;Opisthokonta;Metazoa;Eumetazoa;Bilateria;Protostomia;Spiralia;Lophotrochozoa;Mollusca;Bivalvia;Autobranchia;Heteroconchia;Euherodonta



terodonta;Imparidentia;Venerida;Veneroidea;Veneridae;Mercenaria;Mercenari  
 a mercenaria  
 UdeM00000022768 225164 163.3 UdeM00000022768 XP\_009050975.1 50  
 142 70 1 14 155 13 153 2.70E-37 163.3 225164  
 cellular  
 organisms;Eukaryota;Opisthokonta;Metazoa;Eumetazoa;Bilateria;Protostomia;  
 Spiralia;Lophotrochozoa;Mollusca;Gastropoda;Patellogastropoda;Lottioidea;  
 Lottiidae;Lottia;Lottia gigantea  
 UdeM00000022769 6596 830.1 UdeM00000022769 XP\_045181153.1 69.4 588  
 172 5 1 581 1 587 1.70E-237 830.1 6596 cellular  
 organisms;Eukaryota;Opisthokonta;Metazoa;Eumetazoa;Bilateria;Protostomia;  
 Spiralia;Lophotrochozoa;Mollusca;Bivalvia;Autobranchia;Heteroconchia;Euhe  
 terodonta;Imparidentia;Venerida;Veneroidea;Veneridae;Mercenaria;Mercenari  
 a mercenaria  
 UdeM00000022770 37621 142.9 UdeM00000022770 XP\_014679100.1 37.9 232  
 130 8 768 994 78 300 2.20E-30 142.9 37621 cellular  
 organisms;Eukaryota;Opisthokonta;Metazoa;Eumetazoa;Bilateria;Protostomia;  
 Ecdysozoa;Scalidophora;Priapulida;Priapulimorpha;Priapulimorphida;Priapul  
 idae;Priapulus;Priapulus caudatus  
 UdeM00000022771 46731 92.8 UdeM00000022771 XP\_027042029.1 41.4 133  
 74 2 25 156 32 161 7.30E-16 92.8 46731 cellular  
 organisms;Eukaryota;Opisthokonta;Metazoa;Eumetazoa;Cnidaria;Anthozoa;Hexa  
 corallia;Scleractinia;Astrocoeniina;Pocilloporidae;Pocillopora;Pocillopor  
 a damicornis  
 UdeM00000022772 225164 86.3 UdeM00000022772 XP\_009052701.1 48.1  
 79 41 0 10 88 7 85 2.30E-14 86.3 225164  
 cellular  
 organisms;Eukaryota;Opisthokonta;Metazoa;Eumetazoa;Bilateria;Protostomia;  
 Spiralia;Lophotrochozoa;Mollusca;Gastropoda;Patellogastropoda;Lottioidea;  
 Lottiidae;Lottia;Lottia gigantea  
 UdeM00000022773 6596 354.4 UdeM00000022773 XP\_045183074.1 84.6 208  
 32 0 1 208 1 208 1.00E-94 354.4 6596 cellular  
 organisms;Eukaryota;Opisthokonta;Metazoa;Eumetazoa;Bilateria;Protostomia;  
 Spiralia;Lophotrochozoa;Mollusca;Bivalvia;Autobranchia;Heteroconchia;Euhe  
 terodonta;Imparidentia;Venerida;Veneroidea;Veneridae;Mercenaria;Mercenari  
 a mercenaria  
 UdeM00000022774 29159 67.8 UdeM00000022774 XP\_034313077.1 52.2 69  
 32 1 15 82 156 224 7.60E-09 67.8 29159 cellular  
 organisms;Eukaryota;Opisthokonta;Metazoa;Eumetazoa;Bilateria;Protostomia;  
 Spiralia;Lophotrochozoa;Mollusca;Bivalvia;Autobranchia;Pteriomorpha;Ostr  
 eida;Ostreoidea;Ostreidae;Crassostrea;Crassostrea gigas  
 UdeM00000022775 6596 91.3 UdeM00000022775 XP\_045182833.1 23.1 472  
 301 10 5 433 143 595 3.40E-15 91.3 6596 cellular  
 organisms;Eukaryota;Opisthokonta;Metazoa;Eumetazoa;Bilateria;Protostomia;  
 Spiralia;Lophotrochozoa;Mollusca;Bivalvia;Autobranchia;Heteroconchia;Euhe  
 terodonta;Imparidentia;Venerida;Veneroidea;Veneridae;Mercenaria;Mercenari  
 a mercenaria  
 UdeM00000022776 6596 271.6 UdeM00000022776 XP\_045182382.1 36 503  
 229 7 28 530 6 415 2.20E-69 271.6 6596 cellular  
 organisms;Eukaryota;Opisthokonta;Metazoa;Eumetazoa;Bilateria;Protostomia;  
 Spiralia;Lophotrochozoa;Mollusca;Bivalvia;Autobranchia;Heteroconchia;Euhe  
 terodonta;Imparidentia;Venerida;Veneroidea;Veneridae;Mercenaria;Mercenari  
 a mercenaria

UdeM00000022777 6573 196.8 UdeM00000022777 XP\_021348555.1 28.7 456  
 305 5 24 473 21 462 6.20E-47 196.8 6573 cellular  
 organisms;Eukaryota;Opisthokonta;Metazoa;Eumetazoa;Bilateria;Protostomia;  
 Spiralia;Lophotrochozoa;Mollusca;Bivalvia;Autobranhia;Pteriormorphia;Pect  
 inida;Pectinoidea;Pectinidae;Mizuhopecten;Mizuhopecten yessoensis  
 UdeM00000022778 6573 139 UdeM00000022778 XP\_021365717.1 29.4 326  
 198 13 54 369 44 347 1.60E-29 139 6573 cellular  
 organisms;Eukaryota;Opisthokonta;Metazoa;Eumetazoa;Bilateria;Protostomia;  
 Spiralia;Lophotrochozoa;Mollusca;Bivalvia;Autobranhia;Pteriormorphia;Pect  
 inida;Pectinoidea;Pectinidae;Mizuhopecten;Mizuhopecten yessoensis  
 UdeM00000022779 6573 98.6 UdeM00000022779 XP\_021365717.1 27.2 261  
 163 11 54 307 44 284 2.10E-17 98.6 6573 cellular  
 organisms;Eukaryota;Opisthokonta;Metazoa;Eumetazoa;Bilateria;Protostomia;  
 Spiralia;Lophotrochozoa;Mollusca;Bivalvia;Autobranhia;Pteriormorphia;Pect  
 inida;Pectinoidea;Pectinidae;Mizuhopecten;Mizuhopecten yessoensis  
 UdeM00000022780 6596 348.6 UdeM00000022780 XP\_045181952.1 59.2 272  
 108 2 35 303 29 300 8.30E-93 348.6 6596 cellular  
 organisms;Eukaryota;Opisthokonta;Metazoa;Eumetazoa;Bilateria;Protostomia;  
 Spiralia;Lophotrochozoa;Mollusca;Bivalvia;Autobranhia;Heteroconchia;Euhe  
 terodonta;Imparidentia;Venerida;Veneroidea;Veneridae;Mercenaria;Mercenari  
 a mercenaria  
 UdeM00000022781 6596 423.3 UdeM00000022781 XP\_045180259.1 62.7 370  
 129 4 51 414 62 428 3.50E-115 423.3 6596 cellular  
 organisms;Eukaryota;Opisthokonta;Metazoa;Eumetazoa;Bilateria;Protostomia;  
 Spiralia;Lophotrochozoa;Mollusca;Bivalvia;Autobranhia;Heteroconchia;Euhe  
 terodonta;Imparidentia;Venerida;Veneroidea;Veneridae;Mercenaria;Mercenari  
 a mercenaria  
 UdeM00000022782 6596 1006.5 UdeM00000022782 XP\_045180837.1 42.2  
 1315 656 21 10 1231 6 1309 2.90E-290 1006.5 6596  
 cellular  
 organisms;Eukaryota;Opisthokonta;Metazoa;Eumetazoa;Bilateria;Protostomia;  
 Spiralia;Lophotrochozoa;Mollusca;Bivalvia;Autobranhia;Heteroconchia;Euhe  
 terodonta;Imparidentia;Venerida;Veneroidea;Veneridae;Mercenaria;Mercenari  
 a mercenaria  
 UdeM00000022783 6596 528.5 UdeM00000022783 XP\_045180837.1 41.2 702  
 333 11 10 637 6 701 1.20E-146 528.5 6596 cellular  
 organisms;Eukaryota;Opisthokonta;Metazoa;Eumetazoa;Bilateria;Protostomia;  
 Spiralia;Lophotrochozoa;Mollusca;Bivalvia;Autobranhia;Heteroconchia;Euhe  
 terodonta;Imparidentia;Venerida;Veneroidea;Veneridae;Mercenaria;Mercenari  
 a mercenaria  
 UdeM00000022784 6596 184.1 UdeM00000022784 XP\_045182604.1 38.2 272  
 158 2 103 364 64 335 3.50E-43 184.1 6596 cellular  
 organisms;Eukaryota;Opisthokonta;Metazoa;Eumetazoa;Bilateria;Protostomia;  
 Spiralia;Lophotrochozoa;Mollusca;Bivalvia;Autobranhia;Heteroconchia;Euhe  
 terodonta;Imparidentia;Venerida;Veneroidea;Veneridae;Mercenaria;Mercenari  
 a mercenaria  
 UdeM00000022785 6596 140.6 UdeM00000022785 XP\_045181774.1 31.5 463  
 238 15 200 631 167 581 7.10E-30 140.6 6596 cellular  
 organisms;Eukaryota;Opisthokonta;Metazoa;Eumetazoa;Bilateria;Protostomia;  
 Spiralia;Lophotrochozoa;Mollusca;Bivalvia;Autobranhia;Heteroconchia;Euhe  
 terodonta;Imparidentia;Venerida;Veneroidea;Veneridae;Mercenaria;Mercenari  
 a mercenaria  
 UdeM00000022786 6596 143.7 UdeM00000022786 XP\_045181774.1 31.7 460  
 238 15 200 628 167 581 8.30E-31 143.7 6596 cellular

organisms;Eukaryota;Opisthokonta;Metazoa;Eumetazoa;Bilateria;Protostomia;Spiralia;Lophotrochozoa;Mollusca;Bivalvia;Autobranchia;Heteroconchia;Euheterodonta;Imparidentia;Venerida;Veneroidea;Veneridae;Mercenaria;Mercenaria mercenaria

UdeM00000022787 6596 140.6 UdeM00000022787 XP\_045181774.1 31.5 463  
238 15 194 625 167 581 7.00E-30 140.6 6596 cellular

organisms;Eukaryota;Opisthokonta;Metazoa;Eumetazoa;Bilateria;Protostomia;Spiralia;Lophotrochozoa;Mollusca;Bivalvia;Autobranchia;Heteroconchia;Euheterodonta;Imparidentia;Venerida;Veneroidea;Veneridae;Mercenaria;Mercenaria mercenaria

UdeM00000022788 6596 117.9 UdeM00000022788 XP\_045181771.1 44.1 188  
95 5 79 257 167 353 2.00E-23 117.9 6596 cellular

organisms;Eukaryota;Opisthokonta;Metazoa;Eumetazoa;Bilateria;Protostomia;Spiralia;Lophotrochozoa;Mollusca;Bivalvia;Autobranchia;Heteroconchia;Euheterodonta;Imparidentia;Venerida;Veneroidea;Veneridae;Mercenaria;Mercenaria mercenaria

UdeM00000022789 1735272 65.1 UdeM00000022789 XP\_041360711.1 37.5  
80 50 0 5 84 6 85 6.70E-08 65.1 1735272  
cellular

organisms;Eukaryota;Opisthokonta;Metazoa;Eumetazoa;Bilateria;Protostomia;Spiralia;Lophotrochozoa;Mollusca;Gastropoda;Neomphalina;Neomphaloidea;Peltospiridae;Gigantopelta;Gigantopelta aegis

UdeM00000022790 151771 98.6 UdeM00000022790 XP\_028419301.1 58.8  
85 35 0 1 85 112 196 4.20E-18 98.6 151771  
cellular

organisms;Eukaryota;Opisthokonta;Metazoa;Eumetazoa;Cnidaria;Anthozoa;Octocorallia;Alcyonacea;Alcyoniina;Nephtheidae;Dendronephthya;Dendronephthya gigantea

UdeM00000022791 151771 188.3 UdeM00000022791 XP\_028417860.1 78.1  
105 23 0 1 105 1 105 8.10E-45 188.3 151771  
cellular

organisms;Eukaryota;Opisthokonta;Metazoa;Eumetazoa;Cnidaria;Anthozoa;Octocorallia;Alcyonacea;Alcyoniina;Nephtheidae;Dendronephthya;Dendronephthya gigantea

UdeM00000022792 6579 513.8 UdeM00000022792 XP\_033726457.1 73.9 330  
80 1 1 330 5 328 1.60E-142 513.8 6579 cellular

organisms;Eukaryota;Opisthokonta;Metazoa;Eumetazoa;Bilateria;Protostomia;Spiralia;Lophotrochozoa;Mollusca;Bivalvia;Autobranchia;Pteriomorphia;Pectinida;Pectinoidea;Pectinidae;Pecten;Pecten maximus

UdeM00000022793 6596 483.8 UdeM00000022793 XP\_045181713.1 80.9 282  
54 0 1 282 1 282 1.60E-133 483.8 6596 cellular

organisms;Eukaryota;Opisthokonta;Metazoa;Eumetazoa;Bilateria;Protostomia;Spiralia;Lophotrochozoa;Mollusca;Bivalvia;Autobranchia;Heteroconchia;Euheterodonta;Imparidentia;Venerida;Veneroidea;Veneridae;Mercenaria;Mercenaria mercenaria

UdeM00000022794 6565 303.5 UdeM00000022794 XP\_022314529.1 42.4 394  
150 3 1 317 34 427 3.10E-79 303.5 6565 cellular

organisms;Eukaryota;Opisthokonta;Metazoa;Eumetazoa;Bilateria;Protostomia;Spiralia;Lophotrochozoa;Mollusca;Bivalvia;Autobranchia;Pteriomorphia;Ostreida;Ostreoidea;Ostreidae;Crassostrea;Crassostrea virginica

UdeM00000022795 37621 121.3 UdeM00000022795 XP\_014679849.1 47.9 117  
47 3 1 113 511 617 8.00E-25 121.3 37621 cellular

organisms;Eukaryota;Opisthokonta;Metazoa;Eumetazoa;Bilateria;Protostomia;

Ecdysozoa;Scalidophora;Priapulida;Priapulimorpha;Priapulimorphida;Priapulidae;Priapulus;Priapulus caudatus

UdeM00000022796 37621 390.6 UdeM00000022796 XP\_014679850.1 53.6 407  
123 5 1 353 116 510 2.20E-105 390.6 37621 cellular  
organisms;Eukaryota;Opisthokonta;Metazoa;Eumetazoa;Bilateria;Protostomia;  
Ecdysozoa;Scalidophora;Priapulida;Priapulimorpha;Priapulimorphida;Priapulidae;Priapulus;Priapulus caudatus

UdeM00000022798 6596 1155.6 UdeM00000022798 XP\_045180850.1 56.9  
1072 399 9 71 1087 4 1067 0.00E+00 1155.6 6596  
cellular  
organisms;Eukaryota;Opisthokonta;Metazoa;Eumetazoa;Bilateria;Protostomia;  
Spiralia;Lophotrochozoa;Mollusca;Bivalvia;Autobranhia;Heteroconchia;Euherodonta;Imparidentia;Venerida;Veneroidea;Veneridae;Mercenaria;Mercenaria mercenaria

UdeM00000022799 6573 69.7 UdeM00000022799 XP\_021362121.1 29.1 292  
163 10 263 521 333 613 1.30E-08 69.7 6573 cellular  
organisms;Eukaryota;Opisthokonta;Metazoa;Eumetazoa;Bilateria;Protostomia;  
Spiralia;Lophotrochozoa;Mollusca;Bivalvia;Autobranhia;Pteriormorphia;Pectinida;Pectinoidea;Pectinidae;Mizuhopecten;Mizuhopecten yessoensis

UdeM00000022801 1735272 279.6 UdeM00000022801 XP\_041361438.1 72.4  
185 51 0 1 185 54 238 2.90E-72 279.6 1735272  
cellular  
organisms;Eukaryota;Opisthokonta;Metazoa;Eumetazoa;Bilateria;Protostomia;  
Spiralia;Lophotrochozoa;Mollusca;Gastropoda;Neomphalina;Neomphaloidea;Peltospiridae;Gigantopelta;Gigantopelta aegis

UdeM00000022800 6500 341.3 UdeM00000022800 XP\_005099746.1 71.6 232  
66 0 3 234 2 233 1.00E-90 341.3 6500 cellular  
organisms;Eukaryota;Opisthokonta;Metazoa;Eumetazoa;Bilateria;Protostomia;  
Spiralia;Lophotrochozoa;Mollusca;Gastropoda;Heterobranhia;Euthyneura;Tectipleura;Aplysiida;Aplysioidea;Aplysiidae;Aplysia;Aplysia californica

UdeM00000022802 6596 523.9 UdeM00000022802 XP\_045180371.1 59.6 463  
119 3 96 552 46 446 2.50E-145 523.9 6596 cellular  
organisms;Eukaryota;Opisthokonta;Metazoa;Eumetazoa;Bilateria;Protostomia;  
Spiralia;Lophotrochozoa;Mollusca;Bivalvia;Autobranhia;Heteroconchia;Euherodonta;Imparidentia;Venerida;Veneroidea;Veneridae;Mercenaria;Mercenaria mercenaria

UdeM00000022804 6596 260 UdeM00000022804 XP\_045180341.1 83.1 154  
26 0 2 155 358 511 1.90E-66 260 6596 cellular  
organisms;Eukaryota;Opisthokonta;Metazoa;Eumetazoa;Bilateria;Protostomia;  
Spiralia;Lophotrochozoa;Mollusca;Bivalvia;Autobranhia;Heteroconchia;Euherodonta;Imparidentia;Venerida;Veneroidea;Veneridae;Mercenaria;Mercenaria mercenaria

UdeM00000022803 6596 602.1 UdeM00000022803 XP\_045180341.1 78.6 383  
82 0 105 487 129 511 6.50E-169 602.1 6596 cellular  
organisms;Eukaryota;Opisthokonta;Metazoa;Eumetazoa;Bilateria;Protostomia;  
Spiralia;Lophotrochozoa;Mollusca;Bivalvia;Autobranhia;Heteroconchia;Euherodonta;Imparidentia;Venerida;Veneroidea;Veneridae;Mercenaria;Mercenaria mercenaria

UdeM00000022805 6596 179.1 UdeM00000022805 XP\_045180341.1 76.1 117  
28 0 105 221 129 245 7.00E-42 179.1 6596 cellular  
organisms;Eukaryota;Opisthokonta;Metazoa;Eumetazoa;Bilateria;Protostomia;  
Spiralia;Lophotrochozoa;Mollusca;Bivalvia;Autobranhia;Heteroconchia;Euherodonta;Imparidentia;Venerida;Veneroidea;Veneridae;Mercenaria;Mercenaria mercenaria

UdeM00000022806 6596 172.6 UdeM00000022806 XP\_045181474.1 61.4 145  
 52 2 151 292 81 224 7.80E-40 172.6 6596 cellular  
 organisms;Eukaryota;Opisthokonta;Metazoa;Eumetazoa;Bilateria;Protostomia;  
 Spiralia;Lophotrochozoa;Mollusca;Bivalvia;Autobranchia;Heteroconchia;Euhe  
 terodonta;Imparidentia;Venerida;Veneroidea;Veneridae;Mercenaria;Mercenari  
 a mercenaria

UdeM00000022807 6596 172.6 UdeM00000022807 XP\_045181474.1 61.4 145  
 52 2 101 242 81 224 6.50E-40 172.6 6596 cellular  
 organisms;Eukaryota;Opisthokonta;Metazoa;Eumetazoa;Bilateria;Protostomia;  
 Spiralia;Lophotrochozoa;Mollusca;Bivalvia;Autobranchia;Heteroconchia;Euhe  
 terodonta;Imparidentia;Venerida;Veneroidea;Veneridae;Mercenaria;Mercenari  
 a mercenaria

UdeM00000022808 6596 131.7 UdeM00000022808 XP\_045181371.1 39.5 243  
 109 7 1 222 20 245 1.10E-27 131.7 6596 cellular  
 organisms;Eukaryota;Opisthokonta;Metazoa;Eumetazoa;Bilateria;Protostomia;  
 Spiralia;Lophotrochozoa;Mollusca;Bivalvia;Autobranchia;Heteroconchia;Euhe  
 terodonta;Imparidentia;Venerida;Veneroidea;Veneridae;Mercenaria;Mercenari  
 a mercenaria

UdeM00000022811 6579 1005 UdeM00000022811 XP\_033727239.1 50.2 1032  
 489 10 1 1016 1 1023 6.90E-290 1005 6579 cellular  
 organisms;Eukaryota;Opisthokonta;Metazoa;Eumetazoa;Bilateria;Protostomia;  
 Spiralia;Lophotrochozoa;Mollusca;Bivalvia;Autobranchia;Pteriormorphia;Pect  
 inida;Pectinoidea;Pectinidae;Pecten;Pecten maximus

UdeM00000022812 6596 798.1 UdeM00000022812 XP\_045215313.1 49.9 865  
 413 11 6 867 3148 3995 1.10E-227 798.1 6596 cellular  
 organisms;Eukaryota;Opisthokonta;Metazoa;Eumetazoa;Bilateria;Protostomia;  
 Spiralia;Lophotrochozoa;Mollusca;Bivalvia;Autobranchia;Heteroconchia;Euhe  
 terodonta;Imparidentia;Venerida;Veneroidea;Veneridae;Mercenaria;Mercenari  
 a mercenaria

UdeM00000022813 6596 870.5 UdeM00000022813 XP\_045215313.1 40.4 1118  
 593 14 1 1087 2069 3144 2.20E-249 870.5 6596 cellular  
 organisms;Eukaryota;Opisthokonta;Metazoa;Eumetazoa;Bilateria;Protostomia;  
 Spiralia;Lophotrochozoa;Mollusca;Bivalvia;Autobranchia;Heteroconchia;Euhe  
 terodonta;Imparidentia;Venerida;Veneroidea;Veneridae;Mercenaria;Mercenari  
 a mercenaria

UdeM00000022814 6596 955.7 UdeM00000022814 XP\_045215313.1 41.9 1307  
 675 23 1 1294 811 2045 6.20E-275 955.7 6596 cellular  
 organisms;Eukaryota;Opisthokonta;Metazoa;Eumetazoa;Bilateria;Protostomia;  
 Spiralia;Lophotrochozoa;Mollusca;Bivalvia;Autobranchia;Heteroconchia;Euhe  
 terodonta;Imparidentia;Venerida;Veneroidea;Veneridae;Mercenaria;Mercenari  
 a mercenaria

UdeM00000022815 6596 840.1 UdeM00000022815 XP\_045215313.1 59.7 722  
 268 7 1 719 1 702 2.20E-240 840.1 6596 cellular  
 organisms;Eukaryota;Opisthokonta;Metazoa;Eumetazoa;Bilateria;Protostomia;  
 Spiralia;Lophotrochozoa;Mollusca;Bivalvia;Autobranchia;Heteroconchia;Euhe  
 terodonta;Imparidentia;Venerida;Veneroidea;Veneridae;Mercenaria;Mercenari  
 a mercenaria

UdeM00000022816 6596 94.4 UdeM00000022816 XP\_045183070.1 35.2 179  
 97 4 45 204 21 199 2.10E-16 94.4 6596 cellular  
 organisms;Eukaryota;Opisthokonta;Metazoa;Eumetazoa;Bilateria;Protostomia;  
 Spiralia;Lophotrochozoa;Mollusca;Bivalvia;Autobranchia;Heteroconchia;Euhe  
 terodonta;Imparidentia;Venerida;Veneroidea;Veneridae;Mercenaria;Mercenari  
 a mercenaria

UdeM00000022818 6579 785.4 UdeM00000022818 XP\_033726960.1 61.6 604  
 215 5 6 600 2 597 5.20E-224 785.4 6579 cellular  
 organisms;Eukaryota;Opisthokonta;Metazoa;Eumetazoa;Bilateria;Protostomia;  
 Spiralia;Lophotrochozoa;Mollusca;Bivalvia;Autobranchia;Pteriormorphia;Pect  
 inida;Pectinoidea;Pectinidae;Pecten;Pecten maximus  
 UdeM00000022819 6596 208.4 UdeM00000022819 XP\_045181326.1 46.6 206  
 78 2 1 206 1 174 8.90E-51 208.4 6596 cellular  
 organisms;Eukaryota;Opisthokonta;Metazoa;Eumetazoa;Bilateria;Protostomia;  
 Spiralia;Lophotrochozoa;Mollusca;Bivalvia;Autobranchia;Heteroconchia;Euhe  
 terodonta;Imparidentia;Venerida;Veneroidea;Veneridae;Mercenaria;Mercenari  
 a mercenaria  
 UdeM00000022820 6596 99 UdeM00000022820 XP\_045181326.1 55.2 87  
 38 1 1 87 1 86 3.20E-18 99 6596 cellular  
 organisms;Eukaryota;Opisthokonta;Metazoa;Eumetazoa;Bilateria;Protostomia;  
 Spiralia;Lophotrochozoa;Mollusca;Bivalvia;Autobranchia;Heteroconchia;Euhe  
 terodonta;Imparidentia;Venerida;Veneroidea;Veneridae;Mercenaria;Mercenari  
 a mercenaria  
 UdeM00000022821 225164 211.5 UdeM00000022821 XP\_009061416.1 49.8  
 241 91 6 911 1129 730 962 5.80E-51 211.5 225164  
 cellular  
 organisms;Eukaryota;Opisthokonta;Metazoa;Eumetazoa;Bilateria;Protostomia;  
 Spiralia;Lophotrochozoa;Mollusca;Gastropoda;Patellogastropoda;Lottioidea;  
 Lottiidae;Lottia;Lottia gigantea  
 UdeM00000022823 6596 131.3 UdeM00000022823 XP\_045182272.1 26.1 681  
 327 21 1 558 1 628 3.80E-27 131.3 6596 cellular  
 organisms;Eukaryota;Opisthokonta;Metazoa;Eumetazoa;Bilateria;Protostomia;  
 Spiralia;Lophotrochozoa;Mollusca;Bivalvia;Autobranchia;Heteroconchia;Euhe  
 terodonta;Imparidentia;Venerida;Veneroidea;Veneridae;Mercenaria;Mercenari  
 a mercenaria  
 UdeM00000022824 6596 323.2 UdeM00000022824 XP\_045194144.1 53.7 283  
 125 3 1 280 1 280 3.30E-85 323.2 6596 cellular  
 organisms;Eukaryota;Opisthokonta;Metazoa;Eumetazoa;Bilateria;Protostomia;  
 Spiralia;Lophotrochozoa;Mollusca;Bivalvia;Autobranchia;Heteroconchia;Euhe  
 terodonta;Imparidentia;Venerida;Veneroidea;Veneridae;Mercenaria;Mercenari  
 a mercenaria  
 UdeM00000022825 6596 257.3 UdeM00000022825 XP\_045194143.1 57.2 201  
 85 1 2 201 97 297 1.60E-65 257.3 6596 cellular  
 organisms;Eukaryota;Opisthokonta;Metazoa;Eumetazoa;Bilateria;Protostomia;  
 Spiralia;Lophotrochozoa;Mollusca;Bivalvia;Autobranchia;Heteroconchia;Euhe  
 terodonta;Imparidentia;Venerida;Veneroidea;Veneridae;Mercenaria;Mercenari  
 a mercenaria  
 UdeM00000022826 34773 161 UdeM00000022826 XP\_041941227.1 50.6 162  
 65 6 245 391 242 403 3.10E-36 161 34773 cellular  
 organisms;Eukaryota;Opisthokonta;Metazoa;Eumetazoa;Bilateria;Deuterostomi  
 a;Chordata;Craniata;Vertebrata;Gnathostomata;Teleostomi;Euteleostomi;Acti  
 nopterygii;Actinopteri;Neopterygii;Teleostei;Osteoglossocephalai;Clupeoce  
 phala;Otomorpha;Clupei;Clupeiformes;Clupeoidei;Clupeidae;Alosinae;Alosa;A  
 losa sapidissima  
 UdeM00000022827 6596 72 UdeM00000022827 XP\_045196674.1 30.1 146  
 92 4 7 144 169 312 7.40E-10 72 6596 cellular  
 organisms;Eukaryota;Opisthokonta;Metazoa;Eumetazoa;Bilateria;Protostomia;  
 Spiralia;Lophotrochozoa;Mollusca;Bivalvia;Autobranchia;Heteroconchia;Euhe  
 terodonta;Imparidentia;Venerida;Veneroidea;Veneridae;Mercenaria;Mercenari  
 a mercenaria

UdeM00000022828 6596 74.3 UdeM00000022828 XP\_045196674.1 32.5 123  
 72 2 477 592 29 147 8.50E-10 74.3 6596 cellular  
 organisms;Eukaryota;Opisthokonta;Metazoa;Eumetazoa;Bilateria;Protostomia;  
 Spiralia;Lophotrochozoa;Mollusca;Bivalvia;Autobranchia;Heteroconchia;Euhe  
 terodonta;Imparidentia;Venerida;Veneroidea;Veneridae;Mercenaria;Mercenari  
 a mercenaria

UdeM00000022829 29159 98.6 UdeM00000022829 XP\_019926412.2 40.7 135  
 77 1 1 132 1 135 6.30E-18 98.6 29159 cellular  
 organisms;Eukaryota;Opisthokonta;Metazoa;Eumetazoa;Bilateria;Protostomia;  
 Spiralia;Lophotrochozoa;Mollusca;Bivalvia;Autobranchia;Pteriormorphia;Ostr  
 eida;Ostreoidea;Ostreidae;Crassostrea;Crassostrea gigas

UdeM00000022830 6596 460.3 UdeM00000022830 XP\_045181291.1 79.2 259  
 54 0 1 259 306 564 1.60E-126 460.3 6596 cellular  
 organisms;Eukaryota;Opisthokonta;Metazoa;Eumetazoa;Bilateria;Protostomia;  
 Spiralia;Lophotrochozoa;Mollusca;Bivalvia;Autobranchia;Heteroconchia;Euhe  
 terodonta;Imparidentia;Venerida;Veneroidea;Veneridae;Mercenaria;Mercenari  
 a mercenaria

UdeM00000022831 441366 149.1 UdeM00000022831 XP\_028326620.1 41.5  
 217 117 5 1 216 48 255 6.70E-33 149.1 441366  
 cellular  
 organisms;Eukaryota;Opisthokonta;Metazoa;Eumetazoa;Bilateria;Deuterostomi  
 a;Chordata;Craniata;Vertebrata;Gnathostomata;Teleostomi;Euteleostomi;Acti  
 nopterygii;Actinopteri;Neopterygii;Teleostei;Osteoglossocephalai;Clupeoce  
 phala;Euteleosteomorpha;Neoteleostei;Eurypterygia;Ctenosquamata;Acanthomo  
 rphata;Euacanthomorphacea;Percomorphaceae;Ovalentaria;Blenniimorphae;Blen  
 niiformes;Gobiesocoidei;Gobiesocidae;Gobiesocinae;Gouania;Gouania  
 willdenowi

UdeM00000022832 46514 171.4 UdeM00000022832 XP\_038075667.1 38 271  
 140 6 1 254 301 560 1.50E-39 171.4 46514 cellular  
 organisms;Eukaryota;Opisthokonta;Metazoa;Eumetazoa;Bilateria;Deuterostomi  
 a;Echinodermata;Eleutherozoa;Asterozoa;Asteroidea;Valvatacea;Valvatida;As  
 terinidae;Patiria;Patiria miniata

UdeM00000022833 6596 461.1 UdeM00000022833 XP\_045181291.1 73.6 303  
 80 0 1 303 1 303 1.20E-126 461.1 6596 cellular  
 organisms;Eukaryota;Opisthokonta;Metazoa;Eumetazoa;Bilateria;Protostomia;  
 Spiralia;Lophotrochozoa;Mollusca;Bivalvia;Autobranchia;Heteroconchia;Euhe  
 terodonta;Imparidentia;Venerida;Veneroidea;Veneridae;Mercenaria;Mercenari  
 a mercenaria

UdeM00000022835 70779 59.3 UdeM00000022835 XP\_015753870.1 59.6 52  
 21 0 9 60 340 391 2.90E-06 59.3 70779 cellular  
 organisms;Eukaryota;Opisthokonta;Metazoa;Eumetazoa;Cnidaria;Anthozoa;Hexa  
 corallia;Scleractinia;Astrocoeniina;Acroporidae;Acropora;Acropora  
 digitifera

UdeM00000022836 2652724 283.5 UdeM00000022836 XP\_020895427.1 72.9  
 177 47 1 1 177 1 176 1.90E-73 283.5 2652724  
 cellular  
 organisms;Eukaryota;Opisthokonta;Metazoa;Eumetazoa;Cnidaria;Anthozoa;Hexa  
 corallia;Actiniaria;Aiptasiidae;Exaiptasia;Exaiptasia diaphana

UdeM00000022837 29159 1597.8 UdeM00000022837 XP\_011449049.2 76.4  
 1069 250 2 1 1068 1 1068 0.00E+00 1597.8  
 29159 cellular  
 organisms;Eukaryota;Opisthokonta;Metazoa;Eumetazoa;Bilateria;Protostomia;  
 Spiralia;Lophotrochozoa;Mollusca;Bivalvia;Autobranchia;Pteriormorphia;Ostr  
 eida;Ostreoidea;Ostreidae;Crassostrea;Crassostrea gigas

UdeM00000022838 6596 573.2 UdeM00000022838 XP\_045181151.1 72.6 394  
 107 1 1 394 1 393 2.70E-160 573.2 6596 cellular  
 organisms;Eukaryota;Opisthokonta;Metazoa;Eumetazoa;Bilateria;Protostomia;  
 Spiralia;Lophotrochozoa;Mollusca;Bivalvia;Autobranchia;Heteroconchia;Euhe  
 terodonta;Imparidentia;Venerida;Veneroidea;Veneridae;Mercenaria;Mercenari  
 a mercenaria

UdeM00000022840 6596 195.7 UdeM00000022840 XP\_045181152.1 74.6 122  
 31 0 1 122 1 122 4.10E-47 195.7 6596 cellular  
 organisms;Eukaryota;Opisthokonta;Metazoa;Eumetazoa;Bilateria;Protostomia;  
 Spiralia;Lophotrochozoa;Mollusca;Bivalvia;Autobranchia;Heteroconchia;Euhe  
 terodonta;Imparidentia;Venerida;Veneroidea;Veneridae;Mercenaria;Mercenari  
 a mercenaria

UdeM00000022839 6596 773.5 UdeM00000022839 XP\_045181152.1 79.8 446  
 90 0 1 446 1 446 1.50E-220 773.5 6596 cellular  
 organisms;Eukaryota;Opisthokonta;Metazoa;Eumetazoa;Bilateria;Protostomia;  
 Spiralia;Lophotrochozoa;Mollusca;Bivalvia;Autobranchia;Heteroconchia;Euhe  
 terodonta;Imparidentia;Venerida;Veneroidea;Veneridae;Mercenaria;Mercenari  
 a mercenaria

UdeM00000022841 6565 582.8 UdeM00000022841 XP\_022292088.1 83.2 316  
 53 0 1 316 128 443 2.70E-163 582.8 6565 cellular  
 organisms;Eukaryota;Opisthokonta;Metazoa;Eumetazoa;Bilateria;Protostomia;  
 Spiralia;Lophotrochozoa;Mollusca;Bivalvia;Autobranchia;Pteriormorphia;Ostr  
 eida;Ostreoidea;Ostreidae;Crassostrea;Crassostrea virginica

UdeM00000022847 6573 112.5 UdeM00000022847 XP\_021377527.1 36.5 197  
 113 4 130 321 1 190 1.00E-21 112.5 6573 cellular  
 organisms;Eukaryota;Opisthokonta;Metazoa;Eumetazoa;Bilateria;Protostomia;  
 Spiralia;Lophotrochozoa;Mollusca;Bivalvia;Autobranchia;Pteriormorphia;Pect  
 inida;Pectinoidea;Pectinidae;Mizuhopecten;Mizuhopecten yessoensis

UdeM00000022846 6573 112.5 UdeM00000022846 XP\_021377527.1 36.5 197  
 113 4 67 258 1 190 8.40E-22 112.5 6573 cellular  
 organisms;Eukaryota;Opisthokonta;Metazoa;Eumetazoa;Bilateria;Protostomia;  
 Spiralia;Lophotrochozoa;Mollusca;Bivalvia;Autobranchia;Pteriormorphia;Pect  
 inida;Pectinoidea;Pectinidae;Mizuhopecten;Mizuhopecten yessoensis

UdeM00000022853 1735272 477.6 UdeM00000022853 XP\_041360995.1 56  
 423 183 2 41 463 28 447 1.80E-131 477.6 1735272  
 cellular  
 organisms;Eukaryota;Opisthokonta;Metazoa;Eumetazoa;Bilateria;Protostomia;  
 Spiralia;Lophotrochozoa;Mollusca;Gastropoda;Neomphalina;Neomphaloidea;Pel  
 tospiridae;Gigantopelta;Gigantopelta aegis

UdeM00000022855 1735272 224.2 UdeM00000022855 XP\_041360802.1 92  
 112 9 0 1 112 1 112 8.50E-56 224.2 1735272  
 cellular  
 organisms;Eukaryota;Opisthokonta;Metazoa;Eumetazoa;Bilateria;Protostomia;  
 Spiralia;Lophotrochozoa;Mollusca;Gastropoda;Neomphalina;Neomphaloidea;Pel  
 tospiridae;Gigantopelta;Gigantopelta aegis

UdeM00000022854 1735272 294.3 UdeM00000022854 XP\_041360802.1 86.9  
 153 20 0 1 153 1 153 1.30E-76 294.3 1735272  
 cellular  
 organisms;Eukaryota;Opisthokonta;Metazoa;Eumetazoa;Bilateria;Protostomia;  
 Spiralia;Lophotrochozoa;Mollusca;Gastropoda;Neomphalina;Neomphaloidea;Pel  
 tospiridae;Gigantopelta;Gigantopelta aegis

UdeM00000022856 6596 571.6 UdeM00000022856 XP\_045182129.1 81.5 335  
 62 0 14 348 153 487 6.70E-160 571.6 6596 cellular  
 organisms;Eukaryota;Opisthokonta;Metazoa;Eumetazoa;Bilateria;Protostomia;



Spiralia;Lophotrochozoa;Mollusca;Bivalvia;Autobranchia;Heteroconchia;Euherodonta;Imparidentia;Venerida;Veneroidea;Veneridae;Mercenaria;Mercenaria mercenaria

UdeM00000022857 6596 714.1 UdeM00000022857 XP\_045180195.1 77.9 426  
93 1 8 433 305 729 1.00E-202 714.1 6596 cellular

organisms;Eukaryota;Opisthokonta;Metazoa;Eumetazoa;Bilateria;Protostomia;Spiralia;Lophotrochozoa;Mollusca;Bivalvia;Autobranchia;Heteroconchia;Euherodonta;Imparidentia;Venerida;Veneroidea;Veneridae;Mercenaria;Mercenaria mercenaria

UdeM00000022858 6596 424.1 UdeM00000022858 XP\_045180195.1 62.6 305  
114 0 1 305 1 305 1.50E-115 424.1 6596 cellular

organisms;Eukaryota;Opisthokonta;Metazoa;Eumetazoa;Bilateria;Protostomia;Spiralia;Lophotrochozoa;Mollusca;Bivalvia;Autobranchia;Heteroconchia;Euherodonta;Imparidentia;Venerida;Veneroidea;Veneridae;Mercenaria;Mercenaria mercenaria

UdeM00000022859 1735272 427.9 UdeM00000022859 XP\_041360854.1 77.3  
260 59 0 1 260 10 269 9.00E-117 427.9 1735272  
cellular

organisms;Eukaryota;Opisthokonta;Metazoa;Eumetazoa;Bilateria;Protostomia;Spiralia;Lophotrochozoa;Mollusca;Gastropoda;Neomphalina;Neomphaloidea;Peltospiridae;Gigantopelta;Gigantopelta aegis

UdeM00000022860 6596 1221.5 UdeM00000022860 XP\_045193579.1 73.7  
834 206 8 1 832 1 823 0.00E+00 1221.5 6596

cellular  
organisms;Eukaryota;Opisthokonta;Metazoa;Eumetazoa;Bilateria;Protostomia;Spiralia;Lophotrochozoa;Mollusca;Bivalvia;Autobranchia;Heteroconchia;Euherodonta;Imparidentia;Venerida;Veneroidea;Veneridae;Mercenaria;Mercenaria mercenaria

UdeM00000022861 6596 248.8 UdeM00000022861 XP\_045182165.1 29.6 578  
367 17 1 547 1 569 2.20E-62 248.8 6596 cellular

organisms;Eukaryota;Opisthokonta;Metazoa;Eumetazoa;Bilateria;Protostomia;Spiralia;Lophotrochozoa;Mollusca;Bivalvia;Autobranchia;Heteroconchia;Euherodonta;Imparidentia;Venerida;Veneroidea;Veneridae;Mercenaria;Mercenaria mercenaria

UdeM00000022862 6596 248.8 UdeM00000022862 XP\_045182165.1 29.4 578  
368 17 1 547 1 569 2.20E-62 248.8 6596 cellular

organisms;Eukaryota;Opisthokonta;Metazoa;Eumetazoa;Bilateria;Protostomia;Spiralia;Lophotrochozoa;Mollusca;Bivalvia;Autobranchia;Heteroconchia;Euherodonta;Imparidentia;Venerida;Veneroidea;Veneridae;Mercenaria;Mercenaria mercenaria

UdeM00000022863 6596 66.6 UdeM00000022863 XP\_045187556.1 32.2 115  
75 2 50 162 5 118 9.00E-08 66.6 6596 cellular

organisms;Eukaryota;Opisthokonta;Metazoa;Eumetazoa;Bilateria;Protostomia;Spiralia;Lophotrochozoa;Mollusca;Bivalvia;Autobranchia;Heteroconchia;Euherodonta;Imparidentia;Venerida;Veneroidea;Veneridae;Mercenaria;Mercenaria mercenaria

UdeM00000022864 6596 73.6 UdeM00000022864 XP\_045182165.1 30.4 168  
106 5 4 166 11 172 3.00E-10 73.6 6596 cellular

organisms;Eukaryota;Opisthokonta;Metazoa;Eumetazoa;Bilateria;Protostomia;Spiralia;Lophotrochozoa;Mollusca;Bivalvia;Autobranchia;Heteroconchia;Euherodonta;Imparidentia;Venerida;Veneroidea;Veneridae;Mercenaria;Mercenaria mercenaria

UdeM00000022865 6596 218.4 UdeM00000022865 XP\_045182165.1 28.8 577  
357 20 4 541 11 572 2.40E-53 218.4 6596 cellular

organisms;Eukaryota;Opisthokonta;Metazoa;Eumetazoa;Bilateria;Protostomia;Spiralia;Lophotrochozoa;Mollusca;Bivalvia;Autobranchia;Heteroconchia;Euherodonta;Imparidentia;Venerida;Veneroidea;Veneridae;Mercenaria;Mercenaria mercenaria

UdeM00000022866 6579 469.9 UdeM00000022866 XP\_033727031.1 80.8 318  
56 1 1 318 1 313 2.50E-129 469.9 6579 cellular

organisms;Eukaryota;Opisthokonta;Metazoa;Eumetazoa;Bilateria;Protostomia;Spiralia;Lophotrochozoa;Mollusca;Bivalvia;Autobranchia;Pteriormorphia;Pectinida;Pectinoidea;Pectinidae;Pecten;Pecten maximus

UdeM00000022868 6596 88.6 UdeM00000022868 XP\_045182573.1 46.6 118  
48 5 138 242 137 252 1.20E-14 88.6 6596 cellular

organisms;Eukaryota;Opisthokonta;Metazoa;Eumetazoa;Bilateria;Protostomia;Spiralia;Lophotrochozoa;Mollusca;Bivalvia;Autobranchia;Heteroconchia;Euherodonta;Imparidentia;Venerida;Veneroidea;Veneridae;Mercenaria;Mercenaria mercenaria

UdeM00000022870 6573 134.8 UdeM00000022870 XP\_021355487.1 67.9 109  
29 2 1 109 1 103 6.60E-29 134.8 6573 cellular

organisms;Eukaryota;Opisthokonta;Metazoa;Eumetazoa;Bilateria;Protostomia;Spiralia;Lophotrochozoa;Mollusca;Bivalvia;Autobranchia;Pteriormorphia;Pectinida;Pectinoidea;Pectinidae;Mizuhopecten;Mizuhopecten yessoensis

UdeM00000022871 400727 198.4 UdeM00000022871 XP\_025091176.1 58.3  
278 100 4 14 285 1 268 1.30E-47 198.4 400727  
cellular

organisms;Eukaryota;Opisthokonta;Metazoa;Eumetazoa;Bilateria;Protostomia;Spiralia;Lophotrochozoa;Mollusca;Gastropoda;Caenogastropoda;Architaenioglossa;Ampullarioidea;Ampullariidae;Pomacea;Pomacea canaliculata

UdeM00000022872 7950 96.3 UdeM00000022872 XP\_012672999.1 30.5 197  
120 3 67 260 7 189 1.30E-16 96.3 7950 cellular

organisms;Eukaryota;Opisthokonta;Metazoa;Eumetazoa;Bilateria;Deuterostomia;Chordata;Craniata;Vertebrata;Gnathostomata;Teleostomi;Euteleostomi;Actinopterygii;Actinopteri;Neopterygii;Teleostei;Osteoglossocephalai;Clupeocephala;Otomorpha;Clupei;Clupeiformes;Clupeoidei;Clupeidae;Clupeinae;Clupea;Clupea harengus

UdeM00000022873 6579 199.1 UdeM00000022873 XP\_033729790.1 43.5 237  
133 1 10 245 17 253 1.00E-47 199.1 6579 cellular

organisms;Eukaryota;Opisthokonta;Metazoa;Eumetazoa;Bilateria;Protostomia;Spiralia;Lophotrochozoa;Mollusca;Bivalvia;Autobranchia;Pteriormorphia;Pectinida;Pectinoidea;Pectinidae;Pecten;Pecten maximus

UdeM00000022876 29159 136.7 UdeM00000022876 XP\_034310977.1 61.1 113  
44 0 167 279 61 173 4.40E-29 136.7 29159 cellular

organisms;Eukaryota;Opisthokonta;Metazoa;Eumetazoa;Bilateria;Protostomia;Spiralia;Lophotrochozoa;Mollusca;Bivalvia;Autobranchia;Pteriormorphia;Ostreida;Ostreioidea;Ostreidae;Crassostrea;Crassostrea gigas

UdeM00000022877 29159 183.3 UdeM00000022877 XP\_034310776.1 44.7 304  
144 4 134 413 82 385 6.10E-43 183.3 29159 cellular

organisms;Eukaryota;Opisthokonta;Metazoa;Eumetazoa;Bilateria;Protostomia;Spiralia;Lophotrochozoa;Mollusca;Bivalvia;Autobranchia;Pteriormorphia;Ostreida;Ostreioidea;Ostreidae;Crassostrea;Crassostrea gigas

UdeM00000022878 6596 151.8 UdeM00000022878 XP\_045180816.1 49.7 163  
77 2 6 163 161 323 8.00E-34 151.8 6596 cellular

organisms;Eukaryota;Opisthokonta;Metazoa;Eumetazoa;Bilateria;Protostomia;Spiralia;Lophotrochozoa;Mollusca;Bivalvia;Autobranchia;Heteroconchia;Euherodonta;Imparidentia;Venerida;Veneroidea;Veneridae;Mercenaria;Mercenaria mercenaria

UdeM00000022879 6596 1294.3 UdeM00000022879 XP\_045180933.1 89.6  
710 72 2 59 767 1 709 0.00E+00 1294.3 6596  
cellular

organisms;Eukaryota;Opisthokonta;Metazoa;Eumetazoa;Bilateria;Protostomia;  
Spiralia;Lophotrochozoa;Mollusca;Bivalvia;Autobranhia;Heteroconchia;Euhe  
terodonta;Imparidentia;Venerida;Veneroidea;Veneridae;Mercenaria;Mercenari  
a mercenaria

UdeM00000022880 6596 1045.8 UdeM00000022880 XP\_045181251.1 37.3  
1791 904 30 10 1589 45 1827 6.40E-302 1045.8 6596  
cellular

organisms;Eukaryota;Opisthokonta;Metazoa;Eumetazoa;Bilateria;Protostomia;  
Spiralia;Lophotrochozoa;Mollusca;Bivalvia;Autobranhia;Heteroconchia;Euhe  
terodonta;Imparidentia;Venerida;Veneroidea;Veneridae;Mercenaria;Mercenari  
a mercenaria

UdeM00000022882 6596 354 UdeM00000022882 XP\_045181023.1 53 321  
148 3 9 329 11 328 2.10E-94 354 6596 cellular

organisms;Eukaryota;Opisthokonta;Metazoa;Eumetazoa;Bilateria;Protostomia;  
Spiralia;Lophotrochozoa;Mollusca;Bivalvia;Autobranhia;Heteroconchia;Euhe  
terodonta;Imparidentia;Venerida;Veneroidea;Veneridae;Mercenaria;Mercenari  
a mercenaria

UdeM00000022885 6596 393.3 UdeM00000022885 XP\_045181582.1 49.5 523  
240 6 9 522 11 518 4.90E-106 393.3 6596 cellular

organisms;Eukaryota;Opisthokonta;Metazoa;Eumetazoa;Bilateria;Protostomia;  
Spiralia;Lophotrochozoa;Mollusca;Bivalvia;Autobranhia;Heteroconchia;Euhe  
terodonta;Imparidentia;Venerida;Veneroidea;Veneridae;Mercenaria;Mercenari  
a mercenaria

UdeM00000022886 6596 192.6 UdeM00000022886 XP\_045181575.1 38.7 297  
174 5 399 693 701 991 1.80E-45 192.6 6596 cellular

organisms;Eukaryota;Opisthokonta;Metazoa;Eumetazoa;Bilateria;Protostomia;  
Spiralia;Lophotrochozoa;Mollusca;Bivalvia;Autobranhia;Heteroconchia;Euhe  
terodonta;Imparidentia;Venerida;Veneroidea;Veneridae;Mercenaria;Mercenari  
a mercenaria

UdeM00000022887 6596 328.2 UdeM00000022887 XP\_045181589.1 46.9 354  
170 4 26 364 32 382 1.40E-86 328.2 6596 cellular

organisms;Eukaryota;Opisthokonta;Metazoa;Eumetazoa;Bilateria;Protostomia;  
Spiralia;Lophotrochozoa;Mollusca;Bivalvia;Autobranhia;Heteroconchia;Euhe  
terodonta;Imparidentia;Venerida;Veneroidea;Veneridae;Mercenaria;Mercenari  
a mercenaria

UdeM00000022888 6596 160.2 UdeM00000022888 XP\_045181591.1 34.4 320  
181 8 1 297 1 314 5.60E-36 160.2 6596 cellular

organisms;Eukaryota;Opisthokonta;Metazoa;Eumetazoa;Bilateria;Protostomia;  
Spiralia;Lophotrochozoa;Mollusca;Bivalvia;Autobranhia;Heteroconchia;Euhe  
terodonta;Imparidentia;Venerida;Veneroidea;Veneridae;Mercenaria;Mercenari  
a mercenaria

UdeM00000022889 6596 162.2 UdeM00000022889 XP\_045181591.1 35.4 322  
175 8 1 297 1 314 1.50E-36 162.2 6596 cellular

organisms;Eukaryota;Opisthokonta;Metazoa;Eumetazoa;Bilateria;Protostomia;  
Spiralia;Lophotrochozoa;Mollusca;Bivalvia;Autobranhia;Heteroconchia;Euhe  
terodonta;Imparidentia;Venerida;Veneroidea;Veneridae;Mercenaria;Mercenari  
a mercenaria

UdeM00000022890 6596 207.2 UdeM00000022890 XP\_045181591.1 35.3 377  
220 5 1 355 1 375 4.20E-50 207.2 6596 cellular

organisms;Eukaryota;Opisthokonta;Metazoa;Eumetazoa;Bilateria;Protostomia;  
Spiralia;Lophotrochozoa;Mollusca;Bivalvia;Autobranhia;Heteroconchia;Euhe

terodonta;Imparidentia;Venerida;Veneroidea;Veneridae;Mercenaria;Mercenari  
 a mercenaria  
 UdeM00000022891 6565 159.5 UdeM00000022891 XP\_022329491.1 29.3 443  
 255 10 1 398 1 430 9.50E-36 159.5 6565 cellular  
 organisms;Eukaryota;Opisthokonta;Metazoa;Eumetazoa;Bilateria;Protostomia;  
 Spiralia;Lophotrochozoa;Mollusca;Bivalvia;Autobranchia;Pteriomorpha;Ostr  
 eida;Ostreoidea;Ostreidae;Crassostrea;Crassostrea virginica  
 UdeM00000022892 6596 184.1 UdeM00000022892 XP\_045181593.1 50 192  
 91 2 1 192 1 187 2.40E-43 184.1 6596 cellular  
 organisms;Eukaryota;Opisthokonta;Metazoa;Eumetazoa;Bilateria;Protostomia;  
 Spiralia;Lophotrochozoa;Mollusca;Bivalvia;Autobranchia;Heteroconchia;Euhe  
 terodonta;Imparidentia;Venerida;Veneroidea;Veneridae;Mercenaria;Mercenari  
 a mercenaria  
 UdeM00000022894 29159 100.1 UdeM00000022894 XP\_034312231.1 46.9 162  
 86 0 51 212 37 198 3.70E-18 100.1 29159 cellular  
 organisms;Eukaryota;Opisthokonta;Metazoa;Eumetazoa;Bilateria;Protostomia;  
 Spiralia;Lophotrochozoa;Mollusca;Bivalvia;Autobranchia;Pteriomorpha;Ostr  
 eida;Ostreoidea;Ostreidae;Crassostrea;Crassostrea gigas  
 UdeM00000022896 6596 256.1 UdeM00000022896 XP\_045187052.1 53.3 240  
 107 3 2 240 145 380 5.70E-65 256.1 6596 cellular  
 organisms;Eukaryota;Opisthokonta;Metazoa;Eumetazoa;Bilateria;Protostomia;  
 Spiralia;Lophotrochozoa;Mollusca;Bivalvia;Autobranchia;Heteroconchia;Euhe  
 terodonta;Imparidentia;Venerida;Veneroidea;Veneridae;Mercenaria;Mercenari  
 a mercenaria  
 UdeM00000022897 6596 65.5 UdeM00000022897 XP\_045202346.1 34 106  
 66 2 6 110 16 118 5.10E-08 65.5 6596 cellular  
 organisms;Eukaryota;Opisthokonta;Metazoa;Eumetazoa;Bilateria;Protostomia;  
 Spiralia;Lophotrochozoa;Mollusca;Bivalvia;Autobranchia;Heteroconchia;Euhe  
 terodonta;Imparidentia;Venerida;Veneroidea;Veneridae;Mercenaria;Mercenari  
 a mercenaria  
 UdeM00000022900 6579 518.5 UdeM00000022900 XP\_033762712.1 31.5 1148  
 709 27 1 1115 360 1463 2.90E-143 518.5 6579 cellular  
 organisms;Eukaryota;Opisthokonta;Metazoa;Eumetazoa;Bilateria;Protostomia;  
 Spiralia;Lophotrochozoa;Mollusca;Bivalvia;Autobranchia;Pteriomorpha;Pect  
 inida;Pectinoidea;Pectinidae;Pecten;Pecten maximus  
 UdeM00000022904 6596 211.1 UdeM00000022904 XP\_045163403.1 33.9 395  
 230 11 2 390 365 734 2.70E-51 211.1 6596 cellular  
 organisms;Eukaryota;Opisthokonta;Metazoa;Eumetazoa;Bilateria;Protostomia;  
 Spiralia;Lophotrochozoa;Mollusca;Bivalvia;Autobranchia;Heteroconchia;Euhe  
 terodonta;Imparidentia;Venerida;Veneroidea;Veneridae;Mercenaria;Mercenari  
 a mercenaria  
 UdeM00000022902 6565 247.3 UdeM00000022902 XP\_022295732.1 32.3 505  
 320 13 1 496 349 840 4.10E-62 247.3 6565 cellular  
 organisms;Eukaryota;Opisthokonta;Metazoa;Eumetazoa;Bilateria;Protostomia;  
 Spiralia;Lophotrochozoa;Mollusca;Bivalvia;Autobranchia;Pteriomorpha;Ostr  
 eida;Ostreoidea;Ostreidae;Crassostrea;Crassostrea virginica  
 UdeM00000022903 6579 444.1 UdeM00000022903 XP\_033762712.1 31 1011  
 629 23 1 983 360 1329 4.60E-121 444.1 6579 cellular  
 organisms;Eukaryota;Opisthokonta;Metazoa;Eumetazoa;Bilateria;Protostomia;  
 Spiralia;Lophotrochozoa;Mollusca;Bivalvia;Autobranchia;Pteriomorpha;Pect  
 inida;Pectinoidea;Pectinidae;Pecten;Pecten maximus  
 UdeM00000022905 6596 82.8 UdeM00000022905 XP\_045198663.1 23 269  
 157 6 8 229 533 798 1.20E-12 82.8 6596 cellular  
 organisms;Eukaryota;Opisthokonta;Metazoa;Eumetazoa;Bilateria;Protostomia;

Spiralia;Lophotrochozoa;Mollusca;Bivalvia;Autobranchia;Heteroconchia;Euherodonta;Imparidentia;Venerida;Veneroidea;Veneridae;Mercenaria;Mercenaria mercenaria

UdeM00000022907 6596 166.8 UdeM00000022907 XP\_045162181.1 34.9 261  
153 5 2 259 2265 2511 3.80E-38 166.8 6596 cellular

organisms;Eukaryota;Opisthokonta;Metazoa;Eumetazoa;Bilateria;Protostomia;Spiralia;Lophotrochozoa;Mollusca;Bivalvia;Autobranchia;Heteroconchia;Euherodonta;Imparidentia;Venerida;Veneroidea;Veneridae;Mercenaria;Mercenaria mercenaria

UdeM00000022908 6596 257.3 UdeM00000022908 XP\_045174670.1 26.9 781  
469 23 1 712 838 1585 7.80E-65 257.3 6596 cellular

organisms;Eukaryota;Opisthokonta;Metazoa;Eumetazoa;Bilateria;Protostomia;Spiralia;Lophotrochozoa;Mollusca;Bivalvia;Autobranchia;Heteroconchia;Euherodonta;Imparidentia;Venerida;Veneroidea;Veneridae;Mercenaria;Mercenaria mercenaria

UdeM00000022909 6596 63.2 UdeM00000022909 XP\_045176787.1 31.6 98  
66 1 7 103 7 104 2.50E-07 63.2 6596 cellular

organisms;Eukaryota;Opisthokonta;Metazoa;Eumetazoa;Bilateria;Protostomia;Spiralia;Lophotrochozoa;Mollusca;Bivalvia;Autobranchia;Heteroconchia;Euherodonta;Imparidentia;Venerida;Veneroidea;Veneridae;Mercenaria;Mercenaria mercenaria

UdeM00000022911 6579 491.9 UdeM00000022911 XP\_033762712.1 30.5 1153  
717 30 1 1117 360 1464 2.20E-135 491.9 6579 cellular

organisms;Eukaryota;Opisthokonta;Metazoa;Eumetazoa;Bilateria;Protostomia;Spiralia;Lophotrochozoa;Mollusca;Bivalvia;Autobranchia;Pteriomorphia;Pectinida;Pectinoidea;Pectinidae;Pecten;Pecten maximus

UdeM00000022912 6596 92 UdeM00000022912 XP\_045174670.1 23.9 255  
184 5 7 258 7 254 1.40E-15 92 6596 cellular

organisms;Eukaryota;Opisthokonta;Metazoa;Eumetazoa;Bilateria;Protostomia;Spiralia;Lophotrochozoa;Mollusca;Bivalvia;Autobranchia;Heteroconchia;Euherodonta;Imparidentia;Venerida;Veneroidea;Veneridae;Mercenaria;Mercenaria mercenaria

UdeM00000022913 6579 439.9 UdeM00000022913 XP\_033762712.1 33.5 827  
504 16 1 804 360 1163 7.20E-120 439.9 6579 cellular

organisms;Eukaryota;Opisthokonta;Metazoa;Eumetazoa;Bilateria;Protostomia;Spiralia;Lophotrochozoa;Mollusca;Bivalvia;Autobranchia;Pteriomorphia;Pectinida;Pectinoidea;Pectinidae;Pecten;Pecten maximus

UdeM00000022914 6596 82.8 UdeM00000022914 XP\_045173060.1 35.8 134  
57 3 1 108 145 275 3.20E-13 82.8 6596 cellular

organisms;Eukaryota;Opisthokonta;Metazoa;Eumetazoa;Bilateria;Protostomia;Spiralia;Lophotrochozoa;Mollusca;Bivalvia;Autobranchia;Heteroconchia;Euherodonta;Imparidentia;Venerida;Veneroidea;Veneridae;Mercenaria;Mercenaria mercenaria

UdeM00000022915 6596 87.4 UdeM00000022915 XP\_045163403.1 35.8 176  
102 5 92 261 1055 1225 3.10E-14 87.4 6596 cellular

organisms;Eukaryota;Opisthokonta;Metazoa;Eumetazoa;Bilateria;Protostomia;Spiralia;Lophotrochozoa;Mollusca;Bivalvia;Autobranchia;Heteroconchia;Euherodonta;Imparidentia;Venerida;Veneroidea;Veneridae;Mercenaria;Mercenaria mercenaria

UdeM00000022916 6596 78.6 UdeM00000022916 XP\_045163400.1 25.2 246  
160 6 19 264 1373 1594 2.60E-11 78.6 6596 cellular

organisms;Eukaryota;Opisthokonta;Metazoa;Eumetazoa;Bilateria;Protostomia;Spiralia;Lophotrochozoa;Mollusca;Bivalvia;Autobranchia;Heteroconchia;Euherodonta;Imparidentia;Venerida;Veneroidea;Veneridae;Mercenaria;Mercenaria mercenaria

terodonta;Imparidentia;Venerida;Veneroidea;Veneridae;Mercenaria;Mercenari  
 a mercenaria  
 UdeM00000022917 6596 677.9 UdeM00000022917 XP\_045180310.1 65.6 529  
 169 6 13 538 5 523 1.10E-191 677.9 6596 cellular  
 organisms;Eukaryota;Opisthokonta;Metazoa;Eumetazoa;Bilateria;Protostomia;  
 Spiralia;Lophotrochozoa;Mollusca;Bivalvia;Autobranhia;Heteroconchia;Euhe  
 terodonta;Imparidentia;Venerida;Veneroidea;Veneridae;Mercenaria;Mercenari  
 a mercenaria  
 UdeM00000022918 6596 77.8 UdeM00000022918 XP\_045181535.1 34 141  
 90 3 7 145 8 147 2.60E-11 77.8 6596 cellular  
 organisms;Eukaryota;Opisthokonta;Metazoa;Eumetazoa;Bilateria;Protostomia;  
 Spiralia;Lophotrochozoa;Mollusca;Bivalvia;Autobranhia;Heteroconchia;Euhe  
 terodonta;Imparidentia;Venerida;Veneroidea;Veneridae;Mercenaria;Mercenari  
 a mercenaria  
 UdeM00000022919 6579 188.3 UdeM00000022919 XP\_033726887.1 50.8 195  
 92 2 4 197 15 206 1.00E-44 188.3 6579 cellular  
 organisms;Eukaryota;Opisthokonta;Metazoa;Eumetazoa;Bilateria;Protostomia;  
 Spiralia;Lophotrochozoa;Mollusca;Bivalvia;Autobranhia;Pteriormorphia;Pect  
 inida;Pectinoidea;Pectinidae;Pecten;Pecten maximus  
 UdeM00000022921 6596 174.1 UdeM00000022921 XP\_045167442.1 41 183  
 106 2 10 190 5 187 1.70E-40 174.1 6596 cellular  
 organisms;Eukaryota;Opisthokonta;Metazoa;Eumetazoa;Bilateria;Protostomia;  
 Spiralia;Lophotrochozoa;Mollusca;Bivalvia;Autobranhia;Heteroconchia;Euhe  
 terodonta;Imparidentia;Venerida;Veneroidea;Veneridae;Mercenaria;Mercenari  
 a mercenaria  
 UdeM00000022922 7574 68.2 UdeM00000022922 XP\_013397237.1 35.2 108  
 61 4 16 121 16 116 8.80E-09 68.2 7574 cellular  
 organisms;Eukaryota;Opisthokonta;Metazoa;Eumetazoa;Bilateria;Protostomia;  
 Spiralia;Lophotrochozoa;Brachiopoda;Linguliformea;Lingulata;Lingulida;Lin  
 guloidea;Lingulidae;Lingula;Lingula anatina  
 UdeM00000022923 6596 174.1 UdeM00000022923 XP\_045167442.1 41 183  
 106 2 10 190 5 187 1.70E-40 174.1 6596 cellular  
 organisms;Eukaryota;Opisthokonta;Metazoa;Eumetazoa;Bilateria;Protostomia;  
 Spiralia;Lophotrochozoa;Mollusca;Bivalvia;Autobranhia;Heteroconchia;Euhe  
 terodonta;Imparidentia;Venerida;Veneroidea;Veneridae;Mercenaria;Mercenari  
 a mercenaria  
 UdeM00000022924 7574 68.2 UdeM00000022924 XP\_013397237.1 35.2 108  
 61 4 16 121 16 116 8.80E-09 68.2 7574 cellular  
 organisms;Eukaryota;Opisthokonta;Metazoa;Eumetazoa;Bilateria;Protostomia;  
 Spiralia;Lophotrochozoa;Brachiopoda;Linguliformea;Lingulata;Lingulida;Lin  
 guloidea;Lingulidae;Lingula;Lingula anatina  
 UdeM00000022925 7574 59.7 UdeM00000022925 XP\_013397228.1 31 116  
 72 4 6 119 7 116 3.10E-06 59.7 7574 cellular  
 organisms;Eukaryota;Opisthokonta;Metazoa;Eumetazoa;Bilateria;Protostomia;  
 Spiralia;Lophotrochozoa;Brachiopoda;Linguliformea;Lingulata;Lingulida;Lin  
 guloidea;Lingulidae;Lingula;Lingula anatina  
 UdeM00000022926 7574 67.8 UdeM00000022926 XP\_013397237.1 35.2 108  
 61 4 16 121 16 116 1.20E-08 67.8 7574 cellular  
 organisms;Eukaryota;Opisthokonta;Metazoa;Eumetazoa;Bilateria;Protostomia;  
 Spiralia;Lophotrochozoa;Brachiopoda;Linguliformea;Lingulata;Lingulida;Lin  
 guloidea;Lingulidae;Lingula;Lingula anatina  
 UdeM00000022927 6596 70.1 UdeM00000022927 XP\_045167442.1 42.3 71  
 41 0 10 80 5 75 1.80E-09 70.1 6596 cellular  
 organisms;Eukaryota;Opisthokonta;Metazoa;Eumetazoa;Bilateria;Protostomia;

Spiralia;Lophotrochozoa;Mollusca;Bivalvia;Autobranchia;Heteroconchia;Euherodonta;Imparidentia;Venerida;Veneroidea;Veneridae;Mercenaria;Mercenaria mercenaria

UdeM00000022928 6596 252.3 UdeM00000022928 XP\_045189084.1 32.8 530  
295 11 3 523 1382 1859 1.40E-63 252.3 6596 cellular

organisms;Eukaryota;Opisthokonta;Metazoa;Eumetazoa;Bilateria;Protostomia;Spiralia;Lophotrochozoa;Mollusca;Bivalvia;Autobranchia;Heteroconchia;Euherodonta;Imparidentia;Venerida;Veneroidea;Veneridae;Mercenaria;Mercenaria mercenaria

UdeM00000022929 29159 98.6 UdeM00000022929 XP\_034316342.1 34.4 154  
93 3 2 155 20 165 8.50E-18 98.6 29159 cellular

organisms;Eukaryota;Opisthokonta;Metazoa;Eumetazoa;Bilateria;Protostomia;Spiralia;Lophotrochozoa;Mollusca;Bivalvia;Autobranchia;Pteriomorpha;Ostreida;Ostreoidea;Ostreidae;Crassostrea;Crassostrea gigas

UdeM00000022930 6565 125.9 UdeM00000022930 XP\_022299602.1 45.9 135  
71 2 39 173 2 134 6.20E-26 125.9 6565 cellular

organisms;Eukaryota;Opisthokonta;Metazoa;Eumetazoa;Bilateria;Protostomia;Spiralia;Lophotrochozoa;Mollusca;Bivalvia;Autobranchia;Pteriomorpha;Ostreida;Ostreoidea;Ostreidae;Crassostrea;Crassostrea virginica

UdeM00000022931 6596 273.5 UdeM00000022931 XP\_045177776.1 35.7 479  
261 9 2 472 436 875 6.20E-70 273.5 6596 cellular

organisms;Eukaryota;Opisthokonta;Metazoa;Eumetazoa;Bilateria;Protostomia;Spiralia;Lophotrochozoa;Mollusca;Bivalvia;Autobranchia;Heteroconchia;Euherodonta;Imparidentia;Venerida;Veneroidea;Veneridae;Mercenaria;Mercenaria mercenaria

UdeM00000022932 29159 105.1 UdeM00000022932 XP\_034316342.1 37 154  
89 3 193 346 20 165 1.90E-19 105.1 29159 cellular

organisms;Eukaryota;Opisthokonta;Metazoa;Eumetazoa;Bilateria;Protostomia;Spiralia;Lophotrochozoa;Mollusca;Bivalvia;Autobranchia;Pteriomorpha;Ostreida;Ostreoidea;Ostreidae;Crassostrea;Crassostrea gigas

UdeM00000022933 7741 608.6 UdeM00000022933 XP\_019618826.1 57.5 506  
214 1 1 505 47 552 7.20E-171 608.6 7741 cellular

organisms;Eukaryota;Opisthokonta;Metazoa;Eumetazoa;Bilateria;Deuterostomia;Chordata;Cephalochordata;Leptocardii;Amphioxiformes;Branchiostomidae;Branchiostoma;Branchiostoma belcheri

UdeM00000022936 6500 134.4 UdeM00000022936 XP\_012938416.1 60.8 102  
39 1 3 103 2 103 9.20E-29 134.4 6500 cellular

organisms;Eukaryota;Opisthokonta;Metazoa;Eumetazoa;Bilateria;Protostomia;Spiralia;Lophotrochozoa;Mollusca;Gastropoda;Heterobranchia;Euthyneura;Teptipleura;Aplysiida;Aplysioidea;Aplysiidae;Aplysia;Aplysia californica

UdeM00000022937 1735272 282.7 UdeM00000022937 XP\_041361481.1 48.9  
466 205 9 262 703 272 728 1.30E-72 282.7 1735272

cellular

organisms;Eukaryota;Opisthokonta;Metazoa;Eumetazoa;Bilateria;Protostomia;Spiralia;Lophotrochozoa;Mollusca;Gastropoda;Neomphalina;Neomphaloidea;Peltospiridae;Gigantopelta;Gigantopelta aegis

UdeM00000022938 1735272 247.3 UdeM00000022938 XP\_041361481.1 56.5  
216 90 2 135 348 515 728 3.20E-62 247.3 1735272

cellular

organisms;Eukaryota;Opisthokonta;Metazoa;Eumetazoa;Bilateria;Protostomia;Spiralia;Lophotrochozoa;Mollusca;Gastropoda;Neomphalina;Neomphaloidea;Peltospiridae;Gigantopelta;Gigantopelta aegis

UdeM00000022939 7719 87.4 UdeM00000022939 XP\_026694037.1 24.2 500  
298 27 182 629 1135 1605 9.30E-14 87.4 7719 cellular

organisms;Eukaryota;Opisthokonta;Metazoa;Eumetazoa;Bilateria;Deuterostomia;Chordata;Tunicata;Ascidiacea;Phlebobranchia;Cionidae;Ciona;Ciona intestinalis

UdeM00000022940 6573 93.6 UdeM00000022940 XP\_021365717.1 28.9 225  
139 10 437 650 140 354 1.30E-15 93.6 6573 cellular

organisms;Eukaryota;Opisthokonta;Metazoa;Eumetazoa;Bilateria;Protostomia;Spiralia;Lophotrochozoa;Mollusca;Bivalvia;Autobranchia;Pteriormorphia;Pectinida;Pectinoidea;Pectinidae;Mizuhopecten;Mizuhopecten yessoensis

UdeM00000022941 6573 93.6 UdeM00000022941 XP\_021365717.1 28.5 239  
138 12 14 243 150 364 4.70E-16 93.6 6573 cellular

organisms;Eukaryota;Opisthokonta;Metazoa;Eumetazoa;Bilateria;Protostomia;Spiralia;Lophotrochozoa;Mollusca;Bivalvia;Autobranchia;Pteriormorphia;Pectinida;Pectinoidea;Pectinidae;Mizuhopecten;Mizuhopecten yessoensis

UdeM00000022942 29159 60.8 UdeM00000022942 XP\_034316237.1 27.2 158  
110 4 10 164 22 177 1.80E-06 60.8 29159 cellular

organisms;Eukaryota;Opisthokonta;Metazoa;Eumetazoa;Bilateria;Protostomia;Spiralia;Lophotrochozoa;Mollusca;Bivalvia;Autobranchia;Pteriormorphia;Ostreida;Ostreioidea;Ostreidae;Crassostrea;Crassostrea gigas

UdeM00000022943 29159 61.2 UdeM00000022943 XP\_034316237.1 27.1 166  
113 6 10 170 22 184 1.50E-06 61.2 29159 cellular

organisms;Eukaryota;Opisthokonta;Metazoa;Eumetazoa;Bilateria;Protostomia;Spiralia;Lophotrochozoa;Mollusca;Bivalvia;Autobranchia;Pteriormorphia;Ostreida;Ostreioidea;Ostreidae;Crassostrea;Crassostrea gigas

UdeM00000022944 76194 70.9 UdeM00000022944 XP\_013146412.1 31.3 115  
64 3 272 371 185 299 4.10E-09 70.9 76194 cellular

organisms;Eukaryota;Opisthokonta;Metazoa;Eumetazoa;Bilateria;Protostomia;Ecdysozoa;Panarthropoda;Arthropoda;Mandibulata;Pancrustacea;Hexapoda;Insecta;Dicondylia;Pterygota;Neoptera;Endopterygota;Amphiesmenoptera;Lepidoptera;Glossata;Neolepidoptera;Heteroneura;Ditrysia;Obtectomera;Papilionoidea;Papilionidae;Papilioninae;Papilionini;Papilio;Papilio polytes

UdeM00000022945 76194 70.9 UdeM00000022945 XP\_013146412.1 31.3 115  
64 3 262 361 185 299 4.00E-09 70.9 76194 cellular

organisms;Eukaryota;Opisthokonta;Metazoa;Eumetazoa;Bilateria;Protostomia;Ecdysozoa;Panarthropoda;Arthropoda;Mandibulata;Pancrustacea;Hexapoda;Insecta;Dicondylia;Pterygota;Neoptera;Endopterygota;Amphiesmenoptera;Lepidoptera;Glossata;Neolepidoptera;Heteroneura;Ditrysia;Obtectomera;Papilionoidea;Papilionidae;Papilioninae;Papilionini;Papilio;Papilio polytes

UdeM00000022948 6573 69.3 UdeM00000022948 XP\_021365717.1 33.9 118  
72 4 129 245 179 291 7.70E-09 69.3 6573 cellular

organisms;Eukaryota;Opisthokonta;Metazoa;Eumetazoa;Bilateria;Protostomia;Spiralia;Lophotrochozoa;Mollusca;Bivalvia;Autobranchia;Pteriormorphia;Pectinida;Pectinoidea;Pectinidae;Mizuhopecten;Mizuhopecten yessoensis

UdeM00000022951 225164 79.7 UdeM00000022951 XP\_009057862.1 25.6  
219 143 6 251 454 30 243 1.00E-11 79.7 225164  
cellular

organisms;Eukaryota;Opisthokonta;Metazoa;Eumetazoa;Bilateria;Protostomia;Spiralia;Lophotrochozoa;Mollusca;Gastropoda;Patellogastropoda;Lottioidae;Lottiidae;Lottia;Lottia gigantea

UdeM00000022952 1735272 78.6 UdeM00000022952 XP\_041362144.1 32.7  
159 97 5 4 154 19 175 1.60E-11 78.6 1735272  
cellular

organisms;Eukaryota;Opisthokonta;Metazoa;Eumetazoa;Bilateria;Protostomia;Spiralia;Lophotrochozoa;Mollusca;Gastropoda;Neomphalina;Neomphaloidea;Peltopspiridae;Gigantopelta;Gigantopelta aegis



UdeM00000022953 29159 63.9 UdeM00000022953 XP\_034316237.1 25.5 208  
 142 8 10 210 22 223 4.20E-07 63.9 29159 cellular  
 organisms;Eukaryota;Opisthokonta;Metazoa;Eumetazoa;Bilateria;Protostomia;  
 Spiralia;Lophotrochozoa;Mollusca;Bivalvia;Autobranchia;Pteriomorphia;Ostr  
 eida;Ostreoidea;Ostreidae;Crassostrea;Crassostrea gigas  
 UdeM00000022954 29159 63.9 UdeM00000022954 XP\_034316237.1 25.5 208  
 142 8 10 210 22 223 3.40E-07 63.9 29159 cellular  
 organisms;Eukaryota;Opisthokonta;Metazoa;Eumetazoa;Bilateria;Protostomia;  
 Spiralia;Lophotrochozoa;Mollusca;Bivalvia;Autobranchia;Pteriomorphia;Ostr  
 eida;Ostreoidea;Ostreidae;Crassostrea;Crassostrea gigas  
 UdeM00000022958 6596 67.8 UdeM00000022958 XP\_045206350.1 31.1 119  
 75 4 134 245 186 304 2.20E-08 67.8 6596 cellular  
 organisms;Eukaryota;Opisthokonta;Metazoa;Eumetazoa;Bilateria;Protostomia;  
 Spiralia;Lophotrochozoa;Mollusca;Bivalvia;Autobranchia;Heteroconchia;Euhe  
 terodonta;Imparidentia;Venerida;Veneroidea;Veneridae;Mercenaria;Mercenari  
 a mercenaria  
 UdeM00000022961 225164 79.3 UdeM00000022961 XP\_009057862.1 25.6  
 219 143 6 251 454 30 243 1.40E-11 79.3 225164  
 cellular  
 organisms;Eukaryota;Opisthokonta;Metazoa;Eumetazoa;Bilateria;Protostomia;  
 Spiralia;Lophotrochozoa;Mollusca;Gastropoda;Patellogastropoda;Lottioidea;  
 Lottiidae;Lottia;Lottia gigantea  
 UdeM00000022965 6573 88.6 UdeM00000022965 XP\_021365717.1 31.6 174  
 100 8 11 177 186 347 1.90E-14 88.6 6573 cellular  
 organisms;Eukaryota;Opisthokonta;Metazoa;Eumetazoa;Bilateria;Protostomia;  
 Spiralia;Lophotrochozoa;Mollusca;Bivalvia;Autobranchia;Pteriomorphia;Pect  
 inida;Pectinoidea;Pectinidae;Mizuhopecten;Mizuhopecten yessoensis  
 UdeM00000022966 6573 124.8 UdeM00000022966 XP\_021365717.1 28.1 370  
 230 15 8 368 5 347 3.90E-25 124.8 6573 cellular  
 organisms;Eukaryota;Opisthokonta;Metazoa;Eumetazoa;Bilateria;Protostomia;  
 Spiralia;Lophotrochozoa;Mollusca;Bivalvia;Autobranchia;Pteriomorphia;Pect  
 inida;Pectinoidea;Pectinidae;Mizuhopecten;Mizuhopecten yessoensis  
 UdeM00000022967 6573 124.8 UdeM00000022967 XP\_021365717.1 28.1 370  
 230 15 8 368 5 347 3.80E-25 124.8 6573 cellular  
 organisms;Eukaryota;Opisthokonta;Metazoa;Eumetazoa;Bilateria;Protostomia;  
 Spiralia;Lophotrochozoa;Mollusca;Bivalvia;Autobranchia;Pteriomorphia;Pect  
 inida;Pectinoidea;Pectinidae;Mizuhopecten;Mizuhopecten yessoensis  
 UdeM00000022968 6596 402.5 UdeM00000022968 XP\_045182552.1 82.2 242  
 43 0 1 242 97 338 3.80E-109 402.5 6596 cellular  
 organisms;Eukaryota;Opisthokonta;Metazoa;Eumetazoa;Bilateria;Protostomia;  
 Spiralia;Lophotrochozoa;Mollusca;Bivalvia;Autobranchia;Heteroconchia;Euhe  
 terodonta;Imparidentia;Venerida;Veneroidea;Veneridae;Mercenaria;Mercenari  
 a mercenaria  
 UdeM00000022969 225164 382.5 UdeM00000022969 XP\_009045886.1 91.1  
 257 23 0 1 257 1 257 4.30E-103 382.5 225164  
 cellular  
 organisms;Eukaryota;Opisthokonta;Metazoa;Eumetazoa;Bilateria;Protostomia;  
 Spiralia;Lophotrochozoa;Mollusca;Gastropoda;Patellogastropoda;Lottioidea;  
 Lottiidae;Lottia;Lottia gigantea  
 UdeM00000022970 6596 351.7 UdeM00000022970 XP\_045180975.1 63.3 278  
 95 1 6 276 7 284 8.90E-94 351.7 6596 cellular  
 organisms;Eukaryota;Opisthokonta;Metazoa;Eumetazoa;Bilateria;Protostomia;  
 Spiralia;Lophotrochozoa;Mollusca;Bivalvia;Autobranchia;Heteroconchia;Euhe

terodonta;Imparidentia;Venerida;Veneroidea;Veneridae;Mercenaria;Mercenaria mercenaria  
 UdeM00000022971 6579 174.9 UdeM00000022971 XP\_033727723.1 58.1 148  
 62 0 2 149 24 171 8.00E-41 174.9 6579 cellular  
 organisms;Eukaryota;Opisthokonta;Metazoa;Eumetazoa;Bilateria;Protostomia;  
 Spiralia;Lophotrochozoa;Mollusca;Bivalvia;Autobranhia;Pteriormorphia;Pect  
 inida;Pectinoidea;Pectinidae;Pecten;Pecten maximus  
 UdeM00000022972 6596 124 UdeM00000022972 XP\_045190732.1 34.9 166  
 99 4 8 166 64 227 1.80E-25 124 6596 cellular  
 organisms;Eukaryota;Opisthokonta;Metazoa;Eumetazoa;Bilateria;Protostomia;  
 Spiralia;Lophotrochozoa;Mollusca;Bivalvia;Autobranhia;Heteroconchia;Euhe  
 terodonta;Imparidentia;Venerida;Veneroidea;Veneridae;Mercenaria;Mercenari  
 a mercenaria  
 UdeM00000022973 6565 530.4 UdeM00000022973 XP\_022313181.1 55.3 477  
 201 4 137 611 60 526 3.00E-147 530.4 6565 cellular  
 organisms;Eukaryota;Opisthokonta;Metazoa;Eumetazoa;Bilateria;Protostomia;  
 Spiralia;Lophotrochozoa;Mollusca;Bivalvia;Autobranhia;Pteriormorphia;Ostr  
 eida;Ostreoidea;Ostreidae;Crassostrea;Crassostrea virginica  
 UdeM00000022974 6579 762.7 UdeM00000022974 XP\_033726599.1 34.6 1530  
 692 32 1 1320 4 1435 8.60E-217 762.7 6579 cellular  
 organisms;Eukaryota;Opisthokonta;Metazoa;Eumetazoa;Bilateria;Protostomia;  
 Spiralia;Lophotrochozoa;Mollusca;Bivalvia;Autobranhia;Pteriormorphia;Pect  
 inida;Pectinoidea;Pectinidae;Pecten;Pecten maximus  
 UdeM00000022975 6596 452.6 UdeM00000022975 XP\_045183049.1 70.6 310  
 91 0 1 310 1 310 4.10E-124 452.6 6596 cellular  
 organisms;Eukaryota;Opisthokonta;Metazoa;Eumetazoa;Bilateria;Protostomia;  
 Spiralia;Lophotrochozoa;Mollusca;Bivalvia;Autobranhia;Heteroconchia;Euhe  
 terodonta;Imparidentia;Venerida;Veneroidea;Veneridae;Mercenaria;Mercenari  
 a mercenaria  
 UdeM00000022976 6596 429.1 UdeM00000022976 XP\_045183049.1 74 281  
 73 0 1 281 1 281 4.30E-117 429.1 6596 cellular  
 organisms;Eukaryota;Opisthokonta;Metazoa;Eumetazoa;Bilateria;Protostomia;  
 Spiralia;Lophotrochozoa;Mollusca;Bivalvia;Autobranhia;Heteroconchia;Euhe  
 terodonta;Imparidentia;Venerida;Veneroidea;Veneridae;Mercenaria;Mercenari  
 a mercenaria  
 UdeM00000022977 6579 367.1 UdeM00000022977 XP\_033726505.1 93.9 179  
 11 0 1 179 1 179 1.30E-98 367.1 6579 cellular  
 organisms;Eukaryota;Opisthokonta;Metazoa;Eumetazoa;Bilateria;Protostomia;  
 Spiralia;Lophotrochozoa;Mollusca;Bivalvia;Autobranhia;Pteriormorphia;Pect  
 inida;Pectinoidea;Pectinidae;Pecten;Pecten maximus  
 UdeM00000022979 7574 455.3 UdeM00000022979 XP\_023932112.1 48.7 454  
 228 4 353 804 1 451 1.90E-124 455.3 7574 cellular  
 organisms;Eukaryota;Opisthokonta;Metazoa;Eumetazoa;Bilateria;Protostomia;  
 Spiralia;Lophotrochozoa;Brachiopoda;Linguliformea;Lingulata;Lingulida;Lin  
 guloidea;Lingulidae;Lingula;Lingula anatina  
 UdeM00000022982 6596 407.9 UdeM00000022982 XP\_045177779.1 35.1 726  
 384 14 1 724 97 737 3.50E-110 407.9 6596 cellular  
 organisms;Eukaryota;Opisthokonta;Metazoa;Eumetazoa;Bilateria;Protostomia;  
 Spiralia;Lophotrochozoa;Mollusca;Bivalvia;Autobranhia;Heteroconchia;Euhe  
 terodonta;Imparidentia;Venerida;Veneroidea;Veneridae;Mercenaria;Mercenari  
 a mercenaria  
 UdeM00000022983 29159 83.6 UdeM00000022983 XP\_034334762.1 42.7 96  
 55 0 15 110 808 903 2.50E-13 83.6 29159 cellular  
 organisms;Eukaryota;Opisthokonta;Metazoa;Eumetazoa;Bilateria;Protostomia;

Spiralia;Lophotrochozoa;Mollusca;Bivalvia;Autobranchia;Pteriormorphia;Ostr  
eida;Ostreoidea;Ostreidae;Crassostrea;Crassostrea gigas  
UdeM00000022984 29159 116.3 UdeM00000022984 XP\_034322504.1 40.2 179  
72 6 3 154 2 172 3.80E-23 116.3 29159 cellular  
organisms;Eukaryota;Opisthokonta;Metazoa;Eumetazoa;Bilateria;Protostomia;  
Spiralia;Lophotrochozoa;Mollusca;Bivalvia;Autobranchia;Pteriormorphia;Ostr  
eida;Ostreoidea;Ostreidae;Crassostrea;Crassostrea gigas  
UdeM00000022985 6596 329.7 UdeM00000022985 XP\_045189084.1 34.1 625  
315 12 9 621 1343 1882 1.10E-86 329.7 6596 cellular  
organisms;Eukaryota;Opisthokonta;Metazoa;Eumetazoa;Bilateria;Protostomia;  
Spiralia;Lophotrochozoa;Mollusca;Bivalvia;Autobranchia;Heteroconchia;Euhe  
terodonta;Imparidentia;Venerida;Veneroidea;Veneridae;Mercenaria;Mercenari  
a mercenaria  
UdeM00000022986 6596 288.1 UdeM00000022986 XP\_045181294.1 56.1 269  
79 2 23 290 659 889 1.30E-74 288.1 6596 cellular  
organisms;Eukaryota;Opisthokonta;Metazoa;Eumetazoa;Bilateria;Protostomia;  
Spiralia;Lophotrochozoa;Mollusca;Bivalvia;Autobranchia;Heteroconchia;Euhe  
terodonta;Imparidentia;Venerida;Veneroidea;Veneridae;Mercenaria;Mercenari  
a mercenaria  
UdeM00000039637 6573 251.1 UdeM00000039637 XP\_021349313.1 40.1 297  
171 2 2 295 3 295 1.80E-63 251.1 6573 cellular  
organisms;Eukaryota;Opisthokonta;Metazoa;Eumetazoa;Bilateria;Protostomia;  
Spiralia;Lophotrochozoa;Mollusca;Bivalvia;Autobranchia;Pteriormorphia;Pect  
inida;Pectinoidea;Pectinidae;Mizuhopecten;Mizuhopecten yessoensis  
UdeM00000039638 6945 237.7 UdeM00000039638 XP\_002434331.1 74.1 147  
37 1 1 147 1 146 9.80E-60 237.7 6945 cellular  
organisms;Eukaryota;Opisthokonta;Metazoa;Eumetazoa;Bilateria;Protostomia;  
Ecdysozoa;Panarthropoda;Arthropoda;Chelicerata;Arachnida;Acari;Parasitifo  
rmes;Ixodida;Ixodoidea;Ixodidae;Ixodinae;Ixodes;Ixodes scapularis  
UdeM00000039639 6579 759.6 UdeM00000039639 XP\_033741571.1 50.1 920  
393 23 9 902 1 880 4.60E-216 759.6 6579 cellular  
organisms;Eukaryota;Opisthokonta;Metazoa;Eumetazoa;Bilateria;Protostomia;  
Spiralia;Lophotrochozoa;Mollusca;Bivalvia;Autobranchia;Pteriormorphia;Pect  
inida;Pectinoidea;Pectinidae;Pecten;Pecten maximus  
UdeM00000039640 1437191 142.9 UdeM00000039640 XP\_029054816.1 43.8  
162 88 2 1 159 302 463 3.50E-31 142.9 1437191  
cellular  
organisms;Eukaryota;Opisthokonta;Metazoa;Eumetazoa;Bilateria;Protostomia;  
Ecdysozoa;Panarthropoda;Arthropoda;Mandibulata;Pancrustacea;Hexapoda;Inse  
cta;Dicondylia;Pterygota;Neoptera;Endopterygota;Hymenoptera;Apocrita;Acul  
eata;Apoidea;Megachilidae;Megachilinae;Osmiini;Osmia;Osmia bicornis;Osmia  
bicornis bicornis  
UdeM00000039641 7574 248.8 UdeM00000039641 XP\_013381923.1 74.4 160  
41 0 1 160 1 160 4.60E-63 248.8 7574 cellular  
organisms;Eukaryota;Opisthokonta;Metazoa;Eumetazoa;Bilateria;Protostomia;  
Spiralia;Lophotrochozoa;Brachiopoda;Linguliformea;Lingulata;Lingulida;Lin  
guloidea;Lingulidae;Lingula;Lingula anatina  
UdeM00000039642 400727 208.4 UdeM00000039642 XP\_025075930.1 46.2  
240 125 2 27 263 62 300 1.20E-50 208.4 400727  
cellular  
organisms;Eukaryota;Opisthokonta;Metazoa;Eumetazoa;Bilateria;Protostomia;  
Spiralia;Lophotrochozoa;Mollusca;Gastropoda;Caenogastropoda;Architaeniogl  
ossa;Ampullarioidea;Ampullariidae;Pomacea;Pomacea canaliculata

UdeM00000039643 1735272 237.3 UdeM00000039643 XP\_041363109.1 40  
 305 177 3 31 331 34 336 3.10E-59 237.3 1735272  
 cellular  
 organisms;Eukaryota;Opisthokonta;Metazoa;Eumetazoa;Bilateria;Protostomia;  
 Spiralia;Lophotrochozoa;Mollusca;Gastropoda;Neomphalina;Neomphaloidea;Pel  
 tospiridae;Gigantopelta;Gigantopelta aegis  
 UdeM00000039644 6596 365.9 UdeM00000039644 XP\_045213990.1 57.5 301  
 126 1 5 305 8 306 4.90E-98 365.9 6596 cellular  
 organisms;Eukaryota;Opisthokonta;Metazoa;Eumetazoa;Bilateria;Protostomia;  
 Spiralia;Lophotrochozoa;Mollusca;Bivalvia;Autobranchia;Heteroconchia;Euhe  
 terodonta;Imparidentia;Venerida;Veneroidea;Veneridae;Mercenaria;Mercenari  
 a mercenaria  
 UdeM00000039645 6596 112.5 UdeM00000039645 XP\_045191033.1 36.2 218  
 119 5 12 222 91 295 7.10E-22 112.5 6596 cellular  
 organisms;Eukaryota;Opisthokonta;Metazoa;Eumetazoa;Bilateria;Protostomia;  
 Spiralia;Lophotrochozoa;Mollusca;Bivalvia;Autobranchia;Heteroconchia;Euhe  
 terodonta;Imparidentia;Venerida;Veneroidea;Veneridae;Mercenaria;Mercenari  
 a mercenaria  
 UdeM00000039646 6596 108.6 UdeM00000039646 XP\_045211142.1 44.1 145  
 72 3 53 190 161 303 8.80E-21 108.6 6596 cellular  
 organisms;Eukaryota;Opisthokonta;Metazoa;Eumetazoa;Bilateria;Protostomia;  
 Spiralia;Lophotrochozoa;Mollusca;Bivalvia;Autobranchia;Heteroconchia;Euhe  
 terodonta;Imparidentia;Venerida;Veneroidea;Veneridae;Mercenaria;Mercenari  
 a mercenaria  
 UdeM00000039647 6596 112.1 UdeM00000039647 XP\_045211142.1 44.8 145  
 71 3 53 190 161 303 8.00E-22 112.1 6596 cellular  
 organisms;Eukaryota;Opisthokonta;Metazoa;Eumetazoa;Bilateria;Protostomia;  
 Spiralia;Lophotrochozoa;Mollusca;Bivalvia;Autobranchia;Heteroconchia;Euhe  
 terodonta;Imparidentia;Venerida;Veneroidea;Veneridae;Mercenaria;Mercenari  
 a mercenaria  
 UdeM00000039648 6596 110.2 UdeM00000039648 XP\_045211142.1 43.5 147  
 74 3 9 148 159 303 2.40E-21 110.2 6596 cellular  
 organisms;Eukaryota;Opisthokonta;Metazoa;Eumetazoa;Bilateria;Protostomia;  
 Spiralia;Lophotrochozoa;Mollusca;Bivalvia;Autobranchia;Heteroconchia;Euhe  
 terodonta;Imparidentia;Venerida;Veneroidea;Veneridae;Mercenaria;Mercenari  
 a mercenaria  
 UdeM00000039649 6596 118.2 UdeM00000039649 XP\_045213612.1 71.4 77  
 22 0 4 80 7 83 4.70E-24 118.2 6596 cellular  
 organisms;Eukaryota;Opisthokonta;Metazoa;Eumetazoa;Bilateria;Protostomia;  
 Spiralia;Lophotrochozoa;Mollusca;Bivalvia;Autobranchia;Heteroconchia;Euhe  
 terodonta;Imparidentia;Venerida;Veneroidea;Veneridae;Mercenaria;Mercenari  
 a mercenaria  
 UdeM00000039650 6596 911.4 UdeM00000039650 XP\_045213612.1 76.1 599  
 137 1 32 630 108 700 9.50E-262 911.4 6596 cellular  
 organisms;Eukaryota;Opisthokonta;Metazoa;Eumetazoa;Bilateria;Protostomia;  
 Spiralia;Lophotrochozoa;Mollusca;Bivalvia;Autobranchia;Heteroconchia;Euhe  
 terodonta;Imparidentia;Venerida;Veneroidea;Veneridae;Mercenaria;Mercenari  
 a mercenaria  
 UdeM00000039651 6596 2017.7 UdeM00000039651 XP\_045213612.1 60.6  
 2049 614 30 18 2012 741 2650 0.00E+00 2017.7 6596  
 cellular  
 organisms;Eukaryota;Opisthokonta;Metazoa;Eumetazoa;Bilateria;Protostomia;  
 Spiralia;Lophotrochozoa;Mollusca;Bivalvia;Autobranchia;Heteroconchia;Euhe

terodonta;Imparidentia;Venerida;Veneroidea;Veneridae;Mercenaria;Mercenari  
a mercenaria

UdeM00000039652 6573 563.9 UdeM00000039652 XP\_021361598.1 59.9 439  
170 3 2 435 27 464 1.80E-157 563.9 6573 cellular

organisms;Eukaryota;Opisthokonta;Metazoa;Eumetazoa;Bilateria;Protostomia;  
Spiralia;Lophotrochozoa;Mollusca;Bivalvia;Autobranhia;Pteriormorphia;Pect  
inida;Pectinoidea;Pectinidae;Mizuhopecten;Mizuhopecten yessoensis

UdeM00000039653 1735272 315.5 UdeM00000039653 XP\_041362600.1 55.6  
277 121 1 6 282 3 277 7.10E-83 315.5 1735272  
cellular

organisms;Eukaryota;Opisthokonta;Metazoa;Eumetazoa;Bilateria;Protostomia;  
Spiralia;Lophotrochozoa;Mollusca;Gastropoda;Neomphalina;Neomphaloidea;Pel  
tospiridae;Gigantopelta;Gigantopelta aegis

UdeM00000039654 6596 609.4 UdeM00000039654 XP\_045212387.1 56.1 522  
224 2 1 521 1 518 4.40E-171 609.4 6596 cellular

organisms;Eukaryota;Opisthokonta;Metazoa;Eumetazoa;Bilateria;Protostomia;  
Spiralia;Lophotrochozoa;Mollusca;Bivalvia;Autobranhia;Heteroconchia;Euhe  
terodonta;Imparidentia;Venerida;Veneroidea;Veneridae;Mercenaria;Mercenari  
a mercenaria

UdeM00000039655 6573 130.6 UdeM00000039655 XP\_021343095.1 63.9 122  
32 5 1 111 1 121 1.30E-27 130.6 6573 cellular

organisms;Eukaryota;Opisthokonta;Metazoa;Eumetazoa;Bilateria;Protostomia;  
Spiralia;Lophotrochozoa;Mollusca;Bivalvia;Autobranhia;Pteriormorphia;Pect  
inida;Pectinoidea;Pectinidae;Mizuhopecten;Mizuhopecten yessoensis

UdeM00000039656 6596 2175.2 UdeM00000039656 XP\_045211620.1 64.8  
2936 815 49 2 2827 1 2828 0.00E+00 2175.2 6596  
cellular

organisms;Eukaryota;Opisthokonta;Metazoa;Eumetazoa;Bilateria;Protostomia;  
Spiralia;Lophotrochozoa;Mollusca;Bivalvia;Autobranhia;Heteroconchia;Euhe  
terodonta;Imparidentia;Venerida;Veneroidea;Veneridae;Mercenaria;Mercenari  
a mercenaria

UdeM00000039657 6596 2181 UdeM00000039657 XP\_045211620.1 64.9 2936  
816 48 2 2829 1 2828 0.00E+00 2181 6596 cellular

organisms;Eukaryota;Opisthokonta;Metazoa;Eumetazoa;Bilateria;Protostomia;  
Spiralia;Lophotrochozoa;Mollusca;Bivalvia;Autobranhia;Heteroconchia;Euhe  
terodonta;Imparidentia;Venerida;Veneroidea;Veneridae;Mercenaria;Mercenari  
a mercenaria

UdeM00000039658 6596 502.3 UdeM00000039658 XP\_045211629.1 73.2 336  
89 1 1 336 1 335 4.80E-139 502.3 6596 cellular

organisms;Eukaryota;Opisthokonta;Metazoa;Eumetazoa;Bilateria;Protostomia;  
Spiralia;Lophotrochozoa;Mollusca;Bivalvia;Autobranhia;Heteroconchia;Euhe  
terodonta;Imparidentia;Venerida;Veneroidea;Veneridae;Mercenaria;Mercenari  
a mercenaria

UdeM00000039659 6573 1056.2 UdeM00000039659 XP\_021355239.1 76.1  
683 158 3 1 683 1 678 2.10E-305 1056.2 6573  
cellular

organisms;Eukaryota;Opisthokonta;Metazoa;Eumetazoa;Bilateria;Protostomia;  
Spiralia;Lophotrochozoa;Mollusca;Bivalvia;Autobranhia;Pteriormorphia;Pect  
inida;Pectinoidea;Pectinidae;Mizuhopecten;Mizuhopecten yessoensis

UdeM00000039660 6573 680.6 UdeM00000039660 XP\_021355237.1 67.9 467  
142 2 5 471 4 462 1.50E-192 680.6 6573 cellular

organisms;Eukaryota;Opisthokonta;Metazoa;Eumetazoa;Bilateria;Protostomia;  
Spiralia;Lophotrochozoa;Mollusca;Bivalvia;Autobranhia;Pteriormorphia;Pect  
inida;Pectinoidea;Pectinidae;Mizuhopecten;Mizuhopecten yessoensis

UdeM00000039661 6573 216.1 UdeM00000039661 XP\_021355237.1 71.4 133  
 38 0 5 137 4 136 2.80E-53 216.1 6573 cellular  
 organisms;Eukaryota;Opisthokonta;Metazoa;Eumetazoa;Bilateria;Protostomia;  
 Spiralia;Lophotrochozoa;Mollusca;Bivalvia;Autobranchia;Pteriomorpha;Pect  
 inida;Pectinoidea;Pectinidae;Mizuhopecten;Mizuhopecten yessoensis  
 UdeM00000039662 6596 538.5 UdeM00000039662 XP\_045213596.1 61.6 404  
 153 2 44 447 43 444 8.10E-150 538.5 6596 cellular  
 organisms;Eukaryota;Opisthokonta;Metazoa;Eumetazoa;Bilateria;Protostomia;  
 Spiralia;Lophotrochozoa;Mollusca;Bivalvia;Autobranchia;Heteroconchia;Euhe  
 terodonta;Imparidentia;Venerida;Veneroidea;Veneridae;Mercenaria;Mercenari  
 a mercenaria  
 UdeM00000039663 6573 127.9 UdeM00000039663 XP\_021353616.1 34.8 250  
 135 8 12 236 1251 1497 1.80E-26 127.9 6573 cellular  
 organisms;Eukaryota;Opisthokonta;Metazoa;Eumetazoa;Bilateria;Protostomia;  
 Spiralia;Lophotrochozoa;Mollusca;Bivalvia;Autobranchia;Pteriomorpha;Pect  
 inida;Pectinoidea;Pectinidae;Mizuhopecten;Mizuhopecten yessoensis  
 UdeM00000039664 400727 398.7 UdeM00000039664 XP\_025085573.1 43.6  
 482 244 11 50 523 38 499 1.20E-107 398.7 400727  
 cellular  
 organisms;Eukaryota;Opisthokonta;Metazoa;Eumetazoa;Bilateria;Protostomia;  
 Spiralia;Lophotrochozoa;Mollusca;Gastropoda;Caenogastropoda;Architaeniogl  
 ossa;Ampullarioidea;Ampullariidae;Pomacea;Pomacea canaliculata  
 UdeM00000039665 400727 403.7 UdeM00000039665 XP\_025085573.1 44.7  
 470 242 10 50 509 38 499 3.70E-109 403.7 400727  
 cellular  
 organisms;Eukaryota;Opisthokonta;Metazoa;Eumetazoa;Bilateria;Protostomia;  
 Spiralia;Lophotrochozoa;Mollusca;Gastropoda;Caenogastropoda;Architaeniogl  
 ossa;Ampullarioidea;Ampullariidae;Pomacea;Pomacea canaliculata  
 UdeM00000039666 151771 158.7 UdeM00000039666 XP\_028399635.1 34  
 253 115 4 35 236 839 1090 9.20E-36 158.7 151771  
 cellular  
 organisms;Eukaryota;Opisthokonta;Metazoa;Eumetazoa;Cnidaria;Anthozoa;Octo  
 corallia;Alcyonacea;Alcyoniina;Nephtheidae;Dendronephthya;Dendronephthya  
 gigantea  
 UdeM00000039667 6579 427.2 UdeM00000039667 XP\_033749044.1 59.7 347  
 136 1 9 351 7 353 2.30E-116 427.2 6579 cellular  
 organisms;Eukaryota;Opisthokonta;Metazoa;Eumetazoa;Bilateria;Protostomia;  
 Spiralia;Lophotrochozoa;Mollusca;Bivalvia;Autobranchia;Pteriomorpha;Pect  
 inida;Pectinoidea;Pectinidae;Pecten;Pecten maximus  
 UdeM00000039669 6573 697.6 UdeM00000039669 XP\_021357487.1 84.3 394  
 62 0 7 400 2 395 9.50E-198 697.6 6573 cellular  
 organisms;Eukaryota;Opisthokonta;Metazoa;Eumetazoa;Bilateria;Protostomia;  
 Spiralia;Lophotrochozoa;Mollusca;Bivalvia;Autobranchia;Pteriomorpha;Pect  
 inida;Pectinoidea;Pectinidae;Mizuhopecten;Mizuhopecten yessoensis  
 UdeM00000039668 6573 699.1 UdeM00000039668 XP\_021357487.1 84.3 395  
 62 0 1 395 1 395 3.20E-198 699.1 6573 cellular  
 organisms;Eukaryota;Opisthokonta;Metazoa;Eumetazoa;Bilateria;Protostomia;  
 Spiralia;Lophotrochozoa;Mollusca;Bivalvia;Autobranchia;Pteriomorpha;Pect  
 inida;Pectinoidea;Pectinidae;Mizuhopecten;Mizuhopecten yessoensis  
 UdeM00000039670 1735272 183.7 UdeM00000039670 XP\_041363370.1 57.9  
 140 57 1 14 151 15 154 1.90E-43 183.7 1735272  
 cellular  
 organisms;Eukaryota;Opisthokonta;Metazoa;Eumetazoa;Bilateria;Protostomia;

Spiralia; Lophotrochozoa; Mollusca; Gastropoda; Neomphalina; Neomphaloidea; Pelto-  
 tospiridae; Gigantopelta; Gigantopelta aegis

UdeM00000039671 6579 196.4 UdeM00000039671 XP\_033735211.1 86.4 110  
 10 1 1 110 1 105 1.90E-47 196.4 6579 cellular  
 organisms; Eukaryota; Opisthokonta; Metazoa; Eumetazoa; Bilateria; Protostomia;  
 Spiralia; Lophotrochozoa; Mollusca; Bivalvia; Autobranchia; Pteriomorpha; Pect-  
 inida; Pectinoidea; Pectinidae; Pecten; Pecten maximus

UdeM00000039672 6596 827.4 UdeM00000039672 XP\_045210568.1 49.7 861  
 411 6 9 855 3 855 1.70E-236 827.4 6596 cellular  
 organisms; Eukaryota; Opisthokonta; Metazoa; Eumetazoa; Bilateria; Protostomia;  
 Spiralia; Lophotrochozoa; Mollusca; Bivalvia; Autobranchia; Heteroconchia; Eue-  
 terodonta; Imparidentia; Venerida; Veneroidea; Veneridae; Mercenaria; Mercenari-  
 a mercenaria

UdeM00000039673 6596 410.6 UdeM00000039673 XP\_045213918.1 48.1 478  
 230 9 1 467 68 538 2.70E-111 410.6 6596 cellular  
 organisms; Eukaryota; Opisthokonta; Metazoa; Eumetazoa; Bilateria; Protostomia;  
 Spiralia; Lophotrochozoa; Mollusca; Bivalvia; Autobranchia; Heteroconchia; Eue-  
 terodonta; Imparidentia; Venerida; Veneroidea; Veneridae; Mercenaria; Mercenari-  
 a mercenaria

UdeM00000039674 2607531 149.8 UdeM00000039674 XP\_029639050.1 58.5  
 118 49 0 29 146 25 142 2.70E-33 149.8 2607531  
 cellular  
 organisms; Eukaryota; Opisthokonta; Metazoa; Eumetazoa; Bilateria; Protostomia;  
 Spiralia; Lophotrochozoa; Mollusca; Cephalopoda; Coleoidea; Octopodiformes; Oct-  
 opoda; Incirrata; Octopodidae; Octopus; Octopus sinensis

UdeM00000041158 6596 276.6 UdeM00000041158 XP\_045187579.1 48.1 314  
 157 5 141 451 117 427 6.00E-71 276.6 6596 cellular  
 organisms; Eukaryota; Opisthokonta; Metazoa; Eumetazoa; Bilateria; Protostomia;  
 Spiralia; Lophotrochozoa; Mollusca; Bivalvia; Autobranchia; Heteroconchia; Eue-  
 terodonta; Imparidentia; Venerida; Veneroidea; Veneridae; Mercenaria; Mercenari-  
 a mercenaria

UdeM00000041159 6573 1420.2 UdeM00000041159 XP\_021353017.1 42  
 1932 1047 29 30 1933 100 1985 0.00E+00 1420.2 6573  
 cellular  
 organisms; Eukaryota; Opisthokonta; Metazoa; Eumetazoa; Bilateria; Protostomia;  
 Spiralia; Lophotrochozoa; Mollusca; Bivalvia; Autobranchia; Pteriomorpha; Pect-  
 inida; Pectinoidea; Pectinidae; Mizuhopecten; Mizuhopecten yessoensis

UdeM00000041161 7757 75.9 UdeM00000041161 XP\_032835197.1 64.9 57  
 19 1 2 58 149 204 6.00E-11 75.9 7757 cellular  
 organisms; Eukaryota; Opisthokonta; Metazoa; Eumetazoa; Bilateria; Deuterostomi-  
 a; Chordata; Craniata; Vertebrata; Cyclostomata; Hyperoartia; Petromyzontiforme-  
 s; Petromyzontidae; Petromyzon; Petromyzon marinus

UdeM00000041162 6596 1543.1 UdeM00000041162 XP\_045184130.1 58.1  
 1493 538 27 1 1469 20 1448 0.00E+00 1543.1 6596  
 cellular  
 organisms; Eukaryota; Opisthokonta; Metazoa; Eumetazoa; Bilateria; Protostomia;  
 Spiralia; Lophotrochozoa; Mollusca; Bivalvia; Autobranchia; Heteroconchia; Eue-  
 terodonta; Imparidentia; Venerida; Veneroidea; Veneridae; Mercenaria; Mercenari-  
 a mercenaria

UdeM00000041163 6596 651 UdeM00000041163 XP\_045177992.1 50.2 648  
 277 10 7 623 282 914 1.60E-183 651 6596 cellular  
 organisms; Eukaryota; Opisthokonta; Metazoa; Eumetazoa; Bilateria; Protostomia;  
 Spiralia; Lophotrochozoa; Mollusca; Bivalvia; Autobranchia; Heteroconchia; Eue-

terodonta;Imparidentia;Venerida;Veneroidea;Veneridae;Mercenaria;Mercenaria mercenaria  
 UdeM00000041164 6596 551.6 UdeM00000041164 XP\_045184193.1 70.8 442  
 115 6 1 440 1 430 9.10E-154 551.6 6596 cellular  
 organisms;Eukaryota;Opisthokonta;Metazoa;Eumetazoa;Bilateria;Protostomia;  
 Spiralia;Lophotrochozoa;Mollusca;Bivalvia;Autobranhia;Heteroconchia;Euhe  
 terodonta;Imparidentia;Venerida;Veneroidea;Veneridae;Mercenaria;Mercenari  
 a mercenaria  
 UdeM00000041165 6573 117.5 UdeM00000041165 XP\_021375410.1 26.9 290  
 173 5 29 299 188 457 3.10E-23 117.5 6573 cellular  
 organisms;Eukaryota;Opisthokonta;Metazoa;Eumetazoa;Bilateria;Protostomia;  
 Spiralia;Lophotrochozoa;Mollusca;Bivalvia;Autobranhia;Pteriormorphia;Pect  
 inida;Pectinoidea;Pectinidae;Mizuhopecten;Mizuhopecten yessoensis  
 UdeM00000041166 225164 153.3 UdeM00000041166 XP\_009055819.1 32  
 297 178 6 14 310 170 442 5.30E-34 153.3 225164  
 cellular  
 organisms;Eukaryota;Opisthokonta;Metazoa;Eumetazoa;Bilateria;Protostomia;  
 Spiralia;Lophotrochozoa;Mollusca;Gastropoda;Patellogastropoda;Lottioidea;  
 Lottiidae;Lottia;Lottia gigantea  
 UdeM00000041167 29159 146.7 UdeM00000041167 XP\_034315421.1 39.9 238  
 113 5 12 223 230 463 3.40E-32 146.7 29159 cellular  
 organisms;Eukaryota;Opisthokonta;Metazoa;Eumetazoa;Bilateria;Protostomia;  
 Spiralia;Lophotrochozoa;Mollusca;Bivalvia;Autobranhia;Pteriormorphia;Ostr  
 eida;Ostreoidea;Ostreidae;Crassostrea;Crassostrea gigas  
 UdeM00000041168 6573 159.5 UdeM00000041168 XP\_021375410.1 33.3 291  
 172 5 70 359 188 457 8.50E-36 159.5 6573 cellular  
 organisms;Eukaryota;Opisthokonta;Metazoa;Eumetazoa;Bilateria;Protostomia;  
 Spiralia;Lophotrochozoa;Mollusca;Bivalvia;Autobranhia;Pteriormorphia;Pect  
 inida;Pectinoidea;Pectinidae;Mizuhopecten;Mizuhopecten yessoensis  
 UdeM00000041169 6573 149.1 UdeM00000041169 XP\_021375410.1 34.2 278  
 161 6 28 304 188 444 1.00E-32 149.1 6573 cellular  
 organisms;Eukaryota;Opisthokonta;Metazoa;Eumetazoa;Bilateria;Protostomia;  
 Spiralia;Lophotrochozoa;Mollusca;Bivalvia;Autobranhia;Pteriormorphia;Pect  
 inida;Pectinoidea;Pectinidae;Mizuhopecten;Mizuhopecten yessoensis  
 UdeM00000041170 6573 157.9 UdeM00000041170 XP\_021375410.1 35.1 291  
 164 7 22 308 188 457 2.10E-35 157.9 6573 cellular  
 organisms;Eukaryota;Opisthokonta;Metazoa;Eumetazoa;Bilateria;Protostomia;  
 Spiralia;Lophotrochozoa;Mollusca;Bivalvia;Autobranhia;Pteriormorphia;Pect  
 inida;Pectinoidea;Pectinidae;Mizuhopecten;Mizuhopecten yessoensis  
 UdeM00000041171 29159 171.8 UdeM00000041171 XP\_034315421.1 45.1 237  
 122 4 12 243 230 463 1.10E-39 171.8 29159 cellular  
 organisms;Eukaryota;Opisthokonta;Metazoa;Eumetazoa;Bilateria;Protostomia;  
 Spiralia;Lophotrochozoa;Mollusca;Bivalvia;Autobranhia;Pteriormorphia;Ostr  
 eida;Ostreoidea;Ostreidae;Crassostrea;Crassostrea gigas  
 UdeM00000041173 6573 100.1 UdeM00000041173 XP\_021375410.1 27.2 272  
 128 3 28 231 188 457 4.00E-18 100.1 6573 cellular  
 organisms;Eukaryota;Opisthokonta;Metazoa;Eumetazoa;Bilateria;Protostomia;  
 Spiralia;Lophotrochozoa;Mollusca;Bivalvia;Autobranhia;Pteriormorphia;Pect  
 inida;Pectinoidea;Pectinidae;Mizuhopecten;Mizuhopecten yessoensis  
 UdeM00000041174 6573 151 UdeM00000041174 XP\_021375410.1 31.7 303  
 173 4 28 329 188 457 2.80E-33 151 6573 cellular  
 organisms;Eukaryota;Opisthokonta;Metazoa;Eumetazoa;Bilateria;Protostomia;  
 Spiralia;Lophotrochozoa;Mollusca;Bivalvia;Autobranhia;Pteriormorphia;Pect  
 inida;Pectinoidea;Pectinidae;Mizuhopecten;Mizuhopecten yessoensis



UdeM00000041175 29159 110.9 UdeM00000041175 XP\_034315421.1 35.1 225  
 87 5 12 181 230 450 1.70E-21 110.9 29159 cellular  
 organisms;Eukaryota;Opisthokonta;Metazoa;Eumetazoa;Bilateria;Protostomia;  
 Spiralia;Lophotrochozoa;Mollusca;Bivalvia;Autobranchia;Pteriormorphia;Ostr  
 eida;Ostreoidea;Ostreidae;Crassostrea;Crassostrea gigas  
 UdeM00000041176 6573 97.8 UdeM00000041176 XP\_021375410.1 26.8 272  
 129 3 29 232 188 457 2.00E-17 97.8 6573 cellular  
 organisms;Eukaryota;Opisthokonta;Metazoa;Eumetazoa;Bilateria;Protostomia;  
 Spiralia;Lophotrochozoa;Mollusca;Bivalvia;Autobranchia;Pteriormorphia;Pect  
 inida;Pectinoidea;Pectinidae;Mizuhopecten;Mizuhopecten yessoensis  
 UdeM00000041177 6565 77.8 UdeM00000041177 XP\_022299023.1 51.5 68  
 33 0 32 99 151 218 8.70E-12 77.8 6565 cellular  
 organisms;Eukaryota;Opisthokonta;Metazoa;Eumetazoa;Bilateria;Protostomia;  
 Spiralia;Lophotrochozoa;Mollusca;Bivalvia;Autobranchia;Pteriormorphia;Ostr  
 eida;Ostreoidea;Ostreidae;Crassostrea;Crassostrea virginica  
 UdeM00000041178 6573 150.6 UdeM00000041178 XP\_021375410.1 32.3 303  
 171 6 30 331 188 457 3.70E-33 150.6 6573 cellular  
 organisms;Eukaryota;Opisthokonta;Metazoa;Eumetazoa;Bilateria;Protostomia;  
 Spiralia;Lophotrochozoa;Mollusca;Bivalvia;Autobranchia;Pteriormorphia;Pect  
 inida;Pectinoidea;Pectinidae;Mizuhopecten;Mizuhopecten yessoensis  
 UdeM00000041179 29159 86.3 UdeM00000041179 XP\_034315421.1 52.6 95  
 40 2 65 155 370 463 3.80E-14 86.3 29159 cellular  
 organisms;Eukaryota;Opisthokonta;Metazoa;Eumetazoa;Bilateria;Protostomia;  
 Spiralia;Lophotrochozoa;Mollusca;Bivalvia;Autobranchia;Pteriormorphia;Ostr  
 eida;Ostreoidea;Ostreidae;Crassostrea;Crassostrea gigas  
 UdeM00000041180 6573 155.6 UdeM00000041180 XP\_021375410.1 33.8 302  
 177 7 11 311 178 457 1.10E-34 155.6 6573 cellular  
 organisms;Eukaryota;Opisthokonta;Metazoa;Eumetazoa;Bilateria;Protostomia;  
 Spiralia;Lophotrochozoa;Mollusca;Bivalvia;Autobranchia;Pteriormorphia;Pect  
 inida;Pectinoidea;Pectinidae;Mizuhopecten;Mizuhopecten yessoensis  
 UdeM00000041181 8255 74.3 UdeM00000041181 XP\_019935337.1 48.4 62  
 24 1 29 90 63 116 9.10E-11 74.3 8255 cellular  
 organisms;Eukaryota;Opisthokonta;Metazoa;Eumetazoa;Bilateria;Deuterostomi  
 a;Chordata;Craniata;Vertebrata;Gnathostomata;Teleostomi;Euteleostomi;Acti  
 nopterygii;Actinopteri;Neopterygii;Teleostei;Osteoglossocephalai;Clupeoce  
 phala;Euteleosteomorpha;Neoteleostei;Eurypterygia;Ctenosquamata;Acanthomo  
 rphata;Euacanthomorphacea;Percomorphaceae;Carangaria;Pleuronectiformes;Pl  
 euronectoidei;Paralichthyidae;Paralichthys;Paralichthys olivaceus  
 UdeM00000041183 46514 165.6 UdeM00000041183 XP\_038071378.1 43.5 170  
 92 1 42 207 207 376 6.60E-38 165.6 46514 cellular  
 organisms;Eukaryota;Opisthokonta;Metazoa;Eumetazoa;Bilateria;Deuterostomi  
 a;Echinodermata;Eleutherozoa;Asterozoa;Asteroidea;Valvatacea;Valvatida;As  
 terinidae;Patiria;Patiria miniata  
 UdeM00000041184 13397 85.9 UdeM00000041184 XP\_041035287.1 32.6 144  
 91 3 19 156 420 563 5.10E-14 85.9 13397 cellular  
 organisms;Eukaryota;Opisthokonta;Metazoa;Eumetazoa;Bilateria;Deuterostomi  
 a;Chordata;Craniata;Vertebrata;Gnathostomata;Chondrichthyes;Elasmobranchi  
 i;Selachii;Galeomorphii;Galeoidea;Lamniformes;Alopiidae;Lamninae;Carcharo  
 don;Carcharodon carcharias  
 UdeM00000041186 6579 125.6 UdeM00000041186 XP\_033734392.1 27.6 340  
 227 7 27 351 78 413 1.30E-25 125.6 6579 cellular  
 organisms;Eukaryota;Opisthokonta;Metazoa;Eumetazoa;Bilateria;Protostomia;  
 Spiralia;Lophotrochozoa;Mollusca;Bivalvia;Autobranchia;Pteriormorphia;Pect  
 inida;Pectinoidea;Pectinidae;Pecten;Pecten maximus

UdeM00000041187 6596 119.4 UdeM00000041187 XP\_045186922.1 30.7 322  
 186 12 200 496 153 462 2.50E-23 119.4 6596 cellular  
 organisms;Eukaryota;Opisthokonta;Metazoa;Eumetazoa;Bilateria;Protostomia;  
 Spiralia;Lophotrochozoa;Mollusca;Bivalvia;Autobranchia;Heteroconchia;Euhe  
 terodonta;Imparidentia;Venerida;Veneroidea;Veneridae;Mercenaria;Mercenari  
 a mercenaria

UdeM00000041188 6573 617.8 UdeM00000041188 XP\_021363339.1 48.9 710  
 359 3 1 709 1 707 1.70E-173 617.8 6573 cellular  
 organisms;Eukaryota;Opisthokonta;Metazoa;Eumetazoa;Bilateria;Protostomia;  
 Spiralia;Lophotrochozoa;Mollusca;Bivalvia;Autobranchia;Pteriormorphia;Pect  
 inida;Pectinoidea;Pectinidae;Mizuhopecten;Mizuhopecten yessoensis

UdeM00000041189 6596 184.1 UdeM00000041189 XP\_045168544.1 61.4 145  
 51 1 2 141 7 151 1.40E-43 184.1 6596 cellular  
 organisms;Eukaryota;Opisthokonta;Metazoa;Eumetazoa;Bilateria;Protostomia;  
 Spiralia;Lophotrochozoa;Mollusca;Bivalvia;Autobranchia;Heteroconchia;Euhe  
 terodonta;Imparidentia;Venerida;Veneroidea;Veneridae;Mercenaria;Mercenari  
 a mercenaria

UdeM00000041191 6596 95.9 UdeM00000041191 XP\_045168544.1 41.9 136  
 67 5 28 153 181 314 4.90E-17 95.9 6596 cellular  
 organisms;Eukaryota;Opisthokonta;Metazoa;Eumetazoa;Bilateria;Protostomia;  
 Spiralia;Lophotrochozoa;Mollusca;Bivalvia;Autobranchia;Heteroconchia;Euhe  
 terodonta;Imparidentia;Venerida;Veneroidea;Veneridae;Mercenaria;Mercenari  
 a mercenaria

UdeM00000041192 6596 616.3 UdeM00000041192 XP\_045168598.1 38.3 1417  
 627 44 9 1323 316 1587 9.00E-173 616.3 6596 cellular  
 organisms;Eukaryota;Opisthokonta;Metazoa;Eumetazoa;Bilateria;Protostomia;  
 Spiralia;Lophotrochozoa;Mollusca;Bivalvia;Autobranchia;Heteroconchia;Euhe  
 terodonta;Imparidentia;Venerida;Veneroidea;Veneridae;Mercenaria;Mercenari  
 a mercenaria

UdeM00000041193 6596 598.2 UdeM00000041193 XP\_045168598.1 39.4 1317  
 557 42 84 1303 415 1587 2.50E-167 598.2 6596 cellular  
 organisms;Eukaryota;Opisthokonta;Metazoa;Eumetazoa;Bilateria;Protostomia;  
 Spiralia;Lophotrochozoa;Mollusca;Bivalvia;Autobranchia;Heteroconchia;Euhe  
 terodonta;Imparidentia;Venerida;Veneroidea;Veneridae;Mercenaria;Mercenari  
 a mercenaria

UdeM00000041194 6596 143.7 UdeM00000041194 XP\_045168648.1 40.7 209  
 95 4 1 209 1 180 2.70E-31 143.7 6596 cellular  
 organisms;Eukaryota;Opisthokonta;Metazoa;Eumetazoa;Bilateria;Protostomia;  
 Spiralia;Lophotrochozoa;Mollusca;Bivalvia;Autobranchia;Heteroconchia;Euhe  
 terodonta;Imparidentia;Venerida;Veneroidea;Veneridae;Mercenaria;Mercenari  
 a mercenaria

UdeM00000041195 6596 337.4 UdeM00000041195 XP\_045186415.1 64.4 239  
 84 1 142 379 56 294 2.30E-89 337.4 6596 cellular  
 organisms;Eukaryota;Opisthokonta;Metazoa;Eumetazoa;Bilateria;Protostomia;  
 Spiralia;Lophotrochozoa;Mollusca;Bivalvia;Autobranchia;Heteroconchia;Euhe  
 terodonta;Imparidentia;Venerida;Veneroidea;Veneridae;Mercenaria;Mercenari  
 a mercenaria

UdeM00000041196 29159 400.2 UdeM00000041196 XP\_019930469.2 39.8 495  
 293 2 13 507 3 492 4.50E-108 400.2 29159 cellular  
 organisms;Eukaryota;Opisthokonta;Metazoa;Eumetazoa;Bilateria;Protostomia;  
 Spiralia;Lophotrochozoa;Mollusca;Bivalvia;Autobranchia;Pteriormorphia;Ostr  
 eida;Ostreoidea;Ostreidae;Crassostrea;Crassostrea gigas

UdeM00000041197 29159 395.2 UdeM00000041197 XP\_019930469.2 39.6 498  
 293 3 13 510 3 492 1.40E-106 395.2 29159 cellular

organisms;Eukaryota;Opisthokonta;Metazoa;Eumetazoa;Bilateria;Protostomia;Spiralia;Lophotrochozoa;Mollusca;Bivalvia;Autobranhia;Pteriormorphia;Ostr eida;Ostreoidea;Ostreidae;Crassostrea;Crassostrea gigas  
UdeM00000041198 6596 355.1 UdeM00000041198 XP\_045173727.1 65.4 321  
73 8 121 420 128 431 1.20E-94 355.1 6596 cellular  
organisms;Eukaryota;Opisthokonta;Metazoa;Eumetazoa;Bilateria;Protostomia;Spiralia;Lophotrochozoa;Mollusca;Bivalvia;Autobranhia;Heteroconchia;Euhe terodonta;Imparidentia;Venerida;Veneroidea;Veneridae;Mercenaria;Mercenari a mercenaria  
UdeM00000041199 6596 118.6 UdeM00000041199 XP\_045173713.1 51.5 132  
56 2 8 139 610 733 6.30E-24 118.6 6596 cellular  
organisms;Eukaryota;Opisthokonta;Metazoa;Eumetazoa;Bilateria;Protostomia;Spiralia;Lophotrochozoa;Mollusca;Bivalvia;Autobranhia;Heteroconchia;Euhe terodonta;Imparidentia;Venerida;Veneroidea;Veneridae;Mercenaria;Mercenari a mercenaria  
UdeM00000041200 29159 139.4 UdeM00000041200 XP\_011413447.2 36.9 263  
152 5 216 474 307 559 1.20E-29 139.4 29159 cellular  
organisms;Eukaryota;Opisthokonta;Metazoa;Eumetazoa;Bilateria;Protostomia;Spiralia;Lophotrochozoa;Mollusca;Bivalvia;Autobranhia;Pteriormorphia;Ostr eida;Ostreoidea;Ostreidae;Crassostrea;Crassostrea gigas  
UdeM00000041201 6565 106.3 UdeM00000041201 XP\_022331164.1 47.3 129  
67 1 11 139 18 145 3.40E-20 106.3 6565 cellular  
organisms;Eukaryota;Opisthokonta;Metazoa;Eumetazoa;Bilateria;Protostomia;Spiralia;Lophotrochozoa;Mollusca;Bivalvia;Autobranhia;Pteriormorphia;Ostr eida;Ostreoidea;Ostreidae;Crassostrea;Crassostrea virginica  
UdeM00000041203 6596 164.1 UdeM00000041203 XP\_045170414.1 44.1 238  
116 6 19 253 36 259 2.40E-37 164.1 6596 cellular  
organisms;Eukaryota;Opisthokonta;Metazoa;Eumetazoa;Bilateria;Protostomia;Spiralia;Lophotrochozoa;Mollusca;Bivalvia;Autobranhia;Heteroconchia;Euhe terodonta;Imparidentia;Venerida;Veneroidea;Veneridae;Mercenaria;Mercenari a mercenaria  
UdeM00000041204 6596 341.3 UdeM00000041204 XP\_045187482.1 50.2 400  
159 7 6 373 9 400 1.60E-90 341.3 6596 cellular  
organisms;Eukaryota;Opisthokonta;Metazoa;Eumetazoa;Bilateria;Protostomia;Spiralia;Lophotrochozoa;Mollusca;Bivalvia;Autobranhia;Heteroconchia;Euhe terodonta;Imparidentia;Venerida;Veneroidea;Veneridae;Mercenaria;Mercenari a mercenaria  
UdeM00000041207 6565 164.9 UdeM00000041207 XP\_022328873.1 67.7 124  
37 2 99 221 27 148 1.70E-37 164.9 6565 cellular  
organisms;Eukaryota;Opisthokonta;Metazoa;Eumetazoa;Bilateria;Protostomia;Spiralia;Lophotrochozoa;Mollusca;Bivalvia;Autobranhia;Pteriormorphia;Ostr eida;Ostreoidea;Ostreidae;Crassostrea;Crassostrea virginica  
UdeM00000041208 6596 179.5 UdeM00000041208 XP\_045187288.1 83.1 118  
18 2 86 201 100 217 6.60E-42 179.5 6596 cellular  
organisms;Eukaryota;Opisthokonta;Metazoa;Eumetazoa;Bilateria;Protostomia;Spiralia;Lophotrochozoa;Mollusca;Bivalvia;Autobranhia;Heteroconchia;Euhe terodonta;Imparidentia;Venerida;Veneroidea;Veneridae;Mercenaria;Mercenari a mercenaria  
UdeM00000041209 6565 136.3 UdeM00000041209 XP\_022328873.1 53.6 138  
64 0 73 210 11 148 6.10E-29 136.3 6565 cellular  
organisms;Eukaryota;Opisthokonta;Metazoa;Eumetazoa;Bilateria;Protostomia;Spiralia;Lophotrochozoa;Mollusca;Bivalvia;Autobranhia;Pteriormorphia;Ostr eida;Ostreoidea;Ostreidae;Crassostrea;Crassostrea virginica

UdeM00000041211 6596 335.1 UdeM00000041211 XP\_045159215.1 49.4 328  
 161 4 1 326 12 336 1.00E-88 335.1 6596 cellular  
 organisms;Eukaryota;Opisthokonta;Metazoa;Eumetazoa;Bilateria;Protostomia;  
 Spiralia;Lophotrochozoa;Mollusca;Bivalvia;Autobranchia;Heteroconchia;Euhe  
 terodonta;Imparidentia;Venerida;Veneroidea;Veneridae;Mercenaria;Mercenari  
 a mercenaria  
 UdeM00000041212 6596 324.3 UdeM00000041212 XP\_045216295.1 36.9 580  
 325 16 26 591 29 581 3.60E-85 324.3 6596 cellular  
 organisms;Eukaryota;Opisthokonta;Metazoa;Eumetazoa;Bilateria;Protostomia;  
 Spiralia;Lophotrochozoa;Mollusca;Bivalvia;Autobranchia;Heteroconchia;Euhe  
 terodonta;Imparidentia;Venerida;Veneroidea;Veneridae;Mercenaria;Mercenari  
 a mercenaria  
 UdeM00000041214 29159 326.2 UdeM00000041214 XP\_011451803.1 69.5 305  
 58 9 1 299 1 276 5.40E-86 326.2 29159 cellular  
 organisms;Eukaryota;Opisthokonta;Metazoa;Eumetazoa;Bilateria;Protostomia;  
 Spiralia;Lophotrochozoa;Mollusca;Bivalvia;Autobranchia;Pteriormorphia;Ostr  
 eida;Ostreoidea;Ostreidae;Crassostrea;Crassostrea gigas  
 UdeM00000041215 29159 1275 UdeM00000041215 XP\_011451785.2 72.1 868  
 226 5 1 862 1 858 0.00E+00 1275 29159 cellular  
 organisms;Eukaryota;Opisthokonta;Metazoa;Eumetazoa;Bilateria;Protostomia;  
 Spiralia;Lophotrochozoa;Mollusca;Bivalvia;Autobranchia;Pteriormorphia;Ostr  
 eida;Ostreoidea;Ostreidae;Crassostrea;Crassostrea gigas  
 UdeM00000041216 6596 1000.3 UdeM00000041216 XP\_045174921.1 70.2  
 682 201 2 1 680 1 682 1.20E-288 1000.3 6596  
 cellular  
 organisms;Eukaryota;Opisthokonta;Metazoa;Eumetazoa;Bilateria;Protostomia;  
 Spiralia;Lophotrochozoa;Mollusca;Bivalvia;Autobranchia;Heteroconchia;Euhe  
 terodonta;Imparidentia;Venerida;Veneroidea;Veneridae;Mercenaria;Mercenari  
 a mercenaria  
 UdeM00000041217 6565 248.4 UdeM00000041217 XP\_022328705.1 67.4 334  
 100 6 1 328 8 338 1.20E-62 248.4 6565 cellular  
 organisms;Eukaryota;Opisthokonta;Metazoa;Eumetazoa;Bilateria;Protostomia;  
 Spiralia;Lophotrochozoa;Mollusca;Bivalvia;Autobranchia;Pteriormorphia;Ostr  
 eida;Ostreoidea;Ostreidae;Crassostrea;Crassostrea virginica  
 UdeM00000041218 6596 196.1 UdeM00000041218 XP\_045174909.1 52.3 266  
 91 7 1 244 21 272 7.30E-47 196.1 6596 cellular  
 organisms;Eukaryota;Opisthokonta;Metazoa;Eumetazoa;Bilateria;Protostomia;  
 Spiralia;Lophotrochozoa;Mollusca;Bivalvia;Autobranchia;Heteroconchia;Euhe  
 terodonta;Imparidentia;Venerida;Veneroidea;Veneridae;Mercenaria;Mercenari  
 a mercenaria  
 UdeM00000041219 6596 194.1 UdeM00000041219 XP\_045174909.1 52.5 257  
 89 6 4 238 27 272 2.70E-46 194.1 6596 cellular  
 organisms;Eukaryota;Opisthokonta;Metazoa;Eumetazoa;Bilateria;Protostomia;  
 Spiralia;Lophotrochozoa;Mollusca;Bivalvia;Autobranchia;Heteroconchia;Euhe  
 terodonta;Imparidentia;Venerida;Veneroidea;Veneridae;Mercenaria;Mercenari  
 a mercenaria  
 UdeM00000041220 29159 150.6 UdeM00000041220 XP\_011445167.1 50 144  
 68 1 3 146 9 148 1.60E-33 150.6 29159 cellular  
 organisms;Eukaryota;Opisthokonta;Metazoa;Eumetazoa;Bilateria;Protostomia;  
 Spiralia;Lophotrochozoa;Mollusca;Bivalvia;Autobranchia;Pteriormorphia;Ostr  
 eida;Ostreoidea;Ostreidae;Crassostrea;Crassostrea gigas  
 UdeM00000041221 6573 355.5 UdeM00000041221 XP\_021342061.1 59.8 328  
 119 6 1 320 12 334 7.00E-95 355.5 6573 cellular  
 organisms;Eukaryota;Opisthokonta;Metazoa;Eumetazoa;Bilateria;Protostomia;

Spiralia;Lophotrochozoa;Mollusca;Bivalvia;Autobranchia;Pteriomorpha;Pectinida;Pectinoidea;Pectinidae;Mizuhopecten;Mizuhopecten yessoensis  
UdeM00000041222 6573 71.6 UdeM00000041222 XP\_021380265.1 56.9 65  
26 1 91 153 590 654 1.00E-09 71.6 6573 cellular  
organisms;Eukaryota;Opisthokonta;Metazoa;Eumetazoa;Bilateria;Protostomia;  
Spiralia;Lophotrochozoa;Mollusca;Bivalvia;Autobranchia;Pteriomorpha;Pectinida;Pectinoidea;Pectinidae;Mizuhopecten;Mizuhopecten yessoensis  
UdeM00000041223 6596 449.9 UdeM00000041223 XP\_045173782.1 46 502  
258 6 2 496 5 500 4.20E-123 449.9 6596 cellular  
organisms;Eukaryota;Opisthokonta;Metazoa;Eumetazoa;Bilateria;Protostomia;  
Spiralia;Lophotrochozoa;Mollusca;Bivalvia;Autobranchia;Heteroconchia;Euherodonta;Imparidentia;Venerida;Veneroidea;Veneridae;Mercenaria;Mercenaria mercenaria  
UdeM00000041224 6596 1273.8 UdeM00000041224 XP\_045186908.1 80.8  
817 156 1 51 866 43 859 0.00E+00 1273.8 6596  
cellular  
organisms;Eukaryota;Opisthokonta;Metazoa;Eumetazoa;Bilateria;Protostomia;  
Spiralia;Lophotrochozoa;Mollusca;Bivalvia;Autobranchia;Heteroconchia;Euherodonta;Imparidentia;Venerida;Veneroidea;Veneridae;Mercenaria;Mercenaria mercenaria  
UdeM00000041226 6579 177.9 UdeM00000041226 XP\_033735752.1 59 144  
52 2 91 232 16 154 2.00E-41 177.9 6579 cellular  
organisms;Eukaryota;Opisthokonta;Metazoa;Eumetazoa;Bilateria;Protostomia;  
Spiralia;Lophotrochozoa;Mollusca;Bivalvia;Autobranchia;Pteriomorpha;Pectinida;Pectinoidea;Pectinidae;Pecten;Pecten maximus  
UdeM00000041227 6565 350.9 UdeM00000041227 XP\_022333709.1 47.9 378  
193 2 6 382 4 378 2.10E-93 350.9 6565 cellular  
organisms;Eukaryota;Opisthokonta;Metazoa;Eumetazoa;Bilateria;Protostomia;  
Spiralia;Lophotrochozoa;Mollusca;Bivalvia;Autobranchia;Pteriomorpha;Ostreida;Ostreoidea;Ostreidae;Crassostrea;Crassostrea virginica  
UdeM00000041228 94885 82.8 UdeM00000041228 XP\_034293971.1 52.8 72  
34 0 7 78 14 85 2.40E-13 82.8 94885 cellular  
organisms;Eukaryota;Opisthokonta;Metazoa;Eumetazoa;Bilateria;Deuterostomia;Chordata;Craniata;Vertebrata;Gnathostomata;Teleostomi;Euteleostomi;Sarcopterygii;Dipnotetrapodomorpha;Tetrapoda;Amniota;Sauropsida;Sauria;Lepidosauria;Squamata;Bifurcata;Unidentata;Episquamata;Toxicofera;Serpentes;Colubroidea;Colubridae;Colubrinae;Pantherophis;Pantherophis guttatus  
UdeM00000041230 6579 623.2 UdeM00000041230 XP\_033734560.1 71.9 430  
110 4 4 431 3 423 2.40E-175 623.2 6579 cellular  
organisms;Eukaryota;Opisthokonta;Metazoa;Eumetazoa;Bilateria;Protostomia;  
Spiralia;Lophotrochozoa;Mollusca;Bivalvia;Autobranchia;Pteriomorpha;Pectinida;Pectinoidea;Pectinidae;Pecten;Pecten maximus  
UdeM00000041231 6596 221.5 UdeM00000041231 XP\_045160681.1 62 163  
61 1 64 225 50 212 1.40E-54 221.5 6596 cellular  
organisms;Eukaryota;Opisthokonta;Metazoa;Eumetazoa;Bilateria;Protostomia;  
Spiralia;Lophotrochozoa;Mollusca;Bivalvia;Autobranchia;Heteroconchia;Euherodonta;Imparidentia;Venerida;Veneroidea;Veneridae;Mercenaria;Mercenaria mercenaria  
UdeM00000041233 6596 104.8 UdeM00000041233 XP\_045186915.1 54.4 79  
36 0 499 577 339 417 3.90E-19 104.8 6596 cellular  
organisms;Eukaryota;Opisthokonta;Metazoa;Eumetazoa;Bilateria;Protostomia;  
Spiralia;Lophotrochozoa;Mollusca;Bivalvia;Autobranchia;Heteroconchia;Euherodonta;Imparidentia;Venerida;Veneroidea;Veneridae;Mercenaria;Mercenaria mercenaria

UdeM00000041234 37653 136 UdeM00000041234 XP\_014778962.1 34.2 345  
 184 13 204 527 610 932 1.40E-28 136 37653 cellular  
 organisms;Eukaryota;Opisthokonta;Metazoa;Eumetazoa;Bilateria;Protostomia;  
 Spiralia;Lophotrochozoa;Mollusca;Cephalopoda;Coleoidea;Octopodiformes;Oct  
 opoda;Incirrata;Octopodidae;Octopus;Octopus bimaculoides  
 UdeM00000041235 6573 134.4 UdeM00000041235 XP\_021339352.1 32.3 458  
 234 17 110 546 531 933 4.30E-28 134.4 6573 cellular  
 organisms;Eukaryota;Opisthokonta;Metazoa;Eumetazoa;Bilateria;Protostomia;  
 Spiralia;Lophotrochozoa;Mollusca;Bivalvia;Autobranchia;Pteriormorphia;Pect  
 inida;Pectinoidea;Pectinidae;Mizuhopecten;Mizuhopecten yessoensis  
 UdeM00000041237 6596 200.3 UdeM00000041237 XP\_045165648.1 62.5 160  
 59 1 1 160 208 366 1.90E-48 200.3 6596 cellular  
 organisms;Eukaryota;Opisthokonta;Metazoa;Eumetazoa;Bilateria;Protostomia;  
 Spiralia;Lophotrochozoa;Mollusca;Bivalvia;Autobranchia;Heteroconchia;Euhe  
 terodonta;Imparidentia;Venerida;Veneroidea;Veneridae;Mercenaria;Mercenari  
 a mercenaria  
 UdeM00000041236 1735272 407.9 UdeM00000041236 XP\_041353055.1 69.4  
 301 85 5 18 312 47 346 1.20E-110 407.9 1735272  
 cellular  
 organisms;Eukaryota;Opisthokonta;Metazoa;Eumetazoa;Bilateria;Protostomia;  
 Spiralia;Lophotrochozoa;Mollusca;Gastropoda;Neomphalina;Neomphaloidea;Pel  
 tospiridae;Gigantopelta;Gigantopelta aegis  
 UdeM00000041238 6596 96.7 UdeM00000041238 XP\_045165648.1 58.3 72  
 30 0 1 72 1 72 1.30E-17 96.7 6596 cellular  
 organisms;Eukaryota;Opisthokonta;Metazoa;Eumetazoa;Bilateria;Protostomia;  
 Spiralia;Lophotrochozoa;Mollusca;Bivalvia;Autobranchia;Heteroconchia;Euhe  
 terodonta;Imparidentia;Venerida;Veneroidea;Veneridae;Mercenaria;Mercenari  
 a mercenaria  
 UdeM00000041239 1529436 73.6 UdeM00000041239 XP\_033106553.1 28  
 218 129 5 142 359 211 400 6.10E-10 73.6 1529436  
 cellular  
 organisms;Eukaryota;Opisthokonta;Metazoa;Eumetazoa;Bilateria;Deuterostomi  
 a;Echinodermata;Pelmatozoa;Crinoidea;Articulata;Comatulida;Comatulidae;Co  
 matulinae;Anneissia;Anneissia japonica  
 UdeM00000041240 6579 518.5 UdeM00000041240 XP\_033743002.1 52.6 464  
 213 2 112 574 10 467 1.20E-143 518.5 6579 cellular  
 organisms;Eukaryota;Opisthokonta;Metazoa;Eumetazoa;Bilateria;Protostomia;  
 Spiralia;Lophotrochozoa;Mollusca;Bivalvia;Autobranchia;Pteriormorphia;Pect  
 inida;Pectinoidea;Pectinidae;Pecten;Pecten maximus  
 UdeM00000041241 6579 519.2 UdeM00000041241 XP\_033743002.1 53 460  
 213 2 112 570 10 467 6.80E-144 519.2 6579 cellular  
 organisms;Eukaryota;Opisthokonta;Metazoa;Eumetazoa;Bilateria;Protostomia;  
 Spiralia;Lophotrochozoa;Mollusca;Bivalvia;Autobranchia;Pteriormorphia;Pect  
 inida;Pectinoidea;Pectinidae;Pecten;Pecten maximus  
 UdeM00000041242 6596 508.1 UdeM00000041242 XP\_045165977.1 77.5 338  
 72 3 13 346 4 341 9.40E-141 508.1 6596 cellular  
 organisms;Eukaryota;Opisthokonta;Metazoa;Eumetazoa;Bilateria;Protostomia;  
 Spiralia;Lophotrochozoa;Mollusca;Bivalvia;Autobranchia;Heteroconchia;Euhe  
 terodonta;Imparidentia;Venerida;Veneroidea;Veneridae;Mercenaria;Mercenari  
 a mercenaria  
 UdeM00000041245 6596 314.7 UdeM00000041245 XP\_045158537.1 48.3 315  
 161 1 1 315 1 313 1.30E-82 314.7 6596 cellular  
 organisms;Eukaryota;Opisthokonta;Metazoa;Eumetazoa;Bilateria;Protostomia;  
 Spiralia;Lophotrochozoa;Mollusca;Bivalvia;Autobranchia;Heteroconchia;Euhe

terodonta;Imparidentia;Venerida;Veneroidea;Veneridae;Mercenaria;Mercenari  
 a mercenaria  
 UdeM00000041246 6596 200.7 UdeM00000041246 XP\_045157051.1 79.2 120  
 25 0 1 120 1 120 1.10E-48 200.7 6596 cellular  
 organisms;Eukaryota;Opisthokonta;Metazoa;Eumetazoa;Bilateria;Protostomia;  
 Spiralia;Lophotrochozoa;Mollusca;Bivalvia;Autobranchia;Heteroconchia;Euhe  
 terodonta;Imparidentia;Venerida;Veneroidea;Veneridae;Mercenaria;Mercenari  
 a mercenaria  
 UdeM00000041247 6596 402.9 UdeM00000041247 XP\_045187335.1 53.6 485  
 199 14 1 464 3 482 5.70E-109 402.9 6596 cellular  
 organisms;Eukaryota;Opisthokonta;Metazoa;Eumetazoa;Bilateria;Protostomia;  
 Spiralia;Lophotrochozoa;Mollusca;Bivalvia;Autobranchia;Heteroconchia;Euhe  
 terodonta;Imparidentia;Venerida;Veneroidea;Veneridae;Mercenaria;Mercenari  
 a mercenaria  
 UdeM00000041248 6596 73.2 UdeM00000041248 XP\_045167339.1 35.6 135  
 70 2 39 173 66 183 3.80E-10 73.2 6596 cellular  
 organisms;Eukaryota;Opisthokonta;Metazoa;Eumetazoa;Bilateria;Protostomia;  
 Spiralia;Lophotrochozoa;Mollusca;Bivalvia;Autobranchia;Heteroconchia;Euhe  
 terodonta;Imparidentia;Venerida;Veneroidea;Veneridae;Mercenaria;Mercenari  
 a mercenaria  
 UdeM00000041249 6596 677.2 UdeM00000041249 XP\_045167339.1 63.9 529  
 178 5 2 519 564 1090 1.70E-191 677.2 6596 cellular  
 organisms;Eukaryota;Opisthokonta;Metazoa;Eumetazoa;Bilateria;Protostomia;  
 Spiralia;Lophotrochozoa;Mollusca;Bivalvia;Autobranchia;Heteroconchia;Euhe  
 terodonta;Imparidentia;Venerida;Veneroidea;Veneridae;Mercenaria;Mercenari  
 a mercenaria  
 UdeM00000041250 29159 99 UdeM00000041250 XP\_011450374.2 38.1 336  
 174 4 1 310 1 328 1.20E-17 99 29159 cellular  
 organisms;Eukaryota;Opisthokonta;Metazoa;Eumetazoa;Bilateria;Protostomia;  
 Spiralia;Lophotrochozoa;Mollusca;Bivalvia;Autobranchia;Pteriomorphia;Ostr  
 eida;Ostreoidea;Ostreidae;Crassostrea;Crassostrea gigas  
 UdeM00000041251 2607531 369.8 UdeM00000041251 XP\_036363021.1 93.9  
 213 11 1 1 213 15 225 2.40E-99 369.8 2607531  
 cellular  
 organisms;Eukaryota;Opisthokonta;Metazoa;Eumetazoa;Bilateria;Protostomia;  
 Spiralia;Lophotrochozoa;Mollusca;Cephalopoda;Coleoidea;Octopodiformes;Oct  
 opoda;Incirrata;Octopodidae;Octopus;Octopus sinensis  
 UdeM00000041252 6596 220.7 UdeM00000041252 XP\_045206235.1 31.6 563  
 297 12 1 523 1 515 7.20E-54 220.7 6596 cellular  
 organisms;Eukaryota;Opisthokonta;Metazoa;Eumetazoa;Bilateria;Protostomia;  
 Spiralia;Lophotrochozoa;Mollusca;Bivalvia;Autobranchia;Heteroconchia;Euhe  
 terodonta;Imparidentia;Venerida;Veneroidea;Veneridae;Mercenaria;Mercenari  
 a mercenaria  
 UdeM00000041253 578455 74.3 UdeM00000041253 XP\_003654751.1 31.4  
 118 75 2 9 120 21 138 1.60E-10 74.3 578455  
 cellular  
 organisms;Eukaryota;Opisthokonta;Fungi;Dikarya;Ascomycota;saccharomyceta;  
 Pezizomycotina;leotiomyceta;sordariomyceta;Sordariomycetes;Sordariomyceti  
 dae;Sordariales;Chaetomiaceae;Thermothielavioides;Thermothielavioides  
 terrestris;Thermothielavioides terrestris NRRL 8126  
 UdeM00000041254 6596 222.6 UdeM00000041254 XP\_045206235.1 30.4 586  
 331 11 1 553 1 542 1.90E-54 222.6 6596 cellular  
 organisms;Eukaryota;Opisthokonta;Metazoa;Eumetazoa;Bilateria;Protostomia;  
 Spiralia;Lophotrochozoa;Mollusca;Bivalvia;Autobranchia;Heteroconchia;Euhe

terodonta;Imparidentia;Venerida;Veneroidea;Veneridae;Mercenaria;Mercenaria mercenaria  
 UdeM00000041256 50954 91.3 UdeM00000041256 XP\_037367380.1 35.6 135  
 85 2 4 137 13 146 1.10E-15 91.3 50954 cellular  
 organisms;Eukaryota;Opisthokonta;Metazoa;Eumetazoa;Bilateria;Deuterostomia;Chordata;Craniata;Vertebrata;Gnathostomata;Teleostomi;Euteleostomi;Sarcopterygii;Dipnotetrapodomorpha;Tetrapoda;Amniota;Mammalia;Theria;Eutheria;Boreoeutheria;Laurasiatheria;Eulipotyphla;Talpidae;Talpa;Talpa occidentalis  
 UdeM00000041255 1257118 97.1 UdeM00000041255 XP\_004336073.1 33.6  
 149 97 2 1 148 1 148 2.10E-17 97.1 1257118  
 cellular  
 organisms;Eukaryota;Amoebozoa;Discosea;Longamoebia;Centramoebida;Acanthamoebidae;Acanthamoeba;Acanthamoeba castellanii;Acanthamoeba castellanii str. Neff  
 UdeM00000041258 6596 236.1 UdeM00000041258 XP\_045206235.1 31.9 551  
 314 9 1 525 1 516 1.60E-58 236.1 6596 cellular  
 organisms;Eukaryota;Opisthokonta;Metazoa;Eumetazoa;Bilateria;Protostomia;Spiralia;Lophotrochozoa;Mollusca;Bivalvia;Autobranchia;Heteroconchia;Euheterodonta;Imparidentia;Venerida;Veneroidea;Veneridae;Mercenaria;Mercenaria mercenaria  
 UdeM00000041259 50954 87.4 UdeM00000041259 XP\_037367380.1 34.8 135  
 86 2 4 137 13 146 1.60E-14 87.4 50954 cellular  
 organisms;Eukaryota;Opisthokonta;Metazoa;Eumetazoa;Bilateria;Deuterostomia;Chordata;Craniata;Vertebrata;Gnathostomata;Teleostomi;Euteleostomi;Sarcopterygii;Dipnotetrapodomorpha;Tetrapoda;Amniota;Mammalia;Theria;Eutheria;Boreoeutheria;Laurasiatheria;Eulipotyphla;Talpidae;Talpa;Talpa occidentalis  
 UdeM00000041260 578455 82 UdeM00000041260 XP\_003654751.1 37  
 119 74 1 4 122 21 138 7.60E-13 82 578455  
 cellular  
 organisms;Eukaryota;Opisthokonta;Fungi;Dikarya;Ascomycota;saccharomyceta;Pezizomycotina;leotiomyceta;sordariomyceta;Sordariomycetes;Sordariomycetidae;Sordariales;Chaetomiaceae;Thermothielavioides;Thermothielavioides terrestris;Thermothielavioides terrestris NRRL 8126  
 UdeM00000041261 6596 225.3 UdeM00000041261 XP\_045198257.1 37.8 288  
 177 1 2 289 122 407 2.30E-55 225.3 6596 cellular  
 organisms;Eukaryota;Opisthokonta;Metazoa;Eumetazoa;Bilateria;Protostomia;Spiralia;Lophotrochozoa;Mollusca;Bivalvia;Autobranchia;Heteroconchia;Euheterodonta;Imparidentia;Venerida;Veneroidea;Veneridae;Mercenaria;Mercenaria mercenaria  
 UdeM00000041262 6596 325.5 UdeM00000041262 XP\_045213058.1 31.7 672  
 405 22 10 645 44 697 1.80E-85 325.5 6596 cellular  
 organisms;Eukaryota;Opisthokonta;Metazoa;Eumetazoa;Bilateria;Protostomia;Spiralia;Lophotrochozoa;Mollusca;Bivalvia;Autobranchia;Heteroconchia;Euheterodonta;Imparidentia;Venerida;Veneroidea;Veneridae;Mercenaria;Mercenaria mercenaria  
 UdeM00000041263 6596 323.9 UdeM00000041263 XP\_045213058.1 31.5 673  
 407 22 10 647 44 697 5.20E-85 323.9 6596 cellular  
 organisms;Eukaryota;Opisthokonta;Metazoa;Eumetazoa;Bilateria;Protostomia;Spiralia;Lophotrochozoa;Mollusca;Bivalvia;Autobranchia;Heteroconchia;Euheterodonta;Imparidentia;Venerida;Veneroidea;Veneridae;Mercenaria;Mercenaria mercenaria



UdeM00000041264 6596 301.2 UdeM00000041264 XP\_045198257.1 38 413  
 241 5 6 407 10 418 3.30E-78 301.2 6596 cellular  
 organisms;Eukaryota;Opisthokonta;Metazoa;Eumetazoa;Bilateria;Protostomia;  
 Spiralia;Lophotrochozoa;Mollusca;Bivalvia;Autobranchia;Heteroconchia;Euhe  
 terodonta;Imparidentia;Venerida;Veneroidea;Veneridae;Mercenaria;Mercenari  
 a mercenaria

UdeM00000041264 6596 77.8 UdeM00000041264 XP\_045198257.1 25.4 177  
 93 3 536 673 834 1010 6.00E-11 77.8 6596 cellular  
 organisms;Eukaryota;Opisthokonta;Metazoa;Eumetazoa;Bilateria;Protostomia;  
 Spiralia;Lophotrochozoa;Mollusca;Bivalvia;Autobranchia;Heteroconchia;Euhe  
 terodonta;Imparidentia;Venerida;Veneroidea;Veneridae;Mercenaria;Mercenari  
 a mercenaria

UdeM00000041265 6596 213 UdeM00000041265 XP\_045198257.1 29.8 526  
 238 13 19 428 1057 1567 8.50E-52 213 6596 cellular  
 organisms;Eukaryota;Opisthokonta;Metazoa;Eumetazoa;Bilateria;Protostomia;  
 Spiralia;Lophotrochozoa;Mollusca;Bivalvia;Autobranchia;Heteroconchia;Euhe  
 terodonta;Imparidentia;Venerida;Veneroidea;Veneridae;Mercenaria;Mercenari  
 a mercenaria

UdeM00000041266 6596 322.8 UdeM00000041266 XP\_045198257.1 33.3 517  
 328 8 1 508 12 520 7.90E-85 322.8 6596 cellular  
 organisms;Eukaryota;Opisthokonta;Metazoa;Eumetazoa;Bilateria;Protostomia;  
 Spiralia;Lophotrochozoa;Mollusca;Bivalvia;Autobranchia;Heteroconchia;Euhe  
 terodonta;Imparidentia;Venerida;Veneroidea;Veneridae;Mercenaria;Mercenari  
 a mercenaria

UdeM00000041267 6596 453 UdeM00000041267 XP\_045198257.1 32.8 827  
 486 22 41 819 745 1549 8.30E-124 453 6596 cellular  
 organisms;Eukaryota;Opisthokonta;Metazoa;Eumetazoa;Bilateria;Protostomia;  
 Spiralia;Lophotrochozoa;Mollusca;Bivalvia;Autobranchia;Heteroconchia;Euhe  
 terodonta;Imparidentia;Venerida;Veneroidea;Veneridae;Mercenaria;Mercenari  
 a mercenaria

UdeM00000041268 6526 128.3 UdeM00000041268 NP\_001298190.1 83.2 119  
 15 1 1 119 1 114 6.70E-27 128.3 6526 cellular  
 organisms;Eukaryota;Opisthokonta;Metazoa;Eumetazoa;Bilateria;Protostomia;  
 Spiralia;Lophotrochozoa;Mollusca;Gastropoda;Heterobranchia;Euthyneura;Pan  
 pulmonata;Hygrophila;Lymnaeioidea;Planorbidae;Biomphalaria;Biomphalaria  
 glabrata

UdeM00000041269 6596 174.1 UdeM00000041269 XP\_045183563.1 39.9 233  
 130 4 371 595 37 267 5.30E-40 174.1 6596 cellular  
 organisms;Eukaryota;Opisthokonta;Metazoa;Eumetazoa;Bilateria;Protostomia;  
 Spiralia;Lophotrochozoa;Mollusca;Bivalvia;Autobranchia;Heteroconchia;Euhe  
 terodonta;Imparidentia;Venerida;Veneroidea;Veneridae;Mercenaria;Mercenari  
 a mercenaria

UdeM00000041270 6579 354.8 UdeM00000041270 XP\_033728194.1 39.4 515  
 293 8 169 668 98 608 2.50E-94 354.8 6579 cellular  
 organisms;Eukaryota;Opisthokonta;Metazoa;Eumetazoa;Bilateria;Protostomia;  
 Spiralia;Lophotrochozoa;Mollusca;Bivalvia;Autobranchia;Pteriomorphia;Pect  
 inida;Pectinoidea;Pectinidae;Pecten;Pecten maximus

UdeM00000041271 6596 161.8 UdeM00000041271 XP\_045213047.1 33.3 273  
 168 6 10 274 245 511 1.30E-36 161.8 6596 cellular  
 organisms;Eukaryota;Opisthokonta;Metazoa;Eumetazoa;Bilateria;Protostomia;  
 Spiralia;Lophotrochozoa;Mollusca;Bivalvia;Autobranchia;Heteroconchia;Euhe  
 terodonta;Imparidentia;Venerida;Veneroidea;Veneridae;Mercenaria;Mercenari  
 a mercenaria

UdeM00000041272 6596 101.7 UdeM00000041272 XP\_045213047.1 24.8 327  
 169 6 25 278 829 1151 1.60E-18 101.7 6596 cellular  
 organisms;Eukaryota;Opisthokonta;Metazoa;Eumetazoa;Bilateria;Protostomia;  
 Spiralia;Lophotrochozoa;Mollusca;Bivalvia;Autobranchia;Heteroconchia;Euhe  
 terodonta;Imparidentia;Venerida;Veneroidea;Veneridae;Mercenaria;Mercenari  
 a mercenaria  
 UdeM00000041273 6596 140.6 UdeM00000041273 XP\_045198257.1 35.9 206  
 130 2 10 214 1219 1423 2.40E-30 140.6 6596 cellular  
 organisms;Eukaryota;Opisthokonta;Metazoa;Eumetazoa;Bilateria;Protostomia;  
 Spiralia;Lophotrochozoa;Mollusca;Bivalvia;Autobranchia;Heteroconchia;Euhe  
 terodonta;Imparidentia;Venerida;Veneroidea;Veneridae;Mercenaria;Mercenari  
 a mercenaria  
 UdeM00000041274 6596 321.6 UdeM00000041274 XP\_045183563.1 34.9 519  
 313 12 25 526 37 547 2.10E-84 321.6 6596 cellular  
 organisms;Eukaryota;Opisthokonta;Metazoa;Eumetazoa;Bilateria;Protostomia;  
 Spiralia;Lophotrochozoa;Mollusca;Bivalvia;Autobranchia;Heteroconchia;Euhe  
 terodonta;Imparidentia;Venerida;Veneroidea;Veneridae;Mercenaria;Mercenari  
 a mercenaria  
 UdeM00000041275 6596 232.6 UdeM00000041275 XP\_045198256.1 35.2 375  
 220 11 3 361 127 494 9.20E-58 232.6 6596 cellular  
 organisms;Eukaryota;Opisthokonta;Metazoa;Eumetazoa;Bilateria;Protostomia;  
 Spiralia;Lophotrochozoa;Mollusca;Bivalvia;Autobranchia;Heteroconchia;Euhe  
 terodonta;Imparidentia;Venerida;Veneroidea;Veneridae;Mercenaria;Mercenari  
 a mercenaria  
 UdeM00000041276 6596 209.9 UdeM00000041276 XP\_045198257.1 36.3 339  
 201 10 10 341 1219 1549 5.20E-51 209.9 6596 cellular  
 organisms;Eukaryota;Opisthokonta;Metazoa;Eumetazoa;Bilateria;Protostomia;  
 Spiralia;Lophotrochozoa;Mollusca;Bivalvia;Autobranchia;Heteroconchia;Euhe  
 terodonta;Imparidentia;Venerida;Veneroidea;Veneridae;Mercenaria;Mercenari  
 a mercenaria  
 UdeM00000002822 1735272 79 UdeM00000002822 XP\_041372719.1 32  
 194 117 5 16 207 28 208 8.60E-12 79 1735272  
 cellular  
 organisms;Eukaryota;Opisthokonta;Metazoa;Eumetazoa;Bilateria;Protostomia;  
 Spiralia;Lophotrochozoa;Mollusca;Gastropoda;Neomphalina;Neomphaloidea;Pel  
 tospiridae;Gigantopelta;Gigantopelta aegis  
 UdeM00000002823 6596 310.1 UdeM00000002823 XP\_045209241.1 34.4 608  
 360 22 100 681 86 680 7.30E-81 310.1 6596 cellular  
 organisms;Eukaryota;Opisthokonta;Metazoa;Eumetazoa;Bilateria;Protostomia;  
 Spiralia;Lophotrochozoa;Mollusca;Bivalvia;Autobranchia;Heteroconchia;Euhe  
 terodonta;Imparidentia;Venerida;Veneroidea;Veneridae;Mercenaria;Mercenari  
 a mercenaria  
 UdeM00000002824 6596 149.8 UdeM00000002824 XP\_045215232.1 49.7 179  
 86 3 128 304 224 400 6.40E-33 149.8 6596 cellular  
 organisms;Eukaryota;Opisthokonta;Metazoa;Eumetazoa;Bilateria;Protostomia;  
 Spiralia;Lophotrochozoa;Mollusca;Bivalvia;Autobranchia;Heteroconchia;Euhe  
 terodonta;Imparidentia;Venerida;Veneroidea;Veneridae;Mercenaria;Mercenari  
 a mercenaria  
 UdeM00000002825 6579 60.1 UdeM00000002825 XP\_033744326.1 44.3 79  
 42 1 4 80 8 86 1.80E-06 60.1 6579 cellular  
 organisms;Eukaryota;Opisthokonta;Metazoa;Eumetazoa;Bilateria;Protostomia;  
 Spiralia;Lophotrochozoa;Mollusca;Bivalvia;Autobranchia;Pteriormorphia;Pect  
 inida;Pectinoidea;Pectinidae;Pecten;Pecten maximus

UdeM00000002826 6596 85.1 UdeM00000002826 XP\_045208696.1 33.8 213  
 116 8 65 272 198 390 1.50E-13 85.1 6596 cellular  
 organisms;Eukaryota;Opisthokonta;Metazoa;Eumetazoa;Bilateria;Protostomia;  
 Spiralia;Lophotrochozoa;Mollusca;Bivalvia;Autobranchia;Heteroconchia;Euhe  
 terodonta;Imparidentia;Venerida;Veneroidea;Veneridae;Mercenaria;Mercenari  
 a mercenaria  
 UdeM00000002827 1735272 63.9 UdeM00000002827 XP\_041355798.1 32.4  
 105 70 1 20 124 52 155 2.20E-07 63.9 1735272  
 cellular  
 organisms;Eukaryota;Opisthokonta;Metazoa;Eumetazoa;Bilateria;Protostomia;  
 Spiralia;Lophotrochozoa;Mollusca;Gastropoda;Neomphalina;Neomphaloidea;Pel  
 tospiridae;Gigantopelta;Gigantopelta aegis  
 UdeM00000002828 1735272 95.9 UdeM00000002828 XP\_041355798.1 35.4  
 144 91 2 20 163 52 193 5.10E-17 95.9 1735272  
 cellular  
 organisms;Eukaryota;Opisthokonta;Metazoa;Eumetazoa;Bilateria;Protostomia;  
 Spiralia;Lophotrochozoa;Mollusca;Gastropoda;Neomphalina;Neomphaloidea;Pel  
 tospiridae;Gigantopelta;Gigantopelta aegis  
 UdeM00000002829 6526 85.1 UdeM00000002829 XP\_013062038.1 33.9 121  
 78 1 12 132 567 685 7.70E-14 85.1 6526 cellular  
 organisms;Eukaryota;Opisthokonta;Metazoa;Eumetazoa;Bilateria;Protostomia;  
 Spiralia;Lophotrochozoa;Mollusca;Gastropoda;Heterobranchia;Euthyneura;Pan  
 pulmonata;Hygrophila;Lymnaeoidea;Planorbidae;Biomphalaria;Biomphalaria  
 glabrata  
 UdeM00000002831 7574 171 UdeM00000002831 XP\_013399039.1 59.2 142  
 53 1 3 144 4 140 1.10E-39 171 7574 cellular  
 organisms;Eukaryota;Opisthokonta;Metazoa;Eumetazoa;Bilateria;Protostomia;  
 Spiralia;Lophotrochozoa;Brachiopoda;Linguliformea;Lingulata;Lingulida;Lin  
 guloidea;Lingulidae;Lingula;Lingula anatina  
 UdeM00000002832 7574 330.9 UdeM00000002832 XP\_013384628.1 77.7 197  
 44 0 50 246 364 560 1.40E-87 330.9 7574 cellular  
 organisms;Eukaryota;Opisthokonta;Metazoa;Eumetazoa;Bilateria;Protostomia;  
 Spiralia;Lophotrochozoa;Brachiopoda;Linguliformea;Lingulata;Lingulida;Lin  
 guloidea;Lingulidae;Lingula;Lingula anatina  
 UdeM00000002833 7574 258.8 UdeM00000002833 XP\_013382110.1 52.4 206  
 93 2 2 204 413 616 5.70E-66 258.8 7574 cellular  
 organisms;Eukaryota;Opisthokonta;Metazoa;Eumetazoa;Bilateria;Protostomia;  
 Spiralia;Lophotrochozoa;Brachiopoda;Linguliformea;Lingulata;Lingulida;Lin  
 guloidea;Lingulidae;Lingula;Lingula anatina  
 UdeM00000002834 7574 212.2 UdeM00000002834 XP\_013382110.1 41.7 276  
 102 3 1 227 38 303 6.90E-52 212.2 7574 cellular  
 organisms;Eukaryota;Opisthokonta;Metazoa;Eumetazoa;Bilateria;Protostomia;  
 Spiralia;Lophotrochozoa;Brachiopoda;Linguliformea;Lingulata;Lingulida;Lin  
 guloidea;Lingulidae;Lingula;Lingula anatina  
 UdeM00000002835 29159 71.6 UdeM00000002835 XP\_034303602.1 24.9 418  
 247 14 4 391 371 751 2.40E-09 71.6 29159 cellular  
 organisms;Eukaryota;Opisthokonta;Metazoa;Eumetazoa;Bilateria;Protostomia;  
 Spiralia;Lophotrochozoa;Mollusca;Bivalvia;Autobranchia;Pteriomorphia;Ostr  
 eida;Ostreoidea;Ostreidae;Crassostrea;Crassostrea gigas  
 UdeM00000002836 6565 105.5 UdeM00000002836 XP\_022329522.1 70.7 75  
 22 0 1 75 150 224 7.40E-20 105.5 6565 cellular  
 organisms;Eukaryota;Opisthokonta;Metazoa;Eumetazoa;Bilateria;Protostomia;  
 Spiralia;Lophotrochozoa;Mollusca;Bivalvia;Autobranchia;Pteriomorphia;Ostr  
 eida;Ostreoidea;Ostreidae;Crassostrea;Crassostrea virginica

UdeM00000002839 6565 82.4 UdeM00000002839 XP\_022299602.1 40.6 106  
 61 2 89 193 2 106 7.90E-13 82.4 6565 cellular  
 organisms;Eukaryota;Opisthokonta;Metazoa;Eumetazoa;Bilateria;Protostomia;  
 Spiralia;Lophotrochozoa;Mollusca;Bivalvia;Autobranchia;Pteriormorphia;Ostr  
 eida;Ostreoidea;Ostreidae;Crassostrea;Crassostrea virginica  
 UdeM00000002840 29159 120.2 UdeM00000002840 XP\_011451530.1 48.4 122  
 60 2 100 218 74 195 3.50E-24 120.2 29159 cellular  
 organisms;Eukaryota;Opisthokonta;Metazoa;Eumetazoa;Bilateria;Protostomia;  
 Spiralia;Lophotrochozoa;Mollusca;Bivalvia;Autobranchia;Pteriormorphia;Ostr  
 eida;Ostreoidea;Ostreidae;Crassostrea;Crassostrea gigas  
 UdeM00000002841 29159 64.7 UdeM00000002841 XP\_034329354.1 55.6 54  
 23 1 16 68 190 243 5.40E-08 64.7 29159 cellular  
 organisms;Eukaryota;Opisthokonta;Metazoa;Eumetazoa;Bilateria;Protostomia;  
 Spiralia;Lophotrochozoa;Mollusca;Bivalvia;Autobranchia;Pteriormorphia;Ostr  
 eida;Ostreoidea;Ostreidae;Crassostrea;Crassostrea gigas  
 UdeM00000002842 29159 87.4 UdeM00000002842 XP\_034318141.1 43.8 121  
 59 3 1 112 2 122 2.50E-14 87.4 29159 cellular  
 organisms;Eukaryota;Opisthokonta;Metazoa;Eumetazoa;Bilateria;Protostomia;  
 Spiralia;Lophotrochozoa;Mollusca;Bivalvia;Autobranchia;Pteriormorphia;Ostr  
 eida;Ostreoidea;Ostreidae;Crassostrea;Crassostrea gigas  
 UdeM00000002844 1735272 109 UdeM00000002844 XP\_041379412.1 37  
 162 98 2 15 175 11 169 1.50E-20 109 1735272  
 cellular  
 organisms;Eukaryota;Opisthokonta;Metazoa;Eumetazoa;Bilateria;Protostomia;  
 Spiralia;Lophotrochozoa;Mollusca;Gastropoda;Neomphalina;Neomphaloidea;Pel  
 tospiridae;Gigantopelta;Gigantopelta aegis  
 UdeM00000002849 7574 100.1 UdeM00000002849 XP\_013388573.1 41.5 147  
 84 1 1 147 795 939 2.50E-18 100.1 7574 cellular  
 organisms;Eukaryota;Opisthokonta;Metazoa;Eumetazoa;Bilateria;Protostomia;  
 Spiralia;Lophotrochozoa;Brachiopoda;Linguliformea;Lingulata;Lingulida;Lin  
 guloidea;Lingulidae;Lingula;Lingula anatina  
 UdeM00000002850 7574 143.7 UdeM00000002850 XP\_013388573.1 48.3 145  
 71 2 68 209 603 746 2.70E-31 143.7 7574 cellular  
 organisms;Eukaryota;Opisthokonta;Metazoa;Eumetazoa;Bilateria;Protostomia;  
 Spiralia;Lophotrochozoa;Brachiopoda;Linguliformea;Lingulata;Lingulida;Lin  
 guloidea;Lingulidae;Lingula;Lingula anatina  
 UdeM00000002852 6596 97.8 UdeM00000002852 XP\_045185384.1 48.8 86  
 43 1 12 97 64 148 9.50E-18 97.8 6596 cellular  
 organisms;Eukaryota;Opisthokonta;Metazoa;Eumetazoa;Bilateria;Protostomia;  
 Spiralia;Lophotrochozoa;Mollusca;Bivalvia;Autobranchia;Heteroconchia;Euhe  
 terodonta;Imparidentia;Venerida;Veneroidea;Veneridae;Mercenaria;Mercenari  
 a mercenaria  
 UdeM00000002854 225164 100.5 UdeM00000002854 XP\_009054122.1 33.5  
 206 123 8 113 316 96 289 6.20E-18 100.5 225164  
 cellular  
 organisms;Eukaryota;Opisthokonta;Metazoa;Eumetazoa;Bilateria;Protostomia;  
 Spiralia;Lophotrochozoa;Mollusca;Gastropoda;Patellogastropoda;Lottioidea;  
 Lottiidae;Lottia;Lottia gigantea  
 UdeM00000002855 6596 99.4 UdeM00000002855 XP\_045209446.1 28.4 232  
 158 5 81 307 92 320 8.60E-18 99.4 6596 cellular  
 organisms;Eukaryota;Opisthokonta;Metazoa;Eumetazoa;Bilateria;Protostomia;  
 Spiralia;Lophotrochozoa;Mollusca;Bivalvia;Autobranchia;Heteroconchia;Euhe  
 terodonta;Imparidentia;Venerida;Veneroidea;Veneridae;Mercenaria;Mercenari  
 a mercenaria

UdeM00000002856 10224 71.6 UdeM00000002856 XP\_006819348.1 42.3 78  
 45 0 55 132 369 446 8.50E-10 71.6 10224 cellular  
 organisms;Eukaryota;Opisthokonta;Metazoa;Eumetazoa;Bilateria;Deuterostomi  
 a;Hemichordata;Enteropneusta;Harrimaniidae;Saccoglossus;Saccoglossus  
 kowalevskii  
 UdeM00000002857 29159 69.7 UdeM00000002857 XP\_034315954.1 55.2 58  
 26 0 22 79 104 161 2.10E-09 69.7 29159 cellular  
 organisms;Eukaryota;Opisthokonta;Metazoa;Eumetazoa;Bilateria;Protostomia;  
 Spiralia;Lophotrochozoa;Mollusca;Bivalvia;Autobranchia;Pteriomorpha;Ostr  
 eida;Ostreoidea;Ostreidae;Crassostrea;Crassostrea gigas  
 UdeM00000002858 6565 88.6 UdeM00000002858 XP\_022298030.1 55.8 77  
 32 1 20 96 93 167 5.00E-15 88.6 6565 cellular  
 organisms;Eukaryota;Opisthokonta;Metazoa;Eumetazoa;Bilateria;Protostomia;  
 Spiralia;Lophotrochozoa;Mollusca;Bivalvia;Autobranchia;Pteriomorpha;Ostr  
 eida;Ostreoidea;Ostreidae;Crassostrea;Crassostrea virginica  
 UdeM00000002859 6565 106.3 UdeM00000002859 XP\_022297037.1 37.8 164  
 95 3 6 164 11 172 3.90E-20 106.3 6565 cellular  
 organisms;Eukaryota;Opisthokonta;Metazoa;Eumetazoa;Bilateria;Protostomia;  
 Spiralia;Lophotrochozoa;Mollusca;Bivalvia;Autobranchia;Pteriomorpha;Ostr  
 eida;Ostreoidea;Ostreidae;Crassostrea;Crassostrea virginica  
 UdeM00000002860 6579 164.9 UdeM00000002860 XP\_033758289.1 30 434  
 251 20 57 470 268 668 3.60E-37 164.9 6579 cellular  
 organisms;Eukaryota;Opisthokonta;Metazoa;Eumetazoa;Bilateria;Protostomia;  
 Spiralia;Lophotrochozoa;Mollusca;Bivalvia;Autobranchia;Pteriomorpha;Pect  
 inida;Pectinoidea;Pectinidae;Pecten;Pecten maximus  
 UdeM00000002863 6573 113.2 UdeM00000002863 XP\_021372933.1 26.7 386  
 237 15 224 593 381 736 1.20E-21 113.2 6573 cellular  
 organisms;Eukaryota;Opisthokonta;Metazoa;Eumetazoa;Bilateria;Protostomia;  
 Spiralia;Lophotrochozoa;Mollusca;Bivalvia;Autobranchia;Pteriomorpha;Pect  
 inida;Pectinoidea;Pectinidae;Mizuhopecten;Mizuhopecten yessoensis  
 UdeM00000002864 6596 366.7 UdeM00000002864 XP\_045166352.1 49.3 359  
 167 7 18 370 8 357 3.50E-98 366.7 6596 cellular  
 organisms;Eukaryota;Opisthokonta;Metazoa;Eumetazoa;Bilateria;Protostomia;  
 Spiralia;Lophotrochozoa;Mollusca;Bivalvia;Autobranchia;Heteroconchia;Euhe  
 terodonta;Imparidentia;Venerida;Veneroidea;Veneridae;Mercenaria;Mercenari  
 a mercenaria  
 UdeM00000002865 6596 330.5 UdeM00000002865 XP\_045166352.1 55.3 266  
 113 3 1 264 96 357 2.00E-87 330.5 6596 cellular  
 organisms;Eukaryota;Opisthokonta;Metazoa;Eumetazoa;Bilateria;Protostomia;  
 Spiralia;Lophotrochozoa;Mollusca;Bivalvia;Autobranchia;Heteroconchia;Euhe  
 terodonta;Imparidentia;Venerida;Veneroidea;Veneridae;Mercenaria;Mercenari  
 a mercenaria  
 UdeM00000002866 6596 333.2 UdeM00000002866 XP\_045166352.1 55.6 266  
 112 3 1 264 96 357 3.10E-88 333.2 6596 cellular  
 organisms;Eukaryota;Opisthokonta;Metazoa;Eumetazoa;Bilateria;Protostomia;  
 Spiralia;Lophotrochozoa;Mollusca;Bivalvia;Autobranchia;Heteroconchia;Euhe  
 terodonta;Imparidentia;Venerida;Veneroidea;Veneridae;Mercenaria;Mercenari  
 a mercenaria  
 UdeM00000002867 6596 300.8 UdeM00000002867 XP\_045166352.1 49.8 287  
 131 5 26 308 6 283 2.00E-78 300.8 6596 cellular  
 organisms;Eukaryota;Opisthokonta;Metazoa;Eumetazoa;Bilateria;Protostomia;  
 Spiralia;Lophotrochozoa;Mollusca;Bivalvia;Autobranchia;Heteroconchia;Euhe  
 terodonta;Imparidentia;Venerida;Veneroidea;Veneridae;Mercenaria;Mercenari  
 a mercenaria

UdeM00000002868 29159 63.2 UdeM00000002868 XP\_034330386.1 48.2 85  
 30 2 1 71 133 217 4.20E-07 63.2 29159 cellular  
 organisms;Eukaryota;Opisthokonta;Metazoa;Eumetazoa;Bilateria;Protostomia;  
 Spiralia;Lophotrochozoa;Mollusca;Bivalvia;Autobranchia;Pteriomorphia;Ostr  
 eida;Ostreoidea;Ostreidae;Crassostrea;Crassostrea gigas  
 UdeM00000002869 6596 369 UdeM00000002869 XP\_045166352.1 50.3 332  
 153 5 48 376 35 357 7.30E-99 369 6596 cellular  
 organisms;Eukaryota;Opisthokonta;Metazoa;Eumetazoa;Bilateria;Protostomia;  
 Spiralia;Lophotrochozoa;Mollusca;Bivalvia;Autobranchia;Heteroconchia;Euhe  
 terodonta;Imparidentia;Venerida;Veneroidea;Veneridae;Mercenaria;Mercenari  
 a mercenaria  
 UdeM00000002870 29159 111.3 UdeM00000002870 XP\_011453427.2 28.5 270  
 155 7 2 265 3 240 9.20E-21 111.3 29159 cellular  
 organisms;Eukaryota;Opisthokonta;Metazoa;Eumetazoa;Bilateria;Protostomia;  
 Spiralia;Lophotrochozoa;Mollusca;Bivalvia;Autobranchia;Pteriomorphia;Ostr  
 eida;Ostreoidea;Ostreidae;Crassostrea;Crassostrea gigas  
 UdeM00000002871 29159 111.3 UdeM00000002871 XP\_011453427.2 28.5 270  
 155 7 2 265 3 240 9.90E-21 111.3 29159 cellular  
 organisms;Eukaryota;Opisthokonta;Metazoa;Eumetazoa;Bilateria;Protostomia;  
 Spiralia;Lophotrochozoa;Mollusca;Bivalvia;Autobranchia;Pteriomorphia;Ostr  
 eida;Ostreoidea;Ostreidae;Crassostrea;Crassostrea gigas  
 UdeM00000002872 225164 128.6 UdeM00000002872 XP\_009050902.1 66.3  
 98 32 1 1 98 1 97 5.50E-27 128.6 225164  
 cellular  
 organisms;Eukaryota;Opisthokonta;Metazoa;Eumetazoa;Bilateria;Protostomia;  
 Spiralia;Lophotrochozoa;Mollusca;Gastropoda;Patellogastropoda;Lottioidea;  
 Lottiidae;Lottia;Lottia gigantea  
 UdeM00000002873 6573 310.1 UdeM00000002873 XP\_021357993.1 86.3 182  
 25 0 188 369 87 268 4.90E-81 310.1 6573 cellular  
 organisms;Eukaryota;Opisthokonta;Metazoa;Eumetazoa;Bilateria;Protostomia;  
 Spiralia;Lophotrochozoa;Mollusca;Bivalvia;Autobranchia;Pteriomorphia;Pect  
 inida;Pectinoidea;Pectinidae;Mizuhopecten;Mizuhopecten yessoensis  
 UdeM00000002874 6573 652.9 UdeM00000002874 XP\_021343943.1 55.3 600  
 249 6 1 587 1 594 3.90E-184 652.9 6573 cellular  
 organisms;Eukaryota;Opisthokonta;Metazoa;Eumetazoa;Bilateria;Protostomia;  
 Spiralia;Lophotrochozoa;Mollusca;Bivalvia;Autobranchia;Pteriomorphia;Pect  
 inida;Pectinoidea;Pectinidae;Mizuhopecten;Mizuhopecten yessoensis  
 UdeM00000002875 1735272 473.8 UdeM00000002875 XP\_041375472.1 57.2  
 495 107 3 115 504 144 638 2.90E-130 473.8 1735272  
 cellular  
 organisms;Eukaryota;Opisthokonta;Metazoa;Eumetazoa;Bilateria;Protostomia;  
 Spiralia;Lophotrochozoa;Mollusca;Gastropoda;Neomphalina;Neomphaloidea;Pel  
 tospiridae;Gigantopelta;Gigantopelta aegis  
 UdeM00000002876 6596 164.9 UdeM00000002876 XP\_045192509.1 49.4 164  
 80 2 5 165 6 169 9.90E-38 164.9 6596 cellular  
 organisms;Eukaryota;Opisthokonta;Metazoa;Eumetazoa;Bilateria;Protostomia;  
 Spiralia;Lophotrochozoa;Mollusca;Bivalvia;Autobranchia;Heteroconchia;Euhe  
 terodonta;Imparidentia;Venerida;Veneroidea;Veneridae;Mercenaria;Mercenari  
 a mercenaria  
 UdeM00000002877 6596 622.9 UdeM00000002877 XP\_045206084.1 37.6 947  
 544 24 17 939 63 986 1.10E-174 622.9 6596 cellular  
 organisms;Eukaryota;Opisthokonta;Metazoa;Eumetazoa;Bilateria;Protostomia;  
 Spiralia;Lophotrochozoa;Mollusca;Bivalvia;Autobranchia;Heteroconchia;Euhe

terodonta;Imparidentia;Venerida;Veneroidea;Veneridae;Mercenaria;Mercenari  
a mercenaria

UdeM00000002878 6596 107.5 UdeM00000002878 XP\_045191829.1 74.6 67  
17 0 34 100 429 495 1.00E-20 107.5 6596 cellular

organisms;Eukaryota;Opisthokonta;Metazoa;Eumetazoa;Bilateria;Protostomia;  
Spiralia;Lophotrochozoa;Mollusca;Bivalvia;Autobranhia;Heteroconchia;Euhe  
terodonta;Imparidentia;Venerida;Veneroidea;Veneridae;Mercenaria;Mercenari  
a mercenaria

UdeM00000002879 6596 623.6 UdeM00000002879 XP\_045191829.1 67 439  
140 3 1 437 1 436 1.90E-175 623.6 6596 cellular

organisms;Eukaryota;Opisthokonta;Metazoa;Eumetazoa;Bilateria;Protostomia;  
Spiralia;Lophotrochozoa;Mollusca;Bivalvia;Autobranhia;Heteroconchia;Euhe  
terodonta;Imparidentia;Venerida;Veneroidea;Veneridae;Mercenaria;Mercenari  
a mercenaria

UdeM00000002880 6596 604.7 UdeM00000002880 XP\_045191829.1 61.4 479  
140 4 1 477 1 436 9.90E-170 604.7 6596 cellular

organisms;Eukaryota;Opisthokonta;Metazoa;Eumetazoa;Bilateria;Protostomia;  
Spiralia;Lophotrochozoa;Mollusca;Bivalvia;Autobranhia;Heteroconchia;Euhe  
terodonta;Imparidentia;Venerida;Veneroidea;Veneridae;Mercenaria;Mercenari  
a mercenaria

UdeM00000002881 6596 304.3 UdeM00000002881 XP\_045191831.1 55.4 267  
113 2 1 266 1 262 1.50E-79 304.3 6596 cellular

organisms;Eukaryota;Opisthokonta;Metazoa;Eumetazoa;Bilateria;Protostomia;  
Spiralia;Lophotrochozoa;Mollusca;Bivalvia;Autobranhia;Heteroconchia;Euhe  
terodonta;Imparidentia;Venerida;Veneroidea;Veneridae;Mercenaria;Mercenari  
a mercenaria

UdeM00000002882 6596 657.1 UdeM00000002882 XP\_045193633.1 55.7 582  
252 4 6 583 5 584 2.00E-185 657.1 6596 cellular

organisms;Eukaryota;Opisthokonta;Metazoa;Eumetazoa;Bilateria;Protostomia;  
Spiralia;Lophotrochozoa;Mollusca;Bivalvia;Autobranhia;Heteroconchia;Euhe  
terodonta;Imparidentia;Venerida;Veneroidea;Veneridae;Mercenaria;Mercenari  
a mercenaria

UdeM00000002883 6596 148.3 UdeM00000002883 XP\_045194208.1 55.7 122  
53 1 53 173 35 156 1.00E-32 148.3 6596 cellular

organisms;Eukaryota;Opisthokonta;Metazoa;Eumetazoa;Bilateria;Protostomia;  
Spiralia;Lophotrochozoa;Mollusca;Bivalvia;Autobranhia;Heteroconchia;Euhe  
terodonta;Imparidentia;Venerida;Veneroidea;Veneridae;Mercenaria;Mercenari  
a mercenaria

UdeM00000002884 6596 879.8 UdeM00000002884 XP\_045194209.1 66.7 661  
215 3 1 660 216 872 2.20E-252 879.8 6596 cellular

organisms;Eukaryota;Opisthokonta;Metazoa;Eumetazoa;Bilateria;Protostomia;  
Spiralia;Lophotrochozoa;Mollusca;Bivalvia;Autobranhia;Heteroconchia;Euhe  
terodonta;Imparidentia;Venerida;Veneroidea;Veneridae;Mercenaria;Mercenari  
a mercenaria

UdeM00000002885 225164 270.4 UdeM00000002885 XP\_009061432.1 49  
255 127 1 2 256 5 256 2.40E-69 270.4 225164  
cellular

organisms;Eukaryota;Opisthokonta;Metazoa;Eumetazoa;Bilateria;Protostomia;  
Spiralia;Lophotrochozoa;Mollusca;Gastropoda;Patellogastropoda;Lottiioidea;  
Lottiidae;Lottia;Lottia gigantea

UdeM00000002886 6596 785.8 UdeM00000002886 XP\_045194206.1 69.9 565  
155 5 1 552 194 756 3.60E-224 785.8 6596 cellular

organisms;Eukaryota;Opisthokonta;Metazoa;Eumetazoa;Bilateria;Protostomia;  
Spiralia;Lophotrochozoa;Mollusca;Bivalvia;Autobranhia;Heteroconchia;Euhe

terodonta;Imparidentia;Venerida;Veneroidea;Veneridae;Mercenaria;Mercenari  
 a mercenaria  
 UdeM00000002887 29159 279.3 UdeM00000002887 XP\_011451053.1 78.2 165  
 36 0 1 165 1 165 3.40E-72 279.3 29159 cellular  
 organisms;Eukaryota;Opisthokonta;Metazoa;Eumetazoa;Bilateria;Protostomia;  
 Spiralia;Lophotrochozoa;Mollusca;Bivalvia;Autobranhia;Pteriormorphia;Ostr  
 eida;Ostreoidea;Ostreidae;Crassostrea;Crassostrea gigas  
 UdeM00000002888 6596 229.6 UdeM00000002888 XP\_045191523.1 55.7 201  
 83 2 63 263 39 233 4.70E-57 229.6 6596 cellular  
 organisms;Eukaryota;Opisthokonta;Metazoa;Eumetazoa;Bilateria;Protostomia;  
 Spiralia;Lophotrochozoa;Mollusca;Bivalvia;Autobranhia;Heteroconchia;Euhe  
 terodonta;Imparidentia;Venerida;Veneroidea;Veneridae;Mercenaria;Mercenari  
 a mercenaria  
 UdeM00000002889 6573 1676.8 UdeM00000002889 XP\_021379287.1 63.9  
 1326 425 15 6 1289 5 1318 0.00E+00 1676.8 6573  
 cellular  
 organisms;Eukaryota;Opisthokonta;Metazoa;Eumetazoa;Bilateria;Protostomia;  
 Spiralia;Lophotrochozoa;Mollusca;Bivalvia;Autobranhia;Pteriormorphia;Pect  
 inida;Pectinoidea;Pectinidae;Mizuhopecten;Mizuhopecten yessoensis  
 UdeM00000002890 6579 247.3 UdeM00000002890 XP\_033754816.1 82.1 140  
 25 0 1 140 1192 1331 1.20E-62 247.3 6579 cellular  
 organisms;Eukaryota;Opisthokonta;Metazoa;Eumetazoa;Bilateria;Protostomia;  
 Spiralia;Lophotrochozoa;Mollusca;Bivalvia;Autobranhia;Pteriormorphia;Pect  
 inida;Pectinoidea;Pectinidae;Pecten;Pecten maximus  
 UdeM00000002891 6596 78.6 UdeM00000002891 XP\_045198152.1 34.3 169  
 94 4 1 163 1 158 1.10E-11 78.6 6596 cellular  
 organisms;Eukaryota;Opisthokonta;Metazoa;Eumetazoa;Bilateria;Protostomia;  
 Spiralia;Lophotrochozoa;Mollusca;Bivalvia;Autobranhia;Heteroconchia;Euhe  
 terodonta;Imparidentia;Venerida;Veneroidea;Veneridae;Mercenaria;Mercenari  
 a mercenaria  
 UdeM00000002892 6596 110.5 UdeM00000002892 XP\_045198152.1 38.3 167  
 92 3 1 164 1 159 2.70E-21 110.5 6596 cellular  
 organisms;Eukaryota;Opisthokonta;Metazoa;Eumetazoa;Bilateria;Protostomia;  
 Spiralia;Lophotrochozoa;Mollusca;Bivalvia;Autobranhia;Heteroconchia;Euhe  
 terodonta;Imparidentia;Venerida;Veneroidea;Veneridae;Mercenaria;Mercenari  
 a mercenaria  
 UdeM00000002893 6596 422.2 UdeM00000002893 XP\_045193152.1 63.6 316  
 106 2 2 308 3 318 8.30E-115 422.2 6596 cellular  
 organisms;Eukaryota;Opisthokonta;Metazoa;Eumetazoa;Bilateria;Protostomia;  
 Spiralia;Lophotrochozoa;Mollusca;Bivalvia;Autobranhia;Heteroconchia;Euhe  
 terodonta;Imparidentia;Venerida;Veneroidea;Veneridae;Mercenaria;Mercenari  
 a mercenaria  
 UdeM00000002894 6596 415.2 UdeM00000002894 XP\_045193152.1 62.6 321  
 106 3 2 313 3 318 1.00E-112 415.2 6596 cellular  
 organisms;Eukaryota;Opisthokonta;Metazoa;Eumetazoa;Bilateria;Protostomia;  
 Spiralia;Lophotrochozoa;Mollusca;Bivalvia;Autobranhia;Heteroconchia;Euhe  
 terodonta;Imparidentia;Venerida;Veneroidea;Veneridae;Mercenaria;Mercenari  
 a mercenaria  
 UdeM00000002895 6596 148.7 UdeM00000002895 XP\_045192752.1 58.7 126  
 51 1 1 126 48 172 5.20E-33 148.7 6596 cellular  
 organisms;Eukaryota;Opisthokonta;Metazoa;Eumetazoa;Bilateria;Protostomia;  
 Spiralia;Lophotrochozoa;Mollusca;Bivalvia;Autobranhia;Heteroconchia;Euhe  
 terodonta;Imparidentia;Venerida;Veneroidea;Veneridae;Mercenaria;Mercenari  
 a mercenaria



UdeM00000002896 6596 143.3 UdeM00000002896 XP\_045192828.1 66.7 102  
 34 0 18 119 17 118 2.00E-31 143.3 6596 cellular  
 organisms;Eukaryota;Opisthokonta;Metazoa;Eumetazoa;Bilateria;Protostomia;  
 Spiralia;Lophotrochozoa;Mollusca;Bivalvia;Autobranchia;Heteroconchia;Euhe  
 terodonta;Imparidentia;Venerida;Veneroidea;Veneridae;Mercenaria;Mercenari  
 a mercenaria  
 UdeM00000002897 1735272 466.1 UdeM00000002897 XP\_041376031.1 64.8  
 344 114 3 29 371 30 367 4.20E-128 466.1 1735272  
 cellular  
 organisms;Eukaryota;Opisthokonta;Metazoa;Eumetazoa;Bilateria;Protostomia;  
 Spiralia;Lophotrochozoa;Mollusca;Gastropoda;Neomphalina;Neomphaloidea;Pel  
 tospiridae;Gigantopelta;Gigantopelta aegis  
 UdeM00000002898 6579 211.5 UdeM00000002898 XP\_033754413.1 43.8 381  
 167 11 1 379 1 336 2.10E-51 211.5 6579 cellular  
 organisms;Eukaryota;Opisthokonta;Metazoa;Eumetazoa;Bilateria;Protostomia;  
 Spiralia;Lophotrochozoa;Mollusca;Bivalvia;Autobranchia;Pteriormorphia;Pect  
 inida;Pectinoidea;Pectinidae;Pecten;Pecten maximus  
 UdeM00000002899 29159 137.9 UdeM00000002899 XP\_011442483.2 36.1 368  
 184 10 1 342 62 404 2.50E-29 137.9 29159 cellular  
 organisms;Eukaryota;Opisthokonta;Metazoa;Eumetazoa;Bilateria;Protostomia;  
 Spiralia;Lophotrochozoa;Mollusca;Bivalvia;Autobranchia;Pteriormorphia;Ostr  
 eida;Ostreoidea;Ostreidae;Crassostrea;Crassostrea gigas  
 UdeM00000002900 6596 548.5 UdeM00000002900 XP\_045192835.1 65.7 414  
 120 3 1 412 62 455 7.20E-153 548.5 6596 cellular  
 organisms;Eukaryota;Opisthokonta;Metazoa;Eumetazoa;Bilateria;Protostomia;  
 Spiralia;Lophotrochozoa;Mollusca;Bivalvia;Autobranchia;Heteroconchia;Euhe  
 terodonta;Imparidentia;Venerida;Veneroidea;Veneridae;Mercenaria;Mercenari  
 a mercenaria  
 UdeM00000002901 1203425 360.5 UdeM00000002901 XP\_034536293.1 67.7  
 263 83 1 4 266 3 263 1.80E-96 360.5 1203425  
 cellular  
 organisms;Eukaryota;Opisthokonta;Metazoa;Eumetazoa;Bilateria;Deuterostomi  
 a;Chordata;Craniata;Vertebrata;Gnathostomata;Teleostomi;Euteleostomi;Acti  
 nopterygii;Actinopteri;Neopterygii;Teleostei;Osteoglossocephalai;Clupeoce  
 phala;Euteleosteomorpha;Neoteleostei;Eurypterygia;Ctenosquamata;Acanthomo  
 rphata;Euacanthomorphacea;Percomorphaceae;Eupercaria;Labriformes;Labridae  
 ;Notolabrus;Notolabrus celidotus  
 UdeM00000002902 6579 158.3 UdeM00000002902 XP\_033754617.1 41.6 250  
 129 9 4 249 3 239 2.20E-35 158.3 6579 cellular  
 organisms;Eukaryota;Opisthokonta;Metazoa;Eumetazoa;Bilateria;Protostomia;  
 Spiralia;Lophotrochozoa;Mollusca;Bivalvia;Autobranchia;Pteriormorphia;Pect  
 inida;Pectinoidea;Pectinidae;Pecten;Pecten maximus  
 UdeM00000002903 29159 157.9 UdeM00000002903 XP\_011446220.2 51.4 148  
 71 1 6 152 9 156 1.00E-35 157.9 29159 cellular  
 organisms;Eukaryota;Opisthokonta;Metazoa;Eumetazoa;Bilateria;Protostomia;  
 Spiralia;Lophotrochozoa;Mollusca;Bivalvia;Autobranchia;Pteriormorphia;Ostr  
 eida;Ostreoidea;Ostreidae;Crassostrea;Crassostrea gigas  
 UdeM00000002904 29159 110.5 UdeM00000002904 XP\_034305965.1 33 191  
 114 3 6 196 6 182 2.90E-21 110.5 29159 cellular  
 organisms;Eukaryota;Opisthokonta;Metazoa;Eumetazoa;Bilateria;Protostomia;  
 Spiralia;Lophotrochozoa;Mollusca;Bivalvia;Autobranchia;Pteriormorphia;Ostr  
 eida;Ostreoidea;Ostreidae;Crassostrea;Crassostrea gigas  
 UdeM00000002906 29159 157.1 UdeM00000002906 XP\_034311318.1 56.5 131  
 55 2 1 130 256 385 1.60E-35 157.1 29159 cellular

organisms;Eukaryota;Opisthokonta;Metazoa;Eumetazoa;Bilateria;Protostomia;Spiralia;Lophotrochozoa;Mollusca;Bivalvia;Autobranchia;Pteriomorphia;Ostreida;Ostreoidea;Ostreidae;Crassostrea;Crassostrea gigas  
UdeM00000002905 29159 159.1 UdeM00000002905 XP\_034311318.1 55.9 136  
58 2 1 135 256 390 5.10E-36 159.1 29159 cellular  
organisms;Eukaryota;Opisthokonta;Metazoa;Eumetazoa;Bilateria;Protostomia;Spiralia;Lophotrochozoa;Mollusca;Bivalvia;Autobranchia;Pteriomorphia;Ostreida;Ostreoidea;Ostreidae;Crassostrea;Crassostrea gigas  
UdeM00000002907 7739 82.8 UdeM00000002907 XP\_035699508.1 33 182  
102 5 6 172 657 833 7.00E-13 82.8 7739 cellular  
organisms;Eukaryota;Opisthokonta;Metazoa;Eumetazoa;Bilateria;Deuterostomia;Chordata;Cephalochordata;Leptocardii;Amphioxiformes;Branchiostomidae;Branchiostoma;Branchiostoma floridae  
UdeM00000002908 7739 160.2 UdeM00000002908 XP\_035657529.1 55 151  
62 4 7 152 6 155 2.00E-36 160.2 7739 cellular  
organisms;Eukaryota;Opisthokonta;Metazoa;Eumetazoa;Bilateria;Deuterostomia;Chordata;Cephalochordata;Leptocardii;Amphioxiformes;Branchiostomidae;Branchiostoma;Branchiostoma floridae  
UdeM00000002909 6596 417.5 UdeM00000002909 XP\_045191993.1 45.5 426  
189 4 244 628 193 616 3.00E-113 417.5 6596 cellular  
organisms;Eukaryota;Opisthokonta;Metazoa;Eumetazoa;Bilateria;Protostomia;Spiralia;Lophotrochozoa;Mollusca;Bivalvia;Autobranchia;Heteroconchia;Euheterodonta;Imparidentia;Venerida;Veneroidea;Veneridae;Mercenaria;Mercenaria mercenaria  
UdeM00000002910 6596 412.5 UdeM00000002910 XP\_045191993.1 45.2 429  
189 5 244 631 193 616 9.80E-112 412.5 6596 cellular  
organisms;Eukaryota;Opisthokonta;Metazoa;Eumetazoa;Bilateria;Protostomia;Spiralia;Lophotrochozoa;Mollusca;Bivalvia;Autobranchia;Heteroconchia;Euheterodonta;Imparidentia;Venerida;Veneroidea;Veneridae;Mercenaria;Mercenaria mercenaria  
UdeM00000002911 6596 170.2 UdeM00000002911 XP\_045191993.1 31.4 287  
155 6 3 248 669 954 3.20E-39 170.2 6596 cellular  
organisms;Eukaryota;Opisthokonta;Metazoa;Eumetazoa;Bilateria;Protostomia;Spiralia;Lophotrochozoa;Mollusca;Bivalvia;Autobranchia;Heteroconchia;Euheterodonta;Imparidentia;Venerida;Veneroidea;Veneridae;Mercenaria;Mercenaria mercenaria  
UdeM00000002912 6596 379.8 UdeM00000002912 XP\_045193490.1 50.9 330  
159 1 4 333 3 329 3.60E-102 379.8 6596 cellular  
organisms;Eukaryota;Opisthokonta;Metazoa;Eumetazoa;Bilateria;Protostomia;Spiralia;Lophotrochozoa;Mollusca;Bivalvia;Autobranchia;Heteroconchia;Euheterodonta;Imparidentia;Venerida;Veneroidea;Veneridae;Mercenaria;Mercenaria mercenaria  
UdeM00000002913 29159 536.2 UdeM00000002913 XP\_034336340.1 49.8 498  
246 3 7 501 2 498 4.50E-149 536.2 29159 cellular  
organisms;Eukaryota;Opisthokonta;Metazoa;Eumetazoa;Bilateria;Protostomia;Spiralia;Lophotrochozoa;Mollusca;Bivalvia;Autobranchia;Pteriomorphia;Ostreida;Ostreoidea;Ostreidae;Crassostrea;Crassostrea gigas  
UdeM00000002914 6573 65.9 UdeM00000002914 XP\_021366930.1 31.9 113  
73 2 7 118 18 127 5.80E-08 65.9 6573 cellular  
organisms;Eukaryota;Opisthokonta;Metazoa;Eumetazoa;Bilateria;Protostomia;Spiralia;Lophotrochozoa;Mollusca;Bivalvia;Autobranchia;Pteriomorphia;Pectinida;Pectinoidea;Pectinidae;Mizuhopecten;Mizuhopecten yessoensis  
UdeM00000002915 6596 265.4 UdeM00000002915 XP\_045160746.1 42.2 384  
111 5 38 312 5 386 9.30E-68 265.4 6596 cellular

organisms;Eukaryota;Opisthokonta;Metazoa;Eumetazoa;Bilateria;Protostomia;Spiralia;Lophotrochozoa;Mollusca;Bivalvia;Autobranhia;Heteroconchia;Euherodonta;Imparidentia;Venerida;Veneroidea;Veneridae;Mercenaria;Mercenaria mercenaria

UdeM00000002916 6596 164.5 UdeM00000002916 XP\_045194605.1 37.1 224  
129 4 71 292 1 214 2.20E-37 164.5 6596 cellular

organisms;Eukaryota;Opisthokonta;Metazoa;Eumetazoa;Bilateria;Protostomia;Spiralia;Lophotrochozoa;Mollusca;Bivalvia;Autobranhia;Heteroconchia;Euherodonta;Imparidentia;Venerida;Veneroidea;Veneridae;Mercenaria;Mercenaria mercenaria

UdeM00000002917 6573 125.2 UdeM00000002917 XP\_021363943.1 52.6 116  
52 1 3 115 258 373 5.50E-26 125.2 6573 cellular

organisms;Eukaryota;Opisthokonta;Metazoa;Eumetazoa;Bilateria;Protostomia;Spiralia;Lophotrochozoa;Mollusca;Bivalvia;Autobranhia;Pteriormorphia;Pectinida;Pectinoidea;Pectinidae;Mizuhopecten;Mizuhopecten yessoensis

UdeM00000002918 6596 433 UdeM00000002918 XP\_045160746.1 58.9 382  
137 3 38 399 5 386 4.30E-118 433 6596 cellular

organisms;Eukaryota;Opisthokonta;Metazoa;Eumetazoa;Bilateria;Protostomia;Spiralia;Lophotrochozoa;Mollusca;Bivalvia;Autobranhia;Heteroconchia;Euherodonta;Imparidentia;Venerida;Veneroidea;Veneridae;Mercenaria;Mercenaria mercenaria

UdeM00000002919 6596 423.3 UdeM00000002919 XP\_045160746.1 57.7 381  
141 3 43 403 6 386 3.40E-115 423.3 6596 cellular

organisms;Eukaryota;Opisthokonta;Metazoa;Eumetazoa;Bilateria;Protostomia;Spiralia;Lophotrochozoa;Mollusca;Bivalvia;Autobranhia;Heteroconchia;Euherodonta;Imparidentia;Venerida;Veneroidea;Veneridae;Mercenaria;Mercenaria mercenaria

UdeM00000002920 6579 83.2 UdeM00000002920 XP\_033754270.1 63.9 72  
26 0 1 72 1 72 1.60E-13 83.2 6579 cellular

organisms;Eukaryota;Opisthokonta;Metazoa;Eumetazoa;Bilateria;Protostomia;Spiralia;Lophotrochozoa;Mollusca;Bivalvia;Autobranhia;Pteriormorphia;Pectinida;Pectinoidea;Pectinidae;Pecten;Pecten maximus

UdeM00000002925 6596 586.6 UdeM00000002925 XP\_045192301.1 58.9 482  
191 5 11 486 7 487 2.90E-164 586.6 6596 cellular

organisms;Eukaryota;Opisthokonta;Metazoa;Eumetazoa;Bilateria;Protostomia;Spiralia;Lophotrochozoa;Mollusca;Bivalvia;Autobranhia;Heteroconchia;Euherodonta;Imparidentia;Venerida;Veneroidea;Veneridae;Mercenaria;Mercenaria mercenaria

UdeM00000002926 400727 99 UdeM00000002926 XP\_025115955.1 56.6  
83 36 0 1 83 1 83 3.30E-18 99 400727  
cellular

organisms;Eukaryota;Opisthokonta;Metazoa;Eumetazoa;Bilateria;Protostomia;Spiralia;Lophotrochozoa;Mollusca;Gastropoda;Caenogastropoda;Architaenioglossa;Ampullarioidea;Ampullariidae;Pomacea;Pomacea canaliculata

UdeM00000002927 1735272 572 UdeM00000002927 XP\_041376506.1 63.7  
408 146 1 27 434 51 456 6.40E-160 572 1735272  
cellular

organisms;Eukaryota;Opisthokonta;Metazoa;Eumetazoa;Bilateria;Protostomia;Spiralia;Lophotrochozoa;Mollusca;Gastropoda;Neomphalina;Neomphaloidea;Peltospiridae;Gigantopelta;Gigantopelta aegis

UdeM00000002928 6596 337.8 UdeM00000002928 XP\_045192252.1 43.6 555  
243 18 1 539 517 1017 2.90E-89 337.8 6596 cellular

organisms;Eukaryota;Opisthokonta;Metazoa;Eumetazoa;Bilateria;Protostomia;Spiralia;Lophotrochozoa;Mollusca;Bivalvia;Autobranhia;Heteroconchia;Euherodonta

terodonta;Imparidentia;Venerida;Veneroidea;Veneridae;Mercenaria;Mercenari  
 a mercenaria  
 UdeM00000002929 6565 305.4 UdeM00000002929 XP\_022345476.1 66.6 305  
 96 3 1 304 1 300 7.80E-80 305.4 6565 cellular  
 organisms;Eukaryota;Opisthokonta;Metazoa;Eumetazoa;Bilateria;Protostomia;  
 Spiralia;Lophotrochozoa;Mollusca;Bivalvia;Autobranchia;Pteriormorphia;Ostr  
 eida;Ostreoidea;Ostreidae;Crassostrea;Crassostrea virginica  
 UdeM00000002930 6596 486.5 UdeM00000002930 XP\_045194062.1 67.6 336  
 107 1 12 347 17 350 2.90E-134 486.5 6596 cellular  
 organisms;Eukaryota;Opisthokonta;Metazoa;Eumetazoa;Bilateria;Protostomia;  
 Spiralia;Lophotrochozoa;Mollusca;Bivalvia;Autobranchia;Heteroconchia;Euhe  
 terodonta;Imparidentia;Venerida;Veneroidea;Veneridae;Mercenaria;Mercenari  
 a mercenaria  
 UdeM00000002931 6596 176.4 UdeM00000002931 XP\_045194703.1 50.5 188  
 91 1 1 186 1 188 3.40E-41 176.4 6596 cellular  
 organisms;Eukaryota;Opisthokonta;Metazoa;Eumetazoa;Bilateria;Protostomia;  
 Spiralia;Lophotrochozoa;Mollusca;Bivalvia;Autobranchia;Heteroconchia;Euhe  
 terodonta;Imparidentia;Venerida;Veneroidea;Veneridae;Mercenaria;Mercenari  
 a mercenaria  
 UdeM00000002932 6596 177.2 UdeM00000002932 XP\_045194703.1 50.5 188  
 91 1 21 206 1 188 2.20E-41 177.2 6596 cellular  
 organisms;Eukaryota;Opisthokonta;Metazoa;Eumetazoa;Bilateria;Protostomia;  
 Spiralia;Lophotrochozoa;Mollusca;Bivalvia;Autobranchia;Heteroconchia;Euhe  
 terodonta;Imparidentia;Venerida;Veneroidea;Veneridae;Mercenaria;Mercenari  
 a mercenaria  
 UdeM00000002934 6596 2225.3 UdeM00000002934 XP\_045194080.1 52.9  
 2441 1009 31 11 2423 26 2353 0.00E+00 2225.3 6596  
 cellular  
 organisms;Eukaryota;Opisthokonta;Metazoa;Eumetazoa;Bilateria;Protostomia;  
 Spiralia;Lophotrochozoa;Mollusca;Bivalvia;Autobranchia;Heteroconchia;Euhe  
 terodonta;Imparidentia;Venerida;Veneroidea;Veneridae;Mercenaria;Mercenari  
 a mercenaria  
 UdeM00000002933 6596 2193.3 UdeM00000002933 XP\_045194071.1 52.1  
 2469 1002 33 11 2412 26 2381 0.00E+00 2193.3 6596  
 cellular  
 organisms;Eukaryota;Opisthokonta;Metazoa;Eumetazoa;Bilateria;Protostomia;  
 Spiralia;Lophotrochozoa;Mollusca;Bivalvia;Autobranchia;Heteroconchia;Euhe  
 terodonta;Imparidentia;Venerida;Veneroidea;Veneridae;Mercenaria;Mercenari  
 a mercenaria  
 UdeM00000002935 6596 1931 UdeM00000002935 XP\_045193487.1 42.5 2891  
 1323 72 26 2760 22 2729 0.00E+00 1931 6596 cellular  
 organisms;Eukaryota;Opisthokonta;Metazoa;Eumetazoa;Bilateria;Protostomia;  
 Spiralia;Lophotrochozoa;Mollusca;Bivalvia;Autobranchia;Heteroconchia;Euhe  
 terodonta;Imparidentia;Venerida;Veneroidea;Veneridae;Mercenaria;Mercenari  
 a mercenaria  
 UdeM00000002936 6565 85.5 UdeM00000002936 XP\_022342146.1 47.8 253  
 85 5 1 250 1 209 1.10E-13 85.5 6565 cellular  
 organisms;Eukaryota;Opisthokonta;Metazoa;Eumetazoa;Bilateria;Protostomia;  
 Spiralia;Lophotrochozoa;Mollusca;Bivalvia;Autobranchia;Pteriormorphia;Ostr  
 eida;Ostreoidea;Ostreidae;Crassostrea;Crassostrea virginica  
 UdeM00000002937 6850 344.4 UdeM00000002937 XP\_013781061.1 61.9 268  
 101 1 3 270 8 274 1.40E-91 344.4 6850 cellular  
 organisms;Eukaryota;Opisthokonta;Metazoa;Eumetazoa;Bilateria;Protostomia;

Ecdysozoa; Panarthropoda; Arthropoda; Chelicerata; Merostomata; Xiphosura; Limulidae; Limulus; Limulus polyphemus

UdeM00000002938 6850 344.4 UdeM00000002938 XP\_013781061.1 61.9 268  
101 1 2 269 8 274 1.30E-91 344.4 6850 cellular

organisms; Eukaryota; Opisthokonta; Metazoa; Eumetazoa; Bilateria; Protostomia; Ecdysozoa; Panarthropoda; Arthropoda; Chelicerata; Merostomata; Xiphosura; Limulidae; Limulus; Limulus polyphemus

UdeM00000002939 6596 213.8 UdeM00000002939 XP\_045156247.1 31.5 448  
158 7 87 389 312 755 4.00E-52 213.8 6596 cellular

organisms; Eukaryota; Opisthokonta; Metazoa; Eumetazoa; Bilateria; Protostomia; Spiralia; Lophotrochozoa; Mollusca; Bivalvia; Autobranchia; Heteroconchia; Euheterodonta; Imparidentia; Venerida; Veneroidea; Veneridae; Mercenaria; Mercenaria mercenaria

UdeM00000002940 8168 281.2 UdeM00000002940 XP\_039648926.1 57.3 227  
90 2 3 222 184 410 1.20E-72 281.2 8168 cellular

organisms; Eukaryota; Opisthokonta; Metazoa; Eumetazoa; Bilateria; Deuterostomia; Chordata; Craniata; Vertebrata; Gnathostomata; Teleostomi; Euteleostomi; Actinopterygii; Actinopteri; Neopterygii; Teleostei; Osteoglossocephalai; Clupeocephala; Euteleostei; Neoteleostei; Eurypterygia; Ctenosquamata; Acanthomorphata; Euacanthomorphacea; Percomorphaceae; Eupercaria; Perciformes; Percoidae; Percidae; Percinae; Perca; Perca fluviatilis

UdeM00000002941 50390 295.4 UdeM00000002941 XP\_028147518.1 54.8 228  
98 1 3 225 47 274 6.00E-77 295.4 50390 cellular

organisms; Eukaryota; Opisthokonta; Metazoa; Eumetazoa; Bilateria; Protostomia; Ecdysozoa; Panarthropoda; Arthropoda; Mandibulata; Pancrustacea; Hexapoda; Insecta; Dicondylia; Pterygota; Neoptera; Endopterygota; Coleoptera; Polyphaga; Cucujiformia; Chrysomeloidea; Chrysomelidae; Galerucinae; Luperini; Diabroticina; Diabroticites; Diabrotica; Diabrotica virgifera; Diabrotica virgifera virgifera

UdeM00000002943 6596 251.5 UdeM00000002943 XP\_045201585.1 41.8 342  
168 3 19 329 18 359 1.50E-63 251.5 6596 cellular

organisms; Eukaryota; Opisthokonta; Metazoa; Eumetazoa; Bilateria; Protostomia; Spiralia; Lophotrochozoa; Mollusca; Bivalvia; Autobranchia; Heteroconchia; Euheterodonta; Imparidentia; Venerida; Veneroidea; Veneridae; Mercenaria; Mercenaria mercenaria

UdeM00000002942 6596 256.9 UdeM00000002942 XP\_045201585.1 41.9 346  
170 3 30 344 14 359 3.60E-65 256.9 6596 cellular

organisms; Eukaryota; Opisthokonta; Metazoa; Eumetazoa; Bilateria; Protostomia; Spiralia; Lophotrochozoa; Mollusca; Bivalvia; Autobranchia; Heteroconchia; Euheterodonta; Imparidentia; Venerida; Veneroidea; Veneridae; Mercenaria; Mercenaria mercenaria

UdeM00000002945 6596 301.2 UdeM00000002945 XP\_045201247.1 44 375  
205 4 5 376 8 380 1.90E-78 301.2 6596 cellular

organisms; Eukaryota; Opisthokonta; Metazoa; Eumetazoa; Bilateria; Protostomia; Spiralia; Lophotrochozoa; Mollusca; Bivalvia; Autobranchia; Heteroconchia; Euheterodonta; Imparidentia; Venerida; Veneroidea; Veneridae; Mercenaria; Mercenaria mercenaria

UdeM00000002946 6579 333.2 UdeM00000002946 XP\_033760129.1 46.5 389  
202 5 1 387 29 413 4.50E-88 333.2 6579 cellular

organisms; Eukaryota; Opisthokonta; Metazoa; Eumetazoa; Bilateria; Protostomia; Spiralia; Lophotrochozoa; Mollusca; Bivalvia; Autobranchia; Pteriomorphia; Pectinida; Pectinoidea; Pectinidae; Pecten; Pecten maximus

UdeM00000002947 6596 786.9 UdeM00000002947 XP\_045192161.1 72.5 552  
109 1 43 594 49 557 1.70E-224 786.9 6596 cellular

organisms;Eukaryota;Opisthokonta;Metazoa;Eumetazoa;Bilateria;Protostomia;Spiralia;Lophotrochozoa;Mollusca;Bivalvia;Autobranchia;Heteroconchia;Euherodonta;Imparidentia;Venerida;Veneroidea;Veneridae;Mercenaria;Mercenaria mercenaria

UdeM00000002948 6596 779.6 UdeM00000002948 XP\_045192161.1 68.3 600  
142 3 1 595 1 557 2.80E-22 779.6 6596 cellular

organisms;Eukaryota;Opisthokonta;Metazoa;Eumetazoa;Bilateria;Protostomia;Spiralia;Lophotrochozoa;Mollusca;Bivalvia;Autobranchia;Heteroconchia;Euherodonta;Imparidentia;Venerida;Veneroidea;Veneridae;Mercenaria;Mercenaria mercenaria

UdeM00000002949 6526 170.6 UdeM00000002949 XP\_013077133.1 48.6 362  
130 12 721 1056 475 806 1.50E-38 170.6 6526 cellular

organisms;Eukaryota;Opisthokonta;Metazoa;Eumetazoa;Bilateria;Protostomia;Spiralia;Lophotrochozoa;Mollusca;Gastropoda;Heterobranchia;Euthyneura;Panpulmonata;Hygrophila;Lymnaeidae;Planorbidae;Biomphalaria;Biomphalaria glabrata

UdeM00000002951 6596 166 UdeM00000002951 XP\_045173138.1 33.2 343  
212 5 1 328 15 355 2.50E-37 166 6596 cellular

organisms;Eukaryota;Opisthokonta;Metazoa;Eumetazoa;Bilateria;Protostomia;Spiralia;Lophotrochozoa;Mollusca;Bivalvia;Autobranchia;Heteroconchia;Euherodonta;Imparidentia;Venerida;Veneroidea;Veneridae;Mercenaria;Mercenaria mercenaria

UdeM00000002952 1735272 96.7 UdeM00000002952 XP\_041361370.1 26.6  
349 218 12 2 337 425 748 6.50E-17 96.7 1735272  
cellular

organisms;Eukaryota;Opisthokonta;Metazoa;Eumetazoa;Bilateria;Protostomia;Spiralia;Lophotrochozoa;Mollusca;Gastropoda;Neomphalina;Neomphaloidea;Peltospiridae;Gigantopelta;Gigantopelta aegis

UdeM00000002954 6596 115.2 UdeM00000002954 XP\_045206913.1 32.1 268  
151 9 1 248 86 342 1.20E-22 115.2 6596 cellular

organisms;Eukaryota;Opisthokonta;Metazoa;Eumetazoa;Bilateria;Protostomia;Spiralia;Lophotrochozoa;Mollusca;Bivalvia;Autobranchia;Heteroconchia;Euherodonta;Imparidentia;Venerida;Veneroidea;Veneridae;Mercenaria;Mercenaria mercenaria

UdeM00000002953 6596 143.3 UdeM00000002953 XP\_045206913.1 34.5 255  
144 6 1 237 86 335 1.70E-30 143.3 6596 cellular

organisms;Eukaryota;Opisthokonta;Metazoa;Eumetazoa;Bilateria;Protostomia;Spiralia;Lophotrochozoa;Mollusca;Bivalvia;Autobranchia;Heteroconchia;Euherodonta;Imparidentia;Venerida;Veneroidea;Veneridae;Mercenaria;Mercenaria mercenaria

UdeM00000002955 6579 137.1 UdeM00000002955 XP\_033730245.1 35.9 209  
120 6 45 247 52 252 3.00E-29 137.1 6579 cellular

organisms;Eukaryota;Opisthokonta;Metazoa;Eumetazoa;Bilateria;Protostomia;Spiralia;Lophotrochozoa;Mollusca;Bivalvia;Autobranchia;Pteriomorpha;Pectinida;Pectinoidea;Pectinidae;Pecten;Pecten maximus

UdeM00000002956 29159 133.7 UdeM00000002956 XP\_011436155.2 32.5 295  
155 13 68 342 307 577 4.60E-28 133.7 29159 cellular

organisms;Eukaryota;Opisthokonta;Metazoa;Eumetazoa;Bilateria;Protostomia;Spiralia;Lophotrochozoa;Mollusca;Bivalvia;Autobranchia;Pteriomorpha;Ostreida;Ostreidae;Crassostrea;Crassostrea gigas

UdeM00000002957 29159 131.3 UdeM00000002957 XP\_011436155.2 32.1 299  
155 13 68 346 307 577 2.30E-27 131.3 29159 cellular

organisms;Eukaryota;Opisthokonta;Metazoa;Eumetazoa;Bilateria;Protostomia;

Spiralia;Lophotrochozoa;Mollusca;Bivalvia;Autobranchia;Pteriormorphia;Ostr  
eida;Ostreoidea;Ostreidae;Crassostrea;Crassostrea gigas  
UdeM00000002958 29159 120.2 UdeM00000002958 XP\_034304475.1 35 234  
138 8 21 246 78 305 3.80E-24 120.2 29159 cellular  
organisms;Eukaryota;Opisthokonta;Metazoa;Eumetazoa;Bilateria;Protostomia;  
Spiralia;Lophotrochozoa;Mollusca;Bivalvia;Autobranchia;Pteriormorphia;Ostr  
eida;Ostreoidea;Ostreidae;Crassostrea;Crassostrea gigas  
UdeM00000002959 6596 849.4 UdeM00000002959 XP\_045177368.1 55.5 735  
319 7 64 794 107 837 3.80E-243 849.4 6596 cellular  
organisms;Eukaryota;Opisthokonta;Metazoa;Eumetazoa;Bilateria;Protostomia;  
Spiralia;Lophotrochozoa;Mollusca;Bivalvia;Autobranchia;Heteroconchia;Euhe  
terodonta;Imparidentia;Venerida;Veneroidea;Veneridae;Mercenaria;Mercenari  
a mercenaria  
UdeM00000002960 7741 217.6 UdeM00000002960 XP\_019622111.1 52 202  
95 2 119 320 79 278 2.30E-53 217.6 7741 cellular  
organisms;Eukaryota;Opisthokonta;Metazoa;Eumetazoa;Bilateria;Deuterostomi  
a;Chordata;Cephalochordata;Leptocardii;Amphioxiformes;Branchiostomidae;Br  
anchiostoma;Branchiostoma belcheri  
UdeM00000002961 6596 730.7 UdeM00000002961 XP\_045193301.1 54 1125  
388 17 51 1157 446 1459 2.90E-207 730.7 6596 cellular  
organisms;Eukaryota;Opisthokonta;Metazoa;Eumetazoa;Bilateria;Protostomia;  
Spiralia;Lophotrochozoa;Mollusca;Bivalvia;Autobranchia;Heteroconchia;Euhe  
terodonta;Imparidentia;Venerida;Veneroidea;Veneridae;Mercenaria;Mercenari  
a mercenaria  
UdeM00000002966 6573 98.6 UdeM00000002966 XP\_021364275.1 50.4 121  
52 3 168 284 279 395 1.40E-17 98.6 6573 cellular  
organisms;Eukaryota;Opisthokonta;Metazoa;Eumetazoa;Bilateria;Protostomia;  
Spiralia;Lophotrochozoa;Mollusca;Bivalvia;Autobranchia;Pteriormorphia;Pect  
inida;Pectinoidea;Pectinidae;Mizuhopecten;Mizuhopecten yessoensis  
UdeM00000002969 6596 403.7 UdeM00000002969 XP\_045193811.1 72.7 264  
66 3 1 263 1 259 1.80E-109 403.7 6596 cellular  
organisms;Eukaryota;Opisthokonta;Metazoa;Eumetazoa;Bilateria;Protostomia;  
Spiralia;Lophotrochozoa;Mollusca;Bivalvia;Autobranchia;Heteroconchia;Euhe  
terodonta;Imparidentia;Venerida;Veneroidea;Veneridae;Mercenaria;Mercenari  
a mercenaria  
UdeM00000002970 6596 589.7 UdeM00000002970 XP\_045193803.1 71.8 383  
102 4 1 382 1 378 2.60E-165 589.7 6596 cellular  
organisms;Eukaryota;Opisthokonta;Metazoa;Eumetazoa;Bilateria;Protostomia;  
Spiralia;Lophotrochozoa;Mollusca;Bivalvia;Autobranchia;Heteroconchia;Euhe  
terodonta;Imparidentia;Venerida;Veneroidea;Veneridae;Mercenaria;Mercenari  
a mercenaria  
UdeM00000002971 6565 368.2 UdeM00000002971 XP\_022337693.1 37.9 560  
328 10 306 859 88 633 2.80E-98 368.2 6565 cellular  
organisms;Eukaryota;Opisthokonta;Metazoa;Eumetazoa;Bilateria;Protostomia;  
Spiralia;Lophotrochozoa;Mollusca;Bivalvia;Autobranchia;Pteriormorphia;Ostr  
eida;Ostreoidea;Ostreidae;Crassostrea;Crassostrea virginica  
UdeM00000002972 29159 472.2 UdeM00000002972 XP\_011429695.1 38.3 697  
388 14 2 666 13 699 1.10E-129 472.2 29159 cellular  
organisms;Eukaryota;Opisthokonta;Metazoa;Eumetazoa;Bilateria;Protostomia;  
Spiralia;Lophotrochozoa;Mollusca;Bivalvia;Autobranchia;Pteriormorphia;Ostr  
eida;Ostreoidea;Ostreidae;Crassostrea;Crassostrea gigas  
UdeM00000002973 6565 109.4 UdeM00000002973 XP\_022344537.1 36.8 182  
105 3 7 187 15 187 5.80E-21 109.4 6565 cellular  
organisms;Eukaryota;Opisthokonta;Metazoa;Eumetazoa;Bilateria;Protostomia;

Spiralia; Lophotrochozoa; Mollusca; Bivalvia; Autobranchia; Pteriomorpha; Ostr  
eida; Ostreidae; Crassostrea; Crassostrea virginica  
UdeM00000002974 29159 306.6 UdeM00000002974 XP\_011429695.1 38.5 408  
222 7 1 383 296 699 4.60E-80 306.6 29159 cellular  
organisms; Eukaryota; Opisthokonta; Metazoa; Eumetazoa; Bilateria; Protostomia;  
Spiralia; Lophotrochozoa; Mollusca; Bivalvia; Autobranchia; Pteriomorpha; Ostr  
eida; Ostreidae; Crassostrea; Crassostrea gigas  
UdeM00000002975 29159 449.9 UdeM00000002975 XP\_011429695.1 42.7 590  
304 11 1 564 118 699 5.00E-123 449.9 29159 cellular  
organisms; Eukaryota; Opisthokonta; Metazoa; Eumetazoa; Bilateria; Protostomia;  
Spiralia; Lophotrochozoa; Mollusca; Bivalvia; Autobranchia; Pteriomorpha; Ostr  
eida; Ostreidae; Crassostrea; Crassostrea gigas  
UdeM00000002976 29159 512.3 UdeM00000002976 XP\_011429695.1 36.3 812  
462 19 2 775 13 807 1.10E-141 512.3 29159 cellular  
organisms; Eukaryota; Opisthokonta; Metazoa; Eumetazoa; Bilateria; Protostomia;  
Spiralia; Lophotrochozoa; Mollusca; Bivalvia; Autobranchia; Pteriomorpha; Ostr  
eida; Ostreidae; Crassostrea; Crassostrea gigas  
UdeM00000002977 29159 501.9 UdeM00000002977 XP\_011429695.1 35.7 813  
456 19 7 765 8 807 1.50E-138 501.9 29159 cellular  
organisms; Eukaryota; Opisthokonta; Metazoa; Eumetazoa; Bilateria; Protostomia;  
Spiralia; Lophotrochozoa; Mollusca; Bivalvia; Autobranchia; Pteriomorpha; Ostr  
eida; Ostreidae; Crassostrea; Crassostrea gigas  
UdeM00000002978 29159 514.6 UdeM00000002978 XP\_011429695.1 36 837  
472 24 4 796 6 822 2.20E-142 514.6 29159 cellular  
organisms; Eukaryota; Opisthokonta; Metazoa; Eumetazoa; Bilateria; Protostomia;  
Spiralia; Lophotrochozoa; Mollusca; Bivalvia; Autobranchia; Pteriomorpha; Ostr  
eida; Ostreidae; Crassostrea; Crassostrea gigas  
UdeM00000002979 29159 515 UdeM00000002979 XP\_011429695.1 36.1 829  
467 23 2 786 13 822 1.70E-142 515 29159 cellular  
organisms; Eukaryota; Opisthokonta; Metazoa; Eumetazoa; Bilateria; Protostomia;  
Spiralia; Lophotrochozoa; Mollusca; Bivalvia; Autobranchia; Pteriomorpha; Ostr  
eida; Ostreidae; Crassostrea; Crassostrea gigas  
UdeM00000002980 29159 518.1 UdeM00000002980 XP\_011429695.1 37.7 810  
439 20 2 760 13 807 2.00E-143 518.1 29159 cellular  
organisms; Eukaryota; Opisthokonta; Metazoa; Eumetazoa; Bilateria; Protostomia;  
Spiralia; Lophotrochozoa; Mollusca; Bivalvia; Autobranchia; Pteriomorpha; Ostr  
eida; Ostreidae; Crassostrea; Crassostrea gigas  
UdeM00000002981 1735272 169.9 UdeM00000002981 XP\_041375305.1 69  
113 35 0 10 122 360 472 2.20E-39 169.9 1735272  
cellular  
organisms; Eukaryota; Opisthokonta; Metazoa; Eumetazoa; Bilateria; Protostomia;  
Spiralia; Lophotrochozoa; Mollusca; Gastropoda; Neomphalina; Neomphaloidea; Pel  
tospiridae; Gigantopelta; Gigantopelta aegis  
UdeM00000002982 6596 290.4 UdeM00000002982 XP\_045193329.1 72.6 201  
52 2 29 228 128 326 2.20E-75 290.4 6596 cellular  
organisms; Eukaryota; Opisthokonta; Metazoa; Eumetazoa; Bilateria; Protostomia;  
Spiralia; Lophotrochozoa; Mollusca; Bivalvia; Autobranchia; Heteroconchia; Eue  
terodonta; Imparidentia; Venerida; Veneroidea; Veneridae; Mercenaria; Mercenari  
a mercenaria  
UdeM00000002983 6579 641.7 UdeM00000002983 XP\_033754139.1 70.1 452  
132 3 57 507 26 475 7.70E-181 641.7 6579 cellular  
organisms; Eukaryota; Opisthokonta; Metazoa; Eumetazoa; Bilateria; Protostomia;  
Spiralia; Lophotrochozoa; Mollusca; Bivalvia; Autobranchia; Pteriomorpha; Pect  
inida; Pectinoidea; Pectinidae; Pecten; Pecten maximus



UdeM00000002984 6579 640.6 UdeM00000002984 XP\_033754139.1 70.4 452  
 131 3 26 476 26 475 1.60E-180 640.6 6579 cellular  
 organisms;Eukaryota;Opisthokonta;Metazoa;Eumetazoa;Bilateria;Protostomia;  
 Spiralia;Lophotrochozoa;Mollusca;Bivalvia;Autobranhia;Pteriomorphia;Pect  
 inida;Pectinoidea;Pectinidae;Pecten;Pecten maximus  
 UdeM00000002985 6579 610.5 UdeM00000002985 XP\_033754139.1 67.3 455  
 146 3 24 477 16 468 1.80E-171 610.5 6579 cellular  
 organisms;Eukaryota;Opisthokonta;Metazoa;Eumetazoa;Bilateria;Protostomia;  
 Spiralia;Lophotrochozoa;Mollusca;Bivalvia;Autobranhia;Pteriomorphia;Pect  
 inida;Pectinoidea;Pectinidae;Pecten;Pecten maximus  
 UdeM00000002987 6596 559.7 UdeM00000002987 XP\_045214301.1 58.8 454  
 178 2 7 459 28 473 3.60E-156 559.7 6596 cellular  
 organisms;Eukaryota;Opisthokonta;Metazoa;Eumetazoa;Bilateria;Protostomia;  
 Spiralia;Lophotrochozoa;Mollusca;Bivalvia;Autobranhia;Heteroconchia;Euhe  
 terodonta;Imparidentia;Venerida;Veneroidea;Veneridae;Mercenaria;Mercenari  
 a mercenaria  
 UdeM00000002988 6573 342.4 UdeM00000002988 XP\_021358303.1 61.1 280  
 93 3 1 267 1 277 5.60E-91 342.4 6573 cellular  
 organisms;Eukaryota;Opisthokonta;Metazoa;Eumetazoa;Bilateria;Protostomia;  
 Spiralia;Lophotrochozoa;Mollusca;Bivalvia;Autobranhia;Pteriomorphia;Pect  
 inida;Pectinoidea;Pectinidae;Mizuhopecten;Mizuhopecten yessoensis  
 UdeM00000002989 6596 418.7 UdeM00000002989 XP\_045193155.1 51.7 460  
 167 12 13 430 13 459 9.00E-114 418.7 6596 cellular  
 organisms;Eukaryota;Opisthokonta;Metazoa;Eumetazoa;Bilateria;Protostomia;  
 Spiralia;Lophotrochozoa;Mollusca;Bivalvia;Autobranhia;Heteroconchia;Euhe  
 terodonta;Imparidentia;Venerida;Veneroidea;Veneridae;Mercenaria;Mercenari  
 a mercenaria  
 UdeM00000002990 225164 83.6 UdeM00000002990 XP\_009063967.1 59.7  
 62 25 0 5 66 1 62 2.30E-13 83.6 225164  
 cellular  
 organisms;Eukaryota;Opisthokonta;Metazoa;Eumetazoa;Bilateria;Protostomia;  
 Spiralia;Lophotrochozoa;Mollusca;Gastropoda;Patellogastropoda;Lottioidea;  
 Lottiidae;Lottia;Lottia gigantea  
 UdeM00000002991 6579 162.2 UdeM00000002991 XP\_033755607.1 89.4 85  
 9 0 1 85 1 85 3.60E-37 162.2 6579 cellular  
 organisms;Eukaryota;Opisthokonta;Metazoa;Eumetazoa;Bilateria;Protostomia;  
 Spiralia;Lophotrochozoa;Mollusca;Bivalvia;Autobranhia;Pteriomorphia;Pect  
 inida;Pectinoidea;Pectinidae;Pecten;Pecten maximus  
 UdeM00000002992 6596 104.4 UdeM00000002992 XP\_045202346.1 39.7 131  
 77 1 6 136 16 144 1.20E-19 104.4 6596 cellular  
 organisms;Eukaryota;Opisthokonta;Metazoa;Eumetazoa;Bilateria;Protostomia;  
 Spiralia;Lophotrochozoa;Mollusca;Bivalvia;Autobranhia;Heteroconchia;Euhe  
 terodonta;Imparidentia;Venerida;Veneroidea;Veneridae;Mercenaria;Mercenari  
 a mercenaria  
 UdeM00000002993 6596 267.3 UdeM00000002993 XP\_045183440.1 55.4 240  
 102 3 2 240 145 380 2.70E-68 267.3 6596 cellular  
 organisms;Eukaryota;Opisthokonta;Metazoa;Eumetazoa;Bilateria;Protostomia;  
 Spiralia;Lophotrochozoa;Mollusca;Bivalvia;Autobranhia;Heteroconchia;Euhe  
 terodonta;Imparidentia;Venerida;Veneroidea;Veneridae;Mercenaria;Mercenari  
 a mercenaria  
 UdeM00000002994 6596 190.3 UdeM00000002994 XP\_045191549.1 79 124  
 25 1 1 123 72 195 1.50E-45 190.3 6596 cellular  
 organisms;Eukaryota;Opisthokonta;Metazoa;Eumetazoa;Bilateria;Protostomia;  
 Spiralia;Lophotrochozoa;Mollusca;Bivalvia;Autobranhia;Heteroconchia;Euhe

terodonta;Imparidentia;Venerida;Veneroidea;Veneridae;Mercenaria;Mercenari  
 a mercenaria  
 UdeM00000002995 6596 659.1 UdeM00000002995 XP\_045192162.1 83.1 372  
 60 2 15 383 14 385 3.50E-186 659.1 6596 cellular  
 organisms;Eukaryota;Opisthokonta;Metazoa;Eumetazoa;Bilateria;Protostomia;  
 Spiralia;Lophotrochozoa;Mollusca;Bivalvia;Autobranhia;Heteroconchia;Euhe  
 terodonta;Imparidentia;Venerida;Veneroidea;Veneridae;Mercenaria;Mercenari  
 a mercenaria  
 UdeM00000002996 6596 1292.3 UdeM00000002996 XP\_045193304.1 61.4  
 1044 392 4 1 1034 1 1043 0.00E+00 1292.3 6596  
 cellular  
 organisms;Eukaryota;Opisthokonta;Metazoa;Eumetazoa;Bilateria;Protostomia;  
 Spiralia;Lophotrochozoa;Mollusca;Bivalvia;Autobranhia;Heteroconchia;Euhe  
 terodonta;Imparidentia;Venerida;Veneroidea;Veneridae;Mercenaria;Mercenari  
 a mercenaria  
 UdeM00000002997 6579 311.6 UdeM00000002997 XP\_033754212.1 76.3 194  
 46 0 30 223 428 621 8.10E-82 311.6 6579 cellular  
 organisms;Eukaryota;Opisthokonta;Metazoa;Eumetazoa;Bilateria;Protostomia;  
 Spiralia;Lophotrochozoa;Mollusca;Bivalvia;Autobranhia;Pteriormorphia;Pect  
 inida;Pectinoidea;Pectinidae;Pecten;Pecten maximus  
 UdeM00000002998 6596 207.2 UdeM00000002998 XP\_045193013.1 41.3 414  
 178 14 19 376 4 408 3.60E-50 207.2 6596 cellular  
 organisms;Eukaryota;Opisthokonta;Metazoa;Eumetazoa;Bilateria;Protostomia;  
 Spiralia;Lophotrochozoa;Mollusca;Bivalvia;Autobranhia;Heteroconchia;Euhe  
 terodonta;Imparidentia;Venerida;Veneroidea;Veneridae;Mercenaria;Mercenari  
 a mercenaria  
 UdeM00000002999 1735272 273.1 UdeM00000002999 XP\_041375979.1 33.1  
 472 244 6 1134 1535 939 1408 2.20E-69 273.1 1735272  
 cellular  
 organisms;Eukaryota;Opisthokonta;Metazoa;Eumetazoa;Bilateria;Protostomia;  
 Spiralia;Lophotrochozoa;Mollusca;Gastropoda;Neomphalina;Neomphaloidea;Pel  
 tospiridae;Gigantopelta;Gigantopelta aegis  
 UdeM00000003000 1735272 272.7 UdeM00000003000 XP\_041375979.1 33.1  
 472 244 6 1134 1535 939 1408 2.90E-69 272.7 1735272  
 cellular  
 organisms;Eukaryota;Opisthokonta;Metazoa;Eumetazoa;Bilateria;Protostomia;  
 Spiralia;Lophotrochozoa;Mollusca;Gastropoda;Neomphalina;Neomphaloidea;Pel  
 tospiridae;Gigantopelta;Gigantopelta aegis  
 UdeM00000003001 6596 230.7 UdeM00000003001 XP\_045194899.1 36.5 397  
 184 12 7 342 18 407 2.90E-57 230.7 6596 cellular  
 organisms;Eukaryota;Opisthokonta;Metazoa;Eumetazoa;Bilateria;Protostomia;  
 Spiralia;Lophotrochozoa;Mollusca;Bivalvia;Autobranhia;Heteroconchia;Euhe  
 terodonta;Imparidentia;Venerida;Veneroidea;Veneridae;Mercenaria;Mercenari  
 a mercenaria  
 UdeM00000003002 6579 659.4 UdeM00000003002 XP\_033754256.1 61.9 540  
 193 7 10 548 361 888 4.30E-186 659.4 6579 cellular  
 organisms;Eukaryota;Opisthokonta;Metazoa;Eumetazoa;Bilateria;Protostomia;  
 Spiralia;Lophotrochozoa;Mollusca;Bivalvia;Autobranhia;Pteriormorphia;Pect  
 inida;Pectinoidea;Pectinidae;Pecten;Pecten maximus  
 UdeM00000003003 7574 158.3 UdeM00000003003 XP\_013384628.1 71.7 99  
 27 1 1 98 33 131 5.30E-36 158.3 7574 cellular  
 organisms;Eukaryota;Opisthokonta;Metazoa;Eumetazoa;Bilateria;Protostomia;  
 Spiralia;Lophotrochozoa;Brachiopoda;Linguliformea;Lingulata;Lingulida;Lin  
 guloidea;Lingulidae;Lingula;Lingula anatina

UdeM00000003004 7574 74.3 UdeM00000003004 XP\_013384628.1 74.4 43  
 11 0 96 138 518 560 1.30E-10 74.3 7574 cellular  
 organisms;Eukaryota;Opisthokonta;Metazoa;Eumetazoa;Bilateria;Protostomia;  
 Spiralia;Lophotrochozoa;Brachiopoda;Linguliformea;Lingulata;Lingulida;Lin  
 guloidea;Lingulidae;Lingula;Lingula anatina  
 UdeM00000003005 7574 338.2 UdeM00000003005 XP\_013382110.1 44.2 362  
 185 7 10 370 270 615 1.30E-89 338.2 7574 cellular  
 organisms;Eukaryota;Opisthokonta;Metazoa;Eumetazoa;Bilateria;Protostomia;  
 Spiralia;Lophotrochozoa;Brachiopoda;Linguliformea;Lingulata;Lingulida;Lin  
 guloidea;Lingulidae;Lingula;Lingula anatina  
 UdeM00000003006 7574 256.9 UdeM00000003006 XP\_013382110.1 60.8 194  
 76 0 14 207 45 238 2.20E-65 256.9 7574 cellular  
 organisms;Eukaryota;Opisthokonta;Metazoa;Eumetazoa;Bilateria;Protostomia;  
 Spiralia;Lophotrochozoa;Brachiopoda;Linguliformea;Lingulata;Lingulida;Lin  
 guloidea;Lingulidae;Lingula;Lingula anatina  
 UdeM00000003007 7574 256.5 UdeM00000003007 XP\_013382110.1 58.7 208  
 80 1 1 208 37 238 2.90E-65 256.5 7574 cellular  
 organisms;Eukaryota;Opisthokonta;Metazoa;Eumetazoa;Bilateria;Protostomia;  
 Spiralia;Lophotrochozoa;Brachiopoda;Linguliformea;Lingulata;Lingulida;Lin  
 guloidea;Lingulidae;Lingula;Lingula anatina  
 UdeM00000003008 7574 204.9 UdeM00000003008 XP\_013404796.1 85.8 120  
 17 0 2 121 36 155 5.90E-50 204.9 7574 cellular  
 organisms;Eukaryota;Opisthokonta;Metazoa;Eumetazoa;Bilateria;Protostomia;  
 Spiralia;Lophotrochozoa;Brachiopoda;Linguliformea;Lingulata;Lingulida;Lin  
 guloidea;Lingulidae;Lingula;Lingula anatina  
 UdeM00000003009 6596 386.7 UdeM00000003009 XP\_045192048.1 66 321  
 106 3 24 343 529 847 3.10E-104 386.7 6596 cellular  
 organisms;Eukaryota;Opisthokonta;Metazoa;Eumetazoa;Bilateria;Protostomia;  
 Spiralia;Lophotrochozoa;Mollusca;Bivalvia;Autobranchia;Heteroconchia;Euhe  
 terodonta;Imparidentia;Venerida;Veneroidea;Veneridae;Mercenaria;Mercenari  
 a mercenaria  
 UdeM00000003010 6596 689.9 UdeM00000003010 XP\_045192048.1 68.4 525  
 164 2 9 532 7 530 2.60E-195 689.9 6596 cellular  
 organisms;Eukaryota;Opisthokonta;Metazoa;Eumetazoa;Bilateria;Protostomia;  
 Spiralia;Lophotrochozoa;Mollusca;Bivalvia;Autobranchia;Heteroconchia;Euhe  
 terodonta;Imparidentia;Venerida;Veneroidea;Veneridae;Mercenaria;Mercenari  
 a mercenaria  
 UdeM00000003011 7574 180.3 UdeM00000003011 XP\_013392513.1 60 140  
 56 0 2 141 3 142 1.80E-42 180.3 7574 cellular  
 organisms;Eukaryota;Opisthokonta;Metazoa;Eumetazoa;Bilateria;Protostomia;  
 Spiralia;Lophotrochozoa;Brachiopoda;Linguliformea;Lingulata;Lingulida;Lin  
 guloidea;Lingulidae;Lingula;Lingula anatina  
 UdeM00000003012 6565 677.2 UdeM00000003012 XP\_022344823.1 73.7 429  
 113 0 1 429 1 429 1.40E-191 677.2 6565 cellular  
 organisms;Eukaryota;Opisthokonta;Metazoa;Eumetazoa;Bilateria;Protostomia;  
 Spiralia;Lophotrochozoa;Mollusca;Bivalvia;Autobranchia;Pteriomorphia;Ostr  
 eida;Ostreoidea;Ostreidae;Crassostrea;Crassostrea virginica  
 UdeM00000003013 6596 610.1 UdeM00000003013 XP\_045193998.1 45.4 650  
 336 5 1 632 1 649 3.10E-171 610.1 6596 cellular  
 organisms;Eukaryota;Opisthokonta;Metazoa;Eumetazoa;Bilateria;Protostomia;  
 Spiralia;Lophotrochozoa;Mollusca;Bivalvia;Autobranchia;Heteroconchia;Euhe  
 terodonta;Imparidentia;Venerida;Veneroidea;Veneridae;Mercenaria;Mercenari  
 a mercenaria

UdeM00000003014 6573 360.5 UdeM00000003014 XP\_021373513.1 57.9 285  
 120 0 41 325 45 329 2.20E-96 360.5 6573 cellular  
 organisms;Eukaryota;Opisthokonta;Metazoa;Eumetazoa;Bilateria;Protostomia;  
 Spiralia;Lophotrochozoa;Mollusca;Bivalvia;Autobranchia;Pteriomorpha;Pect  
 inida;Pectinoidea;Pectinidae;Mizuhopecten;Mizuhopecten yessoensis  
 UdeM00000003015 6596 171 UdeM00000003015 XP\_045192300.1 29.7 516  
 204 15 1 357 1 516 2.70E-39 171 6596 cellular  
 organisms;Eukaryota;Opisthokonta;Metazoa;Eumetazoa;Bilateria;Protostomia;  
 Spiralia;Lophotrochozoa;Mollusca;Bivalvia;Autobranchia;Heteroconchia;Euhe  
 terodonta;Imparidentia;Venerida;Veneroidea;Veneridae;Mercenaria;Mercenari  
 a mercenaria  
 UdeM00000003016 6596 384 UdeM00000003016 XP\_045192300.1 44.3 517  
 233 15 1 463 1 516 2.70E-103 384 6596 cellular  
 organisms;Eukaryota;Opisthokonta;Metazoa;Eumetazoa;Bilateria;Protostomia;  
 Spiralia;Lophotrochozoa;Mollusca;Bivalvia;Autobranchia;Heteroconchia;Euhe  
 terodonta;Imparidentia;Venerida;Veneroidea;Veneridae;Mercenaria;Mercenari  
 a mercenaria  
 UdeM00000003018 6596 262.7 UdeM00000003018 XP\_045191764.1 57.2 201  
 85 1 160 359 76 276 6.90E-67 262.7 6596 cellular  
 organisms;Eukaryota;Opisthokonta;Metazoa;Eumetazoa;Bilateria;Protostomia;  
 Spiralia;Lophotrochozoa;Mollusca;Bivalvia;Autobranchia;Heteroconchia;Euhe  
 terodonta;Imparidentia;Venerida;Veneroidea;Veneridae;Mercenaria;Mercenari  
 a mercenaria  
 UdeM00000003019 1735272 203.4 UdeM00000003019 XP\_041377164.1 75.6  
 135 28 1 1 130 1 135 3.20E-49 203.4 1735272  
 cellular  
 organisms;Eukaryota;Opisthokonta;Metazoa;Eumetazoa;Bilateria;Protostomia;  
 Spiralia;Lophotrochozoa;Mollusca;Gastropoda;Neomphalina;Neomphaloidea;Pel  
 tospiridae;Gigantopelta;Gigantopelta aegis  
 UdeM00000003020 1735272 188.7 UdeM00000003020 XP\_041377164.1 62.6  
 163 28 2 1 158 1 135 9.00E-45 188.7 1735272  
 cellular  
 organisms;Eukaryota;Opisthokonta;Metazoa;Eumetazoa;Bilateria;Protostomia;  
 Spiralia;Lophotrochozoa;Mollusca;Gastropoda;Neomphalina;Neomphaloidea;Pel  
 tospiridae;Gigantopelta;Gigantopelta aegis  
 UdeM00000003021 6596 279.3 UdeM00000003021 XP\_045193627.1 72.6 179  
 48 1 20 198 137 314 4.10E-72 279.3 6596 cellular  
 organisms;Eukaryota;Opisthokonta;Metazoa;Eumetazoa;Bilateria;Protostomia;  
 Spiralia;Lophotrochozoa;Mollusca;Bivalvia;Autobranchia;Heteroconchia;Euhe  
 terodonta;Imparidentia;Venerida;Veneroidea;Veneridae;Mercenaria;Mercenari  
 a mercenaria  
 UdeM00000003022 46731 147.9 UdeM00000003022 XP\_027036624.1 59.2 103  
 42 0 6 108 135 237 7.50E-33 147.9 46731 cellular  
 organisms;Eukaryota;Opisthokonta;Metazoa;Eumetazoa;Cnidaria;Anthozoa;Hexa  
 corallia;Scleractinia;Astrocoeniina;Pocilloporidae;Pocillopora;Pocillopor  
 a damicornis  
 UdeM00000003023 34773 106.7 UdeM00000003023 XP\_041958816.1 38.1 126  
 76 1 60 185 164 287 3.50E-20 106.7 34773 cellular  
 organisms;Eukaryota;Opisthokonta;Metazoa;Eumetazoa;Bilateria;Deuterostomi  
 a;Chordata;Craniata;Vertebrata;Gnathostomata;Teleostomi;Euteleostomi;Acti  
 nopterygii;Actinopteri;Neopterygii;Teleostei;Osteoglossocephalai;Clupeoce  
 phala;Otomorpha;Clupei;Clupeiformes;Clupeoidei;Clupeidae;Alosinae;Alosa;A  
 losa sapidissima

UdeM00000003026 6596 112.1 UdeM00000003026 XP\_045180427.1 38.4 177  
 106 2 76 250 98 273 1.10E-21 112.1 6596 cellular  
 organisms;Eukaryota;Opisthokonta;Metazoa;Eumetazoa;Bilateria;Protostomia;  
 Spiralia;Lophotrochozoa;Mollusca;Bivalvia;Autobranchia;Heteroconchia;Euhe  
 terodonta;Imparidentia;Venerida;Veneroidea;Veneridae;Mercenaria;Mercenari  
 a mercenaria  
 UdeM00000003027 90988 103.2 UdeM00000003027 XP\_039529744.1 43.6 110  
 61 1 2 110 414 523 2.20E-19 103.2 90988 cellular  
 organisms;Eukaryota;Opisthokonta;Metazoa;Eumetazoa;Bilateria;Deuterostomi  
 a;Chordata;Craniata;Vertebrata;Gnathostomata;Teleostomi;Euteleostomi;Acti  
 nopterygii;Actinopteri;Neopterygii;Teleostei;Osteoglossocephalai;Clupeoce  
 phala;Otomorpha;Ostariophysi;Otophysi;Cypriniphysae;Cypriniiformes;Cyprino  
 idei;Leuciscidae;Pogonichthyinae;Pimephales;Pimephales promelas  
 UdeM00000003028 46731 99.8 UdeM00000003028 XP\_027036624.1 43.7 103  
 58 0 29 131 135 237 2.80E-18 99.8 46731 cellular  
 organisms;Eukaryota;Opisthokonta;Metazoa;Eumetazoa;Cnidaria;Anthozoa;Hexa  
 corallia;Scleractinia;Astrocoeniina;Pocilloporidae;Pocillopora;Pocillopor  
 a damicornis  
 UdeM00000003029 6596 408.3 UdeM00000003029 XP\_045191399.1 62.6 321  
 117 2 2 322 84 401 9.10E-111 408.3 6596 cellular  
 organisms;Eukaryota;Opisthokonta;Metazoa;Eumetazoa;Bilateria;Protostomia;  
 Spiralia;Lophotrochozoa;Mollusca;Bivalvia;Autobranchia;Heteroconchia;Euhe  
 terodonta;Imparidentia;Venerida;Veneroidea;Veneridae;Mercenaria;Mercenari  
 a mercenaria  
 UdeM00000003030 161584 107.8 UdeM00000003030 XP\_037102707.1 71.6  
 67 19 0 2 68 3 69 5.40E-21 107.8 161584  
 cellular  
 organisms;Eukaryota;Opisthokonta;Metazoa;Eumetazoa;Bilateria;Deuterostomi  
 a;Chordata;Craniata;Vertebrata;Gnathostomata;Teleostomi;Euteleostomi;Acti  
 nopterygii;Actinopteri;Neopterygii;Teleostei;Osteoglossocephalai;Clupeoce  
 phala;Euteleosteomorpha;Neoteleostei;Eurypterygia;Ctenosquamata;Acanthomo  
 rphata;Euacanthomorphacea;Percomorphaceae;Syngnathiaria;Syngnathiiformes;S  
 yngnathoidei;Syngnathidae;Syngnathinae;Syngnathus;Syngnathus acus  
 UdeM00000003031 400727 372.5 UdeM00000003031 XP\_025115027.1 43.3  
 434 235 4 42 471 58 484 9.80E-100 372.5 400727  
 cellular  
 organisms;Eukaryota;Opisthokonta;Metazoa;Eumetazoa;Bilateria;Protostomia;  
 Spiralia;Lophotrochozoa;Mollusca;Gastropoda;Caenogastropoda;Architaeniogl  
 ossa;Ampullarioidea;Ampullariidae;Pomacea;Pomacea canaliculata  
 UdeM00000003032 6596 897.9 UdeM00000003032 XP\_045193173.1 67.2 819  
 248 11 1 808 1 809 9.80E-258 897.9 6596 cellular  
 organisms;Eukaryota;Opisthokonta;Metazoa;Eumetazoa;Bilateria;Protostomia;  
 Spiralia;Lophotrochozoa;Mollusca;Bivalvia;Autobranchia;Heteroconchia;Euhe  
 terodonta;Imparidentia;Venerida;Veneroidea;Veneridae;Mercenaria;Mercenari  
 a mercenaria  
 UdeM00000003033 6596 863.6 UdeM00000003033 XP\_045193173.1 67.3 791  
 238 11 1 780 1 781 2.00E-247 863.6 6596 cellular  
 organisms;Eukaryota;Opisthokonta;Metazoa;Eumetazoa;Bilateria;Protostomia;  
 Spiralia;Lophotrochozoa;Mollusca;Bivalvia;Autobranchia;Heteroconchia;Euhe  
 terodonta;Imparidentia;Venerida;Veneroidea;Veneridae;Mercenaria;Mercenari  
 a mercenaria  
 UdeM00000003034 6596 307.4 UdeM00000003034 XP\_045194490.1 80.9 183  
 35 0 1 183 1 183 1.20E-80 307.4 6596 cellular  
 organisms;Eukaryota;Opisthokonta;Metazoa;Eumetazoa;Bilateria;Protostomia;

Spiralia;Lophotrochozoa;Mollusca;Bivalvia;Autobranchia;Heteroconchia;Euherodonta;Imparidentia;Venerida;Veneroidea;Veneridae;Mercenaria;Mercenaria mercenaria

UdeM00000003035 6596 568.2 UdeM00000003035 XP\_045192654.1 64.2 436  
155 1 78 513 120 554 1.10E-158 568.2 6596 cellular

organisms;Eukaryota;Opisthokonta;Metazoa;Eumetazoa;Bilateria;Protostomia;Spiralia;Lophotrochozoa;Mollusca;Bivalvia;Autobranchia;Heteroconchia;Euherodonta;Imparidentia;Venerida;Veneroidea;Veneridae;Mercenaria;Mercenaria mercenaria

UdeM00000003036 400727 268.5 UdeM00000003036 XP\_025099498.1 31.7  
492 182 2 9 347 10 500 1.20E-68 268.5 400727  
cellular

organisms;Eukaryota;Opisthokonta;Metazoa;Eumetazoa;Bilateria;Protostomia;Spiralia;Lophotrochozoa;Mollusca;Gastropoda;Caenogastropoda;Architaenioglossa;Ampullarioidea;Ampullariidae;Pomacea;Pomacea canaliculata

UdeM00000003037 225164 113.6 UdeM00000003037 XP\_009058938.1 33.5  
185 119 3 1 184 577 758 3.50E-22 113.6 225164  
cellular

organisms;Eukaryota;Opisthokonta;Metazoa;Eumetazoa;Bilateria;Protostomia;Spiralia;Lophotrochozoa;Mollusca;Gastropoda;Patellogastropoda;Lottiidae;Lottia;Lottia gigantea

UdeM00000003038 6596 445.3 UdeM00000003038 XP\_045194706.1 52.5 530  
216 18 2 512 15 527 1.10E-121 445.3 6596 cellular

organisms;Eukaryota;Opisthokonta;Metazoa;Eumetazoa;Bilateria;Protostomia;Spiralia;Lophotrochozoa;Mollusca;Bivalvia;Autobranchia;Heteroconchia;Euherodonta;Imparidentia;Venerida;Veneroidea;Veneridae;Mercenaria;Mercenaria mercenaria

UdeM00000003039 29159 319.3 UdeM00000003039 XP\_011417586.2 54.3 341  
111 9 19 356 34 332 7.30E-84 319.3 29159 cellular

organisms;Eukaryota;Opisthokonta;Metazoa;Eumetazoa;Bilateria;Protostomia;Spiralia;Lophotrochozoa;Mollusca;Bivalvia;Autobranchia;Pteriomorphia;Ostreida;Ostreidae;Crassostrea;Crassostrea gigas

UdeM00000003040 1735272 209.1 UdeM00000003040 XP\_041348352.1 45.2  
241 128 4 5 242 191 430 6.10E-51 209.1 1735272  
cellular

organisms;Eukaryota;Opisthokonta;Metazoa;Eumetazoa;Bilateria;Protostomia;Spiralia;Lophotrochozoa;Mollusca;Gastropoda;Neomphalina;Neomphaloidea;Peltospiridae;Gigantopelta;Gigantopelta aegis

UdeM00000003047 29159 248.8 UdeM00000003047 XP\_034308217.1 34.8 451  
256 11 1 425 22 460 1.20E-62 248.8 29159 cellular

organisms;Eukaryota;Opisthokonta;Metazoa;Eumetazoa;Bilateria;Protostomia;Spiralia;Lophotrochozoa;Mollusca;Bivalvia;Autobranchia;Pteriomorphia;Ostreida;Ostreidae;Crassostrea;Crassostrea gigas

UdeM00000003046 6579 262.3 UdeM00000003046 XP\_033746356.1 35.2 449  
259 9 2 430 54 490 1.10E-66 262.3 6579 cellular

organisms;Eukaryota;Opisthokonta;Metazoa;Eumetazoa;Bilateria;Protostomia;Spiralia;Lophotrochozoa;Mollusca;Bivalvia;Autobranchia;Pteriomorphia;Pectinida;Pectinoidea;Pectinidae;Pecten;Pecten maximus

UdeM00000003048 1735272 77 UdeM00000003048 XP\_041361734.1 50.8  
61 30 0 1 61 23 83 1.10E-11 77 1735272  
cellular

organisms;Eukaryota;Opisthokonta;Metazoa;Eumetazoa;Bilateria;Protostomia;Spiralia;Lophotrochozoa;Mollusca;Gastropoda;Neomphalina;Neomphaloidea;Peltospiridae;Gigantopelta;Gigantopelta aegis

UdeM00000003049 6596 139.4 UdeM00000003049 XP\_045179398.1 31.2 337  
 170 9 1 277 127 461 7.00E-30 139.4 6596 cellular  
 organisms;Eukaryota;Opisthokonta;Metazoa;Eumetazoa;Bilateria;Protostomia;  
 Spiralia;Lophotrochozoa;Mollusca;Bivalvia;Autobranchia;Heteroconchia;Euhe  
 terodonta;Imparidentia;Venerida;Veneroidea;Veneridae;Mercenaria;Mercenari  
 a mercenaria  
 UdeM00000003055 6565 236.9 UdeM00000003055 XP\_022327353.1 33.6 441  
 258 8 1 415 24 455 4.70E-59 236.9 6565 cellular  
 organisms;Eukaryota;Opisthokonta;Metazoa;Eumetazoa;Bilateria;Protostomia;  
 Spiralia;Lophotrochozoa;Mollusca;Bivalvia;Autobranchia;Pteriormorphia;Ostr  
 eida;Ostreoidea;Ostreidae;Crassostrea;Crassostrea virginica  
 UdeM00000003060 29159 255 UdeM00000003060 XP\_034308217.1 35 443  
 254 7 1 420 22 453 1.70E-64 255 29159 cellular  
 organisms;Eukaryota;Opisthokonta;Metazoa;Eumetazoa;Bilateria;Protostomia;  
 Spiralia;Lophotrochozoa;Mollusca;Bivalvia;Autobranchia;Pteriormorphia;Ostr  
 eida;Ostreoidea;Ostreidae;Crassostrea;Crassostrea gigas  
 UdeM00000003059 29159 268.5 UdeM00000003059 XP\_034308217.1 35.2 457  
 262 7 9 442 8 453 1.50E-68 268.5 29159 cellular  
 organisms;Eukaryota;Opisthokonta;Metazoa;Eumetazoa;Bilateria;Protostomia;  
 Spiralia;Lophotrochozoa;Mollusca;Bivalvia;Autobranchia;Pteriormorphia;Ostr  
 eida;Ostreoidea;Ostreidae;Crassostrea;Crassostrea gigas  
 UdeM00000003061 6565 75.1 UdeM00000003061 XP\_022287858.1 42.4 92  
 53 0 2 93 194 285 7.60E-11 75.1 6565 cellular  
 organisms;Eukaryota;Opisthokonta;Metazoa;Eumetazoa;Bilateria;Protostomia;  
 Spiralia;Lophotrochozoa;Mollusca;Bivalvia;Autobranchia;Pteriormorphia;Ostr  
 eida;Ostreoidea;Ostreidae;Crassostrea;Crassostrea virginica  
 UdeM00000003062 6579 162.9 UdeM00000003062 XP\_033746356.1 45.7 164  
 87 2 1 162 47 210 3.40E-37 162.9 6579 cellular  
 organisms;Eukaryota;Opisthokonta;Metazoa;Eumetazoa;Bilateria;Protostomia;  
 Spiralia;Lophotrochozoa;Mollusca;Bivalvia;Autobranchia;Pteriormorphia;Pect  
 inida;Pectinoidea;Pectinidae;Pecten;Pecten maximus  
 UdeM00000003063 29159 273.9 UdeM00000003063 XP\_034308217.1 35 469  
 262 9 2 444 3 454 3.70E-70 273.9 29159 cellular  
 organisms;Eukaryota;Opisthokonta;Metazoa;Eumetazoa;Bilateria;Protostomia;  
 Spiralia;Lophotrochozoa;Mollusca;Bivalvia;Autobranchia;Pteriormorphia;Ostr  
 eida;Ostreoidea;Ostreidae;Crassostrea;Crassostrea gigas  
 UdeM00000003064 6596 77.8 UdeM00000003064 XP\_045195342.1 29.5 237  
 127 7 9 208 355 588 1.90E-11 77.8 6596 cellular  
 organisms;Eukaryota;Opisthokonta;Metazoa;Eumetazoa;Bilateria;Protostomia;  
 Spiralia;Lophotrochozoa;Mollusca;Bivalvia;Autobranchia;Heteroconchia;Euhe  
 terodonta;Imparidentia;Venerida;Veneroidea;Veneridae;Mercenaria;Mercenari  
 a mercenaria  
 UdeM00000003065 6565 88.6 UdeM00000003065 XP\_022332327.1 33.1 163  
 100 4 2 156 179 340 2.00E-14 88.6 6565 cellular  
 organisms;Eukaryota;Opisthokonta;Metazoa;Eumetazoa;Bilateria;Protostomia;  
 Spiralia;Lophotrochozoa;Mollusca;Bivalvia;Autobranchia;Pteriormorphia;Ostr  
 eida;Ostreoidea;Ostreidae;Crassostrea;Crassostrea virginica  
 UdeM00000003066 6596 90.1 UdeM00000003066 XP\_045169267.1 45.5 88  
 48 0 19 106 63 150 1.80E-15 90.1 6596 cellular  
 organisms;Eukaryota;Opisthokonta;Metazoa;Eumetazoa;Bilateria;Protostomia;  
 Spiralia;Lophotrochozoa;Mollusca;Bivalvia;Autobranchia;Heteroconchia;Euhe  
 terodonta;Imparidentia;Venerida;Veneroidea;Veneridae;Mercenaria;Mercenari  
 a mercenaria

UdeM00000003067 29159 248.8 UdeM00000003067 XP\_034308217.1 38.9 339  
 184 3 2 317 3 341 1.40E-62 248.8 29159 cellular  
 organisms;Eukaryota;Opisthokonta;Metazoa;Eumetazoa;Bilateria;Protostomia;  
 Spiralia;Lophotrochozoa;Mollusca;Bivalvia;Autobranchia;Pteriormorphia;Ostr  
 eida;Ostreoidea;Ostreidae;Crassostrea;Crassostrea gigas  
 UdeM00000003068 29159 223.8 UdeM00000003068 XP\_034308217.1 37.1 334  
 186 4 18 327 8 341 4.00E-55 223.8 29159 cellular  
 organisms;Eukaryota;Opisthokonta;Metazoa;Eumetazoa;Bilateria;Protostomia;  
 Spiralia;Lophotrochozoa;Mollusca;Bivalvia;Autobranchia;Pteriormorphia;Ostr  
 eida;Ostreoidea;Ostreidae;Crassostrea;Crassostrea gigas  
 UdeM00000003070 1735272 94 UdeM00000003070 XP\_041372674.1 43.1  
 109 62 0 1 109 161 269 1.70E-16 94 1735272  
 cellular  
 organisms;Eukaryota;Opisthokonta;Metazoa;Eumetazoa;Bilateria;Protostomia;  
 Spiralia;Lophotrochozoa;Mollusca;Gastropoda;Neomphalina;Neomphaloidea;Pel  
 tospiridae;Gigantopelta;Gigantopelta aegis  
 UdeM00000003071 1735272 74.3 UdeM00000003071 XP\_041372637.1 49.2  
 65 33 0 1 65 67 131 6.50E-11 74.3 1735272  
 cellular  
 organisms;Eukaryota;Opisthokonta;Metazoa;Eumetazoa;Bilateria;Protostomia;  
 Spiralia;Lophotrochozoa;Mollusca;Gastropoda;Neomphalina;Neomphaloidea;Pel  
 tospiridae;Gigantopelta;Gigantopelta aegis  
 UdeM00000003072 6596 1222.2 UdeM00000003072 XP\_045193500.1 66.1  
 943 279 5 1 940 1 905 0.00E+00 1222.2 6596  
 cellular  
 organisms;Eukaryota;Opisthokonta;Metazoa;Eumetazoa;Bilateria;Protostomia;  
 Spiralia;Lophotrochozoa;Mollusca;Bivalvia;Autobranchia;Heteroconchia;Euhe  
 terodonta;Imparidentia;Venerida;Veneroidea;Veneridae;Mercenaria;Mercenari  
 a mercenaria  
 UdeM00000003073 6579 265 UdeM00000003073 XP\_033754123.1 56.7 210  
 89 1 1 208 95 304 8.00E-68 265 6579 cellular  
 organisms;Eukaryota;Opisthokonta;Metazoa;Eumetazoa;Bilateria;Protostomia;  
 Spiralia;Lophotrochozoa;Mollusca;Bivalvia;Autobranchia;Pteriormorphia;Pect  
 inida;Pectinoidea;Pectinidae;Pecten;Pecten maximus  
 UdeM00000003074 1735272 436 UdeM00000003074 XP\_041375924.1 60.8  
 329 122 2 36 361 11 335 4.60E-119 436 1735272  
 cellular  
 organisms;Eukaryota;Opisthokonta;Metazoa;Eumetazoa;Bilateria;Protostomia;  
 Spiralia;Lophotrochozoa;Mollusca;Gastropoda;Neomphalina;Neomphaloidea;Pel  
 tospiridae;Gigantopelta;Gigantopelta aegis  
 UdeM00000003080 6579 270.4 UdeM00000003080 XP\_033754250.1 68.3 221  
 66 3 1 221 1 217 2.00E-69 270.4 6579 cellular  
 organisms;Eukaryota;Opisthokonta;Metazoa;Eumetazoa;Bilateria;Protostomia;  
 Spiralia;Lophotrochozoa;Mollusca;Bivalvia;Autobranchia;Pteriormorphia;Pect  
 inida;Pectinoidea;Pectinidae;Pecten;Pecten maximus  
 UdeM00000003081 6596 166.8 UdeM00000003081 XP\_045191712.1 52.6 173  
 80 2 3 175 224 394 2.50E-38 166.8 6596 cellular  
 organisms;Eukaryota;Opisthokonta;Metazoa;Eumetazoa;Bilateria;Protostomia;  
 Spiralia;Lophotrochozoa;Mollusca;Bivalvia;Autobranchia;Heteroconchia;Euhe  
 terodonta;Imparidentia;Venerida;Veneroidea;Veneridae;Mercenaria;Mercenari  
 a mercenaria  
 UdeM00000003082 6596 87.4 UdeM00000003082 XP\_045191711.1 43.8 130  
 63 3 111 240 7 126 3.10E-14 87.4 6596 cellular  
 organisms;Eukaryota;Opisthokonta;Metazoa;Eumetazoa;Bilateria;Protostomia;



Spiralia;Lophotrochozoa;Mollusca;Bivalvia;Autobranchia;Heteroconchia;Euherodonta;Imparidentia;Venerida;Veneroidea;Veneridae;Mercenaria;Mercenaria mercenaria

UdeM00000003084 6579 240 UdeM00000003084 XP\_033749938.1 54.8 208  
92 1 36 243 22 227 3.20E-60 240 6579 cellular

organisms;Eukaryota;Opisthokonta;Metazoa;Eumetazoa;Bilateria;Protostomia;Spiralia;Lophotrochozoa;Mollusca;Bivalvia;Autobranchia;Pteriormorphia;Pectinida;Pectinoidea;Pectinidae;Pecten;Pecten maximus

UdeM00000003085 46731 195.7 UdeM00000003085 XP\_027036624.1 62.1 161  
56 5 45 205 79 234 6.50E-47 195.7 46731 cellular

organisms;Eukaryota;Opisthokonta;Metazoa;Eumetazoa;Cnidaria;Anthozoa;Hexacorallia;Scleractinia;Astrocoeniina;Pocilloporidae;Pocillopora;Pocillopora damicornis

UdeM00000003086 6579 140.2 UdeM00000003086 XP\_033753854.1 74 100  
26 0 1 100 838 937 1.50E-30 140.2 6579 cellular

organisms;Eukaryota;Opisthokonta;Metazoa;Eumetazoa;Bilateria;Protostomia;Spiralia;Lophotrochozoa;Mollusca;Bivalvia;Autobranchia;Pteriormorphia;Pectinida;Pectinoidea;Pectinidae;Pecten;Pecten maximus

UdeM00000003087 6573 144.1 UdeM00000003087 XP\_021352719.1 49.2 187  
55 4 1 182 741 892 2.00E-31 144.1 6573 cellular

organisms;Eukaryota;Opisthokonta;Metazoa;Eumetazoa;Bilateria;Protostomia;Spiralia;Lophotrochozoa;Mollusca;Bivalvia;Autobranchia;Pteriormorphia;Pectinida;Pectinoidea;Pectinidae;Mizuhopecten;Mizuhopecten yessoensis

UdeM00000003088 6573 830.1 UdeM00000003088 XP\_021352719.1 56.5 766  
314 5 1 758 1 755 2.30E-237 830.1 6573 cellular

organisms;Eukaryota;Opisthokonta;Metazoa;Eumetazoa;Bilateria;Protostomia;Spiralia;Lophotrochozoa;Mollusca;Bivalvia;Autobranchia;Pteriormorphia;Pectinida;Pectinoidea;Pectinidae;Mizuhopecten;Mizuhopecten yessoensis

UdeM00000003089 6596 513.8 UdeM00000003089 XP\_045193004.1 71.1 343  
95 2 1 339 40 382 1.60E-142 513.8 6596 cellular

organisms;Eukaryota;Opisthokonta;Metazoa;Eumetazoa;Bilateria;Protostomia;Spiralia;Lophotrochozoa;Mollusca;Bivalvia;Autobranchia;Heteroconchia;Euherodonta;Imparidentia;Venerida;Veneroidea;Veneridae;Mercenaria;Mercenaria mercenaria

UdeM00000003090 29159 193.4 UdeM00000003090 XP\_034339289.1 58.1 160  
65 1 1 158 1 160 2.60E-46 193.4 29159 cellular

organisms;Eukaryota;Opisthokonta;Metazoa;Eumetazoa;Bilateria;Protostomia;Spiralia;Lophotrochozoa;Mollusca;Bivalvia;Autobranchia;Pteriormorphia;Ostreida;Ostreioidea;Ostreidae;Crassostrea;Crassostrea gigas

UdeM00000003091 29159 73.2 UdeM00000003091 XP\_034339288.1 51.4 70  
31 1 8 77 61 127 2.10E-10 73.2 29159 cellular

organisms;Eukaryota;Opisthokonta;Metazoa;Eumetazoa;Bilateria;Protostomia;Spiralia;Lophotrochozoa;Mollusca;Bivalvia;Autobranchia;Pteriormorphia;Ostreida;Ostreioidea;Ostreidae;Crassostrea;Crassostrea gigas

UdeM00000003092 29159 203 UdeM00000003092 XP\_019926412.2 42.8 271  
129 5 10 257 218 485 5.00E-49 203 29159 cellular

organisms;Eukaryota;Opisthokonta;Metazoa;Eumetazoa;Bilateria;Protostomia;Spiralia;Lophotrochozoa;Mollusca;Bivalvia;Autobranchia;Pteriormorphia;Ostreida;Ostreioidea;Ostreidae;Crassostrea;Crassostrea gigas

UdeM00000003093 29159 199.1 UdeM00000003093 XP\_034339289.1 57.5 160  
66 1 1 158 1 160 4.80E-48 199.1 29159 cellular

organisms;Eukaryota;Opisthokonta;Metazoa;Eumetazoa;Bilateria;Protostomia;Spiralia;Lophotrochozoa;Mollusca;Bivalvia;Autobranchia;Pteriormorphia;Ostreida;Ostreioidea;Ostreidae;Crassostrea;Crassostrea gigas

UdeM00000003095 6565 399.1 UdeM00000003095 XP\_022343474.1 66.2 281  
 95 0 1 281 1 281 4.80E-108 399.1 6565 cellular  
 organisms;Eukaryota;Opisthokonta;Metazoa;Eumetazoa;Bilateria;Protostomia;  
 Spiralia;Lophotrochozoa;Mollusca;Bivalvia;Autobranchia;Pteriormorphia;Ostr  
 eida;Ostreoidea;Ostreidae;Crassostrea;Crassostrea virginica  
 UdeM00000003096 6596 72.8 UdeM00000003096 XP\_045192278.1 42.6 108  
 56 4 1 107 1 103 3.40E-10 72.8 6596 cellular  
 organisms;Eukaryota;Opisthokonta;Metazoa;Eumetazoa;Bilateria;Protostomia;  
 Spiralia;Lophotrochozoa;Mollusca;Bivalvia;Autobranchia;Heteroconchia;Euhe  
 terodonta;Imparidentia;Venerida;Veneroidea;Veneridae;Mercenaria;Mercenari  
 a mercenaria  
 UdeM00000003097 6579 216.1 UdeM00000003097 XP\_033755458.1 68.5 168  
 42 1 1 157 1 168 3.20E-53 216.1 6579 cellular  
 organisms;Eukaryota;Opisthokonta;Metazoa;Eumetazoa;Bilateria;Protostomia;  
 Spiralia;Lophotrochozoa;Mollusca;Bivalvia;Autobranchia;Pteriormorphia;Pect  
 inida;Pectinoidea;Pectinidae;Pecten;Pecten maximus  
 UdeM00000003098 6596 609.4 UdeM00000003098 XP\_045192244.1 44.7 713  
 362 9 10 696 6 712 6.20E-171 609.4 6596 cellular  
 organisms;Eukaryota;Opisthokonta;Metazoa;Eumetazoa;Bilateria;Protostomia;  
 Spiralia;Lophotrochozoa;Mollusca;Bivalvia;Autobranchia;Heteroconchia;Euhe  
 terodonta;Imparidentia;Venerida;Veneroidea;Veneridae;Mercenaria;Mercenari  
 a mercenaria  
 UdeM00000003099 6596 188 UdeM00000003099 XP\_045192244.1 53.7 205  
 88 4 1 200 729 931 1.30E-44 188 6596 cellular  
 organisms;Eukaryota;Opisthokonta;Metazoa;Eumetazoa;Bilateria;Protostomia;  
 Spiralia;Lophotrochozoa;Mollusca;Bivalvia;Autobranchia;Heteroconchia;Euhe  
 terodonta;Imparidentia;Venerida;Veneroidea;Veneridae;Mercenaria;Mercenari  
 a mercenaria  
 UdeM00000003100 6596 1785.8 UdeM00000003100 XP\_045191788.1 60.5  
 1518 561 18 1 1510 1 1488 0.00E+00 1785.8 6596  
 cellular  
 organisms;Eukaryota;Opisthokonta;Metazoa;Eumetazoa;Bilateria;Protostomia;  
 Spiralia;Lophotrochozoa;Mollusca;Bivalvia;Autobranchia;Heteroconchia;Euhe  
 terodonta;Imparidentia;Venerida;Veneroidea;Veneridae;Mercenaria;Mercenari  
 a mercenaria  
 UdeM00000003101 6579 231.1 UdeM00000003101 XP\_033749938.1 52.4 208  
 97 1 36 243 22 227 1.50E-57 231.1 6579 cellular  
 organisms;Eukaryota;Opisthokonta;Metazoa;Eumetazoa;Bilateria;Protostomia;  
 Spiralia;Lophotrochozoa;Mollusca;Bivalvia;Autobranchia;Pteriormorphia;Pect  
 inida;Pectinoidea;Pectinidae;Pecten;Pecten maximus  
 UdeM00000003102 6579 231.1 UdeM00000003102 XP\_033749938.1 52.4 208  
 97 1 36 243 22 227 1.50E-57 231.1 6579 cellular  
 organisms;Eukaryota;Opisthokonta;Metazoa;Eumetazoa;Bilateria;Protostomia;  
 Spiralia;Lophotrochozoa;Mollusca;Bivalvia;Autobranchia;Pteriormorphia;Pect  
 inida;Pectinoidea;Pectinidae;Pecten;Pecten maximus  
 UdeM00000003103 6579 229.9 UdeM00000003103 XP\_033749938.1 52.4 208  
 97 1 36 243 22 227 3.30E-57 229.9 6579 cellular  
 organisms;Eukaryota;Opisthokonta;Metazoa;Eumetazoa;Bilateria;Protostomia;  
 Spiralia;Lophotrochozoa;Mollusca;Bivalvia;Autobranchia;Pteriormorphia;Pect  
 inida;Pectinoidea;Pectinidae;Pecten;Pecten maximus  
 UdeM00000003104 6596 573.2 UdeM00000003104 XP\_045193633.1 50.4 587  
 281 6 1 580 1 584 3.80E-160 573.2 6596 cellular  
 organisms;Eukaryota;Opisthokonta;Metazoa;Eumetazoa;Bilateria;Protostomia;  
 Spiralia;Lophotrochozoa;Mollusca;Bivalvia;Autobranchia;Heteroconchia;Euhe

terodonta;Imparidentia;Venerida;Veneroidea;Veneridae;Mercenaria;Mercenari  
 a mercenaria  
 UdeM00000003105 6596 238 UdeM00000003105 XP\_045193636.1 40.7 305  
 174 3 3 300 282 586 1.50E-59 238 6596 cellular  
 organisms;Eukaryota;Opisthokonta;Metazoa;Eumetazoa;Bilateria;Protostomia;  
 Spiralia;Lophotrochozoa;Mollusca;Bivalvia;Autobranchia;Heteroconchia;Euhe  
 terodonta;Imparidentia;Venerida;Veneroidea;Veneridae;Mercenaria;Mercenari  
 a mercenaria  
 UdeM00000003106 6596 250 UdeM00000003106 XP\_045193633.1 52 252  
 95 5 1 228 1 250 2.90E-63 250 6596 cellular  
 organisms;Eukaryota;Opisthokonta;Metazoa;Eumetazoa;Bilateria;Protostomia;  
 Spiralia;Lophotrochozoa;Mollusca;Bivalvia;Autobranchia;Heteroconchia;Euhe  
 terodonta;Imparidentia;Venerida;Veneroidea;Veneridae;Mercenaria;Mercenari  
 a mercenaria  
 UdeM00000003107 6565 81.3 UdeM00000003107 XP\_022337162.1 36.8 106  
 61 4 132 236 269 369 2.30E-12 81.3 6565 cellular  
 organisms;Eukaryota;Opisthokonta;Metazoa;Eumetazoa;Bilateria;Protostomia;  
 Spiralia;Lophotrochozoa;Mollusca;Bivalvia;Autobranchia;Pteriormorphia;Ostr  
 eida;Ostreoidea;Ostreidae;Crassostrea;Crassostrea virginica  
 UdeM00000003108 6579 176 UdeM00000003108 XP\_033753989.1 60.7 422  
 111 8 1 379 1 410 8.90E-41 176 6579 cellular  
 organisms;Eukaryota;Opisthokonta;Metazoa;Eumetazoa;Bilateria;Protostomia;  
 Spiralia;Lophotrochozoa;Mollusca;Bivalvia;Autobranchia;Pteriormorphia;Pect  
 inida;Pectinoidea;Pectinidae;Pecten;Pecten maximus  
 UdeM00000003109 6596 1485.3 UdeM00000003109 XP\_045192235.1 75.7  
 953 228 3 1 950 1 952 0.00E+00 1485.3 6596  
 cellular  
 organisms;Eukaryota;Opisthokonta;Metazoa;Eumetazoa;Bilateria;Protostomia;  
 Spiralia;Lophotrochozoa;Mollusca;Bivalvia;Autobranchia;Heteroconchia;Euhe  
 terodonta;Imparidentia;Venerida;Veneroidea;Veneridae;Mercenaria;Mercenari  
 a mercenaria  
 UdeM00000003110 6596 187.6 UdeM00000003110 XP\_045191747.1 95 101  
 5 0 1 101 1 101 8.00E-45 187.6 6596 cellular  
 organisms;Eukaryota;Opisthokonta;Metazoa;Eumetazoa;Bilateria;Protostomia;  
 Spiralia;Lophotrochozoa;Mollusca;Bivalvia;Autobranchia;Heteroconchia;Euhe  
 terodonta;Imparidentia;Venerida;Veneroidea;Veneridae;Mercenaria;Mercenari  
 a mercenaria  
 UdeM00000003111 6596 181.4 UdeM00000003111 XP\_045191747.1 94.9 98  
 5 0 1 98 4 101 5.60E-43 181.4 6596 cellular  
 organisms;Eukaryota;Opisthokonta;Metazoa;Eumetazoa;Bilateria;Protostomia;  
 Spiralia;Lophotrochozoa;Mollusca;Bivalvia;Autobranchia;Heteroconchia;Euhe  
 terodonta;Imparidentia;Venerida;Veneroidea;Veneridae;Mercenaria;Mercenari  
 a mercenaria  
 UdeM00000003112 6596 198.7 UdeM00000003112 XP\_045191745.1 51.2 244  
 105 7 1 233 1 241 2.10E-47 198.7 6596 cellular  
 organisms;Eukaryota;Opisthokonta;Metazoa;Eumetazoa;Bilateria;Protostomia;  
 Spiralia;Lophotrochozoa;Mollusca;Bivalvia;Autobranchia;Heteroconchia;Euhe  
 terodonta;Imparidentia;Venerida;Veneroidea;Veneridae;Mercenaria;Mercenari  
 a mercenaria  
 UdeM00000003115 51031 97.8 UdeM00000003115 XP\_013304980.1 30.3 221  
 119 6 28 218 198 413 2.60E-17 97.8 51031 cellular  
 organisms;Eukaryota;Opisthokonta;Metazoa;Eumetazoa;Bilateria;Protostomia;  
 Ecdysozoa;Nematoda;Chromadorea;Strongylida;Ancylostomatoidea;Ancylostomat  
 idae;Bunostominae;Necator;Necator americanus

UdeM00000003116 7604 231.5 UdeM00000003116 XP\_033626083.1 34.6 486  
 274 15 35 496 476 941 2.80E-57 231.5 7604 cellular  
 organisms;Eukaryota;Opisthokonta;Metazoa;Eumetazoa;Bilateria;Deuterostomi  
 a;Echinodermata;Eleutherozoa;Asterozoa;Asteroidea;Forcipulatacea;Forcipul  
 atida;Asteroidea;Asteroidea;Asteroidea;Asteroidea;Asteroidea;Asteroidea  
 UdeM00000003117 29159 288.9 UdeM00000003117 XP\_011444696.2 35.1 552  
 299 16 1 535 933 1442 1.40E-74 288.9 29159 cellular  
 organisms;Eukaryota;Opisthokonta;Metazoa;Eumetazoa;Bilateria;Protostomia;  
 Spiralia;Lophotrochozoa;Mollusca;Bivalvia;Autobranchia;Pteriormorphia;Ostr  
 eida;Ostreidae;Crassostrea;Crassostrea gigas  
 UdeM00000003118 6596 182.2 UdeM00000003118 XP\_045192542.1 65.4 130  
 44 1 1 129 1 130 4.30E-43 182.2 6596 cellular  
 organisms;Eukaryota;Opisthokonta;Metazoa;Eumetazoa;Bilateria;Protostomia;  
 Spiralia;Lophotrochozoa;Mollusca;Bivalvia;Autobranchia;Heteroconchia;Euhe  
 terodonta;Imparidentia;Venerida;Veneroidea;Veneridae;Mercenaria;Mercenari  
 a mercenaria  
 UdeM00000003120 6596 1251.1 UdeM00000003120 XP\_045192541.1 67  
 894 276 7 19 907 21 900 0.00E+00 1251.1 6596  
 cellular  
 organisms;Eukaryota;Opisthokonta;Metazoa;Eumetazoa;Bilateria;Protostomia;  
 Spiralia;Lophotrochozoa;Mollusca;Bivalvia;Autobranchia;Heteroconchia;Euhe  
 terodonta;Imparidentia;Venerida;Veneroidea;Veneridae;Mercenaria;Mercenari  
 a mercenaria  
 UdeM00000003121 6596 117.5 UdeM00000003121 XP\_045192878.1 51.7 149  
 31 4 48 157 117 263 1.60E-23 117.5 6596 cellular  
 organisms;Eukaryota;Opisthokonta;Metazoa;Eumetazoa;Bilateria;Protostomia;  
 Spiralia;Lophotrochozoa;Mollusca;Bivalvia;Autobranchia;Heteroconchia;Euhe  
 terodonta;Imparidentia;Venerida;Veneroidea;Veneridae;Mercenaria;Mercenari  
 a mercenaria  
 UdeM00000003122 1735272 449.5 UdeM00000003122 XP\_041376282.1 53.1  
 437 199 2 1 431 1 437 4.80E-123 449.5 1735272  
 cellular  
 organisms;Eukaryota;Opisthokonta;Metazoa;Eumetazoa;Bilateria;Protostomia;  
 Spiralia;Lophotrochozoa;Mollusca;Gastropoda;Neomphalina;Neomphaloidea;Pel  
 tospiridae;Gigantopelta;Gigantopelta aegis  
 UdeM00000003123 1735272 207.6 UdeM00000003123 XP\_041367923.1 42.1  
 259 137 5 199 446 138 394 3.30E-50 207.6 1735272  
 cellular  
 organisms;Eukaryota;Opisthokonta;Metazoa;Eumetazoa;Bilateria;Protostomia;  
 Spiralia;Lophotrochozoa;Mollusca;Gastropoda;Neomphalina;Neomphaloidea;Pel  
 tospiridae;Gigantopelta;Gigantopelta aegis  
 UdeM00000003124 225164 96.3 UdeM00000003124 XP\_009058938.1 30.4  
 191 120 5 1 184 577 761 5.90E-17 96.3 225164  
 cellular  
 organisms;Eukaryota;Opisthokonta;Metazoa;Eumetazoa;Bilateria;Protostomia;  
 Spiralia;Lophotrochozoa;Mollusca;Gastropoda;Patellogastropoda;Lottiidae;  
 Lottia;Lottia gigantea  
 UdeM00000003125 6596 325.5 UdeM00000003125 XP\_045191870.1 49.5 319  
 158 3 1 318 56 372 1.40E-85 325.5 6596 cellular  
 organisms;Eukaryota;Opisthokonta;Metazoa;Eumetazoa;Bilateria;Protostomia;  
 Spiralia;Lophotrochozoa;Mollusca;Bivalvia;Autobranchia;Heteroconchia;Euhe  
 terodonta;Imparidentia;Venerida;Veneroidea;Veneridae;Mercenaria;Mercenari  
 a mercenaria

UdeM00000003126 6596 74.7 UdeM00000003126 XP\_045192320.1 27 230  
 146 9 14 225 9 234 1.70E-10 74.7 6596 cellular  
 organisms;Eukaryota;Opisthokonta;Metazoa;Eumetazoa;Bilateria;Protostomia;  
 Spiralia;Lophotrochozoa;Mollusca;Bivalvia;Autobranchia;Heteroconchia;Euhe  
 terodonta;Imparidentia;Venerida;Veneroidea;Veneridae;Mercenaria;Mercenari  
 a mercenaria

UdeM00000003127 6565 520.8 UdeM00000003127 XP\_022339019.1 38.9 828  
 375 22 485 1274 95 829 7.10E-144 520.8 6565 cellular  
 organisms;Eukaryota;Opisthokonta;Metazoa;Eumetazoa;Bilateria;Protostomia;  
 Spiralia;Lophotrochozoa;Mollusca;Bivalvia;Autobranchia;Pteriormorphia;Ostr  
 eida;Ostreoidea;Ostreidae;Crassostrea;Crassostrea virginica

UdeM00000003128 6596 139.8 UdeM00000003128 XP\_045192376.1 29.3 458  
 256 13 9 442 6 419 8.60E-30 139.8 6596 cellular  
 organisms;Eukaryota;Opisthokonta;Metazoa;Eumetazoa;Bilateria;Protostomia;  
 Spiralia;Lophotrochozoa;Mollusca;Bivalvia;Autobranchia;Heteroconchia;Euhe  
 terodonta;Imparidentia;Venerida;Veneroidea;Veneridae;Mercenaria;Mercenari  
 a mercenaria

UdeM00000003129 6596 396.4 UdeM00000003129 XP\_045192379.1 57.8 348  
 145 2 4 349 18 365 3.90E-107 396.4 6596 cellular  
 organisms;Eukaryota;Opisthokonta;Metazoa;Eumetazoa;Bilateria;Protostomia;  
 Spiralia;Lophotrochozoa;Mollusca;Bivalvia;Autobranchia;Heteroconchia;Euhe  
 terodonta;Imparidentia;Venerida;Veneroidea;Veneridae;Mercenaria;Mercenari  
 a mercenaria

UdeM00000003130 6579 155.6 UdeM00000003130 XP\_033743219.1 39.5 210  
 113 5 10 214 38 238 7.10E-35 155.6 6579 cellular  
 organisms;Eukaryota;Opisthokonta;Metazoa;Eumetazoa;Bilateria;Protostomia;  
 Spiralia;Lophotrochozoa;Mollusca;Bivalvia;Autobranchia;Pteriormorphia;Pect  
 inida;Pectinoidea;Pectinidae;Pecten;Pecten maximus

UdeM00000003131 6596 875.2 UdeM00000003131 XP\_045191850.1 75.9 557  
 134 0 1 557 1 557 5.20E-251 875.2 6596 cellular  
 organisms;Eukaryota;Opisthokonta;Metazoa;Eumetazoa;Bilateria;Protostomia;  
 Spiralia;Lophotrochozoa;Mollusca;Bivalvia;Autobranchia;Heteroconchia;Euhe  
 terodonta;Imparidentia;Venerida;Veneroidea;Veneridae;Mercenaria;Mercenari  
 a mercenaria

UdeM00000003132 1735272 266.9 UdeM00000003132 XP\_041355843.1 63  
 208 77 0 6 213 7 214 2.20E-68 266.9 1735272  
 cellular  
 organisms;Eukaryota;Opisthokonta;Metazoa;Eumetazoa;Bilateria;Protostomia;  
 Spiralia;Lophotrochozoa;Mollusca;Gastropoda;Neomphalina;Neomphaloidea;Pel  
 tospiridae;Gigantopelta;Gigantopelta aegis

UdeM00000003133 1735272 80.1 UdeM00000003133 XP\_041376120.1 21.3  
 239 169 4 34 260 172 403 5.40E-12 80.1 1735272  
 cellular  
 organisms;Eukaryota;Opisthokonta;Metazoa;Eumetazoa;Bilateria;Protostomia;  
 Spiralia;Lophotrochozoa;Mollusca;Gastropoda;Neomphalina;Neomphaloidea;Pel  
 tospiridae;Gigantopelta;Gigantopelta aegis

UdeM00000003134 1735272 423.7 UdeM00000003134 XP\_041376120.1 34.5  
 800 448 15 1 745 430 1208 7.60E-115 423.7 1735272  
 cellular  
 organisms;Eukaryota;Opisthokonta;Metazoa;Eumetazoa;Bilateria;Protostomia;  
 Spiralia;Lophotrochozoa;Mollusca;Gastropoda;Neomphalina;Neomphaloidea;Pel  
 tospiridae;Gigantopelta;Gigantopelta aegis

UdeM00000003135 6596 449.5 UdeM00000003135 XP\_045193186.1 46.5 507  
 239 7 1 498 34 517 5.50E-123 449.5 6596 cellular

organisms;Eukaryota;Opisthokonta;Metazoa;Eumetazoa;Bilateria;Protostomia;Spiralia;Lophotrochozoa;Mollusca;Bivalvia;Autobranhia;Heteroconchia;Euherodonta;Imparidentia;Venerida;Veneroidea;Veneridae;Mercenaria;Mercenaria mercenaria

UdeM00000003136 6596 591.7 UdeM00000003136 XP\_045194056.1 50 678  
314 6 40 698 129 800 1.30E-165 591.7 6596 cellular

organisms;Eukaryota;Opisthokonta;Metazoa;Eumetazoa;Bilateria;Protostomia;Spiralia;Lophotrochozoa;Mollusca;Bivalvia;Autobranhia;Heteroconchia;Euherodonta;Imparidentia;Venerida;Veneroidea;Veneridae;Mercenaria;Mercenaria mercenaria

UdeM00000003137 6596 93.2 UdeM00000003137 XP\_045194054.1 50 108  
48 2 11 115 3 107 5.50E-16 93.2 6596 cellular

organisms;Eukaryota;Opisthokonta;Metazoa;Eumetazoa;Bilateria;Protostomia;Spiralia;Lophotrochozoa;Mollusca;Bivalvia;Autobranhia;Heteroconchia;Euherodonta;Imparidentia;Venerida;Veneroidea;Veneridae;Mercenaria;Mercenaria mercenaria

UdeM00000003139 6579 357.8 UdeM00000003139 XP\_033754572.1 58.8 313  
105 4 52 362 1 291 1.60E-95 357.8 6579 cellular

organisms;Eukaryota;Opisthokonta;Metazoa;Eumetazoa;Bilateria;Protostomia;Spiralia;Lophotrochozoa;Mollusca;Bivalvia;Autobranhia;Pteriomorphia;Pectinida;Pectinoidea;Pectinidae;Pecten;Pecten maximus

UdeM00000003142 6565 334 UdeM00000003142 XP\_022335660.1 59.1 291  
96 3 1 289 27 296 2.10E-88 334 6565 cellular

organisms;Eukaryota;Opisthokonta;Metazoa;Eumetazoa;Bilateria;Protostomia;Spiralia;Lophotrochozoa;Mollusca;Bivalvia;Autobranhia;Pteriomorphia;Ostreida;Ostreoidea;Ostreidae;Crassostrea;Crassostrea virginica

UdeM00000003143 6573 345.9 UdeM00000003143 XP\_021340709.1 53.7 315  
123 3 2 314 8 301 5.60E-92 345.9 6573 cellular

organisms;Eukaryota;Opisthokonta;Metazoa;Eumetazoa;Bilateria;Protostomia;Spiralia;Lophotrochozoa;Mollusca;Bivalvia;Autobranhia;Pteriomorphia;Pectinida;Pectinoidea;Pectinidae;Mizuhopecten;Mizuhopecten yessoensis

UdeM00000003144 6573 347.4 UdeM00000003144 XP\_021340709.1 59.4 286  
95 2 1 286 27 291 1.80E-92 347.4 6573 cellular

organisms;Eukaryota;Opisthokonta;Metazoa;Eumetazoa;Bilateria;Protostomia;Spiralia;Lophotrochozoa;Mollusca;Bivalvia;Autobranhia;Pteriomorphia;Pectinida;Pectinoidea;Pectinidae;Mizuhopecten;Mizuhopecten yessoensis

UdeM00000003145 6565 78.6 UdeM00000003145 XP\_022335660.1 52.9 68  
32 0 1 68 226 293 4.20E-12 78.6 6565 cellular

organisms;Eukaryota;Opisthokonta;Metazoa;Eumetazoa;Bilateria;Protostomia;Spiralia;Lophotrochozoa;Mollusca;Bivalvia;Autobranhia;Pteriomorphia;Ostreida;Ostreoidea;Ostreidae;Crassostrea;Crassostrea virginica

UdeM00000003146 6500 213 UdeM00000003146 XP\_012945639.1 57.2 201  
69 2 168 368 4 187 6.40E-52 213 6500 cellular

organisms;Eukaryota;Opisthokonta;Metazoa;Eumetazoa;Bilateria;Protostomia;Spiralia;Lophotrochozoa;Mollusca;Gastropoda;Heterobranhia;Euthyneura;Teptipleura;Aplysiida;Aplysioidea;Aplysiidae;Aplysia;Aplysia californica

UdeM00000003147 6573 326.2 UdeM00000003147 XP\_021340709.1 54.9 286  
110 2 115 400 22 288 5.70E-86 326.2 6573 cellular

organisms;Eukaryota;Opisthokonta;Metazoa;Eumetazoa;Bilateria;Protostomia;Spiralia;Lophotrochozoa;Mollusca;Bivalvia;Autobranhia;Pteriomorphia;Pectinida;Pectinoidea;Pectinidae;Mizuhopecten;Mizuhopecten yessoensis

UdeM00000003148 225164 334.7 UdeM00000003148 XP\_009067035.1 57.5  
280 100 1 112 391 3 263 1.60E-88 334.7 225164  
cellular

organisms;Eukaryota;Opisthokonta;Metazoa;Eumetazoa;Bilateria;Protostomia; Spiralia;Lophotrochozoa;Mollusca;Gastropoda;Patellogastropoda;Lottioidea; Lottiidae;Lottia;Lottia gigantea

UdeM00000003149 6573 334 UdeM00000003149 XP\_021340709.1 54.8 299  
113 3 36 332 12 290 2.30E-88 334 6573 cellular

organisms;Eukaryota;Opisthokonta;Metazoa;Eumetazoa;Bilateria;Protostomia; Spiralia;Lophotrochozoa;Mollusca;Bivalvia;Autobranchia;Pteriomorpha;Pect inida;Pectinoidea;Pectinidae;Mizuhopecten;Mizuhopecten yessoensis

UdeM00000003150 6573 325.1 UdeM00000003150 XP\_021340709.1 60.4 270  
86 2 98 367 22 270 1.20E-85 325.1 6573 cellular

organisms;Eukaryota;Opisthokonta;Metazoa;Eumetazoa;Bilateria;Protostomia; Spiralia;Lophotrochozoa;Mollusca;Bivalvia;Autobranchia;Pteriomorpha;Pect inida;Pectinoidea;Pectinidae;Mizuhopecten;Mizuhopecten yessoensis

UdeM00000003151 6565 357.1 UdeM00000003151 XP\_022335660.1 61.7 298  
91 2 69 364 17 293 2.90E-95 357.1 6565 cellular

organisms;Eukaryota;Opisthokonta;Metazoa;Eumetazoa;Bilateria;Protostomia; Spiralia;Lophotrochozoa;Mollusca;Bivalvia;Autobranchia;Pteriomorpha;Ostr eida;Ostreoidea;Ostreidae;Crassostrea;Crassostrea virginica

UdeM00000003152 6573 135.2 UdeM00000003152 XP\_021341651.1 50.9 163  
66 4 1 158 1 154 7.40E-29 135.2 6573 cellular

organisms;Eukaryota;Opisthokonta;Metazoa;Eumetazoa;Bilateria;Protostomia; Spiralia;Lophotrochozoa;Mollusca;Bivalvia;Autobranchia;Pteriomorpha;Pect inida;Pectinoidea;Pectinidae;Mizuhopecten;Mizuhopecten yessoensis

UdeM00000003153 6579 144.8 UdeM00000003153 XP\_033743219.1 39.2 199  
107 5 4 197 49 238 1.10E-31 144.8 6579 cellular

organisms;Eukaryota;Opisthokonta;Metazoa;Eumetazoa;Bilateria;Protostomia; Spiralia;Lophotrochozoa;Mollusca;Bivalvia;Autobranchia;Pteriomorpha;Pect inida;Pectinoidea;Pectinidae;Pecten;Pecten maximus

UdeM00000003154 1735272 79.7 UdeM00000003154 XP\_041374489.1 66.1  
59 20 0 9 67 169 227 1.60E-12 79.7 1735272  
cellular

organisms;Eukaryota;Opisthokonta;Metazoa;Eumetazoa;Bilateria;Protostomia; Spiralia;Lophotrochozoa;Mollusca;Gastropoda;Neomphalina;Neomphaloidea;Pel tospiridae;Gigantopelta;Gigantopelta aegis

UdeM00000003155 6579 1366.7 UdeM00000003155 XP\_033755377.1 64.9  
1095 345 13 1 1080 1 1071 0.00E+00 1366.7 6579  
cellular

organisms;Eukaryota;Opisthokonta;Metazoa;Eumetazoa;Bilateria;Protostomia; Spiralia;Lophotrochozoa;Mollusca;Bivalvia;Autobranchia;Pteriomorpha;Pect inida;Pectinoidea;Pectinidae;Pecten;Pecten maximus

UdeM00000003156 379532 89.4 UdeM00000003156 XP\_012493712.1 33.9  
177 99 4 27 201 67 227 6.20E-15 89.4 379532  
cellular

organisms;Eukaryota;Opisthokonta;Metazoa;Eumetazoa;Bilateria;Deuterostomi a;Chordata;Craniata;Vertebrata;Gnathostomata;Teleostomi;Euteleostomi;Sarc opterygii;Dipnotetrapodomorpha;Tetrapoda;Amniota;Mammalia;Theria;Eutheria ;Boreoeutheria;Euarchontoglires;Primates;Strepsirrhini;Lemuriformes;Indri idae;Propithecus;Propithecus coquereli

UdeM00000003157 6573 218.4 UdeM00000003157 XP\_021354315.1 36.5 378  
202 7 179 523 155 527 2.30E-53 218.4 6573 cellular

organisms;Eukaryota;Opisthokonta;Metazoa;Eumetazoa;Bilateria;Protostomia; Spiralia;Lophotrochozoa;Mollusca;Bivalvia;Autobranchia;Pteriomorpha;Pect inida;Pectinoidea;Pectinidae;Mizuhopecten;Mizuhopecten yessoensis

UdeM00000003158 45264 97.8 UdeM00000003158 XP\_044184709.1 51.7 87  
 42 0 38 124 55 141 2.20E-17 97.8 45264 cellular  
 organisms;Eukaryota;Opisthokonta;Metazoa;Eumetazoa;Cnidaria;Anthozoa;Hexa  
 corallia;Scleractinia;Astrocoeniina;Acroporidae;Acropora;Acropora  
 millepora  
 UdeM00000003159 45264 235.7 UdeM00000003159 XP\_044184031.1 45.9 281  
 136 6 1 272 213 486 6.80E-59 235.7 45264 cellular  
 organisms;Eukaryota;Opisthokonta;Metazoa;Eumetazoa;Cnidaria;Anthozoa;Hexa  
 corallia;Scleractinia;Astrocoeniina;Acroporidae;Acropora;Acropora  
 millepora  
 UdeM00000003160 45264 100.1 UdeM00000003160 XP\_044165143.1 45.7 116  
 61 2 1 114 358 473 2.00E-18 100.1 45264 cellular  
 organisms;Eukaryota;Opisthokonta;Metazoa;Eumetazoa;Cnidaria;Anthozoa;Hexa  
 corallia;Scleractinia;Astrocoeniina;Acroporidae;Acropora;Acropora  
 millepora  
 UdeM00000003161 45264 141.4 UdeM00000003161 XP\_044184028.1 48.2 168  
 82 3 27 193 68 231 1.60E-30 141.4 45264 cellular  
 organisms;Eukaryota;Opisthokonta;Metazoa;Eumetazoa;Cnidaria;Anthozoa;Hexa  
 corallia;Scleractinia;Astrocoeniina;Acroporidae;Acropora;Acropora  
 millepora  
 UdeM00000003162 45264 141.4 UdeM00000003162 XP\_044184028.1 48.2 168  
 82 3 42 208 68 231 1.70E-30 141.4 45264 cellular  
 organisms;Eukaryota;Opisthokonta;Metazoa;Eumetazoa;Cnidaria;Anthozoa;Hexa  
 corallia;Scleractinia;Astrocoeniina;Acroporidae;Acropora;Acropora  
 millepora  
 UdeM00000003163 6596 294.3 UdeM00000003163 XP\_045191755.1 33.8 619  
 356 11 71 638 46 661 3.90E-76 294.3 6596 cellular  
 organisms;Eukaryota;Opisthokonta;Metazoa;Eumetazoa;Bilateria;Protostomia;  
 Spiralia;Lophotrochozoa;Mollusca;Bivalvia;Autobranchia;Heteroconchia;Euhe  
 terodonta;Imparidentia;Venerida;Veneroidea;Veneridae;Mercenaria;Mercenari  
 a mercenaria  
 UdeM00000003164 6596 310.1 UdeM00000003164 XP\_045192357.1 49.7 326  
 153 4 1 317 1 324 3.50E-81 310.1 6596 cellular  
 organisms;Eukaryota;Opisthokonta;Metazoa;Eumetazoa;Bilateria;Protostomia;  
 Spiralia;Lophotrochozoa;Mollusca;Bivalvia;Autobranchia;Heteroconchia;Euhe  
 terodonta;Imparidentia;Venerida;Veneroidea;Veneridae;Mercenaria;Mercenari  
 a mercenaria  
 UdeM00000003166 1735272 255.4 UdeM00000003166 XP\_041376541.1 62.9  
 178 66 0 1 178 35 212 5.60E-65 255.4 1735272  
 cellular  
 organisms;Eukaryota;Opisthokonta;Metazoa;Eumetazoa;Bilateria;Protostomia;  
 Spiralia;Lophotrochozoa;Mollusca;Gastropoda;Neomphalina;Neomphaloidea;Pel  
 tospiridae;Gigantopelta;Gigantopelta aegis  
 UdeM00000003167 1735272 69.7 UdeM00000003167 XP\_041376541.1 54.7  
 181 60 4 10 188 218 378 4.50E-09 69.7 1735272  
 cellular  
 organisms;Eukaryota;Opisthokonta;Metazoa;Eumetazoa;Bilateria;Protostomia;  
 Spiralia;Lophotrochozoa;Mollusca;Gastropoda;Neomphalina;Neomphaloidea;Pel  
 tospiridae;Gigantopelta;Gigantopelta aegis  
 UdeM00000003168 6565 710.7 UdeM00000003168 XP\_022342618.1 45.5 1030  
 444 13 7 1022 19 945 2.80E-20 710.7 6565 cellular  
 organisms;Eukaryota;Opisthokonta;Metazoa;Eumetazoa;Bilateria;Protostomia;  
 Spiralia;Lophotrochozoa;Mollusca;Bivalvia;Autobranchia;Pteriormorphia;Ostr  
 eida;Ostreoidea;Ostreidae;Crassostrea;Crassostrea virginica



UdeM00000003169 6573 72.8 UdeM00000003169 XP\_021358275.1 56.5 69  
 21 3 5 68 2 66 3.20E-10 72.8 6573 cellular  
 organisms;Eukaryota;Opisthokonta;Metazoa;Eumetazoa;Bilateria;Protostomia;  
 Spiralia;Lophotrochozoa;Mollusca;Bivalvia;Autobranhia;Pteriomorpha;Pect  
 inida;Pectinoidea;Pectinidae;Mizuhopecten;Mizuhopecten yessoensis  
 UdeM00000003170 6596 496.1 UdeM00000003170 XP\_045192780.1 53 449  
 197 7 5 452 15 450 4.70E-137 496.1 6596 cellular  
 organisms;Eukaryota;Opisthokonta;Metazoa;Eumetazoa;Bilateria;Protostomia;  
 Spiralia;Lophotrochozoa;Mollusca;Bivalvia;Autobranhia;Heteroconchia;Euhe  
 terodonta;Imparidentia;Venerida;Veneroidea;Veneridae;Mercenaria;Mercenari  
 a mercenaria  
 UdeM00000003171 6596 471.5 UdeM00000003171 XP\_045192780.1 53 434  
 191 7 22 454 29 450 1.20E-129 471.5 6596 cellular  
 organisms;Eukaryota;Opisthokonta;Metazoa;Eumetazoa;Bilateria;Protostomia;  
 Spiralia;Lophotrochozoa;Mollusca;Bivalvia;Autobranhia;Heteroconchia;Euhe  
 terodonta;Imparidentia;Venerida;Veneroidea;Veneridae;Mercenaria;Mercenari  
 a mercenaria  
 UdeM00000003173 6596 352.8 UdeM00000003173 XP\_045175062.1 49.4 393  
 195 2 1 390 1 392 5.60E-94 352.8 6596 cellular  
 organisms;Eukaryota;Opisthokonta;Metazoa;Eumetazoa;Bilateria;Protostomia;  
 Spiralia;Lophotrochozoa;Mollusca;Bivalvia;Autobranhia;Heteroconchia;Euhe  
 terodonta;Imparidentia;Venerida;Veneroidea;Veneridae;Mercenaria;Mercenari  
 a mercenaria  
 UdeM00000003174 6596 540 UdeM00000003174 XP\_045175062.1 51.7 547  
 261 3 1 546 1 545 3.40E-150 540 6596 cellular  
 organisms;Eukaryota;Opisthokonta;Metazoa;Eumetazoa;Bilateria;Protostomia;  
 Spiralia;Lophotrochozoa;Mollusca;Bivalvia;Autobranhia;Heteroconchia;Euhe  
 terodonta;Imparidentia;Venerida;Veneroidea;Veneridae;Mercenaria;Mercenari  
 a mercenaria  
 UdeM00000003175 6596 126.3 UdeM00000003175 XP\_045175390.1 30.4 303  
 187 7 39 331 99 387 7.10E-26 126.3 6596 cellular  
 organisms;Eukaryota;Opisthokonta;Metazoa;Eumetazoa;Bilateria;Protostomia;  
 Spiralia;Lophotrochozoa;Mollusca;Bivalvia;Autobranhia;Heteroconchia;Euhe  
 terodonta;Imparidentia;Venerida;Veneroidea;Veneridae;Mercenaria;Mercenari  
 a mercenaria  
 UdeM00000003176 6596 725.3 UdeM00000003176 XP\_045192190.1 80.8 412  
 79 0 1 412 1 412 8.30E-206 725.3 6596 cellular  
 organisms;Eukaryota;Opisthokonta;Metazoa;Eumetazoa;Bilateria;Protostomia;  
 Spiralia;Lophotrochozoa;Mollusca;Bivalvia;Autobranhia;Heteroconchia;Euhe  
 terodonta;Imparidentia;Venerida;Veneroidea;Veneridae;Mercenaria;Mercenari  
 a mercenaria  
 UdeM00000003177 6579 289.3 UdeM00000003177 XP\_033754925.1 71.8 206  
 58 0 1 206 1 206 4.00E-75 289.3 6579 cellular  
 organisms;Eukaryota;Opisthokonta;Metazoa;Eumetazoa;Bilateria;Protostomia;  
 Spiralia;Lophotrochozoa;Mollusca;Bivalvia;Autobranhia;Pteriomorpha;Pect  
 inida;Pectinoidea;Pectinidae;Pecten;Pecten maximus  
 UdeM00000003178 6596 755 UdeM00000003178 XP\_045192182.1 59.5 699  
 225 9 1 662 1 678 8.10E-215 755 6596 cellular  
 organisms;Eukaryota;Opisthokonta;Metazoa;Eumetazoa;Bilateria;Protostomia;  
 Spiralia;Lophotrochozoa;Mollusca;Bivalvia;Autobranhia;Heteroconchia;Euhe  
 terodonta;Imparidentia;Venerida;Veneroidea;Veneridae;Mercenaria;Mercenari  
 a mercenaria  
 UdeM00000003179 6579 303.5 UdeM00000003179 XP\_033755352.1 65.7 216  
 73 1 6 220 3 218 2.20E-79 303.5 6579 cellular

organisms;Eukaryota;Opisthokonta;Metazoa;Eumetazoa;Bilateria;Protostomia; Spiralia;Lophotrochozoa;Mollusca;Bivalvia;Autobranchia;Pteriormorphia;Pect inida;Pectinoidea;Pectinidae;Pecten;Pecten maximus

UdeM00000003180 1735272 502.7 UdeM00000003180 XP\_041376085.1 35.8  
763 447 10 1 732 1 751 8.10E-139 502.7 1735272

cellular

organisms;Eukaryota;Opisthokonta;Metazoa;Eumetazoa;Bilateria;Protostomia; Spiralia;Lophotrochozoa;Mollusca;Gastropoda;Neomphalina;Neomphaloidea;Pel tospiridae;Gigantopelta;Gigantopelta aegis

UdeM00000003181 6596 452.6 UdeM00000003181 XP\_045192179.1 60.2 389  
151 3 6 393 5 390 5.60E-124 452.6 6596 cellular

organisms;Eukaryota;Opisthokonta;Metazoa;Eumetazoa;Bilateria;Protostomia; Spiralia;Lophotrochozoa;Mollusca;Bivalvia;Autobranchia;Heteroconchia;Euhe terodonta;Imparidentia;Venerida;Veneroidea;Veneridae;Mercenaria;Mercenari a mercenaria

UdeM00000003183 6579 295.4 UdeM00000003183 XP\_033753679.1 76.5 179  
34 3 1 172 586 763 6.20E-77 295.4 6579 cellular

organisms;Eukaryota;Opisthokonta;Metazoa;Eumetazoa;Bilateria;Protostomia; Spiralia;Lophotrochozoa;Mollusca;Bivalvia;Autobranchia;Pteriormorphia;Pect inida;Pectinoidea;Pectinidae;Pecten;Pecten maximus

UdeM00000003182 6573 563.9 UdeM00000003182 XP\_021354199.1 50.6 674  
283 12 82 731 120 767 3.20E-157 563.9 6573 cellular

organisms;Eukaryota;Opisthokonta;Metazoa;Eumetazoa;Bilateria;Protostomia; Spiralia;Lophotrochozoa;Mollusca;Bivalvia;Autobranchia;Pteriormorphia;Pect inida;Pectinoidea;Pectinidae;Mizuhopecten;Mizuhopecten yessoensis

UdeM00000003184 6573 454.1 UdeM00000003184 XP\_021354199.1 48.1 580  
259 9 82 644 120 674 2.90E-124 454.1 6573 cellular

organisms;Eukaryota;Opisthokonta;Metazoa;Eumetazoa;Bilateria;Protostomia; Spiralia;Lophotrochozoa;Mollusca;Bivalvia;Autobranchia;Pteriormorphia;Pect inida;Pectinoidea;Pectinidae;Mizuhopecten;Mizuhopecten yessoensis

UdeM00000003185 6596 122.9 UdeM00000003185 XP\_045193571.1 27.7 264  
148 6 85 330 213 451 8.10E-25 122.9 6596 cellular

organisms;Eukaryota;Opisthokonta;Metazoa;Eumetazoa;Bilateria;Protostomia; Spiralia;Lophotrochozoa;Mollusca;Bivalvia;Autobranchia;Heteroconchia;Euhe terodonta;Imparidentia;Venerida;Veneroidea;Veneridae;Mercenaria;Mercenari a mercenaria

UdeM00000003186 6596 211.1 UdeM00000003186 XP\_045193568.1 40.1 269  
155 5 236 500 203 469 3.30E-51 211.1 6596 cellular

organisms;Eukaryota;Opisthokonta;Metazoa;Eumetazoa;Bilateria;Protostomia; Spiralia;Lophotrochozoa;Mollusca;Bivalvia;Autobranchia;Heteroconchia;Euhe terodonta;Imparidentia;Venerida;Veneroidea;Veneridae;Mercenaria;Mercenari a mercenaria

UdeM00000003187 6596 211.1 UdeM00000003187 XP\_045193568.1 40.1 269  
155 5 279 543 203 469 3.60E-51 211.1 6596 cellular

organisms;Eukaryota;Opisthokonta;Metazoa;Eumetazoa;Bilateria;Protostomia; Spiralia;Lophotrochozoa;Mollusca;Bivalvia;Autobranchia;Heteroconchia;Euhe terodonta;Imparidentia;Venerida;Veneroidea;Veneridae;Mercenaria;Mercenari a mercenaria

UdeM00000003188 6596 252.7 UdeM00000003188 XP\_045193323.1 35.5 422  
251 8 25 427 4 423 8.60E-64 252.7 6596 cellular

organisms;Eukaryota;Opisthokonta;Metazoa;Eumetazoa;Bilateria;Protostomia; Spiralia;Lophotrochozoa;Mollusca;Bivalvia;Autobranchia;Heteroconchia;Euhe terodonta;Imparidentia;Venerida;Veneroidea;Veneridae;Mercenaria;Mercenari a mercenaria

UdeM00000003189 6565 64.7 UdeM00000003189 XP\_022337943.1 31.8 129  
 82 4 67 193 485 609 1.60E-07 64.7 6565 cellular  
 organisms;Eukaryota;Opisthokonta;Metazoa;Eumetazoa;Bilateria;Protostomia;  
 Spiralia;Lophotrochozoa;Mollusca;Bivalvia;Autobranchia;Pteriormorphia;Ostr  
 eida;Ostreoidea;Ostreidae;Crassostrea;Crassostrea virginica  
 UdeM00000003190 6596 240.7 UdeM00000003190 XP\_045191300.1 34.7 392  
 234 5 5 375 8 398 3.10E-60 240.7 6596 cellular  
 organisms;Eukaryota;Opisthokonta;Metazoa;Eumetazoa;Bilateria;Protostomia;  
 Spiralia;Lophotrochozoa;Mollusca;Bivalvia;Autobranchia;Heteroconchia;Euhe  
 terodonta;Imparidentia;Venerida;Veneroidea;Veneridae;Mercenaria;Mercenari  
 a mercenaria  
 UdeM00000003191 6596 255.8 UdeM00000003191 XP\_045193323.1 35.8 413  
 241 8 5 395 8 418 9.50E-65 255.8 6596 cellular  
 organisms;Eukaryota;Opisthokonta;Metazoa;Eumetazoa;Bilateria;Protostomia;  
 Spiralia;Lophotrochozoa;Mollusca;Bivalvia;Autobranchia;Heteroconchia;Euhe  
 terodonta;Imparidentia;Venerida;Veneroidea;Veneridae;Mercenaria;Mercenari  
 a mercenaria  
 UdeM00000003193 6565 97.1 UdeM00000003193 XP\_022337943.1 28.5 249  
 160 7 106 352 377 609 5.00E-17 97.1 6565 cellular  
 organisms;Eukaryota;Opisthokonta;Metazoa;Eumetazoa;Bilateria;Protostomia;  
 Spiralia;Lophotrochozoa;Mollusca;Bivalvia;Autobranchia;Pteriormorphia;Ostr  
 eida;Ostreoidea;Ostreidae;Crassostrea;Crassostrea virginica  
 UdeM00000003192 6565 97.1 UdeM00000003192 XP\_022337943.1 28.5 249  
 160 7 116 362 377 609 5.20E-17 97.1 6565 cellular  
 organisms;Eukaryota;Opisthokonta;Metazoa;Eumetazoa;Bilateria;Protostomia;  
 Spiralia;Lophotrochozoa;Mollusca;Bivalvia;Autobranchia;Pteriormorphia;Ostr  
 eida;Ostreoidea;Ostreidae;Crassostrea;Crassostrea virginica  
 UdeM00000003195 6596 229.6 UdeM00000003195 XP\_045192359.1 43.6 273  
 145 5 1 264 1 273 4.80E-57 229.6 6596 cellular  
 organisms;Eukaryota;Opisthokonta;Metazoa;Eumetazoa;Bilateria;Protostomia;  
 Spiralia;Lophotrochozoa;Mollusca;Bivalvia;Autobranchia;Heteroconchia;Euhe  
 terodonta;Imparidentia;Venerida;Veneroidea;Veneridae;Mercenaria;Mercenari  
 a mercenaria  
 UdeM00000003196 6596 792.7 UdeM00000003196 XP\_045191547.1 65.2 577  
 201 0 5 581 3 579 3.30E-226 792.7 6596 cellular  
 organisms;Eukaryota;Opisthokonta;Metazoa;Eumetazoa;Bilateria;Protostomia;  
 Spiralia;Lophotrochozoa;Mollusca;Bivalvia;Autobranchia;Heteroconchia;Euhe  
 terodonta;Imparidentia;Venerida;Veneroidea;Veneridae;Mercenaria;Mercenari  
 a mercenaria  
 UdeM00000003197 6596 527.7 UdeM00000003197 XP\_045193647.1 40.1 694  
 384 10 379 1060 1106 1779 3.40E-146 527.7 6596 cellular  
 organisms;Eukaryota;Opisthokonta;Metazoa;Eumetazoa;Bilateria;Protostomia;  
 Spiralia;Lophotrochozoa;Mollusca;Bivalvia;Autobranchia;Heteroconchia;Euhe  
 terodonta;Imparidentia;Venerida;Veneroidea;Veneridae;Mercenaria;Mercenari  
 a mercenaria  
 UdeM00000003198 400727 800.4 UdeM00000003198 XP\_025115090.1 41.2  
 935 536 8 4 930 58 986 2.40E-228 800.4 400727  
 cellular  
 organisms;Eukaryota;Opisthokonta;Metazoa;Eumetazoa;Bilateria;Protostomia;  
 Spiralia;Lophotrochozoa;Mollusca;Gastropoda;Caenogastropoda;Architaeniogl  
 ossa;Ampullarioidea;Ampullariidae;Pomacea;Pomacea canaliculata  
 UdeM00000003199 6596 691.8 UdeM00000003199 XP\_045194279.1 49 736  
 336 9 1 730 1 703 1.00E-195 691.8 6596 cellular  
 organisms;Eukaryota;Opisthokonta;Metazoa;Eumetazoa;Bilateria;Protostomia;

Spiralia;Lophotrochozoa;Mollusca;Bivalvia;Autobranchia;Heteroconchia;Euherodonta;Imparidentia;Venerida;Veneroidea;Veneridae;Mercenaria;Mercenaria mercenaria

UdeM00000003200 6579 359.4 UdeM00000003200 XP\_033755221.1 36.3 1172  
585 37 98 1174 774 1878 1.80E-95 359.4 6579 cellular

organisms;Eukaryota;Opisthokonta;Metazoa;Eumetazoa;Bilateria;Protostomia;Spiralia;Lophotrochozoa;Mollusca;Bivalvia;Autobranchia;Pteriormorphia;Pectinida;Pectinoidea;Pectinidae;Pecten;Pecten maximus

UdeM00000003201 6596 285 UdeM00000003201 XP\_045191543.1 47.8 458  
213 13 13 446 31 486 1.60E-73 285 6596 cellular

organisms;Eukaryota;Opisthokonta;Metazoa;Eumetazoa;Bilateria;Protostomia;Spiralia;Lophotrochozoa;Mollusca;Bivalvia;Autobranchia;Heteroconchia;Euherodonta;Imparidentia;Venerida;Veneroidea;Veneridae;Mercenaria;Mercenaria mercenaria

UdeM00000003202 6596 457.2 UdeM00000003202 XP\_045191990.1 56.2 457  
186 5 1 447 28 480 2.40E-125 457.2 6596 cellular

organisms;Eukaryota;Opisthokonta;Metazoa;Eumetazoa;Bilateria;Protostomia;Spiralia;Lophotrochozoa;Mollusca;Bivalvia;Autobranchia;Heteroconchia;Euherodonta;Imparidentia;Venerida;Veneroidea;Veneridae;Mercenaria;Mercenaria mercenaria

UdeM00000003203 6565 332.4 UdeM00000003203 XP\_022336011.1 58.9 270  
111 0 1 270 1 270 5.40E-88 332.4 6565 cellular

organisms;Eukaryota;Opisthokonta;Metazoa;Eumetazoa;Bilateria;Protostomia;Spiralia;Lophotrochozoa;Mollusca;Bivalvia;Autobranchia;Pteriormorphia;Ostreida;Ostreioidea;Ostreidae;Crassostrea;Crassostrea virginica

UdeM00000003205 29159 69.7 UdeM00000003205 XP\_034299594.1 37.3 75  
47 0 3 77 478 552 2.30E-09 69.7 29159 cellular

organisms;Eukaryota;Opisthokonta;Metazoa;Eumetazoa;Bilateria;Protostomia;Spiralia;Lophotrochozoa;Mollusca;Bivalvia;Autobranchia;Pteriormorphia;Ostreida;Ostreioidea;Ostreidae;Crassostrea;Crassostrea gigas

UdeM00000003206 6596 1139.8 UdeM00000003206 XP\_045191953.1 73.5  
769 196 3 1 767 1 763 0.00E+00 1139.8 6596  
cellular

organisms;Eukaryota;Opisthokonta;Metazoa;Eumetazoa;Bilateria;Protostomia;Spiralia;Lophotrochozoa;Mollusca;Bivalvia;Autobranchia;Heteroconchia;Euherodonta;Imparidentia;Venerida;Veneroidea;Veneridae;Mercenaria;Mercenaria mercenaria

UdeM00000003207 6596 1146.7 UdeM00000003207 XP\_045191953.1 74  
763 196 2 1 761 1 763 0.00E+00 1146.7 6596  
cellular

organisms;Eukaryota;Opisthokonta;Metazoa;Eumetazoa;Bilateria;Protostomia;Spiralia;Lophotrochozoa;Mollusca;Bivalvia;Autobranchia;Heteroconchia;Euherodonta;Imparidentia;Venerida;Veneroidea;Veneridae;Mercenaria;Mercenaria mercenaria

UdeM00000003208 6596 248.1 UdeM00000003208 XP\_045194414.1 38.4 570  
235 16 10 471 10 571 2.30E-62 248.1 6596 cellular

organisms;Eukaryota;Opisthokonta;Metazoa;Eumetazoa;Bilateria;Protostomia;Spiralia;Lophotrochozoa;Mollusca;Bivalvia;Autobranchia;Heteroconchia;Euherodonta;Imparidentia;Venerida;Veneroidea;Veneridae;Mercenaria;Mercenaria mercenaria

UdeM00000003209 400727 176.4 UdeM00000003209 XP\_025076358.1 38.3  
368 195 6 415 778 32 371 1.40E-40 176.4 400727  
cellular

organisms;Eukaryota;Opisthokonta;Metazoa;Eumetazoa;Bilateria;Protostomia;

Spiralia; Lophotrochozoa; Mollusca; Gastropoda; Caenogastropoda; Architaenioglossa; Ampullarioidea; Ampullariidae; Pomacea; Pomacea canaliculata  
UdeM00000003210 1735272 132.5 UdeM00000003210 XP\_041376920.1 49  
763 164 11 4 720 5 588 2.20E-27 132.5 1735272  
cellular  
organisms; Eukaryota; Opisthokonta; Metazoa; Eumetazoa; Bilateria; Protostomia; Spiralia; Lophotrochozoa; Mollusca; Gastropoda; Neomphalina; Neomphaloidea; Peltopspiridae; Gigantopelta; Gigantopelta aegis  
UdeM00000003211 6596 171 UdeM00000003211 XP\_045192554.1 48.8 244  
82 2 81 316 574 782 2.40E-39 171 6596 cellular  
organisms; Eukaryota; Opisthokonta; Metazoa; Eumetazoa; Bilateria; Protostomia; Spiralia; Lophotrochozoa; Mollusca; Bivalvia; Autobranchia; Heteroconchia; Euheterodonta; Imparidentia; Venerida; Veneroidea; Veneridae; Mercenaria; Mercenaria mercenaria  
UdeM00000003212 6596 148.7 UdeM00000003212 XP\_045192554.1 44.2 337  
116 3 639 956 501 784 3.90E-32 148.7 6596 cellular  
organisms; Eukaryota; Opisthokonta; Metazoa; Eumetazoa; Bilateria; Protostomia; Spiralia; Lophotrochozoa; Mollusca; Bivalvia; Autobranchia; Heteroconchia; Euheterodonta; Imparidentia; Venerida; Veneroidea; Veneridae; Mercenaria; Mercenaria mercenaria  
UdeM00000003213 6596 148.7 UdeM00000003213 XP\_045192554.1 44.2 337  
116 3 647 964 501 784 3.90E-32 148.7 6596 cellular  
organisms; Eukaryota; Opisthokonta; Metazoa; Eumetazoa; Bilateria; Protostomia; Spiralia; Lophotrochozoa; Mollusca; Bivalvia; Autobranchia; Heteroconchia; Euheterodonta; Imparidentia; Venerida; Veneroidea; Veneridae; Mercenaria; Mercenaria mercenaria  
UdeM00000003214 6596 396.7 UdeM00000003214 XP\_045163562.1 76.6 248  
51 2 3 243 8 255 2.10E-107 396.7 6596 cellular  
organisms; Eukaryota; Opisthokonta; Metazoa; Eumetazoa; Bilateria; Protostomia; Spiralia; Lophotrochozoa; Mollusca; Bivalvia; Autobranchia; Heteroconchia; Euheterodonta; Imparidentia; Venerida; Veneroidea; Veneridae; Mercenaria; Mercenaria mercenaria  
UdeM00000003215 94885 79 UdeM00000003215 XP\_034281308.1 61.5 65  
22 2 1 65 1 62 3.10E-12 79 94885 cellular  
organisms; Eukaryota; Opisthokonta; Metazoa; Eumetazoa; Bilateria; Deuterostomia; Chordata; Craniata; Vertebrata; Gnathostomata; Teleostomi; Euteleostomi; Sarcopterygii; Dipnotetrapodomorpha; Tetrapoda; Amniota; Sauropsida; Sauria; Lepidosauria; Squamata; Bifurcata; Unidentata; Episquamata; Toxicofera; Serpentes; Colubroidea; Colubridae; Colubrinae; Pantherophis; Pantherophis guttatus  
UdeM00000003216 6573 254.2 UdeM00000003216 XP\_021352766.1 37.3 370  
213 7 1 359 1 362 2.50E-64 254.2 6573 cellular  
organisms; Eukaryota; Opisthokonta; Metazoa; Eumetazoa; Bilateria; Protostomia; Spiralia; Lophotrochozoa; Mollusca; Bivalvia; Autobranchia; Pteriomorpha; Pectinida; Pectinoidea; Pectinidae; Mizuhopecten; Mizuhopecten yessoensis  
UdeM00000003217 1735272 152.1 UdeM00000003217 XP\_041359833.1 39.9  
183 110 0 9 191 19 201 7.20E-34 152.1 1735272  
cellular  
organisms; Eukaryota; Opisthokonta; Metazoa; Eumetazoa; Bilateria; Protostomia; Spiralia; Lophotrochozoa; Mollusca; Gastropoda; Neomphalina; Neomphaloidea; Peltopspiridae; Gigantopelta; Gigantopelta aegis  
UdeM00000003218 6579 184.1 UdeM00000003218 XP\_033754376.1 37.1 275  
161 5 1506 1779 248 511 1.80E-42 184.1 6579 cellular  
organisms; Eukaryota; Opisthokonta; Metazoa; Eumetazoa; Bilateria; Protostomia;

Spiralia;Lophotrochozoa;Mollusca;Bivalvia;Autobranchia;Pteriormorphia;Pectinida;Pectinoidea;Pectinidae;Pecten;Pecten maximus

UdeM00000003219 6596 651 UdeM00000003219 XP\_045191515.1 60 502  
197 2 1 499 1 501 1.30E-183 651 6596 cellular  
organisms;Eukaryota;Opisthokonta;Metazoa;Eumetazoa;Bilateria;Protostomia;  
Spiralia;Lophotrochozoa;Mollusca;Bivalvia;Autobranchia;Heteroconchia;Euherodonta;Imparidentia;Venerida;Veneroidea;Veneridae;Mercenaria;Mercenaria mercenaria

UdeM00000003220 6596 596.7 UdeM00000003220 XP\_045191619.1 93.2 325  
17 2 1 323 1 322 1.80E-167 596.7 6596 cellular  
organisms;Eukaryota;Opisthokonta;Metazoa;Eumetazoa;Bilateria;Protostomia;  
Spiralia;Lophotrochozoa;Mollusca;Bivalvia;Autobranchia;Heteroconchia;Euherodonta;Imparidentia;Venerida;Veneroidea;Veneridae;Mercenaria;Mercenaria mercenaria

UdeM00000003221 1735272 476.9 UdeM00000003221 XP\_041377064.1 53.3  
467 199 8 58 515 42 498 3.40E-131 476.9 1735272  
cellular  
organisms;Eukaryota;Opisthokonta;Metazoa;Eumetazoa;Bilateria;Protostomia;  
Spiralia;Lophotrochozoa;Mollusca;Gastropoda;Neomphalina;Neomphaloidea;Peltospiridae;Gigantopelta;Gigantopelta aegis

UdeM00000003222 400727 188 UdeM00000003222 XP\_025116008.1 46.3  
270 135 3 1 267 1 263 1.60E-44 188 400727  
cellular  
organisms;Eukaryota;Opisthokonta;Metazoa;Eumetazoa;Bilateria;Protostomia;  
Spiralia;Lophotrochozoa;Mollusca;Gastropoda;Caenogastropoda;Architaenioglossa;Ampullarioidea;Ampullariidae;Pomacea;Pomacea canaliculata

UdeM00000003223 400727 1040.8 UdeM00000003223 XP\_025116008.1  
71.3 788 210 5 1 782 1 778 8.90E-301 1040.8  
400727 cellular  
organisms;Eukaryota;Opisthokonta;Metazoa;Eumetazoa;Bilateria;Protostomia;  
Spiralia;Lophotrochozoa;Mollusca;Gastropoda;Caenogastropoda;Architaenioglossa;Ampullarioidea;Ampullariidae;Pomacea;Pomacea canaliculata

UdeM00000003224 400727 1046.2 UdeM00000003224 XP\_025116008.1  
71.6 785 213 3 1 782 1 778 2.10E-302 1046.2  
400727 cellular  
organisms;Eukaryota;Opisthokonta;Metazoa;Eumetazoa;Bilateria;Protostomia;  
Spiralia;Lophotrochozoa;Mollusca;Gastropoda;Caenogastropoda;Architaenioglossa;Ampullarioidea;Ampullariidae;Pomacea;Pomacea canaliculata

UdeM00000003225 6596 311.2 UdeM00000003225 XP\_045194887.1 33.6 527  
323 9 326 845 27 533 5.80E-81 311.2 6596 cellular  
organisms;Eukaryota;Opisthokonta;Metazoa;Eumetazoa;Bilateria;Protostomia;  
Spiralia;Lophotrochozoa;Mollusca;Bivalvia;Autobranchia;Heteroconchia;Euherodonta;Imparidentia;Venerida;Veneroidea;Veneridae;Mercenaria;Mercenaria mercenaria

UdeM00000003227 6573 441 UdeM00000003227 XP\_021358331.1 87.7 236  
29 0 4 239 5 240 9.40E-121 441 6573 cellular  
organisms;Eukaryota;Opisthokonta;Metazoa;Eumetazoa;Bilateria;Protostomia;  
Spiralia;Lophotrochozoa;Mollusca;Bivalvia;Autobranchia;Pteriormorphia;Pectinida;Pectinoidea;Pectinidae;Mizuhopecten;Mizuhopecten yessoensis

UdeM00000003228 6579 1203.3 UdeM00000003228 XP\_033754451.1 63.5  
924 323 6 1 920 1 914 0.00E+00 1203.3 6579  
cellular  
organisms;Eukaryota;Opisthokonta;Metazoa;Eumetazoa;Bilateria;Protostomia;

Spiralia; Lophotrochozoa; Mollusca; Bivalvia; Autobranchia; Pteriomorpha; Pectinida; Pectinoidea; Pectinidae; Pecten; Pecten maximus

UdeM00000003230 6596 110.9 UdeM00000003230 XP\_045180427.1 39 177  
105 2 76 250 98 273 2.50E-21 110.9 6596 cellular  
organisms; Eukaryota; Opisthokonta; Metazoa; Eumetazoa; Bilateria; Protostomia; Spiralia; Lophotrochozoa; Mollusca; Bivalvia; Autobranchia; Heteroconchia; Euheterodonta; Imparidentia; Venerida; Veneroidea; Veneridae; Mercenaria; Mercenaria mercenaria

UdeM00000003231 6565 1079.7 UdeM00000003231 XP\_022339330.1 68.7  
795 239 4 128 918 94 882 0.00E+00 1079.7 6565  
cellular  
organisms; Eukaryota; Opisthokonta; Metazoa; Eumetazoa; Bilateria; Protostomia; Spiralia; Lophotrochozoa; Mollusca; Bivalvia; Autobranchia; Pteriomorpha; Ostracida; Ostreidae; Crassostrea; Crassostrea virginica

UdeM00000003232 6565 312.8 UdeM00000003232 XP\_022339331.1 70.3 239  
56 4 1 228 888 1122 3.70E-82 312.8 6565 cellular  
organisms; Eukaryota; Opisthokonta; Metazoa; Eumetazoa; Bilateria; Protostomia; Spiralia; Lophotrochozoa; Mollusca; Bivalvia; Autobranchia; Pteriomorpha; Ostracida; Ostreidae; Crassostrea; Crassostrea virginica

UdeM00000003233 6565 132.9 UdeM00000003233 XP\_022339330.1 63.2 117  
37 2 1 111 913 1029 3.00E-28 132.9 6565 cellular  
organisms; Eukaryota; Opisthokonta; Metazoa; Eumetazoa; Bilateria; Protostomia; Spiralia; Lophotrochozoa; Mollusca; Bivalvia; Autobranchia; Pteriomorpha; Ostracida; Ostreidae; Crassostrea; Crassostrea virginica

UdeM00000003234 151771 480.3 UdeM00000003234 XP\_028419301.1 53.6  
448 205 3 27 473 34 479 2.80E-132 480.3 151771  
cellular  
organisms; Eukaryota; Opisthokonta; Metazoa; Eumetazoa; Cnidaria; Anthozoa; Octocorallia; Alcyonacea; Alcyoniina; Nephtheidae; Dendronephthya; Dendronephthya gigantea

UdeM00000003235 151771 470.7 UdeM00000003235 XP\_028419301.1 53.1  
448 201 4 27 467 34 479 2.20E-129 470.7 151771  
cellular  
organisms; Eukaryota; Opisthokonta; Metazoa; Eumetazoa; Cnidaria; Anthozoa; Octocorallia; Alcyonacea; Alcyoniina; Nephtheidae; Dendronephthya; Dendronephthya gigantea

UdeM00000003236 6596 432.2 UdeM00000003236 XP\_045192885.1 71.4 290  
83 0 1 290 702 991 5.80E-118 432.2 6596 cellular  
organisms; Eukaryota; Opisthokonta; Metazoa; Eumetazoa; Bilateria; Protostomia; Spiralia; Lophotrochozoa; Mollusca; Bivalvia; Autobranchia; Heteroconchia; Euheterodonta; Imparidentia; Venerida; Veneroidea; Veneridae; Mercenaria; Mercenaria mercenaria

UdeM00000003238 37653 366.3 UdeM00000003238 XP\_014780554.1 42.5 452  
250 5 22 466 49 497 5.70E-98 366.3 37653 cellular  
organisms; Eukaryota; Opisthokonta; Metazoa; Eumetazoa; Bilateria; Protostomia; Spiralia; Lophotrochozoa; Mollusca; Cephalopoda; Coleoidea; Octopodiformes; Octopoda; Incirrata; Octopodidae; Octopus; Octopus bimaculoides

UdeM00000003239 6596 429.1 UdeM00000003239 XP\_045192914.1 59.7 419  
100 5 8 426 15 364 6.60E-117 429.1 6596 cellular  
organisms; Eukaryota; Opisthokonta; Metazoa; Eumetazoa; Bilateria; Protostomia; Spiralia; Lophotrochozoa; Mollusca; Bivalvia; Autobranchia; Heteroconchia; Euheterodonta; Imparidentia; Venerida; Veneroidea; Veneridae; Mercenaria; Mercenaria mercenaria

UdeM00000003240 1735272 399.8 UdeM00000003240 XP\_041376710.1 32  
 866 432 21 72 903 196 938 9.10E-108 399.8 1735272  
 cellular  
 organisms;Eukaryota;Opisthokonta;Metazoa;Eumetazoa;Bilateria;Protostomia;  
 Spiralia;Lophotrochozoa;Mollusca;Gastropoda;Neomphalina;Neomphaloidea;Pel  
 tospiridae;Gigantopelta;Gigantopelta aegis  
 UdeM00000003241 400727 63.5 UdeM00000003241 XP\_025114569.1 34.3  
 105 61 3 1 105 62 158 4.20E-07 63.5 400727  
 cellular  
 organisms;Eukaryota;Opisthokonta;Metazoa;Eumetazoa;Bilateria;Protostomia;  
 Spiralia;Lophotrochozoa;Mollusca;Gastropoda;Caenogastropoda;Architaeniogl  
 ossa;Ampullarioidea;Ampullariidae;Pomacea;Pomacea canaliculata  
 UdeM00000003242 7574 278.1 UdeM00000003242 XP\_013420590.1 48.4 316  
 141 7 295 599 176 480 2.80E-71 278.1 7574 cellular  
 organisms;Eukaryota;Opisthokonta;Metazoa;Eumetazoa;Bilateria;Protostomia;  
 Spiralia;Lophotrochozoa;Brachiopoda;Linguliformea;Lingulata;Lingulida;Lin  
 guloidea;Lingulidae;Lingula;Lingula anatina  
 UdeM00000003243 6573 116.3 UdeM00000003243 XP\_021358001.1 69.7 89  
 18 2 9 88 143 231 2.00E-23 116.3 6573 cellular  
 organisms;Eukaryota;Opisthokonta;Metazoa;Eumetazoa;Bilateria;Protostomia;  
 Spiralia;Lophotrochozoa;Mollusca;Bivalvia;Autobranchia;Pteriormorphia;Pect  
 inida;Pectinoidea;Pectinidae;Mizuhopecten;Mizuhopecten yessoensis  
 UdeM00000003244 29159 558.9 UdeM00000003244 XP\_034317111.1 51.9 553  
 255 5 1 545 1 550 7.10E-156 558.9 29159 cellular  
 organisms;Eukaryota;Opisthokonta;Metazoa;Eumetazoa;Bilateria;Protostomia;  
 Spiralia;Lophotrochozoa;Mollusca;Bivalvia;Autobranchia;Pteriormorphia;Ostr  
 eida;Ostreoidea;Ostreidae;Crassostrea;Crassostrea gigas  
 UdeM00000003245 29159 836.3 UdeM00000003245 XP\_034317111.1 44.9 1036  
 555 11 1 1027 1 1029 4.30E-239 836.3 29159 cellular  
 organisms;Eukaryota;Opisthokonta;Metazoa;Eumetazoa;Bilateria;Protostomia;  
 Spiralia;Lophotrochozoa;Mollusca;Bivalvia;Autobranchia;Pteriormorphia;Ostr  
 eida;Ostreoidea;Ostreidae;Crassostrea;Crassostrea gigas  
 UdeM00000003246 29159 233 UdeM00000003246 XP\_034324494.1 46.9 288  
 142 5 3 282 266 550 4.60E-58 233 29159 cellular  
 organisms;Eukaryota;Opisthokonta;Metazoa;Eumetazoa;Bilateria;Protostomia;  
 Spiralia;Lophotrochozoa;Mollusca;Bivalvia;Autobranchia;Pteriormorphia;Ostr  
 eida;Ostreoidea;Ostreidae;Crassostrea;Crassostrea gigas  
 UdeM00000003247 29159 182.2 UdeM00000003247 XP\_034317111.1 35.8 358  
 224 5 1 355 675 1029 1.20E-42 182.2 29159 cellular  
 organisms;Eukaryota;Opisthokonta;Metazoa;Eumetazoa;Bilateria;Protostomia;  
 Spiralia;Lophotrochozoa;Mollusca;Bivalvia;Autobranchia;Pteriormorphia;Ostr  
 eida;Ostreoidea;Ostreidae;Crassostrea;Crassostrea gigas  
 UdeM00000003248 37653 157.1 UdeM00000003248 XP\_014776876.1 69.3 127  
 34 3 24 147 3 127 1.70E-35 157.1 37653 cellular  
 organisms;Eukaryota;Opisthokonta;Metazoa;Eumetazoa;Bilateria;Protostomia;  
 Spiralia;Lophotrochozoa;Mollusca;Cephalopoda;Coleoidea;Octopodiformes;Oct  
 opoda;Incirrata;Octopodidae;Octopus;Octopus bimaculoides  
 UdeM00000003249 6596 228.4 UdeM00000003249 XP\_045194587.1 42.2 244  
 132 5 3 238 4 246 9.70E-57 228.4 6596 cellular  
 organisms;Eukaryota;Opisthokonta;Metazoa;Eumetazoa;Bilateria;Protostomia;  
 Spiralia;Lophotrochozoa;Mollusca;Bivalvia;Autobranchia;Heteroconchia;Euhe  
 terodonta;Imparidentia;Venerida;Veneroidea;Veneridae;Mercenaria;Mercenari  
 a mercenaria



UdeM00000003250 6579 100.5 UdeM00000003250 XP\_033745961.1 37.1 116  
 72 1 21 136 17 131 1.80E-18 100.5 6579 cellular  
 organisms;Eukaryota;Opisthokonta;Metazoa;Eumetazoa;Bilateria;Protostomia;  
 Spiralia;Lophotrochozoa;Mollusca;Bivalvia;Autobranchia;Pteriormorphia;Pect  
 inida;Pectinoidea;Pectinidae;Pecten;Pecten maximus  
 UdeM00000003251 4558 99.4 UdeM00000003251 XP\_002450438.2 36.2 149  
 91 3 7 151 322 470 4.40E-18 99.4 4558 cellular  
 organisms;Eukaryota;Viridiplantae;Streptophyta;Streptophytina;Embryophyta  
 ;Tracheophyta;Euphylllophyta;Spermatophyta;Magnoliopsida;Mesangiospermae;L  
 iliopsida;Petrosaviidae;commelinids;Poales;Poaceae;PACMAD  
 clade;Panicoideae;Andropogonodae;Andropogoneae;Sorghinae;Sorghum;Sorghum  
 bicolor  
 UdeM00000003252 6579 221.1 UdeM00000003252 XP\_033744395.1 41.8 275  
 140 5 24 295 23 280 2.10E-54 221.1 6579 cellular  
 organisms;Eukaryota;Opisthokonta;Metazoa;Eumetazoa;Bilateria;Protostomia;  
 Spiralia;Lophotrochozoa;Mollusca;Bivalvia;Autobranchia;Pteriormorphia;Pect  
 inida;Pectinoidea;Pectinidae;Pecten;Pecten maximus  
 UdeM00000003254 6579 165.6 UdeM00000003254 XP\_033739239.1 51.6 157  
 74 1 148 302 103 259 1.00E-37 165.6 6579 cellular  
 organisms;Eukaryota;Opisthokonta;Metazoa;Eumetazoa;Bilateria;Protostomia;  
 Spiralia;Lophotrochozoa;Mollusca;Bivalvia;Autobranchia;Pteriormorphia;Pect  
 inida;Pectinoidea;Pectinidae;Pecten;Pecten maximus  
 UdeM00000003253 6579 108.6 UdeM00000003253 XP\_033755236.1 34.2 193  
 120 4 187 376 17 205 3.10E-20 108.6 6579 cellular  
 organisms;Eukaryota;Opisthokonta;Metazoa;Eumetazoa;Bilateria;Protostomia;  
 Spiralia;Lophotrochozoa;Mollusca;Bivalvia;Autobranchia;Pteriormorphia;Pect  
 inida;Pectinoidea;Pectinidae;Pecten;Pecten maximus  
 UdeM00000003258 225164 123.2 UdeM00000003258 XP\_009058199.1 42.5  
 174 80 3 1 161 1 167 3.10E-25 123.2 225164  
 cellular  
 organisms;Eukaryota;Opisthokonta;Metazoa;Eumetazoa;Bilateria;Protostomia;  
 Spiralia;Lophotrochozoa;Mollusca;Gastropoda;Patellogastropoda;Lottioidea;  
 Lottiidae;Lottia;Lottia gigantea  
 UdeM00000003259 225164 116.3 UdeM00000003259 XP\_009058199.1 45.8  
 144 71 2 1 144 31 167 3.50E-23 116.3 225164  
 cellular  
 organisms;Eukaryota;Opisthokonta;Metazoa;Eumetazoa;Bilateria;Protostomia;  
 Spiralia;Lophotrochozoa;Mollusca;Gastropoda;Patellogastropoda;Lottioidea;  
 Lottiidae;Lottia;Lottia gigantea  
 UdeM00000003260 6579 262.3 UdeM00000003260 XP\_033752673.1 45.6 316  
 153 3 23 338 256 552 8.70E-67 262.3 6579 cellular  
 organisms;Eukaryota;Opisthokonta;Metazoa;Eumetazoa;Bilateria;Protostomia;  
 Spiralia;Lophotrochozoa;Mollusca;Bivalvia;Autobranchia;Pteriormorphia;Pect  
 inida;Pectinoidea;Pectinidae;Pecten;Pecten maximus  
 UdeM00000003261 6579 264.2 UdeM00000003261 XP\_033752673.1 47.6 286  
 144 1 21 306 273 552 2.10E-67 264.2 6579 cellular  
 organisms;Eukaryota;Opisthokonta;Metazoa;Eumetazoa;Bilateria;Protostomia;  
 Spiralia;Lophotrochozoa;Mollusca;Bivalvia;Autobranchia;Pteriormorphia;Pect  
 inida;Pectinoidea;Pectinidae;Pecten;Pecten maximus  
 UdeM00000003262 7604 151.4 UdeM00000003262 XP\_033641066.1 65.4 104  
 36 0 1 104 155 258 9.10E-34 151.4 7604 cellular  
 organisms;Eukaryota;Opisthokonta;Metazoa;Eumetazoa;Bilateria;Deuterostomi  
 a;Echinodermata;Eleutherozoa;Asterozoa;Asteroidea;Forcipulatacea;Forcipul  
 atida;Asteroidea;Asteroidea;Asteroidea;Asteroidea;Asteroidea;Asteroidea;Asterias;Asterias rubens

UdeM00000003263 225164 72 UdeM00000003263 XP\_009058200.1 48.7  
76 39 0 1 76 1 76 3.80E-10 72 225164  
cellular

organisms;Eukaryota;Opisthokonta;Metazoa;Eumetazoa;Bilateria;Protostomia;  
Spiralia;Lophotrochozoa;Mollusca;Gastropoda;Patellogastropoda;Lottioidea;  
Lottiidae;Lottia;Lottia gigantea

UdeM00000003266 29159 99.4 UdeM00000003266 XP\_034322046.1 37.1 151  
81 3 1 143 151 295 4.50E-18 99.4 29159 cellular

organisms;Eukaryota;Opisthokonta;Metazoa;Eumetazoa;Bilateria;Protostomia;  
Spiralia;Lophotrochozoa;Mollusca;Bivalvia;Autobranchia;Pteriormorphia;Ostr  
eida;Ostreoidea;Ostreidae;Crassostrea;Crassostrea gigas

UdeM00000003267 29159 69.3 UdeM00000003267 XP\_034303860.1 58.5 53  
22 0 3 55 350 402 2.10E-09 69.3 29159 cellular

organisms;Eukaryota;Opisthokonta;Metazoa;Eumetazoa;Bilateria;Protostomia;  
Spiralia;Lophotrochozoa;Mollusca;Bivalvia;Autobranchia;Pteriormorphia;Ostr  
eida;Ostreoidea;Ostreidae;Crassostrea;Crassostrea gigas

UdeM00000003268 9646 118.2 UdeM00000003268 XP\_034495081.1 64.4 87  
31 0 14 100 22 108 5.90E-24 118.2 9646 cellular

organisms;Eukaryota;Opisthokonta;Metazoa;Eumetazoa;Bilateria;Deuterostomi  
a;Chordata;Craniata;Vertebrata;Gnathostomata;Teleostomi;Euteleostomi;Sarc  
opterygii;Dipnotetrapodomorpha;Tetrapoda;Amniota;Mammalia;Theria;Eutheria  
;Boreoeutheria;Laurasiatheria;Carnivora;Caniformia;Ursidae;Ailuropoda;Ail  
uropoda melanoleuca

UdeM00000003269 6573 472.2 UdeM00000003269 XP\_021340527.1 74.8 305  
77 0 37 341 26 330 5.40E-130 472.2 6573 cellular

organisms;Eukaryota;Opisthokonta;Metazoa;Eumetazoa;Bilateria;Protostomia;  
Spiralia;Lophotrochozoa;Mollusca;Bivalvia;Autobranchia;Pteriormorphia;Pect  
inida;Pectinoidea;Pectinidae;Mizuhopecten;Mizuhopecten yessoensis

UdeM00000003270 375764 126.7 UdeM00000003270 XP\_029977959.1 56.2  
96 42 0 357 452 36 131 7.40E-26 126.7 375764

cellular

organisms;Eukaryota;Opisthokonta;Metazoa;Eumetazoa;Bilateria;Deuterostomi  
a;Chordata;Craniata;Vertebrata;Gnathostomata;Teleostomi;Euteleostomi;Acti  
nopterygii;Actinopteri;Neopterygii;Teleostei;Osteoglossocephalai;Clupeoce  
phala;Euteleosteomorpha;Neoteleostei;Eurypterygia;Ctenosquamata;Acanthomo  
rphata;Euacanthomorphacea;Percomorphaceae;Gobiaria;Kurtiformes;Apogonoide  
i;Apogonidae;Apogoninae;Sphaeramia;Sphaeramia orbicularis

UdeM00000003271 30732 180.3 UdeM00000003271 XP\_024118320.1 43.8 208  
115 2 14 221 409 614 2.80E-42 180.3 30732 cellular

organisms;Eukaryota;Opisthokonta;Metazoa;Eumetazoa;Bilateria;Deuterostomi  
a;Chordata;Craniata;Vertebrata;Gnathostomata;Teleostomi;Euteleostomi;Acti  
nopterygii;Actinopteri;Neopterygii;Teleostei;Osteoglossocephalai;Clupeoce  
phala;Euteleosteomorpha;Neoteleostei;Eurypterygia;Ctenosquamata;Acanthomo  
rphata;Euacanthomorphacea;Percomorphaceae;Ovalentaria;Atherinomorphae;Bel  
oniformes;Adrianichthyoidei;Adrianichthyidae;Oryziinae;Oryzias;Oryzias  
melastigma

UdeM00000003272 8236 120.2 UdeM00000003272 XP\_044216249.1 39 177  
102 2 31 207 100 270 3.20E-24 120.2 8236 cellular

organisms;Eukaryota;Opisthokonta;Metazoa;Eumetazoa;Bilateria;Deuterostomi  
a;Chordata;Craniata;Vertebrata;Gnathostomata;Teleostomi;Euteleostomi;Acti  
nopterygii;Actinopteri;Neopterygii;Teleostei;Osteoglossocephalai;Clupeoce  
phala;Euteleosteomorpha;Neoteleostei;Eurypterygia;Ctenosquamata;Acanthomo  
rphata;Euacanthomorphacea;Percomorphaceae;Pelagiaria;Scombriformes;Scombr  
idae;Scombrinae;Thunnini;Thunnus;Thunnus albacares

UdeM00000003273 6579 243.8 UdeM00000003273 XP\_033731739.1 36.7 376  
 103 1 2 242 3 378 2.20E-61 243.8 6579 cellular  
 organisms;Eukaryota;Opisthokonta;Metazoa;Eumetazoa;Bilateria;Protostomia;  
 Spiralia;Lophotrochozoa;Mollusca;Bivalvia;Autobranchia;Pteriomorphia;Pect  
 inida;Pectinoidea;Pectinidae;Pecten;Pecten maximus  
 UdeM00000003274 6596 450.3 UdeM00000003274 XP\_045192733.1 43.8 512  
 237 11 1 508 177 641 3.30E-123 450.3 6596 cellular  
 organisms;Eukaryota;Opisthokonta;Metazoa;Eumetazoa;Bilateria;Protostomia;  
 Spiralia;Lophotrochozoa;Mollusca;Bivalvia;Autobranchia;Heteroconchia;Euhe  
 terodonta;Imparidentia;Venerida;Veneroidea;Veneridae;Mercenaria;Mercenari  
 a mercenaria  
 UdeM00000003275 6596 620.5 UdeM00000003275 XP\_045192733.1 49.4 650  
 303 14 5 639 3 641 2.30E-174 620.5 6596 cellular  
 organisms;Eukaryota;Opisthokonta;Metazoa;Eumetazoa;Bilateria;Protostomia;  
 Spiralia;Lophotrochozoa;Mollusca;Bivalvia;Autobranchia;Heteroconchia;Euhe  
 terodonta;Imparidentia;Venerida;Veneroidea;Veneridae;Mercenaria;Mercenari  
 a mercenaria  
 UdeM00000003276 6596 801.2 UdeM00000003276 XP\_045194525.1 45.9 939  
 413 13 3 933 22 873 1.40E-228 801.2 6596 cellular  
 organisms;Eukaryota;Opisthokonta;Metazoa;Eumetazoa;Bilateria;Protostomia;  
 Spiralia;Lophotrochozoa;Mollusca;Bivalvia;Autobranchia;Heteroconchia;Euhe  
 terodonta;Imparidentia;Venerida;Veneroidea;Veneridae;Mercenaria;Mercenari  
 a mercenaria  
 UdeM00000003278 133434 65.1 UdeM00000003278 XP\_022082365.1 43  
 79 38 2 85 156 249 327 1.20E-07 65.1 133434  
 cellular  
 organisms;Eukaryota;Opisthokonta;Metazoa;Eumetazoa;Bilateria;Deuterostomi  
 a;Echinodermata;Eleutherozoa;Asterozoa;Asteroidea;Valvatacea;Valvatida;Ac  
 anthasteridae;Acanthaster;Acanthaster planci  
 UdeM00000003277 7957 102.4 UdeM00000003277 XP\_026114113.1 28.4 264  
 142 7 37 258 2 260 1.00E-18 102.4 7957 cellular  
 organisms;Eukaryota;Opisthokonta;Metazoa;Eumetazoa;Bilateria;Deuterostomi  
 a;Chordata;Craniata;Vertebrata;Gnathostomata;Teleostomi;Euteleostomi;Acti  
 nopterygii;Actinopteri;Neopterygii;Teleostei;Osteoglossocephalai;Clupeoce  
 phala;Otomorpha;Ostariophysi;Otophysi;Cypriniphysae;Cypriniformes;Cyprino  
 idei;Cyprinidae;Cyprininae;Carassius;Carassius auratus  
 UdeM00000003279 6579 392.1 UdeM00000003279 XP\_033744278.1 33.7 730  
 224 6 119 617 280 980 1.40E-105 392.1 6579 cellular  
 organisms;Eukaryota;Opisthokonta;Metazoa;Eumetazoa;Bilateria;Protostomia;  
 Spiralia;Lophotrochozoa;Mollusca;Bivalvia;Autobranchia;Pteriomorphia;Pect  
 inida;Pectinoidea;Pectinidae;Pecten;Pecten maximus  
 UdeM00000003280 6579 291.2 UdeM00000003280 XP\_033744278.1 53.3 246  
 114 1 132 376 735 980 2.20E-75 291.2 6579 cellular  
 organisms;Eukaryota;Opisthokonta;Metazoa;Eumetazoa;Bilateria;Protostomia;  
 Spiralia;Lophotrochozoa;Mollusca;Bivalvia;Autobranchia;Pteriomorphia;Pect  
 inida;Pectinoidea;Pectinidae;Pecten;Pecten maximus  
 UdeM00000003281 6579 642.5 UdeM00000003281 XP\_033741736.1 56.4 527  
 218 4 82 602 347 867 5.80E-181 642.5 6579 cellular  
 organisms;Eukaryota;Opisthokonta;Metazoa;Eumetazoa;Bilateria;Protostomia;  
 Spiralia;Lophotrochozoa;Mollusca;Bivalvia;Autobranchia;Pteriomorphia;Pect  
 inida;Pectinoidea;Pectinidae;Pecten;Pecten maximus  
 UdeM00000003282 210409 103.6 UdeM00000003282 XP\_045124105.1 33.2  
 232 138 8 37 264 25 243 4.10E-19 103.6 210409  
 cellular

organisms;Eukaryota;Opisthokonta;Metazoa;Eumetazoa;Bilateria;Protostomia;Ecdysozoa;Panarthropoda;Arthropoda;Mandibulata;Pancrustacea;Crustacea;Multicrustacea;Malacostraca;Eumalacostraca;Eucarida;Decapoda;Pleocyemata;Brachyura;Eubrachyura;Heterotremata;Portunoidea;Portunidae;Portunus;Portunus trituberculatus

UdeM00000003283 6596 557.4 UdeM00000003283 XP\_045193792.1 78.9 323  
68 0 1 323 331 653 1.20E-155 557.4 6596 cellular

organisms;Eukaryota;Opisthokonta;Metazoa;Eumetazoa;Bilateria;Protostomia;Spiralia;Lophotrochozoa;Mollusca;Bivalvia;Autobranchia;Heteroconchia;Euherodonta;Imparidentia;Venerida;Veneroidea;Veneridae;Mercenaria;Mercenaria mercenaria

UdeM00000003285 6596 533.5 UdeM00000003285 XP\_045188256.1 50.9 546  
241 6 308 845 78 604 5.50E-148 533.5 6596 cellular

organisms;Eukaryota;Opisthokonta;Metazoa;Eumetazoa;Bilateria;Protostomia;Spiralia;Lophotrochozoa;Mollusca;Bivalvia;Autobranchia;Heteroconchia;Euherodonta;Imparidentia;Venerida;Veneroidea;Veneridae;Mercenaria;Mercenaria mercenaria

UdeM00000003287 6596 489.2 UdeM00000003287 XP\_045193246.1 73.1 334  
87 2 1 331 105 438 4.20E-135 489.2 6596 cellular

organisms;Eukaryota;Opisthokonta;Metazoa;Eumetazoa;Bilateria;Protostomia;Spiralia;Lophotrochozoa;Mollusca;Bivalvia;Autobranchia;Heteroconchia;Euherodonta;Imparidentia;Venerida;Veneroidea;Veneridae;Mercenaria;Mercenaria mercenaria

UdeM00000003288 1735272 448.7 UdeM00000003288 XP\_041376027.1 39.3  
624 339 11 14 607 9 622 1.20E-122 448.7 1735272  
cellular

organisms;Eukaryota;Opisthokonta;Metazoa;Eumetazoa;Bilateria;Protostomia;Spiralia;Lophotrochozoa;Mollusca;Gastropoda;Neomphalina;Neomphaloidea;Peltospiridae;Gigantopelta;Gigantopelta aegis

UdeM00000003289 6596 1202.6 UdeM00000003289 XP\_045193235.1 58.4  
1061 424 7 145 1190 127 1185 0.00E+00 1202.6 6596  
cellular

organisms;Eukaryota;Opisthokonta;Metazoa;Eumetazoa;Bilateria;Protostomia;Spiralia;Lophotrochozoa;Mollusca;Bivalvia;Autobranchia;Heteroconchia;Euherodonta;Imparidentia;Venerida;Veneroidea;Veneridae;Mercenaria;Mercenaria mercenaria

UdeM00000003290 6596 62 UdeM00000003290 XP\_045192008.1 59.3 59  
22 2 17 75 412 468 1.40E-06 62 6596 cellular

organisms;Eukaryota;Opisthokonta;Metazoa;Eumetazoa;Bilateria;Protostomia;Spiralia;Lophotrochozoa;Mollusca;Bivalvia;Autobranchia;Heteroconchia;Euherodonta;Imparidentia;Venerida;Veneroidea;Veneridae;Mercenaria;Mercenaria mercenaria

UdeM00000003291 6596 496.9 UdeM00000003291 XP\_045192008.1 65.6 378  
117 5 1 369 1 374 2.30E-137 496.9 6596 cellular

organisms;Eukaryota;Opisthokonta;Metazoa;Eumetazoa;Bilateria;Protostomia;Spiralia;Lophotrochozoa;Mollusca;Bivalvia;Autobranchia;Heteroconchia;Euherodonta;Imparidentia;Venerida;Veneroidea;Veneridae;Mercenaria;Mercenaria mercenaria

UdeM00000003292 6596 1043.5 UdeM00000003292 XP\_045193160.1 69  
754 223 3 1 744 1 753 1.30E-301 1043.5 6596  
cellular

organisms;Eukaryota;Opisthokonta;Metazoa;Eumetazoa;Bilateria;Protostomia;Spiralia;Lophotrochozoa;Mollusca;Bivalvia;Autobranchia;Heteroconchia;Euherodonta

terodonta;Imparidentia;Venerida;Veneroidea;Veneridae;Mercenaria;Mercenari  
 a mercenaria  
 UdeM00000003293 6579 229.9 UdeM00000003293 XP\_033754480.1 65.6 157  
 54 0 6 162 15 171 2.30E-57 229.9 6579 cellular  
 organisms;Eukaryota;Opisthokonta;Metazoa;Eumetazoa;Bilateria;Protostomia;  
 Spiralia;Lophotrochozoa;Mollusca;Bivalvia;Autobranchia;Pteriormorphia;Pect  
 inida;Pectinoidea;Pectinidae;Pecten;Pecten maximus  
 UdeM00000003294 1735272 462.2 UdeM00000003294 XP\_041376935.1 63.2  
 342 113 4 28 356 1 342 6.20E-127 462.2 1735272  
 cellular  
 organisms;Eukaryota;Opisthokonta;Metazoa;Eumetazoa;Bilateria;Protostomia;  
 Spiralia;Lophotrochozoa;Mollusca;Gastropoda;Neomphalina;Neomphaloidea;Pel  
 tospiridae;Gigantopelta;Gigantopelta aegis  
 UdeM00000003296 6596 496.9 UdeM00000003296 XP\_045193545.1 61.2 369  
 135 2 24 390 14 376 2.40E-137 496.9 6596 cellular  
 organisms;Eukaryota;Opisthokonta;Metazoa;Eumetazoa;Bilateria;Protostomia;  
 Spiralia;Lophotrochozoa;Mollusca;Bivalvia;Autobranchia;Heteroconchia;Euhe  
 terodonta;Imparidentia;Venerida;Veneroidea;Veneridae;Mercenaria;Mercenari  
 a mercenaria  
 UdeM00000003295 6596 499.2 UdeM00000003295 XP\_045193546.1 60.9 376  
 135 3 4 377 8 373 4.60E-138 499.2 6596 cellular  
 organisms;Eukaryota;Opisthokonta;Metazoa;Eumetazoa;Bilateria;Protostomia;  
 Spiralia;Lophotrochozoa;Mollusca;Bivalvia;Autobranchia;Heteroconchia;Euhe  
 terodonta;Imparidentia;Venerida;Veneroidea;Veneridae;Mercenaria;Mercenari  
 a mercenaria  
 UdeM00000003297 1735272 1025.8 UdeM00000003297 XP\_041376221.1  
 54.3 915 394 8 7 901 27 937 3.50E-296 1025.8  
 1735272 cellular  
 organisms;Eukaryota;Opisthokonta;Metazoa;Eumetazoa;Bilateria;Protostomia;  
 Spiralia;Lophotrochozoa;Mollusca;Gastropoda;Neomphalina;Neomphaloidea;Pel  
 tospiridae;Gigantopelta;Gigantopelta aegis  
 UdeM00000003299 6596 443 UdeM00000003299 XP\_045193449.1 57 395  
 167 1 27 421 96 487 4.40E-121 443 6596 cellular  
 organisms;Eukaryota;Opisthokonta;Metazoa;Eumetazoa;Bilateria;Protostomia;  
 Spiralia;Lophotrochozoa;Mollusca;Bivalvia;Autobranchia;Heteroconchia;Euhe  
 terodonta;Imparidentia;Venerida;Veneroidea;Veneridae;Mercenaria;Mercenari  
 a mercenaria  
 UdeM00000003298 6596 530.8 UdeM00000003298 XP\_045193449.1 54.9 486  
 216 1 54 539 5 487 2.00E-147 530.8 6596 cellular  
 organisms;Eukaryota;Opisthokonta;Metazoa;Eumetazoa;Bilateria;Protostomia;  
 Spiralia;Lophotrochozoa;Mollusca;Bivalvia;Autobranchia;Heteroconchia;Euhe  
 terodonta;Imparidentia;Venerida;Veneroidea;Veneridae;Mercenaria;Mercenari  
 a mercenaria  
 UdeM00000003300 6573 96.7 UdeM00000003300 XP\_021354308.1 51.7 89  
 43 0 53 141 1 89 3.20E-17 96.7 6573 cellular  
 organisms;Eukaryota;Opisthokonta;Metazoa;Eumetazoa;Bilateria;Protostomia;  
 Spiralia;Lophotrochozoa;Mollusca;Bivalvia;Autobranchia;Pteriormorphia;Pect  
 inida;Pectinoidea;Pectinidae;Mizuhopecten;Mizuhopecten yessoensis  
 UdeM00000003301 6573 97.1 UdeM00000003301 XP\_021354308.1 51.7 89  
 43 0 57 145 1 89 2.50E-17 97.1 6573 cellular  
 organisms;Eukaryota;Opisthokonta;Metazoa;Eumetazoa;Bilateria;Protostomia;  
 Spiralia;Lophotrochozoa;Mollusca;Bivalvia;Autobranchia;Pteriormorphia;Pect  
 inida;Pectinoidea;Pectinidae;Mizuhopecten;Mizuhopecten yessoensis

UdeM00000003302 6596 438.7 UdeM00000003302 XP\_045194176.1 43.3 522  
 244 6 4 501 11 504 9.80E-120 438.7 6596 cellular  
 organisms;Eukaryota;Opisthokonta;Metazoa;Eumetazoa;Bilateria;Protostomia;  
 Spiralia;Lophotrochozoa;Mollusca;Bivalvia;Autobranchia;Heteroconchia;Euhe  
 terodonta;Imparidentia;Venerida;Veneroidea;Veneridae;Mercenaria;Mercenari  
 a mercenaria  
 UdeM00000003303 6596 228.8 UdeM00000003303 XP\_045194118.1 26.5 744  
 236 11 73 507 1690 2431 1.70E-56 228.8 6596 cellular  
 organisms;Eukaryota;Opisthokonta;Metazoa;Eumetazoa;Bilateria;Protostomia;  
 Spiralia;Lophotrochozoa;Mollusca;Bivalvia;Autobranchia;Heteroconchia;Euhe  
 terodonta;Imparidentia;Venerida;Veneroidea;Veneridae;Mercenaria;Mercenari  
 a mercenaria  
 UdeM00000003304 6596 102.4 UdeM00000003304 XP\_045194704.1 42.7 375  
 174 7 32 368 33 404 1.20E-18 102.4 6596 cellular  
 organisms;Eukaryota;Opisthokonta;Metazoa;Eumetazoa;Bilateria;Protostomia;  
 Spiralia;Lophotrochozoa;Mollusca;Bivalvia;Autobranchia;Heteroconchia;Euhe  
 terodonta;Imparidentia;Venerida;Veneroidea;Veneridae;Mercenaria;Mercenari  
 a mercenaria  
 UdeM00000003305 6596 458 UdeM00000003305 XP\_045194095.1 45.3 558  
 203 12 21 521 24 536 1.80E-125 458 6596 cellular  
 organisms;Eukaryota;Opisthokonta;Metazoa;Eumetazoa;Bilateria;Protostomia;  
 Spiralia;Lophotrochozoa;Mollusca;Bivalvia;Autobranchia;Heteroconchia;Euhe  
 terodonta;Imparidentia;Venerida;Veneroidea;Veneridae;Mercenaria;Mercenari  
 a mercenaria  
 UdeM00000003306 6596 462.2 UdeM00000003306 XP\_045194095.1 45.9 553  
 225 13 11 514 6 533 1.10E-126 462.2 6596 cellular  
 organisms;Eukaryota;Opisthokonta;Metazoa;Eumetazoa;Bilateria;Protostomia;  
 Spiralia;Lophotrochozoa;Mollusca;Bivalvia;Autobranchia;Heteroconchia;Euhe  
 terodonta;Imparidentia;Venerida;Veneroidea;Veneridae;Mercenaria;Mercenari  
 a mercenaria  
 UdeM00000003307 6596 300.1 UdeM00000003307 XP\_045194097.1 55.7 244  
 105 2 3 243 56 299 2.70E-78 300.1 6596 cellular  
 organisms;Eukaryota;Opisthokonta;Metazoa;Eumetazoa;Bilateria;Protostomia;  
 Spiralia;Lophotrochozoa;Mollusca;Bivalvia;Autobranchia;Heteroconchia;Euhe  
 terodonta;Imparidentia;Venerida;Veneroidea;Veneridae;Mercenaria;Mercenari  
 a mercenaria  
 UdeM00000003308 6596 223.8 UdeM00000003308 XP\_045194395.1 44.8 288  
 158 1 118 405 1 287 4.30E-55 223.8 6596 cellular  
 organisms;Eukaryota;Opisthokonta;Metazoa;Eumetazoa;Bilateria;Protostomia;  
 Spiralia;Lophotrochozoa;Mollusca;Bivalvia;Autobranchia;Heteroconchia;Euhe  
 terodonta;Imparidentia;Venerida;Veneroidea;Veneridae;Mercenaria;Mercenari  
 a mercenaria  
 UdeM00000003311 6596 415.2 UdeM00000003311 XP\_045192904.1 55.5 366  
 153 5 57 418 56 415 9.70E-113 415.2 6596 cellular  
 organisms;Eukaryota;Opisthokonta;Metazoa;Eumetazoa;Bilateria;Protostomia;  
 Spiralia;Lophotrochozoa;Mollusca;Bivalvia;Autobranchia;Heteroconchia;Euhe  
 terodonta;Imparidentia;Venerida;Veneroidea;Veneridae;Mercenaria;Mercenari  
 a mercenaria  
 UdeM00000003312 6412 62 UdeM00000003312 XP\_009016697.1 33.1 130  
 43 2 1 86 116 245 4.30E-07 62 6412 cellular  
 organisms;Eukaryota;Opisthokonta;Metazoa;Eumetazoa;Bilateria;Protostomia;  
 Spiralia;Lophotrochozoa;Annelida;Clitellata;Hirudinea;Rhynchobdellida;Glo  
 ssiphoniidae;Helobdella;Helobdella robusta

UdeM00000003314 6596 365.9 UdeM00000003314 XP\_045203461.1 49.5 422  
 190 9 14 423 16 426 6.90E-98 365.9 6596 cellular  
 organisms;Eukaryota;Opisthokonta;Metazoa;Eumetazoa;Bilateria;Protostomia;  
 Spiralia;Lophotrochozoa;Mollusca;Bivalvia;Autobranchia;Heteroconchia;Euhe  
 terodonta;Imparidentia;Venerida;Veneroidea;Veneridae;Mercenaria;Mercenari  
 a mercenaria  
 UdeM00000003315 7741 241.9 UdeM00000003315 XP\_019640655.1 51.1 225  
 109 1 5 228 1 225 8.60E-61 241.9 7741 cellular  
 organisms;Eukaryota;Opisthokonta;Metazoa;Eumetazoa;Bilateria;Deuterostomi  
 a;Chordata;Cephalochordata;Leptocardii;Amphioxiformes;Branchiostomidae;Br  
 anchiostoma;Branchiostoma belcheri  
 UdeM00000003316 2652724 69.7 UdeM00000003316 XP\_028516406.1 44.3  
 61 30 1 86 142 2014 2074 3.40E-09 69.7 2652724  
 cellular  
 organisms;Eukaryota;Opisthokonta;Metazoa;Eumetazoa;Cnidaria;Anthozoa;Hexa  
 corallia;Actiniaria;Aiptasiidae;Exaiptasia;Exaiptasia diaphana  
 UdeM00000003317 6579 127.9 UdeM00000003317 XP\_033754552.1 81.7 82  
 13 1 1 82 1 80 3.70E-26 127.9 6579 cellular  
 organisms;Eukaryota;Opisthokonta;Metazoa;Eumetazoa;Bilateria;Protostomia;  
 Spiralia;Lophotrochozoa;Mollusca;Bivalvia;Autobranchia;Pteriormorphia;Pect  
 inida;Pectinoidea;Pectinidae;Pecten;Pecten maximus  
 UdeM00000003318 6596 429.1 UdeM00000003318 XP\_045193590.1 91.1 237  
 19 1 1 237 1 235 3.90E-117 429.1 6596 cellular  
 organisms;Eukaryota;Opisthokonta;Metazoa;Eumetazoa;Bilateria;Protostomia;  
 Spiralia;Lophotrochozoa;Mollusca;Bivalvia;Autobranchia;Heteroconchia;Euhe  
 terodonta;Imparidentia;Venerida;Veneroidea;Veneridae;Mercenaria;Mercenari  
 a mercenaria  
 UdeM00000003319 29159 159.5 UdeM00000003319 XP\_011433135.1 56.9 130  
 51 2 14 138 1 130 3.30E-36 159.5 29159 cellular  
 organisms;Eukaryota;Opisthokonta;Metazoa;Eumetazoa;Bilateria;Protostomia;  
 Spiralia;Lophotrochozoa;Mollusca;Bivalvia;Autobranchia;Pteriormorphia;Ostr  
 eida;Ostreoidea;Ostreidae;Crassostrea;Crassostrea gigas  
 UdeM00000003320 1735272 66.2 UdeM00000003320 XP\_041366951.1 36.7  
 90 51 1 27 116 152 235 3.50E-08 66.2 1735272  
 cellular  
 organisms;Eukaryota;Opisthokonta;Metazoa;Eumetazoa;Bilateria;Protostomia;  
 Spiralia;Lophotrochozoa;Mollusca;Gastropoda;Neomphalina;Neomphaloidea;Pel  
 tospiridae;Gigantopelta;Gigantopelta aegis  
 UdeM00000003321 1735272 84.3 UdeM00000003321 XP\_041362472.1 38.6  
 132 75 4 3 128 206 337 1.20E-13 84.3 1735272  
 cellular  
 organisms;Eukaryota;Opisthokonta;Metazoa;Eumetazoa;Bilateria;Protostomia;  
 Spiralia;Lophotrochozoa;Mollusca;Gastropoda;Neomphalina;Neomphaloidea;Pel  
 tospiridae;Gigantopelta;Gigantopelta aegis  
 UdeM00000003323 1735272 146.4 UdeM00000003323 XP\_041377012.1 47.4  
 152 76 2 1 150 37 186 7.70E-32 146.4 1735272  
 cellular  
 organisms;Eukaryota;Opisthokonta;Metazoa;Eumetazoa;Bilateria;Protostomia;  
 Spiralia;Lophotrochozoa;Mollusca;Gastropoda;Neomphalina;Neomphaloidea;Pel  
 tospiridae;Gigantopelta;Gigantopelta aegis  
 UdeM00000003324 1735272 145.2 UdeM00000003324 XP\_041377012.1 47.3  
 146 75 1 3 146 41 186 1.70E-31 145.2 1735272  
 cellular  
 organisms;Eukaryota;Opisthokonta;Metazoa;Eumetazoa;Bilateria;Protostomia;

Spiralia; Lophotrochozoa; Mollusca; Gastropoda; Neomphalina; Neomphaloidea; Pelto-  
 tospiridae; Gigantopelta; Gigantopelta aegis  
 UdeM00000003325 6596 974.2 UdeM00000003325 XP\_045194509.1 71.3 665  
 187 3 7 669 6 668 8.60E-281 974.2 6596 cellular  
 organisms; Eukaryota; Opisthokonta; Metazoa; Eumetazoa; Bilateria; Protostomia;  
 Spiralia; Lophotrochozoa; Mollusca; Bivalvia; Autobranchia; Heteroconchia; Eue-  
 terodonta; Imparidentia; Venerida; Veneroidea; Veneridae; Mercenaria; Mercenari-  
 a mercenaria  
 UdeM00000003326 6565 144.1 UdeM00000003326 XP\_022342121.1 58.9 107  
 44 0 1 107 200 306 1.10E-31 144.1 6565 cellular  
 organisms; Eukaryota; Opisthokonta; Metazoa; Eumetazoa; Bilateria; Protostomia;  
 Spiralia; Lophotrochozoa; Mollusca; Bivalvia; Autobranchia; Pteriomorpha; Ostr-  
 eida; Ostreoidea; Ostreidae; Crassostrea; Crassostrea virginica  
 UdeM00000003327 7741 224.2 UdeM00000003327 XP\_019622111.1 49.4 239  
 116 4 225 461 43 278 3.50E-55 224.2 7741 cellular  
 organisms; Eukaryota; Opisthokonta; Metazoa; Eumetazoa; Bilateria; Deuterostomi-  
 a; Chordata; Cephalochordata; Leptocardii; Amphioxiformes; Branchiostomidae; Br-  
 anchiostoma; Branchiostoma belcheri  
 UdeM00000003328 6573 88.2 UdeM00000003328 XP\_021349956.1 69 58  
 18 0 1 58 355 412 4.60E-15 88.2 6573 cellular  
 organisms; Eukaryota; Opisthokonta; Metazoa; Eumetazoa; Bilateria; Protostomia;  
 Spiralia; Lophotrochozoa; Mollusca; Bivalvia; Autobranchia; Pteriomorpha; Pect-  
 inida; Pectinoidea; Pectinidae; Mizuhopecten; Mizuhopecten yessoensis  
 UdeM00000003329 6596 431 UdeM00000003329 XP\_045193790.1 58.5 330  
 130 3 27 356 25 347 1.50E-117 431 6596 cellular  
 organisms; Eukaryota; Opisthokonta; Metazoa; Eumetazoa; Bilateria; Protostomia;  
 Spiralia; Lophotrochozoa; Mollusca; Bivalvia; Autobranchia; Heteroconchia; Eue-  
 terodonta; Imparidentia; Venerida; Veneroidea; Veneridae; Mercenaria; Mercenari-  
 a mercenaria  
 UdeM00000003330 6573 874 UdeM00000003330 XP\_021349955.1 44.6 1473  
 568 34 2 1410 20 1308 2.60E-250 874 6573 cellular  
 organisms; Eukaryota; Opisthokonta; Metazoa; Eumetazoa; Bilateria; Protostomia;  
 Spiralia; Lophotrochozoa; Mollusca; Bivalvia; Autobranchia; Pteriomorpha; Pect-  
 inida; Pectinoidea; Pectinidae; Mizuhopecten; Mizuhopecten yessoensis  
 UdeM00000003331 6596 443 UdeM00000003331 XP\_045192585.1 64.8 349  
 85 5 1 335 1 325 4.30E-121 443 6596 cellular  
 organisms; Eukaryota; Opisthokonta; Metazoa; Eumetazoa; Bilateria; Protostomia;  
 Spiralia; Lophotrochozoa; Mollusca; Bivalvia; Autobranchia; Heteroconchia; Eue-  
 terodonta; Imparidentia; Venerida; Veneroidea; Veneridae; Mercenaria; Mercenari-  
 a mercenaria  
 UdeM00000003332 6596 229.2 UdeM00000003332 XP\_045192589.1 87.8 123  
 15 0 1 123 1 123 2.90E-57 229.2 6596 cellular  
 organisms; Eukaryota; Opisthokonta; Metazoa; Eumetazoa; Bilateria; Protostomia;  
 Spiralia; Lophotrochozoa; Mollusca; Bivalvia; Autobranchia; Heteroconchia; Eue-  
 terodonta; Imparidentia; Venerida; Veneroidea; Veneridae; Mercenaria; Mercenari-  
 a mercenaria  
 UdeM00000003334 29159 286.6 UdeM00000003334 XP\_034299106.1 52.1 553  
 199 6 93 635 109 605 8.70E-74 286.6 29159 cellular  
 organisms; Eukaryota; Opisthokonta; Metazoa; Eumetazoa; Bilateria; Protostomia;  
 Spiralia; Lophotrochozoa; Mollusca; Bivalvia; Autobranchia; Pteriomorpha; Ostr-  
 eida; Ostreoidea; Ostreidae; Crassostrea; Crassostrea gigas  
 UdeM00000003335 6565 238.8 UdeM00000003335 XP\_022339162.1 47.9 303  
 124 4 166 460 351 627 1.60E-59 238.8 6565 cellular  
 organisms; Eukaryota; Opisthokonta; Metazoa; Eumetazoa; Bilateria; Protostomia;



Spiralia;Lophotrochozoa;Mollusca;Bivalvia;Autobranchia;Pteriormorphia;Ostr  
 eida;Ostreoidea;Ostreidae;Crassostrea;Crassostrea virginica  
 UdeM00000003336 1735272 292 UdeM00000003336 XP\_041376054.1 94.8  
 154 8 0 1 154 1 154 4.60E-76 292 1735272  
 cellular  
 organisms;Eukaryota;Opisthokonta;Metazoa;Eumetazoa;Bilateria;Protostomia;  
 Spiralia;Lophotrochozoa;Mollusca;Gastropoda;Neomphalina;Neomphaloidea;Pel  
 tospiridae;Gigantopelta;Gigantopelta aegis  
 UdeM00000003337 400727 403.7 UdeM00000003337 XP\_025076467.1 97.5  
 199 5 0 10 208 156 354 1.40E-109 403.7 400727  
 cellular  
 organisms;Eukaryota;Opisthokonta;Metazoa;Eumetazoa;Bilateria;Protostomia;  
 Spiralia;Lophotrochozoa;Mollusca;Gastropoda;Caenogastropoda;Architaeniogl  
 ossa;Ampullarioidea;Ampullariidae;Pomacea;Pomacea canaliculata  
 UdeM00000003338 6596 808.9 UdeM00000003338 XP\_045192594.1 54 759  
 311 15 1 743 1 737 5.40E-231 808.9 6596 cellular  
 organisms;Eukaryota;Opisthokonta;Metazoa;Eumetazoa;Bilateria;Protostomia;  
 Spiralia;Lophotrochozoa;Mollusca;Bivalvia;Autobranchia;Heteroconchia;Euhe  
 terodonta;Imparidentia;Venerida;Veneroidea;Veneridae;Mercenaria;Mercenari  
 a mercenaria  
 UdeM00000003339 6596 530.4 UdeM00000003339 XP\_045192595.1 50.5 553  
 170 5 1 552 1 450 2.70E-147 530.4 6596 cellular  
 organisms;Eukaryota;Opisthokonta;Metazoa;Eumetazoa;Bilateria;Protostomia;  
 Spiralia;Lophotrochozoa;Mollusca;Bivalvia;Autobranchia;Heteroconchia;Euhe  
 terodonta;Imparidentia;Venerida;Veneroidea;Veneridae;Mercenaria;Mercenari  
 a mercenaria  
 UdeM00000003340 6596 181.8 UdeM00000003340 XP\_045192595.1 58.4 173  
 62 4 3 170 447 614 7.70E-43 181.8 6596 cellular  
 organisms;Eukaryota;Opisthokonta;Metazoa;Eumetazoa;Bilateria;Protostomia;  
 Spiralia;Lophotrochozoa;Mollusca;Bivalvia;Autobranchia;Heteroconchia;Euhe  
 terodonta;Imparidentia;Venerida;Veneroidea;Veneridae;Mercenaria;Mercenari  
 a mercenaria  
 UdeM00000003341 6573 107.5 UdeM00000003341 XP\_021358252.1 47.2 123  
 59 2 33 155 622 738 2.00E-20 107.5 6573 cellular  
 organisms;Eukaryota;Opisthokonta;Metazoa;Eumetazoa;Bilateria;Protostomia;  
 Spiralia;Lophotrochozoa;Mollusca;Bivalvia;Autobranchia;Pteriormorphia;Pect  
 inida;Pectinoidea;Pectinidae;Mizuhopecten;Mizuhopecten yessoensis  
 UdeM00000003342 6596 290.8 UdeM00000003342 XP\_045192600.1 53.9 271  
 114 5 1 264 724 990 1.70E-75 290.8 6596 cellular  
 organisms;Eukaryota;Opisthokonta;Metazoa;Eumetazoa;Bilateria;Protostomia;  
 Spiralia;Lophotrochozoa;Mollusca;Bivalvia;Autobranchia;Heteroconchia;Euhe  
 terodonta;Imparidentia;Venerida;Veneroidea;Veneridae;Mercenaria;Mercenari  
 a mercenaria  
 UdeM00000003343 6579 182.2 UdeM00000003343 XP\_033754271.1 51.1 178  
 80 4 1 177 1 172 5.90E-43 182.2 6579 cellular  
 organisms;Eukaryota;Opisthokonta;Metazoa;Eumetazoa;Bilateria;Protostomia;  
 Spiralia;Lophotrochozoa;Mollusca;Bivalvia;Autobranchia;Pteriormorphia;Pect  
 inida;Pectinoidea;Pectinidae;Pecten;Pecten maximus  
 UdeM00000003344 6596 736.5 UdeM00000003344 XP\_045194103.1 62.9 587  
 210 4 105 687 66 648 3.10E-209 736.5 6596 cellular  
 organisms;Eukaryota;Opisthokonta;Metazoa;Eumetazoa;Bilateria;Protostomia;  
 Spiralia;Lophotrochozoa;Mollusca;Bivalvia;Autobranchia;Heteroconchia;Euhe  
 terodonta;Imparidentia;Venerida;Veneroidea;Veneridae;Mercenaria;Mercenari  
 a mercenaria

UdeM00000003345 6596 878.2 UdeM00000003345 XP\_045194103.1 63.5 716  
 249 6 105 815 66 774 8.10E-252 878.2 6596 cellular  
 organisms;Eukaryota;Opisthokonta;Metazoa;Eumetazoa;Bilateria;Protostomia;  
 Spiralia;Lophotrochozoa;Mollusca;Bivalvia;Autobranhia;Heteroconchia;Euhe  
 terodonta;Imparidentia;Venerida;Veneroidea;Veneridae;Mercenaria;Mercenari  
 a mercenaria  
 UdeM00000003347 6596 112.8 UdeM00000003347 XP\_045194103.1 56.6 113  
 42 2 5 116 794 900 3.10E-22 112.8 6596 cellular  
 organisms;Eukaryota;Opisthokonta;Metazoa;Eumetazoa;Bilateria;Protostomia;  
 Spiralia;Lophotrochozoa;Mollusca;Bivalvia;Autobranhia;Heteroconchia;Euhe  
 terodonta;Imparidentia;Venerida;Veneroidea;Veneridae;Mercenaria;Mercenari  
 a mercenaria  
 UdeM00000003349 6596 157.1 UdeM00000003349 XP\_045174980.1 46.9 143  
 71 1 6 148 38 175 2.00E-35 157.1 6596 cellular  
 organisms;Eukaryota;Opisthokonta;Metazoa;Eumetazoa;Bilateria;Protostomia;  
 Spiralia;Lophotrochozoa;Mollusca;Bivalvia;Autobranhia;Heteroconchia;Euhe  
 terodonta;Imparidentia;Venerida;Veneroidea;Veneridae;Mercenaria;Mercenari  
 a mercenaria  
 UdeM00000003350 6579 286.2 UdeM00000003350 XP\_033753779.1 63.5 203  
 74 0 246 448 398 600 7.20E-74 286.2 6579 cellular  
 organisms;Eukaryota;Opisthokonta;Metazoa;Eumetazoa;Bilateria;Protostomia;  
 Spiralia;Lophotrochozoa;Mollusca;Bivalvia;Autobranhia;Pteriormorphia;Pect  
 inida;Pectinoidea;Pectinidae;Pecten;Pecten maximus  
 UdeM00000003351 6596 350.1 UdeM00000003351 XP\_045194776.1 49.2 400  
 179 13 13 398 13 402 3.80E-93 350.1 6596 cellular  
 organisms;Eukaryota;Opisthokonta;Metazoa;Eumetazoa;Bilateria;Protostomia;  
 Spiralia;Lophotrochozoa;Mollusca;Bivalvia;Autobranhia;Heteroconchia;Euhe  
 terodonta;Imparidentia;Venerida;Veneroidea;Veneridae;Mercenaria;Mercenari  
 a mercenaria  
 UdeM00000003352 29159 1546.6 UdeM00000003352 XP\_034337991.1 70.2  
 1055 310 4 29 1081 50 1102 0.00E+00 1546.6  
 29159 cellular  
 organisms;Eukaryota;Opisthokonta;Metazoa;Eumetazoa;Bilateria;Protostomia;  
 Spiralia;Lophotrochozoa;Mollusca;Bivalvia;Autobranhia;Pteriormorphia;Ostr  
 eida;Ostreoidea;Ostreidae;Crassostrea;Crassostrea gigas  
 UdeM00000003353 6579 107.5 UdeM00000003353 XP\_033754065.1 32.2 289  
 156 8 1 272 1 266 2.90E-20 107.5 6579 cellular  
 organisms;Eukaryota;Opisthokonta;Metazoa;Eumetazoa;Bilateria;Protostomia;  
 Spiralia;Lophotrochozoa;Mollusca;Bivalvia;Autobranhia;Pteriormorphia;Pect  
 inida;Pectinoidea;Pectinidae;Pecten;Pecten maximus  
 UdeM00000003356 400727 99.8 UdeM00000003356 XP\_025115682.1 43.1  
 109 61 1 13 120 9 117 2.70E-18 99.8 400727  
 cellular  
 organisms;Eukaryota;Opisthokonta;Metazoa;Eumetazoa;Bilateria;Protostomia;  
 Spiralia;Lophotrochozoa;Mollusca;Gastropoda;Caenogastropoda;Architaeniogl  
 ossa;Ampullarioidea;Ampullariidae;Pomacea;Pomacea canaliculata  
 UdeM00000003358 6596 131.7 UdeM00000003358 XP\_045193285.1 80 85  
 17 0 1 85 112 196 4.40E-28 131.7 6596 cellular  
 organisms;Eukaryota;Opisthokonta;Metazoa;Eumetazoa;Bilateria;Protostomia;  
 Spiralia;Lophotrochozoa;Mollusca;Bivalvia;Autobranhia;Heteroconchia;Euhe  
 terodonta;Imparidentia;Venerida;Veneroidea;Veneridae;Mercenaria;Mercenari  
 a mercenaria  
 UdeM00000003357 6596 287 UdeM00000003357 XP\_045193285.1 78.6 196  
 42 0 1 196 1 196 1.90E-74 287 6596 cellular

organisms;Eukaryota;Opisthokonta;Metazoa;Eumetazoa;Bilateria;Protostomia;Spiralia;Lophotrochozoa;Mollusca;Bivalvia;Autobranchia;Heteroconchia;Euheterodonta;Imparidentia;Venerida;Veneroidea;Veneridae;Mercenaria;Mercenaria mercenaria

UdeM00000003359 6596 493.8 UdeM00000003359 XP\_045193287.1 57.2 411  
172 3 9 418 35 442 2.10E-136 493.8 6596 cellular

organisms;Eukaryota;Opisthokonta;Metazoa;Eumetazoa;Bilateria;Protostomia;Spiralia;Lophotrochozoa;Mollusca;Bivalvia;Autobranchia;Heteroconchia;Euheterodonta;Imparidentia;Venerida;Veneroidea;Veneridae;Mercenaria;Mercenaria mercenaria

UdeM00000003360 6579 334 UdeM00000003360 XP\_033753726.1 57.2 290  
123 1 20 309 15 303 2.40E-88 334 6579 cellular

organisms;Eukaryota;Opisthokonta;Metazoa;Eumetazoa;Bilateria;Protostomia;Spiralia;Lophotrochozoa;Mollusca;Bivalvia;Autobranchia;Pteriormorphia;Pectinida;Pectinoidea;Pectinidae;Pecten;Pecten maximus

UdeM00000003361 29159 399.8 UdeM00000003361 XP\_011423227.2 56.8 558  
228 8 72 619 74 628 6.30E-108 399.8 29159 cellular

organisms;Eukaryota;Opisthokonta;Metazoa;Eumetazoa;Bilateria;Protostomia;Spiralia;Lophotrochozoa;Mollusca;Bivalvia;Autobranchia;Pteriormorphia;Ostreida;Ostreoidea;Ostreidae;Crassostrea;Crassostrea gigas

UdeM00000003362 133434 213.4 UdeM00000003362 XP\_022088924.1 84.3  
108 17 0 1 108 1 108 1.40E-52 213.4 133434  
cellular

organisms;Eukaryota;Opisthokonta;Metazoa;Eumetazoa;Bilateria;Deuterostomia;Echinodermata;Eleutherozoa;Asterozoa;Asteroidea;Valvatacea;Valvatida;Acanthasteridae;Acanthaster;Acanthaster planci

UdeM00000003363 6579 77.4 UdeM00000003363 XP\_033753676.1 49.4 87  
42 1 47 131 478 564 1.70E-11 77.4 6579 cellular

organisms;Eukaryota;Opisthokonta;Metazoa;Eumetazoa;Bilateria;Protostomia;Spiralia;Lophotrochozoa;Mollusca;Bivalvia;Autobranchia;Pteriormorphia;Pectinida;Pectinoidea;Pectinidae;Pecten;Pecten maximus

UdeM00000003364 6573 331.3 UdeM00000003364 XP\_021342966.1 72.1 215  
60 0 13 227 272 486 1.00E-87 331.3 6573 cellular

organisms;Eukaryota;Opisthokonta;Metazoa;Eumetazoa;Bilateria;Protostomia;Spiralia;Lophotrochozoa;Mollusca;Bivalvia;Autobranchia;Pteriormorphia;Pectinida;Pectinoidea;Pectinidae;Mizuhopecten;Mizuhopecten yessoensis

UdeM00000003365 6579 398.7 UdeM00000003365 XP\_033753676.1 67.6 275  
88 1 1 275 1 274 6.60E-108 398.7 6579 cellular

organisms;Eukaryota;Opisthokonta;Metazoa;Eumetazoa;Bilateria;Protostomia;Spiralia;Lophotrochozoa;Mollusca;Bivalvia;Autobranchia;Pteriormorphia;Pectinida;Pectinoidea;Pectinidae;Pecten;Pecten maximus

UdeM00000003366 6565 318.9 UdeM00000003366 XP\_022341970.1 76.8 211  
49 0 1 211 1 211 4.80E-84 318.9 6565 cellular

organisms;Eukaryota;Opisthokonta;Metazoa;Eumetazoa;Bilateria;Protostomia;Spiralia;Lophotrochozoa;Mollusca;Bivalvia;Autobranchia;Pteriormorphia;Ostreida;Ostreoidea;Ostreidae;Crassostrea;Crassostrea virginica

UdeM00000003367 1735272 62.8 UdeM00000003367 XP\_041375845.1 35.6  
90 55 2 12 100 144 231 3.60E-07 62.8 1735272  
cellular

organisms;Eukaryota;Opisthokonta;Metazoa;Eumetazoa;Bilateria;Protostomia;Spiralia;Lophotrochozoa;Mollusca;Gastropoda;Neomphalina;Neomphaloidea;Peltospiridae;Gigantopelta;Gigantopelta aegis

UdeM00000003369 29159 520.4 UdeM00000003369 XP\_034334954.1 23.9 2347  
1480 71 154 2361 10 2188 1.30E-143 520.4 29159 cellular

organisms;Eukaryota;Opisthokonta;Metazoa;Eumetazoa;Bilateria;Protostomia;Spiralia;Lophotrochozoa;Mollusca;Bivalvia;Autobranchia;Pteriomorphia;Ostr

UdeM00000003370 6596 99.4 UdeM00000003370 XP\_045191760.1 43.9 114  
63 1 2 114 364 477 3.30E-18 99.4 6596 cellular

organisms;Eukaryota;Opisthokonta;Metazoa;Eumetazoa;Bilateria;Protostomia;Spiralia;Lophotrochozoa;Mollusca;Bivalvia;Autobranchia;Heteroconchia;Euherodonta;Imparidentia;Venerida;Veneroidea;Veneridae;Mercenaria;Mercenaria mercenaria

UdeM00000003371 6596 384.8 UdeM00000003371 XP\_045158565.1 60.6 292  
113 1 329 620 81 370 2.10E-103 384.8 6596 cellular

organisms;Eukaryota;Opisthokonta;Metazoa;Eumetazoa;Bilateria;Protostomia;Spiralia;Lophotrochozoa;Mollusca;Bivalvia;Autobranchia;Heteroconchia;Euherodonta;Imparidentia;Venerida;Veneroidea;Veneridae;Mercenaria;Mercenaria mercenaria

UdeM00000003372 6596 410.2 UdeM00000003372 XP\_045158558.1 62.1 327  
112 5 25 349 31 347 2.60E-111 410.2 6596 cellular

organisms;Eukaryota;Opisthokonta;Metazoa;Eumetazoa;Bilateria;Protostomia;Spiralia;Lophotrochozoa;Mollusca;Bivalvia;Autobranchia;Heteroconchia;Euherodonta;Imparidentia;Venerida;Veneroidea;Veneridae;Mercenaria;Mercenaria mercenaria

UdeM00000003373 6596 612.5 UdeM00000003373 XP\_045160920.1 40.8 1119  
474 28 1 1074 243 1218 1.10E-171 612.5 6596 cellular

organisms;Eukaryota;Opisthokonta;Metazoa;Eumetazoa;Bilateria;Protostomia;Spiralia;Lophotrochozoa;Mollusca;Bivalvia;Autobranchia;Heteroconchia;Euherodonta;Imparidentia;Venerida;Veneroidea;Veneridae;Mercenaria;Mercenaria mercenaria

UdeM00000003375 6596 70.5 UdeM00000003375 XP\_045160457.1 23.8 277  
159 9 133 401 76 308 5.60E-09 70.5 6596 cellular

organisms;Eukaryota;Opisthokonta;Metazoa;Eumetazoa;Bilateria;Protostomia;Spiralia;Lophotrochozoa;Mollusca;Bivalvia;Autobranchia;Heteroconchia;Euherodonta;Imparidentia;Venerida;Veneroidea;Veneridae;Mercenaria;Mercenaria mercenaria

UdeM00000003376 6500 159.1 UdeM00000003376 XP\_005107071.1 49 155  
78 1 56 210 102 255 6.30E-36 159.1 6500 cellular

organisms;Eukaryota;Opisthokonta;Metazoa;Eumetazoa;Bilateria;Protostomia;Spiralia;Lophotrochozoa;Mollusca;Gastropoda;Heterobranchia;Euthyneura;Teptipleura;Aplysiida;Aplysioidea;Aplysiidae;Aplysia;Aplysia californica

UdeM00000003377 6596 573.2 UdeM00000003377 XP\_045160611.1 65.7 396  
136 0 1 396 1 396 2.60E-160 573.2 6596 cellular

organisms;Eukaryota;Opisthokonta;Metazoa;Eumetazoa;Bilateria;Protostomia;Spiralia;Lophotrochozoa;Mollusca;Bivalvia;Autobranchia;Heteroconchia;Euherodonta;Imparidentia;Venerida;Veneroidea;Veneridae;Mercenaria;Mercenaria mercenaria

UdeM00000003378 1735272 396.7 UdeM00000003378 XP\_041358968.1 66.4  
262 88 0 8 269 48 309 2.30E-107 396.7 1735272  
cellular

organisms;Eukaryota;Opisthokonta;Metazoa;Eumetazoa;Bilateria;Protostomia;Spiralia;Lophotrochozoa;Mollusca;Gastropoda;Neomphalina;Neomphaloidea;Peltospiridae;Gigantopelta;Gigantopelta aegis

UdeM00000003379 29159 255.4 UdeM00000003379 XP\_011423802.2 33.3 684  
342 17 120 751 554 1175 3.00E-64 255.4 29159 cellular

organisms;Eukaryota;Opisthokonta;Metazoa;Eumetazoa;Bilateria;Protostomia;

Spiralia;Lophotrochozoa;Mollusca;Bivalvia;Autobranchia;Pteriormorphia;Ostr  
eida;Ostreoidea;Ostreidae;Crassostrea;Crassostrea gigas  
UdeM00000003380 6573 124.4 UdeM00000003380 XP\_021343717.1 35.8 372  
171 16 9 361 4 326 3.20E-25 124.4 6573 cellular  
organisms;Eukaryota;Opisthokonta;Metazoa;Eumetazoa;Bilateria;Protostomia;  
Spiralia;Lophotrochozoa;Mollusca;Bivalvia;Autobranchia;Pteriormorphia;Pect  
inida;Pectinoidea;Pectinidae;Mizuhopecten;Mizuhopecten yessoensis  
UdeM00000003381 6596 1533.9 UdeM00000003381 XP\_045160148.1 78.1  
967 212 0 1 967 1 967 0.00E+00 1533.9 6596  
cellular  
organisms;Eukaryota;Opisthokonta;Metazoa;Eumetazoa;Bilateria;Protostomia;  
Spiralia;Lophotrochozoa;Mollusca;Bivalvia;Autobranchia;Heteroconchia;Euhe  
terodonta;Imparidentia;Venerida;Veneroidea;Veneridae;Mercenaria;Mercenari  
a mercenaria  
UdeM00000003382 6596 645.2 UdeM00000003382 XP\_045160148.1 73 426  
115 0 105 530 542 967 7.30E-182 645.2 6596 cellular  
organisms;Eukaryota;Opisthokonta;Metazoa;Eumetazoa;Bilateria;Protostomia;  
Spiralia;Lophotrochozoa;Mollusca;Bivalvia;Autobranchia;Heteroconchia;Euhe  
terodonta;Imparidentia;Venerida;Veneroidea;Veneridae;Mercenaria;Mercenari  
a mercenaria  
UdeM00000003383 6565 217.2 UdeM00000003383 XP\_022299727.1 47 234  
121 2 1 232 46 278 2.40E-53 217.2 6565 cellular  
organisms;Eukaryota;Opisthokonta;Metazoa;Eumetazoa;Bilateria;Protostomia;  
Spiralia;Lophotrochozoa;Mollusca;Bivalvia;Autobranchia;Pteriormorphia;Ostr  
eida;Ostreoidea;Ostreidae;Crassostrea;Crassostrea virginica  
UdeM00000003384 6573 526.6 UdeM00000003384 XP\_021350171.1 76.5 319  
75 0 5 323 6 324 3.20E-146 526.6 6573 cellular  
organisms;Eukaryota;Opisthokonta;Metazoa;Eumetazoa;Bilateria;Protostomia;  
Spiralia;Lophotrochozoa;Mollusca;Bivalvia;Autobranchia;Pteriormorphia;Pect  
inida;Pectinoidea;Pectinidae;Mizuhopecten;Mizuhopecten yessoensis  
UdeM00000003385 6565 364.8 UdeM00000003385 XP\_022314754.1 63.7 300  
90 4 1 300 1 281 1.10E-97 364.8 6565 cellular  
organisms;Eukaryota;Opisthokonta;Metazoa;Eumetazoa;Bilateria;Protostomia;  
Spiralia;Lophotrochozoa;Mollusca;Bivalvia;Autobranchia;Pteriormorphia;Ostr  
eida;Ostreoidea;Ostreidae;Crassostrea;Crassostrea virginica  
UdeM00000003388 6596 364 UdeM00000003388 XP\_045159215.1 51.4 346  
157 5 5 342 3 345 2.10E-97 364 6596 cellular  
organisms;Eukaryota;Opisthokonta;Metazoa;Eumetazoa;Bilateria;Protostomia;  
Spiralia;Lophotrochozoa;Mollusca;Bivalvia;Autobranchia;Heteroconchia;Euhe  
terodonta;Imparidentia;Venerida;Veneroidea;Veneridae;Mercenaria;Mercenari  
a mercenaria  
UdeM00000003389 6596 510.8 UdeM00000003389 XP\_045160241.1 62 379  
143 1 1 378 124 502 2.40E-141 510.8 6596 cellular  
organisms;Eukaryota;Opisthokonta;Metazoa;Eumetazoa;Bilateria;Protostomia;  
Spiralia;Lophotrochozoa;Mollusca;Bivalvia;Autobranchia;Heteroconchia;Euhe  
terodonta;Imparidentia;Venerida;Veneroidea;Veneridae;Mercenaria;Mercenari  
a mercenaria  
UdeM00000003390 6596 236.9 UdeM00000003390 XP\_045157220.1 58.4 209  
81 3 7 209 7 215 2.40E-59 236.9 6596 cellular  
organisms;Eukaryota;Opisthokonta;Metazoa;Eumetazoa;Bilateria;Protostomia;  
Spiralia;Lophotrochozoa;Mollusca;Bivalvia;Autobranchia;Heteroconchia;Euhe  
terodonta;Imparidentia;Venerida;Veneroidea;Veneridae;Mercenaria;Mercenari  
a mercenaria

UdeM00000003391 6596 226.9 UdeM00000003391 XP\_045160242.1 57.7 168  
 70 1 15 181 12 179 2.90E-56 226.9 6596 cellular  
 organisms;Eukaryota;Opisthokonta;Metazoa;Eumetazoa;Bilateria;Protostomia;  
 Spiralia;Lophotrochozoa;Mollusca;Bivalvia;Autobranchia;Heteroconchia;Euhe  
 terodonta;Imparidentia;Venerida;Veneroidea;Veneridae;Mercenaria;Mercenari  
 a mercenaria

UdeM00000003392 6596 224.9 UdeM00000003392 XP\_045160242.1 50.3 195  
 88 1 18 212 31 216 1.40E-55 224.9 6596 cellular  
 organisms;Eukaryota;Opisthokonta;Metazoa;Eumetazoa;Bilateria;Protostomia;  
 Spiralia;Lophotrochozoa;Mollusca;Bivalvia;Autobranchia;Heteroconchia;Euhe  
 terodonta;Imparidentia;Venerida;Veneroidea;Veneridae;Mercenaria;Mercenari  
 a mercenaria

UdeM00000003393 6596 1063.5 UdeM00000003393 XP\_045159931.1 50.9  
 1538 573 35 11 1456 7 1454 2.40E-307 1063.5 6596  
 cellular  
 organisms;Eukaryota;Opisthokonta;Metazoa;Eumetazoa;Bilateria;Protostomia;  
 Spiralia;Lophotrochozoa;Mollusca;Bivalvia;Autobranchia;Heteroconchia;Euhe  
 terodonta;Imparidentia;Venerida;Veneroidea;Veneridae;Mercenaria;Mercenari  
 a mercenaria

UdeM00000003394 6596 937.2 UdeM00000003394 XP\_045159933.1 86.9 528  
 60 4 1 520 1 527 9.10E-270 937.2 6596 cellular  
 organisms;Eukaryota;Opisthokonta;Metazoa;Eumetazoa;Bilateria;Protostomia;  
 Spiralia;Lophotrochozoa;Mollusca;Bivalvia;Autobranchia;Heteroconchia;Euhe  
 terodonta;Imparidentia;Venerida;Veneroidea;Veneridae;Mercenaria;Mercenari  
 a mercenaria

UdeM00000003395 6596 144.8 UdeM00000003395 XP\_045187536.1 64.1 117  
 42 0 1 117 396 512 7.00E-32 144.8 6596 cellular  
 organisms;Eukaryota;Opisthokonta;Metazoa;Eumetazoa;Bilateria;Protostomia;  
 Spiralia;Lophotrochozoa;Mollusca;Bivalvia;Autobranchia;Heteroconchia;Euhe  
 terodonta;Imparidentia;Venerida;Veneroidea;Veneridae;Mercenaria;Mercenari  
 a mercenaria

UdeM00000003396 6500 175.3 UdeM00000003396 XP\_005098534.1 46 211  
 86 4 1 208 1 186 1.10E-40 175.3 6500 cellular  
 organisms;Eukaryota;Opisthokonta;Metazoa;Eumetazoa;Bilateria;Protostomia;  
 Spiralia;Lophotrochozoa;Mollusca;Gastropoda;Heterobranchia;Euthyneura;Tec  
 tipleura;Aplysiida;Aplysioidea;Aplysiidae;Aplysia;Aplysia californica

UdeM00000003397 29159 304.3 UdeM00000003397 XP\_034312365.1 70.8 530  
 127 4 2 523 5 514 3.00E-79 304.3 29159 cellular  
 organisms;Eukaryota;Opisthokonta;Metazoa;Eumetazoa;Bilateria;Protostomia;  
 Spiralia;Lophotrochozoa;Mollusca;Bivalvia;Autobranchia;Pteriomorphia;Ostr  
 eida;Ostreoidea;Ostreidae;Crassostrea;Crassostrea gigas

UdeM00000003398 6596 431.8 UdeM00000003398 XP\_045157388.1 55.6 385  
 163 5 30 412 37 415 9.80E-118 431.8 6596 cellular  
 organisms;Eukaryota;Opisthokonta;Metazoa;Eumetazoa;Bilateria;Protostomia;  
 Spiralia;Lophotrochozoa;Mollusca;Bivalvia;Autobranchia;Heteroconchia;Euhe  
 terodonta;Imparidentia;Venerida;Veneroidea;Veneridae;Mercenaria;Mercenari  
 a mercenaria

UdeM00000003399 6596 431.8 UdeM00000003399 XP\_045157388.1 55.6 385  
 163 5 31 413 37 415 9.80E-118 431.8 6596 cellular  
 organisms;Eukaryota;Opisthokonta;Metazoa;Eumetazoa;Bilateria;Protostomia;  
 Spiralia;Lophotrochozoa;Mollusca;Bivalvia;Autobranchia;Heteroconchia;Euhe  
 terodonta;Imparidentia;Venerida;Veneroidea;Veneridae;Mercenaria;Mercenari  
 a mercenaria

UdeM00000003400 6579 180.6 UdeM00000003400 XP\_033738379.1 87.1 101  
 13 0 1 101 1 101 9.70E-43 180.6 6579 cellular  
 organisms;Eukaryota;Opisthokonta;Metazoa;Eumetazoa;Bilateria;Protostomia;  
 Spiralia;Lophotrochozoa;Mollusca;Bivalvia;Autobranhia;Pteriormorphia;Pect  
 inida;Pectinoidea;Pectinidae;Pecten;Pecten maximus  
 UdeM00000003403 6596 317.4 UdeM00000003403 XP\_045157390.1 47.1 340  
 165 7 1 331 1 334 2.20E-83 317.4 6596 cellular  
 organisms;Eukaryota;Opisthokonta;Metazoa;Eumetazoa;Bilateria;Protostomia;  
 Spiralia;Lophotrochozoa;Mollusca;Bivalvia;Autobranhia;Heteroconchia;Euhe  
 terodonta;Imparidentia;Venerida;Veneroidea;Veneridae;Mercenaria;Mercenari  
 a mercenaria  
 UdeM00000003405 6596 94.4 UdeM00000003405 XP\_045209239.1 22.3 516  
 362 16 130 628 69 562 7.50E-16 94.4 6596 cellular  
 organisms;Eukaryota;Opisthokonta;Metazoa;Eumetazoa;Bilateria;Protostomia;  
 Spiralia;Lophotrochozoa;Mollusca;Bivalvia;Autobranhia;Heteroconchia;Euhe  
 terodonta;Imparidentia;Venerida;Veneroidea;Veneridae;Mercenaria;Mercenari  
 a mercenaria  
 UdeM00000003406 6596 104.8 UdeM00000003406 XP\_045209239.1 25.8 461  
 310 15 149 604 71 504 5.70E-19 104.8 6596 cellular  
 organisms;Eukaryota;Opisthokonta;Metazoa;Eumetazoa;Bilateria;Protostomia;  
 Spiralia;Lophotrochozoa;Mollusca;Bivalvia;Autobranhia;Heteroconchia;Euhe  
 terodonta;Imparidentia;Venerida;Veneroidea;Veneridae;Mercenaria;Mercenari  
 a mercenaria  
 UdeM00000003409 6573 331.6 UdeM00000003409 XP\_021362540.1 67 282  
 85 3 4 277 2 283 9.40E-88 331.6 6573 cellular  
 organisms;Eukaryota;Opisthokonta;Metazoa;Eumetazoa;Bilateria;Protostomia;  
 Spiralia;Lophotrochozoa;Mollusca;Bivalvia;Autobranhia;Pteriormorphia;Pect  
 inida;Pectinoidea;Pectinidae;Mizuhopecten;Mizuhopecten yessoensis  
 UdeM00000003410 103944 81.6 UdeM00000003410 XP\_015665535.1 36.1  
 122 76 1 34 155 9 128 1.20E-12 81.6 103944  
 cellular  
 organisms;Eukaryota;Opisthokonta;Metazoa;Eumetazoa;Bilateria;Deuterostomi  
 a;Chordata;Craniata;Vertebrata;Gnathostomata;Teleostomi;Euteleostomi;Sarc  
 opterygii;Dipnotetrapodomorpha;Tetrapoda;Amniota;Sauropsida;Sauria;Lepido  
 sauria;Squamata;Bifurcata;Unidentata;Episquamata;Toxicofera;Serpentes;Col  
 ubroidea;Viperidae;Crotalinae;Protobothrops;Protobothrops mucrosquamatus  
 UdeM00000003411 6596 163.3 UdeM00000003411 XP\_045156967.1 44 182  
 102 0 3 184 14 195 3.50E-37 163.3 6596 cellular  
 organisms;Eukaryota;Opisthokonta;Metazoa;Eumetazoa;Bilateria;Protostomia;  
 Spiralia;Lophotrochozoa;Mollusca;Bivalvia;Autobranhia;Heteroconchia;Euhe  
 terodonta;Imparidentia;Venerida;Veneroidea;Veneridae;Mercenaria;Mercenari  
 a mercenaria  
 UdeM00000003412 6596 174.9 UdeM00000003412 XP\_045156967.1 44.3 194  
 108 0 113 306 2 195 1.80E-40 174.9 6596 cellular  
 organisms;Eukaryota;Opisthokonta;Metazoa;Eumetazoa;Bilateria;Protostomia;  
 Spiralia;Lophotrochozoa;Mollusca;Bivalvia;Autobranhia;Heteroconchia;Euhe  
 terodonta;Imparidentia;Venerida;Veneroidea;Veneridae;Mercenaria;Mercenari  
 a mercenaria  
 UdeM00000003413 1735272 90.1 UdeM00000003413 XP\_041372160.1 36.2  
 130 73 3 21 144 1127 1252 2.50E-15 90.1 1735272  
 cellular  
 organisms;Eukaryota;Opisthokonta;Metazoa;Eumetazoa;Bilateria;Protostomia;  
 Spiralia;Lophotrochozoa;Mollusca;Gastropoda;Neomphalina;Neomphaloidea;Pel  
 tospiridae;Gigantopelta;Gigantopelta aegis

UdeM00000003414 6596 804.3 UdeM00000003414 XP\_045158780.1 77 504  
 109 3 42 540 1 502 9.50E-230 804.3 6596 cellular  
 organisms;Eukaryota;Opisthokonta;Metazoa;Eumetazoa;Bilateria;Protostomia;  
 Spiralia;Lophotrochozoa;Mollusca;Bivalvia;Autobranchia;Heteroconchia;Euhe  
 terodonta;Imparidentia;Venerida;Veneroidea;Veneridae;Mercenaria;Mercenari  
 a mercenaria  
 UdeM00000003415 6573 1063.9 UdeM00000003415 XP\_021370678.1 55.5  
 946 368 3 29 923 11 954 1.10E-307 1063.9 6573  
 cellular  
 organisms;Eukaryota;Opisthokonta;Metazoa;Eumetazoa;Bilateria;Protostomia;  
 Spiralia;Lophotrochozoa;Mollusca;Bivalvia;Autobranchia;Pteriormorphia;Pect  
 inida;Pectinoidea;Pectinidae;Mizuhopecten;Mizuhopecten yessoensis  
 UdeM00000003416 6596 328.2 UdeM00000003416 XP\_045156962.1 77.2 202  
 46 0 1 202 1 202 7.50E-87 328.2 6596 cellular  
 organisms;Eukaryota;Opisthokonta;Metazoa;Eumetazoa;Bilateria;Protostomia;  
 Spiralia;Lophotrochozoa;Mollusca;Bivalvia;Autobranchia;Heteroconchia;Euhe  
 terodonta;Imparidentia;Venerida;Veneroidea;Veneridae;Mercenaria;Mercenari  
 a mercenaria  
 UdeM00000003419 29159 110.5 UdeM00000003419 XP\_011451007.2 51.2 121  
 50 4 1 112 1 121 1.40E-21 110.5 29159 cellular  
 organisms;Eukaryota;Opisthokonta;Metazoa;Eumetazoa;Bilateria;Protostomia;  
 Spiralia;Lophotrochozoa;Mollusca;Bivalvia;Autobranchia;Pteriormorphia;Ostr  
 eida;Ostreoidea;Ostreidae;Crassostrea;Crassostrea gigas  
 UdeM00000003422 6596 583.9 UdeM00000003422 XP\_045160184.1 48.3 598  
 305 3 23 618 53 648 2.40E-163 583.9 6596 cellular  
 organisms;Eukaryota;Opisthokonta;Metazoa;Eumetazoa;Bilateria;Protostomia;  
 Spiralia;Lophotrochozoa;Mollusca;Bivalvia;Autobranchia;Heteroconchia;Euhe  
 terodonta;Imparidentia;Venerida;Veneroidea;Veneridae;Mercenaria;Mercenari  
 a mercenaria  
 UdeM00000003424 6565 139.4 UdeM00000003424 XP\_022314845.1 37.1 186  
 115 1 6 191 3 186 5.00E-30 139.4 6565 cellular  
 organisms;Eukaryota;Opisthokonta;Metazoa;Eumetazoa;Bilateria;Protostomia;  
 Spiralia;Lophotrochozoa;Mollusca;Bivalvia;Autobranchia;Pteriormorphia;Ostr  
 eida;Ostreoidea;Ostreidae;Crassostrea;Crassostrea virginica  
 UdeM00000003425 6579 271.9 UdeM00000003425 XP\_033736727.1 76.9 160  
 37 0 1 160 432 591 5.10E-70 271.9 6579 cellular  
 organisms;Eukaryota;Opisthokonta;Metazoa;Eumetazoa;Bilateria;Protostomia;  
 Spiralia;Lophotrochozoa;Mollusca;Bivalvia;Autobranchia;Pteriormorphia;Pect  
 inida;Pectinoidea;Pectinidae;Pecten;Pecten maximus  
 UdeM00000003426 6579 1008.4 UdeM00000003426 XP\_033736727.1 79.2  
 587 120 1 11 597 7 591 3.70E-291 1008.4 6579  
 cellular  
 organisms;Eukaryota;Opisthokonta;Metazoa;Eumetazoa;Bilateria;Protostomia;  
 Spiralia;Lophotrochozoa;Mollusca;Bivalvia;Autobranchia;Pteriormorphia;Pect  
 inida;Pectinoidea;Pectinidae;Pecten;Pecten maximus  
 UdeM00000003427 6596 470.7 UdeM00000003427 XP\_045160571.1 41.5 674  
 345 11 19 679 27 664 3.10E-129 470.7 6596 cellular  
 organisms;Eukaryota;Opisthokonta;Metazoa;Eumetazoa;Bilateria;Protostomia;  
 Spiralia;Lophotrochozoa;Mollusca;Bivalvia;Autobranchia;Heteroconchia;Euhe  
 terodonta;Imparidentia;Venerida;Veneroidea;Veneridae;Mercenaria;Mercenari  
 a mercenaria  
 UdeM00000003428 6596 389 UdeM00000003428 XP\_045216663.1 35.9 630  
 390 6 4 621 9 636 1.10E-104 389 6596 cellular  
 organisms;Eukaryota;Opisthokonta;Metazoa;Eumetazoa;Bilateria;Protostomia;



Spiralia;Lophotrochozoa;Mollusca;Bivalvia;Autobranchia;Heteroconchia;Euherodonta;Imparidentia;Venerida;Veneroidea;Veneridae;Mercenaria;Mercenaria mercenaria

UdeM00000003429 218467 367.9 UdeM00000003429 XP\_023231567.1 37.5  
606 350 13 15 599 39 636 2.50E-98 367.9 218467

cellular

organisms;Eukaryota;Opisthokonta;Metazoa;Eumetazoa;Bilateria;Protostomia;Ecdysozoa;Panarthropoda;Arthropoda;Chelicerata;Arachnida;Scorpiones;Buthida;Buthoidea;Buthidae;Centruroides;Centruroides sculpturatus

UdeM00000003431 6596 446.8 UdeM00000003431 XP\_045160582.1 58.5 436  
157 8 5 424 493 920 3.40E-122 446.8 6596 cellular

organisms;Eukaryota;Opisthokonta;Metazoa;Eumetazoa;Bilateria;Protostomia;Spiralia;Lophotrochozoa;Mollusca;Bivalvia;Autobranchia;Heteroconchia;Euherodonta;Imparidentia;Venerida;Veneroidea;Veneridae;Mercenaria;Mercenaria mercenaria

UdeM00000003432 6596 546.6 UdeM00000003432 XP\_045160585.1 63.2 487  
167 5 50 533 8 485 4.90E-152 546.6 6596 cellular

organisms;Eukaryota;Opisthokonta;Metazoa;Eumetazoa;Bilateria;Protostomia;Spiralia;Lophotrochozoa;Mollusca;Bivalvia;Autobranchia;Heteroconchia;Euherodonta;Imparidentia;Venerida;Veneroidea;Veneridae;Mercenaria;Mercenaria mercenaria

UdeM00000003433 6596 546.6 UdeM00000003433 XP\_045160585.1 63.2 487  
167 5 51 534 8 485 4.90E-152 546.6 6596 cellular

organisms;Eukaryota;Opisthokonta;Metazoa;Eumetazoa;Bilateria;Protostomia;Spiralia;Lophotrochozoa;Mollusca;Bivalvia;Autobranchia;Heteroconchia;Euherodonta;Imparidentia;Venerida;Veneroidea;Veneridae;Mercenaria;Mercenaria mercenaria

UdeM00000003434 1735272 563.9 UdeM00000003434 XP\_041356738.1 77.6  
371 81 2 1 369 1 371 1.50E-157 563.9 1735272

cellular

organisms;Eukaryota;Opisthokonta;Metazoa;Eumetazoa;Bilateria;Protostomia;Spiralia;Lophotrochozoa;Mollusca;Gastropoda;Neomphalina;Neomphaloidea;Peltospiridae;Gigantopelta;Gigantopelta aegis

UdeM00000003435 6596 177.2 UdeM00000003435 XP\_045157679.1 72.3 119  
31 2 6 123 34 151 1.30E-41 177.2 6596 cellular

organisms;Eukaryota;Opisthokonta;Metazoa;Eumetazoa;Bilateria;Protostomia;Spiralia;Lophotrochozoa;Mollusca;Bivalvia;Autobranchia;Heteroconchia;Euherodonta;Imparidentia;Venerida;Veneroidea;Veneridae;Mercenaria;Mercenaria mercenaria

UdeM00000003436 6565 256.9 UdeM00000003436 XP\_022318026.1 78.1 151  
28 2 1 147 1 150 1.60E-65 256.9 6565 cellular

organisms;Eukaryota;Opisthokonta;Metazoa;Eumetazoa;Bilateria;Protostomia;Spiralia;Lophotrochozoa;Mollusca;Bivalvia;Autobranchia;Pteriomorphia;Ostreida;Ostreoidea;Ostreidae;Crassostrea;Crassostrea virginica

UdeM00000003437 6596 137.9 UdeM00000003437 XP\_045158181.1 53.3 167  
73 2 4 168 22 185 1.80E-29 137.9 6596 cellular

organisms;Eukaryota;Opisthokonta;Metazoa;Eumetazoa;Bilateria;Protostomia;Spiralia;Lophotrochozoa;Mollusca;Bivalvia;Autobranchia;Heteroconchia;Euherodonta;Imparidentia;Venerida;Veneroidea;Veneridae;Mercenaria;Mercenaria mercenaria

UdeM00000003438 6596 476.5 UdeM00000003438 XP\_045160935.1 41.2 633  
328 13 2 626 85 681 8.70E-131 476.5 6596 cellular

organisms;Eukaryota;Opisthokonta;Metazoa;Eumetazoa;Bilateria;Protostomia;Spiralia;Lophotrochozoa;Mollusca;Bivalvia;Autobranchia;Heteroconchia;Euherodonta

terodonta;Imparidentia;Venerida;Veneroidea;Veneridae;Mercenaria;Mercenaria mercenaria  
 UdeM00000003439 48701 320.9 UdeM00000003439 XP\_014832194.1 39.4 469  
 268 8 1 462 128 587 2.70E-84 320.9 48701 cellular  
 organisms;Eukaryota;Opisthokonta;Metazoa;Eumetazoa;Bilateria;Deuterostomia;Chordata;Craniata;Vertebrata;Gnathostomata;Teleostomi;Euteleostomi;Actinopterygii;Actinopteri;Neopterygii;Teleostei;Osteoglossocephalai;Clupeocephala;Euteleostei;Neoteleostei;Eurypterygia;Ctenosquamata;Acanthomorphata;Euacanthomorphacea;Percomorphaceae;Ovalentaria;Atherinomorphae;Cyprinodontiformes;Cyprinodontoides;Poeciliidae;Poeciliinae;Poecilia;Poecilia mexicana  
 UdeM00000003440 6596 92 UdeM00000003440 XP\_045158759.1 34.8 164  
 89 4 44 191 25 186 8.60E-16 92 6596 cellular  
 organisms;Eukaryota;Opisthokonta;Metazoa;Eumetazoa;Bilateria;Protostomia;Spiralia;Lophotrochozoa;Mollusca;Bivalvia;Autobranchia;Heteroconchia;Euteleostomi;Imparidentia;Venerida;Veneroidea;Veneridae;Mercenaria;Mercenaria mercenaria  
 UdeM00000003441 29159 2407.9 UdeM00000003441 XP\_034312697.1 66.5  
 1878 496 24 1 1812 127 1937 0.00E+00 2407.9  
 29159 cellular  
 organisms;Eukaryota;Opisthokonta;Metazoa;Eumetazoa;Bilateria;Protostomia;Spiralia;Lophotrochozoa;Mollusca;Bivalvia;Autobranchia;Pteriomorpha;Ostreida;Ostreidae;Crassostrea;Crassostrea gigas  
 UdeM00000003442 29159 2376.7 UdeM00000003442 XP\_034312695.1 64.7  
 1927 499 26 1 1857 127 1941 0.00E+00 2376.7  
 29159 cellular  
 organisms;Eukaryota;Opisthokonta;Metazoa;Eumetazoa;Bilateria;Protostomia;Spiralia;Lophotrochozoa;Mollusca;Bivalvia;Autobranchia;Pteriomorpha;Ostreida;Ostreidae;Crassostrea;Crassostrea gigas  
 UdeM00000003443 29159 2397.9 UdeM00000003443 XP\_034312695.1 66.2  
 1882 500 25 1 1812 127 1941 0.00E+00 2397.9  
 29159 cellular  
 organisms;Eukaryota;Opisthokonta;Metazoa;Eumetazoa;Bilateria;Protostomia;Spiralia;Lophotrochozoa;Mollusca;Bivalvia;Autobranchia;Pteriomorpha;Ostreida;Ostreidae;Crassostrea;Crassostrea gigas  
 UdeM00000003444 29159 2406.3 UdeM00000003444 XP\_034312697.1 65.8  
 1878 509 24 1 1811 127 1937 0.00E+00 2406.3  
 29159 cellular  
 organisms;Eukaryota;Opisthokonta;Metazoa;Eumetazoa;Bilateria;Protostomia;Spiralia;Lophotrochozoa;Mollusca;Bivalvia;Autobranchia;Pteriomorpha;Ostreida;Ostreidae;Crassostrea;Crassostrea gigas  
 UdeM00000003445 6500 280.4 UdeM00000003445 XP\_012940147.1 83.2 155  
 26 0 3 157 86 240 1.40E-72 280.4 6500 cellular  
 organisms;Eukaryota;Opisthokonta;Metazoa;Eumetazoa;Bilateria;Protostomia;Spiralia;Lophotrochozoa;Mollusca;Gastropoda;Heterobranchia;Euthyneura;Teptipleura;Aplysiida;Aplysioidea;Aplysiidae;Aplysia;Aplysia californica  
 UdeM00000003446 6500 266.2 UdeM00000003446 XP\_012940147.1 83 147  
 25 0 1 147 94 240 2.60E-68 266.2 6500 cellular  
 organisms;Eukaryota;Opisthokonta;Metazoa;Eumetazoa;Bilateria;Protostomia;Spiralia;Lophotrochozoa;Mollusca;Gastropoda;Heterobranchia;Euthyneura;Teptipleura;Aplysiida;Aplysioidea;Aplysiidae;Aplysia;Aplysia californica  
 UdeM00000003447 6596 644.8 UdeM00000003447 XP\_045158757.1 72 540  
 121 8 94 613 44 573 1.10E-181 644.8 6596 cellular  
 organisms;Eukaryota;Opisthokonta;Metazoa;Eumetazoa;Bilateria;Protostomia;

Spiralia;Lophotrochozoa;Mollusca;Bivalvia;Autobranchia;Heteroconchia;Euherodonta;Imparidentia;Venerida;Veneroidea;Veneridae;Mercenaria;Mercenaria mercenaria

UdeM00000003448 6565 160.2 UdeM00000003448 XP\_022308193.1 54 139  
61 2 1 139 423 558 1.90E-36 160.2 6565 cellular

organisms;Eukaryota;Opisthokonta;Metazoa;Eumetazoa;Bilateria;Protostomia;Spiralia;Lophotrochozoa;Mollusca;Bivalvia;Autobranchia;Pteriormorphia;Ostreida;Ostreoidea;Ostreidae;Crassostrea;Crassostrea virginica

UdeM00000003449 2607531 261.9 UdeM00000003449 XP\_036362262.1 36.2  
687 338 11 3 643 55 687 2.10E-66 261.9 2607531  
cellular

organisms;Eukaryota;Opisthokonta;Metazoa;Eumetazoa;Bilateria;Protostomia;Spiralia;Lophotrochozoa;Mollusca;Cephalopoda;Coleoidea;Octopodiformes;Octopoda;Incirrata;Octopodidae;Octopus;Octopus sinensis

UdeM00000003450 225164 96.3 UdeM00000003450 XP\_009047897.1 56.5  
92 32 2 9 100 23 106 3.80E-17 96.3 225164  
cellular

organisms;Eukaryota;Opisthokonta;Metazoa;Eumetazoa;Bilateria;Protostomia;Spiralia;Lophotrochozoa;Mollusca;Gastropoda;Patellogastropoda;Lottioidea;Lottiidae;Lottia;Lottia gigantea

UdeM00000003451 6596 412.1 UdeM00000003451 XP\_045158657.1 71.8 305  
82 2 1 305 1 301 6.00E-112 412.1 6596 cellular

organisms;Eukaryota;Opisthokonta;Metazoa;Eumetazoa;Bilateria;Protostomia;Spiralia;Lophotrochozoa;Mollusca;Bivalvia;Autobranchia;Heteroconchia;Euherodonta;Imparidentia;Venerida;Veneroidea;Veneridae;Mercenaria;Mercenaria mercenaria

UdeM00000003452 29159 372.5 UdeM00000003452 XP\_034310892.1 74.1 232  
60 0 1 232 288 519 4.00E-100 372.5 29159 cellular

organisms;Eukaryota;Opisthokonta;Metazoa;Eumetazoa;Bilateria;Protostomia;Spiralia;Lophotrochozoa;Mollusca;Bivalvia;Autobranchia;Pteriormorphia;Ostreida;Ostreoidea;Ostreidae;Crassostrea;Crassostrea gigas

UdeM00000003453 6596 641 UdeM00000003453 XP\_045190527.1 49.5 656  
320 5 57 707 3 652 1.80E-180 641 6596 cellular

organisms;Eukaryota;Opisthokonta;Metazoa;Eumetazoa;Bilateria;Protostomia;Spiralia;Lophotrochozoa;Mollusca;Bivalvia;Autobranchia;Heteroconchia;Euherodonta;Imparidentia;Venerida;Veneroidea;Veneridae;Mercenaria;Mercenaria mercenaria

UdeM00000003454 6596 309.7 UdeM00000003454 XP\_045158660.1 56.9 255  
106 3 20 273 28 279 3.70E-81 309.7 6596 cellular

organisms;Eukaryota;Opisthokonta;Metazoa;Eumetazoa;Bilateria;Protostomia;Spiralia;Lophotrochozoa;Mollusca;Bivalvia;Autobranchia;Heteroconchia;Euherodonta;Imparidentia;Venerida;Veneroidea;Veneridae;Mercenaria;Mercenaria mercenaria

UdeM00000003455 6596 698.7 UdeM00000003455 XP\_045158663.1 75.9 424  
101 1 52 475 103 525 5.00E-198 698.7 6596 cellular

organisms;Eukaryota;Opisthokonta;Metazoa;Eumetazoa;Bilateria;Protostomia;Spiralia;Lophotrochozoa;Mollusca;Bivalvia;Autobranchia;Heteroconchia;Euherodonta;Imparidentia;Venerida;Veneroidea;Veneridae;Mercenaria;Mercenaria mercenaria

UdeM00000003456 6573 73.6 UdeM00000003456 XP\_021363087.1 48.8 84  
41 2 9 91 9 91 3.60E-10 73.6 6573 cellular

organisms;Eukaryota;Opisthokonta;Metazoa;Eumetazoa;Bilateria;Protostomia;Spiralia;Lophotrochozoa;Mollusca;Bivalvia;Autobranchia;Pteriormorphia;Pectinida;Pectinoidea;Pectinidae;Mizuhopecten;Mizuhopecten yessoensis

UdeM00000003458 1735272 2564.6 UdeM00000003458 XP\_041360035.1  
 76.8 1792 396 8 1 1789 6 1781 0.00E+00 2564.6  
 1735272 cellular  
 organisms;Eukaryota;Opisthokonta;Metazoa;Eumetazoa;Bilateria;Protostomia;  
 Spiralia;Lophotrochozoa;Mollusca;Gastropoda;Neomphalina;Neomphaloidea;Pel  
 tospiridae;Gigantopelta;Gigantopelta aegis  
 UdeM00000003459 6565 623.6 UdeM00000003459 XP\_022317390.1 91.5 329  
 28 0 1 329 1 329 1.40E-175 623.6 6565 cellular  
 organisms;Eukaryota;Opisthokonta;Metazoa;Eumetazoa;Bilateria;Protostomia;  
 Spiralia;Lophotrochozoa;Mollusca;Bivalvia;Autobranchia;Pteriormorphia;Ostr  
 eida;Ostreoidea;Ostreidae;Crassostrea;Crassostrea virginica  
 UdeM00000003460 29159 354.8 UdeM00000003460 XP\_034313302.1 73.6 242  
 64 0 1 242 1 242 1.20E-94 354.8 29159 cellular  
 organisms;Eukaryota;Opisthokonta;Metazoa;Eumetazoa;Bilateria;Protostomia;  
 Spiralia;Lophotrochozoa;Mollusca;Bivalvia;Autobranchia;Pteriormorphia;Ostr  
 eida;Ostreoidea;Ostreidae;Crassostrea;Crassostrea gigas  
 UdeM00000003462 6579 325.1 UdeM00000003462 XP\_033738146.1 71.4 231  
 65 1 19 248 57 287 2.20E-85 325.1 6579 cellular  
 organisms;Eukaryota;Opisthokonta;Metazoa;Eumetazoa;Bilateria;Protostomia;  
 Spiralia;Lophotrochozoa;Mollusca;Bivalvia;Autobranchia;Pteriormorphia;Pect  
 inida;Pectinoidea;Pectinidae;Pecten;Pecten maximus  
 UdeM00000003463 400727 431.8 UdeM00000003463 XP\_025109624.1 59.9  
 344 131 1 1 344 4 340 8.30E-118 431.8 400727  
 cellular  
 organisms;Eukaryota;Opisthokonta;Metazoa;Eumetazoa;Bilateria;Protostomia;  
 Spiralia;Lophotrochozoa;Mollusca;Gastropoda;Caenogastropoda;Architaeniogl  
 ossa;Ampullarioidea;Ampullariidae;Pomacea;Pomacea canaliculata  
 UdeM00000003464 6596 121.3 UdeM00000003464 XP\_045158907.1 82.4 68  
 12 0 13 80 163 230 6.90E-25 121.3 6596 cellular  
 organisms;Eukaryota;Opisthokonta;Metazoa;Eumetazoa;Bilateria;Protostomia;  
 Spiralia;Lophotrochozoa;Mollusca;Bivalvia;Autobranchia;Heteroconchia;Euhe  
 terodonta;Imparidentia;Venerida;Veneroidea;Veneridae;Mercenaria;Mercenari  
 a mercenaria  
 UdeM00000003465 6596 163.3 UdeM00000003465 XP\_045158907.1 75 104  
 26 0 487 590 233 336 9.40E-37 163.3 6596 cellular  
 organisms;Eukaryota;Opisthokonta;Metazoa;Eumetazoa;Bilateria;Protostomia;  
 Spiralia;Lophotrochozoa;Mollusca;Bivalvia;Autobranchia;Heteroconchia;Euhe  
 terodonta;Imparidentia;Venerida;Veneroidea;Veneridae;Mercenaria;Mercenari  
 a mercenaria  
 UdeM00000003466 6573 2141.7 UdeM00000003466 XP\_021357229.1 77.4  
 1391 306 7 1 1385 8 1395 0.00E+00 2141.7 6573  
 cellular  
 organisms;Eukaryota;Opisthokonta;Metazoa;Eumetazoa;Bilateria;Protostomia;  
 Spiralia;Lophotrochozoa;Mollusca;Bivalvia;Autobranchia;Pteriormorphia;Pect  
 inida;Pectinoidea;Pectinidae;Mizuhopecten;Mizuhopecten yessoensis  
 UdeM00000003467 1735272 401.7 UdeM00000003467 XP\_041358440.1 58.7  
 339 138 2 36 373 8 345 1.50E-108 401.7 1735272  
 cellular  
 organisms;Eukaryota;Opisthokonta;Metazoa;Eumetazoa;Bilateria;Protostomia;  
 Spiralia;Lophotrochozoa;Mollusca;Gastropoda;Neomphalina;Neomphaloidea;Pel  
 tospiridae;Gigantopelta;Gigantopelta aegis  
 UdeM00000003468 29159 60.5 UdeM00000003468 XP\_034302955.1 48.5 66  
 31 1 4 66 328 393 1.30E-06 60.5 29159 cellular  
 organisms;Eukaryota;Opisthokonta;Metazoa;Eumetazoa;Bilateria;Protostomia;

Spiralia;Lophotrochozoa;Mollusca;Bivalvia;Autobranchia;Pteriormorphia;Ostr  
eida;Ostreoidea;Ostreidae;Crassostrea;Crassostrea gigas  
UdeM00000003469 6596 933.3 UdeM00000003469 XP\_045158923.1 70 617  
182 2 80 694 975 1590 1.70E-268 933.3 6596 cellular  
organisms;Eukaryota;Opisthokonta;Metazoa;Eumetazoa;Bilateria;Protostomia;  
Spiralia;Lophotrochozoa;Mollusca;Bivalvia;Autobranchia;Heteroconchia;Euhe  
terodonta;Imparidentia;Venerida;Veneroidea;Veneridae;Mercenaria;Mercenari  
a mercenaria  
UdeM00000003470 6596 1094 UdeM00000003470 XP\_045158924.1 57.8 959  
395 4 43 998 27 978 0.00E+00 1094 6596 cellular  
organisms;Eukaryota;Opisthokonta;Metazoa;Eumetazoa;Bilateria;Protostomia;  
Spiralia;Lophotrochozoa;Mollusca;Bivalvia;Autobranchia;Heteroconchia;Euhe  
terodonta;Imparidentia;Venerida;Veneroidea;Veneridae;Mercenaria;Mercenari  
a mercenaria  
UdeM00000003473 6596 278.1 UdeM00000003473 XP\_045159029.1 49.5 440  
187 11 1 409 795 1230 1.80E-71 278.1 6596 cellular  
organisms;Eukaryota;Opisthokonta;Metazoa;Eumetazoa;Bilateria;Protostomia;  
Spiralia;Lophotrochozoa;Mollusca;Bivalvia;Autobranchia;Heteroconchia;Euhe  
terodonta;Imparidentia;Venerida;Veneroidea;Veneridae;Mercenaria;Mercenari  
a mercenaria  
UdeM00000003471 6596 1424.5 UdeM00000003471 XP\_045159031.1 71.6  
1078 270 12 18 1063 140 1213 0.00E+00 1424.5 6596  
cellular  
organisms;Eukaryota;Opisthokonta;Metazoa;Eumetazoa;Bilateria;Protostomia;  
Spiralia;Lophotrochozoa;Mollusca;Bivalvia;Autobranchia;Heteroconchia;Euhe  
terodonta;Imparidentia;Venerida;Veneroidea;Veneridae;Mercenaria;Mercenari  
a mercenaria  
UdeM00000003472 6596 1422.1 UdeM00000003472 XP\_045159031.1 71.1  
1078 275 12 18 1062 140 1213 0.00E+00 1422.1 6596  
cellular  
organisms;Eukaryota;Opisthokonta;Metazoa;Eumetazoa;Bilateria;Protostomia;  
Spiralia;Lophotrochozoa;Mollusca;Bivalvia;Autobranchia;Heteroconchia;Euhe  
terodonta;Imparidentia;Venerida;Veneroidea;Veneridae;Mercenaria;Mercenari  
a mercenaria  
UdeM00000003474 6596 482.6 UdeM00000003474 XP\_045158339.1 78.4 301  
62 2 1 299 1 300 3.70E-133 482.6 6596 cellular  
organisms;Eukaryota;Opisthokonta;Metazoa;Eumetazoa;Bilateria;Protostomia;  
Spiralia;Lophotrochozoa;Mollusca;Bivalvia;Autobranchia;Heteroconchia;Euhe  
terodonta;Imparidentia;Venerida;Veneroidea;Veneridae;Mercenaria;Mercenari  
a mercenaria  
UdeM00000003475 6596 387.1 UdeM00000003475 XP\_045158339.1 82.3 220  
39 0 1 220 81 300 1.60E-104 387.1 6596 cellular  
organisms;Eukaryota;Opisthokonta;Metazoa;Eumetazoa;Bilateria;Protostomia;  
Spiralia;Lophotrochozoa;Mollusca;Bivalvia;Autobranchia;Heteroconchia;Euhe  
terodonta;Imparidentia;Venerida;Veneroidea;Veneridae;Mercenaria;Mercenari  
a mercenaria  
UdeM00000003476 6596 475.3 UdeM00000003476 XP\_045158339.1 78.7 296  
60 2 1 294 1 295 5.60E-131 475.3 6596 cellular  
organisms;Eukaryota;Opisthokonta;Metazoa;Eumetazoa;Bilateria;Protostomia;  
Spiralia;Lophotrochozoa;Mollusca;Bivalvia;Autobranchia;Heteroconchia;Euhe  
terodonta;Imparidentia;Venerida;Veneroidea;Veneridae;Mercenaria;Mercenari  
a mercenaria  
UdeM00000003477 6412 102.8 UdeM00000003477 XP\_009016697.1 53 100  
43 1 17 112 146 245 2.90E-19 102.8 6412 cellular

organisms;Eukaryota;Opisthokonta;Metazoa;Eumetazoa;Bilateria;Protostomia;  
Spiralia;Lophotrochozoa;Annelida;Clitellata;Hirudinea;Rhynchobdellida;Glo  
ssisphoniidae;Helobdella;Helobdella robusta  
UdeM00000003478 6565 209.1 UdeM00000003478 XP\_022317621.1 81.2 117  
22 0 1 117 135 251 3.00E-51 209.1 6565 cellular  
organisms;Eukaryota;Opisthokonta;Metazoa;Eumetazoa;Bilateria;Protostomia;  
Spiralia;Lophotrochozoa;Mollusca;Bivalvia;Autobranchia;Pteriomorpha;Ostr  
eida;Ostreoidea;Ostreidae;Crassostrea;Crassostrea virginica  
UdeM00000003479 29159 1612.8 UdeM00000003479 XP\_034312554.1 70.8  
1330 316 10 255 1575 309 1574 0.00E+00 1612.8  
29159 cellular  
organisms;Eukaryota;Opisthokonta;Metazoa;Eumetazoa;Bilateria;Protostomia;  
Spiralia;Lophotrochozoa;Mollusca;Bivalvia;Autobranchia;Pteriomorpha;Ostr  
eida;Ostreoidea;Ostreidae;Crassostrea;Crassostrea gigas  
UdeM00000003480 29159 1612.4 UdeM00000003480 XP\_034312554.1 70.7  
1331 316 10 255 1576 309 1574 0.00E+00 1612.4  
29159 cellular  
organisms;Eukaryota;Opisthokonta;Metazoa;Eumetazoa;Bilateria;Protostomia;  
Spiralia;Lophotrochozoa;Mollusca;Bivalvia;Autobranchia;Pteriomorpha;Ostr  
eida;Ostreoidea;Ostreidae;Crassostrea;Crassostrea gigas  
UdeM00000003481 6565 456.8 UdeM00000003481 XP\_022316534.1 45.4 679  
296 16 1 633 1 650 6.50E-125 456.8 6565 cellular  
organisms;Eukaryota;Opisthokonta;Metazoa;Eumetazoa;Bilateria;Protostomia;  
Spiralia;Lophotrochozoa;Mollusca;Bivalvia;Autobranchia;Pteriomorpha;Ostr  
eida;Ostreoidea;Ostreidae;Crassostrea;Crassostrea virginica  
UdeM00000003483 6596 747.7 UdeM00000003483 XP\_045160506.1 41.9 1198  
511 25 16 1155 65 1135 2.30E-212 747.7 6596 cellular  
organisms;Eukaryota;Opisthokonta;Metazoa;Eumetazoa;Bilateria;Protostomia;  
Spiralia;Lophotrochozoa;Mollusca;Bivalvia;Autobranchia;Heteroconchia;Euhe  
terodonta;Imparidentia;Venerida;Veneroidea;Veneridae;Mercenaria;Mercenari  
a mercenaria  
UdeM00000003484 6596 622.1 UdeM00000003484 XP\_045160511.1 61.4 516  
186 5 17 523 12 523 6.60E-175 622.1 6596 cellular  
organisms;Eukaryota;Opisthokonta;Metazoa;Eumetazoa;Bilateria;Protostomia;  
Spiralia;Lophotrochozoa;Mollusca;Bivalvia;Autobranchia;Heteroconchia;Euhe  
terodonta;Imparidentia;Venerida;Veneroidea;Veneridae;Mercenaria;Mercenari  
a mercenaria  
UdeM00000003485 6579 648.3 UdeM00000003485 XP\_033738002.1 62.3 541  
193 3 5 545 3 532 8.80E-183 648.3 6579 cellular  
organisms;Eukaryota;Opisthokonta;Metazoa;Eumetazoa;Bilateria;Protostomia;  
Spiralia;Lophotrochozoa;Mollusca;Bivalvia;Autobranchia;Pteriomorpha;Pect  
inida;Pectinoidea;Pectinidae;Pecten;Pecten maximus  
UdeM00000003486 6579 149.8 UdeM00000003486 XP\_033738004.1 46.2 171  
85 3 20 190 18 181 4.90E-33 149.8 6579 cellular  
organisms;Eukaryota;Opisthokonta;Metazoa;Eumetazoa;Bilateria;Protostomia;  
Spiralia;Lophotrochozoa;Mollusca;Bivalvia;Autobranchia;Pteriomorpha;Pect  
inida;Pectinoidea;Pectinidae;Pecten;Pecten maximus  
UdeM00000003487 6596 372.1 UdeM00000003487 XP\_045160319.1 41.4 561  
282 12 24 558 2 541 1.30E-99 372.1 6596 cellular  
organisms;Eukaryota;Opisthokonta;Metazoa;Eumetazoa;Bilateria;Protostomia;  
Spiralia;Lophotrochozoa;Mollusca;Bivalvia;Autobranchia;Heteroconchia;Euhe  
terodonta;Imparidentia;Venerida;Veneroidea;Veneridae;Mercenaria;Mercenari  
a mercenaria

UdeM00000003488 6596 104.8 UdeM00000003488 XP\_045204471.1 47.7 111  
 53 1 2 107 10 120 1.00E-19 104.8 6596 cellular  
 organisms;Eukaryota;Opisthokonta;Metazoa;Eumetazoa;Bilateria;Protostomia;  
 Spiralia;Lophotrochozoa;Mollusca;Bivalvia;Autobranchia;Heteroconchia;Euhe  
 terodonta;Imparidentia;Venerida;Veneroidea;Veneridae;Mercenaria;Mercenari  
 a mercenaria  
 UdeM00000003489 6596 113.2 UdeM00000003489 XP\_045170381.1 52.3 109  
 46 2 5 107 3 111 2.90E-22 113.2 6596 cellular  
 organisms;Eukaryota;Opisthokonta;Metazoa;Eumetazoa;Bilateria;Protostomia;  
 Spiralia;Lophotrochozoa;Mollusca;Bivalvia;Autobranchia;Heteroconchia;Euhe  
 terodonta;Imparidentia;Venerida;Veneroidea;Veneridae;Mercenaria;Mercenari  
 a mercenaria  
 UdeM00000003490 6596 256.5 UdeM00000003490 XP\_045157611.1 51 257  
 122 2 182 434 78 334 6.20E-65 256.5 6596 cellular  
 organisms;Eukaryota;Opisthokonta;Metazoa;Eumetazoa;Bilateria;Protostomia;  
 Spiralia;Lophotrochozoa;Mollusca;Bivalvia;Autobranchia;Heteroconchia;Euhe  
 terodonta;Imparidentia;Venerida;Veneroidea;Veneridae;Mercenaria;Mercenari  
 a mercenaria  
 UdeM00000003491 6596 306.6 UdeM00000003491 XP\_045157611.1 51.4 294  
 139 2 9 298 78 371 3.50E-80 306.6 6596 cellular  
 organisms;Eukaryota;Opisthokonta;Metazoa;Eumetazoa;Bilateria;Protostomia;  
 Spiralia;Lophotrochozoa;Mollusca;Bivalvia;Autobranchia;Heteroconchia;Euhe  
 terodonta;Imparidentia;Venerida;Veneroidea;Veneridae;Mercenaria;Mercenari  
 a mercenaria  
 UdeM00000003492 6565 435.3 UdeM00000003492 XP\_022339409.1 48.7 472  
 225 6 12 480 6 463 1.10E-118 435.3 6565 cellular  
 organisms;Eukaryota;Opisthokonta;Metazoa;Eumetazoa;Bilateria;Protostomia;  
 Spiralia;Lophotrochozoa;Mollusca;Bivalvia;Autobranchia;Pteriomorphia;Ostr  
 eida;Ostreoidea;Ostreidae;Crassostrea;Crassostrea virginica  
 UdeM00000003493 6565 439.1 UdeM00000003493 XP\_022339409.1 48.8 477  
 225 7 94 566 6 467 8.50E-120 439.1 6565 cellular  
 organisms;Eukaryota;Opisthokonta;Metazoa;Eumetazoa;Bilateria;Protostomia;  
 Spiralia;Lophotrochozoa;Mollusca;Bivalvia;Autobranchia;Pteriomorphia;Ostr  
 eida;Ostreoidea;Ostreidae;Crassostrea;Crassostrea virginica  
 UdeM00000003494 29159 305.4 UdeM00000003494 XP\_011455684.2 74.3 214  
 50 2 76 288 236 445 8.30E-80 305.4 29159 cellular  
 organisms;Eukaryota;Opisthokonta;Metazoa;Eumetazoa;Bilateria;Protostomia;  
 Spiralia;Lophotrochozoa;Mollusca;Bivalvia;Autobranchia;Pteriomorphia;Ostr  
 eida;Ostreoidea;Ostreidae;Crassostrea;Crassostrea gigas  
 UdeM00000003495 7725 76.6 UdeM00000003495 XP\_039259523.1 46.5 71  
 38 0 1 71 85 155 1.40E-11 76.6 7725 cellular  
 organisms;Eukaryota;Opisthokonta;Metazoa;Eumetazoa;Bilateria;Deuterostomi  
 a;Chordata;Tunicata;Ascidiacea;Stolidobranchia;Styelidae;Styela;Styela  
 clava  
 UdeM00000003497 6565 703 UdeM00000003497 XP\_022317755.1 75.2 427  
 106 0 2 428 95 521 2.40E-199 703 6565 cellular  
 organisms;Eukaryota;Opisthokonta;Metazoa;Eumetazoa;Bilateria;Protostomia;  
 Spiralia;Lophotrochozoa;Mollusca;Bivalvia;Autobranchia;Pteriomorphia;Ostr  
 eida;Ostreoidea;Ostreidae;Crassostrea;Crassostrea virginica  
 UdeM00000003498 6579 1087.4 UdeM00000003498 XP\_033738305.1 65.1  
 879 261 11 1 870 1 842 0.00E+00 1087.4 6579  
 cellular  
 organisms;Eukaryota;Opisthokonta;Metazoa;Eumetazoa;Bilateria;Protostomia;

Spiralia;Lophotrochozoa;Mollusca;Bivalvia;Autobranchia;Pteriormorphia;Pectinida;Pectinoidea;Pectinidae;Pecten;Pecten maximus  
UdeM00000003499 6596 388.7 UdeM00000003499 XP\_045160266.1 67.5 265  
85 1 1 265 3 266 6.10E-105 388.7 6596 cellular  
organisms;Eukaryota;Opisthokonta;Metazoa;Eumetazoa;Bilateria;Protostomia;  
Spiralia;Lophotrochozoa;Mollusca;Bivalvia;Autobranchia;Heteroconchia;Euherodonta;Imparidentia;Venerida;Veneroidea;Veneridae;Mercenaria;Mercenaria mercenaria  
UdeM00000003500 6596 618.2 UdeM00000003500 XP\_045160265.1 50 602  
300 1 6 607 16 616 1.20E-173 618.2 6596 cellular  
organisms;Eukaryota;Opisthokonta;Metazoa;Eumetazoa;Bilateria;Protostomia;  
Spiralia;Lophotrochozoa;Mollusca;Bivalvia;Autobranchia;Heteroconchia;Euherodonta;Imparidentia;Venerida;Veneroidea;Veneridae;Mercenaria;Mercenaria mercenaria  
UdeM00000003502 37653 435.6 UdeM00000003502 XP\_014784143.1 98.2 219  
4 0 1 219 7 225 3.60E-119 435.6 37653 cellular  
organisms;Eukaryota;Opisthokonta;Metazoa;Eumetazoa;Bilateria;Protostomia;  
Spiralia;Lophotrochozoa;Mollusca;Cephalopoda;Coleoidea;Octopodiformes;Octopoda;Incirrata;Octopodidae;Octopus;Octopus bimaculoides  
UdeM00000003503 37653 235.3 UdeM00000003503 XP\_014784143.1 99.1 115  
1 0 1 115 7 121 3.80E-59 235.3 37653 cellular  
organisms;Eukaryota;Opisthokonta;Metazoa;Eumetazoa;Bilateria;Protostomia;  
Spiralia;Lophotrochozoa;Mollusca;Cephalopoda;Coleoidea;Octopodiformes;Octopoda;Incirrata;Octopodidae;Octopus;Octopus bimaculoides  
UdeM00000003504 29159 430.3 UdeM00000003504 XP\_011432071.2 59.1 337  
131 3 1 335 1 332 2.30E-117 430.3 29159 cellular  
organisms;Eukaryota;Opisthokonta;Metazoa;Eumetazoa;Bilateria;Protostomia;  
Spiralia;Lophotrochozoa;Mollusca;Bivalvia;Autobranchia;Pteriormorphia;Ostreida;Ostreoidea;Ostreidae;Crassostrea;Crassostrea gigas  
UdeM00000003505 2607531 459.9 UdeM00000003505 XP\_029641982.1 45.6  
559 242 8 6 507 7 560 4.40E-126 459.9 2607531  
cellular  
organisms;Eukaryota;Opisthokonta;Metazoa;Eumetazoa;Bilateria;Protostomia;  
Spiralia;Lophotrochozoa;Mollusca;Cephalopoda;Coleoidea;Octopodiformes;Octopoda;Incirrata;Octopodidae;Octopus;Octopus sinensis  
UdeM00000003506 6596 270 UdeM00000003506 XP\_045160416.1 45.6 406  
166 16 35 400 41 431 4.80E-69 270 6596 cellular  
organisms;Eukaryota;Opisthokonta;Metazoa;Eumetazoa;Bilateria;Protostomia;  
Spiralia;Lophotrochozoa;Mollusca;Bivalvia;Autobranchia;Heteroconchia;Euherodonta;Imparidentia;Venerida;Veneroidea;Veneridae;Mercenaria;Mercenaria mercenaria  
UdeM00000003507 6565 236.5 UdeM00000003507 XP\_022314794.1 74.4 156  
40 0 10 165 175 330 2.40E-59 236.5 6565 cellular  
organisms;Eukaryota;Opisthokonta;Metazoa;Eumetazoa;Bilateria;Protostomia;  
Spiralia;Lophotrochozoa;Mollusca;Bivalvia;Autobranchia;Pteriormorphia;Ostreida;Ostreoidea;Ostreidae;Crassostrea;Crassostrea virginica  
UdeM00000003508 6596 200.3 UdeM00000003508 XP\_045158827.1 64.7 150  
52 1 1 149 1 150 3.00E-48 200.3 6596 cellular  
organisms;Eukaryota;Opisthokonta;Metazoa;Eumetazoa;Bilateria;Protostomia;  
Spiralia;Lophotrochozoa;Mollusca;Bivalvia;Autobranchia;Heteroconchia;Euherodonta;Imparidentia;Venerida;Veneroidea;Veneridae;Mercenaria;Mercenaria mercenaria  
UdeM00000003509 6596 200.3 UdeM00000003509 XP\_045158827.1 64.7 150  
52 1 1 149 1 150 2.30E-48 200.3 6596 cellular



organisms;Eukaryota;Opisthokonta;Metazoa;Eumetazoa;Bilateria;Protostomia;Spiralia;Lophotrochozoa;Mollusca;Bivalvia;Autobranchia;Heteroconchia;Euherodonta;Imparidentia;Venerida;Veneroidea;Veneridae;Mercenaria;Mercenaria mercenaria

UdeM00000003511 6596 124.4 UdeM00000003511 XP\_045158819.1 41.8 177  
89 6 6 174 161 331 1.40E-25 124.4 6596 cellular

organisms;Eukaryota;Opisthokonta;Metazoa;Eumetazoa;Bilateria;Protostomia;Spiralia;Lophotrochozoa;Mollusca;Bivalvia;Autobranchia;Heteroconchia;Euherodonta;Imparidentia;Venerida;Veneroidea;Veneridae;Mercenaria;Mercenaria mercenaria

UdeM00000003513 6596 360.5 UdeM00000003513 XP\_045184054.1 31.8 881  
519 22 459 1273 10 874 8.60E-96 360.5 6596 cellular

organisms;Eukaryota;Opisthokonta;Metazoa;Eumetazoa;Bilateria;Protostomia;Spiralia;Lophotrochozoa;Mollusca;Bivalvia;Autobranchia;Heteroconchia;Euherodonta;Imparidentia;Venerida;Veneroidea;Veneridae;Mercenaria;Mercenaria mercenaria

UdeM00000003515 6596 307.4 UdeM00000003515 XP\_045158818.1 71.5 186  
53 0 9 194 39 224 1.30E-80 307.4 6596 cellular

organisms;Eukaryota;Opisthokonta;Metazoa;Eumetazoa;Bilateria;Protostomia;Spiralia;Lophotrochozoa;Mollusca;Bivalvia;Autobranchia;Heteroconchia;Euherodonta;Imparidentia;Venerida;Veneroidea;Veneridae;Mercenaria;Mercenaria mercenaria

UdeM00000003514 6596 308.5 UdeM00000003514 XP\_045158818.1 66.7 201  
67 0 29 229 24 224 7.00E-81 308.5 6596 cellular

organisms;Eukaryota;Opisthokonta;Metazoa;Eumetazoa;Bilateria;Protostomia;Spiralia;Lophotrochozoa;Mollusca;Bivalvia;Autobranchia;Heteroconchia;Euherodonta;Imparidentia;Venerida;Veneroidea;Veneridae;Mercenaria;Mercenaria mercenaria

UdeM00000003517 6596 163.3 UdeM00000003517 XP\_045158816.1 57.9 140  
52 2 1 133 1 140 2.20E-37 163.3 6596 cellular

organisms;Eukaryota;Opisthokonta;Metazoa;Eumetazoa;Bilateria;Protostomia;Spiralia;Lophotrochozoa;Mollusca;Bivalvia;Autobranchia;Heteroconchia;Euherodonta;Imparidentia;Venerida;Veneroidea;Veneridae;Mercenaria;Mercenaria mercenaria

UdeM00000003516 6596 189.9 UdeM00000003516 XP\_045158816.1 59.1 159  
58 2 1 152 1 159 1.30E-44 189.9 6596 cellular

organisms;Eukaryota;Opisthokonta;Metazoa;Eumetazoa;Bilateria;Protostomia;Spiralia;Lophotrochozoa;Mollusca;Bivalvia;Autobranchia;Heteroconchia;Euherodonta;Imparidentia;Venerida;Veneroidea;Veneridae;Mercenaria;Mercenaria mercenaria

UdeM00000003518 6596 733 UdeM00000003518 XP\_045158816.1 74.7 470  
119 0 149 618 286 755 3.10E-208 733 6596 cellular

organisms;Eukaryota;Opisthokonta;Metazoa;Eumetazoa;Bilateria;Protostomia;Spiralia;Lophotrochozoa;Mollusca;Bivalvia;Autobranchia;Heteroconchia;Euherodonta;Imparidentia;Venerida;Veneroidea;Veneridae;Mercenaria;Mercenaria mercenaria

UdeM00000003519 1735272 84 UdeM00000003519 XP\_041360327.1 50.6  
83 38 1 1 80 1 83 6.80E-13 84 1735272  
cellular

organisms;Eukaryota;Opisthokonta;Metazoa;Eumetazoa;Bilateria;Protostomia;Spiralia;Lophotrochozoa;Mollusca;Gastropoda;Neomphalina;Neomphaloidea;Peltospiridae;Gigantopelta;Gigantopelta aegis

UdeM00000003520 1735272 84 UdeM00000003520 XP\_041360327.1 50.6  
83 38 1 1 80 1 83 6.60E-13 84 1735272

cellular  
organisms;Eukaryota;Opisthokonta;Metazoa;Eumetazoa;Bilateria;Protostomia;  
Spiralia;Lophotrochozoa;Mollusca;Gastropoda;Neomphalina;Neomphaloidea;Pel  
tospiridae;Gigantopelta;Gigantopelta aegis  
UdeM00000003521 6579 180.3 UdeM00000003521 XP\_033738842.1 37.9 327  
178 8 3 314 2 318 3.90E-42 180.3 6579 cellular  
organisms;Eukaryota;Opisthokonta;Metazoa;Eumetazoa;Bilateria;Protostomia;  
Spiralia;Lophotrochozoa;Mollusca;Bivalvia;Autobranchia;Pteriormorphia;Pect  
inida;Pectinoidea;Pectinidae;Pecten;Pecten maximus  
UdeM00000003522 6596 409.1 UdeM00000003522 XP\_045159595.1 78 254  
51 1 1 249 1 254 4.20E-111 409.1 6596 cellular  
organisms;Eukaryota;Opisthokonta;Metazoa;Eumetazoa;Bilateria;Protostomia;  
Spiralia;Lophotrochozoa;Mollusca;Bivalvia;Autobranchia;Heteroconchia;Euhe  
terodonta;Imparidentia;Venerida;Veneroidea;Veneridae;Mercenaria;Mercenari  
a mercenaria  
UdeM00000003523 7719 176.4 UdeM00000003523 XP\_004227365.1 55 140  
62 1 8 146 23 162 2.60E-41 176.4 7719 cellular  
organisms;Eukaryota;Opisthokonta;Metazoa;Eumetazoa;Bilateria;Deuterostomi  
a;Chordata;Tunicata;Ascidiacea;Phlebobranchia;Cionidae;Ciona;Ciona  
intestinalis  
UdeM00000003524 6596 350.1 UdeM00000003524 XP\_045159595.1 69.7 241  
73 0 1 241 1 241 2.30E-93 350.1 6596 cellular  
organisms;Eukaryota;Opisthokonta;Metazoa;Eumetazoa;Bilateria;Protostomia;  
Spiralia;Lophotrochozoa;Mollusca;Bivalvia;Autobranchia;Heteroconchia;Euhe  
terodonta;Imparidentia;Venerida;Veneroidea;Veneridae;Mercenaria;Mercenari  
a mercenaria  
UdeM00000003525 6596 149.8 UdeM00000003525 XP\_045159594.1 50.8 130  
64 0 6 135 15 144 2.50E-33 149.8 6596 cellular  
organisms;Eukaryota;Opisthokonta;Metazoa;Eumetazoa;Bilateria;Protostomia;  
Spiralia;Lophotrochozoa;Mollusca;Bivalvia;Autobranchia;Heteroconchia;Euhe  
terodonta;Imparidentia;Venerida;Veneroidea;Veneridae;Mercenaria;Mercenari  
a mercenaria  
UdeM00000003526 6565 350.9 UdeM00000003526 XP\_022318692.1 75.4 211  
52 0 6 216 1 211 1.20E-93 350.9 6565 cellular  
organisms;Eukaryota;Opisthokonta;Metazoa;Eumetazoa;Bilateria;Protostomia;  
Spiralia;Lophotrochozoa;Mollusca;Bivalvia;Autobranchia;Pteriormorphia;Ostr  
eida;Ostreoidea;Ostreidae;Crassostrea;Crassostrea virginica  
UdeM00000003527 6596 476.9 UdeM00000003527 XP\_045159844.1 44.2 735  
332 16 165 881 225 899 5.80E-131 476.9 6596 cellular  
organisms;Eukaryota;Opisthokonta;Metazoa;Eumetazoa;Bilateria;Protostomia;  
Spiralia;Lophotrochozoa;Mollusca;Bivalvia;Autobranchia;Heteroconchia;Euhe  
terodonta;Imparidentia;Venerida;Veneroidea;Veneridae;Mercenaria;Mercenari  
a mercenaria  
UdeM00000003528 6596 322.8 UdeM00000003528 XP\_045159845.1 65.4 228  
74 1 1 223 1 228 3.50E-85 322.8 6596 cellular  
organisms;Eukaryota;Opisthokonta;Metazoa;Eumetazoa;Bilateria;Protostomia;  
Spiralia;Lophotrochozoa;Mollusca;Bivalvia;Autobranchia;Heteroconchia;Euhe  
terodonta;Imparidentia;Venerida;Veneroidea;Veneridae;Mercenaria;Mercenari  
a mercenaria  
UdeM00000003531 6573 262.7 UdeM00000003531 XP\_021366163.1 96.9 130  
4 0 1 130 7 136 2.50E-67 262.7 6573 cellular  
organisms;Eukaryota;Opisthokonta;Metazoa;Eumetazoa;Bilateria;Protostomia;  
Spiralia;Lophotrochozoa;Mollusca;Bivalvia;Autobranchia;Pteriormorphia;Pect  
inida;Pectinoidea;Pectinidae;Mizuhopecten;Mizuhopecten yessoensis

UdeM00000003530 6596 875.5 UdeM00000003530 XP\_045159849.1 76.8 565  
 121 5 1 556 1 564 3.50E-251 875.5 6596 cellular  
 organisms;Eukaryota;Opisthokonta;Metazoa;Eumetazoa;Bilateria;Protostomia;  
 Spiralia;Lophotrochozoa;Mollusca;Bivalvia;Autobranchia;Heteroconchia;Euhe  
 terodonta;Imparidentia;Venerida;Veneroidea;Veneridae;Mercenaria;Mercenari  
 a mercenaria  
 UdeM00000003529 6596 876.7 UdeM00000003529 XP\_045159854.1 82.9 519  
 70 2 1 500 1 519 1.40E-251 876.7 6596 cellular  
 organisms;Eukaryota;Opisthokonta;Metazoa;Eumetazoa;Bilateria;Protostomia;  
 Spiralia;Lophotrochozoa;Mollusca;Bivalvia;Autobranchia;Heteroconchia;Euhe  
 terodonta;Imparidentia;Venerida;Veneroidea;Veneridae;Mercenaria;Mercenari  
 a mercenaria  
 UdeM00000003533 29159 65.1 UdeM00000003533 XP\_034299474.1 33 112  
 72 2 2 112 646 755 6.60E-08 65.1 29159 cellular  
 organisms;Eukaryota;Opisthokonta;Metazoa;Eumetazoa;Bilateria;Protostomia;  
 Spiralia;Lophotrochozoa;Mollusca;Bivalvia;Autobranchia;Pteriormorphia;Ostr  
 eida;Ostreoidea;Ostreidae;Crassostrea;Crassostrea gigas  
 UdeM00000003534 29159 115.9 UdeM00000003534 XP\_034309203.1 24.3 482  
 241 12 9 490 15 372 1.50E-22 115.9 29159 cellular  
 organisms;Eukaryota;Opisthokonta;Metazoa;Eumetazoa;Bilateria;Protostomia;  
 Spiralia;Lophotrochozoa;Mollusca;Bivalvia;Autobranchia;Pteriormorphia;Ostr  
 eida;Ostreoidea;Ostreidae;Crassostrea;Crassostrea gigas  
 UdeM00000003535 37653 681.8 UdeM00000003535 XP\_014780139.1 68.3 505  
 150 6 1 499 2 502 6.60E-193 681.8 37653 cellular  
 organisms;Eukaryota;Opisthokonta;Metazoa;Eumetazoa;Bilateria;Protostomia;  
 Spiralia;Lophotrochozoa;Mollusca;Cephalopoda;Coleoidea;Octopodiformes;Oct  
 opoda;Incirrata;Octopodidae;Octopus;Octopus bimaculoides  
 UdeM00000003536 6596 521.2 UdeM00000003536 XP\_045160406.1 76.3 354  
 74 5 1 347 1 351 1.00E-144 521.2 6596 cellular  
 organisms;Eukaryota;Opisthokonta;Metazoa;Eumetazoa;Bilateria;Protostomia;  
 Spiralia;Lophotrochozoa;Mollusca;Bivalvia;Autobranchia;Heteroconchia;Euhe  
 terodonta;Imparidentia;Venerida;Veneroidea;Veneridae;Mercenaria;Mercenari  
 a mercenaria  
 UdeM00000003537 6565 319.3 UdeM00000003537 XP\_022319758.1 68.9 222  
 68 1 1 222 1 221 3.90E-84 319.3 6565 cellular  
 organisms;Eukaryota;Opisthokonta;Metazoa;Eumetazoa;Bilateria;Protostomia;  
 Spiralia;Lophotrochozoa;Mollusca;Bivalvia;Autobranchia;Pteriormorphia;Ostr  
 eida;Ostreoidea;Ostreidae;Crassostrea;Crassostrea virginica  
 UdeM00000003538 6596 329.7 UdeM00000003538 XP\_045160405.1 54.8 292  
 125 2 1 286 373 663 3.70E-87 329.7 6596 cellular  
 organisms;Eukaryota;Opisthokonta;Metazoa;Eumetazoa;Bilateria;Protostomia;  
 Spiralia;Lophotrochozoa;Mollusca;Bivalvia;Autobranchia;Heteroconchia;Euhe  
 terodonta;Imparidentia;Venerida;Veneroidea;Veneridae;Mercenaria;Mercenari  
 a mercenaria  
 UdeM00000003539 6596 631.7 UdeM00000003539 XP\_045159806.1 62.9 450  
 166 1 14 462 46 495 7.30E-178 631.7 6596 cellular  
 organisms;Eukaryota;Opisthokonta;Metazoa;Eumetazoa;Bilateria;Protostomia;  
 Spiralia;Lophotrochozoa;Mollusca;Bivalvia;Autobranchia;Heteroconchia;Euhe  
 terodonta;Imparidentia;Venerida;Veneroidea;Veneridae;Mercenaria;Mercenari  
 a mercenaria  
 UdeM00000003540 6596 438 UdeM00000003540 XP\_045159814.1 46.7 482  
 251 4 1 480 1 478 1.60E-119 438 6596 cellular  
 organisms;Eukaryota;Opisthokonta;Metazoa;Eumetazoa;Bilateria;Protostomia;  
 Spiralia;Lophotrochozoa;Mollusca;Bivalvia;Autobranchia;Heteroconchia;Euhe

terodonta;Imparidentia;Venerida;Veneroidea;Veneridae;Mercenaria;Mercenaria mercenaria

UdeM00000003541 6573 238 UdeM00000003541 XP\_021362206.1 56 218  
87 2 19 235 28 237 1.30E-59 238 6573 cellular

organisms;Eukaryota;Opisthokonta;Metazoa;Eumetazoa;Bilateria;Protostomia;Spiralia;Lophotrochozoa;Mollusca;Bivalvia;Autobranchia;Pteriomorpha;Pectinida;Pectinoidea;Pectinidae;Mizuhopecten;Mizuhopecten yessoensis

UdeM00000003542 1735272 152.5 UdeM00000003542 XP\_041360149.1 28.9  
346 227 10 1 341 245 576 9.80E-34 152.5 1735272  
cellular

organisms;Eukaryota;Opisthokonta;Metazoa;Eumetazoa;Bilateria;Protostomia;Spiralia;Lophotrochozoa;Mollusca;Gastropoda;Neomphalina;Neomphaloidea;Peltospiridae;Gigantopelta;Gigantopelta aegis

UdeM00000003543 6565 168.7 UdeM00000003543 XP\_022314461.1 36.8 266  
152 5 94 355 53 306 1.40E-38 168.7 6565 cellular

organisms;Eukaryota;Opisthokonta;Metazoa;Eumetazoa;Bilateria;Protostomia;Spiralia;Lophotrochozoa;Mollusca;Bivalvia;Autobranchia;Pteriomorpha;Ostreida;Ostreoidea;Ostreidae;Crassostrea;Crassostrea virginica

UdeM00000003544 6596 525.4 UdeM00000003544 XP\_045159842.1 62.5 416  
146 5 45 455 10 420 9.80E-146 525.4 6596 cellular

organisms;Eukaryota;Opisthokonta;Metazoa;Eumetazoa;Bilateria;Protostomia;Spiralia;Lophotrochozoa;Mollusca;Bivalvia;Autobranchia;Heteroconchia;Euheterodonta;Imparidentia;Venerida;Veneroidea;Veneridae;Mercenaria;Mercenaria mercenaria

UdeM00000003545 6573 221.5 UdeM00000003545 XP\_021378858.1 41.5 371  
181 11 67 412 70 429 2.20E-54 221.5 6573 cellular

organisms;Eukaryota;Opisthokonta;Metazoa;Eumetazoa;Bilateria;Protostomia;Spiralia;Lophotrochozoa;Mollusca;Bivalvia;Autobranchia;Pteriomorpha;Pectinida;Pectinoidea;Pectinidae;Mizuhopecten;Mizuhopecten yessoensis

UdeM00000003546 6573 221.5 UdeM00000003546 XP\_021378858.1 41.5 371  
181 11 47 392 70 429 2.10E-54 221.5 6573 cellular

organisms;Eukaryota;Opisthokonta;Metazoa;Eumetazoa;Bilateria;Protostomia;Spiralia;Lophotrochozoa;Mollusca;Bivalvia;Autobranchia;Pteriomorpha;Pectinida;Pectinoidea;Pectinidae;Mizuhopecten;Mizuhopecten yessoensis

UdeM00000003547 225164 224.6 UdeM00000003547 XP\_009065640.1 37.2  
379 201 11 12 370 1 362 2.10E-55 224.6 225164  
cellular

organisms;Eukaryota;Opisthokonta;Metazoa;Eumetazoa;Bilateria;Protostomia;Spiralia;Lophotrochozoa;Mollusca;Gastropoda;Patellogastropoda;Lottiidae;Lottia;Lottia gigantea

UdeM00000003548 6596 282.3 UdeM00000003548 XP\_045157593.1 45.6 395  
196 10 1 384 1 387 9.00E-73 282.3 6596 cellular

organisms;Eukaryota;Opisthokonta;Metazoa;Eumetazoa;Bilateria;Protostomia;Spiralia;Lophotrochozoa;Mollusca;Bivalvia;Autobranchia;Heteroconchia;Euheterodonta;Imparidentia;Venerida;Veneroidea;Veneridae;Mercenaria;Mercenaria mercenaria

UdeM00000003549 6596 412.5 UdeM00000003549 XP\_045157593.1 56.3 394  
159 6 1 386 1 389 5.80E-112 412.5 6596 cellular

organisms;Eukaryota;Opisthokonta;Metazoa;Eumetazoa;Bilateria;Protostomia;Spiralia;Lophotrochozoa;Mollusca;Bivalvia;Autobranchia;Heteroconchia;Euheterodonta;Imparidentia;Venerida;Veneroidea;Veneridae;Mercenaria;Mercenaria mercenaria

UdeM00000003550 6596 305.1 UdeM00000003550 XP\_045157593.1 47.2 390  
185 8 1 377 1 382 1.30E-79 305.1 6596 cellular

organisms;Eukaryota;Opisthokonta;Metazoa;Eumetazoa;Bilateria;Protostomia;Spiralia;Lophotrochozoa;Mollusca;Bivalvia;Autobranchia;Heteroconchia;Euherodonta;Imparidentia;Venerida;Veneroidea;Veneridae;Mercenaria;Mercenaria mercenaria

UdeM00000003551 6596 328.2 UdeM00000003551 XP\_045157593.1 51.2 389  
168 9 1 374 1 382 1.40E-86 328.2 6596 cellular

organisms;Eukaryota;Opisthokonta;Metazoa;Eumetazoa;Bilateria;Protostomia;Spiralia;Lophotrochozoa;Mollusca;Bivalvia;Autobranchia;Heteroconchia;Euherodonta;Imparidentia;Venerida;Veneroidea;Veneridae;Mercenaria;Mercenaria mercenaria

UdeM00000003552 6596 328.2 UdeM00000003552 XP\_045157593.1 51.2 389  
168 9 5 378 1 382 1.40E-86 328.2 6596 cellular

organisms;Eukaryota;Opisthokonta;Metazoa;Eumetazoa;Bilateria;Protostomia;Spiralia;Lophotrochozoa;Mollusca;Bivalvia;Autobranchia;Heteroconchia;Euherodonta;Imparidentia;Venerida;Veneroidea;Veneridae;Mercenaria;Mercenaria mercenaria

UdeM00000003553 6596 941 UdeM00000003553 XP\_045160447.1 72.7 656  
158 7 18 658 33 682 8.00E-271 941 6596 cellular

organisms;Eukaryota;Opisthokonta;Metazoa;Eumetazoa;Bilateria;Protostomia;Spiralia;Lophotrochozoa;Mollusca;Bivalvia;Autobranchia;Heteroconchia;Euherodonta;Imparidentia;Venerida;Veneroidea;Veneridae;Mercenaria;Mercenaria mercenaria

UdeM00000003554 6579 192.6 UdeM00000003554 XP\_033738450.1 60.8 181  
57 2 1 181 483 649 1.40E-45 192.6 6579 cellular

organisms;Eukaryota;Opisthokonta;Metazoa;Eumetazoa;Bilateria;Protostomia;Spiralia;Lophotrochozoa;Mollusca;Bivalvia;Autobranchia;Pteriormorphia;Pectinida;Pectinoidea;Pectinidae;Pecten;Pecten maximus

UdeM00000003555 6596 606.7 UdeM00000003555 XP\_045160132.1 69.7 439  
120 5 2 432 5 438 5.80E-170 606.7 6596 cellular

organisms;Eukaryota;Opisthokonta;Metazoa;Eumetazoa;Bilateria;Protostomia;Spiralia;Lophotrochozoa;Mollusca;Bivalvia;Autobranchia;Heteroconchia;Euherodonta;Imparidentia;Venerida;Veneroidea;Veneridae;Mercenaria;Mercenaria mercenaria

UdeM00000003556 6596 340.1 UdeM00000003556 XP\_045177362.1 43.2 421  
229 6 2 414 5 423 4.00E-90 340.1 6596 cellular

organisms;Eukaryota;Opisthokonta;Metazoa;Eumetazoa;Bilateria;Protostomia;Spiralia;Lophotrochozoa;Mollusca;Bivalvia;Autobranchia;Heteroconchia;Euherodonta;Imparidentia;Venerida;Veneroidea;Veneridae;Mercenaria;Mercenaria mercenaria

UdeM00000003558 13397 91.3 UdeM00000003558 XP\_041064467.1 30.1 196  
108 4 1 196 295 461 1.60E-15 91.3 13397 cellular

organisms;Eukaryota;Opisthokonta;Metazoa;Eumetazoa;Bilateria;Deuterostomia;Chordata;Craniata;Vertebrata;Gnathostomata;Chondrichthyes;Elasmobranchii;Selachii;Galeomorphii;Galeoidea;Lamniformes;Alopiidae;Lamninae;Carcharodon;Carcharodon carcharias

UdeM00000003559 6596 372.1 UdeM00000003559 XP\_045157835.1 50.8 360  
174 2 65 422 95 453 9.80E-100 372.1 6596 cellular

organisms;Eukaryota;Opisthokonta;Metazoa;Eumetazoa;Bilateria;Protostomia;Spiralia;Lophotrochozoa;Mollusca;Bivalvia;Autobranchia;Heteroconchia;Euherodonta;Imparidentia;Venerida;Veneroidea;Veneridae;Mercenaria;Mercenaria mercenaria

UdeM00000003560 6596 110.2 UdeM00000003560 XP\_045157835.1 42.6 129  
74 0 3 131 129 257 2.50E-21 110.2 6596 cellular

organisms;Eukaryota;Opisthokonta;Metazoa;Eumetazoa;Bilateria;Protostomia;

Spiralia;Lophotrochozoa;Mollusca;Bivalvia;Autobranchia;Heteroconchia;Euherodonta;Imparidentia;Venerida;Veneroidea;Veneridae;Mercenaria;Mercenaria mercenaria

UdeM00000003561 29159 224.6 UdeM00000003561 XP\_011429300.2 23 868  
555 19 172 943 214 1064 5.40E-55 224.6 29159 cellular

organisms;Eukaryota;Opisthokonta;Metazoa;Eumetazoa;Bilateria;Protostomia;Spiralia;Lophotrochozoa;Mollusca;Bivalvia;Autobranchia;Pteriormorphia;Ostreida;Ostreoidea;Ostreidae;Crassostrea;Crassostrea gigas

UdeM00000003562 1735272 2879.7 UdeM00000003562 XP\_041359195.1  
65.1 2298 663 22 8 2271 6 2197 0.00E+00 2879.7  
1735272 cellular

organisms;Eukaryota;Opisthokonta;Metazoa;Eumetazoa;Bilateria;Protostomia;Spiralia;Lophotrochozoa;Mollusca;Gastropoda;Neomphalina;Neomphaloidea;Peltospiridae;Gigantopelta;Gigantopelta aegis

UdeM00000003563 1735272 484.2 UdeM00000003563 XP\_041359193.1 80.3  
320 62 1 1 320 1452 1770 1.30E-133 484.2 1735272  
cellular

organisms;Eukaryota;Opisthokonta;Metazoa;Eumetazoa;Bilateria;Protostomia;Spiralia;Lophotrochozoa;Mollusca;Gastropoda;Neomphalina;Neomphaloidea;Peltospiridae;Gigantopelta;Gigantopelta aegis

UdeM00000003564 6579 444.5 UdeM00000003564 XP\_033738282.1 59.5 341  
136 2 30 370 6 344 1.30E-121 444.5 6579 cellular

organisms;Eukaryota;Opisthokonta;Metazoa;Eumetazoa;Bilateria;Protostomia;Spiralia;Lophotrochozoa;Mollusca;Bivalvia;Autobranchia;Pteriormorphia;Pectinida;Pectinoidea;Pectinidae;Pecten;Pecten maximus

UdeM00000003565 6579 444.5 UdeM00000003565 XP\_033738282.1 59.5 341  
136 2 43 383 6 344 1.40E-121 444.5 6579 cellular

organisms;Eukaryota;Opisthokonta;Metazoa;Eumetazoa;Bilateria;Protostomia;Spiralia;Lophotrochozoa;Mollusca;Bivalvia;Autobranchia;Pteriormorphia;Pectinida;Pectinoidea;Pectinidae;Pecten;Pecten maximus

UdeM00000003566 29159 327.4 UdeM00000003566 XP\_011428208.2 57.6 523  
183 5 20 536 17 506 3.40E-86 327.4 29159 cellular

organisms;Eukaryota;Opisthokonta;Metazoa;Eumetazoa;Bilateria;Protostomia;Spiralia;Lophotrochozoa;Mollusca;Bivalvia;Autobranchia;Pteriormorphia;Ostreida;Ostreoidea;Ostreidae;Crassostrea;Crassostrea gigas

UdeM00000003567 6596 102.8 UdeM00000003567 XP\_045157518.1 78.5 65  
14 0 30 94 52 116 2.40E-19 102.8 6596 cellular

organisms;Eukaryota;Opisthokonta;Metazoa;Eumetazoa;Bilateria;Protostomia;Spiralia;Lophotrochozoa;Mollusca;Bivalvia;Autobranchia;Heteroconchia;Euherodonta;Imparidentia;Venerida;Veneroidea;Veneridae;Mercenaria;Mercenaria mercenaria

UdeM00000003568 6596 120.9 UdeM00000003568 XP\_045157518.1 67.2 116  
36 2 1 114 1 116 1.00E-24 120.9 6596 cellular

organisms;Eukaryota;Opisthokonta;Metazoa;Eumetazoa;Bilateria;Protostomia;Spiralia;Lophotrochozoa;Mollusca;Bivalvia;Autobranchia;Heteroconchia;Euherodonta;Imparidentia;Venerida;Veneroidea;Veneridae;Mercenaria;Mercenaria mercenaria

UdeM00000003569 6596 199.5 UdeM00000003569 XP\_045162406.1 35.1 419  
248 10 1 408 1 406 8.10E-48 199.5 6596 cellular

organisms;Eukaryota;Opisthokonta;Metazoa;Eumetazoa;Bilateria;Protostomia;Spiralia;Lophotrochozoa;Mollusca;Bivalvia;Autobranchia;Heteroconchia;Euherodonta;Imparidentia;Venerida;Veneroidea;Veneridae;Mercenaria;Mercenaria mercenaria

UdeM00000003572 1735272 359 UdeM00000003572 XP\_041359191.1 72.9  
 247 63 3 144 390 1966 2208 7.90E-96 359 1735272  
 cellular  
 organisms;Eukaryota;Opisthokonta;Metazoa;Eumetazoa;Bilateria;Protostomia;  
 Spiralia;Lophotrochozoa;Mollusca;Gastropoda;Neomphalina;Neomphaloidea;Pel  
 tospiridae;Gigantopelta;Gigantopelta aegis  
 UdeM00000003573 6579 441 UdeM00000003573 XP\_033738282.1 59.9 344  
 134 3 7 348 3 344 1.40E-120 441 6579 cellular  
 organisms;Eukaryota;Opisthokonta;Metazoa;Eumetazoa;Bilateria;Protostomia;  
 Spiralia;Lophotrochozoa;Mollusca;Bivalvia;Autobranchia;Pteriomorpha;Pect  
 inida;Pectinoidea;Pectinidae;Pecten;Pecten maximus  
 UdeM00000003574 29159 328.2 UdeM00000003574 XP\_011428208.2 57.7 520  
 184 5 20 533 17 506 2.00E-86 328.2 29159 cellular  
 organisms;Eukaryota;Opisthokonta;Metazoa;Eumetazoa;Bilateria;Protostomia;  
 Spiralia;Lophotrochozoa;Mollusca;Bivalvia;Autobranchia;Pteriomorpha;Ostr  
 eida;Ostreoidea;Ostreidae;Crassostrea;Crassostrea gigas  
 UdeM00000003575 6596 120.9 UdeM00000003575 XP\_045157518.1 67.2 116  
 36 2 1 114 1 116 1.00E-24 120.9 6596 cellular  
 organisms;Eukaryota;Opisthokonta;Metazoa;Eumetazoa;Bilateria;Protostomia;  
 Spiralia;Lophotrochozoa;Mollusca;Bivalvia;Autobranchia;Heteroconchia;Euhe  
 terodonta;Imparidentia;Venerida;Veneroidea;Veneridae;Mercenaria;Mercenari  
 a mercenaria  
 UdeM00000003576 6596 153.7 UdeM00000003576 XP\_045162406.1 33.4 365  
 205 11 1 347 62 406 4.40E-34 153.7 6596 cellular  
 organisms;Eukaryota;Opisthokonta;Metazoa;Eumetazoa;Bilateria;Protostomia;  
 Spiralia;Lophotrochozoa;Mollusca;Bivalvia;Autobranchia;Heteroconchia;Euhe  
 terodonta;Imparidentia;Venerida;Veneroidea;Veneridae;Mercenaria;Mercenari  
 a mercenaria  
 UdeM00000003577 6579 87 UdeM00000003577 XP\_033750916.1 36.1 119  
 76 0 77 195 124 242 2.80E-14 87 6579 cellular  
 organisms;Eukaryota;Opisthokonta;Metazoa;Eumetazoa;Bilateria;Protostomia;  
 Spiralia;Lophotrochozoa;Mollusca;Bivalvia;Autobranchia;Pteriomorpha;Pect  
 inida;Pectinoidea;Pectinidae;Pecten;Pecten maximus  
 UdeM00000003578 6579 86.7 UdeM00000003578 XP\_033750916.1 38.3 107  
 66 0 4 110 136 242 2.10E-14 86.7 6579 cellular  
 organisms;Eukaryota;Opisthokonta;Metazoa;Eumetazoa;Bilateria;Protostomia;  
 Spiralia;Lophotrochozoa;Mollusca;Bivalvia;Autobranchia;Pteriomorpha;Pect  
 inida;Pectinoidea;Pectinidae;Pecten;Pecten maximus  
 UdeM00000003579 29159 282.7 UdeM00000003579 XP\_034339024.1 37 481  
 193 7 1 375 1 477 7.50E-73 282.7 29159 cellular  
 organisms;Eukaryota;Opisthokonta;Metazoa;Eumetazoa;Bilateria;Protostomia;  
 Spiralia;Lophotrochozoa;Mollusca;Bivalvia;Autobranchia;Pteriomorpha;Ostr  
 eida;Ostreoidea;Ostreidae;Crassostrea;Crassostrea gigas  
 UdeM00000003580 6596 1285.8 UdeM00000003580 XP\_045171466.1 63  
 971 345 8 8 969 545 1510 0.00E+00 1285.8 6596  
 cellular  
 organisms;Eukaryota;Opisthokonta;Metazoa;Eumetazoa;Bilateria;Protostomia;  
 Spiralia;Lophotrochozoa;Mollusca;Bivalvia;Autobranchia;Heteroconchia;Euhe  
 terodonta;Imparidentia;Venerida;Veneroidea;Veneridae;Mercenaria;Mercenari  
 a mercenaria  
 UdeM00000003581 6596 1555.4 UdeM00000003581 XP\_045171466.1 52.9  
 1505 523 17 8 1331 11 1510 0.00E+00 1555.4 6596  
 cellular  
 organisms;Eukaryota;Opisthokonta;Metazoa;Eumetazoa;Bilateria;Protostomia;

Spiralia;Lophotrochozoa;Mollusca;Bivalvia;Autobranchia;Heteroconchia;Euherodonta;Imparidentia;Venerida;Veneroidea;Veneridae;Mercenaria;Mercenaria mercenaria

UdeM00000003582 6596 426.8 UdeM00000003582 XP\_045160921.1 33.1 779  
364 13 67 704 3458 4220 5.50E-116 426.8 6596 cellular

organisms;Eukaryota;Opisthokonta;Metazoa;Eumetazoa;Bilateria;Protostomia;Spiralia;Lophotrochozoa;Mollusca;Bivalvia;Autobranchia;Heteroconchia;Euherodonta;Imparidentia;Venerida;Veneroidea;Veneridae;Mercenaria;Mercenaria mercenaria

UdeM000000028791 6565 254.2 UdeM000000028791 XP\_022295999.1 44.8 299  
163 2 62 358 119 417 2.70E-64 254.2 6565 cellular

organisms;Eukaryota;Opisthokonta;Metazoa;Eumetazoa;Bilateria;Protostomia;Spiralia;Lophotrochozoa;Mollusca;Bivalvia;Autobranchia;Pteriormorphia;Ostreida;Ostreoidea;Ostreidae;Crassostrea;Crassostrea virginica

UdeM000000028792 105023 418.3 UdeM000000028792 XP\_015832376.1 59.6  
317 126 1 9 325 47 361 9.10E-114 418.3 105023  
cellular

organisms;Eukaryota;Opisthokonta;Metazoa;Eumetazoa;Bilateria;Deuterostomia;Chordata;Craniata;Vertebrata;Gnathostomata;Teleostomi;Euteleostomi;Actinopterygii;Actinopteri;Neopterygii;Teleostei;Osteoglossocephalai;Clupeocephala;Euteleosteomorpha;Neoteleostei;Eurypterygia;Ctenosquamata;Acanthomorphata;Euacanthomorphacea;Percomorphaceae;Ovalentaria;Atherinomorphae;Cypriodontiformes;Aplocheiloidei;Nothobranchiidae;Nothobranchius;Nothobranchius furzeri

UdeM000000028793 1250792 139.4 UdeM000000028793 XP\_041861569.1 47  
151 77 2 29 179 520 667 4.40E-30 139.4 1250792  
cellular

organisms;Eukaryota;Opisthokonta;Metazoa;Eumetazoa;Bilateria;Deuterostomia;Chordata;Craniata;Vertebrata;Gnathostomata;Teleostomi;Euteleostomi;Actinopterygii;Actinopteri;Neopterygii;Teleostei;Osteoglossocephalai;Clupeocephala;Euteleosteomorpha;Neoteleostei;Eurypterygia;Ctenosquamata;Acanthomorphata;Euacanthomorphacea;Percomorphaceae;Ovalentaria;Atherinomorphae;Atheriniformes;Melanotaeniidae;Melanotaenia;Melanotaenia boesemani

UdeM000000028794 1529436 69.7 UdeM000000028794 XP\_033102039.1 43.7  
87 43 3 36 121 295 376 3.10E-09 69.7 1529436  
cellular

organisms;Eukaryota;Opisthokonta;Metazoa;Eumetazoa;Bilateria;Deuterostomia;Echinodermata;Pelmatozoa;Crinoidea;Articulata;Comatulida;Comatulidae;Comatulinae;Anneissia;Anneissia japonica

UdeM000000028795 6565 417.2 UdeM000000028795 XP\_022333186.1 91.7 228  
19 0 1 228 1 228 1.80E-113 417.2 6565 cellular

organisms;Eukaryota;Opisthokonta;Metazoa;Eumetazoa;Bilateria;Protostomia;Spiralia;Lophotrochozoa;Mollusca;Bivalvia;Autobranchia;Pteriormorphia;Ostreida;Ostreoidea;Ostreidae;Crassostrea;Crassostrea virginica

UdeM000000028796 7741 374 UdeM000000028796 XP\_019632020.1 85.4 213  
31 0 1 213 25 237 1.40E-100 374 7741 cellular

organisms;Eukaryota;Opisthokonta;Metazoa;Eumetazoa;Bilateria;Deuterostomia;Chordata;Cephalochordata;Leptocardii;Amphioxiformes;Branchiostomidae;Branchiostoma;Branchiostoma belcheri

UdeM000000028797 225164 518.8 UdeM000000028797 XP\_009045999.1 40.7  
720 347 18 30 713 51 726 1.10E-143 518.8 225164  
cellular

organisms;Eukaryota;Opisthokonta;Metazoa;Eumetazoa;Bilateria;Protostomia;



Spiralia;Lophotrochozoa;Mollusca;Gastropoda;Patellogastropoda;Lottioidea;Lottiidae;Lottia;Lottia gigantea

UdeM00000028799 72036 87.4 UdeM00000028799 XP\_040576246.1 39.7 126  
68 3 1 122 1 122 1.40E-14 87.4 72036 cellular  
organisms;Eukaryota;Opisthokonta;Metazoa;Eumetazoa;Bilateria;Protostomia;  
Ecdysozoa;Panarthropoda;Arthropoda;Mandibulata;Pancrustacea;Crustacea;Mul  
ticrustacea;Hexanauplia;Copepoda;Neocopepoda;Podoplea;Siphonostomatoida;C  
aligidae;Lepeophtheirus;Lepeophtheirus salmonis

UdeM00000028801 6596 431 UdeM00000028801 XP\_045156424.1 57.4 331  
138 2 144 472 575 904 2.00E-117 431 6596 cellular  
organisms;Eukaryota;Opisthokonta;Metazoa;Eumetazoa;Bilateria;Protostomia;  
Spiralia;Lophotrochozoa;Mollusca;Bivalvia;Autobranchia;Heteroconchia;Euhe  
terodonta;Imparidentia;Venerida;Veneroidea;Veneridae;Mercenaria;Mercenari  
a mercenaria

UdeM00000028802 6596 222.2 UdeM00000028802 XP\_045156424.1 37.8 365  
190 11 33 369 177 532 1.10E-54 222.2 6596 cellular  
organisms;Eukaryota;Opisthokonta;Metazoa;Eumetazoa;Bilateria;Protostomia;  
Spiralia;Lophotrochozoa;Mollusca;Bivalvia;Autobranchia;Heteroconchia;Euhe  
terodonta;Imparidentia;Venerida;Veneroidea;Veneridae;Mercenaria;Mercenari  
a mercenaria

UdeM00000028805 6579 178.3 UdeM00000028805 XP\_033741736.1 53.2 171  
78 1 1 169 671 841 8.60E-42 178.3 6579 cellular  
organisms;Eukaryota;Opisthokonta;Metazoa;Eumetazoa;Bilateria;Protostomia;  
Spiralia;Lophotrochozoa;Mollusca;Bivalvia;Autobranchia;Pteriormorphia;Pect  
inida;Pectinoidea;Pectinidae;Pecten;Pecten maximus

UdeM00000028806 6579 477.6 UdeM00000028806 XP\_033739131.1 63 343  
127 0 1 343 1028 1370 1.30E-131 477.6 6579 cellular  
organisms;Eukaryota;Opisthokonta;Metazoa;Eumetazoa;Bilateria;Protostomia;  
Spiralia;Lophotrochozoa;Mollusca;Bivalvia;Autobranchia;Pteriormorphia;Pect  
inida;Pectinoidea;Pectinidae;Pecten;Pecten maximus

UdeM00000028808 6579 698.7 UdeM00000028808 XP\_033728194.1 51.2 693  
325 5 1 684 282 970 7.20E-198 698.7 6579 cellular  
organisms;Eukaryota;Opisthokonta;Metazoa;Eumetazoa;Bilateria;Protostomia;  
Spiralia;Lophotrochozoa;Mollusca;Bivalvia;Autobranchia;Pteriormorphia;Pect  
inida;Pectinoidea;Pectinidae;Pecten;Pecten maximus

UdeM00000031780 6596 208.4 UdeM00000031780 XP\_045201937.1 52.7 205  
97 0 1 205 1 205 1.00E-50 208.4 6596 cellular  
organisms;Eukaryota;Opisthokonta;Metazoa;Eumetazoa;Bilateria;Protostomia;  
Spiralia;Lophotrochozoa;Mollusca;Bivalvia;Autobranchia;Heteroconchia;Euhe  
terodonta;Imparidentia;Venerida;Veneroidea;Veneridae;Mercenaria;Mercenari  
a mercenaria

UdeM00000031781 6596 953.7 UdeM00000031781 XP\_045199854.1 57.9 810  
272 7 132 876 302 1107 1.60E-274 953.7 6596 cellular  
organisms;Eukaryota;Opisthokonta;Metazoa;Eumetazoa;Bilateria;Protostomia;  
Spiralia;Lophotrochozoa;Mollusca;Bivalvia;Autobranchia;Heteroconchia;Euhe  
terodonta;Imparidentia;Venerida;Veneroidea;Veneridae;Mercenaria;Mercenari  
a mercenaria

UdeM00000031782 6596 199.5 UdeM00000031782 XP\_045199854.1 44.2 226  
121 3 16 239 882 1104 4.80E-48 199.5 6596 cellular  
organisms;Eukaryota;Opisthokonta;Metazoa;Eumetazoa;Bilateria;Protostomia;  
Spiralia;Lophotrochozoa;Mollusca;Bivalvia;Autobranchia;Heteroconchia;Euhe  
terodonta;Imparidentia;Venerida;Veneroidea;Veneridae;Mercenaria;Mercenari  
a mercenaria

UdeM00000031783 6596 208.8 UdeM00000031783 XP\_045199854.1 44.8 212  
 117 0 64 275 887 1098 9.30E-51 208.8 6596 cellular  
 organisms;Eukaryota;Opisthokonta;Metazoa;Eumetazoa;Bilateria;Protostomia;  
 Spiralia;Lophotrochozoa;Mollusca;Bivalvia;Autobranchia;Heteroconchia;Euhe  
 terodonta;Imparidentia;Venerida;Veneroidea;Veneridae;Mercenaria;Mercenari  
 a mercenaria

UdeM00000031784 6596 412.5 UdeM00000031784 XP\_045201159.1 75.3 271  
 59 2 524 786 568 838 1.20E-111 412.5 6596 cellular  
 organisms;Eukaryota;Opisthokonta;Metazoa;Eumetazoa;Bilateria;Protostomia;  
 Spiralia;Lophotrochozoa;Mollusca;Bivalvia;Autobranchia;Heteroconchia;Euhe  
 terodonta;Imparidentia;Venerida;Veneroidea;Veneridae;Mercenaria;Mercenari  
 a mercenaria

UdeM00000031785 29159 251.1 UdeM00000031785 XP\_034330465.1 66.1 171  
 58 0 7 177 62 232 1.10E-63 251.1 29159 cellular  
 organisms;Eukaryota;Opisthokonta;Metazoa;Eumetazoa;Bilateria;Protostomia;  
 Spiralia;Lophotrochozoa;Mollusca;Bivalvia;Autobranchia;Pteriormorphia;Ostr  
 eida;Ostreoidea;Ostreidae;Crassostrea;Crassostrea gigas

UdeM00000031786 6579 337 UdeM00000031786 XP\_033760247.1 58.9 248  
 102 0 6 253 260 507 2.10E-89 337 6579 cellular  
 organisms;Eukaryota;Opisthokonta;Metazoa;Eumetazoa;Bilateria;Protostomia;  
 Spiralia;Lophotrochozoa;Mollusca;Bivalvia;Autobranchia;Pteriormorphia;Pect  
 inida;Pectinoidea;Pectinidae;Pecten;Pecten maximus

UdeM00000031788 32473 131.3 UdeM00000031788 XP\_027863162.1 68.8 80  
 25 0 1 80 71 150 5.40E-28 131.3 32473 cellular  
 organisms;Eukaryota;Opisthokonta;Metazoa;Eumetazoa;Bilateria;Deuterostomi  
 a;Chordata;Craniata;Vertebrata;Gnathostomata;Teleostomi;Euteleostomi;Acti  
 nopterygii;Actinopteri;Neopterygii;Teleostei;Osteoglossocephalai;Clupeoce  
 phala;Euteleosteomorpha;Neoteleostei;Eurypterygia;Ctenosquamata;Acanthomo  
 rphata;Euacanthomorphacea;Percomorphaceae;Ovalentaria;Atherinomorphae;Cyp  
 rinodontiformes;Cyprinodontoidei;Poeciliidae;Poeciliinae;Xiphophorus;Xiph  
 ophorus couchianus

UdeM00000031789 181472 224.2 UdeM00000031789 XP\_029975096.1 53.8  
 199 66 1 1 173 78 276 1.30E-55 224.2 181472  
 cellular  
 organisms;Eukaryota;Opisthokonta;Metazoa;Eumetazoa;Bilateria;Deuterostomi  
 a;Chordata;Craniata;Vertebrata;Gnathostomata;Teleostomi;Euteleostomi;Acti  
 nopterygii;Actinopteri;Neopterygii;Teleostei;Osteoglossocephalai;Clupeoce  
 phala;Euteleosteomorpha;Neoteleostei;Eurypterygia;Ctenosquamata;Acanthomo  
 rphata;Euacanthomorphacea;Percomorphaceae;Ovalentaria;Blenniimorphae;Blen  
 niiformes;Blennioidei;Blenniidae;Salariinae;Salaris;Salaris fasciatus

UdeM00000031790 30732 180.3 UdeM00000031790 XP\_024118320.1 42.3 208  
 118 2 14 221 409 614 2.80E-42 180.3 30732 cellular  
 organisms;Eukaryota;Opisthokonta;Metazoa;Eumetazoa;Bilateria;Deuterostomi  
 a;Chordata;Craniata;Vertebrata;Gnathostomata;Teleostomi;Euteleostomi;Acti  
 nopterygii;Actinopteri;Neopterygii;Teleostei;Osteoglossocephalai;Clupeoce  
 phala;Euteleosteomorpha;Neoteleostei;Eurypterygia;Ctenosquamata;Acanthomo  
 rphata;Euacanthomorphacea;Percomorphaceae;Ovalentaria;Atherinomorphae;Bel  
 oniformes;Adrianichthyoidei;Adrianichthyidae;Oryziinae;Oryzias;Oryzias  
 melastigma

UdeM00000031791 7604 280.8 UdeM00000031791 XP\_033641610.1 43.8 345  
 186 5 17 359 37 375 2.40E-72 280.8 7604 cellular  
 organisms;Eukaryota;Opisthokonta;Metazoa;Eumetazoa;Bilateria;Deuterostomi  
 a;Echinodermata;Eleutherozoa;Asterozoa;Asteroidea;Forcipulatacea;Forcipul  
 atida;Asteroidea;Asteroidea;Asteroidea;Asteroidea;Asteroidea;Asteroidea;Asterias;Asterias rubens

UdeM00000031792 215358 159.5 UdeM00000031792 XP\_027132200.1 33.1  
 293 175 7 1 284 1 281 6.60E-36 159.5 215358  
 cellular  
 organisms;Eukaryota;Opisthokonta;Metazoa;Eumetazoa;Bilateria;Deuterostomi  
 a;Chordata;Craniata;Vertebrata;Gnathostomata;Teleostomi;Euteleostomi;Acti  
 nopterygii;Actinopteri;Neopterygii;Teleostei;Osteoglossocephalai;Clupeoce  
 phala;Euteleostomorpha;Neoteleostei;Eurypterygia;Ctenosquamata;Acanthomo  
 rphata;Euacanthomorphacea;Percomorphaceae;Eupercaria;Eupercaria incertae  
 sedis;Sciaenidae;Larimichthys;Larimichthys crocea  
 UdeM00000031793 6596 475.3 UdeM00000031793 XP\_045201513.1 45.5 1003  
 385 37 57 951 22 970 1.80E-130 475.3 6596 cellular  
 organisms;Eukaryota;Opisthokonta;Metazoa;Eumetazoa;Bilateria;Protostomia;  
 Spiralia;Lophotrochozoa;Mollusca;Bivalvia;Autobranchia;Heteroconchia;Euhe  
 terodonta;Imparidentia;Venerida;Veneroidea;Veneridae;Mercenaria;Mercenari  
 a mercenaria  
 UdeM00000031794 6596 88.6 UdeM00000031794 XP\_045201513.1 35.4 305  
 143 17 57 331 22 302 1.70E-14 88.6 6596 cellular  
 organisms;Eukaryota;Opisthokonta;Metazoa;Eumetazoa;Bilateria;Protostomia;  
 Spiralia;Lophotrochozoa;Mollusca;Bivalvia;Autobranchia;Heteroconchia;Euhe  
 terodonta;Imparidentia;Venerida;Veneroidea;Veneridae;Mercenaria;Mercenari  
 a mercenaria  
 UdeM00000031795 6579 434.5 UdeM00000031795 XP\_033760568.1 77.7 273  
 60 1 19 291 12 283 1.10E-118 434.5 6579 cellular  
 organisms;Eukaryota;Opisthokonta;Metazoa;Eumetazoa;Bilateria;Protostomia;  
 Spiralia;Lophotrochozoa;Mollusca;Bivalvia;Autobranchia;Pteriormorphia;Pect  
 inida;Pectinoidea;Pectinidae;Pecten;Pecten maximus  
 UdeM00000031796 6579 340.9 UdeM00000031796 XP\_033749692.1 67.2 232  
 70 3 1 231 1 227 1.30E-90 340.9 6579 cellular  
 organisms;Eukaryota;Opisthokonta;Metazoa;Eumetazoa;Bilateria;Protostomia;  
 Spiralia;Lophotrochozoa;Mollusca;Bivalvia;Autobranchia;Pteriormorphia;Pect  
 inida;Pectinoidea;Pectinidae;Pecten;Pecten maximus  
 UdeM00000031797 6596 198.4 UdeM00000031797 XP\_045199633.1 93.4 106  
 3 1 1 106 5 106 4.70E-48 198.4 6596 cellular  
 organisms;Eukaryota;Opisthokonta;Metazoa;Eumetazoa;Bilateria;Protostomia;  
 Spiralia;Lophotrochozoa;Mollusca;Bivalvia;Autobranchia;Heteroconchia;Euhe  
 terodonta;Imparidentia;Venerida;Veneroidea;Veneridae;Mercenaria;Mercenari  
 a mercenaria  
 UdeM00000031798 29159 162.5 UdeM00000031798 XP\_011445318.2 49.3 146  
 70 2 239 384 2079 2220 1.50E-36 162.5 29159 cellular  
 organisms;Eukaryota;Opisthokonta;Metazoa;Eumetazoa;Bilateria;Protostomia;  
 Spiralia;Lophotrochozoa;Mollusca;Bivalvia;Autobranchia;Pteriormorphia;Ostr  
 eida;Ostreoidea;Ostreidae;Crassostrea;Crassostrea gigas  
 UdeM00000031800 29159 151.4 UdeM00000031800 XP\_011445318.2 47.2 144  
 72 2 241 384 2081 2220 3.40E-33 151.4 29159 cellular  
 organisms;Eukaryota;Opisthokonta;Metazoa;Eumetazoa;Bilateria;Protostomia;  
 Spiralia;Lophotrochozoa;Mollusca;Bivalvia;Autobranchia;Pteriormorphia;Ostr  
 eida;Ostreoidea;Ostreidae;Crassostrea;Crassostrea gigas  
 UdeM00000031802 6579 638.3 UdeM00000031802 XP\_033760162.1 48.4 754  
 345 14 1 734 1 730 1.20E-179 638.3 6579 cellular  
 organisms;Eukaryota;Opisthokonta;Metazoa;Eumetazoa;Bilateria;Protostomia;  
 Spiralia;Lophotrochozoa;Mollusca;Bivalvia;Autobranchia;Pteriormorphia;Pect  
 inida;Pectinoidea;Pectinidae;Pecten;Pecten maximus  
 UdeM00000031803 6526 102.8 UdeM00000031803 XP\_013068722.1 39.6 139  
 81 2 13 149 15 152 4.40E-19 102.8 6526 cellular

organisms;Eukaryota;Opisthokonta;Metazoa;Eumetazoa;Bilateria;Protostomia; Spiralia;Lophotrochozoa;Mollusca;Gastropoda;Heterobranchia;Euthyneura;Panpulmonata;Hygrophila;Lymnaeoidea;Planorbidae;Biomphalaria;Biomphalaria glabrata

UdeM00000031805 6579 339.3 UdeM00000031805 XP\_033744278.1 54.5 288  
130 1 1 287 726 1013 4.80E-90 339.3 6579 cellular

organisms;Eukaryota;Opisthokonta;Metazoa;Eumetazoa;Bilateria;Protostomia; Spiralia;Lophotrochozoa;Mollusca;Bivalvia;Autobranchia;Pteriormorphia;Pectinida;Pectinoidea;Pectinidae;Pecten;Pecten maximus

UdeM00000031806 6596 88.2 UdeM00000031806 XP\_045200612.1 34.9 149  
89 4 2 147 34 177 1.50E-14 88.2 6596 cellular

organisms;Eukaryota;Opisthokonta;Metazoa;Eumetazoa;Bilateria;Protostomia; Spiralia;Lophotrochozoa;Mollusca;Bivalvia;Autobranchia;Heteroconchia;Euheterodonta;Imparidentia;Venerida;Veneroidea;Veneridae;Mercenaria;Mercenaria mercenaria

UdeM00000031807 37653 107.5 UdeM00000031807 XP\_014784554.1 45 111  
59 2 4 113 39 148 1.30E-20 107.5 37653 cellular

organisms;Eukaryota;Opisthokonta;Metazoa;Eumetazoa;Bilateria;Protostomia; Spiralia;Lophotrochozoa;Mollusca;Cephalopoda;Coleoidea;Octopodiformes;Octopoda;Incirrata;Octopodidae;Octopus;Octopus bimaculoides

UdeM00000031808 6500 118.6 UdeM00000031808 NP\_001191663.1 49.6 115  
58 0 1 115 54 168 5.40E-24 118.6 6500 cellular

organisms;Eukaryota;Opisthokonta;Metazoa;Eumetazoa;Bilateria;Protostomia; Spiralia;Lophotrochozoa;Mollusca;Gastropoda;Heterobranchia;Euthyneura;Tectipleura;Aplysiida;Aplysioidea;Aplysiidae;Aplysia;Aplysia californica

UdeM00000031810 6579 226.5 UdeM00000031810 XP\_033731124.1 41.6 310  
152 7 10 294 6 311 4.50E-56 226.5 6579 cellular

organisms;Eukaryota;Opisthokonta;Metazoa;Eumetazoa;Bilateria;Protostomia; Spiralia;Lophotrochozoa;Mollusca;Bivalvia;Autobranchia;Pteriormorphia;Pectinida;Pectinoidea;Pectinidae;Pecten;Pecten maximus

UdeM00000031811 6596 206.1 UdeM00000031811 XP\_045176664.1 27.8 568  
338 19 7 520 8 557 1.10E-49 206.1 6596 cellular

organisms;Eukaryota;Opisthokonta;Metazoa;Eumetazoa;Bilateria;Protostomia; Spiralia;Lophotrochozoa;Mollusca;Bivalvia;Autobranchia;Heteroconchia;Euheterodonta;Imparidentia;Venerida;Veneroidea;Veneridae;Mercenaria;Mercenaria mercenaria

UdeM00000031812 6596 191 UdeM00000031812 XP\_045176664.1 28.3 527  
306 19 7 479 8 516 3.50E-45 191 6596 cellular

organisms;Eukaryota;Opisthokonta;Metazoa;Eumetazoa;Bilateria;Protostomia; Spiralia;Lophotrochozoa;Mollusca;Bivalvia;Autobranchia;Heteroconchia;Euheterodonta;Imparidentia;Venerida;Veneroidea;Veneridae;Mercenaria;Mercenaria mercenaria

UdeM00000031813 6596 166 UdeM00000031813 XP\_045176664.1 25.5 569  
305 17 4 469 5 557 1.20E-37 166 6596 cellular

organisms;Eukaryota;Opisthokonta;Metazoa;Eumetazoa;Bilateria;Protostomia; Spiralia;Lophotrochozoa;Mollusca;Bivalvia;Autobranchia;Heteroconchia;Euheterodonta;Imparidentia;Venerida;Veneroidea;Veneridae;Mercenaria;Mercenaria mercenaria

UdeM00000031814 1735272 62.8 UdeM00000031814 XP\_041350990.1 45.2  
62 34 0 125 186 461 522 5.40E-07 62.8 1735272  
cellular

organisms;Eukaryota;Opisthokonta;Metazoa;Eumetazoa;Bilateria;Protostomia; Spiralia;Lophotrochozoa;Mollusca;Gastropoda;Neomphalina;Neomphaloidea;Peltopiridae;Gigantopelta;Gigantopelta aegis

UdeM00000031816 6565 77 UdeM00000031816 XP\_022340761.1 52.1 73  
 31 1 1 69 7 79 1.10E-11 77 6565 cellular  
 organisms;Eukaryota;Opisthokonta;Metazoa;Eumetazoa;Bilateria;Protostomia;  
 Spiralia;Lophotrochozoa;Mollusca;Bivalvia;Autobranhia;Pteriomorphia;Ostr  
 eida;Ostreoidea;Ostreidae;Crassostrea;Crassostrea virginica  
 UdeM00000031815 6573 133.7 UdeM00000031815 XP\_021346929.1 44.9 156  
 79 1 5 153 13 168 2.30E-28 133.7 6573 cellular  
 organisms;Eukaryota;Opisthokonta;Metazoa;Eumetazoa;Bilateria;Protostomia;  
 Spiralia;Lophotrochozoa;Mollusca;Bivalvia;Autobranhia;Pteriomorphia;Pect  
 inida;Pectinoidea;Pectinidae;Mizuhopecten;Mizuhopecten yessoensis  
 UdeM00000031817 6565 100.9 UdeM00000031817 XP\_022340762.1 37.3 153  
 91 3 7 158 7 155 1.60E-18 100.9 6565 cellular  
 organisms;Eukaryota;Opisthokonta;Metazoa;Eumetazoa;Bilateria;Protostomia;  
 Spiralia;Lophotrochozoa;Mollusca;Bivalvia;Autobranhia;Pteriomorphia;Ostr  
 eida;Ostreoidea;Ostreidae;Crassostrea;Crassostrea virginica  
 UdeM00000031819 6573 94.7 UdeM00000031819 XP\_021353057.1 63.4 71  
 26 0 13 83 29 99 6.10E-17 94.7 6573 cellular  
 organisms;Eukaryota;Opisthokonta;Metazoa;Eumetazoa;Bilateria;Protostomia;  
 Spiralia;Lophotrochozoa;Mollusca;Bivalvia;Autobranhia;Pteriomorphia;Pect  
 inida;Pectinoidea;Pectinidae;Mizuhopecten;Mizuhopecten yessoensis  
 UdeM00000031820 6565 112.1 UdeM00000031820 XP\_022340762.1 43.2 146  
 81 2 10 154 7 151 6.90E-22 112.1 6565 cellular  
 organisms;Eukaryota;Opisthokonta;Metazoa;Eumetazoa;Bilateria;Protostomia;  
 Spiralia;Lophotrochozoa;Mollusca;Bivalvia;Autobranhia;Pteriomorphia;Ostr  
 eida;Ostreoidea;Ostreidae;Crassostrea;Crassostrea virginica  
 UdeM00000031821 6596 162.9 UdeM00000031821 XP\_045200107.1 37.5 240  
 136 4 1358 1583 1 240 3.40E-36 162.9 6596 cellular  
 organisms;Eukaryota;Opisthokonta;Metazoa;Eumetazoa;Bilateria;Protostomia;  
 Spiralia;Lophotrochozoa;Mollusca;Bivalvia;Autobranhia;Heteroconchia;Euhe  
 terodonta;Imparidentia;Venerida;Veneroidea;Veneridae;Mercenaria;Mercenari  
 a mercenaria  
 UdeM00000031822 6689 470.7 UdeM00000031822 XP\_027227974.1 85.8 247  
 35 0 6 252 7 253 1.20E-129 470.7 6689 cellular  
 organisms;Eukaryota;Opisthokonta;Metazoa;Eumetazoa;Bilateria;Protostomia;  
 Ecdysozoa;Panarthropoda;Arthropoda;Mandibulata;Pancrustacea;Crustacea;Mul  
 ticrustacea;Malacostraca;Eumalacostraca;Eucarida;Decapoda;Dendrobranchiat  
 a;Penaeoidea;Penaeidae;Penaeus;Penaeus vannamei  
 UdeM00000031823 2607531 910.6 UdeM00000031823 XP\_029634269.1 62.6  
 690 255 2 2 688 19 708 1.20E-261 910.6 2607531  
 cellular  
 organisms;Eukaryota;Opisthokonta;Metazoa;Eumetazoa;Bilateria;Protostomia;  
 Spiralia;Lophotrochozoa;Mollusca;Cephalopoda;Coleoidea;Octopodiformes;Oct  
 opoda;Incirrata;Octopodidae;Octopus;Octopus sinensis  
 UdeM00000031826 114398 272.7 UdeM00000031826 XP\_042913678.1 41.3  
 356 202 3 1 352 108 460 6.60E-70 272.7 114398  
 cellular  
 organisms;Eukaryota;Opisthokonta;Metazoa;Eumetazoa;Bilateria;Protostomia;  
 Ecdysozoa;Panarthropoda;Arthropoda;Chelicerata;Arachnida;Araneae;Araneomo  
 rphae;Entelegynae;Orbiculariae;Araneoidea;Theridiidae;Parasteatoda;Parast  
 eatoda tepidariorum  
 UdeM00000031827 7574 83.6 UdeM00000031827 XP\_013380206.1 41 83  
 48 1 31 112 207 289 1.80E-13 83.6 7574 cellular  
 organisms;Eukaryota;Opisthokonta;Metazoa;Eumetazoa;Bilateria;Protostomia;

Spiralia;Lophotrochozoa;Brachiopoda;Linguliformea;Lingulata;Lingulida;Linguloidea;Lingulidae;Lingula;Lingula anatina

UdeM00000031828 6596 1629.4 UdeM00000031828 XP\_045199634.1 61.2  
1394 424 10 5 1334 131 1471 0.00E+00 1629.4 6596  
cellular

organisms;Eukaryota;Opisthokonta;Metazoa;Eumetazoa;Bilateria;Protostomia;Spiralia;Lophotrochozoa;Mollusca;Bivalvia;Autobranchia;Heteroconchia;Euheterodonta;Imparidentia;Venerida;Veneroidea;Veneridae;Mercenaria;Mercenaria mercenaria

UdeM00000031829 6596 1638.2 UdeM00000031829 XP\_045199634.1 62.3  
1370 424 10 5 1310 131 1471 0.00E+00 1638.2 6596  
cellular

organisms;Eukaryota;Opisthokonta;Metazoa;Eumetazoa;Bilateria;Protostomia;Spiralia;Lophotrochozoa;Mollusca;Bivalvia;Autobranchia;Heteroconchia;Euheterodonta;Imparidentia;Venerida;Veneroidea;Veneridae;Mercenaria;Mercenaria mercenaria

UdeM00000031830 6573 136.7 UdeM00000031830 XP\_021355076.1 59.7 119  
46 2 14 132 83 199 4.50E-29 136.7 6573 cellular

organisms;Eukaryota;Opisthokonta;Metazoa;Eumetazoa;Bilateria;Protostomia;Spiralia;Lophotrochozoa;Mollusca;Bivalvia;Autobranchia;Pteriomorphia;Pectinida;Pectinoidea;Pectinidae;Mizuhopecten;Mizuhopecten yessoensis

UdeM00000031831 218467 144.8 UdeM00000031831 XP\_023213948.1 47.6  
170 88 1 4 173 1458 1626 1.20E-31 144.8 218467  
cellular

organisms;Eukaryota;Opisthokonta;Metazoa;Eumetazoa;Bilateria;Protostomia;Ecdysozoa;Panarthropoda;Arthropoda;Chelicerata;Arachnida;Scorpiones;Buthida;Buthoidea;Buthidae;Centruroides;Centruroides sculpturatus

UdeM00000031832 6596 76.6 UdeM00000031832 XP\_045185911.1 45.2 73  
40 0 1 73 1 73 2.20E-11 76.6 6596 cellular

organisms;Eukaryota;Opisthokonta;Metazoa;Eumetazoa;Bilateria;Protostomia;Spiralia;Lophotrochozoa;Mollusca;Bivalvia;Autobranchia;Heteroconchia;Euheterodonta;Imparidentia;Venerida;Veneroidea;Veneridae;Mercenaria;Mercenaria mercenaria

UdeM00000031834 6596 224.9 UdeM00000031834 XP\_045201521.1 58.9 190  
71 4 2 186 12 199 8.30E-56 224.9 6596 cellular

organisms;Eukaryota;Opisthokonta;Metazoa;Eumetazoa;Bilateria;Protostomia;Spiralia;Lophotrochozoa;Mollusca;Bivalvia;Autobranchia;Heteroconchia;Euheterodonta;Imparidentia;Venerida;Veneroidea;Veneridae;Mercenaria;Mercenaria mercenaria

UdeM00000031835 37653 428.7 UdeM00000031835 XP\_014778991.1 84.3 230  
36 0 1 230 16 245 4.70E-117 428.7 37653 cellular

organisms;Eukaryota;Opisthokonta;Metazoa;Eumetazoa;Bilateria;Protostomia;Spiralia;Lophotrochozoa;Mollusca;Cephalopoda;Coleoidea;Octopodiformes;Octopoda;Incirrata;Octopodidae;Octopus;Octopus bimaculoides

UdeM00000031836 6579 425.6 UdeM00000031836 XP\_033760471.1 58.5 342  
135 2 6 340 5 346 5.90E-116 425.6 6579 cellular

organisms;Eukaryota;Opisthokonta;Metazoa;Eumetazoa;Bilateria;Protostomia;Spiralia;Lophotrochozoa;Mollusca;Bivalvia;Autobranchia;Pteriomorphia;Pectinida;Pectinoidea;Pectinidae;Pecten;Pecten maximus

UdeM00000031837 29159 161.8 UdeM00000031837 XP\_011425843.2 24 621  
382 26 1810 2409 624 1175 1.10E-35 161.8 29159 cellular

organisms;Eukaryota;Opisthokonta;Metazoa;Eumetazoa;Bilateria;Protostomia;Spiralia;Lophotrochozoa;Mollusca;Bivalvia;Autobranchia;Pteriomorphia;Ostreida;Ostreoidea;Ostreidae;Crassostrea;Crassostrea gigas

UdeM00000031840 6596 452.6 UdeM00000031840 XP\_045201163.1 59.9 357  
 140 3 1 356 16 370 4.70E-124 452.6 6596 cellular  
 organisms;Eukaryota;Opisthokonta;Metazoa;Eumetazoa;Bilateria;Protostomia;  
 Spiralia;Lophotrochozoa;Mollusca;Bivalvia;Autobranhia;Heteroconchia;Euhe  
 terodonta;Imparidentia;Venerida;Veneroidea;Veneridae;Mercenaria;Mercenari  
 a mercenaria  
 UdeM00000031841 6596 792.7 UdeM00000031841 XP\_045201160.1 41.1 1269  
 575 29 21 1187 7 1204 6.30E-226 792.7 6596 cellular  
 organisms;Eukaryota;Opisthokonta;Metazoa;Eumetazoa;Bilateria;Protostomia;  
 Spiralia;Lophotrochozoa;Mollusca;Bivalvia;Autobranhia;Heteroconchia;Euhe  
 terodonta;Imparidentia;Venerida;Veneroidea;Veneridae;Mercenaria;Mercenari  
 a mercenaria  
 UdeM00000031842 6412 166 UdeM00000031842 XP\_009016697.1 38.8 245  
 105 2 1 200 1 245 4.90E-38 166 6412 cellular  
 organisms;Eukaryota;Opisthokonta;Metazoa;Eumetazoa;Bilateria;Protostomia;  
 Spiralia;Lophotrochozoa;Annelida;Clitellata;Hirudinea;Rhynchobdellida;Glo  
 ssiphoniidae;Helobdella;Helobdella robusta  
 UdeM00000031843 6596 187.2 UdeM00000031843 XP\_045201160.1 58.5 147  
 60 1 1 146 1202 1348 1.70E-44 187.2 6596 cellular  
 organisms;Eukaryota;Opisthokonta;Metazoa;Eumetazoa;Bilateria;Protostomia;  
 Spiralia;Lophotrochozoa;Mollusca;Bivalvia;Autobranhia;Heteroconchia;Euhe  
 terodonta;Imparidentia;Venerida;Veneroidea;Veneridae;Mercenaria;Mercenari  
 a mercenaria  
 UdeM00000031844 6596 108.2 UdeM00000031844 XP\_045201160.1 50 98  
 48 1 13 109 1251 1348 8.00E-21 108.2 6596 cellular  
 organisms;Eukaryota;Opisthokonta;Metazoa;Eumetazoa;Bilateria;Protostomia;  
 Spiralia;Lophotrochozoa;Mollusca;Bivalvia;Autobranhia;Heteroconchia;Euhe  
 terodonta;Imparidentia;Venerida;Veneroidea;Veneridae;Mercenaria;Mercenari  
 a mercenaria  
 UdeM00000031845 6596 723.4 UdeM00000031845 XP\_045201334.1 56.5 722  
 247 16 3 676 14 716 2.70E-205 723.4 6596 cellular  
 organisms;Eukaryota;Opisthokonta;Metazoa;Eumetazoa;Bilateria;Protostomia;  
 Spiralia;Lophotrochozoa;Mollusca;Bivalvia;Autobranhia;Heteroconchia;Euhe  
 terodonta;Imparidentia;Venerida;Veneroidea;Veneridae;Mercenaria;Mercenari  
 a mercenaria  
 UdeM00000031846 6596 485.3 UdeM00000031846 XP\_045200163.1 84.4 352  
 55 0 10 361 651 1002 6.60E-134 485.3 6596 cellular  
 organisms;Eukaryota;Opisthokonta;Metazoa;Eumetazoa;Bilateria;Protostomia;  
 Spiralia;Lophotrochozoa;Mollusca;Bivalvia;Autobranhia;Heteroconchia;Euhe  
 terodonta;Imparidentia;Venerida;Veneroidea;Veneridae;Mercenaria;Mercenari  
 a mercenaria  
 UdeM00000031847 6596 390.6 UdeM00000031847 XP\_045200167.1 57.7 395  
 137 10 1 373 108 494 2.30E-105 390.6 6596 cellular  
 organisms;Eukaryota;Opisthokonta;Metazoa;Eumetazoa;Bilateria;Protostomia;  
 Spiralia;Lophotrochozoa;Mollusca;Bivalvia;Autobranhia;Heteroconchia;Euhe  
 terodonta;Imparidentia;Venerida;Veneroidea;Veneridae;Mercenaria;Mercenari  
 a mercenaria  
 UdeM00000031848 6596 100.5 UdeM00000031848 XP\_045200165.1 82.1 56  
 10 0 1 56 48 103 1.20E-18 100.5 6596 cellular  
 organisms;Eukaryota;Opisthokonta;Metazoa;Eumetazoa;Bilateria;Protostomia;  
 Spiralia;Lophotrochozoa;Mollusca;Bivalvia;Autobranhia;Heteroconchia;Euhe  
 terodonta;Imparidentia;Venerida;Veneroidea;Veneridae;Mercenaria;Mercenari  
 a mercenaria

UdeM00000031849 6596 387.1 UdeM00000031849 XP\_045200165.1 40.7 693  
 349 16 1 648 115 790 4.40E-104 387.1 6596 cellular  
 organisms;Eukaryota;Opisthokonta;Metazoa;Eumetazoa;Bilateria;Protostomia;  
 Spiralia;Lophotrochozoa;Mollusca;Bivalvia;Autobranhia;Heteroconchia;Euhe  
 terodonta;Imparidentia;Venerida;Veneroidea;Veneridae;Mercenaria;Mercenari  
 a mercenaria  
 UdeM00000031850 6596 1006.9 UdeM00000031850 XP\_045200163.1 83.2  
 649 105 1 1 645 3 651 1.20E-290 1006.9 6596  
 cellular  
 organisms;Eukaryota;Opisthokonta;Metazoa;Eumetazoa;Bilateria;Protostomia;  
 Spiralia;Lophotrochozoa;Mollusca;Bivalvia;Autobranhia;Heteroconchia;Euhe  
 terodonta;Imparidentia;Venerida;Veneroidea;Veneridae;Mercenaria;Mercenari  
 a mercenaria  
 UdeM00000031851 6596 1093.6 UdeM00000031851 XP\_045200790.1 64.4  
 809 261 6 60 844 29 834 0.00E+00 1093.6 6596  
 cellular  
 organisms;Eukaryota;Opisthokonta;Metazoa;Eumetazoa;Bilateria;Protostomia;  
 Spiralia;Lophotrochozoa;Mollusca;Bivalvia;Autobranhia;Heteroconchia;Euhe  
 terodonta;Imparidentia;Venerida;Veneroidea;Veneridae;Mercenaria;Mercenari  
 a mercenaria  
 UdeM00000031852 6596 1751.1 UdeM00000031852 XP\_045200790.1 63.3  
 1454 420 14 89 1479 834 2237 0.00E+00 1751.1 6596  
 cellular  
 organisms;Eukaryota;Opisthokonta;Metazoa;Eumetazoa;Bilateria;Protostomia;  
 Spiralia;Lophotrochozoa;Mollusca;Bivalvia;Autobranhia;Heteroconchia;Euhe  
 terodonta;Imparidentia;Venerida;Veneroidea;Veneridae;Mercenaria;Mercenari  
 a mercenaria  
 UdeM00000031853 6596 248.4 UdeM00000031853 XP\_045200794.1 59.9 212  
 68 4 1 211 301 496 1.20E-62 248.4 6596 cellular  
 organisms;Eukaryota;Opisthokonta;Metazoa;Eumetazoa;Bilateria;Protostomia;  
 Spiralia;Lophotrochozoa;Mollusca;Bivalvia;Autobranhia;Heteroconchia;Euhe  
 terodonta;Imparidentia;Venerida;Veneroidea;Veneridae;Mercenaria;Mercenari  
 a mercenaria  
 UdeM00000031854 6596 286.6 UdeM00000031854 XP\_045200794.1 77.1 170  
 39 0 1 170 127 296 2.10E-74 286.6 6596 cellular  
 organisms;Eukaryota;Opisthokonta;Metazoa;Eumetazoa;Bilateria;Protostomia;  
 Spiralia;Lophotrochozoa;Mollusca;Bivalvia;Autobranhia;Heteroconchia;Euhe  
 terodonta;Imparidentia;Venerida;Veneroidea;Veneridae;Mercenaria;Mercenari  
 a mercenaria  
 UdeM00000031855 6573 161.8 UdeM00000031855 XP\_021361574.1 64.6 113  
 40 0 16 128 28 140 5.90E-37 161.8 6573 cellular  
 organisms;Eukaryota;Opisthokonta;Metazoa;Eumetazoa;Bilateria;Protostomia;  
 Spiralia;Lophotrochozoa;Mollusca;Bivalvia;Autobranhia;Pteriomorphia;Pect  
 inida;Pectinoidea;Pectinidae;Mizuhopecten;Mizuhopecten yessoensis  
 UdeM00000031856 6573 82.8 UdeM00000031856 XP\_021344823.1 44.2 86  
 48 0 36 121 33 118 3.30E-13 82.8 6573 cellular  
 organisms;Eukaryota;Opisthokonta;Metazoa;Eumetazoa;Bilateria;Protostomia;  
 Spiralia;Lophotrochozoa;Mollusca;Bivalvia;Autobranhia;Pteriomorphia;Pect  
 inida;Pectinoidea;Pectinidae;Mizuhopecten;Mizuhopecten yessoensis  
 UdeM00000031857 6596 344.4 UdeM00000031857 XP\_045199715.1 52.1 315  
 143 5 7 320 120 427 1.60E-91 344.4 6596 cellular  
 organisms;Eukaryota;Opisthokonta;Metazoa;Eumetazoa;Bilateria;Protostomia;  
 Spiralia;Lophotrochozoa;Mollusca;Bivalvia;Autobranhia;Heteroconchia;Euhe



terodonta;Imparidentia;Venerida;Veneroidea;Veneridae;Mercenaria;Mercenari  
 a mercenaria  
 UdeM00000031858 6596 70.5 UdeM00000031858 XP\_045199715.1 51.7 89  
 32 4 8 86 438 525 2.30E-09 70.5 6596 cellular  
 organisms;Eukaryota;Opisthokonta;Metazoa;Eumetazoa;Bilateria;Protostomia;  
 Spiralia;Lophotrochozoa;Mollusca;Bivalvia;Autobranhia;Heteroconchia;Euhe  
 terodonta;Imparidentia;Venerida;Veneroidea;Veneridae;Mercenaria;Mercenari  
 a mercenaria  
 UdeM00000031859 29159 256.9 UdeM00000031859 XP\_011449844.1 23.6 669  
 499 6 15 673 16 682 7.10E-65 256.9 29159 cellular  
 organisms;Eukaryota;Opisthokonta;Metazoa;Eumetazoa;Bilateria;Protostomia;  
 Spiralia;Lophotrochozoa;Mollusca;Bivalvia;Autobranhia;Pteriormorphia;Ostr  
 eida;Ostreoidea;Ostreidae;Crassostrea;Crassostrea gigas  
 UdeM00000031860 6596 470.7 UdeM00000031860 XP\_045160232.1 65.4 356  
 118 3 194 547 218 570 2.50E-129 470.7 6596 cellular  
 organisms;Eukaryota;Opisthokonta;Metazoa;Eumetazoa;Bilateria;Protostomia;  
 Spiralia;Lophotrochozoa;Mollusca;Bivalvia;Autobranhia;Heteroconchia;Euhe  
 terodonta;Imparidentia;Venerida;Veneroidea;Veneridae;Mercenaria;Mercenari  
 a mercenaria  
 UdeM00000031862 6596 105.1 UdeM00000031862 XP\_045160229.1 81.7 60  
 11 0 3 62 4 63 1.70E-19 105.1 6596 cellular  
 organisms;Eukaryota;Opisthokonta;Metazoa;Eumetazoa;Bilateria;Protostomia;  
 Spiralia;Lophotrochozoa;Mollusca;Bivalvia;Autobranhia;Heteroconchia;Euhe  
 terodonta;Imparidentia;Venerida;Veneroidea;Veneridae;Mercenaria;Mercenari  
 a mercenaria  
 UdeM00000031861 6596 105.1 UdeM00000031861 XP\_045160229.1 81.7 60  
 11 0 3 62 4 63 3.00E-19 105.1 6596 cellular  
 organisms;Eukaryota;Opisthokonta;Metazoa;Eumetazoa;Bilateria;Protostomia;  
 Spiralia;Lophotrochozoa;Mollusca;Bivalvia;Autobranhia;Heteroconchia;Euhe  
 terodonta;Imparidentia;Venerida;Veneroidea;Veneridae;Mercenaria;Mercenari  
 a mercenaria  
 UdeM00000031863 6596 615.5 UdeM00000031863 XP\_045160229.1 76.2 369  
 88 0 1 369 74 442 4.30E-173 615.5 6596 cellular  
 organisms;Eukaryota;Opisthokonta;Metazoa;Eumetazoa;Bilateria;Protostomia;  
 Spiralia;Lophotrochozoa;Mollusca;Bivalvia;Autobranhia;Heteroconchia;Euhe  
 terodonta;Imparidentia;Venerida;Veneroidea;Veneridae;Mercenaria;Mercenari  
 a mercenaria  
 UdeM00000031864 6565 201.8 UdeM00000031864 XP\_022317095.1 39.5 248  
 139 4 11 257 12 249 1.00E-48 201.8 6565 cellular  
 organisms;Eukaryota;Opisthokonta;Metazoa;Eumetazoa;Bilateria;Protostomia;  
 Spiralia;Lophotrochozoa;Mollusca;Bivalvia;Autobranhia;Pteriormorphia;Ostr  
 eida;Ostreoidea;Ostreidae;Crassostrea;Crassostrea virginica  
 UdeM00000031865 6596 354.4 UdeM00000031865 XP\_045160196.1 41.2 439  
 246 6 8 443 7 436 2.10E-94 354.4 6596 cellular  
 organisms;Eukaryota;Opisthokonta;Metazoa;Eumetazoa;Bilateria;Protostomia;  
 Spiralia;Lophotrochozoa;Mollusca;Bivalvia;Autobranhia;Heteroconchia;Euhe  
 terodonta;Imparidentia;Venerida;Veneroidea;Veneridae;Mercenaria;Mercenari  
 a mercenaria  
 UdeM00000031866 1735272 504.6 UdeM00000031866 XP\_041350473.1 60.2  
 472 164 4 1 472 1 448 1.40E-139 504.6 1735272  
 cellular  
 organisms;Eukaryota;Opisthokonta;Metazoa;Eumetazoa;Bilateria;Protostomia;  
 Spiralia;Lophotrochozoa;Mollusca;Gastropoda;Neomphalina;Neomphaloidea;Pel  
 tospiridae;Gigantopelta;Gigantopelta aegis

UdeM00000031867 29159 563.9 UdeM00000031867 XP\_011445956.1 79.7 325  
 63 1 1 325 1 322 1.30E-157 563.9 29159 cellular  
 organisms;Eukaryota;Opisthokonta;Metazoa;Eumetazoa;Bilateria;Protostomia;  
 Spiralia;Lophotrochozoa;Mollusca;Bivalvia;Autobranhia;Pteriomorphia;Ostr  
 eida;Ostreoidea;Ostreidae;Crassostrea;Crassostrea gigas  
 UdeM00000031868 29159 555.4 UdeM00000031868 XP\_011445956.1 79.4 321  
 63 1 1 321 5 322 4.60E-155 555.4 29159 cellular  
 organisms;Eukaryota;Opisthokonta;Metazoa;Eumetazoa;Bilateria;Protostomia;  
 Spiralia;Lophotrochozoa;Mollusca;Bivalvia;Autobranhia;Pteriomorphia;Ostr  
 eida;Ostreoidea;Ostreidae;Crassostrea;Crassostrea gigas  
 UdeM00000031869 29159 195.7 UdeM00000031869 XP\_034315091.1 48.9 266  
 135 1 11 276 12 276 8.70E-47 195.7 29159 cellular  
 organisms;Eukaryota;Opisthokonta;Metazoa;Eumetazoa;Bilateria;Protostomia;  
 Spiralia;Lophotrochozoa;Mollusca;Bivalvia;Autobranhia;Pteriomorphia;Ostr  
 eida;Ostreoidea;Ostreidae;Crassostrea;Crassostrea gigas  
 UdeM00000031870 6596 3523.4 UdeM00000031870 XP\_045161012.1 49.4  
 3601 1485 33 58 3447 64 3539 0.00E+00 3523.4 6596  
 cellular  
 organisms;Eukaryota;Opisthokonta;Metazoa;Eumetazoa;Bilateria;Protostomia;  
 Spiralia;Lophotrochozoa;Mollusca;Bivalvia;Autobranhia;Heteroconchia;Euhe  
 terodonta;Imparidentia;Venerida;Veneroidea;Veneridae;Mercenaria;Mercenari  
 a mercenaria  
 UdeM00000031871 6596 2935.2 UdeM00000031871 XP\_045160168.1 45.7  
 3870 1822 84 8 3719 128 3876 0.00E+00 2935.2 6596  
 cellular  
 organisms;Eukaryota;Opisthokonta;Metazoa;Eumetazoa;Bilateria;Protostomia;  
 Spiralia;Lophotrochozoa;Mollusca;Bivalvia;Autobranhia;Heteroconchia;Euhe  
 terodonta;Imparidentia;Venerida;Veneroidea;Veneridae;Mercenaria;Mercenari  
 a mercenaria  
 UdeM00000031872 6596 385.2 UdeM00000031872 XP\_045160165.1 54.8 354  
 151 4 3 351 612 961 9.20E-104 385.2 6596 cellular  
 organisms;Eukaryota;Opisthokonta;Metazoa;Eumetazoa;Bilateria;Protostomia;  
 Spiralia;Lophotrochozoa;Mollusca;Bivalvia;Autobranhia;Heteroconchia;Euhe  
 terodonta;Imparidentia;Venerida;Veneroidea;Veneridae;Mercenaria;Mercenari  
 a mercenaria  
 UdeM00000031873 6596 979.2 UdeM00000031873 XP\_045160165.1 59 840  
 329 8 8 838 128 961 3.40E-282 979.2 6596 cellular  
 organisms;Eukaryota;Opisthokonta;Metazoa;Eumetazoa;Bilateria;Protostomia;  
 Spiralia;Lophotrochozoa;Mollusca;Bivalvia;Autobranhia;Heteroconchia;Euhe  
 terodonta;Imparidentia;Venerida;Veneroidea;Veneridae;Mercenaria;Mercenari  
 a mercenaria  
 UdeM00000031874 6596 117.5 UdeM00000031874 XP\_045160165.1 57 100  
 43 0 37 136 9 108 1.40E-23 117.5 6596 cellular  
 organisms;Eukaryota;Opisthokonta;Metazoa;Eumetazoa;Bilateria;Protostomia;  
 Spiralia;Lophotrochozoa;Mollusca;Bivalvia;Autobranhia;Heteroconchia;Euhe  
 terodonta;Imparidentia;Venerida;Veneroidea;Veneridae;Mercenaria;Mercenari  
 a mercenaria  
 UdeM00000031875 6596 92.4 UdeM00000031875 XP\_045158292.1 51.6 95  
 43 1 4 95 1 95 7.50E-16 92.4 6596 cellular  
 organisms;Eukaryota;Opisthokonta;Metazoa;Eumetazoa;Bilateria;Protostomia;  
 Spiralia;Lophotrochozoa;Mollusca;Bivalvia;Autobranhia;Heteroconchia;Euhe  
 terodonta;Imparidentia;Venerida;Veneroidea;Veneridae;Mercenaria;Mercenari  
 a mercenaria

UdeM00000031876 6596 425.2 UdeM00000031876 XP\_045158292.1 44.4 620  
 197 12 7 606 150 641 1.50E-115 425.2 6596 cellular  
 organisms;Eukaryota;Opisthokonta;Metazoa;Eumetazoa;Bilateria;Protostomia;  
 Spiralia;Lophotrochozoa;Mollusca;Bivalvia;Autobranchia;Heteroconchia;Euhe  
 terodonta;Imparidentia;Venerida;Veneroidea;Veneridae;Mercenaria;Mercenari  
 a mercenaria

UdeM00000031877 6596 397.5 UdeM00000031877 XP\_045158292.1 53.1 437  
 177 9 6 424 215 641 2.50E-107 397.5 6596 cellular  
 organisms;Eukaryota;Opisthokonta;Metazoa;Eumetazoa;Bilateria;Protostomia;  
 Spiralia;Lophotrochozoa;Mollusca;Bivalvia;Autobranchia;Heteroconchia;Euhe  
 terodonta;Imparidentia;Venerida;Veneroidea;Veneridae;Mercenaria;Mercenari  
 a mercenaria

UdeM00000031878 6565 958.7 UdeM00000031878 XP\_022314345.1 71.8 674  
 172 5 98 764 10 672 4.30E-276 958.7 6565 cellular  
 organisms;Eukaryota;Opisthokonta;Metazoa;Eumetazoa;Bilateria;Protostomia;  
 Spiralia;Lophotrochozoa;Mollusca;Bivalvia;Autobranchia;Pteriormorphia;Ostr  
 eida;Ostreoidea;Ostreidae;Crassostrea;Crassostrea virginica

UdeM00000031879 6596 443 UdeM00000031879 XP\_045182567.1 53.6 386  
 173 3 52 434 14 396 4.70E-121 443 6596 cellular  
 organisms;Eukaryota;Opisthokonta;Metazoa;Eumetazoa;Bilateria;Protostomia;  
 Spiralia;Lophotrochozoa;Mollusca;Bivalvia;Autobranchia;Heteroconchia;Euhe  
 terodonta;Imparidentia;Venerida;Veneroidea;Veneridae;Mercenaria;Mercenari  
 a mercenaria

UdeM00000031880 225164 392.9 UdeM00000031880 XP\_009048435.1 54.2  
 334 150 2 58 391 3 333 4.80E-106 392.9 225164  
 cellular  
 organisms;Eukaryota;Opisthokonta;Metazoa;Eumetazoa;Bilateria;Protostomia;  
 Spiralia;Lophotrochozoa;Mollusca;Gastropoda;Patellogastropoda;Lottioidea;  
 Lottiidae;Lottia;Lottia gigantea

UdeM00000031881 6596 1594.3 UdeM00000031881 XP\_045160306.1 74.1  
 1044 267 2 18 1060 18 1059 0.00E+00 1594.3 6596  
 cellular  
 organisms;Eukaryota;Opisthokonta;Metazoa;Eumetazoa;Bilateria;Protostomia;  
 Spiralia;Lophotrochozoa;Mollusca;Bivalvia;Autobranchia;Heteroconchia;Euhe  
 terodonta;Imparidentia;Venerida;Veneroidea;Veneridae;Mercenaria;Mercenari  
 a mercenaria

UdeM00000031882 6596 1247.6 UdeM00000031882 XP\_045214099.1 46  
 1477 740 16 70 1505 8 1467 0.00E+00 1247.6 6596  
 cellular  
 organisms;Eukaryota;Opisthokonta;Metazoa;Eumetazoa;Bilateria;Protostomia;  
 Spiralia;Lophotrochozoa;Mollusca;Bivalvia;Autobranchia;Heteroconchia;Euhe  
 terodonta;Imparidentia;Venerida;Veneroidea;Veneridae;Mercenaria;Mercenari  
 a mercenaria

UdeM00000031883 6596 1248.8 UdeM00000031883 XP\_045214099.1 46  
 1479 741 16 26 1463 6 1467 0.00E+00 1248.8 6596  
 cellular  
 organisms;Eukaryota;Opisthokonta;Metazoa;Eumetazoa;Bilateria;Protostomia;  
 Spiralia;Lophotrochozoa;Mollusca;Bivalvia;Autobranchia;Heteroconchia;Euhe  
 terodonta;Imparidentia;Venerida;Veneroidea;Veneridae;Mercenaria;Mercenari  
 a mercenaria

UdeM00000031884 6596 573.9 UdeM00000031884 XP\_045174310.1 68.2 421  
 127 3 6 420 35 454 1.70E-160 573.9 6596 cellular  
 organisms;Eukaryota;Opisthokonta;Metazoa;Eumetazoa;Bilateria;Protostomia;  
 Spiralia;Lophotrochozoa;Mollusca;Bivalvia;Autobranchia;Heteroconchia;Euhe

terodonta;Imparidentia;Venerida;Veneroidea;Veneridae;Mercenaria;Mercenari  
 a mercenaria  
 UdeM00000031885 6596 449.9 UdeM00000031885 XP\_045159739.1 51.2 510  
 165 8 7 510 40 471 4.30E-123 449.9 6596 cellular  
 organisms;Eukaryota;Opisthokonta;Metazoa;Eumetazoa;Bilateria;Protostomia;  
 Spiralia;Lophotrochozoa;Mollusca;Bivalvia;Autobranhia;Heteroconchia;Euhe  
 terodonta;Imparidentia;Venerida;Veneroidea;Veneridae;Mercenaria;Mercenari  
 a mercenaria  
 UdeM00000031887 6596 441 UdeM00000031887 XP\_045159876.1 79.8 352  
 71 0 5 356 9 360 1.60E-120 441 6596 cellular  
 organisms;Eukaryota;Opisthokonta;Metazoa;Eumetazoa;Bilateria;Protostomia;  
 Spiralia;Lophotrochozoa;Mollusca;Bivalvia;Autobranhia;Heteroconchia;Euhe  
 terodonta;Imparidentia;Venerida;Veneroidea;Veneridae;Mercenaria;Mercenari  
 a mercenaria  
 UdeM00000031888 6579 281.6 UdeM00000031888 XP\_033738468.1 55.6 288  
 108 5 68 336 53 339 3.50E-72 281.6 6579 cellular  
 organisms;Eukaryota;Opisthokonta;Metazoa;Eumetazoa;Bilateria;Protostomia;  
 Spiralia;Lophotrochozoa;Mollusca;Bivalvia;Autobranhia;Pteriormorphia;Pect  
 inida;Pectinoidea;Pectinidae;Pecten;Pecten maximus  
 UdeM00000031889 6596 2586.6 UdeM00000031889 XP\_045160896.1 45.9  
 3585 1644 83 1 3441 1 3432 0.00E+00 2586.6 6596  
 cellular  
 organisms;Eukaryota;Opisthokonta;Metazoa;Eumetazoa;Bilateria;Protostomia;  
 Spiralia;Lophotrochozoa;Mollusca;Bivalvia;Autobranhia;Heteroconchia;Euhe  
 terodonta;Imparidentia;Venerida;Veneroidea;Veneridae;Mercenaria;Mercenari  
 a mercenaria  
 UdeM00000031890 6596 92.8 UdeM00000031890 XP\_045190867.1 45.4 108  
 58 1 452 559 646 752 1.50E-15 92.8 6596 cellular  
 organisms;Eukaryota;Opisthokonta;Metazoa;Eumetazoa;Bilateria;Protostomia;  
 Spiralia;Lophotrochozoa;Mollusca;Bivalvia;Autobranhia;Heteroconchia;Euhe  
 terodonta;Imparidentia;Venerida;Veneroidea;Veneridae;Mercenaria;Mercenari  
 a mercenaria  
 UdeM00000031891 6596 368.2 UdeM00000031891 XP\_045158475.1 52.7 357  
 164 3 45 399 1 354 1.30E-98 368.2 6596 cellular  
 organisms;Eukaryota;Opisthokonta;Metazoa;Eumetazoa;Bilateria;Protostomia;  
 Spiralia;Lophotrochozoa;Mollusca;Bivalvia;Autobranhia;Heteroconchia;Euhe  
 terodonta;Imparidentia;Venerida;Veneroidea;Veneridae;Mercenaria;Mercenari  
 a mercenaria  
 UdeM00000031892 6596 81.6 UdeM00000031892 XP\_045198179.1 27.9 208  
 137 3 2 205 880 1078 1.20E-12 81.6 6596 cellular  
 organisms;Eukaryota;Opisthokonta;Metazoa;Eumetazoa;Bilateria;Protostomia;  
 Spiralia;Lophotrochozoa;Mollusca;Bivalvia;Autobranhia;Heteroconchia;Euhe  
 terodonta;Imparidentia;Venerida;Veneroidea;Veneridae;Mercenaria;Mercenari  
 a mercenaria  
 UdeM00000031893 6596 494.2 UdeM00000031893 XP\_045157040.1 68.8 340  
 105 1 12 350 15 354 1.40E-136 494.2 6596 cellular  
 organisms;Eukaryota;Opisthokonta;Metazoa;Eumetazoa;Bilateria;Protostomia;  
 Spiralia;Lophotrochozoa;Mollusca;Bivalvia;Autobranhia;Heteroconchia;Euhe  
 terodonta;Imparidentia;Venerida;Veneroidea;Veneridae;Mercenaria;Mercenari  
 a mercenaria  
 UdeM00000031894 6596 351.3 UdeM00000031894 XP\_045157040.1 52.4 330  
 138 5 27 338 24 352 1.40E-93 351.3 6596 cellular  
 organisms;Eukaryota;Opisthokonta;Metazoa;Eumetazoa;Bilateria;Protostomia;  
 Spiralia;Lophotrochozoa;Mollusca;Bivalvia;Autobranhia;Heteroconchia;Euhe

terodonta;Imparidentia;Venerida;Veneroidea;Veneridae;Mercenaria;Mercenari  
a mercenaria

UdeM00000031895 6596 386.3 UdeM00000031895 XP\_045158812.1 43.3 457  
231 7 27 479 28 460 5.70E-104 386.3 6596 cellular

organisms;Eukaryota;Opisthokonta;Metazoa;Eumetazoa;Bilateria;Protostomia;  
Spiralia;Lophotrochozoa;Mollusca;Bivalvia;Autobranchia;Heteroconchia;Euhe  
terodonta;Imparidentia;Venerida;Veneroidea;Veneridae;Mercenaria;Mercenari  
a mercenaria

UdeM00000031896 6596 90.9 UdeM00000031896 XP\_045181700.1 25.3 288  
174 8 18 279 26 298 2.80E-15 90.9 6596 cellular

organisms;Eukaryota;Opisthokonta;Metazoa;Eumetazoa;Bilateria;Protostomia;  
Spiralia;Lophotrochozoa;Mollusca;Bivalvia;Autobranchia;Heteroconchia;Euhe  
terodonta;Imparidentia;Venerida;Veneroidea;Veneridae;Mercenaria;Mercenari  
a mercenaria

UdeM00000031897 2607531 79.3 UdeM00000031897 XP\_036354520.1 25.2  
290 186 10 5 286 21 287 8.80E-12 79.3 2607531  
cellular

organisms;Eukaryota;Opisthokonta;Metazoa;Eumetazoa;Bilateria;Protostomia;  
Spiralia;Lophotrochozoa;Mollusca;Cephalopoda;Coleoidea;Octopodiformes;Oct  
opoda;Incirrata;Octopodidae;Octopus;Octopus sinensis

UdeM00000031898 2607531 78.6 UdeM00000031898 XP\_036354520.1 24.8  
290 187 10 2 283 21 287 1.50E-11 78.6 2607531  
cellular

organisms;Eukaryota;Opisthokonta;Metazoa;Eumetazoa;Bilateria;Protostomia;  
Spiralia;Lophotrochozoa;Mollusca;Cephalopoda;Coleoidea;Octopodiformes;Oct  
opoda;Incirrata;Octopodidae;Octopus;Octopus sinensis

UdeM00000031899 6596 88.6 UdeM00000031899 XP\_045181700.1 26.4 288  
171 10 18 279 26 298 1.40E-14 88.6 6596 cellular

organisms;Eukaryota;Opisthokonta;Metazoa;Eumetazoa;Bilateria;Protostomia;  
Spiralia;Lophotrochozoa;Mollusca;Bivalvia;Autobranchia;Heteroconchia;Euhe  
terodonta;Imparidentia;Venerida;Veneroidea;Veneridae;Mercenaria;Mercenari  
a mercenaria

UdeM00000031900 2607531 79.3 UdeM00000031900 XP\_036354520.1 25.2  
290 186 10 5 286 21 287 8.80E-12 79.3 2607531  
cellular

organisms;Eukaryota;Opisthokonta;Metazoa;Eumetazoa;Bilateria;Protostomia;  
Spiralia;Lophotrochozoa;Mollusca;Cephalopoda;Coleoidea;Octopodiformes;Oct  
opoda;Incirrata;Octopodidae;Octopus;Octopus sinensis

UdeM00000031901 2607531 78.6 UdeM00000031901 XP\_036354520.1 24.8  
290 187 10 2 283 21 287 1.50E-11 78.6 2607531  
cellular

organisms;Eukaryota;Opisthokonta;Metazoa;Eumetazoa;Bilateria;Protostomia;  
Spiralia;Lophotrochozoa;Mollusca;Cephalopoda;Coleoidea;Octopodiformes;Oct  
opoda;Incirrata;Octopodidae;Octopus;Octopus sinensis

UdeM00000031902 6596 88.6 UdeM00000031902 XP\_045181700.1 26.4 288  
171 10 18 279 26 298 1.40E-14 88.6 6596 cellular

organisms;Eukaryota;Opisthokonta;Metazoa;Eumetazoa;Bilateria;Protostomia;  
Spiralia;Lophotrochozoa;Mollusca;Bivalvia;Autobranchia;Heteroconchia;Euhe  
terodonta;Imparidentia;Venerida;Veneroidea;Veneridae;Mercenaria;Mercenari  
a mercenaria

UdeM00000031903 2607531 79 UdeM00000031903 XP\_036354520.1 24.8  
290 187 10 2 283 21 287 1.10E-11 79 2607531  
cellular

organisms;Eukaryota;Opisthokonta;Metazoa;Eumetazoa;Bilateria;Protostomia;

Spiralia;Lophotrochozoa;Mollusca;Cephalopoda;Coleoidea;Octopodiformes;Octopoda;Incirrata;Octopodidae;Octopus;Octopus sinensis

UdeM00000031904 6596 176 UdeM00000031904 XP\_045158855.1 46 189  
95 3 3 191 15 196 4.60E-41 176 6596 cellular  
organisms;Eukaryota;Opisthokonta;Metazoa;Eumetazoa;Bilateria;Protostomia;  
Spiralia;Lophotrochozoa;Mollusca;Bivalvia;Autobranhia;Heteroconchia;Euhe  
terodonta;Imparidentia;Venerida;Veneroidea;Veneridae;Mercenaria;Mercenari  
a mercenaria

UdeM00000031905 6596 151.4 UdeM00000031905 XP\_045158855.1 41 212  
111 5 31 237 1 203 1.60E-33 151.4 6596 cellular  
organisms;Eukaryota;Opisthokonta;Metazoa;Eumetazoa;Bilateria;Protostomia;  
Spiralia;Lophotrochozoa;Mollusca;Bivalvia;Autobranhia;Heteroconchia;Euhe  
terodonta;Imparidentia;Venerida;Veneroidea;Veneridae;Mercenaria;Mercenari  
a mercenaria

UdeM00000031906 6579 900.6 UdeM00000031906 XP\_033736984.1 59.3 815  
285 8 1 804 1 779 1.50E-258 900.6 6579 cellular  
organisms;Eukaryota;Opisthokonta;Metazoa;Eumetazoa;Bilateria;Protostomia;  
Spiralia;Lophotrochozoa;Mollusca;Bivalvia;Autobranhia;Pteriormorphia;Pect  
inida;Pectinoidea;Pectinidae;Pecten;Pecten maximus

UdeM00000031907 6579 977.2 UdeM00000031907 XP\_033736982.1 59 905  
316 12 1 891 1 864 1.40E-281 977.2 6579 cellular  
organisms;Eukaryota;Opisthokonta;Metazoa;Eumetazoa;Bilateria;Protostomia;  
Spiralia;Lophotrochozoa;Mollusca;Bivalvia;Autobranhia;Pteriormorphia;Pect  
inida;Pectinoidea;Pectinidae;Pecten;Pecten maximus

UdeM00000031908 6579 753.8 UdeM00000031908 XP\_033736984.1 57.3 714  
258 8 20 722 102 779 2.00E-214 753.8 6579 cellular  
organisms;Eukaryota;Opisthokonta;Metazoa;Eumetazoa;Bilateria;Protostomia;  
Spiralia;Lophotrochozoa;Mollusca;Bivalvia;Autobranhia;Pteriormorphia;Pect  
inida;Pectinoidea;Pectinidae;Pecten;Pecten maximus

UdeM00000031909 6579 300.8 UdeM00000031909 XP\_033743027.1 71.8 220  
61 1 1 219 4 223 1.40E-78 300.8 6579 cellular  
organisms;Eukaryota;Opisthokonta;Metazoa;Eumetazoa;Bilateria;Protostomia;  
Spiralia;Lophotrochozoa;Mollusca;Bivalvia;Autobranhia;Pteriormorphia;Pect  
inida;Pectinoidea;Pectinidae;Pecten;Pecten maximus

UdeM00000031910 29159 217.2 UdeM00000031910 XP\_011422825.2 27.3 480  
313 11 38 492 17 485 5.90E-53 217.2 29159 cellular  
organisms;Eukaryota;Opisthokonta;Metazoa;Eumetazoa;Bilateria;Protostomia;  
Spiralia;Lophotrochozoa;Mollusca;Bivalvia;Autobranhia;Pteriormorphia;Ostr  
eida;Ostreoidea;Ostreidae;Crassostrea;Crassostrea gigas

UdeM00000031911 29159 217.2 UdeM00000031911 XP\_011422825.2 27.3 480  
313 11 31 485 17 485 5.90E-53 217.2 29159 cellular  
organisms;Eukaryota;Opisthokonta;Metazoa;Eumetazoa;Bilateria;Protostomia;  
Spiralia;Lophotrochozoa;Mollusca;Bivalvia;Autobranhia;Pteriormorphia;Ostr  
eida;Ostreoidea;Ostreidae;Crassostrea;Crassostrea gigas

UdeM00000031912 6596 1387.9 UdeM00000031912 XP\_045160101.1 61.4  
1120 417 6 59 1171 3 1114 0.00E+00 1387.9 6596  
cellular  
organisms;Eukaryota;Opisthokonta;Metazoa;Eumetazoa;Bilateria;Protostomia;  
Spiralia;Lophotrochozoa;Mollusca;Bivalvia;Autobranhia;Heteroconchia;Euhe  
terodonta;Imparidentia;Venerida;Veneroidea;Veneridae;Mercenaria;Mercenari  
a mercenaria

UdeM00000031914 6596 1393.3 UdeM00000031914 XP\_045160101.1 61.6  
1120 415 6 56 1168 3 1114 0.00E+00 1393.3 6596  
cellular

organisms;Eukaryota;Opisthokonta;Metazoa;Eumetazoa;Bilateria;Protostomia;Spiralia;Lophotrochozoa;Mollusca;Bivalvia;Autobranchia;Heteroconchia;Euherodonta;Imparidentia;Venerida;Veneroidea;Veneridae;Mercenaria;Mercenaria mercenaria

UdeM00000031916 1735272 89.4 UdeM00000031916 XP\_041354209.1 28.5  
137 95 2 23 158 19 153 4.60E-15 89.4 1735272  
cellular

organisms;Eukaryota;Opisthokonta;Metazoa;Eumetazoa;Bilateria;Protostomia;Spiralia;Lophotrochozoa;Mollusca;Gastropoda;Neomphalina;Neomphaloidea;Peltospiridae;Gigantopelta;Gigantopelta aegis

UdeM00000031917 118141 75.5 UdeM00000031917 XP\_036372011.1 33.3  
108 69 2 176 281 129 235 1.20E-10 75.5 118141  
cellular

organisms;Eukaryota;Opisthokonta;Metazoa;Eumetazoa;Bilateria;Deuterostomia;Chordata;Craniata;Vertebrata;Gnathostomata;Teleostomi;Euteleostomi;Actinopterygii;Actinopteri;Neopterygii;Teleostei;Elopocephalai;Elopocephala;Elopopomorpha;Elopiiformes;Megalopidae;Megalops;Megalops cyprinoides

UdeM00000031918 50390 195.7 UdeM00000031918 XP\_028127913.1 44 225  
125 1 1 225 1 224 6.90E-47 195.7 50390 cellular

organisms;Eukaryota;Opisthokonta;Metazoa;Eumetazoa;Bilateria;Protostomia;Ecdysozoa;Panarthropoda;Arthropoda;Mandibulata;Pancrustacea;Hexapoda;Insecta;Dicondylia;Pterygota;Neoptera;Endopterygota;Coleoptera;Polyphaga;Cucujiformia;Chrysomeloidea;Chrysomelidae;Galerucinae;Luperini;Diabroticina;Diabroticites;Diabrotica;Diabrotica virgifera;Diabrotica virgifera virgifera

UdeM00000031919 7725 141.7 UdeM00000031919 XP\_039263221.1 60.7 112  
44 0 48 159 9 120 9.70E-31 141.7 7725 cellular

organisms;Eukaryota;Opisthokonta;Metazoa;Eumetazoa;Bilateria;Deuterostomia;Chordata;Tunicata;Ascidiacea;Stolidobranchia;Styelidae;Styela;Styela clava

UdeM00000031920 7741 88.6 UdeM00000031920 XP\_019638446.1 29.5 176  
118 3 105 278 525 696 1.40E-14 88.6 7741 cellular

organisms;Eukaryota;Opisthokonta;Metazoa;Eumetazoa;Bilateria;Deuterostomia;Chordata;Cephalochordata;Leptocardii;Amphioxiformes;Branchiostomidae;Branchiostoma;Branchiostoma belcheri

UdeM00000031921 260615 196.8 UdeM00000031921 XP\_039398742.1 65.5  
177 19 3 22 156 249 425 2.00E-47 196.8 260615  
cellular

organisms;Eukaryota;Opisthokonta;Metazoa;Eumetazoa;Bilateria;Deuterostomia;Chordata;Craniata;Vertebrata;Gnathostomata;Teleostomi;Euteleostomi;Sarcopterygii;Dipnotetrapodomorpha;Tetrapoda;Amniota;Sauropsida;Sauria;Archelosauria;Testudinata;Testudines;Cryptodira;Durocryptodira;Testudinoidea;Geoemydidae;Geoemydinae;Mauremys;Mauremys reevesii

UdeM00000031922 6596 1221.5 UdeM00000031922 XP\_045159298.1 63.1  
908 321 3 1 896 1 906 0.00E+00 1221.5 6596  
cellular

organisms;Eukaryota;Opisthokonta;Metazoa;Eumetazoa;Bilateria;Protostomia;Spiralia;Lophotrochozoa;Mollusca;Bivalvia;Autobranchia;Heteroconchia;Euherodonta;Imparidentia;Venerida;Veneroidea;Veneridae;Mercenaria;Mercenaria mercenaria

UdeM00000031925 1735272 161.4 UdeM00000031925 XP\_041359136.1 72.4  
105 29 0 4 108 4 108 7.00E-37 161.4 1735272  
cellular

organisms;Eukaryota;Opisthokonta;Metazoa;Eumetazoa;Bilateria;Protostomia;

Spiralia; Lophotrochozoa; Mollusca; Gastropoda; Neomphalina; Neomphaloidea; Peltospiridae; Gigantopelta; Gigantopelta aegis

|                 |         |       |                 |                |          |
|-----------------|---------|-------|-----------------|----------------|----------|
| UdeM00000031926 | 1735272 | 184.5 | UdeM00000031926 | XP_041359136.1 | 71.2     |
| 125             | 36      | 0     | 4               | 128            | 4        |
|                 |         |       |                 | 128            | 8.60E-44 |
|                 |         |       |                 | 184.5          | 1735272  |

cellular organisms; Eukaryota; Opisthokonta; Metazoa; Eumetazoa; Bilateria; Protostomia; Spiralia; Lophotrochozoa; Mollusca; Gastropoda; Neomphalina; Neomphaloidea; Peltospiridae; Gigantopelta; Gigantopelta aegis

|                 |        |       |                 |                |          |
|-----------------|--------|-------|-----------------|----------------|----------|
| UdeM00000031927 | 225164 | 165.6 | UdeM00000031927 | XP_009044028.1 | 52       |
| 179             | 76     | 3     | 1               | 170            | 1        |
|                 |        |       |                 | 178            | 5.40E-38 |
|                 |        |       |                 | 165.6          | 225164   |

cellular organisms; Eukaryota; Opisthokonta; Metazoa; Eumetazoa; Bilateria; Protostomia; Spiralia; Lophotrochozoa; Mollusca; Gastropoda; Patellogastropoda; Lottioidea; Lottiidae; Lottia; Lottia gigantea

|                 |      |       |                 |                |      |           |
|-----------------|------|-------|-----------------|----------------|------|-----------|
| UdeM00000031928 | 6596 | 753.4 | UdeM00000031928 | XP_045160914.1 | 63.1 | 654       |
| 187             | 8    | 24    | 674             | 238            | 840  | 2.50E-214 |
|                 |      |       |                 |                |      | 753.4     |
|                 |      |       |                 |                |      | 6596      |

cellular organisms; Eukaryota; Opisthokonta; Metazoa; Eumetazoa; Bilateria; Protostomia; Spiralia; Lophotrochozoa; Mollusca; Bivalvia; Autobranchia; Heteroconchia; Euheterodonta; Imparidentia; Venerida; Veneroidea; Veneridae; Mercenaria; Mercenaria mercenaria

|                 |      |        |                 |                |      |          |
|-----------------|------|--------|-----------------|----------------|------|----------|
| UdeM00000031929 | 6596 | 1148.3 | UdeM00000031929 | XP_045160914.1 | 46   |          |
| 1610            | 356  | 16     | 343             | 1905           | 1357 | 2499     |
|                 |      |        |                 |                |      | 0.00E+00 |
|                 |      |        |                 |                |      | 1148.3   |
|                 |      |        |                 |                |      | 6596     |

cellular organisms; Eukaryota; Opisthokonta; Metazoa; Eumetazoa; Bilateria; Protostomia; Spiralia; Lophotrochozoa; Mollusca; Bivalvia; Autobranchia; Heteroconchia; Euheterodonta; Imparidentia; Venerida; Veneroidea; Veneridae; Mercenaria; Mercenaria mercenaria

|                 |      |       |                 |                |      |          |
|-----------------|------|-------|-----------------|----------------|------|----------|
| UdeM00000031931 | 6596 | 169.5 | UdeM00000031931 | XP_045159158.1 | 24.7 | 534      |
| 368             | 15   | 3     | 518             | 80             | 597  | 1.20E-38 |
|                 |      |       |                 |                |      | 169.5    |
|                 |      |       |                 |                |      | 6596     |

cellular organisms; Eukaryota; Opisthokonta; Metazoa; Eumetazoa; Bilateria; Protostomia; Spiralia; Lophotrochozoa; Mollusca; Bivalvia; Autobranchia; Heteroconchia; Euheterodonta; Imparidentia; Venerida; Veneroidea; Veneridae; Mercenaria; Mercenaria mercenaria

|                 |      |       |                 |                |      |          |
|-----------------|------|-------|-----------------|----------------|------|----------|
| UdeM00000031932 | 6596 | 155.6 | UdeM00000031932 | XP_045159158.1 | 24.9 | 490      |
| 334             | 15   | 50    | 521             | 124            | 597  | 1.80E-34 |
|                 |      |       |                 |                |      | 155.6    |
|                 |      |       |                 |                |      | 6596     |

cellular organisms; Eukaryota; Opisthokonta; Metazoa; Eumetazoa; Bilateria; Protostomia; Spiralia; Lophotrochozoa; Mollusca; Bivalvia; Autobranchia; Heteroconchia; Euheterodonta; Imparidentia; Venerida; Veneroidea; Veneridae; Mercenaria; Mercenaria mercenaria

|                 |       |       |                 |                |      |          |
|-----------------|-------|-------|-----------------|----------------|------|----------|
| UdeM00000031933 | 29159 | 225.3 | UdeM00000031933 | XP_011428105.2 | 50.2 | 231      |
| 95              | 5     | 1     | 220             | 1              | 222  | 7.50E-56 |
|                 |       |       |                 |                |      | 225.3    |
|                 |       |       |                 |                |      | 29159    |

cellular organisms; Eukaryota; Opisthokonta; Metazoa; Eumetazoa; Bilateria; Protostomia; Spiralia; Lophotrochozoa; Mollusca; Bivalvia; Autobranchia; Pteriomorphia; Ostreida; Ostreoidea; Ostreidae; Crassostrea; Crassostrea gigas

|                 |       |       |                 |                |      |          |
|-----------------|-------|-------|-----------------|----------------|------|----------|
| UdeM00000031934 | 29159 | 195.3 | UdeM00000031934 | XP_011428105.2 | 47.7 | 214      |
| 92              | 5     | 46    | 248             | 18             | 222  | 9.30E-47 |
|                 |       |       |                 |                |      | 195.3    |
|                 |       |       |                 |                |      | 29159    |

cellular organisms; Eukaryota; Opisthokonta; Metazoa; Eumetazoa; Bilateria; Protostomia; Spiralia; Lophotrochozoa; Mollusca; Bivalvia; Autobranchia; Pteriomorphia; Ostreida; Ostreoidea; Ostreidae; Crassostrea; Crassostrea gigas

|                 |      |       |                 |                |      |          |
|-----------------|------|-------|-----------------|----------------|------|----------|
| UdeM00000031935 | 6573 | 282.7 | UdeM00000031935 | XP_021378869.1 | 43.4 | 708      |
| 308             | 10   | 1     | 700             | 1              | 623  | 1.30E-72 |
|                 |      |       |                 |                |      | 282.7    |
|                 |      |       |                 |                |      | 6573     |

cellular organisms; Eukaryota; Opisthokonta; Metazoa; Eumetazoa; Bilateria; Protostomia; Spiralia; Lophotrochozoa; Mollusca; Bivalvia; Autobranchia; Pteriomorphia; Pectinida; Pectinoidea; Pectinidae; Mizuhopecten; Mizuhopecten yessoensis



UdeM00000031936 6573 590.5 UdeM00000031936 XP\_021345270.1 34.2 1178  
 696 27 41 1196 28 1148 4.80E-165 590.5 6573 cellular  
 organisms;Eukaryota;Opisthokonta;Metazoa;Eumetazoa;Bilateria;Protostomia;  
 Spiralia;Lophotrochozoa;Mollusca;Bivalvia;Autobranchia;Pteriormorphia;Pect  
 inida;Pectinoidea;Pectinidae;Mizuhopecten;Mizuhopecten yessoensis  
 UdeM00000031937 400727 240 UdeM00000031937 XP\_025109438.1 86.2  
 123 17 0 12 134 50 172 4.50E-60 240 400727  
 cellular  
 organisms;Eukaryota;Opisthokonta;Metazoa;Eumetazoa;Bilateria;Protostomia;  
 Spiralia;Lophotrochozoa;Mollusca;Gastropoda;Caenogastropoda;Architaeniogl  
 ossa;Ampullarioidea;Ampullariidae;Pomacea;Pomacea canaliculata  
 UdeM00000031939 6596 583.6 UdeM00000031939 XP\_045160478.1 61.7 444  
 162 7 2 441 40 479 2.30E-163 583.6 6596 cellular  
 organisms;Eukaryota;Opisthokonta;Metazoa;Eumetazoa;Bilateria;Protostomia;  
 Spiralia;Lophotrochozoa;Mollusca;Bivalvia;Autobranchia;Heteroconchia;Euhe  
 terodonta;Imparidentia;Venerida;Veneroidea;Veneridae;Mercenaria;Mercenari  
 a mercenaria  
 UdeM00000031940 1735272 483.8 UdeM00000031940 XP\_041372725.1 60.2  
 384 145 1 1 384 1 376 2.00E-133 483.8 1735272  
 cellular  
 organisms;Eukaryota;Opisthokonta;Metazoa;Eumetazoa;Bilateria;Protostomia;  
 Spiralia;Lophotrochozoa;Mollusca;Gastropoda;Neomphalina;Neomphaloidea;Pel  
 tospiridae;Gigantopelta;Gigantopelta aegis  
 UdeM00000031941 6596 1220.7 UdeM00000031941 XP\_045157952.1 68.8  
 833 254 4 1 829 1 831 0.00E+00 1220.7 6596  
 cellular  
 organisms;Eukaryota;Opisthokonta;Metazoa;Eumetazoa;Bilateria;Protostomia;  
 Spiralia;Lophotrochozoa;Mollusca;Bivalvia;Autobranchia;Heteroconchia;Euhe  
 terodonta;Imparidentia;Venerida;Veneroidea;Veneridae;Mercenaria;Mercenari  
 a mercenaria  
 UdeM00000031942 6596 1229.2 UdeM00000031942 XP\_045157952.1 69  
 833 253 3 1 830 1 831 0.00E+00 1229.2 6596  
 cellular  
 organisms;Eukaryota;Opisthokonta;Metazoa;Eumetazoa;Bilateria;Protostomia;  
 Spiralia;Lophotrochozoa;Mollusca;Bivalvia;Autobranchia;Heteroconchia;Euhe  
 terodonta;Imparidentia;Venerida;Veneroidea;Veneridae;Mercenaria;Mercenari  
 a mercenaria  
 UdeM00000031943 29159 718.4 UdeM00000031943 XP\_034305523.1 53.8 653  
 295 6 20 670 331 978 8.80E-204 718.4 29159 cellular  
 organisms;Eukaryota;Opisthokonta;Metazoa;Eumetazoa;Bilateria;Protostomia;  
 Spiralia;Lophotrochozoa;Mollusca;Bivalvia;Autobranchia;Pteriormorphia;Ostr  
 eida;Ostreoidea;Ostreidae;Crassostrea;Crassostrea gigas  
 UdeM00000031944 1735272 357.8 UdeM00000031944 XP\_041359087.1 82.8  
 209 36 0 21 229 19 227 1.00E-95 357.8 1735272  
 cellular  
 organisms;Eukaryota;Opisthokonta;Metazoa;Eumetazoa;Bilateria;Protostomia;  
 Spiralia;Lophotrochozoa;Mollusca;Gastropoda;Neomphalina;Neomphaloidea;Pel  
 tospiridae;Gigantopelta;Gigantopelta aegis  
 UdeM00000031945 6596 488.8 UdeM00000031945 XP\_045158892.1 52.4 504  
 197 9 1 470 1 495 7.90E-135 488.8 6596 cellular  
 organisms;Eukaryota;Opisthokonta;Metazoa;Eumetazoa;Bilateria;Protostomia;  
 Spiralia;Lophotrochozoa;Mollusca;Bivalvia;Autobranchia;Heteroconchia;Euhe  
 terodonta;Imparidentia;Venerida;Veneroidea;Veneridae;Mercenaria;Mercenari  
 a mercenaria

UdeM00000031946 6596 72.8 UdeM00000031946 XP\_045175451.1 29.7 165  
 106 2 88 252 363 517 7.90E-10 72.8 6596 cellular  
 organisms;Eukaryota;Opisthokonta;Metazoa;Eumetazoa;Bilateria;Protostomia;  
 Spiralia;Lophotrochozoa;Mollusca;Bivalvia;Autobranchia;Heteroconchia;Euhe  
 terodonta;Imparidentia;Venerida;Veneroidea;Veneridae;Mercenaria;Mercenari  
 a mercenaria  
 UdeM00000031947 6565 2971.4 UdeM00000031947 XP\_022317346.1 80.8  
 1752 336 1 3 1753 1 1752 0.00E+00 2971.4 6565  
 cellular  
 organisms;Eukaryota;Opisthokonta;Metazoa;Eumetazoa;Bilateria;Protostomia;  
 Spiralia;Lophotrochozoa;Mollusca;Bivalvia;Autobranchia;Pteriormorphia;Ostr  
 eida;Ostreoidea;Ostreidae;Crassostrea;Crassostrea virginica  
 UdeM00000031948 1735272 81.3 UdeM00000031948 XP\_041347065.1 38.5  
 148 63 3 1 121 1 147 1.10E-12 81.3 1735272  
 cellular  
 organisms;Eukaryota;Opisthokonta;Metazoa;Eumetazoa;Bilateria;Protostomia;  
 Spiralia;Lophotrochozoa;Mollusca;Gastropoda;Neomphalina;Neomphaloidea;Pel  
 tospiridae;Gigantopelta;Gigantopelta aegis  
 UdeM00000031949 6596 397.9 UdeM00000031949 XP\_045160234.1 53.7 415  
 162 7 3 403 2 400 1.90E-107 397.9 6596 cellular  
 organisms;Eukaryota;Opisthokonta;Metazoa;Eumetazoa;Bilateria;Protostomia;  
 Spiralia;Lophotrochozoa;Mollusca;Bivalvia;Autobranchia;Heteroconchia;Euhe  
 terodonta;Imparidentia;Venerida;Veneroidea;Veneridae;Mercenaria;Mercenari  
 a mercenaria  
 UdeM00000031950 6579 63.2 UdeM00000031950 XP\_033730826.1 36.3 102  
 49 3 11 97 264 364 2.20E-07 63.2 6579 cellular  
 organisms;Eukaryota;Opisthokonta;Metazoa;Eumetazoa;Bilateria;Protostomia;  
 Spiralia;Lophotrochozoa;Mollusca;Bivalvia;Autobranchia;Pteriormorphia;Pect  
 inida;Pectinoidea;Pectinidae;Pecten;Pecten maximus  
 UdeM00000031951 6579 62.4 UdeM00000031951 XP\_033739072.1 35.2 108  
 68 2 30 136 5 111 1.00E-06 62.4 6579 cellular  
 organisms;Eukaryota;Opisthokonta;Metazoa;Eumetazoa;Bilateria;Protostomia;  
 Spiralia;Lophotrochozoa;Mollusca;Bivalvia;Autobranchia;Pteriormorphia;Pect  
 inida;Pectinoidea;Pectinidae;Pecten;Pecten maximus  
 UdeM00000031952 1735272 1477.2 UdeM00000031952 XP\_041357210.1  
 65.1 1091 352 9 3 1072 271 1353 0.00E+00 1477.2  
 1735272 cellular  
 organisms;Eukaryota;Opisthokonta;Metazoa;Eumetazoa;Bilateria;Protostomia;  
 Spiralia;Lophotrochozoa;Mollusca;Gastropoda;Neomphalina;Neomphaloidea;Pel  
 tospiridae;Gigantopelta;Gigantopelta aegis  
 UdeM00000031953 6596 223.8 UdeM00000031953 XP\_045158808.1 52.5 223  
 98 3 1 223 1 215 2.30E-55 223.8 6596 cellular  
 organisms;Eukaryota;Opisthokonta;Metazoa;Eumetazoa;Bilateria;Protostomia;  
 Spiralia;Lophotrochozoa;Mollusca;Bivalvia;Autobranchia;Heteroconchia;Euhe  
 terodonta;Imparidentia;Venerida;Veneroidea;Veneridae;Mercenaria;Mercenari  
 a mercenaria  
 UdeM00000031954 6500 233 UdeM00000031954 XP\_005108035.1 76.3 135  
 32 0 2 136 46 180 2.20E-58 233 6500 cellular  
 organisms;Eukaryota;Opisthokonta;Metazoa;Eumetazoa;Bilateria;Protostomia;  
 Spiralia;Lophotrochozoa;Mollusca;Gastropoda;Heterobranchia;Euthyneura;Tec  
 tipleura;Aplysiida;Aplysioidea;Aplysiidae;Aplysia;Aplysia californica  
 UdeM00000031955 6579 468.8 UdeM00000031955 XP\_033738525.1 66.9 335  
 104 3 1 335 1 328 5.90E-129 468.8 6579 cellular  
 organisms;Eukaryota;Opisthokonta;Metazoa;Eumetazoa;Bilateria;Protostomia;

Spiralia; Lophotrochozoa; Mollusca; Bivalvia; Autobranchia; Pteriomorpha; Pectinida; Pectinoidea; Pectinidae; Pecten; Pecten maximus

UdeM00000031956 6596 801.6 UdeM00000031956 XP\_045158841.1 53.4 872  
379 9 28 886 16 873 1.00E-228 801.6 6596 cellular  
organisms; Eukaryota; Opisthokonta; Metazoa; Eumetazoa; Bilateria; Protostomia; Spiralia; Lophotrochozoa; Mollusca; Bivalvia; Autobranchia; Heteroconchia; Euheterodonta; Imparidentia; Venerida; Veneroidea; Veneridae; Mercenaria; Mercenaria mercenaria

UdeM00000031957 6500 79.7 UdeM00000031957 XP\_012939770.1 44.4 99  
49 1 71 163 67 165 3.90E-12 79.7 6500 cellular  
organisms; Eukaryota; Opisthokonta; Metazoa; Eumetazoa; Bilateria; Protostomia; Spiralia; Lophotrochozoa; Mollusca; Gastropoda; Heterobranchia; Euthyneura; Teptipleura; Aplysiida; Aplysioidea; Aplysiidae; Aplysia; Aplysia californica

UdeM00000031958 6596 222.6 UdeM00000031958 XP\_045160126.1 62.9 364  
112 1 78 418 64 427 9.20E-55 222.6 6596 cellular  
organisms; Eukaryota; Opisthokonta; Metazoa; Eumetazoa; Bilateria; Protostomia; Spiralia; Lophotrochozoa; Mollusca; Bivalvia; Autobranchia; Heteroconchia; Euheterodonta; Imparidentia; Venerida; Veneroidea; Veneridae; Mercenaria; Mercenaria mercenaria

UdeM00000031959 1735272 464.9 UdeM00000031959 XP\_041358927.1 75.1  
301 68 1 1 294 1 301 7.50E-128 464.9 1735272  
cellular  
organisms; Eukaryota; Opisthokonta; Metazoa; Eumetazoa; Bilateria; Protostomia; Spiralia; Lophotrochozoa; Mollusca; Gastropoda; Neomphalina; Neomphaloidea; Peltospiridae; Gigantopelta; Gigantopelta aegis

UdeM00000031960 1735272 602.8 UdeM00000031960 XP\_041358772.1 78.2  
390 78 3 8 392 14 401 3.10E-169 602.8 1735272  
cellular  
organisms; Eukaryota; Opisthokonta; Metazoa; Eumetazoa; Bilateria; Protostomia; Spiralia; Lophotrochozoa; Mollusca; Gastropoda; Neomphalina; Neomphaloidea; Peltospiridae; Gigantopelta; Gigantopelta aegis

UdeM00000031961 6596 513.8 UdeM00000031961 XP\_045160123.1 71 345  
98 1 1 343 1 345 1.60E-142 513.8 6596 cellular  
organisms; Eukaryota; Opisthokonta; Metazoa; Eumetazoa; Bilateria; Protostomia; Spiralia; Lophotrochozoa; Mollusca; Bivalvia; Autobranchia; Heteroconchia; Euheterodonta; Imparidentia; Venerida; Veneroidea; Veneridae; Mercenaria; Mercenaria mercenaria

UdeM00000031962 6596 308.5 UdeM00000031962 XP\_045160121.1 66.5 239  
74 4 18 255 7 240 7.80E-81 308.5 6596 cellular  
organisms; Eukaryota; Opisthokonta; Metazoa; Eumetazoa; Bilateria; Protostomia; Spiralia; Lophotrochozoa; Mollusca; Bivalvia; Autobranchia; Heteroconchia; Euheterodonta; Imparidentia; Venerida; Veneroidea; Veneridae; Mercenaria; Mercenaria mercenaria

UdeM00000031964 6526 521.5 UdeM00000031964 XP\_013076153.1 53.8 489  
215 5 23 504 64 548 1.20E-144 521.5 6526 cellular  
organisms; Eukaryota; Opisthokonta; Metazoa; Eumetazoa; Bilateria; Protostomia; Spiralia; Lophotrochozoa; Mollusca; Gastropoda; Heterobranchia; Euthyneura; Panpulmonata; Hygrophila; Lymnaeidae; Planorbidae; Biomphalaria; Biomphalaria glabrata

UdeM00000031963 6526 521.5 UdeM00000031963 XP\_013076153.1 53.8 489  
215 5 63 544 64 548 1.20E-144 521.5 6526 cellular  
organisms; Eukaryota; Opisthokonta; Metazoa; Eumetazoa; Bilateria; Protostomia; Spiralia; Lophotrochozoa; Mollusca; Gastropoda; Heterobranchia; Euthyneura; Panpulmonata; Hygrophila; Lymnaeidae; Planorbidae; Biomphalaria; Biomphalaria glabrata

pulmonata;Hygrophila;Lymnaeoidea;Planorbidae;Biomphalaria;Biomphalaria glabrata

UdeM00000031965 6573 613.6 UdeM00000031965 XP\_021375341.1 47.1 733  
132 3 1 732 54 531 3.20E-172 613.6 6573 cellular  
organisms;Eukaryota;Opisthokonta;Metazoa;Eumetazoa;Bilateria;Protostomia;  
Spiralia;Lophotrochozoa;Mollusca;Bivalvia;Autobranhia;Pteriormorphia;Pect  
inida;Pectinoidea;Pectinidae;Mizuhopecten;Mizuhopecten yessoensis

UdeM00000031966 29159 1025.4 UdeM00000031966 XP\_034310940.1 70.6  
737 214 2 1 737 1 734 3.60E-296 1025.4  
29159 cellular  
organisms;Eukaryota;Opisthokonta;Metazoa;Eumetazoa;Bilateria;Protostomia;  
Spiralia;Lophotrochozoa;Mollusca;Bivalvia;Autobranhia;Pteriormorphia;Ostr  
eida;Ostreoidea;Ostreidae;Crassostrea;Crassostrea gigas

UdeM00000031967 400727 190.3 UdeM00000031967 XP\_025111217.1 58.2  
158 66 0 8 165 23 180 2.40E-45 190.3 400727  
cellular  
organisms;Eukaryota;Opisthokonta;Metazoa;Eumetazoa;Bilateria;Protostomia;  
Spiralia;Lophotrochozoa;Mollusca;Gastropoda;Caenogastropoda;Architaeniogl  
ossa;Ampullarioidea;Ampullariidae;Pomacea;Pomacea canaliculata

UdeM00000031972 29159 231.5 UdeM00000031972 NP\_001295773.1 64 175  
63 0 50 224 291 465 1.10E-57 231.5 29159 cellular  
organisms;Eukaryota;Opisthokonta;Metazoa;Eumetazoa;Bilateria;Protostomia;  
Spiralia;Lophotrochozoa;Mollusca;Bivalvia;Autobranhia;Pteriormorphia;Ostr  
eida;Ostreoidea;Ostreidae;Crassostrea;Crassostrea gigas

UdeM00000031973 6596 507.3 UdeM00000031973 XP\_045160379.1 81.9 298  
54 0 1 298 2 299 1.60E-140 507.3 6596 cellular  
organisms;Eukaryota;Opisthokonta;Metazoa;Eumetazoa;Bilateria;Protostomia;  
Spiralia;Lophotrochozoa;Mollusca;Bivalvia;Autobranhia;Heteroconchia;Euhe  
terodonta;Imparidentia;Venerida;Veneroidea;Veneridae;Mercenaria;Mercenari  
a mercenaria

UdeM00000031974 6596 240.4 UdeM00000031974 XP\_045160172.1 40.6 434  
206 12 1 420 1 396 4.30E-60 240.4 6596 cellular  
organisms;Eukaryota;Opisthokonta;Metazoa;Eumetazoa;Bilateria;Protostomia;  
Spiralia;Lophotrochozoa;Mollusca;Bivalvia;Autobranhia;Heteroconchia;Euhe  
terodonta;Imparidentia;Venerida;Veneroidea;Veneridae;Mercenaria;Mercenari  
a mercenaria

UdeM00000031975 6596 221.9 UdeM00000031975 XP\_045160172.1 41.8 368  
192 8 43 399 40 396 1.50E-54 221.9 6596 cellular  
organisms;Eukaryota;Opisthokonta;Metazoa;Eumetazoa;Bilateria;Protostomia;  
Spiralia;Lophotrochozoa;Mollusca;Bivalvia;Autobranhia;Heteroconchia;Euhe  
terodonta;Imparidentia;Venerida;Veneroidea;Veneridae;Mercenaria;Mercenari  
a mercenaria

UdeM00000031976 6573 165.6 UdeM00000031976 XP\_021369049.1 39.6 265  
155 3 1 263 1 262 9.70E-38 165.6 6573 cellular  
organisms;Eukaryota;Opisthokonta;Metazoa;Eumetazoa;Bilateria;Protostomia;  
Spiralia;Lophotrochozoa;Mollusca;Bivalvia;Autobranhia;Pteriormorphia;Pect  
inida;Pectinoidea;Pectinidae;Mizuhopecten;Mizuhopecten yessoensis

UdeM00000031977 29159 105.9 UdeM00000031977 XP\_034313478.1 34.6 257  
136 10 23 275 29 257 8.80E-20 105.9 29159 cellular  
organisms;Eukaryota;Opisthokonta;Metazoa;Eumetazoa;Bilateria;Protostomia;  
Spiralia;Lophotrochozoa;Mollusca;Bivalvia;Autobranhia;Pteriormorphia;Ostr  
eida;Ostreoidea;Ostreidae;Crassostrea;Crassostrea gigas

UdeM00000031978 6596 147.1 UdeM00000031978 XP\_045160913.1 29.4 476  
256 13 31 497 39 443 5.90E-32 147.1 6596 cellular

organisms;Eukaryota;Opisthokonta;Metazoa;Eumetazoa;Bilateria;Protostomia;Spiralia;Lophotrochozoa;Mollusca;Bivalvia;Autobranchia;Heteroconchia;Euherodonta;Imparidentia;Venerida;Veneroidea;Veneridae;Mercenaria;Mercenaria mercenaria

UdeM00000031982 2607531 447.2 UdeM00000031982 XP\_029657705.1 53.9  
512 205 7 1 491 1 502 2.70E-122 447.2 2607531  
cellular

organisms;Eukaryota;Opisthokonta;Metazoa;Eumetazoa;Bilateria;Protostomia;Spiralia;Lophotrochozoa;Mollusca;Cephalopoda;Coleoidea;Octopodiformes;Octopoda;Incirrata;Octopodidae;Octopus;Octopus sinensis

UdeM00000031983 1735272 126.3 UdeM00000031983 XP\_041358272.1 75  
72 18 0 1 72 1 72 4.80E-26 126.3 1735272  
cellular

organisms;Eukaryota;Opisthokonta;Metazoa;Eumetazoa;Bilateria;Protostomia;Spiralia;Lophotrochozoa;Mollusca;Gastropoda;Neomphalina;Neomphaloidea;Peltospiridae;Gigantopelta;Gigantopelta aegis

UdeM00000031984 6596 1028.1 UdeM00000031984 XP\_045159866.1 60.2  
897 318 13 1 868 1 887 6.60E-297 1028.1 6596  
cellular

organisms;Eukaryota;Opisthokonta;Metazoa;Eumetazoa;Bilateria;Protostomia;Spiralia;Lophotrochozoa;Mollusca;Bivalvia;Autobranchia;Heteroconchia;Euherodonta;Imparidentia;Venerida;Veneroidea;Veneridae;Mercenaria;Mercenaria mercenaria

UdeM00000031985 6596 511.9 UdeM00000031985 XP\_045160822.1 35.5 1314  
568 40 1 1246 140 1242 2.30E-141 511.9 6596 cellular

organisms;Eukaryota;Opisthokonta;Metazoa;Eumetazoa;Bilateria;Protostomia;Spiralia;Lophotrochozoa;Mollusca;Bivalvia;Autobranchia;Heteroconchia;Euherodonta;Imparidentia;Venerida;Veneroidea;Veneridae;Mercenaria;Mercenaria mercenaria

UdeM00000031987 6573 75.1 UdeM00000031987 XP\_021356235.1 91.9 37  
3 0 1 37 1 37 6.30E-11 75.1 6573 cellular

organisms;Eukaryota;Opisthokonta;Metazoa;Eumetazoa;Bilateria;Protostomia;Spiralia;Lophotrochozoa;Mollusca;Bivalvia;Autobranchia;Pteriomorphia;Pectinida;Pectinoidea;Pectinidae;Mizuhopecten;Mizuhopecten yessoensis

UdeM00000031988 6565 423.3 UdeM00000031988 XP\_022317619.1 65.9 361  
102 6 1 360 1 341 3.10E-115 423.3 6565 cellular

organisms;Eukaryota;Opisthokonta;Metazoa;Eumetazoa;Bilateria;Protostomia;Spiralia;Lophotrochozoa;Mollusca;Bivalvia;Autobranchia;Pteriomorphia;Ostreida;Ostreoidea;Ostreidae;Crassostrea;Crassostrea virginica

UdeM00000031991 6573 133.3 UdeM00000031991 XP\_021346496.1 30.5 295  
153 5 7 260 411 694 4.70E-28 133.3 6573 cellular

organisms;Eukaryota;Opisthokonta;Metazoa;Eumetazoa;Bilateria;Protostomia;Spiralia;Lophotrochozoa;Mollusca;Bivalvia;Autobranchia;Pteriomorphia;Pectinida;Pectinoidea;Pectinidae;Mizuhopecten;Mizuhopecten yessoensis

UdeM00000031993 6596 287.3 UdeM00000031993 XP\_045158202.1 37.5 456  
221 6 8 404 27 477 3.00E-74 287.3 6596 cellular

organisms;Eukaryota;Opisthokonta;Metazoa;Eumetazoa;Bilateria;Protostomia;Spiralia;Lophotrochozoa;Mollusca;Bivalvia;Autobranchia;Heteroconchia;Euherodonta;Imparidentia;Venerida;Veneroidea;Veneridae;Mercenaria;Mercenaria mercenaria

UdeM00000031994 6596 253.4 UdeM00000031994 XP\_045158202.1 36 405  
222 7 1 373 78 477 4.40E-64 253.4 6596 cellular

organisms;Eukaryota;Opisthokonta;Metazoa;Eumetazoa;Bilateria;Protostomia;Spiralia;Lophotrochozoa;Mollusca;Bivalvia;Autobranchia;Heteroconchia;Euherodonta

terodonta;Imparidentia;Venerida;Veneroidea;Veneridae;Mercenaria;Mercenari  
 a mercenaria  
 UdeM00000031995 6573 314.7 UdeM00000031995 XP\_021352044.1 65.4 214  
 70 1 1 210 98 311 1.00E-82 314.7 6573 cellular  
 organisms;Eukaryota;Opisthokonta;Metazoa;Eumetazoa;Bilateria;Protostomia;  
 Spiralia;Lophotrochozoa;Mollusca;Bivalvia;Autobranchia;Pteriomorpha;Pect  
 inida;Pectinoidea;Pectinidae;Mizuhopecten;Mizuhopecten yessoensis  
 UdeM00000031996 6579 203 UdeM00000031996 XP\_033731739.1 61.4 145  
 56 0 1 145 188 332 2.60E-49 203 6579 cellular  
 organisms;Eukaryota;Opisthokonta;Metazoa;Eumetazoa;Bilateria;Protostomia;  
 Spiralia;Lophotrochozoa;Mollusca;Bivalvia;Autobranchia;Pteriomorpha;Pect  
 inida;Pectinoidea;Pectinidae;Pecten;Pecten maximus  
 UdeM00000031997 6596 290.4 UdeM00000031997 XP\_045158202.1 39.2 401  
 175 4 1 333 78 477 2.90E-75 290.4 6596 cellular  
 organisms;Eukaryota;Opisthokonta;Metazoa;Eumetazoa;Bilateria;Protostomia;  
 Spiralia;Lophotrochozoa;Mollusca;Bivalvia;Autobranchia;Heteroconchia;Euhe  
 terodonta;Imparidentia;Venerida;Veneroidea;Veneridae;Mercenaria;Mercenari  
 a mercenaria  
 UdeM00000031998 6596 441 UdeM00000031998 XP\_045158449.1 65.9 314  
 103 2 5 318 14 323 1.30E-120 441 6596 cellular  
 organisms;Eukaryota;Opisthokonta;Metazoa;Eumetazoa;Bilateria;Protostomia;  
 Spiralia;Lophotrochozoa;Mollusca;Bivalvia;Autobranchia;Heteroconchia;Euhe  
 terodonta;Imparidentia;Venerida;Veneroidea;Veneridae;Mercenaria;Mercenari  
 a mercenaria  
 UdeM00000031999 6596 283.1 UdeM00000031999 XP\_045158202.1 35.6 463  
 253 7 8 429 21 479 5.90E-73 283.1 6596 cellular  
 organisms;Eukaryota;Opisthokonta;Metazoa;Eumetazoa;Bilateria;Protostomia;  
 Spiralia;Lophotrochozoa;Mollusca;Bivalvia;Autobranchia;Heteroconchia;Euhe  
 terodonta;Imparidentia;Venerida;Veneroidea;Veneridae;Mercenaria;Mercenari  
 a mercenaria  
 UdeM00000032000 6596 219.2 UdeM00000032000 XP\_045158986.1 63.2 152  
 56 0 5 156 1223 1374 9.70E-54 219.2 6596 cellular  
 organisms;Eukaryota;Opisthokonta;Metazoa;Eumetazoa;Bilateria;Protostomia;  
 Spiralia;Lophotrochozoa;Mollusca;Bivalvia;Autobranchia;Heteroconchia;Euhe  
 terodonta;Imparidentia;Venerida;Veneroidea;Veneridae;Mercenaria;Mercenari  
 a mercenaria  
 UdeM00000032001 6596 620.9 UdeM00000032001 XP\_045158986.1 41.9 888  
 426 14 5 805 490 1374 2.90E-174 620.9 6596 cellular  
 organisms;Eukaryota;Opisthokonta;Metazoa;Eumetazoa;Bilateria;Protostomia;  
 Spiralia;Lophotrochozoa;Mollusca;Bivalvia;Autobranchia;Heteroconchia;Euhe  
 terodonta;Imparidentia;Venerida;Veneroidea;Veneridae;Mercenaria;Mercenari  
 a mercenaria  
 UdeM00000032002 6596 315.5 UdeM00000032002 XP\_045158984.1 47.6 311  
 163 0 246 556 150 460 1.40E-82 315.5 6596 cellular  
 organisms;Eukaryota;Opisthokonta;Metazoa;Eumetazoa;Bilateria;Protostomia;  
 Spiralia;Lophotrochozoa;Mollusca;Bivalvia;Autobranchia;Heteroconchia;Euhe  
 terodonta;Imparidentia;Venerida;Veneroidea;Veneridae;Mercenaria;Mercenari  
 a mercenaria  
 UdeM00000032003 6565 668.7 UdeM00000032003 XP\_022314745.1 54.5 686  
 219 12 493 1168 551 1153 1.40E-188 668.7 6565 cellular  
 organisms;Eukaryota;Opisthokonta;Metazoa;Eumetazoa;Bilateria;Protostomia;  
 Spiralia;Lophotrochozoa;Mollusca;Bivalvia;Autobranchia;Pteriomorpha;Ostr  
 eida;Ostreoidea;Ostreidae;Crassostrea;Crassostrea virginica

UdeM00000032004 6565 310.1 UdeM00000032004 XP\_022319303.1 63 246  
 86 3 74 317 116 358 4.00E-81 310.1 6565 cellular  
 organisms;Eukaryota;Opisthokonta;Metazoa;Eumetazoa;Bilateria;Protostomia;  
 Spiralia;Lophotrochozoa;Mollusca;Bivalvia;Autobranhia;Pteriormorphia;Ostr  
 eida;Ostreioidea;Ostreidae;Crassostrea;Crassostrea virginica  
 UdeM00000032005 6565 316.6 UdeM00000032005 XP\_022319303.1 58.6 370  
 129 8 1 358 1 358 4.70E-83 316.6 6565 cellular  
 organisms;Eukaryota;Opisthokonta;Metazoa;Eumetazoa;Bilateria;Protostomia;  
 Spiralia;Lophotrochozoa;Mollusca;Bivalvia;Autobranhia;Pteriormorphia;Ostr  
 eida;Ostreioidea;Ostreidae;Crassostrea;Crassostrea virginica  
 UdeM00000032007 6579 184.1 UdeM00000032007 XP\_033738825.1 55.7 167  
 71 3 1 165 1 166 1.70E-43 184.1 6579 cellular  
 organisms;Eukaryota;Opisthokonta;Metazoa;Eumetazoa;Bilateria;Protostomia;  
 Spiralia;Lophotrochozoa;Mollusca;Bivalvia;Autobranhia;Pteriormorphia;Pect  
 inida;Pectinoidea;Pectinidae;Pecten;Pecten maximus  
 UdeM00000032006 6573 212.2 UdeM00000032006 XP\_021376720.1 48.2 251  
 116 5 1 243 1 245 9.50E-52 212.2 6573 cellular  
 organisms;Eukaryota;Opisthokonta;Metazoa;Eumetazoa;Bilateria;Protostomia;  
 Spiralia;Lophotrochozoa;Mollusca;Bivalvia;Autobranhia;Pteriormorphia;Pect  
 inida;Pectinoidea;Pectinidae;Mizuhopecten;Mizuhopecten yessoensis  
 UdeM00000032008 6573 212.2 UdeM00000032008 XP\_021376720.1 48.2 251  
 116 5 1 243 1 245 9.80E-52 212.2 6573 cellular  
 organisms;Eukaryota;Opisthokonta;Metazoa;Eumetazoa;Bilateria;Protostomia;  
 Spiralia;Lophotrochozoa;Mollusca;Bivalvia;Autobranhia;Pteriormorphia;Pect  
 inida;Pectinoidea;Pectinidae;Mizuhopecten;Mizuhopecten yessoensis  
 UdeM00000032012 6596 956.4 UdeM00000032012 XP\_045158623.1 55.7 819  
 284 8 3 817 4 747 2.30E-275 956.4 6596 cellular  
 organisms;Eukaryota;Opisthokonta;Metazoa;Eumetazoa;Bilateria;Protostomia;  
 Spiralia;Lophotrochozoa;Mollusca;Bivalvia;Autobranhia;Heteroconchia;Euhe  
 terodonta;Imparidentia;Venerida;Veneroidea;Veneridae;Mercenaria;Mercenari  
 a mercenaria  
 UdeM00000032013 225164 865.1 UdeM00000032013 XP\_009044034.1 64.6  
 639 202 8 1 622 1 632 5.40E-248 865.1 225164  
 cellular  
 organisms;Eukaryota;Opisthokonta;Metazoa;Eumetazoa;Bilateria;Protostomia;  
 Spiralia;Lophotrochozoa;Mollusca;Gastropoda;Patellogastropoda;Lottioidea;  
 Lottiidae;Lottia;Lottia gigantea  
 UdeM00000032014 6565 535 UdeM00000032014 XP\_022317527.1 79.8 321  
 65 0 6 326 4 324 6.60E-149 535 6565 cellular  
 organisms;Eukaryota;Opisthokonta;Metazoa;Eumetazoa;Bilateria;Protostomia;  
 Spiralia;Lophotrochozoa;Mollusca;Bivalvia;Autobranhia;Pteriormorphia;Ostr  
 eida;Ostreioidea;Ostreidae;Crassostrea;Crassostrea virginica  
 UdeM00000032015 6596 242.7 UdeM00000032015 XP\_045158283.1 53.6 274  
 116 5 5 272 2 270 5.60E-61 242.7 6596 cellular  
 organisms;Eukaryota;Opisthokonta;Metazoa;Eumetazoa;Bilateria;Protostomia;  
 Spiralia;Lophotrochozoa;Mollusca;Bivalvia;Autobranhia;Heteroconchia;Euhe  
 terodonta;Imparidentia;Venerida;Veneroidea;Veneridae;Mercenaria;Mercenari  
 a mercenaria  
 UdeM00000032016 6573 127.5 UdeM00000032016 XP\_021361990.1 45.6 125  
 68 0 1 125 1 125 1.20E-26 127.5 6573 cellular  
 organisms;Eukaryota;Opisthokonta;Metazoa;Eumetazoa;Bilateria;Protostomia;  
 Spiralia;Lophotrochozoa;Mollusca;Bivalvia;Autobranhia;Pteriormorphia;Pect  
 inida;Pectinoidea;Pectinidae;Mizuhopecten;Mizuhopecten yessoensis

UdeM00000032017 1735272 159.5 UdeM00000032017 XP\_041367923.1 40  
 210 114 3 1 200 154 361 4.70E-36 159.5 1735272  
 cellular  
 organisms;Eukaryota;Opisthokonta;Metazoa;Eumetazoa;Bilateria;Protostomia;  
 Spiralia;Lophotrochozoa;Mollusca;Gastropoda;Neomphalina;Neomphaloidea;Pel  
 tospiridae;Gigantopelta;Gigantopelta aegis  
 UdeM00000032018 29159 918.3 UdeM00000032018 XP\_034310297.1 76.2 580  
 134 1 1 580 1 576 4.90E-264 918.3 29159 cellular  
 organisms;Eukaryota;Opisthokonta;Metazoa;Eumetazoa;Bilateria;Protostomia;  
 Spiralia;Lophotrochozoa;Mollusca;Bivalvia;Autobranchia;Pteriormorphia;Ostr  
 eida;Ostreoidea;Ostreidae;Crassostrea;Crassostrea gigas  
 UdeM00000032019 6596 654.1 UdeM00000032019 XP\_045158196.1 69.2 507  
 141 5 13 516 13 507 1.50E-184 654.1 6596 cellular  
 organisms;Eukaryota;Opisthokonta;Metazoa;Eumetazoa;Bilateria;Protostomia;  
 Spiralia;Lophotrochozoa;Mollusca;Bivalvia;Autobranchia;Heteroconchia;Euhe  
 terodonta;Imparidentia;Venerida;Veneroidea;Veneridae;Mercenaria;Mercenari  
 a mercenaria  
 UdeM00000032020 6579 596.7 UdeM00000032020 XP\_033738595.1 75.9 386  
 93 0 1 386 22 407 3.20E-167 596.7 6579 cellular  
 organisms;Eukaryota;Opisthokonta;Metazoa;Eumetazoa;Bilateria;Protostomia;  
 Spiralia;Lophotrochozoa;Mollusca;Bivalvia;Autobranchia;Pteriormorphia;Pect  
 inida;Pectinoidea;Pectinidae;Pecten;Pecten maximus  
 UdeM00000032021 6596 1259.2 UdeM00000032021 XP\_045158199.1 31.9  
 2547 1632 51 351 2853 105 2593 0.00E+00 1259.2 6596  
 cellular  
 organisms;Eukaryota;Opisthokonta;Metazoa;Eumetazoa;Bilateria;Protostomia;  
 Spiralia;Lophotrochozoa;Mollusca;Bivalvia;Autobranchia;Heteroconchia;Euhe  
 terodonta;Imparidentia;Venerida;Veneroidea;Veneridae;Mercenaria;Mercenari  
 a mercenaria  
 UdeM00000032022 6573 299.3 UdeM00000032022 XP\_021367798.1 42.8 369  
 196 7 20 379 18 380 7.10E-78 299.3 6573 cellular  
 organisms;Eukaryota;Opisthokonta;Metazoa;Eumetazoa;Bilateria;Protostomia;  
 Spiralia;Lophotrochozoa;Mollusca;Bivalvia;Autobranchia;Pteriormorphia;Pect  
 inida;Pectinoidea;Pectinidae;Mizuhopecten;Mizuhopecten yessoensis  
 UdeM00000032023 6850 112.5 UdeM00000032023 XP\_013789054.1 36.1 169  
 108 0 4 172 15 183 1.70E-21 112.5 6850 cellular  
 organisms;Eukaryota;Opisthokonta;Metazoa;Eumetazoa;Bilateria;Protostomia;  
 Ecdysozoa;Panarthropoda;Arthropoda;Chelicerata;Merostomata;Xiphosura;Limu  
 lidae;Limulus;Limulus polyphemus  
 UdeM00000032024 6596 220.7 UdeM00000032024 XP\_045159463.1 64.1 170  
 59 2 1 170 188 355 1.50E-54 220.7 6596 cellular  
 organisms;Eukaryota;Opisthokonta;Metazoa;Eumetazoa;Bilateria;Protostomia;  
 Spiralia;Lophotrochozoa;Mollusca;Bivalvia;Autobranchia;Heteroconchia;Euhe  
 terodonta;Imparidentia;Venerida;Veneroidea;Veneridae;Mercenaria;Mercenari  
 a mercenaria  
 UdeM00000032025 29159 196.8 UdeM00000032025 XP\_011415785.2 59.3 162  
 64 1 1 160 1 162 2.10E-47 196.8 29159 cellular  
 organisms;Eukaryota;Opisthokonta;Metazoa;Eumetazoa;Bilateria;Protostomia;  
 Spiralia;Lophotrochozoa;Mollusca;Bivalvia;Autobranchia;Pteriormorphia;Ostr  
 eida;Ostreoidea;Ostreidae;Crassostrea;Crassostrea gigas  
 UdeM00000032026 6500 271.6 UdeM00000032026 XP\_012945592.1 82.8 151  
 26 0 1 151 1 151 6.30E-70 271.6 6500 cellular  
 organisms;Eukaryota;Opisthokonta;Metazoa;Eumetazoa;Bilateria;Protostomia;



Spiralia;Lophotrochozoa;Mollusca;Gastropoda;Heterobranchia;Euthyneura;Tectipleura;Aplysiida;Aplysioidea;Aplysiidae;Aplysia;Aplysia californica  
UdeM00000032027 6596 546.2 UdeM00000032027 XP\_045159457.1 49.8 703  
181 9 9 690 441 992 6.60E-152 546.2 6596 cellular  
organisms;Eukaryota;Opisthokonta;Metazoa;Eumetazoa;Bilateria;Protostomia;  
Spiralia;Lophotrochozoa;Mollusca;Bivalvia;Autobranchia;Heteroconchia;Euherodonta;Imparidentia;Venerida;Veneroidea;Veneridae;Mercenaria;Mercenaria mercenaria  
UdeM00000032028 6596 340.1 UdeM00000032028 XP\_045159457.1 69.5 243  
67 2 28 270 65 300 2.80E-90 340.1 6596 cellular  
organisms;Eukaryota;Opisthokonta;Metazoa;Eumetazoa;Bilateria;Protostomia;  
Spiralia;Lophotrochozoa;Mollusca;Bivalvia;Autobranchia;Heteroconchia;Euherodonta;Imparidentia;Venerida;Veneroidea;Veneridae;Mercenaria;Mercenaria mercenaria  
UdeM00000032029 6573 94 UdeM00000032029 XP\_021339461.1 43.9 139  
71 3 3 137 629 764 1.30E-15 94 6573 cellular  
organisms;Eukaryota;Opisthokonta;Metazoa;Eumetazoa;Bilateria;Protostomia;  
Spiralia;Lophotrochozoa;Mollusca;Bivalvia;Autobranchia;Pteriomorphia;Pectinida;Pectinoidea;Pectinidae;Mizuhopecten;Mizuhopecten yessoensis  
UdeM00000032030 1735272 648.7 UdeM00000032030 XP\_041356679.1 55.9  
630 211 7 1 626 1 567 9.10E-183 648.7 1735272  
cellular  
organisms;Eukaryota;Opisthokonta;Metazoa;Eumetazoa;Bilateria;Protostomia;  
Spiralia;Lophotrochozoa;Mollusca;Gastropoda;Neomphalina;Neomphaloidea;Peltospiridae;Gigantopelta;Gigantopelta aegis  
UdeM00000032031 6596 1206 UdeM00000032031 XP\_045159803.1 77.5 754  
164 5 1 750 1 752 0.00E+00 1206 6596 cellular  
organisms;Eukaryota;Opisthokonta;Metazoa;Eumetazoa;Bilateria;Protostomia;  
Spiralia;Lophotrochozoa;Mollusca;Bivalvia;Autobranchia;Heteroconchia;Euherodonta;Imparidentia;Venerida;Veneroidea;Veneridae;Mercenaria;Mercenaria mercenaria  
UdeM00000032032 6596 271.6 UdeM00000032032 XP\_045160201.1 90.1 161  
12 1 1 157 3 163 6.50E-70 271.6 6596 cellular  
organisms;Eukaryota;Opisthokonta;Metazoa;Eumetazoa;Bilateria;Protostomia;  
Spiralia;Lophotrochozoa;Mollusca;Bivalvia;Autobranchia;Heteroconchia;Euherodonta;Imparidentia;Venerida;Veneroidea;Veneridae;Mercenaria;Mercenaria mercenaria  
UdeM00000032033 6596 268.9 UdeM00000032033 XP\_045160201.1 89.4 161  
14 1 1 158 3 163 4.30E-69 268.9 6596 cellular  
organisms;Eukaryota;Opisthokonta;Metazoa;Eumetazoa;Bilateria;Protostomia;  
Spiralia;Lophotrochozoa;Mollusca;Bivalvia;Autobranchia;Heteroconchia;Euherodonta;Imparidentia;Venerida;Veneroidea;Veneridae;Mercenaria;Mercenaria mercenaria  
UdeM00000032034 6579 294.3 UdeM00000032034 XP\_033736644.1 67.8 667  
167 6 8 674 5 623 4.00E-76 294.3 6579 cellular  
organisms;Eukaryota;Opisthokonta;Metazoa;Eumetazoa;Bilateria;Protostomia;  
Spiralia;Lophotrochozoa;Mollusca;Bivalvia;Autobranchia;Pteriomorphia;Pectinida;Pectinoidea;Pectinidae;Pecten;Pecten maximus  
UdeM00000032035 37653 431.4 UdeM00000032035 XP\_014784515.1 72.5 291  
78 1 41 329 1 291 1.00E-117 431.4 37653 cellular  
organisms;Eukaryota;Opisthokonta;Metazoa;Eumetazoa;Bilateria;Protostomia;  
Spiralia;Lophotrochozoa;Mollusca;Cephalopoda;Coleoidea;Octopodiformes;Octopoda;Incirrata;Octopodidae;Octopus;Octopus bimaculoides

UdeM00000032036 225164 620.9 UdeM00000032036 XP\_009044177.1 73.4  
 421 106 4 1 417 1 419 1.20E-174 620.9 225164  
 cellular  
 organisms;Eukaryota;Opisthokonta;Metazoa;Eumetazoa;Bilateria;Protostomia;  
 Spiralia;Lophotrochozoa;Mollusca;Gastropoda;Patellogastropoda;Lottioidea;  
 Lottiidae;Lottia;Lottia gigantea  
 UdeM00000032037 6565 671.8 UdeM00000032037 XP\_022314542.1 76.1 427  
 99 1 1 427 6 429 5.80E-190 671.8 6565 cellular  
 organisms;Eukaryota;Opisthokonta;Metazoa;Eumetazoa;Bilateria;Protostomia;  
 Spiralia;Lophotrochozoa;Mollusca;Bivalvia;Autobranchia;Pteriormorphia;Ostr  
 eida;Ostreoidea;Ostreidae;Crassostrea;Crassostrea virginica  
 UdeM00000032038 6596 997.3 UdeM00000032038 XP\_045158569.1 70.4 767  
 213 5 1 765 157 911 1.10E-287 997.3 6596 cellular  
 organisms;Eukaryota;Opisthokonta;Metazoa;Eumetazoa;Bilateria;Protostomia;  
 Spiralia;Lophotrochozoa;Mollusca;Bivalvia;Autobranchia;Heteroconchia;Euhe  
 terodonta;Imparidentia;Venerida;Veneroidea;Veneridae;Mercenaria;Mercenari  
 a mercenaria  
 UdeM00000032039 6596 72.8 UdeM00000032039 XP\_045158569.1 41.7 108  
 51 3 1 102 26 127 5.10E-10 72.8 6596 cellular  
 organisms;Eukaryota;Opisthokonta;Metazoa;Eumetazoa;Bilateria;Protostomia;  
 Spiralia;Lophotrochozoa;Mollusca;Bivalvia;Autobranchia;Heteroconchia;Euhe  
 terodonta;Imparidentia;Venerida;Veneroidea;Veneridae;Mercenaria;Mercenari  
 a mercenaria  
 UdeM00000032040 6596 282.3 UdeM00000032040 XP\_045159626.1 34.8 506  
 300 5 10 487 1 504 1.20E-72 282.3 6596 cellular  
 organisms;Eukaryota;Opisthokonta;Metazoa;Eumetazoa;Bilateria;Protostomia;  
 Spiralia;Lophotrochozoa;Mollusca;Bivalvia;Autobranchia;Heteroconchia;Euhe  
 terodonta;Imparidentia;Venerida;Veneroidea;Veneridae;Mercenaria;Mercenari  
 a mercenaria  
 UdeM00000032041 6596 168.3 UdeM00000032041 XP\_045160503.1 63.7 124  
 45 0 1 124 2 125 6.10E-39 168.3 6596 cellular  
 organisms;Eukaryota;Opisthokonta;Metazoa;Eumetazoa;Bilateria;Protostomia;  
 Spiralia;Lophotrochozoa;Mollusca;Bivalvia;Autobranchia;Heteroconchia;Euhe  
 terodonta;Imparidentia;Venerida;Veneroidea;Veneridae;Mercenaria;Mercenari  
 a mercenaria  
 UdeM00000032043 7719 661 UdeM00000032043 XP\_009861333.1 83.4 374  
 62 0 4 377 2 375 9.10E-187 661 7719 cellular  
 organisms;Eukaryota;Opisthokonta;Metazoa;Eumetazoa;Bilateria;Deuterostomi  
 a;Chordata;Tunicata;Ascidiacea;Phlebobranchia;Cionidae;Ciona;Ciona  
 intestinalis  
 UdeM00000032044 6596 596.3 UdeM00000032044 XP\_045159181.1 67.8 500  
 128 10 1 483 2 485 3.50E-167 596.3 6596 cellular  
 organisms;Eukaryota;Opisthokonta;Metazoa;Eumetazoa;Bilateria;Protostomia;  
 Spiralia;Lophotrochozoa;Mollusca;Bivalvia;Autobranchia;Heteroconchia;Euhe  
 terodonta;Imparidentia;Venerida;Veneroidea;Veneridae;Mercenaria;Mercenari  
 a mercenaria  
 UdeM00000032045 6596 594.7 UdeM00000032045 XP\_045159181.1 67.6 500  
 130 10 1 484 2 485 1.00E-166 594.7 6596 cellular  
 organisms;Eukaryota;Opisthokonta;Metazoa;Eumetazoa;Bilateria;Protostomia;  
 Spiralia;Lophotrochozoa;Mollusca;Bivalvia;Autobranchia;Heteroconchia;Euhe  
 terodonta;Imparidentia;Venerida;Veneroidea;Veneridae;Mercenaria;Mercenari  
 a mercenaria  
 UdeM00000032046 6579 376.7 UdeM00000032046 XP\_033737854.1 80.6 227  
 44 0 1 227 60 286 2.10E-101 376.7 6579 cellular

organisms;Eukaryota;Opisthokonta;Metazoa;Eumetazoa;Bilateria;Protostomia;Spiralia;Lophotrochozoa;Mollusca;Bivalvia;Autobranchia;Pteriormorphia;Pectinida;Pectinoidea;Pectinidae;Pecten;Pecten maximus

UdeM00000032047 6596 271.2 UdeM00000032047 XP\_045159178.1 53.4 268  
110 5 1 264 1 257 1.40E-69 271.2 6596 cellular

organisms;Eukaryota;Opisthokonta;Metazoa;Eumetazoa;Bilateria;Protostomia;Spiralia;Lophotrochozoa;Mollusca;Bivalvia;Autobranchia;Heteroconchia;Euherodonta;Imparidentia;Venerida;Veneroidea;Veneridae;Mercenaria;Mercenaria mercenaria

UdeM00000032048 6596 238.8 UdeM00000032048 XP\_045159177.1 58.7 189  
77 1 1 188 1 189 6.10E-60 238.8 6596 cellular

organisms;Eukaryota;Opisthokonta;Metazoa;Eumetazoa;Bilateria;Protostomia;Spiralia;Lophotrochozoa;Mollusca;Bivalvia;Autobranchia;Heteroconchia;Euherodonta;Imparidentia;Venerida;Veneroidea;Veneridae;Mercenaria;Mercenaria mercenaria

UdeM00000032049 6596 915.2 UdeM00000032049 XP\_045159177.1 62.5 720  
234 10 154 844 354 1066 6.00E-263 915.2 6596 cellular

organisms;Eukaryota;Opisthokonta;Metazoa;Eumetazoa;Bilateria;Protostomia;Spiralia;Lophotrochozoa;Mollusca;Bivalvia;Autobranchia;Heteroconchia;Euherodonta;Imparidentia;Venerida;Veneroidea;Veneridae;Mercenaria;Mercenaria mercenaria

UdeM00000032050 6596 236.9 UdeM00000032050 XP\_045184115.1 24.9 1030  
643 30 2 947 23 1005 1.10E-58 236.9 6596 cellular

organisms;Eukaryota;Opisthokonta;Metazoa;Eumetazoa;Bilateria;Protostomia;Spiralia;Lophotrochozoa;Mollusca;Bivalvia;Autobranchia;Heteroconchia;Euherodonta;Imparidentia;Venerida;Veneroidea;Veneridae;Mercenaria;Mercenaria mercenaria

UdeM00000032051 6596 247.7 UdeM00000032051 XP\_045184115.1 25.2 1045  
651 30 5 965 8 1005 6.30E-62 247.7 6596 cellular

organisms;Eukaryota;Opisthokonta;Metazoa;Eumetazoa;Bilateria;Protostomia;Spiralia;Lophotrochozoa;Mollusca;Bivalvia;Autobranchia;Heteroconchia;Euherodonta;Imparidentia;Venerida;Veneroidea;Veneridae;Mercenaria;Mercenaria mercenaria

UdeM00000032052 6596 668.7 UdeM00000032052 XP\_045160737.1 72.7 505  
121 4 16 513 17 511 9.30E-189 668.7 6596 cellular

organisms;Eukaryota;Opisthokonta;Metazoa;Eumetazoa;Bilateria;Protostomia;Spiralia;Lophotrochozoa;Mollusca;Bivalvia;Autobranchia;Heteroconchia;Euherodonta;Imparidentia;Venerida;Veneroidea;Veneridae;Mercenaria;Mercenaria mercenaria

UdeM00000032053 6579 293.5 UdeM00000032053 XP\_033737843.1 59.1 220  
90 0 126 345 97 316 3.60E-76 293.5 6579 cellular

organisms;Eukaryota;Opisthokonta;Metazoa;Eumetazoa;Bilateria;Protostomia;Spiralia;Lophotrochozoa;Mollusca;Bivalvia;Autobranchia;Pteriormorphia;Pectinida;Pectinoidea;Pectinidae;Pecten;Pecten maximus

UdeM00000032054 400727 203 UdeM00000032054 XP\_025109352.1 73  
126 34 0 3 128 9 134 2.30E-49 203 400727  
cellular

organisms;Eukaryota;Opisthokonta;Metazoa;Eumetazoa;Bilateria;Protostomia;Spiralia;Lophotrochozoa;Mollusca;Gastropoda;Caenogastropoda;Architaenioglossa;Ampullarioidea;Ampullariidae;Pomacea;Pomacea canaliculata

UdeM00000032055 6596 72.8 UdeM00000032055 XP\_045158252.1 90 40  
4 0 1 40 1 40 1.20E-10 72.8 6596 cellular

organisms;Eukaryota;Opisthokonta;Metazoa;Eumetazoa;Bilateria;Protostomia;Spiralia;Lophotrochozoa;Mollusca;Bivalvia;Autobranchia;Heteroconchia;Euherodonta

terodonta;Imparidentia;Venerida;Veneroidea;Veneridae;Mercenaria;Mercenari  
a mercenaria

UdeM00000032056 400727 1479.2 UdeM00000032056 XP\_025109348.1  
93.2 798 52 1 7 802 8 805 0.00E+00 1479.2  
400727 cellular

organisms;Eukaryota;Opisthokonta;Metazoa;Eumetazoa;Bilateria;Protostomia;  
Spiralia;Lophotrochozoa;Mollusca;Gastropoda;Caenogastropoda;Architaenioglo  
ssa;Ampullarioidea;Ampullariidae;Pomacea;Pomacea canaliculata

UdeM00000032057 6596 494.6 UdeM00000032057 XP\_045160129.1 31.2 1419  
711 32 1 1361 1 1212 4.10E-136 494.6 6596 cellular

organisms;Eukaryota;Opisthokonta;Metazoa;Eumetazoa;Bilateria;Protostomia;  
Spiralia;Lophotrochozoa;Mollusca;Bivalvia;Autobranchia;Heteroconchia;Euhe  
terodonta;Imparidentia;Venerida;Veneroidea;Veneridae;Mercenaria;Mercenari  
a mercenaria

UdeM00000032059 6596 198.7 UdeM00000032059 XP\_045157065.1 60.8 143  
56 0 4 146 2 144 5.00E-48 198.7 6596 cellular

organisms;Eukaryota;Opisthokonta;Metazoa;Eumetazoa;Bilateria;Protostomia;  
Spiralia;Lophotrochozoa;Mollusca;Bivalvia;Autobranchia;Heteroconchia;Euhe  
terodonta;Imparidentia;Venerida;Veneroidea;Veneridae;Mercenaria;Mercenari  
a mercenaria

UdeM00000032060 6596 426 UdeM00000032060 XP\_045158806.1 38.5 615  
365 9 3 608 818 1428 8.00E-116 426 6596 cellular

organisms;Eukaryota;Opisthokonta;Metazoa;Eumetazoa;Bilateria;Protostomia;  
Spiralia;Lophotrochozoa;Mollusca;Bivalvia;Autobranchia;Heteroconchia;Euhe  
terodonta;Imparidentia;Venerida;Veneroidea;Veneridae;Mercenaria;Mercenari  
a mercenaria

UdeM00000032061 6596 941.8 UdeM00000032061 XP\_045158806.1 58.1 767  
307 7 33 791 25 785 6.00E-271 941.8 6596 cellular

organisms;Eukaryota;Opisthokonta;Metazoa;Eumetazoa;Bilateria;Protostomia;  
Spiralia;Lophotrochozoa;Mollusca;Bivalvia;Autobranchia;Heteroconchia;Euhe  
terodonta;Imparidentia;Venerida;Veneroidea;Veneridae;Mercenaria;Mercenari  
a mercenaria

UdeM00000032062 6596 182.6 UdeM00000032062 XP\_045157174.1 78.3 120  
23 1 27 143 43 162 4.20E-43 182.6 6596 cellular

organisms;Eukaryota;Opisthokonta;Metazoa;Eumetazoa;Bilateria;Protostomia;  
Spiralia;Lophotrochozoa;Mollusca;Bivalvia;Autobranchia;Heteroconchia;Euhe  
terodonta;Imparidentia;Venerida;Veneroidea;Veneridae;Mercenaria;Mercenari  
a mercenaria

UdeM00000032063 6596 461.1 UdeM00000032063 XP\_045188813.1 56.9 411  
151 3 17 401 18 428 1.50E-126 461.1 6596 cellular

organisms;Eukaryota;Opisthokonta;Metazoa;Eumetazoa;Bilateria;Protostomia;  
Spiralia;Lophotrochozoa;Mollusca;Bivalvia;Autobranchia;Heteroconchia;Euhe  
terodonta;Imparidentia;Venerida;Veneroidea;Veneridae;Mercenaria;Mercenari  
a mercenaria

UdeM00000032064 29159 348.6 UdeM00000032064 XP\_011442333.1 83.8 191  
31 0 1 191 1 191 8.10E-93 348.6 29159 cellular

organisms;Eukaryota;Opisthokonta;Metazoa;Eumetazoa;Bilateria;Protostomia;  
Spiralia;Lophotrochozoa;Mollusca;Bivalvia;Autobranchia;Pteriomorphia;Ostr  
eida;Ostreoidea;Ostreidae;Crassostrea;Crassostrea gigas

UdeM00000032065 29159 348.6 UdeM00000032065 XP\_011442333.1 83.8 191  
31 0 1 191 1 191 8.90E-93 348.6 29159 cellular

organisms;Eukaryota;Opisthokonta;Metazoa;Eumetazoa;Bilateria;Protostomia;  
Spiralia;Lophotrochozoa;Mollusca;Bivalvia;Autobranchia;Pteriomorphia;Ostr  
eida;Ostreoidea;Ostreidae;Crassostrea;Crassostrea gigas

UdeM00000032066 6579 106.7 UdeM00000032066 XP\_033739227.1 26.2 653  
 326 31 18 588 1052 1630 1.00E-19 106.7 6579 cellular  
 organisms;Eukaryota;Opisthokonta;Metazoa;Eumetazoa;Bilateria;Protostomia;  
 Spiralia;Lophotrochozoa;Mollusca;Bivalvia;Autobranhia;Pteriomorpha;Pect  
 inida;Pectinoidea;Pectinidae;Pecten;Pecten maximus  
 UdeM00000032067 6596 521.5 UdeM00000032067 XP\_045159455.1 82.5 315  
 54 1 43 357 305 618 1.10E-144 521.5 6596 cellular  
 organisms;Eukaryota;Opisthokonta;Metazoa;Eumetazoa;Bilateria;Protostomia;  
 Spiralia;Lophotrochozoa;Mollusca;Bivalvia;Autobranhia;Heteroconchia;Euhe  
 terodonta;Imparidentia;Venerida;Veneroidea;Veneridae;Mercenaria;Mercenari  
 a mercenaria  
 UdeM00000032069 29159 1129.4 UdeM00000032069 XP\_034305946.1 47  
 1262 624 18 54 1286 314 1559 0.00E+00 1129.4  
 29159 cellular  
 organisms;Eukaryota;Opisthokonta;Metazoa;Eumetazoa;Bilateria;Protostomia;  
 Spiralia;Lophotrochozoa;Mollusca;Bivalvia;Autobranhia;Pteriomorpha;Ostr  
 eida;Ostreoidea;Ostreidae;Crassostrea;Crassostrea gigas  
 UdeM00000032070 6573 742.3 UdeM00000032070 XP\_021340694.1 55.7 644  
 284 1 32 675 1467 2109 5.60E-211 742.3 6573 cellular  
 organisms;Eukaryota;Opisthokonta;Metazoa;Eumetazoa;Bilateria;Protostomia;  
 Spiralia;Lophotrochozoa;Mollusca;Bivalvia;Autobranhia;Pteriomorpha;Pect  
 inida;Pectinoidea;Pectinidae;Mizuhopecten;Mizuhopecten yessoensis  
 UdeM00000032071 6596 434.5 UdeM00000032071 XP\_045159103.1 79.2 264  
 55 0 1 264 25 288 1.00E-118 434.5 6596 cellular  
 organisms;Eukaryota;Opisthokonta;Metazoa;Eumetazoa;Bilateria;Protostomia;  
 Spiralia;Lophotrochozoa;Mollusca;Bivalvia;Autobranhia;Heteroconchia;Euhe  
 terodonta;Imparidentia;Venerida;Veneroidea;Veneridae;Mercenaria;Mercenari  
 a mercenaria  
 UdeM00000032073 6579 516.2 UdeM00000032073 XP\_033737895.1 62.6 422  
 116 5 5 425 4 384 4.10E-143 516.2 6579 cellular  
 organisms;Eukaryota;Opisthokonta;Metazoa;Eumetazoa;Bilateria;Protostomia;  
 Spiralia;Lophotrochozoa;Mollusca;Bivalvia;Autobranhia;Pteriomorpha;Pect  
 inida;Pectinoidea;Pectinidae;Pecten;Pecten maximus  
 UdeM00000032075 6596 659.1 UdeM00000032075 XP\_045160239.1 51.4 747  
 313 19 1 706 36 773 6.60E-186 659.1 6596 cellular  
 organisms;Eukaryota;Opisthokonta;Metazoa;Eumetazoa;Bilateria;Protostomia;  
 Spiralia;Lophotrochozoa;Mollusca;Bivalvia;Autobranhia;Heteroconchia;Euhe  
 terodonta;Imparidentia;Venerida;Veneroidea;Veneridae;Mercenaria;Mercenari  
 a mercenaria  
 UdeM00000032076 6596 196.1 UdeM00000032076 XP\_045160240.1 87.1 101  
 13 0 1 101 1 101 2.70E-47 196.1 6596 cellular  
 organisms;Eukaryota;Opisthokonta;Metazoa;Eumetazoa;Bilateria;Protostomia;  
 Spiralia;Lophotrochozoa;Mollusca;Bivalvia;Autobranhia;Heteroconchia;Euhe  
 terodonta;Imparidentia;Venerida;Veneroidea;Veneridae;Mercenaria;Mercenari  
 a mercenaria  
 UdeM00000032077 6596 120.6 UdeM00000032077 XP\_045160240.1 85.7 77  
 11 0 8 84 113 189 1.00E-24 120.6 6596 cellular  
 organisms;Eukaryota;Opisthokonta;Metazoa;Eumetazoa;Bilateria;Protostomia;  
 Spiralia;Lophotrochozoa;Mollusca;Bivalvia;Autobranhia;Heteroconchia;Euhe  
 terodonta;Imparidentia;Venerida;Veneroidea;Veneridae;Mercenaria;Mercenari  
 a mercenaria  
 UdeM00000032079 1529436 60.8 UdeM00000032079 XP\_033110257.1 36.9  
 84 51 1 7 90 162 243 1.10E-06 60.8 1529436  
 cellular

organisms;Eukaryota;Opisthokonta;Metazoa;Eumetazoa;Bilateria;Deuterostomi  
a;Echinodermata;Pelmatozoa;Crinoidea;Articulata;Comatulida;Comatulidae;Co  
matulinae;Anneissia;Anneissia japonica

UdeM00000032080 6596 695.3 UdeM00000032080 XP\_045160240.1 61.9 556  
172 6 6 537 182 721 6.30E-197 695.3 6596 cellular

organisms;Eukaryota;Opisthokonta;Metazoa;Eumetazoa;Bilateria;Protostomia;  
Spiralia;Lophotrochozoa;Mollusca;Bivalvia;Autobranchia;Heteroconchia;Euhe  
terodonta;Imparidentia;Venerida;Veneroidea;Veneridae;Mercenaria;Mercenari  
a mercenaria

UdeM00000044131 6596 388.3 UdeM00000044131 XP\_045170511.1 29.8 866  
507 27 337 1134 97 929 3.90E-104 388.3 6596 cellular

organisms;Eukaryota;Opisthokonta;Metazoa;Eumetazoa;Bilateria;Protostomia;  
Spiralia;Lophotrochozoa;Mollusca;Bivalvia;Autobranchia;Heteroconchia;Euhe  
terodonta;Imparidentia;Venerida;Veneroidea;Veneridae;Mercenaria;Mercenari  
a mercenaria

UdeM00000036591 29159 220.7 UdeM00000036591 XP\_034331610.1 45.7 256  
124 6 277 529 446 689 4.40E-54 220.7 29159 cellular

organisms;Eukaryota;Opisthokonta;Metazoa;Eumetazoa;Bilateria;Protostomia;  
Spiralia;Lophotrochozoa;Mollusca;Bivalvia;Autobranchia;Pteriormorphia;Ostr  
eida;Ostreoidea;Ostreidae;Crassostrea;Crassostrea gigas

UdeM00000036592 29159 114.8 UdeM00000036592 XP\_034329456.1 47.1 104  
55 0 28 131 293 396 8.90E-23 114.8 29159 cellular

organisms;Eukaryota;Opisthokonta;Metazoa;Eumetazoa;Bilateria;Protostomia;  
Spiralia;Lophotrochozoa;Mollusca;Bivalvia;Autobranchia;Pteriormorphia;Ostr  
eida;Ostreoidea;Ostreidae;Crassostrea;Crassostrea gigas

UdeM00000036597 6596 129.4 UdeM00000036597 XP\_045182313.1 48.6 146  
73 2 18 161 1068 1213 4.20E-27 129.4 6596 cellular

organisms;Eukaryota;Opisthokonta;Metazoa;Eumetazoa;Bilateria;Protostomia;  
Spiralia;Lophotrochozoa;Mollusca;Bivalvia;Autobranchia;Heteroconchia;Euhe  
terodonta;Imparidentia;Venerida;Veneroidea;Veneridae;Mercenaria;Mercenari  
a mercenaria

UdeM00000036596 6596 193.4 UdeM00000036596 XP\_045182316.1 28.5 826  
504 27 1 801 392 1155 1.10E-45 193.4 6596 cellular

organisms;Eukaryota;Opisthokonta;Metazoa;Eumetazoa;Bilateria;Protostomia;  
Spiralia;Lophotrochozoa;Mollusca;Bivalvia;Autobranchia;Heteroconchia;Euhe  
terodonta;Imparidentia;Venerida;Veneroidea;Veneridae;Mercenaria;Mercenari  
a mercenaria

UdeM00000028395 2652724 255.8 UdeM00000028395 XP\_028512668.1 39.8  
369 192 9 4 368 91 433 1.00E-64 255.8 2652724  
cellular

organisms;Eukaryota;Opisthokonta;Metazoa;Eumetazoa;Cnidaria;Anthozoa;Hexa  
corallia;Actiniaria;Aiptasiidae;Exaiptasia;Exaiptasia diaphana

UdeM00000028397 7739 281.6 UdeM00000028397 XP\_035668229.1 46.2 340  
167 8 3 327 17 355 1.50E-72 281.6 7739 cellular

organisms;Eukaryota;Opisthokonta;Metazoa;Eumetazoa;Bilateria;Deuterostomi  
a;Chordata;Cephalochordata;Leptocardii;Amphioxiformes;Branchiostomidae;Br  
anchiostoma;Branchiostoma floridae

UdeM00000028398 2652724 293.9 UdeM00000028398 XP\_028512668.1 41.5  
357 192 10 2 341 124 480 4.10E-76 293.9 2652724  
cellular

organisms;Eukaryota;Opisthokonta;Metazoa;Eumetazoa;Cnidaria;Anthozoa;Hexa  
corallia;Actiniaria;Aiptasiidae;Exaiptasia;Exaiptasia diaphana

UdeM00000028399 2652724 286.2 UdeM00000028399 XP\_028512668.1 41.5  
357 190 11 2 339 124 480 8.60E-74 286.2 2652724

cellular  
organisms;Eukaryota;Opisthokonta;Metazoa;Eumetazoa;Cnidaria;Anthozoa;Hexa  
corallia;Actiniaria;Aiptasiidae;Exaiptasia;Exaiptasia diaphana  
UdeM00000028400 48498 86.3 UdeM00000028400 XP\_020632435.1 32.8 195  
99 8 43 226 581 754 5.60E-14 86.3 48498 cellular  
organisms;Eukaryota;Opisthokonta;Metazoa;Eumetazoa;Cnidaria;Anthozoa;Hexa  
corallia;Scleractinia;Faviina;Merulinidae;Orbicella;Orbicella faveolata  
UdeM00000028401 941984 62.4 UdeM00000028401 XP\_040899707.1 28.1  
203 113 7 37 224 931 1115 9.90E-07 62.4 941984  
cellular  
organisms;Eukaryota;Opisthokonta;Metazoa;Eumetazoa;Bilateria;Deuterostomi  
a;Chordata;Craniata;Vertebrata;Gnathostomata;Teleostomi;Euteleostomi;Acti  
nopterygii;Actinopteri;Neopterygii;Teleostei;Osteoglossocephalai;Clupeoce  
phala;Euteleosteomorpha;Neoteleostei;Eurypterygia;Ctenosquamata;Acanthomo  
rphata;Euacanthomorphacea;Percomorphaceae;Carangaria;Carangaria incertae  
sedis;Toxotidae;Toxotes;Toxotes jaculatrix  
UdeM00000028403 37621 118.6 UdeM00000028403 XP\_014676916.1 36.1 208  
131 2 127 332 44 251 1.50E-23 118.6 37621 cellular  
organisms;Eukaryota;Opisthokonta;Metazoa;Eumetazoa;Bilateria;Protostomia;  
Ecdysozoa;Scalidophora;Priapulida;Priapulimorpha;Priapulimorphida;Priapul  
idae;Priapululus;Priapululus caudatus  
UdeM00000028404 6596 298.1 UdeM00000028404 XP\_045181920.1 50.2 281  
130 4 1 274 30 307 1.20E-77 298.1 6596 cellular  
organisms;Eukaryota;Opisthokonta;Metazoa;Eumetazoa;Bilateria;Protostomia;  
Spiralia;Lophotrochozoa;Mollusca;Bivalvia;Autobranchia;Heteroconchia;Euhe  
terodonta;Imparidentia;Venerida;Veneroidea;Veneridae;Mercenaria;Mercenari  
a mercenaria  
UdeM00000028409 1047088 68.6 UdeM00000028409 XP\_038194410.1 26.3  
224 148 6 98 311 111 327 2.90E-08 68.6 1047088  
cellular  
organisms;Eukaryota;Opisthokonta;Metazoa;Eumetazoa;Bilateria;Deuterostomi  
a;Chordata;Craniata;Vertebrata;Gnathostomata;Teleostomi;Euteleostomi;Sarc  
opterygii;Dipnotetrapodomorpha;Tetrapoda;Amniota;Mammalia;Theria;Eutheria  
;Boreoeutheria;Euarchontoglires;Glires;Rodentia;Myomorpha;Muroidea;Cricet  
idae;Arvicolinae;Arvicola;Arvicola amphibius  
UdeM00000028410 7830 73.9 UdeM00000028410 XP\_038669116.1 24.9 285  
191 11 94 364 93 368 7.00E-10 73.9 7830 cellular  
organisms;Eukaryota;Opisthokonta;Metazoa;Eumetazoa;Bilateria;Deuterostomi  
a;Chordata;Craniata;Vertebrata;Gnathostomata;Chondrichthyes;Elasmobranchi  
i;Selachii;Galeomorphii;Galeoidea;Carcharhiniformes;Scyliorhinidae;Scylio  
rhinus;Scyliorhinus canicula  
UdeM00000028411 37621 106.7 UdeM00000028411 XP\_014679850.1 41.9 155  
80 3 14 160 76 228 3.40E-20 106.7 37621 cellular  
organisms;Eukaryota;Opisthokonta;Metazoa;Eumetazoa;Bilateria;Protostomia;  
Ecdysozoa;Scalidophora;Priapulida;Priapulimorpha;Priapulimorphida;Priapul  
idae;Priapululus;Priapululus caudatus  
UdeM00000028411 37621 58.9 UdeM00000028411 XP\_014679850.1 71.4 35  
10 0 161 195 476 510 8.20E-06 58.9 37621 cellular  
organisms;Eukaryota;Opisthokonta;Metazoa;Eumetazoa;Bilateria;Protostomia;  
Ecdysozoa;Scalidophora;Priapulida;Priapulimorpha;Priapulimorphida;Priapul  
idae;Priapululus;Priapululus caudatus  
UdeM00000028413 46514 136.3 UdeM00000028413 XP\_038073135.1 42.9 161  
85 2 275 435 380 533 9.10E-29 136.3 46514 cellular  
organisms;Eukaryota;Opisthokonta;Metazoa;Eumetazoa;Bilateria;Deuterostomi

a;Echinodermata;Eleutherozoa;Asterozoa;Asteroidea;Valvatacea;Valvatida;As  
 terinidae;Patiria;Patiria miniata  
 UdeM00000028417 51337 67.8 UdeM00000028417 XP\_004670381.2 25.4 252  
 157 9 87 328 116 346 4.60E-08 67.8 51337 cellular  
 organisms;Eukaryota;Opisthokonta;Metazoa;Eumetazoa;Bilateria;Deuterostomi  
 a;Chordata;Craniata;Vertebrata;Gnathostomata;Teleostomi;Euteleostomi;Sarc  
 opterygii;Dipnotetrapodomorpha;Tetrapoda;Amniota;Mammalia;Theria;Eutheria  
 ;Boreoeutheria;Euarchontoglires;Glires;Rodentia;Myomorpha;Dipodoidea;Dipo  
 didae;Dipodinae;Jaculus;Jaculus jaculus  
 UdeM00000028418 59472 70.1 UdeM00000028418 XP\_045426894.1 27.9 251  
 140 9 85 318 107 333 5.90E-09 70.1 59472 cellular  
 organisms;Eukaryota;Opisthokonta;Metazoa;Eumetazoa;Bilateria;Deuterostomi  
 a;Chordata;Craniata;Vertebrata;Gnathostomata;Teleostomi;Euteleostomi;Sarc  
 opterygii;Dipnotetrapodomorpha;Tetrapoda;Amniota;Mammalia;Theria;Eutheria  
 ;Boreoeutheria;Laurasiatheria;Chiroptera;Microchiroptera;Vespertilionidae  
 ;Pipistrellus;Pipistrellus kuhlii  
 UdeM00000028419 7739 187.2 UdeM00000028419 XP\_035686596.1 26.8 593  
 263 17 1 434 1 581 4.40E-44 187.2 7739 cellular  
 organisms;Eukaryota;Opisthokonta;Metazoa;Eumetazoa;Bilateria;Deuterostomi  
 a;Chordata;Cephalochordata;Leptocardii;Amphioxiformes;Branchiostomidae;Br  
 anchiostoma;Branchiostoma floridae  
 UdeM00000028420 29159 167.9 UdeM00000028420 XP\_034334268.1 60.2 123  
 46 1 42 164 122 241 1.10E-38 167.9 29159 cellular  
 organisms;Eukaryota;Opisthokonta;Metazoa;Eumetazoa;Bilateria;Protostomia;  
 Spiralia;Lophotrochozoa;Mollusca;Bivalvia;Autobranchia;Pteriormorphia;Ostr  
 eida;Ostreoidea;Ostreidae;Crassostrea;Crassostrea gigas  
 UdeM00000028421 77115 68.2 UdeM00000028421 XP\_038144245.1 44.1 68  
 38 0 5 72 319 386 5.00E-09 68.2 77115 cellular  
 organisms;Eukaryota;Opisthokonta;Metazoa;Eumetazoa;Bilateria;Deuterostomi  
 a;Chordata;Craniata;Vertebrata;Gnathostomata;Teleostomi;Euteleostomi;Acti  
 nopterygii;Actinopteri;Neopterygii;Teleostei;Osteoglossocephalai;Clupeoce  
 phala;Euteleosteomorpha;Neoteleostei;Eurypterygia;Ctenosquamata;Acanthomo  
 rphata;Euacanthomorphacea;Percomorphaceae;Ovalentaria;Atherinomorphae;Cyp  
 rinodontiformes;Cyprinodontoidei;Cyprinodontidae;Cyprinodontinae;Cyprinod  
 ontini;Cyprinodon;Cyprinodon tularosa  
 UdeM00000028423 1735272 62 UdeM00000028423 XP\_041360657.1 31.2  
 128 82 4 229 351 12 138 3.50E-06 62 1735272  
 cellular  
 organisms;Eukaryota;Opisthokonta;Metazoa;Eumetazoa;Bilateria;Protostomia;  
 Spiralia;Lophotrochozoa;Mollusca;Gastropoda;Neomphalina;Neomphaloidea;Pel  
 tospiridae;Gigantopelta;Gigantopelta aegis  
 UdeM00000028424 29159 159.8 UdeM00000028424 XP\_034313081.1 50.7 150  
 73 1 1 150 137 285 2.60E-36 159.8 29159 cellular  
 organisms;Eukaryota;Opisthokonta;Metazoa;Eumetazoa;Bilateria;Protostomia;  
 Spiralia;Lophotrochozoa;Mollusca;Bivalvia;Autobranchia;Pteriormorphia;Ostr  
 eida;Ostreoidea;Ostreidae;Crassostrea;Crassostrea gigas  
 UdeM00000028425 1735272 176.8 UdeM00000028425 XP\_041349280.1 40.1  
 262 137 6 7 258 62 313 4.10E-41 176.8 1735272  
 cellular  
 organisms;Eukaryota;Opisthokonta;Metazoa;Eumetazoa;Bilateria;Protostomia;  
 Spiralia;Lophotrochozoa;Mollusca;Gastropoda;Neomphalina;Neomphaloidea;Pel  
 tospiridae;Gigantopelta;Gigantopelta aegis  
 UdeM00000028426 63436 196.8 UdeM00000028426 XP\_043469808.1 32.5 372  
 212 10 131 470 43 407 6.10E-47 196.8 63436 cellular



organisms;Eukaryota;Opisthokonta;Metazoa;Eumetazoa;Bilateria;Protostomia;Ecdysozoa;Panarthropoda;Arthropoda;Mandibulata;Pancrustacea;Hexapoda;Insecta;Dicondylia;Pterygota;Neoptera;Endopterygota;Hymenoptera;Apocrita;Parasitoida;Cynipoidea;Figitidae;Eucoilinae;Leptopilina;Leptopilina heterotoma

UdeM00000028427 6565 430.6 UdeM00000028427 XP\_022298331.1 70.1 291  
87 0 1 291 116 406 1.60E-117 430.6 6565 cellular

organisms;Eukaryota;Opisthokonta;Metazoa;Eumetazoa;Bilateria;Protostomia;Spiralia;Lophotrochozoa;Mollusca;Bivalvia;Autobranchia;Pteriormorphia;Ostreida;Ostreioidea;Ostreidae;Crassostrea;Crassostrea virginica

UdeM00000028428 6573 448 UdeM00000028428 XP\_021342792.1 59.8 368  
144 3 9 372 99 466 1.20E-122 448 6573 cellular

organisms;Eukaryota;Opisthokonta;Metazoa;Eumetazoa;Bilateria;Protostomia;Spiralia;Lophotrochozoa;Mollusca;Bivalvia;Autobranchia;Pteriormorphia;Pectinida;Pectinoidea;Pectinidae;Mizuhopecten;Mizuhopecten yessoensis

UdeM00000028431 109280 142.5 UdeM00000028431 XP\_019729826.1 37.8  
209 107 2 6 191 10 218 5.50E-31 142.5 109280  
cellular

organisms;Eukaryota;Opisthokonta;Metazoa;Eumetazoa;Bilateria;Deuterostomia;Chordata;Craniata;Vertebrata;Gnathostomata;Teleostomi;Euteleostomi;Actinopterygii;Actinopteri;Neopterygii;Teleostei;Osteoglossocephalai;Clupeocephala;Euteleosteomorpha;Neoteleostei;Eurypterygia;Ctenosquamata;Acanthomorphata;Euacanthomorphacea;Percomorphaceae;Syngnatharia;Syngnathiformes;Syngnathoidei;Syngnathidae;Hippocampinae;Hippocampus;Hippocampus comes

UdeM00000028432 29159 349 UdeM00000028432 XP\_034334268.1 54.4 285  
127 1 1 285 69 350 5.80E-93 349 29159 cellular

organisms;Eukaryota;Opisthokonta;Metazoa;Eumetazoa;Bilateria;Protostomia;Spiralia;Lophotrochozoa;Mollusca;Bivalvia;Autobranchia;Pteriormorphia;Ostreida;Ostreioidea;Ostreidae;Crassostrea;Crassostrea gigas

UdeM00000028433 143302 79 UdeM00000028433 XP\_012589114.1 26.8  
239 158 7 94 319 107 341 2.10E-11 79 143302  
cellular

organisms;Eukaryota;Opisthokonta;Metazoa;Eumetazoa;Bilateria;Deuterostomia;Chordata;Craniata;Vertebrata;Gnathostomata;Teleostomi;Euteleostomi;Sarcopterygii;Dipnotetrapodomorpha;Tetrapoda;Amniota;Mammalia;Theria;Eutheria;Boreoeutheria;Laurasiatheria;Eulipotyphla;Talpidae;Condylura;Condylura cristata

UdeM00000028435 6596 88.2 UdeM00000028435 XP\_045162193.1 39.8 118  
64 3 345 457 456 571 3.80E-14 88.2 6596 cellular

organisms;Eukaryota;Opisthokonta;Metazoa;Eumetazoa;Bilateria;Protostomia;Spiralia;Lophotrochozoa;Mollusca;Bivalvia;Autobranchia;Heteroconchia;Euheterodonta;Imparidentia;Venerida;Veneroidea;Veneridae;Mercenaria;Mercenaria mercenaria

UdeM00000028436 441366 156.4 UdeM00000028436 XP\_028326620.1 42.2  
218 116 5 1 217 48 256 4.20E-35 156.4 441366  
cellular

organisms;Eukaryota;Opisthokonta;Metazoa;Eumetazoa;Bilateria;Deuterostomia;Chordata;Craniata;Vertebrata;Gnathostomata;Teleostomi;Euteleostomi;Actinopterygii;Actinopteri;Neopterygii;Teleostei;Osteoglossocephalai;Clupeocephala;Euteleosteomorpha;Neoteleostei;Eurypterygia;Ctenosquamata;Acanthomorphata;Euacanthomorphacea;Percomorphaceae;Ovalentaria;Blenniimorphae;Blenniiformes;Gobiesocoidae;Gobiesocidae;Gobiesocinae;Gouania;Gouania willdenowi

UdeM00000035458 6596 206.1 UdeM00000035458 XP\_045162610.1 27 736  
 418 27 27 678 45 745 1.70E-49 206.1 6596 cellular  
 organisms;Eukaryota;Opisthokonta;Metazoa;Eumetazoa;Bilateria;Protostomia;  
 Spiralia;Lophotrochozoa;Mollusca;Bivalvia;Autobranchia;Heteroconchia;Euhe  
 terodonta;Imparidentia;Venerida;Veneroidea;Veneridae;Mercenaria;Mercenari  
 a mercenaria  
 UdeM00000035460 400727 368.2 UdeM00000035460 XP\_025108466.1 44.9  
 437 228 4 27 463 119 542 1.60E-98 368.2 400727  
 cellular  
 organisms;Eukaryota;Opisthokonta;Metazoa;Eumetazoa;Bilateria;Protostomia;  
 Spiralia;Lophotrochozoa;Mollusca;Gastropoda;Caenogastropoda;Architaeniogl  
 ossa;Ampullarioidea;Ampullariidae;Pomacea;Pomacea canaliculata  
 UdeM00000035461 6573 632.9 UdeM00000035461 XP\_021354853.1 51.8 581  
 276 3 194 771 147 726 5.50E-178 632.9 6573 cellular  
 organisms;Eukaryota;Opisthokonta;Metazoa;Eumetazoa;Bilateria;Protostomia;  
 Spiralia;Lophotrochozoa;Mollusca;Bivalvia;Autobranchia;Pteriormorphia;Pect  
 inida;Pectinoidea;Pectinidae;Mizuhopecten;Mizuhopecten yessoensis  
 UdeM00000035462 6596 156 UdeM00000035462 XP\_045209241.1 28.6 465  
 297 18 116 565 564 1008 1.60E-34 156 6596 cellular  
 organisms;Eukaryota;Opisthokonta;Metazoa;Eumetazoa;Bilateria;Protostomia;  
 Spiralia;Lophotrochozoa;Mollusca;Bivalvia;Autobranchia;Heteroconchia;Euhe  
 terodonta;Imparidentia;Venerida;Veneroidea;Veneridae;Mercenaria;Mercenari  
 a mercenaria  
 UdeM00000035463 29159 161.4 UdeM00000035463 XP\_034299474.1 47.8 178  
 88 2 1 173 578 755 1.00E-36 161.4 29159 cellular  
 organisms;Eukaryota;Opisthokonta;Metazoa;Eumetazoa;Bilateria;Protostomia;  
 Spiralia;Lophotrochozoa;Mollusca;Bivalvia;Autobranchia;Pteriormorphia;Ostr  
 eida;Ostreoidea;Ostreidae;Crassostrea;Crassostrea gigas  
 UdeM00000035464 29159 207.6 UdeM00000035464 XP\_034299474.1 35.6 362  
 167 6 1 296 394 755 2.20E-50 207.6 29159 cellular  
 organisms;Eukaryota;Opisthokonta;Metazoa;Eumetazoa;Bilateria;Protostomia;  
 Spiralia;Lophotrochozoa;Mollusca;Bivalvia;Autobranchia;Pteriormorphia;Ostr  
 eida;Ostreoidea;Ostreidae;Crassostrea;Crassostrea gigas  
 UdeM00000035465 29159 126.7 UdeM00000035465 XP\_034299474.1 50.8 118  
 56 1 1 116 329 446 1.90E-26 126.7 29159 cellular  
 organisms;Eukaryota;Opisthokonta;Metazoa;Eumetazoa;Bilateria;Protostomia;  
 Spiralia;Lophotrochozoa;Mollusca;Bivalvia;Autobranchia;Pteriormorphia;Ostr  
 eida;Ostreoidea;Ostreidae;Crassostrea;Crassostrea gigas  
 UdeM00000035466 7998 232.6 UdeM00000035466 XP\_017334791.1 71.6 148  
 42 0 1 148 1 148 3.20E-58 232.6 7998 cellular  
 organisms;Eukaryota;Opisthokonta;Metazoa;Eumetazoa;Bilateria;Deuterostomi  
 a;Chordata;Craniata;Vertebrata;Gnathostomata;Teleostomi;Euteleostomi;Acti  
 nopterygii;Actinopteri;Neopterygii;Teleostei;Osteoglossocephalai;Clupeoce  
 phala;Otomorpha;Ostariophysi;Otophysi;Characiphysae;Siluriformes;Siluroid  
 ei;Ictaluridae;Ictalurus;Ictalurus punctatus  
 UdeM00000035467 7998 201.8 UdeM00000035467 XP\_017322823.1 66.4 140  
 47 0 1 140 113 252 5.60E-49 201.8 7998 cellular  
 organisms;Eukaryota;Opisthokonta;Metazoa;Eumetazoa;Bilateria;Deuterostomi  
 a;Chordata;Craniata;Vertebrata;Gnathostomata;Teleostomi;Euteleostomi;Acti  
 nopterygii;Actinopteri;Neopterygii;Teleostei;Osteoglossocephalai;Clupeoce  
 phala;Otomorpha;Ostariophysi;Otophysi;Characiphysae;Siluriformes;Siluroid  
 ei;Ictaluridae;Ictalurus;Ictalurus punctatus  
 UdeM00000035468 7739 583.2 UdeM00000035468 XP\_035696678.1 57.2 481  
 203 1 2 479 423 903 3.30E-163 583.2 7739 cellular

organisms;Eukaryota;Opisthokonta;Metazoa;Eumetazoa;Bilateria;Deuterostomi  
a;Chordata;Cephalochordata;Leptocardii;Amphioxiformes;Branchiostomidae;Br  
anchiostoma;Branchiostoma floridae  
UdeM00000035469 7741 283.5 UdeM00000035469 XP\_019622111.1 51.2 281  
132 4 5 283 1 278 3.00E-73 283.5 7741 cellular  
organisms;Eukaryota;Opisthokonta;Metazoa;Eumetazoa;Bilateria;Deuterostomi  
a;Chordata;Cephalochordata;Leptocardii;Amphioxiformes;Branchiostomidae;Br  
anchiostoma;Branchiostoma belcheri  
UdeM00000035472 202533 96.3 UdeM00000035472 XP\_035214075.1 30.4  
273 157 8 28 280 53 312 7.70E-17 96.3 202533  
cellular  
organisms;Eukaryota;Opisthokonta;Metazoa;Eumetazoa;Bilateria;Protostomia;  
Ecdysozoa;Panarthropoda;Arthropoda;Chelicerata;Arachnida;Araneae;Araneomo  
rphae;Entelegynae;Eresoidea;Eresidae;Stegodyphus;Stegodyphus dumicola  
UdeM00000035473 50429 272.7 UdeM00000035473 XP\_022799197.1 30.1 594  
374 12 11 579 14 591 1.10E-69 272.7 50429 cellular  
organisms;Eukaryota;Opisthokonta;Metazoa;Eumetazoa;Cnidaria;Anthozoa;Hexa  
corallia;Scleractinia;Astrocoeniina;Pocilloporidae;Stylophora;Stylophora  
pistillata  
UdeM00000035474 29159 87.4 UdeM00000035474 XP\_034320029.1 51.1 94  
41 2 49 138 394 486 1.60E-14 87.4 29159 cellular  
organisms;Eukaryota;Opisthokonta;Metazoa;Eumetazoa;Bilateria;Protostomia;  
Spiralia;Lophotrochozoa;Mollusca;Bivalvia;Autobranchia;Pteriormorphia;Ostr  
eida;Ostreoidea;Ostreidae;Crassostrea;Crassostrea gigas  
UdeM00000035475 1735272 63.9 UdeM00000035475 XP\_041355798.1 32.4  
105 70 1 20 124 52 155 2.20E-07 63.9 1735272  
cellular  
organisms;Eukaryota;Opisthokonta;Metazoa;Eumetazoa;Bilateria;Protostomia;  
Spiralia;Lophotrochozoa;Mollusca;Gastropoda;Neomphalina;Neomphaloidea;Pel  
tospiridae;Gigantopelta;Gigantopelta aegis  
UdeM00000035476 1735272 95.9 UdeM00000035476 XP\_041355798.1 35.4  
144 91 2 20 163 52 193 5.10E-17 95.9 1735272  
cellular  
organisms;Eukaryota;Opisthokonta;Metazoa;Eumetazoa;Bilateria;Protostomia;  
Spiralia;Lophotrochozoa;Mollusca;Gastropoda;Neomphalina;Neomphaloidea;Pel  
tospiridae;Gigantopelta;Gigantopelta aegis  
UdeM00000035477 50429 256.1 UdeM00000035477 XP\_022799197.1 28.6 601  
383 13 4 571 5 592 1.00E-64 256.1 50429 cellular  
organisms;Eukaryota;Opisthokonta;Metazoa;Eumetazoa;Cnidaria;Anthozoa;Hexa  
corallia;Scleractinia;Astrocoeniina;Pocilloporidae;Stylophora;Stylophora  
pistillata  
UdeM00000035479 6596 211.8 UdeM00000035479 XP\_045162610.1 27.9 687  
395 24 84 712 101 745 3.30E-51 211.8 6596 cellular  
organisms;Eukaryota;Opisthokonta;Metazoa;Eumetazoa;Bilateria;Protostomia;  
Spiralia;Lophotrochozoa;Mollusca;Bivalvia;Autobranchia;Heteroconchia;Euhe  
terodonta;Imparidentia;Venerida;Veneroidea;Veneridae;Mercenaria;Mercenari  
a mercenaria  
UdeM00000035481 6596 237.7 UdeM00000035481 XP\_045209416.1 29.4 540  
353 18 15 538 371 898 3.60E-59 237.7 6596 cellular  
organisms;Eukaryota;Opisthokonta;Metazoa;Eumetazoa;Bilateria;Protostomia;  
Spiralia;Lophotrochozoa;Mollusca;Bivalvia;Autobranchia;Heteroconchia;Euhe  
terodonta;Imparidentia;Venerida;Veneroidea;Veneridae;Mercenaria;Mercenari  
a mercenaria

UdeM00000035482 72036 407.1 UdeM00000035482 XP\_040576246.1 45.8 461  
 239 6 79 535 8 461 3.40E-110 407.1 72036 cellular  
 organisms;Eukaryota;Opisthokonta;Metazoa;Eumetazoa;Bilateria;Protostomia;  
 Ecdysozoa;Panarthropoda;Arthropoda;Mandibulata;Pancrustacea;Crustacea;Mul  
 ticrustacea;Hexanauplia;Copepoda;Neocopepoda;Podoplea;Siphonostomatoida;C  
 aligidae;Lepeophtheirus;Lepeophtheirus salmonis  
 UdeM00000035484 6596 95.9 UdeM00000035484 XP\_045208792.1 47.3 131  
 61 4 1 125 1 129 8.80E-17 95.9 6596 cellular  
 organisms;Eukaryota;Opisthokonta;Metazoa;Eumetazoa;Bilateria;Protostomia;  
 Spiralia;Lophotrochozoa;Mollusca;Bivalvia;Autobranchia;Heteroconchia;Euhe  
 terodonta;Imparidentia;Venerida;Veneroidea;Veneridae;Mercenaria;Mercenari  
 a mercenaria  
 UdeM00000032879 6596 129.4 UdeM00000032879 XP\_045204527.1 33.8 201  
 129 1 370 566 206 406 1.40E-26 129.4 6596 cellular  
 organisms;Eukaryota;Opisthokonta;Metazoa;Eumetazoa;Bilateria;Protostomia;  
 Spiralia;Lophotrochozoa;Mollusca;Bivalvia;Autobranchia;Heteroconchia;Euhe  
 terodonta;Imparidentia;Venerida;Veneroidea;Veneridae;Mercenaria;Mercenari  
 a mercenaria  
 UdeM00000032880 6596 129.4 UdeM00000032880 XP\_045204527.1 33.8 201  
 129 1 388 584 206 406 1.50E-26 129.4 6596 cellular  
 organisms;Eukaryota;Opisthokonta;Metazoa;Eumetazoa;Bilateria;Protostomia;  
 Spiralia;Lophotrochozoa;Mollusca;Bivalvia;Autobranchia;Heteroconchia;Euhe  
 terodonta;Imparidentia;Venerida;Veneroidea;Veneridae;Mercenaria;Mercenari  
 a mercenaria  
 UdeM00000032881 6565 122.1 UdeM00000032881 XP\_022320945.1 33.6 238  
 130 6 308 538 185 401 2.20E-24 122.1 6565 cellular  
 organisms;Eukaryota;Opisthokonta;Metazoa;Eumetazoa;Bilateria;Protostomia;  
 Spiralia;Lophotrochozoa;Mollusca;Bivalvia;Autobranchia;Pteriormorphia;Ostr  
 eida;Ostreoidea;Ostreidae;Crassostrea;Crassostrea virginica  
 UdeM00000032882 6596 167.9 UdeM00000032882 XP\_045204525.1 32.5 329  
 203 7 23 348 12 324 2.20E-38 167.9 6596 cellular  
 organisms;Eukaryota;Opisthokonta;Metazoa;Eumetazoa;Bilateria;Protostomia;  
 Spiralia;Lophotrochozoa;Mollusca;Bivalvia;Autobranchia;Heteroconchia;Euhe  
 terodonta;Imparidentia;Venerida;Veneroidea;Veneridae;Mercenaria;Mercenari  
 a mercenaria  
 UdeM00000032883 6596 166.8 UdeM00000032883 XP\_045204522.1 34.4 299  
 158 7 58 348 219 487 5.00E-38 166.8 6596 cellular  
 organisms;Eukaryota;Opisthokonta;Metazoa;Eumetazoa;Bilateria;Protostomia;  
 Spiralia;Lophotrochozoa;Mollusca;Bivalvia;Autobranchia;Heteroconchia;Euhe  
 terodonta;Imparidentia;Venerida;Veneroidea;Veneridae;Mercenaria;Mercenari  
 a mercenaria  
 UdeM00000032884 6596 149.8 UdeM00000032884 XP\_045206725.1 25.7 404  
 267 6 2 376 5 404 6.80E-33 149.8 6596 cellular  
 organisms;Eukaryota;Opisthokonta;Metazoa;Eumetazoa;Bilateria;Protostomia;  
 Spiralia;Lophotrochozoa;Mollusca;Bivalvia;Autobranchia;Heteroconchia;Euhe  
 terodonta;Imparidentia;Venerida;Veneroidea;Veneridae;Mercenaria;Mercenari  
 a mercenaria  
 UdeM00000032885 6596 113.2 UdeM00000032885 XP\_045188059.1 27 259  
 164 6 288 530 165 414 1.00E-21 113.2 6596 cellular  
 organisms;Eukaryota;Opisthokonta;Metazoa;Eumetazoa;Bilateria;Protostomia;  
 Spiralia;Lophotrochozoa;Mollusca;Bivalvia;Autobranchia;Heteroconchia;Euhe  
 terodonta;Imparidentia;Venerida;Veneroidea;Veneridae;Mercenaria;Mercenari  
 a mercenaria

UdeM00000032886 6596 119.8 UdeM00000032886 XP\_045204842.1 29.6 257  
 138 7 289 514 333 577 1.00E-23 119.8 6596 cellular  
 organisms;Eukaryota;Opisthokonta;Metazoa;Eumetazoa;Bilateria;Protostomia;  
 Spiralia;Lophotrochozoa;Mollusca;Bivalvia;Autobranhia;Heteroconchia;Euhe  
 terodonta;Imparidentia;Venerida;Veneroidea;Veneridae;Mercenaria;Mercenari  
 a mercenaria  
 UdeM00000032887 6596 118.2 UdeM00000032887 XP\_045204842.1 29.2 264  
 158 5 288 525 317 577 3.10E-23 118.2 6596 cellular  
 organisms;Eukaryota;Opisthokonta;Metazoa;Eumetazoa;Bilateria;Protostomia;  
 Spiralia;Lophotrochozoa;Mollusca;Bivalvia;Autobranhia;Heteroconchia;Euhe  
 terodonta;Imparidentia;Venerida;Veneroidea;Veneridae;Mercenaria;Mercenari  
 a mercenaria  
 UdeM00000032888 6596 164.5 UdeM00000032888 XP\_045188059.1 39.9 238  
 122 3 1234 1456 185 416 1.00E-36 164.5 6596 cellular  
 organisms;Eukaryota;Opisthokonta;Metazoa;Eumetazoa;Bilateria;Protostomia;  
 Spiralia;Lophotrochozoa;Mollusca;Bivalvia;Autobranhia;Heteroconchia;Euhe  
 terodonta;Imparidentia;Venerida;Veneroidea;Veneridae;Mercenaria;Mercenari  
 a mercenaria  
 UdeM00000032891 6596 155.2 UdeM00000032891 XP\_045203542.1 38.2 220  
 120 4 210 424 598 806 1.80E-34 155.2 6596 cellular  
 organisms;Eukaryota;Opisthokonta;Metazoa;Eumetazoa;Bilateria;Protostomia;  
 Spiralia;Lophotrochozoa;Mollusca;Bivalvia;Autobranhia;Heteroconchia;Euhe  
 terodonta;Imparidentia;Venerida;Veneroidea;Veneridae;Mercenaria;Mercenari  
 a mercenaria  
 UdeM00000032893 29159 73.9 UdeM00000032893 XP\_034300181.1 44.2 113  
 57 4 128 234 301 413 3.20E-10 73.9 29159 cellular  
 organisms;Eukaryota;Opisthokonta;Metazoa;Eumetazoa;Bilateria;Protostomia;  
 Spiralia;Lophotrochozoa;Mollusca;Bivalvia;Autobranhia;Pteriormorphia;Ostr  
 eida;Ostreoidea;Ostreidae;Crassostrea;Crassostrea gigas  
 UdeM00000032896 6596 90.1 UdeM00000032896 XP\_045203542.1 36.3 113  
 68 2 115 223 694 806 3.80E-15 90.1 6596 cellular  
 organisms;Eukaryota;Opisthokonta;Metazoa;Eumetazoa;Bilateria;Protostomia;  
 Spiralia;Lophotrochozoa;Mollusca;Bivalvia;Autobranhia;Heteroconchia;Euhe  
 terodonta;Imparidentia;Venerida;Veneroidea;Veneridae;Mercenaria;Mercenari  
 a mercenaria  
 UdeM00000032897 6596 153.3 UdeM00000032897 XP\_045203686.1 37.6 237  
 127 6 304 533 448 670 8.70E-34 153.3 6596 cellular  
 organisms;Eukaryota;Opisthokonta;Metazoa;Eumetazoa;Bilateria;Protostomia;  
 Spiralia;Lophotrochozoa;Mollusca;Bivalvia;Autobranhia;Heteroconchia;Euhe  
 terodonta;Imparidentia;Venerida;Veneroidea;Veneridae;Mercenaria;Mercenari  
 a mercenaria  
 UdeM00000032898 6596 147.5 UdeM00000032898 XP\_045206727.1 36.4 236  
 133 5 273 496 207 437 4.50E-32 147.5 6596 cellular  
 organisms;Eukaryota;Opisthokonta;Metazoa;Eumetazoa;Bilateria;Protostomia;  
 Spiralia;Lophotrochozoa;Mollusca;Bivalvia;Autobranhia;Heteroconchia;Euhe  
 terodonta;Imparidentia;Venerida;Veneroidea;Veneridae;Mercenaria;Mercenari  
 a mercenaria  
 UdeM00000032899 6596 162.5 UdeM00000032899 XP\_045206727.1 39.7 234  
 124 6 329 550 207 435 1.50E-36 162.5 6596 cellular  
 organisms;Eukaryota;Opisthokonta;Metazoa;Eumetazoa;Bilateria;Protostomia;  
 Spiralia;Lophotrochozoa;Mollusca;Bivalvia;Autobranhia;Heteroconchia;Euhe  
 terodonta;Imparidentia;Venerida;Veneroidea;Veneridae;Mercenaria;Mercenari  
 a mercenaria

UdeM00000032900 6565 151.4 UdeM00000032900 XP\_022325378.1 40.5 215  
 116 6 124 328 387 599 2.00E-33 151.4 6565 cellular  
 organisms;Eukaryota;Opisthokonta;Metazoa;Eumetazoa;Bilateria;Protostomia;  
 Spiralia;Lophotrochozoa;Mollusca;Bivalvia;Autobranchia;Pteriomorpha;Ostr  
 eida;Ostreoidea;Ostreidae;Crassostrea;Crassostrea virginica  
 UdeM00000032901 6596 106.7 UdeM00000032901 XP\_045204716.1 26.8 339  
 223 8 8 336 131 454 6.00E-20 106.7 6596 cellular  
 organisms;Eukaryota;Opisthokonta;Metazoa;Eumetazoa;Bilateria;Protostomia;  
 Spiralia;Lophotrochozoa;Mollusca;Bivalvia;Autobranchia;Heteroconchia;Euhe  
 terodonta;Imparidentia;Venerida;Veneroidea;Veneridae;Mercenaria;Mercenari  
 a mercenaria  
 UdeM00000032902 6596 108.6 UdeM00000032902 XP\_045203540.1 31.3 214  
 124 7 367 574 546 742 2.70E-20 108.6 6596 cellular  
 organisms;Eukaryota;Opisthokonta;Metazoa;Eumetazoa;Bilateria;Protostomia;  
 Spiralia;Lophotrochozoa;Mollusca;Bivalvia;Autobranchia;Heteroconchia;Euhe  
 terodonta;Imparidentia;Venerida;Veneroidea;Veneridae;Mercenaria;Mercenari  
 a mercenaria  
 UdeM00000032903 6596 434.5 UdeM00000032903 XP\_045203458.1 30.6 1133  
 661 29 511 1535 9 1124 5.60E-118 434.5 6596 cellular  
 organisms;Eukaryota;Opisthokonta;Metazoa;Eumetazoa;Bilateria;Protostomia;  
 Spiralia;Lophotrochozoa;Mollusca;Bivalvia;Autobranchia;Heteroconchia;Euhe  
 terodonta;Imparidentia;Venerida;Veneroidea;Veneridae;Mercenaria;Mercenari  
 a mercenaria  
 UdeM00000032904 6596 120.6 UdeM00000032904 XP\_045203467.1 22.6 680  
 441 21 12 673 7 619 9.20E-24 120.6 6596 cellular  
 organisms;Eukaryota;Opisthokonta;Metazoa;Eumetazoa;Bilateria;Protostomia;  
 Spiralia;Lophotrochozoa;Mollusca;Bivalvia;Autobranchia;Heteroconchia;Euhe  
 terodonta;Imparidentia;Venerida;Veneroidea;Veneridae;Mercenaria;Mercenari  
 a mercenaria  
 UdeM00000032905 6596 236.9 UdeM00000032905 XP\_045203458.1 24.6 932  
 586 22 7 899 183 1036 1.00E-58 236.9 6596 cellular  
 organisms;Eukaryota;Opisthokonta;Metazoa;Eumetazoa;Bilateria;Protostomia;  
 Spiralia;Lophotrochozoa;Mollusca;Bivalvia;Autobranchia;Heteroconchia;Euhe  
 terodonta;Imparidentia;Venerida;Veneroidea;Veneridae;Mercenaria;Mercenari  
 a mercenaria  
 UdeM00000032906 6596 131.3 UdeM00000032906 XP\_045203467.1 22.7 638  
 430 17 12 611 7 619 4.10E-27 131.3 6596 cellular  
 organisms;Eukaryota;Opisthokonta;Metazoa;Eumetazoa;Bilateria;Protostomia;  
 Spiralia;Lophotrochozoa;Mollusca;Bivalvia;Autobranchia;Heteroconchia;Euhe  
 terodonta;Imparidentia;Venerida;Veneroidea;Veneridae;Mercenaria;Mercenari  
 a mercenaria  
 UdeM00000032907 6596 376.3 UdeM00000032907 XP\_045203458.1 28.7 1001  
 586 24 7 938 183 1124 1.10E-100 376.3 6596 cellular  
 organisms;Eukaryota;Opisthokonta;Metazoa;Eumetazoa;Bilateria;Protostomia;  
 Spiralia;Lophotrochozoa;Mollusca;Bivalvia;Autobranchia;Heteroconchia;Euhe  
 terodonta;Imparidentia;Venerida;Veneroidea;Veneridae;Mercenaria;Mercenari  
 a mercenaria  
 UdeM00000032908 6596 74.7 UdeM00000032908 XP\_045203467.1 29.1 134  
 94 1 12 145 7 139 1.20E-10 74.7 6596 cellular  
 organisms;Eukaryota;Opisthokonta;Metazoa;Eumetazoa;Bilateria;Protostomia;  
 Spiralia;Lophotrochozoa;Mollusca;Bivalvia;Autobranchia;Heteroconchia;Euhe  
 terodonta;Imparidentia;Venerida;Veneroidea;Veneridae;Mercenaria;Mercenari  
 a mercenaria

UdeM00000032909 6596 255.4 UdeM00000032909 XP\_045203603.1 42.8 318  
 168 4 1 306 125 440 1.80E-64 255.4 6596 cellular  
 organisms;Eukaryota;Opisthokonta;Metazoa;Eumetazoa;Bilateria;Protostomia;  
 Spiralia;Lophotrochozoa;Mollusca;Bivalvia;Autobranchia;Heteroconchia;Euhe  
 terodonta;Imparidentia;Venerida;Veneroidea;Veneridae;Mercenaria;Mercenari  
 a mercenaria  
 UdeM00000032910 6565 108.6 UdeM00000032910 XP\_022289724.1 52.1 94  
 45 0 7 100 3 96 5.30E-21 108.6 6565 cellular  
 organisms;Eukaryota;Opisthokonta;Metazoa;Eumetazoa;Bilateria;Protostomia;  
 Spiralia;Lophotrochozoa;Mollusca;Bivalvia;Autobranchia;Pteriormorphia;Ostr  
 eida;Ostreoidea;Ostreidae;Crassostrea;Crassostrea virginica  
 UdeM00000032913 6596 164.5 UdeM00000032913 XP\_045206965.1 45.2 177  
 90 3 1 171 1 176 1.60E-37 164.5 6596 cellular  
 organisms;Eukaryota;Opisthokonta;Metazoa;Eumetazoa;Bilateria;Protostomia;  
 Spiralia;Lophotrochozoa;Mollusca;Bivalvia;Autobranchia;Heteroconchia;Euhe  
 terodonta;Imparidentia;Venerida;Veneroidea;Veneridae;Mercenaria;Mercenari  
 a mercenaria  
 UdeM00000032914 6596 368.2 UdeM00000032914 XP\_045202954.1 41.5 463  
 228 7 7 445 31 474 2.10E-98 368.2 6596 cellular  
 organisms;Eukaryota;Opisthokonta;Metazoa;Eumetazoa;Bilateria;Protostomia;  
 Spiralia;Lophotrochozoa;Mollusca;Bivalvia;Autobranchia;Heteroconchia;Euhe  
 terodonta;Imparidentia;Venerida;Veneroidea;Veneridae;Mercenaria;Mercenari  
 a mercenaria  
 UdeM00000032915 225164 157.5 UdeM00000032915 XP\_009049132.1 42.6  
 204 66 2 7 159 224 427 1.40E-35 157.5 225164  
 cellular  
 organisms;Eukaryota;Opisthokonta;Metazoa;Eumetazoa;Bilateria;Protostomia;  
 Spiralia;Lophotrochozoa;Mollusca;Gastropoda;Patellogastropoda;Lottioidea;  
 Lottiidae;Lottia;Lottia gigantea  
 UdeM00000032916 6596 255.4 UdeM00000032916 XP\_045203603.1 42.8 318  
 168 4 1 306 125 440 1.60E-64 255.4 6596 cellular  
 organisms;Eukaryota;Opisthokonta;Metazoa;Eumetazoa;Bilateria;Protostomia;  
 Spiralia;Lophotrochozoa;Mollusca;Bivalvia;Autobranchia;Heteroconchia;Euhe  
 terodonta;Imparidentia;Venerida;Veneroidea;Veneridae;Mercenaria;Mercenari  
 a mercenaria  
 UdeM00000032917 6565 108.6 UdeM00000032917 XP\_022289724.1 52.1 94  
 45 0 7 100 3 96 5.30E-21 108.6 6565 cellular  
 organisms;Eukaryota;Opisthokonta;Metazoa;Eumetazoa;Bilateria;Protostomia;  
 Spiralia;Lophotrochozoa;Mollusca;Bivalvia;Autobranchia;Pteriormorphia;Ostr  
 eida;Ostreoidea;Ostreidae;Crassostrea;Crassostrea virginica  
 UdeM00000032919 6596 164.5 UdeM00000032919 XP\_045206965.1 45.2 177  
 90 3 1 171 1 176 1.60E-37 164.5 6596 cellular  
 organisms;Eukaryota;Opisthokonta;Metazoa;Eumetazoa;Bilateria;Protostomia;  
 Spiralia;Lophotrochozoa;Mollusca;Bivalvia;Autobranchia;Heteroconchia;Euhe  
 terodonta;Imparidentia;Venerida;Veneroidea;Veneridae;Mercenaria;Mercenari  
 a mercenaria  
 UdeM00000032920 6596 389.8 UdeM00000032920 XP\_045202954.1 44 445  
 226 6 7 429 31 474 6.50E-105 389.8 6596 cellular  
 organisms;Eukaryota;Opisthokonta;Metazoa;Eumetazoa;Bilateria;Protostomia;  
 Spiralia;Lophotrochozoa;Mollusca;Bivalvia;Autobranchia;Heteroconchia;Euhe  
 terodonta;Imparidentia;Venerida;Veneroidea;Veneridae;Mercenaria;Mercenari  
 a mercenaria  
 UdeM00000032921 225164 159.1 UdeM00000032921 XP\_009049132.1 43.1  
 204 65 2 37 189 224 427 5.70E-36 159.1 225164

cellular  
organisms;Eukaryota;Opisthokonta;Metazoa;Eumetazoa;Bilateria;Protostomia;  
Spiralia;Lophotrochozoa;Mollusca;Gastropoda;Patellogastropoda;Lottioidea;  
Lottiidae;Lottia;Lottia gigantea  
UdeM00000032923 6596 252.7 UdeM00000032923 XP\_045203603.1 44 282  
144 5 24 291 183 464 6.20E-64 252.7 6596 cellular  
organisms;Eukaryota;Opisthokonta;Metazoa;Eumetazoa;Bilateria;Protostomia;  
Spiralia;Lophotrochozoa;Mollusca;Bivalvia;Autobranchia;Heteroconchia;Euhe  
terodonta;Imparidentia;Venerida;Veneroidea;Veneridae;Mercenaria;Mercenari  
a mercenaria  
UdeM00000032924 7574 121.3 UdeM00000032924 XP\_013396733.1 37.4 206  
111 3 96 283 43 248 2.00E-24 121.3 7574 cellular  
organisms;Eukaryota;Opisthokonta;Metazoa;Eumetazoa;Bilateria;Protostomia;  
Spiralia;Lophotrochozoa;Brachiopoda;Linguliformea;Lingulata;Lingulida;Lin  
guloidea;Lingulidae;Lingula;Lingula anatina  
UdeM00000032925 6596 113.6 UdeM00000032925 XP\_045204179.1 57.1 98  
41 1 8 104 48 145 1.70E-22 113.6 6596 cellular  
organisms;Eukaryota;Opisthokonta;Metazoa;Eumetazoa;Bilateria;Protostomia;  
Spiralia;Lophotrochozoa;Mollusca;Bivalvia;Autobranchia;Heteroconchia;Euhe  
terodonta;Imparidentia;Venerida;Veneroidea;Veneridae;Mercenaria;Mercenari  
a mercenaria  
UdeM00000032926 6596 229.2 UdeM00000032926 XP\_045203603.1 42.9 266  
145 3 3 261 175 440 1.10E-56 229.2 6596 cellular  
organisms;Eukaryota;Opisthokonta;Metazoa;Eumetazoa;Bilateria;Protostomia;  
Spiralia;Lophotrochozoa;Mollusca;Bivalvia;Autobranchia;Heteroconchia;Euhe  
terodonta;Imparidentia;Venerida;Veneroidea;Veneridae;Mercenaria;Mercenari  
a mercenaria  
UdeM00000032927 6565 110.2 UdeM00000032927 XP\_022290110.1 47.2 123  
56 2 7 129 3 116 2.20E-21 110.2 6565 cellular  
organisms;Eukaryota;Opisthokonta;Metazoa;Eumetazoa;Bilateria;Protostomia;  
Spiralia;Lophotrochozoa;Mollusca;Bivalvia;Autobranchia;Pteriormorphia;Ostr  
eida;Ostreoidea;Ostreidae;Crassostrea;Crassostrea virginica  
UdeM00000032928 6565 214.5 UdeM00000032928 XP\_022288562.1 57.6 170  
71 1 1 169 1 170 1.00E-52 214.5 6565 cellular  
organisms;Eukaryota;Opisthokonta;Metazoa;Eumetazoa;Bilateria;Protostomia;  
Spiralia;Lophotrochozoa;Mollusca;Bivalvia;Autobranchia;Pteriormorphia;Ostr  
eida;Ostreoidea;Ostreidae;Crassostrea;Crassostrea virginica  
UdeM00000032929 29159 129.4 UdeM00000032929 XP\_034307861.1 63.2 95  
34 1 11 105 3 96 2.70E-27 129.4 29159 cellular  
organisms;Eukaryota;Opisthokonta;Metazoa;Eumetazoa;Bilateria;Protostomia;  
Spiralia;Lophotrochozoa;Mollusca;Bivalvia;Autobranchia;Pteriormorphia;Ostr  
eida;Ostreoidea;Ostreidae;Crassostrea;Crassostrea gigas  
UdeM00000032931 6596 302 UdeM00000032931 XP\_045203603.1 47.9 326  
155 3 3 313 115 440 1.50E-78 302 6596 cellular  
organisms;Eukaryota;Opisthokonta;Metazoa;Eumetazoa;Bilateria;Protostomia;  
Spiralia;Lophotrochozoa;Mollusca;Bivalvia;Autobranchia;Heteroconchia;Euhe  
terodonta;Imparidentia;Venerida;Veneroidea;Veneridae;Mercenaria;Mercenari  
a mercenaria  
UdeM00000032932 6596 106.7 UdeM00000032932 XP\_045204411.1 53.6 97  
44 1 7 102 5 101 1.80E-20 106.7 6596 cellular  
organisms;Eukaryota;Opisthokonta;Metazoa;Eumetazoa;Bilateria;Protostomia;  
Spiralia;Lophotrochozoa;Mollusca;Bivalvia;Autobranchia;Heteroconchia;Euhe  
terodonta;Imparidentia;Venerida;Veneroidea;Veneridae;Mercenaria;Mercenari  
a mercenaria



UdeM00000032933 6596 386.7 UdeM00000032933 XP\_045203603.1 48.4 436  
 206 9 2 421 8 440 5.50E-104 386.7 6596 cellular  
 organisms;Eukaryota;Opisthokonta;Metazoa;Eumetazoa;Bilateria;Protostomia;  
 Spiralia;Lophotrochozoa;Mollusca;Bivalvia;Autobranhia;Heteroconchia;Euhe  
 terodonta;Imparidentia;Venerida;Veneroidea;Veneridae;Mercenaria;Mercenari  
 a mercenaria  
 UdeM00000032934 6596 496.9 UdeM00000032934 XP\_045193585.1 56.9 418  
 172 3 413 829 11 421 5.00E-137 496.9 6596 cellular  
 organisms;Eukaryota;Opisthokonta;Metazoa;Eumetazoa;Bilateria;Protostomia;  
 Spiralia;Lophotrochozoa;Mollusca;Bivalvia;Autobranhia;Heteroconchia;Euhe  
 terodonta;Imparidentia;Venerida;Veneroidea;Veneridae;Mercenaria;Mercenari  
 a mercenaria  
 UdeM00000032935 6573 204.5 UdeM00000032935 XP\_021352112.1 47.7 176  
 92 0 91 266 121 296 1.80E-49 204.5 6573 cellular  
 organisms;Eukaryota;Opisthokonta;Metazoa;Eumetazoa;Bilateria;Protostomia;  
 Spiralia;Lophotrochozoa;Mollusca;Bivalvia;Autobranhia;Pteriormorphia;Pect  
 inida;Pectinoidea;Pectinidae;Mizuhopecten;Mizuhopecten yessoensis  
 UdeM00000032936 6596 375.9 UdeM00000032936 XP\_045204875.1 43.7 423  
 209 3 7 409 29 442 6.40E-101 375.9 6596 cellular  
 organisms;Eukaryota;Opisthokonta;Metazoa;Eumetazoa;Bilateria;Protostomia;  
 Spiralia;Lophotrochozoa;Mollusca;Bivalvia;Autobranhia;Heteroconchia;Euhe  
 terodonta;Imparidentia;Venerida;Veneroidea;Veneridae;Mercenaria;Mercenari  
 a mercenaria  
 UdeM00000032937 6573 275.8 UdeM00000032937 XP\_021352112.1 45.5 264  
 144 0 91 354 121 384 7.90E-71 275.8 6573 cellular  
 organisms;Eukaryota;Opisthokonta;Metazoa;Eumetazoa;Bilateria;Protostomia;  
 Spiralia;Lophotrochozoa;Mollusca;Bivalvia;Autobranhia;Pteriormorphia;Pect  
 inida;Pectinoidea;Pectinidae;Mizuhopecten;Mizuhopecten yessoensis  
 UdeM00000032938 6596 380.6 UdeM00000032938 XP\_045204875.1 44.1 426  
 206 3 7 412 29 442 2.60E-102 380.6 6596 cellular  
 organisms;Eukaryota;Opisthokonta;Metazoa;Eumetazoa;Bilateria;Protostomia;  
 Spiralia;Lophotrochozoa;Mollusca;Bivalvia;Autobranhia;Heteroconchia;Euhe  
 terodonta;Imparidentia;Venerida;Veneroidea;Veneridae;Mercenaria;Mercenari  
 a mercenaria  
 UdeM00000032939 6573 274.2 UdeM00000032939 XP\_021352112.1 45.8 260  
 141 0 91 350 121 380 2.30E-70 274.2 6573 cellular  
 organisms;Eukaryota;Opisthokonta;Metazoa;Eumetazoa;Bilateria;Protostomia;  
 Spiralia;Lophotrochozoa;Mollusca;Bivalvia;Autobranhia;Pteriormorphia;Pect  
 inida;Pectinoidea;Pectinidae;Mizuhopecten;Mizuhopecten yessoensis  
 UdeM00000032940 6596 382.5 UdeM00000032940 XP\_045204875.1 44.1 426  
 206 3 7 412 29 442 6.90E-103 382.5 6596 cellular  
 organisms;Eukaryota;Opisthokonta;Metazoa;Eumetazoa;Bilateria;Protostomia;  
 Spiralia;Lophotrochozoa;Mollusca;Bivalvia;Autobranhia;Heteroconchia;Euhe  
 terodonta;Imparidentia;Venerida;Veneroidea;Veneridae;Mercenaria;Mercenari  
 a mercenaria  
 UdeM00000032941 6573 273.1 UdeM00000032941 XP\_021352112.1 45.4 260  
 142 0 49 308 121 380 4.50E-70 273.1 6573 cellular  
 organisms;Eukaryota;Opisthokonta;Metazoa;Eumetazoa;Bilateria;Protostomia;  
 Spiralia;Lophotrochozoa;Mollusca;Bivalvia;Autobranhia;Pteriormorphia;Pect  
 inida;Pectinoidea;Pectinidae;Mizuhopecten;Mizuhopecten yessoensis  
 UdeM00000032942 6596 283.1 UdeM00000032942 XP\_045204660.1 59.3 236  
 89 2 1 229 1 236 3.20E-73 283.1 6596 cellular  
 organisms;Eukaryota;Opisthokonta;Metazoa;Eumetazoa;Bilateria;Protostomia;  
 Spiralia;Lophotrochozoa;Mollusca;Bivalvia;Autobranhia;Heteroconchia;Euhe

terodonta;Imparidentia;Venerida;Veneroidea;Veneridae;Mercenaria;Mercenari  
a mercenaria

UdeM00000032943 1735272 202.2 UdeM00000032943 XP\_041356580.1 35.8  
388 191 12 5 371 277 627 3.70E-48 202.2 1735272  
cellular

organisms;Eukaryota;Opisthokonta;Metazoa;Eumetazoa;Bilateria;Protostomia;  
Spiralia;Lophotrochozoa;Mollusca;Gastropoda;Neomphalina;Neomphaloidea;Pel  
tospiridae;Gigantopelta;Gigantopelta aegis

UdeM00000032944 6596 102.4 UdeM00000032944 XP\_045205621.1 52.5 99  
46 1 1 99 858 955 3.40E-19 102.4 6596 cellular

organisms;Eukaryota;Opisthokonta;Metazoa;Eumetazoa;Bilateria;Protostomia;  
Spiralia;Lophotrochozoa;Mollusca;Bivalvia;Autobranchia;Heteroconchia;Euhe  
terodonta;Imparidentia;Venerida;Veneroidea;Veneridae;Mercenaria;Mercenari  
a mercenaria

UdeM00000032946 6596 716.8 UdeM00000032946 XP\_045203886.1 59.9 591  
191 6 12 580 45 611 2.20E-203 716.8 6596 cellular

organisms;Eukaryota;Opisthokonta;Metazoa;Eumetazoa;Bilateria;Protostomia;  
Spiralia;Lophotrochozoa;Mollusca;Bivalvia;Autobranchia;Heteroconchia;Euhe  
terodonta;Imparidentia;Venerida;Veneroidea;Veneridae;Mercenaria;Mercenari  
a mercenaria

UdeM00000032947 6596 317.8 UdeM00000032947 XP\_045203350.1 68.3 221  
69 1 1 220 6 226 1.10E-83 317.8 6596 cellular

organisms;Eukaryota;Opisthokonta;Metazoa;Eumetazoa;Bilateria;Protostomia;  
Spiralia;Lophotrochozoa;Mollusca;Bivalvia;Autobranchia;Heteroconchia;Euhe  
terodonta;Imparidentia;Venerida;Veneroidea;Veneridae;Mercenaria;Mercenari  
a mercenaria

UdeM00000032948 6573 229.2 UdeM00000032948 XP\_021363019.1 58.3 278  
103 9 11 285 14 281 1.20E-56 229.2 6573 cellular

organisms;Eukaryota;Opisthokonta;Metazoa;Eumetazoa;Bilateria;Protostomia;  
Spiralia;Lophotrochozoa;Mollusca;Bivalvia;Autobranchia;Pteriomorphia;Pect  
inida;Pectinoidea;Pectinidae;Mizuhopecten;Mizuhopecten yessoensis

UdeM00000032950 6596 68.6 UdeM00000032950 XP\_045169421.1 43.6 78  
31 1 21 85 51 128 5.90E-09 68.6 6596 cellular

organisms;Eukaryota;Opisthokonta;Metazoa;Eumetazoa;Bilateria;Protostomia;  
Spiralia;Lophotrochozoa;Mollusca;Bivalvia;Autobranchia;Heteroconchia;Euhe  
terodonta;Imparidentia;Venerida;Veneroidea;Veneridae;Mercenaria;Mercenari  
a mercenaria

UdeM00000032952 6596 160.2 UdeM00000032952 XP\_045188152.1 40.2 256  
129 10 106 353 15 254 4.80E-36 160.2 6596 cellular

organisms;Eukaryota;Opisthokonta;Metazoa;Eumetazoa;Bilateria;Protostomia;  
Spiralia;Lophotrochozoa;Mollusca;Bivalvia;Autobranchia;Heteroconchia;Euhe  
terodonta;Imparidentia;Venerida;Veneroidea;Veneridae;Mercenaria;Mercenari  
a mercenaria

UdeM00000032953 6500 120.6 UdeM00000032953 XP\_035824760.1 40.1 157  
87 3 13 167 366 517 2.00E-24 120.6 6500 cellular

organisms;Eukaryota;Opisthokonta;Metazoa;Eumetazoa;Bilateria;Protostomia;  
Spiralia;Lophotrochozoa;Mollusca;Gastropoda;Heterobranchia;Euthyneura;Tec  
tipleura;Aplysiida;Aplysioidea;Aplysiidae;Aplysia;Aplysia californica

UdeM00000032954 6596 473.8 UdeM00000032954 XP\_045184046.1 44.1 512  
273 4 9 514 7 511 3.10E-130 473.8 6596 cellular

organisms;Eukaryota;Opisthokonta;Metazoa;Eumetazoa;Bilateria;Protostomia;  
Spiralia;Lophotrochozoa;Mollusca;Bivalvia;Autobranchia;Heteroconchia;Euhe  
terodonta;Imparidentia;Venerida;Veneroidea;Veneridae;Mercenaria;Mercenari  
a mercenaria

UdeM00000032955 75366 454.1 UdeM00000032955 XP\_016132731.1 64.8 375  
 132 0 1 375 229 603 1.70E-124 454.1 75366 cellular  
 organisms;Eukaryota;Opisthokonta;Metazoa;Eumetazoa;Bilateria;Deuterostomi  
 a;Chordata;Craniata;Vertebrata;Gnathostomata;Teleostomi;Euteleostomi;Acti  
 nopterygii;Actinopteri;Neopterygii;Teleostei;Osteoglossocephalai;Clupeoce  
 phala;Otomorpha;Ostariophysi;Otophysi;Cypriniphysae;Cypriniiformes;Cyprino  
 idei;Cyprinidae;Cyprininae;Sinocyclocheilus;Sinocyclocheilus grahami  
 UdeM00000032956 4097 177.9 UdeM00000032956 XP\_016476856.1 60.6 155  
 61 0 1 155 222 376 1.00E-41 177.9 4097 cellular  
 organisms;Eukaryota;Viridiplantae;Streptophyta;Streptophytina;Embryophyta  
 ;Tracheophyta;Euphyllophyta;Spermatophyta;Magnoliopsida;Mesangiospermae;e  
 udicotyledons;Gunneridae;Pentapetalae;asterids;lamiids;Solanales;Solanace  
 ae;Nicotianoideae;Nicotianeae;Nicotiana;Nicotiana tabacum  
 UdeM00000032957 6596 661.4 UdeM00000032957 XP\_045202954.1 55.3 577  
 246 4 2 567 26 601 1.00E-186 661.4 6596 cellular  
 organisms;Eukaryota;Opisthokonta;Metazoa;Eumetazoa;Bilateria;Protostomia;  
 Spiralia;Lophotrochozoa;Mollusca;Bivalvia;Autobranchia;Heteroconchia;Euhe  
 terodonta;Imparidentia;Venerida;Veneroidea;Veneridae;Mercenaria;Mercenari  
 a mercenaria  
 UdeM00000032958 6596 714.5 UdeM00000032958 XP\_045202954.1 59.4 577  
 222 4 2 567 26 601 1.00E-202 714.5 6596 cellular  
 organisms;Eukaryota;Opisthokonta;Metazoa;Eumetazoa;Bilateria;Protostomia;  
 Spiralia;Lophotrochozoa;Mollusca;Bivalvia;Autobranchia;Heteroconchia;Euhe  
 terodonta;Imparidentia;Venerida;Veneroidea;Veneridae;Mercenaria;Mercenari  
 a mercenaria  
 UdeM00000032959 1735272 81.3 UdeM00000032959 XP\_041347149.1 45.6  
 103 49 3 5 102 252 352 2.30E-12 81.3 1735272  
 cellular  
 organisms;Eukaryota;Opisthokonta;Metazoa;Eumetazoa;Bilateria;Protostomia;  
 Spiralia;Lophotrochozoa;Mollusca;Gastropoda;Neomphalina;Neomphaloidea;Pel  
 tospiridae;Gigantopelta;Gigantopelta aegis  
 UdeM00000032960 6596 705.7 UdeM00000032960 XP\_045202954.1 60.8 574  
 217 3 4 569 28 601 4.90E-200 705.7 6596 cellular  
 organisms;Eukaryota;Opisthokonta;Metazoa;Eumetazoa;Bilateria;Protostomia;  
 Spiralia;Lophotrochozoa;Mollusca;Bivalvia;Autobranchia;Heteroconchia;Euhe  
 terodonta;Imparidentia;Venerida;Veneroidea;Veneridae;Mercenaria;Mercenari  
 a mercenaria  
 UdeM00000032961 6596 747.3 UdeM00000032961 XP\_045202954.1 63.4 574  
 202 3 4 569 28 601 1.50E-212 747.3 6596 cellular  
 organisms;Eukaryota;Opisthokonta;Metazoa;Eumetazoa;Bilateria;Protostomia;  
 Spiralia;Lophotrochozoa;Mollusca;Bivalvia;Autobranchia;Heteroconchia;Euhe  
 terodonta;Imparidentia;Venerida;Veneroidea;Veneridae;Mercenaria;Mercenari  
 a mercenaria  
 UdeM00000032962 6596 734.2 UdeM00000032962 XP\_045202954.1 62.2 576  
 210 3 2 569 26 601 1.30E-208 734.2 6596 cellular  
 organisms;Eukaryota;Opisthokonta;Metazoa;Eumetazoa;Bilateria;Protostomia;  
 Spiralia;Lophotrochozoa;Mollusca;Bivalvia;Autobranchia;Heteroconchia;Euhe  
 terodonta;Imparidentia;Venerida;Veneroidea;Veneridae;Mercenaria;Mercenari  
 a mercenaria  
 UdeM00000032963 6565 114.4 UdeM00000032963 XP\_022322655.1 55 111  
 47 3 1 111 1 108 1.10E-22 114.4 6565 cellular  
 organisms;Eukaryota;Opisthokonta;Metazoa;Eumetazoa;Bilateria;Protostomia;  
 Spiralia;Lophotrochozoa;Mollusca;Bivalvia;Autobranchia;Pteriormorphia;Ostr  
 eida;Ostreoidea;Ostreidae;Crassostrea;Crassostrea virginica

UdeM00000032964 29159 244.6 UdeM00000032964 XP\_034299474.1 42.6 291  
 153 3 7 297 248 524 1.70E-61 244.6 29159 cellular  
 organisms;Eukaryota;Opisthokonta;Metazoa;Eumetazoa;Bilateria;Protostomia;  
 Spiralia;Lophotrochozoa;Mollusca;Bivalvia;Autobranchia;Pteriomorpha;Ostr  
 eida;Ostreoidea;Ostreidae;Crassostrea;Crassostrea gigas  
 UdeM00000032965 29159 112.1 UdeM00000032965 XP\_034299474.1 61.1 90  
 35 0 1 90 579 668 3.80E-22 112.1 29159 cellular  
 organisms;Eukaryota;Opisthokonta;Metazoa;Eumetazoa;Bilateria;Protostomia;  
 Spiralia;Lophotrochozoa;Mollusca;Bivalvia;Autobranchia;Pteriomorpha;Ostr  
 eida;Ostreoidea;Ostreidae;Crassostrea;Crassostrea gigas  
 UdeM00000032966 29159 306.6 UdeM00000032966 XP\_034330911.1 49 308  
 141 6 5 301 186 488 3.50E-80 306.6 29159 cellular  
 organisms;Eukaryota;Opisthokonta;Metazoa;Eumetazoa;Bilateria;Protostomia;  
 Spiralia;Lophotrochozoa;Mollusca;Bivalvia;Autobranchia;Pteriomorpha;Ostr  
 eida;Ostreoidea;Ostreidae;Crassostrea;Crassostrea gigas  
 UdeM00000032967 29159 328.9 UdeM00000032967 XP\_034330911.1 47.8 343  
 163 6 2 333 151 488 7.30E-87 328.9 29159 cellular  
 organisms;Eukaryota;Opisthokonta;Metazoa;Eumetazoa;Bilateria;Protostomia;  
 Spiralia;Lophotrochozoa;Mollusca;Bivalvia;Autobranchia;Pteriomorpha;Ostr  
 eida;Ostreoidea;Ostreidae;Crassostrea;Crassostrea gigas  
 UdeM00000032968 6596 80.1 UdeM00000032968 XP\_045185032.1 54.5 66  
 28 1 82 145 1 66 7.30E-12 80.1 6596 cellular  
 organisms;Eukaryota;Opisthokonta;Metazoa;Eumetazoa;Bilateria;Protostomia;  
 Spiralia;Lophotrochozoa;Mollusca;Bivalvia;Autobranchia;Heteroconchia;Euhe  
 terodonta;Imparidentia;Venerida;Veneroidea;Veneridae;Mercenaria;Mercenari  
 a mercenaria  
 UdeM00000032969 6596 176.8 UdeM00000032969 XP\_045204716.1 38.9 229  
 135 2 184 408 228 455 9.60E-41 176.8 6596 cellular  
 organisms;Eukaryota;Opisthokonta;Metazoa;Eumetazoa;Bilateria;Protostomia;  
 Spiralia;Lophotrochozoa;Mollusca;Bivalvia;Autobranchia;Heteroconchia;Euhe  
 terodonta;Imparidentia;Venerida;Veneroidea;Veneridae;Mercenaria;Mercenari  
 a mercenaria  
 UdeM00000032970 6596 167.2 UdeM00000032970 XP\_045206103.1 39.2 240  
 142 3 200 437 227 464 6.90E-38 167.2 6596 cellular  
 organisms;Eukaryota;Opisthokonta;Metazoa;Eumetazoa;Bilateria;Protostomia;  
 Spiralia;Lophotrochozoa;Mollusca;Bivalvia;Autobranchia;Heteroconchia;Euhe  
 terodonta;Imparidentia;Venerida;Veneroidea;Veneridae;Mercenaria;Mercenari  
 a mercenaria  
 UdeM00000032971 6596 110.2 UdeM00000032971 XP\_045203854.1 38.5 122  
 75 0 3 124 55 176 2.00E-21 110.2 6596 cellular  
 organisms;Eukaryota;Opisthokonta;Metazoa;Eumetazoa;Bilateria;Protostomia;  
 Spiralia;Lophotrochozoa;Mollusca;Bivalvia;Autobranchia;Heteroconchia;Euhe  
 terodonta;Imparidentia;Venerida;Veneroidea;Veneridae;Mercenaria;Mercenari  
 a mercenaria  
 UdeM00000032972 6596 165.2 UdeM00000032972 XP\_045203542.1 39.8 211  
 122 2 292 498 595 804 3.30E-37 165.2 6596 cellular  
 organisms;Eukaryota;Opisthokonta;Metazoa;Eumetazoa;Bilateria;Protostomia;  
 Spiralia;Lophotrochozoa;Mollusca;Bivalvia;Autobranchia;Heteroconchia;Euhe  
 terodonta;Imparidentia;Venerida;Veneroidea;Veneridae;Mercenaria;Mercenari  
 a mercenaria  
 UdeM00000032973 6596 165.2 UdeM00000032973 XP\_045203542.1 39.8 211  
 122 2 200 406 595 804 2.90E-37 165.2 6596 cellular  
 organisms;Eukaryota;Opisthokonta;Metazoa;Eumetazoa;Bilateria;Protostomia;  
 Spiralia;Lophotrochozoa;Mollusca;Bivalvia;Autobranchia;Heteroconchia;Euhe

terodonta;Imparidentia;Venerida;Veneroidea;Veneridae;Mercenaria;Mercenari  
 a mercenaria  
 UdeM00000032975 6596 263.5 UdeM00000032975 XP\_045203868.1 70.7 184  
 49 3 9 190 10 190 2.10E-67 263.5 6596 cellular  
 organisms;Eukaryota;Opisthokonta;Metazoa;Eumetazoa;Bilateria;Protostomia;  
 Spiralia;Lophotrochozoa;Mollusca;Bivalvia;Autobranhia;Heteroconchia;Euhe  
 terodonta;Imparidentia;Venerida;Veneroidea;Veneridae;Mercenaria;Mercenari  
 a mercenaria  
 UdeM00000032976 6573 188.7 UdeM00000032976 XP\_021363204.1 64.9 148  
 47 2 5 148 4 150 5.20E-45 188.7 6573 cellular  
 organisms;Eukaryota;Opisthokonta;Metazoa;Eumetazoa;Bilateria;Protostomia;  
 Spiralia;Lophotrochozoa;Mollusca;Bivalvia;Autobranhia;Pteriormorphia;Pect  
 inida;Pectinoidea;Pectinidae;Mizuhopecten;Mizuhopecten yessoensis  
 UdeM00000032977 6573 1031.2 UdeM00000032977 XP\_021363224.1 82.6  
 634 101 2 2 626 4 637 5.60E-298 1031.2 6573  
 cellular  
 organisms;Eukaryota;Opisthokonta;Metazoa;Eumetazoa;Bilateria;Protostomia;  
 Spiralia;Lophotrochozoa;Mollusca;Bivalvia;Autobranhia;Pteriormorphia;Pect  
 inida;Pectinoidea;Pectinidae;Mizuhopecten;Mizuhopecten yessoensis  
 UdeM00000032978 6596 567.8 UdeM00000032978 XP\_045206221.1 52.3 581  
 237 4 20 562 27 605 1.60E-158 567.8 6596 cellular  
 organisms;Eukaryota;Opisthokonta;Metazoa;Eumetazoa;Bilateria;Protostomia;  
 Spiralia;Lophotrochozoa;Mollusca;Bivalvia;Autobranhia;Heteroconchia;Euhe  
 terodonta;Imparidentia;Venerida;Veneroidea;Veneridae;Mercenaria;Mercenari  
 a mercenaria  
 UdeM00000032979 6579 430.3 UdeM00000032979 XP\_033743517.1 63 327  
 120 1 31 356 35 361 2.50E-117 430.3 6579 cellular  
 organisms;Eukaryota;Opisthokonta;Metazoa;Eumetazoa;Bilateria;Protostomia;  
 Spiralia;Lophotrochozoa;Mollusca;Bivalvia;Autobranhia;Pteriormorphia;Pect  
 inida;Pectinoidea;Pectinidae;Pecten;Pecten maximus  
 UdeM00000032980 6579 430.3 UdeM00000032980 XP\_033743517.1 63 327  
 120 1 52 377 35 361 2.60E-117 430.3 6579 cellular  
 organisms;Eukaryota;Opisthokonta;Metazoa;Eumetazoa;Bilateria;Protostomia;  
 Spiralia;Lophotrochozoa;Mollusca;Bivalvia;Autobranhia;Pteriormorphia;Pect  
 inida;Pectinoidea;Pectinidae;Pecten;Pecten maximus  
 UdeM00000032981 2607531 474.6 UdeM00000032981 XP\_036363996.1 52.6  
 481 201 5 131 593 104 575 1.90E-130 474.6 2607531  
 cellular  
 organisms;Eukaryota;Opisthokonta;Metazoa;Eumetazoa;Bilateria;Protostomia;  
 Spiralia;Lophotrochozoa;Mollusca;Cephalopoda;Coleoidea;Octopodiformes;Oct  
 opoda;Incirrata;Octopodidae;Octopus;Octopus sinensis  
 UdeM00000032983 6573 175.3 UdeM00000032983 XP\_021370618.1 35 314  
 187 5 74 371 63 375 1.90E-40 175.3 6573 cellular  
 organisms;Eukaryota;Opisthokonta;Metazoa;Eumetazoa;Bilateria;Protostomia;  
 Spiralia;Lophotrochozoa;Mollusca;Bivalvia;Autobranhia;Pteriormorphia;Pect  
 inida;Pectinoidea;Pectinidae;Mizuhopecten;Mizuhopecten yessoensis  
 UdeM00000032984 1735272 215.3 UdeM00000032984 XP\_041354040.1 46.6  
 234 121 1 129 362 157 386 2.30E-52 215.3 1735272  
 cellular  
 organisms;Eukaryota;Opisthokonta;Metazoa;Eumetazoa;Bilateria;Protostomia;  
 Spiralia;Lophotrochozoa;Mollusca;Gastropoda;Neomphalina;Neomphaloidea;Pel  
 tospiridae;Gigantopelta;Gigantopelta aegis  
 UdeM00000032986 29159 131 UdeM00000032986 XP\_034329650.1 47.8 113  
 59 0 1 113 266 378 9.90E-28 131 29159 cellular

organisms;Eukaryota;Opisthokonta;Metazoa;Eumetazoa;Bilateria;Protostomia;  
Spiralia;Lophotrochozoa;Mollusca;Bivalvia;Autobranchia;Pteriormorphia;Ostr  
eida;Ostreoidea;Ostreidae;Crassostrea;Crassostrea gigas  
UdeM00000032987 6573 129 UdeM00000032987 XP\_021352044.1 55.2 116  
27 2 1 92 98 212 3.30E-27 129 6573 cellular  
organisms;Eukaryota;Opisthokonta;Metazoa;Eumetazoa;Bilateria;Protostomia;  
Spiralia;Lophotrochozoa;Mollusca;Bivalvia;Autobranchia;Pteriormorphia;Pect  
inida;Pectinoidea;Pectinidae;Mizuhopecten;Mizuhopecten yessoensis  
UdeM00000032988 6579 73.6 UdeM00000032988 XP\_033761099.1 25.6 207  
130 5 190 377 111 312 6.40E-10 73.6 6579 cellular  
organisms;Eukaryota;Opisthokonta;Metazoa;Eumetazoa;Bilateria;Protostomia;  
Spiralia;Lophotrochozoa;Mollusca;Bivalvia;Autobranchia;Pteriormorphia;Pect  
inida;Pectinoidea;Pectinidae;Pecten;Pecten maximus  
UdeM00000032989 29159 124 UdeM00000032989 XP\_034329650.1 46.3 108  
58 0 4 111 271 378 1.20E-25 124 29159 cellular  
organisms;Eukaryota;Opisthokonta;Metazoa;Eumetazoa;Bilateria;Protostomia;  
Spiralia;Lophotrochozoa;Mollusca;Bivalvia;Autobranchia;Pteriormorphia;Ostr  
eida;Ostreoidea;Ostreidae;Crassostrea;Crassostrea gigas  
UdeM00000032992 6579 72.8 UdeM00000032992 XP\_033761099.1 25.6 207  
130 5 202 389 111 312 1.10E-09 72.8 6579 cellular  
organisms;Eukaryota;Opisthokonta;Metazoa;Eumetazoa;Bilateria;Protostomia;  
Spiralia;Lophotrochozoa;Mollusca;Bivalvia;Autobranchia;Pteriormorphia;Pect  
inida;Pectinoidea;Pectinidae;Pecten;Pecten maximus  
UdeM00000032994 6596 154.5 UdeM00000032994 XP\_045194835.1 46.2 182  
70 4 1 157 518 696 1.60E-34 154.5 6596 cellular  
organisms;Eukaryota;Opisthokonta;Metazoa;Eumetazoa;Bilateria;Protostomia;  
Spiralia;Lophotrochozoa;Mollusca;Bivalvia;Autobranchia;Heteroconchia;Euhe  
terodonta;Imparidentia;Venerida;Veneroidea;Veneridae;Mercenaria;Mercenari  
a mercenaria  
UdeM00000032993 6579 593.6 UdeM00000032993 XP\_033743343.1 49 669  
278 10 1 666 1 609 3.40E-166 593.6 6579 cellular  
organisms;Eukaryota;Opisthokonta;Metazoa;Eumetazoa;Bilateria;Protostomia;  
Spiralia;Lophotrochozoa;Mollusca;Bivalvia;Autobranchia;Pteriormorphia;Pect  
inida;Pectinoidea;Pectinidae;Pecten;Pecten maximus  
UdeM00000032995 6579 450.3 UdeM00000032995 XP\_033743343.1 49.6 512  
197 8 1 510 1 453 3.40E-123 450.3 6579 cellular  
organisms;Eukaryota;Opisthokonta;Metazoa;Eumetazoa;Bilateria;Protostomia;  
Spiralia;Lophotrochozoa;Mollusca;Bivalvia;Autobranchia;Pteriormorphia;Pect  
inida;Pectinoidea;Pectinidae;Pecten;Pecten maximus  
UdeM00000032996 400727 1243.8 UdeM00000032996 XP\_025087117.1  
63.5 944 293 3 1 944 1 892 0.00E+00 1243.8  
400727 cellular  
organisms;Eukaryota;Opisthokonta;Metazoa;Eumetazoa;Bilateria;Protostomia;  
Spiralia;Lophotrochozoa;Mollusca;Gastropoda;Caenogastropoda;Architaeniogl  
ossa;Ampullarioidea;Ampullariidae;Pomacea;Pomacea canaliculata  
UdeM00000032997 6596 176.4 UdeM00000032997 XP\_045202988.1 77 196  
44 1 1 196 90 284 3.50E-41 176.4 6596 cellular  
organisms;Eukaryota;Opisthokonta;Metazoa;Eumetazoa;Bilateria;Protostomia;  
Spiralia;Lophotrochozoa;Mollusca;Bivalvia;Autobranchia;Heteroconchia;Euhe  
terodonta;Imparidentia;Venerida;Veneroidea;Veneridae;Mercenaria;Mercenari  
a mercenaria  
UdeM00000032998 6596 146.7 UdeM00000032998 XP\_045202988.1 80.2 86  
15 2 1 84 1 86 1.60E-32 146.7 6596 cellular  
organisms;Eukaryota;Opisthokonta;Metazoa;Eumetazoa;Bilateria;Protostomia;

Spiralia;Lophotrochozoa;Mollusca;Bivalvia;Autobranchia;Heteroconchia;Euherodonta;Imparidentia;Venerida;Veneroidea;Veneridae;Mercenaria;Mercenaria mercenaria

UdeM00000032999 400727 260.4 UdeM00000032999 XP\_025086607.1 82.4  
142 25 0 1 142 1 142 1.40E-66 260.4 400727

cellular

organisms;Eukaryota;Opisthokonta;Metazoa;Eumetazoa;Bilateria;Protostomia;Spiralia;Lophotrochozoa;Mollusca;Gastropoda;Caenogastropoda;Architaenioglossa;Ampullarioidea;Ampullariidae;Pomacea;Pomacea canaliculata

UdeM00000033000 6596 950.3 UdeM00000033000 XP\_045206220.1 40 1911  
745 36 1 1801 1 1620 4.10E-273 950.3 6596 cellular

organisms;Eukaryota;Opisthokonta;Metazoa;Eumetazoa;Bilateria;Protostomia;Spiralia;Lophotrochozoa;Mollusca;Bivalvia;Autobranchia;Heteroconchia;Euherodonta;Imparidentia;Venerida;Veneroidea;Veneridae;Mercenaria;Mercenaria mercenaria

UdeM00000033001 6596 950.3 UdeM00000033001 XP\_045206220.1 40 1911  
745 36 1 1801 1 1620 4.10E-273 950.3 6596 cellular

organisms;Eukaryota;Opisthokonta;Metazoa;Eumetazoa;Bilateria;Protostomia;Spiralia;Lophotrochozoa;Mollusca;Bivalvia;Autobranchia;Heteroconchia;Euherodonta;Imparidentia;Venerida;Veneroidea;Veneridae;Mercenaria;Mercenaria mercenaria

UdeM00000033002 6596 950.7 UdeM00000033002 XP\_045206220.1 40.1 1910  
745 36 1 1800 1 1620 3.10E-273 950.7 6596 cellular

organisms;Eukaryota;Opisthokonta;Metazoa;Eumetazoa;Bilateria;Protostomia;Spiralia;Lophotrochozoa;Mollusca;Bivalvia;Autobranchia;Heteroconchia;Euherodonta;Imparidentia;Venerida;Veneroidea;Veneridae;Mercenaria;Mercenaria mercenaria

UdeM00000033003 6596 499.6 UdeM00000033003 XP\_045206220.1 65.6 413  
116 7 22 424 1224 1620 4.10E-138 499.6 6596 cellular

organisms;Eukaryota;Opisthokonta;Metazoa;Eumetazoa;Bilateria;Protostomia;Spiralia;Lophotrochozoa;Mollusca;Bivalvia;Autobranchia;Heteroconchia;Euherodonta;Imparidentia;Venerida;Veneroidea;Veneridae;Mercenaria;Mercenaria mercenaria

UdeM00000033004 6579 121.3 UdeM00000033004 XP\_033742713.1 40.7 216  
110 4 45 260 1681 1878 1.80E-24 121.3 6579 cellular

organisms;Eukaryota;Opisthokonta;Metazoa;Eumetazoa;Bilateria;Protostomia;Spiralia;Lophotrochozoa;Mollusca;Bivalvia;Autobranchia;Pteriomorpha;Pectinida;Pectinoidea;Pectinidae;Pecten;Pecten maximus

UdeM00000033005 6596 1169.8 UdeM00000033005 XP\_045206230.1 61.6  
1109 353 23 4 1090 1 1058 0.00E+00 1169.8 6596

cellular

organisms;Eukaryota;Opisthokonta;Metazoa;Eumetazoa;Bilateria;Protostomia;Spiralia;Lophotrochozoa;Mollusca;Bivalvia;Autobranchia;Heteroconchia;Euherodonta;Imparidentia;Venerida;Veneroidea;Veneridae;Mercenaria;Mercenaria mercenaria

UdeM00000033006 7574 1337.4 UdeM00000033006 XP\_013394207.1 58.6  
1096 430 6 6 1078 1947 3041 0.00E+00 1337.4 7574

cellular

organisms;Eukaryota;Opisthokonta;Metazoa;Eumetazoa;Bilateria;Protostomia;Spiralia;Lophotrochozoa;Brachiopoda;Linguliformea;Lingulata;Lingulida;Linguloidea;Lingulidae;Lingula;Lingula anatina

UdeM00000033007 7574 325.5 UdeM00000033007 XP\_013413797.1 59.4 251  
102 0 5 255 1696 1946 6.20E-86 325.5 7574 cellular

organisms;Eukaryota;Opisthokonta;Metazoa;Eumetazoa;Bilateria;Protostomia;

Spiralia;Lophotrochozoa;Brachiopoda;Linguliformea;Lingulata;Lingulida;Linguloidea;Lingulidae;Lingula;Lingula anatina

UdeM00000033008 225164 1880.5 UdeM00000033008 XP\_009051304.1  
55.9 1643 713 9 34 1673 29 1663 0.00E+00 1880.5  
225164 cellular

organisms;Eukaryota;Opisthokonta;Metazoa;Eumetazoa;Bilateria;Protostomia;Spiralia;Lophotrochozoa;Mollusca;Gastropoda;Patellogastropoda;Lottioidea;Lottiidae;Lottia;Lottia gigantea

UdeM00000033009 29159 110.5 UdeM00000033009 XP\_019925978.2 24.2 347  
238 6 601 936 458 790 1.10E-20 110.5 29159 cellular

organisms;Eukaryota;Opisthokonta;Metazoa;Eumetazoa;Bilateria;Protostomia;Spiralia;Lophotrochozoa;Mollusca;Bivalvia;Autobranchia;Pteriormorphia;Ostreida;Ostreioidea;Ostreidae;Crassostrea;Crassostrea gigas

UdeM00000033010 6565 144.8 UdeM00000033010 XP\_022327686.1 28.3 360  
234 8 6 361 5 344 2.10E-31 144.8 6565 cellular

organisms;Eukaryota;Opisthokonta;Metazoa;Eumetazoa;Bilateria;Protostomia;Spiralia;Lophotrochozoa;Mollusca;Bivalvia;Autobranchia;Pteriormorphia;Ostreida;Ostreioidea;Ostreidae;Crassostrea;Crassostrea virginica

UdeM00000033011 6596 110.5 UdeM00000033011 XP\_045203696.1 33.2 190  
118 2 23 212 30 210 2.60E-21 110.5 6596 cellular

organisms;Eukaryota;Opisthokonta;Metazoa;Eumetazoa;Bilateria;Protostomia;Spiralia;Lophotrochozoa;Mollusca;Bivalvia;Autobranchia;Heteroconchia;Euheterodonta;Imparidentia;Venerida;Veneroidea;Veneridae;Mercenaria;Mercenaria mercenaria

UdeM00000033012 6596 121.7 UdeM00000033012 XP\_045203698.1 33.3 192  
116 3 20 203 24 211 1.10E-24 121.7 6596 cellular

organisms;Eukaryota;Opisthokonta;Metazoa;Eumetazoa;Bilateria;Protostomia;Spiralia;Lophotrochozoa;Mollusca;Bivalvia;Autobranchia;Heteroconchia;Euheterodonta;Imparidentia;Venerida;Veneroidea;Veneridae;Mercenaria;Mercenaria mercenaria

UdeM00000033013 6579 131 UdeM00000033013 XP\_033743222.1 49.7 143  
55 4 2 133 70 206 1.30E-27 131 6579 cellular

organisms;Eukaryota;Opisthokonta;Metazoa;Eumetazoa;Bilateria;Protostomia;Spiralia;Lophotrochozoa;Mollusca;Bivalvia;Autobranchia;Pteriormorphia;Pectinida;Pectinoidea;Pectinidae;Pecten;Pecten maximus

UdeM00000033014 6596 149.1 UdeM00000033014 XP\_045204333.1 29.3 454  
275 14 1 436 1 426 1.40E-32 149.1 6596 cellular

organisms;Eukaryota;Opisthokonta;Metazoa;Eumetazoa;Bilateria;Protostomia;Spiralia;Lophotrochozoa;Mollusca;Bivalvia;Autobranchia;Heteroconchia;Euheterodonta;Imparidentia;Venerida;Veneroidea;Veneridae;Mercenaria;Mercenaria mercenaria

UdeM00000033015 29159 115.5 UdeM00000033015 XP\_011449386.1 51.4 105  
47 2 1 103 1 103 4.10E-23 115.5 29159 cellular

organisms;Eukaryota;Opisthokonta;Metazoa;Eumetazoa;Bilateria;Protostomia;Spiralia;Lophotrochozoa;Mollusca;Bivalvia;Autobranchia;Pteriormorphia;Ostreida;Ostreioidea;Ostreidae;Crassostrea;Crassostrea gigas

UdeM00000033017 6596 648.7 UdeM00000033017 XP\_045204644.1 53.2 682  
292 7 1 666 140 810 8.30E-183 648.7 6596 cellular

organisms;Eukaryota;Opisthokonta;Metazoa;Eumetazoa;Bilateria;Protostomia;Spiralia;Lophotrochozoa;Mollusca;Bivalvia;Autobranchia;Heteroconchia;Euheterodonta;Imparidentia;Venerida;Veneroidea;Veneridae;Mercenaria;Mercenaria mercenaria

UdeM00000033018 6596 680.6 UdeM00000033018 XP\_045204644.1 50.7 745  
346 9 15 741 30 771 2.20E-192 680.6 6596 cellular



organisms;Eukaryota;Opisthokonta;Metazoa;Eumetazoa;Bilateria;Protostomia;Spiralia;Lophotrochozoa;Mollusca;Bivalvia;Autobranhia;Heteroconchia;Euherodonta;Imparidentia;Venerida;Veneroidea;Veneridae;Mercenaria;Mercenaria mercenaria

UdeM00000033019 6596 708 UdeM00000033019 XP\_045204644.1 54.7 706  
296 9 46 731 70 771 1.30E-200 708 6596 cellular

organisms;Eukaryota;Opisthokonta;Metazoa;Eumetazoa;Bilateria;Protostomia;Spiralia;Lophotrochozoa;Mollusca;Bivalvia;Autobranhia;Heteroconchia;Euherodonta;Imparidentia;Venerida;Veneroidea;Veneridae;Mercenaria;Mercenaria mercenaria

UdeM00000033020 6573 94.4 UdeM00000033020 XP\_021365625.1 52.9 87  
41 0 59 145 40 126 2.40E-16 94.4 6573 cellular

organisms;Eukaryota;Opisthokonta;Metazoa;Eumetazoa;Bilateria;Protostomia;Spiralia;Lophotrochozoa;Mollusca;Bivalvia;Autobranhia;Pteriormorphia;Pectinida;Pectinoidea;Pectinidae;Mizuhopecten;Mizuhopecten yessoensis

UdeM00000033021 6596 305.8 UdeM00000033021 XP\_045206242.1 58.5 275  
98 3 77 338 12 283 7.00E-80 305.8 6596 cellular

organisms;Eukaryota;Opisthokonta;Metazoa;Eumetazoa;Bilateria;Protostomia;Spiralia;Lophotrochozoa;Mollusca;Bivalvia;Autobranhia;Heteroconchia;Euherodonta;Imparidentia;Venerida;Veneroidea;Veneridae;Mercenaria;Mercenaria mercenaria

UdeM00000033022 6596 382.1 UdeM00000033022 XP\_045204644.1 53.3 381  
165 2 1 368 391 771 8.40E-103 382.1 6596 cellular

organisms;Eukaryota;Opisthokonta;Metazoa;Eumetazoa;Bilateria;Protostomia;Spiralia;Lophotrochozoa;Mollusca;Bivalvia;Autobranhia;Heteroconchia;Euherodonta;Imparidentia;Venerida;Veneroidea;Veneridae;Mercenaria;Mercenaria mercenaria

UdeM00000033023 6596 666.8 UdeM00000033023 XP\_045204648.1 50.5 703  
316 8 58 741 66 755 3.30E-188 666.8 6596 cellular

organisms;Eukaryota;Opisthokonta;Metazoa;Eumetazoa;Bilateria;Protostomia;Spiralia;Lophotrochozoa;Mollusca;Bivalvia;Autobranhia;Heteroconchia;Euherodonta;Imparidentia;Venerida;Veneroidea;Veneridae;Mercenaria;Mercenaria mercenaria

UdeM00000033024 6596 586.3 UdeM00000033024 XP\_045206242.1 45.9 724  
350 8 68 762 13 723 5.80E-164 586.3 6596 cellular

organisms;Eukaryota;Opisthokonta;Metazoa;Eumetazoa;Bilateria;Protostomia;Spiralia;Lophotrochozoa;Mollusca;Bivalvia;Autobranhia;Heteroconchia;Euherodonta;Imparidentia;Venerida;Veneroidea;Veneridae;Mercenaria;Mercenaria mercenaria

UdeM00000033025 6596 2334.3 UdeM00000033025 XP\_045204537.1 83.1  
1348 222 2 1 1344 1 1346 0.00E+00 2334.3 6596  
cellular

organisms;Eukaryota;Opisthokonta;Metazoa;Eumetazoa;Bilateria;Protostomia;Spiralia;Lophotrochozoa;Mollusca;Bivalvia;Autobranhia;Heteroconchia;Euherodonta;Imparidentia;Venerida;Veneroidea;Veneridae;Mercenaria;Mercenaria mercenaria

UdeM00000033026 6596 566.6 UdeM00000033026 XP\_045206424.1 49.8 580  
252 10 11 554 10 586 3.70E-158 566.6 6596 cellular

organisms;Eukaryota;Opisthokonta;Metazoa;Eumetazoa;Bilateria;Protostomia;Spiralia;Lophotrochozoa;Mollusca;Bivalvia;Autobranhia;Heteroconchia;Euherodonta;Imparidentia;Venerida;Veneroidea;Veneridae;Mercenaria;Mercenaria mercenaria

UdeM00000033027 29159 257.7 UdeM00000033027 XP\_011445494.2 64.5 197  
70 0 1 197 1 197 1.20E-65 257.7 29159 cellular

organisms;Eukaryota;Opisthokonta;Metazoa;Eumetazoa;Bilateria;Protostomia;  
Spiralia;Lophotrochozoa;Mollusca;Bivalvia;Autobranchia;Pteriomorphia;Ostr  
eida;Ostreoidea;Ostreidae;Crassostrea;Crassostrea gigas  
UdeM00000033028 6596 352.1 UdeM00000033028 XP\_045189373.1 60.7 270  
96 2 5 274 26 285 9.60E-94 352.1 6596 cellular  
organisms;Eukaryota;Opisthokonta;Metazoa;Eumetazoa;Bilateria;Protostomia;  
Spiralia;Lophotrochozoa;Mollusca;Bivalvia;Autobranchia;Heteroconchia;Euhe  
terodonta;Imparidentia;Venerida;Veneroidea;Veneridae;Mercenaria;Mercenari  
a mercenaria  
UdeM00000033029 6596 573.2 UdeM00000033029 XP\_045205042.1 75.9 348  
78 2 1 343 1 347 2.40E-160 573.2 6596 cellular  
organisms;Eukaryota;Opisthokonta;Metazoa;Eumetazoa;Bilateria;Protostomia;  
Spiralia;Lophotrochozoa;Mollusca;Bivalvia;Autobranchia;Heteroconchia;Euhe  
terodonta;Imparidentia;Venerida;Veneroidea;Veneridae;Mercenaria;Mercenari  
a mercenaria  
UdeM00000033030 6596 1483 UdeM00000033030 XP\_045205055.1 66 1107  
346 10 5 1086 20 1121 0.00E+00 1483 6596 cellular  
organisms;Eukaryota;Opisthokonta;Metazoa;Eumetazoa;Bilateria;Protostomia;  
Spiralia;Lophotrochozoa;Mollusca;Bivalvia;Autobranchia;Heteroconchia;Euhe  
terodonta;Imparidentia;Venerida;Veneroidea;Veneridae;Mercenaria;Mercenari  
a mercenaria  
UdeM00000033031 6596 175.3 UdeM00000033031 XP\_045204751.1 51.8 164  
74 2 5 165 3 164 1.20E-40 175.3 6596 cellular  
organisms;Eukaryota;Opisthokonta;Metazoa;Eumetazoa;Bilateria;Protostomia;  
Spiralia;Lophotrochozoa;Mollusca;Bivalvia;Autobranchia;Heteroconchia;Euhe  
terodonta;Imparidentia;Venerida;Veneroidea;Veneridae;Mercenaria;Mercenari  
a mercenaria  
UdeM00000033032 6596 161.8 UdeM00000033032 XP\_045204751.1 48.2 170  
77 3 5 171 3 164 1.10E-36 161.8 6596 cellular  
organisms;Eukaryota;Opisthokonta;Metazoa;Eumetazoa;Bilateria;Protostomia;  
Spiralia;Lophotrochozoa;Mollusca;Bivalvia;Autobranchia;Heteroconchia;Euhe  
terodonta;Imparidentia;Venerida;Veneroidea;Veneridae;Mercenaria;Mercenari  
a mercenaria  
UdeM00000033033 6526 222.6 UdeM00000033033 XP\_013069929.1 29.9 511  
322 12 79 566 1156 1653 1.30E-54 222.6 6526 cellular  
organisms;Eukaryota;Opisthokonta;Metazoa;Eumetazoa;Bilateria;Protostomia;  
Spiralia;Lophotrochozoa;Mollusca;Gastropoda;Heterobranchia;Euthyneura;Pan  
pulmonata;Hygrophila;Lymnaeioidea;Planorbidae;Biomphalaria;Biomphalaria  
glabrata  
UdeM00000033034 6596 587.4 UdeM00000033034 XP\_045206867.1 47.5 577  
296 3 7 581 12 583 2.00E-164 587.4 6596 cellular  
organisms;Eukaryota;Opisthokonta;Metazoa;Eumetazoa;Bilateria;Protostomia;  
Spiralia;Lophotrochozoa;Mollusca;Bivalvia;Autobranchia;Heteroconchia;Euhe  
terodonta;Imparidentia;Venerida;Veneroidea;Veneridae;Mercenaria;Mercenari  
a mercenaria  
UdeM00000033036 6579 448.7 UdeM00000033036 XP\_033742656.1 77 283  
64 1 5 286 3 285 9.20E-123 448.7 6579 cellular  
organisms;Eukaryota;Opisthokonta;Metazoa;Eumetazoa;Bilateria;Protostomia;  
Spiralia;Lophotrochozoa;Mollusca;Bivalvia;Autobranchia;Pteriomorphia;Pect  
inida;Pectinoidea;Pectinidae;Pecten;Pecten maximus  
UdeM00000033037 29159 649 UdeM00000033037 XP\_034299855.1 68.9 447  
139 0 20 466 4 450 4.40E-183 649 29159 cellular  
organisms;Eukaryota;Opisthokonta;Metazoa;Eumetazoa;Bilateria;Protostomia;

Spiralia;Lophotrochozoa;Mollusca;Bivalvia;Autobranchia;Pteriormorphia;Ostr  
eida;Ostreoidea;Ostreidae;Crassostrea;Crassostrea gigas  
UdeM00000033038 6596 401.7 UdeM00000033038 XP\_045205075.1 42 614  
274 13 17 556 16 621 1.50E-108 401.7 6596 cellular  
organisms;Eukaryota;Opisthokonta;Metazoa;Eumetazoa;Bilateria;Protostomia;  
Spiralia;Lophotrochozoa;Mollusca;Bivalvia;Autobranchia;Heteroconchia;Euhe  
terodonta;Imparidentia;Venerida;Veneroidea;Veneridae;Mercenaria;Mercenari  
a mercenaria  
UdeM00000033039 6596 349.4 UdeM00000033039 XP\_045205077.1 79.7 212  
43 0 9 220 454 665 3.40E-93 349.4 6596 cellular  
organisms;Eukaryota;Opisthokonta;Metazoa;Eumetazoa;Bilateria;Protostomia;  
Spiralia;Lophotrochozoa;Mollusca;Bivalvia;Autobranchia;Heteroconchia;Euhe  
terodonta;Imparidentia;Venerida;Veneroidea;Veneridae;Mercenaria;Mercenari  
a mercenaria  
UdeM00000033040 6596 162.2 UdeM00000033040 XP\_045204980.1 26 712  
448 23 236 921 86 744 3.30E-36 162.2 6596 cellular  
organisms;Eukaryota;Opisthokonta;Metazoa;Eumetazoa;Bilateria;Protostomia;  
Spiralia;Lophotrochozoa;Mollusca;Bivalvia;Autobranchia;Heteroconchia;Euhe  
terodonta;Imparidentia;Venerida;Veneroidea;Veneridae;Mercenaria;Mercenari  
a mercenaria  
UdeM00000033041 6573 282.3 UdeM00000033041 XP\_021363057.1 54.6 269  
114 3 1 266 1 264 6.20E-73 282.3 6573 cellular  
organisms;Eukaryota;Opisthokonta;Metazoa;Eumetazoa;Bilateria;Protostomia;  
Spiralia;Lophotrochozoa;Mollusca;Bivalvia;Autobranchia;Pteriormorphia;Pect  
inida;Pectinoidea;Pectinidae;Mizuhopecten;Mizuhopecten yessoensis  
UdeM00000033042 6596 422.9 UdeM00000033042 XP\_045204796.1 42.6 528  
294 5 9 528 6 532 5.90E-115 422.9 6596 cellular  
organisms;Eukaryota;Opisthokonta;Metazoa;Eumetazoa;Bilateria;Protostomia;  
Spiralia;Lophotrochozoa;Mollusca;Bivalvia;Autobranchia;Heteroconchia;Euhe  
terodonta;Imparidentia;Venerida;Veneroidea;Veneridae;Mercenaria;Mercenari  
a mercenaria  
UdeM00000033043 6596 184.9 UdeM00000033043 XP\_045187289.1 32.2 419  
216 10 5 362 6 417 1.80E-43 184.9 6596 cellular  
organisms;Eukaryota;Opisthokonta;Metazoa;Eumetazoa;Bilateria;Protostomia;  
Spiralia;Lophotrochozoa;Mollusca;Bivalvia;Autobranchia;Heteroconchia;Euhe  
terodonta;Imparidentia;Venerida;Veneroidea;Veneridae;Mercenaria;Mercenari  
a mercenaria  
UdeM00000033044 6573 241.9 UdeM00000033044 XP\_021340456.1 76.1 159  
32 3 12 168 19 173 5.90E-61 241.9 6573 cellular  
organisms;Eukaryota;Opisthokonta;Metazoa;Eumetazoa;Bilateria;Protostomia;  
Spiralia;Lophotrochozoa;Mollusca;Bivalvia;Autobranchia;Pteriormorphia;Pect  
inida;Pectinoidea;Pectinidae;Mizuhopecten;Mizuhopecten yessoensis  
UdeM00000033045 6573 168.7 UdeM00000033045 XP\_021340457.1 44.9 263  
136 4 61 316 174 434 1.50E-38 168.7 6573 cellular  
organisms;Eukaryota;Opisthokonta;Metazoa;Eumetazoa;Bilateria;Protostomia;  
Spiralia;Lophotrochozoa;Mollusca;Bivalvia;Autobranchia;Pteriormorphia;Pect  
inida;Pectinoidea;Pectinidae;Mizuhopecten;Mizuhopecten yessoensis  
UdeM00000033046 6573 170.6 UdeM00000033046 XP\_021340457.1 45.2 263  
134 5 61 315 174 434 4.00E-39 170.6 6573 cellular  
organisms;Eukaryota;Opisthokonta;Metazoa;Eumetazoa;Bilateria;Protostomia;  
Spiralia;Lophotrochozoa;Mollusca;Bivalvia;Autobranchia;Pteriormorphia;Pect  
inida;Pectinoidea;Pectinidae;Mizuhopecten;Mizuhopecten yessoensis  
UdeM00000033047 6573 243.8 UdeM00000033047 XP\_021340456.1 76.3 156  
31 3 15 168 22 173 1.60E-61 243.8 6573 cellular

organisms;Eukaryota;Opisthokonta;Metazoa;Eumetazoa;Bilateria;Protostomia;Spiralia;Lophotrochozoa;Mollusca;Bivalvia;Autobranhia;Pteriomorphia;Pectinida;Pectinoidea;Pectinidae;Mizuhopecten;Mizuhopecten yessoensis  
UdeM00000033048 6573 137.5 UdeM00000033048 XP\_021340457.1 43.1 269  
147 5 20 284 174 440 3.30E-29 137.5 6573 cellular

organisms;Eukaryota;Opisthokonta;Metazoa;Eumetazoa;Bilateria;Protostomia;Spiralia;Lophotrochozoa;Mollusca;Bivalvia;Autobranhia;Pteriomorphia;Pectinida;Pectinoidea;Pectinidae;Mizuhopecten;Mizuhopecten yessoensis  
UdeM00000033049 6596 840.5 UdeM00000033049 XP\_045203207.1 73.9 755  
158 15 11 741 80 819 1.60E-240 840.5 6596 cellular

organisms;Eukaryota;Opisthokonta;Metazoa;Eumetazoa;Bilateria;Protostomia;Spiralia;Lophotrochozoa;Mollusca;Bivalvia;Autobranhia;Heteroconchia;Euheterodonta;Imparidentia;Venerida;Veneroidea;Veneridae;Mercenaria;Mercenaria mercenaria  
UdeM00000033050 6579 70.5 UdeM00000033050 XP\_033742783.1 29.4 218  
119 6 3 208 2 196 2.90E-09 70.5 6579 cellular

organisms;Eukaryota;Opisthokonta;Metazoa;Eumetazoa;Bilateria;Protostomia;Spiralia;Lophotrochozoa;Mollusca;Bivalvia;Autobranhia;Pteriomorphia;Pectinida;Pectinoidea;Pectinidae;Pecten;Pecten maximus  
UdeM00000033052 6596 541.6 UdeM00000033052 XP\_045205619.1 34.8 1234  
612 37 1 1104 1 1172 2.40E-150 541.6 6596 cellular

organisms;Eukaryota;Opisthokonta;Metazoa;Eumetazoa;Bilateria;Protostomia;Spiralia;Lophotrochozoa;Mollusca;Bivalvia;Autobranhia;Heteroconchia;Euheterodonta;Imparidentia;Venerida;Veneroidea;Veneridae;Mercenaria;Mercenaria mercenaria  
UdeM00000033053 6596 513.1 UdeM00000033053 XP\_045205619.1 33.4 1269  
632 37 1 1153 1 1172 9.50E-142 513.1 6596 cellular

organisms;Eukaryota;Opisthokonta;Metazoa;Eumetazoa;Bilateria;Protostomia;Spiralia;Lophotrochozoa;Mollusca;Bivalvia;Autobranhia;Heteroconchia;Euheterodonta;Imparidentia;Venerida;Veneroidea;Veneridae;Mercenaria;Mercenaria mercenaria  
UdeM00000033054 1735272 108.2 UdeM00000033054 XP\_041358609.1 45.5  
156 67 7 27 174 671 816 1.10E-20 108.2 1735272  
cellular

organisms;Eukaryota;Opisthokonta;Metazoa;Eumetazoa;Bilateria;Protostomia;Spiralia;Lophotrochozoa;Mollusca;Gastropoda;Neomphalina;Neomphaloidea;Peltospiridae;Gigantopelta;Gigantopelta aegis  
UdeM00000033056 6596 364 UdeM00000033056 XP\_045205622.1 48.7 478  
180 10 1 414 1 477 4.10E-97 364 6596 cellular

organisms;Eukaryota;Opisthokonta;Metazoa;Eumetazoa;Bilateria;Protostomia;Spiralia;Lophotrochozoa;Mollusca;Bivalvia;Autobranhia;Heteroconchia;Euheterodonta;Imparidentia;Venerida;Veneroidea;Veneridae;Mercenaria;Mercenaria mercenaria  
UdeM00000033057 6573 1196.8 UdeM00000033057 XP\_021363040.1 68.8  
1117 314 12 2 1092 6 1114 0.00E+00 1196.8 6573  
cellular

organisms;Eukaryota;Opisthokonta;Metazoa;Eumetazoa;Bilateria;Protostomia;Spiralia;Lophotrochozoa;Mollusca;Bivalvia;Autobranhia;Pteriomorphia;Pectinida;Pectinoidea;Pectinidae;Mizuhopecten;Mizuhopecten yessoensis  
UdeM00000033058 116153 414.5 UdeM00000033058 XP\_019866035.1 60.3  
378 147 1 69 443 534 911 1.80E-112 414.5 116153  
cellular

organisms;Eukaryota;Opisthokonta;Metazoa;Eumetazoa;Bilateria;Protostomia;Ecdysozoa;Panarthropoda;Arthropoda;Mandibulata;Pancrustacea;Hexapoda;Insecta

cta;Dicondylia;Pterygota;Neoptera;Endopterygota;Coleoptera;Polyphaga;Cucujiformia;Cucujoidea;Nitidulidae;Nitidulinae;Aethina;Aethina tumida  
UdeM00000033059 116153 415.2 UdeM00000033059 XP\_019866035.1 60.2  
379 148 1 47 422 533 911 9.80E-113 415.2 116153  
cellular  
organisms;Eukaryota;Opisthokonta;Metazoa;Eumetazoa;Bilateria;Protostomia;Ecdysozoa;Panarthropoda;Arthropoda;Mandibulata;Pancrustacea;Hexapoda;Insecta;Dicondylia;Pterygota;Neoptera;Endopterygota;Coleoptera;Polyphaga;Cucujiformia;Cucujoidea;Nitidulidae;Nitidulinae;Aethina;Aethina tumida  
UdeM00000033060 116153 419.1 UdeM00000033060 XP\_019866035.1 59.8  
386 152 1 1 383 526 911 6.20E-114 419.1 116153  
cellular  
organisms;Eukaryota;Opisthokonta;Metazoa;Eumetazoa;Bilateria;Protostomia;Ecdysozoa;Panarthropoda;Arthropoda;Mandibulata;Pancrustacea;Hexapoda;Insecta;Dicondylia;Pterygota;Neoptera;Endopterygota;Coleoptera;Polyphaga;Cucujiformia;Cucujoidea;Nitidulidae;Nitidulinae;Aethina;Aethina tumida  
UdeM00000033061 116153 419.9 UdeM00000033061 XP\_019866035.1 60.1  
386 151 1 1 383 526 911 3.60E-114 419.9 116153  
cellular  
organisms;Eukaryota;Opisthokonta;Metazoa;Eumetazoa;Bilateria;Protostomia;Ecdysozoa;Panarthropoda;Arthropoda;Mandibulata;Pancrustacea;Hexapoda;Insecta;Dicondylia;Pterygota;Neoptera;Endopterygota;Coleoptera;Polyphaga;Cucujiformia;Cucujoidea;Nitidulidae;Nitidulinae;Aethina;Aethina tumida  
UdeM00000033062 6596 580.9 UdeM00000033062 XP\_045203144.1 48 615  
283 4 1 615 11 588 2.00E-162 580.9 6596 cellular  
organisms;Eukaryota;Opisthokonta;Metazoa;Eumetazoa;Bilateria;Protostomia;Spiralia;Lophotrochozoa;Mollusca;Bivalvia;Autobranchia;Heteroconchia;Euheterodonta;Imparidentia;Venerida;Veneroidea;Veneridae;Mercenaria;Mercenaria mercenaria  
UdeM00000033063 6565 68.6 UdeM00000033063 XP\_022326654.1 36.5 85  
53 1 1 85 140 223 5.70E-09 68.6 6565 cellular  
organisms;Eukaryota;Opisthokonta;Metazoa;Eumetazoa;Bilateria;Protostomia;Spiralia;Lophotrochozoa;Mollusca;Bivalvia;Autobranchia;Pteriormorphia;Ostreida;Ostreoidea;Ostreidae;Crassostrea;Crassostrea virginica  
UdeM00000033064 6596 583.9 UdeM00000033064 XP\_045203144.1 48.5 613  
281 4 1 613 11 588 2.30E-163 583.9 6596 cellular  
organisms;Eukaryota;Opisthokonta;Metazoa;Eumetazoa;Bilateria;Protostomia;Spiralia;Lophotrochozoa;Mollusca;Bivalvia;Autobranchia;Heteroconchia;Euheterodonta;Imparidentia;Venerida;Veneroidea;Veneridae;Mercenaria;Mercenaria mercenaria  
UdeM00000033066 6565 266.2 UdeM00000033066 XP\_022326654.1 50.8 242  
118 1 13 254 32 272 4.50E-68 266.2 6565 cellular  
organisms;Eukaryota;Opisthokonta;Metazoa;Eumetazoa;Bilateria;Protostomia;Spiralia;Lophotrochozoa;Mollusca;Bivalvia;Autobranchia;Pteriormorphia;Ostreida;Ostreoidea;Ostreidae;Crassostrea;Crassostrea virginica  
UdeM00000033067 6565 267.3 UdeM00000033067 XP\_022326654.1 50.8 242  
118 1 18 259 32 272 2.10E-68 267.3 6565 cellular  
organisms;Eukaryota;Opisthokonta;Metazoa;Eumetazoa;Bilateria;Protostomia;Spiralia;Lophotrochozoa;Mollusca;Bivalvia;Autobranchia;Pteriormorphia;Ostreida;Ostreoidea;Ostreidae;Crassostrea;Crassostrea virginica  
UdeM00000033068 29159 255 UdeM00000033068 XP\_034302754.1 48.1 233  
120 1 60 292 43 274 1.20E-64 255 29159 cellular  
organisms;Eukaryota;Opisthokonta;Metazoa;Eumetazoa;Bilateria;Protostomia;

Spiralia; Lophotrochozoa; Mollusca; Bivalvia; Autobranchia; Pteriomorphia; Ostr  
eida; Ostreoidea; Ostreidae; Crassostrea; Crassostrea gigas  
UdeM00000033069 6596 653.7 UdeM00000033069 XP\_045203144.1 56 573  
249 2 9 581 19 588 2.20E-184 653.7 6596 cellular  
organisms; Eukaryota; Opisthokonta; Metazoa; Eumetazoa; Bilateria; Protostomia;  
Spiralia; Lophotrochozoa; Mollusca; Bivalvia; Autobranchia; Heteroconchia; Eue  
terodonta; Imparidentia; Venerida; Veneroidea; Veneridae; Mercenaria; Mercenari  
a mercenaria  
UdeM00000033070 6596 653.3 UdeM00000033070 XP\_045203144.1 56 573  
249 2 9 581 19 588 2.90E-184 653.3 6596 cellular  
organisms; Eukaryota; Opisthokonta; Metazoa; Eumetazoa; Bilateria; Protostomia;  
Spiralia; Lophotrochozoa; Mollusca; Bivalvia; Autobranchia; Heteroconchia; Eue  
terodonta; Imparidentia; Venerida; Veneroidea; Veneridae; Mercenaria; Mercenari  
a mercenaria  
UdeM00000033071 6596 656 UdeM00000033071 XP\_045203144.1 56.5 573  
246 2 9 581 19 588 4.50E-185 656 6596 cellular  
organisms; Eukaryota; Opisthokonta; Metazoa; Eumetazoa; Bilateria; Protostomia;  
Spiralia; Lophotrochozoa; Mollusca; Bivalvia; Autobranchia; Heteroconchia; Eue  
terodonta; Imparidentia; Venerida; Veneroidea; Veneridae; Mercenaria; Mercenari  
a mercenaria  
UdeM00000033072 6596 647.9 UdeM00000033072 XP\_045203144.1 55.8 573  
250 2 9 581 19 588 1.20E-182 647.9 6596 cellular  
organisms; Eukaryota; Opisthokonta; Metazoa; Eumetazoa; Bilateria; Protostomia;  
Spiralia; Lophotrochozoa; Mollusca; Bivalvia; Autobranchia; Heteroconchia; Eue  
terodonta; Imparidentia; Venerida; Veneroidea; Veneridae; Mercenaria; Mercenari  
a mercenaria  
UdeM00000033073 6573 434.9 UdeM00000033073 XP\_021379079.1 74.1 293  
61 2 7 292 173 457 8.30E-119 434.9 6573 cellular  
organisms; Eukaryota; Opisthokonta; Metazoa; Eumetazoa; Bilateria; Protostomia;  
Spiralia; Lophotrochozoa; Mollusca; Bivalvia; Autobranchia; Pteriomorphia; Pect  
inida; Pectinoidea; Pectinidae; Mizuhopecten; Mizuhopecten yessoensis  
UdeM00000033074 6596 105.5 UdeM00000033074 XP\_045205131.1 41 122  
69 1 1 122 1 119 5.30E-20 105.5 6596 cellular  
organisms; Eukaryota; Opisthokonta; Metazoa; Eumetazoa; Bilateria; Protostomia;  
Spiralia; Lophotrochozoa; Mollusca; Bivalvia; Autobranchia; Heteroconchia; Eue  
terodonta; Imparidentia; Venerida; Veneroidea; Veneridae; Mercenaria; Mercenari  
a mercenaria  
UdeM00000033075 6596 117.1 UdeM00000033075 XP\_045205147.1 35.4 288  
158 5 8 288 13 279 3.90E-23 117.1 6596 cellular  
organisms; Eukaryota; Opisthokonta; Metazoa; Eumetazoa; Bilateria; Protostomia;  
Spiralia; Lophotrochozoa; Mollusca; Bivalvia; Autobranchia; Heteroconchia; Eue  
terodonta; Imparidentia; Venerida; Veneroidea; Veneridae; Mercenaria; Mercenari  
a mercenaria  
UdeM00000033076 400727 326.6 UdeM00000033076 XP\_025086651.1 60.1  
271 106 2 29 297 49 319 3.30E-86 326.6 400727  
cellular  
organisms; Eukaryota; Opisthokonta; Metazoa; Eumetazoa; Bilateria; Protostomia;  
Spiralia; Lophotrochozoa; Mollusca; Gastropoda; Caenogastropoda; Architaeniogl  
ossa; Ampullarioidea; Ampullariidae; Pomacea; Pomacea canaliculata  
UdeM00000033077 7515 77 UdeM00000033077 XP\_026475035.1 54.5 66  
24 2 8 68 7 71 1.00E-11 77 7515 cellular  
organisms; Eukaryota; Opisthokonta; Metazoa; Eumetazoa; Bilateria; Protostomia;  
Ecdysozoa; Panarthropoda; Arthropoda; Mandibulata; Pancrustacea; Hexapoda; Inse  
cta; Dicondylia; Pterygota; Neoptera; Endopterygota; Siphonaptera; Pulicomorpha

;Pulicoidea;Pulicidae;Archaeopsyllinae;Ctenocephalides;Ctenocephalides felis

UdeM00000033078 6565 437.2 UdeM00000033078 XP\_022321251.1 42.1 558  
308 4 62 607 20 574 3.50E-119 437.2 6565 cellular  
organisms;Eukaryota;Opisthokonta;Metazoa;Eumetazoa;Bilateria;Protostomia;  
Spiralia;Lophotrochozoa;Mollusca;Bivalvia;Autobranchia;Pteriormorphia;Ostr  
eida;Ostreoidea;Ostreidae;Crassostrea;Crassostrea virginica

UdeM00000033079 6565 430.3 UdeM00000033079 XP\_022321251.1 41.6 565  
308 5 62 614 20 574 4.30E-117 430.3 6565 cellular  
organisms;Eukaryota;Opisthokonta;Metazoa;Eumetazoa;Bilateria;Protostomia;  
Spiralia;Lophotrochozoa;Mollusca;Bivalvia;Autobranchia;Pteriormorphia;Ostr  
eida;Ostreoidea;Ostreidae;Crassostrea;Crassostrea virginica

UdeM00000033080 6573 428.7 UdeM00000033080 XP\_021363226.1 45.8 474  
249 2 44 511 78 549 1.10E-116 428.7 6573 cellular  
organisms;Eukaryota;Opisthokonta;Metazoa;Eumetazoa;Bilateria;Protostomia;  
Spiralia;Lophotrochozoa;Mollusca;Bivalvia;Autobranchia;Pteriormorphia;Pect  
inida;Pectinoidea;Pectinidae;Mizuhopecten;Mizuhopecten yessoensis

UdeM00000033081 6573 429.1 UdeM00000033081 XP\_021363226.1 45.8 474  
249 2 44 511 78 549 8.40E-117 429.1 6573 cellular  
organisms;Eukaryota;Opisthokonta;Metazoa;Eumetazoa;Bilateria;Protostomia;  
Spiralia;Lophotrochozoa;Mollusca;Bivalvia;Autobranchia;Pteriormorphia;Pect  
inida;Pectinoidea;Pectinidae;Mizuhopecten;Mizuhopecten yessoensis

UdeM00000033082 1415580 242.3 UdeM00000033082 XP\_030075314.1 46.4  
289 136 3 3 288 326 598 7.70E-61 242.3 1415580  
cellular  
organisms;Eukaryota;Opisthokonta;Metazoa;Eumetazoa;Bilateria;Deuterostomi  
a;Chordata;Craniata;Vertebrata;Gnathostomata;Teleostomi;Euteleostomi;Sarc  
opterygii;Dipnotetrapodomorpha;Tetrapoda;Amphibia;Gymnophiona;Siphonopida  
e;Microcaecilia;Microcaecilia unicolor

UdeM00000033083 7757 283.5 UdeM00000033083 XP\_032835197.1 81 168  
32 0 77 244 3 170 2.70E-73 283.5 7757 cellular  
organisms;Eukaryota;Opisthokonta;Metazoa;Eumetazoa;Bilateria;Deuterostomi  
a;Chordata;Craniata;Vertebrata;Cyclostomata;Hyperoartia;Petromyzontiforme  
s;Petromyzontidae;Petromyzon;Petromyzon marinus

UdeM00000033084 6596 261.5 UdeM00000033084 XP\_045204501.1 40.4 450  
244 10 13 451 7 443 2.00E-66 261.5 6596 cellular  
organisms;Eukaryota;Opisthokonta;Metazoa;Eumetazoa;Bilateria;Protostomia;  
Spiralia;Lophotrochozoa;Mollusca;Bivalvia;Autobranchia;Heteroconchia;Euhe  
terodonta;Imparidentia;Venerida;Veneroidea;Veneridae;Mercenaria;Mercenari  
a mercenaria

UdeM00000033085 6596 246.9 UdeM00000033085 XP\_045204501.1 37.4 484  
231 9 23 505 24 436 5.60E-62 246.9 6596 cellular  
organisms;Eukaryota;Opisthokonta;Metazoa;Eumetazoa;Bilateria;Protostomia;  
Spiralia;Lophotrochozoa;Mollusca;Bivalvia;Autobranchia;Heteroconchia;Euhe  
terodonta;Imparidentia;Venerida;Veneroidea;Veneridae;Mercenaria;Mercenari  
a mercenaria

UdeM00000033086 6565 362.5 UdeM00000033086 XP\_022334858.1 48.1 349  
170 4 9 352 10 352 6.30E-97 362.5 6565 cellular  
organisms;Eukaryota;Opisthokonta;Metazoa;Eumetazoa;Bilateria;Protostomia;  
Spiralia;Lophotrochozoa;Mollusca;Bivalvia;Autobranchia;Pteriormorphia;Ostr  
eida;Ostreoidea;Ostreidae;Crassostrea;Crassostrea virginica

UdeM00000033087 6596 318.9 UdeM00000033087 XP\_045204482.1 52.3 342  
134 9 330 659 250 574 1.50E-83 318.9 6596 cellular  
organisms;Eukaryota;Opisthokonta;Metazoa;Eumetazoa;Bilateria;Protostomia;

Spiralia;Lophotrochozoa;Mollusca;Bivalvia;Autobranchia;Heteroconchia;Euherodonta;Imparidentia;Venerida;Veneroidea;Veneridae;Mercenaria;Mercenaria mercenaria

|                 |      |        |   |   |      |                 |                |          |        |      |
|-----------------|------|--------|---|---|------|-----------------|----------------|----------|--------|------|
| UdeM00000033088 | 6596 | 3397.4 |   |   |      | UdeM00000033088 | XP_045204485.1 | 79.6     |        |      |
|                 | 2104 | 427    | 2 | 2 | 2103 | 2224            | 4327           | 0.00E+00 | 3397.4 | 6596 |

cellular

organisms;Eukaryota;Opisthokonta;Metazoa;Eumetazoa;Bilateria;Protostomia;Spiralia;Lophotrochozoa;Mollusca;Bivalvia;Autobranchia;Heteroconchia;Euherodonta;Imparidentia;Venerida;Veneroidea;Veneridae;Mercenaria;Mercenaria mercenaria

|                 |      |        |   |   |      |                 |                |          |        |      |
|-----------------|------|--------|---|---|------|-----------------|----------------|----------|--------|------|
| UdeM00000033089 | 6596 | 3629.3 |   |   |      | UdeM00000033089 | XP_045204485.1 | 79.6     |        |      |
|                 | 2226 | 435    | 5 | 1 | 2210 | 1               | 2224           | 0.00E+00 | 3629.3 | 6596 |

cellular

organisms;Eukaryota;Opisthokonta;Metazoa;Eumetazoa;Bilateria;Protostomia;Spiralia;Lophotrochozoa;Mollusca;Bivalvia;Autobranchia;Heteroconchia;Euherodonta;Imparidentia;Venerida;Veneroidea;Veneridae;Mercenaria;Mercenaria mercenaria

|                 |      |       |    |     |   |                 |                |       |      |          |
|-----------------|------|-------|----|-----|---|-----------------|----------------|-------|------|----------|
| UdeM00000033090 | 6579 | 394.8 |    |     |   | UdeM00000033090 | XP_033743685.1 | 79.5  | 234  |          |
|                 | 46   | 2     | 43 | 275 | 1 | 233             | 8.90E-107      | 394.8 | 6579 | cellular |

organisms;Eukaryota;Opisthokonta;Metazoa;Eumetazoa;Bilateria;Protostomia;Spiralia;Lophotrochozoa;Mollusca;Bivalvia;Autobranchia;Pteriormorphia;Pectinida;Pectinoidea;Pectinidae;Pecten;Pecten maximus

|                 |      |       |   |     |   |                 |                |       |      |          |
|-----------------|------|-------|---|-----|---|-----------------|----------------|-------|------|----------|
| UdeM00000033091 | 6596 | 207.6 |   |     |   | UdeM00000033091 | XP_045216805.1 | 37.3  | 292  |          |
|                 | 174  | 5     | 8 | 297 | 9 | 293             | 2.20E-50       | 207.6 | 6596 | cellular |

organisms;Eukaryota;Opisthokonta;Metazoa;Eumetazoa;Bilateria;Protostomia;Spiralia;Lophotrochozoa;Mollusca;Bivalvia;Autobranchia;Heteroconchia;Euherodonta;Imparidentia;Venerida;Veneroidea;Veneridae;Mercenaria;Mercenaria mercenaria

|                 |      |       |   |     |   |                 |                |       |      |          |
|-----------------|------|-------|---|-----|---|-----------------|----------------|-------|------|----------|
| UdeM00000033092 | 6596 | 207.2 |   |     |   | UdeM00000033092 | XP_045216805.1 | 37.3  | 292  |          |
|                 | 174  | 5     | 5 | 294 | 9 | 293             | 2.80E-50       | 207.2 | 6596 | cellular |

organisms;Eukaryota;Opisthokonta;Metazoa;Eumetazoa;Bilateria;Protostomia;Spiralia;Lophotrochozoa;Mollusca;Bivalvia;Autobranchia;Heteroconchia;Euherodonta;Imparidentia;Venerida;Veneroidea;Veneridae;Mercenaria;Mercenaria mercenaria

|                 |      |       |    |     |    |                 |                |       |      |          |
|-----------------|------|-------|----|-----|----|-----------------|----------------|-------|------|----------|
| UdeM00000033093 | 6579 | 761.5 |    |     |    | UdeM00000033093 | XP_033761049.1 | 48.7  | 762  |          |
|                 | 378  | 6     | 78 | 834 | 12 | 765             | 1.10E-216      | 761.5 | 6579 | cellular |

organisms;Eukaryota;Opisthokonta;Metazoa;Eumetazoa;Bilateria;Protostomia;Spiralia;Lophotrochozoa;Mollusca;Bivalvia;Autobranchia;Pteriormorphia;Pectinida;Pectinoidea;Pectinidae;Pecten;Pecten maximus

|                 |      |    |   |     |   |                 |                |      |      |          |
|-----------------|------|----|---|-----|---|-----------------|----------------|------|------|----------|
| UdeM00000033094 | 6596 | 87 |   |     |   | UdeM00000033094 | XP_045204503.1 | 45.8 | 118  |          |
|                 | 56   | 2  | 1 | 118 | 1 | 110             | 1.80E-14       | 87   | 6596 | cellular |

organisms;Eukaryota;Opisthokonta;Metazoa;Eumetazoa;Bilateria;Protostomia;Spiralia;Lophotrochozoa;Mollusca;Bivalvia;Autobranchia;Heteroconchia;Euherodonta;Imparidentia;Venerida;Veneroidea;Veneridae;Mercenaria;Mercenaria mercenaria

|                 |      |     |   |     |     |                 |                |      |      |          |
|-----------------|------|-----|---|-----|-----|-----------------|----------------|------|------|----------|
| UdeM00000033096 | 6596 | 119 |   |     |     | UdeM00000033096 | XP_045206225.1 | 28.8 | 406  |          |
|                 | 249  | 9   | 2 | 390 | 425 | 807             | 1.80E-23       | 119  | 6596 | cellular |

organisms;Eukaryota;Opisthokonta;Metazoa;Eumetazoa;Bilateria;Protostomia;Spiralia;Lophotrochozoa;Mollusca;Bivalvia;Autobranchia;Heteroconchia;Euherodonta;Imparidentia;Venerida;Veneroidea;Veneridae;Mercenaria;Mercenaria mercenaria

|                 |      |       |    |     |    |                 |                |       |      |          |
|-----------------|------|-------|----|-----|----|-----------------|----------------|-------|------|----------|
| UdeM00000033097 | 6573 | 123.6 |    |     |    | UdeM00000033097 | XP_021379116.1 | 34.2  | 260  |          |
|                 | 154  | 7     | 14 | 269 | 62 | 308             | 6.80E-25       | 123.6 | 6573 | cellular |

organisms;Eukaryota;Opisthokonta;Metazoa;Eumetazoa;Bilateria;Protostomia;



Spiralia;Lophotrochozoa;Mollusca;Bivalvia;Autobranchia;Pteriormorphia;Pectinida;Pectinoidea;Pectinidae;Mizuhopecten;Mizuhopecten yessoensis  
UdeM00000033098 6596 287.7 UdeM00000033098 XP\_045204501.1 38.6 461  
247 10 4 460 6 434 2.70E-74 287.7 6596 cellular  
organisms;Eukaryota;Opisthokonta;Metazoa;Eumetazoa;Bilateria;Protostomia;  
Spiralia;Lophotrochozoa;Mollusca;Bivalvia;Autobranchia;Heteroconchia;Euherodonta;Imparidentia;Venerida;Veneroidea;Veneridae;Mercenaria;Mercenaria mercenaria  
UdeM00000033099 6596 97.1 UdeM00000033099 XP\_045204501.1 40.2 132  
79 0 19 150 24 155 3.60E-17 97.1 6596 cellular  
organisms;Eukaryota;Opisthokonta;Metazoa;Eumetazoa;Bilateria;Protostomia;  
Spiralia;Lophotrochozoa;Mollusca;Bivalvia;Autobranchia;Heteroconchia;Euherodonta;Imparidentia;Venerida;Veneroidea;Veneridae;Mercenaria;Mercenaria mercenaria  
UdeM00000033100 6596 96.3 UdeM00000033100 XP\_045204501.1 33.5 164  
109 0 2 165 8 171 3.90E-17 96.3 6596 cellular  
organisms;Eukaryota;Opisthokonta;Metazoa;Eumetazoa;Bilateria;Protostomia;  
Spiralia;Lophotrochozoa;Mollusca;Bivalvia;Autobranchia;Heteroconchia;Euherodonta;Imparidentia;Venerida;Veneroidea;Veneridae;Mercenaria;Mercenaria mercenaria  
UdeM00000033101 6596 571.2 UdeM00000033101 XP\_045205732.1 65.3 401  
139 0 6 406 5 405 1.00E-159 571.2 6596 cellular  
organisms;Eukaryota;Opisthokonta;Metazoa;Eumetazoa;Bilateria;Protostomia;  
Spiralia;Lophotrochozoa;Mollusca;Bivalvia;Autobranchia;Heteroconchia;Euherodonta;Imparidentia;Venerida;Veneroidea;Veneridae;Mercenaria;Mercenaria mercenaria  
UdeM00000033102 6596 500.7 UdeM00000033102 XP\_045205732.1 66.1 348  
118 0 1 348 58 405 1.50E-138 500.7 6596 cellular  
organisms;Eukaryota;Opisthokonta;Metazoa;Eumetazoa;Bilateria;Protostomia;  
Spiralia;Lophotrochozoa;Mollusca;Bivalvia;Autobranchia;Heteroconchia;Euherodonta;Imparidentia;Venerida;Veneroidea;Veneridae;Mercenaria;Mercenaria mercenaria  
UdeM00000033103 6596 494.6 UdeM00000033103 XP\_045206106.1 54.1 482  
204 4 61 542 9 473 1.60E-136 494.6 6596 cellular  
organisms;Eukaryota;Opisthokonta;Metazoa;Eumetazoa;Bilateria;Protostomia;  
Spiralia;Lophotrochozoa;Mollusca;Bivalvia;Autobranchia;Heteroconchia;Euherodonta;Imparidentia;Venerida;Veneroidea;Veneridae;Mercenaria;Mercenaria mercenaria  
UdeM00000033104 1735272 532.3 UdeM00000033104 XP\_041355817.1 48.3  
538 262 8 26 558 24 550 7.60E-148 532.3 1735272  
cellular  
organisms;Eukaryota;Opisthokonta;Metazoa;Eumetazoa;Bilateria;Protostomia;  
Spiralia;Lophotrochozoa;Mollusca;Gastropoda;Neomphalina;Neomphaloidea;Peltospiridae;Gigantopelta;Gigantopelta aegis  
UdeM00000033105 1735272 542.3 UdeM00000033105 XP\_041355817.1 48.9  
530 257 6 25 550 24 543 7.20E-151 542.3 1735272  
cellular  
organisms;Eukaryota;Opisthokonta;Metazoa;Eumetazoa;Bilateria;Protostomia;  
Spiralia;Lophotrochozoa;Mollusca;Gastropoda;Neomphalina;Neomphaloidea;Peltospiridae;Gigantopelta;Gigantopelta aegis  
UdeM00000033106 1735272 542.3 UdeM00000033106 XP\_041355817.1 48.9  
530 257 6 25 550 24 543 7.40E-151 542.3 1735272  
cellular  
organisms;Eukaryota;Opisthokonta;Metazoa;Eumetazoa;Bilateria;Protostomia;

Spiralia;Lophotrochozoa;Mollusca;Gastropoda;Neomphalina;Neomphaloidea;Pel  
tospiridae;Gigantopelta;Gigantopelta aegis  
UdeM00000033107 6579 66.2 UdeM00000033107 XP\_033742806.1 44.7 76  
40 1 45 118 36 111 3.40E-08 66.2 6579 cellular  
organisms;Eukaryota;Opisthokonta;Metazoa;Eumetazoa;Bilateria;Protostomia;  
Spiralia;Lophotrochozoa;Mollusca;Bivalvia;Autobranchia;Pteriomorpha;Pect  
inida;Pectinoidea;Pectinidae;Pecten;Pecten maximus  
UdeM00000033108 6596 694.5 UdeM00000033108 XP\_045204805.1 73.9 475  
112 3 6 475 38 505 9.40E-197 694.5 6596 cellular  
organisms;Eukaryota;Opisthokonta;Metazoa;Eumetazoa;Bilateria;Protostomia;  
Spiralia;Lophotrochozoa;Mollusca;Bivalvia;Autobranchia;Heteroconchia;Euhe  
terodonta;Imparidentia;Venerida;Veneroidea;Veneridae;Mercenaria;Mercenari  
a mercenaria  
UdeM00000033109 6596 276.9 UdeM00000033109 XP\_045205623.1 53 283  
115 4 5 270 171 452 2.70E-71 276.9 6596 cellular  
organisms;Eukaryota;Opisthokonta;Metazoa;Eumetazoa;Bilateria;Protostomia;  
Spiralia;Lophotrochozoa;Mollusca;Bivalvia;Autobranchia;Heteroconchia;Euhe  
terodonta;Imparidentia;Venerida;Veneroidea;Veneridae;Mercenaria;Mercenari  
a mercenaria  
UdeM00000033110 6565 237.3 UdeM00000033110 XP\_022321503.1 27.8 569  
389 15 130 686 89 647 6.00E-59 237.3 6565 cellular  
organisms;Eukaryota;Opisthokonta;Metazoa;Eumetazoa;Bilateria;Protostomia;  
Spiralia;Lophotrochozoa;Mollusca;Bivalvia;Autobranchia;Pteriomorpha;Ostr  
eida;Ostreoidea;Ostreidae;Crassostrea;Crassostrea virginica  
UdeM00000033111 6565 652.9 UdeM00000033111 XP\_022325356.1 57.3 557  
226 6 1 553 1 549 3.60E-184 652.9 6565 cellular  
organisms;Eukaryota;Opisthokonta;Metazoa;Eumetazoa;Bilateria;Protostomia;  
Spiralia;Lophotrochozoa;Mollusca;Bivalvia;Autobranchia;Pteriomorpha;Ostr  
eida;Ostreoidea;Ostreidae;Crassostrea;Crassostrea virginica  
UdeM00000033112 6596 580.9 UdeM00000033112 XP\_045205829.1 37.9 973  
476 22 1 865 1 953 2.80E-162 580.9 6596 cellular  
organisms;Eukaryota;Opisthokonta;Metazoa;Eumetazoa;Bilateria;Protostomia;  
Spiralia;Lophotrochozoa;Mollusca;Bivalvia;Autobranchia;Heteroconchia;Euhe  
terodonta;Imparidentia;Venerida;Veneroidea;Veneridae;Mercenaria;Mercenari  
a mercenaria  
UdeM00000033113 6565 295.8 UdeM00000033113 XP\_022322438.1 68.3 218  
45 1 1 194 1 218 4.00E-77 295.8 6565 cellular  
organisms;Eukaryota;Opisthokonta;Metazoa;Eumetazoa;Bilateria;Protostomia;  
Spiralia;Lophotrochozoa;Mollusca;Bivalvia;Autobranchia;Pteriomorpha;Ostr  
eida;Ostreoidea;Ostreidae;Crassostrea;Crassostrea virginica  
UdeM00000033114 6596 533.9 UdeM00000033114 XP\_045204191.1 57.6 446  
156 7 5 421 6 447 1.90E-148 533.9 6596 cellular  
organisms;Eukaryota;Opisthokonta;Metazoa;Eumetazoa;Bilateria;Protostomia;  
Spiralia;Lophotrochozoa;Mollusca;Bivalvia;Autobranchia;Heteroconchia;Euhe  
terodonta;Imparidentia;Venerida;Veneroidea;Veneridae;Mercenaria;Mercenari  
a mercenaria  
UdeM00000033115 6579 196.8 UdeM00000033115 XP\_033729790.1 45.3 214  
117 0 10 223 17 230 3.40E-47 196.8 6579 cellular  
organisms;Eukaryota;Opisthokonta;Metazoa;Eumetazoa;Bilateria;Protostomia;  
Spiralia;Lophotrochozoa;Mollusca;Bivalvia;Autobranchia;Pteriomorpha;Pect  
inida;Pectinoidea;Pectinidae;Pecten;Pecten maximus  
UdeM00000033117 2652724 173.3 UdeM00000033117 XP\_020913146.1 49  
194 98 1 167 360 177 369 6.80E-40 173.3 2652724  
cellular

organisms;Eukaryota;Opisthokonta;Metazoa;Eumetazoa;Cnidaria;Anthozoa;Hexa  
corallia;Actiniaria;Aiptasiidae;Exaiptasia;Exaiptasia diaphana  
UdeM00000033118 6565 305.8 UdeM00000033118 XP\_022322441.1 73.4 188  
50 0 3 190 440 627 3.80E-80 305.8 6565 cellular  
organisms;Eukaryota;Opisthokonta;Metazoa;Eumetazoa;Bilateria;Protostomia;  
Spiralia;Lophotrochozoa;Mollusca;Bivalvia;Autobranchia;Pteriormorphia;Ostr  
eida;Ostreoidea;Ostreidae;Crassostrea;Crassostrea virginica  
UdeM00000033119 6565 260.8 UdeM00000033119 XP\_022322441.1 73.9 157  
41 0 1 157 471 627 1.10E-66 260.8 6565 cellular  
organisms;Eukaryota;Opisthokonta;Metazoa;Eumetazoa;Bilateria;Protostomia;  
Spiralia;Lophotrochozoa;Mollusca;Bivalvia;Autobranchia;Pteriormorphia;Ostr  
eida;Ostreoidea;Ostreidae;Crassostrea;Crassostrea virginica  
UdeM00000033120 6596 269.2 UdeM00000033120 XP\_045203279.1 75.6 172  
41 1 6 176 5 176 3.60E-69 269.2 6596 cellular  
organisms;Eukaryota;Opisthokonta;Metazoa;Eumetazoa;Bilateria;Protostomia;  
Spiralia;Lophotrochozoa;Mollusca;Bivalvia;Autobranchia;Heteroconchia;Euhe  
terodonta;Imparidentia;Venerida;Veneroidea;Veneridae;Mercenaria;Mercenari  
a mercenaria  
UdeM00000033121 105023 94.4 UdeM00000033121 XP\_015827797.1 36.8  
136 83 1 1 133 137 272 1.20E-16 94.4 105023  
cellular  
organisms;Eukaryota;Opisthokonta;Metazoa;Eumetazoa;Bilateria;Deuterostomi  
a;Chordata;Craniata;Vertebrata;Gnathostomata;Teleostomi;Euteleostomi;Acti  
nopterygii;Actinopteri;Neopterygii;Teleostei;Osteoglossocephalai;Clupeoce  
phala;Euteleosteomorpha;Neoteleostei;Eurypterygia;Ctenosquamata;Acanthomo  
rphata;Euacanthomorphacea;Percomorphaceae;Ovalentaria;Atherinomorphae;Cyp  
rinodontiformes;Aplocheiloidei;Nothobranchiidae;Nothobranchius;Nothbranc  
hius furzeri  
UdeM00000033122 6596 590.9 UdeM00000033122 XP\_045203279.1 81.7 344  
63 0 1 344 180 523 1.10E-165 590.9 6596 cellular  
organisms;Eukaryota;Opisthokonta;Metazoa;Eumetazoa;Bilateria;Protostomia;  
Spiralia;Lophotrochozoa;Mollusca;Bivalvia;Autobranchia;Heteroconchia;Euhe  
terodonta;Imparidentia;Venerida;Veneroidea;Veneridae;Mercenaria;Mercenari  
a mercenaria  
UdeM00000033123 7725 69.3 UdeM00000033123 XP\_039259631.1 45.3 75  
37 2 3 73 38 112 4.50E-09 69.3 7725 cellular  
organisms;Eukaryota;Opisthokonta;Metazoa;Eumetazoa;Bilateria;Deuterostomi  
a;Chordata;Tunicata;Ascidiacea;Stolidobranchia;Styelidae;Styela;Styela  
clava  
UdeM00000033125 6596 250.8 UdeM00000033125 XP\_045204670.1 54.8 252  
96 5 1 244 200 441 1.80E-63 250.8 6596 cellular  
organisms;Eukaryota;Opisthokonta;Metazoa;Eumetazoa;Bilateria;Protostomia;  
Spiralia;Lophotrochozoa;Mollusca;Bivalvia;Autobranchia;Heteroconchia;Euhe  
terodonta;Imparidentia;Venerida;Veneroidea;Veneridae;Mercenaria;Mercenari  
a mercenaria  
UdeM00000033124 6596 475.7 UdeM00000033124 XP\_045204670.1 61.4 409  
140 5 46 446 43 441 6.40E-131 475.7 6596 cellular  
organisms;Eukaryota;Opisthokonta;Metazoa;Eumetazoa;Bilateria;Protostomia;  
Spiralia;Lophotrochozoa;Mollusca;Bivalvia;Autobranchia;Heteroconchia;Euhe  
terodonta;Imparidentia;Venerida;Veneroidea;Veneridae;Mercenaria;Mercenari  
a mercenaria  
UdeM00000033126 6596 459.9 UdeM00000033126 XP\_045203481.1 43 577  
306 10 36 603 113 675 4.90E-126 459.9 6596 cellular  
organisms;Eukaryota;Opisthokonta;Metazoa;Eumetazoa;Bilateria;Protostomia;

Spiralia;Lophotrochozoa;Mollusca;Bivalvia;Autobranchia;Heteroconchia;Euherodonta;Imparidentia;Venerida;Veneroidea;Veneridae;Mercenaria;Mercenaria mercenaria

UdeM00000033127 6596 133.3 UdeM00000033127 XP\_045203481.1 50.4 135  
63 1 44 178 113 243 3.40E-28 133.3 6596 cellular

organisms;Eukaryota;Opisthokonta;Metazoa;Eumetazoa;Bilateria;Protostomia;Spiralia;Lophotrochozoa;Mollusca;Bivalvia;Autobranchia;Heteroconchia;Euherodonta;Imparidentia;Venerida;Veneroidea;Veneridae;Mercenaria;Mercenaria mercenaria

UdeM00000033128 6596 246.1 UdeM00000033128 XP\_045203504.1 36.5 408  
218 9 1 381 195 588 7.10E-62 246.1 6596 cellular

organisms;Eukaryota;Opisthokonta;Metazoa;Eumetazoa;Bilateria;Protostomia;Spiralia;Lophotrochozoa;Mollusca;Bivalvia;Autobranchia;Heteroconchia;Euherodonta;Imparidentia;Venerida;Veneroidea;Veneridae;Mercenaria;Mercenaria mercenaria

UdeM00000033129 6596 97.1 UdeM00000033129 XP\_045205783.1 54.7 95  
40 2 47 138 2 96 2.20E-17 97.1 6596 cellular

organisms;Eukaryota;Opisthokonta;Metazoa;Eumetazoa;Bilateria;Protostomia;Spiralia;Lophotrochozoa;Mollusca;Bivalvia;Autobranchia;Heteroconchia;Euherodonta;Imparidentia;Venerida;Veneroidea;Veneridae;Mercenaria;Mercenaria mercenaria

UdeM00000033130 6596 370.2 UdeM00000033130 XP\_045203504.1 41.8 476  
256 8 1 472 130 588 4.00E-99 370.2 6596 cellular

organisms;Eukaryota;Opisthokonta;Metazoa;Eumetazoa;Bilateria;Protostomia;Spiralia;Lophotrochozoa;Mollusca;Bivalvia;Autobranchia;Heteroconchia;Euherodonta;Imparidentia;Venerida;Veneroidea;Veneridae;Mercenaria;Mercenaria mercenaria

UdeM00000033132 1735272 239.6 UdeM00000033132 XP\_041361546.1 47  
234 116 5 1 228 441 672 4.00E-60 239.6 1735272

cellular

organisms;Eukaryota;Opisthokonta;Metazoa;Eumetazoa;Bilateria;Protostomia;Spiralia;Lophotrochozoa;Mollusca;Gastropoda;Neomphalina;Neomphaloidea;Peltospiridae;Gigantopelta;Gigantopelta aegis

UdeM00000033131 6596 391.7 UdeM00000033131 XP\_045167902.1 43.2 428  
212 7 370 796 351 748 2.20E-105 391.7 6596 cellular

organisms;Eukaryota;Opisthokonta;Metazoa;Eumetazoa;Bilateria;Protostomia;Spiralia;Lophotrochozoa;Mollusca;Bivalvia;Autobranchia;Heteroconchia;Euherodonta;Imparidentia;Venerida;Veneroidea;Veneridae;Mercenaria;Mercenaria mercenaria

UdeM00000033133 6596 818.5 UdeM00000033133 XP\_045168250.1 43.1 873  
481 9 76 937 55 922 8.60E-234 818.5 6596 cellular

organisms;Eukaryota;Opisthokonta;Metazoa;Eumetazoa;Bilateria;Protostomia;Spiralia;Lophotrochozoa;Mollusca;Bivalvia;Autobranchia;Heteroconchia;Euherodonta;Imparidentia;Venerida;Veneroidea;Veneridae;Mercenaria;Mercenaria mercenaria

UdeM00000033134 29159 184.9 UdeM00000033134 XP\_011423714.3 25.5 542  
388 11 5 537 140 674 2.70E-43 184.9 29159 cellular

organisms;Eukaryota;Opisthokonta;Metazoa;Eumetazoa;Bilateria;Protostomia;Spiralia;Lophotrochozoa;Mollusca;Bivalvia;Autobranchia;Pteriomorpha;Ostreida;Ostreoidea;Ostreidae;Crassostrea;Crassostrea gigas

UdeM00000033135 6596 161 UdeM00000033135 XP\_045203860.1 32.3 464  
225 14 36 486 29 416 3.80E-36 161 6596 cellular

organisms;Eukaryota;Opisthokonta;Metazoa;Eumetazoa;Bilateria;Protostomia;Spiralia;Lophotrochozoa;Mollusca;Bivalvia;Autobranchia;Heteroconchia;Euherodonta;Imparidentia;Venerida;Veneroidea;Veneridae;Mercenaria;Mercenaria mercenaria

terodonta;Imparidentia;Venerida;Veneroidea;Veneridae;Mercenaria;Mercenari  
 a mercenaria  
 UdeM00000033136 6596 161.4 UdeM00000033136 XP\_045203860.1 32.3 464  
 225 14 37 487 29 416 2.90E-36 161.4 6596 cellular  
 organisms;Eukaryota;Opisthokonta;Metazoa;Eumetazoa;Bilateria;Protostomia;  
 Spiralia;Lophotrochozoa;Mollusca;Bivalvia;Autobranchia;Heteroconchia;Euhe  
 terodonta;Imparidentia;Venerida;Veneroidea;Veneridae;Mercenaria;Mercenari  
 a mercenaria  
 UdeM00000033137 6596 184.9 UdeM00000033137 XP\_045203688.1 39.8 289  
 154 6 372 654 135 409 3.30E-43 184.9 6596 cellular  
 organisms;Eukaryota;Opisthokonta;Metazoa;Eumetazoa;Bilateria;Protostomia;  
 Spiralia;Lophotrochozoa;Mollusca;Bivalvia;Autobranchia;Heteroconchia;Euhe  
 terodonta;Imparidentia;Venerida;Veneroidea;Veneridae;Mercenaria;Mercenari  
 a mercenaria  
 UdeM00000033138 6596 184.9 UdeM00000033138 XP\_045203688.1 39.8 289  
 154 6 388 670 135 409 3.40E-43 184.9 6596 cellular  
 organisms;Eukaryota;Opisthokonta;Metazoa;Eumetazoa;Bilateria;Protostomia;  
 Spiralia;Lophotrochozoa;Mollusca;Bivalvia;Autobranchia;Heteroconchia;Euhe  
 terodonta;Imparidentia;Venerida;Veneroidea;Veneridae;Mercenaria;Mercenari  
 a mercenaria  
 UdeM00000033139 6596 186.4 UdeM00000033139 XP\_045203688.1 42.8 250  
 123 6 76 319 170 405 5.70E-44 186.4 6596 cellular  
 organisms;Eukaryota;Opisthokonta;Metazoa;Eumetazoa;Bilateria;Protostomia;  
 Spiralia;Lophotrochozoa;Mollusca;Bivalvia;Autobranchia;Heteroconchia;Euhe  
 terodonta;Imparidentia;Venerida;Veneroidea;Veneridae;Mercenaria;Mercenari  
 a mercenaria  
 UdeM00000033141 6596 176.8 UdeM00000033141 XP\_045203864.1 36.4 291  
 169 6 9 294 22 301 4.20E-41 176.8 6596 cellular  
 organisms;Eukaryota;Opisthokonta;Metazoa;Eumetazoa;Bilateria;Protostomia;  
 Spiralia;Lophotrochozoa;Mollusca;Bivalvia;Autobranchia;Heteroconchia;Euhe  
 terodonta;Imparidentia;Venerida;Veneroidea;Veneridae;Mercenaria;Mercenari  
 a mercenaria  
 UdeM00000033142 6565 171 UdeM00000033142 XP\_022306954.1 38.7 212  
 126 2 1 208 737 948 1.60E-39 171 6565 cellular  
 organisms;Eukaryota;Opisthokonta;Metazoa;Eumetazoa;Bilateria;Protostomia;  
 Spiralia;Lophotrochozoa;Mollusca;Bivalvia;Autobranchia;Pteriomorphia;Ostr  
 eida;Ostreoidea;Ostreidae;Crassostrea;Crassostrea virginica  
 UdeM00000033143 6596 125.6 UdeM00000033143 XP\_045203864.1 33.1 236  
 122 4 132 338 73 301 1.30E-25 125.6 6596 cellular  
 organisms;Eukaryota;Opisthokonta;Metazoa;Eumetazoa;Bilateria;Protostomia;  
 Spiralia;Lophotrochozoa;Mollusca;Bivalvia;Autobranchia;Heteroconchia;Euhe  
 terodonta;Imparidentia;Venerida;Veneroidea;Veneridae;Mercenaria;Mercenari  
 a mercenaria  
 UdeM00000033144 6596 114.8 UdeM00000033144 XP\_045180427.1 39.5 177  
 104 2 76 250 98 273 1.70E-22 114.8 6596 cellular  
 organisms;Eukaryota;Opisthokonta;Metazoa;Eumetazoa;Bilateria;Protostomia;  
 Spiralia;Lophotrochozoa;Mollusca;Bivalvia;Autobranchia;Heteroconchia;Euhe  
 terodonta;Imparidentia;Venerida;Veneroidea;Veneridae;Mercenaria;Mercenari  
 a mercenaria  
 UdeM00000033145 6596 155.2 UdeM00000033145 XP\_045206077.1 38.1 218  
 125 5 317 534 242 449 2.30E-34 155.2 6596 cellular  
 organisms;Eukaryota;Opisthokonta;Metazoa;Eumetazoa;Bilateria;Protostomia;  
 Spiralia;Lophotrochozoa;Mollusca;Bivalvia;Autobranchia;Heteroconchia;Euhe

terodonta;Imparidentia;Venerida;Veneroidea;Veneridae;Mercenaria;Mercenari  
 a mercenaria  
 UdeM00000033147 6579 158.3 UdeM00000033147 XP\_033742796.1 34.1 337  
 182 6 16 322 114 440 1.70E-35 158.3 6579 cellular  
 organisms;Eukaryota;Opisthokonta;Metazoa;Eumetazoa;Bilateria;Protostomia;  
 Spiralia;Lophotrochozoa;Mollusca;Bivalvia;Autobranhia;Pteriormorphia;Pect  
 inida;Pectinoidea;Pectinidae;Pecten;Pecten maximus  
 UdeM00000033148 6596 172.2 UdeM00000033148 XP\_045203688.1 38.2 325  
 170 10 21 334 96 400 1.20E-39 172.2 6596 cellular  
 organisms;Eukaryota;Opisthokonta;Metazoa;Eumetazoa;Bilateria;Protostomia;  
 Spiralia;Lophotrochozoa;Mollusca;Bivalvia;Autobranhia;Heteroconchia;Euhe  
 terodonta;Imparidentia;Venerida;Veneroidea;Veneridae;Mercenaria;Mercenari  
 a mercenaria  
 UdeM00000033149 6596 194.1 UdeM00000033149 XP\_045203860.1 38.8 312  
 163 7 151 440 116 421 4.40E-46 194.1 6596 cellular  
 organisms;Eukaryota;Opisthokonta;Metazoa;Eumetazoa;Bilateria;Protostomia;  
 Spiralia;Lophotrochozoa;Mollusca;Bivalvia;Autobranhia;Heteroconchia;Euhe  
 terodonta;Imparidentia;Venerida;Veneroidea;Veneridae;Mercenaria;Mercenari  
 a mercenaria  
 UdeM00000033150 6596 172.9 UdeM00000033150 XP\_045203688.1 34.4 343  
 200 10 176 506 148 477 1.00E-39 172.9 6596 cellular  
 organisms;Eukaryota;Opisthokonta;Metazoa;Eumetazoa;Bilateria;Protostomia;  
 Spiralia;Lophotrochozoa;Mollusca;Bivalvia;Autobranhia;Heteroconchia;Euhe  
 terodonta;Imparidentia;Venerida;Veneroidea;Veneridae;Mercenaria;Mercenari  
 a mercenaria  
 UdeM00000033151 6596 155.6 UdeM00000033151 XP\_045203860.1 40.6 234  
 122 6 1 224 195 421 8.80E-35 155.6 6596 cellular  
 organisms;Eukaryota;Opisthokonta;Metazoa;Eumetazoa;Bilateria;Protostomia;  
 Spiralia;Lophotrochozoa;Mollusca;Bivalvia;Autobranhia;Heteroconchia;Euhe  
 terodonta;Imparidentia;Venerida;Veneroidea;Veneridae;Mercenaria;Mercenari  
 a mercenaria  
 UdeM00000033152 6579 58.9 UdeM00000033152 XP\_033743291.1 30.3 119  
 79 2 8 123 146 263 6.80E-06 58.9 6579 cellular  
 organisms;Eukaryota;Opisthokonta;Metazoa;Eumetazoa;Bilateria;Protostomia;  
 Spiralia;Lophotrochozoa;Mollusca;Bivalvia;Autobranhia;Pteriormorphia;Pect  
 inida;Pectinoidea;Pectinidae;Pecten;Pecten maximus  
 UdeM00000033153 151771 751.5 UdeM00000033153 XP\_028414839.1 41.1  
 1029 536 22 13 999 156 1156 1.40E-213 751.5 151771  
 cellular  
 organisms;Eukaryota;Opisthokonta;Metazoa;Eumetazoa;Cnidaria;Anthozoa;Octo  
 corallia;Alcyonacea;Alcyoniina;Nephtheidae;Dendronephthya;Dendronephthya  
 gigantea  
 UdeM00000033154 63436 529.3 UdeM00000033154 XP\_043460997.1 35.6 831  
 409 16 140 862 118 930 9.80E-147 529.3 63436 cellular  
 organisms;Eukaryota;Opisthokonta;Metazoa;Eumetazoa;Bilateria;Protostomia;  
 Ecdysozoa;Panarthropoda;Arthropoda;Mandibulata;Pancrustacea;Hexapoda;Inse  
 cta;Dicondylia;Pterygota;Neoptera;Endopterygota;Hymenoptera;Apocrita;Para  
 sitoida;Cynipoidea;Figitidae;Eucoilinae;Leptopilina;Leptopilina  
 heterotoma  
 UdeM00000033155 7493 111.7 UdeM00000033155 XP\_014235688.2 31.7 186  
 111 2 96 274 142 318 1.50E-21 111.7 7493 cellular  
 organisms;Eukaryota;Opisthokonta;Metazoa;Eumetazoa;Bilateria;Protostomia;  
 Ecdysozoa;Panarthropoda;Arthropoda;Mandibulata;Pancrustacea;Hexapoda;Inse  
 cta;Dicondylia;Pterygota;Neoptera;Endopterygota;Hymenoptera;Apocrita;Para

sitoida;Chalcidoidea;Trichogrammatidae;Trichogramma;Trichogramma  
 pretiosum  
 UdeM00000033156 6596 188 UdeM00000033156 XP\_045203860.1 36.9 312  
 169 7 184 473 116 421 3.20E-44 188 6596 cellular  
 organisms;Eukaryota;Opisthokonta;Metazoa;Eumetazoa;Bilateria;Protostomia;  
 Spiralia;Lophotrochozoa;Mollusca;Bivalvia;Autobranhia;Heteroconchia;Euhe  
 terodonta;Imparidentia;Venerida;Veneroidea;Veneridae;Mercenaria;Mercenari  
 a mercenaria  
 UdeM00000033157 6596 190.7 UdeM00000033157 XP\_045203860.1 38.2 304  
 160 7 153 433 116 414 4.10E-45 190.7 6596 cellular  
 organisms;Eukaryota;Opisthokonta;Metazoa;Eumetazoa;Bilateria;Protostomia;  
 Spiralia;Lophotrochozoa;Mollusca;Bivalvia;Autobranhia;Heteroconchia;Euhe  
 terodonta;Imparidentia;Venerida;Veneroidea;Veneridae;Mercenaria;Mercenari  
 a mercenaria  
 UdeM00000033158 6573 123.2 UdeM00000033158 XP\_021376884.1 32 259  
 162 8 11 262 12 263 5.50E-25 123.2 6573 cellular  
 organisms;Eukaryota;Opisthokonta;Metazoa;Eumetazoa;Bilateria;Protostomia;  
 Spiralia;Lophotrochozoa;Mollusca;Bivalvia;Autobranhia;Pteriomorphia;Pect  
 inida;Pectinoidea;Pectinidae;Mizuhopecten;Mizuhopecten yessoensis  
 UdeM00000033159 6573 116.7 UdeM00000033159 XP\_021376884.1 32.4 244  
 151 8 11 247 12 248 4.40E-23 116.7 6573 cellular  
 organisms;Eukaryota;Opisthokonta;Metazoa;Eumetazoa;Bilateria;Protostomia;  
 Spiralia;Lophotrochozoa;Mollusca;Bivalvia;Autobranhia;Pteriomorphia;Pect  
 inida;Pectinoidea;Pectinidae;Mizuhopecten;Mizuhopecten yessoensis  
 UdeM00000033160 6596 198.7 UdeM00000033160 XP\_045206626.1 41.9 258  
 124 5 10 266 11 243 9.20E-48 198.7 6596 cellular  
 organisms;Eukaryota;Opisthokonta;Metazoa;Eumetazoa;Bilateria;Protostomia;  
 Spiralia;Lophotrochozoa;Mollusca;Bivalvia;Autobranhia;Heteroconchia;Euhe  
 terodonta;Imparidentia;Venerida;Veneroidea;Veneridae;Mercenaria;Mercenari  
 a mercenaria  
 UdeM00000033161 6596 678.3 UdeM00000033161 XP\_045204834.1 56.7 577  
 242 6 5 575 10 584 8.40E-192 678.3 6596 cellular  
 organisms;Eukaryota;Opisthokonta;Metazoa;Eumetazoa;Bilateria;Protostomia;  
 Spiralia;Lophotrochozoa;Mollusca;Bivalvia;Autobranhia;Heteroconchia;Euhe  
 terodonta;Imparidentia;Venerida;Veneroidea;Veneridae;Mercenaria;Mercenari  
 a mercenaria  
 UdeM00000033162 6579 295.4 UdeM00000033162 XP\_033734618.1 56.8 257  
 105 3 1 257 1 251 6.90E-77 295.4 6579 cellular  
 organisms;Eukaryota;Opisthokonta;Metazoa;Eumetazoa;Bilateria;Protostomia;  
 Spiralia;Lophotrochozoa;Mollusca;Bivalvia;Autobranhia;Pteriomorphia;Pect  
 inida;Pectinoidea;Pectinidae;Pecten;Pecten maximus  
 UdeM00000033163 6579 185.3 UdeM00000033163 XP\_033743066.1 28.7 647  
 321 20 3 533 1 623 2.10E-43 185.3 6579 cellular  
 organisms;Eukaryota;Opisthokonta;Metazoa;Eumetazoa;Bilateria;Protostomia;  
 Spiralia;Lophotrochozoa;Mollusca;Bivalvia;Autobranhia;Pteriomorphia;Pect  
 inida;Pectinoidea;Pectinidae;Pecten;Pecten maximus  
 UdeM00000033164 6596 407.1 UdeM00000033164 XP\_045175517.1 36.2 638  
 372 13 15 637 13 630 4.00E-110 407.1 6596 cellular  
 organisms;Eukaryota;Opisthokonta;Metazoa;Eumetazoa;Bilateria;Protostomia;  
 Spiralia;Lophotrochozoa;Mollusca;Bivalvia;Autobranhia;Heteroconchia;Euhe  
 terodonta;Imparidentia;Venerida;Veneroidea;Veneridae;Mercenaria;Mercenari  
 a mercenaria  
 UdeM00000033165 29159 384 UdeM00000033165 XP\_011447315.1 66.1 274  
 90 2 1 273 1 272 1.60E-103 384 29159 cellular

organisms;Eukaryota;Opisthokonta;Metazoa;Eumetazoa;Bilateria;Protostomia; Spiralia;Lophotrochozoa;Mollusca;Bivalvia;Autobranchia;Pteriormorphia;Ostr eida;Ostreoidea;Ostreidae;Crassostrea;Crassostrea gigas

UdeM00000033166 37653 118.2 UdeM00000033166 XP\_014773616.1 52.6 114  
54 0 2 115 3 116 6.80E-24 118.2 37653 cellular

organisms;Eukaryota;Opisthokonta;Metazoa;Eumetazoa;Bilateria;Protostomia; Spiralia;Lophotrochozoa;Mollusca;Cephalopoda;Coleoidea;Octopodiformes;Oct opoda;Incirrata;Octopodidae;Octopus;Octopus bimaculoides

UdeM00000033167 6579 1003 UdeM00000033167 XP\_033743077.1 79.6 587  
117 1 37 623 53 636 1.60E-289 1003 6579 cellular

organisms;Eukaryota;Opisthokonta;Metazoa;Eumetazoa;Bilateria;Protostomia; Spiralia;Lophotrochozoa;Mollusca;Bivalvia;Autobranchia;Pteriormorphia;Pect inida;Pectinoidea;Pectinidae;Pecten;Pecten maximus

UdeM00000033168 6579 2191 UdeM00000033168 XP\_033743075.1 56.7 2209  
878 31 1 2173 1 2167 0.00E+00 2191 6579 cellular

organisms;Eukaryota;Opisthokonta;Metazoa;Eumetazoa;Bilateria;Protostomia; Spiralia;Lophotrochozoa;Mollusca;Bivalvia;Autobranchia;Pteriormorphia;Pect inida;Pectinoidea;Pectinidae;Pecten;Pecten maximus

UdeM00000033169 6579 2191 UdeM00000033169 XP\_033743075.1 56.7 2207  
881 30 1 2172 1 2167 0.00E+00 2191 6579 cellular

organisms;Eukaryota;Opisthokonta;Metazoa;Eumetazoa;Bilateria;Protostomia; Spiralia;Lophotrochozoa;Mollusca;Bivalvia;Autobranchia;Pteriormorphia;Pect inida;Pectinoidea;Pectinidae;Pecten;Pecten maximus

UdeM00000033170 1735272 235 UdeM00000033170 XP\_041358579.1 57  
193 83 0 18 210 5 197 1.20E-58 235 1735272

cellular

organisms;Eukaryota;Opisthokonta;Metazoa;Eumetazoa;Bilateria;Protostomia; Spiralia;Lophotrochozoa;Mollusca;Gastropoda;Neomphalina;Neomphaloidea;Pel tospiridae;Gigantopelta;Gigantopelta aegis

UdeM00000033171 6596 439.5 UdeM00000033171 XP\_045202984.1 47.2 867  
402 21 34 871 7 846 9.90E-120 439.5 6596 cellular

organisms;Eukaryota;Opisthokonta;Metazoa;Eumetazoa;Bilateria;Protostomia; Spiralia;Lophotrochozoa;Mollusca;Bivalvia;Autobranchia;Heteroconchia;Euhe terodonta;Imparidentia;Venerida;Veneroidea;Veneridae;Mercenaria;Mercenari a mercenaria

UdeM00000033172 1735272 67.4 UdeM00000033172 XP\_041358579.1 46.3  
82 36 2 10 84 196 276 1.00E-08 67.4 1735272

cellular

organisms;Eukaryota;Opisthokonta;Metazoa;Eumetazoa;Bilateria;Protostomia; Spiralia;Lophotrochozoa;Mollusca;Gastropoda;Neomphalina;Neomphaloidea;Pel tospiridae;Gigantopelta;Gigantopelta aegis

UdeM00000033173 6596 792.7 UdeM00000033173 XP\_045160383.1 32.5 1693  
1016 49 12 1628 5 1646 8.80E-226 792.7 6596 cellular

organisms;Eukaryota;Opisthokonta;Metazoa;Eumetazoa;Bilateria;Protostomia; Spiralia;Lophotrochozoa;Mollusca;Bivalvia;Autobranchia;Heteroconchia;Euhe terodonta;Imparidentia;Venerida;Veneroidea;Veneridae;Mercenaria;Mercenari a mercenaria

UdeM00000033174 6596 350.9 UdeM00000033174 XP\_045204432.1 47.6 347  
177 3 7 348 6 352 1.90E-93 350.9 6596 cellular

organisms;Eukaryota;Opisthokonta;Metazoa;Eumetazoa;Bilateria;Protostomia; Spiralia;Lophotrochozoa;Mollusca;Bivalvia;Autobranchia;Heteroconchia;Euhe terodonta;Imparidentia;Venerida;Veneroidea;Veneridae;Mercenaria;Mercenari a mercenaria



UdeM00000033175 6596 321.2 UdeM00000033175 XP\_045204432.1 42.6 352  
 199 2 1 349 1 352 1.60E-84 321.2 6596 cellular  
 organisms;Eukaryota;Opisthokonta;Metazoa;Eumetazoa;Bilateria;Protostomia;  
 Spiralia;Lophotrochozoa;Mollusca;Bivalvia;Autobranchia;Heteroconchia;Euhe  
 terodonta;Imparidentia;Venerida;Veneroidea;Veneridae;Mercenaria;Mercenari  
 a mercenaria

UdeM00000033176 29159 498 UdeM00000033176 XP\_034307109.1 44.9 584  
 308 7 6 578 24 604 1.60E-137 498 29159 cellular  
 organisms;Eukaryota;Opisthokonta;Metazoa;Eumetazoa;Bilateria;Protostomia;  
 Spiralia;Lophotrochozoa;Mollusca;Bivalvia;Autobranchia;Pteriormorphia;Ostr  
 eida;Ostreoidea;Ostreidae;Crassostrea;Crassostrea gigas

UdeM00000033177 6596 330.9 UdeM00000033177 XP\_045204432.1 44.6 352  
 192 2 1 349 1 352 2.00E-87 330.9 6596 cellular  
 organisms;Eukaryota;Opisthokonta;Metazoa;Eumetazoa;Bilateria;Protostomia;  
 Spiralia;Lophotrochozoa;Mollusca;Bivalvia;Autobranchia;Heteroconchia;Euhe  
 terodonta;Imparidentia;Venerida;Veneroidea;Veneridae;Mercenaria;Mercenari  
 a mercenaria

UdeM00000033178 400727 121.3 UdeM00000033178 XP\_025099402.1 49.2  
 120 60 1 4 123 252 370 1.00E-24 121.3 400727  
 cellular  
 organisms;Eukaryota;Opisthokonta;Metazoa;Eumetazoa;Bilateria;Protostomia;  
 Spiralia;Lophotrochozoa;Mollusca;Gastropoda;Caenogastropoda;Architaeniogl  
 ossa;Ampullarioidea;Ampullariidae;Pomacea;Pomacea canaliculata

UdeM00000033179 6596 773.9 UdeM00000033179 XP\_045160383.1 32.5 1666  
 1000 48 41 1632 19 1634 4.20E-220 773.9 6596 cellular  
 organisms;Eukaryota;Opisthokonta;Metazoa;Eumetazoa;Bilateria;Protostomia;  
 Spiralia;Lophotrochozoa;Mollusca;Bivalvia;Autobranchia;Heteroconchia;Euhe  
 terodonta;Imparidentia;Venerida;Veneroidea;Veneridae;Mercenaria;Mercenari  
 a mercenaria

UdeM00000033180 6526 79.3 UdeM00000033180 XP\_013087029.1 48.9 94  
 46 2 1 93 1 93 3.40E-12 79.3 6526 cellular  
 organisms;Eukaryota;Opisthokonta;Metazoa;Eumetazoa;Bilateria;Protostomia;  
 Spiralia;Lophotrochozoa;Mollusca;Gastropoda;Heterobranchia;Euthyneura;Pan  
 pulmonata;Hygrophila;Lymnaeioidea;Planorbidae;Biomphalaria;Biomphalaria  
 glabrata

UdeM00000033181 6596 234.6 UdeM00000033181 XP\_045167776.1 31 525  
 297 16 7 478 1152 1664 2.90E-58 234.6 6596 cellular  
 organisms;Eukaryota;Opisthokonta;Metazoa;Eumetazoa;Bilateria;Protostomia;  
 Spiralia;Lophotrochozoa;Mollusca;Bivalvia;Autobranchia;Heteroconchia;Euhe  
 terodonta;Imparidentia;Venerida;Veneroidea;Veneridae;Mercenaria;Mercenari  
 a mercenaria

UdeM00000033182 6596 293.9 UdeM00000033182 XP\_045160383.1 33.4 569  
 344 15 16 567 456 1006 4.40E-76 293.9 6596 cellular  
 organisms;Eukaryota;Opisthokonta;Metazoa;Eumetazoa;Bilateria;Protostomia;  
 Spiralia;Lophotrochozoa;Mollusca;Bivalvia;Autobranchia;Heteroconchia;Euhe  
 terodonta;Imparidentia;Venerida;Veneroidea;Veneridae;Mercenaria;Mercenari  
 a mercenaria

UdeM00000033183 6596 188.3 UdeM00000033183 XP\_045161016.1 38.8 291  
 161 10 1 283 809 1090 1.30E-44 188.3 6596 cellular  
 organisms;Eukaryota;Opisthokonta;Metazoa;Eumetazoa;Bilateria;Protostomia;  
 Spiralia;Lophotrochozoa;Mollusca;Bivalvia;Autobranchia;Heteroconchia;Euhe  
 terodonta;Imparidentia;Venerida;Veneroidea;Veneridae;Mercenaria;Mercenari  
 a mercenaria

UdeM00000033184 6596 144.1 UdeM00000033184 XP\_045160383.1 34.3 254  
 152 4 25 264 176 428 2.60E-31 144.1 6596 cellular  
 organisms;Eukaryota;Opisthokonta;Metazoa;Eumetazoa;Bilateria;Protostomia;  
 Spiralia;Lophotrochozoa;Mollusca;Bivalvia;Autobranchia;Heteroconchia;Euhe  
 terodonta;Imparidentia;Venerida;Veneroidea;Veneridae;Mercenaria;Mercenari  
 a mercenaria  
 UdeM00000033185 7998 175.6 UdeM00000033185 XP\_017334791.1 66.9 118  
 39 0 1 118 62 179 4.90E-41 175.6 7998 cellular  
 organisms;Eukaryota;Opisthokonta;Metazoa;Eumetazoa;Bilateria;Deuterostomi  
 a;Chordata;Craniata;Vertebrata;Gnathostomata;Teleostomi;Euteleostomi;Acti  
 nopterygii;Actinopteri;Neopterygii;Teleostei;Osteoglossocephalai;Clupeoce  
 phala;Otomorpha;Ostariophysi;Otophysi;Characiphysae;Siluriformes;Siluroid  
 ei;Ictaluridae;Ictalurus;Ictalurus punctatus  
 UdeM00000033186 7741 243.8 UdeM00000033186 XP\_019622111.1 50.2 243  
 118 3 1 242 38 278 2.20E-61 243.8 7741 cellular  
 organisms;Eukaryota;Opisthokonta;Metazoa;Eumetazoa;Bilateria;Deuterostomi  
 a;Chordata;Cephalochordata;Leptocardii;Amphioxiformes;Branchiostomidae;Br  
 anchiostoma;Branchiostoma belcheri  
 UdeM00000033187 6596 351.3 UdeM00000033187 XP\_045204432.1 46.7 347  
 180 3 7 348 6 352 1.40E-93 351.3 6596 cellular  
 organisms;Eukaryota;Opisthokonta;Metazoa;Eumetazoa;Bilateria;Protostomia;  
 Spiralia;Lophotrochozoa;Mollusca;Bivalvia;Autobranchia;Heteroconchia;Euhe  
 terodonta;Imparidentia;Venerida;Veneroidea;Veneridae;Mercenaria;Mercenari  
 a mercenaria  
 UdeM00000033188 6596 327 UdeM00000033188 XP\_045204432.1 43.2 352  
 197 2 1 349 1 352 2.90E-86 327 6596 cellular  
 organisms;Eukaryota;Opisthokonta;Metazoa;Eumetazoa;Bilateria;Protostomia;  
 Spiralia;Lophotrochozoa;Mollusca;Bivalvia;Autobranchia;Heteroconchia;Euhe  
 terodonta;Imparidentia;Venerida;Veneroidea;Veneridae;Mercenaria;Mercenari  
 a mercenaria  
 UdeM00000033189 6573 109.4 UdeM00000033189 XP\_021352054.1 49.6 117  
 55 2 1 114 1 116 3.50E-21 109.4 6573 cellular  
 organisms;Eukaryota;Opisthokonta;Metazoa;Eumetazoa;Bilateria;Protostomia;  
 Spiralia;Lophotrochozoa;Mollusca;Bivalvia;Autobranchia;Pteriomorphia;Pect  
 inida;Pectinoidea;Pectinidae;Mizuhopecten;Mizuhopecten yessoensis  
 UdeM00000033190 6565 296.2 UdeM00000033190 XP\_022295545.1 45.6 287  
 142 5 1 280 137 416 4.40E-77 296.2 6565 cellular  
 organisms;Eukaryota;Opisthokonta;Metazoa;Eumetazoa;Bilateria;Protostomia;  
 Spiralia;Lophotrochozoa;Mollusca;Bivalvia;Autobranchia;Pteriomorphia;Ostr  
 eida;Ostreoidea;Ostreidae;Crassostrea;Crassostrea virginica  
 UdeM00000033191 37621 162.5 UdeM00000033191 XP\_014677462.1 51.2 166  
 62 3 1 147 1 166 5.50E-37 162.5 37621 cellular  
 organisms;Eukaryota;Opisthokonta;Metazoa;Eumetazoa;Bilateria;Protostomia;  
 Ecdysozoa;Scalidophora;Priapulida;Priapulimorpha;Priapulimorphida;Priapul  
 idae;Priapululus;Priapululus caudatus  
 UdeM00000033192 6573 490 UdeM00000033192 XP\_021353682.1 44.8 585  
 311 6 12 584 39 623 4.30E-135 490 6573 cellular  
 organisms;Eukaryota;Opisthokonta;Metazoa;Eumetazoa;Bilateria;Protostomia;  
 Spiralia;Lophotrochozoa;Mollusca;Bivalvia;Autobranchia;Pteriomorphia;Pect  
 inida;Pectinoidea;Pectinidae;Mizuhopecten;Mizuhopecten yessoensis  
 UdeM00000033193 6596 252.7 UdeM00000033193 XP\_045204432.1 48 248  
 126 2 10 254 105 352 5.00E-64 252.7 6596 cellular  
 organisms;Eukaryota;Opisthokonta;Metazoa;Eumetazoa;Bilateria;Protostomia;  
 Spiralia;Lophotrochozoa;Mollusca;Bivalvia;Autobranchia;Heteroconchia;Euhe

terodonta;Imparidentia;Venerida;Veneroidea;Veneridae;Mercenaria;Mercenari  
 a mercenaria  
 UdeM00000033195 10224 256.5 UdeM00000033195 XP\_002738718.1 50.6 255  
 121 1 2 251 7 261 3.50E-65 256.5 10224 cellular  
 organisms;Eukaryota;Opisthokonta;Metazoa;Eumetazoa;Bilateria;Deuterostomi  
 a;Hemichordata;Enteropneusta;Harrimaniidae;Saccoglossus;Saccoglossus  
 kowalevskii  
 UdeM00000033194 556484 311.6 UdeM00000033194 XP\_002184253.1 40  
 450 168 3 6 359 8 451 1.30E-81 311.6 556484  
 cellular  
 organisms;Eukaryota;Sar;Stramenopiles;Ochrophyta;Bacillariophyta;Bacillar  
 iophyceae;Bacillariophycidae;Naviculales;Phaeodactylaceae;Phaeodactylum;P  
 haeodactylum tricornutum;Phaeodactylum tricornutum CCAP 1055/1  
 UdeM00000033196 6596 516.9 UdeM00000033196 XP\_045161006.1 34.6 1013  
 576 31 196 1146 733 1721 6.50E-143 516.9 6596 cellular  
 organisms;Eukaryota;Opisthokonta;Metazoa;Eumetazoa;Bilateria;Protostomia;  
 Spiralia;Lophotrochozoa;Mollusca;Bivalvia;Autobranchia;Heteroconchia;Euhe  
 terodonta;Imparidentia;Venerida;Veneroidea;Veneridae;Mercenaria;Mercenari  
 a mercenaria  
 UdeM00000033197 6573 58.5 UdeM00000033197 XP\_021358159.1 40 90  
 50 3 36 123 520 607 7.00E-06 58.5 6573 cellular  
 organisms;Eukaryota;Opisthokonta;Metazoa;Eumetazoa;Bilateria;Protostomia;  
 Spiralia;Lophotrochozoa;Mollusca;Bivalvia;Autobranchia;Pteriormorphia;Pect  
 inida;Pectinoidea;Pectinidae;Mizuhopecten;Mizuhopecten yessoensis  
 UdeM00000033198 6596 314.7 UdeM00000033198 XP\_045160383.1 32.3 666  
 416 15 12 655 5 657 3.00E-82 314.7 6596 cellular  
 organisms;Eukaryota;Opisthokonta;Metazoa;Eumetazoa;Bilateria;Protostomia;  
 Spiralia;Lophotrochozoa;Mollusca;Bivalvia;Autobranchia;Heteroconchia;Euhe  
 terodonta;Imparidentia;Venerida;Veneroidea;Veneridae;Mercenaria;Mercenari  
 a mercenaria  
 UdeM00000033199 6596 353.6 UdeM00000033199 XP\_045204432.1 47 347  
 179 3 7 348 6 352 2.90E-94 353.6 6596 cellular  
 organisms;Eukaryota;Opisthokonta;Metazoa;Eumetazoa;Bilateria;Protostomia;  
 Spiralia;Lophotrochozoa;Mollusca;Bivalvia;Autobranchia;Heteroconchia;Euhe  
 terodonta;Imparidentia;Venerida;Veneroidea;Veneridae;Mercenaria;Mercenari  
 a mercenaria  
 UdeM00000033200 6596 324.7 UdeM00000033200 XP\_045204432.1 43.2 352  
 197 2 1 349 1 352 1.40E-85 324.7 6596 cellular  
 organisms;Eukaryota;Opisthokonta;Metazoa;Eumetazoa;Bilateria;Protostomia;  
 Spiralia;Lophotrochozoa;Mollusca;Bivalvia;Autobranchia;Heteroconchia;Euhe  
 terodonta;Imparidentia;Venerida;Veneroidea;Veneridae;Mercenaria;Mercenari  
 a mercenaria  
 UdeM00000033201 6596 267.7 UdeM00000033201 XP\_045204432.1 44.4 288  
 157 2 1 285 65 352 1.70E-68 267.7 6596 cellular  
 organisms;Eukaryota;Opisthokonta;Metazoa;Eumetazoa;Bilateria;Protostomia;  
 Spiralia;Lophotrochozoa;Mollusca;Bivalvia;Autobranchia;Heteroconchia;Euhe  
 terodonta;Imparidentia;Venerida;Veneroidea;Veneridae;Mercenaria;Mercenari  
 a mercenaria  
 UdeM00000033202 6573 492.3 UdeM00000033202 XP\_021353682.1 44.8 585  
 311 5 12 584 39 623 8.70E-136 492.3 6573 cellular  
 organisms;Eukaryota;Opisthokonta;Metazoa;Eumetazoa;Bilateria;Protostomia;  
 Spiralia;Lophotrochozoa;Mollusca;Bivalvia;Autobranchia;Pteriormorphia;Pect  
 inida;Pectinoidea;Pectinidae;Mizuhopecten;Mizuhopecten yessoensis

UdeM00000033203 6596 329.7 UdeM00000033203 XP\_045204432.1 44.3 352  
 193 2 1 349 1 352 4.50E-87 329.7 6596 cellular  
 organisms;Eukaryota;Opisthokonta;Metazoa;Eumetazoa;Bilateria;Protostomia;  
 Spiralia;Lophotrochozoa;Mollusca;Bivalvia;Autobranchia;Heteroconchia;Euhe  
 terodonta;Imparidentia;Venerida;Veneroidea;Veneridae;Mercenaria;Mercenari  
 a mercenaria  
 UdeM00000033204 45351 441.8 UdeM00000033204 XP\_032240171.1 48.7 464  
 220 5 3 449 14 476 1.00E-120 441.8 45351 cellular  
 organisms;Eukaryota;Opisthokonta;Metazoa;Eumetazoa;Cnidaria;Anthozoa;Hexa  
 corallia;Actiniaria;Edwardsiidae;Nematostella;Nematostella vectensis  
 UdeM00000033205 29159 444.5 UdeM00000033205 XP\_034307109.1 43.6 580  
 312 8 10 578 29 604 2.10E-121 444.5 29159 cellular  
 organisms;Eukaryota;Opisthokonta;Metazoa;Eumetazoa;Bilateria;Protostomia;  
 Spiralia;Lophotrochozoa;Mollusca;Bivalvia;Autobranchia;Pteriormorphia;Ostr  
 eida;Ostreoidea;Ostreidae;Crassostrea;Crassostrea gigas  
 UdeM00000033206 29159 106.3 UdeM00000033206 XP\_011445731.2 37.5 144  
 86 3 245 388 208 347 9.40E-20 106.3 29159 cellular  
 organisms;Eukaryota;Opisthokonta;Metazoa;Eumetazoa;Bilateria;Protostomia;  
 Spiralia;Lophotrochozoa;Mollusca;Bivalvia;Autobranchia;Pteriormorphia;Ostr  
 eida;Ostreoidea;Ostreidae;Crassostrea;Crassostrea gigas  
 UdeM00000033207 29159 103.6 UdeM00000033207 XP\_011445731.2 40.7 123  
 71 2 14 136 227 347 2.30E-19 103.6 29159 cellular  
 organisms;Eukaryota;Opisthokonta;Metazoa;Eumetazoa;Bilateria;Protostomia;  
 Spiralia;Lophotrochozoa;Mollusca;Bivalvia;Autobranchia;Pteriormorphia;Ostr  
 eida;Ostreoidea;Ostreidae;Crassostrea;Crassostrea gigas  
 UdeM00000033208 6565 788.9 UdeM00000033208 XP\_022322568.1 68.8 890  
 268 2 2 891 7 886 6.80E-225 788.9 6565 cellular  
 organisms;Eukaryota;Opisthokonta;Metazoa;Eumetazoa;Bilateria;Protostomia;  
 Spiralia;Lophotrochozoa;Mollusca;Bivalvia;Autobranchia;Pteriormorphia;Ostr  
 eida;Ostreoidea;Ostreidae;Crassostrea;Crassostrea virginica  
 UdeM00000033209 29159 82.8 UdeM00000033209 XP\_034317111.1 53.3 75  
 35 0 2 76 330 404 2.10E-13 82.8 29159 cellular  
 organisms;Eukaryota;Opisthokonta;Metazoa;Eumetazoa;Bilateria;Protostomia;  
 Spiralia;Lophotrochozoa;Mollusca;Bivalvia;Autobranchia;Pteriormorphia;Ostr  
 eida;Ostreoidea;Ostreidae;Crassostrea;Crassostrea gigas  
 UdeM00000033210 29159 229.9 UdeM00000033210 XP\_011423850.2 64.9 168  
 59 0 1 168 14 181 2.30E-57 229.9 29159 cellular  
 organisms;Eukaryota;Opisthokonta;Metazoa;Eumetazoa;Bilateria;Protostomia;  
 Spiralia;Lophotrochozoa;Mollusca;Bivalvia;Autobranchia;Pteriormorphia;Ostr  
 eida;Ostreoidea;Ostreidae;Crassostrea;Crassostrea gigas  
 UdeM00000033211 29159 1133.6 UdeM00000033211 XP\_011432546.2 60.6  
 1031 367 12 3 1023 2 1003 0.00E+00 1133.6  
 29159 cellular  
 organisms;Eukaryota;Opisthokonta;Metazoa;Eumetazoa;Bilateria;Protostomia;  
 Spiralia;Lophotrochozoa;Mollusca;Bivalvia;Autobranchia;Pteriormorphia;Ostr  
 eida;Ostreoidea;Ostreidae;Crassostrea;Crassostrea gigas  
 UdeM00000033212 6596 536.2 UdeM00000033212 XP\_045202966.1 75 336  
 84 0 1 336 1 336 3.00E-149 536.2 6596 cellular  
 organisms;Eukaryota;Opisthokonta;Metazoa;Eumetazoa;Bilateria;Protostomia;  
 Spiralia;Lophotrochozoa;Mollusca;Bivalvia;Autobranchia;Heteroconchia;Euhe  
 terodonta;Imparidentia;Venerida;Veneroidea;Veneridae;Mercenaria;Mercenari  
 a mercenaria  
 UdeM00000033213 6596 78.6 UdeM00000033213 XP\_045203301.1 27.9 262  
 144 7 207 429 103 358 2.90E-11 78.6 6596 cellular

organisms;Eukaryota;Opisthokonta;Metazoa;Eumetazoa;Bilateria;Protostomia;Spiralia;Lophotrochozoa;Mollusca;Bivalvia;Autobranhia;Heteroconchia;Euherodonta;Imparidentia;Venerida;Veneroidea;Veneridae;Mercenaria;Mercenaria mercenaria

UdeM00000033214 6596 78.6 UdeM00000033214 XP\_045203301.1 27.9 262  
144 7 226 448 103 358 3.00E-11 78.6 6596 cellular

organisms;Eukaryota;Opisthokonta;Metazoa;Eumetazoa;Bilateria;Protostomia;Spiralia;Lophotrochozoa;Mollusca;Bivalvia;Autobranhia;Heteroconchia;Euherodonta;Imparidentia;Venerida;Veneroidea;Veneridae;Mercenaria;Mercenaria mercenaria

UdeM00000033216 29159 63.9 UdeM00000033216 XP\_011449844.1 25.3 269  
169 9 119 381 403 645 5.60E-07 63.9 29159 cellular

organisms;Eukaryota;Opisthokonta;Metazoa;Eumetazoa;Bilateria;Protostomia;Spiralia;Lophotrochozoa;Mollusca;Bivalvia;Autobranhia;Pteriormorphia;Ostreida;Ostreoidea;Ostreidae;Crassostrea;Crassostrea gigas

UdeM00000033217 6596 319.7 UdeM00000033217 XP\_045204923.1 83.5 182  
30 0 1 182 1 182 2.40E-84 319.7 6596 cellular

organisms;Eukaryota;Opisthokonta;Metazoa;Eumetazoa;Bilateria;Protostomia;Spiralia;Lophotrochozoa;Mollusca;Bivalvia;Autobranhia;Heteroconchia;Euherodonta;Imparidentia;Venerida;Veneroidea;Veneridae;Mercenaria;Mercenaria mercenaria

UdeM00000033218 29159 264.6 UdeM00000033218 XP\_034307382.1 51.4 259  
122 2 44 302 33 287 1.50E-67 264.6 29159 cellular

organisms;Eukaryota;Opisthokonta;Metazoa;Eumetazoa;Bilateria;Protostomia;Spiralia;Lophotrochozoa;Mollusca;Bivalvia;Autobranhia;Pteriormorphia;Ostreida;Ostreoidea;Ostreidae;Crassostrea;Crassostrea gigas

UdeM00000014002 6596 252.7 UdeM00000014002 XP\_045156247.1 35.1 442  
141 6 8 306 317 755 6.10E-64 252.7 6596 cellular

organisms;Eukaryota;Opisthokonta;Metazoa;Eumetazoa;Bilateria;Protostomia;Spiralia;Lophotrochozoa;Mollusca;Bivalvia;Autobranhia;Heteroconchia;Euherodonta;Imparidentia;Venerida;Veneroidea;Veneridae;Mercenaria;Mercenaria mercenaria

UdeM00000014003 7739 77 UdeM00000014003 XP\_035677667.1 47.8 69  
36 0 4 72 7 75 2.30E-11 77 7739 cellular

organisms;Eukaryota;Opisthokonta;Metazoa;Eumetazoa;Bilateria;Deuterostomia;Chordata;Cephalochordata;Leptocardii;Amphioxiformes;Branchiostomidae;Branchiostoma;Branchiostoma floridae

UdeM00000014007 6596 298.1 UdeM00000014007 XP\_045164960.1 44.4 399  
191 9 1 387 114 493 1.70E-77 298.1 6596 cellular

organisms;Eukaryota;Opisthokonta;Metazoa;Eumetazoa;Bilateria;Protostomia;Spiralia;Lophotrochozoa;Mollusca;Bivalvia;Autobranhia;Heteroconchia;Euherodonta;Imparidentia;Venerida;Veneroidea;Veneridae;Mercenaria;Mercenaria mercenaria

UdeM00000014009 10224 317 UdeM00000014009 XP\_002736880.1 54.1 283  
107 1 32 291 35 317 3.00E-83 317 10224 cellular

organisms;Eukaryota;Opisthokonta;Metazoa;Eumetazoa;Bilateria;Deuterostomia;Hemichordata;Enteropneusta;Harrimaniidae;Saccoglossus;Saccoglossus kowalevskii

UdeM00000014010 6596 126.3 UdeM00000014010 XP\_045178416.1 32.2 255  
121 3 1 203 11 265 4.40E-26 126.3 6596 cellular

organisms;Eukaryota;Opisthokonta;Metazoa;Eumetazoa;Bilateria;Protostomia;Spiralia;Lophotrochozoa;Mollusca;Bivalvia;Autobranhia;Heteroconchia;Euherodonta;Imparidentia;Venerida;Veneroidea;Veneridae;Mercenaria;Mercenaria mercenaria

UdeM00000014012 6596 213.8 UdeM00000014012 XP\_045178416.1 43.4 256  
 140 4 1 252 11 265 2.60E-52 213.8 6596 cellular  
 organisms;Eukaryota;Opisthokonta;Metazoa;Eumetazoa;Bilateria;Protostomia;  
 Spiralia;Lophotrochozoa;Mollusca;Bivalvia;Autobranchia;Heteroconchia;Euhe  
 terodonta;Imparidentia;Venerida;Veneroidea;Veneridae;Mercenaria;Mercenari  
 a mercenaria  
 UdeM00000014011 6596 219.2 UdeM00000014011 XP\_045178416.1 43.3 263  
 144 4 106 364 4 265 8.80E-54 219.2 6596 cellular  
 organisms;Eukaryota;Opisthokonta;Metazoa;Eumetazoa;Bilateria;Protostomia;  
 Spiralia;Lophotrochozoa;Mollusca;Bivalvia;Autobranchia;Heteroconchia;Euhe  
 terodonta;Imparidentia;Venerida;Veneroidea;Veneridae;Mercenaria;Mercenari  
 a mercenaria  
 UdeM00000014013 2652724 80.1 UdeM00000014013 XP\_028514197.1 35  
 123 76 3 9 128 41 162 2.80E-12 80.1 2652724  
 cellular  
 organisms;Eukaryota;Opisthokonta;Metazoa;Eumetazoa;Cnidaria;Anthozoa;Hexa  
 corallia;Actiniaria;Aiptasiidae;Exaiptasia;Exaiptasia diaphana  
 UdeM00000014014 6596 67.8 UdeM00000014014 XP\_045177776.1 33.1 127  
 79 3 21 147 945 1065 1.60E-08 67.8 6596 cellular  
 organisms;Eukaryota;Opisthokonta;Metazoa;Eumetazoa;Bilateria;Protostomia;  
 Spiralia;Lophotrochozoa;Mollusca;Bivalvia;Autobranchia;Heteroconchia;Euhe  
 terodonta;Imparidentia;Venerida;Veneroidea;Veneridae;Mercenaria;Mercenari  
 a mercenaria  
 UdeM00000014016 6579 97.8 UdeM00000014016 XP\_033731337.1 33.8 160  
 94 3 13 170 174 323 1.60E-17 97.8 6579 cellular  
 organisms;Eukaryota;Opisthokonta;Metazoa;Eumetazoa;Bilateria;Protostomia;  
 Spiralia;Lophotrochozoa;Mollusca;Bivalvia;Autobranchia;Pteriomorphia;Pect  
 inida;Pectinoidea;Pectinidae;Pecten;Pecten maximus  
 UdeM00000014017 29159 93.2 UdeM00000014017 XP\_034330187.1 35.1 171  
 88 6 164 334 9 156 7.10E-16 93.2 29159 cellular  
 organisms;Eukaryota;Opisthokonta;Metazoa;Eumetazoa;Bilateria;Protostomia;  
 Spiralia;Lophotrochozoa;Mollusca;Bivalvia;Autobranchia;Pteriomorphia;Ostr  
 eida;Ostreoidea;Ostreidae;Crassostrea;Crassostrea gigas  
 UdeM00000014018 6596 60.1 UdeM00000014018 XP\_045186063.1 33.6 113  
 65 2 175 278 354 465 5.40E-06 60.1 6596 cellular  
 organisms;Eukaryota;Opisthokonta;Metazoa;Eumetazoa;Bilateria;Protostomia;  
 Spiralia;Lophotrochozoa;Mollusca;Bivalvia;Autobranchia;Heteroconchia;Euhe  
 terodonta;Imparidentia;Venerida;Veneroidea;Veneridae;Mercenaria;Mercenari  
 a mercenaria  
 UdeM00000014019 7725 75.5 UdeM00000014019 XP\_039258759.1 40.8 76  
 45 0 12 87 139 214 3.80E-11 75.5 7725 cellular  
 organisms;Eukaryota;Opisthokonta;Metazoa;Eumetazoa;Bilateria;Deuterostomi  
 a;Chordata;Tunicata;Ascidiacea;Stolidobranchia;Styelidae;Styela;Styela  
 clava  
 UdeM00000014020 29159 91.3 UdeM00000014020 XP\_034331441.1 46.6 103  
 52 3 1 102 722 822 8.20E-16 91.3 29159 cellular  
 organisms;Eukaryota;Opisthokonta;Metazoa;Eumetazoa;Bilateria;Protostomia;  
 Spiralia;Lophotrochozoa;Mollusca;Bivalvia;Autobranchia;Pteriomorphia;Ostr  
 eida;Ostreoidea;Ostreidae;Crassostrea;Crassostrea gigas  
 UdeM00000014024 29159 146.4 UdeM00000014024 XP\_034299474.1 36 247  
 90 2 6 184 509 755 3.70E-32 146.4 29159 cellular  
 organisms;Eukaryota;Opisthokonta;Metazoa;Eumetazoa;Bilateria;Protostomia;  
 Spiralia;Lophotrochozoa;Mollusca;Bivalvia;Autobranchia;Pteriomorphia;Ostr  
 eida;Ostreoidea;Ostreidae;Crassostrea;Crassostrea gigas

UdeM00000014025 6565 123.2 UdeM00000014025 XP\_022299602.1 40.5 168  
 93 5 78 244 2 163 1.20E-24 123.2 6565 cellular  
 organisms;Eukaryota;Opisthokonta;Metazoa;Eumetazoa;Bilateria;Protostomia;  
 Spiralia;Lophotrochozoa;Mollusca;Bivalvia;Autobranchia;Pteriomorpha;Ostr  
 eida;Ostreoidea;Ostreidae;Crassostrea;Crassostrea virginica  
 UdeM00000014026 6565 123.2 UdeM00000014026 XP\_022299602.1 40.5 168  
 93 5 155 321 2 163 1.30E-24 123.2 6565 cellular  
 organisms;Eukaryota;Opisthokonta;Metazoa;Eumetazoa;Bilateria;Protostomia;  
 Spiralia;Lophotrochozoa;Mollusca;Bivalvia;Autobranchia;Pteriomorpha;Ostr  
 eida;Ostreoidea;Ostreidae;Crassostrea;Crassostrea virginica  
 UdeM00000014027 7741 233 UdeM00000014027 XP\_019622111.1 45.8 249  
 133 2 23 270 27 274 4.50E-58 233 7741 cellular  
 organisms;Eukaryota;Opisthokonta;Metazoa;Eumetazoa;Bilateria;Deuterostomi  
 a;Chordata;Cephalochordata;Leptocardii;Amphioxiformes;Branchiostomidae;Br  
 anchiostoma;Branchiostoma belcheri  
 UdeM00000014028 6596 280 UdeM00000014028 XP\_045177776.1 40.6 433  
 234 8 1 426 405 821 5.00E-72 280 6596 cellular  
 organisms;Eukaryota;Opisthokonta;Metazoa;Eumetazoa;Bilateria;Protostomia;  
 Spiralia;Lophotrochozoa;Mollusca;Bivalvia;Autobranchia;Heteroconchia;Euhe  
 terodonta;Imparidentia;Venerida;Veneroidea;Veneridae;Mercenaria;Mercenari  
 a mercenaria  
 UdeM00000014030 6579 81.6 UdeM00000014030 XP\_033737465.1 52.9 70  
 33 0 8 77 431 500 5.20E-13 81.6 6579 cellular  
 organisms;Eukaryota;Opisthokonta;Metazoa;Eumetazoa;Bilateria;Protostomia;  
 Spiralia;Lophotrochozoa;Mollusca;Bivalvia;Autobranchia;Pteriomorpha;Pect  
 inida;Pectinoidea;Pectinidae;Pecten;Pecten maximus  
 UdeM00000014032 29159 82.4 UdeM00000014032 XP\_034330187.1 44.6 92  
 49 2 181 271 75 165 1.10E-12 82.4 29159 cellular  
 organisms;Eukaryota;Opisthokonta;Metazoa;Eumetazoa;Bilateria;Protostomia;  
 Spiralia;Lophotrochozoa;Mollusca;Bivalvia;Autobranchia;Pteriomorpha;Ostr  
 eida;Ostreoidea;Ostreidae;Crassostrea;Crassostrea gigas  
 UdeM00000014033 29159 90.9 UdeM00000014033 XP\_034330187.1 34.7 173  
 86 5 164 334 9 156 3.50E-15 90.9 29159 cellular  
 organisms;Eukaryota;Opisthokonta;Metazoa;Eumetazoa;Bilateria;Protostomia;  
 Spiralia;Lophotrochozoa;Mollusca;Bivalvia;Autobranchia;Pteriomorpha;Ostr  
 eida;Ostreoidea;Ostreidae;Crassostrea;Crassostrea gigas  
 UdeM00000014036 6596 431 UdeM00000014036 XP\_045178868.1 72.2 273  
 76 0 1 273 1 273 1.10E-117 431 6596 cellular  
 organisms;Eukaryota;Opisthokonta;Metazoa;Eumetazoa;Bilateria;Protostomia;  
 Spiralia;Lophotrochozoa;Mollusca;Bivalvia;Autobranchia;Heteroconchia;Euhe  
 terodonta;Imparidentia;Venerida;Veneroidea;Veneridae;Mercenaria;Mercenari  
 a mercenaria  
 UdeM00000014037 6596 120.6 UdeM00000014037 XP\_045178868.1 64.8 91  
 31 1 84 174 273 362 3.20E-24 120.6 6596 cellular  
 organisms;Eukaryota;Opisthokonta;Metazoa;Eumetazoa;Bilateria;Protostomia;  
 Spiralia;Lophotrochozoa;Mollusca;Bivalvia;Autobranchia;Heteroconchia;Euhe  
 terodonta;Imparidentia;Venerida;Veneroidea;Veneridae;Mercenaria;Mercenari  
 a mercenaria  
 UdeM00000014038 6596 1212.6 UdeM00000014038 XP\_045178874.1 62  
 1043 336 12 8 1035 355 1352 0.00E+00 1212.6 6596  
 cellular  
 organisms;Eukaryota;Opisthokonta;Metazoa;Eumetazoa;Bilateria;Protostomia;  
 Spiralia;Lophotrochozoa;Mollusca;Bivalvia;Autobranchia;Heteroconchia;Euhe

terodonta;Imparidentia;Venerida;Veneroidea;Veneridae;Mercenaria;Mercenari  
 a mercenaria  
 UdeM00000014042 6596 806.2 UdeM00000014042 XP\_045179433.1 68.1 576  
 180 1 2 573 5 580 2.90E-230 806.2 6596 cellular  
 organisms;Eukaryota;Opisthokonta;Metazoa;Eumetazoa;Bilateria;Protostomia;  
 Spiralia;Lophotrochozoa;Mollusca;Bivalvia;Autobranhia;Heteroconchia;Euhe  
 terodonta;Imparidentia;Venerida;Veneroidea;Veneridae;Mercenaria;Mercenari  
 a mercenaria  
 UdeM00000014043 6565 454.1 UdeM00000014043 XP\_022322249.1 61.8 327  
 123 1 6 332 505 829 1.50E-124 454.1 6565 cellular  
 organisms;Eukaryota;Opisthokonta;Metazoa;Eumetazoa;Bilateria;Protostomia;  
 Spiralia;Lophotrochozoa;Mollusca;Bivalvia;Autobranhia;Pteriormorphia;Ostr  
 eida;Ostreoidea;Ostreidae;Crassostrea;Crassostrea virginica  
 UdeM00000014044 6573 432.6 UdeM00000014044 XP\_021342574.1 51.5 388  
 184 2 10 394 52 438 5.60E-118 432.6 6573 cellular  
 organisms;Eukaryota;Opisthokonta;Metazoa;Eumetazoa;Bilateria;Protostomia;  
 Spiralia;Lophotrochozoa;Mollusca;Bivalvia;Autobranhia;Pteriormorphia;Pect  
 inida;Pectinoidea;Pectinidae;Mizuhopecten;Mizuhopecten yessoensis  
 UdeM00000014045 225164 395.2 UdeM00000014045 XP\_009050116.1 52.1  
 355 166 4 10 363 7 358 9.10E-107 395.2 225164  
 cellular  
 organisms;Eukaryota;Opisthokonta;Metazoa;Eumetazoa;Bilateria;Protostomia;  
 Spiralia;Lophotrochozoa;Mollusca;Gastropoda;Patellogastropoda;Lottioidea;  
 Lottiidae;Lottia;Lottia gigantea  
 UdeM00000014046 6573 790.8 UdeM00000014046 XP\_021342572.1 57.7 640  
 262 6 13 647 232 867 1.30E-225 790.8 6573 cellular  
 organisms;Eukaryota;Opisthokonta;Metazoa;Eumetazoa;Bilateria;Protostomia;  
 Spiralia;Lophotrochozoa;Mollusca;Bivalvia;Autobranhia;Pteriormorphia;Pect  
 inida;Pectinoidea;Pectinidae;Mizuhopecten;Mizuhopecten yessoensis  
 UdeM00000014049 7739 585.9 UdeM00000014049 XP\_035696678.1 57.6 481  
 201 1 2 479 423 903 5.00E-164 585.9 7739 cellular  
 organisms;Eukaryota;Opisthokonta;Metazoa;Eumetazoa;Bilateria;Deuterostomi  
 a;Chordata;Cephalochordata;Leptocardii;Amphioxiformes;Branchiostomidae;Br  
 anchiostoma;Branchiostoma floridae  
 UdeM00000014050 29159 580.5 UdeM00000014050 XP\_034331610.1 44.1 709  
 361 10 480 1185 446 1122 4.90E-162 580.5 29159 cellular  
 organisms;Eukaryota;Opisthokonta;Metazoa;Eumetazoa;Bilateria;Protostomia;  
 Spiralia;Lophotrochozoa;Mollusca;Bivalvia;Autobranhia;Pteriormorphia;Ostr  
 eida;Ostreoidea;Ostreidae;Crassostrea;Crassostrea gigas  
 UdeM00000014052 6579 566.2 UdeM00000014052 XP\_033728059.1 32.4 1301  
 722 34 14 1250 5 1211 1.00E-157 566.2 6579 cellular  
 organisms;Eukaryota;Opisthokonta;Metazoa;Eumetazoa;Bilateria;Protostomia;  
 Spiralia;Lophotrochozoa;Mollusca;Bivalvia;Autobranhia;Pteriormorphia;Pect  
 inida;Pectinoidea;Pectinidae;Pecten;Pecten maximus  
 UdeM00000014053 6596 368.2 UdeM00000014053 XP\_045177779.1 38.6 536  
 322 6 75 607 78 609 2.00E-98 368.2 6596 cellular  
 organisms;Eukaryota;Opisthokonta;Metazoa;Eumetazoa;Bilateria;Protostomia;  
 Spiralia;Lophotrochozoa;Mollusca;Bivalvia;Autobranhia;Heteroconchia;Euhe  
 terodonta;Imparidentia;Venerida;Veneroidea;Veneridae;Mercenaria;Mercenari  
 a mercenaria  
 UdeM00000014055 6579 137.1 UdeM00000014055 XP\_033732676.1 32.3 282  
 170 8 251 524 136 404 6.40E-29 137.1 6579 cellular  
 organisms;Eukaryota;Opisthokonta;Metazoa;Eumetazoa;Bilateria;Protostomia;



Spiralia; Lophotrochozoa; Mollusca; Bivalvia; Autobranchia; Pteriomorpha; Pectinida; Pectinoidea; Pectinidae; Pecten; Pecten maximus  
UdeM00000025027 6579 857.8 UdeM00000025027 XP\_033728194.1 47.4 988  
449 17 187 1123 124 1091 1.60E-245 857.8 6579 cellular  
organisms; Eukaryota; Opisthokonta; Metazoa; Eumetazoa; Bilateria; Protostomia; Spiralia; Lophotrochozoa; Mollusca; Bivalvia; Autobranchia; Pteriomorpha; Pectinida; Pectinoidea; Pectinidae; Pecten; Pecten maximus  
UdeM00000025028 6579 65.9 UdeM00000025028 XP\_033747958.1 55.2 58  
24 1 1 56 87 144 2.00E-08 65.9 6579 cellular  
organisms; Eukaryota; Opisthokonta; Metazoa; Eumetazoa; Bilateria; Protostomia; Spiralia; Lophotrochozoa; Mollusca; Bivalvia; Autobranchia; Pteriomorpha; Pectinida; Pectinoidea; Pectinidae; Pecten; Pecten maximus  
UdeM00000025029 6565 839 UdeM00000025029 XP\_022334993.1 49.4 893  
413 13 1 878 1 869 5.70E-240 839 6565 cellular  
organisms; Eukaryota; Opisthokonta; Metazoa; Eumetazoa; Bilateria; Protostomia; Spiralia; Lophotrochozoa; Mollusca; Bivalvia; Autobranchia; Pteriomorpha; Ostracida; Ostreidae; Crassostrea; Crassostrea virginica  
UdeM00000025030 6565 212.6 UdeM00000025030 XP\_022287303.1 34.2 310  
190 7 6 303 443 750 6.90E-52 212.6 6565 cellular  
organisms; Eukaryota; Opisthokonta; Metazoa; Eumetazoa; Bilateria; Protostomia; Spiralia; Lophotrochozoa; Mollusca; Bivalvia; Autobranchia; Pteriomorpha; Ostracida; Ostreidae; Crassostrea; Crassostrea virginica  
UdeM00000025031 6565 132.1 UdeM00000025031 XP\_022334997.1 44.8 154  
80 3 6 156 29 180 6.20E-28 132.1 6565 cellular  
organisms; Eukaryota; Opisthokonta; Metazoa; Eumetazoa; Bilateria; Protostomia; Spiralia; Lophotrochozoa; Mollusca; Bivalvia; Autobranchia; Pteriomorpha; Ostracida; Ostreidae; Crassostrea; Crassostrea virginica  
UdeM00000025033 6596 221.1 UdeM00000025033 XP\_045161541.1 41.7 295  
147 5 14 286 30 321 2.00E-54 221.1 6596 cellular  
organisms; Eukaryota; Opisthokonta; Metazoa; Eumetazoa; Bilateria; Protostomia; Spiralia; Lophotrochozoa; Mollusca; Bivalvia; Autobranchia; Heteroconchia; Euheterodonta; Imparidentia; Venerida; Veneroidea; Veneridae; Mercenaria; Mercenaria mercenaria  
UdeM00000025035 6565 77 UdeM00000025035 XP\_022290317.1 51.7 58  
28 0 2 59 4 61 1.20E-11 77 6565 cellular  
organisms; Eukaryota; Opisthokonta; Metazoa; Eumetazoa; Bilateria; Protostomia; Spiralia; Lophotrochozoa; Mollusca; Bivalvia; Autobranchia; Pteriomorpha; Ostracida; Ostreidae; Crassostrea; Crassostrea virginica  
UdeM00000044404 1095194 189.5 UdeM00000044404 XP\_038746483.1 43.7  
252 141 1 1 251 1 252 5.40E-45 189.5 1095194  
cellular  
organisms; Eukaryota; Opisthokonta; Fungi; Dikarya; Ascomycota; saccharomyceta; Pezizomycotina; leotiomyceta; sordariomyceta; Sordariomycetes; Hypocreomycetidae; Glomerellales; Glomerellaceae; Colletotrichum; Colletotrichum boninense species complex; Colletotrichum karsti  
UdeM00000012765 6596 129.8 UdeM00000012765 XP\_045186558.1 63.2 106  
33 1 3 108 71 170 2.10E-27 129.8 6596 cellular  
organisms; Eukaryota; Opisthokonta; Metazoa; Eumetazoa; Bilateria; Protostomia; Spiralia; Lophotrochozoa; Mollusca; Bivalvia; Autobranchia; Heteroconchia; Euheterodonta; Imparidentia; Venerida; Veneroidea; Veneridae; Mercenaria; Mercenaria mercenaria  
UdeM00000012767 6573 1111.3 UdeM00000012767 XP\_021347494.1 68  
823 261 1 1 821 775 1597 0.00E+00 1111.3 6573  
cellular

organisms;Eukaryota;Opisthokonta;Metazoa;Eumetazoa;Bilateria;Protostomia;Spiralia;Lophotrochozoa;Mollusca;Bivalvia;Autobranchia;Pteriomorpha;Pectinida;Pectinoidea;Pectinidae;Mizuhopecten;Mizuhopecten yessoensis

UdeM00000012766 6573 1834.3 UdeM00000012766 XP\_021347494.1 60.1  
1613 573 12 1 1558 1 1597 0.00E+00 1834.3 6573  
cellular

organisms;Eukaryota;Opisthokonta;Metazoa;Eumetazoa;Bilateria;Protostomia;Spiralia;Lophotrochozoa;Mollusca;Bivalvia;Autobranchia;Pteriomorpha;Pectinida;Pectinoidea;Pectinidae;Mizuhopecten;Mizuhopecten yessoensis

UdeM00000012768 6573 690.6 UdeM00000012768 XP\_021347494.1 55.7 668  
268 9 1 656 1 652 1.90E-195 690.6 6573 cellular

organisms;Eukaryota;Opisthokonta;Metazoa;Eumetazoa;Bilateria;Protostomia;Spiralia;Lophotrochozoa;Mollusca;Bivalvia;Autobranchia;Pteriomorpha;Pectinida;Pectinoidea;Pectinidae;Mizuhopecten;Mizuhopecten yessoensis

UdeM00000012769 6565 170.6 UdeM00000012769 XP\_022329833.1 50.2 203  
74 5 47 249 73 248 2.60E-39 170.6 6565 cellular

organisms;Eukaryota;Opisthokonta;Metazoa;Eumetazoa;Bilateria;Protostomia;Spiralia;Lophotrochozoa;Mollusca;Bivalvia;Autobranchia;Pteriomorpha;Ostreida;Ostreoidea;Ostreidae;Crassostrea;Crassostrea virginica

UdeM00000012770 1735272 374.4 UdeM00000012770 XP\_041353524.1 41.6  
464 254 7 66 521 150 604 2.40E-100 374.4 1735272  
cellular

organisms;Eukaryota;Opisthokonta;Metazoa;Eumetazoa;Bilateria;Protostomia;Spiralia;Lophotrochozoa;Mollusca;Gastropoda;Neomphalina;Neomphaloidea;Peltospiridae;Gigantopelta;Gigantopelta aegis

UdeM00000012771 6573 2417.1 UdeM00000012771 XP\_021347323.1 51.8  
2476 1146 10 1 2438 2738 5203 0.00E+00 2417.1 6573  
cellular

organisms;Eukaryota;Opisthokonta;Metazoa;Eumetazoa;Bilateria;Protostomia;Spiralia;Lophotrochozoa;Mollusca;Bivalvia;Autobranchia;Pteriomorpha;Pectinida;Pectinoidea;Pectinidae;Mizuhopecten;Mizuhopecten yessoensis

UdeM00000012772 29159 1211.4 UdeM00000012772 XP\_034325660.1 51.7  
1117 525 6 3 1104 1468 2584 0.00E+00 1211.4  
29159 cellular

organisms;Eukaryota;Opisthokonta;Metazoa;Eumetazoa;Bilateria;Protostomia;Spiralia;Lophotrochozoa;Mollusca;Bivalvia;Autobranchia;Pteriomorpha;Ostreida;Ostreoidea;Ostreidae;Crassostrea;Crassostrea gigas

UdeM00000012773 6596 271.2 UdeM00000012773 XP\_045158584.1 44.6 323  
171 6 16 336 96 412 1.90E-69 271.2 6596 cellular

organisms;Eukaryota;Opisthokonta;Metazoa;Eumetazoa;Bilateria;Protostomia;Spiralia;Lophotrochozoa;Mollusca;Bivalvia;Autobranchia;Heteroconchia;Euheterodonta;Imparidentia;Venerida;Veneroidea;Veneridae;Mercenaria;Mercenaria mercenaria

UdeM00000012774 6579 1763.4 UdeM00000012774 XP\_033733564.1 50.8  
1670 706 11 28 1601 14 1663 0.00E+00 1763.4 6579  
cellular

organisms;Eukaryota;Opisthokonta;Metazoa;Eumetazoa;Bilateria;Protostomia;Spiralia;Lophotrochozoa;Mollusca;Bivalvia;Autobranchia;Pteriomorpha;Pectinida;Pectinoidea;Pectinidae;Pecten;Pecten maximus

UdeM00000012775 6573 161.8 UdeM00000012775 XP\_021345423.1 57.2 138  
58 1 2 138 3 140 7.80E-37 161.8 6573 cellular

organisms;Eukaryota;Opisthokonta;Metazoa;Eumetazoa;Bilateria;Protostomia;Spiralia;Lophotrochozoa;Mollusca;Bivalvia;Autobranchia;Pteriomorpha;Pectinida;Pectinoidea;Pectinidae;Mizuhopecten;Mizuhopecten yessoensis

UdeM00000012776 6573 823.2 UdeM00000012776 XP\_021360421.1 60.4 627  
 244 4 30 654 26 650 3.20E-235 823.2 6573 cellular  
 organisms;Eukaryota;Opisthokonta;Metazoa;Eumetazoa;Bilateria;Protostomia;  
 Spiralia;Lophotrochozoa;Mollusca;Bivalvia;Autobranchia;Pteriormorphia;Pect  
 inida;Pectinoidea;Pectinidae;Mizuhopecten;Mizuhopecten yessoensis  
 UdeM00000012777 6565 430.6 UdeM00000012777 XP\_022327962.1 56.9 390  
 164 3 1 386 323 712 4.00E-117 430.6 6565 cellular  
 organisms;Eukaryota;Opisthokonta;Metazoa;Eumetazoa;Bilateria;Protostomia;  
 Spiralia;Lophotrochozoa;Mollusca;Bivalvia;Autobranchia;Pteriormorphia;Ostr  
 eida;Ostreoidea;Ostreidae;Crassostrea;Crassostrea virginica  
 UdeM00000012778 1529436 172.6 UdeM00000012778 XP\_033125825.1 57.7  
 149 62 1 1 148 1 149 3.90E-40 172.6 1529436  
 cellular  
 organisms;Eukaryota;Opisthokonta;Metazoa;Eumetazoa;Bilateria;Deuterostomi  
 a;Echinodermata;Pelmatozoa;Crinoidea;Articulata;Comatulida;Comatulidae;Co  
 matulinae;Anneissia;Anneissia japonica  
 UdeM00000012779 29159 275.4 UdeM00000012779 XP\_011436588.1 91.9 149  
 12 0 1 149 1 149 4.30E-71 275.4 29159 cellular  
 organisms;Eukaryota;Opisthokonta;Metazoa;Eumetazoa;Bilateria;Protostomia;  
 Spiralia;Lophotrochozoa;Mollusca;Bivalvia;Autobranchia;Pteriormorphia;Ostr  
 eida;Ostreoidea;Ostreidae;Crassostrea;Crassostrea gigas  
 UdeM00000012780 8005 290.4 UdeM00000012780 XP\_026867805.1 98 149  
 3 0 1 149 1 149 1.30E-75 290.4 8005 cellular  
 organisms;Eukaryota;Opisthokonta;Metazoa;Eumetazoa;Bilateria;Deuterostomi  
 a;Chordata;Craniata;Vertebrata;Gnathostomata;Teleostomi;Euteleostomi;Acti  
 nopterygii;Actinopteri;Neopterygii;Teleostei;Osteoglossocephalai;Clupeoce  
 phala;Otomorpha;Ostariophysi;Otophysi;Characiphysae;Gymnotiformes;Gymnoto  
 idei;Gymnotidae;Electrophorus;Electrophorus electricus  
 UdeM00000012781 9755 157.1 UdeM00000012781 XP\_023974562.1 47.1 174  
 83 3 14 187 57 221 2.10E-35 157.1 9755 cellular  
 organisms;Eukaryota;Opisthokonta;Metazoa;Eumetazoa;Bilateria;Deuterostomi  
 a;Chordata;Craniata;Vertebrata;Gnathostomata;Teleostomi;Euteleostomi;Sarc  
 opterygii;Dipnotetrapodomorpha;Tetrapoda;Amniota;Mammalia;Theria;Eutheria  
 ;Boreoeutheria;Laurasiatheria;Artiodactyla;Whippomorpha;Cetacea;Odontocet  
 i;Physeteridae;Physeter;Physeter catodon  
 UdeM00000012782 9798 243.4 UdeM00000012782 XP\_008516751.1 74.6 169  
 38 2 24 192 14 177 2.30E-61 243.4 9798 cellular  
 organisms;Eukaryota;Opisthokonta;Metazoa;Eumetazoa;Bilateria;Deuterostomi  
 a;Chordata;Craniata;Vertebrata;Gnathostomata;Teleostomi;Euteleostomi;Sarc  
 opterygii;Dipnotetrapodomorpha;Tetrapoda;Amniota;Mammalia;Theria;Eutheria  
 ;Boreoeutheria;Laurasiatheria;Perissodactyla;Equidae;Equus;Equus;Equus  
 przewalskii  
 UdeM00000012783 7739 237.3 UdeM00000012783 XP\_035669437.1 77 148  
 34 0 1 148 1 148 1.30E-59 237.3 7739 cellular  
 organisms;Eukaryota;Opisthokonta;Metazoa;Eumetazoa;Bilateria;Deuterostomi  
 a;Chordata;Cephalochordata;Leptocardii;Amphioxiformes;Branchiostomidae;Br  
 anchiostoma;Branchiostoma floridae  
 UdeM00000012784 1156394 211.1 UdeM00000012784 XP\_008607073.1 68.7  
 150 46 1 1 150 1 149 1.00E-51 211.1 1156394  
 cellular  
 organisms;Eukaryota;Sar;Stramenopiles;Oomycota;Saprolegniales;Saprolegnia  
 ceae;Saprolegnia;Saprolegnia diclina;Saprolegnia diclina VS20  
 UdeM00000012785 29139 147.5 UdeM00000012785 XP\_027718166.1 47.7 149  
 77 1 1 148 1 149 1.40E-32 147.5 29139 cellular

organisms;Eukaryota;Opisthokonta;Metazoa;Eumetazoa;Bilateria;Deuterostomia;Chordata;Craniata;Vertebrata;Gnathostomata;Teleostomi;Euteleostomi;Sarcopterygii;Dipnotetrapodomorpha;Tetrapoda;Amniota;Mammalia;Theria;Metatheria;Diprotodontia;Vombatidae;Vombatus;Vombatus ursinus

UdeM00000012787 412030 240.4 UdeM00000012787 XP\_001448363.1 77.2  
149 34 0 1 149 1 149 1.50E-60 240.4 412030  
cellular

organisms;Eukaryota;Sar;Alveolata;Ciliophora;Intramacronucleata;Oligohymenophorea;Peniculida;Parameciidae;Paramecium;Paramecium tetraurelia;Paramecium tetraurelia strain d4-2

UdeM00000012788 109461 285 UdeM00000012788 XP\_022654919.1 95.3  
149 7 0 1 149 1 149 5.40E-74 285 109461  
cellular

organisms;Eukaryota;Opisthokonta;Metazoa;Eumetazoa;Bilateria;Protostomia;Ecdysozoa;Panarthropoda;Arthropoda;Chelicerata;Arachnida;Acari;Parasitiformes;Mesostigmata;Monogynaspida;Gamasina;Dermanyssoidea;Varroidae;Varroa;Varroa destructor

UdeM00000012789 3981 184.1 UdeM00000012789 XP\_021690954.1 63.3 150  
51 2 1 149 1 147 1.30E-43 184.1 3981 cellular

organisms;Eukaryota;Viridiplantae;Streptophyta;Streptophytina;Embryophyta;Tracheophyta;Euphyllophyta;Spermatophyta;Magnoliopsida;Mesangiospermae;eudicotyledons;Gunneridae;Pentapetalae;rosids;fabids;Malpighiales;Euphorbiaceae;Crotonoideae;Micrandreae;Hevea;Hevea brasiliensis

UdeM00000012790 6596 245 UdeM00000012790 XP\_045165014.1 42.1 304  
159 5 2 288 4 307 1.20E-61 245 6596 cellular

organisms;Eukaryota;Opisthokonta;Metazoa;Eumetazoa;Bilateria;Protostomia;Spiralia;Lophotrochozoa;Mollusca;Bivalvia;Autobranchia;Heteroconchia;Euheterodonta;Imparidentia;Venerida;Veneroidea;Veneridae;Mercenaria;Mercenaria mercenaria

UdeM00000012791 78828 198.4 UdeM00000012791 XP\_020583000.1 67.1 146  
47 1 1 145 1 146 6.60E-48 198.4 78828 cellular

organisms;Eukaryota;Viridiplantae;Streptophyta;Streptophytina;Embryophyta;Tracheophyta;Euphyllophyta;Spermatophyta;Magnoliopsida;Mesangiospermae;Liliopsida;Petrosaviidae;Asparagales;Orchidaceae;Epidendroideae;Vandae;Aeridinae;Phalaenopsis;Phalaenopsis equestris

UdeM00000012792 6573 231.9 UdeM00000012792 XP\_021349551.1 75.8 149  
36 0 1 149 1 149 5.40E-58 231.9 6573 cellular

organisms;Eukaryota;Opisthokonta;Metazoa;Eumetazoa;Bilateria;Protostomia;Spiralia;Lophotrochozoa;Mollusca;Bivalvia;Autobranchia;Pteriormorphia;Pectinida;Pectinoidea;Pectinidae;Mizuhopecten;Mizuhopecten yessoensis

UdeM00000012793 6573 120.6 UdeM00000012793 XP\_021341946.1 36.2 174  
95 3 26 183 31 204 2.40E-24 120.6 6573 cellular

organisms;Eukaryota;Opisthokonta;Metazoa;Eumetazoa;Bilateria;Protostomia;Spiralia;Lophotrochozoa;Mollusca;Bivalvia;Autobranchia;Pteriormorphia;Pectinida;Pectinoidea;Pectinidae;Mizuhopecten;Mizuhopecten yessoensis

UdeM00000012794 29159 68.9 UdeM00000012794 XP\_034318944.1 58.1 62  
24 1 5 64 422 483 5.70E-09 68.9 29159 cellular

organisms;Eukaryota;Opisthokonta;Metazoa;Eumetazoa;Bilateria;Protostomia;Spiralia;Lophotrochozoa;Mollusca;Bivalvia;Autobranchia;Pteriormorphia;Ostreida;Ostreoidea;Ostreidae;Crassostrea;Crassostrea gigas

UdeM00000012795 400727 1016.9 UdeM00000012795 XP\_025104635.1  
68.4 709 220 1 1 705 1 709 1.30E-293 1016.9  
400727 cellular

organisms;Eukaryota;Opisthokonta;Metazoa;Eumetazoa;Bilateria;Protostomia;

Spiralia; Lophotrochozoa; Mollusca; Gastropoda; Caenogastropoda; Architaenioglossa; Ampullarioidea; Ampullariidae; Pomacea; Pomacea canaliculata

UdeM00000012796 6596 515.8 UdeM00000012796 XP\_045175931.1 67.8 367  
113 3 1 365 1 364 4.60E-143 515.8 6596 cellular  
organisms; Eukaryota; Opisthokonta; Metazoa; Eumetazoa; Bilateria; Protostomia; Spiralia; Lophotrochozoa; Mollusca; Bivalvia; Autobranchia; Heteroconchia; Euheterodonta; Imparidentia; Venerida; Veneroidea; Veneridae; Mercenaria; Mercenaria mercenaria

UdeM00000012797 6596 443.7 UdeM00000012797 XP\_045175943.1 73.4 289  
75 1 12 298 5 293 2.00E-121 443.7 6596 cellular  
organisms; Eukaryota; Opisthokonta; Metazoa; Eumetazoa; Bilateria; Protostomia; Spiralia; Lophotrochozoa; Mollusca; Bivalvia; Autobranchia; Heteroconchia; Euheterodonta; Imparidentia; Venerida; Veneroidea; Veneridae; Mercenaria; Mercenaria mercenaria

UdeM00000012798 6596 444.1 UdeM00000012798 XP\_045175943.1 73.4 289  
75 1 6 292 5 293 1.50E-121 444.1 6596 cellular  
organisms; Eukaryota; Opisthokonta; Metazoa; Eumetazoa; Bilateria; Protostomia; Spiralia; Lophotrochozoa; Mollusca; Bivalvia; Autobranchia; Heteroconchia; Euheterodonta; Imparidentia; Venerida; Veneroidea; Veneridae; Mercenaria; Mercenaria mercenaria

UdeM00000012799 6596 293.1 UdeM00000012799 XP\_045175918.1 51.9 260  
125 0 15 274 8 267 3.90E-76 293.1 6596 cellular  
organisms; Eukaryota; Opisthokonta; Metazoa; Eumetazoa; Bilateria; Protostomia; Spiralia; Lophotrochozoa; Mollusca; Bivalvia; Autobranchia; Heteroconchia; Euheterodonta; Imparidentia; Venerida; Veneroidea; Veneridae; Mercenaria; Mercenaria mercenaria

UdeM00000012801 7741 194.1 UdeM00000012801 XP\_019640293.1 64.5 141  
49 1 19 158 267 407 1.50E-46 194.1 7741 cellular  
organisms; Eukaryota; Opisthokonta; Metazoa; Eumetazoa; Bilateria; Deuterostomia; Chordata; Cephalochordata; Leptocardii; Amphioxiformes; Branchiostomidae; Branchiostoma; Branchiostoma belcheri

UdeM00000012802 6596 1511.9 UdeM00000012802 XP\_045216282.1 67.8  
1156 316 7 4 1141 13 1130 0.00E+00 1511.9 6596  
cellular  
organisms; Eukaryota; Opisthokonta; Metazoa; Eumetazoa; Bilateria; Protostomia; Spiralia; Lophotrochozoa; Mollusca; Bivalvia; Autobranchia; Heteroconchia; Euheterodonta; Imparidentia; Venerida; Veneroidea; Veneridae; Mercenaria; Mercenaria mercenaria

UdeM00000012804 225164 585.9 UdeM00000012804 XP\_009063622.1 74.2  
407 56 1 9 415 6 363 4.20E-164 585.9 225164  
cellular  
organisms; Eukaryota; Opisthokonta; Metazoa; Eumetazoa; Bilateria; Protostomia; Spiralia; Lophotrochozoa; Mollusca; Gastropoda; Patellogastropoda; Lottiidae; Lottia; Lottia gigantea

UdeM00000012803 6579 963.8 UdeM00000012803 XP\_033734019.1 69.5 721  
114 3 9 673 6 676 1.20E-277 963.8 6579 cellular  
organisms; Eukaryota; Opisthokonta; Metazoa; Eumetazoa; Bilateria; Protostomia; Spiralia; Lophotrochozoa; Mollusca; Bivalvia; Autobranchia; Pteriomorpha; Pectinida; Pectinoidea; Pectinidae; Pecten; Pecten maximus

UdeM00000012805 1735272 230.7 UdeM00000012805 XP\_041352812.1 51.1  
225 95 3 45 265 33 246 2.40E-57 230.7 1735272  
cellular  
organisms; Eukaryota; Opisthokonta; Metazoa; Eumetazoa; Bilateria; Protostomia;

Spiralia;Lophotrochozoa;Mollusca;Gastropoda;Neomphalina;Neomphaloidea;Pel  
tospiridae;Gigantopelta;Gigantopelta aegis  
UdeM00000012806 6596 552 UdeM00000012806 XP\_045215928.1 40.2 748  
419 10 76 808 104 838 1.30E-153 552 6596 cellular  
organisms;Eukaryota;Opisthokonta;Metazoa;Eumetazoa;Bilateria;Protostomia;  
Spiralia;Lophotrochozoa;Mollusca;Bivalvia;Autobranchia;Heteroconchia;Euhe  
terodonta;Imparidentia;Venerida;Veneroidea;Veneridae;Mercenaria;Mercenari  
a mercenaria  
UdeM00000012807 6596 552.4 UdeM00000012807 XP\_045215928.1 40.4 757  
418 11 66 806 99 838 1.00E-153 552.4 6596 cellular  
organisms;Eukaryota;Opisthokonta;Metazoa;Eumetazoa;Bilateria;Protostomia;  
Spiralia;Lophotrochozoa;Mollusca;Bivalvia;Autobranchia;Heteroconchia;Euhe  
terodonta;Imparidentia;Venerida;Veneroidea;Veneridae;Mercenaria;Mercenari  
a mercenaria  
UdeM00000012808 6596 564.3 UdeM00000012808 XP\_045215928.1 41.4 723  
399 9 42 751 119 829 2.40E-157 564.3 6596 cellular  
organisms;Eukaryota;Opisthokonta;Metazoa;Eumetazoa;Bilateria;Protostomia;  
Spiralia;Lophotrochozoa;Mollusca;Bivalvia;Autobranchia;Heteroconchia;Euhe  
terodonta;Imparidentia;Venerida;Veneroidea;Veneridae;Mercenaria;Mercenari  
a mercenaria  
UdeM00000012809 6596 138.3 UdeM00000012809 XP\_045214703.1 54.1 135  
46 4 32 151 75 208 9.70E-30 138.3 6596 cellular  
organisms;Eukaryota;Opisthokonta;Metazoa;Eumetazoa;Bilateria;Protostomia;  
Spiralia;Lophotrochozoa;Mollusca;Bivalvia;Autobranchia;Heteroconchia;Euhe  
terodonta;Imparidentia;Venerida;Veneroidea;Veneridae;Mercenaria;Mercenari  
a mercenaria  
UdeM00000012810 6412 74.7 UdeM00000012810 XP\_009012646.1 42.6 108  
53 3 1 100 1 107 7.80E-11 74.7 6412 cellular  
organisms;Eukaryota;Opisthokonta;Metazoa;Eumetazoa;Bilateria;Protostomia;  
Spiralia;Lophotrochozoa;Annelida;Clitellata;Hirudinea;Rhynchobdellida;Glo  
ssisphoniidae;Helobdella;Helobdella robusta  
UdeM00000012811 6579 131 UdeM00000012811 XP\_033734617.1 38 242  
131 5 22 257 222 450 1.10E-26 131 6579 cellular  
organisms;Eukaryota;Opisthokonta;Metazoa;Eumetazoa;Bilateria;Protostomia;  
Spiralia;Lophotrochozoa;Mollusca;Bivalvia;Autobranchia;Pteriomorphia;Pect  
inida;Pectinoidea;Pectinidae;Pecten;Pecten maximus  
UdeM00000012812 29159 73.9 UdeM00000012812 XP\_034307341.1 38.6 88  
54 0 3 90 5 92 1.70E-10 73.9 29159 cellular  
organisms;Eukaryota;Opisthokonta;Metazoa;Eumetazoa;Bilateria;Protostomia;  
Spiralia;Lophotrochozoa;Mollusca;Bivalvia;Autobranchia;Pteriomorphia;Ostr  
eida;Ostreoidea;Ostreidae;Crassostrea;Crassostrea gigas  
UdeM00000012813 29159 92 UdeM00000012813 XP\_034307341.1 39.8 118  
63 2 9 118 230 347 9.10E-16 92 29159 cellular  
organisms;Eukaryota;Opisthokonta;Metazoa;Eumetazoa;Bilateria;Protostomia;  
Spiralia;Lophotrochozoa;Mollusca;Bivalvia;Autobranchia;Pteriomorphia;Ostr  
eida;Ostreoidea;Ostreidae;Crassostrea;Crassostrea gigas  
UdeM00000012814 1735272 304.3 UdeM00000012814 XP\_041379319.1 50.2  
285 138 3 2 284 640 922 1.60E-79 304.3 1735272  
cellular  
organisms;Eukaryota;Opisthokonta;Metazoa;Eumetazoa;Bilateria;Protostomia;  
Spiralia;Lophotrochozoa;Mollusca;Gastropoda;Neomphalina;Neomphaloidea;Pel  
tospiridae;Gigantopelta;Gigantopelta aegis  
UdeM00000012816 6596 545.4 UdeM00000012816 XP\_045187536.1 67.3 401  
128 2 1 401 327 724 5.90E-152 545.4 6596 cellular

organisms;Eukaryota;Opisthokonta;Metazoa;Eumetazoa;Bilateria;Protostomia;Spiralia;Lophotrochozoa;Mollusca;Bivalvia;Autobranchia;Heteroconchia;Euherodonta;Imparidentia;Venerida;Veneroidea;Veneridae;Mercenaria;Mercenaria mercenaria

UdeM00000012815 6596 674.5 UdeM00000012815 XP\_045187536.1 67.6 500  
159 2 2 501 228 724 1.10E-190 674.5 6596 cellular

organisms;Eukaryota;Opisthokonta;Metazoa;Eumetazoa;Bilateria;Protostomia;Spiralia;Lophotrochozoa;Mollusca;Bivalvia;Autobranchia;Heteroconchia;Euherodonta;Imparidentia;Venerida;Veneroidea;Veneridae;Mercenaria;Mercenaria mercenaria

UdeM00000012817 6596 1759.6 UdeM00000012817 XP\_045158123.1 67.5  
1296 396 5 1 1296 1 1271 0.00E+00 1759.6 6596  
cellular

organisms;Eukaryota;Opisthokonta;Metazoa;Eumetazoa;Bilateria;Protostomia;Spiralia;Lophotrochozoa;Mollusca;Bivalvia;Autobranchia;Heteroconchia;Euherodonta;Imparidentia;Venerida;Veneroidea;Veneridae;Mercenaria;Mercenaria mercenaria

UdeM00000012818 6596 381.7 UdeM00000012818 XP\_045168008.1 51.5 375  
164 2 16 372 19 393 1.60E-102 381.7 6596 cellular

organisms;Eukaryota;Opisthokonta;Metazoa;Eumetazoa;Bilateria;Protostomia;Spiralia;Lophotrochozoa;Mollusca;Bivalvia;Autobranchia;Heteroconchia;Euherodonta;Imparidentia;Venerida;Veneroidea;Veneridae;Mercenaria;Mercenaria mercenaria

UdeM00000012819 6596 380.9 UdeM00000012819 XP\_045168025.1 54.2 349  
159 1 1 349 1 348 2.60E-102 380.9 6596 cellular

organisms;Eukaryota;Opisthokonta;Metazoa;Eumetazoa;Bilateria;Protostomia;Spiralia;Lophotrochozoa;Mollusca;Bivalvia;Autobranchia;Heteroconchia;Euherodonta;Imparidentia;Venerida;Veneroidea;Veneridae;Mercenaria;Mercenaria mercenaria

UdeM00000012820 6596 130.6 UdeM00000012820 XP\_045176009.1 46.3 108  
58 0 1 108 422 529 1.20E-27 130.6 6596 cellular

organisms;Eukaryota;Opisthokonta;Metazoa;Eumetazoa;Bilateria;Protostomia;Spiralia;Lophotrochozoa;Mollusca;Bivalvia;Autobranchia;Heteroconchia;Euherodonta;Imparidentia;Venerida;Veneroidea;Veneridae;Mercenaria;Mercenaria mercenaria

UdeM00000012821 1735272 209.9 UdeM00000012821 XP\_041352291.1 57.1  
175 73 1 1 173 354 528 2.60E-51 209.9 1735272  
cellular

organisms;Eukaryota;Opisthokonta;Metazoa;Eumetazoa;Bilateria;Protostomia;Spiralia;Lophotrochozoa;Mollusca;Gastropoda;Neomphalina;Neomphaloidea;Peltospiridae;Gigantopelta;Gigantopelta aegis

UdeM00000012822 6579 184.5 UdeM00000012822 XP\_033735324.1 55.6 153  
66 1 4 156 31 181 1.10E-43 184.5 6579 cellular

organisms;Eukaryota;Opisthokonta;Metazoa;Eumetazoa;Bilateria;Protostomia;Spiralia;Lophotrochozoa;Mollusca;Bivalvia;Autobranchia;Pteriomorphia;Pectinida;Pectinoidea;Pectinidae;Pecten;Pecten maximus

UdeM00000012825 6596 659.4 UdeM00000012825 XP\_045175967.1 48.2 730  
345 5 313 1019 197 916 7.20E-186 659.4 6596 cellular

organisms;Eukaryota;Opisthokonta;Metazoa;Eumetazoa;Bilateria;Protostomia;Spiralia;Lophotrochozoa;Mollusca;Bivalvia;Autobranchia;Heteroconchia;Euherodonta;Imparidentia;Venerida;Veneroidea;Veneridae;Mercenaria;Mercenaria mercenaria

UdeM00000012824 6596 666.4 UdeM00000012824 XP\_045175967.1 35 1304  
724 20 313 1549 197 1443 8.90E-188 666.4 6596 cellular

organisms;Eukaryota;Opisthokonta;Metazoa;Eumetazoa;Bilateria;Protostomia;Spiralia;Lophotrochozoa;Mollusca;Bivalvia;Autobranchia;Heteroconchia;Euheterodonta;Imparidentia;Venerida;Veneroidea;Veneridae;Mercenaria;Mercenaria mercenaria

UdeM00000012826 6596 1062.8 UdeM00000012826 XP\_045175954.1 79.7  
634 124 1 26 659 29 657 1.80E-307 1062.8 6596  
cellular

organisms;Eukaryota;Opisthokonta;Metazoa;Eumetazoa;Bilateria;Protostomia;Spiralia;Lophotrochozoa;Mollusca;Bivalvia;Autobranchia;Heteroconchia;Euheterodonta;Imparidentia;Venerida;Veneroidea;Veneridae;Mercenaria;Mercenaria mercenaria

UdeM00000012827 29159 105.9 UdeM00000012827 XP\_034325534.1 67.2 67  
22 0 1 67 125 191 2.10E-20 105.9 29159 cellular

organisms;Eukaryota;Opisthokonta;Metazoa;Eumetazoa;Bilateria;Protostomia;Spiralia;Lophotrochozoa;Mollusca;Bivalvia;Autobranchia;Pteriormorphia;Ostreida;Ostreoidea;Ostreidae;Crassostrea;Crassostrea gigas

UdeM00000012828 6579 148.3 UdeM00000012828 XP\_033733810.1 57.4 101  
43 0 28 128 28 128 7.10E-33 148.3 6579 cellular

organisms;Eukaryota;Opisthokonta;Metazoa;Eumetazoa;Bilateria;Protostomia;Spiralia;Lophotrochozoa;Mollusca;Bivalvia;Autobranchia;Pteriormorphia;Pectinida;Pectinoidea;Pectinidae;Pecten;Pecten maximus

UdeM00000012829 6596 443.7 UdeM00000012829 XP\_045186364.1 45.4 509  
252 8 40 544 11 497 3.30E-121 443.7 6596 cellular

organisms;Eukaryota;Opisthokonta;Metazoa;Eumetazoa;Bilateria;Protostomia;Spiralia;Lophotrochozoa;Mollusca;Bivalvia;Autobranchia;Heteroconchia;Euheterodonta;Imparidentia;Venerida;Veneroidea;Veneridae;Mercenaria;Mercenaria mercenaria

UdeM00000012830 6596 530.8 UdeM00000012830 XP\_045186372.1 41.1 776  
71 2 20 795 15 404 3.00E-147 530.8 6596 cellular

organisms;Eukaryota;Opisthokonta;Metazoa;Eumetazoa;Bilateria;Protostomia;Spiralia;Lophotrochozoa;Mollusca;Bivalvia;Autobranchia;Heteroconchia;Euheterodonta;Imparidentia;Venerida;Veneroidea;Veneridae;Mercenaria;Mercenaria mercenaria

UdeM00000012831 6579 235.3 UdeM00000012831 XP\_033735831.1 39.2 355  
199 5 1 343 1 350 1.50E-58 235.3 6579 cellular

organisms;Eukaryota;Opisthokonta;Metazoa;Eumetazoa;Bilateria;Protostomia;Spiralia;Lophotrochozoa;Mollusca;Bivalvia;Autobranchia;Pteriormorphia;Pectinida;Pectinoidea;Pectinidae;Pecten;Pecten maximus

UdeM00000012832 29159 80.1 UdeM00000012832 XP\_034339171.1 37.3 118  
71 1 1 118 653 767 2.30E-12 80.1 29159 cellular

organisms;Eukaryota;Opisthokonta;Metazoa;Eumetazoa;Bilateria;Protostomia;Spiralia;Lophotrochozoa;Mollusca;Bivalvia;Autobranchia;Pteriormorphia;Ostreida;Ostreoidea;Ostreidae;Crassostrea;Crassostrea gigas

UdeM00000012833 29159 128.6 UdeM00000012833 XP\_034331441.1 37.3 212  
120 6 153 358 14 218 1.60E-26 128.6 29159 cellular

organisms;Eukaryota;Opisthokonta;Metazoa;Eumetazoa;Bilateria;Protostomia;Spiralia;Lophotrochozoa;Mollusca;Bivalvia;Autobranchia;Pteriormorphia;Ostreida;Ostreoidea;Ostreidae;Crassostrea;Crassostrea gigas

UdeM00000012834 29159 122.5 UdeM00000012834 XP\_034331441.1 42.6 155  
83 3 15 165 66 218 5.20E-25 122.5 29159 cellular

organisms;Eukaryota;Opisthokonta;Metazoa;Eumetazoa;Bilateria;Protostomia;Spiralia;Lophotrochozoa;Mollusca;Bivalvia;Autobranchia;Pteriormorphia;Ostreida;Ostreoidea;Ostreidae;Crassostrea;Crassostrea gigas



UdeM00000012836 29159 80.1 UdeM00000012836 XP\_034339171.1 37.3 118  
 71 1 1 118 653 767 2.30E-12 80.1 29159 cellular  
 organisms;Eukaryota;Opisthokonta;Metazoa;Eumetazoa;Bilateria;Protostomia;  
 Spiralia;Lophotrochozoa;Mollusca;Bivalvia;Autobranhia;Pteriomorphia;Ostr  
 eida;Ostreoidea;Ostreidae;Crassostrea;Crassostrea gigas  
 UdeM00000012835 29159 97.8 UdeM00000012835 XP\_034339171.1 37 146  
 88 2 4 148 625 767 1.30E-17 97.8 29159 cellular  
 organisms;Eukaryota;Opisthokonta;Metazoa;Eumetazoa;Bilateria;Protostomia;  
 Spiralia;Lophotrochozoa;Mollusca;Bivalvia;Autobranhia;Pteriomorphia;Ostr  
 eida;Ostreoidea;Ostreidae;Crassostrea;Crassostrea gigas  
 UdeM00000012837 29159 122.5 UdeM00000012837 XP\_034331441.1 42.6 155  
 83 3 15 165 66 218 5.20E-25 122.5 29159 cellular  
 organisms;Eukaryota;Opisthokonta;Metazoa;Eumetazoa;Bilateria;Protostomia;  
 Spiralia;Lophotrochozoa;Mollusca;Bivalvia;Autobranhia;Pteriomorphia;Ostr  
 eida;Ostreoidea;Ostreidae;Crassostrea;Crassostrea gigas  
 UdeM00000012838 29159 98.2 UdeM00000012838 XP\_034339171.1 37.7 146  
 87 2 4 148 625 767 1.00E-17 98.2 29159 cellular  
 organisms;Eukaryota;Opisthokonta;Metazoa;Eumetazoa;Bilateria;Protostomia;  
 Spiralia;Lophotrochozoa;Mollusca;Bivalvia;Autobranhia;Pteriomorphia;Ostr  
 eida;Ostreoidea;Ostreidae;Crassostrea;Crassostrea gigas  
 UdeM00000012839 6596 88.6 UdeM00000012839 XP\_045171063.1 31 174  
 108 4 2 165 43 214 9.80E-15 88.6 6596 cellular  
 organisms;Eukaryota;Opisthokonta;Metazoa;Eumetazoa;Bilateria;Protostomia;  
 Spiralia;Lophotrochozoa;Mollusca;Bivalvia;Autobranhia;Heteroconchia;Euhe  
 terodonta;Imparidentia;Venerida;Veneroidea;Veneridae;Mercenaria;Mercenari  
 a mercenaria  
 UdeM00000012840 6579 425.6 UdeM00000012840 XP\_033736222.1 56.7 367  
 144 5 12 372 10 367 6.40E-116 425.6 6579 cellular  
 organisms;Eukaryota;Opisthokonta;Metazoa;Eumetazoa;Bilateria;Protostomia;  
 Spiralia;Lophotrochozoa;Mollusca;Bivalvia;Autobranhia;Pteriomorphia;Pect  
 inida;Pectinoidea;Pectinidae;Pecten;Pecten maximus  
 UdeM00000012841 6596 183.3 UdeM00000012841 XP\_045168049.1 58.4 149  
 52 2 15 153 9 157 2.40E-43 183.3 6596 cellular  
 organisms;Eukaryota;Opisthokonta;Metazoa;Eumetazoa;Bilateria;Protostomia;  
 Spiralia;Lophotrochozoa;Mollusca;Bivalvia;Autobranhia;Heteroconchia;Euhe  
 terodonta;Imparidentia;Venerida;Veneroidea;Veneridae;Mercenaria;Mercenari  
 a mercenaria  
 UdeM00000012842 400727 121.3 UdeM00000012842 XP\_025103718.1 46.9  
 128 67 1 7 133 16 143 1.10E-24 121.3 400727  
 cellular  
 organisms;Eukaryota;Opisthokonta;Metazoa;Eumetazoa;Bilateria;Protostomia;  
 Spiralia;Lophotrochozoa;Mollusca;Gastropoda;Caenogastropoda;Architaeniogl  
 ossa;Ampullarioidea;Ampullariidae;Pomacea;Pomacea canaliculata  
 UdeM00000012843 6573 438 UdeM00000012843 XP\_021359218.1 56.3 364  
 158 1 134 497 405 767 1.70E-119 438 6573 cellular  
 organisms;Eukaryota;Opisthokonta;Metazoa;Eumetazoa;Bilateria;Protostomia;  
 Spiralia;Lophotrochozoa;Mollusca;Bivalvia;Autobranhia;Pteriomorphia;Pect  
 inida;Pectinoidea;Pectinidae;Mizuhopecten;Mizuhopecten yessoensis  
 UdeM00000012844 6579 768.8 UdeM00000012844 XP\_033734428.1 85.3 435  
 64 0 19 453 41 475 3.80E-219 768.8 6579 cellular  
 organisms;Eukaryota;Opisthokonta;Metazoa;Eumetazoa;Bilateria;Protostomia;  
 Spiralia;Lophotrochozoa;Mollusca;Bivalvia;Autobranhia;Pteriomorphia;Pect  
 inida;Pectinoidea;Pectinidae;Pecten;Pecten maximus

UdeM00000012845 400727 781.2 UdeM00000012845 XP\_025103500.1 83.6  
 445 72 1 19 462 35 479 7.40E-223 781.2 400727  
 cellular  
 organisms;Eukaryota;Opisthokonta;Metazoa;Eumetazoa;Bilateria;Protostomia;  
 Spiralia;Lophotrochozoa;Mollusca;Gastropoda;Caenogastropoda;Architaenioglossa;  
 Ampullarioidea;Ampullariidae;Pomacea;Pomacea canaliculata  
 UdeM00000012846 260615 124.8 UdeM00000012846 XP\_039383630.1 95.3  
 64 3 0 96 159 276 339 9.90E-26 124.8 260615  
 cellular  
 organisms;Eukaryota;Opisthokonta;Metazoa;Eumetazoa;Bilateria;Deuterostomia;  
 Chordata;Craniata;Vertebrata;Gnathostomata;Teleostomi;Euteleostomi;Sarcopterygii;  
 Dipnotetrapodomorpha;Tetrapoda;Amniota;Sauropsida;Sauria;Archelosauria;  
 Testudinata;Testudines;Cryptodira;Durocryptodira;Testudinoidea;Geoemydidae;  
 Geoemydinae;Mauremys;Mauremys reevesii  
 UdeM00000012847 6565 169.1 UdeM00000012847 XP\_022332323.1 55.6 144  
 64 0 4 147 3 146 4.30E-39 169.1 6565 cellular  
 organisms;Eukaryota;Opisthokonta;Metazoa;Eumetazoa;Bilateria;Protostomia;  
 Spiralia;Lophotrochozoa;Mollusca;Bivalvia;Autobranchia;Pteriormorphia;Ostreida;  
 Ostreidae;Crassostrea;Crassostrea virginica  
 UdeM00000012848 7574 194.1 UdeM00000012848 XP\_013392779.1 60.6 142  
 56 0 23 164 1 142 1.40E-46 194.1 7574 cellular  
 organisms;Eukaryota;Opisthokonta;Metazoa;Eumetazoa;Bilateria;Protostomia;  
 Spiralia;Lophotrochozoa;Brachiopoda;Linguliformea;Lingulata;Lingulida;Linguloidea;  
 Lingulidae;Lingula;Lingula anatina  
 UdeM00000012850 6596 83.6 UdeM00000012850 XP\_045187526.1 60 70  
 26 1 311 378 350 419 8.80E-13 83.6 6596 cellular  
 organisms;Eukaryota;Opisthokonta;Metazoa;Eumetazoa;Bilateria;Protostomia;  
 Spiralia;Lophotrochozoa;Mollusca;Bivalvia;Autobranchia;Heteroconchia;Euheterodonta;  
 Imparidentia;Venerida;Veneroidea;Veneridae;Mercenaria;Mercenaria mercenaria  
 UdeM00000012851 6596 83.6 UdeM00000012851 XP\_045187526.1 60 70  
 26 1 311 378 350 419 9.00E-13 83.6 6596 cellular  
 organisms;Eukaryota;Opisthokonta;Metazoa;Eumetazoa;Bilateria;Protostomia;  
 Spiralia;Lophotrochozoa;Mollusca;Bivalvia;Autobranchia;Heteroconchia;Euheterodonta;  
 Imparidentia;Venerida;Veneroidea;Veneridae;Mercenaria;Mercenaria mercenaria  
 UdeM00000012849 6596 83.6 UdeM00000012849 XP\_045187526.1 60 70  
 26 1 311 378 350 419 1.00E-12 83.6 6596 cellular  
 organisms;Eukaryota;Opisthokonta;Metazoa;Eumetazoa;Bilateria;Protostomia;  
 Spiralia;Lophotrochozoa;Mollusca;Bivalvia;Autobranchia;Heteroconchia;Euheterodonta;  
 Imparidentia;Venerida;Veneroidea;Veneridae;Mercenaria;Mercenaria mercenaria  
 UdeM00000012854 6573 330.1 UdeM00000012854 XP\_021353694.1 87.9 173  
 21 0 1 173 1 173 1.70E-87 330.1 6573 cellular  
 organisms;Eukaryota;Opisthokonta;Metazoa;Eumetazoa;Bilateria;Protostomia;  
 Spiralia;Lophotrochozoa;Mollusca;Bivalvia;Autobranchia;Pteriormorphia;Pectinida;  
 Pectinoidea;Pectinidae;Mizuhopecten;Mizuhopecten yessoensis  
 UdeM00000012855 70779 104.4 UdeM00000012855 XP\_015760391.1 50 98  
 49 0 10 107 312 409 9.90E-20 104.4 70779 cellular  
 organisms;Eukaryota;Opisthokonta;Metazoa;Eumetazoa;Cnidaria;Anthozoa;Hexacorallia;  
 Scleractinia;Astrocoeniina;Acroporidae;Acropora;Acropora digitifera  
 UdeM00000012856 10224 114.8 UdeM00000012856 XP\_006820181.1 54.2 107  
 48 1 3 109 373 478 9.10E-23 114.8 10224 cellular

organisms;Eukaryota;Opisthokonta;Metazoa;Eumetazoa;Bilateria;Deuterostomi  
a;Hemichordata;Enteropneusta;Harrimaniidae;Saccoglossus;Saccoglossus  
kowalevskii  
UdeM00000012857 10224 186 UdeM00000012857 XP\_006820181.1 48.5 196  
100 1 1 195 164 359 4.50E-44 186 10224 cellular  
organisms;Eukaryota;Opisthokonta;Metazoa;Eumetazoa;Bilateria;Deuterostomi  
a;Hemichordata;Enteropneusta;Harrimaniidae;Saccoglossus;Saccoglossus  
kowalevskii  
UdeM00000012858 6526 270.8 UdeM00000012858 XP\_013072216.1 97.7 131  
3 0 25 155 3 133 1.10E-69 270.8 6526 cellular  
organisms;Eukaryota;Opisthokonta;Metazoa;Eumetazoa;Bilateria;Protostomia;  
Spiralia;Lophotrochozoa;Mollusca;Gastropoda;Heterobranchia;Euthyneura;Pan  
pulmonata;Hygrophila;Lymnaeoidae;Planorbidae;Biomphalaria;Biomphalaria  
glabrata  
UdeM00000012859 6596 544.7 UdeM00000012859 XP\_045162235.1 69.5 857  
187 9 2 836 1 805 2.10E-151 544.7 6596 cellular  
organisms;Eukaryota;Opisthokonta;Metazoa;Eumetazoa;Bilateria;Protostomia;  
Spiralia;Lophotrochozoa;Mollusca;Bivalvia;Autobranchia;Heteroconchia;Euhe  
terodonta;Imparidentia;Venerida;Veneroidea;Veneridae;Mercenaria;Mercenari  
a mercenaria  
UdeM00000012860 29159 246.5 UdeM00000012860 XP\_011413365.2 63.7 259  
64 6 1 257 1 231 4.00E-62 246.5 29159 cellular  
organisms;Eukaryota;Opisthokonta;Metazoa;Eumetazoa;Bilateria;Protostomia;  
Spiralia;Lophotrochozoa;Mollusca;Bivalvia;Autobranchia;Pteriormorphia;Ostr  
eida;Ostreoidae;Crassostrea;Crassostrea gigas  
UdeM00000012861 6596 67.4 UdeM00000012861 XP\_045161434.1 26.9 216  
148 3 166 371 14 229 4.40E-08 67.4 6596 cellular  
organisms;Eukaryota;Opisthokonta;Metazoa;Eumetazoa;Bilateria;Protostomia;  
Spiralia;Lophotrochozoa;Mollusca;Bivalvia;Autobranchia;Heteroconchia;Euhe  
terodonta;Imparidentia;Venerida;Veneroidea;Veneridae;Mercenaria;Mercenari  
a mercenaria  
UdeM00000012862 6596 97.1 UdeM00000012862 XP\_045187003.1 48.3 180  
86 2 1 180 1 173 3.00E-17 97.1 6596 cellular  
organisms;Eukaryota;Opisthokonta;Metazoa;Eumetazoa;Bilateria;Protostomia;  
Spiralia;Lophotrochozoa;Mollusca;Bivalvia;Autobranchia;Heteroconchia;Euhe  
terodonta;Imparidentia;Venerida;Veneroidea;Veneridae;Mercenaria;Mercenari  
a mercenaria  
UdeM00000012863 6526 68.9 UdeM00000012863 XP\_013094521.1 43 121  
68 1 2 121 176 296 1.00E-08 68.9 6526 cellular  
organisms;Eukaryota;Opisthokonta;Metazoa;Eumetazoa;Bilateria;Protostomia;  
Spiralia;Lophotrochozoa;Mollusca;Gastropoda;Heterobranchia;Euthyneura;Pan  
pulmonata;Hygrophila;Lymnaeoidae;Planorbidae;Biomphalaria;Biomphalaria  
glabrata  
UdeM00000012864 6596 105.5 UdeM00000012864 XP\_045188023.1 53.7 121  
52 1 8 128 8 124 6.10E-20 105.5 6596 cellular  
organisms;Eukaryota;Opisthokonta;Metazoa;Eumetazoa;Bilateria;Protostomia;  
Spiralia;Lophotrochozoa;Mollusca;Bivalvia;Autobranchia;Heteroconchia;Euhe  
terodonta;Imparidentia;Venerida;Veneroidea;Veneridae;Mercenaria;Mercenari  
a mercenaria  
UdeM00000012865 6596 102.4 UdeM00000012865 XP\_045188023.1 53.7 121  
52 1 8 128 8 124 5.10E-19 102.4 6596 cellular  
organisms;Eukaryota;Opisthokonta;Metazoa;Eumetazoa;Bilateria;Protostomia;  
Spiralia;Lophotrochozoa;Mollusca;Bivalvia;Autobranchia;Heteroconchia;Euhe

terodonta;Imparidentia;Venerida;Veneroidea;Veneridae;Mercenaria;Mercenaria mercenaria  
 UdeM00000012866 6596 193.7 UdeM00000012866 XP\_045171063.1 36.2 293  
 172 6 15 296 7 295 4.30E-46 193.7 6596 cellular  
 organisms;Eukaryota;Opisthokonta;Metazoa;Eumetazoa;Bilateria;Protostomia;  
 Spiralia;Lophotrochozoa;Mollusca;Bivalvia;Autobranhia;Heteroconchia;Euhe  
 terodonta;Imparidentia;Venerida;Veneroidea;Veneridae;Mercenaria;Mercenari  
 a mercenaria  
 UdeM00000012867 29159 145.6 UdeM00000012867 XP\_034331441.1 38.7 222  
 129 5 1 219 1 218 1.10E-31 145.6 29159 cellular  
 organisms;Eukaryota;Opisthokonta;Metazoa;Eumetazoa;Bilateria;Protostomia;  
 Spiralia;Lophotrochozoa;Mollusca;Bivalvia;Autobranhia;Pteriormorphia;Ostr  
 eida;Ostreoidea;Ostreidae;Crassostrea;Crassostrea gigas  
 UdeM00000012868 6565 291.2 UdeM00000012868 XP\_022305442.1 38.5 405  
 238 9 6 404 70 469 2.10E-75 291.2 6565 cellular  
 organisms;Eukaryota;Opisthokonta;Metazoa;Eumetazoa;Bilateria;Protostomia;  
 Spiralia;Lophotrochozoa;Mollusca;Bivalvia;Autobranhia;Pteriormorphia;Ostr  
 eida;Ostreoidea;Ostreidae;Crassostrea;Crassostrea virginica  
 UdeM00000012869 6579 71.6 UdeM00000012869 XP\_033739514.1 30.7 163  
 95 4 37 181 620 782 1.20E-09 71.6 6579 cellular  
 organisms;Eukaryota;Opisthokonta;Metazoa;Eumetazoa;Bilateria;Protostomia;  
 Spiralia;Lophotrochozoa;Mollusca;Bivalvia;Autobranhia;Pteriormorphia;Pect  
 inida;Pectinoidea;Pectinidae;Pecten;Pecten maximus  
 UdeM00000012875 6573 64.3 UdeM00000012875 XP\_021341921.1 21.4 753  
 454 29 170 882 146 800 1.10E-06 64.3 6573 cellular  
 organisms;Eukaryota;Opisthokonta;Metazoa;Eumetazoa;Bilateria;Protostomia;  
 Spiralia;Lophotrochozoa;Mollusca;Bivalvia;Autobranhia;Pteriormorphia;Pect  
 inida;Pectinoidea;Pectinidae;Mizuhopecten;Mizuhopecten yessoensis  
 UdeM00000012876 29159 130.6 UdeM00000012876 XP\_011413368.2 43.6 365  
 129 6 318 618 123 474 7.00E-27 130.6 29159 cellular  
 organisms;Eukaryota;Opisthokonta;Metazoa;Eumetazoa;Bilateria;Protostomia;  
 Spiralia;Lophotrochozoa;Mollusca;Bivalvia;Autobranhia;Pteriormorphia;Ostr  
 eida;Ostreoidea;Ostreidae;Crassostrea;Crassostrea gigas  
 UdeM00000012877 6573 84.7 UdeM00000012877 XP\_021341890.1 39.2 120  
 68 1 47 166 37 151 1.20E-13 84.7 6573 cellular  
 organisms;Eukaryota;Opisthokonta;Metazoa;Eumetazoa;Bilateria;Protostomia;  
 Spiralia;Lophotrochozoa;Mollusca;Bivalvia;Autobranhia;Pteriormorphia;Pect  
 inida;Pectinoidea;Pectinidae;Mizuhopecten;Mizuhopecten yessoensis  
 UdeM00000012878 6596 253.1 UdeM00000012878 XP\_045156787.1 40.8 331  
 167 3 5 333 2896 3199 5.10E-64 253.1 6596 cellular  
 organisms;Eukaryota;Opisthokonta;Metazoa;Eumetazoa;Bilateria;Protostomia;  
 Spiralia;Lophotrochozoa;Mollusca;Bivalvia;Autobranhia;Heteroconchia;Euhe  
 terodonta;Imparidentia;Venerida;Veneroidea;Veneridae;Mercenaria;Mercenari  
 a mercenaria  
 UdeM00000012879 6596 97.4 UdeM00000012879 XP\_045187191.1 40.9 137  
 81 0 7 143 10 146 1.50E-17 97.4 6596 cellular  
 organisms;Eukaryota;Opisthokonta;Metazoa;Eumetazoa;Bilateria;Protostomia;  
 Spiralia;Lophotrochozoa;Mollusca;Bivalvia;Autobranhia;Heteroconchia;Euhe  
 terodonta;Imparidentia;Venerida;Veneroidea;Veneridae;Mercenaria;Mercenari  
 a mercenaria  
 UdeM00000012880 6596 115.5 UdeM00000012880 XP\_045187190.1 43.1 137  
 78 0 7 143 10 146 5.40E-23 115.5 6596 cellular  
 organisms;Eukaryota;Opisthokonta;Metazoa;Eumetazoa;Bilateria;Protostomia;  
 Spiralia;Lophotrochozoa;Mollusca;Bivalvia;Autobranhia;Heteroconchia;Euhe

terodonta;Imparidentia;Venerida;Veneroidea;Veneridae;Mercenaria;Mercenaria  
 mercenaria  
 UdeM00000012881 13686 152.5 UdeM00000012881 XP\_011170408.3 37.9 240  
 130 6 73 301 117 348 8.80E-34 152.5 13686 cellular  
 organisms;Eukaryota;Opisthokonta;Metazoa;Eumetazoa;Bilateria;Protostomia;  
 Ecdysozoa;Panarthropoda;Arthropoda;Mandibulata;Pancrustacea;Hexapoda;Inse  
 cta;Dicondylia;Pterygota;Neoptera;Endopterygota;Hymenoptera;Apocrita;Acul  
 eata;Formicoidea;Formicidae;Myrmicinae;Solenopsidini;Solenopsis;Solenopsi  
 s invicta  
 UdeM00000012882 6596 108.6 UdeM00000012882 XP\_045187190.1 39.4 137  
 81 2 7 141 10 146 6.50E-21 108.6 6596 cellular  
 organisms;Eukaryota;Opisthokonta;Metazoa;Eumetazoa;Bilateria;Protostomia;  
 Spiralia;Lophotrochozoa;Mollusca;Bivalvia;Autobranchia;Heteroconchia;Euhe  
 terodonta;Imparidentia;Venerida;Veneroidea;Veneridae;Mercenaria;Mercenari  
 a mercenaria  
 UdeM00000012883 6596 110.2 UdeM00000012883 XP\_045179367.1 42.3 142  
 77 4 3 140 63 203 2.30E-21 110.2 6596 cellular  
 organisms;Eukaryota;Opisthokonta;Metazoa;Eumetazoa;Bilateria;Protostomia;  
 Spiralia;Lophotrochozoa;Mollusca;Bivalvia;Autobranchia;Heteroconchia;Euhe  
 terodonta;Imparidentia;Venerida;Veneroidea;Veneridae;Mercenaria;Mercenari  
 a mercenaria  
 UdeM00000012884 6596 370.5 UdeM00000012884 XP\_045177666.1 47.9 388  
 184 3 25 394 142 529 2.60E-99 370.5 6596 cellular  
 organisms;Eukaryota;Opisthokonta;Metazoa;Eumetazoa;Bilateria;Protostomia;  
 Spiralia;Lophotrochozoa;Mollusca;Bivalvia;Autobranchia;Heteroconchia;Euhe  
 terodonta;Imparidentia;Venerida;Veneroidea;Veneridae;Mercenaria;Mercenari  
 a mercenaria  
 UdeM00000012885 6579 938.7 UdeM00000012885 XP\_033733639.1 55.5 840  
 358 9 28 864 666 1492 5.20E-270 938.7 6579 cellular  
 organisms;Eukaryota;Opisthokonta;Metazoa;Eumetazoa;Bilateria;Protostomia;  
 Spiralia;Lophotrochozoa;Mollusca;Bivalvia;Autobranchia;Pteriormorphia;Pect  
 inida;Pectinoidea;Pectinidae;Pecten;Pecten maximus  
 UdeM00000012886 6573 1381.7 UdeM00000012886 XP\_021379972.1 60.7  
 1131 423 7 30 1143 74 1199 0.00E+00 1381.7 6573  
 cellular  
 organisms;Eukaryota;Opisthokonta;Metazoa;Eumetazoa;Bilateria;Protostomia;  
 Spiralia;Lophotrochozoa;Mollusca;Bivalvia;Autobranchia;Pteriormorphia;Pect  
 inida;Pectinoidea;Pectinidae;Mizuhopecten;Mizuhopecten yessoensis  
 UdeM00000012887 7757 562.4 UdeM00000012887 XP\_032835197.1 78.4 357  
 75 2 77 432 3 358 5.70E-157 562.4 7757 cellular  
 organisms;Eukaryota;Opisthokonta;Metazoa;Eumetazoa;Bilateria;Deuterostomi  
 a;Chordata;Craniata;Vertebrata;Cyclostomata;Hyperoartia;Petromyzontiforme  
 s;Petromyzontidae;Petromyzon;Petromyzon marinus  
 UdeM00000012888 1415580 177.9 UdeM00000012888 XP\_030075314.1 53.8  
 158 72 1 3 160 326 482 1.00E-41 177.9 1415580  
 cellular  
 organisms;Eukaryota;Opisthokonta;Metazoa;Eumetazoa;Bilateria;Deuterostomi  
 a;Chordata;Craniata;Vertebrata;Gnathostomata;Teleostomi;Euteleostomi;Sarc  
 opterygii;Dipnotetrapodomorpha;Tetrapoda;Amphibia;Gymnophiona;Siphonopida  
 e;Microcaecilia;Microcaecilia unicolor  
 UdeM00000012891 225164 114 UdeM00000012891 XP\_009059259.1 29.6  
 277 184 6 230 500 91 362 5.50E-22 114 225164  
 cellular  
 organisms;Eukaryota;Opisthokonta;Metazoa;Eumetazoa;Bilateria;Protostomia;

Spiralia;Lophotrochozoa;Mollusca;Gastropoda;Patellogastropoda;Lottioidea;Lottiidae;Lottia;Lottia gigantea

UdeM00000012892 6596 619 UdeM00000012892 XP\_045185472.1 63.3 458  
164 3 8 463 2 457 4.90E-174 619 6596 cellular  
organisms;Eukaryota;Opisthokonta;Metazoa;Eumetazoa;Bilateria;Protostomia;  
Spiralia;Lophotrochozoa;Mollusca;Bivalvia;Autobranchia;Heteroconchia;Euhe-  
terodonta;Imparidentia;Venerida;Veneroidea;Veneridae;Mercenaria;Mercenari-  
a mercenaria

UdeM00000012893 6579 160.2 UdeM00000012893 XP\_033735462.1 52.3 149  
71 0 1 149 1 149 2.10E-36 160.2 6579 cellular  
organisms;Eukaryota;Opisthokonta;Metazoa;Eumetazoa;Bilateria;Protostomia;  
Spiralia;Lophotrochozoa;Mollusca;Bivalvia;Autobranchia;Pteriormorphia;Pect-  
inida;Pectinoidea;Pectinidae;Pecten;Pecten maximus

UdeM00000012894 6579 777.3 UdeM00000012894 XP\_033735282.1 38.5 1422  
649 35 1 1274 122 1465 2.90E-221 777.3 6579 cellular  
organisms;Eukaryota;Opisthokonta;Metazoa;Eumetazoa;Bilateria;Protostomia;  
Spiralia;Lophotrochozoa;Mollusca;Bivalvia;Autobranchia;Pteriormorphia;Pect-  
inida;Pectinoidea;Pectinidae;Pecten;Pecten maximus

UdeM00000012895 225164 226.5 UdeM00000012895 XP\_009063161.1 46.2  
266 141 2 42 306 1 265 4.70E-56 226.5 225164  
cellular  
organisms;Eukaryota;Opisthokonta;Metazoa;Eumetazoa;Bilateria;Protostomia;  
Spiralia;Lophotrochozoa;Mollusca;Gastropoda;Patellogastropoda;Lottioidea;  
Lottiidae;Lottia;Lottia gigantea

UdeM00000012896 133434 237.3 UdeM00000012896 XP\_022088649.1 64  
342 109 3 1 337 10 342 2.90E-59 237.3 133434  
cellular  
organisms;Eukaryota;Opisthokonta;Metazoa;Eumetazoa;Bilateria;Deuterostomi-  
a;Echinodermata;Eleutherozoa;Asterozoa;Asteroidea;Valvatacea;Valvatida;Ac-  
anthasteridae;Acanthaster;Acanthaster planci

UdeM00000012898 50390 266.5 UdeM00000012898 XP\_028127913.1 41.4 333  
189 3 1 332 1 328 4.40E-68 266.5 50390 cellular  
organisms;Eukaryota;Opisthokonta;Metazoa;Eumetazoa;Bilateria;Protostomia;  
Ecdysozoa;Panarthropoda;Arthropoda;Mandibulata;Pancrustacea;Hexapoda;Inse-  
cta;Dicondylia;Pterygota;Neoptera;Endopterygota;Coleoptera;Polyphaga;Cucu-  
jiformia;Chrysomeloidea;Chrysomelidae;Galerucinae;Luperini;Diabroticina;D-  
iabroticites;Diabrotica;Diabrotica virgifera;Diabrotica virgifera  
virgifera

UdeM00000012899 6596 285.4 UdeM00000012899 XP\_045169106.1 69.2 198  
58 2 52 246 36 233 7.70E-74 285.4 6596 cellular  
organisms;Eukaryota;Opisthokonta;Metazoa;Eumetazoa;Bilateria;Protostomia;  
Spiralia;Lophotrochozoa;Mollusca;Bivalvia;Autobranchia;Heteroconchia;Euhe-  
terodonta;Imparidentia;Venerida;Veneroidea;Veneridae;Mercenaria;Mercenari-  
a mercenaria

UdeM00000012900 6565 81.3 UdeM00000012900 XP\_022331514.1 37.4 99  
58 1 9 103 8 106 8.50E-13 81.3 6565 cellular  
organisms;Eukaryota;Opisthokonta;Metazoa;Eumetazoa;Bilateria;Protostomia;  
Spiralia;Lophotrochozoa;Mollusca;Bivalvia;Autobranchia;Pteriormorphia;Ostr-  
eida;Ostreoidea;Ostreidae;Crassostrea;Crassostrea virginica

UdeM00000012901 225164 294.3 UdeM00000012901 XP\_009056063.1 100  
149 0 0 1 149 1 149 8.90E-77 294.3 225164  
cellular  
organisms;Eukaryota;Opisthokonta;Metazoa;Eumetazoa;Bilateria;Protostomia;

Spiralia; Lophotrochozoa; Mollusca; Gastropoda; Patellogastropoda; Lottioidea; Lottiidae; Lottia; Lottia gigantea

UdeM00000012902 6596 914.4 UdeM00000012902 XP\_045213630.1 65.2 658  
226 2 1 657 32 687 8.00E-263 914.4 6596 cellular  
organisms; Eukaryota; Opisthokonta; Metazoa; Eumetazoa; Bilateria; Protostomia; Spiralia; Lophotrochozoa; Mollusca; Bivalvia; Autobranchia; Heteroconchia; Euheterodonta; Imparidentia; Venerida; Veneroidea; Veneridae; Mercenaria; Mercenaria mercenaria

UdeM00000012903 1735272 75.1 UdeM00000012903 XP\_041378228.1 51.5  
66 31 1 1 66 73 137 3.90E-11 75.1 1735272  
cellular  
organisms; Eukaryota; Opisthokonta; Metazoa; Eumetazoa; Bilateria; Protostomia; Spiralia; Lophotrochozoa; Mollusca; Gastropoda; Neomphalina; Neomphaloidea; Peltospiridae; Gigantopelta; Gigantopelta aegis

UdeM00000012904 6596 951.4 UdeM00000012904 XP\_045213630.1 67.3 658  
212 2 1 657 32 687 5.90E-274 951.4 6596 cellular  
organisms; Eukaryota; Opisthokonta; Metazoa; Eumetazoa; Bilateria; Protostomia; Spiralia; Lophotrochozoa; Mollusca; Bivalvia; Autobranchia; Heteroconchia; Euheterodonta; Imparidentia; Venerida; Veneroidea; Veneridae; Mercenaria; Mercenaria mercenaria

UdeM00000012905 6596 199.1 UdeM00000012905 XP\_045186616.1 46.7 214  
110 1 1 214 1 210 5.60E-48 199.1 6596 cellular  
organisms; Eukaryota; Opisthokonta; Metazoa; Eumetazoa; Bilateria; Protostomia; Spiralia; Lophotrochozoa; Mollusca; Bivalvia; Autobranchia; Heteroconchia; Euheterodonta; Imparidentia; Venerida; Veneroidea; Veneridae; Mercenaria; Mercenaria mercenaria

UdeM00000012907 6596 908.7 UdeM00000012907 XP\_045187007.1 59.9 837  
279 6 1 785 1 832 5.90E-261 908.7 6596 cellular  
organisms; Eukaryota; Opisthokonta; Metazoa; Eumetazoa; Bilateria; Protostomia; Spiralia; Lophotrochozoa; Mollusca; Bivalvia; Autobranchia; Heteroconchia; Euheterodonta; Imparidentia; Venerida; Veneroidea; Veneridae; Mercenaria; Mercenaria mercenaria

UdeM00000012908 6526 472.2 UdeM00000012908 XP\_013069396.1 71.8 301  
84 1 9 308 10 310 7.30E-130 472.2 6526 cellular  
organisms; Eukaryota; Opisthokonta; Metazoa; Eumetazoa; Bilateria; Protostomia; Spiralia; Lophotrochozoa; Mollusca; Gastropoda; Heterobranchia; Euthyneura; Panpulmonata; Hygrophila; Lymnaeioidea; Planorbidae; Biomphalaria; Biomphalaria glabrata

UdeM00000012909 7574 149.4 UdeM00000012909 XP\_013417267.1 45.5 165  
72 4 4 150 10 174 3.70E-33 149.4 7574 cellular  
organisms; Eukaryota; Opisthokonta; Metazoa; Eumetazoa; Bilateria; Protostomia; Spiralia; Lophotrochozoa; Brachiopoda; Linguliformea; Lingulata; Lingulida; Linguloidea; Lingulidae; Lingula; Lingula anatina

UdeM00000012911 6596 248.4 UdeM00000012911 XP\_045180801.1 40.1 394  
218 9 57 446 107 486 1.70E-62 248.4 6596 cellular  
organisms; Eukaryota; Opisthokonta; Metazoa; Eumetazoa; Bilateria; Protostomia; Spiralia; Lophotrochozoa; Mollusca; Bivalvia; Autobranchia; Heteroconchia; Euheterodonta; Imparidentia; Venerida; Veneroidea; Veneridae; Mercenaria; Mercenaria mercenaria

UdeM00000012912 6596 624.4 UdeM00000012912 XP\_045176523.1 73.6 375  
96 1 8 379 5 379 9.50E-176 624.4 6596 cellular  
organisms; Eukaryota; Opisthokonta; Metazoa; Eumetazoa; Bilateria; Protostomia; Spiralia; Lophotrochozoa; Mollusca; Bivalvia; Autobranchia; Heteroconchia; Euheterodonta; Imparidentia; Venerida; Veneroidea; Veneridae; Mercenaria; Mercenaria mercenaria

terodonta;Imparidentia;Venerida;Veneroidea;Veneridae;Mercenaria;Mercenaria mercenaria

UdeM00000012913 6500 97.8 UdeM00000012913 XP\_005107613.1 43.5 85  
48 0 25 109 19 103 9.00E-18 97.8 6500 cellular

organisms;Eukaryota;Opisthokonta;Metazoa;Eumetazoa;Bilateria;Protostomia;Spiralia;Lophotrochozoa;Mollusca;Gastropoda;Heterobranchia;Euthyneura;Tectipleura;Aplysiida;Aplysioidea;Aplysiidae;Aplysia;Aplysia californica

UdeM00000012914 29159 594 UdeM00000012914 XP\_034324244.1 81.3 358  
65 2 1 357 1 357 1.90E-166 594 29159 cellular

organisms;Eukaryota;Opisthokonta;Metazoa;Eumetazoa;Bilateria;Protostomia;Spiralia;Lophotrochozoa;Mollusca;Bivalvia;Autobranchia;Pteriormorphia;Ostreida;Ostreoidea;Ostreidae;Crassostrea;Crassostrea gigas

UdeM00000012915 6596 172.2 UdeM00000012915 XP\_045187266.1 58.4 161  
58 3 12 164 7 166 5.60E-40 172.2 6596 cellular

organisms;Eukaryota;Opisthokonta;Metazoa;Eumetazoa;Bilateria;Protostomia;Spiralia;Lophotrochozoa;Mollusca;Bivalvia;Autobranchia;Heteroconchia;Euheterodonta;Imparidentia;Venerida;Veneroidea;Veneridae;Mercenaria;Mercenaria mercenaria

UdeM00000012916 217634 87.4 UdeM00000012916 XP\_018566622.1 53.7  
82 38 0 4 85 1 82 1.30E-14 87.4 217634

cellular

organisms;Eukaryota;Opisthokonta;Metazoa;Eumetazoa;Bilateria;Protostomia;Ecdysozoa;Panarthropoda;Arthropoda;Mandibulata;Pancrustacea;Hexapoda;Insecta;Dicondylia;Pterygota;Neoptera;Endopterygota;Coleoptera;Polyphaga;Cucujiformia;Chrysomeloidea;Cerambycidae;Lamiinae;Lamiini;Anoplophora;Anoplophora glabripennis

UdeM00000012917 1735272 309.3 UdeM00000012917 XP\_041352726.1 54.5  
279 120 4 14 290 2 275 1.00E-80 309.3 1735272

cellular

organisms;Eukaryota;Opisthokonta;Metazoa;Eumetazoa;Bilateria;Protostomia;Spiralia;Lophotrochozoa;Mollusca;Gastropoda;Neomphalina;Neomphaloidea;Peltospiridae;Gigantopelta;Gigantopelta aegis

UdeM00000012918 6596 646.7 UdeM00000012918 XP\_045167927.1 51.5 660  
288 17 1 652 1 636 3.10E-182 646.7 6596 cellular

organisms;Eukaryota;Opisthokonta;Metazoa;Eumetazoa;Bilateria;Protostomia;Spiralia;Lophotrochozoa;Mollusca;Bivalvia;Autobranchia;Heteroconchia;Euheterodonta;Imparidentia;Venerida;Veneroidea;Veneridae;Mercenaria;Mercenaria mercenaria

UdeM00000012919 7741 238 UdeM00000012919 XP\_019639017.1 51.1 221  
105 3 18 237 35 253 1.20E-59 238 7741 cellular

organisms;Eukaryota;Opisthokonta;Metazoa;Eumetazoa;Bilateria;Deuterostomia;Chordata;Cephalochordata;Leptocardii;Amphioxiformes;Branchiostomidae;Branchiostoma;Branchiostoma belcheri

UdeM00000012920 6596 1254.2 UdeM00000012920 XP\_045186297.1 74.1  
857 221 1 1 856 1 857 0.00E+00 1254.2 6596

cellular

organisms;Eukaryota;Opisthokonta;Metazoa;Eumetazoa;Bilateria;Protostomia;Spiralia;Lophotrochozoa;Mollusca;Bivalvia;Autobranchia;Heteroconchia;Euheterodonta;Imparidentia;Venerida;Veneroidea;Veneridae;Mercenaria;Mercenaria mercenaria

UdeM00000012921 6596 4150.5 UdeM00000012921 XP\_045186297.1 69.7  
3129 906 11 1 3106 859 3968 0.00E+00 4150.5 6596

cellular

organisms;Eukaryota;Opisthokonta;Metazoa;Eumetazoa;Bilateria;Protostomia;



Spiralia;Lophotrochozoa;Mollusca;Bivalvia;Autobranchia;Heteroconchia;Euherodonta;Imparidentia;Venerida;Veneroidea;Veneridae;Mercenaria;Mercenaria mercenaria

UdeM00000012922 6105 252.7 UdeM00000012922 XP\_031566938.1 34.6 434  
244 12 83 512 25 422 1.00E-63 252.7 6105 cellular  
organisms;Eukaryota;Opisthokonta;Metazoa;Eumetazoa;Cnidaria;Anthozoa;Hexacorallia;Actiniaria;Actiniidae;Actinia;Actinia tenebrosa

UdeM00000012923 6596 401 UdeM00000012923 XP\_045165310.1 47.8 433  
193 4 1 407 1 426 1.90E-108 401 6596 cellular  
organisms;Eukaryota;Opisthokonta;Metazoa;Eumetazoa;Bilateria;Protostomia;Spiralia;Lophotrochozoa;Mollusca;Bivalvia;Autobranchia;Heteroconchia;Euherodonta;Imparidentia;Venerida;Veneroidea;Veneridae;Mercenaria;Mercenaria mercenaria

UdeM00000012924 6596 437.6 UdeM00000012924 XP\_045165305.1 51.4 422  
173 4 4 393 239 660 1.70E-119 437.6 6596 cellular  
organisms;Eukaryota;Opisthokonta;Metazoa;Eumetazoa;Bilateria;Protostomia;Spiralia;Lophotrochozoa;Mollusca;Bivalvia;Autobranchia;Heteroconchia;Euherodonta;Imparidentia;Venerida;Veneroidea;Veneridae;Mercenaria;Mercenaria mercenaria

UdeM00000012925 6596 113.6 UdeM00000012925 XP\_045165283.1 42.3 149  
82 2 4 150 6 152 2.40E-22 113.6 6596 cellular  
organisms;Eukaryota;Opisthokonta;Metazoa;Eumetazoa;Bilateria;Protostomia;Spiralia;Lophotrochozoa;Mollusca;Bivalvia;Autobranchia;Heteroconchia;Euherodonta;Imparidentia;Venerida;Veneroidea;Veneridae;Mercenaria;Mercenaria mercenaria

UdeM00000012926 6596 159.8 UdeM00000012926 XP\_045165252.1 43.2 162  
92 0 1 162 4 165 2.80E-36 159.8 6596 cellular  
organisms;Eukaryota;Opisthokonta;Metazoa;Eumetazoa;Bilateria;Protostomia;Spiralia;Lophotrochozoa;Mollusca;Bivalvia;Autobranchia;Heteroconchia;Euherodonta;Imparidentia;Venerida;Veneroidea;Veneridae;Mercenaria;Mercenaria mercenaria

UdeM00000012927 6596 444.1 UdeM00000012927 XP\_045185607.1 44.3 467  
248 5 7 464 4 467 2.30E-121 444.1 6596 cellular  
organisms;Eukaryota;Opisthokonta;Metazoa;Eumetazoa;Bilateria;Protostomia;Spiralia;Lophotrochozoa;Mollusca;Bivalvia;Autobranchia;Heteroconchia;Euherodonta;Imparidentia;Venerida;Veneroidea;Veneridae;Mercenaria;Mercenaria mercenaria

UdeM00000012928 29159 99.8 UdeM00000012928 XP\_034326852.1 43.1 116  
63 2 20 132 113 228 2.90E-18 99.8 29159 cellular  
organisms;Eukaryota;Opisthokonta;Metazoa;Eumetazoa;Bilateria;Protostomia;Spiralia;Lophotrochozoa;Mollusca;Bivalvia;Autobranchia;Pteriomorpha;Ostreida;Ostreoidea;Ostreidae;Crassostrea;Crassostrea gigas

UdeM00000012929 6596 446.8 UdeM00000012929 XP\_045180102.1 50.6 443  
205 5 1 433 7 445 3.30E-122 446.8 6596 cellular  
organisms;Eukaryota;Opisthokonta;Metazoa;Eumetazoa;Bilateria;Protostomia;Spiralia;Lophotrochozoa;Mollusca;Bivalvia;Autobranchia;Heteroconchia;Euherodonta;Imparidentia;Venerida;Veneroidea;Veneridae;Mercenaria;Mercenaria mercenaria

UdeM00000012930 6945 62.4 UdeM00000012930 XP\_040079019.1 41.2 68  
40 0 51 118 5 72 1.30E-06 62.4 6945 cellular  
organisms;Eukaryota;Opisthokonta;Metazoa;Eumetazoa;Bilateria;Protostomia;Ecdysozoa;Panarthropoda;Arthropoda;Chelicerata;Arachnida;Acari;Parasitiformes;Ixodida;Ixodoidea;Ixodidae;Ixodinae;Ixodes;Ixodes scapularis

UdeM00000012931 6596 1248 UdeM00000012931 XP\_045181951.1 43.6 1506  
 829 12 77 1579 89 1576 0.00E+00 1248 6596 cellular  
 organisms;Eukaryota;Opisthokonta;Metazoa;Eumetazoa;Bilateria;Protostomia;  
 Spiralia;Lophotrochozoa;Mollusca;Bivalvia;Autobranchia;Heteroconchia;Euhe  
 terodonta;Imparidentia;Venerida;Veneroidea;Veneridae;Mercenaria;Mercenari  
 a mercenaria  
 UdeM00000012932 6579 260 UdeM00000012932 XP\_033755648.1 33.6 452  
 275 9 1 434 11 455 5.70E-66 260 6579 cellular  
 organisms;Eukaryota;Opisthokonta;Metazoa;Eumetazoa;Bilateria;Protostomia;  
 Spiralia;Lophotrochozoa;Mollusca;Bivalvia;Autobranchia;Pteriormorphia;Pect  
 inida;Pectinoidea;Pectinidae;Pecten;Pecten maximus  
 UdeM00000012934 6565 79 UdeM00000012934 XP\_022330448.1 64.8 54  
 19 0 151 204 287 340 8.00E-12 79 6565 cellular  
 organisms;Eukaryota;Opisthokonta;Metazoa;Eumetazoa;Bilateria;Protostomia;  
 Spiralia;Lophotrochozoa;Mollusca;Bivalvia;Autobranchia;Pteriormorphia;Ostr  
 eida;Ostreoidea;Ostreidae;Crassostrea;Crassostrea virginica  
 UdeM00000012935 6579 369.8 UdeM00000012935 XP\_033733812.1 55.4 323  
 139 1 58 375 67 389 4.30E-99 369.8 6579 cellular  
 organisms;Eukaryota;Opisthokonta;Metazoa;Eumetazoa;Bilateria;Protostomia;  
 Spiralia;Lophotrochozoa;Mollusca;Bivalvia;Autobranchia;Pteriormorphia;Pect  
 inida;Pectinoidea;Pectinidae;Pecten;Pecten maximus  
 UdeM00000012936 6596 287.7 UdeM00000012936 XP\_045162751.1 67.2 204  
 67 0 22 225 379 582 1.30E-74 287.7 6596 cellular  
 organisms;Eukaryota;Opisthokonta;Metazoa;Eumetazoa;Bilateria;Protostomia;  
 Spiralia;Lophotrochozoa;Mollusca;Bivalvia;Autobranchia;Heteroconchia;Euhe  
 terodonta;Imparidentia;Venerida;Veneroidea;Veneridae;Mercenaria;Mercenari  
 a mercenaria  
 UdeM00000012937 6565 421 UdeM00000012937 XP\_022335157.1 65.9 349  
 114 3 11 355 437 784 1.50E-114 421 6565 cellular  
 organisms;Eukaryota;Opisthokonta;Metazoa;Eumetazoa;Bilateria;Protostomia;  
 Spiralia;Lophotrochozoa;Mollusca;Bivalvia;Autobranchia;Pteriormorphia;Ostr  
 eida;Ostreoidea;Ostreidae;Crassostrea;Crassostrea virginica  
 UdeM00000012938 6565 934.9 UdeM00000012938 XP\_022335157.1 64 786  
 277 4 1 782 1 784 6.80E-269 934.9 6565 cellular  
 organisms;Eukaryota;Opisthokonta;Metazoa;Eumetazoa;Bilateria;Protostomia;  
 Spiralia;Lophotrochozoa;Mollusca;Bivalvia;Autobranchia;Pteriormorphia;Ostr  
 eida;Ostreoidea;Ostreidae;Crassostrea;Crassostrea virginica  
 UdeM00000012939 29159 912.9 UdeM00000012939 XP\_011455679.1 75 572  
 137 3 1 572 1 566 2.00E-262 912.9 29159 cellular  
 organisms;Eukaryota;Opisthokonta;Metazoa;Eumetazoa;Bilateria;Protostomia;  
 Spiralia;Lophotrochozoa;Mollusca;Bivalvia;Autobranchia;Pteriormorphia;Ostr  
 eida;Ostreoidea;Ostreidae;Crassostrea;Crassostrea gigas  
 UdeM00000012940 6579 210.3 UdeM00000012940 XP\_033736190.1 70 140  
 42 0 1 140 1 140 1.60E-51 210.3 6579 cellular  
 organisms;Eukaryota;Opisthokonta;Metazoa;Eumetazoa;Bilateria;Protostomia;  
 Spiralia;Lophotrochozoa;Mollusca;Bivalvia;Autobranchia;Pteriormorphia;Pect  
 inida;Pectinoidea;Pectinidae;Pecten;Pecten maximus  
 UdeM00000012941 6596 662.1 UdeM00000012941 XP\_045187099.1 66.9 499  
 163 2 1 498 34 531 5.40E-187 662.1 6596 cellular  
 organisms;Eukaryota;Opisthokonta;Metazoa;Eumetazoa;Bilateria;Protostomia;  
 Spiralia;Lophotrochozoa;Mollusca;Bivalvia;Autobranchia;Heteroconchia;Euhe  
 terodonta;Imparidentia;Venerida;Veneroidea;Veneridae;Mercenaria;Mercenari  
 a mercenaria

UdeM00000012943 6596 157.9 UdeM00000012943 XP\_045182803.1 49 143  
 73 0 133 275 103 245 1.80E-35 157.9 6596 cellular  
 organisms;Eukaryota;Opisthokonta;Metazoa;Eumetazoa;Bilateria;Protostomia;  
 Spiralia;Lophotrochozoa;Mollusca;Bivalvia;Autobranhia;Heteroconchia;Euhe  
 terodonta;Imparidentia;Venerida;Veneroidea;Veneridae;Mercenaria;Mercenari  
 a mercenaria  
 UdeM00000012942 6596 157.9 UdeM00000012942 XP\_045182803.1 49 143  
 73 0 135 277 103 245 1.80E-35 157.9 6596 cellular  
 organisms;Eukaryota;Opisthokonta;Metazoa;Eumetazoa;Bilateria;Protostomia;  
 Spiralia;Lophotrochozoa;Mollusca;Bivalvia;Autobranhia;Heteroconchia;Euhe  
 terodonta;Imparidentia;Venerida;Veneroidea;Veneridae;Mercenaria;Mercenari  
 a mercenaria  
 UdeM00000012944 6573 388.3 UdeM00000012944 XP\_021367630.1 95.8 191  
 8 0 1 191 1 191 5.80E-105 388.3 6573 cellular  
 organisms;Eukaryota;Opisthokonta;Metazoa;Eumetazoa;Bilateria;Protostomia;  
 Spiralia;Lophotrochozoa;Mollusca;Bivalvia;Autobranhia;Pteriormorphia;Pect  
 inida;Pectinoidea;Pectinidae;Mizuhopecten;Mizuhopecten yessoensis  
 UdeM00000012946 29159 434.9 UdeM00000012946 XP\_019926413.2 61 372  
 70 2 1 298 239 609 9.70E-119 434.9 29159 cellular  
 organisms;Eukaryota;Opisthokonta;Metazoa;Eumetazoa;Bilateria;Protostomia;  
 Spiralia;Lophotrochozoa;Mollusca;Bivalvia;Autobranhia;Pteriormorphia;Ostr  
 eida;Ostreoidea;Ostreidae;Crassostrea;Crassostrea gigas  
 UdeM00000012947 29159 242.3 UdeM00000012947 XP\_019926413.2 79.2 154  
 31 1 1 153 53 206 4.10E-61 242.3 29159 cellular  
 organisms;Eukaryota;Opisthokonta;Metazoa;Eumetazoa;Bilateria;Protostomia;  
 Spiralia;Lophotrochozoa;Mollusca;Bivalvia;Autobranhia;Pteriormorphia;Ostr  
 eida;Ostreoidea;Ostreidae;Crassostrea;Crassostrea gigas  
 UdeM00000012948 6596 461.1 UdeM00000012948 XP\_045183835.1 49.3 755  
 283 29 1 716 162 855 2.60E-126 461.1 6596 cellular  
 organisms;Eukaryota;Opisthokonta;Metazoa;Eumetazoa;Bilateria;Protostomia;  
 Spiralia;Lophotrochozoa;Mollusca;Bivalvia;Autobranhia;Heteroconchia;Euhe  
 terodonta;Imparidentia;Venerida;Veneroidea;Veneridae;Mercenaria;Mercenari  
 a mercenaria  
 UdeM00000012949 6596 120.6 UdeM00000012949 XP\_045162401.1 39 154  
 86 2 26 171 75 228 2.90E-24 120.6 6596 cellular  
 organisms;Eukaryota;Opisthokonta;Metazoa;Eumetazoa;Bilateria;Protostomia;  
 Spiralia;Lophotrochozoa;Mollusca;Bivalvia;Autobranhia;Heteroconchia;Euhe  
 terodonta;Imparidentia;Venerida;Veneroidea;Veneridae;Mercenaria;Mercenari  
 a mercenaria  
 UdeM00000012952 6565 324.3 UdeM00000012952 XP\_022332521.1 75.3 259  
 60 3 1 257 1 257 1.50E-85 324.3 6565 cellular  
 organisms;Eukaryota;Opisthokonta;Metazoa;Eumetazoa;Bilateria;Protostomia;  
 Spiralia;Lophotrochozoa;Mollusca;Bivalvia;Autobranhia;Pteriormorphia;Ostr  
 eida;Ostreoidea;Ostreidae;Crassostrea;Crassostrea virginica  
 UdeM00000012954 6565 615.9 UdeM00000012954 XP\_022330544.1 76.8 427  
 92 5 3 426 1 423 4.50E-173 615.9 6565 cellular  
 organisms;Eukaryota;Opisthokonta;Metazoa;Eumetazoa;Bilateria;Protostomia;  
 Spiralia;Lophotrochozoa;Mollusca;Bivalvia;Autobranhia;Pteriormorphia;Ostr  
 eida;Ostreoidea;Ostreidae;Crassostrea;Crassostrea virginica  
 UdeM00000012955 6596 738.8 UdeM00000012955 XP\_045187076.1 95.1 391  
 19 0 5 395 3 393 3.60E-210 738.8 6596 cellular  
 organisms;Eukaryota;Opisthokonta;Metazoa;Eumetazoa;Bilateria;Protostomia;  
 Spiralia;Lophotrochozoa;Mollusca;Bivalvia;Autobranhia;Heteroconchia;Euhe

terodonta;Imparidentia;Venerida;Veneroidea;Veneridae;Mercenaria;Mercenari  
a mercenaria

UdeM00000012956 6596 1395.2 UdeM00000012956 XP\_045187075.1 61.7  
1274 416 21 1 1207 1 1269 0.00E+00 1395.2 6596  
cellular

organisms;Eukaryota;Opisthokonta;Metazoa;Eumetazoa;Bilateria;Protostomia;  
Spiralia;Lophotrochozoa;Mollusca;Bivalvia;Autobranchia;Heteroconchia;Euhe  
terodonta;Imparidentia;Venerida;Veneroidea;Veneridae;Mercenaria;Mercenari  
a mercenaria

UdeM00000012957 13616 128.3 UdeM00000012957 XP\_007472864.1 57.6 99  
42 0 1 99 59 157 5.60E-27 128.3 13616 cellular

organisms;Eukaryota;Opisthokonta;Metazoa;Eumetazoa;Bilateria;Deuterostomi  
a;Chordata;Craniata;Vertebrata;Gnathostomata;Teleostomi;Euteleostomi;Sarc  
opterygii;Dipnotetrapodomorpha;Tetrapoda;Amniota;Mammalia;Theria;Metather  
ia;Didelphimorphia;Didelphidae;Didelphinae;Monodelphis;Monodelphis  
domestica

UdeM00000012958 34773 127.5 UdeM00000012958 XP\_041927996.1 63.4 93  
34 0 7 99 5 97 9.60E-27 127.5 34773 cellular

organisms;Eukaryota;Opisthokonta;Metazoa;Eumetazoa;Bilateria;Deuterostomi  
a;Chordata;Craniata;Vertebrata;Gnathostomata;Teleostomi;Euteleostomi;Acti  
nopterygii;Actinopteri;Neopterygii;Teleostei;Osteoglossocephalai;Clupeoce  
phala;Otomorpha;Clupei;Clupeiformes;Clupeoidei;Clupeidae;Alosinae;Alosa;A  
losa sapidissima

UdeM00000012959 400727 560.5 UdeM00000012959 XP\_025104604.1 69.9  
422 124 3 1 421 1 420 7.10E-156 560.5 400727  
cellular

organisms;Eukaryota;Opisthokonta;Metazoa;Eumetazoa;Bilateria;Protostomia;  
Spiralia;Lophotrochozoa;Mollusca;Gastropoda;Caenogastropoda;Architaeniogl  
ossa;Ampullarioidea;Ampullariidae;Pomacea;Pomacea canaliculata

UdeM00000012960 6596 357.5 UdeM00000012960 XP\_045170693.1 61.7 295  
112 1 1 294 1 295 1.70E-95 357.5 6596 cellular

organisms;Eukaryota;Opisthokonta;Metazoa;Eumetazoa;Bilateria;Protostomia;  
Spiralia;Lophotrochozoa;Mollusca;Bivalvia;Autobranchia;Heteroconchia;Euhe  
terodonta;Imparidentia;Venerida;Veneroidea;Veneridae;Mercenaria;Mercenari  
a mercenaria

UdeM00000012961 6596 515.4 UdeM00000012961 XP\_045170682.1 82.4 313  
51 2 1 313 1 309 5.10E-143 515.4 6596 cellular

organisms;Eukaryota;Opisthokonta;Metazoa;Eumetazoa;Bilateria;Protostomia;  
Spiralia;Lophotrochozoa;Mollusca;Bivalvia;Autobranchia;Heteroconchia;Euhe  
terodonta;Imparidentia;Venerida;Veneroidea;Veneridae;Mercenaria;Mercenari  
a mercenaria

UdeM00000012962 6596 751.9 UdeM00000012962 XP\_045170667.1 78.5 465  
92 5 1 463 1 459 4.80E-214 751.9 6596 cellular

organisms;Eukaryota;Opisthokonta;Metazoa;Eumetazoa;Bilateria;Protostomia;  
Spiralia;Lophotrochozoa;Mollusca;Bivalvia;Autobranchia;Heteroconchia;Euhe  
terodonta;Imparidentia;Venerida;Veneroidea;Veneridae;Mercenaria;Mercenari  
a mercenaria

UdeM00000012963 6596 962.6 UdeM00000012963 XP\_045170646.1 64.1 715  
257 0 1 715 1 715 2.80E-277 962.6 6596 cellular

organisms;Eukaryota;Opisthokonta;Metazoa;Eumetazoa;Bilateria;Protostomia;  
Spiralia;Lophotrochozoa;Mollusca;Bivalvia;Autobranchia;Heteroconchia;Euhe  
terodonta;Imparidentia;Venerida;Veneroidea;Veneridae;Mercenaria;Mercenari  
a mercenaria

UdeM00000012964 6596 104.8 UdeM00000012964 XP\_045202044.1 55.8 283  
 125 0 7 289 8 290 2.00E-19 104.8 6596 cellular  
 organisms;Eukaryota;Opisthokonta;Metazoa;Eumetazoa;Bilateria;Protostomia;  
 Spiralia;Lophotrochozoa;Mollusca;Bivalvia;Autobranhia;Heteroconchia;Euhe  
 terodonta;Imparidentia;Venerida;Veneroidea;Veneridae;Mercenaria;Mercenari  
 a mercenaria

UdeM00000012965 6596 516.9 UdeM00000012965 XP\_045170718.1 52.4 521  
 226 9 1 506 1 514 4.50E-143 516.9 6596 cellular  
 organisms;Eukaryota;Opisthokonta;Metazoa;Eumetazoa;Bilateria;Protostomia;  
 Spiralia;Lophotrochozoa;Mollusca;Bivalvia;Autobranhia;Heteroconchia;Euhe  
 terodonta;Imparidentia;Venerida;Veneroidea;Veneridae;Mercenaria;Mercenari  
 a mercenaria

UdeM00000012966 7574 370.5 UdeM00000012966 XP\_013407698.1 77.7 238  
 51 2 12 248 15 251 1.60E-99 370.5 7574 cellular  
 organisms;Eukaryota;Opisthokonta;Metazoa;Eumetazoa;Bilateria;Protostomia;  
 Spiralia;Lophotrochozoa;Brachiopoda;Linguliformea;Lingulata;Lingulida;Lin  
 guloidea;Lingulidae;Lingula;Lingula anatina

UdeM00000012967 1735272 114 UdeM00000012967 XP\_041354124.1 63.9  
 83 29 1 10 92 12 93 1.10E-22 114 1735272  
 cellular  
 organisms;Eukaryota;Opisthokonta;Metazoa;Eumetazoa;Bilateria;Protostomia;  
 Spiralia;Lophotrochozoa;Mollusca;Gastropoda;Neomphalina;Neomphaloidea;Pel  
 tospiridae;Gigantopelta;Gigantopelta aegis

UdeM00000012968 6579 259.2 UdeM00000012968 XP\_033735933.1 33.6 819  
 375 21 21 819 4 673 1.80E-65 259.2 6579 cellular  
 organisms;Eukaryota;Opisthokonta;Metazoa;Eumetazoa;Bilateria;Protostomia;  
 Spiralia;Lophotrochozoa;Mollusca;Bivalvia;Autobranhia;Pteriormorphia;Pect  
 inida;Pectinoidea;Pectinidae;Pecten;Pecten maximus

UdeM00000012969 6579 634.8 UdeM00000012969 XP\_033735936.1 56.5 637  
 236 14 1 612 1 621 1.10E-178 634.8 6579 cellular  
 organisms;Eukaryota;Opisthokonta;Metazoa;Eumetazoa;Bilateria;Protostomia;  
 Spiralia;Lophotrochozoa;Mollusca;Bivalvia;Autobranhia;Pteriormorphia;Pect  
 inida;Pectinoidea;Pectinidae;Pecten;Pecten maximus

UdeM00000012970 6565 411.4 UdeM00000012970 XP\_022330644.1 40.5 666  
 354 14 80 726 791 1433 2.70E-111 411.4 6565 cellular  
 organisms;Eukaryota;Opisthokonta;Metazoa;Eumetazoa;Bilateria;Protostomia;  
 Spiralia;Lophotrochozoa;Mollusca;Bivalvia;Autobranhia;Pteriormorphia;Ostr  
 eida;Ostreoidea;Ostreidae;Crassostrea;Crassostrea virginica

UdeM00000012971 1735272 189.9 UdeM00000012971 XP\_041355165.1 36.2  
 426 212 16 135 542 1643 2026 8.60E-45 189.9 1735272  
 cellular  
 organisms;Eukaryota;Opisthokonta;Metazoa;Eumetazoa;Bilateria;Protostomia;  
 Spiralia;Lophotrochozoa;Mollusca;Gastropoda;Neomphalina;Neomphaloidea;Pel  
 tospiridae;Gigantopelta;Gigantopelta aegis

UdeM00000012972 6596 431 UdeM00000012972 XP\_045172589.1 59.1 362  
 146 2 1 362 1 360 1.50E-117 431 6596 cellular  
 organisms;Eukaryota;Opisthokonta;Metazoa;Eumetazoa;Bilateria;Protostomia;  
 Spiralia;Lophotrochozoa;Mollusca;Bivalvia;Autobranhia;Heteroconchia;Euhe  
 terodonta;Imparidentia;Venerida;Veneroidea;Veneridae;Mercenaria;Mercenari  
 a mercenaria

UdeM00000012973 6596 396 UdeM00000012973 XP\_045162154.1 68 266  
 85 0 9 274 34 299 4.00E-107 396 6596 cellular  
 organisms;Eukaryota;Opisthokonta;Metazoa;Eumetazoa;Bilateria;Protostomia;  
 Spiralia;Lophotrochozoa;Mollusca;Bivalvia;Autobranhia;Heteroconchia;Euhe

terodonta;Imparidentia;Venerida;Veneroidea;Veneridae;Mercenaria;Mercenari  
 a mercenaria  
 UdeM00000012974 6596 249.2 UdeM00000012974 XP\_045187140.1 53.1 416  
 176 3 1 405 1 408 8.90E-63 249.2 6596 cellular  
 organisms;Eukaryota;Opisthokonta;Metazoa;Eumetazoa;Bilateria;Protostomia;  
 Spiralia;Lophotrochozoa;Mollusca;Bivalvia;Autobranchia;Heteroconchia;Euhe  
 terodonta;Imparidentia;Venerida;Veneroidea;Veneridae;Mercenaria;Mercenari  
 a mercenaria  
 UdeM00000012975 6596 524.2 UdeM00000012975 XP\_045187139.1 37.6 798  
 458 12 12 787 25 804 2.80E-145 524.2 6596 cellular  
 organisms;Eukaryota;Opisthokonta;Metazoa;Eumetazoa;Bilateria;Protostomia;  
 Spiralia;Lophotrochozoa;Mollusca;Bivalvia;Autobranchia;Heteroconchia;Euhe  
 terodonta;Imparidentia;Venerida;Veneroidea;Veneridae;Mercenaria;Mercenari  
 a mercenaria  
 UdeM00000012976 6596 912.9 UdeM00000012976 XP\_045172463.1 63.2 726  
 242 12 5 711 3 722 2.50E-262 912.9 6596 cellular  
 organisms;Eukaryota;Opisthokonta;Metazoa;Eumetazoa;Bilateria;Protostomia;  
 Spiralia;Lophotrochozoa;Mollusca;Bivalvia;Autobranchia;Heteroconchia;Euhe  
 terodonta;Imparidentia;Venerida;Veneroidea;Veneridae;Mercenaria;Mercenari  
 a mercenaria  
 UdeM00000012977 225164 105.5 UdeM00000012977 XP\_009065828.1 63.2  
 87 29 2 1 85 1 86 3.50E-20 105.5 225164  
 cellular  
 organisms;Eukaryota;Opisthokonta;Metazoa;Eumetazoa;Bilateria;Protostomia;  
 Spiralia;Lophotrochozoa;Mollusca;Gastropoda;Patellogastropoda;Lottioidea;  
 Lottiidae;Lottia;Lottia gigantea  
 UdeM00000012978 6596 1009.6 UdeM00000012978 XP\_045179818.1 52  
 942 420 7 1 932 1 920 2.60E-291 1009.6 6596  
 cellular  
 organisms;Eukaryota;Opisthokonta;Metazoa;Eumetazoa;Bilateria;Protostomia;  
 Spiralia;Lophotrochozoa;Mollusca;Bivalvia;Autobranchia;Heteroconchia;Euhe  
 terodonta;Imparidentia;Venerida;Veneroidea;Veneridae;Mercenaria;Mercenari  
 a mercenaria  
 UdeM00000012979 6596 214.9 UdeM00000012979 XP\_045179837.1 69.9 146  
 43 1 1 145 1 146 6.80E-53 214.9 6596 cellular  
 organisms;Eukaryota;Opisthokonta;Metazoa;Eumetazoa;Bilateria;Protostomia;  
 Spiralia;Lophotrochozoa;Mollusca;Bivalvia;Autobranchia;Heteroconchia;Euhe  
 terodonta;Imparidentia;Venerida;Veneroidea;Veneridae;Mercenaria;Mercenari  
 a mercenaria  
 UdeM00000012980 6565 199.1 UdeM00000012980 XP\_022329427.1 72.4 123  
 34 0 27 149 76 198 3.90E-48 199.1 6565 cellular  
 organisms;Eukaryota;Opisthokonta;Metazoa;Eumetazoa;Bilateria;Protostomia;  
 Spiralia;Lophotrochozoa;Mollusca;Bivalvia;Autobranchia;Pteriomorphia;Ostr  
 eida;Ostreoidea;Ostreidae;Crassostrea;Crassostrea virginica  
 UdeM00000012981 6596 80.9 UdeM00000012981 XP\_045185588.1 55.1 78  
 34 1 1 78 1 77 1.30E-12 80.9 6596 cellular  
 organisms;Eukaryota;Opisthokonta;Metazoa;Eumetazoa;Bilateria;Protostomia;  
 Spiralia;Lophotrochozoa;Mollusca;Bivalvia;Autobranchia;Heteroconchia;Euhe  
 terodonta;Imparidentia;Venerida;Veneroidea;Veneridae;Mercenaria;Mercenari  
 a mercenaria  
 UdeM00000012982 6596 263.5 UdeM00000012982 XP\_045162039.1 65.4 182  
 57 2 17 198 27 202 2.30E-67 263.5 6596 cellular  
 organisms;Eukaryota;Opisthokonta;Metazoa;Eumetazoa;Bilateria;Protostomia;  
 Spiralia;Lophotrochozoa;Mollusca;Bivalvia;Autobranchia;Heteroconchia;Euhe

terodonta;Imparidentia;Venerida;Veneroidea;Veneridae;Mercenaria;Mercenari  
 a mercenaria  
 UdeM00000012984 6596 231.1 UdeM00000012984 XP\_045162039.1 63.9 166  
 54 3 2 167 43 202 1.10E-57 231.1 6596 cellular  
 organisms;Eukaryota;Opisthokonta;Metazoa;Eumetazoa;Bilateria;Protostomia;  
 Spiralia;Lophotrochozoa;Mollusca;Bivalvia;Autobranhia;Heteroconchia;Euhe  
 terodonta;Imparidentia;Venerida;Veneroidea;Veneridae;Mercenaria;Mercenari  
 a mercenaria  
 UdeM00000012983 6596 253.4 UdeM00000012983 XP\_045162039.1 63.4 183  
 61 3 25 207 26 202 2.50E-64 253.4 6596 cellular  
 organisms;Eukaryota;Opisthokonta;Metazoa;Eumetazoa;Bilateria;Protostomia;  
 Spiralia;Lophotrochozoa;Mollusca;Bivalvia;Autobranhia;Heteroconchia;Euhe  
 terodonta;Imparidentia;Venerida;Veneroidea;Veneridae;Mercenaria;Mercenari  
 a mercenaria  
 UdeM00000012986 6573 167.5 UdeM00000012986 XP\_021368772.1 54.2 155  
 60 6 2 151 44 192 1.30E-38 167.5 6573 cellular  
 organisms;Eukaryota;Opisthokonta;Metazoa;Eumetazoa;Bilateria;Protostomia;  
 Spiralia;Lophotrochozoa;Mollusca;Bivalvia;Autobranhia;Pteriormorphia;Pect  
 inida;Pectinoidea;Pectinidae;Mizuhopecten;Mizuhopecten yessoensis  
 UdeM00000012985 6573 210.3 UdeM00000012985 XP\_021368772.1 56.5 184  
 69 6 11 189 15 192 2.20E-51 210.3 6573 cellular  
 organisms;Eukaryota;Opisthokonta;Metazoa;Eumetazoa;Bilateria;Protostomia;  
 Spiralia;Lophotrochozoa;Mollusca;Bivalvia;Autobranhia;Pteriormorphia;Pect  
 inida;Pectinoidea;Pectinidae;Mizuhopecten;Mizuhopecten yessoensis  
 UdeM00000012987 6596 148.3 UdeM00000012987 XP\_045187840.1 50 142  
 71 0 301 442 302 443 2.40E-32 148.3 6596 cellular  
 organisms;Eukaryota;Opisthokonta;Metazoa;Eumetazoa;Bilateria;Protostomia;  
 Spiralia;Lophotrochozoa;Mollusca;Bivalvia;Autobranhia;Heteroconchia;Euhe  
 terodonta;Imparidentia;Venerida;Veneroidea;Veneridae;Mercenaria;Mercenari  
 a mercenaria  
 UdeM00000012988 6596 150.2 UdeM00000012988 XP\_045187867.1 43.1 181  
 94 1 235 415 227 398 5.80E-33 150.2 6596 cellular  
 organisms;Eukaryota;Opisthokonta;Metazoa;Eumetazoa;Bilateria;Protostomia;  
 Spiralia;Lophotrochozoa;Mollusca;Bivalvia;Autobranhia;Heteroconchia;Euhe  
 terodonta;Imparidentia;Venerida;Veneroidea;Veneridae;Mercenaria;Mercenari  
 a mercenaria  
 UdeM00000012989 6579 94.4 UdeM00000012989 XP\_033752274.1 35.3 139  
 77 2 30 155 218 356 1.50E-16 94.4 6579 cellular  
 organisms;Eukaryota;Opisthokonta;Metazoa;Eumetazoa;Bilateria;Protostomia;  
 Spiralia;Lophotrochozoa;Mollusca;Bivalvia;Autobranhia;Pteriormorphia;Pect  
 inida;Pectinoidea;Pectinidae;Pecten;Pecten maximus  
 UdeM00000038440 6596 295 UdeM00000038440 XP\_045170131.1 63.4 224  
 79 2 1 224 1 221 7.90E-77 295 6596 cellular  
 organisms;Eukaryota;Opisthokonta;Metazoa;Eumetazoa;Bilateria;Protostomia;  
 Spiralia;Lophotrochozoa;Mollusca;Bivalvia;Autobranhia;Heteroconchia;Euhe  
 terodonta;Imparidentia;Venerida;Veneroidea;Veneridae;Mercenaria;Mercenari  
 a mercenaria  
 UdeM00000038441 6573 469.2 UdeM00000038441 XP\_021352742.1 71.9 303  
 85 0 1 303 1 303 4.10E-129 469.2 6573 cellular  
 organisms;Eukaryota;Opisthokonta;Metazoa;Eumetazoa;Bilateria;Protostomia;  
 Spiralia;Lophotrochozoa;Mollusca;Bivalvia;Autobranhia;Pteriormorphia;Pect  
 inida;Pectinoidea;Pectinidae;Mizuhopecten;Mizuhopecten yessoensis  
 UdeM00000038442 6573 102.8 UdeM00000038442 XP\_021352394.1 50 116  
 51 2 5 115 162 275 4.30E-19 102.8 6573 cellular

organisms;Eukaryota;Opisthokonta;Metazoa;Eumetazoa;Bilateria;Protostomia;Spiralia;Lophotrochozoa;Mollusca;Bivalvia;Autobranhia;Pteriomorpha;Pectinida;Pectinoidea;Pectinidae;Mizuhopecten;Mizuhopecten yessoensis  
UdeM00000038443 6579 176.8 UdeM00000038443 XP\_033754505.1 56.6 145  
63 0 1 145 16 160 2.30E-41 176.8 6579 cellular  
organisms;Eukaryota;Opisthokonta;Metazoa;Eumetazoa;Bilateria;Protostomia;Spiralia;Lophotrochozoa;Mollusca;Bivalvia;Autobranhia;Pteriomorpha;Pectinida;Pectinoidea;Pectinidae;Pecten;Pecten maximus  
UdeM00000038444 6579 154.5 UdeM00000038444 XP\_033754505.1 57.7 123  
52 0 3 125 38 160 1.00E-34 154.5 6579 cellular  
organisms;Eukaryota;Opisthokonta;Metazoa;Eumetazoa;Bilateria;Protostomia;Spiralia;Lophotrochozoa;Mollusca;Bivalvia;Autobranhia;Pteriomorpha;Pectinida;Pectinoidea;Pectinidae;Pecten;Pecten maximus  
UdeM00000038445 6596 326.2 UdeM00000038445 XP\_045192847.1 67.2 262  
84 2 9 270 11 270 4.70E-86 326.2 6596 cellular  
organisms;Eukaryota;Opisthokonta;Metazoa;Eumetazoa;Bilateria;Protostomia;Spiralia;Lophotrochozoa;Mollusca;Bivalvia;Autobranhia;Heteroconchia;Euherodonta;Imparidentia;Venerida;Veneroidea;Veneridae;Mercenaria;Mercenaria mercenaria  
UdeM00000038446 6596 57.8 UdeM00000038446 XP\_045188985.1 43.9 82  
43 2 26 105 217 297 1.00E-05 57.8 6596 cellular  
organisms;Eukaryota;Opisthokonta;Metazoa;Eumetazoa;Bilateria;Protostomia;Spiralia;Lophotrochozoa;Mollusca;Bivalvia;Autobranhia;Heteroconchia;Euherodonta;Imparidentia;Venerida;Veneroidea;Veneridae;Mercenaria;Mercenaria mercenaria  
UdeM00000038447 6596 563.1 UdeM00000038447 XP\_045192867.1 73.4 353  
93 1 61 412 29 381 2.80E-157 563.1 6596 cellular  
organisms;Eukaryota;Opisthokonta;Metazoa;Eumetazoa;Bilateria;Protostomia;Spiralia;Lophotrochozoa;Mollusca;Bivalvia;Autobranhia;Heteroconchia;Euherodonta;Imparidentia;Venerida;Veneroidea;Veneridae;Mercenaria;Mercenaria mercenaria  
UdeM00000038449 6596 481.5 UdeM00000038449 XP\_045170131.1 65.5 357  
120 2 1 357 1 354 9.50E-133 481.5 6596 cellular  
organisms;Eukaryota;Opisthokonta;Metazoa;Eumetazoa;Bilateria;Protostomia;Spiralia;Lophotrochozoa;Mollusca;Bivalvia;Autobranhia;Heteroconchia;Euherodonta;Imparidentia;Venerida;Veneroidea;Veneridae;Mercenaria;Mercenaria mercenaria  
UdeM00000038450 6596 144.8 UdeM00000038450 XP\_045192856.1 68.8 96  
29 1 26 120 306 401 7.00E-32 144.8 6596 cellular  
organisms;Eukaryota;Opisthokonta;Metazoa;Eumetazoa;Bilateria;Protostomia;Spiralia;Lophotrochozoa;Mollusca;Bivalvia;Autobranhia;Heteroconchia;Euherodonta;Imparidentia;Venerida;Veneroidea;Veneridae;Mercenaria;Mercenaria mercenaria  
UdeM00000038451 6596 481.5 UdeM00000038451 XP\_045170131.1 65.5 357  
120 2 1 357 1 354 9.50E-133 481.5 6596 cellular  
organisms;Eukaryota;Opisthokonta;Metazoa;Eumetazoa;Bilateria;Protostomia;Spiralia;Lophotrochozoa;Mollusca;Bivalvia;Autobranhia;Heteroconchia;Euherodonta;Imparidentia;Venerida;Veneroidea;Veneridae;Mercenaria;Mercenaria mercenaria  
UdeM00000038452 6596 144.8 UdeM00000038452 XP\_045192856.1 68.8 96  
29 1 26 120 306 401 7.00E-32 144.8 6596 cellular  
organisms;Eukaryota;Opisthokonta;Metazoa;Eumetazoa;Bilateria;Protostomia;Spiralia;Lophotrochozoa;Mollusca;Bivalvia;Autobranhia;Heteroconchia;Euherodonta;Imparidentia;Venerida;Veneroidea;Veneridae;Mercenaria;Mercenaria mercenaria



terodonta;Imparidentia;Venerida;Veneroidea;Veneridae;Mercenaria;Mercenaria  
 UdeM00000038453 13686 311.2 UdeM00000038453 XP\_011170408.3 30 706  
 325 13 132 678 115 810 3.20E-81 311.2 13686 cellular  
 organisms;Eukaryota;Opisthokonta;Metazoa;Eumetazoa;Bilateria;Protostomia;  
 Ecdysozoa;Panarthropoda;Arthropoda;Mandibulata;Pancrustacea;Hexapoda;Inse  
 cta;Dicondylia;Pterygota;Neoptera;Endopterygota;Hymenoptera;Apocrita;Acul  
 eata;Formicoidea;Formicidae;Myrmicinae;Solenopsidini;Solenopsis;Solenopsi  
 s invicta  
 UdeM00000038454 6596 478.4 UdeM00000038454 XP\_045170131.1 65.7 353  
 118 2 14 366 5 354 8.30E-132 478.4 6596 cellular  
 organisms;Eukaryota;Opisthokonta;Metazoa;Eumetazoa;Bilateria;Protostomia;  
 Spiralia;Lophotrochozoa;Mollusca;Bivalvia;Autobranhia;Heteroconchia;Euhe  
 terodonta;Imparidentia;Venerida;Veneroidea;Veneridae;Mercenaria;Mercenari  
 a mercenaria  
 UdeM00000038456 6573 469.2 UdeM00000038456 XP\_021352742.1 71.9 303  
 85 0 1 303 1 303 4.10E-129 469.2 6573 cellular  
 organisms;Eukaryota;Opisthokonta;Metazoa;Eumetazoa;Bilateria;Protostomia;  
 Spiralia;Lophotrochozoa;Mollusca;Bivalvia;Autobranhia;Pteriormorphia;Pect  
 inida;Pectinoidea;Pectinidae;Mizuhopecten;Mizuhopecten yessoensis  
 UdeM00000040555 6596 308.5 UdeM00000040555 XP\_045194229.1 30.1 722  
 453 14 419 1116 15 708 3.40E-80 308.5 6596 cellular  
 organisms;Eukaryota;Opisthokonta;Metazoa;Eumetazoa;Bilateria;Protostomia;  
 Spiralia;Lophotrochozoa;Mollusca;Bivalvia;Autobranhia;Heteroconchia;Euhe  
 terodonta;Imparidentia;Venerida;Veneroidea;Veneridae;Mercenaria;Mercenari  
 a mercenaria  
 UdeM00000040556 6596 311.2 UdeM00000040556 XP\_045191742.1 30.3 717  
 462 13 8 703 6 705 3.40E-81 311.2 6596 cellular  
 organisms;Eukaryota;Opisthokonta;Metazoa;Eumetazoa;Bilateria;Protostomia;  
 Spiralia;Lophotrochozoa;Mollusca;Bivalvia;Autobranhia;Heteroconchia;Euhe  
 terodonta;Imparidentia;Venerida;Veneroidea;Veneridae;Mercenaria;Mercenari  
 a mercenaria  
 UdeM00000040557 6596 136.3 UdeM00000040557 XP\_045204548.1 40.9 159  
 87 5 1 157 386 539 3.30E-29 136.3 6596 cellular  
 organisms;Eukaryota;Opisthokonta;Metazoa;Eumetazoa;Bilateria;Protostomia;  
 Spiralia;Lophotrochozoa;Mollusca;Bivalvia;Autobranhia;Heteroconchia;Euhe  
 terodonta;Imparidentia;Venerida;Veneroidea;Veneridae;Mercenaria;Mercenari  
 a mercenaria  
 UdeM00000040558 6596 133.7 UdeM00000040558 XP\_045204548.1 40.3 159  
 88 5 1 157 386 539 2.10E-28 133.7 6596 cellular  
 organisms;Eukaryota;Opisthokonta;Metazoa;Eumetazoa;Bilateria;Protostomia;  
 Spiralia;Lophotrochozoa;Mollusca;Bivalvia;Autobranhia;Heteroconchia;Euhe  
 terodonta;Imparidentia;Venerida;Veneroidea;Veneridae;Mercenaria;Mercenari  
 a mercenaria  
 UdeM00000040559 29159 328.6 UdeM00000040559 XP\_034321663.1 46.4 338  
 175 5 24 361 9 340 1.10E-86 328.6 29159 cellular  
 organisms;Eukaryota;Opisthokonta;Metazoa;Eumetazoa;Bilateria;Protostomia;  
 Spiralia;Lophotrochozoa;Mollusca;Bivalvia;Autobranhia;Pteriormorphia;Ostr  
 eida;Ostreoidea;Ostreidae;Crassostrea;Crassostrea gigas  
 UdeM00000040560 6596 133.7 UdeM00000040560 XP\_045204548.1 40.3 159  
 88 5 1 157 386 539 2.10E-28 133.7 6596 cellular  
 organisms;Eukaryota;Opisthokonta;Metazoa;Eumetazoa;Bilateria;Protostomia;  
 Spiralia;Lophotrochozoa;Mollusca;Bivalvia;Autobranhia;Heteroconchia;Euhe

terodonta;Imparidentia;Venerida;Veneroidea;Veneridae;Mercenaria;Mercenaria mercenaria

UdeM00000040561 1735272 281.6 UdeM00000040561 XP\_041370326.1 44.3  
291 150 4 27 307 14 302 1.20E-72 281.6 1735272  
cellular

organisms;Eukaryota;Opisthokonta;Metazoa;Eumetazoa;Bilateria;Protostomia;Spiralia;Lophotrochozoa;Mollusca;Gastropoda;Neomphalina;Neomphaloidea;Peltospiridae;Gigantopelta;Gigantopelta aegis

UdeM00000040562 6579 501.5 UdeM00000040562 XP\_033732123.1 43.2 544  
294 5 5 539 1 538 1.30E-138 501.5 6579 cellular

organisms;Eukaryota;Opisthokonta;Metazoa;Eumetazoa;Bilateria;Protostomia;Spiralia;Lophotrochozoa;Mollusca;Bivalvia;Autobranchia;Pteriormorphia;Pectinida;Pectinoidea;Pectinidae;Pecten;Pecten maximus

UdeM00000040563 6579 501.5 UdeM00000040563 XP\_033732123.1 43.2 544  
294 5 26 560 1 538 1.40E-138 501.5 6579 cellular

organisms;Eukaryota;Opisthokonta;Metazoa;Eumetazoa;Bilateria;Protostomia;Spiralia;Lophotrochozoa;Mollusca;Bivalvia;Autobranchia;Pteriormorphia;Pectinida;Pectinoidea;Pectinidae;Pecten;Pecten maximus

UdeM00000040568 6573 391 UdeM00000040568 XP\_021357394.1 77.6 241  
50 2 1 238 1 240 1.90E-105 391 6573 cellular

organisms;Eukaryota;Opisthokonta;Metazoa;Eumetazoa;Bilateria;Protostomia;Spiralia;Lophotrochozoa;Mollusca;Bivalvia;Autobranchia;Pteriormorphia;Pectinida;Pectinoidea;Pectinidae;Mizuhopecten;Mizuhopecten yessoensis

UdeM00000040569 6573 369.8 UdeM00000040569 XP\_021357394.1 65.6 285  
50 3 1 282 1 240 4.90E-99 369.8 6573 cellular

organisms;Eukaryota;Opisthokonta;Metazoa;Eumetazoa;Bilateria;Protostomia;Spiralia;Lophotrochozoa;Mollusca;Bivalvia;Autobranchia;Pteriormorphia;Pectinida;Pectinoidea;Pectinidae;Mizuhopecten;Mizuhopecten yessoensis

UdeM00000040570 6596 479.2 UdeM00000040570 XP\_045197937.1 67 336  
107 1 1 336 8 339 4.40E-132 479.2 6596 cellular

organisms;Eukaryota;Opisthokonta;Metazoa;Eumetazoa;Bilateria;Protostomia;Spiralia;Lophotrochozoa;Mollusca;Bivalvia;Autobranchia;Heteroconchia;Euheterodonta;Imparidentia;Venerida;Veneroidea;Veneridae;Mercenaria;Mercenaria mercenaria

UdeM00000040571 6596 470.7 UdeM00000040571 XP\_045196786.1 62.2 357  
131 3 1 354 1 356 1.70E-129 470.7 6596 cellular

organisms;Eukaryota;Opisthokonta;Metazoa;Eumetazoa;Bilateria;Protostomia;Spiralia;Lophotrochozoa;Mollusca;Bivalvia;Autobranchia;Heteroconchia;Euheterodonta;Imparidentia;Venerida;Veneroidea;Veneridae;Mercenaria;Mercenaria mercenaria

UdeM00000040572 6573 190.3 UdeM00000040572 XP\_021367187.1 40.8 250  
143 3 13 262 14 258 3.20E-45 190.3 6573 cellular

organisms;Eukaryota;Opisthokonta;Metazoa;Eumetazoa;Bilateria;Protostomia;Spiralia;Lophotrochozoa;Mollusca;Bivalvia;Autobranchia;Pteriormorphia;Pectinida;Pectinoidea;Pectinidae;Mizuhopecten;Mizuhopecten yessoensis

UdeM00000040573 6579 285.8 UdeM00000040573 XP\_033763355.1 49.3 286  
141 3 2 283 16 301 6.10E-74 285.8 6579 cellular

organisms;Eukaryota;Opisthokonta;Metazoa;Eumetazoa;Bilateria;Protostomia;Spiralia;Lophotrochozoa;Mollusca;Bivalvia;Autobranchia;Pteriormorphia;Pectinida;Pectinoidea;Pectinidae;Pecten;Pecten maximus

UdeM00000040574 1735272 94.4 UdeM00000040574 XP\_041368704.1 29.8  
305 173 12 24 312 31 310 3.10E-16 94.4 1735272

cellular

organisms;Eukaryota;Opisthokonta;Metazoa;Eumetazoa;Bilateria;Protostomia;

Spiralia;Lophotrochozoa;Mollusca;Gastropoda;Neomphalina;Neomphaloidea;Pel  
tospiridae;Gigantopelta;Gigantopelta aegis  
UdeM00000040575 7574 141.7 UdeM00000040575 XP\_013386407.1 58.7 109  
45 0 3 111 7 115 5.50E-31 141.7 7574 cellular  
organisms;Eukaryota;Opisthokonta;Metazoa;Eumetazoa;Bilateria;Protostomia;  
Spiralia;Lophotrochozoa;Brachiopoda;Linguliformea;Lingulata;Lingulida;Lin  
guloidea;Lingulidae;Lingula;Lingula anatina  
UdeM00000040576 6596 730.3 UdeM00000040576 XP\_045205441.1 60.1 557  
222 0 21 577 42 598 1.90E-207 730.3 6596 cellular  
organisms;Eukaryota;Opisthokonta;Metazoa;Eumetazoa;Bilateria;Protostomia;  
Spiralia;Lophotrochozoa;Mollusca;Bivalvia;Autobranchia;Heteroconchia;Euhe  
terodonta;Imparidentia;Venerida;Veneroidea;Veneridae;Mercenaria;Mercenari  
a mercenaria  
UdeM00000040577 114398 422.2 UdeM00000040577 XP\_042903861.1 39.1  
609 353 7 1 598 1 602 1.10E-114 422.2 114398  
cellular  
organisms;Eukaryota;Opisthokonta;Metazoa;Eumetazoa;Bilateria;Protostomia;  
Ecdysozoa;Panarthropoda;Arthropoda;Chelicerata;Arachnida;Araneae;Araneomo  
rphae;Entelegynae;Orbiculariae;Araneoidea;Theridiidae;Parasteatoda;Parast  
eatoda tepidariorum  
UdeM00000040578 29159 145.6 UdeM00000040578 XP\_011449844.1 24 525  
361 12 14 513 174 685 1.70E-31 145.6 29159 cellular  
organisms;Eukaryota;Opisthokonta;Metazoa;Eumetazoa;Bilateria;Protostomia;  
Spiralia;Lophotrochozoa;Mollusca;Bivalvia;Autobranchia;Pteriormorphia;Ostr  
eida;Ostreoidea;Ostreidae;Crassostrea;Crassostrea gigas  
UdeM00000040579 161013 139.8 UdeM00000040579 XP\_034251733.1 45.8  
142 64 2 5 133 66 207 2.60E-30 139.8 161013  
cellular  
organisms;Eukaryota;Opisthokonta;Metazoa;Eumetazoa;Bilateria;Protostomia;  
Ecdysozoa;Panarthropoda;Arthropoda;Mandibulata;Pancrustacea;Hexapoda;Inse  
cta;Dicondylia;Pterygota;Neoptera;Paraneoptera;Thysanoptera;Terebrantia;T  
hripoidea;Thripidae;Thripinae;Thrips;Thrips palmi  
UdeM00000040580 29159 371.3 UdeM00000040580 XP\_034318672.1 40.1 544  
193 8 249 668 359 893 2.70E-99 371.3 29159 cellular  
organisms;Eukaryota;Opisthokonta;Metazoa;Eumetazoa;Bilateria;Protostomia;  
Spiralia;Lophotrochozoa;Mollusca;Bivalvia;Autobranchia;Pteriormorphia;Ostr  
eida;Ostreoidea;Ostreidae;Crassostrea;Crassostrea gigas  
UdeM00000040581 7741 433 UdeM00000040581 XP\_019627143.1 56.3 375  
158 6 4 372 159 533 4.10E-118 433 7741 cellular  
organisms;Eukaryota;Opisthokonta;Metazoa;Eumetazoa;Bilateria;Deuterostomi  
a;Chordata;Cephalochordata;Leptocardii;Amphioxiformes;Branchiostomidae;Br  
anchiostoma;Branchiostoma belcheri  
UdeM00000040582 29159 63.9 UdeM00000040582 XP\_034320570.1 42.2 83  
47 1 65 147 768 849 2.10E-07 63.9 29159 cellular  
organisms;Eukaryota;Opisthokonta;Metazoa;Eumetazoa;Bilateria;Protostomia;  
Spiralia;Lophotrochozoa;Mollusca;Bivalvia;Autobranchia;Pteriormorphia;Ostr  
eida;Ostreoidea;Ostreidae;Crassostrea;Crassostrea gigas  
UdeM00000040583 7574 137.5 UdeM00000040583 XP\_013407624.1 54.8 135  
60 1 1 135 167 300 1.40E-29 137.5 7574 cellular  
organisms;Eukaryota;Opisthokonta;Metazoa;Eumetazoa;Bilateria;Protostomia;  
Spiralia;Lophotrochozoa;Brachiopoda;Linguliformea;Lingulata;Lingulida;Lin  
guloidea;Lingulidae;Lingula;Lingula anatina  
UdeM00000040584 1735272 185.7 UdeM00000040584 XP\_041347279.1 33.2  
334 197 7 1 313 1 329 9.30E-44 185.7 1735272

cellular  
organisms;Eukaryota;Opisthokonta;Metazoa;Eumetazoa;Bilateria;Protostomia;  
Spiralia;Lophotrochozoa;Mollusca;Gastropoda;Neomphalina;Neomphaloidea;Pel  
tospiridae;Gigantopelta;Gigantopelta aegis

UdeM00000040585 1735272 575.1 UdeM00000040585 XP\_041347279.1 56.4  
479 208 1 1 478 404 882 8.30E-161 575.1 1735272

cellular  
organisms;Eukaryota;Opisthokonta;Metazoa;Eumetazoa;Bilateria;Protostomia;  
Spiralia;Lophotrochozoa;Mollusca;Gastropoda;Neomphalina;Neomphaloidea;Pel  
tospiridae;Gigantopelta;Gigantopelta aegis

UdeM00000040586 1735272 519.2 UdeM00000040586 XP\_041347279.1 56.5  
430 186 1 2 430 453 882 4.90E-144 519.2 1735272

cellular  
organisms;Eukaryota;Opisthokonta;Metazoa;Eumetazoa;Bilateria;Protostomia;  
Spiralia;Lophotrochozoa;Mollusca;Gastropoda;Neomphalina;Neomphaloidea;Pel  
tospiridae;Gigantopelta;Gigantopelta aegis

UdeM00000040587 29159 110.2 UdeM00000040587 XP\_011457078.3 37.4 139  
83 2 166 304 49 183 4.90E-21 110.2 29159 cellular

organisms;Eukaryota;Opisthokonta;Metazoa;Eumetazoa;Bilateria;Protostomia;  
Spiralia;Lophotrochozoa;Mollusca;Bivalvia;Autobranchia;Pteriomorphia;Ostr  
eida;Ostreoidea;Ostreidae;Crassostrea;Crassostrea gigas

UdeM00000040588 29159 110.2 UdeM00000040588 XP\_011457078.3 37.4 139  
83 2 160 298 49 183 4.80E-21 110.2 29159 cellular

organisms;Eukaryota;Opisthokonta;Metazoa;Eumetazoa;Bilateria;Protostomia;  
Spiralia;Lophotrochozoa;Mollusca;Bivalvia;Autobranchia;Pteriomorphia;Ostr  
eida;Ostreoidea;Ostreidae;Crassostrea;Crassostrea gigas

UdeM00000040589 441366 635.6 UdeM00000040589 XP\_028318218.1 48.8  
565 289 0 1 565 216 780 6.70E-179 635.6 441366

cellular  
organisms;Eukaryota;Opisthokonta;Metazoa;Eumetazoa;Bilateria;Deuterostomi  
a;Chordata;Craniata;Vertebrata;Gnathostomata;Teleostomi;Euteleostomi;Acti  
nopterygii;Actinopteri;Neopterygii;Teleostei;Osteoglossocephalai;Clupeoce  
phala;Euteleosteomorpha;Neoteleostei;Eurypterygia;Ctenosquamata;Acanthomo  
rphata;Euacanthomorphacea;Percomorphaceae;Ovalentaria;Blenniimorphae;Blen  
niiformes;Gobiesocoidei;Gobiesocidae;Gobiesocinae;Gouania;Gouania  
willdenowi

UdeM00000040590 6596 117.1 UdeM00000040590 XP\_045206986.1 44.2 154  
79 3 13 162 122 272 2.10E-23 117.1 6596 cellular

organisms;Eukaryota;Opisthokonta;Metazoa;Eumetazoa;Bilateria;Protostomia;  
Spiralia;Lophotrochozoa;Mollusca;Bivalvia;Autobranchia;Heteroconchia;Euhe  
terodonta;Imparidentia;Venerida;Veneroidea;Veneridae;Mercenaria;Mercenari  
a mercenaria

UdeM00000040593 6596 124.8 UdeM00000040593 XP\_045206986.1 42.3 163  
88 2 48 206 112 272 1.30E-25 124.8 6596 cellular

organisms;Eukaryota;Opisthokonta;Metazoa;Eumetazoa;Bilateria;Protostomia;  
Spiralia;Lophotrochozoa;Mollusca;Bivalvia;Autobranchia;Heteroconchia;Euhe  
terodonta;Imparidentia;Venerida;Veneroidea;Veneridae;Mercenaria;Mercenari  
a mercenaria

UdeM00000040592 6596 124.8 UdeM00000040592 XP\_045206986.1 42.3 163  
88 2 99 257 112 272 1.60E-25 124.8 6596 cellular

organisms;Eukaryota;Opisthokonta;Metazoa;Eumetazoa;Bilateria;Protostomia;  
Spiralia;Lophotrochozoa;Mollusca;Bivalvia;Autobranchia;Heteroconchia;Euhe  
terodonta;Imparidentia;Venerida;Veneroidea;Veneridae;Mercenaria;Mercenari  
a mercenaria

UdeM00000040594 6596 1335.1 UdeM00000040594 XP\_045194112.1 47.3  
 1390 636 15 6 1315 62 1435 0.00E+00 1335.1 6596  
 cellular  
 organisms;Eukaryota;Opisthokonta;Metazoa;Eumetazoa;Bilateria;Protostomia;  
 Spiralia;Lophotrochozoa;Mollusca;Bivalvia;Autobranhia;Heteroconchia;Euhe  
 terodonta;Imparidentia;Venerida;Veneroidea;Veneridae;Mercenaria;Mercenari  
 a mercenaria  
 UdeM00000040595 6596 333.2 UdeM00000040595 XP\_045210908.1 66.7 246  
 71 4 23 258 36 280 3.00E-88 333.2 6596 cellular  
 organisms;Eukaryota;Opisthokonta;Metazoa;Eumetazoa;Bilateria;Protostomia;  
 Spiralia;Lophotrochozoa;Mollusca;Bivalvia;Autobranhia;Heteroconchia;Euhe  
 terodonta;Imparidentia;Venerida;Veneroidea;Veneridae;Mercenaria;Mercenari  
 a mercenaria  
 UdeM00000040596 6579 94 UdeM00000040596 XP\_033727551.1 30.6 232  
 133 9 3 210 36 263 6.20E-16 94 6579 cellular  
 organisms;Eukaryota;Opisthokonta;Metazoa;Eumetazoa;Bilateria;Protostomia;  
 Spiralia;Lophotrochozoa;Mollusca;Bivalvia;Autobranhia;Pteriormorphia;Pect  
 inida;Pectinoidea;Pectinidae;Pecten;Pecten maximus  
 UdeM00000040597 6579 90.5 UdeM00000040597 XP\_033727551.1 27.1 221  
 141 4 3 204 36 255 3.00E-15 90.5 6579 cellular  
 organisms;Eukaryota;Opisthokonta;Metazoa;Eumetazoa;Bilateria;Protostomia;  
 Spiralia;Lophotrochozoa;Mollusca;Bivalvia;Autobranhia;Pteriormorphia;Pect  
 inida;Pectinoidea;Pectinidae;Pecten;Pecten maximus  
 UdeM00000040600 218467 77.4 UdeM00000040600 XP\_023232316.1 34.3  
 140 86 3 61 199 64 198 3.00E-11 77.4 218467  
 cellular  
 organisms;Eukaryota;Opisthokonta;Metazoa;Eumetazoa;Bilateria;Protostomia;  
 Ecdysozoa;Panarthropoda;Arthropoda;Chelicerata;Arachnida;Scorpiones;Buthi  
 da;Buthoidea;Buthidae;Centruroides;Centruroides sculpturatus  
 UdeM00000040603 543639 79.3 UdeM00000040603 XP\_037565501.1 33.7  
 98 64 1 3 99 41 138 6.40E-12 79.3 543639  
 cellular  
 organisms;Eukaryota;Opisthokonta;Metazoa;Eumetazoa;Bilateria;Protostomia;  
 Ecdysozoa;Panarthropoda;Arthropoda;Chelicerata;Arachnida;Acari;Parasitifo  
 rmes;Ixodida;Ixodoidea;Ixodidae;Rhipicephalinae;Dermacentor;Dermacentor  
 silvarum  
 UdeM00000040606 6945 90.1 UdeM00000040606 XP\_040069682.2 28.6 182  
 111 5 12 182 43 216 5.40E-15 90.1 6945 cellular  
 organisms;Eukaryota;Opisthokonta;Metazoa;Eumetazoa;Bilateria;Protostomia;  
 Ecdysozoa;Panarthropoda;Arthropoda;Chelicerata;Arachnida;Acari;Parasitifo  
 rmes;Ixodida;Ixodoidea;Ixodidae;Ixodinae;Ixodes;Ixodes scapularis  
 UdeM00000040607 543639 84.7 UdeM00000040607 XP\_037564446.1 29.1  
 182 108 7 12 180 40 213 2.10E-13 84.7 543639  
 cellular  
 organisms;Eukaryota;Opisthokonta;Metazoa;Eumetazoa;Bilateria;Protostomia;  
 Ecdysozoa;Panarthropoda;Arthropoda;Chelicerata;Arachnida;Acari;Parasitifo  
 rmes;Ixodida;Ixodoidea;Ixodidae;Rhipicephalinae;Dermacentor;Dermacentor  
 silvarum  
 UdeM00000040610 6945 82 UdeM00000040610 XP\_040069237.1 28.8 226  
 135 5 26 225 52 277 1.40E-12 82 6945 cellular  
 organisms;Eukaryota;Opisthokonta;Metazoa;Eumetazoa;Bilateria;Protostomia;  
 Ecdysozoa;Panarthropoda;Arthropoda;Chelicerata;Arachnida;Acari;Parasitifo  
 rmes;Ixodida;Ixodoidea;Ixodidae;Ixodinae;Ixodes;Ixodes scapularis

UdeM00000040611 6579 93.2 UdeM00000040611 XP\_033727551.1 30.3 234  
 138 9 3 217 36 263 6.40E-16 93.2 6579 cellular  
 organisms;Eukaryota;Opisthokonta;Metazoa;Eumetazoa;Bilateria;Protostomia;  
 Spiralia;Lophotrochozoa;Mollusca;Bivalvia;Autobranchia;Pteriormorphia;Pect  
 inida;Pectinoidea;Pectinidae;Pecten;Pecten maximus  
 UdeM00000040612 6579 97.1 UdeM00000040612 XP\_033727551.1 27.4 223  
 142 4 3 206 36 257 4.30E-17 97.1 6579 cellular  
 organisms;Eukaryota;Opisthokonta;Metazoa;Eumetazoa;Bilateria;Protostomia;  
 Spiralia;Lophotrochozoa;Mollusca;Bivalvia;Autobranchia;Pteriormorphia;Pect  
 inida;Pectinoidea;Pectinidae;Pecten;Pecten maximus  
 UdeM00000040613 6579 97.1 UdeM00000040613 XP\_033727551.1 27.4 223  
 142 4 3 206 36 257 4.30E-17 97.1 6579 cellular  
 organisms;Eukaryota;Opisthokonta;Metazoa;Eumetazoa;Bilateria;Protostomia;  
 Spiralia;Lophotrochozoa;Mollusca;Bivalvia;Autobranchia;Pteriormorphia;Pect  
 inida;Pectinoidea;Pectinidae;Pecten;Pecten maximus  
 UdeM00000040614 218467 88.2 UdeM00000040614 XP\_023232316.1 37.7  
 122 75 1 61 181 64 185 2.00E-14 88.2 218467  
 cellular  
 organisms;Eukaryota;Opisthokonta;Metazoa;Eumetazoa;Bilateria;Protostomia;  
 Ecdysozoa;Panarthropoda;Arthropoda;Chelicerata;Arachnida;Scorpiones;Buthi  
 da;Buthoidea;Buthidae;Centruroides;Centruroides sculpturatus  
 UdeM00000040615 218467 85.1 UdeM00000040615 XP\_023232316.1 31.8  
 170 104 4 23 181 17 185 1.20E-13 85.1 218467  
 cellular  
 organisms;Eukaryota;Opisthokonta;Metazoa;Eumetazoa;Bilateria;Protostomia;  
 Ecdysozoa;Panarthropoda;Arthropoda;Chelicerata;Arachnida;Scorpiones;Buthi  
 da;Buthoidea;Buthidae;Centruroides;Centruroides sculpturatus  
 UdeM00000040616 218467 85.1 UdeM00000040616 XP\_023232316.1 31.8  
 170 104 4 23 181 17 185 1.20E-13 85.1 218467  
 cellular  
 organisms;Eukaryota;Opisthokonta;Metazoa;Eumetazoa;Bilateria;Protostomia;  
 Ecdysozoa;Panarthropoda;Arthropoda;Chelicerata;Arachnida;Scorpiones;Buthi  
 da;Buthoidea;Buthidae;Centruroides;Centruroides sculpturatus  
 UdeM00000040617 218467 83.6 UdeM00000040617 XP\_023232316.1 31.8  
 170 104 4 23 181 17 185 3.60E-13 83.6 218467  
 cellular  
 organisms;Eukaryota;Opisthokonta;Metazoa;Eumetazoa;Bilateria;Protostomia;  
 Ecdysozoa;Panarthropoda;Arthropoda;Chelicerata;Arachnida;Scorpiones;Buthi  
 da;Buthoidea;Buthidae;Centruroides;Centruroides sculpturatus  
 UdeM00000040618 218467 83.6 UdeM00000040618 XP\_023232316.1 31.8  
 170 104 4 23 181 17 185 5.00E-13 83.6 218467  
 cellular  
 organisms;Eukaryota;Opisthokonta;Metazoa;Eumetazoa;Bilateria;Protostomia;  
 Ecdysozoa;Panarthropoda;Arthropoda;Chelicerata;Arachnida;Scorpiones;Buthi  
 da;Buthoidea;Buthidae;Centruroides;Centruroides sculpturatus  
 UdeM00000040619 218467 85.1 UdeM00000040619 XP\_023232316.1 31.8  
 170 104 4 23 181 17 185 1.30E-13 85.1 218467  
 cellular  
 organisms;Eukaryota;Opisthokonta;Metazoa;Eumetazoa;Bilateria;Protostomia;  
 Ecdysozoa;Panarthropoda;Arthropoda;Chelicerata;Arachnida;Scorpiones;Buthi  
 da;Buthoidea;Buthidae;Centruroides;Centruroides sculpturatus  
 UdeM00000040620 218467 85.1 UdeM00000040620 XP\_023232316.1 31.8  
 170 104 4 23 181 17 185 1.30E-13 85.1 218467  
 cellular

organisms;Eukaryota;Opisthokonta;Metazoa;Eumetazoa;Bilateria;Protostomia;  
Ecdysozoa;Panarthropoda;Arthropoda;Chelicerata;Arachnida;Scorpiones;Buthi  
da;Buthoidea;Buthidae;Centruroides;Centruroides sculpturatus

UdeM00000040621 218467 86.3 UdeM00000040621 XP\_023232316.1 31.8  
170 104 4 23 181 17 185 9.90E-14 86.3 218467

cellular

organisms;Eukaryota;Opisthokonta;Metazoa;Eumetazoa;Bilateria;Protostomia;  
Ecdysozoa;Panarthropoda;Arthropoda;Chelicerata;Arachnida;Scorpiones;Buthi  
da;Buthoidea;Buthidae;Centruroides;Centruroides sculpturatus

UdeM00000040622 218467 85.1 UdeM00000040622 XP\_023232316.1 31.8  
170 104 4 23 181 17 185 1.30E-13 85.1 218467

cellular

organisms;Eukaryota;Opisthokonta;Metazoa;Eumetazoa;Bilateria;Protostomia;  
Ecdysozoa;Panarthropoda;Arthropoda;Chelicerata;Arachnida;Scorpiones;Buthi  
da;Buthoidea;Buthidae;Centruroides;Centruroides sculpturatus

UdeM00000040623 218467 85.1 UdeM00000040623 XP\_023232316.1 31.8  
170 104 4 23 181 17 185 1.20E-13 85.1 218467

cellular

organisms;Eukaryota;Opisthokonta;Metazoa;Eumetazoa;Bilateria;Protostomia;  
Ecdysozoa;Panarthropoda;Arthropoda;Chelicerata;Arachnida;Scorpiones;Buthi  
da;Buthoidea;Buthidae;Centruroides;Centruroides sculpturatus

UdeM00000040624 218467 86.3 UdeM00000040624 XP\_023232316.1 31.8  
170 104 4 23 181 17 185 7.70E-14 86.3 218467

cellular

organisms;Eukaryota;Opisthokonta;Metazoa;Eumetazoa;Bilateria;Protostomia;  
Ecdysozoa;Panarthropoda;Arthropoda;Chelicerata;Arachnida;Scorpiones;Buthi  
da;Buthoidea;Buthidae;Centruroides;Centruroides sculpturatus

UdeM00000040625 6596 226.1 UdeM00000040625 XP\_045187659.1 76.2 143  
32 2 3 144 452 593 2.90E-56 226.1 6596 cellular

organisms;Eukaryota;Opisthokonta;Metazoa;Eumetazoa;Bilateria;Protostomia;  
Spiralia;Lophotrochozoa;Mollusca;Bivalvia;Autobranchia;Heteroconchia;Euhe  
terodonta;Imparidentia;Venerida;Veneroidea;Veneridae;Mercenaria;Mercenari  
a mercenaria

UdeM00000040626 6596 741.1 UdeM00000040626 XP\_045187648.1 81.5 443  
79 1 1 443 12 451 2.30E-210 741.1 6596 cellular

organisms;Eukaryota;Opisthokonta;Metazoa;Eumetazoa;Bilateria;Protostomia;  
Spiralia;Lophotrochozoa;Mollusca;Bivalvia;Autobranchia;Heteroconchia;Euhe  
terodonta;Imparidentia;Venerida;Veneroidea;Veneridae;Mercenaria;Mercenari  
a mercenaria

UdeM00000040627 29159 441 UdeM00000040627 XP\_034313077.1 63.8 323  
117 0 1 323 1 323 1.30E-120 441 29159 cellular

organisms;Eukaryota;Opisthokonta;Metazoa;Eumetazoa;Bilateria;Protostomia;  
Spiralia;Lophotrochozoa;Mollusca;Bivalvia;Autobranchia;Pteriomorphia;Ostr  
eida;Ostreoidea;Ostreidae;Crassostrea;Crassostrea gigas

UdeM00000040628 6579 127.1 UdeM00000040628 XP\_033728274.1 31.2 311  
161 9 1 262 1 307 3.40E-26 127.1 6579 cellular

organisms;Eukaryota;Opisthokonta;Metazoa;Eumetazoa;Bilateria;Protostomia;  
Spiralia;Lophotrochozoa;Mollusca;Bivalvia;Autobranchia;Pteriomorphia;Pect  
inida;Pectinoidea;Pectinidae;Pecten;Pecten maximus

UdeM00000040629 6596 1043.1 UdeM00000040629 XP\_045187625.1 57.2  
1101 433 18 5 1076 63 1154 2.40E-301 1043.1 6596

cellular

organisms;Eukaryota;Opisthokonta;Metazoa;Eumetazoa;Bilateria;Protostomia;  
Spiralia;Lophotrochozoa;Mollusca;Bivalvia;Autobranchia;Heteroconchia;Euhe

terodonta;Imparidentia;Venerida;Veneroidea;Veneridae;Mercenaria;Mercenaria mercenaria

UdeM00000042577 83332 812.4 UdeM00000042577 NP\_215287.1 81.6 489 90  
0 1 489 23 511 3.20E-232 812.4 83332 cellular

organisms;Bacteria;Terrabacteria

group;Actinobacteria;Actinomycetia;Corynebacteriales;Mycobacteriaceae;Mycobacterium;Mycobacterium tuberculosis complex;Mycobacterium tuberculosis;Mycobacterium tuberculosis H37Rv

UdeM00000041602 6579 262.7 UdeM00000041602 XP\_033741736.1 55.7 228  
99 1 1 226 614 841 4.50E-67 262.7 6579 cellular

organisms;Eukaryota;Opisthokonta;Metazoa;Eumetazoa;Bilateria;Protostomia;Spiralia;Lophotrochozoa;Mollusca;Bivalvia;Autobranchia;Pteriormorphia;Pectinida;Pectinoidea;Pectinidae;Pecten;Pecten maximus

UdeM00000041603 6579 219.2 UdeM00000041603 XP\_033741736.1 52.7 205  
95 1 1 203 637 841 5.20E-54 219.2 6579 cellular

organisms;Eukaryota;Opisthokonta;Metazoa;Eumetazoa;Bilateria;Protostomia;Spiralia;Lophotrochozoa;Mollusca;Bivalvia;Autobranchia;Pteriormorphia;Pectinida;Pectinoidea;Pectinidae;Pecten;Pecten maximus

UdeM00000041604 6596 1362.8 UdeM00000041604 XP\_045156859.1 30.6  
2828 1584 51 1 2538 5592 8331 0.00E+00 1362.8 6596  
cellular

organisms;Eukaryota;Opisthokonta;Metazoa;Eumetazoa;Bilateria;Protostomia;Spiralia;Lophotrochozoa;Mollusca;Bivalvia;Autobranchia;Heteroconchia;Euheterodonta;Imparidentia;Venerida;Veneroidea;Veneridae;Mercenaria;Mercenaria mercenaria

UdeM00000041605 6579 139 UdeM00000041605 XP\_033724553.1 34.2 190  
118 4 1 188 364 548 6.00E-30 139 6579 cellular

organisms;Eukaryota;Opisthokonta;Metazoa;Eumetazoa;Bilateria;Protostomia;Spiralia;Lophotrochozoa;Mollusca;Bivalvia;Autobranchia;Pteriormorphia;Pectinida;Pectinoidea;Pectinidae;Pecten;Pecten maximus

UdeM00000041606 6573 1112.1 UdeM00000041606 XP\_021353290.1 28.9  
2737 1630 68 4 2599 186 2746 0.00E+00 1112.1 6573  
cellular

organisms;Eukaryota;Opisthokonta;Metazoa;Eumetazoa;Bilateria;Protostomia;Spiralia;Lophotrochozoa;Mollusca;Bivalvia;Autobranchia;Pteriormorphia;Pectinida;Pectinoidea;Pectinidae;Mizuhopecten;Mizuhopecten yessoensis

UdeM00000041607 6573 564.3 UdeM00000041607 XP\_021353372.1 50.2 584  
277 8 15 593 14 588 1.80E-157 564.3 6573 cellular

organisms;Eukaryota;Opisthokonta;Metazoa;Eumetazoa;Bilateria;Protostomia;Spiralia;Lophotrochozoa;Mollusca;Bivalvia;Autobranchia;Pteriormorphia;Pectinida;Pectinoidea;Pectinidae;Mizuhopecten;Mizuhopecten yessoensis

UdeM00000041608 1735272 70.9 UdeM00000041608 XP\_041378093.1 25.6  
203 87 4 93 233 7552 7752 3.50E-09 70.9 1735272  
cellular

organisms;Eukaryota;Opisthokonta;Metazoa;Eumetazoa;Bilateria;Protostomia;Spiralia;Lophotrochozoa;Mollusca;Gastropoda;Neomphalina;Neomphaloidea;Peltospiridae;Gigantopelta;Gigantopelta aegis

UdeM00000041611 6565 207.6 UdeM00000041611 XP\_022297447.1 61 164  
63 1 421 584 204 366 4.30E-50 207.6 6565 cellular

organisms;Eukaryota;Opisthokonta;Metazoa;Eumetazoa;Bilateria;Protostomia;Spiralia;Lophotrochozoa;Mollusca;Bivalvia;Autobranchia;Pteriormorphia;Ostreida;Ostreoidea;Ostreidae;Crassostrea;Crassostrea virginica

UdeM00000014721 6573 92 UdeM00000014721 XP\_021372908.1 53.8 91  
37 1 1 91 263 348 4.40E-16 92 6573 cellular



organisms;Eukaryota;Opisthokonta;Metazoa;Eumetazoa;Bilateria;Protostomia;Spiralia;Lophotrochozoa;Mollusca;Bivalvia;Autobranchia;Pteriomorpha;Pectinida;Pectinoidea;Pectinidae;Mizuhopecten;Mizuhopecten yessoensis  
UdeM00000014722 6596 619.8 UdeM00000014722 XP\_045160659.1 53.9 566  
255 3 26 590 35 595 3.70E-174 619.8 6596 cellular  
organisms;Eukaryota;Opisthokonta;Metazoa;Eumetazoa;Bilateria;Protostomia;Spiralia;Lophotrochozoa;Mollusca;Bivalvia;Autobranchia;Heteroconchia;Euherodonta;Imparidentia;Venerida;Veneroidea;Veneridae;Mercenaria;Mercenaria mercenaria  
UdeM00000014723 6596 603.6 UdeM00000014723 XP\_045158739.1 78.3 405  
39 5 33 430 3 365 2.00E-169 603.6 6596 cellular  
organisms;Eukaryota;Opisthokonta;Metazoa;Eumetazoa;Bilateria;Protostomia;Spiralia;Lophotrochozoa;Mollusca;Bivalvia;Autobranchia;Heteroconchia;Euherodonta;Imparidentia;Venerida;Veneroidea;Veneridae;Mercenaria;Mercenaria mercenaria  
UdeM00000014724 6596 596.3 UdeM00000014724 XP\_045158739.1 76.9 412  
39 6 33 437 3 365 3.20E-167 596.3 6596 cellular  
organisms;Eukaryota;Opisthokonta;Metazoa;Eumetazoa;Bilateria;Protostomia;Spiralia;Lophotrochozoa;Mollusca;Bivalvia;Autobranchia;Heteroconchia;Euherodonta;Imparidentia;Venerida;Veneroidea;Veneridae;Mercenaria;Mercenaria mercenaria  
UdeM00000014725 6596 606.3 UdeM00000014725 XP\_045158739.1 78.7 404  
37 5 17 413 4 365 2.90E-170 606.3 6596 cellular  
organisms;Eukaryota;Opisthokonta;Metazoa;Eumetazoa;Bilateria;Protostomia;Spiralia;Lophotrochozoa;Mollusca;Bivalvia;Autobranchia;Heteroconchia;Euherodonta;Imparidentia;Venerida;Veneroidea;Veneridae;Mercenaria;Mercenaria mercenaria  
UdeM00000014726 6596 920.6 UdeM00000014726 XP\_045158737.1 83.8 517  
80 2 15 527 8 524 9.00E-265 920.6 6596 cellular  
organisms;Eukaryota;Opisthokonta;Metazoa;Eumetazoa;Bilateria;Protostomia;Spiralia;Lophotrochozoa;Mollusca;Bivalvia;Autobranchia;Heteroconchia;Euherodonta;Imparidentia;Venerida;Veneroidea;Veneridae;Mercenaria;Mercenaria mercenaria  
UdeM00000014727 6573 112.1 UdeM00000014727 XP\_021345932.1 30.4 316  
187 8 948 1239 86 392 7.40E-21 112.1 6573 cellular  
organisms;Eukaryota;Opisthokonta;Metazoa;Eumetazoa;Bilateria;Protostomia;Spiralia;Lophotrochozoa;Mollusca;Bivalvia;Autobranchia;Pteriomorpha;Pectinida;Pectinoidea;Pectinidae;Mizuhopecten;Mizuhopecten yessoensis  
UdeM00000014728 37621 129.4 UdeM00000014728 XP\_014678940.1 54.6 108  
49 0 5 112 461 568 3.30E-27 129.4 37621 cellular  
organisms;Eukaryota;Opisthokonta;Metazoa;Eumetazoa;Bilateria;Protostomia;Ecdysozoa;Scalidophora;Priapulida;Priapulimorpha;Priapulimorphida;Priapulidae;Priapululus;Priapululus caudatus  
UdeM00000014729 37621 216.1 UdeM00000014729 XP\_014672567.1 52.9 174  
82 0 10 183 345 518 4.80E-53 216.1 37621 cellular  
organisms;Eukaryota;Opisthokonta;Metazoa;Eumetazoa;Bilateria;Protostomia;Ecdysozoa;Scalidophora;Priapulida;Priapulimorpha;Priapulimorphida;Priapulidae;Priapululus;Priapululus caudatus  
UdeM00000014730 7668 120.2 UdeM00000014730 XP\_011671223.1 48.4 124  
62 2 8 131 10 131 2.60E-24 120.2 7668 cellular  
organisms;Eukaryota;Opisthokonta;Metazoa;Eumetazoa;Bilateria;Deuterostomia;Echinodermata;Eleutherozoa;Echinozoa;Echinoidea;Euechinoidea;Echinacea;Camarodonta;Echinidea;Strongylocentrotidae;Strongylocentrotus;Strongylocentrotus purpuratus

UdeM00000014731 6596 422.5 UdeM00000014731 XP\_045158400.1 62.1 594  
 201 10 8 589 6 587 1.10E-114 422.5 6596 cellular  
 organisms;Eukaryota;Opisthokonta;Metazoa;Eumetazoa;Bilateria;Protostomia;  
 Spiralia;Lophotrochozoa;Mollusca;Bivalvia;Autobranhia;Heteroconchia;Euhe  
 terodonta;Imparidentia;Venerida;Veneroidea;Veneridae;Mercenaria;Mercenari  
 a mercenaria  
 UdeM00000014732 6579 679.5 UdeM00000014732 XP\_033738770.1 40.3 1083  
 490 19 1 1057 21 972 6.90E-192 679.5 6579 cellular  
 organisms;Eukaryota;Opisthokonta;Metazoa;Eumetazoa;Bilateria;Protostomia;  
 Spiralia;Lophotrochozoa;Mollusca;Bivalvia;Autobranhia;Pteriormorphia;Pect  
 inida;Pectinoidea;Pectinidae;Pecten;Pecten maximus  
 UdeM00000014733 6579 680.2 UdeM00000014733 XP\_033738770.1 40.3 1084  
 492 19 1 1061 21 972 4.10E-192 680.2 6579 cellular  
 organisms;Eukaryota;Opisthokonta;Metazoa;Eumetazoa;Bilateria;Protostomia;  
 Spiralia;Lophotrochozoa;Mollusca;Bivalvia;Autobranhia;Pteriormorphia;Pect  
 inida;Pectinoidea;Pectinidae;Pecten;Pecten maximus  
 UdeM00000014734 6596 1796.9 UdeM00000014734 XP\_045158402.1 82.5  
 1032 181 0 3 1034 2 1033 0.00E+00 1796.9 6596  
 cellular  
 organisms;Eukaryota;Opisthokonta;Metazoa;Eumetazoa;Bilateria;Protostomia;  
 Spiralia;Lophotrochozoa;Mollusca;Bivalvia;Autobranhia;Heteroconchia;Euhe  
 terodonta;Imparidentia;Venerida;Veneroidea;Veneridae;Mercenaria;Mercenari  
 a mercenaria  
 UdeM00000014735 400727 72.8 UdeM00000014735 XP\_025110490.1 33.3  
 108 56 3 54 149 184 287 4.30E-10 72.8 400727  
 cellular  
 organisms;Eukaryota;Opisthokonta;Metazoa;Eumetazoa;Bilateria;Protostomia;  
 Spiralia;Lophotrochozoa;Mollusca;Gastropoda;Caenogastropoda;Architaeniogl  
 ossa;Ampullarioidea;Ampullariidae;Pomacea;Pomacea canaliculata  
 UdeM00000014736 6500 72.8 UdeM00000014736 XP\_012941846.1 41.5 94  
 52 1 27 117 231 324 3.90E-10 72.8 6500 cellular  
 organisms;Eukaryota;Opisthokonta;Metazoa;Eumetazoa;Bilateria;Protostomia;  
 Spiralia;Lophotrochozoa;Mollusca;Gastropoda;Heterobranhia;Euthyneura;Tec  
 tipleura;Aplysiida;Aplysioidea;Aplysiidae;Aplysia;Aplysia californica  
 UdeM00000014738 6500 72.4 UdeM00000014738 XP\_012941846.1 41.5 94  
 52 1 22 112 231 324 4.90E-10 72.4 6500 cellular  
 organisms;Eukaryota;Opisthokonta;Metazoa;Eumetazoa;Bilateria;Protostomia;  
 Spiralia;Lophotrochozoa;Mollusca;Gastropoda;Heterobranhia;Euthyneura;Tec  
 tipleura;Aplysiida;Aplysioidea;Aplysiidae;Aplysia;Aplysia californica  
 UdeM00000014740 6500 72.4 UdeM00000014740 XP\_012941846.1 41.5 94  
 52 1 35 125 231 324 5.30E-10 72.4 6500 cellular  
 organisms;Eukaryota;Opisthokonta;Metazoa;Eumetazoa;Bilateria;Protostomia;  
 Spiralia;Lophotrochozoa;Mollusca;Gastropoda;Heterobranhia;Euthyneura;Tec  
 tipleura;Aplysiida;Aplysioidea;Aplysiidae;Aplysia;Aplysia californica  
 UdeM00000014743 6596 3162.5 UdeM00000014743 XP\_045160618.1 64.8  
 2524 766 18 98 2547 95 2569 0.00E+00 3162.5 6596  
 cellular  
 organisms;Eukaryota;Opisthokonta;Metazoa;Eumetazoa;Bilateria;Protostomia;  
 Spiralia;Lophotrochozoa;Mollusca;Bivalvia;Autobranhia;Heteroconchia;Euhe  
 terodonta;Imparidentia;Venerida;Veneroidea;Veneridae;Mercenaria;Mercenari  
 a mercenaria  
 UdeM00000014744 6596 3154.4 UdeM00000014744 XP\_045160618.1 64.4  
 2539 766 19 98 2562 95 2569 0.00E+00 3154.4 6596  
 cellular

organisms;Eukaryota;Opisthokonta;Metazoa;Eumetazoa;Bilateria;Protostomia;Spiralia;Lophotrochozoa;Mollusca;Bivalvia;Autobranchia;Heteroconchia;Euheterodonta;Imparidentia;Venerida;Veneroidea;Veneridae;Mercenaria;Mercenaria mercenaria

UdeM00000014745 6579 141 UdeM00000014745 XP\_033730201.1 49.3 152  
77 0 14 165 20 171 1.40E-30 141 6579 cellular

organisms;Eukaryota;Opisthokonta;Metazoa;Eumetazoa;Bilateria;Protostomia;Spiralia;Lophotrochozoa;Mollusca;Bivalvia;Autobranchia;Pteriomorphia;Pectinida;Pectinoidea;Pectinidae;Pecten;Pecten maximus

UdeM00000014746 6596 369 UdeM00000014746 XP\_045159757.1 41.8 498  
270 8 1 487 1 489 9.20E-99 369 6596 cellular

organisms;Eukaryota;Opisthokonta;Metazoa;Eumetazoa;Bilateria;Protostomia;Spiralia;Lophotrochozoa;Mollusca;Bivalvia;Autobranchia;Heteroconchia;Euheterodonta;Imparidentia;Venerida;Veneroidea;Veneridae;Mercenaria;Mercenaria mercenaria

UdeM00000014747 6596 331.6 UdeM00000014747 XP\_045157074.1 55.5 281  
121 3 13 291 16 294 9.90E-88 331.6 6596 cellular

organisms;Eukaryota;Opisthokonta;Metazoa;Eumetazoa;Bilateria;Protostomia;Spiralia;Lophotrochozoa;Mollusca;Bivalvia;Autobranchia;Heteroconchia;Euheterodonta;Imparidentia;Venerida;Veneroidea;Veneridae;Mercenaria;Mercenaria mercenaria

UdeM00000014748 6573 1620.5 UdeM00000014748 XP\_021359588.1 78  
978 215 0 32 1009 31 1008 0.00E+00 1620.5 6573  
cellular

organisms;Eukaryota;Opisthokonta;Metazoa;Eumetazoa;Bilateria;Protostomia;Spiralia;Lophotrochozoa;Mollusca;Bivalvia;Autobranchia;Pteriomorphia;Pectinida;Pectinoidea;Pectinidae;Mizuhopecten;Mizuhopecten yessoensis

UdeM00000014749 6565 94.4 UdeM00000014749 XP\_022292556.1 44 109  
52 1 2 110 187 286 1.10E-16 94.4 6565 cellular

organisms;Eukaryota;Opisthokonta;Metazoa;Eumetazoa;Bilateria;Protostomia;Spiralia;Lophotrochozoa;Mollusca;Bivalvia;Autobranchia;Pteriomorphia;Ostreida;Ostreoidea;Ostreidae;Crassostrea;Crassostrea virginica

UdeM00000014750 6565 61.6 UdeM00000014750 XP\_022292556.1 41.6 77  
36 1 4 80 219 286 6.00E-07 61.6 6565 cellular

organisms;Eukaryota;Opisthokonta;Metazoa;Eumetazoa;Bilateria;Protostomia;Spiralia;Lophotrochozoa;Mollusca;Bivalvia;Autobranchia;Pteriomorphia;Ostreida;Ostreoidea;Ostreidae;Crassostrea;Crassostrea virginica

UdeM00000014751 29159 77 UdeM00000014751 XP\_034307341.1 34.8 135  
74 2 2 122 59 193 3.00E-11 77 29159 cellular

organisms;Eukaryota;Opisthokonta;Metazoa;Eumetazoa;Bilateria;Protostomia;Spiralia;Lophotrochozoa;Mollusca;Bivalvia;Autobranchia;Pteriomorphia;Ostreida;Ostreoidea;Ostreidae;Crassostrea;Crassostrea gigas

UdeM00000014752 6596 1220.7 UdeM00000014752 XP\_045159227.1 39.8  
1773 910 37 282 2007 751 2413 0.00E+00 1220.7 6596  
cellular

organisms;Eukaryota;Opisthokonta;Metazoa;Eumetazoa;Bilateria;Protostomia;Spiralia;Lophotrochozoa;Mollusca;Bivalvia;Autobranchia;Heteroconchia;Euheterodonta;Imparidentia;Venerida;Veneroidea;Veneridae;Mercenaria;Mercenaria mercenaria

UdeM00000014753 29159 65.9 UdeM00000014753 XP\_034302097.1 51.6 64  
31 0 9 72 561 624 3.60E-08 65.9 29159 cellular

organisms;Eukaryota;Opisthokonta;Metazoa;Eumetazoa;Bilateria;Protostomia;Spiralia;Lophotrochozoa;Mollusca;Bivalvia;Autobranchia;Pteriomorphia;Ostreida;Ostreoidea;Ostreidae;Crassostrea;Crassostrea gigas

UdeM00000014754 6596 669.8 UdeM00000014754 XP\_045159227.1 35.2 1209  
 653 29 282 1464 751 1855 7.60E-189 669.8 6596 cellular  
 organisms;Eukaryota;Opisthokonta;Metazoa;Eumetazoa;Bilateria;Protostomia;  
 Spiralia;Lophotrochozoa;Mollusca;Bivalvia;Autobranchia;Heteroconchia;Euhe  
 terodonta;Imparidentia;Venerida;Veneroidea;Veneridae;Mercenaria;Mercenari  
 a mercenaria  
 UdeM00000014755 6565 537 UdeM00000014755 XP\_022316532.1 55.3 494  
 198 7 50 533 1609 2089 2.90E-149 537 6565 cellular  
 organisms;Eukaryota;Opisthokonta;Metazoa;Eumetazoa;Bilateria;Protostomia;  
 Spiralia;Lophotrochozoa;Mollusca;Bivalvia;Autobranchia;Pteriormorphia;Ostr  
 eida;Ostreoidea;Ostreidae;Crassostrea;Crassostrea virginica  
 UdeM00000014756 6596 827.8 UdeM00000014756 XP\_045159227.1 37.2 1300  
 644 24 4 1152 1035 2312 1.80E-236 827.8 6596 cellular  
 organisms;Eukaryota;Opisthokonta;Metazoa;Eumetazoa;Bilateria;Protostomia;  
 Spiralia;Lophotrochozoa;Mollusca;Bivalvia;Autobranchia;Heteroconchia;Euhe  
 terodonta;Imparidentia;Venerida;Veneroidea;Veneridae;Mercenaria;Mercenari  
 a mercenaria  
 UdeM00000014758 29159 179.5 UdeM00000014758 XP\_034324494.1 43.7 247  
 131 4 11 252 293 536 5.40E-42 179.5 29159 cellular  
 organisms;Eukaryota;Opisthokonta;Metazoa;Eumetazoa;Bilateria;Protostomia;  
 Spiralia;Lophotrochozoa;Mollusca;Bivalvia;Autobranchia;Pteriormorphia;Ostr  
 eida;Ostreoidea;Ostreidae;Crassostrea;Crassostrea gigas  
 UdeM00000014759 110193 60.8 UdeM00000014759 XP\_017777214.1 40.7  
 81 47 1 10 90 11 90 1.80E-06 60.8 110193  
 cellular  
 organisms;Eukaryota;Opisthokonta;Metazoa;Eumetazoa;Bilateria;Protostomia;  
 Ecdysozoa;Panarthropoda;Arthropoda;Mandibulata;Pancrustacea;Hexapoda;Inse  
 cta;Dicondylia;Pterygota;Neoptera;Endopterygota;Coleoptera;Polyphaga;Stap  
 hyliniformia;Staphylinoidea;Silphidae;Nicrophorinae;Nicrophorus;Nicrophor  
 us vespilloides  
 UdeM00000014760 6412 87.8 UdeM00000014760 XP\_009015452.1 53.6 69  
 32 0 1 69 1 69 6.00E-15 87.8 6412 cellular  
 organisms;Eukaryota;Opisthokonta;Metazoa;Eumetazoa;Bilateria;Protostomia;  
 Spiralia;Lophotrochozoa;Annelida;Clitellata;Hirudinea;Rhynchobdellida;Glo  
 ssiphoniidae;Helobdella;Helobdella robusta  
 UdeM00000014761 7054 95.9 UdeM00000014761 XP\_031328250.1 55 80  
 36 0 1 80 249 328 4.50E-17 95.9 7054 cellular  
 organisms;Eukaryota;Opisthokonta;Metazoa;Eumetazoa;Bilateria;Protostomia;  
 Ecdysozoa;Panarthropoda;Arthropoda;Mandibulata;Pancrustacea;Hexapoda;Inse  
 cta;Dicondylia;Pterygota;Neoptera;Endopterygota;Coleoptera;Polyphaga;Elat  
 eriformia;Elateroidea;Lampyridae;Lampyrinae;Photinus;Photinus pyralis  
 UdeM00000014764 6596 407.9 UdeM00000014764 XP\_045157467.1 55 358  
 142 2 22 379 62 400 1.40E-110 407.9 6596 cellular  
 organisms;Eukaryota;Opisthokonta;Metazoa;Eumetazoa;Bilateria;Protostomia;  
 Spiralia;Lophotrochozoa;Mollusca;Bivalvia;Autobranchia;Heteroconchia;Euhe  
 terodonta;Imparidentia;Venerida;Veneroidea;Veneridae;Mercenaria;Mercenari  
 a mercenaria  
 UdeM00000014765 6596 210.7 UdeM00000014765 XP\_045158977.1 52.2 203  
 94 1 1 203 726 925 1.80E-51 210.7 6596 cellular  
 organisms;Eukaryota;Opisthokonta;Metazoa;Eumetazoa;Bilateria;Protostomia;  
 Spiralia;Lophotrochozoa;Mollusca;Bivalvia;Autobranchia;Heteroconchia;Euhe  
 terodonta;Imparidentia;Venerida;Veneroidea;Veneridae;Mercenaria;Mercenari  
 a mercenaria

UdeM00000014766 400727 422.2 UdeM00000014766 XP\_025109803.1 42.1  
 743 292 22 6 721 14 645 1.40E-114 422.2 400727  
 cellular  
 organisms;Eukaryota;Opisthokonta;Metazoa;Eumetazoa;Bilateria;Protostomia;  
 Spiralia;Lophotrochozoa;Mollusca;Gastropoda;Caenogastropoda;Architaenioglossa;  
 Ampullarioidea;Ampullariidae;Pomacea;Pomacea canaliculata  
 UdeM00000014769 29159 208 UdeM00000014769 XP\_034331749.1 42.5 261  
 139 4 195 455 133 382 2.60E-50 208 29159 cellular  
 organisms;Eukaryota;Opisthokonta;Metazoa;Eumetazoa;Bilateria;Protostomia;  
 Spiralia;Lophotrochozoa;Mollusca;Bivalvia;Autobranchia;Pteriormorphia;Ostreida;  
 Ostreioidea;Ostreidae;Crassostrea;Crassostrea gigas  
 UdeM00000014771 29159 282 UdeM00000014771 XP\_034331749.1 46.3 298  
 157 2 17 312 89 385 9.70E-73 282 29159 cellular  
 organisms;Eukaryota;Opisthokonta;Metazoa;Eumetazoa;Bilateria;Protostomia;  
 Spiralia;Lophotrochozoa;Mollusca;Bivalvia;Autobranchia;Pteriormorphia;Ostreida;  
 Ostreioidea;Ostreidae;Crassostrea;Crassostrea gigas  
 UdeM00000014770 29159 282 UdeM00000014770 XP\_034331749.1 46.3 298  
 157 2 104 399 89 385 1.20E-72 282 29159 cellular  
 organisms;Eukaryota;Opisthokonta;Metazoa;Eumetazoa;Bilateria;Protostomia;  
 Spiralia;Lophotrochozoa;Mollusca;Bivalvia;Autobranchia;Pteriormorphia;Ostreida;  
 Ostreioidea;Ostreidae;Crassostrea;Crassostrea gigas  
 UdeM00000014772 29159 278.5 UdeM00000014772 XP\_034331749.1 47.3 300  
 149 5 17 310 89 385 1.10E-71 278.5 29159 cellular  
 organisms;Eukaryota;Opisthokonta;Metazoa;Eumetazoa;Bilateria;Protostomia;  
 Spiralia;Lophotrochozoa;Mollusca;Bivalvia;Autobranchia;Pteriormorphia;Ostreida;  
 Ostreioidea;Ostreidae;Crassostrea;Crassostrea gigas  
 UdeM00000014773 6565 230.7 UdeM00000014773 XP\_022293871.1 38 332  
 169 4 21 349 89 386 2.80E-57 230.7 6565 cellular  
 organisms;Eukaryota;Opisthokonta;Metazoa;Eumetazoa;Bilateria;Protostomia;  
 Spiralia;Lophotrochozoa;Mollusca;Bivalvia;Autobranchia;Pteriormorphia;Ostreida;  
 Ostreioidea;Ostreidae;Crassostrea;Crassostrea virginica  
 UdeM00000014775 225164 158.3 UdeM00000014775 XP\_009062695.1 61.8  
 102 39 0 7 108 10 111 5.50E-36 158.3 225164  
 cellular  
 organisms;Eukaryota;Opisthokonta;Metazoa;Eumetazoa;Bilateria;Protostomia;  
 Spiralia;Lophotrochozoa;Mollusca;Gastropoda;Patellogastropoda;Lottiioidea;  
 Lottiidae;Lottia;Lottia gigantea  
 UdeM00000014776 6573 957.6 UdeM00000014776 XP\_021343541.1 76.8 577  
 130 3 48 623 108 681 7.80E-276 957.6 6573 cellular  
 organisms;Eukaryota;Opisthokonta;Metazoa;Eumetazoa;Bilateria;Protostomia;  
 Spiralia;Lophotrochozoa;Mollusca;Bivalvia;Autobranchia;Pteriormorphia;Pectinida;  
 Pectinoidea;Pectinidae;Mizuhopecten;Mizuhopecten yessoensis  
 UdeM00000014778 1735272 109 UdeM00000014778 XP\_041358477.1 42.5  
 120 67 1 1 118 18 137 4.40E-21 109 1735272  
 cellular  
 organisms;Eukaryota;Opisthokonta;Metazoa;Eumetazoa;Bilateria;Protostomia;  
 Spiralia;Lophotrochozoa;Mollusca;Gastropoda;Neomphalina;Neomphaloidea;Peltospiridae;  
 Gigantopelta;Gigantopelta aegis  
 UdeM00000014777 6573 274.2 UdeM00000014777 XP\_021379001.1 35.6 489  
 258 11 30 477 49 521 3.20E-70 274.2 6573 cellular  
 organisms;Eukaryota;Opisthokonta;Metazoa;Eumetazoa;Bilateria;Protostomia;  
 Spiralia;Lophotrochozoa;Mollusca;Bivalvia;Autobranchia;Pteriormorphia;Pectinida;  
 Pectinoidea;Pectinidae;Mizuhopecten;Mizuhopecten yessoensis

UdeM00000014779 6596 807 UdeM00000014779 XP\_045158633.1 47.2 1038  
 475 24 2 1000 141 1144 2.70E-230 807 6596 cellular  
 organisms;Eukaryota;Opisthokonta;Metazoa;Eumetazoa;Bilateria;Protostomia;  
 Spiralia;Lophotrochozoa;Mollusca;Bivalvia;Autobranchia;Heteroconchia;Euhe  
 terodonta;Imparidentia;Venerida;Veneroidea;Veneridae;Mercenaria;Mercenari  
 a mercenaria

UdeM00000014780 6596 798.5 UdeM00000014780 XP\_045158633.1 47 1038  
 472 25 2 995 141 1144 9.70E-228 798.5 6596 cellular  
 organisms;Eukaryota;Opisthokonta;Metazoa;Eumetazoa;Bilateria;Protostomia;  
 Spiralia;Lophotrochozoa;Mollusca;Bivalvia;Autobranchia;Heteroconchia;Euhe  
 terodonta;Imparidentia;Venerida;Veneroidea;Veneridae;Mercenaria;Mercenari  
 a mercenaria

UdeM00000014781 6579 109 UdeM00000014781 XP\_033736710.1 50 98  
 49 0 12 109 43 140 4.10E-21 109 6579 cellular  
 organisms;Eukaryota;Opisthokonta;Metazoa;Eumetazoa;Bilateria;Protostomia;  
 Spiralia;Lophotrochozoa;Mollusca;Bivalvia;Autobranchia;Pteriormorphia;Pect  
 inida;Pectinoidea;Pectinidae;Pecten;Pecten maximus

UdeM00000014782 6596 654.8 UdeM00000014782 XP\_045157880.1 43.4 958  
 426 20 37 935 3 903 1.60E-184 654.8 6596 cellular  
 organisms;Eukaryota;Opisthokonta;Metazoa;Eumetazoa;Bilateria;Protostomia;  
 Spiralia;Lophotrochozoa;Mollusca;Bivalvia;Autobranchia;Heteroconchia;Euhe  
 terodonta;Imparidentia;Venerida;Veneroidea;Veneridae;Mercenaria;Mercenari  
 a mercenaria

UdeM00000014783 6596 141.4 UdeM00000014783 XP\_045172484.1 20.1 728  
 480 13 14 721 78 723 4.60E-30 141.4 6596 cellular  
 organisms;Eukaryota;Opisthokonta;Metazoa;Eumetazoa;Bilateria;Protostomia;  
 Spiralia;Lophotrochozoa;Mollusca;Bivalvia;Autobranchia;Heteroconchia;Euhe  
 terodonta;Imparidentia;Venerida;Veneroidea;Veneridae;Mercenaria;Mercenari  
 a mercenaria

UdeM00000014784 6596 192.2 UdeM00000014784 XP\_045160249.1 49.5 186  
 92 2 18 201 19 204 7.50E-46 192.2 6596 cellular  
 organisms;Eukaryota;Opisthokonta;Metazoa;Eumetazoa;Bilateria;Protostomia;  
 Spiralia;Lophotrochozoa;Mollusca;Bivalvia;Autobranchia;Heteroconchia;Euhe  
 terodonta;Imparidentia;Venerida;Veneroidea;Veneridae;Mercenaria;Mercenari  
 a mercenaria

UdeM00000014785 299123 97.4 UdeM00000014785 XP\_021384513.1 61.6  
 73 28 0 18 90 7 79 9.70E-18 97.4 299123  
 cellular  
 organisms;Eukaryota;Opisthokonta;Metazoa;Eumetazoa;Bilateria;Deuterostomi  
 a;Chordata;Craniata;Vertebrata;Gnathostomata;Teleostomi;Euteleostomi;Sarc  
 opterygii;Dipnotetrapodomorpha;Tetrapoda;Amniota;Sauropsida;Sauria;Archel  
 osauria;Archosauria;Dinosauria;Saurischia;Theropoda;Coelurosauria;Aves;Ne  
 ognathae;Passeriformes;Passeroidea;Estrildidae;Estrildinae;Lonchura;Lonch  
 ura striata;Lonchura striata domestica

UdeM00000014786 6596 288.1 UdeM00000014786 XP\_045157841.1 40.5 439  
 231 5 29 444 24 455 2.10E-74 288.1 6596 cellular  
 organisms;Eukaryota;Opisthokonta;Metazoa;Eumetazoa;Bilateria;Protostomia;  
 Spiralia;Lophotrochozoa;Mollusca;Bivalvia;Autobranchia;Heteroconchia;Euhe  
 terodonta;Imparidentia;Venerida;Veneroidea;Veneridae;Mercenaria;Mercenari  
 a mercenaria

UdeM00000014787 6596 582.8 UdeM00000014787 XP\_045157840.1 75.2 363  
 90 0 6 368 7 369 3.10E-163 582.8 6596 cellular  
 organisms;Eukaryota;Opisthokonta;Metazoa;Eumetazoa;Bilateria;Protostomia;  
 Spiralia;Lophotrochozoa;Mollusca;Bivalvia;Autobranchia;Heteroconchia;Euhe

terodonta;Imparidentia;Venerida;Veneroidea;Veneridae;Mercenaria;Mercenaria mercenaria

UdeM00000014789 6565 106.3 UdeM00000014789 XP\_022318533.1 31.3 217  
119 5 135 349 116 304 2.10E-19 106.3 6565 cellular

organisms;Eukaryota;Opisthokonta;Metazoa;Eumetazoa;Bilateria;Protostomia;Spiralia;Lophotrochozoa;Mollusca;Bivalvia;Autobranchia;Pteriormorphia;Ostreida;Ostreoidea;Ostreidae;Crassostrea;Crassostrea virginica

UdeM00000014790 6573 131.3 UdeM00000014790 XP\_021347744.1 47.6 143  
73 2 1 142 6 147 1.00E-27 131.3 6573 cellular

organisms;Eukaryota;Opisthokonta;Metazoa;Eumetazoa;Bilateria;Protostomia;Spiralia;Lophotrochozoa;Mollusca;Bivalvia;Autobranchia;Pteriormorphia;Pectinida;Pectinoidea;Pectinidae;Mizuhopecten;Mizuhopecten yessoensis

UdeM00000014791 6573 189.1 UdeM00000014791 XP\_021345285.1 58.9 151  
61 1 53 202 92 242 7.00E-45 189.1 6573 cellular

organisms;Eukaryota;Opisthokonta;Metazoa;Eumetazoa;Bilateria;Protostomia;Spiralia;Lophotrochozoa;Mollusca;Bivalvia;Autobranchia;Pteriormorphia;Pectinida;Pectinoidea;Pectinidae;Mizuhopecten;Mizuhopecten yessoensis

UdeM00000014793 400727 181.8 UdeM00000014793 XP\_025109884.1 70.9  
110 32 0 3 112 89 198 4.90E-43 181.8 400727

cellular

organisms;Eukaryota;Opisthokonta;Metazoa;Eumetazoa;Bilateria;Protostomia;Spiralia;Lophotrochozoa;Mollusca;Gastropoda;Caenogastropoda;Architaenioglossa;Ampullarioidea;Ampullariidae;Pomacea;Pomacea canaliculata

UdeM00000014792 400727 196.1 UdeM00000014792 XP\_025109884.1 70.2  
121 36 0 1 121 78 198 2.70E-47 196.1 400727

cellular

organisms;Eukaryota;Opisthokonta;Metazoa;Eumetazoa;Bilateria;Protostomia;Spiralia;Lophotrochozoa;Mollusca;Gastropoda;Caenogastropoda;Architaenioglossa;Ampullarioidea;Ampullariidae;Pomacea;Pomacea canaliculata

UdeM00000014794 37653 302.8 UdeM00000014794 XP\_014778423.1 90.7 162  
15 0 1 162 1 162 2.70E-79 302.8 37653 cellular

organisms;Eukaryota;Opisthokonta;Metazoa;Eumetazoa;Bilateria;Protostomia;Spiralia;Lophotrochozoa;Mollusca;Cephalopoda;Coleoidea;Octopodiformes;Octopoda;Incirrata;Octopodidae;Octopus;Octopus bimaculoides

UdeM00000014795 37653 355.9 UdeM00000014795 XP\_014778423.1 91.1 190  
17 0 1 190 1 190 3.20E-95 355.9 37653 cellular

organisms;Eukaryota;Opisthokonta;Metazoa;Eumetazoa;Bilateria;Protostomia;Spiralia;Lophotrochozoa;Mollusca;Cephalopoda;Coleoidea;Octopodiformes;Octopoda;Incirrata;Octopodidae;Octopus;Octopus bimaculoides

UdeM00000014796 13686 206.1 UdeM00000014796 XP\_011170408.3 39.5 296  
174 3 2 294 586 879 6.30E-50 206.1 13686 cellular

organisms;Eukaryota;Opisthokonta;Metazoa;Eumetazoa;Bilateria;Protostomia;Ecdysozoa;Panarthropoda;Arthropoda;Mandibulata;Pancrustacea;Hexapoda;Insecta;Dicondylia;Pterygota;Neoptera;Endopterygota;Hymenoptera;Apocrita;Aculeata;Formicoidea;Formicidae;Myrmicinae;Solenopsidini;Solenopsis;Solenopsis invicta

UdeM00000014797 3562 124 UdeM00000014797 XP\_021865768.1 52.2 115  
53 1 1 113 340 454 1.30E-25 124 3562 cellular

organisms;Eukaryota;Viridiplantae;Streptophyta;Streptophytina;Embryophyta;Tracheophyta;Euphyllophyta;Spermatophyta;Magnoliopsida;Mesangiospermae;eudicotyledons;Gunneridae;Pentapetalae;Caryophyllales;Chenopodiaceae;Chenopodioideae;Anserineae;Spinacia;Spinacia oleracea

UdeM00000014798 6596 1815 UdeM00000014798 XP\_045158260.1 80.4 1130  
210 4 1 1129 4 1122 0.00E+00 1815 6596 cellular

organisms;Eukaryota;Opisthokonta;Metazoa;Eumetazoa;Bilateria;Protostomia; Spiralia;Lophotrochozoa;Mollusca;Bivalvia;Autobranchia;Heteroconchia;Euherodonta;Imparidentia;Venerida;Veneroidea;Veneridae;Mercenaria;Mercenaria mercenaria

UdeM00000014799 1735272 84.7 UdeM00000014799 XP\_041357543.1 35.5  
124 76 2 1 124 1 120 9.70E-14 84.7 1735272  
cellular

organisms;Eukaryota;Opisthokonta;Metazoa;Eumetazoa;Bilateria;Protostomia; Spiralia;Lophotrochozoa;Mollusca;Gastropoda;Neomphalina;Neomphaloidea;Peltospiridae;Gigantopelta;Gigantopelta aegis

UdeM00000014800 2607531 307 UdeM00000014800 XP\_036361273.1 64.1  
421 110 5 1 420 1 381 3.80E-80 307 2607531  
cellular

organisms;Eukaryota;Opisthokonta;Metazoa;Eumetazoa;Bilateria;Protostomia; Spiralia;Lophotrochozoa;Mollusca;Cephalopoda;Coleoidea;Octopodiformes;Octopoda;Incirrata;Octopodidae;Octopus;Octopus sinensis

UdeM00000014802 218467 235 UdeM00000014802 XP\_023232860.1 97.2  
109 3 0 1 109 1 109 6.30E-59 235 218467  
cellular

organisms;Eukaryota;Opisthokonta;Metazoa;Eumetazoa;Bilateria;Protostomia; Ecdysozoa;Panarthropoda;Arthropoda;Chelicerata;Arachnida;Scorpiones;Buthida;Buthoidea;Buthidae;Centruroides;Centruroides sculpturatus

UdeM00000014803 6565 147.9 UdeM00000014803 XP\_022315750.1 43 172  
84 1 1 172 1 158 1.20E-32 147.9 6565 cellular

organisms;Eukaryota;Opisthokonta;Metazoa;Eumetazoa;Bilateria;Protostomia; Spiralia;Lophotrochozoa;Mollusca;Bivalvia;Autobranchia;Pteriomorphia;Ostreida;Ostreoidea;Ostreidae;Crassostrea;Crassostrea virginica

UdeM00000014805 2607531 178.3 UdeM00000014805 XP\_029640321.1 48  
202 98 3 1 200 1 197 9.70E-42 178.3 2607531  
cellular

organisms;Eukaryota;Opisthokonta;Metazoa;Eumetazoa;Bilateria;Protostomia; Spiralia;Lophotrochozoa;Mollusca;Cephalopoda;Coleoidea;Octopodiformes;Octopoda;Incirrata;Octopodidae;Octopus;Octopus sinensis

UdeM00000014804 6565 147.1 UdeM00000014804 XP\_022315750.1 43 172  
84 1 1 172 1 158 2.20E-32 147.1 6565 cellular

organisms;Eukaryota;Opisthokonta;Metazoa;Eumetazoa;Bilateria;Protostomia; Spiralia;Lophotrochozoa;Mollusca;Bivalvia;Autobranchia;Pteriomorphia;Ostreida;Ostreoidea;Ostreidae;Crassostrea;Crassostrea virginica

UdeM00000014806 6596 434.1 UdeM00000014806 XP\_045160525.1 29 1799  
986 56 7 1627 3 1687 7.80E-118 434.1 6596 cellular

organisms;Eukaryota;Opisthokonta;Metazoa;Eumetazoa;Bilateria;Protostomia; Spiralia;Lophotrochozoa;Mollusca;Bivalvia;Autobranchia;Heteroconchia;Euherodonta;Imparidentia;Venerida;Veneroidea;Veneridae;Mercenaria;Mercenaria mercenaria

UdeM00000014807 29159 288.9 UdeM00000014807 XP\_011454588.2 38.3 551  
232 7 1 548 1 446 1.40E-74 288.9 29159 cellular

organisms;Eukaryota;Opisthokonta;Metazoa;Eumetazoa;Bilateria;Protostomia; Spiralia;Lophotrochozoa;Mollusca;Bivalvia;Autobranchia;Pteriomorphia;Ostreida;Ostreoidea;Ostreidae;Crassostrea;Crassostrea gigas

UdeM00000014808 29159 344.7 UdeM00000014808 XP\_019926412.2 58.6 290  
116 2 67 352 2 291 1.40E-91 344.7 29159 cellular

organisms;Eukaryota;Opisthokonta;Metazoa;Eumetazoa;Bilateria;Protostomia; Spiralia;Lophotrochozoa;Mollusca;Bivalvia;Autobranchia;Pteriomorphia;Ostreida;Ostreoidea;Ostreidae;Crassostrea;Crassostrea gigas



UdeM00000014809 6579 696.8 UdeM00000014809 XP\_033738245.1 84.4 392  
 60 1 18 408 119 510 1.60E-197 696.8 6579 cellular  
 organisms;Eukaryota;Opisthokonta;Metazoa;Eumetazoa;Bilateria;Protostomia;  
 Spiralia;Lophotrochozoa;Mollusca;Bivalvia;Autobranchia;Pteriormorphia;Pect  
 inida;Pectinoidea;Pectinidae;Pecten;Pecten maximus  
 UdeM00000014810 6596 692.6 UdeM00000014810 XP\_045160517.1 38.6 1268  
 484 30 11 1074 24 1201 9.30E-196 692.6 6596 cellular  
 organisms;Eukaryota;Opisthokonta;Metazoa;Eumetazoa;Bilateria;Protostomia;  
 Spiralia;Lophotrochozoa;Mollusca;Bivalvia;Autobranchia;Heteroconchia;Euhe  
 terodonta;Imparidentia;Venerida;Veneroidea;Veneridae;Mercenaria;Mercenari  
 a mercenaria  
 UdeM00000014812 6596 688.3 UdeM00000014812 XP\_045160517.1 39.2 1244  
 461 30 8 1046 24 1177 1.50E-194 688.3 6596 cellular  
 organisms;Eukaryota;Opisthokonta;Metazoa;Eumetazoa;Bilateria;Protostomia;  
 Spiralia;Lophotrochozoa;Mollusca;Bivalvia;Autobranchia;Heteroconchia;Euhe  
 terodonta;Imparidentia;Venerida;Veneroidea;Veneridae;Mercenaria;Mercenari  
 a mercenaria  
 UdeM00000014811 6596 688.3 UdeM00000014811 XP\_045160517.1 39.2 1244  
 461 30 11 1049 24 1177 1.50E-194 688.3 6596 cellular  
 organisms;Eukaryota;Opisthokonta;Metazoa;Eumetazoa;Bilateria;Protostomia;  
 Spiralia;Lophotrochozoa;Mollusca;Bivalvia;Autobranchia;Heteroconchia;Euhe  
 terodonta;Imparidentia;Venerida;Veneroidea;Veneridae;Mercenaria;Mercenari  
 a mercenaria  
 UdeM00000014813 29053 100.5 UdeM00000014813 XP\_014209011.1 46.7 92  
 49 0 9 100 1 92 1.30E-18 100.5 29053 cellular  
 organisms;Eukaryota;Opisthokonta;Metazoa;Eumetazoa;Bilateria;Protostomia;  
 Ecdysozoa;Panarthropoda;Arthropoda;Mandibulata;Pancrustacea;Hexapoda;Inse  
 cta;Dicondylia;Pterygota;Neoptera;Endopterygota;Hymenoptera;Apocrita;Para  
 sitoida;Chalcidoidea;Encyrtidae;Encyrtinae;Copidosoma;Copidosoma  
 floridanum  
 UdeM00000014814 6579 448.7 UdeM00000014814 XP\_033737525.1 73.9 264  
 69 0 5 268 67 330 5.10E-123 448.7 6579 cellular  
 organisms;Eukaryota;Opisthokonta;Metazoa;Eumetazoa;Bilateria;Protostomia;  
 Spiralia;Lophotrochozoa;Mollusca;Bivalvia;Autobranchia;Pteriormorphia;Pect  
 inida;Pectinoidea;Pectinidae;Pecten;Pecten maximus  
 UdeM00000014815 7574 82 UdeM00000014815 XP\_013404633.1 25.2 282  
 146 7 19 296 25 245 1.40E-12 82 7574 cellular  
 organisms;Eukaryota;Opisthokonta;Metazoa;Eumetazoa;Bilateria;Protostomia;  
 Spiralia;Lophotrochozoa;Brachiopoda;Linguliformea;Lingulata;Lingulida;Lin  
 guloidea;Lingulidae;Lingula;Lingula anatina  
 UdeM00000014816 6579 360.1 UdeM00000014816 XP\_033762705.1 47.3 391  
 186 7 18 398 71 451 3.60E-96 360.1 6579 cellular  
 organisms;Eukaryota;Opisthokonta;Metazoa;Eumetazoa;Bilateria;Protostomia;  
 Spiralia;Lophotrochozoa;Mollusca;Bivalvia;Autobranchia;Pteriormorphia;Pect  
 inida;Pectinoidea;Pectinidae;Pecten;Pecten maximus  
 UdeM00000014817 6579 335.5 UdeM00000014817 XP\_033762705.1 44.4 408  
 207 7 1 398 54 451 1.00E-88 335.5 6579 cellular  
 organisms;Eukaryota;Opisthokonta;Metazoa;Eumetazoa;Bilateria;Protostomia;  
 Spiralia;Lophotrochozoa;Mollusca;Bivalvia;Autobranchia;Pteriormorphia;Pect  
 inida;Pectinoidea;Pectinidae;Pecten;Pecten maximus  
 UdeM00000014818 6579 536.2 UdeM00000014818 XP\_033740878.1 41.4 760  
 360 13 1 720 1 715 6.50E-149 536.2 6579 cellular  
 organisms;Eukaryota;Opisthokonta;Metazoa;Eumetazoa;Bilateria;Protostomia;

Spiralia; Lophotrochozoa; Mollusca; Bivalvia; Autobranchia; Pteriomorpha; Pectinida; Pectinoidea; Pectinidae; Pecten; Pecten maximus  
UdeM00000014820 6579 213.8 UdeM00000014820 XP\_033753599.1 37.1 388  
135 10 82 363 193 577 3.80E-52 213.8 6579 cellular  
organisms; Eukaryota; Opisthokonta; Metazoa; Eumetazoa; Bilateria; Protostomia; Spiralia; Lophotrochozoa; Mollusca; Bivalvia; Autobranchia; Pteriomorpha; Pectinida; Pectinoidea; Pectinidae; Pecten; Pecten maximus  
UdeM00000014820 6579 59.3 UdeM00000014820 XP\_033753599.1 44.8 67  
37 0 4 70 13 79 1.20E-05 59.3 6579 cellular  
organisms; Eukaryota; Opisthokonta; Metazoa; Eumetazoa; Bilateria; Protostomia; Spiralia; Lophotrochozoa; Mollusca; Bivalvia; Autobranchia; Pteriomorpha; Pectinida; Pectinoidea; Pectinidae; Pecten; Pecten maximus  
UdeM00000014821 6579 465.3 UdeM00000014821 XP\_033740878.1 39.9 697  
335 12 1 657 1 653 1.30E-127 465.3 6579 cellular  
organisms; Eukaryota; Opisthokonta; Metazoa; Eumetazoa; Bilateria; Protostomia; Spiralia; Lophotrochozoa; Mollusca; Bivalvia; Autobranchia; Pteriomorpha; Pectinida; Pectinoidea; Pectinidae; Pecten; Pecten maximus  
UdeM00000014822 29159 176.8 UdeM00000014822 XP\_034318677.1 41.3 283  
139 9 271 540 6 274 1.80E-40 176.8 29159 cellular  
organisms; Eukaryota; Opisthokonta; Metazoa; Eumetazoa; Bilateria; Protostomia; Spiralia; Lophotrochozoa; Mollusca; Bivalvia; Autobranchia; Pteriomorpha; Ostracoda; Ostreidae; Crassostrea; Crassostrea gigas  
UdeM00000014825 37653 142.5 UdeM00000014825 XP\_014782194.1 58.8 114  
46 1 1 114 1 113 4.40E-31 142.5 37653 cellular  
organisms; Eukaryota; Opisthokonta; Metazoa; Eumetazoa; Bilateria; Protostomia; Spiralia; Lophotrochozoa; Mollusca; Cephalopoda; Coleoidea; Octopodiformes; Octopoda; Incirrata; Octopodidae; Octopus; Octopus bimaculoides  
UdeM00000014826 6596 68.6 UdeM00000014826 XP\_045202912.1 22.7 344  
240 10 2 333 380 709 3.30E-08 68.6 6596 cellular  
organisms; Eukaryota; Opisthokonta; Metazoa; Eumetazoa; Bilateria; Protostomia; Spiralia; Lophotrochozoa; Mollusca; Bivalvia; Autobranchia; Heteroconchia; Euheterodonta; Imparidentia; Venerida; Veneroidea; Veneridae; Mercenaria; Mercenaria mercenaria  
UdeM00000014827 7574 103.2 UdeM00000014827 XP\_013390618.1 56.8 88  
37 1 1 88 21 107 1.90E-19 103.2 7574 cellular  
organisms; Eukaryota; Opisthokonta; Metazoa; Eumetazoa; Bilateria; Protostomia; Spiralia; Lophotrochozoa; Brachiopoda; Linguliformea; Lingulata; Lingulida; Linguloidea; Lingulidae; Lingula; Lingula anatina  
UdeM00000014828 1529436 63.9 UdeM00000014828 XP\_033122224.1 21.1  
346 237 10 326 655 68 393 1.20E-06 63.9 1529436  
cellular  
organisms; Eukaryota; Opisthokonta; Metazoa; Eumetazoa; Bilateria; Deuterostomia; Echinodermata; Pelmatozoa; Crinoidea; Articulata; Comatulida; Comatulidae; Comatulinae; Anneissia; Anneissia japonica  
UdeM00000014831 6579 152.1 UdeM00000014831 XP\_033753599.1 31 377  
107 9 1 225 202 577 8.90E-34 152.1 6579 cellular  
organisms; Eukaryota; Opisthokonta; Metazoa; Eumetazoa; Bilateria; Protostomia; Spiralia; Lophotrochozoa; Mollusca; Bivalvia; Autobranchia; Pteriomorpha; Pectinida; Pectinoidea; Pectinidae; Pecten; Pecten maximus  
UdeM00000014832 6596 74.3 UdeM00000014832 XP\_045214561.1 24.6 333  
203 15 1 302 391 706 3.20E-10 74.3 6596 cellular  
organisms; Eukaryota; Opisthokonta; Metazoa; Eumetazoa; Bilateria; Protostomia; Spiralia; Lophotrochozoa; Mollusca; Bivalvia; Autobranchia; Heteroconchia; Euheterodonta

terodonta;Imparidentia;Venerida;Veneroidea;Veneridae;Mercenaria;Mercenari  
 a mercenaria  
 UdeM00000014835 6596 62.8 UdeM00000014835 XP\_045216883.1 23.5 391  
 250 15 383 746 9 377 2.80E-06 62.8 6596 cellular  
 organisms;Eukaryota;Opisthokonta;Metazoa;Eumetazoa;Bilateria;Protostomia;  
 Spiralia;Lophotrochozoa;Mollusca;Bivalvia;Autobranchia;Heteroconchia;Euhe  
 terodonta;Imparidentia;Venerida;Veneroidea;Veneridae;Mercenaria;Mercenari  
 a mercenaria  
 UdeM00000014836 6565 214.5 UdeM00000014836 XP\_022306197.1 58.7 179  
 71 2 1 176 504 682 1.10E-52 214.5 6565 cellular  
 organisms;Eukaryota;Opisthokonta;Metazoa;Eumetazoa;Bilateria;Protostomia;  
 Spiralia;Lophotrochozoa;Mollusca;Bivalvia;Autobranchia;Pteriormorphia;Ostr  
 eida;Ostreoidea;Ostreidae;Crassostrea;Crassostrea virginica  
 UdeM00000014837 6596 559.7 UdeM00000014837 XP\_045158774.1 58.5 516  
 163 3 11 526 8 472 4.40E-156 559.7 6596 cellular  
 organisms;Eukaryota;Opisthokonta;Metazoa;Eumetazoa;Bilateria;Protostomia;  
 Spiralia;Lophotrochozoa;Mollusca;Bivalvia;Autobranchia;Heteroconchia;Euhe  
 terodonta;Imparidentia;Venerida;Veneroidea;Veneridae;Mercenaria;Mercenari  
 a mercenaria  
 UdeM00000014838 6596 548.9 UdeM00000014838 XP\_045158774.1 57.1 536  
 169 5 7 537 10 489 7.50E-153 548.9 6596 cellular  
 organisms;Eukaryota;Opisthokonta;Metazoa;Eumetazoa;Bilateria;Protostomia;  
 Spiralia;Lophotrochozoa;Mollusca;Bivalvia;Autobranchia;Heteroconchia;Euhe  
 terodonta;Imparidentia;Venerida;Veneroidea;Veneridae;Mercenaria;Mercenari  
 a mercenaria  
 UdeM00000014839 7741 283.5 UdeM00000014839 XP\_019622111.1 51.1 280  
 134 3 65 343 1 278 3.60E-73 283.5 7741 cellular  
 organisms;Eukaryota;Opisthokonta;Metazoa;Eumetazoa;Bilateria;Deuterostomi  
 a;Chordata;Cephalochordata;Leptocardii;Amphioxiformes;Branchiostomidae;Br  
 anchiostoma;Branchiostoma belcheri  
 UdeM00000014840 6596 571.6 UdeM00000014840 XP\_045158774.1 59.8 522  
 175 2 8 529 10 496 1.10E-159 571.6 6596 cellular  
 organisms;Eukaryota;Opisthokonta;Metazoa;Eumetazoa;Bilateria;Protostomia;  
 Spiralia;Lophotrochozoa;Mollusca;Bivalvia;Autobranchia;Heteroconchia;Euhe  
 terodonta;Imparidentia;Venerida;Veneroidea;Veneridae;Mercenaria;Mercenari  
 a mercenaria  
 UdeM00000014841 1735272 390.2 UdeM00000014841 XP\_041379368.1 56  
 332 139 5 82 407 12 342 3.40E-105 390.2 1735272  
 cellular  
 organisms;Eukaryota;Opisthokonta;Metazoa;Eumetazoa;Bilateria;Protostomia;  
 Spiralia;Lophotrochozoa;Mollusca;Gastropoda;Neomphalina;Neomphaloidea;Pel  
 tospiridae;Gigantopelta;Gigantopelta aegis  
 UdeM00000014842 6596 69.3 UdeM00000014842 XP\_045202187.1 31 184  
 107 6 27 193 30 210 6.50E-09 69.3 6596 cellular  
 organisms;Eukaryota;Opisthokonta;Metazoa;Eumetazoa;Bilateria;Protostomia;  
 Spiralia;Lophotrochozoa;Mollusca;Bivalvia;Autobranchia;Heteroconchia;Euhe  
 terodonta;Imparidentia;Venerida;Veneroidea;Veneridae;Mercenaria;Mercenari  
 a mercenaria  
 UdeM00000014843 6565 76.6 UdeM00000014843 XP\_022297524.1 32.2 143  
 90 4 27 164 129 269 3.30E-11 76.6 6565 cellular  
 organisms;Eukaryota;Opisthokonta;Metazoa;Eumetazoa;Bilateria;Protostomia;  
 Spiralia;Lophotrochozoa;Mollusca;Bivalvia;Autobranchia;Pteriormorphia;Ostr  
 eida;Ostreoidea;Ostreidae;Crassostrea;Crassostrea virginica

UdeM00000014845 29159 68.9 UdeM00000014845 XP\_034305323.1 32.6 132  
 86 2 71 202 22 150 8.30E-09 68.9 29159 cellular  
 organisms;Eukaryota;Opisthokonta;Metazoa;Eumetazoa;Bilateria;Protostomia;  
 Spiralia;Lophotrochozoa;Mollusca;Bivalvia;Autobranchia;Pteriomorphia;Ostr  
 eida;Ostreoidea;Ostreidae;Crassostrea;Crassostrea gigas  
 UdeM00000014846 1735272 367.9 UdeM00000014846 XP\_041379368.1 51.9  
 347 162 4 3 346 8 352 1.50E-98 367.9 1735272  
 cellular  
 organisms;Eukaryota;Opisthokonta;Metazoa;Eumetazoa;Bilateria;Protostomia;  
 Spiralia;Lophotrochozoa;Mollusca;Gastropoda;Neomphalina;Neomphaloidea;Pel  
 tospiridae;Gigantopelta;Gigantopelta aegis  
 UdeM00000014848 1735272 397.1 UdeM00000014848 XP\_041379368.1 56.6  
 346 145 4 26 367 5 349 2.50E-107 397.1 1735272  
 cellular  
 organisms;Eukaryota;Opisthokonta;Metazoa;Eumetazoa;Bilateria;Protostomia;  
 Spiralia;Lophotrochozoa;Mollusca;Gastropoda;Neomphalina;Neomphaloidea;Pel  
 tospiridae;Gigantopelta;Gigantopelta aegis  
 UdeM00000014849 29159 85.1 UdeM00000014849 XP\_011426443.2 27.8 302  
 186 9 10 296 13 297 1.70E-13 85.1 29159 cellular  
 organisms;Eukaryota;Opisthokonta;Metazoa;Eumetazoa;Bilateria;Protostomia;  
 Spiralia;Lophotrochozoa;Mollusca;Bivalvia;Autobranchia;Pteriomorphia;Ostr  
 eida;Ostreoidea;Ostreidae;Crassostrea;Crassostrea gigas  
 UdeM00000014850 29159 95.9 UdeM00000014850 XP\_011426443.2 28.6 304  
 180 10 11 295 14 299 9.50E-17 95.9 29159 cellular  
 organisms;Eukaryota;Opisthokonta;Metazoa;Eumetazoa;Bilateria;Protostomia;  
 Spiralia;Lophotrochozoa;Mollusca;Bivalvia;Autobranchia;Pteriomorphia;Ostr  
 eida;Ostreoidea;Ostreidae;Crassostrea;Crassostrea gigas  
 UdeM00000014852 10224 512.7 UdeM00000014852 XP\_002733515.1 41.9 733  
 371 18 32 733 15 723 8.00E-142 512.7 10224 cellular  
 organisms;Eukaryota;Opisthokonta;Metazoa;Eumetazoa;Bilateria;Deuterostomi  
 a;Hemichordata;Enteropneusta;Harrimaniidae;Saccoglossus;Saccoglossus  
 kowalevskii  
 UdeM00000014853 1735272 153.3 UdeM00000014853 XP\_041379368.1 56.6  
 129 55 1 4 131 138 266 2.30E-34 153.3 1735272  
 cellular  
 organisms;Eukaryota;Opisthokonta;Metazoa;Eumetazoa;Bilateria;Protostomia;  
 Spiralia;Lophotrochozoa;Mollusca;Gastropoda;Neomphalina;Neomphaloidea;Pel  
 tospiridae;Gigantopelta;Gigantopelta aegis  
 UdeM00000014854 7574 152.1 UdeM00000014854 XP\_013416846.1 54.3 127  
 58 0 65 191 18 144 7.50E-34 152.1 7574 cellular  
 organisms;Eukaryota;Opisthokonta;Metazoa;Eumetazoa;Bilateria;Protostomia;  
 Spiralia;Lophotrochozoa;Brachiopoda;Linguliformea;Lingulata;Lingulida;Lin  
 guloidea;Lingulidae;Lingula;Lingula anatina  
 UdeM00000014855 10224 484.6 UdeM00000014855 XP\_002733515.1 39.6 735  
 393 19 29 739 15 722 2.40E-133 484.6 10224 cellular  
 organisms;Eukaryota;Opisthokonta;Metazoa;Eumetazoa;Bilateria;Deuterostomi  
 a;Hemichordata;Enteropneusta;Harrimaniidae;Saccoglossus;Saccoglossus  
 kowalevskii  
 UdeM00000014857 10224 365.2 UdeM00000014857 XP\_002733515.1 36.2 627  
 321 15 29 591 15 626 1.60E-97 365.2 10224 cellular  
 organisms;Eukaryota;Opisthokonta;Metazoa;Eumetazoa;Bilateria;Deuterostomi  
 a;Hemichordata;Enteropneusta;Harrimaniidae;Saccoglossus;Saccoglossus  
 kowalevskii

UdeM00000014856 10224 468.4 UdeM00000014856 XP\_002733515.1 38.9 725  
 362 17 29 688 15 723 1.60E-128 468.4 10224 cellular  
 organisms;Eukaryota;Opisthokonta;Metazoa;Eumetazoa;Bilateria;Deuterostomi  
 a;Hemichordata;Enteropneusta;Harrimaniidae;Saccoglossus;Saccoglossus  
 kowalevskii

UdeM00000014858 1735272 323.9 UdeM00000014858 XP\_041379368.1 49.3  
 339 150 5 24 342 10 346 2.50E-85 323.9 1735272  
 cellular

organisms;Eukaryota;Opisthokonta;Metazoa;Eumetazoa;Bilateria;Protostomia;  
 Spiralia;Lophotrochozoa;Mollusca;Gastropoda;Neomphalina;Neomphaloidea;Pel  
 tospiridae;Gigantopelta;Gigantopelta aegis

UdeM00000014859 48498 171.8 UdeM00000014859 XP\_020620340.1 43.3 201  
 109 3 2 200 818 1015 9.00E-40 171.8 48498 cellular

organisms;Eukaryota;Opisthokonta;Metazoa;Eumetazoa;Cnidaria;Anthozoa;Hexa  
 corallia;Scleractinia;Faviina;Merulinidae;Orbicella;Orbicella faveolata

UdeM00000014860 1735272 379.4 UdeM00000014860 XP\_041379368.1 55.3  
 340 137 5 312 638 11 348 9.00E-102 379.4 1735272  
 cellular

organisms;Eukaryota;Opisthokonta;Metazoa;Eumetazoa;Bilateria;Protostomia;  
 Spiralia;Lophotrochozoa;Mollusca;Gastropoda;Neomphalina;Neomphaloidea;Pel  
 tospiridae;Gigantopelta;Gigantopelta aegis

UdeM00000014861 7739 205.7 UdeM00000014861 XP\_035698644.1 42.4 262  
 135 7 145 397 87 341 1.10E-49 205.7 7739 cellular

organisms;Eukaryota;Opisthokonta;Metazoa;Eumetazoa;Bilateria;Deuterostomi  
 a;Chordata;Cephalochordata;Leptocardii;Amphioxiformes;Branchiostomidae;Br  
 anchiostoma;Branchiostoma floridae

UdeM00000014862 7741 179.9 UdeM00000014862 XP\_019633261.1 40.8 228  
 125 4 3 222 44 269 3.60E-42 179.9 7741 cellular

organisms;Eukaryota;Opisthokonta;Metazoa;Eumetazoa;Bilateria;Deuterostomi  
 a;Chordata;Cephalochordata;Leptocardii;Amphioxiformes;Branchiostomidae;Br  
 anchiostoma;Branchiostoma belcheri

UdeM00000014863 7574 173.3 UdeM00000014863 XP\_013390464.1 46.4 194  
 97 5 8 196 795 986 3.20E-40 173.3 7574 cellular

organisms;Eukaryota;Opisthokonta;Metazoa;Eumetazoa;Bilateria;Protostomia;  
 Spiralia;Lophotrochozoa;Brachiopoda;Linguliformea;Lingulata;Lingulida;Lin  
 guloidea;Lingulidae;Lingula;Lingula anatina

UdeM00000014864 7574 180.3 UdeM00000014864 XP\_013390464.1 43.2 220  
 117 6 2 216 770 986 2.90E-42 180.3 7574 cellular

organisms;Eukaryota;Opisthokonta;Metazoa;Eumetazoa;Bilateria;Protostomia;  
 Spiralia;Lophotrochozoa;Brachiopoda;Linguliformea;Lingulata;Lingulida;Lin  
 guloidea;Lingulidae;Lingula;Lingula anatina

UdeM00000014865 1735272 367.9 UdeM00000014865 XP\_041379368.1 52.6  
 342 157 4 146 484 10 349 2.10E-98 367.9 1735272  
 cellular

organisms;Eukaryota;Opisthokonta;Metazoa;Eumetazoa;Bilateria;Protostomia;  
 Spiralia;Lophotrochozoa;Mollusca;Gastropoda;Neomphalina;Neomphaloidea;Pel  
 tospiridae;Gigantopelta;Gigantopelta aegis

UdeM00000014866 1735272 361.7 UdeM00000014866 XP\_041379368.1 53.6  
 330 148 4 111 437 10 337 1.30E-96 361.7 1735272  
 cellular

organisms;Eukaryota;Opisthokonta;Metazoa;Eumetazoa;Bilateria;Protostomia;  
 Spiralia;Lophotrochozoa;Mollusca;Gastropoda;Neomphalina;Neomphaloidea;Pel  
 tospiridae;Gigantopelta;Gigantopelta aegis

UdeM00000014867 29159 1218 UdeM00000014867 XP\_034307112.1 51.7 1181  
 519 14 1 1136 142 1316 0.00E+00 1218 29159 cellular  
 organisms;Eukaryota;Opisthokonta;Metazoa;Eumetazoa;Bilateria;Protostomia;  
 Spiralia;Lophotrochozoa;Mollusca;Bivalvia;Autobranhia;Pteriomorphia;Ostr  
 eida;Ostreoidea;Ostreidae;Crassostrea;Crassostrea gigas  
 UdeM00000014868 6565 159.5 UdeM00000014868 XP\_022328252.1 44.1 211  
 100 5 1 193 1105 1315 4.40E-36 159.5 6565 cellular  
 organisms;Eukaryota;Opisthokonta;Metazoa;Eumetazoa;Bilateria;Protostomia;  
 Spiralia;Lophotrochozoa;Mollusca;Bivalvia;Autobranhia;Pteriomorphia;Ostr  
 eida;Ostreoidea;Ostreidae;Crassostrea;Crassostrea virginica  
 UdeM00000014869 6596 191.8 UdeM00000014869 XP\_045174625.1 60.3 151  
 59 1 31 180 226 376 7.50E-46 191.8 6596 cellular  
 organisms;Eukaryota;Opisthokonta;Metazoa;Eumetazoa;Bilateria;Protostomia;  
 Spiralia;Lophotrochozoa;Mollusca;Bivalvia;Autobranhia;Heteroconchia;Euhe  
 terodonta;Imparidentia;Venerida;Veneroidea;Veneridae;Mercenaria;Mercenari  
 a mercenaria  
 UdeM00000014870 6596 191.8 UdeM00000014870 XP\_045174625.1 61.5 148  
 56 1 31 177 226 373 7.40E-46 191.8 6596 cellular  
 organisms;Eukaryota;Opisthokonta;Metazoa;Eumetazoa;Bilateria;Protostomia;  
 Spiralia;Lophotrochozoa;Mollusca;Bivalvia;Autobranhia;Heteroconchia;Euhe  
 terodonta;Imparidentia;Venerida;Veneroidea;Veneridae;Mercenaria;Mercenari  
 a mercenaria  
 UdeM00000014871 7574 154.8 UdeM00000014871 XP\_013416846.1 55.1 127  
 57 0 33 159 18 144 9.80E-35 154.8 7574 cellular  
 organisms;Eukaryota;Opisthokonta;Metazoa;Eumetazoa;Bilateria;Protostomia;  
 Spiralia;Lophotrochozoa;Brachiopoda;Linguliformea;Lingulata;Lingulida;Lin  
 guloidea;Lingulidae;Lingula;Lingula anatina  
 UdeM00000014872 10224 498 UdeM00000014872 XP\_002733515.1 41.6 731  
 384 18 99 809 15 722 2.20E-137 498 10224 cellular  
 organisms;Eukaryota;Opisthokonta;Metazoa;Eumetazoa;Bilateria;Deuterostomi  
 a;Hemichordata;Enteropneusta;Harrimaniidae;Saccoglossus;Saccoglossus  
 kowalevskii  
 UdeM00000014873 10224 459.5 UdeM00000014873 XP\_002733515.1 38 719  
 408 14 30 721 16 723 7.90E-126 459.5 10224 cellular  
 organisms;Eukaryota;Opisthokonta;Metazoa;Eumetazoa;Bilateria;Deuterostomi  
 a;Hemichordata;Enteropneusta;Harrimaniidae;Saccoglossus;Saccoglossus  
 kowalevskii  
 UdeM00000014874 6573 74.7 UdeM00000014874 XP\_021367843.1 50 72  
 36 0 4 75 135 206 7.10E-11 74.7 6573 cellular  
 organisms;Eukaryota;Opisthokonta;Metazoa;Eumetazoa;Bilateria;Protostomia;  
 Spiralia;Lophotrochozoa;Mollusca;Bivalvia;Autobranhia;Pteriomorphia;Pect  
 inida;Pectinoidea;Pectinidae;Mizuhopecten;Mizuhopecten yessoensis  
 UdeM00000014875 1735272 372.5 UdeM00000014875 XP\_041379368.1 53.7  
 339 152 4 24 359 10 346 6.50E-100 372.5 1735272  
 cellular  
 organisms;Eukaryota;Opisthokonta;Metazoa;Eumetazoa;Bilateria;Protostomia;  
 Spiralia;Lophotrochozoa;Mollusca;Gastropoda;Neomphalina;Neomphaloidea;Pel  
 tospiridae;Gigantopelta;Gigantopelta aegis  
 UdeM00000014877 48498 198.7 UdeM00000014877 XP\_020620340.1 42.3 222  
 123 3 30 249 797 1015 8.50E-48 198.7 48498 cellular  
 organisms;Eukaryota;Opisthokonta;Metazoa;Eumetazoa;Cnidaria;Anthozoa;Hexa  
 corallia;Scleractinia;Faviina;Merulinidae;Orbicella;Orbicella faveolata  
 UdeM00000014878 1735272 377.1 UdeM00000014878 XP\_041379368.1 54.7  
 340 139 5 335 661 11 348 4.60E-101 377.1 1735272

cellular  
organisms;Eukaryota;Opisthokonta;Metazoa;Eumetazoa;Bilateria;Protostomia;  
Spiralia;Lophotrochozoa;Mollusca;Gastropoda;Neomphalina;Neomphaloidea;Pel  
tospiridae;Gigantopelta;Gigantopelta aegis  
UdeM00000014879 48498 205.7 UdeM00000014879 XP\_020620340.1 46.5 226  
113 4 26 249 798 1017 7.00E-50 205.7 48498 cellular  
organisms;Eukaryota;Opisthokonta;Metazoa;Eumetazoa;Cnidaria;Anthozoa;Hexa  
corallia;Scleractinia;Faviina;Merulinidae;Orbicella;Orbicella faveolata  
UdeM00000014880 48498 205.7 UdeM00000014880 XP\_020620340.1 46.5 226  
113 4 21 244 798 1017 6.90E-50 205.7 48498 cellular  
organisms;Eukaryota;Opisthokonta;Metazoa;Eumetazoa;Cnidaria;Anthozoa;Hexa  
corallia;Scleractinia;Faviina;Merulinidae;Orbicella;Orbicella faveolata  
UdeM00000014881 48498 205.3 UdeM00000014881 XP\_020620340.1 46.1 228  
113 4 21 246 798 1017 9.10E-50 205.3 48498 cellular  
organisms;Eukaryota;Opisthokonta;Metazoa;Eumetazoa;Cnidaria;Anthozoa;Hexa  
corallia;Scleractinia;Faviina;Merulinidae;Orbicella;Orbicella faveolata  
UdeM00000014882 7741 179.9 UdeM00000014882 XP\_019633261.1 41.2 228  
124 4 3 222 44 269 3.60E-42 179.9 7741 cellular  
organisms;Eukaryota;Opisthokonta;Metazoa;Eumetazoa;Bilateria;Deuterostomi  
a;Chordata;Cephalochordata;Leptocardii;Amphioxiformes;Branchiostomidae;Br  
anchiostoma;Branchiostoma belcheri  
UdeM00000014883 7574 181.4 UdeM00000014883 XP\_013389395.1 46.4 222  
111 6 2 220 749 965 1.30E-42 181.4 7574 cellular  
organisms;Eukaryota;Opisthokonta;Metazoa;Eumetazoa;Bilateria;Protostomia;  
Spiralia;Lophotrochozoa;Brachiopoda;Linguliformea;Lingulata;Lingulida;Lin  
guloidea;Lingulidae;Lingula;Lingula anatina  
UdeM00000014884 1735272 279.3 UdeM00000014884 XP\_041379368.1 43.1  
341 132 5 10 289 10 349 5.80E-72 279.3 1735272  
cellular  
organisms;Eukaryota;Opisthokonta;Metazoa;Eumetazoa;Bilateria;Protostomia;  
Spiralia;Lophotrochozoa;Mollusca;Gastropoda;Neomphalina;Neomphaloidea;Pel  
tospiridae;Gigantopelta;Gigantopelta aegis  
UdeM00000014885 1735272 373.6 UdeM00000014885 XP\_041379368.1 52.9  
342 156 4 10 348 10 349 2.70E-100 373.6 1735272  
cellular  
organisms;Eukaryota;Opisthokonta;Metazoa;Eumetazoa;Bilateria;Protostomia;  
Spiralia;Lophotrochozoa;Mollusca;Gastropoda;Neomphalina;Neomphaloidea;Pel  
tospiridae;Gigantopelta;Gigantopelta aegis  
UdeM00000014886 1735272 367.9 UdeM00000014886 XP\_041379368.1 53.9  
330 147 4 10 336 10 337 1.40E-98 367.9 1735272  
cellular  
organisms;Eukaryota;Opisthokonta;Metazoa;Eumetazoa;Bilateria;Protostomia;  
Spiralia;Lophotrochozoa;Mollusca;Gastropoda;Neomphalina;Neomphaloidea;Pel  
tospiridae;Gigantopelta;Gigantopelta aegis  
UdeM00000014887 6579 76.3 UdeM00000014887 XP\_033750644.1 36.6 112  
50 2 17 107 24 135 2.70E-11 76.3 6579 cellular  
organisms;Eukaryota;Opisthokonta;Metazoa;Eumetazoa;Bilateria;Protostomia;  
Spiralia;Lophotrochozoa;Mollusca;Bivalvia;Autobranchia;Pteriomorphia;Pect  
inida;Pectinoidea;Pectinidae;Pecten;Pecten maximus  
UdeM00000014888 1735272 278.5 UdeM00000014888 XP\_041379368.1 51.9  
260 122 3 25 284 90 346 1.00E-71 278.5 1735272  
cellular  
organisms;Eukaryota;Opisthokonta;Metazoa;Eumetazoa;Bilateria;Protostomia;

Spiralia;Lophotrochozoa;Mollusca;Gastropoda;Neomphalina;Neomphaloidea;Pel  
tospiridae;Gigantopelta;Gigantopelta aegis  
UdeM00000014889 48498 194.1 UdeM00000014889 XP\_020620340.1 42.3 222  
123 3 30 249 797 1015 2.10E-46 194.1 48498 cellular  
organisms;Eukaryota;Opisthokonta;Metazoa;Eumetazoa;Cnidaria;Anthozoa;Hexa  
corallia;Scleractinia;Faviina;Merulinidae;Orbicella;Orbicella faveolata  
UdeM00000014890 1735272 377.1 UdeM00000014890 XP\_041379368.1 54.7  
340 139 5 341 667 11 348 4.70E-101 377.1 1735272  
cellular  
organisms;Eukaryota;Opisthokonta;Metazoa;Eumetazoa;Bilateria;Protostomia;  
Spiralia;Lophotrochozoa;Mollusca;Gastropoda;Neomphalina;Neomphaloidea;Pel  
tospiridae;Gigantopelta;Gigantopelta aegis  
UdeM00000014891 7739 204.9 UdeM00000014891 XP\_035698644.1 44.8 230  
117 5 46 270 121 345 1.30E-49 204.9 7739 cellular  
organisms;Eukaryota;Opisthokonta;Metazoa;Eumetazoa;Bilateria;Deuterostomi  
a;Chordata;Cephalochordata;Leptocardii;Amphioxiformes;Branchiostomidae;Br  
anchiostoma;Branchiostoma floridae  
UdeM00000014892 7741 181.4 UdeM00000014892 XP\_019633261.1 41.2 228  
124 4 3 222 44 269 1.30E-42 181.4 7741 cellular  
organisms;Eukaryota;Opisthokonta;Metazoa;Eumetazoa;Bilateria;Deuterostomi  
a;Chordata;Cephalochordata;Leptocardii;Amphioxiformes;Branchiostomidae;Br  
anchiostoma;Branchiostoma belcheri  
UdeM00000014893 7574 174.1 UdeM00000014893 XP\_013389395.1 44.1 222  
115 6 2 219 749 965 2.10E-40 174.1 7574 cellular  
organisms;Eukaryota;Opisthokonta;Metazoa;Eumetazoa;Bilateria;Protostomia;  
Spiralia;Lophotrochozoa;Brachiopoda;Linguliformea;Lingulata;Lingulida;Lin  
guloidea;Lingulidae;Lingula;Lingula anatina  
UdeM00000014894 1735272 367.5 UdeM00000014894 XP\_041379368.1 52.6  
342 157 4 146 484 10 349 2.70E-98 367.5 1735272  
cellular  
organisms;Eukaryota;Opisthokonta;Metazoa;Eumetazoa;Bilateria;Protostomia;  
Spiralia;Lophotrochozoa;Mollusca;Gastropoda;Neomphalina;Neomphaloidea;Pel  
tospiridae;Gigantopelta;Gigantopelta aegis  
UdeM00000014895 1735272 361.3 UdeM00000014895 XP\_041379368.1 53.6  
330 148 4 111 437 10 337 1.70E-96 361.3 1735272  
cellular  
organisms;Eukaryota;Opisthokonta;Metazoa;Eumetazoa;Bilateria;Protostomia;  
Spiralia;Lophotrochozoa;Mollusca;Gastropoda;Neomphalina;Neomphaloidea;Pel  
tospiridae;Gigantopelta;Gigantopelta aegis  
UdeM00000014896 29159 1216.4 UdeM00000014896 XP\_034307112.1 51.7  
1181 520 14 1 1136 142 1316 0.00E+00 1216.4  
29159 cellular  
organisms;Eukaryota;Opisthokonta;Metazoa;Eumetazoa;Bilateria;Protostomia;  
Spiralia;Lophotrochozoa;Mollusca;Bivalvia;Autobranchia;Pteriomorphia;Ostr  
eida;Ostreoidea;Ostreidae;Crassostrea;Crassostrea gigas  
UdeM00000014897 6565 159.5 UdeM00000014897 XP\_022328252.1 44.1 211  
100 5 1 193 1105 1315 4.40E-36 159.5 6565 cellular  
organisms;Eukaryota;Opisthokonta;Metazoa;Eumetazoa;Bilateria;Protostomia;  
Spiralia;Lophotrochozoa;Mollusca;Bivalvia;Autobranchia;Pteriomorphia;Ostr  
eida;Ostreoidea;Ostreidae;Crassostrea;Crassostrea virginica  
UdeM00000014898 6596 191.8 UdeM00000014898 XP\_045174625.1 60.3 151  
59 1 31 180 226 376 7.50E-46 191.8 6596 cellular  
organisms;Eukaryota;Opisthokonta;Metazoa;Eumetazoa;Bilateria;Protostomia;  
Spiralia;Lophotrochozoa;Mollusca;Bivalvia;Autobranchia;Heteroconchia;Euhe



terodonta;Imparidentia;Venerida;Veneroidea;Veneridae;Mercenaria;Mercenari  
 a mercenaria  
 UdeM00000014899 6596 191.8 UdeM00000014899 XP\_045174625.1 61.5 148  
 56 1 31 177 226 373 7.40E-46 191.8 6596 cellular  
 organisms;Eukaryota;Opisthokonta;Metazoa;Eumetazoa;Bilateria;Protostomia;  
 Spiralia;Lophotrochozoa;Mollusca;Bivalvia;Autobranchia;Heteroconchia;Euhe  
 terodonta;Imparidentia;Venerida;Veneroidea;Veneridae;Mercenaria;Mercenari  
 a mercenaria  
 UdeM00000014900 7574 154.8 UdeM00000014900 XP\_013416846.1 55.1 127  
 57 0 33 159 18 144 9.80E-35 154.8 7574 cellular  
 organisms;Eukaryota;Opisthokonta;Metazoa;Eumetazoa;Bilateria;Protostomia;  
 Spiralia;Lophotrochozoa;Brachiopoda;Linguliformea;Lingulata;Lingulida;Lin  
 guloidea;Lingulidae;Lingula;Lingula anatina  
 UdeM00000014901 10224 489.2 UdeM00000014901 XP\_002733515.1 39.9 735  
 391 19 91 801 15 722 1.00E-134 489.2 10224 cellular  
 organisms;Eukaryota;Opisthokonta;Metazoa;Eumetazoa;Bilateria;Deuterostomi  
 a;Hemichordata;Enteropneusta;Harrimaniidae;Saccoglossus;Saccoglossus  
 kowalevskii  
 UdeM00000014902 10224 489.2 UdeM00000014902 XP\_002733515.1 39.9 735  
 391 19 99 809 15 722 1.00E-134 489.2 10224 cellular  
 organisms;Eukaryota;Opisthokonta;Metazoa;Eumetazoa;Bilateria;Deuterostomi  
 a;Hemichordata;Enteropneusta;Harrimaniidae;Saccoglossus;Saccoglossus  
 kowalevskii  
 UdeM00000014904 10224 368.6 UdeM00000014904 XP\_002733515.1 36.2 624  
 325 15 29 591 15 626 1.50E-98 368.6 10224 cellular  
 organisms;Eukaryota;Opisthokonta;Metazoa;Eumetazoa;Bilateria;Deuterostomi  
 a;Hemichordata;Enteropneusta;Harrimaniidae;Saccoglossus;Saccoglossus  
 kowalevskii  
 UdeM00000014903 10224 471.5 UdeM00000014903 XP\_002733515.1 38.9 722  
 366 17 29 688 15 723 1.90E-129 471.5 10224 cellular  
 organisms;Eukaryota;Opisthokonta;Metazoa;Eumetazoa;Bilateria;Deuterostomi  
 a;Hemichordata;Enteropneusta;Harrimaniidae;Saccoglossus;Saccoglossus  
 kowalevskii  
 UdeM00000014905 1735272 364.4 UdeM00000014905 XP\_041379368.1 52.8  
 339 155 4 24 359 10 346 1.80E-97 364.4 1735272  
 cellular  
 organisms;Eukaryota;Opisthokonta;Metazoa;Eumetazoa;Bilateria;Protostomia;  
 Spiralia;Lophotrochozoa;Mollusca;Gastropoda;Neomphalina;Neomphaloidea;Pel  
 tospiridae;Gigantopelta;Gigantopelta aegis  
 UdeM00000014906 151771 155.2 UdeM00000014906 XP\_028399681.1 33.9  
 239 127 3 6 213 479 717 9.50E-35 155.2 151771  
 cellular  
 organisms;Eukaryota;Opisthokonta;Metazoa;Eumetazoa;Cnidaria;Anthozoa;Octo  
 corallia;Alcyonacea;Alcyoniina;Nephtheidae;Dendronephthya;Dendronephthya  
 gigantea  
 UdeM00000014907 1735272 379 UdeM00000014907 XP\_041379368.1 55  
 340 138 5 367 693 11 348 1.30E-101 379 1735272  
 cellular  
 organisms;Eukaryota;Opisthokonta;Metazoa;Eumetazoa;Bilateria;Protostomia;  
 Spiralia;Lophotrochozoa;Mollusca;Gastropoda;Neomphalina;Neomphaloidea;Pel  
 tospiridae;Gigantopelta;Gigantopelta aegis  
 UdeM00000014908 7739 201.1 UdeM00000014908 XP\_035698644.1 41.2 262  
 138 7 145 397 87 341 2.80E-48 201.1 7739 cellular  
 organisms;Eukaryota;Opisthokonta;Metazoa;Eumetazoa;Bilateria;Deuterostomi

a;Chordata;Cephalochordata;Leptocardii;Amphioxiformes;Branchiostomidae;Branchiostoma;Branchiostoma floridae

UdeM00000014909 7741 181 UdeM00000014909 XP\_019633261.1 40.8 228  
125 4 3 222 44 269 1.60E-42 181 7741 cellular  
organisms;Eukaryota;Opisthokonta;Metazoa;Eumetazoa;Bilateria;Deuterostomia;Chordata;Cephalochordata;Leptocardii;Amphioxiformes;Branchiostomidae;Branchiostoma;Branchiostoma belcheri

UdeM00000014910 7574 173.3 UdeM00000014910 XP\_013390464.1 46.4 194  
97 5 8 196 795 986 3.20E-40 173.3 7574 cellular  
organisms;Eukaryota;Opisthokonta;Metazoa;Eumetazoa;Bilateria;Protostomia;Spiralia;Lophotrochozoa;Brachiopoda;Linguliformea;Lingulata;Lingulida;Linguloidea;Lingulidae;Lingula;Lingula anatina

UdeM00000014911 1735272 367.9 UdeM00000014911 XP\_041379368.1 52.6  
342 157 4 146 484 10 349 2.10E-98 367.9 1735272  
cellular  
organisms;Eukaryota;Opisthokonta;Metazoa;Eumetazoa;Bilateria;Protostomia;Spiralia;Lophotrochozoa;Mollusca;Gastropoda;Neomphalina;Neomphaloidea;Peltospiridae;Gigantopelta;Gigantopelta aegis

UdeM00000014912 1735272 361.7 UdeM00000014912 XP\_041379368.1 53.6  
330 148 4 111 437 10 337 1.30E-96 361.7 1735272  
cellular  
organisms;Eukaryota;Opisthokonta;Metazoa;Eumetazoa;Bilateria;Protostomia;Spiralia;Lophotrochozoa;Mollusca;Gastropoda;Neomphalina;Neomphaloidea;Peltospiridae;Gigantopelta;Gigantopelta aegis

UdeM00000014913 29159 122.1 UdeM00000014913 XP\_034300429.1 56.8 111  
45 2 18 126 9 118 5.10E-25 122.1 29159 cellular  
organisms;Eukaryota;Opisthokonta;Metazoa;Eumetazoa;Bilateria;Protostomia;Spiralia;Lophotrochozoa;Mollusca;Bivalvia;Autobranchia;Pteriomorphia;Ostreida;Ostreoidea;Ostreidae;Crassostrea;Crassostrea gigas

UdeM00000014914 6596 338.6 UdeM00000014914 XP\_045174625.1 65.3 245  
83 2 31 274 226 469 7.70E-90 338.6 6596 cellular  
organisms;Eukaryota;Opisthokonta;Metazoa;Eumetazoa;Bilateria;Protostomia;Spiralia;Lophotrochozoa;Mollusca;Bivalvia;Autobranchia;Heteroconchia;Euherodonta;Imparidentia;Venerida;Veneroidea;Veneridae;Mercenaria;Mercenaria mercenaria

UdeM00000014915 6579 383.3 UdeM00000014915 XP\_033737212.1 69.5 266  
75 2 1 260 283 548 2.50E-103 383.3 6579 cellular  
organisms;Eukaryota;Opisthokonta;Metazoa;Eumetazoa;Bilateria;Protostomia;Spiralia;Lophotrochozoa;Mollusca;Bivalvia;Autobranchia;Pteriomorphia;Pectinida;Pectinoidea;Pectinidae;Pecten;Pecten maximus

UdeM00000014916 6596 401 UdeM00000014916 XP\_045157837.1 38.6 718  
357 16 10 705 17 672 4.00E-108 401 6596 cellular  
organisms;Eukaryota;Opisthokonta;Metazoa;Eumetazoa;Bilateria;Protostomia;Spiralia;Lophotrochozoa;Mollusca;Bivalvia;Autobranchia;Heteroconchia;Euherodonta;Imparidentia;Venerida;Veneroidea;Veneridae;Mercenaria;Mercenaria mercenaria

UdeM00000014917 6596 281.6 UdeM00000014917 XP\_045188814.1 45.5 312  
166 4 1 309 41 351 1.30E-72 281.6 6596 cellular  
organisms;Eukaryota;Opisthokonta;Metazoa;Eumetazoa;Bilateria;Protostomia;Spiralia;Lophotrochozoa;Mollusca;Bivalvia;Autobranchia;Heteroconchia;Euherodonta;Imparidentia;Venerida;Veneroidea;Veneridae;Mercenaria;Mercenaria mercenaria

UdeM00000014918 6526 358.6 UdeM00000014918 XP\_013061033.1 56.6 316  
129 4 16 331 33 340 8.60E-96 358.6 6526 cellular

organisms;Eukaryota;Opisthokonta;Metazoa;Eumetazoa;Bilateria;Protostomia;Spiralia;Lophotrochozoa;Mollusca;Gastropoda;Heterobranchia;Euthyneura;Panpulmonata;Hygrophila;Lymnaeoidea;Planorbidae;Biomphalaria;Biomphalaria glabrata

UdeM00000014919 6596 85.5 UdeM00000014919 XP\_045208672.1 31.8 157  
99 4 1 155 1 151 6.60E-14 85.5 6596 cellular

organisms;Eukaryota;Opisthokonta;Metazoa;Eumetazoa;Bilateria;Protostomia;Spiralia;Lophotrochozoa;Mollusca;Bivalvia;Autobranchia;Heteroconchia;Euheterodonta;Imparidentia;Venerida;Veneroidea;Veneridae;Mercenaria;Mercenaria mercenaria

UdeM00000014920 6596 345.9 UdeM00000014920 XP\_045160441.1 29.2 870  
537 18 4 824 191 1030 1.40E-91 345.9 6596 cellular

organisms;Eukaryota;Opisthokonta;Metazoa;Eumetazoa;Bilateria;Protostomia;Spiralia;Lophotrochozoa;Mollusca;Bivalvia;Autobranchia;Heteroconchia;Euheterodonta;Imparidentia;Venerida;Veneroidea;Veneridae;Mercenaria;Mercenaria mercenaria

UdeM00000014921 6596 414.5 UdeM00000014921 XP\_045160441.1 29.5 1017  
644 20 18 989 42 1030 3.90E-112 414.5 6596 cellular

organisms;Eukaryota;Opisthokonta;Metazoa;Eumetazoa;Bilateria;Protostomia;Spiralia;Lophotrochozoa;Mollusca;Bivalvia;Autobranchia;Heteroconchia;Euheterodonta;Imparidentia;Venerida;Veneroidea;Veneridae;Mercenaria;Mercenaria mercenaria

UdeM00000014922 6596 336.7 UdeM00000014922 XP\_045160441.1 29.1 866  
520 19 4 801 191 1030 8.40E-89 336.7 6596 cellular

organisms;Eukaryota;Opisthokonta;Metazoa;Eumetazoa;Bilateria;Protostomia;Spiralia;Lophotrochozoa;Mollusca;Bivalvia;Autobranchia;Heteroconchia;Euheterodonta;Imparidentia;Venerida;Veneroidea;Veneridae;Mercenaria;Mercenaria mercenaria

UdeM00000014923 29159 76.3 UdeM00000014923 XP\_019923079.2 31.3 115  
72 2 1 112 41 151 2.90E-11 76.3 29159 cellular

organisms;Eukaryota;Opisthokonta;Metazoa;Eumetazoa;Bilateria;Protostomia;Spiralia;Lophotrochozoa;Mollusca;Bivalvia;Autobranchia;Pteriomorpha;Ostreida;Ostreoidea;Ostreidae;Crassostrea;Crassostrea gigas

UdeM00000014925 310571 77.8 UdeM00000014925 XP\_033493961.1 35.8  
109 61 4 9 116 64 164 1.10E-11 77.8 310571  
cellular

organisms;Eukaryota;Opisthokonta;Metazoa;Eumetazoa;Bilateria;Deuterostomia;Chordata;Craniata;Vertebrata;Gnathostomata;Teleostomi;Euteleostomi;Actinopterygii;Actinopteri;Neopterygii;Teleostei;Osteoglossocephalai;Clupeocephala;Euteleostei;Neoteleostei;Eurypterygia;Ctenosquamata;Acanthopterygii;Euacanthopterygii;Percomorphaceae;Eupercaria;Perciformes;Serranidae;Serranidae;Epinephelinae;Epinephelini;Epinephelus;Epinephelus lanceolatus

UdeM00000014926 6565 60.5 UdeM00000014926 XP\_022293077.1 34.3 99  
58 2 2 100 57 148 1.50E-06 60.5 6565 cellular

organisms;Eukaryota;Opisthokonta;Metazoa;Eumetazoa;Bilateria;Protostomia;Spiralia;Lophotrochozoa;Mollusca;Bivalvia;Autobranchia;Pteriomorpha;Ostreida;Ostreoidea;Ostreidae;Crassostrea;Crassostrea virginica

UdeM00000014928 37621 133.7 UdeM00000014928 XP\_014678940.1 40 185  
87 2 3 163 771 955 2.40E-28 133.7 37621 cellular

organisms;Eukaryota;Opisthokonta;Metazoa;Eumetazoa;Bilateria;Protostomia;Ecdysozoa;Scalidophora;Priapulida;Priapulimorpha;Priapulimorphida;Priapulidae;Priapulidae;Priapulidae caudatus

UdeM00000014929 38358 70.9 UdeM00000014929 XP\_037048502.1 37.5 104  
 59 3 1 103 74 172 1.10E-09 70.9 38358 cellular  
 organisms;Eukaryota;Opisthokonta;Metazoa;Eumetazoa;Bilateria;Protostomia;  
 Ecdysozoa;Panarthropoda;Arthropoda;Mandibulata;Pancrustacea;Hexapoda;Inse  
 cta;Dicondylia;Pterygota;Neoptera;Endopterygota;Diptera;Nematocera;Bibion  
 omorpha;Sciaroidea;Sciaridae;Bradysia;Bradysia coprophila  
 UdeM00000014930 6596 106.3 UdeM00000014930 XP\_045209235.1 39.5 152  
 83 7 5 153 21 166 3.50E-20 106.3 6596 cellular  
 organisms;Eukaryota;Opisthokonta;Metazoa;Eumetazoa;Bilateria;Protostomia;  
 Spiralia;Lophotrochozoa;Mollusca;Bivalvia;Autobranchia;Heteroconchia;Euhe  
 terodonta;Imparidentia;Venerida;Veneroidea;Veneridae;Mercenaria;Mercenari  
 a mercenaria  
 UdeM00000014931 6573 88.2 UdeM00000014931 XP\_021367867.1 35.4 113  
 69 4 3 114 51 160 7.90E-15 88.2 6573 cellular  
 organisms;Eukaryota;Opisthokonta;Metazoa;Eumetazoa;Bilateria;Protostomia;  
 Spiralia;Lophotrochozoa;Mollusca;Bivalvia;Autobranchia;Pteriormorphia;Pect  
 inida;Pectinoidea;Pectinidae;Mizuhopecten;Mizuhopecten yessoensis  
 UdeM00000014932 6573 107.1 UdeM00000014932 XP\_021367867.1 32.1 159  
 100 5 4 157 5 160 2.20E-20 107.1 6573 cellular  
 organisms;Eukaryota;Opisthokonta;Metazoa;Eumetazoa;Bilateria;Protostomia;  
 Spiralia;Lophotrochozoa;Mollusca;Bivalvia;Autobranchia;Pteriormorphia;Pect  
 inida;Pectinoidea;Pectinidae;Mizuhopecten;Mizuhopecten yessoensis  
 UdeM00000014933 37653 275 UdeM00000014933 XP\_014786603.1 43.5 306  
 160 2 19 322 56 350 1.20E-70 275 37653 cellular  
 organisms;Eukaryota;Opisthokonta;Metazoa;Eumetazoa;Bilateria;Protostomia;  
 Spiralia;Lophotrochozoa;Mollusca;Cephalopoda;Coleoidea;Octopodiformes;Oct  
 opoda;Incirrata;Octopodidae;Octopus;Octopus bimaculoides  
 UdeM00000014935 400727 660.2 UdeM00000014935 XP\_025109825.1 67.5  
 483 145 3 18 488 20 502 2.10E-186 660.2 400727  
 cellular  
 organisms;Eukaryota;Opisthokonta;Metazoa;Eumetazoa;Bilateria;Protostomia;  
 Spiralia;Lophotrochozoa;Mollusca;Gastropoda;Caenogastropoda;Architaeniogl  
 ossa;Ampullarioidea;Ampullariidae;Pomacea;Pomacea canaliculata  
 UdeM00000014936 6596 95.9 UdeM00000014936 XP\_045160441.1 32.7 153  
 97 4 23 174 69 216 6.50E-17 95.9 6596 cellular  
 organisms;Eukaryota;Opisthokonta;Metazoa;Eumetazoa;Bilateria;Protostomia;  
 Spiralia;Lophotrochozoa;Mollusca;Bivalvia;Autobranchia;Heteroconchia;Euhe  
 terodonta;Imparidentia;Venerida;Veneroidea;Veneridae;Mercenaria;Mercenari  
 a mercenaria  
 UdeM00000014937 6596 284.3 UdeM00000014937 XP\_045160441.1 28.8 736  
 476 18 1 712 317 1028 4.40E-73 284.3 6596 cellular  
 organisms;Eukaryota;Opisthokonta;Metazoa;Eumetazoa;Bilateria;Protostomia;  
 Spiralia;Lophotrochozoa;Mollusca;Bivalvia;Autobranchia;Heteroconchia;Euhe  
 terodonta;Imparidentia;Venerida;Veneroidea;Veneridae;Mercenaria;Mercenari  
 a mercenaria  
 UdeM00000014938 6596 211.8 UdeM00000014938 XP\_045160441.1 27.8 608  
 392 17 6 590 445 1028 2.30E-51 211.8 6596 cellular  
 organisms;Eukaryota;Opisthokonta;Metazoa;Eumetazoa;Bilateria;Protostomia;  
 Spiralia;Lophotrochozoa;Mollusca;Bivalvia;Autobranchia;Heteroconchia;Euhe  
 terodonta;Imparidentia;Venerida;Veneroidea;Veneridae;Mercenaria;Mercenari  
 a mercenaria  
 UdeM00000014939 6596 302.4 UdeM00000014939 XP\_045160997.1 38.9 401  
 239 5 1 397 38 436 2.80E-78 302.4 6596 cellular  
 organisms;Eukaryota;Opisthokonta;Metazoa;Eumetazoa;Bilateria;Protostomia;

Spiralia;Lophotrochozoa;Mollusca;Bivalvia;Autobranchia;Heteroconchia;Euherodonta;Imparidentia;Venerida;Veneroidea;Veneridae;Mercenaria;Mercenaria mercenaria

UdeM00000014941 6596 213.8 UdeM00000014941 XP\_045160146.1 46.4 323  
121 9 13 317 308 596 3.30E-52 213.8 6596 cellular

organisms;Eukaryota;Opisthokonta;Metazoa;Eumetazoa;Bilateria;Protostomia;Spiralia;Lophotrochozoa;Mollusca;Bivalvia;Autobranchia;Heteroconchia;Euherodonta;Imparidentia;Venerida;Veneroidea;Veneridae;Mercenaria;Mercenaria mercenaria

UdeM00000014940 6596 214.2 UdeM00000014940 XP\_045160146.1 46.1 330  
126 9 138 449 301 596 3.50E-52 214.2 6596 cellular

organisms;Eukaryota;Opisthokonta;Metazoa;Eumetazoa;Bilateria;Protostomia;Spiralia;Lophotrochozoa;Mollusca;Bivalvia;Autobranchia;Heteroconchia;Euherodonta;Imparidentia;Venerida;Veneroidea;Veneridae;Mercenaria;Mercenaria mercenaria

UdeM00000014942 6596 581.3 UdeM00000014942 XP\_045160145.1 90.3 308  
30 0 1 308 1 308 7.50E-163 581.3 6596 cellular

organisms;Eukaryota;Opisthokonta;Metazoa;Eumetazoa;Bilateria;Protostomia;Spiralia;Lophotrochozoa;Mollusca;Bivalvia;Autobranchia;Heteroconchia;Euherodonta;Imparidentia;Venerida;Veneroidea;Veneridae;Mercenaria;Mercenaria mercenaria

UdeM00000014943 6596 133.3 UdeM00000014943 XP\_045157214.1 41.8 153  
82 1 15 167 16 161 3.00E-28 133.3 6596 cellular

organisms;Eukaryota;Opisthokonta;Metazoa;Eumetazoa;Bilateria;Protostomia;Spiralia;Lophotrochozoa;Mollusca;Bivalvia;Autobranchia;Heteroconchia;Euherodonta;Imparidentia;Venerida;Veneroidea;Veneridae;Mercenaria;Mercenaria mercenaria

UdeM00000014945 6573 111.7 UdeM00000014945 XP\_021351868.1 47 115  
61 0 1 115 36 150 6.30E-22 111.7 6573 cellular

organisms;Eukaryota;Opisthokonta;Metazoa;Eumetazoa;Bilateria;Protostomia;Spiralia;Lophotrochozoa;Mollusca;Bivalvia;Autobranchia;Pteriomorphia;Pectinida;Pectinoidea;Pectinidae;Mizuhopecten;Mizuhopecten yessoensis

UdeM00000014946 29159 328.9 UdeM00000014946 XP\_011437089.2 68.3 537  
164 2 1 536 1 532 1.30E-86 328.9 29159 cellular

organisms;Eukaryota;Opisthokonta;Metazoa;Eumetazoa;Bilateria;Protostomia;Spiralia;Lophotrochozoa;Mollusca;Bivalvia;Autobranchia;Pteriomorphia;Ostreida;Ostreoidea;Ostreidae;Crassostrea;Crassostrea gigas

UdeM00000014947 225164 218.4 UdeM00000014947 XP\_009060999.1 64.4  
163 51 2 2 163 1 157 7.10E-54 218.4 225164

cellular

organisms;Eukaryota;Opisthokonta;Metazoa;Eumetazoa;Bilateria;Protostomia;Spiralia;Lophotrochozoa;Mollusca;Gastropoda;Patellogastropoda;Lottioidae;Lottiidae;Lottia;Lottia gigantea

UdeM00000014948 6596 1092.4 UdeM00000014948 XP\_045160177.1 67.6  
806 223 9 1 793 1 781 0.00E+00 1092.4 6596

cellular

organisms;Eukaryota;Opisthokonta;Metazoa;Eumetazoa;Bilateria;Protostomia;Spiralia;Lophotrochozoa;Mollusca;Bivalvia;Autobranchia;Heteroconchia;Euherodonta;Imparidentia;Venerida;Veneroidea;Veneridae;Mercenaria;Mercenaria mercenaria

UdeM00000014949 37621 61.2 UdeM00000014949 XP\_014670836.1 49.2 63  
29 2 460 519 751 813 4.40E-06 61.2 37621 cellular

organisms;Eukaryota;Opisthokonta;Metazoa;Eumetazoa;Bilateria;Protostomia;

Ecdysozoa; Scalidophora; Priapulida; Priapulimorpha; Priapulimorphida; Priapulidae; Priapululus; Priapululus caudatus

UdeM00000014951 2652724 132.5 UdeM00000014951 XP\_020915646.1 46.9  
143 75 1 42 184 3 144 5.50E-28 132.5 2652724  
cellular

organisms; Eukaryota; Opisthokonta; Metazoa; Eumetazoa; Cnidaria; Anthozoa; Hexacorallia; Actiniaria; Aiptasiidae; Exaiptasia; Exaiptasia diaphana

UdeM00000014952 6596 153.7 UdeM00000014952 XP\_045187052.1 54.9 144  
60 3 1 143 198 337 2.00E-34 153.7 6596 cellular

organisms; Eukaryota; Opisthokonta; Metazoa; Eumetazoa; Bilateria; Protostomia; Spiralia; Lophotrochozoa; Mollusca; Bivalvia; Autobranchia; Heteroconchia; Euheterodonta; Imparidentia; Venerida; Veneroidea; Veneridae; Mercenaria; Mercenaria mercenaria

UdeM00000014958 6596 1498 UdeM00000014958 XP\_045159227.1 42.1 2046  
1042 35 3 1988 447 2409 0.00E+00 1498 6596 cellular

organisms; Eukaryota; Opisthokonta; Metazoa; Eumetazoa; Bilateria; Protostomia; Spiralia; Lophotrochozoa; Mollusca; Bivalvia; Autobranchia; Heteroconchia; Euheterodonta; Imparidentia; Venerida; Veneroidea; Veneridae; Mercenaria; Mercenaria mercenaria

UdeM00000014960 6596 1522.3 UdeM00000014960 XP\_045159227.1 42.5  
2059 1046 36 3 2009 447 2419 0.00E+00 1522.3 6596  
cellular

organisms; Eukaryota; Opisthokonta; Metazoa; Eumetazoa; Bilateria; Protostomia; Spiralia; Lophotrochozoa; Mollusca; Bivalvia; Autobranchia; Heteroconchia; Euheterodonta; Imparidentia; Venerida; Veneroidea; Veneridae; Mercenaria; Mercenaria mercenaria

UdeM00000014962 6596 1072.4 UdeM00000014962 XP\_045159227.1 38.1  
1725 952 30 1 1668 445 2110 5.7e-310 1072.4 6596  
cellular

organisms; Eukaryota; Opisthokonta; Metazoa; Eumetazoa; Bilateria; Protostomia; Spiralia; Lophotrochozoa; Mollusca; Bivalvia; Autobranchia; Heteroconchia; Euheterodonta; Imparidentia; Venerida; Veneroidea; Veneridae; Mercenaria; Mercenaria mercenaria

UdeM00000014963 6596 375.6 UdeM00000014963 XP\_045159231.1 61.4 298  
97 4 1 295 778 1060 6.00E-101 375.6 6596 cellular

organisms; Eukaryota; Opisthokonta; Metazoa; Eumetazoa; Bilateria; Protostomia; Spiralia; Lophotrochozoa; Mollusca; Bivalvia; Autobranchia; Heteroconchia; Euheterodonta; Imparidentia; Venerida; Veneroidea; Veneridae; Mercenaria; Mercenaria mercenaria

UdeM00000014964 6596 1418.7 UdeM00000014964 XP\_045159227.1 41.5  
2023 999 37 456 2422 513 2407 0.00E+00 1418.7 6596  
cellular

organisms; Eukaryota; Opisthokonta; Metazoa; Eumetazoa; Bilateria; Protostomia; Spiralia; Lophotrochozoa; Mollusca; Bivalvia; Autobranchia; Heteroconchia; Euheterodonta; Imparidentia; Venerida; Veneroidea; Veneridae; Mercenaria; Mercenaria mercenaria

UdeM00000014965 6596 255 UdeM00000014965 XP\_045160186.1 52.7 262  
72 5 51 278 3 246 1.10E-64 255 6596 cellular

organisms; Eukaryota; Opisthokonta; Metazoa; Eumetazoa; Bilateria; Protostomia; Spiralia; Lophotrochozoa; Mollusca; Bivalvia; Autobranchia; Heteroconchia; Euheterodonta; Imparidentia; Venerida; Veneroidea; Veneridae; Mercenaria; Mercenaria mercenaria

UdeM00000014968 6596 1529.2 UdeM00000014968 XP\_045159227.1 41.1  
2186 1118 35 149 2258 321 2412 0.00E+00 1529.2 6596

cellular  
organisms;Eukaryota;Opisthokonta;Metazoa;Eumetazoa;Bilateria;Protostomia;  
Spiralia;Lophotrochozoa;Mollusca;Bivalvia;Autobranchia;Heteroconchia;Euhe  
terodonta;Imparidentia;Venerida;Veneroidea;Veneridae;Mercenaria;Mercenari  
a mercenaria

|                 |      |        |                 |                |      |      |          |        |      |
|-----------------|------|--------|-----------------|----------------|------|------|----------|--------|------|
| UdeM00000014967 | 6596 | 1529.2 | UdeM00000014967 | XP_045159227.1 | 41.1 |      |          |        |      |
| 2186            | 1118 | 35     | 167             | 2276           | 321  | 2412 | 0.00E+00 | 1529.2 | 6596 |

cellular  
organisms;Eukaryota;Opisthokonta;Metazoa;Eumetazoa;Bilateria;Protostomia;  
Spiralia;Lophotrochozoa;Mollusca;Bivalvia;Autobranchia;Heteroconchia;Euhe  
terodonta;Imparidentia;Venerida;Veneroidea;Veneridae;Mercenaria;Mercenari  
a mercenaria

|                 |      |        |                 |                |     |      |          |        |      |
|-----------------|------|--------|-----------------|----------------|-----|------|----------|--------|------|
| UdeM00000014969 | 6596 | 1523.1 | UdeM00000014969 | XP_045159227.1 | 41  |      |          |        |      |
| 2163            | 1140 | 37     | 146             | 2239           | 312 | 2407 | 0.00E+00 | 1523.1 | 6596 |

cellular  
organisms;Eukaryota;Opisthokonta;Metazoa;Eumetazoa;Bilateria;Protostomia;  
Spiralia;Lophotrochozoa;Mollusca;Bivalvia;Autobranchia;Heteroconchia;Euhe  
terodonta;Imparidentia;Venerida;Veneroidea;Veneridae;Mercenaria;Mercenari  
a mercenaria

|                 |      |      |                 |                |      |          |      |      |          |
|-----------------|------|------|-----------------|----------------|------|----------|------|------|----------|
| UdeM00000014972 | 6579 | 91.7 | UdeM00000014972 | XP_033727362.1 | 30.2 | 242      |      |      |          |
| 141             | 6    | 83   | 321             | 6              | 222  | 2.60E-15 | 91.7 | 6579 | cellular |

organisms;Eukaryota;Opisthokonta;Metazoa;Eumetazoa;Bilateria;Protostomia;  
Spiralia;Lophotrochozoa;Mollusca;Bivalvia;Autobranchia;Pteriormorphia;Pect  
inida;Pectinoidea;Pectinidae;Pecten;Pecten maximus

|                 |      |      |                 |                |      |          |      |      |          |
|-----------------|------|------|-----------------|----------------|------|----------|------|------|----------|
| UdeM00000014970 | 6579 | 92.4 | UdeM00000014970 | XP_033727362.1 | 30.2 | 242      |      |      |          |
| 141             | 6    | 83   | 321             | 6              | 222  | 1.50E-15 | 92.4 | 6579 | cellular |

organisms;Eukaryota;Opisthokonta;Metazoa;Eumetazoa;Bilateria;Protostomia;  
Spiralia;Lophotrochozoa;Mollusca;Bivalvia;Autobranchia;Pteriormorphia;Pect  
inida;Pectinoidea;Pectinidae;Pecten;Pecten maximus

|                 |      |    |                 |                |      |          |    |      |          |
|-----------------|------|----|-----------------|----------------|------|----------|----|------|----------|
| UdeM00000014971 | 6579 | 99 | UdeM00000014971 | XP_033727362.1 | 31.1 | 235      |    |      |          |
| 141             | 5    | 83 | 314             | 6              | 222  | 1.60E-17 | 99 | 6579 | cellular |

organisms;Eukaryota;Opisthokonta;Metazoa;Eumetazoa;Bilateria;Protostomia;  
Spiralia;Lophotrochozoa;Mollusca;Bivalvia;Autobranchia;Pteriormorphia;Pect  
inida;Pectinoidea;Pectinidae;Pecten;Pecten maximus

|                 |      |        |                 |                |     |      |          |        |      |
|-----------------|------|--------|-----------------|----------------|-----|------|----------|--------|------|
| UdeM00000014973 | 6596 | 1210.3 | UdeM00000014973 | XP_045159227.1 | 40  |      |          |        |      |
| 1732            | 937  | 32     | 406             | 2084           | 735 | 2417 | 0.00E+00 | 1210.3 | 6596 |

cellular  
organisms;Eukaryota;Opisthokonta;Metazoa;Eumetazoa;Bilateria;Protostomia;  
Spiralia;Lophotrochozoa;Mollusca;Bivalvia;Autobranchia;Heteroconchia;Euhe  
terodonta;Imparidentia;Venerida;Veneroidea;Veneridae;Mercenaria;Mercenari  
a mercenaria

|                 |      |        |                 |                |     |      |          |        |      |
|-----------------|------|--------|-----------------|----------------|-----|------|----------|--------|------|
| UdeM00000014974 | 6596 | 1210.3 | UdeM00000014974 | XP_045159227.1 | 40  |      |          |        |      |
| 1732            | 937  | 32     | 405             | 2083           | 735 | 2417 | 0.00E+00 | 1210.3 | 6596 |

cellular  
organisms;Eukaryota;Opisthokonta;Metazoa;Eumetazoa;Bilateria;Protostomia;  
Spiralia;Lophotrochozoa;Mollusca;Bivalvia;Autobranchia;Heteroconchia;Euhe  
terodonta;Imparidentia;Venerida;Veneroidea;Veneridae;Mercenaria;Mercenari  
a mercenaria

|                 |      |        |                 |                |     |      |          |        |      |
|-----------------|------|--------|-----------------|----------------|-----|------|----------|--------|------|
| UdeM00000014975 | 6596 | 1210.3 | UdeM00000014975 | XP_045159227.1 | 40  |      |          |        |      |
| 1732            | 937  | 32     | 47              | 1725           | 735 | 2417 | 0.00E+00 | 1210.3 | 6596 |

cellular  
organisms;Eukaryota;Opisthokonta;Metazoa;Eumetazoa;Bilateria;Protostomia;  
Spiralia;Lophotrochozoa;Mollusca;Bivalvia;Autobranchia;Heteroconchia;Euhe

terodonta;Imparidentia;Venerida;Veneroidea;Veneridae;Mercenaria;Mercenari  
 a mercenaria  
 UdeM00000014976 6596 657.5 UdeM00000014976 XP\_045159227.1 45.1 792  
 389 14 1 766 1637 2408 2.00E-185 657.5 6596 cellular  
 organisms;Eukaryota;Opisthokonta;Metazoa;Eumetazoa;Bilateria;Protostomia;  
 Spiralia;Lophotrochozoa;Mollusca;Bivalvia;Autobranchia;Heteroconchia;Euhe  
 terodonta;Imparidentia;Venerida;Veneroidea;Veneridae;Mercenaria;Mercenari  
 a mercenaria  
 UdeM00000014978 6596 257.3 UdeM00000014978 XP\_045159227.1 38.5 384  
 212 7 470 837 754 1129 6.80E-65 257.3 6596 cellular  
 organisms;Eukaryota;Opisthokonta;Metazoa;Eumetazoa;Bilateria;Protostomia;  
 Spiralia;Lophotrochozoa;Mollusca;Bivalvia;Autobranchia;Heteroconchia;Euhe  
 terodonta;Imparidentia;Venerida;Veneroidea;Veneridae;Mercenaria;Mercenari  
 a mercenaria  
 UdeM00000014979 6573 225.3 UdeM00000014979 XP\_021341058.1 38.2 408  
 189 15 31 426 684 1040 3.60E-55 225.3 6573 cellular  
 organisms;Eukaryota;Opisthokonta;Metazoa;Eumetazoa;Bilateria;Protostomia;  
 Spiralia;Lophotrochozoa;Mollusca;Bivalvia;Autobranchia;Pteriormorphia;Pect  
 inida;Pectinoidea;Pectinidae;Mizuhopecten;Mizuhopecten yessoensis  
 UdeM00000014981 29159 88.2 UdeM00000014981 XP\_034307861.1 61.3 62  
 24 0 137 198 109 170 1.40E-14 88.2 29159 cellular  
 organisms;Eukaryota;Opisthokonta;Metazoa;Eumetazoa;Bilateria;Protostomia;  
 Spiralia;Lophotrochozoa;Mollusca;Bivalvia;Autobranchia;Pteriormorphia;Ostr  
 eida;Ostreoidea;Ostreidae;Crassostrea;Crassostrea gigas  
 UdeM00000014982 6565 90.9 UdeM00000014982 XP\_022288562.1 47.4 97  
 51 0 1 97 73 169 9.80E-16 90.9 6565 cellular  
 organisms;Eukaryota;Opisthokonta;Metazoa;Eumetazoa;Bilateria;Protostomia;  
 Spiralia;Lophotrochozoa;Mollusca;Bivalvia;Autobranchia;Pteriormorphia;Ostr  
 eida;Ostreoidea;Ostreidae;Crassostrea;Crassostrea virginica  
 UdeM00000014983 29159 85.9 UdeM00000014983 XP\_034307861.1 59.7 62  
 25 0 137 198 109 170 6.80E-14 85.9 29159 cellular  
 organisms;Eukaryota;Opisthokonta;Metazoa;Eumetazoa;Bilateria;Protostomia;  
 Spiralia;Lophotrochozoa;Mollusca;Bivalvia;Autobranchia;Pteriormorphia;Ostr  
 eida;Ostreoidea;Ostreidae;Crassostrea;Crassostrea gigas  
 UdeM00000014984 29159 85.5 UdeM00000014984 XP\_034307861.1 59.7 62  
 25 0 39 100 109 170 4.70E-14 85.5 29159 cellular  
 organisms;Eukaryota;Opisthokonta;Metazoa;Eumetazoa;Bilateria;Protostomia;  
 Spiralia;Lophotrochozoa;Mollusca;Bivalvia;Autobranchia;Pteriormorphia;Ostr  
 eida;Ostreoidea;Ostreidae;Crassostrea;Crassostrea gigas  
 UdeM00000014985 6565 88.2 UdeM00000014985 XP\_022288562.1 46.4 97  
 52 0 1 97 73 169 6.30E-15 88.2 6565 cellular  
 organisms;Eukaryota;Opisthokonta;Metazoa;Eumetazoa;Bilateria;Protostomia;  
 Spiralia;Lophotrochozoa;Mollusca;Bivalvia;Autobranchia;Pteriormorphia;Ostr  
 eida;Ostreoidea;Ostreidae;Crassostrea;Crassostrea virginica  
 UdeM00000014986 10224 70.1 UdeM00000014986 XP\_006819375.1 48.8 80  
 41 0 1 80 342 421 1.50E-09 70.1 10224 cellular  
 organisms;Eukaryota;Opisthokonta;Metazoa;Eumetazoa;Bilateria;Deuterostomi  
 a;Hemichordata;Enteropneusta;Harrimaniidae;Saccoglossus;Saccoglossus  
 kowalevskii  
 UdeM00000014987 6573 269.6 UdeM00000014987 XP\_021341058.1 37.1 501  
 239 17 33 514 612 1055 2.00E-68 269.6 6573 cellular  
 organisms;Eukaryota;Opisthokonta;Metazoa;Eumetazoa;Bilateria;Protostomia;  
 Spiralia;Lophotrochozoa;Mollusca;Bivalvia;Autobranchia;Pteriormorphia;Pect  
 inida;Pectinoidea;Pectinidae;Mizuhopecten;Mizuhopecten yessoensis



UdeM00000014988 6573 269.6 UdeM00000014988 XP\_021341058.1 37.1 501  
 239 17 33 514 612 1055 2.00E-68 269.6 6573 cellular  
 organisms;Eukaryota;Opisthokonta;Metazoa;Eumetazoa;Bilateria;Protostomia;  
 Spiralia;Lophotrochozoa;Mollusca;Bivalvia;Autobranchia;Pteriormorphia;Pect  
 inida;Pectinoidea;Pectinidae;Mizuhopecten;Mizuhopecten yessoensis  
 UdeM00000014989 6596 243.4 UdeM00000014989 XP\_045157449.1 36.3 644  
 296 27 21 598 12 607 8.20E-61 243.4 6596 cellular  
 organisms;Eukaryota;Opisthokonta;Metazoa;Eumetazoa;Bilateria;Protostomia;  
 Spiralia;Lophotrochozoa;Mollusca;Bivalvia;Autobranchia;Heteroconchia;Euhe  
 terodonta;Imparidentia;Venerida;Veneroidea;Veneridae;Mercenaria;Mercenari  
 a mercenaria  
 UdeM00000014990 29159 178.7 UdeM00000014990 XP\_034312908.1 26.3 651  
 313 19 5 523 6 621 1.90E-41 178.7 29159 cellular  
 organisms;Eukaryota;Opisthokonta;Metazoa;Eumetazoa;Bilateria;Protostomia;  
 Spiralia;Lophotrochozoa;Mollusca;Bivalvia;Autobranchia;Pteriormorphia;Ostr  
 eida;Ostreoidea;Ostreidae;Crassostrea;Crassostrea gigas  
 UdeM00000014991 1735272 70.5 UdeM00000014991 XP\_041357166.1 48.9  
 88 39 2 6 89 3 88 2.80E-09 70.5 1735272  
 cellular  
 organisms;Eukaryota;Opisthokonta;Metazoa;Eumetazoa;Bilateria;Protostomia;  
 Spiralia;Lophotrochozoa;Mollusca;Gastropoda;Neomphalina;Neomphaloidea;Pel  
 tospiridae;Gigantopelta;Gigantopelta aegis  
 UdeM00000014993 6573 219.9 UdeM00000014993 XP\_021341071.1 46.6 320  
 125 11 2 316 19 297 4.50E-54 219.9 6573 cellular  
 organisms;Eukaryota;Opisthokonta;Metazoa;Eumetazoa;Bilateria;Protostomia;  
 Spiralia;Lophotrochozoa;Mollusca;Bivalvia;Autobranchia;Pteriormorphia;Pect  
 inida;Pectinoidea;Pectinidae;Mizuhopecten;Mizuhopecten yessoensis  
 UdeM00000014994 6579 97.4 UdeM00000014994 XP\_033746854.1 22.1 412  
 290 8 61 449 18 421 6.30E-17 97.4 6579 cellular  
 organisms;Eukaryota;Opisthokonta;Metazoa;Eumetazoa;Bilateria;Protostomia;  
 Spiralia;Lophotrochozoa;Mollusca;Bivalvia;Autobranchia;Pteriormorphia;Pect  
 inida;Pectinoidea;Pectinidae;Pecten;Pecten maximus  
 UdeM00000014995 1735272 124.4 UdeM00000014995 XP\_041360711.1 34.7  
 196 115 3 5 198 6 190 1.80E-25 124.4 1735272  
 cellular  
 organisms;Eukaryota;Opisthokonta;Metazoa;Eumetazoa;Bilateria;Protostomia;  
 Spiralia;Lophotrochozoa;Mollusca;Gastropoda;Neomphalina;Neomphaloidea;Pel  
 tospiridae;Gigantopelta;Gigantopelta aegis  
 UdeM00000014996 6565 143.7 UdeM00000014996 XP\_022326764.1 24.9 433  
 302 9 10 426 17 442 8.70E-31 143.7 6565 cellular  
 organisms;Eukaryota;Opisthokonta;Metazoa;Eumetazoa;Bilateria;Protostomia;  
 Spiralia;Lophotrochozoa;Mollusca;Bivalvia;Autobranchia;Pteriormorphia;Ostr  
 eida;Ostreoidea;Ostreidae;Crassostrea;Crassostrea virginica  
 UdeM00000014997 7739 72 UdeM00000014997 XP\_035659254.1 36.5 126  
 71 5 6 125 37 159 6.20E-10 72 7739 cellular  
 organisms;Eukaryota;Opisthokonta;Metazoa;Eumetazoa;Bilateria;Deuterostomi  
 a;Chordata;Cephalochordata;Leptocardii;Amphioxiformes;Branchiostomidae;Br  
 anchiostoma;Branchiostoma floridae  
 UdeM00000014998 6565 92.4 UdeM00000014998 XP\_022326764.1 48.2 85  
 42 1 10 94 17 99 3.70E-16 92.4 6565 cellular  
 organisms;Eukaryota;Opisthokonta;Metazoa;Eumetazoa;Bilateria;Protostomia;  
 Spiralia;Lophotrochozoa;Mollusca;Bivalvia;Autobranchia;Pteriormorphia;Ostr  
 eida;Ostreoidea;Ostreidae;Crassostrea;Crassostrea virginica

UdeM00000015001 7574 69.3 UdeM00000015001 XP\_013388573.1 43.4 76  
 41 1 95 170 349 422 5.30E-09 69.3 7574 cellular  
 organisms;Eukaryota;Opisthokonta;Metazoa;Eumetazoa;Bilateria;Protostomia;  
 Spiralia;Lophotrochozoa;Brachiopoda;Linguliformea;Lingulata;Lingulida;Lin  
 guloidea;Lingulidae;Lingula;Lingula anatina  
 UdeM00000015002 6565 137.5 UdeM00000015002 XP\_022326764.1 24.5 433  
 304 9 10 426 17 442 6.20E-29 137.5 6565 cellular  
 organisms;Eukaryota;Opisthokonta;Metazoa;Eumetazoa;Bilateria;Protostomia;  
 Spiralia;Lophotrochozoa;Mollusca;Bivalvia;Autobranhia;Pteriormorphia;Ostr  
 eida;Ostreoidea;Ostreidae;Crassostrea;Crassostrea virginica  
 UdeM00000015003 29159 164.5 UdeM00000015003 XP\_011422172.2 21.9 643  
 445 19 8 601 13 647 4.40E-37 164.5 29159 cellular  
 organisms;Eukaryota;Opisthokonta;Metazoa;Eumetazoa;Bilateria;Protostomia;  
 Spiralia;Lophotrochozoa;Mollusca;Bivalvia;Autobranhia;Pteriormorphia;Ostr  
 eida;Ostreoidea;Ostreidae;Crassostrea;Crassostrea gigas  
 UdeM00000015004 6573 576.6 UdeM00000015004 XP\_021366074.1 60.3 481  
 176 4 1 481 1 466 2.90E-161 576.6 6573 cellular  
 organisms;Eukaryota;Opisthokonta;Metazoa;Eumetazoa;Bilateria;Protostomia;  
 Spiralia;Lophotrochozoa;Mollusca;Bivalvia;Autobranhia;Pteriormorphia;Pect  
 inida;Pectinoidea;Pectinidae;Mizuhopecten;Mizuhopecten yessoensis  
 UdeM00000015005 6596 90.9 UdeM00000015005 XP\_045160466.1 42.7 131  
 67 2 3 128 7 134 1.60E-15 90.9 6596 cellular  
 organisms;Eukaryota;Opisthokonta;Metazoa;Eumetazoa;Bilateria;Protostomia;  
 Spiralia;Lophotrochozoa;Mollusca;Bivalvia;Autobranhia;Heteroconchia;Euhe  
 terodonta;Imparidentia;Venerida;Veneroidea;Veneridae;Mercenaria;Mercenari  
 a mercenaria  
 UdeM00000015006 29159 111.7 UdeM00000015006 XP\_011425163.2 27.4 212  
 147 3 31 242 68 272 1.40E-21 111.7 29159 cellular  
 organisms;Eukaryota;Opisthokonta;Metazoa;Eumetazoa;Bilateria;Protostomia;  
 Spiralia;Lophotrochozoa;Mollusca;Bivalvia;Autobranhia;Pteriormorphia;Ostr  
 eida;Ostreoidea;Ostreidae;Crassostrea;Crassostrea gigas  
 UdeM00000015007 6573 585.5 UdeM00000015007 XP\_021356753.1 43.2 674  
 361 9 5 668 259 920 8.60E-164 585.5 6573 cellular  
 organisms;Eukaryota;Opisthokonta;Metazoa;Eumetazoa;Bilateria;Protostomia;  
 Spiralia;Lophotrochozoa;Mollusca;Bivalvia;Autobranhia;Pteriormorphia;Pect  
 inida;Pectinoidea;Pectinidae;Mizuhopecten;Mizuhopecten yessoensis  
 UdeM00000015008 6573 393.7 UdeM00000015008 XP\_021356752.1 53.5 501  
 134 16 1 460 1 443 3.30E-106 393.7 6573 cellular  
 organisms;Eukaryota;Opisthokonta;Metazoa;Eumetazoa;Bilateria;Protostomia;  
 Spiralia;Lophotrochozoa;Mollusca;Bivalvia;Autobranhia;Pteriormorphia;Pect  
 inida;Pectinoidea;Pectinidae;Mizuhopecten;Mizuhopecten yessoensis  
 UdeM00000015009 225164 84 UdeM00000015009 XP\_009058199.1 48.1  
 81 37 1 1 81 1 76 1.00E-13 84 225164  
 cellular  
 organisms;Eukaryota;Opisthokonta;Metazoa;Eumetazoa;Bilateria;Protostomia;  
 Spiralia;Lophotrochozoa;Mollusca;Gastropoda;Patellogastropoda;Lottioida;  
 Lottiidae;Lottia;Lottia gigantea  
 UdeM00000015010 6596 111.3 UdeM00000015010 XP\_045188640.1 42.7 131  
 63 3 6 130 67 191 9.70E-22 111.3 6596 cellular  
 organisms;Eukaryota;Opisthokonta;Metazoa;Eumetazoa;Bilateria;Protostomia;  
 Spiralia;Lophotrochozoa;Mollusca;Bivalvia;Autobranhia;Heteroconchia;Euhe  
 terodonta;Imparidentia;Venerida;Veneroidea;Veneridae;Mercenaria;Mercenari  
 a mercenaria

UdeM00000015011 6573 86.7 UdeM00000015011 XP\_021367843.1 62.7 67  
 24 1 128 193 465 531 3.70E-14 86.7 6573 cellular  
 organisms;Eukaryota;Opisthokonta;Metazoa;Eumetazoa;Bilateria;Protostomia;  
 Spiralia;Lophotrochozoa;Mollusca;Bivalvia;Autobranchia;Pteriormorphia;Pect  
 inida;Pectinoidea;Pectinidae;Mizuhopecten;Mizuhopecten yessoensis  
 UdeM00000015012 1250792 177.9 UdeM00000015012 XP\_041860347.1 57.7  
 130 55 0 4 133 219 348 1.00E-41 177.9 1250792  
 cellular  
 organisms;Eukaryota;Opisthokonta;Metazoa;Eumetazoa;Bilateria;Deuterostomi  
 a;Chordata;Craniata;Vertebrata;Gnathostomata;Teleostomi;Euteleostomi;Acti  
 nopterygii;Actinopteri;Neopterygii;Teleostei;Osteoglossocephalai;Clupeoce  
 phala;Euteleosteomorpha;Neoteleostei;Eurypterygia;Ctenosquamata;Acanthomo  
 rphata;Euacanthomorphacea;Percomorphaceae;Ovalentaria;Atherinomorphae;Ath  
 eriniformes;Melanotaeniidae;Melanotaenia;Melanotaenia boesemani  
 UdeM00000015013 6573 103.2 UdeM00000015013 XP\_021378874.1 26.5 275  
 153 7 377 634 109 351 1.20E-18 103.2 6573 cellular  
 organisms;Eukaryota;Opisthokonta;Metazoa;Eumetazoa;Bilateria;Protostomia;  
 Spiralia;Lophotrochozoa;Mollusca;Bivalvia;Autobranchia;Pteriormorphia;Pect  
 inida;Pectinoidea;Pectinidae;Mizuhopecten;Mizuhopecten yessoensis  
 UdeM00000015014 6579 239.6 UdeM00000015014 XP\_033737683.1 62.1 203  
 76 1 3 204 1202 1404 3.60E-60 239.6 6579 cellular  
 organisms;Eukaryota;Opisthokonta;Metazoa;Eumetazoa;Bilateria;Protostomia;  
 Spiralia;Lophotrochozoa;Mollusca;Bivalvia;Autobranchia;Pteriormorphia;Pect  
 inida;Pectinoidea;Pectinidae;Pecten;Pecten maximus  
 UdeM00000015015 6579 227.6 UdeM00000015015 XP\_033737683.1 56.5 223  
 76 2 3 224 1202 1404 1.50E-56 227.6 6579 cellular  
 organisms;Eukaryota;Opisthokonta;Metazoa;Eumetazoa;Bilateria;Protostomia;  
 Spiralia;Lophotrochozoa;Mollusca;Bivalvia;Autobranchia;Pteriormorphia;Pect  
 inida;Pectinoidea;Pectinidae;Pecten;Pecten maximus  
 UdeM00000015016 400727 303.9 UdeM00000015016 XP\_025108466.1 45.6  
 349 182 4 7 353 26 368 2.80E-79 303.9 400727  
 cellular  
 organisms;Eukaryota;Opisthokonta;Metazoa;Eumetazoa;Bilateria;Protostomia;  
 Spiralia;Lophotrochozoa;Mollusca;Gastropoda;Caenogastropoda;Architaeniogl  
 ossa;Ampullarioidea;Ampullariidae;Pomacea;Pomacea canaliculata  
 UdeM00000015017 6579 1616.3 UdeM00000015017 XP\_033737683.1 65.5  
 1216 392 11 1 1204 1 1200 0.00E+00 1616.3 6579  
 cellular  
 organisms;Eukaryota;Opisthokonta;Metazoa;Eumetazoa;Bilateria;Protostomia;  
 Spiralia;Lophotrochozoa;Mollusca;Bivalvia;Autobranchia;Pteriormorphia;Pect  
 inida;Pectinoidea;Pectinidae;Pecten;Pecten maximus  
 UdeM00000015018 6596 251.5 UdeM00000015018 XP\_045157195.1 72.5 178  
 43 1 3 174 5 182 7.70E-64 251.5 6596 cellular  
 organisms;Eukaryota;Opisthokonta;Metazoa;Eumetazoa;Bilateria;Protostomia;  
 Spiralia;Lophotrochozoa;Mollusca;Bivalvia;Autobranchia;Heteroconchia;Euhe  
 terodonta;Imparidentia;Venerida;Veneroidea;Veneridae;Mercenaria;Mercenari  
 a mercenaria  
 UdeM00000015019 6596 240.7 UdeM00000015019 XP\_045157718.1 46.2 344  
 148 10 40 361 1566 1894 3.00E-60 240.7 6596 cellular  
 organisms;Eukaryota;Opisthokonta;Metazoa;Eumetazoa;Bilateria;Protostomia;  
 Spiralia;Lophotrochozoa;Mollusca;Bivalvia;Autobranchia;Heteroconchia;Euhe  
 terodonta;Imparidentia;Venerida;Veneroidea;Veneridae;Mercenaria;Mercenari  
 a mercenaria

UdeM00000015020 6579 441 UdeM00000015020 XP\_033738064.1 44.7 646  
 290 17 1 627 819 1416 2.50E-120 441 6579 cellular  
 organisms;Eukaryota;Opisthokonta;Metazoa;Eumetazoa;Bilateria;Protostomia;  
 Spiralia;Lophotrochozoa;Mollusca;Bivalvia;Autobranhia;Pteriomorpha;Pect  
 inida;Pectinoidea;Pectinidae;Pecten;Pecten maximus  
 UdeM00000015021 6596 965.3 UdeM00000015021 XP\_045157718.1 61.2 796  
 246 3 1 733 1 796 4.40E-278 965.3 6596 cellular  
 organisms;Eukaryota;Opisthokonta;Metazoa;Eumetazoa;Bilateria;Protostomia;  
 Spiralia;Lophotrochozoa;Mollusca;Bivalvia;Autobranhia;Heteroconchia;Euhe  
 terodonta;Imparidentia;Venerida;Veneroidea;Veneridae;Mercenaria;Mercenari  
 a mercenaria  
 UdeM00000015022 6573 484.6 UdeM00000015022 XP\_021343624.1 67.8 311  
 100 0 1 311 1 311 9.60E-134 484.6 6573 cellular  
 organisms;Eukaryota;Opisthokonta;Metazoa;Eumetazoa;Bilateria;Protostomia;  
 Spiralia;Lophotrochozoa;Mollusca;Bivalvia;Autobranhia;Pteriomorpha;Pect  
 inida;Pectinoidea;Pectinidae;Mizuhopecten;Mizuhopecten yessoensis  
 UdeM00000015023 6596 660.6 UdeM00000015023 XP\_045159939.1 69 491  
 135 5 39 524 7 485 1.70E-186 660.6 6596 cellular  
 organisms;Eukaryota;Opisthokonta;Metazoa;Eumetazoa;Bilateria;Protostomia;  
 Spiralia;Lophotrochozoa;Mollusca;Bivalvia;Autobranhia;Heteroconchia;Euhe  
 terodonta;Imparidentia;Venerida;Veneroidea;Veneridae;Mercenaria;Mercenari  
 a mercenaria  
 UdeM00000015024 6596 339.7 UdeM00000015024 XP\_045157707.1 50.8 303  
 144 2 19 316 7 309 3.90E-90 339.7 6596 cellular  
 organisms;Eukaryota;Opisthokonta;Metazoa;Eumetazoa;Bilateria;Protostomia;  
 Spiralia;Lophotrochozoa;Mollusca;Bivalvia;Autobranhia;Heteroconchia;Euhe  
 terodonta;Imparidentia;Venerida;Veneroidea;Veneridae;Mercenaria;Mercenari  
 a mercenaria  
 UdeM00000015026 1735272 500.4 UdeM00000015026 XP\_041358222.1 54.4  
 447 187 4 10 444 19 460 2.40E-138 500.4 1735272  
 cellular  
 organisms;Eukaryota;Opisthokonta;Metazoa;Eumetazoa;Bilateria;Protostomia;  
 Spiralia;Lophotrochozoa;Mollusca;Gastropoda;Neomphalina;Neomphaloidea;Pel  
 tospiridae;Gigantopelta;Gigantopelta aegis  
 UdeM00000015027 1735272 301.6 UdeM00000015027 XP\_041358222.1 54.9  
 268 111 2 1 258 170 437 9.60E-79 301.6 1735272  
 cellular  
 organisms;Eukaryota;Opisthokonta;Metazoa;Eumetazoa;Bilateria;Protostomia;  
 Spiralia;Lophotrochozoa;Mollusca;Gastropoda;Neomphalina;Neomphaloidea;Pel  
 tospiridae;Gigantopelta;Gigantopelta aegis  
 UdeM00000015028 6596 154.5 UdeM00000015028 XP\_045157714.1 27.7 711  
 349 24 16 616 49 704 4.50E-34 154.5 6596 cellular  
 organisms;Eukaryota;Opisthokonta;Metazoa;Eumetazoa;Bilateria;Protostomia;  
 Spiralia;Lophotrochozoa;Mollusca;Bivalvia;Autobranhia;Heteroconchia;Euhe  
 terodonta;Imparidentia;Venerida;Veneroidea;Veneridae;Mercenaria;Mercenari  
 a mercenaria  
 UdeM00000015029 6596 149.4 UdeM00000015029 XP\_045157714.1 27.7 712  
 349 25 16 617 49 704 1.50E-32 149.4 6596 cellular  
 organisms;Eukaryota;Opisthokonta;Metazoa;Eumetazoa;Bilateria;Protostomia;  
 Spiralia;Lophotrochozoa;Mollusca;Bivalvia;Autobranhia;Heteroconchia;Euhe  
 terodonta;Imparidentia;Venerida;Veneroidea;Veneridae;Mercenaria;Mercenari  
 a mercenaria  
 UdeM00000015030 6596 446.4 UdeM00000015030 XP\_045159956.1 24.8 1896  
 1067 51 1 1628 1 1805 1.50E-121 446.4 6596 cellular

organisms;Eukaryota;Opisthokonta;Metazoa;Eumetazoa;Bilateria;Protostomia;Spiralia;Lophotrochozoa;Mollusca;Bivalvia;Autobranchia;Heteroconchia;Euherodonta;Imparidentia;Venerida;Veneroidea;Veneridae;Mercenaria;Mercenaria mercenaria

UdeM00000015031 6526 223.8 UdeM00000015031 XP\_013086602.1 69.4 160  
46 1 5 164 7 163 1.60E-55 223.8 6526 cellular

organisms;Eukaryota;Opisthokonta;Metazoa;Eumetazoa;Bilateria;Protostomia;Spiralia;Lophotrochozoa;Mollusca;Gastropoda;Heterobranchia;Euthyneura;Panpulmonata;Hygrophila;Lymnaeoidea;Planorbidae;Biomphalaria;Biomphalaria glabrata

UdeM00000015034 6596 273.9 UdeM00000015034 XP\_045160049.1 97.1 139  
4 0 1 139 1 139 1.20E-70 273.9 6596 cellular

organisms;Eukaryota;Opisthokonta;Metazoa;Eumetazoa;Bilateria;Protostomia;Spiralia;Lophotrochozoa;Mollusca;Bivalvia;Autobranchia;Heteroconchia;Euherodonta;Imparidentia;Venerida;Veneroidea;Veneridae;Mercenaria;Mercenaria mercenaria

UdeM00000015033 6596 709.9 UdeM00000015033 XP\_045160049.1 97.2 351  
10 0 1 351 1 351 1.60E-201 709.9 6596 cellular

organisms;Eukaryota;Opisthokonta;Metazoa;Eumetazoa;Bilateria;Protostomia;Spiralia;Lophotrochozoa;Mollusca;Bivalvia;Autobranchia;Heteroconchia;Euherodonta;Imparidentia;Venerida;Veneroidea;Veneridae;Mercenaria;Mercenaria mercenaria

UdeM00000015035 6596 689.9 UdeM00000015035 XP\_045160049.1 87 392  
10 1 1 392 1 351 1.90E-195 689.9 6596 cellular

organisms;Eukaryota;Opisthokonta;Metazoa;Eumetazoa;Bilateria;Protostomia;Spiralia;Lophotrochozoa;Mollusca;Bivalvia;Autobranchia;Heteroconchia;Euherodonta;Imparidentia;Venerida;Veneroidea;Veneridae;Mercenaria;Mercenaria mercenaria

UdeM00000015036 6500 66.6 UdeM00000015036 XP\_035828272.1 48.5 68  
33 2 48 114 40 106 2.30E-08 66.6 6500 cellular

organisms;Eukaryota;Opisthokonta;Metazoa;Eumetazoa;Bilateria;Protostomia;Spiralia;Lophotrochozoa;Mollusca;Gastropoda;Heterobranchia;Euthyneura;Tectipleura;Aplysiida;Aplysioidea;Aplysiidae;Aplysia;Aplysia californica

UdeM00000015037 7668 122.5 UdeM00000015037 XP\_030832292.1 33 224  
129 5 2 224 257 460 9.00E-25 122.5 7668 cellular

organisms;Eukaryota;Opisthokonta;Metazoa;Eumetazoa;Bilateria;Deuterostomia;Echinodermata;Eleutherozoa;Echinozoa;Echinoidea;Euechinoidea;Echinacea;Camarodonta;Echinidea;Strongylocentrotidae;Strongylocentrotus;Strongylocentrotus purpuratus

UdeM00000015039 6596 1474.9 UdeM00000015039 XP\_045160051.1 73  
979 242 5 7 974 1535 2502 0.00E+00 1474.9 6596  
cellular

organisms;Eukaryota;Opisthokonta;Metazoa;Eumetazoa;Bilateria;Protostomia;Spiralia;Lophotrochozoa;Mollusca;Bivalvia;Autobranchia;Heteroconchia;Euherodonta;Imparidentia;Venerida;Veneroidea;Veneridae;Mercenaria;Mercenaria mercenaria

UdeM00000015038 6596 1930.2 UdeM00000015038 XP\_045160051.1 72.5  
1311 336 7 21 1319 1204 2502 0.00E+00 1930.2 6596  
cellular

organisms;Eukaryota;Opisthokonta;Metazoa;Eumetazoa;Bilateria;Protostomia;Spiralia;Lophotrochozoa;Mollusca;Bivalvia;Autobranchia;Heteroconchia;Euherodonta;Imparidentia;Venerida;Veneroidea;Veneridae;Mercenaria;Mercenaria mercenaria

UdeM00000015040 6596 462.2 UdeM00000015040 XP\_045160051.1 71.2 333  
 94 2 21 352 1204 1535 8.90E-127 462.2 6596 cellular  
 organisms;Eukaryota;Opisthokonta;Metazoa;Eumetazoa;Bilateria;Protostomia;  
 Spiralia;Lophotrochozoa;Mollusca;Bivalvia;Autobranchia;Heteroconchia;Euhe  
 terodonta;Imparidentia;Venerida;Veneroidea;Veneridae;Mercenaria;Mercenari  
 a mercenaria  
 UdeM00000015041 6596 855.5 UdeM00000015041 XP\_045160051.1 73.9 590  
 145 5 15 598 618 1204 4.00E-245 855.5 6596 cellular  
 organisms;Eukaryota;Opisthokonta;Metazoa;Eumetazoa;Bilateria;Protostomia;  
 Spiralia;Lophotrochozoa;Mollusca;Bivalvia;Autobranchia;Heteroconchia;Euhe  
 terodonta;Imparidentia;Venerida;Veneroidea;Veneridae;Mercenaria;Mercenari  
 a mercenaria  
 UdeM00000015042 6596 750.7 UdeM00000015042 XP\_045160051.1 62.5 658  
 165 11 1 583 1 651 1.40E-213 750.7 6596 cellular  
 organisms;Eukaryota;Opisthokonta;Metazoa;Eumetazoa;Bilateria;Protostomia;  
 Spiralia;Lophotrochozoa;Mollusca;Bivalvia;Autobranchia;Heteroconchia;Euhe  
 terodonta;Imparidentia;Venerida;Veneroidea;Veneridae;Mercenaria;Mercenari  
 a mercenaria  
 UdeM00000015043 6596 750.4 UdeM00000015043 XP\_045160051.1 62.3 657  
 167 10 1 582 1 651 1.80E-213 750.4 6596 cellular  
 organisms;Eukaryota;Opisthokonta;Metazoa;Eumetazoa;Bilateria;Protostomia;  
 Spiralia;Lophotrochozoa;Mollusca;Bivalvia;Autobranchia;Heteroconchia;Euhe  
 terodonta;Imparidentia;Venerida;Veneroidea;Veneridae;Mercenaria;Mercenari  
 a mercenaria  
 UdeM00000015044 6596 236.9 UdeM00000015044 XP\_045157466.1 34.2 383  
 114 6 7 252 22 403 2.80E-59 236.9 6596 cellular  
 organisms;Eukaryota;Opisthokonta;Metazoa;Eumetazoa;Bilateria;Protostomia;  
 Spiralia;Lophotrochozoa;Mollusca;Bivalvia;Autobranchia;Heteroconchia;Euhe  
 terodonta;Imparidentia;Venerida;Veneroidea;Veneridae;Mercenaria;Mercenari  
 a mercenaria  
 UdeM00000015045 6565 159.1 UdeM00000015045 XP\_022328252.1 44.5 211  
 99 5 1 193 1105 1315 5.80E-36 159.1 6565 cellular  
 organisms;Eukaryota;Opisthokonta;Metazoa;Eumetazoa;Bilateria;Protostomia;  
 Spiralia;Lophotrochozoa;Mollusca;Bivalvia;Autobranchia;Pteriormorphia;Ostr  
 eida;Ostreoidea;Ostreidae;Crassostrea;Crassostrea virginica  
 UdeM00000015046 88015 146 UdeM00000015046 XP\_023331622.1 81.5 81  
 15 0 1 81 1 81 2.10E-32 146 88015 cellular  
 organisms;Eukaryota;Opisthokonta;Metazoa;Eumetazoa;Bilateria;Protostomia;  
 Ecdysozoa;Panarthropoda;Arthropoda;Mandibulata;Pancrustacea;Crustacea;Mul  
 ticrustacea;Hexanauplia;Copepoda;Neocopepoda;Gymnoplea;Calanoida;Temorida  
 e;Eurytemora;Eurytemora affinis  
 UdeM00000015047 88015 149.4 UdeM00000015047 XP\_023343883.1 80.7 83  
 16 0 1 83 1 83 2.00E-33 149.4 88015 cellular  
 organisms;Eukaryota;Opisthokonta;Metazoa;Eumetazoa;Bilateria;Protostomia;  
 Ecdysozoa;Panarthropoda;Arthropoda;Mandibulata;Pancrustacea;Crustacea;Mul  
 ticrustacea;Hexanauplia;Copepoda;Neocopepoda;Gymnoplea;Calanoida;Temorida  
 e;Eurytemora;Eurytemora affinis  
 UdeM00000015048 7739 188 UdeM00000015048 XP\_035680064.1 70.1 134  
 40 0 1 134 1 134 8.10E-45 188 7739 cellular  
 organisms;Eukaryota;Opisthokonta;Metazoa;Eumetazoa;Bilateria;Deuterostomi  
 a;Chordata;Cephalochordata;Leptocardii;Amphioxiformes;Branchiostomidae;Br  
 anchiostoma;Branchiostoma floridae  
 UdeM00000015049 6596 699.5 UdeM00000015049 XP\_045157725.1 42.9 916  
 462 14 2 902 17 886 5.50E-198 699.5 6596 cellular

organisms;Eukaryota;Opisthokonta;Metazoa;Eumetazoa;Bilateria;Protostomia;Spiralia;Lophotrochozoa;Mollusca;Bivalvia;Autobranchia;Heteroconchia;Euherodonta;Imparidentia;Venerida;Veneroidea;Veneridae;Mercenaria;Mercenaria mercenaria

UdeM00000015051 13686 212.2 UdeM00000015051 XP\_011170408.3 40.6 293  
169 3 2 291 586 876 8.70E-52 212.2 13686 cellular

organisms;Eukaryota;Opisthokonta;Metazoa;Eumetazoa;Bilateria;Protostomia;Ecdysozoa;Panarthropoda;Arthropoda;Mandibulata;Pancrustacea;Hexapoda;Insecta;Dicondylia;Pterygota;Neoptera;Endopterygota;Hymenoptera;Apocrita;Aculeata;Formicoidea;Formicidae;Myrmicinae;Solenopsidini;Solenopsis;Solenopsis invicta

UdeM00000015052 6596 962.6 UdeM00000015052 XP\_045157289.1 49.8 1361  
391 35 1 1287 1 1143 5.60E-277 962.6 6596 cellular

organisms;Eukaryota;Opisthokonta;Metazoa;Eumetazoa;Bilateria;Protostomia;Spiralia;Lophotrochozoa;Mollusca;Bivalvia;Autobranchia;Heteroconchia;Euherodonta;Imparidentia;Venerida;Veneroidea;Veneridae;Mercenaria;Mercenaria mercenaria

UdeM00000015054 6596 499.6 UdeM00000015054 XP\_045157358.1 59.5 415  
153 5 1 406 840 1248 3.80E-138 499.6 6596 cellular

organisms;Eukaryota;Opisthokonta;Metazoa;Eumetazoa;Bilateria;Protostomia;Spiralia;Lophotrochozoa;Mollusca;Bivalvia;Autobranchia;Heteroconchia;Euherodonta;Imparidentia;Venerida;Veneroidea;Veneridae;Mercenaria;Mercenaria mercenaria

UdeM00000015053 6596 511.5 UdeM00000015053 XP\_045157358.1 60 422  
154 5 1 413 833 1248 9.80E-142 511.5 6596 cellular

organisms;Eukaryota;Opisthokonta;Metazoa;Eumetazoa;Bilateria;Protostomia;Spiralia;Lophotrochozoa;Mollusca;Bivalvia;Autobranchia;Heteroconchia;Euherodonta;Imparidentia;Venerida;Veneroidea;Veneridae;Mercenaria;Mercenaria mercenaria

UdeM00000015056 6565 225.3 UdeM00000015056 XP\_022286598.1 44 323  
133 9 1 293 1 305 9.90E-56 225.3 6565 cellular

organisms;Eukaryota;Opisthokonta;Metazoa;Eumetazoa;Bilateria;Protostomia;Spiralia;Lophotrochozoa;Mollusca;Bivalvia;Autobranchia;Pteriomorphia;Ostreida;Ostreioidea;Ostreidae;Crassostrea;Crassostrea virginica

UdeM00000015055 6565 369.4 UdeM00000015055 XP\_022320668.1 32.9 809  
287 14 11 586 5 790 8.90E-99 369.4 6565 cellular

organisms;Eukaryota;Opisthokonta;Metazoa;Eumetazoa;Bilateria;Protostomia;Spiralia;Lophotrochozoa;Mollusca;Bivalvia;Autobranchia;Pteriomorphia;Ostreida;Ostreioidea;Ostreidae;Crassostrea;Crassostrea virginica

UdeM00000015057 6565 228.8 UdeM00000015057 XP\_022320668.1 40.4 327  
78 1 1 210 464 790 7.30E-57 228.8 6565 cellular

organisms;Eukaryota;Opisthokonta;Metazoa;Eumetazoa;Bilateria;Protostomia;Spiralia;Lophotrochozoa;Mollusca;Bivalvia;Autobranchia;Pteriomorphia;Ostreida;Ostreioidea;Ostreidae;Crassostrea;Crassostrea virginica

UdeM00000015058 6579 797.3 UdeM00000015058 XP\_033738232.1 48.5 859  
405 13 1 840 27 867 1.90E-227 797.3 6579 cellular

organisms;Eukaryota;Opisthokonta;Metazoa;Eumetazoa;Bilateria;Protostomia;Spiralia;Lophotrochozoa;Mollusca;Bivalvia;Autobranchia;Pteriomorphia;Pectinida;Pectinoidea;Pectinidae;Pecten;Pecten maximus

UdeM00000015059 6565 139.4 UdeM00000015059 XP\_022328252.1 45.1 173  
87 3 1 165 1105 1277 4.20E-30 139.4 6565 cellular

organisms;Eukaryota;Opisthokonta;Metazoa;Eumetazoa;Bilateria;Protostomia;Spiralia;Lophotrochozoa;Mollusca;Bivalvia;Autobranchia;Pteriomorphia;Ostreida;Ostreioidea;Ostreidae;Crassostrea;Crassostrea virginica

UdeM00000015062 6596 111.3 UdeM00000015062 XP\_045160251.1 34.6 214  
 102 5 5 185 703 911 1.70E-21 111.3 6596 cellular  
 organisms;Eukaryota;Opisthokonta;Metazoa;Eumetazoa;Bilateria;Protostomia;  
 Spiralia;Lophotrochozoa;Mollusca;Bivalvia;Autobranhia;Heteroconchia;Euhe  
 terodonta;Imparidentia;Venerida;Veneroidea;Veneridae;Mercenaria;Mercenari  
 a mercenaria  
 UdeM00000015063 6596 577.4 UdeM00000015063 XP\_045160259.1 51.1 597  
 253 5 1 587 1 568 2.10E-161 577.4 6596 cellular  
 organisms;Eukaryota;Opisthokonta;Metazoa;Eumetazoa;Bilateria;Protostomia;  
 Spiralia;Lophotrochozoa;Mollusca;Bivalvia;Autobranhia;Heteroconchia;Euhe  
 terodonta;Imparidentia;Venerida;Veneroidea;Veneridae;Mercenaria;Mercenari  
 a mercenaria  
 UdeM00000015064 6573 365.9 UdeM00000015064 XP\_021378852.1 72.8 228  
 62 0 1 228 1 228 3.70E-98 365.9 6573 cellular  
 organisms;Eukaryota;Opisthokonta;Metazoa;Eumetazoa;Bilateria;Protostomia;  
 Spiralia;Lophotrochozoa;Mollusca;Bivalvia;Autobranhia;Pteriormorphia;Pect  
 inida;Pectinoidea;Pectinidae;Mizuhopecten;Mizuhopecten yessoensis  
 UdeM00000015065 6579 362.5 UdeM00000015065 XP\_033737816.1 32.1 711  
 433 10 1 666 1 706 1.30E-96 362.5 6579 cellular  
 organisms;Eukaryota;Opisthokonta;Metazoa;Eumetazoa;Bilateria;Protostomia;  
 Spiralia;Lophotrochozoa;Mollusca;Bivalvia;Autobranhia;Pteriormorphia;Pect  
 inida;Pectinoidea;Pectinidae;Pecten;Pecten maximus  
 UdeM00000015066 6596 853.2 UdeM00000015066 XP\_045159402.1 76.1 553  
 121 4 1 552 1 543 1.80E-244 853.2 6596 cellular  
 organisms;Eukaryota;Opisthokonta;Metazoa;Eumetazoa;Bilateria;Protostomia;  
 Spiralia;Lophotrochozoa;Mollusca;Bivalvia;Autobranhia;Heteroconchia;Euhe  
 terodonta;Imparidentia;Venerida;Veneroidea;Veneridae;Mercenaria;Mercenari  
 a mercenaria  
 UdeM00000015067 29159 417.5 UdeM00000015067 XP\_011413995.2 51.9 378  
 176 5 26 403 23 394 2.10E-113 417.5 29159 cellular  
 organisms;Eukaryota;Opisthokonta;Metazoa;Eumetazoa;Bilateria;Protostomia;  
 Spiralia;Lophotrochozoa;Mollusca;Bivalvia;Autobranhia;Pteriormorphia;Ostr  
 eida;Ostreoidea;Ostreidae;Crassostrea;Crassostrea gigas  
 UdeM00000015068 6596 408.3 UdeM00000015068 XP\_045157093.1 46.4 468  
 192 7 13 475 11 424 1.40E-110 408.3 6596 cellular  
 organisms;Eukaryota;Opisthokonta;Metazoa;Eumetazoa;Bilateria;Protostomia;  
 Spiralia;Lophotrochozoa;Mollusca;Bivalvia;Autobranhia;Heteroconchia;Euhe  
 terodonta;Imparidentia;Venerida;Veneroidea;Veneridae;Mercenaria;Mercenari  
 a mercenaria  
 UdeM00000015069 225164 140.6 UdeM00000015069 XP\_009058199.1 54.5  
 134 54 2 1 134 1 127 1.50E-30 140.6 225164  
 cellular  
 organisms;Eukaryota;Opisthokonta;Metazoa;Eumetazoa;Bilateria;Protostomia;  
 Spiralia;Lophotrochozoa;Mollusca;Gastropoda;Patellogastropoda;Lottioidea;  
 Lottiidae;Lottia;Lottia gigantea  
 UdeM00000015071 6579 390.2 UdeM00000015071 XP\_033752673.1 65.7 277  
 95 0 13 289 376 652 2.30E-105 390.2 6579 cellular  
 organisms;Eukaryota;Opisthokonta;Metazoa;Eumetazoa;Bilateria;Protostomia;  
 Spiralia;Lophotrochozoa;Mollusca;Bivalvia;Autobranhia;Pteriormorphia;Pect  
 inida;Pectinoidea;Pectinidae;Pecten;Pecten maximus  
 UdeM00000015072 7604 453.4 UdeM00000015072 XP\_033641066.1 56.1 378  
 165 1 4 380 3 380 3.00E-124 453.4 7604 cellular  
 organisms;Eukaryota;Opisthokonta;Metazoa;Eumetazoa;Bilateria;Deuterostomi



a;Echinodermata;Eleutherozoa;Asterozoa;Asteroidea;Forcipulatacea;Forcipul  
 atida;Asteriidae;Asterias;Asterias rubens  
 UdeM00000015073 6579 85.9 UdeM00000015073 XP\_033737198.1 38.2 110  
 61 2 20 123 14 122 4.30E-14 85.9 6579 cellular  
 organisms;Eukaryota;Opisthokonta;Metazoa;Eumetazoa;Bilateria;Protostomia;  
 Spiralia;Lophotrochozoa;Mollusca;Bivalvia;Autobranchia;Pteriormorphia;Pect  
 inida;Pectinoidea;Pectinidae;Pecten;Pecten maximus  
 UdeM00000015074 8407 185.3 UdeM00000015074 XP\_040211420.1 42 238  
 134 2 36 271 570 805 1.10E-43 185.3 8407 cellular  
 organisms;Eukaryota;Opisthokonta;Metazoa;Eumetazoa;Bilateria;Deuterostomi  
 a;Chordata;Craniata;Vertebrata;Gnathostomata;Teleostomi;Euteleostomi;Sarc  
 opterygii;Dipnotetrapodomorpha;Tetrapoda;Amphibia;Batrachia;Anura;Neobatr  
 achia;Ranoidea;Ranidae;Rana;Rana;Rana temporaria  
 UdeM00000015075 6573 403.7 UdeM00000015075 XP\_021350898.1 54 372  
 155 7 567 929 338 702 6.60E-109 403.7 6573 cellular  
 organisms;Eukaryota;Opisthokonta;Metazoa;Eumetazoa;Bilateria;Protostomia;  
 Spiralia;Lophotrochozoa;Mollusca;Bivalvia;Autobranchia;Pteriormorphia;Pect  
 inida;Pectinoidea;Pectinidae;Mizuhopecten;Mizuhopecten yessoensis  
 UdeM00000015076 6573 145.2 UdeM00000015076 XP\_021350896.1 54.3 129  
 54 2 567 690 338 466 3.10E-31 145.2 6573 cellular  
 organisms;Eukaryota;Opisthokonta;Metazoa;Eumetazoa;Bilateria;Protostomia;  
 Spiralia;Lophotrochozoa;Mollusca;Bivalvia;Autobranchia;Pteriormorphia;Pect  
 inida;Pectinoidea;Pectinidae;Mizuhopecten;Mizuhopecten yessoensis  
 UdeM00000015077 6573 462.6 UdeM00000015077 XP\_021358642.1 27.8 1358  
 842 38 12 1294 1 1294 1.70E-126 462.6 6573 cellular  
 organisms;Eukaryota;Opisthokonta;Metazoa;Eumetazoa;Bilateria;Protostomia;  
 Spiralia;Lophotrochozoa;Mollusca;Bivalvia;Autobranchia;Pteriormorphia;Pect  
 inida;Pectinoidea;Pectinidae;Mizuhopecten;Mizuhopecten yessoensis  
 UdeM00000015079 6573 79.7 UdeM00000015079 XP\_021339969.1 24.2 372  
 229 15 29 366 900 1252 9.00E-12 79.7 6573 cellular  
 organisms;Eukaryota;Opisthokonta;Metazoa;Eumetazoa;Bilateria;Protostomia;  
 Spiralia;Lophotrochozoa;Mollusca;Bivalvia;Autobranchia;Pteriormorphia;Pect  
 inida;Pectinoidea;Pectinidae;Mizuhopecten;Mizuhopecten yessoensis  
 UdeM00000015080 29159 260 UdeM00000015080 XP\_034316161.1 44.3 291  
 161 1 1 290 718 1008 3.60E-66 260 29159 cellular  
 organisms;Eukaryota;Opisthokonta;Metazoa;Eumetazoa;Bilateria;Protostomia;  
 Spiralia;Lophotrochozoa;Mollusca;Bivalvia;Autobranchia;Pteriormorphia;Ostr  
 eida;Ostreoidea;Ostreidae;Crassostrea;Crassostrea gigas  
 UdeM00000015081 6596 268.9 UdeM00000015081 XP\_045160699.1 71.7 173  
 49 0 8 180 1003 1175 4.80E-69 268.9 6596 cellular  
 organisms;Eukaryota;Opisthokonta;Metazoa;Eumetazoa;Bilateria;Protostomia;  
 Spiralia;Lophotrochozoa;Mollusca;Bivalvia;Autobranchia;Heteroconchia;Euhe  
 terodonta;Imparidentia;Venerida;Veneroidea;Veneridae;Mercenaria;Mercenari  
 a mercenaria  
 UdeM00000015082 6565 139 UdeM00000015082 XP\_022316963.1 34.4 279  
 158 8 9 280 615 875 9.00E-30 139 6565 cellular  
 organisms;Eukaryota;Opisthokonta;Metazoa;Eumetazoa;Bilateria;Protostomia;  
 Spiralia;Lophotrochozoa;Mollusca;Bivalvia;Autobranchia;Pteriormorphia;Ostr  
 eida;Ostreoidea;Ostreidae;Crassostrea;Crassostrea virginica  
 UdeM00000015083 6596 304.3 UdeM00000015083 XP\_045160699.1 32.2 839  
 387 18 39 715 31 849 4.10E-79 304.3 6596 cellular  
 organisms;Eukaryota;Opisthokonta;Metazoa;Eumetazoa;Bilateria;Protostomia;  
 Spiralia;Lophotrochozoa;Mollusca;Bivalvia;Autobranchia;Heteroconchia;Euhe

terodonta;Imparidentia;Venerida;Veneroidea;Veneridae;Mercenaria;Mercenari  
 a mercenaria  
 UdeM00000015084 29159 1057 UdeM00000015084 XP\_011446082.2 79.9 658  
 129 3 1 655 1 658 9.90E-306 1057 29159 cellular  
 organisms;Eukaryota;Opisthokonta;Metazoa;Eumetazoa;Bilateria;Protostomia;  
 Spiralia;Lophotrochozoa;Mollusca;Bivalvia;Autobranchia;Pteriormorphia;Ostr  
 eida;Ostreoidea;Ostreidae;Crassostrea;Crassostrea gigas  
 UdeM00000015085 2652724 60.5 UdeM00000015085 XP\_028512982.1 53.7  
 41 19 0 56 96 887 927 1.50E-06 60.5 2652724  
 cellular  
 organisms;Eukaryota;Opisthokonta;Metazoa;Eumetazoa;Cnidaria;Anthozoa;Hexa  
 corallia;Actiniaria;Aiptasiidae;Exaiptasia;Exaiptasia diaphana  
 UdeM00000015086 6596 188.3 UdeM00000015086 XP\_045160465.1 49.8 247  
 99 8 5 239 6 239 1.10E-44 188.3 6596 cellular  
 organisms;Eukaryota;Opisthokonta;Metazoa;Eumetazoa;Bilateria;Protostomia;  
 Spiralia;Lophotrochozoa;Mollusca;Bivalvia;Autobranchia;Heteroconchia;Euhe  
 terodonta;Imparidentia;Venerida;Veneroidea;Veneridae;Mercenaria;Mercenari  
 a mercenaria  
 UdeM00000015088 6596 193.4 UdeM00000015088 XP\_045160466.1 53.6 222  
 82 4 16 236 15 216 3.40E-46 193.4 6596 cellular  
 organisms;Eukaryota;Opisthokonta;Metazoa;Eumetazoa;Bilateria;Protostomia;  
 Spiralia;Lophotrochozoa;Mollusca;Bivalvia;Autobranchia;Heteroconchia;Euhe  
 terodonta;Imparidentia;Venerida;Veneroidea;Veneridae;Mercenaria;Mercenari  
 a mercenaria  
 UdeM00000015090 6596 222.2 UdeM00000015090 XP\_045158930.1 42.5 301  
 145 6 23 310 30 315 9.10E-55 222.2 6596 cellular  
 organisms;Eukaryota;Opisthokonta;Metazoa;Eumetazoa;Bilateria;Protostomia;  
 Spiralia;Lophotrochozoa;Mollusca;Bivalvia;Autobranchia;Heteroconchia;Euhe  
 terodonta;Imparidentia;Venerida;Veneroidea;Veneridae;Mercenaria;Mercenari  
 a mercenaria  
 UdeM00000015092 6596 481.9 UdeM00000015092 XP\_045158529.1 52.3 482  
 218 5 10 489 8 479 9.80E-133 481.9 6596 cellular  
 organisms;Eukaryota;Opisthokonta;Metazoa;Eumetazoa;Bilateria;Protostomia;  
 Spiralia;Lophotrochozoa;Mollusca;Bivalvia;Autobranchia;Heteroconchia;Euhe  
 terodonta;Imparidentia;Venerida;Veneroidea;Veneridae;Mercenaria;Mercenari  
 a mercenaria  
 UdeM00000015093 6596 453.4 UdeM00000015093 XP\_045158721.1 72.3 300  
 83 0 11 310 7 306 2.40E-124 453.4 6596 cellular  
 organisms;Eukaryota;Opisthokonta;Metazoa;Eumetazoa;Bilateria;Protostomia;  
 Spiralia;Lophotrochozoa;Mollusca;Bivalvia;Autobranchia;Heteroconchia;Euhe  
 terodonta;Imparidentia;Venerida;Veneroidea;Veneridae;Mercenaria;Mercenari  
 a mercenaria  
 UdeM00000015094 6565 219.2 UdeM00000015094 XP\_022314242.1 40.1 659  
 330 18 55 679 1203 1830 1.70E-53 219.2 6565 cellular  
 organisms;Eukaryota;Opisthokonta;Metazoa;Eumetazoa;Bilateria;Protostomia;  
 Spiralia;Lophotrochozoa;Mollusca;Bivalvia;Autobranchia;Pteriormorphia;Ostr  
 eida;Ostreoidea;Ostreidae;Crassostrea;Crassostrea virginica  
 UdeM00000015095 6596 173.3 UdeM00000015095 XP\_045158530.1 32.1 604  
 311 25 283 829 259 820 1.30E-39 173.3 6596 cellular  
 organisms;Eukaryota;Opisthokonta;Metazoa;Eumetazoa;Bilateria;Protostomia;  
 Spiralia;Lophotrochozoa;Mollusca;Bivalvia;Autobranchia;Heteroconchia;Euhe  
 terodonta;Imparidentia;Venerida;Veneroidea;Veneridae;Mercenaria;Mercenari  
 a mercenaria

UdeM00000015096 6596 170.6 UdeM00000015096 XP\_045160769.1 48.2 222  
 85 5 33 237 238 446 2.40E-39 170.6 6596 cellular  
 organisms;Eukaryota;Opisthokonta;Metazoa;Eumetazoa;Bilateria;Protostomia;  
 Spiralia;Lophotrochozoa;Mollusca;Bivalvia;Autobranchia;Heteroconchia;Euhe  
 terodonta;Imparidentia;Venerida;Veneroidea;Veneridae;Mercenaria;Mercenari  
 a mercenaria  
 UdeM00000015097 6596 89 UdeM00000015097 XP\_045160769.1 78 50  
 11 0 28 77 10 59 2.90E-15 89 6596 cellular  
 organisms;Eukaryota;Opisthokonta;Metazoa;Eumetazoa;Bilateria;Protostomia;  
 Spiralia;Lophotrochozoa;Mollusca;Bivalvia;Autobranchia;Heteroconchia;Euhe  
 terodonta;Imparidentia;Venerida;Veneroidea;Veneridae;Mercenaria;Mercenari  
 a mercenaria  
 UdeM00000015099 6565 277.3 UdeM00000015099 XP\_022286943.1 53.1 254  
 101 3 2 243 77 324 1.90E-71 277.3 6565 cellular  
 organisms;Eukaryota;Opisthokonta;Metazoa;Eumetazoa;Bilateria;Protostomia;  
 Spiralia;Lophotrochozoa;Mollusca;Bivalvia;Autobranchia;Pteriormorphia;Ostr  
 eida;Ostreoidea;Ostreidae;Crassostrea;Crassostrea virginica  
 UdeM00000015100 29159 198 UdeM00000015100 XP\_034311711.1 51.1 188  
 89 3 1 185 1 188 1.10E-47 198 29159 cellular  
 organisms;Eukaryota;Opisthokonta;Metazoa;Eumetazoa;Bilateria;Protostomia;  
 Spiralia;Lophotrochozoa;Mollusca;Bivalvia;Autobranchia;Pteriormorphia;Ostr  
 eida;Ostreoidea;Ostreidae;Crassostrea;Crassostrea gigas  
 UdeM00000015101 6579 203.4 UdeM00000015101 XP\_033738981.1 56.8 155  
 61 2 148 297 107 260 4.10E-49 203.4 6579 cellular  
 organisms;Eukaryota;Opisthokonta;Metazoa;Eumetazoa;Bilateria;Protostomia;  
 Spiralia;Lophotrochozoa;Mollusca;Bivalvia;Autobranchia;Pteriormorphia;Pect  
 inida;Pectinoidea;Pectinidae;Pecten;Pecten maximus  
 UdeM00000015102 6579 233 UdeM00000015102 XP\_033738981.1 56.1 180  
 73 2 132 306 82 260 5.00E-58 233 6579 cellular  
 organisms;Eukaryota;Opisthokonta;Metazoa;Eumetazoa;Bilateria;Protostomia;  
 Spiralia;Lophotrochozoa;Mollusca;Bivalvia;Autobranchia;Pteriormorphia;Pect  
 inida;Pectinoidea;Pectinidae;Pecten;Pecten maximus  
 UdeM00000015103 6596 736.1 UdeM00000015103 XP\_045160528.1 72.9 532  
 141 1 1 529 1 532 3.10E-209 736.1 6596 cellular  
 organisms;Eukaryota;Opisthokonta;Metazoa;Eumetazoa;Bilateria;Protostomia;  
 Spiralia;Lophotrochozoa;Mollusca;Bivalvia;Autobranchia;Heteroconchia;Euhe  
 terodonta;Imparidentia;Venerida;Veneroidea;Veneridae;Mercenaria;Mercenari  
 a mercenaria  
 UdeM00000015104 1735272 488.8 UdeM00000015104 XP\_041358382.1 80.1  
 312 62 0 9 320 18 329 5.30E-135 488.8 1735272  
 cellular  
 organisms;Eukaryota;Opisthokonta;Metazoa;Eumetazoa;Bilateria;Protostomia;  
 Spiralia;Lophotrochozoa;Mollusca;Gastropoda;Neomphalina;Neomphaloidea;Pel  
 tospiridae;Gigantopelta;Gigantopelta aegis  
 UdeM00000015105 1735272 226.1 UdeM00000015105 XP\_041358380.1 73.4  
 177 47 0 9 185 18 194 3.80E-56 226.1 1735272  
 cellular  
 organisms;Eukaryota;Opisthokonta;Metazoa;Eumetazoa;Bilateria;Protostomia;  
 Spiralia;Lophotrochozoa;Mollusca;Gastropoda;Neomphalina;Neomphaloidea;Pel  
 tospiridae;Gigantopelta;Gigantopelta aegis  
 UdeM00000015106 6596 120.6 UdeM00000015106 XP\_045161009.1 33.6 286  
 125 5 8 229 129 413 2.70E-24 120.6 6596 cellular  
 organisms;Eukaryota;Opisthokonta;Metazoa;Eumetazoa;Bilateria;Protostomia;  
 Spiralia;Lophotrochozoa;Mollusca;Bivalvia;Autobranchia;Heteroconchia;Euhe

terodonta;Imparidentia;Venerida;Veneroidea;Veneridae;Mercenaria;Mercenaria mercenaria  
 UdeM00000015107 6596 112.5 UdeM00000015107 XP\_045161009.1 34.9 238  
 109 3 6 198 177 413 6.40E-22 112.5 6596 cellular  
 organisms;Eukaryota;Opisthokonta;Metazoa;Eumetazoa;Bilateria;Protostomia;  
 Spiralia;Lophotrochozoa;Mollusca;Bivalvia;Autobranchia;Heteroconchia;Euhe  
 terodonta;Imparidentia;Venerida;Veneroidea;Veneridae;Mercenaria;Mercenari  
 a mercenaria  
 UdeM00000015109 6596 422.9 UdeM00000015109 XP\_045160393.1 52.5 381  
 181 0 18 398 10 390 4.50E-115 422.9 6596 cellular  
 organisms;Eukaryota;Opisthokonta;Metazoa;Eumetazoa;Bilateria;Protostomia;  
 Spiralia;Lophotrochozoa;Mollusca;Bivalvia;Autobranchia;Heteroconchia;Euhe  
 terodonta;Imparidentia;Venerida;Veneroidea;Veneridae;Mercenaria;Mercenari  
 a mercenaria  
 UdeM00000015110 6596 417.9 UdeM00000015110 XP\_045161008.1 49.7 390  
 193 3 19 406 23 411 1.50E-113 417.9 6596 cellular  
 organisms;Eukaryota;Opisthokonta;Metazoa;Eumetazoa;Bilateria;Protostomia;  
 Spiralia;Lophotrochozoa;Mollusca;Bivalvia;Autobranchia;Heteroconchia;Euhe  
 terodonta;Imparidentia;Venerida;Veneroidea;Veneridae;Mercenaria;Mercenari  
 a mercenaria  
 UdeM00000015111 1735272 907.1 UdeM00000015111 XP\_041359629.1 62.3  
 732 252 10 1 712 241 968 1.40E-260 907.1 1735272  
 cellular  
 organisms;Eukaryota;Opisthokonta;Metazoa;Eumetazoa;Bilateria;Protostomia;  
 Spiralia;Lophotrochozoa;Mollusca;Gastropoda;Neomphalina;Neomphaloidea;Pel  
 tospiridae;Gigantopelta;Gigantopelta aegis  
 UdeM00000015112 27687 276.6 UdeM00000015112 XP\_028659128.1 62.1 214  
 79 1 2 215 64 275 2.80E-71 276.6 27687 cellular  
 organisms;Eukaryota;Opisthokonta;Metazoa;Eumetazoa;Bilateria;Deuterostomi  
 a;Chordata;Craniata;Vertebrata;Gnathostomata;Teleostomi;Euteleostomi;Acti  
 nopterygii;Cladistia;Polypteriformes;Polypteridae;Erpetoichthys;Erpetoich  
 thys calabaricus  
 UdeM00000015113 6565 137.1 UdeM00000015113 XP\_022345797.1 56.1 114  
 49 1 109 221 16 129 2.80E-29 137.1 6565 cellular  
 organisms;Eukaryota;Opisthokonta;Metazoa;Eumetazoa;Bilateria;Protostomia;  
 Spiralia;Lophotrochozoa;Mollusca;Bivalvia;Autobranchia;Pteriormorphia;Ostr  
 eida;Ostreoidea;Ostreidae;Crassostrea;Crassostrea virginica  
 UdeM00000015114 37621 65.1 UdeM00000015114 XP\_014678447.1 29.7 145  
 96 4 11 152 64 205 9.60E-08 65.1 37621 cellular  
 organisms;Eukaryota;Opisthokonta;Metazoa;Eumetazoa;Bilateria;Protostomia;  
 Ecdysozoa;Scalidophora;Priapulida;Priapulimorpha;Priapulimorphida;Priapul  
 idae;Priapululus;Priapululus caudatus  
 UdeM00000015119 29159 223 UdeM00000015119 XP\_034317111.1 57.3 178  
 71 1 1 173 1 178 3.10E-55 223 29159 cellular  
 organisms;Eukaryota;Opisthokonta;Metazoa;Eumetazoa;Bilateria;Protostomia;  
 Spiralia;Lophotrochozoa;Mollusca;Bivalvia;Autobranchia;Pteriormorphia;Ostr  
 eida;Ostreoidea;Ostreidae;Crassostrea;Crassostrea gigas  
 UdeM00000015121 6579 169.1 UdeM00000015121 XP\_033737071.1 53.4 133  
 62 0 12 144 9 141 4.50E-39 169.1 6579 cellular  
 organisms;Eukaryota;Opisthokonta;Metazoa;Eumetazoa;Bilateria;Protostomia;  
 Spiralia;Lophotrochozoa;Mollusca;Bivalvia;Autobranchia;Pteriormorphia;Pect  
 inida;Pectinoidea;Pectinidae;Pecten;Pecten maximus  
 UdeM00000015122 6596 220.3 UdeM00000015122 XP\_045158310.1 80 135  
 27 0 15 149 334 468 1.70E-54 220.3 6596 cellular

organisms;Eukaryota;Opisthokonta;Metazoa;Eumetazoa;Bilateria;Protostomia;Spiralia;Lophotrochozoa;Mollusca;Bivalvia;Autobranchia;Heteroconchia;Euherodonta;Imparidentia;Venerida;Veneroidea;Veneridae;Mercenaria;Mercenaria mercenaria

UdeM00000015123 6596 164.9 UdeM00000015123 XP\_045158310.1 39.5 314  
138 8 1 272 1 304 1.60E-37 164.9 6596 cellular

organisms;Eukaryota;Opisthokonta;Metazoa;Eumetazoa;Bilateria;Protostomia;Spiralia;Lophotrochozoa;Mollusca;Bivalvia;Autobranchia;Heteroconchia;Euherodonta;Imparidentia;Venerida;Veneroidea;Veneridae;Mercenaria;Mercenaria mercenaria

UdeM00000015124 6596 1151.7 UdeM00000015124 XP\_045158306.1 86.9  
632 76 3 1 628 1 629 0.00E+00 1151.7 6596  
cellular

organisms;Eukaryota;Opisthokonta;Metazoa;Eumetazoa;Bilateria;Protostomia;Spiralia;Lophotrochozoa;Mollusca;Bivalvia;Autobranchia;Heteroconchia;Euherodonta;Imparidentia;Venerida;Veneroidea;Veneridae;Mercenaria;Mercenaria mercenaria

UdeM00000015125 6596 685.6 UdeM00000015125 XP\_045158306.1 89.7 379  
35 1 1 375 632 1010 3.40E-194 685.6 6596 cellular

organisms;Eukaryota;Opisthokonta;Metazoa;Eumetazoa;Bilateria;Protostomia;Spiralia;Lophotrochozoa;Mollusca;Bivalvia;Autobranchia;Heteroconchia;Euherodonta;Imparidentia;Venerida;Veneroidea;Veneridae;Mercenaria;Mercenaria mercenaria

UdeM00000015126 6526 394.4 UdeM00000015126 XP\_013083928.1 80.9 340  
48 1 25 364 60 382 1.60E-106 394.4 6526 cellular

organisms;Eukaryota;Opisthokonta;Metazoa;Eumetazoa;Bilateria;Protostomia;Spiralia;Lophotrochozoa;Mollusca;Gastropoda;Heterobranchia;Euthyneura;Planorbata;Hygrophila;Lymnaeidae;Planorbidae;Biomphalaria;Biomphalaria glabrata

UdeM00000015127 29159 425.6 UdeM00000015127 XP\_011429265.1 63.3 319  
113 2 8 323 110 427 5.50E-116 425.6 29159 cellular

organisms;Eukaryota;Opisthokonta;Metazoa;Eumetazoa;Bilateria;Protostomia;Spiralia;Lophotrochozoa;Mollusca;Bivalvia;Autobranchia;Pteriomorpha;Ostreida;Ostreidae;Crassostrea;Crassostrea gigas

UdeM00000015128 189513 95.9 UdeM00000015128 XP\_044737889.1 32.1  
184 120 3 245 427 109 288 1.80E-16 95.9 189513  
cellular

organisms;Eukaryota;Opisthokonta;Metazoa;Eumetazoa;Bilateria;Protostomia;Ecdysozoa;Panarthropoda;Arthropoda;Mandibulata;Pancrustacea;Hexapoda;Insecta;Dicondylia;Pterygota;Neoptera;Endopterygota;Neuropterida;Neoptera;Hemerobiiiformia;Chrysopidae;Chrysopinae;Chrysoperla;Chrysoperla carnea

UdeM00000015129 6596 133.7 UdeM00000015129 XP\_045180427.1 40.9 274  
120 5 1 233 1 273 3.30E-28 133.7 6596 cellular

organisms;Eukaryota;Opisthokonta;Metazoa;Eumetazoa;Bilateria;Protostomia;Spiralia;Lophotrochozoa;Mollusca;Bivalvia;Autobranchia;Heteroconchia;Euherodonta;Imparidentia;Venerida;Veneroidea;Veneridae;Mercenaria;Mercenaria mercenaria

UdeM00000015131 6565 60.8 UdeM00000015131 XP\_022305768.1 46.3 54  
29 0 84 137 7 60 2.00E-06 60.8 6565 cellular

organisms;Eukaryota;Opisthokonta;Metazoa;Eumetazoa;Bilateria;Protostomia;Spiralia;Lophotrochozoa;Mollusca;Bivalvia;Autobranchia;Pteriomorpha;Ostreida;Ostreidae;Crassostrea;Crassostrea virginica

UdeM00000015132 28377 85.5 UdeM00000015132 XP\_003220754.1 50.7 73  
35 1 155 226 179 251 9.90E-14 85.5 28377 cellular

organisms;Eukaryota;Opisthokonta;Metazoa;Eumetazoa;Bilateria;Deuterostomi  
a;Chordata;Craniata;Vertebrata;Gnathostomata;Teleostomi;Euteleostomi;Sarc  
opterygii;Dipnotetrapodomorpha;Tetrapoda;Amniota;Sauropsida;Sauria;Lepido  
sauria;Squamata;Bifurcata;Unidentata;Episquamata;Toxicofera;Iguania;Dacty  
loidae;Anolis;Anolis carolinensis

UdeM00000015133 6573 246.9 UdeM00000015133 XP\_021378082.1 66.9 175  
58 0 7 181 30 204 3.60E-62 246.9 6573 cellular

organisms;Eukaryota;Opisthokonta;Metazoa;Eumetazoa;Bilateria;Protostomia;  
Spiralia;Lophotrochozoa;Mollusca;Bivalvia;Autobranchia;Pteriormorphia;Pect  
inida;Pectinoidea;Pectinidae;Mizuhopecten;Mizuhopecten yessoensis

UdeM00000015134 6579 542.7 UdeM00000015134 XP\_033738649.1 58.6 454  
173 4 22 463 1 451 4.50E-151 542.7 6579 cellular

organisms;Eukaryota;Opisthokonta;Metazoa;Eumetazoa;Bilateria;Protostomia;  
Spiralia;Lophotrochozoa;Mollusca;Bivalvia;Autobranchia;Pteriormorphia;Pect  
inida;Pectinoidea;Pectinidae;Pecten;Pecten maximus

UdeM00000015135 6596 226.9 UdeM00000015135 XP\_045189070.1 33.3 481  
236 13 2 401 1 477 4.70E-56 226.9 6596 cellular

organisms;Eukaryota;Opisthokonta;Metazoa;Eumetazoa;Bilateria;Protostomia;  
Spiralia;Lophotrochozoa;Mollusca;Bivalvia;Autobranchia;Heteroconchia;Euhe  
terodonta;Imparidentia;Venerida;Veneroidea;Veneridae;Mercenaria;Mercenari  
a mercenaria

UdeM00000015136 6579 657.9 UdeM00000015136 XP\_033738649.1 66.7 472  
149 3 1 472 1 464 9.80E-186 657.9 6579 cellular

organisms;Eukaryota;Opisthokonta;Metazoa;Eumetazoa;Bilateria;Protostomia;  
Spiralia;Lophotrochozoa;Mollusca;Bivalvia;Autobranchia;Pteriormorphia;Pect  
inida;Pectinoidea;Pectinidae;Pecten;Pecten maximus

UdeM00000015138 7574 170.6 UdeM00000015138 XP\_013395993.1 50.3 167  
76 3 168 328 238 403 3.50E-39 170.6 7574 cellular

organisms;Eukaryota;Opisthokonta;Metazoa;Eumetazoa;Bilateria;Protostomia;  
Spiralia;Lophotrochozoa;Brachiopoda;Linguliformea;Lingulata;Lingulida;Lin  
guloidea;Lingulidae;Lingula;Lingula anatina

UdeM00000015139 6573 197.2 UdeM00000015139 XP\_021378088.1 38.3 392  
184 13 33 405 15 367 4.30E-47 197.2 6573 cellular

organisms;Eukaryota;Opisthokonta;Metazoa;Eumetazoa;Bilateria;Protostomia;  
Spiralia;Lophotrochozoa;Mollusca;Bivalvia;Autobranchia;Pteriormorphia;Pect  
inida;Pectinoidea;Pectinidae;Mizuhopecten;Mizuhopecten yessoensis

UdeM00000015141 400727 339.3 UdeM00000015141 XP\_025111233.1 59.2  
282 106 1 19 300 5 277 4.90E-90 339.3 400727  
cellular

organisms;Eukaryota;Opisthokonta;Metazoa;Eumetazoa;Bilateria;Protostomia;  
Spiralia;Lophotrochozoa;Mollusca;Gastropoda;Caenogastropoda;Architaeniogl  
ossa;Ampullarioidea;Ampullariidae;Pomacea;Pomacea canaliculata

UdeM00000015142 400727 546.2 UdeM00000015142 XP\_025111406.1 62.9  
448 150 4 9 443 61 505 3.80E-152 546.2 400727  
cellular

organisms;Eukaryota;Opisthokonta;Metazoa;Eumetazoa;Bilateria;Protostomia;  
Spiralia;Lophotrochozoa;Mollusca;Gastropoda;Caenogastropoda;Architaeniogl  
ossa;Ampullarioidea;Ampullariidae;Pomacea;Pomacea canaliculata

UdeM00000015143 6596 1101.3 UdeM00000015143 XP\_045160463.1 78.5  
687 146 1 1 687 1 685 0.00E+00 1101.3 6596  
cellular

organisms;Eukaryota;Opisthokonta;Metazoa;Eumetazoa;Bilateria;Protostomia;  
Spiralia;Lophotrochozoa;Mollusca;Bivalvia;Autobranchia;Heteroconchia;Euhe

terodonta;Imparidentia;Venerida;Veneroidea;Veneridae;Mercenaria;Mercenaria  
 a mercenaria  
 UdeM00000015144 29159 191 UdeM00000015144 XP\_034312721.1 72.8 136  
 36 1 1 136 120 254 9.70E-46 191 29159 cellular  
 organisms;Eukaryota;Opisthokonta;Metazoa;Eumetazoa;Bilateria;Protostomia;  
 Spiralia;Lophotrochozoa;Mollusca;Bivalvia;Autobranhia;Pteriormorphia;Ostr  
 eida;Ostreoidea;Ostreidae;Crassostrea;Crassostrea gigas  
 UdeM00000015145 6573 379.4 UdeM00000015145 XP\_021362266.1 74.5 255  
 64 1 1 255 1 254 3.60E-102 379.4 6573 cellular  
 organisms;Eukaryota;Opisthokonta;Metazoa;Eumetazoa;Bilateria;Protostomia;  
 Spiralia;Lophotrochozoa;Mollusca;Bivalvia;Autobranhia;Pteriormorphia;Pect  
 inida;Pectinoidea;Pectinidae;Mizuhopecten;Mizuhopecten yessoensis  
 UdeM00000015146 29159 758.1 UdeM00000015146 XP\_011444815.1 98.1 376  
 7 0 1 376 1 376 5.50E-216 758.1 29159 cellular  
 organisms;Eukaryota;Opisthokonta;Metazoa;Eumetazoa;Bilateria;Protostomia;  
 Spiralia;Lophotrochozoa;Mollusca;Bivalvia;Autobranhia;Pteriormorphia;Ostr  
 eida;Ostreoidea;Ostreidae;Crassostrea;Crassostrea gigas  
 UdeM00000015147 6565 74.7 UdeM00000015147 XP\_022287659.1 45.3 86  
 39 2 14 92 147 231 9.40E-11 74.7 6565 cellular  
 organisms;Eukaryota;Opisthokonta;Metazoa;Eumetazoa;Bilateria;Protostomia;  
 Spiralia;Lophotrochozoa;Mollusca;Bivalvia;Autobranhia;Pteriormorphia;Ostr  
 eida;Ostreoidea;Ostreidae;Crassostrea;Crassostrea virginica  
 UdeM00000015148 7668 149.4 UdeM00000015148 XP\_003729577.2 58.9 107  
 44 0 9 115 712 818 3.10E-33 149.4 7668 cellular  
 organisms;Eukaryota;Opisthokonta;Metazoa;Eumetazoa;Bilateria;Deuterostomi  
 a;Echinodermata;Eleutherozoa;Echinozoa;Echinoidea;Euechinoidea;Echinacea;  
 Camarodonta;Echinidea;Strongylocentrotidae;Strongylocentrotus;Strongyloce  
 ntrotus purpuratus  
 UdeM00000015149 72105 701.8 UdeM00000015149 XP\_037633840.1 91.2 374  
 33 0 4 377 2 375 4.70E-199 701.8 72105 cellular  
 organisms;Eukaryota;Opisthokonta;Metazoa;Eumetazoa;Bilateria;Deuterostomi  
 a;Chordata;Craniata;Vertebrata;Gnathostomata;Teleostomi;Euteleostomi;Acti  
 nopterygii;Actinopteri;Neopterygii;Teleostei;Osteoglossocephalai;Clupeoce  
 phala;Euteleosteomorpha;Neoteleostei;Eurypterygia;Ctenosquamata;Acanthomo  
 rphata;Euacanthomorphacea;Percomorphaceae;Eupercaria;Perciformes;Scorpaen  
 oidei;Sebastidae;Sebastinae;Sebastes;Sebastes umbrosus  
 UdeM00000015150 6565 572.4 UdeM00000015150 XP\_022325998.1 86.7 332  
 17 1 1 305 45 376 3.50E-160 572.4 6565 cellular  
 organisms;Eukaryota;Opisthokonta;Metazoa;Eumetazoa;Bilateria;Protostomia;  
 Spiralia;Lophotrochozoa;Mollusca;Bivalvia;Autobranhia;Pteriormorphia;Ostr  
 eida;Ostreoidea;Ostreidae;Crassostrea;Crassostrea virginica  
 UdeM00000015151 37621 400.6 UdeM00000015151 XP\_014672567.1 45.8 421  
 212 5 1 408 101 518 2.70E-108 400.6 37621 cellular  
 organisms;Eukaryota;Opisthokonta;Metazoa;Eumetazoa;Bilateria;Protostomia;  
 Ecdysozoa;Scalidophora;Priapulida;Priapulimorpha;Priapulimorphida;Priapul  
 idae;Priapulid;Priapulid caudatus  
 UdeM00000015152 37621 106.3 UdeM00000015152 XP\_014672570.1 64.9 74  
 26 0 3 76 47 120 1.80E-20 106.3 37621 cellular  
 organisms;Eukaryota;Opisthokonta;Metazoa;Eumetazoa;Bilateria;Protostomia;  
 Ecdysozoa;Scalidophora;Priapulida;Priapulimorpha;Priapulimorphida;Priapul  
 idae;Priapulid;Priapulid caudatus  
 UdeM00000015153 45351 754.6 UdeM00000015153 XP\_001621292.2 98.1 374  
 7 0 4 377 3 376 6.10E-215 754.6 45351 cellular

organisms;Eukaryota;Opisthokonta;Metazoa;Eumetazoa;Cnidaria;Anthozoa;Hexa  
corallia;Actiniaria;Edwardsiidae;Nematostella;Nematostella vectensis  
UdeM00000015154 6573 344.7 UdeM00000015154 XP\_021364592.1 51.3 347  
161 4 1 339 131 477 1.30E-91 344.7 6573 cellular  
organisms;Eukaryota;Opisthokonta;Metazoa;Eumetazoa;Bilateria;Protostomia;  
Spiralia;Lophotrochozoa;Mollusca;Bivalvia;Autobranchia;Pteriormorphia;Pect  
inida;Pectinoidea;Pectinidae;Mizuhopecten;Mizuhopecten yessoensis  
UdeM00000015155 6596 137.9 UdeM00000015155 XP\_045157283.1 62.1 103  
39 0 1 103 486 588 7.40E-30 137.9 6596 cellular  
organisms;Eukaryota;Opisthokonta;Metazoa;Eumetazoa;Bilateria;Protostomia;  
Spiralia;Lophotrochozoa;Mollusca;Bivalvia;Autobranchia;Heteroconchia;Euhe  
terodonta;Imparidentia;Venerida;Veneroidea;Veneridae;Mercenaria;Mercenari  
a mercenaria  
UdeM00000015156 6596 599.7 UdeM00000015156 XP\_045160659.1 52.8 580  
270 3 11 587 10 588 3.90E-168 599.7 6596 cellular  
organisms;Eukaryota;Opisthokonta;Metazoa;Eumetazoa;Bilateria;Protostomia;  
Spiralia;Lophotrochozoa;Mollusca;Bivalvia;Autobranchia;Heteroconchia;Euhe  
terodonta;Imparidentia;Venerida;Veneroidea;Veneridae;Mercenaria;Mercenari  
a mercenaria  
UdeM00000015157 6596 591.7 UdeM00000015157 XP\_045160659.1 51.6 579  
278 1 11 587 10 588 1.10E-165 591.7 6596 cellular  
organisms;Eukaryota;Opisthokonta;Metazoa;Eumetazoa;Bilateria;Protostomia;  
Spiralia;Lophotrochozoa;Mollusca;Bivalvia;Autobranchia;Heteroconchia;Euhe  
terodonta;Imparidentia;Venerida;Veneroidea;Veneridae;Mercenaria;Mercenari  
a mercenaria  
UdeM00000015158 6239 756.9 UdeM00000015158 NP\_001370033.1 97.9 376  
8 0 1 376 1 376 1.20E-215 756.9 6239 cellular  
organisms;Eukaryota;Opisthokonta;Metazoa;Eumetazoa;Bilateria;Protostomia;  
Ecdysozoa;Nematoda;Chromadorea;Rhabditida;Rhabditina;Rhabditomorpha;Rhabd  
itoidea;Rhabditidae;Peloderinae;Caenorhabditis;Caenorhabditis elegans  
UdeM00000015160 50390 308.9 UdeM00000015160 XP\_028154228.1 61.6 203  
78 0 1 203 430 632 4.80E-81 308.9 50390 cellular  
organisms;Eukaryota;Opisthokonta;Metazoa;Eumetazoa;Bilateria;Protostomia;  
Ecdysozoa;Panarthropoda;Arthropoda;Mandibulata;Pancrustacea;Hexapoda;Inse  
cta;Dicondylia;Pterygota;Neoptera;Endopterygota;Coleoptera;Polyphaga;Cucu  
jiformia;Chrysomeloidea;Chrysomelidae;Galerucinae;Luperini;Diabroticina;D  
iabroticites;Diabrotica;Diabrotica virgifera;Diabrotica virgifera  
virgifera  
UdeM00000015161 6579 225.7 UdeM00000015161 XP\_033737173.1 43.3 252  
143 0 78 329 24 275 1.00E-55 225.7 6579 cellular  
organisms;Eukaryota;Opisthokonta;Metazoa;Eumetazoa;Bilateria;Protostomia;  
Spiralia;Lophotrochozoa;Mollusca;Bivalvia;Autobranchia;Pteriormorphia;Pect  
inida;Pectinoidea;Pectinidae;Pecten;Pecten maximus  
UdeM00000015162 29159 187.2 UdeM00000015162 XP\_034314559.1 43.8 242  
98 4 96 303 34 271 3.60E-44 187.2 29159 cellular  
organisms;Eukaryota;Opisthokonta;Metazoa;Eumetazoa;Bilateria;Protostomia;  
Spiralia;Lophotrochozoa;Mollusca;Bivalvia;Autobranchia;Pteriormorphia;Ostr  
eida;Ostreoidea;Ostreidae;Crassostrea;Crassostrea gigas  
UdeM00000015163 6565 194.9 UdeM00000015163 XP\_022319115.1 42.4 255  
109 4 10 230 21 271 1.40E-46 194.9 6565 cellular  
organisms;Eukaryota;Opisthokonta;Metazoa;Eumetazoa;Bilateria;Protostomia;  
Spiralia;Lophotrochozoa;Mollusca;Bivalvia;Autobranchia;Pteriormorphia;Ostr  
eida;Ostreoidea;Ostreidae;Crassostrea;Crassostrea virginica



UdeM00000015164 6579 223.8 UdeM00000015164 XP\_033737173.1 43.3 252  
 143 0 59 310 24 275 3.60E-55 223.8 6579 cellular  
 organisms;Eukaryota;Opisthokonta;Metazoa;Eumetazoa;Bilateria;Protostomia;  
 Spiralia;Lophotrochozoa;Mollusca;Bivalvia;Autobranhia;Pteriormorphia;Pect  
 inida;Pectinoidea;Pectinidae;Pecten;Pecten maximus  
 UdeM00000015165 6573 251.9 UdeM00000015165 XP\_021360451.1 44.1 290  
 134 5 17 294 30 303 1.10E-63 251.9 6573 cellular  
 organisms;Eukaryota;Opisthokonta;Metazoa;Eumetazoa;Bilateria;Protostomia;  
 Spiralia;Lophotrochozoa;Mollusca;Bivalvia;Autobranhia;Pteriormorphia;Pect  
 inida;Pectinoidea;Pectinidae;Mizuhopecten;Mizuhopecten yessoensis  
 UdeM00000015169 1529436 262.7 UdeM00000015169 XP\_033103324.1 38.9  
 393 203 11 24 408 4 367 1.30E-66 262.7 1529436  
 cellular  
 organisms;Eukaryota;Opisthokonta;Metazoa;Eumetazoa;Bilateria;Deuterostomi  
 a;Echinodermata;Pelmatozoa;Crinoidea;Articulata;Comatulida;Comatulidae;Co  
 matulinae;Anneissia;Anneissia japonica  
 UdeM00000015170 6596 900.2 UdeM00000015170 XP\_045209208.1 35.9 1623  
 834 37 6 1492 1202 2754 3.80E-258 900.2 6596 cellular  
 organisms;Eukaryota;Opisthokonta;Metazoa;Eumetazoa;Bilateria;Protostomia;  
 Spiralia;Lophotrochozoa;Mollusca;Bivalvia;Autobranhia;Heteroconchia;Euhe  
 terodonta;Imparidentia;Venerida;Veneroidea;Veneridae;Mercenaria;Mercenari  
 a mercenaria  
 UdeM00000015172 400727 659.4 UdeM00000015172 XP\_025110416.1 61.4  
 484 181 1 17 494 13 496 3.70E-186 659.4 400727  
 cellular  
 organisms;Eukaryota;Opisthokonta;Metazoa;Eumetazoa;Bilateria;Protostomia;  
 Spiralia;Lophotrochozoa;Mollusca;Gastropoda;Caenogastropoda;Architaeniogl  
 ossa;Ampullarioidea;Ampullariidae;Pomacea;Pomacea canaliculata  
 UdeM00000015173 6596 702.2 UdeM00000015173 XP\_045159805.1 36.1 1188  
 696 25 99 1238 58 1230 1.20E-198 702.2 6596 cellular  
 organisms;Eukaryota;Opisthokonta;Metazoa;Eumetazoa;Bilateria;Protostomia;  
 Spiralia;Lophotrochozoa;Mollusca;Bivalvia;Autobranhia;Heteroconchia;Euhe  
 terodonta;Imparidentia;Venerida;Veneroidea;Veneridae;Mercenaria;Mercenari  
 a mercenaria  
 UdeM00000015174 6579 196.4 UdeM00000015174 XP\_033738514.1 43.6 202  
 113 1 69 270 74 274 5.40E-47 196.4 6579 cellular  
 organisms;Eukaryota;Opisthokonta;Metazoa;Eumetazoa;Bilateria;Protostomia;  
 Spiralia;Lophotrochozoa;Mollusca;Bivalvia;Autobranhia;Pteriormorphia;Pect  
 inida;Pectinoidea;Pectinidae;Pecten;Pecten maximus  
 UdeM00000015175 6596 229.6 UdeM00000015175 XP\_045165694.1 65.1 166  
 39 1 1 147 138 303 2.70E-57 229.6 6596 cellular  
 organisms;Eukaryota;Opisthokonta;Metazoa;Eumetazoa;Bilateria;Protostomia;  
 Spiralia;Lophotrochozoa;Mollusca;Bivalvia;Autobranhia;Heteroconchia;Euhe  
 terodonta;Imparidentia;Venerida;Veneroidea;Veneridae;Mercenaria;Mercenari  
 a mercenaria  
 UdeM00000015176 6596 128.3 UdeM00000015176 XP\_045165694.1 65.6 96  
 33 0 6 101 3 98 5.70E-27 128.3 6596 cellular  
 organisms;Eukaryota;Opisthokonta;Metazoa;Eumetazoa;Bilateria;Protostomia;  
 Spiralia;Lophotrochozoa;Mollusca;Bivalvia;Autobranhia;Heteroconchia;Euhe  
 terodonta;Imparidentia;Venerida;Veneroidea;Veneridae;Mercenaria;Mercenari  
 a mercenaria  
 UdeM00000015177 6579 193.7 UdeM00000015177 XP\_033738514.1 43.7 199  
 111 1 52 250 74 271 3.30E-46 193.7 6579 cellular  
 organisms;Eukaryota;Opisthokonta;Metazoa;Eumetazoa;Bilateria;Protostomia;

Spiralia; Lophotrochozoa; Mollusca; Bivalvia; Autobranchia; Pteriomorpha; Pectinida; Pectinoidea; Pectinidae; Pecten; Pecten maximus  
UdeM00000015178 6596 429.5 UdeM00000015178 XP\_045165694.1 69 303  
92 1 6 308 3 303 3.70E-117 429.5 6596 cellular  
organisms; Eukaryota; Opisthokonta; Metazoa; Eumetazoa; Bilateria; Protostomia; Spiralia; Lophotrochozoa; Mollusca; Bivalvia; Autobranchia; Heteroconchia; Euheterodonta; Imparidentia; Venerida; Veneroidea; Veneridae; Mercenaria; Mercenaria mercenaria  
UdeM00000015179 6573 318.5 UdeM00000015179 XP\_021359594.1 60 455  
146 12 1 428 1 446 1.30E-83 318.5 6573 cellular  
organisms; Eukaryota; Opisthokonta; Metazoa; Eumetazoa; Bilateria; Protostomia; Spiralia; Lophotrochozoa; Mollusca; Bivalvia; Autobranchia; Pteriomorpha; Pectinida; Pectinoidea; Pectinidae; Mizuhopecten; Mizuhopecten yessoensis  
UdeM00000015180 6565 94.7 UdeM00000015180 XP\_022313566.1 55.1 78  
34 1 1 78 36 112 1.10E-16 94.7 6565 cellular  
organisms; Eukaryota; Opisthokonta; Metazoa; Eumetazoa; Bilateria; Protostomia; Spiralia; Lophotrochozoa; Mollusca; Bivalvia; Autobranchia; Pteriomorpha; Ostracida; Ostreidae; Crassostrea; Crassostrea virginica  
UdeM00000015181 400727 141.4 UdeM00000015181 XP\_025111142.1 68.8  
93 28 1 9 101 11 102 1.20E-30 141.4 400727  
cellular  
organisms; Eukaryota; Opisthokonta; Metazoa; Eumetazoa; Bilateria; Protostomia; Spiralia; Lophotrochozoa; Mollusca; Gastropoda; Caenogastropoda; Architaenioglossa; Ampullarioidea; Ampullariidae; Pomacea; Pomacea canaliculata  
UdeM00000015182 6565 775 UdeM00000015182 XP\_022319867.1 64.5 650  
165 6 128 768 126 718 8.80E-221 775 6565 cellular  
organisms; Eukaryota; Opisthokonta; Metazoa; Eumetazoa; Bilateria; Protostomia; Spiralia; Lophotrochozoa; Mollusca; Bivalvia; Autobranchia; Pteriomorpha; Ostracida; Ostreidae; Crassostrea; Crassostrea virginica  
UdeM00000015183 6573 461.5 UdeM00000015183 XP\_021379039.1 42.7 707  
282 20 88 772 2 607 2.20E-126 461.5 6573 cellular  
organisms; Eukaryota; Opisthokonta; Metazoa; Eumetazoa; Bilateria; Protostomia; Spiralia; Lophotrochozoa; Mollusca; Bivalvia; Autobranchia; Pteriomorpha; Pectinida; Pectinoidea; Pectinidae; Mizuhopecten; Mizuhopecten yessoensis  
UdeM00000015184 591936 607.4 UdeM00000015184 XP\_023073333.1 79.2  
375 76 2 3 376 2 375 1.20E-170 607.4 591936  
cellular  
organisms; Eukaryota; Opisthokonta; Metazoa; Eumetazoa; Bilateria; Deuterostomia; Chordata; Craniata; Vertebrata; Gnathostomata; Teleostomi; Euteleostomi; Sarcopterygii; Dipnotetrapodomorpha; Tetrapoda; Amniota; Mammalia; Theria; Eutheria; Boreoeutheria; Euarchontoglires; Primates; Haplorrhini; Simiiformes; Catarrhini; Cercopithecoidea; Cercopithecidae; Colobinae; Piliocolobus; Piliocolobus tephrosceles  
UdeM00000015185 6596 355.1 UdeM00000015185 XP\_045157642.1 82.7 196  
34 0 69 264 19 214 7.50E-95 355.1 6596 cellular  
organisms; Eukaryota; Opisthokonta; Metazoa; Eumetazoa; Bilateria; Protostomia; Spiralia; Lophotrochozoa; Mollusca; Bivalvia; Autobranchia; Heteroconchia; Euheterodonta; Imparidentia; Venerida; Veneroidea; Veneridae; Mercenaria; Mercenaria mercenaria  
UdeM00000015186 6596 159.5 UdeM00000015186 XP\_045157642.1 86.9 84  
11 0 69 152 19 102 3.50E-36 159.5 6596 cellular  
organisms; Eukaryota; Opisthokonta; Metazoa; Eumetazoa; Bilateria; Protostomia; Spiralia; Lophotrochozoa; Mollusca; Bivalvia; Autobranchia; Heteroconchia; Euheterodonta

terodonta;Imparidentia;Venerida;Veneroidea;Veneridae;Mercenaria;Mercenari  
 a mercenaria  
 UdeM00000015187 6596 94.4 UdeM00000015187 XP\_045200973.1 26.7 258  
 135 8 136 391 303 508 3.80E-16 94.4 6596 cellular  
 organisms;Eukaryota;Opisthokonta;Metazoa;Eumetazoa;Bilateria;Protostomia;  
 Spiralia;Lophotrochozoa;Mollusca;Bivalvia;Autobranhia;Heteroconchia;Euhe  
 terodonta;Imparidentia;Venerida;Veneroidea;Veneridae;Mercenaria;Mercenari  
 a mercenaria  
 UdeM00000015188 6596 166.4 UdeM00000015188 XP\_045200973.1 23.6 516  
 331 9 284 792 303 762 1.50E-37 166.4 6596 cellular  
 organisms;Eukaryota;Opisthokonta;Metazoa;Eumetazoa;Bilateria;Protostomia;  
 Spiralia;Lophotrochozoa;Mollusca;Bivalvia;Autobranhia;Heteroconchia;Euhe  
 terodonta;Imparidentia;Venerida;Veneroidea;Veneridae;Mercenaria;Mercenari  
 a mercenaria  
 UdeM00000015189 6596 166.4 UdeM00000015189 XP\_045200973.1 23.6 516  
 331 9 284 792 303 762 1.50E-37 166.4 6596 cellular  
 organisms;Eukaryota;Opisthokonta;Metazoa;Eumetazoa;Bilateria;Protostomia;  
 Spiralia;Lophotrochozoa;Mollusca;Bivalvia;Autobranhia;Heteroconchia;Euhe  
 terodonta;Imparidentia;Venerida;Veneroidea;Veneridae;Mercenaria;Mercenari  
 a mercenaria  
 UdeM00000015190 6596 80.5 UdeM00000015190 XP\_045206702.1 30.7 150  
 104 0 3 152 593 742 2.40E-12 80.5 6596 cellular  
 organisms;Eukaryota;Opisthokonta;Metazoa;Eumetazoa;Bilateria;Protostomia;  
 Spiralia;Lophotrochozoa;Mollusca;Bivalvia;Autobranhia;Heteroconchia;Euhe  
 terodonta;Imparidentia;Venerida;Veneroidea;Veneridae;Mercenaria;Mercenari  
 a mercenaria  
 UdeM00000015192 6596 166.8 UdeM00000015192 XP\_045193560.1 25 784  
 450 26 18 752 33 727 1.10E-37 166.8 6596 cellular  
 organisms;Eukaryota;Opisthokonta;Metazoa;Eumetazoa;Bilateria;Protostomia;  
 Spiralia;Lophotrochozoa;Mollusca;Bivalvia;Autobranhia;Heteroconchia;Euhe  
 terodonta;Imparidentia;Venerida;Veneroidea;Veneridae;Mercenaria;Mercenari  
 a mercenaria  
 UdeM00000015193 6596 83.2 UdeM00000015193 XP\_045181029.1 29.2 144  
 100 2 3 145 598 740 3.70E-13 83.2 6596 cellular  
 organisms;Eukaryota;Opisthokonta;Metazoa;Eumetazoa;Bilateria;Protostomia;  
 Spiralia;Lophotrochozoa;Mollusca;Bivalvia;Autobranhia;Heteroconchia;Euhe  
 terodonta;Imparidentia;Venerida;Veneroidea;Veneridae;Mercenaria;Mercenari  
 a mercenaria  
 UdeM00000015194 6596 106.7 UdeM00000015194 XP\_045194410.1 26.1 486  
 319 12 11 472 12 481 8.50E-20 106.7 6596 cellular  
 organisms;Eukaryota;Opisthokonta;Metazoa;Eumetazoa;Bilateria;Protostomia;  
 Spiralia;Lophotrochozoa;Mollusca;Bivalvia;Autobranhia;Heteroconchia;Euhe  
 terodonta;Imparidentia;Venerida;Veneroidea;Veneridae;Mercenaria;Mercenari  
 a mercenaria  
 UdeM00000015195 6596 86.3 UdeM00000015195 XP\_045181029.1 29.9 144  
 99 2 3 145 598 740 4.40E-14 86.3 6596 cellular  
 organisms;Eukaryota;Opisthokonta;Metazoa;Eumetazoa;Bilateria;Protostomia;  
 Spiralia;Lophotrochozoa;Mollusca;Bivalvia;Autobranhia;Heteroconchia;Euhe  
 terodonta;Imparidentia;Venerida;Veneroidea;Veneridae;Mercenaria;Mercenari  
 a mercenaria  
 UdeM00000015197 6596 71.6 UdeM00000015197 XP\_045194411.1 24.6 422  
 255 14 6 390 20 415 2.50E-09 71.6 6596 cellular  
 organisms;Eukaryota;Opisthokonta;Metazoa;Eumetazoa;Bilateria;Protostomia;  
 Spiralia;Lophotrochozoa;Mollusca;Bivalvia;Autobranhia;Heteroconchia;Euhe

terodonta;Imparidentia;Venerida;Veneroidea;Veneridae;Mercenaria;Mercenari  
 a mercenaria  
 UdeM00000015196 6596 72.4 UdeM00000015196 XP\_045194411.1 25.1 435  
 257 15 4 395 7 415 1.50E-09 72.4 6596 cellular  
 organisms;Eukaryota;Opisthokonta;Metazoa;Eumetazoa;Bilateria;Protostomia;  
 Spiralia;Lophotrochozoa;Mollusca;Bivalvia;Autobranchia;Heteroconchia;Euhe  
 terodonta;Imparidentia;Venerida;Veneroidea;Veneridae;Mercenaria;Mercenari  
 a mercenaria  
 UdeM00000015199 29159 756.9 UdeM00000015199 XP\_034314726.1 98.1 376  
 7 0 1 376 1 376 1.20E-215 756.9 29159 cellular  
 organisms;Eukaryota;Opisthokonta;Metazoa;Eumetazoa;Bilateria;Protostomia;  
 Spiralia;Lophotrochozoa;Mollusca;Bivalvia;Autobranchia;Pteriormorphia;Ostr  
 eida;Ostreoidea;Ostreidae;Crassostrea;Crassostrea gigas  
 UdeM00000015200 6412 745 UdeM00000015200 XP\_009025437.1 96 376  
 15 0 1 376 1 376 4.80E-212 745 6412 cellular  
 organisms;Eukaryota;Opisthokonta;Metazoa;Eumetazoa;Bilateria;Protostomia;  
 Spiralia;Lophotrochozoa;Annelida;Clitellata;Hirudinea;Rhynchobdellida;Glo  
 ssisiphoniidae;Helobdella;Helobdella robusta  
 UdeM00000015201 8153 135.2 UdeM00000015201 XP\_042079790.1 91.2 68  
 6 0 1 68 305 372 3.20E-29 135.2 8153 cellular  
 organisms;Eukaryota;Opisthokonta;Metazoa;Eumetazoa;Bilateria;Deuterostomi  
 a;Chordata;Craniata;Vertebrata;Gnathostomata;Teleostomi;Euteleostomi;Acti  
 nopterygii;Actinopteri;Neopterygii;Teleostei;Osteoglossocephalai;Clupeoce  
 phala;Euteleosteomorpha;Neoteleostei;Eurypterygia;Ctenosquamata;Acanthomo  
 rphata;Euacanthomorphacea;Percomorphaceae;Ovalentaria;Cichlomorphae;Cichl  
 iformes;Cichlidae;African  
 cichlids;Pseudocrenilabrinae;Haplochromini;Haplochromis;Haplochromis  
 burtoni  
 UdeM00000015202 29159 98.2 UdeM00000015202 XP\_019926412.2 48.9 88  
 45 0 67 154 2 89 9.70E-18 98.2 29159 cellular  
 organisms;Eukaryota;Opisthokonta;Metazoa;Eumetazoa;Bilateria;Protostomia;  
 Spiralia;Lophotrochozoa;Mollusca;Bivalvia;Autobranchia;Pteriormorphia;Ostr  
 eida;Ostreoidea;Ostreidae;Crassostrea;Crassostrea gigas  
 UdeM00000015203 6412 570.9 UdeM00000015203 XP\_009030330.1 95.2 291  
 14 0 1 291 1 291 9.60E-160 570.9 6412 cellular  
 organisms;Eukaryota;Opisthokonta;Metazoa;Eumetazoa;Bilateria;Protostomia;  
 Spiralia;Lophotrochozoa;Annelida;Clitellata;Hirudinea;Rhynchobdellida;Glo  
 ssisiphoniidae;Helobdella;Helobdella robusta  
 UdeM00000015204 9337 144.4 UdeM00000015204 XP\_036599390.1 91.5 71  
 6 0 1 71 305 375 5.50E-32 144.4 9337 cellular  
 organisms;Eukaryota;Opisthokonta;Metazoa;Eumetazoa;Bilateria;Deuterostomi  
 a;Chordata;Craniata;Vertebrata;Gnathostomata;Teleostomi;Euteleostomi;Sarc  
 opterygii;Dipnotetrapodomorpha;Tetrapoda;Amniota;Mammalia;Theria;Metather  
 ia;Diprotodontia;Phalangeridae;Trichosurus;Trichosurus vulpecula  
 UdeM00000015205 29159 715.3 UdeM00000015205 XP\_034314726.1 92.8 376  
 27 0 1 376 1 376 4.10E-203 715.3 29159 cellular  
 organisms;Eukaryota;Opisthokonta;Metazoa;Eumetazoa;Bilateria;Protostomia;  
 Spiralia;Lophotrochozoa;Mollusca;Bivalvia;Autobranchia;Pteriormorphia;Ostr  
 eida;Ostreoidea;Ostreidae;Crassostrea;Crassostrea gigas  
 UdeM00000015207 6596 227.6 UdeM00000015207 XP\_045158674.1 81.1 143  
 26 1 16 158 13 154 2.50E-56 227.6 6596 cellular  
 organisms;Eukaryota;Opisthokonta;Metazoa;Eumetazoa;Bilateria;Protostomia;  
 Spiralia;Lophotrochozoa;Mollusca;Bivalvia;Autobranchia;Heteroconchia;Euhe

terodonta;Imparidentia;Venerida;Veneroidea;Veneridae;Mercenaria;Mercenari  
 a mercenaria  
 UdeM00000015206 6596 227.6 UdeM00000015206 XP\_045158674.1 81.1 143  
 26 1 17 159 13 154 2.50E-56 227.6 6596 cellular  
 organisms;Eukaryota;Opisthokonta;Metazoa;Eumetazoa;Bilateria;Protostomia;  
 Spiralia;Lophotrochozoa;Mollusca;Bivalvia;Autobranhia;Heteroconchia;Euhe  
 terodonta;Imparidentia;Venerida;Veneroidea;Veneridae;Mercenaria;Mercenari  
 a mercenaria  
 UdeM00000015208 6596 300.4 UdeM00000015208 XP\_045158680.1 65.9 246  
 82 2 1 246 1 244 2.00E-78 300.4 6596 cellular  
 organisms;Eukaryota;Opisthokonta;Metazoa;Eumetazoa;Bilateria;Protostomia;  
 Spiralia;Lophotrochozoa;Mollusca;Bivalvia;Autobranhia;Heteroconchia;Euhe  
 terodonta;Imparidentia;Venerida;Veneroidea;Veneridae;Mercenaria;Mercenari  
 a mercenaria  
 UdeM00000015222 6596 859 UdeM00000015222 XP\_045163574.1 66.8 633  
 201 6 1 626 721 1351 3.80E-246 859 6596 cellular  
 organisms;Eukaryota;Opisthokonta;Metazoa;Eumetazoa;Bilateria;Protostomia;  
 Spiralia;Lophotrochozoa;Mollusca;Bivalvia;Autobranhia;Heteroconchia;Euhe  
 terodonta;Imparidentia;Venerida;Veneroidea;Veneridae;Mercenaria;Mercenari  
 a mercenaria  
 UdeM00000015223 6565 1134.4 UdeM00000015223 XP\_022345820.1 67.2  
 800 253 5 6 802 4 797 0.00E+00 1134.4 6565  
 cellular  
 organisms;Eukaryota;Opisthokonta;Metazoa;Eumetazoa;Bilateria;Protostomia;  
 Spiralia;Lophotrochozoa;Mollusca;Bivalvia;Autobranhia;Pteriormorphia;Ostr  
 eida;Ostreoidea;Ostreidae;Crassostrea;Crassostrea virginica  
 UdeM00000015224 29159 118.6 UdeM00000015224 XP\_034322590.1 58.3 84  
 35 0 1 84 14 97 3.80E-24 118.6 29159 cellular  
 organisms;Eukaryota;Opisthokonta;Metazoa;Eumetazoa;Bilateria;Protostomia;  
 Spiralia;Lophotrochozoa;Mollusca;Bivalvia;Autobranhia;Pteriormorphia;Ostr  
 eida;Ostreoidea;Ostreidae;Crassostrea;Crassostrea gigas  
 UdeM00000015225 29159 118.6 UdeM00000015225 XP\_034322590.1 58.3 84  
 35 0 1 84 14 97 3.80E-24 118.6 29159 cellular  
 organisms;Eukaryota;Opisthokonta;Metazoa;Eumetazoa;Bilateria;Protostomia;  
 Spiralia;Lophotrochozoa;Mollusca;Bivalvia;Autobranhia;Pteriormorphia;Ostr  
 eida;Ostreoidea;Ostreidae;Crassostrea;Crassostrea gigas  
 UdeM00000015226 29159 118.6 UdeM00000015226 XP\_034322590.1 58.3 84  
 35 0 1 84 14 97 3.80E-24 118.6 29159 cellular  
 organisms;Eukaryota;Opisthokonta;Metazoa;Eumetazoa;Bilateria;Protostomia;  
 Spiralia;Lophotrochozoa;Mollusca;Bivalvia;Autobranhia;Pteriormorphia;Ostr  
 eida;Ostreoidea;Ostreidae;Crassostrea;Crassostrea gigas  
 UdeM00000015227 29159 118.6 UdeM00000015227 XP\_034322590.1 58.3 84  
 35 0 1 84 14 97 3.80E-24 118.6 29159 cellular  
 organisms;Eukaryota;Opisthokonta;Metazoa;Eumetazoa;Bilateria;Protostomia;  
 Spiralia;Lophotrochozoa;Mollusca;Bivalvia;Autobranhia;Pteriormorphia;Ostr  
 eida;Ostreoidea;Ostreidae;Crassostrea;Crassostrea gigas  
 UdeM00000015228 29159 118.6 UdeM00000015228 XP\_034322590.1 58.3 84  
 35 0 1 84 14 97 3.80E-24 118.6 29159 cellular  
 organisms;Eukaryota;Opisthokonta;Metazoa;Eumetazoa;Bilateria;Protostomia;  
 Spiralia;Lophotrochozoa;Mollusca;Bivalvia;Autobranhia;Pteriormorphia;Ostr  
 eida;Ostreoidea;Ostreidae;Crassostrea;Crassostrea gigas  
 UdeM00000015229 29159 130.6 UdeM00000015229 XP\_034322590.1 58.2 91  
 38 0 5 95 7 97 1.10E-27 130.6 29159 cellular  
 organisms;Eukaryota;Opisthokonta;Metazoa;Eumetazoa;Bilateria;Protostomia;

Spiralia;Lophotrochozoa;Mollusca;Bivalvia;Autobranchia;Pteriormorphia;Ostr  
eida;Ostreoidea;Ostreidae;Crassostrea;Crassostrea gigas  
UdeM00000015230 6596 71.2 UdeM00000015230 XP\_045162778.1 50.8 59  
26 2 41 97 30 87 9.00E-10 71.2 6596 cellular  
organisms;Eukaryota;Opisthokonta;Metazoa;Eumetazoa;Bilateria;Protostomia;  
Spiralia;Lophotrochozoa;Mollusca;Bivalvia;Autobranchia;Heteroconchia;Euhe  
terodonta;Imparidentia;Venerida;Veneroidea;Veneridae;Mercenaria;Mercenari  
a mercenaria  
UdeM00000015231 6596 151.4 UdeM00000015231 XP\_045161405.1 33.7 258  
165 2 3 258 20 273 1.60E-33 151.4 6596 cellular  
organisms;Eukaryota;Opisthokonta;Metazoa;Eumetazoa;Bilateria;Protostomia;  
Spiralia;Lophotrochozoa;Mollusca;Bivalvia;Autobranchia;Heteroconchia;Euhe  
terodonta;Imparidentia;Venerida;Veneroidea;Veneridae;Mercenaria;Mercenari  
a mercenaria  
UdeM00000015232 6596 540 UdeM00000015232 XP\_045163539.1 35.1 1326  
638 40 1 1244 1 1186 7.80E-150 540 6596 cellular  
organisms;Eukaryota;Opisthokonta;Metazoa;Eumetazoa;Bilateria;Protostomia;  
Spiralia;Lophotrochozoa;Mollusca;Bivalvia;Autobranchia;Heteroconchia;Euhe  
terodonta;Imparidentia;Venerida;Veneroidea;Veneridae;Mercenaria;Mercenari  
a mercenaria  
UdeM00000015233 543639 79.3 UdeM00000015233 XP\_037572324.1 36.2  
141 84 5 53 187 128 268 7.00E-12 79.3 543639  
cellular  
organisms;Eukaryota;Opisthokonta;Metazoa;Eumetazoa;Bilateria;Protostomia;  
Ecdysozoa;Panarthropoda;Arthropoda;Chelicerata;Arachnida;Acari;Parasitifo  
rmes;Ixodida;Ixodoidea;Ixodidae;Rhipicephalinae;Dermacentor;Dermacentor  
silvarum  
UdeM00000015234 6596 449.9 UdeM00000015234 XP\_045162824.1 39 780  
384 14 1 757 1 711 6.40E-123 449.9 6596 cellular  
organisms;Eukaryota;Opisthokonta;Metazoa;Eumetazoa;Bilateria;Protostomia;  
Spiralia;Lophotrochozoa;Mollusca;Bivalvia;Autobranchia;Heteroconchia;Euhe  
terodonta;Imparidentia;Venerida;Veneroidea;Veneridae;Mercenaria;Mercenari  
a mercenaria  
UdeM00000015235 400727 493.8 UdeM00000015235 XP\_025084208.1 86.4  
272 37 0 1 272 1 272 1.40E-136 493.8 400727  
cellular  
organisms;Eukaryota;Opisthokonta;Metazoa;Eumetazoa;Bilateria;Protostomia;  
Spiralia;Lophotrochozoa;Mollusca;Gastropoda;Caenogastropoda;Architaeniogl  
ossa;Ampullarioidea;Ampullariidae;Pomacea;Pomacea canaliculata  
UdeM00000015237 6596 973.4 UdeM00000015237 XP\_045162765.1 76.3 628  
95 6 1 607 1 595 1.30E-280 973.4 6596 cellular  
organisms;Eukaryota;Opisthokonta;Metazoa;Eumetazoa;Bilateria;Protostomia;  
Spiralia;Lophotrochozoa;Mollusca;Bivalvia;Autobranchia;Heteroconchia;Euhe  
terodonta;Imparidentia;Venerida;Veneroidea;Veneridae;Mercenaria;Mercenari  
a mercenaria  
UdeM00000015238 6596 159.8 UdeM00000015238 XP\_045162826.1 39.8 324  
140 9 1 311 1 282 5.50E-36 159.8 6596 cellular  
organisms;Eukaryota;Opisthokonta;Metazoa;Eumetazoa;Bilateria;Protostomia;  
Spiralia;Lophotrochozoa;Mollusca;Bivalvia;Autobranchia;Heteroconchia;Euhe  
terodonta;Imparidentia;Venerida;Veneroidea;Veneridae;Mercenaria;Mercenari  
a mercenaria  
UdeM00000015239 6500 714.9 UdeM00000015239 XP\_012945013.1 71.6 504  
138 3 24 523 69 571 7.80E-203 714.9 6500 cellular  
organisms;Eukaryota;Opisthokonta;Metazoa;Eumetazoa;Bilateria;Protostomia;

Spiralia; Lophotrochozoa; Mollusca; Gastropoda; Heterobranchia; Euthyneura; Tectipleura; Aplysiida; Aplysioidea; Aplysiidae; Aplysia; Aplysia californica

UdeM00000015242 6565 525 UdeM00000015242 XP\_022308439.1 48.3 580  
286 7 298 874 604 1172 1.90E-145 525 6565 cellular  
organisms; Eukaryota; Opisthokonta; Metazoa; Eumetazoa; Bilateria; Protostomia; Spiralia; Lophotrochozoa; Mollusca; Bivalvia; Autobranchia; Pteriomorpha; Ostr  
eida; Ostreioidea; Ostreidae; Crassostrea; Crassostrea virginica

UdeM00000015244 29159 271.6 UdeM00000015244 XP\_034339432.1 44.8 324  
175 3 1 321 162 484 1.30E-69 271.6 29159 cellular  
organisms; Eukaryota; Opisthokonta; Metazoa; Eumetazoa; Bilateria; Protostomia; Spiralia; Lophotrochozoa; Mollusca; Bivalvia; Autobranchia; Pteriomorpha; Ostr  
eida; Ostreioidea; Ostreidae; Crassostrea; Crassostrea gigas

UdeM00000015245 29159 102.4 UdeM00000015245 XP\_034322504.1 45.9 122  
54 4 3 124 2 111 8.10E-19 102.4 29159 cellular  
organisms; Eukaryota; Opisthokonta; Metazoa; Eumetazoa; Bilateria; Protostomia; Spiralia; Lophotrochozoa; Mollusca; Bivalvia; Autobranchia; Pteriomorpha; Ostr  
eida; Ostreioidea; Ostreidae; Crassostrea; Crassostrea gigas

UdeM00000015246 6596 118.6 UdeM00000015246 XP\_045176664.1 24.9 438  
244 11 41 399 36 467 1.80E-23 118.6 6596 cellular  
organisms; Eukaryota; Opisthokonta; Metazoa; Eumetazoa; Bilateria; Protostomia; Spiralia; Lophotrochozoa; Mollusca; Bivalvia; Autobranchia; Heteroconchia; Eue  
terodonta; Imparidentia; Venerida; Veneroidea; Veneridae; Mercenaria; Mercenari  
a mercenaria

UdeM00000015247 6596 106.7 UdeM00000015247 XP\_045176664.1 36.7 199  
104 8 14 201 380 567 3.60E-20 106.7 6596 cellular  
organisms; Eukaryota; Opisthokonta; Metazoa; Eumetazoa; Bilateria; Protostomia; Spiralia; Lophotrochozoa; Mollusca; Bivalvia; Autobranchia; Heteroconchia; Eue  
terodonta; Imparidentia; Venerida; Veneroidea; Veneridae; Mercenaria; Mercenari  
a mercenaria

UdeM00000015248 6596 90.5 UdeM00000015248 XP\_045176006.1 36.5 156  
81 5 1 141 359 511 1.90E-15 90.5 6596 cellular  
organisms; Eukaryota; Opisthokonta; Metazoa; Eumetazoa; Bilateria; Protostomia; Spiralia; Lophotrochozoa; Mollusca; Bivalvia; Autobranchia; Heteroconchia; Eue  
terodonta; Imparidentia; Venerida; Veneroidea; Veneridae; Mercenaria; Mercenari  
a mercenaria

UdeM00000015249 6579 63.9 UdeM00000015249 XP\_033752062.1 30.6 111  
77 0 48 158 57 167 3.10E-07 63.9 6579 cellular  
organisms; Eukaryota; Opisthokonta; Metazoa; Eumetazoa; Bilateria; Protostomia; Spiralia; Lophotrochozoa; Mollusca; Bivalvia; Autobranchia; Pteriomorpha; Pect  
inida; Pectinoidea; Pectinidae; Pecten; Pecten maximus

UdeM00000015250 6596 99.4 UdeM00000015250 XP\_045176664.1 35.4 181  
96 6 14 182 380 551 5.30E-18 99.4 6596 cellular  
organisms; Eukaryota; Opisthokonta; Metazoa; Eumetazoa; Bilateria; Protostomia; Spiralia; Lophotrochozoa; Mollusca; Bivalvia; Autobranchia; Heteroconchia; Eue  
terodonta; Imparidentia; Venerida; Veneroidea; Veneridae; Mercenaria; Mercenari  
a mercenaria

UdeM00000015252 202533 184.9 UdeM00000015252 XP\_035207656.1 42.3  
215 111 3 26 227 95 309 1.20E-43 184.9 202533  
cellular  
organisms; Eukaryota; Opisthokonta; Metazoa; Eumetazoa; Bilateria; Protostomia; Ecdysozoa; Panarthropoda; Arthropoda; Chelicerata; Arachnida; Araneae; Araneomo  
rphae; Entelegynae; Eresoidea; Eresidae; Stegodyphus; Stegodyphus dumicola

UdeM00000015253 6596 129 UdeM00000015253 XP\_045176094.1 44.8 154  
76 3 131 278 83 233 9.40E-27 129 6596 cellular

organisms;Eukaryota;Opisthokonta;Metazoa;Eumetazoa;Bilateria;Protostomia;Spiralia;Lophotrochozoa;Mollusca;Bivalvia;Autobranhia;Heteroconchia;Euherodonta;Imparidentia;Venerida;Veneroidea;Veneridae;Mercenaria;Mercenaria mercenaria

UdeM00000015254 6596 69.7 UdeM00000015254 XP\_045177372.1 36.7 90  
56 1 1 90 424 512 2.70E-09 69.7 6596 cellular

organisms;Eukaryota;Opisthokonta;Metazoa;Eumetazoa;Bilateria;Protostomia;Spiralia;Lophotrochozoa;Mollusca;Bivalvia;Autobranhia;Heteroconchia;Euherodonta;Imparidentia;Venerida;Veneroidea;Veneridae;Mercenaria;Mercenaria mercenaria

UdeM00000015255 6596 137.1 UdeM00000015255 XP\_045176094.1 43 179  
93 6 96 270 94 267 3.60E-29 137.1 6596 cellular

organisms;Eukaryota;Opisthokonta;Metazoa;Eumetazoa;Bilateria;Protostomia;Spiralia;Lophotrochozoa;Mollusca;Bivalvia;Autobranhia;Heteroconchia;Euherodonta;Imparidentia;Venerida;Veneroidea;Veneridae;Mercenaria;Mercenaria mercenaria

UdeM00000015256 6596 80.1 UdeM00000015256 XP\_045176664.1 50.6 77  
38 0 4 80 392 468 1.60E-12 80.1 6596 cellular

organisms;Eukaryota;Opisthokonta;Metazoa;Eumetazoa;Bilateria;Protostomia;Spiralia;Lophotrochozoa;Mollusca;Bivalvia;Autobranhia;Heteroconchia;Euherodonta;Imparidentia;Venerida;Veneroidea;Veneridae;Mercenaria;Mercenaria mercenaria

UdeM00000015257 6596 118.6 UdeM00000015257 XP\_045177372.1 30.7 238  
147 7 108 333 273 504 1.50E-23 118.6 6596 cellular

organisms;Eukaryota;Opisthokonta;Metazoa;Eumetazoa;Bilateria;Protostomia;Spiralia;Lophotrochozoa;Mollusca;Bivalvia;Autobranhia;Heteroconchia;Euherodonta;Imparidentia;Venerida;Veneroidea;Veneridae;Mercenaria;Mercenaria mercenaria

UdeM00000015258 6596 117.5 UdeM00000015258 XP\_045181277.1 28.5 284  
142 8 102 331 143 419 3.50E-23 117.5 6596 cellular

organisms;Eukaryota;Opisthokonta;Metazoa;Eumetazoa;Bilateria;Protostomia;Spiralia;Lophotrochozoa;Mollusca;Bivalvia;Autobranhia;Heteroconchia;Euherodonta;Imparidentia;Venerida;Veneroidea;Veneridae;Mercenaria;Mercenaria mercenaria

UdeM00000015259 6596 83.6 UdeM00000015259 XP\_045215643.1 33.6 131  
84 2 1 128 264 394 2.30E-13 83.6 6596 cellular

organisms;Eukaryota;Opisthokonta;Metazoa;Eumetazoa;Bilateria;Protostomia;Spiralia;Lophotrochozoa;Mollusca;Bivalvia;Autobranhia;Heteroconchia;Euherodonta;Imparidentia;Venerida;Veneroidea;Veneridae;Mercenaria;Mercenaria mercenaria

UdeM00000015260 6596 145.6 UdeM00000015260 XP\_045215643.1 35.9 251  
148 5 28 272 161 404 1.40E-31 145.6 6596 cellular

organisms;Eukaryota;Opisthokonta;Metazoa;Eumetazoa;Bilateria;Protostomia;Spiralia;Lophotrochozoa;Mollusca;Bivalvia;Autobranhia;Heteroconchia;Euherodonta;Imparidentia;Venerida;Veneroidea;Veneridae;Mercenaria;Mercenaria mercenaria

UdeM00000015261 6573 63.5 UdeM00000015261 XP\_021358586.1 34.9 83  
51 1 14 96 167 246 1.70E-07 63.5 6573 cellular

organisms;Eukaryota;Opisthokonta;Metazoa;Eumetazoa;Bilateria;Protostomia;Spiralia;Lophotrochozoa;Mollusca;Bivalvia;Autobranhia;Pteriomorphia;Pectinida;Pectinoidea;Pectinidae;Mizuhopecten;Mizuhopecten yessoensis

UdeM00000015262 6596 120.9 UdeM00000015262 XP\_045177372.1 31.5 238  
145 7 138 363 273 504 3.30E-24 120.9 6596 cellular

organisms;Eukaryota;Opisthokonta;Metazoa;Eumetazoa;Bilateria;Protostomia;



Spiralia;Lophotrochozoa;Mollusca;Bivalvia;Autobranchia;Heteroconchia;Euherodonta;Imparidentia;Venerida;Veneroidea;Veneridae;Mercenaria;Mercenaria mercenaria

UdeM00000015263 29159 198.4 UdeM00000015263 XP\_034334268.1 46.4 194  
101 1 1 194 160 350 8.60E-48 198.4 29159 cellular

organisms;Eukaryota;Opisthokonta;Metazoa;Eumetazoa;Bilateria;Protostomia;Spiralia;Lophotrochozoa;Mollusca;Bivalvia;Autobranchia;Pteriomorpha;Ostreida;Ostreoidea;Ostreidae;Crassostrea;Crassostrea gigas

UdeM00000015264 29159 100.9 UdeM00000015264 XP\_034307857.1 34.8 187  
109 4 102 280 100 281 2.80E-18 100.9 29159 cellular

organisms;Eukaryota;Opisthokonta;Metazoa;Eumetazoa;Bilateria;Protostomia;Spiralia;Lophotrochozoa;Mollusca;Bivalvia;Autobranchia;Pteriomorpha;Ostreida;Ostreoidea;Ostreidae;Crassostrea;Crassostrea gigas

UdeM00000015265 6596 120.6 UdeM00000015265 XP\_045176094.1 41.6 161  
87 4 109 269 60 213 3.70E-24 120.6 6596 cellular

organisms;Eukaryota;Opisthokonta;Metazoa;Eumetazoa;Bilateria;Protostomia;Spiralia;Lophotrochozoa;Mollusca;Bivalvia;Autobranchia;Heteroconchia;Euherodonta;Imparidentia;Venerida;Veneroidea;Veneridae;Mercenaria;Mercenaria mercenaria

UdeM00000015266 7574 80.9 UdeM00000015266 XP\_013388025.1 49.4 85  
38 1 263 347 385 464 3.70E-12 80.9 7574 cellular

organisms;Eukaryota;Opisthokonta;Metazoa;Eumetazoa;Bilateria;Protostomia;Spiralia;Lophotrochozoa;Brachiopoda;Linguliformea;Lingulata;Lingulida;Linguloidea;Lingulidae;Lingula;Lingula anatina

UdeM00000015267 6596 200.7 UdeM00000015267 XP\_045208216.1 68.1 160  
48 1 1 160 1 157 1.40E-48 200.7 6596 cellular

organisms;Eukaryota;Opisthokonta;Metazoa;Eumetazoa;Bilateria;Protostomia;Spiralia;Lophotrochozoa;Mollusca;Bivalvia;Autobranchia;Heteroconchia;Euherodonta;Imparidentia;Venerida;Veneroidea;Veneridae;Mercenaria;Mercenaria mercenaria

UdeM00000015268 6596 401.4 UdeM00000015268 XP\_045162819.1 34 720  
279 10 25 743 200 724 2.60E-108 401.4 6596 cellular

organisms;Eukaryota;Opisthokonta;Metazoa;Eumetazoa;Bilateria;Protostomia;Spiralia;Lophotrochozoa;Mollusca;Bivalvia;Autobranchia;Heteroconchia;Euherodonta;Imparidentia;Venerida;Veneroidea;Veneridae;Mercenaria;Mercenaria mercenaria

UdeM00000015269 6596 153.7 UdeM00000015269 XP\_045162819.1 56.8 125  
54 0 1 125 789 913 1.60E-34 153.7 6596 cellular

organisms;Eukaryota;Opisthokonta;Metazoa;Eumetazoa;Bilateria;Protostomia;Spiralia;Lophotrochozoa;Mollusca;Bivalvia;Autobranchia;Heteroconchia;Euherodonta;Imparidentia;Venerida;Veneroidea;Veneridae;Mercenaria;Mercenaria mercenaria

UdeM00000015270 6573 927.9 UdeM00000015270 XP\_021372897.1 43.2 1521  
704 34 25 1445 15 1475 1.50E-266 927.9 6573 cellular

organisms;Eukaryota;Opisthokonta;Metazoa;Eumetazoa;Bilateria;Protostomia;Spiralia;Lophotrochozoa;Mollusca;Bivalvia;Autobranchia;Pteriomorpha;Pectinida;Pectinoidea;Pectinidae;Mizuhopecten;Mizuhopecten yessoensis

UdeM00000015271 52239 344.7 UdeM00000015271 XP\_033946627.1 62.4 234  
84 1 1 230 115 348 8.90E-92 344.7 52239 cellular

organisms;Eukaryota;Opisthokonta;Metazoa;Eumetazoa;Bilateria;Deuterostomia;Chordata;Craniata;Vertebrata;Gnathostomata;Teleostomi;Euteleostomi;Actinopterygii;Actinopteri;Neopterygii;Teleostei;Osteoglossocephalai;Clupeocephala;Euteleostei;Neoteleostei;Eurypterygia;Ctenosquamata;Acanthomo

rphata;Euacanthomorphaea;Percomorphaceae;Eupercaria;Perciformes;Notothenioidi;Channichthyidae;Pseudochaenichthys;Pseudochaenichthys georgianus

UdeM00000015272 6596 232.3 UdeM00000015272 XP\_045166747.1 55.2 203  
91 0 1 203 1 203 5.60E-58 232.3 6596 cellular  
organisms;Eukaryota;Opisthokonta;Metazoa;Eumetazoa;Bilateria;Protostomia;Spiralia;Lophotrochozoa;Mollusca;Bivalvia;Autobranchia;Heteroconchia;Euherodonta;Imparidentia;Venerida;Veneroidea;Veneridae;Mercenaria;Mercenaria mercenaria

UdeM00000015273 6596 748.4 UdeM00000015273 XP\_045162494.1 78.3 465  
100 1 5 468 8 472 5.40E-213 748.4 6596 cellular  
organisms;Eukaryota;Opisthokonta;Metazoa;Eumetazoa;Bilateria;Protostomia;Spiralia;Lophotrochozoa;Mollusca;Bivalvia;Autobranchia;Heteroconchia;Euherodonta;Imparidentia;Venerida;Veneroidea;Veneridae;Mercenaria;Mercenaria mercenaria

UdeM00000015274 6596 719.2 UdeM00000015274 XP\_045162497.1 76 470  
110 2 10 479 4 470 3.60E-204 719.2 6596 cellular  
organisms;Eukaryota;Opisthokonta;Metazoa;Eumetazoa;Bilateria;Protostomia;Spiralia;Lophotrochozoa;Mollusca;Bivalvia;Autobranchia;Heteroconchia;Euherodonta;Imparidentia;Venerida;Veneroidea;Veneridae;Mercenaria;Mercenaria mercenaria

UdeM00000015275 6596 375.2 UdeM00000015275 XP\_045177776.1 32.3 753  
419 14 659 1360 386 1098 4.10E-100 375.2 6596 cellular  
organisms;Eukaryota;Opisthokonta;Metazoa;Eumetazoa;Bilateria;Protostomia;Spiralia;Lophotrochozoa;Mollusca;Bivalvia;Autobranchia;Heteroconchia;Euherodonta;Imparidentia;Venerida;Veneroidea;Veneridae;Mercenaria;Mercenaria mercenaria

UdeM00000015276 6596 375.2 UdeM00000015276 XP\_045177776.1 32.3 753  
419 14 659 1360 386 1098 4.10E-100 375.2 6596 cellular  
organisms;Eukaryota;Opisthokonta;Metazoa;Eumetazoa;Bilateria;Protostomia;Spiralia;Lophotrochozoa;Mollusca;Bivalvia;Autobranchia;Heteroconchia;Euherodonta;Imparidentia;Venerida;Veneroidea;Veneridae;Mercenaria;Mercenaria mercenaria

UdeM00000015277 6596 375.2 UdeM00000015277 XP\_045177776.1 32.3 753  
419 14 632 1333 386 1098 4.10E-100 375.2 6596 cellular  
organisms;Eukaryota;Opisthokonta;Metazoa;Eumetazoa;Bilateria;Protostomia;Spiralia;Lophotrochozoa;Mollusca;Bivalvia;Autobranchia;Heteroconchia;Euherodonta;Imparidentia;Venerida;Veneroidea;Veneridae;Mercenaria;Mercenaria mercenaria

UdeM00000015278 6596 90.5 UdeM00000015278 XP\_045189697.1 54.8 84  
37 1 86 168 1202 1285 3.10E-15 90.5 6596 cellular  
organisms;Eukaryota;Opisthokonta;Metazoa;Eumetazoa;Bilateria;Protostomia;Spiralia;Lophotrochozoa;Mollusca;Bivalvia;Autobranchia;Heteroconchia;Euherodonta;Imparidentia;Venerida;Veneroidea;Veneridae;Mercenaria;Mercenaria mercenaria

UdeM00000015280 6579 104.8 UdeM00000015280 XP\_033761570.1 37.3 161  
98 3 18 176 692 851 2.60E-19 104.8 6579 cellular  
organisms;Eukaryota;Opisthokonta;Metazoa;Eumetazoa;Bilateria;Protostomia;Spiralia;Lophotrochozoa;Mollusca;Bivalvia;Autobranchia;Pteriomorpha;Pectinida;Pectinoidea;Pectinidae;Pecten;Pecten maximus

UdeM00000015281 6596 281.2 UdeM00000015281 XP\_045177779.1 33.1 586  
315 14 202 776 89 608 4.10E-72 281.2 6596 cellular  
organisms;Eukaryota;Opisthokonta;Metazoa;Eumetazoa;Bilateria;Protostomia;Spiralia;Lophotrochozoa;Mollusca;Bivalvia;Autobranchia;Heteroconchia;Euherodonta;Imparidentia;Venerida;Veneroidea;Veneridae;Mercenaria;Mercenaria mercenaria

terodonta;Imparidentia;Venerida;Veneroidea;Veneridae;Mercenaria;Mercenaria mercenaria  
 UdeM00000015282 37621 111.3 UdeM00000015282 XP\_014672567.1 55 100  
 36 2 3 93 368 467 1.00E-21 111.3 37621 cellular  
 organisms;Eukaryota;Opisthokonta;Metazoa;Eumetazoa;Bilateria;Protostomia;  
 Ecdysozoa;Scalidophora;Priapulida;Priapulimorpha;Priapulimorphida;Priapulidae;Priapulus;Priapulus caudatus  
 UdeM00000015283 1735272 250.8 UdeM00000015283 XP\_041370702.1 44.6  
 435 143 5 52 396 875 1301 3.00E-63 250.8 1735272  
 cellular  
 organisms;Eukaryota;Opisthokonta;Metazoa;Eumetazoa;Bilateria;Protostomia;  
 Spiralia;Lophotrochozoa;Mollusca;Gastropoda;Neomphalina;Neomphaloidea;Peltospiridae;Gigantopelta;Gigantopelta aegis  
 UdeM00000015284 6596 249.6 UdeM00000015284 XP\_045189699.1 42.3 459  
 173 5 61 427 866 1324 7.40E-63 249.6 6596 cellular  
 organisms;Eukaryota;Opisthokonta;Metazoa;Eumetazoa;Bilateria;Protostomia;  
 Spiralia;Lophotrochozoa;Mollusca;Bivalvia;Autobranchia;Heteroconchia;Euheterodonta;Imparidentia;Venerida;Veneroidea;Veneridae;Mercenaria;Mercenaria mercenaria  
 UdeM00000015285 6596 123.2 UdeM00000015285 XP\_045163049.1 60.8 79  
 31 0 28 106 33 111 1.90E-25 123.2 6596 cellular  
 organisms;Eukaryota;Opisthokonta;Metazoa;Eumetazoa;Bilateria;Protostomia;  
 Spiralia;Lophotrochozoa;Mollusca;Bivalvia;Autobranchia;Heteroconchia;Euheterodonta;Imparidentia;Venerida;Veneroidea;Veneridae;Mercenaria;Mercenaria mercenaria  
 UdeM00000015286 6596 470.7 UdeM00000015286 XP\_045163049.1 61.8 359  
 137 0 5 363 111 469 1.70E-129 470.7 6596 cellular  
 organisms;Eukaryota;Opisthokonta;Metazoa;Eumetazoa;Bilateria;Protostomia;  
 Spiralia;Lophotrochozoa;Mollusca;Bivalvia;Autobranchia;Heteroconchia;Euheterodonta;Imparidentia;Venerida;Veneroidea;Veneridae;Mercenaria;Mercenaria mercenaria  
 UdeM00000015287 6596 141 UdeM00000015287 XP\_045163032.1 58.1 117  
 49 0 407 523 364 480 4.40E-30 141 6596 cellular  
 organisms;Eukaryota;Opisthokonta;Metazoa;Eumetazoa;Bilateria;Protostomia;  
 Spiralia;Lophotrochozoa;Mollusca;Bivalvia;Autobranchia;Heteroconchia;Euheterodonta;Imparidentia;Venerida;Veneroidea;Veneridae;Mercenaria;Mercenaria mercenaria  
 UdeM00000015288 6596 175.3 UdeM00000015288 XP\_045163049.1 49.4 158  
 69 2 1 158 480 626 6.80E-41 175.3 6596 cellular  
 organisms;Eukaryota;Opisthokonta;Metazoa;Eumetazoa;Bilateria;Protostomia;  
 Spiralia;Lophotrochozoa;Mollusca;Bivalvia;Autobranchia;Heteroconchia;Euheterodonta;Imparidentia;Venerida;Veneroidea;Veneridae;Mercenaria;Mercenaria mercenaria  
 UdeM00000015289 6596 362.1 UdeM00000015289 XP\_045161097.1 40.6 446  
 241 4 33 478 29 450 1.10E-96 362.1 6596 cellular  
 organisms;Eukaryota;Opisthokonta;Metazoa;Eumetazoa;Bilateria;Protostomia;  
 Spiralia;Lophotrochozoa;Mollusca;Bivalvia;Autobranchia;Heteroconchia;Euheterodonta;Imparidentia;Venerida;Veneroidea;Veneridae;Mercenaria;Mercenaria mercenaria  
 UdeM00000015290 6596 234.2 UdeM00000015290 XP\_045189699.1 39.9 489  
 194 7 61 450 866 1353 3.30E-58 234.2 6596 cellular  
 organisms;Eukaryota;Opisthokonta;Metazoa;Eumetazoa;Bilateria;Protostomia;  
 Spiralia;Lophotrochozoa;Mollusca;Bivalvia;Autobranchia;Heteroconchia;Euheterodonta;Imparidentia;Venerida;Veneroidea;Veneridae;Mercenaria;Mercenaria mercenaria

terodonta;Imparidentia;Venerida;Veneroidea;Veneridae;Mercenaria;Mercenari  
 a mercenaria  
 UdeM00000015291 6565 194.5 UdeM00000015291 XP\_022345679.1 44.4 232  
 126 1 1 229 91 322 1.80E-46 194.5 6565 cellular  
 organisms;Eukaryota;Opisthokonta;Metazoa;Eumetazoa;Bilateria;Protostomia;  
 Spiralia;Lophotrochozoa;Mollusca;Bivalvia;Autobranchia;Pteriormorphia;Ostr  
 eida;Ostreoidea;Ostreidae;Crassostrea;Crassostrea virginica  
 UdeM00000015292 6579 272.3 UdeM00000015292 XP\_033724717.1 44.2 339  
 179 4 34 366 38 372 9.90E-70 272.3 6579 cellular  
 organisms;Eukaryota;Opisthokonta;Metazoa;Eumetazoa;Bilateria;Protostomia;  
 Spiralia;Lophotrochozoa;Mollusca;Bivalvia;Autobranchia;Pteriormorphia;Pect  
 inida;Pectinoidea;Pectinidae;Pecten;Pecten maximus  
 UdeM00000015293 6596 184.9 UdeM00000015293 XP\_045178436.1 33.7 341  
 197 5 234 572 5 318 3.00E-43 184.9 6596 cellular  
 organisms;Eukaryota;Opisthokonta;Metazoa;Eumetazoa;Bilateria;Protostomia;  
 Spiralia;Lophotrochozoa;Mollusca;Bivalvia;Autobranchia;Heteroconchia;Euhe  
 terodonta;Imparidentia;Venerida;Veneroidea;Veneridae;Mercenaria;Mercenari  
 a mercenaria  
 UdeM00000015294 6596 232.6 UdeM00000015294 XP\_045163056.1 46.6 356  
 147 12 16 360 15 338 7.60E-58 232.6 6596 cellular  
 organisms;Eukaryota;Opisthokonta;Metazoa;Eumetazoa;Bilateria;Protostomia;  
 Spiralia;Lophotrochozoa;Mollusca;Bivalvia;Autobranchia;Heteroconchia;Euhe  
 terodonta;Imparidentia;Venerida;Veneroidea;Veneridae;Mercenaria;Mercenari  
 a mercenaria  
 UdeM00000015295 6596 282.7 UdeM00000015295 XP\_045163057.1 52.7 332  
 127 9 13 324 18 339 5.80E-73 282.7 6596 cellular  
 organisms;Eukaryota;Opisthokonta;Metazoa;Eumetazoa;Bilateria;Protostomia;  
 Spiralia;Lophotrochozoa;Mollusca;Bivalvia;Autobranchia;Heteroconchia;Euhe  
 terodonta;Imparidentia;Venerida;Veneroidea;Veneridae;Mercenaria;Mercenari  
 a mercenaria  
 UdeM00000015296 6596 627.9 UdeM00000015296 XP\_045162172.1 37.2 1184  
 562 25 1 1138 12 1059 2.60E-176 627.9 6596 cellular  
 organisms;Eukaryota;Opisthokonta;Metazoa;Eumetazoa;Bilateria;Protostomia;  
 Spiralia;Lophotrochozoa;Mollusca;Bivalvia;Autobranchia;Heteroconchia;Euhe  
 terodonta;Imparidentia;Venerida;Veneroidea;Veneridae;Mercenaria;Mercenari  
 a mercenaria  
 UdeM00000015297 6596 292 UdeM00000015297 XP\_045161552.1 66 215  
 73 0 1 215 1 215 6.40E-76 292 6596 cellular  
 organisms;Eukaryota;Opisthokonta;Metazoa;Eumetazoa;Bilateria;Protostomia;  
 Spiralia;Lophotrochozoa;Mollusca;Bivalvia;Autobranchia;Heteroconchia;Euhe  
 terodonta;Imparidentia;Venerida;Veneroidea;Veneridae;Mercenaria;Mercenari  
 a mercenaria  
 UdeM00000015298 1735272 204.9 UdeM00000015298 XP\_041377681.1 30.6  
 706 369 25 5 698 258 854 3.70E-49 204.9 1735272  
 cellular  
 organisms;Eukaryota;Opisthokonta;Metazoa;Eumetazoa;Bilateria;Protostomia;  
 Spiralia;Lophotrochozoa;Mollusca;Gastropoda;Neomphalina;Neomphaloidea;Pel  
 tospiridae;Gigantopelta;Gigantopelta aegis  
 UdeM00000015299 6596 277.3 UdeM00000015299 XP\_045161876.1 52.7 256  
 120 1 1 255 1 256 3.10E-71 277.3 6596 cellular  
 organisms;Eukaryota;Opisthokonta;Metazoa;Eumetazoa;Bilateria;Protostomia;  
 Spiralia;Lophotrochozoa;Mollusca;Bivalvia;Autobranchia;Heteroconchia;Euhe  
 terodonta;Imparidentia;Venerida;Veneroidea;Veneridae;Mercenaria;Mercenari  
 a mercenaria

UdeM00000015300 6573 81.3 UdeM00000015300 XP\_021342508.1 33.1 236  
 124 7 42 258 339 559 8.40E-12 81.3 6573 cellular  
 organisms;Eukaryota;Opisthokonta;Metazoa;Eumetazoa;Bilateria;Protostomia;  
 Spiralia;Lophotrochozoa;Mollusca;Bivalvia;Autobranhia;Pteriomorpha;Pect  
 inida;Pectinoidea;Pectinidae;Mizuhopecten;Mizuhopecten yessoensis  
 UdeM00000015301 6573 66.2 UdeM00000015301 XP\_021342506.1 33.7 193  
 110 6 10 188 72 260 5.00E-08 66.2 6573 cellular  
 organisms;Eukaryota;Opisthokonta;Metazoa;Eumetazoa;Bilateria;Protostomia;  
 Spiralia;Lophotrochozoa;Mollusca;Bivalvia;Autobranhia;Pteriomorpha;Pect  
 inida;Pectinoidea;Pectinidae;Mizuhopecten;Mizuhopecten yessoensis  
 UdeM00000015302 6596 1544.3 UdeM00000015302 XP\_045162491.1 62  
 1285 440 13 1 1267 66 1320 0.00E+00 1544.3 6596  
 cellular  
 organisms;Eukaryota;Opisthokonta;Metazoa;Eumetazoa;Bilateria;Protostomia;  
 Spiralia;Lophotrochozoa;Mollusca;Bivalvia;Autobranhia;Heteroconchia;Euhe  
 terodonta;Imparidentia;Venerida;Veneroidea;Veneridae;Mercenaria;Mercenari  
 a mercenaria  
 UdeM00000015303 6526 345.5 UdeM00000015303 XP\_013079593.1 50.3 332  
 136 4 71 378 82 408 8.50E-92 345.5 6526 cellular  
 organisms;Eukaryota;Opisthokonta;Metazoa;Eumetazoa;Bilateria;Protostomia;  
 Spiralia;Lophotrochozoa;Mollusca;Gastropoda;Heterobranhia;Euthyneura;Pan  
 pulmonata;Hygrophila;Lymnaeoidea;Planorbidae;Biomphalaria;Biomphalaria  
 glabrata  
 UdeM00000015304 6526 307.4 UdeM00000015304 XP\_013079593.1 53.8 264  
 112 3 1 259 150 408 1.80E-80 307.4 6526 cellular  
 organisms;Eukaryota;Opisthokonta;Metazoa;Eumetazoa;Bilateria;Protostomia;  
 Spiralia;Lophotrochozoa;Mollusca;Gastropoda;Heterobranhia;Euthyneura;Pan  
 pulmonata;Hygrophila;Lymnaeoidea;Planorbidae;Biomphalaria;Biomphalaria  
 glabrata  
 UdeM00000015305 6526 382.9 UdeM00000015305 XP\_013079593.1 53.9 332  
 143 3 71 397 82 408 5.00E-103 382.9 6526 cellular  
 organisms;Eukaryota;Opisthokonta;Metazoa;Eumetazoa;Bilateria;Protostomia;  
 Spiralia;Lophotrochozoa;Mollusca;Gastropoda;Heterobranhia;Euthyneura;Pan  
 pulmonata;Hygrophila;Lymnaeoidea;Planorbidae;Biomphalaria;Biomphalaria  
 glabrata  
 UdeM00000015306 6573 104.8 UdeM00000015306 XP\_021365372.1 39 141  
 78 3 103 238 19 156 1.60E-19 104.8 6573 cellular  
 organisms;Eukaryota;Opisthokonta;Metazoa;Eumetazoa;Bilateria;Protostomia;  
 Spiralia;Lophotrochozoa;Mollusca;Bivalvia;Autobranhia;Pteriomorpha;Pect  
 inida;Pectinoidea;Pectinidae;Mizuhopecten;Mizuhopecten yessoensis  
 UdeM00000015307 6596 429.5 UdeM00000015307 XP\_045163180.1 61 331  
 127 1 26 354 64 394 4.20E-117 429.5 6596 cellular  
 organisms;Eukaryota;Opisthokonta;Metazoa;Eumetazoa;Bilateria;Protostomia;  
 Spiralia;Lophotrochozoa;Mollusca;Bivalvia;Autobranhia;Heteroconchia;Euhe  
 terodonta;Imparidentia;Venerida;Veneroidea;Veneridae;Mercenaria;Mercenari  
 a mercenaria  
 UdeM00000015308 6596 339.3 UdeM00000015308 XP\_045163180.1 65.3 239  
 83 0 1 239 101 339 4.00E-90 339.3 6596 cellular  
 organisms;Eukaryota;Opisthokonta;Metazoa;Eumetazoa;Bilateria;Protostomia;  
 Spiralia;Lophotrochozoa;Mollusca;Bivalvia;Autobranhia;Heteroconchia;Euhe  
 terodonta;Imparidentia;Venerida;Veneroidea;Veneridae;Mercenaria;Mercenari  
 a mercenaria  
 UdeM00000015309 6596 225.3 UdeM00000015309 XP\_045163399.1 91.7 121  
 10 0 11 131 3 123 4.70E-56 225.3 6596 cellular

organisms;Eukaryota;Opisthokonta;Metazoa;Eumetazoa;Bilateria;Protostomia; Spiralia;Lophotrochozoa;Mollusca;Bivalvia;Autobranchia;Heteroconchia;Euherodonta;Imparidentia;Venerida;Veneroidea;Veneridae;Mercenaria;Mercenaria mercenaria

UdeM00000015310 6596 121.7 UdeM00000015310 XP\_045163399.1 71.1 83  
24 0 18 100 103 185 5.50E-25 121.7 6596 cellular

organisms;Eukaryota;Opisthokonta;Metazoa;Eumetazoa;Bilateria;Protostomia; Spiralia;Lophotrochozoa;Mollusca;Bivalvia;Autobranchia;Heteroconchia;Euherodonta;Imparidentia;Venerida;Veneroidea;Veneridae;Mercenaria;Mercenaria mercenaria

UdeM00000015311 6579 203.4 UdeM00000015311 XP\_033724855.1 73.8 130  
34 0 7 136 204 333 4.10E-49 203.4 6579 cellular

organisms;Eukaryota;Opisthokonta;Metazoa;Eumetazoa;Bilateria;Protostomia; Spiralia;Lophotrochozoa;Mollusca;Bivalvia;Autobranchia;Pteriormorphia;Pectinida;Pectinoidea;Pectinidae;Pecten;Pecten maximus

UdeM00000015312 133434 71.6 UdeM00000015312 XP\_022111779.1 33.8  
139 78 7 104 239 37 164 1.50E-09 71.6 133434  
cellular

organisms;Eukaryota;Opisthokonta;Metazoa;Eumetazoa;Bilateria;Deuterostomia;Echinodermata;Eleutherozoa;Asterozoa;Asteroidea;Valvatataceae;Valvatida;Acanthasteridae;Acanthaster;Acanthaster planci

UdeM00000015314 7897 360.9 UdeM00000015314 XP\_006006334.1 45.1 399  
195 4 88 480 32 412 2.50E-96 360.9 7897 cellular

organisms;Eukaryota;Opisthokonta;Metazoa;Eumetazoa;Bilateria;Deuterostomia;Chordata;Craniata;Vertebrata;Gnathostomata;Teleostomi;Euteleostomi;Sarcopterygii;Coelacanthimorpha;Coelacanthiformes;Coelacanthidae;Latimeria;Latimeria chalumnae

UdeM00000015313 7897 366.3 UdeM00000015313 XP\_006006334.1 44.9 410  
202 4 88 491 32 423 6.10E-98 366.3 7897 cellular

organisms;Eukaryota;Opisthokonta;Metazoa;Eumetazoa;Bilateria;Deuterostomia;Chordata;Craniata;Vertebrata;Gnathostomata;Teleostomi;Euteleostomi;Sarcopterygii;Coelacanthimorpha;Coelacanthiformes;Coelacanthidae;Latimeria;Latimeria chalumnae

UdeM00000015315 6596 196.8 UdeM00000015315 XP\_045161937.1 44.9 227  
116 3 33 251 41 266 3.20E-47 196.8 6596 cellular

organisms;Eukaryota;Opisthokonta;Metazoa;Eumetazoa;Bilateria;Protostomia; Spiralia;Lophotrochozoa;Mollusca;Bivalvia;Autobranchia;Heteroconchia;Euherodonta;Imparidentia;Venerida;Veneroidea;Veneridae;Mercenaria;Mercenaria mercenaria

UdeM00000015316 1735272 102.8 UdeM00000015316 XP\_041358468.1 51.9  
81 39 0 9 89 303 383 3.20E-19 102.8 1735272  
cellular

organisms;Eukaryota;Opisthokonta;Metazoa;Eumetazoa;Bilateria;Protostomia; Spiralia;Lophotrochozoa;Mollusca;Gastropoda;Neomphalina;Neomphaloidea;Peltospiridae;Gigantopelta;Gigantopelta aegis

UdeM00000015317 6596 355.9 UdeM00000015317 XP\_045161615.1 67.5 271  
74 5 122 388 13 273 6.80E-95 355.9 6596 cellular

organisms;Eukaryota;Opisthokonta;Metazoa;Eumetazoa;Bilateria;Protostomia; Spiralia;Lophotrochozoa;Mollusca;Bivalvia;Autobranchia;Heteroconchia;Euherodonta;Imparidentia;Venerida;Veneroidea;Veneridae;Mercenaria;Mercenaria mercenaria

UdeM00000015318 6596 798.9 UdeM00000015318 XP\_045163032.1 60.7 619  
214 4 32 647 44 636 4.80E-228 798.9 6596 cellular

organisms;Eukaryota;Opisthokonta;Metazoa;Eumetazoa;Bilateria;Protostomia;

Spiralia;Lophotrochozoa;Mollusca;Bivalvia;Autobranchia;Heteroconchia;Euherodonta;Imparidentia;Venerida;Veneroidea;Veneridae;Mercenaria;Mercenaria mercenaria

UdeM00000015319 6596 615.9 UdeM00000015319 XP\_045163032.1 49.8 605  
196 3 28 539 44 633 4.90E-173 615.9 6596 cellular  
organisms;Eukaryota;Opisthokonta;Metazoa;Eumetazoa;Bilateria;Protostomia;Spiralia;Lophotrochozoa;Mollusca;Bivalvia;Autobranchia;Heteroconchia;Euherodonta;Imparidentia;Venerida;Veneroidea;Veneridae;Mercenaria;Mercenaria mercenaria

UdeM00000015320 6596 774.6 UdeM00000015320 XP\_045163049.1 57.3 625  
256 3 8 632 13 626 9.60E-221 774.6 6596 cellular  
organisms;Eukaryota;Opisthokonta;Metazoa;Eumetazoa;Bilateria;Protostomia;Spiralia;Lophotrochozoa;Mollusca;Bivalvia;Autobranchia;Heteroconchia;Euherodonta;Imparidentia;Venerida;Veneroidea;Veneridae;Mercenaria;Mercenaria mercenaria

UdeM00000015321 6596 487.6 UdeM00000015321 XP\_045162308.1 44.7 580  
311 7 10 582 12 588 2.20E-134 487.6 6596 cellular  
organisms;Eukaryota;Opisthokonta;Metazoa;Eumetazoa;Bilateria;Protostomia;Spiralia;Lophotrochozoa;Mollusca;Bivalvia;Autobranchia;Heteroconchia;Euherodonta;Imparidentia;Venerida;Veneroidea;Veneridae;Mercenaria;Mercenaria mercenaria

UdeM00000015322 6596 261.2 UdeM00000015322 XP\_045162308.1 38.8 387  
208 5 4 384 46 409 2.20E-66 261.2 6596 cellular  
organisms;Eukaryota;Opisthokonta;Metazoa;Eumetazoa;Bilateria;Protostomia;Spiralia;Lophotrochozoa;Mollusca;Bivalvia;Autobranchia;Heteroconchia;Euherodonta;Imparidentia;Venerida;Veneroidea;Veneridae;Mercenaria;Mercenaria mercenaria

UdeM00000015323 6596 503.8 UdeM00000015323 XP\_045162308.1 45.8 594  
305 7 17 599 11 598 3.00E-139 503.8 6596 cellular  
organisms;Eukaryota;Opisthokonta;Metazoa;Eumetazoa;Bilateria;Protostomia;Spiralia;Lophotrochozoa;Mollusca;Bivalvia;Autobranchia;Heteroconchia;Euherodonta;Imparidentia;Venerida;Veneroidea;Veneridae;Mercenaria;Mercenaria mercenaria

UdeM00000015324 6573 311.2 UdeM00000015324 XP\_021358437.1 28.2 921  
542 29 238 1111 420 1268 5.40E-81 311.2 6573 cellular  
organisms;Eukaryota;Opisthokonta;Metazoa;Eumetazoa;Bilateria;Protostomia;Spiralia;Lophotrochozoa;Mollusca;Bivalvia;Autobranchia;Pteriomorphia;Pectinida;Pectinoidea;Pectinidae;Mizuhopecten;Mizuhopecten yessoensis

UdeM00000015325 6596 673.3 UdeM00000015325 XP\_045162242.1 48.2 711  
336 10 22 703 67 774 3.40E-190 673.3 6596 cellular  
organisms;Eukaryota;Opisthokonta;Metazoa;Eumetazoa;Bilateria;Protostomia;Spiralia;Lophotrochozoa;Mollusca;Bivalvia;Autobranchia;Heteroconchia;Euherodonta;Imparidentia;Venerida;Veneroidea;Veneridae;Mercenaria;Mercenaria mercenaria

UdeM00000015326 6596 684.1 UdeM00000015326 XP\_045162242.1 49.8 705  
324 8 23 699 72 774 1.90E-193 684.1 6596 cellular  
organisms;Eukaryota;Opisthokonta;Metazoa;Eumetazoa;Bilateria;Protostomia;Spiralia;Lophotrochozoa;Mollusca;Bivalvia;Autobranchia;Heteroconchia;Euherodonta;Imparidentia;Venerida;Veneroidea;Veneridae;Mercenaria;Mercenaria mercenaria

UdeM00000015327 6596 174.1 UdeM00000015327 XP\_045163217.1 66.4 128  
43 0 1 128 1 128 1.20E-40 174.1 6596 cellular  
organisms;Eukaryota;Opisthokonta;Metazoa;Eumetazoa;Bilateria;Protostomia;Spiralia;Lophotrochozoa;Mollusca;Bivalvia;Autobranchia;Heteroconchia;Euherodonta;Imparidentia;Venerida;Veneroidea;Veneridae;Mercenaria;Mercenaria mercenaria

terodonta;Imparidentia;Venerida;Veneroidea;Veneridae;Mercenaria;Mercenari  
 a mercenaria  
 UdeM00000015328 6573 546.2 UdeM00000015328 XP\_021353667.1 85.3 292  
 43 0 1 292 140 431 2.50E-152 546.2 6573 cellular  
 organisms;Eukaryota;Opisthokonta;Metazoa;Eumetazoa;Bilateria;Protostomia;  
 Spiralia;Lophotrochozoa;Mollusca;Bivalvia;Autobranchia;Pteriomorpha;Pect  
 inida;Pectinoidea;Pectinidae;Mizuhopecten;Mizuhopecten yessoensis  
 UdeM00000015329 6596 422.2 UdeM00000015329 XP\_045163069.1 65 320  
 97 4 1 320 1 305 6.00E-115 422.2 6596 cellular  
 organisms;Eukaryota;Opisthokonta;Metazoa;Eumetazoa;Bilateria;Protostomia;  
 Spiralia;Lophotrochozoa;Mollusca;Bivalvia;Autobranchia;Heteroconchia;Euhe  
 terodonta;Imparidentia;Venerida;Veneroidea;Veneridae;Mercenaria;Mercenari  
 a mercenaria  
 UdeM00000015331 6565 648.3 UdeM00000015331 XP\_022345668.1 68.4 478  
 137 4 1 471 59 529 7.80E-183 648.3 6565 cellular  
 organisms;Eukaryota;Opisthokonta;Metazoa;Eumetazoa;Bilateria;Protostomia;  
 Spiralia;Lophotrochozoa;Mollusca;Bivalvia;Autobranchia;Pteriomorpha;Ostr  
 eida;Ostreoidea;Ostreidae;Crassostrea;Crassostrea virginica  
 UdeM00000015330 29159 1145.2 UdeM00000015330 XP\_034298901.1 61  
 971 317 9 1 953 57 983 0.00E+00 1145.2  
 29159 cellular  
 organisms;Eukaryota;Opisthokonta;Metazoa;Eumetazoa;Bilateria;Protostomia;  
 Spiralia;Lophotrochozoa;Mollusca;Bivalvia;Autobranchia;Pteriomorpha;Ostr  
 eida;Ostreoidea;Ostreidae;Crassostrea;Crassostrea gigas  
 UdeM00000015332 6596 505.8 UdeM00000015332 XP\_045163336.1 56.3 485  
 198 4 2 485 586 1057 6.30E-140 505.8 6596 cellular  
 organisms;Eukaryota;Opisthokonta;Metazoa;Eumetazoa;Bilateria;Protostomia;  
 Spiralia;Lophotrochozoa;Mollusca;Bivalvia;Autobranchia;Heteroconchia;Euhe  
 terodonta;Imparidentia;Venerida;Veneroidea;Veneridae;Mercenaria;Mercenari  
 a mercenaria  
 UdeM00000015333 1735272 120.9 UdeM00000015333 XP\_041378005.1 41.1  
 214 92 5 60 264 274 462 2.40E-24 120.9 1735272  
 cellular  
 organisms;Eukaryota;Opisthokonta;Metazoa;Eumetazoa;Bilateria;Protostomia;  
 Spiralia;Lophotrochozoa;Mollusca;Gastropoda;Neomphalina;Neomphaloidea;Pel  
 tospiridae;Gigantopelta;Gigantopelta aegis  
 UdeM00000015336 6573 65.9 UdeM00000015336 XP\_021353726.1 41.3 63  
 37 0 63 125 116 178 3.20E-07 65.9 6573 cellular  
 organisms;Eukaryota;Opisthokonta;Metazoa;Eumetazoa;Bilateria;Protostomia;  
 Spiralia;Lophotrochozoa;Mollusca;Bivalvia;Autobranchia;Pteriomorpha;Pect  
 inida;Pectinoidea;Pectinidae;Mizuhopecten;Mizuhopecten yessoensis  
 UdeM00000015337 52239 58.5 UdeM00000015337 XP\_033952160.1 43.9 66  
 36 1 14 79 128 192 5.50E-06 58.5 52239 cellular  
 organisms;Eukaryota;Opisthokonta;Metazoa;Eumetazoa;Bilateria;Deuterostomi  
 a;Chordata;Craniata;Vertebrata;Gnathostomata;Teleostomi;Euteleostomi;Acti  
 nopterygii;Actinopteri;Neopterygii;Teleostei;Osteoglossocephalai;Clupeoce  
 phala;Euteleosteomorpha;Neoteleostei;Eurypterygia;Ctenosquamata;Acanthomo  
 rphata;Euacanthomorpha;Percomorphaceae;Eupercaria;Perciformes;Notothen  
 ioidei;Channichthyidae;Pseudochaenichthys;Pseudochaenichthys georgianus  
 UdeM00000015338 7604 213.8 UdeM00000015338 XP\_033644645.1 46.1 230  
 120 4 8 233 305 534 2.50E-52 213.8 7604 cellular  
 organisms;Eukaryota;Opisthokonta;Metazoa;Eumetazoa;Bilateria;Deuterostomi  
 a;Echinodermata;Eleutherozoa;Asterozoa;Asteroidea;Forcipulatacea;Forcipul  
 atida;Asteroidea;Asteroidea;Asterias;Asterias rubens



UdeM00000015340 6573 130.2 UdeM00000015340 XP\_021353726.1 36.5 178  
 105 6 6 180 13 185 5.10E-27 130.2 6573 cellular  
 organisms;Eukaryota;Opisthokonta;Metazoa;Eumetazoa;Bilateria;Protostomia;  
 Spiralia;Lophotrochozoa;Mollusca;Bivalvia;Autobranchia;Pteriormorphia;Pect  
 inida;Pectinoidea;Pectinidae;Mizuhopecten;Mizuhopecten yessoensis  
 UdeM00000015342 6573 118.6 UdeM00000015342 XP\_021353726.1 34.3 169  
 100 5 8 167 11 177 1.20E-23 118.6 6573 cellular  
 organisms;Eukaryota;Opisthokonta;Metazoa;Eumetazoa;Bilateria;Protostomia;  
 Spiralia;Lophotrochozoa;Mollusca;Bivalvia;Autobranchia;Pteriormorphia;Pect  
 inida;Pectinoidea;Pectinidae;Mizuhopecten;Mizuhopecten yessoensis  
 UdeM00000015343 6573 118.6 UdeM00000015343 XP\_021353726.1 34.3 169  
 100 5 8 167 11 177 1.20E-23 118.6 6573 cellular  
 organisms;Eukaryota;Opisthokonta;Metazoa;Eumetazoa;Bilateria;Protostomia;  
 Spiralia;Lophotrochozoa;Mollusca;Bivalvia;Autobranchia;Pteriormorphia;Pect  
 inida;Pectinoidea;Pectinidae;Mizuhopecten;Mizuhopecten yessoensis  
 UdeM00000015344 225164 222.6 UdeM00000015344 XP\_009064069.1 54.9  
 173 74 2 406 576 53 223 1.60E-54 222.6 225164  
 cellular  
 organisms;Eukaryota;Opisthokonta;Metazoa;Eumetazoa;Bilateria;Protostomia;  
 Spiralia;Lophotrochozoa;Mollusca;Gastropoda;Patellogastropoda;Lottioidea;  
 Lottiidae;Lottia;Lottia gigantea  
 UdeM00000015345 6596 396.4 UdeM00000015345 XP\_045163237.1 74.9 251  
 63 0 1 251 1 251 2.80E-107 396.4 6596 cellular  
 organisms;Eukaryota;Opisthokonta;Metazoa;Eumetazoa;Bilateria;Protostomia;  
 Spiralia;Lophotrochozoa;Mollusca;Bivalvia;Autobranchia;Heteroconchia;Euhe  
 terodonta;Imparidentia;Venerida;Veneroidea;Veneridae;Mercenaria;Mercenari  
 a mercenaria  
 UdeM00000015346 6573 522.7 UdeM00000015346 XP\_021366557.1 50.8 537  
 239 7 3 520 4 534 5.30E-145 522.7 6573 cellular  
 organisms;Eukaryota;Opisthokonta;Metazoa;Eumetazoa;Bilateria;Protostomia;  
 Spiralia;Lophotrochozoa;Mollusca;Bivalvia;Autobranchia;Pteriormorphia;Pect  
 inida;Pectinoidea;Pectinidae;Mizuhopecten;Mizuhopecten yessoensis  
 UdeM00000015347 6596 278.9 UdeM00000015347 XP\_045163886.1 48.4 306  
 152 2 1 301 1 305 7.80E-72 278.9 6596 cellular  
 organisms;Eukaryota;Opisthokonta;Metazoa;Eumetazoa;Bilateria;Protostomia;  
 Spiralia;Lophotrochozoa;Mollusca;Bivalvia;Autobranchia;Heteroconchia;Euhe  
 terodonta;Imparidentia;Venerida;Veneroidea;Veneridae;Mercenaria;Mercenari  
 a mercenaria  
 UdeM00000015348 29159 108.6 UdeM00000015348 XP\_034336102.1 40.8 130  
 44 1 1 97 1 130 4.70E-21 108.6 29159 cellular  
 organisms;Eukaryota;Opisthokonta;Metazoa;Eumetazoa;Bilateria;Protostomia;  
 Spiralia;Lophotrochozoa;Mollusca;Bivalvia;Autobranchia;Pteriormorphia;Ostr  
 eida;Ostreoidea;Ostreidae;Crassostrea;Crassostrea gigas  
 UdeM00000015349 7574 236.9 UdeM00000015349 XP\_013409676.1 50.7 268  
 115 5 1 261 1 258 3.60E-59 236.9 7574 cellular  
 organisms;Eukaryota;Opisthokonta;Metazoa;Eumetazoa;Bilateria;Protostomia;  
 Spiralia;Lophotrochozoa;Brachiopoda;Linguliformea;Lingulata;Lingulida;Lin  
 guloidea;Lingulidae;Lingula;Lingula anatina  
 UdeM00000015350 7574 444.1 UdeM00000015350 XP\_013382110.1 46.9 475  
 229 7 1 472 37 491 2.20E-121 444.1 7574 cellular  
 organisms;Eukaryota;Opisthokonta;Metazoa;Eumetazoa;Bilateria;Protostomia;  
 Spiralia;Lophotrochozoa;Brachiopoda;Linguliformea;Lingulata;Lingulida;Lin  
 guloidea;Lingulidae;Lingula;Lingula anatina

UdeM00000015351 6596 102.4 UdeM00000015351 XP\_045162127.1 51.4 107  
 45 2 2 101 68 174 3.40E-19 102.4 6596 cellular  
 organisms;Eukaryota;Opisthokonta;Metazoa;Eumetazoa;Bilateria;Protostomia;  
 Spiralia;Lophotrochozoa;Mollusca;Bivalvia;Autobranhia;Heteroconchia;Euhe  
 terodonta;Imparidentia;Venerida;Veneroidea;Veneridae;Mercenaria;Mercenari  
 a mercenaria

UdeM00000015353 6596 636.3 UdeM00000015353 XP\_045161437.1 79.7 384  
 78 0 43 426 36 419 3.20E-179 636.3 6596 cellular  
 organisms;Eukaryota;Opisthokonta;Metazoa;Eumetazoa;Bilateria;Protostomia;  
 Spiralia;Lophotrochozoa;Mollusca;Bivalvia;Autobranhia;Heteroconchia;Euhe  
 terodonta;Imparidentia;Venerida;Veneroidea;Veneridae;Mercenaria;Mercenari  
 a mercenaria

UdeM00000015354 6596 421.4 UdeM00000015354 XP\_045162399.1 54.6 559  
 165 11 1 501 1 528 1.60E-114 421.4 6596 cellular  
 organisms;Eukaryota;Opisthokonta;Metazoa;Eumetazoa;Bilateria;Protostomia;  
 Spiralia;Lophotrochozoa;Mollusca;Bivalvia;Autobranhia;Heteroconchia;Euhe  
 terodonta;Imparidentia;Venerida;Veneroidea;Veneridae;Mercenaria;Mercenari  
 a mercenaria

UdeM00000015355 1735272 120.2 UdeM00000015355 XP\_041353531.1 38.8  
 160 96 2 29 186 41 200 2.90E-24 120.2 1735272  
 cellular  
 organisms;Eukaryota;Opisthokonta;Metazoa;Eumetazoa;Bilateria;Protostomia;  
 Spiralia;Lophotrochozoa;Mollusca;Gastropoda;Neomphalina;Neomphaloidea;Pel  
 tospiridae;Gigantopelta;Gigantopelta aegis

UdeM00000015356 1735272 158.7 UdeM00000015356 XP\_041353531.1 37.1  
 221 137 2 29 247 41 261 1.10E-35 158.7 1735272  
 cellular  
 organisms;Eukaryota;Opisthokonta;Metazoa;Eumetazoa;Bilateria;Protostomia;  
 Spiralia;Lophotrochozoa;Mollusca;Gastropoda;Neomphalina;Neomphaloidea;Pel  
 tospiridae;Gigantopelta;Gigantopelta aegis

UdeM00000015357 1735272 199.9 UdeM00000015357 XP\_041354653.1 42.8  
 236 133 2 2 235 154 389 3.70E-48 199.9 1735272  
 cellular  
 organisms;Eukaryota;Opisthokonta;Metazoa;Eumetazoa;Bilateria;Protostomia;  
 Spiralia;Lophotrochozoa;Mollusca;Gastropoda;Neomphalina;Neomphaloidea;Pel  
 tospiridae;Gigantopelta;Gigantopelta aegis

UdeM00000015358 7741 508.8 UdeM00000015358 XP\_019618826.1 56.8 435  
 187 1 1 434 47 481 8.50E-141 508.8 7741 cellular  
 organisms;Eukaryota;Opisthokonta;Metazoa;Eumetazoa;Bilateria;Deuterostomi  
 a;Chordata;Cephalochordata;Leptocardii;Amphioxiformes;Branchiostomidae;Br  
 anchiostoma;Branchiostoma belcheri

UdeM00000015359 1735272 370.9 UdeM00000015359 XP\_041353531.1 40.2  
 473 275 5 36 504 41 509 2.50E-99 370.9 1735272  
 cellular  
 organisms;Eukaryota;Opisthokonta;Metazoa;Eumetazoa;Bilateria;Protostomia;  
 Spiralia;Lophotrochozoa;Mollusca;Gastropoda;Neomphalina;Neomphaloidea;Pel  
 tospiridae;Gigantopelta;Gigantopelta aegis

UdeM00000015360 37621 310.1 UdeM00000015360 XP\_014669105.1 69 255  
 79 0 1 255 1 255 2.70E-81 310.1 37621 cellular  
 organisms;Eukaryota;Opisthokonta;Metazoa;Eumetazoa;Bilateria;Protostomia;  
 Ecdysozoa;Scalidophora;Priapulida;Priapulimorpha;Priapulimorphida;Priapul  
 idae;Priapululus;Priapululus caudatus

UdeM00000015361 6596 845.5 UdeM00000015361 XP\_045163067.1 73.1 588  
 147 5 1 585 1 580 4.30E-242 845.5 6596 cellular

organisms;Eukaryota;Opisthokonta;Metazoa;Eumetazoa;Bilateria;Protostomia; Spiralia;Lophotrochozoa;Mollusca;Bivalvia;Autobranchia;Heteroconchia;Euheterodonta;Imparidentia;Venerida;Veneroidea;Veneridae;Mercenaria;Mercenaria mercenaria

UdeM00000015362 6579 1221.8 UdeM00000015362 XP\_033763671.1 64.6  
917 297 9 194 1106 552 1444 0.00E+00 1221.8 6579  
cellular

organisms;Eukaryota;Opisthokonta;Metazoa;Eumetazoa;Bilateria;Protostomia; Spiralia;Lophotrochozoa;Mollusca;Bivalvia;Autobranchia;Pteriomorpha;Pectinida;Pectinoidea;Pectinidae;Pecten;Pecten maximus

UdeM00000015363 1735272 119 UdeM00000015363 XP\_041379021.1 44.5  
128 67 1 328 451 33 160 1.60E-23 119 1735272  
cellular

organisms;Eukaryota;Opisthokonta;Metazoa;Eumetazoa;Bilateria;Protostomia; Spiralia;Lophotrochozoa;Mollusca;Gastropoda;Neomphalina;Neomphaloidea;Peltospiridae;Gigantopelta;Gigantopelta aegis

UdeM00000015364 6596 236.5 UdeM00000015364 XP\_045162516.1 54.1 209  
94 1 3 209 2 210 3.10E-59 236.5 6596 cellular

organisms;Eukaryota;Opisthokonta;Metazoa;Eumetazoa;Bilateria;Protostomia; Spiralia;Lophotrochozoa;Mollusca;Bivalvia;Autobranchia;Heteroconchia;Euheterodonta;Imparidentia;Venerida;Veneroidea;Veneridae;Mercenaria;Mercenaria mercenaria

UdeM00000015365 6565 123.6 UdeM00000015365 XP\_022336943.1 43.8 176  
85 5 48 211 95 268 3.20E-25 123.6 6565 cellular

organisms;Eukaryota;Opisthokonta;Metazoa;Eumetazoa;Bilateria;Protostomia; Spiralia;Lophotrochozoa;Mollusca;Bivalvia;Autobranchia;Pteriomorpha;Ostreida;Ostreoidea;Ostreidae;Crassostrea;Crassostrea virginica

UdeM00000015366 6579 468.4 UdeM00000015366 XP\_033764057.1 68.6 325  
96 2 8 326 12 336 7.50E-129 468.4 6579 cellular

organisms;Eukaryota;Opisthokonta;Metazoa;Eumetazoa;Bilateria;Protostomia; Spiralia;Lophotrochozoa;Mollusca;Bivalvia;Autobranchia;Pteriomorpha;Pectinida;Pectinoidea;Pectinidae;Pecten;Pecten maximus

UdeM00000015367 225164 125.2 UdeM00000015367 XP\_009066736.1 70.8  
72 21 0 20 91 314 385 4.70E-26 125.2 225164  
cellular

organisms;Eukaryota;Opisthokonta;Metazoa;Eumetazoa;Bilateria;Protostomia; Spiralia;Lophotrochozoa;Mollusca;Gastropoda;Patellogastropoda;Lottioidae;Lottiidae;Lottia;Lottia gigantea

UdeM00000015368 6565 580.5 UdeM00000015368 XP\_022308439.1 46.3 698  
339 10 417 1099 604 1280 4.60E-162 580.5 6565 cellular

organisms;Eukaryota;Opisthokonta;Metazoa;Eumetazoa;Bilateria;Protostomia; Spiralia;Lophotrochozoa;Mollusca;Bivalvia;Autobranchia;Pteriomorpha;Ostreida;Ostreoidea;Ostreidae;Crassostrea;Crassostrea virginica

UdeM00000015369 29159 529.3 UdeM00000015369 XP\_034315642.1 45.5 671  
329 10 400 1053 80 730 1.20E-146 529.3 29159 cellular

organisms;Eukaryota;Opisthokonta;Metazoa;Eumetazoa;Bilateria;Protostomia; Spiralia;Lophotrochozoa;Mollusca;Bivalvia;Autobranchia;Pteriomorpha;Ostreida;Ostreoidea;Ostreidae;Crassostrea;Crassostrea gigas

UdeM00000015370 52670 82.4 UdeM00000015370 XP\_013874439.1 56.7 60  
26 0 46 105 1714 1773 3.90E-13 82.4 52670 cellular

organisms;Eukaryota;Opisthokonta;Metazoa;Eumetazoa;Bilateria;Deuterostomia;Chordata;Craniata;Vertebrata;Gnathostomata;Teleostomi;Euteleostomi;Actinopterygii;Actinopteri;Neopterygii;Teleostei;Osteoglossocephalai;Clupeocephala;Euteleostei;Neoteleostei;Eurypterygia;Ctenosquamata;Acantho-

rphata;Euacanthomorpha;Percomorphaceae;Ovalentaria;Atherinomorphae;Cyp  
rinodontiformes;Aplocheiloidei;Rivulidae;Austrofundulus;Austrofundulus  
limnaeus

UdeM00000015371 52670 82.4 UdeM00000015371 XP\_013874439.1 56.7 60  
26 0 44 103 1714 1773 3.80E-13 82.4 52670 cellular

organisms;Eukaryota;Opisthokonta;Metazoa;Eumetazoa;Bilateria;Deuterostomi  
a;Chordata;Craniata;Vertebrata;Gnathostomata;Teleostomi;Euteleostomi;Acti  
nopterygii;Actinopteri;Neopterygii;Teleostei;Osteoglossocephalai;Clupeoce  
phala;Euteleosteomorpha;Neoteleostei;Eurypterygia;Ctenosquamata;Acanthomo  
rphata;Euacanthomorpha;Percomorphaceae;Ovalentaria;Atherinomorphae;Cyp  
rinodontiformes;Aplocheiloidei;Rivulidae;Austrofundulus;Austrofundulus  
limnaeus

UdeM00000015372 1232801 60.5 UdeM00000015372 XP\_043214649.1 42.4  
66 31 1 35 93 2516 2581 1.40E-06 60.5 1232801  
cellular

organisms;Eukaryota;Opisthokonta;Metazoa;Eumetazoa;Bilateria;Protostomia;  
Ecdysozoa;Panarthropoda;Arthropoda;Mandibulata;Pancrustacea;Crustacea;Mul  
ticrustacea;Hexanauplia;Thecostraca;Cirripedia;Thoracica;Sessilia;Balanid  
ae;Amphibalanus;Amphibalanus amphitrite

UdeM00000015373 6596 102.4 UdeM00000015373 XP\_045181277.1 33.9 186  
103 6 151 324 143 320 1.10E-18 102.4 6596 cellular

organisms;Eukaryota;Opisthokonta;Metazoa;Eumetazoa;Bilateria;Protostomia;  
Spiralia;Lophotrochozoa;Mollusca;Bivalvia;Autobranchia;Heteroconchia;Euhe  
terodonta;Imparidentia;Venerida;Veneroidea;Veneridae;Mercenaria;Mercenari  
a mercenaria

UdeM00000042814 6596 529.3 UdeM00000042814 XP\_045209597.1 69 381  
118 0 17 397 26 406 4.40E-147 529.3 6596 cellular

organisms;Eukaryota;Opisthokonta;Metazoa;Eumetazoa;Bilateria;Protostomia;  
Spiralia;Lophotrochozoa;Mollusca;Bivalvia;Autobranchia;Heteroconchia;Euhe  
terodonta;Imparidentia;Venerida;Veneroidea;Veneridae;Mercenaria;Mercenari  
a mercenaria

UdeM00000044130 6596 1093.2 UdeM00000044130 XP\_045193712.1 46.1  
1659 763 42 9 1588 18 1623 0.00E+00 1093.2 6596  
cellular

organisms;Eukaryota;Opisthokonta;Metazoa;Eumetazoa;Bilateria;Protostomia;  
Spiralia;Lophotrochozoa;Mollusca;Bivalvia;Autobranchia;Heteroconchia;Euhe  
terodonta;Imparidentia;Venerida;Veneroidea;Veneridae;Mercenaria;Mercenari  
a mercenaria

UdeM00000031494 6596 492.3 UdeM00000031494 XP\_045175120.1 72 318  
89 0 1 318 1 318 4.70E-136 492.3 6596 cellular

organisms;Eukaryota;Opisthokonta;Metazoa;Eumetazoa;Bilateria;Protostomia;  
Spiralia;Lophotrochozoa;Mollusca;Bivalvia;Autobranchia;Heteroconchia;Euhe  
terodonta;Imparidentia;Venerida;Veneroidea;Veneridae;Mercenaria;Mercenari  
a mercenaria

UdeM00000031495 27687 112.1 UdeM00000031495 XP\_028665326.1 37.1 194  
98 5 10 196 43 219 8.60E-22 112.1 27687 cellular

organisms;Eukaryota;Opisthokonta;Metazoa;Eumetazoa;Bilateria;Deuterostomi  
a;Chordata;Craniata;Vertebrata;Gnathostomata;Teleostomi;Euteleostomi;Acti  
nopterygii;Cladistia;Polypteriformes;Polypteridae;Erpetoichthys;Erpetoich  
thys calabaricus

UdeM00000031496 6596 1281.5 UdeM00000031496 XP\_045175624.1 58.3  
1139 413 16 13 1101 99 1225 0.00E+00 1281.5 6596  
cellular

organisms;Eukaryota;Opisthokonta;Metazoa;Eumetazoa;Bilateria;Protostomia;

Spiralia;Lophotrochozoa;Mollusca;Bivalvia;Autobranchia;Heteroconchia;Euheterodonta;Imparidentia;Venerida;Veneroidea;Veneridae;Mercenaria;Mercenaria mercenaria

UdeM00000031498 6596 137.9 UdeM00000031498 XP\_045166822.1 38.5 174  
103 2 329 499 30 202 3.60E-29 137.9 6596 cellular

organisms;Eukaryota;Opisthokonta;Metazoa;Eumetazoa;Bilateria;Protostomia;Spiralia;Lophotrochozoa;Mollusca;Bivalvia;Autobranchia;Heteroconchia;Euheterodonta;Imparidentia;Venerida;Veneroidea;Veneridae;Mercenaria;Mercenaria mercenaria

UdeM00000031499 6565 89 UdeM00000031499 XP\_022325297.1 34.1 220  
119 6 288 499 399 600 2.00E-14 89 6565 cellular

organisms;Eukaryota;Opisthokonta;Metazoa;Eumetazoa;Bilateria;Protostomia;Spiralia;Lophotrochozoa;Mollusca;Bivalvia;Autobranchia;Pteriormorphia;Ostreida;Ostreoidea;Ostreidae;Crassostrea;Crassostrea virginica

UdeM00000031500 225164 89.7 UdeM00000031500 XP\_009050521.1 29.3  
215 116 5 278 486 288 472 1.10E-14 89.7 225164  
cellular

organisms;Eukaryota;Opisthokonta;Metazoa;Eumetazoa;Bilateria;Protostomia;Spiralia;Lophotrochozoa;Mollusca;Gastropoda;Patellogastropoda;Lottioidea;Lottiidae;Lottia;Lottia gigantea

UdeM00000031502 6573 119 UdeM00000031502 XP\_021370093.1 41.8 153  
87 2 609 761 423 573 2.60E-23 119 6573 cellular

organisms;Eukaryota;Opisthokonta;Metazoa;Eumetazoa;Bilateria;Protostomia;Spiralia;Lophotrochozoa;Mollusca;Bivalvia;Autobranchia;Pteriormorphia;Pectinida;Pectinoidea;Pectinidae;Mizuhopecten;Mizuhopecten yessoensis

UdeM00000031503 6565 91.3 UdeM00000031503 XP\_022325297.1 33.6 217  
123 5 340 551 399 599 4.30E-15 91.3 6565 cellular

organisms;Eukaryota;Opisthokonta;Metazoa;Eumetazoa;Bilateria;Protostomia;Spiralia;Lophotrochozoa;Mollusca;Bivalvia;Autobranchia;Pteriormorphia;Ostreida;Ostreoidea;Ostreidae;Crassostrea;Crassostrea virginica

UdeM00000031505 6565 95.5 UdeM00000031505 XP\_022325297.1 30.7 270  
160 6 287 551 352 599 2.30E-16 95.5 6565 cellular

organisms;Eukaryota;Opisthokonta;Metazoa;Eumetazoa;Bilateria;Protostomia;Spiralia;Lophotrochozoa;Mollusca;Bivalvia;Autobranchia;Pteriormorphia;Ostreida;Ostreoidea;Ostreidae;Crassostrea;Crassostrea virginica

UdeM00000031507 215358 84.7 UdeM00000031507 XP\_019113880.2 28.1  
210 133 5 279 485 2 196 3.50E-13 84.7 215358

cellular  
organisms;Eukaryota;Opisthokonta;Metazoa;Eumetazoa;Bilateria;Deuterostomia;Chordata;Craniata;Vertebrata;Gnathostomata;Teleostomi;Euteleostomi;Actinopterygii;Actinopteri;Neopterygii;Teleostei;Osteoglossocephalai;Clupeocephala;Euteleosteomorpha;Neoteleostei;Eurypterygia;Ctenosquamata;Acanthomorphata;Euacanthomorphacea;Percomorphaceae;Eupercaria;Eupercaria incertae sedis;Sciaenidae;Larimichthys;Larimichthys crocea

UdeM00000031510 48699 139 UdeM00000031510 XP\_014873036.1 26 431  
280 9 96 513 47 451 1.60E-29 139 48699 cellular

organisms;Eukaryota;Opisthokonta;Metazoa;Eumetazoa;Bilateria;Deuterostomia;Chordata;Craniata;Vertebrata;Gnathostomata;Teleostomi;Euteleostomi;Actinopterygii;Actinopteri;Neopterygii;Teleostei;Osteoglossocephalai;Clupeocephala;Euteleosteomorpha;Neoteleostei;Eurypterygia;Ctenosquamata;Acanthomorphata;Euacanthomorphacea;Percomorphaceae;Ovalentaria;Atherinomorphae;Cypriodontiformes;Cyprinodontoides;Poeciliidae;Poeciliinae;Poecilia;Poecilia latipinna

UdeM00000031511 48699 145.2 UdeM00000031511 XP\_014873036.1 27.5 443  
 260 11 96 515 47 451 2.30E-31 145.2 48699 cellular  
 organisms;Eukaryota;Opisthokonta;Metazoa;Eumetazoa;Bilateria;Deuterostomi  
 a;Chordata;Craniata;Vertebrata;Gnathostomata;Teleostomi;Euteleostomi;Acti  
 nopterygii;Actinopteri;Neopterygii;Teleostei;Osteoglossocephalai;Clupeoce  
 phala;Euteleostei;Neoteleostei;Eurypterygia;Ctenosquamata;Acanthomo  
 rphata;Euacanthomorpha;Percomorphaceae;Ovalentaria;Atherinomorphae;Cyp  
 rinodontiformes;Cyprinodontoides;Poeciliidae;Poeciliinae;Poecilia;Poecili  
 a latipinna

UdeM00000031512 7539 198.7 UdeM00000031512 XP\_023028017.1 39.3 257  
 153 2 34 287 78 334 1.00E-47 198.7 7539 cellular  
 organisms;Eukaryota;Opisthokonta;Metazoa;Eumetazoa;Bilateria;Protostomia;  
 Ecdysozoa;Panarthropoda;Arthropoda;Mandibulata;Pancrustacea;Hexapoda;Inse  
 cta;Dicondylia;Pterygota;Neoptera;Endopterygota;Coleoptera;Polyphaga;Cucu  
 jiformia;Chrysomeloidea;Chrysomelidae;Chrysomelinae;Doryphorini;Leptinota  
 rsa;Leptinotarsa decemlineata

UdeM00000031513 6573 131.3 UdeM00000031513 XP\_021353057.1 58.5 106  
 42 1 1 106 1 104 5.10E-27 131.3 6573 cellular  
 organisms;Eukaryota;Opisthokonta;Metazoa;Eumetazoa;Bilateria;Protostomia;  
 Spiralia;Lophotrochozoa;Mollusca;Bivalvia;Autobranchia;Pteriormorphia;Pect  
 inida;Pectinoidea;Pectinidae;Mizuhopecten;Mizuhopecten yessoensis

UdeM00000031515 225164 209.1 UdeM00000031515 XP\_009053848.1 44.9  
 234 123 3 1 229 143 375 9.30E-51 209.1 225164  
 cellular  
 organisms;Eukaryota;Opisthokonta;Metazoa;Eumetazoa;Bilateria;Protostomia;  
 Spiralia;Lophotrochozoa;Mollusca;Gastropoda;Patellogastropoda;Lottioidea;  
 Lottiidae;Lottia;Lottia gigantea

UdeM00000031517 225164 235 UdeM00000031517 XP\_009053848.1 42.3  
 291 163 3 32 318 84 373 2.00E-58 235 225164  
 cellular  
 organisms;Eukaryota;Opisthokonta;Metazoa;Eumetazoa;Bilateria;Protostomia;  
 Spiralia;Lophotrochozoa;Mollusca;Gastropoda;Patellogastropoda;Lottioidea;  
 Lottiidae;Lottia;Lottia gigantea

UdeM00000031518 6565 795 UdeM00000031518 XP\_022302594.1 73.8 504  
 131 1 1 504 1 503 5.50E-227 795 6565 cellular  
 organisms;Eukaryota;Opisthokonta;Metazoa;Eumetazoa;Bilateria;Protostomia;  
 Spiralia;Lophotrochozoa;Mollusca;Bivalvia;Autobranchia;Pteriormorphia;Ostr  
 eida;Ostreidae;Crassostrea;Crassostrea virginica

UdeM00000031519 6596 320.1 UdeM00000031519 XP\_045174596.1 32.2 855  
 407 22 241 1064 342 1054 1.10E-83 320.1 6596 cellular  
 organisms;Eukaryota;Opisthokonta;Metazoa;Eumetazoa;Bilateria;Protostomia;  
 Spiralia;Lophotrochozoa;Mollusca;Bivalvia;Autobranchia;Heteroconchia;Euhe  
 terodonta;Imparidentia;Venerida;Veneroidea;Veneridae;Mercenaria;Mercenari  
 a mercenaria

UdeM00000031520 6565 156.4 UdeM00000031520 XP\_022322655.1 47.9 169  
 71 2 6 157 243 411 5.50E-35 156.4 6565 cellular  
 organisms;Eukaryota;Opisthokonta;Metazoa;Eumetazoa;Bilateria;Protostomia;  
 Spiralia;Lophotrochozoa;Mollusca;Bivalvia;Autobranchia;Pteriormorphia;Ostr  
 eida;Ostreidae;Crassostrea;Crassostrea virginica

UdeM00000031520 6565 83.2 UdeM00000031520 XP\_022322655.1 48.8 82  
 42 0 205 286 667 748 6.00E-13 83.2 6565 cellular  
 organisms;Eukaryota;Opisthokonta;Metazoa;Eumetazoa;Bilateria;Protostomia;  
 Spiralia;Lophotrochozoa;Mollusca;Bivalvia;Autobranchia;Pteriormorphia;Ostr  
 eida;Ostreidae;Crassostrea;Crassostrea virginica

UdeM00000031521 6565 132.1 UdeM00000031521 XP\_022322655.1 59 105  
 43 0 1 105 307 411 9.20E-28 132.1 6565 cellular  
 organisms;Eukaryota;Opisthokonta;Metazoa;Eumetazoa;Bilateria;Protostomia;  
 Spiralia;Lophotrochozoa;Mollusca;Bivalvia;Autobranchia;Pteriormorphia;Ostr  
 eida;Ostreoidea;Ostreidae;Crassostrea;Crassostrea virginica  
 UdeM00000031521 6565 83.2 UdeM00000031521 XP\_022322655.1 48.8 82  
 42 0 153 234 667 748 4.90E-13 83.2 6565 cellular  
 organisms;Eukaryota;Opisthokonta;Metazoa;Eumetazoa;Bilateria;Protostomia;  
 Spiralia;Lophotrochozoa;Mollusca;Bivalvia;Autobranchia;Pteriormorphia;Ostr  
 eida;Ostreoidea;Ostreidae;Crassostrea;Crassostrea virginica  
 UdeM00000031522 6565 109.8 UdeM00000031522 XP\_022331706.1 48.5 103  
 53 0 14 116 62 164 2.50E-21 109.8 6565 cellular  
 organisms;Eukaryota;Opisthokonta;Metazoa;Eumetazoa;Bilateria;Protostomia;  
 Spiralia;Lophotrochozoa;Mollusca;Bivalvia;Autobranchia;Pteriormorphia;Ostr  
 eida;Ostreoidea;Ostreidae;Crassostrea;Crassostrea virginica  
 UdeM00000031524 6565 253.4 UdeM00000031524 XP\_022341462.1 33.7 448  
 251 8 105 528 85 510 6.20E-64 253.4 6565 cellular  
 organisms;Eukaryota;Opisthokonta;Metazoa;Eumetazoa;Bilateria;Protostomia;  
 Spiralia;Lophotrochozoa;Mollusca;Bivalvia;Autobranchia;Pteriormorphia;Ostr  
 eida;Ostreoidea;Ostreidae;Crassostrea;Crassostrea virginica  
 UdeM00000031525 6573 236.5 UdeM00000031525 XP\_021349492.1 35.1 388  
 232 7 102 471 49 434 7.00E-59 236.5 6573 cellular  
 organisms;Eukaryota;Opisthokonta;Metazoa;Eumetazoa;Bilateria;Protostomia;  
 Spiralia;Lophotrochozoa;Mollusca;Bivalvia;Autobranchia;Pteriormorphia;Pect  
 inida;Pectinoidea;Pectinidae;Mizuhopecten;Mizuhopecten yessoensis  
 UdeM00000031526 2607531 243.8 UdeM00000031526 XP\_029637171.1 37.3  
 383 216 7 123 492 27 398 4.60E-61 243.8 2607531  
 cellular  
 organisms;Eukaryota;Opisthokonta;Metazoa;Eumetazoa;Bilateria;Protostomia;  
 Spiralia;Lophotrochozoa;Mollusca;Cephalopoda;Coleoidea;Octopodiformes;Oct  
 opoda;Incirrata;Octopodidae;Octopus;Octopus sinensis  
 UdeM00000031527 2607531 243.8 UdeM00000031527 XP\_029637171.1 37.3  
 383 216 7 204 573 27 398 5.30E-61 243.8 2607531  
 cellular  
 organisms;Eukaryota;Opisthokonta;Metazoa;Eumetazoa;Bilateria;Protostomia;  
 Spiralia;Lophotrochozoa;Mollusca;Cephalopoda;Coleoidea;Octopodiformes;Oct  
 opoda;Incirrata;Octopodidae;Octopus;Octopus sinensis  
 UdeM00000031528 7739 63.9 UdeM00000031528 XP\_035677667.1 39.8 93  
 53 2 50 142 288 377 2.00E-07 63.9 7739 cellular  
 organisms;Eukaryota;Opisthokonta;Metazoa;Eumetazoa;Bilateria;Deuterostomi  
 a;Chordata;Cephalochordata;Leptocardii;Amphioxiformes;Branchiostomidae;Br  
 anchiostoma;Branchiostoma floridae  
 UdeM00000031529 29159 502.3 UdeM00000031529 XP\_034316046.1 70.7 321  
 94 0 7 327 45 365 4.80E-139 502.3 29159 cellular  
 organisms;Eukaryota;Opisthokonta;Metazoa;Eumetazoa;Bilateria;Protostomia;  
 Spiralia;Lophotrochozoa;Mollusca;Bivalvia;Autobranchia;Pteriormorphia;Ostr  
 eida;Ostreoidea;Ostreidae;Crassostrea;Crassostrea gigas  
 UdeM00000031530 37653 708.8 UdeM00000031530 XP\_014772707.1 94.5 347  
 19 0 1 347 1 347 3.50E-201 708.8 37653 cellular  
 organisms;Eukaryota;Opisthokonta;Metazoa;Eumetazoa;Bilateria;Protostomia;  
 Spiralia;Lophotrochozoa;Mollusca;Cephalopoda;Coleoidea;Octopodiformes;Oct  
 opoda;Incirrata;Octopodidae;Octopus;Octopus bimaculoides  
 UdeM00000031531 6596 950.7 UdeM00000031531 XP\_045204827.1 39 1483  
 809 26 8 1430 28 1475 2.20E-273 950.7 6596 cellular

organisms;Eukaryota;Opisthokonta;Metazoa;Eumetazoa;Bilateria;Protostomia;Spiralia;Lophotrochozoa;Mollusca;Bivalvia;Autobranchia;Heteroconchia;Euherodonta;Imparidentia;Venerida;Veneroidea;Veneridae;Mercenaria;Mercenaria mercenaria

UdeM00000031532 225164 99.4 UdeM00000031532 XP\_009048365.1 82.4  
51 9 0 30 80 22 72 2.50E-18 99.4 225164  
cellular

organisms;Eukaryota;Opisthokonta;Metazoa;Eumetazoa;Bilateria;Protostomia;Spiralia;Lophotrochozoa;Mollusca;Gastropoda;Patellogastropoda;Lottioidea;Lottiidae;Lottia;Lottia gigantea

UdeM00000031535 400727 204.5 UdeM00000031535 XP\_025086971.1 55.4  
166 67 2 1 163 268 429 1.00E-49 204.5 400727  
cellular

organisms;Eukaryota;Opisthokonta;Metazoa;Eumetazoa;Bilateria;Protostomia;Spiralia;Lophotrochozoa;Mollusca;Gastropoda;Caenogastropoda;Architaenioglossa;Ampullarioidea;Ampullariidae;Pomacea;Pomacea canaliculata

UdeM00000031536 6596 115.5 UdeM00000031536 XP\_045208432.1 41 188  
92 9 180 353 236 418 1.90E-22 115.5 6596 cellular

organisms;Eukaryota;Opisthokonta;Metazoa;Eumetazoa;Bilateria;Protostomia;Spiralia;Lophotrochozoa;Mollusca;Bivalvia;Autobranchia;Heteroconchia;Euherodonta;Imparidentia;Venerida;Veneroidea;Veneridae;Mercenaria;Mercenaria mercenaria

UdeM00000031537 6596 115.5 UdeM00000031537 XP\_045208432.1 41 188  
92 9 180 353 236 418 1.90E-22 115.5 6596 cellular

organisms;Eukaryota;Opisthokonta;Metazoa;Eumetazoa;Bilateria;Protostomia;Spiralia;Lophotrochozoa;Mollusca;Bivalvia;Autobranchia;Heteroconchia;Euherodonta;Imparidentia;Venerida;Veneroidea;Veneridae;Mercenaria;Mercenaria mercenaria

UdeM00000031538 6706 229.2 UdeM00000031538 XP\_042228469.1 84.3 121  
19 0 1 121 5 125 2.90E-57 229.2 6706 cellular

organisms;Eukaryota;Opisthokonta;Metazoa;Eumetazoa;Bilateria;Protostomia;Ecdysozoa;Panarthropoda;Arthropoda;Mandibulata;Pancrustacea;Crustacea;Multicrustacea;Malacostraca;Eumalacostraca;Eucarida;Decapoda;Pleocyemata;Astacidea;Nephropoidea;Nephropidae;Homarus;Homarus americanus

UdeM00000031539 6596 116.7 UdeM00000031539 XP\_045208432.1 40.7 177  
91 6 217 382 236 409 9.10E-23 116.7 6596 cellular

organisms;Eukaryota;Opisthokonta;Metazoa;Eumetazoa;Bilateria;Protostomia;Spiralia;Lophotrochozoa;Mollusca;Bivalvia;Autobranchia;Heteroconchia;Euherodonta;Imparidentia;Venerida;Veneroidea;Veneridae;Mercenaria;Mercenaria mercenaria

UdeM00000031540 6596 116.7 UdeM00000031540 XP\_045208432.1 40.7 177  
91 6 217 382 236 409 9.20E-23 116.7 6596 cellular

organisms;Eukaryota;Opisthokonta;Metazoa;Eumetazoa;Bilateria;Protostomia;Spiralia;Lophotrochozoa;Mollusca;Bivalvia;Autobranchia;Heteroconchia;Euherodonta;Imparidentia;Venerida;Veneroidea;Veneridae;Mercenaria;Mercenaria mercenaria

UdeM00000031541 6596 116.7 UdeM00000031541 XP\_045208432.1 40.7 177  
91 6 202 367 236 409 9.00E-23 116.7 6596 cellular

organisms;Eukaryota;Opisthokonta;Metazoa;Eumetazoa;Bilateria;Protostomia;Spiralia;Lophotrochozoa;Mollusca;Bivalvia;Autobranchia;Heteroconchia;Euherodonta;Imparidentia;Venerida;Veneroidea;Veneridae;Mercenaria;Mercenaria mercenaria

UdeM00000031542 6596 107.8 UdeM00000031542 XP\_045208432.1 39.8 176  
90 7 216 377 236 409 4.20E-20 107.8 6596 cellular



organisms;Eukaryota;Opisthokonta;Metazoa;Eumetazoa;Bilateria;Protostomia;Spiralia;Lophotrochozoa;Mollusca;Bivalvia;Autobranhia;Heteroconchia;Euherodonta;Imparidentia;Venerida;Veneroidea;Veneridae;Mercenaria;Mercenaria mercenaria

UdeM00000031543 6596 115.2 UdeM00000031543 XP\_045208432.1 42.6 176  
85 7 239 400 236 409 2.80E-22 115.2 6596 cellular

organisms;Eukaryota;Opisthokonta;Metazoa;Eumetazoa;Bilateria;Protostomia;Spiralia;Lophotrochozoa;Mollusca;Bivalvia;Autobranhia;Heteroconchia;Euherodonta;Imparidentia;Venerida;Veneroidea;Veneridae;Mercenaria;Mercenaria mercenaria

UdeM00000031544 6596 115.2 UdeM00000031544 XP\_045208432.1 42.6 176  
85 7 217 378 236 409 2.70E-22 115.2 6596 cellular

organisms;Eukaryota;Opisthokonta;Metazoa;Eumetazoa;Bilateria;Protostomia;Spiralia;Lophotrochozoa;Mollusca;Bivalvia;Autobranhia;Heteroconchia;Euherodonta;Imparidentia;Venerida;Veneroidea;Veneridae;Mercenaria;Mercenaria mercenaria

UdeM00000031546 6579 492.3 UdeM00000031546 XP\_033763107.1 42.8 593  
321 9 9 586 7 596 8.70E-136 492.3 6579 cellular

organisms;Eukaryota;Opisthokonta;Metazoa;Eumetazoa;Bilateria;Protostomia;Spiralia;Lophotrochozoa;Mollusca;Bivalvia;Autobranhia;Pteriormorphia;Pectinida;Pectinoidea;Pectinidae;Pecten;Pecten maximus

UdeM00000031547 6596 471.5 UdeM00000031547 XP\_045177255.1 51.4 405  
196 1 29 432 22 426 1.20E-129 471.5 6596 cellular

organisms;Eukaryota;Opisthokonta;Metazoa;Eumetazoa;Bilateria;Protostomia;Spiralia;Lophotrochozoa;Mollusca;Bivalvia;Autobranhia;Heteroconchia;Euherodonta;Imparidentia;Venerida;Veneroidea;Veneridae;Mercenaria;Mercenaria mercenaria

UdeM00000031548 6596 300.8 UdeM00000031548 XP\_045175907.1 73.8 210  
53 2 1 209 1 209 1.40E-78 300.8 6596 cellular

organisms;Eukaryota;Opisthokonta;Metazoa;Eumetazoa;Bilateria;Protostomia;Spiralia;Lophotrochozoa;Mollusca;Bivalvia;Autobranhia;Heteroconchia;Euherodonta;Imparidentia;Venerida;Veneroidea;Veneridae;Mercenaria;Mercenaria mercenaria

UdeM00000031549 6579 296.2 UdeM00000031549 XP\_033752908.1 72.2 205  
56 1 1 204 1 205 3.50E-77 296.2 6579 cellular

organisms;Eukaryota;Opisthokonta;Metazoa;Eumetazoa;Bilateria;Protostomia;Spiralia;Lophotrochozoa;Mollusca;Bivalvia;Autobranhia;Pteriormorphia;Pectinida;Pectinoidea;Pectinidae;Pecten;Pecten maximus

UdeM00000031550 6596 77 UdeM00000031550 XP\_045215434.1 44.9 89  
49 0 12 100 245 333 1.50E-11 77 6596 cellular

organisms;Eukaryota;Opisthokonta;Metazoa;Eumetazoa;Bilateria;Protostomia;Spiralia;Lophotrochozoa;Mollusca;Bivalvia;Autobranhia;Heteroconchia;Euherodonta;Imparidentia;Venerida;Veneroidea;Veneridae;Mercenaria;Mercenaria mercenaria

UdeM00000031551 139649 108.2 UdeM00000031551 XP\_037944215.1 58.8  
85 34 1 3 86 590 674 5.20E-21 108.2 139649  
cellular

organisms;Eukaryota;Opisthokonta;Metazoa;Eumetazoa;Bilateria;Protostomia;Ecdysozoa;Panarthropoda;Arthropoda;Mandibulata;Pancrustacea;Hexapoda;Insecta;Dicondylia;Pterygota;Neoptera;Endopterygota;Diptera;Brachycera;Muscomorpha;Eremoneura;Cyclorrhapha;Schizophora;Acalyptratae;Diopsoidea;Diopsideae;Teleopsis;Teleopsis dalmanni

UdeM00000031552 139649 135.2 UdeM00000031552 XP\_037944215.1 57.5  
106 44 1 1 105 569 674 4.90E-29 135.2 139649

cellular

organisms;Eukaryota;Opisthokonta;Metazoa;Eumetazoa;Bilateria;Protostomia;Ecdysozoa;Panarthropoda;Arthropoda;Mandibulata;Pancrustacea;Hexapoda;Insecta;Dicondylia;Pterygota;Neoptera;Endopterygota;Diptera;Brachycera;Muscomorpha;Eremoneura;Cyclorrhapha;Schizophora;Acalyptratae;Diopsoidea;Diopsidae;Teleopsis;Teleopsis dalmanni

UdeM00000031553 6596 94.7 UdeM00000031553 XP\_045177028.1 27.7 264  
172 5 94 353 30 278 2.50E-16 94.7 6596 cellular

organisms;Eukaryota;Opisthokonta;Metazoa;Eumetazoa;Bilateria;Protostomia;Spiralia;Lophotrochozoa;Mollusca;Bivalvia;Autobranchia;Heteroconchia;Euheterodonta;Imparidentia;Venerida;Veneroidea;Veneridae;Mercenaria;Mercenaria mercenaria

UdeM00000031554 6596 70.9 UdeM00000031554 XP\_045177028.1 26.8 153  
110 1 21 173 125 275 2.00E-09 70.9 6596 cellular

organisms;Eukaryota;Opisthokonta;Metazoa;Eumetazoa;Bilateria;Protostomia;Spiralia;Lophotrochozoa;Mollusca;Bivalvia;Autobranchia;Heteroconchia;Euheterodonta;Imparidentia;Venerida;Veneroidea;Veneridae;Mercenaria;Mercenaria mercenaria

UdeM00000031557 6579 890.2 UdeM00000031557 XP\_033751358.1 61 764  
251 10 1 738 1 743 1.80E-255 890.2 6579 cellular

organisms;Eukaryota;Opisthokonta;Metazoa;Eumetazoa;Bilateria;Protostomia;Spiralia;Lophotrochozoa;Mollusca;Bivalvia;Autobranchia;Pteriormorphia;Pectinida;Pectinoidea;Pectinidae;Pecten;Pecten maximus

UdeM00000031558 6573 840.9 UdeM00000031558 XP\_021360165.1 56.6 836  
333 12 12 835 11 828 1.40E-240 840.9 6573 cellular

organisms;Eukaryota;Opisthokonta;Metazoa;Eumetazoa;Bilateria;Protostomia;Spiralia;Lophotrochozoa;Mollusca;Bivalvia;Autobranchia;Pteriormorphia;Pectinida;Pectinoidea;Pectinidae;Mizuhopecten;Mizuhopecten yessoensis

UdeM00000031559 6596 288.5 UdeM00000031559 XP\_045174742.1 38.7 375  
216 8 163 532 263 628 1.70E-74 288.5 6596 cellular

organisms;Eukaryota;Opisthokonta;Metazoa;Eumetazoa;Bilateria;Protostomia;Spiralia;Lophotrochozoa;Mollusca;Bivalvia;Autobranchia;Heteroconchia;Euheterodonta;Imparidentia;Venerida;Veneroidea;Veneridae;Mercenaria;Mercenaria mercenaria

UdeM00000031560 6596 238 UdeM00000031560 XP\_045175789.1 47.2 250  
126 4 1 246 1 248 1.30E-59 238 6596 cellular

organisms;Eukaryota;Opisthokonta;Metazoa;Eumetazoa;Bilateria;Protostomia;Spiralia;Lophotrochozoa;Mollusca;Bivalvia;Autobranchia;Heteroconchia;Euheterodonta;Imparidentia;Venerida;Veneroidea;Veneridae;Mercenaria;Mercenaria mercenaria

UdeM00000031561 6596 105.1 UdeM00000031561 XP\_045175780.1 30.2 248  
61 3 1 136 1 248 7.90E-20 105.1 6596 cellular

organisms;Eukaryota;Opisthokonta;Metazoa;Eumetazoa;Bilateria;Protostomia;Spiralia;Lophotrochozoa;Mollusca;Bivalvia;Autobranchia;Heteroconchia;Euheterodonta;Imparidentia;Venerida;Veneroidea;Veneridae;Mercenaria;Mercenaria mercenaria

UdeM00000031562 7906 465.7 UdeM00000031562 XP\_034762010.1 64.2 385  
135 1 1 385 1 382 6.20E-128 465.7 7906 cellular

organisms;Eukaryota;Opisthokonta;Metazoa;Eumetazoa;Bilateria;Deuterostomia;Chordata;Craniata;Vertebrata;Gnathostomata;Teleostomi;Euteleostomi;Actinopterygii;Actinopteri;Chondrostei;Acipenseriformes;Acipenseroides;Acipenseridae;Acipenserinae;Acipenserini;Acipenser;Acipenser ruthenus

UdeM00000018793 6596 210.3 UdeM00000018793 XP\_045207455.1 67.8 149  
48 0 1 149 703 851 1.70E-51 210.3 6596 cellular

organisms;Eukaryota;Opisthokonta;Metazoa;Eumetazoa;Bilateria;Protostomia;Spiralia;Lophotrochozoa;Mollusca;Bivalvia;Autobranchia;Heteroconchia;Euheterodonta;Imparidentia;Venerida;Veneroidea;Veneridae;Mercenaria;Mercenaria mercenaria

UdeM00000018794 6573 67.4 UdeM00000018794 XP\_021354703.1 26.3 175  
95 2 21 162 17 190 2.20E-08 67.4 6573 cellular

organisms;Eukaryota;Opisthokonta;Metazoa;Eumetazoa;Bilateria;Protostomia;Spiralia;Lophotrochozoa;Mollusca;Bivalvia;Autobranchia;Pteriormorphia;Pectinida;Pectinoidea;Pectinidae;Mizuhopecten;Mizuhopecten yessoensis

UdeM00000018795 6596 870.2 UdeM00000018795 XP\_045188050.1 46 1035  
501 9 7 1022 421 1416 2.70E-249 870.2 6596 cellular

organisms;Eukaryota;Opisthokonta;Metazoa;Eumetazoa;Bilateria;Protostomia;Spiralia;Lophotrochozoa;Mollusca;Bivalvia;Autobranchia;Heteroconchia;Euheterodonta;Imparidentia;Venerida;Veneroidea;Veneridae;Mercenaria;Mercenaria mercenaria

UdeM00000018796 2607531 287.3 UdeM00000018796 XP\_036359723.1 32.7  
545 356 7 89 628 119 657 4.60E-74 287.3 2607531  
cellular

organisms;Eukaryota;Opisthokonta;Metazoa;Eumetazoa;Bilateria;Protostomia;Spiralia;Lophotrochozoa;Mollusca;Cephalopoda;Coleoidea;Octopodiformes;Octopoda;Incirrata;Octopodidae;Octopus;Octopus sinensis

UdeM00000018797 2607531 287.3 UdeM00000018797 XP\_036359723.1 32.7  
545 356 7 79 618 119 657 4.60E-74 287.3 2607531

cellular

organisms;Eukaryota;Opisthokonta;Metazoa;Eumetazoa;Bilateria;Protostomia;Spiralia;Lophotrochozoa;Mollusca;Cephalopoda;Coleoidea;Octopodiformes;Octopoda;Incirrata;Octopodidae;Octopus;Octopus sinensis

UdeM00000018798 6596 318.5 UdeM00000018798 XP\_045176613.1 48.3 325  
159 7 30 350 23 342 1.10E-83 318.5 6596 cellular

organisms;Eukaryota;Opisthokonta;Metazoa;Eumetazoa;Bilateria;Protostomia;Spiralia;Lophotrochozoa;Mollusca;Bivalvia;Autobranchia;Heteroconchia;Euheterodonta;Imparidentia;Venerida;Veneroidea;Veneridae;Mercenaria;Mercenaria mercenaria

UdeM00000018802 6596 311.2 UdeM00000018802 XP\_045173349.1 25.7 1036  
536 24 22 842 52 1068 4.00E-81 311.2 6596 cellular

organisms;Eukaryota;Opisthokonta;Metazoa;Eumetazoa;Bilateria;Protostomia;Spiralia;Lophotrochozoa;Mollusca;Bivalvia;Autobranchia;Heteroconchia;Euheterodonta;Imparidentia;Venerida;Veneroidea;Veneridae;Mercenaria;Mercenaria mercenaria

UdeM00000018805 6573 166.8 UdeM00000018805 XP\_021375729.1 29.6 328  
99 2 14 209 10 337 3.00E-38 166.8 6573 cellular

organisms;Eukaryota;Opisthokonta;Metazoa;Eumetazoa;Bilateria;Protostomia;Spiralia;Lophotrochozoa;Mollusca;Bivalvia;Autobranchia;Pteriormorphia;Pectinida;Pectinoidea;Pectinidae;Mizuhopecten;Mizuhopecten yessoensis

UdeM00000018806 6573 144.8 UdeM00000018806 XP\_021371061.1 38.7 235  
108 6 1 204 1 230 1.30E-31 144.8 6573 cellular

organisms;Eukaryota;Opisthokonta;Metazoa;Eumetazoa;Bilateria;Protostomia;Spiralia;Lophotrochozoa;Mollusca;Bivalvia;Autobranchia;Pteriormorphia;Pectinida;Pectinoidea;Pectinidae;Mizuhopecten;Mizuhopecten yessoensis

UdeM00000018807 28377 136.7 UdeM00000018807 XP\_008111589.1 57.5 113  
35 3 11 110 98 210 1.80E-29 136.7 28377 cellular

organisms;Eukaryota;Opisthokonta;Metazoa;Eumetazoa;Bilateria;Deuterostomia;Chordata;Craniata;Vertebrata;Gnathostomata;Teleostomi;Euteleostomi;Sarcopterygii;Dipnotetrapodomorpha;Tetrapoda;Amniota;Sauropsida;Sauria;Lepido

sauria;Squamata;Bifurcata;Unidentata;Episquamata;Toxicofera;Iguania;Dacty  
 loidae;Anolis;Anolis carolinensis  
 UdeM00000018808 29159 215.3 UdeM00000018808 XP\_034324671.1 84.5 129  
 20 0 4 132 226 354 5.40E-53 215.3 29159 cellular  
 organisms;Eukaryota;Opisthokonta;Metazoa;Eumetazoa;Bilateria;Protostomia;  
 Spiralia;Lophotrochozoa;Mollusca;Bivalvia;Autobranchia;Pteriormorphia;Ostr  
 eida;Ostreioidea;Ostreidae;Crassostrea;Crassostrea gigas  
 UdeM00000018809 29159 357.1 UdeM00000018809 XP\_034324671.1 83.3 204  
 34 0 2 205 253 456 1.50E-95 357.1 29159 cellular  
 organisms;Eukaryota;Opisthokonta;Metazoa;Eumetazoa;Bilateria;Protostomia;  
 Spiralia;Lophotrochozoa;Mollusca;Bivalvia;Autobranchia;Pteriormorphia;Ostr  
 eida;Ostreioidea;Ostreidae;Crassostrea;Crassostrea gigas  
 UdeM00000018810 7913 77.8 UdeM00000018810 XP\_041082893.1 51.7 87  
 39 2 1 86 1 85 7.80E-12 77.8 7913 cellular  
 organisms;Eukaryota;Opisthokonta;Metazoa;Eumetazoa;Bilateria;Deuterostomi  
 a;Chordata;Craniata;Vertebrata;Gnathostomata;Teleostomi;Euteleostomi;Acti  
 nopterygii;Actinopteri;Chondrostei;Acipenseriformes;Acipenseroidi;Polyod  
 ontidae;Polyodontinae;Polyodontini;Polyodon;Polyodon spathula  
 UdeM00000018812 6596 332.8 UdeM00000018812 XP\_045176613.1 48.6 346  
 168 8 3 343 4 344 5.20E-88 332.8 6596 cellular  
 organisms;Eukaryota;Opisthokonta;Metazoa;Eumetazoa;Bilateria;Protostomia;  
 Spiralia;Lophotrochozoa;Mollusca;Bivalvia;Autobranchia;Heteroconchia;Euhe  
 terodonta;Imparidentia;Venerida;Veneroidea;Veneridae;Mercenaria;Mercenari  
 a mercenaria  
 UdeM00000018811 6596 332.4 UdeM00000018811 XP\_045176613.1 48.6 346  
 168 8 8 348 4 344 6.90E-88 332.4 6596 cellular  
 organisms;Eukaryota;Opisthokonta;Metazoa;Eumetazoa;Bilateria;Protostomia;  
 Spiralia;Lophotrochozoa;Mollusca;Bivalvia;Autobranchia;Heteroconchia;Euhe  
 terodonta;Imparidentia;Venerida;Veneroidea;Veneridae;Mercenaria;Mercenari  
 a mercenaria  
 UdeM00000018814 6565 114.4 UdeM00000018814 XP\_022297037.1 39.5 167  
 94 3 6 167 11 175 1.40E-22 114.4 6565 cellular  
 organisms;Eukaryota;Opisthokonta;Metazoa;Eumetazoa;Bilateria;Protostomia;  
 Spiralia;Lophotrochozoa;Mollusca;Bivalvia;Autobranchia;Pteriormorphia;Ostr  
 eida;Ostreioidea;Ostreidae;Crassostrea;Crassostrea virginica  
 UdeM00000018815 6596 114 UdeM00000018815 XP\_045202576.1 54.6 108  
 48 1 1 107 87 194 2.00E-22 114 6596 cellular  
 organisms;Eukaryota;Opisthokonta;Metazoa;Eumetazoa;Bilateria;Protostomia;  
 Spiralia;Lophotrochozoa;Mollusca;Bivalvia;Autobranchia;Heteroconchia;Euhe  
 terodonta;Imparidentia;Venerida;Veneroidea;Veneridae;Mercenaria;Mercenari  
 a mercenaria  
 UdeM00000018816 6596 102.8 UdeM00000018816 XP\_045202346.1 37.6 133  
 79 2 12 143 35 164 3.60E-19 102.8 6596 cellular  
 organisms;Eukaryota;Opisthokonta;Metazoa;Eumetazoa;Bilateria;Protostomia;  
 Spiralia;Lophotrochozoa;Mollusca;Bivalvia;Autobranchia;Heteroconchia;Euhe  
 terodonta;Imparidentia;Venerida;Veneroidea;Veneridae;Mercenaria;Mercenari  
 a mercenaria  
 UdeM00000018817 6596 80.1 UdeM00000018817 XP\_045201969.1 44.7 114  
 51 3 1 106 19 128 4.20E-12 80.1 6596 cellular  
 organisms;Eukaryota;Opisthokonta;Metazoa;Eumetazoa;Bilateria;Protostomia;  
 Spiralia;Lophotrochozoa;Mollusca;Bivalvia;Autobranchia;Heteroconchia;Euhe  
 terodonta;Imparidentia;Venerida;Veneroidea;Veneridae;Mercenaria;Mercenari  
 a mercenaria

UdeM00000018818 6596 65.9 UdeM00000018818 XP\_045202346.1 50 54  
 27 0 2 55 94 147 3.50E-08 65.9 6596 cellular  
 organisms;Eukaryota;Opisthokonta;Metazoa;Eumetazoa;Bilateria;Protostomia;  
 Spiralia;Lophotrochozoa;Mollusca;Bivalvia;Autobranhia;Heteroconchia;Euhe  
 terodonta;Imparidentia;Venerida;Veneroidea;Veneridae;Mercenaria;Mercenari  
 a mercenaria  
 UdeM00000018820 6105 117.5 UdeM00000018820 XP\_031551063.1 44 134  
 67 1 1 126 591 724 1.30E-23 117.5 6105 cellular  
 organisms;Eukaryota;Opisthokonta;Metazoa;Eumetazoa;Cnidaria;Anthozoa;Hexa  
 corallia;Actiniaria;Actiniidae;Actinia;Actinia tenebrosa  
 UdeM00000018821 6596 58.9 UdeM00000018821 XP\_045169256.1 30.6 124  
 79 2 11 134 12 128 5.90E-06 58.9 6596 cellular  
 organisms;Eukaryota;Opisthokonta;Metazoa;Eumetazoa;Bilateria;Protostomia;  
 Spiralia;Lophotrochozoa;Mollusca;Bivalvia;Autobranhia;Heteroconchia;Euhe  
 terodonta;Imparidentia;Venerida;Veneroidea;Veneridae;Mercenaria;Mercenari  
 a mercenaria  
 UdeM00000018822 6596 184.1 UdeM00000018822 XP\_045169256.1 44.8 192  
 94 3 1 187 151 335 1.90E-43 184.1 6596 cellular  
 organisms;Eukaryota;Opisthokonta;Metazoa;Eumetazoa;Bilateria;Protostomia;  
 Spiralia;Lophotrochozoa;Mollusca;Bivalvia;Autobranhia;Heteroconchia;Euhe  
 terodonta;Imparidentia;Venerida;Veneroidea;Veneridae;Mercenaria;Mercenari  
 a mercenaria  
 UdeM00000018824 6596 295 UdeM00000018824 XP\_045168479.1 43 342  
 188 2 14 354 33 368 1.30E-76 295 6596 cellular  
 organisms;Eukaryota;Opisthokonta;Metazoa;Eumetazoa;Bilateria;Protostomia;  
 Spiralia;Lophotrochozoa;Mollusca;Bivalvia;Autobranhia;Heteroconchia;Euhe  
 terodonta;Imparidentia;Venerida;Veneroidea;Veneridae;Mercenaria;Mercenari  
 a mercenaria  
 UdeM00000018825 6596 87 UdeM00000018825 XP\_045169256.1 28.8 177  
 119 1 11 187 12 181 2.80E-14 87 6596 cellular  
 organisms;Eukaryota;Opisthokonta;Metazoa;Eumetazoa;Bilateria;Protostomia;  
 Spiralia;Lophotrochozoa;Mollusca;Bivalvia;Autobranhia;Heteroconchia;Euhe  
 terodonta;Imparidentia;Venerida;Veneroidea;Veneridae;Mercenaria;Mercenari  
 a mercenaria  
 UdeM00000018826 29159 74.3 UdeM00000018826 XP\_019928906.2 24.8 286  
 132 6 32 237 442 724 2.30E-10 74.3 29159 cellular  
 organisms;Eukaryota;Opisthokonta;Metazoa;Eumetazoa;Bilateria;Protostomia;  
 Spiralia;Lophotrochozoa;Mollusca;Bivalvia;Autobranhia;Pteriomorphia;Ostr  
 eida;Ostreoidea;Ostreidae;Crassostrea;Crassostrea gigas  
 UdeM00000018827 6596 229.6 UdeM00000018827 XP\_045168479.1 37.1 337  
 157 3 11 292 30 366 5.30E-57 229.6 6596 cellular  
 organisms;Eukaryota;Opisthokonta;Metazoa;Eumetazoa;Bilateria;Protostomia;  
 Spiralia;Lophotrochozoa;Mollusca;Bivalvia;Autobranhia;Heteroconchia;Euhe  
 terodonta;Imparidentia;Venerida;Veneroidea;Veneridae;Mercenaria;Mercenari  
 a mercenaria  
 UdeM00000018828 6596 293.1 UdeM00000018828 XP\_045168479.1 37.6 402  
 243 3 11 411 30 424 5.50E-76 293.1 6596 cellular  
 organisms;Eukaryota;Opisthokonta;Metazoa;Eumetazoa;Bilateria;Protostomia;  
 Spiralia;Lophotrochozoa;Mollusca;Bivalvia;Autobranhia;Heteroconchia;Euhe  
 terodonta;Imparidentia;Venerida;Veneroidea;Veneridae;Mercenaria;Mercenari  
 a mercenaria  
 UdeM00000018830 6596 88.2 UdeM00000018830 XP\_045169256.1 29 162  
 108 1 25 186 26 180 1.30E-14 88.2 6596 cellular  
 organisms;Eukaryota;Opisthokonta;Metazoa;Eumetazoa;Bilateria;Protostomia;

Spiralia;Lophotrochozoa;Mollusca;Bivalvia;Autobranchia;Heteroconchia;Euherodonta;Imparidentia;Venerida;Veneroidea;Veneridae;Mercenaria;Mercenaria mercenaria

UdeM00000018831 6105 161.8 UdeM00000018831 XP\_031551063.1 33.7 288  
175 5 4 275 437 724 1.30E-36 161.8 6105 cellular

organisms;Eukaryota;Opisthokonta;Metazoa;Eumetazoa;Cnidaria;Anthozoa;Hexacorallia;Actiniaria;Actiniidae;Actinia;Actinia tenebrosa

UdeM00000018832 6596 58.5 UdeM00000018832 XP\_045168478.1 38.9 72  
44 0 4 75 648 719 4.40E-06 58.5 6596 cellular

organisms;Eukaryota;Opisthokonta;Metazoa;Eumetazoa;Bilateria;Protostomia;Spiralia;Lophotrochozoa;Mollusca;Bivalvia;Autobranchia;Heteroconchia;Euherodonta;Imparidentia;Venerida;Veneroidea;Veneridae;Mercenaria;Mercenaria mercenaria

UdeM00000018833 6596 389.8 UdeM00000018833 XP\_045168479.1 33.7 627  
392 7 11 637 30 632 6.60E-105 389.8 6596 cellular

organisms;Eukaryota;Opisthokonta;Metazoa;Eumetazoa;Bilateria;Protostomia;Spiralia;Lophotrochozoa;Mollusca;Bivalvia;Autobranchia;Heteroconchia;Euherodonta;Imparidentia;Venerida;Veneroidea;Veneridae;Mercenaria;Mercenaria mercenaria

UdeM00000018834 45351 86.3 UdeM00000018834 XP\_001623471.2 32.8 201  
105 7 10 187 12 205 5.00E-14 86.3 45351 cellular

organisms;Eukaryota;Opisthokonta;Metazoa;Eumetazoa;Cnidaria;Anthozoa;Hexacorallia;Actiniaria;Edwardsiidae;Nematostella;Nematostella vectensis

UdeM00000018835 6596 297.7 UdeM00000018835 XP\_045173349.1 26.2 922  
453 21 22 730 52 959 4.80E-77 297.7 6596 cellular

organisms;Eukaryota;Opisthokonta;Metazoa;Eumetazoa;Bilateria;Protostomia;Spiralia;Lophotrochozoa;Mollusca;Bivalvia;Autobranchia;Heteroconchia;Euherodonta;Imparidentia;Venerida;Veneroidea;Veneridae;Mercenaria;Mercenaria mercenaria

UdeM00000018836 6596 466.8 UdeM00000018836 XP\_045186644.1 32.2 938  
545 26 219 1124 153 1031 7.50E-128 466.8 6596 cellular

organisms;Eukaryota;Opisthokonta;Metazoa;Eumetazoa;Bilateria;Protostomia;Spiralia;Lophotrochozoa;Mollusca;Bivalvia;Autobranchia;Heteroconchia;Euherodonta;Imparidentia;Venerida;Veneroidea;Veneridae;Mercenaria;Mercenaria mercenaria

UdeM00000018837 6596 803.1 UdeM00000018837 XP\_045210494.1 81.7 802  
127 6 21 807 148 944 3.20E-229 803.1 6596 cellular

organisms;Eukaryota;Opisthokonta;Metazoa;Eumetazoa;Bilateria;Protostomia;Spiralia;Lophotrochozoa;Mollusca;Bivalvia;Autobranchia;Heteroconchia;Euherodonta;Imparidentia;Venerida;Veneroidea;Veneridae;Mercenaria;Mercenaria mercenaria

UdeM00000018838 29159 228.4 UdeM00000018838 XP\_011434686.2 79.9 134  
26 1 1 133 7 140 3.00E-56 228.4 29159 cellular

organisms;Eukaryota;Opisthokonta;Metazoa;Eumetazoa;Bilateria;Protostomia;Spiralia;Lophotrochozoa;Mollusca;Bivalvia;Autobranchia;Pteriomorpha;Ostreida;Ostreoidea;Ostreidae;Crassostrea;Crassostrea gigas

UdeM00000018839 6596 330.1 UdeM00000018839 XP\_045208227.1 74.7 225  
56 1 1 224 1 225 2.30E-87 330.1 6596 cellular

organisms;Eukaryota;Opisthokonta;Metazoa;Eumetazoa;Bilateria;Protostomia;Spiralia;Lophotrochozoa;Mollusca;Bivalvia;Autobranchia;Heteroconchia;Euherodonta;Imparidentia;Venerida;Veneroidea;Veneridae;Mercenaria;Mercenaria mercenaria

UdeM00000018841 6579 134.4 UdeM00000018841 XP\_033733207.1 26.7 570  
344 18 1 558 1 508 4.70E-28 134.4 6579 cellular

organisms;Eukaryota;Opisthokonta;Metazoa;Eumetazoa;Bilateria;Protostomia;Spiralia;Lophotrochozoa;Mollusca;Bivalvia;Autobranhia;Pteriomorphia;Pectinida;Pectinoidea;Pectinidae;Pecten;Pecten maximus

UdeM00000018842 6596 90.5 UdeM00000018842 XP\_045207521.1 43.8 112  
61 1 5 114 466 577 3.70E-15 90.5 6596 cellular

organisms;Eukaryota;Opisthokonta;Metazoa;Eumetazoa;Bilateria;Protostomia;Spiralia;Lophotrochozoa;Mollusca;Bivalvia;Autobranhia;Heteroconchia;Euherodonta;Imparidentia;Venerida;Veneroidea;Veneridae;Mercenaria;Mercenaria mercenaria

UdeM00000018843 6596 231.9 UdeM00000018843 XP\_045207522.1 30.9 611  
200 11 290 718 6 576 3.20E-57 231.9 6596 cellular

organisms;Eukaryota;Opisthokonta;Metazoa;Eumetazoa;Bilateria;Protostomia;Spiralia;Lophotrochozoa;Mollusca;Bivalvia;Autobranhia;Heteroconchia;Euherodonta;Imparidentia;Venerida;Veneroidea;Veneridae;Mercenaria;Mercenaria mercenaria

UdeM00000018844 7574 349.7 UdeM00000018844 XP\_013392871.1 34.2 657  
363 11 127 737 73 706 1.40E-92 349.7 7574 cellular

organisms;Eukaryota;Opisthokonta;Metazoa;Eumetazoa;Bilateria;Protostomia;Spiralia;Lophotrochozoa;Brachiopoda;Linguliformea;Lingulata;Lingulida;Linguloidea;Lingulidae;Lingula;Lingula anatina

UdeM00000018845 6596 89 UdeM00000018845 XP\_045185612.1 18.6 826  
546 27 491 1263 405 1157 4.90E-14 89 6596 cellular

organisms;Eukaryota;Opisthokonta;Metazoa;Eumetazoa;Bilateria;Protostomia;Spiralia;Lophotrochozoa;Mollusca;Bivalvia;Autobranhia;Heteroconchia;Euherodonta;Imparidentia;Venerida;Veneroidea;Veneridae;Mercenaria;Mercenaria mercenaria

UdeM00000018846 6596 100.9 UdeM00000018846 XP\_045209928.1 34.7 170  
105 3 1 169 1 165 1.70E-18 100.9 6596 cellular

organisms;Eukaryota;Opisthokonta;Metazoa;Eumetazoa;Bilateria;Protostomia;Spiralia;Lophotrochozoa;Mollusca;Bivalvia;Autobranhia;Heteroconchia;Euherodonta;Imparidentia;Venerida;Veneroidea;Veneridae;Mercenaria;Mercenaria mercenaria

UdeM00000018851 6596 108.6 UdeM00000018851 XP\_045209928.1 38.3 167  
100 2 1 166 1 165 7.90E-21 108.6 6596 cellular

organisms;Eukaryota;Opisthokonta;Metazoa;Eumetazoa;Bilateria;Protostomia;Spiralia;Lophotrochozoa;Mollusca;Bivalvia;Autobranhia;Heteroconchia;Euherodonta;Imparidentia;Venerida;Veneroidea;Veneridae;Mercenaria;Mercenaria mercenaria

UdeM00000018852 6596 72 UdeM00000018852 XP\_045209928.1 27.7 173  
119 1 1 173 1 167 8.70E-10 72 6596 cellular

organisms;Eukaryota;Opisthokonta;Metazoa;Eumetazoa;Bilateria;Protostomia;Spiralia;Lophotrochozoa;Mollusca;Bivalvia;Autobranhia;Heteroconchia;Euherodonta;Imparidentia;Venerida;Veneroidea;Veneridae;Mercenaria;Mercenaria mercenaria

UdeM00000018855 6596 80.9 UdeM00000018855 XP\_045209928.1 32.4 170  
109 2 1 169 1 165 2.40E-12 80.9 6596 cellular

organisms;Eukaryota;Opisthokonta;Metazoa;Eumetazoa;Bilateria;Protostomia;Spiralia;Lophotrochozoa;Mollusca;Bivalvia;Autobranhia;Heteroconchia;Euherodonta;Imparidentia;Venerida;Veneroidea;Veneridae;Mercenaria;Mercenaria mercenaria

UdeM00000018858 29159 59.7 UdeM00000018858 XP\_019919096.1 33.3 108  
62 2 1 106 1 100 4.90E-06 59.7 29159 cellular

organisms;Eukaryota;Opisthokonta;Metazoa;Eumetazoa;Bilateria;Protostomia;

Spiralia;Lophotrochozoa;Mollusca;Bivalvia;Autobranchia;Pteriormorphia;Ostr  
 eida;Ostreoidea;Ostreidae;Crassostrea;Crassostrea gigas  
 UdeM00000018859 6596 109.4 UdeM00000018859 XP\_045209928.1 37.7 167  
 101 2 1 166 1 165 4.70E-21 109.4 6596 cellular  
 organisms;Eukaryota;Opisthokonta;Metazoa;Eumetazoa;Bilateria;Protostomia;  
 Spiralia;Lophotrochozoa;Mollusca;Bivalvia;Autobranchia;Heteroconchia;Euhe  
 terodonta;Imparidentia;Venerida;Veneroidea;Veneridae;Mercenaria;Mercenari  
 a mercenaria  
 UdeM00000018862 29159 60.8 UdeM00000018862 XP\_011424717.2 35.6 118  
 63 4 20 129 40 152 1.70E-06 60.8 29159 cellular  
 organisms;Eukaryota;Opisthokonta;Metazoa;Eumetazoa;Bilateria;Protostomia;  
 Spiralia;Lophotrochozoa;Mollusca;Bivalvia;Autobranchia;Pteriormorphia;Ostr  
 eida;Ostreoidea;Ostreidae;Crassostrea;Crassostrea gigas  
 UdeM00000018863 6596 88.6 UdeM00000018863 XP\_045209928.1 33.5 173  
 109 2 1 172 1 168 3.60E-14 88.6 6596 cellular  
 organisms;Eukaryota;Opisthokonta;Metazoa;Eumetazoa;Bilateria;Protostomia;  
 Spiralia;Lophotrochozoa;Mollusca;Bivalvia;Autobranchia;Heteroconchia;Euhe  
 terodonta;Imparidentia;Venerida;Veneroidea;Veneridae;Mercenaria;Mercenari  
 a mercenaria  
 UdeM00000018864 6596 115.9 UdeM00000018864 XP\_045209928.1 40.7 167  
 96 2 1 166 1 165 5.00E-23 115.9 6596 cellular  
 organisms;Eukaryota;Opisthokonta;Metazoa;Eumetazoa;Bilateria;Protostomia;  
 Spiralia;Lophotrochozoa;Mollusca;Bivalvia;Autobranchia;Heteroconchia;Euhe  
 terodonta;Imparidentia;Venerida;Veneroidea;Veneridae;Mercenaria;Mercenari  
 a mercenaria  
 UdeM00000018865 6596 116.7 UdeM00000018865 XP\_045209928.1 39.5 167  
 98 2 1 166 1 165 2.90E-23 116.7 6596 cellular  
 organisms;Eukaryota;Opisthokonta;Metazoa;Eumetazoa;Bilateria;Protostomia;  
 Spiralia;Lophotrochozoa;Mollusca;Bivalvia;Autobranchia;Heteroconchia;Euhe  
 terodonta;Imparidentia;Venerida;Veneroidea;Veneridae;Mercenaria;Mercenari  
 a mercenaria  
 UdeM00000018866 6596 93.2 UdeM00000018866 XP\_045209928.1 33.5 170  
 108 2 1 170 1 165 3.60E-16 93.2 6596 cellular  
 organisms;Eukaryota;Opisthokonta;Metazoa;Eumetazoa;Bilateria;Protostomia;  
 Spiralia;Lophotrochozoa;Mollusca;Bivalvia;Autobranchia;Heteroconchia;Euhe  
 terodonta;Imparidentia;Venerida;Veneroidea;Veneridae;Mercenaria;Mercenari  
 a mercenaria  
 UdeM00000018867 6596 327.4 UdeM00000018867 XP\_045207178.1 54 263  
 118 1 231 490 1150 1412 3.10E-86 327.4 6596 cellular  
 organisms;Eukaryota;Opisthokonta;Metazoa;Eumetazoa;Bilateria;Protostomia;  
 Spiralia;Lophotrochozoa;Mollusca;Bivalvia;Autobranchia;Heteroconchia;Euhe  
 terodonta;Imparidentia;Venerida;Veneroidea;Veneridae;Mercenaria;Mercenari  
 a mercenaria  
 UdeM00000018868 6596 305.1 UdeM00000018868 XP\_045205492.1 39.9 409  
 221 7 18 404 55 460 1.40E-79 305.1 6596 cellular  
 organisms;Eukaryota;Opisthokonta;Metazoa;Eumetazoa;Bilateria;Protostomia;  
 Spiralia;Lophotrochozoa;Mollusca;Bivalvia;Autobranchia;Heteroconchia;Euhe  
 terodonta;Imparidentia;Venerida;Veneroidea;Veneridae;Mercenaria;Mercenari  
 a mercenaria  
 UdeM00000018869 6596 687.6 UdeM00000018869 XP\_045208802.1 50 1145  
 448 34 1 1106 109 1168 2.70E-194 687.6 6596 cellular  
 organisms;Eukaryota;Opisthokonta;Metazoa;Eumetazoa;Bilateria;Protostomia;  
 Spiralia;Lophotrochozoa;Mollusca;Bivalvia;Autobranchia;Heteroconchia;Euhe



terodonta;Imparidentia;Venerida;Veneroidea;Veneridae;Mercenaria;Mercenari  
 a mercenaria  
 UdeM00000018870 6596 745 UdeM00000018870 XP\_045209128.1 47.3 879  
 352 13 1 869 1 778 1.10E-211 745 6596 cellular  
 organisms;Eukaryota;Opisthokonta;Metazoa;Eumetazoa;Bilateria;Protostomia;  
 Spiralia;Lophotrochozoa;Mollusca;Bivalvia;Autobranhia;Heteroconchia;Euhe  
 terodonta;Imparidentia;Venerida;Veneroidea;Veneridae;Mercenaria;Mercenari  
 a mercenaria  
 UdeM00000018871 6596 609.4 UdeM00000018871 XP\_045209598.1 45.7 716  
 319 11 4 657 13 720 5.50E-171 609.4 6596 cellular  
 organisms;Eukaryota;Opisthokonta;Metazoa;Eumetazoa;Bilateria;Protostomia;  
 Spiralia;Lophotrochozoa;Mollusca;Bivalvia;Autobranhia;Heteroconchia;Euhe  
 terodonta;Imparidentia;Venerida;Veneroidea;Veneridae;Mercenaria;Mercenari  
 a mercenaria  
 UdeM00000018872 6596 347.8 UdeM00000018872 XP\_045209598.1 56.9 283  
 99 3 1 260 438 720 1.20E-92 347.8 6596 cellular  
 organisms;Eukaryota;Opisthokonta;Metazoa;Eumetazoa;Bilateria;Protostomia;  
 Spiralia;Lophotrochozoa;Mollusca;Bivalvia;Autobranhia;Heteroconchia;Euhe  
 terodonta;Imparidentia;Venerida;Veneroidea;Veneridae;Mercenaria;Mercenari  
 a mercenaria  
 UdeM00000018873 6596 612.8 UdeM00000018873 XP\_045209598.1 50.6 609  
 259 8 76 650 120 720 4.90E-172 612.8 6596 cellular  
 organisms;Eukaryota;Opisthokonta;Metazoa;Eumetazoa;Bilateria;Protostomia;  
 Spiralia;Lophotrochozoa;Mollusca;Bivalvia;Autobranhia;Heteroconchia;Euhe  
 terodonta;Imparidentia;Venerida;Veneroidea;Veneridae;Mercenaria;Mercenari  
 a mercenaria  
 UdeM00000018875 37621 121.3 UdeM00000018875 XP\_014676995.1 27 319  
 106 3 1 192 136 454 1.50E-24 121.3 37621 cellular  
 organisms;Eukaryota;Opisthokonta;Metazoa;Eumetazoa;Bilateria;Protostomia;  
 Ecdysozoa;Scalidophora;Priapulida;Priapulimorpha;Priapulimorphida;Priapul  
 idae;Priapulul;Priapulul caudatus  
 UdeM00000018876 37621 144.4 UdeM00000018876 XP\_014676995.1 28.4 356  
 128 3 1 229 136 491 1.80E-31 144.4 37621 cellular  
 organisms;Eukaryota;Opisthokonta;Metazoa;Eumetazoa;Bilateria;Protostomia;  
 Ecdysozoa;Scalidophora;Priapulida;Priapulimorpha;Priapulimorphida;Priapul  
 idae;Priapulul;Priapulul caudatus  
 UdeM00000018878 6596 1255.4 UdeM00000018878 XP\_045189898.1 37.4  
 1734 1005 38 102 1793 182 1877 0.00E+00 1255.4 6596  
 cellular  
 organisms;Eukaryota;Opisthokonta;Metazoa;Eumetazoa;Bilateria;Protostomia;  
 Spiralia;Lophotrochozoa;Mollusca;Bivalvia;Autobranhia;Heteroconchia;Euhe  
 terodonta;Imparidentia;Venerida;Veneroidea;Veneridae;Mercenaria;Mercenari  
 a mercenaria  
 UdeM00000018879 6596 267.7 UdeM00000018879 XP\_045199866.1 45 311  
 164 3 26 330 1818 2127 2.80E-68 267.7 6596 cellular  
 organisms;Eukaryota;Opisthokonta;Metazoa;Eumetazoa;Bilateria;Protostomia;  
 Spiralia;Lophotrochozoa;Mollusca;Bivalvia;Autobranhia;Heteroconchia;Euhe  
 terodonta;Imparidentia;Venerida;Veneroidea;Veneridae;Mercenaria;Mercenari  
 a mercenaria  
 UdeM00000018880 1735272 308.9 UdeM00000018880 XP\_041357551.1 33.9  
 607 382 14 1 599 41 636 1.40E-80 308.9 1735272  
 cellular  
 organisms;Eukaryota;Opisthokonta;Metazoa;Eumetazoa;Bilateria;Protostomia;

Spiralia; Lophotrochozoa; Mollusca; Gastropoda; Neomphalina; Neomphaloidea; Peltospiridae; Gigantopelta; Gigantopelta aegis

UdeM00000018881 6596 103.2 UdeM00000018881 XP\_045167077.1 53.8 78  
36 0 111 188 872 949 4.70E-19 103.2 6596 cellular  
organisms; Eukaryota; Opisthokonta; Metazoa; Eumetazoa; Bilateria; Protostomia; Spiralia; Lophotrochozoa; Mollusca; Bivalvia; Autobranchia; Heteroconchia; Euheterodonta; Imparidentia; Venerida; Veneroidea; Veneridae; Mercenaria; Mercenaria mercenaria

UdeM00000018882 50429 249.6 UdeM00000018882 XP\_022803615.1 30 516  
323 6 6 484 346 860 8.70E-63 249.6 50429 cellular  
organisms; Eukaryota; Opisthokonta; Metazoa; Eumetazoa; Cnidaria; Anthozoa; Hexacorallia; Scleractinia; Astrocoeniina; Pocilloporidae; Stylophora; Stylophora pistillata

UdeM00000018883 50429 249.6 UdeM00000018883 XP\_022803615.1 30 516  
323 6 6 484 346 860 8.70E-63 249.6 50429 cellular  
organisms; Eukaryota; Opisthokonta; Metazoa; Eumetazoa; Cnidaria; Anthozoa; Hexacorallia; Scleractinia; Astrocoeniina; Pocilloporidae; Stylophora; Stylophora pistillata

UdeM00000018884 1735272 315.5 UdeM00000018884 XP\_041357551.1 30.9  
647 425 9 27 665 38 670 1.90E-82 315.5 1735272  
cellular  
organisms; Eukaryota; Opisthokonta; Metazoa; Eumetazoa; Bilateria; Protostomia; Spiralia; Lophotrochozoa; Mollusca; Gastropoda; Neomphalina; Neomphaloidea; Peltospiridae; Gigantopelta; Gigantopelta aegis

UdeM00000018885 1735272 303.1 UdeM00000018885 XP\_041357551.1 33.7  
597 381 13 6 597 4 590 7.80E-79 303.1 1735272  
cellular  
organisms; Eukaryota; Opisthokonta; Metazoa; Eumetazoa; Bilateria; Protostomia; Spiralia; Lophotrochozoa; Mollusca; Gastropoda; Neomphalina; Neomphaloidea; Peltospiridae; Gigantopelta; Gigantopelta aegis

UdeM00000018887 6596 250.4 UdeM00000018887 XP\_045199866.1 44.7 291  
157 2 1 288 1838 2127 4.20E-63 250.4 6596 cellular  
organisms; Eukaryota; Opisthokonta; Metazoa; Eumetazoa; Bilateria; Protostomia; Spiralia; Lophotrochozoa; Mollusca; Bivalvia; Autobranchia; Heteroconchia; Euheterodonta; Imparidentia; Venerida; Veneroidea; Veneridae; Mercenaria; Mercenaria mercenaria

UdeM00000018888 1735272 273.5 UdeM00000018888 XP\_041357551.1 33.3  
550 308 12 3 542 25 525 5.90E-70 273.5 1735272  
cellular  
organisms; Eukaryota; Opisthokonta; Metazoa; Eumetazoa; Bilateria; Protostomia; Spiralia; Lophotrochozoa; Mollusca; Gastropoda; Neomphalina; Neomphaloidea; Peltospiridae; Gigantopelta; Gigantopelta aegis

UdeM00000018889 6596 909.8 UdeM00000018889 XP\_045157300.1 40.8 1158  
603 26 1 1104 423 1551 4.10E-261 909.8 6596 cellular  
organisms; Eukaryota; Opisthokonta; Metazoa; Eumetazoa; Bilateria; Protostomia; Spiralia; Lophotrochozoa; Mollusca; Bivalvia; Autobranchia; Heteroconchia; Euheterodonta; Imparidentia; Venerida; Veneroidea; Veneridae; Mercenaria; Mercenaria mercenaria

UdeM00000018890 6596 192.2 UdeM00000018890 XP\_045157647.1 31.7 312  
194 6 94 396 2209 2510 1.30E-45 192.2 6596 cellular  
organisms; Eukaryota; Opisthokonta; Metazoa; Eumetazoa; Bilateria; Protostomia; Spiralia; Lophotrochozoa; Mollusca; Bivalvia; Autobranchia; Heteroconchia; Euheterodonta; Imparidentia; Venerida; Veneroidea; Veneridae; Mercenaria; Mercenaria mercenaria

UdeM00000018891 45264 365.2 UdeM00000018891 XP\_029208193.2 29.2 887  
 567 22 20 873 66 924 2.80E-97 365.2 45264 cellular  
 organisms;Eukaryota;Opisthokonta;Metazoa;Eumetazoa;Cnidaria;Anthozoa;Hexa  
 corallia;Scleractinia;Astrocoeniina;Acroporidae;Acropora;Acropora  
 millepora  
 UdeM00000018892 1735272 245.7 UdeM00000018892 XP\_041369837.1 44.6  
 307 164 5 3 306 1881 2184 7.80E-62 245.7 1735272  
 cellular  
 organisms;Eukaryota;Opisthokonta;Metazoa;Eumetazoa;Bilateria;Protostomia;  
 Spiralia;Lophotrochozoa;Mollusca;Gastropoda;Neomphalina;Neomphaloidea;Pel  
 tospiridae;Gigantopelta;Gigantopelta aegis  
 UdeM00000018893 6105 461.5 UdeM00000018893 XP\_031553297.1 55.3 394  
 160 8 25 418 331 708 1.50E-126 461.5 6105 cellular  
 organisms;Eukaryota;Opisthokonta;Metazoa;Eumetazoa;Cnidaria;Anthozoa;Hexa  
 corallia;Actiniaria;Actiniidae;Actinia;Actinia tenebrosa  
 UdeM00000018894 6105 461.5 UdeM00000018894 XP\_031553297.1 55.3 394  
 160 8 25 418 331 708 1.50E-126 461.5 6105 cellular  
 organisms;Eukaryota;Opisthokonta;Metazoa;Eumetazoa;Cnidaria;Anthozoa;Hexa  
 corallia;Actiniaria;Actiniidae;Actinia;Actinia tenebrosa  
 UdeM00000018895 7906 223.8 UdeM00000018895 XP\_034762010.1 67.2 183  
 58 2 1 182 1 182 1.80E-55 223.8 7906 cellular  
 organisms;Eukaryota;Opisthokonta;Metazoa;Eumetazoa;Bilateria;Deuterostomi  
 a;Chordata;Craniata;Vertebrata;Gnathostomata;Teleostomi;Euteleostomi;Acti  
 nopterygii;Actinopteri;Chondrostei;Acipenseriformes;Acipenseroidei;Acipen  
 seridae;Acipenserinae;Acipenserini;Acipenser;Acipenser ruthenus  
 UdeM00000018896 7913 247.3 UdeM00000018896 XP\_041081195.1 64.8 196  
 69 0 1 196 11 206 1.60E-62 247.3 7913 cellular  
 organisms;Eukaryota;Opisthokonta;Metazoa;Eumetazoa;Bilateria;Deuterostomi  
 a;Chordata;Craniata;Vertebrata;Gnathostomata;Teleostomi;Euteleostomi;Acti  
 nopterygii;Actinopteri;Chondrostei;Acipenseriformes;Acipenseroidei;Polyod  
 ontidae;Polyodontinae;Polyodontini;Polyodon;Polyodon spathula  
 UdeM00000018897 55291 127.1 UdeM00000018897 XP\_039621511.1 53.7 123  
 57 0 3 125 262 384 1.70E-26 127.1 55291 cellular  
 organisms;Eukaryota;Opisthokonta;Metazoa;Eumetazoa;Bilateria;Deuterostomi  
 a;Chordata;Craniata;Vertebrata;Gnathostomata;Teleostomi;Euteleostomi;Acti  
 nopterygii;Cladistia;Polypteriformes;Polypteridae;Polypterus;Polypterus  
 senegalus  
 UdeM00000018900 7574 409.5 UdeM00000018900 XP\_013384367.1 51.6 407  
 185 5 274 672 516 918 8.50E-111 409.5 7574 cellular  
 organisms;Eukaryota;Opisthokonta;Metazoa;Eumetazoa;Bilateria;Protostomia;  
 Spiralia;Lophotrochozoa;Brachiopoda;Linguliformea;Lingulata;Lingulida;Lin  
 guloidea;Lingulidae;Lingula;Lingula anatina  
 UdeM00000018901 44394 92 UdeM00000018901 XP\_014127848.2 36.6 131  
 76 2 90 215 832 960 9.80E-16 92 44394 cellular  
 organisms;Eukaryota;Opisthokonta;Metazoa;Eumetazoa;Bilateria;Deuterostomi  
 a;Chordata;Craniata;Vertebrata;Gnathostomata;Teleostomi;Euteleostomi;Sarc  
 opterygii;Dipnotetrapodomorpha;Tetrapoda;Amniota;Sauropsida;Sauria;Archel  
 osauria;Archosauria;Dinosauria;Saurischia;Theropoda;Coelurosauria;Aves;Ne  
 ognathae;Passeriformes;Passerellidae;Zonotrichia;Zonotrichia albicollis  
 UdeM00000018902 7574 302.4 UdeM00000018902 XP\_023932112.1 56.7 254  
 106 3 1 253 201 451 8.40E-79 302.4 7574 cellular  
 organisms;Eukaryota;Opisthokonta;Metazoa;Eumetazoa;Bilateria;Protostomia;  
 Spiralia;Lophotrochozoa;Brachiopoda;Linguliformea;Lingulata;Lingulida;Lin  
 guloidea;Lingulidae;Lingula;Lingula anatina

UdeM00000018903 118141 61.6 UdeM00000018903 XP\_036387862.1 37.9  
 87 50 2 123 207 432 516 1.60E-06 61.6 118141  
 cellular  
 organisms;Eukaryota;Opisthokonta;Metazoa;Eumetazoa;Bilateria;Deuterostomi  
 a;Chordata;Craniata;Vertebrata;Gnathostomata;Teleostomi;Euteleostomi;Acti  
 nopterygii;Actinopteri;Neopterygii;Teleostei;Elopocephalai;Elopocephala;E  
 lopomorpha;Elopiformes;Megalopidae;Megalops;Megalops cyprinoides  
 UdeM00000018904 303518 135.2 UdeM00000018904 XP\_005751641.1 51.1  
 141 66 2 1 138 292 432 6.40E-29 135.2 303518  
 cellular  
 organisms;Eukaryota;Opisthokonta;Metazoa;Eumetazoa;Bilateria;Deuterostomi  
 a;Chordata;Craniata;Vertebrata;Gnathostomata;Teleostomi;Euteleostomi;Acti  
 nopterygii;Actinopteri;Neopterygii;Teleostei;Osteoglossocephalai;Clupeoce  
 phala;Euteleosteomorpha;Neoteleostei;Eurypterygia;Ctenosquamata;Acanthomo  
 rphata;Euacanthomorphacea;Percomorphaceae;Ovalentaria;Cichlomorphae;Cichl  
 iformes;Cichlidae;African  
 cichlids;Pseudocrenilabrinae;Haplochromini;Pundamilia;Pundamilia nyererei  
 UdeM00000018905 6573 204.5 UdeM00000018905 XP\_021341731.1 21.9 658  
 470 15 1 622 31 680 3.90E-49 204.5 6573 cellular  
 organisms;Eukaryota;Opisthokonta;Metazoa;Eumetazoa;Bilateria;Protostomia;  
 Spiralia;Lophotrochozoa;Mollusca;Bivalvia;Autobranchia;Pteriormorphia;Pect  
 inida;Pectinoidea;Pectinidae;Mizuhopecten;Mizuhopecten yessoensis  
 UdeM00000018906 6573 173.3 UdeM00000018906 XP\_021341731.1 21.8 583  
 425 12 7 568 108 680 8.70E-40 173.3 6573 cellular  
 organisms;Eukaryota;Opisthokonta;Metazoa;Eumetazoa;Bilateria;Protostomia;  
 Spiralia;Lophotrochozoa;Mollusca;Bivalvia;Autobranchia;Pteriormorphia;Pect  
 inida;Pectinoidea;Pectinidae;Mizuhopecten;Mizuhopecten yessoensis  
 UdeM00000018907 6596 607.1 UdeM00000018907 XP\_045157647.1 37.3 946  
 536 17 1463 2388 2212 3120 9.90E-170 607.1 6596 cellular  
 organisms;Eukaryota;Opisthokonta;Metazoa;Eumetazoa;Bilateria;Protostomia;  
 Spiralia;Lophotrochozoa;Mollusca;Bivalvia;Autobranchia;Heteroconchia;Euhe  
 terodonta;Imparidentia;Venerida;Veneroidea;Veneridae;Mercenaria;Mercenari  
 a mercenaria  
 UdeM00000018908 6596 241.1 UdeM00000018908 XP\_045209202.1 49.3 205  
 103 1 33 237 1558 1761 1.40E-60 241.1 6596 cellular  
 organisms;Eukaryota;Opisthokonta;Metazoa;Eumetazoa;Bilateria;Protostomia;  
 Spiralia;Lophotrochozoa;Mollusca;Bivalvia;Autobranchia;Heteroconchia;Euhe  
 terodonta;Imparidentia;Venerida;Veneroidea;Veneridae;Mercenaria;Mercenari  
 a mercenaria  
 UdeM00000018909 90988 150.2 UdeM00000018909 XP\_039529744.1 37.1 205  
 125 2 6 206 387 591 3.00E-33 150.2 90988 cellular  
 organisms;Eukaryota;Opisthokonta;Metazoa;Eumetazoa;Bilateria;Deuterostomi  
 a;Chordata;Craniata;Vertebrata;Gnathostomata;Teleostomi;Euteleostomi;Acti  
 nopterygii;Actinopteri;Neopterygii;Teleostei;Osteoglossocephalai;Clupeoce  
 phala;Otomorpha;Ostariophysi;Otophysi;Cypriniphysae;Cypriniformes;Cyprino  
 ideii;Leuciscidae;Pogonichthyinae;Pimephales;Pimephales promelas  
 UdeM00000018910 6565 109 UdeM00000018910 XP\_022340918.1 24.2 326  
 223 6 64 386 193 497 1.40E-20 109 6565 cellular  
 organisms;Eukaryota;Opisthokonta;Metazoa;Eumetazoa;Bilateria;Protostomia;  
 Spiralia;Lophotrochozoa;Mollusca;Bivalvia;Autobranchia;Pteriormorphia;Ostr  
 eida;Ostreoidea;Ostreidae;Crassostrea;Crassostrea virginica  
 UdeM00000018911 6596 194.1 UdeM00000018911 XP\_045189898.1 36.6 290  
 173 5 11 297 1426 1707 4.70E-46 194.1 6596 cellular  
 organisms;Eukaryota;Opisthokonta;Metazoa;Eumetazoa;Bilateria;Protostomia;

Spiralia;Lophotrochozoa;Mollusca;Bivalvia;Autobranchia;Heteroconchia;Euherodonta;Imparidentia;Venerida;Veneroidea;Veneridae;Mercenaria;Mercenaria mercenaria

UdeM00000018912 6596 1026.2 UdeM00000018912 XP\_045209202.1 39.4  
1475 812 31 7 1455 636 2054 4.90E-296 1026.2 6596  
cellular

organisms;Eukaryota;Opisthokonta;Metazoa;Eumetazoa;Bilateria;Protostomia;Spiralia;Lophotrochozoa;Mollusca;Bivalvia;Autobranchia;Heteroconchia;Euherodonta;Imparidentia;Venerida;Veneroidea;Veneridae;Mercenaria;Mercenaria mercenaria

UdeM00000018913 6596 957.6 UdeM00000018913 XP\_045209202.1 42 1233  
669 24 11 1219 844 2054 1.90E-275 957.6 6596 cellular

organisms;Eukaryota;Opisthokonta;Metazoa;Eumetazoa;Bilateria;Protostomia;Spiralia;Lophotrochozoa;Mollusca;Bivalvia;Autobranchia;Heteroconchia;Euherodonta;Imparidentia;Venerida;Veneroidea;Veneridae;Mercenaria;Mercenaria mercenaria

UdeM00000018914 6596 1011.5 UdeM00000018914 XP\_045189898.1 38.6  
1455 833 30 523 1949 286 1707 1.60E-291 1011.5 6596  
cellular

organisms;Eukaryota;Opisthokonta;Metazoa;Eumetazoa;Bilateria;Protostomia;Spiralia;Lophotrochozoa;Mollusca;Bivalvia;Autobranchia;Heteroconchia;Euherodonta;Imparidentia;Venerida;Veneroidea;Veneridae;Mercenaria;Mercenaria mercenaria

UdeM00000018915 6596 864.4 UdeM00000018915 XP\_045157300.1 35.4 1426  
780 27 374 1692 6 1397 2.70E-247 864.4 6596 cellular

organisms;Eukaryota;Opisthokonta;Metazoa;Eumetazoa;Bilateria;Protostomia;Spiralia;Lophotrochozoa;Mollusca;Bivalvia;Autobranchia;Heteroconchia;Euherodonta;Imparidentia;Venerida;Veneroidea;Veneridae;Mercenaria;Mercenaria mercenaria

UdeM00000018916 6596 135.2 UdeM00000018916 XP\_045207645.1 28.8 385  
223 9 2706 3046 1837 2214 1.40E-27 135.2 6596 cellular

organisms;Eukaryota;Opisthokonta;Metazoa;Eumetazoa;Bilateria;Protostomia;Spiralia;Lophotrochozoa;Mollusca;Bivalvia;Autobranchia;Heteroconchia;Euherodonta;Imparidentia;Venerida;Veneroidea;Veneridae;Mercenaria;Mercenaria mercenaria

UdeM00000018918 7741 233.8 UdeM00000018918 XP\_019632704.1 28 669  
384 24 35862 36450 789 1439 3.50E-56 233.8 7741 cellular

organisms;Eukaryota;Opisthokonta;Metazoa;Eumetazoa;Bilateria;Deuterostomia;Chordata;Cephalochordata;Leptocardii;Amphioxiformes;Branchiostomidae;Branchiostoma;Branchiostoma belcheri

UdeM00000018919 400727 104 UdeM00000018919 XP\_025080552.1 61.2  
85 32 1 4 87 1 85 1.00E-19 104 400727  
cellular

organisms;Eukaryota;Opisthokonta;Metazoa;Eumetazoa;Bilateria;Protostomia;Spiralia;Lophotrochozoa;Mollusca;Gastropoda;Caenogastropoda;Architaenioglossa;Ampullarioidea;Ampullariidae;Pomacea;Pomacea canaliculata

UdeM00000018920 7574 402.9 UdeM00000018920 XP\_013398667.1 52.3 428  
181 6 1 423 1 410 1.00E-108 402.9 7574 cellular

organisms;Eukaryota;Opisthokonta;Metazoa;Eumetazoa;Bilateria;Protostomia;Spiralia;Lophotrochozoa;Brachiopoda;Linguliformea;Lingulata;Lingulida;Linguloidea;Lingulidae;Lingula;Lingula anatina

UdeM00000018921 6573 428.7 UdeM00000018921 XP\_021342694.1 61.7 355  
112 2 1 355 42 372 1.50E-116 428.7 6573 cellular

organisms;Eukaryota;Opisthokonta;Metazoa;Eumetazoa;Bilateria;Protostomia;

Spiralia;Lophotrochozoa;Mollusca;Bivalvia;Autobranchia;Pteriomorpha;Pectinida;Pectinoidea;Pectinidae;Mizuhopecten;Mizuhopecten yessoensis

UdeM00000018922 6596 148.7 UdeM00000018922 XP\_045209881.1 24.2 833  
507 24 1 725 1 817 2.90E-32 148.7 6596 cellular  
organisms;Eukaryota;Opisthokonta;Metazoa;Eumetazoa;Bilateria;Protostomia;  
Spiralia;Lophotrochozoa;Mollusca;Bivalvia;Autobranchia;Heteroconchia;Euhe  
terodonta;Imparidentia;Venerida;Veneroidea;Veneridae;Mercenaria;Mercenari  
a mercenaria

UdeM00000018923 6596 326.6 UdeM00000018923 XP\_045209880.1 44.6 392  
202 6 1 383 11 396 4.20E-86 326.6 6596 cellular  
organisms;Eukaryota;Opisthokonta;Metazoa;Eumetazoa;Bilateria;Protostomia;  
Spiralia;Lophotrochozoa;Mollusca;Bivalvia;Autobranchia;Heteroconchia;Euhe  
terodonta;Imparidentia;Venerida;Veneroidea;Veneridae;Mercenaria;Mercenari  
a mercenaria

UdeM00000018925 6596 77.4 UdeM00000018925 XP\_045169502.1 28.1 217  
129 4 237 440 52 254 5.10E-11 77.4 6596 cellular  
organisms;Eukaryota;Opisthokonta;Metazoa;Eumetazoa;Bilateria;Protostomia;  
Spiralia;Lophotrochozoa;Mollusca;Bivalvia;Autobranchia;Heteroconchia;Euhe  
terodonta;Imparidentia;Venerida;Veneroidea;Veneridae;Mercenaria;Mercenari  
a mercenaria

UdeM00000018924 8236 72.4 UdeM00000018924 XP\_044191554.1 24.9 301  
195 8 146 419 287 583 1.60E-09 72.4 8236 cellular  
organisms;Eukaryota;Opisthokonta;Metazoa;Eumetazoa;Bilateria;Deuterostomi  
a;Chordata;Craniata;Vertebrata;Gnathostomata;Teleostomi;Euteleostomi;Acti  
nopterygii;Actinopteri;Neopterygii;Teleostei;Osteoglossocephalai;Clupeoce  
phala;Euteleosteomorpha;Neoteleostei;Eurypterygia;Ctenosquamata;Acanthomo  
rphata;Euacanthomorphacea;Percomorphaceae;Pelagiaria;Scombriformes;Scombr  
idae;Scombrinae;Thunnini;Thunnus;Thunnus albacares

UdeM00000018926 8236 72.4 UdeM00000018926 XP\_044191554.1 24.9 301  
195 8 191 464 287 583 1.80E-09 72.4 8236 cellular  
organisms;Eukaryota;Opisthokonta;Metazoa;Eumetazoa;Bilateria;Deuterostomi  
a;Chordata;Craniata;Vertebrata;Gnathostomata;Teleostomi;Euteleostomi;Acti  
nopterygii;Actinopteri;Neopterygii;Teleostei;Osteoglossocephalai;Clupeoce  
phala;Euteleosteomorpha;Neoteleostei;Eurypterygia;Ctenosquamata;Acanthomo  
rphata;Euacanthomorphacea;Percomorphaceae;Pelagiaria;Scombriformes;Scombr  
idae;Scombrinae;Thunnini;Thunnus;Thunnus albacares

UdeM00000018927 6596 401.7 UdeM00000018927 XP\_045209879.1 77.2 232  
53 0 84 315 88 319 8.60E-109 401.7 6596 cellular  
organisms;Eukaryota;Opisthokonta;Metazoa;Eumetazoa;Bilateria;Protostomia;  
Spiralia;Lophotrochozoa;Mollusca;Bivalvia;Autobranchia;Heteroconchia;Euhe  
terodonta;Imparidentia;Venerida;Veneroidea;Veneridae;Mercenaria;Mercenari  
a mercenaria

UdeM00000018928 6596 140.6 UdeM00000018928 XP\_045163890.1 38.8 165  
94 3 8 165 22 186 1.80E-30 140.6 6596 cellular  
organisms;Eukaryota;Opisthokonta;Metazoa;Eumetazoa;Bilateria;Protostomia;  
Spiralia;Lophotrochozoa;Mollusca;Bivalvia;Autobranchia;Heteroconchia;Euhe  
terodonta;Imparidentia;Venerida;Veneroidea;Veneridae;Mercenaria;Mercenari  
a mercenaria

UdeM00000018929 6596 706.1 UdeM00000018929 XP\_045209877.1 66.4 557  
148 8 1 542 105 637 4.90E-200 706.1 6596 cellular  
organisms;Eukaryota;Opisthokonta;Metazoa;Eumetazoa;Bilateria;Protostomia;  
Spiralia;Lophotrochozoa;Mollusca;Bivalvia;Autobranchia;Heteroconchia;Euhe  
terodonta;Imparidentia;Venerida;Veneroidea;Veneridae;Mercenaria;Mercenari  
a mercenaria

UdeM00000018930 6596 345.1 UdeM00000018930 XP\_045207280.1 48.2 357  
 180 3 1 353 28 383 1.10E-91 345.1 6596 cellular  
 organisms;Eukaryota;Opisthokonta;Metazoa;Eumetazoa;Bilateria;Protostomia;  
 Spiralia;Lophotrochozoa;Mollusca;Bivalvia;Autobranhia;Heteroconchia;Euhe  
 terodonta;Imparidentia;Venerida;Veneroidea;Veneridae;Mercenaria;Mercenari  
 a mercenaria  
 UdeM00000018931 6596 1708.7 UdeM00000018931 XP\_045208936.1 56  
 1553 476 10 20 1368 32 1581 0.00E+00 1708.7 6596  
 cellular  
 organisms;Eukaryota;Opisthokonta;Metazoa;Eumetazoa;Bilateria;Protostomia;  
 Spiralia;Lophotrochozoa;Mollusca;Bivalvia;Autobranhia;Heteroconchia;Euhe  
 terodonta;Imparidentia;Venerida;Veneroidea;Veneridae;Mercenaria;Mercenari  
 a mercenaria  
 UdeM00000026331 6579 145.6 UdeM00000026331 XP\_033752461.1 46 174  
 90 2 8 181 145 314 6.90E-32 145.6 6579 cellular  
 organisms;Eukaryota;Opisthokonta;Metazoa;Eumetazoa;Bilateria;Protostomia;  
 Spiralia;Lophotrochozoa;Mollusca;Bivalvia;Autobranhia;Pteriormorphia;Pect  
 inida;Pectinoidea;Pectinidae;Pecten;Pecten maximus  
 UdeM00000026333 6573 98.2 UdeM00000026333 XP\_021339669.1 37.6 157  
 77 3 1 136 194 350 8.50E-18 98.2 6573 cellular  
 organisms;Eukaryota;Opisthokonta;Metazoa;Eumetazoa;Bilateria;Protostomia;  
 Spiralia;Lophotrochozoa;Mollusca;Bivalvia;Autobranhia;Pteriormorphia;Pect  
 inida;Pectinoidea;Pectinidae;Mizuhopecten;Mizuhopecten yessoensis  
 UdeM00000026334 6573 233.4 UdeM00000026334 XP\_021339669.1 48.6 257  
 128 2 1 257 87 339 3.30E-58 233.4 6573 cellular  
 organisms;Eukaryota;Opisthokonta;Metazoa;Eumetazoa;Bilateria;Protostomia;  
 Spiralia;Lophotrochozoa;Mollusca;Bivalvia;Autobranhia;Pteriormorphia;Pect  
 inida;Pectinoidea;Pectinidae;Mizuhopecten;Mizuhopecten yessoensis  
 UdeM00000026335 6573 213.8 UdeM00000026335 XP\_021339669.1 46.7 257  
 115 4 1 236 87 342 2.50E-52 213.8 6573 cellular  
 organisms;Eukaryota;Opisthokonta;Metazoa;Eumetazoa;Bilateria;Protostomia;  
 Spiralia;Lophotrochozoa;Mollusca;Bivalvia;Autobranhia;Pteriormorphia;Pect  
 inida;Pectinoidea;Pectinidae;Mizuhopecten;Mizuhopecten yessoensis  
 UdeM00000026336 6596 260.8 UdeM00000026336 XP\_045175789.1 52.1 259  
 116 4 1 255 1 255 1.90E-66 260.8 6596 cellular  
 organisms;Eukaryota;Opisthokonta;Metazoa;Eumetazoa;Bilateria;Protostomia;  
 Spiralia;Lophotrochozoa;Mollusca;Bivalvia;Autobranhia;Heteroconchia;Euhe  
 terodonta;Imparidentia;Venerida;Veneroidea;Veneridae;Mercenaria;Mercenari  
 a mercenaria  
 UdeM00000026339 6596 70.5 UdeM00000026339 XP\_045175484.1 29.3 225  
 120 7 4 224 11 200 7.50E-09 70.5 6596 cellular  
 organisms;Eukaryota;Opisthokonta;Metazoa;Eumetazoa;Bilateria;Protostomia;  
 Spiralia;Lophotrochozoa;Mollusca;Bivalvia;Autobranhia;Heteroconchia;Euhe  
 terodonta;Imparidentia;Venerida;Veneroidea;Veneridae;Mercenaria;Mercenari  
 a mercenaria  
 UdeM00000026341 6596 65.5 UdeM00000026341 XP\_045175484.1 29 224  
 121 8 4 223 11 200 2.40E-07 65.5 6596 cellular  
 organisms;Eukaryota;Opisthokonta;Metazoa;Eumetazoa;Bilateria;Protostomia;  
 Spiralia;Lophotrochozoa;Mollusca;Bivalvia;Autobranhia;Heteroconchia;Euhe  
 terodonta;Imparidentia;Venerida;Veneroidea;Veneridae;Mercenaria;Mercenari  
 a mercenaria  
 UdeM00000026342 6596 65.5 UdeM00000026342 XP\_045175484.1 29 224  
 121 8 4 223 11 200 2.40E-07 65.5 6596 cellular  
 organisms;Eukaryota;Opisthokonta;Metazoa;Eumetazoa;Bilateria;Protostomia;

Spiralia;Lophotrochozoa;Mollusca;Bivalvia;Autobranchia;Heteroconchia;Euherodonta;Imparidentia;Venerida;Veneroidea;Veneridae;Mercenaria;Mercenaria mercenaria

UdeM00000026344 6596 69.7 UdeM00000026344 XP\_045175484.1 29.2 226  
118 7 4 223 11 200 9.50E-09 69.7 6596 cellular

organisms;Eukaryota;Opisthokonta;Metazoa;Eumetazoa;Bilateria;Protostomia;Spiralia;Lophotrochozoa;Mollusca;Bivalvia;Autobranchia;Heteroconchia;Euherodonta;Imparidentia;Venerida;Veneroidea;Veneridae;Mercenaria;Mercenaria mercenaria

UdeM00000026345 6500 68.9 UdeM00000026345 XP\_005096038.1 37.6 117  
67 3 12 125 11 124 1.80E-08 68.9 6500 cellular

organisms;Eukaryota;Opisthokonta;Metazoa;Eumetazoa;Bilateria;Protostomia;Spiralia;Lophotrochozoa;Mollusca;Gastropoda;Heterobranchia;Euthyneura;Tectipleura;Aplysiida;Aplysioidea;Aplysiidae;Aplysia;Aplysia californica

UdeM00000026346 6596 61.6 UdeM00000026346 XP\_045175466.1 33 109  
62 2 11 113 53 156 2.90E-06 61.6 6596 cellular

organisms;Eukaryota;Opisthokonta;Metazoa;Eumetazoa;Bilateria;Protostomia;Spiralia;Lophotrochozoa;Mollusca;Bivalvia;Autobranchia;Heteroconchia;Euherodonta;Imparidentia;Venerida;Veneroidea;Veneridae;Mercenaria;Mercenaria mercenaria

UdeM00000026347 6596 99.8 UdeM00000026347 XP\_045175466.1 25.8 310  
217 2 15 311 65 374 1.20E-17 99.8 6596 cellular

organisms;Eukaryota;Opisthokonta;Metazoa;Eumetazoa;Bilateria;Protostomia;Spiralia;Lophotrochozoa;Mollusca;Bivalvia;Autobranchia;Heteroconchia;Euherodonta;Imparidentia;Venerida;Veneroidea;Veneridae;Mercenaria;Mercenaria mercenaria

UdeM00000026352 742174 171 UdeM00000026352 XP\_025202388.1 27.1  
543 301 15 80 528 24 565 4.10E-39 171 742174  
cellular

organisms;Eukaryota;Opisthokonta;Metazoa;Eumetazoa;Bilateria;Protostomia;Ecdysozoa;Panarthropoda;Arthropoda;Mandibulata;Pancrustacea;Hexapoda;Insecta;Dicondylia;Pterygota;Neoptera;Paraneoptera;Hemiptera;Sternorrhyncha;Aphidomorpha;Aphidoidea;Aphididae;Aphidinae;Aphidini;Melanaphis;Melanaphis sacchari

UdeM00000026353 1735272 461.5 UdeM00000026353 XP\_041366994.1 72.3  
336 85 4 1 328 338 673 1.10E-126 461.5 1735272  
cellular

organisms;Eukaryota;Opisthokonta;Metazoa;Eumetazoa;Bilateria;Protostomia;Spiralia;Lophotrochozoa;Mollusca;Gastropoda;Neomphalina;Neomphaloidea;Peltospiridae;Gigantopelta;Gigantopelta aegis

UdeM00000026354 400727 389.8 UdeM00000026354 XP\_025086927.1 55.8  
337 145 3 1 334 1 336 3.50E-105 389.8 400727  
cellular

organisms;Eukaryota;Opisthokonta;Metazoa;Eumetazoa;Bilateria;Protostomia;Spiralia;Lophotrochozoa;Mollusca;Gastropoda;Caenogastropoda;Architaenioglossa;Ampullarioidea;Ampullariidae;Pomacea;Pomacea canaliculata

UdeM00000026355 6573 344.7 UdeM00000026355 XP\_021348020.1 55.4 314  
136 3 8 319 11 322 1.20E-91 344.7 6573 cellular

organisms;Eukaryota;Opisthokonta;Metazoa;Eumetazoa;Bilateria;Protostomia;Spiralia;Lophotrochozoa;Mollusca;Bivalvia;Autobranchia;Pteriomorphia;Pectinida;Pectinoidea;Pectinidae;Mizuhopecten;Mizuhopecten yessoensis

UdeM00000026356 6579 248.8 UdeM00000026356 XP\_033752130.1 43.4 267  
146 2 45 306 17 283 8.80E-63 248.8 6579 cellular

organisms;Eukaryota;Opisthokonta;Metazoa;Eumetazoa;Bilateria;Protostomia;



Spiralia;Lophotrochozoa;Mollusca;Bivalvia;Autobranchia;Pteriormorphia;Pectinida;Pectinoidea;Pectinidae;Pecten;Pecten maximus

UdeM00000026357 6596 63.2 UdeM00000026357 XP\_045176417.1 41.4 58  
34 0 15 72 11 68 1.60E-07 63.2 6596 cellular  
organisms;Eukaryota;Opisthokonta;Metazoa;Eumetazoa;Bilateria;Protostomia;  
Spiralia;Lophotrochozoa;Mollusca;Bivalvia;Autobranchia;Heteroconchia;Euherodonta;Imparidentia;Venerida;Veneroidea;Veneridae;Mercenaria;Mercenaria mercenaria

UdeM00000026358 6596 63.5 UdeM00000026358 XP\_045176417.1 41.4 58  
34 0 12 69 11 68 1.20E-07 63.5 6596 cellular  
organisms;Eukaryota;Opisthokonta;Metazoa;Eumetazoa;Bilateria;Protostomia;  
Spiralia;Lophotrochozoa;Mollusca;Bivalvia;Autobranchia;Heteroconchia;Euherodonta;Imparidentia;Venerida;Veneroidea;Veneridae;Mercenaria;Mercenaria mercenaria

UdeM00000026359 6596 84.7 UdeM00000026359 XP\_045177020.1 43.4 99  
52 3 1 96 91 188 8.20E-14 84.7 6596 cellular  
organisms;Eukaryota;Opisthokonta;Metazoa;Eumetazoa;Bilateria;Protostomia;  
Spiralia;Lophotrochozoa;Mollusca;Bivalvia;Autobranchia;Heteroconchia;Euherodonta;Imparidentia;Venerida;Veneroidea;Veneridae;Mercenaria;Mercenaria mercenaria

UdeM00000026360 6573 248.8 UdeM00000026360 XP\_021343061.1 44.8 268  
136 4 41 297 29 295 8.50E-63 248.8 6573 cellular  
organisms;Eukaryota;Opisthokonta;Metazoa;Eumetazoa;Bilateria;Protostomia;  
Spiralia;Lophotrochozoa;Mollusca;Bivalvia;Autobranchia;Pteriormorphia;Pectinida;Pectinoidea;Pectinidae;Mizuhopecten;Mizuhopecten yessoensis

UdeM00000026361 6596 270.4 UdeM00000026361 XP\_045176418.1 46.3 294  
153 3 11 302 11 301 2.80E-69 270.4 6596 cellular  
organisms;Eukaryota;Opisthokonta;Metazoa;Eumetazoa;Bilateria;Protostomia;  
Spiralia;Lophotrochozoa;Mollusca;Bivalvia;Autobranchia;Heteroconchia;Euherodonta;Imparidentia;Venerida;Veneroidea;Veneridae;Mercenaria;Mercenaria mercenaria

UdeM00000026362 6596 862.1 UdeM00000026362 XP\_045177368.1 50.9 829  
354 9 17 821 38 837 5.90E-247 862.1 6596 cellular  
organisms;Eukaryota;Opisthokonta;Metazoa;Eumetazoa;Bilateria;Protostomia;  
Spiralia;Lophotrochozoa;Mollusca;Bivalvia;Autobranchia;Heteroconchia;Euherodonta;Imparidentia;Venerida;Veneroidea;Veneridae;Mercenaria;Mercenaria mercenaria

UdeM00000026363 6596 957.2 UdeM00000026363 XP\_045177368.1 57.1 821  
339 10 11 824 16 830 1.30E-275 957.2 6596 cellular  
organisms;Eukaryota;Opisthokonta;Metazoa;Eumetazoa;Bilateria;Protostomia;  
Spiralia;Lophotrochozoa;Mollusca;Bivalvia;Autobranchia;Heteroconchia;Euherodonta;Imparidentia;Venerida;Veneroidea;Veneridae;Mercenaria;Mercenaria mercenaria

UdeM00000026365 6596 862.1 UdeM00000026365 XP\_045177368.1 58.9 705  
279 8 1 699 131 830 5.00E-247 862.1 6596 cellular  
organisms;Eukaryota;Opisthokonta;Metazoa;Eumetazoa;Bilateria;Protostomia;  
Spiralia;Lophotrochozoa;Mollusca;Bivalvia;Autobranchia;Heteroconchia;Euherodonta;Imparidentia;Venerida;Veneroidea;Veneridae;Mercenaria;Mercenaria mercenaria

UdeM00000026364 6596 919.8 UdeM00000026364 XP\_045177368.1 57.3 792  
319 10 10 787 44 830 2.30E-264 919.8 6596 cellular  
organisms;Eukaryota;Opisthokonta;Metazoa;Eumetazoa;Bilateria;Protostomia;  
Spiralia;Lophotrochozoa;Mollusca;Bivalvia;Autobranchia;Heteroconchia;Euherodonta;Imparidentia;Venerida;Veneroidea;Veneridae;Mercenaria;Mercenaria mercenaria



UdeM00000026376 6596 505.4 UdeM00000026376 XP\_045174432.1 53.5 465  
 188 6 1 453 1 449 7.70E-140 505.4 6596 cellular  
 organisms;Eukaryota;Opisthokonta;Metazoa;Eumetazoa;Bilateria;Protostomia;  
 Spiralia;Lophotrochozoa;Mollusca;Bivalvia;Autobranchia;Heteroconchia;Euhe  
 terodonta;Imparidentia;Venerida;Veneroidea;Veneridae;Mercenaria;Mercenari  
 a mercenaria  
 UdeM00000026377 6596 384.4 UdeM00000026377 XP\_045176425.1 73.8 260  
 67 1 1 260 15 273 1.10E-103 384.4 6596 cellular  
 organisms;Eukaryota;Opisthokonta;Metazoa;Eumetazoa;Bilateria;Protostomia;  
 Spiralia;Lophotrochozoa;Mollusca;Bivalvia;Autobranchia;Heteroconchia;Euhe  
 terodonta;Imparidentia;Venerida;Veneroidea;Veneridae;Mercenaria;Mercenari  
 a mercenaria  
 UdeM00000026378 6596 274.6 UdeM00000026378 XP\_045174803.1 38 542  
 278 11 1 501 1 525 2.40E-70 274.6 6596 cellular  
 organisms;Eukaryota;Opisthokonta;Metazoa;Eumetazoa;Bilateria;Protostomia;  
 Spiralia;Lophotrochozoa;Mollusca;Bivalvia;Autobranchia;Heteroconchia;Euhe  
 terodonta;Imparidentia;Venerida;Veneroidea;Veneridae;Mercenaria;Mercenari  
 a mercenaria  
 UdeM00000026380 1735272 128.6 UdeM00000026380 XP\_041367632.1 48  
 127 62 2 18 140 19 145 6.10E-27 128.6 1735272  
 cellular  
 organisms;Eukaryota;Opisthokonta;Metazoa;Eumetazoa;Bilateria;Protostomia;  
 Spiralia;Lophotrochozoa;Mollusca;Gastropoda;Neomphalina;Neomphaloidea;Pel  
 tospiridae;Gigantopelta;Gigantopelta aegis  
 UdeM00000026381 6579 726.5 UdeM00000026381 XP\_033751734.1 62.1 617  
 200 12 6 598 334 940 2.80E-206 726.5 6579 cellular  
 organisms;Eukaryota;Opisthokonta;Metazoa;Eumetazoa;Bilateria;Protostomia;  
 Spiralia;Lophotrochozoa;Mollusca;Bivalvia;Autobranchia;Pteriormorphia;Pect  
 inida;Pectinoidea;Pectinidae;Pecten;Pecten maximus  
 UdeM00000026382 6573 296.6 UdeM00000026382 XP\_021379056.1 63.6 220  
 80 0 77 296 33 252 3.60E-77 296.6 6573 cellular  
 organisms;Eukaryota;Opisthokonta;Metazoa;Eumetazoa;Bilateria;Protostomia;  
 Spiralia;Lophotrochozoa;Mollusca;Bivalvia;Autobranchia;Pteriormorphia;Pect  
 inida;Pectinoidea;Pectinidae;Mizuhopecten;Mizuhopecten yessoensis  
 UdeM00000026383 29159 257.3 UdeM00000026383 XP\_011414934.2 32.9 502  
 271 13 116 615 8 445 4.90E-65 257.3 29159 cellular  
 organisms;Eukaryota;Opisthokonta;Metazoa;Eumetazoa;Bilateria;Protostomia;  
 Spiralia;Lophotrochozoa;Mollusca;Bivalvia;Autobranchia;Pteriormorphia;Ostr  
 eida;Ostreoidea;Ostreidae;Crassostrea;Crassostrea gigas  
 UdeM00000026384 6596 598.6 UdeM00000026384 XP\_045174763.1 53.1 531  
 234 4 25 540 28 558 7.90E-168 598.6 6596 cellular  
 organisms;Eukaryota;Opisthokonta;Metazoa;Eumetazoa;Bilateria;Protostomia;  
 Spiralia;Lophotrochozoa;Mollusca;Bivalvia;Autobranchia;Heteroconchia;Euhe  
 terodonta;Imparidentia;Venerida;Veneroidea;Veneridae;Mercenaria;Mercenari  
 a mercenaria  
 UdeM00000026385 6596 606.3 UdeM00000026385 XP\_045174763.1 54 531  
 229 2 25 540 28 558 3.80E-170 606.3 6596 cellular  
 organisms;Eukaryota;Opisthokonta;Metazoa;Eumetazoa;Bilateria;Protostomia;  
 Spiralia;Lophotrochozoa;Mollusca;Bivalvia;Autobranchia;Heteroconchia;Euhe  
 terodonta;Imparidentia;Venerida;Veneroidea;Veneridae;Mercenaria;Mercenari  
 a mercenaria  
 UdeM00000026386 29159 84.3 UdeM00000026386 XP\_011414934.2 50 68  
 33 1 98 164 378 445 1.50E-13 84.3 29159 cellular  
 organisms;Eukaryota;Opisthokonta;Metazoa;Eumetazoa;Bilateria;Protostomia;

Spiralia;Lophotrochozoa;Mollusca;Bivalvia;Autobranchia;Pteriormorphia;Ostr  
eida;Ostreoidea;Ostreidae;Crassostrea;Crassostrea gigas  
UdeM00000026387 6596 610.1 UdeM00000026387 XP\_045174763.1 54.4 531  
227 2 72 587 28 558 2.90E-171 610.1 6596 cellular  
organisms;Eukaryota;Opisthokonta;Metazoa;Eumetazoa;Bilateria;Protostomia;  
Spiralia;Lophotrochozoa;Mollusca;Bivalvia;Autobranchia;Heteroconchia;Euhe  
terodonta;Imparidentia;Venerida;Veneroidea;Veneridae;Mercenaria;Mercenari  
a mercenaria  
UdeM00000026388 6596 283.5 UdeM00000026388 XP\_045174763.1 45.7 315  
156 2 1 300 244 558 3.10E-73 283.5 6596 cellular  
organisms;Eukaryota;Opisthokonta;Metazoa;Eumetazoa;Bilateria;Protostomia;  
Spiralia;Lophotrochozoa;Mollusca;Bivalvia;Autobranchia;Heteroconchia;Euhe  
terodonta;Imparidentia;Venerida;Veneroidea;Veneridae;Mercenaria;Mercenari  
a mercenaria  
UdeM00000026391 1735272 356.7 UdeM00000026391 XP\_041365303.1 53  
332 156 0 16 347 271 602 3.40E-95 356.7 1735272  
cellular  
organisms;Eukaryota;Opisthokonta;Metazoa;Eumetazoa;Bilateria;Protostomia;  
Spiralia;Lophotrochozoa;Mollusca;Gastropoda;Neomphalina;Neomphaloidea;Pel  
tospiridae;Gigantopelta;Gigantopelta aegis  
UdeM00000026392 6596 1196.4 UdeM00000026392 XP\_045175366.1 85.2  
687 100 2 1 686 1 686 0.00E+00 1196.4 6596  
cellular  
organisms;Eukaryota;Opisthokonta;Metazoa;Eumetazoa;Bilateria;Protostomia;  
Spiralia;Lophotrochozoa;Mollusca;Bivalvia;Autobranchia;Heteroconchia;Euhe  
terodonta;Imparidentia;Venerida;Veneroidea;Veneridae;Mercenaria;Mercenari  
a mercenaria  
UdeM00000026393 1735272 499.2 UdeM00000026393 XP\_041365410.1 66.5  
340 114 0 4 343 17 356 4.20E-138 499.2 1735272  
cellular  
organisms;Eukaryota;Opisthokonta;Metazoa;Eumetazoa;Bilateria;Protostomia;  
Spiralia;Lophotrochozoa;Mollusca;Gastropoda;Neomphalina;Neomphaloidea;Pel  
tospiridae;Gigantopelta;Gigantopelta aegis  
UdeM00000026394 7741 468.4 UdeM00000026394 XP\_019618826.1 51.6 461  
174 4 6 421 5 461 1.00E-128 468.4 7741 cellular  
organisms;Eukaryota;Opisthokonta;Metazoa;Eumetazoa;Bilateria;Deuterostomi  
a;Chordata;Cephalochordata;Leptocardii;Amphioxiformes;Branchiostomidae;Br  
anchiostoma;Branchiostoma belcheri  
UdeM00000026395 7998 401.7 UdeM00000026395 XP\_017334791.1 66.2 284  
92 1 1 284 15 294 8.90E-109 401.7 7998 cellular  
organisms;Eukaryota;Opisthokonta;Metazoa;Eumetazoa;Bilateria;Deuterostomi  
a;Chordata;Craniata;Vertebrata;Gnathostomata;Teleostomi;Euteleostomi;Acti  
nopterygii;Actinopteri;Neopterygii;Teleostei;Osteoglossocephalai;Clupeoce  
phala;Otomorpha;Ostariophysi;Otophysi;Characiphysae;Siluriformes;Siluroid  
ei;Ictaluridae;Ictalurus;Ictalurus punctatus  
UdeM00000026396 6596 489.6 UdeM00000026396 XP\_045176991.1 43.6 864  
407 27 57 889 22 836 8.60E-135 489.6 6596 cellular  
organisms;Eukaryota;Opisthokonta;Metazoa;Eumetazoa;Bilateria;Protostomia;  
Spiralia;Lophotrochozoa;Mollusca;Bivalvia;Autobranchia;Heteroconchia;Euhe  
terodonta;Imparidentia;Venerida;Veneroidea;Veneridae;Mercenaria;Mercenari  
a mercenaria  
UdeM00000026397 6596 548.9 UdeM00000026397 XP\_045176286.1 60.3 408  
159 2 1 407 1 406 5.40E-153 548.9 6596 cellular  
organisms;Eukaryota;Opisthokonta;Metazoa;Eumetazoa;Bilateria;Protostomia;

Spiralia;Lophotrochozoa;Mollusca;Bivalvia;Autobranchia;Heteroconchia;Euherodonta;Imparidentia;Venerida;Veneroidea;Veneridae;Mercenaria;Mercenaria mercenaria

UdeM00000026398 225164 486.5 UdeM00000026398 XP\_009051658.1 26.9  
1913 1114 50 13 1800 6 1759 1.50E-133 486.5 225164  
cellular

organisms;Eukaryota;Opisthokonta;Metazoa;Eumetazoa;Bilateria;Protostomia;Spiralia;Lophotrochozoa;Mollusca;Gastropoda;Patellogastropoda;Lottioidea;Lottiidae;Lottia;Lottia gigantea

UdeM00000026399 225164 486.9 UdeM00000026399 XP\_009051658.1 26.9  
1915 1114 50 13 1803 6 1759 1.10E-133 486.9 225164  
cellular

organisms;Eukaryota;Opisthokonta;Metazoa;Eumetazoa;Bilateria;Protostomia;Spiralia;Lophotrochozoa;Mollusca;Gastropoda;Patellogastropoda;Lottioidea;Lottiidae;Lottia;Lottia gigantea

UdeM00000026400 1735272 64.3 UdeM00000026400 XP\_041364911.1 53.3  
60 28 0 10 69 7 66 1.80E-07 64.3 1735272  
cellular

organisms;Eukaryota;Opisthokonta;Metazoa;Eumetazoa;Bilateria;Protostomia;Spiralia;Lophotrochozoa;Mollusca;Gastropoda;Neomphalina;Neomphaloidea;Peltospiridae;Gigantopelta;Gigantopelta aegis

UdeM00000026401 6596 277.3 UdeM00000026401 XP\_045176879.1 68 206  
60 4 31 236 23 222 1.80E-71 277.3 6596 cellular

organisms;Eukaryota;Opisthokonta;Metazoa;Eumetazoa;Bilateria;Protostomia;Spiralia;Lophotrochozoa;Mollusca;Bivalvia;Autobranchia;Heteroconchia;Euherodonta;Imparidentia;Venerida;Veneroidea;Veneridae;Mercenaria;Mercenaria mercenaria

UdeM00000026402 6596 708 UdeM00000026402 XP\_045176876.1 48.8 715  
348 6 18 715 9 722 1.20E-200 708 6596 cellular

organisms;Eukaryota;Opisthokonta;Metazoa;Eumetazoa;Bilateria;Protostomia;Spiralia;Lophotrochozoa;Mollusca;Bivalvia;Autobranchia;Heteroconchia;Euherodonta;Imparidentia;Venerida;Veneroidea;Veneridae;Mercenaria;Mercenaria mercenaria

UdeM00000026403 6596 709.1 UdeM00000026403 XP\_045176876.1 48.7 719  
347 6 18 719 9 722 5.60E-201 709.1 6596 cellular

organisms;Eukaryota;Opisthokonta;Metazoa;Eumetazoa;Bilateria;Protostomia;Spiralia;Lophotrochozoa;Mollusca;Bivalvia;Autobranchia;Heteroconchia;Euherodonta;Imparidentia;Venerida;Veneroidea;Veneridae;Mercenaria;Mercenaria mercenaria

UdeM00000026404 6565 489.6 UdeM00000026404 XP\_022323310.1 49.6 452  
224 2 63 513 459 907 4.90E-135 489.6 6565 cellular

organisms;Eukaryota;Opisthokonta;Metazoa;Eumetazoa;Bilateria;Protostomia;Spiralia;Lophotrochozoa;Mollusca;Bivalvia;Autobranchia;Pteriomorphia;Ostreida;Ostreoidea;Ostreidae;Crassostrea;Crassostrea virginica

UdeM00000026406 400727 185.3 UdeM00000026406 XP\_025086394.1 86  
107 15 0 102 208 95 201 8.10E-44 185.3 400727  
cellular

organisms;Eukaryota;Opisthokonta;Metazoa;Eumetazoa;Bilateria;Protostomia;Spiralia;Lophotrochozoa;Mollusca;Gastropoda;Caenogastropoda;Architaenioglossa;Ampullarioidea;Ampullariidae;Pomacea;Pomacea canaliculata

UdeM00000026407 6573 315.8 UdeM00000026407 XP\_021347853.1 39 528  
223 13 12 484 127 610 9.80E-83 315.8 6573 cellular

organisms;Eukaryota;Opisthokonta;Metazoa;Eumetazoa;Bilateria;Protostomia;

Spiralia; Lophotrochozoa; Mollusca; Bivalvia; Autobranchia; Pteriomorpha; Pectinida; Pectinoidea; Pectinidae; Mizuhopecten; Mizuhopecten yessoensis  
UdeM00000026408 6596 61.6 UdeM00000026408 XP\_045212436.1 53.2 47  
22 0 268 314 33 79 2.10E-06 61.6 6596 cellular  
organisms; Eukaryota; Opisthokonta; Metazoa; Eumetazoa; Bilateria; Protostomia; Spiralia; Lophotrochozoa; Mollusca; Bivalvia; Autobranchia; Heteroconchia; Euheterodonta; Imparidentia; Venerida; Veneroidea; Veneridae; Mercenaria; Mercenaria mercenaria

UdeM00000026413 6579 699.9 UdeM00000026413 XP\_033751213.1 56 670  
261 15 5 648 262 923 3.00E-198 699.9 6579 cellular  
organisms; Eukaryota; Opisthokonta; Metazoa; Eumetazoa; Bilateria; Protostomia; Spiralia; Lophotrochozoa; Mollusca; Bivalvia; Autobranchia; Pteriomorpha; Pectinida; Pectinoidea; Pectinidae; Pecten; Pecten maximus

UdeM00000026414 6596 275.8 UdeM00000026414 XP\_045174409.1 68.1 191  
59 1 6 196 5 193 7.70E-71 275.8 6596 cellular  
organisms; Eukaryota; Opisthokonta; Metazoa; Eumetazoa; Bilateria; Protostomia; Spiralia; Lophotrochozoa; Mollusca; Bivalvia; Autobranchia; Heteroconchia; Euheterodonta; Imparidentia; Venerida; Veneroidea; Veneridae; Mercenaria; Mercenaria mercenaria

UdeM00000026415 6596 515.4 UdeM00000026415 XP\_045177000.1 62.8 400  
138 4 6 400 4 397 6.60E-143 515.4 6596 cellular  
organisms; Eukaryota; Opisthokonta; Metazoa; Eumetazoa; Bilateria; Protostomia; Spiralia; Lophotrochozoa; Mollusca; Bivalvia; Autobranchia; Heteroconchia; Euheterodonta; Imparidentia; Venerida; Veneroidea; Veneridae; Mercenaria; Mercenaria mercenaria

UdeM00000026416 6596 202.6 UdeM00000026416 XP\_045174240.1 37.9 277  
168 1 8 284 36 308 2.50E-48 202.6 6596 cellular  
organisms; Eukaryota; Opisthokonta; Metazoa; Eumetazoa; Bilateria; Protostomia; Spiralia; Lophotrochozoa; Mollusca; Bivalvia; Autobranchia; Heteroconchia; Euheterodonta; Imparidentia; Venerida; Veneroidea; Veneridae; Mercenaria; Mercenaria mercenaria

UdeM00000026417 114398 136.7 UdeM00000026417 XP\_015920988.2 90.1  
71 7 0 2 72 9 79 1.20E-29 136.7 114398  
cellular  
organisms; Eukaryota; Opisthokonta; Metazoa; Eumetazoa; Bilateria; Protostomia; Ecdysozoa; Panarthropoda; Arthropoda; Chelicerata; Arachnida; Araneae; Araneomorphae; Entelegynae; Orbiculariae; Araneoidea; Theridiidae; Parasteatoda; Parasteatoda tepidariorum

UdeM00000026418 6596 240.4 UdeM00000026418 XP\_045174281.1 53.6 233  
103 2 1 232 1 229 3.50E-60 240.4 6596 cellular  
organisms; Eukaryota; Opisthokonta; Metazoa; Eumetazoa; Bilateria; Protostomia; Spiralia; Lophotrochozoa; Mollusca; Bivalvia; Autobranchia; Heteroconchia; Euheterodonta; Imparidentia; Venerida; Veneroidea; Veneridae; Mercenaria; Mercenaria mercenaria

UdeM00000026419 225164 631.7 UdeM00000026419 XP\_009046252.1 58.5  
470 188 3 15 484 60 522 7.60E-178 631.7 225164  
cellular  
organisms; Eukaryota; Opisthokonta; Metazoa; Eumetazoa; Bilateria; Protostomia; Spiralia; Lophotrochozoa; Mollusca; Gastropoda; Patellogastropoda; Lottiidae; Lottia; Lottia gigantea

UdeM00000026424 29159 204.1 UdeM00000026424 XP\_011413207.2 84.7 118  
18 0 105 222 29 146 2.90E-49 204.1 29159 cellular  
organisms; Eukaryota; Opisthokonta; Metazoa; Eumetazoa; Bilateria; Protostomia;

Spiralia;Lophotrochozoa;Mollusca;Bivalvia;Autobranchia;Pteriormorphia;Ostr  
eida;Ostreoidea;Ostreidae;Crassostrea;Crassostrea gigas  
UdeM00000026426 29159 184.9 UdeM00000026426 XP\_034312908.1 27.3 631  
381 18 3 568 6 623 2.90E-43 184.9 29159 cellular  
organisms;Eukaryota;Opisthokonta;Metazoa;Eumetazoa;Bilateria;Protostomia;  
Spiralia;Lophotrochozoa;Mollusca;Bivalvia;Autobranchia;Pteriormorphia;Ostr  
eida;Ostreoidea;Ostreidae;Crassostrea;Crassostrea gigas  
UdeM00000026427 29159 184.9 UdeM00000026427 XP\_034312908.1 27.3 631  
381 18 3 568 6 623 2.90E-43 184.9 29159 cellular  
organisms;Eukaryota;Opisthokonta;Metazoa;Eumetazoa;Bilateria;Protostomia;  
Spiralia;Lophotrochozoa;Mollusca;Bivalvia;Autobranchia;Pteriormorphia;Ostr  
eida;Ostreoidea;Ostreidae;Crassostrea;Crassostrea gigas  
UdeM00000026429 6596 1085.9 UdeM00000026429 XP\_045174255.1 68.3  
775 192 2 1 774 1 722 0.00E+00 1085.9 6596  
cellular  
organisms;Eukaryota;Opisthokonta;Metazoa;Eumetazoa;Bilateria;Protostomia;  
Spiralia;Lophotrochozoa;Mollusca;Bivalvia;Autobranchia;Heteroconchia;Euhe  
terodonta;Imparidentia;Venerida;Veneroidea;Veneridae;Mercenaria;Mercenari  
a mercenaria  
UdeM00000026430 6596 237.7 UdeM00000026430 XP\_045174258.1 49.8 261  
122 5 2 258 5 260 1.80E-59 237.7 6596 cellular  
organisms;Eukaryota;Opisthokonta;Metazoa;Eumetazoa;Bilateria;Protostomia;  
Spiralia;Lophotrochozoa;Mollusca;Bivalvia;Autobranchia;Heteroconchia;Euhe  
terodonta;Imparidentia;Venerida;Veneroidea;Veneridae;Mercenaria;Mercenari  
a mercenaria  
UdeM00000026431 45264 118.2 UdeM00000026431 XP\_044165535.1 47 115  
61 0 238 352 356 470 2.10E-23 118.2 45264 cellular  
organisms;Eukaryota;Opisthokonta;Metazoa;Eumetazoa;Cnidaria;Anthozoa;Hexa  
corallia;Scleractinia;Astrocoeniina;Acroporidae;Acropora;Acropora  
millepora  
UdeM00000026432 6596 95.1 UdeM00000026432 XP\_045177104.1 34.2 199  
115 6 28 220 23 211 1.60E-16 95.1 6596 cellular  
organisms;Eukaryota;Opisthokonta;Metazoa;Eumetazoa;Bilateria;Protostomia;  
Spiralia;Lophotrochozoa;Mollusca;Bivalvia;Autobranchia;Heteroconchia;Euhe  
terodonta;Imparidentia;Venerida;Veneroidea;Veneridae;Mercenaria;Mercenari  
a mercenaria  
UdeM00000026433 6596 83.6 UdeM00000026433 XP\_045177105.1 39 172  
93 6 16 185 288 449 3.80E-13 83.6 6596 cellular  
organisms;Eukaryota;Opisthokonta;Metazoa;Eumetazoa;Bilateria;Protostomia;  
Spiralia;Lophotrochozoa;Mollusca;Bivalvia;Autobranchia;Heteroconchia;Euhe  
terodonta;Imparidentia;Venerida;Veneroidea;Veneridae;Mercenaria;Mercenari  
a mercenaria  
UdeM00000026434 6596 327 UdeM00000026434 XP\_045176466.1 64.2 240  
85 1 35 273 21 260 2.30E-86 327 6596 cellular  
organisms;Eukaryota;Opisthokonta;Metazoa;Eumetazoa;Bilateria;Protostomia;  
Spiralia;Lophotrochozoa;Mollusca;Bivalvia;Autobranchia;Heteroconchia;Euhe  
terodonta;Imparidentia;Venerida;Veneroidea;Veneridae;Mercenaria;Mercenari  
a mercenaria  
UdeM00000026435 6596 358.6 UdeM00000026435 XP\_045176466.1 65 260  
90 1 244 502 1 260 1.30E-95 358.6 6596 cellular  
organisms;Eukaryota;Opisthokonta;Metazoa;Eumetazoa;Bilateria;Protostomia;  
Spiralia;Lophotrochozoa;Mollusca;Bivalvia;Autobranchia;Heteroconchia;Euhe  
terodonta;Imparidentia;Venerida;Veneroidea;Veneridae;Mercenaria;Mercenari  
a mercenaria

UdeM00000026436 6565 546.2 UdeM00000026436 XP\_022287414.1 67.5 391  
 125 1 1 391 1 389 3.50E-152 546.2 6565 cellular  
 organisms;Eukaryota;Opisthokonta;Metazoa;Eumetazoa;Bilateria;Protostomia;  
 Spiralia;Lophotrochozoa;Mollusca;Bivalvia;Autobranhia;Pteriormorphia;Ostr  
 eida;Ostreoidea;Ostreidae;Crassostrea;Crassostrea virginica  
 UdeM00000026437 6565 372.9 UdeM00000026437 XP\_022287414.1 60.8 296  
 106 2 1 296 1 286 4.00E-100 372.9 6565 cellular  
 organisms;Eukaryota;Opisthokonta;Metazoa;Eumetazoa;Bilateria;Protostomia;  
 Spiralia;Lophotrochozoa;Mollusca;Bivalvia;Autobranhia;Pteriormorphia;Ostr  
 eida;Ostreoidea;Ostreidae;Crassostrea;Crassostrea virginica  
 UdeM00000026438 29159 653.3 UdeM00000026438 XP\_034332830.1 35.4 1239  
 396 19 33 1245 389 1248 6.40E-184 653.3 29159 cellular  
 organisms;Eukaryota;Opisthokonta;Metazoa;Eumetazoa;Bilateria;Protostomia;  
 Spiralia;Lophotrochozoa;Mollusca;Bivalvia;Autobranhia;Pteriormorphia;Ostr  
 eida;Ostreoidea;Ostreidae;Crassostrea;Crassostrea gigas  
 UdeM00000026439 6596 758.4 UdeM00000026439 XP\_045177245.1 47.8 808  
 384 11 21 817 33 813 9.30E-216 758.4 6596 cellular  
 organisms;Eukaryota;Opisthokonta;Metazoa;Eumetazoa;Bilateria;Protostomia;  
 Spiralia;Lophotrochozoa;Mollusca;Bivalvia;Autobranhia;Heteroconchia;Euhe  
 terodonta;Imparidentia;Venerida;Veneroidea;Veneridae;Mercenaria;Mercenari  
 a mercenaria  
 UdeM00000026440 6596 765.4 UdeM00000026440 XP\_045177245.1 47.2 834  
 396 13 10 830 11 813 7.70E-218 765.4 6596 cellular  
 organisms;Eukaryota;Opisthokonta;Metazoa;Eumetazoa;Bilateria;Protostomia;  
 Spiralia;Lophotrochozoa;Mollusca;Bivalvia;Autobranhia;Heteroconchia;Euhe  
 terodonta;Imparidentia;Venerida;Veneroidea;Veneridae;Mercenaria;Mercenari  
 a mercenaria  
 UdeM00000026441 6596 4700.6 UdeM00000026441 XP\_045177213.1 62.7  
 3659 1286 23 22 3618 1093 4735 0.00E+00 4700.6 6596  
 cellular  
 organisms;Eukaryota;Opisthokonta;Metazoa;Eumetazoa;Bilateria;Protostomia;  
 Spiralia;Lophotrochozoa;Mollusca;Bivalvia;Autobranhia;Heteroconchia;Euhe  
 terodonta;Imparidentia;Venerida;Veneroidea;Veneridae;Mercenaria;Mercenari  
 a mercenaria  
 UdeM00000026442 6596 292 UdeM00000026442 XP\_045202904.1 68.1 191  
 60 1 3 192 56 246 5.70E-76 292 6596 cellular  
 organisms;Eukaryota;Opisthokonta;Metazoa;Eumetazoa;Bilateria;Protostomia;  
 Spiralia;Lophotrochozoa;Mollusca;Bivalvia;Autobranhia;Heteroconchia;Euhe  
 terodonta;Imparidentia;Venerida;Veneroidea;Veneridae;Mercenaria;Mercenari  
 a mercenaria  
 UdeM00000026445 6596 80.5 UdeM00000026445 XP\_045202904.1 78.6 42  
 9 0 14 55 151 192 1.20E-12 80.5 6596 cellular  
 organisms;Eukaryota;Opisthokonta;Metazoa;Eumetazoa;Bilateria;Protostomia;  
 Spiralia;Lophotrochozoa;Mollusca;Bivalvia;Autobranhia;Heteroconchia;Euhe  
 terodonta;Imparidentia;Venerida;Veneroidea;Veneridae;Mercenaria;Mercenari  
 a mercenaria  
 UdeM00000026447 6596 820.8 UdeM00000026447 XP\_045174738.1 83.2 501  
 57 2 1 499 1 476 9.10E-235 820.8 6596 cellular  
 organisms;Eukaryota;Opisthokonta;Metazoa;Eumetazoa;Bilateria;Protostomia;  
 Spiralia;Lophotrochozoa;Mollusca;Bivalvia;Autobranhia;Heteroconchia;Euhe  
 terodonta;Imparidentia;Venerida;Veneroidea;Veneridae;Mercenaria;Mercenari  
 a mercenaria  
 UdeM00000026448 6596 822.8 UdeM00000026448 XP\_045174740.1 86.3 476  
 63 1 1 474 1 476 2.30E-235 822.8 6596 cellular



organisms;Eukaryota;Opisthokonta;Metazoa;Eumetazoa;Bilateria;Protostomia;Spiralia;Lophotrochozoa;Mollusca;Bivalvia;Autobranchia;Heteroconchia;Euherodonta;Imparidentia;Venerida;Veneroidea;Veneridae;Mercenaria;Mercenaria mercenaria

UdeM00000026450 6596 467.2 UdeM00000026450 XP\_045175187.1 61 374  
144 2 2 374 4 376 2.00E-128 467.2 6596 cellular

organisms;Eukaryota;Opisthokonta;Metazoa;Eumetazoa;Bilateria;Protostomia;Spiralia;Lophotrochozoa;Mollusca;Bivalvia;Autobranchia;Heteroconchia;Euherodonta;Imparidentia;Venerida;Veneroidea;Veneridae;Mercenaria;Mercenaria mercenaria

UdeM00000026451 6596 234.2 UdeM00000026451 XP\_045177131.1 42 274  
144 3 292 558 8 273 4.10E-58 234.2 6596 cellular

organisms;Eukaryota;Opisthokonta;Metazoa;Eumetazoa;Bilateria;Protostomia;Spiralia;Lophotrochozoa;Mollusca;Bivalvia;Autobranchia;Heteroconchia;Euherodonta;Imparidentia;Venerida;Veneroidea;Veneridae;Mercenaria;Mercenaria mercenaria

UdeM00000026452 29159 202.2 UdeM00000026452 XP\_011434731.2 46.9 239  
112 4 4 237 16 244 7.70E-49 202.2 29159 cellular

organisms;Eukaryota;Opisthokonta;Metazoa;Eumetazoa;Bilateria;Protostomia;Spiralia;Lophotrochozoa;Mollusca;Bivalvia;Autobranchia;Pteriomorphia;Ostreida;Ostreoidea;Ostreidae;Crassostrea;Crassostrea gigas

UdeM00000026453 29159 456.8 UdeM00000026453 XP\_034316400.1 74.8 282  
71 0 1 282 42 323 2.00E-125 456.8 29159 cellular

organisms;Eukaryota;Opisthokonta;Metazoa;Eumetazoa;Bilateria;Protostomia;Spiralia;Lophotrochozoa;Mollusca;Bivalvia;Autobranchia;Pteriomorphia;Ostreida;Ostreoidea;Ostreidae;Crassostrea;Crassostrea gigas

UdeM00000026454 29159 470.7 UdeM00000026454 XP\_034316400.1 74.8 290  
73 0 59 348 34 323 1.60E-129 470.7 29159 cellular

organisms;Eukaryota;Opisthokonta;Metazoa;Eumetazoa;Bilateria;Protostomia;Spiralia;Lophotrochozoa;Mollusca;Bivalvia;Autobranchia;Pteriomorphia;Ostreida;Ostreoidea;Ostreidae;Crassostrea;Crassostrea gigas

UdeM00000026455 6596 219.9 UdeM00000026455 XP\_045176285.1 59.9 177  
67 1 1 177 1 173 2.50E-54 219.9 6596 cellular

organisms;Eukaryota;Opisthokonta;Metazoa;Eumetazoa;Bilateria;Protostomia;Spiralia;Lophotrochozoa;Mollusca;Bivalvia;Autobranchia;Heteroconchia;Euherodonta;Imparidentia;Venerida;Veneroidea;Veneridae;Mercenaria;Mercenaria mercenaria

UdeM00000026456 6596 216.5 UdeM00000026456 XP\_045176285.1 60.7 178  
64 2 1 177 1 173 2.80E-53 216.5 6596 cellular

organisms;Eukaryota;Opisthokonta;Metazoa;Eumetazoa;Bilateria;Protostomia;Spiralia;Lophotrochozoa;Mollusca;Bivalvia;Autobranchia;Heteroconchia;Euherodonta;Imparidentia;Venerida;Veneroidea;Veneridae;Mercenaria;Mercenaria mercenaria

UdeM00000026457 6596 289.7 UdeM00000026457 XP\_045181306.1 68.5 197  
61 1 4 199 18 214 2.90E-75 289.7 6596 cellular

organisms;Eukaryota;Opisthokonta;Metazoa;Eumetazoa;Bilateria;Protostomia;Spiralia;Lophotrochozoa;Mollusca;Bivalvia;Autobranchia;Heteroconchia;Euherodonta;Imparidentia;Venerida;Veneroidea;Veneridae;Mercenaria;Mercenaria mercenaria

UdeM00000026458 6573 144.1 UdeM00000026458 XP\_021345759.1 27.7 560  
342 18 2 535 27 549 6.40E-31 144.1 6573 cellular

organisms;Eukaryota;Opisthokonta;Metazoa;Eumetazoa;Bilateria;Protostomia;Spiralia;Lophotrochozoa;Mollusca;Bivalvia;Autobranchia;Pteriomorphia;Pectinida;Pectinoidea;Pectinidae;Mizuhopecten;Mizuhopecten yessoensis

UdeM00000026459 6579 396.4 UdeM00000026459 XP\_033751381.1 52.1 380  
 171 4 187 559 210 585 6.20E-107 396.4 6579 cellular  
 organisms;Eukaryota;Opisthokonta;Metazoa;Eumetazoa;Bilateria;Protostomia;  
 Spiralia;Lophotrochozoa;Mollusca;Bivalvia;Autobranchia;Pteriomorpha;Pect  
 inida;Pectinoidea;Pectinidae;Pecten;Pecten maximus  
 UdeM00000026462 6596 149.1 UdeM00000026462 XP\_045177095.1 44.2 156  
 83 1 469 620 646 801 2.00E-32 149.1 6596 cellular  
 organisms;Eukaryota;Opisthokonta;Metazoa;Eumetazoa;Bilateria;Protostomia;  
 Spiralia;Lophotrochozoa;Mollusca;Bivalvia;Autobranchia;Heteroconchia;Euhe  
 terodonta;Imparidentia;Venerida;Veneroidea;Veneridae;Mercenaria;Mercenari  
 a mercenaria  
 UdeM00000026464 6596 94.4 UdeM00000026464 XP\_045177095.1 33.8 139  
 87 2 176 313 668 802 2.90E-16 94.4 6596 cellular  
 organisms;Eukaryota;Opisthokonta;Metazoa;Eumetazoa;Bilateria;Protostomia;  
 Spiralia;Lophotrochozoa;Mollusca;Bivalvia;Autobranchia;Heteroconchia;Euhe  
 terodonta;Imparidentia;Venerida;Veneroidea;Veneridae;Mercenaria;Mercenari  
 a mercenaria  
 UdeM00000026465 225164 919.1 UdeM00000026465 XP\_009051792.1 49.2  
 926 362 4 1 821 88 1010 4.20E-264 919.1 225164  
 cellular  
 organisms;Eukaryota;Opisthokonta;Metazoa;Eumetazoa;Bilateria;Protostomia;  
 Spiralia;Lophotrochozoa;Mollusca;Gastropoda;Patellogastropoda;Lottioidea;  
 Lottiidae;Lottia;Lottia gigantea  
 UdeM00000026466 6596 610.1 UdeM00000026466 XP\_045177141.1 58 541  
 206 7 3 535 4 531 2.90E-171 610.1 6596 cellular  
 organisms;Eukaryota;Opisthokonta;Metazoa;Eumetazoa;Bilateria;Protostomia;  
 Spiralia;Lophotrochozoa;Mollusca;Bivalvia;Autobranchia;Heteroconchia;Euhe  
 terodonta;Imparidentia;Venerida;Veneroidea;Veneridae;Mercenaria;Mercenari  
 a mercenaria  
 UdeM00000026467 29159 533.1 UdeM00000026467 XP\_034307357.1 41.5 878  
 379 15 602 1404 1038 1855 1.10E-147 533.1 29159 cellular  
 organisms;Eukaryota;Opisthokonta;Metazoa;Eumetazoa;Bilateria;Protostomia;  
 Spiralia;Lophotrochozoa;Mollusca;Bivalvia;Autobranchia;Pteriomorpha;Ostr  
 eida;Ostreoidea;Ostreidae;Crassostrea;Crassostrea gigas  
 UdeM00000026468 6573 100.9 UdeM00000026468 XP\_021351393.1 33.8 299  
 149 11 241 522 277 543 7.30E-18 100.9 6573 cellular  
 organisms;Eukaryota;Opisthokonta;Metazoa;Eumetazoa;Bilateria;Protostomia;  
 Spiralia;Lophotrochozoa;Mollusca;Bivalvia;Autobranchia;Pteriomorpha;Pect  
 inida;Pectinoidea;Pectinidae;Mizuhopecten;Mizuhopecten yessoensis  
 UdeM00000026469 6565 424.5 UdeM00000026469 XP\_022316735.1 93.1 218  
 15 0 1 218 1 218 1.30E-115 424.5 6565 cellular  
 organisms;Eukaryota;Opisthokonta;Metazoa;Eumetazoa;Bilateria;Protostomia;  
 Spiralia;Lophotrochozoa;Mollusca;Bivalvia;Autobranchia;Pteriomorpha;Ostr  
 eida;Ostreoidea;Ostreidae;Crassostrea;Crassostrea virginica  
 UdeM00000026470 29159 311.6 UdeM00000026470 XP\_011423431.2 46.5 409  
 175 7 42 450 27 391 2.40E-81 311.6 29159 cellular  
 organisms;Eukaryota;Opisthokonta;Metazoa;Eumetazoa;Bilateria;Protostomia;  
 Spiralia;Lophotrochozoa;Mollusca;Bivalvia;Autobranchia;Pteriomorpha;Ostr  
 eida;Ostreoidea;Ostreidae;Crassostrea;Crassostrea gigas  
 UdeM00000026471 6596 470.7 UdeM00000026471 XP\_045176006.1 53.3 405  
 183 3 8 407 346 749 2.00E-129 470.7 6596 cellular  
 organisms;Eukaryota;Opisthokonta;Metazoa;Eumetazoa;Bilateria;Protostomia;  
 Spiralia;Lophotrochozoa;Mollusca;Bivalvia;Autobranchia;Heteroconchia;Euhe

terodonta;Imparidentia;Venerida;Veneroidea;Veneridae;Mercenaria;Mercenari  
 a mercenaria  
 UdeM00000026472 6596 423.7 UdeM00000026472 XP\_045176006.1 53.5 361  
 163 2 8 363 346 706 2.50E-115 423.7 6596 cellular  
 organisms;Eukaryota;Opisthokonta;Metazoa;Eumetazoa;Bilateria;Protostomia;  
 Spiralia;Lophotrochozoa;Mollusca;Bivalvia;Autobranchia;Heteroconchia;Euhe  
 terodonta;Imparidentia;Venerida;Veneroidea;Veneridae;Mercenaria;Mercenari  
 a mercenaria  
 UdeM00000026473 6579 156 UdeM00000026473 XP\_033751927.1 30.6 307  
 164 6 20 279 36 340 7.30E-35 156 6579 cellular  
 organisms;Eukaryota;Opisthokonta;Metazoa;Eumetazoa;Bilateria;Protostomia;  
 Spiralia;Lophotrochozoa;Mollusca;Bivalvia;Autobranchia;Pteriormorphia;Pect  
 inida;Pectinoidea;Pectinidae;Pecten;Pecten maximus  
 UdeM00000026474 6596 186.4 UdeM00000026474 XP\_045184616.1 35.9 281  
 155 2 441 721 28 283 1.60E-43 186.4 6596 cellular  
 organisms;Eukaryota;Opisthokonta;Metazoa;Eumetazoa;Bilateria;Protostomia;  
 Spiralia;Lophotrochozoa;Mollusca;Bivalvia;Autobranchia;Heteroconchia;Euhe  
 terodonta;Imparidentia;Venerida;Veneroidea;Veneridae;Mercenaria;Mercenari  
 a mercenaria  
 UdeM00000026475 6579 1154.8 UdeM00000026475 XP\_033752273.1 50.7  
 1220 213 1 777 1996 26 857 0.00E+00 1154.8 6579  
 cellular  
 organisms;Eukaryota;Opisthokonta;Metazoa;Eumetazoa;Bilateria;Protostomia;  
 Spiralia;Lophotrochozoa;Mollusca;Bivalvia;Autobranchia;Pteriormorphia;Pect  
 inida;Pectinoidea;Pectinidae;Pecten;Pecten maximus  
 UdeM00000026476 6596 456.8 UdeM00000026476 XP\_045174246.1 52.9 495  
 180 11 5 488 64 516 3.40E-125 456.8 6596 cellular  
 organisms;Eukaryota;Opisthokonta;Metazoa;Eumetazoa;Bilateria;Protostomia;  
 Spiralia;Lophotrochozoa;Mollusca;Bivalvia;Autobranchia;Heteroconchia;Euhe  
 terodonta;Imparidentia;Venerida;Veneroidea;Veneridae;Mercenaria;Mercenari  
 a mercenaria  
 UdeM00000026477 6573 852.4 UdeM00000026477 XP\_021350365.1 69 578  
 162 3 8 580 5 570 4.40E-244 852.4 6573 cellular  
 organisms;Eukaryota;Opisthokonta;Metazoa;Eumetazoa;Bilateria;Protostomia;  
 Spiralia;Lophotrochozoa;Mollusca;Bivalvia;Autobranchia;Pteriormorphia;Pect  
 inida;Pectinoidea;Pectinidae;Mizuhopecten;Mizuhopecten yessoensis  
 UdeM00000026478 6579 209.1 UdeM00000026478 XP\_033752190.1 75.5 155  
 38 0 1 155 1 155 4.00E-51 209.1 6579 cellular  
 organisms;Eukaryota;Opisthokonta;Metazoa;Eumetazoa;Bilateria;Protostomia;  
 Spiralia;Lophotrochozoa;Mollusca;Bivalvia;Autobranchia;Pteriormorphia;Pect  
 inida;Pectinoidea;Pectinidae;Pecten;Pecten maximus  
 UdeM00000026479 29159 253.4 UdeM00000026479 XP\_011446375.3 57.8 206  
 87 0 9 214 414 619 2.50E-64 253.4 29159 cellular  
 organisms;Eukaryota;Opisthokonta;Metazoa;Eumetazoa;Bilateria;Protostomia;  
 Spiralia;Lophotrochozoa;Mollusca;Bivalvia;Autobranchia;Pteriormorphia;Ostr  
 eida;Ostreoidea;Ostreidae;Crassostrea;Crassostrea gigas  
 UdeM00000026480 6573 429.1 UdeM00000026480 XP\_021345824.1 55.9 390  
 157 3 12 393 59 441 6.10E-117 429.1 6573 cellular  
 organisms;Eukaryota;Opisthokonta;Metazoa;Eumetazoa;Bilateria;Protostomia;  
 Spiralia;Lophotrochozoa;Mollusca;Bivalvia;Autobranchia;Pteriormorphia;Pect  
 inida;Pectinoidea;Pectinidae;Mizuhopecten;Mizuhopecten yessoensis  
 UdeM00000026481 6526 297 UdeM00000026481 XP\_013092019.1 94.4 142  
 8 0 1 142 1 142 1.30E-77 297 6526 cellular  
 organisms;Eukaryota;Opisthokonta;Metazoa;Eumetazoa;Bilateria;Protostomia;

Spiralia;Lophotrochozoa;Mollusca;Gastropoda;Heterobranchia;Euthyneura;Panpulmonata;Hygrophila;Lymnaeoidea;Planorbidae;Biomphalaria;Biomphalaria glabrata

UdeM00000026482 6500 258.5 UdeM00000026482 XP\_035827730.1 45 280  
148 2 17 290 26 305 1.10E-65 258.5 6500 cellular

organisms;Eukaryota;Opisthokonta;Metazoa;Eumetazoa;Bilateria;Protostomia;Spiralia;Lophotrochozoa;Mollusca;Gastropoda;Heterobranchia;Euthyneura;Tectipleura;Aplysiida;Aplysioidea;Aplysiidae;Aplysia;Aplysia californica

UdeM00000026483 6573 75.1 UdeM00000026483 XP\_021357665.1 23.8 277  
191 7 146 402 9 285 3.80E-10 75.1 6573 cellular

organisms;Eukaryota;Opisthokonta;Metazoa;Eumetazoa;Bilateria;Protostomia;Spiralia;Lophotrochozoa;Mollusca;Bivalvia;Autobranchia;Pteriormorphia;Pectinida;Pectinoidea;Pectinidae;Mizuhopecten;Mizuhopecten yessoensis

UdeM00000026486 6565 63.2 UdeM00000026486 XP\_022314409.1 28.8 177  
74 4 1 125 1139 1315 2.80E-07 63.2 6565 cellular

organisms;Eukaryota;Opisthokonta;Metazoa;Eumetazoa;Bilateria;Protostomia;Spiralia;Lophotrochozoa;Mollusca;Bivalvia;Autobranchia;Pteriormorphia;Ostreida;Ostreioidea;Ostreidae;Crassostrea;Crassostrea virginica

UdeM00000026487 6565 115.9 UdeM00000026487 XP\_022295839.1 62.2 98  
36 1 79 176 48 144 5.20E-23 115.9 6565 cellular

organisms;Eukaryota;Opisthokonta;Metazoa;Eumetazoa;Bilateria;Protostomia;Spiralia;Lophotrochozoa;Mollusca;Bivalvia;Autobranchia;Pteriormorphia;Ostreida;Ostreioidea;Ostreidae;Crassostrea;Crassostrea virginica

UdeM00000026488 6596 133.3 UdeM00000026488 XP\_045176394.1 76.9 78  
18 0 1 78 1 78 2.30E-28 133.3 6596 cellular

organisms;Eukaryota;Opisthokonta;Metazoa;Eumetazoa;Bilateria;Protostomia;Spiralia;Lophotrochozoa;Mollusca;Bivalvia;Autobranchia;Heteroconchia;Euheterodonta;Imparidentia;Venerida;Veneroidea;Veneridae;Mercenaria;Mercenaria mercenaria

UdeM00000026489 6596 251.5 UdeM00000026489 XP\_045174370.1 52.2 224  
106 1 1 223 4 227 1.30E-63 251.5 6596 cellular

organisms;Eukaryota;Opisthokonta;Metazoa;Eumetazoa;Bilateria;Protostomia;Spiralia;Lophotrochozoa;Mollusca;Bivalvia;Autobranchia;Heteroconchia;Euheterodonta;Imparidentia;Venerida;Veneroidea;Veneridae;Mercenaria;Mercenaria mercenaria

UdeM00000026490 6596 325.9 UdeM00000026490 XP\_045176008.1 52.3 327  
147 4 3 324 2 324 6.10E-86 325.9 6596 cellular

organisms;Eukaryota;Opisthokonta;Metazoa;Eumetazoa;Bilateria;Protostomia;Spiralia;Lophotrochozoa;Mollusca;Bivalvia;Autobranchia;Heteroconchia;Euheterodonta;Imparidentia;Venerida;Veneroidea;Veneridae;Mercenaria;Mercenaria mercenaria

UdeM00000026494 1735272 89.7 UdeM00000026494 XP\_041375983.1 32.2  
177 74 4 35 165 2508 2684 4.20E-15 89.7 1735272

cellular

organisms;Eukaryota;Opisthokonta;Metazoa;Eumetazoa;Bilateria;Protostomia;Spiralia;Lophotrochozoa;Mollusca;Gastropoda;Neomphalina;Neomphaloidea;Peltospiridae;Gigantopelta;Gigantopelta aegis

UdeM00000026497 6579 154.5 UdeM00000026497 XP\_033753302.1 67.3 101  
33 0 1 101 1 101 7.50E-35 154.5 6579 cellular

organisms;Eukaryota;Opisthokonta;Metazoa;Eumetazoa;Bilateria;Protostomia;Spiralia;Lophotrochozoa;Mollusca;Bivalvia;Autobranchia;Pteriormorphia;Pectinida;Pectinoidea;Pectinidae;Pecten;Pecten maximus

UdeM00000026498 1735272 115.9 UdeM00000026498 XP\_041367377.1 62.1  
87 32 1 3 89 2 87 2.60E-23 115.9 1735272

cellular  
organisms;Eukaryota;Opisthokonta;Metazoa;Eumetazoa;Bilateria;Protostomia;  
Spiralia;Lophotrochozoa;Mollusca;Gastropoda;Neomphalina;Neomphaloidea;Pel  
tospiridae;Gigantopelta;Gigantopelta aegis  
UdeM00000026499 6596 288.1 UdeM00000026499 XP\_045175261.1 50.7 274  
132 2 27 297 716 989 1.30E-74 288.1 6596 cellular  
organisms;Eukaryota;Opisthokonta;Metazoa;Eumetazoa;Bilateria;Protostomia;  
Spiralia;Lophotrochozoa;Mollusca;Bivalvia;Autobranchia;Heteroconchia;Euhe  
terodonta;Imparidentia;Venerida;Veneroidea;Veneridae;Mercenaria;Mercenari  
a mercenaria  
UdeM00000026500 6596 340.9 UdeM00000026500 XP\_045175261.1 30.8 933  
468 25 1 833 135 989 4.60E-90 340.9 6596 cellular  
organisms;Eukaryota;Opisthokonta;Metazoa;Eumetazoa;Bilateria;Protostomia;  
Spiralia;Lophotrochozoa;Mollusca;Bivalvia;Autobranchia;Heteroconchia;Euhe  
terodonta;Imparidentia;Venerida;Veneroidea;Veneridae;Mercenaria;Mercenari  
a mercenaria  
UdeM00000026501 6596 368.6 UdeM00000026501 XP\_045175261.1 30.8 1006  
508 26 20 925 72 989 2.30E-98 368.6 6596 cellular  
organisms;Eukaryota;Opisthokonta;Metazoa;Eumetazoa;Bilateria;Protostomia;  
Spiralia;Lophotrochozoa;Mollusca;Bivalvia;Autobranchia;Heteroconchia;Euhe  
terodonta;Imparidentia;Venerida;Veneroidea;Veneridae;Mercenaria;Mercenari  
a mercenaria  
UdeM00000026503 6596 428.3 UdeM00000026503 XP\_045176475.1 57.4 399  
134 3 1 368 1 394 9.70E-117 428.3 6596 cellular  
organisms;Eukaryota;Opisthokonta;Metazoa;Eumetazoa;Bilateria;Protostomia;  
Spiralia;Lophotrochozoa;Mollusca;Bivalvia;Autobranchia;Heteroconchia;Euhe  
terodonta;Imparidentia;Venerida;Veneroidea;Veneridae;Mercenaria;Mercenari  
a mercenaria  
UdeM00000026504 6596 276.2 UdeM00000026504 XP\_045177414.1 52.8 305  
113 8 17 313 832 1113 5.30E-71 276.2 6596 cellular  
organisms;Eukaryota;Opisthokonta;Metazoa;Eumetazoa;Bilateria;Protostomia;  
Spiralia;Lophotrochozoa;Mollusca;Bivalvia;Autobranchia;Heteroconchia;Euhe  
terodonta;Imparidentia;Venerida;Veneroidea;Veneridae;Mercenaria;Mercenari  
a mercenaria  
UdeM00000026505 6573 1048.9 UdeM00000026505 XP\_021345797.1 61.2  
824 309 4 10 831 6 820 3.50E-303 1048.9 6573  
cellular  
organisms;Eukaryota;Opisthokonta;Metazoa;Eumetazoa;Bilateria;Protostomia;  
Spiralia;Lophotrochozoa;Mollusca;Bivalvia;Autobranchia;Pteriomorphia;Pect  
inida;Pectinoidea;Pectinidae;Mizuhopecten;Mizuhopecten yessoensis  
UdeM00000026506 6573 1050 UdeM00000026506 XP\_021345797.1 60.9 829  
313 4 10 836 6 825 1.50E-303 1050 6573 cellular  
organisms;Eukaryota;Opisthokonta;Metazoa;Eumetazoa;Bilateria;Protostomia;  
Spiralia;Lophotrochozoa;Mollusca;Bivalvia;Autobranchia;Pteriomorphia;Pect  
inida;Pectinoidea;Pectinidae;Mizuhopecten;Mizuhopecten yessoensis  
UdeM00000026508 6579 735.7 UdeM00000026508 XP\_033752592.1 69.1 479  
148 0 10 488 6 484 3.80E-209 735.7 6579 cellular  
organisms;Eukaryota;Opisthokonta;Metazoa;Eumetazoa;Bilateria;Protostomia;  
Spiralia;Lophotrochozoa;Mollusca;Bivalvia;Autobranchia;Pteriomorphia;Pect  
inida;Pectinoidea;Pectinidae;Pecten;Pecten maximus  
UdeM00000026507 6573 294.7 UdeM00000026507 XP\_021345797.1 50.6 322  
147 5 2 320 515 827 1.50E-76 294.7 6573 cellular  
organisms;Eukaryota;Opisthokonta;Metazoa;Eumetazoa;Bilateria;Protostomia;

Spiralia;Lophotrochozoa;Mollusca;Bivalvia;Autobranchia;Pteriomorpha;Pectinida;Pectinoidea;Pectinidae;Mizuhopecten;Mizuhopecten yessoensis  
 UdeM00000026509 6596 670.6 UdeM00000026509 XP\_045175115.1 62.4 583  
 210 3 1 579 1 578 1.80E-189 670.6 6596 cellular  
 organisms;Eukaryota;Opisthokonta;Metazoa;Eumetazoa;Bilateria;Protostomia;Spiralia;Lophotrochozoa;Mollusca;Bivalvia;Autobranchia;Heteroconchia;Euherodonta;Imparidentia;Venerida;Veneroidea;Veneridae;Mercenaria;Mercenaria mercenaria  
 UdeM00000026510 6573 744.2 UdeM00000026510 XP\_021340687.1 85.6 411  
 58 1 1 410 1 411 8.90E-212 744.2 6573 cellular  
 organisms;Eukaryota;Opisthokonta;Metazoa;Eumetazoa;Bilateria;Protostomia;Spiralia;Lophotrochozoa;Mollusca;Bivalvia;Autobranchia;Pteriomorpha;Pectinida;Pectinoidea;Pectinidae;Mizuhopecten;Mizuhopecten yessoensis  
 UdeM00000026511 1735272 206.8 UdeM00000026511 XP\_041366493.1 34.5  
 354 211 6 42 389 25 363 4.90E-50 206.8 1735272  
 cellular  
 organisms;Eukaryota;Opisthokonta;Metazoa;Eumetazoa;Bilateria;Protostomia;Spiralia;Lophotrochozoa;Mollusca;Gastropoda;Neomphalina;Neomphaloidea;Peltospiridae;Gigantopelta;Gigantopelta aegis  
 UdeM00000026513 6596 121.3 UdeM00000026513 XP\_045176561.1 43.6 236  
 94 7 19 219 1 232 2.60E-24 121.3 6596 cellular  
 organisms;Eukaryota;Opisthokonta;Metazoa;Eumetazoa;Bilateria;Protostomia;Spiralia;Lophotrochozoa;Mollusca;Bivalvia;Autobranchia;Heteroconchia;Euherodonta;Imparidentia;Venerida;Veneroidea;Veneridae;Mercenaria;Mercenaria mercenaria  
 UdeM00000044287 6565 293.1 UdeM00000044287 XP\_022293635.1 65.1 218  
 76 0 58 275 58 275 4.10E-76 293.1 6565 cellular  
 organisms;Eukaryota;Opisthokonta;Metazoa;Eumetazoa;Bilateria;Protostomia;Spiralia;Lophotrochozoa;Mollusca;Bivalvia;Autobranchia;Pteriomorpha;Ostreida;Ostreoidea;Ostreidae;Crassostrea;Crassostrea virginica  
 UdeM00000006718 6596 162.2 UdeM00000006718 XP\_045212344.1 61 123  
 47 1 21 143 170 291 5.10E-37 162.2 6596 cellular  
 organisms;Eukaryota;Opisthokonta;Metazoa;Eumetazoa;Bilateria;Protostomia;Spiralia;Lophotrochozoa;Mollusca;Bivalvia;Autobranchia;Heteroconchia;Euherodonta;Imparidentia;Venerida;Veneroidea;Veneridae;Mercenaria;Mercenaria mercenaria  
 UdeM00000006719 6596 252.3 UdeM00000006719 XP\_045212344.1 44.5 283  
 144 5 17 292 15 291 7.60E-64 252.3 6596 cellular  
 organisms;Eukaryota;Opisthokonta;Metazoa;Eumetazoa;Bilateria;Protostomia;Spiralia;Lophotrochozoa;Mollusca;Bivalvia;Autobranchia;Heteroconchia;Euherodonta;Imparidentia;Venerida;Veneroidea;Veneridae;Mercenaria;Mercenaria mercenaria  
 UdeM00000006720 6596 219.5 UdeM00000006720 XP\_045212344.1 42.4 271  
 149 6 25 292 23 289 5.50E-54 219.5 6596 cellular  
 organisms;Eukaryota;Opisthokonta;Metazoa;Eumetazoa;Bilateria;Protostomia;Spiralia;Lophotrochozoa;Mollusca;Bivalvia;Autobranchia;Heteroconchia;Euherodonta;Imparidentia;Venerida;Veneroidea;Veneridae;Mercenaria;Mercenaria mercenaria  
 UdeM00000006723 6596 2111.6 UdeM00000006723 XP\_045214147.1 60.6  
 2170 745 32 23 2129 169 2290 0.00E+00 2111.6 6596  
 cellular  
 organisms;Eukaryota;Opisthokonta;Metazoa;Eumetazoa;Bilateria;Protostomia;Spiralia;Lophotrochozoa;Mollusca;Bivalvia;Autobranchia;Heteroconchia;Euherodonta;Imparidentia;Venerida;Veneroidea;Veneridae;Mercenaria;Mercenaria mercenaria

terodonta;Imparidentia;Venerida;Veneroidea;Veneridae;Mercenaria;Mercenaria mercenaria

UdeM00000006725 6596 413.7 UdeM00000006725 XP\_045214151.1 48.1 422  
195 4 5 403 15 435 3.60E-112 413.7 6596 cellular

organisms;Eukaryota;Opisthokonta;Metazoa;Eumetazoa;Bilateria;Protostomia;Spiralia;Lophotrochozoa;Mollusca;Bivalvia;Autobranchia;Heteroconchia;Euheterodonta;Imparidentia;Venerida;Veneroidea;Veneridae;Mercenaria;Mercenaria mercenaria

UdeM00000006726 6596 797 UdeM00000006726 XP\_045212126.1 49.6 939  
353 13 10 841 64 989 2.40E-227 797 6596 cellular

organisms;Eukaryota;Opisthokonta;Metazoa;Eumetazoa;Bilateria;Protostomia;Spiralia;Lophotrochozoa;Mollusca;Bivalvia;Autobranchia;Heteroconchia;Euheterodonta;Imparidentia;Venerida;Veneroidea;Veneridae;Mercenaria;Mercenaria mercenaria

UdeM00000006728 6573 263.8 UdeM00000006728 XP\_021376357.1 49.6 258  
125 3 3 257 251 506 5.60E-67 263.8 6573 cellular

organisms;Eukaryota;Opisthokonta;Metazoa;Eumetazoa;Bilateria;Protostomia;Spiralia;Lophotrochozoa;Mollusca;Bivalvia;Autobranchia;Pteriomorphia;Pectinida;Pectinoidea;Pectinidae;Mizuhopecten;Mizuhopecten yessoensis

UdeM00000006729 6565 247.7 UdeM00000006729 XP\_022297409.1 38.5 330  
198 5 1 327 82 409 2.10E-62 247.7 6565 cellular

organisms;Eukaryota;Opisthokonta;Metazoa;Eumetazoa;Bilateria;Protostomia;Spiralia;Lophotrochozoa;Mollusca;Bivalvia;Autobranchia;Pteriomorphia;Ostreida;Ostreoidea;Ostreidae;Crassostrea;Crassostrea virginica

UdeM00000006730 29159 366.7 UdeM00000006730 XP\_034322771.1 33.4 682  
298 12 6 654 24 582 6.20E-98 366.7 29159 cellular

organisms;Eukaryota;Opisthokonta;Metazoa;Eumetazoa;Bilateria;Protostomia;Spiralia;Lophotrochozoa;Mollusca;Bivalvia;Autobranchia;Pteriomorphia;Ostreida;Ostreoidea;Ostreidae;Crassostrea;Crassostrea gigas

UdeM00000006731 482537 246.5 UdeM00000006731 XP\_008590618.1 32.2  
429 247 7 613 1011 284 698 1.60E-61 246.5 482537

cellular

organisms;Eukaryota;Opisthokonta;Metazoa;Eumetazoa;Bilateria;Deuterostomia;Chordata;Craniata;Vertebrata;Gnathostomata;Teleostomi;Euteleostomi;Sarcopterygii;Dipnotetrapodomorpha;Tetrapoda;Amniota;Mammalia;Theria;Eutheria;Boreoeutheria;Euarchontoglires;Dermoptera;Cynocephalidae;Galeopterus;Galiopterus variegatus

UdeM00000006732 146911 354.4 UdeM00000006732 XP\_015283557.1 33.9  
581 340 11 275 853 52 590 4.50E-94 354.4 146911

cellular

organisms;Eukaryota;Opisthokonta;Metazoa;Eumetazoa;Bilateria;Deuterostomia;Chordata;Craniata;Vertebrata;Gnathostomata;Teleostomi;Euteleostomi;Sarcopterygii;Dipnotetrapodomorpha;Tetrapoda;Amniota;Sauropsida;Sauria;Lepidosauria;Squamata;Bifurcata;Gekkota;Gekkonidae;Gekkoninae;Gekko;Gekko japonicus

UdeM00000006733 29159 314.7 UdeM00000006733 XP\_034312343.1 84.9 172  
26 0 1 172 1 172 7.40E-83 314.7 29159 cellular

organisms;Eukaryota;Opisthokonta;Metazoa;Eumetazoa;Bilateria;Protostomia;Spiralia;Lophotrochozoa;Mollusca;Bivalvia;Autobranchia;Pteriomorphia;Ostreida;Ostreoidea;Ostreidae;Crassostrea;Crassostrea gigas

UdeM00000006734 6573 1472.6 UdeM00000006734 XP\_021350588.1 66.3  
1752 570 5 1 1737 238 1984 0.00E+00 1472.6 6573

cellular

organisms;Eukaryota;Opisthokonta;Metazoa;Eumetazoa;Bilateria;Protostomia;

Spiralia;Lophotrochozoa;Mollusca;Bivalvia;Autobranchia;Pteriormorphia;Pectinida;Pectinoidea;Pectinidae;Mizuhopecten;Mizuhopecten yessoensis  
UdeM00000006735 6596 499.2 UdeM00000006735 XP\_045214249.1 47.4 511  
265 3 4 511 13 522 6.30E-138 499.2 6596 cellular  
organisms;Eukaryota;Opisthokonta;Metazoa;Eumetazoa;Bilateria;Protostomia;  
Spiralia;Lophotrochozoa;Mollusca;Bivalvia;Autobranchia;Heteroconchia;Euherodonta;Imparidentia;Venerida;Veneroidea;Veneridae;Mercenaria;Mercenaria mercenaria  
UdeM00000006736 6596 453.8 UdeM00000006736 XP\_045212556.1 50.7 517  
223 12 6 491 14 529 2.90E-124 453.8 6596 cellular  
organisms;Eukaryota;Opisthokonta;Metazoa;Eumetazoa;Bilateria;Protostomia;  
Spiralia;Lophotrochozoa;Mollusca;Bivalvia;Autobranchia;Heteroconchia;Euherodonta;Imparidentia;Venerida;Veneroidea;Veneridae;Mercenaria;Mercenaria mercenaria  
UdeM00000006737 6596 322 UdeM00000006737 XP\_045212556.1 55.9 315  
124 6 10 310 216 529 8.30E-85 322 6596 cellular  
organisms;Eukaryota;Opisthokonta;Metazoa;Eumetazoa;Bilateria;Protostomia;  
Spiralia;Lophotrochozoa;Mollusca;Bivalvia;Autobranchia;Heteroconchia;Euherodonta;Imparidentia;Venerida;Veneroidea;Veneridae;Mercenaria;Mercenaria mercenaria  
UdeM00000006738 6596 505.4 UdeM00000006738 XP\_045214444.1 48.9 611  
237 11 55 627 64 637 1.10E-139 505.4 6596 cellular  
organisms;Eukaryota;Opisthokonta;Metazoa;Eumetazoa;Bilateria;Protostomia;  
Spiralia;Lophotrochozoa;Mollusca;Bivalvia;Autobranchia;Heteroconchia;Euherodonta;Imparidentia;Venerida;Veneroidea;Veneridae;Mercenaria;Mercenaria mercenaria  
UdeM00000006740 6596 661.4 UdeM00000006740 XP\_045212612.1 53.1 695  
308 7 1 691 1 681 1.30E-186 661.4 6596 cellular  
organisms;Eukaryota;Opisthokonta;Metazoa;Eumetazoa;Bilateria;Protostomia;  
Spiralia;Lophotrochozoa;Mollusca;Bivalvia;Autobranchia;Heteroconchia;Euherodonta;Imparidentia;Venerida;Veneroidea;Veneridae;Mercenaria;Mercenaria mercenaria  
UdeM00000006741 8355 221.1 UdeM00000006741 XP\_041422762.1 31.2 538  
323 11 99 627 801 1300 4.00E-54 221.1 8355 cellular  
organisms;Eukaryota;Opisthokonta;Metazoa;Eumetazoa;Bilateria;Deuterostomia;Chordata;Craniata;Vertebrata;Gnathostomata;Teleostomi;Euteleostomi;Sarcopterygii;Dipnotetrapodomorpha;Tetrapoda;Amphibia;Batrachia;Anura;Pipoidea;Pipidae;Xenopodinae;Xenopus;Xenopus;Xenopus laevis  
UdeM00000006742 189513 145.2 UdeM00000006742 XP\_044728352.1 24.2  
690 378 20 210 850 557 1150 3.80E-31 145.2 189513  
cellular  
organisms;Eukaryota;Opisthokonta;Metazoa;Eumetazoa;Bilateria;Protostomia;  
Ecdysozoa;Panarthropoda;Arthropoda;Mandibulata;Pancrustacea;Hexapoda;Insecta;Dicondylia;Pterygota;Neoptera;Endopterygota;Neuropterida;Neoptera;Hemerobiiiformia;Chrysopidae;Chrysopinae;Chrysoperla;Chrysoperla carnea  
UdeM00000006743 189513 145.2 UdeM00000006743 XP\_044728352.1 24.2  
690 378 20 217 857 557 1150 3.80E-31 145.2 189513  
cellular  
organisms;Eukaryota;Opisthokonta;Metazoa;Eumetazoa;Bilateria;Protostomia;  
Ecdysozoa;Panarthropoda;Arthropoda;Mandibulata;Pancrustacea;Hexapoda;Insecta;Dicondylia;Pterygota;Neoptera;Endopterygota;Neuropterida;Neoptera;Hemerobiiiformia;Chrysopidae;Chrysopinae;Chrysoperla;Chrysoperla carnea  
UdeM00000006744 6596 159.5 UdeM00000006744 XP\_045200918.1 23.1 850  
546 31 3 811 1982 2764 1.90E-35 159.5 6596 cellular



organisms;Eukaryota;Opisthokonta;Metazoa;Eumetazoa;Bilateria;Protostomia;Spiralia;Lophotrochozoa;Mollusca;Bivalvia;Autobranchia;Heteroconchia;Euherodonta;Imparidentia;Venerida;Veneroidea;Veneridae;Mercenaria;Mercenaria mercenaria

UdeM00000006745 6596 95.1 UdeM00000006745 XP\_045202508.1 28.2 273  
168 10 7 256 227 494 1.60E-16 95.1 6596 cellular

organisms;Eukaryota;Opisthokonta;Metazoa;Eumetazoa;Bilateria;Protostomia;Spiralia;Lophotrochozoa;Mollusca;Bivalvia;Autobranchia;Heteroconchia;Euherodonta;Imparidentia;Venerida;Veneroidea;Veneridae;Mercenaria;Mercenaria mercenaria

UdeM00000006746 6596 103.2 UdeM00000006746 XP\_045200918.1 22.8 517  
293 18 2 481 1247 1694 1.00E-18 103.2 6596 cellular

organisms;Eukaryota;Opisthokonta;Metazoa;Eumetazoa;Bilateria;Protostomia;Spiralia;Lophotrochozoa;Mollusca;Bivalvia;Autobranchia;Heteroconchia;Euherodonta;Imparidentia;Venerida;Veneroidea;Veneridae;Mercenaria;Mercenaria mercenaria

UdeM00000006747 6596 179.5 UdeM00000006747 XP\_045202508.1 25.1 874  
567 33 164 1008 943 1757 2.20E-41 179.5 6596 cellular

organisms;Eukaryota;Opisthokonta;Metazoa;Eumetazoa;Bilateria;Protostomia;Spiralia;Lophotrochozoa;Mollusca;Bivalvia;Autobranchia;Heteroconchia;Euherodonta;Imparidentia;Venerida;Veneroidea;Veneridae;Mercenaria;Mercenaria mercenaria

UdeM00000006748 6596 179.5 UdeM00000006748 XP\_045202508.1 25.1 874  
567 33 177 1021 943 1757 2.20E-41 179.5 6596 cellular

organisms;Eukaryota;Opisthokonta;Metazoa;Eumetazoa;Bilateria;Protostomia;Spiralia;Lophotrochozoa;Mollusca;Bivalvia;Autobranchia;Heteroconchia;Euherodonta;Imparidentia;Venerida;Veneroidea;Veneridae;Mercenaria;Mercenaria mercenaria

UdeM00000006749 6596 541.2 UdeM00000006749 XP\_045212425.1 60.5 478  
177 5 1 471 1 473 1.30E-150 541.2 6596 cellular

organisms;Eukaryota;Opisthokonta;Metazoa;Eumetazoa;Bilateria;Protostomia;Spiralia;Lophotrochozoa;Mollusca;Bivalvia;Autobranchia;Heteroconchia;Euherodonta;Imparidentia;Venerida;Veneroidea;Veneridae;Mercenaria;Mercenaria mercenaria

UdeM00000006750 6500 317.4 UdeM00000006750 XP\_012938994.2 51.5 301  
146 0 34 334 69 369 2.30E-83 317.4 6500 cellular

organisms;Eukaryota;Opisthokonta;Metazoa;Eumetazoa;Bilateria;Protostomia;Spiralia;Lophotrochozoa;Mollusca;Gastropoda;Heterobranchia;Euthyneura;Teptipleura;Aplysiida;Aplysioidea;Aplysiidae;Aplysia;Aplysia californica

UdeM00000006751 6596 258.1 UdeM00000006751 XP\_045213765.1 82 150  
25 1 1 150 15 162 1.20E-65 258.1 6596 cellular

organisms;Eukaryota;Opisthokonta;Metazoa;Eumetazoa;Bilateria;Protostomia;Spiralia;Lophotrochozoa;Mollusca;Bivalvia;Autobranchia;Heteroconchia;Euherodonta;Imparidentia;Venerida;Veneroidea;Veneridae;Mercenaria;Mercenaria mercenaria

UdeM00000006752 6596 224.2 UdeM00000006752 XP\_045211580.1 62.4 173  
64 1 36 207 30 202 1.60E-55 224.2 6596 cellular

organisms;Eukaryota;Opisthokonta;Metazoa;Eumetazoa;Bilateria;Protostomia;Spiralia;Lophotrochozoa;Mollusca;Bivalvia;Autobranchia;Heteroconchia;Euherodonta;Imparidentia;Venerida;Veneroidea;Veneridae;Mercenaria;Mercenaria mercenaria

UdeM00000006753 29159 285.8 UdeM00000006753 XP\_011454365.2 62.9 224  
81 2 1 222 1 224 4.70E-74 285.8 29159 cellular

organisms;Eukaryota;Opisthokonta;Metazoa;Eumetazoa;Bilateria;Protostomia;

Spiralia;Lophotrochozoa;Mollusca;Bivalvia;Autobranchia;Pteriormorphia;Ostr  
eida;Ostreoidea;Ostreidae;Crassostrea;Crassostrea gigas  
UdeM00000006754 6596 119 UdeM00000006754 XP\_045180427.1 48.7 115  
57 1 78 190 159 273 6.80E-24 119 6596 cellular  
organisms;Eukaryota;Opisthokonta;Metazoa;Eumetazoa;Bilateria;Protostomia;  
Spiralia;Lophotrochozoa;Mollusca;Bivalvia;Autobranchia;Heteroconchia;Euhe  
terodonta;Imparidentia;Venerida;Veneroidea;Veneridae;Mercenaria;Mercenari  
a mercenaria  
UdeM00000006755 6573 94 UdeM00000006755 XP\_021365625.1 52.9 87  
41 0 29 115 40 126 1.80E-16 94 6573 cellular  
organisms;Eukaryota;Opisthokonta;Metazoa;Eumetazoa;Bilateria;Protostomia;  
Spiralia;Lophotrochozoa;Mollusca;Bivalvia;Autobranchia;Pteriormorphia;Pect  
inida;Pectinoidea;Pectinidae;Mizuhopecten;Mizuhopecten yessoensis  
UdeM00000006757 1735272 540.8 UdeM00000006757 XP\_041363490.1 50.2  
611 178 13 97 696 117 612 3.10E-150 540.8 1735272  
cellular  
organisms;Eukaryota;Opisthokonta;Metazoa;Eumetazoa;Bilateria;Protostomia;  
Spiralia;Lophotrochozoa;Mollusca;Gastropoda;Neomphalina;Neomphaloidea;Pel  
tospiridae;Gigantopelta;Gigantopelta aegis  
UdeM00000006758 1735272 172.6 UdeM00000006758 XP\_041363491.1 48.4  
188 90 3 1 183 1 186 4.80E-40 172.6 1735272  
cellular  
organisms;Eukaryota;Opisthokonta;Metazoa;Eumetazoa;Bilateria;Protostomia;  
Spiralia;Lophotrochozoa;Mollusca;Gastropoda;Neomphalina;Neomphaloidea;Pel  
tospiridae;Gigantopelta;Gigantopelta aegis  
UdeM00000006759 6500 627.5 UdeM00000006759 XP\_005108504.1 83 358  
58 3 1 357 1 356 1.30E-176 627.5 6500 cellular  
organisms;Eukaryota;Opisthokonta;Metazoa;Eumetazoa;Bilateria;Protostomia;  
Spiralia;Lophotrochozoa;Mollusca;Gastropoda;Heterobranchia;Euthyneura;Tec  
tipleura;Aplysiida;Aplysioidea;Aplysiidae;Aplysia;Aplysia californica  
UdeM00000006760 6596 543.1 UdeM00000006760 XP\_045211200.1 76.8 341  
73 2 1 341 1 335 2.50E-151 543.1 6596 cellular  
organisms;Eukaryota;Opisthokonta;Metazoa;Eumetazoa;Bilateria;Protostomia;  
Spiralia;Lophotrochozoa;Mollusca;Bivalvia;Autobranchia;Heteroconchia;Euhe  
terodonta;Imparidentia;Venerida;Veneroidea;Veneridae;Mercenaria;Mercenari  
a mercenaria  
UdeM00000006761 6596 518.1 UdeM00000006761 XP\_045211016.1 49.1 560  
244 10 22 552 13 560 1.40E-143 518.1 6596 cellular  
organisms;Eukaryota;Opisthokonta;Metazoa;Eumetazoa;Bilateria;Protostomia;  
Spiralia;Lophotrochozoa;Mollusca;Bivalvia;Autobranchia;Heteroconchia;Euhe  
terodonta;Imparidentia;Venerida;Veneroidea;Veneridae;Mercenaria;Mercenari  
a mercenaria  
UdeM00000006762 6596 507.7 UdeM00000006762 XP\_045172969.1 52.9 499  
209 5 25 500 17 512 1.70E-140 507.7 6596 cellular  
organisms;Eukaryota;Opisthokonta;Metazoa;Eumetazoa;Bilateria;Protostomia;  
Spiralia;Lophotrochozoa;Mollusca;Bivalvia;Autobranchia;Heteroconchia;Euhe  
terodonta;Imparidentia;Venerida;Veneroidea;Veneridae;Mercenaria;Mercenari  
a mercenaria  
UdeM00000006763 1735272 944.9 UdeM00000006763 XP\_041364910.1 61.1  
858 282 18 1 829 79 913 6.90E-272 944.9 1735272  
cellular  
organisms;Eukaryota;Opisthokonta;Metazoa;Eumetazoa;Bilateria;Protostomia;  
Spiralia;Lophotrochozoa;Mollusca;Gastropoda;Neomphalina;Neomphaloidea;Pel  
tospiridae;Gigantopelta;Gigantopelta aegis

UdeM00000006764 1735272 969.9 UdeM00000006764 XP\_041362874.1 49.6  
953 445 10 1 928 1 943 2.40E-279 969.9 1735272  
cellular

organisms;Eukaryota;Opisthokonta;Metazoa;Eumetazoa;Bilateria;Protostomia;  
Spiralia;Lophotrochozoa;Mollusca;Gastropoda;Neomphalina;Neomphaloidea;Pel  
tospiridae;Gigantopelta;Gigantopelta aegis

UdeM00000006765 29159 840.1 UdeM00000006765 XP\_034311703.1 77.8 549  
108 4 1 545 538 1076 1.80E-240 840.1 29159 cellular

organisms;Eukaryota;Opisthokonta;Metazoa;Eumetazoa;Bilateria;Protostomia;  
Spiralia;Lophotrochozoa;Mollusca;Bivalvia;Autobranchia;Pteriormorphia;Ostr  
eida;Ostreoidea;Ostreidae;Crassostrea;Crassostrea gigas

UdeM00000006766 6573 204.5 UdeM00000006766 XP\_021380113.1 85.1 114  
17 0 1 114 516 629 7.40E-50 204.5 6573 cellular

organisms;Eukaryota;Opisthokonta;Metazoa;Eumetazoa;Bilateria;Protostomia;  
Spiralia;Lophotrochozoa;Mollusca;Bivalvia;Autobranchia;Pteriormorphia;Pect  
inida;Pectinoidea;Pectinidae;Mizuhopecten;Mizuhopecten yessoensis

UdeM00000006767 6596 678.7 UdeM00000006767 XP\_045210796.1 77.9 439  
88 3 1 438 41 471 5.00E-192 678.7 6596 cellular

organisms;Eukaryota;Opisthokonta;Metazoa;Eumetazoa;Bilateria;Protostomia;  
Spiralia;Lophotrochozoa;Mollusca;Bivalvia;Autobranchia;Heteroconchia;Euhe  
terodonta;Imparidentia;Venerida;Veneroidea;Veneridae;Mercenaria;Mercenari  
a mercenaria

UdeM00000006768 6500 220.3 UdeM00000006768 XP\_005092919.1 55.8 181  
80 0 2 182 5 185 2.00E-54 220.3 6500 cellular

organisms;Eukaryota;Opisthokonta;Metazoa;Eumetazoa;Bilateria;Protostomia;  
Spiralia;Lophotrochozoa;Mollusca;Gastropoda;Heterobranchia;Euthyneura;Tec  
tipleura;Aplysiida;Aplysioidea;Aplysiidae;Aplysia;Aplysia californica

UdeM00000006769 6596 958 UdeM00000006769 XP\_045213581.1 82.7 584  
97 2 14 596 15 595 5.90E-276 958 6596 cellular

organisms;Eukaryota;Opisthokonta;Metazoa;Eumetazoa;Bilateria;Protostomia;  
Spiralia;Lophotrochozoa;Mollusca;Bivalvia;Autobranchia;Heteroconchia;Euhe  
terodonta;Imparidentia;Venerida;Veneroidea;Veneridae;Mercenaria;Mercenari  
a mercenaria

UdeM00000006770 6596 901.4 UdeM00000006770 XP\_045214159.1 74.5 581  
146 2 81 659 580 1160 7.00E-259 901.4 6596 cellular

organisms;Eukaryota;Opisthokonta;Metazoa;Eumetazoa;Bilateria;Protostomia;  
Spiralia;Lophotrochozoa;Mollusca;Bivalvia;Autobranchia;Heteroconchia;Euhe  
terodonta;Imparidentia;Venerida;Veneroidea;Veneridae;Mercenaria;Mercenari  
a mercenaria

UdeM00000006771 6596 568.2 UdeM00000006771 XP\_045212280.1 92 299  
24 0 1 299 1 299 6.40E-159 568.2 6596 cellular

organisms;Eukaryota;Opisthokonta;Metazoa;Eumetazoa;Bilateria;Protostomia;  
Spiralia;Lophotrochozoa;Mollusca;Bivalvia;Autobranchia;Heteroconchia;Euhe  
terodonta;Imparidentia;Venerida;Veneroidea;Veneridae;Mercenaria;Mercenari  
a mercenaria

UdeM00000006772 400727 283.9 UdeM00000006772 XP\_025084469.1 58  
243 100 2 10 250 14 256 2.00E-73 283.9 400727

cellular

organisms;Eukaryota;Opisthokonta;Metazoa;Eumetazoa;Bilateria;Protostomia;  
Spiralia;Lophotrochozoa;Mollusca;Gastropoda;Caenogastropoda;Architaeniogl  
ossa;Ampullarioidea;Ampullariidae;Pomacea;Pomacea canaliculata

UdeM00000006773 6579 373.2 UdeM00000006773 XP\_033739650.1 49.1 375  
173 6 1 363 4 372 3.70E-100 373.2 6579 cellular

organisms;Eukaryota;Opisthokonta;Metazoa;Eumetazoa;Bilateria;Protostomia;

Spiralia;Lophotrochozoa;Mollusca;Bivalvia;Autobranchia;Pteriomorpha;Pectinida;Pectinoidea;Pectinidae;Pecten;Pecten maximus

UdeM00000006774 6596 1674.4 UdeM00000006774 XP\_045212515.1 54.1  
1700 729 16 1 1682 34 1699 0.00E+00 1674.4 6596  
cellular

organisms;Eukaryota;Opisthokonta;Metazoa;Eumetazoa;Bilateria;Protostomia;Spiralia;Lophotrochozoa;Mollusca;Bivalvia;Autobranchia;Heteroconchia;Euheterodonta;Imparidentia;Venerida;Veneroidea;Veneridae;Mercenaria;Mercenaria mercenaria

UdeM00000006775 6573 450.3 UdeM00000006775 XP\_021372707.1 55.7 465  
169 12 4 461 32 466 3.00E-123 450.3 6573 cellular

organisms;Eukaryota;Opisthokonta;Metazoa;Eumetazoa;Bilateria;Protostomia;Spiralia;Lophotrochozoa;Mollusca;Bivalvia;Autobranchia;Pteriomorpha;Pectinida;Pectinoidea;Pectinidae;Mizuhopecten;Mizuhopecten yessoensis

UdeM00000006776 400727 327 UdeM00000006776 XP\_025095209.1 63.2  
269 91 2 19 286 11 272 3.10E-86 327 400727  
cellular

organisms;Eukaryota;Opisthokonta;Metazoa;Eumetazoa;Bilateria;Protostomia;Spiralia;Lophotrochozoa;Mollusca;Gastropoda;Caenogastropoda;Architaenioglossa;Ampullarioidea;Ampullariidae;Pomacea;Pomacea canaliculata

UdeM00000006777 6596 976.9 UdeM00000006777 XP\_045214239.1 54.9 878  
386 6 7 876 8 883 1.70E-281 976.9 6596 cellular

organisms;Eukaryota;Opisthokonta;Metazoa;Eumetazoa;Bilateria;Protostomia;Spiralia;Lophotrochozoa;Mollusca;Bivalvia;Autobranchia;Heteroconchia;Euheterodonta;Imparidentia;Venerida;Veneroidea;Veneridae;Mercenaria;Mercenaria mercenaria

UdeM00000006779 6579 369 UdeM00000006779 XP\_033739401.1 74 246  
49 8 1 236 1 241 4.50E-99 369 6579 cellular

organisms;Eukaryota;Opisthokonta;Metazoa;Eumetazoa;Bilateria;Protostomia;Spiralia;Lophotrochozoa;Mollusca;Bivalvia;Autobranchia;Pteriomorpha;Pectinida;Pectinoidea;Pectinidae;Pecten;Pecten maximus

UdeM00000006780 10224 94.4 UdeM00000006780 XP\_006814936.1 35.8 151  
92 3 49 194 94 244 1.80E-16 94.4 10224 cellular

organisms;Eukaryota;Opisthokonta;Metazoa;Eumetazoa;Bilateria;Deuterostomia;Hemichordata;Enteropneusta;Harrimaniidae;Saccoglossus;Saccoglossus kowalevskii

UdeM00000006781 6596 780 UdeM00000006781 XP\_045177368.1 47.2 815  
400 9 33 840 37 828 3.00E-222 780 6596 cellular

organisms;Eukaryota;Opisthokonta;Metazoa;Eumetazoa;Bilateria;Protostomia;Spiralia;Lophotrochozoa;Mollusca;Bivalvia;Autobranchia;Heteroconchia;Euheterodonta;Imparidentia;Venerida;Veneroidea;Veneridae;Mercenaria;Mercenaria mercenaria

UdeM00000006784 6596 136.3 UdeM00000006784 XP\_045199098.1 35.4 189  
115 2 7 188 18 206 1.20E-28 136.3 6596 cellular

organisms;Eukaryota;Opisthokonta;Metazoa;Eumetazoa;Bilateria;Protostomia;Spiralia;Lophotrochozoa;Mollusca;Bivalvia;Autobranchia;Heteroconchia;Euheterodonta;Imparidentia;Venerida;Veneroidea;Veneridae;Mercenaria;Mercenaria mercenaria

UdeM00000006785 6596 475.3 UdeM00000006785 XP\_045213874.1 61.8 359  
129 1 6 356 455 813 6.80E-131 475.3 6596 cellular

organisms;Eukaryota;Opisthokonta;Metazoa;Eumetazoa;Bilateria;Protostomia;Spiralia;Lophotrochozoa;Mollusca;Bivalvia;Autobranchia;Heteroconchia;Euheterodonta;Imparidentia;Venerida;Veneroidea;Veneridae;Mercenaria;Mercenaria mercenaria

UdeM00000006786 6596 175.3 UdeM00000006786 XP\_045213874.1 59.1 137  
 48 1 3 131 455 591 5.30E-41 175.3 6596 cellular  
 organisms;Eukaryota;Opisthokonta;Metazoa;Eumetazoa;Bilateria;Protostomia;  
 Spiralia;Lophotrochozoa;Mollusca;Bivalvia;Autobranhia;Heteroconchia;Euhe  
 terodonta;Imparidentia;Venerida;Veneroidea;Veneridae;Mercenaria;Mercenari  
 a mercenaria  
 UdeM00000006787 46514 297 UdeM00000006787 XP\_038047233.1 64.2 204  
 73 0 8 211 150 353 2.00E-77 297 46514 cellular  
 organisms;Eukaryota;Opisthokonta;Metazoa;Eumetazoa;Bilateria;Deuterostomi  
 a;Echinodermata;Eleutherozoa;Asterozoa;Asteroidea;Valvatacea;Valvatida;As  
 terinidae;Patiria;Patiria miniata  
 UdeM00000006788 6596 575.9 UdeM00000006788 XP\_045191482.1 55 505  
 225 1 462 964 110 614 9.90E-161 575.9 6596 cellular  
 organisms;Eukaryota;Opisthokonta;Metazoa;Eumetazoa;Bilateria;Protostomia;  
 Spiralia;Lophotrochozoa;Mollusca;Bivalvia;Autobranhia;Heteroconchia;Euhe  
 terodonta;Imparidentia;Venerida;Veneroidea;Veneridae;Mercenaria;Mercenari  
 a mercenaria  
 UdeM00000006789 46514 342 UdeM00000006789 XP\_038047233.1 67 227  
 75 0 24 250 130 356 6.20E-91 342 46514 cellular  
 organisms;Eukaryota;Opisthokonta;Metazoa;Eumetazoa;Bilateria;Deuterostomi  
 a;Echinodermata;Eleutherozoa;Asterozoa;Asteroidea;Valvatacea;Valvatida;As  
 terinidae;Patiria;Patiria miniata  
 UdeM00000006790 7574 414.1 UdeM00000006790 XP\_013411173.1 60.1 321  
 111 1 38 358 73 376 1.90E-112 414.1 7574 cellular  
 organisms;Eukaryota;Opisthokonta;Metazoa;Eumetazoa;Bilateria;Protostomia;  
 Spiralia;Lophotrochozoa;Brachiopoda;Linguliformea;Lingulata;Lingulida;Lin  
 guloidea;Lingulidae;Lingula;Lingula anatina  
 UdeM00000006791 29159 368.6 UdeM00000006791 XP\_011425832.2 55.1 361  
 154 4 6 365 4 357 9.10E-99 368.6 29159 cellular  
 organisms;Eukaryota;Opisthokonta;Metazoa;Eumetazoa;Bilateria;Protostomia;  
 Spiralia;Lophotrochozoa;Mollusca;Bivalvia;Autobranhia;Pteriormorphia;Ostr  
 eida;Ostreoidea;Ostreidae;Crassostrea;Crassostrea gigas  
 UdeM00000006793 6596 330.5 UdeM00000006793 XP\_045211394.1 58.3 290  
 117 2 10 299 8 293 2.30E-87 330.5 6596 cellular  
 organisms;Eukaryota;Opisthokonta;Metazoa;Eumetazoa;Bilateria;Protostomia;  
 Spiralia;Lophotrochozoa;Mollusca;Bivalvia;Autobranhia;Heteroconchia;Euhe  
 terodonta;Imparidentia;Venerida;Veneroidea;Veneridae;Mercenaria;Mercenari  
 a mercenaria  
 UdeM00000006794 6596 96.7 UdeM00000006794 XP\_045202117.1 58.7 75  
 31 0 17 91 1 75 1.80E-17 96.7 6596 cellular  
 organisms;Eukaryota;Opisthokonta;Metazoa;Eumetazoa;Bilateria;Protostomia;  
 Spiralia;Lophotrochozoa;Mollusca;Bivalvia;Autobranhia;Heteroconchia;Euhe  
 terodonta;Imparidentia;Venerida;Veneroidea;Veneridae;Mercenaria;Mercenari  
 a mercenaria  
 UdeM00000006795 6596 90.5 UdeM00000006795 XP\_045194227.1 58.7 63  
 26 0 2 64 16 78 8.70E-16 90.5 6596 cellular  
 organisms;Eukaryota;Opisthokonta;Metazoa;Eumetazoa;Bilateria;Protostomia;  
 Spiralia;Lophotrochozoa;Mollusca;Bivalvia;Autobranhia;Heteroconchia;Euhe  
 terodonta;Imparidentia;Venerida;Veneroidea;Veneridae;Mercenaria;Mercenari  
 a mercenaria  
 UdeM00000006796 1735272 209.1 UdeM00000006796 XP\_041362970.1 50.2  
 321 115 17 1 294 1 303 7.40E-51 209.1 1735272  
 cellular  
 organisms;Eukaryota;Opisthokonta;Metazoa;Eumetazoa;Bilateria;Protostomia;

Spiralia; Lophotrochozoa; Mollusca; Gastropoda; Neomphalina; Neomphaloidea; Peltospiridae; Gigantopelta; Gigantopelta aegis

UdeM00000006797 6596 365.2 UdeM00000006797 XP\_045212253.1 58.5 289  
109 3 1 283 63 346 8.90E-98 365.2 6596 cellular  
organisms; Eukaryota; Opisthokonta; Metazoa; Eumetazoa; Bilateria; Protostomia; Spiralia; Lophotrochozoa; Mollusca; Bivalvia; Autobranchia; Heteroconchia; Euheterodonta; Imparidentia; Venerida; Veneroidea; Veneridae; Mercenaria; Mercenaria mercenaria

UdeM00000006798 46514 89 UdeM00000006798 XP\_038060036.1 36.5 222  
116 5 18 220 56 271 8.50E-15 89 46514 cellular  
organisms; Eukaryota; Opisthokonta; Metazoa; Eumetazoa; Bilateria; Deuterostomia; Echinodermata; Eleutherozoa; Asterozoa; Asteroidea; Valvatacea; Valvatida; Asterinidae; Patiria; Patiria miniata

UdeM00000006799 6596 171 UdeM00000006799 XP\_045213212.1 39.8 246  
135 6 1 243 1 236 1.80E-39 171 6596 cellular  
organisms; Eukaryota; Opisthokonta; Metazoa; Eumetazoa; Bilateria; Protostomia; Spiralia; Lophotrochozoa; Mollusca; Bivalvia; Autobranchia; Heteroconchia; Euheterodonta; Imparidentia; Venerida; Veneroidea; Veneridae; Mercenaria; Mercenaria mercenaria

UdeM00000006800 1735272 446.4 UdeM00000006800 XP\_041362283.1 69.4  
310 94 1 7 316 12 320 3.00E-122 446.4 1735272  
cellular  
organisms; Eukaryota; Opisthokonta; Metazoa; Eumetazoa; Bilateria; Protostomia; Spiralia; Lophotrochozoa; Mollusca; Gastropoda; Neomphalina; Neomphaloidea; Peltospiridae; Gigantopelta; Gigantopelta aegis

UdeM00000006801 151771 194.5 UdeM00000006801 XP\_028408207.1 32.5  
388 184 6 5 323 108 486 2.10E-46 194.5 151771  
cellular  
organisms; Eukaryota; Opisthokonta; Metazoa; Eumetazoa; Cnidaria; Anthozoa; Octocorallia; Alcyonacea; Alcyoniina; Nephtheidae; Dendronephthya; Dendronephthya gigantea

UdeM00000006803 1735272 479.6 UdeM00000006803 XP\_041362509.1 48.9  
511 228 8 11 515 5 488 5.20E-132 479.6 1735272  
cellular  
organisms; Eukaryota; Opisthokonta; Metazoa; Eumetazoa; Bilateria; Protostomia; Spiralia; Lophotrochozoa; Mollusca; Gastropoda; Neomphalina; Neomphaloidea; Peltospiridae; Gigantopelta; Gigantopelta aegis

UdeM00000006804 6596 521.9 UdeM00000006804 XP\_045214247.1 44.1 735  
405 5 5 735 5 737 1.30E-144 521.9 6596 cellular  
organisms; Eukaryota; Opisthokonta; Metazoa; Eumetazoa; Bilateria; Protostomia; Spiralia; Lophotrochozoa; Mollusca; Bivalvia; Autobranchia; Heteroconchia; Euheterodonta; Imparidentia; Venerida; Veneroidea; Veneridae; Mercenaria; Mercenaria mercenaria

UdeM00000006805 6596 269.6 UdeM00000006805 XP\_045214247.1 35.4 545  
346 5 5 545 5 547 8.60E-69 269.6 6596 cellular  
organisms; Eukaryota; Opisthokonta; Metazoa; Eumetazoa; Bilateria; Protostomia; Spiralia; Lophotrochozoa; Mollusca; Bivalvia; Autobranchia; Heteroconchia; Euheterodonta; Imparidentia; Venerida; Veneroidea; Veneridae; Mercenaria; Mercenaria mercenaria

UdeM00000006806 6579 95.9 UdeM00000006806 XP\_033747905.1 48.2 112  
55 1 1 112 1 109 3.60E-17 95.9 6579 cellular  
organisms; Eukaryota; Opisthokonta; Metazoa; Eumetazoa; Bilateria; Protostomia; Spiralia; Lophotrochozoa; Mollusca; Bivalvia; Autobranchia; Pteriomorpha; Pectinida; Pectinoidea; Pectinidae; Pecten; Pecten maximus

UdeM00000006807 1735272 258.5 UdeM00000006807 XP\_041363113.1 29.7  
 2001 869 64 1 1954 1 1510 7.10E-65 258.5 1735272  
 cellular  
 organisms;Eukaryota;Opisthokonta;Metazoa;Eumetazoa;Bilateria;Protostomia;  
 Spiralia;Lophotrochozoa;Mollusca;Gastropoda;Neomphalina;Neomphaloidea;Pel  
 tospiridae;Gigantopelta;Gigantopelta aegis  
 UdeM00000006809 225164 330.1 UdeM00000006809 XP\_009056107.1 45.6  
 388 190 8 34 402 144 529 4.00E-87 330.1 225164  
 cellular  
 organisms;Eukaryota;Opisthokonta;Metazoa;Eumetazoa;Bilateria;Protostomia;  
 Spiralia;Lophotrochozoa;Mollusca;Gastropoda;Patellogastropoda;Lottioidea;  
 Lottiidae;Lottia;Lottia gigantea  
 UdeM00000006810 6596 239.2 UdeM00000006810 XP\_045156951.1 49 239  
 104 6 36 266 3 231 7.00E-60 239.2 6596 cellular  
 organisms;Eukaryota;Opisthokonta;Metazoa;Eumetazoa;Bilateria;Protostomia;  
 Spiralia;Lophotrochozoa;Mollusca;Bivalvia;Autobranchia;Heteroconchia;Euhe  
 terodonta;Imparidentia;Venerida;Veneroidea;Veneridae;Mercenaria;Mercenari  
 a mercenaria  
 UdeM00000006811 6596 67.8 UdeM00000006811 XP\_045214125.1 27.6 170  
 115 3 1 163 723 891 2.80E-08 67.8 6596 cellular  
 organisms;Eukaryota;Opisthokonta;Metazoa;Eumetazoa;Bilateria;Protostomia;  
 Spiralia;Lophotrochozoa;Mollusca;Bivalvia;Autobranchia;Heteroconchia;Euhe  
 terodonta;Imparidentia;Venerida;Veneroidea;Veneridae;Mercenaria;Mercenari  
 a mercenaria  
 UdeM00000006812 6596 238.8 UdeM00000006812 XP\_045156951.1 49.6 234  
 110 5 4 234 3 231 8.20E-60 238.8 6596 cellular  
 organisms;Eukaryota;Opisthokonta;Metazoa;Eumetazoa;Bilateria;Protostomia;  
 Spiralia;Lophotrochozoa;Mollusca;Bivalvia;Autobranchia;Heteroconchia;Euhe  
 terodonta;Imparidentia;Venerida;Veneroidea;Veneridae;Mercenaria;Mercenari  
 a mercenaria  
 UdeM00000006813 6579 1293.5 UdeM00000006813 XP\_033754776.1 31.9  
 3211 1908 96 29 3078 2972 6065 0.00E+00 1293.5 6579  
 cellular  
 organisms;Eukaryota;Opisthokonta;Metazoa;Eumetazoa;Bilateria;Protostomia;  
 Spiralia;Lophotrochozoa;Mollusca;Bivalvia;Autobranchia;Pteriomorphia;Pect  
 inida;Pectinoidea;Pectinidae;Pecten;Pecten maximus  
 UdeM00000006814 6565 427.6 UdeM00000006814 XP\_022313289.1 29.1 1310  
 731 31 101 1368 113 1266 6.30E-116 427.6 6565 cellular  
 organisms;Eukaryota;Opisthokonta;Metazoa;Eumetazoa;Bilateria;Protostomia;  
 Spiralia;Lophotrochozoa;Mollusca;Bivalvia;Autobranchia;Pteriomorphia;Ostr  
 eida;Ostreoidea;Ostreidae;Crassostrea;Crassostrea virginica  
 UdeM00000006815 6565 195.7 UdeM00000006815 XP\_022313289.1 36.1 368  
 219 8 25 384 704 1063 1.10E-46 195.7 6565 cellular  
 organisms;Eukaryota;Opisthokonta;Metazoa;Eumetazoa;Bilateria;Protostomia;  
 Spiralia;Lophotrochozoa;Mollusca;Bivalvia;Autobranchia;Pteriomorphia;Ostr  
 eida;Ostreoidea;Ostreidae;Crassostrea;Crassostrea virginica  
 UdeM00000006816 6596 231.1 UdeM00000006816 XP\_045210925.1 32 528  
 339 10 101 628 146 653 3.90E-57 231.1 6596 cellular  
 organisms;Eukaryota;Opisthokonta;Metazoa;Eumetazoa;Bilateria;Protostomia;  
 Spiralia;Lophotrochozoa;Mollusca;Bivalvia;Autobranchia;Heteroconchia;Euhe  
 terodonta;Imparidentia;Venerida;Veneroidea;Veneridae;Mercenaria;Mercenari  
 a mercenaria  
 UdeM00000006817 29159 358.6 UdeM00000006817 XP\_034314746.1 35.6 700  
 287 16 5 694 18 563 1.80E-95 358.6 29159 cellular

organisms;Eukaryota;Opisthokonta;Metazoa;Eumetazoa;Bilateria;Protostomia;Spiralia;Lophotrochozoa;Mollusca;Bivalvia;Autobranchia;Pteriormorphia;Ostr eida;Ostreoidea;Ostreidae;Crassostrea;Crassostrea gigas  
UdeM00000006818 6526 153.3 UdeM00000006818 XP\_013084201.1 25.7 544  
338 16 1 514 95 602 8.50E-34 153.3 6526 cellular  
organisms;Eukaryota;Opisthokonta;Metazoa;Eumetazoa;Bilateria;Protostomia;Spiralia;Lophotrochozoa;Mollusca;Gastropoda;Heterobranchia;Euthyneura;Pan pulmonata;Hygrophila;Lymnaeoidea;Planorbidae;Biomphalaria;Biomphalaria glabrata  
UdeM00000006819 6573 171.4 UdeM00000006819 XP\_021348966.1 54.9 348  
132 7 17 346 25 365 2.00E-39 171.4 6573 cellular  
organisms;Eukaryota;Opisthokonta;Metazoa;Eumetazoa;Bilateria;Protostomia;Spiralia;Lophotrochozoa;Mollusca;Bivalvia;Autobranchia;Pteriormorphia;Pect inida;Pectinoidea;Pectinidae;Mizuhopecten;Mizuhopecten yessoensis  
UdeM00000006820 6596 193 UdeM00000006820 XP\_045211972.1 35.3 334  
200 5 3 320 278 611 6.20E-46 193 6596 cellular  
organisms;Eukaryota;Opisthokonta;Metazoa;Eumetazoa;Bilateria;Protostomia;Spiralia;Lophotrochozoa;Mollusca;Bivalvia;Autobranchia;Heteroconchia;Euhe terodonta;Imparidentia;Venerida;Veneroidea;Veneridae;Mercenaria;Mercenari a mercenaria  
UdeM00000006821 6596 176 UdeM00000006821 XP\_045211972.1 35.6 295  
159 4 91 378 340 610 8.90E-41 176 6596 cellular  
organisms;Eukaryota;Opisthokonta;Metazoa;Eumetazoa;Bilateria;Protostomia;Spiralia;Lophotrochozoa;Mollusca;Bivalvia;Autobranchia;Heteroconchia;Euhe terodonta;Imparidentia;Venerida;Veneroidea;Veneridae;Mercenaria;Mercenari a mercenaria  
UdeM00000006822 29159 90.5 UdeM00000006822 XP\_034323288.1 32.9 149  
96 3 1 148 136 281 2.50E-15 90.5 29159 cellular  
organisms;Eukaryota;Opisthokonta;Metazoa;Eumetazoa;Bilateria;Protostomia;Spiralia;Lophotrochozoa;Mollusca;Bivalvia;Autobranchia;Pteriormorphia;Ostr eida;Ostreoidea;Ostreidae;Crassostrea;Crassostrea gigas  
UdeM00000006823 6596 137.5 UdeM00000006823 XP\_045211972.1 32.6 301  
154 7 52 337 344 610 3.30E-29 137.5 6596 cellular  
organisms;Eukaryota;Opisthokonta;Metazoa;Eumetazoa;Bilateria;Protostomia;Spiralia;Lophotrochozoa;Mollusca;Bivalvia;Autobranchia;Heteroconchia;Euhe terodonta;Imparidentia;Venerida;Veneroidea;Veneridae;Mercenaria;Mercenari a mercenaria  
UdeM00000006824 6596 79.3 UdeM00000006824 XP\_045211972.1 32.5 123  
82 1 19 140 375 497 4.30E-12 79.3 6596 cellular  
organisms;Eukaryota;Opisthokonta;Metazoa;Eumetazoa;Bilateria;Protostomia;Spiralia;Lophotrochozoa;Mollusca;Bivalvia;Autobranchia;Heteroconchia;Euhe terodonta;Imparidentia;Venerida;Veneroidea;Veneridae;Mercenaria;Mercenari a mercenaria  
UdeM00000006825 6596 201.8 UdeM00000006825 XP\_045211972.1 39.1 307  
179 5 2 300 304 610 1.30E-48 201.8 6596 cellular  
organisms;Eukaryota;Opisthokonta;Metazoa;Eumetazoa;Bilateria;Protostomia;Spiralia;Lophotrochozoa;Mollusca;Bivalvia;Autobranchia;Heteroconchia;Euhe terodonta;Imparidentia;Venerida;Veneroidea;Veneridae;Mercenaria;Mercenari a mercenaria  
UdeM00000006826 6596 244.6 UdeM00000006826 XP\_045212182.1 40.1 384  
173 10 5 376 435 773 2.90E-61 244.6 6596 cellular  
organisms;Eukaryota;Opisthokonta;Metazoa;Eumetazoa;Bilateria;Protostomia;Spiralia;Lophotrochozoa;Mollusca;Bivalvia;Autobranchia;Heteroconchia;Euhe



terodonta;Imparidentia;Venerida;Veneroidea;Veneridae;Mercenaria;Mercenaria mercenaria

|                 |      |        |                 |                |      |      |          |        |      |
|-----------------|------|--------|-----------------|----------------|------|------|----------|--------|------|
| UdeM00000006828 | 6596 | 1093.6 | UdeM00000006828 | XP_045212182.1 | 64   |      |          |        |      |
| 862             | 269  | 11     | 465             | 1317           | 1081 | 1910 | 0.00E+00 | 1093.6 | 6596 |

cellular

organisms;Eukaryota;Opisthokonta;Metazoa;Eumetazoa;Bilateria;Protostomia;Spiralia;Lophotrochozoa;Mollusca;Bivalvia;Autobranchia;Heteroconchia;Euheterodonta;Imparidentia;Venerida;Veneroidea;Veneridae;Mercenaria;Mercenaria mercenaria

|                 |      |       |                 |                |      |           |       |      |          |
|-----------------|------|-------|-----------------|----------------|------|-----------|-------|------|----------|
| UdeM00000006829 | 6579 | 404.8 | UdeM00000006829 | XP_033737248.1 | 39.6 | 727       |       |      |          |
| 275             | 22   | 2     | 713             | 17             | 594  | 2.20E-109 | 404.8 | 6579 | cellular |

organisms;Eukaryota;Opisthokonta;Metazoa;Eumetazoa;Bilateria;Protostomia;Spiralia;Lophotrochozoa;Mollusca;Bivalvia;Autobranchia;Pteriormorphia;Pectinida;Pectinoidea;Pectinidae;Pecten;Pecten maximus

|                 |      |      |                 |                |      |          |      |      |          |
|-----------------|------|------|-----------------|----------------|------|----------|------|------|----------|
| UdeM00000006831 | 7936 | 67.8 | UdeM00000006831 | XP_035253181.1 | 43.3 | 104      |      |      |          |
| 56              | 2    | 1    | 102             | 307            | 409  | 9.70E-09 | 67.8 | 7936 | cellular |

organisms;Eukaryota;Opisthokonta;Metazoa;Eumetazoa;Bilateria;Deuterostomia;Chordata;Craniata;Vertebrata;Gnathostomata;Teleostomi;Euteleostomi;Actinopterygii;Actinopteri;Neopterygii;Teleostei;Elopocephalai;Elopocephala;Elopocephala;Anguilliformes;Anguillidae;Anguilla;Anguilla anguilla

|                 |      |       |                 |                |      |          |       |      |          |
|-----------------|------|-------|-----------------|----------------|------|----------|-------|------|----------|
| UdeM00000006832 | 6565 | 127.1 | UdeM00000006832 | XP_022329607.1 | 31.4 | 239      |       |      |          |
| 145             | 7    | 43    | 265             | 3              | 238  | 3.50E-26 | 127.1 | 6565 | cellular |

organisms;Eukaryota;Opisthokonta;Metazoa;Eumetazoa;Bilateria;Protostomia;Spiralia;Lophotrochozoa;Mollusca;Bivalvia;Autobranchia;Pteriormorphia;Ostreida;Ostreoidea;Ostreidae;Crassostrea;Crassostrea virginica

|                 |      |     |                 |                |      |          |     |      |          |
|-----------------|------|-----|-----------------|----------------|------|----------|-----|------|----------|
| UdeM00000006834 | 6579 | 136 | UdeM00000006834 | XP_033741823.1 | 33.8 | 266      |     |      |          |
| 153             | 7    | 19  | 269             | 8              | 265  | 8.00E-29 | 136 | 6579 | cellular |

organisms;Eukaryota;Opisthokonta;Metazoa;Eumetazoa;Bilateria;Protostomia;Spiralia;Lophotrochozoa;Mollusca;Bivalvia;Autobranchia;Pteriormorphia;Pectinida;Pectinoidea;Pectinidae;Pecten;Pecten maximus

|                 |      |       |                 |                |      |          |       |      |          |
|-----------------|------|-------|-----------------|----------------|------|----------|-------|------|----------|
| UdeM00000006833 | 6579 | 134.8 | UdeM00000006833 | XP_033741823.1 | 33.6 | 247      |       |      |          |
| 142             | 6    | 58    | 290             | 27             | 265  | 1.90E-28 | 134.8 | 6579 | cellular |

organisms;Eukaryota;Opisthokonta;Metazoa;Eumetazoa;Bilateria;Protostomia;Spiralia;Lophotrochozoa;Mollusca;Bivalvia;Autobranchia;Pteriormorphia;Pectinida;Pectinoidea;Pectinidae;Pecten;Pecten maximus

|                 |      |       |                 |                |      |          |       |      |          |
|-----------------|------|-------|-----------------|----------------|------|----------|-------|------|----------|
| UdeM00000006835 | 6596 | 218.8 | UdeM00000006835 | XP_045212182.1 | 66.9 | 169      |       |      |          |
| 35              | 1    | 25    | 172             | 1729           | 1897 | 5.60E-54 | 218.8 | 6596 | cellular |

organisms;Eukaryota;Opisthokonta;Metazoa;Eumetazoa;Bilateria;Protostomia;Spiralia;Lophotrochozoa;Mollusca;Bivalvia;Autobranchia;Heteroconchia;Euheterodonta;Imparidentia;Venerida;Veneroidea;Veneridae;Mercenaria;Mercenaria mercenaria

|                 |      |       |                 |                |      |           |       |      |          |
|-----------------|------|-------|-----------------|----------------|------|-----------|-------|------|----------|
| UdeM00000006836 | 6579 | 390.2 | UdeM00000006836 | XP_033737248.1 | 39.5 | 701       |       |      |          |
| 262             | 20   | 44    | 729             | 41             | 594  | 5.80E-105 | 390.2 | 6579 | cellular |

organisms;Eukaryota;Opisthokonta;Metazoa;Eumetazoa;Bilateria;Protostomia;Spiralia;Lophotrochozoa;Mollusca;Bivalvia;Autobranchia;Pteriormorphia;Pectinida;Pectinoidea;Pectinidae;Pecten;Pecten maximus

|                 |      |       |                 |                |      |          |       |      |          |
|-----------------|------|-------|-----------------|----------------|------|----------|-------|------|----------|
| UdeM00000006838 | 6596 | 167.2 | UdeM00000006838 | XP_045210520.1 | 41.4 | 232      |       |      |          |
| 118             | 6    | 3     | 227             | 21             | 241  | 2.70E-38 | 167.2 | 6596 | cellular |

organisms;Eukaryota;Opisthokonta;Metazoa;Eumetazoa;Bilateria;Protostomia;Spiralia;Lophotrochozoa;Mollusca;Bivalvia;Autobranchia;Heteroconchia;Euheterodonta;Imparidentia;Venerida;Veneroidea;Veneridae;Mercenaria;Mercenaria mercenaria

|                 |      |     |                 |                |      |           |     |      |          |
|-----------------|------|-----|-----------------|----------------|------|-----------|-----|------|----------|
| UdeM00000006837 | 6573 | 421 | UdeM00000006837 | XP_021379447.1 | 35.7 | 821       |     |      |          |
| 394             | 16   | 7   | 783             | 13             | 743  | 3.30E-114 | 421 | 6573 | cellular |

organisms;Eukaryota;Opisthokonta;Metazoa;Eumetazoa;Bilateria;Protostomia;  
Spiralia;Lophotrochozoa;Mollusca;Bivalvia;Autobranhia;Pteriomorphia;Pect  
inida;Pectinoidea;Pectinidae;Mizuhopecten;Mizuhopecten yessoensis  
UdeM00000006839 6596 412.5 UdeM00000006839 XP\_045210518.1 35.5 819  
380 19 190 907 41 812 1.40E-111 412.5 6596 cellular  
organisms;Eukaryota;Opisthokonta;Metazoa;Eumetazoa;Bilateria;Protostomia;  
Spiralia;Lophotrochozoa;Mollusca;Bivalvia;Autobranhia;Heteroconchia;Euhe  
terodonta;Imparidentia;Venerida;Veneroidea;Veneridae;Mercenaria;Mercenari  
a mercenaria  
UdeM00000006840 6573 274.2 UdeM00000006840 XP\_021367335.1 45.1 315  
170 1 10 324 26 337 2.20E-70 274.2 6573 cellular  
organisms;Eukaryota;Opisthokonta;Metazoa;Eumetazoa;Bilateria;Protostomia;  
Spiralia;Lophotrochozoa;Mollusca;Bivalvia;Autobranhia;Pteriomorphia;Pect  
inida;Pectinoidea;Pectinidae;Mizuhopecten;Mizuhopecten yessoensis  
UdeM00000006841 6573 86.3 UdeM00000006841 XP\_021350053.1 85.4 48  
7 0 1 48 1 48 2.50E-14 86.3 6573 cellular  
organisms;Eukaryota;Opisthokonta;Metazoa;Eumetazoa;Bilateria;Protostomia;  
Spiralia;Lophotrochozoa;Mollusca;Bivalvia;Autobranhia;Pteriomorphia;Pect  
inida;Pectinoidea;Pectinidae;Mizuhopecten;Mizuhopecten yessoensis  
UdeM00000006842 6596 202.2 UdeM00000006842 XP\_045211177.1 48.5 200  
93 3 1 195 196 390 6.40E-49 202.2 6596 cellular  
organisms;Eukaryota;Opisthokonta;Metazoa;Eumetazoa;Bilateria;Protostomia;  
Spiralia;Lophotrochozoa;Mollusca;Bivalvia;Autobranhia;Heteroconchia;Euhe  
terodonta;Imparidentia;Venerida;Veneroidea;Veneridae;Mercenaria;Mercenari  
a mercenaria  
UdeM00000006843 6596 97.1 UdeM00000006843 XP\_045214519.1 38.1 155  
87 3 7 159 7 154 2.30E-17 97.1 6596 cellular  
organisms;Eukaryota;Opisthokonta;Metazoa;Eumetazoa;Bilateria;Protostomia;  
Spiralia;Lophotrochozoa;Mollusca;Bivalvia;Autobranhia;Heteroconchia;Euhe  
terodonta;Imparidentia;Venerida;Veneroidea;Veneridae;Mercenaria;Mercenari  
a mercenaria  
UdeM00000006844 6596 283.9 UdeM00000006844 XP\_045214688.1 60.2 236  
92 1 5 240 4 237 1.90E-73 283.9 6596 cellular  
organisms;Eukaryota;Opisthokonta;Metazoa;Eumetazoa;Bilateria;Protostomia;  
Spiralia;Lophotrochozoa;Mollusca;Bivalvia;Autobranhia;Heteroconchia;Euhe  
terodonta;Imparidentia;Venerida;Veneroidea;Veneridae;Mercenaria;Mercenari  
a mercenaria  
UdeM00000006845 6579 1062 UdeM00000006845 XP\_033738729.1 65.3 935  
315 5 1 928 13 945 4.50E-307 1062 6579 cellular  
organisms;Eukaryota;Opisthokonta;Metazoa;Eumetazoa;Bilateria;Protostomia;  
Spiralia;Lophotrochozoa;Mollusca;Bivalvia;Autobranhia;Pteriomorphia;Pect  
inida;Pectinoidea;Pectinidae;Pecten;Pecten maximus  
UdeM00000006847 6579 223 UdeM00000006847 XP\_033738751.1 62.3 162  
60 1 12 173 151 311 3.00E-55 223 6579 cellular  
organisms;Eukaryota;Opisthokonta;Metazoa;Eumetazoa;Bilateria;Protostomia;  
Spiralia;Lophotrochozoa;Mollusca;Bivalvia;Autobranhia;Pteriomorphia;Pect  
inida;Pectinoidea;Pectinidae;Pecten;Pecten maximus  
UdeM00000006846 6573 481.1 UdeM00000006846 XP\_021358383.1 72.8 312  
84 1 1 312 1 311 1.10E-132 481.1 6573 cellular  
organisms;Eukaryota;Opisthokonta;Metazoa;Eumetazoa;Bilateria;Protostomia;  
Spiralia;Lophotrochozoa;Mollusca;Bivalvia;Autobranhia;Pteriomorphia;Pect  
inida;Pectinoidea;Pectinidae;Mizuhopecten;Mizuhopecten yessoensis  
UdeM00000006848 6573 483.8 UdeM00000006848 XP\_021358384.1 72.1 312  
86 1 1 312 1 311 1.70E-133 483.8 6573 cellular

organisms;Eukaryota;Opisthokonta;Metazoa;Eumetazoa;Bilateria;Protostomia;Spiralia;Lophotrochozoa;Mollusca;Bivalvia;Autobranchia;Pteriomorpha;Pectinida;Pectinoidea;Pectinidae;Mizuhopecten;Mizuhopecten yessoensis

UdeM00000006849 6579 805.4 UdeM00000006849 XP\_033738738.1 75 504  
122 2 1 503 1 501 5.50E-230 805.4 6579 cellular

organisms;Eukaryota;Opisthokonta;Metazoa;Eumetazoa;Bilateria;Protostomia;Spiralia;Lophotrochozoa;Mollusca;Bivalvia;Autobranchia;Pteriomorpha;Pectinida;Pectinoidea;Pectinidae;Pecten;Pecten maximus

UdeM00000006850 6596 1606.3 UdeM00000006850 XP\_045212306.1 74.1  
1068 227 6 24 1047 31 1092 0.00E+00 1606.3 6596  
cellular

organisms;Eukaryota;Opisthokonta;Metazoa;Eumetazoa;Bilateria;Protostomia;Spiralia;Lophotrochozoa;Mollusca;Bivalvia;Autobranchia;Heteroconchia;Euheterodonta;Imparidentia;Venerida;Veneroidea;Veneridae;Mercenaria;Mercenaria mercenaria

UdeM00000006851 6596 319.7 UdeM00000006851 XP\_045213496.1 63.5 266  
85 6 1 259 1 261 3.40E-84 319.7 6596 cellular

organisms;Eukaryota;Opisthokonta;Metazoa;Eumetazoa;Bilateria;Protostomia;Spiralia;Lophotrochozoa;Mollusca;Bivalvia;Autobranchia;Heteroconchia;Euheterodonta;Imparidentia;Venerida;Veneroidea;Veneridae;Mercenaria;Mercenaria mercenaria

UdeM00000006852 6596 292.4 UdeM00000006852 XP\_045214740.1 43.9 417  
192 10 1 404 96 483 9.10E-76 292.4 6596 cellular

organisms;Eukaryota;Opisthokonta;Metazoa;Eumetazoa;Bilateria;Protostomia;Spiralia;Lophotrochozoa;Mollusca;Bivalvia;Autobranchia;Heteroconchia;Euheterodonta;Imparidentia;Venerida;Veneroidea;Veneridae;Mercenaria;Mercenaria mercenaria

UdeM00000006853 6596 60.1 UdeM00000006853 XP\_045214753.1 31.1 106  
70 2 42 144 108 213 4.50E-06 60.1 6596 cellular

organisms;Eukaryota;Opisthokonta;Metazoa;Eumetazoa;Bilateria;Protostomia;Spiralia;Lophotrochozoa;Mollusca;Bivalvia;Autobranchia;Heteroconchia;Euheterodonta;Imparidentia;Venerida;Veneroidea;Veneridae;Mercenaria;Mercenaria mercenaria

UdeM00000006854 37653 490.7 UdeM00000006854 XP\_014784610.1 56.7 413  
167 3 1 402 1 412 1.80E-135 490.7 37653 cellular

organisms;Eukaryota;Opisthokonta;Metazoa;Eumetazoa;Bilateria;Protostomia;Spiralia;Lophotrochozoa;Mollusca;Cephalopoda;Coleoidea;Octopodiformes;Octopoda;Incirrata;Octopodidae;Octopus;Octopus bimaculoides

UdeM00000006855 37653 496.5 UdeM00000006855 XP\_014784610.1 57.1 413  
165 3 1 402 1 412 3.20E-137 496.5 37653 cellular

organisms;Eukaryota;Opisthokonta;Metazoa;Eumetazoa;Bilateria;Protostomia;Spiralia;Lophotrochozoa;Mollusca;Cephalopoda;Coleoidea;Octopodiformes;Octopoda;Incirrata;Octopodidae;Octopus;Octopus bimaculoides

UdeM00000006857 6596 74.7 UdeM00000006857 XP\_045214753.1 40.3 77  
46 0 2 78 13 89 1.30E-10 74.7 6596 cellular

organisms;Eukaryota;Opisthokonta;Metazoa;Eumetazoa;Bilateria;Protostomia;Spiralia;Lophotrochozoa;Mollusca;Bivalvia;Autobranchia;Heteroconchia;Euheterodonta;Imparidentia;Venerida;Veneroidea;Veneridae;Mercenaria;Mercenaria mercenaria

UdeM00000006860 6579 1214.1 UdeM00000006860 XP\_033743617.1 66.9  
852 267 2 15 865 22 859 0.00E+00 1214.1 6579  
cellular

organisms;Eukaryota;Opisthokonta;Metazoa;Eumetazoa;Bilateria;Protostomia;

Spiralia;Lophotrochozoa;Mollusca;Bivalvia;Autobranchia;Pteriormorphia;Pectinida;Pectinoidea;Pectinidae;Pecten;Pecten maximus

UdeM00000006861 37653 120.9 UdeM00000006861 XP\_014777927.1 65.6 93  
32 0 162 254 201 293 2.30E-24 120.9 37653 cellular  
organisms;Eukaryota;Opisthokonta;Metazoa;Eumetazoa;Bilateria;Protostomia;  
Spiralia;Lophotrochozoa;Mollusca;Cephalopoda;Coleoidea;Octopodiformes;Octopoda;Incirrata;Octopodidae;Octopus;Octopus bimaculoides

UdeM00000006862 6596 127.9 UdeM00000006862 XP\_045210982.1 33.2 401  
158 12 1 311 1 381 2.30E-26 127.9 6596 cellular  
organisms;Eukaryota;Opisthokonta;Metazoa;Eumetazoa;Bilateria;Protostomia;  
Spiralia;Lophotrochozoa;Mollusca;Bivalvia;Autobranchia;Heteroconchia;Euherodonta;Imparidentia;Venerida;Veneroidea;Veneridae;Mercenaria;Mercenaria mercenaria

UdeM00000006863 6596 6637.4 UdeM00000006863 XP\_045214409.1 80.3  
4089 771 13 1 4063 1 4080 0.00E+00 6637.4 6596  
cellular  
organisms;Eukaryota;Opisthokonta;Metazoa;Eumetazoa;Bilateria;Protostomia;  
Spiralia;Lophotrochozoa;Mollusca;Bivalvia;Autobranchia;Heteroconchia;Euherodonta;Imparidentia;Venerida;Veneroidea;Veneridae;Mercenaria;Mercenaria mercenaria

UdeM00000006864 6596 220.7 UdeM00000006864 XP\_045214408.1 66 144  
49 0 1 144 1 144 1.20E-54 220.7 6596 cellular  
organisms;Eukaryota;Opisthokonta;Metazoa;Eumetazoa;Bilateria;Protostomia;  
Spiralia;Lophotrochozoa;Mollusca;Bivalvia;Autobranchia;Heteroconchia;Euherodonta;Imparidentia;Venerida;Veneroidea;Veneridae;Mercenaria;Mercenaria mercenaria

UdeM00000006865 6596 220.3 UdeM00000006865 XP\_045214408.1 66 144  
49 0 2 145 1 144 1.60E-54 220.3 6596 cellular  
organisms;Eukaryota;Opisthokonta;Metazoa;Eumetazoa;Bilateria;Protostomia;  
Spiralia;Lophotrochozoa;Mollusca;Bivalvia;Autobranchia;Heteroconchia;Euherodonta;Imparidentia;Venerida;Veneroidea;Veneridae;Mercenaria;Mercenaria mercenaria

UdeM00000006866 6596 199.9 UdeM00000006866 XP\_045214407.1 61.1 144  
55 1 1 144 1 143 2.20E-48 199.9 6596 cellular  
organisms;Eukaryota;Opisthokonta;Metazoa;Eumetazoa;Bilateria;Protostomia;  
Spiralia;Lophotrochozoa;Mollusca;Bivalvia;Autobranchia;Heteroconchia;Euherodonta;Imparidentia;Venerida;Veneroidea;Veneridae;Mercenaria;Mercenaria mercenaria

UdeM00000006868 1735272 248.1 UdeM00000006868 XP\_041364648.1 56  
200 81 1 4 203 11 203 9.90E-63 248.1 1735272  
cellular  
organisms;Eukaryota;Opisthokonta;Metazoa;Eumetazoa;Bilateria;Protostomia;  
Spiralia;Lophotrochozoa;Mollusca;Gastropoda;Neomphalina;Neomphaloidea;Peltospiridae;Gigantopelta;Gigantopelta aegis

UdeM00000006869 6579 703.7 UdeM00000006869 XP\_033736515.1 45.1 894  
432 18 1 870 1 859 4.30E-199 703.7 6579 cellular  
organisms;Eukaryota;Opisthokonta;Metazoa;Eumetazoa;Bilateria;Protostomia;  
Spiralia;Lophotrochozoa;Mollusca;Bivalvia;Autobranchia;Pteriormorphia;Pectinida;Pectinoidea;Pectinidae;Pecten;Pecten maximus

UdeM00000006870 6565 173.7 UdeM00000006870 XP\_022328239.1 25.9 835  
488 25 11 837 5 716 1.00E-39 173.7 6565 cellular  
organisms;Eukaryota;Opisthokonta;Metazoa;Eumetazoa;Bilateria;Protostomia;  
Spiralia;Lophotrochozoa;Mollusca;Bivalvia;Autobranchia;Pteriormorphia;Ostreida;Ostreoidea;Ostreidae;Crassostrea;Crassostrea virginica

UdeM00000006871 6596 197.2 UdeM00000006871 XP\_045213576.1 27.8 715  
 395 21 1 710 1 599 8.10E-47 197.2 6596 cellular  
 organisms;Eukaryota;Opisthokonta;Metazoa;Eumetazoa;Bilateria;Protostomia;  
 Spiralia;Lophotrochozoa;Mollusca;Bivalvia;Autobranhia;Heteroconchia;Euhe  
 terodonta;Imparidentia;Venerida;Veneroidea;Veneridae;Mercenaria;Mercenari  
 a mercenaria

UdeM00000006872 29159 531.9 UdeM00000006872 XP\_011437055.1 84.6 306  
 46 1 1 305 1 306 5.30E-148 531.9 29159 cellular  
 organisms;Eukaryota;Opisthokonta;Metazoa;Eumetazoa;Bilateria;Protostomia;  
 Spiralia;Lophotrochozoa;Mollusca;Bivalvia;Autobranhia;Pteriormorphia;Ostr  
 eida;Ostreoidea;Ostreidae;Crassostrea;Crassostrea gigas

UdeM00000006873 6596 310.1 UdeM00000006873 XP\_045213440.1 70.7 222  
 62 3 200 419 102 322 4.40E-81 310.1 6596 cellular  
 organisms;Eukaryota;Opisthokonta;Metazoa;Eumetazoa;Bilateria;Protostomia;  
 Spiralia;Lophotrochozoa;Mollusca;Bivalvia;Autobranhia;Heteroconchia;Euhe  
 terodonta;Imparidentia;Venerida;Veneroidea;Veneridae;Mercenaria;Mercenari  
 a mercenaria

UdeM00000006874 6596 619.8 UdeM00000006874 XP\_045213441.1 56.6 583  
 235 9 9 586 11 580 3.70E-174 619.8 6596 cellular  
 organisms;Eukaryota;Opisthokonta;Metazoa;Eumetazoa;Bilateria;Protostomia;  
 Spiralia;Lophotrochozoa;Mollusca;Bivalvia;Autobranhia;Heteroconchia;Euhe  
 terodonta;Imparidentia;Venerida;Veneroidea;Veneridae;Mercenaria;Mercenari  
 a mercenaria

UdeM00000006875 6573 697.2 UdeM00000006875 XP\_021363404.1 62.3 544  
 202 3 64 605 78 620 2.00E-197 697.2 6573 cellular  
 organisms;Eukaryota;Opisthokonta;Metazoa;Eumetazoa;Bilateria;Protostomia;  
 Spiralia;Lophotrochozoa;Mollusca;Bivalvia;Autobranhia;Pteriormorphia;Pect  
 inida;Pectinoidea;Pectinidae;Mizuhopecten;Mizuhopecten yessoensis

UdeM00000006876 6596 144.1 UdeM00000006876 XP\_045213443.1 49.4 154  
 73 4 26 179 25 173 3.50E-31 144.1 6596 cellular  
 organisms;Eukaryota;Opisthokonta;Metazoa;Eumetazoa;Bilateria;Protostomia;  
 Spiralia;Lophotrochozoa;Mollusca;Bivalvia;Autobranhia;Heteroconchia;Euhe  
 terodonta;Imparidentia;Venerida;Veneroidea;Veneridae;Mercenaria;Mercenari  
 a mercenaria

UdeM00000006878 6596 205.7 UdeM00000006878 XP\_045213455.1 52.4 212  
 82 5 18 210 23 234 9.10E-50 205.7 6596 cellular  
 organisms;Eukaryota;Opisthokonta;Metazoa;Eumetazoa;Bilateria;Protostomia;  
 Spiralia;Lophotrochozoa;Mollusca;Bivalvia;Autobranhia;Heteroconchia;Euhe  
 terodonta;Imparidentia;Venerida;Veneroidea;Veneridae;Mercenaria;Mercenari  
 a mercenaria

UdeM00000006877 6596 179.5 UdeM00000006877 XP\_045213455.1 49 198  
 82 5 53 231 37 234 7.50E-42 179.5 6596 cellular  
 organisms;Eukaryota;Opisthokonta;Metazoa;Eumetazoa;Bilateria;Protostomia;  
 Spiralia;Lophotrochozoa;Mollusca;Bivalvia;Autobranhia;Heteroconchia;Euhe  
 terodonta;Imparidentia;Venerida;Veneroidea;Veneridae;Mercenaria;Mercenari  
 a mercenaria

UdeM00000006879 6596 295.4 UdeM00000006879 XP\_045213454.1 31.8 628  
 353 16 12 610 20 601 1.60E-76 295.4 6596 cellular  
 organisms;Eukaryota;Opisthokonta;Metazoa;Eumetazoa;Bilateria;Protostomia;  
 Spiralia;Lophotrochozoa;Mollusca;Bivalvia;Autobranhia;Heteroconchia;Euhe  
 terodonta;Imparidentia;Venerida;Veneroidea;Veneridae;Mercenaria;Mercenari  
 a mercenaria

UdeM00000006880 6596 378.6 UdeM00000006880 XP\_045212127.1 57.2 313  
 132 1 1 313 1 311 7.60E-102 378.6 6596 cellular

organisms;Eukaryota;Opisthokonta;Metazoa;Eumetazoa;Bilateria;Protostomia;Spiralia;Lophotrochozoa;Mollusca;Bivalvia;Autobranchia;Heteroconchia;Euherodonta;Imparidentia;Venerida;Veneroidea;Veneridae;Mercenaria;Mercenaria mercenaria

UdeM00000006881 6596 569.7 UdeM00000006881 XP\_045213422.1 76 362  
79 3 29 388 1 356 2.90E-159 569.7 6596 cellular

organisms;Eukaryota;Opisthokonta;Metazoa;Eumetazoa;Bilateria;Protostomia;Spiralia;Lophotrochozoa;Mollusca;Bivalvia;Autobranchia;Heteroconchia;Euherodonta;Imparidentia;Venerida;Veneroidea;Veneridae;Mercenaria;Mercenaria mercenaria

UdeM00000006883 6579 138.7 UdeM00000006883 XP\_033752673.1 58.7 104  
43 0 1 104 339 442 5.20E-30 138.7 6579 cellular

organisms;Eukaryota;Opisthokonta;Metazoa;Eumetazoa;Bilateria;Protostomia;Spiralia;Lophotrochozoa;Mollusca;Bivalvia;Autobranchia;Pteriomorphia;Pectinida;Pectinoidea;Pectinidae;Pecten;Pecten maximus

UdeM00000006884 6596 580.9 UdeM00000006884 XP\_045210822.1 50.6 544  
263 4 36 577 39 578 1.80E-162 580.9 6596 cellular

organisms;Eukaryota;Opisthokonta;Metazoa;Eumetazoa;Bilateria;Protostomia;Spiralia;Lophotrochozoa;Mollusca;Bivalvia;Autobranchia;Heteroconchia;Euherodonta;Imparidentia;Venerida;Veneroidea;Veneridae;Mercenaria;Mercenaria mercenaria

UdeM00000006885 6596 120.2 UdeM00000006885 XP\_045210822.1 43.6 133  
74 1 36 168 39 170 2.80E-24 120.2 6596 cellular

organisms;Eukaryota;Opisthokonta;Metazoa;Eumetazoa;Bilateria;Protostomia;Spiralia;Lophotrochozoa;Mollusca;Bivalvia;Autobranchia;Heteroconchia;Euherodonta;Imparidentia;Venerida;Veneroidea;Veneridae;Mercenaria;Mercenaria mercenaria

UdeM00000006886 6579 262.7 UdeM00000006886 XP\_033756756.1 39.6 338  
184 5 69 392 26 357 7.60E-67 262.7 6579 cellular

organisms;Eukaryota;Opisthokonta;Metazoa;Eumetazoa;Bilateria;Protostomia;Spiralia;Lophotrochozoa;Mollusca;Bivalvia;Autobranchia;Pteriomorphia;Pectinida;Pectinoidea;Pectinidae;Pecten;Pecten maximus

UdeM00000006888 6596 324.3 UdeM00000006888 XP\_045211105.1 56.3 323  
118 4 1 300 169 491 2.20E-85 324.3 6596 cellular

organisms;Eukaryota;Opisthokonta;Metazoa;Eumetazoa;Bilateria;Protostomia;Spiralia;Lophotrochozoa;Mollusca;Bivalvia;Autobranchia;Heteroconchia;Euherodonta;Imparidentia;Venerida;Veneroidea;Veneridae;Mercenaria;Mercenaria mercenaria

UdeM00000006889 6573 432.2 UdeM00000006889 XP\_021373046.1 58.8 342  
123 3 6 344 4 330 6.30E-118 432.2 6573 cellular

organisms;Eukaryota;Opisthokonta;Metazoa;Eumetazoa;Bilateria;Protostomia;Spiralia;Lophotrochozoa;Mollusca;Bivalvia;Autobranchia;Pteriomorphia;Pectinida;Pectinoidea;Pectinidae;Mizuhopecten;Mizuhopecten yessoensis

UdeM00000006890 6596 976.1 UdeM00000006890 XP\_045211641.1 76.4 597  
139 2 1 596 1 596 2.00E-281 976.1 6596 cellular

organisms;Eukaryota;Opisthokonta;Metazoa;Eumetazoa;Bilateria;Protostomia;Spiralia;Lophotrochozoa;Mollusca;Bivalvia;Autobranchia;Heteroconchia;Euherodonta;Imparidentia;Venerida;Veneroidea;Veneridae;Mercenaria;Mercenaria mercenaria

UdeM00000006891 6596 1462.2 UdeM00000006891 XP\_045211641.1 80.1  
890 168 5 2 890 611 1492 0.00E+00 1462.2 6596  
cellular

organisms;Eukaryota;Opisthokonta;Metazoa;Eumetazoa;Bilateria;Protostomia;Spiralia;Lophotrochozoa;Mollusca;Bivalvia;Autobranchia;Heteroconchia;Euherodonta

terodonta;Imparidentia;Venerida;Veneroidea;Veneridae;Mercenaria;Mercenari  
 a mercenaria  
 UdeM00000006892 6596 110.5 UdeM00000006892 XP\_045212895.1 66.3 86  
 28 1 30 115 23 107 1.50E-21 110.5 6596 cellular  
 organisms;Eukaryota;Opisthokonta;Metazoa;Eumetazoa;Bilateria;Protostomia;  
 Spiralia;Lophotrochozoa;Mollusca;Bivalvia;Autobranchia;Heteroconchia;Euhe  
 terodonta;Imparidentia;Venerida;Veneroidea;Veneridae;Mercenaria;Mercenari  
 a mercenaria  
 UdeM00000006893 6596 649.8 UdeM00000006893 XP\_045212895.1 65.2 523  
 156 4 30 529 23 542 2.90E-183 649.8 6596 cellular  
 organisms;Eukaryota;Opisthokonta;Metazoa;Eumetazoa;Bilateria;Protostomia;  
 Spiralia;Lophotrochozoa;Mollusca;Bivalvia;Autobranchia;Heteroconchia;Euhe  
 terodonta;Imparidentia;Venerida;Veneroidea;Veneridae;Mercenaria;Mercenari  
 a mercenaria  
 UdeM00000006894 6596 360.5 UdeM00000006894 XP\_045212894.1 57.8 277  
 117 0 8 284 7 283 1.90E-96 360.5 6596 cellular  
 organisms;Eukaryota;Opisthokonta;Metazoa;Eumetazoa;Bilateria;Protostomia;  
 Spiralia;Lophotrochozoa;Mollusca;Bivalvia;Autobranchia;Heteroconchia;Euhe  
 terodonta;Imparidentia;Venerida;Veneroidea;Veneridae;Mercenaria;Mercenari  
 a mercenaria  
 UdeM00000006895 6579 142.5 UdeM00000006895 XP\_033735308.1 32.5 419  
 215 9 1 415 1 355 1.50E-30 142.5 6579 cellular  
 organisms;Eukaryota;Opisthokonta;Metazoa;Eumetazoa;Bilateria;Protostomia;  
 Spiralia;Lophotrochozoa;Mollusca;Bivalvia;Autobranchia;Pteriomorpha;Pect  
 inida;Pectinoidea;Pectinidae;Pecten;Pecten maximus  
 UdeM00000006896 6596 340.5 UdeM00000006896 XP\_045214995.1 50 340  
 166 3 20 358 23 359 2.70E-90 340.5 6596 cellular  
 organisms;Eukaryota;Opisthokonta;Metazoa;Eumetazoa;Bilateria;Protostomia;  
 Spiralia;Lophotrochozoa;Mollusca;Bivalvia;Autobranchia;Heteroconchia;Euhe  
 terodonta;Imparidentia;Venerida;Veneroidea;Veneridae;Mercenaria;Mercenari  
 a mercenaria  
 UdeM00000006897 6596 340.5 UdeM00000006897 XP\_045214995.1 49.7 340  
 167 3 49 387 23 359 2.90E-90 340.5 6596 cellular  
 organisms;Eukaryota;Opisthokonta;Metazoa;Eumetazoa;Bilateria;Protostomia;  
 Spiralia;Lophotrochozoa;Mollusca;Bivalvia;Autobranchia;Heteroconchia;Euhe  
 terodonta;Imparidentia;Venerida;Veneroidea;Veneridae;Mercenaria;Mercenari  
 a mercenaria  
 UdeM00000006898 6596 303.5 UdeM00000006898 XP\_045213253.1 63.9 230  
 83 0 6 235 13 242 2.30E-79 303.5 6596 cellular  
 organisms;Eukaryota;Opisthokonta;Metazoa;Eumetazoa;Bilateria;Protostomia;  
 Spiralia;Lophotrochozoa;Mollusca;Bivalvia;Autobranchia;Heteroconchia;Euhe  
 terodonta;Imparidentia;Venerida;Veneroidea;Veneridae;Mercenaria;Mercenari  
 a mercenaria  
 UdeM00000006899 6596 329.3 UdeM00000006899 XP\_045213763.1 51.5 334  
 126 6 1 315 1 317 5.30E-87 329.3 6596 cellular  
 organisms;Eukaryota;Opisthokonta;Metazoa;Eumetazoa;Bilateria;Protostomia;  
 Spiralia;Lophotrochozoa;Mollusca;Bivalvia;Autobranchia;Heteroconchia;Euhe  
 terodonta;Imparidentia;Venerida;Veneroidea;Veneridae;Mercenaria;Mercenari  
 a mercenaria  
 UdeM00000006900 218467 216.5 UdeM00000006900 XP\_023220759.1 51.3  
 224 107 2 6 228 451 673 3.60E-53 216.5 218467  
 cellular  
 organisms;Eukaryota;Opisthokonta;Metazoa;Eumetazoa;Bilateria;Protostomia;

Ecdysozoa; Panarthropoda; Arthropoda; Chelicerata; Arachnida; Scorpiones; Buthida; Buthoidea; Buthidae; Centruroides; Centruroides sculpturatus  
UdeM00000006901 218467 252.3 UdeM00000006901 XP\_023220759.1 51.6  
250 120 1 6 255 121 369 6.90E-64 252.3 218467  
cellular  
organisms; Eukaryota; Opisthokonta; Metazoa; Eumetazoa; Bilateria; Protostomia; Ecdysozoa; Panarthropoda; Arthropoda; Chelicerata; Arachnida; Scorpiones; Buthida; Buthoidea; Buthidae; Centruroides; Centruroides sculpturatus  
UdeM00000006903 6596 666 UdeM00000006903 XP\_045164800.1 59.4 498  
201 1 27 524 42 538 3.90E-188 666 6596 cellular  
organisms; Eukaryota; Opisthokonta; Metazoa; Eumetazoa; Bilateria; Protostomia; Spiralia; Lophotrochozoa; Mollusca; Bivalvia; Autobranchia; Heteroconchia; Euheterodonta; Imparidentia; Venerida; Veneroidea; Veneridae; Mercenaria; Mercenaria mercenaria  
UdeM00000006902 6596 666 UdeM00000006902 XP\_045164800.1 59.4 498  
201 1 36 533 42 538 4.00E-188 666 6596 cellular  
organisms; Eukaryota; Opisthokonta; Metazoa; Eumetazoa; Bilateria; Protostomia; Spiralia; Lophotrochozoa; Mollusca; Bivalvia; Autobranchia; Heteroconchia; Euheterodonta; Imparidentia; Venerida; Veneroidea; Veneridae; Mercenaria; Mercenaria mercenaria  
UdeM00000030747 6596 582.4 UdeM00000030747 XP\_045176360.1 53 628  
264 9 1 607 1 618 6.70E-163 582.4 6596 cellular  
organisms; Eukaryota; Opisthokonta; Metazoa; Eumetazoa; Bilateria; Protostomia; Spiralia; Lophotrochozoa; Mollusca; Bivalvia; Autobranchia; Heteroconchia; Euheterodonta; Imparidentia; Venerida; Veneroidea; Veneridae; Mercenaria; Mercenaria mercenaria  
UdeM00000030748 6596 1028.5 UdeM00000030748 XP\_045169805.1 63.5  
904 230 7 39 936 681 1490 5.40E-297 1028.5 6596  
cellular  
organisms; Eukaryota; Opisthokonta; Metazoa; Eumetazoa; Bilateria; Protostomia; Spiralia; Lophotrochozoa; Mollusca; Bivalvia; Autobranchia; Heteroconchia; Euheterodonta; Imparidentia; Venerida; Veneroidea; Veneridae; Mercenaria; Mercenaria mercenaria  
UdeM00000030749 1735272 321.2 UdeM00000030749 XP\_041367343.1 67.7  
223 72 0 195 417 344 566 2.10E-84 321.2 1735272  
cellular  
organisms; Eukaryota; Opisthokonta; Metazoa; Eumetazoa; Bilateria; Protostomia; Spiralia; Lophotrochozoa; Mollusca; Gastropoda; Neomphalina; Neomphaloidea; Peltopspiridae; Gigantopelta; Gigantopelta aegis  
UdeM00000030750 6596 466.1 UdeM00000030750 XP\_045169805.1 67.9 330  
100 4 19 345 13 339 4.10E-128 466.1 6596 cellular  
organisms; Eukaryota; Opisthokonta; Metazoa; Eumetazoa; Bilateria; Protostomia; Spiralia; Lophotrochozoa; Mollusca; Bivalvia; Autobranchia; Heteroconchia; Euheterodonta; Imparidentia; Venerida; Veneroidea; Veneridae; Mercenaria; Mercenaria mercenaria  
UdeM00000030752 6596 76.3 UdeM00000030752 XP\_045170263.1 72.3 47  
13 0 117 163 304 350 4.20E-11 76.3 6596 cellular  
organisms; Eukaryota; Opisthokonta; Metazoa; Eumetazoa; Bilateria; Protostomia; Spiralia; Lophotrochozoa; Mollusca; Bivalvia; Autobranchia; Heteroconchia; Euheterodonta; Imparidentia; Venerida; Veneroidea; Veneridae; Mercenaria; Mercenaria mercenaria  
UdeM00000030751 6596 473 UdeM00000030751 XP\_045170263.1 72.6 299  
81 1 117 415 304 601 4.50E-130 473 6596 cellular  
organisms; Eukaryota; Opisthokonta; Metazoa; Eumetazoa; Bilateria; Protostomia;



Spiralia;Lophotrochozoa;Mollusca;Bivalvia;Autobranchia;Heteroconchia;Euherodonta;Imparidentia;Venerida;Veneroidea;Veneridae;Mercenaria;Mercenaria mercenaria

UdeM00000030753 6573 265 UdeM00000030753 XP\_021375143.1 50.1 375  
148 16 15 369 73 428 1.50E-67 265 6573 cellular

organisms;Eukaryota;Opisthokonta;Metazoa;Eumetazoa;Bilateria;Protostomia;Spiralia;Lophotrochozoa;Mollusca;Bivalvia;Autobranchia;Pteriomorpha;Pectinida;Pectinoidea;Pectinidae;Mizuhopecten;Mizuhopecten yessoensis

UdeM00000030754 6596 392.5 UdeM00000030754 XP\_045167949.1 44.7 510  
264 11 41 537 6 510 8.60E-106 392.5 6596 cellular

organisms;Eukaryota;Opisthokonta;Metazoa;Eumetazoa;Bilateria;Protostomia;Spiralia;Lophotrochozoa;Mollusca;Bivalvia;Autobranchia;Heteroconchia;Euherodonta;Imparidentia;Venerida;Veneroidea;Veneridae;Mercenaria;Mercenaria mercenaria

UdeM00000030755 6573 229.2 UdeM00000030755 XP\_021342550.1 45.4 269  
142 3 4 272 240 503 6.40E-57 229.2 6573 cellular

organisms;Eukaryota;Opisthokonta;Metazoa;Eumetazoa;Bilateria;Protostomia;Spiralia;Lophotrochozoa;Mollusca;Bivalvia;Autobranchia;Pteriomorpha;Pectinida;Pectinoidea;Pectinidae;Mizuhopecten;Mizuhopecten yessoensis

UdeM00000030757 7574 89 UdeM00000030757 XP\_013388573.1 43 107  
61 0 1 107 795 901 4.70E-15 89 7574 cellular

organisms;Eukaryota;Opisthokonta;Metazoa;Eumetazoa;Bilateria;Protostomia;Spiralia;Lophotrochozoa;Brachiopoda;Linguliformea;Lingulata;Lingulida;Linguloidea;Lingulidae;Lingula;Lingula anatina

UdeM00000030758 7574 161.8 UdeM00000030758 XP\_013388573.1 40.4 203  
121 0 2 204 699 901 1.00E-36 161.8 7574 cellular

organisms;Eukaryota;Opisthokonta;Metazoa;Eumetazoa;Bilateria;Protostomia;Spiralia;Lophotrochozoa;Brachiopoda;Linguliformea;Lingulata;Lingulida;Linguloidea;Lingulidae;Lingula;Lingula anatina

UdeM00000030759 7574 161.4 UdeM00000030759 XP\_013388573.1 37.5 288  
151 12 96 377 349 613 2.30E-36 161.4 7574 cellular

organisms;Eukaryota;Opisthokonta;Metazoa;Eumetazoa;Bilateria;Protostomia;Spiralia;Lophotrochozoa;Brachiopoda;Linguliformea;Lingulata;Lingulida;Linguloidea;Lingulidae;Lingula;Lingula anatina

UdeM00000030760 29159 305.1 UdeM00000030760 XP\_034339171.1 29.6 760  
472 19 25 755 13 738 2.50E-79 305.1 29159 cellular

organisms;Eukaryota;Opisthokonta;Metazoa;Eumetazoa;Bilateria;Protostomia;Spiralia;Lophotrochozoa;Mollusca;Bivalvia;Autobranchia;Pteriomorpha;Ostreida;Ostreoidea;Ostreidae;Crassostrea;Crassostrea gigas

UdeM00000030761 29159 151 UdeM00000030761 XP\_034339171.1 49 149  
74 1 25 171 13 161 1.50E-33 151 29159 cellular

organisms;Eukaryota;Opisthokonta;Metazoa;Eumetazoa;Bilateria;Protostomia;Spiralia;Lophotrochozoa;Mollusca;Bivalvia;Autobranchia;Pteriomorpha;Ostreida;Ostreoidea;Ostreidae;Crassostrea;Crassostrea gigas

UdeM00000030764 6565 207.2 UdeM00000030764 XP\_022306399.1 36 378  
222 10 118 488 167 531 6.80E-50 207.2 6565 cellular

organisms;Eukaryota;Opisthokonta;Metazoa;Eumetazoa;Bilateria;Protostomia;Spiralia;Lophotrochozoa;Mollusca;Bivalvia;Autobranchia;Pteriomorpha;Ostreida;Ostreoidea;Ostreidae;Crassostrea;Crassostrea virginica

UdeM00000030766 6596 242.3 UdeM00000030766 XP\_045167682.1 90.3 124  
12 0 385 508 14 137 1.40E-60 242.3 6596 cellular

organisms;Eukaryota;Opisthokonta;Metazoa;Eumetazoa;Bilateria;Protostomia;Spiralia;Lophotrochozoa;Mollusca;Bivalvia;Autobranchia;Heteroconchia;Euherodonta

terodonta;Imparidentia;Venerida;Veneroidea;Veneridae;Mercenaria;Mercenari  
a mercenaria

UdeM00000030767 6596 1274.2 UdeM00000030767 XP\_045168361.1 69  
942 230 7 1383 2287 1570 2486 0.00E+00 1274.2 6596  
cellular

organisms;Eukaryota;Opisthokonta;Metazoa;Eumetazoa;Bilateria;Protostomia;  
Spiralia;Lophotrochozoa;Mollusca;Bivalvia;Autobranchia;Heteroconchia;Euhe  
terodonta;Imparidentia;Venerida;Veneroidea;Veneridae;Mercenaria;Mercenari  
a mercenaria

UdeM00000030768 6596 1217.2 UdeM00000030768 XP\_045168361.1 69.7  
890 206 7 65 914 1621 2486 0.00E+00 1217.2 6596  
cellular

organisms;Eukaryota;Opisthokonta;Metazoa;Eumetazoa;Bilateria;Protostomia;  
Spiralia;Lophotrochozoa;Mollusca;Bivalvia;Autobranchia;Heteroconchia;Euhe  
terodonta;Imparidentia;Venerida;Veneroidea;Veneridae;Mercenaria;Mercenari  
a mercenaria

UdeM00000030769 6596 150.2 UdeM00000030769 XP\_045167403.1 31.5 295  
194 4 24 317 35 322 4.80E-33 150.2 6596 cellular

organisms;Eukaryota;Opisthokonta;Metazoa;Eumetazoa;Bilateria;Protostomia;  
Spiralia;Lophotrochozoa;Mollusca;Bivalvia;Autobranchia;Heteroconchia;Euhe  
terodonta;Imparidentia;Venerida;Veneroidea;Veneridae;Mercenaria;Mercenari  
a mercenaria

UdeM00000030770 6596 671 UdeM00000030770 XP\_045170504.1 60.8 572  
200 6 324 881 397 958 2.10E-189 671 6596 cellular

organisms;Eukaryota;Opisthokonta;Metazoa;Eumetazoa;Bilateria;Protostomia;  
Spiralia;Lophotrochozoa;Mollusca;Bivalvia;Autobranchia;Heteroconchia;Euhe  
terodonta;Imparidentia;Venerida;Veneroidea;Veneridae;Mercenaria;Mercenari  
a mercenaria

UdeM00000030771 6596 420.2 UdeM00000030771 XP\_045167982.1 51.9 405  
178 9 22 419 20 414 3.00E-114 420.2 6596 cellular

organisms;Eukaryota;Opisthokonta;Metazoa;Eumetazoa;Bilateria;Protostomia;  
Spiralia;Lophotrochozoa;Mollusca;Bivalvia;Autobranchia;Heteroconchia;Euhe  
terodonta;Imparidentia;Venerida;Veneroidea;Veneridae;Mercenaria;Mercenari  
a mercenaria

UdeM00000030772 6596 341.3 UdeM00000030772 XP\_045169151.1 72.7 216  
59 0 1 216 140 355 9.20E-91 341.3 6596 cellular

organisms;Eukaryota;Opisthokonta;Metazoa;Eumetazoa;Bilateria;Protostomia;  
Spiralia;Lophotrochozoa;Mollusca;Bivalvia;Autobranchia;Heteroconchia;Euhe  
terodonta;Imparidentia;Venerida;Veneroidea;Veneridae;Mercenaria;Mercenari  
a mercenaria

UdeM00000030773 6596 344 UdeM00000030773 XP\_045169151.1 72.8 217  
59 0 2839 3055 139 355 2.00E-90 344 6596 cellular

organisms;Eukaryota;Opisthokonta;Metazoa;Eumetazoa;Bilateria;Protostomia;  
Spiralia;Lophotrochozoa;Mollusca;Bivalvia;Autobranchia;Heteroconchia;Euhe  
terodonta;Imparidentia;Venerida;Veneroidea;Veneridae;Mercenaria;Mercenari  
a mercenaria

UdeM00000030773 6596 219.5 UdeM00000030773 XP\_045169151.1 74.1 139  
35 1 1 139 1 138 5.70E-53 219.5 6596 cellular

organisms;Eukaryota;Opisthokonta;Metazoa;Eumetazoa;Bilateria;Protostomia;  
Spiralia;Lophotrochozoa;Mollusca;Bivalvia;Autobranchia;Heteroconchia;Euhe  
terodonta;Imparidentia;Venerida;Veneroidea;Veneridae;Mercenaria;Mercenari  
a mercenaria

UdeM00000030774 6596 220.3 UdeM00000030774 XP\_045169151.1 74.1 139  
35 1 1 139 1 138 1.60E-54 220.3 6596 cellular

organisms;Eukaryota;Opisthokonta;Metazoa;Eumetazoa;Bilateria;Protostomia;Spiralia;Lophotrochozoa;Mollusca;Bivalvia;Autobranhia;Heteroconchia;Euherodonta;Imparidentia;Venerida;Veneroidea;Veneridae;Mercenaria;Mercenaria mercenaria

UdeM00000030775 6596 536.6 UdeM00000030775 XP\_045169151.1 71.1 356  
102 1 1 356 1 355 2.40E-149 536.6 6596 cellular

organisms;Eukaryota;Opisthokonta;Metazoa;Eumetazoa;Bilateria;Protostomia;Spiralia;Lophotrochozoa;Mollusca;Bivalvia;Autobranhia;Heteroconchia;Euherodonta;Imparidentia;Venerida;Veneroidea;Veneridae;Mercenaria;Mercenaria mercenaria

UdeM00000030776 6596 73.2 UdeM00000030776 XP\_045208478.1 27.1 288  
173 10 34 313 89 347 6.80E-10 73.2 6596 cellular

organisms;Eukaryota;Opisthokonta;Metazoa;Eumetazoa;Bilateria;Protostomia;Spiralia;Lophotrochozoa;Mollusca;Bivalvia;Autobranhia;Heteroconchia;Euherodonta;Imparidentia;Venerida;Veneroidea;Veneridae;Mercenaria;Mercenaria mercenaria

UdeM00000030777 6573 229.2 UdeM00000030777 XP\_021376410.1 50.9 222  
104 3 35 255 64 281 6.10E-57 229.2 6573 cellular

organisms;Eukaryota;Opisthokonta;Metazoa;Eumetazoa;Bilateria;Protostomia;Spiralia;Lophotrochozoa;Mollusca;Bivalvia;Autobranhia;Pteriormorphia;Pectinida;Pectinoidea;Pectinidae;Mizuhopecten;Mizuhopecten yessoensis

UdeM00000030778 6573 229.6 UdeM00000030778 XP\_021376410.1 50.9 222  
104 3 17 237 64 281 4.40E-57 229.6 6573 cellular

organisms;Eukaryota;Opisthokonta;Metazoa;Eumetazoa;Bilateria;Protostomia;Spiralia;Lophotrochozoa;Mollusca;Bivalvia;Autobranhia;Pteriormorphia;Pectinida;Pectinoidea;Pectinidae;Mizuhopecten;Mizuhopecten yessoensis

UdeM00000030779 6596 370.5 UdeM00000030779 XP\_045169901.1 41.7 521  
281 6 22 527 14 526 3.50E-99 370.5 6596 cellular

organisms;Eukaryota;Opisthokonta;Metazoa;Eumetazoa;Bilateria;Protostomia;Spiralia;Lophotrochozoa;Mollusca;Bivalvia;Autobranhia;Heteroconchia;Euherodonta;Imparidentia;Venerida;Veneroidea;Veneridae;Mercenaria;Mercenaria mercenaria

UdeM00000030780 6596 124 UdeM00000030780 XP\_045169901.1 38.6 176  
102 3 8 181 5 176 2.10E-25 124 6596 cellular

organisms;Eukaryota;Opisthokonta;Metazoa;Eumetazoa;Bilateria;Protostomia;Spiralia;Lophotrochozoa;Mollusca;Bivalvia;Autobranhia;Heteroconchia;Euherodonta;Imparidentia;Venerida;Veneroidea;Veneridae;Mercenaria;Mercenaria mercenaria

UdeM00000030781 6596 353.2 UdeM00000030781 XP\_045169901.1 40.2 510  
289 7 8 511 5 504 5.80E-94 353.2 6596 cellular

organisms;Eukaryota;Opisthokonta;Metazoa;Eumetazoa;Bilateria;Protostomia;Spiralia;Lophotrochozoa;Mollusca;Bivalvia;Autobranhia;Heteroconchia;Euherodonta;Imparidentia;Venerida;Veneroidea;Veneridae;Mercenaria;Mercenaria mercenaria

UdeM00000030782 29159 357.1 UdeM00000030782 XP\_034338648.1 39.7 448  
264 4 4 447 19 464 3.40E-95 357.1 29159 cellular

organisms;Eukaryota;Opisthokonta;Metazoa;Eumetazoa;Bilateria;Protostomia;Spiralia;Lophotrochozoa;Mollusca;Bivalvia;Autobranhia;Pteriormorphia;Ostreida;Ostreoidea;Ostreidae;Crassostrea;Crassostrea gigas

UdeM00000030783 6596 363.6 UdeM00000030783 XP\_045169901.1 40.6 512  
284 8 8 511 5 504 4.30E-97 363.6 6596 cellular

organisms;Eukaryota;Opisthokonta;Metazoa;Eumetazoa;Bilateria;Protostomia;Spiralia;Lophotrochozoa;Mollusca;Bivalvia;Autobranhia;Heteroconchia;Euherodonta

terodonta;Imparidentia;Venerida;Veneroidea;Veneridae;Mercenaria;Mercenari  
 a mercenaria  
 UdeM00000030785 6596 254.6 UdeM00000030785 XP\_045169596.1 48.9 262  
 134 0 1 262 81 342 1.40E-64 254.6 6596 cellular  
 organisms;Eukaryota;Opisthokonta;Metazoa;Eumetazoa;Bilateria;Protostomia;  
 Spiralia;Lophotrochozoa;Mollusca;Bivalvia;Autobranchia;Heteroconchia;Euhe  
 terodonta;Imparidentia;Venerida;Veneroidea;Veneridae;Mercenaria;Mercenari  
 a mercenaria  
 UdeM00000030788 1735272 267.7 UdeM00000030788 XP\_041366524.1 28.3  
 699 441 20 13 675 9 683 4.00E-68 267.7 1735272  
 cellular  
 organisms;Eukaryota;Opisthokonta;Metazoa;Eumetazoa;Bilateria;Protostomia;  
 Spiralia;Lophotrochozoa;Mollusca;Gastropoda;Neomphalina;Neomphaloidea;Pel  
 tospiridae;Gigantopelta;Gigantopelta aegis  
 UdeM00000030789 1735272 274.6 UdeM00000030789 XP\_041366524.1 28.5  
 699 448 19 13 683 9 683 3.30E-70 274.6 1735272  
 cellular  
 organisms;Eukaryota;Opisthokonta;Metazoa;Eumetazoa;Bilateria;Protostomia;  
 Spiralia;Lophotrochozoa;Mollusca;Gastropoda;Neomphalina;Neomphaloidea;Pel  
 tospiridae;Gigantopelta;Gigantopelta aegis  
 UdeM00000030790 6596 278.9 UdeM00000030790 XP\_045170144.1 52.9 293  
 129 6 1 291 1 286 8.80E-72 278.9 6596 cellular  
 organisms;Eukaryota;Opisthokonta;Metazoa;Eumetazoa;Bilateria;Protostomia;  
 Spiralia;Lophotrochozoa;Mollusca;Bivalvia;Autobranchia;Heteroconchia;Euhe  
 terodonta;Imparidentia;Venerida;Veneroidea;Veneridae;Mercenaria;Mercenari  
 a mercenaria  
 UdeM00000030791 6596 94.4 UdeM00000030791 XP\_045168472.1 31.6 405  
 217 11 33 430 343 694 3.90E-16 94.4 6596 cellular  
 organisms;Eukaryota;Opisthokonta;Metazoa;Eumetazoa;Bilateria;Protostomia;  
 Spiralia;Lophotrochozoa;Mollusca;Bivalvia;Autobranchia;Heteroconchia;Euhe  
 terodonta;Imparidentia;Venerida;Veneroidea;Veneridae;Mercenaria;Mercenari  
 a mercenaria  
 UdeM00000030792 37621 195.7 UdeM00000030792 XP\_014670792.1 63.7 135  
 48 1 1 134 55 189 4.10E-47 195.7 37621 cellular  
 organisms;Eukaryota;Opisthokonta;Metazoa;Eumetazoa;Bilateria;Protostomia;  
 Ecdysozoa;Scalidophora;Priapulida;Priapulimorpha;Priapulimorphida;Priapul  
 idae;Priapululus;Priapululus caudatus  
 UdeM00000030794 6596 482.3 UdeM00000030794 XP\_045168470.1 66.8 358  
 109 1 4 351 8 365 5.70E-133 482.3 6596 cellular  
 organisms;Eukaryota;Opisthokonta;Metazoa;Eumetazoa;Bilateria;Protostomia;  
 Spiralia;Lophotrochozoa;Mollusca;Bivalvia;Autobranchia;Heteroconchia;Euhe  
 terodonta;Imparidentia;Venerida;Veneroidea;Veneridae;Mercenaria;Mercenari  
 a mercenaria  
 UdeM00000030795 6596 501.1 UdeM00000030795 XP\_045168473.1 58.6 415  
 167 3 2 414 3 414 1.30E-138 501.1 6596 cellular  
 organisms;Eukaryota;Opisthokonta;Metazoa;Eumetazoa;Bilateria;Protostomia;  
 Spiralia;Lophotrochozoa;Mollusca;Bivalvia;Autobranchia;Heteroconchia;Euhe  
 terodonta;Imparidentia;Venerida;Veneroidea;Veneridae;Mercenaria;Mercenari  
 a mercenaria  
 UdeM00000030796 6596 415.2 UdeM00000030796 XP\_045167780.1 41 534  
 293 8 840 1356 10 538 3.70E-112 415.2 6596 cellular  
 organisms;Eukaryota;Opisthokonta;Metazoa;Eumetazoa;Bilateria;Protostomia;  
 Spiralia;Lophotrochozoa;Mollusca;Bivalvia;Autobranchia;Heteroconchia;Euhe

terodonta;Imparidentia;Venerida;Veneroidea;Veneridae;Mercenaria;Mercenari  
 a mercenaria  
 UdeM00000030797 6596 415.2 UdeM00000030797 XP\_045167780.1 41 534  
 293 8 841 1357 10 538 3.70E-112 415.2 6596 cellular  
 organisms;Eukaryota;Opisthokonta;Metazoa;Eumetazoa;Bilateria;Protostomia;  
 Spiralia;Lophotrochozoa;Mollusca;Bivalvia;Autobranchia;Heteroconchia;Euhe  
 terodonta;Imparidentia;Venerida;Veneroidea;Veneridae;Mercenaria;Mercenari  
 a mercenaria  
 UdeM00000030798 6596 861.3 UdeM00000030798 XP\_045167893.1 57.8 907  
 302 22 310 1149 133 1025 2.10E-246 861.3 6596 cellular  
 organisms;Eukaryota;Opisthokonta;Metazoa;Eumetazoa;Bilateria;Protostomia;  
 Spiralia;Lophotrochozoa;Mollusca;Bivalvia;Autobranchia;Heteroconchia;Euhe  
 terodonta;Imparidentia;Venerida;Veneroidea;Veneridae;Mercenaria;Mercenari  
 a mercenaria  
 UdeM00000030799 6596 755.4 UdeM00000030799 XP\_045167893.1 57.3 820  
 269 22 16 768 220 1025 1.20E-214 755.4 6596 cellular  
 organisms;Eukaryota;Opisthokonta;Metazoa;Eumetazoa;Bilateria;Protostomia;  
 Spiralia;Lophotrochozoa;Mollusca;Bivalvia;Autobranchia;Heteroconchia;Euhe  
 terodonta;Imparidentia;Venerida;Veneroidea;Veneridae;Mercenaria;Mercenari  
 a mercenaria  
 UdeM00000030800 29159 95.9 UdeM00000030800 XP\_034310305.1 66.7 72  
 21 1 4 72 943 1014 1.90E-16 95.9 29159 cellular  
 organisms;Eukaryota;Opisthokonta;Metazoa;Eumetazoa;Bilateria;Protostomia;  
 Spiralia;Lophotrochozoa;Mollusca;Bivalvia;Autobranchia;Pteriormorphia;Ostr  
 eida;Ostreoidea;Ostreidae;Crassostrea;Crassostrea gigas  
 UdeM00000030801 6596 443 UdeM00000030801 XP\_045170262.1 64.8 335  
 114 2 2 333 25 358 3.40E-121 443 6596 cellular  
 organisms;Eukaryota;Opisthokonta;Metazoa;Eumetazoa;Bilateria;Protostomia;  
 Spiralia;Lophotrochozoa;Mollusca;Bivalvia;Autobranchia;Heteroconchia;Euhe  
 terodonta;Imparidentia;Venerida;Veneroidea;Veneridae;Mercenaria;Mercenari  
 a mercenaria  
 UdeM00000030802 6596 370.5 UdeM00000030802 XP\_045170262.1 55.1 325  
 138 2 13 331 36 358 2.20E-99 370.5 6596 cellular  
 organisms;Eukaryota;Opisthokonta;Metazoa;Eumetazoa;Bilateria;Protostomia;  
 Spiralia;Lophotrochozoa;Mollusca;Bivalvia;Autobranchia;Heteroconchia;Euhe  
 terodonta;Imparidentia;Venerida;Veneroidea;Veneridae;Mercenaria;Mercenari  
 a mercenaria  
 UdeM00000030804 6596 328.2 UdeM00000030804 XP\_045187824.1 43.2 424  
 203 6 9 427 6 396 1.60E-86 328.2 6596 cellular  
 organisms;Eukaryota;Opisthokonta;Metazoa;Eumetazoa;Bilateria;Protostomia;  
 Spiralia;Lophotrochozoa;Mollusca;Bivalvia;Autobranchia;Heteroconchia;Euhe  
 terodonta;Imparidentia;Venerida;Veneroidea;Veneridae;Mercenaria;Mercenari  
 a mercenaria  
 UdeM00000030805 6596 274.6 UdeM00000030805 XP\_045187824.1 39.3 417  
 183 6 9 381 6 396 1.90E-70 274.6 6596 cellular  
 organisms;Eukaryota;Opisthokonta;Metazoa;Eumetazoa;Bilateria;Protostomia;  
 Spiralia;Lophotrochozoa;Mollusca;Bivalvia;Autobranchia;Heteroconchia;Euhe  
 terodonta;Imparidentia;Venerida;Veneroidea;Veneridae;Mercenaria;Mercenari  
 a mercenaria  
 UdeM00000030806 6596 128.3 UdeM00000030806 XP\_045168564.1 44.7 132  
 69 2 63 190 58 189 1.70E-26 128.3 6596 cellular  
 organisms;Eukaryota;Opisthokonta;Metazoa;Eumetazoa;Bilateria;Protostomia;  
 Spiralia;Lophotrochozoa;Mollusca;Bivalvia;Autobranchia;Heteroconchia;Euhe

terodonta;Imparidentia;Venerida;Veneroidea;Veneridae;Mercenaria;Mercenaria mercenaria

|                 |        |       |                 |                |      |     |          |       |        |
|-----------------|--------|-------|-----------------|----------------|------|-----|----------|-------|--------|
| UdeM00000030809 | 125878 | 116.3 | UdeM00000030809 | XP_018411826.1 | 30.9 |     |          |       |        |
| 230             | 147    | 4     | 48              | 277            | 4    | 221 | 8.80E-23 | 116.3 | 125878 |

cellular

organisms;Eukaryota;Opisthokonta;Metazoa;Eumetazoa;Bilateria;Deuterostomia;Chordata;Craniata;Vertebrata;Gnathostomata;Teleostomi;Euteleostomi;Sarcopterygii;Dipnotetrapodomorpha;Tetrapoda;Amphibia;Batrachia;Anura;Neobatrachia;Ranoidea;Dicroglossidae;Dicroglossinae;Nanorana;Nanorana parkeri

|                 |      |       |                 |                |      |          |       |      |          |
|-----------------|------|-------|-----------------|----------------|------|----------|-------|------|----------|
| UdeM00000030810 | 8005 | 111.3 | UdeM00000030810 | XP_026867604.2 | 32.9 | 216      |       |      |          |
| 131             | 6    | 6     | 218             | 8              | 212  | 2.50E-21 | 111.3 | 8005 | cellular |

organisms;Eukaryota;Opisthokonta;Metazoa;Eumetazoa;Bilateria;Deuterostomia;Chordata;Craniata;Vertebrata;Gnathostomata;Teleostomi;Euteleostomi;Actinopterygii;Actinopteri;Neopterygii;Teleostei;Osteoglossocephalai;Clupeocephala;Otomorpha;Ostariophysi;Otophysi;Characiphysae;Gymnotiformes;Gymnotoidei;Gymnotidae;Electrophorus;Electrophorus electricus

|                 |      |       |                 |                |      |          |       |      |          |
|-----------------|------|-------|-----------------|----------------|------|----------|-------|------|----------|
| UdeM00000030811 | 8005 | 117.5 | UdeM00000030811 | XP_026867604.2 | 29.8 | 309      |       |      |          |
| 195             | 10   | 6     | 306             | 8              | 302  | 3.10E-23 | 117.5 | 8005 | cellular |

organisms;Eukaryota;Opisthokonta;Metazoa;Eumetazoa;Bilateria;Deuterostomia;Chordata;Craniata;Vertebrata;Gnathostomata;Teleostomi;Euteleostomi;Actinopterygii;Actinopteri;Neopterygii;Teleostei;Osteoglossocephalai;Clupeocephala;Otomorpha;Ostariophysi;Otophysi;Characiphysae;Gymnotiformes;Gymnotoidei;Gymnotidae;Electrophorus;Electrophorus electricus

|                 |       |       |                 |                |     |          |       |       |          |
|-----------------|-------|-------|-----------------|----------------|-----|----------|-------|-------|----------|
| UdeM00000030812 | 55291 | 115.5 | UdeM00000030812 | XP_039601029.1 | 31  | 242      |       |       |          |
| 151             | 7     | 5     | 241             | 28             | 258 | 1.40E-22 | 115.5 | 55291 | cellular |

organisms;Eukaryota;Opisthokonta;Metazoa;Eumetazoa;Bilateria;Deuterostomia;Chordata;Craniata;Vertebrata;Gnathostomata;Teleostomi;Euteleostomi;Actinopterygii;Cladistia;Polypteriformes;Polypteridae;Polypterus;Polypterus senegalus

|                 |      |       |                 |             |          |       |      |          |
|-----------------|------|-------|-----------------|-------------|----------|-------|------|----------|
| UdeM00000030813 | 7955 | 109.8 | UdeM00000030813 | XP_694444.6 | 32       | 219   | 127  |          |
| 8               | 7    | 225   | 9               | 205         | 7.50E-21 | 109.8 | 7955 | cellular |

organisms;Eukaryota;Opisthokonta;Metazoa;Eumetazoa;Bilateria;Deuterostomia;Chordata;Craniata;Vertebrata;Gnathostomata;Teleostomi;Euteleostomi;Actinopterygii;Actinopteri;Neopterygii;Teleostei;Osteoglossocephalai;Clupeocephala;Otomorpha;Ostariophysi;Otophysi;Cypriniphysae;Cypriniiformes;Cyprinoidei;Danionidae;Danioninae;Danio;Danio rerio

|                 |      |       |                 |                |      |          |       |      |          |
|-----------------|------|-------|-----------------|----------------|------|----------|-------|------|----------|
| UdeM00000030814 | 6596 | 113.2 | UdeM00000030814 | XP_045185318.1 | 28.6 | 419      |       |      |          |
| 247             | 12   | 1     | 405             | 1              | 381  | 7.70E-22 | 113.2 | 6596 | cellular |

organisms;Eukaryota;Opisthokonta;Metazoa;Eumetazoa;Bilateria;Protostomia;Spiralia;Lophotrochozoa;Mollusca;Bivalvia;Autobranchia;Heteroconchia;Euterodonta;Imparidentia;Venerida;Veneroidea;Veneridae;Mercenaria;Mercenaria mercenaria

|                 |       |       |                 |                |      |          |       |       |          |
|-----------------|-------|-------|-----------------|----------------|------|----------|-------|-------|----------|
| UdeM00000030815 | 10224 | 193.4 | UdeM00000030815 | XP_006822101.1 | 43.7 | 229      |       |       |          |
| 118             | 2     | 1     | 229             | 243            | 460  | 4.20E-46 | 193.4 | 10224 | cellular |

organisms;Eukaryota;Opisthokonta;Metazoa;Eumetazoa;Bilateria;Deuterostomia;Hemichordata;Enteropneusta;Harrimaniidae;Saccoglossus;Saccoglossus kowalevskii

|                 |       |      |                 |                |     |          |      |       |          |
|-----------------|-------|------|-----------------|----------------|-----|----------|------|-------|----------|
| UdeM00000030816 | 10224 | 59.7 | UdeM00000030816 | XP_006824625.1 | 33  | 88       |      |       |          |
| 59              | 0     | 24   | 111             | 101            | 188 | 2.80E-06 | 59.7 | 10224 | cellular |

organisms;Eukaryota;Opisthokonta;Metazoa;Eumetazoa;Bilateria;Deuterostomia;Hemichordata;Enteropneusta;Harrimaniidae;Saccoglossus;Saccoglossus kowalevskii

|                 |      |       |                 |                |      |          |       |      |          |
|-----------------|------|-------|-----------------|----------------|------|----------|-------|------|----------|
| UdeM00000030817 | 6565 | 370.9 | UdeM00000030817 | XP_022308808.1 | 66.3 | 264      |       |      |          |
| 85              | 1    | 5     | 268             | 463            | 722  | 1.30E-99 | 370.9 | 6565 | cellular |

organisms;Eukaryota;Opisthokonta;Metazoa;Eumetazoa;Bilateria;Protostomia;  
Spiralia;Lophotrochozoa;Mollusca;Bivalvia;Autobranchia;Pteriomorpha;Ostr  
eida;Ostreoidea;Ostreidae;Crassostrea;Crassostrea virginica  
UdeM00000030818 50429 159.8 UdeM00000030818 XP\_022808032.1 47.8 157  
78 2 1 153 556 712 5.70E-36 159.8 50429 cellular  
organisms;Eukaryota;Opisthokonta;Metazoa;Eumetazoa;Cnidaria;Anthozoa;Hexa  
corallia;Scleractinia;Astrocoeniina;Pocilloporidae;Stylophora;Stylophora  
pistillata  
UdeM00000030822 1735272 548.9 UdeM00000030822 XP\_041347279.1 36  
885 418 11 471 1210 1 882 1.60E-152 548.9 1735272  
cellular  
organisms;Eukaryota;Opisthokonta;Metazoa;Eumetazoa;Bilateria;Protostomia;  
Spiralia;Lophotrochozoa;Mollusca;Gastropoda;Neomphalina;Neomphaloidea;Pel  
tospiridae;Gigantopelta;Gigantopelta aegis  
UdeM00000030823 6579 292.7 UdeM00000030823 XP\_033761799.1 60.4 240  
84 2 1 230 1 239 4.00E-76 292.7 6579 cellular  
organisms;Eukaryota;Opisthokonta;Metazoa;Eumetazoa;Bilateria;Protostomia;  
Spiralia;Lophotrochozoa;Mollusca;Bivalvia;Autobranchia;Pteriomorpha;Pect  
inida;Pectinoidea;Pectinidae;Pecten;Pecten maximus  
UdeM00000030824 6596 322.8 UdeM00000030824 XP\_045167981.1 69.4 229  
69 1 5 233 2 229 3.60E-85 322.8 6596 cellular  
organisms;Eukaryota;Opisthokonta;Metazoa;Eumetazoa;Bilateria;Protostomia;  
Spiralia;Lophotrochozoa;Mollusca;Bivalvia;Autobranchia;Heteroconchia;Euhe  
terodonta;Imparidentia;Venerida;Veneroidea;Veneridae;Mercenaria;Mercenari  
a mercenaria  
UdeM00000030825 1232801 104.4 UdeM00000030825 XP\_043215542.1 58.3  
84 35 0 1 84 46 129 8.30E-20 104.4 1232801  
cellular  
organisms;Eukaryota;Opisthokonta;Metazoa;Eumetazoa;Bilateria;Protostomia;  
Ecdysozoa;Panarthropoda;Arthropoda;Mandibulata;Pancrustacea;Crustacea;Mul  
ticrustacea;Hexanauplia;Thecostraca;Cirripedia;Thoracica;Sessilia;Balanid  
ae;Amphibalanus;Amphibalanus amphitrite  
UdeM00000030826 6412 79.3 UdeM00000030826 XP\_009012646.1 60.3 63  
25 0 1 63 1 63 2.30E-12 79.3 6412 cellular  
organisms;Eukaryota;Opisthokonta;Metazoa;Eumetazoa;Bilateria;Protostomia;  
Spiralia;Lophotrochozoa;Annelida;Clitellata;Hirudinea;Rhynchobdellida;Glo  
ssiphoniidae;Helobdella;Helobdella robusta  
UdeM00000030827 6596 196.8 UdeM00000030827 XP\_045168208.1 45.6 204  
108 2 6 207 560 762 3.80E-47 196.8 6596 cellular  
organisms;Eukaryota;Opisthokonta;Metazoa;Eumetazoa;Bilateria;Protostomia;  
Spiralia;Lophotrochozoa;Mollusca;Bivalvia;Autobranchia;Heteroconchia;Euhe  
terodonta;Imparidentia;Venerida;Veneroidea;Veneridae;Mercenaria;Mercenari  
a mercenaria  
UdeM00000030828 6596 648.3 UdeM00000030828 XP\_045168208.1 57.1 527  
222 2 2 525 34 559 8.50E-183 648.3 6596 cellular  
organisms;Eukaryota;Opisthokonta;Metazoa;Eumetazoa;Bilateria;Protostomia;  
Spiralia;Lophotrochozoa;Mollusca;Bivalvia;Autobranchia;Heteroconchia;Euhe  
terodonta;Imparidentia;Venerida;Veneroidea;Veneridae;Mercenaria;Mercenari  
a mercenaria  
UdeM00000030829 6596 172.6 UdeM00000030829 XP\_045168208.1 41.8 201  
113 2 2 199 34 233 5.40E-40 172.6 6596 cellular  
organisms;Eukaryota;Opisthokonta;Metazoa;Eumetazoa;Bilateria;Protostomia;  
Spiralia;Lophotrochozoa;Mollusca;Bivalvia;Autobranchia;Heteroconchia;Euhe

terodonta;Imparidentia;Venerida;Veneroidea;Veneridae;Mercenaria;Mercenari  
a mercenaria

UdeM00000030830 6596 1727.6 UdeM00000030830 XP\_045167828.1 37.3  
7356 1688 63 1098 6571 3431 9743 0.00E+00 1727.6 6596  
cellular

organisms;Eukaryota;Opisthokonta;Metazoa;Eumetazoa;Bilateria;Protostomia;  
Spiralia;Lophotrochozoa;Mollusca;Bivalvia;Autobranchia;Heteroconchia;Euhe  
terodonta;Imparidentia;Venerida;Veneroidea;Veneridae;Mercenaria;Mercenari  
a mercenaria

UdeM00000030831 6596 2028.1 UdeM00000030831 XP\_045167828.1 63.4  
1435 505 7 18 1445 36 1457 0.00E+00 2028.1 6596  
cellular

organisms;Eukaryota;Opisthokonta;Metazoa;Eumetazoa;Bilateria;Protostomia;  
Spiralia;Lophotrochozoa;Mollusca;Bivalvia;Autobranchia;Heteroconchia;Euhe  
terodonta;Imparidentia;Venerida;Veneroidea;Veneridae;Mercenaria;Mercenari  
a mercenaria

UdeM00000030832 6596 1996.5 UdeM00000030832 XP\_045167828.1 62.7  
1435 500 8 18 1430 36 1457 0.00E+00 1996.5 6596  
cellular

organisms;Eukaryota;Opisthokonta;Metazoa;Eumetazoa;Bilateria;Protostomia;  
Spiralia;Lophotrochozoa;Mollusca;Bivalvia;Autobranchia;Heteroconchia;Euhe  
terodonta;Imparidentia;Venerida;Veneroidea;Veneridae;Mercenaria;Mercenari  
a mercenaria

UdeM00000030833 6596 4137 UdeM00000030833 XP\_045167828.1 46.4  
10224 2840 96 14 8105 32 9743 0.00E+00 4137 6596  
cellular

organisms;Eukaryota;Opisthokonta;Metazoa;Eumetazoa;Bilateria;Protostomia;  
Spiralia;Lophotrochozoa;Mollusca;Bivalvia;Autobranchia;Heteroconchia;Euhe  
terodonta;Imparidentia;Venerida;Veneroidea;Veneridae;Mercenaria;Mercenari  
a mercenaria

UdeM00000030834 29159 204.1 UdeM00000030834 XP\_011413207.2 84.7 118  
18 0 105 222 29 146 2.90E-49 204.1 29159 cellular

organisms;Eukaryota;Opisthokonta;Metazoa;Eumetazoa;Bilateria;Protostomia;  
Spiralia;Lophotrochozoa;Mollusca;Bivalvia;Autobranchia;Pteriomorphia;Ostr  
eida;Ostreoidea;Ostreidae;Crassostrea;Crassostrea gigas

UdeM00000030837 6596 641.3 UdeM00000030837 XP\_045168651.1 58.3 569  
199 2 77 608 47 614 1.20E-180 641.3 6596 cellular

organisms;Eukaryota;Opisthokonta;Metazoa;Eumetazoa;Bilateria;Protostomia;  
Spiralia;Lophotrochozoa;Mollusca;Bivalvia;Autobranchia;Heteroconchia;Euhe  
terodonta;Imparidentia;Venerida;Veneroidea;Veneridae;Mercenaria;Mercenari  
a mercenaria

UdeM00000030839 6579 71.2 UdeM00000030839 XP\_033758230.1 49.2 63  
32 0 1 63 634 696 8.30E-10 71.2 6579 cellular

organisms;Eukaryota;Opisthokonta;Metazoa;Eumetazoa;Bilateria;Protostomia;  
Spiralia;Lophotrochozoa;Mollusca;Bivalvia;Autobranchia;Pteriomorphia;Pect  
inida;Pectinoidea;Pectinidae;Pecten;Pecten maximus

UdeM00000030841 6596 426 UdeM00000030841 XP\_045169752.1 39 589  
327 7 6 565 3 588 7.40E-116 426 6596 cellular

organisms;Eukaryota;Opisthokonta;Metazoa;Eumetazoa;Bilateria;Protostomia;  
Spiralia;Lophotrochozoa;Mollusca;Bivalvia;Autobranchia;Heteroconchia;Euhe  
terodonta;Imparidentia;Venerida;Veneroidea;Veneridae;Mercenaria;Mercenari  
a mercenaria

UdeM00000030842 225164 825.9 UdeM00000030842 XP\_009049129.1 45.9  
852 416 12 13 854 20 836 4.90E-236 825.9 225164



cellular  
organisms;Eukaryota;Opisthokonta;Metazoa;Eumetazoa;Bilateria;Protostomia;  
Spiralia;Lophotrochozoa;Mollusca;Gastropoda;Patellogastropoda;Lottioidea;  
Lottiidae;Lottia;Lottia gigantea  
UdeM00000030843 6596 440.3 UdeM00000030843 XP\_045168527.1 56.5 391  
149 6 11 395 18 393 2.70E-120 440.3 6596 cellular  
organisms;Eukaryota;Opisthokonta;Metazoa;Eumetazoa;Bilateria;Protostomia;  
Spiralia;Lophotrochozoa;Mollusca;Bivalvia;Autobranchia;Heteroconchia;Euhe  
terodonta;Imparidentia;Venerida;Veneroidea;Veneridae;Mercenaria;Mercenari  
a mercenaria  
UdeM00000030844 6596 428.7 UdeM00000030844 XP\_045168527.1 53.2 408  
170 6 30 431 1 393 8.80E-117 428.7 6596 cellular  
organisms;Eukaryota;Opisthokonta;Metazoa;Eumetazoa;Bilateria;Protostomia;  
Spiralia;Lophotrochozoa;Mollusca;Bivalvia;Autobranchia;Heteroconchia;Euhe  
terodonta;Imparidentia;Venerida;Veneroidea;Veneridae;Mercenaria;Mercenari  
a mercenaria  
UdeM00000030845 6596 429.9 UdeM00000030845 XP\_045168527.1 53.5 398  
174 5 12 404 1 392 3.70E-117 429.9 6596 cellular  
organisms;Eukaryota;Opisthokonta;Metazoa;Eumetazoa;Bilateria;Protostomia;  
Spiralia;Lophotrochozoa;Mollusca;Bivalvia;Autobranchia;Heteroconchia;Euhe  
terodonta;Imparidentia;Venerida;Veneroidea;Veneridae;Mercenaria;Mercenari  
a mercenaria  
UdeM00000030846 6596 435.3 UdeM00000030846 XP\_045168527.1 56.3 391  
159 5 6 392 11 393 8.50E-119 435.3 6596 cellular  
organisms;Eukaryota;Opisthokonta;Metazoa;Eumetazoa;Bilateria;Protostomia;  
Spiralia;Lophotrochozoa;Mollusca;Bivalvia;Autobranchia;Heteroconchia;Euhe  
terodonta;Imparidentia;Venerida;Veneroidea;Veneridae;Mercenaria;Mercenari  
a mercenaria  
UdeM00000030847 6596 436 UdeM00000030847 XP\_045168527.1 56.3 391  
159 5 14 400 11 393 5.10E-119 436 6596 cellular  
organisms;Eukaryota;Opisthokonta;Metazoa;Eumetazoa;Bilateria;Protostomia;  
Spiralia;Lophotrochozoa;Mollusca;Bivalvia;Autobranchia;Heteroconchia;Euhe  
terodonta;Imparidentia;Venerida;Veneroidea;Veneridae;Mercenaria;Mercenari  
a mercenaria  
UdeM00000030848 77115 70.1 UdeM00000030848 XP\_038144245.1 44.4 72  
40 0 1 72 315 386 1.30E-09 70.1 77115 cellular  
organisms;Eukaryota;Opisthokonta;Metazoa;Eumetazoa;Bilateria;Deuterostomi  
a;Chordata;Craniata;Vertebrata;Gnathostomata;Teleostomi;Euteleostomi;Acti  
nopterygii;Actinopteri;Neopterygii;Teleostei;Osteoglossocephalai;Clupeoce  
phala;Euteleosteomorpha;Neoteleostei;Eurypterygia;Ctenosquamata;Acanthomo  
rphata;Euacanthomorphacea;Percomorphaceae;Ovalentaria;Atherinomorphae;Cyp  
rinodontiformes;Cyprinodontoidei;Cyprinodontidae;Cyprinodontinae;Cyprinod  
ontini;Cyprinodon;Cyprinodon tularosa  
UdeM00000010153 7574 264.6 UdeM00000010153 XP\_013421860.1 49.3 282  
131 4 3 278 4 279 1.40E-67 264.6 7574 cellular  
organisms;Eukaryota;Opisthokonta;Metazoa;Eumetazoa;Bilateria;Protostomia;  
Spiralia;Lophotrochozoa;Brachiopoda;Linguliformea;Lingulata;Lingulida;Lin  
guloidea;Lingulidae;Lingula;Lingula anatina  
UdeM00000010154 7574 236.9 UdeM00000010154 XP\_013409676.1 50.7 268  
115 5 1 261 1 258 3.00E-59 236.9 7574 cellular  
organisms;Eukaryota;Opisthokonta;Metazoa;Eumetazoa;Bilateria;Protostomia;  
Spiralia;Lophotrochozoa;Brachiopoda;Linguliformea;Lingulata;Lingulida;Lin  
guloidea;Lingulidae;Lingula;Lingula anatina

UdeM00000010155 7574 526.6 UdeM00000010155 XP\_013382110.1 48.9 522  
 252 5 14 534 45 552 4.10E-146 526.6 7574 cellular  
 organisms;Eukaryota;Opisthokonta;Metazoa;Eumetazoa;Bilateria;Protostomia;  
 Spiralia;Lophotrochozoa;Brachiopoda;Linguliformea;Lingulata;Lingulida;Lin  
 guloidea;Lingulidae;Lingula;Lingula anatina  
 UdeM00000010156 30023 65.5 UdeM00000010156 XP\_017127385.1 35.5 110  
 65 2 22 131 68 171 1.00E-07 65.5 30023 cellular  
 organisms;Eukaryota;Opisthokonta;Metazoa;Eumetazoa;Bilateria;Protostomia;  
 Ecdysozoa;Panarthropoda;Arthropoda;Mandibulata;Pancrustacea;Hexapoda;Inse  
 cta;Dicondylia;Pterygota;Neoptera;Endopterygota;Diptera;Brachycera;Muscom  
 orpha;Eremoneura;Cyclorrhapha;Schizophora;Acalyptratae;Ephydroidea;Drosop  
 hilidae;Drosophilinae;Drosophilini;Drosophila;Sophophora;melanogaster  
 group;elegans subgroup;Drosophila elegans  
 UdeM00000010157 125878 73.2 UdeM00000010157 XP\_018429758.1 38.3  
 94 55 2 14 107 100 190 3.50E-10 73.2 125878  
 cellular  
 organisms;Eukaryota;Opisthokonta;Metazoa;Eumetazoa;Bilateria;Deuterostomi  
 a;Chordata;Craniata;Vertebrata;Gnathostomata;Teleostomi;Euteleostomi;Sarc  
 opterygii;Dipnotetrapodomorpha;Tetrapoda;Amphibia;Batrachia;Anura;Neobatr  
 achia;Ranoidea;Dicroglossidae;Dicroglossinae;Nanorana;Nanorana parkeri  
 UdeM00000010158 7913 68.9 UdeM00000010158 XP\_041101535.1 46.2 65  
 34 1 1 65 275 338 9.30E-09 68.9 7913 cellular  
 organisms;Eukaryota;Opisthokonta;Metazoa;Eumetazoa;Bilateria;Deuterostomi  
 a;Chordata;Craniata;Vertebrata;Gnathostomata;Teleostomi;Euteleostomi;Acti  
 nopterygii;Actinopteri;Chondrostei;Acipenseriformes;Acipenseroidei;Polyod  
 ontidae;Polyodontinae;Polyodontini;Polyodon;Polyodon spathula  
 UdeM00000010159 6596 214.2 UdeM00000010159 XP\_045196404.1 37.1 315  
 180 6 345 646 480 789 5.00E-52 214.2 6596 cellular  
 organisms;Eukaryota;Opisthokonta;Metazoa;Eumetazoa;Bilateria;Protostomia;  
 Spiralia;Lophotrochozoa;Mollusca;Bivalvia;Autobranchia;Heteroconchia;Euhe  
 terodonta;Imparidentia;Venerida;Veneroidea;Veneridae;Mercenaria;Mercenari  
 a mercenaria  
 UdeM00000010160 6596 214.2 UdeM00000010160 XP\_045196404.1 37.1 315  
 180 6 146 447 480 789 3.50E-52 214.2 6596 cellular  
 organisms;Eukaryota;Opisthokonta;Metazoa;Eumetazoa;Bilateria;Protostomia;  
 Spiralia;Lophotrochozoa;Mollusca;Bivalvia;Autobranchia;Heteroconchia;Euhe  
 terodonta;Imparidentia;Venerida;Veneroidea;Veneridae;Mercenaria;Mercenari  
 a mercenaria  
 UdeM00000010161 225164 118.6 UdeM00000010161 XP\_009062103.1 30.5  
 190 131 1 1 189 1 190 9.50E-24 118.6 225164  
 cellular  
 organisms;Eukaryota;Opisthokonta;Metazoa;Eumetazoa;Bilateria;Protostomia;  
 Spiralia;Lophotrochozoa;Mollusca;Gastropoda;Patellogastropoda;Lottioidae;  
 Lottiidae;Lottia;Lottia gigantea  
 UdeM00000010162 7574 111.7 UdeM00000010162 XP\_013404178.2 32.8 201  
 118 4 19 206 21 217 1.10E-21 111.7 7574 cellular  
 organisms;Eukaryota;Opisthokonta;Metazoa;Eumetazoa;Bilateria;Protostomia;  
 Spiralia;Lophotrochozoa;Brachiopoda;Linguliformea;Lingulata;Lingulida;Lin  
 guloidea;Lingulidae;Lingula;Lingula anatina  
 UdeM00000010163 225164 107.5 UdeM00000010163 XP\_009062103.1 31  
 200 134 3 1 198 1 198 2.20E-20 107.5 225164  
 cellular  
 organisms;Eukaryota;Opisthokonta;Metazoa;Eumetazoa;Bilateria;Protostomia;

Spiralia; Lophotrochozoa; Mollusca; Gastropoda; Patellogastropoda; Lottioidea; Lottiidae; Lottia; Lottia gigantea

UdeM00000010165 72036 198.7 UdeM00000010165 XP\_040576246.1 48.2 193  
99 1 2 193 191 383 7.30E-48 198.7 72036 cellular  
organisms; Eukaryota; Opisthokonta; Metazoa; Eumetazoa; Bilateria; Protostomia; Ecdysozoa; Panarthropoda; Arthropoda; Mandibulata; Pancrustacea; Crustacea; Multicrustacea; Hexanauplia; Copepoda; Neocopepoda; Podoplea; Siphonostomatoida; Caligidae; Lepeophtheirus; Lepeophtheirus salmonis

UdeM00000010166 225164 111.3 UdeM00000010166 XP\_009062103.1 32  
200 132 3 1 198 1 198 1.50E-21 111.3 225164  
cellular  
organisms; Eukaryota; Opisthokonta; Metazoa; Eumetazoa; Bilateria; Protostomia; Spiralia; Lophotrochozoa; Mollusca; Gastropoda; Patellogastropoda; Lottioidea; Lottiidae; Lottia; Lottia gigantea

UdeM00000010167 225164 113.2 UdeM00000010167 XP\_009062103.1 31.8  
198 133 2 1 196 1 198 4.00E-22 113.2 225164  
cellular  
organisms; Eukaryota; Opisthokonta; Metazoa; Eumetazoa; Bilateria; Protostomia; Spiralia; Lophotrochozoa; Mollusca; Gastropoda; Patellogastropoda; Lottioidea; Lottiidae; Lottia; Lottia gigantea

UdeM00000010169 72036 197.6 UdeM00000010169 XP\_040576246.1 47.7 193  
100 1 2 193 191 383 1.60E-47 197.6 72036 cellular  
organisms; Eukaryota; Opisthokonta; Metazoa; Eumetazoa; Bilateria; Protostomia; Ecdysozoa; Panarthropoda; Arthropoda; Mandibulata; Pancrustacea; Crustacea; Multicrustacea; Hexanauplia; Copepoda; Neocopepoda; Podoplea; Siphonostomatoida; Caligidae; Lepeophtheirus; Lepeophtheirus salmonis

UdeM00000010170 225164 108.2 UdeM00000010170 XP\_009062103.1 30.8  
198 135 2 1 196 1 198 1.30E-20 108.2 225164  
cellular  
organisms; Eukaryota; Opisthokonta; Metazoa; Eumetazoa; Bilateria; Protostomia; Spiralia; Lophotrochozoa; Mollusca; Gastropoda; Patellogastropoda; Lottioidea; Lottiidae; Lottia; Lottia gigantea

UdeM00000010171 225164 106.7 UdeM00000010171 XP\_009062103.1 31  
200 134 3 1 198 1 198 3.70E-20 106.7 225164  
cellular  
organisms; Eukaryota; Opisthokonta; Metazoa; Eumetazoa; Bilateria; Protostomia; Spiralia; Lophotrochozoa; Mollusca; Gastropoda; Patellogastropoda; Lottioidea; Lottiidae; Lottia; Lottia gigantea

UdeM00000010172 13632 70.1 UdeM00000010172 XP\_037823191.1 27.5 240  
162 4 6 237 8 243 5.70E-09 70.1 13632 cellular  
organisms; Eukaryota; Opisthokonta; Metazoa; Eumetazoa; Bilateria; Protostomia; Ecdysozoa; Panarthropoda; Arthropoda; Mandibulata; Pancrustacea; Hexapoda; Insecta; Dicondylia; Pterygota; Neoptera; Endopterygota; Diptera; Brachycera; Muscomorpha; Eremoneura; Cyclorrhapha; Schizophora; Calyptratae; Oestroidea; Calliphoridae; Luciliinae; Lucilia; Lucilia sericata

UdeM00000010176 6573 680.2 UdeM00000010176 XP\_021363592.1 81.6 413  
70 4 16 428 45 451 1.60E-192 680.2 6573 cellular  
organisms; Eukaryota; Opisthokonta; Metazoa; Eumetazoa; Bilateria; Protostomia; Spiralia; Lophotrochozoa; Mollusca; Bivalvia; Autobranchia; Pteriomorpha; Pectinida; Pectinoidea; Pectinidae; Mizuhopecten; Mizuhopecten yessoensis

UdeM00000010175 6573 743.4 UdeM00000010175 XP\_021363592.1 80.7 457  
78 5 1 453 1 451 1.70E-211 743.4 6573 cellular  
organisms; Eukaryota; Opisthokonta; Metazoa; Eumetazoa; Bilateria; Protostomia;

Spiralia; Lophotrochozoa; Mollusca; Bivalvia; Autobranchia; Pteriomorpha; Pectinida; Pectinoidea; Pectinidae; Mizuhopecten; Mizuhopecten yessoensis  
UdeM00000010177 6573 750.4 UdeM00000010177 XP\_021363592.1 81.1 456  
77 4 1 452 1 451 1.40E-213 750.4 6573 cellular  
organisms; Eukaryota; Opisthokonta; Metazoa; Eumetazoa; Bilateria; Protostomia; Spiralia; Lophotrochozoa; Mollusca; Bivalvia; Autobranchia; Pteriomorpha; Pectinida; Pectinoidea; Pectinidae; Mizuhopecten; Mizuhopecten yessoensis  
UdeM00000010178 6565 226.1 UdeM00000010178 XP\_022292438.1 70.3 145  
43 0 1 145 192 336 2.90E-56 226.1 6565 cellular  
organisms; Eukaryota; Opisthokonta; Metazoa; Eumetazoa; Bilateria; Protostomia; Spiralia; Lophotrochozoa; Mollusca; Bivalvia; Autobranchia; Pteriomorpha; Ostracida; Ostreidae; Crassostrea; Crassostrea virginica  
UdeM00000010179 29159 1128.2 UdeM00000010179 XP\_011430908.2 76.5  
693 163 0 1 693 1 693 0.00E+00 1128.2  
29159 cellular  
organisms; Eukaryota; Opisthokonta; Metazoa; Eumetazoa; Bilateria; Protostomia; Spiralia; Lophotrochozoa; Mollusca; Bivalvia; Autobranchia; Pteriomorpha; Ostracida; Ostreidae; Crassostrea; Crassostrea gigas  
UdeM00000010180 2607531 351.7 UdeM00000010180 XP\_029649452.1 57.4  
312 122 6 6 311 10 316 1.00E-93 351.7 2607531  
cellular  
organisms; Eukaryota; Opisthokonta; Metazoa; Eumetazoa; Bilateria; Protostomia; Spiralia; Lophotrochozoa; Mollusca; Cephalopoda; Coleoidea; Octopodiformes; Octopoda; Incirrata; Octopodidae; Octopus; Octopus sinensis  
UdeM00000010181 6579 62 UdeM00000010181 XP\_033741473.1 55.3 47  
21 0 57 103 60 106 5.30E-07 62 6579 cellular  
organisms; Eukaryota; Opisthokonta; Metazoa; Eumetazoa; Bilateria; Protostomia; Spiralia; Lophotrochozoa; Mollusca; Bivalvia; Autobranchia; Pteriomorpha; Pectinida; Pectinoidea; Pectinidae; Pecten; Pecten maximus  
UdeM00000010182 6596 652.5 UdeM00000010182 XP\_045195357.1 55 535  
241 0 153 687 41 575 6.00E-184 652.5 6596 cellular  
organisms; Eukaryota; Opisthokonta; Metazoa; Eumetazoa; Bilateria; Protostomia; Spiralia; Lophotrochozoa; Mollusca; Bivalvia; Autobranchia; Heteroconchia; Euheterodonta; Imparidentia; Venerida; Veneroidea; Veneridae; Mercenaria; Mercenaria mercenaria  
UdeM00000010183 6596 158.7 UdeM00000010183 XP\_045195357.1 62.2 119  
45 0 13 131 359 477 5.20E-36 158.7 6596 cellular  
organisms; Eukaryota; Opisthokonta; Metazoa; Eumetazoa; Bilateria; Protostomia; Spiralia; Lophotrochozoa; Mollusca; Bivalvia; Autobranchia; Heteroconchia; Euheterodonta; Imparidentia; Venerida; Veneroidea; Veneridae; Mercenaria; Mercenaria mercenaria  
UdeM00000010184 6596 641.7 UdeM00000010184 XP\_045195357.1 57.4 514  
219 0 133 646 42 555 9.80E-181 641.7 6596 cellular  
organisms; Eukaryota; Opisthokonta; Metazoa; Eumetazoa; Bilateria; Protostomia; Spiralia; Lophotrochozoa; Mollusca; Bivalvia; Autobranchia; Heteroconchia; Euheterodonta; Imparidentia; Venerida; Veneroidea; Veneridae; Mercenaria; Mercenaria mercenaria  
UdeM00000010186 6596 608.2 UdeM00000010186 XP\_045195357.1 54.3 530  
198 1 6 491 26 555 9.10E-171 608.2 6596 cellular  
organisms; Eukaryota; Opisthokonta; Metazoa; Eumetazoa; Bilateria; Protostomia; Spiralia; Lophotrochozoa; Mollusca; Bivalvia; Autobranchia; Heteroconchia; Euheterodonta; Imparidentia; Venerida; Veneroidea; Veneridae; Mercenaria; Mercenaria mercenaria

UdeM00000010187 6596 676.4 UdeM00000010187 XP\_045195357.1 56 550  
 242 0 6 555 26 575 3.10E-191 676.4 6596 cellular  
 organisms;Eukaryota;Opisthokonta;Metazoa;Eumetazoa;Bilateria;Protostomia;  
 Spiralia;Lophotrochozoa;Mollusca;Bivalvia;Autobranchia;Heteroconchia;Euhe  
 terodonta;Imparidentia;Venerida;Veneroidea;Veneridae;Mercenaria;Mercenari  
 a mercenaria  
 UdeM00000010188 6596 105.5 UdeM00000010188 XP\_045195573.1 26.1 283  
 184 10 10 281 18 286 3.10E-19 105.5 6596 cellular  
 organisms;Eukaryota;Opisthokonta;Metazoa;Eumetazoa;Bilateria;Protostomia;  
 Spiralia;Lophotrochozoa;Mollusca;Bivalvia;Autobranchia;Heteroconchia;Euhe  
 terodonta;Imparidentia;Venerida;Veneroidea;Veneridae;Mercenaria;Mercenari  
 a mercenaria  
 UdeM00000010189 6596 105.9 UdeM00000010189 XP\_045195573.1 26.1 283  
 184 10 10 281 18 286 2.40E-19 105.9 6596 cellular  
 organisms;Eukaryota;Opisthokonta;Metazoa;Eumetazoa;Bilateria;Protostomia;  
 Spiralia;Lophotrochozoa;Mollusca;Bivalvia;Autobranchia;Heteroconchia;Euhe  
 terodonta;Imparidentia;Venerida;Veneroidea;Veneridae;Mercenaria;Mercenari  
 a mercenaria  
 UdeM00000010190 6596 94 UdeM00000010190 XP\_045195573.1 27.1 255  
 165 10 5 250 42 284 8.60E-16 94 6596 cellular  
 organisms;Eukaryota;Opisthokonta;Metazoa;Eumetazoa;Bilateria;Protostomia;  
 Spiralia;Lophotrochozoa;Mollusca;Bivalvia;Autobranchia;Heteroconchia;Euhe  
 terodonta;Imparidentia;Venerida;Veneroidea;Veneridae;Mercenaria;Mercenari  
 a mercenaria  
 UdeM00000010191 6596 96.7 UdeM00000010191 XP\_045195573.1 27.7 267  
 171 11 25 281 32 286 1.40E-16 96.7 6596 cellular  
 organisms;Eukaryota;Opisthokonta;Metazoa;Eumetazoa;Bilateria;Protostomia;  
 Spiralia;Lophotrochozoa;Mollusca;Bivalvia;Autobranchia;Heteroconchia;Euhe  
 terodonta;Imparidentia;Venerida;Veneroidea;Veneridae;Mercenaria;Mercenari  
 a mercenaria  
 UdeM00000010192 6596 106.3 UdeM00000010192 XP\_045200436.1 26.4 277  
 183 10 18 279 25 295 1.10E-19 106.3 6596 cellular  
 organisms;Eukaryota;Opisthokonta;Metazoa;Eumetazoa;Bilateria;Protostomia;  
 Spiralia;Lophotrochozoa;Mollusca;Bivalvia;Autobranchia;Heteroconchia;Euhe  
 terodonta;Imparidentia;Venerida;Veneroidea;Veneridae;Mercenaria;Mercenari  
 a mercenaria  
 UdeM00000010194 6596 122.9 UdeM00000010194 XP\_045200436.1 31.6 285  
 178 8 39 313 26 303 1.10E-24 122.9 6596 cellular  
 organisms;Eukaryota;Opisthokonta;Metazoa;Eumetazoa;Bilateria;Protostomia;  
 Spiralia;Lophotrochozoa;Mollusca;Bivalvia;Autobranchia;Heteroconchia;Euhe  
 terodonta;Imparidentia;Venerida;Veneroidea;Veneridae;Mercenaria;Mercenari  
 a mercenaria  
 UdeM00000010195 6565 125.6 UdeM00000010195 XP\_022324603.1 27.2 323  
 190 13 4 313 20 310 1.10E-25 125.6 6565 cellular  
 organisms;Eukaryota;Opisthokonta;Metazoa;Eumetazoa;Bilateria;Protostomia;  
 Spiralia;Lophotrochozoa;Mollusca;Bivalvia;Autobranchia;Pteriomorphia;Ostr  
 eida;Ostreoidea;Ostreidae;Crassostrea;Crassostrea virginica  
 UdeM00000010196 6565 121.3 UdeM00000010196 XP\_022324607.1 27.8 313  
 198 12 6 311 19 310 2.10E-24 121.3 6565 cellular  
 organisms;Eukaryota;Opisthokonta;Metazoa;Eumetazoa;Bilateria;Protostomia;  
 Spiralia;Lophotrochozoa;Mollusca;Bivalvia;Autobranchia;Pteriomorphia;Ostr  
 eida;Ostreoidea;Ostreidae;Crassostrea;Crassostrea virginica  
 UdeM00000010197 6565 121.3 UdeM00000010197 XP\_022324607.1 27.8 313  
 198 12 3 308 19 310 2.10E-24 121.3 6565 cellular

organisms;Eukaryota;Opisthokonta;Metazoa;Eumetazoa;Bilateria;Protostomia;Spiralia;Lophotrochozoa;Mollusca;Bivalvia;Autobranhia;Pteriormorphia;Ostreida;Ostreoidea;Ostreidae;Crassostrea;Crassostrea virginica  
UdeM00000010198 6596 132.1 UdeM00000010198 XP\_045197828.1 55.6 142  
54 3 29 165 58 195 6.90E-28 132.1 6596 cellular  
organisms;Eukaryota;Opisthokonta;Metazoa;Eumetazoa;Bilateria;Protostomia;Spiralia;Lophotrochozoa;Mollusca;Bivalvia;Autobranhia;Heteroconchia;Euheterodonta;Imparidentia;Venerida;Veneroidea;Veneridae;Mercenaria;Mercenaria mercenaria  
UdeM00000010199 6596 131.7 UdeM00000010199 XP\_045197826.1 52.8 163  
71 3 11 170 42 201 9.10E-28 131.7 6596 cellular  
organisms;Eukaryota;Opisthokonta;Metazoa;Eumetazoa;Bilateria;Protostomia;Spiralia;Lophotrochozoa;Mollusca;Bivalvia;Autobranhia;Heteroconchia;Euheterodonta;Imparidentia;Venerida;Veneroidea;Veneridae;Mercenaria;Mercenaria mercenaria  
UdeM00000010200 6573 669.8 UdeM00000010200 XP\_021347779.1 36.3 1052  
630 18 9 1037 1842 2876 6.10E-189 669.8 6573 cellular  
organisms;Eukaryota;Opisthokonta;Metazoa;Eumetazoa;Bilateria;Protostomia;Spiralia;Lophotrochozoa;Mollusca;Bivalvia;Autobranhia;Pteriormorphia;Pectinida;Pectinoidea;Pectinidae;Mizuhopecten;Mizuhopecten yessoensis  
UdeM00000010201 6573 669.8 UdeM00000010201 XP\_021347779.1 36.3 1052  
630 18 9 1037 1842 2876 6.20E-189 669.8 6573 cellular  
organisms;Eukaryota;Opisthokonta;Metazoa;Eumetazoa;Bilateria;Protostomia;Spiralia;Lophotrochozoa;Mollusca;Bivalvia;Autobranhia;Pteriormorphia;Pectinida;Pectinoidea;Pectinidae;Mizuhopecten;Mizuhopecten yessoensis  
UdeM00000010203 8240 77 UdeM00000010203 XP\_042244713.1 54.2 59  
27 0 16 74 315 373 1.10E-11 77 8240 cellular  
organisms;Eukaryota;Opisthokonta;Metazoa;Eumetazoa;Bilateria;Deuterostomia;Chordata;Craniata;Vertebrata;Gnathostomata;Teleostomi;Euteleostomi;Actinopterygii;Actinopteri;Neopterygii;Teleostei;Osteoglossocephalai;Clupeocephala;Euteleostei;Neoteleostei;Eurypterygia;Ctenosquamata;Acanthomorphata;Euacanthomorphacea;Percomorphaceae;Pelagiaria;Scombriformes;Scombridae;Scombrinae;Thunnini;Thunnus;Thunnus maccoyii  
UdeM00000010204 6573 602.4 UdeM00000010204 XP\_021347779.1 36.8 927  
557 13 7 912 1883 2801 1.00E-168 602.4 6573 cellular  
organisms;Eukaryota;Opisthokonta;Metazoa;Eumetazoa;Bilateria;Protostomia;Spiralia;Lophotrochozoa;Mollusca;Bivalvia;Autobranhia;Pteriormorphia;Pectinida;Pectinoidea;Pectinidae;Mizuhopecten;Mizuhopecten yessoensis  
UdeM00000010205 7574 81.3 UdeM00000010205 XP\_013386941.1 64.8 54  
19 0 14 67 886 939 5.40E-13 81.3 7574 cellular  
organisms;Eukaryota;Opisthokonta;Metazoa;Eumetazoa;Bilateria;Protostomia;Spiralia;Lophotrochozoa;Brachiopoda;Linguliformea;Lingulata;Lingulida;Linguloidea;Lingulidae;Lingula;Lingula anatina  
UdeM00000010206 6596 438.7 UdeM00000010206 XP\_045197975.1 43.8 582  
271 7 28 558 1413 1989 1.40E-119 438.7 6596 cellular  
organisms;Eukaryota;Opisthokonta;Metazoa;Eumetazoa;Bilateria;Protostomia;Spiralia;Lophotrochozoa;Mollusca;Bivalvia;Autobranhia;Heteroconchia;Euheterodonta;Imparidentia;Venerida;Veneroidea;Veneridae;Mercenaria;Mercenaria mercenaria  
UdeM00000010207 6573 209.1 UdeM00000010207 XP\_021347779.1 29.5 457  
311 9 26 479 1839 2287 1.20E-50 209.1 6573 cellular  
organisms;Eukaryota;Opisthokonta;Metazoa;Eumetazoa;Bilateria;Protostomia;Spiralia;Lophotrochozoa;Mollusca;Bivalvia;Autobranhia;Pteriormorphia;Pectinida;Pectinoidea;Pectinidae;Mizuhopecten;Mizuhopecten yessoensis

UdeM00000010208 6596 60.5 UdeM00000010208 XP\_045197975.1 34.8 112  
 62 3 20 127 1931 2035 6.00E-06 60.5 6596 cellular  
 organisms;Eukaryota;Opisthokonta;Metazoa;Eumetazoa;Bilateria;Protostomia;  
 Spiralia;Lophotrochozoa;Mollusca;Bivalvia;Autobranchia;Heteroconchia;Euhe  
 terodonta;Imparidentia;Venerida;Veneroidea;Veneridae;Mercenaria;Mercenari  
 a mercenaria  
 UdeM00000010209 6573 1175.2 UdeM00000010209 XP\_021347779.1 30.9  
 2723 1721 66 107 2758 122 2755 0.00E+00 1175.2 6573  
 cellular  
 organisms;Eukaryota;Opisthokonta;Metazoa;Eumetazoa;Bilateria;Protostomia;  
 Spiralia;Lophotrochozoa;Mollusca;Bivalvia;Autobranchia;Pteriormorphia;Pect  
 inida;Pectinoidea;Pectinidae;Mizuhopecten;Mizuhopecten yessoensis  
 UdeM00000010210 6573 580.5 UdeM00000010210 XP\_021347779.1 28.3 1772  
 1158 51 107 1826 122 1833 7.60E-162 580.5 6573 cellular  
 organisms;Eukaryota;Opisthokonta;Metazoa;Eumetazoa;Bilateria;Protostomia;  
 Spiralia;Lophotrochozoa;Mollusca;Bivalvia;Autobranchia;Pteriormorphia;Pect  
 inida;Pectinoidea;Pectinidae;Mizuhopecten;Mizuhopecten yessoensis  
 UdeM00000010213 6596 338.2 UdeM00000010213 XP\_045195433.1 56 298  
 128 2 322 616 23 320 2.30E-89 338.2 6596 cellular  
 organisms;Eukaryota;Opisthokonta;Metazoa;Eumetazoa;Bilateria;Protostomia;  
 Spiralia;Lophotrochozoa;Mollusca;Bivalvia;Autobranchia;Heteroconchia;Euhe  
 terodonta;Imparidentia;Venerida;Veneroidea;Veneridae;Mercenaria;Mercenari  
 a mercenaria  
 UdeM00000010214 70779 59.3 UdeM00000010214 XP\_015759403.1 43.4 76  
 43 0 22 97 718 793 3.20E-06 59.3 70779 cellular  
 organisms;Eukaryota;Opisthokonta;Metazoa;Eumetazoa;Cnidaria;Anthozoa;Hexa  
 corallia;Scleractinia;Astrocoeniina;Acroporidae;Acropora;Acropora  
 digitifera  
 UdeM00000010215 6596 379.8 UdeM00000010215 XP\_045197973.1 56.6 327  
 136 2 1 324 1 324 3.50E-102 379.8 6596 cellular  
 organisms;Eukaryota;Opisthokonta;Metazoa;Eumetazoa;Bilateria;Protostomia;  
 Spiralia;Lophotrochozoa;Mollusca;Bivalvia;Autobranchia;Heteroconchia;Euhe  
 terodonta;Imparidentia;Venerida;Veneroidea;Veneridae;Mercenaria;Mercenari  
 a mercenaria  
 UdeM00000010216 6596 374.8 UdeM00000010216 XP\_045197973.1 56.6 327  
 136 2 1 324 1 324 1.10E-100 374.8 6596 cellular  
 organisms;Eukaryota;Opisthokonta;Metazoa;Eumetazoa;Bilateria;Protostomia;  
 Spiralia;Lophotrochozoa;Mollusca;Bivalvia;Autobranchia;Heteroconchia;Euhe  
 terodonta;Imparidentia;Venerida;Veneroidea;Veneridae;Mercenaria;Mercenari  
 a mercenaria  
 UdeM00000010217 6565 604.4 UdeM00000010217 XP\_022293178.1 62.9 483  
 146 7 7 479 6 465 2.20E-169 604.4 6565 cellular  
 organisms;Eukaryota;Opisthokonta;Metazoa;Eumetazoa;Bilateria;Protostomia;  
 Spiralia;Lophotrochozoa;Mollusca;Bivalvia;Autobranchia;Pteriormorphia;Ostr  
 eida;Ostreoidea;Ostreidae;Crassostrea;Crassostrea virginica  
 UdeM00000010218 6596 378.6 UdeM00000010218 XP\_045197973.1 55.9 324  
 143 0 1 324 1 324 7.80E-102 378.6 6596 cellular  
 organisms;Eukaryota;Opisthokonta;Metazoa;Eumetazoa;Bilateria;Protostomia;  
 Spiralia;Lophotrochozoa;Mollusca;Bivalvia;Autobranchia;Heteroconchia;Euhe  
 terodonta;Imparidentia;Venerida;Veneroidea;Veneridae;Mercenaria;Mercenari  
 a mercenaria  
 UdeM00000010219 6565 568.5 UdeM00000010219 XP\_022293178.1 59.6 488  
 131 7 7 456 6 465 1.30E-158 568.5 6565 cellular  
 organisms;Eukaryota;Opisthokonta;Metazoa;Eumetazoa;Bilateria;Protostomia;

Spiralia;Lophotrochozoa;Mollusca;Bivalvia;Autobranchia;Pteriormorphia;Ostr  
 eida;Ostreoidea;Ostreidae;Crassostrea;Crassostrea virginica  
 UdeM00000010220 6596 619 UdeM00000010220 XP\_045196926.1 51.7 977  
 276 11 5 795 7 973 8.40E-174 619 6596 cellular  
 organisms;Eukaryota;Opisthokonta;Metazoa;Eumetazoa;Bilateria;Protostomia;  
 Spiralia;Lophotrochozoa;Mollusca;Bivalvia;Autobranchia;Heteroconchia;Euhe  
 terodonta;Imparidentia;Venerida;Veneroidea;Veneridae;Mercenaria;Mercenari  
 a mercenaria  
 UdeM00000010222 6596 641.7 UdeM00000010222 XP\_045197473.1 70.3 448  
 121 5 28 468 12 454 7.10E-181 641.7 6596 cellular  
 organisms;Eukaryota;Opisthokonta;Metazoa;Eumetazoa;Bilateria;Protostomia;  
 Spiralia;Lophotrochozoa;Mollusca;Bivalvia;Autobranchia;Heteroconchia;Euhe  
 terodonta;Imparidentia;Venerida;Veneroidea;Veneridae;Mercenaria;Mercenari  
 a mercenaria  
 UdeM00000010223 6596 628.2 UdeM00000010223 XP\_045197471.1 71.9 424  
 111 4 53 469 134 556 8.10E-177 628.2 6596 cellular  
 organisms;Eukaryota;Opisthokonta;Metazoa;Eumetazoa;Bilateria;Protostomia;  
 Spiralia;Lophotrochozoa;Mollusca;Bivalvia;Autobranchia;Heteroconchia;Euhe  
 terodonta;Imparidentia;Venerida;Veneroidea;Veneridae;Mercenaria;Mercenari  
 a mercenaria  
 UdeM00000010224 6579 142.5 UdeM00000010224 XP\_033740430.1 35.8 240  
 130 8 6 237 15 238 1.40E-30 142.5 6579 cellular  
 organisms;Eukaryota;Opisthokonta;Metazoa;Eumetazoa;Bilateria;Protostomia;  
 Spiralia;Lophotrochozoa;Mollusca;Bivalvia;Autobranchia;Pteriormorphia;Pect  
 inida;Pectinoidea;Pectinidae;Pecten;Pecten maximus  
 UdeM00000010225 6596 327 UdeM00000010225 XP\_045197766.1 59.9 272  
 100 3 5 269 4 273 3.70E-86 327 6596 cellular  
 organisms;Eukaryota;Opisthokonta;Metazoa;Eumetazoa;Bilateria;Protostomia;  
 Spiralia;Lophotrochozoa;Mollusca;Bivalvia;Autobranchia;Heteroconchia;Euhe  
 terodonta;Imparidentia;Venerida;Veneroidea;Veneridae;Mercenaria;Mercenari  
 a mercenaria  
 UdeM00000010226 6596 776.2 UdeM00000010226 XP\_045198627.1 47.9 892  
 330 9 1 884 1 765 4.50E-221 776.2 6596 cellular  
 organisms;Eukaryota;Opisthokonta;Metazoa;Eumetazoa;Bilateria;Protostomia;  
 Spiralia;Lophotrochozoa;Mollusca;Bivalvia;Autobranchia;Heteroconchia;Euhe  
 terodonta;Imparidentia;Venerida;Veneroidea;Veneridae;Mercenaria;Mercenari  
 a mercenaria  
 UdeM00000010227 6579 228.8 UdeM00000010227 XP\_033741488.1 38.6 479  
 239 15 1 466 306 742 1.40E-56 228.8 6579 cellular  
 organisms;Eukaryota;Opisthokonta;Metazoa;Eumetazoa;Bilateria;Protostomia;  
 Spiralia;Lophotrochozoa;Mollusca;Bivalvia;Autobranchia;Pteriormorphia;Pect  
 inida;Pectinoidea;Pectinidae;Pecten;Pecten maximus  
 UdeM00000010228 6596 73.6 UdeM00000010228 XP\_045166996.1 52.5 61  
 29 0 16 76 394 454 1.30E-10 73.6 6596 cellular  
 organisms;Eukaryota;Opisthokonta;Metazoa;Eumetazoa;Bilateria;Protostomia;  
 Spiralia;Lophotrochozoa;Mollusca;Bivalvia;Autobranchia;Heteroconchia;Euhe  
 terodonta;Imparidentia;Venerida;Veneroidea;Veneridae;Mercenaria;Mercenari  
 a mercenaria  
 UdeM00000010229 6596 70.5 UdeM00000010229 XP\_045166996.1 50.8 61  
 30 0 81 141 394 454 2.00E-09 70.5 6596 cellular  
 organisms;Eukaryota;Opisthokonta;Metazoa;Eumetazoa;Bilateria;Protostomia;  
 Spiralia;Lophotrochozoa;Mollusca;Bivalvia;Autobranchia;Heteroconchia;Euhe  
 terodonta;Imparidentia;Venerida;Veneroidea;Veneridae;Mercenaria;Mercenari  
 a mercenaria



UdeM00000010230 6596 64.3 UdeM00000010230 XP\_045195102.1 28.9 114  
 80 1 78 190 582 695 2.00E-07 64.3 6596 cellular  
 organisms;Eukaryota;Opisthokonta;Metazoa;Eumetazoa;Bilateria;Protostomia;  
 Spiralia;Lophotrochozoa;Mollusca;Bivalvia;Autobranchia;Heteroconchia;Euhe  
 terodonta;Imparidentia;Venerida;Veneroidea;Veneridae;Mercenaria;Mercenari  
 a mercenaria  
 UdeM00000010232 6596 333.6 UdeM00000010232 XP\_045199387.1 31.8 707  
 434 15 4 674 3 697 6.00E-88 333.6 6596 cellular  
 organisms;Eukaryota;Opisthokonta;Metazoa;Eumetazoa;Bilateria;Protostomia;  
 Spiralia;Lophotrochozoa;Mollusca;Bivalvia;Autobranchia;Heteroconchia;Euhe  
 terodonta;Imparidentia;Venerida;Veneroidea;Veneridae;Mercenaria;Mercenari  
 a mercenaria  
 UdeM00000010233 6565 73.2 UdeM00000010233 XP\_022327962.1 47.1 70  
 37 0 9 78 503 572 2.80E-10 73.2 6565 cellular  
 organisms;Eukaryota;Opisthokonta;Metazoa;Eumetazoa;Bilateria;Protostomia;  
 Spiralia;Lophotrochozoa;Mollusca;Bivalvia;Autobranchia;Pteriormorphia;Ostr  
 eida;Ostreoidea;Ostreidae;Crassostrea;Crassostrea virginica  
 UdeM00000010234 6596 84.3 UdeM00000010234 XP\_045201869.1 36.2 138  
 81 3 28 160 563 698 1.60E-13 84.3 6596 cellular  
 organisms;Eukaryota;Opisthokonta;Metazoa;Eumetazoa;Bilateria;Protostomia;  
 Spiralia;Lophotrochozoa;Mollusca;Bivalvia;Autobranchia;Heteroconchia;Euhe  
 terodonta;Imparidentia;Venerida;Veneroidea;Veneridae;Mercenaria;Mercenari  
 a mercenaria  
 UdeM00000010235 6596 256.1 UdeM00000010235 XP\_045199387.1 33.1 504  
 305 10 4 484 3 497 9.00E-65 256.1 6596 cellular  
 organisms;Eukaryota;Opisthokonta;Metazoa;Eumetazoa;Bilateria;Protostomia;  
 Spiralia;Lophotrochozoa;Mollusca;Bivalvia;Autobranchia;Heteroconchia;Euhe  
 terodonta;Imparidentia;Venerida;Veneroidea;Veneridae;Mercenaria;Mercenari  
 a mercenaria  
 UdeM00000010236 6596 320.1 UdeM00000010236 XP\_045199387.1 30.8 711  
 436 17 4 674 3 697 6.90E-84 320.1 6596 cellular  
 organisms;Eukaryota;Opisthokonta;Metazoa;Eumetazoa;Bilateria;Protostomia;  
 Spiralia;Lophotrochozoa;Mollusca;Bivalvia;Autobranchia;Heteroconchia;Euhe  
 terodonta;Imparidentia;Venerida;Veneroidea;Veneridae;Mercenaria;Mercenari  
 a mercenaria  
 UdeM00000037481 6596 666 UdeM00000037481 XP\_045205818.1 83.4 403  
 66 1 1 403 507 908 3.00E-188 666 6596 cellular  
 organisms;Eukaryota;Opisthokonta;Metazoa;Eumetazoa;Bilateria;Protostomia;  
 Spiralia;Lophotrochozoa;Mollusca;Bivalvia;Autobranchia;Heteroconchia;Euhe  
 terodonta;Imparidentia;Venerida;Veneroidea;Veneridae;Mercenaria;Mercenari  
 a mercenaria  
 UdeM00000037482 6596 239.2 UdeM00000037482 XP\_045205818.1 49.4 261  
 116 5 34 282 247 503 6.40E-60 239.2 6596 cellular  
 organisms;Eukaryota;Opisthokonta;Metazoa;Eumetazoa;Bilateria;Protostomia;  
 Spiralia;Lophotrochozoa;Mollusca;Bivalvia;Autobranchia;Heteroconchia;Euhe  
 terodonta;Imparidentia;Venerida;Veneroidea;Veneridae;Mercenaria;Mercenari  
 a mercenaria  
 UdeM00000037483 6596 242.7 UdeM00000037483 XP\_045205818.1 58.9 207  
 84 1 32 238 24 229 4.90E-61 242.7 6596 cellular  
 organisms;Eukaryota;Opisthokonta;Metazoa;Eumetazoa;Bilateria;Protostomia;  
 Spiralia;Lophotrochozoa;Mollusca;Bivalvia;Autobranchia;Heteroconchia;Euhe  
 terodonta;Imparidentia;Venerida;Veneroidea;Veneridae;Mercenaria;Mercenari  
 a mercenaria

UdeM00000037484 6596 912.1 UdeM00000037484 XP\_045206515.1 55.5 890  
 296 15 127 990 139 954 6.10E-262 912.1 6596 cellular  
 organisms;Eukaryota;Opisthokonta;Metazoa;Eumetazoa;Bilateria;Protostomia;  
 Spiralia;Lophotrochozoa;Mollusca;Bivalvia;Autobranhia;Heteroconchia;Euhe  
 terodonta;Imparidentia;Venerida;Veneroidea;Veneridae;Mercenaria;Mercenari  
 a mercenaria  
 UdeM00000037485 6579 192.2 UdeM00000037485 XP\_033729790.1 39.3 267  
 149 1 10 276 17 270 9.70E-46 192.2 6579 cellular  
 organisms;Eukaryota;Opisthokonta;Metazoa;Eumetazoa;Bilateria;Protostomia;  
 Spiralia;Lophotrochozoa;Mollusca;Bivalvia;Autobranhia;Pteriormorphia;Pect  
 inida;Pectinoidea;Pectinidae;Pecten;Pecten maximus  
 UdeM00000037487 2652724 175.3 UdeM00000037487 XP\_020913146.1 54.3  
 164 75 0 167 330 177 340 1.80E-40 175.3 2652724  
 cellular  
 organisms;Eukaryota;Opisthokonta;Metazoa;Eumetazoa;Cnidaria;Anthozoa;Hexa  
 corallia;Actiniaria;Aiptasiidae;Exaiptasia;Exaiptasia diaphana  
 UdeM00000037489 6596 384.4 UdeM00000037489 XP\_045203850.1 46 413  
 219 4 5 416 310 719 1.90E-103 384.4 6596 cellular  
 organisms;Eukaryota;Opisthokonta;Metazoa;Eumetazoa;Bilateria;Protostomia;  
 Spiralia;Lophotrochozoa;Mollusca;Bivalvia;Autobranhia;Heteroconchia;Euhe  
 terodonta;Imparidentia;Venerida;Veneroidea;Veneridae;Mercenaria;Mercenari  
 a mercenaria  
 UdeM00000037490 6596 849.7 UdeM00000037490 XP\_045203339.1 54 859  
 354 15 313 1159 318 1147 4.20E-243 849.7 6596 cellular  
 organisms;Eukaryota;Opisthokonta;Metazoa;Eumetazoa;Bilateria;Protostomia;  
 Spiralia;Lophotrochozoa;Mollusca;Bivalvia;Autobranhia;Heteroconchia;Euhe  
 terodonta;Imparidentia;Venerida;Veneroidea;Veneridae;Mercenaria;Mercenari  
 a mercenaria  
 UdeM00000037491 6596 850.5 UdeM00000037491 XP\_045203339.1 54.1 860  
 353 16 313 1160 318 1147 2.50E-243 850.5 6596 cellular  
 organisms;Eukaryota;Opisthokonta;Metazoa;Eumetazoa;Bilateria;Protostomia;  
 Spiralia;Lophotrochozoa;Mollusca;Bivalvia;Autobranhia;Heteroconchia;Euhe  
 terodonta;Imparidentia;Venerida;Veneroidea;Veneridae;Mercenaria;Mercenari  
 a mercenaria  
 UdeM00000037493 29159 246.1 UdeM00000037493 XP\_011427376.1 61.4 202  
 74 2 5 206 4 201 4.00E-62 246.1 29159 cellular  
 organisms;Eukaryota;Opisthokonta;Metazoa;Eumetazoa;Bilateria;Protostomia;  
 Spiralia;Lophotrochozoa;Mollusca;Bivalvia;Autobranhia;Pteriormorphia;Ostr  
 eida;Ostreoidea;Ostreidae;Crassostrea;Crassostrea gigas  
 UdeM00000037494 6579 276.6 UdeM00000037494 XP\_033754228.1 30.5 704  
 469 11 8 699 13 708 3.40E-70 276.6 6579 cellular  
 organisms;Eukaryota;Opisthokonta;Metazoa;Eumetazoa;Bilateria;Protostomia;  
 Spiralia;Lophotrochozoa;Mollusca;Bivalvia;Autobranhia;Pteriormorphia;Pect  
 inida;Pectinoidea;Pectinidae;Pecten;Pecten maximus  
 UdeM00000037495 6596 523.1 UdeM00000037495 XP\_045203969.1 76.2 307  
 73 0 35 341 18 324 2.70E-145 523.1 6596 cellular  
 organisms;Eukaryota;Opisthokonta;Metazoa;Eumetazoa;Bilateria;Protostomia;  
 Spiralia;Lophotrochozoa;Mollusca;Bivalvia;Autobranhia;Heteroconchia;Euhe  
 terodonta;Imparidentia;Venerida;Veneroidea;Veneridae;Mercenaria;Mercenari  
 a mercenaria  
 UdeM00000037496 6579 567.8 UdeM00000037496 XP\_033743639.1 34.4 1039  
 634 16 22 1023 19 1046 2.90E-158 567.8 6579 cellular  
 organisms;Eukaryota;Opisthokonta;Metazoa;Eumetazoa;Bilateria;Protostomia;

Spiralia;Lophotrochozoa;Mollusca;Bivalvia;Autobranchia;Pteriormorphia;Pectinida;Pectinoidea;Pectinidae;Pecten;Pecten maximus  
UdeM00000037497 6579 567.8 UdeM00000037497 XP\_033743639.1 34.4 1039  
634 16 15 1016 19 1046 2.90E-158 567.8 6579 cellular  
organisms;Eukaryota;Opisthokonta;Metazoa;Eumetazoa;Bilateria;Protostomia;  
Spiralia;Lophotrochozoa;Mollusca;Bivalvia;Autobranchia;Pteriormorphia;Pectinida;Pectinoidea;Pectinidae;Pecten;Pecten maximus  
UdeM00000037498 10224 152.1 UdeM00000037498 XP\_002733140.2 30.3 366  
222 10 6 341 18 380 1.20E-33 152.1 10224 cellular  
organisms;Eukaryota;Opisthokonta;Metazoa;Eumetazoa;Bilateria;Deuterostomia;Hemichordata;Enteropneusta;Harrimaniidae;Saccoglossus;Saccoglossus  
kowalevskii  
UdeM00000037499 6596 181.8 UdeM00000037499 XP\_045202117.1 51.1 184  
62 2 1 182 1 158 7.80E-43 181.8 6596 cellular  
organisms;Eukaryota;Opisthokonta;Metazoa;Eumetazoa;Bilateria;Protostomia;  
Spiralia;Lophotrochozoa;Mollusca;Bivalvia;Autobranchia;Heteroconchia;Euheterodonta;Imparidentia;Venerida;Veneroidea;Veneridae;Mercenaria;Mercenaria mercenaria  
UdeM00000037500 6579 612.5 UdeM00000037500 XP\_033743643.1 36.3 1159  
660 19 1 1115 1 1125 1.10E-171 612.5 6579 cellular  
organisms;Eukaryota;Opisthokonta;Metazoa;Eumetazoa;Bilateria;Protostomia;  
Spiralia;Lophotrochozoa;Mollusca;Bivalvia;Autobranchia;Pteriormorphia;Pectinida;Pectinoidea;Pectinidae;Pecten;Pecten maximus  
UdeM00000037501 6579 236.5 UdeM00000037501 XP\_033743323.1 44.6 361  
165 11 19 364 24 364 5.40E-59 236.5 6579 cellular  
organisms;Eukaryota;Opisthokonta;Metazoa;Eumetazoa;Bilateria;Protostomia;  
Spiralia;Lophotrochozoa;Mollusca;Bivalvia;Autobranchia;Pteriormorphia;Pectinida;Pectinoidea;Pectinidae;Pecten;Pecten maximus  
UdeM00000037502 6596 561.6 UdeM00000037502 XP\_045204830.1 48.1 576  
294 3 67 642 1 571 1.30E-156 561.6 6596 cellular  
organisms;Eukaryota;Opisthokonta;Metazoa;Eumetazoa;Bilateria;Protostomia;  
Spiralia;Lophotrochozoa;Mollusca;Bivalvia;Autobranchia;Heteroconchia;Euheterodonta;Imparidentia;Venerida;Veneroidea;Veneridae;Mercenaria;Mercenaria mercenaria  
UdeM00000037504 29159 382.5 UdeM00000037504 XP\_011444702.1 80.5 221  
43 0 29 249 23 243 4.90E-103 382.5 29159 cellular  
organisms;Eukaryota;Opisthokonta;Metazoa;Eumetazoa;Bilateria;Protostomia;  
Spiralia;Lophotrochozoa;Mollusca;Bivalvia;Autobranchia;Pteriormorphia;Ostreida;Ostreoidea;Ostreidae;Crassostrea;Crassostrea gigas  
UdeM00000037503 6596 783.1 UdeM00000037503 XP\_045204424.1 81.6 451  
83 0 29 479 23 473 2.00E-223 783.1 6596 cellular  
organisms;Eukaryota;Opisthokonta;Metazoa;Eumetazoa;Bilateria;Protostomia;  
Spiralia;Lophotrochozoa;Mollusca;Bivalvia;Autobranchia;Heteroconchia;Euheterodonta;Imparidentia;Venerida;Veneroidea;Veneridae;Mercenaria;Mercenaria mercenaria  
UdeM00000037505 6573 438 UdeM00000037505 XP\_021340548.1 75.1 341  
74 4 1 338 9 341 1.10E-119 438 6573 cellular  
organisms;Eukaryota;Opisthokonta;Metazoa;Eumetazoa;Bilateria;Protostomia;  
Spiralia;Lophotrochozoa;Mollusca;Bivalvia;Autobranchia;Pteriormorphia;Pectinida;Pectinoidea;Pectinidae;Mizuhopecten;Mizuhopecten yessoensis  
UdeM00000037506 6573 423.7 UdeM00000037506 XP\_021340547.1 54 546  
242 2 1 537 1 546 3.50E-115 423.7 6573 cellular  
organisms;Eukaryota;Opisthokonta;Metazoa;Eumetazoa;Bilateria;Protostomia;

Spiralia;Lophotrochozoa;Mollusca;Bivalvia;Autobranchia;Pteriormorphia;Pectinida;Pectinoidea;Pectinidae;Mizuhopecten;Mizuhopecten yessoensis  
UdeM00000037507 6573 471.1 UdeM00000037507 XP\_021340547.1 51.7 592  
286 0 1 592 526 1117 2.10E-129 471.1 6573 cellular  
organisms;Eukaryota;Opisthokonta;Metazoa;Eumetazoa;Bilateria;Protostomia;  
Spiralia;Lophotrochozoa;Mollusca;Bivalvia;Autobranchia;Pteriormorphia;Pectinida;Pectinoidea;Pectinidae;Mizuhopecten;Mizuhopecten yessoensis  
UdeM00000037508 6579 329.7 UdeM00000037508 XP\_033743546.1 82.3 192  
34 0 1 192 1119 1310 2.50E-87 329.7 6579 cellular  
organisms;Eukaryota;Opisthokonta;Metazoa;Eumetazoa;Bilateria;Protostomia;  
Spiralia;Lophotrochozoa;Mollusca;Bivalvia;Autobranchia;Pteriormorphia;Pectinida;Pectinoidea;Pectinidae;Pecten;Pecten maximus  
UdeM00000037509 45264 375.2 UdeM00000037509 XP\_044165535.1 47 389  
188 3 12 383 148 535 1.40E-100 375.2 45264 cellular  
organisms;Eukaryota;Opisthokonta;Metazoa;Eumetazoa;Cnidaria;Anthozoa;Hexacorallia;Scleractinia;Astrocoeniina;Acroporidae;Acropora;Acropora millepora  
UdeM00000037510 6573 179.1 UdeM00000037510 XP\_021340547.1 37.8 283  
176 0 44 326 333 615 9.10E-42 179.1 6573 cellular  
organisms;Eukaryota;Opisthokonta;Metazoa;Eumetazoa;Bilateria;Protostomia;  
Spiralia;Lophotrochozoa;Mollusca;Bivalvia;Autobranchia;Pteriormorphia;Pectinida;Pectinoidea;Pectinidae;Mizuhopecten;Mizuhopecten yessoensis  
UdeM00000037511 6573 503.1 UdeM00000037511 XP\_021340547.1 44.5 686  
369 5 4 682 626 1306 6.40E-139 503.1 6573 cellular  
organisms;Eukaryota;Opisthokonta;Metazoa;Eumetazoa;Bilateria;Protostomia;  
Spiralia;Lophotrochozoa;Mollusca;Bivalvia;Autobranchia;Pteriormorphia;Pectinida;Pectinoidea;Pectinidae;Mizuhopecten;Mizuhopecten yessoensis  
UdeM00000037513 6596 481.5 UdeM00000037513 XP\_045172573.1 38 700  
308 8 7 703 4 580 1.80E-132 481.5 6596 cellular  
organisms;Eukaryota;Opisthokonta;Metazoa;Eumetazoa;Bilateria;Protostomia;  
Spiralia;Lophotrochozoa;Mollusca;Bivalvia;Autobranchia;Heteroconchia;Euheterodonta;Imparidentia;Venerida;Veneroidea;Veneridae;Mercenaria;Mercenaria mercenaria  
UdeM00000037512 6596 481.5 UdeM00000037512 XP\_045172573.1 38 700  
308 8 33 729 4 580 1.90E-132 481.5 6596 cellular  
organisms;Eukaryota;Opisthokonta;Metazoa;Eumetazoa;Bilateria;Protostomia;  
Spiralia;Lophotrochozoa;Mollusca;Bivalvia;Autobranchia;Heteroconchia;Euheterodonta;Imparidentia;Venerida;Veneroidea;Veneridae;Mercenaria;Mercenaria mercenaria  
UdeM00000037514 6596 1204.9 UdeM00000037514 XP\_045205039.1 52.2  
1210 560 13 9 1211 18 1216 0.00E+00 1204.9 6596  
cellular  
organisms;Eukaryota;Opisthokonta;Metazoa;Eumetazoa;Bilateria;Protostomia;  
Spiralia;Lophotrochozoa;Mollusca;Bivalvia;Autobranchia;Heteroconchia;Euheterodonta;Imparidentia;Venerida;Veneroidea;Veneridae;Mercenaria;Mercenaria mercenaria  
UdeM00000037515 6596 2177.9 UdeM00000037515 XP\_045205040.1 53  
2106 963 8 70 2158 2 2098 0.00E+00 2177.9 6596  
cellular  
organisms;Eukaryota;Opisthokonta;Metazoa;Eumetazoa;Bilateria;Protostomia;  
Spiralia;Lophotrochozoa;Mollusca;Bivalvia;Autobranchia;Heteroconchia;Euheterodonta;Imparidentia;Venerida;Veneroidea;Veneridae;Mercenaria;Mercenaria mercenaria

UdeM00000037516 6573 747.7 UdeM00000037516 XP\_021348390.1 43.2 886  
 363 10 21 902 3471 4220 1.80E-212 747.7 6573 cellular  
 organisms;Eukaryota;Opisthokonta;Metazoa;Eumetazoa;Bilateria;Protostomia;  
 Spiralia;Lophotrochozoa;Mollusca;Bivalvia;Autobranchia;Pteriomorpha;Pect  
 inida;Pectinoidea;Pectinidae;Mizuhopecten;Mizuhopecten yessoensis  
 UdeM00000037517 6573 769.2 UdeM00000037517 XP\_021348390.1 46.2 832  
 362 10 21 848 3471 4220 5.40E-219 769.2 6573 cellular  
 organisms;Eukaryota;Opisthokonta;Metazoa;Eumetazoa;Bilateria;Protostomia;  
 Spiralia;Lophotrochozoa;Mollusca;Bivalvia;Autobranchia;Pteriomorpha;Pect  
 inida;Pectinoidea;Pectinidae;Mizuhopecten;Mizuhopecten yessoensis  
 UdeM00000037518 6573 794.3 UdeM00000037518 XP\_021348390.1 49.2 778  
 363 9 21 794 3471 4220 1.50E-226 794.3 6573 cellular  
 organisms;Eukaryota;Opisthokonta;Metazoa;Eumetazoa;Bilateria;Protostomia;  
 Spiralia;Lophotrochozoa;Mollusca;Bivalvia;Autobranchia;Pteriomorpha;Pect  
 inida;Pectinoidea;Pectinidae;Mizuhopecten;Mizuhopecten yessoensis  
 UdeM00000037519 29159 342 UdeM00000037519 XP\_011429616.1 82.9 199  
 34 0 1 199 1 199 5.00E-91 342 29159 cellular  
 organisms;Eukaryota;Opisthokonta;Metazoa;Eumetazoa;Bilateria;Protostomia;  
 Spiralia;Lophotrochozoa;Mollusca;Bivalvia;Autobranchia;Pteriomorpha;Ostr  
 eida;Ostreoidea;Ostreidae;Crassostrea;Crassostrea gigas  
 UdeM00000037520 6596 848.2 UdeM00000037520 XP\_045204337.1 60.8 641  
 247 3 22 662 72 708 7.10E-243 848.2 6596 cellular  
 organisms;Eukaryota;Opisthokonta;Metazoa;Eumetazoa;Bilateria;Protostomia;  
 Spiralia;Lophotrochozoa;Mollusca;Bivalvia;Autobranchia;Heteroconchia;Euhe  
 terodonta;Imparidentia;Venerida;Veneroidea;Veneridae;Mercenaria;Mercenari  
 a mercenaria  
 UdeM00000037524 6596 216.5 UdeM00000037524 XP\_045205295.1 49.2 238  
 111 5 51 281 49 283 4.70E-53 216.5 6596 cellular  
 organisms;Eukaryota;Opisthokonta;Metazoa;Eumetazoa;Bilateria;Protostomia;  
 Spiralia;Lophotrochozoa;Mollusca;Bivalvia;Autobranchia;Heteroconchia;Euhe  
 terodonta;Imparidentia;Venerida;Veneroidea;Veneridae;Mercenaria;Mercenari  
 a mercenaria  
 UdeM00000037523 6596 315.8 UdeM00000037523 XP\_045205295.1 52.7 315  
 139 5 51 358 49 360 7.00E-83 315.8 6596 cellular  
 organisms;Eukaryota;Opisthokonta;Metazoa;Eumetazoa;Bilateria;Protostomia;  
 Spiralia;Lophotrochozoa;Mollusca;Bivalvia;Autobranchia;Heteroconchia;Euhe  
 terodonta;Imparidentia;Venerida;Veneroidea;Veneridae;Mercenaria;Mercenari  
 a mercenaria  
 UdeM00000037525 6596 510 UdeM00000037525 XP\_045205295.1 66.8 398  
 124 5 4 401 354 743 2.80E-141 510 6596 cellular  
 organisms;Eukaryota;Opisthokonta;Metazoa;Eumetazoa;Bilateria;Protostomia;  
 Spiralia;Lophotrochozoa;Mollusca;Bivalvia;Autobranchia;Heteroconchia;Euhe  
 terodonta;Imparidentia;Venerida;Veneroidea;Veneridae;Mercenaria;Mercenari  
 a mercenaria  
 UdeM00000037526 6565 65.9 UdeM00000037526 XP\_022326333.1 38.1 147  
 90 1 1 146 1 147 5.00E-08 65.9 6565 cellular  
 organisms;Eukaryota;Opisthokonta;Metazoa;Eumetazoa;Bilateria;Protostomia;  
 Spiralia;Lophotrochozoa;Mollusca;Bivalvia;Autobranchia;Pteriomorpha;Ostr  
 eida;Ostreoidea;Ostreidae;Crassostrea;Crassostrea virginica  
 UdeM00000037527 6565 682.2 UdeM00000037527 XP\_022326333.1 65.9 587  
 199 1 1 587 190 775 5.90E-193 682.2 6565 cellular  
 organisms;Eukaryota;Opisthokonta;Metazoa;Eumetazoa;Bilateria;Protostomia;  
 Spiralia;Lophotrochozoa;Mollusca;Bivalvia;Autobranchia;Pteriomorpha;Ostr  
 eida;Ostreoidea;Ostreidae;Crassostrea;Crassostrea virginica

UdeM00000037528 6596 594.7 UdeM00000037528 XP\_045204928.1 46 648  
 303 9 7 633 14 635 1.40E-166 594.7 6596 cellular  
 organisms;Eukaryota;Opisthokonta;Metazoa;Eumetazoa;Bilateria;Protostomia;  
 Spiralia;Lophotrochozoa;Mollusca;Bivalvia;Autobranhia;Heteroconchia;Euhe  
 terodonta;Imparidentia;Venerida;Veneroidea;Veneridae;Mercenaria;Mercenari  
 a mercenaria

UdeM00000037529 6596 612.1 UdeM00000037529 XP\_045204928.1 46.9 648  
 309 8 7 645 14 635 8.50E-172 612.1 6596 cellular  
 organisms;Eukaryota;Opisthokonta;Metazoa;Eumetazoa;Bilateria;Protostomia;  
 Spiralia;Lophotrochozoa;Mollusca;Bivalvia;Autobranhia;Heteroconchia;Euhe  
 terodonta;Imparidentia;Venerida;Veneroidea;Veneridae;Mercenaria;Mercenari  
 a mercenaria

UdeM00000037530 6573 336.7 UdeM00000037530 XP\_021361375.1 47.4 416  
 203 9 1 412 1 404 4.30E-89 336.7 6573 cellular  
 organisms;Eukaryota;Opisthokonta;Metazoa;Eumetazoa;Bilateria;Protostomia;  
 Spiralia;Lophotrochozoa;Mollusca;Bivalvia;Autobranhia;Pteriormorphia;Pect  
 inida;Pectinoidea;Pectinidae;Mizuhopecten;Mizuhopecten yessoensis

UdeM00000037531 29159 116.3 UdeM00000037531 XP\_011428466.1 50 110  
 55 0 7 116 190 299 2.70E-23 116.3 29159 cellular  
 organisms;Eukaryota;Opisthokonta;Metazoa;Eumetazoa;Bilateria;Protostomia;  
 Spiralia;Lophotrochozoa;Mollusca;Bivalvia;Autobranhia;Pteriormorphia;Ostr  
 eida;Ostreoidea;Ostreidae;Crassostrea;Crassostrea gigas

UdeM00000037532 6596 194.5 UdeM00000037532 XP\_045206841.1 53.6 168  
 78 0 19 186 20 187 1.20E-46 194.5 6596 cellular  
 organisms;Eukaryota;Opisthokonta;Metazoa;Eumetazoa;Bilateria;Protostomia;  
 Spiralia;Lophotrochozoa;Mollusca;Bivalvia;Autobranhia;Heteroconchia;Euhe  
 terodonta;Imparidentia;Venerida;Veneroidea;Veneridae;Mercenaria;Mercenari  
 a mercenaria

UdeM00000037533 225164 264.2 UdeM00000037533 XP\_009056902.1 68.4  
 174 55 0 7 180 19 192 1.20E-67 264.2 225164  
 cellular  
 organisms;Eukaryota;Opisthokonta;Metazoa;Eumetazoa;Bilateria;Protostomia;  
 Spiralia;Lophotrochozoa;Mollusca;Gastropoda;Patellogastropoda;Lottioidea;  
 Lottiidae;Lottia;Lottia gigantea

UdeM00000037534 6596 309.3 UdeM00000037534 XP\_045206841.1 53.3 289  
 133 2 13 300 14 301 5.40E-81 309.3 6596 cellular  
 organisms;Eukaryota;Opisthokonta;Metazoa;Eumetazoa;Bilateria;Protostomia;  
 Spiralia;Lophotrochozoa;Mollusca;Bivalvia;Autobranhia;Heteroconchia;Euhe  
 terodonta;Imparidentia;Venerida;Veneroidea;Veneridae;Mercenaria;Mercenari  
 a mercenaria

UdeM00000037535 6596 278.1 UdeM00000037535 XP\_045206843.1 50.3 290  
 137 4 9 292 4 292 1.30E-71 278.1 6596 cellular  
 organisms;Eukaryota;Opisthokonta;Metazoa;Eumetazoa;Bilateria;Protostomia;  
 Spiralia;Lophotrochozoa;Mollusca;Bivalvia;Autobranhia;Heteroconchia;Euhe  
 terodonta;Imparidentia;Venerida;Veneroidea;Veneridae;Mercenaria;Mercenari  
 a mercenaria

UdeM00000037536 6596 162.5 UdeM00000037536 XP\_045203045.1 37.4 310  
 132 8 8 263 5 306 7.20E-37 162.5 6596 cellular  
 organisms;Eukaryota;Opisthokonta;Metazoa;Eumetazoa;Bilateria;Protostomia;  
 Spiralia;Lophotrochozoa;Mollusca;Bivalvia;Autobranhia;Heteroconchia;Euhe  
 terodonta;Imparidentia;Venerida;Veneroidea;Veneridae;Mercenaria;Mercenari  
 a mercenaria

UdeM00000037537 6596 231.9 UdeM00000037537 XP\_045203045.1 43.3 312  
 153 6 8 302 1 305 1.10E-57 231.9 6596 cellular

organisms;Eukaryota;Opisthokonta;Metazoa;Eumetazoa;Bilateria;Protostomia;Spiralia;Lophotrochozoa;Mollusca;Bivalvia;Autobranchia;Heteroconchia;Euherodonta;Imparidentia;Venerida;Veneroidea;Veneridae;Mercenaria;Mercenaria mercenaria

UdeM00000037538 6596 183 UdeM00000037538 XP\_045206845.1 34.2 295  
185 2 4 289 5 299 5.60E-43 183 6596 cellular

organisms;Eukaryota;Opisthokonta;Metazoa;Eumetazoa;Bilateria;Protostomia;Spiralia;Lophotrochozoa;Mollusca;Bivalvia;Autobranchia;Heteroconchia;Euherodonta;Imparidentia;Venerida;Veneroidea;Veneridae;Mercenaria;Mercenaria mercenaria

UdeM00000037539 6596 370.5 UdeM00000037539 XP\_045203099.1 65.6 323  
77 4 1 295 1 317 1.90E-99 370.5 6596 cellular

organisms;Eukaryota;Opisthokonta;Metazoa;Eumetazoa;Bilateria;Protostomia;Spiralia;Lophotrochozoa;Mollusca;Bivalvia;Autobranchia;Heteroconchia;Euherodonta;Imparidentia;Venerida;Veneroidea;Veneridae;Mercenaria;Mercenaria mercenaria

UdeM00000037540 6596 363.6 UdeM00000037540 XP\_045203099.1 64.4 317  
65 2 1 269 1 317 2.20E-97 363.6 6596 cellular

organisms;Eukaryota;Opisthokonta;Metazoa;Eumetazoa;Bilateria;Protostomia;Spiralia;Lophotrochozoa;Mollusca;Bivalvia;Autobranchia;Heteroconchia;Euherodonta;Imparidentia;Venerida;Veneroidea;Veneridae;Mercenaria;Mercenaria mercenaria

UdeM00000037541 6573 419.1 UdeM00000037541 XP\_021339205.1 67.2 293  
96 0 5 297 28 320 4.80E-114 419.1 6573 cellular

organisms;Eukaryota;Opisthokonta;Metazoa;Eumetazoa;Bilateria;Protostomia;Spiralia;Lophotrochozoa;Mollusca;Bivalvia;Autobranchia;Pteriomorphia;Pectinida;Pectinoidea;Pectinidae;Mizuhopecten;Mizuhopecten yessoensis

UdeM00000037542 6565 632.1 UdeM00000037542 XP\_022320475.1 76.1 415  
99 0 1 415 1 415 5.00E-178 632.1 6565 cellular

organisms;Eukaryota;Opisthokonta;Metazoa;Eumetazoa;Bilateria;Protostomia;Spiralia;Lophotrochozoa;Mollusca;Bivalvia;Autobranchia;Pteriomorphia;Ostreida;Ostreoidea;Ostreidae;Crassostrea;Crassostrea virginica

UdeM00000037544 6596 91.3 UdeM00000037544 XP\_045171063.1 48.9 88  
44 1 15 102 7 93 8.00E-16 91.3 6596 cellular

organisms;Eukaryota;Opisthokonta;Metazoa;Eumetazoa;Bilateria;Protostomia;Spiralia;Lophotrochozoa;Mollusca;Bivalvia;Autobranchia;Heteroconchia;Euherodonta;Imparidentia;Venerida;Veneroidea;Veneridae;Mercenaria;Mercenaria mercenaria

UdeM00000037545 29159 117.1 UdeM00000037545 XP\_034331441.1 46.6 118  
63 0 10 127 61 178 1.80E-23 117.1 29159 cellular

organisms;Eukaryota;Opisthokonta;Metazoa;Eumetazoa;Bilateria;Protostomia;Spiralia;Lophotrochozoa;Mollusca;Bivalvia;Autobranchia;Pteriomorphia;Ostreida;Ostreoidea;Ostreidae;Crassostrea;Crassostrea gigas

UdeM00000037546 29159 306.6 UdeM00000037546 XP\_034331441.1 40.7 413  
232 11 7 413 499 904 4.90E-80 306.6 29159 cellular

organisms;Eukaryota;Opisthokonta;Metazoa;Eumetazoa;Bilateria;Protostomia;Spiralia;Lophotrochozoa;Mollusca;Bivalvia;Autobranchia;Pteriomorphia;Ostreida;Ostreoidea;Ostreidae;Crassostrea;Crassostrea gigas

UdeM00000037547 6596 203 UdeM00000037547 XP\_045204699.1 56.2 162  
71 0 1 162 23 184 3.50E-49 203 6596 cellular

organisms;Eukaryota;Opisthokonta;Metazoa;Eumetazoa;Bilateria;Protostomia;Spiralia;Lophotrochozoa;Mollusca;Bivalvia;Autobranchia;Heteroconchia;Euherodonta;Imparidentia;Venerida;Veneroidea;Veneridae;Mercenaria;Mercenaria mercenaria

UdeM00000037549 2607531 151.8 UdeM00000037549 XP\_029648774.2 39  
 246 134 5 51 280 13 258 1.90E-33 151.8 2607531  
 cellular  
 organisms;Eukaryota;Opisthokonta;Metazoa;Eumetazoa;Bilateria;Protostomia;  
 Spiralia;Lophotrochozoa;Mollusca;Cephalopoda;Coleoidea;Octopodiformes;Oct  
 opoda;Incirrata;Octopodidae;Octopus;Octopus sinensis  
 UdeM00000037548 2607531 156.8 UdeM00000037548 XP\_036367586.1 39.4  
 249 135 5 7 239 5 253 5.20E-35 156.8 2607531  
 cellular  
 organisms;Eukaryota;Opisthokonta;Metazoa;Eumetazoa;Bilateria;Protostomia;  
 Spiralia;Lophotrochozoa;Mollusca;Cephalopoda;Coleoidea;Octopodiformes;Oct  
 opoda;Incirrata;Octopodidae;Octopus;Octopus sinensis  
 UdeM00000037550 6596 412.9 UdeM00000037550 XP\_045205289.1 58 522  
 204 5 1 511 69 586 7.20E-112 412.9 6596 cellular  
 organisms;Eukaryota;Opisthokonta;Metazoa;Eumetazoa;Bilateria;Protostomia;  
 Spiralia;Lophotrochozoa;Mollusca;Bivalvia;Autobranchia;Heteroconchia;Euhe  
 terodonta;Imparidentia;Venerida;Veneroidea;Veneridae;Mercenaria;Mercenari  
 a mercenaria  
 UdeM00000037551 6596 422.5 UdeM00000037551 XP\_045205289.1 59.5 519  
 198 5 1 508 69 586 9.10E-115 422.5 6596 cellular  
 organisms;Eukaryota;Opisthokonta;Metazoa;Eumetazoa;Bilateria;Protostomia;  
 Spiralia;Lophotrochozoa;Mollusca;Bivalvia;Autobranchia;Heteroconchia;Euhe  
 terodonta;Imparidentia;Venerida;Veneroidea;Veneridae;Mercenaria;Mercenari  
 a mercenaria  
 UdeM00000037552 6596 234.2 UdeM00000037552 XP\_045205288.1 72 275  
 76 1 14 287 211 485 2.10E-58 234.2 6596 cellular  
 organisms;Eukaryota;Opisthokonta;Metazoa;Eumetazoa;Bilateria;Protostomia;  
 Spiralia;Lophotrochozoa;Mollusca;Bivalvia;Autobranchia;Heteroconchia;Euhe  
 terodonta;Imparidentia;Venerida;Veneroidea;Veneridae;Mercenaria;Mercenari  
 a mercenaria  
 UdeM00000037553 6500 112.8 UdeM00000037553 XP\_012943152.1 46.7 122  
 64 1 3 124 53 173 3.60E-22 112.8 6500 cellular  
 organisms;Eukaryota;Opisthokonta;Metazoa;Eumetazoa;Bilateria;Protostomia;  
 Spiralia;Lophotrochozoa;Mollusca;Gastropoda;Heterobranchia;Euthyneura;Tec  
 tipleura;Aplysiida;Aplysioidea;Aplysiidae;Aplysia;Aplysia californica  
 UdeM00000037554 6596 287 UdeM00000037554 XP\_045206052.1 30.6 1234  
 637 36 45 1187 561 1665 1.10E-73 287 6596 cellular  
 organisms;Eukaryota;Opisthokonta;Metazoa;Eumetazoa;Bilateria;Protostomia;  
 Spiralia;Lophotrochozoa;Mollusca;Bivalvia;Autobranchia;Heteroconchia;Euhe  
 terodonta;Imparidentia;Venerida;Veneroidea;Veneridae;Mercenaria;Mercenari  
 a mercenaria  
 UdeM00000037555 6596 167.9 UdeM00000037555 XP\_045206052.1 43 309  
 136 13 123 407 1788 2080 2.60E-38 167.9 6596 cellular  
 organisms;Eukaryota;Opisthokonta;Metazoa;Eumetazoa;Bilateria;Protostomia;  
 Spiralia;Lophotrochozoa;Mollusca;Bivalvia;Autobranchia;Heteroconchia;Euhe  
 terodonta;Imparidentia;Venerida;Veneroidea;Veneridae;Mercenaria;Mercenari  
 a mercenaria  
 UdeM00000037556 6596 251.5 UdeM00000037556 XP\_045206033.1 42.5 301  
 163 6 1054 1346 689 987 6.50E-63 251.5 6596 cellular  
 organisms;Eukaryota;Opisthokonta;Metazoa;Eumetazoa;Bilateria;Protostomia;  
 Spiralia;Lophotrochozoa;Mollusca;Bivalvia;Autobranchia;Heteroconchia;Euhe  
 terodonta;Imparidentia;Venerida;Veneroidea;Veneridae;Mercenaria;Mercenari  
 a mercenaria



UdeM00000037557 6579 771.5 UdeM00000037557 XP\_033742900.1 74.3 502  
 108 6 1 483 1 500 6.10E-220 771.5 6579 cellular  
 organisms;Eukaryota;Opisthokonta;Metazoa;Eumetazoa;Bilateria;Protostomia;  
 Spiralia;Lophotrochozoa;Mollusca;Bivalvia;Autobranchia;Pteriormorphia;Pect  
 inida;Pectinoidea;Pectinidae;Pecten;Pecten maximus  
 UdeM00000037560 6573 227.3 UdeM00000037560 XP\_021362108.1 91.8 110  
 9 0 1 110 5 114 9.90E-57 227.3 6573 cellular  
 organisms;Eukaryota;Opisthokonta;Metazoa;Eumetazoa;Bilateria;Protostomia;  
 Spiralia;Lophotrochozoa;Mollusca;Bivalvia;Autobranchia;Pteriormorphia;Pect  
 inida;Pectinoidea;Pectinidae;Mizuhopecten;Mizuhopecten yessoensis  
 UdeM00000037561 6596 238.4 UdeM00000037561 XP\_045203106.1 49.4 247  
 117 3 1 241 19 263 9.30E-60 238.4 6596 cellular  
 organisms;Eukaryota;Opisthokonta;Metazoa;Eumetazoa;Bilateria;Protostomia;  
 Spiralia;Lophotrochozoa;Mollusca;Bivalvia;Autobranchia;Heteroconchia;Euhe  
 terodonta;Imparidentia;Venerida;Veneroidea;Veneridae;Mercenaria;Mercenari  
 a mercenaria  
 UdeM00000037562 2587831 268.9 UdeM00000037562 XP\_029767823.1 36.7  
 449 266 6 10 443 111 556 1.20E-68 268.9 2587831  
 cellular  
 organisms;Eukaryota;Opisthokonta;Metazoa;Eumetazoa;Bilateria;Deuterostomi  
 a;Chordata;Craniata;Vertebrata;Gnathostomata;Teleostomi;Euteleostomi;Sarc  
 opterygii;Dipnotetrapodomorpha;Tetrapoda;Amniota;Sauropsida;Sauria;Archel  
 osauria;Testudinata;Testudines;Cryptodira;Durocryptodira;Testudinoidea;Em  
 ydidae;Terrapene;Terrapene carolina;Terrapene carolina triunguis  
 UdeM00000037563 29159 185.3 UdeM00000037563 XP\_034300731.1 66.4 134  
 45 0 1 134 351 484 5.40E-44 185.3 29159 cellular  
 organisms;Eukaryota;Opisthokonta;Metazoa;Eumetazoa;Bilateria;Protostomia;  
 Spiralia;Lophotrochozoa;Mollusca;Bivalvia;Autobranchia;Pteriormorphia;Ostr  
 eida;Ostreoidea;Ostreidae;Crassostrea;Crassostrea gigas  
 UdeM00000037564 6596 110.9 UdeM00000037564 XP\_045206816.1 41.5 147  
 82 2 183 325 101 247 4.20E-21 110.9 6596 cellular  
 organisms;Eukaryota;Opisthokonta;Metazoa;Eumetazoa;Bilateria;Protostomia;  
 Spiralia;Lophotrochozoa;Mollusca;Bivalvia;Autobranchia;Heteroconchia;Euhe  
 terodonta;Imparidentia;Venerida;Veneroidea;Veneridae;Mercenaria;Mercenari  
 a mercenaria  
 UdeM00000037565 6596 93.6 UdeM00000037565 XP\_045206665.1 35.5 169  
 98 2 229 395 59 218 6.20E-16 93.6 6596 cellular  
 organisms;Eukaryota;Opisthokonta;Metazoa;Eumetazoa;Bilateria;Protostomia;  
 Spiralia;Lophotrochozoa;Mollusca;Bivalvia;Autobranchia;Heteroconchia;Euhe  
 terodonta;Imparidentia;Venerida;Veneroidea;Veneridae;Mercenaria;Mercenari  
 a mercenaria  
 UdeM00000037566 6596 661 UdeM00000037566 XP\_045203693.1 49.1 625  
 311 6 1 624 38 656 1.50E-186 661 6596 cellular  
 organisms;Eukaryota;Opisthokonta;Metazoa;Eumetazoa;Bilateria;Protostomia;  
 Spiralia;Lophotrochozoa;Mollusca;Bivalvia;Autobranchia;Heteroconchia;Euhe  
 terodonta;Imparidentia;Venerida;Veneroidea;Veneridae;Mercenaria;Mercenari  
 a mercenaria  
 UdeM00000037567 6596 156.8 UdeM00000037567 XP\_045191019.1 37 257  
 144 3 48 290 54 306 4.30E-35 156.8 6596 cellular  
 organisms;Eukaryota;Opisthokonta;Metazoa;Eumetazoa;Bilateria;Protostomia;  
 Spiralia;Lophotrochozoa;Mollusca;Bivalvia;Autobranchia;Heteroconchia;Euhe  
 terodonta;Imparidentia;Venerida;Veneroidea;Veneridae;Mercenaria;Mercenari  
 a mercenaria

UdeM00000037568 6596 146.4 UdeM00000037568 XP\_045203136.1 39.3 252  
 130 8 40 290 961 1190 5.90E-32 146.4 6596 cellular  
 organisms;Eukaryota;Opisthokonta;Metazoa;Eumetazoa;Bilateria;Protostomia;  
 Spiralia;Lophotrochozoa;Mollusca;Bivalvia;Autobranchia;Heteroconchia;Euhe  
 terodonta;Imparidentia;Venerida;Veneroidea;Veneridae;Mercenaria;Mercenari  
 a mercenaria  
 UdeM00000037569 7739 396.7 UdeM00000037569 XP\_035696678.1 53.7 354  
 161 1 279 629 550 903 5.60E-107 396.7 7739 cellular  
 organisms;Eukaryota;Opisthokonta;Metazoa;Eumetazoa;Bilateria;Deuterostomi  
 a;Chordata;Cephalochordata;Leptocardii;Amphioxiformes;Branchiostomidae;Br  
 anchiostoma;Branchiostoma floridae  
 UdeM00000037570 7739 351.7 UdeM00000037570 XP\_035696678.1 52.5 318  
 148 1 309 623 586 903 2.00E-93 351.7 7739 cellular  
 organisms;Eukaryota;Opisthokonta;Metazoa;Eumetazoa;Bilateria;Deuterostomi  
 a;Chordata;Cephalochordata;Leptocardii;Amphioxiformes;Branchiostomidae;Br  
 anchiostoma;Branchiostoma floridae  
 UdeM00000037571 6596 138.7 UdeM00000037571 XP\_045203667.1 29.2 431  
 256 13 32 428 111 526 1.80E-29 138.7 6596 cellular  
 organisms;Eukaryota;Opisthokonta;Metazoa;Eumetazoa;Bilateria;Protostomia;  
 Spiralia;Lophotrochozoa;Mollusca;Bivalvia;Autobranchia;Heteroconchia;Euhe  
 terodonta;Imparidentia;Venerida;Veneroidea;Veneridae;Mercenaria;Mercenari  
 a mercenaria  
 UdeM00000037573 225164 100.1 UdeM00000037573 XP\_009065434.1 28.3  
 223 133 6 10 205 27 249 3.90E-18 100.1 225164  
 cellular  
 organisms;Eukaryota;Opisthokonta;Metazoa;Eumetazoa;Bilateria;Protostomia;  
 Spiralia;Lophotrochozoa;Mollusca;Gastropoda;Patellogastropoda;Lottioidea;  
 Lottiidae;Lottia;Lottia gigantea  
 UdeM00000037574 6596 89.7 UdeM00000037574 XP\_045206699.1 36.5 137  
 76 3 97 232 505 631 5.40E-15 89.7 6596 cellular  
 organisms;Eukaryota;Opisthokonta;Metazoa;Eumetazoa;Bilateria;Protostomia;  
 Spiralia;Lophotrochozoa;Mollusca;Bivalvia;Autobranchia;Heteroconchia;Euhe  
 terodonta;Imparidentia;Venerida;Veneroidea;Veneridae;Mercenaria;Mercenari  
 a mercenaria  
 UdeM00000037575 6596 89.7 UdeM00000037575 XP\_045206699.1 36.5 137  
 76 3 138 273 505 631 6.30E-15 89.7 6596 cellular  
 organisms;Eukaryota;Opisthokonta;Metazoa;Eumetazoa;Bilateria;Protostomia;  
 Spiralia;Lophotrochozoa;Mollusca;Bivalvia;Autobranchia;Heteroconchia;Euhe  
 terodonta;Imparidentia;Venerida;Veneroidea;Veneridae;Mercenaria;Mercenari  
 a mercenaria  
 UdeM00000037576 6596 89.7 UdeM00000037576 XP\_045206699.1 36.5 137  
 76 3 176 311 505 631 7.10E-15 89.7 6596 cellular  
 organisms;Eukaryota;Opisthokonta;Metazoa;Eumetazoa;Bilateria;Protostomia;  
 Spiralia;Lophotrochozoa;Mollusca;Bivalvia;Autobranchia;Heteroconchia;Euhe  
 terodonta;Imparidentia;Venerida;Veneroidea;Veneridae;Mercenaria;Mercenari  
 a mercenaria  
 UdeM00000037577 6565 106.3 UdeM00000037577 XP\_022324784.1 38.9 167  
 92 2 413 569 529 695 2.90E-19 106.3 6565 cellular  
 organisms;Eukaryota;Opisthokonta;Metazoa;Eumetazoa;Bilateria;Protostomia;  
 Spiralia;Lophotrochozoa;Mollusca;Bivalvia;Autobranchia;Pteriomorphia;Ostr  
 eida;Ostreoidea;Ostreidae;Crassostrea;Crassostrea virginica  
 UdeM00000037578 6565 106.3 UdeM00000037578 XP\_022324784.1 38.9 167  
 92 2 413 569 529 695 2.90E-19 106.3 6565 cellular  
 organisms;Eukaryota;Opisthokonta;Metazoa;Eumetazoa;Bilateria;Protostomia;

Spiralia;Lophotrochozoa;Mollusca;Bivalvia;Autobranchia;Pteriormorphia;Ostr  
eida;Ostreoidea;Ostreidae;Crassostrea;Crassostrea virginica  
UdeM00000037579 6596 151.4 UdeM00000037579 XP\_045203687.1 30 417  
252 10 88 485 231 626 3.10E-33 151.4 6596 cellular  
organisms;Eukaryota;Opisthokonta;Metazoa;Eumetazoa;Bilateria;Protostomia;  
Spiralia;Lophotrochozoa;Mollusca;Bivalvia;Autobranchia;Heteroconchia;Euhe  
terodonta;Imparidentia;Venerida;Veneroidea;Veneridae;Mercenaria;Mercenari  
a mercenaria  
UdeM00000037581 6596 140.6 UdeM00000037581 XP\_045203687.1 28.6 412  
243 13 329 716 238 622 8.00E-30 140.6 6596 cellular  
organisms;Eukaryota;Opisthokonta;Metazoa;Eumetazoa;Bilateria;Protostomia;  
Spiralia;Lophotrochozoa;Mollusca;Bivalvia;Autobranchia;Heteroconchia;Euhe  
terodonta;Imparidentia;Venerida;Veneroidea;Veneridae;Mercenaria;Mercenari  
a mercenaria  
UdeM00000037582 6596 137.1 UdeM00000037582 XP\_045203864.1 31.4 287  
170 7 488 769 39 303 9.40E-29 137.1 6596 cellular  
organisms;Eukaryota;Opisthokonta;Metazoa;Eumetazoa;Bilateria;Protostomia;  
Spiralia;Lophotrochozoa;Mollusca;Bivalvia;Autobranchia;Heteroconchia;Euhe  
terodonta;Imparidentia;Venerida;Veneroidea;Veneridae;Mercenaria;Mercenari  
a mercenaria  
UdeM00000037583 6596 169.9 UdeM00000037583 XP\_045206665.1 39.3 252  
144 4 35 283 50 295 5.10E-39 169.9 6596 cellular  
organisms;Eukaryota;Opisthokonta;Metazoa;Eumetazoa;Bilateria;Protostomia;  
Spiralia;Lophotrochozoa;Mollusca;Bivalvia;Autobranchia;Heteroconchia;Euhe  
terodonta;Imparidentia;Venerida;Veneroidea;Veneridae;Mercenaria;Mercenari  
a mercenaria  
UdeM00000037584 6596 159.8 UdeM00000037584 XP\_045206699.1 38 237  
138 4 209 442 402 632 7.70E-36 159.8 6596 cellular  
organisms;Eukaryota;Opisthokonta;Metazoa;Eumetazoa;Bilateria;Protostomia;  
Spiralia;Lophotrochozoa;Mollusca;Bivalvia;Autobranchia;Heteroconchia;Euhe  
terodonta;Imparidentia;Venerida;Veneroidea;Veneridae;Mercenaria;Mercenari  
a mercenaria  
UdeM00000037585 6596 147.1 UdeM00000037585 XP\_045206703.1 40.7 231  
117 6 94 315 414 633 4.00E-32 147.1 6596 cellular  
organisms;Eukaryota;Opisthokonta;Metazoa;Eumetazoa;Bilateria;Protostomia;  
Spiralia;Lophotrochozoa;Mollusca;Bivalvia;Autobranchia;Heteroconchia;Euhe  
terodonta;Imparidentia;Venerida;Veneroidea;Veneridae;Mercenaria;Mercenari  
a mercenaria  
UdeM00000037586 6596 164.5 UdeM00000037586 XP\_045206665.1 40.2 259  
141 5 13 266 48 297 2.90E-37 164.5 6596 cellular  
organisms;Eukaryota;Opisthokonta;Metazoa;Eumetazoa;Bilateria;Protostomia;  
Spiralia;Lophotrochozoa;Mollusca;Bivalvia;Autobranchia;Heteroconchia;Euhe  
terodonta;Imparidentia;Venerida;Veneroidea;Veneridae;Mercenaria;Mercenari  
a mercenaria  
UdeM00000037588 6596 89 UdeM00000037588 XP\_045203860.1 34.9 192  
105 6 35 216 145 326 8.20E-15 89 6596 cellular  
organisms;Eukaryota;Opisthokonta;Metazoa;Eumetazoa;Bilateria;Protostomia;  
Spiralia;Lophotrochozoa;Mollusca;Bivalvia;Autobranchia;Heteroconchia;Euhe  
terodonta;Imparidentia;Venerida;Veneroidea;Veneridae;Mercenaria;Mercenari  
a mercenaria  
UdeM00000037589 7741 94 UdeM00000037589 XP\_019634421.1 31.8 192  
99 6 9 185 17 191 2.50E-16 94 7741 cellular  
organisms;Eukaryota;Opisthokonta;Metazoa;Eumetazoa;Bilateria;Deuterostomi

a;Chordata;Cephalochordata;Leptocardii;Amphioxiformes;Branchiostomidae;Branchiostoma;Branchiostoma belcheri

UdeM00000037590 6565 155.2 UdeM00000037590 XP\_022327488.1 38.9 247  
134 7 218 459 400 634 2.00E-34 155.2 6565 cellular  
organisms;Eukaryota;Opisthokonta;Metazoa;Eumetazoa;Bilateria;Protostomia;  
Spiralia;Lophotrochozoa;Mollusca;Bivalvia;Autobranchia;Pteriormorphia;Ostr  
eida;Ostreoidea;Ostreidae;Crassostrea;Crassostrea virginica

UdeM00000037591 6596 133.7 UdeM00000037591 XP\_045206077.1 39.7 232  
122 7 1 229 245 461 3.10E-28 133.7 6596 cellular  
organisms;Eukaryota;Opisthokonta;Metazoa;Eumetazoa;Bilateria;Protostomia;  
Spiralia;Lophotrochozoa;Mollusca;Bivalvia;Autobranchia;Heteroconchia;Euhe  
terodonta;Imparidentia;Venerida;Veneroidea;Veneridae;Mercenaria;Mercenari  
a mercenaria

UdeM00000037592 6596 154.8 UdeM00000037592 XP\_045206665.1 40.4 223  
125 3 238 457 80 297 2.70E-34 154.8 6596 cellular  
organisms;Eukaryota;Opisthokonta;Metazoa;Eumetazoa;Bilateria;Protostomia;  
Spiralia;Lophotrochozoa;Mollusca;Bivalvia;Autobranchia;Heteroconchia;Euhe  
terodonta;Imparidentia;Venerida;Veneroidea;Veneridae;Mercenaria;Mercenari  
a mercenaria

UdeM00000037593 6596 148.3 UdeM00000037593 XP\_045206703.1 40.4 228  
122 5 173 394 414 633 2.20E-32 148.3 6596 cellular  
organisms;Eukaryota;Opisthokonta;Metazoa;Eumetazoa;Bilateria;Protostomia;  
Spiralia;Lophotrochozoa;Mollusca;Bivalvia;Autobranchia;Heteroconchia;Euhe  
terodonta;Imparidentia;Venerida;Veneroidea;Veneridae;Mercenaria;Mercenari  
a mercenaria

UdeM00000037595 6596 148.7 UdeM00000037595 XP\_045206103.1 36.2 218  
122 5 1 213 231 436 9.50E-33 148.7 6596 cellular  
organisms;Eukaryota;Opisthokonta;Metazoa;Eumetazoa;Bilateria;Protostomia;  
Spiralia;Lophotrochozoa;Mollusca;Bivalvia;Autobranchia;Heteroconchia;Euhe  
terodonta;Imparidentia;Venerida;Veneroidea;Veneridae;Mercenaria;Mercenari  
a mercenaria

UdeM00000037594 6596 161.4 UdeM00000037594 XP\_045206665.1 39.2 240  
136 4 222 457 75 308 2.80E-36 161.4 6596 cellular  
organisms;Eukaryota;Opisthokonta;Metazoa;Eumetazoa;Bilateria;Protostomia;  
Spiralia;Lophotrochozoa;Mollusca;Bivalvia;Autobranchia;Heteroconchia;Euhe  
terodonta;Imparidentia;Venerida;Veneroidea;Veneridae;Mercenaria;Mercenari  
a mercenaria

UdeM00000037596 6596 157.5 UdeM00000037596 XP\_045204703.1 38.5 260  
144 6 248 497 511 764 4.30E-35 157.5 6596 cellular  
organisms;Eukaryota;Opisthokonta;Metazoa;Eumetazoa;Bilateria;Protostomia;  
Spiralia;Lophotrochozoa;Mollusca;Bivalvia;Autobranchia;Heteroconchia;Euhe  
terodonta;Imparidentia;Venerida;Veneroidea;Veneridae;Mercenaria;Mercenari  
a mercenaria

UdeM00000037597 6596 456.1 UdeM00000037597 XP\_045204069.1 66.3 323  
109 0 111 433 33 355 5.10E-125 456.1 6596 cellular  
organisms;Eukaryota;Opisthokonta;Metazoa;Eumetazoa;Bilateria;Protostomia;  
Spiralia;Lophotrochozoa;Mollusca;Bivalvia;Autobranchia;Heteroconchia;Euhe  
terodonta;Imparidentia;Venerida;Veneroidea;Veneridae;Mercenaria;Mercenari  
a mercenaria

UdeM00000037599 6596 417.2 UdeM00000037599 XP\_045204069.1 66.3 291  
98 0 1 291 63 353 1.80E-113 417.2 6596 cellular  
organisms;Eukaryota;Opisthokonta;Metazoa;Eumetazoa;Bilateria;Protostomia;  
Spiralia;Lophotrochozoa;Mollusca;Bivalvia;Autobranchia;Heteroconchia;Euhe

terodonta;Imparidentia;Venerida;Veneroidea;Veneridae;Mercenaria;Mercenaria mercenaria

UdeM00000037598 6596 422.5 UdeM00000037598 XP\_045204069.1 61.7 329  
125 1 4 331 25 353 4.80E-115 422.5 6596 cellular

organisms;Eukaryota;Opisthokonta;Metazoa;Eumetazoa;Bilateria;Protostomia;Spiralia;Lophotrochozoa;Mollusca;Bivalvia;Autobranchia;Heteroconchia;Euherodonta;Imparidentia;Venerida;Veneroidea;Veneridae;Mercenaria;Mercenaria mercenaria

UdeM00000037601 6596 431.4 UdeM00000037601 XP\_045204067.1 74.5 271  
65 2 13 283 6 272 8.80E-118 431.4 6596 cellular

organisms;Eukaryota;Opisthokonta;Metazoa;Eumetazoa;Bilateria;Protostomia;Spiralia;Lophotrochozoa;Mollusca;Bivalvia;Autobranchia;Heteroconchia;Euherodonta;Imparidentia;Venerida;Veneroidea;Veneridae;Mercenaria;Mercenaria mercenaria

UdeM00000037600 6596 709.9 UdeM00000037600 XP\_045204068.1 71.5 467  
129 2 13 479 6 468 2.20E-201 709.9 6596 cellular

organisms;Eukaryota;Opisthokonta;Metazoa;Eumetazoa;Bilateria;Protostomia;Spiralia;Lophotrochozoa;Mollusca;Bivalvia;Autobranchia;Heteroconchia;Euherodonta;Imparidentia;Venerida;Veneroidea;Veneridae;Mercenaria;Mercenaria mercenaria

UdeM00000037602 6596 107.1 UdeM00000037602 XP\_045204067.1 49.1 114  
55 1 1 111 424 537 1.50E-20 107.1 6596 cellular

organisms;Eukaryota;Opisthokonta;Metazoa;Eumetazoa;Bilateria;Protostomia;Spiralia;Lophotrochozoa;Mollusca;Bivalvia;Autobranchia;Heteroconchia;Euherodonta;Imparidentia;Venerida;Veneroidea;Veneridae;Mercenaria;Mercenaria mercenaria

UdeM00000037603 6596 1590.9 UdeM00000037603 XP\_045204049.1 66.6  
1256 334 9 23 1232 27 1242 0.00E+00 1590.9 6596  
cellular

organisms;Eukaryota;Opisthokonta;Metazoa;Eumetazoa;Bilateria;Protostomia;Spiralia;Lophotrochozoa;Mollusca;Bivalvia;Autobranchia;Heteroconchia;Euherodonta;Imparidentia;Venerida;Veneroidea;Veneridae;Mercenaria;Mercenaria mercenaria

UdeM00000037604 6573 1599.3 UdeM00000037604 XP\_021366170.1 68.6  
1212 335 14 24 1211 28 1217 0.00E+00 1599.3 6573  
cellular

organisms;Eukaryota;Opisthokonta;Metazoa;Eumetazoa;Bilateria;Protostomia;Spiralia;Lophotrochozoa;Mollusca;Bivalvia;Autobranchia;Pteriomorpha;Pectinida;Pectinoidea;Pectinidae;Mizuhopecten;Mizuhopecten yessoensis

UdeM00000037605 6596 1591.6 UdeM00000037605 XP\_045204049.1 68.2  
1225 336 10 23 1203 27 1242 0.00E+00 1591.6 6596  
cellular

organisms;Eukaryota;Opisthokonta;Metazoa;Eumetazoa;Bilateria;Protostomia;Spiralia;Lophotrochozoa;Mollusca;Bivalvia;Autobranchia;Heteroconchia;Euherodonta;Imparidentia;Venerida;Veneroidea;Veneridae;Mercenaria;Mercenaria mercenaria

UdeM00000037606 6565 1572.8 UdeM00000037606 XP\_022322046.1 62.7  
1304 428 13 23 1286 27 1312 0.00E+00 1572.8 6565  
cellular

organisms;Eukaryota;Opisthokonta;Metazoa;Eumetazoa;Bilateria;Protostomia;Spiralia;Lophotrochozoa;Mollusca;Bivalvia;Autobranchia;Pteriomorpha;Ostreida;Ostreoidea;Ostreidae;Crassostrea;Crassostrea virginica

UdeM00000037607 6573 1593.6 UdeM00000037607 XP\_021366170.1 68.5  
1215 334 16 24 1214 28 1217 0.00E+00 1593.6 6573

cellular  
organisms;Eukaryota;Opisthokonta;Metazoa;Eumetazoa;Bilateria;Protostomia;  
Spiralia;Lophotrochozoa;Mollusca;Bivalvia;Autobranhia;Pteriormorphia;Pect  
inida;Pectinoidea;Pectinidae;Mizuhopecten;Mizuhopecten yessoensis  
UdeM00000037608 6573 219.2 UdeM00000037608 XP\_021366129.1 57.8 185  
76 1 1 183 1 185 4.50E-54 219.2 6573 cellular  
organisms;Eukaryota;Opisthokonta;Metazoa;Eumetazoa;Bilateria;Protostomia;  
Spiralia;Lophotrochozoa;Mollusca;Bivalvia;Autobranhia;Pteriormorphia;Pect  
inida;Pectinoidea;Pectinidae;Mizuhopecten;Mizuhopecten yessoensis  
UdeM00000037610 6596 767.3 UdeM00000037610 XP\_045204042.1 55.8 753  
241 10 1 673 1 741 1.70E-218 767.3 6596 cellular  
organisms;Eukaryota;Opisthokonta;Metazoa;Eumetazoa;Bilateria;Protostomia;  
Spiralia;Lophotrochozoa;Mollusca;Bivalvia;Autobranhia;Heteroconchia;Euhe  
terodonta;Imparidentia;Venerida;Veneroidea;Veneridae;Mercenaria;Mercenari  
a mercenaria  
UdeM00000037611 6596 650.2 UdeM00000037611 XP\_045204042.1 61.3 520  
192 2 8 527 743 1253 2.60E-183 650.2 6596 cellular  
organisms;Eukaryota;Opisthokonta;Metazoa;Eumetazoa;Bilateria;Protostomia;  
Spiralia;Lophotrochozoa;Mollusca;Bivalvia;Autobranhia;Heteroconchia;Euhe  
terodonta;Imparidentia;Venerida;Veneroidea;Veneridae;Mercenaria;Mercenari  
a mercenaria  
UdeM00000037612 6596 265 UdeM00000037612 XP\_045189020.1 40.6 401  
148 7 10 322 40 438 1.30E-67 265 6596 cellular  
organisms;Eukaryota;Opisthokonta;Metazoa;Eumetazoa;Bilateria;Protostomia;  
Spiralia;Lophotrochozoa;Mollusca;Bivalvia;Autobranhia;Heteroconchia;Euhe  
terodonta;Imparidentia;Venerida;Veneroidea;Veneridae;Mercenaria;Mercenari  
a mercenaria  
UdeM00000037613 6596 85.5 UdeM00000037613 XP\_045189020.1 27.1 262  
105 6 29 206 179 438 9.00E-14 85.5 6596 cellular  
organisms;Eukaryota;Opisthokonta;Metazoa;Eumetazoa;Bilateria;Protostomia;  
Spiralia;Lophotrochozoa;Mollusca;Bivalvia;Autobranhia;Heteroconchia;Euhe  
terodonta;Imparidentia;Venerida;Veneroidea;Veneridae;Mercenaria;Mercenari  
a mercenaria  
UdeM00000037615 6596 278.5 UdeM00000037615 XP\_045189020.1 40.6 404  
154 6 7 326 37 438 1.10E-71 278.5 6596 cellular  
organisms;Eukaryota;Opisthokonta;Metazoa;Eumetazoa;Bilateria;Protostomia;  
Spiralia;Lophotrochozoa;Mollusca;Bivalvia;Autobranhia;Heteroconchia;Euhe  
terodonta;Imparidentia;Venerida;Veneroidea;Veneridae;Mercenaria;Mercenari  
a mercenaria  
UdeM00000037616 6596 1501.9 UdeM00000037616 XP\_045204042.1 60.7  
1270 436 10 1 1221 1 1256 0.00E+00 1501.9 6596  
cellular  
organisms;Eukaryota;Opisthokonta;Metazoa;Eumetazoa;Bilateria;Protostomia;  
Spiralia;Lophotrochozoa;Mollusca;Bivalvia;Autobranhia;Heteroconchia;Euhe  
terodonta;Imparidentia;Venerida;Veneroidea;Veneridae;Mercenaria;Mercenari  
a mercenaria  
UdeM00000037617 6573 97.4 UdeM00000037617 XP\_021345471.1 46.5 99  
41 2 17 107 27 121 1.60E-17 97.4 6573 cellular  
organisms;Eukaryota;Opisthokonta;Metazoa;Eumetazoa;Bilateria;Protostomia;  
Spiralia;Lophotrochozoa;Mollusca;Bivalvia;Autobranhia;Pteriormorphia;Pect  
inida;Pectinoidea;Pectinidae;Mizuhopecten;Mizuhopecten yessoensis  
UdeM00000037620 6596 367.1 UdeM00000037620 XP\_045203799.1 27.1 1586  
850 50 136 1639 7 1368 1.20E-97 367.1 6596 cellular  
organisms;Eukaryota;Opisthokonta;Metazoa;Eumetazoa;Bilateria;Protostomia;

Spiralia;Lophotrochozoa;Mollusca;Bivalvia;Autobranchia;Heteroconchia;Euherodonta;Imparidentia;Venerida;Veneroidea;Veneridae;Mercenaria;Mercenaria mercenaria

UdeM00000037622 6596 328.2 UdeM00000037622 XP\_045204194.1 41.2 386  
213 4 132 514 275 649 1.90E-86 328.2 6596 cellular

organisms;Eukaryota;Opisthokonta;Metazoa;Eumetazoa;Bilateria;Protostomia;Spiralia;Lophotrochozoa;Mollusca;Bivalvia;Autobranchia;Heteroconchia;Euherodonta;Imparidentia;Venerida;Veneroidea;Veneridae;Mercenaria;Mercenaria mercenaria

UdeM00000037623 6596 168.7 UdeM00000037623 XP\_045204716.1 34.3 286  
175 4 563 843 179 456 3.20E-38 168.7 6596 cellular

organisms;Eukaryota;Opisthokonta;Metazoa;Eumetazoa;Bilateria;Protostomia;Spiralia;Lophotrochozoa;Mollusca;Bivalvia;Autobranchia;Heteroconchia;Euherodonta;Imparidentia;Venerida;Veneroidea;Veneridae;Mercenaria;Mercenaria mercenaria

UdeM00000037624 6412 92.8 UdeM00000037624 XP\_009028875.1 47.2 89  
46 1 4 92 80 167 2.40E-16 92.8 6412 cellular

organisms;Eukaryota;Opisthokonta;Metazoa;Eumetazoa;Bilateria;Protostomia;Spiralia;Lophotrochozoa;Annelida;Clitellata;Hirudinea;Rhynchobdellida;Glossiphoniidae;Helobdella;Helobdella robusta

UdeM00000037625 6596 169.9 UdeM00000037625 XP\_045203134.1 35.8 302  
174 7 354 644 502 794 1.10E-38 169.9 6596 cellular

organisms;Eukaryota;Opisthokonta;Metazoa;Eumetazoa;Bilateria;Protostomia;Spiralia;Lophotrochozoa;Mollusca;Bivalvia;Autobranchia;Heteroconchia;Euherodonta;Imparidentia;Venerida;Veneroidea;Veneridae;Mercenaria;Mercenaria mercenaria

UdeM00000037626 6596 170.2 UdeM00000037626 XP\_045203136.1 39.3 262  
134 6 420 671 945 1191 8.70E-39 170.2 6596 cellular

organisms;Eukaryota;Opisthokonta;Metazoa;Eumetazoa;Bilateria;Protostomia;Spiralia;Lophotrochozoa;Mollusca;Bivalvia;Autobranchia;Heteroconchia;Euherodonta;Imparidentia;Venerida;Veneroidea;Veneridae;Mercenaria;Mercenaria mercenaria

UdeM00000037628 6596 170.2 UdeM00000037628 XP\_045203137.1 36.7 275  
156 6 569 834 925 1190 1.10E-38 170.2 6596 cellular

organisms;Eukaryota;Opisthokonta;Metazoa;Eumetazoa;Bilateria;Protostomia;Spiralia;Lophotrochozoa;Mollusca;Bivalvia;Autobranchia;Heteroconchia;Euherodonta;Imparidentia;Venerida;Veneroidea;Veneridae;Mercenaria;Mercenaria mercenaria

UdeM00000037629 6596 170.2 UdeM00000037629 XP\_045203137.1 36.7 275  
156 6 594 859 925 1190 1.10E-38 170.2 6596 cellular

organisms;Eukaryota;Opisthokonta;Metazoa;Eumetazoa;Bilateria;Protostomia;Spiralia;Lophotrochozoa;Mollusca;Bivalvia;Autobranchia;Heteroconchia;Euherodonta;Imparidentia;Venerida;Veneroidea;Veneridae;Mercenaria;Mercenaria mercenaria

UdeM00000037630 6596 170.2 UdeM00000037630 XP\_045203137.1 37.3 276  
153 7 323 588 925 1190 7.60E-39 170.2 6596 cellular

organisms;Eukaryota;Opisthokonta;Metazoa;Eumetazoa;Bilateria;Protostomia;Spiralia;Lophotrochozoa;Mollusca;Bivalvia;Autobranchia;Heteroconchia;Euherodonta;Imparidentia;Venerida;Veneroidea;Veneridae;Mercenaria;Mercenaria mercenaria

UdeM00000037631 29159 199.9 UdeM00000037631 XP\_034334268.1 47.4 194  
99 1 1 194 160 350 3.00E-48 199.9 29159 cellular

organisms;Eukaryota;Opisthokonta;Metazoa;Eumetazoa;Bilateria;Protostomia;

Spiralia;Lophotrochozoa;Mollusca;Bivalvia;Autobranchia;Pteriormorphia;Ostr  
eida;Ostreoidea;Ostreidae;Crassostrea;Crassostrea gigas  
UdeM00000037632 6596 178.7 UdeM00000037632 XP\_045203135.1 28.1 608  
358 19 400 978 171 728 3.60E-41 178.7 6596 cellular  
organisms;Eukaryota;Opisthokonta;Metazoa;Eumetazoa;Bilateria;Protostomia;  
Spiralia;Lophotrochozoa;Mollusca;Bivalvia;Autobranchia;Heteroconchia;Euhe  
terodonta;Imparidentia;Venerida;Veneroidea;Veneridae;Mercenaria;Mercenari  
a mercenaria  
UdeM00000037633 6596 165.2 UdeM00000037633 XP\_045204729.1 38.7 238  
137 4 874 1111 215 443 4.60E-37 165.2 6596 cellular  
organisms;Eukaryota;Opisthokonta;Metazoa;Eumetazoa;Bilateria;Protostomia;  
Spiralia;Lophotrochozoa;Mollusca;Bivalvia;Autobranchia;Heteroconchia;Euhe  
terodonta;Imparidentia;Venerida;Veneroidea;Veneridae;Mercenaria;Mercenari  
a mercenaria  
UdeM00000037634 29159 297 UdeM00000037634 XP\_034317111.1 61.3 222  
86 0 1 222 1 222 2.10E-77 297 29159 cellular  
organisms;Eukaryota;Opisthokonta;Metazoa;Eumetazoa;Bilateria;Protostomia;  
Spiralia;Lophotrochozoa;Mollusca;Bivalvia;Autobranchia;Pteriormorphia;Ostr  
eida;Ostreoidea;Ostreidae;Crassostrea;Crassostrea gigas  
UdeM00000037635 6596 139.8 UdeM00000037635 XP\_045203136.1 30 327  
190 8 404 720 892 1189 1.40E-29 139.8 6596 cellular  
organisms;Eukaryota;Opisthokonta;Metazoa;Eumetazoa;Bilateria;Protostomia;  
Spiralia;Lophotrochozoa;Mollusca;Bivalvia;Autobranchia;Heteroconchia;Euhe  
terodonta;Imparidentia;Venerida;Veneroidea;Veneridae;Mercenaria;Mercenari  
a mercenaria  
UdeM00000037637 6596 110.5 UdeM00000037637 XP\_045203599.1 33.2 202  
124 4 12 213 300 490 2.70E-21 110.5 6596 cellular  
organisms;Eukaryota;Opisthokonta;Metazoa;Eumetazoa;Bilateria;Protostomia;  
Spiralia;Lophotrochozoa;Mollusca;Bivalvia;Autobranchia;Heteroconchia;Euhe  
terodonta;Imparidentia;Venerida;Veneroidea;Veneridae;Mercenaria;Mercenari  
a mercenaria  
UdeM00000037638 6596 109.4 UdeM00000037638 XP\_045205085.1 47.9 121  
61 2 4 122 24 144 3.50E-21 109.4 6596 cellular  
organisms;Eukaryota;Opisthokonta;Metazoa;Eumetazoa;Bilateria;Protostomia;  
Spiralia;Lophotrochozoa;Mollusca;Bivalvia;Autobranchia;Heteroconchia;Euhe  
terodonta;Imparidentia;Venerida;Veneroidea;Veneridae;Mercenaria;Mercenari  
a mercenaria  
UdeM00000037639 6596 328.2 UdeM00000037639 XP\_045205085.1 40.9 508  
281 9 34 538 153 644 2.00E-86 328.2 6596 cellular  
organisms;Eukaryota;Opisthokonta;Metazoa;Eumetazoa;Bilateria;Protostomia;  
Spiralia;Lophotrochozoa;Mollusca;Bivalvia;Autobranchia;Heteroconchia;Euhe  
terodonta;Imparidentia;Venerida;Veneroidea;Veneridae;Mercenaria;Mercenari  
a mercenaria  
UdeM00000037643 6596 178.3 UdeM00000037643 XP\_045206703.1 43 221  
119 3 355 568 414 634 2.70E-41 178.3 6596 cellular  
organisms;Eukaryota;Opisthokonta;Metazoa;Eumetazoa;Bilateria;Protostomia;  
Spiralia;Lophotrochozoa;Mollusca;Bivalvia;Autobranchia;Heteroconchia;Euhe  
terodonta;Imparidentia;Venerida;Veneroidea;Veneridae;Mercenaria;Mercenari  
a mercenaria  
UdeM00000037644 6596 194.5 UdeM00000037644 XP\_045206699.1 44.2 233  
124 4 467 694 401 632 4.40E-46 194.5 6596 cellular  
organisms;Eukaryota;Opisthokonta;Metazoa;Eumetazoa;Bilateria;Protostomia;  
Spiralia;Lophotrochozoa;Mollusca;Bivalvia;Autobranchia;Heteroconchia;Euhe



terodonta;Imparidentia;Venerida;Veneroidea;Veneridae;Mercenaria;Mercenaria mercenaria  
 UdeM00000037646 6596 160.2 UdeM00000037646 XP\_045203864.1 31.3 294  
 178 8 156 449 35 304 6.20E-36 160.2 6596 cellular  
 organisms;Eukaryota;Opisthokonta;Metazoa;Eumetazoa;Bilateria;Protostomia;  
 Spiralia;Lophotrochozoa;Mollusca;Bivalvia;Autobranchia;Heteroconchia;Euhe  
 terodonta;Imparidentia;Venerida;Veneroidea;Veneridae;Mercenaria;Mercenari  
 a mercenaria  
 UdeM00000037647 6565 103.6 UdeM00000037647 XP\_022324784.1 51 102  
 50 0 134 235 594 695 5.90E-19 103.6 6565 cellular  
 organisms;Eukaryota;Opisthokonta;Metazoa;Eumetazoa;Bilateria;Protostomia;  
 Spiralia;Lophotrochozoa;Mollusca;Bivalvia;Autobranchia;Pteriormorphia;Ostr  
 eida;Ostreoidea;Ostreidae;Crassostrea;Crassostrea virginica  
 UdeM00000040668 29159 93.2 UdeM00000040668 XP\_034336755.1 30.8 211  
 123 4 5 201 577 778 6.50E-16 93.2 29159 cellular  
 organisms;Eukaryota;Opisthokonta;Metazoa;Eumetazoa;Bilateria;Protostomia;  
 Spiralia;Lophotrochozoa;Mollusca;Bivalvia;Autobranchia;Pteriormorphia;Ostr  
 eida;Ostreoidea;Ostreidae;Crassostrea;Crassostrea gigas  
 UdeM00000040669 6596 460.3 UdeM00000040669 XP\_045163437.1 49.2 528  
 251 10 1 523 109 624 3.50E-126 460.3 6596 cellular  
 organisms;Eukaryota;Opisthokonta;Metazoa;Eumetazoa;Bilateria;Protostomia;  
 Spiralia;Lophotrochozoa;Mollusca;Bivalvia;Autobranchia;Heteroconchia;Euhe  
 terodonta;Imparidentia;Venerida;Veneroidea;Veneridae;Mercenaria;Mercenari  
 a mercenaria  
 UdeM00000040670 2652724 106.7 UdeM00000040670 XP\_020913146.1 54.2  
 96 44 0 98 193 172 267 3.40E-20 106.7 2652724  
 cellular  
 organisms;Eukaryota;Opisthokonta;Metazoa;Eumetazoa;Cnidaria;Anthozoa;Hexa  
 corallia;Actiniaria;Aiptasiidae;Exaiptasia;Exaiptasia diaphana  
 UdeM00000040671 400727 174.1 UdeM00000040671 XP\_025083954.1 29.5  
 430 274 15 121 532 2752 3170 7.40E-40 174.1 400727  
 cellular  
 organisms;Eukaryota;Opisthokonta;Metazoa;Eumetazoa;Bilateria;Protostomia;  
 Spiralia;Lophotrochozoa;Mollusca;Gastropoda;Caenogastropoda;Architaeniogl  
 ossa;Ampullarioidea;Ampullariidae;Pomacea;Pomacea canaliculata  
 UdeM00000040672 7739 101.3 UdeM00000040672 XP\_035657435.1 32.3 186  
 118 6 128 306 2890 3074 5.00E-18 101.3 7739 cellular  
 organisms;Eukaryota;Opisthokonta;Metazoa;Eumetazoa;Bilateria;Deuterostomi  
 a;Chordata;Cephalochordata;Leptocardii;Amphioxiformes;Branchiostomidae;Br  
 anchiostoma;Branchiostoma floridae  
 UdeM00000040673 6596 373.2 UdeM00000040673 XP\_045183930.1 54.4 320  
 139 5 20 335 14 330 3.40E-100 373.2 6596 cellular  
 organisms;Eukaryota;Opisthokonta;Metazoa;Eumetazoa;Bilateria;Protostomia;  
 Spiralia;Lophotrochozoa;Mollusca;Bivalvia;Autobranchia;Heteroconchia;Euhe  
 terodonta;Imparidentia;Venerida;Veneroidea;Veneridae;Mercenaria;Mercenari  
 a mercenaria  
 UdeM00000040675 6596 225.7 UdeM00000040675 XP\_045161481.1 74.3 152  
 38 1 1 151 1 152 4.10E-56 225.7 6596 cellular  
 organisms;Eukaryota;Opisthokonta;Metazoa;Eumetazoa;Bilateria;Protostomia;  
 Spiralia;Lophotrochozoa;Mollusca;Bivalvia;Autobranchia;Heteroconchia;Euhe  
 terodonta;Imparidentia;Venerida;Veneroidea;Veneridae;Mercenaria;Mercenari  
 a mercenaria  
 UdeM00000040674 6596 707.2 UdeM00000040674 XP\_045161481.1 70.6 480  
 137 1 1 480 1 476 1.40E-200 707.2 6596 cellular

organisms;Eukaryota;Opisthokonta;Metazoa;Eumetazoa;Bilateria;Protostomia;Spiralia;Lophotrochozoa;Mollusca;Bivalvia;Autobranchia;Heteroconchia;Euherodonta;Imparidentia;Venerida;Veneroidea;Veneridae;Mercenaria;Mercenaria mercenaria

UdeM00000040676 6596 425.2 UdeM00000040676 XP\_045161480.1 69.3 287  
84 1 6 292 596 878 6.50E-116 425.2 6596 cellular

organisms;Eukaryota;Opisthokonta;Metazoa;Eumetazoa;Bilateria;Protostomia;Spiralia;Lophotrochozoa;Mollusca;Bivalvia;Autobranchia;Heteroconchia;Euherodonta;Imparidentia;Venerida;Veneroidea;Veneridae;Mercenaria;Mercenaria mercenaria

UdeM00000040677 1735272 131 UdeM00000040677 XP\_041377629.1 49.3  
142 66 2 31 169 16 154 1.80E-27 131 1735272  
cellular

organisms;Eukaryota;Opisthokonta;Metazoa;Eumetazoa;Bilateria;Protostomia;Spiralia;Lophotrochozoa;Mollusca;Gastropoda;Neomphalina;Neomphaloidea;Peltopspiridae;Gigantopelta;Gigantopelta aegis

UdeM00000040678 6596 1672.5 UdeM00000040678 XP\_045163506.1 46.5  
1794 777 24 1 1771 85 1719 0.00E+00 1672.5 6596  
cellular

organisms;Eukaryota;Opisthokonta;Metazoa;Eumetazoa;Bilateria;Protostomia;Spiralia;Lophotrochozoa;Mollusca;Bivalvia;Autobranchia;Heteroconchia;Euherodonta;Imparidentia;Venerida;Veneroidea;Veneridae;Mercenaria;Mercenaria mercenaria

UdeM00000040679 6596 1667.9 UdeM00000040679 XP\_045163506.1 46.5  
1795 777 25 1 1772 85 1719 0.00E+00 1667.9 6596  
cellular

organisms;Eukaryota;Opisthokonta;Metazoa;Eumetazoa;Bilateria;Protostomia;Spiralia;Lophotrochozoa;Mollusca;Bivalvia;Autobranchia;Heteroconchia;Euherodonta;Imparidentia;Venerida;Veneroidea;Veneridae;Mercenaria;Mercenaria mercenaria

UdeM00000040680 6596 429.5 UdeM00000040680 XP\_045161278.1 68.5 298  
94 0 1 298 1 298 3.70E-117 429.5 6596 cellular

organisms;Eukaryota;Opisthokonta;Metazoa;Eumetazoa;Bilateria;Protostomia;Spiralia;Lophotrochozoa;Mollusca;Bivalvia;Autobranchia;Heteroconchia;Euherodonta;Imparidentia;Venerida;Veneroidea;Veneridae;Mercenaria;Mercenaria mercenaria

UdeM00000040681 6565 73.6 UdeM00000040681 XP\_022339292.1 56.1 66  
28 1 5 70 978 1042 1.20E-10 73.6 6565 cellular

organisms;Eukaryota;Opisthokonta;Metazoa;Eumetazoa;Bilateria;Protostomia;Spiralia;Lophotrochozoa;Mollusca;Bivalvia;Autobranchia;Pteriomorphia;Ostreida;Ostreoidea;Ostreidae;Crassostrea;Crassostrea virginica

UdeM00000040682 6596 549.3 UdeM00000040682 XP\_045186644.1 34.1 984  
579 26 284 1245 95 1031 1.30E-152 549.3 6596 cellular

organisms;Eukaryota;Opisthokonta;Metazoa;Eumetazoa;Bilateria;Protostomia;Spiralia;Lophotrochozoa;Mollusca;Bivalvia;Autobranchia;Heteroconchia;Euherodonta;Imparidentia;Venerida;Veneroidea;Veneridae;Mercenaria;Mercenaria mercenaria

UdeM00000012990 1234273 63.5 UdeM00000012990 XP\_027027793.1 36.4  
88 47 3 14 94 78 163 1.70E-07 63.5 1234273  
cellular

organisms;Eukaryota;Opisthokonta;Metazoa;Eumetazoa;Bilateria;Deuterostomia;Chordata;Craniata;Vertebrata;Gnathostomata;Teleostomi;Euteleostomi;Actinopterygii;Actinopteri;Neopterygii;Teleostei;Osteoglossoccephalai;Clupeocea

phala;Otomorpha;Ostariophysii;Otophysii;Characiphysae;Siluriformes;Siluroid  
ei;Bagridae;Tachysurus;Tachysurus fulvidraco

UdeM00000012991 1234273 63.5 UdeM00000012991 XP\_027027793.1 36.4  
88 47 3 14 94 78 163 1.70E-07 63.5 1234273

cellular

organisms;Eukaryota;Opisthokonta;Metazoa;Eumetazoa;Bilateria;Deuterostomi  
a;Chordata;Craniata;Vertebrata;Gnathostomata;Teleostomi;Euteleostomi;Acti  
nopterygii;Actinopteri;Neopterygii;Teleostei;Osteoglossocephalai;Clupeoce  
phala;Otomorpha;Ostariophysii;Otophysii;Characiphysae;Siluriformes;Siluroid  
ei;Bagridae;Tachysurus;Tachysurus fulvidraco

UdeM00000012992 1735272 132.5 UdeM00000012992 XP\_041346997.1 55.9  
111 45 3 24 134 48 154 4.10E-28 132.5 1735272

cellular

organisms;Eukaryota;Opisthokonta;Metazoa;Eumetazoa;Bilateria;Protostomia;  
Spiralia;Lophotrochozoa;Mollusca;Gastropoda;Neomphalina;Neomphaloidea;Pel  
tospiridae;Gigantopelta;Gigantopelta aegis

UdeM00000012993 29159 80.9 UdeM00000012993 XP\_034307624.1 28.2 195  
115 4 4 197 2 172 2.00E-12 80.9 29159 cellular

organisms;Eukaryota;Opisthokonta;Metazoa;Eumetazoa;Bilateria;Protostomia;  
Spiralia;Lophotrochozoa;Mollusca;Bivalvia;Autobranchia;Pteriormorphia;Ostr  
eida;Ostreoidea;Ostreidae;Crassostrea;Crassostrea gigas

UdeM00000012995 6596 307.4 UdeM00000012995 XP\_045167141.1 57.2 290  
101 3 3 269 22 311 1.80E-80 307.4 6596 cellular

organisms;Eukaryota;Opisthokonta;Metazoa;Eumetazoa;Bilateria;Protostomia;  
Spiralia;Lophotrochozoa;Mollusca;Bivalvia;Autobranchia;Heteroconchia;Euhe  
terodonta;Imparidentia;Venerida;Veneroidea;Veneridae;Mercenaria;Mercenari  
a mercenaria

UdeM00000012994 6596 307.8 UdeM00000012994 XP\_045167141.1 57.2 290  
101 3 23 289 22 311 1.50E-80 307.8 6596 cellular

organisms;Eukaryota;Opisthokonta;Metazoa;Eumetazoa;Bilateria;Protostomia;  
Spiralia;Lophotrochozoa;Mollusca;Bivalvia;Autobranchia;Heteroconchia;Euhe  
terodonta;Imparidentia;Venerida;Veneroidea;Veneridae;Mercenaria;Mercenari  
a mercenaria

UdeM00000012996 1529436 157.1 UdeM00000012996 XP\_033111952.1 35.2  
273 174 3 27 296 38 310 3.40E-35 157.1 1529436

cellular

organisms;Eukaryota;Opisthokonta;Metazoa;Eumetazoa;Bilateria;Deuterostomi  
a;Echinodermata;Pelmatozoa;Crinoidea;Articulata;Comatulida;Comatulidae;Co  
matulinae;Anneissia;Anneissia japonica

UdeM00000012998 6596 72.8 UdeM00000012998 XP\_045165023.1 33.6 125  
74 3 57 175 72 193 5.80E-10 72.8 6596 cellular

organisms;Eukaryota;Opisthokonta;Metazoa;Eumetazoa;Bilateria;Protostomia;  
Spiralia;Lophotrochozoa;Mollusca;Bivalvia;Autobranchia;Heteroconchia;Euhe  
terodonta;Imparidentia;Venerida;Veneroidea;Veneridae;Mercenaria;Mercenari  
a mercenaria

UdeM00000012999 6596 90.1 UdeM00000012999 XP\_045165023.1 38.6 127  
69 3 51 174 68 188 3.90E-15 90.1 6596 cellular

organisms;Eukaryota;Opisthokonta;Metazoa;Eumetazoa;Bilateria;Protostomia;  
Spiralia;Lophotrochozoa;Mollusca;Bivalvia;Autobranchia;Heteroconchia;Euhe  
terodonta;Imparidentia;Venerida;Veneroidea;Veneridae;Mercenaria;Mercenari  
a mercenaria

UdeM00000013000 6596 93.2 UdeM00000013000 XP\_045165023.1 38 129  
73 2 51 177 68 191 4.30E-16 93.2 6596 cellular

organisms;Eukaryota;Opisthokonta;Metazoa;Eumetazoa;Bilateria;Protostomia;

Spiralia;Lophotrochozoa;Mollusca;Bivalvia;Autobranchia;Heteroconchia;Euherodonta;Imparidentia;Venerida;Veneroidea;Veneridae;Mercenaria;Mercenaria mercenaria

UdeM00000013001 6596 93.2 UdeM00000013001 XP\_045165023.1 38 129  
73 2 66 192 68 191 4.60E-16 93.2 6596 cellular

organisms;Eukaryota;Opisthokonta;Metazoa;Eumetazoa;Bilateria;Protostomia;Spiralia;Lophotrochozoa;Mollusca;Bivalvia;Autobranchia;Heteroconchia;Euherodonta;Imparidentia;Venerida;Veneroidea;Veneridae;Mercenaria;Mercenaria mercenaria

UdeM00000013002 6596 75.5 UdeM00000013002 XP\_045165023.1 34.1 135  
79 4 33 159 61 193 7.70E-11 75.5 6596 cellular

organisms;Eukaryota;Opisthokonta;Metazoa;Eumetazoa;Bilateria;Protostomia;Spiralia;Lophotrochozoa;Mollusca;Bivalvia;Autobranchia;Heteroconchia;Euherodonta;Imparidentia;Venerida;Veneroidea;Veneridae;Mercenaria;Mercenaria mercenaria

UdeM00000013003 6596 71.6 UdeM00000013003 XP\_045165023.1 41.2 85  
48 1 82 164 94 178 1.20E-09 71.6 6596 cellular

organisms;Eukaryota;Opisthokonta;Metazoa;Eumetazoa;Bilateria;Protostomia;Spiralia;Lophotrochozoa;Mollusca;Bivalvia;Autobranchia;Heteroconchia;Euherodonta;Imparidentia;Venerida;Veneroidea;Veneridae;Mercenaria;Mercenaria mercenaria

UdeM00000013004 6596 67.8 UdeM00000013004 XP\_045165023.1 37.9 87  
52 1 85 169 97 183 1.70E-08 67.8 6596 cellular

organisms;Eukaryota;Opisthokonta;Metazoa;Eumetazoa;Bilateria;Protostomia;Spiralia;Lophotrochozoa;Mollusca;Bivalvia;Autobranchia;Heteroconchia;Euherodonta;Imparidentia;Venerida;Veneroidea;Veneridae;Mercenaria;Mercenaria mercenaria

UdeM00000013005 6596 411.4 UdeM00000013005 XP\_045166596.1 55.4 715  
225 14 1 688 123 770 2.30E-111 411.4 6596 cellular

organisms;Eukaryota;Opisthokonta;Metazoa;Eumetazoa;Bilateria;Protostomia;Spiralia;Lophotrochozoa;Mollusca;Bivalvia;Autobranchia;Heteroconchia;Euherodonta;Imparidentia;Venerida;Veneroidea;Veneridae;Mercenaria;Mercenaria mercenaria

UdeM00000013006 6596 218.4 UdeM00000013006 XP\_045166596.1 90.9 121  
11 0 1 121 1 121 5.50E-54 218.4 6596 cellular

organisms;Eukaryota;Opisthokonta;Metazoa;Eumetazoa;Bilateria;Protostomia;Spiralia;Lophotrochozoa;Mollusca;Bivalvia;Autobranchia;Heteroconchia;Euherodonta;Imparidentia;Venerida;Veneroidea;Veneridae;Mercenaria;Mercenaria mercenaria

UdeM00000013007 6596 427.2 UdeM00000013007 XP\_045164575.1 69.2 318  
85 4 80 387 387 701 2.30E-116 427.2 6596 cellular

organisms;Eukaryota;Opisthokonta;Metazoa;Eumetazoa;Bilateria;Protostomia;Spiralia;Lophotrochozoa;Mollusca;Bivalvia;Autobranchia;Heteroconchia;Euherodonta;Imparidentia;Venerida;Veneroidea;Veneridae;Mercenaria;Mercenaria mercenaria

UdeM00000013008 6596 137.1 UdeM00000013008 XP\_045164575.1 40.7 344  
135 9 43 329 34 365 4.60E-29 137.1 6596 cellular

organisms;Eukaryota;Opisthokonta;Metazoa;Eumetazoa;Bilateria;Protostomia;Spiralia;Lophotrochozoa;Mollusca;Bivalvia;Autobranchia;Heteroconchia;Euherodonta;Imparidentia;Venerida;Veneroidea;Veneridae;Mercenaria;Mercenaria mercenaria

UdeM00000013009 400727 81.3 UdeM00000013009 XP\_025106791.1 35.1  
131 69 3 2 118 13 141 9.50E-13 81.3 400727

cellular



organisms;Eukaryota;Opisthokonta;Metazoa;Eumetazoa;Bilateria;Protostomia;  
 Spiralia;Lophotrochozoa;Mollusca;Bivalvia;Autobranhia;Pteriormorphia;Ostr  
 eida;Ostreoidea;Ostreidae;Crassostrea;Crassostrea virginica  
 UdeM00000013022 6579 311.6 UdeM00000013022 XP\_033746361.1 65.9 217  
 70 2 1 217 1 213 7.80E-82 311.6 6579 cellular  
 organisms;Eukaryota;Opisthokonta;Metazoa;Eumetazoa;Bilateria;Protostomia;  
 Spiralia;Lophotrochozoa;Mollusca;Bivalvia;Autobranhia;Pteriormorphia;Pect  
 inida;Pectinoidea;Pectinidae;Pecten;Pecten maximus  
 UdeM00000013023 6573 174.5 UdeM00000013023 XP\_021378367.1 94.2 86  
 5 0 2 87 3 88 6.00E-41 174.5 6573 cellular  
 organisms;Eukaryota;Opisthokonta;Metazoa;Eumetazoa;Bilateria;Protostomia;  
 Spiralia;Lophotrochozoa;Mollusca;Bivalvia;Autobranhia;Pteriormorphia;Pect  
 inida;Pectinoidea;Pectinidae;Mizuhopecten;Mizuhopecten yessoensis  
 UdeM00000013024 6573 1006.5 UdeM00000013024 XP\_021371807.1 74.8  
 655 160 1 1 655 1 650 1.50E-290 1006.5 6573  
 cellular  
 organisms;Eukaryota;Opisthokonta;Metazoa;Eumetazoa;Bilateria;Protostomia;  
 Spiralia;Lophotrochozoa;Mollusca;Bivalvia;Autobranhia;Pteriormorphia;Pect  
 inida;Pectinoidea;Pectinidae;Mizuhopecten;Mizuhopecten yessoensis  
 UdeM00000013025 6596 592.8 UdeM00000013025 XP\_045194569.1 66.7 430  
 143 0 1 430 1 430 3.50E-166 592.8 6596 cellular  
 organisms;Eukaryota;Opisthokonta;Metazoa;Eumetazoa;Bilateria;Protostomia;  
 Spiralia;Lophotrochozoa;Mollusca;Bivalvia;Autobranhia;Heteroconchia;Euhe  
 terodonta;Imparidentia;Venerida;Veneroidea;Veneridae;Mercenaria;Mercenari  
 a mercenaria  
 UdeM00000013026 118141 65.1 UdeM00000013026 XP\_036374264.1 58.2  
 55 22 1 2 56 5 58 8.70E-08 65.1 118141  
 cellular  
 organisms;Eukaryota;Opisthokonta;Metazoa;Eumetazoa;Bilateria;Deuterostomi  
 a;Chordata;Craniata;Vertebrata;Gnathostomata;Teleostomi;Euteleostomi;Acti  
 nopterygii;Actinopteri;Neopterygii;Teleostei;Elopocephalai;Elopocephala;E  
 lopomorpha;Elopiformes;Megalopidae;Megalops;Megalops cyprinoides  
 UdeM00000013027 6596 330.9 UdeM00000013027 XP\_045164798.1 72.2 209  
 58 0 1 209 1 209 1.30E-87 330.9 6596 cellular  
 organisms;Eukaryota;Opisthokonta;Metazoa;Eumetazoa;Bilateria;Protostomia;  
 Spiralia;Lophotrochozoa;Mollusca;Bivalvia;Autobranhia;Heteroconchia;Euhe  
 terodonta;Imparidentia;Venerida;Veneroidea;Veneridae;Mercenaria;Mercenari  
 a mercenaria  
 UdeM00000013028 6573 228.4 UdeM00000013028 XP\_021371047.1 39 377  
 181 7 1 329 1 376 2.90E-56 228.4 6573 cellular  
 organisms;Eukaryota;Opisthokonta;Metazoa;Eumetazoa;Bilateria;Protostomia;  
 Spiralia;Lophotrochozoa;Mollusca;Bivalvia;Autobranhia;Pteriormorphia;Pect  
 inida;Pectinoidea;Pectinidae;Mizuhopecten;Mizuhopecten yessoensis  
 UdeM00000013029 6596 471.9 UdeM00000013029 XP\_045166287.1 72.5 302  
 82 1 120 421 122 422 9.00E-130 471.9 6596 cellular  
 organisms;Eukaryota;Opisthokonta;Metazoa;Eumetazoa;Bilateria;Protostomia;  
 Spiralia;Lophotrochozoa;Mollusca;Bivalvia;Autobranhia;Heteroconchia;Euhe  
 terodonta;Imparidentia;Venerida;Veneroidea;Veneridae;Mercenaria;Mercenari  
 a mercenaria  
 UdeM00000013030 6596 229.6 UdeM00000013030 XP\_045166286.1 73.9 142  
 36 1 1 142 282 422 2.70E-57 229.6 6596 cellular  
 organisms;Eukaryota;Opisthokonta;Metazoa;Eumetazoa;Bilateria;Protostomia;  
 Spiralia;Lophotrochozoa;Mollusca;Bivalvia;Autobranhia;Heteroconchia;Euhe

terodonta;Imparidentia;Venerida;Veneroidea;Veneridae;Mercenaria;Mercenari  
 a mercenaria  
 UdeM00000013031 29159 151.4 UdeM00000013031 XP\_011451740.2 64.3 112  
 37 1 1 109 332 443 6.90E-34 151.4 29159 cellular  
 organisms;Eukaryota;Opisthokonta;Metazoa;Eumetazoa;Bilateria;Protostomia;  
 Spiralia;Lophotrochozoa;Mollusca;Bivalvia;Autobranhia;Pteriormorphia;Ostr  
 eida;Ostreoidea;Ostreidae;Crassostrea;Crassostrea gigas  
 UdeM00000013032 6596 1011.9 UdeM00000013032 XP\_045166289.1 50.4  
 1216 181 7 16 1229 13 808 6.90E-292 1011.9 6596  
 cellular  
 organisms;Eukaryota;Opisthokonta;Metazoa;Eumetazoa;Bilateria;Protostomia;  
 Spiralia;Lophotrochozoa;Mollusca;Bivalvia;Autobranhia;Heteroconchia;Euhe  
 terodonta;Imparidentia;Venerida;Veneroidea;Veneridae;Mercenaria;Mercenari  
 a mercenaria  
 UdeM00000013033 6596 447.2 UdeM00000013033 XP\_045166291.1 64.1 329  
 90 1 13 341 14 314 1.90E-122 447.2 6596 cellular  
 organisms;Eukaryota;Opisthokonta;Metazoa;Eumetazoa;Bilateria;Protostomia;  
 Spiralia;Lophotrochozoa;Mollusca;Bivalvia;Autobranhia;Heteroconchia;Euhe  
 terodonta;Imparidentia;Venerida;Veneroidea;Veneridae;Mercenaria;Mercenari  
 a mercenaria  
 UdeM00000013034 6596 436 UdeM00000013034 XP\_045166291.1 59.1 357  
 90 1 13 369 14 314 4.80E-119 436 6596 cellular  
 organisms;Eukaryota;Opisthokonta;Metazoa;Eumetazoa;Bilateria;Protostomia;  
 Spiralia;Lophotrochozoa;Mollusca;Bivalvia;Autobranhia;Heteroconchia;Euhe  
 terodonta;Imparidentia;Venerida;Veneroidea;Veneridae;Mercenaria;Mercenari  
 a mercenaria  
 UdeM00000013035 6596 461.8 UdeM00000013035 XP\_045166291.1 70.1 301  
 90 0 13 313 14 314 7.00E-127 461.8 6596 cellular  
 organisms;Eukaryota;Opisthokonta;Metazoa;Eumetazoa;Bilateria;Protostomia;  
 Spiralia;Lophotrochozoa;Mollusca;Bivalvia;Autobranhia;Heteroconchia;Euhe  
 terodonta;Imparidentia;Venerida;Veneroidea;Veneridae;Mercenaria;Mercenari  
 a mercenaria  
 UdeM00000013036 6596 794.7 UdeM00000013036 XP\_045167227.1 54.1 1097  
 326 19 373 1461 362 1288 3.40E-226 794.7 6596 cellular  
 organisms;Eukaryota;Opisthokonta;Metazoa;Eumetazoa;Bilateria;Protostomia;  
 Spiralia;Lophotrochozoa;Mollusca;Bivalvia;Autobranhia;Heteroconchia;Euhe  
 terodonta;Imparidentia;Venerida;Veneroidea;Veneridae;Mercenaria;Mercenari  
 a mercenaria  
 UdeM00000013037 6596 794.7 UdeM00000013037 XP\_045167227.1 54.1 1097  
 326 19 373 1461 362 1288 3.20E-226 794.7 6596 cellular  
 organisms;Eukaryota;Opisthokonta;Metazoa;Eumetazoa;Bilateria;Protostomia;  
 Spiralia;Lophotrochozoa;Mollusca;Bivalvia;Autobranhia;Heteroconchia;Euhe  
 terodonta;Imparidentia;Venerida;Veneroidea;Veneridae;Mercenaria;Mercenari  
 a mercenaria  
 UdeM00000013038 6565 105.5 UdeM00000013038 XP\_022300363.1 36.3 157  
 91 3 24 171 32 188 6.80E-20 105.5 6565 cellular  
 organisms;Eukaryota;Opisthokonta;Metazoa;Eumetazoa;Bilateria;Protostomia;  
 Spiralia;Lophotrochozoa;Mollusca;Bivalvia;Autobranhia;Pteriormorphia;Ostr  
 eida;Ostreoidea;Ostreidae;Crassostrea;Crassostrea virginica  
 UdeM00000013039 6579 236.5 UdeM00000013039 XP\_033745252.1 61.1 193  
 69 4 66 255 37 226 3.80E-59 236.5 6579 cellular  
 organisms;Eukaryota;Opisthokonta;Metazoa;Eumetazoa;Bilateria;Protostomia;  
 Spiralia;Lophotrochozoa;Mollusca;Bivalvia;Autobranhia;Pteriormorphia;Pect  
 inida;Pectinoidea;Pectinidae;Pecten;Pecten maximus

UdeM00000013040 6596 216.5 UdeM00000013040 XP\_045165323.1 55.8 181  
 79 1 73 253 42 221 4.00E-53 216.5 6596 cellular  
 organisms;Eukaryota;Opisthokonta;Metazoa;Eumetazoa;Bilateria;Protostomia;  
 Spiralia;Lophotrochozoa;Mollusca;Bivalvia;Autobranchia;Heteroconchia;Euhe  
 terodonta;Imparidentia;Venerida;Veneroidea;Veneridae;Mercenaria;Mercenari  
 a mercenaria  
 UdeM00000013041 6565 218 UdeM00000013041 XP\_022334339.1 23.5 663  
 471 13 2 640 103 753 3.50E-53 218 6565 cellular  
 organisms;Eukaryota;Opisthokonta;Metazoa;Eumetazoa;Bilateria;Protostomia;  
 Spiralia;Lophotrochozoa;Mollusca;Bivalvia;Autobranchia;Pteriormorphia;Ostr  
 eida;Ostreoidea;Ostreidae;Crassostrea;Crassostrea virginica  
 UdeM00000013043 6596 77 UdeM00000013043 XP\_045211554.1 28.6 185  
 121 4 4 184 84 261 4.40E-11 77 6596 cellular  
 organisms;Eukaryota;Opisthokonta;Metazoa;Eumetazoa;Bilateria;Protostomia;  
 Spiralia;Lophotrochozoa;Mollusca;Bivalvia;Autobranchia;Heteroconchia;Euhe  
 terodonta;Imparidentia;Venerida;Veneroidea;Veneridae;Mercenaria;Mercenari  
 a mercenaria  
 UdeM00000013045 6596 424.5 UdeM00000013045 XP\_045164087.1 48.1 503  
 234 10 32 529 12 492 2.00E-115 424.5 6596 cellular  
 organisms;Eukaryota;Opisthokonta;Metazoa;Eumetazoa;Bilateria;Protostomia;  
 Spiralia;Lophotrochozoa;Mollusca;Bivalvia;Autobranchia;Heteroconchia;Euhe  
 terodonta;Imparidentia;Venerida;Veneroidea;Veneridae;Mercenaria;Mercenari  
 a mercenaria  
 UdeM00000013047 6596 183.3 UdeM00000013047 XP\_045164470.1 50.3 185  
 81 4 1 174 1 185 2.60E-43 183.3 6596 cellular  
 organisms;Eukaryota;Opisthokonta;Metazoa;Eumetazoa;Bilateria;Protostomia;  
 Spiralia;Lophotrochozoa;Mollusca;Bivalvia;Autobranchia;Heteroconchia;Euhe  
 terodonta;Imparidentia;Venerida;Veneroidea;Veneridae;Mercenaria;Mercenari  
 a mercenaria  
 UdeM00000013048 6596 192.2 UdeM00000013048 XP\_045164943.1 31.4 634  
 368 21 288 884 60 663 3.30E-45 192.2 6596 cellular  
 organisms;Eukaryota;Opisthokonta;Metazoa;Eumetazoa;Bilateria;Protostomia;  
 Spiralia;Lophotrochozoa;Mollusca;Bivalvia;Autobranchia;Heteroconchia;Euhe  
 terodonta;Imparidentia;Venerida;Veneroidea;Veneridae;Mercenaria;Mercenari  
 a mercenaria  
 UdeM00000013050 6596 410.6 UdeM00000013050 XP\_045164282.1 70.8 312  
 75 10 2 305 32 335 1.70E-111 410.6 6596 cellular  
 organisms;Eukaryota;Opisthokonta;Metazoa;Eumetazoa;Bilateria;Protostomia;  
 Spiralia;Lophotrochozoa;Mollusca;Bivalvia;Autobranchia;Heteroconchia;Euhe  
 terodonta;Imparidentia;Venerida;Veneroidea;Veneridae;Mercenaria;Mercenari  
 a mercenaria  
 UdeM00000013051 6596 755 UdeM00000013051 XP\_045165907.1 55.9 615  
 268 2 10 622 23 636 7.60E-215 755 6596 cellular  
 organisms;Eukaryota;Opisthokonta;Metazoa;Eumetazoa;Bilateria;Protostomia;  
 Spiralia;Lophotrochozoa;Mollusca;Bivalvia;Autobranchia;Heteroconchia;Euhe  
 terodonta;Imparidentia;Venerida;Veneroidea;Veneridae;Mercenaria;Mercenari  
 a mercenaria  
 UdeM00000013052 6565 224.9 UdeM00000013052 XP\_022297664.1 65.6 163  
 55 1 10 172 11 172 7.70E-56 224.9 6565 cellular  
 organisms;Eukaryota;Opisthokonta;Metazoa;Eumetazoa;Bilateria;Protostomia;  
 Spiralia;Lophotrochozoa;Mollusca;Bivalvia;Autobranchia;Pteriormorphia;Ostr  
 eida;Ostreoidea;Ostreidae;Crassostrea;Crassostrea virginica  
 UdeM00000013053 6573 706.8 UdeM00000013053 XP\_021344993.1 28.3 1756  
 1163 42 18 1719 24 1737 6.60E-200 706.8 6573 cellular



organisms;Eukaryota;Opisthokonta;Metazoa;Eumetazoa;Bilateria;Protostomia;  
 Spiralia;Lophotrochozoa;Mollusca;Bivalvia;Autobranchia;Pteriomorpha;Pecti  
 nida;Pectinoidea;Pectinidae;Mizuhopecten;Mizuhopecten yessoensis  
 UdeM00000013054 6596 743.8 UdeM00000013054 XP\_045165907.1 53.7 631  
 289 2 5 633 6 635 1.90E-211 743.8 6596 cellular  
 organisms;Eukaryota;Opisthokonta;Metazoa;Eumetazoa;Bilateria;Protostomia;  
 Spiralia;Lophotrochozoa;Mollusca;Bivalvia;Autobranchia;Heteroconchia;Euhe  
 terodonta;Imparidentia;Venerida;Veneroidea;Veneridae;Mercenaria;Mercenari  
 a mercenaria  
 UdeM00000013055 6596 791.2 UdeM00000013055 XP\_045165907.1 51.7 685  
 324 5 1 680 1 683 1.10E-225 791.2 6596 cellular  
 organisms;Eukaryota;Opisthokonta;Metazoa;Eumetazoa;Bilateria;Protostomia;  
 Spiralia;Lophotrochozoa;Mollusca;Bivalvia;Autobranchia;Heteroconchia;Euhe  
 terodonta;Imparidentia;Venerida;Veneroidea;Veneridae;Mercenaria;Mercenari  
 a mercenaria  
 UdeM00000013056 6596 635.6 UdeM00000013056 XP\_045165907.1 49.3 594  
 238 3 1 532 43 635 6.10E-179 635.6 6596 cellular  
 organisms;Eukaryota;Opisthokonta;Metazoa;Eumetazoa;Bilateria;Protostomia;  
 Spiralia;Lophotrochozoa;Mollusca;Bivalvia;Autobranchia;Heteroconchia;Euhe  
 terodonta;Imparidentia;Venerida;Veneroidea;Veneridae;Mercenaria;Mercenari  
 a mercenaria  
 UdeM00000013057 94827 144.1 UdeM00000013057 XP\_010214492.1 30.1 329  
 187 6 1 291 616 939 3.00E-31 144.1 94827 cellular  
 organisms;Eukaryota;Opisthokonta;Metazoa;Eumetazoa;Bilateria;Deuterostomi  
 a;Chordata;Craniata;Vertebrata;Gnathostomata;Teleostomi;Euteleostomi;Sarc  
 opterygii;Dipnotetrapodomorpha;Tetrapoda;Amniota;Sauropsida;Sauria;Archel  
 osauria;Archosauria;Dinosauria;Saurischia;Theropoda;Coelurosauria;Aves;Pa  
 laeognathae;Tinamiformes;Tinamidae;Tinamus;Tinamus guttatus  
 UdeM00000013058 6596 839.7 UdeM00000013058 XP\_045165359.1 52.2 856  
 271 12 25 743 38 892 2.90E-240 839.7 6596 cellular  
 organisms;Eukaryota;Opisthokonta;Metazoa;Eumetazoa;Bilateria;Protostomia;  
 Spiralia;Lophotrochozoa;Mollusca;Bivalvia;Autobranchia;Heteroconchia;Euhe  
 terodonta;Imparidentia;Venerida;Veneroidea;Veneridae;Mercenaria;Mercenari  
 a mercenaria  
 UdeM00000013059 6596 1440.2 UdeM00000013059 XP\_045165359.1 64  
 1068 323 4 1 1067 920 1926 0.00E+00 1440.2 6596  
 cellular  
 organisms;Eukaryota;Opisthokonta;Metazoa;Eumetazoa;Bilateria;Protostomia;  
 Spiralia;Lophotrochozoa;Mollusca;Bivalvia;Autobranchia;Heteroconchia;Euhe  
 terodonta;Imparidentia;Venerida;Veneroidea;Veneridae;Mercenaria;Mercenari  
 a mercenaria  
 UdeM00000013060 6596 764.6 UdeM00000013060 XP\_045164728.1 44 1082  
 410 22 1 989 1 979 1.50E-217 764.6 6596 cellular  
 organisms;Eukaryota;Opisthokonta;Metazoa;Eumetazoa;Bilateria;Protostomia;  
 Spiralia;Lophotrochozoa;Mollusca;Bivalvia;Autobranchia;Heteroconchia;Euhe  
 terodonta;Imparidentia;Venerida;Veneroidea;Veneridae;Mercenaria;Mercenari  
 a mercenaria  
 UdeM00000013061 1735272 156.4 UdeM00000013061 XP\_041346997.1 59.7  
 119 44 3 18 134 38 154 2.70E-35 156.4 1735272  
 cellular  
 organisms;Eukaryota;Opisthokonta;Metazoa;Eumetazoa;Bilateria;Protostomia;  
 Spiralia;Lophotrochozoa;Mollusca;Gastropoda;Neomphalina;Neomphaloidea;Pel  
 tospiridae;Gigantopelta;Gigantopelta aegis

UdeM00000013062 1735272 156 UdeM00000013062 XP\_041346997.1 58.8  
 119 45 3 1 117 38 154 3.00E-35 156 1735272  
 cellular  
 organisms;Eukaryota;Opisthokonta;Metazoa;Eumetazoa;Bilateria;Protostomia;  
 Spiralia;Lophotrochozoa;Mollusca;Gastropoda;Neomphalina;Neomphaloidea;Pel  
 tospiridae;Gigantopelta;Gigantopelta aegis  
 UdeM00000013063 1735272 156 UdeM00000013063 XP\_041346997.1 58.8  
 119 45 3 1 117 38 154 3.00E-35 156 1735272  
 cellular  
 organisms;Eukaryota;Opisthokonta;Metazoa;Eumetazoa;Bilateria;Protostomia;  
 Spiralia;Lophotrochozoa;Mollusca;Gastropoda;Neomphalina;Neomphaloidea;Pel  
 tospiridae;Gigantopelta;Gigantopelta aegis  
 UdeM00000013064 1735272 161.4 UdeM00000013064 XP\_041346997.1 60.5  
 119 45 2 1 119 38 154 7.40E-37 161.4 1735272  
 cellular  
 organisms;Eukaryota;Opisthokonta;Metazoa;Eumetazoa;Bilateria;Protostomia;  
 Spiralia;Lophotrochozoa;Mollusca;Gastropoda;Neomphalina;Neomphaloidea;Pel  
 tospiridae;Gigantopelta;Gigantopelta aegis  
 UdeM00000013065 1735272 156.4 UdeM00000013065 XP\_041346997.1 60.7  
 112 42 2 24 135 45 154 2.70E-35 156.4 1735272  
 cellular  
 organisms;Eukaryota;Opisthokonta;Metazoa;Eumetazoa;Bilateria;Protostomia;  
 Spiralia;Lophotrochozoa;Mollusca;Gastropoda;Neomphalina;Neomphaloidea;Pel  
 tospiridae;Gigantopelta;Gigantopelta aegis  
 UdeM00000013066 1735272 152.9 UdeM00000013066 XP\_041346997.1 56.3  
 119 50 2 19 137 38 154 3.00E-34 152.9 1735272  
 cellular  
 organisms;Eukaryota;Opisthokonta;Metazoa;Eumetazoa;Bilateria;Protostomia;  
 Spiralia;Lophotrochozoa;Mollusca;Gastropoda;Neomphalina;Neomphaloidea;Pel  
 tospiridae;Gigantopelta;Gigantopelta aegis  
 UdeM00000013067 1735272 158.7 UdeM00000013067 XP\_041346997.1 57.1  
 119 49 2 19 137 38 154 5.50E-36 158.7 1735272  
 cellular  
 organisms;Eukaryota;Opisthokonta;Metazoa;Eumetazoa;Bilateria;Protostomia;  
 Spiralia;Lophotrochozoa;Mollusca;Gastropoda;Neomphalina;Neomphaloidea;Pel  
 tospiridae;Gigantopelta;Gigantopelta aegis  
 UdeM00000013068 1735272 161.8 UdeM00000013068 XP\_041346997.1 64.3  
 112 38 2 24 135 45 154 6.40E-37 161.8 1735272  
 cellular  
 organisms;Eukaryota;Opisthokonta;Metazoa;Eumetazoa;Bilateria;Protostomia;  
 Spiralia;Lophotrochozoa;Mollusca;Gastropoda;Neomphalina;Neomphaloidea;Pel  
 tospiridae;Gigantopelta;Gigantopelta aegis  
 UdeM00000013069 1735272 142.9 UdeM00000013069 XP\_041379003.1 57.5  
 106 44 1 35 140 25 129 3.30E-31 142.9 1735272  
 cellular  
 organisms;Eukaryota;Opisthokonta;Metazoa;Eumetazoa;Bilateria;Protostomia;  
 Spiralia;Lophotrochozoa;Mollusca;Gastropoda;Neomphalina;Neomphaloidea;Pel  
 tospiridae;Gigantopelta;Gigantopelta aegis  
 UdeM00000013071 6579 751.9 UdeM00000013071 XP\_033745952.1 54.9 736  
 295 9 20 750 40 743 7.90E-214 751.9 6579 cellular  
 organisms;Eukaryota;Opisthokonta;Metazoa;Eumetazoa;Bilateria;Protostomia;  
 Spiralia;Lophotrochozoa;Mollusca;Bivalvia;Autobranchia;Pteriomorphia;Pect  
 inida;Pectinoidea;Pectinidae;Pecten;Pecten maximus

UdeM00000013073 6945 60.8 UdeM00000013073 XP\_040078187.1 28.2 131  
 93 1 146 275 38 168 5.00E-06 60.8 6945 cellular  
 organisms;Eukaryota;Opisthokonta;Metazoa;Eumetazoa;Bilateria;Protostomia;  
 Ecdysozoa;Panarthropoda;Arthropoda;Chelicerata;Arachnida;Acari;Parasitifo  
 rmes;Ixodida;Ixodoidea;Ixodidae;Ixodinae;Ixodes;Ixodes scapularis  
 UdeM00000013074 1735272 81.6 UdeM00000013074 XP\_041379274.1 34.4  
 122 78 2 2 122 245 365 7.80E-13 81.6 1735272  
 cellular  
 organisms;Eukaryota;Opisthokonta;Metazoa;Eumetazoa;Bilateria;Protostomia;  
 Spiralia;Lophotrochozoa;Mollusca;Gastropoda;Neomphalina;Neomphaloidea;Pel  
 tospiridae;Gigantopelta;Gigantopelta aegis  
 UdeM00000013075 6087 167.9 UdeM00000013075 XP\_012565456.1 60.6 127  
 48 1 4 128 890 1016 8.50E-39 167.9 6087 cellular  
 organisms;Eukaryota;Opisthokonta;Metazoa;Eumetazoa;Cnidaria;Hydrozoa;Hydr  
 oidolina;Anthoathecata;Aplanulata;Hydridae;Hydra;Hydra vulgaris  
 UdeM00000013078 45264 406.4 UdeM00000013078 XP\_044165143.1 59.8 333  
 132 2 30 360 141 473 4.00E-110 406.4 45264 cellular  
 organisms;Eukaryota;Opisthokonta;Metazoa;Eumetazoa;Cnidaria;Anthozoa;Hexa  
 corallia;Scleractinia;Astrocoeniina;Acroporidae;Acropora;Acropora  
 millepora  
 UdeM00000013081 29159 80.9 UdeM00000013081 XP\_034318666.1 33.3 129  
 47 2 35 163 865 954 1.70E-12 80.9 29159 cellular  
 organisms;Eukaryota;Opisthokonta;Metazoa;Eumetazoa;Bilateria;Protostomia;  
 Spiralia;Lophotrochozoa;Mollusca;Bivalvia;Autobranchia;Pteriormorphia;Ostr  
 eida;Ostreoidea;Ostreidae;Crassostrea;Crassostrea gigas  
 UdeM00000013083 6596 104.8 UdeM00000013083 XP\_045208720.1 24.8 415  
 213 9 60 471 671 989 3.70E-19 104.8 6596 cellular  
 organisms;Eukaryota;Opisthokonta;Metazoa;Eumetazoa;Bilateria;Protostomia;  
 Spiralia;Lophotrochozoa;Mollusca;Bivalvia;Autobranchia;Heteroconchia;Euhe  
 terodonta;Imparidentia;Venerida;Veneroidea;Veneridae;Mercenaria;Mercenari  
 a mercenaria  
 UdeM00000013085 6596 94 UdeM00000013085 XP\_045208720.1 31.2 224  
 138 5 186 401 727 942 6.30E-16 94 6596 cellular  
 organisms;Eukaryota;Opisthokonta;Metazoa;Eumetazoa;Bilateria;Protostomia;  
 Spiralia;Lophotrochozoa;Mollusca;Bivalvia;Autobranchia;Heteroconchia;Euhe  
 terodonta;Imparidentia;Venerida;Veneroidea;Veneridae;Mercenaria;Mercenari  
 a mercenaria  
 UdeM00000013085 6596 56.6 UdeM00000013085 XP\_045208720.1 34.5 87  
 57 0 441 527 1205 1291 1.10E-04 56.6 6596 cellular  
 organisms;Eukaryota;Opisthokonta;Metazoa;Eumetazoa;Bilateria;Protostomia;  
 Spiralia;Lophotrochozoa;Mollusca;Bivalvia;Autobranchia;Heteroconchia;Euhe  
 terodonta;Imparidentia;Venerida;Veneroidea;Veneridae;Mercenaria;Mercenari  
 a mercenaria  
 UdeM00000013086 6596 224.2 UdeM00000013086 XP\_045161541.1 42 295  
 146 5 14 286 30 321 2.40E-55 224.2 6596 cellular  
 organisms;Eukaryota;Opisthokonta;Metazoa;Eumetazoa;Bilateria;Protostomia;  
 Spiralia;Lophotrochozoa;Mollusca;Bivalvia;Autobranchia;Heteroconchia;Euhe  
 terodonta;Imparidentia;Venerida;Veneroidea;Veneridae;Mercenaria;Mercenari  
 a mercenaria  
 UdeM00000013087 6579 223 UdeM00000013087 XP\_033726657.1 47.4 266  
 122 6 10 258 247 511 4.30E-55 223 6579 cellular  
 organisms;Eukaryota;Opisthokonta;Metazoa;Eumetazoa;Bilateria;Protostomia;  
 Spiralia;Lophotrochozoa;Mollusca;Bivalvia;Autobranchia;Pteriormorphia;Pect  
 inida;Pectinoidea;Pectinidae;Pecten;Pecten maximus

UdeM00000013089 6596 62 UdeM00000013089 XP\_045208696.1 38.7 93  
 55 2 197 287 301 393 1.40E-06 62 6596 cellular  
 organisms;Eukaryota;Opisthokonta;Metazoa;Eumetazoa;Bilateria;Protostomia;  
 Spiralia;Lophotrochozoa;Mollusca;Bivalvia;Autobranchia;Heteroconchia;Euhe  
 terodonta;Imparidentia;Venerida;Veneroidea;Veneridae;Mercenaria;Mercenari  
 a mercenaria

UdeM00000013093 6596 147.5 UdeM00000013093 XP\_045209416.1 27.6 409  
 264 12 163 553 667 1061 5.00E-32 147.5 6596 cellular  
 organisms;Eukaryota;Opisthokonta;Metazoa;Eumetazoa;Bilateria;Protostomia;  
 Spiralia;Lophotrochozoa;Mollusca;Bivalvia;Autobranchia;Heteroconchia;Euhe  
 terodonta;Imparidentia;Venerida;Veneroidea;Veneridae;Mercenaria;Mercenari  
 a mercenaria

UdeM00000013094 29144 109.4 UdeM00000013094 XP\_030636346.1 27.2 346  
 209 11 56 400 112 415 1.60E-20 109.4 29144 cellular  
 organisms;Eukaryota;Opisthokonta;Metazoa;Eumetazoa;Bilateria;Deuterostomi  
 a;Chordata;Craniata;Vertebrata;Gnathostomata;Teleostomi;Euteleostomi;Acti  
 nopterygii;Actinopteri;Neopterygii;Teleostei;Osteoglossocephalai;Clupeoce  
 phala;Otomorpha;Ostariophysi;Anotophysii;Gonorynchiformes;Chanoidei;Chanid  
 ae;Chanos;Chanos chanos

UdeM00000013097 6573 838.6 UdeM00000013097 XP\_021358732.1 62.3 702  
 248 5 23 720 17 705 6.10E-240 838.6 6573 cellular  
 organisms;Eukaryota;Opisthokonta;Metazoa;Eumetazoa;Bilateria;Protostomia;  
 Spiralia;Lophotrochozoa;Mollusca;Bivalvia;Autobranchia;Pteriormorphia;Pect  
 inida;Pectinoidea;Pectinidae;Mizuhopecten;Mizuhopecten yessoensis

UdeM00000013098 6579 697.6 UdeM00000013098 XP\_033758588.1 60.8 607  
 230 6 16 622 10 608 1.50E-197 697.6 6579 cellular  
 organisms;Eukaryota;Opisthokonta;Metazoa;Eumetazoa;Bilateria;Protostomia;  
 Spiralia;Lophotrochozoa;Mollusca;Bivalvia;Autobranchia;Pteriormorphia;Pect  
 inida;Pectinoidea;Pectinidae;Pecten;Pecten maximus

UdeM00000013099 48698 190.3 UdeM00000013099 XP\_007573043.1 38.9 247  
 137 3 911 1157 243 475 1.50E-44 190.3 48698 cellular  
 organisms;Eukaryota;Opisthokonta;Metazoa;Eumetazoa;Bilateria;Deuterostomi  
 a;Chordata;Craniata;Vertebrata;Gnathostomata;Teleostomi;Euteleostomi;Acti  
 nopterygii;Actinopteri;Neopterygii;Teleostei;Osteoglossocephalai;Clupeoce  
 phala;Euteleosteomorpha;Neoteleostei;Eurypterygia;Ctenosquamata;Acanthomo  
 rphata;Euacanthomorphacea;Percomorphaceae;Ovalentaria;Atherinomorphae;Cyp  
 rinodontiformes;Cyprinodontoidei;Poeciliidae;Poeciliinae;Poecilia;Poecili  
 a formosa

UdeM00000013100 6579 389 UdeM00000013100 XP\_033726011.1 41.5 597  
 292 15 55 627 17 580 1.10E-104 389 6579 cellular  
 organisms;Eukaryota;Opisthokonta;Metazoa;Eumetazoa;Bilateria;Protostomia;  
 Spiralia;Lophotrochozoa;Mollusca;Bivalvia;Autobranchia;Pteriormorphia;Pect  
 inida;Pectinoidea;Pectinidae;Pecten;Pecten maximus

UdeM00000013101 6500 331.6 UdeM00000013101 XP\_005105299.2 43.3 411  
 144 4 61 468 7 331 1.60E-87 331.6 6500 cellular  
 organisms;Eukaryota;Opisthokonta;Metazoa;Eumetazoa;Bilateria;Protostomia;  
 Spiralia;Lophotrochozoa;Mollusca;Gastropoda;Heterobranchia;Euthyneura;Tec  
 tipleura;Aplysiida;Aplysiioidea;Aplysiidae;Aplysia;Aplysia californica

UdeM00000013102 400727 178.7 UdeM00000013102 XP\_025082781.1 72.3  
 119 33 0 1 119 250 368 4.40E-42 178.7 400727  
 cellular  
 organisms;Eukaryota;Opisthokonta;Metazoa;Eumetazoa;Bilateria;Protostomia;  
 Spiralia;Lophotrochozoa;Mollusca;Gastropoda;Caenogastropoda;Architaeniogl  
 ossa;Ampullarioidea;Ampullariidae;Pomacea;Pomacea canaliculata

UdeM00000013103 6500 347.8 UdeM00000013103 XP\_005112828.1 75.7 214  
 52 0 8 221 82 295 1.80E-92 347.8 6500 cellular  
 organisms;Eukaryota;Opisthokonta;Metazoa;Eumetazoa;Bilateria;Protostomia;  
 Spiralia;Lophotrochozoa;Mollusca;Gastropoda;Heterobranchia;Euthyneura;Tec  
 tipleura;Aplysiida;Aplysioidea;Aplysiidae;Aplysia;Aplysia californica  
 UdeM00000013104 400727 325.5 UdeM00000013104 XP\_025108466.1 45.1  
 386 200 5 7 390 26 401 9.40E-86 325.5 400727  
 cellular  
 organisms;Eukaryota;Opisthokonta;Metazoa;Eumetazoa;Bilateria;Protostomia;  
 Spiralia;Lophotrochozoa;Mollusca;Gastropoda;Caenogastropoda;Architaeniogl  
 ossa;Ampullarioidea;Ampullariidae;Pomacea;Pomacea canaliculata  
 UdeM00000013105 2652724 65.5 UdeM00000013105 XP\_020913208.1 74.4  
 39 10 0 2 40 3 41 3.50E-08 65.5 2652724  
 cellular  
 organisms;Eukaryota;Opisthokonta;Metazoa;Eumetazoa;Cnidaria;Anthozoa;Hexa  
 corallia;Actiniaria;Aiptasiidae;Exaiptasia;Exaiptasia diaphana  
 UdeM00000013106 225164 143.7 UdeM00000013106 XP\_009051291.1 29.8  
 359 214 9 9 350 184 521 9.60E-31 143.7 225164  
 cellular  
 organisms;Eukaryota;Opisthokonta;Metazoa;Eumetazoa;Bilateria;Protostomia;  
 Spiralia;Lophotrochozoa;Mollusca;Gastropoda;Patellogastropoda;Lottioidea;  
 Lottiidae;Lottia;Lottia gigantea  
 UdeM00000013107 6596 531.6 UdeM00000013107 XP\_045163169.1 66.6 368  
 123 0 3 370 7 374 8.40E-148 531.6 6596 cellular  
 organisms;Eukaryota;Opisthokonta;Metazoa;Eumetazoa;Bilateria;Protostomia;  
 Spiralia;Lophotrochozoa;Mollusca;Bivalvia;Autobranchia;Heteroconchia;Euhe  
 terodonta;Imparidentia;Venerida;Veneroidea;Veneridae;Mercenaria;Mercenari  
 a mercenaria  
 UdeM00000013108 218467 270.8 UdeM00000013108 XP\_023212519.1 52.3  
 266 126 1 1 266 1 265 1.90E-69 270.8 218467  
 cellular  
 organisms;Eukaryota;Opisthokonta;Metazoa;Eumetazoa;Bilateria;Protostomia;  
 Ecdysozoa;Panarthropoda;Arthropoda;Chelicerata;Arachnida;Scorpiones;Buthi  
 da;Buthoidea;Buthidae;Centruroides;Centruroides sculpturatus  
 UdeM00000013110 6596 1052 UdeM00000013110 XP\_045210136.1 41.5 1573  
 759 32 116 1604 27 1522 8.10E-304 1052 6596 cellular  
 organisms;Eukaryota;Opisthokonta;Metazoa;Eumetazoa;Bilateria;Protostomia;  
 Spiralia;Lophotrochozoa;Mollusca;Bivalvia;Autobranchia;Heteroconchia;Euhe  
 terodonta;Imparidentia;Venerida;Veneroidea;Veneridae;Mercenaria;Mercenari  
 a mercenaria  
 UdeM00000013111 6596 1049.3 UdeM00000013111 XP\_045210136.1 41.1  
 1587 761 31 116 1620 27 1522 5.30E-303 1049.3 6596  
 cellular  
 organisms;Eukaryota;Opisthokonta;Metazoa;Eumetazoa;Bilateria;Protostomia;  
 Spiralia;Lophotrochozoa;Mollusca;Bivalvia;Autobranchia;Heteroconchia;Euhe  
 terodonta;Imparidentia;Venerida;Veneroidea;Veneridae;Mercenaria;Mercenari  
 a mercenaria  
 UdeM00000013112 6596 1036.9 UdeM00000013112 XP\_045210136.1 40.3  
 1619 761 31 116 1652 27 1522 2.80E-299 1036.9 6596  
 cellular  
 organisms;Eukaryota;Opisthokonta;Metazoa;Eumetazoa;Bilateria;Protostomia;  
 Spiralia;Lophotrochozoa;Mollusca;Bivalvia;Autobranchia;Heteroconchia;Euhe  
 terodonta;Imparidentia;Venerida;Veneroidea;Veneridae;Mercenaria;Mercenari  
 a mercenaria

UdeM00000013113 6596 1043.1 UdeM00000013113 XP\_045210136.1 40.7  
 1603 761 31 116 1636 27 1522 3.90E-301 1043.1 6596  
 cellular  
 organisms;Eukaryota;Opisthokonta;Metazoa;Eumetazoa;Bilateria;Protostomia;  
 Spiralia;Lophotrochozoa;Mollusca;Bivalvia;Autobranchia;Heteroconchia;Euhe  
 terodonta;Imparidentia;Venerida;Veneroidea;Veneridae;Mercenaria;Mercenari  
 a mercenaria  
 UdeM00000013114 6596 1077.8 UdeM00000013114 XP\_045210137.1 45.2  
 1523 616 33 1 1494 247 1579 0.00E+00 1077.8 6596  
 cellular  
 organisms;Eukaryota;Opisthokonta;Metazoa;Eumetazoa;Bilateria;Protostomia;  
 Spiralia;Lophotrochozoa;Mollusca;Bivalvia;Autobranchia;Heteroconchia;Euhe  
 terodonta;Imparidentia;Venerida;Veneroidea;Veneridae;Mercenaria;Mercenari  
 a mercenaria  
 UdeM00000013115 6596 193 UdeM00000013115 XP\_045210132.1 69.5 131  
 39 1 26 155 16 146 3.00E-46 193 6596 cellular  
 organisms;Eukaryota;Opisthokonta;Metazoa;Eumetazoa;Bilateria;Protostomia;  
 Spiralia;Lophotrochozoa;Mollusca;Bivalvia;Autobranchia;Heteroconchia;Euhe  
 terodonta;Imparidentia;Venerida;Veneroidea;Veneridae;Mercenaria;Mercenari  
 a mercenaria  
 UdeM00000013116 29159 761.5 UdeM00000013116 XP\_019926413.2 75.2 508  
 124 2 1 507 1 507 6.70E-217 761.5 29159 cellular  
 organisms;Eukaryota;Opisthokonta;Metazoa;Eumetazoa;Bilateria;Protostomia;  
 Spiralia;Lophotrochozoa;Mollusca;Bivalvia;Autobranchia;Pteriomorphia;Ostr  
 eida;Ostreoidea;Ostreidae;Crassostrea;Crassostrea gigas  
 UdeM00000013117 29159 142.5 UdeM00000013117 XP\_019926413.2 36.8 250  
 48 1 1 140 1 250 7.40E-31 142.5 29159 cellular  
 organisms;Eukaryota;Opisthokonta;Metazoa;Eumetazoa;Bilateria;Protostomia;  
 Spiralia;Lophotrochozoa;Mollusca;Bivalvia;Autobranchia;Pteriomorphia;Ostr  
 eida;Ostreoidea;Ostreidae;Crassostrea;Crassostrea gigas  
 UdeM00000013117 29159 72.4 UdeM00000013117 XP\_019926413.2 55.8 52  
 23 0 161 212 558 609 9.40E-10 72.4 29159 cellular  
 organisms;Eukaryota;Opisthokonta;Metazoa;Eumetazoa;Bilateria;Protostomia;  
 Spiralia;Lophotrochozoa;Mollusca;Bivalvia;Autobranchia;Pteriomorphia;Ostr  
 eida;Ostreoidea;Ostreidae;Crassostrea;Crassostrea gigas  
 UdeM00000013118 7574 97.1 UdeM00000013118 XP\_013401704.1 38.7 119  
 67 1 10 128 719 831 1.80E-17 97.1 7574 cellular  
 organisms;Eukaryota;Opisthokonta;Metazoa;Eumetazoa;Bilateria;Protostomia;  
 Spiralia;Lophotrochozoa;Brachiopoda;Linguliformea;Lingulata;Lingulida;Lin  
 guloidea;Lingulidae;Lingula;Lingula anatina  
 UdeM00000013119 29159 255.8 UdeM00000013119 XP\_011450415.2 33.2 587  
 335 10 18 599 36 570 2.70E-64 255.8 29159 cellular  
 organisms;Eukaryota;Opisthokonta;Metazoa;Eumetazoa;Bilateria;Protostomia;  
 Spiralia;Lophotrochozoa;Mollusca;Bivalvia;Autobranchia;Pteriomorphia;Ostr  
 eida;Ostreoidea;Ostreidae;Crassostrea;Crassostrea gigas  
 UdeM00000013125 6565 98.2 UdeM00000013125 XP\_022324853.1 50.8 124  
 61 0 13 136 20 143 1.50E-17 98.2 6565 cellular  
 organisms;Eukaryota;Opisthokonta;Metazoa;Eumetazoa;Bilateria;Protostomia;  
 Spiralia;Lophotrochozoa;Mollusca;Bivalvia;Autobranchia;Pteriomorphia;Ostr  
 eida;Ostreoidea;Ostreidae;Crassostrea;Crassostrea virginica  
 UdeM00000013126 6565 95.1 UdeM00000013126 XP\_022324853.1 52.1 94  
 45 0 13 106 20 113 6.30E-17 95.1 6565 cellular  
 organisms;Eukaryota;Opisthokonta;Metazoa;Eumetazoa;Bilateria;Protostomia;

Spiralia;Lophotrochozoa;Mollusca;Bivalvia;Autobranchia;Pteriormorphia;Ostr  
eida;Ostreoidea;Ostreidae;Crassostrea;Crassostrea virginica  
UdeM00000013127 6596 301.6 UdeM00000013127 XP\_045209594.1 61.5 260  
96 3 595 853 578 834 3.20E-78 301.6 6596 cellular  
organisms;Eukaryota;Opisthokonta;Metazoa;Eumetazoa;Bilateria;Protostomia;  
Spiralia;Lophotrochozoa;Mollusca;Bivalvia;Autobranchia;Heteroconchia;Euhe  
terodonta;Imparidentia;Venerida;Veneroidea;Veneridae;Mercenaria;Mercenari  
a mercenaria  
UdeM00000013128 6596 302.8 UdeM00000013128 XP\_045209594.1 61.5 260  
96 3 592 850 578 834 1.40E-78 302.8 6596 cellular  
organisms;Eukaryota;Opisthokonta;Metazoa;Eumetazoa;Bilateria;Protostomia;  
Spiralia;Lophotrochozoa;Mollusca;Bivalvia;Autobranchia;Heteroconchia;Euhe  
terodonta;Imparidentia;Venerida;Veneroidea;Veneridae;Mercenaria;Mercenari  
a mercenaria  
UdeM00000013129 225164 267.7 UdeM00000013129 XP\_009045636.1 65.3  
170 58 1 14 182 62 231 1.10E-68 267.7 225164  
cellular  
organisms;Eukaryota;Opisthokonta;Metazoa;Eumetazoa;Bilateria;Protostomia;  
Spiralia;Lophotrochozoa;Mollusca;Gastropoda;Patellogastropoda;Lottioidea;  
Lottiidae;Lottia;Lottia gigantea  
UdeM00000013130 1735272 100.9 UdeM00000013130 XP\_041372993.1 54.3  
81 36 1 3 82 2 82 1.60E-18 100.9 1735272  
cellular  
organisms;Eukaryota;Opisthokonta;Metazoa;Eumetazoa;Bilateria;Protostomia;  
Spiralia;Lophotrochozoa;Mollusca;Gastropoda;Neomphalina;Neomphaloidea;Pel  
tospiridae;Gigantopelta;Gigantopelta aegis  
UdeM00000013131 29159 84.7 UdeM00000013131 XP\_034308073.1 67.9 56  
18 0 121 176 4 59 1.30E-13 84.7 29159 cellular  
organisms;Eukaryota;Opisthokonta;Metazoa;Eumetazoa;Bilateria;Protostomia;  
Spiralia;Lophotrochozoa;Mollusca;Bivalvia;Autobranchia;Pteriormorphia;Ostr  
eida;Ostreoidea;Ostreidae;Crassostrea;Crassostrea gigas  
UdeM00000013132 6579 176.8 UdeM00000013132 XP\_033744592.1 48.8 166  
85 0 1 166 212 377 2.30E-41 176.8 6579 cellular  
organisms;Eukaryota;Opisthokonta;Metazoa;Eumetazoa;Bilateria;Protostomia;  
Spiralia;Lophotrochozoa;Mollusca;Bivalvia;Autobranchia;Pteriormorphia;Pect  
inida;Pectinoidea;Pectinidae;Pecten;Pecten maximus  
UdeM00000013133 6596 249.2 UdeM00000013133 XP\_045208887.1 51.8 228  
107 2 1 227 539 764 5.10E-63 249.2 6596 cellular  
organisms;Eukaryota;Opisthokonta;Metazoa;Eumetazoa;Bilateria;Protostomia;  
Spiralia;Lophotrochozoa;Mollusca;Bivalvia;Autobranchia;Heteroconchia;Euhe  
terodonta;Imparidentia;Venerida;Veneroidea;Veneridae;Mercenaria;Mercenari  
a mercenaria  
UdeM00000013134 10228 112.8 UdeM00000013134 XP\_002118406.1 41.9 136  
76 2 3 138 166 298 3.50E-22 112.8 10228 cellular  
organisms;Eukaryota;Opisthokonta;Metazoa;Eumetazoa;Placozoa;Trichoplacida  
e;Trichoplax;Trichoplax adhaerens  
UdeM00000013135 6596 216.1 UdeM00000013135 XP\_045161541.1 41.6 315  
156 7 18 312 30 336 6.60E-53 216.1 6596 cellular  
organisms;Eukaryota;Opisthokonta;Metazoa;Eumetazoa;Bilateria;Protostomia;  
Spiralia;Lophotrochozoa;Mollusca;Bivalvia;Autobranchia;Heteroconchia;Euhe  
terodonta;Imparidentia;Venerida;Veneroidea;Veneridae;Mercenaria;Mercenari  
a mercenaria  
UdeM00000013136 6596 216.1 UdeM00000013136 XP\_045161541.1 43.2 287  
139 5 19 281 35 321 6.50E-53 216.1 6596 cellular

organisms;Eukaryota;Opisthokonta;Metazoa;Eumetazoa;Bilateria;Protostomia;Spiralia;Lophotrochozoa;Mollusca;Bivalvia;Autobranchia;Heteroconchia;Euheterodonta;Imparidentia;Venerida;Veneroidea;Veneridae;Mercenaria;Mercenaria mercenaria

UdeM00000013138 29159 141.4 UdeM00000013138 XP\_034319277.1 33.3 264  
153 6 69 326 36 282 2.40E-30 141.4 29159 cellular

organisms;Eukaryota;Opisthokonta;Metazoa;Eumetazoa;Bilateria;Protostomia;Spiralia;Lophotrochozoa;Mollusca;Bivalvia;Autobranchia;Pteriormorphia;Ostreida;Ostreoidea;Ostreidae;Crassostrea;Crassostrea gigas

UdeM00000013139 6579 320.5 UdeM00000013139 XP\_033756770.1 67.7 229  
73 1 1 229 130 357 1.80E-84 320.5 6579 cellular

organisms;Eukaryota;Opisthokonta;Metazoa;Eumetazoa;Bilateria;Protostomia;Spiralia;Lophotrochozoa;Mollusca;Bivalvia;Autobranchia;Pteriormorphia;Pectinida;Pectinoidea;Pectinidae;Pecten;Pecten maximus

UdeM00000013140 6573 185.3 UdeM00000013140 XP\_021351638.1 50.5 198  
76 6 5 192 7 192 7.50E-44 185.3 6573 cellular

organisms;Eukaryota;Opisthokonta;Metazoa;Eumetazoa;Bilateria;Protostomia;Spiralia;Lophotrochozoa;Mollusca;Bivalvia;Autobranchia;Pteriormorphia;Pectinida;Pectinoidea;Pectinidae;Mizuhopecten;Mizuhopecten yessoensis

UdeM00000013142 46514 64.7 UdeM00000013142 XP\_038075930.1 34.1 85  
48 2 7 84 722 805 6.50E-08 64.7 46514 cellular

organisms;Eukaryota;Opisthokonta;Metazoa;Eumetazoa;Bilateria;Deuterostomia;Echinodermata;Eleutherozoa;Asterozoa;Asteroidea;Valvatataceae;Valvatida;Asterinidae;Patiria;Patiria miniata

UdeM00000013143 6596 247.3 UdeM00000013143 XP\_045209566.1 40.4 322  
188 4 33 351 32 352 3.50E-62 247.3 6596 cellular

organisms;Eukaryota;Opisthokonta;Metazoa;Eumetazoa;Bilateria;Protostomia;Spiralia;Lophotrochozoa;Mollusca;Bivalvia;Autobranchia;Heteroconchia;Euheterodonta;Imparidentia;Venerida;Veneroidea;Veneridae;Mercenaria;Mercenaria mercenaria

UdeM00000013144 6596 185.7 UdeM00000013144 XP\_045209566.1 42 224  
127 3 3 223 129 352 8.70E-44 185.7 6596 cellular

organisms;Eukaryota;Opisthokonta;Metazoa;Eumetazoa;Bilateria;Protostomia;Spiralia;Lophotrochozoa;Mollusca;Bivalvia;Autobranchia;Heteroconchia;Euheterodonta;Imparidentia;Venerida;Veneroidea;Veneridae;Mercenaria;Mercenaria mercenaria

UdeM00000013145 1735272 419.9 UdeM00000013145 XP\_041346684.1 33  
811 493 21 108 880 25 823 8.20E-114 419.9 1735272  
cellular

organisms;Eukaryota;Opisthokonta;Metazoa;Eumetazoa;Bilateria;Protostomia;Spiralia;Lophotrochozoa;Mollusca;Gastropoda;Neomphalina;Neomphaloidea;Peltospiridae;Gigantopelta;Gigantopelta aegis

UdeM00000013146 1735272 220.7 UdeM00000013146 XP\_041347279.1 71.1  
135 39 0 1 135 748 882 1.10E-54 220.7 1735272  
cellular

organisms;Eukaryota;Opisthokonta;Metazoa;Eumetazoa;Bilateria;Protostomia;Spiralia;Lophotrochozoa;Mollusca;Gastropoda;Neomphalina;Neomphaloidea;Peltospiridae;Gigantopelta;Gigantopelta aegis

UdeM00000013147 6596 261.2 UdeM00000013147 XP\_045209566.1 41.3 385  
217 7 12 390 33 414 2.20E-66 261.2 6596 cellular

organisms;Eukaryota;Opisthokonta;Metazoa;Eumetazoa;Bilateria;Protostomia;Spiralia;Lophotrochozoa;Mollusca;Bivalvia;Autobranchia;Heteroconchia;Euheterodonta;Imparidentia;Venerida;Veneroidea;Veneridae;Mercenaria;Mercenaria mercenaria



UdeM00000013148 6596 248.8 UdeM00000013148 XP\_045209566.1 41.9 353  
 198 6 1 349 65 414 1.00E-62 248.8 6596 cellular  
 organisms;Eukaryota;Opisthokonta;Metazoa;Eumetazoa;Bilateria;Protostomia;  
 Spiralia;Lophotrochozoa;Mollusca;Bivalvia;Autobranchia;Heteroconchia;Euhe  
 terodonta;Imparidentia;Venerida;Veneroidea;Veneridae;Mercenaria;Mercenari  
 a mercenaria

UdeM00000013149 6596 219.5 UdeM00000013149 XP\_045161541.1 43.2 292  
 140 4 12 280 30 318 5.90E-54 219.5 6596 cellular  
 organisms;Eukaryota;Opisthokonta;Metazoa;Eumetazoa;Bilateria;Protostomia;  
 Spiralia;Lophotrochozoa;Mollusca;Bivalvia;Autobranchia;Heteroconchia;Euhe  
 terodonta;Imparidentia;Venerida;Veneroidea;Veneridae;Mercenaria;Mercenari  
 a mercenaria

UdeM00000013150 6596 252.7 UdeM00000013150 XP\_045209566.1 36.8 394  
 238 8 4 388 29 420 7.70E-64 252.7 6596 cellular  
 organisms;Eukaryota;Opisthokonta;Metazoa;Eumetazoa;Bilateria;Protostomia;  
 Spiralia;Lophotrochozoa;Mollusca;Bivalvia;Autobranchia;Heteroconchia;Euhe  
 terodonta;Imparidentia;Venerida;Veneroidea;Veneridae;Mercenaria;Mercenari  
 a mercenaria

UdeM00000013151 7515 59.3 UdeM00000013151 XP\_026470919.1 33.6 131  
 74 5 5 127 443 568 5.80E-06 59.3 7515 cellular  
 organisms;Eukaryota;Opisthokonta;Metazoa;Eumetazoa;Bilateria;Protostomia;  
 Ecdysozoa;Panarthropoda;Arthropoda;Mandibulata;Pancrustacea;Hexapoda;Inse  
 cta;Dicondylia;Pterygota;Neoptera;Endopterygota;Siphonaptera;Pulicomorpha  
 ;Pulicoidea;Pulicidae;Archaeopsyllinae;Ctenocephalides;Ctenocephalides  
 felis

UdeM00000013153 6596 765.8 UdeM00000013153 XP\_045209682.1 47.6 1051  
 437 26 3 996 133 1126 6.90E-218 765.8 6596 cellular  
 organisms;Eukaryota;Opisthokonta;Metazoa;Eumetazoa;Bilateria;Protostomia;  
 Spiralia;Lophotrochozoa;Mollusca;Bivalvia;Autobranchia;Heteroconchia;Euhe  
 terodonta;Imparidentia;Venerida;Veneroidea;Veneridae;Mercenaria;Mercenari  
 a mercenaria

UdeM00000013154 6596 851.7 UdeM00000013154 XP\_045209682.1 49.9 1091  
 433 26 1 1034 93 1126 1.00E-243 851.7 6596 cellular  
 organisms;Eukaryota;Opisthokonta;Metazoa;Eumetazoa;Bilateria;Protostomia;  
 Spiralia;Lophotrochozoa;Mollusca;Bivalvia;Autobranchia;Heteroconchia;Euhe  
 terodonta;Imparidentia;Venerida;Veneroidea;Veneridae;Mercenaria;Mercenari  
 a mercenaria

UdeM00000013155 1735272 180.6 UdeM00000013155 XP\_041373271.1 82.1  
 112 20 0 1 112 1 112 1.10E-42 180.6 1735272  
 cellular  
 organisms;Eukaryota;Opisthokonta;Metazoa;Eumetazoa;Bilateria;Protostomia;  
 Spiralia;Lophotrochozoa;Mollusca;Gastropoda;Neomphalina;Neomphaloidea;Pel  
 tospiridae;Gigantopelta;Gigantopelta aegis

UdeM00000013156 400727 143.3 UdeM00000013156 XP\_025101379.1 39.7  
 209 121 2 1 207 6 211 3.50E-31 143.3 400727  
 cellular  
 organisms;Eukaryota;Opisthokonta;Metazoa;Eumetazoa;Bilateria;Protostomia;  
 Spiralia;Lophotrochozoa;Mollusca;Gastropoda;Caenogastropoda;Architaeniogl  
 ossa;Ampullarioidea;Ampullariidae;Pomacea;Pomacea canaliculata

UdeM00000013157 6596 3712.2 UdeM00000013157 XP\_045207564.1 79.8  
 2278 434 12 1 2270 1 2260 0.00E+00 3712.2 6596  
 cellular  
 organisms;Eukaryota;Opisthokonta;Metazoa;Eumetazoa;Bilateria;Protostomia;  
 Spiralia;Lophotrochozoa;Mollusca;Bivalvia;Autobranchia;Heteroconchia;Euhe

terodonta;Imparidentia;Venerida;Veneroidea;Veneridae;Mercenaria;Mercenari  
a mercenaria

UdeM00000013158 225164 310.5 UdeM00000013158 XP\_009049365.1 58.9  
241 96 1 1 241 30 267 1.90E-81 310.5 225164  
cellular

organisms;Eukaryota;Opisthokonta;Metazoa;Eumetazoa;Bilateria;Protostomia;  
Spiralia;Lophotrochozoa;Mollusca;Gastropoda;Patellogastropoda;Lottioidea;  
Lottiidae;Lottia;Lottia gigantea

UdeM00000013159 6596 189.5 UdeM00000013159 XP\_045207561.1 46.8 233  
118 3 1 233 1 227 4.90E-45 189.5 6596 cellular

organisms;Eukaryota;Opisthokonta;Metazoa;Eumetazoa;Bilateria;Protostomia;  
Spiralia;Lophotrochozoa;Mollusca;Bivalvia;Autobranchia;Heteroconchia;Euhe  
terodonta;Imparidentia;Venerida;Veneroidea;Veneridae;Mercenaria;Mercenari  
a mercenaria

UdeM00000013160 6573 62 UdeM00000013160 XP\_021358301.1 33.3 120  
75 2 193 307 154 273 1.80E-06 62 6573 cellular

organisms;Eukaryota;Opisthokonta;Metazoa;Eumetazoa;Bilateria;Protostomia;  
Spiralia;Lophotrochozoa;Mollusca;Bivalvia;Autobranchia;Pteriormorphia;Pect  
inida;Pectinoidea;Pectinidae;Mizuhopecten;Mizuhopecten yessoensis

UdeM00000013161 6596 1290 UdeM00000013161 XP\_045210410.1 55.3 1390  
492 37 61 1373 142 1478 0.00E+00 1290 6596 cellular

organisms;Eukaryota;Opisthokonta;Metazoa;Eumetazoa;Bilateria;Protostomia;  
Spiralia;Lophotrochozoa;Mollusca;Bivalvia;Autobranchia;Heteroconchia;Euhe  
terodonta;Imparidentia;Venerida;Veneroidea;Veneridae;Mercenaria;Mercenari  
a mercenaria

UdeM00000013164 6596 780 UdeM00000013164 XP\_045209947.1 48.5 965  
387 20 1 921 2 900 3.30E-22 780 6596 cellular

organisms;Eukaryota;Opisthokonta;Metazoa;Eumetazoa;Bilateria;Protostomia;  
Spiralia;Lophotrochozoa;Mollusca;Bivalvia;Autobranchia;Heteroconchia;Euhe  
terodonta;Imparidentia;Venerida;Veneroidea;Veneridae;Mercenaria;Mercenari  
a mercenaria

UdeM00000013166 6596 201.1 UdeM00000013166 XP\_045207284.1 52.7 186  
88 0 79 264 840 1025 1.80E-48 201.1 6596 cellular

organisms;Eukaryota;Opisthokonta;Metazoa;Eumetazoa;Bilateria;Protostomia;  
Spiralia;Lophotrochozoa;Mollusca;Bivalvia;Autobranchia;Heteroconchia;Euhe  
terodonta;Imparidentia;Venerida;Veneroidea;Veneridae;Mercenaria;Mercenari  
a mercenaria

UdeM00000013165 6579 115.5 UdeM00000013165 XP\_033757806.1 57.8 90  
38 0 48 137 330 419 1.20E-22 115.5 6579 cellular

organisms;Eukaryota;Opisthokonta;Metazoa;Eumetazoa;Bilateria;Protostomia;  
Spiralia;Lophotrochozoa;Mollusca;Bivalvia;Autobranchia;Pteriormorphia;Pect  
inida;Pectinoidea;Pectinidae;Pecten;Pecten maximus

UdeM00000013167 6596 250.4 UdeM00000013167 XP\_045207284.1 58.7 213  
81 2 17 225 6 215 2.90E-63 250.4 6596 cellular

organisms;Eukaryota;Opisthokonta;Metazoa;Eumetazoa;Bilateria;Protostomia;  
Spiralia;Lophotrochozoa;Mollusca;Bivalvia;Autobranchia;Heteroconchia;Euhe  
terodonta;Imparidentia;Venerida;Veneroidea;Veneridae;Mercenaria;Mercenari  
a mercenaria

UdeM00000013168 6573 356.7 UdeM00000013168 XP\_021355187.1 38.6 617  
275 17 82 658 83 635 6.60E-95 356.7 6573 cellular

organisms;Eukaryota;Opisthokonta;Metazoa;Eumetazoa;Bilateria;Protostomia;  
Spiralia;Lophotrochozoa;Mollusca;Bivalvia;Autobranchia;Pteriormorphia;Pect  
inida;Pectinoidea;Pectinidae;Mizuhopecten;Mizuhopecten yessoensis

UdeM00000013169 6579 821.2 UdeM00000013169 XP\_033757804.1 57.9 775  
 255 19 7 747 643 1380 1.00E-234 821.2 6579 cellular  
 organisms;Eukaryota;Opisthokonta;Metazoa;Eumetazoa;Bilateria;Protostomia;  
 Spiralia;Lophotrochozoa;Mollusca;Bivalvia;Autobranchia;Pteriomorpha;Pect  
 inida;Pectinoidea;Pectinidae;Pecten;Pecten maximus  
 UdeM00000013170 6596 132.5 UdeM00000013170 XP\_045203566.1 61.3 111  
 41 1 6 116 7 115 3.50E-28 132.5 6596 cellular  
 organisms;Eukaryota;Opisthokonta;Metazoa;Eumetazoa;Bilateria;Protostomia;  
 Spiralia;Lophotrochozoa;Mollusca;Bivalvia;Autobranchia;Heteroconchia;Euhe  
 terodonta;Imparidentia;Venerida;Veneroidea;Veneridae;Mercenaria;Mercenari  
 a mercenaria  
 UdeM00000013171 6579 298.1 UdeM00000013171 XP\_033758602.1 41.4 367  
 185 6 33 377 290 648 1.20E-76 298.1 6579 cellular  
 organisms;Eukaryota;Opisthokonta;Metazoa;Eumetazoa;Bilateria;Protostomia;  
 Spiralia;Lophotrochozoa;Mollusca;Bivalvia;Autobranchia;Pteriomorpha;Pect  
 inida;Pectinoidea;Pectinidae;Pecten;Pecten maximus  
 UdeM00000013178 29159 441 UdeM00000013178 XP\_011450421.2 61.4 373  
 138 5 1 371 1 369 1.70E-120 441 29159 cellular  
 organisms;Eukaryota;Opisthokonta;Metazoa;Eumetazoa;Bilateria;Protostomia;  
 Spiralia;Lophotrochozoa;Mollusca;Bivalvia;Autobranchia;Pteriomorpha;Ostr  
 eida;Ostreoidea;Ostreidae;Crassostrea;Crassostrea gigas  
 UdeM00000013179 6526 243.8 UdeM00000013179 XP\_013063294.1 65.2 187  
 63 2 16 202 139 323 2.00E-61 243.8 6526 cellular  
 organisms;Eukaryota;Opisthokonta;Metazoa;Eumetazoa;Bilateria;Protostomia;  
 Spiralia;Lophotrochozoa;Mollusca;Gastropoda;Heterobranchia;Euthyneura;Pan  
 pulmonata;Hygrophila;Lymnaeoidea;Planorbidae;Biomphalaria;Biomphalaria  
 glabrata  
 UdeM00000013180 6526 243.8 UdeM00000013180 XP\_013063294.1 65.2 187  
 63 2 14 200 139 323 2.00E-61 243.8 6526 cellular  
 organisms;Eukaryota;Opisthokonta;Metazoa;Eumetazoa;Bilateria;Protostomia;  
 Spiralia;Lophotrochozoa;Mollusca;Gastropoda;Heterobranchia;Euthyneura;Pan  
 pulmonata;Hygrophila;Lymnaeoidea;Planorbidae;Biomphalaria;Biomphalaria  
 glabrata  
 UdeM00000013181 225164 330.1 UdeM00000013181 XP\_009055570.1 64.7  
 272 87 5 23 294 139 401 3.10E-87 330.1 225164  
 cellular  
 organisms;Eukaryota;Opisthokonta;Metazoa;Eumetazoa;Bilateria;Protostomia;  
 Spiralia;Lophotrochozoa;Mollusca;Gastropoda;Patellogastropoda;Lottioidea;  
 Lottiidae;Lottia;Lottia gigantea  
 UdeM00000013182 6596 115.2 UdeM00000013182 XP\_045208673.1 27.5 349  
 229 11 4 347 103 432 1.70E-22 115.2 6596 cellular  
 organisms;Eukaryota;Opisthokonta;Metazoa;Eumetazoa;Bilateria;Protostomia;  
 Spiralia;Lophotrochozoa;Mollusca;Bivalvia;Autobranchia;Heteroconchia;Euhe  
 terodonta;Imparidentia;Venerida;Veneroidea;Veneridae;Mercenaria;Mercenari  
 a mercenaria  
 UdeM00000013183 6579 399.8 UdeM00000013183 XP\_033726154.1 86.8 234  
 28 1 4 234 5 238 2.40E-108 399.8 6579 cellular  
 organisms;Eukaryota;Opisthokonta;Metazoa;Eumetazoa;Bilateria;Protostomia;  
 Spiralia;Lophotrochozoa;Mollusca;Bivalvia;Autobranchia;Pteriomorpha;Pect  
 inida;Pectinoidea;Pectinidae;Pecten;Pecten maximus  
 UdeM00000013184 6565 112.5 UdeM00000013184 XP\_022311735.1 47.7 155  
 30 3 3 106 52 206 3.70E-22 112.5 6565 cellular  
 organisms;Eukaryota;Opisthokonta;Metazoa;Eumetazoa;Bilateria;Protostomia;

Spiralia; Lophotrochozoa; Mollusca; Bivalvia; Autobranchia; Pteriomorpha; Ostr  
 eida; Ostreidae; Ostreidae; Crassostrea; Crassostrea virginica  
 UdeM00000013185 6579 288.1 UdeM00000013185 XP\_033726154.1 65.8 237  
 73 5 4 235 5 238 1.00E-74 288.1 6579 cellular  
 organisms; Eukaryota; Opisthokonta; Metazoa; Eumetazoa; Bilateria; Protostomia;  
 Spiralia; Lophotrochozoa; Mollusca; Bivalvia; Autobranchia; Pteriomorpha; Pect  
 inida; Pectinoidea; Pectinidae; Pecten; Pecten maximus  
 UdeM00000013187 6579 289.7 UdeM00000013187 XP\_033726154.1 77.8 185  
 38 2 6 187 7 191 2.80E-75 289.7 6579 cellular  
 organisms; Eukaryota; Opisthokonta; Metazoa; Eumetazoa; Bilateria; Protostomia;  
 Spiralia; Lophotrochozoa; Mollusca; Bivalvia; Autobranchia; Pteriomorpha; Pect  
 inida; Pectinoidea; Pectinidae; Pecten; Pecten maximus  
 UdeM00000013186 6579 328.9 UdeM00000013186 XP\_033726154.1 71.1 232  
 64 2 6 234 7 238 5.10E-87 328.9 6579 cellular  
 organisms; Eukaryota; Opisthokonta; Metazoa; Eumetazoa; Bilateria; Protostomia;  
 Spiralia; Lophotrochozoa; Mollusca; Bivalvia; Autobranchia; Pteriomorpha; Pect  
 inida; Pectinoidea; Pectinidae; Pecten; Pecten maximus  
 UdeM00000013189 6579 196.4 UdeM00000013189 XP\_033739209.1 52.5 177  
 84 0 10 186 3 179 3.10E-47 196.4 6579 cellular  
 organisms; Eukaryota; Opisthokonta; Metazoa; Eumetazoa; Bilateria; Protostomia;  
 Spiralia; Lophotrochozoa; Mollusca; Bivalvia; Autobranchia; Pteriomorpha; Pect  
 inida; Pectinoidea; Pectinidae; Pecten; Pecten maximus  
 UdeM00000013190 7054 113.2 UdeM00000013190 XP\_031328250.1 55.4 92  
 40 1 1 91 301 392 2.00E-22 113.2 7054 cellular  
 organisms; Eukaryota; Opisthokonta; Metazoa; Eumetazoa; Bilateria; Protostomia;  
 Ecdysozoa; Panarthropoda; Arthropoda; Mandibulata; Pancrustacea; Hexapoda; Inse  
 cta; Dicondylia; Pterygota; Neoptera; Endopterygota; Coleoptera; Polyphaga; Elat  
 eriformia; Elateroidea; Lampyridae; Lampyrinae; Photinus; Photinus pyralis  
 UdeM00000013191 6579 149.4 UdeM00000013191 XP\_033743220.1 42.8 180  
 92 4 14 191 27 197 4.50E-33 149.4 6579 cellular  
 organisms; Eukaryota; Opisthokonta; Metazoa; Eumetazoa; Bilateria; Protostomia;  
 Spiralia; Lophotrochozoa; Mollusca; Bivalvia; Autobranchia; Pteriomorpha; Pect  
 inida; Pectinoidea; Pectinidae; Pecten; Pecten maximus  
 UdeM00000013192 6579 149.4 UdeM00000013192 XP\_033743220.1 42.8 180  
 92 4 13 190 27 197 4.50E-33 149.4 6579 cellular  
 organisms; Eukaryota; Opisthokonta; Metazoa; Eumetazoa; Bilateria; Protostomia;  
 Spiralia; Lophotrochozoa; Mollusca; Bivalvia; Autobranchia; Pteriomorpha; Pect  
 inida; Pectinoidea; Pectinidae; Pecten; Pecten maximus  
 UdeM00000013193 6573 133.7 UdeM00000013193 XP\_021377831.1 23.5 575  
 346 12 23 525 19 571 7.60E-28 133.7 6573 cellular  
 organisms; Eukaryota; Opisthokonta; Metazoa; Eumetazoa; Bilateria; Protostomia;  
 Spiralia; Lophotrochozoa; Mollusca; Bivalvia; Autobranchia; Pteriomorpha; Pect  
 inida; Pectinoidea; Pectinidae; Mizuhopecten; Mizuhopecten yessoensis  
 UdeM00000013195 6596 335.1 UdeM00000013195 XP\_045183817.1 66.1 236  
 80 0 1 236 1 236 7.20E-89 335.1 6596 cellular  
 organisms; Eukaryota; Opisthokonta; Metazoa; Eumetazoa; Bilateria; Protostomia;  
 Spiralia; Lophotrochozoa; Mollusca; Bivalvia; Autobranchia; Heteroconchia; Eue  
 terodonta; Imparidentia; Venerida; Veneroidea; Veneridae; Mercenaria; Mercenari  
 a mercenaria  
 UdeM00000013194 6596 1000.3 UdeM00000013194 XP\_045183818.1 55.3  
 921 263 2 1 921 1 772 1.60E-288 1000.3 6596  
 cellular  
 organisms; Eukaryota; Opisthokonta; Metazoa; Eumetazoa; Bilateria; Protostomia;  
 Spiralia; Lophotrochozoa; Mollusca; Bivalvia; Autobranchia; Heteroconchia; Eue

terodonta;Imparidentia;Venerida;Veneroidea;Veneridae;Mercenaria;Mercenari  
a mercenaria

|                 |      |        |   |   |     |                 |                |           |        |      |
|-----------------|------|--------|---|---|-----|-----------------|----------------|-----------|--------|------|
| UdeM00000013196 | 6596 | 1056.6 |   |   |     | UdeM00000013196 | XP_045183818.1 | 65.8      |        |      |
|                 | 772  | 262    | 1 | 1 | 770 | 1               | 772            | 1.50E-305 | 1056.6 | 6596 |

cellular

organisms;Eukaryota;Opisthokonta;Metazoa;Eumetazoa;Bilateria;Protostomia;  
Spiralia;Lophotrochozoa;Mollusca;Bivalvia;Autobranchia;Heteroconchia;Euhe  
terodonta;Imparidentia;Venerida;Veneroidea;Veneridae;Mercenaria;Mercenari  
a mercenaria

|                 |      |      |   |      |    |                 |                |      |      |          |
|-----------------|------|------|---|------|----|-----------------|----------------|------|------|----------|
| UdeM00000013197 | 6596 | 1030 |   |      |    | UdeM00000013197 | XP_045183481.1 | 42.4 | 1245 |          |
|                 | 546  | 22   | 2 | 1130 | 30 | 1219            | 2.20E-297      | 1030 | 6596 | cellular |

organisms;Eukaryota;Opisthokonta;Metazoa;Eumetazoa;Bilateria;Protostomia;  
Spiralia;Lophotrochozoa;Mollusca;Bivalvia;Autobranchia;Heteroconchia;Euhe  
terodonta;Imparidentia;Venerida;Veneroidea;Veneridae;Mercenaria;Mercenari  
a mercenaria

|                 |      |        |    |   |      |                 |                |           |        |      |
|-----------------|------|--------|----|---|------|-----------------|----------------|-----------|--------|------|
| UdeM00000013198 | 6596 | 1013.8 |    |   |      | UdeM00000013198 | XP_045183481.1 | 41.7      |        |      |
|                 | 1245 | 528    | 20 | 2 | 1103 | 30              | 1219           | 1.60E-292 | 1013.8 | 6596 |

cellular

organisms;Eukaryota;Opisthokonta;Metazoa;Eumetazoa;Bilateria;Protostomia;  
Spiralia;Lophotrochozoa;Mollusca;Bivalvia;Autobranchia;Heteroconchia;Euhe  
terodonta;Imparidentia;Venerida;Veneroidea;Veneridae;Mercenaria;Mercenari  
a mercenaria

|                 |       |       |     |     |    |                 |                |       |       |          |
|-----------------|-------|-------|-----|-----|----|-----------------|----------------|-------|-------|----------|
| UdeM00000013199 | 10228 | 106.7 |     |     |    | UdeM00000013199 | XP_002109514.1 | 50    | 90    |          |
|                 | 44    | 1     | 591 | 680 | 58 | 146             | 1.20E-19       | 106.7 | 10228 | cellular |

organisms;Eukaryota;Opisthokonta;Metazoa;Eumetazoa;Placozoa;Trichoplacida  
e;Trichoplax;Trichoplax adhaerens

|                 |      |        |    |    |      |                 |                |          |        |      |
|-----------------|------|--------|----|----|------|-----------------|----------------|----------|--------|------|
| UdeM00000013200 | 6596 | 1324.3 |    |    |      | UdeM00000013200 | XP_045184960.1 | 49.1     |        |      |
|                 | 1484 | 631    | 26 | 43 | 1460 | 10              | 1435           | 0.00E+00 | 1324.3 | 6596 |

cellular

organisms;Eukaryota;Opisthokonta;Metazoa;Eumetazoa;Bilateria;Protostomia;  
Spiralia;Lophotrochozoa;Mollusca;Bivalvia;Autobranchia;Heteroconchia;Euhe  
terodonta;Imparidentia;Venerida;Veneroidea;Veneridae;Mercenaria;Mercenari  
a mercenaria

|                 |      |       |    |     |    |                 |                |       |      |          |
|-----------------|------|-------|----|-----|----|-----------------|----------------|-------|------|----------|
| UdeM00000013201 | 6596 | 202.6 |    |     |    | UdeM00000013201 | XP_045184959.1 | 34.4  | 398  |          |
|                 | 229  | 8     | 80 | 471 | 31 | 402             | 1.10E-48       | 202.6 | 6596 | cellular |

organisms;Eukaryota;Opisthokonta;Metazoa;Eumetazoa;Bilateria;Protostomia;  
Spiralia;Lophotrochozoa;Mollusca;Bivalvia;Autobranchia;Heteroconchia;Euhe  
terodonta;Imparidentia;Venerida;Veneroidea;Veneridae;Mercenaria;Mercenari  
a mercenaria

|                 |      |       |   |     |     |                 |                |       |      |          |
|-----------------|------|-------|---|-----|-----|-----------------|----------------|-------|------|----------|
| UdeM00000013202 | 6596 | 684.5 |   |     |     | UdeM00000013202 | XP_045184959.1 | 63.4  | 517  |          |
|                 | 178  | 4     | 6 | 514 | 401 | 914             | 1.10E-193      | 684.5 | 6596 | cellular |

organisms;Eukaryota;Opisthokonta;Metazoa;Eumetazoa;Bilateria;Protostomia;  
Spiralia;Lophotrochozoa;Mollusca;Bivalvia;Autobranchia;Heteroconchia;Euhe  
terodonta;Imparidentia;Venerida;Veneroidea;Veneridae;Mercenaria;Mercenari  
a mercenaria

|                 |        |     |   |   |     |                 |                |          |     |        |
|-----------------|--------|-----|---|---|-----|-----------------|----------------|----------|-----|--------|
| UdeM00000013203 | 218467 |     |   |   |     | UdeM00000013203 | XP_023212519.1 | 50.4     |     |        |
|                 | 266    | 131 | 1 | 1 | 266 | 1               | 265            | 1.10E-64 | 255 | 218467 |

cellular

organisms;Eukaryota;Opisthokonta;Metazoa;Eumetazoa;Bilateria;Protostomia;  
Ecdysozoa;Panarthropoda;Arthropoda;Chelicerata;Arachnida;Scorpiones;Buthi  
da;Buthoidea;Buthidae;Centruroides;Centruroides sculpturatus

|                 |        |     |   |   |     |                 |                |          |       |        |
|-----------------|--------|-----|---|---|-----|-----------------|----------------|----------|-------|--------|
| UdeM00000013204 | 218467 |     |   |   |     | UdeM00000013204 | XP_023220759.1 | 47.7     |       |        |
|                 | 256    | 130 | 3 | 1 | 255 | 421             | 673            | 1.90E-55 | 224.2 | 218467 |

cellular

organisms;Eukaryota;Opisthokonta;Metazoa;Eumetazoa;Bilateria;Protostomia;  
Ecdysozoa;Panarthropoda;Arthropoda;Chelicerata;Arachnida;Scorpiones;Buthi  
da;Buthoidea;Buthidae;Centruroides;Centruroides sculpturatus  
UdeM00000013205 6596 439.9 UdeM00000013205 XP\_045184959.1 47.9 516  
208 11 1 469 924 1425 4.40E-120 439.9 6596 cellular  
organisms;Eukaryota;Opisthokonta;Metazoa;Eumetazoa;Bilateria;Protostomia;  
Spiralia;Lophotrochozoa;Mollusca;Bivalvia;Autobranhia;Heteroconchia;Euhe  
terodonta;Imparidentia;Venerida;Veneroidea;Veneridae;Mercenaria;Mercenari  
a mercenaria  
UdeM00000013206 6579 198.7 UdeM00000013206 XP\_033741736.1 53.5 187  
85 1 1 185 671 857 6.80E-48 198.7 6579 cellular  
organisms;Eukaryota;Opisthokonta;Metazoa;Eumetazoa;Bilateria;Protostomia;  
Spiralia;Lophotrochozoa;Mollusca;Bivalvia;Autobranhia;Pteriormorphia;Pect  
inida;Pectinoidea;Pectinidae;Pecten;Pecten maximus  
UdeM00000013207 1735272 272.7 UdeM00000013207 XP\_041374927.1 63  
200 74 0 1 200 1154 1353 3.70E-70 272.7 1735272  
cellular  
organisms;Eukaryota;Opisthokonta;Metazoa;Eumetazoa;Bilateria;Protostomia;  
Spiralia;Lophotrochozoa;Mollusca;Gastropoda;Neomphalina;Neomphaloidea;Pel  
tospiridae;Gigantopelta;Gigantopelta aegis  
UdeM00000013209 6579 790 UdeM00000013209 XP\_033725584.1 62.4 716  
229 12 1 686 106 811 2.40E-225 790 6579 cellular  
organisms;Eukaryota;Opisthokonta;Metazoa;Eumetazoa;Bilateria;Protostomia;  
Spiralia;Lophotrochozoa;Mollusca;Bivalvia;Autobranhia;Pteriormorphia;Pect  
inida;Pectinoidea;Pectinidae;Pecten;Pecten maximus  
UdeM00000013210 6596 177.2 UdeM00000013210 XP\_045184161.1 35.7 252  
133 7 57 285 302 547 3.40E-41 177.2 6596 cellular  
organisms;Eukaryota;Opisthokonta;Metazoa;Eumetazoa;Bilateria;Protostomia;  
Spiralia;Lophotrochozoa;Mollusca;Bivalvia;Autobranhia;Heteroconchia;Euhe  
terodonta;Imparidentia;Venerida;Veneroidea;Veneridae;Mercenaria;Mercenari  
a mercenaria  
UdeM00000013211 6565 171.4 UdeM00000013211 XP\_022315053.1 31.3 396  
199 19 26 387 226 582 2.70E-39 171.4 6565 cellular  
organisms;Eukaryota;Opisthokonta;Metazoa;Eumetazoa;Bilateria;Protostomia;  
Spiralia;Lophotrochozoa;Mollusca;Bivalvia;Autobranhia;Pteriormorphia;Ostr  
eida;Ostreoidea;Ostreidae;Crassostrea;Crassostrea virginica  
UdeM00000013212 77115 371.7 UdeM00000013212 XP\_038133904.1 62.3 273  
101 1 9 281 11 281 8.30E-100 371.7 77115 cellular  
organisms;Eukaryota;Opisthokonta;Metazoa;Eumetazoa;Bilateria;Deuterostomi  
a;Chordata;Craniata;Vertebrata;Gnathostomata;Teleostomi;Euteleostomi;Acti  
nopterygii;Actinopteri;Neopterygii;Teleostei;Osteoglossocephalai;Clupeoce  
phala;Euteleosteomorpha;Neoteleostei;Eurypterygia;Ctenosquamata;Acanthomo  
rphata;Euacanthomorphacea;Percomorphaceae;Ovalentaria;Atherinomorphae;Cyp  
rinodontiformes;Cyprinodontoides;Cyprinodontidae;Cyprinodontinae;Cyprinod  
ontini;Cyprinodon;Cyprinodon tularosa  
UdeM00000013213 6596 197.2 UdeM00000013213 XP\_045184161.1 33.6 333  
191 10 60 385 285 594 4.10E-47 197.2 6596 cellular  
organisms;Eukaryota;Opisthokonta;Metazoa;Eumetazoa;Bilateria;Protostomia;  
Spiralia;Lophotrochozoa;Mollusca;Bivalvia;Autobranhia;Heteroconchia;Euhe  
terodonta;Imparidentia;Venerida;Veneroidea;Veneridae;Mercenaria;Mercenari  
a mercenaria  
UdeM00000013214 1735272 60.8 UdeM00000013214 XP\_041369224.1 30.7  
101 70 0 83 183 32 132 2.10E-06 60.8 1735272  
cellular

organisms;Eukaryota;Opisthokonta;Metazoa;Eumetazoa;Bilateria;Protostomia;Spiralia;Lophotrochozoa;Mollusca;Gastropoda;Neomphalina;Neomphaloidea;Peltospiridae;Gigantopelta;Gigantopelta aegis

UdeM00000013215 6596 323.2 UdeM00000013215 XP\_045181541.1 26.4 1181  
767 33 32 1153 92 1229 1.40E-84 323.2 6596 cellular

organisms;Eukaryota;Opisthokonta;Metazoa;Eumetazoa;Bilateria;Protostomia;Spiralia;Lophotrochozoa;Mollusca;Bivalvia;Autobranchia;Heteroconchia;Euheterodonta;Imparidentia;Venerida;Veneroidea;Veneridae;Mercenaria;Mercenaria mercenaria

UdeM00000013216 6573 1788.9 UdeM00000013216 XP\_021341468.1 62.2  
1493 537 10 4 1488 78 1550 0.00E+00 1788.9 6573  
cellular

organisms;Eukaryota;Opisthokonta;Metazoa;Eumetazoa;Bilateria;Protostomia;Spiralia;Lophotrochozoa;Mollusca;Bivalvia;Autobranchia;Pteriomorpha;Pectinida;Pectinoidea;Pectinidae;Mizuhopecten;Mizuhopecten yessoensis

UdeM00000013217 6573 1769.2 UdeM00000013217 XP\_021341468.1 57.3  
1561 625 8 9 1555 17 1550 0.00E+00 1769.2 6573  
cellular

organisms;Eukaryota;Opisthokonta;Metazoa;Eumetazoa;Bilateria;Protostomia;Spiralia;Lophotrochozoa;Mollusca;Bivalvia;Autobranchia;Pteriomorpha;Pectinida;Pectinoidea;Pectinidae;Mizuhopecten;Mizuhopecten yessoensis

UdeM00000013219 2652724 108.2 UdeM00000013219 XP\_028513771.1 47.9  
121 62 1 2 122 109 228 1.40E-20 108.2 2652724  
cellular

organisms;Eukaryota;Opisthokonta;Metazoa;Eumetazoa;Cnidaria;Anthozoa;Hexacorallia;Actiniaria;Aiptasiidae;Exaiptasia;Exaiptasia diaphana

UdeM00000013221 6579 129.4 UdeM00000013221 XP\_033729790.1 50 120  
60 0 10 129 17 136 3.30E-27 129.4 6579 cellular

organisms;Eukaryota;Opisthokonta;Metazoa;Eumetazoa;Bilateria;Protostomia;Spiralia;Lophotrochozoa;Mollusca;Bivalvia;Autobranchia;Pteriomorpha;Pectinida;Pectinoidea;Pectinidae;Pecten;Pecten maximus

UdeM00000013222 10181 269.2 UdeM00000013222 XP\_021101535.1 50 238  
114 1 66 303 359 591 7.20E-69 269.2 10181 cellular

organisms;Eukaryota;Opisthokonta;Metazoa;Eumetazoa;Bilateria;Deuterostomia;Chordata;Craniata;Vertebrata;Gnathostomata;Teleostomi;Euteleostomi;Sarcopterygii;Dipnotetrapodomorpha;Tetrapoda;Amniota;Mammalia;Theria;Eutheria;Boreoeutheria;Euarchontoglires;Glires;Rodentia;Hystricomorpha;Bathyergidae;Heterocephalus;Heterocephalus glaber

UdeM00000013224 29159 325.9 UdeM00000013224 XP\_034316161.1 45.1 364  
199 1 1 363 645 1008 6.70E-86 325.9 29159 cellular

organisms;Eukaryota;Opisthokonta;Metazoa;Eumetazoa;Bilateria;Protostomia;Spiralia;Lophotrochozoa;Mollusca;Bivalvia;Autobranchia;Pteriomorpha;Ostreida;Ostreoidea;Ostreidae;Crassostrea;Crassostrea gigas

UdeM00000013225 6596 1302.7 UdeM00000013225 XP\_045207510.1 65.2  
1018 339 6 1 1014 214 1220 0.00E+00 1302.7 6596  
cellular

organisms;Eukaryota;Opisthokonta;Metazoa;Eumetazoa;Bilateria;Protostomia;Spiralia;Lophotrochozoa;Mollusca;Bivalvia;Autobranchia;Heteroconchia;Euheterodonta;Imparidentia;Venerida;Veneroidea;Veneridae;Mercenaria;Mercenaria mercenaria

UdeM00000013226 260995 84.7 UdeM00000013226 XP\_033812940.1 52  
75 35 1 4 78 4 77 6.50E-14 84.7 260995  
cellular

organisms;Eukaryota;Opisthokonta;Metazoa;Eumetazoa;Bilateria;Deuterostomia

a;Chordata;Craniata;Vertebrata;Gnathostomata;Teleostomi;Euteleostomi;Sarcopterygii;Dipnotetrapodomorpha;Tetrapoda;Amphibia;Gymnophiona;Dermophiidae;Geotrypetes;Geotrypetes seraphini

UdeM00000013227 7757 485 UdeM00000013227 XP\_032835197.1 79.5 308  
62 1 1 308 52 358 1.00E-133 485 7757 cellular  
organisms;Eukaryota;Opisthokonta;Metazoa;Eumetazoa;Bilateria;Deuterostomia;Chordata;Craniata;Vertebrata;Cyclostomata;Hyperoartia;Petromyzontiformes;Petromyzontidae;Petromyzon;Petromyzon marinus

UdeM00000013228 6573 493.8 UdeM00000013228 XP\_021341468.1 48.9 513  
243 6 73 571 17 524 2.90E-136 493.8 6573 cellular  
organisms;Eukaryota;Opisthokonta;Metazoa;Eumetazoa;Bilateria;Protostomia;Spiralia;Lophotrochozoa;Mollusca;Bivalvia;Autobranchia;Pteriormorphia;Pectinida;Pectinoidea;Pectinidae;Mizuhopecten;Mizuhopecten yessoensis

UdeM00000013229 8520 109.4 UdeM00000013229 XP\_042306421.1 50.5 93  
46 0 60 152 481 573 6.10E-21 109.4 8520 cellular  
organisms;Eukaryota;Opisthokonta;Metazoa;Eumetazoa;Bilateria;Deuterostomia;Chordata;Craniata;Vertebrata;Gnathostomata;Teleostomi;Euteleostomi;Sarcopterygii;Dipnotetrapodomorpha;Tetrapoda;Amniota;Sauropsida;Sauria;Lepidosauria;Squamata;Bifurcata;Unidentata;Episquamata;Toxicofera;Iguania;Phrynosomatidae;Phrynosomatinae;Sceloporus;Sceloporus undulatus

UdeM00000013230 6579 438.7 UdeM00000013230 XP\_033725832.1 67.2 308  
100 1 65 371 69 376 7.40E-120 438.7 6579 cellular  
organisms;Eukaryota;Opisthokonta;Metazoa;Eumetazoa;Bilateria;Protostomia;Spiralia;Lophotrochozoa;Mollusca;Bivalvia;Autobranchia;Pteriormorphia;Pectinida;Pectinoidea;Pectinidae;Pecten;Pecten maximus

UdeM00000013231 6573 150.2 UdeM00000013231 XP\_021376972.1 56.8 139  
59 1 1 139 1 138 2.00E-33 150.2 6573 cellular  
organisms;Eukaryota;Opisthokonta;Metazoa;Eumetazoa;Bilateria;Protostomia;Spiralia;Lophotrochozoa;Mollusca;Bivalvia;Autobranchia;Pteriormorphia;Pectinida;Pectinoidea;Pectinidae;Mizuhopecten;Mizuhopecten yessoensis

UdeM00000013232 6596 340.9 UdeM00000013232 XP\_045183487.1 37 791  
384 24 50 793 146 869 2.00E-89 340.9 6596 cellular  
organisms;Eukaryota;Opisthokonta;Metazoa;Eumetazoa;Bilateria;Protostomia;Spiralia;Lophotrochozoa;Mollusca;Bivalvia;Autobranchia;Heteroconchia;Euherterodonta;Imparidentia;Venerida;Veneroidea;Veneridae;Mercenaria;Mercenaria mercenaria

UdeM00000013234 29159 63.5 UdeM00000013234 XP\_011434093.1 61.5 39  
15 0 203 241 164 202 4.10E-07 63.5 29159 cellular  
organisms;Eukaryota;Opisthokonta;Metazoa;Eumetazoa;Bilateria;Protostomia;Spiralia;Lophotrochozoa;Mollusca;Bivalvia;Autobranchia;Pteriormorphia;Ostreida;Ostreioidea;Ostreidae;Crassostrea;Crassostrea gigas

UdeM00000013235 29159 187.2 UdeM00000013235 XP\_034318836.1 32.7 361  
195 8 5 318 7 366 5.10E-44 187.2 29159 cellular  
organisms;Eukaryota;Opisthokonta;Metazoa;Eumetazoa;Bilateria;Protostomia;Spiralia;Lophotrochozoa;Mollusca;Bivalvia;Autobranchia;Pteriormorphia;Ostreida;Ostreioidea;Ostreidae;Crassostrea;Crassostrea gigas

UdeM00000013236 6565 589.7 UdeM00000013236 XP\_022318046.1 43.2 806  
357 10 9 790 2 730 5.50E-165 589.7 6565 cellular  
organisms;Eukaryota;Opisthokonta;Metazoa;Eumetazoa;Bilateria;Protostomia;Spiralia;Lophotrochozoa;Mollusca;Bivalvia;Autobranchia;Pteriormorphia;Ostreida;Ostreioidea;Ostreidae;Crassostrea;Crassostrea virginica

UdeM00000013237 29159 211.8 UdeM00000013237 XP\_034310940.1 43.3 275  
147 2 46 311 456 730 1.20E-51 211.8 29159 cellular  
organisms;Eukaryota;Opisthokonta;Metazoa;Eumetazoa;Bilateria;Protostomia;



Spiralia;Lophotrochozoa;Mollusca;Bivalvia;Autobranchia;Pteriormorphia;Ostr  
eida;Ostreoidea;Ostreidae;Crassostrea;Crassostrea gigas  
UdeM00000013238 6565 436 UdeM00000013238 XP\_022318046.1 53 445  
191 5 3 443 2 432 6.00E-119 436 6565 cellular  
organisms;Eukaryota;Opisthokonta;Metazoa;Eumetazoa;Bilateria;Protostomia;  
Spiralia;Lophotrochozoa;Mollusca;Bivalvia;Autobranchia;Pteriormorphia;Ostr  
eida;Ostreoidea;Ostreidae;Crassostrea;Crassostrea virginica  
UdeM00000013239 1735272 1454.1 UdeM00000013239 XP\_041356018.1  
40.8 3504 1515 92 7 3265 147 3337 0.00E+00 1454.1  
1735272 cellular  
organisms;Eukaryota;Opisthokonta;Metazoa;Eumetazoa;Bilateria;Protostomia;  
Spiralia;Lophotrochozoa;Mollusca;Gastropoda;Neomphalina;Neomphaloidea;Pel  
tospiridae;Gigantopelta;Gigantopelta aegis  
UdeM00000013240 225164 77.8 UdeM00000013240 XP\_009054150.1 65.6  
61 21 0 1 61 1 61 7.70E-12 77.8 225164  
cellular  
organisms;Eukaryota;Opisthokonta;Metazoa;Eumetazoa;Bilateria;Protostomia;  
Spiralia;Lophotrochozoa;Mollusca;Gastropoda;Patellogastropoda;Lottioidea;  
Lottiidae;Lottia;Lottia gigantea  
UdeM00000013241 6596 274.2 UdeM00000013241 XP\_045188965.1 28.9 712  
421 17 43 739 77 718 5.00E-70 274.2 6596 cellular  
organisms;Eukaryota;Opisthokonta;Metazoa;Eumetazoa;Bilateria;Protostomia;  
Spiralia;Lophotrochozoa;Mollusca;Bivalvia;Autobranchia;Heteroconchia;Euhe  
terodonta;Imparidentia;Venerida;Veneroidea;Veneridae;Mercenaria;Mercenari  
a mercenaria  
UdeM00000013242 6596 292.7 UdeM00000013242 XP\_045184082.1 48.7 271  
132 5 23 289 17 284 5.00E-76 292.7 6596 cellular  
organisms;Eukaryota;Opisthokonta;Metazoa;Eumetazoa;Bilateria;Protostomia;  
Spiralia;Lophotrochozoa;Mollusca;Bivalvia;Autobranchia;Heteroconchia;Euhe  
terodonta;Imparidentia;Venerida;Veneroidea;Veneridae;Mercenaria;Mercenari  
a mercenaria  
UdeM00000013243 69319 81.3 UdeM00000013243 XP\_014295166.1 65.5 58  
20 0 19 76 8 65 6.30E-13 81.3 69319 cellular  
organisms;Eukaryota;Opisthokonta;Metazoa;Eumetazoa;Bilateria;Protostomia;  
Ecdysozoa;Panarthropoda;Arthropoda;Mandibulata;Pancrustacea;Hexapoda;Inse  
cta;Dicondylia;Pterygota;Neoptera;Endopterygota;Hymenoptera;Apocrita;Para  
sitoida;Ichneumonoidea;Braconidae;Microgastrinae;Microplitis;Microplitis  
demolitor  
UdeM00000013244 6565 221.9 UdeM00000013244 XP\_022327372.1 47.2 235  
123 1 2 236 348 581 8.90E-55 221.9 6565 cellular  
organisms;Eukaryota;Opisthokonta;Metazoa;Eumetazoa;Bilateria;Protostomia;  
Spiralia;Lophotrochozoa;Mollusca;Bivalvia;Autobranchia;Pteriormorphia;Ostr  
eida;Ostreoidea;Ostreidae;Crassostrea;Crassostrea virginica  
UdeM00000013245 6596 137.5 UdeM00000013245 XP\_045204106.1 71.6 88  
25 0 7 94 223 310 1.20E-29 137.5 6596 cellular  
organisms;Eukaryota;Opisthokonta;Metazoa;Eumetazoa;Bilateria;Protostomia;  
Spiralia;Lophotrochozoa;Mollusca;Bivalvia;Autobranchia;Heteroconchia;Euhe  
terodonta;Imparidentia;Venerida;Veneroidea;Veneridae;Mercenaria;Mercenari  
a mercenaria  
UdeM00000013246 6596 594.7 UdeM00000013246 XP\_045204674.1 51.8 581  
273 5 1 579 1 576 1.20E-166 594.7 6596 cellular  
organisms;Eukaryota;Opisthokonta;Metazoa;Eumetazoa;Bilateria;Protostomia;  
Spiralia;Lophotrochozoa;Mollusca;Bivalvia;Autobranchia;Heteroconchia;Euhe

terodonta;Imparidentia;Venerida;Veneroidea;Veneridae;Mercenaria;Mercenaria mercenaria  
 UdeM00000013248 69319 74.7 UdeM00000013248 XP\_014295166.1 55.7 61  
 27 0 16 76 5 65 5.90E-11 74.7 69319 cellular  
 organisms;Eukaryota;Opisthokonta;Metazoa;Eumetazoa;Bilateria;Protostomia;  
 Ecdysozoa;Panarthropoda;Arthropoda;Mandibulata;Pancrustacea;Hexapoda;Insecta;  
 Dicondylia;Pterygota;Neoptera;Endopterygota;Hymenoptera;Apocrita;Parasitoida;  
 Ichneumonoidea;Braconidae;Microgastrinae;Microplitis;Microplitis demolitor  
 UdeM00000013250 6573 171 UdeM00000013250 XP\_021379386.1 39.6 197  
 115 3 6 200 25 219 1.50E-39 171 6573 cellular  
 organisms;Eukaryota;Opisthokonta;Metazoa;Eumetazoa;Bilateria;Protostomia;  
 Spiralia;Lophotrochozoa;Mollusca;Bivalvia;Autobranchia;Pteriomorpha;Pectinida;  
 Pectinoidea;Pectinidae;Mizuhopecten;Mizuhopecten yessoensis  
 UdeM00000013249 6573 171.4 UdeM00000013249 XP\_021379386.1 39.6 197  
 115 3 36 230 25 219 1.30E-39 171.4 6573 cellular  
 organisms;Eukaryota;Opisthokonta;Metazoa;Eumetazoa;Bilateria;Protostomia;  
 Spiralia;Lophotrochozoa;Mollusca;Bivalvia;Autobranchia;Pteriomorpha;Pectinida;  
 Pectinoidea;Pectinidae;Mizuhopecten;Mizuhopecten yessoensis  
 UdeM00000013251 6596 265 UdeM00000013251 XP\_045184535.1 66.1 180  
 59 1 6 183 5 184 7.20E-68 265 6596 cellular  
 organisms;Eukaryota;Opisthokonta;Metazoa;Eumetazoa;Bilateria;Protostomia;  
 Spiralia;Lophotrochozoa;Mollusca;Bivalvia;Autobranchia;Heteroconchia;Euheterodonta;  
 Imparidentia;Venerida;Veneroidea;Veneridae;Mercenaria;Mercenaria mercenaria  
 UdeM00000013252 6596 867.1 UdeM00000013252 XP\_045183286.1 63.7 680  
 227 9 73 748 2 665 1.70E-248 867.1 6596 cellular  
 organisms;Eukaryota;Opisthokonta;Metazoa;Eumetazoa;Bilateria;Protostomia;  
 Spiralia;Lophotrochozoa;Mollusca;Bivalvia;Autobranchia;Heteroconchia;Euheterodonta;  
 Imparidentia;Venerida;Veneroidea;Veneridae;Mercenaria;Mercenaria mercenaria  
 UdeM00000013253 8364 58.2 UdeM00000013253 XP\_012810572.1 47.2 53  
 28 0 1 53 460 512 9.10E-06 58.2 8364 cellular  
 organisms;Eukaryota;Opisthokonta;Metazoa;Eumetazoa;Bilateria;Deuterostomia;  
 Chordata;Craniata;Vertebrata;Gnathostomata;Teleostomi;Euteleostomi;Sarcopterygii;  
 Dipnotetrapodomorpha;Tetrapoda;Amphibia;Batrachia;Anura;Pipoidea;Pipidae;  
 Xenopodinae;Xenopus;Silurana;Xenopus tropicalis  
 UdeM00000013254 1735272 218.8 UdeM00000013254 XP\_041355495.1 41.7  
 271 151 3 434 697 214 484 2.20E-53 218.8 1735272 cellular  
 organisms;Eukaryota;Opisthokonta;Metazoa;Eumetazoa;Bilateria;Protostomia;  
 Spiralia;Lophotrochozoa;Mollusca;Gastropoda;Neomphalina;Neomphaloidea;Peltospiridae;  
 Gigantopelta;Gigantopelta aegis  
 UdeM00000013254 1735272 85.1 UdeM00000013254 XP\_041355495.1 41.5  
 94 53 1 351 442 46 139 3.80E-13 85.1 1735272 cellular  
 organisms;Eukaryota;Opisthokonta;Metazoa;Eumetazoa;Bilateria;Protostomia;  
 Spiralia;Lophotrochozoa;Mollusca;Gastropoda;Neomphalina;Neomphaloidea;Peltospiridae;  
 Gigantopelta;Gigantopelta aegis  
 UdeM00000013255 1735272 218.8 UdeM00000013255 XP\_041355495.1 41.7  
 271 151 3 25 288 214 484 9.10E-54 218.8 1735272 cellular  
 organisms;Eukaryota;Opisthokonta;Metazoa;Eumetazoa;Bilateria;Protostomia;

Spiralia; Lophotrochozoa; Mollusca; Gastropoda; Neomphalina; Neomphaloidea; Pelto-  
 tospiridae; Gigantopelta; Gigantopelta aegis

UdeM00000013256 6596 413.3 UdeM00000013256 XP\_045190792.1 43.1 499  
 279 4 1 496 1 497 4.40E-112 413.3 6596 cellular  
 organisms; Eukaryota; Opisthokonta; Metazoa; Eumetazoa; Bilateria; Protostomia;  
 Spiralia; Lophotrochozoa; Mollusca; Bivalvia; Autobranchia; Heteroconchia; Eue-  
 terodonta; Imparidentia; Venerida; Veneroidea; Veneridae; Mercenaria; Mercenari  
 a mercenaria

UdeM00000013258 6596 282 UdeM00000013258 XP\_045190792.1 47 287  
 152 0 4 290 210 496 8.90E-73 282 6596 cellular  
 organisms; Eukaryota; Opisthokonta; Metazoa; Eumetazoa; Bilateria; Protostomia;  
 Spiralia; Lophotrochozoa; Mollusca; Bivalvia; Autobranchia; Heteroconchia; Eue-  
 terodonta; Imparidentia; Venerida; Veneroidea; Veneridae; Mercenaria; Mercenari  
 a mercenaria

UdeM00000013259 6596 439.9 UdeM00000013259 XP\_045190792.1 44.9 499  
 271 3 1 497 1 497 4.30E-120 439.9 6596 cellular  
 organisms; Eukaryota; Opisthokonta; Metazoa; Eumetazoa; Bilateria; Protostomia;  
 Spiralia; Lophotrochozoa; Mollusca; Bivalvia; Autobranchia; Heteroconchia; Eue-  
 terodonta; Imparidentia; Venerida; Veneroidea; Veneridae; Mercenaria; Mercenari  
 a mercenaria

UdeM00000013260 6579 201.4 UdeM00000013260 XP\_033743634.1 35.9 309  
 155 3 8 316 73 338 1.80E-48 201.4 6579 cellular  
 organisms; Eukaryota; Opisthokonta; Metazoa; Eumetazoa; Bilateria; Protostomia;  
 Spiralia; Lophotrochozoa; Mollusca; Bivalvia; Autobranchia; Pteriomorphia; Pect-  
 inida; Pectinoidea; Pectinidae; Pecten; Pecten maximus

UdeM00000013261 6596 403.7 UdeM00000013261 XP\_045190792.1 42.9 499  
 281 3 1 497 1 497 3.50E-109 403.7 6596 cellular  
 organisms; Eukaryota; Opisthokonta; Metazoa; Eumetazoa; Bilateria; Protostomia;  
 Spiralia; Lophotrochozoa; Mollusca; Bivalvia; Autobranchia; Heteroconchia; Eue-  
 terodonta; Imparidentia; Venerida; Veneroidea; Veneridae; Mercenaria; Mercenari  
 a mercenaria

UdeM00000013262 6596 307 UdeM00000013262 XP\_045190792.1 39.3 399  
 217 4 47 422 102 498 3.70E-80 307 6596 cellular  
 organisms; Eukaryota; Opisthokonta; Metazoa; Eumetazoa; Bilateria; Protostomia;  
 Spiralia; Lophotrochozoa; Mollusca; Bivalvia; Autobranchia; Heteroconchia; Eue-  
 terodonta; Imparidentia; Venerida; Veneroidea; Veneridae; Mercenaria; Mercenari  
 a mercenaria

UdeM00000013263 6500 116.3 UdeM00000013263 XP\_035826490.1 31.2 256  
 141 6 2 225 3 255 5.60E-23 116.3 6500 cellular  
 organisms; Eukaryota; Opisthokonta; Metazoa; Eumetazoa; Bilateria; Protostomia;  
 Spiralia; Lophotrochozoa; Mollusca; Gastropoda; Heterobranchia; Euthyneura; Tec-  
 tipleura; Aplysiida; Aplysioidea; Aplysiidae; Aplysia; Aplysia californica

UdeM00000013264 6596 427.9 UdeM00000013264 XP\_045190792.1 43.1 501  
 280 4 1 499 1 498 1.70E-116 427.9 6596 cellular  
 organisms; Eukaryota; Opisthokonta; Metazoa; Eumetazoa; Bilateria; Protostomia;  
 Spiralia; Lophotrochozoa; Mollusca; Bivalvia; Autobranchia; Heteroconchia; Eue-  
 terodonta; Imparidentia; Venerida; Veneroidea; Veneridae; Mercenaria; Mercenari  
 a mercenaria

UdeM00000013265 6596 433.3 UdeM00000013265 XP\_045190792.1 44.6 498  
 272 3 1 496 1 496 4.10E-118 433.3 6596 cellular  
 organisms; Eukaryota; Opisthokonta; Metazoa; Eumetazoa; Bilateria; Protostomia;  
 Spiralia; Lophotrochozoa; Mollusca; Bivalvia; Autobranchia; Heteroconchia; Eue-  
 terodonta; Imparidentia; Venerida; Veneroidea; Veneridae; Mercenaria; Mercenari  
 a mercenaria

UdeM00000013266 6596 433 UdeM00000013266 XP\_045190792.1 44.3 499  
 274 3 1 497 1 497 5.30E-118 433 6596 cellular  
 organisms;Eukaryota;Opisthokonta;Metazoa;Eumetazoa;Bilateria;Protostomia;  
 Spiralia;Lophotrochozoa;Mollusca;Bivalvia;Autobranchia;Heteroconchia;Euhe  
 terodonta;Imparidentia;Venerida;Veneroidea;Veneridae;Mercenaria;Mercenari  
 a mercenaria  
 UdeM00000013267 6579 436 UdeM00000013267 XP\_033725827.1 73.3 393  
 98 4 38 430 1 386 1.10E-118 436 6579 cellular  
 organisms;Eukaryota;Opisthokonta;Metazoa;Eumetazoa;Bilateria;Protostomia;  
 Spiralia;Lophotrochozoa;Mollusca;Bivalvia;Autobranchia;Pteriormorphia;Pect  
 inida;Pectinoidea;Pectinidae;Pecten;Pecten maximus  
 UdeM00000013267 6579 57 UdeM00000013267 XP\_033725827.1 65 40  
 14 0 853 892 780 819 1.40E-04 57 6579 cellular  
 organisms;Eukaryota;Opisthokonta;Metazoa;Eumetazoa;Bilateria;Protostomia;  
 Spiralia;Lophotrochozoa;Mollusca;Bivalvia;Autobranchia;Pteriormorphia;Pect  
 inida;Pectinoidea;Pectinidae;Pecten;Pecten maximus  
 UdeM00000013268 6579 436 UdeM00000013268 XP\_033725827.1 73.3 393  
 98 4 37 429 1 386 1.10E-118 436 6579 cellular  
 organisms;Eukaryota;Opisthokonta;Metazoa;Eumetazoa;Bilateria;Protostomia;  
 Spiralia;Lophotrochozoa;Mollusca;Bivalvia;Autobranchia;Pteriormorphia;Pect  
 inida;Pectinoidea;Pectinidae;Pecten;Pecten maximus  
 UdeM00000013268 6579 57 UdeM00000013268 XP\_033725827.1 65 40  
 14 0 852 891 780 819 1.40E-04 57 6579 cellular  
 organisms;Eukaryota;Opisthokonta;Metazoa;Eumetazoa;Bilateria;Protostomia;  
 Spiralia;Lophotrochozoa;Mollusca;Bivalvia;Autobranchia;Pteriormorphia;Pect  
 inida;Pectinoidea;Pectinidae;Pecten;Pecten maximus  
 UdeM00000013269 6565 540.8 UdeM00000013269 XP\_022312087.1 37.4 756  
 416 18 11 748 28 744 3.50E-150 540.8 6565 cellular  
 organisms;Eukaryota;Opisthokonta;Metazoa;Eumetazoa;Bilateria;Protostomia;  
 Spiralia;Lophotrochozoa;Mollusca;Bivalvia;Autobranchia;Pteriormorphia;Ostr  
 eida;Ostreoidea;Ostreidae;Crassostrea;Crassostrea virginica  
 UdeM00000013270 6573 241.5 UdeM00000013270 XP\_021340469.1 32.6 374  
 207 5 25 361 360 725 9.70E-60 241.5 6573 cellular  
 organisms;Eukaryota;Opisthokonta;Metazoa;Eumetazoa;Bilateria;Protostomia;  
 Spiralia;Lophotrochozoa;Mollusca;Bivalvia;Autobranchia;Pteriormorphia;Pect  
 inida;Pectinoidea;Pectinidae;Mizuhopecten;Mizuhopecten yessoensis  
 UdeM00000013271 6596 229.2 UdeM00000013271 XP\_045206212.1 53.4 204  
 95 0 4 207 327 530 4.90E-57 229.2 6596 cellular  
 organisms;Eukaryota;Opisthokonta;Metazoa;Eumetazoa;Bilateria;Protostomia;  
 Spiralia;Lophotrochozoa;Mollusca;Bivalvia;Autobranchia;Heteroconchia;Euhe  
 terodonta;Imparidentia;Venerida;Veneroidea;Veneridae;Mercenaria;Mercenari  
 a mercenaria  
 UdeM00000013272 6596 96.7 UdeM00000013272 XP\_045205540.1 31.2 321  
 163 10 1 272 1 312 5.20E-17 96.7 6596 cellular  
 organisms;Eukaryota;Opisthokonta;Metazoa;Eumetazoa;Bilateria;Protostomia;  
 Spiralia;Lophotrochozoa;Mollusca;Bivalvia;Autobranchia;Heteroconchia;Euhe  
 terodonta;Imparidentia;Venerida;Veneroidea;Veneridae;Mercenaria;Mercenari  
 a mercenaria  
 UdeM00000013275 7741 77 UdeM00000013275 XP\_019622111.1 49.4 81  
 37 1 5 85 1 77 1.40E-11 77 7741 cellular  
 organisms;Eukaryota;Opisthokonta;Metazoa;Eumetazoa;Bilateria;Deuterostomi  
 a;Chordata;Cephalochordata;Leptocardii;Amphioxiformes;Branchiostomidae;Br  
 anchiostoma;Branchiostoma belcheri

UdeM00000013276 6565 62.4 UdeM00000013276 XP\_022299023.1 48.5 68  
 34 1 1 68 148 214 2.70E-07 62.4 6565 cellular  
 organisms;Eukaryota;Opisthokonta;Metazoa;Eumetazoa;Bilateria;Protostomia;  
 Spiralia;Lophotrochozoa;Mollusca;Bivalvia;Autobranchia;Pteriomorphia;Ostr  
 eida;Ostreoidea;Ostreidae;Crassostrea;Crassostrea virginica  
 UdeM00000013277 6596 433 UdeM00000013277 XP\_045183321.1 73.2 284  
 74 2 1 282 1 284 3.00E-118 433 6596 cellular  
 organisms;Eukaryota;Opisthokonta;Metazoa;Eumetazoa;Bilateria;Protostomia;  
 Spiralia;Lophotrochozoa;Mollusca;Bivalvia;Autobranchia;Heteroconchia;Euhe  
 terodonta;Imparidentia;Venerida;Veneroidea;Veneridae;Mercenaria;Mercenari  
 a mercenaria  
 UdeM00000013278 6596 246.9 UdeM00000013278 XP\_045180518.1 34.6 494  
 286 8 1 473 1 478 5.10E-62 246.9 6596 cellular  
 organisms;Eukaryota;Opisthokonta;Metazoa;Eumetazoa;Bilateria;Protostomia;  
 Spiralia;Lophotrochozoa;Mollusca;Bivalvia;Autobranchia;Heteroconchia;Euhe  
 terodonta;Imparidentia;Venerida;Veneroidea;Veneridae;Mercenaria;Mercenari  
 a mercenaria  
 UdeM00000013279 6596 255 UdeM00000013279 XP\_045180518.1 34.4 497  
 283 8 1 473 1 478 1.90E-64 255 6596 cellular  
 organisms;Eukaryota;Opisthokonta;Metazoa;Eumetazoa;Bilateria;Protostomia;  
 Spiralia;Lophotrochozoa;Mollusca;Bivalvia;Autobranchia;Heteroconchia;Euhe  
 terodonta;Imparidentia;Venerida;Veneroidea;Veneridae;Mercenaria;Mercenari  
 a mercenaria  
 UdeM00000013280 6573 97.1 UdeM00000013280 XP\_021377465.1 26.5 294  
 149 10 3 290 132 364 5.70E-17 97.1 6573 cellular  
 organisms;Eukaryota;Opisthokonta;Metazoa;Eumetazoa;Bilateria;Protostomia;  
 Spiralia;Lophotrochozoa;Mollusca;Bivalvia;Autobranchia;Pteriomorphia;Pect  
 inida;Pectinoidea;Pectinidae;Mizuhopecten;Mizuhopecten yessoensis  
 UdeM00000013282 6596 63.5 UdeM00000013282 XP\_045209553.1 24.9 177  
 122 4 111 281 32 203 7.20E-07 63.5 6596 cellular  
 organisms;Eukaryota;Opisthokonta;Metazoa;Eumetazoa;Bilateria;Protostomia;  
 Spiralia;Lophotrochozoa;Mollusca;Bivalvia;Autobranchia;Heteroconchia;Euhe  
 terodonta;Imparidentia;Venerida;Veneroidea;Veneridae;Mercenaria;Mercenari  
 a mercenaria  
 UdeM00000013284 6596 181 UdeM00000013284 XP\_045159530.1 25.1 716  
 468 23 56 742 59 735 5.50E-42 181 6596 cellular  
 organisms;Eukaryota;Opisthokonta;Metazoa;Eumetazoa;Bilateria;Protostomia;  
 Spiralia;Lophotrochozoa;Mollusca;Bivalvia;Autobranchia;Heteroconchia;Euhe  
 terodonta;Imparidentia;Venerida;Veneroidea;Veneridae;Mercenaria;Mercenari  
 a mercenaria  
 UdeM00000013285 6573 89.7 UdeM00000013285 XP\_021368035.1 29.6 226  
 122 7 57 280 70 260 6.60E-15 89.7 6573 cellular  
 organisms;Eukaryota;Opisthokonta;Metazoa;Eumetazoa;Bilateria;Protostomia;  
 Spiralia;Lophotrochozoa;Mollusca;Bivalvia;Autobranchia;Pteriomorphia;Pect  
 inida;Pectinoidea;Pectinidae;Mizuhopecten;Mizuhopecten yessoensis  
 UdeM00000013287 6573 165.2 UdeM00000013287 XP\_021368035.1 31.2 349  
 201 7 57 399 70 385 2.60E-37 165.2 6573 cellular  
 organisms;Eukaryota;Opisthokonta;Metazoa;Eumetazoa;Bilateria;Protostomia;  
 Spiralia;Lophotrochozoa;Mollusca;Bivalvia;Autobranchia;Pteriomorphia;Pect  
 inida;Pectinoidea;Pectinidae;Mizuhopecten;Mizuhopecten yessoensis  
 UdeM00000013288 6579 610.1 UdeM00000013288 XP\_033725542.1 43.2 776  
 418 6 1 755 5 778 3.70E-171 610.1 6579 cellular  
 organisms;Eukaryota;Opisthokonta;Metazoa;Eumetazoa;Bilateria;Protostomia;

Spiralia; Lophotrochozoa; Mollusca; Bivalvia; Autobranchia; Pteriomorphia; Pectinida; Pectinoidea; Pectinidae; Pecten; Pecten maximus

UdeM00000013289 8218 291.2 UdeM00000013289 XP\_034073629.1 56.5 223  
94 1 173 395 120 339 3.20E-75 291.2 8218 cellular  
organisms; Eukaryota; Opisthokonta; Metazoa; Eumetazoa; Bilateria; Deuterostomia; Chordata; Craniata; Vertebrata; Gnathostomata; Teleostomi; Euteleostomi; Actinopterygii; Actinopteri; Neopterygii; Teleostei; Osteoglossocephalai; Clupecocephala; Euteleostei; Neoteleostei; Eurypterygia; Ctenosquamata; Acanthomorphata; Euacanthomorphacea; Percomorphaceae; Eupercaria; Perciformes; Notothenioidei; Bathydraconidae; Gymnodraco; Gymnodraco acuticeps

UdeM00000013290 6596 377.5 UdeM00000013290 XP\_045209666.1 37.5 512  
309 4 45 554 28 530 3.00E-101 377.5 6596 cellular  
organisms; Eukaryota; Opisthokonta; Metazoa; Eumetazoa; Bilateria; Protostomia; Spiralia; Lophotrochozoa; Mollusca; Bivalvia; Autobranchia; Heteroconchia; Euheterodonta; Imparidentia; Venerida; Veneroidea; Veneridae; Mercenaria; Mercenaria mercenaria

UdeM00000013291 6596 151.8 UdeM00000013291 XP\_045207017.1 55.6 180  
80 0 21 200 22 201 9.50E-34 151.8 6596 cellular  
organisms; Eukaryota; Opisthokonta; Metazoa; Eumetazoa; Bilateria; Protostomia; Spiralia; Lophotrochozoa; Mollusca; Bivalvia; Autobranchia; Heteroconchia; Euheterodonta; Imparidentia; Venerida; Veneroidea; Veneridae; Mercenaria; Mercenaria mercenaria

UdeM00000013292 6565 273.9 UdeM00000013292 XP\_022321508.1 45.6 349  
144 6 4 324 7 337 6.60E-70 273.9 6565 cellular  
organisms; Eukaryota; Opisthokonta; Metazoa; Eumetazoa; Bilateria; Protostomia; Spiralia; Lophotrochozoa; Mollusca; Bivalvia; Autobranchia; Pteriomorphia; Ostreida; Ostreoidea; Ostreidae; Crassostrea; Crassostrea virginica

UdeM00000013293 6579 374 UdeM00000013293 XP\_033758572.1 67.7 319  
69 11 1 294 1 310 1.70E-100 374 6579 cellular  
organisms; Eukaryota; Opisthokonta; Metazoa; Eumetazoa; Bilateria; Protostomia; Spiralia; Lophotrochozoa; Mollusca; Bivalvia; Autobranchia; Pteriomorphia; Pectinida; Pectinoidea; Pectinidae; Pecten; Pecten maximus

UdeM00000013294 29159 346.3 UdeM00000013294 XP\_034334854.1 32.7 648  
354 19 5 648 983 1552 8.70E-92 346.3 29159 cellular  
organisms; Eukaryota; Opisthokonta; Metazoa; Eumetazoa; Bilateria; Protostomia; Spiralia; Lophotrochozoa; Mollusca; Bivalvia; Autobranchia; Pteriomorphia; Ostreida; Ostreoidea; Ostreidae; Crassostrea; Crassostrea gigas

UdeM00000013296 6596 388.7 UdeM00000013296 XP\_045156625.1 30.8 825  
525 19 47 853 82 878 2.00E-104 388.7 6596 cellular  
organisms; Eukaryota; Opisthokonta; Metazoa; Eumetazoa; Bilateria; Protostomia; Spiralia; Lophotrochozoa; Mollusca; Bivalvia; Autobranchia; Heteroconchia; Euheterodonta; Imparidentia; Venerida; Veneroidea; Veneridae; Mercenaria; Mercenaria mercenaria

UdeM00000013297 7739 555.8 UdeM00000013297 XP\_035696678.1 53.4 513  
222 3 2 497 423 935 5.40E-155 555.8 7739 cellular  
organisms; Eukaryota; Opisthokonta; Metazoa; Eumetazoa; Bilateria; Deuterostomia; Chordata; Cephalochordata; Leptocardii; Amphioxiformes; Branchiostomidae; Branchiostoma; Branchiostoma floridae

UdeM00000013298 6573 515.4 UdeM00000013298 XP\_021344034.1 43.7 666  
366 6 1 661 23 684 1.10E-142 515.4 6573 cellular  
organisms; Eukaryota; Opisthokonta; Metazoa; Eumetazoa; Bilateria; Protostomia; Spiralia; Lophotrochozoa; Mollusca; Bivalvia; Autobranchia; Pteriomorphia; Pectinida; Pectinoidea; Pectinidae; Mizuhopecten; Mizuhopecten yessoensis

UdeM00000013300 6565 434.9 UdeM00000013300 XP\_022326296.1 63.3 349  
 126 1 1 349 18 364 1.00E-118 434.9 6565 cellular  
 organisms;Eukaryota;Opisthokonta;Metazoa;Eumetazoa;Bilateria;Protostomia;  
 Spiralia;Lophotrochozoa;Mollusca;Bivalvia;Autobranchia;Pteriormorphia;Ostr  
 eida;Ostreoidea;Ostreidae;Crassostrea;Crassostrea virginica  
 UdeM00000013303 336983 206.5 UdeM00000013303 XP\_011818337.1 70.8  
 144 41 1 1 144 1 143 2.40E-50 206.5 336983  
 cellular  
 organisms;Eukaryota;Opisthokonta;Metazoa;Eumetazoa;Bilateria;Deuterostomi  
 a;Chordata;Craniata;Vertebrata;Gnathostomata;Teleostomi;Euteleostomi;Sarc  
 opterygii;Dipnotetrapodomorpha;Tetrapoda;Amniota;Mammalia;Theria;Eutheria  
 ;Boreoeutheria;Euarchontoglires;Primates;Haplorrhini;Simiiformes;Catarri  
 ni;Cercopithecoidea;Cercopithecidae;Colobinae;Colobus;Colobus  
 angolensis;Colobus angolensis palliatus  
 UdeM00000013304 6565 218.8 UdeM00000013304 XP\_022344891.1 50.9 228  
 105 2 5 225 1 228 8.20E-54 218.8 6565 cellular  
 organisms;Eukaryota;Opisthokonta;Metazoa;Eumetazoa;Bilateria;Protostomia;  
 Spiralia;Lophotrochozoa;Mollusca;Bivalvia;Autobranchia;Pteriormorphia;Ostr  
 eida;Ostreoidea;Ostreidae;Crassostrea;Crassostrea virginica  
 UdeM00000013305 6579 80.1 UdeM00000013305 XP\_033761355.1 46.1 76  
 35 1 4 73 154 229 1.30E-12 80.1 6579 cellular  
 organisms;Eukaryota;Opisthokonta;Metazoa;Eumetazoa;Bilateria;Protostomia;  
 Spiralia;Lophotrochozoa;Mollusca;Bivalvia;Autobranchia;Pteriormorphia;Pect  
 inida;Pectinoidea;Pectinidae;Pecten;Pecten maximus  
 UdeM00000013306 30522 273.5 UdeM00000013306 XP\_027388104.1 89.9 149  
 15 0 1 149 1 149 1.60E-70 273.5 30522 cellular  
 organisms;Eukaryota;Opisthokonta;Metazoa;Eumetazoa;Bilateria;Deuterostomi  
 a;Chordata;Craniata;Vertebrata;Gnathostomata;Teleostomi;Euteleostomi;Sarc  
 opterygii;Dipnotetrapodomorpha;Tetrapoda;Amniota;Mammalia;Theria;Eutheria  
 ;Boreoeutheria;Laurasiatheria;Artiodactyla;Ruminantia;Pecora;Bovidae;Bovi  
 nae;Bos;Bos indicus x Bos taurus  
 UdeM00000013307 6579 334.3 UdeM00000013307 XP\_033733776.1 55.9 304  
 130 4 2 304 381 681 1.60E-88 334.3 6579 cellular  
 organisms;Eukaryota;Opisthokonta;Metazoa;Eumetazoa;Bilateria;Protostomia;  
 Spiralia;Lophotrochozoa;Mollusca;Bivalvia;Autobranchia;Pteriormorphia;Pect  
 inida;Pectinoidea;Pectinidae;Pecten;Pecten maximus  
 UdeM00000013308 6565 226.1 UdeM00000013308 XP\_022333190.1 55.7 212  
 91 1 1 209 157 368 4.20E-56 226.1 6565 cellular  
 organisms;Eukaryota;Opisthokonta;Metazoa;Eumetazoa;Bilateria;Protostomia;  
 Spiralia;Lophotrochozoa;Mollusca;Bivalvia;Autobranchia;Pteriormorphia;Ostr  
 eida;Ostreoidea;Ostreidae;Crassostrea;Crassostrea virginica  
 UdeM00000013309 7741 255.4 UdeM00000013309 XP\_019640655.1 52.5 240  
 110 3 5 242 1 238 7.40E-65 255.4 7741 cellular  
 organisms;Eukaryota;Opisthokonta;Metazoa;Eumetazoa;Bilateria;Deuterostomi  
 a;Chordata;Cephalochordata;Leptocardii;Amphioxiformes;Branchiostomidae;Br  
 anchiostoma;Branchiostoma belcheri  
 UdeM00000013310 29159 196.8 UdeM00000013310 XP\_011416055.1 53.8 186  
 78 3 1 183 1 181 2.40E-47 196.8 29159 cellular  
 organisms;Eukaryota;Opisthokonta;Metazoa;Eumetazoa;Bilateria;Protostomia;  
 Spiralia;Lophotrochozoa;Mollusca;Bivalvia;Autobranchia;Pteriormorphia;Ostr  
 eida;Ostreoidea;Ostreidae;Crassostrea;Crassostrea gigas  
 UdeM00000013312 6579 258.1 UdeM00000013312 XP\_033758668.1 43.1 297  
 168 1 5 301 566 861 1.50E-65 258.1 6579 cellular  
 organisms;Eukaryota;Opisthokonta;Metazoa;Eumetazoa;Bilateria;Protostomia;

Spiralia;Lophotrochozoa;Mollusca;Bivalvia;Autobranchia;Pteriormorphia;Pectinida;Pectinoidea;Pectinidae;Pecten;Pecten maximus  
UdeM00000013314 6596 426.8 UdeM00000013314 XP\_045190792.1 42.4 500  
284 3 1 498 1 498 3.80E-116 426.8 6596 cellular  
organisms;Eukaryota;Opisthokonta;Metazoa;Eumetazoa;Bilateria;Protostomia;Spiralia;Lophotrochozoa;Mollusca;Bivalvia;Autobranchia;Heteroconchia;Euheterodonta;Imparidentia;Venerida;Veneroidea;Veneridae;Mercenaria;Mercenaria mercenaria  
UdeM00000013315 6596 472.6 UdeM00000013315 XP\_045207349.1 37.8 897  
489 16 1 855 35 904 1.00E-129 472.6 6596 cellular  
organisms;Eukaryota;Opisthokonta;Metazoa;Eumetazoa;Bilateria;Protostomia;Spiralia;Lophotrochozoa;Mollusca;Bivalvia;Autobranchia;Heteroconchia;Euheterodonta;Imparidentia;Venerida;Veneroidea;Veneridae;Mercenaria;Mercenaria mercenaria  
UdeM00000013316 6579 257.7 UdeM00000013316 XP\_033758668.1 41.6 298  
173 1 58 355 565 861 2.20E-65 257.7 6579 cellular  
organisms;Eukaryota;Opisthokonta;Metazoa;Eumetazoa;Bilateria;Protostomia;Spiralia;Lophotrochozoa;Mollusca;Bivalvia;Autobranchia;Pteriormorphia;Pectinida;Pectinoidea;Pectinidae;Pecten;Pecten maximus  
UdeM00000013317 6579 260 UdeM00000013317 XP\_033758668.1 41.9 298  
172 1 4 301 565 861 3.80E-66 260 6579 cellular  
organisms;Eukaryota;Opisthokonta;Metazoa;Eumetazoa;Bilateria;Protostomia;Spiralia;Lophotrochozoa;Mollusca;Bivalvia;Autobranchia;Pteriormorphia;Pectinida;Pectinoidea;Pectinidae;Pecten;Pecten maximus  
UdeM00000013318 6573 334.3 UdeM00000013318 XP\_021372647.1 28 847  
538 16 39 823 25 861 4.30E-88 334.3 6573 cellular  
organisms;Eukaryota;Opisthokonta;Metazoa;Eumetazoa;Bilateria;Protostomia;Spiralia;Lophotrochozoa;Mollusca;Bivalvia;Autobranchia;Pteriormorphia;Pectinida;Pectinoidea;Pectinidae;Mizuhopecten;Mizuhopecten yessoensis  
UdeM00000013319 6579 273.5 UdeM00000013319 XP\_033758668.1 40.4 329  
195 1 2 330 534 861 3.70E-70 273.5 6579 cellular  
organisms;Eukaryota;Opisthokonta;Metazoa;Eumetazoa;Bilateria;Protostomia;Spiralia;Lophotrochozoa;Mollusca;Bivalvia;Autobranchia;Pteriormorphia;Pectinida;Pectinoidea;Pectinidae;Pecten;Pecten maximus  
UdeM00000013320 1735272 371.3 UdeM00000013320 XP\_041353366.1 35.6  
539 341 5 90 627 41 574 2.40E-99 371.3 1735272  
cellular  
organisms;Eukaryota;Opisthokonta;Metazoa;Eumetazoa;Bilateria;Protostomia;Spiralia;Lophotrochozoa;Mollusca;Gastropoda;Neomphalina;Neomphaloidea;Peltospiridae;Gigantopelta;Gigantopelta aegis  
UdeM00000013327 48498 63.2 UdeM00000013327 XP\_020632604.1 25 176  
119 5 118 287 208 376 1.00E-06 63.2 48498 cellular  
organisms;Eukaryota;Opisthokonta;Metazoa;Eumetazoa;Cnidaria;Anthozoa;Hexacorallia;Scleractinia;Faviina;Merulinidae;Orbicella;Orbicella faveolata  
UdeM00000013329 6573 65.9 UdeM00000013329 XP\_021366345.1 29.3 164  
101 6 193 350 53 207 1.60E-07 65.9 6573 cellular  
organisms;Eukaryota;Opisthokonta;Metazoa;Eumetazoa;Bilateria;Protostomia;Spiralia;Lophotrochozoa;Mollusca;Bivalvia;Autobranchia;Pteriormorphia;Pectinida;Pectinoidea;Pectinidae;Mizuhopecten;Mizuhopecten yessoensis  
UdeM00000013337 48498 67 UdeM00000013337 XP\_020632604.1 31.7 161  
93 8 12 164 225 376 4.00E-08 67 48498 cellular  
organisms;Eukaryota;Opisthokonta;Metazoa;Eumetazoa;Cnidaria;Anthozoa;Hexacorallia;Scleractinia;Faviina;Merulinidae;Orbicella;Orbicella faveolata



UdeM00000013339 1735272 66.2 UdeM00000013339 XP\_041372976.1 24.7  
 239 147 8 87 299 188 419 9.40E-08 66.2 1735272  
 cellular  
 organisms;Eukaryota;Opisthokonta;Metazoa;Eumetazoa;Bilateria;Protostomia;  
 Spiralia;Lophotrochozoa;Mollusca;Gastropoda;Neomphalina;Neomphaloidea;Pel  
 tospiridae;Gigantopelta;Gigantopelta aegis  
 UdeM00000013340 400727 73.6 UdeM00000013340 XP\_025100004.1 28.2  
 170 99 4 265 417 536 699 9.60E-10 73.6 400727  
 cellular  
 organisms;Eukaryota;Opisthokonta;Metazoa;Eumetazoa;Bilateria;Protostomia;  
 Spiralia;Lophotrochozoa;Mollusca;Gastropoda;Caenogastropoda;Architaeniogl  
 ossa;Ampullarioidea;Ampullariidae;Pomacea;Pomacea canaliculata  
 UdeM00000013341 400727 91.3 UdeM00000013341 XP\_025100004.1 32.7  
 171 103 5 265 430 536 699 4.60E-15 91.3 400727  
 cellular  
 organisms;Eukaryota;Opisthokonta;Metazoa;Eumetazoa;Bilateria;Protostomia;  
 Spiralia;Lophotrochozoa;Mollusca;Gastropoda;Caenogastropoda;Architaeniogl  
 ossa;Ampullarioidea;Ampullariidae;Pomacea;Pomacea canaliculata  
 UdeM00000013347 1735272 126.3 UdeM00000013347 XP\_041360711.1 36.5  
 192 113 4 5 194 6 190 4.80E-26 126.3 1735272  
 cellular  
 organisms;Eukaryota;Opisthokonta;Metazoa;Eumetazoa;Bilateria;Protostomia;  
 Spiralia;Lophotrochozoa;Mollusca;Gastropoda;Neomphalina;Neomphaloidea;Pel  
 tospiridae;Gigantopelta;Gigantopelta aegis  
 UdeM00000013350 1735272 90.1 UdeM00000013350 XP\_041373020.1 26.2  
 317 198 13 99 399 469 765 9.60E-15 90.1 1735272  
 cellular  
 organisms;Eukaryota;Opisthokonta;Metazoa;Eumetazoa;Bilateria;Protostomia;  
 Spiralia;Lophotrochozoa;Mollusca;Gastropoda;Neomphalina;Neomphaloidea;Pel  
 tospiridae;Gigantopelta;Gigantopelta aegis  
 UdeM00000013351 1735272 387.5 UdeM00000013351 XP\_041353366.1 36.4  
 583 350 7 1 571 1 574 3.00E-104 387.5 1735272  
 cellular  
 organisms;Eukaryota;Opisthokonta;Metazoa;Eumetazoa;Bilateria;Protostomia;  
 Spiralia;Lophotrochozoa;Mollusca;Gastropoda;Neomphalina;Neomphaloidea;Pel  
 tospiridae;Gigantopelta;Gigantopelta aegis  
 UdeM00000013357 46514 144.1 UdeM00000013357 XP\_038075930.1 44.7 170  
 86 4 2 168 58 222 1.70E-31 144.1 46514 cellular  
 organisms;Eukaryota;Opisthokonta;Metazoa;Eumetazoa;Bilateria;Deuterostomi  
 a;Echinodermata;Eleutherozoa;Asterozoa;Asteroidea;Valvatacea;Valvatida;As  
 terinidae;Patiria;Patiria miniata  
 UdeM00000013358 37621 77 UdeM00000013358 XP\_014678955.1 41.2 102  
 57 2 81 179 52 153 5.00E-11 77 37621 cellular  
 organisms;Eukaryota;Opisthokonta;Metazoa;Eumetazoa;Bilateria;Protostomia;  
 Ecdysozoa;Scalidophora;Priapulida;Priapulimorpha;Priapulimorphida;Priapul  
 idae;Priapululus;Priapululus caudatus  
 UdeM00000013359 400727 1554.7 UdeM00000013359 XP\_025100221.1  
 76.9 993 225 2 60 1052 41 1029 0.00E+00 1554.7  
 400727 cellular  
 organisms;Eukaryota;Opisthokonta;Metazoa;Eumetazoa;Bilateria;Protostomia;  
 Spiralia;Lophotrochozoa;Mollusca;Gastropoda;Caenogastropoda;Architaeniogl  
 ossa;Ampullarioidea;Ampullariidae;Pomacea;Pomacea canaliculata  
 UdeM00000013360 6596 1543.9 UdeM00000013360 XP\_045207606.1 75.1  
 1017 251 2 110 1125 17 1032 0.00E+00 1543.9 6596

cellular  
organisms;Eukaryota;Opisthokonta;Metazoa;Eumetazoa;Bilateria;Protostomia;  
Spiralia;Lophotrochozoa;Mollusca;Bivalvia;Autobranhia;Heteroconchia;Euhe  
terodonta;Imparidentia;Venerida;Veneroidea;Veneridae;Mercenaria;Mercenari  
a mercenaria

|                 |      |        |   |                 |                |      |          |        |      |
|-----------------|------|--------|---|-----------------|----------------|------|----------|--------|------|
| UdeM00000013361 | 6596 | 1792.3 |   | UdeM00000013361 | XP_045207606.1 | 85.9 |          |        |      |
| 1034            | 144  | 2      | 1 | 1034            | 1              | 1032 | 0.00E+00 | 1792.3 | 6596 |

cellular  
organisms;Eukaryota;Opisthokonta;Metazoa;Eumetazoa;Bilateria;Protostomia;  
Spiralia;Lophotrochozoa;Mollusca;Bivalvia;Autobranhia;Heteroconchia;Euhe  
terodonta;Imparidentia;Venerida;Veneroidea;Veneridae;Mercenaria;Mercenari  
a mercenaria

|                 |      |      |      |                 |                |          |      |      |          |
|-----------------|------|------|------|-----------------|----------------|----------|------|------|----------|
| UdeM00000013362 | 6596 | 1763 |      | UdeM00000013362 | XP_045207606.1 | 84.9     | 1021 |      |          |
| 152             | 2    | 10   | 1030 | 14              | 1032           | 0.00E+00 | 1763 | 6596 | cellular |

organisms;Eukaryota;Opisthokonta;Metazoa;Eumetazoa;Bilateria;Protostomia;  
Spiralia;Lophotrochozoa;Mollusca;Bivalvia;Autobranhia;Heteroconchia;Euhe  
terodonta;Imparidentia;Venerida;Veneroidea;Veneridae;Mercenaria;Mercenari  
a mercenaria

|                 |      |       |     |                 |                |          |       |      |          |
|-----------------|------|-------|-----|-----------------|----------------|----------|-------|------|----------|
| UdeM00000013364 | 6573 | 218.8 |     | UdeM00000013364 | XP_021361807.1 | 43.2     | 273   |      |          |
| 150             | 2    | 1     | 268 | 1               | 273            | 1.10E-53 | 218.8 | 6573 | cellular |

organisms;Eukaryota;Opisthokonta;Metazoa;Eumetazoa;Bilateria;Protostomia;  
Spiralia;Lophotrochozoa;Mollusca;Bivalvia;Autobranhia;Pteriormorphia;Pect  
inida;Pectinoidea;Pectinidae;Mizuhopecten;Mizuhopecten yessoensis

|                 |      |       |     |                 |                |          |       |      |          |
|-----------------|------|-------|-----|-----------------|----------------|----------|-------|------|----------|
| UdeM00000013365 | 6573 | 199.5 |     | UdeM00000013365 | XP_021361807.1 | 42.5     | 273   |      |          |
| 142             | 5    | 1     | 258 | 1               | 273            | 5.70E-48 | 199.5 | 6573 | cellular |

organisms;Eukaryota;Opisthokonta;Metazoa;Eumetazoa;Bilateria;Protostomia;  
Spiralia;Lophotrochozoa;Mollusca;Bivalvia;Autobranhia;Pteriormorphia;Pect  
inida;Pectinoidea;Pectinidae;Mizuhopecten;Mizuhopecten yessoensis

|                 |      |       |     |                 |                |          |       |      |          |
|-----------------|------|-------|-----|-----------------|----------------|----------|-------|------|----------|
| UdeM00000013366 | 6596 | 188.3 |     | UdeM00000013366 | XP_045208026.1 | 37       | 354   |      |          |
| 191             | 8    | 10    | 343 | 7               | 348            | 1.90E-44 | 188.3 | 6596 | cellular |

organisms;Eukaryota;Opisthokonta;Metazoa;Eumetazoa;Bilateria;Protostomia;  
Spiralia;Lophotrochozoa;Mollusca;Bivalvia;Autobranhia;Heteroconchia;Euhe  
terodonta;Imparidentia;Venerida;Veneroidea;Veneridae;Mercenaria;Mercenari  
a mercenaria

|                 |      |       |     |                 |                |          |       |      |          |
|-----------------|------|-------|-----|-----------------|----------------|----------|-------|------|----------|
| UdeM00000013368 | 6596 | 184.1 |     | UdeM00000013368 | XP_045208026.1 | 42.2     | 256   |      |          |
| 136             | 4    | 37    | 289 | 5               | 251            | 3.10E-43 | 184.1 | 6596 | cellular |

organisms;Eukaryota;Opisthokonta;Metazoa;Eumetazoa;Bilateria;Protostomia;  
Spiralia;Lophotrochozoa;Mollusca;Bivalvia;Autobranhia;Heteroconchia;Euhe  
terodonta;Imparidentia;Venerida;Veneroidea;Veneridae;Mercenaria;Mercenari  
a mercenaria

|                 |      |       |     |                 |                |          |       |      |          |
|-----------------|------|-------|-----|-----------------|----------------|----------|-------|------|----------|
| UdeM00000013369 | 6596 | 167.2 |     | UdeM00000013369 | XP_045208026.1 | 37.7     | 260   |      |          |
| 144             | 5    | 5     | 258 | 5               | 252            | 4.60E-38 | 167.2 | 6596 | cellular |

organisms;Eukaryota;Opisthokonta;Metazoa;Eumetazoa;Bilateria;Protostomia;  
Spiralia;Lophotrochozoa;Mollusca;Bivalvia;Autobranhia;Heteroconchia;Euhe  
terodonta;Imparidentia;Venerida;Veneroidea;Veneridae;Mercenaria;Mercenari  
a mercenaria

|                 |      |    |    |                 |                |          |    |      |          |
|-----------------|------|----|----|-----------------|----------------|----------|----|------|----------|
| UdeM00000013371 | 6596 | 67 |    | UdeM00000013371 | XP_045208026.1 | 51       | 51 |      |          |
| 25              | 0    | 14 | 64 | 197             | 247            | 2.80E-08 | 67 | 6596 | cellular |

organisms;Eukaryota;Opisthokonta;Metazoa;Eumetazoa;Bilateria;Protostomia;  
Spiralia;Lophotrochozoa;Mollusca;Bivalvia;Autobranhia;Heteroconchia;Euhe  
terodonta;Imparidentia;Venerida;Veneroidea;Veneridae;Mercenaria;Mercenari  
a mercenaria

|                 |      |       |     |                 |                |          |       |      |          |
|-----------------|------|-------|-----|-----------------|----------------|----------|-------|------|----------|
| UdeM00000013370 | 6596 | 143.7 |     | UdeM00000013370 | XP_045208026.1 | 34       | 253   |      |          |
| 124             | 6    | 11    | 232 | 7               | 247            | 4.50E-31 | 143.7 | 6596 | cellular |

organisms;Eukaryota;Opisthokonta;Metazoa;Eumetazoa;Bilateria;Protostomia;Spiralia;Lophotrochozoa;Mollusca;Bivalvia;Autobranhia;Heteroconchia;Euherodonta;Imparidentia;Venerida;Veneroidea;Veneridae;Mercenaria;Mercenaria mercenaria

UdeM00000013372 6596 156 UdeM00000013372 XP\_045208026.1 33.8 364  
197 14 8 360 5 335 1.10E-34 156 6596 cellular

organisms;Eukaryota;Opisthokonta;Metazoa;Eumetazoa;Bilateria;Protostomia;Spiralia;Lophotrochozoa;Mollusca;Bivalvia;Autobranhia;Heteroconchia;Euherodonta;Imparidentia;Venerida;Veneroidea;Veneridae;Mercenaria;Mercenaria mercenaria

UdeM00000013373 6596 183.7 UdeM00000013373 XP\_045208026.1 35.2 355  
191 11 10 343 7 343 4.10E-43 183.7 6596 cellular

organisms;Eukaryota;Opisthokonta;Metazoa;Eumetazoa;Bilateria;Protostomia;Spiralia;Lophotrochozoa;Mollusca;Bivalvia;Autobranhia;Heteroconchia;Euherodonta;Imparidentia;Venerida;Veneroidea;Veneridae;Mercenaria;Mercenaria mercenaria

UdeM00000013374 6596 130.2 UdeM00000013374 XP\_045194524.1 31.5 289  
189 4 18 300 16 301 5.00E-27 130.2 6596 cellular

organisms;Eukaryota;Opisthokonta;Metazoa;Eumetazoa;Bilateria;Protostomia;Spiralia;Lophotrochozoa;Mollusca;Bivalvia;Autobranhia;Heteroconchia;Euherodonta;Imparidentia;Venerida;Veneroidea;Veneridae;Mercenaria;Mercenaria mercenaria

UdeM00000013375 6596 182.2 UdeM00000013375 XP\_045208187.1 41.5 270  
154 3 1 266 1 270 8.90E-43 182.2 6596 cellular

organisms;Eukaryota;Opisthokonta;Metazoa;Eumetazoa;Bilateria;Protostomia;Spiralia;Lophotrochozoa;Mollusca;Bivalvia;Autobranhia;Heteroconchia;Euherodonta;Imparidentia;Venerida;Veneroidea;Veneridae;Mercenaria;Mercenaria mercenaria

UdeM00000013376 6596 212.2 UdeM00000013376 XP\_045208187.1 49.6 274  
133 4 1 270 1 273 8.00E-52 212.2 6596 cellular

organisms;Eukaryota;Opisthokonta;Metazoa;Eumetazoa;Bilateria;Protostomia;Spiralia;Lophotrochozoa;Mollusca;Bivalvia;Autobranhia;Heteroconchia;Euherodonta;Imparidentia;Venerida;Veneroidea;Veneridae;Mercenaria;Mercenaria mercenaria

UdeM00000013377 6596 137.9 UdeM00000013377 XP\_045208187.1 52.5 183  
85 2 1 181 1 183 1.90E-29 137.9 6596 cellular

organisms;Eukaryota;Opisthokonta;Metazoa;Eumetazoa;Bilateria;Protostomia;Spiralia;Lophotrochozoa;Mollusca;Bivalvia;Autobranhia;Heteroconchia;Euherodonta;Imparidentia;Venerida;Veneroidea;Veneridae;Mercenaria;Mercenaria mercenaria

UdeM00000013378 6596 208 UdeM00000013378 XP\_045208187.1 45.4 273  
146 3 1 270 1 273 1.50E-50 208 6596 cellular

organisms;Eukaryota;Opisthokonta;Metazoa;Eumetazoa;Bilateria;Protostomia;Spiralia;Lophotrochozoa;Mollusca;Bivalvia;Autobranhia;Heteroconchia;Euherodonta;Imparidentia;Venerida;Veneroidea;Veneridae;Mercenaria;Mercenaria mercenaria

UdeM00000013379 6596 213 UdeM00000013379 XP\_045214542.1 43.4 244  
136 1 170 413 220 461 7.20E-52 213 6596 cellular

organisms;Eukaryota;Opisthokonta;Metazoa;Eumetazoa;Bilateria;Protostomia;Spiralia;Lophotrochozoa;Mollusca;Bivalvia;Autobranhia;Heteroconchia;Euherodonta;Imparidentia;Venerida;Veneroidea;Veneridae;Mercenaria;Mercenaria mercenaria

UdeM00000013380 6596 208.8 UdeM00000013380 XP\_045214542.1 42.2 251  
136 2 170 420 220 461 1.40E-50 208.8 6596 cellular

organisms;Eukaryota;Opisthokonta;Metazoa;Eumetazoa;Bilateria;Protostomia;Spiralia;Lophotrochozoa;Mollusca;Bivalvia;Autobranchia;Heteroconchia;Euheterodonta;Imparidentia;Venerida;Veneroidea;Veneridae;Mercenaria;Mercenaria mercenaria

UdeM00000013382 6573 85.9 UdeM00000013382 XP\_021369049.1 52 127  
55 1 4 124 81 207 7.90E-14 85.9 6573 cellular

organisms;Eukaryota;Opisthokonta;Metazoa;Eumetazoa;Bilateria;Protostomia;Spiralia;Lophotrochozoa;Mollusca;Bivalvia;Autobranchia;Pteriormorphia;Pectinida;Pectinoidea;Pectinidae;Mizuhopecten;Mizuhopecten yessoensis

UdeM00000013383 6579 173.3 UdeM00000013383 XP\_033759309.1 34.8 279  
172 5 1 277 1 271 6.00E-40 173.3 6579 cellular

organisms;Eukaryota;Opisthokonta;Metazoa;Eumetazoa;Bilateria;Protostomia;Spiralia;Lophotrochozoa;Mollusca;Bivalvia;Autobranchia;Pteriormorphia;Pectinida;Pectinoidea;Pectinidae;Pecten;Pecten maximus

UdeM00000013384 6579 141.7 UdeM00000013384 XP\_033759309.1 36 247  
142 5 1 242 1 236 1.60E-30 141.7 6579 cellular

organisms;Eukaryota;Opisthokonta;Metazoa;Eumetazoa;Bilateria;Protostomia;Spiralia;Lophotrochozoa;Mollusca;Bivalvia;Autobranchia;Pteriormorphia;Pectinida;Pectinoidea;Pectinidae;Pecten;Pecten maximus

UdeM00000013386 6573 181.8 UdeM00000013386 XP\_021369049.1 36.7 278  
145 3 1 250 1 275 1.10E-42 181.8 6573 cellular

organisms;Eukaryota;Opisthokonta;Metazoa;Eumetazoa;Bilateria;Protostomia;Spiralia;Lophotrochozoa;Mollusca;Bivalvia;Autobranchia;Pteriormorphia;Pectinida;Pectinoidea;Pectinidae;Mizuhopecten;Mizuhopecten yessoensis

UdeM00000013388 6596 201.4 UdeM00000013388 XP\_045173241.1 30.9 582  
335 22 50 588 373 930 3.10E-48 201.4 6596 cellular

organisms;Eukaryota;Opisthokonta;Metazoa;Eumetazoa;Bilateria;Protostomia;Spiralia;Lophotrochozoa;Mollusca;Bivalvia;Autobranchia;Heteroconchia;Euheterodonta;Imparidentia;Venerida;Veneroidea;Veneridae;Mercenaria;Mercenaria mercenaria

UdeM00000013390 1735272 134 UdeM00000013390 XP\_041378189.1 57.7  
104 43 1 15 118 201 303 1.20E-28 134 1735272  
cellular

organisms;Eukaryota;Opisthokonta;Metazoa;Eumetazoa;Bilateria;Protostomia;Spiralia;Lophotrochozoa;Mollusca;Gastropoda;Neomphalina;Neomphaloidea;Peltospiridae;Gigantopelta;Gigantopelta aegis

UdeM00000013392 6596 108.6 UdeM00000013392 XP\_045192627.1 52.5 101  
48 0 3 103 71 171 6.10E-21 108.6 6596 cellular

organisms;Eukaryota;Opisthokonta;Metazoa;Eumetazoa;Bilateria;Protostomia;Spiralia;Lophotrochozoa;Mollusca;Bivalvia;Autobranchia;Heteroconchia;Euheterodonta;Imparidentia;Venerida;Veneroidea;Veneridae;Mercenaria;Mercenaria mercenaria

UdeM00000013391 6596 172.9 UdeM00000013391 XP\_045192627.1 53.7 164  
76 0 5 168 8 171 3.90E-40 172.9 6596 cellular

organisms;Eukaryota;Opisthokonta;Metazoa;Eumetazoa;Bilateria;Protostomia;Spiralia;Lophotrochozoa;Mollusca;Bivalvia;Autobranchia;Heteroconchia;Euheterodonta;Imparidentia;Venerida;Veneroidea;Veneridae;Mercenaria;Mercenaria mercenaria

UdeM00000013393 6565 176 UdeM00000013393 XP\_022336632.1 22.4 625  
436 15 15 616 47 645 1.50E-40 176 6565 cellular

organisms;Eukaryota;Opisthokonta;Metazoa;Eumetazoa;Bilateria;Protostomia;Spiralia;Lophotrochozoa;Mollusca;Bivalvia;Autobranchia;Pteriormorphia;Ostreida;Ostreoidea;Ostreidae;Crassostrea;Crassostrea virginica

UdeM00000013394 37653 80.5 UdeM00000013394 XP\_014770328.1 47.2 108  
 53 3 23 128 310 415 1.70E-12 80.5 37653 cellular  
 organisms;Eukaryota;Opisthokonta;Metazoa;Eumetazoa;Bilateria;Protostomia;  
 Spiralia;Lophotrochozoa;Mollusca;Cephalopoda;Coleoidea;Octopodiformes;Oct  
 opoda;Incirrata;Octopodidae;Octopus;Octopus bimaculoides  
 UdeM00000013395 29159 188 UdeM00000013395 XP\_011420009.2 24.2 654  
 437 16 15 639 18 641 3.90E-44 188 29159 cellular  
 organisms;Eukaryota;Opisthokonta;Metazoa;Eumetazoa;Bilateria;Protostomia;  
 Spiralia;Lophotrochozoa;Mollusca;Bivalvia;Autobranchia;Pteriormorphia;Ostr  
 eida;Ostreoidea;Ostreidae;Crassostrea;Crassostrea gigas  
 UdeM00000013396 6565 188 UdeM00000013396 XP\_022336632.1 22.3 659  
 443 19 15 639 47 670 3.90E-44 188 6565 cellular  
 organisms;Eukaryota;Opisthokonta;Metazoa;Eumetazoa;Bilateria;Protostomia;  
 Spiralia;Lophotrochozoa;Mollusca;Bivalvia;Autobranchia;Pteriormorphia;Ostr  
 eida;Ostreoidea;Ostreidae;Crassostrea;Crassostrea virginica  
 UdeM00000013397 1735272 271.9 UdeM00000013397 XP\_041378189.1 46.6  
 305 150 4 5 304 3 299 1.20E-69 271.9 1735272  
 cellular  
 organisms;Eukaryota;Opisthokonta;Metazoa;Eumetazoa;Bilateria;Protostomia;  
 Spiralia;Lophotrochozoa;Mollusca;Gastropoda;Neomphalina;Neomphaloidea;Pel  
 tospiridae;Gigantopelta;Gigantopelta aegis  
 UdeM00000013398 6579 202.2 UdeM00000013398 XP\_033758968.1 24.3 683  
 473 12 1 647 1 675 2.00E-48 202.2 6579 cellular  
 organisms;Eukaryota;Opisthokonta;Metazoa;Eumetazoa;Bilateria;Protostomia;  
 Spiralia;Lophotrochozoa;Mollusca;Bivalvia;Autobranchia;Pteriormorphia;Pect  
 inida;Pectinoidea;Pectinidae;Pecten;Pecten maximus  
 UdeM00000013399 6573 180.6 UdeM00000013399 XP\_021366217.1 23 643  
 453 15 13 639 12 628 6.20E-42 180.6 6573 cellular  
 organisms;Eukaryota;Opisthokonta;Metazoa;Eumetazoa;Bilateria;Protostomia;  
 Spiralia;Lophotrochozoa;Mollusca;Bivalvia;Autobranchia;Pteriormorphia;Pect  
 inida;Pectinoidea;Pectinidae;Mizuhopecten;Mizuhopecten yessoensis  
 UdeM00000013400 6565 97.1 UdeM00000013400 XP\_022308052.1 38.6 145  
 82 4 3 146 7 145 2.30E-17 97.1 6565 cellular  
 organisms;Eukaryota;Opisthokonta;Metazoa;Eumetazoa;Bilateria;Protostomia;  
 Spiralia;Lophotrochozoa;Mollusca;Bivalvia;Autobranchia;Pteriormorphia;Ostr  
 eida;Ostreoidea;Ostreidae;Crassostrea;Crassostrea virginica  
 UdeM00000013401 29159 207.6 UdeM00000013401 XP\_011420009.2 25.4 614  
 411 12 5 596 28 616 4.60E-50 207.6 29159 cellular  
 organisms;Eukaryota;Opisthokonta;Metazoa;Eumetazoa;Bilateria;Protostomia;  
 Spiralia;Lophotrochozoa;Mollusca;Bivalvia;Autobranchia;Pteriormorphia;Ostr  
 eida;Ostreoidea;Ostreidae;Crassostrea;Crassostrea gigas  
 UdeM00000013404 29159 79 UdeM00000013404 XP\_034323800.1 25.7 202  
 148 2 20 220 180 380 9.10E-12 79 29159 cellular  
 organisms;Eukaryota;Opisthokonta;Metazoa;Eumetazoa;Bilateria;Protostomia;  
 Spiralia;Lophotrochozoa;Mollusca;Bivalvia;Autobranchia;Pteriormorphia;Ostr  
 eida;Ostreoidea;Ostreidae;Crassostrea;Crassostrea gigas  
 UdeM00000013405 6596 228 UdeM00000013405 XP\_045207357.1 48.8 381  
 161 11 1 373 1 355 2.10E-56 228 6596 cellular  
 organisms;Eukaryota;Opisthokonta;Metazoa;Eumetazoa;Bilateria;Protostomia;  
 Spiralia;Lophotrochozoa;Mollusca;Bivalvia;Autobranchia;Heteroconchia;Euhe  
 terodonta;Imparidentia;Venerida;Veneroidea;Veneridae;Mercenaria;Mercenari  
 a mercenaria  
 UdeM00000013406 1735272 935.3 UdeM00000013406 XP\_041373153.1 68.6  
 724 198 5 1 721 1 698 4.80E-269 935.3 1735272

cellular  
organisms;Eukaryota;Opisthokonta;Metazoa;Eumetazoa;Bilateria;Protostomia;  
Spiralia;Lophotrochozoa;Mollusca;Gastropoda;Neomphalina;Neomphaloidea;Pel  
tospiridae;Gigantopelta;Gigantopelta aegis  
UdeM00000013407 29159 215.7 UdeM00000013407 XP\_011455332.2 41.4 302  
151 8 10 299 33 320 8.20E-53 215.7 29159 cellular  
organisms;Eukaryota;Opisthokonta;Metazoa;Eumetazoa;Bilateria;Protostomia;  
Spiralia;Lophotrochozoa;Mollusca;Bivalvia;Autobranchia;Pteriormorphia;Ostr  
eida;Ostreoidea;Ostreidae;Crassostrea;Crassostrea gigas  
UdeM00000013408 6573 2062.3 UdeM00000013408 XP\_021377318.1 50.2  
2142 992 22 37 2119 31 2157 0.00E+00 2062.3 6573  
cellular  
organisms;Eukaryota;Opisthokonta;Metazoa;Eumetazoa;Bilateria;Protostomia;  
Spiralia;Lophotrochozoa;Mollusca;Bivalvia;Autobranchia;Pteriormorphia;Pect  
inida;Pectinoidea;Pectinidae;Mizuhopecten;Mizuhopecten yessoensis  
UdeM00000013409 6579 200.3 UdeM00000013409 XP\_033761306.1 30.2 447  
234 16 3 382 269 704 4.60E-48 200.3 6579 cellular  
organisms;Eukaryota;Opisthokonta;Metazoa;Eumetazoa;Bilateria;Protostomia;  
Spiralia;Lophotrochozoa;Mollusca;Bivalvia;Autobranchia;Pteriormorphia;Pect  
inida;Pectinoidea;Pectinidae;Pecten;Pecten maximus  
UdeM00000013410 29159 145.6 UdeM00000013410 XP\_034302097.1 50 132  
66 0 1 132 73 204 4.70E-32 145.6 29159 cellular  
organisms;Eukaryota;Opisthokonta;Metazoa;Eumetazoa;Bilateria;Protostomia;  
Spiralia;Lophotrochozoa;Mollusca;Bivalvia;Autobranchia;Pteriormorphia;Ostr  
eida;Ostreoidea;Ostreidae;Crassostrea;Crassostrea gigas  
UdeM00000013411 6596 195.3 UdeM00000013411 XP\_045179451.1 41.7 254  
140 4 37 285 4 254 1.10E-46 195.3 6596 cellular  
organisms;Eukaryota;Opisthokonta;Metazoa;Eumetazoa;Bilateria;Protostomia;  
Spiralia;Lophotrochozoa;Mollusca;Bivalvia;Autobranchia;Heteroconchia;Euhe  
terodonta;Imparidentia;Venerida;Veneroidea;Veneridae;Mercenaria;Mercenari  
a mercenaria  
UdeM00000013412 6596 317 UdeM00000013412 XP\_045201968.1 35.4 458  
274 6 11 448 104 559 4.00E-83 317 6596 cellular  
organisms;Eukaryota;Opisthokonta;Metazoa;Eumetazoa;Bilateria;Protostomia;  
Spiralia;Lophotrochozoa;Mollusca;Bivalvia;Autobranchia;Heteroconchia;Euhe  
terodonta;Imparidentia;Venerida;Veneroidea;Veneridae;Mercenaria;Mercenari  
a mercenaria  
UdeM00000013413 6596 276.9 UdeM00000013413 XP\_045201968.1 35.1 393  
233 6 11 383 169 559 4.00E-71 276.9 6596 cellular  
organisms;Eukaryota;Opisthokonta;Metazoa;Eumetazoa;Bilateria;Protostomia;  
Spiralia;Lophotrochozoa;Mollusca;Bivalvia;Autobranchia;Heteroconchia;Euhe  
terodonta;Imparidentia;Venerida;Veneroidea;Veneridae;Mercenaria;Mercenari  
a mercenaria  
UdeM00000013414 6596 300.1 UdeM00000013414 XP\_045164047.1 29.5 641  
316 15 36 548 51 683 6.00E-78 300.1 6596 cellular  
organisms;Eukaryota;Opisthokonta;Metazoa;Eumetazoa;Bilateria;Protostomia;  
Spiralia;Lophotrochozoa;Mollusca;Bivalvia;Autobranchia;Heteroconchia;Euhe  
terodonta;Imparidentia;Venerida;Veneroidea;Veneridae;Mercenaria;Mercenari  
a mercenaria  
UdeM00000013415 6596 160.6 UdeM00000013415 XP\_045209566.1 34.1 270  
176 2 25 293 33 301 3.10E-36 160.6 6596 cellular  
organisms;Eukaryota;Opisthokonta;Metazoa;Eumetazoa;Bilateria;Protostomia;  
Spiralia;Lophotrochozoa;Mollusca;Bivalvia;Autobranchia;Heteroconchia;Euhe

terodonta;Imparidentia;Venerida;Veneroidea;Veneridae;Mercenaria;Mercenari  
 a mercenaria  
 UdeM00000013417 6596 188 UdeM00000013417 XP\_045209566.1 36.1 327  
 198 7 11 331 17 338 2.40E-44 188 6596 cellular  
 organisms;Eukaryota;Opisthokonta;Metazoa;Eumetazoa;Bilateria;Protostomia;  
 Spiralia;Lophotrochozoa;Mollusca;Bivalvia;Autobranchia;Heteroconchia;Euhe  
 terodonta;Imparidentia;Venerida;Veneroidea;Veneridae;Mercenaria;Mercenari  
 a mercenaria  
 UdeM00000013416 6596 188 UdeM00000013416 XP\_045209566.1 36.1 327  
 198 7 18 338 17 338 2.40E-44 188 6596 cellular  
 organisms;Eukaryota;Opisthokonta;Metazoa;Eumetazoa;Bilateria;Protostomia;  
 Spiralia;Lophotrochozoa;Mollusca;Bivalvia;Autobranchia;Heteroconchia;Euhe  
 terodonta;Imparidentia;Venerida;Veneroidea;Veneridae;Mercenaria;Mercenari  
 a mercenaria  
 UdeM00000013419 6596 77.4 UdeM00000013419 XP\_045187491.1 23.8 261  
 180 4 25 276 19 269 4.10E-11 77.4 6596 cellular  
 organisms;Eukaryota;Opisthokonta;Metazoa;Eumetazoa;Bilateria;Protostomia;  
 Spiralia;Lophotrochozoa;Mollusca;Bivalvia;Autobranchia;Heteroconchia;Euhe  
 terodonta;Imparidentia;Venerida;Veneroidea;Veneridae;Mercenaria;Mercenari  
 a mercenaria  
 UdeM00000013421 6596 87.4 UdeM00000013421 XP\_045187491.1 26.4 261  
 170 5 18 267 18 267 4.70E-14 87.4 6596 cellular  
 organisms;Eukaryota;Opisthokonta;Metazoa;Eumetazoa;Bilateria;Protostomia;  
 Spiralia;Lophotrochozoa;Mollusca;Bivalvia;Autobranchia;Heteroconchia;Euhe  
 terodonta;Imparidentia;Venerida;Veneroidea;Veneridae;Mercenaria;Mercenari  
 a mercenaria  
 UdeM00000013422 29159 114.4 UdeM00000013422 XP\_011451278.2 28.6 259  
 163 8 34 276 28 280 2.50E-22 114.4 29159 cellular  
 organisms;Eukaryota;Opisthokonta;Metazoa;Eumetazoa;Bilateria;Protostomia;  
 Spiralia;Lophotrochozoa;Mollusca;Bivalvia;Autobranchia;Pteriormorphia;Ostr  
 eida;Ostreoidea;Ostreidae;Crassostrea;Crassostrea gigas  
 UdeM00000013423 88015 222.6 UdeM00000013423 XP\_023330573.1 39.9 434  
 212 11 1 388 875 1305 8.50E-55 222.6 88015 cellular  
 organisms;Eukaryota;Opisthokonta;Metazoa;Eumetazoa;Bilateria;Protostomia;  
 Ecdysozoa;Panarthropoda;Arthropoda;Mandibulata;Pancrustacea;Crustacea;Mul  
 ticrustacea;Hexanauplia;Copepoda;Neocopepoda;Gymnoplea;Calanoida;Temorida  
 e;Eurytemora;Eurytemora affinis  
 UdeM00000013424 6565 215.3 UdeM00000013424 XP\_022325724.1 51.7 232  
 94 3 22 235 52 283 8.30E-53 215.3 6565 cellular  
 organisms;Eukaryota;Opisthokonta;Metazoa;Eumetazoa;Bilateria;Protostomia;  
 Spiralia;Lophotrochozoa;Mollusca;Bivalvia;Autobranchia;Pteriormorphia;Ostr  
 eida;Ostreoidea;Ostreidae;Crassostrea;Crassostrea virginica  
 UdeM00000013425 225164 334.3 UdeM00000013425 XP\_009054694.1 66  
 238 80 1 1 238 1 237 1.20E-88 334.3 225164  
 cellular  
 organisms;Eukaryota;Opisthokonta;Metazoa;Eumetazoa;Bilateria;Protostomia;  
 Spiralia;Lophotrochozoa;Mollusca;Gastropoda;Patellogastropoda;Lottioida;  
 Lottiidae;Lottia;Lottia gigantea  
 UdeM00000013426 1735272 429.9 UdeM00000013426 XP\_041373629.1 68.6  
 296 93 0 37 332 31 326 3.20E-117 429.9 1735272  
 cellular  
 organisms;Eukaryota;Opisthokonta;Metazoa;Eumetazoa;Bilateria;Protostomia;  
 Spiralia;Lophotrochozoa;Mollusca;Gastropoda;Neomphalina;Neomphaloidea;Pel  
 tospiridae;Gigantopelta;Gigantopelta aegis

UdeM00000013427 400727 441 UdeM00000013427 XP\_025100283.1 62  
 345 115 3 1 340 1 334 1.30E-120 441 400727  
 cellular  
 organisms;Eukaryota;Opisthokonta;Metazoa;Eumetazoa;Bilateria;Protostomia;  
 Spiralia;Lophotrochozoa;Mollusca;Gastropoda;Caenogastropoda;Architaenioglossa;  
 Ampullarioidea;Ampullariidae;Pomacea;Pomacea canaliculata  
 UdeM00000013428 6596 473 UdeM00000013428 XP\_045209954.1 50.5 436  
 210 5 2 432 146 580 4.00E-130 473 6596 cellular  
 organisms;Eukaryota;Opisthokonta;Metazoa;Eumetazoa;Bilateria;Protostomia;  
 Spiralia;Lophotrochozoa;Mollusca;Bivalvia;Autobranchia;Heteroconchia;Euheterodonta;  
 Imparidentia;Venerida;Veneroidea;Veneridae;Mercenaria;Mercenaria mercenaria  
 UdeM00000013429 6596 152.1 UdeM00000013429 XP\_045209954.1 59.4 133  
 50 3 63 194 17 146 8.20E-34 152.1 6596 cellular  
 organisms;Eukaryota;Opisthokonta;Metazoa;Eumetazoa;Bilateria;Protostomia;  
 Spiralia;Lophotrochozoa;Mollusca;Bivalvia;Autobranchia;Heteroconchia;Euheterodonta;  
 Imparidentia;Venerida;Veneroidea;Veneridae;Mercenaria;Mercenaria mercenaria  
 UdeM00000013430 6596 835.1 UdeM00000013430 XP\_045209952.1 68.2 559  
 176 2 1 558 1 558 5.30E-239 835.1 6596 cellular  
 organisms;Eukaryota;Opisthokonta;Metazoa;Eumetazoa;Bilateria;Protostomia;  
 Spiralia;Lophotrochozoa;Mollusca;Bivalvia;Autobranchia;Heteroconchia;Euheterodonta;  
 Imparidentia;Venerida;Veneroidea;Veneridae;Mercenaria;Mercenaria mercenaria  
 UdeM00000013431 6596 819.3 UdeM00000013431 XP\_045209952.1 66.9 559  
 183 2 1 558 1 558 3.00E-234 819.3 6596 cellular  
 organisms;Eukaryota;Opisthokonta;Metazoa;Eumetazoa;Bilateria;Protostomia;  
 Spiralia;Lophotrochozoa;Mollusca;Bivalvia;Autobranchia;Heteroconchia;Euheterodonta;  
 Imparidentia;Venerida;Veneroidea;Veneridae;Mercenaria;Mercenaria mercenaria  
 UdeM00000013432 6596 375.9 UdeM00000013432 XP\_045187763.1 36.8 570  
 247 7 4 465 3 567 7.20E-101 375.9 6596 cellular  
 organisms;Eukaryota;Opisthokonta;Metazoa;Eumetazoa;Bilateria;Protostomia;  
 Spiralia;Lophotrochozoa;Mollusca;Bivalvia;Autobranchia;Heteroconchia;Euheterodonta;  
 Imparidentia;Venerida;Veneroidea;Veneridae;Mercenaria;Mercenaria mercenaria  
 UdeM00000013433 29159 205.3 UdeM00000013433 XP\_034299573.1 37.8 291  
 165 5 40 322 1 283 1.20E-49 205.3 29159 cellular  
 organisms;Eukaryota;Opisthokonta;Metazoa;Eumetazoa;Bilateria;Protostomia;  
 Spiralia;Lophotrochozoa;Mollusca;Bivalvia;Autobranchia;Pteriomorpha;Ostreida;  
 Ostreioidea;Ostreidae;Crassostrea;Crassostrea gigas  
 UdeM00000013434 6579 418.7 UdeM00000013434 XP\_033757921.1 85 227  
 33 1 1 226 1 227 6.60E-114 418.7 6579 cellular  
 organisms;Eukaryota;Opisthokonta;Metazoa;Eumetazoa;Bilateria;Protostomia;  
 Spiralia;Lophotrochozoa;Mollusca;Bivalvia;Autobranchia;Pteriomorpha;Pectinida;  
 Pectinoidea;Pectinidae;Pecten;Pecten maximus  
 UdeM00000013435 6596 121.3 UdeM00000013435 XP\_045208392.1 49.2 132  
 47 3 1 132 6 117 1.40E-24 121.3 6596 cellular  
 organisms;Eukaryota;Opisthokonta;Metazoa;Eumetazoa;Bilateria;Protostomia;  
 Spiralia;Lophotrochozoa;Mollusca;Bivalvia;Autobranchia;Heteroconchia;Euheterodonta;  
 Imparidentia;Venerida;Veneroidea;Veneridae;Mercenaria;Mercenaria mercenaria  
 UdeM00000013436 6596 164.9 UdeM00000013436 XP\_045209470.1 41.9 234  
 130 2 4 232 6 238 1.30E-37 164.9 6596 cellular



organisms;Eukaryota;Opisthokonta;Metazoa;Eumetazoa;Bilateria;Protostomia;Spiralia;Lophotrochozoa;Mollusca;Bivalvia;Autobranchia;Heteroconchia;Euheterodonta;Imparidentia;Venerida;Veneroidea;Veneridae;Mercenaria;Mercenaria mercenaria

UdeM00000013437 6596 137.5 UdeM00000013437 XP\_045209470.1 48.5 167  
85 1 4 170 6 171 1.80E-29 137.5 6596 cellular

organisms;Eukaryota;Opisthokonta;Metazoa;Eumetazoa;Bilateria;Protostomia;Spiralia;Lophotrochozoa;Mollusca;Bivalvia;Autobranchia;Heteroconchia;Euheterodonta;Imparidentia;Venerida;Veneroidea;Veneridae;Mercenaria;Mercenaria mercenaria

UdeM00000013438 6596 89.4 UdeM00000013438 XP\_045207118.1 39.3 135  
78 1 11 145 4 134 4.60E-15 89.4 6596 cellular

organisms;Eukaryota;Opisthokonta;Metazoa;Eumetazoa;Bilateria;Protostomia;Spiralia;Lophotrochozoa;Mollusca;Bivalvia;Autobranchia;Heteroconchia;Euheterodonta;Imparidentia;Venerida;Veneroidea;Veneridae;Mercenaria;Mercenaria mercenaria

UdeM00000013439 29159 452.2 UdeM00000013439 XP\_011455855.1 73.8 290  
74 1 1 290 1 288 4.90E-124 452.2 29159 cellular

organisms;Eukaryota;Opisthokonta;Metazoa;Eumetazoa;Bilateria;Protostomia;Spiralia;Lophotrochozoa;Mollusca;Bivalvia;Autobranchia;Pteriormorphia;Ostreida;Ostreioidea;Ostreidae;Crassostrea;Crassostrea gigas

UdeM00000013440 32473 96.3 UdeM00000013440 XP\_027884920.1 30.2 245  
114 8 828 1020 327 566 2.40E-16 96.3 32473 cellular

organisms;Eukaryota;Opisthokonta;Metazoa;Eumetazoa;Bilateria;Deuterostomia;Chordata;Craniata;Vertebrata;Gnathostomata;Teleostomi;Euteleostomi;Actinopterygii;Actinopteri;Neopterygii;Teleostei;Osteoglossocephalai;Clupeocephala;Euteleostei;Neoteleostei;Eurypterygia;Ctenosquamata;Acanthomorphata;Euacanthomorphacea;Percomorphaceae;Ovalentaria;Atherinomorphae;Cyprinodontiformes;Cyprinodontoides;Poeciliidae;Poeciliinae;Xiphophorus;Xiphophorus couchianus

UdeM00000013441 7574 307.8 UdeM00000013441 XP\_013419855.1 60.3 252  
91 2 22 267 197 445 1.40E-80 307.8 7574 cellular

organisms;Eukaryota;Opisthokonta;Metazoa;Eumetazoa;Bilateria;Protostomia;Spiralia;Lophotrochozoa;Brachiopoda;Linguliformea;Lingulata;Lingulida;Linguloidea;Lingulidae;Lingula;Lingula anatina

UdeM00000013442 6500 241.5 UdeM00000013442 XP\_005110648.1 59.1 186  
76 0 1 186 8 193 8.70E-61 241.5 6500 cellular

organisms;Eukaryota;Opisthokonta;Metazoa;Eumetazoa;Bilateria;Protostomia;Spiralia;Lophotrochozoa;Mollusca;Gastropoda;Heterobranchia;Euthyneura;Tectipleura;Aplysiida;Aplysioidea;Aplysiidae;Aplysia;Aplysia californica

UdeM00000013443 6500 236.9 UdeM00000013443 XP\_005110648.1 58.8 187  
76 1 1 187 8 193 2.20E-59 236.9 6500 cellular

organisms;Eukaryota;Opisthokonta;Metazoa;Eumetazoa;Bilateria;Protostomia;Spiralia;Lophotrochozoa;Mollusca;Gastropoda;Heterobranchia;Euthyneura;Tectipleura;Aplysiida;Aplysioidea;Aplysiidae;Aplysia;Aplysia californica

UdeM00000013444 6579 330.9 UdeM00000013444 XP\_033758480.1 72.7 556  
150 2 1 554 1 556 3.20E-87 330.9 6579 cellular

organisms;Eukaryota;Opisthokonta;Metazoa;Eumetazoa;Bilateria;Protostomia;Spiralia;Lophotrochozoa;Mollusca;Bivalvia;Autobranchia;Pteriormorphia;Pectinida;Pectinoidea;Pectinidae;Pecten;Pecten maximus

UdeM00000013445 6579 336.3 UdeM00000013445 XP\_033758479.1 73.2 559  
148 2 1 557 1 559 7.60E-89 336.3 6579 cellular

organisms;Eukaryota;Opisthokonta;Metazoa;Eumetazoa;Bilateria;Protostomia;

Spiralia;Lophotrochozoa;Mollusca;Bivalvia;Autobranchia;Pteriormorphia;Pectinida;Pectinoidea;Pectinidae;Pecten;Pecten maximus  
UdeM00000013446 29159 187.6 UdeM00000013446 XP\_034303022.1 45.7 221  
88 5 195 402 1960 2161 3.20E-44 187.6 29159 cellular  
organisms;Eukaryota;Opisthokonta;Metazoa;Eumetazoa;Bilateria;Protostomia;  
Spiralia;Lophotrochozoa;Mollusca;Bivalvia;Autobranchia;Pteriormorphia;Ostr  
eida;Ostreoidea;Ostreidae;Crassostrea;Crassostrea gigas  
UdeM00000013447 29159 248.1 UdeM00000013447 XP\_034303025.1 36.1 881  
477 25 6 848 722 1554 5.40E-62 248.1 29159 cellular  
organisms;Eukaryota;Opisthokonta;Metazoa;Eumetazoa;Bilateria;Protostomia;  
Spiralia;Lophotrochozoa;Mollusca;Bivalvia;Autobranchia;Pteriormorphia;Ostr  
eida;Ostreoidea;Ostreidae;Crassostrea;Crassostrea gigas  
UdeM00000013448 6579 309.3 UdeM00000013448 XP\_033757922.1 31.3 691  
357 11 1 679 32 616 1.30E-80 309.3 6579 cellular  
organisms;Eukaryota;Opisthokonta;Metazoa;Eumetazoa;Bilateria;Protostomia;  
Spiralia;Lophotrochozoa;Mollusca;Bivalvia;Autobranchia;Pteriormorphia;Pect  
inida;Pectinoidea;Pectinidae;Pecten;Pecten maximus  
UdeM00000013449 6596 634 UdeM00000013449 XP\_045207717.1 53.2 631  
253 9 1 599 1 621 2.00E-178 634 6596 cellular  
organisms;Eukaryota;Opisthokonta;Metazoa;Eumetazoa;Bilateria;Protostomia;  
Spiralia;Lophotrochozoa;Mollusca;Bivalvia;Autobranchia;Heteroconchia;Euhe  
terodonta;Imparidentia;Venerida;Veneroidea;Veneridae;Mercenaria;Mercenari  
a mercenaria  
UdeM00000013450 6596 665.6 UdeM00000013450 XP\_045207717.1 54.7 645  
222 10 1 591 1 629 6.00E-188 665.6 6596 cellular  
organisms;Eukaryota;Opisthokonta;Metazoa;Eumetazoa;Bilateria;Protostomia;  
Spiralia;Lophotrochozoa;Mollusca;Bivalvia;Autobranchia;Heteroconchia;Euhe  
terodonta;Imparidentia;Venerida;Veneroidea;Veneridae;Mercenaria;Mercenari  
a mercenaria  
UdeM00000013451 6596 182.6 UdeM00000013451 XP\_045208504.1 35.7 266  
169 1 7 270 4 269 6.90E-43 182.6 6596 cellular  
organisms;Eukaryota;Opisthokonta;Metazoa;Eumetazoa;Bilateria;Protostomia;  
Spiralia;Lophotrochozoa;Mollusca;Bivalvia;Autobranchia;Heteroconchia;Euhe  
terodonta;Imparidentia;Venerida;Veneroidea;Veneridae;Mercenaria;Mercenari  
a mercenaria  
UdeM00000013452 1735272 290 UdeM00000013452 XP\_041373135.1 45.3  
338 176 6 4 339 9 339 3.90E-75 290 1735272  
cellular  
organisms;Eukaryota;Opisthokonta;Metazoa;Eumetazoa;Bilateria;Protostomia;  
Spiralia;Lophotrochozoa;Mollusca;Gastropoda;Neomphalina;Neomphaloidea;Pel  
tospiridae;Gigantopelta;Gigantopelta aegis  
UdeM00000013453 400727 93.2 UdeM00000013453 XP\_025100206.1 56.3  
87 35 2 125 210 44 128 4.40E-16 93.2 400727  
cellular  
organisms;Eukaryota;Opisthokonta;Metazoa;Eumetazoa;Bilateria;Protostomia;  
Spiralia;Lophotrochozoa;Mollusca;Gastropoda;Caenogastropoda;Architaeniogl  
ossa;Ampullarioidea;Ampullariidae;Pomacea;Pomacea canaliculata  
UdeM00000013454 6596 160.2 UdeM00000013454 XP\_045207530.1 48.2 224  
58 6 11 217 10 192 3.40E-36 160.2 6596 cellular  
organisms;Eukaryota;Opisthokonta;Metazoa;Eumetazoa;Bilateria;Protostomia;  
Spiralia;Lophotrochozoa;Mollusca;Bivalvia;Autobranchia;Heteroconchia;Euhe  
terodonta;Imparidentia;Venerida;Veneroidea;Veneridae;Mercenaria;Mercenari  
a mercenaria

UdeM00000013455 6596 485 UdeM00000013455 XP\_045207530.1 71.9 335  
 78 6 6 328 188 518 7.80E-134 485 6596 cellular  
 organisms;Eukaryota;Opisthokonta;Metazoa;Eumetazoa;Bilateria;Protostomia;  
 Spiralia;Lophotrochozoa;Mollusca;Bivalvia;Autobranchia;Heteroconchia;Euhe  
 terodonta;Imparidentia;Venerida;Veneroidea;Veneridae;Mercenaria;Mercenari  
 a mercenaria  
 UdeM00000013456 1735272 128.6 UdeM00000013456 XP\_041372841.1 66.7  
 126 40 2 1 126 63 186 5.50E-27 128.6 1735272  
 cellular  
 organisms;Eukaryota;Opisthokonta;Metazoa;Eumetazoa;Bilateria;Protostomia;  
 Spiralia;Lophotrochozoa;Mollusca;Gastropoda;Neomphalina;Neomphaloidea;Pel  
 tospiridae;Gigantopelta;Gigantopelta aegis  
 UdeM00000013457 7741 200.7 UdeM00000013457 XP\_019632005.1 47.1 223  
 101 5 12 221 9 227 2.90E-48 200.7 7741 cellular  
 organisms;Eukaryota;Opisthokonta;Metazoa;Eumetazoa;Bilateria;Deuterostomi  
 a;Chordata;Cephalochordata;Leptocardii;Amphioxiformes;Branchiostomidae;Br  
 anchiostoma;Branchiostoma belcheri  
 UdeM00000013458 225164 191 UdeM00000013458 XP\_009061726.1 41.2  
 250 140 3 82 324 1156 1405 2.70E-45 191 225164  
 cellular  
 organisms;Eukaryota;Opisthokonta;Metazoa;Eumetazoa;Bilateria;Protostomia;  
 Spiralia;Lophotrochozoa;Mollusca;Gastropoda;Patellogastropoda;Lottioidea;  
 Lottiidae;Lottia;Lottia gigantea  
 UdeM00000013459 6596 568.9 UdeM00000013459 XP\_045216427.1 47.7 633  
 295 7 1 613 237 853 9.40E-159 568.9 6596 cellular  
 organisms;Eukaryota;Opisthokonta;Metazoa;Eumetazoa;Bilateria;Protostomia;  
 Spiralia;Lophotrochozoa;Mollusca;Bivalvia;Autobranchia;Heteroconchia;Euhe  
 terodonta;Imparidentia;Venerida;Veneroidea;Veneridae;Mercenaria;Mercenari  
 a mercenaria  
 UdeM00000013460 6565 276.2 UdeM00000013460 XP\_022344612.1 32.8 528  
 225 6 10 414 1351 1871 7.60E-71 276.2 6565 cellular  
 organisms;Eukaryota;Opisthokonta;Metazoa;Eumetazoa;Bilateria;Protostomia;  
 Spiralia;Lophotrochozoa;Mollusca;Bivalvia;Autobranchia;Pteriomorphia;Ostr  
 eida;Ostreoidea;Ostreidae;Crassostrea;Crassostrea virginica  
 UdeM00000013461 1735272 253.4 UdeM00000013461 XP\_041369346.1 45.7  
 300 146 8 19 311 38 327 4.00E-64 253.4 1735272  
 cellular  
 organisms;Eukaryota;Opisthokonta;Metazoa;Eumetazoa;Bilateria;Protostomia;  
 Spiralia;Lophotrochozoa;Mollusca;Gastropoda;Neomphalina;Neomphaloidea;Pel  
 tospiridae;Gigantopelta;Gigantopelta aegis  
 UdeM00000013462 1735272 250.8 UdeM00000013462 XP\_041369346.1 43.8  
 308 153 7 19 316 38 335 2.60E-63 250.8 1735272  
 cellular  
 organisms;Eukaryota;Opisthokonta;Metazoa;Eumetazoa;Bilateria;Protostomia;  
 Spiralia;Lophotrochozoa;Mollusca;Gastropoda;Neomphalina;Neomphaloidea;Pel  
 tospiridae;Gigantopelta;Gigantopelta aegis  
 UdeM00000013463 6573 131.3 UdeM00000013463 XP\_021377309.1 32.8 238  
 156 2 93 326 427 664 2.30E-27 131.3 6573 cellular  
 organisms;Eukaryota;Opisthokonta;Metazoa;Eumetazoa;Bilateria;Protostomia;  
 Spiralia;Lophotrochozoa;Mollusca;Bivalvia;Autobranchia;Pteriomorphia;Pect  
 inida;Pectinoidea;Pectinidae;Mizuhopecten;Mizuhopecten yessoensis  
 UdeM00000013464 1735272 154.5 UdeM00000013464 XP\_041366822.1 39.7  
 232 133 3 354 579 3 233 8.20E-34 154.5 1735272  
 cellular

organisms;Eukaryota;Opisthokonta;Metazoa;Eumetazoa;Bilateria;Protostomia; Spiralia;Lophotrochozoa;Mollusca;Gastropoda;Neomphalina;Neomphaloidea;Pel tospiridae;Gigantopelta;Gigantopelta aegis

UdeM00000013465 1735272 330.5 UdeM00000013465 XP\_041369346.1 41.8  
467 245 9 1 448 1 459 3.40E-87 330.5 1735272  
cellular

organisms;Eukaryota;Opisthokonta;Metazoa;Eumetazoa;Bilateria;Protostomia; Spiralia;Lophotrochozoa;Mollusca;Gastropoda;Neomphalina;Neomphaloidea;Pel tospiridae;Gigantopelta;Gigantopelta aegis

UdeM00000013466 6573 132.1 UdeM00000013466 XP\_021377309.1 37.9 190  
111 3 586 769 476 664 3.00E-27 132.1 6573 cellular

organisms;Eukaryota;Opisthokonta;Metazoa;Eumetazoa;Bilateria;Protostomia; Spiralia;Lophotrochozoa;Mollusca;Bivalvia;Autobranchia;Pteriormorphia;Pect inida;Pectinoidea;Pectinidae;Mizuhopecten;Mizuhopecten yessoensis

UdeM00000013467 1735272 322.4 UdeM00000013467 XP\_041369346.1 41.7  
460 224 13 14 442 13 459 9.10E-85 322.4 1735272  
cellular

organisms;Eukaryota;Opisthokonta;Metazoa;Eumetazoa;Bilateria;Protostomia; Spiralia;Lophotrochozoa;Mollusca;Gastropoda;Neomphalina;Neomphaloidea;Pel tospiridae;Gigantopelta;Gigantopelta aegis

UdeM00000013468 6596 148.7 UdeM00000013468 XP\_045209314.1 32 309  
179 7 12 304 13 306 1.50E-32 148.7 6596 cellular

organisms;Eukaryota;Opisthokonta;Metazoa;Eumetazoa;Bilateria;Protostomia; Spiralia;Lophotrochozoa;Mollusca;Bivalvia;Autobranchia;Heteroconchia;Euhe terodonta;Imparidentia;Venerida;Veneroidea;Veneridae;Mercenaria;Mercenari a mercenaria

UdeM00000013469 1735272 143.7 UdeM00000013469 XP\_041369341.1 42.3  
182 104 1 952 1133 403 583 1.50E-30 143.7 1735272  
cellular

organisms;Eukaryota;Opisthokonta;Metazoa;Eumetazoa;Bilateria;Protostomia; Spiralia;Lophotrochozoa;Mollusca;Gastropoda;Neomphalina;Neomphaloidea;Pel tospiridae;Gigantopelta;Gigantopelta aegis

UdeM00000013470 1735272 321.2 UdeM00000013470 XP\_041369346.1 41.7  
460 224 13 14 442 13 459 2.00E-84 321.2 1735272  
cellular

organisms;Eukaryota;Opisthokonta;Metazoa;Eumetazoa;Bilateria;Protostomia; Spiralia;Lophotrochozoa;Mollusca;Gastropoda;Neomphalina;Neomphaloidea;Pel tospiridae;Gigantopelta;Gigantopelta aegis

UdeM00000013471 6596 154.1 UdeM00000013471 XP\_045209271.1 32.9 334  
205 8 17 333 22 353 3.50E-34 154.1 6596 cellular

organisms;Eukaryota;Opisthokonta;Metazoa;Eumetazoa;Bilateria;Protostomia; Spiralia;Lophotrochozoa;Mollusca;Bivalvia;Autobranchia;Heteroconchia;Euhe terodonta;Imparidentia;Venerida;Veneroidea;Veneridae;Mercenaria;Mercenari a mercenaria

UdeM00000013472 6596 147.1 UdeM00000013472 XP\_045209271.1 32.8 335  
205 9 17 334 22 353 4.30E-32 147.1 6596 cellular

organisms;Eukaryota;Opisthokonta;Metazoa;Eumetazoa;Bilateria;Protostomia; Spiralia;Lophotrochozoa;Mollusca;Bivalvia;Autobranchia;Heteroconchia;Euhe terodonta;Imparidentia;Venerida;Veneroidea;Veneridae;Mercenaria;Mercenari a mercenaria

UdeM00000013475 6579 134 UdeM00000013475 XP\_033758551.1 43.5 154  
84 1 118 268 468 621 2.80E-28 134 6579 cellular

organisms;Eukaryota;Opisthokonta;Metazoa;Eumetazoa;Bilateria;Protostomia;

Spiralia;Lophotrochozoa;Mollusca;Bivalvia;Autobranchia;Pteriomorpha;Pectinida;Pectinoidea;Pectinidae;Pecten;Pecten maximus

UdeM00000013479 1735272 127.9 UdeM00000013479 XP\_041369341.1 53.4  
116 54 0 16 131 468 583 1.00E-26 127.9 1735272  
cellular

organisms;Eukaryota;Opisthokonta;Metazoa;Eumetazoa;Bilateria;Protostomia;Spiralia;Lophotrochozoa;Mollusca;Gastropoda;Neomphalina;Neomphaloidea;Peltospiridae;Gigantopelta;Gigantopelta aegis

UdeM00000013480 1735272 117.9 UdeM00000013480 XP\_041369341.1 41.9  
167 88 3 25 187 422 583 1.50E-23 117.9 1735272  
cellular

organisms;Eukaryota;Opisthokonta;Metazoa;Eumetazoa;Bilateria;Protostomia;Spiralia;Lophotrochozoa;Mollusca;Gastropoda;Neomphalina;Neomphaloidea;Peltospiridae;Gigantopelta;Gigantopelta aegis

UdeM00000013481 1735272 141.7 UdeM00000013481 XP\_041369341.1 41.8  
182 105 1 622 803 403 583 4.00E-30 141.7 1735272  
cellular

organisms;Eukaryota;Opisthokonta;Metazoa;Eumetazoa;Bilateria;Protostomia;Spiralia;Lophotrochozoa;Mollusca;Gastropoda;Neomphalina;Neomphaloidea;Peltospiridae;Gigantopelta;Gigantopelta aegis

UdeM00000013482 1735272 250.8 UdeM00000013482 XP\_041369346.1 36.8  
456 200 13 14 390 13 459 3.00E-63 250.8 1735272  
cellular

organisms;Eukaryota;Opisthokonta;Metazoa;Eumetazoa;Bilateria;Protostomia;Spiralia;Lophotrochozoa;Mollusca;Gastropoda;Neomphalina;Neomphaloidea;Peltospiridae;Gigantopelta;Gigantopelta aegis

UdeM00000013483 1735272 117.1 UdeM00000013483 XP\_041369342.1 46.7  
135 69 3 14 147 31 163 1.90E-23 117.1 1735272  
cellular

organisms;Eukaryota;Opisthokonta;Metazoa;Eumetazoa;Bilateria;Protostomia;Spiralia;Lophotrochozoa;Mollusca;Gastropoda;Neomphalina;Neomphaloidea;Peltospiridae;Gigantopelta;Gigantopelta aegis

UdeM00000013484 6596 154.5 UdeM00000013484 XP\_045209271.1 33.2 334  
204 8 17 333 22 353 2.70E-34 154.5 6596 cellular

organisms;Eukaryota;Opisthokonta;Metazoa;Eumetazoa;Bilateria;Protostomia;Spiralia;Lophotrochozoa;Mollusca;Bivalvia;Autobranchia;Heteroconchia;Euherodonta;Imparidentia;Venerida;Veneroidea;Veneridae;Mercenaria;Mercenaria mercenaria

UdeM00000013485 6596 148.7 UdeM00000013485 XP\_045209271.1 32.8 335  
202 9 17 331 22 353 1.50E-32 148.7 6596 cellular

organisms;Eukaryota;Opisthokonta;Metazoa;Eumetazoa;Bilateria;Protostomia;Spiralia;Lophotrochozoa;Mollusca;Bivalvia;Autobranchia;Heteroconchia;Euherodonta;Imparidentia;Venerida;Veneroidea;Veneridae;Mercenaria;Mercenaria mercenaria

UdeM00000013487 1735272 128.3 UdeM00000013487 XP\_041369341.1 42.9  
161 85 2 407 560 423 583 3.20E-26 128.3 1735272  
cellular

organisms;Eukaryota;Opisthokonta;Metazoa;Eumetazoa;Bilateria;Protostomia;Spiralia;Lophotrochozoa;Mollusca;Gastropoda;Neomphalina;Neomphaloidea;Peltospiridae;Gigantopelta;Gigantopelta aegis

UdeM00000013488 6596 120.2 UdeM00000013488 XP\_045209612.1 29 279  
185 4 11 278 8 284 7.90E-24 120.2 6596 cellular

organisms;Eukaryota;Opisthokonta;Metazoa;Eumetazoa;Bilateria;Protostomia;Spiralia;Lophotrochozoa;Mollusca;Bivalvia;Autobranchia;Heteroconchia;Euherodonta

terodonta;Imparidentia;Venerida;Veneroidea;Veneridae;Mercenaria;Mercenari  
 a mercenaria  
 UdeM00000013489 6596 149.8 UdeM00000013489 XP\_045209271.1 32.8 335  
 205 9 17 334 22 353 6.60E-33 149.8 6596 cellular  
 organisms;Eukaryota;Opisthokonta;Metazoa;Eumetazoa;Bilateria;Protostomia;  
 Spiralia;Lophotrochozoa;Mollusca;Bivalvia;Autobranhia;Heteroconchia;Euhe  
 terodonta;Imparidentia;Venerida;Veneroidea;Veneridae;Mercenaria;Mercenari  
 a mercenaria  
 UdeM00000013490 6579 137.1 UdeM00000013490 XP\_033758551.1 44.9 158  
 83 3 392 545 464 621 6.70E-29 137.1 6579 cellular  
 organisms;Eukaryota;Opisthokonta;Metazoa;Eumetazoa;Bilateria;Protostomia;  
 Spiralia;Lophotrochozoa;Mollusca;Bivalvia;Autobranhia;Pteriormorphia;Pect  
 inida;Pectinoidea;Pectinidae;Pecten;Pecten maximus  
 UdeM00000013491 6596 69.7 UdeM00000013491 XP\_045209612.1 31.1 151  
 93 3 1 142 136 284 9.80E-09 69.7 6596 cellular  
 organisms;Eukaryota;Opisthokonta;Metazoa;Eumetazoa;Bilateria;Protostomia;  
 Spiralia;Lophotrochozoa;Mollusca;Bivalvia;Autobranhia;Heteroconchia;Euhe  
 terodonta;Imparidentia;Venerida;Veneroidea;Veneridae;Mercenaria;Mercenari  
 a mercenaria  
 UdeM00000013493 6596 497.7 UdeM00000013493 XP\_045207378.1 47 500  
 259 4 1 497 2 498 1.80E-137 497.7 6596 cellular  
 organisms;Eukaryota;Opisthokonta;Metazoa;Eumetazoa;Bilateria;Protostomia;  
 Spiralia;Lophotrochozoa;Mollusca;Bivalvia;Autobranhia;Heteroconchia;Euhe  
 terodonta;Imparidentia;Venerida;Veneroidea;Veneridae;Mercenaria;Mercenari  
 a mercenaria  
 UdeM00000013494 6579 148.7 UdeM00000013494 XP\_033758757.1 41.5 248  
 90 7 3 231 2 213 9.40E-33 148.7 6579 cellular  
 organisms;Eukaryota;Opisthokonta;Metazoa;Eumetazoa;Bilateria;Protostomia;  
 Spiralia;Lophotrochozoa;Mollusca;Bivalvia;Autobranhia;Pteriormorphia;Pect  
 inida;Pectinoidea;Pectinidae;Pecten;Pecten maximus  
 UdeM00000013495 29159 540 UdeM00000013495 XP\_034303556.1 47.9 614  
 299 9 1 609 1 598 3.80E-150 540 29159 cellular  
 organisms;Eukaryota;Opisthokonta;Metazoa;Eumetazoa;Bilateria;Protostomia;  
 Spiralia;Lophotrochozoa;Mollusca;Bivalvia;Autobranhia;Pteriormorphia;Ostr  
 eida;Ostreoidea;Ostreidae;Crassostrea;Crassostrea gigas  
 UdeM00000013496 6596 88.6 UdeM00000013496 XP\_045207494.1 61.8 76  
 26 1 17 89 2 77 7.50E-15 88.6 6596 cellular  
 organisms;Eukaryota;Opisthokonta;Metazoa;Eumetazoa;Bilateria;Protostomia;  
 Spiralia;Lophotrochozoa;Mollusca;Bivalvia;Autobranhia;Heteroconchia;Euhe  
 terodonta;Imparidentia;Venerida;Veneroidea;Veneridae;Mercenaria;Mercenari  
 a mercenaria  
 UdeM00000013497 6596 609.4 UdeM00000013497 XP\_045207494.1 76.7 382  
 86 1 41 422 102 480 3.60E-171 609.4 6596 cellular  
 organisms;Eukaryota;Opisthokonta;Metazoa;Eumetazoa;Bilateria;Protostomia;  
 Spiralia;Lophotrochozoa;Mollusca;Bivalvia;Autobranhia;Heteroconchia;Euhe  
 terodonta;Imparidentia;Venerida;Veneroidea;Veneridae;Mercenaria;Mercenari  
 a mercenaria  
 UdeM00000013498 6596 244.6 UdeM00000013498 XP\_045207354.1 54.1 220  
 82 4 186 403 146 348 2.20E-61 244.6 6596 cellular  
 organisms;Eukaryota;Opisthokonta;Metazoa;Eumetazoa;Bilateria;Protostomia;  
 Spiralia;Lophotrochozoa;Mollusca;Bivalvia;Autobranhia;Heteroconchia;Euhe  
 terodonta;Imparidentia;Venerida;Veneroidea;Veneridae;Mercenaria;Mercenari  
 a mercenaria

UdeM00000013499 6596 82.4 UdeM00000013499 XP\_045208667.1 25.3 257  
 168 8 25 271 80 322 1.20E-12 82.4 6596 cellular  
 organisms;Eukaryota;Opisthokonta;Metazoa;Eumetazoa;Bilateria;Protostomia;  
 Spiralia;Lophotrochozoa;Mollusca;Bivalvia;Autobranchia;Heteroconchia;Euhe  
 terodonta;Imparidentia;Venerida;Veneroidea;Veneridae;Mercenaria;Mercenari  
 a mercenaria  
 UdeM00000013500 6596 122.1 UdeM00000013500 XP\_045208667.1 28.8 271  
 185 3 10 273 74 343 1.30E-24 122.1 6596 cellular  
 organisms;Eukaryota;Opisthokonta;Metazoa;Eumetazoa;Bilateria;Protostomia;  
 Spiralia;Lophotrochozoa;Mollusca;Bivalvia;Autobranchia;Heteroconchia;Euhe  
 terodonta;Imparidentia;Venerida;Veneroidea;Veneridae;Mercenaria;Mercenari  
 a mercenaria  
 UdeM00000013501 6596 69.3 UdeM00000013501 XP\_045161599.1 26.2 195  
 125 4 14 189 28 222 8.00E-09 69.3 6596 cellular  
 organisms;Eukaryota;Opisthokonta;Metazoa;Eumetazoa;Bilateria;Protostomia;  
 Spiralia;Lophotrochozoa;Mollusca;Bivalvia;Autobranchia;Heteroconchia;Euhe  
 terodonta;Imparidentia;Venerida;Veneroidea;Veneridae;Mercenaria;Mercenari  
 a mercenaria  
 UdeM00000013510 29159 86.7 UdeM00000013510 XP\_034307860.1 50.6 83  
 41 0 1 83 1 83 1.60E-14 86.7 29159 cellular  
 organisms;Eukaryota;Opisthokonta;Metazoa;Eumetazoa;Bilateria;Protostomia;  
 Spiralia;Lophotrochozoa;Mollusca;Bivalvia;Autobranchia;Pteriormorphia;Ostr  
 eida;Ostreoidea;Ostreidae;Crassostrea;Crassostrea gigas  
 UdeM00000013514 6596 64.7 UdeM00000013514 XP\_045208667.1 23.4 269  
 178 9 29 286 75 326 2.60E-07 64.7 6596 cellular  
 organisms;Eukaryota;Opisthokonta;Metazoa;Eumetazoa;Bilateria;Protostomia;  
 Spiralia;Lophotrochozoa;Mollusca;Bivalvia;Autobranchia;Heteroconchia;Euhe  
 terodonta;Imparidentia;Venerida;Veneroidea;Veneridae;Mercenaria;Mercenari  
 a mercenaria  
 UdeM00000013516 6596 143.3 UdeM00000013516 XP\_045166258.1 45.6 160  
 82 2 2 161 103 257 2.70E-31 143.3 6596 cellular  
 organisms;Eukaryota;Opisthokonta;Metazoa;Eumetazoa;Bilateria;Protostomia;  
 Spiralia;Lophotrochozoa;Mollusca;Bivalvia;Autobranchia;Heteroconchia;Euhe  
 terodonta;Imparidentia;Venerida;Veneroidea;Veneridae;Mercenaria;Mercenari  
 a mercenaria  
 UdeM00000013517 6579 174.5 UdeM00000013517 XP\_033730233.1 63.8 141  
 48 2 1 139 369 508 9.60E-41 174.5 6579 cellular  
 organisms;Eukaryota;Opisthokonta;Metazoa;Eumetazoa;Bilateria;Protostomia;  
 Spiralia;Lophotrochozoa;Mollusca;Bivalvia;Autobranchia;Pteriormorphia;Pect  
 inida;Pectinoidea;Pectinidae;Pecten;Pecten maximus  
 UdeM00000013522 6596 65.5 UdeM00000013522 XP\_045211114.1 25 252  
 165 7 14 263 11 240 1.50E-07 65.5 6596 cellular  
 organisms;Eukaryota;Opisthokonta;Metazoa;Eumetazoa;Bilateria;Protostomia;  
 Spiralia;Lophotrochozoa;Mollusca;Bivalvia;Autobranchia;Heteroconchia;Euhe  
 terodonta;Imparidentia;Venerida;Veneroidea;Veneridae;Mercenaria;Mercenari  
 a mercenaria  
 UdeM00000013533 6573 1657.1 UdeM00000013533 XP\_021345690.1 64.4  
 1412 473 10 1 1398 1 1397 0.00E+00 1657.1 6573  
 cellular  
 organisms;Eukaryota;Opisthokonta;Metazoa;Eumetazoa;Bilateria;Protostomia;  
 Spiralia;Lophotrochozoa;Mollusca;Bivalvia;Autobranchia;Pteriormorphia;Pect  
 inida;Pectinoidea;Pectinidae;Mizuhopecten;Mizuhopecten yessoensis  
 UdeM00000013534 6573 785 UdeM00000013534 XP\_021345689.1 78.9 513  
 105 3 503 1012 1405 1917 1.10E-223 785 6573 cellular

organisms;Eukaryota;Opisthokonta;Metazoa;Eumetazoa;Bilateria;Protostomia;
Spiralia;Lophotrochozoa;Mollusca;Bivalvia;Autobranchia;Pteriomorpha;Pect
inida;Pectinoidea;Pectinidae;Mizuhopecten;Mizuhopecten yessoensis
UdeM00000013535 6596 157.5 UdeM00000013535 XP\_045182138.1 30.8 344
231 3 114 453 58 398 4.00E-35 157.5 6596 cellular
organisms;Eukaryota;Opisthokonta;Metazoa;Eumetazoa;Bilateria;Protostomia;
Spiralia;Lophotrochozoa;Mollusca;Bivalvia;Autobranchia;Heteroconchia;Euhe
terodonta;Imparidentia;Venerida;Veneroidea;Veneridae;Mercenaria;Mercenari
a mercenaria
UdeM00000013536 6596 261.5 UdeM00000013536 XP\_045208212.1 33.3 478
281 11 80 526 96 566 2.30E-66 261.5 6596 cellular
organisms;Eukaryota;Opisthokonta;Metazoa;Eumetazoa;Bilateria;Protostomia;
Spiralia;Lophotrochozoa;Mollusca;Bivalvia;Autobranchia;Heteroconchia;Euhe
terodonta;Imparidentia;Venerida;Veneroidea;Veneridae;Mercenaria;Mercenari
a mercenaria
UdeM00000013537 6596 260 UdeM00000013537 XP\_045208212.1 34 479
274 13 73 516 96 567 6.40E-66 260 6596 cellular
organisms;Eukaryota;Opisthokonta;Metazoa;Eumetazoa;Bilateria;Protostomia;
Spiralia;Lophotrochozoa;Mollusca;Bivalvia;Autobranchia;Heteroconchia;Euhe
terodonta;Imparidentia;Venerida;Veneroidea;Veneridae;Mercenaria;Mercenari
a mercenaria
UdeM00000013538 6596 252.7 UdeM00000013538 XP\_045208212.1 33 466
272 10 168 600 95 553 1.20E-63 252.7 6596 cellular
organisms;Eukaryota;Opisthokonta;Metazoa;Eumetazoa;Bilateria;Protostomia;
Spiralia;Lophotrochozoa;Mollusca;Bivalvia;Autobranchia;Heteroconchia;Euhe
terodonta;Imparidentia;Venerida;Veneroidea;Veneridae;Mercenaria;Mercenari
a mercenaria
UdeM00000013539 6596 259.6 UdeM00000013539 XP\_045208212.1 33.3 460
277 9 28 459 96 553 7.80E-66 259.6 6596 cellular
organisms;Eukaryota;Opisthokonta;Metazoa;Eumetazoa;Bilateria;Protostomia;
Spiralia;Lophotrochozoa;Mollusca;Bivalvia;Autobranchia;Heteroconchia;Euhe
terodonta;Imparidentia;Venerida;Veneroidea;Veneridae;Mercenaria;Mercenari
a mercenaria
UdeM00000013540 6596 248.1 UdeM00000013540 XP\_045208212.1 33.4 461
273 13 39 468 96 553 2.40E-62 248.1 6596 cellular
organisms;Eukaryota;Opisthokonta;Metazoa;Eumetazoa;Bilateria;Protostomia;
Spiralia;Lophotrochozoa;Mollusca;Bivalvia;Autobranchia;Heteroconchia;Euhe
terodonta;Imparidentia;Venerida;Veneroidea;Veneridae;Mercenaria;Mercenari
a mercenaria
UdeM00000013541 6596 255.8 UdeM00000013541 XP\_045208212.1 33 473
281 12 25 464 97 566 1.10E-64 255.8 6596 cellular
organisms;Eukaryota;Opisthokonta;Metazoa;Eumetazoa;Bilateria;Protostomia;
Spiralia;Lophotrochozoa;Mollusca;Bivalvia;Autobranchia;Heteroconchia;Euhe
terodonta;Imparidentia;Venerida;Veneroidea;Veneridae;Mercenaria;Mercenari
a mercenaria
UdeM00000013542 6596 228.8 UdeM00000013542 XP\_045208212.1 30.2 474
299 12 33 477 96 566 1.50E-56 228.8 6596 cellular
organisms;Eukaryota;Opisthokonta;Metazoa;Eumetazoa;Bilateria;Protostomia;
Spiralia;Lophotrochozoa;Mollusca;Bivalvia;Autobranchia;Heteroconchia;Euhe
terodonta;Imparidentia;Venerida;Veneroidea;Veneridae;Mercenaria;Mercenari
a mercenaria
UdeM00000013543 6596 260.8 UdeM00000013543 XP\_045208212.1 34.5 475
275 12 23 465 96 566 3.40E-66 260.8 6596 cellular
organisms;Eukaryota;Opisthokonta;Metazoa;Eumetazoa;Bilateria;Protostomia;



Spiralia;Lophotrochozoa;Mollusca;Bivalvia;Autobranchia;Heteroconchia;Euherodonta;Imparidentia;Venerida;Veneroidea;Veneridae;Mercenaria;Mercenaria mercenaria

UdeM00000013545 6573 361.7 UdeM00000013545 XP\_021371247.1 35 566  
357 8 12 572 80 639 1.70E-96 361.7 6573 cellular

organisms;Eukaryota;Opisthokonta;Metazoa;Eumetazoa;Bilateria;Protostomia;Spiralia;Lophotrochozoa;Mollusca;Bivalvia;Autobranchia;Pteriomorpha;Pectinida;Pectinoidea;Pectinidae;Mizuhopecten;Mizuhopecten yessoensis

UdeM00000013546 6596 261.5 UdeM00000013546 XP\_045208212.1 32.9 474  
280 12 7 444 95 566 1.90E-66 261.5 6596 cellular

organisms;Eukaryota;Opisthokonta;Metazoa;Eumetazoa;Bilateria;Protostomia;Spiralia;Lophotrochozoa;Mollusca;Bivalvia;Autobranchia;Heteroconchia;Euherodonta;Imparidentia;Venerida;Veneroidea;Veneridae;Mercenaria;Mercenaria mercenaria

UdeM00000013547 37653 99.8 UdeM00000013547 XP\_014769497.1 42 200  
82 14 24 210 20 198 4.80E-18 99.8 37653 cellular

organisms;Eukaryota;Opisthokonta;Metazoa;Eumetazoa;Bilateria;Protostomia;Spiralia;Lophotrochozoa;Mollusca;Cephalopoda;Coleoidea;Octopodiformes;Octopoda;Incirrata;Octopodidae;Octopus;Octopus bimaculoides

UdeM00000013548 400727 247.3 UdeM00000013548 XP\_025081082.1 59.1  
381 103 11 178 507 275 653 4.20E-62 247.3 400727

cellular

organisms;Eukaryota;Opisthokonta;Metazoa;Eumetazoa;Bilateria;Protostomia;Spiralia;Lophotrochozoa;Mollusca;Gastropoda;Caenogastropoda;Architaenioglossa;Ampullarioidea;Ampullariidae;Pomacea;Pomacea canaliculata

UdeM00000013549 6596 510.8 UdeM00000013549 XP\_045212898.1 33.2 903  
551 18 1 880 366 1239 3.60E-141 510.8 6596 cellular

organisms;Eukaryota;Opisthokonta;Metazoa;Eumetazoa;Bilateria;Protostomia;Spiralia;Lophotrochozoa;Mollusca;Bivalvia;Autobranchia;Heteroconchia;Euherodonta;Imparidentia;Venerida;Veneroidea;Veneridae;Mercenaria;Mercenaria mercenaria

UdeM00000013550 6596 612.8 UdeM00000013550 XP\_045186644.1 34 1010  
621 18 92 1080 46 1030 8.20E-172 612.8 6596 cellular

organisms;Eukaryota;Opisthokonta;Metazoa;Eumetazoa;Bilateria;Protostomia;Spiralia;Lophotrochozoa;Mollusca;Bivalvia;Autobranchia;Heteroconchia;Euherodonta;Imparidentia;Venerida;Veneroidea;Veneridae;Mercenaria;Mercenaria mercenaria

UdeM00000013551 6573 167.5 UdeM00000013551 XP\_021358159.1 37 270  
157 7 3 262 394 660 3.60E-38 167.5 6573 cellular

organisms;Eukaryota;Opisthokonta;Metazoa;Eumetazoa;Bilateria;Protostomia;Spiralia;Lophotrochozoa;Mollusca;Bivalvia;Autobranchia;Pteriomorpha;Pectinida;Pectinoidea;Pectinidae;Mizuhopecten;Mizuhopecten yessoensis

UdeM00000013552 29159 134 UdeM00000013552 XP\_034324268.1 35.2 244  
120 11 553 770 850 1081 8.30E-28 134 29159 cellular

organisms;Eukaryota;Opisthokonta;Metazoa;Eumetazoa;Bilateria;Protostomia;Spiralia;Lophotrochozoa;Mollusca;Bivalvia;Autobranchia;Pteriomorpha;Ostreida;Ostreoidea;Ostreidae;Crassostrea;Crassostrea gigas

UdeM00000013553 29159 137.1 UdeM00000013553 XP\_034328389.1 36.9 203  
88 7 816 985 674 869 1.30E-28 137.1 29159 cellular

organisms;Eukaryota;Opisthokonta;Metazoa;Eumetazoa;Bilateria;Protostomia;Spiralia;Lophotrochozoa;Mollusca;Bivalvia;Autobranchia;Pteriomorpha;Ostreida;Ostreoidea;Ostreidae;Crassostrea;Crassostrea gigas

UdeM00000013554 29159 137.1 UdeM00000013554 XP\_034328389.1 36.9 203  
88 7 587 756 674 869 1.10E-28 137.1 29159 cellular

organisms;Eukaryota;Opisthokonta;Metazoa;Eumetazoa;Bilateria;Protostomia;  
Spiralia;Lophotrochozoa;Mollusca;Bivalvia;Autobranhia;Pteriomorphia;Ostr  
eida;Ostreoidea;Ostreidae;Crassostrea;Crassostrea gigas  
UdeM00000013556 6596 198.4 UdeM00000013556 XP\_045173241.1 32.2 482  
283 15 904 1366 393 849 6.10E-47 198.4 6596 cellular  
organisms;Eukaryota;Opisthokonta;Metazoa;Eumetazoa;Bilateria;Protostomia;  
Spiralia;Lophotrochozoa;Mollusca;Bivalvia;Autobranhia;Heteroconchia;Euhe  
terodonta;Imparidentia;Venerida;Veneroidea;Veneridae;Mercenaria;Mercenari  
a mercenaria  
UdeM00000013557 6596 198.4 UdeM00000013557 XP\_045173241.1 32.2 482  
283 15 874 1336 393 849 6.00E-47 198.4 6596 cellular  
organisms;Eukaryota;Opisthokonta;Metazoa;Eumetazoa;Bilateria;Protostomia;  
Spiralia;Lophotrochozoa;Mollusca;Bivalvia;Autobranhia;Heteroconchia;Euhe  
terodonta;Imparidentia;Venerida;Veneroidea;Veneridae;Mercenaria;Mercenari  
a mercenaria  
UdeM00000013559 6579 283.1 UdeM00000013559 XP\_033759079.1 85 227  
34 0 12 238 1652 1878 3.30E-73 283.1 6579 cellular  
organisms;Eukaryota;Opisthokonta;Metazoa;Eumetazoa;Bilateria;Protostomia;  
Spiralia;Lophotrochozoa;Mollusca;Bivalvia;Autobranhia;Pteriomorphia;Pect  
inida;Pectinoidea;Pectinidae;Pecten;Pecten maximus  
UdeM00000013558 6579 283.5 UdeM00000013558 XP\_033759079.1 85.5 227  
33 0 68 294 1652 1878 3.10E-73 283.5 6579 cellular  
organisms;Eukaryota;Opisthokonta;Metazoa;Eumetazoa;Bilateria;Protostomia;  
Spiralia;Lophotrochozoa;Mollusca;Bivalvia;Autobranhia;Pteriomorphia;Pect  
inida;Pectinoidea;Pectinidae;Pecten;Pecten maximus  
UdeM00000013560 6596 252.3 UdeM00000013560 XP\_045207701.1 38.8 894  
384 27 1 840 168 952 2.20E-63 252.3 6596 cellular  
organisms;Eukaryota;Opisthokonta;Metazoa;Eumetazoa;Bilateria;Protostomia;  
Spiralia;Lophotrochozoa;Mollusca;Bivalvia;Autobranhia;Heteroconchia;Euhe  
terodonta;Imparidentia;Venerida;Veneroidea;Veneridae;Mercenaria;Mercenari  
a mercenaria  
UdeM00000013561 6565 149.4 UdeM00000013561 XP\_022320478.1 59 117  
48 0 3 119 8 124 2.90E-33 149.4 6565 cellular  
organisms;Eukaryota;Opisthokonta;Metazoa;Eumetazoa;Bilateria;Protostomia;  
Spiralia;Lophotrochozoa;Mollusca;Bivalvia;Autobranhia;Pteriomorphia;Ostr  
eida;Ostreoidea;Ostreidae;Crassostrea;Crassostrea virginica  
UdeM00000013562 6573 353.6 UdeM00000013562 XP\_021373771.1 47.3 402  
186 9 6 396 16 402 3.50E-94 353.6 6573 cellular  
organisms;Eukaryota;Opisthokonta;Metazoa;Eumetazoa;Bilateria;Protostomia;  
Spiralia;Lophotrochozoa;Mollusca;Bivalvia;Autobranhia;Pteriomorphia;Pect  
inida;Pectinoidea;Pectinidae;Mizuhopecten;Mizuhopecten yessoensis  
UdeM00000013563 6596 331.6 UdeM00000013563 XP\_045209696.1 91.8 170  
12 1 1 168 7 176 5.70E-88 331.6 6596 cellular  
organisms;Eukaryota;Opisthokonta;Metazoa;Eumetazoa;Bilateria;Protostomia;  
Spiralia;Lophotrochozoa;Mollusca;Bivalvia;Autobranhia;Heteroconchia;Euhe  
terodonta;Imparidentia;Venerida;Veneroidea;Veneridae;Mercenaria;Mercenari  
a mercenaria  
UdeM00000013564 6596 192.2 UdeM00000013564 XP\_045210075.1 76.1 134  
31 1 13 146 5 137 4.70E-46 192.2 6596 cellular  
organisms;Eukaryota;Opisthokonta;Metazoa;Eumetazoa;Bilateria;Protostomia;  
Spiralia;Lophotrochozoa;Mollusca;Bivalvia;Autobranhia;Heteroconchia;Euhe  
terodonta;Imparidentia;Venerida;Veneroidea;Veneridae;Mercenaria;Mercenari  
a mercenaria

UdeM00000013565 6565 284.6 UdeM00000013565 XP\_022321126.1 35.4 796  
 361 20 7 718 11 737 3.40E-73 284.6 6565 cellular  
 organisms;Eukaryota;Opisthokonta;Metazoa;Eumetazoa;Bilateria;Protostomia;  
 Spiralia;Lophotrochozoa;Mollusca;Bivalvia;Autobranchia;Pteriormorphia;Ostr  
 eida;Ostreoidea;Ostreidae;Crassostrea;Crassostrea virginica  
 UdeM00000013566 6596 205.3 UdeM00000013566 XP\_045169793.1 53 217  
 86 6 1 207 1 211 8.30E-50 205.3 6596 cellular  
 organisms;Eukaryota;Opisthokonta;Metazoa;Eumetazoa;Bilateria;Protostomia;  
 Spiralia;Lophotrochozoa;Mollusca;Bivalvia;Autobranchia;Heteroconchia;Euhe  
 terodonta;Imparidentia;Venerida;Veneroidea;Veneridae;Mercenaria;Mercenari  
 a mercenaria  
 UdeM00000013567 1735272 145.2 UdeM00000013567 XP\_041347065.1 68.4  
 95 30 0 1 95 1 95 5.60E-32 145.2 1735272  
 cellular  
 organisms;Eukaryota;Opisthokonta;Metazoa;Eumetazoa;Bilateria;Protostomia;  
 Spiralia;Lophotrochozoa;Mollusca;Gastropoda;Neomphalina;Neomphaloidea;Pel  
 tospiridae;Gigantopelta;Gigantopelta aegis  
 UdeM00000013568 6596 548.9 UdeM00000013568 XP\_045209694.1 64 553  
 162 10 59 587 69 608 7.90E-153 548.9 6596 cellular  
 organisms;Eukaryota;Opisthokonta;Metazoa;Eumetazoa;Bilateria;Protostomia;  
 Spiralia;Lophotrochozoa;Mollusca;Bivalvia;Autobranchia;Heteroconchia;Euhe  
 terodonta;Imparidentia;Venerida;Veneroidea;Veneridae;Mercenaria;Mercenari  
 a mercenaria  
 UdeM00000013569 6596 396.7 UdeM00000013569 XP\_045209694.1 67.1 395  
 101 6 1 376 224 608 3.20E-107 396.7 6596 cellular  
 organisms;Eukaryota;Opisthokonta;Metazoa;Eumetazoa;Bilateria;Protostomia;  
 Spiralia;Lophotrochozoa;Mollusca;Bivalvia;Autobranchia;Heteroconchia;Euhe  
 terodonta;Imparidentia;Venerida;Veneroidea;Veneridae;Mercenaria;Mercenari  
 a mercenaria  
 UdeM00000013570 6596 521.9 UdeM00000013570 XP\_045210085.1 56.6 484  
 198 9 4 481 32 509 8.40E-145 521.9 6596 cellular  
 organisms;Eukaryota;Opisthokonta;Metazoa;Eumetazoa;Bilateria;Protostomia;  
 Spiralia;Lophotrochozoa;Mollusca;Bivalvia;Autobranchia;Heteroconchia;Euhe  
 terodonta;Imparidentia;Venerida;Veneroidea;Veneridae;Mercenaria;Mercenari  
 a mercenaria  
 UdeM00000013571 8128 443.4 UdeM00000013571 XP\_019211780.1 41.1 540  
 303 5 50 579 183 717 7.70E-121 443.4 8128 cellular  
 organisms;Eukaryota;Opisthokonta;Metazoa;Eumetazoa;Bilateria;Deuterostomi  
 a;Chordata;Craniata;Vertebrata;Gnathostomata;Teleostomi;Euteleostomi;Acti  
 nopterygii;Actinopteri;Neopterygii;Teleostei;Osteoglossocephalai;Clupeoce  
 phala;Euteleosteomorpha;Neoteleostei;Eurypterygia;Ctenosquamata;Acanthomo  
 rphata;Euacanthomorphacea;Percomorphaceae;Ovalentaria;Cichlomorphae;Cichl  
 iformes;Cichlidae;African  
 cichlids;Pseudocrenilabrinae;Oreochromini;Oreochromis;Oreochromis  
 niloticus  
 UdeM00000013572 215358 65.1 UdeM00000013572 XP\_027134537.1 58.3  
 60 25 0 10 69 46 105 4.40E-08 65.1 215358  
 cellular  
 organisms;Eukaryota;Opisthokonta;Metazoa;Eumetazoa;Bilateria;Deuterostomi  
 a;Chordata;Craniata;Vertebrata;Gnathostomata;Teleostomi;Euteleostomi;Acti  
 nopterygii;Actinopteri;Neopterygii;Teleostei;Osteoglossocephalai;Clupeoce  
 phala;Euteleosteomorpha;Neoteleostei;Eurypterygia;Ctenosquamata;Acanthomo  
 rphata;Euacanthomorphacea;Percomorphaceae;Eupercaria;Eupercaria incertae  
 sedis;Sciaenidae;Larimichthys;Larimichthys crocea

UdeM00000013573 6596 493 UdeM00000013573 XP\_045207678.1 79.4 296  
 61 0 1 296 1 296 2.60E-136 493 6596 cellular  
 organisms;Eukaryota;Opisthokonta;Metazoa;Eumetazoa;Bilateria;Protostomia;  
 Spiralia;Lophotrochozoa;Mollusca;Bivalvia;Autobranchia;Heteroconchia;Euhe-  
 terodonta;Imparidentia;Venerida;Veneroidea;Veneridae;Mercenaria;Mercenari-  
 a mercenaria

UdeM00000013574 37003 87 UdeM00000013574 XP\_024858324.1 27.7 267  
 169 7 36 291 26 279 4.60E-14 87 37003 cellular  
 organisms;Eukaryota;Opisthokonta;Metazoa;Eumetazoa;Bilateria;Deuterostomi-  
 a;Chordata;Craniata;Vertebrata;Gnathostomata;Teleostomi;Euteleostomi;Acti-  
 nopterygii;Actinopteri;Neopterygii;Teleostei;Osteoglossocephalai;Clupeoce-  
 phala;Euteleosteomorpha;Neoteleostei;Eurypterygia;Ctenosquamata;Acanthomo-  
 rphata;Euacanthomorphacea;Percomorphaceae;Ovalentaria;Atherinomorphae;Cyp-  
 rinodontiformes;Aplocheiloidei;Rivulidae;Kryptolebias;Kryptolebias  
 marmoratus

UdeM00000038457 6565 483 UdeM00000038457 XP\_022339358.1 59.9 601  
 162 5 228 814 180 715 1.40E-132 483 6565 cellular  
 organisms;Eukaryota;Opisthokonta;Metazoa;Eumetazoa;Bilateria;Protostomia;  
 Spiralia;Lophotrochozoa;Mollusca;Bivalvia;Autobranchia;Pteriormorphia;Ostr-  
 eida;Ostreoidea;Ostreidae;Crassostrea;Crassostrea virginica

UdeM00000038458 6579 130.2 UdeM00000038458 XP\_033756674.1 65.4 107  
 27 2 6 111 16 113 1.70E-27 130.2 6579 cellular  
 organisms;Eukaryota;Opisthokonta;Metazoa;Eumetazoa;Bilateria;Protostomia;  
 Spiralia;Lophotrochozoa;Mollusca;Bivalvia;Autobranchia;Pteriormorphia;Pect-  
 inida;Pectinoidea;Pectinidae;Pecten;Pecten maximus

UdeM00000038459 6579 391.3 UdeM00000038459 XP\_033756675.1 69.1 269  
 82 1 1 269 1 268 1.20E-105 391.3 6579 cellular  
 organisms;Eukaryota;Opisthokonta;Metazoa;Eumetazoa;Bilateria;Protostomia;  
 Spiralia;Lophotrochozoa;Mollusca;Bivalvia;Autobranchia;Pteriormorphia;Pect-  
 inida;Pectinoidea;Pectinidae;Pecten;Pecten maximus

UdeM00000038460 29159 213.4 UdeM00000038460 XP\_011419796.1 85.8 120  
 15 1 8 127 315 432 1.70E-52 213.4 29159 cellular  
 organisms;Eukaryota;Opisthokonta;Metazoa;Eumetazoa;Bilateria;Protostomia;  
 Spiralia;Lophotrochozoa;Mollusca;Bivalvia;Autobranchia;Pteriormorphia;Ostr-  
 eida;Ostreoidea;Ostreidae;Crassostrea;Crassostrea gigas

UdeM00000038461 1735272 75.5 UdeM00000038461 XP\_041373507.1 36.7  
 169 99 7 157 324 69 230 1.60E-10 75.5 1735272  
 cellular  
 organisms;Eukaryota;Opisthokonta;Metazoa;Eumetazoa;Bilateria;Protostomia;  
 Spiralia;Lophotrochozoa;Mollusca;Gastropoda;Neomphalina;Neomphaloidea;Pel-  
 tospiridae;Gigantopelta;Gigantopelta aegis

UdeM00000038462 6579 169.1 UdeM00000038462 XP\_033758269.1 27.3 490  
 311 12 20 472 205 686 1.40E-38 169.1 6579 cellular  
 organisms;Eukaryota;Opisthokonta;Metazoa;Eumetazoa;Bilateria;Protostomia;  
 Spiralia;Lophotrochozoa;Mollusca;Bivalvia;Autobranchia;Pteriormorphia;Pect-  
 inida;Pectinoidea;Pectinidae;Pecten;Pecten maximus

UdeM00000038463 8240 67 UdeM00000038463 XP\_042279317.1 27.7 224  
 138 7 95 305 631 843 8.30E-08 67 8240 cellular  
 organisms;Eukaryota;Opisthokonta;Metazoa;Eumetazoa;Bilateria;Deuterostomi-  
 a;Chordata;Craniata;Vertebrata;Gnathostomata;Teleostomi;Euteleostomi;Acti-  
 nopterygii;Actinopteri;Neopterygii;Teleostei;Osteoglossocephalai;Clupeoce-  
 phala;Euteleosteomorpha;Neoteleostei;Eurypterygia;Ctenosquamata;Acanthomo-  
 rphata;Euacanthomorphacea;Percomorphaceae;Pelagiaria;Scombriformes;Scombr-  
 idae;Scombrinae;Thunnini;Thunnus;Thunnus maccoyii

UdeM00000038464 6596 70.1 UdeM00000038464 XP\_045201969.1 68.8 48  
 15 0 10 57 32 79 3.00E-09 70.1 6596 cellular  
 organisms;Eukaryota;Opisthokonta;Metazoa;Eumetazoa;Bilateria;Protostomia;  
 Spiralia;Lophotrochozoa;Mollusca;Bivalvia;Autobranchia;Heteroconchia;Euhe  
 terodonta;Imparidentia;Venerida;Veneroidea;Veneridae;Mercenaria;Mercenari  
 a mercenaria  
 UdeM00000038465 6596 73.9 UdeM00000038465 XP\_045202576.1 63.9 61  
 21 1 1 60 124 184 2.10E-10 73.9 6596 cellular  
 organisms;Eukaryota;Opisthokonta;Metazoa;Eumetazoa;Bilateria;Protostomia;  
 Spiralia;Lophotrochozoa;Mollusca;Bivalvia;Autobranchia;Heteroconchia;Euhe  
 terodonta;Imparidentia;Venerida;Veneroidea;Veneridae;Mercenaria;Mercenari  
 a mercenaria  
 UdeM00000038466 6596 107.1 UdeM00000038466 XP\_045187052.1 62 92  
 33 2 1 91 198 288 1.40E-20 107.1 6596 cellular  
 organisms;Eukaryota;Opisthokonta;Metazoa;Eumetazoa;Bilateria;Protostomia;  
 Spiralia;Lophotrochozoa;Mollusca;Bivalvia;Autobranchia;Heteroconchia;Euhe  
 terodonta;Imparidentia;Venerida;Veneroidea;Veneridae;Mercenaria;Mercenari  
 a mercenaria  
 UdeM00000038467 6596 92.4 UdeM00000038467 XP\_045202346.1 47.6 82  
 43 0 25 106 91 172 4.10E-16 92.4 6596 cellular  
 organisms;Eukaryota;Opisthokonta;Metazoa;Eumetazoa;Bilateria;Protostomia;  
 Spiralia;Lophotrochozoa;Mollusca;Bivalvia;Autobranchia;Heteroconchia;Euhe  
 terodonta;Imparidentia;Venerida;Veneroidea;Veneridae;Mercenaria;Mercenari  
 a mercenaria  
 UdeM00000038468 6596 81.6 UdeM00000038468 XP\_045208944.1 23.6 254  
 114 4 1 175 42 294 1.20E-12 81.6 6596 cellular  
 organisms;Eukaryota;Opisthokonta;Metazoa;Eumetazoa;Bilateria;Protostomia;  
 Spiralia;Lophotrochozoa;Mollusca;Bivalvia;Autobranchia;Heteroconchia;Euhe  
 terodonta;Imparidentia;Venerida;Veneroidea;Veneridae;Mercenaria;Mercenari  
 a mercenaria  
 UdeM00000038471 6596 268.9 UdeM00000038471 XP\_045188553.1 35.7 457  
 264 9 2 438 635 1081 1.30E-68 268.9 6596 cellular  
 organisms;Eukaryota;Opisthokonta;Metazoa;Eumetazoa;Bilateria;Protostomia;  
 Spiralia;Lophotrochozoa;Mollusca;Bivalvia;Autobranchia;Heteroconchia;Euhe  
 terodonta;Imparidentia;Venerida;Veneroidea;Veneridae;Mercenaria;Mercenari  
 a mercenaria  
 UdeM00000038472 1735272 70.1 UdeM00000038472 XP\_041361601.1 29.5  
 149 72 4 1 143 404 525 3.20E-09 70.1 1735272  
 cellular  
 organisms;Eukaryota;Opisthokonta;Metazoa;Eumetazoa;Bilateria;Protostomia;  
 Spiralia;Lophotrochozoa;Mollusca;Gastropoda;Neomphalina;Neomphaloidea;Pel  
 tospiridae;Gigantopelta;Gigantopelta aegis  
 UdeM00000033269 6579 959.1 UdeM00000033269 XP\_033764242.1 68.5 714  
 213 7 3 712 1 706 3.10E-276 959.1 6579 cellular  
 organisms;Eukaryota;Opisthokonta;Metazoa;Eumetazoa;Bilateria;Protostomia;  
 Spiralia;Lophotrochozoa;Mollusca;Bivalvia;Autobranchia;Pteriomorphia;Pect  
 inida;Pectinoidea;Pectinidae;Pecten;Pecten maximus  
 UdeM00000033270 6596 669.5 UdeM00000033270 XP\_045161537.1 62.1 589  
 196 6 32 594 4 591 4.00E-189 669.5 6596 cellular  
 organisms;Eukaryota;Opisthokonta;Metazoa;Eumetazoa;Bilateria;Protostomia;  
 Spiralia;Lophotrochozoa;Mollusca;Bivalvia;Autobranchia;Heteroconchia;Euhe  
 terodonta;Imparidentia;Venerida;Veneroidea;Veneridae;Mercenaria;Mercenari  
 a mercenaria

UdeM00000033271 6596 480.7 UdeM00000033271 XP\_045162378.1 35.9 1001  
 524 25 22 991 384 1297 5.20E-132 480.7 6596 cellular  
 organisms;Eukaryota;Opisthokonta;Metazoa;Eumetazoa;Bilateria;Protostomia;  
 Spiralia;Lophotrochozoa;Mollusca;Bivalvia;Autobranchia;Heteroconchia;Euhe  
 terodonta;Imparidentia;Venerida;Veneroidea;Veneridae;Mercenaria;Mercenari  
 a mercenaria  
 UdeM00000033272 6596 213.8 UdeM00000033272 XP\_045162378.1 40.1 339  
 179 9 1 329 393 717 3.40E-52 213.8 6596 cellular  
 organisms;Eukaryota;Opisthokonta;Metazoa;Eumetazoa;Bilateria;Protostomia;  
 Spiralia;Lophotrochozoa;Mollusca;Bivalvia;Autobranchia;Heteroconchia;Euhe  
 terodonta;Imparidentia;Venerida;Veneroidea;Veneridae;Mercenaria;Mercenari  
 a mercenaria  
 UdeM00000033273 6596 107.5 UdeM00000033273 XP\_045162378.1 62.4 101  
 31 3 7 105 258 353 1.80E-20 107.5 6596 cellular  
 organisms;Eukaryota;Opisthokonta;Metazoa;Eumetazoa;Bilateria;Protostomia;  
 Spiralia;Lophotrochozoa;Mollusca;Bivalvia;Autobranchia;Heteroconchia;Euhe  
 terodonta;Imparidentia;Venerida;Veneroidea;Veneridae;Mercenaria;Mercenari  
 a mercenaria  
 UdeM00000033274 6596 140.2 UdeM00000033274 XP\_045162197.1 46.9 130  
 69 0 1 130 14 143 3.40E-30 140.2 6596 cellular  
 organisms;Eukaryota;Opisthokonta;Metazoa;Eumetazoa;Bilateria;Protostomia;  
 Spiralia;Lophotrochozoa;Mollusca;Bivalvia;Autobranchia;Heteroconchia;Euhe  
 terodonta;Imparidentia;Venerida;Veneroidea;Veneridae;Mercenaria;Mercenari  
 a mercenaria  
 UdeM00000033275 6596 508.4 UdeM00000033275 XP\_045162197.1 57.4 413  
 175 1 13 424 181 593 1.20E-140 508.4 6596 cellular  
 organisms;Eukaryota;Opisthokonta;Metazoa;Eumetazoa;Bilateria;Protostomia;  
 Spiralia;Lophotrochozoa;Mollusca;Bivalvia;Autobranchia;Heteroconchia;Euhe  
 terodonta;Imparidentia;Venerida;Veneroidea;Veneridae;Mercenaria;Mercenari  
 a mercenaria  
 UdeM00000033276 6573 607.8 UdeM00000033276 XP\_021372867.1 43.8 849  
 403 15 82 923 603 1384 4.70E-170 607.8 6573 cellular  
 organisms;Eukaryota;Opisthokonta;Metazoa;Eumetazoa;Bilateria;Protostomia;  
 Spiralia;Lophotrochozoa;Mollusca;Bivalvia;Autobranchia;Pteriomorphia;Pect  
 inida;Pectinoidea;Pectinidae;Mizuhopecten;Mizuhopecten yessoensis  
 UdeM00000033278 6596 354.4 UdeM00000033278 XP\_045163542.1 55 300  
 131 2 10 308 13 309 1.50E-94 354.4 6596 cellular  
 organisms;Eukaryota;Opisthokonta;Metazoa;Eumetazoa;Bilateria;Protostomia;  
 Spiralia;Lophotrochozoa;Mollusca;Bivalvia;Autobranchia;Heteroconchia;Euhe  
 terodonta;Imparidentia;Venerida;Veneroidea;Veneridae;Mercenaria;Mercenari  
 a mercenaria  
 UdeM00000033280 6596 90.9 UdeM00000033280 XP\_045162745.1 30.8 169  
 97 7 8 163 6 167 1.90E-15 90.9 6596 cellular  
 organisms;Eukaryota;Opisthokonta;Metazoa;Eumetazoa;Bilateria;Protostomia;  
 Spiralia;Lophotrochozoa;Mollusca;Bivalvia;Autobranchia;Heteroconchia;Euhe  
 terodonta;Imparidentia;Venerida;Veneroidea;Veneridae;Mercenaria;Mercenari  
 a mercenaria  
 UdeM00000033281 6596 393.7 UdeM00000033281 XP\_045163584.1 64.2 360  
 128 1 5 364 10 368 2.60E-106 393.7 6596 cellular  
 organisms;Eukaryota;Opisthokonta;Metazoa;Eumetazoa;Bilateria;Protostomia;  
 Spiralia;Lophotrochozoa;Mollusca;Bivalvia;Autobranchia;Heteroconchia;Euhe  
 terodonta;Imparidentia;Venerida;Veneroidea;Veneridae;Mercenaria;Mercenari  
 a mercenaria

UdeM00000033282 6579 223 UdeM00000033282 XP\_033752673.1 62.9 170  
 63 0 34 203 475 644 3.40E-55 223 6579 cellular  
 organisms;Eukaryota;Opisthokonta;Metazoa;Eumetazoa;Bilateria;Protostomia;  
 Spiralia;Lophotrochozoa;Mollusca;Bivalvia;Autobranchia;Pteriomorphia;Pect  
 inida;Pectinoidea;Pectinidae;Pecten;Pecten maximus  
 UdeM00000033283 1250792 224.2 UdeM00000033283 XP\_041860347.1 52.1  
 194 93 0 51 244 192 385 1.80E-55 224.2 1250792  
 cellular  
 organisms;Eukaryota;Opisthokonta;Metazoa;Eumetazoa;Bilateria;Deuterostomi  
 a;Chordata;Craniata;Vertebrata;Gnathostomata;Teleostomi;Euteleostomi;Acti  
 nopterygii;Actinopteri;Neopterygii;Teleostei;Osteoglossocephalai;Clupeoce  
 phala;Euteleosteomorpha;Neoteleostei;Eurypterygia;Ctenosquamata;Acanthomo  
 rphata;Euacanthomorphacea;Percomorphaceae;Ovalentaria;Atherinomorphae;Ath  
 eriniformes;Melanotaeniidae;Melanotaenia;Melanotaenia boesemani  
 UdeM00000033284 6596 232.6 UdeM00000033284 XP\_045161120.1 43.9 278  
 155 1 234 510 82 359 1.10E-57 232.6 6596 cellular  
 organisms;Eukaryota;Opisthokonta;Metazoa;Eumetazoa;Bilateria;Protostomia;  
 Spiralia;Lophotrochozoa;Mollusca;Bivalvia;Autobranchia;Heteroconchia;Euhe  
 terodonta;Imparidentia;Venerida;Veneroidea;Veneridae;Mercenaria;Mercenari  
 a mercenaria  
 UdeM00000033288 6579 231.9 UdeM00000033288 XP\_033764362.1 45.7 280  
 131 4 1 278 1 261 1.00E-57 231.9 6579 cellular  
 organisms;Eukaryota;Opisthokonta;Metazoa;Eumetazoa;Bilateria;Protostomia;  
 Spiralia;Lophotrochozoa;Mollusca;Bivalvia;Autobranchia;Pteriomorphia;Pect  
 inida;Pectinoidea;Pectinidae;Pecten;Pecten maximus  
 UdeM00000033289 6573 107.8 UdeM00000033289 XP\_021366551.1 63.4 93  
 30 1 15 103 323 415 8.70E-21 107.8 6573 cellular  
 organisms;Eukaryota;Opisthokonta;Metazoa;Eumetazoa;Bilateria;Protostomia;  
 Spiralia;Lophotrochozoa;Mollusca;Bivalvia;Autobranchia;Pteriomorphia;Pect  
 inida;Pectinoidea;Pectinidae;Mizuhopecten;Mizuhopecten yessoensis  
 UdeM00000033290 7574 363.6 UdeM00000033290 XP\_013412013.1 57.5 332  
 140 1 287 617 354 685 5.20E-97 363.6 7574 cellular  
 organisms;Eukaryota;Opisthokonta;Metazoa;Eumetazoa;Bilateria;Protostomia;  
 Spiralia;Lophotrochozoa;Brachiopoda;Linguliformea;Lingulata;Lingulida;Lin  
 guloidea;Lingulidae;Lingula;Lingula anatina  
 UdeM00000033291 400727 264.2 UdeM00000033291 XP\_025083327.1 79.4  
 194 40 0 1 194 1 194 1.30E-67 264.2 400727  
 cellular  
 organisms;Eukaryota;Opisthokonta;Metazoa;Eumetazoa;Bilateria;Protostomia;  
 Spiralia;Lophotrochozoa;Mollusca;Gastropoda;Caenogastropoda;Architaeniogl  
 ossa;Ampullarioidea;Ampullariidae;Pomacea;Pomacea canaliculata  
 UdeM00000033292 6596 436.8 UdeM00000033292 XP\_045163382.1 66.7 342  
 108 3 1 342 1 336 2.60E-119 436.8 6596 cellular  
 organisms;Eukaryota;Opisthokonta;Metazoa;Eumetazoa;Bilateria;Protostomia;  
 Spiralia;Lophotrochozoa;Mollusca;Bivalvia;Autobranchia;Heteroconchia;Euhe  
 terodonta;Imparidentia;Venerida;Veneroidea;Veneridae;Mercenaria;Mercenari  
 a mercenaria  
 UdeM00000033293 6579 148.7 UdeM00000033293 XP\_033763715.1 33.4 347  
 214 5 198 528 191 536 2.30E-32 148.7 6579 cellular  
 organisms;Eukaryota;Opisthokonta;Metazoa;Eumetazoa;Bilateria;Protostomia;  
 Spiralia;Lophotrochozoa;Mollusca;Bivalvia;Autobranchia;Pteriomorphia;Pect  
 inida;Pectinoidea;Pectinidae;Pecten;Pecten maximus  
 UdeM00000033294 7741 147.9 UdeM00000033294 XP\_019637445.1 82.5 80  
 14 0 1 80 60 139 6.40E-33 147.9 7741 cellular

organisms;Eukaryota;Opisthokonta;Metazoa;Eumetazoa;Bilateria;Deuterostomi  
a;Chordata;Cephalochordata;Leptocardii;Amphioxiformes;Branchiostomidae;Br  
anchiostoma;Branchiostoma belcheri

UdeM00000033295 6565 432.6 UdeM00000033295 XP\_022341048.1 65.7 312  
104 2 1 311 142 451 4.80E-118 432.6 6565 cellular

organisms;Eukaryota;Opisthokonta;Metazoa;Eumetazoa;Bilateria;Protostomia;  
Spiralia;Lophotrochozoa;Mollusca;Bivalvia;Autobranhia;Pteriormorphia;Ostr  
eida;Ostreoidea;Ostreidae;Crassostrea;Crassostrea virginica

UdeM00000033297 113540 536.2 UdeM00000033297 XP\_029110631.1 35.3  
853 527 14 5 840 14 858 1.10E-148 536.2 113540  
cellular

organisms;Eukaryota;Opisthokonta;Metazoa;Eumetazoa;Bilateria;Deuterostomi  
a;Chordata;Craniata;Vertebrata;Gnathostomata;Teleostomi;Euteleostomi;Acti  
nopterygii;Actinopteri;Neopterygii;Teleostei;Osteoglossoccephalai;Osteoglo  
ssocephala;Osteoglossomorpha;Osteoglossiformes;Osteoglossidae;Scleropages  
;Scleropages formosus

UdeM00000033298 113540 538.9 UdeM00000033298 XP\_029110631.1 36  
836 508 15 78 895 32 858 1.70E-149 538.9 113540  
cellular

organisms;Eukaryota;Opisthokonta;Metazoa;Eumetazoa;Bilateria;Deuterostomi  
a;Chordata;Craniata;Vertebrata;Gnathostomata;Teleostomi;Euteleostomi;Acti  
nopterygii;Actinopteri;Neopterygii;Teleostei;Osteoglossoccephalai;Osteoglo  
ssocephala;Osteoglossomorpha;Osteoglossiformes;Osteoglossidae;Scleropages  
;Scleropages formosus

UdeM00000033299 29159 112.8 UdeM00000033299 XP\_034306975.1 39.7 141  
84 1 39 178 179 319 4.50E-22 112.8 29159 cellular

organisms;Eukaryota;Opisthokonta;Metazoa;Eumetazoa;Bilateria;Protostomia;  
Spiralia;Lophotrochozoa;Mollusca;Bivalvia;Autobranhia;Pteriormorphia;Ostr  
eida;Ostreoidea;Ostreidae;Crassostrea;Crassostrea gigas

UdeM00000033300 6579 755.7 UdeM00000033300 XP\_033724709.1 70.8 493  
144 0 15 507 23 515 3.70E-215 755.7 6579 cellular

organisms;Eukaryota;Opisthokonta;Metazoa;Eumetazoa;Bilateria;Protostomia;  
Spiralia;Lophotrochozoa;Mollusca;Bivalvia;Autobranhia;Pteriormorphia;Pect  
inida;Pectinoidea;Pectinidae;Pecten;Pecten maximus

UdeM00000033301 6596 386.7 UdeM00000033301 XP\_045167151.1 45.6 557  
292 8 23 572 218 770 5.90E-104 386.7 6596 cellular

organisms;Eukaryota;Opisthokonta;Metazoa;Eumetazoa;Bilateria;Protostomia;  
Spiralia;Lophotrochozoa;Mollusca;Bivalvia;Autobranhia;Heteroconchia;Euhe  
terodonta;Imparidentia;Venerida;Veneroidea;Veneridae;Mercenaria;Mercenari  
a mercenaria

UdeM00000033302 6596 372.9 UdeM00000033302 XP\_045167151.1 49.8 444  
216 5 59 499 332 771 6.80E-100 372.9 6596 cellular

organisms;Eukaryota;Opisthokonta;Metazoa;Eumetazoa;Bilateria;Protostomia;  
Spiralia;Lophotrochozoa;Mollusca;Bivalvia;Autobranhia;Heteroconchia;Euhe  
terodonta;Imparidentia;Venerida;Veneroidea;Veneridae;Mercenaria;Mercenari  
a mercenaria

UdeM00000033303 6596 215.7 UdeM00000033303 XP\_045167150.1 39.6 374  
201 10 5 366 57 417 1.10E-52 215.7 6596 cellular

organisms;Eukaryota;Opisthokonta;Metazoa;Eumetazoa;Bilateria;Protostomia;  
Spiralia;Lophotrochozoa;Mollusca;Bivalvia;Autobranhia;Heteroconchia;Euhe  
terodonta;Imparidentia;Venerida;Veneroidea;Veneridae;Mercenaria;Mercenari  
a mercenaria

UdeM00000033304 6596 560.1 UdeM00000033304 XP\_045167151.1 45 767  
403 12 71 827 38 795 5.10E-156 560.1 6596 cellular



organisms;Eukaryota;Opisthokonta;Metazoa;Eumetazoa;Bilateria;Protostomia;Spiralia;Lophotrochozoa;Mollusca;Bivalvia;Autobranhia;Heteroconchia;Euherodonta;Imparidentia;Venerida;Veneroidea;Veneridae;Mercenaria;Mercenaria mercenaria

UdeM00000033305 6596 380.2 UdeM00000033305 XP\_045167151.1 48.6 475  
234 7 4 472 325 795 4.40E-102 380.2 6596 cellular

organisms;Eukaryota;Opisthokonta;Metazoa;Eumetazoa;Bilateria;Protostomia;Spiralia;Lophotrochozoa;Mollusca;Bivalvia;Autobranhia;Heteroconchia;Euherodonta;Imparidentia;Venerida;Veneroidea;Veneridae;Mercenaria;Mercenaria mercenaria

UdeM00000033306 6596 208 UdeM00000033306 XP\_045166389.1 37.2 352  
211 8 24 369 42 389 2.40E-50 208 6596 cellular

organisms;Eukaryota;Opisthokonta;Metazoa;Eumetazoa;Bilateria;Protostomia;Spiralia;Lophotrochozoa;Mollusca;Bivalvia;Autobranhia;Heteroconchia;Euherodonta;Imparidentia;Venerida;Veneroidea;Veneridae;Mercenaria;Mercenaria mercenaria

UdeM00000033307 6579 187.6 UdeM00000033307 XP\_033724612.1 52.9 153  
68 2 26 178 28 176 1.40E-44 187.6 6579 cellular

organisms;Eukaryota;Opisthokonta;Metazoa;Eumetazoa;Bilateria;Protostomia;Spiralia;Lophotrochozoa;Mollusca;Bivalvia;Autobranhia;Pteriormorphia;Pectinida;Pectinoidea;Pectinidae;Pecten;Pecten maximus

UdeM00000033308 6596 260.8 UdeM00000033308 XP\_045162921.1 39.9 346  
196 5 7 349 10 346 2.60E-66 260.8 6596 cellular

organisms;Eukaryota;Opisthokonta;Metazoa;Eumetazoa;Bilateria;Protostomia;Spiralia;Lophotrochozoa;Mollusca;Bivalvia;Autobranhia;Heteroconchia;Euherodonta;Imparidentia;Venerida;Veneroidea;Veneridae;Mercenaria;Mercenaria mercenaria

UdeM00000033309 6596 689.9 UdeM00000033309 XP\_045162921.1 43.6 901  
463 16 7 893 10 879 4.90E-195 689.9 6596 cellular

organisms;Eukaryota;Opisthokonta;Metazoa;Eumetazoa;Bilateria;Protostomia;Spiralia;Lophotrochozoa;Mollusca;Bivalvia;Autobranhia;Heteroconchia;Euherodonta;Imparidentia;Venerida;Veneroidea;Veneridae;Mercenaria;Mercenaria mercenaria

UdeM00000033310 6596 331.3 UdeM00000033310 XP\_045162036.1 44 521  
243 14 16 501 821 1327 2.20E-87 331.3 6596 cellular

organisms;Eukaryota;Opisthokonta;Metazoa;Eumetazoa;Bilateria;Protostomia;Spiralia;Lophotrochozoa;Mollusca;Bivalvia;Autobranhia;Heteroconchia;Euherodonta;Imparidentia;Venerida;Veneroidea;Veneridae;Mercenaria;Mercenaria mercenaria

UdeM00000033312 50390 571.6 UdeM00000033312 XP\_028142380.1 54.8 427  
193 0 1 427 5 431 8.30E-160 571.6 50390 cellular

organisms;Eukaryota;Opisthokonta;Metazoa;Eumetazoa;Bilateria;Protostomia;Ecdysozoa;Panarthropoda;Arthropoda;Mandibulata;Pancrustacea;Hexapoda;Insecta;Dicondylia;Pterygota;Neoptera;Endopterygota;Coleoptera;Polyphaga;Cucujiformia;Chrysomeloidea;Chrysomelidae;Galerucinae;Luperini;Diabroticina;Diabroticites;Diabrotica;Diabrotica virgifera;Diabrotica virgifera virgifera

UdeM00000033313 72036 282.3 UdeM00000033313 XP\_040576246.1 40.9 350  
200 4 4 351 17 361 9.80E-73 282.3 72036 cellular

organisms;Eukaryota;Opisthokonta;Metazoa;Eumetazoa;Bilateria;Protostomia;Ecdysozoa;Panarthropoda;Arthropoda;Mandibulata;Pancrustacea;Crustacea;Multicrustacea;Hexanauplia;Copepoda;Neocopepoda;Podoplea;Siphonostomatoida;Caligidae;Lepeophtheirus;Lepeophtheirus salmonis

UdeM00000033314 1232801 60.5 UdeM00000033314 XP\_043214649.1 42.4  
 66 31 1 35 93 2516 2581 1.40E-06 60.5 1232801  
 cellular  
 organisms;Eukaryota;Opisthokonta;Metazoa;Eumetazoa;Bilateria;Protostomia;  
 Ecdysozoa;Panarthropoda;Arthropoda;Mandibulata;Pancrustacea;Crustacea;Mul  
 ticrustacea;Hexanauplia;Thecostraca;Cirripectida;Thoracica;Sessilia;Balanid  
 ae;Amphibalanus;Amphibalanus amphitrite  
 UdeM00000033315 1232801 60.5 UdeM00000033315 XP\_043214649.1 42.4  
 66 31 1 35 93 2516 2581 1.40E-06 60.5 1232801  
 cellular  
 organisms;Eukaryota;Opisthokonta;Metazoa;Eumetazoa;Bilateria;Protostomia;  
 Ecdysozoa;Panarthropoda;Arthropoda;Mandibulata;Pancrustacea;Crustacea;Mul  
 ticrustacea;Hexanauplia;Thecostraca;Cirripectida;Thoracica;Sessilia;Balanid  
 ae;Amphibalanus;Amphibalanus amphitrite  
 UdeM00000032814 6579 365.5 UdeM00000032814 XP\_033752456.1 94 183  
 11 0 1 183 1 183 3.90E-98 365.5 6579 cellular  
 organisms;Eukaryota;Opisthokonta;Metazoa;Eumetazoa;Bilateria;Protostomia;  
 Spiralia;Lophotrochozoa;Mollusca;Bivalvia;Autobranchia;Pteriomorpha;Pect  
 inida;Pectinoidea;Pectinidae;Pecten;Pecten maximus  
 UdeM00000032815 6579 311.6 UdeM00000032815 XP\_033752456.1 95.9 147  
 6 0 12 158 37 183 5.70E-82 311.6 6579 cellular  
 organisms;Eukaryota;Opisthokonta;Metazoa;Eumetazoa;Bilateria;Protostomia;  
 Spiralia;Lophotrochozoa;Mollusca;Bivalvia;Autobranchia;Pteriomorpha;Pect  
 inida;Pectinoidea;Pectinidae;Pecten;Pecten maximus  
 UdeM00000032816 29159 619 UdeM00000032816 XP\_034332943.1 68.2 412  
 123 4 3 409 28 436 4.30E-174 619 29159 cellular  
 organisms;Eukaryota;Opisthokonta;Metazoa;Eumetazoa;Bilateria;Protostomia;  
 Spiralia;Lophotrochozoa;Mollusca;Bivalvia;Autobranchia;Pteriomorpha;Ostr  
 eida;Ostreoidea;Ostreidae;Crassostrea;Crassostrea gigas  
 UdeM00000032817 6573 458 UdeM00000032817 XP\_021342464.1 64 331  
 113 2 3 328 5 334 1.00E-125 458 6573 cellular  
 organisms;Eukaryota;Opisthokonta;Metazoa;Eumetazoa;Bilateria;Protostomia;  
 Spiralia;Lophotrochozoa;Mollusca;Bivalvia;Autobranchia;Pteriomorpha;Pect  
 inida;Pectinoidea;Pectinidae;Mizuhopecten;Mizuhopecten yessoensis  
 UdeM00000032818 6596 801.2 UdeM00000032818 XP\_045174868.1 59.2 660  
 261 4 3 657 2 658 1.00E-228 801.2 6596 cellular  
 organisms;Eukaryota;Opisthokonta;Metazoa;Eumetazoa;Bilateria;Protostomia;  
 Spiralia;Lophotrochozoa;Mollusca;Bivalvia;Autobranchia;Heteroconchia;Euhe  
 terodonta;Imparidentia;Venerida;Veneroidea;Veneridae;Mercenaria;Mercenari  
 a mercenaria  
 UdeM00000032819 6596 284.3 UdeM00000032819 XP\_045174700.1 69.9 209  
 41 3 85 281 1489 1687 1.70E-73 284.3 6596 cellular  
 organisms;Eukaryota;Opisthokonta;Metazoa;Eumetazoa;Bilateria;Protostomia;  
 Spiralia;Lophotrochozoa;Mollusca;Bivalvia;Autobranchia;Heteroconchia;Euhe  
 terodonta;Imparidentia;Venerida;Veneroidea;Veneridae;Mercenaria;Mercenari  
 a mercenaria  
 UdeM00000032820 6596 1495.7 UdeM00000032820 XP\_045174700.1 58.5  
 1486 503 31 1 1424 1 1435 0.00E+00 1495.7 6596  
 cellular  
 organisms;Eukaryota;Opisthokonta;Metazoa;Eumetazoa;Bilateria;Protostomia;  
 Spiralia;Lophotrochozoa;Mollusca;Bivalvia;Autobranchia;Heteroconchia;Euhe  
 terodonta;Imparidentia;Venerida;Veneroidea;Veneridae;Mercenaria;Mercenari  
 a mercenaria

UdeM00000032821 6596 1496.9 UdeM00000032821 XP\_045174700.1 58.7  
 1488 509 32 1 1435 1 1435 0.00E+00 1496.9 6596  
 cellular  
 organisms;Eukaryota;Opisthokonta;Metazoa;Eumetazoa;Bilateria;Protostomia;  
 Spiralia;Lophotrochozoa;Mollusca;Bivalvia;Autobranchia;Heteroconchia;Euhe  
 terodonta;Imparidentia;Venerida;Veneroidea;Veneridae;Mercenaria;Mercenari  
 a mercenaria  
 UdeM00000032822 4155 126.7 UdeM00000032822 XP\_012833272.1 43.2 146  
 83 0 2 147 136 281 3.10E-26 126.7 4155 cellular  
 organisms;Eukaryota;Viridiplantae;Streptophyta;Streptophytina;Embryophyta  
 ;Tracheophyta;Euphylllophyta;Spermatophyta;Magnoliopsida;Mesangiospermae;e  
 udicotyledons;Gunneridae;Pentapetalae;asterids;lamiids;Lamiales;Phrymacea  
 e;Erythranthe;Erythranthe guttata  
 UdeM00000032823 6596 265.4 UdeM00000032823 XP\_045175657.1 59.6 213  
 86 0 10 222 13 225 6.60E-68 265.4 6596 cellular  
 organisms;Eukaryota;Opisthokonta;Metazoa;Eumetazoa;Bilateria;Protostomia;  
 Spiralia;Lophotrochozoa;Mollusca;Bivalvia;Autobranchia;Heteroconchia;Euhe  
 terodonta;Imparidentia;Venerida;Veneroidea;Veneridae;Mercenaria;Mercenari  
 a mercenaria  
 UdeM00000032824 1735272 434.9 UdeM00000032824 XP\_041350427.1 50.5  
 455 221 3 112 562 36 490 1.60E-118 434.9 1735272  
 cellular  
 organisms;Eukaryota;Opisthokonta;Metazoa;Eumetazoa;Bilateria;Protostomia;  
 Spiralia;Lophotrochozoa;Mollusca;Gastropoda;Neomphalina;Neomphaloidea;Pel  
 tospiridae;Gigantopelta;Gigantopelta aegis  
 UdeM00000032825 225164 70.1 UdeM00000032825 XP\_009056511.1 47.6  
 84 35 3 32 107 1 83 2.00E-09 70.1 225164  
 cellular  
 organisms;Eukaryota;Opisthokonta;Metazoa;Eumetazoa;Bilateria;Protostomia;  
 Spiralia;Lophotrochozoa;Mollusca;Gastropoda;Patellogastropoda;Lottioidea;  
 Lottiidae;Lottia;Lottia gigantea  
 UdeM00000032826 6596 571.6 UdeM00000032826 XP\_045177155.1 59.9 454  
 176 3 1 450 2 453 8.70E-160 571.6 6596 cellular  
 organisms;Eukaryota;Opisthokonta;Metazoa;Eumetazoa;Bilateria;Protostomia;  
 Spiralia;Lophotrochozoa;Mollusca;Bivalvia;Autobranchia;Heteroconchia;Euhe  
 terodonta;Imparidentia;Venerida;Veneroidea;Veneridae;Mercenaria;Mercenari  
 a mercenaria  
 UdeM00000032827 7574 362.1 UdeM00000032827 XP\_013408985.1 79.4 228  
 47 0 7 234 1 228 5.60E-97 362.1 7574 cellular  
 organisms;Eukaryota;Opisthokonta;Metazoa;Eumetazoa;Bilateria;Protostomia;  
 Spiralia;Lophotrochozoa;Brachiopoda;Linguliformea;Lingulata;Lingulida;Lin  
 guloidea;Lingulidae;Lingula;Lingula anatina  
 UdeM00000032828 6596 498.8 UdeM00000032828 XP\_045176903.1 46 831  
 332 26 140 876 263 1070 1.40E-137 498.8 6596 cellular  
 organisms;Eukaryota;Opisthokonta;Metazoa;Eumetazoa;Bilateria;Protostomia;  
 Spiralia;Lophotrochozoa;Mollusca;Bivalvia;Autobranchia;Heteroconchia;Euhe  
 terodonta;Imparidentia;Venerida;Veneroidea;Veneridae;Mercenaria;Mercenari  
 a mercenaria  
 UdeM00000032829 6596 529.6 UdeM00000032829 XP\_045176903.1 47.5 832  
 338 26 140 896 263 1070 7.60E-147 529.6 6596 cellular  
 organisms;Eukaryota;Opisthokonta;Metazoa;Eumetazoa;Bilateria;Protostomia;  
 Spiralia;Lophotrochozoa;Mollusca;Bivalvia;Autobranchia;Heteroconchia;Euhe  
 terodonta;Imparidentia;Venerida;Veneroidea;Veneridae;Mercenaria;Mercenari  
 a mercenaria

UdeM00000032830 6596 338.6 UdeM00000032830 XP\_045176901.1 85.5 186  
 27 0 1 186 1114 1299 5.10E-90 338.6 6596 cellular  
 organisms;Eukaryota;Opisthokonta;Metazoa;Eumetazoa;Bilateria;Protostomia;  
 Spiralia;Lophotrochozoa;Mollusca;Bivalvia;Autobranchia;Heteroconchia;Euhe  
 terodonta;Imparidentia;Venerida;Veneroidea;Veneridae;Mercenaria;Mercenari  
 a mercenaria  
 UdeM00000032831 6596 228.8 UdeM00000032831 XP\_045177413.1 65 177  
 56 3 3 176 1 174 5.40E-57 228.8 6596 cellular  
 organisms;Eukaryota;Opisthokonta;Metazoa;Eumetazoa;Bilateria;Protostomia;  
 Spiralia;Lophotrochozoa;Mollusca;Bivalvia;Autobranchia;Heteroconchia;Euhe  
 terodonta;Imparidentia;Venerida;Veneroidea;Veneridae;Mercenaria;Mercenari  
 a mercenaria  
 UdeM00000032832 29159 382.9 UdeM00000032832 XP\_034315846.1 52.3 577  
 243 7 3 560 2 565 7.20E-103 382.9 29159 cellular  
 organisms;Eukaryota;Opisthokonta;Metazoa;Eumetazoa;Bilateria;Protostomia;  
 Spiralia;Lophotrochozoa;Mollusca;Bivalvia;Autobranchia;Pteriormorphia;Ostr  
 eida;Ostreoidea;Ostreidae;Crassostrea;Crassostrea gigas  
 UdeM00000032833 6596 290.8 UdeM00000032833 XP\_045174745.1 38.2 641  
 320 21 13 609 28 636 4.00E-75 290.8 6596 cellular  
 organisms;Eukaryota;Opisthokonta;Metazoa;Eumetazoa;Bilateria;Protostomia;  
 Spiralia;Lophotrochozoa;Mollusca;Bivalvia;Autobranchia;Heteroconchia;Euhe  
 terodonta;Imparidentia;Venerida;Veneroidea;Veneridae;Mercenaria;Mercenari  
 a mercenaria  
 UdeM00000032834 6573 808.9 UdeM00000032834 XP\_021338950.1 68 581  
 185 1 1 581 1 580 5.40E-231 808.9 6573 cellular  
 organisms;Eukaryota;Opisthokonta;Metazoa;Eumetazoa;Bilateria;Protostomia;  
 Spiralia;Lophotrochozoa;Mollusca;Bivalvia;Autobranchia;Pteriormorphia;Pect  
 inida;Pectinoidea;Pectinidae;Mizuhopecten;Mizuhopecten yessoensis  
 UdeM00000032835 6579 117.1 UdeM00000032835 XP\_033751571.1 34.5 165  
 107 1 46 209 194 358 2.80E-23 117.1 6579 cellular  
 organisms;Eukaryota;Opisthokonta;Metazoa;Eumetazoa;Bilateria;Protostomia;  
 Spiralia;Lophotrochozoa;Mollusca;Bivalvia;Autobranchia;Pteriormorphia;Pect  
 inida;Pectinoidea;Pectinidae;Pecten;Pecten maximus  
 UdeM00000032836 6579 117.1 UdeM00000032836 XP\_033751571.1 34.5 165  
 107 1 46 209 194 358 2.80E-23 117.1 6579 cellular  
 organisms;Eukaryota;Opisthokonta;Metazoa;Eumetazoa;Bilateria;Protostomia;  
 Spiralia;Lophotrochozoa;Mollusca;Bivalvia;Autobranchia;Pteriormorphia;Pect  
 inida;Pectinoidea;Pectinidae;Pecten;Pecten maximus  
 UdeM00000032837 6596 585.5 UdeM00000032837 XP\_045164383.1 51.8 608  
 274 5 3 591 145 752 8.00E-164 585.5 6596 cellular  
 organisms;Eukaryota;Opisthokonta;Metazoa;Eumetazoa;Bilateria;Protostomia;  
 Spiralia;Lophotrochozoa;Mollusca;Bivalvia;Autobranchia;Heteroconchia;Euhe  
 terodonta;Imparidentia;Venerida;Veneroidea;Veneridae;Mercenaria;Mercenari  
 a mercenaria  
 UdeM00000032838 6596 658.3 UdeM00000032838 XP\_045164383.1 49 718  
 335 7 3 689 145 862 1.10E-185 658.3 6596 cellular  
 organisms;Eukaryota;Opisthokonta;Metazoa;Eumetazoa;Bilateria;Protostomia;  
 Spiralia;Lophotrochozoa;Mollusca;Bivalvia;Autobranchia;Heteroconchia;Euhe  
 terodonta;Imparidentia;Venerida;Veneroidea;Veneridae;Mercenaria;Mercenari  
 a mercenaria  
 UdeM00000032840 6596 467.2 UdeM00000032840 XP\_045174288.1 73.7 316  
 75 2 10 324 133 441 1.70E-128 467.2 6596 cellular  
 organisms;Eukaryota;Opisthokonta;Metazoa;Eumetazoa;Bilateria;Protostomia;  
 Spiralia;Lophotrochozoa;Mollusca;Bivalvia;Autobranchia;Heteroconchia;Euhe

terodonta;Imparidentia;Venerida;Veneroidea;Veneridae;Mercenaria;Mercenari  
 a mercenaria  
 UdeM00000032839 6596 625.9 UdeM00000032839 XP\_045174288.1 70.1 448  
 119 3 1 440 1 441 3.80E-176 625.9 6596 cellular  
 organisms;Eukaryota;Opisthokonta;Metazoa;Eumetazoa;Bilateria;Protostomia;  
 Spiralia;Lophotrochozoa;Mollusca;Bivalvia;Autobranhia;Heteroconchia;Euhe  
 terodonta;Imparidentia;Venerida;Veneroidea;Veneridae;Mercenaria;Mercenari  
 a mercenaria  
 UdeM00000032841 6596 162.9 UdeM00000032841 XP\_045174288.1 60.9 133  
 45 1 1 126 1 133 3.00E-37 162.9 6596 cellular  
 organisms;Eukaryota;Opisthokonta;Metazoa;Eumetazoa;Bilateria;Protostomia;  
 Spiralia;Lophotrochozoa;Mollusca;Bivalvia;Autobranhia;Heteroconchia;Euhe  
 terodonta;Imparidentia;Venerida;Veneroidea;Veneridae;Mercenaria;Mercenari  
 a mercenaria  
 UdeM00000032842 6579 73.9 UdeM00000032842 XP\_033752753.1 24.4 308  
 186 9 17 281 29 332 4.40E-10 73.9 6579 cellular  
 organisms;Eukaryota;Opisthokonta;Metazoa;Eumetazoa;Bilateria;Protostomia;  
 Spiralia;Lophotrochozoa;Mollusca;Bivalvia;Autobranhia;Pteriormorphia;Pect  
 inida;Pectinoidea;Pectinidae;Pecten;Pecten maximus  
 UdeM00000032843 6596 420.2 UdeM00000032843 XP\_045175159.1 91.2 228  
 20 0 1 228 1 228 1.70E-114 420.2 6596 cellular  
 organisms;Eukaryota;Opisthokonta;Metazoa;Eumetazoa;Bilateria;Protostomia;  
 Spiralia;Lophotrochozoa;Mollusca;Bivalvia;Autobranhia;Heteroconchia;Euhe  
 terodonta;Imparidentia;Venerida;Veneroidea;Veneridae;Mercenaria;Mercenari  
 a mercenaria  
 UdeM00000032844 6596 338.2 UdeM00000032844 XP\_045175156.1 90.5 179  
 17 0 2 180 79 257 6.80E-90 338.2 6596 cellular  
 organisms;Eukaryota;Opisthokonta;Metazoa;Eumetazoa;Bilateria;Protostomia;  
 Spiralia;Lophotrochozoa;Mollusca;Bivalvia;Autobranhia;Heteroconchia;Euhe  
 terodonta;Imparidentia;Venerida;Veneroidea;Veneridae;Mercenaria;Mercenari  
 a mercenaria  
 UdeM00000032845 6945 322 UdeM00000032845 XP\_040075067.1 68.7 249  
 65 3 1 248 2 238 6.60E-85 322 6945 cellular  
 organisms;Eukaryota;Opisthokonta;Metazoa;Eumetazoa;Bilateria;Protostomia;  
 Ecdysozoa;Panarthropoda;Arthropoda;Chelicerata;Arachnida;Acari;Parasitifo  
 rmes;Ixodida;Ixodoidea;Ixodidae;Ixodinae;Ixodes;Ixodes scapularis  
 UdeM00000032846 10224 580.9 UdeM00000032846 XP\_002735881.1 59.4 475  
 187 2 12 485 5 474 1.50E-162 580.9 10224 cellular  
 organisms;Eukaryota;Opisthokonta;Metazoa;Eumetazoa;Bilateria;Deuterostomi  
 a;Hemichordata;Enteropneusta;Harrimaniidae;Saccoglossus;Saccoglossus  
 kowalevskii  
 UdeM00000032847 6596 205.7 UdeM00000032847 XP\_045174516.1 36.6 453  
 227 9 1 443 1 403 1.70E-49 205.7 6596 cellular  
 organisms;Eukaryota;Opisthokonta;Metazoa;Eumetazoa;Bilateria;Protostomia;  
 Spiralia;Lophotrochozoa;Mollusca;Bivalvia;Autobranhia;Heteroconchia;Euhe  
 terodonta;Imparidentia;Venerida;Veneroidea;Veneridae;Mercenaria;Mercenari  
 a mercenaria  
 UdeM00000032848 6596 205.7 UdeM00000032848 XP\_045174516.1 36.6 453  
 227 9 1 443 1 403 1.70E-49 205.7 6596 cellular  
 organisms;Eukaryota;Opisthokonta;Metazoa;Eumetazoa;Bilateria;Protostomia;  
 Spiralia;Lophotrochozoa;Mollusca;Bivalvia;Autobranhia;Heteroconchia;Euhe  
 terodonta;Imparidentia;Venerida;Veneroidea;Veneridae;Mercenaria;Mercenari  
 a mercenaria

UdeM00000032849 6573 264.2 UdeM00000032849 XP\_021369023.1 57.1 233  
 94 2 33 260 1 232 1.70E-67 264.2 6573 cellular  
 organisms;Eukaryota;Opisthokonta;Metazoa;Eumetazoa;Bilateria;Protostomia;  
 Spiralia;Lophotrochozoa;Mollusca;Bivalvia;Autobranhia;Pteriomorphia;Pect  
 inida;Pectinoidea;Pectinidae;Mizuhopecten;Mizuhopecten yessoensis  
 UdeM00000032850 6573 264.6 UdeM00000032850 XP\_021369023.1 57.1 233  
 94 2 1 228 1 232 1.20E-67 264.6 6573 cellular  
 organisms;Eukaryota;Opisthokonta;Metazoa;Eumetazoa;Bilateria;Protostomia;  
 Spiralia;Lophotrochozoa;Mollusca;Bivalvia;Autobranhia;Pteriomorphia;Pect  
 inida;Pectinoidea;Pectinidae;Mizuhopecten;Mizuhopecten yessoensis  
 UdeM00000032851 6596 837 UdeM00000032851 XP\_045176149.1 47.2 1219  
 514 23 13 1125 80 1274 2.80E-239 837 6596 cellular  
 organisms;Eukaryota;Opisthokonta;Metazoa;Eumetazoa;Bilateria;Protostomia;  
 Spiralia;Lophotrochozoa;Mollusca;Bivalvia;Autobranhia;Heteroconchia;Euhe  
 terodonta;Imparidentia;Venerida;Veneroidea;Veneridae;Mercenaria;Mercenari  
 a mercenaria  
 UdeM00000032852 6596 793.9 UdeM00000032852 XP\_045176152.1 46.8 1202  
 501 24 13 1099 80 1257 2.70E-226 793.9 6596 cellular  
 organisms;Eukaryota;Opisthokonta;Metazoa;Eumetazoa;Bilateria;Protostomia;  
 Spiralia;Lophotrochozoa;Mollusca;Bivalvia;Autobranhia;Heteroconchia;Euhe  
 terodonta;Imparidentia;Venerida;Veneroidea;Veneridae;Mercenaria;Mercenari  
 a mercenaria  
 UdeM00000032853 6579 157.5 UdeM00000032853 XP\_033752078.1 36.8 280  
 131 7 812 1047 2 279 9.10E-35 157.5 6579 cellular  
 organisms;Eukaryota;Opisthokonta;Metazoa;Eumetazoa;Bilateria;Protostomia;  
 Spiralia;Lophotrochozoa;Mollusca;Bivalvia;Autobranhia;Pteriomorphia;Pect  
 inida;Pectinoidea;Pectinidae;Pecten;Pecten maximus  
 UdeM00000032854 6596 426.8 UdeM00000032854 XP\_045175921.1 63.7 416  
 121 2 1 388 1 414 3.10E-116 426.8 6596 cellular  
 organisms;Eukaryota;Opisthokonta;Metazoa;Eumetazoa;Bilateria;Protostomia;  
 Spiralia;Lophotrochozoa;Mollusca;Bivalvia;Autobranhia;Heteroconchia;Euhe  
 terodonta;Imparidentia;Venerida;Veneroidea;Veneridae;Mercenaria;Mercenari  
 a mercenaria  
 UdeM00000032855 6596 266.5 UdeM00000032855 XP\_045176144.1 60.9 215  
 73 3 9 221 5 210 3.00E-68 266.5 6596 cellular  
 organisms;Eukaryota;Opisthokonta;Metazoa;Eumetazoa;Bilateria;Protostomia;  
 Spiralia;Lophotrochozoa;Mollusca;Bivalvia;Autobranhia;Heteroconchia;Euhe  
 terodonta;Imparidentia;Venerida;Veneroidea;Veneridae;Mercenaria;Mercenari  
 a mercenaria  
 UdeM00000032856 6596 239.2 UdeM00000032856 XP\_045158901.1 48.5 241  
 122 2 1 240 10 249 5.50E-60 239.2 6596 cellular  
 organisms;Eukaryota;Opisthokonta;Metazoa;Eumetazoa;Bilateria;Protostomia;  
 Spiralia;Lophotrochozoa;Mollusca;Bivalvia;Autobranhia;Heteroconchia;Euhe  
 terodonta;Imparidentia;Venerida;Veneroidea;Veneridae;Mercenaria;Mercenari  
 a mercenaria  
 UdeM00000032857 6573 295.8 UdeM00000032857 XP\_021360896.1 43.3 436  
 180 7 7 377 236 669 1.80E-76 295.8 6573 cellular  
 organisms;Eukaryota;Opisthokonta;Metazoa;Eumetazoa;Bilateria;Protostomia;  
 Spiralia;Lophotrochozoa;Mollusca;Bivalvia;Autobranhia;Pteriomorphia;Pect  
 inida;Pectinoidea;Pectinidae;Mizuhopecten;Mizuhopecten yessoensis  
 UdeM00000032858 6596 104.8 UdeM00000032858 XP\_045175830.1 37.6 165  
 101 2 5 168 4 167 1.20E-19 104.8 6596 cellular  
 organisms;Eukaryota;Opisthokonta;Metazoa;Eumetazoa;Bilateria;Protostomia;  
 Spiralia;Lophotrochozoa;Mollusca;Bivalvia;Autobranhia;Heteroconchia;Euhe

terodonta;Imparidentia;Venerida;Veneroidea;Veneridae;Mercenaria;Mercenari  
 a mercenaria  
 UdeM00000032859 6596 103.6 UdeM00000032859 XP\_045175830.1 35.5 172  
 99 4 3 169 4 168 2.80E-19 103.6 6596 cellular  
 organisms;Eukaryota;Opisthokonta;Metazoa;Eumetazoa;Bilateria;Protostomia;  
 Spiralia;Lophotrochozoa;Mollusca;Bivalvia;Autobranchia;Heteroconchia;Euhe  
 terodonta;Imparidentia;Venerida;Veneroidea;Veneridae;Mercenaria;Mercenari  
 a mercenaria  
 UdeM00000032860 6596 371.7 UdeM00000032860 XP\_045173162.1 70.2 245  
 68 3 1 245 1 240 7.20E-100 371.7 6596 cellular  
 organisms;Eukaryota;Opisthokonta;Metazoa;Eumetazoa;Bilateria;Protostomia;  
 Spiralia;Lophotrochozoa;Mollusca;Bivalvia;Autobranchia;Heteroconchia;Euhe  
 terodonta;Imparidentia;Venerida;Veneroidea;Veneridae;Mercenaria;Mercenari  
 a mercenaria  
 UdeM00000032861 6596 140.6 UdeM00000032861 XP\_045187765.1 67.3 101  
 30 2 1 101 1 98 1.10E-30 140.6 6596 cellular  
 organisms;Eukaryota;Opisthokonta;Metazoa;Eumetazoa;Bilateria;Protostomia;  
 Spiralia;Lophotrochozoa;Mollusca;Bivalvia;Autobranchia;Heteroconchia;Euhe  
 terodonta;Imparidentia;Venerida;Veneroidea;Veneridae;Mercenaria;Mercenari  
 a mercenaria  
 UdeM00000032862 6596 186 UdeM00000032862 XP\_045187765.1 71.6 116  
 32 1 1 116 121 235 2.70E-44 186 6596 cellular  
 organisms;Eukaryota;Opisthokonta;Metazoa;Eumetazoa;Bilateria;Protostomia;  
 Spiralia;Lophotrochozoa;Mollusca;Bivalvia;Autobranchia;Heteroconchia;Euhe  
 terodonta;Imparidentia;Venerida;Veneroidea;Veneridae;Mercenaria;Mercenari  
 a mercenaria  
 UdeM00000032863 6596 269.6 UdeM00000032863 XP\_045162039.1 61 205  
 71 3 1 202 6 204 3.20E-69 269.6 6596 cellular  
 organisms;Eukaryota;Opisthokonta;Metazoa;Eumetazoa;Bilateria;Protostomia;  
 Spiralia;Lophotrochozoa;Mollusca;Bivalvia;Autobranchia;Heteroconchia;Euhe  
 terodonta;Imparidentia;Venerida;Veneroidea;Veneridae;Mercenaria;Mercenari  
 a mercenaria  
 UdeM00000032864 6596 266.9 UdeM00000032864 XP\_045162039.1 64.9 185  
 59 2 16 200 26 204 2.10E-68 266.9 6596 cellular  
 organisms;Eukaryota;Opisthokonta;Metazoa;Eumetazoa;Bilateria;Protostomia;  
 Spiralia;Lophotrochozoa;Mollusca;Bivalvia;Autobranchia;Heteroconchia;Euhe  
 terodonta;Imparidentia;Venerida;Veneroidea;Veneridae;Mercenaria;Mercenari  
 a mercenaria  
 UdeM00000032865 6596 241.5 UdeM00000032865 XP\_045162039.1 64.9 168  
 53 2 2 169 43 204 7.90E-61 241.5 6596 cellular  
 organisms;Eukaryota;Opisthokonta;Metazoa;Eumetazoa;Bilateria;Protostomia;  
 Spiralia;Lophotrochozoa;Mollusca;Bivalvia;Autobranchia;Heteroconchia;Euhe  
 terodonta;Imparidentia;Venerida;Veneroidea;Veneridae;Mercenaria;Mercenari  
 a mercenaria  
 UdeM00000032866 1735272 98.2 UdeM00000032866 XP\_041365892.1 37.5  
 120 75 0 1 120 1601 1720 1.90E-17 98.2 1735272  
 cellular  
 organisms;Eukaryota;Opisthokonta;Metazoa;Eumetazoa;Bilateria;Protostomia;  
 Spiralia;Lophotrochozoa;Mollusca;Gastropoda;Neomphalina;Neomphaloidea;Pel  
 tospiridae;Gigantopelta;Gigantopelta aegis  
 UdeM00000032867 6565 205.7 UdeM00000032867 XP\_022309566.1 50.6 164  
 81 0 310 473 709 872 1.50E-49 205.7 6565 cellular  
 organisms;Eukaryota;Opisthokonta;Metazoa;Eumetazoa;Bilateria;Protostomia;

Spiralia;Lophotrochozoa;Mollusca;Bivalvia;Autobranchia;Pteriormorphia;Ostr  
eida;Ostreoidea;Ostreidae;Crassostrea;Crassostrea virginica  
UdeM00000032868 6565 129.4 UdeM00000032868 XP\_022325073.1 41.7 204  
105 8 244 439 625 822 1.40E-26 129.4 6565 cellular  
organisms;Eukaryota;Opisthokonta;Metazoa;Eumetazoa;Bilateria;Protostomia;  
Spiralia;Lophotrochozoa;Mollusca;Bivalvia;Autobranchia;Pteriormorphia;Ostr  
eida;Ostreoidea;Ostreidae;Crassostrea;Crassostrea virginica  
UdeM00000032869 6596 917.1 UdeM00000032869 XP\_045176532.1 53.4 834  
319 4 1 825 62 834 1.50E-263 917.1 6596 cellular  
organisms;Eukaryota;Opisthokonta;Metazoa;Eumetazoa;Bilateria;Protostomia;  
Spiralia;Lophotrochozoa;Mollusca;Bivalvia;Autobranchia;Heteroconchia;Euhe  
terodonta;Imparidentia;Venerida;Veneroidea;Veneridae;Mercenaria;Mercenari  
a mercenaria  
UdeM00000032870 6596 929.9 UdeM00000032870 XP\_045176532.1 56.4 773  
328 2 1 764 62 834 2.10E-267 929.9 6596 cellular  
organisms;Eukaryota;Opisthokonta;Metazoa;Eumetazoa;Bilateria;Protostomia;  
Spiralia;Lophotrochozoa;Mollusca;Bivalvia;Autobranchia;Heteroconchia;Euhe  
terodonta;Imparidentia;Venerida;Veneroidea;Veneridae;Mercenaria;Mercenari  
a mercenaria  
UdeM00000032871 6596 201.4 UdeM00000032871 XP\_045176531.1 59 156  
64 0 1 156 679 834 8.30E-49 201.4 6596 cellular  
organisms;Eukaryota;Opisthokonta;Metazoa;Eumetazoa;Bilateria;Protostomia;  
Spiralia;Lophotrochozoa;Mollusca;Bivalvia;Autobranchia;Heteroconchia;Euhe  
terodonta;Imparidentia;Venerida;Veneroidea;Veneridae;Mercenaria;Mercenari  
a mercenaria  
UdeM00000032872 6579 441.4 UdeM00000032872 XP\_033752807.1 46.6 455  
242 1 13 467 15 468 1.40E-120 441.4 6579 cellular  
organisms;Eukaryota;Opisthokonta;Metazoa;Eumetazoa;Bilateria;Protostomia;  
Spiralia;Lophotrochozoa;Mollusca;Bivalvia;Autobranchia;Pteriormorphia;Pect  
inida;Pectinoidea;Pectinidae;Pecten;Pecten maximus  
UdeM00000032873 6579 446 UdeM00000032873 XP\_033752807.1 46.8 464  
242 2 4 463 6 468 5.70E-122 446 6579 cellular  
organisms;Eukaryota;Opisthokonta;Metazoa;Eumetazoa;Bilateria;Protostomia;  
Spiralia;Lophotrochozoa;Mollusca;Bivalvia;Autobranchia;Pteriormorphia;Pect  
inida;Pectinoidea;Pectinidae;Pecten;Pecten maximus  
UdeM00000032874 6573 105.1 UdeM00000032874 XP\_021360895.1 42.4 250  
100 10 1 216 1 240 1.50E-19 105.1 6573 cellular  
organisms;Eukaryota;Opisthokonta;Metazoa;Eumetazoa;Bilateria;Protostomia;  
Spiralia;Lophotrochozoa;Mollusca;Bivalvia;Autobranchia;Pteriormorphia;Pect  
inida;Pectinoidea;Pectinidae;Mizuhopecten;Mizuhopecten yessoensis  
UdeM00000027527 6596 186 UdeM00000027527 XP\_045161977.1 47.1 478  
216 10 100 558 101 560 1.30E-43 186 6596 cellular  
organisms;Eukaryota;Opisthokonta;Metazoa;Eumetazoa;Bilateria;Protostomia;  
Spiralia;Lophotrochozoa;Mollusca;Bivalvia;Autobranchia;Heteroconchia;Euhe  
terodonta;Imparidentia;Venerida;Veneroidea;Veneridae;Mercenaria;Mercenari  
a mercenaria  
UdeM00000027528 6596 283.9 UdeM00000027528 XP\_045161977.1 85.2 155  
23 0 1 155 567 721 1.20E-73 283.9 6596 cellular  
organisms;Eukaryota;Opisthokonta;Metazoa;Eumetazoa;Bilateria;Protostomia;  
Spiralia;Lophotrochozoa;Mollusca;Bivalvia;Autobranchia;Heteroconchia;Euhe  
terodonta;Imparidentia;Venerida;Veneroidea;Veneridae;Mercenaria;Mercenari  
a mercenaria  
UdeM00000027529 6573 145.6 UdeM00000027529 XP\_021379320.1 24.4 540  
340 17 35 526 79 598 2.10E-31 145.6 6573 cellular



organisms;Eukaryota;Opisthokonta;Metazoa;Eumetazoa;Bilateria;Protostomia;Spiralia;Lophotrochozoa;Mollusca;Bivalvia;Autobranchia;Pteriomorpha;Pectinida;Pectinoidea;Pectinidae;Mizuhopecten;Mizuhopecten yessoensis  
UdeM00000027530 29159 221.9 UdeM00000027530 XP\_011439505.1 69.9 156  
41 1 2 151 29 184 5.80E-55 221.9 29159 cellular

organisms;Eukaryota;Opisthokonta;Metazoa;Eumetazoa;Bilateria;Protostomia;Spiralia;Lophotrochozoa;Mollusca;Bivalvia;Autobranchia;Pteriomorpha;Ostreida;Ostreoidea;Ostreidae;Crassostrea;Crassostrea gigas  
UdeM00000027532 6565 369.8 UdeM00000027532 XP\_022331028.1 58.1 344  
79 4 4 282 183 526 3.10E-99 369.8 6565 cellular

organisms;Eukaryota;Opisthokonta;Metazoa;Eumetazoa;Bilateria;Protostomia;Spiralia;Lophotrochozoa;Mollusca;Bivalvia;Autobranchia;Pteriomorpha;Ostreida;Ostreoidea;Ostreidae;Crassostrea;Crassostrea virginica  
UdeM00000027533 6945 84.3 UdeM00000027533 XP\_040065097.1 28.5 193  
112 4 59 225 85 277 2.90E-13 84.3 6945 cellular

organisms;Eukaryota;Opisthokonta;Metazoa;Eumetazoa;Bilateria;Protostomia;Ecdysozoa;Panarthropoda;Arthropoda;Chelicerata;Arachnida;Acari;Parasitiformes;Ixodida;Ixodoidea;Ixodidae;Ixodinae;Ixodes;Ixodes scapularis  
UdeM00000027534 7574 321.6 UdeM00000027534 XP\_013381563.1 44.7 342  
169 7 66 395 50 383 1.50E-84 321.6 7574 cellular

organisms;Eukaryota;Opisthokonta;Metazoa;Eumetazoa;Bilateria;Protostomia;Spiralia;Lophotrochozoa;Brachiopoda;Linguliformea;Lingulata;Lingulida;Linguloidea;Lingulidae;Lingula;Lingula anatina  
UdeM00000027535 6579 1047.3 UdeM00000027535 XP\_033734815.1 56.7  
927 377 9 1 914 1 916 1.10E-302 1047.3 6579  
cellular

organisms;Eukaryota;Opisthokonta;Metazoa;Eumetazoa;Bilateria;Protostomia;Spiralia;Lophotrochozoa;Mollusca;Bivalvia;Autobranchia;Pteriomorpha;Pectinida;Pectinoidea;Pectinidae;Pecten;Pecten maximus  
UdeM00000027537 6596 140.6 UdeM00000027537 XP\_045166060.1 48 150  
73 2 39 188 41 185 2.10E-30 140.6 6596 cellular

organisms;Eukaryota;Opisthokonta;Metazoa;Eumetazoa;Bilateria;Protostomia;Spiralia;Lophotrochozoa;Mollusca;Bivalvia;Autobranchia;Heteroconchia;Euheterodonta;Imparidentia;Venerida;Veneroidea;Veneridae;Mercenaria;Mercenaria mercenaria  
UdeM00000027536 6596 131.3 UdeM00000027536 XP\_045166060.1 50.4 135  
62 2 39 173 41 170 1.30E-27 131.3 6596 cellular

organisms;Eukaryota;Opisthokonta;Metazoa;Eumetazoa;Bilateria;Protostomia;Spiralia;Lophotrochozoa;Mollusca;Bivalvia;Autobranchia;Heteroconchia;Euheterodonta;Imparidentia;Venerida;Veneroidea;Veneridae;Mercenaria;Mercenaria mercenaria  
UdeM00000027539 6596 620.9 UdeM00000027539 XP\_045162013.1 42.4 851  
117 3 1 832 1 497 2.40E-174 620.9 6596 cellular

organisms;Eukaryota;Opisthokonta;Metazoa;Eumetazoa;Bilateria;Protostomia;Spiralia;Lophotrochozoa;Mollusca;Bivalvia;Autobranchia;Heteroconchia;Euheterodonta;Imparidentia;Venerida;Veneroidea;Veneridae;Mercenaria;Mercenaria mercenaria  
UdeM00000027542 1735272 385.6 UdeM00000027542 XP\_041354632.1 61.4  
316 120 2 6 321 9 322 6.30E-104 385.6 1735272  
cellular

organisms;Eukaryota;Opisthokonta;Metazoa;Eumetazoa;Bilateria;Protostomia;Spiralia;Lophotrochozoa;Mollusca;Gastropoda;Neomphalina;Neomphaloidea;Peltopiridae;Gigantopelta;Gigantopelta aegis

UdeM00000027543 1735272 113.2 UdeM00000027543 XP\_041354632.1 66.3  
 86 28 1 6 91 9 93 1.90E-22 113.2 1735272  
 cellular  
 organisms;Eukaryota;Opisthokonta;Metazoa;Eumetazoa;Bilateria;Protostomia;  
 Spiralia;Lophotrochozoa;Mollusca;Gastropoda;Neomphalina;Neomphaloidea;Pel  
 tospiridae;Gigantopelta;Gigantopelta aegis  
 UdeM00000027544 6596 1059.7 UdeM00000027544 XP\_045187449.1 38.9  
 1663 829 28 9 1625 23 1544 3.80E-306 1059.7 6596  
 cellular  
 organisms;Eukaryota;Opisthokonta;Metazoa;Eumetazoa;Bilateria;Protostomia;  
 Spiralia;Lophotrochozoa;Mollusca;Bivalvia;Autobranchia;Heteroconchia;Euhe  
 terodonta;Imparidentia;Venerida;Veneroidea;Veneridae;Mercenaria;Mercenari  
 a mercenaria  
 UdeM00000027546 6573 160.6 UdeM00000027546 XP\_021378494.1 52.8 142  
 64 2 1 142 1 139 1.50E-36 160.6 6573 cellular  
 organisms;Eukaryota;Opisthokonta;Metazoa;Eumetazoa;Bilateria;Protostomia;  
 Spiralia;Lophotrochozoa;Mollusca;Bivalvia;Autobranchia;Pteriormorphia;Pect  
 inida;Pectinoidea;Pectinidae;Mizuhopecten;Mizuhopecten yessoensis  
 UdeM00000027547 6596 154.1 UdeM00000027547 XP\_045187459.1 46.5 202  
 95 5 1 197 1 194 1.90E-34 154.1 6596 cellular  
 organisms;Eukaryota;Opisthokonta;Metazoa;Eumetazoa;Bilateria;Protostomia;  
 Spiralia;Lophotrochozoa;Mollusca;Bivalvia;Autobranchia;Heteroconchia;Euhe  
 terodonta;Imparidentia;Venerida;Veneroidea;Veneridae;Mercenaria;Mercenari  
 a mercenaria  
 UdeM00000027548 29159 439.9 UdeM00000027548 XP\_034329191.1 73.2 280  
 75 0 22 301 5 284 2.60E-120 439.9 29159 cellular  
 organisms;Eukaryota;Opisthokonta;Metazoa;Eumetazoa;Bilateria;Protostomia;  
 Spiralia;Lophotrochozoa;Mollusca;Bivalvia;Autobranchia;Pteriormorphia;Ostr  
 eida;Ostreoidea;Ostreidae;Crassostrea;Crassostrea gigas  
 UdeM00000027549 6565 140.2 UdeM00000027549 XP\_022334388.1 75.3 97  
 22 2 2 96 3 99 1.40E-30 140.2 6565 cellular  
 organisms;Eukaryota;Opisthokonta;Metazoa;Eumetazoa;Bilateria;Protostomia;  
 Spiralia;Lophotrochozoa;Mollusca;Bivalvia;Autobranchia;Pteriormorphia;Ostr  
 eida;Ostreoidea;Ostreidae;Crassostrea;Crassostrea virginica  
 UdeM00000027550 54380 100.9 UdeM00000027550 XP\_009697826.1 55.2 87  
 37 1 1 85 49 135 1.00E-18 100.9 54380 cellular  
 organisms;Eukaryota;Opisthokonta;Metazoa;Eumetazoa;Bilateria;Deuterostomi  
 a;Chordata;Craniata;Vertebrata;Gnathostomata;Teleostomi;Euteleostomi;Sarc  
 opterygii;Dipnotetrapodomorpha;Tetrapoda;Amniota;Sauropsida;Sauria;Archel  
 osauria;Archosauria;Dinosauria;Saurischia;Theropoda;Coelurosauria;Aves;Ne  
 ognathae;Cariamiformes;Cariamidae;Cariama;Cariama cristata  
 UdeM00000027551 6706 318.2 UdeM00000027551 XP\_042211389.1 79.6 191  
 39 0 1 191 39 229 1.20E-83 318.2 6706 cellular  
 organisms;Eukaryota;Opisthokonta;Metazoa;Eumetazoa;Bilateria;Protostomia;  
 Ecdysozoa;Panarthropoda;Arthropoda;Mandibulata;Pancrustacea;Crustacea;Mul  
 ticrustacea;Malacostraca;Eumalacostraca;Eucarida;Decapoda;Pleocyemata;Ast  
 acidea;Nephropoidea;Nephropidae;Homarus;Homarus americanus  
 UdeM00000027552 6579 1385.2 UdeM00000027552 XP\_033735213.1 56.6  
 1047 434 9 3 1035 163 1203 0.00E+00 1385.2 6579  
 cellular  
 organisms;Eukaryota;Opisthokonta;Metazoa;Eumetazoa;Bilateria;Protostomia;  
 Spiralia;Lophotrochozoa;Mollusca;Bivalvia;Autobranchia;Pteriormorphia;Pect  
 inida;Pectinoidea;Pectinidae;Pecten;Pecten maximus

UdeM00000027554 6596 201.8 UdeM00000027554 XP\_045184288.1 48.2 226  
 108 4 18 242 2 219 1.10E-48 201.8 6596 cellular  
 organisms;Eukaryota;Opisthokonta;Metazoa;Eumetazoa;Bilateria;Protostomia;  
 Spiralia;Lophotrochozoa;Mollusca;Bivalvia;Autobranchia;Heteroconchia;Euhe  
 terodonta;Imparidentia;Venerida;Veneroidea;Veneridae;Mercenaria;Mercenari  
 a mercenaria

UdeM00000027555 6596 184.5 UdeM00000027555 XP\_045187676.1 63.9 147  
 49 1 8 150 11 157 1.00E-43 184.5 6596 cellular  
 organisms;Eukaryota;Opisthokonta;Metazoa;Eumetazoa;Bilateria;Protostomia;  
 Spiralia;Lophotrochozoa;Mollusca;Bivalvia;Autobranchia;Heteroconchia;Euhe  
 terodonta;Imparidentia;Venerida;Veneroidea;Veneridae;Mercenaria;Mercenari  
 a mercenaria

UdeM00000027556 400727 388.7 UdeM00000027556 XP\_025106103.1 77.2  
 237 52 1 3 239 301 535 5.60E-105 388.7 400727  
 cellular  
 organisms;Eukaryota;Opisthokonta;Metazoa;Eumetazoa;Bilateria;Protostomia;  
 Spiralia;Lophotrochozoa;Mollusca;Gastropoda;Caenogastropoda;Architaeniogl  
 ossa;Ampullarioidea;Ampullariidae;Pomacea;Pomacea canaliculata

UdeM00000027557 225164 567 UdeM00000027557 XP\_009064815.1 87.6  
 306 38 0 1 306 1 306 1.50E-158 567 225164  
 cellular  
 organisms;Eukaryota;Opisthokonta;Metazoa;Eumetazoa;Bilateria;Protostomia;  
 Spiralia;Lophotrochozoa;Mollusca;Gastropoda;Patellogastropoda;Lottioidea;  
 Lottiidae;Lottia;Lottia gigantea

UdeM00000027558 1735272 232.3 UdeM00000027558 XP\_041373487.1 90.8  
 120 11 0 1 120 1 120 3.30E-58 232.3 1735272  
 cellular  
 organisms;Eukaryota;Opisthokonta;Metazoa;Eumetazoa;Bilateria;Protostomia;  
 Spiralia;Lophotrochozoa;Mollusca;Gastropoda;Neomphalina;Neomphaloidea;Pel  
 tospiridae;Gigantopelta;Gigantopelta aegis

UdeM00000027560 6596 311.2 UdeM00000027560 XP\_045174721.1 65.2 210  
 72 1 243 452 5 213 2.10E-81 311.2 6596 cellular  
 organisms;Eukaryota;Opisthokonta;Metazoa;Eumetazoa;Bilateria;Protostomia;  
 Spiralia;Lophotrochozoa;Mollusca;Bivalvia;Autobranchia;Heteroconchia;Euhe  
 terodonta;Imparidentia;Venerida;Veneroidea;Veneridae;Mercenaria;Mercenari  
 a mercenaria

UdeM00000027561 6596 309.3 UdeM00000027561 XP\_045174721.1 65.7 210  
 71 1 292 501 5 213 8.90E-81 309.3 6596 cellular  
 organisms;Eukaryota;Opisthokonta;Metazoa;Eumetazoa;Bilateria;Protostomia;  
 Spiralia;Lophotrochozoa;Mollusca;Bivalvia;Autobranchia;Heteroconchia;Euhe  
 terodonta;Imparidentia;Venerida;Veneroidea;Veneridae;Mercenaria;Mercenari  
 a mercenaria

UdeM00000027562 6596 322.8 UdeM00000027562 XP\_045166562.1 46.5 391  
 184 7 1 379 10 387 5.90E-85 322.8 6596 cellular  
 organisms;Eukaryota;Opisthokonta;Metazoa;Eumetazoa;Bilateria;Protostomia;  
 Spiralia;Lophotrochozoa;Mollusca;Bivalvia;Autobranchia;Heteroconchia;Euhe  
 terodonta;Imparidentia;Venerida;Veneroidea;Veneridae;Mercenaria;Mercenari  
 a mercenaria

UdeM00000027563 46514 100.1 UdeM00000027563 XP\_038074330.1 39.7 146  
 69 2 1 145 1 128 3.30E-18 100.1 46514 cellular  
 organisms;Eukaryota;Opisthokonta;Metazoa;Eumetazoa;Bilateria;Deuterostomi  
 a;Echinodermata;Eleutherozoa;Asterozoa;Asteroidea;Valvatacea;Valvatida;As  
 terinidae;Patiria;Patiria miniata

UdeM00000027564 6596 412.1 UdeM00000027564 XP\_045213677.1 54.2 367  
 158 3 83 449 64 420 9.10E-112 412.1 6596 cellular  
 organisms;Eukaryota;Opisthokonta;Metazoa;Eumetazoa;Bilateria;Protostomia;  
 Spiralia;Lophotrochozoa;Mollusca;Bivalvia;Autobranhia;Heteroconchia;Euhe  
 terodonta;Imparidentia;Venerida;Veneroidea;Veneridae;Mercenaria;Mercenari  
 a mercenaria  
 UdeM00000027565 6596 445.7 UdeM00000027565 XP\_045213689.1 59.1 347  
 137 2 1 344 1 345 5.50E-122 445.7 6596 cellular  
 organisms;Eukaryota;Opisthokonta;Metazoa;Eumetazoa;Bilateria;Protostomia;  
 Spiralia;Lophotrochozoa;Mollusca;Bivalvia;Autobranhia;Heteroconchia;Euhe  
 terodonta;Imparidentia;Venerida;Veneroidea;Veneridae;Mercenaria;Mercenari  
 a mercenaria  
 UdeM00000027566 6573 425.6 UdeM00000027566 XP\_021369446.1 53.2 462  
 182 6 16 472 157 589 8.20E-116 425.6 6573 cellular  
 organisms;Eukaryota;Opisthokonta;Metazoa;Eumetazoa;Bilateria;Protostomia;  
 Spiralia;Lophotrochozoa;Mollusca;Bivalvia;Autobranhia;Pteriormorphia;Pect  
 inida;Pectinoidea;Pectinidae;Mizuhopecten;Mizuhopecten yessoensis  
 UdeM00000027567 6573 320.1 UdeM00000027567 XP\_021369446.1 57.6 309  
 100 5 25 331 183 462 3.30E-84 320.1 6573 cellular  
 organisms;Eukaryota;Opisthokonta;Metazoa;Eumetazoa;Bilateria;Protostomia;  
 Spiralia;Lophotrochozoa;Mollusca;Bivalvia;Autobranhia;Pteriormorphia;Pect  
 inida;Pectinoidea;Pectinidae;Mizuhopecten;Mizuhopecten yessoensis  
 UdeM00000027568 6565 219.2 UdeM00000027568 XP\_022299727.1 46.4 233  
 122 2 1 231 46 277 5.80E-54 219.2 6565 cellular  
 organisms;Eukaryota;Opisthokonta;Metazoa;Eumetazoa;Bilateria;Protostomia;  
 Spiralia;Lophotrochozoa;Mollusca;Bivalvia;Autobranhia;Pteriormorphia;Ostr  
 eida;Ostreoidea;Ostreidae;Crassostrea;Crassostrea virginica  
 UdeM00000027569 6596 329.3 UdeM00000027569 XP\_045166529.1 46.5 490  
 260 1 455 944 18 505 1.60E-86 329.3 6596 cellular  
 organisms;Eukaryota;Opisthokonta;Metazoa;Eumetazoa;Bilateria;Protostomia;  
 Spiralia;Lophotrochozoa;Mollusca;Bivalvia;Autobranhia;Heteroconchia;Euhe  
 terodonta;Imparidentia;Venerida;Veneroidea;Veneridae;Mercenaria;Mercenari  
 a mercenaria  
 UdeM00000027570 6596 57.8 UdeM00000027570 XP\_045189070.1 41.4 87  
 49 2 2 87 1 86 9.00E-06 57.8 6596 cellular  
 organisms;Eukaryota;Opisthokonta;Metazoa;Eumetazoa;Bilateria;Protostomia;  
 Spiralia;Lophotrochozoa;Mollusca;Bivalvia;Autobranhia;Heteroconchia;Euhe  
 terodonta;Imparidentia;Venerida;Veneroidea;Veneridae;Mercenaria;Mercenari  
 a mercenaria  
 UdeM00000027571 29159 204.5 UdeM00000027571 XP\_034339171.1 42.1 240  
 134 2 25 259 13 252 1.70E-49 204.5 29159 cellular  
 organisms;Eukaryota;Opisthokonta;Metazoa;Eumetazoa;Bilateria;Protostomia;  
 Spiralia;Lophotrochozoa;Mollusca;Bivalvia;Autobranhia;Pteriormorphia;Ostr  
 eida;Ostreoidea;Ostreidae;Crassostrea;Crassostrea gigas  
 UdeM00000027572 29159 204.5 UdeM00000027572 XP\_034339171.1 42.1 240  
 134 2 21 255 13 252 1.70E-49 204.5 29159 cellular  
 organisms;Eukaryota;Opisthokonta;Metazoa;Eumetazoa;Bilateria;Protostomia;  
 Spiralia;Lophotrochozoa;Mollusca;Bivalvia;Autobranhia;Pteriormorphia;Ostr  
 eida;Ostreoidea;Ostreidae;Crassostrea;Crassostrea gigas  
 UdeM00000027573 6596 276.6 UdeM00000027573 XP\_045166620.1 41 293  
 170 2 76 367 8 298 4.80E-71 276.6 6596 cellular  
 organisms;Eukaryota;Opisthokonta;Metazoa;Eumetazoa;Bilateria;Protostomia;  
 Spiralia;Lophotrochozoa;Mollusca;Bivalvia;Autobranhia;Heteroconchia;Euhe

terodonta;Imparidentia;Venerida;Veneroidea;Veneridae;Mercenaria;Mercenari  
 a mercenaria  
 UdeM00000027574 6596 339.3 UdeM00000027574 XP\_045166620.1 62.6 265  
 85 3 1 259 299 555 4.30E-90 339.3 6596 cellular  
 organisms;Eukaryota;Opisthokonta;Metazoa;Eumetazoa;Bilateria;Protostomia;  
 Spiralia;Lophotrochozoa;Mollusca;Bivalvia;Autobranhia;Heteroconchia;Euhe  
 terodonta;Imparidentia;Venerida;Veneroidea;Veneridae;Mercenaria;Mercenari  
 a mercenaria  
 UdeM00000027575 6596 271.9 UdeM00000027575 XP\_045166640.1 46.6 262  
 135 3 35 293 33 292 9.50E-70 271.9 6596 cellular  
 organisms;Eukaryota;Opisthokonta;Metazoa;Eumetazoa;Bilateria;Protostomia;  
 Spiralia;Lophotrochozoa;Mollusca;Bivalvia;Autobranhia;Heteroconchia;Euhe  
 terodonta;Imparidentia;Venerida;Veneroidea;Veneridae;Mercenaria;Mercenari  
 a mercenaria  
 UdeM00000027576 6596 281.2 UdeM00000027576 XP\_045177005.1 86.7 165  
 21 1 1 165 1 164 8.70E-73 281.2 6596 cellular  
 organisms;Eukaryota;Opisthokonta;Metazoa;Eumetazoa;Bilateria;Protostomia;  
 Spiralia;Lophotrochozoa;Mollusca;Bivalvia;Autobranhia;Heteroconchia;Euhe  
 terodonta;Imparidentia;Venerida;Veneroidea;Veneridae;Mercenaria;Mercenari  
 a mercenaria  
 UdeM00000027577 400727 627.5 UdeM00000027577 XP\_025104875.1 71  
 421 118 2 211 627 225 645 2.50E-176 627.5 400727  
 cellular  
 organisms;Eukaryota;Opisthokonta;Metazoa;Eumetazoa;Bilateria;Protostomia;  
 Spiralia;Lophotrochozoa;Mollusca;Gastropoda;Caenogastropoda;Architaeniogl  
 ossa;Ampullarioidea;Ampullariidae;Pomacea;Pomacea canaliculata  
 UdeM00000027578 6596 497.7 UdeM00000027578 XP\_045216493.1 73.5 306  
 81 0 41 346 603 908 1.20E-137 497.7 6596 cellular  
 organisms;Eukaryota;Opisthokonta;Metazoa;Eumetazoa;Bilateria;Protostomia;  
 Spiralia;Lophotrochozoa;Mollusca;Bivalvia;Autobranhia;Heteroconchia;Euhe  
 terodonta;Imparidentia;Venerida;Veneroidea;Veneridae;Mercenaria;Mercenari  
 a mercenaria  
 UdeM00000027579 7741 113.6 UdeM00000027579 XP\_019615443.1 36.3 237  
 116 9 1 210 143 371 3.00E-22 113.6 7741 cellular  
 organisms;Eukaryota;Opisthokonta;Metazoa;Eumetazoa;Bilateria;Deuterostomi  
 a;Chordata;Cephalochordata;Leptocardii;Amphioxiformes;Branchiostomidae;Br  
 anchiostoma;Branchiostoma belcheri  
 UdeM00000027582 6573 1126.7 UdeM00000027582 XP\_021371918.1 50.2  
 1091 498 11 82 1155 29 1091 0.00E+00 1126.7 6573  
 cellular  
 organisms;Eukaryota;Opisthokonta;Metazoa;Eumetazoa;Bilateria;Protostomia;  
 Spiralia;Lophotrochozoa;Mollusca;Bivalvia;Autobranhia;Pteriormorphia;Pect  
 inida;Pectinoidea;Pectinidae;Mizuhopecten;Mizuhopecten yessoensis  
 UdeM00000027583 6573 1126.7 UdeM00000027583 XP\_021371918.1 50.2  
 1091 498 11 12 1085 29 1091 0.00E+00 1126.7 6573  
 cellular  
 organisms;Eukaryota;Opisthokonta;Metazoa;Eumetazoa;Bilateria;Protostomia;  
 Spiralia;Lophotrochozoa;Mollusca;Bivalvia;Autobranhia;Pteriormorphia;Pect  
 inida;Pectinoidea;Pectinidae;Mizuhopecten;Mizuhopecten yessoensis  
 UdeM00000027584 6596 379 UdeM00000027584 XP\_045164355.1 49.5 368  
 185 1 9 375 6 373 7.00E-102 379 6596 cellular  
 organisms;Eukaryota;Opisthokonta;Metazoa;Eumetazoa;Bilateria;Protostomia;  
 Spiralia;Lophotrochozoa;Mollusca;Bivalvia;Autobranhia;Heteroconchia;Euhe

terodonta;Imparidentia;Venerida;Veneroidea;Veneridae;Mercenaria;Mercenaria mercenaria

UdeM00000027585 29159 155.6 UdeM00000027585 XP\_011455793.2 58.3 127  
53 0 5 131 63 189 4.30E-35 155.6 29159 cellular

organisms;Eukaryota;Opisthokonta;Metazoa;Eumetazoa;Bilateria;Protostomia;Spiralia;Lophotrochozoa;Mollusca;Bivalvia;Autobranchia;Pteriormorphia;Ostreida;Ostreoidea;Ostreidae;Crassostrea;Crassostrea gigas

UdeM00000027586 10224 396.7 UdeM00000027586 XP\_002740450.1 62.5 307  
115 0 3 309 8 314 2.60E-107 396.7 10224 cellular

organisms;Eukaryota;Opisthokonta;Metazoa;Eumetazoa;Bilateria;Deuterostomia;Hemichordata;Enteropneusta;Harrimaniidae;Saccoglossus;Saccoglossus kowalevskii

UdeM00000027587 1735272 597 UdeM00000027587 XP\_041352992.1 45.4  
776 351 16 1 772 1 707 3.30E-167 597 1735272  
cellular

organisms;Eukaryota;Opisthokonta;Metazoa;Eumetazoa;Bilateria;Protostomia;Spiralia;Lophotrochozoa;Mollusca;Gastropoda;Neomphalina;Neomphaloidea;Peltospiridae;Gigantopelta;Gigantopelta aegis

UdeM00000027588 1735272 602.8 UdeM00000027588 XP\_041352992.1 45.5  
776 351 15 1 773 1 707 6.00E-169 602.8 1735272  
cellular

organisms;Eukaryota;Opisthokonta;Metazoa;Eumetazoa;Bilateria;Protostomia;Spiralia;Lophotrochozoa;Mollusca;Gastropoda;Neomphalina;Neomphaloidea;Peltospiridae;Gigantopelta;Gigantopelta aegis

UdeM00000027589 1735272 590.9 UdeM00000027589 XP\_041352991.1 45.3  
775 351 16 5 775 6 711 2.40E-165 590.9 1735272  
cellular

organisms;Eukaryota;Opisthokonta;Metazoa;Eumetazoa;Bilateria;Protostomia;Spiralia;Lophotrochozoa;Mollusca;Gastropoda;Neomphalina;Neomphaloidea;Peltospiridae;Gigantopelta;Gigantopelta aegis

UdeM00000027590 6596 1332 UdeM00000027590 XP\_045163665.1 57.6 1343  
489 19 121 1396 107 1436 0.00E+00 1332 6596 cellular

organisms;Eukaryota;Opisthokonta;Metazoa;Eumetazoa;Bilateria;Protostomia;Spiralia;Lophotrochozoa;Mollusca;Bivalvia;Autobranchia;Heteroconchia;Euheterodonta;Imparidentia;Venerida;Veneroidea;Veneridae;Mercenaria;Mercenaria mercenaria

UdeM00000027591 6596 1338.2 UdeM00000027591 XP\_045163764.1 58.4  
1328 466 20 121 1391 107 1405 0.00E+00 1338.2 6596  
cellular

organisms;Eukaryota;Opisthokonta;Metazoa;Eumetazoa;Bilateria;Protostomia;Spiralia;Lophotrochozoa;Mollusca;Bivalvia;Autobranchia;Heteroconchia;Euheterodonta;Imparidentia;Venerida;Veneroidea;Veneridae;Mercenaria;Mercenaria mercenaria

UdeM00000027592 6596 1373.6 UdeM00000027592 XP\_045163600.1 57.4  
1405 511 23 121 1479 107 1470 0.00E+00 1373.6 6596  
cellular

organisms;Eukaryota;Opisthokonta;Metazoa;Eumetazoa;Bilateria;Protostomia;Spiralia;Lophotrochozoa;Mollusca;Bivalvia;Autobranchia;Heteroconchia;Euheterodonta;Imparidentia;Venerida;Veneroidea;Veneridae;Mercenaria;Mercenaria mercenaria

UdeM00000027593 6596 1647.9 UdeM00000027593 XP\_045163796.1 67  
1274 361 12 1 1219 3944 5212 0.00E+00 1647.9 6596  
cellular

organisms;Eukaryota;Opisthokonta;Metazoa;Eumetazoa;Bilateria;Protostomia;

Spiralia;Lophotrochozoa;Mollusca;Bivalvia;Autobranchia;Heteroconchia;Euherodonta;Imparidentia;Venerida;Veneroidea;Veneridae;Mercenaria;Mercenaria mercenaria

|                 |      |        |   |                 |                |      |      |          |        |      |
|-----------------|------|--------|---|-----------------|----------------|------|------|----------|--------|------|
| UdeM00000027594 | 6596 | 1091.6 |   | UdeM00000027594 | XP_045163796.1 | 74.5 |      |          |        |      |
|                 | 711  | 181    | 0 | 1               | 711            | 3236 | 3946 | 0.00E+00 | 1091.6 | 6596 |

cellular

organisms;Eukaryota;Opisthokonta;Metazoa;Eumetazoa;Bilateria;Protostomia;Spiralia;Lophotrochozoa;Mollusca;Bivalvia;Autobranchia;Heteroconchia;Euherodonta;Imparidentia;Venerida;Veneroidea;Veneridae;Mercenaria;Mercenaria mercenaria

|                 |      |       |   |                 |                |      |           |       |      |          |
|-----------------|------|-------|---|-----------------|----------------|------|-----------|-------|------|----------|
| UdeM00000027595 | 6596 | 799.7 |   | UdeM00000027595 | XP_045163796.1 | 75.6 | 517       |       |      |          |
|                 | 126  | 0     | 1 | 517             | 3236           | 3752 | 2.20E-228 | 799.7 | 6596 | cellular |

organisms;Eukaryota;Opisthokonta;Metazoa;Eumetazoa;Bilateria;Protostomia;Spiralia;Lophotrochozoa;Mollusca;Bivalvia;Autobranchia;Heteroconchia;Euherodonta;Imparidentia;Venerida;Veneroidea;Veneridae;Mercenaria;Mercenaria mercenaria

|                 |      |        |    |                 |                |      |      |          |        |      |
|-----------------|------|--------|----|-----------------|----------------|------|------|----------|--------|------|
| UdeM00000027596 | 6596 | 2940.6 |    | UdeM00000027596 | XP_045163796.1 | 69.9 |      |          |        |      |
|                 | 2112 | 543    | 11 | 1               | 2039           | 1121 | 3212 | 0.00E+00 | 2940.6 | 6596 |

cellular

organisms;Eukaryota;Opisthokonta;Metazoa;Eumetazoa;Bilateria;Protostomia;Spiralia;Lophotrochozoa;Mollusca;Bivalvia;Autobranchia;Heteroconchia;Euherodonta;Imparidentia;Venerida;Veneroidea;Veneridae;Mercenaria;Mercenaria mercenaria

|                 |      |       |   |                 |                |      |          |       |      |          |
|-----------------|------|-------|---|-----------------|----------------|------|----------|-------|------|----------|
| UdeM00000027597 | 6596 | 258.8 |   | UdeM00000027597 | XP_045163796.1 | 53   | 317      |       |      |          |
|                 | 127  | 2     | 2 | 318             | 778            | 1072 | 9.10E-66 | 258.8 | 6596 | cellular |

organisms;Eukaryota;Opisthokonta;Metazoa;Eumetazoa;Bilateria;Protostomia;Spiralia;Lophotrochozoa;Mollusca;Bivalvia;Autobranchia;Heteroconchia;Euherodonta;Imparidentia;Venerida;Veneroidea;Veneridae;Mercenaria;Mercenaria mercenaria

|                 |      |       |   |                 |                |      |           |       |      |          |
|-----------------|------|-------|---|-----------------|----------------|------|-----------|-------|------|----------|
| UdeM00000027598 | 6596 | 648.7 |   | UdeM00000027598 | XP_045163796.1 | 51.8 | 761       |       |      |          |
|                 | 305  | 15    | 1 | 713             | 16             | 762  | 8.90E-183 | 648.7 | 6596 | cellular |

organisms;Eukaryota;Opisthokonta;Metazoa;Eumetazoa;Bilateria;Protostomia;Spiralia;Lophotrochozoa;Mollusca;Bivalvia;Autobranchia;Heteroconchia;Euherodonta;Imparidentia;Venerida;Veneroidea;Veneridae;Mercenaria;Mercenaria mercenaria

|                 |         |     |       |                 |                |    |     |           |       |         |
|-----------------|---------|-----|-------|-----------------|----------------|----|-----|-----------|-------|---------|
| UdeM00000027599 | 1735272 |     | 674.9 | UdeM00000027599 | XP_041352288.1 | 65 |     |           |       |         |
|                 | 491     | 160 | 4     | 1               | 487            | 1  | 483 | 7.90E-191 | 674.9 | 1735272 |

cellular

organisms;Eukaryota;Opisthokonta;Metazoa;Eumetazoa;Bilateria;Protostomia;Spiralia;Lophotrochozoa;Mollusca;Gastropoda;Neomphalina;Neomphaloidea;Peltospiridae;Gigantopelta;Gigantopelta aegis

|                 |         |    |       |                 |                |      |      |          |       |         |
|-----------------|---------|----|-------|-----------------|----------------|------|------|----------|-------|---------|
| UdeM00000027601 | 1735272 |    | 170.6 | UdeM00000027601 | XP_041355143.1 | 82.5 |      |          |       |         |
|                 | 97      | 17 | 0     | 1               | 97             | 2280 | 2376 | 9.70E-40 | 170.6 | 1735272 |

cellular

organisms;Eukaryota;Opisthokonta;Metazoa;Eumetazoa;Bilateria;Protostomia;Spiralia;Lophotrochozoa;Mollusca;Gastropoda;Neomphalina;Neomphaloidea;Peltospiridae;Gigantopelta;Gigantopelta aegis

|                 |         |    |       |                 |                |      |      |           |       |         |
|-----------------|---------|----|-------|-----------------|----------------|------|------|-----------|-------|---------|
| UdeM00000027600 | 1735272 |    | 618.6 | UdeM00000027600 | XP_041355146.1 | 75.5 |      |           |       |         |
|                 | 384     | 93 | 1     | 381             | 764            | 1988 | 2370 | 1.00E-173 | 618.6 | 1735272 |

cellular

organisms;Eukaryota;Opisthokonta;Metazoa;Eumetazoa;Bilateria;Protostomia;Spiralia;Lophotrochozoa;Mollusca;Gastropoda;Neomphalina;Neomphaloidea;Peltospiridae;Gigantopelta;Gigantopelta aegis

UdeM00000027602 6596 1598.9 UdeM00000027602 XP\_045162262.1 62.1  
 1424 459 24 1 1383 569 1952 0.00E+00 1598.9 6596  
 cellular  
 organisms;Eukaryota;Opisthokonta;Metazoa;Eumetazoa;Bilateria;Protostomia;  
 Spiralia;Lophotrochozoa;Mollusca;Bivalvia;Autobranchia;Heteroconchia;Euhe  
 terodonta;Imparidentia;Venerida;Veneroidea;Veneridae;Mercenaria;Mercenari  
 a mercenaria  
 UdeM00000027603 6596 1004.6 UdeM00000027603 XP\_045162262.1 84.9  
 558 83 1 3 559 7 564 5.00E-290 1004.6 6596  
 cellular  
 organisms;Eukaryota;Opisthokonta;Metazoa;Eumetazoa;Bilateria;Protostomia;  
 Spiralia;Lophotrochozoa;Mollusca;Bivalvia;Autobranchia;Heteroconchia;Euhe  
 terodonta;Imparidentia;Venerida;Veneroidea;Veneridae;Mercenaria;Mercenari  
 a mercenaria  
 UdeM00000027604 6596 193.7 UdeM00000027604 XP\_045167416.1 50.7 292  
 113 8 1 271 1 282 3.00E-46 193.7 6596 cellular  
 organisms;Eukaryota;Opisthokonta;Metazoa;Eumetazoa;Bilateria;Protostomia;  
 Spiralia;Lophotrochozoa;Mollusca;Bivalvia;Autobranchia;Heteroconchia;Euhe  
 terodonta;Imparidentia;Venerida;Veneroidea;Veneridae;Mercenaria;Mercenari  
 a mercenaria  
 UdeM00000027605 6573 260.8 UdeM00000027605 XP\_021367625.1 63.8 188  
 67 1 10 197 19 205 1.50E-66 260.8 6573 cellular  
 organisms;Eukaryota;Opisthokonta;Metazoa;Eumetazoa;Bilateria;Protostomia;  
 Spiralia;Lophotrochozoa;Mollusca;Bivalvia;Autobranchia;Pteriomorphia;Pect  
 inida;Pectinoidea;Pectinidae;Mizuhopecten;Mizuhopecten yessoensis  
 UdeM00000027607 6573 202.2 UdeM00000027607 XP\_021367625.1 56 166  
 72 1 15 180 41 205 5.60E-49 202.2 6573 cellular  
 organisms;Eukaryota;Opisthokonta;Metazoa;Eumetazoa;Bilateria;Protostomia;  
 Spiralia;Lophotrochozoa;Mollusca;Bivalvia;Autobranchia;Pteriomorphia;Pect  
 inida;Pectinoidea;Pectinidae;Mizuhopecten;Mizuhopecten yessoensis  
 UdeM00000027606 39640 104 UdeM00000027606 YP\_184883.1 35.8 187 108  
 7 1 184 31 208 2.30E-19 104 39640  
 Viruses;Polydnaviridae;Bracovirus;Cotesia congregata bracovirus  
 UdeM00000027608 6579 427.2 UdeM00000027608 XP\_033735280.1 37.5 1015  
 459 33 68 1035 19 905 6.10E-116 427.2 6579 cellular  
 organisms;Eukaryota;Opisthokonta;Metazoa;Eumetazoa;Bilateria;Protostomia;  
 Spiralia;Lophotrochozoa;Mollusca;Bivalvia;Autobranchia;Pteriomorphia;Pect  
 inida;Pectinoidea;Pectinidae;Pecten;Pecten maximus  
 UdeM00000027609 7574 86.3 UdeM00000027609 XP\_013387515.1 44.3 97  
 54 0 280 376 89 185 1.30E-13 86.3 7574 cellular  
 organisms;Eukaryota;Opisthokonta;Metazoa;Eumetazoa;Bilateria;Protostomia;  
 Spiralia;Lophotrochozoa;Brachiopoda;Linguliformea;Lingulata;Lingulida;Lin  
 guloidea;Lingulidae;Lingula;Lingula anatina  
 UdeM00000027610 6596 607.4 UdeM00000027610 XP\_045214979.1 42.3 848  
 353 12 220 1061 8 725 3.50E-170 607.4 6596 cellular  
 organisms;Eukaryota;Opisthokonta;Metazoa;Eumetazoa;Bilateria;Protostomia;  
 Spiralia;Lophotrochozoa;Mollusca;Bivalvia;Autobranchia;Heteroconchia;Euhe  
 terodonta;Imparidentia;Venerida;Veneroidea;Veneridae;Mercenaria;Mercenari  
 a mercenaria  
 UdeM00000027611 6596 214.2 UdeM00000027611 XP\_045214979.1 67.3 159  
 52 0 2 160 903 1061 1.60E-52 214.2 6596 cellular  
 organisms;Eukaryota;Opisthokonta;Metazoa;Eumetazoa;Bilateria;Protostomia;  
 Spiralia;Lophotrochozoa;Mollusca;Bivalvia;Autobranchia;Heteroconchia;Euhe



terodonta;Imparidentia;Venerida;Veneroidea;Veneridae;Mercenaria;Mercenari  
 a mercenaria  
 UdeM00000027612 6579 168.3 UdeM00000027612 XP\_033741736.1 51.5 171  
 81 1 1 169 671 841 8.90E-39 168.3 6579 cellular  
 organisms;Eukaryota;Opisthokonta;Metazoa;Eumetazoa;Bilateria;Protostomia;  
 Spiralia;Lophotrochozoa;Mollusca;Bivalvia;Autobranchia;Pteriormorphia;Pect  
 inida;Pectinoidea;Pectinidae;Pecten;Pecten maximus  
 UdeM00000027613 7739 469.5 UdeM00000027613 XP\_035696678.1 49.7 477  
 183 2 2 421 423 899 4.70E-129 469.5 7739 cellular  
 organisms;Eukaryota;Opisthokonta;Metazoa;Eumetazoa;Bilateria;Deuterostomi  
 a;Chordata;Cephalochordata;Leptocardii;Amphioxiformes;Branchiostomidae;Br  
 anchiostoma;Branchiostoma floridae  
 UdeM00000027614 6596 517.3 UdeM00000027614 XP\_045184899.1 64.2 452  
 144 9 8 454 701 1139 2.00E-143 517.3 6596 cellular  
 organisms;Eukaryota;Opisthokonta;Metazoa;Eumetazoa;Bilateria;Protostomia;  
 Spiralia;Lophotrochozoa;Mollusca;Bivalvia;Autobranchia;Heteroconchia;Euhe  
 terodonta;Imparidentia;Venerida;Veneroidea;Veneridae;Mercenaria;Mercenari  
 a mercenaria  
 UdeM00000027615 6596 468 UdeM00000027615 XP\_045184899.1 56.8 387  
 155 3 97 471 313 699 1.50E-128 468 6596 cellular  
 organisms;Eukaryota;Opisthokonta;Metazoa;Eumetazoa;Bilateria;Protostomia;  
 Spiralia;Lophotrochozoa;Mollusca;Bivalvia;Autobranchia;Heteroconchia;Euhe  
 terodonta;Imparidentia;Venerida;Veneroidea;Veneridae;Mercenaria;Mercenari  
 a mercenaria  
 UdeM00000027616 6596 276.2 UdeM00000027616 XP\_045184899.1 66 191  
 64 1 135 325 122 311 5.50E-71 276.2 6596 cellular  
 organisms;Eukaryota;Opisthokonta;Metazoa;Eumetazoa;Bilateria;Protostomia;  
 Spiralia;Lophotrochozoa;Mollusca;Bivalvia;Autobranchia;Heteroconchia;Euhe  
 terodonta;Imparidentia;Venerida;Veneroidea;Veneridae;Mercenaria;Mercenari  
 a mercenaria  
 UdeM00000027617 6596 157.5 UdeM00000027617 XP\_045184899.1 66.7 120  
 40 0 1 120 1 120 1.10E-35 157.5 6596 cellular  
 organisms;Eukaryota;Opisthokonta;Metazoa;Eumetazoa;Bilateria;Protostomia;  
 Spiralia;Lophotrochozoa;Mollusca;Bivalvia;Autobranchia;Heteroconchia;Euhe  
 terodonta;Imparidentia;Venerida;Veneroidea;Veneridae;Mercenaria;Mercenari  
 a mercenaria  
 UdeM00000027618 6596 548.9 UdeM00000027618 XP\_045184889.1 76.5 340  
 78 1 1 340 2 339 4.60E-153 548.9 6596 cellular  
 organisms;Eukaryota;Opisthokonta;Metazoa;Eumetazoa;Bilateria;Protostomia;  
 Spiralia;Lophotrochozoa;Mollusca;Bivalvia;Autobranchia;Heteroconchia;Euhe  
 terodonta;Imparidentia;Venerida;Veneroidea;Veneridae;Mercenaria;Mercenari  
 a mercenaria  
 UdeM00000027619 225164 203.8 UdeM00000027619 XP\_009064821.1 76  
 125 30 0 1 125 1 125 1.40E-49 203.8 225164  
 cellular  
 organisms;Eukaryota;Opisthokonta;Metazoa;Eumetazoa;Bilateria;Protostomia;  
 Spiralia;Lophotrochozoa;Mollusca;Gastropoda;Patellogastropoda;Lottioidae;  
 Lottiidae;Lottia;Lottia gigantea  
 UdeM00000027620 6573 283.5 UdeM00000027620 XP\_021373118.1 99.3 142  
 1 0 1 142 16 157 1.50E-73 283.5 6573 cellular  
 organisms;Eukaryota;Opisthokonta;Metazoa;Eumetazoa;Bilateria;Protostomia;  
 Spiralia;Lophotrochozoa;Mollusca;Bivalvia;Autobranchia;Pteriormorphia;Pect  
 inida;Pectinoidea;Pectinidae;Mizuhopecten;Mizuhopecten yessoensis

UdeM00000027621 6579 697.6 UdeM00000027621 XP\_033733741.1 41 1373  
 644 40 1 1345 1 1235 3.10E-197 697.6 6579 cellular  
 organisms;Eukaryota;Opisthokonta;Metazoa;Eumetazoa;Bilateria;Protostomia;  
 Spiralia;Lophotrochozoa;Mollusca;Bivalvia;Autobranhia;Pteriormorphia;Pect  
 inida;Pectinoidea;Pectinidae;Pecten;Pecten maximus  
 UdeM00000027622 6573 162.5 UdeM00000027622 XP\_021343769.1 50.3 145  
 72 0 13 157 22 166 4.90E-37 162.5 6573 cellular  
 organisms;Eukaryota;Opisthokonta;Metazoa;Eumetazoa;Bilateria;Protostomia;  
 Spiralia;Lophotrochozoa;Mollusca;Bivalvia;Autobranhia;Pteriormorphia;Pect  
 inida;Pectinoidea;Pectinidae;Mizuhopecten;Mizuhopecten yessoensis  
 UdeM00000027624 6596 1029.2 UdeM00000027624 XP\_045186172.1 41.7  
 1850 840 50 136 1847 128 1877 6.20E-297 1029.2 6596  
 cellular  
 organisms;Eukaryota;Opisthokonta;Metazoa;Eumetazoa;Bilateria;Protostomia;  
 Spiralia;Lophotrochozoa;Mollusca;Bivalvia;Autobranhia;Heteroconchia;Euhe  
 terodonta;Imparidentia;Venerida;Veneroidea;Veneridae;Mercenaria;Mercenari  
 a mercenaria  
 UdeM00000027625 6573 354.4 UdeM00000027625 XP\_021377966.1 45.1 397  
 200 7 19 406 39 426 2.00E-94 354.4 6573 cellular  
 organisms;Eukaryota;Opisthokonta;Metazoa;Eumetazoa;Bilateria;Protostomia;  
 Spiralia;Lophotrochozoa;Mollusca;Bivalvia;Autobranhia;Pteriormorphia;Pect  
 inida;Pectinoidea;Pectinidae;Mizuhopecten;Mizuhopecten yessoensis  
 UdeM00000027626 400727 363.2 UdeM00000027626 XP\_025103389.1 47.5  
 436 206 8 14 437 13 437 4.60E-97 363.2 400727  
 cellular  
 organisms;Eukaryota;Opisthokonta;Metazoa;Eumetazoa;Bilateria;Protostomia;  
 Spiralia;Lophotrochozoa;Mollusca;Gastropoda;Caenogastropoda;Architaeniogl  
 ossa;Ampullarioidea;Ampullariidae;Pomacea;Pomacea canaliculata  
 UdeM00000027627 1735272 376.7 UdeM00000027627 XP\_041352611.1 41.1  
 577 292 20 46 594 95 651 5.60E-101 376.7 1735272  
 cellular  
 organisms;Eukaryota;Opisthokonta;Metazoa;Eumetazoa;Bilateria;Protostomia;  
 Spiralia;Lophotrochozoa;Mollusca;Gastropoda;Neomphalina;Neomphaloidea;Pel  
 tospiridae;Gigantopelta;Gigantopelta aegis  
 UdeM00000027628 1735272 311.6 UdeM00000027628 XP\_041353376.1 57.6  
 250 103 2 38 286 116 363 1.10E-81 311.6 1735272  
 cellular  
 organisms;Eukaryota;Opisthokonta;Metazoa;Eumetazoa;Bilateria;Protostomia;  
 Spiralia;Lophotrochozoa;Mollusca;Gastropoda;Neomphalina;Neomphaloidea;Pel  
 tospiridae;Gigantopelta;Gigantopelta aegis  
 UdeM00000027629 6596 219.2 UdeM00000027629 XP\_045180189.1 44.2 267  
 144 4 1 266 51 313 1.00E-53 219.2 6596 cellular  
 organisms;Eukaryota;Opisthokonta;Metazoa;Eumetazoa;Bilateria;Protostomia;  
 Spiralia;Lophotrochozoa;Mollusca;Bivalvia;Autobranhia;Heteroconchia;Euhe  
 terodonta;Imparidentia;Venerida;Veneroidea;Veneridae;Mercenaria;Mercenari  
 a mercenaria  
 UdeM00000027630 6596 214.5 UdeM00000027630 XP\_045180189.1 46.3 242  
 126 3 3 244 76 313 2.40E-52 214.5 6596 cellular  
 organisms;Eukaryota;Opisthokonta;Metazoa;Eumetazoa;Bilateria;Protostomia;  
 Spiralia;Lophotrochozoa;Mollusca;Bivalvia;Autobranhia;Heteroconchia;Euhe  
 terodonta;Imparidentia;Venerida;Veneroidea;Veneridae;Mercenaria;Mercenari  
 a mercenaria  
 UdeM00000027632 6596 681.8 UdeM00000027632 XP\_045180242.1 63.9 660  
 196 12 26 673 235 864 1.00E-192 681.8 6596 cellular

organisms;Eukaryota;Opisthokonta;Metazoa;Eumetazoa;Bilateria;Protostomia;Spiralia;Lophotrochozoa;Mollusca;Bivalvia;Autobranchia;Heteroconchia;Euherodonta;Imparidentia;Venerida;Veneroidea;Veneridae;Mercenaria;Mercenaria mercenaria

UdeM00000027631 6596 997.7 UdeM00000027631 XP\_045180242.1 64.5 898  
270 15 1 883 1 864 1.10E-287 997.7 6596 cellular

organisms;Eukaryota;Opisthokonta;Metazoa;Eumetazoa;Bilateria;Protostomia;Spiralia;Lophotrochozoa;Mollusca;Bivalvia;Autobranchia;Heteroconchia;Euherodonta;Imparidentia;Venerida;Veneroidea;Veneridae;Mercenaria;Mercenaria mercenaria

UdeM00000027633 6596 980.3 UdeM00000027633 XP\_045180242.1 63.9 898  
269 16 1 877 1 864 1.80E-282 980.3 6596 cellular

organisms;Eukaryota;Opisthokonta;Metazoa;Eumetazoa;Bilateria;Protostomia;Spiralia;Lophotrochozoa;Mollusca;Bivalvia;Autobranchia;Heteroconchia;Euherodonta;Imparidentia;Venerida;Veneroidea;Veneridae;Mercenaria;Mercenaria mercenaria

UdeM00000027634 1735272 162.2 UdeM00000027634 XP\_041353593.1 54.1  
135 61 1 49 182 57 191 6.40E-37 162.2 1735272  
cellular

organisms;Eukaryota;Opisthokonta;Metazoa;Eumetazoa;Bilateria;Protostomia;Spiralia;Lophotrochozoa;Mollusca;Gastropoda;Neomphalina;Neomphaloidea;Peltospiridae;Gigantopelta;Gigantopelta aegis

UdeM00000027635 29159 678.7 UdeM00000027635 XP\_034325819.1 64.9 490  
171 1 1 489 1 490 5.50E-192 678.7 29159 cellular

organisms;Eukaryota;Opisthokonta;Metazoa;Eumetazoa;Bilateria;Protostomia;Spiralia;Lophotrochozoa;Mollusca;Bivalvia;Autobranchia;Pteriomorphia;Ostreida;Ostreoidea;Ostreidae;Crassostrea;Crassostrea gigas

UdeM00000027636 6596 796.2 UdeM00000027636 XP\_045180330.1 67.2 543  
177 1 1 542 1 543 2.60E-227 796.2 6596 cellular

organisms;Eukaryota;Opisthokonta;Metazoa;Eumetazoa;Bilateria;Protostomia;Spiralia;Lophotrochozoa;Mollusca;Bivalvia;Autobranchia;Heteroconchia;Euherodonta;Imparidentia;Venerida;Veneroidea;Veneridae;Mercenaria;Mercenaria mercenaria

UdeM00000027637 29159 557.4 UdeM00000027637 XP\_034325819.1 66.7 390  
129 1 30 418 101 490 1.60E-155 557.4 29159 cellular

organisms;Eukaryota;Opisthokonta;Metazoa;Eumetazoa;Bilateria;Protostomia;Spiralia;Lophotrochozoa;Mollusca;Bivalvia;Autobranchia;Pteriomorphia;Ostreida;Ostreoidea;Ostreidae;Crassostrea;Crassostrea gigas

UdeM00000027638 6596 797 UdeM00000027638 XP\_045180330.1 67.4 543  
176 1 1 542 1 543 1.50E-227 797 6596 cellular

organisms;Eukaryota;Opisthokonta;Metazoa;Eumetazoa;Bilateria;Protostomia;Spiralia;Lophotrochozoa;Mollusca;Bivalvia;Autobranchia;Heteroconchia;Euherodonta;Imparidentia;Venerida;Veneroidea;Veneridae;Mercenaria;Mercenaria mercenaria

UdeM00000027639 29159 159.5 UdeM00000027639 XP\_011429969.1 37.1 210  
62 1 1 140 1 210 3.70E-36 159.5 29159 cellular

organisms;Eukaryota;Opisthokonta;Metazoa;Eumetazoa;Bilateria;Protostomia;Spiralia;Lophotrochozoa;Mollusca;Bivalvia;Autobranchia;Pteriomorphia;Ostreida;Ostreoidea;Ostreidae;Crassostrea;Crassostrea gigas

UdeM00000027640 6596 98.6 UdeM00000027640 XP\_045209522.1 36.5 167  
97 3 2 160 165 330 2.80E-17 98.6 6596 cellular

organisms;Eukaryota;Opisthokonta;Metazoa;Eumetazoa;Bilateria;Protostomia;Spiralia;Lophotrochozoa;Mollusca;Bivalvia;Autobranchia;Heteroconchia;Euherodonta

terodonta;Imparidentia;Venerida;Veneroidea;Veneridae;Mercenaria;Mercenaria mercenaria

UdeM00000027641 29159 166 UdeM00000027641 XP\_034319278.1 55.3 150  
62 2 183 327 38 187 8.00E-38 166 29159 cellular

organisms;Eukaryota;Opisthokonta;Metazoa;Eumetazoa;Bilateria;Protostomia;Spiralia;Lophotrochozoa;Mollusca;Bivalvia;Autobranchia;Pteriomorpha;Ostreida;Ostreoidea;Ostreidae;Crassostrea;Crassostrea gigas

UdeM00000027643 6565 79 UdeM00000027643 XP\_022335000.1 40 105  
60 2 7 108 76 180 1.00E-11 79 6565 cellular

organisms;Eukaryota;Opisthokonta;Metazoa;Eumetazoa;Bilateria;Protostomia;Spiralia;Lophotrochozoa;Mollusca;Bivalvia;Autobranchia;Pteriomorpha;Ostreida;Ostreoidea;Ostreidae;Crassostrea;Crassostrea virginica

UdeM00000027645 1735272 457.2 UdeM00000027645 XP\_041347279.1 34.8  
859 482 32 594 1407 1 826 7.50E-125 457.2 1735272  
cellular

organisms;Eukaryota;Opisthokonta;Metazoa;Eumetazoa;Bilateria;Protostomia;Spiralia;Lophotrochozoa;Mollusca;Gastropoda;Neomphalina;Neomphaloidea;Peltospiridae;Gigantopelta;Gigantopelta aegis

UdeM00000027646 218467 80.1 UdeM00000027646 XP\_023231487.1 31.5  
181 111 6 15 187 891 1066 4.70E-12 80.1 218467  
cellular

organisms;Eukaryota;Opisthokonta;Metazoa;Eumetazoa;Bilateria;Protostomia;Ecdysozoa;Panarthropoda;Arthropoda;Chelicerata;Arachnida;Scorpiones;Buthida;Buthoidea;Buthidae;Centruroides;Centruroides sculpturatus

UdeM00000027647 6579 106.3 UdeM00000027647 XP\_033762031.1 34.5 197  
111 7 10 200 320 504 4.70E-20 106.3 6579 cellular

organisms;Eukaryota;Opisthokonta;Metazoa;Eumetazoa;Bilateria;Protostomia;Spiralia;Lophotrochozoa;Mollusca;Bivalvia;Autobranchia;Pteriomorpha;Pectinida;Pectinoidea;Pectinidae;Pecten;Pecten maximus

UdeM00000027650 1735272 150.6 UdeM00000027650 XP\_041372569.1 30.6  
395 248 11 260 641 195 576 7.00E-33 150.6 1735272  
cellular

organisms;Eukaryota;Opisthokonta;Metazoa;Eumetazoa;Bilateria;Protostomia;Spiralia;Lophotrochozoa;Mollusca;Gastropoda;Neomphalina;Neomphaloidea;Peltospiridae;Gigantopelta;Gigantopelta aegis

UdeM00000027652 6596 177.2 UdeM00000027652 XP\_045173349.1 34.5 336  
204 10 4 329 127 456 6.40E-41 177.2 6596 cellular

organisms;Eukaryota;Opisthokonta;Metazoa;Eumetazoa;Bilateria;Protostomia;Spiralia;Lophotrochozoa;Mollusca;Bivalvia;Autobranchia;Heteroconchia;Euheterodonta;Imparidentia;Venerida;Veneroidea;Veneridae;Mercenaria;Mercenaria mercenaria

UdeM00000027651 6596 204.1 UdeM00000027651 XP\_045173349.1 31.9 455  
276 15 7 441 16 456 5.80E-49 204.1 6596 cellular

organisms;Eukaryota;Opisthokonta;Metazoa;Eumetazoa;Bilateria;Protostomia;Spiralia;Lophotrochozoa;Mollusca;Bivalvia;Autobranchia;Heteroconchia;Euheterodonta;Imparidentia;Venerida;Veneroidea;Veneridae;Mercenaria;Mercenaria mercenaria

UdeM00000027653 260995 83.2 UdeM00000027653 XP\_033812940.1 52.7  
74 34 1 1 74 1 73 1.60E-13 83.2 260995  
cellular

organisms;Eukaryota;Opisthokonta;Metazoa;Eumetazoa;Bilateria;Deuterostomia;Chordata;Craniata;Vertebrata;Gnathostomata;Teleostomi;Euteleostomi;Sarcopterygii;Dipnotetrapodomorpha;Tetrapoda;Amphibia;Gymnophiona;Dermophiidae;Geotrypetes;Geotrypetes seraphini

UdeM00000027654 7757 477.6 UdeM00000027654 XP\_032835197.1 77.9 308  
 67 1 1 308 52 358 1.60E-131 477.6 7757 cellular  
 organisms;Eukaryota;Opisthokonta;Metazoa;Eumetazoa;Bilateria;Deuterostomi  
 a;Chordata;Craniata;Vertebrata;Cyclostomata;Hyperoartia;Petromyzontiforme  
 s;Petromyzontidae;Petromyzon;Petromyzon marinus  
 UdeM00000027655 6596 168.7 UdeM00000027655 XP\_045209247.1 27.3 461  
 303 12 150 596 400 842 2.50E-38 168.7 6596 cellular  
 organisms;Eukaryota;Opisthokonta;Metazoa;Eumetazoa;Bilateria;Protostomia;  
 Spiralia;Lophotrochozoa;Mollusca;Bivalvia;Autobranchia;Heteroconchia;Euhe  
 terodonta;Imparidentia;Venerida;Veneroidea;Veneridae;Mercenaria;Mercenari  
 a mercenaria  
 UdeM00000027656 6596 220.7 UdeM00000027656 XP\_045173349.1 33.5 462  
 284 14 12 462 7 456 6.10E-54 220.7 6596 cellular  
 organisms;Eukaryota;Opisthokonta;Metazoa;Eumetazoa;Bilateria;Protostomia;  
 Spiralia;Lophotrochozoa;Mollusca;Bivalvia;Autobranchia;Heteroconchia;Euhe  
 terodonta;Imparidentia;Venerida;Veneroidea;Veneridae;Mercenaria;Mercenari  
 a mercenaria  
 UdeM00000027657 6596 110.9 UdeM00000027657 XP\_045209522.1 37.1 175  
 105 3 7 176 179 353 1.70E-21 110.9 6596 cellular  
 organisms;Eukaryota;Opisthokonta;Metazoa;Eumetazoa;Bilateria;Protostomia;  
 Spiralia;Lophotrochozoa;Mollusca;Bivalvia;Autobranchia;Heteroconchia;Euhe  
 terodonta;Imparidentia;Venerida;Veneroidea;Veneridae;Mercenaria;Mercenari  
 a mercenaria  
 UdeM00000027659 6565 268.5 UdeM00000027659 XP\_022308966.1 44.7 313  
 147 7 18 314 231 533 1.10E-68 268.5 6565 cellular  
 organisms;Eukaryota;Opisthokonta;Metazoa;Eumetazoa;Bilateria;Protostomia;  
 Spiralia;Lophotrochozoa;Mollusca;Bivalvia;Autobranchia;Pteriormorphia;Ostr  
 eida;Ostreoidea;Ostreidae;Crassostrea;Crassostrea virginica  
 UdeM00000027660 6573 63.2 UdeM00000027660 XP\_021377276.1 52 50  
 24 0 33 82 103 152 3.40E-07 63.2 6573 cellular  
 organisms;Eukaryota;Opisthokonta;Metazoa;Eumetazoa;Bilateria;Protostomia;  
 Spiralia;Lophotrochozoa;Mollusca;Bivalvia;Autobranchia;Pteriormorphia;Pect  
 inida;Pectinoidea;Pectinidae;Mizuhopecten;Mizuhopecten yessoensis  
 UdeM00000027661 6596 132.5 UdeM00000027661 XP\_045209522.1 38.5 221  
 130 5 48 263 136 355 1.20E-27 132.5 6596 cellular  
 organisms;Eukaryota;Opisthokonta;Metazoa;Eumetazoa;Bilateria;Protostomia;  
 Spiralia;Lophotrochozoa;Mollusca;Bivalvia;Autobranchia;Heteroconchia;Euhe  
 terodonta;Imparidentia;Venerida;Veneroidea;Veneridae;Mercenaria;Mercenari  
 a mercenaria  
 UdeM00000027664 48498 150.2 UdeM00000027664 XP\_020608168.1 26.7 535  
 286 23 4 494 63 535 9.30E-33 150.2 48498 cellular  
 organisms;Eukaryota;Opisthokonta;Metazoa;Eumetazoa;Cnidaria;Anthozoa;Hexa  
 corallia;Scleractinia;Faviina;Merulinidae;Orbicella;Orbicella faveolata  
 UdeM00000027665 8128 131.3 UdeM00000027665 XP\_025763703.1 29.2 339  
 216 9 139 463 732 1060 4.30E-27 131.3 8128 cellular  
 organisms;Eukaryota;Opisthokonta;Metazoa;Eumetazoa;Bilateria;Deuterostomi  
 a;Chordata;Craniata;Vertebrata;Gnathostomata;Teleostomi;Euteleostomi;Acti  
 nopterygii;Actinopteri;Neopterygii;Teleostei;Osteoglossocephalai;Clupeoce  
 phala;Euteleosteomorpha;Neoteleostei;Eurypterygia;Ctenosquamata;Acanthomo  
 rphata;Euacanthomorphacea;Percomorphaceae;Ovalentaria;Cichlomorphae;Cichl  
 iformes;Cichlidae;African  
 cichlids;Pseudocrenilabrinae;Oreochromini;Oreochromis;Oreochromis  
 niloticus

UdeM00000027667 6579 105.5 UdeM00000027667 XP\_033762031.1 38.3 188  
 106 6 4 188 324 504 7.40E-20 105.5 6579 cellular  
 organisms;Eukaryota;Opisthokonta;Metazoa;Eumetazoa;Bilateria;Protostomia;  
 Spiralia;Lophotrochozoa;Mollusca;Bivalvia;Autobranhia;Pteriomorphia;Pect  
 inida;Pectinoidea;Pectinidae;Pecten;Pecten maximus  
 UdeM00000027669 6579 163.7 UdeM00000027669 XP\_033758283.1 31 393  
 248 10 9 395 1 376 5.80E-37 163.7 6579 cellular  
 organisms;Eukaryota;Opisthokonta;Metazoa;Eumetazoa;Bilateria;Protostomia;  
 Spiralia;Lophotrochozoa;Mollusca;Bivalvia;Autobranhia;Pteriomorphia;Pect  
 inida;Pectinoidea;Pectinidae;Pecten;Pecten maximus  
 UdeM00000027670 1735272 118.2 UdeM00000027670 XP\_041373507.1 32.8  
 232 149 6 13 242 88 314 3.90E-23 118.2 1735272  
 cellular  
 organisms;Eukaryota;Opisthokonta;Metazoa;Eumetazoa;Bilateria;Protostomia;  
 Spiralia;Lophotrochozoa;Mollusca;Gastropoda;Neomphalina;Neomphaloidea;Pel  
 tospiridae;Gigantopelta;Gigantopelta aegis  
 UdeM00000027671 6579 136.7 UdeM00000027671 XP\_033762031.1 35.1 268  
 161 7 185 450 290 546 1.10E-28 136.7 6579 cellular  
 organisms;Eukaryota;Opisthokonta;Metazoa;Eumetazoa;Bilateria;Protostomia;  
 Spiralia;Lophotrochozoa;Mollusca;Bivalvia;Autobranhia;Pteriomorphia;Pect  
 inida;Pectinoidea;Pectinidae;Pecten;Pecten maximus  
 UdeM00000027672 6579 136.7 UdeM00000027672 XP\_033762031.1 35.1 268  
 161 7 185 450 290 546 1.10E-28 136.7 6579 cellular  
 organisms;Eukaryota;Opisthokonta;Metazoa;Eumetazoa;Bilateria;Protostomia;  
 Spiralia;Lophotrochozoa;Mollusca;Bivalvia;Autobranhia;Pteriomorphia;Pect  
 inida;Pectinoidea;Pectinidae;Pecten;Pecten maximus  
 UdeM00000027674 1735272 196.8 UdeM00000027674 XP\_041346803.1 30.2  
 484 315 15 28 497 21 495 7.50E-47 196.8 1735272  
 cellular  
 organisms;Eukaryota;Opisthokonta;Metazoa;Eumetazoa;Bilateria;Protostomia;  
 Spiralia;Lophotrochozoa;Mollusca;Gastropoda;Neomphalina;Neomphaloidea;Pel  
 tospiridae;Gigantopelta;Gigantopelta aegis  
 UdeM00000027676 6565 169.9 UdeM00000027676 XP\_022299727.1 46 187  
 99 1 1 185 46 232 3.20E-39 169.9 6565 cellular  
 organisms;Eukaryota;Opisthokonta;Metazoa;Eumetazoa;Bilateria;Protostomia;  
 Spiralia;Lophotrochozoa;Mollusca;Bivalvia;Autobranhia;Pteriomorphia;Ostr  
 eida;Ostreoidea;Ostreidae;Crassostrea;Crassostrea virginica  
 UdeM00000027678 6596 102.8 UdeM00000027678 XP\_045209435.1 30.1 239  
 160 3 17 249 94 331 7.30E-19 102.8 6596 cellular  
 organisms;Eukaryota;Opisthokonta;Metazoa;Eumetazoa;Bilateria;Protostomia;  
 Spiralia;Lophotrochozoa;Mollusca;Bivalvia;Autobranhia;Heteroconchia;Euhe  
 terodonta;Imparidentia;Venerida;Veneroidea;Veneridae;Mercenaria;Mercenari  
 a mercenaria  
 UdeM00000027677 6596 104.8 UdeM00000027677 XP\_045209435.1 28.6 266  
 176 4 54 313 74 331 2.40E-19 104.8 6596 cellular  
 organisms;Eukaryota;Opisthokonta;Metazoa;Eumetazoa;Bilateria;Protostomia;  
 Spiralia;Lophotrochozoa;Mollusca;Bivalvia;Autobranhia;Heteroconchia;Euhe  
 terodonta;Imparidentia;Venerida;Veneroidea;Veneridae;Mercenaria;Mercenari  
 a mercenaria  
 UdeM00000027680 1735272 142.1 UdeM00000027680 XP\_041372788.1 31.2  
 320 205 7 2 309 1017 1333 1.20E-30 142.1 1735272  
 cellular  
 organisms;Eukaryota;Opisthokonta;Metazoa;Eumetazoa;Bilateria;Protostomia;

Spiralia;Lophotrochozoa;Mollusca;Gastropoda;Neomphalina;Neomphaloidea;Pel  
tospiridae;Gigantopelta;Gigantopelta aegis  
UdeM00000027681 6596 66.6 UdeM00000027681 XP\_045208720.1 36.4 107  
52 2 10 112 1200 1294 2.50E-08 66.6 6596 cellular  
organisms;Eukaryota;Opisthokonta;Metazoa;Eumetazoa;Bilateria;Protostomia;  
Spiralia;Lophotrochozoa;Mollusca;Bivalvia;Autobranchia;Heteroconchia;Euhe  
terodonta;Imparidentia;Venerida;Veneroidea;Veneridae;Mercenaria;Mercenari  
a mercenaria  
UdeM00000027682 1735272 79.7 UdeM00000027682 XP\_041359107.1 29.2  
202 127 4 9 208 5 192 6.90E-12 79.7 1735272  
cellular  
organisms;Eukaryota;Opisthokonta;Metazoa;Eumetazoa;Bilateria;Protostomia;  
Spiralia;Lophotrochozoa;Mollusca;Gastropoda;Neomphalina;Neomphaloidea;Pel  
tospiridae;Gigantopelta;Gigantopelta aegis  
UdeM00000027683 6596 70.1 UdeM00000027683 XP\_045162958.1 46.5 86  
46 0 3 88 183 268 1.90E-09 70.1 6596 cellular  
organisms;Eukaryota;Opisthokonta;Metazoa;Eumetazoa;Bilateria;Protostomia;  
Spiralia;Lophotrochozoa;Mollusca;Bivalvia;Autobranchia;Heteroconchia;Euhe  
terodonta;Imparidentia;Venerida;Veneroidea;Veneridae;Mercenaria;Mercenari  
a mercenaria  
UdeM00000027684 1735272 195.3 UdeM00000027684 XP\_041347016.1 48.7  
197 77 3 2 175 160 355 6.90E-47 195.3 1735272  
cellular  
organisms;Eukaryota;Opisthokonta;Metazoa;Eumetazoa;Bilateria;Protostomia;  
Spiralia;Lophotrochozoa;Mollusca;Gastropoda;Neomphalina;Neomphaloidea;Pel  
tospiridae;Gigantopelta;Gigantopelta aegis  
UdeM00000027685 6579 162.2 UdeM00000027685 XP\_033743002.1 50.6 158  
76 2 1 156 142 299 5.50E-37 162.2 6579 cellular  
organisms;Eukaryota;Opisthokonta;Metazoa;Eumetazoa;Bilateria;Protostomia;  
Spiralia;Lophotrochozoa;Mollusca;Bivalvia;Autobranchia;Pteriomorphia;Pect  
inida;Pectinoidea;Pectinidae;Pecten;Pecten maximus  
UdeM00000027686 1735272 82 UdeM00000027686 XP\_041373507.1 32.2  
171 107 5 273 438 66 232 2.00E-12 82 1735272  
cellular  
organisms;Eukaryota;Opisthokonta;Metazoa;Eumetazoa;Bilateria;Protostomia;  
Spiralia;Lophotrochozoa;Mollusca;Gastropoda;Neomphalina;Neomphaloidea;Pel  
tospiridae;Gigantopelta;Gigantopelta aegis  
UdeM00000027687 6596 152.1 UdeM00000027687 XP\_045208704.1 26.3 411  
267 11 3 383 363 767 1.70E-33 152.1 6596 cellular  
organisms;Eukaryota;Opisthokonta;Metazoa;Eumetazoa;Bilateria;Protostomia;  
Spiralia;Lophotrochozoa;Mollusca;Bivalvia;Autobranchia;Heteroconchia;Euhe  
terodonta;Imparidentia;Venerida;Veneroidea;Veneridae;Mercenaria;Mercenari  
a mercenaria  
UdeM00000027689 6565 164.5 UdeM00000027689 XP\_022320668.1 32.5 314  
102 3 1 206 475 786 1.50E-37 164.5 6565 cellular  
organisms;Eukaryota;Opisthokonta;Metazoa;Eumetazoa;Bilateria;Protostomia;  
Spiralia;Lophotrochozoa;Mollusca;Bivalvia;Autobranchia;Pteriomorphia;Ostr  
eida;Ostreoidea;Ostreidae;Crassostrea;Crassostrea virginica  
UdeM00000027690 6579 98.2 UdeM00000027690 XP\_033725098.1 46.7 92  
49 0 1 92 319 410 5.80E-18 98.2 6579 cellular  
organisms;Eukaryota;Opisthokonta;Metazoa;Eumetazoa;Bilateria;Protostomia;  
Spiralia;Lophotrochozoa;Mollusca;Bivalvia;Autobranchia;Pteriomorphia;Pect  
inida;Pectinoidea;Pectinidae;Pecten;Pecten maximus

UdeM00000027692 6579 158.3 UdeM00000027692 XP\_033758269.1 31.2 398  
 234 11 4 376 208 590 3.10E-35 158.3 6579 cellular  
 organisms;Eukaryota;Opisthokonta;Metazoa;Eumetazoa;Bilateria;Protostomia;  
 Spiralia;Lophotrochozoa;Mollusca;Bivalvia;Autobranchia;Pteriomorpha;Pect  
 inida;Pectinoidea;Pectinidae;Pecten;Pecten maximus  
 UdeM00000027691 6579 233.8 UdeM00000027691 XP\_033758269.1 31 555  
 335 15 27 554 57 590 7.60E-58 233.8 6579 cellular  
 organisms;Eukaryota;Opisthokonta;Metazoa;Eumetazoa;Bilateria;Protostomia;  
 Spiralia;Lophotrochozoa;Mollusca;Bivalvia;Autobranchia;Pteriomorpha;Pect  
 inida;Pectinoidea;Pectinidae;Pecten;Pecten maximus  
 UdeM00000027693 218467 67.8 UdeM00000027693 XP\_023231487.1 30.1  
 133 90 2 24 156 891 1020 2.00E-08 67.8 218467  
 cellular  
 organisms;Eukaryota;Opisthokonta;Metazoa;Eumetazoa;Bilateria;Protostomia;  
 Ecdysozoa;Panarthropoda;Arthropoda;Chelicerata;Arachnida;Scorpiones;Buthi  
 da;Buthoidea;Buthidae;Centruroides;Centruroides sculpturatus  
 UdeM00000027694 1735272 99 UdeM00000027694 XP\_041379610.1 33.3  
 174 101 2 7 172 12 178 6.50E-18 99 1735272  
 cellular  
 organisms;Eukaryota;Opisthokonta;Metazoa;Eumetazoa;Bilateria;Protostomia;  
 Spiralia;Lophotrochozoa;Mollusca;Gastropoda;Neomphalina;Neomphaloidea;Pel  
 tospiridae;Gigantopelta;Gigantopelta aegis  
 UdeM00000027695 1735272 98.6 UdeM00000027695 XP\_041379610.1 33.3  
 174 101 2 4 169 12 178 8.40E-18 98.6 1735272  
 cellular  
 organisms;Eukaryota;Opisthokonta;Metazoa;Eumetazoa;Bilateria;Protostomia;  
 Spiralia;Lophotrochozoa;Mollusca;Gastropoda;Neomphalina;Neomphaloidea;Pel  
 tospiridae;Gigantopelta;Gigantopelta aegis  
 UdeM00000027696 1735272 341.7 UdeM00000027696 XP\_041379319.1 48.9  
 354 173 5 1 347 18 370 1.40E-90 341.7 1735272  
 cellular  
 organisms;Eukaryota;Opisthokonta;Metazoa;Eumetazoa;Bilateria;Protostomia;  
 Spiralia;Lophotrochozoa;Mollusca;Gastropoda;Neomphalina;Neomphaloidea;Pel  
 tospiridae;Gigantopelta;Gigantopelta aegis  
 UdeM00000027697 6579 75.9 UdeM00000027697 XP\_033731727.1 37.7 114  
 70 1 87 200 141 253 7.00E-11 75.9 6579 cellular  
 organisms;Eukaryota;Opisthokonta;Metazoa;Eumetazoa;Bilateria;Protostomia;  
 Spiralia;Lophotrochozoa;Mollusca;Bivalvia;Autobranchia;Pteriomorpha;Pect  
 inida;Pectinoidea;Pectinidae;Pecten;Pecten maximus  
 UdeM00000027698 37653 176.8 UdeM00000027698 XP\_014784938.1 45.2 197  
 97 2 93 278 46 242 4.30E-41 176.8 37653 cellular  
 organisms;Eukaryota;Opisthokonta;Metazoa;Eumetazoa;Bilateria;Protostomia;  
 Spiralia;Lophotrochozoa;Mollusca;Cephalopoda;Coleoidea;Octopodiformes;Oct  
 opoda;Incirrata;Octopodidae;Octopus;Octopus bimaculoides  
 UdeM00000027700 1735272 175.3 UdeM00000027700 XP\_041346803.1 29.5  
 454 299 13 174 614 45 490 2.80E-40 175.3 1735272  
 cellular  
 organisms;Eukaryota;Opisthokonta;Metazoa;Eumetazoa;Bilateria;Protostomia;  
 Spiralia;Lophotrochozoa;Mollusca;Gastropoda;Neomphalina;Neomphaloidea;Pel  
 tospiridae;Gigantopelta;Gigantopelta aegis  
 UdeM00000027701 1735272 172.9 UdeM00000027701 XP\_041346803.1 29.5  
 438 290 12 174 600 45 474 1.40E-39 172.9 1735272  
 cellular  
 organisms;Eukaryota;Opisthokonta;Metazoa;Eumetazoa;Bilateria;Protostomia;



Spiralia;Lophotrochozoa;Mollusca;Gastropoda;Neomphalina;Neomphaloidea;Pel  
tospiridae;Gigantopelta;Gigantopelta aegis  
UdeM00000027702 6579 121.3 UdeM00000027702 XP\_033762031.1 37.6 202  
116 6 192 391 295 488 2.80E-24 121.3 6579 cellular  
organisms;Eukaryota;Opisthokonta;Metazoa;Eumetazoa;Bilateria;Protostomia;  
Spiralia;Lophotrochozoa;Mollusca;Bivalvia;Autobranchia;Pteriormorphia;Pect  
inida;Pectinoidea;Pectinidae;Pecten;Pecten maximus  
UdeM00000027704 6565 71.6 UdeM00000027704 XP\_022316307.1 28.1 135  
93 1 4 134 429 563 1.50E-09 71.6 6565 cellular  
organisms;Eukaryota;Opisthokonta;Metazoa;Eumetazoa;Bilateria;Protostomia;  
Spiralia;Lophotrochozoa;Mollusca;Bivalvia;Autobranchia;Pteriormorphia;Ostr  
eida;Ostreoidea;Ostreidae;Crassostrea;Crassostrea virginica  
UdeM00000027706 1735272 182.2 UdeM00000027706 XP\_041372788.1 28.9  
530 336 17 86 598 825 1330 2.10E-42 182.2 1735272  
cellular  
organisms;Eukaryota;Opisthokonta;Metazoa;Eumetazoa;Bilateria;Protostomia;  
Spiralia;Lophotrochozoa;Mollusca;Gastropoda;Neomphalina;Neomphaloidea;Pel  
tospiridae;Gigantopelta;Gigantopelta aegis  
UdeM00000027707 1735272 181.8 UdeM00000027707 XP\_041372788.1 28.9  
530 336 17 86 598 825 1330 3.50E-42 181.8 1735272  
cellular  
organisms;Eukaryota;Opisthokonta;Metazoa;Eumetazoa;Bilateria;Protostomia;  
Spiralia;Lophotrochozoa;Mollusca;Gastropoda;Neomphalina;Neomphaloidea;Pel  
tospiridae;Gigantopelta;Gigantopelta aegis  
UdeM00000027710 6579 59.7 UdeM00000027710 XP\_033726149.1 35.9 103  
64 2 83 185 185 285 6.20E-06 59.7 6579 cellular  
organisms;Eukaryota;Opisthokonta;Metazoa;Eumetazoa;Bilateria;Protostomia;  
Spiralia;Lophotrochozoa;Mollusca;Bivalvia;Autobranchia;Pteriormorphia;Pect  
inida;Pectinoidea;Pectinidae;Pecten;Pecten maximus  
UdeM00000027711 6596 143.3 UdeM00000027711 XP\_045208704.1 25.2 412  
277 11 3 389 363 768 6.70E-31 143.3 6596 cellular  
organisms;Eukaryota;Opisthokonta;Metazoa;Eumetazoa;Bilateria;Protostomia;  
Spiralia;Lophotrochozoa;Mollusca;Bivalvia;Autobranchia;Heteroconchia;Euhe  
terodonta;Imparidentia;Venerida;Veneroidea;Veneridae;Mercenaria;Mercenari  
a mercenaria  
UdeM00000027715 7574 300.1 UdeM00000027715 XP\_013382110.1 52.2 291  
123 4 1 291 37 311 3.20E-78 300.1 7574 cellular  
organisms;Eukaryota;Opisthokonta;Metazoa;Eumetazoa;Bilateria;Protostomia;  
Spiralia;Lophotrochozoa;Brachiopoda;Linguliformea;Lingulata;Lingulida;Lin  
guloidea;Lingulidae;Lingula;Lingula anatina  
UdeM00000027716 7574 524.2 UdeM00000027716 XP\_013384628.1 51.9 538  
180 5 1 469 33 560 1.70E-145 524.2 7574 cellular  
organisms;Eukaryota;Opisthokonta;Metazoa;Eumetazoa;Bilateria;Protostomia;  
Spiralia;Lophotrochozoa;Brachiopoda;Linguliformea;Lingulata;Lingulida;Lin  
guloidea;Lingulidae;Lingula;Lingula anatina  
UdeM00000027717 6579 141.4 UdeM00000027717 XP\_033762031.1 31.8 314  
197 8 146 450 290 595 4.50E-30 141.4 6579 cellular  
organisms;Eukaryota;Opisthokonta;Metazoa;Eumetazoa;Bilateria;Protostomia;  
Spiralia;Lophotrochozoa;Mollusca;Bivalvia;Autobranchia;Pteriormorphia;Pect  
inida;Pectinoidea;Pectinidae;Pecten;Pecten maximus  
UdeM00000027718 1735272 246.1 UdeM00000027718 XP\_041372788.1 31.3  
604 377 22 132 716 746 1330 1.70E-61 246.1 1735272  
cellular  
organisms;Eukaryota;Opisthokonta;Metazoa;Eumetazoa;Bilateria;Protostomia;

Spiralia; Lophotrochozoa; Mollusca; Gastropoda; Neomphalina; Neomphaloidea; Pelto-  
 tospiridae; Gigantopelta; Gigantopelta aegis  
 UdeM00000027721 6579 170.2 UdeM00000027721 XP\_033725098.1 51.3 150  
 73 0 1 150 319 468 2.20E-39 170.2 6579 cellular  
 organisms; Eukaryota; Opisthokonta; Metazoa; Eumetazoa; Bilateria; Protostomia;  
 Spiralia; Lophotrochozoa; Mollusca; Bivalvia; Autobranchia; Pteriomorpha; Pect-  
 inida; Pectinoidea; Pectinidae; Pecten; Pecten maximus  
 UdeM00000027722 6565 122.1 UdeM00000027722 XP\_022320668.1 48.8 127  
 63 2 26 152 666 790 6.20E-25 122.1 6565 cellular  
 organisms; Eukaryota; Opisthokonta; Metazoa; Eumetazoa; Bilateria; Protostomia;  
 Spiralia; Lophotrochozoa; Mollusca; Bivalvia; Autobranchia; Pteriomorpha; Ostr-  
 eida; Ostreidae; Crassostrea; Crassostrea virginica  
 UdeM00000027723 37653 196.1 UdeM00000027723 XP\_014784938.1 57.2 152  
 64 1 5 156 212 362 3.70E-47 196.1 37653 cellular  
 organisms; Eukaryota; Opisthokonta; Metazoa; Eumetazoa; Bilateria; Protostomia;  
 Spiralia; Lophotrochozoa; Mollusca; Cephalopoda; Coleoidea; Octopodiformes; Oct-  
 opoda; Incirrata; Octopodidae; Octopus; Octopus bimaculoides  
 UdeM00000027724 8049 261.2 UdeM00000027724 XP\_030193753.1 36.2 376  
 224 4 135 505 17 381 2.80E-66 261.2 8049 cellular  
 organisms; Eukaryota; Opisthokonta; Metazoa; Eumetazoa; Bilateria; Deuterostomi-  
 a; Chordata; Craniata; Vertebrata; Gnathostomata; Teleostomi; Euteleostomi; Acti-  
 nopterygii; Actinopteri; Neopterygii; Teleostei; Osteoglossocephalai; Clupeoce-  
 phala; Euteleosteomorpha; Neoteleostei; Eurypterygia; Ctenosquamata; Acanthomo-  
 rphata; Paracanthopterygii; Zeiogadaria; Gadariae; Gadiformes; Gadoidei; Gadida-  
 e; Gadus; Gadus morhua  
 UdeM00000032083 10036 70.9 UdeM00000032083 XP\_040604007.1 54.3 70  
 32 0 2 71 34 103 1.00E-09 70.9 10036 cellular  
 organisms; Eukaryota; Opisthokonta; Metazoa; Eumetazoa; Bilateria; Deuterostomi-  
 a; Chordata; Craniata; Vertebrata; Gnathostomata; Teleostomi; Euteleostomi; Sarc-  
 opterygii; Dipnotetrapodomorpha; Tetrapoda; Amniota; Mammalia; Theria; Eutheria  
 ; Boreoeutheria; Euarchontoglires; Glires; Rodentia; Myomorpha; Muroidea; Cricet-  
 idae; Cricetinae; Mesocricetus; Mesocricetus auratus  
 UdeM00000032085 6596 135.2 UdeM00000032085 XP\_045167823.1 29.5 455  
 219 11 26 468 26 390 2.20E-28 135.2 6596 cellular  
 organisms; Eukaryota; Opisthokonta; Metazoa; Eumetazoa; Bilateria; Protostomia;  
 Spiralia; Lophotrochozoa; Mollusca; Bivalvia; Autobranchia; Heteroconchia; Eue-  
 terodonta; Imparidentia; Venerida; Veneroidea; Veneridae; Mercenaria; Mercenari-  
 a mercenaria  
 UdeM00000032089 481459 265.8 UdeM00000032089 XP\_040031014.1 35.6  
 393 235 5 61 446 72 453 1.00E-67 265.8 481459  
 cellular  
 organisms; Eukaryota; Opisthokonta; Metazoa; Eumetazoa; Bilateria; Deuterostomi-  
 a; Chordata; Craniata; Vertebrata; Gnathostomata; Teleostomi; Euteleostomi; Acti-  
 nopterygii; Actinopteri; Neopterygii; Teleostei; Osteoglossocephalai; Clupeoce-  
 phala; Euteleosteomorpha; Neoteleostei; Eurypterygia; Ctenosquamata; Acanthomo-  
 rphata; Euacanthomorphacea; Percomorphaceae; Eupercaria; Perciformes; Cottioi-  
 dei; Gasterosteales; Gasterosteidae; Gasterosteus; Gasterosteus  
 aculeatus; Gasterosteus aculeatus aculeatus  
 UdeM00000032090 45264 99.4 UdeM00000032090 XP\_044177087.1 55.8 77  
 34 0 1 77 323 399 2.50E-18 99.4 45264 cellular  
 organisms; Eukaryota; Opisthokonta; Metazoa; Eumetazoa; Cnidaria; Anthozoa; Hexa-  
 corallia; Scleractinia; Astrocoeniina; Acroporidae; Acropora; Acropora  
 millepora

UdeM00000032091 29159 87.4 UdeM00000032091 XP\_034339171.1 39.5 124  
 75 0 45 168 68 191 2.00E-14 87.4 29159 cellular  
 organisms;Eukaryota;Opisthokonta;Metazoa;Eumetazoa;Bilateria;Protostomia;  
 Spiralia;Lophotrochozoa;Mollusca;Bivalvia;Autobranchia;Pteriormorphia;Ostr  
 eida;Ostreoidea;Ostreidae;Crassostrea;Crassostrea gigas  
 UdeM00000032093 29159 551.6 UdeM00000032093 XP\_034317596.1 54.1 479  
 214 2 9 487 105 577 1.00E-153 551.6 29159 cellular  
 organisms;Eukaryota;Opisthokonta;Metazoa;Eumetazoa;Bilateria;Protostomia;  
 Spiralia;Lophotrochozoa;Mollusca;Bivalvia;Autobranchia;Pteriormorphia;Ostr  
 eida;Ostreoidea;Ostreidae;Crassostrea;Crassostrea gigas  
 UdeM00000032094 6579 165.2 UdeM00000032094 XP\_033761931.1 64.7 119  
 41 1 5 123 467 584 5.50E-38 165.2 6579 cellular  
 organisms;Eukaryota;Opisthokonta;Metazoa;Eumetazoa;Bilateria;Protostomia;  
 Spiralia;Lophotrochozoa;Mollusca;Bivalvia;Autobranchia;Pteriormorphia;Pect  
 inida;Pectinoidea;Pectinidae;Pecten;Pecten maximus  
 UdeM00000032095 6596 399.8 UdeM00000032095 XP\_045168583.1 62.6 310  
 113 2 1 308 1 309 3.10E-108 399.8 6596 cellular  
 organisms;Eukaryota;Opisthokonta;Metazoa;Eumetazoa;Bilateria;Protostomia;  
 Spiralia;Lophotrochozoa;Mollusca;Bivalvia;Autobranchia;Heteroconchia;Euhe  
 terodonta;Imparidentia;Venerida;Veneroidea;Veneridae;Mercenaria;Mercenari  
 a mercenaria  
 UdeM00000032097 6565 650.6 UdeM00000032097 XP\_022311383.1 64.5 496  
 147 3 59 554 11 477 1.80E-183 650.6 6565 cellular  
 organisms;Eukaryota;Opisthokonta;Metazoa;Eumetazoa;Bilateria;Protostomia;  
 Spiralia;Lophotrochozoa;Mollusca;Bivalvia;Autobranchia;Pteriormorphia;Ostr  
 eida;Ostreoidea;Ostreidae;Crassostrea;Crassostrea virginica  
 UdeM00000032098 6565 696.4 UdeM00000032098 XP\_022311383.1 71.7 466  
 129 2 10 475 15 477 2.50E-197 696.4 6565 cellular  
 organisms;Eukaryota;Opisthokonta;Metazoa;Eumetazoa;Bilateria;Protostomia;  
 Spiralia;Lophotrochozoa;Mollusca;Bivalvia;Autobranchia;Pteriormorphia;Ostr  
 eida;Ostreoidea;Ostreidae;Crassostrea;Crassostrea virginica  
 UdeM00000032099 6596 241.9 UdeM00000032099 XP\_045168605.1 53.8 225  
 101 1 35 256 552 776 9.00E-61 241.9 6596 cellular  
 organisms;Eukaryota;Opisthokonta;Metazoa;Eumetazoa;Bilateria;Protostomia;  
 Spiralia;Lophotrochozoa;Mollusca;Bivalvia;Autobranchia;Heteroconchia;Euhe  
 terodonta;Imparidentia;Venerida;Veneroidea;Veneridae;Mercenaria;Mercenari  
 a mercenaria  
 UdeM00000032100 6596 379.4 UdeM00000032100 XP\_045168528.1 46.9 424  
 202 6 10 427 7 413 6.00E-102 379.4 6596 cellular  
 organisms;Eukaryota;Opisthokonta;Metazoa;Eumetazoa;Bilateria;Protostomia;  
 Spiralia;Lophotrochozoa;Mollusca;Bivalvia;Autobranchia;Heteroconchia;Euhe  
 terodonta;Imparidentia;Venerida;Veneroidea;Veneridae;Mercenaria;Mercenari  
 a mercenaria  
 UdeM00000032101 6573 476.9 UdeM00000032101 XP\_021375134.1 45.4 625  
 311 11 208 823 136 739 5.70E-131 476.9 6573 cellular  
 organisms;Eukaryota;Opisthokonta;Metazoa;Eumetazoa;Bilateria;Protostomia;  
 Spiralia;Lophotrochozoa;Mollusca;Bivalvia;Autobranchia;Pteriormorphia;Pect  
 inida;Pectinoidea;Pectinidae;Mizuhopecten;Mizuhopecten yessoensis  
 UdeM00000032102 6573 476.9 UdeM00000032102 XP\_021375135.1 45.3 618  
 304 10 208 816 136 728 5.70E-131 476.9 6573 cellular  
 organisms;Eukaryota;Opisthokonta;Metazoa;Eumetazoa;Bilateria;Protostomia;  
 Spiralia;Lophotrochozoa;Mollusca;Bivalvia;Autobranchia;Pteriormorphia;Pect  
 inida;Pectinoidea;Pectinidae;Mizuhopecten;Mizuhopecten yessoensis

UdeM00000032103 6573 146 UdeM00000032103 XP\_021363861.1 52.9 136  
 59 2 13 147 9 140 3.90E-32 146 6573 cellular  
 organisms;Eukaryota;Opisthokonta;Metazoa;Eumetazoa;Bilateria;Protostomia;  
 Spiralia;Lophotrochozoa;Mollusca;Bivalvia;Autobranchia;Pteriomorpha;Pect  
 inida;Pectinoidea;Pectinidae;Mizuhopecten;Mizuhopecten yessoensis  
 UdeM00000032104 6579 210.7 UdeM00000032104 XP\_033762983.1 65 180  
 49 2 6 171 16 195 1.50E-51 210.7 6579 cellular  
 organisms;Eukaryota;Opisthokonta;Metazoa;Eumetazoa;Bilateria;Protostomia;  
 Spiralia;Lophotrochozoa;Mollusca;Bivalvia;Autobranchia;Pteriomorpha;Pect  
 inida;Pectinoidea;Pectinidae;Pecten;Pecten maximus  
 UdeM00000032106 6596 519.2 UdeM00000032106 XP\_045172598.1 41.3 716  
 315 14 464 1086 99 802 1.20E-143 519.2 6596 cellular  
 organisms;Eukaryota;Opisthokonta;Metazoa;Eumetazoa;Bilateria;Protostomia;  
 Spiralia;Lophotrochozoa;Mollusca;Bivalvia;Autobranchia;Heteroconchia;Euhe  
 terodonta;Imparidentia;Venerida;Veneroidea;Veneridae;Mercenaria;Mercenari  
 a mercenaria  
 UdeM00000032108 6596 158.7 UdeM00000032108 XP\_045172598.1 71.4 112  
 32 0 1 112 1 112 9.50E-36 158.7 6596 cellular  
 organisms;Eukaryota;Opisthokonta;Metazoa;Eumetazoa;Bilateria;Protostomia;  
 Spiralia;Lophotrochozoa;Mollusca;Bivalvia;Autobranchia;Heteroconchia;Euhe  
 terodonta;Imparidentia;Venerida;Veneroidea;Veneridae;Mercenaria;Mercenari  
 a mercenaria  
 UdeM00000032109 6579 120.9 UdeM00000032109 XP\_033762265.1 73.8 80  
 21 0 6 85 11 90 3.40E-24 120.9 6579 cellular  
 organisms;Eukaryota;Opisthokonta;Metazoa;Eumetazoa;Bilateria;Protostomia;  
 Spiralia;Lophotrochozoa;Mollusca;Bivalvia;Autobranchia;Pteriomorpha;Pect  
 inida;Pectinoidea;Pectinidae;Pecten;Pecten maximus  
 UdeM00000032110 29159 174.9 UdeM00000032110 XP\_034310403.1 41.7 230  
 120 8 23 249 21 239 1.30E-40 174.9 29159 cellular  
 organisms;Eukaryota;Opisthokonta;Metazoa;Eumetazoa;Bilateria;Protostomia;  
 Spiralia;Lophotrochozoa;Mollusca;Bivalvia;Autobranchia;Pteriomorpha;Ostr  
 eida;Ostreoidea;Ostreidae;Crassostrea;Crassostrea gigas  
 UdeM00000032111 1735272 132.5 UdeM00000032111 XP\_041367035.1 47.3  
 150 71 4 20 163 94 241 5.10E-28 132.5 1735272  
 cellular  
 organisms;Eukaryota;Opisthokonta;Metazoa;Eumetazoa;Bilateria;Protostomia;  
 Spiralia;Lophotrochozoa;Mollusca;Gastropoda;Neomphalina;Neomphaloidea;Pel  
 tospiridae;Gigantopelta;Gigantopelta aegis  
 UdeM00000032113 6573 444.1 UdeM00000032113 XP\_021342886.1 34.7 760  
 459 10 1 742 39 779 3.40E-121 444.1 6573 cellular  
 organisms;Eukaryota;Opisthokonta;Metazoa;Eumetazoa;Bilateria;Protostomia;  
 Spiralia;Lophotrochozoa;Mollusca;Bivalvia;Autobranchia;Pteriomorpha;Pect  
 inida;Pectinoidea;Pectinidae;Mizuhopecten;Mizuhopecten yessoensis  
 UdeM00000032114 6579 447.2 UdeM00000032114 XP\_033749525.1 33.7 763  
 458 13 1 742 37 772 4.10E-122 447.2 6579 cellular  
 organisms;Eukaryota;Opisthokonta;Metazoa;Eumetazoa;Bilateria;Protostomia;  
 Spiralia;Lophotrochozoa;Mollusca;Bivalvia;Autobranchia;Pteriomorpha;Pect  
 inida;Pectinoidea;Pectinidae;Pecten;Pecten maximus  
 UdeM00000032115 6596 123.6 UdeM00000032115 XP\_045194927.1 40.5 148  
 88 0 3 150 404 551 3.00E-25 123.6 6596 cellular  
 organisms;Eukaryota;Opisthokonta;Metazoa;Eumetazoa;Bilateria;Protostomia;  
 Spiralia;Lophotrochozoa;Mollusca;Bivalvia;Autobranchia;Heteroconchia;Euhe  
 terodonta;Imparidentia;Venerida;Veneroidea;Veneridae;Mercenaria;Mercenari  
 a mercenaria

UdeM00000032119 6596 308.9 UdeM00000032119 XP\_045167660.1 75.7 210  
 50 1 1 209 1 210 5.80E-81 308.9 6596 cellular  
 organisms;Eukaryota;Opisthokonta;Metazoa;Eumetazoa;Bilateria;Protostomia;  
 Spiralia;Lophotrochozoa;Mollusca;Bivalvia;Autobranchia;Heteroconchia;Euhe  
 terodonta;Imparidentia;Venerida;Veneroidea;Veneridae;Mercenaria;Mercenari  
 a mercenaria  
 UdeM00000032120 6596 389.4 UdeM00000032120 XP\_045167660.1 58.7 649  
 200 7 1 581 1 649 7.90E-105 389.4 6596 cellular  
 organisms;Eukaryota;Opisthokonta;Metazoa;Eumetazoa;Bilateria;Protostomia;  
 Spiralia;Lophotrochozoa;Mollusca;Bivalvia;Autobranchia;Heteroconchia;Euhe  
 terodonta;Imparidentia;Venerida;Veneroidea;Veneridae;Mercenaria;Mercenari  
 a mercenaria  
 UdeM00000032121 6596 1349 UdeM00000032121 XP\_045168209.1 81 1014  
 172 5 17 1013 11 1020 0.00E+00 1349 6596 cellular  
 organisms;Eukaryota;Opisthokonta;Metazoa;Eumetazoa;Bilateria;Protostomia;  
 Spiralia;Lophotrochozoa;Mollusca;Bivalvia;Autobranchia;Heteroconchia;Euhe  
 terodonta;Imparidentia;Venerida;Veneroidea;Veneridae;Mercenaria;Mercenari  
 a mercenaria  
 UdeM00000032124 2607531 63.5 UdeM00000032124 XP\_036370402.1 40  
 65 39 0 4 68 66 130 1.30E-07 63.5 2607531  
 cellular  
 organisms;Eukaryota;Opisthokonta;Metazoa;Eumetazoa;Bilateria;Protostomia;  
 Spiralia;Lophotrochozoa;Mollusca;Cephalopoda;Coleoidea;Octopodiformes;Oct  
 opoda;Incirrata;Octopodidae;Octopus;Octopus sinensis  
 UdeM00000032125 6596 174.1 UdeM00000032125 XP\_045168577.1 39 313  
 90 5 1 212 116 428 2.30E-40 174.1 6596 cellular  
 organisms;Eukaryota;Opisthokonta;Metazoa;Eumetazoa;Bilateria;Protostomia;  
 Spiralia;Lophotrochozoa;Mollusca;Bivalvia;Autobranchia;Heteroconchia;Euhe  
 terodonta;Imparidentia;Venerida;Veneroidea;Veneridae;Mercenaria;Mercenari  
 a mercenaria  
 UdeM00000032126 6596 282.3 UdeM00000032126 XP\_045168500.1 77.7 193  
 43 0 2 194 651 843 4.70E-73 282.3 6596 cellular  
 organisms;Eukaryota;Opisthokonta;Metazoa;Eumetazoa;Bilateria;Protostomia;  
 Spiralia;Lophotrochozoa;Mollusca;Bivalvia;Autobranchia;Heteroconchia;Euhe  
 terodonta;Imparidentia;Venerida;Veneroidea;Veneridae;Mercenaria;Mercenari  
 a mercenaria  
 UdeM00000032127 6596 847 UdeM00000032127 XP\_045168500.1 65.2 661  
 221 4 1 657 1 656 1.60E-242 847 6596 cellular  
 organisms;Eukaryota;Opisthokonta;Metazoa;Eumetazoa;Bilateria;Protostomia;  
 Spiralia;Lophotrochozoa;Mollusca;Bivalvia;Autobranchia;Heteroconchia;Euhe  
 terodonta;Imparidentia;Venerida;Veneroidea;Veneridae;Mercenaria;Mercenari  
 a mercenaria  
 UdeM00000032128 6596 439.9 UdeM00000032128 XP\_045169947.1 41.5 607  
 318 8 6 608 350 923 5.30E-120 439.9 6596 cellular  
 organisms;Eukaryota;Opisthokonta;Metazoa;Eumetazoa;Bilateria;Protostomia;  
 Spiralia;Lophotrochozoa;Mollusca;Bivalvia;Autobranchia;Heteroconchia;Euhe  
 terodonta;Imparidentia;Venerida;Veneroidea;Veneridae;Mercenaria;Mercenari  
 a mercenaria  
 UdeM00000032131 1735272 288.5 UdeM00000032131 XP\_041365820.1 48.5  
 291 135 4 10 298 46 323 9.90E-75 288.5 1735272  
 cellular  
 organisms;Eukaryota;Opisthokonta;Metazoa;Eumetazoa;Bilateria;Protostomia;  
 Spiralia;Lophotrochozoa;Mollusca;Gastropoda;Neomphalina;Neomphaloidea;Pel  
 tospiridae;Gigantopelta;Gigantopelta aegis

UdeM00000032132 29159 147.1 UdeM00000032132 XP\_034301372.1 57.1 112  
 45 1 27 138 53 161 2.10E-32 147.1 29159 cellular  
 organisms;Eukaryota;Opisthokonta;Metazoa;Eumetazoa;Bilateria;Protostomia;  
 Spiralia;Lophotrochozoa;Mollusca;Bivalvia;Autobranchia;Pteriormorphia;Ostr  
 eida;Ostreoidea;Ostreidae;Crassostrea;Crassostrea gigas  
 UdeM00000032133 29159 147.1 UdeM00000032133 XP\_034301372.1 57.1 112  
 45 1 15 126 53 161 1.50E-32 147.1 29159 cellular  
 organisms;Eukaryota;Opisthokonta;Metazoa;Eumetazoa;Bilateria;Protostomia;  
 Spiralia;Lophotrochozoa;Mollusca;Bivalvia;Autobranchia;Pteriormorphia;Ostr  
 eida;Ostreoidea;Ostreidae;Crassostrea;Crassostrea gigas  
 UdeM00000032134 29159 338.2 UdeM00000032134 XP\_034301372.1 51.1 368  
 126 5 1 366 178 493 1.40E-89 338.2 29159 cellular  
 organisms;Eukaryota;Opisthokonta;Metazoa;Eumetazoa;Bilateria;Protostomia;  
 Spiralia;Lophotrochozoa;Mollusca;Bivalvia;Autobranchia;Pteriormorphia;Ostr  
 eida;Ostreoidea;Ostreidae;Crassostrea;Crassostrea gigas  
 UdeM00000032137 6596 547.4 UdeM00000032137 XP\_045163235.1 49.1 562  
 280 3 19 579 5 561 2.30E-152 547.4 6596 cellular  
 organisms;Eukaryota;Opisthokonta;Metazoa;Eumetazoa;Bilateria;Protostomia;  
 Spiralia;Lophotrochozoa;Mollusca;Bivalvia;Autobranchia;Heteroconchia;Euhe  
 terodonta;Imparidentia;Venerida;Veneroidea;Veneridae;Mercenaria;Mercenari  
 a mercenaria  
 UdeM00000032139 6579 300.1 UdeM00000032139 XP\_033744145.1 46.2 329  
 126 2 3 280 155 483 3.20E-78 300.1 6579 cellular  
 organisms;Eukaryota;Opisthokonta;Metazoa;Eumetazoa;Bilateria;Protostomia;  
 Spiralia;Lophotrochozoa;Mollusca;Bivalvia;Autobranchia;Pteriormorphia;Pect  
 inida;Pectinoidea;Pectinidae;Pecten;Pecten maximus  
 UdeM00000032140 29159 526.9 UdeM00000032140 XP\_034301372.1 56.8 456  
 180 4 37 490 53 493 2.80E-146 526.9 29159 cellular  
 organisms;Eukaryota;Opisthokonta;Metazoa;Eumetazoa;Bilateria;Protostomia;  
 Spiralia;Lophotrochozoa;Mollusca;Bivalvia;Autobranchia;Pteriormorphia;Ostr  
 eida;Ostreoidea;Ostreidae;Crassostrea;Crassostrea gigas  
 UdeM00000032141 29159 515.8 UdeM00000032141 XP\_034301372.1 56.6 442  
 168 2 37 455 53 493 5.90E-143 515.8 29159 cellular  
 organisms;Eukaryota;Opisthokonta;Metazoa;Eumetazoa;Bilateria;Protostomia;  
 Spiralia;Lophotrochozoa;Mollusca;Bivalvia;Autobranchia;Pteriormorphia;Ostr  
 eida;Ostreoidea;Ostreidae;Crassostrea;Crassostrea gigas  
 UdeM00000032142 6573 228.8 UdeM00000032142 XP\_021352103.1 56.2 194  
 78 1 16 202 20 213 6.20E-57 228.8 6573 cellular  
 organisms;Eukaryota;Opisthokonta;Metazoa;Eumetazoa;Bilateria;Protostomia;  
 Spiralia;Lophotrochozoa;Mollusca;Bivalvia;Autobranchia;Pteriormorphia;Pect  
 inida;Pectinoidea;Pectinidae;Mizuhopecten;Mizuhopecten yessoensis  
 UdeM00000032143 6573 645.2 UdeM00000032143 XP\_021376256.1 61.8 534  
 200 4 27 557 1 533 7.60E-182 645.2 6573 cellular  
 organisms;Eukaryota;Opisthokonta;Metazoa;Eumetazoa;Bilateria;Protostomia;  
 Spiralia;Lophotrochozoa;Mollusca;Bivalvia;Autobranchia;Pteriormorphia;Pect  
 inida;Pectinoidea;Pectinidae;Mizuhopecten;Mizuhopecten yessoensis  
 UdeM00000032144 6596 1629.4 UdeM00000032144 XP\_045167350.1 66  
 1286 379 7 123 1358 61 1338 0.00E+00 1629.4 6596  
 cellular  
 organisms;Eukaryota;Opisthokonta;Metazoa;Eumetazoa;Bilateria;Protostomia;  
 Spiralia;Lophotrochozoa;Mollusca;Bivalvia;Autobranchia;Heteroconchia;Euhe  
 terodonta;Imparidentia;Venerida;Veneroidea;Veneridae;Mercenaria;Mercenari  
 a mercenaria

UdeM00000032145 6596 641.7 UdeM00000032145 XP\_045167595.1 73.6 450  
 113 1 2 445 977 1426 6.80E-181 641.7 6596 cellular  
 organisms;Eukaryota;Opisthokonta;Metazoa;Eumetazoa;Bilateria;Protostomia;  
 Spiralia;Lophotrochozoa;Mollusca;Bivalvia;Autobranchia;Heteroconchia;Euhe  
 terodonta;Imparidentia;Venerida;Veneroidea;Veneridae;Mercenaria;Mercenari  
 a mercenaria  
 UdeM00000032146 6596 639.8 UdeM00000032146 XP\_045167595.1 73.3 450  
 114 1 2 445 977 1426 2.60E-180 639.8 6596 cellular  
 organisms;Eukaryota;Opisthokonta;Metazoa;Eumetazoa;Bilateria;Protostomia;  
 Spiralia;Lophotrochozoa;Mollusca;Bivalvia;Autobranchia;Heteroconchia;Euhe  
 terodonta;Imparidentia;Venerida;Veneroidea;Veneridae;Mercenaria;Mercenari  
 a mercenaria  
 UdeM00000032147 6596 641.7 UdeM00000032147 XP\_045167595.1 73.6 450  
 113 1 2 445 977 1426 6.80E-181 641.7 6596 cellular  
 organisms;Eukaryota;Opisthokonta;Metazoa;Eumetazoa;Bilateria;Protostomia;  
 Spiralia;Lophotrochozoa;Mollusca;Bivalvia;Autobranchia;Heteroconchia;Euhe  
 terodonta;Imparidentia;Venerida;Veneroidea;Veneridae;Mercenaria;Mercenari  
 a mercenaria  
 UdeM00000032148 6596 638.3 UdeM00000032148 XP\_045167595.1 73.3 450  
 114 1 2 445 977 1426 7.50E-180 638.3 6596 cellular  
 organisms;Eukaryota;Opisthokonta;Metazoa;Eumetazoa;Bilateria;Protostomia;  
 Spiralia;Lophotrochozoa;Mollusca;Bivalvia;Autobranchia;Heteroconchia;Euhe  
 terodonta;Imparidentia;Venerida;Veneroidea;Veneridae;Mercenaria;Mercenari  
 a mercenaria  
 UdeM00000032149 6596 638.3 UdeM00000032149 XP\_045167595.1 73.3 450  
 114 1 2 445 977 1426 7.50E-180 638.3 6596 cellular  
 organisms;Eukaryota;Opisthokonta;Metazoa;Eumetazoa;Bilateria;Protostomia;  
 Spiralia;Lophotrochozoa;Mollusca;Bivalvia;Autobranchia;Heteroconchia;Euhe  
 terodonta;Imparidentia;Venerida;Veneroidea;Veneridae;Mercenaria;Mercenari  
 a mercenaria  
 UdeM00000032150 6596 641.7 UdeM00000032150 XP\_045167595.1 73.6 450  
 113 1 2 445 977 1426 6.80E-181 641.7 6596 cellular  
 organisms;Eukaryota;Opisthokonta;Metazoa;Eumetazoa;Bilateria;Protostomia;  
 Spiralia;Lophotrochozoa;Mollusca;Bivalvia;Autobranchia;Heteroconchia;Euhe  
 terodonta;Imparidentia;Venerida;Veneroidea;Veneridae;Mercenaria;Mercenari  
 a mercenaria  
 UdeM00000032151 6579 634.4 UdeM00000032151 XP\_033762681.1 49.4 650  
 311 5 15 650 27 672 1.60E-178 634.4 6579 cellular  
 organisms;Eukaryota;Opisthokonta;Metazoa;Eumetazoa;Bilateria;Protostomia;  
 Spiralia;Lophotrochozoa;Mollusca;Bivalvia;Autobranchia;Pteriormorphia;Pect  
 inida;Pectinoidea;Pectinidae;Pecten;Pecten maximus  
 UdeM00000032152 6573 820.8 UdeM00000032152 XP\_021376253.1 57.1 711  
 301 3 1 709 1 709 1.30E-234 820.8 6573 cellular  
 organisms;Eukaryota;Opisthokonta;Metazoa;Eumetazoa;Bilateria;Protostomia;  
 Spiralia;Lophotrochozoa;Mollusca;Bivalvia;Autobranchia;Pteriormorphia;Pect  
 inida;Pectinoidea;Pectinidae;Mizuhopecten;Mizuhopecten yessoensis  
 UdeM00000032153 400727 277.3 UdeM00000032153 XP\_025095687.1 55.7  
 228 99 1 2 227 492 719 1.70E-71 277.3 400727  
 cellular  
 organisms;Eukaryota;Opisthokonta;Metazoa;Eumetazoa;Bilateria;Protostomia;  
 Spiralia;Lophotrochozoa;Mollusca;Gastropoda;Caenogastropoda;Architaeniogl  
 ossa;Ampullarioidea;Ampullariidae;Pomacea;Pomacea canaliculata  
 UdeM00000032154 6596 454.5 UdeM00000032154 XP\_045168179.1 69.9 329  
 96 2 24 350 25 352 1.20E-124 454.5 6596 cellular

organisms;Eukaryota;Opisthokonta;Metazoa;Eumetazoa;Bilateria;Protostomia;Spiralia;Lophotrochozoa;Mollusca;Bivalvia;Autobranchia;Heteroconchia;Euherodonta;Imparidentia;Venerida;Veneroidea;Veneridae;Mercenaria;Mercenaria mercenaria

UdeM00000032157 1415580 407.1 UdeM00000032157 XP\_030075314.1 51.5  
421 185 3 1 418 221 625 2.60E-110 407.1 1415580  
cellular

organisms;Eukaryota;Opisthokonta;Metazoa;Eumetazoa;Bilateria;Deuterostomia;Chordata;Craniata;Vertebrata;Gnathostomata;Teleostomi;Euteleostomi;Sarcopterygii;Dipnotetrapodomorpha;Tetrapoda;Amphibia;Gymnophiona;Siphonopidae;Microcaecilia;Microcaecilia unicolor

UdeM00000032156 1415580 483.4 UdeM00000032156 XP\_030075314.1 52.6  
479 208 3 1 476 163 625 3.30E-133 483.4 1415580  
cellular

organisms;Eukaryota;Opisthokonta;Metazoa;Eumetazoa;Bilateria;Deuterostomia;Chordata;Craniata;Vertebrata;Gnathostomata;Teleostomi;Euteleostomi;Sarcopterygii;Dipnotetrapodomorpha;Tetrapoda;Amphibia;Gymnophiona;Siphonopidae;Microcaecilia;Microcaecilia unicolor

UdeM00000032158 260995 131.7 UdeM00000032158 XP\_033812940.1 46.8  
139 73 1 1 139 1 138 7.10E-28 131.7 260995  
cellular

organisms;Eukaryota;Opisthokonta;Metazoa;Eumetazoa;Bilateria;Deuterostomia;Chordata;Craniata;Vertebrata;Gnathostomata;Teleostomi;Euteleostomi;Sarcopterygii;Dipnotetrapodomorpha;Tetrapoda;Amphibia;Gymnophiona;Dermophiidae;Geotrypetes;Geotrypetes seraphini

UdeM00000032160 1415580 132.1 UdeM00000032160 XP\_030075314.1 71.4  
91 26 0 2 92 535 625 3.60E-28 132.1 1415580  
cellular

organisms;Eukaryota;Opisthokonta;Metazoa;Eumetazoa;Bilateria;Deuterostomia;Chordata;Craniata;Vertebrata;Gnathostomata;Teleostomi;Euteleostomi;Sarcopterygii;Dipnotetrapodomorpha;Tetrapoda;Amphibia;Gymnophiona;Siphonopidae;Microcaecilia;Microcaecilia unicolor

UdeM00000032162 7757 329.3 UdeM00000032162 XP\_032835197.1 78.2 211  
45 1 2 212 149 358 4.60E-87 329.3 7757 cellular

organisms;Eukaryota;Opisthokonta;Metazoa;Eumetazoa;Bilateria;Deuterostomia;Chordata;Craniata;Vertebrata;Cyclostomata;Hyperoartia;Petromyzontiformes;Petromyzontidae;Petromyzon;Petromyzon marinus

UdeM00000032161 7757 430.6 UdeM00000032161 XP\_032835197.1 80 270  
53 1 1 270 90 358 1.80E-117 430.6 7757 cellular

organisms;Eukaryota;Opisthokonta;Metazoa;Eumetazoa;Bilateria;Deuterostomia;Chordata;Craniata;Vertebrata;Cyclostomata;Hyperoartia;Petromyzontiformes;Petromyzontidae;Petromyzon;Petromyzon marinus

UdeM00000032163 260995 131.7 UdeM00000032163 XP\_033812940.1 46.8  
139 73 1 1 139 1 138 7.10E-28 131.7 260995  
cellular

organisms;Eukaryota;Opisthokonta;Metazoa;Eumetazoa;Bilateria;Deuterostomia;Chordata;Craniata;Vertebrata;Gnathostomata;Teleostomi;Euteleostomi;Sarcopterygii;Dipnotetrapodomorpha;Tetrapoda;Amphibia;Gymnophiona;Dermophiidae;Geotrypetes;Geotrypetes seraphini

UdeM00000032165 1415580 137.9 UdeM00000032165 XP\_030075314.1 72.5  
91 25 0 2 92 535 625 6.60E-30 137.9 1415580  
cellular

organisms;Eukaryota;Opisthokonta;Metazoa;Eumetazoa;Bilateria;Deuterostomia;Chordata;Craniata;Vertebrata;Gnathostomata;Teleostomi;Euteleostomi;Sarc



opterygii;Dipnotetrapodomorpha;Tetrapoda;Amphibia;Gymnophiona;Siphonopida  
 e;Microcaecilia;Microcaecilia unicolor  
 UdeM00000032166 7757 553.9 UdeM00000032166 XP\_032835197.1 77.6 357  
 79 1 54 410 3 358 2.00E-154 553.9 7757 cellular  
 organisms;Eukaryota;Opisthokonta;Metazoa;Eumetazoa;Bilateria;Deuterostomi  
 a;Chordata;Craniata;Vertebrata;Cyclostomata;Hyperoartia;Petromyzontiforme  
 s;Petromyzontidae;Petromyzon;Petromyzon marinus  
 UdeM00000032168 1415580 538.5 UdeM00000032168 XP\_030075314.1 54  
 517 219 4 1 514 125 625 9.30E-150 538.5 1415580  
 cellular  
 organisms;Eukaryota;Opisthokonta;Metazoa;Eumetazoa;Bilateria;Deuterostomi  
 a;Chordata;Craniata;Vertebrata;Gnathostomata;Teleostomi;Euteleostomi;Sarc  
 opterygii;Dipnotetrapodomorpha;Tetrapoda;Amphibia;Gymnophiona;Siphonopida  
 e;Microcaecilia;Microcaecilia unicolor  
 UdeM00000032169 6579 283.9 UdeM00000032169 XP\_033761935.1 50 284  
 135 5 97 375 112 393 5.20E-73 283.9 6579 cellular  
 organisms;Eukaryota;Opisthokonta;Metazoa;Eumetazoa;Bilateria;Protostomia;  
 Spiralia;Lophotrochozoa;Mollusca;Bivalvia;Autobranchia;Pteriormorphia;Pect  
 inida;Pectinoidea;Pectinidae;Pecten;Pecten maximus  
 UdeM00000032171 6565 283.5 UdeM00000032171 XP\_022309896.1 39.6 381  
 180 6 110 473 130 477 5.00E-73 283.5 6565 cellular  
 organisms;Eukaryota;Opisthokonta;Metazoa;Eumetazoa;Bilateria;Protostomia;  
 Spiralia;Lophotrochozoa;Mollusca;Bivalvia;Autobranchia;Pteriormorphia;Ostr  
 eida;Ostreoidea;Ostreidae;Crassostrea;Crassostrea virginica  
 UdeM00000032172 6565 926.4 UdeM00000032172 XP\_022305147.1 90.8 541  
 15 1 1 541 1 506 1.70E-266 926.4 6565 cellular  
 organisms;Eukaryota;Opisthokonta;Metazoa;Eumetazoa;Bilateria;Protostomia;  
 Spiralia;Lophotrochozoa;Mollusca;Bivalvia;Autobranchia;Pteriormorphia;Ostr  
 eida;Ostreoidea;Ostreidae;Crassostrea;Crassostrea virginica  
 UdeM00000032173 400727 150.6 UdeM00000032173 XP\_025094682.1 59.5  
 116 45 2 32 145 35 150 1.50E-33 150.6 400727  
 cellular  
 organisms;Eukaryota;Opisthokonta;Metazoa;Eumetazoa;Bilateria;Protostomia;  
 Spiralia;Lophotrochozoa;Mollusca;Gastropoda;Caenogastropoda;Architaeniogl  
 ossa;Ampullarioidea;Ampullariidae;Pomacea;Pomacea canaliculata  
 UdeM00000032174 6596 347.8 UdeM00000032174 XP\_045177776.1 40.3 534  
 274 11 1 504 405 923 3.20E-92 347.8 6596 cellular  
 organisms;Eukaryota;Opisthokonta;Metazoa;Eumetazoa;Bilateria;Protostomia;  
 Spiralia;Lophotrochozoa;Mollusca;Bivalvia;Autobranchia;Heteroconchia;Euhe  
 terodonta;Imparidentia;Venerida;Veneroidea;Veneridae;Mercenaria;Mercenari  
 a mercenaria  
 UdeM00000032175 6596 184.1 UdeM00000032175 XP\_045158722.1 44.3 219  
 111 3 13 231 38 245 2.30E-43 184.1 6596 cellular  
 organisms;Eukaryota;Opisthokonta;Metazoa;Eumetazoa;Bilateria;Protostomia;  
 Spiralia;Lophotrochozoa;Mollusca;Bivalvia;Autobranchia;Heteroconchia;Euhe  
 terodonta;Imparidentia;Venerida;Veneroidea;Veneridae;Mercenaria;Mercenari  
 a mercenaria  
 UdeM00000032176 1735272 98.2 UdeM00000032176 XP\_041354133.1 44  
 116 59 3 3 118 1 110 1.10E-17 98.2 1735272  
 cellular  
 organisms;Eukaryota;Opisthokonta;Metazoa;Eumetazoa;Bilateria;Protostomia;  
 Spiralia;Lophotrochozoa;Mollusca;Gastropoda;Neomphalina;Neomphaloidea;Pel  
 tospiridae;Gigantopelta;Gigantopelta aegis

UdeM00000032177 6565 539.7 UdeM00000032177 XP\_022323131.1 46.7 721  
 140 5 9 726 40 519 5.90E-150 539.7 6565 cellular  
 organisms;Eukaryota;Opisthokonta;Metazoa;Eumetazoa;Bilateria;Protostomia;  
 Spiralia;Lophotrochozoa;Mollusca;Bivalvia;Autobranchia;Pteriomorpha;Ostr  
 eida;Ostreoidea;Ostreidae;Crassostrea;Crassostrea virginica  
 UdeM00000032178 6596 228 UdeM00000032178 XP\_045204491.1 25.3 697  
 454 18 15 691 14 663 3.60E-56 228 6596 cellular  
 organisms;Eukaryota;Opisthokonta;Metazoa;Eumetazoa;Bilateria;Protostomia;  
 Spiralia;Lophotrochozoa;Mollusca;Bivalvia;Autobranchia;Heteroconchia;Euhe  
 terodonta;Imparidentia;Venerida;Veneroidea;Veneridae;Mercenaria;Mercenari  
 a mercenaria  
 UdeM00000032179 6596 104.4 UdeM00000032179 XP\_045192593.1 27.6 283  
 183 6 192 465 443 712 4.10E-19 104.4 6596 cellular  
 organisms;Eukaryota;Opisthokonta;Metazoa;Eumetazoa;Bilateria;Protostomia;  
 Spiralia;Lophotrochozoa;Mollusca;Bivalvia;Autobranchia;Heteroconchia;Euhe  
 terodonta;Imparidentia;Venerida;Veneroidea;Veneridae;Mercenaria;Mercenari  
 a mercenaria  
 UdeM00000032180 6596 387.5 UdeM00000032180 XP\_045178296.1 49.4 429  
 203 5 50 465 30 457 2.40E-104 387.5 6596 cellular  
 organisms;Eukaryota;Opisthokonta;Metazoa;Eumetazoa;Bilateria;Protostomia;  
 Spiralia;Lophotrochozoa;Mollusca;Bivalvia;Autobranchia;Heteroconchia;Euhe  
 terodonta;Imparidentia;Venerida;Veneroidea;Veneridae;Mercenaria;Mercenari  
 a mercenaria  
 UdeM00000032181 6596 286.2 UdeM00000032181 XP\_045178294.1 50.3 334  
 152 7 1 326 127 454 5.30E-74 286.2 6596 cellular  
 organisms;Eukaryota;Opisthokonta;Metazoa;Eumetazoa;Bilateria;Protostomia;  
 Spiralia;Lophotrochozoa;Mollusca;Bivalvia;Autobranchia;Heteroconchia;Euhe  
 terodonta;Imparidentia;Venerida;Veneroidea;Veneridae;Mercenaria;Mercenari  
 a mercenaria  
 UdeM00000032182 6596 413.7 UdeM00000032182 XP\_045178296.1 51.6 436  
 195 5 23 449 26 454 3.00E-112 413.7 6596 cellular  
 organisms;Eukaryota;Opisthokonta;Metazoa;Eumetazoa;Bilateria;Protostomia;  
 Spiralia;Lophotrochozoa;Mollusca;Bivalvia;Autobranchia;Heteroconchia;Euhe  
 terodonta;Imparidentia;Venerida;Veneroidea;Veneridae;Mercenaria;Mercenari  
 a mercenaria  
 UdeM00000032183 6596 401.4 UdeM00000032183 XP\_045178296.1 50.5 434  
 201 7 21 442 18 449 1.60E-108 401.4 6596 cellular  
 organisms;Eukaryota;Opisthokonta;Metazoa;Eumetazoa;Bilateria;Protostomia;  
 Spiralia;Lophotrochozoa;Mollusca;Bivalvia;Autobranchia;Heteroconchia;Euhe  
 terodonta;Imparidentia;Venerida;Veneroidea;Veneridae;Mercenaria;Mercenari  
 a mercenaria  
 UdeM00000032184 6596 633.3 UdeM00000032184 XP\_045177660.1 77.5 395  
 88 1 1 394 1 395 2.20E-178 633.3 6596 cellular  
 organisms;Eukaryota;Opisthokonta;Metazoa;Eumetazoa;Bilateria;Protostomia;  
 Spiralia;Lophotrochozoa;Mollusca;Bivalvia;Autobranchia;Heteroconchia;Euhe  
 terodonta;Imparidentia;Venerida;Veneroidea;Veneridae;Mercenaria;Mercenari  
 a mercenaria  
 UdeM00000032186 6565 545 UdeM00000032186 XP\_022334994.1 38.9 873  
 273 14 33 650 1 868 1.30E-151 545 6565 cellular  
 organisms;Eukaryota;Opisthokonta;Metazoa;Eumetazoa;Bilateria;Protostomia;  
 Spiralia;Lophotrochozoa;Mollusca;Bivalvia;Autobranchia;Pteriomorpha;Ostr  
 eida;Ostreoidea;Ostreidae;Crassostrea;Crassostrea virginica  
 UdeM00000032187 6565 543.1 UdeM00000032187 XP\_022334994.1 38.8 871  
 274 13 24 640 3 868 4.70E-151 543.1 6565 cellular

organisms;Eukaryota;Opisthokonta;Metazoa;Eumetazoa;Bilateria;Protostomia;  
Spiralia;Lophotrochozoa;Mollusca;Bivalvia;Autobranhia;Pteriormorphia;Ostr  
eida;Ostreoidea;Ostreidae;Crassostrea;Crassostrea virginica  
UdeM00000032188 6565 433.7 UdeM00000032188 XP\_022334993.1 39.1 654  
199 8 72 531 221 869 3.30E-118 433.7 6565 cellular  
organisms;Eukaryota;Opisthokonta;Metazoa;Eumetazoa;Bilateria;Protostomia;  
Spiralia;Lophotrochozoa;Mollusca;Bivalvia;Autobranhia;Pteriormorphia;Ostr  
eida;Ostreoidea;Ostreidae;Crassostrea;Crassostrea virginica  
UdeM00000032189 29159 129 UdeM00000032189 XP\_034331441.1 43.4 159  
85 3 10 164 61 218 9.40E-27 129 29159 cellular  
organisms;Eukaryota;Opisthokonta;Metazoa;Eumetazoa;Bilateria;Protostomia;  
Spiralia;Lophotrochozoa;Mollusca;Bivalvia;Autobranhia;Pteriormorphia;Ostr  
eida;Ostreoidea;Ostreidae;Crassostrea;Crassostrea gigas  
UdeM00000032193 6596 82 UdeM00000032193 XP\_045169911.1 34.8 115  
74 1 30 144 56 169 6.80E-13 82 6596 cellular  
organisms;Eukaryota;Opisthokonta;Metazoa;Eumetazoa;Bilateria;Protostomia;  
Spiralia;Lophotrochozoa;Mollusca;Bivalvia;Autobranhia;Heteroconchia;Euhe  
terodonta;Imparidentia;Venerida;Veneroidea;Veneridae;Mercenaria;Mercenari  
a mercenaria  
UdeM00000032194 29159 137.5 UdeM00000032194 XP\_011419444.2 34.9 232  
145 3 5 234 7 234 2.20E-29 137.5 29159 cellular  
organisms;Eukaryota;Opisthokonta;Metazoa;Eumetazoa;Bilateria;Protostomia;  
Spiralia;Lophotrochozoa;Mollusca;Bivalvia;Autobranhia;Pteriormorphia;Ostr  
eida;Ostreoidea;Ostreidae;Crassostrea;Crassostrea gigas  
UdeM00000032195 6596 136.3 UdeM00000032195 XP\_045193663.1 51.3 117  
57 0 117 233 30 146 4.80E-29 136.3 6596 cellular  
organisms;Eukaryota;Opisthokonta;Metazoa;Eumetazoa;Bilateria;Protostomia;  
Spiralia;Lophotrochozoa;Mollusca;Bivalvia;Autobranhia;Heteroconchia;Euhe  
terodonta;Imparidentia;Venerida;Veneroidea;Veneridae;Mercenaria;Mercenari  
a mercenaria  
UdeM00000032196 6596 142.9 UdeM00000032196 XP\_045181202.1 53.4 116  
54 0 95 210 86 201 4.70E-31 142.9 6596 cellular  
organisms;Eukaryota;Opisthokonta;Metazoa;Eumetazoa;Bilateria;Protostomia;  
Spiralia;Lophotrochozoa;Mollusca;Bivalvia;Autobranhia;Heteroconchia;Euhe  
terodonta;Imparidentia;Venerida;Veneroidea;Veneridae;Mercenaria;Mercenari  
a mercenaria  
UdeM00000032197 6596 145.6 UdeM00000032197 XP\_045169911.1 53.5 114  
53 0 34 147 56 169 5.10E-32 145.6 6596 cellular  
organisms;Eukaryota;Opisthokonta;Metazoa;Eumetazoa;Bilateria;Protostomia;  
Spiralia;Lophotrochozoa;Mollusca;Bivalvia;Autobranhia;Heteroconchia;Euhe  
terodonta;Imparidentia;Venerida;Veneroidea;Veneridae;Mercenaria;Mercenari  
a mercenaria  
UdeM00000032198 45264 417.9 UdeM00000032198 XP\_044165535.1 50.6 385  
186 1 1 381 158 542 1.90E-113 417.9 45264 cellular  
organisms;Eukaryota;Opisthokonta;Metazoa;Eumetazoa;Cnidaria;Anthozoa;Hexa  
corallia;Scleractinia;Astrocoeniina;Acroporidae;Acropora;Acropora  
millepora  
UdeM00000032199 6573 134 UdeM00000032199 XP\_021346733.1 89.6 67  
7 0 12 78 6 72 8.10E-29 134 6573 cellular  
organisms;Eukaryota;Opisthokonta;Metazoa;Eumetazoa;Bilateria;Protostomia;  
Spiralia;Lophotrochozoa;Mollusca;Bivalvia;Autobranhia;Pteriormorphia;Pect  
inida;Pectinoidea;Pectinidae;Mizuhopecten;Mizuhopecten yessoensis  
UdeM00000032200 29159 397.1 UdeM00000032200 XP\_034301528.1 64.1 334  
100 6 8 322 36 368 2.20E-107 397.1 29159 cellular

organisms;Eukaryota;Opisthokonta;Metazoa;Eumetazoa;Bilateria;Protostomia;Spiralia;Lophotrochozoa;Mollusca;Bivalvia;Autobranchia;Pteriormorphia;Ostr  
eida;Ostreoidea;Ostreidae;Crassostrea;Crassostrea gigas  
UdeM00000032201 6565 130.6 UdeM00000032201 XP\_022337904.1 28.6 234  
167 0 286 519 91 324 5.90E-27 130.6 6565 cellular  
organisms;Eukaryota;Opisthokonta;Metazoa;Eumetazoa;Bilateria;Protostomia;Spiralia;Lophotrochozoa;Mollusca;Bivalvia;Autobranchia;Pteriormorphia;Ostr  
eida;Ostreoidea;Ostreidae;Crassostrea;Crassostrea virginica  
UdeM00000032202 6596 259.2 UdeM00000032202 XP\_045178865.1 42.3 423  
140 10 11 394 219 576 1.30E-65 259.2 6596 cellular  
organisms;Eukaryota;Opisthokonta;Metazoa;Eumetazoa;Bilateria;Protostomia;Spiralia;Lophotrochozoa;Mollusca;Bivalvia;Autobranchia;Heteroconchia;Euhe  
terodonta;Imparidentia;Venerida;Veneroidea;Veneridae;Mercenaria;Mercenari  
a mercenaria  
UdeM00000032203 6596 101.3 UdeM00000032203 XP\_045178840.1 86.8 53  
7 0 387 439 1691 1743 3.20E-18 101.3 6596 cellular  
organisms;Eukaryota;Opisthokonta;Metazoa;Eumetazoa;Bilateria;Protostomia;Spiralia;Lophotrochozoa;Mollusca;Bivalvia;Autobranchia;Heteroconchia;Euhe  
terodonta;Imparidentia;Venerida;Veneroidea;Veneridae;Mercenaria;Mercenari  
a mercenaria  
UdeM00000032204 6596 101.3 UdeM00000032204 XP\_045178840.1 86.8 53  
7 0 148 200 1691 1743 1.50E-18 101.3 6596 cellular  
organisms;Eukaryota;Opisthokonta;Metazoa;Eumetazoa;Bilateria;Protostomia;Spiralia;Lophotrochozoa;Mollusca;Bivalvia;Autobranchia;Heteroconchia;Euhe  
terodonta;Imparidentia;Venerida;Veneroidea;Veneridae;Mercenaria;Mercenari  
a mercenaria  
UdeM00000032205 1735272 813.1 UdeM00000032205 XP\_041374005.1 72.6  
580 124 9 12 559 15 591 2.10E-232 813.1 1735272  
cellular  
organisms;Eukaryota;Opisthokonta;Metazoa;Eumetazoa;Bilateria;Protostomia;Spiralia;Lophotrochozoa;Mollusca;Gastropoda;Neomphalina;Neomphaloidea;Pel  
tospiridae;Gigantopelta;Gigantopelta aegis  
UdeM00000032206 6565 396.7 UdeM00000032206 XP\_022325234.1 82 239  
40 3 35 271 31 268 2.30E-107 396.7 6565 cellular  
organisms;Eukaryota;Opisthokonta;Metazoa;Eumetazoa;Bilateria;Protostomia;Spiralia;Lophotrochozoa;Mollusca;Bivalvia;Autobranchia;Pteriormorphia;Ostr  
eida;Ostreoidea;Ostreidae;Crassostrea;Crassostrea virginica  
UdeM00000032207 6579 338.6 UdeM00000032207 XP\_033728633.1 60.5 261  
101 1 1 259 5 265 7.30E-90 338.6 6579 cellular  
organisms;Eukaryota;Opisthokonta;Metazoa;Eumetazoa;Bilateria;Protostomia;Spiralia;Lophotrochozoa;Mollusca;Bivalvia;Autobranchia;Pteriormorphia;Pect  
inida;Pectinoidea;Pectinidae;Pecten;Pecten maximus  
UdeM00000032208 6579 347.1 UdeM00000032208 XP\_033728633.1 56.4 280  
120 1 1 278 5 284 2.10E-92 347.1 6579 cellular  
organisms;Eukaryota;Opisthokonta;Metazoa;Eumetazoa;Bilateria;Protostomia;Spiralia;Lophotrochozoa;Mollusca;Bivalvia;Autobranchia;Pteriormorphia;Pect  
inida;Pectinoidea;Pectinidae;Pecten;Pecten maximus  
UdeM00000032209 6596 383.3 UdeM00000032209 XP\_045211214.1 32.8 741  
448 18 8 709 6 735 7.00E-103 383.3 6596 cellular  
organisms;Eukaryota;Opisthokonta;Metazoa;Eumetazoa;Bilateria;Protostomia;Spiralia;Lophotrochozoa;Mollusca;Bivalvia;Autobranchia;Heteroconchia;Euhe  
terodonta;Imparidentia;Venerida;Veneroidea;Veneridae;Mercenaria;Mercenari  
a mercenaria

UdeM00000032210 6565 807.7 UdeM00000032210 XP\_022320284.1 57.1 736  
 198 7 6 726 4 636 1.20E-230 807.7 6565 cellular  
 organisms;Eukaryota;Opisthokonta;Metazoa;Eumetazoa;Bilateria;Protostomia;  
 Spiralia;Lophotrochozoa;Mollusca;Bivalvia;Autobranchia;Pteriomorpha;Ostr  
 eida;Ostreoidea;Ostreidae;Crassostrea;Crassostrea virginica  
 UdeM00000032211 6565 1115.1 UdeM00000032211 XP\_022320284.1 57.9  
 989 241 11 6 979 4 832 0.00E+00 1115.1 6565  
 cellular  
 organisms;Eukaryota;Opisthokonta;Metazoa;Eumetazoa;Bilateria;Protostomia;  
 Spiralia;Lophotrochozoa;Mollusca;Bivalvia;Autobranchia;Pteriomorpha;Ostr  
 eida;Ostreoidea;Ostreidae;Crassostrea;Crassostrea virginica  
 UdeM00000032212 6596 932.6 UdeM00000032212 XP\_045177681.1 65.2 755  
 246 6 597 1336 233 985 6.20E-268 932.6 6596 cellular  
 organisms;Eukaryota;Opisthokonta;Metazoa;Eumetazoa;Bilateria;Protostomia;  
 Spiralia;Lophotrochozoa;Mollusca;Bivalvia;Autobranchia;Heteroconchia;Euhe  
 terodonta;Imparidentia;Venerida;Veneroidea;Veneridae;Mercenaria;Mercenari  
 a mercenaria  
 UdeM00000032213 6596 128.6 UdeM00000032213 XP\_045177681.1 50.9 114  
 55 1 1 113 75 188 2.70E-26 128.6 6596 cellular  
 organisms;Eukaryota;Opisthokonta;Metazoa;Eumetazoa;Bilateria;Protostomia;  
 Spiralia;Lophotrochozoa;Mollusca;Bivalvia;Autobranchia;Heteroconchia;Euhe  
 terodonta;Imparidentia;Venerida;Veneroidea;Veneridae;Mercenaria;Mercenari  
 a mercenaria  
 UdeM00000032214 6596 89.7 UdeM00000032214 XP\_045202346.1 36.9 130  
 78 2 6 134 16 142 3.20E-15 89.7 6596 cellular  
 organisms;Eukaryota;Opisthokonta;Metazoa;Eumetazoa;Bilateria;Protostomia;  
 Spiralia;Lophotrochozoa;Mollusca;Bivalvia;Autobranchia;Heteroconchia;Euhe  
 terodonta;Imparidentia;Venerida;Veneroidea;Veneridae;Mercenaria;Mercenari  
 a mercenaria  
 UdeM00000032215 6596 181.4 UdeM00000032215 XP\_045183440.1 55 171  
 72 3 1 170 198 364 1.50E-42 181.4 6596 cellular  
 organisms;Eukaryota;Opisthokonta;Metazoa;Eumetazoa;Bilateria;Protostomia;  
 Spiralia;Lophotrochozoa;Mollusca;Bivalvia;Autobranchia;Heteroconchia;Euhe  
 terodonta;Imparidentia;Venerida;Veneroidea;Veneridae;Mercenaria;Mercenari  
 a mercenaria  
 UdeM00000032216 6596 60.1 UdeM00000032216 XP\_045181188.1 29.3 174  
 108 5 1 161 1 172 3.20E-06 60.1 6596 cellular  
 organisms;Eukaryota;Opisthokonta;Metazoa;Eumetazoa;Bilateria;Protostomia;  
 Spiralia;Lophotrochozoa;Mollusca;Bivalvia;Autobranchia;Heteroconchia;Euhe  
 terodonta;Imparidentia;Venerida;Veneroidea;Veneridae;Mercenaria;Mercenari  
 a mercenaria  
 UdeM00000032219 10224 66.2 UdeM00000032219 XP\_006820186.1 25.7 152  
 67 3 31 139 85 233 3.70E-08 66.2 10224 cellular  
 organisms;Eukaryota;Opisthokonta;Metazoa;Eumetazoa;Bilateria;Deuterostomi  
 a;Hemichordata;Enteropneusta;Harrimaniidae;Saccoglossus;Saccoglossus  
 kowalevskii  
 UdeM00000032220 29159 75.5 UdeM00000032220 XP\_011450796.2 37 135  
 79 2 5 139 2 130 7.40E-11 75.5 29159 cellular  
 organisms;Eukaryota;Opisthokonta;Metazoa;Eumetazoa;Bilateria;Protostomia;  
 Spiralia;Lophotrochozoa;Mollusca;Bivalvia;Autobranchia;Pteriomorpha;Ostr  
 eida;Ostreoidea;Ostreidae;Crassostrea;Crassostrea gigas  
 UdeM00000032221 6573 69.3 UdeM00000032221 XP\_021367170.1 36.7 128  
 75 2 1 124 1 126 6.60E-09 69.3 6573 cellular  
 organisms;Eukaryota;Opisthokonta;Metazoa;Eumetazoa;Bilateria;Protostomia;

Spiralia;Lophotrochozoa;Mollusca;Bivalvia;Autobranchia;Pteriomorpha;Pectinida;Pectinoidea;Pectinidae;Mizuhopecten;Mizuhopecten yessoensis  
UdeM00000032223 6565 203.8 UdeM00000032223 XP\_022312414.1 51.6 215  
99 4 4 217 190 400 2.30E-49 203.8 6565 cellular  
organisms;Eukaryota;Opisthokonta;Metazoa;Eumetazoa;Bilateria;Protostomia;  
Spiralia;Lophotrochozoa;Mollusca;Bivalvia;Autobranchia;Pteriomorpha;Ostr  
eida;Ostreoidea;Ostreidae;Crassostrea;Crassostrea virginica  
UdeM00000032224 6596 92 UdeM00000032224 XP\_045209928.1 35.3 167  
103 3 1 164 1 165 7.60E-16 92 6596 cellular  
organisms;Eukaryota;Opisthokonta;Metazoa;Eumetazoa;Bilateria;Protostomia;  
Spiralia;Lophotrochozoa;Mollusca;Bivalvia;Autobranchia;Heteroconchia;Euhe  
terodonta;Imparidentia;Venerida;Veneroidea;Veneridae;Mercenaria;Mercenari  
a mercenaria  
UdeM00000032225 6596 209.5 UdeM00000032225 XP\_045177681.1 64 178  
44 2 11 168 851 1028 3.50E-51 209.5 6596 cellular  
organisms;Eukaryota;Opisthokonta;Metazoa;Eumetazoa;Bilateria;Protostomia;  
Spiralia;Lophotrochozoa;Mollusca;Bivalvia;Autobranchia;Heteroconchia;Euhe  
terodonta;Imparidentia;Venerida;Veneroidea;Veneridae;Mercenaria;Mercenari  
a mercenaria  
UdeM00000032226 6596 862.1 UdeM00000032226 XP\_045177681.1 56.9 796  
314 10 44 825 71 851 5.90E-247 862.1 6596 cellular  
organisms;Eukaryota;Opisthokonta;Metazoa;Eumetazoa;Bilateria;Protostomia;  
Spiralia;Lophotrochozoa;Mollusca;Bivalvia;Autobranchia;Heteroconchia;Euhe  
terodonta;Imparidentia;Venerida;Veneroidea;Veneridae;Mercenaria;Mercenari  
a mercenaria  
UdeM00000032227 6596 942.6 UdeM00000032227 XP\_045177681.1 60 823  
299 11 1 799 237 1053 3.50E-271 942.6 6596 cellular  
organisms;Eukaryota;Opisthokonta;Metazoa;Eumetazoa;Bilateria;Protostomia;  
Spiralia;Lophotrochozoa;Mollusca;Bivalvia;Autobranchia;Heteroconchia;Euhe  
terodonta;Imparidentia;Venerida;Veneroidea;Veneridae;Mercenaria;Mercenari  
a mercenaria  
UdeM00000032228 29159 141 UdeM00000032228 XP\_011442195.2 56.8 111  
48 0 46 156 34 144 1.70E-30 141 29159 cellular  
organisms;Eukaryota;Opisthokonta;Metazoa;Eumetazoa;Bilateria;Protostomia;  
Spiralia;Lophotrochozoa;Mollusca;Bivalvia;Autobranchia;Pteriomorpha;Ostr  
eida;Ostreoidea;Ostreidae;Crassostrea;Crassostrea gigas  
UdeM00000032229 6596 230.7 UdeM00000032229 XP\_045185533.1 42.9 280  
157 3 90 368 116 393 3.00E-57 230.7 6596 cellular  
organisms;Eukaryota;Opisthokonta;Metazoa;Eumetazoa;Bilateria;Protostomia;  
Spiralia;Lophotrochozoa;Mollusca;Bivalvia;Autobranchia;Heteroconchia;Euhe  
terodonta;Imparidentia;Venerida;Veneroidea;Veneridae;Mercenaria;Mercenari  
a mercenaria  
UdeM00000032230 6596 128.6 UdeM00000032230 XP\_045185533.1 30.5 279  
109 5 81 275 115 392 1.20E-26 128.6 6596 cellular  
organisms;Eukaryota;Opisthokonta;Metazoa;Eumetazoa;Bilateria;Protostomia;  
Spiralia;Lophotrochozoa;Mollusca;Bivalvia;Autobranchia;Heteroconchia;Euhe  
terodonta;Imparidentia;Venerida;Veneroidea;Veneridae;Mercenaria;Mercenari  
a mercenaria  
UdeM00000032231 6596 219.5 UdeM00000032231 XP\_045185533.1 43.1 281  
157 3 70 349 115 393 6.50E-54 219.5 6596 cellular  
organisms;Eukaryota;Opisthokonta;Metazoa;Eumetazoa;Bilateria;Protostomia;  
Spiralia;Lophotrochozoa;Mollusca;Bivalvia;Autobranchia;Heteroconchia;Euhe  
terodonta;Imparidentia;Venerida;Veneroidea;Veneridae;Mercenaria;Mercenari  
a mercenaria

UdeM00000032232 6596 200.3 UdeM00000032232 XP\_045185533.1 40.1 279  
 161 5 37 311 116 392 3.70E-48 200.3 6596 cellular  
 organisms;Eukaryota;Opisthokonta;Metazoa;Eumetazoa;Bilateria;Protostomia;  
 Spiralia;Lophotrochozoa;Mollusca;Bivalvia;Autobranchia;Heteroconchia;Euhe  
 terodonta;Imparidentia;Venerida;Veneroidea;Veneridae;Mercenaria;Mercenari  
 a mercenaria  
 UdeM00000032233 6596 194.9 UdeM00000032233 XP\_045185533.1 37.3 279  
 172 3 85 362 116 392 1.80E-46 194.9 6596 cellular  
 organisms;Eukaryota;Opisthokonta;Metazoa;Eumetazoa;Bilateria;Protostomia;  
 Spiralia;Lophotrochozoa;Mollusca;Bivalvia;Autobranchia;Heteroconchia;Euhe  
 terodonta;Imparidentia;Venerida;Veneroidea;Veneridae;Mercenaria;Mercenari  
 a mercenaria  
 UdeM00000032234 6573 146.4 UdeM00000032234 XP\_021372692.1 43.4 166  
 88 4 16 180 155 315 4.10E-32 146.4 6573 cellular  
 organisms;Eukaryota;Opisthokonta;Metazoa;Eumetazoa;Bilateria;Protostomia;  
 Spiralia;Lophotrochozoa;Mollusca;Bivalvia;Autobranchia;Pteriormorphia;Pect  
 inida;Pectinoidea;Pectinidae;Mizuhopecten;Mizuhopecten yessoensis  
 UdeM00000032235 50390 83.6 UdeM00000032235 XP\_028130636.1 35 140  
 63 4 5 117 21 159 2.30E-13 83.6 50390 cellular  
 organisms;Eukaryota;Opisthokonta;Metazoa;Eumetazoa;Bilateria;Protostomia;  
 Ecdysozoa;Panarthropoda;Arthropoda;Mandibulata;Pancrustacea;Hexapoda;Inse  
 cta;Dicondylia;Pterygota;Neoptera;Endopterygota;Coleoptera;Polyphaga;Cucu  
 jiformia;Chrysomeloidea;Chrysomelidae;Galerucinae;Luperini;Diabroticina;D  
 iabroticites;Diabrotica;Diabrotica virgifera;Diabrotica virgifera  
 virgifera  
 UdeM00000032236 6573 84 UdeM00000032236 XP\_021379254.1 36.7 147  
 79 6 45 189 1 135 2.70E-13 84 6573 cellular  
 organisms;Eukaryota;Opisthokonta;Metazoa;Eumetazoa;Bilateria;Protostomia;  
 Spiralia;Lophotrochozoa;Mollusca;Bivalvia;Autobranchia;Pteriormorphia;Pect  
 inida;Pectinoidea;Pectinidae;Mizuhopecten;Mizuhopecten yessoensis  
 UdeM00000032237 7070 84.3 UdeM00000032237 XP\_015833605.1 37.7 114  
 66 2 3 116 2 110 1.80E-13 84.3 7070 cellular  
 organisms;Eukaryota;Opisthokonta;Metazoa;Eumetazoa;Bilateria;Protostomia;  
 Ecdysozoa;Panarthropoda;Arthropoda;Mandibulata;Pancrustacea;Hexapoda;Inse  
 cta;Dicondylia;Pterygota;Neoptera;Endopterygota;Coleoptera;Polyphaga;Cucu  
 jiformia;Tenebrionoidea;Tenebrionidae;Tenebrionidae incertae  
 sedis;Tribolium;Tribolium castaneum  
 UdeM00000032238 6596 83.6 UdeM00000032238 XP\_045178174.1 36 139  
 71 6 14 149 103 226 2.80E-13 83.6 6596 cellular  
 organisms;Eukaryota;Opisthokonta;Metazoa;Eumetazoa;Bilateria;Protostomia;  
 Spiralia;Lophotrochozoa;Mollusca;Bivalvia;Autobranchia;Heteroconchia;Euhe  
 terodonta;Imparidentia;Venerida;Veneroidea;Veneridae;Mercenaria;Mercenari  
 a mercenaria  
 UdeM00000032239 6596 194.5 UdeM00000032239 XP\_045156280.1 51.5 206  
 95 4 1 203 593 796 1.40E-46 194.5 6596 cellular  
 organisms;Eukaryota;Opisthokonta;Metazoa;Eumetazoa;Bilateria;Protostomia;  
 Spiralia;Lophotrochozoa;Mollusca;Bivalvia;Autobranchia;Heteroconchia;Euhe  
 terodonta;Imparidentia;Venerida;Veneroidea;Veneridae;Mercenaria;Mercenari  
 a mercenaria  
 UdeM00000032240 6596 65.5 UdeM00000032240 XP\_045215511.1 74.4 39  
 10 0 1 39 379 417 2.00E-08 65.5 6596 cellular  
 organisms;Eukaryota;Opisthokonta;Metazoa;Eumetazoa;Bilateria;Protostomia;  
 Spiralia;Lophotrochozoa;Mollusca;Bivalvia;Autobranchia;Heteroconchia;Euhe

terodonta;Imparidentia;Venerida;Veneroidea;Veneridae;Mercenaria;Mercenaria mercenaria  
 UdeM00000032241 6573 122.5 UdeM00000032241 XP\_021349151.1 30.4 283  
 53 2 1 139 49 331 4.40E-25 122.5 6573 cellular  
 organisms;Eukaryota;Opisthokonta;Metazoa;Eumetazoa;Bilateria;Protostomia;  
 Spiralia;Lophotrochozoa;Mollusca;Bivalvia;Autobranchia;Pteriomorpha;Pectinida;  
 Pectinoidea;Pectinidae;Mizuhopecten;Mizuhopecten yessoensis  
 UdeM00000032242 6596 108.6 UdeM00000032242 XP\_045198179.1 48.5 99  
 51 0 1 99 232 330 4.70E-21 108.6 6596 cellular  
 organisms;Eukaryota;Opisthokonta;Metazoa;Eumetazoa;Bilateria;Protostomia;  
 Spiralia;Lophotrochozoa;Mollusca;Bivalvia;Autobranchia;Heteroconchia;Euterodonta;  
 Imparidentia;Venerida;Veneroidea;Veneridae;Mercenaria;Mercenaria mercenaria  
 UdeM00000032243 7070 89.7 UdeM00000032243 XP\_015833605.1 32.6 141  
 85 4 3 137 2 138 4.10E-15 89.7 7070 cellular  
 organisms;Eukaryota;Opisthokonta;Metazoa;Eumetazoa;Bilateria;Protostomia;  
 Ecdysozoa;Panarthropoda;Arthropoda;Mandibulata;Pancrustacea;Hexapoda;Insecta;  
 Dicondylia;Pterygota;Neoptera;Endopterygota;Coleoptera;Polyphaga;Cucujiformia;  
 Tenebrionoidea;Tenebrionidae;Tenebrionidae incertae sedis;Tribolium;Tribolium castaneum  
 UdeM00000032244 29159 137.1 UdeM00000032244 XP\_034299474.1 38.9 208  
 95 3 3 183 239 441 2.30E-29 137.1 29159 cellular  
 organisms;Eukaryota;Opisthokonta;Metazoa;Eumetazoa;Bilateria;Protostomia;  
 Spiralia;Lophotrochozoa;Mollusca;Bivalvia;Autobranchia;Pteriomorpha;Ostreida;  
 Ostreidae;Crassostrea;Crassostrea gigas  
 UdeM00000032246 6565 120.6 UdeM00000032246 XP\_022290343.1 37.1 175  
 109 1 1 175 126 299 2.10E-24 120.6 6565 cellular  
 organisms;Eukaryota;Opisthokonta;Metazoa;Eumetazoa;Bilateria;Protostomia;  
 Spiralia;Lophotrochozoa;Mollusca;Bivalvia;Autobranchia;Pteriomorpha;Ostreida;  
 Ostreidae;Crassostrea;Crassostrea virginica  
 UdeM00000032247 6573 85.5 UdeM00000032247 XP\_021379254.1 34.5 145  
 84 4 66 209 1 135 9.90E-14 85.5 6573 cellular  
 organisms;Eukaryota;Opisthokonta;Metazoa;Eumetazoa;Bilateria;Protostomia;  
 Spiralia;Lophotrochozoa;Mollusca;Bivalvia;Autobranchia;Pteriomorpha;Pectinida;  
 Pectinoidea;Pectinidae;Mizuhopecten;Mizuhopecten yessoensis  
 UdeM00000032248 7070 89.7 UdeM00000032248 XP\_015833605.1 32.6 141  
 85 4 3 137 2 138 4.10E-15 89.7 7070 cellular  
 organisms;Eukaryota;Opisthokonta;Metazoa;Eumetazoa;Bilateria;Protostomia;  
 Ecdysozoa;Panarthropoda;Arthropoda;Mandibulata;Pancrustacea;Hexapoda;Insecta;  
 Dicondylia;Pterygota;Neoptera;Endopterygota;Coleoptera;Polyphaga;Cucujiformia;  
 Tenebrionoidea;Tenebrionidae;Tenebrionidae incertae sedis;Tribolium;Tribolium castaneum  
 UdeM00000032249 29159 205.7 UdeM00000032249 XP\_034299474.1 38.6 290  
 145 4 61 322 157 441 9.00E-50 205.7 29159 cellular  
 organisms;Eukaryota;Opisthokonta;Metazoa;Eumetazoa;Bilateria;Protostomia;  
 Spiralia;Lophotrochozoa;Mollusca;Bivalvia;Autobranchia;Pteriomorpha;Ostreida;  
 Ostreidae;Crassostrea;Crassostrea gigas  
 UdeM00000032251 6565 120.6 UdeM00000032251 XP\_022290343.1 37.1 175  
 109 1 1 175 126 299 2.10E-24 120.6 6565 cellular  
 organisms;Eukaryota;Opisthokonta;Metazoa;Eumetazoa;Bilateria;Protostomia;  
 Spiralia;Lophotrochozoa;Mollusca;Bivalvia;Autobranchia;Pteriomorpha;Ostreida;  
 Ostreidae;Crassostrea;Crassostrea virginica  
 UdeM00000032252 6573 85.5 UdeM00000032252 XP\_021379254.1 34.5 145  
 84 4 31 174 1 135 8.40E-14 85.5 6573 cellular



organisms;Eukaryota;Opisthokonta;Metazoa;Eumetazoa;Bilateria;Protostomia;Spiralia;Lophotrochozoa;Mollusca;Bivalvia;Autobranhia;Pteriormorphia;Pectinida;Pectinoidea;Pectinidae;Mizuhopecten;Mizuhopecten yessoensis  
UdeM00000032253 6596 328.9 UdeM00000032253 XP\_045178625.1 78.2 193  
41 1 1066 1258 174 365 2.70E-86 328.9 6596 cellular

organisms;Eukaryota;Opisthokonta;Metazoa;Eumetazoa;Bilateria;Protostomia;Spiralia;Lophotrochozoa;Mollusca;Bivalvia;Autobranhia;Heteroconchia;Euheterodonta;Imparidentia;Venerida;Veneroidea;Veneridae;Mercenaria;Mercenaria mercenaria  
UdeM00000032254 6596 717.2 UdeM00000032254 XP\_045177687.1 80.6 463  
88 2 1 463 1 461 1.50E-203 717.2 6596 cellular

organisms;Eukaryota;Opisthokonta;Metazoa;Eumetazoa;Bilateria;Protostomia;Spiralia;Lophotrochozoa;Mollusca;Bivalvia;Autobranhia;Heteroconchia;Euheterodonta;Imparidentia;Venerida;Veneroidea;Veneridae;Mercenaria;Mercenaria mercenaria  
UdeM00000032255 6579 290 UdeM00000032255 XP\_033757668.1 42.3 381  
210 7 1 375 334 710 4.30E-75 290 6579 cellular

organisms;Eukaryota;Opisthokonta;Metazoa;Eumetazoa;Bilateria;Protostomia;Spiralia;Lophotrochozoa;Mollusca;Bivalvia;Autobranhia;Pteriormorphia;Pectinida;Pectinoidea;Pectinidae;Pecten;Pecten maximus  
UdeM00000032256 6573 162.2 UdeM00000032256 XP\_021351643.1 46.1 167  
82 4 108 274 143 301 9.90E-37 162.2 6573 cellular

organisms;Eukaryota;Opisthokonta;Metazoa;Eumetazoa;Bilateria;Protostomia;Spiralia;Lophotrochozoa;Mollusca;Bivalvia;Autobranhia;Pteriormorphia;Pectinida;Pectinoidea;Pectinidae;Mizuhopecten;Mizuhopecten yessoensis  
UdeM00000032257 7574 79 UdeM00000032257 XP\_013401006.1 60.6 66  
26 0 19 84 422 487 4.60E-12 79 7574 cellular

organisms;Eukaryota;Opisthokonta;Metazoa;Eumetazoa;Bilateria;Protostomia;Spiralia;Lophotrochozoa;Brachiopoda;Linguliformea;Lingulata;Lingulida;Linguloidea;Lingulidae;Lingula;Lingula anatina  
UdeM00000032258 7370 60.8 UdeM00000032258 XP\_005175168.1 45.8 59  
30 1 41 97 630 688 1.10E-06 60.8 7370 cellular

organisms;Eukaryota;Opisthokonta;Metazoa;Eumetazoa;Bilateria;Protostomia;Ecdysozoa;Panarthropoda;Arthropoda;Mandibulata;Pancrustacea;Hexapoda;Insecta;Dicondylia;Pterygota;Neoptera;Endopterygota;Diptera;Brachycera;Muscomorpha;Eremoneura;Cyclorrhapha;Schizophora;Calyptratae;Muscoidea;Muscidae;Muscinae;Muscini;Musca;Musca;Musca domestica  
UdeM00000032259 7574 104 UdeM00000032259 XP\_013396733.1 36.4 187  
95 3 5 167 60 246 1.90E-19 104 7574 cellular

organisms;Eukaryota;Opisthokonta;Metazoa;Eumetazoa;Bilateria;Protostomia;Spiralia;Lophotrochozoa;Brachiopoda;Linguliformea;Lingulata;Lingulida;Linguloidea;Lingulidae;Lingula;Lingula anatina  
UdeM00000032260 6573 400.2 UdeM00000032260 XP\_021351643.1 41.4 539  
284 15 105 629 143 663 4.80E-108 400.2 6573 cellular

organisms;Eukaryota;Opisthokonta;Metazoa;Eumetazoa;Bilateria;Protostomia;Spiralia;Lophotrochozoa;Mollusca;Bivalvia;Autobranhia;Pteriormorphia;Pectinida;Pectinoidea;Pectinidae;Mizuhopecten;Mizuhopecten yessoensis  
UdeM00000032261 6596 163.7 UdeM00000032261 XP\_045170578.1 34.5 275  
146 7 14 258 28 298 3.30E-37 163.7 6596 cellular

organisms;Eukaryota;Opisthokonta;Metazoa;Eumetazoa;Bilateria;Protostomia;Spiralia;Lophotrochozoa;Mollusca;Bivalvia;Autobranhia;Heteroconchia;Euheterodonta;Imparidentia;Venerida;Veneroidea;Veneridae;Mercenaria;Mercenaria mercenaria

UdeM00000032262 29159 969.5 UdeM00000032262 XP\_034301291.1 41.7 1386  
 656 32 90 1376 86 1418 4.80E-279 969.5 29159 cellular  
 organisms;Eukaryota;Opisthokonta;Metazoa;Eumetazoa;Bilateria;Protostomia;  
 Spiralia;Lophotrochozoa;Mollusca;Bivalvia;Autobranhia;Pteriormorphia;Ostr  
 eida;Ostreoidea;Ostreidae;Crassostrea;Crassostrea gigas  
 UdeM00000032263 6579 989.9 UdeM00000032263 XP\_033728979.1 42.9 1348  
 652 28 99 1366 70 1379 3.40E-285 989.9 6579 cellular  
 organisms;Eukaryota;Opisthokonta;Metazoa;Eumetazoa;Bilateria;Protostomia;  
 Spiralia;Lophotrochozoa;Mollusca;Bivalvia;Autobranhia;Pteriormorphia;Pect  
 inida;Pectinoidea;Pectinidae;Pecten;Pecten maximus  
 UdeM00000032264 29159 297.7 UdeM00000032264 XP\_034301296.1 34.7 556  
 307 16 103 619 155 693 3.30E-77 297.7 29159 cellular  
 organisms;Eukaryota;Opisthokonta;Metazoa;Eumetazoa;Bilateria;Protostomia;  
 Spiralia;Lophotrochozoa;Mollusca;Bivalvia;Autobranhia;Pteriormorphia;Ostr  
 eida;Ostreoidea;Ostreidae;Crassostrea;Crassostrea gigas  
 UdeM00000032265 29159 666.8 UdeM00000032265 XP\_034301291.1 52.9 677  
 264 10 1 635 755 1418 3.30E-188 666.8 29159 cellular  
 organisms;Eukaryota;Opisthokonta;Metazoa;Eumetazoa;Bilateria;Protostomia;  
 Spiralia;Lophotrochozoa;Mollusca;Bivalvia;Autobranhia;Pteriormorphia;Ostr  
 eida;Ostreoidea;Ostreidae;Crassostrea;Crassostrea gigas  
 UdeM00000032266 6596 96.3 UdeM00000032266 XP\_045170578.1 40.9 132  
 61 3 1 118 170 298 3.10E-17 96.3 6596 cellular  
 organisms;Eukaryota;Opisthokonta;Metazoa;Eumetazoa;Bilateria;Protostomia;  
 Spiralia;Lophotrochozoa;Mollusca;Bivalvia;Autobranhia;Heteroconchia;Euhe  
 terodonta;Imparidentia;Venerida;Veneroidea;Veneridae;Mercenaria;Mercenari  
 a mercenaria  
 UdeM00000032267 6573 78.2 UdeM00000032267 XP\_021353546.1 45.3 86  
 45 2 30 113 43 128 8.10E-12 78.2 6573 cellular  
 organisms;Eukaryota;Opisthokonta;Metazoa;Eumetazoa;Bilateria;Protostomia;  
 Spiralia;Lophotrochozoa;Mollusca;Bivalvia;Autobranhia;Pteriormorphia;Pect  
 inida;Pectinoidea;Pectinidae;Mizuhopecten;Mizuhopecten yessoensis  
 UdeM00000032268 29159 268.5 UdeM00000032268 XP\_034301296.1 31.4 548  
 323 15 29 551 54 573 2.80E-68 268.5 29159 cellular  
 organisms;Eukaryota;Opisthokonta;Metazoa;Eumetazoa;Bilateria;Protostomia;  
 Spiralia;Lophotrochozoa;Mollusca;Bivalvia;Autobranhia;Pteriormorphia;Ostr  
 eida;Ostreoidea;Ostreidae;Crassostrea;Crassostrea gigas  
 UdeM00000032269 6596 771.2 UdeM00000032269 XP\_045180107.1 50.7 864  
 339 18 26 825 625 1465 1.50E-219 771.2 6596 cellular  
 organisms;Eukaryota;Opisthokonta;Metazoa;Eumetazoa;Bilateria;Protostomia;  
 Spiralia;Lophotrochozoa;Mollusca;Bivalvia;Autobranhia;Heteroconchia;Euhe  
 terodonta;Imparidentia;Venerida;Veneroidea;Veneridae;Mercenaria;Mercenari  
 a mercenaria  
 UdeM00000032270 6565 553.1 UdeM00000032270 XP\_022345479.1 43.1 787  
 415 16 51 817 53 826 6.50E-154 553.1 6565 cellular  
 organisms;Eukaryota;Opisthokonta;Metazoa;Eumetazoa;Bilateria;Protostomia;  
 Spiralia;Lophotrochozoa;Mollusca;Bivalvia;Autobranhia;Pteriormorphia;Ostr  
 eida;Ostreoidea;Ostreidae;Crassostrea;Crassostrea virginica  
 UdeM00000032273 45264 202.6 UdeM00000032273 XP\_029214501.2 40.2 234  
 140 0 17 250 335 568 8.80E-49 202.6 45264 cellular  
 organisms;Eukaryota;Opisthokonta;Metazoa;Eumetazoa;Cnidaria;Anthozoa;Hexa  
 corallia;Scleractinia;Astrocoeniina;Acroporidae;Acropora;Acropora  
 millepora  
 UdeM00000032274 7054 141.4 UdeM00000032274 XP\_031355375.1 39.6 197  
 109 3 8 203 2 189 1.40E-30 141.4 7054 cellular

organisms;Eukaryota;Opisthokonta;Metazoa;Eumetazoa;Bilateria;Protostomia;Ecdysozoa;Panarthropoda;Arthropoda;Mandibulata;Pancrustacea;Hexapoda;Insecta;Dicondylia;Pterygota;Neoptera;Endopterygota;Coleoptera;Polyphaga;Elateriformia;Elateroidea;Lampyridae;Lampyrinae;Photinus;Photinus pyralis  
UdeM00000032275 6579 270 UdeM00000032275 XP\_033728071.1 35.9 376  
224 6 9 384 25 383 4.60E-69 270 6579 cellular  
organisms;Eukaryota;Opisthokonta;Metazoa;Eumetazoa;Bilateria;Protostomia;Spiralia;Lophotrochozoa;Mollusca;Bivalvia;Autobranhia;Pteriormorphia;Pectinida;Pectinoidea;Pectinidae;Pecten;Pecten maximus  
UdeM00000032276 6596 190.3 UdeM00000032276 XP\_045159271.1 33.3 457  
261 18 440 878 869 1299 1.10E-44 190.3 6596 cellular  
organisms;Eukaryota;Opisthokonta;Metazoa;Eumetazoa;Bilateria;Protostomia;Spiralia;Lophotrochozoa;Mollusca;Bivalvia;Autobranhia;Heteroconchia;Euheterodonta;Imparidentia;Venerida;Veneroidea;Veneridae;Mercenaria;Mercenaria mercenaria  
UdeM00000032277 6596 183.7 UdeM00000032277 XP\_045159271.1 33.4 458  
260 19 441 880 869 1299 1.00E-42 183.7 6596 cellular  
organisms;Eukaryota;Opisthokonta;Metazoa;Eumetazoa;Bilateria;Protostomia;Spiralia;Lophotrochozoa;Mollusca;Bivalvia;Autobranhia;Heteroconchia;Euheterodonta;Imparidentia;Venerida;Veneroidea;Veneridae;Mercenaria;Mercenaria mercenaria  
UdeM00000032278 6573 138.3 UdeM00000032278 XP\_021367842.1 35 337  
169 16 2 317 129 436 1.80E-29 138.3 6573 cellular  
organisms;Eukaryota;Opisthokonta;Metazoa;Eumetazoa;Bilateria;Protostomia;Spiralia;Lophotrochozoa;Mollusca;Bivalvia;Autobranhia;Pteriormorphia;Pectinida;Pectinoidea;Pectinidae;Mizuhopecten;Mizuhopecten yessoensis  
UdeM00000032279 6596 74.7 UdeM00000032279 XP\_045158122.1 32.2 152  
91 5 2 150 42 184 1.30E-10 74.7 6596 cellular  
organisms;Eukaryota;Opisthokonta;Metazoa;Eumetazoa;Bilateria;Protostomia;Spiralia;Lophotrochozoa;Mollusca;Bivalvia;Autobranhia;Heteroconchia;Euheterodonta;Imparidentia;Venerida;Veneroidea;Veneridae;Mercenaria;Mercenaria mercenaria  
UdeM00000032280 6526 62.8 UdeM00000032280 XP\_013079198.1 24 225  
136 3 128 329 296 508 1.10E-06 62.8 6526 cellular  
organisms;Eukaryota;Opisthokonta;Metazoa;Eumetazoa;Bilateria;Protostomia;Spiralia;Lophotrochozoa;Mollusca;Gastropoda;Heterobranhia;Euthyneura;Pulmonata;Hygrophila;Lymnaeioidea;Planorbidae;Biophalaria;Biophalaria glabrata  
UdeM00000032281 6596 181 UdeM00000032281 XP\_045159271.1 31.8 515  
297 21 158 654 821 1299 4.90E-42 181 6596 cellular  
organisms;Eukaryota;Opisthokonta;Metazoa;Eumetazoa;Bilateria;Protostomia;Spiralia;Lophotrochozoa;Mollusca;Bivalvia;Autobranhia;Heteroconchia;Euheterodonta;Imparidentia;Venerida;Veneroidea;Veneridae;Mercenaria;Mercenaria mercenaria  
UdeM00000032282 8153 154.8 UdeM00000032282 XP\_005952062.1 37.4 257  
142 7 26 273 198 444 1.60E-34 154.8 8153 cellular  
organisms;Eukaryota;Opisthokonta;Metazoa;Eumetazoa;Bilateria;Deuterostomia;Chordata;Craniata;Vertebrata;Gnathostomata;Teleostomi;Euteleostomi;Actinopterygii;Actinopteri;Neopterygii;Teleostei;Osteoglossocephalai;Clupeocephala;Euteleostei;Neoteleostei;Eurypterygia;Ctenosquamata;Acanthopterygii;Euacanthopterygii;Percomorphaceae;Ovalentaria;Cichlomorphae;Cichliformes;Cichlidae;African cichlids;Pseudocrenilabrinae;Haplochromini;Haplochromis;Haplochromis burtoni

UdeM00000032283 34773 100.1 UdeM00000032283 XP\_041960873.1 49.6 113  
 51 2 3 111 261 371 1.90E-18 100.1 34773 cellular  
 organisms;Eukaryota;Opisthokonta;Metazoa;Eumetazoa;Bilateria;Deuterostomi  
 a;Chordata;Craniata;Vertebrata;Gnathostomata;Teleostomi;Euteleostomi;Acti  
 nopterygii;Actinopteri;Neopterygii;Teleostei;Osteoglossocephalai;Clupeoce  
 phala;Otomorpha;Clupei;Clupeiformes;Clupeoidei;Clupeidae;Alosinae;Alosa;A  
 losa sapidissima  
 UdeM00000032284 6596 75.5 UdeM00000032284 XP\_045176315.1 26.6 267  
 162 11 16 270 311 555 1.50E-10 75.5 6596 cellular  
 organisms;Eukaryota;Opisthokonta;Metazoa;Eumetazoa;Bilateria;Protostomia;  
 Spiralia;Lophotrochozoa;Mollusca;Bivalvia;Autobranchia;Heteroconchia;Euhe  
 terodonta;Imparidentia;Venerida;Veneroidea;Veneridae;Mercenaria;Mercenari  
 a mercenaria  
 UdeM00000032285 6579 193.4 UdeM00000032285 XP\_033731328.1 48.8 207  
 93 3 124 317 97 303 4.90E-46 193.4 6579 cellular  
 organisms;Eukaryota;Opisthokonta;Metazoa;Eumetazoa;Bilateria;Protostomia;  
 Spiralia;Lophotrochozoa;Mollusca;Bivalvia;Autobranchia;Pteriormorphia;Pect  
 inida;Pectinoidea;Pectinidae;Pecten;Pecten maximus  
 UdeM00000032286 6573 70.9 UdeM00000032286 XP\_021375193.1 35.4 144  
 83 4 1 136 202 343 1.50E-09 70.9 6573 cellular  
 organisms;Eukaryota;Opisthokonta;Metazoa;Eumetazoa;Bilateria;Protostomia;  
 Spiralia;Lophotrochozoa;Mollusca;Bivalvia;Autobranchia;Pteriormorphia;Pect  
 inida;Pectinoidea;Pectinidae;Mizuhopecten;Mizuhopecten yessoensis  
 UdeM00000032288 6579 500 UdeM00000032288 XP\_033729024.1 59.8 455  
 122 3 1 452 79 475 3.20E-138 500 6579 cellular  
 organisms;Eukaryota;Opisthokonta;Metazoa;Eumetazoa;Bilateria;Protostomia;  
 Spiralia;Lophotrochozoa;Mollusca;Bivalvia;Autobranchia;Pteriormorphia;Pect  
 inida;Pectinoidea;Pectinidae;Pecten;Pecten maximus  
 UdeM00000032289 50429 63.2 UdeM00000032289 XP\_022779123.1 41.5 65  
 38 0 161 225 92 156 5.70E-07 63.2 50429 cellular  
 organisms;Eukaryota;Opisthokonta;Metazoa;Eumetazoa;Cnidaria;Anthozoa;Hexa  
 corallia;Scleractinia;Astrocoeniina;Pocilloporidae;Stylophora;Stylophora  
 pistillata  
 UdeM00000032291 7888 108.2 UdeM00000032291 XP\_043940009.1 37.6 133  
 83 0 1 133 815 947 8.20E-21 108.2 7888 cellular  
 organisms;Eukaryota;Opisthokonta;Metazoa;Eumetazoa;Bilateria;Deuterostomi  
 a;Chordata;Craniata;Vertebrata;Gnathostomata;Teleostomi;Euteleostomi;Sarc  
 opterygii;Dipnotetrapodomorpha;Dipnomorpha;Ceratomontae;Ceratomontiformes  
 ;Lepidosirenoidei;Protopterygidae;Protopterus;Protopterus annectens  
 UdeM00000032292 6596 93.6 UdeM00000032292 XP\_045184450.1 42.5 113  
 65 0 2 114 68 180 1.80E-16 93.6 6596 cellular  
 organisms;Eukaryota;Opisthokonta;Metazoa;Eumetazoa;Bilateria;Protostomia;  
 Spiralia;Lophotrochozoa;Mollusca;Bivalvia;Autobranchia;Heteroconchia;Euhe  
 terodonta;Imparidentia;Venerida;Veneroidea;Veneridae;Mercenaria;Mercenari  
 a mercenaria  
 UdeM00000032293 6565 104.4 UdeM00000032293 XP\_022325739.1 42.9 119  
 66 1 14 132 370 486 1.40E-19 104.4 6565 cellular  
 organisms;Eukaryota;Opisthokonta;Metazoa;Eumetazoa;Bilateria;Protostomia;  
 Spiralia;Lophotrochozoa;Mollusca;Bivalvia;Autobranchia;Pteriormorphia;Ostr  
 eida;Ostreidae;Crassostrea;Crassostrea virginica  
 UdeM00000032294 6565 92.4 UdeM00000032294 XP\_022325739.1 27.3 322  
 123 7 40 260 56 367 9.20E-16 92.4 6565 cellular  
 organisms;Eukaryota;Opisthokonta;Metazoa;Eumetazoa;Bilateria;Protostomia;

Spiralia;Lophotrochozoa;Mollusca;Bivalvia;Autobranchia;Pteriormorphia;Ostr  
 eida;Ostreoidea;Ostreidae;Crassostrea;Crassostrea virginica  
 UdeM00000032295 29159 931.8 UdeM00000032295 XP\_011421703.2 49.9 925  
 449 5 81 1004 28 939 7.40E-268 931.8 29159 cellular  
 organisms;Eukaryota;Opisthokonta;Metazoa;Eumetazoa;Bilateria;Protostomia;  
 Spiralia;Lophotrochozoa;Mollusca;Bivalvia;Autobranchia;Pteriormorphia;Ostr  
 eida;Ostreoidea;Ostreidae;Crassostrea;Crassostrea gigas  
 UdeM00000032296 6573 826.2 UdeM00000032296 XP\_021350145.1 45.4 923  
 491 7 87 1005 18 931 4.40E-236 826.2 6573 cellular  
 organisms;Eukaryota;Opisthokonta;Metazoa;Eumetazoa;Bilateria;Protostomia;  
 Spiralia;Lophotrochozoa;Mollusca;Bivalvia;Autobranchia;Pteriormorphia;Pect  
 inida;Pectinoidea;Pectinidae;Mizuhopecten;Mizuhopecten yessoensis  
 UdeM00000032298 29159 761.5 UdeM00000032298 XP\_011421703.2 46.9 826  
 426 4 1 826 127 939 1.10E-216 761.5 29159 cellular  
 organisms;Eukaryota;Opisthokonta;Metazoa;Eumetazoa;Bilateria;Protostomia;  
 Spiralia;Lophotrochozoa;Mollusca;Bivalvia;Autobranchia;Pteriormorphia;Ostr  
 eida;Ostreoidea;Ostreidae;Crassostrea;Crassostrea gigas  
 UdeM00000032297 29159 868.6 UdeM00000032297 XP\_011421703.2 46.9 944  
 482 7 59 1000 13 939 7.60E-249 868.6 29159 cellular  
 organisms;Eukaryota;Opisthokonta;Metazoa;Eumetazoa;Bilateria;Protostomia;  
 Spiralia;Lophotrochozoa;Mollusca;Bivalvia;Autobranchia;Pteriormorphia;Ostr  
 eida;Ostreoidea;Ostreidae;Crassostrea;Crassostrea gigas  
 UdeM00000032299 29159 854 UdeM00000032299 XP\_011421703.2 46.3 922  
 481 5 28 948 32 940 1.80E-244 854 29159 cellular  
 organisms;Eukaryota;Opisthokonta;Metazoa;Eumetazoa;Bilateria;Protostomia;  
 Spiralia;Lophotrochozoa;Mollusca;Bivalvia;Autobranchia;Pteriormorphia;Ostr  
 eida;Ostreoidea;Ostreidae;Crassostrea;Crassostrea gigas  
 UdeM00000032300 6579 320.5 UdeM00000032300 XP\_033748001.1 41 376  
 211 4 9 382 8 374 3.00E-84 320.5 6579 cellular  
 organisms;Eukaryota;Opisthokonta;Metazoa;Eumetazoa;Bilateria;Protostomia;  
 Spiralia;Lophotrochozoa;Mollusca;Bivalvia;Autobranchia;Pteriormorphia;Pect  
 inida;Pectinoidea;Pectinidae;Pecten;Pecten maximus  
 UdeM00000032301 6579 278.5 UdeM00000032301 XP\_033748001.1 38 374  
 204 5 11 365 10 374 1.20E-71 278.5 6579 cellular  
 organisms;Eukaryota;Opisthokonta;Metazoa;Eumetazoa;Bilateria;Protostomia;  
 Spiralia;Lophotrochozoa;Mollusca;Bivalvia;Autobranchia;Pteriormorphia;Pect  
 inida;Pectinoidea;Pectinidae;Pecten;Pecten maximus  
 UdeM00000032302 7574 179.1 UdeM00000032302 XP\_013384628.1 68 125  
 38 1 1 125 33 155 3.70E-42 179.1 7574 cellular  
 organisms;Eukaryota;Opisthokonta;Metazoa;Eumetazoa;Bilateria;Protostomia;  
 Spiralia;Lophotrochozoa;Brachiopoda;Linguliformea;Lingulata;Lingulida;Lin  
 guloidea;Lingulidae;Lingula;Lingula anatina  
 UdeM00000032303 7574 187.6 UdeM00000032303 XP\_013384628.1 59 161  
 57 2 1 161 33 184 1.60E-44 187.6 7574 cellular  
 organisms;Eukaryota;Opisthokonta;Metazoa;Eumetazoa;Bilateria;Protostomia;  
 Spiralia;Lophotrochozoa;Brachiopoda;Linguliformea;Lingulata;Lingulida;Lin  
 guloidea;Lingulidae;Lingula;Lingula anatina  
 UdeM00000032304 7574 455.7 UdeM00000032304 XP\_013382110.1 46.6 496  
 241 7 1 492 37 512 7.60E-125 455.7 7574 cellular  
 organisms;Eukaryota;Opisthokonta;Metazoa;Eumetazoa;Bilateria;Protostomia;  
 Spiralia;Lophotrochozoa;Brachiopoda;Linguliformea;Lingulata;Lingulida;Lin  
 guloidea;Lingulidae;Lingula;Lingula anatina  
 UdeM00000032305 6565 852.4 UdeM00000032305 XP\_022325739.1 47.3 934  
 474 8 33 962 21 940 5.40E-244 852.4 6565 cellular

organisms;Eukaryota;Opisthokonta;Metazoa;Eumetazoa;Bilateria;Protostomia;  
Spiralia;Lophotrochozoa;Mollusca;Bivalvia;Autobranchia;Pteriomorpha;Ostr  
eida;Ostreoidea;Ostreidae;Crassostrea;Crassostrea virginica  
UdeM00000032306 6565 940.6 UdeM00000032306 XP\_022325739.1 51 926  
439 7 125 1048 28 940 1.70E-270 940.6 6565 cellular  
organisms;Eukaryota;Opisthokonta;Metazoa;Eumetazoa;Bilateria;Protostomia;  
Spiralia;Lophotrochozoa;Mollusca;Bivalvia;Autobranchia;Pteriomorpha;Ostr  
eida;Ostreoidea;Ostreidae;Crassostrea;Crassostrea virginica  
UdeM00000032307 29159 937.6 UdeM00000032307 XP\_011421703.2 49.8 928  
447 7 111 1035 28 939 1.40E-269 937.6 29159 cellular  
organisms;Eukaryota;Opisthokonta;Metazoa;Eumetazoa;Bilateria;Protostomia;  
Spiralia;Lophotrochozoa;Mollusca;Bivalvia;Autobranchia;Pteriomorpha;Ostr  
eida;Ostreoidea;Ostreidae;Crassostrea;Crassostrea gigas  
UdeM00000032308 29159 107.1 UdeM00000032308 XP\_011421703.2 54.9 91  
40 1 111 200 28 118 3.00E-20 107.1 29159 cellular  
organisms;Eukaryota;Opisthokonta;Metazoa;Eumetazoa;Bilateria;Protostomia;  
Spiralia;Lophotrochozoa;Mollusca;Bivalvia;Autobranchia;Pteriomorpha;Ostr  
eida;Ostreoidea;Ostreidae;Crassostrea;Crassostrea gigas  
UdeM00000032309 29159 110.5 UdeM00000032309 XP\_011421703.2 55.4 92  
40 1 106 196 28 119 2.40E-21 110.5 29159 cellular  
organisms;Eukaryota;Opisthokonta;Metazoa;Eumetazoa;Bilateria;Protostomia;  
Spiralia;Lophotrochozoa;Mollusca;Bivalvia;Autobranchia;Pteriomorpha;Ostr  
eida;Ostreoidea;Ostreidae;Crassostrea;Crassostrea gigas  
UdeM00000032310 225164 334 UdeM00000032310 XP\_009067107.1 95.2  
165 8 0 1 165 1 165 1.10E-88 334 225164  
cellular  
organisms;Eukaryota;Opisthokonta;Metazoa;Eumetazoa;Bilateria;Protostomia;  
Spiralia;Lophotrochozoa;Mollusca;Gastropoda;Patellogastropoda;Lottioidea;  
Lottiidae;Lottia;Lottia gigantea  
UdeM00000032311 1735272 1968.4 UdeM00000032311 XP\_041374336.1  
74.9 1288 308 8 10 1293 7 1283 0.00E+00 1968.4  
1735272 cellular  
organisms;Eukaryota;Opisthokonta;Metazoa;Eumetazoa;Bilateria;Protostomia;  
Spiralia;Lophotrochozoa;Mollusca;Gastropoda;Neomphalina;Neomphaloidea;Pel  
tospiridae;Gigantopelta;Gigantopelta aegis  
UdeM00000032312 29159 447.2 UdeM00000032312 XP\_011426440.2 38.9 666  
372 16 40 690 46 691 3.90E-122 447.2 29159 cellular  
organisms;Eukaryota;Opisthokonta;Metazoa;Eumetazoa;Bilateria;Protostomia;  
Spiralia;Lophotrochozoa;Mollusca;Bivalvia;Autobranchia;Pteriomorpha;Ostr  
eida;Ostreoidea;Ostreidae;Crassostrea;Crassostrea gigas  
UdeM00000032313 6596 756.1 UdeM00000032313 XP\_045180123.1 89.8 402  
40 1 32 432 26 427 2.40E-215 756.1 6596 cellular  
organisms;Eukaryota;Opisthokonta;Metazoa;Eumetazoa;Bilateria;Protostomia;  
Spiralia;Lophotrochozoa;Mollusca;Bivalvia;Autobranchia;Heteroconchia;Euhe  
terodonta;Imparidentia;Venerida;Veneroidea;Veneridae;Mercenaria;Mercenari  
a mercenaria  
UdeM00000032314 6596 448 UdeM00000032314 XP\_045178488.1 58.7 445  
157 12 1 435 1 428 1.40E-122 448 6596 cellular  
organisms;Eukaryota;Opisthokonta;Metazoa;Eumetazoa;Bilateria;Protostomia;  
Spiralia;Lophotrochozoa;Mollusca;Bivalvia;Autobranchia;Heteroconchia;Euhe  
terodonta;Imparidentia;Venerida;Veneroidea;Veneridae;Mercenaria;Mercenari  
a mercenaria  
UdeM00000032315 6596 107.1 UdeM00000032315 XP\_045169960.1 25 280  
194 6 563 832 326 599 1.10E-19 107.1 6596 cellular

organisms;Eukaryota;Opisthokonta;Metazoa;Eumetazoa;Bilateria;Protostomia;Spiralia;Lophotrochozoa;Mollusca;Bivalvia;Autobranchia;Heteroconchia;Euherodonta;Imparidentia;Venerida;Veneroidea;Veneridae;Mercenaria;Mercenaria mercenaria

|                 |      |        |                 |                |      |     |          |        |      |
|-----------------|------|--------|-----------------|----------------|------|-----|----------|--------|------|
| UdeM00000032316 | 6596 | 1152.1 | UdeM00000032316 | XP_045178603.1 | 68.8 |     |          |        |      |
| 779             | 235  | 5      | 19              | 792            | 11   | 786 | 0.00E+00 | 1152.1 | 6596 |

cellular

organisms;Eukaryota;Opisthokonta;Metazoa;Eumetazoa;Bilateria;Protostomia;Spiralia;Lophotrochozoa;Mollusca;Bivalvia;Autobranchia;Heteroconchia;Euherodonta;Imparidentia;Venerida;Veneroidea;Veneridae;Mercenaria;Mercenaria mercenaria

|                 |       |       |                 |                |      |          |       |       |          |
|-----------------|-------|-------|-----------------|----------------|------|----------|-------|-------|----------|
| UdeM00000032317 | 29159 | 255.8 | UdeM00000032317 | XP_034316161.1 | 43.6 | 291      |       |       |          |
| 163             | 1     | 1     | 290             | 718            | 1008 | 6.80E-65 | 255.8 | 29159 | cellular |

organisms;Eukaryota;Opisthokonta;Metazoa;Eumetazoa;Bilateria;Protostomia;Spiralia;Lophotrochozoa;Mollusca;Bivalvia;Autobranchia;Pteriomorphia;Ostreida;Ostreoidea;Ostreidae;Crassostrea;Crassostrea gigas

|                 |      |        |                 |                |      |      |          |        |      |
|-----------------|------|--------|-----------------|----------------|------|------|----------|--------|------|
| UdeM00000032318 | 6579 | 1161.7 | UdeM00000032318 | XP_033727870.1 | 46.6 |      |          |        |      |
| 1668            | 541  | 25     | 110             | 1731           | 68   | 1432 | 0.00E+00 | 1161.7 | 6579 |

cellular

organisms;Eukaryota;Opisthokonta;Metazoa;Eumetazoa;Bilateria;Protostomia;Spiralia;Lophotrochozoa;Mollusca;Bivalvia;Autobranchia;Pteriomorphia;Pectinida;Pectinoidea;Pectinidae;Pecten;Pecten maximus

|                 |      |       |                 |                |      |          |       |      |          |
|-----------------|------|-------|-----------------|----------------|------|----------|-------|------|----------|
| UdeM00000032319 | 6596 | 340.9 | UdeM00000032319 | XP_045177648.1 | 54.6 | 284      |       |      |          |
| 123             | 3    | 15    | 295             | 13             | 293  | 1.60E-90 | 340.9 | 6596 | cellular |

organisms;Eukaryota;Opisthokonta;Metazoa;Eumetazoa;Bilateria;Protostomia;Spiralia;Lophotrochozoa;Mollusca;Bivalvia;Autobranchia;Heteroconchia;Euherodonta;Imparidentia;Venerida;Veneroidea;Veneridae;Mercenaria;Mercenaria mercenaria

|                 |      |       |                 |                |      |          |       |      |          |
|-----------------|------|-------|-----------------|----------------|------|----------|-------|------|----------|
| UdeM00000032320 | 6596 | 262.3 | UdeM00000032320 | XP_045177648.1 | 43.4 | 295      |       |      |          |
| 151             | 5    | 1     | 284             | 1              | 290  | 7.30E-67 | 262.3 | 6596 | cellular |

organisms;Eukaryota;Opisthokonta;Metazoa;Eumetazoa;Bilateria;Protostomia;Spiralia;Lophotrochozoa;Mollusca;Bivalvia;Autobranchia;Heteroconchia;Euherodonta;Imparidentia;Venerida;Veneroidea;Veneridae;Mercenaria;Mercenaria mercenaria

|                 |      |       |                 |                |      |          |       |      |          |
|-----------------|------|-------|-----------------|----------------|------|----------|-------|------|----------|
| UdeM00000032322 | 6596 | 195.7 | UdeM00000032322 | XP_045173241.1 | 29.4 | 562      |       |      |          |
| 349             | 15   | 4     | 552             | 323            | 849  | 1.60E-46 | 195.7 | 6596 | cellular |

organisms;Eukaryota;Opisthokonta;Metazoa;Eumetazoa;Bilateria;Protostomia;Spiralia;Lophotrochozoa;Mollusca;Bivalvia;Autobranchia;Heteroconchia;Euherodonta;Imparidentia;Venerida;Veneroidea;Veneridae;Mercenaria;Mercenaria mercenaria

|                 |      |      |                 |                |      |          |      |      |          |
|-----------------|------|------|-----------------|----------------|------|----------|------|------|----------|
| UdeM00000032323 | 8496 | 87.8 | UdeM00000032323 | XP_014461102.1 | 37.7 | 122      |      |      |          |
| 72              | 3    | 4    | 122             | 228            | 348  | 1.00E-14 | 87.8 | 8496 | cellular |

organisms;Eukaryota;Opisthokonta;Metazoa;Eumetazoa;Bilateria;Deuterostomia;Chordata;Craniata;Vertebrata;Gnathostomata;Teleostomi;Euteleostomi;Sarcopterygii;Dipnotetrapodomorpha;Tetrapoda;Amniota;Sauropsida;Sauria;Archelosauria;Archosauria;Crocodylia;Alligatoridae;Alligatorinae;Alligator;Alligator mississippiensis

|                 |       |       |                 |                |      |          |       |       |          |
|-----------------|-------|-------|-----------------|----------------|------|----------|-------|-------|----------|
| UdeM00000032324 | 29159 | 150.6 | UdeM00000032324 | XP_034323195.1 | 46.2 | 158      |       |       |          |
| 78              | 3     | 1     | 156             | 231            | 383  | 1.70E-33 | 150.6 | 29159 | cellular |

organisms;Eukaryota;Opisthokonta;Metazoa;Eumetazoa;Bilateria;Protostomia;Spiralia;Lophotrochozoa;Mollusca;Bivalvia;Autobranchia;Pteriomorphia;Ostreida;Ostreoidea;Ostreidae;Crassostrea;Crassostrea gigas

|                 |       |      |                 |                |      |          |      |       |          |
|-----------------|-------|------|-----------------|----------------|------|----------|------|-------|----------|
| UdeM00000032327 | 45264 | 92.4 | UdeM00000032327 | XP_044164583.1 | 50.5 | 97       |      |       |          |
| 44              | 1     | 1    | 97              | 130            | 222  | 3.60E-16 | 92.4 | 45264 | cellular |

organisms;Eukaryota;Opisthokonta;Metazoa;Eumetazoa;Cnidaria;Anthozoa;Hexa  
corallia;Scleractinia;Astrocoeniina;Acroporidae;Acropora;Acropora  
millepora

UdeM00000032332 6579 300.1 UdeM00000032332 XP\_033739803.1 67.5 209  
68 0 1 209 25 233 2.30E-78 300.1 6579 cellular

organisms;Eukaryota;Opisthokonta;Metazoa;Eumetazoa;Bilateria;Protostomia;  
Spiralia;Lophotrochozoa;Mollusca;Bivalvia;Autobranchia;Pteriormorphia;Pect  
inida;Pectinoidea;Pectinidae;Pecten;Pecten maximus

UdeM00000032333 6579 253.4 UdeM00000032333 XP\_033739803.1 68.6 172  
54 0 1 172 62 233 2.00E-64 253.4 6579 cellular

organisms;Eukaryota;Opisthokonta;Metazoa;Eumetazoa;Bilateria;Protostomia;  
Spiralia;Lophotrochozoa;Mollusca;Bivalvia;Autobranchia;Pteriormorphia;Pect  
inida;Pectinoidea;Pectinidae;Pecten;Pecten maximus

UdeM00000032334 2607531 213.8 UdeM00000032334 XP\_029655223.1 53.1  
196 92 0 3 198 2 197 2.00E-52 213.8 2607531

cellular

organisms;Eukaryota;Opisthokonta;Metazoa;Eumetazoa;Bilateria;Protostomia;  
Spiralia;Lophotrochozoa;Mollusca;Cephalopoda;Coleoidea;Octopodiformes;Oct  
opoda;Incirrata;Octopodidae;Octopus;Octopus sinensis

UdeM00000032335 6596 218 UdeM00000032335 XP\_045195627.1 60.7 173  
68 0 67 239 6 178 1.30E-53 218 6596 cellular

organisms;Eukaryota;Opisthokonta;Metazoa;Eumetazoa;Bilateria;Protostomia;  
Spiralia;Lophotrochozoa;Mollusca;Bivalvia;Autobranchia;Heteroconchia;Euhe  
terodonta;Imparidentia;Venerida;Veneroidea;Veneridae;Mercenaria;Mercenari  
a mercenaria

UdeM00000032336 6596 75.1 UdeM00000032336 XP\_045173548.1 47.4 57  
28 1 157 213 613 667 1.20E-10 75.1 6596 cellular

organisms;Eukaryota;Opisthokonta;Metazoa;Eumetazoa;Bilateria;Protostomia;  
Spiralia;Lophotrochozoa;Mollusca;Bivalvia;Autobranchia;Heteroconchia;Euhe  
terodonta;Imparidentia;Venerida;Veneroidea;Veneridae;Mercenaria;Mercenari  
a mercenaria

UdeM00000032337 6565 154.5 UdeM00000032337 XP\_022292643.1 44.4 207  
109 2 91 293 471 675 2.20E-34 154.5 6565 cellular

organisms;Eukaryota;Opisthokonta;Metazoa;Eumetazoa;Bilateria;Protostomia;  
Spiralia;Lophotrochozoa;Mollusca;Bivalvia;Autobranchia;Pteriormorphia;Ostr  
eida;Ostreoidea;Ostreidae;Crassostrea;Crassostrea virginica

UdeM00000032339 29159 811.6 UdeM00000032339 XP\_011439713.1 82.1 502  
89 1 1 501 1 502 5.50E-232 811.6 29159 cellular

organisms;Eukaryota;Opisthokonta;Metazoa;Eumetazoa;Bilateria;Protostomia;  
Spiralia;Lophotrochozoa;Mollusca;Bivalvia;Autobranchia;Pteriormorphia;Ostr  
eida;Ostreoidea;Ostreidae;Crassostrea;Crassostrea gigas

UdeM00000032340 6579 283.5 UdeM00000032340 XP\_033740142.1 73.1 175  
47 0 164 338 170 344 3.50E-73 283.5 6579 cellular

organisms;Eukaryota;Opisthokonta;Metazoa;Eumetazoa;Bilateria;Protostomia;  
Spiralia;Lophotrochozoa;Mollusca;Bivalvia;Autobranchia;Pteriormorphia;Pect  
inida;Pectinoidea;Pectinidae;Pecten;Pecten maximus

UdeM00000032341 6596 151.4 UdeM00000032341 XP\_045196077.1 50.3 171  
75 3 14 179 49 214 1.20E-33 151.4 6596 cellular

organisms;Eukaryota;Opisthokonta;Metazoa;Eumetazoa;Bilateria;Protostomia;  
Spiralia;Lophotrochozoa;Mollusca;Bivalvia;Autobranchia;Heteroconchia;Euhe  
terodonta;Imparidentia;Venerida;Veneroidea;Veneridae;Mercenaria;Mercenari  
a mercenaria

UdeM00000032342 6579 265.4 UdeM00000032342 XP\_033740142.1 65.6 180  
62 0 7 186 160 339 5.70E-68 265.4 6579 cellular



organisms;Eukaryota;Opisthokonta;Metazoa;Eumetazoa;Bilateria;Protostomia;  
Spiralia;Lophotrochozoa;Mollusca;Bivalvia;Autobranhia;Pteriormorphia;Pect  
inida;Pectinoidea;Pectinidae;Pecten;Pecten maximus  
UdeM00000032343 6579 185.7 UdeM00000032343 XP\_033761495.1 66.9 124  
41 0 36 159 24 147 5.20E-44 185.7 6579 cellular  
organisms;Eukaryota;Opisthokonta;Metazoa;Eumetazoa;Bilateria;Protostomia;  
Spiralia;Lophotrochozoa;Mollusca;Bivalvia;Autobranhia;Pteriormorphia;Pect  
inida;Pectinoidea;Pectinidae;Pecten;Pecten maximus  
UdeM00000032344 6579 67.4 UdeM00000032344 XP\_033755666.1 54.9 51  
23 0 1 51 137 187 2.70E-08 67.4 6579 cellular  
organisms;Eukaryota;Opisthokonta;Metazoa;Eumetazoa;Bilateria;Protostomia;  
Spiralia;Lophotrochozoa;Mollusca;Bivalvia;Autobranhia;Pteriormorphia;Pect  
inida;Pectinoidea;Pectinidae;Pecten;Pecten maximus  
UdeM00000032345 1735272 73.2 UdeM00000032345 XP\_041362151.1 36.9  
103 64 1 1 102 573 675 2.40E-10 73.2 1735272  
cellular  
organisms;Eukaryota;Opisthokonta;Metazoa;Eumetazoa;Bilateria;Protostomia;  
Spiralia;Lophotrochozoa;Mollusca;Gastropoda;Neomphalina;Neomphaloidea;Pel  
tospiridae;Gigantopelta;Gigantopelta aegis  
UdeM00000032347 6596 219.5 UdeM00000032347 XP\_045196404.1 39.6 308  
166 6 77 378 496 789 7.00E-54 219.5 6596 cellular  
organisms;Eukaryota;Opisthokonta;Metazoa;Eumetazoa;Bilateria;Protostomia;  
Spiralia;Lophotrochozoa;Mollusca;Bivalvia;Autobranhia;Heteroconchia;Euhe  
terodonta;Imparidentia;Venerida;Veneroidea;Veneridae;Mercenaria;Mercenari  
a mercenaria  
UdeM00000032348 6596 195.3 UdeM00000032348 XP\_045211400.1 35.5 318  
189 7 21 327 57 369 1.30E-46 195.3 6596 cellular  
organisms;Eukaryota;Opisthokonta;Metazoa;Eumetazoa;Bilateria;Protostomia;  
Spiralia;Lophotrochozoa;Mollusca;Bivalvia;Autobranhia;Heteroconchia;Euhe  
terodonta;Imparidentia;Venerida;Veneroidea;Veneridae;Mercenaria;Mercenari  
a mercenaria  
UdeM00000032349 6596 226.1 UdeM00000032349 XP\_045196404.1 34.2 377  
222 9 118 487 402 759 1.00E-55 226.1 6596 cellular  
organisms;Eukaryota;Opisthokonta;Metazoa;Eumetazoa;Bilateria;Protostomia;  
Spiralia;Lophotrochozoa;Mollusca;Bivalvia;Autobranhia;Heteroconchia;Euhe  
terodonta;Imparidentia;Venerida;Veneroidea;Veneridae;Mercenaria;Mercenari  
a mercenaria  
UdeM00000032351 6596 253.1 UdeM00000032351 XP\_045196404.1 35.1 456  
244 12 242 691 379 788 1.00E-63 253.1 6596 cellular  
organisms;Eukaryota;Opisthokonta;Metazoa;Eumetazoa;Bilateria;Protostomia;  
Spiralia;Lophotrochozoa;Mollusca;Bivalvia;Autobranhia;Heteroconchia;Euhe  
terodonta;Imparidentia;Venerida;Veneroidea;Veneridae;Mercenaria;Mercenari  
a mercenaria  
UdeM00000032352 6596 260.8 UdeM00000032352 XP\_045196404.1 36.7 431  
246 11 242 666 379 788 4.90E-66 260.8 6596 cellular  
organisms;Eukaryota;Opisthokonta;Metazoa;Eumetazoa;Bilateria;Protostomia;  
Spiralia;Lophotrochozoa;Mollusca;Bivalvia;Autobranhia;Heteroconchia;Euhe  
terodonta;Imparidentia;Venerida;Veneroidea;Veneridae;Mercenaria;Mercenari  
a mercenaria  
UdeM00000032353 6596 248.4 UdeM00000032353 XP\_045196404.1 35.2 474  
272 14 36 495 336 788 1.90E-62 248.4 6596 cellular  
organisms;Eukaryota;Opisthokonta;Metazoa;Eumetazoa;Bilateria;Protostomia;  
Spiralia;Lophotrochozoa;Mollusca;Bivalvia;Autobranhia;Heteroconchia;Euhe

terodonta;Imparidentia;Venerida;Veneroidea;Veneridae;Mercenaria;Mercenari  
 a mercenaria  
 UdeM00000032355 6596 273.5 UdeM00000032355 XP\_045196868.1 36.9 407  
 205 11 303 701 160 522 7.60E-70 273.5 6596 cellular  
 organisms;Eukaryota;Opisthokonta;Metazoa;Eumetazoa;Bilateria;Protostomia;  
 Spiralia;Lophotrochozoa;Mollusca;Bivalvia;Autobranchia;Heteroconchia;Euhe  
 terodonta;Imparidentia;Venerida;Veneroidea;Veneridae;Mercenaria;Mercenari  
 a mercenaria  
 UdeM00000032356 6596 257.3 UdeM00000032356 XP\_045196865.1 35.4 401  
 221 8 268 664 160 526 5.30E-65 257.3 6596 cellular  
 organisms;Eukaryota;Opisthokonta;Metazoa;Eumetazoa;Bilateria;Protostomia;  
 Spiralia;Lophotrochozoa;Mollusca;Bivalvia;Autobranchia;Heteroconchia;Euhe  
 terodonta;Imparidentia;Venerida;Veneroidea;Veneridae;Mercenaria;Mercenari  
 a mercenaria  
 UdeM00000032358 6565 339 UdeM00000032358 XP\_022294498.1 46.8 361  
 174 8 29 379 29 381 8.00E-90 339 6565 cellular  
 organisms;Eukaryota;Opisthokonta;Metazoa;Eumetazoa;Bilateria;Protostomia;  
 Spiralia;Lophotrochozoa;Mollusca;Bivalvia;Autobranchia;Pteriormorphia;Ostr  
 eida;Ostreoidea;Ostreidae;Crassostrea;Crassostrea virginica  
 UdeM00000032359 6596 301.6 UdeM00000032359 XP\_045195160.1 65.8 202  
 67 1 14 213 13 214 8.00E-79 301.6 6596 cellular  
 organisms;Eukaryota;Opisthokonta;Metazoa;Eumetazoa;Bilateria;Protostomia;  
 Spiralia;Lophotrochozoa;Mollusca;Bivalvia;Autobranchia;Heteroconchia;Euhe  
 terodonta;Imparidentia;Venerida;Veneroidea;Veneridae;Mercenaria;Mercenari  
 a mercenaria  
 UdeM00000032360 6596 3020.7 UdeM00000032360 XP\_045198169.1 76  
 1949 414 4 13 1917 194 2133 0.00E+00 3020.7 6596  
 cellular  
 organisms;Eukaryota;Opisthokonta;Metazoa;Eumetazoa;Bilateria;Protostomia;  
 Spiralia;Lophotrochozoa;Mollusca;Bivalvia;Autobranchia;Heteroconchia;Euhe  
 terodonta;Imparidentia;Venerida;Veneroidea;Veneridae;Mercenaria;Mercenari  
 a mercenaria  
 UdeM00000032361 6579 289.3 UdeM00000032361 XP\_033740578.1 67.3 202  
 65 1 1 201 1 202 4.40E-75 289.3 6579 cellular  
 organisms;Eukaryota;Opisthokonta;Metazoa;Eumetazoa;Bilateria;Protostomia;  
 Spiralia;Lophotrochozoa;Mollusca;Bivalvia;Autobranchia;Pteriormorphia;Pect  
 inida;Pectinoidea;Pectinidae;Pecten;Pecten maximus  
 UdeM00000032362 6596 250 UdeM00000032362 XP\_045198168.1 47 266  
 126 6 12 264 13 276 3.50E-63 250 6596 cellular  
 organisms;Eukaryota;Opisthokonta;Metazoa;Eumetazoa;Bilateria;Protostomia;  
 Spiralia;Lophotrochozoa;Mollusca;Bivalvia;Autobranchia;Heteroconchia;Euhe  
 terodonta;Imparidentia;Venerida;Veneroidea;Veneridae;Mercenaria;Mercenari  
 a mercenaria  
 UdeM00000032363 6573 449.9 UdeM00000032363 XP\_021355383.1 41.6 519  
 297 3 18 533 21 536 4.50E-123 449.9 6573 cellular  
 organisms;Eukaryota;Opisthokonta;Metazoa;Eumetazoa;Bilateria;Protostomia;  
 Spiralia;Lophotrochozoa;Mollusca;Bivalvia;Autobranchia;Pteriormorphia;Pect  
 inida;Pectinoidea;Pectinidae;Mizuhopecten;Mizuhopecten yessoensis  
 UdeM00000032364 6565 199.9 UdeM00000032364 XP\_022289083.1 49.2 722  
 336 12 10 706 413 1128 1.10E-47 199.9 6565 cellular  
 organisms;Eukaryota;Opisthokonta;Metazoa;Eumetazoa;Bilateria;Protostomia;  
 Spiralia;Lophotrochozoa;Mollusca;Bivalvia;Autobranchia;Pteriormorphia;Ostr  
 eida;Ostreoidea;Ostreidae;Crassostrea;Crassostrea virginica

UdeM00000032365 6596 592 UdeM00000032365 XP\_045195110.1 71.7 407  
 112 1 1 407 1 404 6.00E-166 592 6596 cellular  
 organisms;Eukaryota;Opisthokonta;Metazoa;Eumetazoa;Bilateria;Protostomia;  
 Spiralia;Lophotrochozoa;Mollusca;Bivalvia;Autobranchia;Heteroconchia;Euhe  
 terodonta;Imparidentia;Venerida;Veneroidea;Veneridae;Mercenaria;Mercenari  
 a mercenaria  
 UdeM00000032366 1735272 90.5 UdeM00000032366 XP\_041351731.1 43  
 93 51 1 1 93 1 91 1.30E-15 90.5 1735272  
 cellular  
 organisms;Eukaryota;Opisthokonta;Metazoa;Eumetazoa;Bilateria;Protostomia;  
 Spiralia;Lophotrochozoa;Mollusca;Gastropoda;Neomphalina;Neomphaloidea;Pel  
 tospiridae;Gigantopelta;Gigantopelta aegis  
 UdeM00000032367 29159 1510 UdeM00000032367 XP\_034332320.1 61.1 1312  
 459 21 1 1301 8 1278 0.00E+00 1510 29159 cellular  
 organisms;Eukaryota;Opisthokonta;Metazoa;Eumetazoa;Bilateria;Protostomia;  
 Spiralia;Lophotrochozoa;Mollusca;Bivalvia;Autobranchia;Pteriormorphia;Ostr  
 eida;Ostreoidea;Ostreidae;Crassostrea;Crassostrea gigas  
 UdeM00000032369 50429 110.9 UdeM00000032369 XP\_022794541.1 30.2 252  
 152 6 1 243 1 237 4.50E-21 110.9 50429 cellular  
 organisms;Eukaryota;Opisthokonta;Metazoa;Eumetazoa;Cnidaria;Anthozoa;Hexa  
 corallia;Scleractinia;Astrocoeniina;Pocilloporidae;Stylophora;Stylophora  
 pistillata  
 UdeM00000032370 6596 689.9 UdeM00000032370 XP\_045195220.1 72.7 472  
 115 5 1 465 210 674 2.30E-195 689.9 6596 cellular  
 organisms;Eukaryota;Opisthokonta;Metazoa;Eumetazoa;Bilateria;Protostomia;  
 Spiralia;Lophotrochozoa;Mollusca;Bivalvia;Autobranchia;Heteroconchia;Euhe  
 terodonta;Imparidentia;Venerida;Veneroidea;Veneridae;Mercenaria;Mercenari  
 a mercenaria  
 UdeM00000032371 6596 183.3 UdeM00000032371 XP\_045195215.1 51.2 201  
 85 3 1 193 1 196 2.90E-43 183.3 6596 cellular  
 organisms;Eukaryota;Opisthokonta;Metazoa;Eumetazoa;Bilateria;Protostomia;  
 Spiralia;Lophotrochozoa;Mollusca;Bivalvia;Autobranchia;Heteroconchia;Euhe  
 terodonta;Imparidentia;Venerida;Veneroidea;Veneridae;Mercenaria;Mercenari  
 a mercenaria  
 UdeM00000032373 50429 112.8 UdeM00000032373 XP\_022779153.1 31.2 231  
 141 4 1 225 1 219 1.20E-21 112.8 50429 cellular  
 organisms;Eukaryota;Opisthokonta;Metazoa;Eumetazoa;Cnidaria;Anthozoa;Hexa  
 corallia;Scleractinia;Astrocoeniina;Pocilloporidae;Stylophora;Stylophora  
 pistillata  
 UdeM00000032374 6596 550.8 UdeM00000032374 XP\_045195220.1 73 370  
 93 4 1 370 323 685 1.30E-153 550.8 6596 cellular  
 organisms;Eukaryota;Opisthokonta;Metazoa;Eumetazoa;Bilateria;Protostomia;  
 Spiralia;Lophotrochozoa;Mollusca;Bivalvia;Autobranchia;Heteroconchia;Euhe  
 terodonta;Imparidentia;Venerida;Veneroidea;Veneridae;Mercenaria;Mercenari  
 a mercenaria  
 UdeM00000032375 6596 401.7 UdeM00000032375 XP\_045195215.1 61.4 337  
 122 2 1 337 1 329 8.90E-109 401.7 6596 cellular  
 organisms;Eukaryota;Opisthokonta;Metazoa;Eumetazoa;Bilateria;Protostomia;  
 Spiralia;Lophotrochozoa;Mollusca;Bivalvia;Autobranchia;Heteroconchia;Euhe  
 terodonta;Imparidentia;Venerida;Veneroidea;Veneridae;Mercenaria;Mercenari  
 a mercenaria  
 UdeM00000032377 50429 111.3 UdeM00000032377 XP\_022779103.1 31.6 234  
 144 3 1 229 1 223 3.40E-21 111.3 50429 cellular  
 organisms;Eukaryota;Opisthokonta;Metazoa;Eumetazoa;Cnidaria;Anthozoa;Hexa

corallia;Scleractinia;Astrocoeniina;Pocilloporidae;Stylophora;Stylophora  
 pistillata  
 UdeM00000032378 6596 595.1 UdeM00000032378 XP\_045195247.1 75.6 353  
 85 1 37 388 1 353 9.00E-167 595.1 6596 cellular  
 organisms;Eukaryota;Opisthokonta;Metazoa;Eumetazoa;Bilateria;Protostomia;  
 Spiralia;Lophotrochozoa;Mollusca;Bivalvia;Autobranchia;Heteroconchia;Euhe  
 terodonta;Imparidentia;Venerida;Veneroidea;Veneridae;Mercenaria;Mercenari  
 a mercenaria  
 UdeM00000032379 6596 200.3 UdeM00000032379 XP\_045173241.1 32.5 505  
 297 17 35 527 389 861 7.10E-48 200.3 6596 cellular  
 organisms;Eukaryota;Opisthokonta;Metazoa;Eumetazoa;Bilateria;Protostomia;  
 Spiralia;Lophotrochozoa;Mollusca;Bivalvia;Autobranchia;Heteroconchia;Euhe  
 terodonta;Imparidentia;Venerida;Veneroidea;Veneridae;Mercenaria;Mercenari  
 a mercenaria  
 UdeM00000032380 50429 110.5 UdeM00000032380 XP\_022779153.1 30.9 230  
 143 3 1 225 1 219 5.80E-21 110.5 50429 cellular  
 organisms;Eukaryota;Opisthokonta;Metazoa;Eumetazoa;Cnidaria;Anthozoa;Hexa  
 corallia;Scleractinia;Astrocoeniina;Pocilloporidae;Stylophora;Stylophora  
 pistillata  
 UdeM00000032381 7998 236.5 UdeM00000032381 NP\_001187808.1 70.7 150  
 40 1 5 154 4 149 2.60E-59 236.5 7998 cellular  
 organisms;Eukaryota;Opisthokonta;Metazoa;Eumetazoa;Bilateria;Deuterostomi  
 a;Chordata;Craniata;Vertebrata;Gnathostomata;Teleostomi;Euteleostomi;Acti  
 nopterygii;Actinopteri;Neopterygii;Teleostei;Osteoglossocephalai;Clupeoce  
 phala;Otomorpha;Ostariophysi;Otophysi;Characiphysae;Siluriformes;Siluroid  
 ei;Ictaluridae;Ictalurus;Ictalurus punctatus  
 UdeM00000032382 6573 339.3 UdeM00000032382 XP\_021348148.1 81.5 189  
 34 1 1 188 166 354 3.10E-90 339.3 6573 cellular  
 organisms;Eukaryota;Opisthokonta;Metazoa;Eumetazoa;Bilateria;Protostomia;  
 Spiralia;Lophotrochozoa;Mollusca;Bivalvia;Autobranchia;Pteriomorphia;Pect  
 inida;Pectinoidea;Pectinidae;Mizuhopecten;Mizuhopecten yessoensis  
 UdeM00000032383 6596 198.4 UdeM00000032383 XP\_045173241.1 32.1 505  
 299 16 35 527 389 861 2.70E-47 198.4 6596 cellular  
 organisms;Eukaryota;Opisthokonta;Metazoa;Eumetazoa;Bilateria;Protostomia;  
 Spiralia;Lophotrochozoa;Mollusca;Bivalvia;Autobranchia;Heteroconchia;Euhe  
 terodonta;Imparidentia;Venerida;Veneroidea;Veneridae;Mercenaria;Mercenari  
 a mercenaria  
 UdeM00000032384 29159 112.8 UdeM00000032384 XP\_034321636.1 35.6 205  
 110 4 13 203 14 210 1.20E-21 112.8 29159 cellular  
 organisms;Eukaryota;Opisthokonta;Metazoa;Eumetazoa;Bilateria;Protostomia;  
 Spiralia;Lophotrochozoa;Mollusca;Bivalvia;Autobranchia;Pteriomorphia;Ostr  
 eida;Ostreoidea;Ostreidae;Crassostrea;Crassostrea gigas  
 UdeM00000032385 6596 879.8 UdeM00000032385 XP\_045195220.1 64.1 713  
 217 8 1 713 1 674 2.40E-252 879.8 6596 cellular  
 organisms;Eukaryota;Opisthokonta;Metazoa;Eumetazoa;Bilateria;Protostomia;  
 Spiralia;Lophotrochozoa;Mollusca;Bivalvia;Autobranchia;Heteroconchia;Euhe  
 terodonta;Imparidentia;Venerida;Veneroidea;Veneridae;Mercenaria;Mercenari  
 a mercenaria  
 UdeM00000032386 50429 110.9 UdeM00000032386 XP\_022779103.1 31.6 234  
 144 3 1 229 1 223 4.50E-21 110.9 50429 cellular  
 organisms;Eukaryota;Opisthokonta;Metazoa;Eumetazoa;Cnidaria;Anthozoa;Hexa  
 corallia;Scleractinia;Astrocoeniina;Pocilloporidae;Stylophora;Stylophora  
 pistillata

UdeM00000032387 29159 536.6 UdeM00000032387 XP\_034317111.1 57.4 453  
 192 1 1 452 1 453 3.10E-149 536.6 29159 cellular  
 organisms;Eukaryota;Opisthokonta;Metazoa;Eumetazoa;Bilateria;Protostomia;  
 Spiralia;Lophotrochozoa;Mollusca;Bivalvia;Autobranhia;Pteriormorphia;Ostr  
 eida;Ostreoidea;Ostreidae;Crassostrea;Crassostrea gigas  
 UdeM00000032388 6596 586.3 UdeM00000032388 XP\_045195247.1 76 346  
 82 1 1 345 8 353 3.90E-164 586.3 6596 cellular  
 organisms;Eukaryota;Opisthokonta;Metazoa;Eumetazoa;Bilateria;Protostomia;  
 Spiralia;Lophotrochozoa;Mollusca;Bivalvia;Autobranhia;Heteroconchia;Euhe  
 terodonta;Imparidentia;Venerida;Veneroidea;Veneridae;Mercenaria;Mercenari  
 a mercenaria  
 UdeM00000032389 6596 199.5 UdeM00000032389 XP\_045173241.1 32.5 505  
 297 17 35 527 389 861 1.20E-47 199.5 6596 cellular  
 organisms;Eukaryota;Opisthokonta;Metazoa;Eumetazoa;Bilateria;Protostomia;  
 Spiralia;Lophotrochozoa;Mollusca;Bivalvia;Autobranhia;Heteroconchia;Euhe  
 terodonta;Imparidentia;Venerida;Veneroidea;Veneridae;Mercenaria;Mercenari  
 a mercenaria  
 UdeM00000032390 50429 113.2 UdeM00000032390 XP\_022778017.1 27.6 257  
 151 6 3 252 17 245 1.00E-21 113.2 50429 cellular  
 organisms;Eukaryota;Opisthokonta;Metazoa;Eumetazoa;Cnidaria;Anthozoa;Hexa  
 corallia;Scleractinia;Astrocoeniina;Pocilloporidae;Stylophora;Stylophora  
 pistillata  
 UdeM00000032392 29159 726.5 UdeM00000032392 XP\_034332325.1 74.7 446  
 104 4 1 440 7 449 2.10E-206 726.5 29159 cellular  
 organisms;Eukaryota;Opisthokonta;Metazoa;Eumetazoa;Bilateria;Protostomia;  
 Spiralia;Lophotrochozoa;Mollusca;Bivalvia;Autobranhia;Pteriormorphia;Ostr  
 eida;Ostreoidea;Ostreidae;Crassostrea;Crassostrea gigas  
 UdeM00000032393 400727 119 UdeM00000032393 XP\_025098321.1 47.5  
 120 60 1 151 267 149 268 9.70E-24 119 400727  
 cellular  
 organisms;Eukaryota;Opisthokonta;Metazoa;Eumetazoa;Bilateria;Protostomia;  
 Spiralia;Lophotrochozoa;Mollusca;Gastropoda;Caenogastropoda;Architaeniogl  
 ossa;Ampullarioidea;Ampullariidae;Pomacea;Pomacea canaliculata  
 UdeM00000032394 41139 335.5 UdeM00000032394 XP\_044750645.1 47 364  
 187 2 19 381 2 360 9.00E-89 335.5 41139 cellular  
 organisms;Eukaryota;Opisthokonta;Metazoa;Eumetazoa;Bilateria;Protostomia;  
 Ecdysozoa;Panarthropoda;Arthropoda;Mandibulata;Pancrustacea;Hexapoda;Inse  
 cta;Dicondylia;Pterygota;Neoptera;Endopterygota;Coleoptera;Polyphaga;Cucu  
 jiformia;Cucujoidea;Coccinellidae;Coccinellinae;Coccinellini;Coccinella;C  
 occinella septempunctata  
 UdeM00000032395 6596 68.2 UdeM00000032395 XP\_045195691.1 79.1 43  
 9 0 1 43 1 43 3.00E-09 68.2 6596 cellular  
 organisms;Eukaryota;Opisthokonta;Metazoa;Eumetazoa;Bilateria;Protostomia;  
 Spiralia;Lophotrochozoa;Mollusca;Bivalvia;Autobranhia;Heteroconchia;Euhe  
 terodonta;Imparidentia;Venerida;Veneroidea;Veneridae;Mercenaria;Mercenari  
 a mercenaria  
 UdeM00000032396 6596 296.2 UdeM00000032396 XP\_045195691.1 75.7 189  
 40 1 11 193 45 233 3.10E-77 296.2 6596 cellular  
 organisms;Eukaryota;Opisthokonta;Metazoa;Eumetazoa;Bilateria;Protostomia;  
 Spiralia;Lophotrochozoa;Mollusca;Bivalvia;Autobranhia;Heteroconchia;Euhe  
 terodonta;Imparidentia;Venerida;Veneroidea;Veneridae;Mercenaria;Mercenari  
 a mercenaria  
 UdeM00000032397 6596 526.2 UdeM00000032397 XP\_045195681.1 43.4 1229  
 508 30 505 1655 726 1845 1.50E-145 526.2 6596 cellular

organisms;Eukaryota;Opisthokonta;Metazoa;Eumetazoa;Bilateria;Protostomia;Spiralia;Lophotrochozoa;Mollusca;Bivalvia;Autobranchia;Heteroconchia;Euherodonta;Imparidentia;Venerida;Veneroidea;Veneridae;Mercenaria;Mercenaria mercenaria

UdeM00000032398 6596 496.5 UdeM00000032398 XP\_045195690.1 58.4 442  
154 4 1 417 111 547 3.30E-137 496.5 6596 cellular

organisms;Eukaryota;Opisthokonta;Metazoa;Eumetazoa;Bilateria;Protostomia;Spiralia;Lophotrochozoa;Mollusca;Bivalvia;Autobranchia;Heteroconchia;Euherodonta;Imparidentia;Venerida;Veneroidea;Veneridae;Mercenaria;Mercenaria mercenaria

UdeM00000032399 6596 352.4 UdeM00000032399 XP\_045196037.1 76.7 215  
49 1 1 214 1 215 3.90E-94 352.4 6596 cellular

organisms;Eukaryota;Opisthokonta;Metazoa;Eumetazoa;Bilateria;Protostomia;Spiralia;Lophotrochozoa;Mollusca;Bivalvia;Autobranchia;Heteroconchia;Euherodonta;Imparidentia;Venerida;Veneroidea;Veneridae;Mercenaria;Mercenaria mercenaria

UdeM00000032400 37621 132.1 UdeM00000032400 XP\_014677168.1 42.4 172  
96 3 3 172 8 178 8.50E-28 132.1 37621 cellular

organisms;Eukaryota;Opisthokonta;Metazoa;Eumetazoa;Bilateria;Protostomia;Ecdysozoa;Scalidophora;Priapulida;Priapulimorpha;Priapulimorphida;Priapulidae;Priapululus;Priapululus caudatus

UdeM00000032401 151771 234.6 UdeM00000032401 XP\_028419301.1 45.1  
273 91 3 27 242 34 304 1.40E-58 234.6 151771

cellular

organisms;Eukaryota;Opisthokonta;Metazoa;Eumetazoa;Cnidaria;Anthozoa;Octocorallia;Alcyonacea;Alcyoniina;Nephtheidae;Dendronephthya;Dendronephthya gigantea

UdeM00000032402 70779 96.3 UdeM00000032402 XP\_015747352.1 44.4 108  
58 1 2 107 297 404 2.80E-17 96.3 70779 cellular

organisms;Eukaryota;Opisthokonta;Metazoa;Eumetazoa;Cnidaria;Anthozoa;Hexacorallia;Scleractinia;Astrocoeniina;Acroporidae;Acropora;Acropora digitifera

UdeM00000032404 6565 92.8 UdeM00000032404 XP\_022305631.1 52.9 85  
40 0 13 97 43 127 3.00E-16 92.8 6565 cellular

organisms;Eukaryota;Opisthokonta;Metazoa;Eumetazoa;Bilateria;Protostomia;Spiralia;Lophotrochozoa;Mollusca;Bivalvia;Autobranchia;Pteriomorpha;Ostreida;Ostreoidea;Ostreidae;Crassostrea;Crassostrea virginica

UdeM00000009432 1735272 353.2 UdeM00000009432 XP\_041365728.1 53.5  
316 146 1 5 320 4 318 3.50E-94 353.2 1735272

cellular

organisms;Eukaryota;Opisthokonta;Metazoa;Eumetazoa;Bilateria;Protostomia;Spiralia;Lophotrochozoa;Mollusca;Gastropoda;Neomphalina;Neomphaloidea;Peltospiridae;Gigantopelta;Gigantopelta aegis

UdeM00000009433 1735272 446.8 UdeM00000009433 XP\_041355758.1 70.8  
291 83 2 75 364 80 369 2.60E-122 446.8 1735272

cellular

organisms;Eukaryota;Opisthokonta;Metazoa;Eumetazoa;Bilateria;Protostomia;Spiralia;Lophotrochozoa;Mollusca;Gastropoda;Neomphalina;Neomphaloidea;Peltospiridae;Gigantopelta;Gigantopelta aegis

UdeM00000009434 1735272 446.8 UdeM00000009434 XP\_041355758.1 70.8  
291 83 2 35 324 80 369 2.30E-122 446.8 1735272

cellular

organisms;Eukaryota;Opisthokonta;Metazoa;Eumetazoa;Bilateria;Protostomia;

Spiralia;Lophotrochozoa;Mollusca;Gastropoda;Neomphalina;Neomphaloidea;Pel  
tospiridae;Gigantopelta;Gigantopelta aegis  
UdeM00000009435 37653 211.8 UdeM00000009435 XP\_014783746.1 74.2 128  
33 0 1 128 115 242 5.80E-52 211.8 37653 cellular  
organisms;Eukaryota;Opisthokonta;Metazoa;Eumetazoa;Bilateria;Protostomia;  
Spiralia;Lophotrochozoa;Mollusca;Cephalopoda;Coleoidea;Octopodiformes;Oct  
opoda;Incirrata;Octopodidae;Octopus;Octopus bimaculoides  
UdeM00000009436 1735272 79.7 UdeM00000009436 XP\_041355758.1 77.3  
44 10 0 23 66 326 369 1.50E-12 79.7 1735272  
cellular  
organisms;Eukaryota;Opisthokonta;Metazoa;Eumetazoa;Bilateria;Protostomia;  
Spiralia;Lophotrochozoa;Mollusca;Gastropoda;Neomphalina;Neomphaloidea;Pel  
tospiridae;Gigantopelta;Gigantopelta aegis  
UdeM00000009437 6596 145.2 UdeM00000009437 XP\_045168882.1 27.1 273  
196 2 25 297 22 291 1.60E-31 145.2 6596 cellular  
organisms;Eukaryota;Opisthokonta;Metazoa;Eumetazoa;Bilateria;Protostomia;  
Spiralia;Lophotrochozoa;Mollusca;Bivalvia;Autobranchia;Heteroconchia;Euhe  
terodonta;Imparidentia;Venerida;Veneroidea;Veneridae;Mercenaria;Mercenari  
a mercenaria  
UdeM00000009438 6596 396.7 UdeM00000009438 XP\_045168381.1 44.9 702  
355 9 1 673 1 699 5.70E-107 396.7 6596 cellular  
organisms;Eukaryota;Opisthokonta;Metazoa;Eumetazoa;Bilateria;Protostomia;  
Spiralia;Lophotrochozoa;Mollusca;Bivalvia;Autobranchia;Heteroconchia;Euhe  
terodonta;Imparidentia;Venerida;Veneroidea;Veneridae;Mercenaria;Mercenari  
a mercenaria  
UdeM00000009439 41139 63.9 UdeM00000009439 XP\_044753457.1 48.4 64  
33 0 3 66 5 68 8.70E-08 63.9 41139 cellular  
organisms;Eukaryota;Opisthokonta;Metazoa;Eumetazoa;Bilateria;Protostomia;  
Ecdysozoa;Panarthropoda;Arthropoda;Mandibulata;Pancrustacea;Hexapoda;Inse  
cta;Dicondylia;Pterygota;Neoptera;Endopterygota;Coleoptera;Polyphaga;Cucu  
jiformia;Cucujoidea;Coccinellidae;Coccinellinae;Coccinellini;Coccinella;C  
occinella septempunctata  
UdeM00000009440 29159 293.9 UdeM00000009440 XP\_011447664.1 55.2 261  
117 0 5 265 6 266 2.10E-76 293.9 29159 cellular  
organisms;Eukaryota;Opisthokonta;Metazoa;Eumetazoa;Bilateria;Protostomia;  
Spiralia;Lophotrochozoa;Mollusca;Bivalvia;Autobranchia;Pteriomorphia;Ostr  
eida;Ostreoidea;Ostreidae;Crassostrea;Crassostrea gigas  
UdeM00000009441 6596 785.4 UdeM00000009441 XP\_045170516.1 56.4 1397  
493 31 380 1750 64 1370 2.20E-223 785.4 6596 cellular  
organisms;Eukaryota;Opisthokonta;Metazoa;Eumetazoa;Bilateria;Protostomia;  
Spiralia;Lophotrochozoa;Mollusca;Bivalvia;Autobranchia;Heteroconchia;Euhe  
terodonta;Imparidentia;Venerida;Veneroidea;Veneridae;Mercenaria;Mercenari  
a mercenaria  
UdeM00000009443 6573 95.5 UdeM00000009443 XP\_021354625.1 34.5 174  
100 5 44 207 59 228 8.40E-17 95.5 6573 cellular  
organisms;Eukaryota;Opisthokonta;Metazoa;Eumetazoa;Bilateria;Protostomia;  
Spiralia;Lophotrochozoa;Mollusca;Bivalvia;Autobranchia;Pteriomorphia;Pect  
inida;Pectinoidea;Pectinidae;Mizuhopecten;Mizuhopecten yessoensis  
UdeM00000009444 6573 95.5 UdeM00000009444 XP\_021354625.1 34.3 175  
103 5 18 183 57 228 7.50E-17 95.5 6573 cellular  
organisms;Eukaryota;Opisthokonta;Metazoa;Eumetazoa;Bilateria;Protostomia;  
Spiralia;Lophotrochozoa;Mollusca;Bivalvia;Autobranchia;Pteriomorphia;Pect  
inida;Pectinoidea;Pectinidae;Mizuhopecten;Mizuhopecten yessoensis

UdeM00000009445 6579 88.6 UdeM00000009445 XP\_033729305.1 33.1 163  
 102 4 50 205 53 215 1.00E-14 88.6 6579 cellular  
 organisms;Eukaryota;Opisthokonta;Metazoa;Eumetazoa;Bilateria;Protostomia;  
 Spiralia;Lophotrochozoa;Mollusca;Bivalvia;Autobranchia;Pteriormorphia;Pect  
 inida;Pectinoidea;Pectinidae;Pecten;Pecten maximus  
 UdeM00000009447 6579 98.6 UdeM00000009447 XP\_033729305.1 29.5 210  
 143 3 3 207 6 215 1.00E-17 98.6 6579 cellular  
 organisms;Eukaryota;Opisthokonta;Metazoa;Eumetazoa;Bilateria;Protostomia;  
 Spiralia;Lophotrochozoa;Mollusca;Bivalvia;Autobranchia;Pteriormorphia;Pect  
 inida;Pectinoidea;Pectinidae;Pecten;Pecten maximus  
 UdeM00000009448 6573 99 UdeM00000009448 XP\_021354625.1 33.9 171  
 105 4 44 207 59 228 7.60E-18 99 6573 cellular  
 organisms;Eukaryota;Opisthokonta;Metazoa;Eumetazoa;Bilateria;Protostomia;  
 Spiralia;Lophotrochozoa;Mollusca;Bivalvia;Autobranchia;Pteriormorphia;Pect  
 inida;Pectinoidea;Pectinidae;Mizuhopecten;Mizuhopecten yessoensis  
 UdeM00000009449 6596 652.1 UdeM00000009449 XP\_045170518.1 41 1626  
 532 36 302 1908 64 1281 2.50E-183 652.1 6596 cellular  
 organisms;Eukaryota;Opisthokonta;Metazoa;Eumetazoa;Bilateria;Protostomia;  
 Spiralia;Lophotrochozoa;Mollusca;Bivalvia;Autobranchia;Heteroconchia;Euhe  
 terodonta;Imparidentia;Venerida;Veneroidea;Veneridae;Mercenaria;Mercenari  
 a mercenaria  
 UdeM00000009450 6579 99.4 UdeM00000009450 XP\_033729305.1 34.9 169  
 99 4 50 213 53 215 6.00E-18 99.4 6579 cellular  
 organisms;Eukaryota;Opisthokonta;Metazoa;Eumetazoa;Bilateria;Protostomia;  
 Spiralia;Lophotrochozoa;Mollusca;Bivalvia;Autobranchia;Pteriormorphia;Pect  
 inida;Pectinoidea;Pectinidae;Pecten;Pecten maximus  
 UdeM00000009451 6573 89.4 UdeM00000009451 XP\_021354625.1 31.8 176  
 110 3 44 215 59 228 6.30E-15 89.4 6573 cellular  
 organisms;Eukaryota;Opisthokonta;Metazoa;Eumetazoa;Bilateria;Protostomia;  
 Spiralia;Lophotrochozoa;Mollusca;Bivalvia;Autobranchia;Pteriormorphia;Pect  
 inida;Pectinoidea;Pectinidae;Mizuhopecten;Mizuhopecten yessoensis  
 UdeM00000009452 6579 83.6 UdeM00000009452 XP\_033729305.1 28.1 210  
 144 4 3 205 6 215 3.30E-13 83.6 6579 cellular  
 organisms;Eukaryota;Opisthokonta;Metazoa;Eumetazoa;Bilateria;Protostomia;  
 Spiralia;Lophotrochozoa;Mollusca;Bivalvia;Autobranchia;Pteriormorphia;Pect  
 inida;Pectinoidea;Pectinidae;Pecten;Pecten maximus  
 UdeM00000009454 6573 87.8 UdeM00000009454 XP\_021354625.1 32.9 170  
 106 4 44 205 59 228 1.70E-14 87.8 6573 cellular  
 organisms;Eukaryota;Opisthokonta;Metazoa;Eumetazoa;Bilateria;Protostomia;  
 Spiralia;Lophotrochozoa;Mollusca;Bivalvia;Autobranchia;Pteriormorphia;Pect  
 inida;Pectinoidea;Pectinidae;Mizuhopecten;Mizuhopecten yessoensis  
 UdeM00000009455 400727 76.6 UdeM00000009455 XP\_025116226.1 40.8  
 103 55 3 27 125 424 524 2.50E-11 76.6 400727  
 cellular  
 organisms;Eukaryota;Opisthokonta;Metazoa;Eumetazoa;Bilateria;Protostomia;  
 Spiralia;Lophotrochozoa;Mollusca;Gastropoda;Caenogastropoda;Architaeniogl  
 ossa;Ampullarioidea;Ampullariidae;Pomacea;Pomacea canaliculata  
 UdeM00000009456 6579 201.8 UdeM00000009456 XP\_033739209.1 54.1 183  
 84 0 9 191 2 184 7.80E-49 201.8 6579 cellular  
 organisms;Eukaryota;Opisthokonta;Metazoa;Eumetazoa;Bilateria;Protostomia;  
 Spiralia;Lophotrochozoa;Mollusca;Bivalvia;Autobranchia;Pteriormorphia;Pect  
 inida;Pectinoidea;Pectinidae;Pecten;Pecten maximus  
 UdeM00000009457 6573 357.8 UdeM00000009457 XP\_021346496.1 38.3 491  
 257 3 1 457 213 691 2.00E-95 357.8 6573 cellular



organisms;Eukaryota;Opisthokonta;Metazoa;Eumetazoa;Bilateria;Protostomia; Spiralia;Lophotrochozoa;Mollusca;Bivalvia;Autobranchia;Pteriomorpha;Pectinida;Pectinoidea;Pectinidae;Mizuhopecten;Mizuhopecten yessoensis

UdeM00000009460 1735272 209.9 UdeM00000009460 XP\_041367330.1 35.8  
358 189 10 22 364 38 369 5.40E-51 209.9 1735272

cellular

organisms;Eukaryota;Opisthokonta;Metazoa;Eumetazoa;Bilateria;Protostomia; Spiralia;Lophotrochozoa;Mollusca;Gastropoda;Neomphalina;Neomphaloidea;Peltospiridae;Gigantopelta;Gigantopelta aegis

UdeM00000009462 151771 125.6 UdeM00000009462 XP\_028408228.1 41.5  
207 107 3 2 197 91 294 7.40E-26 125.6 151771

cellular

organisms;Eukaryota;Opisthokonta;Metazoa;Eumetazoa;Cnidaria;Anthozoa;Octocorallia;Alcyonacea;Alcyoniina;Nephtheidae;Dendronephthya;Dendronephthya gigantea

UdeM00000009463 6579 200.3 UdeM00000009463 XP\_033729790.1 38.7 274  
163 2 10 283 17 285 7.80E-48 200.3 6579 cellular

organisms;Eukaryota;Opisthokonta;Metazoa;Eumetazoa;Bilateria;Protostomia; Spiralia;Lophotrochozoa;Mollusca;Bivalvia;Autobranchia;Pteriomorpha;Pectinida;Pectinoidea;Pectinidae;Pecten;Pecten maximus

UdeM00000009465 6596 275.8 UdeM00000009465 XP\_045169764.1 67.2 195  
64 0 1 195 1 195 4.30E-71 275.8 6596 cellular

organisms;Eukaryota;Opisthokonta;Metazoa;Eumetazoa;Bilateria;Protostomia; Spiralia;Lophotrochozoa;Mollusca;Bivalvia;Autobranchia;Heteroconchia;Euheterodonta;Imparidentia;Venerida;Veneroidea;Veneridae;Mercenaria;Mercenaria mercenaria

UdeM00000009466 6526 420.6 UdeM00000009466 XP\_013088120.1 87.9 224  
27 0 1 224 1 224 1.20E-114 420.6 6526 cellular

organisms;Eukaryota;Opisthokonta;Metazoa;Eumetazoa;Bilateria;Protostomia; Spiralia;Lophotrochozoa;Mollusca;Gastropoda;Heterobranchia;Euthyneura;Panpulmonata;Hygrophila;Lymnaeioidea;Planorbidae;Biomphalaria;Biomphalaria glabrata

UdeM00000009467 6526 417.2 UdeM00000009467 XP\_013088120.1 87.8 222  
27 0 1 222 3 224 1.40E-113 417.2 6526 cellular

organisms;Eukaryota;Opisthokonta;Metazoa;Eumetazoa;Bilateria;Protostomia; Spiralia;Lophotrochozoa;Mollusca;Gastropoda;Heterobranchia;Euthyneura;Panpulmonata;Hygrophila;Lymnaeioidea;Planorbidae;Biomphalaria;Biomphalaria glabrata

UdeM00000009468 6596 110.5 UdeM00000009468 XP\_045180427.1 37.8 180  
103 2 76 250 98 273 3.20E-21 110.5 6596 cellular

organisms;Eukaryota;Opisthokonta;Metazoa;Eumetazoa;Bilateria;Protostomia; Spiralia;Lophotrochozoa;Mollusca;Bivalvia;Autobranchia;Heteroconchia;Euheterodonta;Imparidentia;Venerida;Veneroidea;Veneridae;Mercenaria;Mercenaria mercenaria

UdeM00000009470 7888 147.1 UdeM00000009470 XP\_043917682.1 35.8 226  
104 2 1 190 319 539 2.30E-32 147.1 7888 cellular

organisms;Eukaryota;Opisthokonta;Metazoa;Eumetazoa;Bilateria;Deuterostomia;Chordata;Craniata;Vertebrata;Gnathostomata;Teleostomi;Euteleostomi;Sarcopterygii;Dipnotetrapodomorpha;Dipnomorpha;Ceratodontae;Ceratodontiformes;Lepidosirenoidei;Protopterygidae;Protopterus;Protopterus annectens

UdeM00000009471 6573 58.9 UdeM00000009471 XP\_021353547.1 26.3 209  
137 8 38 237 61 261 1.00E-05 58.9 6573 cellular

organisms;Eukaryota;Opisthokonta;Metazoa;Eumetazoa;Bilateria;Protostomia;

Spiralia;Lophotrochozoa;Mollusca;Bivalvia;Autobranchia;Pteriomorpha;Pectinida;Pectinoidea;Pectinidae;Mizuhopecten;Mizuhopecten yessoensis  
UdeM00000009473 6596 90.9 UdeM00000009473 XP\_045167442.1 31.5 124  
84 1 27 150 31 153 1.80E-15 90.9 6596 cellular  
organisms;Eukaryota;Opisthokonta;Metazoa;Eumetazoa;Bilateria;Protostomia;  
Spiralia;Lophotrochozoa;Mollusca;Bivalvia;Autobranchia;Heteroconchia;Euherodonta;Imparidentia;Venerida;Veneroidea;Veneridae;Mercenaria;Mercenaria mercenaria  
UdeM00000009474 6565 81.6 UdeM00000009474 XP\_022305875.1 26.5 151  
100 5 7 152 6 150 1.10E-12 81.6 6565 cellular  
organisms;Eukaryota;Opisthokonta;Metazoa;Eumetazoa;Bilateria;Protostomia;  
Spiralia;Lophotrochozoa;Mollusca;Bivalvia;Autobranchia;Pteriomorpha;Ostreida;Ostreoidea;Ostreidae;Crassostrea;Crassostrea virginica  
UdeM00000009476 6596 186 UdeM00000009476 XP\_045167442.1 44.5 182  
98 2 12 190 7 188 4.30E-44 186 6596 cellular  
organisms;Eukaryota;Opisthokonta;Metazoa;Eumetazoa;Bilateria;Protostomia;  
Spiralia;Lophotrochozoa;Mollusca;Bivalvia;Autobranchia;Heteroconchia;Euherodonta;Imparidentia;Venerida;Veneroidea;Veneridae;Mercenaria;Mercenaria mercenaria  
UdeM00000009477 6596 178.7 UdeM00000009477 XP\_045167442.1 44.4 178  
96 2 10 186 5 180 6.90E-42 178.7 6596 cellular  
organisms;Eukaryota;Opisthokonta;Metazoa;Eumetazoa;Bilateria;Protostomia;  
Spiralia;Lophotrochozoa;Mollusca;Bivalvia;Autobranchia;Heteroconchia;Euherodonta;Imparidentia;Venerida;Veneroidea;Veneridae;Mercenaria;Mercenaria mercenaria  
UdeM00000009478 6596 263.1 UdeM00000009478 XP\_045168280.1 60 190  
76 0 1 190 18 207 2.80E-67 263.1 6596 cellular  
organisms;Eukaryota;Opisthokonta;Metazoa;Eumetazoa;Bilateria;Protostomia;  
Spiralia;Lophotrochozoa;Mollusca;Bivalvia;Autobranchia;Heteroconchia;Euherodonta;Imparidentia;Venerida;Veneroidea;Veneridae;Mercenaria;Mercenaria mercenaria  
UdeM00000009479 29159 228.8 UdeM00000009479 XP\_011456096.2 69.2 156  
47 1 1 156 1 155 6.40E-57 228.8 29159 cellular  
organisms;Eukaryota;Opisthokonta;Metazoa;Eumetazoa;Bilateria;Protostomia;  
Spiralia;Lophotrochozoa;Mollusca;Bivalvia;Autobranchia;Pteriomorpha;Ostreida;Ostreoidea;Ostreidae;Crassostrea;Crassostrea gigas  
UdeM00000009482 6579 93.6 UdeM00000009482 XP\_033727859.1 33.1 139  
81 5 205 334 19 154 5.20E-16 93.6 6579 cellular  
organisms;Eukaryota;Opisthokonta;Metazoa;Eumetazoa;Bilateria;Protostomia;  
Spiralia;Lophotrochozoa;Mollusca;Bivalvia;Autobranchia;Pteriomorpha;Pectinida;Pectinoidea;Pectinidae;Pecten;Pecten maximus  
UdeM00000009484 6596 1198.7 UdeM00000009484 XP\_045169444.1 65.6  
936 291 7 1 930 1 911 0.00E+00 1198.7 6596  
cellular  
organisms;Eukaryota;Opisthokonta;Metazoa;Eumetazoa;Bilateria;Protostomia;  
Spiralia;Lophotrochozoa;Mollusca;Bivalvia;Autobranchia;Heteroconchia;Euherodonta;Imparidentia;Venerida;Veneroidea;Veneridae;Mercenaria;Mercenaria mercenaria  
UdeM00000009485 29159 388.3 UdeM00000009485 XP\_034318427.1 85.2 223  
33 0 6 228 4 226 6.90E-105 388.3 29159 cellular  
organisms;Eukaryota;Opisthokonta;Metazoa;Eumetazoa;Bilateria;Protostomia;  
Spiralia;Lophotrochozoa;Mollusca;Bivalvia;Autobranchia;Pteriomorpha;Ostreida;Ostreoidea;Ostreidae;Crassostrea;Crassostrea gigas

UdeM00000009486 6565 147.9 UdeM00000009486 XP\_022299727.1 47.3 146  
 77 0 1 146 106 251 1.00E-32 147.9 6565 cellular  
 organisms;Eukaryota;Opisthokonta;Metazoa;Eumetazoa;Bilateria;Protostomia;  
 Spiralia;Lophotrochozoa;Mollusca;Bivalvia;Autobranchia;Pteriomorpha;Ostr  
 eida;Ostreoidea;Ostreidae;Crassostrea;Crassostrea virginica  
 UdeM00000009487 6596 573.5 UdeM00000009487 XP\_045169445.1 61.6 495  
 155 6 25 513 246 711 2.60E-160 573.5 6596 cellular  
 organisms;Eukaryota;Opisthokonta;Metazoa;Eumetazoa;Bilateria;Protostomia;  
 Spiralia;Lophotrochozoa;Mollusca;Bivalvia;Autobranchia;Heteroconchia;Euhe  
 terodonta;Imparidentia;Venerida;Veneroidea;Veneridae;Mercenaria;Mercenari  
 a mercenaria  
 UdeM00000009488 6596 430.6 UdeM00000009488 XP\_045169445.1 60.4 371  
 114 4 14 378 368 711 2.00E-117 430.6 6596 cellular  
 organisms;Eukaryota;Opisthokonta;Metazoa;Eumetazoa;Bilateria;Protostomia;  
 Spiralia;Lophotrochozoa;Mollusca;Bivalvia;Autobranchia;Heteroconchia;Euhe  
 terodonta;Imparidentia;Venerida;Veneroidea;Veneridae;Mercenaria;Mercenari  
 a mercenaria  
 UdeM00000009489 70779 86.7 UdeM00000009489 XP\_015770379.1 54.9 71  
 31 1 1 70 1 71 1.60E-14 86.7 70779 cellular  
 organisms;Eukaryota;Opisthokonta;Metazoa;Eumetazoa;Cnidaria;Anthozoa;Hexa  
 corallia;Scleractinia;Astrocoeniina;Acroporidae;Acropora;Acropora  
 digitifera  
 UdeM00000009490 70779 68.9 UdeM00000009490 XP\_015764363.1 34.1 138  
 72 4 1 120 21 157 5.40E-09 68.9 70779 cellular  
 organisms;Eukaryota;Opisthokonta;Metazoa;Eumetazoa;Cnidaria;Anthozoa;Hexa  
 corallia;Scleractinia;Astrocoeniina;Acroporidae;Acropora;Acropora  
 digitifera  
 UdeM00000009492 1735272 366.3 UdeM00000009492 XP\_041365728.1 54.7  
 316 142 1 3 318 4 318 3.90E-98 366.3 1735272  
 cellular  
 organisms;Eukaryota;Opisthokonta;Metazoa;Eumetazoa;Bilateria;Protostomia;  
 Spiralia;Lophotrochozoa;Mollusca;Gastropoda;Neomphalina;Neomphaloidea;Pel  
 tospiridae;Gigantopelta;Gigantopelta aegis  
 UdeM00000009493 1735272 379 UdeM00000009493 XP\_041365728.1 56.8  
 315 136 0 5 319 4 318 5.90E-102 379 1735272  
 cellular  
 organisms;Eukaryota;Opisthokonta;Metazoa;Eumetazoa;Bilateria;Protostomia;  
 Spiralia;Lophotrochozoa;Mollusca;Gastropoda;Neomphalina;Neomphaloidea;Pel  
 tospiridae;Gigantopelta;Gigantopelta aegis  
 UdeM00000009494 6579 169.1 UdeM00000009494 XP\_033761321.1 30.6 330  
 215 5 4 326 16 338 1.30E-38 169.1 6579 cellular  
 organisms;Eukaryota;Opisthokonta;Metazoa;Eumetazoa;Bilateria;Protostomia;  
 Spiralia;Lophotrochozoa;Mollusca;Bivalvia;Autobranchia;Pteriomorpha;Pect  
 inida;Pectinoidea;Pectinidae;Pecten;Pecten maximus  
 UdeM00000009495 6579 157.5 UdeM00000009495 XP\_033761321.1 30.4 316  
 206 5 1 309 30 338 3.90E-35 157.5 6579 cellular  
 organisms;Eukaryota;Opisthokonta;Metazoa;Eumetazoa;Bilateria;Protostomia;  
 Spiralia;Lophotrochozoa;Mollusca;Bivalvia;Autobranchia;Pteriomorpha;Pect  
 inida;Pectinoidea;Pectinidae;Pecten;Pecten maximus  
 UdeM00000009496 6579 537 UdeM00000009496 XP\_033762963.1 42.1 668  
 346 15 268 923 185 823 4.90E-149 537 6579 cellular  
 organisms;Eukaryota;Opisthokonta;Metazoa;Eumetazoa;Bilateria;Protostomia;  
 Spiralia;Lophotrochozoa;Mollusca;Bivalvia;Autobranchia;Pteriomorpha;Pect  
 inida;Pectinoidea;Pectinidae;Pecten;Pecten maximus

UdeM00000009497 6500 378.6 UdeM00000009497 XP\_005089461.1 42.5 440  
 240 7 1 433 401 834 1.00E-101 378.6 6500 cellular  
 organisms;Eukaryota;Opisthokonta;Metazoa;Eumetazoa;Bilateria;Protostomia;  
 Spiralia;Lophotrochozoa;Mollusca;Gastropoda;Heterobranchia;Euthyneura;Tec  
 tipleura;Aplysiida;Aplysioidea;Aplysiidae;Aplysia;Aplysia californica  
 UdeM00000009499 6500 372.9 UdeM00000009499 XP\_005089461.1 42.1 435  
 240 6 1 429 401 829 5.60E-100 372.9 6500 cellular  
 organisms;Eukaryota;Opisthokonta;Metazoa;Eumetazoa;Bilateria;Protostomia;  
 Spiralia;Lophotrochozoa;Mollusca;Gastropoda;Heterobranchia;Euthyneura;Tec  
 tipleura;Aplysiida;Aplysioidea;Aplysiidae;Aplysia;Aplysia californica  
 UdeM00000009498 6500 419.1 UdeM00000009498 XP\_005089461.1 43.1 483  
 255 7 20 496 361 829 7.90E-114 419.1 6500 cellular  
 organisms;Eukaryota;Opisthokonta;Metazoa;Eumetazoa;Bilateria;Protostomia;  
 Spiralia;Lophotrochozoa;Mollusca;Gastropoda;Heterobranchia;Euthyneura;Tec  
 tipleura;Aplysiida;Aplysioidea;Aplysiidae;Aplysia;Aplysia californica  
 UdeM00000009500 29159 532.7 UdeM00000009500 XP\_034317111.1 57.2 453  
 193 1 1 452 1 453 4.50E-148 532.7 29159 cellular  
 organisms;Eukaryota;Opisthokonta;Metazoa;Eumetazoa;Bilateria;Protostomia;  
 Spiralia;Lophotrochozoa;Mollusca;Bivalvia;Autobranchia;Pteriormorphia;Ostr  
 eida;Ostreioidea;Ostreidae;Crassostrea;Crassostrea gigas  
 UdeM00000009501 29159 535 UdeM00000009501 XP\_034317111.1 57.4 453  
 192 1 1 452 1 453 9.10E-149 535 29159 cellular  
 organisms;Eukaryota;Opisthokonta;Metazoa;Eumetazoa;Bilateria;Protostomia;  
 Spiralia;Lophotrochozoa;Mollusca;Bivalvia;Autobranchia;Pteriormorphia;Ostr  
 eida;Ostreioidea;Ostreidae;Crassostrea;Crassostrea gigas  
 UdeM00000009502 6579 184.9 UdeM00000009502 XP\_033762959.1 51.4 181  
 73 5 197 372 187 357 1.90E-43 184.9 6579 cellular  
 organisms;Eukaryota;Opisthokonta;Metazoa;Eumetazoa;Bilateria;Protostomia;  
 Spiralia;Lophotrochozoa;Mollusca;Bivalvia;Autobranchia;Pteriormorphia;Pect  
 inida;Pectinoidea;Pectinidae;Pecten;Pecten maximus  
 UdeM00000009503 29159 238.4 UdeM00000009503 XP\_011443279.2 40.1 287  
 161 3 7 282 10 296 1.20E-59 238.4 29159 cellular  
 organisms;Eukaryota;Opisthokonta;Metazoa;Eumetazoa;Bilateria;Protostomia;  
 Spiralia;Lophotrochozoa;Mollusca;Bivalvia;Autobranchia;Pteriormorphia;Ostr  
 eida;Ostreioidea;Ostreidae;Crassostrea;Crassostrea gigas  
 UdeM00000009504 6596 570.1 UdeM00000009504 XP\_045167770.1 51.8 583  
 261 9 23 588 2 581 3.30E-159 570.1 6596 cellular  
 organisms;Eukaryota;Opisthokonta;Metazoa;Eumetazoa;Bilateria;Protostomia;  
 Spiralia;Lophotrochozoa;Mollusca;Bivalvia;Autobranchia;Heteroconchia;Euhe  
 terodonta;Imparidentia;Venerida;Veneroidea;Veneridae;Mercenaria;Mercenari  
 a mercenaria  
 UdeM00000009505 6596 221.1 UdeM00000009505 XP\_045167770.1 48.9 237  
 114 4 1 231 346 581 1.50E-54 221.1 6596 cellular  
 organisms;Eukaryota;Opisthokonta;Metazoa;Eumetazoa;Bilateria;Protostomia;  
 Spiralia;Lophotrochozoa;Mollusca;Bivalvia;Autobranchia;Heteroconchia;Euhe  
 terodonta;Imparidentia;Venerida;Veneroidea;Veneridae;Mercenaria;Mercenari  
 a mercenaria  
 UdeM00000009506 6596 127.5 UdeM00000009506 XP\_045168571.1 54 113  
 44 2 1 105 244 356 1.10E-26 127.5 6596 cellular  
 organisms;Eukaryota;Opisthokonta;Metazoa;Eumetazoa;Bilateria;Protostomia;  
 Spiralia;Lophotrochozoa;Mollusca;Bivalvia;Autobranchia;Heteroconchia;Euhe  
 terodonta;Imparidentia;Venerida;Veneroidea;Veneridae;Mercenaria;Mercenari  
 a mercenaria

UdeM00000009507 6565 144.8 UdeM00000009507 XP\_022325149.1 57 128  
 53 2 10 137 434 559 8.40E-32 144.8 6565 cellular  
 organisms;Eukaryota;Opisthokonta;Metazoa;Eumetazoa;Bilateria;Protostomia;  
 Spiralia;Lophotrochozoa;Mollusca;Bivalvia;Autobranchia;Pteriomorphia;Ostr  
 eida;Ostreoidea;Ostreidae;Crassostrea;Crassostrea virginica  
 UdeM00000009508 6596 547.7 UdeM00000009508 XP\_045167770.1 48.9 581  
 276 7 29 595 8 581 1.80E-152 547.7 6596 cellular  
 organisms;Eukaryota;Opisthokonta;Metazoa;Eumetazoa;Bilateria;Protostomia;  
 Spiralia;Lophotrochozoa;Mollusca;Bivalvia;Autobranchia;Heteroconchia;Euhe  
 terodonta;Imparidentia;Venerida;Veneroidea;Veneridae;Mercenaria;Mercenari  
 a mercenaria  
 UdeM00000009509 6596 542 UdeM00000009509 XP\_045167770.1 48.1 588  
 283 8 22 594 1 581 9.70E-151 542 6596 cellular  
 organisms;Eukaryota;Opisthokonta;Metazoa;Eumetazoa;Bilateria;Protostomia;  
 Spiralia;Lophotrochozoa;Mollusca;Bivalvia;Autobranchia;Heteroconchia;Euhe  
 terodonta;Imparidentia;Venerida;Veneroidea;Veneridae;Mercenaria;Mercenari  
 a mercenaria  
 UdeM00000009510 6596 493.4 UdeM00000009510 XP\_045169015.1 50.7 495  
 227 7 58 538 11 502 3.80E-136 493.4 6596 cellular  
 organisms;Eukaryota;Opisthokonta;Metazoa;Eumetazoa;Bilateria;Protostomia;  
 Spiralia;Lophotrochozoa;Mollusca;Bivalvia;Autobranchia;Heteroconchia;Euhe  
 terodonta;Imparidentia;Venerida;Veneroidea;Veneridae;Mercenaria;Mercenari  
 a mercenaria  
 UdeM00000009511 6596 579.7 UdeM00000009511 XP\_045167770.1 52.9 577  
 254 9 7 566 6 581 4.00E-162 579.7 6596 cellular  
 organisms;Eukaryota;Opisthokonta;Metazoa;Eumetazoa;Bilateria;Protostomia;  
 Spiralia;Lophotrochozoa;Mollusca;Bivalvia;Autobranchia;Heteroconchia;Euhe  
 terodonta;Imparidentia;Venerida;Veneroidea;Veneridae;Mercenaria;Mercenari  
 a mercenaria  
 UdeM00000009512 6596 526.9 UdeM00000009512 XP\_045167770.1 48.8 576  
 256 8 27 563 6 581 3.10E-146 526.9 6596 cellular  
 organisms;Eukaryota;Opisthokonta;Metazoa;Eumetazoa;Bilateria;Protostomia;  
 Spiralia;Lophotrochozoa;Mollusca;Bivalvia;Autobranchia;Heteroconchia;Euhe  
 terodonta;Imparidentia;Venerida;Veneroidea;Veneridae;Mercenaria;Mercenari  
 a mercenaria  
 UdeM00000009513 6565 348.2 UdeM00000009513 XP\_022310134.1 56.4 280  
 121 1 2 280 1 280 9.70E-93 348.2 6565 cellular  
 organisms;Eukaryota;Opisthokonta;Metazoa;Eumetazoa;Bilateria;Protostomia;  
 Spiralia;Lophotrochozoa;Mollusca;Bivalvia;Autobranchia;Pteriomorphia;Ostr  
 eida;Ostreoidea;Ostreidae;Crassostrea;Crassostrea virginica  
 UdeM00000009514 6596 743.8 UdeM00000009514 XP\_045168814.1 45.1 985  
 362 15 1 856 1 935 2.50E-211 743.8 6596 cellular  
 organisms;Eukaryota;Opisthokonta;Metazoa;Eumetazoa;Bilateria;Protostomia;  
 Spiralia;Lophotrochozoa;Mollusca;Bivalvia;Autobranchia;Heteroconchia;Euhe  
 terodonta;Imparidentia;Venerida;Veneroidea;Veneridae;Mercenaria;Mercenari  
 a mercenaria  
 UdeM00000009515 50429 214.2 UdeM00000009515 XP\_022792342.1 59.2 179  
 54 2 3 180 2 162 1.40E-52 214.2 50429 cellular  
 organisms;Eukaryota;Opisthokonta;Metazoa;Eumetazoa;Cnidaria;Anthozoa;Hexa  
 corallia;Scleractinia;Astrocoeniina;Pocilloporidae;Stylophora;Stylophora  
 pistillata  
 UdeM00000009516 50429 219.2 UdeM00000009516 XP\_022792342.1 65.2 161  
 54 2 3 161 2 162 3.90E-54 219.2 50429 cellular  
 organisms;Eukaryota;Opisthokonta;Metazoa;Eumetazoa;Cnidaria;Anthozoa;Hexa

corallia;Scleractinia;Astrocoeniina;Pocilloporidae;Stylophora;Stylophora  
pistillata

UdeM00000009517 6596 1161 UdeM00000009517 XP\_045168062.1 56.3 1004  
400 8 40 1004 43 1046 0.00E+00 1161 6596 cellular

organisms;Eukaryota;Opisthokonta;Metazoa;Eumetazoa;Bilateria;Protostomia;  
Spiralia;Lophotrochozoa;Mollusca;Bivalvia;Autobranchia;Heteroconchia;Euhe  
terodonta;Imparidentia;Venerida;Veneroidea;Veneridae;Mercenaria;Mercenari  
a mercenaria

UdeM00000009518 6596 220.7 UdeM00000009518 XP\_045169686.1 51.6 186  
90 0 34 219 23 208 1.90E-54 220.7 6596 cellular

organisms;Eukaryota;Opisthokonta;Metazoa;Eumetazoa;Bilateria;Protostomia;  
Spiralia;Lophotrochozoa;Mollusca;Bivalvia;Autobranchia;Heteroconchia;Euhe  
terodonta;Imparidentia;Venerida;Veneroidea;Veneridae;Mercenaria;Mercenari  
a mercenaria

UdeM00000009519 6596 110.2 UdeM00000009519 XP\_045169715.1 46 139  
71 3 40 174 381 519 3.00E-21 110.2 6596 cellular

organisms;Eukaryota;Opisthokonta;Metazoa;Eumetazoa;Bilateria;Protostomia;  
Spiralia;Lophotrochozoa;Mollusca;Bivalvia;Autobranchia;Heteroconchia;Euhe  
terodonta;Imparidentia;Venerida;Veneroidea;Veneridae;Mercenaria;Mercenari  
a mercenaria

UdeM00000009520 6596 583.6 UdeM00000009520 XP\_045169716.1 54.5 516  
230 4 6 516 4 519 2.60E-163 583.6 6596 cellular

organisms;Eukaryota;Opisthokonta;Metazoa;Eumetazoa;Bilateria;Protostomia;  
Spiralia;Lophotrochozoa;Mollusca;Bivalvia;Autobranchia;Heteroconchia;Euhe  
terodonta;Imparidentia;Venerida;Veneroidea;Veneridae;Mercenaria;Mercenari  
a mercenaria

UdeM00000009524 6596 194.9 UdeM00000009524 XP\_045169410.1 51.5 262  
101 6 25 286 1 236 1.40E-46 194.9 6596 cellular

organisms;Eukaryota;Opisthokonta;Metazoa;Eumetazoa;Bilateria;Protostomia;  
Spiralia;Lophotrochozoa;Mollusca;Bivalvia;Autobranchia;Heteroconchia;Euhe  
terodonta;Imparidentia;Venerida;Veneroidea;Veneridae;Mercenaria;Mercenari  
a mercenaria

UdeM00000009525 6596 189.9 UdeM00000009525 XP\_045169410.1 51.3 263  
101 7 25 287 1 236 4.60E-45 189.9 6596 cellular

organisms;Eukaryota;Opisthokonta;Metazoa;Eumetazoa;Bilateria;Protostomia;  
Spiralia;Lophotrochozoa;Mollusca;Bivalvia;Autobranchia;Heteroconchia;Euhe  
terodonta;Imparidentia;Venerida;Veneroidea;Veneridae;Mercenaria;Mercenari  
a mercenaria

UdeM00000009527 6596 126.3 UdeM00000009527 XP\_045169410.1 83.8 74  
12 0 1 74 249 322 1.70E-26 126.3 6596 cellular

organisms;Eukaryota;Opisthokonta;Metazoa;Eumetazoa;Bilateria;Protostomia;  
Spiralia;Lophotrochozoa;Mollusca;Bivalvia;Autobranchia;Heteroconchia;Euhe  
terodonta;Imparidentia;Venerida;Veneroidea;Veneridae;Mercenaria;Mercenari  
a mercenaria

UdeM00000009526 6596 783.5 UdeM00000009526 XP\_045169410.1 77.7 512  
79 5 1 504 249 733 1.60E-223 783.5 6596 cellular

organisms;Eukaryota;Opisthokonta;Metazoa;Eumetazoa;Bilateria;Protostomia;  
Spiralia;Lophotrochozoa;Mollusca;Bivalvia;Autobranchia;Heteroconchia;Euhe  
terodonta;Imparidentia;Venerida;Veneroidea;Veneridae;Mercenaria;Mercenari  
a mercenaria

UdeM00000009528 6596 664.1 UdeM00000009528 XP\_045169410.1 77.1 433  
66 4 24 450 328 733 1.30E-187 664.1 6596 cellular

organisms;Eukaryota;Opisthokonta;Metazoa;Eumetazoa;Bilateria;Protostomia;  
Spiralia;Lophotrochozoa;Mollusca;Bivalvia;Autobranchia;Heteroconchia;Euhe

terodonta;Imparidentia;Venerida;Veneroidea;Veneridae;Mercenaria;Mercenari  
a mercenaria

|                 |      |        |   |                 |                |     |          |        |      |
|-----------------|------|--------|---|-----------------|----------------|-----|----------|--------|------|
| UdeM00000009529 | 6596 | 1215.7 |   | UdeM00000009529 | XP_045168273.1 | 81  |          |        |      |
| 722             | 137  | 0      | 1 | 722             | 2              | 723 | 0.00E+00 | 1215.7 | 6596 |

cellular

organisms;Eukaryota;Opisthokonta;Metazoa;Eumetazoa;Bilateria;Protostomia;  
Spiralia;Lophotrochozoa;Mollusca;Bivalvia;Autobranchia;Heteroconchia;Euhe  
terodonta;Imparidentia;Venerida;Veneroidea;Veneridae;Mercenaria;Mercenari  
a mercenaria

|                 |        |       |   |                 |                |      |          |       |        |
|-----------------|--------|-------|---|-----------------|----------------|------|----------|-------|--------|
| UdeM00000009530 | 173247 | 300.8 |   | UdeM00000009530 | XP_029369965.1 | 66.8 |          |       |        |
| 223             | 70     | 3     | 1 | 220             | 1              | 222  | 1.40E-78 | 300.8 | 173247 |

cellular

organisms;Eukaryota;Opisthokonta;Metazoa;Eumetazoa;Bilateria;Deuterostomi  
a;Chordata;Craniata;Vertebrata;Gnathostomata;Teleostomi;Euteleostomi;Acti  
nopterygii;Actinopteri;Neopterygii;Teleostei;Osteoglossocephalai;Clupeoce  
phala;Euteleosteoromorpha;Neoteleostei;Eurypterygia;Ctenosquamata;Acanthomo  
rphata;Euacanthomorphacea;Percomorphaceae;Carangaria;Carangiiformes;Echene  
idae;Echeneis;Echeneis naucrates

|                 |      |       |     |                 |                |          |       |      |          |
|-----------------|------|-------|-----|-----------------|----------------|----------|-------|------|----------|
| UdeM00000009531 | 6596 | 192.2 |     | UdeM00000009531 | XP_045168322.1 | 56       | 150   |      |          |
| 65              | 1    | 2     | 151 | 396             | 544            | 4.80E-46 | 192.2 | 6596 | cellular |

organisms;Eukaryota;Opisthokonta;Metazoa;Eumetazoa;Bilateria;Protostomia;  
Spiralia;Lophotrochozoa;Mollusca;Bivalvia;Autobranchia;Heteroconchia;Euhe  
terodonta;Imparidentia;Venerida;Veneroidea;Veneridae;Mercenaria;Mercenari  
a mercenaria

|                 |      |       |     |                 |                |           |       |      |          |
|-----------------|------|-------|-----|-----------------|----------------|-----------|-------|------|----------|
| UdeM00000009532 | 6573 | 460.7 |     | UdeM00000009532 | XP_021368495.1 | 57        | 391   |      |          |
| 164             | 1    | 3     | 389 | 16              | 406            | 1.90E-126 | 460.7 | 6573 | cellular |

organisms;Eukaryota;Opisthokonta;Metazoa;Eumetazoa;Bilateria;Protostomia;  
Spiralia;Lophotrochozoa;Mollusca;Bivalvia;Autobranchia;Pteriomorphia;Pect  
inida;Pectinoidea;Pectinidae;Mizuhopecten;Mizuhopecten yessoensis

|                 |      |      |     |                 |                |          |      |      |          |
|-----------------|------|------|-----|-----------------|----------------|----------|------|------|----------|
| UdeM00000009534 | 6706 | 80.9 |     | UdeM00000009534 | XP_042235765.1 | 32.9     | 158  |      |          |
| 62              | 2    | 1    | 115 | 1               | 157            | 1.20E-12 | 80.9 | 6706 | cellular |

organisms;Eukaryota;Opisthokonta;Metazoa;Eumetazoa;Bilateria;Protostomia;  
Ecdysozoa;Panarthropoda;Arthropoda;Mandibulata;Pancrustacea;Crustacea;Mul  
ticrustacea;Malacostraca;Eumalacostraca;Eucarida;Decapoda;Pleocyemata;Ast  
acidea;Nephropoidea;Nephropidae;Homarus;Homarus americanus

|                 |      |       |     |                 |                |          |       |      |          |
|-----------------|------|-------|-----|-----------------|----------------|----------|-------|------|----------|
| UdeM00000009535 | 6596 | 150.6 |     | UdeM00000009535 | XP_045168327.1 | 58.1     | 117   |      |          |
| 47              | 1    | 1     | 115 | 5               | 121            | 1.70E-33 | 150.6 | 6596 | cellular |

organisms;Eukaryota;Opisthokonta;Metazoa;Eumetazoa;Bilateria;Protostomia;  
Spiralia;Lophotrochozoa;Mollusca;Bivalvia;Autobranchia;Heteroconchia;Euhe  
terodonta;Imparidentia;Venerida;Veneroidea;Veneridae;Mercenaria;Mercenari  
a mercenaria

|                 |      |       |     |                 |                |           |       |      |          |
|-----------------|------|-------|-----|-----------------|----------------|-----------|-------|------|----------|
| UdeM00000009536 | 6526 | 965.7 |     | UdeM00000009536 | XP_013063651.1 | 76.2      | 629   |      |          |
| 141             | 3    | 1     | 627 | 1               | 622            | 2.90E-278 | 965.7 | 6526 | cellular |

organisms;Eukaryota;Opisthokonta;Metazoa;Eumetazoa;Bilateria;Protostomia;  
Spiralia;Lophotrochozoa;Mollusca;Gastropoda;Heterobranchia;Euthyneura;Pan  
pulmonata;Hygrophila;Lymnaeioidea;Planorbidae;Biophalaria;Biophalaria  
glabrata

|                 |         |       |    |                 |                |      |          |       |         |
|-----------------|---------|-------|----|-----------------|----------------|------|----------|-------|---------|
| UdeM00000009537 | 1735272 | 355.1 |    | UdeM00000009537 | XP_041366481.1 | 57.1 |          |       |         |
| 310             | 126     | 4     | 33 | 338             | 128            | 434  | 9.60E-95 | 355.1 | 1735272 |

cellular

organisms;Eukaryota;Opisthokonta;Metazoa;Eumetazoa;Bilateria;Protostomia;  
Spiralia;Lophotrochozoa;Mollusca;Gastropoda;Neomphalina;Neomphaloidea;Pel  
topiridae;Gigantopelta;Gigantopelta aegis

UdeM00000009538 6850 196.4 UdeM00000009538 XP\_022251095.1 79.3 111  
 23 0 7 117 24 134 2.00E-47 196.4 6850 cellular  
 organisms;Eukaryota;Opisthokonta;Metazoa;Eumetazoa;Bilateria;Protostomia;  
 Ecdysozoa;Panarthropoda;Arthropoda;Chelicerata;Merostomata;Xiphosura;Limu  
 lidae;Limulus;Limulus polyphemus  
 UdeM00000009539 6579 230.7 UdeM00000009539 XP\_033731637.1 32.3 433  
 217 8 11 441 11 369 3.60E-57 230.7 6579 cellular  
 organisms;Eukaryota;Opisthokonta;Metazoa;Eumetazoa;Bilateria;Protostomia;  
 Spiralia;Lophotrochozoa;Mollusca;Bivalvia;Autobranchia;Pteriormorphia;Pect  
 inida;Pectinoidea;Pectinidae;Pecten;Pecten maximus  
 UdeM00000009540 6596 222.6 UdeM00000009540 XP\_045169752.1 50.7 211  
 97 2 7 210 6 216 4.90E-55 222.6 6596 cellular  
 organisms;Eukaryota;Opisthokonta;Metazoa;Eumetazoa;Bilateria;Protostomia;  
 Spiralia;Lophotrochozoa;Mollusca;Bivalvia;Autobranchia;Heteroconchia;Euhe  
 terodonta;Imparidentia;Venerida;Veneroidea;Veneridae;Mercenaria;Mercenari  
 a mercenaria  
 UdeM00000009541 6596 510 UdeM00000009541 XP\_045169752.1 43.7 584  
 300 5 7 562 6 588 3.90E-141 510 6596 cellular  
 organisms;Eukaryota;Opisthokonta;Metazoa;Eumetazoa;Bilateria;Protostomia;  
 Spiralia;Lophotrochozoa;Mollusca;Bivalvia;Autobranchia;Heteroconchia;Euhe  
 terodonta;Imparidentia;Venerida;Veneroidea;Veneridae;Mercenaria;Mercenari  
 a mercenaria  
 UdeM00000009542 6596 343.2 UdeM00000009542 XP\_045168319.1 77.6 210  
 41 1 1 204 502 711 2.30E-91 343.2 6596 cellular  
 organisms;Eukaryota;Opisthokonta;Metazoa;Eumetazoa;Bilateria;Protostomia;  
 Spiralia;Lophotrochozoa;Mollusca;Bivalvia;Autobranchia;Heteroconchia;Euhe  
 terodonta;Imparidentia;Venerida;Veneroidea;Veneridae;Mercenaria;Mercenari  
 a mercenaria  
 UdeM00000009543 6596 581.6 UdeM00000009543 XP\_045168319.1 67.5 452  
 110 4 1 415 1 452 8.00E-163 581.6 6596 cellular  
 organisms;Eukaryota;Opisthokonta;Metazoa;Eumetazoa;Bilateria;Protostomia;  
 Spiralia;Lophotrochozoa;Mollusca;Bivalvia;Autobranchia;Heteroconchia;Euhe  
 terodonta;Imparidentia;Venerida;Veneroidea;Veneridae;Mercenaria;Mercenari  
 a mercenaria  
 UdeM00000009544 6596 634.4 UdeM00000009544 XP\_045167519.1 71.9 434  
 119 3 1 431 1 434 1.00E-178 634.4 6596 cellular  
 organisms;Eukaryota;Opisthokonta;Metazoa;Eumetazoa;Bilateria;Protostomia;  
 Spiralia;Lophotrochozoa;Mollusca;Bivalvia;Autobranchia;Heteroconchia;Euhe  
 terodonta;Imparidentia;Venerida;Veneroidea;Veneridae;Mercenaria;Mercenari  
 a mercenaria  
 UdeM00000009545 6596 573.5 UdeM00000009545 XP\_045168780.1 73.5 385  
 97 3 3 385 2 383 2.00E-160 573.5 6596 cellular  
 organisms;Eukaryota;Opisthokonta;Metazoa;Eumetazoa;Bilateria;Protostomia;  
 Spiralia;Lophotrochozoa;Mollusca;Bivalvia;Autobranchia;Heteroconchia;Euhe  
 terodonta;Imparidentia;Venerida;Veneroidea;Veneridae;Mercenaria;Mercenari  
 a mercenaria  
 UdeM00000009546 6579 122.5 UdeM00000009546 XP\_033762157.1 62.2 82  
 31 0 1 82 370 451 2.60E-25 122.5 6579 cellular  
 organisms;Eukaryota;Opisthokonta;Metazoa;Eumetazoa;Bilateria;Protostomia;  
 Spiralia;Lophotrochozoa;Mollusca;Bivalvia;Autobranchia;Pteriormorphia;Pect  
 inida;Pectinoidea;Pectinidae;Pecten;Pecten maximus  
 UdeM00000009547 6579 592 UdeM00000009547 XP\_033762157.1 63.1 452  
 166 1 1 452 1 451 6.20E-166 592 6579 cellular  
 organisms;Eukaryota;Opisthokonta;Metazoa;Eumetazoa;Bilateria;Protostomia;



Spiralia; Lophotrochozoa; Mollusca; Bivalvia; Autobranchia; Pteriomorphia; Pectinida; Pectinoidea; Pectinidae; Pecten; Pecten maximus

UdeM00000009548 42526 236.5 UdeM00000009548 XP\_036419876.1 36 369  
204 7 15 375 185 529 5.50E-59 236.5 42526 cellular  
organisms; Eukaryota; Opisthokonta; Metazoa; Eumetazoa; Bilateria; Deuterostomia; Chordata; Craniata; Vertebrata; Gnathostomata; Teleostomi; Euteleostomi; Actinopterygii; Actinopteri; Neopterygii; Teleostei; Osteoglossocephalai; Clupeocephala; Otomorpha; Ostariophysi; Otophysi; Characiphysae; Characiformes; Characidei; Serrasalminae; Colossoma; Colossoma macropomum

UdeM00000009551 42526 223.4 UdeM00000009551 XP\_036419876.1 34 368  
211 6 15 374 185 528 4.80E-55 223.4 42526 cellular  
organisms; Eukaryota; Opisthokonta; Metazoa; Eumetazoa; Bilateria; Deuterostomia; Chordata; Craniata; Vertebrata; Gnathostomata; Teleostomi; Euteleostomi; Actinopterygii; Actinopteri; Neopterygii; Teleostei; Osteoglossocephalai; Clupeocephala; Otomorpha; Ostariophysi; Otophysi; Characiphysae; Characiformes; Characidei; Serrasalminae; Colossoma; Colossoma macropomum

UdeM00000009553 6596 86.3 UdeM00000009553 XP\_045169168.1 30.2 212  
133 3 1 203 1 206 5.30E-14 86.3 6596 cellular  
organisms; Eukaryota; Opisthokonta; Metazoa; Eumetazoa; Bilateria; Protostomia; Spiralia; Lophotrochozoa; Mollusca; Bivalvia; Autobranchia; Heteroconchia; Euheterodonta; Imparidentia; Venerida; Veneroidea; Veneridae; Mercenaria; Mercenaria mercenaria

UdeM00000009554 6596 85.1 UdeM00000009554 XP\_045169421.1 44.7 94  
39 1 22 102 35 128 7.00E-14 85.1 6596 cellular  
organisms; Eukaryota; Opisthokonta; Metazoa; Eumetazoa; Bilateria; Protostomia; Spiralia; Lophotrochozoa; Mollusca; Bivalvia; Autobranchia; Heteroconchia; Euheterodonta; Imparidentia; Venerida; Veneroidea; Veneridae; Mercenaria; Mercenaria mercenaria

UdeM00000009555 6573 86.7 UdeM00000009555 XP\_021373000.1 46.9 128  
58 4 1 123 1 123 2.50E-14 86.7 6573 cellular  
organisms; Eukaryota; Opisthokonta; Metazoa; Eumetazoa; Bilateria; Protostomia; Spiralia; Lophotrochozoa; Mollusca; Bivalvia; Autobranchia; Pteriomorphia; Pectinida; Pectinoidea; Pectinidae; Mizuhopecten; Mizuhopecten yessoensis

UdeM00000009556 29159 923.7 UdeM00000009556 XP\_011412959.2 75.6 611  
125 7 11 613 137 731 1.20E-265 923.7 29159 cellular  
organisms; Eukaryota; Opisthokonta; Metazoa; Eumetazoa; Bilateria; Protostomia; Spiralia; Lophotrochozoa; Mollusca; Bivalvia; Autobranchia; Pteriomorphia; Ostreida; Ostreidae; Crassostrea; Crassostrea gigas

UdeM00000009557 6596 310.5 UdeM00000009557 XP\_045168658.1 69.4 229  
68 1 1 227 4 232 1.90E-81 310.5 6596 cellular  
organisms; Eukaryota; Opisthokonta; Metazoa; Eumetazoa; Bilateria; Protostomia; Spiralia; Lophotrochozoa; Mollusca; Bivalvia; Autobranchia; Heteroconchia; Euheterodonta; Imparidentia; Venerida; Veneroidea; Veneridae; Mercenaria; Mercenaria mercenaria

UdeM00000009559 6596 390.2 UdeM00000009559 XP\_045169303.1 37.2 726  
379 22 5 711 79 746 5.70E-105 390.2 6596 cellular  
organisms; Eukaryota; Opisthokonta; Metazoa; Eumetazoa; Bilateria; Protostomia; Spiralia; Lophotrochozoa; Mollusca; Bivalvia; Autobranchia; Heteroconchia; Euheterodonta; Imparidentia; Venerida; Veneroidea; Veneridae; Mercenaria; Mercenaria mercenaria

UdeM00000009560 6596 489.6 UdeM00000009560 XP\_045170118.1 66.8 343  
113 1 22 363 1068 1410 3.50E-135 489.6 6596 cellular  
organisms; Eukaryota; Opisthokonta; Metazoa; Eumetazoa; Bilateria; Protostomia; Spiralia; Lophotrochozoa; Mollusca; Bivalvia; Autobranchia; Heteroconchia; Euheterodonta; Imparidentia; Venerida; Veneroidea; Veneridae; Mercenaria; Mercenaria mercenaria

terodonta;Imparidentia;Venerida;Veneroidea;Veneridae;Mercenaria;Mercenari  
a mercenaria

UdeM00000009561 1735272 362.8 UdeM00000009561 XP\_041365861.1 41.3  
596 264 17 2 577 457 986 8.70E-97 362.8 1735272  
cellular

organisms;Eukaryota;Opisthokonta;Metazoa;Eumetazoa;Bilateria;Protostomia;  
Spiralia;Lophotrochozoa;Mollusca;Gastropoda;Neomphalina;Neomphaloidea;Pel  
tospiridae;Gigantopelta;Gigantopelta aegis

UdeM00000009562 6596 122.1 UdeM00000009562 XP\_045180427.1 33.2 274  
129 4 1 221 1 273 9.60E-25 122.1 6596 cellular

organisms;Eukaryota;Opisthokonta;Metazoa;Eumetazoa;Bilateria;Protostomia;  
Spiralia;Lophotrochozoa;Mollusca;Bivalvia;Autobranchia;Heteroconchia;Euhe  
terodonta;Imparidentia;Venerida;Veneroidea;Veneridae;Mercenaria;Mercenari  
a mercenaria

UdeM00000009563 400727 285.4 UdeM00000009563 XP\_025093800.1 49.4  
255 125 2 1 254 1 252 7.40E-74 285.4 400727  
cellular

organisms;Eukaryota;Opisthokonta;Metazoa;Eumetazoa;Bilateria;Protostomia;  
Spiralia;Lophotrochozoa;Mollusca;Gastropoda;Caenogastropoda;Architaeniogl  
ossa;Ampullarioidea;Ampullariidae;Pomacea;Pomacea canaliculata

UdeM00000009564 6596 603.2 UdeM00000009564 XP\_045168270.1 52.5 579  
272 2 7 584 1 577 3.50E-169 603.2 6596 cellular

organisms;Eukaryota;Opisthokonta;Metazoa;Eumetazoa;Bilateria;Protostomia;  
Spiralia;Lophotrochozoa;Mollusca;Bivalvia;Autobranchia;Heteroconchia;Euhe  
terodonta;Imparidentia;Venerida;Veneroidea;Veneridae;Mercenaria;Mercenari  
a mercenaria

UdeM00000009565 6596 324.7 UdeM00000009565 XP\_045168270.1 52.9 295  
139 0 1 295 283 577 1.20E-85 324.7 6596 cellular

organisms;Eukaryota;Opisthokonta;Metazoa;Eumetazoa;Bilateria;Protostomia;  
Spiralia;Lophotrochozoa;Mollusca;Bivalvia;Autobranchia;Heteroconchia;Euhe  
terodonta;Imparidentia;Venerida;Veneroidea;Veneridae;Mercenaria;Mercenari  
a mercenaria

UdeM00000009566 6596 448.7 UdeM00000009566 XP\_045169493.1 62.2 360  
127 2 50 408 34 385 7.80E-123 448.7 6596 cellular

organisms;Eukaryota;Opisthokonta;Metazoa;Eumetazoa;Bilateria;Protostomia;  
Spiralia;Lophotrochozoa;Mollusca;Bivalvia;Autobranchia;Heteroconchia;Euhe  
terodonta;Imparidentia;Venerida;Veneroidea;Veneridae;Mercenaria;Mercenari  
a mercenaria

UdeM00000009567 6596 75.5 UdeM00000009567 XP\_045170251.1 30.3 185  
105 6 12 175 15 196 7.80E-11 75.5 6596 cellular

organisms;Eukaryota;Opisthokonta;Metazoa;Eumetazoa;Bilateria;Protostomia;  
Spiralia;Lophotrochozoa;Mollusca;Bivalvia;Autobranchia;Heteroconchia;Euhe  
terodonta;Imparidentia;Venerida;Veneroidea;Veneridae;Mercenaria;Mercenari  
a mercenaria

UdeM00000009569 6596 393.3 UdeM00000009569 XP\_045170251.1 34 717  
444 14 13 719 346 1043 6.90E-106 393.3 6596 cellular

organisms;Eukaryota;Opisthokonta;Metazoa;Eumetazoa;Bilateria;Protostomia;  
Spiralia;Lophotrochozoa;Mollusca;Bivalvia;Autobranchia;Heteroconchia;Euhe  
terodonta;Imparidentia;Venerida;Veneroidea;Veneridae;Mercenaria;Mercenari  
a mercenaria

UdeM00000009570 6596 61.6 UdeM00000009570 XP\_045170251.1 44.3 79  
41 2 2 80 1060 1135 5.50E-07 61.6 6596 cellular

organisms;Eukaryota;Opisthokonta;Metazoa;Eumetazoa;Bilateria;Protostomia;  
Spiralia;Lophotrochozoa;Mollusca;Bivalvia;Autobranchia;Heteroconchia;Euhe

terodonta;Imparidentia;Venerida;Veneroidea;Veneridae;Mercenaria;Mercenari  
 a mercenaria  
 UdeM00000009571 6596 553.9 UdeM00000009571 XP\_045170251.1 35.2 1036  
 605 27 2 1001 132 1137 4.20E-154 553.9 6596 cellular  
 organisms;Eukaryota;Opisthokonta;Metazoa;Eumetazoa;Bilateria;Protostomia;  
 Spiralia;Lophotrochozoa;Mollusca;Bivalvia;Autobranchia;Heteroconchia;Euhe  
 terodonta;Imparidentia;Venerida;Veneroidea;Veneridae;Mercenaria;Mercenari  
 a mercenaria  
 UdeM00000009572 6596 122.1 UdeM00000009572 XP\_045170251.1 42.7 157  
 82 4 48 199 984 1137 8.10E-25 122.1 6596 cellular  
 organisms;Eukaryota;Opisthokonta;Metazoa;Eumetazoa;Bilateria;Protostomia;  
 Spiralia;Lophotrochozoa;Mollusca;Bivalvia;Autobranchia;Heteroconchia;Euhe  
 terodonta;Imparidentia;Venerida;Veneroidea;Veneridae;Mercenaria;Mercenari  
 a mercenaria  
 UdeM00000009573 6596 577.8 UdeM00000009573 XP\_045170251.1 35 1145  
 658 36 27 1124 30 1135 3.00E-161 577.8 6596 cellular  
 organisms;Eukaryota;Opisthokonta;Metazoa;Eumetazoa;Bilateria;Protostomia;  
 Spiralia;Lophotrochozoa;Mollusca;Bivalvia;Autobranchia;Heteroconchia;Euhe  
 terodonta;Imparidentia;Venerida;Veneroidea;Veneridae;Mercenaria;Mercenari  
 a mercenaria  
 UdeM00000009574 225164 135.2 UdeM00000009574 XP\_009055556.1 81.7  
 71 13 0 83 153 4345 4415 9.50E-29 135.2 225164  
 cellular  
 organisms;Eukaryota;Opisthokonta;Metazoa;Eumetazoa;Bilateria;Protostomia;  
 Spiralia;Lophotrochozoa;Mollusca;Gastropoda;Patellogastropoda;Lottioidea;  
 Lottiidae;Lottia;Lottia gigantea  
 UdeM00000009575 6596 590.5 UdeM00000009575 XP\_045170251.1 34.7 1133  
 659 30 27 1110 30 1130 4.50E-165 590.5 6596 cellular  
 organisms;Eukaryota;Opisthokonta;Metazoa;Eumetazoa;Bilateria;Protostomia;  
 Spiralia;Lophotrochozoa;Mollusca;Bivalvia;Autobranchia;Heteroconchia;Euhe  
 terodonta;Imparidentia;Venerida;Veneroidea;Veneridae;Mercenaria;Mercenari  
 a mercenaria  
 UdeM00000009576 29159 166.4 UdeM00000009576 XP\_034301736.1 81.3 91  
 17 0 119 209 4556 4646 3.90E-38 166.4 29159 cellular  
 organisms;Eukaryota;Opisthokonta;Metazoa;Eumetazoa;Bilateria;Protostomia;  
 Spiralia;Lophotrochozoa;Mollusca;Bivalvia;Autobranchia;Pteriomorphia;Ostr  
 eida;Ostreoidea;Ostreidae;Crassostrea;Crassostrea gigas  
 UdeM00000009576 29159 79.7 UdeM00000009576 XP\_034301736.1 51.1 92  
 45 0 28 119 3450 3541 4.80E-12 79.7 29159 cellular  
 organisms;Eukaryota;Opisthokonta;Metazoa;Eumetazoa;Bilateria;Protostomia;  
 Spiralia;Lophotrochozoa;Mollusca;Bivalvia;Autobranchia;Pteriomorphia;Ostr  
 eida;Ostreoidea;Ostreidae;Crassostrea;Crassostrea gigas  
 UdeM00000009577 6596 239.6 UdeM00000009577 XP\_045170251.1 29.3 587  
 377 13 1 564 529 1100 1.00E-59 239.6 6596 cellular  
 organisms;Eukaryota;Opisthokonta;Metazoa;Eumetazoa;Bilateria;Protostomia;  
 Spiralia;Lophotrochozoa;Mollusca;Bivalvia;Autobranchia;Heteroconchia;Euhe  
 terodonta;Imparidentia;Venerida;Veneroidea;Veneridae;Mercenaria;Mercenari  
 a mercenaria  
 UdeM00000009578 6579 114.4 UdeM00000009578 XP\_033758038.1 70.8 89  
 26 0 7 95 3459 3547 1.20E-22 114.4 6579 cellular  
 organisms;Eukaryota;Opisthokonta;Metazoa;Eumetazoa;Bilateria;Protostomia;  
 Spiralia;Lophotrochozoa;Mollusca;Bivalvia;Autobranchia;Pteriomorphia;Pect  
 inida;Pectinoidea;Pectinidae;Pecten;Pecten maximus

UdeM00000009579 6596 173.3 UdeM00000009579 XP\_045170252.1 22 898  
 444 23 2 651 131 1020 9.90E-40 173.3 6596 cellular  
 organisms;Eukaryota;Opisthokonta;Metazoa;Eumetazoa;Bilateria;Protostomia;  
 Spiralia;Lophotrochozoa;Mollusca;Bivalvia;Autobranhia;Heteroconchia;Euhe  
 terodonta;Imparidentia;Venerida;Veneroidea;Veneridae;Mercenaria;Mercenari  
 a mercenaria

UdeM00000009582 6596 406.8 UdeM00000009582 XP\_045170251.1 34.4 850  
 484 23 27 824 30 857 6.80E-110 406.8 6596 cellular  
 organisms;Eukaryota;Opisthokonta;Metazoa;Eumetazoa;Bilateria;Protostomia;  
 Spiralia;Lophotrochozoa;Mollusca;Bivalvia;Autobranhia;Heteroconchia;Euhe  
 terodonta;Imparidentia;Venerida;Veneroidea;Veneridae;Mercenaria;Mercenari  
 a mercenaria

UdeM00000009583 6596 402.5 UdeM00000009583 XP\_045170251.1 34.2 850  
 485 23 27 824 30 857 1.30E-108 402.5 6596 cellular  
 organisms;Eukaryota;Opisthokonta;Metazoa;Eumetazoa;Bilateria;Protostomia;  
 Spiralia;Lophotrochozoa;Mollusca;Bivalvia;Autobranhia;Heteroconchia;Euhe  
 terodonta;Imparidentia;Venerida;Veneroidea;Veneridae;Mercenaria;Mercenari  
 a mercenaria

UdeM00000009584 6596 117.9 UdeM00000009584 XP\_045170251.1 43.5 138  
 70 3 49 178 984 1121 3.20E-23 117.9 6596 cellular  
 organisms;Eukaryota;Opisthokonta;Metazoa;Eumetazoa;Bilateria;Protostomia;  
 Spiralia;Lophotrochozoa;Mollusca;Bivalvia;Autobranhia;Heteroconchia;Euhe  
 terodonta;Imparidentia;Venerida;Veneroidea;Veneridae;Mercenaria;Mercenari  
 a mercenaria

UdeM00000009585 70779 77.8 UdeM00000009585 XP\_015747352.1 50 66  
 33 0 2 67 297 362 8.20E-12 77.8 70779 cellular  
 organisms;Eukaryota;Opisthokonta;Metazoa;Eumetazoa;Cnidaria;Anthozoa;Hexa  
 corallia;Scleractinia;Astrocoeniina;Acroporidae;Acropora;Acropora  
 digitifera

UdeM00000009586 45264 294.7 UdeM00000009586 XP\_044165143.1 56 275  
 113 3 2 272 41 311 1.20E-76 294.7 45264 cellular  
 organisms;Eukaryota;Opisthokonta;Metazoa;Eumetazoa;Cnidaria;Anthozoa;Hexa  
 corallia;Scleractinia;Astrocoeniina;Acroporidae;Acropora;Acropora  
 millepora

UdeM00000009587 6596 127.9 UdeM00000009587 XP\_045170251.1 44.1 145  
 76 2 6 145 986 1130 1.10E-26 127.9 6596 cellular  
 organisms;Eukaryota;Opisthokonta;Metazoa;Eumetazoa;Bilateria;Protostomia;  
 Spiralia;Lophotrochozoa;Mollusca;Bivalvia;Autobranhia;Heteroconchia;Euhe  
 terodonta;Imparidentia;Venerida;Veneroidea;Veneridae;Mercenaria;Mercenari  
 a mercenaria

UdeM00000009588 6573 2918.6 UdeM00000009588 XP\_021370668.1 80.6  
 1791 348 0 3 1793 2840 4630 0.00E+00 2918.6 6573  
 cellular  
 organisms;Eukaryota;Opisthokonta;Metazoa;Eumetazoa;Bilateria;Protostomia;  
 Spiralia;Lophotrochozoa;Mollusca;Bivalvia;Autobranhia;Pteriormorphia;Pect  
 inida;Pectinoidea;Pectinidae;Mizuhopecten;Mizuhopecten yessoensis

UdeM00000009589 6596 109.8 UdeM00000009589 XP\_045180427.1 37.2 180  
 104 2 76 250 98 273 5.50E-21 109.8 6596 cellular  
 organisms;Eukaryota;Opisthokonta;Metazoa;Eumetazoa;Bilateria;Protostomia;  
 Spiralia;Lophotrochozoa;Mollusca;Bivalvia;Autobranhia;Heteroconchia;Euhe  
 terodonta;Imparidentia;Venerida;Veneroidea;Veneridae;Mercenaria;Mercenari  
 a mercenaria

UdeM00000009590 6596 4372 UdeM00000009590 XP\_045170220.1 75.8 2847  
 647 9 10 2835 23 2847 0.00E+00 4372 6596 cellular

organisms;Eukaryota;Opisthokonta;Metazoa;Eumetazoa;Bilateria;Protostomia;Spiralia;Lophotrochozoa;Mollusca;Bivalvia;Autobranhia;Heteroconchia;Euherodonta;Imparidentia;Venerida;Veneroidea;Veneridae;Mercenaria;Mercenaria mercenaria

UdeM00000009591 6596 214.9 UdeM00000009591 XP\_045168193.1 29 556  
320 27 80 592 98 621 2.80E-52 214.9 6596 cellular

organisms;Eukaryota;Opisthokonta;Metazoa;Eumetazoa;Bilateria;Protostomia;Spiralia;Lophotrochozoa;Mollusca;Bivalvia;Autobranhia;Heteroconchia;Euherodonta;Imparidentia;Venerida;Veneroidea;Veneridae;Mercenaria;Mercenaria mercenaria

UdeM00000009592 6596 223 UdeM00000009592 XP\_045168866.1 29.5 560  
335 20 110 638 18 548 1.10E-54 223 6596 cellular

organisms;Eukaryota;Opisthokonta;Metazoa;Eumetazoa;Bilateria;Protostomia;Spiralia;Lophotrochozoa;Mollusca;Bivalvia;Autobranhia;Heteroconchia;Euherodonta;Imparidentia;Venerida;Veneroidea;Veneridae;Mercenaria;Mercenaria mercenaria

UdeM00000009593 6579 851.7 UdeM00000009593 XP\_033733127.1 63 691  
241 7 383 1066 336 1018 1.00E-243 851.7 6579 cellular

organisms;Eukaryota;Opisthokonta;Metazoa;Eumetazoa;Bilateria;Protostomia;Spiralia;Lophotrochozoa;Mollusca;Bivalvia;Autobranhia;Pteriormorphia;Pectinida;Pectinoidea;Pectinidae;Pecten;Pecten maximus

UdeM00000009594 225164 98.2 UdeM00000009594 XP\_009067187.1 46.9  
98 51 1 47 143 15 112 9.20E-18 98.2 225164

cellular

organisms;Eukaryota;Opisthokonta;Metazoa;Eumetazoa;Bilateria;Protostomia;Spiralia;Lophotrochozoa;Mollusca;Gastropoda;Patellogastropoda;Lottioidea;Lottiidae;Lottia;Lottia gigantea

UdeM00000009595 7460 106.7 UdeM00000009595 XP\_026301736.1 40 175  
97 4 5 178 983 1150 4.30E-20 106.7 7460 cellular

organisms;Eukaryota;Opisthokonta;Metazoa;Eumetazoa;Bilateria;Protostomia;Ecdysozoa;Panarthropoda;Arthropoda;Mandibulata;Pancrustacea;Hexapoda;Insecta;Dicondylia;Pterygota;Neoptera;Endopterygota;Hymenoptera;Apocrita;Aculeata;Apoidea;Apidae;Apinae;Apini;Apis;Apis mellifera

UdeM00000009596 473952 77.8 UdeM00000009596 XP\_034195245.1 25.8  
155 113 1 1 155 720 872 1.40E-11 77.8 473952

cellular

organisms;Eukaryota;Opisthokonta;Metazoa;Eumetazoa;Bilateria;Protostomia;Ecdysozoa;Panarthropoda;Arthropoda;Mandibulata;Pancrustacea;Hexapoda;Insecta;Dicondylia;Pterygota;Neoptera;Endopterygota;Hymenoptera;Apocrita;Aculeata;Apoidea;Megachilidae;Megachilinae;Osmiini;Osmia;Osmia lignaria

UdeM00000009597 225164 77.8 UdeM00000009597 XP\_009067187.1 47.9  
71 37 0 1 71 42 112 6.80E-12 77.8 225164

cellular

organisms;Eukaryota;Opisthokonta;Metazoa;Eumetazoa;Bilateria;Protostomia;Spiralia;Lophotrochozoa;Mollusca;Gastropoda;Patellogastropoda;Lottioidea;Lottiidae;Lottia;Lottia gigantea

UdeM00000009598 225164 87 UdeM00000009598 XP\_009067187.1 40.4  
104 61 1 38 140 15 118 2.00E-14 87 225164

cellular

organisms;Eukaryota;Opisthokonta;Metazoa;Eumetazoa;Bilateria;Protostomia;Spiralia;Lophotrochozoa;Mollusca;Gastropoda;Patellogastropoda;Lottioidea;Lottiidae;Lottia;Lottia gigantea

UdeM00000009600 6596 538.1 UdeM00000009600 XP\_045163235.1 48.1 563  
286 3 83 644 4 561 1.60E-149 538.1 6596 cellular

organisms;Eukaryota;Opisthokonta;Metazoa;Eumetazoa;Bilateria;Protostomia; Spiralia;Lophotrochozoa;Mollusca;Bivalvia;Autobranchia;Heteroconchia;Euherodonta;Imparidentia;Venerida;Veneroidea;Veneridae;Mercenaria;Mercenaria mercenaria

UdeM00000009601 6596 522.3 UdeM00000009601 XP\_045163235.1 49.7 523  
257 3 1 522 44 561 7.20E-145 522.3 6596 cellular

organisms;Eukaryota;Opisthokonta;Metazoa;Eumetazoa;Bilateria;Protostomia; Spiralia;Lophotrochozoa;Mollusca;Bivalvia;Autobranchia;Heteroconchia;Euherodonta;Imparidentia;Venerida;Veneroidea;Veneridae;Mercenaria;Mercenaria mercenaria

UdeM00000009602 6596 94 UdeM00000009602 XP\_045170404.1 39.6 144  
75 3 1 141 1 135 1.70E-16 94 6596 cellular

organisms;Eukaryota;Opisthokonta;Metazoa;Eumetazoa;Bilateria;Protostomia; Spiralia;Lophotrochozoa;Mollusca;Bivalvia;Autobranchia;Heteroconchia;Euherodonta;Imparidentia;Venerida;Veneroidea;Veneridae;Mercenaria;Mercenaria mercenaria

UdeM00000009603 6596 548.1 UdeM00000009603 XP\_045163235.1 48.8 562  
282 3 19 579 5 561 1.40E-152 548.1 6596 cellular

organisms;Eukaryota;Opisthokonta;Metazoa;Eumetazoa;Bilateria;Protostomia; Spiralia;Lophotrochozoa;Mollusca;Bivalvia;Autobranchia;Heteroconchia;Euherodonta;Imparidentia;Venerida;Veneroidea;Veneridae;Mercenaria;Mercenaria mercenaria

UdeM00000009604 6596 548.1 UdeM00000009604 XP\_045163235.1 48.8 562  
282 3 18 578 5 561 1.40E-152 548.1 6596 cellular

organisms;Eukaryota;Opisthokonta;Metazoa;Eumetazoa;Bilateria;Protostomia; Spiralia;Lophotrochozoa;Mollusca;Bivalvia;Autobranchia;Heteroconchia;Euherodonta;Imparidentia;Venerida;Veneroidea;Veneridae;Mercenaria;Mercenaria mercenaria

UdeM00000009605 29159 68.6 UdeM00000009605 XP\_011447506.2 43.7 87  
49 0 45 131 51 137 7.20E-09 68.6 29159 cellular

organisms;Eukaryota;Opisthokonta;Metazoa;Eumetazoa;Bilateria;Protostomia; Spiralia;Lophotrochozoa;Mollusca;Bivalvia;Autobranchia;Pteriomorpha;Ostreida;Ostreoidea;Ostreidae;Crassostrea;Crassostrea gigas

UdeM00000009607 7574 371.3 UdeM00000009607 XP\_013397625.1 46 446  
194 5 3 403 5 448 1.60E-99 371.3 7574 cellular

organisms;Eukaryota;Opisthokonta;Metazoa;Eumetazoa;Bilateria;Protostomia; Spiralia;Lophotrochozoa;Brachiopoda;Linguliformea;Lingulata;Lingulida;Linguloidea;Lingulidae;Lingula;Lingula anatina

UdeM00000009606 6596 491.5 UdeM00000009606 XP\_045163235.1 45.4 559  
259 4 19 534 5 560 1.40E-135 491.5 6596 cellular

organisms;Eukaryota;Opisthokonta;Metazoa;Eumetazoa;Bilateria;Protostomia; Spiralia;Lophotrochozoa;Mollusca;Bivalvia;Autobranchia;Heteroconchia;Euherodonta;Imparidentia;Venerida;Veneroidea;Veneridae;Mercenaria;Mercenaria mercenaria

UdeM00000009611 8049 232.3 UdeM00000009611 XP\_030193753.1 34.2 374  
196 4 128 460 17 381 1.30E-57 232.3 8049 cellular

organisms;Eukaryota;Opisthokonta;Metazoa;Eumetazoa;Bilateria;Deuterostomia;Chordata;Craniata;Vertebrata;Gnathostomata;Teleostomi;Euteleostomi;Actinopterygii;Actinopteri;Neopterygii;Teleostei;Osteoglossocephalai;Clupeocephala;Euteleostei;Neoteleostei;Eurypterygia;Ctenosquamata;Acanthopterygii;Paracanthopterygii;Zeiozadaria;Gadariae;Gadiformes;Gadoidei;Gadidae;Gadus;Gadus morhua

UdeM00000009617 7574 178.7 UdeM00000009617 XP\_023933057.1 53.5 170  
79 0 59 228 101 270 8.30E-42 178.7 7574 cellular

organisms;Eukaryota;Opisthokonta;Metazoa;Eumetazoa;Bilateria;Protostomia;Spiralia;Lophotrochozoa;Brachiopoda;Linguliformea;Lingulata;Lingulida;Linguloidea;Lingulidae;Lingula;Lingula anatina

UdeM00000009622 6596 84 UdeM00000009622 XP\_045168977.1 37.3 110  
63 3 4 108 149 257 3.80E-13 84 6596 cellular

organisms;Eukaryota;Opisthokonta;Metazoa;Eumetazoa;Bilateria;Protostomia;Spiralia;Lophotrochozoa;Mollusca;Bivalvia;Autobranchia;Heteroconchia;Euheterodonta;Imparidentia;Venerida;Veneroidea;Veneridae;Mercenaria;Mercenaria mercenaria

UdeM00000009626 7574 100.5 UdeM00000009626 XP\_013397625.1 40.3 154  
79 3 139 279 296 449 3.50E-18 100.5 7574 cellular

organisms;Eukaryota;Opisthokonta;Metazoa;Eumetazoa;Bilateria;Protostomia;Spiralia;Lophotrochozoa;Brachiopoda;Linguliformea;Lingulata;Lingulida;Linguloidea;Lingulidae;Lingula;Lingula anatina

UdeM00000009627 6596 68.6 UdeM00000009627 XP\_045163235.1 45.6 79  
39 1 8 82 445 523 4.40E-09 68.6 6596 cellular

organisms;Eukaryota;Opisthokonta;Metazoa;Eumetazoa;Bilateria;Protostomia;Spiralia;Lophotrochozoa;Mollusca;Bivalvia;Autobranchia;Heteroconchia;Euheterodonta;Imparidentia;Venerida;Veneroidea;Veneridae;Mercenaria;Mercenaria mercenaria

UdeM00000009628 6565 68.9 UdeM00000009628 XP\_022303658.1 39.3 89  
54 0 7 95 49 137 4.10E-09 68.9 6565 cellular

organisms;Eukaryota;Opisthokonta;Metazoa;Eumetazoa;Bilateria;Protostomia;Spiralia;Lophotrochozoa;Mollusca;Bivalvia;Autobranchia;Pteriormorphia;Ostreida;Ostreoidea;Ostreidae;Crassostrea;Crassostrea virginica

UdeM00000009629 6596 468.8 UdeM00000009629 XP\_045163232.1 45.8 557  
258 5 19 532 56 611 9.60E-129 468.8 6596 cellular

organisms;Eukaryota;Opisthokonta;Metazoa;Eumetazoa;Bilateria;Protostomia;Spiralia;Lophotrochozoa;Mollusca;Bivalvia;Autobranchia;Heteroconchia;Euheterodonta;Imparidentia;Venerida;Veneroidea;Veneridae;Mercenaria;Mercenaria mercenaria

UdeM00000009632 1735272 235 UdeM00000009632 XP\_041347204.1 36.7  
379 212 14 1 373 208 564 1.60E-58 235 1735272  
cellular

organisms;Eukaryota;Opisthokonta;Metazoa;Eumetazoa;Bilateria;Protostomia;Spiralia;Lophotrochozoa;Mollusca;Gastropoda;Neomphalina;Neomphaloidea;Peltospiridae;Gigantopelta;Gigantopelta aegis

UdeM00000009635 6596 100.5 UdeM00000009635 XP\_045170404.1 42.4 144  
71 3 1 141 1 135 1.80E-18 100.5 6596 cellular

organisms;Eukaryota;Opisthokonta;Metazoa;Eumetazoa;Bilateria;Protostomia;Spiralia;Lophotrochozoa;Mollusca;Bivalvia;Autobranchia;Heteroconchia;Euheterodonta;Imparidentia;Venerida;Veneroidea;Veneridae;Mercenaria;Mercenaria mercenaria

UdeM00000009636 6596 198.4 UdeM00000009636 XP\_045168977.1 27.2 618  
364 18 61 642 33 600 2.80E-47 198.4 6596 cellular

organisms;Eukaryota;Opisthokonta;Metazoa;Eumetazoa;Bilateria;Protostomia;Spiralia;Lophotrochozoa;Mollusca;Bivalvia;Autobranchia;Heteroconchia;Euheterodonta;Imparidentia;Venerida;Veneroidea;Veneridae;Mercenaria;Mercenaria mercenaria

UdeM00000009639 6596 97.1 UdeM00000009639 XP\_045170404.1 41 144  
73 3 1 141 1 135 2.00E-17 97.1 6596 cellular

organisms;Eukaryota;Opisthokonta;Metazoa;Eumetazoa;Bilateria;Protostomia;Spiralia;Lophotrochozoa;Mollusca;Bivalvia;Autobranchia;Heteroconchia;Euheterodonta;Imparidentia;Venerida;Veneroidea;Veneridae;Mercenaria;Mercenaria mercenaria

terodonta;Imparidentia;Venerida;Veneroidea;Veneridae;Mercenaria;Mercenari  
 a mercenaria  
 UdeM00000009646 6596 95.5 UdeM00000009646 XP\_045170404.1 40.3 144  
 74 3 1 141 1 135 5.90E-17 95.5 6596 cellular  
 organisms;Eukaryota;Opisthokonta;Metazoa;Eumetazoa;Bilateria;Protostomia;  
 Spiralia;Lophotrochozoa;Mollusca;Bivalvia;Autobranchia;Heteroconchia;Euhe  
 terodonta;Imparidentia;Venerida;Veneroidea;Veneridae;Mercenaria;Mercenari  
 a mercenaria  
 UdeM00000009653 6596 88.6 UdeM00000009653 XP\_045170404.1 39.6 144  
 75 3 1 141 1 135 7.30E-15 88.6 6596 cellular  
 organisms;Eukaryota;Opisthokonta;Metazoa;Eumetazoa;Bilateria;Protostomia;  
 Spiralia;Lophotrochozoa;Mollusca;Bivalvia;Autobranchia;Heteroconchia;Euhe  
 terodonta;Imparidentia;Venerida;Veneroidea;Veneridae;Mercenaria;Mercenari  
 a mercenaria  
 UdeM00000009655 6573 80.1 UdeM00000009655 XP\_021369941.1 25.8 399  
 229 13 17 367 33 412 6.60E-12 80.1 6573 cellular  
 organisms;Eukaryota;Opisthokonta;Metazoa;Eumetazoa;Bilateria;Protostomia;  
 Spiralia;Lophotrochozoa;Mollusca;Bivalvia;Autobranchia;Pteriormorphia;Pect  
 inida;Pectinoidea;Pectinidae;Mizuhopecten;Mizuhopecten yessoensis  
 UdeM00000009658 6596 173.7 UdeM00000009658 XP\_045168977.1 37.1 251  
 140 7 6 240 9 257 3.20E-40 173.7 6596 cellular  
 organisms;Eukaryota;Opisthokonta;Metazoa;Eumetazoa;Bilateria;Protostomia;  
 Spiralia;Lophotrochozoa;Mollusca;Bivalvia;Autobranchia;Heteroconchia;Euhe  
 terodonta;Imparidentia;Venerida;Veneroidea;Veneridae;Mercenaria;Mercenari  
 a mercenaria  
 UdeM00000009665 6596 96.3 UdeM00000009665 XP\_045170404.1 41.7 144  
 73 3 1 142 1 135 3.50E-17 96.3 6596 cellular  
 organisms;Eukaryota;Opisthokonta;Metazoa;Eumetazoa;Bilateria;Protostomia;  
 Spiralia;Lophotrochozoa;Mollusca;Bivalvia;Autobranchia;Heteroconchia;Euhe  
 terodonta;Imparidentia;Venerida;Veneroidea;Veneridae;Mercenaria;Mercenari  
 a mercenaria  
 UdeM00000009666 6596 199.1 UdeM00000009666 XP\_045168977.1 27.2 618  
 364 18 61 642 33 600 1.70E-47 199.1 6596 cellular  
 organisms;Eukaryota;Opisthokonta;Metazoa;Eumetazoa;Bilateria;Protostomia;  
 Spiralia;Lophotrochozoa;Mollusca;Bivalvia;Autobranchia;Heteroconchia;Euhe  
 terodonta;Imparidentia;Venerida;Veneroidea;Veneridae;Mercenaria;Mercenari  
 a mercenaria  
 UdeM00000043854 6596 377.1 UdeM00000043854 XP\_045168006.1 57.5 313  
 111 3 17 322 9 306 2.30E-101 377.1 6596 cellular  
 organisms;Eukaryota;Opisthokonta;Metazoa;Eumetazoa;Bilateria;Protostomia;  
 Spiralia;Lophotrochozoa;Mollusca;Bivalvia;Autobranchia;Heteroconchia;Euhe  
 terodonta;Imparidentia;Venerida;Veneroidea;Veneridae;Mercenaria;Mercenari  
 a mercenaria  
 UdeM00000043853 6596 377.1 UdeM00000043853 XP\_045168006.1 57.5 313  
 111 3 7 312 9 306 2.20E-101 377.1 6596 cellular  
 organisms;Eukaryota;Opisthokonta;Metazoa;Eumetazoa;Bilateria;Protostomia;  
 Spiralia;Lophotrochozoa;Mollusca;Bivalvia;Autobranchia;Heteroconchia;Euhe  
 terodonta;Imparidentia;Venerida;Veneroidea;Veneridae;Mercenaria;Mercenari  
 a mercenaria  
 UdeM00000043855 6596 241.9 UdeM00000043855 XP\_045169500.1 51.5 274  
 114 7 97 365 84 343 1.30E-60 241.9 6596 cellular  
 organisms;Eukaryota;Opisthokonta;Metazoa;Eumetazoa;Bilateria;Protostomia;  
 Spiralia;Lophotrochozoa;Mollusca;Bivalvia;Autobranchia;Heteroconchia;Euhe



terodonta;Imparidentia;Venerida;Veneroidea;Veneridae;Mercenaria;Mercenari  
 a mercenaria  
 UdeM00000043856 6596 236.5 UdeM00000043856 XP\_045170507.1 58.3 218  
 83 3 1 218 1 210 4.10E-59 236.5 6596 cellular  
 organisms;Eukaryota;Opisthokonta;Metazoa;Eumetazoa;Bilateria;Protostomia;  
 Spiralia;Lophotrochozoa;Mollusca;Bivalvia;Autobranchia;Heteroconchia;Euhe  
 terodonta;Imparidentia;Venerida;Veneroidea;Veneridae;Mercenaria;Mercenari  
 a mercenaria  
 UdeM00000043859 1735272 80.5 UdeM00000043859 XP\_041374802.1 44.7  
 85 47 0 50 134 246 330 1.80E-12 80.5 1735272  
 cellular  
 organisms;Eukaryota;Opisthokonta;Metazoa;Eumetazoa;Bilateria;Protostomia;  
 Spiralia;Lophotrochozoa;Mollusca;Gastropoda;Neomphalina;Neomphaloidea;Pel  
 tospiridae;Gigantopelta;Gigantopelta aegis  
 UdeM00000043860 6596 808.5 UdeM00000043860 XP\_045170218.1 91.4 418  
 36 0 1 418 1 418 3.90E-231 808.5 6596 cellular  
 organisms;Eukaryota;Opisthokonta;Metazoa;Eumetazoa;Bilateria;Protostomia;  
 Spiralia;Lophotrochozoa;Mollusca;Bivalvia;Autobranchia;Heteroconchia;Euhe  
 terodonta;Imparidentia;Venerida;Veneroidea;Veneridae;Mercenaria;Mercenari  
 a mercenaria  
 UdeM00000043861 6596 802.4 UdeM00000043861 XP\_045170218.1 90.4 418  
 40 0 4 421 1 418 2.80E-229 802.4 6596 cellular  
 organisms;Eukaryota;Opisthokonta;Metazoa;Eumetazoa;Bilateria;Protostomia;  
 Spiralia;Lophotrochozoa;Mollusca;Bivalvia;Autobranchia;Heteroconchia;Euhe  
 terodonta;Imparidentia;Venerida;Veneroidea;Veneridae;Mercenaria;Mercenari  
 a mercenaria  
 UdeM00000043862 6596 181 UdeM00000043862 XP\_045170165.1 43.4 244  
 126 6 20 253 43 284 1.90E-42 181 6596 cellular  
 organisms;Eukaryota;Opisthokonta;Metazoa;Eumetazoa;Bilateria;Protostomia;  
 Spiralia;Lophotrochozoa;Mollusca;Bivalvia;Autobranchia;Heteroconchia;Euhe  
 terodonta;Imparidentia;Venerida;Veneroidea;Veneridae;Mercenaria;Mercenari  
 a mercenaria  
 UdeM00000043863 1735272 392.1 UdeM00000043863 XP\_041366521.1 46.4  
 537 239 9 2 534 3 494 1.10E-105 392.1 1735272  
 cellular  
 organisms;Eukaryota;Opisthokonta;Metazoa;Eumetazoa;Bilateria;Protostomia;  
 Spiralia;Lophotrochozoa;Mollusca;Gastropoda;Neomphalina;Neomphaloidea;Pel  
 tospiridae;Gigantopelta;Gigantopelta aegis  
 UdeM00000043864 6596 521.2 UdeM00000043864 XP\_045169005.1 64 422  
 95 1 24 445 32 396 1.60E-144 521.2 6596 cellular  
 organisms;Eukaryota;Opisthokonta;Metazoa;Eumetazoa;Bilateria;Protostomia;  
 Spiralia;Lophotrochozoa;Mollusca;Bivalvia;Autobranchia;Heteroconchia;Euhe  
 terodonta;Imparidentia;Venerida;Veneroidea;Veneridae;Mercenaria;Mercenari  
 a mercenaria  
 UdeM00000043865 6565 222.2 UdeM00000043865 XP\_022309141.1 78.2 142  
 30 1 24 164 35 176 4.70E-55 222.2 6565 cellular  
 organisms;Eukaryota;Opisthokonta;Metazoa;Eumetazoa;Bilateria;Protostomia;  
 Spiralia;Lophotrochozoa;Mollusca;Bivalvia;Autobranchia;Pteriomorphia;Ostr  
 eida;Ostreoidea;Ostreidae;Crassostrea;Crassostrea virginica  
 UdeM00000043866 6596 317.8 UdeM00000043866 XP\_045168717.1 48.6 323  
 130 2 4 290 3 325 1.50E-83 317.8 6596 cellular  
 organisms;Eukaryota;Opisthokonta;Metazoa;Eumetazoa;Bilateria;Protostomia;  
 Spiralia;Lophotrochozoa;Mollusca;Bivalvia;Autobranchia;Heteroconchia;Euhe

terodonta;Imparidentia;Venerida;Veneroidea;Veneridae;Mercenaria;Mercenari  
 a mercenaria  
 UdeM00000043870 6596 482.6 UdeM00000043870 XP\_045167596.1 78.2 294  
 64 0 53 346 776 1069 4.10E-133 482.6 6596 cellular  
 organisms;Eukaryota;Opisthokonta;Metazoa;Eumetazoa;Bilateria;Protostomia;  
 Spiralia;Lophotrochozoa;Mollusca;Bivalvia;Autobranhia;Heteroconchia;Euhe  
 terodonta;Imparidentia;Venerida;Veneroidea;Veneridae;Mercenaria;Mercenari  
 a mercenaria  
 UdeM00000043871 6596 70.9 UdeM00000043871 XP\_045168968.1 33 109  
 68 3 21 126 101 207 1.50E-09 70.9 6596 cellular  
 organisms;Eukaryota;Opisthokonta;Metazoa;Eumetazoa;Bilateria;Protostomia;  
 Spiralia;Lophotrochozoa;Mollusca;Bivalvia;Autobranhia;Heteroconchia;Euhe  
 terodonta;Imparidentia;Venerida;Veneroidea;Veneridae;Mercenaria;Mercenari  
 a mercenaria  
 UdeM00000035542 6565 109.8 UdeM00000035542 XP\_022308047.1 36.5 156  
 91 4 2 155 6 155 3.50E-21 109.8 6565 cellular  
 organisms;Eukaryota;Opisthokonta;Metazoa;Eumetazoa;Bilateria;Protostomia;  
 Spiralia;Lophotrochozoa;Mollusca;Bivalvia;Autobranhia;Pteriormorphia;Ostr  
 eida;Ostreoidea;Ostreidae;Crassostrea;Crassostrea virginica  
 UdeM00000035543 6579 87.8 UdeM00000035543 XP\_033746501.1 48.5 97  
 45 2 13 109 1001 1092 1.00E-14 87.8 6579 cellular  
 organisms;Eukaryota;Opisthokonta;Metazoa;Eumetazoa;Bilateria;Protostomia;  
 Spiralia;Lophotrochozoa;Mollusca;Bivalvia;Autobranhia;Pteriormorphia;Pect  
 inida;Pectinoidea;Pectinidae;Pecten;Pecten maximus  
 UdeM00000035544 6573 244.2 UdeM00000035544 XP\_021347654.1 50.6 261  
 108 3 74 318 398 653 2.40E-61 244.2 6573 cellular  
 organisms;Eukaryota;Opisthokonta;Metazoa;Eumetazoa;Bilateria;Protostomia;  
 Spiralia;Lophotrochozoa;Mollusca;Bivalvia;Autobranhia;Pteriormorphia;Pect  
 inida;Pectinoidea;Pectinidae;Mizuhopecten;Mizuhopecten yessoensis  
 UdeM00000035545 6573 430.6 UdeM00000035545 XP\_021347653.1 54.6 405  
 150 6 34 428 32 412 2.30E-117 430.6 6573 cellular  
 organisms;Eukaryota;Opisthokonta;Metazoa;Eumetazoa;Bilateria;Protostomia;  
 Spiralia;Lophotrochozoa;Mollusca;Bivalvia;Autobranhia;Pteriormorphia;Pect  
 inida;Pectinoidea;Pectinidae;Mizuhopecten;Mizuhopecten yessoensis  
 UdeM00000035546 6596 853.6 UdeM00000035546 XP\_045165907.1 57.9 668  
 258 7 1 649 43 706 1.60E-244 853.6 6596 cellular  
 organisms;Eukaryota;Opisthokonta;Metazoa;Eumetazoa;Bilateria;Protostomia;  
 Spiralia;Lophotrochozoa;Mollusca;Bivalvia;Autobranhia;Heteroconchia;Euhe  
 terodonta;Imparidentia;Venerida;Veneroidea;Veneridae;Mercenaria;Mercenari  
 a mercenaria  
 UdeM00000035547 6596 646.7 UdeM00000035547 XP\_045164339.1 64.3 474  
 149 5 3 458 1 472 2.20E-182 646.7 6596 cellular  
 organisms;Eukaryota;Opisthokonta;Metazoa;Eumetazoa;Bilateria;Protostomia;  
 Spiralia;Lophotrochozoa;Mollusca;Bivalvia;Autobranhia;Heteroconchia;Euhe  
 terodonta;Imparidentia;Venerida;Veneroidea;Veneridae;Mercenaria;Mercenari  
 a mercenaria  
 UdeM00000035549 6579 426.4 UdeM00000035549 XP\_033744632.1 66.4 420  
 117 6 1 400 1 416 4.00E-116 426.4 6579 cellular  
 organisms;Eukaryota;Opisthokonta;Metazoa;Eumetazoa;Bilateria;Protostomia;  
 Spiralia;Lophotrochozoa;Mollusca;Bivalvia;Autobranhia;Pteriormorphia;Pect  
 inida;Pectinoidea;Pectinidae;Pecten;Pecten maximus  
 UdeM00000035550 1735272 157.9 UdeM00000035550 XP\_041347510.1 64.1  
 117 31 1 25 141 29 134 9.50E-36 157.9 1735272  
 cellular

organisms;Eukaryota;Opisthokonta;Metazoa;Eumetazoa;Bilateria;Protostomia; Spiralia;Lophotrochozoa;Mollusca;Gastropoda;Neomphalina;Neomphaloidea;Pel tospiridae;Gigantopelta;Gigantopelta aegis

UdeM00000035551 45264 263.8 UdeM00000035551 XP\_044165143.1 40.1 397  
135 7 41 338 34 426 2.90E-67 263.8 45264 cellular

organisms;Eukaryota;Opisthokonta;Metazoa;Eumetazoa;Cnidaria;Anthozoa;Hexa corallia;Scleractinia;Astrocoeniina;Acroporidae;Acropora;Acropora millepora

UdeM00000035552 151771 343.6 UdeM00000035552 XP\_028406951.1 35.7  
582 322 13 47 617 88 628 5.30E-91 343.6 151771  
cellular

organisms;Eukaryota;Opisthokonta;Metazoa;Eumetazoa;Cnidaria;Anthozoa;Octo corallia;Alcyonacea;Alcyoniina;Nephtheidae;Dendronephthya;Dendronephthya gigantea

UdeM00000035553 6565 75.9 UdeM00000035553 XP\_022314409.1 39.8 123  
61 4 156 265 1193 1315 8.80E-11 75.9 6565 cellular

organisms;Eukaryota;Opisthokonta;Metazoa;Eumetazoa;Bilateria;Protostomia; Spiralia;Lophotrochozoa;Mollusca;Bivalvia;Autobranchia;Pteriormorphia;Ostr eida;Ostreoidea;Ostreidae;Crassostrea;Crassostrea virginica

UdeM00000035554 6573 223.8 UdeM00000035554 XP\_021342767.1 61.3 168  
64 1 1 168 9 175 5.10E-55 223.8 6573 cellular

organisms;Eukaryota;Opisthokonta;Metazoa;Eumetazoa;Bilateria;Protostomia; Spiralia;Lophotrochozoa;Mollusca;Bivalvia;Autobranchia;Pteriormorphia;Pect inida;Pectinoidea;Pectinidae;Mizuhopecten;Mizuhopecten yessoensis

UdeM00000035555 6565 152.9 UdeM00000035555 XP\_022299941.1 54.8 135  
55 3 2 132 67 199 9.90E-34 152.9 6565 cellular

organisms;Eukaryota;Opisthokonta;Metazoa;Eumetazoa;Bilateria;Protostomia; Spiralia;Lophotrochozoa;Mollusca;Bivalvia;Autobranchia;Pteriormorphia;Ostr eida;Ostreoidea;Ostreidae;Crassostrea;Crassostrea virginica

UdeM00000035556 6596 454.9 UdeM00000035556 XP\_045165855.1 51.5 511  
210 15 19 499 15 517 1.30E-124 454.9 6596 cellular

organisms;Eukaryota;Opisthokonta;Metazoa;Eumetazoa;Bilateria;Protostomia; Spiralia;Lophotrochozoa;Mollusca;Bivalvia;Autobranchia;Heteroconchia;Euhe terodonta;Imparidentia;Venerida;Veneroidea;Veneridae;Mercenaria;Mercenari a mercenaria

UdeM00000035557 6596 461.5 UdeM00000035557 XP\_045167233.1 62.3 353  
133 0 58 410 67 419 1.20E-126 461.5 6596 cellular

organisms;Eukaryota;Opisthokonta;Metazoa;Eumetazoa;Bilateria;Protostomia; Spiralia;Lophotrochozoa;Mollusca;Bivalvia;Autobranchia;Heteroconchia;Euhe terodonta;Imparidentia;Venerida;Veneroidea;Veneridae;Mercenaria;Mercenari a mercenaria

UdeM00000035558 6596 791.2 UdeM00000035558 XP\_045167233.1 64.8 579  
204 0 1 579 427 1005 9.00E-226 791.2 6596 cellular

organisms;Eukaryota;Opisthokonta;Metazoa;Eumetazoa;Bilateria;Protostomia; Spiralia;Lophotrochozoa;Mollusca;Bivalvia;Autobranchia;Heteroconchia;Euhe terodonta;Imparidentia;Venerida;Veneroidea;Veneridae;Mercenaria;Mercenari a mercenaria

UdeM00000035559 225164 245.4 UdeM00000035559 XP\_009066743.1 58  
212 86 1 3 211 2 213 6.70E-62 245.4 225164  
cellular

organisms;Eukaryota;Opisthokonta;Metazoa;Eumetazoa;Bilateria;Protostomia; Spiralia;Lophotrochozoa;Mollusca;Gastropoda;Patellogastropoda;Lottioidae; Lottiidae;Lottia;Lottia gigantea

UdeM00000035560 6596 112.8 UdeM00000035560 XP\_045166358.1 58.4 89  
 37 0 1 89 124 212 2.20E-22 112.8 6596 cellular  
 organisms;Eukaryota;Opisthokonta;Metazoa;Eumetazoa;Bilateria;Protostomia;  
 Spiralia;Lophotrochozoa;Mollusca;Bivalvia;Autobranhia;Heteroconchia;Euhe  
 terodonta;Imparidentia;Venerida;Veneroidea;Veneridae;Mercenaria;Mercenari  
 a mercenaria

UdeM00000035561 6596 439.9 UdeM00000035561 XP\_045167319.1 46.2 532  
 268 6 71 596 482 1001 5.20E-120 439.9 6596 cellular  
 organisms;Eukaryota;Opisthokonta;Metazoa;Eumetazoa;Bilateria;Protostomia;  
 Spiralia;Lophotrochozoa;Mollusca;Bivalvia;Autobranhia;Heteroconchia;Euhe  
 terodonta;Imparidentia;Venerida;Veneroidea;Veneridae;Mercenaria;Mercenari  
 a mercenaria

UdeM00000035562 6596 105.1 UdeM00000035562 XP\_045167318.1 53.6 112  
 39 4 2 112 344 443 6.50E-20 105.1 6596 cellular  
 organisms;Eukaryota;Opisthokonta;Metazoa;Eumetazoa;Bilateria;Protostomia;  
 Spiralia;Lophotrochozoa;Mollusca;Bivalvia;Autobranhia;Heteroconchia;Euhe  
 terodonta;Imparidentia;Venerida;Veneroidea;Veneridae;Mercenaria;Mercenari  
 a mercenaria

UdeM00000035563 6596 302.4 UdeM00000035563 XP\_045167318.1 51.6 281  
 132 3 1 281 1 277 6.20E-79 302.4 6596 cellular  
 organisms;Eukaryota;Opisthokonta;Metazoa;Eumetazoa;Bilateria;Protostomia;  
 Spiralia;Lophotrochozoa;Mollusca;Bivalvia;Autobranhia;Heteroconchia;Euhe  
 terodonta;Imparidentia;Venerida;Veneroidea;Veneridae;Mercenaria;Mercenari  
 a mercenaria

UdeM00000035565 43700 68.2 UdeM00000035565 XP\_020474880.1 72.1 43  
 12 0 54 96 36 78 7.20E-09 68.2 43700 cellular  
 organisms;Eukaryota;Opisthokonta;Metazoa;Eumetazoa;Bilateria;Deuterostomi  
 a;Chordata;Craniata;Vertebrata;Gnathostomata;Teleostomi;Euteleostomi;Acti  
 nopterygii;Actinopteri;Neopterygii;Teleostei;Osteoglossocephalai;Clupeoce  
 phala;Euteleosteomorpha;Neoteleostei;Eurypterygia;Ctenosquamata;Acanthomo  
 rphata;Euacanthomorphacea;Percomorphaceae;Anabantaria;Synbranchiformes;Sy  
 nbranchioidei;Synbranchidae;Monopterus;Monopterus albus

UdeM00000035566 6579 270.4 UdeM00000035566 XP\_033746322.1 50.8 380  
 148 10 6 354 2 373 3.30E-69 270.4 6579 cellular  
 organisms;Eukaryota;Opisthokonta;Metazoa;Eumetazoa;Bilateria;Protostomia;  
 Spiralia;Lophotrochozoa;Mollusca;Bivalvia;Autobranhia;Pteriormorphia;Pect  
 inida;Pectinoidea;Pectinidae;Pecten;Pecten maximus

UdeM00000035567 400727 873.6 UdeM00000035567 XP\_025107106.1 71.8  
 593 162 2 249 841 68 655 2.00E-250 873.6 400727  
 cellular  
 organisms;Eukaryota;Opisthokonta;Metazoa;Eumetazoa;Bilateria;Protostomia;  
 Spiralia;Lophotrochozoa;Mollusca;Gastropoda;Caenogastropoda;Architaeniogl  
 ossa;Ampullarioidea;Ampullariidae;Pomacea;Pomacea canaliculata

UdeM00000035568 6596 454.9 UdeM00000035568 XP\_045167050.1 56 389  
 134 2 13 380 49 421 1.00E-124 454.9 6596 cellular  
 organisms;Eukaryota;Opisthokonta;Metazoa;Eumetazoa;Bilateria;Protostomia;  
 Spiralia;Lophotrochozoa;Mollusca;Bivalvia;Autobranhia;Heteroconchia;Euhe  
 terodonta;Imparidentia;Venerida;Veneroidea;Veneridae;Mercenaria;Mercenari  
 a mercenaria

UdeM00000035569 6596 82.4 UdeM00000035569 XP\_045165395.1 32.7 208  
 106 7 519 715 510 694 4.10E-12 82.4 6596 cellular  
 organisms;Eukaryota;Opisthokonta;Metazoa;Eumetazoa;Bilateria;Protostomia;  
 Spiralia;Lophotrochozoa;Mollusca;Bivalvia;Autobranhia;Heteroconchia;Euhe

terodonta;Imparidentia;Venerida;Veneroidea;Veneridae;Mercenaria;Mercenari  
a mercenaria

UdeM00000035571 6596 905.2 UdeM00000035571 XP\_045165867.1 59.7 786  
301 6 4 778 5 785 6.30E-260 905.2 6596 cellular

organisms;Eukaryota;Opisthokonta;Metazoa;Eumetazoa;Bilateria;Protostomia;  
Spiralia;Lophotrochozoa;Mollusca;Bivalvia;Autobranhia;Heteroconchia;Euhe  
terodonta;Imparidentia;Venerida;Veneroidea;Veneridae;Mercenaria;Mercenari  
a mercenaria

UdeM00000035572 6596 573.5 UdeM00000035572 XP\_045165092.1 51.5 612  
283 9 4 606 19 625 3.10E-160 573.5 6596 cellular

organisms;Eukaryota;Opisthokonta;Metazoa;Eumetazoa;Bilateria;Protostomia;  
Spiralia;Lophotrochozoa;Mollusca;Bivalvia;Autobranhia;Heteroconchia;Euhe  
terodonta;Imparidentia;Venerida;Veneroidea;Veneridae;Mercenaria;Mercenari  
a mercenaria

UdeM00000035574 6596 147.5 UdeM00000035574 XP\_045166317.1 38.7 248  
138 3 1 237 1 245 2.20E-32 147.5 6596 cellular

organisms;Eukaryota;Opisthokonta;Metazoa;Eumetazoa;Bilateria;Protostomia;  
Spiralia;Lophotrochozoa;Mollusca;Bivalvia;Autobranhia;Heteroconchia;Euhe  
terodonta;Imparidentia;Venerida;Veneroidea;Veneridae;Mercenaria;Mercenari  
a mercenaria

UdeM00000035576 6596 162.9 UdeM00000035576 XP\_045164985.1 43.3 187  
104 2 27 212 1 186 4.50E-37 162.9 6596 cellular

organisms;Eukaryota;Opisthokonta;Metazoa;Eumetazoa;Bilateria;Protostomia;  
Spiralia;Lophotrochozoa;Mollusca;Bivalvia;Autobranhia;Heteroconchia;Euhe  
terodonta;Imparidentia;Venerida;Veneroidea;Veneridae;Mercenaria;Mercenari  
a mercenaria

UdeM00000035577 6573 761.1 UdeM00000035577 XP\_021356935.1 62.1 631  
212 9 4 619 14 632 1.10E-216 761.1 6573 cellular

organisms;Eukaryota;Opisthokonta;Metazoa;Eumetazoa;Bilateria;Protostomia;  
Spiralia;Lophotrochozoa;Mollusca;Bivalvia;Autobranhia;Pteriomorphia;Pect  
inida;Pectinoidea;Pectinidae;Mizuhopecten;Mizuhopecten yessoensis

UdeM00000035578 6596 637.9 UdeM00000035578 XP\_045165673.1 66.2 458  
143 3 1 456 1 448 1.00E-179 637.9 6596 cellular

organisms;Eukaryota;Opisthokonta;Metazoa;Eumetazoa;Bilateria;Protostomia;  
Spiralia;Lophotrochozoa;Mollusca;Bivalvia;Autobranhia;Heteroconchia;Euhe  
terodonta;Imparidentia;Venerida;Veneroidea;Veneridae;Mercenaria;Mercenari  
a mercenaria

UdeM00000035579 6596 1866.3 UdeM00000035579 XP\_045166695.1 62.7  
1567 577 2 24 1584 202 1767 0.00E+00 1866.3 6596  
cellular

organisms;Eukaryota;Opisthokonta;Metazoa;Eumetazoa;Bilateria;Protostomia;  
Spiralia;Lophotrochozoa;Mollusca;Bivalvia;Autobranhia;Heteroconchia;Euhe  
terodonta;Imparidentia;Venerida;Veneroidea;Veneridae;Mercenaria;Mercenari  
a mercenaria

UdeM00000035580 6596 335.5 UdeM00000035580 XP\_045166695.1 75.7 202  
47 1 1 200 1 202 5.40E-89 335.5 6596 cellular

organisms;Eukaryota;Opisthokonta;Metazoa;Eumetazoa;Bilateria;Protostomia;  
Spiralia;Lophotrochozoa;Mollusca;Bivalvia;Autobranhia;Heteroconchia;Euhe  
terodonta;Imparidentia;Venerida;Veneroidea;Veneridae;Mercenaria;Mercenari  
a mercenaria

UdeM00000035582 1735272 464.5 UdeM00000035582 XP\_041350140.1 57.1  
450 178 6 2 444 3 444 1.50E-127 464.5 1735272  
cellular

organisms;Eukaryota;Opisthokonta;Metazoa;Eumetazoa;Bilateria;Protostomia;

Spiralia;Lophotrochozoa;Mollusca;Gastropoda;Neomphalina;Neomphaloidea;Pel  
 tospiridae;Gigantopelta;Gigantopelta aegis

UdeM00000035583 6596 671 UdeM00000035583 XP\_045164941.1 63.1 485  
 173 3 15 496 55 536 1.20E-189 671 6596 cellular  
 organisms;Eukaryota;Opisthokonta;Metazoa;Eumetazoa;Bilateria;Protostomia;  
 Spiralia;Lophotrochozoa;Mollusca;Bivalvia;Autobranchia;Heteroconchia;Euhe  
 terodonta;Imparidentia;Venerida;Veneroidea;Veneridae;Mercenaria;Mercenari  
 a mercenaria

UdeM00000035584 6573 502.7 UdeM00000035584 XP\_021371828.1 51.2 523  
 245 4 13 534 77 590 5.90E-139 502.7 6573 cellular  
 organisms;Eukaryota;Opisthokonta;Metazoa;Eumetazoa;Bilateria;Protostomia;  
 Spiralia;Lophotrochozoa;Mollusca;Bivalvia;Autobranchia;Pteriormorphia;Pect  
 inida;Pectinoidea;Pectinidae;Mizuhopecten;Mizuhopecten yessoensis

UdeM00000035585 6573 502.7 UdeM00000035585 XP\_021371828.1 51.2 523  
 245 4 79 600 77 590 6.60E-139 502.7 6573 cellular  
 organisms;Eukaryota;Opisthokonta;Metazoa;Eumetazoa;Bilateria;Protostomia;  
 Spiralia;Lophotrochozoa;Mollusca;Bivalvia;Autobranchia;Pteriormorphia;Pect  
 inida;Pectinoidea;Pectinidae;Mizuhopecten;Mizuhopecten yessoensis

UdeM00000035586 6596 435.3 UdeM00000035586 XP\_045164100.1 87.2 235  
 30 0 4 238 5 239 5.40E-119 435.3 6596 cellular  
 organisms;Eukaryota;Opisthokonta;Metazoa;Eumetazoa;Bilateria;Protostomia;  
 Spiralia;Lophotrochozoa;Mollusca;Bivalvia;Autobranchia;Heteroconchia;Euhe  
 terodonta;Imparidentia;Venerida;Veneroidea;Veneridae;Mercenaria;Mercenari  
 a mercenaria

UdeM00000035587 6596 588.2 UdeM00000035587 XP\_045164101.1 86 314  
 44 0 4 317 5 318 6.30E-165 588.2 6596 cellular  
 organisms;Eukaryota;Opisthokonta;Metazoa;Eumetazoa;Bilateria;Protostomia;  
 Spiralia;Lophotrochozoa;Mollusca;Bivalvia;Autobranchia;Heteroconchia;Euhe  
 terodonta;Imparidentia;Venerida;Veneroidea;Veneridae;Mercenaria;Mercenari  
 a mercenaria

UdeM00000035589 6596 203.8 UdeM00000035589 XP\_045166955.1 59.3 162  
 66 0 2 163 260 421 1.90E-49 203.8 6596 cellular  
 organisms;Eukaryota;Opisthokonta;Metazoa;Eumetazoa;Bilateria;Protostomia;  
 Spiralia;Lophotrochozoa;Mollusca;Bivalvia;Autobranchia;Heteroconchia;Euhe  
 terodonta;Imparidentia;Venerida;Veneroidea;Veneridae;Mercenaria;Mercenari  
 a mercenaria

UdeM00000035588 7574 432.2 UdeM00000035588 XP\_013411211.1 48.2 488  
 230 6 1 466 1 487 8.90E-118 432.2 7574 cellular  
 organisms;Eukaryota;Opisthokonta;Metazoa;Eumetazoa;Bilateria;Protostomia;  
 Spiralia;Lophotrochozoa;Brachiopoda;Linguliformea;Lingulata;Lingulida;Lin  
 guloidea;Lingulidae;Lingula;Lingula anatina

UdeM00000035590 7574 268.5 UdeM00000035590 XP\_013411211.1 45.5 336  
 160 6 1 314 1 335 1.10E-68 268.5 7574 cellular  
 organisms;Eukaryota;Opisthokonta;Metazoa;Eumetazoa;Bilateria;Protostomia;  
 Spiralia;Lophotrochozoa;Brachiopoda;Linguliformea;Lingulata;Lingulida;Lin  
 guloidea;Lingulidae;Lingula;Lingula anatina

UdeM00000035591 151771 112.1 UdeM00000035591 XP\_028405874.1 55.2  
 96 43 0 6 101 55 150 5.20E-22 112.1 151771  
 cellular  
 organisms;Eukaryota;Opisthokonta;Metazoa;Eumetazoa;Cnidaria;Anthozoa;Octo  
 corallia;Alcyonacea;Alcyoniina;Nephtheidae;Dendronephthya;Dendronephthya  
 gigantea

UdeM00000035592 45264 288.1 UdeM00000035592 XP\_044165143.1 54.9 275  
 107 3 2 263 41 311 1.10E-74 288.1 45264 cellular

organisms;Eukaryota;Opisthokonta;Metazoa;Eumetazoa;Cnidaria;Anthozoa;Hexa  
corallia;Scleractinia;Astrocoeniina;Acroporidae;Acropora;Acropora  
millepora

UdeM00000035593 6596 266.5 UdeM00000035593 XP\_045164442.1 34.4 582  
334 18 20 592 16 558 7.90E-68 266.5 6596 cellular

organisms;Eukaryota;Opisthokonta;Metazoa;Eumetazoa;Bilateria;Protostomia;  
Spiralia;Lophotrochozoa;Mollusca;Bivalvia;Autobranchia;Heteroconchia;Euhe  
terodonta;Imparidentia;Venerida;Veneroidea;Veneridae;Mercenaria;Mercenari  
a mercenaria

UdeM00000035594 6573 1192.6 UdeM00000035594 XP\_021356950.1 79.9  
748 145 3 1 747 412 1155 0.00E+00 1192.6 6573  
cellular

organisms;Eukaryota;Opisthokonta;Metazoa;Eumetazoa;Bilateria;Protostomia;  
Spiralia;Lophotrochozoa;Mollusca;Bivalvia;Autobranchia;Pteriormorphia;Pect  
inida;Pectinoidea;Pectinidae;Mizuhopecten;Mizuhopecten yessoensis

UdeM00000035595 225164 199.5 UdeM00000035595 XP\_009050006.1 77.4  
133 30 0 1 133 411 543 2.90E-48 199.5 225164  
cellular

organisms;Eukaryota;Opisthokonta;Metazoa;Eumetazoa;Bilateria;Protostomia;  
Spiralia;Lophotrochozoa;Mollusca;Gastropoda;Patellogastropoda;Lottioida;  
Lottiidae;Lottia;Lottia gigantea

UdeM00000035596 6596 83.2 UdeM00000035596 XP\_045166190.1 58.6 58  
24 0 153 210 343 400 5.10E-13 83.2 6596 cellular

organisms;Eukaryota;Opisthokonta;Metazoa;Eumetazoa;Bilateria;Protostomia;  
Spiralia;Lophotrochozoa;Mollusca;Bivalvia;Autobranchia;Heteroconchia;Euhe  
terodonta;Imparidentia;Venerida;Veneroidea;Veneridae;Mercenaria;Mercenari  
a mercenaria

UdeM00000035597 6596 550.8 UdeM00000035597 XP\_045166190.1 75.2 347  
82 1 1 347 1 343 1.20E-153 550.8 6596 cellular

organisms;Eukaryota;Opisthokonta;Metazoa;Eumetazoa;Bilateria;Protostomia;  
Spiralia;Lophotrochozoa;Mollusca;Bivalvia;Autobranchia;Heteroconchia;Euhe  
terodonta;Imparidentia;Venerida;Veneroidea;Veneridae;Mercenaria;Mercenari  
a mercenaria

UdeM00000035599 6596 438.7 UdeM00000035599 XP\_045164745.1 46.5 492  
254 3 8 492 435 924 1.10E-119 438.7 6596 cellular

organisms;Eukaryota;Opisthokonta;Metazoa;Eumetazoa;Bilateria;Protostomia;  
Spiralia;Lophotrochozoa;Mollusca;Bivalvia;Autobranchia;Heteroconchia;Euhe  
terodonta;Imparidentia;Venerida;Veneroidea;Veneridae;Mercenaria;Mercenari  
a mercenaria

UdeM00000035600 6565 143.7 UdeM00000035600 XP\_022306835.1 53.2 139  
65 0 1 139 19 157 1.90E-31 143.7 6565 cellular

organisms;Eukaryota;Opisthokonta;Metazoa;Eumetazoa;Bilateria;Protostomia;  
Spiralia;Lophotrochozoa;Mollusca;Bivalvia;Autobranchia;Pteriormorphia;Ostr  
eida;Ostreoida;Ostreidae;Crassostrea;Crassostrea virginica

UdeM00000035601 29159 90.1 UdeM00000035601 XP\_034329650.1 47.2 72  
38 0 2 73 307 378 1.30E-15 90.1 29159 cellular

organisms;Eukaryota;Opisthokonta;Metazoa;Eumetazoa;Bilateria;Protostomia;  
Spiralia;Lophotrochozoa;Mollusca;Bivalvia;Autobranchia;Pteriormorphia;Ostr  
eida;Ostreoida;Ostreidae;Crassostrea;Crassostrea gigas

UdeM00000035602 6579 115.5 UdeM00000035602 XP\_033731739.1 64.9 77  
27 0 1 77 202 278 3.00E-23 115.5 6579 cellular

organisms;Eukaryota;Opisthokonta;Metazoa;Eumetazoa;Bilateria;Protostomia;  
Spiralia;Lophotrochozoa;Mollusca;Bivalvia;Autobranchia;Pteriormorphia;Pect  
inida;Pectinoidea;Pectinidae;Pecten;Pecten maximus

UdeM00000035603 6573 158.7 UdeM00000035603 XP\_021352044.1 64.3 115  
 41 0 1 115 1 115 5.20E-36 158.7 6573 cellular  
 organisms;Eukaryota;Opisthokonta;Metazoa;Eumetazoa;Bilateria;Protostomia;  
 Spiralia;Lophotrochozoa;Mollusca;Bivalvia;Autobranchia;Pteriomorpha;Pecti  
 nida;Pectinoidea;Pectinidae;Mizuhopecten;Mizuhopecten yessoensis  
 UdeM00000035604 6596 726.1 UdeM00000035604 XP\_045164745.1 41.7 918  
 498 10 1 897 118 1019 5.50E-206 726.1 6596 cellular  
 organisms;Eukaryota;Opisthokonta;Metazoa;Eumetazoa;Bilateria;Protostomia;  
 Spiralia;Lophotrochozoa;Mollusca;Bivalvia;Autobranchia;Heteroconchia;Euhe  
 terodonta;Imparidentia;Venerida;Veneroidea;Veneridae;Mercenaria;Mercenari  
 a mercenaria  
 UdeM00000035605 6596 707.6 UdeM00000035605 XP\_045165465.1 40.5 913  
 513 6 67 969 118 1010 2.20E-200 707.6 6596 cellular  
 organisms;Eukaryota;Opisthokonta;Metazoa;Eumetazoa;Bilateria;Protostomia;  
 Spiralia;Lophotrochozoa;Mollusca;Bivalvia;Autobranchia;Heteroconchia;Euhe  
 terodonta;Imparidentia;Venerida;Veneroidea;Veneridae;Mercenaria;Mercenari  
 a mercenaria  
 UdeM00000035606 6596 710.3 UdeM00000035606 XP\_045164745.1 41 915  
 496 8 67 944 114 1021 3.30E-201 710.3 6596 cellular  
 organisms;Eukaryota;Opisthokonta;Metazoa;Eumetazoa;Bilateria;Protostomia;  
 Spiralia;Lophotrochozoa;Mollusca;Bivalvia;Autobranchia;Heteroconchia;Euhe  
 terodonta;Imparidentia;Venerida;Veneroidea;Veneridae;Mercenaria;Mercenari  
 a mercenaria  
 UdeM00000035607 7574 376.7 UdeM00000035607 XP\_023930490.1 89.9 198  
 20 0 17 214 4467 4664 2.00E-101 376.7 7574 cellular  
 organisms;Eukaryota;Opisthokonta;Metazoa;Eumetazoa;Bilateria;Protostomia;  
 Spiralia;Lophotrochozoa;Brachiopoda;Linguliformea;Lingulata;Lingulida;Lin  
 guloidea;Lingulidae;Lingula;Lingula anatina  
 UdeM00000035608 6596 166 UdeM00000035608 XP\_045164745.1 32.3 260  
 158 3 1 243 118 376 6.00E-38 166 6596 cellular  
 organisms;Eukaryota;Opisthokonta;Metazoa;Eumetazoa;Bilateria;Protostomia;  
 Spiralia;Lophotrochozoa;Mollusca;Bivalvia;Autobranchia;Heteroconchia;Euhe  
 terodonta;Imparidentia;Venerida;Veneroidea;Veneridae;Mercenaria;Mercenari  
 a mercenaria  
 UdeM00000035609 1735272 133.3 UdeM00000035609 XP\_041349366.1 34.4  
 180 109 1 63 233 75 254 4.40E-28 133.3 1735272  
 cellular  
 organisms;Eukaryota;Opisthokonta;Metazoa;Eumetazoa;Bilateria;Protostomia;  
 Spiralia;Lophotrochozoa;Mollusca;Gastropoda;Neomphalina;Neomphaloidea;Pel  
 tospiridae;Gigantopelta;Gigantopelta aegis  
 UdeM00000035610 6596 197.2 UdeM00000035610 XP\_045164745.1 42.5 221  
 120 2 8 222 435 654 2.40E-47 197.2 6596 cellular  
 organisms;Eukaryota;Opisthokonta;Metazoa;Eumetazoa;Bilateria;Protostomia;  
 Spiralia;Lophotrochozoa;Mollusca;Bivalvia;Autobranchia;Heteroconchia;Euhe  
 terodonta;Imparidentia;Venerida;Veneroidea;Veneridae;Mercenaria;Mercenari  
 a mercenaria  
 UdeM00000035611 6596 202.6 UdeM00000035611 XP\_045165465.1 42.5 266  
 134 2 6 270 763 1010 6.50E-49 202.6 6596 cellular  
 organisms;Eukaryota;Opisthokonta;Metazoa;Eumetazoa;Bilateria;Protostomia;  
 Spiralia;Lophotrochozoa;Mollusca;Bivalvia;Autobranchia;Heteroconchia;Euhe  
 terodonta;Imparidentia;Venerida;Veneroidea;Veneridae;Mercenaria;Mercenari  
 a mercenaria  
 UdeM00000035612 6596 537.7 UdeM00000035612 XP\_045164745.1 40.6 697  
 396 6 67 750 114 805 2.50E-149 537.7 6596 cellular



organisms;Eukaryota;Opisthokonta;Metazoa;Eumetazoa;Bilateria;Protostomia;Spiralia;Lophotrochozoa;Mollusca;Bivalvia;Autobranchia;Heteroconchia;Euherodonta;Imparidentia;Venerida;Veneroidea;Veneridae;Mercenaria;Mercenaria mercenaria

UdeM00000035616 6596 2503.4 UdeM00000035616 XP\_045167191.1 57.7  
2925 997 47 13 2843 1798 4576 0.00E+00 2503.4 6596  
cellular

organisms;Eukaryota;Opisthokonta;Metazoa;Eumetazoa;Bilateria;Protostomia;Spiralia;Lophotrochozoa;Mollusca;Bivalvia;Autobranchia;Heteroconchia;Euherodonta;Imparidentia;Venerida;Veneroidea;Veneridae;Mercenaria;Mercenaria mercenaria

UdeM00000035617 6596 2197.9 UdeM00000035617 XP\_045167191.1 67.7  
1792 457 18 1 1718 33 1777 0.00E+00 2197.9 6596  
cellular

organisms;Eukaryota;Opisthokonta;Metazoa;Eumetazoa;Bilateria;Protostomia;Spiralia;Lophotrochozoa;Mollusca;Bivalvia;Autobranchia;Heteroconchia;Euherodonta;Imparidentia;Venerida;Veneroidea;Veneridae;Mercenaria;Mercenaria mercenaria

UdeM00000035619 225164 140.2 UdeM00000035619 XP\_009060469.1 31.4  
261 152 6 238 497 5 239 7.20E-30 140.2 225164  
cellular

organisms;Eukaryota;Opisthokonta;Metazoa;Eumetazoa;Bilateria;Protostomia;Spiralia;Lophotrochozoa;Mollusca;Gastropoda;Patellogastropoda;Lottioidae;Lottiidae;Lottia;Lottia gigantea

UdeM00000035620 6579 394 UdeM00000035620 XP\_033746731.1 67.9 277  
88 1 1 276 1 277 1.50E-106 394 6579 cellular

organisms;Eukaryota;Opisthokonta;Metazoa;Eumetazoa;Bilateria;Protostomia;Spiralia;Lophotrochozoa;Mollusca;Bivalvia;Autobranchia;Pteriomorphia;Pectinida;Pectinoidea;Pectinidae;Pecten;Pecten maximus

UdeM00000035621 6573 393.7 UdeM00000035621 XP\_021357777.1 67.1 277  
91 0 1 277 1 277 2.00E-106 393.7 6573 cellular

organisms;Eukaryota;Opisthokonta;Metazoa;Eumetazoa;Bilateria;Protostomia;Spiralia;Lophotrochozoa;Mollusca;Bivalvia;Autobranchia;Pteriomorphia;Pectinida;Pectinoidea;Pectinidae;Mizuhopecten;Mizuhopecten yessoensis

UdeM00000035622 6596 693.7 UdeM00000035622 XP\_045164440.1 50.3 720  
337 10 4 718 6 709 2.60E-196 693.7 6596 cellular

organisms;Eukaryota;Opisthokonta;Metazoa;Eumetazoa;Bilateria;Protostomia;Spiralia;Lophotrochozoa;Mollusca;Bivalvia;Autobranchia;Heteroconchia;Euherodonta;Imparidentia;Venerida;Veneroidea;Veneridae;Mercenaria;Mercenaria mercenaria

UdeM00000035623 6596 699.5 UdeM00000035623 XP\_045164440.1 49.9 736  
347 11 4 733 6 725 4.50E-198 699.5 6596 cellular

organisms;Eukaryota;Opisthokonta;Metazoa;Eumetazoa;Bilateria;Protostomia;Spiralia;Lophotrochozoa;Mollusca;Bivalvia;Autobranchia;Heteroconchia;Euherodonta;Imparidentia;Venerida;Veneroidea;Veneridae;Mercenaria;Mercenaria mercenaria

UdeM00000035627 6579 58.5 UdeM00000035627 XP\_033727799.1 57.1 49  
18 2 90 137 80 126 7.60E-06 58.5 6579 cellular

organisms;Eukaryota;Opisthokonta;Metazoa;Eumetazoa;Bilateria;Protostomia;Spiralia;Lophotrochozoa;Mollusca;Bivalvia;Autobranchia;Pteriomorphia;Pectinida;Pectinoidea;Pectinidae;Pecten;Pecten maximus

UdeM00000035628 6565 142.1 UdeM00000035628 XP\_022323822.1 34.4 212  
128 7 53 258 978 1184 1.10E-30 142.1 6565 cellular

organisms;Eukaryota;Opisthokonta;Metazoa;Eumetazoa;Bilateria;Protostomia;

Spiralia;Lophotrochozoa;Mollusca;Bivalvia;Autobranchia;Pteriormorphia;Ostr  
 eida;Ostreoidea;Ostreidae;Crassostrea;Crassostrea virginica  
 UdeM00000035630 6565 90.9 UdeM00000035630 XP\_022288855.1 41.3 121  
 65 5 20 139 973 1088 3.10E-15 90.9 6565 cellular  
 organisms;Eukaryota;Opisthokonta;Metazoa;Eumetazoa;Bilateria;Protostomia;  
 Spiralia;Lophotrochozoa;Mollusca;Bivalvia;Autobranchia;Pteriormorphia;Ostr  
 eida;Ostreoidea;Ostreidae;Crassostrea;Crassostrea virginica  
 UdeM00000035634 6565 97.4 UdeM00000035634 XP\_022325431.1 32.5 169  
 106 6 13 181 1172 1332 3.70E-17 97.4 6565 cellular  
 organisms;Eukaryota;Opisthokonta;Metazoa;Eumetazoa;Bilateria;Protostomia;  
 Spiralia;Lophotrochozoa;Mollusca;Bivalvia;Autobranchia;Pteriormorphia;Ostr  
 eida;Ostreoidea;Ostreidae;Crassostrea;Crassostrea virginica  
 UdeM00000035632 6565 110.9 UdeM00000035632 XP\_022325431.1 30 217  
 131 8 17 230 1076 1274 3.70E-21 110.9 6565 cellular  
 organisms;Eukaryota;Opisthokonta;Metazoa;Eumetazoa;Bilateria;Protostomia;  
 Spiralia;Lophotrochozoa;Mollusca;Bivalvia;Autobranchia;Pteriormorphia;Ostr  
 eida;Ostreoidea;Ostreidae;Crassostrea;Crassostrea virginica  
 UdeM00000035633 6565 100.1 UdeM00000035633 XP\_022322604.1 28.6 220  
 136 7 17 236 559 757 6.60E-18 100.1 6565 cellular  
 organisms;Eukaryota;Opisthokonta;Metazoa;Eumetazoa;Bilateria;Protostomia;  
 Spiralia;Lophotrochozoa;Mollusca;Bivalvia;Autobranchia;Pteriormorphia;Ostr  
 eida;Ostreoidea;Ostreidae;Crassostrea;Crassostrea virginica  
 UdeM00000035635 6579 116.7 UdeM00000035635 XP\_033744257.1 41.4 140  
 82 0 1 140 154 293 2.60E-23 116.7 6579 cellular  
 organisms;Eukaryota;Opisthokonta;Metazoa;Eumetazoa;Bilateria;Protostomia;  
 Spiralia;Lophotrochozoa;Mollusca;Bivalvia;Autobranchia;Pteriormorphia;Pect  
 inida;Pectinoidea;Pectinidae;Pecten;Pecten maximus  
 UdeM00000035636 6596 114.4 UdeM00000035636 XP\_045191674.1 24.8 262  
 173 9 16 273 1574 1815 3.60E-22 114.4 6596 cellular  
 organisms;Eukaryota;Opisthokonta;Metazoa;Eumetazoa;Bilateria;Protostomia;  
 Spiralia;Lophotrochozoa;Mollusca;Bivalvia;Autobranchia;Heteroconchia;Euhe  
 terodonta;Imparidentia;Venerida;Veneroidea;Veneridae;Mercenaria;Mercenari  
 a mercenaria  
 UdeM00000035637 6579 116.7 UdeM00000035637 XP\_033744257.1 41.4 140  
 82 0 1 140 154 293 2.60E-23 116.7 6579 cellular  
 organisms;Eukaryota;Opisthokonta;Metazoa;Eumetazoa;Bilateria;Protostomia;  
 Spiralia;Lophotrochozoa;Mollusca;Bivalvia;Autobranchia;Pteriormorphia;Pect  
 inida;Pectinoidea;Pectinidae;Pecten;Pecten maximus  
 UdeM00000035639 6579 119.4 UdeM00000035639 XP\_033744257.1 41 144  
 85 0 79 222 150 293 6.10E-24 119.4 6579 cellular  
 organisms;Eukaryota;Opisthokonta;Metazoa;Eumetazoa;Bilateria;Protostomia;  
 Spiralia;Lophotrochozoa;Mollusca;Bivalvia;Autobranchia;Pteriormorphia;Pect  
 inida;Pectinoidea;Pectinidae;Pecten;Pecten maximus  
 UdeM00000035640 6565 97.8 UdeM00000035640 XP\_022325431.1 33.1 172  
 102 6 13 181 1113 1274 1.60E-17 97.8 6565 cellular  
 organisms;Eukaryota;Opisthokonta;Metazoa;Eumetazoa;Bilateria;Protostomia;  
 Spiralia;Lophotrochozoa;Mollusca;Bivalvia;Autobranchia;Pteriormorphia;Ostr  
 eida;Ostreoidea;Ostreidae;Crassostrea;Crassostrea virginica  
 UdeM00000044420 6579 96.7 UdeM00000044420 XP\_033734060.1 53.2 79  
 37 0 38 116 182 260 4.00E-17 96.7 6579 cellular  
 organisms;Eukaryota;Opisthokonta;Metazoa;Eumetazoa;Bilateria;Protostomia;  
 Spiralia;Lophotrochozoa;Mollusca;Bivalvia;Autobranchia;Pteriormorphia;Pect  
 inida;Pectinoidea;Pectinidae;Pecten;Pecten maximus

UdeM00000042255 29159 99 UdeM00000042255 XP\_034322429.1 32.5 206  
 76 3 6 148 3 208 6.00E-18 99 29159 cellular  
 organisms;Eukaryota;Opisthokonta;Metazoa;Eumetazoa;Bilateria;Protostomia;  
 Spiralia;Lophotrochozoa;Mollusca;Bivalvia;Autobranhia;Pteriormorphia;Ostr  
 eida;Ostreioidea;Ostreidae;Crassostrea;Crassostrea gigas  
 UdeM00000032578 29159 65.5 UdeM00000032578 XP\_034302783.1 38.6 101  
 60 1 13 111 215 315 6.00E-08 65.5 29159 cellular  
 organisms;Eukaryota;Opisthokonta;Metazoa;Eumetazoa;Bilateria;Protostomia;  
 Spiralia;Lophotrochozoa;Mollusca;Bivalvia;Autobranhia;Pteriormorphia;Ostr  
 eida;Ostreioidea;Ostreidae;Crassostrea;Crassostrea gigas  
 UdeM00000032579 6579 140.2 UdeM00000032579 XP\_033728272.1 60.7 112  
 41 1 36 144 140 251 2.10E-30 140.2 6579 cellular  
 organisms;Eukaryota;Opisthokonta;Metazoa;Eumetazoa;Bilateria;Protostomia;  
 Spiralia;Lophotrochozoa;Mollusca;Bivalvia;Autobranhia;Pteriormorphia;Pect  
 inida;Pectinoidea;Pectinidae;Pecten;Pecten maximus  
 UdeM00000032581 6579 88.6 UdeM00000032581 XP\_033725462.1 38.6 166  
 90 8 1 164 12 167 8.20E-15 88.6 6579 cellular  
 organisms;Eukaryota;Opisthokonta;Metazoa;Eumetazoa;Bilateria;Protostomia;  
 Spiralia;Lophotrochozoa;Mollusca;Bivalvia;Autobranhia;Pteriormorphia;Pect  
 inida;Pectinoidea;Pectinidae;Pecten;Pecten maximus  
 UdeM00000032580 29159 159.5 UdeM00000032580 XP\_034318677.1 43 228  
 107 7 5 223 13 226 5.10E-36 159.5 29159 cellular  
 organisms;Eukaryota;Opisthokonta;Metazoa;Eumetazoa;Bilateria;Protostomia;  
 Spiralia;Lophotrochozoa;Mollusca;Bivalvia;Autobranhia;Pteriormorphia;Ostr  
 eida;Ostreioidea;Ostreidae;Crassostrea;Crassostrea gigas  
 UdeM00000032582 6596 571.6 UdeM00000032582 XP\_045167770.1 51.6 578  
 262 8 27 588 6 581 1.10E-159 571.6 6596 cellular  
 organisms;Eukaryota;Opisthokonta;Metazoa;Eumetazoa;Bilateria;Protostomia;  
 Spiralia;Lophotrochozoa;Mollusca;Bivalvia;Autobranhia;Heteroconchia;Euhe  
 terodonta;Imparidentia;Venerida;Veneroidea;Veneridae;Mercenaria;Mercenari  
 a mercenaria  
 UdeM00000032583 6596 203 UdeM00000032583 XP\_045168722.1 55.7 183  
 63 2 1 169 1 179 3.10E-49 203 6596 cellular  
 organisms;Eukaryota;Opisthokonta;Metazoa;Eumetazoa;Bilateria;Protostomia;  
 Spiralia;Lophotrochozoa;Mollusca;Bivalvia;Autobranhia;Heteroconchia;Euhe  
 terodonta;Imparidentia;Venerida;Veneroidea;Veneridae;Mercenaria;Mercenari  
 a mercenaria  
 UdeM00000032584 6596 79.7 UdeM00000032584 XP\_045169219.1 40.6 138  
 66 5 2 139 16 137 3.60E-12 79.7 6596 cellular  
 organisms;Eukaryota;Opisthokonta;Metazoa;Eumetazoa;Bilateria;Protostomia;  
 Spiralia;Lophotrochozoa;Mollusca;Bivalvia;Autobranhia;Heteroconchia;Euhe  
 terodonta;Imparidentia;Venerida;Veneroidea;Veneridae;Mercenaria;Mercenari  
 a mercenaria  
 UdeM00000032585 29159 189.5 UdeM00000032585 XP\_034315421.1 51 206  
 95 3 114 315 271 474 6.50E-45 189.5 29159 cellular  
 organisms;Eukaryota;Opisthokonta;Metazoa;Eumetazoa;Bilateria;Protostomia;  
 Spiralia;Lophotrochozoa;Mollusca;Bivalvia;Autobranhia;Pteriormorphia;Ostr  
 eida;Ostreioidea;Ostreidae;Crassostrea;Crassostrea gigas  
 UdeM00000032586 29159 365.9 UdeM00000032586 XP\_034318948.1 68.8 247  
 76 1 1 246 374 620 4.20E-98 365.9 29159 cellular  
 organisms;Eukaryota;Opisthokonta;Metazoa;Eumetazoa;Bilateria;Protostomia;  
 Spiralia;Lophotrochozoa;Mollusca;Bivalvia;Autobranhia;Pteriormorphia;Ostr  
 eida;Ostreioidea;Ostreidae;Crassostrea;Crassostrea gigas

UdeM00000032587 29159 129.8 UdeM00000032587 XP\_034319609.1 48.7 117  
 58 2 1 116 839 954 2.30E-27 129.8 29159 cellular  
 organisms;Eukaryota;Opisthokonta;Metazoa;Eumetazoa;Bilateria;Protostomia;  
 Spiralia;Lophotrochozoa;Mollusca;Bivalvia;Autobranhia;Pteriomorphia;Ostr  
 eida;Ostreoidea;Ostreidae;Crassostrea;Crassostrea gigas  
 UdeM00000032588 6596 391.3 UdeM00000032588 XP\_045169126.1 50.6 397  
 180 7 23 417 21 403 1.60E-105 391.3 6596 cellular  
 organisms;Eukaryota;Opisthokonta;Metazoa;Eumetazoa;Bilateria;Protostomia;  
 Spiralia;Lophotrochozoa;Mollusca;Bivalvia;Autobranhia;Heteroconchia;Euhe  
 terodonta;Imparidentia;Venerida;Veneroidea;Veneridae;Mercenaria;Mercenari  
 a mercenaria  
 UdeM00000032589 29159 659.8 UdeM00000032589 XP\_011416735.2 61.9 586  
 213 6 99 676 74 657 3.60E-186 659.8 29159 cellular  
 organisms;Eukaryota;Opisthokonta;Metazoa;Eumetazoa;Bilateria;Protostomia;  
 Spiralia;Lophotrochozoa;Mollusca;Bivalvia;Autobranhia;Pteriomorphia;Ostr  
 eida;Ostreoidea;Ostreidae;Crassostrea;Crassostrea gigas  
 UdeM00000032590 6573 674.1 UdeM00000032590 XP\_021374213.1 56.5 671  
 264 9 4 651 12 677 1.80E-190 674.1 6573 cellular  
 organisms;Eukaryota;Opisthokonta;Metazoa;Eumetazoa;Bilateria;Protostomia;  
 Spiralia;Lophotrochozoa;Mollusca;Bivalvia;Autobranhia;Pteriomorphia;Pect  
 inida;Pectinoidea;Pectinidae;Mizuhopecten;Mizuhopecten yessoensis  
 UdeM00000032595 6596 484.6 UdeM00000032595 XP\_045169065.1 68.3 360  
 108 2 91 449 123 477 1.40E-133 484.6 6596 cellular  
 organisms;Eukaryota;Opisthokonta;Metazoa;Eumetazoa;Bilateria;Protostomia;  
 Spiralia;Lophotrochozoa;Mollusca;Bivalvia;Autobranhia;Heteroconchia;Euhe  
 terodonta;Imparidentia;Venerida;Veneroidea;Veneridae;Mercenaria;Mercenari  
 a mercenaria  
 UdeM00000032596 6596 125.6 UdeM00000032596 XP\_045169065.1 58.3 127  
 40 7 37 154 17 139 5.80E-26 125.6 6596 cellular  
 organisms;Eukaryota;Opisthokonta;Metazoa;Eumetazoa;Bilateria;Protostomia;  
 Spiralia;Lophotrochozoa;Mollusca;Bivalvia;Autobranhia;Heteroconchia;Euhe  
 terodonta;Imparidentia;Venerida;Veneroidea;Veneridae;Mercenaria;Mercenari  
 a mercenaria  
 UdeM00000032597 29159 298.5 UdeM00000032597 XP\_034322771.1 33.2 576  
 310 10 13 538 32 582 1.70E-77 298.5 29159 cellular  
 organisms;Eukaryota;Opisthokonta;Metazoa;Eumetazoa;Bilateria;Protostomia;  
 Spiralia;Lophotrochozoa;Mollusca;Bivalvia;Autobranhia;Pteriomorphia;Ostr  
 eida;Ostreoidea;Ostreidae;Crassostrea;Crassostrea gigas  
 UdeM00000032598 6565 297.7 UdeM00000032598 XP\_022286721.1 76.6 175  
 40 1 1 175 546 719 9.40E-78 297.7 6565 cellular  
 organisms;Eukaryota;Opisthokonta;Metazoa;Eumetazoa;Bilateria;Protostomia;  
 Spiralia;Lophotrochozoa;Mollusca;Bivalvia;Autobranhia;Pteriomorphia;Ostr  
 eida;Ostreoidea;Ostreidae;Crassostrea;Crassostrea virginica  
 UdeM00000032599 6596 311.6 UdeM00000032599 XP\_045169975.1 42.7 482  
 228 13 1 447 1 469 1.60E-81 311.6 6596 cellular  
 organisms;Eukaryota;Opisthokonta;Metazoa;Eumetazoa;Bilateria;Protostomia;  
 Spiralia;Lophotrochozoa;Mollusca;Bivalvia;Autobranhia;Heteroconchia;Euhe  
 terodonta;Imparidentia;Venerida;Veneroidea;Veneridae;Mercenaria;Mercenari  
 a mercenaria  
 UdeM00000032600 6596 311.2 UdeM00000032600 XP\_045169975.1 43.2 482  
 225 14 1 446 1 469 2.10E-81 311.2 6596 cellular  
 organisms;Eukaryota;Opisthokonta;Metazoa;Eumetazoa;Bilateria;Protostomia;  
 Spiralia;Lophotrochozoa;Mollusca;Bivalvia;Autobranhia;Heteroconchia;Euhe

terodonta;Imparidentia;Venerida;Veneroidea;Veneridae;Mercenaria;Mercenaria mercenaria  
 UdeM00000032602 6596 752.7 UdeM00000032602 XP\_045169122.1 72.1 487  
 136 0 1 487 38 524 3.30E-214 752.7 6596 cellular  
 organisms;Eukaryota;Opisthokonta;Metazoa;Eumetazoa;Bilateria;Protostomia;  
 Spiralia;Lophotrochozoa;Mollusca;Bivalvia;Autobranhia;Heteroconchia;Euhe  
 terodonta;Imparidentia;Venerida;Veneroidea;Veneridae;Mercenaria;Mercenari  
 a mercenaria  
 UdeM00000032601 6596 785.8 UdeM00000032601 XP\_045169122.1 70.2 531  
 145 1 4 534 7 524 3.80E-224 785.8 6596 cellular  
 organisms;Eukaryota;Opisthokonta;Metazoa;Eumetazoa;Bilateria;Protostomia;  
 Spiralia;Lophotrochozoa;Mollusca;Bivalvia;Autobranhia;Heteroconchia;Euhe  
 terodonta;Imparidentia;Venerida;Veneroidea;Veneridae;Mercenaria;Mercenari  
 a mercenaria  
 UdeM00000032603 46514 90.1 UdeM00000032603 XP\_038073135.1 38.7 111  
 62 1 1 111 393 497 1.90E-15 90.1 46514 cellular  
 organisms;Eukaryota;Opisthokonta;Metazoa;Eumetazoa;Bilateria;Deuterostomi  
 a;Echinodermata;Eleutherozoa;Asterozoa;Asteroidea;Valvatacea;Valvatida;As  
 terinidae;Patiria;Patiria miniata  
 UdeM00000032604 400727 60.5 UdeM00000032604 XP\_025095902.1 44.6  
 83 42 2 40 120 35 115 1.70E-06 60.5 400727  
 cellular  
 organisms;Eukaryota;Opisthokonta;Metazoa;Eumetazoa;Bilateria;Protostomia;  
 Spiralia;Lophotrochozoa;Mollusca;Gastropoda;Caenogastropoda;Architaeniogl  
 ossa;Ampullarioidea;Ampullariidae;Pomacea;Pomacea canaliculata  
 UdeM00000032606 43689 58.2 UdeM00000032606 XP\_039862795.1 34.5 84  
 54 1 1 84 124 206 6.10E-06 58.2 43689 cellular  
 organisms;Eukaryota;Opisthokonta;Metazoa;Eumetazoa;Bilateria;Deuterostomi  
 a;Chordata;Craniata;Vertebrata;Gnathostomata;Teleostomi;Euteleostomi;Acti  
 nopterygii;Actinopteri;Neopterygii;Teleostei;Osteoglossocephalai;Clupeoce  
 phala;Euteleosteomorpha;Neoteleostei;Eurypterygia;Ctenosquamata;Acanthomo  
 rphata;Euacanthomorphacea;Percomorphaceae;Ovalentaria;Cichlomorphae;Cichl  
 iformes;Cichlidae;African  
 cichlids;Pseudocrenilabrinae;Tropheini;Simochromis;Simochromis diagramma  
 UdeM00000032607 400682 63.9 UdeM00000032607 XP\_011409510.1 55.3  
 47 21 0 1 47 234 280 1.50E-07 63.9 400682  
 cellular  
 organisms;Eukaryota;Opisthokonta;Metazoa;Porifera;Demospongiae;Heteroscle  
 romorpha;Haplosclerida;Niphatidae;Amphimedon;Amphimedon queenslandica  
 UdeM00000032609 1257118 402.1 UdeM00000032609 XP\_004334931.1 43.3  
 545 252 18 40 566 38 543 1.20E-108 402.1 1257118  
 cellular  
 organisms;Eukaryota;Amoebozoa;Discosea;Longamoebia;Centramoebida;Acantham  
 oebidae;Acanthamoeba;Acanthamoeba castellanii;Acanthamoeba castellanii  
 str. Neff  
 UdeM00000032611 6596 510.4 UdeM00000032611 XP\_045193585.1 68.8 336  
 105 0 1 336 86 421 1.80E-141 510.4 6596 cellular  
 organisms;Eukaryota;Opisthokonta;Metazoa;Eumetazoa;Bilateria;Protostomia;  
 Spiralia;Lophotrochozoa;Mollusca;Bivalvia;Autobranhia;Heteroconchia;Euhe  
 terodonta;Imparidentia;Venerida;Veneroidea;Veneridae;Mercenaria;Mercenari  
 a mercenaria  
 UdeM00000032610 6596 593.6 UdeM00000032610 XP\_045193585.1 66 421  
 127 1 1 405 1 421 1.90E-166 593.6 6596 cellular  
 organisms;Eukaryota;Opisthokonta;Metazoa;Eumetazoa;Bilateria;Protostomia;

Spiralia;Lophotrochozoa;Mollusca;Bivalvia;Autobranchia;Heteroconchia;Euherodonta;Imparidentia;Venerida;Veneroidea;Veneridae;Mercenaria;Mercenaria mercenaria

UdeM00000032612 37653 124.4 UdeM00000032612 XP\_014774940.1 59.4 143  
57 1 2 143 3 145 2.40E-25 124.4 37653 cellular

organisms;Eukaryota;Opisthokonta;Metazoa;Eumetazoa;Bilateria;Protostomia;Spiralia;Lophotrochozoa;Mollusca;Cephalopoda;Coleoidea;Octopodiformes;Octopoda;Incirrata;Octopodidae;Octopus;Octopus bimaculoides

UdeM00000032613 8236 124 UdeM00000032613 XP\_044195363.1 78.1 73  
16 0 1 73 1 73 3.00E-25 124 8236 cellular

organisms;Eukaryota;Opisthokonta;Metazoa;Eumetazoa;Bilateria;Deuterostomia;Chordata;Craniata;Vertebrata;Gnathostomata;Teleostomi;Euteleostomi;Actinopterygii;Actinopteri;Neopterygii;Teleostei;Osteoglossocephalai;Clupeocephala;Euteleostei;Neoteleostei;Eurypterygia;Ctenosquamata;Acanthomorpha;Euacanthomorpha;Percomorphaceae;Pelagiaria;Scombriformes;Scombridae;Scombrinae;Thunnini;Thunnus;Thunnus albacares

UdeM00000032614 6596 633.6 UdeM00000032614 XP\_045193585.1 68.6 421  
132 0 1 421 1 421 1.70E-178 633.6 6596 cellular

organisms;Eukaryota;Opisthokonta;Metazoa;Eumetazoa;Bilateria;Protostomia;Spiralia;Lophotrochozoa;Mollusca;Bivalvia;Autobranchia;Heteroconchia;Euherodonta;Imparidentia;Venerida;Veneroidea;Veneridae;Mercenaria;Mercenaria mercenaria

UdeM00000032615 400727 189.5 UdeM00000032615 XP\_025096265.1 69.2  
120 37 0 1 120 284 403 2.50E-45 189.5 400727  
cellular

organisms;Eukaryota;Opisthokonta;Metazoa;Eumetazoa;Bilateria;Protostomia;Spiralia;Lophotrochozoa;Mollusca;Gastropoda;Caenogastropoda;Architaenioglossa;Ampullarioidea;Ampullariidae;Pomacea;Pomacea canaliculata

UdeM00000032616 6596 258.5 UdeM00000032616 XP\_045164927.1 35 448  
274 8 28 464 123 564 1.70E-65 258.5 6596 cellular

organisms;Eukaryota;Opisthokonta;Metazoa;Eumetazoa;Bilateria;Protostomia;Spiralia;Lophotrochozoa;Mollusca;Bivalvia;Autobranchia;Heteroconchia;Euherodonta;Imparidentia;Venerida;Veneroidea;Veneridae;Mercenaria;Mercenaria mercenaria

UdeM00000032617 6579 72 UdeM00000032617 XP\_033762814.1 45.2 73  
39 1 24 95 23 95 5.50E-10 72 6579 cellular

organisms;Eukaryota;Opisthokonta;Metazoa;Eumetazoa;Bilateria;Protostomia;Spiralia;Lophotrochozoa;Mollusca;Bivalvia;Autobranchia;Pteriomorpha;Pectinida;Pectinoidea;Pectinidae;Pecten;Pecten maximus

UdeM00000032618 6579 66.6 UdeM00000032618 XP\_033762814.1 37.6 125  
64 4 7 119 8 130 5.50E-08 66.6 6579 cellular

organisms;Eukaryota;Opisthokonta;Metazoa;Eumetazoa;Bilateria;Protostomia;Spiralia;Lophotrochozoa;Mollusca;Bivalvia;Autobranchia;Pteriomorpha;Pectinida;Pectinoidea;Pectinidae;Pecten;Pecten maximus

UdeM00000032619 6596 221.9 UdeM00000032619 XP\_045170287.1 62.8 180  
66 1 1 180 1 179 6.80E-55 221.9 6596 cellular

organisms;Eukaryota;Opisthokonta;Metazoa;Eumetazoa;Bilateria;Protostomia;Spiralia;Lophotrochozoa;Mollusca;Bivalvia;Autobranchia;Heteroconchia;Euherodonta;Imparidentia;Venerida;Veneroidea;Veneridae;Mercenaria;Mercenaria mercenaria

UdeM00000032620 1735272 85.1 UdeM00000032620 XP\_041375019.1 52.3  
88 42 0 1 88 217 304 5.30E-14 85.1 1735272  
cellular

organisms;Eukaryota;Opisthokonta;Metazoa;Eumetazoa;Bilateria;Protostomia;

Spiralia;Lophotrochozoa;Mollusca;Gastropoda;Neomphalina;Neomphaloidea;Pel  
tospiridae;Gigantopelta;Gigantopelta aegis  
UdeM00000032621 6596 464.5 UdeM00000032621 XP\_045170287.1 67 385  
114 6 1 384 181 553 1.30E-127 464.5 6596 cellular  
organisms;Eukaryota;Opisthokonta;Metazoa;Eumetazoa;Bilateria;Protostomia;  
Spiralia;Lophotrochozoa;Mollusca;Bivalvia;Autobranchia;Heteroconchia;Euhe  
terodonta;Imparidentia;Venerida;Veneroidea;Veneridae;Mercenaria;Mercenari  
a mercenaria  
UdeM00000032622 6573 775.8 UdeM00000032622 XP\_021341158.1 75.8 608  
144 2 127 732 77 683 5.80E-221 775.8 6573 cellular  
organisms;Eukaryota;Opisthokonta;Metazoa;Eumetazoa;Bilateria;Protostomia;  
Spiralia;Lophotrochozoa;Mollusca;Bivalvia;Autobranchia;Pteriormorphia;Pect  
inida;Pectinoidea;Pectinidae;Mizuhopecten;Mizuhopecten yessoensis  
UdeM00000032623 6596 436.4 UdeM00000032623 XP\_045170120.1 55.5 375  
163 3 3 376 25 396 3.60E-119 436.4 6596 cellular  
organisms;Eukaryota;Opisthokonta;Metazoa;Eumetazoa;Bilateria;Protostomia;  
Spiralia;Lophotrochozoa;Mollusca;Bivalvia;Autobranchia;Heteroconchia;Euhe  
terodonta;Imparidentia;Venerida;Veneroidea;Veneridae;Mercenaria;Mercenari  
a mercenaria  
UdeM00000032624 6573 232.3 UdeM00000032624 XP\_021377110.1 83.1 136  
23 0 1 136 1 136 3.80E-58 232.3 6573 cellular  
organisms;Eukaryota;Opisthokonta;Metazoa;Eumetazoa;Bilateria;Protostomia;  
Spiralia;Lophotrochozoa;Mollusca;Bivalvia;Autobranchia;Pteriormorphia;Pect  
inida;Pectinoidea;Pectinidae;Mizuhopecten;Mizuhopecten yessoensis  
UdeM00000032625 6596 357.5 UdeM00000032625 XP\_045185334.1 51.1 317  
151 1 11 327 10 322 1.90E-95 357.5 6596 cellular  
organisms;Eukaryota;Opisthokonta;Metazoa;Eumetazoa;Bilateria;Protostomia;  
Spiralia;Lophotrochozoa;Mollusca;Bivalvia;Autobranchia;Heteroconchia;Euhe  
terodonta;Imparidentia;Venerida;Veneroidea;Veneridae;Mercenaria;Mercenari  
a mercenaria  
UdeM00000032626 6596 354 UdeM00000032626 XP\_045169854.1 51.2 326  
151 5 7 327 1 323 2.40E-94 354 6596 cellular  
organisms;Eukaryota;Opisthokonta;Metazoa;Eumetazoa;Bilateria;Protostomia;  
Spiralia;Lophotrochozoa;Mollusca;Bivalvia;Autobranchia;Heteroconchia;Euhe  
terodonta;Imparidentia;Venerida;Veneroidea;Veneridae;Mercenaria;Mercenari  
a mercenaria  
UdeM00000032627 6565 399.1 UdeM00000032627 XP\_022309189.1 55.8 355  
148 5 8 358 3 352 6.40E-108 399.1 6565 cellular  
organisms;Eukaryota;Opisthokonta;Metazoa;Eumetazoa;Bilateria;Protostomia;  
Spiralia;Lophotrochozoa;Mollusca;Bivalvia;Autobranchia;Pteriormorphia;Ostr  
eida;Ostreoidea;Ostreidae;Crassostrea;Crassostrea virginica  
UdeM00000032628 1735272 138.3 UdeM00000032628 XP\_041365223.1 47.7  
130 65 3 8 136 12 139 1.10E-29 138.3 1735272  
cellular  
organisms;Eukaryota;Opisthokonta;Metazoa;Eumetazoa;Bilateria;Protostomia;  
Spiralia;Lophotrochozoa;Mollusca;Gastropoda;Neomphalina;Neomphaloidea;Pel  
tospiridae;Gigantopelta;Gigantopelta aegis  
UdeM00000032629 6565 179.9 UdeM00000032629 XP\_022309189.1 59.3 145  
58 1 15 158 199 343 2.60E-42 179.9 6565 cellular  
organisms;Eukaryota;Opisthokonta;Metazoa;Eumetazoa;Bilateria;Protostomia;  
Spiralia;Lophotrochozoa;Mollusca;Bivalvia;Autobranchia;Pteriormorphia;Ostr  
eida;Ostreoidea;Ostreidae;Crassostrea;Crassostrea virginica  
UdeM00000032630 6596 605.1 UdeM00000032630 XP\_045169733.1 67.9 424  
132 3 10 432 7 427 6.90E-170 605.1 6596 cellular

organisms;Eukaryota;Opisthokonta;Metazoa;Eumetazoa;Bilateria;Protostomia;Spiralia;Lophotrochozoa;Mollusca;Bivalvia;Autobranhia;Heteroconchia;Euheterodonta;Imparidentia;Venerida;Veneroidea;Veneridae;Mercenaria;Mercenaria mercenaria

UdeM00000032631 6579 309.3 UdeM00000032631 XP\_033762544.1 55.1 245  
110 0 1 245 20 264 4.40E-81 309.3 6579 cellular

organisms;Eukaryota;Opisthokonta;Metazoa;Eumetazoa;Bilateria;Protostomia;Spiralia;Lophotrochozoa;Mollusca;Bivalvia;Autobranhia;Pteriormorphia;Pectinida;Pectinoidea;Pectinidae;Pecten;Pecten maximus

UdeM00000032632 6596 375.2 UdeM00000032632 XP\_045167953.1 67.1 550  
177 1 1 546 1 550 1.40E-100 375.2 6596 cellular

organisms;Eukaryota;Opisthokonta;Metazoa;Eumetazoa;Bilateria;Protostomia;Spiralia;Lophotrochozoa;Mollusca;Bivalvia;Autobranhia;Heteroconchia;Euheterodonta;Imparidentia;Venerida;Veneroidea;Veneridae;Mercenaria;Mercenaria mercenaria

UdeM00000032633 6596 350.5 UdeM00000032633 XP\_045167953.1 67.9 524  
168 0 5 528 27 550 3.70E-93 350.5 6596 cellular

organisms;Eukaryota;Opisthokonta;Metazoa;Eumetazoa;Bilateria;Protostomia;Spiralia;Lophotrochozoa;Mollusca;Bivalvia;Autobranhia;Heteroconchia;Euheterodonta;Imparidentia;Venerida;Veneroidea;Veneridae;Mercenaria;Mercenaria mercenaria

UdeM00000032634 400727 397.5 UdeM00000032634 XP\_025093996.1 55.8  
310 132 3 13 320 12 318 1.60E-107 397.5 400727  
cellular

organisms;Eukaryota;Opisthokonta;Metazoa;Eumetazoa;Bilateria;Protostomia;Spiralia;Lophotrochozoa;Mollusca;Gastropoda;Caenogastropoda;Architaenioglossa;Ampullarioidea;Ampullariidae;Pomacea;Pomacea canaliculata

UdeM00000032636 46514 305.1 UdeM00000032636 XP\_038075667.1 38 487  
237 10 15 452 94 564 1.50E-79 305.1 46514 cellular

organisms;Eukaryota;Opisthokonta;Metazoa;Eumetazoa;Bilateria;Deuterostomia;Echinodermata;Eleutherozoa;Asterozoa;Asteroidea;Valvatacea;Valvatida;Asterinidae;Patiria;Patiria miniata

UdeM00000032637 6596 457.6 UdeM00000032637 XP\_045168399.1 48.9 444  
221 2 1 444 9 446 1.80E-125 457.6 6596 cellular

organisms;Eukaryota;Opisthokonta;Metazoa;Eumetazoa;Bilateria;Protostomia;Spiralia;Lophotrochozoa;Mollusca;Bivalvia;Autobranhia;Heteroconchia;Euheterodonta;Imparidentia;Venerida;Veneroidea;Veneridae;Mercenaria;Mercenaria mercenaria

UdeM00000032639 6596 85.9 UdeM00000032639 XP\_045169097.1 51.4 74  
33 1 81 151 88 161 5.50E-14 85.9 6596 cellular

organisms;Eukaryota;Opisthokonta;Metazoa;Eumetazoa;Bilateria;Protostomia;Spiralia;Lophotrochozoa;Mollusca;Bivalvia;Autobranhia;Heteroconchia;Euheterodonta;Imparidentia;Venerida;Veneroidea;Veneridae;Mercenaria;Mercenaria mercenaria

UdeM00000032641 6596 85.9 UdeM00000032641 XP\_045170036.1 37.9 95  
58 1 3 97 261 354 3.20E-14 85.9 6596 cellular

organisms;Eukaryota;Opisthokonta;Metazoa;Eumetazoa;Bilateria;Protostomia;Spiralia;Lophotrochozoa;Mollusca;Bivalvia;Autobranhia;Heteroconchia;Euheterodonta;Imparidentia;Venerida;Veneroidea;Veneridae;Mercenaria;Mercenaria mercenaria

UdeM00000032642 6596 172.2 UdeM00000032642 XP\_045168630.1 46.8 186  
97 2 7 190 10 195 7.30E-40 172.2 6596 cellular

organisms;Eukaryota;Opisthokonta;Metazoa;Eumetazoa;Bilateria;Protostomia;Spiralia;Lophotrochozoa;Mollusca;Bivalvia;Autobranhia;Heteroconchia;Euheterodonta;Imparidentia;Venerida;Veneroidea;Veneridae;Mercenaria;Mercenaria mercenaria



terodonta;Imparidentia;Venerida;Veneroidea;Veneridae;Mercenaria;Mercenari  
 a mercenaria  
 UdeM00000032644 7574 124 UdeM00000032644 XP\_013379183.1 38.6 207  
 80 5 2 202 48 213 5.30E-25 124 7574 cellular  
 organisms;Eukaryota;Opisthokonta;Metazoa;Eumetazoa;Bilateria;Protostomia;  
 Spiralia;Lophotrochozoa;Brachiopoda;Linguliformea;Lingulata;Lingulida;Lin  
 guloidea;Lingulidae;Lingula;Lingula anatina  
 UdeM00000032645 6596 184.9 UdeM00000032645 XP\_045177958.1 44.5 236  
 105 4 23 233 47 281 1.20E-43 184.9 6596 cellular  
 organisms;Eukaryota;Opisthokonta;Metazoa;Eumetazoa;Bilateria;Protostomia;  
 Spiralia;Lophotrochozoa;Mollusca;Bivalvia;Autobranchia;Heteroconchia;Euhe  
 terodonta;Imparidentia;Venerida;Veneroidea;Veneridae;Mercenaria;Mercenari  
 a mercenaria  
 UdeM00000032646 6596 164.1 UdeM00000032646 XP\_045177958.1 48.3 180  
 85 2 1 172 94 273 1.70E-37 164.1 6596 cellular  
 organisms;Eukaryota;Opisthokonta;Metazoa;Eumetazoa;Bilateria;Protostomia;  
 Spiralia;Lophotrochozoa;Mollusca;Bivalvia;Autobranchia;Heteroconchia;Euhe  
 terodonta;Imparidentia;Venerida;Veneroidea;Veneridae;Mercenaria;Mercenari  
 a mercenaria  
 UdeM00000032647 1735272 239.6 UdeM00000032647 XP\_041367191.1 59.9  
 202 81 0 10 211 8 209 3.80E-60 239.6 1735272  
 cellular  
 organisms;Eukaryota;Opisthokonta;Metazoa;Eumetazoa;Bilateria;Protostomia;  
 Spiralia;Lophotrochozoa;Mollusca;Gastropoda;Neomphalina;Neomphaloidea;Pel  
 tospiridae;Gigantopelta;Gigantopelta aegis  
 UdeM00000032648 6596 359.8 UdeM00000032648 XP\_045168298.1 57.4 289  
 122 1 1 288 8 296 3.30E-96 359.8 6596 cellular  
 organisms;Eukaryota;Opisthokonta;Metazoa;Eumetazoa;Bilateria;Protostomia;  
 Spiralia;Lophotrochozoa;Mollusca;Bivalvia;Autobranchia;Heteroconchia;Euhe  
 terodonta;Imparidentia;Venerida;Veneroidea;Veneridae;Mercenaria;Mercenari  
 a mercenaria  
 UdeM00000032649 1735272 217.2 UdeM00000032649 XP\_041366966.1 55.2  
 203 82 5 1 199 1 198 1.90E-53 217.2 1735272  
 cellular  
 organisms;Eukaryota;Opisthokonta;Metazoa;Eumetazoa;Bilateria;Protostomia;  
 Spiralia;Lophotrochozoa;Mollusca;Gastropoda;Neomphalina;Neomphaloidea;Pel  
 tospiridae;Gigantopelta;Gigantopelta aegis  
 UdeM00000032650 6565 83.6 UdeM00000032650 XP\_022338028.1 32.7 153  
 92 5 5 153 256 401 4.80E-13 83.6 6565 cellular  
 organisms;Eukaryota;Opisthokonta;Metazoa;Eumetazoa;Bilateria;Protostomia;  
 Spiralia;Lophotrochozoa;Mollusca;Bivalvia;Autobranchia;Pteriomorphia;Ostr  
 eida;Ostreoidea;Ostreidae;Crassostrea;Crassostrea virginica  
 UdeM00000032651 6579 197.6 UdeM00000032651 XP\_033755207.1 35.3 371  
 205 15 6 364 45 392 3.90E-47 197.6 6579 cellular  
 organisms;Eukaryota;Opisthokonta;Metazoa;Eumetazoa;Bilateria;Protostomia;  
 Spiralia;Lophotrochozoa;Mollusca;Bivalvia;Autobranchia;Pteriomorphia;Pect  
 inida;Pectinoidea;Pectinidae;Pecten;Pecten maximus  
 UdeM00000032654 6596 995.3 UdeM00000032654 XP\_045167378.1 70 767  
 229 1 73 838 26 792 4.50E-287 995.3 6596 cellular  
 organisms;Eukaryota;Opisthokonta;Metazoa;Eumetazoa;Bilateria;Protostomia;  
 Spiralia;Lophotrochozoa;Mollusca;Bivalvia;Autobranchia;Heteroconchia;Euhe  
 terodonta;Imparidentia;Venerida;Veneroidea;Veneridae;Mercenaria;Mercenari  
 a mercenaria

UdeM00000032655 6596 174.5 UdeM00000032655 XP\_045167378.1 61 136  
 52 1 25 159 26 161 1.20E-40 174.5 6596 cellular  
 organisms;Eukaryota;Opisthokonta;Metazoa;Eumetazoa;Bilateria;Protostomia;  
 Spiralia;Lophotrochozoa;Mollusca;Bivalvia;Autobranhia;Heteroconchia;Euhe  
 terodonta;Imparidentia;Venerida;Veneroidea;Veneridae;Mercenaria;Mercenari  
 a mercenaria  
 UdeM00000032656 6596 68.2 UdeM00000032656 XP\_045163626.1 47 83  
 39 3 1 80 1 81 5.60E-09 68.2 6596 cellular  
 organisms;Eukaryota;Opisthokonta;Metazoa;Eumetazoa;Bilateria;Protostomia;  
 Spiralia;Lophotrochozoa;Mollusca;Bivalvia;Autobranhia;Heteroconchia;Euhe  
 terodonta;Imparidentia;Venerida;Veneroidea;Veneridae;Mercenaria;Mercenari  
 a mercenaria  
 UdeM00000032657 29159 61.6 UdeM00000032657 XP\_034319761.1 51.9 52  
 24 1 34 84 1643 1694 5.60E-06 61.6 29159 cellular  
 organisms;Eukaryota;Opisthokonta;Metazoa;Eumetazoa;Bilateria;Protostomia;  
 Spiralia;Lophotrochozoa;Mollusca;Bivalvia;Autobranhia;Pteriormorphia;Ostr  
 eida;Ostreoidea;Ostreidae;Crassostrea;Crassostrea gigas  
 UdeM00000032658 6573 434.1 UdeM00000032658 XP\_021365063.1 55.1 405  
 156 5 80 484 45 423 2.40E-118 434.1 6573 cellular  
 organisms;Eukaryota;Opisthokonta;Metazoa;Eumetazoa;Bilateria;Protostomia;  
 Spiralia;Lophotrochozoa;Mollusca;Bivalvia;Autobranhia;Pteriormorphia;Pect  
 inida;Pectinoidea;Pectinidae;Mizuhopecten;Mizuhopecten yessoensis  
 UdeM00000032659 6573 223 UdeM00000032659 XP\_021352426.1 47.3 224  
 108 3 267 486 174 391 8.20E-55 223 6573 cellular  
 organisms;Eukaryota;Opisthokonta;Metazoa;Eumetazoa;Bilateria;Protostomia;  
 Spiralia;Lophotrochozoa;Mollusca;Bivalvia;Autobranhia;Pteriormorphia;Pect  
 inida;Pectinoidea;Pectinidae;Mizuhopecten;Mizuhopecten yessoensis  
 UdeM00000032660 6596 340.1 UdeM00000032660 XP\_045198992.1 54.2 297  
 134 2 1 297 9 303 2.80E-90 340.1 6596 cellular  
 organisms;Eukaryota;Opisthokonta;Metazoa;Eumetazoa;Bilateria;Protostomia;  
 Spiralia;Lophotrochozoa;Mollusca;Bivalvia;Autobranhia;Heteroconchia;Euhe  
 terodonta;Imparidentia;Venerida;Veneroidea;Veneridae;Mercenaria;Mercenari  
 a mercenaria  
 UdeM00000032661 6596 613.2 UdeM00000032661 XP\_045167795.1 37.8 873  
 517 16 153 1006 6517 7382 5.80E-172 613.2 6596 cellular  
 organisms;Eukaryota;Opisthokonta;Metazoa;Eumetazoa;Bilateria;Protostomia;  
 Spiralia;Lophotrochozoa;Mollusca;Bivalvia;Autobranhia;Heteroconchia;Euhe  
 terodonta;Imparidentia;Venerida;Veneroidea;Veneridae;Mercenaria;Mercenari  
 a mercenaria  
 UdeM00000032662 6596 447.2 UdeM00000032662 XP\_045168675.1 40.7 750  
 367 22 465 1161 632 1356 9.70E-122 447.2 6596 cellular  
 organisms;Eukaryota;Opisthokonta;Metazoa;Eumetazoa;Bilateria;Protostomia;  
 Spiralia;Lophotrochozoa;Mollusca;Bivalvia;Autobranhia;Heteroconchia;Euhe  
 terodonta;Imparidentia;Venerida;Veneroidea;Veneridae;Mercenaria;Mercenari  
 a mercenaria  
 UdeM00000032663 6579 847.4 UdeM00000032663 XP\_033761970.1 59.3 831  
 326 6 387 1210 457 1282 2.30E-242 847.4 6579 cellular  
 organisms;Eukaryota;Opisthokonta;Metazoa;Eumetazoa;Bilateria;Protostomia;  
 Spiralia;Lophotrochozoa;Mollusca;Bivalvia;Autobranhia;Pteriormorphia;Pect  
 inida;Pectinoidea;Pectinidae;Pecten;Pecten maximus  
 UdeM00000032664 29159 436.8 UdeM00000032664 XP\_019926384.2 47 583  
 303 2 1 579 1 581 4.30E-119 436.8 29159 cellular  
 organisms;Eukaryota;Opisthokonta;Metazoa;Eumetazoa;Bilateria;Protostomia;

Spiralia;Lophotrochozoa;Mollusca;Bivalvia;Autobranchia;Pteriormorphia;Ostr  
eida;Ostreoidea;Ostreidae;Crassostrea;Crassostrea gigas

UdeM00000032665 6596 1149.4 UdeM00000032665 XP\_045170320.1 63.1  
971 308 8 1 940 31 982 0.00E+00 1149.4 6596  
cellular

organisms;Eukaryota;Opisthokonta;Metazoa;Eumetazoa;Bilateria;Protostomia;  
Spiralia;Lophotrochozoa;Mollusca;Bivalvia;Autobranchia;Heteroconchia;Euhe  
terodonta;Imparidentia;Venerida;Veneroidea;Veneridae;Mercenaria;Mercenari  
a mercenaria

UdeM00000032666 6596 322.4 UdeM00000032666 XP\_045170320.1 47 383  
156 5 128 481 618 982 9.80E-85 322.4 6596 cellular

organisms;Eukaryota;Opisthokonta;Metazoa;Eumetazoa;Bilateria;Protostomia;  
Spiralia;Lophotrochozoa;Mollusca;Bivalvia;Autobranchia;Heteroconchia;Euhe  
terodonta;Imparidentia;Venerida;Veneroidea;Veneridae;Mercenaria;Mercenari  
a mercenaria

UdeM00000032667 6596 631.7 UdeM00000032667 XP\_045168033.1 58.3 638  
227 13 31 638 4 632 1.00E-177 631.7 6596 cellular

organisms;Eukaryota;Opisthokonta;Metazoa;Eumetazoa;Bilateria;Protostomia;  
Spiralia;Lophotrochozoa;Mollusca;Bivalvia;Autobranchia;Heteroconchia;Euhe  
terodonta;Imparidentia;Venerida;Veneroidea;Veneridae;Mercenaria;Mercenari  
a mercenaria

UdeM00000032668 6596 176.4 UdeM00000032668 XP\_045167467.1 38.4 229  
127 5 37 254 22 247 4.60E-41 176.4 6596 cellular

organisms;Eukaryota;Opisthokonta;Metazoa;Eumetazoa;Bilateria;Protostomia;  
Spiralia;Lophotrochozoa;Mollusca;Bivalvia;Autobranchia;Heteroconchia;Euhe  
terodonta;Imparidentia;Venerida;Veneroidea;Veneridae;Mercenaria;Mercenari  
a mercenaria

UdeM00000032670 133434 76.6 UdeM00000032670 XP\_022099026.1 46.2  
80 43 0 2 81 167 246 3.00E-11 76.6 133434

cellular

organisms;Eukaryota;Opisthokonta;Metazoa;Eumetazoa;Bilateria;Deuterostomi  
a;Echinodermata;Eleutherozoa;Asterozoa;Asteroidea;Valvatacea;Valvatida;Ac  
anthasteridae;Acanthaster;Acanthaster planci

UdeM00000032671 13397 155.2 UdeM00000032671 XP\_041037025.1 40.3 221  
119 4 4 223 6 214 1.00E-34 155.2 13397 cellular

organisms;Eukaryota;Opisthokonta;Metazoa;Eumetazoa;Bilateria;Deuterostomi  
a;Chordata;Craniata;Vertebrata;Gnathostomata;Chondrichthyes;Elasmobranchi  
i;Selachii;Galeomorphii;Galeoidea;Lamniformes;Alopiidae;Lamninae;Carcharo  
don;Carcharodon carcharias

UdeM00000032672 6579 186.4 UdeM00000032672 XP\_033761764.1 44.4 216  
114 3 53 262 215 430 4.60E-44 186.4 6579 cellular

organisms;Eukaryota;Opisthokonta;Metazoa;Eumetazoa;Bilateria;Protostomia;  
Spiralia;Lophotrochozoa;Mollusca;Bivalvia;Autobranchia;Pteriormorphia;Pect  
inida;Pectinoidea;Pectinidae;Pecten;Pecten maximus

UdeM00000032673 6596 131.7 UdeM00000032673 XP\_045168170.1 33.7 563  
256 22 2 509 477 977 2.60E-27 131.7 6596 cellular

organisms;Eukaryota;Opisthokonta;Metazoa;Eumetazoa;Bilateria;Protostomia;  
Spiralia;Lophotrochozoa;Mollusca;Bivalvia;Autobranchia;Heteroconchia;Euhe  
terodonta;Imparidentia;Venerida;Veneroidea;Veneridae;Mercenaria;Mercenari  
a mercenaria

UdeM00000032674 6579 542 UdeM00000032674 XP\_033761865.1 78.4 320  
69 0 16 335 42 361 7.90E-151 542 6579 cellular

organisms;Eukaryota;Opisthokonta;Metazoa;Eumetazoa;Bilateria;Protostomia;

Spiralia;Lophotrochozoa;Mollusca;Bivalvia;Autobranchia;Pteriormorphia;Pectinida;Pectinoidea;Pectinidae;Pecten;Pecten maximus  
 UdeM00000032675 1735272 209.5 UdeM00000032675 XP\_041366054.1 39.7  
 310 177 6 1 309 2 302 6.20E-51 209.5 1735272  
 cellular  
 organisms;Eukaryota;Opisthokonta;Metazoa;Eumetazoa;Bilateria;Protostomia;Spiralia;Lophotrochozoa;Mollusca;Gastropoda;Neomphalina;Neomphaloidea;Peltospiridae;Gigantopelta;Gigantopelta aegis  
 UdeM00000032676 6565 581.3 UdeM00000032676 XP\_022336360.1 83.8 339  
 55 0 1 339 1 339 8.30E-163 581.3 6565 cellular  
 organisms;Eukaryota;Opisthokonta;Metazoa;Eumetazoa;Bilateria;Protostomia;Spiralia;Lophotrochozoa;Mollusca;Bivalvia;Autobranchia;Pteriormorphia;Ostreida;Ostreoidea;Ostreidae;Crassostrea;Crassostrea virginica  
 UdeM00000032677 6596 678.3 UdeM00000032677 XP\_045186372.1 78.3 401  
 87 0 29 429 4 404 6.30E-192 678.3 6596 cellular  
 organisms;Eukaryota;Opisthokonta;Metazoa;Eumetazoa;Bilateria;Protostomia;Spiralia;Lophotrochozoa;Mollusca;Bivalvia;Autobranchia;Heteroconchia;Euheterodonta;Imparidentia;Venerida;Veneroidea;Veneridae;Mercenaria;Mercenaria mercenaria  
 UdeM00000032678 6596 637.9 UdeM00000032678 XP\_045186372.1 79.9 368  
 74 0 2 369 37 404 8.10E-180 637.9 6596 cellular  
 organisms;Eukaryota;Opisthokonta;Metazoa;Eumetazoa;Bilateria;Protostomia;Spiralia;Lophotrochozoa;Mollusca;Bivalvia;Autobranchia;Heteroconchia;Euheterodonta;Imparidentia;Venerida;Veneroidea;Veneridae;Mercenaria;Mercenaria mercenaria  
 UdeM00000032679 1735272 152.5 UdeM00000032679 XP\_041366822.1 39.2  
 232 134 3 252 477 3 233 2.60E-33 152.5 1735272  
 cellular  
 organisms;Eukaryota;Opisthokonta;Metazoa;Eumetazoa;Bilateria;Protostomia;Spiralia;Lophotrochozoa;Mollusca;Gastropoda;Neomphalina;Neomphaloidea;Peltospiridae;Gigantopelta;Gigantopelta aegis  
 UdeM00000032680 6500 968 UdeM00000032680 XP\_035828507.1 80.9 572  
 109 0 292 863 236 807 8.00E-279 968 6500 cellular  
 organisms;Eukaryota;Opisthokonta;Metazoa;Eumetazoa;Bilateria;Protostomia;Spiralia;Lophotrochozoa;Mollusca;Gastropoda;Heterobranchia;Euthyneura;Tectipleura;Aplysiida;Aplysioidea;Aplysiidae;Aplysia;Aplysia californica  
 UdeM00000032681 6596 369 UdeM00000032681 XP\_045168925.1 46.7 443  
 203 8 13 437 43 470 8.40E-99 369 6596 cellular  
 organisms;Eukaryota;Opisthokonta;Metazoa;Eumetazoa;Bilateria;Protostomia;Spiralia;Lophotrochozoa;Mollusca;Bivalvia;Autobranchia;Heteroconchia;Euheterodonta;Imparidentia;Venerida;Veneroidea;Veneridae;Mercenaria;Mercenaria mercenaria  
 UdeM00000032682 1735272 273.5 UdeM00000032682 XP\_041366271.1 94  
 133 8 0 1 133 1 133 5.50E-70 273.5 1735272  
 cellular  
 organisms;Eukaryota;Opisthokonta;Metazoa;Eumetazoa;Bilateria;Protostomia;Spiralia;Lophotrochozoa;Mollusca;Gastropoda;Neomphalina;Neomphaloidea;Peltospiridae;Gigantopelta;Gigantopelta aegis  
 UdeM00000032683 6565 866.7 UdeM00000032683 XP\_022310335.1 93.4 454  
 30 0 1 454 1 454 1.30E-248 866.7 6565 cellular  
 organisms;Eukaryota;Opisthokonta;Metazoa;Eumetazoa;Bilateria;Protostomia;Spiralia;Lophotrochozoa;Mollusca;Bivalvia;Autobranchia;Pteriormorphia;Ostreida;Ostreoidea;Ostreidae;Crassostrea;Crassostrea virginica

UdeM00000032684 6596 421.8 UdeM00000032684 XP\_045168337.1 35.5 1143  
 589 31 1 1086 12 1063 3.10E-114 421.8 6596 cellular  
 organisms;Eukaryota;Opisthokonta;Metazoa;Eumetazoa;Bilateria;Protostomia;  
 Spiralia;Lophotrochozoa;Mollusca;Bivalvia;Autobranchia;Heteroconchia;Euhe  
 terodonta;Imparidentia;Venerida;Veneroidea;Veneridae;Mercenaria;Mercenari  
 a mercenaria  
 UdeM00000032685 6596 277.3 UdeM00000032685 XP\_045168919.1 54 237  
 107 1 4 240 14 248 3.30E-71 277.3 6596 cellular  
 organisms;Eukaryota;Opisthokonta;Metazoa;Eumetazoa;Bilateria;Protostomia;  
 Spiralia;Lophotrochozoa;Mollusca;Bivalvia;Autobranchia;Heteroconchia;Euhe  
 terodonta;Imparidentia;Venerida;Veneroidea;Veneridae;Mercenaria;Mercenari  
 a mercenaria  
 UdeM00000032686 6579 97.8 UdeM00000032686 XP\_033762080.1 40.3 124  
 73 1 3 125 6 129 1.60E-17 97.8 6579 cellular  
 organisms;Eukaryota;Opisthokonta;Metazoa;Eumetazoa;Bilateria;Protostomia;  
 Spiralia;Lophotrochozoa;Mollusca;Bivalvia;Autobranchia;Pteriormorphia;Pect  
 inida;Pectinoidea;Pectinidae;Pecten;Pecten maximus  
 UdeM00000032687 6579 837.4 UdeM00000032687 XP\_033761887.1 54.6 866  
 317 14 2 807 3 852 1.50E-239 837.4 6579 cellular  
 organisms;Eukaryota;Opisthokonta;Metazoa;Eumetazoa;Bilateria;Protostomia;  
 Spiralia;Lophotrochozoa;Mollusca;Bivalvia;Autobranchia;Pteriormorphia;Pect  
 inida;Pectinoidea;Pectinidae;Pecten;Pecten maximus  
 UdeM00000032688 6596 802.4 UdeM00000032688 XP\_045170417.1 81.2 629  
 117 1 4 631 3 631 4.30E-229 802.4 6596 cellular  
 organisms;Eukaryota;Opisthokonta;Metazoa;Eumetazoa;Bilateria;Protostomia;  
 Spiralia;Lophotrochozoa;Mollusca;Bivalvia;Autobranchia;Heteroconchia;Euhe  
 terodonta;Imparidentia;Venerida;Veneroidea;Veneridae;Mercenaria;Mercenari  
 a mercenaria  
 UdeM00000032689 225164 301.6 UdeM00000032689 XP\_009064772.1 77.5  
 187 40 1 6 190 7 193 7.30E-79 301.6 225164  
 cellular  
 organisms;Eukaryota;Opisthokonta;Metazoa;Eumetazoa;Bilateria;Protostomia;  
 Spiralia;Lophotrochozoa;Mollusca;Gastropoda;Patellogastropoda;Lottioidea;  
 Lottiidae;Lottia;Lottia gigantea  
 UdeM00000032690 6596 147.5 UdeM00000032690 XP\_045169740.1 48.6 138  
 71 0 549 686 190 327 6.80E-32 147.5 6596 cellular  
 organisms;Eukaryota;Opisthokonta;Metazoa;Eumetazoa;Bilateria;Protostomia;  
 Spiralia;Lophotrochozoa;Mollusca;Bivalvia;Autobranchia;Heteroconchia;Euhe  
 terodonta;Imparidentia;Venerida;Veneroidea;Veneridae;Mercenaria;Mercenari  
 a mercenaria  
 UdeM00000032691 6579 94.4 UdeM00000032691 XP\_033763014.1 37.7 122  
 75 1 24 144 27 148 1.40E-16 94.4 6579 cellular  
 organisms;Eukaryota;Opisthokonta;Metazoa;Eumetazoa;Bilateria;Protostomia;  
 Spiralia;Lophotrochozoa;Mollusca;Bivalvia;Autobranchia;Pteriormorphia;Pect  
 inida;Pectinoidea;Pectinidae;Pecten;Pecten maximus  
 UdeM00000032692 6596 184.5 UdeM00000032692 XP\_045170910.1 98.9 89  
 1 0 1 89 1 89 6.00E-44 184.5 6596 cellular  
 organisms;Eukaryota;Opisthokonta;Metazoa;Eumetazoa;Bilateria;Protostomia;  
 Spiralia;Lophotrochozoa;Mollusca;Bivalvia;Autobranchia;Heteroconchia;Euhe  
 terodonta;Imparidentia;Venerida;Veneroidea;Veneridae;Mercenaria;Mercenari  
 a mercenaria  
 UdeM00000032693 6579 183.7 UdeM00000032693 XP\_033748438.1 98.9 89  
 1 0 1 89 1 89 1.00E-43 183.7 6579 cellular  
 organisms;Eukaryota;Opisthokonta;Metazoa;Eumetazoa;Bilateria;Protostomia;

Spiralia;Lophotrochozoa;Mollusca;Bivalvia;Autobranchia;Pteriomorphia;Pectinida;Pectinoidea;Pectinidae;Pecten;Pecten maximus  
UdeM00000032694 7739 177.9 UdeM00000032694 XP\_035680064.1 67.9 134  
43 0 1 134 1 134 8.40E-42 177.9 7739 cellular  
organisms;Eukaryota;Opisthokonta;Metazoa;Eumetazoa;Bilateria;Deuterostomia;Chordata;Cephalochordata;Leptocardii;Amphioxiformes;Branchiostomidae;Branchiostoma;Branchiostoma floridae  
UdeM00000032695 6596 552.4 UdeM00000032695 XP\_045168251.1 62.2 426  
149 3 6 428 5 421 5.20E-154 552.4 6596 cellular  
organisms;Eukaryota;Opisthokonta;Metazoa;Eumetazoa;Bilateria;Protostomia;Spiralia;Lophotrochozoa;Mollusca;Bivalvia;Autobranchia;Heteroconchia;Euheterodonta;Imparidentia;Venerida;Veneroidea;Veneridae;Mercenaria;Mercenaria mercenaria  
UdeM00000032696 6596 136 UdeM00000032696 XP\_045188485.1 33.5 242  
147 6 127 360 23 258 1.40E-28 136 6596 cellular  
organisms;Eukaryota;Opisthokonta;Metazoa;Eumetazoa;Bilateria;Protostomia;Spiralia;Lophotrochozoa;Mollusca;Bivalvia;Autobranchia;Heteroconchia;Euheterodonta;Imparidentia;Venerida;Veneroidea;Veneridae;Mercenaria;Mercenaria mercenaria  
UdeM00000032697 7757 487.6 UdeM00000032697 XP\_032835197.1 80.9 298  
57 0 77 374 3 300 1.40E-134 487.6 7757 cellular  
organisms;Eukaryota;Opisthokonta;Metazoa;Eumetazoa;Bilateria;Deuterostomia;Chordata;Craniata;Vertebrata;Cyclostomata;Hyperoartia;Petromyzontiformes;Petromyzontidae;Petromyzon;Petromyzon marinus  
UdeM00000032699 6573 177.2 UdeM00000032699 XP\_021341655.1 44 234  
121 4 1 227 8 238 4.60E-41 177.2 6573 cellular  
organisms;Eukaryota;Opisthokonta;Metazoa;Eumetazoa;Bilateria;Protostomia;Spiralia;Lophotrochozoa;Mollusca;Bivalvia;Autobranchia;Pteriomorphia;Pectinida;Pectinoidea;Pectinidae;Mizuhopecten;Mizuhopecten yessoensis  
UdeM00000032700 6596 365.5 UdeM00000032700 XP\_045168917.1 40.4 569  
220 8 1 451 53 620 9.50E-98 365.5 6596 cellular  
organisms;Eukaryota;Opisthokonta;Metazoa;Eumetazoa;Bilateria;Protostomia;Spiralia;Lophotrochozoa;Mollusca;Bivalvia;Autobranchia;Heteroconchia;Euheterodonta;Imparidentia;Venerida;Veneroidea;Veneridae;Mercenaria;Mercenaria mercenaria  
UdeM00000032701 6596 90.5 UdeM00000032701 XP\_045161329.1 47.6 103  
50 3 68 167 1 102 2.20E-15 90.5 6596 cellular  
organisms;Eukaryota;Opisthokonta;Metazoa;Eumetazoa;Bilateria;Protostomia;Spiralia;Lophotrochozoa;Mollusca;Bivalvia;Autobranchia;Heteroconchia;Euheterodonta;Imparidentia;Venerida;Veneroidea;Veneridae;Mercenaria;Mercenaria mercenaria  
UdeM00000032702 6596 90.1 UdeM00000032702 XP\_045161329.1 47.6 103  
50 3 68 167 1 102 2.90E-15 90.1 6596 cellular  
organisms;Eukaryota;Opisthokonta;Metazoa;Eumetazoa;Bilateria;Protostomia;Spiralia;Lophotrochozoa;Mollusca;Bivalvia;Autobranchia;Heteroconchia;Euheterodonta;Imparidentia;Venerida;Veneroidea;Veneridae;Mercenaria;Mercenaria mercenaria  
UdeM00000032703 6596 90.5 UdeM00000032703 XP\_045163626.1 48 100  
47 3 4 100 5 102 1.30E-15 90.5 6596 cellular  
organisms;Eukaryota;Opisthokonta;Metazoa;Eumetazoa;Bilateria;Protostomia;Spiralia;Lophotrochozoa;Mollusca;Bivalvia;Autobranchia;Heteroconchia;Euheterodonta;Imparidentia;Venerida;Veneroidea;Veneridae;Mercenaria;Mercenaria mercenaria

UdeM00000032704 6596 90.1 UdeM00000032704 XP\_045161329.1 47.6 103  
 50 3 1 100 1 102 1.70E-15 90.1 6596 cellular  
 organisms;Eukaryota;Opisthokonta;Metazoa;Eumetazoa;Bilateria;Protostomia;  
 Spiralia;Lophotrochozoa;Mollusca;Bivalvia;Autobranchia;Heteroconchia;Euhe  
 terodonta;Imparidentia;Venerida;Veneroidea;Veneridae;Mercenaria;Mercenari  
 a mercenaria

UdeM00000032705 6596 165.6 UdeM00000032705 XP\_045177958.1 42.5 228  
 109 4 23 228 47 274 7.50E-38 165.6 6596 cellular  
 organisms;Eukaryota;Opisthokonta;Metazoa;Eumetazoa;Bilateria;Protostomia;  
 Spiralia;Lophotrochozoa;Mollusca;Bivalvia;Autobranchia;Heteroconchia;Euhe  
 terodonta;Imparidentia;Venerida;Veneroidea;Veneridae;Mercenaria;Mercenari  
 a mercenaria

UdeM00000032706 6596 177.6 UdeM00000032706 XP\_045177958.1 44.9 225  
 102 4 22 224 47 271 1.90E-41 177.6 6596 cellular  
 organisms;Eukaryota;Opisthokonta;Metazoa;Eumetazoa;Bilateria;Protostomia;  
 Spiralia;Lophotrochozoa;Mollusca;Bivalvia;Autobranchia;Heteroconchia;Euhe  
 terodonta;Imparidentia;Venerida;Veneroidea;Veneridae;Mercenaria;Mercenari  
 a mercenaria

UdeM00000032707 6596 176.4 UdeM00000032707 XP\_045177958.1 45.1 226  
 102 4 22 225 47 272 4.30E-41 176.4 6596 cellular  
 organisms;Eukaryota;Opisthokonta;Metazoa;Eumetazoa;Bilateria;Protostomia;  
 Spiralia;Lophotrochozoa;Mollusca;Bivalvia;Autobranchia;Heteroconchia;Euhe  
 terodonta;Imparidentia;Venerida;Veneroidea;Veneridae;Mercenaria;Mercenari  
 a mercenaria

UdeM00000032708 6596 90.9 UdeM00000032708 XP\_045163626.1 48.6 107  
 48 5 1 102 1 105 1.00E-15 90.9 6596 cellular  
 organisms;Eukaryota;Opisthokonta;Metazoa;Eumetazoa;Bilateria;Protostomia;  
 Spiralia;Lophotrochozoa;Mollusca;Bivalvia;Autobranchia;Heteroconchia;Euhe  
 terodonta;Imparidentia;Venerida;Veneroidea;Veneridae;Mercenaria;Mercenari  
 a mercenaria

UdeM00000032709 6596 84 UdeM00000032709 XP\_045161329.1 46.2 93  
 46 3 5 94 4 95 1.20E-13 84 6596 cellular  
 organisms;Eukaryota;Opisthokonta;Metazoa;Eumetazoa;Bilateria;Protostomia;  
 Spiralia;Lophotrochozoa;Mollusca;Bivalvia;Autobranchia;Heteroconchia;Euhe  
 terodonta;Imparidentia;Venerida;Veneroidea;Veneridae;Mercenaria;Mercenari  
 a mercenaria

UdeM00000032710 29159 132.1 UdeM00000032710 XP\_034331441.1 43.4 159  
 86 2 10 165 61 218 8.10E-28 132.1 29159 cellular  
 organisms;Eukaryota;Opisthokonta;Metazoa;Eumetazoa;Bilateria;Protostomia;  
 Spiralia;Lophotrochozoa;Mollusca;Bivalvia;Autobranchia;Pteriomorphia;Ostr  
 eida;Ostreoidea;Ostreidae;Crassostrea;Crassostrea gigas

UdeM00000032712 29159 199.5 UdeM00000032712 XP\_034299594.1 37.4 278  
 170 4 3 278 478 753 5.60E-48 199.5 29159 cellular  
 organisms;Eukaryota;Opisthokonta;Metazoa;Eumetazoa;Bilateria;Protostomia;  
 Spiralia;Lophotrochozoa;Mollusca;Bivalvia;Autobranchia;Pteriomorphia;Ostr  
 eida;Ostreoidea;Ostreidae;Crassostrea;Crassostrea gigas

UdeM00000032714 6596 681.8 UdeM00000032714 XP\_045170124.1 57 626  
 228 6 143 730 83 705 9.70E-193 681.8 6596 cellular  
 organisms;Eukaryota;Opisthokonta;Metazoa;Eumetazoa;Bilateria;Protostomia;  
 Spiralia;Lophotrochozoa;Mollusca;Bivalvia;Autobranchia;Heteroconchia;Euhe  
 terodonta;Imparidentia;Venerida;Veneroidea;Veneridae;Mercenaria;Mercenari  
 a mercenaria

UdeM00000032715 6596 820.5 UdeM00000032715 XP\_045170127.1 63.8 639  
 223 4 43 680 41 672 1.60E-234 820.5 6596 cellular

organisms;Eukaryota;Opisthokonta;Metazoa;Eumetazoa;Bilateria;Protostomia;Spiralia;Lophotrochozoa;Mollusca;Bivalvia;Autobranchia;Heteroconchia;Euherodonta;Imparidentia;Venerida;Veneroidea;Veneridae;Mercenaria;Mercenaria mercenaria

UdeM00000032716 6565 129 UdeM00000032716 XP\_022322655.1 50.8 118  
58 0 1 118 417 534 3.90E-27 129 6565 cellular

organisms;Eukaryota;Opisthokonta;Metazoa;Eumetazoa;Bilateria;Protostomia;Spiralia;Lophotrochozoa;Mollusca;Bivalvia;Autobranchia;Pteriormorphia;Ostreida;Ostreoidea;Ostreidae;Crassostrea;Crassostrea virginica

UdeM00000032717 6565 131.3 UdeM00000032717 XP\_022322655.1 54.8 124  
53 1 44 164 245 368 1.20E-27 131.3 6565 cellular

organisms;Eukaryota;Opisthokonta;Metazoa;Eumetazoa;Bilateria;Protostomia;Spiralia;Lophotrochozoa;Mollusca;Bivalvia;Autobranchia;Pteriormorphia;Ostreida;Ostreoidea;Ostreidae;Crassostrea;Crassostrea virginica

UdeM00000032718 46514 69.3 UdeM00000032718 XP\_038075930.1 41.2 80  
44 2 1 77 116 195 2.40E-09 69.3 46514 cellular

organisms;Eukaryota;Opisthokonta;Metazoa;Eumetazoa;Bilateria;Deuterostomia;Echinodermata;Eleutherozoa;Asterozoa;Asteroidea;Valvatacea;Valvatida;Asterinidae;Patiria;Patiria miniata

UdeM00000032720 6579 77.8 UdeM00000032720 XP\_033728706.1 49.1 57  
29 0 1 57 112 168 1.30E-11 77.8 6579 cellular

organisms;Eukaryota;Opisthokonta;Metazoa;Eumetazoa;Bilateria;Protostomia;Spiralia;Lophotrochozoa;Mollusca;Bivalvia;Autobranchia;Pteriormorphia;Pectinida;Pectinoidea;Pectinidae;Pecten;Pecten maximus

UdeM00000032722 6565 158.7 UdeM00000032722 XP\_022297447.1 52.4 147  
54 2 120 250 48 194 9.80E-36 158.7 6565 cellular

organisms;Eukaryota;Opisthokonta;Metazoa;Eumetazoa;Bilateria;Protostomia;Spiralia;Lophotrochozoa;Mollusca;Bivalvia;Autobranchia;Pteriormorphia;Ostreida;Ostreoidea;Ostreidae;Crassostrea;Crassostrea virginica

UdeM00000032723 6596 735.7 UdeM00000032723 XP\_045168415.1 65.4 592  
118 4 12 589 6 524 4.50E-209 735.7 6596 cellular

organisms;Eukaryota;Opisthokonta;Metazoa;Eumetazoa;Bilateria;Protostomia;Spiralia;Lophotrochozoa;Mollusca;Bivalvia;Autobranchia;Heteroconchia;Euherodonta;Imparidentia;Venerida;Veneroidea;Veneridae;Mercenaria;Mercenaria mercenaria

UdeM00000032724 6596 761.1 UdeM00000032724 XP\_045168416.1 73.2 526  
111 3 12 530 6 508 9.10E-217 761.1 6596 cellular

organisms;Eukaryota;Opisthokonta;Metazoa;Eumetazoa;Bilateria;Protostomia;Spiralia;Lophotrochozoa;Mollusca;Bivalvia;Autobranchia;Heteroconchia;Euherodonta;Imparidentia;Venerida;Veneroidea;Veneridae;Mercenaria;Mercenaria mercenaria

UdeM00000032726 6596 944.9 UdeM00000032726 XP\_045168708.1 47.5 1106  
508 26 12 1075 73 1147 9.00E-272 944.9 6596 cellular

organisms;Eukaryota;Opisthokonta;Metazoa;Eumetazoa;Bilateria;Protostomia;Spiralia;Lophotrochozoa;Mollusca;Bivalvia;Autobranchia;Heteroconchia;Euherodonta;Imparidentia;Venerida;Veneroidea;Veneridae;Mercenaria;Mercenaria mercenaria

UdeM00000032727 6500 201.4 UdeM00000032727 XP\_005097393.1 88.2 119  
14 0 1 119 1 119 6.50E-49 201.4 6500 cellular

organisms;Eukaryota;Opisthokonta;Metazoa;Eumetazoa;Bilateria;Protostomia;Spiralia;Lophotrochozoa;Mollusca;Gastropoda;Heterobranchia;Euthyneura;Teptipleura;Aplysiida;Aplysioidea;Aplysiidae;Aplysia;Aplysia californica

UdeM00000032728 400727 357.8 UdeM00000032728 XP\_025093173.1 51.6  
341 164 1 18 358 66 405 1.60E-95 357.8 400727



cellular  
organisms;Eukaryota;Opisthokonta;Metazoa;Eumetazoa;Bilateria;Protostomia;  
Spiralia;Lophotrochozoa;Mollusca;Gastropoda;Caenogastropoda;Architaenioglossa;  
Ampullarioidea;Ampullariidae;Pomacea;Pomacea canaliculata  
UdeM00000032729 400727 357.5 UdeM00000032729 XP\_025093173.1 51.6  
341 164 1 51 391 66 405 2.20E-95 357.5 400727

cellular  
organisms;Eukaryota;Opisthokonta;Metazoa;Eumetazoa;Bilateria;Protostomia;  
Spiralia;Lophotrochozoa;Mollusca;Gastropoda;Caenogastropoda;Architaenioglossa;  
Ampullarioidea;Ampullariidae;Pomacea;Pomacea canaliculata  
UdeM00000032730 6596 131.3 UdeM00000032730 XP\_045185326.1 67.4 89  
29 0 1 89 1 89 1.40E-27 131.3 6596 cellular

organisms;Eukaryota;Opisthokonta;Metazoa;Eumetazoa;Bilateria;Protostomia;  
Spiralia;Lophotrochozoa;Mollusca;Bivalvia;Autobranchia;Heteroconchia;Euheterodonta;  
Imparidentia;Venerida;Veneroidea;Veneridae;Mercenaria;Mercenaria mercenaria  
UdeM00000032731 6596 542.7 UdeM00000032731 XP\_045168922.1 88.7 310  
32 2 1 307 13 322 2.90E-151 542.7 6596 cellular

organisms;Eukaryota;Opisthokonta;Metazoa;Eumetazoa;Bilateria;Protostomia;  
Spiralia;Lophotrochozoa;Mollusca;Bivalvia;Autobranchia;Heteroconchia;Euheterodonta;  
Imparidentia;Venerida;Veneroidea;Veneridae;Mercenaria;Mercenaria mercenaria  
UdeM00000032732 6596 547.4 UdeM00000032732 XP\_045168922.1 88.8 313  
32 2 10 319 10 322 1.20E-152 547.4 6596 cellular

organisms;Eukaryota;Opisthokonta;Metazoa;Eumetazoa;Bilateria;Protostomia;  
Spiralia;Lophotrochozoa;Mollusca;Bivalvia;Autobranchia;Heteroconchia;Euheterodonta;  
Imparidentia;Venerida;Veneroidea;Veneridae;Mercenaria;Mercenaria mercenaria  
UdeM00000032733 6596 981.5 UdeM00000032733 XP\_045169855.1 62.8 806  
254 11 1 770 1 796 6.30E-283 981.5 6596 cellular

organisms;Eukaryota;Opisthokonta;Metazoa;Eumetazoa;Bilateria;Protostomia;  
Spiralia;Lophotrochozoa;Mollusca;Bivalvia;Autobranchia;Heteroconchia;Euheterodonta;  
Imparidentia;Venerida;Veneroidea;Veneridae;Mercenaria;Mercenaria mercenaria  
UdeM00000032734 6596 786.2 UdeM00000032734 XP\_045169855.1 52 848  
277 17 1 770 1 796 3.90E-224 786.2 6596 cellular

organisms;Eukaryota;Opisthokonta;Metazoa;Eumetazoa;Bilateria;Protostomia;  
Spiralia;Lophotrochozoa;Mollusca;Bivalvia;Autobranchia;Pteriomorpha;Ostreida;  
Ostreoidea;Ostreidae;Crassostrea;Crassostrea virginica  
UdeM00000032735 6565 512.7 UdeM00000032735 XP\_022310528.1 71.3 317  
91 0 5 321 29 345 3.40E-142 512.7 6565 cellular

organisms;Eukaryota;Opisthokonta;Metazoa;Eumetazoa;Bilateria;Protostomia;  
Spiralia;Lophotrochozoa;Mollusca;Bivalvia;Autobranchia;Pteriomorpha;Ostreida;  
Ostreoidea;Ostreidae;Crassostrea;Crassostrea virginica  
UdeM00000032736 1735272 334 UdeM00000032736 XP\_041367617.1 68.3  
224 65 2 11 234 9 226 1.60E-88 334 1735272  
cellular

organisms;Eukaryota;Opisthokonta;Metazoa;Eumetazoa;Bilateria;Protostomia;  
Spiralia;Lophotrochozoa;Mollusca;Gastropoda;Neomphalina;Neomphaloidea;Pelto-  
spiridae;Gigantopelta;Gigantopelta aegis  
UdeM00000032737 6579 84 UdeM00000032737 XP\_033762933.1 30.9 191  
116 3 52 226 32 222 3.00E-13 84 6579 cellular  
organisms;Eukaryota;Opisthokonta;Metazoa;Eumetazoa;Bilateria;Protostomia;

Spiralia;Lophotrochozoa;Mollusca;Bivalvia;Autobranchia;Pteriormorphia;Pectinida;Pectinoidea;Pectinidae;Pecten;Pecten maximus  
UdeM00000032739 6596 201.4 UdeM00000032739 XP\_045169241.1 73.6 144  
34 1 63 206 85 224 1.10E-48 201.4 6596 cellular  
organisms;Eukaryota;Opisthokonta;Metazoa;Eumetazoa;Bilateria;Protostomia;  
Spiralia;Lophotrochozoa;Mollusca;Bivalvia;Autobranchia;Heteroconchia;Euherodonta;Imparidentia;Venerida;Veneroidea;Veneridae;Mercenaria;Mercenaria mercenaria  
UdeM00000032740 7888 87 UdeM00000032740 XP\_043921024.1 35.8 109  
66 2 8 116 211 315 2.00E-14 87 7888 cellular  
organisms;Eukaryota;Opisthokonta;Metazoa;Eumetazoa;Bilateria;Deuterostomia;  
Chordata;Craniata;Vertebrata;Gnathostomata;Teleostomi;Euteleostomi;Sarcopterygii;Dipnotetrapodomorpha;Dipnomorpha;Ceratodontae;Ceratodontiformes;  
Lepidosirenoidei;Protopteridae;Protopterus;Protopterus annectens  
UdeM00000032741 1735272 85.1 UdeM00000032741 XP\_041367618.1 35.4  
127 69 3 3 121 7 128 7.40E-14 85.1 1735272  
cellular  
organisms;Eukaryota;Opisthokonta;Metazoa;Eumetazoa;Bilateria;Protostomia;  
Spiralia;Lophotrochozoa;Mollusca;Gastropoda;Neomphalina;Neomphaloidea;Peltospiridae;Gigantopelta;Gigantopelta aegis  
UdeM00000032742 7888 92.8 UdeM00000032742 XP\_043921024.1 37.4 107  
65 1 8 114 211 315 3.60E-16 92.8 7888 cellular  
organisms;Eukaryota;Opisthokonta;Metazoa;Eumetazoa;Bilateria;Deuterostomia;  
Chordata;Craniata;Vertebrata;Gnathostomata;Teleostomi;Euteleostomi;Sarcopterygii;Dipnotetrapodomorpha;Dipnomorpha;Ceratodontae;Ceratodontiformes;  
Lepidosirenoidei;Protopteridae;Protopterus;Protopterus annectens  
UdeM00000032743 6596 175.3 UdeM00000032743 XP\_045169816.1 83.9 93  
15 0 1 93 887 979 3.80E-41 175.3 6596 cellular  
organisms;Eukaryota;Opisthokonta;Metazoa;Eumetazoa;Bilateria;Protostomia;  
Spiralia;Lophotrochozoa;Mollusca;Bivalvia;Autobranchia;Heteroconchia;Euherodonta;Imparidentia;Venerida;Veneroidea;Veneridae;Mercenaria;Mercenaria mercenaria  
UdeM00000032744 7739 129.4 UdeM00000032744 XP\_035663392.1 27.5 385  
216 21 23 381 1484 1831 9.70E-27 129.4 7739 cellular  
organisms;Eukaryota;Opisthokonta;Metazoa;Eumetazoa;Bilateria;Deuterostomia;  
Chordata;Cephalochordata;Leptocardii;Amphioxiformes;Branchiostomidae;Branchiostoma;Branchiostoma floridae  
UdeM00000032745 6596 877.5 UdeM00000032745 XP\_045169816.1 49.9 1024  
358 18 6 921 3 979 1.50E-251 877.5 6596 cellular  
organisms;Eukaryota;Opisthokonta;Metazoa;Eumetazoa;Bilateria;Protostomia;  
Spiralia;Lophotrochozoa;Mollusca;Bivalvia;Autobranchia;Heteroconchia;Euherodonta;Imparidentia;Venerida;Veneroidea;Veneridae;Mercenaria;Mercenaria mercenaria  
UdeM00000032747 6573 184.1 UdeM00000032747 XP\_021370236.1 71.7 113  
32 0 1 113 3 115 1.20E-43 184.1 6573 cellular  
organisms;Eukaryota;Opisthokonta;Metazoa;Eumetazoa;Bilateria;Protostomia;  
Spiralia;Lophotrochozoa;Mollusca;Bivalvia;Autobranchia;Pteriormorphia;Pectinida;Pectinoidea;Pectinidae;Mizuhopecten;Mizuhopecten yessoensis  
UdeM00000032748 6573 413.7 UdeM00000032748 XP\_021370236.1 68.1 313  
98 1 5 315 137 449 2.30E-112 413.7 6573 cellular  
organisms;Eukaryota;Opisthokonta;Metazoa;Eumetazoa;Bilateria;Protostomia;  
Spiralia;Lophotrochozoa;Mollusca;Bivalvia;Autobranchia;Pteriormorphia;Pectinida;Pectinoidea;Pectinidae;Mizuhopecten;Mizuhopecten yessoensis

UdeM00000032749 6573 385.2 UdeM00000032749 XP\_021370236.1 68.8 288  
 88 1 1 286 162 449 7.90E-104 385.2 6573 cellular  
 organisms;Eukaryota;Opisthokonta;Metazoa;Eumetazoa;Bilateria;Protostomia;  
 Spiralia;Lophotrochozoa;Mollusca;Bivalvia;Autobranhia;Pteriomorphia;Pect  
 inida;Pectinoidea;Pectinidae;Mizuhopecten;Mizuhopecten yessoensis  
 UdeM00000032750 6565 167.2 UdeM00000032750 XP\_022309131.1 35.9 345  
 193 10 1 334 461 788 6.70E-38 167.2 6565 cellular  
 organisms;Eukaryota;Opisthokonta;Metazoa;Eumetazoa;Bilateria;Protostomia;  
 Spiralia;Lophotrochozoa;Mollusca;Bivalvia;Autobranhia;Pteriomorphia;Ostr  
 eida;Ostreoidea;Ostreidae;Crassostrea;Crassostrea virginica  
 UdeM00000032751 6596 197.6 UdeM00000032751 XP\_045167397.1 50.4 246  
 97 11 1 232 1 235 1.80E-47 197.6 6596 cellular  
 organisms;Eukaryota;Opisthokonta;Metazoa;Eumetazoa;Bilateria;Protostomia;  
 Spiralia;Lophotrochozoa;Mollusca;Bivalvia;Autobranhia;Heteroconchia;Euhe  
 terodonta;Imparidentia;Venerida;Veneroidea;Veneridae;Mercenaria;Mercenari  
 a mercenaria  
 UdeM00000032752 6596 361.3 UdeM00000032752 XP\_045169230.1 60.2 299  
 114 2 19 317 22 315 1.30E-96 361.3 6596 cellular  
 organisms;Eukaryota;Opisthokonta;Metazoa;Eumetazoa;Bilateria;Protostomia;  
 Spiralia;Lophotrochozoa;Mollusca;Bivalvia;Autobranhia;Heteroconchia;Euhe  
 terodonta;Imparidentia;Venerida;Veneroidea;Veneridae;Mercenaria;Mercenari  
 a mercenaria  
 UdeM00000032753 6579 214.5 UdeM00000032753 XP\_033762148.1 63.9 180  
 59 3 2 175 3 182 1.40E-52 214.5 6579 cellular  
 organisms;Eukaryota;Opisthokonta;Metazoa;Eumetazoa;Bilateria;Protostomia;  
 Spiralia;Lophotrochozoa;Mollusca;Bivalvia;Autobranhia;Pteriomorphia;Pect  
 inida;Pectinoidea;Pectinidae;Pecten;Pecten maximus  
 UdeM00000032754 370355 365.2 UdeM00000032754 XP\_004254374.1 47.3  
 366 186 2 5 363 9 374 1.00E-97 365.2 370355  
 cellular  
 organisms;Eukaryota;Amoebozoa;Evosea;Archamoebae;Mastigamoebida;Entamoebi  
 dae;Entamoeba;Entamoeba invadens;Entamoeba invadens IP1  
 UdeM00000032755 6596 379.4 UdeM00000032755 XP\_045192116.1 75.6 246  
 59 1 1 245 1 246 3.50E-102 379.4 6596 cellular  
 organisms;Eukaryota;Opisthokonta;Metazoa;Eumetazoa;Bilateria;Protostomia;  
 Spiralia;Lophotrochozoa;Mollusca;Bivalvia;Autobranhia;Heteroconchia;Euhe  
 terodonta;Imparidentia;Venerida;Veneroidea;Veneridae;Mercenaria;Mercenari  
 a mercenaria  
 UdeM00000032756 29159 1243.4 UdeM00000032756 XP\_034309269.1 51.6  
 1272 524 7 51 1236 60 1325 0.00E+00 1243.4  
 29159 cellular  
 organisms;Eukaryota;Opisthokonta;Metazoa;Eumetazoa;Bilateria;Protostomia;  
 Spiralia;Lophotrochozoa;Mollusca;Bivalvia;Autobranhia;Pteriomorphia;Ostr  
 eida;Ostreoidea;Ostreidae;Crassostrea;Crassostrea gigas  
 UdeM00000032757 29159 1378.6 UdeM00000032757 XP\_034309269.1 55.7  
 1267 540 5 76 1323 68 1332 0.00E+00 1378.6  
 29159 cellular  
 organisms;Eukaryota;Opisthokonta;Metazoa;Eumetazoa;Bilateria;Protostomia;  
 Spiralia;Lophotrochozoa;Mollusca;Bivalvia;Autobranhia;Pteriomorphia;Ostr  
 eida;Ostreoidea;Ostreidae;Crassostrea;Crassostrea gigas  
 UdeM00000032758 45264 174.9 UdeM00000032758 XP\_044184031.1 48.2 191  
 89 4 1 185 300 486 9.70E-41 174.9 45264 cellular  
 organisms;Eukaryota;Opisthokonta;Metazoa;Eumetazoa;Cnidaria;Anthozoa;Hexa

corallia;Scleractinia;Astrocoeniina;Acroporidae;Acropora;Acropora  
millepora  
UdeM00000032759 151771 483.4 UdeM00000032759 XP\_028419301.1 54  
448 203 3 42 488 34 479 3.40E-133 483.4 151771  
cellular  
organisms;Eukaryota;Opisthokonta;Metazoa;Eumetazoa;Cnidaria;Anthozoa;Octo  
corallia;Alcyonacea;Alcyoniina;Nephtheidae;Dendronephthya;Dendronephthya  
gigantea  
UdeM00000032760 29159 1323.1 UdeM00000032760 XP\_034309269.1 53.7  
1281 563 10 52 1310 60 1332 0.00E+00 1323.1  
29159 cellular  
organisms;Eukaryota;Opisthokonta;Metazoa;Eumetazoa;Bilateria;Protostomia;  
Spiralia;Lophotrochozoa;Mollusca;Bivalvia;Autobranchia;Pteriormorphia;Ostr  
eida;Ostreoidea;Ostreidae;Crassostrea;Crassostrea gigas  
UdeM00000032761 1735272 59.3 UdeM00000032761 XP\_041351363.1 52.2  
46 20 1 19 64 124 167 2.50E-06 59.3 1735272  
cellular  
organisms;Eukaryota;Opisthokonta;Metazoa;Eumetazoa;Bilateria;Protostomia;  
Spiralia;Lophotrochozoa;Mollusca;Gastropoda;Neomphalina;Neomphaloidea;Pel  
tospiridae;Gigantopelta;Gigantopelta aegis  
UdeM00000032762 6596 159.5 UdeM00000032762 XP\_045170047.1 43.2 190  
93 7 6 184 5 190 4.20E-36 159.5 6596 cellular  
organisms;Eukaryota;Opisthokonta;Metazoa;Eumetazoa;Bilateria;Protostomia;  
Spiralia;Lophotrochozoa;Mollusca;Bivalvia;Autobranchia;Heteroconchia;Euhe  
terodonta;Imparidentia;Venerida;Veneroidea;Veneridae;Mercenaria;Mercenari  
a mercenaria  
UdeM00000032763 218467 185.7 UdeM00000032763 XP\_023222943.1 74.3  
109 19 1 27 135 54 153 4.00E-44 185.7 218467  
cellular  
organisms;Eukaryota;Opisthokonta;Metazoa;Eumetazoa;Bilateria;Protostomia;  
Ecdysozoa;Panarthropoda;Arthropoda;Chelicerata;Arachnida;Scorpiones;Buthi  
da;Buthoidea;Buthidae;Centruroides;Centruroides sculpturatus  
UdeM00000032764 37621 203.4 UdeM00000032764 XP\_014679850.1 51.4 212  
92 5 1 204 1 209 2.80E-49 203.4 37621 cellular  
organisms;Eukaryota;Opisthokonta;Metazoa;Eumetazoa;Bilateria;Protostomia;  
Ecdysozoa;Scalidophora;Priapulida;Priapulimorpha;Priapulimorphida;Priapul  
idae;Priapululus;Priapululus caudatus  
UdeM00000032766 6596 547.7 UdeM00000032766 XP\_045169388.1 69.2 403  
117 5 51 448 71 471 1.30E-152 547.7 6596 cellular  
organisms;Eukaryota;Opisthokonta;Metazoa;Eumetazoa;Bilateria;Protostomia;  
Spiralia;Lophotrochozoa;Mollusca;Bivalvia;Autobranchia;Heteroconchia;Euhe  
terodonta;Imparidentia;Venerida;Veneroidea;Veneridae;Mercenaria;Mercenari  
a mercenaria  
UdeM00000032767 6596 2471.4 UdeM00000032767 XP\_045170488.1 68  
1828 498 17 3 1761 2 1811 0.00E+00 2471.4 6596  
cellular  
organisms;Eukaryota;Opisthokonta;Metazoa;Eumetazoa;Bilateria;Protostomia;  
Spiralia;Lophotrochozoa;Mollusca;Bivalvia;Autobranchia;Heteroconchia;Euhe  
terodonta;Imparidentia;Venerida;Veneroidea;Veneridae;Mercenaria;Mercenari  
a mercenaria  
UdeM00000032768 6596 2478.4 UdeM00000032768 XP\_045170488.1 68.2  
1823 498 16 3 1756 2 1811 0.00E+00 2478.4 6596  
cellular  
organisms;Eukaryota;Opisthokonta;Metazoa;Eumetazoa;Bilateria;Protostomia;

Spiralia;Lophotrochozoa;Mollusca;Bivalvia;Autobranchia;Heteroconchia;Euherodonta;Imparidentia;Venerida;Veneroidea;Veneridae;Mercenaria;Mercenaria mercenaria

UdeM00000032769 6573 245 UdeM00000032769 XP\_021350454.1 48.9 227  
114 1 2754 2980 2337 2561 1.20E-60 245 6573 cellular

organisms;Eukaryota;Opisthokonta;Metazoa;Eumetazoa;Bilateria;Protostomia;Spiralia;Lophotrochozoa;Mollusca;Bivalvia;Autobranchia;Pteriormorphia;Pectinida;Pectinoidea;Pectinidae;Mizuhopecten;Mizuhopecten yessoensis

UdeM00000032769 6573 151.4 UdeM00000032769 XP\_021350454.1 55.2 143  
55 4 1 135 1 142 1.90E-32 151.4 6573 cellular

organisms;Eukaryota;Opisthokonta;Metazoa;Eumetazoa;Bilateria;Protostomia;Spiralia;Lophotrochozoa;Mollusca;Bivalvia;Autobranchia;Pteriormorphia;Pectinida;Pectinoidea;Pectinidae;Mizuhopecten;Mizuhopecten yessoensis

UdeM00000032771 6596 505 UdeM00000032771 XP\_045169905.1 70.9 326  
92 2 1 326 1 323 7.30E-140 505 6596 cellular

organisms;Eukaryota;Opisthokonta;Metazoa;Eumetazoa;Bilateria;Protostomia;Spiralia;Lophotrochozoa;Mollusca;Bivalvia;Autobranchia;Heteroconchia;Euherodonta;Imparidentia;Venerida;Veneroidea;Veneridae;Mercenaria;Mercenaria mercenaria

UdeM00000032772 1415580 181.8 UdeM00000032772 XP\_030050276.1 39.8  
266 156 4 47 310 40 303 1.40E-42 181.8 1415580

cellular

organisms;Eukaryota;Opisthokonta;Metazoa;Eumetazoa;Bilateria;Deuterostomia;Chordata;Craniata;Vertebrata;Gnathostomata;Teleostomi;Euteleostomi;Sarcopterygii;Dipnotetrapodomorpha;Tetrapoda;Amphibia;Gymnophiona;Siphonopidae;Microcaecilia;Microcaecilia unicolor

UdeM00000032773 6500 211.1 UdeM00000032773 XP\_005097180.1 41.1 270  
150 2 750 1010 49 318 6.70E-51 211.1 6500 cellular

organisms;Eukaryota;Opisthokonta;Metazoa;Eumetazoa;Bilateria;Protostomia;Spiralia;Lophotrochozoa;Mollusca;Gastropoda;Heterobranchia;Euthyneura;Tectipleura;Aplysiida;Aplysiioidea;Aplysiidae;Aplysia;Aplysia californica

UdeM00000032775 6579 60.1 UdeM00000032775 XP\_033761365.1 45.7 81  
33 2 40 110 34 113 2.20E-06 60.1 6579 cellular

organisms;Eukaryota;Opisthokonta;Metazoa;Eumetazoa;Bilateria;Protostomia;Spiralia;Lophotrochozoa;Mollusca;Bivalvia;Autobranchia;Pteriormorphia;Pectinida;Pectinoidea;Pectinidae;Pecten;Pecten maximus

UdeM00000032774 6579 76.3 UdeM00000032774 XP\_033761366.1 46.3 108  
44 3 40 137 34 137 1.30E-10 76.3 6579 cellular

organisms;Eukaryota;Opisthokonta;Metazoa;Eumetazoa;Bilateria;Protostomia;Spiralia;Lophotrochozoa;Mollusca;Bivalvia;Autobranchia;Pteriormorphia;Pectinida;Pectinoidea;Pectinidae;Pecten;Pecten maximus

UdeM00000032776 6596 987.3 UdeM00000032776 XP\_045168747.1 54.2 965  
340 10 8 927 29 936 1.40E-284 987.3 6596 cellular

organisms;Eukaryota;Opisthokonta;Metazoa;Eumetazoa;Bilateria;Protostomia;Spiralia;Lophotrochozoa;Mollusca;Bivalvia;Autobranchia;Heteroconchia;Euherodonta;Imparidentia;Venerida;Veneroidea;Veneridae;Mercenaria;Mercenaria mercenaria

UdeM00000032777 6596 286.2 UdeM00000032777 XP\_045168495.1 37.8 400  
219 9 76 464 24 404 7.60E-74 286.2 6596 cellular

organisms;Eukaryota;Opisthokonta;Metazoa;Eumetazoa;Bilateria;Protostomia;Spiralia;Lophotrochozoa;Mollusca;Bivalvia;Autobranchia;Heteroconchia;Euherodonta;Imparidentia;Venerida;Veneroidea;Veneridae;Mercenaria;Mercenaria mercenaria

UdeM00000032778 6596 136.7 UdeM00000032778 XP\_045168882.1 27.2 279  
 196 3 20 296 22 295 5.40E-29 136.7 6596 cellular  
 organisms;Eukaryota;Opisthokonta;Metazoa;Eumetazoa;Bilateria;Protostomia;  
 Spiralia;Lophotrochozoa;Mollusca;Bivalvia;Autobranchia;Heteroconchia;Euhe  
 terodonta;Imparidentia;Venerida;Veneroidea;Veneridae;Mercenaria;Mercenari  
 a mercenaria  
 UdeM00000032779 29159 803.5 UdeM00000032779 XP\_011419261.2 64 583  
 206 3 45 626 43 622 1.90E-229 803.5 29159 cellular  
 organisms;Eukaryota;Opisthokonta;Metazoa;Eumetazoa;Bilateria;Protostomia;  
 Spiralia;Lophotrochozoa;Mollusca;Bivalvia;Autobranchia;Pteriormorphia;Ostr  
 eida;Ostreoidea;Ostreidae;Crassostrea;Crassostrea gigas  
 UdeM00000032780 6573 209.5 UdeM00000032780 XP\_021376292.1 41 234  
 136 2 2 235 4 235 1.30E-50 209.5 6573 cellular  
 organisms;Eukaryota;Opisthokonta;Metazoa;Eumetazoa;Bilateria;Protostomia;  
 Spiralia;Lophotrochozoa;Mollusca;Bivalvia;Autobranchia;Pteriormorphia;Pect  
 inida;Pectinoidea;Pectinidae;Mizuhopecten;Mizuhopecten yessoensis  
 UdeM00000032782 6573 67.4 UdeM00000032782 XP\_021373758.1 67.4 43  
 14 0 21 63 26 68 7.90E-09 67.4 6573 cellular  
 organisms;Eukaryota;Opisthokonta;Metazoa;Eumetazoa;Bilateria;Protostomia;  
 Spiralia;Lophotrochozoa;Mollusca;Bivalvia;Autobranchia;Pteriormorphia;Pect  
 inida;Pectinoidea;Pectinidae;Mizuhopecten;Mizuhopecten yessoensis  
 UdeM00000032781 6596 1225.7 UdeM00000032781 XP\_045169032.1 82.8  
 728 125 0 18 745 15 742 0.00E+00 1225.7 6596  
 cellular  
 organisms;Eukaryota;Opisthokonta;Metazoa;Eumetazoa;Bilateria;Protostomia;  
 Spiralia;Lophotrochozoa;Mollusca;Bivalvia;Autobranchia;Heteroconchia;Euhe  
 terodonta;Imparidentia;Venerida;Veneroidea;Veneridae;Mercenaria;Mercenari  
 a mercenaria  
 UdeM00000032783 46514 89 UdeM00000032783 XP\_038075667.1 46.6 88  
 46 1 12 99 478 564 3.90E-15 89 46514 cellular  
 organisms;Eukaryota;Opisthokonta;Metazoa;Eumetazoa;Bilateria;Deuterostomi  
 a;Echinodermata;Eleutherozoa;Asterozoa;Asteroidea;Valvatacea;Valvatida;As  
 terinidae;Patiria;Patiria miniata  
 UdeM00000032784 441366 141.7 UdeM00000032784 XP\_028326620.1 40.4  
 213 117 5 1 212 48 251 1.00E-30 141.7 441366  
 cellular  
 organisms;Eukaryota;Opisthokonta;Metazoa;Eumetazoa;Bilateria;Deuterostomi  
 a;Chordata;Craniata;Vertebrata;Gnathostomata;Teleostomi;Euteleostomi;Acti  
 nopterygii;Actinopteri;Neopterygii;Teleostei;Osteoglossocephalai;Clupeoce  
 phala;Euteleosteomorpha;Neoteleostei;Eurypterygia;Ctenosquamata;Acanthomo  
 rphata;Euacanthomorphacea;Percomorphaceae;Ovalentaria;Blenniimorphae;Blen  
 niiformes;Gobiesocoidei;Gobiesocidae;Gobiesocinae;Gouania;Gouania  
 willdenowi  
 UdeM00000032785 441366 186 UdeM00000032785 XP\_028296753.1 39.1  
 304 168 9 2 303 28 316 6.90E-44 186 441366  
 cellular  
 organisms;Eukaryota;Opisthokonta;Metazoa;Eumetazoa;Bilateria;Deuterostomi  
 a;Chordata;Craniata;Vertebrata;Gnathostomata;Teleostomi;Euteleostomi;Acti  
 nopterygii;Actinopteri;Neopterygii;Teleostei;Osteoglossocephalai;Clupeoce  
 phala;Euteleosteomorpha;Neoteleostei;Eurypterygia;Ctenosquamata;Acanthomo  
 rphata;Euacanthomorphacea;Percomorphaceae;Ovalentaria;Blenniimorphae;Blen  
 niiformes;Gobiesocoidei;Gobiesocidae;Gobiesocinae;Gouania;Gouania  
 willdenowi

UdeM00000032786 1232801 58.2 UdeM00000032786 XP\_043203715.1 33.3  
 75 50 0 1 75 82 156 5.60E-06 58.2 1232801  
 cellular  
 organisms;Eukaryota;Opisthokonta;Metazoa;Eumetazoa;Bilateria;Protostomia;  
 Ecdysozoa;Panarthropoda;Arthropoda;Mandibulata;Pancrustacea;Crustacea;Mul  
 ticrustacea;Hexanauplia;Thecostraca;Cirripedia;Thoracica;Sessilia;Balanid  
 ae;Amphibalanus;Amphibalanus amphitrite  
 UdeM00000032787 29159 453 UdeM00000032787 XP\_011450089.1 59.9 409  
 152 6 52 455 72 473 4.50E-124 453 29159 cellular  
 organisms;Eukaryota;Opisthokonta;Metazoa;Eumetazoa;Bilateria;Protostomia;  
 Spiralia;Lophotrochozoa;Mollusca;Bivalvia;Autobranchia;Pteriormorphia;Ostr  
 eida;Ostreoidea;Ostreidae;Crassostrea;Crassostrea gigas  
 UdeM00000032788 1735272 212.6 UdeM00000032788 XP\_041351386.1 52.4  
 210 98 2 1 209 1 209 4.90E-52 212.6 1735272  
 cellular  
 organisms;Eukaryota;Opisthokonta;Metazoa;Eumetazoa;Bilateria;Protostomia;  
 Spiralia;Lophotrochozoa;Mollusca;Gastropoda;Neomphalina;Neomphaloidea;Pel  
 tospiridae;Gigantopelta;Gigantopelta aegis  
 UdeM00000032791 6573 139.8 UdeM00000032791 XP\_021368572.1 36.9 195  
 115 5 53 243 1205 1395 5.30E-30 139.8 6573 cellular  
 organisms;Eukaryota;Opisthokonta;Metazoa;Eumetazoa;Bilateria;Protostomia;  
 Spiralia;Lophotrochozoa;Mollusca;Bivalvia;Autobranchia;Pteriormorphia;Pect  
 inida;Pectinoidea;Pectinidae;Mizuhopecten;Mizuhopecten yessoensis  
 UdeM00000032792 6596 132.1 UdeM00000032792 XP\_045170557.1 32.4 247  
 146 7 12 247 72 308 1.00E-27 132.1 6596 cellular  
 organisms;Eukaryota;Opisthokonta;Metazoa;Eumetazoa;Bilateria;Protostomia;  
 Spiralia;Lophotrochozoa;Mollusca;Bivalvia;Autobranchia;Heteroconchia;Euhe  
 terodonta;Imparidentia;Venerida;Veneroidea;Veneridae;Mercenaria;Mercenari  
 a mercenaria  
 UdeM00000032793 6565 113.2 UdeM00000032793 XP\_022308598.1 33.6 220  
 137 5 31 246 15 229 4.60E-22 113.2 6565 cellular  
 organisms;Eukaryota;Opisthokonta;Metazoa;Eumetazoa;Bilateria;Protostomia;  
 Spiralia;Lophotrochozoa;Mollusca;Bivalvia;Autobranchia;Pteriormorphia;Ostr  
 eida;Ostreoidea;Ostreidae;Crassostrea;Crassostrea virginica  
 UdeM00000032794 6596 124.4 UdeM00000032794 XP\_045177779.1 31.8 211  
 136 4 1 211 617 819 3.50E-25 124.4 6596 cellular  
 organisms;Eukaryota;Opisthokonta;Metazoa;Eumetazoa;Bilateria;Protostomia;  
 Spiralia;Lophotrochozoa;Mollusca;Bivalvia;Autobranchia;Heteroconchia;Euhe  
 terodonta;Imparidentia;Venerida;Veneroidea;Veneridae;Mercenaria;Mercenari  
 a mercenaria  
 UdeM00000032795 6596 189.9 UdeM00000032795 XP\_045179269.1 46.2 210  
 112 1 17 225 245 454 3.80E-45 189.9 6596 cellular  
 organisms;Eukaryota;Opisthokonta;Metazoa;Eumetazoa;Bilateria;Protostomia;  
 Spiralia;Lophotrochozoa;Mollusca;Bivalvia;Autobranchia;Heteroconchia;Euhe  
 terodonta;Imparidentia;Venerida;Veneroidea;Veneridae;Mercenaria;Mercenari  
 a mercenaria  
 UdeM00000032796 6596 194.1 UdeM00000032796 XP\_045191793.1 41.2 296  
 155 6 299 582 251 539 4.90E-46 194.1 6596 cellular  
 organisms;Eukaryota;Opisthokonta;Metazoa;Eumetazoa;Bilateria;Protostomia;  
 Spiralia;Lophotrochozoa;Mollusca;Bivalvia;Autobranchia;Heteroconchia;Euhe  
 terodonta;Imparidentia;Venerida;Veneroidea;Veneridae;Mercenaria;Mercenari  
 a mercenaria  
 UdeM00000032797 6596 222.6 UdeM00000032797 XP\_045169693.1 40.9 301  
 160 7 8 302 91 379 7.20E-55 222.6 6596 cellular

organisms;Eukaryota;Opisthokonta;Metazoa;Eumetazoa;Bilateria;Protostomia;Spiralia;Lophotrochozoa;Mollusca;Bivalvia;Autobranchia;Heteroconchia;Euherodonta;Imparidentia;Venerida;Veneroidea;Veneridae;Mercenaria;Mercenaria mercenaria

UdeM00000032798 6596 306.6 UdeM00000032798 XP\_045183440.1 49.4 310  
151 4 2 310 76 380 3.60E-80 306.6 6596 cellular

organisms;Eukaryota;Opisthokonta;Metazoa;Eumetazoa;Bilateria;Protostomia;Spiralia;Lophotrochozoa;Mollusca;Bivalvia;Autobranchia;Heteroconchia;Euherodonta;Imparidentia;Venerida;Veneroidea;Veneridae;Mercenaria;Mercenaria mercenaria

UdeM00000032799 6596 1137.5 UdeM00000032799 XP\_045168136.1 61.2  
943 334 8 264 1181 1 936 0.00E+00 1137.5 6596  
cellular

organisms;Eukaryota;Opisthokonta;Metazoa;Eumetazoa;Bilateria;Protostomia;Spiralia;Lophotrochozoa;Mollusca;Bivalvia;Autobranchia;Heteroconchia;Euherodonta;Imparidentia;Venerida;Veneroidea;Veneridae;Mercenaria;Mercenaria mercenaria

UdeM00000032800 6596 521.5 UdeM00000032800 XP\_045168136.1 65.5 400  
129 4 45 439 541 936 1.00E-144 521.5 6596 cellular

organisms;Eukaryota;Opisthokonta;Metazoa;Eumetazoa;Bilateria;Protostomia;Spiralia;Lophotrochozoa;Mollusca;Bivalvia;Autobranchia;Heteroconchia;Euherodonta;Imparidentia;Venerida;Veneroidea;Veneridae;Mercenaria;Mercenaria mercenaria

UdeM00000032801 6565 268.5 UdeM00000032801 XP\_022305608.1 64.2 204  
68 2 4 207 5 203 7.40E-69 268.5 6565 cellular

organisms;Eukaryota;Opisthokonta;Metazoa;Eumetazoa;Bilateria;Protostomia;Spiralia;Lophotrochozoa;Mollusca;Bivalvia;Autobranchia;Pteriomorphia;Ostreida;Ostreoidea;Ostreidae;Crassostrea;Crassostrea virginica

UdeM00000032802 6579 751.9 UdeM00000032802 XP\_033762371.1 70.1 552  
143 6 1 541 1 541 5.60E-214 751.9 6579 cellular

organisms;Eukaryota;Opisthokonta;Metazoa;Eumetazoa;Bilateria;Protostomia;Spiralia;Lophotrochozoa;Mollusca;Bivalvia;Autobranchia;Pteriomorphia;Pectinida;Pectinoidea;Pectinidae;Pecten;Pecten maximus

UdeM00000032803 6579 223 UdeM00000032803 XP\_033739304.1 35.4 333  
207 3 5 329 7 339 7.00E-55 223 6579 cellular

organisms;Eukaryota;Opisthokonta;Metazoa;Eumetazoa;Bilateria;Protostomia;Spiralia;Lophotrochozoa;Mollusca;Bivalvia;Autobranchia;Pteriomorphia;Pectinida;Pectinoidea;Pectinidae;Pecten;Pecten maximus

UdeM00000032804 166361 130.6 UdeM00000032804 XP\_022910605.1 37.1  
178 112 0 6 183 4 181 2.40E-27 130.6 166361  
cellular

organisms;Eukaryota;Opisthokonta;Metazoa;Eumetazoa;Bilateria;Protostomia;Ecdysozoa;Panarthropoda;Arthropoda;Mandibulata;Pancrustacea;Hexapoda;Insecta;Dicondylia;Pterygota;Neoptera;Endopterygota;Coleoptera;Polyphaga;Scarabaeiformia;Scarabaeoidea;Scarabaeidae;Scarabaeinae;Scarabaeinae incertae sedis;Onthophagus;Onthophagus taurus

UdeM00000032805 166361 129.4 UdeM00000032805 XP\_022910605.1 36.5  
178 113 0 6 183 4 181 5.30E-27 129.4 166361  
cellular

organisms;Eukaryota;Opisthokonta;Metazoa;Eumetazoa;Bilateria;Protostomia;Ecdysozoa;Panarthropoda;Arthropoda;Mandibulata;Pancrustacea;Hexapoda;Insecta;Dicondylia;Pterygota;Neoptera;Endopterygota;Coleoptera;Polyphaga;Scarabaeiformia;Scarabaeoidea;Scarabaeidae;Scarabaeinae;Scarabaeinae incertae sedis;Onthophagus;Onthophagus taurus



UdeM00000032811 6596 731.5 UdeM00000032811 XP\_045192074.1 52 752  
 356 3 1 749 1678 2427 1.10E-207 731.5 6596 cellular  
 organisms;Eukaryota;Opisthokonta;Metazoa;Eumetazoa;Bilateria;Protostomia;  
 Spiralia;Lophotrochozoa;Mollusca;Bivalvia;Autobranchia;Heteroconchia;Euhe  
 terodonta;Imparidentia;Venerida;Veneroidea;Veneridae;Mercenaria;Mercenari  
 a mercenaria

UdeM00000032812 7574 100.1 UdeM00000032812 XP\_013410728.1 45.8 120  
 62 1 397 513 222 341 9.20E-18 100.1 7574 cellular  
 organisms;Eukaryota;Opisthokonta;Metazoa;Eumetazoa;Bilateria;Protostomia;  
 Spiralia;Lophotrochozoa;Brachiopoda;Linguliformea;Lingulata;Lingulida;Lin  
 guloidea;Lingulidae;Lingula;Lingula anatina

UdeM00000032813 7574 100.1 UdeM00000032813 XP\_013410728.1 45.8 120  
 62 1 227 343 222 341 6.40E-18 100.1 7574 cellular  
 organisms;Eukaryota;Opisthokonta;Metazoa;Eumetazoa;Bilateria;Protostomia;  
 Spiralia;Lophotrochozoa;Brachiopoda;Linguliformea;Lingulata;Lingulida;Lin  
 guloidea;Lingulidae;Lingula;Lingula anatina

UdeM00000022207 6596 1481.1 UdeM00000022207 XP\_045216968.1 50.6  
 1635 672 23 28 1615 162 1708 0.00E+00 1481.1 6596  
 cellular  
 organisms;Eukaryota;Opisthokonta;Metazoa;Eumetazoa;Bilateria;Protostomia;  
 Spiralia;Lophotrochozoa;Mollusca;Bivalvia;Autobranchia;Heteroconchia;Euhe  
 terodonta;Imparidentia;Venerida;Veneroidea;Veneridae;Mercenaria;Mercenari  
 a mercenaria

UdeM00000022208 6596 128.6 UdeM00000022208 XP\_045216968.1 42.6 136  
 74 2 3 136 27 160 5.90E-27 128.6 6596 cellular  
 organisms;Eukaryota;Opisthokonta;Metazoa;Eumetazoa;Bilateria;Protostomia;  
 Spiralia;Lophotrochozoa;Mollusca;Bivalvia;Autobranchia;Heteroconchia;Euhe  
 terodonta;Imparidentia;Venerida;Veneroidea;Veneridae;Mercenaria;Mercenari  
 a mercenaria

UdeM00000022209 1415580 139.4 UdeM00000022209 XP\_030075314.1 73.6  
 91 24 0 2 92 535 625 2.30E-30 139.4 1415580  
 cellular  
 organisms;Eukaryota;Opisthokonta;Metazoa;Eumetazoa;Bilateria;Deuterostomi  
 a;Chordata;Craniata;Vertebrata;Gnathostomata;Teleostomi;Euteleostomi;Sarc  
 opterygii;Dipnotetrapodomorpha;Tetrapoda;Amphibia;Gymnophiona;Siphonopida  
 e;Microcaecilia;Microcaecilia unicolor

UdeM00000022210 7757 580.1 UdeM00000022210 XP\_032835197.1 80.1 357  
 70 1 77 433 3 358 2.80E-162 580.1 7757 cellular  
 organisms;Eukaryota;Opisthokonta;Metazoa;Eumetazoa;Bilateria;Deuterostomi  
 a;Chordata;Craniata;Vertebrata;Cyclostomata;Hyperoartia;Petromyzontiforme  
 s;Petromyzontidae;Petromyzon;Petromyzon marinus

UdeM00000022211 6596 815.8 UdeM00000022211 XP\_045156195.1 75.8 598  
 102 8 1 562 3 593 3.30E-233 815.8 6596 cellular  
 organisms;Eukaryota;Opisthokonta;Metazoa;Eumetazoa;Bilateria;Protostomia;  
 Spiralia;Lophotrochozoa;Mollusca;Bivalvia;Autobranchia;Heteroconchia;Euhe  
 terodonta;Imparidentia;Venerida;Veneroidea;Veneridae;Mercenaria;Mercenari  
 a mercenaria

UdeM00000022212 6941 76.6 UdeM00000022212 XP\_037292159.1 51.5 101  
 37 4 1 97 1 93 1.90E-11 76.6 6941 cellular  
 organisms;Eukaryota;Opisthokonta;Metazoa;Eumetazoa;Bilateria;Protostomia;  
 Ecdysozoa;Panarthropoda;Arthropoda;Chelicerata;Arachnida;Acari;Parasitifo  
 rmes;Ixodida;Ixodoidea;Ixodidae;Rhipicephalinae;Rhipicephalus;Boophilus;R  
 hipicephalus microplus

UdeM00000022213 6941 75.1 UdeM00000022213 XP\_037292158.1 49 98  
 45 3 1 95 1 96 5.40E-11 75.1 6941 cellular  
 organisms;Eukaryota;Opisthokonta;Metazoa;Eumetazoa;Bilateria;Protostomia;  
 Ecdysozoa;Panarthropoda;Arthropoda;Chelicerata;Arachnida;Acari;Parasitifo  
 rmes;Ixodida;Ixodoidea;Ixodidae;Rhipicephalinae;Rhipicephalus;Boophilus;R  
 hipicephalus microplus  
 UdeM00000022214 6596 231.9 UdeM00000022214 XP\_045216699.1 65.1 172  
 59 1 1 171 1 172 3.30E-57 231.9 6596 cellular  
 organisms;Eukaryota;Opisthokonta;Metazoa;Eumetazoa;Bilateria;Protostomia;  
 Spiralia;Lophotrochozoa;Mollusca;Bivalvia;Autobranhia;Heteroconchia;Euhe  
 terodonta;Imparidentia;Venerida;Veneroidea;Veneridae;Mercenaria;Mercenari  
 a mercenaria  
 UdeM00000022215 6596 235.3 UdeM00000022215 XP\_045216699.1 65.7 172  
 58 1 1 171 1 172 2.40E-58 235.3 6596 cellular  
 organisms;Eukaryota;Opisthokonta;Metazoa;Eumetazoa;Bilateria;Protostomia;  
 Spiralia;Lophotrochozoa;Mollusca;Bivalvia;Autobranhia;Heteroconchia;Euhe  
 terodonta;Imparidentia;Venerida;Veneroidea;Veneridae;Mercenaria;Mercenari  
 a mercenaria  
 UdeM00000022218 6579 686.4 UdeM00000022218 XP\_033750212.1 44.6 778  
 414 7 87 851 124 897 5.60E-194 686.4 6579 cellular  
 organisms;Eukaryota;Opisthokonta;Metazoa;Eumetazoa;Bilateria;Protostomia;  
 Spiralia;Lophotrochozoa;Mollusca;Bivalvia;Autobranhia;Pteriormorphia;Pect  
 inida;Pectinoidea;Pectinidae;Pecten;Pecten maximus  
 UdeM00000022216 6579 714.1 UdeM00000022216 XP\_033750212.1 45.2 786  
 414 7 87 860 124 904 2.10E-202 714.1 6579 cellular  
 organisms;Eukaryota;Opisthokonta;Metazoa;Eumetazoa;Bilateria;Protostomia;  
 Spiralia;Lophotrochozoa;Mollusca;Bivalvia;Autobranhia;Pteriormorphia;Pect  
 inida;Pectinoidea;Pectinidae;Pecten;Pecten maximus  
 UdeM00000022217 6579 758.8 UdeM00000022217 XP\_033750212.1 45.8 824  
 430 7 87 898 124 942 7.70E-216 758.8 6579 cellular  
 organisms;Eukaryota;Opisthokonta;Metazoa;Eumetazoa;Bilateria;Protostomia;  
 Spiralia;Lophotrochozoa;Mollusca;Bivalvia;Autobranhia;Pteriormorphia;Pect  
 inida;Pectinoidea;Pectinidae;Pecten;Pecten maximus  
 UdeM00000022219 6596 62 UdeM00000022219 XP\_045215561.1 30 130  
 81 5 5 125 589 717 2.00E-06 62 6596 cellular  
 organisms;Eukaryota;Opisthokonta;Metazoa;Eumetazoa;Bilateria;Protostomia;  
 Spiralia;Lophotrochozoa;Mollusca;Bivalvia;Autobranhia;Heteroconchia;Euhe  
 terodonta;Imparidentia;Venerida;Veneroidea;Veneridae;Mercenaria;Mercenari  
 a mercenaria  
 UdeM00000022220 6596 250 UdeM00000022220 XP\_045156874.1 70.4 159  
 47 0 1 159 617 775 2.60E-63 250 6596 cellular  
 organisms;Eukaryota;Opisthokonta;Metazoa;Eumetazoa;Bilateria;Protostomia;  
 Spiralia;Lophotrochozoa;Mollusca;Bivalvia;Autobranhia;Heteroconchia;Euhe  
 terodonta;Imparidentia;Venerida;Veneroidea;Veneridae;Mercenaria;Mercenari  
 a mercenaria  
 UdeM00000022221 6596 857.8 UdeM00000022221 XP\_045156874.1 72 574  
 147 2 16 588 215 775 8.50E-246 857.8 6596 cellular  
 organisms;Eukaryota;Opisthokonta;Metazoa;Eumetazoa;Bilateria;Protostomia;  
 Spiralia;Lophotrochozoa;Mollusca;Bivalvia;Autobranhia;Heteroconchia;Euhe  
 terodonta;Imparidentia;Venerida;Veneroidea;Veneridae;Mercenaria;Mercenari  
 a mercenaria  
 UdeM00000022222 6596 387.9 UdeM00000022222 XP\_045187150.1 51.3 394  
 187 2 1 394 229 617 1.60E-104 387.9 6596 cellular  
 organisms;Eukaryota;Opisthokonta;Metazoa;Eumetazoa;Bilateria;Protostomia;

Spiralia;Lophotrochozoa;Mollusca;Bivalvia;Autobranchia;Heteroconchia;Euherodonta;Imparidentia;Venerida;Veneroidea;Veneridae;Mercenaria;Mercenaria mercenaria

UdeM00000022223 6596 181.4 UdeM00000022223 XP\_045156871.1 75.6 119  
26 2 26 143 67 183 8.30E-43 181.4 6596 cellular

organisms;Eukaryota;Opisthokonta;Metazoa;Eumetazoa;Bilateria;Protostomia;Spiralia;Lophotrochozoa;Mollusca;Bivalvia;Autobranchia;Heteroconchia;Euherodonta;Imparidentia;Venerida;Veneroidea;Veneridae;Mercenaria;Mercenaria mercenaria

UdeM00000022224 6596 508.4 UdeM00000022224 XP\_045216930.1 67.6 361  
117 0 1 361 1 361 7.20E-141 508.4 6596 cellular

organisms;Eukaryota;Opisthokonta;Metazoa;Eumetazoa;Bilateria;Protostomia;Spiralia;Lophotrochozoa;Mollusca;Bivalvia;Autobranchia;Heteroconchia;Euherodonta;Imparidentia;Venerida;Veneroidea;Veneridae;Mercenaria;Mercenaria mercenaria

UdeM00000022225 6596 178.3 UdeM00000022225 XP\_045216930.1 56.4 149  
65 0 1 149 1 149 7.20E-42 178.3 6596 cellular

organisms;Eukaryota;Opisthokonta;Metazoa;Eumetazoa;Bilateria;Protostomia;Spiralia;Lophotrochozoa;Mollusca;Bivalvia;Autobranchia;Heteroconchia;Euherodonta;Imparidentia;Venerida;Veneroidea;Veneridae;Mercenaria;Mercenaria mercenaria

UdeM00000022226 6579 154.5 UdeM00000022226 XP\_033740278.1 53.9 154  
68 3 1 154 148 298 1.20E-34 154.5 6579 cellular

organisms;Eukaryota;Opisthokonta;Metazoa;Eumetazoa;Bilateria;Protostomia;Spiralia;Lophotrochozoa;Mollusca;Bivalvia;Autobranchia;Pteriomorphia;Pectinida;Pectinoidea;Pectinidae;Pecten;Pecten maximus

UdeM00000022227 6573 121.7 UdeM00000022227 XP\_021349151.1 58.1 93  
39 0 2 94 30 122 5.30E-25 121.7 6573 cellular

organisms;Eukaryota;Opisthokonta;Metazoa;Eumetazoa;Bilateria;Protostomia;Spiralia;Lophotrochozoa;Mollusca;Bivalvia;Autobranchia;Pteriomorphia;Pectinida;Pectinoidea;Pectinidae;Mizuhopecten;Mizuhopecten yessoensis

UdeM00000022228 6596 392.9 UdeM00000022228 XP\_045215344.1 31.9 771  
376 13 7 684 53 767 8.60E-106 392.9 6596 cellular

organisms;Eukaryota;Opisthokonta;Metazoa;Eumetazoa;Bilateria;Protostomia;Spiralia;Lophotrochozoa;Mollusca;Bivalvia;Autobranchia;Heteroconchia;Euherodonta;Imparidentia;Venerida;Veneroidea;Veneridae;Mercenaria;Mercenaria mercenaria

UdeM00000022229 29159 309.7 UdeM00000022229 XP\_019930758.2 32.2 562  
275 5 9 472 178 731 6.90E-81 309.7 29159 cellular

organisms;Eukaryota;Opisthokonta;Metazoa;Eumetazoa;Bilateria;Protostomia;Spiralia;Lophotrochozoa;Mollusca;Bivalvia;Autobranchia;Pteriomorphia;Ostreida;Ostreoidea;Ostreidae;Crassostrea;Crassostrea gigas

UdeM00000022230 6579 350.9 UdeM00000022230 XP\_033750611.1 31.8 707  
366 14 10 613 100 793 3.40E-93 350.9 6579 cellular

organisms;Eukaryota;Opisthokonta;Metazoa;Eumetazoa;Bilateria;Protostomia;Spiralia;Lophotrochozoa;Mollusca;Bivalvia;Autobranchia;Pteriomorphia;Pectinida;Pectinoidea;Pectinidae;Pecten;Pecten maximus

UdeM00000022231 6573 352.4 UdeM00000022231 XP\_021345879.1 31.4 697  
362 11 8 601 43 726 1.20E-93 352.4 6573 cellular

organisms;Eukaryota;Opisthokonta;Metazoa;Eumetazoa;Bilateria;Protostomia;Spiralia;Lophotrochozoa;Mollusca;Bivalvia;Autobranchia;Pteriomorphia;Pectinida;Pectinoidea;Pectinidae;Mizuhopecten;Mizuhopecten yessoensis

UdeM00000022232 6573 352.1 UdeM00000022232 XP\_021345879.1 31.4 697  
362 11 2 595 43 726 1.50E-93 352.1 6573 cellular

organisms;Eukaryota;Opisthokonta;Metazoa;Eumetazoa;Bilateria;Protostomia;Spiralia;Lophotrochozoa;Mollusca;Bivalvia;Autobranchia;Pteriomorpha;Pectinida;Pectinoidea;Pectinidae;Mizuhopecten;Mizuhopecten yessoensis

UdeM00000022233 6596 410.6 UdeM00000022233 XP\_045215344.1 33.6 720  
379 10 8 634 54 767 3.70E-111 410.6 6596 cellular

organisms;Eukaryota;Opisthokonta;Metazoa;Eumetazoa;Bilateria;Protostomia;Spiralia;Lophotrochozoa;Mollusca;Bivalvia;Autobranchia;Heteroconchia;Euherodonta;Imparidentia;Venerida;Veneroidea;Veneridae;Mercenaria;Mercenaria mercenaria

UdeM00000022234 6596 414.8 UdeM00000022234 XP\_045215344.1 33.2 719  
385 9 6 632 52 767 2.00E-112 414.8 6596 cellular

organisms;Eukaryota;Opisthokonta;Metazoa;Eumetazoa;Bilateria;Protostomia;Spiralia;Lophotrochozoa;Mollusca;Bivalvia;Autobranchia;Heteroconchia;Euherodonta;Imparidentia;Venerida;Veneroidea;Veneridae;Mercenaria;Mercenaria mercenaria

UdeM00000022235 6596 258.8 UdeM00000022235 XP\_045215344.1 31 526  
288 12 9 461 244 767 1.30E-65 258.8 6596 cellular

organisms;Eukaryota;Opisthokonta;Metazoa;Eumetazoa;Bilateria;Protostomia;Spiralia;Lophotrochozoa;Mollusca;Bivalvia;Autobranchia;Heteroconchia;Euherodonta;Imparidentia;Venerida;Veneroidea;Veneridae;Mercenaria;Mercenaria mercenaria

UdeM00000022236 6596 111.7 UdeM00000022236 XP\_045180427.1 39 177  
105 2 80 254 98 273 1.50E-21 111.7 6596 cellular

organisms;Eukaryota;Opisthokonta;Metazoa;Eumetazoa;Bilateria;Protostomia;Spiralia;Lophotrochozoa;Mollusca;Bivalvia;Autobranchia;Heteroconchia;Euherodonta;Imparidentia;Venerida;Veneroidea;Veneridae;Mercenaria;Mercenaria mercenaria

UdeM00000022238 6596 556.2 UdeM00000022238 XP\_045216650.1 60.7 466  
180 3 1 463 1 466 3.90E-155 556.2 6596 cellular

organisms;Eukaryota;Opisthokonta;Metazoa;Eumetazoa;Bilateria;Protostomia;Spiralia;Lophotrochozoa;Mollusca;Bivalvia;Autobranchia;Heteroconchia;Euherodonta;Imparidentia;Venerida;Veneroidea;Veneridae;Mercenaria;Mercenaria mercenaria

UdeM00000022239 6596 1065.8 UdeM00000022239 XP\_045215994.1 60.8  
909 331 8 3 896 6 904 2.90E-308 1065.8 6596  
cellular

organisms;Eukaryota;Opisthokonta;Metazoa;Eumetazoa;Bilateria;Protostomia;Spiralia;Lophotrochozoa;Mollusca;Bivalvia;Autobranchia;Heteroconchia;Euherodonta;Imparidentia;Venerida;Veneroidea;Veneridae;Mercenaria;Mercenaria mercenaria

UdeM00000022241 441366 314.3 UdeM00000022241 XP\_028296753.1 38.8  
500 278 12 6 499 32 509 2.80E-82 314.3 441366  
cellular

organisms;Eukaryota;Opisthokonta;Metazoa;Eumetazoa;Bilateria;Deuterostomia;Chordata;Craniata;Vertebrata;Gnathostomata;Teleostomi;Euteleostomi;Actinopterygii;Actinopteri;Neopterygii;Teleostei;Osteoglossocephalai;Clupeocephala;Euteleostei;Neoteleostei;Eurypterygia;Ctenosquamata;Acanthopterygii;Euacanthopterygii;Percomorphaceae;Ovalentaria;Blenniiformes;Blenniiformes;Gobiesocidae;Gobiesocinae;Gouania;Gouania willdenowi

UdeM00000022246 6596 680.6 UdeM00000022246 XP\_045168041.1 34.2 1265  
768 17 30 1241 74 1326 3.70E-192 680.6 6596 cellular

organisms;Eukaryota;Opisthokonta;Metazoa;Eumetazoa;Bilateria;Protostomia;Spiralia;Lophotrochozoa;Mollusca;Bivalvia;Autobranchia;Heteroconchia;Euherodonta;Imparidentia;Venerida;Veneroidea;Veneridae;Mercenaria;Mercenaria mercenaria

terodonta;Imparidentia;Venerida;Veneroidea;Veneridae;Mercenaria;Mercenaria mercenaria  
 UdeM00000022249 29159 190.3 UdeM00000022249 XP\_034309929.1 52.8 180  
 84 1 1 179 1143 1322 2.20E-45 190.3 29159 cellular  
 organisms;Eukaryota;Opisthokonta;Metazoa;Eumetazoa;Bilateria;Protostomia;  
 Spiralia;Lophotrochozoa;Mollusca;Bivalvia;Autobranchia;Pteriormorphia;Ostr  
 eida;Ostreoidea;Ostreidae;Crassostrea;Crassostrea gigas  
 UdeM00000022250 6596 688.7 UdeM00000022250 XP\_045168041.1 34.3 1276  
 751 19 30 1241 74 1326 1.30E-194 688.7 6596 cellular  
 organisms;Eukaryota;Opisthokonta;Metazoa;Eumetazoa;Bilateria;Protostomia;  
 Spiralia;Lophotrochozoa;Mollusca;Bivalvia;Autobranchia;Heteroconchia;Euhe  
 terodonta;Imparidentia;Venerida;Veneroidea;Veneridae;Mercenaria;Mercenari  
 a mercenaria  
 UdeM00000022251 7038 73.2 UdeM00000022251 XP\_018901806.1 71.4 56  
 16 0 1 56 1 56 1.50E-10 73.2 7038 cellular  
 organisms;Eukaryota;Opisthokonta;Metazoa;Eumetazoa;Bilateria;Protostomia;  
 Ecdysozoa;Panarthropoda;Arthropoda;Mandibulata;Pancrustacea;Hexapoda;Inse  
 cta;Dicondylia;Pterygota;Neoptera;Paraneoptera;Hemiptera;Sternorrhyncha;A  
 leyrodoidea;Aleyrodidae;Aleyrodinae;Bemisia;Bemisia tabaci  
 UdeM00000022252 6565 112.8 UdeM00000022252 XP\_022333591.1 72.3 119  
 26 2 1 112 1 119 2.80E-22 112.8 6565 cellular  
 organisms;Eukaryota;Opisthokonta;Metazoa;Eumetazoa;Bilateria;Protostomia;  
 Spiralia;Lophotrochozoa;Mollusca;Bivalvia;Autobranchia;Pteriormorphia;Ostr  
 eida;Ostreoidea;Ostreidae;Crassostrea;Crassostrea virginica  
 UdeM00000022258 6596 449.5 UdeM00000022258 XP\_045215558.1 65.2 325  
 113 0 1 325 1 325 4.80E-123 449.5 6596 cellular  
 organisms;Eukaryota;Opisthokonta;Metazoa;Eumetazoa;Bilateria;Protostomia;  
 Spiralia;Lophotrochozoa;Mollusca;Bivalvia;Autobranchia;Heteroconchia;Euhe  
 terodonta;Imparidentia;Venerida;Veneroidea;Veneridae;Mercenaria;Mercenari  
 a mercenaria  
 UdeM00000022259 2607531 172.9 UdeM00000022259 XP\_036357135.1 32.9  
 337 215 7 31 359 38 371 7.30E-40 172.9 2607531  
 cellular  
 organisms;Eukaryota;Opisthokonta;Metazoa;Eumetazoa;Bilateria;Protostomia;  
 Spiralia;Lophotrochozoa;Mollusca;Cephalopoda;Coleoidea;Octopodiformes;Oct  
 opoda;Incirrata;Octopodidae;Octopus;Octopus sinensis  
 UdeM00000022260 6596 1296.2 UdeM00000022260 XP\_045216497.1 73.8  
 915 227 5 11 925 263 1164 0.00E+00 1296.2 6596  
 cellular  
 organisms;Eukaryota;Opisthokonta;Metazoa;Eumetazoa;Bilateria;Protostomia;  
 Spiralia;Lophotrochozoa;Mollusca;Bivalvia;Autobranchia;Heteroconchia;Euhe  
 terodonta;Imparidentia;Venerida;Veneroidea;Veneridae;Mercenaria;Mercenari  
 a mercenaria  
 UdeM00000022261 6573 304.7 UdeM00000022261 XP\_021346033.1 68.2 217  
 68 1 117 333 193 408 1.60E-79 304.7 6573 cellular  
 organisms;Eukaryota;Opisthokonta;Metazoa;Eumetazoa;Bilateria;Protostomia;  
 Spiralia;Lophotrochozoa;Mollusca;Bivalvia;Autobranchia;Pteriormorphia;Pect  
 inida;Pectinoidea;Pectinidae;Mizuhopecten;Mizuhopecten yessoensis  
 UdeM00000022262 6573 884.4 UdeM00000022262 XP\_021371682.1 65.9 657  
 222 2 1 656 1 656 8.80E-254 884.4 6573 cellular  
 organisms;Eukaryota;Opisthokonta;Metazoa;Eumetazoa;Bilateria;Protostomia;  
 Spiralia;Lophotrochozoa;Mollusca;Bivalvia;Autobranchia;Pteriormorphia;Pect  
 inida;Pectinoidea;Pectinidae;Mizuhopecten;Mizuhopecten yessoensis

UdeM00000022263 6596 577.4 UdeM00000022263 XP\_045156322.1 84.6 337  
 52 0 3 339 2 338 1.30E-161 577.4 6596 cellular  
 organisms;Eukaryota;Opisthokonta;Metazoa;Eumetazoa;Bilateria;Protostomia;  
 Spiralia;Lophotrochozoa;Mollusca;Bivalvia;Autobranchia;Heteroconchia;Euhe  
 terodonta;Imparidentia;Venerida;Veneroidea;Veneridae;Mercenaria;Mercenari  
 a mercenaria  
 UdeM00000022264 6596 258.5 UdeM00000022264 XP\_045156322.1 90.6 138  
 13 0 14 151 2 139 5.50E-66 258.5 6596 cellular  
 organisms;Eukaryota;Opisthokonta;Metazoa;Eumetazoa;Bilateria;Protostomia;  
 Spiralia;Lophotrochozoa;Mollusca;Bivalvia;Autobranchia;Heteroconchia;Euhe  
 terodonta;Imparidentia;Venerida;Veneroidea;Veneridae;Mercenaria;Mercenari  
 a mercenaria  
 UdeM00000022265 6596 506.9 UdeM00000022265 XP\_045156833.1 70.6 340  
 100 0 9 348 62 401 2.00E-140 506.9 6596 cellular  
 organisms;Eukaryota;Opisthokonta;Metazoa;Eumetazoa;Bilateria;Protostomia;  
 Spiralia;Lophotrochozoa;Mollusca;Bivalvia;Autobranchia;Heteroconchia;Euhe  
 terodonta;Imparidentia;Venerida;Veneroidea;Veneridae;Mercenaria;Mercenari  
 a mercenaria  
 UdeM00000022266 218467 195.3 UdeM00000022266 XP\_023215387.1 57.4  
 162 66 2 13 174 93 251 6.60E-47 195.3 218467  
 cellular  
 organisms;Eukaryota;Opisthokonta;Metazoa;Eumetazoa;Bilateria;Protostomia;  
 Ecdysozoa;Panarthropoda;Arthropoda;Chelicerata;Arachnida;Scorpiones;Buthi  
 da;Buthoidea;Buthidae;Centruroides;Centruroides sculpturatus  
 UdeM00000022267 6596 721.5 UdeM00000022267 XP\_045156840.1 66.8 560  
 172 8 1 552 1 554 8.50E-205 721.5 6596 cellular  
 organisms;Eukaryota;Opisthokonta;Metazoa;Eumetazoa;Bilateria;Protostomia;  
 Spiralia;Lophotrochozoa;Mollusca;Bivalvia;Autobranchia;Heteroconchia;Euhe  
 terodonta;Imparidentia;Venerida;Veneroidea;Veneridae;Mercenaria;Mercenari  
 a mercenaria  
 UdeM00000022269 6596 149.8 UdeM00000022269 XP\_045216535.1 71.2 125  
 27 6 1 120 1 121 2.20E-33 149.8 6596 cellular  
 organisms;Eukaryota;Opisthokonta;Metazoa;Eumetazoa;Bilateria;Protostomia;  
 Spiralia;Lophotrochozoa;Mollusca;Bivalvia;Autobranchia;Heteroconchia;Euhe  
 terodonta;Imparidentia;Venerida;Veneroidea;Veneridae;Mercenaria;Mercenari  
 a mercenaria  
 UdeM00000022268 6579 392.9 UdeM00000022268 XP\_033750077.1 40 945  
 239 29 1 894 1 668 1.10E-105 392.9 6579 cellular  
 organisms;Eukaryota;Opisthokonta;Metazoa;Eumetazoa;Bilateria;Protostomia;  
 Spiralia;Lophotrochozoa;Mollusca;Bivalvia;Autobranchia;Pteriomorphia;Pect  
 inida;Pectinoidea;Pectinidae;Pecten;Pecten maximus  
 UdeM00000022270 6579 313.2 UdeM00000022270 XP\_033747514.1 49.9 347  
 158 5 21 365 32 364 4.60E-82 313.2 6579 cellular  
 organisms;Eukaryota;Opisthokonta;Metazoa;Eumetazoa;Bilateria;Protostomia;  
 Spiralia;Lophotrochozoa;Mollusca;Bivalvia;Autobranchia;Pteriomorphia;Pect  
 inida;Pectinoidea;Pectinidae;Pecten;Pecten maximus  
 UdeM00000022271 6596 496.1 UdeM00000022271 XP\_045159951.1 64.9 370  
 119 4 5 363 37 406 3.90E-137 496.1 6596 cellular  
 organisms;Eukaryota;Opisthokonta;Metazoa;Eumetazoa;Bilateria;Protostomia;  
 Spiralia;Lophotrochozoa;Mollusca;Bivalvia;Autobranchia;Heteroconchia;Euhe  
 terodonta;Imparidentia;Venerida;Veneroidea;Veneridae;Mercenaria;Mercenari  
 a mercenaria  
 UdeM00000022272 6596 495.7 UdeM00000022272 XP\_045159951.1 64.9 370  
 119 4 12 370 37 406 5.20E-137 495.7 6596 cellular

organisms;Eukaryota;Opisthokonta;Metazoa;Eumetazoa;Bilateria;Protostomia;Spiralia;Lophotrochozoa;Mollusca;Bivalvia;Autobranchia;Heteroconchia;Euherodonta;Imparidentia;Venerida;Veneroidea;Veneridae;Mercenaria;Mercenaria mercenaria

UdeM00000022273 6596 530.4 UdeM00000022273 XP\_045159951.1 59.7 452  
161 5 7 438 33 483 2.20E-147 530.4 6596 cellular

organisms;Eukaryota;Opisthokonta;Metazoa;Eumetazoa;Bilateria;Protostomia;Spiralia;Lophotrochozoa;Mollusca;Bivalvia;Autobranchia;Heteroconchia;Euherodonta;Imparidentia;Venerida;Veneroidea;Veneridae;Mercenaria;Mercenaria mercenaria

UdeM00000022275 6596 523.9 UdeM00000022275 XP\_045159951.1 59.5 447  
141 6 12 418 37 483 1.90E-145 523.9 6596 cellular

organisms;Eukaryota;Opisthokonta;Metazoa;Eumetazoa;Bilateria;Protostomia;Spiralia;Lophotrochozoa;Mollusca;Bivalvia;Autobranchia;Heteroconchia;Euherodonta;Imparidentia;Venerida;Veneroidea;Veneridae;Mercenaria;Mercenaria mercenaria

UdeM00000022274 6596 523.9 UdeM00000022274 XP\_045159951.1 59.5 447  
141 6 14 420 37 483 2.00E-145 523.9 6596 cellular

organisms;Eukaryota;Opisthokonta;Metazoa;Eumetazoa;Bilateria;Protostomia;Spiralia;Lophotrochozoa;Mollusca;Bivalvia;Autobranchia;Heteroconchia;Euherodonta;Imparidentia;Venerida;Veneroidea;Veneridae;Mercenaria;Mercenaria mercenaria

UdeM00000022279 6565 92 UdeM00000022279 XP\_022312977.1 66.2 71  
23 1 34 103 99 169 4.60E-16 92 6565 cellular

organisms;Eukaryota;Opisthokonta;Metazoa;Eumetazoa;Bilateria;Protostomia;Spiralia;Lophotrochozoa;Mollusca;Bivalvia;Autobranchia;Pteriomorphia;Ostreida;Ostreoidea;Ostreidae;Crassostrea;Crassostrea virginica

UdeM00000022281 6596 537 UdeM00000022281 XP\_045159951.1 60 447  
159 4 12 438 37 483 2.30E-149 537 6596 cellular

organisms;Eukaryota;Opisthokonta;Metazoa;Eumetazoa;Bilateria;Protostomia;Spiralia;Lophotrochozoa;Mollusca;Bivalvia;Autobranchia;Heteroconchia;Euherodonta;Imparidentia;Venerida;Veneroidea;Veneridae;Mercenaria;Mercenaria mercenaria

UdeM00000022285 6596 500.4 UdeM00000022285 XP\_045159951.1 65.1 370  
118 4 5 363 37 406 2.10E-138 500.4 6596 cellular

organisms;Eukaryota;Opisthokonta;Metazoa;Eumetazoa;Bilateria;Protostomia;Spiralia;Lophotrochozoa;Mollusca;Bivalvia;Autobranchia;Heteroconchia;Euherodonta;Imparidentia;Venerida;Veneroidea;Veneridae;Mercenaria;Mercenaria mercenaria

UdeM00000022286 6596 500 UdeM00000022286 XP\_045159951.1 65.1 370  
118 4 12 370 37 406 2.80E-138 500 6596 cellular

organisms;Eukaryota;Opisthokonta;Metazoa;Eumetazoa;Bilateria;Protostomia;Spiralia;Lophotrochozoa;Mollusca;Bivalvia;Autobranchia;Heteroconchia;Euherodonta;Imparidentia;Venerida;Veneroidea;Veneridae;Mercenaria;Mercenaria mercenaria

UdeM00000022287 6596 538.5 UdeM00000022287 XP\_045159951.1 60.2 447  
158 4 12 438 37 483 8.00E-150 538.5 6596 cellular

organisms;Eukaryota;Opisthokonta;Metazoa;Eumetazoa;Bilateria;Protostomia;Spiralia;Lophotrochozoa;Mollusca;Bivalvia;Autobranchia;Heteroconchia;Euherodonta;Imparidentia;Venerida;Veneroidea;Veneridae;Mercenaria;Mercenaria mercenaria

UdeM00000022291 6596 456.4 UdeM00000022291 XP\_045215473.1 58.9 397  
142 3 1 378 40 434 3.40E-125 456.4 6596 cellular

organisms;Eukaryota;Opisthokonta;Metazoa;Eumetazoa;Bilateria;Protostomia;

Spiralia;Lophotrochozoa;Mollusca;Bivalvia;Autobranchia;Heteroconchia;Euherodonta;Imparidentia;Venerida;Veneroidea;Veneridae;Mercenaria;Mercenaria mercenaria

UdeM00000022292 6565 322 UdeM00000022292 XP\_022332730.1 41.1 411  
221 3 12 411 10 410 1.10E-84 322 6565 cellular

organisms;Eukaryota;Opisthokonta;Metazoa;Eumetazoa;Bilateria;Protostomia;Spiralia;Lophotrochozoa;Mollusca;Bivalvia;Autobranchia;Pteriormorphia;Ostreida;Ostreoidea;Ostreidae;Crassostrea;Crassostrea virginica

UdeM00000022293 1735272 184.9 UdeM00000022293 XP\_041353751.1 40.7  
209 123 1 3 211 143 350 1.10E-43 184.9 1735272  
cellular

organisms;Eukaryota;Opisthokonta;Metazoa;Eumetazoa;Bilateria;Protostomia;Spiralia;Lophotrochozoa;Mollusca;Gastropoda;Neomphalina;Neomphaloidea;Peltospiridae;Gigantopelta;Gigantopelta aegis

UdeM00000022294 6596 1115.5 UdeM00000022294 XP\_045216235.1 53.8  
929 407 10 13 923 72 996 0.00E+00 1115.5 6596  
cellular

organisms;Eukaryota;Opisthokonta;Metazoa;Eumetazoa;Bilateria;Protostomia;Spiralia;Lophotrochozoa;Mollusca;Bivalvia;Autobranchia;Heteroconchia;Euherodonta;Imparidentia;Venerida;Veneroidea;Veneridae;Mercenaria;Mercenaria mercenaria

UdeM00000022295 6596 76.3 UdeM00000022295 XP\_045168099.1 55.4 65  
28 1 1 64 225 289 1.70E-11 76.3 6596 cellular

organisms;Eukaryota;Opisthokonta;Metazoa;Eumetazoa;Bilateria;Protostomia;Spiralia;Lophotrochozoa;Mollusca;Bivalvia;Autobranchia;Heteroconchia;Euherodonta;Imparidentia;Venerida;Veneroidea;Veneridae;Mercenaria;Mercenaria mercenaria

UdeM00000022296 6579 91.7 UdeM00000022296 XP\_033747958.1 56.9 65  
28 0 1 65 87 151 3.90E-16 91.7 6579 cellular

organisms;Eukaryota;Opisthokonta;Metazoa;Eumetazoa;Bilateria;Protostomia;Spiralia;Lophotrochozoa;Mollusca;Bivalvia;Autobranchia;Pteriormorphia;Pectinida;Pectinoidea;Pectinidae;Pecten;Pecten maximus

UdeM00000022298 6596 80.1 UdeM00000022298 XP\_045215464.1 40.7 123  
64 6 1 122 5 119 2.20E-12 80.1 6596 cellular

organisms;Eukaryota;Opisthokonta;Metazoa;Eumetazoa;Bilateria;Protostomia;Spiralia;Lophotrochozoa;Mollusca;Bivalvia;Autobranchia;Heteroconchia;Euherodonta;Imparidentia;Venerida;Veneroidea;Veneridae;Mercenaria;Mercenaria mercenaria

UdeM00000022299 6596 144.1 UdeM00000022299 XP\_045216234.1 29.2 455  
264 11 10 432 7 435 4.30E-31 144.1 6596 cellular

organisms;Eukaryota;Opisthokonta;Metazoa;Eumetazoa;Bilateria;Protostomia;Spiralia;Lophotrochozoa;Mollusca;Bivalvia;Autobranchia;Heteroconchia;Euherodonta;Imparidentia;Venerida;Veneroidea;Veneridae;Mercenaria;Mercenaria mercenaria

UdeM00000022300 6596 564.7 UdeM00000022300 XP\_045216392.1 57 474  
204 0 1 474 1 474 1.10E-157 564.7 6596 cellular

organisms;Eukaryota;Opisthokonta;Metazoa;Eumetazoa;Bilateria;Protostomia;Spiralia;Lophotrochozoa;Mollusca;Bivalvia;Autobranchia;Heteroconchia;Euherodonta;Imparidentia;Venerida;Veneroidea;Veneridae;Mercenaria;Mercenaria mercenaria

UdeM00000022301 6596 565.1 UdeM00000022301 XP\_045216392.1 57 474  
204 0 6 479 1 474 8.70E-158 565.1 6596 cellular

organisms;Eukaryota;Opisthokonta;Metazoa;Eumetazoa;Bilateria;Protostomia;Spiralia;Lophotrochozoa;Mollusca;Bivalvia;Autobranchia;Heteroconchia;Euherodonta;Imparidentia;Venerida;Veneroidea;Veneridae;Mercenaria;Mercenaria mercenaria



terodonta;Imparidentia;Venerida;Veneroidea;Veneridae;Mercenaria;Mercenaria mercenaria

UdeM00000022302 400727 387.9 UdeM00000022302 XP\_025076711.1 60.4  
303 116 2 3 302 5 306 1.30E-104 387.9 400727  
cellular

organisms;Eukaryota;Opisthokonta;Metazoa;Eumetazoa;Bilateria;Protostomia;Spiralia;Lophotrochozoa;Mollusca;Gastropoda;Caenogastropoda;Architaenioglossa;Ampullarioidea;Ampullariidae;Pomacea;Pomacea canaliculata

UdeM00000022303 6573 303.5 UdeM00000022303 XP\_021346000.1 50.7 341  
155 7 46 378 22 357 3.80E-79 303.5 6573 cellular

organisms;Eukaryota;Opisthokonta;Metazoa;Eumetazoa;Bilateria;Protostomia;Spiralia;Lophotrochozoa;Mollusca;Bivalvia;Autobranchia;Pteriomorphia;Pectinida;Pectinoidea;Pectinidae;Mizuhopecten;Mizuhopecten yessoensis

UdeM00000022304 1735272 165.6 UdeM00000022304 XP\_041350007.1 49.7  
157 74 3 2 157 12 164 5.10E-38 165.6 1735272

cellular

organisms;Eukaryota;Opisthokonta;Metazoa;Eumetazoa;Bilateria;Protostomia;Spiralia;Lophotrochozoa;Mollusca;Gastropoda;Neomphalina;Neomphaloidea;Peltospiridae;Gigantopelta;Gigantopelta aegis

UdeM00000022307 6596 625.2 UdeM00000022307 XP\_045216793.1 63.4 495  
168 6 1 483 37 530 7.10E-176 625.2 6596 cellular

organisms;Eukaryota;Opisthokonta;Metazoa;Eumetazoa;Bilateria;Protostomia;Spiralia;Lophotrochozoa;Mollusca;Bivalvia;Autobranchia;Heteroconchia;Euheterodonta;Imparidentia;Venerida;Veneroidea;Veneridae;Mercenaria;Mercenaria mercenaria

UdeM00000022308 29159 200.3 UdeM00000022308 XP\_034316161.1 42.7 241  
136 2 1 239 718 958 2.80E-48 200.3 29159 cellular

organisms;Eukaryota;Opisthokonta;Metazoa;Eumetazoa;Bilateria;Protostomia;Spiralia;Lophotrochozoa;Mollusca;Bivalvia;Autobranchia;Pteriomorphia;Ostreida;Ostreoidea;Ostreidae;Crassostrea;Crassostrea gigas

UdeM00000022309 6596 253.4 UdeM00000022309 XP\_045156241.1 68.8 173  
53 1 36 207 16 188 2.40E-64 253.4 6596 cellular

organisms;Eukaryota;Opisthokonta;Metazoa;Eumetazoa;Bilateria;Protostomia;Spiralia;Lophotrochozoa;Mollusca;Bivalvia;Autobranchia;Heteroconchia;Euheterodonta;Imparidentia;Venerida;Veneroidea;Veneridae;Mercenaria;Mercenaria mercenaria

UdeM00000022310 6573 100.1 UdeM00000022310 XP\_021365632.1 21.3 718  
419 22 218 876 242 872 1.50E-17 100.1 6573 cellular

organisms;Eukaryota;Opisthokonta;Metazoa;Eumetazoa;Bilateria;Protostomia;Spiralia;Lophotrochozoa;Mollusca;Bivalvia;Autobranchia;Pteriomorphia;Pectinida;Pectinoidea;Pectinidae;Mizuhopecten;Mizuhopecten yessoensis

UdeM00000022312 6596 369.4 UdeM00000022312 XP\_045216380.1 48.7 386  
174 9 11 377 5 385 5.50E-99 369.4 6596 cellular

organisms;Eukaryota;Opisthokonta;Metazoa;Eumetazoa;Bilateria;Protostomia;Spiralia;Lophotrochozoa;Mollusca;Bivalvia;Autobranchia;Heteroconchia;Euheterodonta;Imparidentia;Venerida;Veneroidea;Veneridae;Mercenaria;Mercenaria mercenaria

UdeM00000022313 6596 73.6 UdeM00000022313 XP\_045199277.1 36.8 95  
60 0 8 102 31 125 1.70E-10 73.6 6596 cellular

organisms;Eukaryota;Opisthokonta;Metazoa;Eumetazoa;Bilateria;Protostomia;Spiralia;Lophotrochozoa;Mollusca;Bivalvia;Autobranchia;Heteroconchia;Euheterodonta;Imparidentia;Venerida;Veneroidea;Veneridae;Mercenaria;Mercenaria mercenaria

UdeM00000022314 6596 92 UdeM00000022314 XP\_045199277.1 46.5 101  
 54 0 2 102 25 125 4.80E-16 92 6596 cellular  
 organisms;Eukaryota;Opisthokonta;Metazoa;Eumetazoa;Bilateria;Protostomia;  
 Spiralia;Lophotrochozoa;Mollusca;Bivalvia;Autobranhia;Heteroconchia;Euhe  
 terodonta;Imparidentia;Venerida;Veneroidea;Veneridae;Mercenaria;Mercenari  
 a mercenaria

UdeM00000022315 6596 98.2 UdeM00000022315 XP\_045199277.1 47.5 101  
 53 0 2 102 25 125 6.70E-18 98.2 6596 cellular  
 organisms;Eukaryota;Opisthokonta;Metazoa;Eumetazoa;Bilateria;Protostomia;  
 Spiralia;Lophotrochozoa;Mollusca;Bivalvia;Autobranhia;Heteroconchia;Euhe  
 terodonta;Imparidentia;Venerida;Veneroidea;Veneridae;Mercenaria;Mercenari  
 a mercenaria

UdeM00000022316 6596 85.5 UdeM00000022316 XP\_045199277.1 43.2 95  
 54 0 8 102 31 125 4.30E-14 85.5 6596 cellular  
 organisms;Eukaryota;Opisthokonta;Metazoa;Eumetazoa;Bilateria;Protostomia;  
 Spiralia;Lophotrochozoa;Mollusca;Bivalvia;Autobranhia;Heteroconchia;Euhe  
 terodonta;Imparidentia;Venerida;Veneroidea;Veneridae;Mercenaria;Mercenari  
 a mercenaria

UdeM00000022317 6596 94.4 UdeM00000022317 XP\_045199277.1 45.5 101  
 55 0 2 102 25 125 9.60E-17 94.4 6596 cellular  
 organisms;Eukaryota;Opisthokonta;Metazoa;Eumetazoa;Bilateria;Protostomia;  
 Spiralia;Lophotrochozoa;Mollusca;Bivalvia;Autobranhia;Heteroconchia;Euhe  
 terodonta;Imparidentia;Venerida;Veneroidea;Veneridae;Mercenaria;Mercenari  
 a mercenaria

UdeM00000022318 6596 85.9 UdeM00000022318 XP\_045199277.1 44.2 95  
 53 0 8 102 31 125 3.30E-14 85.9 6596 cellular  
 organisms;Eukaryota;Opisthokonta;Metazoa;Eumetazoa;Bilateria;Protostomia;  
 Spiralia;Lophotrochozoa;Mollusca;Bivalvia;Autobranhia;Heteroconchia;Euhe  
 terodonta;Imparidentia;Venerida;Veneroidea;Veneridae;Mercenaria;Mercenari  
 a mercenaria

UdeM00000022319 6596 97.8 UdeM00000022319 XP\_045199277.1 47.5 101  
 53 0 2 102 25 125 8.70E-18 97.8 6596 cellular  
 organisms;Eukaryota;Opisthokonta;Metazoa;Eumetazoa;Bilateria;Protostomia;  
 Spiralia;Lophotrochozoa;Mollusca;Bivalvia;Autobranhia;Heteroconchia;Euhe  
 terodonta;Imparidentia;Venerida;Veneroidea;Veneridae;Mercenaria;Mercenari  
 a mercenaria

UdeM00000022320 6596 84 UdeM00000022320 XP\_045199277.1 44 100  
 55 1 4 102 26 125 1.30E-13 84 6596 cellular  
 organisms;Eukaryota;Opisthokonta;Metazoa;Eumetazoa;Bilateria;Protostomia;  
 Spiralia;Lophotrochozoa;Mollusca;Bivalvia;Autobranhia;Heteroconchia;Euhe  
 terodonta;Imparidentia;Venerida;Veneroidea;Veneridae;Mercenaria;Mercenari  
 a mercenaria

UdeM00000022321 6596 97.1 UdeM00000022321 XP\_045199277.1 47.5 101  
 53 0 2 102 25 125 1.80E-17 97.1 6596 cellular  
 organisms;Eukaryota;Opisthokonta;Metazoa;Eumetazoa;Bilateria;Protostomia;  
 Spiralia;Lophotrochozoa;Mollusca;Bivalvia;Autobranhia;Heteroconchia;Euhe  
 terodonta;Imparidentia;Venerida;Veneroidea;Veneridae;Mercenaria;Mercenari  
 a mercenaria

UdeM00000022322 6596 82 UdeM00000022322 XP\_045199277.1 43.2 95  
 54 0 8 102 31 125 4.80E-13 82 6596 cellular  
 organisms;Eukaryota;Opisthokonta;Metazoa;Eumetazoa;Bilateria;Protostomia;  
 Spiralia;Lophotrochozoa;Mollusca;Bivalvia;Autobranhia;Heteroconchia;Euhe  
 terodonta;Imparidentia;Venerida;Veneroidea;Veneridae;Mercenaria;Mercenari  
 a mercenaria

UdeM00000022323 6596 96.3 UdeM00000022323 XP\_045199277.1 46.5 101  
 54 0 2 102 25 125 2.50E-17 96.3 6596 cellular  
 organisms;Eukaryota;Opisthokonta;Metazoa;Eumetazoa;Bilateria;Protostomia;  
 Spiralia;Lophotrochozoa;Mollusca;Bivalvia;Autobranchia;Heteroconchia;Euhe  
 terodonta;Imparidentia;Venerida;Veneroidea;Veneridae;Mercenaria;Mercenari  
 a mercenaria  
 UdeM00000022324 6596 97.8 UdeM00000022324 XP\_045199277.1 47.5 101  
 53 0 2 102 25 125 8.70E-18 97.8 6596 cellular  
 organisms;Eukaryota;Opisthokonta;Metazoa;Eumetazoa;Bilateria;Protostomia;  
 Spiralia;Lophotrochozoa;Mollusca;Bivalvia;Autobranchia;Heteroconchia;Euhe  
 terodonta;Imparidentia;Venerida;Veneroidea;Veneridae;Mercenaria;Mercenari  
 a mercenaria  
 UdeM00000022325 6596 92.8 UdeM00000022325 XP\_045199277.1 46.5 101  
 54 0 2 102 25 125 2.80E-16 92.8 6596 cellular  
 organisms;Eukaryota;Opisthokonta;Metazoa;Eumetazoa;Bilateria;Protostomia;  
 Spiralia;Lophotrochozoa;Mollusca;Bivalvia;Autobranchia;Heteroconchia;Euhe  
 terodonta;Imparidentia;Venerida;Veneroidea;Veneridae;Mercenaria;Mercenari  
 a mercenaria  
 UdeM00000022326 6596 363.2 UdeM00000022326 XP\_045215837.1 51.5 1020  
 378 27 10 1001 6 936 1.20E-96 363.2 6596 cellular  
 organisms;Eukaryota;Opisthokonta;Metazoa;Eumetazoa;Bilateria;Protostomia;  
 Spiralia;Lophotrochozoa;Mollusca;Bivalvia;Autobranchia;Heteroconchia;Euhe  
 terodonta;Imparidentia;Venerida;Veneroidea;Veneridae;Mercenaria;Mercenari  
 a mercenaria  
 UdeM00000022327 6596 572 UdeM00000022327 XP\_045156597.1 76.9 373  
 81 3 1 373 1 368 5.50E-160 572 6596 cellular  
 organisms;Eukaryota;Opisthokonta;Metazoa;Eumetazoa;Bilateria;Protostomia;  
 Spiralia;Lophotrochozoa;Mollusca;Bivalvia;Autobranchia;Heteroconchia;Euhe  
 terodonta;Imparidentia;Venerida;Veneroidea;Veneridae;Mercenaria;Mercenari  
 a mercenaria  
 UdeM00000022328 6596 138.3 UdeM00000022328 XP\_045215732.1 57.4 129  
 54 1 2 130 3 130 1.00E-29 138.3 6596 cellular  
 organisms;Eukaryota;Opisthokonta;Metazoa;Eumetazoa;Bilateria;Protostomia;  
 Spiralia;Lophotrochozoa;Mollusca;Bivalvia;Autobranchia;Heteroconchia;Euhe  
 terodonta;Imparidentia;Venerida;Veneroidea;Veneridae;Mercenaria;Mercenari  
 a mercenaria  
 UdeM00000022329 6687 77.4 UdeM00000022329 XP\_037797021.1 41.7 115  
 60 5 16 125 41 153 1.50E-11 77.4 6687 cellular  
 organisms;Eukaryota;Opisthokonta;Metazoa;Eumetazoa;Bilateria;Protostomia;  
 Ecdysozoa;Panarthropoda;Arthropoda;Mandibulata;Pancrustacea;Crustacea;Mul  
 ticrustacea;Malacostraca;Eumalacostraca;Eucarida;Decapoda;Dendrobranchiat  
 a;Penaeoidea;Penaeidae;Penaeus;Penaeus monodon  
 UdeM00000022330 6596 218 UdeM00000022330 XP\_045216874.1 54.9 195  
 84 2 5 195 8 202 1.10E-53 218 6596 cellular  
 organisms;Eukaryota;Opisthokonta;Metazoa;Eumetazoa;Bilateria;Protostomia;  
 Spiralia;Lophotrochozoa;Mollusca;Bivalvia;Autobranchia;Heteroconchia;Euhe  
 terodonta;Imparidentia;Venerida;Veneroidea;Veneridae;Mercenaria;Mercenari  
 a mercenaria  
 UdeM00000022331 29159 807 UdeM00000022331 XP\_011439447.2 61.9 713  
 253 7 6 712 6 705 1.90E-230 807 29159 cellular  
 organisms;Eukaryota;Opisthokonta;Metazoa;Eumetazoa;Bilateria;Protostomia;  
 Spiralia;Lophotrochozoa;Mollusca;Bivalvia;Autobranchia;Pteriomorphia;Ostr  
 eida;Ostreoidea;Ostreidae;Crassostrea;Crassostrea gigas

UdeM00000022332 29159 371.3 UdeM00000022332 XP\_011439446.1 81.9 210  
 37 1 1 209 1 210 9.00E-100 371.3 29159 cellular  
 organisms;Eukaryota;Opisthokonta;Metazoa;Eumetazoa;Bilateria;Protostomia;  
 Spiralia;Lophotrochozoa;Mollusca;Bivalvia;Autobranchia;Pteriomorpha;Ostr  
 eida;Ostreoidea;Ostreidae;Crassostrea;Crassostrea gigas  
 UdeM00000022333 6573 317.8 UdeM00000022333 XP\_021358934.1 72.1 219  
 59 1 1 217 1 219 1.10E-83 317.8 6573 cellular  
 organisms;Eukaryota;Opisthokonta;Metazoa;Eumetazoa;Bilateria;Protostomia;  
 Spiralia;Lophotrochozoa;Mollusca;Bivalvia;Autobranchia;Pteriomorpha;Pect  
 inida;Pectinoidea;Pectinidae;Mizuhopecten;Mizuhopecten yessoensis  
 UdeM00000022334 1735272 892.1 UdeM00000022334 XP\_041370685.1 76.5  
 561 126 1 3 557 16 576 3.60E-256 892.1 1735272  
 cellular  
 organisms;Eukaryota;Opisthokonta;Metazoa;Eumetazoa;Bilateria;Protostomia;  
 Spiralia;Lophotrochozoa;Mollusca;Gastropoda;Neomphalina;Neomphaloidea;Pel  
 tospiridae;Gigantopelta;Gigantopelta aegis  
 UdeM00000022335 6573 287.3 UdeM00000022335 XP\_021359350.1 49.1 271  
 138 0 6 276 4 274 2.00E-74 287.3 6573 cellular  
 organisms;Eukaryota;Opisthokonta;Metazoa;Eumetazoa;Bilateria;Protostomia;  
 Spiralia;Lophotrochozoa;Mollusca;Bivalvia;Autobranchia;Pteriomorpha;Pect  
 inida;Pectinoidea;Pectinidae;Mizuhopecten;Mizuhopecten yessoensis  
 UdeM00000022336 29159 98.2 UdeM00000022336 XP\_011436378.2 35.6 149  
 86 4 228 376 62 200 2.40E-17 98.2 29159 cellular  
 organisms;Eukaryota;Opisthokonta;Metazoa;Eumetazoa;Bilateria;Protostomia;  
 Spiralia;Lophotrochozoa;Mollusca;Bivalvia;Autobranchia;Pteriomorpha;Ostr  
 eida;Ostreoidea;Ostreidae;Crassostrea;Crassostrea gigas  
 UdeM00000022337 6596 295.4 UdeM00000022337 XP\_045216693.1 75.9 166  
 40 0 25 190 27 192 5.10E-77 295.4 6596 cellular  
 organisms;Eukaryota;Opisthokonta;Metazoa;Eumetazoa;Bilateria;Protostomia;  
 Spiralia;Lophotrochozoa;Mollusca;Bivalvia;Autobranchia;Heteroconchia;Euhe  
 terodonta;Imparidentia;Venerida;Veneroidea;Veneridae;Mercenaria;Mercenari  
 a mercenaria  
 UdeM00000022338 6596 610.5 UdeM00000022338 XP\_045216349.1 64 461  
 102 2 1 461 1 397 1.80E-171 610.5 6596 cellular  
 organisms;Eukaryota;Opisthokonta;Metazoa;Eumetazoa;Bilateria;Protostomia;  
 Spiralia;Lophotrochozoa;Mollusca;Bivalvia;Autobranchia;Heteroconchia;Euhe  
 terodonta;Imparidentia;Venerida;Veneroidea;Veneridae;Mercenaria;Mercenari  
 a mercenaria  
 UdeM00000022339 225164 156 UdeM00000022339 XP\_009046251.1 28.7  
 390 262 5 20 406 4 380 1.00E-34 156 225164  
 cellular  
 organisms;Eukaryota;Opisthokonta;Metazoa;Eumetazoa;Bilateria;Protostomia;  
 Spiralia;Lophotrochozoa;Mollusca;Gastropoda;Patellogastropoda;Lottioidea;  
 Lottiidae;Lottia;Lottia gigantea  
 UdeM00000022340 6579 280.4 UdeM00000022340 XP\_033750728.1 35.5 485  
 294 9 33 505 31 508 4.50E-72 280.4 6579 cellular  
 organisms;Eukaryota;Opisthokonta;Metazoa;Eumetazoa;Bilateria;Protostomia;  
 Spiralia;Lophotrochozoa;Mollusca;Bivalvia;Autobranchia;Pteriomorpha;Pect  
 inida;Pectinoidea;Pectinidae;Pecten;Pecten maximus  
 UdeM00000022341 1735272 511.9 UdeM00000022341 XP\_041373621.1 56.2  
 454 190 4 3 451 7 456 9.10E-142 511.9 1735272  
 cellular  
 organisms;Eukaryota;Opisthokonta;Metazoa;Eumetazoa;Bilateria;Protostomia;

Spiralia; Lophotrochozoa; Mollusca; Gastropoda; Neomphalina; Neomphaloidea; Peltospiridae; Gigantopelta; Gigantopelta aegis

UdeM00000022342 6596 63.5 UdeM00000022342 XP\_045183448.1 31.5 130  
82 3 30 158 42 165 4.90E-07 63.5 6596 cellular  
organisms; Eukaryota; Opisthokonta; Metazoa; Eumetazoa; Bilateria; Protostomia; Spiralia; Lophotrochozoa; Mollusca; Bivalvia; Autobranchia; Heteroconchia; Euheterodonta; Imparidentia; Venerida; Veneroidea; Veneridae; Mercenaria; Mercenaria mercenaria

UdeM00000022343 6412 182.6 UdeM00000022343 XP\_009008669.1 37.2 277  
148 6 43 316 133 386 8.00E-43 182.6 6412 cellular  
organisms; Eukaryota; Opisthokonta; Metazoa; Eumetazoa; Bilateria; Protostomia; Spiralia; Lophotrochozoa; Annelida; Clitellata; Hirudinea; Rhynchobdellida; Glossiphoniidae; Helobdella; Helobdella robusta

UdeM00000022344 6500 141.7 UdeM00000022344 XP\_012946305.1 29.9 381  
222 12 27 371 30 401 2.00E-30 141.7 6500 cellular  
organisms; Eukaryota; Opisthokonta; Metazoa; Eumetazoa; Bilateria; Protostomia; Spiralia; Lophotrochozoa; Mollusca; Gastropoda; Heterobranchia; Euthyneura; Tectipleura; Aplysiida; Aplysioidea; Aplysiidae; Aplysia; Aplysia californica

UdeM00000022346 6579 107.8 UdeM00000022346 XP\_033753652.1 37.2 172  
104 4 4 171 183 354 1.50E-20 107.8 6579 cellular  
organisms; Eukaryota; Opisthokonta; Metazoa; Eumetazoa; Bilateria; Protostomia; Spiralia; Lophotrochozoa; Mollusca; Bivalvia; Autobranchia; Pteriomorpha; Pectinida; Pectinoidea; Pectinidae; Pecten; Pecten maximus

UdeM00000022347 6500 85.5 UdeM00000022347 XP\_012946305.1 35.8 176  
97 5 23 190 203 370 8.10E-14 85.5 6500 cellular  
organisms; Eukaryota; Opisthokonta; Metazoa; Eumetazoa; Bilateria; Protostomia; Spiralia; Lophotrochozoa; Mollusca; Gastropoda; Heterobranchia; Euthyneura; Tectipleura; Aplysiida; Aplysioidea; Aplysiidae; Aplysia; Aplysia californica

UdeM00000022348 6579 161 UdeM00000022348 XP\_033753657.1 30.7 361  
236 8 5 362 4 353 2.90E-36 161 6579 cellular  
organisms; Eukaryota; Opisthokonta; Metazoa; Eumetazoa; Bilateria; Protostomia; Spiralia; Lophotrochozoa; Mollusca; Bivalvia; Autobranchia; Pteriomorpha; Pectinida; Pectinoidea; Pectinidae; Pecten; Pecten maximus

UdeM00000022349 6500 160.2 UdeM00000022349 XP\_012946305.1 32.8 375  
209 12 24 363 30 396 5.00E-36 160.2 6500 cellular  
organisms; Eukaryota; Opisthokonta; Metazoa; Eumetazoa; Bilateria; Protostomia; Spiralia; Lophotrochozoa; Mollusca; Gastropoda; Heterobranchia; Euthyneura; Tectipleura; Aplysiida; Aplysioidea; Aplysiidae; Aplysia; Aplysia californica

UdeM00000022350 1735272 378.3 UdeM00000022350 XP\_041373365.1 71.3  
408 82 4 1 406 1 375 1.30E-101 378.3 1735272  
cellular  
organisms; Eukaryota; Opisthokonta; Metazoa; Eumetazoa; Bilateria; Protostomia; Spiralia; Lophotrochozoa; Mollusca; Gastropoda; Neomphalina; Neomphaloidea; Peltospiridae; Gigantopelta; Gigantopelta aegis

UdeM00000022351 6596 401.7 UdeM00000022351 XP\_045216334.1 35.4 721  
430 14 124 830 95 793 2.20E-108 401.7 6596 cellular  
organisms; Eukaryota; Opisthokonta; Metazoa; Eumetazoa; Bilateria; Protostomia; Spiralia; Lophotrochozoa; Mollusca; Bivalvia; Autobranchia; Heteroconchia; Euheterodonta; Imparidentia; Venerida; Veneroidea; Veneridae; Mercenaria; Mercenaria mercenaria

UdeM00000022352 6596 396.7 UdeM00000022352 XP\_045216334.1 35.2 725  
430 15 124 834 95 793 7.10E-107 396.7 6596 cellular  
organisms; Eukaryota; Opisthokonta; Metazoa; Eumetazoa; Bilateria; Protostomia; Spiralia; Lophotrochozoa; Mollusca; Bivalvia; Autobranchia; Heteroconchia; Euheterodonta; Imparidentia; Venerida; Veneroidea; Veneridae; Mercenaria; Mercenaria mercenaria

terodonta;Imparidentia;Venerida;Veneroidea;Veneridae;Mercenaria;Mercenari  
 a mercenaria  
 UdeM00000022353 29159 319.3 UdeM00000022353 XP\_034324553.1 33.5 526  
 320 8 357 856 433 954 1.50E-83 319.3 29159 cellular  
 organisms;Eukaryota;Opisthokonta;Metazoa;Eumetazoa;Bilateria;Protostomia;  
 Spiralia;Lophotrochozoa;Mollusca;Bivalvia;Autobranchia;Pteriormorphia;Ostr  
 eida;Ostreoidea;Ostreidae;Crassostrea;Crassostrea gigas  
 UdeM00000022354 6565 282.3 UdeM00000022354 XP\_022335012.1 84 162  
 26 0 1 162 1 162 3.80E-73 282.3 6565 cellular  
 organisms;Eukaryota;Opisthokonta;Metazoa;Eumetazoa;Bilateria;Protostomia;  
 Spiralia;Lophotrochozoa;Mollusca;Bivalvia;Autobranchia;Pteriormorphia;Ostr  
 eida;Ostreoidea;Ostreidae;Crassostrea;Crassostrea virginica  
 UdeM00000022355 6565 106.7 UdeM00000022355 XP\_022331954.1 41.4 186  
 69 5 240 408 186 348 7.20E-20 106.7 6565 cellular  
 organisms;Eukaryota;Opisthokonta;Metazoa;Eumetazoa;Bilateria;Protostomia;  
 Spiralia;Lophotrochozoa;Mollusca;Bivalvia;Autobranchia;Pteriormorphia;Ostr  
 eida;Ostreoidea;Ostreidae;Crassostrea;Crassostrea virginica  
 UdeM00000022356 6579 82 UdeM00000022356 XP\_033739653.1 28.8 264  
 164 11 19 266 28 283 1.20E-12 82 6579 cellular  
 organisms;Eukaryota;Opisthokonta;Metazoa;Eumetazoa;Bilateria;Protostomia;  
 Spiralia;Lophotrochozoa;Mollusca;Bivalvia;Autobranchia;Pteriormorphia;Pect  
 inida;Pectinoidea;Pectinidae;Pecten;Pecten maximus  
 UdeM00000022358 6596 105.9 UdeM00000022358 XP\_045198207.1 25 260  
 175 9 46 290 2 256 1.10E-19 105.9 6596 cellular  
 organisms;Eukaryota;Opisthokonta;Metazoa;Eumetazoa;Bilateria;Protostomia;  
 Spiralia;Lophotrochozoa;Mollusca;Bivalvia;Autobranchia;Heteroconchia;Euhe  
 terodonta;Imparidentia;Venerida;Veneroidea;Veneridae;Mercenaria;Mercenari  
 a mercenaria  
 UdeM00000022359 29159 80.9 UdeM00000022359 XP\_011416417.2 25.6 277  
 181 14 5 267 12 277 2.80E-12 80.9 29159 cellular  
 organisms;Eukaryota;Opisthokonta;Metazoa;Eumetazoa;Bilateria;Protostomia;  
 Spiralia;Lophotrochozoa;Mollusca;Bivalvia;Autobranchia;Pteriormorphia;Ostr  
 eida;Ostreoidea;Ostreidae;Crassostrea;Crassostrea gigas  
 UdeM00000022361 29159 100.5 UdeM00000022361 XP\_011416417.2 27.4 259  
 167 10 35 279 38 289 8.80E-18 100.5 29159 cellular  
 organisms;Eukaryota;Opisthokonta;Metazoa;Eumetazoa;Bilateria;Protostomia;  
 Spiralia;Lophotrochozoa;Mollusca;Bivalvia;Autobranchia;Pteriormorphia;Ostr  
 eida;Ostreoidea;Ostreidae;Crassostrea;Crassostrea gigas  
 UdeM00000022362 29159 100.5 UdeM00000022362 XP\_011416417.2 27.4 259  
 167 10 35 279 38 289 8.90E-18 100.5 29159 cellular  
 organisms;Eukaryota;Opisthokonta;Metazoa;Eumetazoa;Bilateria;Protostomia;  
 Spiralia;Lophotrochozoa;Mollusca;Bivalvia;Autobranchia;Pteriormorphia;Ostr  
 eida;Ostreoidea;Ostreidae;Crassostrea;Crassostrea gigas  
 UdeM00000022364 6596 444.5 UdeM00000022364 XP\_045216352.1 67.8 348  
 109 2 44 388 23 370 1.40E-121 444.5 6596 cellular  
 organisms;Eukaryota;Opisthokonta;Metazoa;Eumetazoa;Bilateria;Protostomia;  
 Spiralia;Lophotrochozoa;Mollusca;Bivalvia;Autobranchia;Heteroconchia;Euhe  
 terodonta;Imparidentia;Venerida;Veneroidea;Veneridae;Mercenaria;Mercenari  
 a mercenaria  
 UdeM00000022365 6565 157.1 UdeM00000022365 XP\_022331337.1 51.3 152  
 71 1 8 156 3 154 1.80E-35 157.1 6565 cellular  
 organisms;Eukaryota;Opisthokonta;Metazoa;Eumetazoa;Bilateria;Protostomia;  
 Spiralia;Lophotrochozoa;Mollusca;Bivalvia;Autobranchia;Pteriormorphia;Ostr  
 eida;Ostreoidea;Ostreidae;Crassostrea;Crassostrea virginica

UdeM00000022366 6565 141.7 UdeM00000022366 XP\_022331337.1 42.6 183  
 71 2 8 187 3 154 9.20E-31 141.7 6565 cellular  
 organisms;Eukaryota;Opisthokonta;Metazoa;Eumetazoa;Bilateria;Protostomia;  
 Spiralia;Lophotrochozoa;Mollusca;Bivalvia;Autobranchia;Pteriomorpha;Ostr  
 eida;Ostreoidea;Ostreidae;Crassostrea;Crassostrea virginica  
 UdeM00000022369 6596 84.3 UdeM00000022369 XP\_045215193.1 43 86  
 49 0 1 86 1 86 1.20E-13 84.3 6596 cellular  
 organisms;Eukaryota;Opisthokonta;Metazoa;Eumetazoa;Bilateria;Protostomia;  
 Spiralia;Lophotrochozoa;Mollusca;Bivalvia;Autobranchia;Heteroconchia;Euhe  
 terodonta;Imparidentia;Venerida;Veneroidea;Veneridae;Mercenaria;Mercenari  
 a mercenaria  
 UdeM00000022370 29159 104 UdeM00000022370 XP\_034321636.1 35.6 160  
 100 1 7 163 9 168 2.30E-19 104 29159 cellular  
 organisms;Eukaryota;Opisthokonta;Metazoa;Eumetazoa;Bilateria;Protostomia;  
 Spiralia;Lophotrochozoa;Mollusca;Bivalvia;Autobranchia;Pteriomorpha;Ostr  
 eida;Ostreoidea;Ostreidae;Crassostrea;Crassostrea gigas  
 UdeM00000022371 1735272 73.2 UdeM00000022371 XP\_041348860.1 21.5  
 284 190 9 114 369 148 426 1.20E-09 73.2 1735272  
 cellular  
 organisms;Eukaryota;Opisthokonta;Metazoa;Eumetazoa;Bilateria;Protostomia;  
 Spiralia;Lophotrochozoa;Mollusca;Gastropoda;Neomphalina;Neomphaloidea;Pel  
 tospiridae;Gigantopelta;Gigantopelta aegis  
 UdeM00000022372 6596 371.3 UdeM00000022372 XP\_045198124.1 31.2 653  
 444 1 13 660 651 1303 2.70E-99 371.3 6596 cellular  
 organisms;Eukaryota;Opisthokonta;Metazoa;Eumetazoa;Bilateria;Protostomia;  
 Spiralia;Lophotrochozoa;Mollusca;Bivalvia;Autobranchia;Heteroconchia;Euhe  
 terodonta;Imparidentia;Venerida;Veneroidea;Veneridae;Mercenaria;Mercenari  
 a mercenaria  
 UdeM00000022374 2652724 115.9 UdeM00000022374 XP\_020900815.1 65.1  
 83 29 0 1 83 698 780 2.50E-23 115.9 2652724  
 cellular  
 organisms;Eukaryota;Opisthokonta;Metazoa;Eumetazoa;Cnidaria;Anthozoa;Hexa  
 corallia;Actiniaria;Aiptasiidae;Exaiptasia;Exaiptasia diaphana  
 UdeM00000022375 13686 291.2 UdeM00000022375 XP\_011170408.3 38.8 387  
 231 2 1 383 372 756 2.00E-75 291.2 13686 cellular  
 organisms;Eukaryota;Opisthokonta;Metazoa;Eumetazoa;Bilateria;Protostomia;  
 Ecdysozoa;Panarthropoda;Arthropoda;Mandibulata;Pancrustacea;Hexapoda;Inse  
 cta;Dicondylia;Pterygota;Neoptera;Endopterygota;Hymenoptera;Apocrita;Acul  
 eata;Formicoidea;Formicidae;Myrmicinae;Solenopsidini;Solenopsis;Solenopsi  
 s invicta  
 UdeM00000022376 6579 873.2 UdeM00000022376 XP\_033760558.1 25 2472  
 1689 33 10 2400 441 2827 8.40E-250 873.2 6579 cellular  
 organisms;Eukaryota;Opisthokonta;Metazoa;Eumetazoa;Bilateria;Protostomia;  
 Spiralia;Lophotrochozoa;Mollusca;Bivalvia;Autobranchia;Pteriomorpha;Pect  
 inida;Pectinoidea;Pectinidae;Pecten;Pecten maximus  
 UdeM00000022378 2652724 115.9 UdeM00000022378 XP\_020900815.1 65.1  
 83 29 0 1 83 698 780 2.50E-23 115.9 2652724  
 cellular  
 organisms;Eukaryota;Opisthokonta;Metazoa;Eumetazoa;Cnidaria;Anthozoa;Hexa  
 corallia;Actiniaria;Aiptasiidae;Exaiptasia;Exaiptasia diaphana  
 UdeM00000022379 13686 391.3 UdeM00000022379 XP\_011170408.3 41 507  
 290 4 1 500 372 876 1.90E-105 391.3 13686 cellular  
 organisms;Eukaryota;Opisthokonta;Metazoa;Eumetazoa;Bilateria;Protostomia;  
 Ecdysozoa;Panarthropoda;Arthropoda;Mandibulata;Pancrustacea;Hexapoda;Inse

cta;Dicondylia;Pterygota;Neoptera;Endopterygota;Hymenoptera;Apocrita;Aculeata;Formicoidea;Formicidae;Myrmicinae;Solenopsidini;Solenopsis;Solenopsis invicta

UdeM00000022380 6565 536.6 UdeM00000022380 XP\_022331275.1 56.5 453  
193 2 1 453 1 449 3.10E-149 536.6 6565 cellular  
organisms;Eukaryota;Opisthokonta;Metazoa;Eumetazoa;Bilateria;Protostomia;  
Spiralia;Lophotrochozoa;Mollusca;Bivalvia;Autobranchia;Pteriormorphia;Ostreida;  
Ostreoidea;Ostreidae;Crassostrea;Crassostrea virginica

UdeM00000022381 6596 439.9 UdeM00000022381 XP\_045156255.1 48.7 499  
227 8 1 478 1 491 4.20E-120 439.9 6596 cellular  
organisms;Eukaryota;Opisthokonta;Metazoa;Eumetazoa;Bilateria;Protostomia;  
Spiralia;Lophotrochozoa;Mollusca;Bivalvia;Autobranchia;Heteroconchia;Euheterodonta;  
Imparidentia;Venerida;Veneroidea;Veneridae;Mercenaria;Mercenaria mercenaria

UdeM00000022382 6579 505 UdeM00000022382 XP\_033749572.1 72.6 307  
81 1 18 324 6 309 7.20E-140 505 6579 cellular  
organisms;Eukaryota;Opisthokonta;Metazoa;Eumetazoa;Bilateria;Protostomia;  
Spiralia;Lophotrochozoa;Mollusca;Bivalvia;Autobranchia;Pteriormorphia;Pectinida;  
Pectinoidea;Pectinidae;Pecten;Pecten maximus

UdeM00000022384 7741 131.3 UdeM00000022384 XP\_019618826.1 23.4 526  
256 10 46 436 3 516 3.10E-27 131.3 7741 cellular  
organisms;Eukaryota;Opisthokonta;Metazoa;Eumetazoa;Bilateria;Deuterostomia;  
Chordata;Cephalochordata;Leptocardii;Amphioxiformes;Branchiostomidae;Branchiostoma;  
Branchiostoma belcheri

UdeM00000022386 45264 283.9 UdeM00000022386 XP\_044166166.1 33.5 511  
225 11 10 420 321 816 7.40E-73 283.9 45264 cellular  
organisms;Eukaryota;Opisthokonta;Metazoa;Eumetazoa;Cnidaria;Anthozoa;Hexacorallia;  
Scleractinia;Astrocoeniina;Acroporidae;Acropora;Acropora millepora

UdeM00000022387 6596 218.8 UdeM00000022387 XP\_045187224.1 39.5 296  
179 0 9 304 9 304 1.10E-53 218.8 6596 cellular  
organisms;Eukaryota;Opisthokonta;Metazoa;Eumetazoa;Bilateria;Protostomia;  
Spiralia;Lophotrochozoa;Mollusca;Bivalvia;Autobranchia;Heteroconchia;Euheterodonta;  
Imparidentia;Venerida;Veneroidea;Veneridae;Mercenaria;Mercenaria mercenaria

UdeM00000022388 6596 209.9 UdeM00000022388 XP\_045187224.1 39.9 308  
181 1 4 307 8 315 5.10E-51 209.9 6596 cellular  
organisms;Eukaryota;Opisthokonta;Metazoa;Eumetazoa;Bilateria;Protostomia;  
Spiralia;Lophotrochozoa;Mollusca;Bivalvia;Autobranchia;Heteroconchia;Euheterodonta;  
Imparidentia;Venerida;Veneroidea;Veneridae;Mercenaria;Mercenaria mercenaria

UdeM00000022389 6596 388.3 UdeM00000022389 XP\_045216631.1 53.1 397  
175 5 1 392 1 391 1.20E-104 388.3 6596 cellular  
organisms;Eukaryota;Opisthokonta;Metazoa;Eumetazoa;Bilateria;Protostomia;  
Spiralia;Lophotrochozoa;Mollusca;Bivalvia;Autobranchia;Heteroconchia;Euheterodonta;  
Imparidentia;Venerida;Veneroidea;Veneridae;Mercenaria;Mercenaria mercenaria

UdeM00000022390 6596 379 UdeM00000022390 XP\_045187224.1 50.5 400  
177 5 1 387 1 392 7.20E-102 379 6596 cellular  
organisms;Eukaryota;Opisthokonta;Metazoa;Eumetazoa;Bilateria;Protostomia;  
Spiralia;Lophotrochozoa;Mollusca;Bivalvia;Autobranchia;Heteroconchia;Euheterodonta;  
Imparidentia;Venerida;Veneroidea;Veneridae;Mercenaria;Mercenaria mercenaria



UdeM00000022391 6596 213.8 UdeM00000022391 XP\_045185723.1 46.3 231  
 122 2 7 237 455 683 4.20E-52 213.8 6596 cellular  
 organisms;Eukaryota;Opisthokonta;Metazoa;Eumetazoa;Bilateria;Protostomia;  
 Spiralia;Lophotrochozoa;Mollusca;Bivalvia;Autobranchia;Heteroconchia;Euhe  
 terodonta;Imparidentia;Venerida;Veneroidea;Veneridae;Mercenaria;Mercenari  
 a mercenaria  
 UdeM00000022395 1735272 388.7 UdeM00000022395 XP\_041372487.1 36  
 705 392 21 4 692 11 672 1.60E-104 388.7 1735272  
 cellular  
 organisms;Eukaryota;Opisthokonta;Metazoa;Eumetazoa;Bilateria;Protostomia;  
 Spiralia;Lophotrochozoa;Mollusca;Gastropoda;Neomphalina;Neomphaloidea;Pel  
 tospiridae;Gigantopelta;Gigantopelta aegis  
 UdeM00000022396 6596 686 UdeM00000022396 XP\_045156656.1 57.1 620  
 227 12 622 1213 421 1029 9.90E-194 686 6596 cellular  
 organisms;Eukaryota;Opisthokonta;Metazoa;Eumetazoa;Bilateria;Protostomia;  
 Spiralia;Lophotrochozoa;Mollusca;Bivalvia;Autobranchia;Heteroconchia;Euhe  
 terodonta;Imparidentia;Venerida;Veneroidea;Veneridae;Mercenaria;Mercenari  
 a mercenaria  
 UdeM00000022397 1735272 90.1 UdeM00000022397 XP\_041360471.1 23.8  
 341 215 4 1 300 1 337 5.70E-15 90.1 1735272  
 cellular  
 organisms;Eukaryota;Opisthokonta;Metazoa;Eumetazoa;Bilateria;Protostomia;  
 Spiralia;Lophotrochozoa;Mollusca;Gastropoda;Neomphalina;Neomphaloidea;Pel  
 tospiridae;Gigantopelta;Gigantopelta aegis  
 UdeM00000022399 6596 183.3 UdeM00000022399 XP\_045215707.1 33.3 294  
 127 5 5 230 17 309 5.30E-43 183.3 6596 cellular  
 organisms;Eukaryota;Opisthokonta;Metazoa;Eumetazoa;Bilateria;Protostomia;  
 Spiralia;Lophotrochozoa;Mollusca;Bivalvia;Autobranchia;Heteroconchia;Euhe  
 terodonta;Imparidentia;Venerida;Veneroidea;Veneridae;Mercenaria;Mercenari  
 a mercenaria  
 UdeM00000022400 6596 315.1 UdeM00000022400 XP\_045215703.1 40.8 373  
 165 7 1 328 479 840 1.10E-82 315.1 6596 cellular  
 organisms;Eukaryota;Opisthokonta;Metazoa;Eumetazoa;Bilateria;Protostomia;  
 Spiralia;Lophotrochozoa;Mollusca;Bivalvia;Autobranchia;Heteroconchia;Euhe  
 terodonta;Imparidentia;Venerida;Veneroidea;Veneridae;Mercenaria;Mercenari  
 a mercenaria  
 UdeM00000022402 1735272 384.8 UdeM00000022402 XP\_041376293.1 56.5  
 354 141 3 1 354 106 446 1.20E-103 384.8 1735272  
 cellular  
 organisms;Eukaryota;Opisthokonta;Metazoa;Eumetazoa;Bilateria;Protostomia;  
 Spiralia;Lophotrochozoa;Mollusca;Gastropoda;Neomphalina;Neomphaloidea;Pel  
 tospiridae;Gigantopelta;Gigantopelta aegis  
 UdeM00000022403 202533 275.8 UdeM00000022403 XP\_035218899.1 33.1  
 489 287 9 2 473 3 468 1.00E-70 275.8 202533  
 cellular  
 organisms;Eukaryota;Opisthokonta;Metazoa;Eumetazoa;Bilateria;Protostomia;  
 Ecdysozoa;Panarthropoda;Arthropoda;Chelicerata;Arachnida;Araneae;Araneomo  
 rphae;Entelegynae;Eresoidea;Eresidae;Stegodyphus;Stegodyphus dumicola  
 UdeM00000022404 6596 378.6 UdeM00000022404 XP\_045216313.1 60.6 302  
 117 2 1 302 1 300 7.30E-102 378.6 6596 cellular  
 organisms;Eukaryota;Opisthokonta;Metazoa;Eumetazoa;Bilateria;Protostomia;  
 Spiralia;Lophotrochozoa;Mollusca;Bivalvia;Autobranchia;Heteroconchia;Euhe  
 terodonta;Imparidentia;Venerida;Veneroidea;Veneridae;Mercenaria;Mercenari  
 a mercenaria

UdeM00000022405 6596 170.6 UdeM00000022405 XP\_045216381.1 69.5 105  
 32 0 84 188 78 182 1.90E-39 170.6 6596 cellular  
 organisms;Eukaryota;Opisthokonta;Metazoa;Eumetazoa;Bilateria;Protostomia;  
 Spiralia;Lophotrochozoa;Mollusca;Bivalvia;Autobranchia;Heteroconchia;Euhe-  
 terodonta;Imparidentia;Venerida;Veneroidea;Veneridae;Mercenaria;Mercenari-  
 a mercenaria

UdeM00000022406 7654 204.5 UdeM00000022406 XP\_041464686.1 62.7 142  
 52 1 8 149 22 162 9.80E-50 204.5 7654 cellular  
 organisms;Eukaryota;Opisthokonta;Metazoa;Eumetazoa;Bilateria;Deuterostomi-  
 a;Echinodermata;Eleutherozoa;Echinozoa;Echinoidea;Euechinoidea;Echinacea;  
 Temnopleuroidea;Toxopneustidae;Lytechinus;Lytechinus variegatus

UdeM00000022408 70779 168.3 UdeM00000022408 XP\_015765219.1 56.8 148  
 50 2 1 135 1 147 7.20E-39 168.3 70779 cellular  
 organisms;Eukaryota;Opisthokonta;Metazoa;Eumetazoa;Cnidaria;Anthozoa;Hexa-  
 corallia;Scleractinia;Astrocoeniina;Acroporidae;Acropora;Acropora  
 digitifera

UdeM00000022409 7739 61.6 UdeM00000022409 XP\_035659738.1 34.5 113  
 68 3 10 122 7 113 9.50E-07 61.6 7739 cellular  
 organisms;Eukaryota;Opisthokonta;Metazoa;Eumetazoa;Bilateria;Deuterostomi-  
 a;Chordata;Cephalochordata;Leptocardii;Amphioxiformes;Branchiostomidae;Br-  
 anchiostoma;Branchiostoma floridae

UdeM00000022410 8384 61.6 UdeM00000022410 XP\_040285011.1 71.4 42  
 12 0 35 76 429 470 5.20E-07 61.6 8384 cellular  
 organisms;Eukaryota;Opisthokonta;Metazoa;Eumetazoa;Bilateria;Deuterostomi-  
 a;Chordata;Craniata;Vertebrata;Gnathostomata;Teleostomi;Euteleostomi;Sarc-  
 opterygii;Dipnotetrapodomorpha;Tetrapoda;Amphibia;Batrachia;Anura;Neobatr-  
 achia;Hyloidea;Bufonidae;Bufo;Bufo bufo

UdeM00000022411 8384 60.8 UdeM00000022411 XP\_040285011.1 74.4 39  
 10 0 36 74 432 470 8.60E-07 60.8 8384 cellular  
 organisms;Eukaryota;Opisthokonta;Metazoa;Eumetazoa;Bilateria;Deuterostomi-  
 a;Chordata;Craniata;Vertebrata;Gnathostomata;Teleostomi;Euteleostomi;Sarc-  
 opterygii;Dipnotetrapodomorpha;Tetrapoda;Amphibia;Batrachia;Anura;Neobatr-  
 achia;Hyloidea;Bufonidae;Bufo;Bufo bufo

UdeM00000022412 151771 138.7 UdeM00000022412 XP\_028415423.1 32  
 319 204 7 4 321 7 313 1.50E-29 138.7 151771  
 cellular  
 organisms;Eukaryota;Opisthokonta;Metazoa;Eumetazoa;Cnidaria;Anthozoa;Octo-  
 corallia;Alcyonacea;Alcyoniina;Nephtheidae;Dendronephthya;Dendronephthya  
 gigantea

UdeM00000022413 7574 68.2 UdeM00000022413 XP\_013412800.1 32.8 134  
 82 5 12 142 844 972 1.00E-08 68.2 7574 cellular  
 organisms;Eukaryota;Opisthokonta;Metazoa;Eumetazoa;Bilateria;Protostomia;  
 Spiralia;Lophotrochozoa;Brachiopoda;Linguliformea;Lingulata;Lingulida;Lin-  
 guloidea;Lingulidae;Lingula;Lingula anatina

UdeM00000022414 400727 202.2 UdeM00000022414 XP\_025076613.1 64  
 150 51 2 3 150 28 176 4.90E-49 202.2 400727  
 cellular  
 organisms;Eukaryota;Opisthokonta;Metazoa;Eumetazoa;Bilateria;Protostomia;  
 Spiralia;Lophotrochozoa;Mollusca;Gastropoda;Caenogastropoda;Architaeniogl-  
 ossa;Ampullarioidea;Ampullariidae;Pomacea;Pomacea canaliculata

UdeM00000022415 7574 60.5 UdeM00000022415 XP\_013399071.1 38.3 107  
 61 3 2 107 30 132 2.10E-06 60.5 7574 cellular  
 organisms;Eukaryota;Opisthokonta;Metazoa;Eumetazoa;Bilateria;Protostomia;

Spiralia; Lophotrochozoa; Brachiopoda; Linguliformea; Lingulata; Lingulida; Linguloidea; Lingulidae; Lingula; Lingula anatina

UdeM00000022416 6596 279.3 UdeM00000022416 XP\_045156738.1 57.6 236  
74 3 39 274 258 467 5.40E-72 279.3 6596 cellular  
organisms; Eukaryota; Opisthokonta; Metazoa; Eumetazoa; Bilateria; Protostomia; Spiralia; Lophotrochozoa; Mollusca; Bivalvia; Autobranchia; Heteroconchia; Euheterodonta; Imparidentia; Venerida; Veneroidea; Veneridae; Mercenaria; Mercenaria mercenaria

UdeM00000022417 6573 210.3 UdeM00000022417 XP\_021357387.1 72.7 128  
35 0 13 140 114 241 1.60E-51 210.3 6573 cellular  
organisms; Eukaryota; Opisthokonta; Metazoa; Eumetazoa; Bilateria; Protostomia; Spiralia; Lophotrochozoa; Mollusca; Bivalvia; Autobranchia; Pteriomorpha; Pectinida; Pectinoidea; Pectinidae; Mizuhopecten; Mizuhopecten yessoensis

UdeM00000022418 6596 161.4 UdeM00000022418 XP\_045156738.1 69.3 101  
31 0 32 132 43 143 8.00E-37 161.4 6596 cellular  
organisms; Eukaryota; Opisthokonta; Metazoa; Eumetazoa; Bilateria; Protostomia; Spiralia; Lophotrochozoa; Mollusca; Bivalvia; Autobranchia; Heteroconchia; Euheterodonta; Imparidentia; Venerida; Veneroidea; Veneridae; Mercenaria; Mercenaria mercenaria

UdeM00000022419 6573 726.1 UdeM00000022419 XP\_021345725.1 36.4 1184  
649 20 3 1155 2 1112 7.10E-206 726.1 6573 cellular  
organisms; Eukaryota; Opisthokonta; Metazoa; Eumetazoa; Bilateria; Protostomia; Spiralia; Lophotrochozoa; Mollusca; Bivalvia; Autobranchia; Pteriomorpha; Pectinida; Pectinoidea; Pectinidae; Mizuhopecten; Mizuhopecten yessoensis

UdeM00000022420 6596 420.2 UdeM00000022420 XP\_045162551.1 61 336  
114 4 1 321 1 334 2.30E-114 420.2 6596 cellular  
organisms; Eukaryota; Opisthokonta; Metazoa; Eumetazoa; Bilateria; Protostomia; Spiralia; Lophotrochozoa; Mollusca; Bivalvia; Autobranchia; Heteroconchia; Euheterodonta; Imparidentia; Venerida; Veneroidea; Veneridae; Mercenaria; Mercenaria mercenaria

UdeM00000022421 6596 421 UdeM00000022421 XP\_045162551.1 61.3 336  
113 4 1 321 1 334 1.40E-114 421 6596 cellular  
organisms; Eukaryota; Opisthokonta; Metazoa; Eumetazoa; Bilateria; Protostomia; Spiralia; Lophotrochozoa; Mollusca; Bivalvia; Autobranchia; Heteroconchia; Euheterodonta; Imparidentia; Venerida; Veneroidea; Veneridae; Mercenaria; Mercenaria mercenaria

UdeM00000022422 7574 612.1 UdeM00000022422 XP\_013389960.1 64.3 456  
161 2 1 455 3 457 5.90E-172 612.1 7574 cellular  
organisms; Eukaryota; Opisthokonta; Metazoa; Eumetazoa; Bilateria; Protostomia; Spiralia; Lophotrochozoa; Brachiopoda; Linguliformea; Lingulata; Lingulida; Linguloidea; Lingulidae; Lingula; Lingula anatina

UdeM00000022423 63155 109 UdeM00000022423 XP\_030579233.1 55.8 95  
42 0 1 95 16 110 5.00E-21 109 63155 cellular  
organisms; Eukaryota; Opisthokonta; Metazoa; Eumetazoa; Bilateria; Deuterostomia; Chordata; Craniata; Vertebrata; Gnathostomata; Teleostomi; Euteleostomi; Actinopterygii; Actinopteri; Neopterygii; Teleostei; Osteoglossocephalai; Clupeocephala; Euteleostei; Neoteleostei; Eurypterygia; Ctenosquamata; Acanthopterygii; Euacanthopterygii; Percomorphaceae; Ovalentaria; Cichlomorphae; Cichliformes; Cichlidae; New World cichlids; Cichlasomatinae; Heroini; Archocentrus; Archocentrus centrarchus

UdeM00000022424 6565 233 UdeM00000022424 XP\_022295401.1 32.6 488  
285 13 641 1122 354 803 2.80E-57 233 6565 cellular  
organisms; Eukaryota; Opisthokonta; Metazoa; Eumetazoa; Bilateria; Protostomia;

Spiralia; Lophotrochozoa; Mollusca; Bivalvia; Autobranchia; Pteriomorpha; Ostr  
eida; Ostreidae; Crassostrea; Crassostrea virginica  
UdeM00000022424 6565 58.2 UdeM00000022424 XP\_022295401.1 32.9 79  
49 1 1647 1725 1010 1084 1.20E-04 58.2 6565 cellular  
organisms; Eukaryota; Opisthokonta; Metazoa; Eumetazoa; Bilateria; Protostomia;  
Spiralia; Lophotrochozoa; Mollusca; Bivalvia; Autobranchia; Pteriomorpha; Ostr  
eida; Ostreidae; Crassostrea; Crassostrea virginica  
UdeM00000022425 6596 279.3 UdeM00000022425 XP\_045216681.1 43.5 329  
172 4 14 336 32 352 6.70E-72 279.3 6596 cellular  
organisms; Eukaryota; Opisthokonta; Metazoa; Eumetazoa; Bilateria; Protostomia;  
Spiralia; Lophotrochozoa; Mollusca; Bivalvia; Autobranchia; Heteroconchia; Eue  
terodonta; Imparidentia; Venerida; Veneroidea; Veneridae; Mercenaria; Mercenari  
a mercenaria  
UdeM00000022426 6573 566.2 UdeM00000022426 XP\_021368696.1 48.9 665  
295 10 1 627 1 658 5.10E-158 566.2 6573 cellular  
organisms; Eukaryota; Opisthokonta; Metazoa; Eumetazoa; Bilateria; Protostomia;  
Spiralia; Lophotrochozoa; Mollusca; Bivalvia; Autobranchia; Pteriomorpha; Pect  
inida; Pectinoidea; Pectinidae; Mizuhopecten; Mizuhopecten yessoensis  
UdeM00000022428 7574 206.5 UdeM00000022428 XP\_013385112.1 68.3 145  
44 1 7 149 6 150 2.40E-50 206.5 7574 cellular  
organisms; Eukaryota; Opisthokonta; Metazoa; Eumetazoa; Bilateria; Protostomia;  
Spiralia; Lophotrochozoa; Brachiopoda; Linguliformea; Lingulata; Lingulida; Lin  
guloidea; Lingulidae; Lingula; Lingula anatina  
UdeM00000022427 6596 527.7 UdeM00000022427 XP\_045216275.1 68.8 346  
107 1 5 349 12 357 1.10E-146 527.7 6596 cellular  
organisms; Eukaryota; Opisthokonta; Metazoa; Eumetazoa; Bilateria; Protostomia;  
Spiralia; Lophotrochozoa; Mollusca; Bivalvia; Autobranchia; Heteroconchia; Eue  
terodonta; Imparidentia; Venerida; Veneroidea; Veneridae; Mercenaria; Mercenari  
a mercenaria  
UdeM00000022429 6500 161.8 UdeM00000022429 XP\_005089729.1 68.5 130  
33 3 32 153 32 161 7.60E-37 161.8 6500 cellular  
organisms; Eukaryota; Opisthokonta; Metazoa; Eumetazoa; Bilateria; Protostomia;  
Spiralia; Lophotrochozoa; Mollusca; Gastropoda; Heterobranchia; Euthyneura; Tec  
tipleura; Aplysiida; Aplysiidae; Aplysia; Aplysia californica  
UdeM00000022430 6596 1123.6 UdeM00000022430 XP\_045156250.1 79.4  
723 143 4 1 718 1 722 0.00E+00 1123.6 6596  
cellular  
organisms; Eukaryota; Opisthokonta; Metazoa; Eumetazoa; Bilateria; Protostomia;  
Spiralia; Lophotrochozoa; Mollusca; Bivalvia; Autobranchia; Heteroconchia; Eue  
terodonta; Imparidentia; Venerida; Veneroidea; Veneridae; Mercenaria; Mercenari  
a mercenaria  
UdeM00000022431 6596 498.8 UdeM00000022431 XP\_045215533.1 47.7 501  
247 3 10 510 6 491 8.20E-138 498.8 6596 cellular  
organisms; Eukaryota; Opisthokonta; Metazoa; Eumetazoa; Bilateria; Protostomia;  
Spiralia; Lophotrochozoa; Mollusca; Bivalvia; Autobranchia; Heteroconchia; Eue  
terodonta; Imparidentia; Venerida; Veneroidea; Veneridae; Mercenaria; Mercenari  
a mercenaria  
UdeM00000022432 6573 94.7 UdeM00000022432 XP\_021357618.1 33.1 175  
117 0 23 197 24 198 1.40E-16 94.7 6573 cellular  
organisms; Eukaryota; Opisthokonta; Metazoa; Eumetazoa; Bilateria; Protostomia;  
Spiralia; Lophotrochozoa; Mollusca; Bivalvia; Autobranchia; Pteriomorpha; Pect  
inida; Pectinoidea; Pectinidae; Mizuhopecten; Mizuhopecten yessoensis  
UdeM00000022433 6596 300.4 UdeM00000022433 XP\_045156655.1 70.4 213  
58 4 8 218 23 232 1.80E-78 300.4 6596 cellular

organisms;Eukaryota;Opisthokonta;Metazoa;Eumetazoa;Bilateria;Protostomia;Spiralia;Lophotrochozoa;Mollusca;Bivalvia;Autobranhia;Heteroconchia;Euherodonta;Imparidentia;Venerida;Veneroidea;Veneridae;Mercenaria;Mercenaria mercenaria

UdeM00000022435 6596 313.2 UdeM00000022435 XP\_045214789.1 35.4 494  
305 8 55 540 54 541 6.80E-82 313.2 6596 cellular

organisms;Eukaryota;Opisthokonta;Metazoa;Eumetazoa;Bilateria;Protostomia;Spiralia;Lophotrochozoa;Mollusca;Bivalvia;Autobranhia;Heteroconchia;Euherodonta;Imparidentia;Venerida;Veneroidea;Veneridae;Mercenaria;Mercenaria mercenaria

UdeM00000022436 6573 413.3 UdeM00000022436 XP\_021346042.1 35.7 691  
403 17 7 662 7 691 5.90E-112 413.3 6573 cellular

organisms;Eukaryota;Opisthokonta;Metazoa;Eumetazoa;Bilateria;Protostomia;Spiralia;Lophotrochozoa;Mollusca;Bivalvia;Autobranhia;Pteriormorphia;Pectinida;Pectinoidea;Pectinidae;Mizuhopecten;Mizuhopecten yessoensis

UdeM00000022437 6573 414.5 UdeM00000022437 XP\_021346042.1 36.8 649  
376 16 31 651 49 691 2.60E-112 414.5 6573 cellular

organisms;Eukaryota;Opisthokonta;Metazoa;Eumetazoa;Bilateria;Protostomia;Spiralia;Lophotrochozoa;Mollusca;Bivalvia;Autobranhia;Pteriormorphia;Pectinida;Pectinoidea;Pectinidae;Mizuhopecten;Mizuhopecten yessoensis

UdeM00000022438 6573 407.5 UdeM00000022438 XP\_021346042.1 36.9 648  
377 16 41 661 49 691 3.20E-110 407.5 6573 cellular

organisms;Eukaryota;Opisthokonta;Metazoa;Eumetazoa;Bilateria;Protostomia;Spiralia;Lophotrochozoa;Mollusca;Bivalvia;Autobranhia;Pteriormorphia;Pectinida;Pectinoidea;Pectinidae;Mizuhopecten;Mizuhopecten yessoensis

UdeM00000022439 6596 282 UdeM00000022439 XP\_045216195.1 79.4 160  
33 0 58 217 16 175 6.60E-73 282 6596 cellular

organisms;Eukaryota;Opisthokonta;Metazoa;Eumetazoa;Bilateria;Protostomia;Spiralia;Lophotrochozoa;Mollusca;Bivalvia;Autobranhia;Heteroconchia;Euherodonta;Imparidentia;Venerida;Veneroidea;Veneridae;Mercenaria;Mercenaria mercenaria

UdeM00000022440 6596 304.3 UdeM00000022440 XP\_045216195.1 78.3 175  
38 0 1 175 1 175 1.00E-79 304.3 6596 cellular

organisms;Eukaryota;Opisthokonta;Metazoa;Eumetazoa;Bilateria;Protostomia;Spiralia;Lophotrochozoa;Mollusca;Bivalvia;Autobranhia;Heteroconchia;Euherodonta;Imparidentia;Venerida;Veneroidea;Veneridae;Mercenaria;Mercenaria mercenaria

UdeM00000022441 6596 342.4 UdeM00000022441 XP\_045156284.1 64.4 275  
93 2 11 280 22 296 5.40E-91 342.4 6596 cellular

organisms;Eukaryota;Opisthokonta;Metazoa;Eumetazoa;Bilateria;Protostomia;Spiralia;Lophotrochozoa;Mollusca;Bivalvia;Autobranhia;Heteroconchia;Euherodonta;Imparidentia;Venerida;Veneroidea;Veneridae;Mercenaria;Mercenaria mercenaria

UdeM00000022442 6596 718.4 UdeM00000022442 XP\_045156420.1 50.6 759  
331 8 38 760 40 790 9.90E-204 718.4 6596 cellular

organisms;Eukaryota;Opisthokonta;Metazoa;Eumetazoa;Bilateria;Protostomia;Spiralia;Lophotrochozoa;Mollusca;Bivalvia;Autobranhia;Heteroconchia;Euherodonta;Imparidentia;Venerida;Veneroidea;Veneridae;Mercenaria;Mercenaria mercenaria

UdeM00000022443 6596 717.2 UdeM00000022443 XP\_045156420.1 50.5 760  
331 8 38 761 40 790 2.20E-203 717.2 6596 cellular

organisms;Eukaryota;Opisthokonta;Metazoa;Eumetazoa;Bilateria;Protostomia;Spiralia;Lophotrochozoa;Mollusca;Bivalvia;Autobranhia;Heteroconchia;Euherodonta;Imparidentia;Venerida;Veneroidea;Veneridae;Mercenaria;Mercenaria mercenaria

terodonta;Imparidentia;Venerida;Veneroidea;Veneridae;Mercenaria;Mercenaria mercenaria

UdeM00000022444 6573 230.3 UdeM00000022444 XP\_021368646.1 56.2 1471  
482 40 1 1366 2 1415 1.40E-56 230.3 6573 cellular

organisms;Eukaryota;Opisthokonta;Metazoa;Eumetazoa;Bilateria;Protostomia;Spiralia;Lophotrochozoa;Mollusca;Bivalvia;Autobranchia;Pteriormorphia;Pectinida;Pectinoidea;Pectinidae;Mizuhopecten;Mizuhopecten yessoensis

UdeM00000022445 6596 445.7 UdeM00000022445 XP\_045215780.1 66.9 305  
101 0 151 455 1 305 7.30E-122 445.7 6596 cellular

organisms;Eukaryota;Opisthokonta;Metazoa;Eumetazoa;Bilateria;Protostomia;Spiralia;Lophotrochozoa;Mollusca;Bivalvia;Autobranchia;Heteroconchia;Euheterodonta;Imparidentia;Venerida;Veneroidea;Veneridae;Mercenaria;Mercenaria mercenaria

UdeM00000022446 1415580 270.4 UdeM00000022446 XP\_030075314.1 50.2  
297 129 5 1 294 345 625 2.70E-69 270.4 1415580

cellular

organisms;Eukaryota;Opisthokonta;Metazoa;Eumetazoa;Bilateria;Deuterostomia;Chordata;Craniata;Vertebrata;Gnathostomata;Teleostomi;Euteleostomi;Sarcopterygii;Dipnotetrapodomorpha;Tetrapoda;Amphibia;Gymnophiona;Siphonopidae;Microcaecilia;Microcaecilia unicolor

UdeM00000022447 7757 282 UdeM00000022447 XP\_032835197.1 80.8 167  
32 0 77 243 3 169 7.40E-73 282 7757 cellular

organisms;Eukaryota;Opisthokonta;Metazoa;Eumetazoa;Bilateria;Deuterostomia;Chordata;Craniata;Vertebrata;Cyclostomata;Hyperoartia;Petromyzontiformes;Petromyzontidae;Petromyzon;Petromyzon marinus

UdeM00000022449 6596 434.9 UdeM00000022449 XP\_045216544.1 39.5 815  
406 18 67 836 10 782 2.70E-118 434.9 6596 cellular

organisms;Eukaryota;Opisthokonta;Metazoa;Eumetazoa;Bilateria;Protostomia;Spiralia;Lophotrochozoa;Mollusca;Bivalvia;Autobranchia;Heteroconchia;Euheterodonta;Imparidentia;Venerida;Veneroidea;Veneridae;Mercenaria;Mercenaria mercenaria

UdeM00000022450 29159 149.1 UdeM00000022450 XP\_011413383.3 34.5 200  
129 2 1 199 1 199 6.30E-33 149.1 29159 cellular

organisms;Eukaryota;Opisthokonta;Metazoa;Eumetazoa;Bilateria;Protostomia;Spiralia;Lophotrochozoa;Mollusca;Bivalvia;Autobranchia;Pteriormorphia;Ostreida;Ostreoidea;Ostreidae;Crassostrea;Crassostrea gigas

UdeM00000022452 6573 67.8 UdeM00000022452 XP\_021367843.1 56.4 55  
24 0 42 96 461 515 9.50E-09 67.8 6573 cellular

organisms;Eukaryota;Opisthokonta;Metazoa;Eumetazoa;Bilateria;Protostomia;Spiralia;Lophotrochozoa;Mollusca;Bivalvia;Autobranchia;Pteriormorphia;Pectinida;Pectinoidea;Pectinidae;Mizuhopecten;Mizuhopecten yessoensis

UdeM00000022453 181472 114 UdeM00000022453 XP\_029975096.1 43.9  
132 53 1 1 132 274 384 1.50E-22 114 181472

cellular

organisms;Eukaryota;Opisthokonta;Metazoa;Eumetazoa;Bilateria;Deuterostomia;Chordata;Craniata;Vertebrata;Gnathostomata;Teleostomi;Euteleostomi;Actinopterygii;Actinopteri;Neopterygii;Teleostei;Osteoglossocephalai;Clupeocephala;Euteleostei;Neoteleostei;Eurypterygia;Ctenosquamata;Acanthomorphata;Euacanthomorphacea;Percomorphaceae;Ovalentaria;Blenniiformes;Blenniiformes;Blennioidei;Blenniidae;Salariinae;Salaris;Salaris fasciatus

UdeM00000022455 6596 243.8 UdeM00000022455 XP\_045216848.1 53.5 217  
99 1 34 250 46 260 2.80E-61 243.8 6596 cellular

organisms;Eukaryota;Opisthokonta;Metazoa;Eumetazoa;Bilateria;Protostomia;Spiralia;Lophotrochozoa;Mollusca;Bivalvia;Autobranchia;Heteroconchia;Euheterodonta

terodonta;Imparidentia;Venerida;Veneroidea;Veneridae;Mercenaria;Mercenari  
 a mercenaria  
 UdeM00000022456 29159 316.6 UdeM00000022456 XP\_034317111.1 55.8 283  
 124 1 2 283 171 453 3.20E-83 316.6 29159 cellular  
 organisms;Eukaryota;Opisthokonta;Metazoa;Eumetazoa;Bilateria;Protostomia;  
 Spiralia;Lophotrochozoa;Mollusca;Bivalvia;Autobranhia;Pteriormorphia;Ostr  
 eida;Ostreoidea;Ostreidae;Crassostrea;Crassostrea gigas  
 UdeM00000022458 6596 219.5 UdeM00000022458 XP\_045216202.1 49.3 213  
 106 2 40 251 40 251 6.90E-54 219.5 6596 cellular  
 organisms;Eukaryota;Opisthokonta;Metazoa;Eumetazoa;Bilateria;Protostomia;  
 Spiralia;Lophotrochozoa;Mollusca;Bivalvia;Autobranhia;Heteroconchia;Euhe  
 terodonta;Imparidentia;Venerida;Veneroidea;Veneridae;Mercenaria;Mercenari  
 a mercenaria  
 UdeM00000022459 6596 219.9 UdeM00000022459 XP\_045216200.1 49.1 218  
 109 2 40 256 40 256 5.00E-54 219.9 6596 cellular  
 organisms;Eukaryota;Opisthokonta;Metazoa;Eumetazoa;Bilateria;Protostomia;  
 Spiralia;Lophotrochozoa;Mollusca;Bivalvia;Autobranhia;Heteroconchia;Euhe  
 terodonta;Imparidentia;Venerida;Veneroidea;Veneridae;Mercenaria;Mercenari  
 a mercenaria  
 UdeM00000022460 6579 604 UdeM00000022460 XP\_033750754.1 83.7 349  
 56 1 1 349 1 348 1.20E-169 604 6579 cellular  
 organisms;Eukaryota;Opisthokonta;Metazoa;Eumetazoa;Bilateria;Protostomia;  
 Spiralia;Lophotrochozoa;Mollusca;Bivalvia;Autobranhia;Pteriormorphia;Pect  
 inida;Pectinoidea;Pectinidae;Pecten;Pecten maximus  
 UdeM00000022461 6596 114.8 UdeM00000022461 XP\_045189901.1 46 150  
 52 1 1 150 1 121 9.70E-23 114.8 6596 cellular  
 organisms;Eukaryota;Opisthokonta;Metazoa;Eumetazoa;Bilateria;Protostomia;  
 Spiralia;Lophotrochozoa;Mollusca;Bivalvia;Autobranhia;Heteroconchia;Euhe  
 terodonta;Imparidentia;Venerida;Veneroidea;Veneridae;Mercenaria;Mercenari  
 a mercenaria  
 UdeM00000022462 6596 72.8 UdeM00000022462 XP\_045199277.1 36.6 101  
 64 0 2 102 25 125 3.00E-10 72.8 6596 cellular  
 organisms;Eukaryota;Opisthokonta;Metazoa;Eumetazoa;Bilateria;Protostomia;  
 Spiralia;Lophotrochozoa;Mollusca;Bivalvia;Autobranhia;Heteroconchia;Euhe  
 terodonta;Imparidentia;Venerida;Veneroidea;Veneridae;Mercenaria;Mercenari  
 a mercenaria  
 UdeM00000022463 46514 82.4 UdeM00000022463 XP\_038069953.1 39.1 115  
 69 1 7 120 1182 1296 4.30E-13 82.4 46514 cellular  
 organisms;Eukaryota;Opisthokonta;Metazoa;Eumetazoa;Bilateria;Deuterostomi  
 a;Echinodermata;Eleutherozoa;Asterozoa;Asteroidea;Valvatacea;Valvatida;As  
 terinidae;Patiria;Patiria miniata  
 UdeM00000022464 6596 468.8 UdeM00000022464 XP\_045215543.1 60.7 379  
 146 3 13 389 10 387 7.00E-129 468.8 6596 cellular  
 organisms;Eukaryota;Opisthokonta;Metazoa;Eumetazoa;Bilateria;Protostomia;  
 Spiralia;Lophotrochozoa;Mollusca;Bivalvia;Autobranhia;Heteroconchia;Euhe  
 terodonta;Imparidentia;Venerida;Veneroidea;Veneridae;Mercenaria;Mercenari  
 a mercenaria  
 UdeM00000022465 29159 59.3 UdeM00000022465 XP\_011456954.1 51.7 58  
 24 1 13 66 16 73 2.80E-06 59.3 29159 cellular  
 organisms;Eukaryota;Opisthokonta;Metazoa;Eumetazoa;Bilateria;Protostomia;  
 Spiralia;Lophotrochozoa;Mollusca;Bivalvia;Autobranhia;Pteriormorphia;Ostr  
 eida;Ostreoidea;Ostreidae;Crassostrea;Crassostrea gigas  
 UdeM00000022466 6573 332.4 UdeM00000022466 XP\_021359341.1 76.2 227  
 53 1 31 256 139 365 5.00E-88 332.4 6573 cellular

organisms;Eukaryota;Opisthokonta;Metazoa;Eumetazoa;Bilateria;Protostomia;Spiralia;Lophotrochozoa;Mollusca;Bivalvia;Autobranchia;Pteriomorpha;Pectinida;Pectinoidea;Pectinidae;Mizuhopecten;Mizuhopecten yessoensis  
UdeM00000022467 6500 88.6 UdeM00000022467 XP\_005099452.1 55.8 95  
39 2 1 94 1 93 5.40E-15 88.6 6500 cellular  
organisms;Eukaryota;Opisthokonta;Metazoa;Eumetazoa;Bilateria;Protostomia;Spiralia;Lophotrochozoa;Mollusca;Gastropoda;Heterobranchia;Euthyneura;Teptipleura;Aplysiida;Aplysioidea;Aplysiidae;Aplysia;Aplysia californica  
UdeM00000022468 8078 201.1 UdeM00000022468 XP\_035989474.1 39 308  
173 5 1 301 167 466 2.20E-48 201.1 8078 cellular  
organisms;Eukaryota;Opisthokonta;Metazoa;Eumetazoa;Bilateria;Deuterostomia;Chordata;Craniata;Vertebrata;Gnathostomata;Teleostomi;Euteleostomi;Actinopterygii;Actinopteri;Neopterygii;Teleostei;Osteoglossocephalai;Clupeocephala;Euteleostei;Neoteleostei;Eurypterygia;Ctenosquamata;Acanthomorphata;Euacanthomorphacea;Percomorphaceae;Ovalentaria;Atherinomorphae;Cypriodontiformes;Cyprinodontoides;Fundulidae;Fundulus;Fundulus heteroclitus  
UdeM00000022469 400682 133.3 UdeM00000022469 XP\_003390251.1 33.2  
199 123 3 3 201 26 214 3.50E-28 133.3 400682  
cellular  
organisms;Eukaryota;Opisthokonta;Metazoa;Porifera;Demospongiae;Heteroscleromorpha;Haplosclerida;Niphatidae;Amphimedon;Amphimedon queenslandica  
UdeM00000022470 6596 436.8 UdeM00000022470 XP\_045216499.1 75.9 278  
66 1 1 277 22 299 2.10E-119 436.8 6596 cellular  
organisms;Eukaryota;Opisthokonta;Metazoa;Eumetazoa;Bilateria;Protostomia;Spiralia;Lophotrochozoa;Mollusca;Bivalvia;Autobranchia;Heteroconchia;Euheterodonta;Imparidentia;Venerida;Veneroidea;Veneridae;Mercenaria;Mercenaria mercenaria  
UdeM00000022471 6596 1717.6 UdeM00000022471 XP\_045216517.1 56.8  
1745 623 22 2 1657 300 2003 0.00E+00 1717.6 6596  
cellular  
organisms;Eukaryota;Opisthokonta;Metazoa;Eumetazoa;Bilateria;Protostomia;Spiralia;Lophotrochozoa;Mollusca;Bivalvia;Autobranchia;Heteroconchia;Euheterodonta;Imparidentia;Venerida;Veneroidea;Veneridae;Mercenaria;Mercenaria mercenaria  
UdeM00000022472 6596 1716.8 UdeM00000022472 XP\_045216517.1 56.8  
1745 623 22 2 1657 300 2003 0.00E+00 1716.8 6596  
cellular  
organisms;Eukaryota;Opisthokonta;Metazoa;Eumetazoa;Bilateria;Protostomia;Spiralia;Lophotrochozoa;Mollusca;Bivalvia;Autobranchia;Heteroconchia;Euheterodonta;Imparidentia;Venerida;Veneroidea;Veneridae;Mercenaria;Mercenaria mercenaria  
UdeM00000022473 7574 199.1 UdeM00000022473 XP\_013405546.1 40.2 249  
136 6 23 265 15 256 8.30E-48 199.1 7574 cellular  
organisms;Eukaryota;Opisthokonta;Metazoa;Eumetazoa;Bilateria;Protostomia;Spiralia;Lophotrochozoa;Brachiopoda;Linguliformea;Lingulata;Lingulida;Linguloidea;Lingulidae;Lingula;Lingula anatina  
UdeM00000022475 7574 128.3 UdeM00000022475 XP\_013405546.1 48.3 120  
60 1 1 120 139 256 1.10E-26 128.3 7574 cellular  
organisms;Eukaryota;Opisthokonta;Metazoa;Eumetazoa;Bilateria;Protostomia;Spiralia;Lophotrochozoa;Brachiopoda;Linguliformea;Lingulata;Lingulida;Linguloidea;Lingulidae;Lingula;Lingula anatina  
UdeM00000022476 7574 82.4 UdeM00000022476 XP\_013396877.1 33.1 133  
80 3 34 162 31 158 5.80E-13 82.4 7574 cellular



organisms;Eukaryota;Opisthokonta;Metazoa;Eumetazoa;Bilateria;Protostomia;  
Spiralia;Lophotrochozoa;Brachiopoda;Linguliformea;Lingulata;Lingulida;Lin  
guloidea;Lingulidae;Lingula;Lingula anatina  
UdeM00000022477 7574 73.9 UdeM00000022477 XP\_013405546.1 51.5 68  
29 1 2 69 210 273 1.20E-10 73.9 7574 cellular  
organisms;Eukaryota;Opisthokonta;Metazoa;Eumetazoa;Bilateria;Protostomia;  
Spiralia;Lophotrochozoa;Brachiopoda;Linguliformea;Lingulata;Lingulida;Lin  
guloidea;Lingulidae;Lingula;Lingula anatina  
UdeM00000022478 7574 196.4 UdeM00000022478 XP\_013405546.1 40.2 249  
136 6 23 265 15 256 5.70E-47 196.4 7574 cellular  
organisms;Eukaryota;Opisthokonta;Metazoa;Eumetazoa;Bilateria;Protostomia;  
Spiralia;Lophotrochozoa;Brachiopoda;Linguliformea;Lingulata;Lingulida;Lin  
guloidea;Lingulidae;Lingula;Lingula anatina  
UdeM00000022479 7574 204.5 UdeM00000022479 XP\_013396877.1 40.2 251  
139 4 10 256 13 256 1.60E-49 204.5 7574 cellular  
organisms;Eukaryota;Opisthokonta;Metazoa;Eumetazoa;Bilateria;Protostomia;  
Spiralia;Lophotrochozoa;Brachiopoda;Linguliformea;Lingulata;Lingulida;Lin  
guloidea;Lingulidae;Lingula;Lingula anatina  
UdeM00000022480 6579 97.8 UdeM00000022480 XP\_033739131.1 39.8 113  
68 0 1 113 1028 1140 1.10E-17 97.8 6579 cellular  
organisms;Eukaryota;Opisthokonta;Metazoa;Eumetazoa;Bilateria;Protostomia;  
Spiralia;Lophotrochozoa;Mollusca;Bivalvia;Autobranchia;Pteriormorphia;Pect  
inida;Pectinoidea;Pectinidae;Pecten;Pecten maximus  
UdeM00000022481 7539 113.6 UdeM00000022481 XP\_023014929.1 54.7 95  
42 1 1 94 1 95 1.40E-22 113.6 7539 cellular  
organisms;Eukaryota;Opisthokonta;Metazoa;Eumetazoa;Bilateria;Protostomia;  
Ecdysozoa;Panarthropoda;Arthropoda;Mandibulata;Pancrustacea;Hexapoda;Inse  
cta;Dicondylia;Pterygota;Neoptera;Endopterygota;Coleoptera;Polyphaga;Cucu  
jiformia;Chrysomeloidea;Chrysomelidae;Chrysomelinae;Doryphorini;Leptinota  
rsa;Leptinotarsa decemlineata  
UdeM00000022482 6596 259.2 UdeM00000022482 XP\_045156566.1 40.6 374  
106 5 7 266 31 402 5.60E-66 259.2 6596 cellular  
organisms;Eukaryota;Opisthokonta;Metazoa;Eumetazoa;Bilateria;Protostomia;  
Spiralia;Lophotrochozoa;Mollusca;Bivalvia;Autobranchia;Heteroconchia;Euhe  
terodonta;Imparidentia;Venerida;Veneroidea;Veneridae;Mercenaria;Mercenari  
a mercenaria  
UdeM00000022483 6579 197.2 UdeM00000022483 XP\_033736448.1 38.6 272  
156 5 5 267 10 279 4.80E-47 197.2 6579 cellular  
organisms;Eukaryota;Opisthokonta;Metazoa;Eumetazoa;Bilateria;Protostomia;  
Spiralia;Lophotrochozoa;Mollusca;Bivalvia;Autobranchia;Pteriormorphia;Pect  
inida;Pectinoidea;Pectinidae;Pecten;Pecten maximus  
UdeM00000022484 29159 403.3 UdeM00000022484 XP\_034311318.1 51.7 389  
175 9 157 536 1 385 4.90E-109 403.3 29159 cellular  
organisms;Eukaryota;Opisthokonta;Metazoa;Eumetazoa;Bilateria;Protostomia;  
Spiralia;Lophotrochozoa;Mollusca;Bivalvia;Autobranchia;Pteriormorphia;Ostr  
eida;Ostreoidea;Ostreidae;Crassostrea;Crassostrea gigas  
UdeM00000022485 6596 365.5 UdeM00000022485 XP\_045156645.1 52.5 339  
155 3 19 356 26 359 8.80E-98 365.5 6596 cellular  
organisms;Eukaryota;Opisthokonta;Metazoa;Eumetazoa;Bilateria;Protostomia;  
Spiralia;Lophotrochozoa;Mollusca;Bivalvia;Autobranchia;Heteroconchia;Euhe  
terodonta;Imparidentia;Venerida;Veneroidea;Veneridae;Mercenaria;Mercenari  
a mercenaria  
UdeM00000022487 6565 63.2 UdeM00000022487 XP\_022297447.1 29.4 170  
54 4 24 127 197 366 2.90E-07 63.2 6565 cellular

organisms;Eukaryota;Opisthokonta;Metazoa;Eumetazoa;Bilateria;Protostomia;Spiralia;Lophotrochozoa;Mollusca;Bivalvia;Autobranchia;Pteriomorpha;Ostr  
eida;Ostreoidea;Ostreidae;Crassostrea;Crassostrea virginica  
UdeM00000022488 6596 104.4 UdeM00000022488 XP\_045180326.1 49.1 112  
54 1 34 145 62 170 1.50E-19 104.4 6596 cellular  
organisms;Eukaryota;Opisthokonta;Metazoa;Eumetazoa;Bilateria;Protostomia;Spiralia;Lophotrochozoa;Mollusca;Bivalvia;Autobranchia;Heteroconchia;Euhe  
terodonta;Imparidentia;Venerida;Veneroidea;Veneridae;Mercenaria;Mercenari  
a mercenaria  
UdeM00000022489 6596 472.2 UdeM00000022489 XP\_045216824.1 60.6 376  
145 3 1 376 1 373 6.20E-130 472.2 6596 cellular  
organisms;Eukaryota;Opisthokonta;Metazoa;Eumetazoa;Bilateria;Protostomia;Spiralia;Lophotrochozoa;Mollusca;Bivalvia;Autobranchia;Heteroconchia;Euhe  
terodonta;Imparidentia;Venerida;Veneroidea;Veneridae;Mercenaria;Mercenari  
a mercenaria  
UdeM00000022490 6565 317 UdeM00000022490 XP\_022328252.1 42.8 418  
173 7 5 357 899 1315 3.10E-83 317 6565 cellular  
organisms;Eukaryota;Opisthokonta;Metazoa;Eumetazoa;Bilateria;Protostomia;Spiralia;Lophotrochozoa;Mollusca;Bivalvia;Autobranchia;Pteriomorpha;Ostr  
eida;Ostreoidea;Ostreidae;Crassostrea;Crassostrea virginica  
UdeM00000022491 6565 95.5 UdeM00000022491 XP\_022314409.1 40.1 152  
78 4 8 146 1164 1315 5.90E-17 95.5 6565 cellular  
organisms;Eukaryota;Opisthokonta;Metazoa;Eumetazoa;Bilateria;Protostomia;Spiralia;Lophotrochozoa;Mollusca;Bivalvia;Autobranchia;Pteriomorpha;Ostr  
eida;Ostreoidea;Ostreidae;Crassostrea;Crassostrea virginica  
UdeM00000022492 6565 78.2 UdeM00000022492 XP\_022314409.1 37.8 135  
71 4 3 124 1181 1315 8.30E-12 78.2 6565 cellular  
organisms;Eukaryota;Opisthokonta;Metazoa;Eumetazoa;Bilateria;Protostomia;Spiralia;Lophotrochozoa;Mollusca;Bivalvia;Autobranchia;Pteriomorpha;Ostr  
eida;Ostreoidea;Ostreidae;Crassostrea;Crassostrea virginica  
UdeM00000022496 6596 206.1 UdeM00000022496 XP\_045213577.1 30.6 402  
260 9 93 487 48 437 1.10E-49 206.1 6596 cellular  
organisms;Eukaryota;Opisthokonta;Metazoa;Eumetazoa;Bilateria;Protostomia;Spiralia;Lophotrochozoa;Mollusca;Bivalvia;Autobranchia;Heteroconchia;Euhe  
terodonta;Imparidentia;Venerida;Veneroidea;Veneridae;Mercenaria;Mercenari  
a mercenaria  
UdeM00000022501 6573 188.7 UdeM00000022501 XP\_021360621.1 36.6 505  
250 13 18 491 983 1448 1.70E-44 188.7 6573 cellular  
organisms;Eukaryota;Opisthokonta;Metazoa;Eumetazoa;Bilateria;Protostomia;Spiralia;Lophotrochozoa;Mollusca;Bivalvia;Autobranchia;Pteriomorpha;Pect  
inida;Pectinoidea;Pectinidae;Mizuhopecten;Mizuhopecten yessoensis  
UdeM00000022502 6596 68.6 UdeM00000022502 XP\_045215891.1 75.7 70  
17 0 89 158 873 942 9.10E-09 68.6 6596 cellular  
organisms;Eukaryota;Opisthokonta;Metazoa;Eumetazoa;Bilateria;Protostomia;Spiralia;Lophotrochozoa;Mollusca;Bivalvia;Autobranchia;Heteroconchia;Euhe  
terodonta;Imparidentia;Venerida;Veneroidea;Veneridae;Mercenaria;Mercenari  
a mercenaria  
UdeM00000022503 6573 81.3 UdeM00000022503 XP\_021360622.1 31.5 257  
176 0 3 259 515 771 2.30E-12 81.3 6573 cellular  
organisms;Eukaryota;Opisthokonta;Metazoa;Eumetazoa;Bilateria;Protostomia;Spiralia;Lophotrochozoa;Mollusca;Bivalvia;Autobranchia;Pteriomorpha;Pect  
inida;Pectinoidea;Pectinidae;Mizuhopecten;Mizuhopecten yessoensis  
UdeM00000022504 6596 358.6 UdeM00000022504 XP\_045215891.1 52.5 398  
168 5 111 496 13 401 1.30E-95 358.6 6596 cellular

organisms;Eukaryota;Opisthokonta;Metazoa;Eumetazoa;Bilateria;Protostomia;Spiralia;Lophotrochozoa;Mollusca;Bivalvia;Autobranchia;Heteroconchia;Euherodonta;Imparidentia;Venerida;Veneroidea;Veneridae;Mercenaria;Mercenaria mercenaria

UdeM00000022509 6573 1422.9 UdeM00000022509 XP\_021343658.1 50.3  
1460 697 16 1 1449 350 1791 0.00E+00 1422.9 6573  
cellular

organisms;Eukaryota;Opisthokonta;Metazoa;Eumetazoa;Bilateria;Protostomia;Spiralia;Lophotrochozoa;Mollusca;Bivalvia;Autobranchia;Pteriomorpha;Pectinida;Pectinoidea;Pectinidae;Mizuhopecten;Mizuhopecten yessoensis

UdeM00000022510 6573 314.7 UdeM00000022510 XP\_021343658.1 50.3 314  
152 3 14 325 1293 1604 1.40E-82 314.7 6573 cellular

organisms;Eukaryota;Opisthokonta;Metazoa;Eumetazoa;Bilateria;Protostomia;Spiralia;Lophotrochozoa;Mollusca;Bivalvia;Autobranchia;Pteriomorpha;Pectinida;Pectinoidea;Pectinidae;Mizuhopecten;Mizuhopecten yessoensis

UdeM00000022511 6573 136.7 UdeM00000022511 XP\_021343658.1 40 175  
99 3 5 175 131 303 2.80E-29 136.7 6573 cellular

organisms;Eukaryota;Opisthokonta;Metazoa;Eumetazoa;Bilateria;Protostomia;Spiralia;Lophotrochozoa;Mollusca;Bivalvia;Autobranchia;Pteriomorpha;Pectinida;Pectinoidea;Pectinidae;Mizuhopecten;Mizuhopecten yessoensis

UdeM00000022512 6573 76.6 UdeM00000022512 XP\_021343658.1 45.3 86  
40 2 46 131 21 99 4.10E-11 76.6 6573 cellular

organisms;Eukaryota;Opisthokonta;Metazoa;Eumetazoa;Bilateria;Protostomia;Spiralia;Lophotrochozoa;Mollusca;Bivalvia;Autobranchia;Pteriomorpha;Pectinida;Pectinoidea;Pectinidae;Mizuhopecten;Mizuhopecten yessoensis

UdeM00000022514 6596 526.6 UdeM00000022514 XP\_045215937.1 67.5 443  
121 9 18 455 8 432 3.30E-146 526.6 6596 cellular

organisms;Eukaryota;Opisthokonta;Metazoa;Eumetazoa;Bilateria;Protostomia;Spiralia;Lophotrochozoa;Mollusca;Bivalvia;Autobranchia;Heteroconchia;Euherodonta;Imparidentia;Venerida;Veneroidea;Veneridae;Mercenaria;Mercenaria mercenaria

UdeM00000022515 6573 450.7 UdeM00000022515 XP\_021362185.1 93 244  
17 0 3 246 940 1183 1.20E-123 450.7 6573 cellular

organisms;Eukaryota;Opisthokonta;Metazoa;Eumetazoa;Bilateria;Protostomia;Spiralia;Lophotrochozoa;Mollusca;Bivalvia;Autobranchia;Pteriomorpha;Pectinida;Pectinoidea;Pectinidae;Mizuhopecten;Mizuhopecten yessoensis

UdeM00000022516 6579 251.1 UdeM00000022516 XP\_033749357.1 83.5 158  
23 2 43 199 773 928 1.20E-63 251.1 6579 cellular

organisms;Eukaryota;Opisthokonta;Metazoa;Eumetazoa;Bilateria;Protostomia;Spiralia;Lophotrochozoa;Mollusca;Bivalvia;Autobranchia;Pteriomorpha;Pectinida;Pectinoidea;Pectinidae;Pecten;Pecten maximus

UdeM00000022517 6596 131.3 UdeM00000022517 XP\_045216417.1 60.4 134  
43 5 1 129 647 775 9.20E-28 131.3 6596 cellular

organisms;Eukaryota;Opisthokonta;Metazoa;Eumetazoa;Bilateria;Protostomia;Spiralia;Lophotrochozoa;Mollusca;Bivalvia;Autobranchia;Heteroconchia;Euherodonta;Imparidentia;Venerida;Veneroidea;Veneridae;Mercenaria;Mercenaria mercenaria

UdeM00000022518 6596 426.4 UdeM00000022518 XP\_045216417.1 44.7 665  
325 23 1 652 1 635 6.60E-116 426.4 6596 cellular

organisms;Eukaryota;Opisthokonta;Metazoa;Eumetazoa;Bilateria;Protostomia;Spiralia;Lophotrochozoa;Mollusca;Bivalvia;Autobranchia;Heteroconchia;Euherodonta;Imparidentia;Venerida;Veneroidea;Veneridae;Mercenaria;Mercenaria mercenaria

UdeM00000022519 6565 1481.5 UdeM00000022519 XP\_022335104.1 85.7  
 842 120 0 1 842 1 842 0.00E+00 1481.5 6565  
 cellular  
 organisms;Eukaryota;Opisthokonta;Metazoa;Eumetazoa;Bilateria;Protostomia;  
 Spiralia;Lophotrochozoa;Mollusca;Bivalvia;Autobranchia;Pteriomorpha;Ostr  
 eida;Ostreoidea;Ostreidae;Crassostrea;Crassostrea virginica  
 UdeM00000022520 6565 1463.4 UdeM00000022520 XP\_022335104.1 85.8  
 830 118 0 1 830 13 842 0.00E+00 1463.4 6565  
 cellular  
 organisms;Eukaryota;Opisthokonta;Metazoa;Eumetazoa;Bilateria;Protostomia;  
 Spiralia;Lophotrochozoa;Mollusca;Bivalvia;Autobranchia;Pteriomorpha;Ostr  
 eida;Ostreoidea;Ostreidae;Crassostrea;Crassostrea virginica  
 UdeM00000022521 6596 503.8 UdeM00000022521 XP\_045156451.1 68.5 327  
 102 1 19 344 22 348 3.90E-139 503.8 6596 cellular  
 organisms;Eukaryota;Opisthokonta;Metazoa;Eumetazoa;Bilateria;Protostomia;  
 Spiralia;Lophotrochozoa;Mollusca;Bivalvia;Autobranchia;Heteroconchia;Euhe  
 terodonta;Imparidentia;Venerida;Veneroidea;Veneridae;Mercenaria;Mercenari  
 a mercenaria  
 UdeM00000022522 29159 357.5 UdeM00000022522 XP\_034326716.1 51.6 337  
 155 5 30 364 36 366 2.10E-95 357.5 29159 cellular  
 organisms;Eukaryota;Opisthokonta;Metazoa;Eumetazoa;Bilateria;Protostomia;  
 Spiralia;Lophotrochozoa;Mollusca;Bivalvia;Autobranchia;Pteriomorpha;Ostr  
 eida;Ostreoidea;Ostreidae;Crassostrea;Crassostrea gigas  
 UdeM00000022523 6565 401 UdeM00000022523 XP\_022333108.1 31.1 748  
 473 14 97 830 93 812 3.90E-108 401 6565 cellular  
 organisms;Eukaryota;Opisthokonta;Metazoa;Eumetazoa;Bilateria;Protostomia;  
 Spiralia;Lophotrochozoa;Mollusca;Bivalvia;Autobranchia;Pteriomorpha;Ostr  
 eida;Ostreoidea;Ostreidae;Crassostrea;Crassostrea virginica  
 UdeM00000022524 6565 409.5 UdeM00000022524 XP\_022333108.1 31.7 734  
 473 13 97 816 93 812 1.10E-110 409.5 6565 cellular  
 organisms;Eukaryota;Opisthokonta;Metazoa;Eumetazoa;Bilateria;Protostomia;  
 Spiralia;Lophotrochozoa;Mollusca;Bivalvia;Autobranchia;Pteriomorpha;Ostr  
 eida;Ostreoidea;Ostreidae;Crassostrea;Crassostrea virginica  
 UdeM00000022525 1735272 374.4 UdeM00000022525 XP\_041362669.1 45  
 458 224 6 9 459 11 447 2.20E-100 374.4 1735272  
 cellular  
 organisms;Eukaryota;Opisthokonta;Metazoa;Eumetazoa;Bilateria;Protostomia;  
 Spiralia;Lophotrochozoa;Mollusca;Gastropoda;Neomphalina;Neomphaloidea;Pel  
 tospiridae;Gigantopelta;Gigantopelta aegis  
 UdeM00000022526 6500 1194.9 UdeM00000022526 XP\_012944402.1 66.8  
 953 279 7 82 1006 132 1075 0.00E+00 1194.9 6500  
 cellular  
 organisms;Eukaryota;Opisthokonta;Metazoa;Eumetazoa;Bilateria;Protostomia;  
 Spiralia;Lophotrochozoa;Mollusca;Gastropoda;Heterobranchia;Euthyneura;Tec  
 tipleura;Aplysiida;Aplysioidea;Aplysiidae;Aplysia;Aplysia californica  
 UdeM00000022527 1735272 584.3 UdeM00000022527 XP\_041365186.1 70.2  
 419 118 4 11 426 8 422 1.20E-163 584.3 1735272  
 cellular  
 organisms;Eukaryota;Opisthokonta;Metazoa;Eumetazoa;Bilateria;Protostomia;  
 Spiralia;Lophotrochozoa;Mollusca;Gastropoda;Neomphalina;Neomphaloidea;Pel  
 tospiridae;Gigantopelta;Gigantopelta aegis  
 UdeM00000022528 1735272 231.5 UdeM00000022528 XP\_041360807.1 48  
 254 125 3 1 248 5 257 1.20E-57 231.5 1735272  
 cellular

organisms;Eukaryota;Opisthokonta;Metazoa;Eumetazoa;Bilateria;Protostomia;Spiralia;Lophotrochozoa;Mollusca;Gastropoda;Neomphalina;Neomphaloidea;Peltospiridae;Gigantopelta;Gigantopelta aegis

UdeM00000022529 6579 268.9 UdeM00000022529 XP\_033750566.1 88.3 154  
18 0 2 155 182 335 4.20E-69 268.9 6579 cellular

organisms;Eukaryota;Opisthokonta;Metazoa;Eumetazoa;Bilateria;Protostomia;Spiralia;Lophotrochozoa;Mollusca;Bivalvia;Autobranchia;Pteriomorpha;Pectinida;Pectinoidea;Pectinidae;Pecten;Pecten maximus

UdeM00000022530 6565 113.6 UdeM00000022530 XP\_022297037.1 39.3 178  
100 4 6 178 11 185 2.80E-22 113.6 6565 cellular

organisms;Eukaryota;Opisthokonta;Metazoa;Eumetazoa;Bilateria;Protostomia;Spiralia;Lophotrochozoa;Mollusca;Bivalvia;Autobranchia;Pteriomorpha;Ostreida;Ostreoidea;Ostreidae;Crassostrea;Crassostrea virginica

UdeM00000022531 6573 209.5 UdeM00000022531 XP\_021354485.1 76.1 134  
32 0 17 150 19 152 3.00E-51 209.5 6573 cellular

organisms;Eukaryota;Opisthokonta;Metazoa;Eumetazoa;Bilateria;Protostomia;Spiralia;Lophotrochozoa;Mollusca;Bivalvia;Autobranchia;Pteriomorpha;Pectinida;Pectinoidea;Pectinidae;Mizuhopecten;Mizuhopecten yessoensis

UdeM00000022532 29159 549.7 UdeM00000022532 XP\_011419913.1 78.7 333  
71 0 5 337 3 335 2.70E-153 549.7 29159 cellular

organisms;Eukaryota;Opisthokonta;Metazoa;Eumetazoa;Bilateria;Protostomia;Spiralia;Lophotrochozoa;Mollusca;Bivalvia;Autobranchia;Pteriomorpha;Ostreida;Ostreoidea;Ostreidae;Crassostrea;Crassostrea gigas

UdeM00000022533 6573 424.9 UdeM00000022533 XP\_021377143.1 51.9 422  
199 3 355 774 1415 1834 2.30E-115 424.9 6573 cellular

organisms;Eukaryota;Opisthokonta;Metazoa;Eumetazoa;Bilateria;Protostomia;Spiralia;Lophotrochozoa;Mollusca;Bivalvia;Autobranchia;Pteriomorpha;Pectinida;Pectinoidea;Pectinidae;Mizuhopecten;Mizuhopecten yessoensis

UdeM00000022534 6573 998.4 UdeM00000022534 XP\_021377143.1 55 1712  
675 12 119 1743 134 1836 1.10E-287 998.4 6573 cellular

organisms;Eukaryota;Opisthokonta;Metazoa;Eumetazoa;Bilateria;Protostomia;Spiralia;Lophotrochozoa;Mollusca;Bivalvia;Autobranchia;Pteriomorpha;Pectinida;Pectinoidea;Pectinidae;Mizuhopecten;Mizuhopecten yessoensis

UdeM00000022536 1735272 387.9 UdeM00000022536 XP\_041373276.1 48.4  
353 182 0 72 424 57 409 1.70E-104 387.9 1735272

cellular

organisms;Eukaryota;Opisthokonta;Metazoa;Eumetazoa;Bilateria;Protostomia;Spiralia;Lophotrochozoa;Mollusca;Gastropoda;Neomphalina;Neomphaloidea;Peltospiridae;Gigantopelta;Gigantopelta aegis

UdeM00000022537 6596 147.9 UdeM00000022537 XP\_045216553.1 32.9 538  
236 20 1578 2095 2027 2459 1.40E-31 147.9 6596 cellular

organisms;Eukaryota;Opisthokonta;Metazoa;Eumetazoa;Bilateria;Protostomia;Spiralia;Lophotrochozoa;Mollusca;Bivalvia;Autobranchia;Heteroconchia;Euherodonta;Imparidentia;Venerida;Veneroidea;Veneridae;Mercenaria;Mercenaria mercenaria

UdeM00000022537 6596 53.5 UdeM00000022537 XP\_045216553.1 25.6 371  
186 9 1169 1508 1293 1604 3.70E-03 53.5 6596 cellular

organisms;Eukaryota;Opisthokonta;Metazoa;Eumetazoa;Bilateria;Protostomia;Spiralia;Lophotrochozoa;Mollusca;Bivalvia;Autobranchia;Heteroconchia;Euherodonta;Imparidentia;Venerida;Veneroidea;Veneridae;Mercenaria;Mercenaria mercenaria

UdeM00000022538 6596 1048.5 UdeM00000022538 XP\_045216553.1 58  
926 345 12 27 912 2751 3672 5.00E-303 1048.5 6596

cellular

organisms;Eukaryota;Opisthokonta;Metazoa;Eumetazoa;Bilateria;Protostomia;Spiralia;Lophotrochozoa;Mollusca;Bivalvia;Autobranchia;Heteroconchia;Euheterodonta;Imparidentia;Venerida;Veneroidea;Veneridae;Mercenaria;Mercenaria mercenaria

UdeM00000022539 1735272 247.7 UdeM00000022539 XP\_041365717.1 35.6  
435 244 12 6 428 10 420 4.60E-62 247.7 1735272  
cellular

organisms;Eukaryota;Opisthokonta;Metazoa;Eumetazoa;Bilateria;Protostomia;Spiralia;Lophotrochozoa;Mollusca;Gastropoda;Neomphalina;Neomphaloidea;Peltospiridae;Gigantopelta;Gigantopelta aegis

UdeM00000022540 1735272 247.7 UdeM00000022540 XP\_041365717.1 35.6  
435 244 12 6 428 10 420 4.70E-62 247.7 1735272  
cellular

organisms;Eukaryota;Opisthokonta;Metazoa;Eumetazoa;Bilateria;Protostomia;Spiralia;Lophotrochozoa;Mollusca;Gastropoda;Neomphalina;Neomphaloidea;Peltospiridae;Gigantopelta;Gigantopelta aegis

UdeM00000022541 6596 82 UdeM00000022541 XP\_045173855.1 40.2 107  
62 1 2 106 640 746 6.80E-13 82 6596 cellular

organisms;Eukaryota;Opisthokonta;Metazoa;Eumetazoa;Bilateria;Protostomia;Spiralia;Lophotrochozoa;Mollusca;Bivalvia;Autobranchia;Heteroconchia;Euheterodonta;Imparidentia;Venerida;Veneroidea;Veneridae;Mercenaria;Mercenaria mercenaria

UdeM00000022542 29159 204.5 UdeM00000022542 XP\_011412797.2 46.4 209  
111 1 50 257 126 334 1.60E-49 204.5 29159 cellular

organisms;Eukaryota;Opisthokonta;Metazoa;Eumetazoa;Bilateria;Protostomia;Spiralia;Lophotrochozoa;Mollusca;Bivalvia;Autobranchia;Pteriormorphia;Ostreida;Ostreoidea;Ostreidae;Crassostrea;Crassostrea gigas

UdeM00000022543 6565 189.1 UdeM00000022543 XP\_022301022.1 36.4 294  
145 8 6 257 93 386 7.50E-45 189.1 6565 cellular

organisms;Eukaryota;Opisthokonta;Metazoa;Eumetazoa;Bilateria;Protostomia;Spiralia;Lophotrochozoa;Mollusca;Bivalvia;Autobranchia;Pteriormorphia;Ostreida;Ostreoidea;Ostreidae;Crassostrea;Crassostrea virginica

UdeM00000022544 6596 366.3 UdeM00000022544 XP\_045166426.1 31.9 705  
434 12 11 680 78 771 8.40E-98 366.3 6596 cellular

organisms;Eukaryota;Opisthokonta;Metazoa;Eumetazoa;Bilateria;Protostomia;Spiralia;Lophotrochozoa;Mollusca;Bivalvia;Autobranchia;Heteroconchia;Euheterodonta;Imparidentia;Venerida;Veneroidea;Veneridae;Mercenaria;Mercenaria mercenaria

UdeM00000022545 6596 396 UdeM00000022545 XP\_045166426.1 32.7 686  
421 10 34 687 79 755 1.00E-106 396 6596 cellular

organisms;Eukaryota;Opisthokonta;Metazoa;Eumetazoa;Bilateria;Protostomia;Spiralia;Lophotrochozoa;Mollusca;Bivalvia;Autobranchia;Heteroconchia;Euheterodonta;Imparidentia;Venerida;Veneroidea;Veneridae;Mercenaria;Mercenaria mercenaria

UdeM00000022546 6596 317 UdeM00000022546 XP\_045166426.1 29.2 703  
388 12 11 612 78 771 5.20E-83 317 6596 cellular

organisms;Eukaryota;Opisthokonta;Metazoa;Eumetazoa;Bilateria;Protostomia;Spiralia;Lophotrochozoa;Mollusca;Bivalvia;Autobranchia;Heteroconchia;Euheterodonta;Imparidentia;Venerida;Veneroidea;Veneridae;Mercenaria;Mercenaria mercenaria

UdeM00000022547 6565 319.3 UdeM00000022547 XP\_022301022.1 34.7 528  
326 12 3 516 67 589 9.10E-84 319.3 6565 cellular

organisms;Eukaryota;Opisthokonta;Metazoa;Eumetazoa;Bilateria;Protostomia;

Spiralia;Lophotrochozoa;Mollusca;Bivalvia;Autobranchia;Pteriormorphia;Ostr  
eida;Ostreoidea;Ostreidae;Crassostrea;Crassostrea virginica  
UdeM00000022548 29159 386.7 UdeM00000022548 XP\_011412797.2 33.9 646  
411 9 8 640 32 674 6.00E-104 386.7 29159 cellular  
organisms;Eukaryota;Opisthokonta;Metazoa;Eumetazoa;Bilateria;Protostomia;  
Spiralia;Lophotrochozoa;Mollusca;Bivalvia;Autobranchia;Pteriormorphia;Ostr  
eida;Ostreoidea;Ostreidae;Crassostrea;Crassostrea gigas  
UdeM00000022549 6596 391 UdeM00000022549 XP\_045215665.1 82.6 236  
41 0 1 236 185 420 1.20E-105 391 6596 cellular  
organisms;Eukaryota;Opisthokonta;Metazoa;Eumetazoa;Bilateria;Protostomia;  
Spiralia;Lophotrochozoa;Mollusca;Bivalvia;Autobranchia;Heteroconchia;Euhe  
terodonta;Imparidentia;Venerida;Veneroidea;Veneridae;Mercenaria;Mercenari  
a mercenaria  
UdeM00000022550 6573 143.7 UdeM00000022550 XP\_021359332.1 72.4 98  
25 1 62 159 1 96 2.10E-31 143.7 6573 cellular  
organisms;Eukaryota;Opisthokonta;Metazoa;Eumetazoa;Bilateria;Protostomia;  
Spiralia;Lophotrochozoa;Mollusca;Bivalvia;Autobranchia;Pteriormorphia;Pect  
inida;Pectinoidea;Pectinidae;Mizuhopecten;Mizuhopecten yessoensis  
UdeM00000022552 29159 143.7 UdeM00000022552 XP\_034307860.1 35.1 268  
69 2 1 163 1 268 2.60E-31 143.7 29159 cellular  
organisms;Eukaryota;Opisthokonta;Metazoa;Eumetazoa;Bilateria;Protostomia;  
Spiralia;Lophotrochozoa;Mollusca;Bivalvia;Autobranchia;Pteriormorphia;Ostr  
eida;Ostreoidea;Ostreidae;Crassostrea;Crassostrea gigas  
UdeM00000022551 29159 102.8 UdeM00000022551 XP\_034307860.1 51 98  
48 0 1 98 1 98 3.00E-19 102.8 29159 cellular  
organisms;Eukaryota;Opisthokonta;Metazoa;Eumetazoa;Bilateria;Protostomia;  
Spiralia;Lophotrochozoa;Mollusca;Bivalvia;Autobranchia;Pteriormorphia;Ostr  
eida;Ostreoidea;Ostreidae;Crassostrea;Crassostrea gigas  
UdeM00000022553 6596 408.3 UdeM00000022553 XP\_045166426.1 32.7 695  
427 11 34 695 79 765 2.00E-110 408.3 6596 cellular  
organisms;Eukaryota;Opisthokonta;Metazoa;Eumetazoa;Bilateria;Protostomia;  
Spiralia;Lophotrochozoa;Mollusca;Bivalvia;Autobranchia;Heteroconchia;Euhe  
terodonta;Imparidentia;Venerida;Veneroidea;Veneridae;Mercenaria;Mercenari  
a mercenaria  
UdeM00000022554 29159 398.7 UdeM00000022554 XP\_019919373.2 34.1 659  
416 12 13 660 77 728 1.50E-107 398.7 29159 cellular  
organisms;Eukaryota;Opisthokonta;Metazoa;Eumetazoa;Bilateria;Protostomia;  
Spiralia;Lophotrochozoa;Mollusca;Bivalvia;Autobranchia;Pteriormorphia;Ostr  
eida;Ostreoidea;Ostreidae;Crassostrea;Crassostrea gigas  
UdeM00000022555 6596 701.8 UdeM00000022555 XP\_045215665.1 83.7 418  
68 0 17 434 3 420 5.70E-199 701.8 6596 cellular  
organisms;Eukaryota;Opisthokonta;Metazoa;Eumetazoa;Bilateria;Protostomia;  
Spiralia;Lophotrochozoa;Mollusca;Bivalvia;Autobranchia;Heteroconchia;Euhe  
terodonta;Imparidentia;Venerida;Veneroidea;Veneridae;Mercenaria;Mercenari  
a mercenaria  
UdeM00000022556 6596 423.7 UdeM00000022556 XP\_045166426.1 34.1 695  
417 11 34 695 79 765 4.60E-115 423.7 6596 cellular  
organisms;Eukaryota;Opisthokonta;Metazoa;Eumetazoa;Bilateria;Protostomia;  
Spiralia;Lophotrochozoa;Mollusca;Bivalvia;Autobranchia;Heteroconchia;Euhe  
terodonta;Imparidentia;Venerida;Veneroidea;Veneridae;Mercenaria;Mercenari  
a mercenaria  
UdeM00000022557 6596 271.9 UdeM00000022557 XP\_045184037.1 35.2 403  
249 6 52 445 9 408 1.40E-69 271.9 6596 cellular  
organisms;Eukaryota;Opisthokonta;Metazoa;Eumetazoa;Bilateria;Protostomia;

Spiralia;Lophotrochozoa;Mollusca;Bivalvia;Autobranchia;Heteroconchia;Euherodonta;Imparidentia;Venerida;Veneroidea;Veneridae;Mercenaria;Mercenaria mercenaria

UdeM00000022558 6596 325.5 UdeM00000022558 XP\_045188650.1 37.5 445  
274 3 1 442 39 482 1.10E-85 325.5 6596 cellular

organisms;Eukaryota;Opisthokonta;Metazoa;Eumetazoa;Bilateria;Protostomia;Spiralia;Lophotrochozoa;Mollusca;Bivalvia;Autobranchia;Heteroconchia;Euherodonta;Imparidentia;Venerida;Veneroidea;Veneridae;Mercenaria;Mercenaria mercenaria

UdeM00000022559 6573 499.6 UdeM00000022559 XP\_021345870.1 47.9 635  
284 12 50 654 53 670 6.10E-138 499.6 6573 cellular

organisms;Eukaryota;Opisthokonta;Metazoa;Eumetazoa;Bilateria;Protostomia;Spiralia;Lophotrochozoa;Mollusca;Bivalvia;Autobranchia;Pteriomorpha;Pectinida;Pectinoidea;Pectinidae;Mizuhopecten;Mizuhopecten yessoensis

UdeM00000022560 6573 582.4 UdeM00000022560 XP\_021355763.1 41.2 678  
380 7 1 664 198 870 7.30E-163 582.4 6573 cellular

organisms;Eukaryota;Opisthokonta;Metazoa;Eumetazoa;Bilateria;Protostomia;Spiralia;Lophotrochozoa;Mollusca;Bivalvia;Autobranchia;Pteriomorpha;Pectinida;Pectinoidea;Pectinidae;Mizuhopecten;Mizuhopecten yessoensis

UdeM00000022562 6500 161.8 UdeM00000022562 XP\_012946358.1 70.6 109  
32 0 26 134 1 109 6.20E-37 161.8 6500 cellular

organisms;Eukaryota;Opisthokonta;Metazoa;Eumetazoa;Bilateria;Protostomia;Spiralia;Lophotrochozoa;Mollusca;Gastropoda;Heterobranchia;Euthyneura;Tectipleura;Aplysiida;Aplysioidea;Aplysiidae;Aplysia;Aplysia californica

UdeM00000022563 6596 602.1 UdeM00000022563 XP\_045215896.1 71.3 404  
108 3 17 414 17 418 5.50E-169 602.1 6596 cellular

organisms;Eukaryota;Opisthokonta;Metazoa;Eumetazoa;Bilateria;Protostomia;Spiralia;Lophotrochozoa;Mollusca;Bivalvia;Autobranchia;Heteroconchia;Euherodonta;Imparidentia;Venerida;Veneroidea;Veneridae;Mercenaria;Mercenaria mercenaria

UdeM00000022564 6105 241.1 UdeM00000022564 XP\_031570721.1 33.3 489  
270 13 69 542 243 690 3.30E-60 241.1 6105 cellular

organisms;Eukaryota;Opisthokonta;Metazoa;Eumetazoa;Cnidaria;Anthozoa;Hexacorallia;Actiniaria;Actiniidae;Actinia;Actinia tenebrosa

UdeM00000022565 6105 241.1 UdeM00000022565 XP\_031570721.1 33.3 489  
270 13 91 564 243 690 3.40E-60 241.1 6105 cellular

organisms;Eukaryota;Opisthokonta;Metazoa;Eumetazoa;Cnidaria;Anthozoa;Hexacorallia;Actiniaria;Actiniidae;Actinia;Actinia tenebrosa

UdeM00000022566 6596 1215.7 UdeM00000022566 XP\_045216832.1 63.3  
934 337 5 9 939 94 1024 0.00E+00 1215.7 6596

cellular organisms;Eukaryota;Opisthokonta;Metazoa;Eumetazoa;Bilateria;Protostomia;Spiralia;Lophotrochozoa;Mollusca;Bivalvia;Autobranchia;Heteroconchia;Euherodonta;Imparidentia;Venerida;Veneroidea;Veneridae;Mercenaria;Mercenaria mercenaria

UdeM00000022567 6596 136.3 UdeM00000022567 XP\_045216832.1 80.2 86  
17 0 1 86 9 94 2.00E-29 136.3 6596 cellular

organisms;Eukaryota;Opisthokonta;Metazoa;Eumetazoa;Bilateria;Protostomia;Spiralia;Lophotrochozoa;Mollusca;Bivalvia;Autobranchia;Heteroconchia;Euherodonta;Imparidentia;Venerida;Veneroidea;Veneridae;Mercenaria;Mercenaria mercenaria

UdeM00000022568 6596 80.1 UdeM00000022568 XP\_045216832.1 84.4 45  
7 0 1 45 9 53 8.80E-13 80.1 6596 cellular

organisms;Eukaryota;Opisthokonta;Metazoa;Eumetazoa;Bilateria;Protostomia;



Spiralia;Lophotrochozoa;Mollusca;Bivalvia;Autobranchia;Heteroconchia;Euherodonta;Imparidentia;Venerida;Veneroidea;Veneridae;Mercenaria;Mercenaria mercenaria

UdeM00000022569 1735272 94.4 UdeM00000022569 XP\_041365673.1 62.2  
74 26 1 9 82 12 83 9.30E-17 94.4 1735272  
cellular

organisms;Eukaryota;Opisthokonta;Metazoa;Eumetazoa;Bilateria;Protostomia;Spiralia;Lophotrochozoa;Mollusca;Gastropoda;Neomphalina;Neomphaloidea;Peltospiridae;Gigantopelta;Gigantopelta aegis

UdeM00000022570 6596 642.5 UdeM00000022570 XP\_045216830.1 73.6 416  
107 2 29 443 89 502 1.50E-180 642.5 6596 cellular

organisms;Eukaryota;Opisthokonta;Metazoa;Eumetazoa;Bilateria;Protostomia;Spiralia;Lophotrochozoa;Mollusca;Bivalvia;Autobranchia;Heteroconchia;Euherodonta;Imparidentia;Venerida;Veneroidea;Veneridae;Mercenaria;Mercenaria mercenaria

UdeM00000022571 6596 2383.6 UdeM00000022571 XP\_045215363.1 42.9  
3428 1566 64 7 3213 10 3268 0.00E+00 2383.6 6596  
cellular

organisms;Eukaryota;Opisthokonta;Metazoa;Eumetazoa;Bilateria;Protostomia;Spiralia;Lophotrochozoa;Mollusca;Bivalvia;Autobranchia;Heteroconchia;Euherodonta;Imparidentia;Venerida;Veneroidea;Veneridae;Mercenaria;Mercenaria mercenaria

UdeM00000022572 6596 2313.1 UdeM00000022572 XP\_045215363.1 64.6  
1711 592 10 5 1709 3292 4995 0.00E+00 2313.1 6596  
cellular

organisms;Eukaryota;Opisthokonta;Metazoa;Eumetazoa;Bilateria;Protostomia;Spiralia;Lophotrochozoa;Mollusca;Bivalvia;Autobranchia;Heteroconchia;Euherodonta;Imparidentia;Venerida;Veneroidea;Veneridae;Mercenaria;Mercenaria mercenaria

UdeM00000022573 6565 147.5 UdeM00000022573 XP\_022333522.1 72.6 106  
28 1 1 105 1 106 1.00E-32 147.5 6565 cellular

organisms;Eukaryota;Opisthokonta;Metazoa;Eumetazoa;Bilateria;Protostomia;Spiralia;Lophotrochozoa;Mollusca;Bivalvia;Autobranchia;Pteriomorphia;Ostreida;Ostreoidea;Ostreidae;Crassostrea;Crassostrea virginica

UdeM00000022574 6596 83.6 UdeM00000022574 XP\_045215323.1 27.9 373  
183 12 1 354 1 306 6.00E-13 83.6 6596 cellular

organisms;Eukaryota;Opisthokonta;Metazoa;Eumetazoa;Bilateria;Protostomia;Spiralia;Lophotrochozoa;Mollusca;Bivalvia;Autobranchia;Heteroconchia;Euherodonta;Imparidentia;Venerida;Veneroidea;Veneridae;Mercenaria;Mercenaria mercenaria

UdeM00000022575 6573 916.8 UdeM00000022575 XP\_021379580.1 53.6 912  
342 10 81 966 545 1401 2.70E-263 916.8 6573 cellular

organisms;Eukaryota;Opisthokonta;Metazoa;Eumetazoa;Bilateria;Protostomia;Spiralia;Lophotrochozoa;Mollusca;Bivalvia;Autobranchia;Pteriomorphia;Pectinida;Pectinoidea;Pectinidae;Mizuhopecten;Mizuhopecten yessoensis

UdeM00000022577 6596 102.4 UdeM00000022577 XP\_045159443.1 48 127  
59 3 90 209 337 463 7.90E-19 102.4 6596 cellular

organisms;Eukaryota;Opisthokonta;Metazoa;Eumetazoa;Bilateria;Protostomia;Spiralia;Lophotrochozoa;Mollusca;Bivalvia;Autobranchia;Heteroconchia;Euherodonta;Imparidentia;Venerida;Veneroidea;Veneridae;Mercenaria;Mercenaria mercenaria

UdeM00000022579 6579 282 UdeM00000022579 XP\_033731751.1 42.9 375  
155 7 1 325 872 1237 1.10E-72 282 6579 cellular

organisms;Eukaryota;Opisthokonta;Metazoa;Eumetazoa;Bilateria;Protostomia;

Spiralia;Lophotrochozoa;Mollusca;Bivalvia;Autobranchia;Pteriormorphia;Pectinida;Pectinoidea;Pectinidae;Pecten;Pecten maximus

UdeM00000022581 6565 81.3 UdeM00000022581 XP\_022297447.1 60.9 64  
24 1 109 171 146 209 1.80E-12 81.3 6565 cellular  
organisms;Eukaryota;Opisthokonta;Metazoa;Eumetazoa;Bilateria;Protostomia;  
Spiralia;Lophotrochozoa;Mollusca;Bivalvia;Autobranchia;Pteriormorphia;Ostr  
eida;Ostreoidea;Ostreidae;Crassostrea;Crassostrea virginica

UdeM00000022582 6596 95.5 UdeM00000022582 XP\_045215193.1 49.4 83  
42 0 1 83 1 83 3.50E-17 95.5 6596 cellular  
organisms;Eukaryota;Opisthokonta;Metazoa;Eumetazoa;Bilateria;Protostomia;  
Spiralia;Lophotrochozoa;Mollusca;Bivalvia;Autobranchia;Heteroconchia;Euhe  
terodonta;Imparidentia;Venerida;Veneroidea;Veneridae;Mercenaria;Mercenari  
a mercenaria

UdeM00000022583 6596 352.1 UdeM00000022583 XP\_045215193.1 57.4 305  
120 2 1 302 74 371 7.30E-94 352.1 6596 cellular  
organisms;Eukaryota;Opisthokonta;Metazoa;Eumetazoa;Bilateria;Protostomia;  
Spiralia;Lophotrochozoa;Mollusca;Bivalvia;Autobranchia;Heteroconchia;Euhe  
terodonta;Imparidentia;Venerida;Veneroidea;Veneridae;Mercenaria;Mercenari  
a mercenaria

UdeM00000022584 6596 397.5 UdeM00000022584 XP\_045215193.1 53.2 378  
170 3 1 378 1 371 1.90E-107 397.5 6596 cellular  
organisms;Eukaryota;Opisthokonta;Metazoa;Eumetazoa;Bilateria;Protostomia;  
Spiralia;Lophotrochozoa;Mollusca;Bivalvia;Autobranchia;Heteroconchia;Euhe  
terodonta;Imparidentia;Venerida;Veneroidea;Veneridae;Mercenaria;Mercenari  
a mercenaria

UdeM00000022585 6596 367.9 UdeM00000022585 XP\_045215193.1 55.2 339  
145 3 2 340 40 371 1.40E-98 367.9 6596 cellular  
organisms;Eukaryota;Opisthokonta;Metazoa;Eumetazoa;Bilateria;Protostomia;  
Spiralia;Lophotrochozoa;Mollusca;Bivalvia;Autobranchia;Heteroconchia;Euhe  
terodonta;Imparidentia;Venerida;Veneroidea;Veneridae;Mercenaria;Mercenari  
a mercenaria

UdeM00000022586 6579 223.8 UdeM00000022586 XP\_033749959.1 73.6 140  
37 0 5 144 6 145 1.40E-55 223.8 6579 cellular  
organisms;Eukaryota;Opisthokonta;Metazoa;Eumetazoa;Bilateria;Protostomia;  
Spiralia;Lophotrochozoa;Mollusca;Bivalvia;Autobranchia;Pteriormorphia;Pect  
inida;Pectinoidea;Pectinidae;Pecten;Pecten maximus

UdeM00000022587 6579 576.6 UdeM00000022587 XP\_033750191.1 50.5 576  
276 6 1 573 1 570 4.80E-161 576.6 6579 cellular  
organisms;Eukaryota;Opisthokonta;Metazoa;Eumetazoa;Bilateria;Protostomia;  
Spiralia;Lophotrochozoa;Mollusca;Bivalvia;Autobranchia;Pteriormorphia;Pect  
inida;Pectinoidea;Pectinidae;Pecten;Pecten maximus

UdeM00000022588 6596 151.8 UdeM00000022588 XP\_045184330.1 56.8 118  
51 0 1 118 1 118 8.50E-34 151.8 6596 cellular  
organisms;Eukaryota;Opisthokonta;Metazoa;Eumetazoa;Bilateria;Protostomia;  
Spiralia;Lophotrochozoa;Mollusca;Bivalvia;Autobranchia;Heteroconchia;Euhe  
terodonta;Imparidentia;Venerida;Veneroidea;Veneridae;Mercenaria;Mercenari  
a mercenaria

UdeM00000022589 6596 151.8 UdeM00000022589 XP\_045184330.1 56.8 118  
51 0 1 118 1 118 7.90E-34 151.8 6596 cellular  
organisms;Eukaryota;Opisthokonta;Metazoa;Eumetazoa;Bilateria;Protostomia;  
Spiralia;Lophotrochozoa;Mollusca;Bivalvia;Autobranchia;Heteroconchia;Euhe  
terodonta;Imparidentia;Venerida;Veneroidea;Veneridae;Mercenaria;Mercenari  
a mercenaria

UdeM00000022590 6579 819.3 UdeM00000022590 XP\_033749738.1 75.8 520  
 125 1 1 520 1 519 2.80E-234 819.3 6579 cellular  
 organisms;Eukaryota;Opisthokonta;Metazoa;Eumetazoa;Bilateria;Protostomia;  
 Spiralia;Lophotrochozoa;Mollusca;Bivalvia;Autobranchia;Pteriomorphia;Pect  
 inida;Pectinoidea;Pectinidae;Pecten;Pecten maximus  
 UdeM00000022591 40690 125.6 UdeM00000022591 XP\_034006674.1 35.2 196  
 122 3 8 200 11 204 7.40E-26 125.6 40690 cellular  
 organisms;Eukaryota;Opisthokonta;Metazoa;Eumetazoa;Bilateria;Deuterostomi  
 a;Chordata;Craniata;Vertebrata;Gnathostomata;Teleostomi;Euteleostomi;Acti  
 nopterygii;Actinopteri;Neopterygii;Teleostei;Osteoglossocephalai;Clupeoce  
 phala;Euteleosteomorpha;Neoteleostei;Eurypterygia;Ctenosquamata;Acanthomo  
 rphata;Euacanthomorphacea;Percomorphaceae;Eupercaria;Perciformes;Notothen  
 ioidei;Nototheniidae;Trematomus;Trematomus bernacchii  
 UdeM00000022592 6565 293.1 UdeM00000022592 XP\_022339231.1 86.7 166  
 20 1 1 166 1 164 2.30E-76 293.1 6565 cellular  
 organisms;Eukaryota;Opisthokonta;Metazoa;Eumetazoa;Bilateria;Protostomia;  
 Spiralia;Lophotrochozoa;Mollusca;Bivalvia;Autobranchia;Pteriomorphia;Ostr  
 eida;Ostreoidea;Ostreidae;Crassostrea;Crassostrea virginica  
 UdeM00000022593 29159 542 UdeM00000022593 XP\_034334854.1 28 1615  
 912 50 86 1653 141 1552 2.70E-150 542 29159 cellular  
 organisms;Eukaryota;Opisthokonta;Metazoa;Eumetazoa;Bilateria;Protostomia;  
 Spiralia;Lophotrochozoa;Mollusca;Bivalvia;Autobranchia;Pteriomorphia;Ostr  
 eida;Ostreoidea;Ostreidae;Crassostrea;Crassostrea gigas  
 UdeM00000022594 1735272 303.5 UdeM00000022594 XP\_041362731.1 60  
 245 95 2 33 277 1 242 2.80E-79 303.5 1735272  
 cellular  
 organisms;Eukaryota;Opisthokonta;Metazoa;Eumetazoa;Bilateria;Protostomia;  
 Spiralia;Lophotrochozoa;Mollusca;Gastropoda;Neomphalina;Neomphaloidea;Pel  
 tospiridae;Gigantopelta;Gigantopelta aegis  
 UdeM00000022595 1735272 223 UdeM00000022595 XP\_041362731.1 60.6  
 180 69 1 1 180 65 242 3.20E-55 223 1735272  
 cellular  
 organisms;Eukaryota;Opisthokonta;Metazoa;Eumetazoa;Bilateria;Protostomia;  
 Spiralia;Lophotrochozoa;Mollusca;Gastropoda;Neomphalina;Neomphaloidea;Pel  
 tospiridae;Gigantopelta;Gigantopelta aegis  
 UdeM00000022597 6596 91.7 UdeM00000022597 XP\_045216307.1 44.7 103  
 54 1 213 312 293 395 1.80E-15 91.7 6596 cellular  
 organisms;Eukaryota;Opisthokonta;Metazoa;Eumetazoa;Bilateria;Protostomia;  
 Spiralia;Lophotrochozoa;Mollusca;Bivalvia;Autobranchia;Heteroconchia;Euhe  
 terodonta;Imparidentia;Venerida;Veneroidea;Veneridae;Mercenaria;Mercenari  
 a mercenaria  
 UdeM00000022598 6579 1456.4 UdeM00000022598 XP\_033750471.1 65.3  
 1062 363 4 7 1063 336 1396 0.00E+00 1456.4 6579  
 cellular  
 organisms;Eukaryota;Opisthokonta;Metazoa;Eumetazoa;Bilateria;Protostomia;  
 Spiralia;Lophotrochozoa;Mollusca;Bivalvia;Autobranchia;Pteriomorphia;Pect  
 inida;Pectinoidea;Pectinidae;Pecten;Pecten maximus  
 UdeM00000022599 1735272 452.2 UdeM00000022599 XP\_041373227.1 70.5  
 315 92 1 51 365 18 331 6.30E-124 452.2 1735272  
 cellular  
 organisms;Eukaryota;Opisthokonta;Metazoa;Eumetazoa;Bilateria;Protostomia;  
 Spiralia;Lophotrochozoa;Mollusca;Gastropoda;Neomphalina;Neomphaloidea;Pel  
 tospiridae;Gigantopelta;Gigantopelta aegis

UdeM00000022600 1735272 439.1 UdeM00000022600 XP\_041362904.1 57.2  
 362 154 1 1 361 1 362 5.50E-120 439.1 1735272  
 cellular  
 organisms;Eukaryota;Opisthokonta;Metazoa;Eumetazoa;Bilateria;Protostomia;  
 Spiralia;Lophotrochozoa;Mollusca;Gastropoda;Neomphalina;Neomphaloidea;Pel  
 tospiridae;Gigantopelta;Gigantopelta aegis  
 UdeM00000022603 6579 136 UdeM00000022603 XP\_033750411.1 27.3 429  
 275 6 80 483 32 448 1.30E-28 136 6579 cellular  
 organisms;Eukaryota;Opisthokonta;Metazoa;Eumetazoa;Bilateria;Protostomia;  
 Spiralia;Lophotrochozoa;Mollusca;Bivalvia;Autobranchia;Pteriomorpha;Pect  
 inida;Pectinoidea;Pectinidae;Pecten;Pecten maximus  
 UdeM00000022604 6596 697.2 UdeM00000022604 XP\_045156318.1 82.9 403  
 67 2 1 402 4 405 1.20E-197 697.2 6596 cellular  
 organisms;Eukaryota;Opisthokonta;Metazoa;Eumetazoa;Bilateria;Protostomia;  
 Spiralia;Lophotrochozoa;Mollusca;Bivalvia;Autobranchia;Heteroconchia;Euhe  
 terodonta;Imparidentia;Venerida;Veneroidea;Veneridae;Mercenaria;Mercenari  
 a mercenaria  
 UdeM00000022605 6579 113.2 UdeM00000022605 XP\_033751014.1 38.8 214  
 108 6 71 284 1 191 6.90E-22 113.2 6579 cellular  
 organisms;Eukaryota;Opisthokonta;Metazoa;Eumetazoa;Bilateria;Protostomia;  
 Spiralia;Lophotrochozoa;Mollusca;Bivalvia;Autobranchia;Pteriomorpha;Pect  
 inida;Pectinoidea;Pectinidae;Pecten;Pecten maximus  
 UdeM00000022606 6596 70.9 UdeM00000022606 XP\_045216208.1 23.2 280  
 164 5 41 269 32 311 2.90E-09 70.9 6596 cellular  
 organisms;Eukaryota;Opisthokonta;Metazoa;Eumetazoa;Bilateria;Protostomia;  
 Spiralia;Lophotrochozoa;Mollusca;Bivalvia;Autobranchia;Heteroconchia;Euhe  
 terodonta;Imparidentia;Venerida;Veneroidea;Veneridae;Mercenaria;Mercenari  
 a mercenaria  
 UdeM00000022607 6596 89.7 UdeM00000022607 XP\_045189922.1 24.5 318  
 206 10 9 303 22 328 8.80E-15 89.7 6596 cellular  
 organisms;Eukaryota;Opisthokonta;Metazoa;Eumetazoa;Bilateria;Protostomia;  
 Spiralia;Lophotrochozoa;Mollusca;Bivalvia;Autobranchia;Heteroconchia;Euhe  
 terodonta;Imparidentia;Venerida;Veneroidea;Veneridae;Mercenaria;Mercenari  
 a mercenaria  
 UdeM00000022609 6596 110.5 UdeM00000022609 XP\_045189921.1 26.8 336  
 217 10 16 331 8 334 4.70E-21 110.5 6596 cellular  
 organisms;Eukaryota;Opisthokonta;Metazoa;Eumetazoa;Bilateria;Protostomia;  
 Spiralia;Lophotrochozoa;Mollusca;Bivalvia;Autobranchia;Heteroconchia;Euhe  
 terodonta;Imparidentia;Venerida;Veneroidea;Veneridae;Mercenaria;Mercenari  
 a mercenaria  
 UdeM00000022611 6596 280.4 UdeM00000022611 XP\_045156356.1 50.9 277  
 125 3 5 272 36 310 2.40E-72 280.4 6596 cellular  
 organisms;Eukaryota;Opisthokonta;Metazoa;Eumetazoa;Bilateria;Protostomia;  
 Spiralia;Lophotrochozoa;Mollusca;Bivalvia;Autobranchia;Heteroconchia;Euhe  
 terodonta;Imparidentia;Venerida;Veneroidea;Veneridae;Mercenaria;Mercenari  
 a mercenaria  
 UdeM00000022612 6596 182.6 UdeM00000022612 XP\_045189922.1 34.1 399  
 229 12 3 389 8 384 9.80E-43 182.6 6596 cellular  
 organisms;Eukaryota;Opisthokonta;Metazoa;Eumetazoa;Bilateria;Protostomia;  
 Spiralia;Lophotrochozoa;Mollusca;Bivalvia;Autobranchia;Heteroconchia;Euhe  
 terodonta;Imparidentia;Venerida;Veneroidea;Veneridae;Mercenaria;Mercenari  
 a mercenaria  
 UdeM00000022613 6596 210.3 UdeM00000022613 XP\_045216763.1 83.9 124  
 20 0 3 126 2 125 1.40E-51 210.3 6596 cellular

organisms;Eukaryota;Opisthokonta;Metazoa;Eumetazoa;Bilateria;Protostomia;Spiralia;Lophotrochozoa;Mollusca;Bivalvia;Autobranhia;Heteroconchia;Euherodonta;Imparidentia;Venerida;Veneroidea;Veneridae;Mercenaria;Mercenaria mercenaria

UdeM00000022614 6596 657.1 UdeM00000022614 XP\_045216763.1 88.1 353  
42 0 3 355 2 354 1.20E-185 657.1 6596 cellular

organisms;Eukaryota;Opisthokonta;Metazoa;Eumetazoa;Bilateria;Protostomia;Spiralia;Lophotrochozoa;Mollusca;Bivalvia;Autobranhia;Heteroconchia;Euherodonta;Imparidentia;Venerida;Veneroidea;Veneridae;Mercenaria;Mercenaria mercenaria

UdeM00000022615 6596 237.7 UdeM00000022615 XP\_045184362.1 36.2 362  
201 8 144 490 151 497 3.20E-59 237.7 6596 cellular

organisms;Eukaryota;Opisthokonta;Metazoa;Eumetazoa;Bilateria;Protostomia;Spiralia;Lophotrochozoa;Mollusca;Bivalvia;Autobranhia;Heteroconchia;Euherodonta;Imparidentia;Venerida;Veneroidea;Veneridae;Mercenaria;Mercenaria mercenaria

UdeM00000022616 6573 255.8 UdeM00000022616 XP\_021360569.1 48 248  
119 2 4 241 5 252 5.70E-65 255.8 6573 cellular

organisms;Eukaryota;Opisthokonta;Metazoa;Eumetazoa;Bilateria;Protostomia;Spiralia;Lophotrochozoa;Mollusca;Bivalvia;Autobranhia;Pteriormorphia;Pectinida;Pectinoidea;Pectinidae;Mizuhopecten;Mizuhopecten yessoensis

UdeM00000022618 6596 183 UdeM00000022618 XP\_045216690.1 82.7 104  
18 0 1 104 1 104 2.00E-43 183 6596 cellular

organisms;Eukaryota;Opisthokonta;Metazoa;Eumetazoa;Bilateria;Protostomia;Spiralia;Lophotrochozoa;Mollusca;Bivalvia;Autobranhia;Heteroconchia;Euherodonta;Imparidentia;Venerida;Veneroidea;Veneridae;Mercenaria;Mercenaria mercenaria

UdeM00000022619 6596 792.7 UdeM00000022619 XP\_045216690.1 63.3 586  
214 1 2 586 111 696 3.20E-226 792.7 6596 cellular

organisms;Eukaryota;Opisthokonta;Metazoa;Eumetazoa;Bilateria;Protostomia;Spiralia;Lophotrochozoa;Mollusca;Bivalvia;Autobranhia;Heteroconchia;Euherodonta;Imparidentia;Venerida;Veneroidea;Veneridae;Mercenaria;Mercenaria mercenaria

UdeM00000022620 6596 793.1 UdeM00000022620 XP\_045216690.1 63.9 582  
209 1 2 582 111 692 2.40E-226 793.1 6596 cellular

organisms;Eukaryota;Opisthokonta;Metazoa;Eumetazoa;Bilateria;Protostomia;Spiralia;Lophotrochozoa;Mollusca;Bivalvia;Autobranhia;Heteroconchia;Euherodonta;Imparidentia;Venerida;Veneroidea;Veneridae;Mercenaria;Mercenaria mercenaria

UdeM00000022621 1735272 394.4 UdeM00000022621 XP\_041376454.1 39.8  
522 289 7 26 536 25 532 2.30E-106 394.4 1735272  
cellular

organisms;Eukaryota;Opisthokonta;Metazoa;Eumetazoa;Bilateria;Protostomia;Spiralia;Lophotrochozoa;Mollusca;Gastropoda;Neomphalina;Neomphaloidea;Peltospiridae;Gigantopelta;Gigantopelta aegis

UdeM00000022622 6596 561.6 UdeM00000022622 XP\_045215182.1 41 703  
376 11 26 698 2 695 1.40E-156 561.6 6596 cellular

organisms;Eukaryota;Opisthokonta;Metazoa;Eumetazoa;Bilateria;Protostomia;Spiralia;Lophotrochozoa;Mollusca;Bivalvia;Autobranhia;Heteroconchia;Euherodonta;Imparidentia;Venerida;Veneroidea;Veneridae;Mercenaria;Mercenaria mercenaria

UdeM00000022623 45264 97.8 UdeM00000022623 XP\_044184709.1 51.7 87  
42 0 38 124 55 141 2.20E-17 97.8 45264 cellular

organisms;Eukaryota;Opisthokonta;Metazoa;Eumetazoa;Cnidaria;Anthozoa;Hexa

corallia;Scleractinia;Astrocoeniina;Acroporidae;Acropora;Acropora  
millepora  
UdeM00000022624 45264 235.7 UdeM00000022624 XP\_044184031.1 45.9 281  
136 6 1 272 213 486 6.80E-59 235.7 45264 cellular  
organisms;Eukaryota;Opisthokonta;Metazoa;Eumetazoa;Cnidaria;Anthozoa;Hexa  
corallia;Scleractinia;Astrocoeniina;Acroporidae;Acropora;Acropora  
millepora  
UdeM00000022626 45264 92 UdeM00000022626 XP\_044165143.1 45.8 107  
56 2 2 106 367 473 5.20E-16 92 45264 cellular  
organisms;Eukaryota;Opisthokonta;Metazoa;Eumetazoa;Cnidaria;Anthozoa;Hexa  
corallia;Scleractinia;Astrocoeniina;Acroporidae;Acropora;Acropora  
millepora  
UdeM00000022625 45264 361.3 UdeM00000022625 XP\_044165143.1 45.6 443  
175 6 27 407 35 473 1.60E-96 361.3 45264 cellular  
organisms;Eukaryota;Opisthokonta;Metazoa;Eumetazoa;Cnidaria;Anthozoa;Hexa  
corallia;Scleractinia;Astrocoeniina;Acroporidae;Acropora;Acropora  
millepora  
UdeM00000022627 45264 314.7 UdeM00000022627 XP\_044165143.1 56.9 274  
113 2 42 314 35 304 1.30E-82 314.7 45264 cellular  
organisms;Eukaryota;Opisthokonta;Metazoa;Eumetazoa;Cnidaria;Anthozoa;Hexa  
corallia;Scleractinia;Astrocoeniina;Acroporidae;Acropora;Acropora  
millepora  
UdeM00000022628 6596 80.9 UdeM00000022628 XP\_045215306.1 31 197  
125 7 35 227 1 190 2.30E-12 80.9 6596 cellular  
organisms;Eukaryota;Opisthokonta;Metazoa;Eumetazoa;Bilateria;Protostomia;  
Spiralia;Lophotrochozoa;Mollusca;Bivalvia;Autobranchia;Heteroconchia;Euhe  
terodonta;Imparidentia;Venerida;Veneroidea;Veneridae;Mercenaria;Mercenari  
a mercenaria  
UdeM00000022629 7574 144.1 UdeM00000022629 XP\_013405563.1 34.8 267  
137 6 1 264 146 378 2.70E-31 144.1 7574 cellular  
organisms;Eukaryota;Opisthokonta;Metazoa;Eumetazoa;Bilateria;Protostomia;  
Spiralia;Lophotrochozoa;Brachiopoda;Linguliformea;Lingulata;Lingulida;Lin  
guloidea;Lingulidae;Lingula;Lingula anatina  
UdeM00000022631 6579 72.4 UdeM00000022631 XP\_033739209.1 41.6 101  
43 2 2 97 159 248 3.70E-10 72.4 6579 cellular  
organisms;Eukaryota;Opisthokonta;Metazoa;Eumetazoa;Bilateria;Protostomia;  
Spiralia;Lophotrochozoa;Mollusca;Bivalvia;Autobranchia;Pteriomorphia;Pect  
inida;Pectinoidea;Pectinidae;Pecten;Pecten maximus  
UdeM00000022632 6579 112.1 UdeM00000022632 XP\_033739209.1 58.1 86  
36 0 9 94 2 87 4.40E-22 112.1 6579 cellular  
organisms;Eukaryota;Opisthokonta;Metazoa;Eumetazoa;Bilateria;Protostomia;  
Spiralia;Lophotrochozoa;Mollusca;Bivalvia;Autobranchia;Pteriomorphia;Pect  
inida;Pectinoidea;Pectinidae;Pecten;Pecten maximus  
UdeM00000022633 6596 211.5 UdeM00000022633 XP\_045187536.1 61.6 159  
60 1 1 158 566 724 8.00E-52 211.5 6596 cellular  
organisms;Eukaryota;Opisthokonta;Metazoa;Eumetazoa;Bilateria;Protostomia;  
Spiralia;Lophotrochozoa;Mollusca;Bivalvia;Autobranchia;Heteroconchia;Euhe  
terodonta;Imparidentia;Venerida;Veneroidea;Veneridae;Mercenaria;Mercenari  
a mercenaria  
UdeM00000022634 6596 179.9 UdeM00000022634 XP\_045187536.1 37.7 329  
49 2 1 173 396 724 2.80E-42 179.9 6596 cellular  
organisms;Eukaryota;Opisthokonta;Metazoa;Eumetazoa;Bilateria;Protostomia;  
Spiralia;Lophotrochozoa;Mollusca;Bivalvia;Autobranchia;Heteroconchia;Euhe

terodonta;Imparidentia;Venerida;Veneroidea;Veneridae;Mercenaria;Mercenari  
 a mercenaria  
 UdeM00000022635 6596 179.1 UdeM00000022635 XP\_045187536.1 71.7 127  
 36 0 1 127 396 522 3.70E-42 179.1 6596 cellular  
 organisms;Eukaryota;Opisthokonta;Metazoa;Eumetazoa;Bilateria;Protostomia;  
 Spiralia;Lophotrochozoa;Mollusca;Bivalvia;Autobranhia;Heteroconchia;Euhe  
 terodonta;Imparidentia;Venerida;Veneroidea;Veneridae;Mercenaria;Mercenari  
 a mercenaria  
 UdeM00000022638 6579 150.6 UdeM00000022638 XP\_033739209.1 54.2 131  
 60 0 9 139 2 132 1.50E-33 150.6 6579 cellular  
 organisms;Eukaryota;Opisthokonta;Metazoa;Eumetazoa;Bilateria;Protostomia;  
 Spiralia;Lophotrochozoa;Mollusca;Bivalvia;Autobranhia;Pteriormorphia;Pect  
 inida;Pectinoidea;Pectinidae;Pecten;Pecten maximus  
 UdeM00000022639 6596 238.4 UdeM00000022639 XP\_045215306.1 46.2 355  
 161 11 48 381 248 593 1.50E-59 238.4 6596 cellular  
 organisms;Eukaryota;Opisthokonta;Metazoa;Eumetazoa;Bilateria;Protostomia;  
 Spiralia;Lophotrochozoa;Mollusca;Bivalvia;Autobranhia;Heteroconchia;Euhe  
 terodonta;Imparidentia;Venerida;Veneroidea;Veneridae;Mercenaria;Mercenari  
 a mercenaria  
 UdeM00000022640 6596 245 UdeM00000022640 XP\_045215306.1 42.7 361  
 166 6 29 381 620 947 1.60E-61 245 6596 cellular  
 organisms;Eukaryota;Opisthokonta;Metazoa;Eumetazoa;Bilateria;Protostomia;  
 Spiralia;Lophotrochozoa;Mollusca;Bivalvia;Autobranhia;Heteroconchia;Euhe  
 terodonta;Imparidentia;Venerida;Veneroidea;Veneridae;Mercenaria;Mercenari  
 a mercenaria  
 UdeM00000022641 6596 167.2 UdeM00000022641 XP\_045215306.1 42.7 234  
 103 2 2 235 634 836 2.60E-38 167.2 6596 cellular  
 organisms;Eukaryota;Opisthokonta;Metazoa;Eumetazoa;Bilateria;Protostomia;  
 Spiralia;Lophotrochozoa;Mollusca;Bivalvia;Autobranhia;Heteroconchia;Euhe  
 terodonta;Imparidentia;Venerida;Veneroidea;Veneridae;Mercenaria;Mercenari  
 a mercenaria  
 UdeM00000022642 6596 841.6 UdeM00000022642 XP\_045165907.1 58 633  
 264 2 8 640 6 636 7.00E-241 841.6 6596 cellular  
 organisms;Eukaryota;Opisthokonta;Metazoa;Eumetazoa;Bilateria;Protostomia;  
 Spiralia;Lophotrochozoa;Mollusca;Bivalvia;Autobranhia;Heteroconchia;Euhe  
 terodonta;Imparidentia;Venerida;Veneroidea;Veneridae;Mercenaria;Mercenari  
 a mercenaria  
 UdeM00000022643 6596 205.3 UdeM00000022643 XP\_045215306.1 39.4 348  
 167 8 6 329 1005 1332 1.20E-49 205.3 6596 cellular  
 organisms;Eukaryota;Opisthokonta;Metazoa;Eumetazoa;Bilateria;Protostomia;  
 Spiralia;Lophotrochozoa;Mollusca;Bivalvia;Autobranhia;Heteroconchia;Euhe  
 terodonta;Imparidentia;Venerida;Veneroidea;Veneridae;Mercenaria;Mercenari  
 a mercenaria  
 UdeM00000022644 6596 171 UdeM00000022644 XP\_045215306.1 41 310  
 150 8 750 1051 2340 2624 1.60E-38 171 6596 cellular  
 organisms;Eukaryota;Opisthokonta;Metazoa;Eumetazoa;Bilateria;Protostomia;  
 Spiralia;Lophotrochozoa;Mollusca;Bivalvia;Autobranhia;Heteroconchia;Euhe  
 terodonta;Imparidentia;Venerida;Veneroidea;Veneridae;Mercenaria;Mercenari  
 a mercenaria  
 UdeM00000022645 151771 338.2 UdeM00000022645 XP\_028408207.1 48.3  
 329 164 3 2 326 280 606 1.20E-89 338.2 151771  
 cellular  
 organisms;Eukaryota;Opisthokonta;Metazoa;Eumetazoa;Cnidaria;Anthozoa;Octo

corallia;Alcyonacea;Alcyoniina;Nephtheidae;Dendronephthya;Dendronephthya  
 gigantea  
 UdeM00000022646 451745 93.6 UdeM00000022646 XP\_037553707.1 41  
 105 56 1 17 121 536 634 1.90E-16 93.6 451745  
 cellular  
 organisms;Eukaryota;Opisthokonta;Metazoa;Eumetazoa;Bilateria;Deuterostomi  
 a;Chordata;Craniata;Vertebrata;Gnathostomata;Teleostomi;Euteleostomi;Acti  
 nopterygii;Actinopteri;Neopterygii;Teleostei;Osteoglossocephalai;Clupeoce  
 phala;Euteleostomorpha;Neoteleostei;Eurypterygia;Ctenosquamata;Acanthomo  
 rphata;Euacanthomorphacea;Percomorphaceae;Ovalentaria;Atherinomorphae;Cyp  
 rinodontiformes;Aplocheiloidei;Rivulidae;Nematolebias;Nematolebias whitei  
 UdeM00000022647 6565 466.8 UdeM00000022647 XP\_022332655.1 86.9 267  
 35 0 18 284 22 288 1.90E-128 466.8 6565 cellular  
 organisms;Eukaryota;Opisthokonta;Metazoa;Eumetazoa;Bilateria;Protostomia;  
 Spiralia;Lophotrochozoa;Mollusca;Bivalvia;Autobranchia;Pteriormorphia;Ostr  
 eida;Ostreoidea;Ostreidae;Crassostrea;Crassostrea virginica  
 UdeM00000022648 6596 424.9 UdeM00000022648 XP\_045156573.1 68.4 294  
 92 1 1 293 1 294 9.00E-116 424.9 6596 cellular  
 organisms;Eukaryota;Opisthokonta;Metazoa;Eumetazoa;Bilateria;Protostomia;  
 Spiralia;Lophotrochozoa;Mollusca;Bivalvia;Autobranchia;Heteroconchia;Euhe  
 terodonta;Imparidentia;Venerida;Veneroidea;Veneridae;Mercenaria;Mercenari  
 a mercenaria  
 UdeM00000022649 6596 348.6 UdeM00000022649 XP\_045216758.1 52.5 358  
 163 4 22 375 17 371 1.00E-92 348.6 6596 cellular  
 organisms;Eukaryota;Opisthokonta;Metazoa;Eumetazoa;Bilateria;Protostomia;  
 Spiralia;Lophotrochozoa;Mollusca;Bivalvia;Autobranchia;Heteroconchia;Euhe  
 terodonta;Imparidentia;Venerida;Veneroidea;Veneridae;Mercenaria;Mercenari  
 a mercenaria  
 UdeM00000022651 218467 155.6 UdeM00000022651 XP\_023212519.1 49.4  
 168 73 2 1 168 1 156 5.90E-35 155.6 218467  
 cellular  
 organisms;Eukaryota;Opisthokonta;Metazoa;Eumetazoa;Bilateria;Protostomia;  
 Ecdysozoa;Panarthropoda;Arthropoda;Chelicerata;Arachnida;Scorpiones;Buthi  
 da;Buthoidea;Buthidae;Centruroides;Centruroides sculpturatus  
 UdeM00000022652 6526 61.2 UdeM00000022652 XP\_013095873.1 39.5 76  
 43 1 36 111 50 122 2.40E-06 61.2 6526 cellular  
 organisms;Eukaryota;Opisthokonta;Metazoa;Eumetazoa;Bilateria;Protostomia;  
 Spiralia;Lophotrochozoa;Mollusca;Gastropoda;Heterobranchia;Euthyneura;Pan  
 pulmonata;Hygrophila;Lymnaeioidea;Planorbidae;Biomphalaria;Biomphalaria  
 glabrata  
 UdeM00000022653 6579 550.1 UdeM00000022653 XP\_033749223.1 82.6 327  
 57 0 1 327 1151 1477 2.00E-153 550.1 6579 cellular  
 organisms;Eukaryota;Opisthokonta;Metazoa;Eumetazoa;Bilateria;Protostomia;  
 Spiralia;Lophotrochozoa;Mollusca;Bivalvia;Autobranchia;Pteriormorphia;Pect  
 inida;Pectinoidea;Pectinidae;Pecten;Pecten maximus  
 UdeM00000022654 6596 414.1 UdeM00000022654 XP\_045216835.1 57.3 648  
 223 18 5 632 515 1128 3.20E-112 414.1 6596 cellular  
 organisms;Eukaryota;Opisthokonta;Metazoa;Eumetazoa;Bilateria;Protostomia;  
 Spiralia;Lophotrochozoa;Mollusca;Bivalvia;Autobranchia;Heteroconchia;Euhe  
 terodonta;Imparidentia;Venerida;Veneroidea;Veneridae;Mercenaria;Mercenari  
 a mercenaria  
 UdeM00000022655 6573 640.6 UdeM00000022655 XP\_021364125.1 78.1 425  
 68 3 17 428 1 413 1.50E-180 640.6 6573 cellular  
 organisms;Eukaryota;Opisthokonta;Metazoa;Eumetazoa;Bilateria;Protostomia;



Spiralia;Lophotrochozoa;Mollusca;Bivalvia;Autobranchia;Pteriomorpha;Pectinida;Pectinoidea;Pectinidae;Mizuhopecten;Mizuhopecten yessoensis  
UdeM00000022656 37621 215.3 UdeM00000022656 XP\_014675321.1 59 166  
65 2 13 177 73 236 6.20E-53 215.3 37621 cellular  
organisms;Eukaryota;Opisthokonta;Metazoa;Eumetazoa;Bilateria;Protostomia;  
Ecdysozoa;Scalidophora;Priapulida;Priapulimorpha;Priapulimorphida;Priapulidae;Priapulus;Priapulus caudatus  
UdeM00000022657 37621 124.4 UdeM00000022657 XP\_014675321.1 55.6 108  
45 2 1 107 131 236 8.80E-26 124.4 37621 cellular  
organisms;Eukaryota;Opisthokonta;Metazoa;Eumetazoa;Bilateria;Protostomia;  
Ecdysozoa;Scalidophora;Priapulida;Priapulimorpha;Priapulimorphida;Priapulidae;Priapulus;Priapulus caudatus  
UdeM00000022658 29159 65.9 UdeM00000022658 XP\_034324494.1 41 83  
49 0 54 136 167 249 5.80E-08 65.9 29159 cellular  
organisms;Eukaryota;Opisthokonta;Metazoa;Eumetazoa;Bilateria;Protostomia;  
Spiralia;Lophotrochozoa;Mollusca;Bivalvia;Autobranchia;Pteriomorpha;Ostr  
eida;Ostreoidea;Ostreidae;Crassostrea;Crassostrea gigas  
UdeM00000022659 225164 145.2 UdeM00000022659 XP\_009044157.1 72.8  
92 24 1 1 91 1 92 9.60E-32 145.2 225164  
cellular  
organisms;Eukaryota;Opisthokonta;Metazoa;Eumetazoa;Bilateria;Protostomia;  
Spiralia;Lophotrochozoa;Mollusca;Gastropoda;Patellogastropoda;Lottioidea;  
Lottiidae;Lottia;Lottia gigantea  
UdeM00000022660 6596 331.3 UdeM00000022660 XP\_045184046.1 41.4 399  
221 5 31 424 19 409 3.30E-87 331.3 6596 cellular  
organisms;Eukaryota;Opisthokonta;Metazoa;Eumetazoa;Bilateria;Protostomia;  
Spiralia;Lophotrochozoa;Mollusca;Bivalvia;Autobranchia;Heteroconchia;Euhe  
terodonta;Imparidentia;Venerida;Veneroidea;Veneridae;Mercenaria;Mercenari  
a mercenaria  
UdeM00000022665 6596 579.3 UdeM00000022665 XP\_045156683.1 38.4 789  
438 7 102 884 17 763 8.20E-162 579.3 6596 cellular  
organisms;Eukaryota;Opisthokonta;Metazoa;Eumetazoa;Bilateria;Protostomia;  
Spiralia;Lophotrochozoa;Mollusca;Bivalvia;Autobranchia;Heteroconchia;Euhe  
terodonta;Imparidentia;Venerida;Veneroidea;Veneridae;Mercenaria;Mercenari  
a mercenaria  
UdeM00000022664 6596 578.6 UdeM00000022664 XP\_045156683.1 40.1 725  
396 5 102 822 17 707 2.30E-161 578.6 6596 cellular  
organisms;Eukaryota;Opisthokonta;Metazoa;Eumetazoa;Bilateria;Protostomia;  
Spiralia;Lophotrochozoa;Mollusca;Bivalvia;Autobranchia;Heteroconchia;Euhe  
terodonta;Imparidentia;Venerida;Veneroidea;Veneridae;Mercenaria;Mercenari  
a mercenaria  
UdeM00000022666 6596 1889.4 UdeM00000022666 XP\_045215952.1 67.6  
1455 455 6 6 1445 255 1707 0.00E+00 1889.4 6596  
cellular  
organisms;Eukaryota;Opisthokonta;Metazoa;Eumetazoa;Bilateria;Protostomia;  
Spiralia;Lophotrochozoa;Mollusca;Bivalvia;Autobranchia;Heteroconchia;Euhe  
terodonta;Imparidentia;Venerida;Veneroidea;Veneridae;Mercenaria;Mercenari  
a mercenaria  
UdeM00000022667 6596 233.4 UdeM00000022667 XP\_045215952.1 83.2 125  
21 0 1 125 69 193 1.60E-58 233.4 6596 cellular  
organisms;Eukaryota;Opisthokonta;Metazoa;Eumetazoa;Bilateria;Protostomia;  
Spiralia;Lophotrochozoa;Mollusca;Bivalvia;Autobranchia;Heteroconchia;Euhe  
terodonta;Imparidentia;Venerida;Veneroidea;Veneridae;Mercenaria;Mercenari  
a mercenaria

UdeM00000022668 6596 221.9 UdeM00000022668 XP\_045198374.1 36.1 413  
 116 6 1 275 1 403 1.00E-54 221.9 6596 cellular  
 organisms;Eukaryota;Opisthokonta;Metazoa;Eumetazoa;Bilateria;Protostomia;  
 Spiralia;Lophotrochozoa;Mollusca;Bivalvia;Autobranchia;Heteroconchia;Euhe  
 terodonta;Imparidentia;Venerida;Veneroidea;Veneridae;Mercenaria;Mercenari  
 a mercenaria  
 UdeM00000022669 6565 188.3 UdeM00000022669 XP\_022327962.1 39.4 274  
 112 3 1 220 445 718 1.00E-44 188.3 6565 cellular  
 organisms;Eukaryota;Opisthokonta;Metazoa;Eumetazoa;Bilateria;Protostomia;  
 Spiralia;Lophotrochozoa;Mollusca;Bivalvia;Autobranchia;Pteriormorphia;Ostr  
 eida;Ostreoidea;Ostreidae;Crassostrea;Crassostrea virginica  
 UdeM00000022670 6596 314.3 UdeM00000022670 XP\_045215943.1 45.1 350  
 192 0 91 440 96 445 2.50E-82 314.3 6596 cellular  
 organisms;Eukaryota;Opisthokonta;Metazoa;Eumetazoa;Bilateria;Protostomia;  
 Spiralia;Lophotrochozoa;Mollusca;Bivalvia;Autobranchia;Heteroconchia;Euhe  
 terodonta;Imparidentia;Venerida;Veneroidea;Veneridae;Mercenaria;Mercenari  
 a mercenaria  
 UdeM00000022671 6596 461.8 UdeM00000022671 XP\_045215944.1 61.3 403  
 135 3 4 385 5 407 8.30E-127 461.8 6596 cellular  
 organisms;Eukaryota;Opisthokonta;Metazoa;Eumetazoa;Bilateria;Protostomia;  
 Spiralia;Lophotrochozoa;Mollusca;Bivalvia;Autobranchia;Heteroconchia;Euhe  
 terodonta;Imparidentia;Venerida;Veneroidea;Veneridae;Mercenaria;Mercenari  
 a mercenaria  
 UdeM00000022672 6596 369.8 UdeM00000022672 XP\_045215941.1 71.5 508  
 80 2 1 448 1 503 5.20E-99 369.8 6596 cellular  
 organisms;Eukaryota;Opisthokonta;Metazoa;Eumetazoa;Bilateria;Protostomia;  
 Spiralia;Lophotrochozoa;Mollusca;Bivalvia;Autobranchia;Heteroconchia;Euhe  
 terodonta;Imparidentia;Venerida;Veneroidea;Veneridae;Mercenaria;Mercenari  
 a mercenaria  
 UdeM00000022673 6596 374.4 UdeM00000022673 XP\_045215941.1 72 508  
 77 2 1 448 1 503 2.00E-100 374.4 6596 cellular  
 organisms;Eukaryota;Opisthokonta;Metazoa;Eumetazoa;Bilateria;Protostomia;  
 Spiralia;Lophotrochozoa;Mollusca;Bivalvia;Autobranchia;Heteroconchia;Euhe  
 terodonta;Imparidentia;Venerida;Veneroidea;Veneridae;Mercenaria;Mercenari  
 a mercenaria  
 UdeM00000022674 6500 107.1 UdeM00000022674 XP\_005088944.1 33.5 263  
 132 9 78 304 75 330 4.40E-20 107.1 6500 cellular  
 organisms;Eukaryota;Opisthokonta;Metazoa;Eumetazoa;Bilateria;Protostomia;  
 Spiralia;Lophotrochozoa;Mollusca;Gastropoda;Heterobranchia;Euthyneura;Tec  
 tipleura;Aplysiida;Aplysioidea;Aplysiidae;Aplysia;Aplysia californica  
 UdeM00000022675 6500 106.3 UdeM00000022675 XP\_005088944.1 33.5 263  
 132 9 17 243 75 330 6.20E-20 106.3 6500 cellular  
 organisms;Eukaryota;Opisthokonta;Metazoa;Eumetazoa;Bilateria;Protostomia;  
 Spiralia;Lophotrochozoa;Mollusca;Gastropoda;Heterobranchia;Euthyneura;Tec  
 tipleura;Aplysiida;Aplysioidea;Aplysiidae;Aplysia;Aplysia californica  
 UdeM00000022676 72036 340.5 UdeM00000022676 XP\_040576246.1 41.8 426  
 238 7 9 429 43 463 3.10E-90 340.5 72036 cellular  
 organisms;Eukaryota;Opisthokonta;Metazoa;Eumetazoa;Bilateria;Protostomia;  
 Ecdysozoa;Panarthropoda;Arthropoda;Mandibulata;Pancrustacea;Crustacea;Mul  
 ticrustacea;Hexanauplia;Copepoda;Neocopepoda;Podoplea;Siphonostomatoida;C  
 aligidae;Lepeophtheirus;Lepeophtheirus salmonis  
 UdeM00000022677 6596 551.2 UdeM00000022677 XP\_045156727.1 69.7 390  
 115 2 1 387 58 447 1.00E-153 551.2 6596 cellular  
 organisms;Eukaryota;Opisthokonta;Metazoa;Eumetazoa;Bilateria;Protostomia;

Spiralia;Lophotrochozoa;Mollusca;Bivalvia;Autobranchia;Heteroconchia;Euherodonta;Imparidentia;Venerida;Veneroidea;Veneridae;Mercenaria;Mercenaria mercenaria

UdeM00000022680 6596 567 UdeM00000022680 XP\_045156727.1 76.5 361  
83 1 2 360 87 447 1.70E-158 567 6596 cellular

organisms;Eukaryota;Opisthokonta;Metazoa;Eumetazoa;Bilateria;Protostomia;Spiralia;Lophotrochozoa;Mollusca;Bivalvia;Autobranchia;Heteroconchia;Euherodonta;Imparidentia;Venerida;Veneroidea;Veneridae;Mercenaria;Mercenaria mercenaria

UdeM00000022678 6596 675.2 UdeM00000022678 XP\_045156727.1 66.3 499  
110 2 13 509 5 447 6.30E-191 675.2 6596 cellular

organisms;Eukaryota;Opisthokonta;Metazoa;Eumetazoa;Bilateria;Protostomia;Spiralia;Lophotrochozoa;Mollusca;Bivalvia;Autobranchia;Heteroconchia;Euherodonta;Imparidentia;Venerida;Veneroidea;Veneridae;Mercenaria;Mercenaria mercenaria

UdeM00000022679 6596 688.3 UdeM00000022679 XP\_045156725.1 73.2 444  
117 1 13 454 5 448 6.40E-195 688.3 6596 cellular

organisms;Eukaryota;Opisthokonta;Metazoa;Eumetazoa;Bilateria;Protostomia;Spiralia;Lophotrochozoa;Mollusca;Bivalvia;Autobranchia;Heteroconchia;Euherodonta;Imparidentia;Venerida;Veneroidea;Veneridae;Mercenaria;Mercenaria mercenaria

UdeM00000022681 6573 127.9 UdeM00000022681 XP\_021372240.1 47.6 126  
65 1 1 126 175 299 9.60E-27 127.9 6573 cellular

organisms;Eukaryota;Opisthokonta;Metazoa;Eumetazoa;Bilateria;Protostomia;Spiralia;Lophotrochozoa;Mollusca;Bivalvia;Autobranchia;Pteriormorphia;Pectinida;Pectinoidea;Pectinidae;Mizuhopecten;Mizuhopecten yessoensis

UdeM00000022682 6596 210.3 UdeM00000022682 XP\_045216726.1 60.2 161  
64 0 1 161 1 161 1.90E-51 210.3 6596 cellular

organisms;Eukaryota;Opisthokonta;Metazoa;Eumetazoa;Bilateria;Protostomia;Spiralia;Lophotrochozoa;Mollusca;Bivalvia;Autobranchia;Heteroconchia;Euherodonta;Imparidentia;Venerida;Veneroidea;Veneridae;Mercenaria;Mercenaria mercenaria

UdeM00000022683 6596 126.3 UdeM00000022683 XP\_045216157.1 51.2 125  
61 0 1 125 9 133 2.70E-26 126.3 6596 cellular

organisms;Eukaryota;Opisthokonta;Metazoa;Eumetazoa;Bilateria;Protostomia;Spiralia;Lophotrochozoa;Mollusca;Bivalvia;Autobranchia;Heteroconchia;Euherodonta;Imparidentia;Venerida;Veneroidea;Veneridae;Mercenaria;Mercenaria mercenaria

UdeM00000022684 6596 476.9 UdeM00000022684 XP\_045215253.1 76.6 290  
58 3 19 306 32 313 2.00E-131 476.9 6596 cellular

organisms;Eukaryota;Opisthokonta;Metazoa;Eumetazoa;Bilateria;Protostomia;Spiralia;Lophotrochozoa;Mollusca;Bivalvia;Autobranchia;Heteroconchia;Euherodonta;Imparidentia;Venerida;Veneroidea;Veneridae;Mercenaria;Mercenaria mercenaria

UdeM00000022686 6596 119.8 UdeM00000022686 XP\_045215835.1 69.2 237  
65 5 3 235 5 237 4.70E-24 119.8 6596 cellular

organisms;Eukaryota;Opisthokonta;Metazoa;Eumetazoa;Bilateria;Protostomia;Spiralia;Lophotrochozoa;Mollusca;Bivalvia;Autobranchia;Heteroconchia;Euherodonta;Imparidentia;Venerida;Veneroidea;Veneridae;Mercenaria;Mercenaria mercenaria

UdeM00000022687 6500 122.1 UdeM00000022687 XP\_005091780.1 63.9 108  
39 0 1 108 1 108 4.50E-25 122.1 6500 cellular

organisms;Eukaryota;Opisthokonta;Metazoa;Eumetazoa;Bilateria;Protostomia;

Spiralia;Lophotrochozoa;Mollusca;Gastropoda;Heterobranchia;Euthyneura;Tectipleura;Aplysiida;Aplysioidea;Aplysiidae;Aplysia;Aplysia californica  
 UdeM00000022688 6596 986.1 UdeM00000022688 XP\_045216790.1 77.3 651  
 142 3 3 649 2 650 2.10E-284 986.1 6596 cellular  
 organisms;Eukaryota;Opisthokonta;Metazoa;Eumetazoa;Bilateria;Protostomia;  
 Spiralia;Lophotrochozoa;Mollusca;Bivalvia;Autobranchia;Heteroconchia;Euherodonta;Imparidentia;Venerida;Veneroidea;Veneridae;Mercenaria;Mercenaria mercenaria  
 UdeM00000022689 6596 802.4 UdeM00000022689 XP\_045216790.1 65.1 651  
 160 7 103 688 2 650 4.60E-229 802.4 6596 cellular  
 organisms;Eukaryota;Opisthokonta;Metazoa;Eumetazoa;Bilateria;Protostomia;  
 Spiralia;Lophotrochozoa;Mollusca;Bivalvia;Autobranchia;Heteroconchia;Euherodonta;Imparidentia;Venerida;Veneroidea;Veneridae;Mercenaria;Mercenaria mercenaria  
 UdeM00000022690 6596 228.8 UdeM00000022690 XP\_045216376.1 42.2 277  
 154 3 10 285 42 313 1.10E-56 228.8 6596 cellular  
 organisms;Eukaryota;Opisthokonta;Metazoa;Eumetazoa;Bilateria;Protostomia;  
 Spiralia;Lophotrochozoa;Mollusca;Bivalvia;Autobranchia;Heteroconchia;Euherodonta;Imparidentia;Venerida;Veneroidea;Veneridae;Mercenaria;Mercenaria mercenaria  
 UdeM00000022691 6573 278.1 UdeM00000022691 XP\_021339447.1 36.3 410  
 243 8 158 556 5 407 2.50E-71 278.1 6573 cellular  
 organisms;Eukaryota;Opisthokonta;Metazoa;Eumetazoa;Bilateria;Protostomia;  
 Spiralia;Lophotrochozoa;Mollusca;Bivalvia;Autobranchia;Pteriormorphia;Pectinida;Pectinoidea;Pectinidae;Mizuhopecten;Mizuhopecten yessoensis  
 UdeM00000022692 6596 225.7 UdeM00000022692 XP\_045187824.1 40.5 294  
 169 3 26 317 22 311 1.00E-55 225.7 6596 cellular  
 organisms;Eukaryota;Opisthokonta;Metazoa;Eumetazoa;Bilateria;Protostomia;  
 Spiralia;Lophotrochozoa;Mollusca;Bivalvia;Autobranchia;Heteroconchia;Euherodonta;Imparidentia;Venerida;Veneroidea;Veneridae;Mercenaria;Mercenaria mercenaria  
 UdeM00000022693 1735272 193.4 UdeM00000022693 XP\_041372814.1 69.7  
 145 41 2 1 143 15 158 2.30E-46 193.4 1735272  
 cellular  
 organisms;Eukaryota;Opisthokonta;Metazoa;Eumetazoa;Bilateria;Protostomia;  
 Spiralia;Lophotrochozoa;Mollusca;Gastropoda;Neomphalina;Neomphaloidea;Peltospiridae;Gigantopelta;Gigantopelta aegis  
 UdeM00000022694 1735272 184.5 UdeM00000022694 XP\_041372801.1 72.9  
 129 34 1 1 129 27 154 1.10E-43 184.5 1735272  
 cellular  
 organisms;Eukaryota;Opisthokonta;Metazoa;Eumetazoa;Bilateria;Protostomia;  
 Spiralia;Lophotrochozoa;Mollusca;Gastropoda;Neomphalina;Neomphaloidea;Peltospiridae;Gigantopelta;Gigantopelta aegis  
 UdeM00000022697 7739 208 UdeM00000022697 XP\_035686596.1 34.6 384  
 202 10 1 351 2 369 2.50E-50 208 7739 cellular  
 organisms;Eukaryota;Opisthokonta;Metazoa;Eumetazoa;Bilateria;Deuterostomia;Chordata;Cephalochordata;Leptocardii;Amphioxiformes;Branchiostomidae;Branchiostoma;Branchiostoma floridae  
 UdeM00000022698 6596 897.1 UdeM00000022698 XP\_045215843.1 84 537  
 83 2 5 540 3 537 1.10E-257 897.1 6596 cellular  
 organisms;Eukaryota;Opisthokonta;Metazoa;Eumetazoa;Bilateria;Protostomia;  
 Spiralia;Lophotrochozoa;Mollusca;Bivalvia;Autobranchia;Heteroconchia;Euherodonta;Imparidentia;Venerida;Veneroidea;Veneridae;Mercenaria;Mercenaria mercenaria

UdeM00000022699 6596 153.7 UdeM00000022699 XP\_045215901.1 50.3 149  
 70 2 1 147 1 147 1.90E-34 153.7 6596 cellular  
 organisms;Eukaryota;Opisthokonta;Metazoa;Eumetazoa;Bilateria;Protostomia;  
 Spiralia;Lophotrochozoa;Mollusca;Bivalvia;Autobranchia;Heteroconchia;Euhe  
 terodonta;Imparidentia;Venerida;Veneroidea;Veneridae;Mercenaria;Mercenari  
 a mercenaria

UdeM00000022700 6526 206.8 UdeM00000022700 XP\_013090315.1 65.4 153  
 52 1 1 153 1 152 1.90E-50 206.8 6526 cellular  
 organisms;Eukaryota;Opisthokonta;Metazoa;Eumetazoa;Bilateria;Protostomia;  
 Spiralia;Lophotrochozoa;Mollusca;Gastropoda;Heterobranchia;Euthyneura;Pan  
 pulmonata;Hygrophila;Lymnaeioidea;Planorbidae;Biomphalaria;Biomphalaria  
 glabrata

UdeM00000022701 45351 59.3 UdeM00000022701 XP\_032238345.1 41.8 79  
 42 1 1 75 434 512 2.70E-06 59.3 45351 cellular  
 organisms;Eukaryota;Opisthokonta;Metazoa;Eumetazoa;Cnidaria;Anthozoa;Hexa  
 corallia;Actiniaria;Edwardsiidae;Nematostella;Nematostella vectensis

UdeM00000022702 37032 72.8 UdeM00000022702 XP\_029777003.1 26.8 246  
 144 9 79 296 18 255 8.30E-10 72.8 37032 cellular  
 organisms;Eukaryota;Opisthokonta;Metazoa;Eumetazoa;Bilateria;Deuterostomi  
 a;Chordata;Craniata;Vertebrata;Gnathostomata;Teleostomi;Euteleostomi;Sarc  
 opterygii;Dipnotetrapodomorpha;Tetrapoda;Amniota;Mammalia;Theria;Eutheria  
 ;Boreoeutheria;Laurasiatheria;Carnivora;Feliformia;Herpestidae;Suricata;S  
 uricata suricatta

UdeM00000022703 6579 65.5 UdeM00000022703 XP\_033760293.1 24.4 283  
 178 9 47 302 94 367 1.40E-07 65.5 6579 cellular  
 organisms;Eukaryota;Opisthokonta;Metazoa;Eumetazoa;Bilateria;Protostomia;  
 Spiralia;Lophotrochozoa;Mollusca;Bivalvia;Autobranchia;Pteriormorphia;Pect  
 inida;Pectinoidea;Pectinidae;Pecten;Pecten maximus

UdeM00000017767 29159 64.3 UdeM00000017767 XP\_034312617.1 31.5 92  
 62 1 68 159 3850 3940 2.30E-07 64.3 29159 cellular  
 organisms;Eukaryota;Opisthokonta;Metazoa;Eumetazoa;Bilateria;Protostomia;  
 Spiralia;Lophotrochozoa;Mollusca;Bivalvia;Autobranchia;Pteriormorphia;Ostr  
 eida;Ostreioidea;Ostreidae;Crassostrea;Crassostrea gigas

UdeM00000017769 29159 183.3 UdeM00000017769 XP\_011456725.1 45 218  
 62 4 2 164 12 226 2.50E-43 183.3 29159 cellular  
 organisms;Eukaryota;Opisthokonta;Metazoa;Eumetazoa;Bilateria;Protostomia;  
 Spiralia;Lophotrochozoa;Mollusca;Bivalvia;Autobranchia;Pteriormorphia;Ostr  
 eida;Ostreioidea;Ostreidae;Crassostrea;Crassostrea gigas

UdeM00000017770 29159 116.7 UdeM00000017770 XP\_034331441.1 40.2 169  
 97 4 1 168 1 166 3.00E-23 116.7 29159 cellular  
 organisms;Eukaryota;Opisthokonta;Metazoa;Eumetazoa;Bilateria;Protostomia;  
 Spiralia;Lophotrochozoa;Mollusca;Bivalvia;Autobranchia;Pteriormorphia;Ostr  
 eida;Ostreioidea;Ostreidae;Crassostrea;Crassostrea gigas

UdeM00000017772 7574 236.9 UdeM00000017772 XP\_013409676.1 50.7 268  
 115 5 1 261 1 258 3.00E-59 236.9 7574 cellular  
 organisms;Eukaryota;Opisthokonta;Metazoa;Eumetazoa;Bilateria;Protostomia;  
 Spiralia;Lophotrochozoa;Brachiopoda;Linguliformea;Lingulata;Lingulida;Lin  
 guloidea;Lingulidae;Lingula;Lingula anatina

UdeM00000017774 7574 260.8 UdeM00000017774 XP\_013382110.1 61.9 194  
 74 0 14 207 45 238 1.50E-66 260.8 7574 cellular  
 organisms;Eukaryota;Opisthokonta;Metazoa;Eumetazoa;Bilateria;Protostomia;  
 Spiralia;Lophotrochozoa;Brachiopoda;Linguliformea;Lingulata;Lingulida;Lin  
 guloidea;Lingulidae;Lingula;Lingula anatina

UdeM00000017773 7574 260.8 UdeM00000017773 XP\_013382110.1 59.6 208  
 78 1 1 208 37 238 1.50E-66 260.8 7574 cellular  
 organisms;Eukaryota;Opisthokonta;Metazoa;Eumetazoa;Bilateria;Protostomia;  
 Spiralia;Lophotrochozoa;Brachiopoda;Linguliformea;Lingulata;Lingulida;Lin  
 guloidea;Lingulidae;Lingula;Lingula anatina  
 UdeM00000017776 6565 318.9 UdeM00000017776 XP\_022317233.1 24 1677  
 902 72 7 1654 2493 3825 4.00E-83 318.9 6565 cellular  
 organisms;Eukaryota;Opisthokonta;Metazoa;Eumetazoa;Bilateria;Protostomia;  
 Spiralia;Lophotrochozoa;Mollusca;Bivalvia;Autobranchia;Pteriormorphia;Ostr  
 eida;Ostreoidea;Ostreidae;Crassostrea;Crassostrea virginica  
 UdeM00000017777 6579 234.2 UdeM00000017777 XP\_033740601.1 30.5 613  
 278 24 379 948 998 1505 7.00E-58 234.2 6579 cellular  
 organisms;Eukaryota;Opisthokonta;Metazoa;Eumetazoa;Bilateria;Protostomia;  
 Spiralia;Lophotrochozoa;Mollusca;Bivalvia;Autobranchia;Pteriormorphia;Pect  
 inida;Pectinoidea;Pectinidae;Pecten;Pecten maximus  
 UdeM00000017778 29159 501.1 UdeM00000017778 XP\_034312617.1 32 1037  
 570 31 20 956 998 1999 3.10E-138 501.1 29159 cellular  
 organisms;Eukaryota;Opisthokonta;Metazoa;Eumetazoa;Bilateria;Protostomia;  
 Spiralia;Lophotrochozoa;Mollusca;Bivalvia;Autobranchia;Pteriormorphia;Ostr  
 eida;Ostreoidea;Ostreidae;Crassostrea;Crassostrea gigas  
 UdeM00000017779 29159 536.6 UdeM00000017779 XP\_034312618.1 36.3 903  
 474 28 118 942 94 973 6.50E-149 536.6 29159 cellular  
 organisms;Eukaryota;Opisthokonta;Metazoa;Eumetazoa;Bilateria;Protostomia;  
 Spiralia;Lophotrochozoa;Mollusca;Bivalvia;Autobranchia;Pteriormorphia;Ostr  
 eida;Ostreoidea;Ostreidae;Crassostrea;Crassostrea gigas  
 UdeM00000017781 1735272 257.7 UdeM00000017781 XP\_041362240.1 26.3  
 757 468 28 68 797 119 812 6.90E-65 257.7 1735272  
 cellular  
 organisms;Eukaryota;Opisthokonta;Metazoa;Eumetazoa;Bilateria;Protostomia;  
 Spiralia;Lophotrochozoa;Mollusca;Gastropoda;Neomphalina;Neomphaloidea;Pel  
 tospiridae;Gigantopelta;Gigantopelta aegis  
 UdeM00000017782 1735272 257.7 UdeM00000017782 XP\_041362240.1 26.3  
 757 468 28 68 797 119 812 6.10E-65 257.7 1735272  
 cellular  
 organisms;Eukaryota;Opisthokonta;Metazoa;Eumetazoa;Bilateria;Protostomia;  
 Spiralia;Lophotrochozoa;Mollusca;Gastropoda;Neomphalina;Neomphaloidea;Pel  
 tospiridae;Gigantopelta;Gigantopelta aegis  
 UdeM00000017783 29159 1351.3 UdeM00000017783 XP\_034312617.1 35.6  
 2331 1292 73 71 2337 29 2215 0.00E+00 1351.3  
 29159 cellular  
 organisms;Eukaryota;Opisthokonta;Metazoa;Eumetazoa;Bilateria;Protostomia;  
 Spiralia;Lophotrochozoa;Mollusca;Bivalvia;Autobranchia;Pteriormorphia;Ostr  
 eida;Ostreoidea;Ostreidae;Crassostrea;Crassostrea gigas  
 UdeM00000017784 29159 694.5 UdeM00000017784 XP\_034312617.1 28.6 1836  
 874 57 162 1605 44 1834 3.20E-196 694.5 29159 cellular  
 organisms;Eukaryota;Opisthokonta;Metazoa;Eumetazoa;Bilateria;Protostomia;  
 Spiralia;Lophotrochozoa;Mollusca;Bivalvia;Autobranchia;Pteriormorphia;Ostr  
 eida;Ostreoidea;Ostreidae;Crassostrea;Crassostrea gigas  
 UdeM00000017785 114398 318.2 UdeM00000017785 XP\_015906392.2 40.5  
 422 244 4 1 420 1 417 1.60E-83 318.2 114398  
 cellular  
 organisms;Eukaryota;Opisthokonta;Metazoa;Eumetazoa;Bilateria;Protostomia;  
 Ecdysozoa;Panarthropoda;Arthropoda;Chelicerata;Arachnida;Araneae;Araneomo

rphae;Entelegynae;Orbiculariae;Araneoidea;Theridiidae;Parasteatoda;Parasteatoda tepidariorum  
 UdeM00000017786 6579 430.3 UdeM00000017786 XP\_033740601.1 35 749  
 430 23 2 721 785 1505 5.20E-117 430.3 6579 cellular  
 organisms;Eukaryota;Opisthokonta;Metazoa;Eumetazoa;Bilateria;Protostomia;  
 Spiralia;Lophotrochozoa;Mollusca;Bivalvia;Autobranhia;Pteriormorphia;Pectinida;  
 Pectinoidea;Pectinidae;Pecten;Pecten maximus  
 UdeM00000017787 6526 699.9 UdeM00000017787 XP\_013084208.1 28.3 2109  
 1069 75 11 2049 699 2433 9.80E-198 699.9 6526 cellular  
 organisms;Eukaryota;Opisthokonta;Metazoa;Eumetazoa;Bilateria;Protostomia;  
 Spiralia;Lophotrochozoa;Mollusca;Gastropoda;Heterobranhia;Euthyneura;Panpulmonata;  
 Hygrophila;Lymnaeoidae;Planorbidae;Biomphalaria;Biomphalaria glabrata  
 UdeM00000017788 6579 240 UdeM00000017788 XP\_033734021.1 53.4 264  
 123 0 1 264 299 562 8.20E-60 240 6579 cellular  
 organisms;Eukaryota;Opisthokonta;Metazoa;Eumetazoa;Bilateria;Protostomia;  
 Spiralia;Lophotrochozoa;Mollusca;Bivalvia;Autobranhia;Pteriormorphia;Pectinida;  
 Pectinoidea;Pectinidae;Pecten;Pecten maximus  
 UdeM00000017789 6596 310.5 UdeM00000017789 XP\_045212586.1 60.6 282  
 95 8 1 278 1 270 2.80E-81 310.5 6596 cellular  
 organisms;Eukaryota;Opisthokonta;Metazoa;Eumetazoa;Bilateria;Protostomia;  
 Spiralia;Lophotrochozoa;Mollusca;Bivalvia;Autobranhia;Heteroconchia;Euheterodonta;  
 Imparidentia;Venerida;Veneroidea;Veneridae;Mercenaria;Mercenaria mercenaria  
 UdeM00000017790 1735272 363.6 UdeM00000017790 XP\_041362603.1 58  
 324 130 1 17 334 10 333 2.70E-97 363.6 1735272  
 cellular  
 organisms;Eukaryota;Opisthokonta;Metazoa;Eumetazoa;Bilateria;Protostomia;  
 Spiralia;Lophotrochozoa;Mollusca;Gastropoda;Neomphalina;Neomphaloidea;Peltospiridae;  
 Gigantopelta;Gigantopelta aegis  
 UdeM00000017791 6579 641.7 UdeM00000017791 XP\_033752761.1 73.2 426  
 114 0 28 453 30 455 6.90E-181 641.7 6579 cellular  
 organisms;Eukaryota;Opisthokonta;Metazoa;Eumetazoa;Bilateria;Protostomia;  
 Spiralia;Lophotrochozoa;Mollusca;Bivalvia;Autobranhia;Pteriormorphia;Pectinida;  
 Pectinoidea;Pectinidae;Pecten;Pecten maximus  
 UdeM00000017793 6596 243.4 UdeM00000017793 XP\_045213494.1 47.5 265  
 129 6 17 274 10 271 3.40E-61 243.4 6596 cellular  
 organisms;Eukaryota;Opisthokonta;Metazoa;Eumetazoa;Bilateria;Protostomia;  
 Spiralia;Lophotrochozoa;Mollusca;Bivalvia;Autobranhia;Heteroconchia;Euheterodonta;  
 Imparidentia;Venerida;Veneroidea;Veneridae;Mercenaria;Mercenaria mercenaria  
 UdeM00000017794 6596 249.2 UdeM00000017794 XP\_045213494.1 49 261  
 127 3 17 272 10 269 6.10E-63 249.2 6596 cellular  
 organisms;Eukaryota;Opisthokonta;Metazoa;Eumetazoa;Bilateria;Protostomia;  
 Spiralia;Lophotrochozoa;Mollusca;Bivalvia;Autobranhia;Heteroconchia;Euheterodonta;  
 Imparidentia;Venerida;Veneroidea;Veneridae;Mercenaria;Mercenaria mercenaria  
 UdeM00000017795 6596 117.5 UdeM00000017795 XP\_045191051.1 48.3 118  
 53 3 11 125 7 119 1.30E-23 117.5 6596 cellular  
 organisms;Eukaryota;Opisthokonta;Metazoa;Eumetazoa;Bilateria;Protostomia;  
 Spiralia;Lophotrochozoa;Mollusca;Bivalvia;Autobranhia;Heteroconchia;Euheterodonta;  
 Imparidentia;Venerida;Veneroidea;Veneridae;Mercenaria;Mercenaria mercenaria

UdeM00000017796 6500 97.8 UdeM00000017796 XP\_012941888.1 42.3 137  
 70 4 1 134 6 136 1.10E-17 97.8 6500 cellular  
 organisms;Eukaryota;Opisthokonta;Metazoa;Eumetazoa;Bilateria;Protostomia;  
 Spiralia;Lophotrochozoa;Mollusca;Gastropoda;Heterobranchia;Euthyneura;Tec  
 tipleura;Aplysiida;Aplysioidea;Aplysiidae;Aplysia;Aplysia californica  
 UdeM00000017797 6596 102.4 UdeM00000017797 XP\_045171115.1 45 120  
 56 4 16 131 20 133 4.50E-19 102.4 6596 cellular  
 organisms;Eukaryota;Opisthokonta;Metazoa;Eumetazoa;Bilateria;Protostomia;  
 Spiralia;Lophotrochozoa;Mollusca;Bivalvia;Autobranchia;Heteroconchia;Euhe  
 terodonta;Imparidentia;Venerida;Veneroidea;Veneridae;Mercenaria;Mercenari  
 a mercenaria  
 UdeM00000017798 6596 98.6 UdeM00000017798 XP\_045171115.1 45 120  
 56 4 16 131 20 133 6.50E-18 98.6 6596 cellular  
 organisms;Eukaryota;Opisthokonta;Metazoa;Eumetazoa;Bilateria;Protostomia;  
 Spiralia;Lophotrochozoa;Mollusca;Bivalvia;Autobranchia;Heteroconchia;Euhe  
 terodonta;Imparidentia;Venerida;Veneroidea;Veneridae;Mercenaria;Mercenari  
 a mercenaria  
 UdeM00000017799 6596 107.8 UdeM00000017799 XP\_045191051.1 44.9 127  
 57 5 52 173 1 119 1.40E-20 107.8 6596 cellular  
 organisms;Eukaryota;Opisthokonta;Metazoa;Eumetazoa;Bilateria;Protostomia;  
 Spiralia;Lophotrochozoa;Mollusca;Bivalvia;Autobranchia;Heteroconchia;Euhe  
 terodonta;Imparidentia;Venerida;Veneroidea;Veneridae;Mercenaria;Mercenari  
 a mercenaria  
 UdeM00000017800 6596 107.1 UdeM00000017800 XP\_045191051.1 45.2 126  
 56 5 1 121 2 119 1.70E-20 107.1 6596 cellular  
 organisms;Eukaryota;Opisthokonta;Metazoa;Eumetazoa;Bilateria;Protostomia;  
 Spiralia;Lophotrochozoa;Mollusca;Bivalvia;Autobranchia;Heteroconchia;Euhe  
 terodonta;Imparidentia;Venerida;Veneroidea;Veneridae;Mercenaria;Mercenari  
 a mercenaria  
 UdeM00000017801 6579 99.4 UdeM00000017801 XP\_033729354.1 44.4 133  
 59 4 1 122 1 129 3.60E-18 99.4 6579 cellular  
 organisms;Eukaryota;Opisthokonta;Metazoa;Eumetazoa;Bilateria;Protostomia;  
 Spiralia;Lophotrochozoa;Mollusca;Bivalvia;Autobranchia;Pteriomorphia;Pect  
 inida;Pectinoidea;Pectinidae;Pecten;Pecten maximus  
 UdeM00000017802 6573 248.4 UdeM00000017802 XP\_021357273.1 35.8 358  
 218 6 368 719 3049 3400 4.00E-62 248.4 6573 cellular  
 organisms;Eukaryota;Opisthokonta;Metazoa;Eumetazoa;Bilateria;Protostomia;  
 Spiralia;Lophotrochozoa;Mollusca;Bivalvia;Autobranchia;Pteriomorphia;Pect  
 inida;Pectinoidea;Pectinidae;Mizuhopecten;Mizuhopecten yessoensis  
 UdeM00000017805 6596 67.8 UdeM00000017805 XP\_045213470.1 38.7 150  
 75 7 368 507 451 593 6.80E-08 67.8 6596 cellular  
 organisms;Eukaryota;Opisthokonta;Metazoa;Eumetazoa;Bilateria;Protostomia;  
 Spiralia;Lophotrochozoa;Mollusca;Bivalvia;Autobranchia;Heteroconchia;Euhe  
 terodonta;Imparidentia;Venerida;Veneroidea;Veneridae;Mercenaria;Mercenari  
 a mercenaria  
 UdeM00000017806 6579 298.9 UdeM00000017806 XP\_033735855.1 38 492  
 266 12 1 464 1 481 1.10E-77 298.9 6579 cellular  
 organisms;Eukaryota;Opisthokonta;Metazoa;Eumetazoa;Bilateria;Protostomia;  
 Spiralia;Lophotrochozoa;Mollusca;Bivalvia;Autobranchia;Pteriomorphia;Pect  
 inida;Pectinoidea;Pectinidae;Pecten;Pecten maximus  
 UdeM00000017807 6579 240.4 UdeM00000017807 XP\_033731739.1 36.4 376  
 104 1 2 242 3 378 2.50E-60 240.4 6579 cellular  
 organisms;Eukaryota;Opisthokonta;Metazoa;Eumetazoa;Bilateria;Protostomia;



Spiralia;Lophotrochozoa;Mollusca;Bivalvia;Autobranchia;Pteriormorphia;Pectinida;Pectinoidea;Pectinidae;Pecten;Pecten maximus  
UdeM00000017808 6565 123.2 UdeM00000017808 XP\_022319170.1 67.9 84  
23 2 36 118 347 427 2.20E-25 123.2 6565 cellular  
organisms;Eukaryota;Opisthokonta;Metazoa;Eumetazoa;Bilateria;Protostomia;  
Spiralia;Lophotrochozoa;Mollusca;Bivalvia;Autobranchia;Pteriormorphia;Ostr  
eida;Ostreoidea;Ostreidae;Crassostrea;Crassostrea virginica  
UdeM00000017809 6596 266.5 UdeM00000017809 XP\_045212389.1 47.1 263  
132 4 2 262 162 419 3.50E-68 266.5 6596 cellular  
organisms;Eukaryota;Opisthokonta;Metazoa;Eumetazoa;Bilateria;Protostomia;  
Spiralia;Lophotrochozoa;Mollusca;Bivalvia;Autobranchia;Heteroconchia;Euhe  
terodonta;Imparidentia;Venerida;Veneroidea;Veneridae;Mercenaria;Mercenari  
a mercenaria  
UdeM00000017810 6596 592 UdeM00000017810 XP\_045213968.1 56.8 648  
171 10 4 581 3 611 8.10E-166 592 6596 cellular  
organisms;Eukaryota;Opisthokonta;Metazoa;Eumetazoa;Bilateria;Protostomia;  
Spiralia;Lophotrochozoa;Mollusca;Bivalvia;Autobranchia;Heteroconchia;Euhe  
terodonta;Imparidentia;Venerida;Veneroidea;Veneridae;Mercenaria;Mercenari  
a mercenaria  
UdeM00000017811 6596 598.2 UdeM00000017811 XP\_045213968.1 57.4 641  
171 9 4 574 3 611 1.10E-167 598.2 6596 cellular  
organisms;Eukaryota;Opisthokonta;Metazoa;Eumetazoa;Bilateria;Protostomia;  
Spiralia;Lophotrochozoa;Mollusca;Bivalvia;Autobranchia;Heteroconchia;Euhe  
terodonta;Imparidentia;Venerida;Veneroidea;Veneridae;Mercenaria;Mercenari  
a mercenaria  
UdeM00000017812 400727 398.3 UdeM00000017812 XP\_025114462.1 59.1  
345 122 5 1 345 4 329 1.00E-107 398.3 400727  
cellular  
organisms;Eukaryota;Opisthokonta;Metazoa;Eumetazoa;Bilateria;Protostomia;  
Spiralia;Lophotrochozoa;Mollusca;Gastropoda;Caenogastropoda;Architaeniogl  
ossa;Ampullarioidea;Ampullariidae;Pomacea;Pomacea canaliculata  
UdeM00000017813 400727 389.8 UdeM00000017813 XP\_025114384.1 54  
400 136 10 1 393 4 362 4.10E-105 389.8 400727  
cellular  
organisms;Eukaryota;Opisthokonta;Metazoa;Eumetazoa;Bilateria;Protostomia;  
Spiralia;Lophotrochozoa;Mollusca;Gastropoda;Caenogastropoda;Architaeniogl  
ossa;Ampullarioidea;Ampullariidae;Pomacea;Pomacea canaliculata  
UdeM00000017814 1735272 275 UdeM00000017814 XP\_041363386.1 47.2  
394 175 14 9 384 6 384 1.40E-70 275 1735272  
cellular  
organisms;Eukaryota;Opisthokonta;Metazoa;Eumetazoa;Bilateria;Protostomia;  
Spiralia;Lophotrochozoa;Mollusca;Gastropoda;Neomphalina;Neomphaloidea;Pel  
tospiridae;Gigantopelta;Gigantopelta aegis  
UdeM00000017817 1735272 377.9 UdeM00000017817 XP\_041362693.1 88.7  
212 24 0 1 212 1 212 8.70E-102 377.9 1735272  
cellular  
organisms;Eukaryota;Opisthokonta;Metazoa;Eumetazoa;Bilateria;Protostomia;  
Spiralia;Lophotrochozoa;Mollusca;Gastropoda;Neomphalina;Neomphaloidea;Pel  
tospiridae;Gigantopelta;Gigantopelta aegis  
UdeM00000017818 29159 374 UdeM00000017818 XP\_019926611.2 63.3 305  
101 2 1 305 1 294 1.80E-100 374 29159 cellular  
organisms;Eukaryota;Opisthokonta;Metazoa;Eumetazoa;Bilateria;Protostomia;  
Spiralia;Lophotrochozoa;Mollusca;Bivalvia;Autobranchia;Pteriormorphia;Ostr  
eida;Ostreoidea;Ostreidae;Crassostrea;Crassostrea gigas

UdeM00000017819 6596 241.9 UdeM00000017819 XP\_045212585.1 55.6 189  
 83 1 5 193 51 238 6.90E-61 241.9 6596 cellular  
 organisms;Eukaryota;Opisthokonta;Metazoa;Eumetazoa;Bilateria;Protostomia;  
 Spiralia;Lophotrochozoa;Mollusca;Bivalvia;Autobranhia;Heteroconchia;Euhe  
 terodonta;Imparidentia;Venerida;Veneroidea;Veneridae;Mercenaria;Mercenari  
 a mercenaria  
 UdeM00000017820 6573 124 UdeM00000017820 XP\_021355633.1 48.5 130  
 66 1 9 137 11 140 1.80E-25 124 6573 cellular  
 organisms;Eukaryota;Opisthokonta;Metazoa;Eumetazoa;Bilateria;Protostomia;  
 Spiralia;Lophotrochozoa;Mollusca;Bivalvia;Autobranhia;Pteriormorphia;Pect  
 inida;Pectinoidea;Pectinidae;Mizuhopecten;Mizuhopecten yessoensis  
 UdeM00000017821 29159 146 UdeM00000017821 XP\_034320422.1 70.7 92  
 25 1 27 116 133 224 3.40E-32 146 29159 cellular  
 organisms;Eukaryota;Opisthokonta;Metazoa;Eumetazoa;Bilateria;Protostomia;  
 Spiralia;Lophotrochozoa;Mollusca;Bivalvia;Autobranhia;Pteriormorphia;Ostr  
 eida;Ostreoidea;Ostreidae;Crassostrea;Crassostrea gigas  
 UdeM00000017822 6579 1808.9 UdeM00000017822 XP\_033752749.1 57.7  
 1643 605 13 43 1674 24 1587 0.00E+00 1808.9 6579  
 cellular  
 organisms;Eukaryota;Opisthokonta;Metazoa;Eumetazoa;Bilateria;Protostomia;  
 Spiralia;Lophotrochozoa;Mollusca;Bivalvia;Autobranhia;Pteriormorphia;Pect  
 inida;Pectinoidea;Pectinidae;Pecten;Pecten maximus  
 UdeM00000017823 6596 499.2 UdeM00000017823 XP\_045211148.1 58.9 387  
 154 3 32 416 25 408 5.30E-138 499.2 6596 cellular  
 organisms;Eukaryota;Opisthokonta;Metazoa;Eumetazoa;Bilateria;Protostomia;  
 Spiralia;Lophotrochozoa;Mollusca;Bivalvia;Autobranhia;Heteroconchia;Euhe  
 terodonta;Imparidentia;Venerida;Veneroidea;Veneridae;Mercenaria;Mercenari  
 a mercenaria  
 UdeM00000017824 6596 507.3 UdeM00000017824 XP\_045211148.1 58.2 409  
 165 4 12 417 3 408 2.20E-140 507.3 6596 cellular  
 organisms;Eukaryota;Opisthokonta;Metazoa;Eumetazoa;Bilateria;Protostomia;  
 Spiralia;Lophotrochozoa;Mollusca;Bivalvia;Autobranhia;Heteroconchia;Euhe  
 terodonta;Imparidentia;Venerida;Veneroidea;Veneridae;Mercenaria;Mercenari  
 a mercenaria  
 UdeM00000017825 6596 77 UdeM00000017825 XP\_045211147.1 42.4 92  
 48 2 45 131 39 130 2.40E-11 77 6596 cellular  
 organisms;Eukaryota;Opisthokonta;Metazoa;Eumetazoa;Bilateria;Protostomia;  
 Spiralia;Lophotrochozoa;Mollusca;Bivalvia;Autobranhia;Heteroconchia;Euhe  
 terodonta;Imparidentia;Venerida;Veneroidea;Veneridae;Mercenaria;Mercenari  
 a mercenaria  
 UdeM00000017826 225164 60.1 UdeM00000017826 XP\_009062040.1 33.3  
 138 72 5 12 141 26 151 3.00E-06 60.1 225164  
 cellular  
 organisms;Eukaryota;Opisthokonta;Metazoa;Eumetazoa;Bilateria;Protostomia;  
 Spiralia;Lophotrochozoa;Mollusca;Gastropoda;Patellogastropoda;Lottioida;  
 Lottiidae;Lottia;Lottia gigantea  
 UdeM00000017827 1735272 1040.4 UdeM00000017827 XP\_041365007.1  
 58.3 896 354 8 11 903 6 884 1.30E-300 1040.4  
 1735272 cellular  
 organisms;Eukaryota;Opisthokonta;Metazoa;Eumetazoa;Bilateria;Protostomia;  
 Spiralia;Lophotrochozoa;Mollusca;Gastropoda;Neomphalina;Neomphaloidea;Pel  
 tospiridae;Gigantopelta;Gigantopelta aegis  
 UdeM00000017828 1735272 985.3 UdeM00000017828 XP\_041365007.1 56.7  
 887 349 9 11 870 6 884 4.90E-284 985.3 1735272

cellular  
organisms;Eukaryota;Opisthokonta;Metazoa;Eumetazoa;Bilateria;Protostomia;  
Spiralia;Lophotrochozoa;Mollusca;Gastropoda;Neomphalina;Neomphaloidea;Pel  
tospiridae;Gigantopelta;Gigantopelta aegis  
UdeM00000017829 6596 566.2 UdeM00000017829 XP\_045212453.1 52.8 669  
275 23 1 651 1 646 5.40E-158 566.2 6596 cellular  
organisms;Eukaryota;Opisthokonta;Metazoa;Eumetazoa;Bilateria;Protostomia;  
Spiralia;Lophotrochozoa;Mollusca;Bivalvia;Autobranchia;Heteroconchia;Euhe  
terodonta;Imparidentia;Venerida;Veneroidea;Veneridae;Mercenaria;Mercenari  
a mercenaria  
UdeM00000017830 6596 560.8 UdeM00000017830 XP\_045212453.1 52.3 669  
277 23 1 650 1 646 2.30E-156 560.8 6596 cellular  
organisms;Eukaryota;Opisthokonta;Metazoa;Eumetazoa;Bilateria;Protostomia;  
Spiralia;Lophotrochozoa;Mollusca;Bivalvia;Autobranchia;Heteroconchia;Euhe  
terodonta;Imparidentia;Venerida;Veneroidea;Veneridae;Mercenaria;Mercenari  
a mercenaria  
UdeM00000017831 1735272 62.8 UdeM00000017831 XP\_041350990.1 45.2  
62 34 0 126 187 461 522 5.50E-07 62.8 1735272  
cellular  
organisms;Eukaryota;Opisthokonta;Metazoa;Eumetazoa;Bilateria;Protostomia;  
Spiralia;Lophotrochozoa;Mollusca;Gastropoda;Neomphalina;Neomphaloidea;Pel  
tospiridae;Gigantopelta;Gigantopelta aegis  
UdeM00000017832 6596 204.9 UdeM00000017832 XP\_045212346.1 65.6 183  
44 4 45 213 5 182 1.10E-49 204.9 6596 cellular  
organisms;Eukaryota;Opisthokonta;Metazoa;Eumetazoa;Bilateria;Protostomia;  
Spiralia;Lophotrochozoa;Mollusca;Bivalvia;Autobranchia;Heteroconchia;Euhe  
terodonta;Imparidentia;Venerida;Veneroidea;Veneridae;Mercenaria;Mercenari  
a mercenaria  
UdeM00000017833 6596 202.6 UdeM00000017833 XP\_045212346.1 65.9 182  
43 4 12 179 4 180 4.60E-49 202.6 6596 cellular  
organisms;Eukaryota;Opisthokonta;Metazoa;Eumetazoa;Bilateria;Protostomia;  
Spiralia;Lophotrochozoa;Mollusca;Bivalvia;Autobranchia;Heteroconchia;Euhe  
terodonta;Imparidentia;Venerida;Veneroidea;Veneridae;Mercenaria;Mercenari  
a mercenaria  
UdeM00000017834 6596 212.6 UdeM00000017834 XP\_045173066.1 37.7 305  
186 3 51 352 46 349 8.30E-52 212.6 6596 cellular  
organisms;Eukaryota;Opisthokonta;Metazoa;Eumetazoa;Bilateria;Protostomia;  
Spiralia;Lophotrochozoa;Mollusca;Bivalvia;Autobranchia;Heteroconchia;Euhe  
terodonta;Imparidentia;Venerida;Veneroidea;Veneridae;Mercenaria;Mercenari  
a mercenaria  
UdeM00000017835 6596 5417.8 UdeM00000017835 XP\_045171731.1 86.3  
3089 422 0 1 3089 1420 4508 0.00E+00 5417.8 6596  
cellular  
organisms;Eukaryota;Opisthokonta;Metazoa;Eumetazoa;Bilateria;Protostomia;  
Spiralia;Lophotrochozoa;Mollusca;Bivalvia;Autobranchia;Heteroconchia;Euhe  
terodonta;Imparidentia;Venerida;Veneroidea;Veneridae;Mercenaria;Mercenari  
a mercenaria  
UdeM00000017836 6596 2154.8 UdeM00000017836 XP\_045171731.1 73.2  
1441 330 2 2 1386 3 1443 0.00E+00 2154.8 6596  
cellular  
organisms;Eukaryota;Opisthokonta;Metazoa;Eumetazoa;Bilateria;Protostomia;  
Spiralia;Lophotrochozoa;Mollusca;Bivalvia;Autobranchia;Heteroconchia;Euhe  
terodonta;Imparidentia;Venerida;Veneroidea;Veneridae;Mercenaria;Mercenari  
a mercenaria

UdeM00000017837 6596 7604.2 UdeM00000017837 XP\_045171731.1 83.1  
4508 718 3 2 4466 3 4508 0.00E+00 7604.2 6596  
cellular  
organisms;Eukaryota;Opisthokonta;Metazoa;Eumetazoa;Bilateria;Protostomia;  
Spiralia;Lophotrochozoa;Mollusca;Bivalvia;Autobranchia;Heteroconchia;Euhe  
terodonta;Imparidentia;Venerida;Veneroidea;Veneridae;Mercenaria;Mercenari  
a mercenaria  
UdeM00000017838 1735272 588.6 UdeM00000017838 XP\_041364721.1 57.1  
496 204 3 28 522 47 534 8.00E-165 588.6 1735272  
cellular  
organisms;Eukaryota;Opisthokonta;Metazoa;Eumetazoa;Bilateria;Protostomia;  
Spiralia;Lophotrochozoa;Mollusca;Gastropoda;Neomphalina;Neomphaloidea;Pel  
tospiridae;Gigantopelta;Gigantopelta aegis  
UdeM00000017839 1735272 473 UdeM00000017839 XP\_041364757.1 52.5  
491 190 11 4 457 3 487 4.30E-130 473 1735272  
cellular  
organisms;Eukaryota;Opisthokonta;Metazoa;Eumetazoa;Bilateria;Protostomia;  
Spiralia;Lophotrochozoa;Mollusca;Gastropoda;Neomphalina;Neomphaloidea;Pel  
tospiridae;Gigantopelta;Gigantopelta aegis  
UdeM00000017840 7574 284.3 UdeM00000017840 XP\_013395488.1 70 180  
54 0 1 180 80 259 2.00E-73 284.3 7574 cellular  
organisms;Eukaryota;Opisthokonta;Metazoa;Eumetazoa;Bilateria;Protostomia;  
Spiralia;Lophotrochozoa;Brachiopoda;Linguliformea;Lingulata;Lingulida;Lin  
guloidea;Lingulidae;Lingula;Lingula anatina  
UdeM00000017841 2607531 153.7 UdeM00000017841 XP\_029651116.1 40.2  
264 121 8 9 251 217 464 3.20E-34 153.7 2607531  
cellular  
organisms;Eukaryota;Opisthokonta;Metazoa;Eumetazoa;Bilateria;Protostomia;  
Spiralia;Lophotrochozoa;Mollusca;Cephalopoda;Coleoidea;Octopodiformes;Oct  
opoda;Incirrata;Octopodidae;Octopus;Octopus sinensis  
UdeM00000017842 225164 800 UdeM00000017842 XP\_009060013.1 54.8  
695 297 3 29 721 5 684 2.40E-228 800 225164  
cellular  
organisms;Eukaryota;Opisthokonta;Metazoa;Eumetazoa;Bilateria;Protostomia;  
Spiralia;Lophotrochozoa;Mollusca;Gastropoda;Patellogastropoda;Lottioidea;  
Lottiidae;Lottia;Lottia gigantea  
UdeM00000017843 6573 344 UdeM00000017843 XP\_021379548.1 59.5 259  
105 0 28 286 42 300 1.90E-91 344 6573 cellular  
organisms;Eukaryota;Opisthokonta;Metazoa;Eumetazoa;Bilateria;Protostomia;  
Spiralia;Lophotrochozoa;Mollusca;Bivalvia;Autobranchia;Pteriomorphia;Pect  
inida;Pectinoidea;Pectinidae;Mizuhopecten;Mizuhopecten yessoensis  
UdeM00000017844 7604 80.5 UdeM00000017844 XP\_033642466.1 65.6 64  
21 1 1 63 1 64 1.20E-12 80.5 7604 cellular  
organisms;Eukaryota;Opisthokonta;Metazoa;Eumetazoa;Bilateria;Deuterostomi  
a;Echinodermata;Eleutherozoa;Asterozoa;Asteroidea;Forcipulatacea;Forcipul  
atida;Asteroidea;Asterias;Asterias rubens  
UdeM00000017846 6596 248.1 UdeM00000017846 XP\_045212439.1 51.8 247  
111 3 4 243 4 249 1.20E-62 248.1 6596 cellular  
organisms;Eukaryota;Opisthokonta;Metazoa;Eumetazoa;Bilateria;Protostomia;  
Spiralia;Lophotrochozoa;Mollusca;Bivalvia;Autobranchia;Heteroconchia;Euhe  
terodonta;Imparidentia;Venerida;Veneroidea;Veneridae;Mercenaria;Mercenari  
a mercenaria  
UdeM00000017848 29159 168.7 UdeM00000017848 XP\_011454473.2 68.9 119  
37 0 1 119 749 867 4.60E-39 168.7 29159 cellular

organisms;Eukaryota;Opisthokonta;Metazoa;Eumetazoa;Bilateria;Protostomia;Spiralia;Lophotrochozoa;Mollusca;Bivalvia;Autobranchia;Pteriomorpha;Ostr

eida;Ostreoidea;Ostreidae;Crassostrea;Crassostrea gigas  
UdeM00000017847 6596 638.6 UdeM00000017847 XP\_045214331.1 65.7 487  
120 3 1 442 395 879 5.70E-180 638.6 6596 cellular

organisms;Eukaryota;Opisthokonta;Metazoa;Eumetazoa;Bilateria;Protostomia;Spiralia;Lophotrochozoa;Mollusca;Bivalvia;Autobranchia;Heteroconchia;Euhe

terodonta;Imparidentia;Venerida;Veneroidea;Veneridae;Mercenaria;Mercenari  
a mercenaria  
UdeM00000017849 6596 330.9 UdeM00000017849 XP\_045214331.1 70.6 245  
62 5 10 249 3 242 1.50E-87 330.9 6596 cellular

organisms;Eukaryota;Opisthokonta;Metazoa;Eumetazoa;Bilateria;Protostomia;Spiralia;Lophotrochozoa;Mollusca;Bivalvia;Autobranchia;Heteroconchia;Euhe

terodonta;Imparidentia;Venerida;Veneroidea;Veneridae;Mercenaria;Mercenari  
a mercenaria  
UdeM00000017853 6579 485 UdeM00000017853 XP\_033756081.1 67.7 350  
109 1 186 531 264 613 1.30E-133 485 6579 cellular

organisms;Eukaryota;Opisthokonta;Metazoa;Eumetazoa;Bilateria;Protostomia;Spiralia;Lophotrochozoa;Mollusca;Bivalvia;Autobranchia;Pteriomorpha;Pect

inida;Pectinoidea;Pectinidae;Pecten;Pecten maximus  
UdeM00000017855 6565 1189.9 UdeM00000017855 XP\_022317607.1 55.5  
1066 434 8 1 1061 1 1031 0.00E+00 1189.9 6565  
cellular

organisms;Eukaryota;Opisthokonta;Metazoa;Eumetazoa;Bilateria;Protostomia;Spiralia;Lophotrochozoa;Mollusca;Bivalvia;Autobranchia;Pteriomorpha;Ostr

eida;Ostreoidea;Ostreidae;Crassostrea;Crassostrea virginica  
UdeM00000017856 6573 254.6 UdeM00000017856 XP\_021351109.1 60.8 209  
82 0 9 217 10 218 1.20E-64 254.6 6573 cellular

organisms;Eukaryota;Opisthokonta;Metazoa;Eumetazoa;Bilateria;Protostomia;Spiralia;Lophotrochozoa;Mollusca;Bivalvia;Autobranchia;Pteriomorpha;Pect

inida;Pectinoidea;Pectinidae;Mizuhopecten;Mizuhopecten yessoensis  
UdeM00000017857 6565 1941 UdeM00000017857 XP\_022317950.1 76 1238  
291 5 1 1236 1 1234 0.00E+00 1941 6565 cellular

organisms;Eukaryota;Opisthokonta;Metazoa;Eumetazoa;Bilateria;Protostomia;Spiralia;Lophotrochozoa;Mollusca;Bivalvia;Autobranchia;Pteriomorpha;Ostr

eida;Ostreoidea;Ostreidae;Crassostrea;Crassostrea virginica  
UdeM00000017858 6565 1592 UdeM00000017858 XP\_022317950.1 74.7 1044  
258 5 1 1042 1 1040 0.00E+00 1592 6565 cellular

organisms;Eukaryota;Opisthokonta;Metazoa;Eumetazoa;Bilateria;Protostomia;Spiralia;Lophotrochozoa;Mollusca;Bivalvia;Autobranchia;Pteriomorpha;Ostr

eida;Ostreoidea;Ostreidae;Crassostrea;Crassostrea virginica  
UdeM00000017859 29159 217.6 UdeM00000017859 XP\_034311791.1 51 194  
95 0 1 194 142 335 1.40E-53 217.6 29159 cellular

organisms;Eukaryota;Opisthokonta;Metazoa;Eumetazoa;Bilateria;Protostomia;Spiralia;Lophotrochozoa;Mollusca;Bivalvia;Autobranchia;Pteriomorpha;Ostr

eida;Ostreoidea;Ostreidae;Crassostrea;Crassostrea gigas  
UdeM00000017861 6596 1546.6 UdeM00000017861 XP\_045213304.1 51.8  
1628 753 15 35 1643 160 1775 0.00E+00 1546.6 6596  
cellular

organisms;Eukaryota;Opisthokonta;Metazoa;Eumetazoa;Bilateria;Protostomia;Spiralia;Lophotrochozoa;Mollusca;Bivalvia;Autobranchia;Heteroconchia;Euhe

terodonta;Imparidentia;Venerida;Veneroidea;Veneridae;Mercenaria;Mercenari  
a mercenaria

UdeM00000017862 6573 149.8 UdeM00000017862 XP\_021356991.1 57 135  
 57 1 36 169 29 163 3.20E-33 149.8 6573 cellular  
 organisms;Eukaryota;Opisthokonta;Metazoa;Eumetazoa;Bilateria;Protostomia;  
 Spiralia;Lophotrochozoa;Mollusca;Bivalvia;Autobranhia;Pteriomorpha;Pect  
 inida;Pectinoidea;Pectinidae;Mizuhopecten;Mizuhopecten yessoensis  
 UdeM00000017865 6596 501.9 UdeM00000017865 XP\_045214075.1 60 395  
 151 2 1 388 1 395 7.30E-139 501.9 6596 cellular  
 organisms;Eukaryota;Opisthokonta;Metazoa;Eumetazoa;Bilateria;Protostomia;  
 Spiralia;Lophotrochozoa;Mollusca;Bivalvia;Autobranhia;Heteroconchia;Euhe  
 terodonta;Imparidentia;Venerida;Veneroidea;Veneridae;Mercenaria;Mercenari  
 a mercenaria  
 UdeM00000017866 6565 94.7 UdeM00000017866 XP\_022318952.1 54.3 81  
 37 0 18 98 5 85 6.80E-17 94.7 6565 cellular  
 organisms;Eukaryota;Opisthokonta;Metazoa;Eumetazoa;Bilateria;Protostomia;  
 Spiralia;Lophotrochozoa;Mollusca;Bivalvia;Autobranhia;Pteriomorpha;Ostr  
 eida;Ostreoidea;Ostreidae;Crassostrea;Crassostrea virginica  
 UdeM00000017867 6579 703.7 UdeM00000017867 XP\_033736482.1 48.6 673  
 311 7 2 641 276 946 2.10E-199 703.7 6579 cellular  
 organisms;Eukaryota;Opisthokonta;Metazoa;Eumetazoa;Bilateria;Protostomia;  
 Spiralia;Lophotrochozoa;Mollusca;Bivalvia;Autobranhia;Pteriomorpha;Pect  
 inida;Pectinoidea;Pectinidae;Pecten;Pecten maximus  
 UdeM00000017868 6596 600.1 UdeM00000017868 XP\_045210875.1 77.4 376  
 84 1 2 376 6 381 1.90E-168 600.1 6596 cellular  
 organisms;Eukaryota;Opisthokonta;Metazoa;Eumetazoa;Bilateria;Protostomia;  
 Spiralia;Lophotrochozoa;Mollusca;Bivalvia;Autobranhia;Heteroconchia;Euhe  
 terodonta;Imparidentia;Venerida;Veneroidea;Veneridae;Mercenaria;Mercenari  
 a mercenaria  
 UdeM00000017869 6573 4831.5 UdeM00000017869 XP\_021350578.1 66.9  
 3630 1101 35 1 3595 1 3566 0.00E+00 4831.5 6573  
 cellular  
 organisms;Eukaryota;Opisthokonta;Metazoa;Eumetazoa;Bilateria;Protostomia;  
 Spiralia;Lophotrochozoa;Mollusca;Bivalvia;Autobranhia;Pteriomorpha;Pect  
 inida;Pectinoidea;Pectinidae;Mizuhopecten;Mizuhopecten yessoensis  
 UdeM00000017870 6579 381.3 UdeM00000017870 XP\_033747705.1 50.1 411  
 158 9 1 407 3139 3506 1.50E-102 381.3 6579 cellular  
 organisms;Eukaryota;Opisthokonta;Metazoa;Eumetazoa;Bilateria;Protostomia;  
 Spiralia;Lophotrochozoa;Mollusca;Bivalvia;Autobranhia;Pteriomorpha;Pect  
 inida;Pectinoidea;Pectinidae;Pecten;Pecten maximus  
 UdeM00000017871 29159 300.1 UdeM00000017871 XP\_011432031.1 94.4 144  
 8 0 1 144 1 144 1.60E-78 300.1 29159 cellular  
 organisms;Eukaryota;Opisthokonta;Metazoa;Eumetazoa;Bilateria;Protostomia;  
 Spiralia;Lophotrochozoa;Mollusca;Bivalvia;Autobranhia;Pteriomorpha;Ostr  
 eida;Ostreoidea;Ostreidae;Crassostrea;Crassostrea gigas  
 UdeM00000017872 29159 73.9 UdeM00000017872 XP\_034322417.1 25.3 182  
 110 5 39 200 38 213 3.20E-10 73.9 29159 cellular  
 organisms;Eukaryota;Opisthokonta;Metazoa;Eumetazoa;Bilateria;Protostomia;  
 Spiralia;Lophotrochozoa;Mollusca;Bivalvia;Autobranhia;Pteriomorpha;Ostr  
 eida;Ostreoidea;Ostreidae;Crassostrea;Crassostrea gigas  
 UdeM00000017873 7668 99.8 UdeM00000017873 XP\_030845073.1 30.3 218  
 130 5 90 296 643 849 6.70E-18 99.8 7668 cellular  
 organisms;Eukaryota;Opisthokonta;Metazoa;Eumetazoa;Bilateria;Deuterostomi  
 a;Echinodermata;Eleutherozoa;Echinozoa;Echinoidea;Euechinoidea;Echinacea;  
 Camarodonta;Echinidea;Strongylocentrotidae;Strongylocentrotus;Strongyloce  
 ntrotus purpuratus

UdeM00000017874 6596 156.8 UdeM00000017874 XP\_045211505.1 59.4 138  
 46 5 1 131 5 139 2.10E-35 156.8 6596 cellular  
 organisms;Eukaryota;Opisthokonta;Metazoa;Eumetazoa;Bilateria;Protostomia;  
 Spiralia;Lophotrochozoa;Mollusca;Bivalvia;Autobranchia;Heteroconchia;Euhe  
 terodonta;Imparidentia;Venerida;Veneroidea;Veneridae;Mercenaria;Mercenari  
 a mercenaria  
 UdeM00000017875 1735272 357.8 UdeM00000017875 XP\_041362967.1 60.2  
 304 107 4 9 312 19 308 1.40E-95 357.8 1735272  
 cellular  
 organisms;Eukaryota;Opisthokonta;Metazoa;Eumetazoa;Bilateria;Protostomia;  
 Spiralia;Lophotrochozoa;Mollusca;Gastropoda;Neomphalina;Neomphaloidea;Pel  
 tospiridae;Gigantopelta;Gigantopelta aegis  
 UdeM00000017876 6596 323.2 UdeM00000017876 XP\_045214358.1 76.2 206  
 47 1 1 206 42 245 2.50E-85 323.2 6596 cellular  
 organisms;Eukaryota;Opisthokonta;Metazoa;Eumetazoa;Bilateria;Protostomia;  
 Spiralia;Lophotrochozoa;Mollusca;Bivalvia;Autobranchia;Heteroconchia;Euhe  
 terodonta;Imparidentia;Venerida;Veneroidea;Veneridae;Mercenaria;Mercenari  
 a mercenaria  
 UdeM00000017877 6596 1049.3 UdeM00000017877 XP\_045211563.1 43.2  
 1478 632 33 4 1351 3 1402 4.30E-303 1049.3 6596  
 cellular  
 organisms;Eukaryota;Opisthokonta;Metazoa;Eumetazoa;Bilateria;Protostomia;  
 Spiralia;Lophotrochozoa;Mollusca;Bivalvia;Autobranchia;Heteroconchia;Euhe  
 terodonta;Imparidentia;Venerida;Veneroidea;Veneridae;Mercenaria;Mercenari  
 a mercenaria  
 UdeM00000017878 6596 317.8 UdeM00000017878 XP\_045215002.1 57.9 240  
 101 0 4 243 1 240 1.20E-83 317.8 6596 cellular  
 organisms;Eukaryota;Opisthokonta;Metazoa;Eumetazoa;Bilateria;Protostomia;  
 Spiralia;Lophotrochozoa;Mollusca;Bivalvia;Autobranchia;Heteroconchia;Euhe  
 terodonta;Imparidentia;Venerida;Veneroidea;Veneridae;Mercenaria;Mercenari  
 a mercenaria  
 UdeM00000017879 6596 153.7 UdeM00000017879 XP\_045215002.1 57.6 118  
 50 0 4 121 1 118 1.50E-34 153.7 6596 cellular  
 organisms;Eukaryota;Opisthokonta;Metazoa;Eumetazoa;Bilateria;Protostomia;  
 Spiralia;Lophotrochozoa;Mollusca;Bivalvia;Autobranchia;Heteroconchia;Euhe  
 terodonta;Imparidentia;Venerida;Veneroidea;Veneridae;Mercenaria;Mercenari  
 a mercenaria  
 UdeM00000017880 6596 187.6 UdeM00000017880 XP\_045213789.1 86.1 115  
 15 1 1 114 1 115 9.00E-45 187.6 6596 cellular  
 organisms;Eukaryota;Opisthokonta;Metazoa;Eumetazoa;Bilateria;Protostomia;  
 Spiralia;Lophotrochozoa;Mollusca;Bivalvia;Autobranchia;Heteroconchia;Euhe  
 terodonta;Imparidentia;Venerida;Veneroidea;Veneridae;Mercenaria;Mercenari  
 a mercenaria  
 UdeM00000017881 6596 263.8 UdeM00000017881 XP\_045213788.1 68.7 214  
 67 0 3 216 2 215 1.90E-67 263.8 6596 cellular  
 organisms;Eukaryota;Opisthokonta;Metazoa;Eumetazoa;Bilateria;Protostomia;  
 Spiralia;Lophotrochozoa;Mollusca;Bivalvia;Autobranchia;Heteroconchia;Euhe  
 terodonta;Imparidentia;Venerida;Veneroidea;Veneridae;Mercenaria;Mercenari  
 a mercenaria  
 UdeM00000017882 6596 387.1 UdeM00000017882 XP\_045213784.1 84.7 216  
 33 0 1 216 1 216 1.50E-104 387.1 6596 cellular  
 organisms;Eukaryota;Opisthokonta;Metazoa;Eumetazoa;Bilateria;Protostomia;  
 Spiralia;Lophotrochozoa;Mollusca;Bivalvia;Autobranchia;Heteroconchia;Euhe

terodonta;Imparidentia;Venerida;Veneroidea;Veneridae;Mercenaria;Mercenaria mercenaria  
 UdeM00000017883 29159 357.8 UdeM00000017883 XP\_034313138.1 39.6 1488  
 615 33 398 1768 62 1382 7.70E-95 357.8 29159 cellular  
 organisms;Eukaryota;Opisthokonta;Metazoa;Eumetazoa;Bilateria;Protostomia;  
 Spiralia;Lophotrochozoa;Mollusca;Bivalvia;Autobranchia;Pteriormorphia;Ostr  
 eida;Ostreoidea;Ostreidae;Crassostrea;Crassostrea gigas  
 UdeM00000017885 6596 377.1 UdeM00000017885 XP\_045213785.1 48.4 434  
 189 10 1 431 227 628 3.00E-101 377.1 6596 cellular  
 organisms;Eukaryota;Opisthokonta;Metazoa;Eumetazoa;Bilateria;Protostomia;  
 Spiralia;Lophotrochozoa;Mollusca;Bivalvia;Autobranchia;Heteroconchia;Euhe  
 terodonta;Imparidentia;Venerida;Veneroidea;Veneridae;Mercenaria;Mercenari  
 a mercenaria  
 UdeM00000017884 6596 624 UdeM00000017884 XP\_045213785.1 50.6 656  
 275 11 9 661 19 628 2.20E-175 624 6596 cellular  
 organisms;Eukaryota;Opisthokonta;Metazoa;Eumetazoa;Bilateria;Protostomia;  
 Spiralia;Lophotrochozoa;Mollusca;Bivalvia;Autobranchia;Heteroconchia;Euhe  
 terodonta;Imparidentia;Venerida;Veneroidea;Veneridae;Mercenaria;Mercenari  
 a mercenaria  
 UdeM00000017886 6565 301.6 UdeM00000017886 XP\_022318659.1 81.4 188  
 35 0 1 188 1 188 7.00E-79 301.6 6565 cellular  
 organisms;Eukaryota;Opisthokonta;Metazoa;Eumetazoa;Bilateria;Protostomia;  
 Spiralia;Lophotrochozoa;Mollusca;Bivalvia;Autobranchia;Pteriormorphia;Ostr  
 eida;Ostreoidea;Ostreidae;Crassostrea;Crassostrea virginica  
 UdeM00000017887 6579 408.3 UdeM00000017887 XP\_033729367.1 60.9 320  
 123 2 4 322 3 321 1.30E-110 408.3 6579 cellular  
 organisms;Eukaryota;Opisthokonta;Metazoa;Eumetazoa;Bilateria;Protostomia;  
 Spiralia;Lophotrochozoa;Mollusca;Bivalvia;Autobranchia;Pteriormorphia;Pect  
 inida;Pectinoidea;Pectinidae;Pecten;Pecten maximus  
 UdeM00000017888 6596 1230.3 UdeM00000017888 XP\_045210746.1 58.3  
 1033 405 10 40 1060 52 1070 0.00E+00 1230.3 6596  
 cellular  
 organisms;Eukaryota;Opisthokonta;Metazoa;Eumetazoa;Bilateria;Protostomia;  
 Spiralia;Lophotrochozoa;Mollusca;Bivalvia;Autobranchia;Heteroconchia;Euhe  
 terodonta;Imparidentia;Venerida;Veneroidea;Veneridae;Mercenaria;Mercenari  
 a mercenaria  
 UdeM00000017889 6596 137.9 UdeM00000017889 XP\_045213497.1 35.7 325  
 151 12 1 308 1 284 2.20E-29 137.9 6596 cellular  
 organisms;Eukaryota;Opisthokonta;Metazoa;Eumetazoa;Bilateria;Protostomia;  
 Spiralia;Lophotrochozoa;Mollusca;Bivalvia;Autobranchia;Heteroconchia;Euhe  
 terodonta;Imparidentia;Venerida;Veneroidea;Veneridae;Mercenaria;Mercenari  
 a mercenaria  
 UdeM00000017890 6596 135.6 UdeM00000017890 XP\_045211344.1 59.3 113  
 44 1 12 124 8 118 4.40E-29 135.6 6596 cellular  
 organisms;Eukaryota;Opisthokonta;Metazoa;Eumetazoa;Bilateria;Protostomia;  
 Spiralia;Lophotrochozoa;Mollusca;Bivalvia;Autobranchia;Heteroconchia;Euhe  
 terodonta;Imparidentia;Venerida;Veneroidea;Veneridae;Mercenaria;Mercenari  
 a mercenaria  
 UdeM00000017891 1735272 73.2 UdeM00000017891 XP\_041364761.1 50  
 58 29 0 1 58 87 144 1.80E-10 73.2 1735272  
 cellular  
 organisms;Eukaryota;Opisthokonta;Metazoa;Eumetazoa;Bilateria;Protostomia;  
 Spiralia;Lophotrochozoa;Mollusca;Gastropoda;Neomphalina;Neomphaloidea;Pel  
 tospiridae;Gigantopelta;Gigantopelta aegis



UdeM00000017892 6596 329.7 UdeM00000017892 XP\_045213980.1 54.2 295  
 127 3 71 363 112 400 4.70E-87 329.7 6596 cellular  
 organisms;Eukaryota;Opisthokonta;Metazoa;Eumetazoa;Bilateria;Protostomia;  
 Spiralia;Lophotrochozoa;Mollusca;Bivalvia;Autobranhia;Heteroconchia;Euhe  
 terodonta;Imparidentia;Venerida;Veneroidea;Veneridae;Mercenaria;Mercenari  
 a mercenaria

UdeM00000017893 6596 947.6 UdeM00000017893 XP\_045210552.1 51.7 1061  
 423 26 24 1059 33 1029 1.40E-272 947.6 6596 cellular  
 organisms;Eukaryota;Opisthokonta;Metazoa;Eumetazoa;Bilateria;Protostomia;  
 Spiralia;Lophotrochozoa;Mollusca;Bivalvia;Autobranhia;Heteroconchia;Euhe  
 terodonta;Imparidentia;Venerida;Veneroidea;Veneridae;Mercenaria;Mercenari  
 a mercenaria

UdeM00000017894 6596 280.4 UdeM00000017894 XP\_045214357.1 73.1 182  
 49 0 1 182 1 182 1.60E-72 280.4 6596 cellular  
 organisms;Eukaryota;Opisthokonta;Metazoa;Eumetazoa;Bilateria;Protostomia;  
 Spiralia;Lophotrochozoa;Mollusca;Bivalvia;Autobranhia;Heteroconchia;Euhe  
 terodonta;Imparidentia;Venerida;Veneroidea;Veneridae;Mercenaria;Mercenari  
 a mercenaria

UdeM00000017895 6596 300.4 UdeM00000017895 XP\_045213111.1 53.5 282  
 113 1 9 290 3 266 2.40E-78 300.4 6596 cellular  
 organisms;Eukaryota;Opisthokonta;Metazoa;Eumetazoa;Bilateria;Protostomia;  
 Spiralia;Lophotrochozoa;Mollusca;Bivalvia;Autobranhia;Heteroconchia;Euhe  
 terodonta;Imparidentia;Venerida;Veneroidea;Veneridae;Mercenaria;Mercenari  
 a mercenaria

UdeM00000017896 6573 104 UdeM00000017896 XP\_021379564.1 37.5 275  
 116 9 7 249 50 300 3.60E-19 104 6573 cellular  
 organisms;Eukaryota;Opisthokonta;Metazoa;Eumetazoa;Bilateria;Protostomia;  
 Spiralia;Lophotrochozoa;Mollusca;Bivalvia;Autobranhia;Pteriomorphia;Pect  
 inida;Pectinoidea;Pectinidae;Mizuhopecten;Mizuhopecten yessoensis

UdeM00000017897 6565 516.5 UdeM00000017897 XP\_022317408.1 60.6 507  
 158 12 3 492 280 761 3.60E-143 516.5 6565 cellular  
 organisms;Eukaryota;Opisthokonta;Metazoa;Eumetazoa;Bilateria;Protostomia;  
 Spiralia;Lophotrochozoa;Mollusca;Bivalvia;Autobranhia;Pteriomorphia;Ostr  
 eida;Ostreoidea;Ostreidae;Crassostrea;Crassostrea virginica

UdeM00000017899 6579 645.2 UdeM00000017899 XP\_033755580.1 46.7 793  
 343 13 5 729 807 1587 1.00E-181 645.2 6579 cellular  
 organisms;Eukaryota;Opisthokonta;Metazoa;Eumetazoa;Bilateria;Protostomia;  
 Spiralia;Lophotrochozoa;Mollusca;Bivalvia;Autobranhia;Pteriomorphia;Pect  
 inida;Pectinoidea;Pectinidae;Pecten;Pecten maximus

UdeM00000017898 6579 828.6 UdeM00000017898 XP\_033755580.1 46.7 1023  
 453 17 1 947 581 1587 8.30E-237 828.6 6579 cellular  
 organisms;Eukaryota;Opisthokonta;Metazoa;Eumetazoa;Bilateria;Protostomia;  
 Spiralia;Lophotrochozoa;Mollusca;Bivalvia;Autobranhia;Pteriomorphia;Pect  
 inida;Pectinoidea;Pectinidae;Pecten;Pecten maximus

UdeM00000017900 6596 229.2 UdeM00000017900 XP\_045210595.1 56 234  
 93 3 1 227 585 815 6.10E-57 229.2 6596 cellular  
 organisms;Eukaryota;Opisthokonta;Metazoa;Eumetazoa;Bilateria;Protostomia;  
 Spiralia;Lophotrochozoa;Mollusca;Bivalvia;Autobranhia;Heteroconchia;Euhe  
 terodonta;Imparidentia;Venerida;Veneroidea;Veneridae;Mercenaria;Mercenari  
 a mercenaria

UdeM00000017901 6596 245.7 UdeM00000017901 XP\_045210595.1 56.3 215  
 90 3 2 213 368 581 5.30E-62 245.7 6596 cellular  
 organisms;Eukaryota;Opisthokonta;Metazoa;Eumetazoa;Bilateria;Protostomia;  
 Spiralia;Lophotrochozoa;Mollusca;Bivalvia;Autobranhia;Heteroconchia;Euhe

terodonta;Imparidentia;Venerida;Veneroidea;Veneridae;Mercenaria;Mercenaria mercenaria

UdeM00000017902 29159 147.5 UdeM00000017902 XP\_034339171.1 48.3 149  
75 1 25 171 13 161 1.70E-32 147.5 29159 cellular  
organisms;Eukaryota;Opisthokonta;Metazoa;Eumetazoa;Bilateria;Protostomia;  
Spiralia;Lophotrochozoa;Mollusca;Bivalvia;Autobranhia;Pteriomorphia;Ostr  
eida;Ostreoidea;Ostreidae;Crassostrea;Crassostrea gigas

UdeM00000017903 29159 489.2 UdeM00000017903 XP\_034331441.1 31.6 1034  
654 23 71 1084 1 1001 1.40E-134 489.2 29159 cellular  
organisms;Eukaryota;Opisthokonta;Metazoa;Eumetazoa;Bilateria;Protostomia;  
Spiralia;Lophotrochozoa;Mollusca;Bivalvia;Autobranhia;Pteriomorphia;Ostr  
eida;Ostreoidea;Ostreidae;Crassostrea;Crassostrea gigas

UdeM00000017904 7574 417.5 UdeM00000017904 XP\_013388573.1 40.4 617  
333 15 96 703 349 939 3.30E-113 417.5 7574 cellular  
organisms;Eukaryota;Opisthokonta;Metazoa;Eumetazoa;Bilateria;Protostomia;  
Spiralia;Lophotrochozoa;Brachiopoda;Linguliformea;Lingulata;Lingulida;Lin  
guloidea;Lingulidae;Lingula;Lingula anatina

UdeM00000017907 6573 124 UdeM00000017907 XP\_021379559.1 68.2 88  
28 0 99 186 1176 1263 2.70E-25 124 6573 cellular  
organisms;Eukaryota;Opisthokonta;Metazoa;Eumetazoa;Bilateria;Protostomia;  
Spiralia;Lophotrochozoa;Mollusca;Bivalvia;Autobranhia;Pteriomorphia;Pect  
inida;Pectinoidea;Pectinidae;Mizuhopecten;Mizuhopecten yessoensis

UdeM00000017908 1735272 123.2 UdeM00000017908 XP\_041347065.1 35.4  
206 79 2 1 152 1 206 1.20E-24 123.2 1735272  
cellular

organisms;Eukaryota;Opisthokonta;Metazoa;Eumetazoa;Bilateria;Protostomia;  
Spiralia;Lophotrochozoa;Mollusca;Gastropoda;Neomphalina;Neomphaloidea;Pel  
tospiridae;Gigantopelta;Gigantopelta aegis

UdeM00000017909 6596 95.5 UdeM00000017909 XP\_045210595.1 53.5 86  
40 0 4 89 1023 1108 3.60E-17 95.5 6596 cellular  
organisms;Eukaryota;Opisthokonta;Metazoa;Eumetazoa;Bilateria;Protostomia;  
Spiralia;Lophotrochozoa;Mollusca;Bivalvia;Autobranhia;Heteroconchia;Euhe  
terodonta;Imparidentia;Venerida;Veneroidea;Veneridae;Mercenaria;Mercenari  
a mercenaria

UdeM00000017910 6573 291.2 UdeM00000017910 XP\_021379559.1 47.1 365  
170 6 1 361 1242 1587 1.80E-75 291.2 6573 cellular  
organisms;Eukaryota;Opisthokonta;Metazoa;Eumetazoa;Bilateria;Protostomia;  
Spiralia;Lophotrochozoa;Mollusca;Bivalvia;Autobranhia;Pteriomorphia;Pect  
inida;Pectinoidea;Pectinidae;Mizuhopecten;Mizuhopecten yessoensis

UdeM00000017911 6573 250.4 UdeM00000017911 XP\_021379559.1 46.3 298  
138 4 74 351 882 1177 3.50E-63 250.4 6573 cellular  
organisms;Eukaryota;Opisthokonta;Metazoa;Eumetazoa;Bilateria;Protostomia;  
Spiralia;Lophotrochozoa;Mollusca;Bivalvia;Autobranhia;Pteriomorphia;Pect  
inida;Pectinoidea;Pectinidae;Mizuhopecten;Mizuhopecten yessoensis

UdeM00000017912 1735272 69.3 UdeM00000017912 XP\_041360711.1 37.3  
83 52 0 2 84 3 85 3.80E-09 69.3 1735272  
cellular

organisms;Eukaryota;Opisthokonta;Metazoa;Eumetazoa;Bilateria;Protostomia;  
Spiralia;Lophotrochozoa;Mollusca;Gastropoda;Neomphalina;Neomphaloidea;Pel  
tospiridae;Gigantopelta;Gigantopelta aegis

UdeM00000017913 6596 461.5 UdeM00000017913 XP\_045210595.1 43.8 624  
242 11 183 787 283 816 2.30E-126 461.5 6596 cellular  
organisms;Eukaryota;Opisthokonta;Metazoa;Eumetazoa;Bilateria;Protostomia;  
Spiralia;Lophotrochozoa;Mollusca;Bivalvia;Autobranhia;Heteroconchia;Euhe

terodonta;Imparidentia;Venerida;Veneroidea;Veneridae;Mercenaria;Mercenari  
 a mercenaria  
 UdeM00000017914 6579 641.7 UdeM00000017914 XP\_033755580.1 45.9 787  
 354 10 2 749 808 1561 1.20E-180 641.7 6579 cellular  
 organisms;Eukaryota;Opisthokonta;Metazoa;Eumetazoa;Bilateria;Protostomia;  
 Spiralia;Lophotrochozoa;Mollusca;Bivalvia;Autobranchia;Pteriomorpha;Pect  
 inida;Pectinoidea;Pectinidae;Pecten;Pecten maximus  
 UdeM00000017915 6596 476.1 UdeM00000017915 XP\_045210595.1 43.4 638  
 230 9 14 635 307 829 7.10E-131 476.1 6596 cellular  
 organisms;Eukaryota;Opisthokonta;Metazoa;Eumetazoa;Bilateria;Protostomia;  
 Spiralia;Lophotrochozoa;Mollusca;Bivalvia;Autobranchia;Heteroconchia;Euhe  
 terodonta;Imparidentia;Venerida;Veneroidea;Veneridae;Mercenaria;Mercenari  
 a mercenaria  
 UdeM00000017916 6579 795.4 UdeM00000017916 XP\_033755580.1 46.6 972  
 443 13 44 1006 683 1587 8.30E-227 795.4 6579 cellular  
 organisms;Eukaryota;Opisthokonta;Metazoa;Eumetazoa;Bilateria;Protostomia;  
 Spiralia;Lophotrochozoa;Mollusca;Bivalvia;Autobranchia;Pteriomorpha;Pect  
 inida;Pectinoidea;Pectinidae;Pecten;Pecten maximus  
 UdeM00000017917 6596 338.2 UdeM00000017917 XP\_045210595.1 60.2 269  
 101 3 2 269 369 632 9.80E-90 338.2 6596 cellular  
 organisms;Eukaryota;Opisthokonta;Metazoa;Eumetazoa;Bilateria;Protostomia;  
 Spiralia;Lophotrochozoa;Mollusca;Bivalvia;Autobranchia;Heteroconchia;Euhe  
 terodonta;Imparidentia;Venerida;Veneroidea;Veneridae;Mercenaria;Mercenari  
 a mercenaria  
 UdeM00000017918 6596 1324.7 UdeM00000017918 XP\_045210595.1 47.1  
 1638 642 27 183 1753 59 1539 0.00E+00 1324.7 6596  
 cellular  
 organisms;Eukaryota;Opisthokonta;Metazoa;Eumetazoa;Bilateria;Protostomia;  
 Spiralia;Lophotrochozoa;Mollusca;Bivalvia;Autobranchia;Heteroconchia;Euhe  
 terodonta;Imparidentia;Venerida;Veneroidea;Veneridae;Mercenaria;Mercenari  
 a mercenaria  
 UdeM00000017919 6596 615.9 UdeM00000017919 XP\_045210595.1 48.2 724  
 323 14 183 891 59 745 8.00E-173 615.9 6596 cellular  
 organisms;Eukaryota;Opisthokonta;Metazoa;Eumetazoa;Bilateria;Protostomia;  
 Spiralia;Lophotrochozoa;Mollusca;Bivalvia;Autobranchia;Heteroconchia;Euhe  
 terodonta;Imparidentia;Venerida;Veneroidea;Veneridae;Mercenaria;Mercenari  
 a mercenaria  
 UdeM00000017921 6579 211.1 UdeM00000017921 XP\_033741736.1 51.5 202  
 96 1 15 214 656 857 1.50E-51 211.1 6579 cellular  
 organisms;Eukaryota;Opisthokonta;Metazoa;Eumetazoa;Bilateria;Protostomia;  
 Spiralia;Lophotrochozoa;Mollusca;Bivalvia;Autobranchia;Pteriomorpha;Pect  
 inida;Pectinoidea;Pectinidae;Pecten;Pecten maximus  
 UdeM00000017922 6579 198.7 UdeM00000017922 XP\_033741736.1 53.5 187  
 85 1 1 185 671 857 6.80E-48 198.7 6579 cellular  
 organisms;Eukaryota;Opisthokonta;Metazoa;Eumetazoa;Bilateria;Protostomia;  
 Spiralia;Lophotrochozoa;Mollusca;Bivalvia;Autobranchia;Pteriomorpha;Pect  
 inida;Pectinoidea;Pectinidae;Pecten;Pecten maximus  
 UdeM00000017923 1735272 201.8 UdeM00000017923 XP\_041374927.1 66.9  
 139 46 0 2 140 1215 1353 5.60E-49 201.8 1735272  
 cellular  
 organisms;Eukaryota;Opisthokonta;Metazoa;Eumetazoa;Bilateria;Protostomia;  
 Spiralia;Lophotrochozoa;Mollusca;Gastropoda;Neomphalina;Neomphaloidea;Pel  
 tospiridae;Gigantopelta;Gigantopelta aegis

UdeM00000017925 6596 721.5 UdeM00000017925 XP\_045211878.1 66.1 528  
 171 3 4 527 8 531 7.90E-205 721.5 6596 cellular  
 organisms;Eukaryota;Opisthokonta;Metazoa;Eumetazoa;Bilateria;Protostomia;  
 Spiralia;Lophotrochozoa;Mollusca;Bivalvia;Autobranchia;Heteroconchia;Euhe  
 terodonta;Imparidentia;Venerida;Veneroidea;Veneridae;Mercenaria;Mercenari  
 a mercenaria

UdeM00000017926 7574 115.2 UdeM00000017926 XP\_013391571.1 82.4 68  
 12 0 19 86 29 96 8.80E-23 115.2 7574 cellular  
 organisms;Eukaryota;Opisthokonta;Metazoa;Eumetazoa;Bilateria;Protostomia;  
 Spiralia;Lophotrochozoa;Brachiopoda;Linguliformea;Lingulata;Lingulida;Lin  
 guloidea;Lingulidae;Lingula;Lingula anatina

UdeM00000017926 7574 58.5 UdeM00000017926 XP\_013391571.1 63.3 49  
 11 1 85 126 382 430 9.80E-06 58.5 7574 cellular  
 organisms;Eukaryota;Opisthokonta;Metazoa;Eumetazoa;Bilateria;Protostomia;  
 Spiralia;Lophotrochozoa;Brachiopoda;Linguliformea;Lingulata;Lingulida;Lin  
 guloidea;Lingulidae;Lingula;Lingula anatina

UdeM00000017927 6596 434.1 UdeM00000017927 XP\_045214973.1 65 449  
 124 8 1 442 1 423 2.40E-118 434.1 6596 cellular  
 organisms;Eukaryota;Opisthokonta;Metazoa;Eumetazoa;Bilateria;Protostomia;  
 Spiralia;Lophotrochozoa;Mollusca;Bivalvia;Autobranchia;Heteroconchia;Euhe  
 terodonta;Imparidentia;Venerida;Veneroidea;Veneridae;Mercenaria;Mercenari  
 a mercenaria

UdeM00000017928 6596 144.8 UdeM00000017928 XP\_045214975.1 57 128  
 53 2 3 130 4 129 8.30E-32 144.8 6596 cellular  
 organisms;Eukaryota;Opisthokonta;Metazoa;Eumetazoa;Bilateria;Protostomia;  
 Spiralia;Lophotrochozoa;Mollusca;Bivalvia;Autobranchia;Heteroconchia;Euhe  
 terodonta;Imparidentia;Venerida;Veneroidea;Veneridae;Mercenaria;Mercenari  
 a mercenaria

UdeM00000017929 6596 74.7 UdeM00000017929 XP\_045169297.1 36.6 145  
 50 2 7 110 26 169 8.50E-11 74.7 6596 cellular  
 organisms;Eukaryota;Opisthokonta;Metazoa;Eumetazoa;Bilateria;Protostomia;  
 Spiralia;Lophotrochozoa;Mollusca;Bivalvia;Autobranchia;Heteroconchia;Euhe  
 terodonta;Imparidentia;Venerida;Veneroidea;Veneridae;Mercenaria;Mercenari  
 a mercenaria

UdeM00000017930 151771 215.7 UdeM00000017930 XP\_028415423.1 28.9  
 515 236 8 3 392 5 514 1.40E-52 215.7 151771  
 cellular  
 organisms;Eukaryota;Opisthokonta;Metazoa;Eumetazoa;Cnidaria;Anthozoa;Octo  
 corallia;Alcyonacea;Alcyoniina;Nephtheidae;Dendronephthya;Dendronephthya  
 gigantea

UdeM00000017931 6596 127.9 UdeM00000017931 XP\_045169297.1 46.9 145  
 76 1 24 168 26 169 1.30E-26 127.9 6596 cellular  
 organisms;Eukaryota;Opisthokonta;Metazoa;Eumetazoa;Bilateria;Protostomia;  
 Spiralia;Lophotrochozoa;Mollusca;Bivalvia;Autobranchia;Heteroconchia;Euhe  
 terodonta;Imparidentia;Venerida;Veneroidea;Veneridae;Mercenaria;Mercenari  
 a mercenaria

UdeM00000017932 225164 1305.4 UdeM00000017932 XP\_009063558.1  
 78.4 778 168 0 384 1161 152 929 0.00E+00 1305.4  
 225164 cellular  
 organisms;Eukaryota;Opisthokonta;Metazoa;Eumetazoa;Bilateria;Protostomia;  
 Spiralia;Lophotrochozoa;Mollusca;Gastropoda;Patellogastropoda;Lottioidae;  
 Lottiidae;Lottia;Lottia gigantea

UdeM00000017933 6596 506.9 UdeM00000017933 XP\_045210760.1 32.5 1345  
 769 31 809 2094 840 2104 1.20E-139 506.9 6596 cellular

organisms;Eukaryota;Opisthokonta;Metazoa;Eumetazoa;Bilateria;Protostomia;Spiralia;Lophotrochozoa;Mollusca;Bivalvia;Autobranchia;Heteroconchia;Euheterodonta;Imparidentia;Venerida;Veneroidea;Veneridae;Mercenaria;Mercenaria mercenaria

UdeM00000017934 6596 162.5 UdeM00000017934 XP\_045213331.1 64.5 124  
44 0 1 124 1 124 3.40E-37 162.5 6596 cellular

organisms;Eukaryota;Opisthokonta;Metazoa;Eumetazoa;Bilateria;Protostomia;Spiralia;Lophotrochozoa;Mollusca;Bivalvia;Autobranchia;Heteroconchia;Euheterodonta;Imparidentia;Venerida;Veneroidea;Veneridae;Mercenaria;Mercenaria mercenaria

UdeM00000017935 6596 473.4 UdeM00000017935 XP\_045212417.1 42.9 569  
312 7 1 562 1 563 4.00E-130 473.4 6596 cellular

organisms;Eukaryota;Opisthokonta;Metazoa;Eumetazoa;Bilateria;Protostomia;Spiralia;Lophotrochozoa;Mollusca;Bivalvia;Autobranchia;Heteroconchia;Euheterodonta;Imparidentia;Venerida;Veneroidea;Veneridae;Mercenaria;Mercenaria mercenaria

UdeM00000017936 6579 115.5 UdeM00000017936 XP\_033741736.1 55.4 101  
44 1 32 132 1090 1189 5.00E-23 115.5 6579 cellular

organisms;Eukaryota;Opisthokonta;Metazoa;Eumetazoa;Bilateria;Protostomia;Spiralia;Lophotrochozoa;Mollusca;Bivalvia;Autobranchia;Pteriomorphia;Pectinida;Pectinoidea;Pectinidae;Pecten;Pecten maximus

UdeM00000017937 10224 104.8 UdeM00000017937 XP\_006822441.1 58 88  
37 0 4 91 903 990 6.10E-20 104.8 10224 cellular

organisms;Eukaryota;Opisthokonta;Metazoa;Eumetazoa;Bilateria;Deuterostomia;Hemichordata;Enteropneusta;Harrimaniidae;Saccoglossus;Saccoglossus kowalevskii

UdeM00000017938 6596 473 UdeM00000017938 XP\_045212797.1 37.5 704  
423 13 5 700 4 698 6.50E-130 473 6596 cellular

organisms;Eukaryota;Opisthokonta;Metazoa;Eumetazoa;Bilateria;Protostomia;Spiralia;Lophotrochozoa;Mollusca;Bivalvia;Autobranchia;Heteroconchia;Euheterodonta;Imparidentia;Venerida;Veneroidea;Veneridae;Mercenaria;Mercenaria mercenaria

UdeM00000017940 1735272 146 UdeM00000017940 XP\_041362678.1 23  
985 610 27 32 932 88 1008 2.50E-31 146 1735272  
cellular

organisms;Eukaryota;Opisthokonta;Metazoa;Eumetazoa;Bilateria;Protostomia;Spiralia;Lophotrochozoa;Mollusca;Gastropoda;Neomphalina;Neomphaloidea;Peltospiridae;Gigantopelta;Gigantopelta aegis

UdeM00000017941 6579 178.3 UdeM00000017941 XP\_033741736.1 53.2 171  
78 1 1 169 671 841 8.60E-42 178.3 6579 cellular

organisms;Eukaryota;Opisthokonta;Metazoa;Eumetazoa;Bilateria;Protostomia;Spiralia;Lophotrochozoa;Mollusca;Bivalvia;Autobranchia;Pteriomorphia;Pectinida;Pectinoidea;Pectinidae;Pecten;Pecten maximus

UdeM00000017942 6579 1149.4 UdeM00000017942 XP\_033739131.1 60.3  
884 347 3 25 905 488 1370 0.00E+00 1149.4 6579  
cellular

organisms;Eukaryota;Opisthokonta;Metazoa;Eumetazoa;Bilateria;Protostomia;Spiralia;Lophotrochozoa;Mollusca;Bivalvia;Autobranchia;Pteriomorphia;Pectinida;Pectinoidea;Pectinidae;Pecten;Pecten maximus

UdeM00000017943 6579 198.7 UdeM00000017943 XP\_033741736.1 53.5 187  
85 1 1 185 671 857 6.80E-48 198.7 6579 cellular

organisms;Eukaryota;Opisthokonta;Metazoa;Eumetazoa;Bilateria;Protostomia;Spiralia;Lophotrochozoa;Mollusca;Bivalvia;Autobranchia;Pteriomorphia;Pectinida;Pectinoidea;Pectinidae;Pecten;Pecten maximus

UdeM00000017944 29159 92 UdeM00000017944 XP\_034307341.1 39.8 118  
 63 2 9 118 230 347 9.60E-16 92 29159 cellular  
 organisms;Eukaryota;Opisthokonta;Metazoa;Eumetazoa;Bilateria;Protostomia;  
 Spiralia;Lophotrochozoa;Mollusca;Bivalvia;Autobranchia;Pteriormorphia;Ostr  
 eida;Ostreoidea;Ostreidae;Crassostrea;Crassostrea gigas  
 UdeM00000017945 6596 149.4 UdeM00000017945 XP\_045213152.1 24.9 949  
 555 24 30 918 117 967 2.20E-32 149.4 6596 cellular  
 organisms;Eukaryota;Opisthokonta;Metazoa;Eumetazoa;Bilateria;Protostomia;  
 Spiralia;Lophotrochozoa;Mollusca;Bivalvia;Autobranchia;Heteroconchia;Euhe  
 terodonta;Imparidentia;Venerida;Veneroidea;Veneridae;Mercenaria;Mercenari  
 a mercenaria  
 UdeM00000017946 6596 107.1 UdeM00000017946 XP\_045213152.1 23.7 949  
 560 26 30 912 117 967 1.20E-19 107.1 6596 cellular  
 organisms;Eukaryota;Opisthokonta;Metazoa;Eumetazoa;Bilateria;Protostomia;  
 Spiralia;Lophotrochozoa;Mollusca;Bivalvia;Autobranchia;Heteroconchia;Euhe  
 terodonta;Imparidentia;Venerida;Veneroidea;Veneridae;Mercenaria;Mercenari  
 a mercenaria  
 UdeM00000017947 72036 353.6 UdeM00000017947 XP\_040576246.1 44.3 427  
 227 7 11 430 39 461 3.60E-94 353.6 72036 cellular  
 organisms;Eukaryota;Opisthokonta;Metazoa;Eumetazoa;Bilateria;Protostomia;  
 Ecdysozoa;Panarthropoda;Arthropoda;Mandibulata;Pancrustacea;Crustacea;Mul  
 ticrustacea;Hexanauplia;Copepoda;Neocopepoda;Podoplea;Siphonostomatoida;C  
 aligidae;Lepeophtheirus;Lepeophtheirus salmonis  
 UdeM00000017948 1735272 1070.5 UdeM00000017948 XP\_041362800.1  
 57.8 883 357 9 114 991 135 1006 0.00E+00 1070.5  
 1735272 cellular  
 organisms;Eukaryota;Opisthokonta;Metazoa;Eumetazoa;Bilateria;Protostomia;  
 Spiralia;Lophotrochozoa;Mollusca;Gastropoda;Neomphalina;Neomphaloidea;Pel  
 tospiridae;Gigantopelta;Gigantopelta aegis  
 UdeM00000017949 400727 462.6 UdeM00000017949 XP\_025092919.1 68.4  
 307 96 1 4 309 2 308 5.60E-127 462.6 400727  
 cellular  
 organisms;Eukaryota;Opisthokonta;Metazoa;Eumetazoa;Bilateria;Protostomia;  
 Spiralia;Lophotrochozoa;Mollusca;Gastropoda;Caenogastropoda;Architaeniogl  
 ossa;Ampullarioidea;Ampullariidae;Pomacea;Pomacea canaliculata  
 UdeM00000017950 6596 339 UdeM00000017950 XP\_045213493.1 43 391  
 196 8 26 402 12 389 8.80E-90 339 6596 cellular  
 organisms;Eukaryota;Opisthokonta;Metazoa;Eumetazoa;Bilateria;Protostomia;  
 Spiralia;Lophotrochozoa;Mollusca;Bivalvia;Autobranchia;Heteroconchia;Euhe  
 terodonta;Imparidentia;Venerida;Veneroidea;Veneridae;Mercenaria;Mercenari  
 a mercenaria  
 UdeM00000017951 400727 375.6 UdeM00000017951 XP\_025092919.1 59  
 307 125 1 7 312 3 309 1.10E-100 375.6 400727  
 cellular  
 organisms;Eukaryota;Opisthokonta;Metazoa;Eumetazoa;Bilateria;Protostomia;  
 Spiralia;Lophotrochozoa;Mollusca;Gastropoda;Caenogastropoda;Architaeniogl  
 ossa;Ampullarioidea;Ampullariidae;Pomacea;Pomacea canaliculata  
 UdeM00000017952 6500 376.7 UdeM00000017952 XP\_012946050.1 57.7 305  
 129 0 8 312 3 307 5.10E-101 376.7 6500 cellular  
 organisms;Eukaryota;Opisthokonta;Metazoa;Eumetazoa;Bilateria;Protostomia;  
 Spiralia;Lophotrochozoa;Mollusca;Gastropoda;Heterobranchia;Euthyneura;Tec  
 tipleura;Aplysiida;Aplysioidea;Aplysiidae;Aplysia;Aplysia californica  
 UdeM00000017953 400727 375.6 UdeM00000017953 XP\_025092919.1 57.9  
 316 132 1 7 321 3 318 1.10E-100 375.6 400727

cellular  
organisms;Eukaryota;Opisthokonta;Metazoa;Eumetazoa;Bilateria;Protostomia;  
Spiralia;Lophotrochozoa;Mollusca;Gastropoda;Caenogastropoda;Architaeniogl  
ossa;Ampullarioidea;Ampullariidae;Pomacea;Pomacea canaliculata  
UdeM00000017954 400727 380.2 UdeM00000017954 XP\_025092919.1 58.2  
316 131 1 7 321 3 318 4.60E-102 380.2 400727

cellular  
organisms;Eukaryota;Opisthokonta;Metazoa;Eumetazoa;Bilateria;Protostomia;  
Spiralia;Lophotrochozoa;Mollusca;Gastropoda;Caenogastropoda;Architaeniogl  
ossa;Ampullarioidea;Ampullariidae;Pomacea;Pomacea canaliculata  
UdeM00000017955 400727 378.3 UdeM00000017955 XP\_025092919.1 59.5  
304 122 1 7 309 3 306 1.70E-101 378.3 400727

cellular  
organisms;Eukaryota;Opisthokonta;Metazoa;Eumetazoa;Bilateria;Protostomia;  
Spiralia;Lophotrochozoa;Mollusca;Gastropoda;Caenogastropoda;Architaeniogl  
ossa;Ampullarioidea;Ampullariidae;Pomacea;Pomacea canaliculata  
UdeM00000017956 400727 378.6 UdeM00000017956 XP\_025092919.1 59.3  
307 124 1 7 312 3 309 1.30E-101 378.6 400727

cellular  
organisms;Eukaryota;Opisthokonta;Metazoa;Eumetazoa;Bilateria;Protostomia;  
Spiralia;Lophotrochozoa;Mollusca;Gastropoda;Caenogastropoda;Architaeniogl  
ossa;Ampullarioidea;Ampullariidae;Pomacea;Pomacea canaliculata  
UdeM00000017957 400727 327 UdeM00000017957 XP\_025092919.1 61.9  
252 95 1 15 265 52 303 4.30E-86 327 400727

cellular  
organisms;Eukaryota;Opisthokonta;Metazoa;Eumetazoa;Bilateria;Protostomia;  
Spiralia;Lophotrochozoa;Mollusca;Gastropoda;Caenogastropoda;Architaeniogl  
ossa;Ampullarioidea;Ampullariidae;Pomacea;Pomacea canaliculata  
UdeM00000017962 6596 689.5 UdeM00000017962 XP\_045214200.1 73.1 468  
122 3 121 587 2 466 3.70E-195 689.5 6596 cellular

organisms;Eukaryota;Opisthokonta;Metazoa;Eumetazoa;Bilateria;Protostomia;  
Spiralia;Lophotrochozoa;Mollusca;Bivalvia;Autobranchia;Heteroconchia;Euhe  
terodonta;Imparidentia;Venerida;Veneroidea;Veneridae;Mercenaria;Mercenari  
a mercenaria  
UdeM00000017963 6579 251.1 UdeM00000017963 XP\_033739209.1 50 258  
113 2 9 261 2 248 1.50E-63 251.1 6579 cellular

organisms;Eukaryota;Opisthokonta;Metazoa;Eumetazoa;Bilateria;Protostomia;  
Spiralia;Lophotrochozoa;Mollusca;Bivalvia;Autobranchia;Pteriomorphia;Pect  
inida;Pectinoidea;Pectinidae;Pecten;Pecten maximus  
UdeM00000017964 6573 460.7 UdeM00000017964 XP\_021346496.1 40.2 602  
313 4 245 812 103 691 3.90E-126 460.7 6573 cellular

organisms;Eukaryota;Opisthokonta;Metazoa;Eumetazoa;Bilateria;Protostomia;  
Spiralia;Lophotrochozoa;Mollusca;Bivalvia;Autobranchia;Pteriomorphia;Pect  
inida;Pectinoidea;Pectinidae;Mizuhopecten;Mizuhopecten yessoensis  
UdeM00000017965 6596 71.6 UdeM00000017965 XP\_045198585.1 30.9 162  
96 3 144 289 259 420 2.80E-09 71.6 6596 cellular

organisms;Eukaryota;Opisthokonta;Metazoa;Eumetazoa;Bilateria;Protostomia;  
Spiralia;Lophotrochozoa;Mollusca;Bivalvia;Autobranchia;Heteroconchia;Euhe  
terodonta;Imparidentia;Venerida;Veneroidea;Veneridae;Mercenaria;Mercenari  
a mercenaria  
UdeM00000017966 6596 326.6 UdeM00000017966 XP\_045214208.1 44.8 357  
185 3 2 357 7 352 4.40E-86 326.6 6596 cellular

organisms;Eukaryota;Opisthokonta;Metazoa;Eumetazoa;Bilateria;Protostomia;  
Spiralia;Lophotrochozoa;Mollusca;Bivalvia;Autobranchia;Heteroconchia;Euhe

terodonta;Imparidentia;Venerida;Veneroidea;Veneridae;Mercenaria;Mercenari  
 a mercenaria  
 UdeM00000017967 6596 328.2 UdeM00000017967 XP\_045214209.1 49.7 324  
 159 3 28 349 34 355 1.30E-86 328.2 6596 cellular  
 organisms;Eukaryota;Opisthokonta;Metazoa;Eumetazoa;Bilateria;Protostomia;  
 Spiralia;Lophotrochozoa;Mollusca;Bivalvia;Autobranchia;Heteroconchia;Euhe  
 terodonta;Imparidentia;Venerida;Veneroidea;Veneridae;Mercenaria;Mercenari  
 a mercenaria  
 UdeM00000017968 6596 388.3 UdeM00000017968 XP\_045211689.1 61.4 308  
 113 2 77 384 83 384 1.20E-104 388.3 6596 cellular  
 organisms;Eukaryota;Opisthokonta;Metazoa;Eumetazoa;Bilateria;Protostomia;  
 Spiralia;Lophotrochozoa;Mollusca;Bivalvia;Autobranchia;Heteroconchia;Euhe  
 terodonta;Imparidentia;Venerida;Veneroidea;Veneridae;Mercenaria;Mercenari  
 a mercenaria  
 UdeM00000017969 6565 185.7 UdeM00000017969 XP\_022306835.1 59.4 155  
 63 0 5 159 7 161 4.90E-44 185.7 6565 cellular  
 organisms;Eukaryota;Opisthokonta;Metazoa;Eumetazoa;Bilateria;Protostomia;  
 Spiralia;Lophotrochozoa;Mollusca;Bivalvia;Autobranchia;Pteriormorphia;Ostr  
 eida;Ostreoidea;Ostreidae;Crassostrea;Crassostrea virginica  
 UdeM00000017970 6596 390.6 UdeM00000017970 XP\_045211689.1 68.6 258  
 81 0 147 404 127 384 2.50E-105 390.6 6596 cellular  
 organisms;Eukaryota;Opisthokonta;Metazoa;Eumetazoa;Bilateria;Protostomia;  
 Spiralia;Lophotrochozoa;Mollusca;Bivalvia;Autobranchia;Heteroconchia;Euhe  
 terodonta;Imparidentia;Venerida;Veneroidea;Veneridae;Mercenaria;Mercenari  
 a mercenaria  
 UdeM00000017971 260995 71.6 UdeM00000017971 XP\_033788733.1 44  
 84 46 1 1 84 301 383 5.40E-10 71.6 260995  
 cellular  
 organisms;Eukaryota;Opisthokonta;Metazoa;Eumetazoa;Bilateria;Deuterostomi  
 a;Chordata;Craniata;Vertebrata;Gnathostomata;Teleostomi;Euteleostomi;Sarc  
 opterygii;Dipnotetrapodomorpha;Tetrapoda;Amphibia;Gymnophiona;Dermophiida  
 e;Geotrypetes;Geotrypetes seraphini  
 UdeM00000017974 6596 385.6 UdeM00000017974 XP\_045211689.1 62.4 303  
 114 0 105 407 82 384 8.00E-104 385.6 6596 cellular  
 organisms;Eukaryota;Opisthokonta;Metazoa;Eumetazoa;Bilateria;Protostomia;  
 Spiralia;Lophotrochozoa;Mollusca;Bivalvia;Autobranchia;Heteroconchia;Euhe  
 terodonta;Imparidentia;Venerida;Veneroidea;Veneridae;Mercenaria;Mercenari  
 a mercenaria  
 UdeM00000017975 6596 80.9 UdeM00000017975 XP\_045214197.1 44 84  
 45 1 4 87 26 107 2.80E-12 80.9 6596 cellular  
 organisms;Eukaryota;Opisthokonta;Metazoa;Eumetazoa;Bilateria;Protostomia;  
 Spiralia;Lophotrochozoa;Mollusca;Bivalvia;Autobranchia;Heteroconchia;Euhe  
 terodonta;Imparidentia;Venerida;Veneroidea;Veneridae;Mercenaria;Mercenari  
 a mercenaria  
 UdeM00000017976 6565 99.8 UdeM00000017976 XP\_022315633.1 20.7 709  
 447 25 63 738 270 896 1.60E-17 99.8 6565 cellular  
 organisms;Eukaryota;Opisthokonta;Metazoa;Eumetazoa;Bilateria;Protostomia;  
 Spiralia;Lophotrochozoa;Mollusca;Bivalvia;Autobranchia;Pteriormorphia;Ostr  
 eida;Ostreoidea;Ostreidae;Crassostrea;Crassostrea virginica  
 UdeM00000017977 6565 118.2 UdeM00000017977 XP\_022315628.1 30.3 251  
 163 4 1 249 1 241 1.60E-23 118.2 6565 cellular  
 organisms;Eukaryota;Opisthokonta;Metazoa;Eumetazoa;Bilateria;Protostomia;  
 Spiralia;Lophotrochozoa;Mollusca;Bivalvia;Autobranchia;Pteriormorphia;Ostr  
 eida;Ostreoidea;Ostreidae;Crassostrea;Crassostrea virginica



UdeM00000017979 6596 389.4 UdeM00000017979 XP\_045214940.1 65.1 304  
 102 2 45 344 39 342 4.70E-105 389.4 6596 cellular  
 organisms;Eukaryota;Opisthokonta;Metazoa;Eumetazoa;Bilateria;Protostomia;  
 Spiralia;Lophotrochozoa;Mollusca;Bivalvia;Autobranchia;Heteroconchia;Euhe  
 terodonta;Imparidentia;Venerida;Veneroidea;Veneridae;Mercenaria;Mercenari  
 a mercenaria  
 UdeM00000017980 1735272 93.6 UdeM00000017980 XP\_041364553.1 57  
 79 30 1 1 79 1 75 1.30E-16 93.6 1735272  
 cellular  
 organisms;Eukaryota;Opisthokonta;Metazoa;Eumetazoa;Bilateria;Protostomia;  
 Spiralia;Lophotrochozoa;Mollusca;Gastropoda;Neomphalina;Neomphaloidea;Pel  
 tospiridae;Gigantopelta;Gigantopelta aegis  
 UdeM00000017982 6579 172.9 UdeM00000017982 XP\_033740492.1 33.7 312  
 172 4 37 343 88 369 6.80E-40 172.9 6579 cellular  
 organisms;Eukaryota;Opisthokonta;Metazoa;Eumetazoa;Bilateria;Protostomia;  
 Spiralia;Lophotrochozoa;Mollusca;Bivalvia;Autobranchia;Pteriormorphia;Pect  
 inida;Pectinoidea;Pectinidae;Pecten;Pecten maximus  
 UdeM00000017983 6596 409.8 UdeM00000017983 XP\_045214544.1 31.5 1036  
 527 24 148 1082 92 1045 1.10E-110 409.8 6596 cellular  
 organisms;Eukaryota;Opisthokonta;Metazoa;Eumetazoa;Bilateria;Protostomia;  
 Spiralia;Lophotrochozoa;Mollusca;Bivalvia;Autobranchia;Heteroconchia;Euhe  
 terodonta;Imparidentia;Venerida;Veneroidea;Veneridae;Mercenaria;Mercenari  
 a mercenaria  
 UdeM00000017984 6596 409.8 UdeM00000017984 XP\_045214544.1 31.5 1036  
 527 24 168 1102 92 1045 1.10E-110 409.8 6596 cellular  
 organisms;Eukaryota;Opisthokonta;Metazoa;Eumetazoa;Bilateria;Protostomia;  
 Spiralia;Lophotrochozoa;Mollusca;Bivalvia;Autobranchia;Heteroconchia;Euhe  
 terodonta;Imparidentia;Venerida;Veneroidea;Veneridae;Mercenaria;Mercenari  
 a mercenaria  
 UdeM00000017985 1735272 146.7 UdeM00000017985 XP\_041363612.1 32.9  
 249 148 3 10 250 18 255 4.40E-32 146.7 1735272  
 cellular  
 organisms;Eukaryota;Opisthokonta;Metazoa;Eumetazoa;Bilateria;Protostomia;  
 Spiralia;Lophotrochozoa;Mollusca;Gastropoda;Neomphalina;Neomphaloidea;Pel  
 tospiridae;Gigantopelta;Gigantopelta aegis  
 UdeM00000017986 6596 676.8 UdeM00000017986 XP\_045214316.1 66.5 570  
 175 3 3 559 464 1030 2.80E-191 676.8 6596 cellular  
 organisms;Eukaryota;Opisthokonta;Metazoa;Eumetazoa;Bilateria;Protostomia;  
 Spiralia;Lophotrochozoa;Mollusca;Bivalvia;Autobranchia;Heteroconchia;Euhe  
 terodonta;Imparidentia;Venerida;Veneroidea;Veneridae;Mercenaria;Mercenari  
 a mercenaria  
 UdeM00000017987 6596 713 UdeM00000017987 XP\_045214319.1 73.9 441  
 114 1 1 440 1 441 3.70E-202 713 6596 cellular  
 organisms;Eukaryota;Opisthokonta;Metazoa;Eumetazoa;Bilateria;Protostomia;  
 Spiralia;Lophotrochozoa;Mollusca;Bivalvia;Autobranchia;Heteroconchia;Euhe  
 terodonta;Imparidentia;Venerida;Veneroidea;Veneridae;Mercenaria;Mercenari  
 a mercenaria  
 UdeM00000017988 6596 496.5 UdeM00000017988 XP\_045211982.1 56.2 560  
 220 9 1 553 1 542 4.40E-137 496.5 6596 cellular  
 organisms;Eukaryota;Opisthokonta;Metazoa;Eumetazoa;Bilateria;Protostomia;  
 Spiralia;Lophotrochozoa;Mollusca;Bivalvia;Autobranchia;Heteroconchia;Euhe  
 terodonta;Imparidentia;Venerida;Veneroidea;Veneridae;Mercenaria;Mercenari  
 a mercenaria

UdeM00000017990 6596 125.2 UdeM00000017990 XP\_045214821.1 40.7 214  
 110 5 7 215 9 210 2.30E-25 125.2 6596 cellular  
 organisms;Eukaryota;Opisthokonta;Metazoa;Eumetazoa;Bilateria;Protostomia;  
 Spiralia;Lophotrochozoa;Mollusca;Bivalvia;Autobranchia;Heteroconchia;Euhe  
 terodonta;Imparidentia;Venerida;Veneroidea;Veneridae;Mercenaria;Mercenari  
 a mercenaria  
 UdeM00000017991 6596 58.9 UdeM00000017991 XP\_045214887.1 34.1 82  
 38 2 1 82 39 104 6.10E-06 58.9 6596 cellular  
 organisms;Eukaryota;Opisthokonta;Metazoa;Eumetazoa;Bilateria;Protostomia;  
 Spiralia;Lophotrochozoa;Mollusca;Bivalvia;Autobranchia;Heteroconchia;Euhe  
 terodonta;Imparidentia;Venerida;Veneroidea;Veneridae;Mercenaria;Mercenari  
 a mercenaria  
 UdeM00000017992 6596 693.7 UdeM00000017992 XP\_045214377.1 54.7 685  
 269 6 1 658 1 671 2.20E-196 693.7 6596 cellular  
 organisms;Eukaryota;Opisthokonta;Metazoa;Eumetazoa;Bilateria;Protostomia;  
 Spiralia;Lophotrochozoa;Mollusca;Bivalvia;Autobranchia;Heteroconchia;Euhe  
 terodonta;Imparidentia;Venerida;Veneroidea;Veneridae;Mercenaria;Mercenari  
 a mercenaria  
 UdeM00000017993 6573 96.7 UdeM00000017993 XP\_021350034.1 64.2 67  
 24 0 9 75 9 75 1.40E-17 96.7 6573 cellular  
 organisms;Eukaryota;Opisthokonta;Metazoa;Eumetazoa;Bilateria;Protostomia;  
 Spiralia;Lophotrochozoa;Mollusca;Bivalvia;Autobranchia;Pteriormorphia;Pect  
 inida;Pectinoidea;Pectinidae;Mizuhopecten;Mizuhopecten yessoensis  
 UdeM00000017994 6596 651 UdeM00000017994 XP\_045214381.1 68.8 430  
 134 0 1 430 74 503 1.10E-183 651 6596 cellular  
 organisms;Eukaryota;Opisthokonta;Metazoa;Eumetazoa;Bilateria;Protostomia;  
 Spiralia;Lophotrochozoa;Mollusca;Bivalvia;Autobranchia;Heteroconchia;Euhe  
 terodonta;Imparidentia;Venerida;Veneroidea;Veneridae;Mercenaria;Mercenari  
 a mercenaria  
 UdeM00000017995 6596 599.4 UdeM00000017995 XP\_045214382.1 70.3 435  
 129 0 1 435 2 436 5.80E-168 599.4 6596 cellular  
 organisms;Eukaryota;Opisthokonta;Metazoa;Eumetazoa;Bilateria;Protostomia;  
 Spiralia;Lophotrochozoa;Mollusca;Bivalvia;Autobranchia;Heteroconchia;Euhe  
 terodonta;Imparidentia;Venerida;Veneroidea;Veneridae;Mercenaria;Mercenari  
 a mercenaria  
 UdeM00000017996 6596 589.3 UdeM00000017996 XP\_045214382.1 68.6 443  
 131 1 1 443 2 436 6.10E-165 589.3 6596 cellular  
 organisms;Eukaryota;Opisthokonta;Metazoa;Eumetazoa;Bilateria;Protostomia;  
 Spiralia;Lophotrochozoa;Mollusca;Bivalvia;Autobranchia;Heteroconchia;Euhe  
 terodonta;Imparidentia;Venerida;Veneroidea;Veneridae;Mercenaria;Mercenari  
 a mercenaria  
 UdeM00000017997 6596 188.3 UdeM00000017997 XP\_045214384.1 52.3 176  
 83 1 6 181 5 179 8.30E-45 188.3 6596 cellular  
 organisms;Eukaryota;Opisthokonta;Metazoa;Eumetazoa;Bilateria;Protostomia;  
 Spiralia;Lophotrochozoa;Mollusca;Bivalvia;Autobranchia;Heteroconchia;Euhe  
 terodonta;Imparidentia;Venerida;Veneroidea;Veneridae;Mercenaria;Mercenari  
 a mercenaria  
 UdeM00000017998 8078 63.5 UdeM00000017998 XP\_035990535.1 47.5 59  
 29 1 7 65 2 58 1.30E-07 63.5 8078 cellular  
 organisms;Eukaryota;Opisthokonta;Metazoa;Eumetazoa;Bilateria;Deuterostomi  
 a;Chordata;Craniata;Vertebrata;Gnathostomata;Teleostomi;Euteleostomi;Acti  
 nopterygii;Actinopteri;Neopterygii;Teleostei;Osteoglossocephalai;Clupeoce  
 phala;Euteleosteomorpha;Neoteleostei;Eurypterygia;Ctenosquamata;Acanthomo  
 rphata;Euacanthomorpha;Percomorphaceae;Ovalentaria;Atherinomorphae;Cyp

rinodontiformes;Cyprinodontoidei;Fundulidae;Fundulus;Fundulus heteroclitus

|                                                                                                                                                                          |      |      |                 |                |      |          |
|--------------------------------------------------------------------------------------------------------------------------------------------------------------------------|------|------|-----------------|----------------|------|----------|
| UdeM00000017999                                                                                                                                                          | 7725 | 80.9 | UdeM00000017999 | XP_039259523.1 | 45.5 | 77       |
| 41                                                                                                                                                                       | 1    | 7    | 83              | 92             | 167  | 8.70E-13 |
| 80.9 7725 cellular organisms;Eukaryota;Opisthokonta;Metazoa;Eumetazoa;Bilateria;Deuterostomia;Chordata;Tunicata;Ascidiacea;Stolidobranchia;Styelidae;Styela;Styela clava |      |      |                 |                |      |          |

|                                                                                                                                                                                                                                                                                                                                                                                                                |      |      |                 |                |      |          |
|----------------------------------------------------------------------------------------------------------------------------------------------------------------------------------------------------------------------------------------------------------------------------------------------------------------------------------------------------------------------------------------------------------------|------|------|-----------------|----------------|------|----------|
| UdeM00000018000                                                                                                                                                                                                                                                                                                                                                                                                | 8049 | 58.2 | UdeM00000018000 | XP_030229478.1 | 32.6 | 141      |
| 69                                                                                                                                                                                                                                                                                                                                                                                                             | 4    | 9    | 131             | 231            | 363  | 9.90E-06 |
| 58.2 8049 cellular organisms;Eukaryota;Opisthokonta;Metazoa;Eumetazoa;Bilateria;Deuterostomia;Chordata;Craniata;Vertebrata;Gnathostomata;Teleostomi;Euteleostomi;Actinopterygii;Actinopteri;Neopterygii;Teleostei;Osteoglossocephalai;Clupeocephala;Euteleostei;Neoteleostei;Eurypterygia;Ctenosquamata;Acanthopterygii;Paracanthopterygii;Zeiogadaria;Gadariae;Gadiformes;Gadoidei;Gadidae;Gadus;Gadus morhua |      |      |                 |                |      |          |

|                                                                                                                                                                                                                                                 |        |       |                 |                |      |     |
|-------------------------------------------------------------------------------------------------------------------------------------------------------------------------------------------------------------------------------------------------|--------|-------|-----------------|----------------|------|-----|
| UdeM00000018001                                                                                                                                                                                                                                 | 400727 | 138.3 | UdeM00000018001 | XP_025101913.1 | 33.9 |     |
| 345                                                                                                                                                                                                                                             | 193    | 12    | 5               | 337            | 187  | 508 |
| 1.90E-29 138.3 400727 cellular organisms;Eukaryota;Opisthokonta;Metazoa;Eumetazoa;Bilateria;Protostomia;Spiralia;Lophotrochozoa;Mollusca;Gastropoda;Caenogastropoda;Architaenioglossa;Ampullarioidea;Ampullariidae;Pomacea;Pomacea canaliculata |        |       |                 |                |      |     |

|                                                                                                                                                                                                                           |      |       |                 |                |      |          |
|---------------------------------------------------------------------------------------------------------------------------------------------------------------------------------------------------------------------------|------|-------|-----------------|----------------|------|----------|
| UdeM00000018002                                                                                                                                                                                                           | 6579 | 102.8 | UdeM00000018002 | XP_033733480.1 | 38.7 | 155      |
| 88                                                                                                                                                                                                                        | 3    | 36    | 185             | 35             | 187  | 1.30E-18 |
| 102.8 6579 cellular organisms;Eukaryota;Opisthokonta;Metazoa;Eumetazoa;Bilateria;Protostomia;Spiralia;Lophotrochozoa;Mollusca;Bivalvia;Autobranchia;Pteriormorphia;Pectinida;Pectinoidea;Pectinidae;Pecten;Pecten maximus |      |       |                 |                |      |          |

|                                                                                                                                                                                                                                  |       |       |                 |                |      |          |
|----------------------------------------------------------------------------------------------------------------------------------------------------------------------------------------------------------------------------------|-------|-------|-----------------|----------------|------|----------|
| UdeM00000018003                                                                                                                                                                                                                  | 29159 | 110.2 | UdeM00000018003 | XP_011419243.2 | 32.3 | 229      |
| 145                                                                                                                                                                                                                              | 5     | 123   | 346             | 148            | 371  | 7.90E-21 |
| 110.2 29159 cellular organisms;Eukaryota;Opisthokonta;Metazoa;Eumetazoa;Bilateria;Protostomia;Spiralia;Lophotrochozoa;Mollusca;Bivalvia;Autobranchia;Pteriormorphia;Ostreida;Ostreioidea;Ostreidae;Crassostrea;Crassostrea gigas |       |       |                 |                |      |          |

|                                                                                                                                                                                                                              |         |       |                 |                |      |     |
|------------------------------------------------------------------------------------------------------------------------------------------------------------------------------------------------------------------------------|---------|-------|-----------------|----------------|------|-----|
| UdeM00000018004                                                                                                                                                                                                              | 1735272 | 103.6 | UdeM00000018004 | XP_041379324.1 | 26.2 |     |
| 416                                                                                                                                                                                                                          | 279     | 14    | 9               | 412            | 24   | 423 |
| 6.20E-19 103.6 1735272 cellular organisms;Eukaryota;Opisthokonta;Metazoa;Eumetazoa;Bilateria;Protostomia;Spiralia;Lophotrochozoa;Mollusca;Gastropoda;Neomphalina;Neomphaloidea;Peltospiridae;Gigantopelta;Gigantopelta aegis |         |       |                 |                |      |     |

|                                                                                                                                                                                                                                |       |     |                 |                |      |          |
|--------------------------------------------------------------------------------------------------------------------------------------------------------------------------------------------------------------------------------|-------|-----|-----------------|----------------|------|----------|
| UdeM00000018005                                                                                                                                                                                                                | 29159 | 124 | UdeM00000018005 | XP_011419243.2 | 29.6 | 324      |
| 215                                                                                                                                                                                                                            | 8     | 56  | 373             | 81             | 397  | 4.50E-25 |
| 124 29159 cellular organisms;Eukaryota;Opisthokonta;Metazoa;Eumetazoa;Bilateria;Protostomia;Spiralia;Lophotrochozoa;Mollusca;Bivalvia;Autobranchia;Pteriormorphia;Ostreida;Ostreioidea;Ostreidae;Crassostrea;Crassostrea gigas |       |     |                 |                |      |          |

|                                                                                                                                                                                                                                |       |     |                 |                |      |          |
|--------------------------------------------------------------------------------------------------------------------------------------------------------------------------------------------------------------------------------|-------|-----|-----------------|----------------|------|----------|
| UdeM00000018006                                                                                                                                                                                                                | 29159 | 124 | UdeM00000018006 | XP_011419243.2 | 29.6 | 324      |
| 215                                                                                                                                                                                                                            | 8     | 56  | 373             | 81             | 397  | 4.60E-25 |
| 124 29159 cellular organisms;Eukaryota;Opisthokonta;Metazoa;Eumetazoa;Bilateria;Protostomia;Spiralia;Lophotrochozoa;Mollusca;Bivalvia;Autobranchia;Pteriormorphia;Ostreida;Ostreioidea;Ostreidae;Crassostrea;Crassostrea gigas |       |     |                 |                |      |          |

|                                                                                                                                                                                                                               |         |       |                 |                |      |     |
|-------------------------------------------------------------------------------------------------------------------------------------------------------------------------------------------------------------------------------|---------|-------|-----------------|----------------|------|-----|
| UdeM00000018007                                                                                                                                                                                                               | 1735272 | 642.5 | UdeM00000018007 | XP_041362902.1 | 71.3 |     |
| 443                                                                                                                                                                                                                           | 117     | 3     | 5               | 442            | 3    | 440 |
| 3.90E-181 642.5 1735272 cellular organisms;Eukaryota;Opisthokonta;Metazoa;Eumetazoa;Bilateria;Protostomia;Spiralia;Lophotrochozoa;Mollusca;Gastropoda;Neomphalina;Neomphaloidea;Peltospiridae;Gigantopelta;Gigantopelta aegis |         |       |                 |                |      |     |

UdeM00000018008 6573 349.4 UdeM00000018008 XP\_021358873.1 48.2 417  
 207 4 2 417 3 411 6.60E-93 349.4 6573 cellular  
 organisms;Eukaryota;Opisthokonta;Metazoa;Eumetazoa;Bilateria;Protostomia;  
 Spiralia;Lophotrochozoa;Mollusca;Bivalvia;Autobranchia;Pteriomorpha;Pect  
 inida;Pectinoidea;Pectinidae;Mizuhopecten;Mizuhopecten yessoensis  
 UdeM00000018009 6573 145.2 UdeM00000018009 XP\_021358871.1 46.9 177  
 94 0 1 177 246 422 8.10E-32 145.2 6573 cellular  
 organisms;Eukaryota;Opisthokonta;Metazoa;Eumetazoa;Bilateria;Protostomia;  
 Spiralia;Lophotrochozoa;Mollusca;Bivalvia;Autobranchia;Pteriomorpha;Pect  
 inida;Pectinoidea;Pectinidae;Mizuhopecten;Mizuhopecten yessoensis  
 UdeM00000018010 6579 286.6 UdeM00000018010 XP\_033753412.1 52.6 306  
 140 3 22 326 440 741 6.20E-74 286.6 6579 cellular  
 organisms;Eukaryota;Opisthokonta;Metazoa;Eumetazoa;Bilateria;Protostomia;  
 Spiralia;Lophotrochozoa;Mollusca;Bivalvia;Autobranchia;Pteriomorpha;Pect  
 inida;Pectinoidea;Pectinidae;Pecten;Pecten maximus  
 UdeM00000018011 1735272 66.2 UdeM00000018011 XP\_041365026.1 40.5  
 74 41 2 12 82 713 786 3.90E-08 66.2 1735272  
 cellular  
 organisms;Eukaryota;Opisthokonta;Metazoa;Eumetazoa;Bilateria;Protostomia;  
 Spiralia;Lophotrochozoa;Mollusca;Gastropoda;Neomphalina;Neomphaloidea;Pel  
 tospiridae;Gigantopelta;Gigantopelta aegis  
 UdeM00000018012 6573 258.5 UdeM00000018012 XP\_021342925.1 33.7 486  
 254 11 5 481 13 439 1.70E-65 258.5 6573 cellular  
 organisms;Eukaryota;Opisthokonta;Metazoa;Eumetazoa;Bilateria;Protostomia;  
 Spiralia;Lophotrochozoa;Mollusca;Bivalvia;Autobranchia;Pteriomorpha;Pect  
 inida;Pectinoidea;Pectinidae;Mizuhopecten;Mizuhopecten yessoensis  
 UdeM00000018013 105255 64.3 UdeM00000018013 XP\_042540089.1 35.6  
 101 53 2 3 103 145 233 2.10E-07 64.3 105255  
 cellular  
 organisms;Eukaryota;Opisthokonta;Metazoa;Eumetazoa;Bilateria;Deuterostomi  
 a;Chordata;Craniata;Vertebrata;Gnathostomata;Teleostomi;Euteleostomi;Sarc  
 opterygii;Dipnotetrapodomorpha;Tetrapoda;Amniota;Mammalia;Theria;Eutheria  
 ;Boreoeutheria;Euarchontoglires;Glires;Rodentia;Castorimorpha;Heteromyida  
 e;Dipodomys;Dipodomys spectabilis  
 UdeM00000018015 6596 92.8 UdeM00000018015 XP\_045173434.1 24.1 328  
 244 3 46 371 29 353 1.00E-15 92.8 6596 cellular  
 organisms;Eukaryota;Opisthokonta;Metazoa;Eumetazoa;Bilateria;Protostomia;  
 Spiralia;Lophotrochozoa;Mollusca;Bivalvia;Autobranchia;Heteroconchia;Euhe  
 terodonta;Imparidentia;Venerida;Veneroidea;Veneridae;Mercenaria;Mercenari  
 a mercenaria  
 UdeM00000018016 7574 506.5 UdeM00000018016 XP\_013394313.1 60.1 411  
 151 4 30 439 36 434 3.40E-140 506.5 7574 cellular  
 organisms;Eukaryota;Opisthokonta;Metazoa;Eumetazoa;Bilateria;Protostomia;  
 Spiralia;Lophotrochozoa;Brachiopoda;Linguliformea;Lingulata;Lingulida;Lin  
 guloidea;Lingulidae;Lingula;Lingula anatina  
 UdeM00000018017 6596 468.4 UdeM00000018017 XP\_045187317.1 51.6 444  
 198 5 3 440 4 436 1.00E-128 468.4 6596 cellular  
 organisms;Eukaryota;Opisthokonta;Metazoa;Eumetazoa;Bilateria;Protostomia;  
 Spiralia;Lophotrochozoa;Mollusca;Bivalvia;Autobranchia;Heteroconchia;Euhe  
 terodonta;Imparidentia;Venerida;Veneroidea;Veneridae;Mercenaria;Mercenari  
 a mercenaria  
 UdeM00000018019 6573 542.7 UdeM00000018019 XP\_021369020.1 44.8 723  
 353 8 26 745 21 700 7.20E-151 542.7 6573 cellular  
 organisms;Eukaryota;Opisthokonta;Metazoa;Eumetazoa;Bilateria;Protostomia;

Spiralia;Lophotrochozoa;Mollusca;Bivalvia;Autobranchia;Pteriomorphia;Pectinida;Pectinoidea;Pectinidae;Mizuhopecten;Mizuhopecten yessoensis  
UdeM00000018021 1735272 483 UdeM00000018021 XP\_041353687.1 58.9  
416 163 5 10 419 5 418 3.90E-133 483 1735272  
cellular  
organisms;Eukaryota;Opisthokonta;Metazoa;Eumetazoa;Bilateria;Protostomia;Spiralia;Lophotrochozoa;Mollusca;Gastropoda;Neomphalina;Neomphaloidea;Peltospiridae;Gigantopelta;Gigantopelta aegis  
UdeM00000018022 1735272 483 UdeM00000018022 XP\_041353687.1 58.9  
416 163 5 9 418 5 418 3.90E-133 483 1735272  
cellular  
organisms;Eukaryota;Opisthokonta;Metazoa;Eumetazoa;Bilateria;Protostomia;Spiralia;Lophotrochozoa;Mollusca;Gastropoda;Neomphalina;Neomphaloidea;Peltospiridae;Gigantopelta;Gigantopelta aegis  
UdeM00000018024 1735272 355.1 UdeM00000018024 XP\_041351932.1 52.2  
356 166 2 517 871 6 358 2.60E-94 355.1 1735272  
cellular  
organisms;Eukaryota;Opisthokonta;Metazoa;Eumetazoa;Bilateria;Protostomia;Spiralia;Lophotrochozoa;Mollusca;Gastropoda;Neomphalina;Neomphaloidea;Peltospiridae;Gigantopelta;Gigantopelta aegis  
UdeM00000018025 6573 475.3 UdeM00000018025 XP\_021363760.1 68.7 345  
108 0 14 358 38 382 7.20E-131 475.3 6573 cellular  
organisms;Eukaryota;Opisthokonta;Metazoa;Eumetazoa;Bilateria;Protostomia;Spiralia;Lophotrochozoa;Mollusca;Bivalvia;Autobranchia;Pteriomorphia;Pectinida;Pectinoidea;Pectinidae;Mizuhopecten;Mizuhopecten yessoensis  
UdeM00000018026 6596 1243.4 UdeM00000018026 XP\_045180432.1 56.9  
1121 433 14 40 1148 46 1128 0.00E+00 1243.4 6596  
cellular  
organisms;Eukaryota;Opisthokonta;Metazoa;Eumetazoa;Bilateria;Protostomia;Spiralia;Lophotrochozoa;Mollusca;Bivalvia;Autobranchia;Heteroconchia;Euheterodonta;Imparidentia;Venerida;Veneroidea;Veneridae;Mercenaria;Mercenaria mercenaria  
UdeM00000018027 6596 1087.4 UdeM00000018027 XP\_045213086.1 74.7  
661 165 2 55 713 53 713 0.00E+00 1087.4 6596  
cellular  
organisms;Eukaryota;Opisthokonta;Metazoa;Eumetazoa;Bilateria;Protostomia;Spiralia;Lophotrochozoa;Mollusca;Bivalvia;Autobranchia;Heteroconchia;Euheterodonta;Imparidentia;Venerida;Veneroidea;Veneridae;Mercenaria;Mercenaria mercenaria  
UdeM00000018028 6579 484.2 UdeM00000018028 XP\_033748994.1 71.9 345  
89 4 1 338 82 425 1.40E-133 484.2 6579 cellular  
organisms;Eukaryota;Opisthokonta;Metazoa;Eumetazoa;Bilateria;Protostomia;Spiralia;Lophotrochozoa;Mollusca;Bivalvia;Autobranchia;Pteriomorphia;Pectinida;Pectinoidea;Pectinidae;Pecten;Pecten maximus  
UdeM00000018030 400727 167.2 UdeM00000018030 XP\_025087143.1 84.2  
101 16 0 1 101 1 101 2.20E-38 167.2 400727  
cellular  
organisms;Eukaryota;Opisthokonta;Metazoa;Eumetazoa;Bilateria;Protostomia;Spiralia;Lophotrochozoa;Mollusca;Gastropoda;Caenogastropoda;Architaenioglossa;Ampullarioidea;Ampullariidae;Pomacea;Pomacea canaliculata  
UdeM00000018031 400727 144.8 UdeM00000018031 XP\_025087143.1 79.6  
93 19 0 1 93 1 93 1.20E-31 144.8 400727  
cellular  
organisms;Eukaryota;Opisthokonta;Metazoa;Eumetazoa;Bilateria;Protostomia;

Spiralia; Lophotrochozoa; Mollusca; Gastropoda; Caenogastropoda; Architaenioglossa; Ampullarioidea; Ampullariidae; Pomacea; Pomacea canaliculata

UdeM00000018033 6565 181.8 UdeM00000018033 XP\_022319370.1 84.3 102  
16 0 1 102 1 102 8.40E-43 181.8 6565 cellular  
organisms; Eukaryota; Opisthokonta; Metazoa; Eumetazoa; Bilateria; Protostomia; Spiralia; Lophotrochozoa; Mollusca; Bivalvia; Autobranchia; Pteriomorpha; Ostreida; Ostreioidea; Ostreidae; Crassostrea; Crassostrea virginica

UdeM00000018035 6573 161 UdeM00000018035 XP\_021361648.1 65.2 253  
70 2 322 556 292 544 9.80E-36 161 6573 cellular  
organisms; Eukaryota; Opisthokonta; Metazoa; Eumetazoa; Bilateria; Protostomia; Spiralia; Lophotrochozoa; Mollusca; Bivalvia; Autobranchia; Pteriomorpha; Pectinida; Pectinoidea; Pectinidae; Mizuhopecten; Mizuhopecten yessoensis

UdeM00000018036 6579 137.5 UdeM00000018036 XP\_033751802.1 28.5 627  
404 16 10 618 14 614 5.80E-29 137.5 6579 cellular  
organisms; Eukaryota; Opisthokonta; Metazoa; Eumetazoa; Bilateria; Protostomia; Spiralia; Lophotrochozoa; Mollusca; Bivalvia; Autobranchia; Pteriomorpha; Pectinida; Pectinoidea; Pectinidae; Pecten; Pecten maximus

UdeM00000018037 29159 745.3 UdeM00000018037 XP\_011416098.2 84.1 452  
71 1 1 451 1 452 4.40E-212 745.3 29159 cellular  
organisms; Eukaryota; Opisthokonta; Metazoa; Eumetazoa; Bilateria; Protostomia; Spiralia; Lophotrochozoa; Mollusca; Bivalvia; Autobranchia; Pteriomorpha; Ostreida; Ostreioidea; Ostreidae; Crassostrea; Crassostrea gigas

UdeM00000018038 6579 553.1 UdeM00000018038 XP\_033751763.1 50.8 707  
255 13 2 699 3 625 5.00E-154 553.1 6579 cellular  
organisms; Eukaryota; Opisthokonta; Metazoa; Eumetazoa; Bilateria; Protostomia; Spiralia; Lophotrochozoa; Mollusca; Bivalvia; Autobranchia; Pteriomorpha; Pectinida; Pectinoidea; Pectinidae; Pecten; Pecten maximus

UdeM00000018039 29159 258.5 UdeM00000018039 XP\_011416101.1 65.9 176  
60 0 8 183 1 176 6.60E-66 258.5 29159 cellular  
organisms; Eukaryota; Opisthokonta; Metazoa; Eumetazoa; Bilateria; Protostomia; Spiralia; Lophotrochozoa; Mollusca; Bivalvia; Autobranchia; Pteriomorpha; Ostreida; Ostreioidea; Ostreidae; Crassostrea; Crassostrea gigas

UdeM00000018040 29159 839.7 UdeM00000018040 XP\_011416101.1 60.8 674  
229 9 8 662 1 658 2.50E-240 839.7 29159 cellular  
organisms; Eukaryota; Opisthokonta; Metazoa; Eumetazoa; Bilateria; Protostomia; Spiralia; Lophotrochozoa; Mollusca; Bivalvia; Autobranchia; Pteriomorpha; Ostreida; Ostreioidea; Ostreidae; Crassostrea; Crassostrea gigas

UdeM00000018041 6500 193.7 UdeM00000018041 XP\_005092492.1 56.8 183  
71 2 1 176 1 182 2.30E-46 193.7 6500 cellular  
organisms; Eukaryota; Opisthokonta; Metazoa; Eumetazoa; Bilateria; Protostomia; Spiralia; Lophotrochozoa; Mollusca; Gastropoda; Heterobranchia; Euthyneura; Teptipleura; Aplysiida; Aplysioidea; Aplysiidae; Aplysia; Aplysia californica

UdeM00000018042 6526 125.2 UdeM00000018042 XP\_013090275.1 37.6 173  
100 3 33 200 62 231 1.00E-25 125.2 6526 cellular  
organisms; Eukaryota; Opisthokonta; Metazoa; Eumetazoa; Bilateria; Protostomia; Spiralia; Lophotrochozoa; Mollusca; Gastropoda; Heterobranchia; Euthyneura; Panpulmonata; Hygrophila; Lymnaeioidea; Planorbidae; Biomphalaria; Biomphalaria glabrata

UdeM00000018043 6596 1543.1 UdeM00000018043 XP\_045210857.1 50.8  
3069 1146 33 1 3044 1 2730 0.00E+00 1543.1 6596  
cellular  
organisms; Eukaryota; Opisthokonta; Metazoa; Eumetazoa; Bilateria; Protostomia; Spiralia; Lophotrochozoa; Mollusca; Bivalvia; Autobranchia; Heteroconchia; Euhe

terodonta;Imparidentia;Venerida;Veneroidea;Veneridae;Mercenaria;Mercenari  
 a mercenaria  
 UdeM00000018044 29159 180.6 UdeM00000018044 XP\_011425581.2 31.8 308  
 203 1 60 367 23 323 3.70E-42 180.6 29159 cellular  
 organisms;Eukaryota;Opisthokonta;Metazoa;Eumetazoa;Bilateria;Protostomia;  
 Spiralia;Lophotrochozoa;Mollusca;Bivalvia;Autobranchia;Pteriormorphia;Ostr  
 eida;Ostreoidea;Ostreidae;Crassostrea;Crassostrea gigas  
 UdeM00000018045 6596 1080.5 UdeM00000018045 XP\_045213735.1 54.4  
 974 377 9 30 986 29 952 0.00E+00 1080.5 6596  
 cellular  
 organisms;Eukaryota;Opisthokonta;Metazoa;Eumetazoa;Bilateria;Protostomia;  
 Spiralia;Lophotrochozoa;Mollusca;Bivalvia;Autobranchia;Heteroconchia;Euhe  
 terodonta;Imparidentia;Venerida;Veneroidea;Veneridae;Mercenaria;Mercenari  
 a mercenaria  
 UdeM00000018046 6596 90.5 UdeM00000018046 XP\_045213725.1 43.7 119  
 57 4 1 111 1 117 4.00E-15 90.5 6596 cellular  
 organisms;Eukaryota;Opisthokonta;Metazoa;Eumetazoa;Bilateria;Protostomia;  
 Spiralia;Lophotrochozoa;Mollusca;Bivalvia;Autobranchia;Heteroconchia;Euhe  
 terodonta;Imparidentia;Venerida;Veneroidea;Veneridae;Mercenaria;Mercenari  
 a mercenaria  
 UdeM00000018047 6596 373.2 UdeM00000018047 XP\_045208460.1 52.4 347  
 158 2 23 368 21 361 3.80E-100 373.2 6596 cellular  
 organisms;Eukaryota;Opisthokonta;Metazoa;Eumetazoa;Bilateria;Protostomia;  
 Spiralia;Lophotrochozoa;Mollusca;Bivalvia;Autobranchia;Heteroconchia;Euhe  
 terodonta;Imparidentia;Venerida;Veneroidea;Veneridae;Mercenaria;Mercenari  
 a mercenaria  
 UdeM00000018048 6596 187.6 UdeM00000018048 XP\_045199556.1 31.9 354  
 236 4 45 395 787 1138 5.00E-44 187.6 6596 cellular  
 organisms;Eukaryota;Opisthokonta;Metazoa;Eumetazoa;Bilateria;Protostomia;  
 Spiralia;Lophotrochozoa;Mollusca;Bivalvia;Autobranchia;Heteroconchia;Euhe  
 terodonta;Imparidentia;Venerida;Veneroidea;Veneridae;Mercenaria;Mercenari  
 a mercenaria  
 UdeM00000018049 37653 135.6 UdeM00000018049 XP\_014790756.1 31.9 263  
 173 3 80 339 568 827 1.60E-28 135.6 37653 cellular  
 organisms;Eukaryota;Opisthokonta;Metazoa;Eumetazoa;Bilateria;Protostomia;  
 Spiralia;Lophotrochozoa;Mollusca;Cephalopoda;Coleoidea;Octopodiformes;Oct  
 opoda;Incirrata;Octopodidae;Octopus;Octopus bimaculoides  
 UdeM00000018050 6596 779.6 UdeM00000018050 XP\_045214999.1 53.7 750  
 248 7 1 677 5 728 3.20E-222 779.6 6596 cellular  
 organisms;Eukaryota;Opisthokonta;Metazoa;Eumetazoa;Bilateria;Protostomia;  
 Spiralia;Lophotrochozoa;Mollusca;Bivalvia;Autobranchia;Heteroconchia;Euhe  
 terodonta;Imparidentia;Venerida;Veneroidea;Veneridae;Mercenaria;Mercenari  
 a mercenaria  
 UdeM00000018051 6596 311.6 UdeM00000018051 XP\_045214997.1 48.5 355  
 175 3 12 362 744 1094 1.30E-81 311.6 6596 cellular  
 organisms;Eukaryota;Opisthokonta;Metazoa;Eumetazoa;Bilateria;Protostomia;  
 Spiralia;Lophotrochozoa;Mollusca;Bivalvia;Autobranchia;Heteroconchia;Euhe  
 terodonta;Imparidentia;Venerida;Veneroidea;Veneridae;Mercenaria;Mercenari  
 a mercenaria  
 UdeM00000018052 6565 510 UdeM00000018052 XP\_022315827.1 45.1 685  
 304 9 1 676 1 622 4.70E-141 510 6565 cellular  
 organisms;Eukaryota;Opisthokonta;Metazoa;Eumetazoa;Bilateria;Protostomia;  
 Spiralia;Lophotrochozoa;Mollusca;Bivalvia;Autobranchia;Pteriormorphia;Ostr  
 eida;Ostreoidea;Ostreidae;Crassostrea;Crassostrea virginica

UdeM00000018053 6565 522.3 UdeM00000018053 XP\_022315827.1 45.5 685  
 305 8 1 680 1 622 9.10E-145 522.3 6565 cellular  
 organisms;Eukaryota;Opisthokonta;Metazoa;Eumetazoa;Bilateria;Protostomia;  
 Spiralia;Lophotrochozoa;Mollusca;Bivalvia;Autobranchia;Pteriomorpha;Ostr  
 eida;Ostreoidea;Ostreidae;Crassostrea;Crassostrea virginica  
 UdeM00000018054 29159 1216.1 UdeM00000018054 XP\_011448973.2 52.8  
 1427 593 24 53 1437 34 1421 0.00E+00 1216.1  
 29159 cellular  
 organisms;Eukaryota;Opisthokonta;Metazoa;Eumetazoa;Bilateria;Protostomia;  
 Spiralia;Lophotrochozoa;Mollusca;Bivalvia;Autobranchia;Pteriomorpha;Ostr  
 eida;Ostreoidea;Ostreidae;Crassostrea;Crassostrea gigas  
 UdeM00000018055 6596 194.5 UdeM00000018055 XP\_045186494.1 43 277  
 153 3 49 322 19 293 2.20E-46 194.5 6596 cellular  
 organisms;Eukaryota;Opisthokonta;Metazoa;Eumetazoa;Bilateria;Protostomia;  
 Spiralia;Lophotrochozoa;Mollusca;Bivalvia;Autobranchia;Heteroconchia;Euhe  
 terodonta;Imparidentia;Venerida;Veneroidea;Veneridae;Mercenaria;Mercenari  
 a mercenaria  
 UdeM00000018056 6579 5567.7 UdeM00000018056 XP\_033749225.1 40.7  
 8331 4525 136 20 8093 1244 9412 0.00E+00 5567.7 6579  
 cellular  
 organisms;Eukaryota;Opisthokonta;Metazoa;Eumetazoa;Bilateria;Protostomia;  
 Spiralia;Lophotrochozoa;Mollusca;Bivalvia;Autobranchia;Pteriomorpha;Pect  
 inida;Pectinoidea;Pectinidae;Pecten;Pecten maximus  
 UdeM00000018057 6579 5584.6 UdeM00000018057 XP\_033749225.1 40.8  
 8304 4525 135 20 8066 1244 9412 0.00E+00 5584.6 6579  
 cellular  
 organisms;Eukaryota;Opisthokonta;Metazoa;Eumetazoa;Bilateria;Protostomia;  
 Spiralia;Lophotrochozoa;Mollusca;Bivalvia;Autobranchia;Pteriomorpha;Pect  
 inida;Pectinoidea;Pectinidae;Pecten;Pecten maximus  
 UdeM00000018058 6565 320.5 UdeM00000018058 XP\_022317156.1 41.5 532  
 278 15 2 514 698 1215 4.60E-84 320.5 6565 cellular  
 organisms;Eukaryota;Opisthokonta;Metazoa;Eumetazoa;Bilateria;Protostomia;  
 Spiralia;Lophotrochozoa;Mollusca;Bivalvia;Autobranchia;Pteriomorpha;Ostr  
 eida;Ostreoidea;Ostreidae;Crassostrea;Crassostrea virginica  
 UdeM00000018059 6565 357.5 UdeM00000018059 XP\_022314359.1 36.6 680  
 363 18 86 725 56 707 4.10E-95 357.5 6565 cellular  
 organisms;Eukaryota;Opisthokonta;Metazoa;Eumetazoa;Bilateria;Protostomia;  
 Spiralia;Lophotrochozoa;Mollusca;Bivalvia;Autobranchia;Pteriomorpha;Ostr  
 eida;Ostreoidea;Ostreidae;Crassostrea;Crassostrea virginica  
 UdeM00000018060 108931 257.3 UdeM00000018060 XP\_039300608.1 51.2  
 240 113 2 1 236 648 887 2.00E-65 257.3 108931  
 cellular  
 organisms;Eukaryota;Opisthokonta;Metazoa;Eumetazoa;Bilateria;Protostomia;  
 Ecdysozoa;Panarthropoda;Arthropoda;Mandibulata;Pancrustacea;Hexapoda;Inse  
 cta;Dicondylia;Pterygota;Neoptera;Paraneoptera;Hemiptera;Auchenorrhyncha;  
 Fulgoromorpha;Fulgoroidea;Delphacidae;Delphacinae;Nilaparvata;Nilaparvata  
 lugens  
 UdeM00000018061 29159 309.7 UdeM00000018061 XP\_034314268.1 34.1 692  
 406 20 25 683 2 676 9.60E-81 309.7 29159 cellular  
 organisms;Eukaryota;Opisthokonta;Metazoa;Eumetazoa;Bilateria;Protostomia;  
 Spiralia;Lophotrochozoa;Mollusca;Bivalvia;Autobranchia;Pteriomorpha;Ostr  
 eida;Ostreoidea;Ostreidae;Crassostrea;Crassostrea gigas  
 UdeM00000018062 6579 721.8 UdeM00000018062 XP\_033749225.1 31.9 1723  
 1078 40 11 1706 6432 8086 2.00E-204 721.8 6579 cellular



organisms;Eukaryota;Opisthokonta;Metazoa;Eumetazoa;Bilateria;Protostomia;Spiralia;Lophotrochozoa;Mollusca;Bivalvia;Autobranhia;Pteriormorphia;Pectinida;Pectinoidea;Pectinidae;Pecten;Pecten maximus

UdeM00000018063 6573 964.1 UdeM00000018063 XP\_021358863.1 42 1344  
733 25 158 1478 8099 9419 2.00E-277 964.1 6573 cellular

organisms;Eukaryota;Opisthokonta;Metazoa;Eumetazoa;Bilateria;Protostomia;Spiralia;Lophotrochozoa;Mollusca;Bivalvia;Autobranhia;Pteriormorphia;Pectinida;Pectinoidea;Pectinidae;Mizuhopecten;Mizuhopecten yessoensis

UdeM00000018064 6565 1400.2 UdeM00000018064 XP\_022314359.1 37.4  
2541 1454 60 22 2486 2 2481 0.00E+00 1400.2 6565  
cellular

organisms;Eukaryota;Opisthokonta;Metazoa;Eumetazoa;Bilateria;Protostomia;Spiralia;Lophotrochozoa;Mollusca;Bivalvia;Autobranhia;Pteriormorphia;Ostreida;Ostreoidea;Ostreidae;Crassostrea;Crassostrea virginica

UdeM00000018065 6596 620.9 UdeM00000018065 XP\_045197975.1 41.4 871  
480 16 46 906 1078 1928 2.60E-174 620.9 6596 cellular

organisms;Eukaryota;Opisthokonta;Metazoa;Eumetazoa;Bilateria;Protostomia;Spiralia;Lophotrochozoa;Mollusca;Bivalvia;Autobranhia;Heteroconchia;Euheterodonta;Imparidentia;Venerida;Veneroidea;Veneridae;Mercenaria;Mercenaria mercenaria

UdeM00000018067 6573 91.7 UdeM00000018067 XP\_021340920.1 27.7 188  
112 5 35 212 753 926 3.50E-15 91.7 6573 cellular

organisms;Eukaryota;Opisthokonta;Metazoa;Eumetazoa;Bilateria;Protostomia;Spiralia;Lophotrochozoa;Mollusca;Bivalvia;Autobranhia;Pteriormorphia;Pectinida;Pectinoidea;Pectinidae;Mizuhopecten;Mizuhopecten yessoensis

UdeM00000018068 6596 191.4 UdeM00000018068 XP\_045213213.1 67.9 140  
44 1 1 139 1 140 7.80E-46 191.4 6596 cellular

organisms;Eukaryota;Opisthokonta;Metazoa;Eumetazoa;Bilateria;Protostomia;Spiralia;Lophotrochozoa;Mollusca;Bivalvia;Autobranhia;Heteroconchia;Euheterodonta;Imparidentia;Venerida;Veneroidea;Veneridae;Mercenaria;Mercenaria mercenaria

UdeM00000018069 1735272 447.2 UdeM00000018069 XP\_041363765.1 69.9  
306 92 0 56 361 64 369 2.00E-122 447.2 1735272  
cellular

organisms;Eukaryota;Opisthokonta;Metazoa;Eumetazoa;Bilateria;Protostomia;Spiralia;Lophotrochozoa;Mollusca;Gastropoda;Neomphalina;Neomphaloidea;Peltospiridae;Gigantopelta;Gigantopelta aegis

UdeM00000018070 6596 1518.8 UdeM00000018070 XP\_045210708.1 67.5  
1096 351 4 1 1092 19 1113 0.00E+00 1518.8 6596  
cellular

organisms;Eukaryota;Opisthokonta;Metazoa;Eumetazoa;Bilateria;Protostomia;Spiralia;Lophotrochozoa;Mollusca;Bivalvia;Autobranhia;Heteroconchia;Euheterodonta;Imparidentia;Venerida;Veneroidea;Veneridae;Mercenaria;Mercenaria mercenaria

UdeM00000018071 6573 1311.2 UdeM00000018071 XP\_021340610.1 65.2  
957 320 6 17 960 1125 2081 0.00E+00 1311.2 6573  
cellular

organisms;Eukaryota;Opisthokonta;Metazoa;Eumetazoa;Bilateria;Protostomia;Spiralia;Lophotrochozoa;Mollusca;Bivalvia;Autobranhia;Pteriormorphia;Pectinida;Pectinoidea;Pectinidae;Mizuhopecten;Mizuhopecten yessoensis

UdeM00000018072 6596 788.1 UdeM00000018072 XP\_045210708.1 60.1 749  
236 7 2 702 1923 2656 9.20E-225 788.1 6596 cellular

organisms;Eukaryota;Opisthokonta;Metazoa;Eumetazoa;Bilateria;Protostomia;Spiralia;Lophotrochozoa;Mollusca;Bivalvia;Autobranhia;Heteroconchia;Euheterodonta

terodonta;Imparidentia;Venerida;Veneroidea;Veneridae;Mercenaria;Mercenari  
 a mercenaria  
 UdeM00000018073 6596 592.8 UdeM00000018073 XP\_045210778.1 30.8 1204  
 663 31 119 1234 522 1643 1.00E-165 592.8 6596 cellular  
 organisms;Eukaryota;Opisthokonta;Metazoa;Eumetazoa;Bilateria;Protostomia;  
 Spiralia;Lophotrochozoa;Mollusca;Bivalvia;Autobranhia;Heteroconchia;Euhe  
 terodonta;Imparidentia;Venerida;Veneroidea;Veneridae;Mercenaria;Mercenari  
 a mercenaria  
 UdeM00000018073 6596 275 UdeM00000018073 XP\_045210778.1 23.7 1233  
 776 41 5 1163 3 1144 4.70E-70 275 6596 cellular  
 organisms;Eukaryota;Opisthokonta;Metazoa;Eumetazoa;Bilateria;Protostomia;  
 Spiralia;Lophotrochozoa;Mollusca;Bivalvia;Autobranhia;Heteroconchia;Euhe  
 terodonta;Imparidentia;Venerida;Veneroidea;Veneridae;Mercenaria;Mercenari  
 a mercenaria  
 UdeM00000018074 6596 594 UdeM00000018074 XP\_045210778.1 30.8 1204  
 660 30 119 1231 522 1643 4.60E-166 594 6596 cellular  
 organisms;Eukaryota;Opisthokonta;Metazoa;Eumetazoa;Bilateria;Protostomia;  
 Spiralia;Lophotrochozoa;Mollusca;Bivalvia;Autobranhia;Heteroconchia;Euhe  
 terodonta;Imparidentia;Venerida;Veneroidea;Veneridae;Mercenaria;Mercenari  
 a mercenaria  
 UdeM00000018074 6596 278.5 UdeM00000018074 XP\_045210778.1 23.8 1240  
 780 42 5 1170 3 1151 4.20E-71 278.5 6596 cellular  
 organisms;Eukaryota;Opisthokonta;Metazoa;Eumetazoa;Bilateria;Protostomia;  
 Spiralia;Lophotrochozoa;Mollusca;Bivalvia;Autobranhia;Heteroconchia;Euhe  
 terodonta;Imparidentia;Venerida;Veneroidea;Veneridae;Mercenaria;Mercenari  
 a mercenaria  
 UdeM00000018075 6596 312 UdeM00000018075 XP\_045214610.1 51.4 286  
 120 2 1 269 1 284 7.40E-82 312 6596 cellular  
 organisms;Eukaryota;Opisthokonta;Metazoa;Eumetazoa;Bilateria;Protostomia;  
 Spiralia;Lophotrochozoa;Mollusca;Bivalvia;Autobranhia;Heteroconchia;Euhe  
 terodonta;Imparidentia;Venerida;Veneroidea;Veneridae;Mercenaria;Mercenari  
 a mercenaria  
 UdeM00000018076 6596 342 UdeM00000018076 XP\_045163874.1 41.9 430  
 234 4 6 431 7 424 1.10E-90 342 6596 cellular  
 organisms;Eukaryota;Opisthokonta;Metazoa;Eumetazoa;Bilateria;Protostomia;  
 Spiralia;Lophotrochozoa;Mollusca;Bivalvia;Autobranhia;Heteroconchia;Euhe  
 terodonta;Imparidentia;Venerida;Veneroidea;Veneridae;Mercenaria;Mercenari  
 a mercenaria  
 UdeM00000018077 6596 250 UdeM00000018077 XP\_045206114.1 39.4 312  
 185 1 14 321 16 327 4.40E-63 250 6596 cellular  
 organisms;Eukaryota;Opisthokonta;Metazoa;Eumetazoa;Bilateria;Protostomia;  
 Spiralia;Lophotrochozoa;Mollusca;Bivalvia;Autobranhia;Heteroconchia;Euhe  
 terodonta;Imparidentia;Venerida;Veneroidea;Veneridae;Mercenaria;Mercenari  
 a mercenaria  
 UdeM00000018078 6596 882.5 UdeM00000018078 XP\_045213523.1 66.3 621  
 207 2 67 685 11 631 3.50E-253 882.5 6596 cellular  
 organisms;Eukaryota;Opisthokonta;Metazoa;Eumetazoa;Bilateria;Protostomia;  
 Spiralia;Lophotrochozoa;Mollusca;Bivalvia;Autobranhia;Heteroconchia;Euhe  
 terodonta;Imparidentia;Venerida;Veneroidea;Veneridae;Mercenaria;Mercenari  
 a mercenaria  
 UdeM00000018080 6565 117.1 UdeM00000018080 XP\_022310266.1 54.8 115  
 48 1 1 115 216 326 1.60E-23 117.1 6565 cellular  
 organisms;Eukaryota;Opisthokonta;Metazoa;Eumetazoa;Bilateria;Protostomia;

Spiralia; Lophotrochozoa; Mollusca; Bivalvia; Autobranchia; Pteriomorpha; Ostr  
eida; Ostreidae; Crassostrea; Crassostrea virginica  
UdeM00000018081 6565 117.1 UdeM00000018081 XP\_022310266.1 54.8 115  
48 1 1 115 216 326 1.60E-23 117.1 6565 cellular  
organisms; Eukaryota; Opisthokonta; Metazoa; Eumetazoa; Bilateria; Protostomia;  
Spiralia; Lophotrochozoa; Mollusca; Bivalvia; Autobranchia; Pteriomorpha; Ostr  
eida; Ostreidae; Crassostrea; Crassostrea virginica  
UdeM00000018083 6565 117.1 UdeM00000018083 XP\_022310266.1 54.8 115  
48 1 1 115 216 326 1.60E-23 117.1 6565 cellular  
organisms; Eukaryota; Opisthokonta; Metazoa; Eumetazoa; Bilateria; Protostomia;  
Spiralia; Lophotrochozoa; Mollusca; Bivalvia; Autobranchia; Pteriomorpha; Ostr  
eida; Ostreidae; Crassostrea; Crassostrea virginica  
UdeM00000018084 6565 117.1 UdeM00000018084 XP\_022310266.1 54.8 115  
48 1 1 115 216 326 1.60E-23 117.1 6565 cellular  
organisms; Eukaryota; Opisthokonta; Metazoa; Eumetazoa; Bilateria; Protostomia;  
Spiralia; Lophotrochozoa; Mollusca; Bivalvia; Autobranchia; Pteriomorpha; Ostr  
eida; Ostreidae; Crassostrea; Crassostrea virginica  
UdeM00000018085 6565 117.1 UdeM00000018085 XP\_022310266.1 54.8 115  
48 1 1 115 216 326 1.60E-23 117.1 6565 cellular  
organisms; Eukaryota; Opisthokonta; Metazoa; Eumetazoa; Bilateria; Protostomia;  
Spiralia; Lophotrochozoa; Mollusca; Bivalvia; Autobranchia; Pteriomorpha; Ostr  
eida; Ostreidae; Crassostrea; Crassostrea virginica  
UdeM00000018087 6565 117.1 UdeM00000018087 XP\_022310266.1 54.8 115  
48 1 1 115 216 326 1.60E-23 117.1 6565 cellular  
organisms; Eukaryota; Opisthokonta; Metazoa; Eumetazoa; Bilateria; Protostomia;  
Spiralia; Lophotrochozoa; Mollusca; Bivalvia; Autobranchia; Pteriomorpha; Ostr  
eida; Ostreidae; Crassostrea; Crassostrea virginica  
UdeM00000018086 6565 122.1 UdeM00000018086 XP\_022310266.1 50 134  
63 1 111 244 197 326 1.00E-24 122.1 6565 cellular  
organisms; Eukaryota; Opisthokonta; Metazoa; Eumetazoa; Bilateria; Protostomia;  
Spiralia; Lophotrochozoa; Mollusca; Bivalvia; Autobranchia; Pteriomorpha; Ostr  
eida; Ostreidae; Crassostrea; Crassostrea virginica  
UdeM00000018088 6565 117.1 UdeM00000018088 XP\_022310266.1 54.8 115  
48 1 1 115 216 326 1.60E-23 117.1 6565 cellular  
organisms; Eukaryota; Opisthokonta; Metazoa; Eumetazoa; Bilateria; Protostomia;  
Spiralia; Lophotrochozoa; Mollusca; Bivalvia; Autobranchia; Pteriomorpha; Ostr  
eida; Ostreidae; Crassostrea; Crassostrea virginica  
UdeM00000018090 441921 88.6 UdeM00000018090 XP\_015509563.1 47.1  
85 42 2 2 84 586 669 4.20E-15 88.6 441921  
cellular  
organisms; Eukaryota; Opisthokonta; Metazoa; Eumetazoa; Bilateria; Protostomia;  
Ecdysozoa; Panarthropoda; Arthropoda; Mandibulata; Pancrustacea; Hexapoda; Inse  
cta; Dicondylia; Pterygota; Neoptera; Endopterygota; Hymenoptera; Tenthredinoid  
ea; Diprionidae; Diprioninae; Neodiprion; Neodiprion lecontei  
UdeM00000018091 6565 117.1 UdeM00000018091 XP\_022310266.1 54.8 115  
48 1 1 115 216 326 1.60E-23 117.1 6565 cellular  
organisms; Eukaryota; Opisthokonta; Metazoa; Eumetazoa; Bilateria; Protostomia;  
Spiralia; Lophotrochozoa; Mollusca; Bivalvia; Autobranchia; Pteriomorpha; Ostr  
eida; Ostreidae; Crassostrea; Crassostrea virginica  
UdeM00000018092 6565 117.1 UdeM00000018092 XP\_022310266.1 54.8 115  
48 1 1 115 216 326 1.60E-23 117.1 6565 cellular  
organisms; Eukaryota; Opisthokonta; Metazoa; Eumetazoa; Bilateria; Protostomia;  
Spiralia; Lophotrochozoa; Mollusca; Bivalvia; Autobranchia; Pteriomorpha; Ostr  
eida; Ostreidae; Crassostrea; Crassostrea virginica

UdeM00000018094 6573 2147.5 UdeM00000018094 XP\_021377221.1 63.4  
 1734 582 13 7 1713 132 1839 0.00E+00 2147.5 6573  
 cellular  
 organisms;Eukaryota;Opisthokonta;Metazoa;Eumetazoa;Bilateria;Protostomia;  
 Spiralia;Lophotrochozoa;Mollusca;Bivalvia;Autobranchia;Pteriomorpha;Pect  
 inida;Pectinoidea;Pectinidae;Mizuhopecten;Mizuhopecten yessoensis  
 UdeM00000018095 29159 315.8 UdeM00000018095 XP\_011454463.2 40.9 486  
 231 11 6 482 6 444 9.20E-83 315.8 29159 cellular  
 organisms;Eukaryota;Opisthokonta;Metazoa;Eumetazoa;Bilateria;Protostomia;  
 Spiralia;Lophotrochozoa;Mollusca;Bivalvia;Autobranchia;Pteriomorpha;Ostr  
 eida;Ostreoidea;Ostreidae;Crassostrea;Crassostrea gigas  
 UdeM00000018096 6565 341.7 UdeM00000018096 XP\_022314183.1 78.8 264  
 44 4 2 254 6 268 8.60E-91 341.7 6565 cellular  
 organisms;Eukaryota;Opisthokonta;Metazoa;Eumetazoa;Bilateria;Protostomia;  
 Spiralia;Lophotrochozoa;Mollusca;Bivalvia;Autobranchia;Pteriomorpha;Ostr  
 eida;Ostreoidea;Ostreidae;Crassostrea;Crassostrea virginica  
 UdeM00000018097 29159 158.3 UdeM00000018097 XP\_011454459.2 55.5 164  
 66 6 119 278 413 573 1.40E-35 158.3 29159 cellular  
 organisms;Eukaryota;Opisthokonta;Metazoa;Eumetazoa;Bilateria;Protostomia;  
 Spiralia;Lophotrochozoa;Mollusca;Bivalvia;Autobranchia;Pteriomorpha;Ostr  
 eida;Ostreoidea;Ostreidae;Crassostrea;Crassostrea gigas  
 UdeM00000018098 6596 359.8 UdeM00000018098 XP\_045159557.1 48 358  
 183 2 94 451 65 419 5.20E-96 359.8 6596 cellular  
 organisms;Eukaryota;Opisthokonta;Metazoa;Eumetazoa;Bilateria;Protostomia;  
 Spiralia;Lophotrochozoa;Mollusca;Bivalvia;Autobranchia;Heteroconchia;Euhe  
 terodonta;Imparidentia;Venerida;Veneroidea;Veneridae;Mercenaria;Mercenari  
 a mercenaria  
 UdeM00000018101 6596 231.5 UdeM00000018101 XP\_045185723.1 43.8 288  
 146 4 8 295 456 727 1.50E-57 231.5 6596 cellular  
 organisms;Eukaryota;Opisthokonta;Metazoa;Eumetazoa;Bilateria;Protostomia;  
 Spiralia;Lophotrochozoa;Mollusca;Bivalvia;Autobranchia;Heteroconchia;Euhe  
 terodonta;Imparidentia;Venerida;Veneroidea;Veneridae;Mercenaria;Mercenari  
 a mercenaria  
 UdeM00000018102 6596 453.8 UdeM00000018102 XP\_045188223.1 48.7 454  
 229 2 408 861 216 665 5.10E-124 453.8 6596 cellular  
 organisms;Eukaryota;Opisthokonta;Metazoa;Eumetazoa;Bilateria;Protostomia;  
 Spiralia;Lophotrochozoa;Mollusca;Bivalvia;Autobranchia;Heteroconchia;Euhe  
 terodonta;Imparidentia;Venerida;Veneroidea;Veneridae;Mercenaria;Mercenari  
 a mercenaria  
 UdeM00000018103 6596 121.3 UdeM00000018103 XP\_045206982.1 51.9 104  
 50 0 4 107 80 183 8.30E-25 121.3 6596 cellular  
 organisms;Eukaryota;Opisthokonta;Metazoa;Eumetazoa;Bilateria;Protostomia;  
 Spiralia;Lophotrochozoa;Mollusca;Bivalvia;Autobranchia;Heteroconchia;Euhe  
 terodonta;Imparidentia;Venerida;Veneroidea;Veneridae;Mercenaria;Mercenari  
 a mercenaria  
 UdeM00000018104 6579 401.4 UdeM00000018104 XP\_033731896.1 53 406  
 168 9 56 454 44 433 1.60E-108 401.4 6579 cellular  
 organisms;Eukaryota;Opisthokonta;Metazoa;Eumetazoa;Bilateria;Protostomia;  
 Spiralia;Lophotrochozoa;Mollusca;Bivalvia;Autobranchia;Pteriomorpha;Pect  
 inida;Pectinoidea;Pectinidae;Pecten;Pecten maximus  
 UdeM00000018105 29159 616.3 UdeM00000018105 XP\_011451905.3 75.4 382  
 89 3 1 379 1 380 2.60E-173 616.3 29159 cellular  
 organisms;Eukaryota;Opisthokonta;Metazoa;Eumetazoa;Bilateria;Protostomia;

Spiralia;Lophotrochozoa;Mollusca;Bivalvia;Autobranchia;Pteriormorphia;Ostr  
eida;Ostreoidea;Ostreidae;Crassostrea;Crassostrea gigas  
UdeM00000018106 6596 815.8 UdeM00000018106 XP\_045212136.1 63.9 609  
217 3 5 611 14 621 3.70E-233 815.8 6596 cellular  
organisms;Eukaryota;Opisthokonta;Metazoa;Eumetazoa;Bilateria;Protostomia;  
Spiralia;Lophotrochozoa;Mollusca;Bivalvia;Autobranchia;Heteroconchia;Euhe  
terodonta;Imparidentia;Venerida;Veneroidea;Veneridae;Mercenaria;Mercenari  
a mercenaria  
UdeM00000018107 6596 850.5 UdeM00000018107 XP\_045212136.1 67.2 609  
196 4 5 610 14 621 1.30E-243 850.5 6596 cellular  
organisms;Eukaryota;Opisthokonta;Metazoa;Eumetazoa;Bilateria;Protostomia;  
Spiralia;Lophotrochozoa;Mollusca;Bivalvia;Autobranchia;Heteroconchia;Euhe  
terodonta;Imparidentia;Venerida;Veneroidea;Veneridae;Mercenaria;Mercenari  
a mercenaria  
UdeM00000018108 6596 122.9 UdeM00000018108 XP\_045213029.1 31.6 339  
188 11 13 317 12 340 1.20E-24 122.9 6596 cellular  
organisms;Eukaryota;Opisthokonta;Metazoa;Eumetazoa;Bilateria;Protostomia;  
Spiralia;Lophotrochozoa;Mollusca;Bivalvia;Autobranchia;Heteroconchia;Euhe  
terodonta;Imparidentia;Venerida;Veneroidea;Veneridae;Mercenaria;Mercenari  
a mercenaria  
UdeM00000018109 6596 148.3 UdeM00000018109 XP\_045213029.1 32.1 343  
204 10 13 336 12 344 2.10E-32 148.3 6596 cellular  
organisms;Eukaryota;Opisthokonta;Metazoa;Eumetazoa;Bilateria;Protostomia;  
Spiralia;Lophotrochozoa;Mollusca;Bivalvia;Autobranchia;Heteroconchia;Euhe  
terodonta;Imparidentia;Venerida;Veneroidea;Veneridae;Mercenaria;Mercenari  
a mercenaria  
UdeM00000018110 6596 150.2 UdeM00000018110 XP\_045213029.1 33.3 339  
198 9 13 333 12 340 6.00E-33 150.2 6596 cellular  
organisms;Eukaryota;Opisthokonta;Metazoa;Eumetazoa;Bilateria;Protostomia;  
Spiralia;Lophotrochozoa;Mollusca;Bivalvia;Autobranchia;Heteroconchia;Euhe  
terodonta;Imparidentia;Venerida;Veneroidea;Veneridae;Mercenaria;Mercenari  
a mercenaria  
UdeM00000018111 6596 142.5 UdeM00000018111 XP\_045210764.1 29.6 557  
325 16 31 556 180 700 1.60E-30 142.5 6596 cellular  
organisms;Eukaryota;Opisthokonta;Metazoa;Eumetazoa;Bilateria;Protostomia;  
Spiralia;Lophotrochozoa;Mollusca;Bivalvia;Autobranchia;Heteroconchia;Euhe  
terodonta;Imparidentia;Venerida;Veneroidea;Veneridae;Mercenaria;Mercenari  
a mercenaria  
UdeM00000018112 6596 201.4 UdeM00000018112 XP\_045169459.1 40.7 258  
147 3 50 306 333 585 2.10E-48 201.4 6596 cellular  
organisms;Eukaryota;Opisthokonta;Metazoa;Eumetazoa;Bilateria;Protostomia;  
Spiralia;Lophotrochozoa;Mollusca;Bivalvia;Autobranchia;Heteroconchia;Euhe  
terodonta;Imparidentia;Venerida;Veneroidea;Veneridae;Mercenaria;Mercenari  
a mercenaria  
UdeM00000018113 6596 151 UdeM00000018113 XP\_045213029.1 32.6 331  
191 10 13 324 12 329 4.50E-33 151 6596 cellular  
organisms;Eukaryota;Opisthokonta;Metazoa;Eumetazoa;Bilateria;Protostomia;  
Spiralia;Lophotrochozoa;Mollusca;Bivalvia;Autobranchia;Heteroconchia;Euhe  
terodonta;Imparidentia;Venerida;Veneroidea;Veneridae;Mercenaria;Mercenari  
a mercenaria  
UdeM00000018115 6596 2491.5 UdeM00000018115 XP\_045210711.1 36.1  
4582 2466 99 268 4714 7 4263 0.00E+00 2491.5 6596  
cellular  
organisms;Eukaryota;Opisthokonta;Metazoa;Eumetazoa;Bilateria;Protostomia;

Spiralia;Lophotrochozoa;Mollusca;Bivalvia;Autobranchia;Heteroconchia;Euherodonta;Imparidentia;Venerida;Veneroidea;Veneridae;Mercenaria;Mercenaria mercenaria

UdeM00000018116 400727 452.2 UdeM00000018116 XP\_025092274.1 74.8  
286 72 0 14 299 6 291 5.20E-124 452.2 400727

cellular

organisms;Eukaryota;Opisthokonta;Metazoa;Eumetazoa;Bilateria;Protostomia;Spiralia;Lophotrochozoa;Mollusca;Gastropoda;Caenogastropoda;Architaenioglossa;Ampullarioidea;Ampullariidae;Pomacea;Pomacea canaliculata

UdeM00000018117 6573 1414.8 UdeM00000018117 XP\_021358901.1 43.1  
1726 940 19 57 1768 30 1727 0.00E+00 1414.8 6573

cellular

organisms;Eukaryota;Opisthokonta;Metazoa;Eumetazoa;Bilateria;Protostomia;Spiralia;Lophotrochozoa;Mollusca;Bivalvia;Autobranchia;Pteriormorphia;Pectinida;Pectinoidea;Pectinidae;Mizuhopecten;Mizuhopecten yessoensis

UdeM00000018118 6579 179.9 UdeM00000018118 XP\_033755140.1 37.3 263  
157 4 877 1132 369 630 1.90E-41 179.9 6579 cellular

organisms;Eukaryota;Opisthokonta;Metazoa;Eumetazoa;Bilateria;Protostomia;Spiralia;Lophotrochozoa;Mollusca;Bivalvia;Autobranchia;Pteriormorphia;Pectinida;Pectinoidea;Pectinidae;Pecten;Pecten maximus

UdeM00000018120 6596 116.3 UdeM00000018120 XP\_045214178.1 39 182  
108 3 29 207 37 218 4.60E-23 116.3 6596 cellular

organisms;Eukaryota;Opisthokonta;Metazoa;Eumetazoa;Bilateria;Protostomia;Spiralia;Lophotrochozoa;Mollusca;Bivalvia;Autobranchia;Heteroconchia;Euherodonta;Imparidentia;Venerida;Veneroidea;Veneridae;Mercenaria;Mercenaria mercenaria

UdeM00000018121 6579 165.6 UdeM00000018121 XP\_033753770.1 34.9 249  
137 6 22 252 26 267 8.00E-38 165.6 6579 cellular

organisms;Eukaryota;Opisthokonta;Metazoa;Eumetazoa;Bilateria;Protostomia;Spiralia;Lophotrochozoa;Mollusca;Bivalvia;Autobranchia;Pteriormorphia;Pectinida;Pectinoidea;Pectinidae;Pecten;Pecten maximus

UdeM00000018122 6596 309.7 UdeM00000018122 XP\_045212187.1 56.4 227  
99 0 34 260 19 245 3.60E-81 309.7 6596 cellular

organisms;Eukaryota;Opisthokonta;Metazoa;Eumetazoa;Bilateria;Protostomia;Spiralia;Lophotrochozoa;Mollusca;Bivalvia;Autobranchia;Heteroconchia;Euherodonta;Imparidentia;Venerida;Veneroidea;Veneridae;Mercenaria;Mercenaria mercenaria

UdeM00000018123 6579 498 UdeM00000018123 XP\_033726834.1 39.8 761  
409 19 8 741 61 799 2.10E-137 498 6579 cellular

organisms;Eukaryota;Opisthokonta;Metazoa;Eumetazoa;Bilateria;Protostomia;Spiralia;Lophotrochozoa;Mollusca;Bivalvia;Autobranchia;Pteriormorphia;Pectinida;Pectinoidea;Pectinidae;Pecten;Pecten maximus

UdeM00000018125 6596 825.1 UdeM00000018125 XP\_045214949.1 62.7 684  
222 5 14 668 10 689 6.50E-236 825.1 6596 cellular

organisms;Eukaryota;Opisthokonta;Metazoa;Eumetazoa;Bilateria;Protostomia;Spiralia;Lophotrochozoa;Mollusca;Bivalvia;Autobranchia;Heteroconchia;Euherodonta;Imparidentia;Venerida;Veneroidea;Veneridae;Mercenaria;Mercenaria mercenaria

UdeM00000018126 6596 345.9 UdeM00000018126 XP\_045213615.1 80.4 194  
38 0 27 220 15 208 3.80E-92 345.9 6596 cellular

organisms;Eukaryota;Opisthokonta;Metazoa;Eumetazoa;Bilateria;Protostomia;Spiralia;Lophotrochozoa;Mollusca;Bivalvia;Autobranchia;Heteroconchia;Euherodonta;Imparidentia;Venerida;Veneroidea;Veneridae;Mercenaria;Mercenaria mercenaria

UdeM00000018127 6596 277.7 UdeM00000018127 XP\_045213620.1 42.6 343  
 184 4 18 355 34 368 2.00E-71 277.7 6596 cellular  
 organisms;Eukaryota;Opisthokonta;Metazoa;Eumetazoa;Bilateria;Protostomia;  
 Spiralia;Lophotrochozoa;Mollusca;Bivalvia;Autobranchia;Heteroconchia;Euhe  
 terodonta;Imparidentia;Venerida;Veneroidea;Veneridae;Mercenaria;Mercenari  
 a mercenaria  
 UdeM00000018128 6596 132.9 UdeM00000018128 XP\_045213622.1 49.6 129  
 63 2 8 136 32 158 3.10E-28 132.9 6596 cellular  
 organisms;Eukaryota;Opisthokonta;Metazoa;Eumetazoa;Bilateria;Protostomia;  
 Spiralia;Lophotrochozoa;Mollusca;Bivalvia;Autobranchia;Heteroconchia;Euhe  
 terodonta;Imparidentia;Venerida;Veneroidea;Veneridae;Mercenaria;Mercenari  
 a mercenaria  
 UdeM00000018129 29159 324.3 UdeM00000018129 XP\_034313077.1 64 236  
 85 0 17 252 77 312 1.40E-85 324.3 29159 cellular  
 organisms;Eukaryota;Opisthokonta;Metazoa;Eumetazoa;Bilateria;Protostomia;  
 Spiralia;Lophotrochozoa;Mollusca;Bivalvia;Autobranchia;Pteriormorphia;Ostr  
 eida;Ostreoidea;Ostreidae;Crassostrea;Crassostrea gigas  
 UdeM00000018130 6596 300.8 UdeM00000018130 XP\_045213622.1 46.2 290  
 153 2 20 309 220 506 2.00E-78 300.8 6596 cellular  
 organisms;Eukaryota;Opisthokonta;Metazoa;Eumetazoa;Bilateria;Protostomia;  
 Spiralia;Lophotrochozoa;Mollusca;Bivalvia;Autobranchia;Heteroconchia;Euhe  
 terodonta;Imparidentia;Venerida;Veneroidea;Veneridae;Mercenaria;Mercenari  
 a mercenaria  
 UdeM00000018131 6596 101.7 UdeM00000018131 XP\_045213622.1 46.5 86  
 45 1 14 99 422 506 6.40E-19 101.7 6596 cellular  
 organisms;Eukaryota;Opisthokonta;Metazoa;Eumetazoa;Bilateria;Protostomia;  
 Spiralia;Lophotrochozoa;Mollusca;Bivalvia;Autobranchia;Heteroconchia;Euhe  
 terodonta;Imparidentia;Venerida;Veneroidea;Veneridae;Mercenaria;Mercenari  
 a mercenaria  
 UdeM00000018132 6579 656.8 UdeM00000018132 XP\_033735599.1 68.9 457  
 138 3 1 455 1 455 2.10E-185 656.8 6579 cellular  
 organisms;Eukaryota;Opisthokonta;Metazoa;Eumetazoa;Bilateria;Protostomia;  
 Spiralia;Lophotrochozoa;Mollusca;Bivalvia;Autobranchia;Pteriormorphia;Pect  
 inida;Pectinoidea;Pectinidae;Pecten;Pecten maximus  
 UdeM00000018133 6573 845.1 UdeM00000018133 XP\_021363368.1 49.3 1184  
 476 17 24 1184 50 1132 1.10E-241 845.1 6573 cellular  
 organisms;Eukaryota;Opisthokonta;Metazoa;Eumetazoa;Bilateria;Protostomia;  
 Spiralia;Lophotrochozoa;Mollusca;Bivalvia;Autobranchia;Pteriormorphia;Pect  
 inida;Pectinoidea;Pectinidae;Mizuhopecten;Mizuhopecten yessoensis  
 UdeM00000018134 6573 865.9 UdeM00000018134 XP\_021363368.1 51.1 1142  
 476 16 24 1142 50 1132 5.70E-248 865.9 6573 cellular  
 organisms;Eukaryota;Opisthokonta;Metazoa;Eumetazoa;Bilateria;Protostomia;  
 Spiralia;Lophotrochozoa;Mollusca;Bivalvia;Autobranchia;Pteriormorphia;Pect  
 inida;Pectinoidea;Pectinidae;Mizuhopecten;Mizuhopecten yessoensis  
 UdeM00000018135 6596 671.8 UdeM00000018135 XP\_045213487.1 61 567  
 204 10 1 565 1 552 7.80E-190 671.8 6596 cellular  
 organisms;Eukaryota;Opisthokonta;Metazoa;Eumetazoa;Bilateria;Protostomia;  
 Spiralia;Lophotrochozoa;Mollusca;Bivalvia;Autobranchia;Heteroconchia;Euhe  
 terodonta;Imparidentia;Venerida;Veneroidea;Veneridae;Mercenaria;Mercenari  
 a mercenaria  
 UdeM00000018136 6596 458.4 UdeM00000018136 XP\_045210834.1 32.5 1906  
 848 43 11 1728 23 1678 4.40E-125 458.4 6596 cellular  
 organisms;Eukaryota;Opisthokonta;Metazoa;Eumetazoa;Bilateria;Protostomia;  
 Spiralia;Lophotrochozoa;Mollusca;Bivalvia;Autobranchia;Heteroconchia;Euhe

terodonta;Imparidentia;Venerida;Veneroidea;Veneridae;Mercenaria;Mercenari  
 a mercenaria  
 UdeM00000018137 6596 429.1 UdeM00000018137 XP\_045210834.1 32 1906  
 845 44 11 1715 23 1678 2.80E-116 429.1 6596 cellular  
 organisms;Eukaryota;Opisthokonta;Metazoa;Eumetazoa;Bilateria;Protostomia;  
 Spiralia;Lophotrochozoa;Mollusca;Bivalvia;Autobranchia;Heteroconchia;Euhe  
 terodonta;Imparidentia;Venerida;Veneroidea;Veneridae;Mercenaria;Mercenari  
 a mercenaria  
 UdeM00000018138 6573 485.7 UdeM00000018138 XP\_021348666.1 65.8 345  
 85 1 1 345 1 312 4.90E-134 485.7 6573 cellular  
 organisms;Eukaryota;Opisthokonta;Metazoa;Eumetazoa;Bilateria;Protostomia;  
 Spiralia;Lophotrochozoa;Mollusca;Bivalvia;Autobranchia;Pteriormorphia;Pect  
 inida;Pectinoidea;Pectinidae;Mizuhopecten;Mizuhopecten yessoensis  
 UdeM00000018139 6573 179.5 UdeM00000018139 XP\_021348666.1 64.7 133  
 47 0 44 176 313 445 5.10E-42 179.5 6573 cellular  
 organisms;Eukaryota;Opisthokonta;Metazoa;Eumetazoa;Bilateria;Protostomia;  
 Spiralia;Lophotrochozoa;Mollusca;Bivalvia;Autobranchia;Pteriormorphia;Pect  
 inida;Pectinoidea;Pectinidae;Mizuhopecten;Mizuhopecten yessoensis  
 UdeM00000018140 29159 709.9 UdeM00000018140 XP\_011419679.2 68 450  
 143 1 12 461 26 474 2.10E-201 709.9 29159 cellular  
 organisms;Eukaryota;Opisthokonta;Metazoa;Eumetazoa;Bilateria;Protostomia;  
 Spiralia;Lophotrochozoa;Mollusca;Bivalvia;Autobranchia;Pteriormorphia;Ostr  
 eida;Ostreoidea;Ostreidae;Crassostrea;Crassostrea gigas  
 UdeM00000018141 45264 429.9 UdeM00000018141 XP\_044165143.1 53.9 412  
 167 5 42 451 35 425 4.10E-117 429.9 45264 cellular  
 organisms;Eukaryota;Opisthokonta;Metazoa;Eumetazoa;Cnidaria;Anthozoa;Hexa  
 corallia;Scleractinia;Astrocoeniina;Acroporidae;Acropora;Acropora  
 millepora  
 UdeM00000018142 45264 172.9 UdeM00000018142 XP\_044184031.1 48.7 191  
 88 5 1 185 300 486 3.70E-40 172.9 45264 cellular  
 organisms;Eukaryota;Opisthokonta;Metazoa;Eumetazoa;Cnidaria;Anthozoa;Hexa  
 corallia;Scleractinia;Astrocoeniina;Acroporidae;Acropora;Acropora  
 millepora  
 UdeM00000018143 48498 1839.7 UdeM00000018143 XP\_020614589.1 31.8  
 3835 2367 75 1 3660 195 3957 0.00E+00 1839.7  
 48498 cellular  
 organisms;Eukaryota;Opisthokonta;Metazoa;Eumetazoa;Cnidaria;Anthozoa;Hexa  
 corallia;Scleractinia;Faviina;Merulinidae;Orbicella;Orbicella faveolata  
 UdeM00000018144 1735272 235.3 UdeM00000018144 XP\_041364645.1 42.6  
 298 156 7 105 394 31 321 1.30E-58 235.3 1735272  
 cellular  
 organisms;Eukaryota;Opisthokonta;Metazoa;Eumetazoa;Bilateria;Protostomia;  
 Spiralia;Lophotrochozoa;Mollusca;Gastropoda;Neomphalina;Neomphaloidea;Pel  
 tospiridae;Gigantopelta;Gigantopelta aegis  
 UdeM00000018145 37653 716.1 UdeM00000018145 XP\_014791320.1 57.9 639  
 241 8 14 627 65 700 4.00E-203 716.1 37653 cellular  
 organisms;Eukaryota;Opisthokonta;Metazoa;Eumetazoa;Bilateria;Protostomia;  
 Spiralia;Lophotrochozoa;Mollusca;Cephalopoda;Coleoidea;Octopodiformes;Oct  
 opoda;Incirrata;Octopodidae;Octopus;Octopus bimaculoides  
 UdeM00000018146 2607531 318.5 UdeM00000018146 XP\_029634814.1 52.9  
 310 137 5 14 317 60 366 1.10E-83 318.5 2607531  
 cellular  
 organisms;Eukaryota;Opisthokonta;Metazoa;Eumetazoa;Bilateria;Protostomia;



Spiralia; Lophotrochozoa; Mollusca; Cephalopoda; Coleoidea; Octopodiformes; Octopoda; Incirrata; Octopodidae; Octopus; Octopus sinensis

UdeM00000018147 6573 473.8 UdeM00000018147 XP\_021341841.1 72.9 295  
80 0 1 295 244 538 1.60E-130 473.8 6573 cellular  
organisms; Eukaryota; Opisthokonta; Metazoa; Eumetazoa; Bilateria; Protostomia; Spiralia; Lophotrochozoa; Mollusca; Bivalvia; Autobranchia; Pteriomorpha; Pectinida; Pectinoidea; Pectinidae; Mizuhopecten; Mizuhopecten yessoensis

UdeM00000018148 6573 733.4 UdeM00000018148 XP\_021341841.1 63.8 538  
190 4 6 542 5 538 2.10E-208 733.4 6573 cellular  
organisms; Eukaryota; Opisthokonta; Metazoa; Eumetazoa; Bilateria; Protostomia; Spiralia; Lophotrochozoa; Mollusca; Bivalvia; Autobranchia; Pteriomorpha; Pectinida; Pectinoidea; Pectinidae; Mizuhopecten; Mizuhopecten yessoensis

UdeM00000018149 6596 495.7 UdeM00000018149 XP\_045214354.1 46.1 540  
261 9 62 577 91 624 7.80E-137 495.7 6596 cellular  
organisms; Eukaryota; Opisthokonta; Metazoa; Eumetazoa; Bilateria; Protostomia; Spiralia; Lophotrochozoa; Mollusca; Bivalvia; Autobranchia; Heteroconchia; Euheterodonta; Imparidentia; Venerida; Veneroidea; Veneridae; Mercenaria; Mercenaria mercenaria

UdeM00000018150 6596 495.7 UdeM00000018150 XP\_045214354.1 46.1 540  
261 9 109 624 91 624 8.40E-137 495.7 6596 cellular  
organisms; Eukaryota; Opisthokonta; Metazoa; Eumetazoa; Bilateria; Protostomia; Spiralia; Lophotrochozoa; Mollusca; Bivalvia; Autobranchia; Heteroconchia; Euheterodonta; Imparidentia; Venerida; Veneroidea; Veneridae; Mercenaria; Mercenaria mercenaria

UdeM00000018151 225164 181 UdeM00000018151 XP\_009061878.1 55.4  
157 69 1 4 159 5 161 1.20E-42 181 225164  
cellular  
organisms; Eukaryota; Opisthokonta; Metazoa; Eumetazoa; Bilateria; Protostomia; Spiralia; Lophotrochozoa; Mollusca; Gastropoda; Patellogastropoda; Lottioidea; Lottiidae; Lottia; Lottia gigantea

UdeM00000018152 7574 441.4 UdeM00000018152 XP\_013422192.1 53.5 387  
175 1 7 388 1 387 1.20E-120 441.4 7574 cellular  
organisms; Eukaryota; Opisthokonta; Metazoa; Eumetazoa; Bilateria; Protostomia; Spiralia; Lophotrochozoa; Brachiopoda; Linguliformea; Lingulata; Lingulida; Linguloidea; Lingulidae; Lingula; Lingula anatina

UdeM00000018153 6596 714.5 UdeM00000018153 XP\_045213214.1 67.4 506  
160 4 19 522 18 520 9.70E-203 714.5 6596 cellular  
organisms; Eukaryota; Opisthokonta; Metazoa; Eumetazoa; Bilateria; Protostomia; Spiralia; Lophotrochozoa; Mollusca; Bivalvia; Autobranchia; Heteroconchia; Euheterodonta; Imparidentia; Venerida; Veneroidea; Veneridae; Mercenaria; Mercenaria mercenaria

UdeM00000018154 6596 711.8 UdeM00000018154 XP\_045213214.1 68.2 494  
153 3 2 494 30 520 5.90E-202 711.8 6596 cellular  
organisms; Eukaryota; Opisthokonta; Metazoa; Eumetazoa; Bilateria; Protostomia; Spiralia; Lophotrochozoa; Mollusca; Bivalvia; Autobranchia; Heteroconchia; Euheterodonta; Imparidentia; Venerida; Veneroidea; Veneridae; Mercenaria; Mercenaria mercenaria

UdeM00000018155 29159 168.3 UdeM00000018155 XP\_034312253.1 78 91  
20 0 1 91 1 91 6.10E-39 168.3 29159 cellular  
organisms; Eukaryota; Opisthokonta; Metazoa; Eumetazoa; Bilateria; Protostomia; Spiralia; Lophotrochozoa; Mollusca; Bivalvia; Autobranchia; Pteriomorpha; Ostreida; Ostreidae; Crassostrea; Crassostrea gigas

UdeM00000018156 40690 134 UdeM00000018156 XP\_034006674.1 36.6 202  
124 3 2 201 4 203 2.10E-28 134 40690 cellular

organisms;Eukaryota;Opisthokonta;Metazoa;Eumetazoa;Bilateria;Deuterostomi  
a;Chordata;Craniata;Vertebrata;Gnathostomata;Teleostomi;Euteleostomi;Acti  
nopterygii;Actinopteri;Neopterygii;Teleostei;Osteoglossocephalai;Clupeoce  
phala;Euteleostomorpha;Neoteleostei;Eurypterygia;Ctenosquamata;Acanthomo  
rphata;Euacanthomorphacea;Percomorphaceae;Eupercaria;Perciformes;Notothen  
ioidei;Nototheniidae;Trematomus;Trematomus bernacchii

UdeM00000018157 7957 67.8 UdeM00000018157 XP\_026072939.1 43.7 71  
40 0 25 95 148 218 8.70E-09 67.8 7957 cellular

organisms;Eukaryota;Opisthokonta;Metazoa;Eumetazoa;Bilateria;Deuterostomi  
a;Chordata;Craniata;Vertebrata;Gnathostomata;Teleostomi;Euteleostomi;Acti  
nopterygii;Actinopteri;Neopterygii;Teleostei;Osteoglossocephalai;Clupeoce  
phala;Otomorpha;Ostariophysi;Otophysi;Cypriniphysae;Cypriniiformes;Cyprino  
idei;Cyprinidae;Cyprininae;Carassius;Carassius auratus

UdeM00000018158 6596 949.9 UdeM00000018158 XP\_045213215.1 85.7 531  
75 1 20 550 122 651 1.40E-273 949.9 6596 cellular

organisms;Eukaryota;Opisthokonta;Metazoa;Eumetazoa;Bilateria;Protostomia;  
Spiralia;Lophotrochozoa;Mollusca;Bivalvia;Autobranchia;Heteroconchia;Euhe  
terodonta;Imparidentia;Venerida;Veneroidea;Veneridae;Mercenaria;Mercenari  
a mercenaria

UdeM00000018159 400727 129 UdeM00000018159 XP\_025085515.1 31.9  
248 141 9 39 268 28 265 1.80E-26 129 400727  
cellular

organisms;Eukaryota;Opisthokonta;Metazoa;Eumetazoa;Bilateria;Protostomia;  
Spiralia;Lophotrochozoa;Mollusca;Gastropoda;Caenogastropoda;Architaeniogl  
ossa;Ampullarioidea;Ampullariidae;Pomacea;Pomacea canaliculata

UdeM00000018160 400727 129 UdeM00000018160 XP\_025085515.1 31.9  
248 141 9 39 268 28 265 1.70E-26 129 400727  
cellular

organisms;Eukaryota;Opisthokonta;Metazoa;Eumetazoa;Bilateria;Protostomia;  
Spiralia;Lophotrochozoa;Mollusca;Gastropoda;Caenogastropoda;Architaeniogl  
ossa;Ampullarioidea;Ampullariidae;Pomacea;Pomacea canaliculata

UdeM00000018162 6579 493.4 UdeM00000018162 XP\_033743181.1 46.8 617  
309 10 71 682 9 611 4.50E-136 493.4 6579 cellular

organisms;Eukaryota;Opisthokonta;Metazoa;Eumetazoa;Bilateria;Protostomia;  
Spiralia;Lophotrochozoa;Mollusca;Bivalvia;Autobranchia;Pteriomorphia;Pect  
inida;Pectinoidea;Pectinidae;Pecten;Pecten maximus

UdeM00000018164 6596 520 UdeM00000018164 XP\_045213883.1 55 462  
202 3 29 489 24 480 3.50E-144 520 6596 cellular

organisms;Eukaryota;Opisthokonta;Metazoa;Eumetazoa;Bilateria;Protostomia;  
Spiralia;Lophotrochozoa;Mollusca;Bivalvia;Autobranchia;Heteroconchia;Euhe  
terodonta;Imparidentia;Venerida;Veneroidea;Veneridae;Mercenaria;Mercenari  
a mercenaria

UdeM00000018165 29159 437.6 UdeM00000018165 XP\_011432949.1 73.4 263  
70 0 6 268 11 273 1.20E-119 437.6 29159 cellular

organisms;Eukaryota;Opisthokonta;Metazoa;Eumetazoa;Bilateria;Protostomia;  
Spiralia;Lophotrochozoa;Mollusca;Bivalvia;Autobranchia;Pteriomorphia;Ostr  
eida;Ostreoidea;Ostreidae;Crassostrea;Crassostrea gigas

UdeM00000018166 6596 121.7 UdeM00000018166 XP\_045213505.1 47.1 155  
75 2 1 153 1 150 8.20E-25 121.7 6596 cellular

organisms;Eukaryota;Opisthokonta;Metazoa;Eumetazoa;Bilateria;Protostomia;  
Spiralia;Lophotrochozoa;Mollusca;Bivalvia;Autobranchia;Heteroconchia;Euhe  
terodonta;Imparidentia;Venerida;Veneroidea;Veneridae;Mercenaria;Mercenari  
a mercenaria

UdeM00000018167 1735272 332.4 UdeM00000018167 XP\_041362649.1 49.4  
 338 164 3 263 598 370 702 1.20E-87 332.4 1735272  
 cellular  
 organisms;Eukaryota;Opisthokonta;Metazoa;Eumetazoa;Bilateria;Protostomia;  
 Spiralia;Lophotrochozoa;Mollusca;Gastropoda;Neomphalina;Neomphaloidea;Pel  
 tospiridae;Gigantopelta;Gigantopelta aegis  
 UdeM00000018168 400727 77.8 UdeM00000018168 XP\_025115168.1 40  
 85 49 1 4 88 7 89 7.80E-12 77.8 400727  
 cellular  
 organisms;Eukaryota;Opisthokonta;Metazoa;Eumetazoa;Bilateria;Protostomia;  
 Spiralia;Lophotrochozoa;Mollusca;Gastropoda;Caenogastropoda;Architaeniogl  
 ossa;Ampullarioidea;Ampullariidae;Pomacea;Pomacea canaliculata  
 UdeM00000018169 29159 1403.3 UdeM00000018169 XP\_034312450.1 33.9  
 2498 1289 53 6 2448 147 2337 0.00E+00 1403.3  
 29159 cellular  
 organisms;Eukaryota;Opisthokonta;Metazoa;Eumetazoa;Bilateria;Protostomia;  
 Spiralia;Lophotrochozoa;Mollusca;Bivalvia;Autobranchia;Pteriormorphia;Ostr  
 eida;Ostreoidea;Ostreidae;Crassostrea;Crassostrea gigas  
 UdeM00000018170 2607531 149.8 UdeM00000018170 XP\_029639050.1 58.5  
 118 49 0 29 146 25 142 2.70E-33 149.8 2607531  
 cellular  
 organisms;Eukaryota;Opisthokonta;Metazoa;Eumetazoa;Bilateria;Protostomia;  
 Spiralia;Lophotrochozoa;Mollusca;Cephalopoda;Coleoidea;Octopodiformes;Oct  
 opoda;Incirrata;Octopodidae;Octopus;Octopus sinensis  
 UdeM00000018171 6596 407.5 UdeM00000018171 XP\_045213918.1 47.9 478  
 231 9 1 467 68 538 2.30E-110 407.5 6596 cellular  
 organisms;Eukaryota;Opisthokonta;Metazoa;Eumetazoa;Bilateria;Protostomia;  
 Spiralia;Lophotrochozoa;Mollusca;Bivalvia;Autobranchia;Heteroconchia;Euhe  
 terodonta;Imparidentia;Venerida;Veneroidea;Veneridae;Mercenaria;Mercenari  
 a mercenaria  
 UdeM00000018172 7604 300.8 UdeM00000018172 XP\_033633146.1 40.8 390  
 213 3 262 633 29 418 4.50E-78 300.8 7604 cellular  
 organisms;Eukaryota;Opisthokonta;Metazoa;Eumetazoa;Bilateria;Deuterostomi  
 a;Echinodermata;Eleutherozoa;Asterozoa;Asteroidea;Forcipulatacea;Forcipul  
 atida;Asteroidea;Asteroidea;Asterias;Asterias rubens  
 UdeM00000018173 6596 827.8 UdeM00000018173 XP\_045210568.1 49.8 860  
 410 6 9 854 3 854 1.30E-236 827.8 6596 cellular  
 organisms;Eukaryota;Opisthokonta;Metazoa;Eumetazoa;Bilateria;Protostomia;  
 Spiralia;Lophotrochozoa;Mollusca;Bivalvia;Autobranchia;Heteroconchia;Euhe  
 terodonta;Imparidentia;Venerida;Veneroidea;Veneridae;Mercenaria;Mercenari  
 a mercenaria  
 UdeM00000018174 6579 196.4 UdeM00000018174 XP\_033735211.1 86.4 110  
 10 1 1 110 1 105 1.90E-47 196.4 6579 cellular  
 organisms;Eukaryota;Opisthokonta;Metazoa;Eumetazoa;Bilateria;Protostomia;  
 Spiralia;Lophotrochozoa;Mollusca;Bivalvia;Autobranchia;Pteriormorphia;Pect  
 inida;Pectinoidea;Pectinidae;Pecten;Pecten maximus  
 UdeM00000018175 1735272 183.7 UdeM00000018175 XP\_041363370.1 57.9  
 140 57 1 14 151 15 154 1.90E-43 183.7 1735272  
 cellular  
 organisms;Eukaryota;Opisthokonta;Metazoa;Eumetazoa;Bilateria;Protostomia;  
 Spiralia;Lophotrochozoa;Mollusca;Gastropoda;Neomphalina;Neomphaloidea;Pel  
 tospiridae;Gigantopelta;Gigantopelta aegis  
 UdeM00000018176 6573 699.1 UdeM00000018176 XP\_021357487.1 84.3 395  
 62 0 1 395 1 395 3.20E-198 699.1 6573 cellular

organisms;Eukaryota;Opisthokonta;Metazoa;Eumetazoa;Bilateria;Protostomia;Spiralia;Lophotrochozoa;Mollusca;Bivalvia;Autobranchia;Pteriomorpha;Pectinida;Pectinoidea;Pectinidae;Mizuhopecten;Mizuhopecten yessoensis  
UdeM00000018177 6573 697.6 UdeM00000018177 XP\_021357487.1 84.3 394  
62 0 7 400 2 395 9.50E-198 697.6 6573 cellular  
organisms;Eukaryota;Opisthokonta;Metazoa;Eumetazoa;Bilateria;Protostomia;Spiralia;Lophotrochozoa;Mollusca;Bivalvia;Autobranchia;Pteriomorpha;Pectinida;Pectinoidea;Pectinidae;Mizuhopecten;Mizuhopecten yessoensis  
UdeM00000018178 6579 427.2 UdeM00000018178 XP\_033749044.1 59.7 347  
136 1 9 351 7 353 2.30E-116 427.2 6579 cellular  
organisms;Eukaryota;Opisthokonta;Metazoa;Eumetazoa;Bilateria;Protostomia;Spiralia;Lophotrochozoa;Mollusca;Bivalvia;Autobranchia;Pteriomorpha;Pectinida;Pectinoidea;Pectinidae;Pecten;Pecten maximus  
UdeM00000018179 6573 239.6 UdeM00000018179 XP\_021363767.1 45.9 246  
130 2 38 282 584 827 4.90E-60 239.6 6573 cellular  
organisms;Eukaryota;Opisthokonta;Metazoa;Eumetazoa;Bilateria;Protostomia;Spiralia;Lophotrochozoa;Mollusca;Bivalvia;Autobranchia;Pteriomorpha;Pectinida;Pectinoidea;Pectinidae;Mizuhopecten;Mizuhopecten yessoensis  
UdeM00000018180 400727 403.7 UdeM00000018180 XP\_025085573.1 44.7  
470 242 10 50 509 38 499 3.70E-109 403.7 400727  
cellular  
organisms;Eukaryota;Opisthokonta;Metazoa;Eumetazoa;Bilateria;Protostomia;Spiralia;Lophotrochozoa;Mollusca;Gastropoda;Caenogastropoda;Architaenioglossa;Ampullarioidea;Ampullariidae;Pomacea;Pomacea canaliculata  
UdeM00000018181 6573 125.9 UdeM00000018181 XP\_021353616.1 37 216  
120 6 12 214 1251 1463 7.00E-26 125.9 6573 cellular  
organisms;Eukaryota;Opisthokonta;Metazoa;Eumetazoa;Bilateria;Protostomia;Spiralia;Lophotrochozoa;Mollusca;Bivalvia;Autobranchia;Pteriomorpha;Pectinida;Pectinoidea;Pectinidae;Mizuhopecten;Mizuhopecten yessoensis  
UdeM00000018182 6596 552 UdeM00000018182 XP\_045213596.1 59.9 446  
169 4 1 438 1 444 6.90E-154 552 6596 cellular  
organisms;Eukaryota;Opisthokonta;Metazoa;Eumetazoa;Bilateria;Protostomia;Spiralia;Lophotrochozoa;Mollusca;Bivalvia;Autobranchia;Heteroconchia;Euheterodonta;Imparidentia;Venerida;Veneroidea;Veneridae;Mercenaria;Mercenaria mercenaria  
UdeM00000018183 6573 680.6 UdeM00000018183 XP\_021355237.1 67.9 467  
142 2 5 471 4 462 1.50E-192 680.6 6573 cellular  
organisms;Eukaryota;Opisthokonta;Metazoa;Eumetazoa;Bilateria;Protostomia;Spiralia;Lophotrochozoa;Mollusca;Bivalvia;Autobranchia;Pteriomorpha;Pectinida;Pectinoidea;Pectinidae;Mizuhopecten;Mizuhopecten yessoensis  
UdeM00000018184 6573 713.4 UdeM00000018184 XP\_021355246.1 79.5 438  
90 0 14 451 224 661 2.30E-202 713.4 6573 cellular  
organisms;Eukaryota;Opisthokonta;Metazoa;Eumetazoa;Bilateria;Protostomia;Spiralia;Lophotrochozoa;Mollusca;Bivalvia;Autobranchia;Pteriomorpha;Pectinida;Pectinoidea;Pectinidae;Mizuhopecten;Mizuhopecten yessoensis  
UdeM00000044359 1125630 147.5 UdeM00000044359 YP\_005226368.1 49.7  
167 80 1 2 168 87 249 1.50E-32 147.5 1125630  
cellular  
organisms;Bacteria;Proteobacteria;Gammaproteobacteria;Enterobacteriales;Enterobacteriaceae;Klebsiella;Klebsiella pneumoniae;Klebsiella pneumoniae subsp. pneumoniae;Klebsiella pneumoniae subsp. pneumoniae HS11286  
UdeM00000040836 45264 430.6 UdeM00000040836 XP\_044179186.1 54.4 386  
173 2 28 413 87 469 2.20E-117 430.6 45264 cellular  
organisms;Eukaryota;Opisthokonta;Metazoa;Eumetazoa;Cnidaria;Anthozoa;Hexa

corallia;Scleractinia;Astrocoeniina;Acroporidae;Acropora;Acropora  
millepora  
UdeM00000040837 13397 83.2 UdeM00000040837 XP\_041070753.1 35 117  
74 1 1 117 501 615 2.50E-13 83.2 13397 cellular  
organisms;Eukaryota;Opisthokonta;Metazoa;Eumetazoa;Bilateria;Deuterostomi  
a;Chordata;Craniata;Vertebrata;Gnathostomata;Chondrichthyes;Elasmobranchi  
i;Selachii;Galeomorphii;Galeoidea;Lamniformes;Alopiidae;Lamninae;Carcharo  
don;Carcharodon carcharias  
UdeM00000040838 8218 66.2 UdeM00000040838 XP\_034081603.1 32.6 138  
84 3 88 220 158 291 6.30E-08 66.2 8218 cellular  
organisms;Eukaryota;Opisthokonta;Metazoa;Eumetazoa;Bilateria;Deuterostomi  
a;Chordata;Craniata;Vertebrata;Gnathostomata;Teleostomi;Euteleostomi;Acti  
nopterygii;Actinopteri;Neopterygii;Teleostei;Osteoglossocephalai;Clupeoce  
phala;Euteleosteomorpha;Neoteleostei;Eurypterygia;Ctenosquamata;Acanthomo  
rphata;Euacanthomorphacea;Percomorphaceae;Eupercaria;Perciformes;Notothen  
ioidei;Bathydraconidae;Gymnodraco;Gymnodraco acuticeps  
UdeM00000040839 2652724 60.8 UdeM00000040839 XP\_020895639.1 30.3  
89 62 0 22 110 73 161 1.40E-06 60.8 2652724  
cellular  
organisms;Eukaryota;Opisthokonta;Metazoa;Eumetazoa;Cnidaria;Anthozoa;Hexa  
corallia;Actiniaria;Aiptasiidae;Exaiptasia;Exaiptasia diaphana  
UdeM00000040840 29159 70.9 UdeM00000040840 XP\_011412814.1 40.2 102  
57 2 5 105 9 107 1.10E-09 70.9 29159 cellular  
organisms;Eukaryota;Opisthokonta;Metazoa;Eumetazoa;Bilateria;Protostomia;  
Spiralia;Lophotrochozoa;Mollusca;Bivalvia;Autobranchia;Pteriormorphia;Ostr  
eida;Ostreoidea;Ostreidae;Crassostrea;Crassostrea gigas  
UdeM00000040841 1735272 471.9 UdeM00000040841 XP\_041377268.1 32.3  
882 500 18 29 837 25 882 1.80E-129 471.9 1735272  
cellular  
organisms;Eukaryota;Opisthokonta;Metazoa;Eumetazoa;Bilateria;Protostomia;  
Spiralia;Lophotrochozoa;Mollusca;Gastropoda;Neomphalina;Neomphaloidea;Pel  
tospiridae;Gigantopelta;Gigantopelta aegis  
UdeM00000040842 6573 360.5 UdeM00000040842 XP\_021356427.1 46.2 483  
176 8 1 411 1 471 2.80E-96 360.5 6573 cellular  
organisms;Eukaryota;Opisthokonta;Metazoa;Eumetazoa;Bilateria;Protostomia;  
Spiralia;Lophotrochozoa;Mollusca;Bivalvia;Autobranchia;Pteriormorphia;Pect  
inida;Pectinoidea;Pectinidae;Mizuhopecten;Mizuhopecten yessoensis  
UdeM00000040843 6573 350.5 UdeM00000040843 XP\_021356427.1 64.6 285  
81 4 92 368 199 471 2.60E-93 350.5 6573 cellular  
organisms;Eukaryota;Opisthokonta;Metazoa;Eumetazoa;Bilateria;Protostomia;  
Spiralia;Lophotrochozoa;Mollusca;Bivalvia;Autobranchia;Pteriormorphia;Pect  
inida;Pectinoidea;Pectinidae;Mizuhopecten;Mizuhopecten yessoensis  
UdeM00000040844 29159 123.2 UdeM00000040844 XP\_034305523.1 60.9 87  
34 0 42 128 816 902 3.60E-25 123.2 29159 cellular  
organisms;Eukaryota;Opisthokonta;Metazoa;Eumetazoa;Bilateria;Protostomia;  
Spiralia;Lophotrochozoa;Mollusca;Bivalvia;Autobranchia;Pteriormorphia;Ostr  
eida;Ostreoidea;Ostreidae;Crassostrea;Crassostrea gigas  
UdeM00000040844 29159 57.8 UdeM00000040844 XP\_034305523.1 59 39  
16 0 159 197 1341 1379 1.90E-05 57.8 29159 cellular  
organisms;Eukaryota;Opisthokonta;Metazoa;Eumetazoa;Bilateria;Protostomia;  
Spiralia;Lophotrochozoa;Mollusca;Bivalvia;Autobranchia;Pteriormorphia;Ostr  
eida;Ostreoidea;Ostreidae;Crassostrea;Crassostrea gigas  
UdeM00000040847 2652724 175.6 UdeM00000040847 XP\_020913146.1 49.5  
194 97 1 167 360 177 369 1.40E-40 175.6 2652724

cellular  
organisms;Eukaryota;Opisthokonta;Metazoa;Eumetazoa;Cnidaria;Anthozoa;Hexa  
corallia;Actiniaria;Aiptasiidae;Exaiptasia;Exaiptasia diaphana  
UdeM00000040848 6579 194.9 UdeM00000040848 XP\_033729790.1 42.6 244  
136 1 10 253 17 256 4.70E-46 194.9 6579 cellular  
organisms;Eukaryota;Opisthokonta;Metazoa;Eumetazoa;Bilateria;Protostomia;  
Spiralia;Lophotrochozoa;Mollusca;Bivalvia;Autobranchia;Pteriomorpha;Pect  
inida;Pectinoidea;Pectinidae;Pecten;Pecten maximus  
UdeM00000040849 6579 201.1 UdeM00000040849 XP\_033752673.1 62.3 159  
57 1 1 156 493 651 1.10E-48 201.1 6579 cellular  
organisms;Eukaryota;Opisthokonta;Metazoa;Eumetazoa;Bilateria;Protostomia;  
Spiralia;Lophotrochozoa;Mollusca;Bivalvia;Autobranchia;Pteriomorpha;Pect  
inida;Pectinoidea;Pectinidae;Pecten;Pecten maximus  
UdeM00000040851 225164 60.5 UdeM00000040851 XP\_009058200.1 66.7  
39 13 0 114 152 108 146 2.20E-06 60.5 225164  
cellular  
organisms;Eukaryota;Opisthokonta;Metazoa;Eumetazoa;Bilateria;Protostomia;  
Spiralia;Lophotrochozoa;Mollusca;Gastropoda;Patellogastropoda;Lottioidea;  
Lottiidae;Lottia;Lottia gigantea  
UdeM00000040850 225164 60.5 UdeM00000040850 XP\_009058200.1 66.7  
39 13 0 137 175 108 146 2.60E-06 60.5 225164  
cellular  
organisms;Eukaryota;Opisthokonta;Metazoa;Eumetazoa;Bilateria;Protostomia;  
Spiralia;Lophotrochozoa;Mollusca;Gastropoda;Patellogastropoda;Lottioidea;  
Lottiidae;Lottia;Lottia gigantea  
UdeM00000040854 1735272 70.1 UdeM00000040854 XP\_041366980.1 26.2  
240 142 8 41 253 54 285 4.60E-09 70.1 1735272  
cellular  
organisms;Eukaryota;Opisthokonta;Metazoa;Eumetazoa;Bilateria;Protostomia;  
Spiralia;Lophotrochozoa;Mollusca;Gastropoda;Neomphalina;Neomphaloidea;Pel  
tospiridae;Gigantopelta;Gigantopelta aegis  
UdeM00000040855 6596 106.7 UdeM00000040855 XP\_045176006.1 37.2 196  
107 7 4 189 358 547 3.70E-20 106.7 6596 cellular  
organisms;Eukaryota;Opisthokonta;Metazoa;Eumetazoa;Bilateria;Protostomia;  
Spiralia;Lophotrochozoa;Mollusca;Bivalvia;Autobranchia;Heteroconchia;Euhe  
terodonta;Imparidentia;Venerida;Veneroidea;Veneridae;Mercenaria;Mercenari  
a mercenaria  
UdeM00000040857 6596 78.2 UdeM00000040857 XP\_045181277.1 38.8 103  
61 2 143 244 218 319 1.70E-11 78.2 6596 cellular  
organisms;Eukaryota;Opisthokonta;Metazoa;Eumetazoa;Bilateria;Protostomia;  
Spiralia;Lophotrochozoa;Mollusca;Bivalvia;Autobranchia;Heteroconchia;Euhe  
terodonta;Imparidentia;Venerida;Veneroidea;Veneridae;Mercenaria;Mercenari  
a mercenaria  
UdeM00000044400 6596 407.9 UdeM00000044400 XP\_045157043.1 42.1 606  
310 14 1 592 1 579 2.20E-110 407.9 6596 cellular  
organisms;Eukaryota;Opisthokonta;Metazoa;Eumetazoa;Bilateria;Protostomia;  
Spiralia;Lophotrochozoa;Mollusca;Bivalvia;Autobranchia;Heteroconchia;Euhe  
terodonta;Imparidentia;Venerida;Veneroidea;Veneridae;Mercenaria;Mercenari  
a mercenaria  
UdeM00000044107 37621 141.4 UdeM00000044107 XP\_014679100.1 37.5 232  
131 8 768 994 78 300 6.40E-30 141.4 37621 cellular  
organisms;Eukaryota;Opisthokonta;Metazoa;Eumetazoa;Bilateria;Protostomia;  
Ecdysozoa;Scalidophora;Priapulida;Priapulimorpha;Priapulimorphida;Priapul  
idae;Priapululus;Priapululus caudatus

UdeM00000044146 29159 365.5 UdeM00000044146 XP\_034331235.1 64.4 267  
 90 4 44 308 97 360 6.50E-98 365.5 29159 cellular  
 organisms;Eukaryota;Opisthokonta;Metazoa;Eumetazoa;Bilateria;Protostomia;  
 Spiralia;Lophotrochozoa;Mollusca;Bivalvia;Autobranchia;Pteriomorphia;Ostr  
 eida;Ostreoidea;Ostreidae;Crassostrea;Crassostrea gigas  
 UdeM00000044147 1735272 405.6 UdeM00000044147 XP\_041354926.1 62.7  
 308 114 1 41 348 57 363 6.40E-110 405.6 1735272  
 cellular  
 organisms;Eukaryota;Opisthokonta;Metazoa;Eumetazoa;Bilateria;Protostomia;  
 Spiralia;Lophotrochozoa;Mollusca;Gastropoda;Neomphalina;Neomphaloidea;Pel  
 tospiridae;Gigantopelta;Gigantopelta aegis  
 UdeM00000044148 6573 218 UdeM00000044148 XP\_021368888.1 68.2 148  
 46 1 1 147 213 360 8.00E-54 218 6573 cellular  
 organisms;Eukaryota;Opisthokonta;Metazoa;Eumetazoa;Bilateria;Protostomia;  
 Spiralia;Lophotrochozoa;Mollusca;Bivalvia;Autobranchia;Pteriomorphia;Pect  
 inida;Pectinoidea;Pectinidae;Mizuhopecten;Mizuhopecten yessoensis  
 UdeM00000044149 6596 109 UdeM00000044149 XP\_045197725.1 57 86  
 36 1 39 124 78 162 4.40E-21 109 6596 cellular  
 organisms;Eukaryota;Opisthokonta;Metazoa;Eumetazoa;Bilateria;Protostomia;  
 Spiralia;Lophotrochozoa;Mollusca;Bivalvia;Autobranchia;Heteroconchia;Euhe  
 terodonta;Imparidentia;Venerida;Veneroidea;Veneridae;Mercenaria;Mercenari  
 a mercenaria  
 UdeM00000044150 29159 409.1 UdeM00000044150 XP\_034331235.1 56.7 363  
 139 5 1 348 1 360 5.80E-111 409.1 29159 cellular  
 organisms;Eukaryota;Opisthokonta;Metazoa;Eumetazoa;Bilateria;Protostomia;  
 Spiralia;Lophotrochozoa;Mollusca;Bivalvia;Autobranchia;Pteriomorphia;Ostr  
 eida;Ostreoidea;Ostreidae;Crassostrea;Crassostrea gigas  
 UdeM00000044151 29159 365.5 UdeM00000044151 XP\_034331235.1 64.4 267  
 90 4 44 308 97 360 6.50E-98 365.5 29159 cellular  
 organisms;Eukaryota;Opisthokonta;Metazoa;Eumetazoa;Bilateria;Protostomia;  
 Spiralia;Lophotrochozoa;Mollusca;Bivalvia;Autobranchia;Pteriomorphia;Ostr  
 eida;Ostreoidea;Ostreidae;Crassostrea;Crassostrea gigas  
 UdeM00000044152 1735272 405.6 UdeM00000044152 XP\_041354926.1 62.7  
 308 114 1 41 348 57 363 6.40E-110 405.6 1735272  
 cellular  
 organisms;Eukaryota;Opisthokonta;Metazoa;Eumetazoa;Bilateria;Protostomia;  
 Spiralia;Lophotrochozoa;Mollusca;Gastropoda;Neomphalina;Neomphaloidea;Pel  
 tospiridae;Gigantopelta;Gigantopelta aegis  
 UdeM00000044153 6573 218 UdeM00000044153 XP\_021368888.1 68.2 148  
 46 1 1 147 213 360 8.00E-54 218 6573 cellular  
 organisms;Eukaryota;Opisthokonta;Metazoa;Eumetazoa;Bilateria;Protostomia;  
 Spiralia;Lophotrochozoa;Mollusca;Bivalvia;Autobranchia;Pteriomorphia;Pect  
 inida;Pectinoidea;Pectinidae;Mizuhopecten;Mizuhopecten yessoensis  
 UdeM00000044154 6087 103.2 UdeM00000044154 XP\_012560424.1 58 81  
 33 1 51 130 83 163 2.50E-19 103.2 6087 cellular  
 organisms;Eukaryota;Opisthokonta;Metazoa;Eumetazoa;Cnidaria;Hydrozoa;Hydr  
 oidolina;Anthoathecata;Aplanulata;Hydridae;Hydra;Hydra vulgaris  
 UdeM00000044155 29159 409.1 UdeM00000044155 XP\_034331235.1 56.7 363  
 139 5 1 348 1 360 5.80E-111 409.1 29159 cellular  
 organisms;Eukaryota;Opisthokonta;Metazoa;Eumetazoa;Bilateria;Protostomia;  
 Spiralia;Lophotrochozoa;Mollusca;Bivalvia;Autobranchia;Pteriomorphia;Ostr  
 eida;Ostreoidea;Ostreidae;Crassostrea;Crassostrea gigas  
 UdeM00000044156 29159 364.8 UdeM00000044156 XP\_034331235.1 65.3 265  
 87 4 52 314 99 360 1.10E-97 364.8 29159 cellular

organisms;Eukaryota;Opisthokonta;Metazoa;Eumetazoa;Bilateria;Protostomia;Spiralia;Lophotrochozoa;Mollusca;Bivalvia;Autobranchia;Pteriormorphia;Ostreida;Ostreioidea;Ostreidae;Crassostrea;Crassostrea gigas

UdeM00000044157 29159 407.9 UdeM00000044157 XP\_034331235.1 56.7 363  
139 5 1 348 1 360 1.30E-110 407.9 29159 cellular

organisms;Eukaryota;Opisthokonta;Metazoa;Eumetazoa;Bilateria;Protostomia;Spiralia;Lophotrochozoa;Mollusca;Bivalvia;Autobranchia;Pteriormorphia;Ostreida;Ostreioidea;Ostreidae;Crassostrea;Crassostrea gigas

UdeM00000044158 29159 367.1 UdeM00000044158 XP\_034331235.1 64.8 267  
89 4 44 308 97 360 2.20E-98 367.1 29159 cellular

organisms;Eukaryota;Opisthokonta;Metazoa;Eumetazoa;Bilateria;Protostomia;Spiralia;Lophotrochozoa;Mollusca;Bivalvia;Autobranchia;Pteriormorphia;Ostreida;Ostreioidea;Ostreidae;Crassostrea;Crassostrea gigas

UdeM00000044159 1735272 405.6 UdeM00000044159 XP\_041354926.1 62.7  
308 114 1 41 348 57 363 6.40E-110 405.6 1735272

cellular

organisms;Eukaryota;Opisthokonta;Metazoa;Eumetazoa;Bilateria;Protostomia;Spiralia;Lophotrochozoa;Mollusca;Gastropoda;Neomphalina;Neomphaloidea;Peltospiridae;Gigantopelta;Gigantopelta aegis

UdeM00000044462 225164 113.2 UdeM00000044462 XP\_009062103.1 31.8  
198 133 2 1 196 1 198 4.00E-22 113.2 225164

cellular

organisms;Eukaryota;Opisthokonta;Metazoa;Eumetazoa;Bilateria;Protostomia;Spiralia;Lophotrochozoa;Mollusca;Gastropoda;Patellogastropoda;Lottioidea;Lottiidae;Lottia;Lottia gigantea

UdeM00000044463 225164 111.3 UdeM00000044463 XP\_009062103.1 32  
200 132 3 1 198 1 198 1.50E-21 111.3 225164

cellular

organisms;Eukaryota;Opisthokonta;Metazoa;Eumetazoa;Bilateria;Protostomia;Spiralia;Lophotrochozoa;Mollusca;Gastropoda;Patellogastropoda;Lottioidea;Lottiidae;Lottia;Lottia gigantea

UdeM00000043622 83332 421 UdeM00000043622 NP\_218033.1 90.5 231 22  
0 1 231 33 263 9.70E-115 421 83332 cellular

organisms;Bacteria;Terrabacteria

group;Actinobacteria;Actinomycetia;Corynebacteriales;Mycobacteriaceae;Mycobacterium;Mycobacterium tuberculosis complex;Mycobacterium tuberculosis;Mycobacterium tuberculosis H37Rv

UdeM00000044397 83332 251.9 UdeM00000044397 NP\_214612.1 68.5 168 53  
0 21 188 16 183 6.40E-64 251.9 83332 cellular

organisms;Bacteria;Terrabacteria

group;Actinobacteria;Actinomycetia;Corynebacteriales;Mycobacteriaceae;Mycobacterium;Mycobacterium tuberculosis complex;Mycobacterium tuberculosis;Mycobacterium tuberculosis H37Rv

UdeM00000021545 6596 224.9 UdeM00000021545 XP\_045211301.1 50.7 219  
104 3 3 221 21 235 9.80E-56 224.9 6596 cellular

organisms;Eukaryota;Opisthokonta;Metazoa;Eumetazoa;Bilateria;Protostomia;Spiralia;Lophotrochozoa;Mollusca;Bivalvia;Autobranchia;Heteroconchia;Euherterodonta;Imparidentia;Venerida;Veneroidea;Veneridae;Mercenaria;Mercenaria mercenaria

UdeM00000021546 151771 459.5 UdeM00000021546 XP\_028415423.1 39.2  
625 317 7 5 571 5 624 6.20E-126 459.5 151771

cellular

organisms;Eukaryota;Opisthokonta;Metazoa;Eumetazoa;Cnidaria;Anthozoa;Octo



corallia;Alcyonacea;Alcyoniina;Nephtheidae;Dendronephthya;Dendronephthya gigantea  
 UdeM00000021547 6596 447.6 UdeM00000021547 XP\_045164867.1 67.5 465  
 135 7 7 461 6 464 2.10E-122 447.6 6596 cellular  
 organisms;Eukaryota;Opisthokonta;Metazoa;Eumetazoa;Bilateria;Protostomia;  
 Spiralia;Lophotrochozoa;Mollusca;Bivalvia;Autobranchia;Heteroconchia;Euhe  
 terodonta;Imparidentia;Venerida;Veneroidea;Veneridae;Mercenaria;Mercenari  
 a mercenaria  
 UdeM00000021548 6579 802.7 UdeM00000021548 XP\_033730263.1 42.4 1768  
 945 20 1 1726 474 2209 9.20E-229 802.7 6579 cellular  
 organisms;Eukaryota;Opisthokonta;Metazoa;Eumetazoa;Bilateria;Protostomia;  
 Spiralia;Lophotrochozoa;Mollusca;Bivalvia;Autobranchia;Pteriormorphia;Pect  
 inida;Pectinoidea;Pectinidae;Pecten;Pecten maximus  
 UdeM00000021549 6596 723.4 UdeM00000021549 XP\_045164867.1 55 1351  
 514 24 140 1424 862 2184 6.30E-205 723.4 6596 cellular  
 organisms;Eukaryota;Opisthokonta;Metazoa;Eumetazoa;Bilateria;Protostomia;  
 Spiralia;Lophotrochozoa;Mollusca;Bivalvia;Autobranchia;Heteroconchia;Euhe  
 terodonta;Imparidentia;Venerida;Veneroidea;Veneridae;Mercenaria;Mercenari  
 a mercenaria  
 UdeM00000021550 29159 239.2 UdeM00000021550 XP\_034299662.1 49.2 502  
 211 8 1 469 2149 2639 1.10E-59 239.2 29159 cellular  
 organisms;Eukaryota;Opisthokonta;Metazoa;Eumetazoa;Bilateria;Protostomia;  
 Spiralia;Lophotrochozoa;Mollusca;Bivalvia;Autobranchia;Pteriormorphia;Ostr  
 eida;Ostreoidea;Ostreidae;Crassostrea;Crassostrea gigas  
 UdeM00000021551 225164 354.8 UdeM00000021551 XP\_009056451.1 51.9  
 314 133 5 35 347 1 297 1.30E-94 354.8 225164  
 cellular  
 organisms;Eukaryota;Opisthokonta;Metazoa;Eumetazoa;Bilateria;Protostomia;  
 Spiralia;Lophotrochozoa;Mollusca;Gastropoda;Patellogastropoda;Lottioidea;  
 Lottiidae;Lottia;Lottia gigantea  
 UdeM00000021552 6596 775.4 UdeM00000021552 XP\_045161449.1 49.4 688  
 336 7 40 722 29 709 6.40E-221 775.4 6596 cellular  
 organisms;Eukaryota;Opisthokonta;Metazoa;Eumetazoa;Bilateria;Protostomia;  
 Spiralia;Lophotrochozoa;Mollusca;Bivalvia;Autobranchia;Heteroconchia;Euhe  
 terodonta;Imparidentia;Venerida;Veneroidea;Veneridae;Mercenaria;Mercenari  
 a mercenaria  
 UdeM00000021553 6596 895.2 UdeM00000021553 XP\_045161449.1 57.1 683  
 279 8 35 709 31 707 5.50E-257 895.2 6596 cellular  
 organisms;Eukaryota;Opisthokonta;Metazoa;Eumetazoa;Bilateria;Protostomia;  
 Spiralia;Lophotrochozoa;Mollusca;Bivalvia;Autobranchia;Heteroconchia;Euhe  
 terodonta;Imparidentia;Venerida;Veneroidea;Veneridae;Mercenaria;Mercenari  
 a mercenaria  
 UdeM00000021554 6573 352.8 UdeM00000021554 XP\_021367257.1 49.3 371  
 170 8 1 367 2 358 5.20E-94 352.8 6573 cellular  
 organisms;Eukaryota;Opisthokonta;Metazoa;Eumetazoa;Bilateria;Protostomia;  
 Spiralia;Lophotrochozoa;Mollusca;Bivalvia;Autobranchia;Pteriormorphia;Pect  
 inida;Pectinoidea;Pectinidae;Mizuhopecten;Mizuhopecten yessoensis  
 UdeM00000021555 6596 355.9 UdeM00000021555 XP\_045156248.1 41.4 466  
 242 6 4 467 7 443 7.90E-95 355.9 6596 cellular  
 organisms;Eukaryota;Opisthokonta;Metazoa;Eumetazoa;Bilateria;Protostomia;  
 Spiralia;Lophotrochozoa;Mollusca;Bivalvia;Autobranchia;Heteroconchia;Euhe  
 terodonta;Imparidentia;Venerida;Veneroidea;Veneridae;Mercenaria;Mercenari  
 a mercenaria

UdeM00000021556 225164 185.3 UdeM00000021556 XP\_009063967.1 51.7  
 172 76 2 1 165 37 208 6.80E-44 185.3 225164  
 cellular  
 organisms;Eukaryota;Opisthokonta;Metazoa;Eumetazoa;Bilateria;Protostomia;  
 Spiralia;Lophotrochozoa;Mollusca;Gastropoda;Patellogastropoda;Lottioidea;  
 Lottiidae;Lottia;Lottia gigantea  
 UdeM00000021557 6596 302 UdeM00000021557 XP\_045160376.1 78.1 192  
 41 1 1 191 325 516 5.50E-79 302 6596 cellular  
 organisms;Eukaryota;Opisthokonta;Metazoa;Eumetazoa;Bilateria;Protostomia;  
 Spiralia;Lophotrochozoa;Mollusca;Bivalvia;Autobranchia;Heteroconchia;Euhe  
 terodonta;Imparidentia;Venerida;Veneroidea;Veneridae;Mercenaria;Mercenari  
 a mercenaria  
 UdeM00000021559 10224 338.6 UdeM00000021559 XP\_002736880.1 57.6 283  
 118 2 32 312 35 317 9.40E-90 338.6 10224 cellular  
 organisms;Eukaryota;Opisthokonta;Metazoa;Eumetazoa;Bilateria;Deuterostomi  
 a;Hemichordata;Enteropneusta;Harrimaniidae;Saccoglossus;Saccoglossus  
 kowalevskii  
 UdeM00000021560 6565 140.6 UdeM00000021560 XP\_022287521.1 53.8 132  
 60 1 1 131 109 240 1.50E-30 140.6 6565 cellular  
 organisms;Eukaryota;Opisthokonta;Metazoa;Eumetazoa;Bilateria;Protostomia;  
 Spiralia;Lophotrochozoa;Mollusca;Bivalvia;Autobranchia;Pteriormorphia;Ostr  
 eida;Ostreoidea;Ostreidae;Crassostrea;Crassostrea virginica  
 UdeM00000021561 6573 91.3 UdeM00000021561 XP\_021346237.1 33.7 196  
 65 3 1 131 328 523 1.00E-15 91.3 6573 cellular  
 organisms;Eukaryota;Opisthokonta;Metazoa;Eumetazoa;Bilateria;Protostomia;  
 Spiralia;Lophotrochozoa;Mollusca;Bivalvia;Autobranchia;Pteriormorphia;Pect  
 inida;Pectinoidea;Pectinidae;Mizuhopecten;Mizuhopecten yessoensis  
 UdeM00000021564 6565 171.8 UdeM00000021564 XP\_022341899.1 48.5 194  
 91 3 1 186 1 193 9.00E-40 171.8 6565 cellular  
 organisms;Eukaryota;Opisthokonta;Metazoa;Eumetazoa;Bilateria;Protostomia;  
 Spiralia;Lophotrochozoa;Mollusca;Bivalvia;Autobranchia;Pteriormorphia;Ostr  
 eida;Ostreoidea;Ostreidae;Crassostrea;Crassostrea virginica  
 UdeM00000021566 1735272 82 UdeM00000021566 XP\_041360711.1 37.5  
 104 65 0 5 108 6 109 5.00E-13 82 1735272  
 cellular  
 organisms;Eukaryota;Opisthokonta;Metazoa;Eumetazoa;Bilateria;Protostomia;  
 Spiralia;Lophotrochozoa;Mollusca;Gastropoda;Neomphalina;Neomphaloidea;Pel  
 tospiridae;Gigantopelta;Gigantopelta aegis  
 UdeM00000021565 1735272 92.4 UdeM00000021565 XP\_041360711.1 30.1  
 216 113 6 5 192 6 211 7.30E-16 92.4 1735272  
 cellular  
 organisms;Eukaryota;Opisthokonta;Metazoa;Eumetazoa;Bilateria;Protostomia;  
 Spiralia;Lophotrochozoa;Mollusca;Gastropoda;Neomphalina;Neomphaloidea;Pel  
 tospiridae;Gigantopelta;Gigantopelta aegis  
 UdeM00000021568 6596 153.7 UdeM00000021568 XP\_045206295.1 44.3 158  
 87 1 116 273 5 161 3.50E-34 153.7 6596 cellular  
 organisms;Eukaryota;Opisthokonta;Metazoa;Eumetazoa;Bilateria;Protostomia;  
 Spiralia;Lophotrochozoa;Mollusca;Bivalvia;Autobranchia;Heteroconchia;Euhe  
 terodonta;Imparidentia;Venerida;Veneroidea;Veneridae;Mercenaria;Mercenari  
 a mercenaria  
 UdeM00000021569 7574 120.2 UdeM00000021569 XP\_013399038.1 28.8 323  
 119 6 84 303 60 374 4.80E-24 120.2 7574 cellular  
 organisms;Eukaryota;Opisthokonta;Metazoa;Eumetazoa;Bilateria;Protostomia;

Spiralia;Lophotrochozoa;Brachiopoda;Linguliformea;Lingulata;Lingulida;Linguloidea;Lingulidae;Lingula;Lingula anatina

|                 |      |       |                 |                |      |          |
|-----------------|------|-------|-----------------|----------------|------|----------|
| UdeM00000021570 | 7574 | 129.8 | UdeM00000021570 | XP_013382110.1 | 65.2 | 92       |
| 32              | 0    | 1     | 92              | 146            | 237  | 1.90E-27 |

129.8 7574 cellular organisms;Eukaryota;Opisthokonta;Metazoa;Eumetazoa;Bilateria;Protostomia;Spiralia;Lophotrochozoa;Brachiopoda;Linguliformea;Lingulata;Lingulida;Linguloidea;Lingulidae;Lingula;Lingula anatina

|                 |      |       |                 |                |      |          |
|-----------------|------|-------|-----------------|----------------|------|----------|
| UdeM00000021571 | 7574 | 116.3 | UdeM00000021571 | XP_013384628.1 | 51.2 | 121      |
| 55              | 1    | 6     | 126             | 60             | 176  | 4.00E-23 |

116.3 7574 cellular organisms;Eukaryota;Opisthokonta;Metazoa;Eumetazoa;Bilateria;Protostomia;Spiralia;Lophotrochozoa;Brachiopoda;Linguliformea;Lingulata;Lingulida;Linguloidea;Lingulidae;Lingula;Lingula anatina

|                 |      |     |                 |                |      |          |
|-----------------|------|-----|-----------------|----------------|------|----------|
| UdeM00000021571 | 7574 | 72  | UdeM00000021571 | XP_013384628.1 | 83.3 | 36       |
| 6               | 0    | 146 | 181             | 525            | 560  | 8.70E-10 |

72 7574 cellular organisms;Eukaryota;Opisthokonta;Metazoa;Eumetazoa;Bilateria;Protostomia;Spiralia;Lophotrochozoa;Brachiopoda;Linguliformea;Lingulata;Lingulida;Linguloidea;Lingulidae;Lingula;Lingula anatina

|                 |      |       |                 |                |      |          |
|-----------------|------|-------|-----------------|----------------|------|----------|
| UdeM00000021572 | 7574 | 113.6 | UdeM00000021572 | XP_013384628.1 | 51.7 | 116      |
| 52              | 1    | 20    | 135             | 65             | 176  | 2.20E-22 |

113.6 7574 cellular organisms;Eukaryota;Opisthokonta;Metazoa;Eumetazoa;Bilateria;Protostomia;Spiralia;Lophotrochozoa;Brachiopoda;Linguliformea;Lingulata;Lingulida;Linguloidea;Lingulidae;Lingula;Lingula anatina

|                 |         |      |                 |                |      |     |
|-----------------|---------|------|-----------------|----------------|------|-----|
| UdeM00000021573 | 1735272 | 76.6 | UdeM00000021573 | XP_041360711.1 | 34.6 |     |
| 104             | 68      | 0    | 5               | 108            | 6    | 109 |

2.10E-11 76.6 1735272 cellular organisms;Eukaryota;Opisthokonta;Metazoa;Eumetazoa;Bilateria;Protostomia;Spiralia;Lophotrochozoa;Mollusca;Gastropoda;Neomphalina;Neomphaloidea;Peltospiridae;Gigantopelta;Gigantopelta aegis

|                 |      |      |                 |                |     |          |
|-----------------|------|------|-----------------|----------------|-----|----------|
| UdeM00000021574 | 6573 | 78.2 | UdeM00000021574 | XP_021342792.1 | 75  | 48       |
| 12              | 0    | 1    | 48              | 314            | 361 | 1.90E-11 |

78.2 6573 cellular organisms;Eukaryota;Opisthokonta;Metazoa;Eumetazoa;Bilateria;Protostomia;Spiralia;Lophotrochozoa;Mollusca;Bivalvia;Autobranchia;Pteriomorphia;Pectinida;Pectinoidea;Pectinidae;Mizuhopecten;Mizuhopecten yessoensis

|                 |      |       |                 |                |      |           |
|-----------------|------|-------|-----------------|----------------|------|-----------|
| UdeM00000021576 | 6596 | 530.8 | UdeM00000021576 | XP_045214156.1 | 34.6 | 1058      |
| 584             | 26   | 3     | 1013            | 673            | 1669 | 3.80E-147 |

530.8 6596 cellular organisms;Eukaryota;Opisthokonta;Metazoa;Eumetazoa;Bilateria;Protostomia;Spiralia;Lophotrochozoa;Mollusca;Bivalvia;Autobranchia;Heteroconchia;Euheterodonta;Imparidentia;Venerida;Veneroidea;Veneridae;Mercenaria;Mercenaria mercenaria

|                 |      |       |                 |                |     |           |
|-----------------|------|-------|-----------------|----------------|-----|-----------|
| UdeM00000021577 | 6596 | 511.5 | UdeM00000021577 | XP_045214156.1 | 50  | 482       |
| 239             | 2    | 1     | 482             | 107            | 586 | 1.60E-141 |

511.5 6596 cellular organisms;Eukaryota;Opisthokonta;Metazoa;Eumetazoa;Bilateria;Protostomia;Spiralia;Lophotrochozoa;Mollusca;Bivalvia;Autobranchia;Heteroconchia;Euheterodonta;Imparidentia;Venerida;Veneroidea;Veneridae;Mercenaria;Mercenaria mercenaria

|                 |         |       |                 |                |      |     |
|-----------------|---------|-------|-----------------|----------------|------|-----|
| UdeM00000021578 | 1735272 | 199.1 | UdeM00000021578 | XP_041372418.1 | 54.3 |     |
| 173             | 73      | 3     | 15              | 187            | 303  | 469 |

4.90E-48 199.1 1735272 cellular organisms;Eukaryota;Opisthokonta;Metazoa;Eumetazoa;Bilateria;Protostomia;Spiralia;Lophotrochozoa;Mollusca;Gastropoda;Neomphalina;Neomphaloidea;Peltospiridae;Gigantopelta;Gigantopelta aegis

|                 |         |       |                 |                |      |     |
|-----------------|---------|-------|-----------------|----------------|------|-----|
| UdeM00000021579 | 1735272 | 211.5 | UdeM00000021579 | XP_041373846.1 | 64.6 |     |
| 147             | 51      | 1     | 27              | 173            | 158  | 303 |

8.90E-52 211.5 1735272 cellular

organisms;Eukaryota;Opisthokonta;Metazoa;Eumetazoa;Bilateria;Protostomia;Spiralia;Lophotrochozoa;Mollusca;Gastropoda;Neomphalina;Neomphaloidea;Peltospiridae;Gigantopelta;Gigantopelta aegis

UdeM00000021580 6596 286.6 UdeM00000021580 XP\_045188650.1 34.5 412  
267 2 4 412 60 471 5.50E-74 286.6 6596 cellular

organisms;Eukaryota;Opisthokonta;Metazoa;Eumetazoa;Bilateria;Protostomia;Spiralia;Lophotrochozoa;Mollusca;Bivalvia;Autobranchia;Heteroconchia;Euherodonta;Imparidentia;Venerida;Veneroidea;Veneridae;Mercenaria;Mercenaria mercenaria

UdeM00000021581 6596 325.5 UdeM00000021581 XP\_045157633.1 34.7 473  
307 2 7 478 30 501 1.10E-85 325.5 6596 cellular

organisms;Eukaryota;Opisthokonta;Metazoa;Eumetazoa;Bilateria;Protostomia;Spiralia;Lophotrochozoa;Mollusca;Bivalvia;Autobranchia;Heteroconchia;Euherodonta;Imparidentia;Venerida;Veneroidea;Veneridae;Mercenaria;Mercenaria mercenaria

UdeM00000021582 6596 258.5 UdeM00000021582 XP\_045175625.1 40.2 306  
183 0 17 322 196 501 1.20E-65 258.5 6596 cellular

organisms;Eukaryota;Opisthokonta;Metazoa;Eumetazoa;Bilateria;Protostomia;Spiralia;Lophotrochozoa;Mollusca;Bivalvia;Autobranchia;Heteroconchia;Euherodonta;Imparidentia;Venerida;Veneroidea;Veneridae;Mercenaria;Mercenaria mercenaria

UdeM00000021583 6596 314.7 UdeM00000021583 XP\_045157633.1 34 473  
310 2 7 478 30 501 2.00E-82 314.7 6596 cellular

organisms;Eukaryota;Opisthokonta;Metazoa;Eumetazoa;Bilateria;Protostomia;Spiralia;Lophotrochozoa;Mollusca;Bivalvia;Autobranchia;Heteroconchia;Euherodonta;Imparidentia;Venerida;Veneroidea;Veneridae;Mercenaria;Mercenaria mercenaria

UdeM00000021584 6500 139 UdeM00000021584 XP\_005105622.2 50 122  
61 0 2 123 312 433 4.10E-30 139 6500 cellular

organisms;Eukaryota;Opisthokonta;Metazoa;Eumetazoa;Bilateria;Protostomia;Spiralia;Lophotrochozoa;Mollusca;Gastropoda;Heterobranchia;Euthyneura;Tectipleura;Aplysiida;Aplysioidea;Aplysiidae;Aplysia;Aplysia californica

UdeM00000021585 6596 268.5 UdeM00000021585 XP\_045157633.1 36.5 356  
226 0 15 370 146 501 1.30E-68 268.5 6596 cellular

organisms;Eukaryota;Opisthokonta;Metazoa;Eumetazoa;Bilateria;Protostomia;Spiralia;Lophotrochozoa;Mollusca;Bivalvia;Autobranchia;Heteroconchia;Euherodonta;Imparidentia;Venerida;Veneroidea;Veneridae;Mercenaria;Mercenaria mercenaria

UdeM00000021586 29159 389.8 UdeM00000021586 XP\_034303860.1 44.1 497  
213 13 5 451 21 502 4.70E-105 389.8 29159 cellular

organisms;Eukaryota;Opisthokonta;Metazoa;Eumetazoa;Bilateria;Protostomia;Spiralia;Lophotrochozoa;Mollusca;Bivalvia;Autobranchia;Pteriomorpha;Ostreida;Ostreoidea;Ostreidae;Crassostrea;Crassostrea gigas

UdeM00000021587 6596 278.9 UdeM00000021587 XP\_045188650.1 38.4 349  
213 2 3 350 135 482 9.60E-72 278.9 6596 cellular

organisms;Eukaryota;Opisthokonta;Metazoa;Eumetazoa;Bilateria;Protostomia;Spiralia;Lophotrochozoa;Mollusca;Bivalvia;Autobranchia;Heteroconchia;Euherodonta;Imparidentia;Venerida;Veneroidea;Veneridae;Mercenaria;Mercenaria mercenaria

UdeM00000021588 6596 82 UdeM00000021588 XP\_045190529.1 37.8 90  
56 0 29 118 42 131 7.30E-13 82 6596 cellular

organisms;Eukaryota;Opisthokonta;Metazoa;Eumetazoa;Bilateria;Protostomia;Spiralia;Lophotrochozoa;Mollusca;Bivalvia;Autobranchia;Heteroconchia;Euherodonta

terodonta;Imparidentia;Venerida;Veneroidea;Veneridae;Mercenaria;Mercenaria mercenaria

UdeM00000021589 6573 194.1 UdeM00000021589 XP\_021340579.1 58 138  
56 1 1 138 222 357 1.20E-46 194.1 6573 cellular

organisms;Eukaryota;Opisthokonta;Metazoa;Eumetazoa;Bilateria;Protostomia;Spiralia;Lophotrochozoa;Mollusca;Bivalvia;Autobranchia;Pteriomorpha;Pectinida;Pectinoidea;Pectinidae;Mizuhopecten;Mizuhopecten yessoensis

UdeM00000021590 6573 205.3 UdeM00000021590 XP\_021340579.1 56.3 151  
64 1 11 161 209 357 6.20E-50 205.3 6573 cellular

organisms;Eukaryota;Opisthokonta;Metazoa;Eumetazoa;Bilateria;Protostomia;Spiralia;Lophotrochozoa;Mollusca;Bivalvia;Autobranchia;Pteriomorpha;Pectinida;Pectinoidea;Pectinidae;Mizuhopecten;Mizuhopecten yessoensis

UdeM00000021592 29159 73.6 UdeM00000021592 XP\_034307878.1 32.3 99  
67 0 1 99 92 190 4.90E-10 73.6 29159 cellular

organisms;Eukaryota;Opisthokonta;Metazoa;Eumetazoa;Bilateria;Protostomia;Spiralia;Lophotrochozoa;Mollusca;Bivalvia;Autobranchia;Pteriomorpha;Ostreida;Ostreoidea;Ostreidae;Crassostrea;Crassostrea gigas

UdeM00000021594 29159 216.5 UdeM00000021594 XP\_034312908.1 28.2 649  
342 20 9 564 6 623 8.90E-53 216.5 29159 cellular

organisms;Eukaryota;Opisthokonta;Metazoa;Eumetazoa;Bilateria;Protostomia;Spiralia;Lophotrochozoa;Mollusca;Bivalvia;Autobranchia;Pteriomorpha;Ostreida;Ostreoidea;Ostreidae;Crassostrea;Crassostrea gigas

UdeM00000021595 6596 261.5 UdeM00000021595 XP\_045169243.1 51.2 248  
111 3 1 248 1 238 1.10E-66 261.5 6596 cellular

organisms;Eukaryota;Opisthokonta;Metazoa;Eumetazoa;Bilateria;Protostomia;Spiralia;Lophotrochozoa;Mollusca;Bivalvia;Autobranchia;Heteroconchia;Euheterodonta;Imparidentia;Venerida;Veneroidea;Veneridae;Mercenaria;Mercenaria mercenaria

UdeM00000021596 7604 82.8 UdeM00000021596 XP\_033636849.1 54.5 88  
38 1 1 86 176 263 2.50E-13 82.8 7604 cellular

organisms;Eukaryota;Opisthokonta;Metazoa;Eumetazoa;Bilateria;Deuterostomia;Echinodermata;Eleutherozoa;Asterozoa;Asteroidea;Forcipulatacea;Forcipulatacida;Asteroidea;Asteroidea;Asteroidea;Asterias;Asterias rubens

UdeM00000021597 1735272 177.6 UdeM00000021597 XP\_041370269.1 78.8  
99 21 0 1 99 1 99 8.10E-42 177.6 1735272

cellular

organisms;Eukaryota;Opisthokonta;Metazoa;Eumetazoa;Bilateria;Protostomia;Spiralia;Lophotrochozoa;Mollusca;Gastropoda;Neomphalina;Neomphaloidea;Peltospiridae;Gigantopelta;Gigantopelta aegis

UdeM00000021598 37653 374.8 UdeM00000021598 XP\_014767702.1 87.8 213  
24 1 1 211 1 213 7.30E-101 374.8 37653 cellular

organisms;Eukaryota;Opisthokonta;Metazoa;Eumetazoa;Bilateria;Protostomia;Spiralia;Lophotrochozoa;Mollusca;Cephalopoda;Coleoidea;Octopodiformes;Octopoda;Incirrata;Octopodidae;Octopus;Octopus bimaculoides

UdeM00000021599 1735272 283.5 UdeM00000021599 XP\_041368763.1 86  
171 21 2 1 168 44 214 1.80E-73 283.5 1735272

cellular

organisms;Eukaryota;Opisthokonta;Metazoa;Eumetazoa;Bilateria;Protostomia;Spiralia;Lophotrochozoa;Mollusca;Gastropoda;Neomphalina;Neomphaloidea;Peltospiridae;Gigantopelta;Gigantopelta aegis

UdeM00000021600 6596 812.8 UdeM00000021600 XP\_045200719.1 39.2 2192  
999 54 10 1938 37 2157 9.60E-232 812.8 6596 cellular

organisms;Eukaryota;Opisthokonta;Metazoa;Eumetazoa;Bilateria;Protostomia;Spiralia;Lophotrochozoa;Mollusca;Bivalvia;Autobranchia;Heteroconchia;Euheteroconchia

terodonta;Imparidentia;Venerida;Veneroidea;Veneridae;Mercenaria;Mercenari  
 a mercenaria  
 UdeM00000021601 6596 158.3 UdeM00000021601 XP\_045201254.1 26 435  
 299 8 15 442 15 433 2.30E-35 158.3 6596 cellular  
 organisms;Eukaryota;Opisthokonta;Metazoa;Eumetazoa;Bilateria;Protostomia;  
 Spiralia;Lophotrochozoa;Mollusca;Bivalvia;Autobranhia;Heteroconchia;Euhe  
 terodonta;Imparidentia;Venerida;Veneroidea;Veneridae;Mercenaria;Mercenari  
 a mercenaria  
 UdeM00000021602 6596 422.2 UdeM00000021602 XP\_045206401.1 68.6 471  
 104 1 1 471 1 427 8.90E-115 422.2 6596 cellular  
 organisms;Eukaryota;Opisthokonta;Metazoa;Eumetazoa;Bilateria;Protostomia;  
 Spiralia;Lophotrochozoa;Mollusca;Bivalvia;Autobranhia;Heteroconchia;Euhe  
 terodonta;Imparidentia;Venerida;Veneroidea;Veneridae;Mercenaria;Mercenari  
 a mercenaria  
 UdeM00000021603 6596 450.3 UdeM00000021603 XP\_045206401.1 76.3 427  
 101 0 1 427 1 427 2.80E-123 450.3 6596 cellular  
 organisms;Eukaryota;Opisthokonta;Metazoa;Eumetazoa;Bilateria;Protostomia;  
 Spiralia;Lophotrochozoa;Mollusca;Bivalvia;Autobranhia;Heteroconchia;Euhe  
 terodonta;Imparidentia;Venerida;Veneroidea;Veneridae;Mercenaria;Mercenari  
 a mercenaria  
 UdeM00000021605 29159 71.2 UdeM00000021605 XP\_011421015.2 39.6 149  
 71 8 15 151 170 311 1.20E-09 71.2 29159 cellular  
 organisms;Eukaryota;Opisthokonta;Metazoa;Eumetazoa;Bilateria;Protostomia;  
 Spiralia;Lophotrochozoa;Mollusca;Bivalvia;Autobranhia;Pteriormorphia;Ostr  
 eida;Ostreioidea;Ostreidae;Crassostrea;Crassostrea gigas  
 UdeM00000021604 29159 141.4 UdeM00000021604 XP\_011421015.2 39.8 322  
 151 15 5 297 4 311 1.90E-30 141.4 29159 cellular  
 organisms;Eukaryota;Opisthokonta;Metazoa;Eumetazoa;Bilateria;Protostomia;  
 Spiralia;Lophotrochozoa;Mollusca;Bivalvia;Autobranhia;Pteriormorphia;Ostr  
 eida;Ostreioidea;Ostreidae;Crassostrea;Crassostrea gigas  
 UdeM00000021606 29159 100.1 UdeM00000021606 XP\_034307341.1 36.8 125  
 77 1 2 124 209 333 3.40E-18 100.1 29159 cellular  
 organisms;Eukaryota;Opisthokonta;Metazoa;Eumetazoa;Bilateria;Protostomia;  
 Spiralia;Lophotrochozoa;Mollusca;Bivalvia;Autobranhia;Pteriormorphia;Ostr  
 eida;Ostreioidea;Ostreidae;Crassostrea;Crassostrea gigas  
 UdeM00000021607 6596 344.7 UdeM00000021607 XP\_045209189.1 49.3 355  
 154 4 67 396 150 503 1.60E-91 344.7 6596 cellular  
 organisms;Eukaryota;Opisthokonta;Metazoa;Eumetazoa;Bilateria;Protostomia;  
 Spiralia;Lophotrochozoa;Mollusca;Bivalvia;Autobranhia;Heteroconchia;Euhe  
 terodonta;Imparidentia;Venerida;Veneroidea;Veneridae;Mercenaria;Mercenari  
 a mercenaria  
 UdeM00000021608 6596 379 UdeM00000021608 XP\_045192808.1 49.1 387  
 185 4 49 430 118 497 8.00E-102 379 6596 cellular  
 organisms;Eukaryota;Opisthokonta;Metazoa;Eumetazoa;Bilateria;Protostomia;  
 Spiralia;Lophotrochozoa;Mollusca;Bivalvia;Autobranhia;Heteroconchia;Euhe  
 terodonta;Imparidentia;Venerida;Veneroidea;Veneridae;Mercenaria;Mercenari  
 a mercenaria  
 UdeM00000021609 6596 163.3 UdeM00000021609 XP\_045199821.1 64.2 120  
 43 0 15 134 23 142 2.10E-37 163.3 6596 cellular  
 organisms;Eukaryota;Opisthokonta;Metazoa;Eumetazoa;Bilateria;Protostomia;  
 Spiralia;Lophotrochozoa;Mollusca;Bivalvia;Autobranhia;Heteroconchia;Euhe  
 terodonta;Imparidentia;Venerida;Veneroidea;Veneridae;Mercenaria;Mercenari  
 a mercenaria

UdeM00000021610 6596 153.7 UdeM00000021610 XP\_045199821.1 52.6 133  
 58 1 13 145 14 141 1.90E-34 153.7 6596 cellular  
 organisms;Eukaryota;Opisthokonta;Metazoa;Eumetazoa;Bilateria;Protostomia;  
 Spiralia;Lophotrochozoa;Mollusca;Bivalvia;Autobranchia;Heteroconchia;Euhe  
 terodonta;Imparidentia;Venerida;Veneroidea;Veneridae;Mercenaria;Mercenari  
 a mercenaria  
 UdeM00000021611 6579 127.9 UdeM00000021611 XP\_033732265.1 46.3 147  
 71 2 1 147 1 139 1.10E-26 127.9 6579 cellular  
 organisms;Eukaryota;Opisthokonta;Metazoa;Eumetazoa;Bilateria;Protostomia;  
 Spiralia;Lophotrochozoa;Mollusca;Bivalvia;Autobranchia;Pteriormorphia;Pect  
 inida;Pectinoidea;Pectinidae;Pecten;Pecten maximus  
 UdeM00000021612 6596 335.5 UdeM00000021612 XP\_045167481.1 48 354  
 173 7 11 355 75 426 8.40E-89 335.5 6596 cellular  
 organisms;Eukaryota;Opisthokonta;Metazoa;Eumetazoa;Bilateria;Protostomia;  
 Spiralia;Lophotrochozoa;Mollusca;Bivalvia;Autobranchia;Heteroconchia;Euhe  
 terodonta;Imparidentia;Venerida;Veneroidea;Veneridae;Mercenaria;Mercenari  
 a mercenaria  
 UdeM00000021613 6596 297 UdeM00000021613 XP\_045204754.1 53.5 310  
 130 5 2 301 29 334 2.80E-77 297 6596 cellular  
 organisms;Eukaryota;Opisthokonta;Metazoa;Eumetazoa;Bilateria;Protostomia;  
 Spiralia;Lophotrochozoa;Mollusca;Bivalvia;Autobranchia;Heteroconchia;Euhe  
 terodonta;Imparidentia;Venerida;Veneroidea;Veneridae;Mercenaria;Mercenari  
 a mercenaria  
 UdeM00000021614 6579 639.4 UdeM00000021614 XP\_033732483.1 63 462  
 168 1 7 465 10 471 3.50E-180 639.4 6579 cellular  
 organisms;Eukaryota;Opisthokonta;Metazoa;Eumetazoa;Bilateria;Protostomia;  
 Spiralia;Lophotrochozoa;Mollusca;Bivalvia;Autobranchia;Pteriormorphia;Pect  
 inida;Pectinoidea;Pectinidae;Pecten;Pecten maximus  
 UdeM00000021615 6573 615.1 UdeM00000021615 XP\_021375290.1 59.3 467  
 175 3 2 453 16 482 6.90E-173 615.1 6573 cellular  
 organisms;Eukaryota;Opisthokonta;Metazoa;Eumetazoa;Bilateria;Protostomia;  
 Spiralia;Lophotrochozoa;Mollusca;Bivalvia;Autobranchia;Pteriormorphia;Pect  
 inida;Pectinoidea;Pectinidae;Mizuhopecten;Mizuhopecten yessoensis  
 UdeM00000021616 1735272 728.4 UdeM00000021616 XP\_041368304.1 83  
 418 71 0 1 418 1 418 5.20E-207 728.4 1735272  
 cellular  
 organisms;Eukaryota;Opisthokonta;Metazoa;Eumetazoa;Bilateria;Protostomia;  
 Spiralia;Lophotrochozoa;Mollusca;Gastropoda;Neomphalina;Neomphaloidea;Pel  
 tospiridae;Gigantopelta;Gigantopelta aegis  
 UdeM00000021617 6565 103.2 UdeM00000021617 XP\_022288562.1 47.6 103  
 54 0 1 103 73 175 2.00E-19 103.2 6565 cellular  
 organisms;Eukaryota;Opisthokonta;Metazoa;Eumetazoa;Bilateria;Protostomia;  
 Spiralia;Lophotrochozoa;Mollusca;Bivalvia;Autobranchia;Pteriormorphia;Ostr  
 eida;Ostreoidea;Ostreidae;Crassostrea;Crassostrea virginica  
 UdeM00000021618 7918 288.1 UdeM00000021618 XP\_015203073.1 78.5 181  
 39 0 1 181 1 181 7.70E-75 288.1 7918 cellular  
 organisms;Eukaryota;Opisthokonta;Metazoa;Eumetazoa;Bilateria;Deuterostomi  
 a;Chordata;Craniata;Vertebrata;Gnathostomata;Teleostomi;Euteleostomi;Acti  
 nopterygii;Actinopteri;Neopterygii;Holostei;Semionotiformes;Lepisosteidae  
 ;Lepisosteus;Lepisosteus oculatus  
 UdeM00000021619 6579 833.9 UdeM00000021619 XP\_033730029.1 66.8 600  
 186 5 6 599 16 608 1.20E-238 833.9 6579 cellular  
 organisms;Eukaryota;Opisthokonta;Metazoa;Eumetazoa;Bilateria;Protostomia;

Spiralia; Lophotrochozoa; Mollusca; Bivalvia; Autobranchia; Pteriomorpha; Pectinida; Pectinoidea; Pectinidae; Pecten; Pecten maximus

UdeM00000021622 6565 223.4 UdeM00000021622 XP\_022323588.1 50.2 225  
107 3 4 225 43 265 2.90E-55 223.4 6565 cellular  
organisms; Eukaryota; Opisthokonta; Metazoa; Eumetazoa; Bilateria; Protostomia; Spiralia; Lophotrochozoa; Mollusca; Bivalvia; Autobranchia; Pteriomorpha; Ostracida; Ostreidae; Crassostrea; Crassostrea virginica

UdeM00000021620 6565 247.7 UdeM00000021620 XP\_022320891.1 47 279  
131 4 1 276 1 265 1.80E-62 247.7 6565 cellular  
organisms; Eukaryota; Opisthokonta; Metazoa; Eumetazoa; Bilateria; Protostomia; Spiralia; Lophotrochozoa; Mollusca; Bivalvia; Autobranchia; Pteriomorpha; Ostracida; Ostreidae; Crassostrea; Crassostrea virginica

UdeM00000021621 6565 252.7 UdeM00000021621 XP\_022320891.1 48.3 271  
131 4 1 268 1 265 5.40E-64 252.7 6565 cellular  
organisms; Eukaryota; Opisthokonta; Metazoa; Eumetazoa; Bilateria; Protostomia; Spiralia; Lophotrochozoa; Mollusca; Bivalvia; Autobranchia; Pteriomorpha; Ostracida; Ostreidae; Crassostrea; Crassostrea virginica

UdeM00000021623 6596 332.8 UdeM00000021623 XP\_045201218.1 53.6 304  
139 2 1 303 40 342 4.60E-88 332.8 6596 cellular  
organisms; Eukaryota; Opisthokonta; Metazoa; Eumetazoa; Bilateria; Protostomia; Spiralia; Lophotrochozoa; Mollusca; Bivalvia; Autobranchia; Heteroconchia; Euheterodonta; Imparidentia; Venerida; Veneroidea; Veneridae; Mercenaria; Mercenaria mercenaria

UdeM00000021627 46514 97.4 UdeM00000021627 XP\_038046569.1 52.9 102  
44 1 21 122 28 125 1.30E-17 97.4 46514 cellular  
organisms; Eukaryota; Opisthokonta; Metazoa; Eumetazoa; Bilateria; Deuterostomia; Echinodermata; Eleutherozoa; Asterozoa; Asteroidea; Valvatacea; Valvatida; Asterinidae; Patiria; Patiria miniata

UdeM00000021628 7574 102.4 UdeM00000021628 XP\_013389566.1 32.9 173  
108 5 55 225 138 304 2.90E-18 102.4 7574 cellular  
organisms; Eukaryota; Opisthokonta; Metazoa; Eumetazoa; Bilateria; Protostomia; Spiralia; Lophotrochozoa; Brachiopoda; Linguliformea; Lingulata; Lingulida; Linguloidea; Lingulidae; Lingula; Lingula anatina

UdeM00000021629 46731 123.2 UdeM00000021629 XP\_027057471.1 32.7 199  
100 3 324 521 261 426 9.40E-25 123.2 46731 cellular  
organisms; Eukaryota; Opisthokonta; Metazoa; Eumetazoa; Cnidaria; Anthozoa; Hexacorallia; Scleractinia; Astrocoeniina; Pocilloporidae; Pocillopora; Pocillopora damicornis

UdeM00000021630 6565 198.7 UdeM00000021630 XP\_022324861.1 23.5 817  
449 28 462 1165 974 1727 4.20E-47 198.7 6565 cellular  
organisms; Eukaryota; Opisthokonta; Metazoa; Eumetazoa; Bilateria; Protostomia; Spiralia; Lophotrochozoa; Mollusca; Bivalvia; Autobranchia; Pteriomorpha; Ostracida; Ostreidae; Crassostrea; Crassostrea virginica

UdeM00000021631 6596 562.4 UdeM00000021631 XP\_045194594.1 48.1 603  
292 7 571 1167 598 1185 1.40E-156 562.4 6596 cellular  
organisms; Eukaryota; Opisthokonta; Metazoa; Eumetazoa; Bilateria; Protostomia; Spiralia; Lophotrochozoa; Mollusca; Bivalvia; Autobranchia; Heteroconchia; Euheterodonta; Imparidentia; Venerida; Veneroidea; Veneridae; Mercenaria; Mercenaria mercenaria

UdeM00000021632 6579 175.3 UdeM00000021632 XP\_033733290.1 48.1 162  
74 4 26 187 24 175 7.60E-41 175.3 6579 cellular  
organisms; Eukaryota; Opisthokonta; Metazoa; Eumetazoa; Bilateria; Protostomia; Spiralia; Lophotrochozoa; Mollusca; Bivalvia; Autobranchia; Pteriomorpha; Pectinida; Pectinoidea; Pectinidae; Pecten; Pecten maximus



UdeM00000021633 6596 1341.3 UdeM00000021633 XP\_045196680.1 45.2  
1446 746 18 5 1431 132 1549 0.00E+00 1341.3 6596  
cellular

organisms;Eukaryota;Opisthokonta;Metazoa;Eumetazoa;Bilateria;Protostomia;  
Spiralia;Lophotrochozoa;Mollusca;Bivalvia;Autobranhia;Heteroconchia;Euhe  
terodonta;Imparidentia;Venerida;Veneroidea;Veneridae;Mercenaria;Mercenari  
a mercenaria

UdeM00000021634 6596 115.2 UdeM00000021634 XP\_045196680.1 48.1 106  
45 2 1 106 630 725 1.20E-22 115.2 6596 cellular

organisms;Eukaryota;Opisthokonta;Metazoa;Eumetazoa;Bilateria;Protostomia;  
Spiralia;Lophotrochozoa;Mollusca;Bivalvia;Autobranhia;Heteroconchia;Euhe  
terodonta;Imparidentia;Venerida;Veneroidea;Veneridae;Mercenaria;Mercenari  
a mercenaria

UdeM00000021636 6573 82.8 UdeM00000021636 XP\_021350433.1 21.7 374  
258 12 2 348 444 809 9.50E-13 82.8 6573 cellular

organisms;Eukaryota;Opisthokonta;Metazoa;Eumetazoa;Bilateria;Protostomia;  
Spiralia;Lophotrochozoa;Mollusca;Bivalvia;Autobranhia;Pteriormorphia;Pect  
inida;Pectinoidea;Pectinidae;Mizuhopecten;Mizuhopecten yessoensis

UdeM00000021637 6573 84.7 UdeM00000021637 XP\_021350433.1 22.1 417  
285 14 2 389 444 849 3.50E-13 84.7 6573 cellular

organisms;Eukaryota;Opisthokonta;Metazoa;Eumetazoa;Bilateria;Protostomia;  
Spiralia;Lophotrochozoa;Mollusca;Bivalvia;Autobranhia;Pteriormorphia;Pect  
inida;Pectinoidea;Pectinidae;Mizuhopecten;Mizuhopecten yessoensis

UdeM00000021638 6573 114.8 UdeM00000021638 XP\_021373777.1 24.1 369  
259 9 14 364 48 413 2.60E-22 114.8 6573 cellular

organisms;Eukaryota;Opisthokonta;Metazoa;Eumetazoa;Bilateria;Protostomia;  
Spiralia;Lophotrochozoa;Mollusca;Bivalvia;Autobranhia;Pteriormorphia;Pect  
inida;Pectinoidea;Pectinidae;Mizuhopecten;Mizuhopecten yessoensis

UdeM00000021639 6573 74.3 UdeM00000021639 XP\_021373777.1 25.3 221  
152 5 5 213 194 413 2.40E-10 74.3 6573 cellular

organisms;Eukaryota;Opisthokonta;Metazoa;Eumetazoa;Bilateria;Protostomia;  
Spiralia;Lophotrochozoa;Mollusca;Bivalvia;Autobranhia;Pteriormorphia;Pect  
inida;Pectinoidea;Pectinidae;Mizuhopecten;Mizuhopecten yessoensis

UdeM00000021640 6573 74.3 UdeM00000021640 XP\_021373777.1 25.3 221  
152 5 5 213 194 413 2.40E-10 74.3 6573 cellular

organisms;Eukaryota;Opisthokonta;Metazoa;Eumetazoa;Bilateria;Protostomia;  
Spiralia;Lophotrochozoa;Mollusca;Bivalvia;Autobranhia;Pteriormorphia;Pect  
inida;Pectinoidea;Pectinidae;Mizuhopecten;Mizuhopecten yessoensis

UdeM00000021641 225164 60.1 UdeM00000021641 XP\_009053805.1 31.2  
128 83 3 7 131 383 508 2.80E-06 60.1 225164

cellular

organisms;Eukaryota;Opisthokonta;Metazoa;Eumetazoa;Bilateria;Protostomia;  
Spiralia;Lophotrochozoa;Mollusca;Gastropoda;Patellogastropoda;Lottioida;  
Lottiidae;Lottia;Lottia gigantea

UdeM00000021642 6596 137.9 UdeM00000021642 XP\_045188705.1 59.1 110  
45 0 815 924 638 747 6.60E-29 137.9 6596 cellular

organisms;Eukaryota;Opisthokonta;Metazoa;Eumetazoa;Bilateria;Protostomia;  
Spiralia;Lophotrochozoa;Mollusca;Bivalvia;Autobranhia;Heteroconchia;Euhe  
terodonta;Imparidentia;Venerida;Veneroidea;Veneridae;Mercenaria;Mercenari  
a mercenaria

UdeM00000021642 6596 76.3 UdeM00000021642 XP\_045188705.1 47.8 69  
33 1 10 75 525 593 2.40E-10 76.3 6596 cellular

organisms;Eukaryota;Opisthokonta;Metazoa;Eumetazoa;Bilateria;Protostomia;  
Spiralia;Lophotrochozoa;Mollusca;Bivalvia;Autobranhia;Heteroconchia;Euhe

terodonta;Imparidentia;Venerida;Veneroidea;Veneridae;Mercenaria;Mercenari  
 a mercenaria  
 UdeM00000021643 6596 479.6 UdeM00000021643 XP\_045199716.1 72.3 300  
 83 0 1 300 1 300 3.00E-132 479.6 6596 cellular  
 organisms;Eukaryota;Opisthokonta;Metazoa;Eumetazoa;Bilateria;Protostomia;  
 Spiralia;Lophotrochozoa;Mollusca;Bivalvia;Autobranchia;Heteroconchia;Euhe  
 terodonta;Imparidentia;Venerida;Veneroidea;Veneridae;Mercenaria;Mercenari  
 a mercenaria  
 UdeM00000025637 6596 1307.7 UdeM00000025637 XP\_045207736.1 54.3  
 1324 547 11 1 1318 39 1310 0.00E+00 1307.7 6596  
 cellular  
 organisms;Eukaryota;Opisthokonta;Metazoa;Eumetazoa;Bilateria;Protostomia;  
 Spiralia;Lophotrochozoa;Mollusca;Bivalvia;Autobranchia;Heteroconchia;Euhe  
 terodonta;Imparidentia;Venerida;Veneroidea;Veneridae;Mercenaria;Mercenari  
 a mercenaria  
 UdeM00000025638 6596 292.4 UdeM00000025638 XP\_045185641.1 50 278  
 131 5 1 270 50 327 6.10E-76 292.4 6596 cellular  
 organisms;Eukaryota;Opisthokonta;Metazoa;Eumetazoa;Bilateria;Protostomia;  
 Spiralia;Lophotrochozoa;Mollusca;Bivalvia;Autobranchia;Heteroconchia;Euhe  
 terodonta;Imparidentia;Venerida;Veneroidea;Veneridae;Mercenaria;Mercenari  
 a mercenaria  
 UdeM00000025639 6596 352.1 UdeM00000025639 XP\_045185641.1 51.5 330  
 149 6 1 322 1 327 8.00E-94 352.1 6596 cellular  
 organisms;Eukaryota;Opisthokonta;Metazoa;Eumetazoa;Bilateria;Protostomia;  
 Spiralia;Lophotrochozoa;Mollusca;Bivalvia;Autobranchia;Heteroconchia;Euhe  
 terodonta;Imparidentia;Venerida;Veneroidea;Veneridae;Mercenaria;Mercenari  
 a mercenaria  
 UdeM00000025640 6500 196.4 UdeM00000025640 XP\_035828236.1 51.1 219  
 103 3 3 218 8 225 3.70E-47 196.4 6500 cellular  
 organisms;Eukaryota;Opisthokonta;Metazoa;Eumetazoa;Bilateria;Protostomia;  
 Spiralia;Lophotrochozoa;Mollusca;Gastropoda;Heterobranchia;Euthyneura;Tec  
 tipleura;Aplysiida;Aplysioidea;Aplysiidae;Aplysia;Aplysia californica  
 UdeM00000025641 6579 413.3 UdeM00000025641 XP\_033758654.1 81.8 253  
 41 1 1 248 1 253 2.30E-112 413.3 6579 cellular  
 organisms;Eukaryota;Opisthokonta;Metazoa;Eumetazoa;Bilateria;Protostomia;  
 Spiralia;Lophotrochozoa;Mollusca;Bivalvia;Autobranchia;Pteriomorphia;Pect  
 inida;Pectinoidea;Pectinidae;Pecten;Pecten maximus  
 UdeM00000025642 6565 359.4 UdeM00000025642 XP\_022326349.1 94.5 182  
 10 0 1 182 255 436 3.00E-96 359.4 6565 cellular  
 organisms;Eukaryota;Opisthokonta;Metazoa;Eumetazoa;Bilateria;Protostomia;  
 Spiralia;Lophotrochozoa;Mollusca;Bivalvia;Autobranchia;Pteriomorphia;Ostr  
 eida;Ostreoidea;Ostreidae;Crassostrea;Crassostrea virginica  
 UdeM00000025645 6573 354 UdeM00000025645 XP\_021369947.1 28.6 819  
 483 11 37 761 382 1192 4.80E-94 354 6573 cellular  
 organisms;Eukaryota;Opisthokonta;Metazoa;Eumetazoa;Bilateria;Protostomia;  
 Spiralia;Lophotrochozoa;Mollusca;Bivalvia;Autobranchia;Pteriomorphia;Pect  
 inida;Pectinoidea;Pectinidae;Mizuhopecten;Mizuhopecten yessoensis  
 UdeM00000025646 6596 958.4 UdeM00000025646 XP\_045210094.1 70.3 666  
 194 2 34 696 20 684 5.10E-276 958.4 6596 cellular  
 organisms;Eukaryota;Opisthokonta;Metazoa;Eumetazoa;Bilateria;Protostomia;  
 Spiralia;Lophotrochozoa;Mollusca;Bivalvia;Autobranchia;Heteroconchia;Euhe  
 terodonta;Imparidentia;Venerida;Veneroidea;Veneridae;Mercenaria;Mercenari  
 a mercenaria

UdeM00000025647 6596 85.1 UdeM00000025647 XP\_045183379.1 31.3 163  
 86 4 20 163 21 176 9.40E-14 85.1 6596 cellular  
 organisms;Eukaryota;Opisthokonta;Metazoa;Eumetazoa;Bilateria;Protostomia;  
 Spiralia;Lophotrochozoa;Mollusca;Bivalvia;Autobranchia;Heteroconchia;Euhe  
 terodonta;Imparidentia;Venerida;Veneroidea;Veneridae;Mercenaria;Mercenari  
 a mercenaria  
 UdeM00000025648 6596 245.7 UdeM00000025648 XP\_045208363.1 54.9 255  
 99 6 7 250 8 257 6.10E-62 245.7 6596 cellular  
 organisms;Eukaryota;Opisthokonta;Metazoa;Eumetazoa;Bilateria;Protostomia;  
 Spiralia;Lophotrochozoa;Mollusca;Bivalvia;Autobranchia;Heteroconchia;Euhe  
 terodonta;Imparidentia;Venerida;Veneroidea;Veneridae;Mercenaria;Mercenari  
 a mercenaria  
 UdeM00000025649 6596 256.5 UdeM00000025649 XP\_045208363.1 56.5 255  
 99 6 7 254 8 257 3.50E-65 256.5 6596 cellular  
 organisms;Eukaryota;Opisthokonta;Metazoa;Eumetazoa;Bilateria;Protostomia;  
 Spiralia;Lophotrochozoa;Mollusca;Bivalvia;Autobranchia;Heteroconchia;Euhe  
 terodonta;Imparidentia;Venerida;Veneroidea;Veneridae;Mercenaria;Mercenari  
 a mercenaria  
 UdeM00000025650 6596 354 UdeM00000025650 XP\_045209942.1 49.5 366  
 181 4 1 363 1 365 2.30E-94 354 6596 cellular  
 organisms;Eukaryota;Opisthokonta;Metazoa;Eumetazoa;Bilateria;Protostomia;  
 Spiralia;Lophotrochozoa;Mollusca;Bivalvia;Autobranchia;Heteroconchia;Euhe  
 terodonta;Imparidentia;Venerida;Veneroidea;Veneridae;Mercenaria;Mercenari  
 a mercenaria  
 UdeM00000025651 6596 303.5 UdeM00000025651 XP\_045209942.1 51.5 301  
 140 3 2 297 66 365 2.90E-79 303.5 6596 cellular  
 organisms;Eukaryota;Opisthokonta;Metazoa;Eumetazoa;Bilateria;Protostomia;  
 Spiralia;Lophotrochozoa;Mollusca;Bivalvia;Autobranchia;Heteroconchia;Euhe  
 terodonta;Imparidentia;Venerida;Veneroidea;Veneridae;Mercenaria;Mercenari  
 a mercenaria  
 UdeM00000025652 6579 760.8 UdeM00000025652 XP\_033758341.1 57.8 713  
 263 9 12 717 6 687 1.70E-216 760.8 6579 cellular  
 organisms;Eukaryota;Opisthokonta;Metazoa;Eumetazoa;Bilateria;Protostomia;  
 Spiralia;Lophotrochozoa;Mollusca;Bivalvia;Autobranchia;Pteriomorphia;Pect  
 inida;Pectinoidea;Pectinidae;Pecten;Pecten maximus  
 UdeM00000025653 6596 215.7 UdeM00000025653 XP\_045209988.1 31.9 523  
 311 11 1 491 1 510 1.50E-52 215.7 6596 cellular  
 organisms;Eukaryota;Opisthokonta;Metazoa;Eumetazoa;Bilateria;Protostomia;  
 Spiralia;Lophotrochozoa;Mollusca;Bivalvia;Autobranchia;Heteroconchia;Euhe  
 terodonta;Imparidentia;Venerida;Veneroidea;Veneridae;Mercenaria;Mercenari  
 a mercenaria  
 UdeM00000025654 6579 813.1 UdeM00000025654 XP\_033759157.1 67 588  
 188 4 3 589 177 759 2.60E-232 813.1 6579 cellular  
 organisms;Eukaryota;Opisthokonta;Metazoa;Eumetazoa;Bilateria;Protostomia;  
 Spiralia;Lophotrochozoa;Mollusca;Bivalvia;Autobranchia;Pteriomorphia;Pect  
 inida;Pectinoidea;Pectinidae;Pecten;Pecten maximus  
 UdeM00000025655 6596 3275.7 UdeM00000025655 XP\_045209625.1 70.5  
 2396 639 9 1 2382 2168 4509 0.00E+00 3275.7 6596  
 cellular  
 organisms;Eukaryota;Opisthokonta;Metazoa;Eumetazoa;Bilateria;Protostomia;  
 Spiralia;Lophotrochozoa;Mollusca;Bivalvia;Autobranchia;Heteroconchia;Euhe  
 terodonta;Imparidentia;Venerida;Veneroidea;Veneridae;Mercenaria;Mercenari  
 a mercenaria

UdeM00000025656 6573 4518.8 UdeM00000025656 XP\_021371082.1 71.8  
 3197 854 17 1 3179 1 3166 0.00E+00 4518.8 6573  
 cellular  
 organisms;Eukaryota;Opisthokonta;Metazoa;Eumetazoa;Bilateria;Protostomia;  
 Spiralia;Lophotrochozoa;Mollusca;Bivalvia;Autobranchia;Pteriomorpha;Pect  
 inida;Pectinoidea;Pectinidae;Mizuhopecten;Mizuhopecten yessoensis  
 UdeM00000025657 6579 589.7 UdeM00000025657 XP\_033755700.1 58.4 476  
 184 5 14 478 14 486 3.30E-165 589.7 6579 cellular  
 organisms;Eukaryota;Opisthokonta;Metazoa;Eumetazoa;Bilateria;Protostomia;  
 Spiralia;Lophotrochozoa;Mollusca;Bivalvia;Autobranchia;Pteriomorpha;Pect  
 inida;Pectinoidea;Pectinidae;Pecten;Pecten maximus  
 UdeM00000025658 6596 733.8 UdeM00000025658 XP\_045209609.1 57.4 728  
 276 9 1 706 1 716 2.10E-208 733.8 6596 cellular  
 organisms;Eukaryota;Opisthokonta;Metazoa;Eumetazoa;Bilateria;Protostomia;  
 Spiralia;Lophotrochozoa;Mollusca;Bivalvia;Autobranchia;Heteroconchia;Euhe  
 terodonta;Imparidentia;Venerida;Veneroidea;Veneridae;Mercenaria;Mercenari  
 a mercenaria  
 UdeM00000025660 6579 1603.2 UdeM00000025660 XP\_033758364.1 29.6  
 5756 3011 156 1 5093 1 5376 0.00E+00 1603.2 6579  
 cellular  
 organisms;Eukaryota;Opisthokonta;Metazoa;Eumetazoa;Bilateria;Protostomia;  
 Spiralia;Lophotrochozoa;Mollusca;Bivalvia;Autobranchia;Pteriomorpha;Pect  
 inida;Pectinoidea;Pectinidae;Pecten;Pecten maximus  
 UdeM00000025661 6573 552 UdeM00000025661 XP\_021371075.1 55.8 486  
 203 5 29 511 24 500 8.10E-154 552 6573 cellular  
 organisms;Eukaryota;Opisthokonta;Metazoa;Eumetazoa;Bilateria;Protostomia;  
 Spiralia;Lophotrochozoa;Mollusca;Bivalvia;Autobranchia;Pteriomorpha;Pect  
 inida;Pectinoidea;Pectinidae;Mizuhopecten;Mizuhopecten yessoensis  
 UdeM00000025662 6596 243.8 UdeM00000025662 XP\_045187536.1 58.3 216  
 87 2 1 215 396 609 2.00E-61 243.8 6596 cellular  
 organisms;Eukaryota;Opisthokonta;Metazoa;Eumetazoa;Bilateria;Protostomia;  
 Spiralia;Lophotrochozoa;Mollusca;Bivalvia;Autobranchia;Heteroconchia;Euhe  
 terodonta;Imparidentia;Venerida;Veneroidea;Veneridae;Mercenaria;Mercenari  
 a mercenaria  
 UdeM00000025663 6579 385.2 UdeM00000025663 XP\_033757948.1 78.7 230  
 49 0 1 230 1 230 5.90E-104 385.2 6579 cellular  
 organisms;Eukaryota;Opisthokonta;Metazoa;Eumetazoa;Bilateria;Protostomia;  
 Spiralia;Lophotrochozoa;Mollusca;Bivalvia;Autobranchia;Pteriomorpha;Pect  
 inida;Pectinoidea;Pectinidae;Pecten;Pecten maximus  
 UdeM00000025664 6596 258.8 UdeM00000025664 XP\_045210042.1 56.1 255  
 90 6 1 253 1 235 7.30E-66 258.8 6596 cellular  
 organisms;Eukaryota;Opisthokonta;Metazoa;Eumetazoa;Bilateria;Protostomia;  
 Spiralia;Lophotrochozoa;Mollusca;Bivalvia;Autobranchia;Heteroconchia;Euhe  
 terodonta;Imparidentia;Venerida;Veneroidea;Veneridae;Mercenaria;Mercenari  
 a mercenaria  
 UdeM00000025665 1735272 745 UdeM00000025665 XP\_041372421.1 79.5  
 419 86 0 306 724 226 644 9.70E-212 745 1735272  
 cellular  
 organisms;Eukaryota;Opisthokonta;Metazoa;Eumetazoa;Bilateria;Protostomia;  
 Spiralia;Lophotrochozoa;Mollusca;Gastropoda;Neomphalina;Neomphaloidea;Pel  
 tospiridae;Gigantopelta;Gigantopelta aegis  
 UdeM00000025667 400727 62 UdeM00000025667 XP\_025079720.1 32.5  
 120 67 4 5 113 17 133 1.60E-06 62 400727  
 cellular

organisms;Eukaryota;Opisthokonta;Metazoa;Eumetazoa;Bilateria;Protostomia;  
 Spiralia;Lophotrochozoa;Mollusca;Gastropoda;Caenogastropoda;Architaenioglossa;  
 Ampullarioidea;Ampullariidae;Pomacea;Pomacea canaliculata  
 UdeM00000025668 7955 63.2 UdeM00000025668 XP\_021322271.1 26.9 175  
 109 5 125 297 301 458 1.10E-06 63.2 7955 cellular  
 organisms;Eukaryota;Opisthokonta;Metazoa;Eumetazoa;Bilateria;Deuterostomia;  
 Chordata;Craniata;Vertebrata;Gnathostomata;Teleostomi;Euteleostomi;Actinopterygii;  
 Actinopteri;Neopterygii;Teleostei;Osteoglossocephalai;Clupeocephala;Otomorpha;  
 Ostariophysi;Otophysi;Cypriniphysae;Cypriniformes;Cyprinidae;Danionidae;  
 Danioninae;Danio;Danio rerio  
 UdeM00000025669 8177 73.6 UdeM00000025669 XP\_036931280.1 24.5 372  
 203 13 138 484 141 459 1.30E-09 73.6 8177 cellular  
 organisms;Eukaryota;Opisthokonta;Metazoa;Eumetazoa;Bilateria;Deuterostomia;  
 Chordata;Craniata;Vertebrata;Gnathostomata;Teleostomi;Euteleostomi;Actinopterygii;  
 Actinopteri;Neopterygii;Teleostei;Osteoglossocephalai;Clupeocephala;Euteleostei;  
 Neoteleostei;Eurypterygia;Ctenosquamata;Acanthomorpha;Euacanthomorpha;  
 Percomorphaceae;Eupercaria;Spariformes;Sparidae;Acanthopagrus;Acanthopagrus  
 latus  
 UdeM00000025671 7955 75.9 UdeM00000025671 NP\_001107266.1 22.7 427  
 243 15 143 553 481 836 2.60E-10 75.9 7955 cellular  
 organisms;Eukaryota;Opisthokonta;Metazoa;Eumetazoa;Bilateria;Deuterostomia;  
 Chordata;Craniata;Vertebrata;Gnathostomata;Teleostomi;Euteleostomi;Actinopterygii;  
 Actinopteri;Neopterygii;Teleostei;Osteoglossocephalai;Clupeocephala;Otomorpha;  
 Ostariophysi;Otophysi;Cypriniphysae;Cypriniformes;Cyprinidae;Danionidae;  
 Danioninae;Danio;Danio rerio  
 UdeM00000025673 7955 80.1 UdeM00000025673 XP\_021322271.1 22.7 458  
 262 18 321 765 83 461 1.70E-11 80.1 7955 cellular  
 organisms;Eukaryota;Opisthokonta;Metazoa;Eumetazoa;Bilateria;Deuterostomia;  
 Chordata;Craniata;Vertebrata;Gnathostomata;Teleostomi;Euteleostomi;Actinopterygii;  
 Actinopteri;Neopterygii;Teleostei;Osteoglossocephalai;Clupeocephala;Otomorpha;  
 Ostariophysi;Otophysi;Cypriniphysae;Cypriniformes;Cyprinidae;Danionidae;  
 Danioninae;Danio;Danio rerio  
 UdeM00000025676 29159 204.1 UdeM00000025676 XP\_019926412.2 52.9 210  
 88 3 1 207 1 202 1.90E-49 204.1 29159 cellular  
 organisms;Eukaryota;Opisthokonta;Metazoa;Eumetazoa;Bilateria;Protostomia;  
 Spiralia;Lophotrochozoa;Mollusca;Bivalvia;Autobranchia;Pteriomorpha;Ostreida;  
 Ostreidae;Crassostrea;Crassostrea gigas  
 UdeM00000025677 6579 219.9 UdeM00000025677 XP\_033758661.1 53.8 236  
 73 6 99 333 53 253 6.30E-54 219.9 6579 cellular  
 organisms;Eukaryota;Opisthokonta;Metazoa;Eumetazoa;Bilateria;Protostomia;  
 Spiralia;Lophotrochozoa;Mollusca;Bivalvia;Autobranchia;Pteriomorpha;Pectinida;  
 Pectinoidea;Pectinidae;Pecten;Pecten maximus  
 UdeM00000025679 6596 222.6 UdeM00000025679 XP\_045207029.1 42.2 282  
 145 7 7 273 8 286 6.00E-55 222.6 6596 cellular  
 organisms;Eukaryota;Opisthokonta;Metazoa;Eumetazoa;Bilateria;Protostomia;  
 Spiralia;Lophotrochozoa;Mollusca;Bivalvia;Autobranchia;Heteroconchia;Euheterodonta;  
 Imparidentia;Venerida;Veneroidea;Veneridae;Mercenaria;Mercenaria mercenaria  
 UdeM00000025680 6573 191.4 UdeM00000025680 XP\_021369049.1 42.2 277  
 153 3 8 283 5 275 4.50E-45 191.4 6573 cellular  
 organisms;Eukaryota;Opisthokonta;Metazoa;Eumetazoa;Bilateria;Protostomia;  
 Spiralia;Lophotrochozoa;Mollusca;Bivalvia;Autobranchia;Pteriomorpha;Pectinida;  
 Pectinoidea;Pectinidae;Mizuhopecten;Mizuhopecten yessoensis

UdeM00000025681 6596 58.9 UdeM00000025681 XP\_045207091.1 29.9 137  
 89 2 12 146 33 164 6.20E-06 58.9 6596 cellular  
 organisms;Eukaryota;Opisthokonta;Metazoa;Eumetazoa;Bilateria;Protostomia;  
 Spiralia;Lophotrochozoa;Mollusca;Bivalvia;Autobranhia;Heteroconchia;Euhe  
 terodonta;Imparidentia;Venerida;Veneroidea;Veneridae;Mercenaria;Mercenari  
 a mercenaria  
 UdeM00000025682 6596 61.6 UdeM00000025682 XP\_045207091.1 30.7 127  
 78 3 27 146 41 164 9.60E-07 61.6 6596 cellular  
 organisms;Eukaryota;Opisthokonta;Metazoa;Eumetazoa;Bilateria;Protostomia;  
 Spiralia;Lophotrochozoa;Mollusca;Bivalvia;Autobranhia;Heteroconchia;Euhe  
 terodonta;Imparidentia;Venerida;Veneroidea;Veneridae;Mercenaria;Mercenari  
 a mercenaria  
 UdeM00000025683 29159 213.8 UdeM00000025683 XP\_011443721.2 41.1 355  
 184 9 1 344 36 376 3.50E-52 213.8 29159 cellular  
 organisms;Eukaryota;Opisthokonta;Metazoa;Eumetazoa;Bilateria;Protostomia;  
 Spiralia;Lophotrochozoa;Mollusca;Bivalvia;Autobranhia;Pteriormorphia;Ostr  
 eida;Ostreoidea;Ostreidae;Crassostrea;Crassostrea gigas  
 UdeM00000025684 6579 715.7 UdeM00000025684 XP\_033739131.1 60.8 536  
 208 2 1 535 835 1369 4.40E-203 715.7 6579 cellular  
 organisms;Eukaryota;Opisthokonta;Metazoa;Eumetazoa;Bilateria;Protostomia;  
 Spiralia;Lophotrochozoa;Mollusca;Bivalvia;Autobranhia;Pteriormorphia;Pect  
 inida;Pectinoidea;Pectinidae;Pecten;Pecten maximus  
 UdeM00000025685 29159 70.5 UdeM00000025685 XP\_034305523.1 31 155  
 81 3 2 156 417 545 2.20E-09 70.5 29159 cellular  
 organisms;Eukaryota;Opisthokonta;Metazoa;Eumetazoa;Bilateria;Protostomia;  
 Spiralia;Lophotrochozoa;Mollusca;Bivalvia;Autobranhia;Pteriormorphia;Ostr  
 eida;Ostreoidea;Ostreidae;Crassostrea;Crassostrea gigas  
 UdeM00000025686 6565 313.2 UdeM00000025686 XP\_022286864.1 62.8 250  
 86 4 5 248 3 251 3.10E-82 313.2 6565 cellular  
 organisms;Eukaryota;Opisthokonta;Metazoa;Eumetazoa;Bilateria;Protostomia;  
 Spiralia;Lophotrochozoa;Mollusca;Bivalvia;Autobranhia;Pteriormorphia;Ostr  
 eida;Ostreoidea;Ostreidae;Crassostrea;Crassostrea virginica  
 UdeM00000025687 6573 84.7 UdeM00000025687 XP\_021371803.1 25.4 185  
 136 2 19 202 178 361 1.70E-13 84.7 6573 cellular  
 organisms;Eukaryota;Opisthokonta;Metazoa;Eumetazoa;Bilateria;Protostomia;  
 Spiralia;Lophotrochozoa;Mollusca;Bivalvia;Autobranhia;Pteriormorphia;Pect  
 inida;Pectinoidea;Pectinidae;Mizuhopecten;Mizuhopecten yessoensis  
 UdeM00000025688 29159 325.5 UdeM00000025688 XP\_011437458.1 66.7 240  
 73 3 15 252 15 249 6.20E-86 325.5 29159 cellular  
 organisms;Eukaryota;Opisthokonta;Metazoa;Eumetazoa;Bilateria;Protostomia;  
 Spiralia;Lophotrochozoa;Mollusca;Bivalvia;Autobranhia;Pteriormorphia;Ostr  
 eida;Ostreoidea;Ostreidae;Crassostrea;Crassostrea gigas  
 UdeM00000025689 6596 640.2 UdeM00000025689 XP\_045183373.1 64.2 492  
 172 3 12 500 11 501 2.20E-180 640.2 6596 cellular  
 organisms;Eukaryota;Opisthokonta;Metazoa;Eumetazoa;Bilateria;Protostomia;  
 Spiralia;Lophotrochozoa;Mollusca;Bivalvia;Autobranhia;Heteroconchia;Euhe  
 terodonta;Imparidentia;Venerida;Veneroidea;Veneridae;Mercenaria;Mercenari  
 a mercenaria  
 UdeM00000025693 6596 221.9 UdeM00000025693 XP\_045185216.1 56.4 211  
 69 3 1 188 1 211 7.30E-55 221.9 6596 cellular  
 organisms;Eukaryota;Opisthokonta;Metazoa;Eumetazoa;Bilateria;Protostomia;  
 Spiralia;Lophotrochozoa;Mollusca;Bivalvia;Autobranhia;Heteroconchia;Euhe  
 terodonta;Imparidentia;Venerida;Veneroidea;Veneridae;Mercenaria;Mercenari  
 a mercenaria

UdeM00000025694 8005 611.7 UdeM00000025694 XP\_035380990.1 50.4 655  
 296 7 34 669 1 645 1.40E-171 611.7 8005 cellular  
 organisms;Eukaryota;Opisthokonta;Metazoa;Eumetazoa;Bilateria;Deuterostomi  
 a;Chordata;Craniata;Vertebrata;Gnathostomata;Teleostomi;Euteleostomi;Acti  
 nopterygii;Actinopteri;Neopterygii;Teleostei;Osteoglossocephalai;Clupeoce  
 phala;Otomorpha;Ostariophysi;Otophysi;Characiphysae;Gymnotiformes;Gymnoto  
 idei;Gymnotidae;Electrophorus;Electrophorus electricus  
 UdeM00000025695 6596 251.1 UdeM00000025695 XP\_045164710.1 77.8 158  
 32 1 8 162 30 187 9.40E-64 251.1 6596 cellular  
 organisms;Eukaryota;Opisthokonta;Metazoa;Eumetazoa;Bilateria;Protostomia;  
 Spiralia;Lophotrochozoa;Mollusca;Bivalvia;Autobranhia;Heteroconchia;Euhe  
 terodonta;Imparidentia;Venerida;Veneroidea;Veneridae;Mercenaria;Mercenari  
 a mercenaria  
 UdeM00000025697 6565 111.7 UdeM00000025697 XP\_022299727.1 32.1 196  
 111 5 1 174 480 675 9.60E-22 111.7 6565 cellular  
 organisms;Eukaryota;Opisthokonta;Metazoa;Eumetazoa;Bilateria;Protostomia;  
 Spiralia;Lophotrochozoa;Mollusca;Bivalvia;Autobranhia;Pteriormorphia;Ostr  
 eida;Ostreoidea;Ostreidae;Crassostrea;Crassostrea virginica  
 UdeM00000025698 6565 107.1 UdeM00000025698 XP\_022299727.1 41.7 139  
 79 1 1 137 46 184 1.90E-20 107.1 6565 cellular  
 organisms;Eukaryota;Opisthokonta;Metazoa;Eumetazoa;Bilateria;Protostomia;  
 Spiralia;Lophotrochozoa;Mollusca;Bivalvia;Autobranhia;Pteriormorphia;Ostr  
 eida;Ostreoidea;Ostreidae;Crassostrea;Crassostrea virginica  
 UdeM00000025699 6596 178.7 UdeM00000025699 XP\_045209951.1 55.4 168  
 70 2 4 166 5 172 6.10E-42 178.7 6596 cellular  
 organisms;Eukaryota;Opisthokonta;Metazoa;Eumetazoa;Bilateria;Protostomia;  
 Spiralia;Lophotrochozoa;Mollusca;Bivalvia;Autobranhia;Heteroconchia;Euhe  
 terodonta;Imparidentia;Venerida;Veneroidea;Veneridae;Mercenaria;Mercenari  
 a mercenaria  
 UdeM00000025701 6596 759.2 UdeM00000025701 XP\_045210180.1 53.6 716  
 315 10 8 719 5 707 4.70E-216 759.2 6596 cellular  
 organisms;Eukaryota;Opisthokonta;Metazoa;Eumetazoa;Bilateria;Protostomia;  
 Spiralia;Lophotrochozoa;Mollusca;Bivalvia;Autobranhia;Heteroconchia;Euhe  
 terodonta;Imparidentia;Venerida;Veneroidea;Veneridae;Mercenaria;Mercenari  
 a mercenaria  
 UdeM00000025700 6596 757.7 UdeM00000025700 XP\_045210179.1 53.6 709  
 312 10 8 712 5 700 1.40E-215 757.7 6596 cellular  
 organisms;Eukaryota;Opisthokonta;Metazoa;Eumetazoa;Bilateria;Protostomia;  
 Spiralia;Lophotrochozoa;Mollusca;Bivalvia;Autobranhia;Heteroconchia;Euhe  
 terodonta;Imparidentia;Venerida;Veneroidea;Veneridae;Mercenaria;Mercenari  
 a mercenaria  
 UdeM00000025702 6596 323.2 UdeM00000025702 XP\_045201968.1 36.5 427  
 256 2 12 423 64 490 5.30E-85 323.2 6596 cellular  
 organisms;Eukaryota;Opisthokonta;Metazoa;Eumetazoa;Bilateria;Protostomia;  
 Spiralia;Lophotrochozoa;Mollusca;Bivalvia;Autobranhia;Heteroconchia;Euhe  
 terodonta;Imparidentia;Venerida;Veneroidea;Veneridae;Mercenaria;Mercenari  
 a mercenaria  
 UdeM00000025703 6596 486.5 UdeM00000025703 XP\_045201968.1 37.4 652  
 338 8 47 678 34 635 5.60E-134 486.5 6596 cellular  
 organisms;Eukaryota;Opisthokonta;Metazoa;Eumetazoa;Bilateria;Protostomia;  
 Spiralia;Lophotrochozoa;Mollusca;Bivalvia;Autobranhia;Heteroconchia;Euhe  
 terodonta;Imparidentia;Venerida;Veneroidea;Veneridae;Mercenaria;Mercenari  
 a mercenaria

UdeM00000025704 6573 190.7 UdeM00000025704 XP\_021361678.1 40.2 259  
 136 5 4 247 3 257 2.30E-45 190.7 6573 cellular  
 organisms;Eukaryota;Opisthokonta;Metazoa;Eumetazoa;Bilateria;Protostomia;  
 Spiralia;Lophotrochozoa;Mollusca;Bivalvia;Autobranchia;Pteriomorpha;Pecti  
 nida;Pectinoidea;Pectinidae;Mizuhopecten;Mizuhopecten yessoensis  
 UdeM00000025705 6596 436 UdeM00000025705 XP\_045162551.1 62.3 337  
 116 4 1 329 1 334 4.20E-119 436 6596 cellular  
 organisms;Eukaryota;Opisthokonta;Metazoa;Eumetazoa;Bilateria;Protostomia;  
 Spiralia;Lophotrochozoa;Mollusca;Bivalvia;Autobranchia;Heteroconchia;Euhe  
 terodonta;Imparidentia;Venerida;Veneroidea;Veneridae;Mercenaria;Mercenari  
 a mercenaria  
 UdeM00000025706 6565 75.9 UdeM00000025706 XP\_022300942.1 61.8 55  
 21 0 6 60 106 160 2.20E-11 75.9 6565 cellular  
 organisms;Eukaryota;Opisthokonta;Metazoa;Eumetazoa;Bilateria;Protostomia;  
 Spiralia;Lophotrochozoa;Mollusca;Bivalvia;Autobranchia;Pteriomorpha;Ostr  
 eida;Ostreoidea;Ostreidae;Crassostrea;Crassostrea virginica  
 UdeM00000025707 29159 61.6 UdeM00000025707 XP\_011446571.2 37.8 90  
 47 2 33 116 199 285 7.80E-07 61.6 29159 cellular  
 organisms;Eukaryota;Opisthokonta;Metazoa;Eumetazoa;Bilateria;Protostomia;  
 Spiralia;Lophotrochozoa;Mollusca;Bivalvia;Autobranchia;Pteriomorpha;Ostr  
 eida;Ostreoidea;Ostreidae;Crassostrea;Crassostrea gigas  
 UdeM00000025708 1250792 148.3 UdeM00000025708 XP\_041861569.1 44.2  
 165 86 3 3 166 508 667 8.80E-33 148.3 1250792  
 cellular  
 organisms;Eukaryota;Opisthokonta;Metazoa;Eumetazoa;Bilateria;Deuterostomi  
 a;Chordata;Craniata;Vertebrata;Gnathostomata;Teleostomi;Euteleostomi;Acti  
 nopterygii;Actinopteri;Neopterygii;Teleostei;Osteoglossocephalai;Clupeoce  
 phala;Euteleosteomorpha;Neoteleostei;Eurypterygia;Ctenosquamata;Acanthomo  
 rphata;Euacanthomorphacea;Percomorphaceae;Ovalentaria;Atherinomorphae;Ath  
 eriniformes;Melanotaeniidae;Melanotaenia;Melanotaenia boesemani  
 UdeM00000025709 6596 839.7 UdeM00000025709 XP\_045208923.1 40 1222  
 644 23 10 1191 61 1233 4.50E-240 839.7 6596 cellular  
 organisms;Eukaryota;Opisthokonta;Metazoa;Eumetazoa;Bilateria;Protostomia;  
 Spiralia;Lophotrochozoa;Mollusca;Bivalvia;Autobranchia;Heteroconchia;Euhe  
 terodonta;Imparidentia;Venerida;Veneroidea;Veneridae;Mercenaria;Mercenari  
 a mercenaria  
 UdeM00000025710 6596 2749.2 UdeM00000025710 XP\_045210442.1 45  
 3306 1689 51 5 3236 1230 4481 0.00E+00 2749.2 6596  
 cellular  
 organisms;Eukaryota;Opisthokonta;Metazoa;Eumetazoa;Bilateria;Protostomia;  
 Spiralia;Lophotrochozoa;Mollusca;Bivalvia;Autobranchia;Heteroconchia;Euhe  
 terodonta;Imparidentia;Venerida;Veneroidea;Veneridae;Mercenaria;Mercenari  
 a mercenaria  
 UdeM00000025712 6565 67.8 UdeM00000025712 XP\_022304826.1 26.3 266  
 168 9 26 272 101 357 4.30E-08 67.8 6565 cellular  
 organisms;Eukaryota;Opisthokonta;Metazoa;Eumetazoa;Bilateria;Protostomia;  
 Spiralia;Lophotrochozoa;Mollusca;Bivalvia;Autobranchia;Pteriomorpha;Ostr  
 eida;Ostreoidea;Ostreidae;Crassostrea;Crassostrea virginica  
 UdeM00000025715 6565 66.6 UdeM00000025715 XP\_022304826.1 26 304  
 181 13 26 299 101 390 8.40E-08 66.6 6565 cellular  
 organisms;Eukaryota;Opisthokonta;Metazoa;Eumetazoa;Bilateria;Protostomia;  
 Spiralia;Lophotrochozoa;Mollusca;Bivalvia;Autobranchia;Pteriomorpha;Ostr  
 eida;Ostreoidea;Ostreidae;Crassostrea;Crassostrea virginica



UdeM00000025716 6596 100.5 UdeM00000025716 XP\_045209241.1 27.5 349  
 213 17 75 388 84 427 1.00E-17 100.5 6596 cellular  
 organisms;Eukaryota;Opisthokonta;Metazoa;Eumetazoa;Bilateria;Protostomia;  
 Spiralia;Lophotrochozoa;Mollusca;Bivalvia;Autobranchia;Heteroconchia;Euhe  
 terodonta;Imparidentia;Venerida;Veneroidea;Veneridae;Mercenaria;Mercenari  
 a mercenaria  
 UdeM00000025717 37621 206.8 UdeM00000025717 XP\_014678940.1 62.7 153  
 56 1 1 152 499 651 1.90E-50 206.8 37621 cellular  
 organisms;Eukaryota;Opisthokonta;Metazoa;Eumetazoa;Bilateria;Protostomia;  
 Ecdysozoa;Scalidophora;Priapulida;Priapulimorpha;Priapulimorphida;Priapul  
 idae;Priapululus;Priapululus caudatus  
 UdeM00000025718 6565 146.4 UdeM00000025718 XP\_022287645.1 41.9 203  
 87 4 24 204 306 499 4.20E-32 146.4 6565 cellular  
 organisms;Eukaryota;Opisthokonta;Metazoa;Eumetazoa;Bilateria;Protostomia;  
 Spiralia;Lophotrochozoa;Mollusca;Bivalvia;Autobranchia;Pteriormorpha;Ostr  
 eida;Ostreoidea;Ostreidae;Crassostrea;Crassostrea virginica  
 UdeM00000025719 6596 154.1 UdeM00000025719 XP\_045210442.1 48.8 162  
 82 1 33 193 2021 2182 2.20E-34 154.1 6596 cellular  
 organisms;Eukaryota;Opisthokonta;Metazoa;Eumetazoa;Bilateria;Protostomia;  
 Spiralia;Lophotrochozoa;Mollusca;Bivalvia;Autobranchia;Heteroconchia;Euhe  
 terodonta;Imparidentia;Venerida;Veneroidea;Veneridae;Mercenaria;Mercenari  
 a mercenaria  
 UdeM00000025720 6565 271.6 UdeM00000025720 XP\_022326494.1 66.9 172  
 56 1 1 171 2445 2616 7.20E-70 271.6 6565 cellular  
 organisms;Eukaryota;Opisthokonta;Metazoa;Eumetazoa;Bilateria;Protostomia;  
 Spiralia;Lophotrochozoa;Mollusca;Bivalvia;Autobranchia;Pteriormorpha;Ostr  
 eida;Ostreoidea;Ostreidae;Crassostrea;Crassostrea virginica  
 UdeM00000025721 6596 1372.8 UdeM00000025721 XP\_045210442.1 41.8  
 1864 973 41 1 1791 2657 4481 0.00E+00 1372.8 6596  
 cellular  
 organisms;Eukaryota;Opisthokonta;Metazoa;Eumetazoa;Bilateria;Protostomia;  
 Spiralia;Lophotrochozoa;Mollusca;Bivalvia;Autobranchia;Heteroconchia;Euhe  
 terodonta;Imparidentia;Venerida;Veneroidea;Veneridae;Mercenaria;Mercenari  
 a mercenaria  
 UdeM00000025723 6596 123.6 UdeM00000025723 XP\_045209241.1 26.3 452  
 276 20 145 553 166 603 1.30E-24 123.6 6596 cellular  
 organisms;Eukaryota;Opisthokonta;Metazoa;Eumetazoa;Bilateria;Protostomia;  
 Spiralia;Lophotrochozoa;Mollusca;Bivalvia;Autobranchia;Heteroconchia;Euhe  
 terodonta;Imparidentia;Venerida;Veneroidea;Veneridae;Mercenaria;Mercenari  
 a mercenaria  
 UdeM00000025724 6565 340.9 UdeM00000025724 XP\_022287645.1 36.8 538  
 217 8 2 440 298 811 2.50E-90 340.9 6565 cellular  
 organisms;Eukaryota;Opisthokonta;Metazoa;Eumetazoa;Bilateria;Protostomia;  
 Spiralia;Lophotrochozoa;Mollusca;Bivalvia;Autobranchia;Pteriormorpha;Ostr  
 eida;Ostreoidea;Ostreidae;Crassostrea;Crassostrea virginica  
 UdeM00000025730 400727 138.7 UdeM00000025730 XP\_025100004.1 26.5  
 539 338 25 2 514 364 870 3.50E-29 138.7 400727  
 cellular  
 organisms;Eukaryota;Opisthokonta;Metazoa;Eumetazoa;Bilateria;Protostomia;  
 Spiralia;Lophotrochozoa;Mollusca;Gastropoda;Caenogastropoda;Architaeniogl  
 ossa;Ampullarioidea;Ampullariidae;Pomacea;Pomacea canaliculata  
 UdeM00000025731 37621 253.4 UdeM00000025731 XP\_014673010.1 52.2 228  
 98 4 17 243 123 340 2.90E-64 253.4 37621 cellular  
 organisms;Eukaryota;Opisthokonta;Metazoa;Eumetazoa;Bilateria;Protostomia;

Ecdysozoa; Scalidophora; Priapulida; Priapulimorpha; Priapulimorphida; Priapulidae; Priapulus; Priapulus caudatus  
 UdeM00000025732 6565 105.9 UdeM00000025732 XP\_022287645.1 55.1 78  
 35 0 109 186 282 359 8.00E-20 105.9 6565 cellular  
 organisms; Eukaryota; Opisthokonta; Metazoa; Eumetazoa; Bilateria; Protostomia; Spiralia; Lophotrochozoa; Mollusca; Bivalvia; Autobranchia; Pteriomorpha; Ostreida; Ostreioidea; Ostreidae; Crassostrea; Crassostrea virginica  
 UdeM00000025734 6573 121.3 UdeM00000025734 XP\_021353057.1 61.6 86  
 33 0 1 86 1 86 9.10E-25 121.3 6573 cellular  
 organisms; Eukaryota; Opisthokonta; Metazoa; Eumetazoa; Bilateria; Protostomia; Spiralia; Lophotrochozoa; Mollusca; Bivalvia; Autobranchia; Pteriomorpha; Pectinida; Pectinoidea; Pectinidae; Mizuhopecten; Mizuhopecten yessoensis  
 UdeM00000025735 37621 258.5 UdeM00000025735 XP\_014679849.1 49.6 234  
 101 5 3 229 394 617 9.10E-66 258.5 37621 cellular  
 organisms; Eukaryota; Opisthokonta; Metazoa; Eumetazoa; Bilateria; Protostomia; Ecdysozoa; Scalidophora; Priapulida; Priapulimorpha; Priapulimorphida; Priapulidae; Priapulus; Priapulus caudatus  
 UdeM00000025736 6573 129 UdeM00000025736 XP\_021375729.1 43.6 140  
 79 0 9 148 224 363 5.10E-27 129 6573 cellular  
 organisms; Eukaryota; Opisthokonta; Metazoa; Eumetazoa; Bilateria; Protostomia; Spiralia; Lophotrochozoa; Mollusca; Bivalvia; Autobranchia; Pteriomorpha; Pectinida; Pectinoidea; Pectinidae; Mizuhopecten; Mizuhopecten yessoensis  
 UdeM00000025737 37621 216.1 UdeM00000025737 XP\_014676916.1 36.2 356  
 192 4 232 555 44 396 1.20E-52 216.1 37621 cellular  
 organisms; Eukaryota; Opisthokonta; Metazoa; Eumetazoa; Bilateria; Protostomia; Ecdysozoa; Scalidophora; Priapulida; Priapulimorpha; Priapulimorphida; Priapulidae; Priapulus; Priapulus caudatus  
 UdeM00000025738 6596 177.6 UdeM00000025738 XP\_045216906.1 41.8 201  
 112 4 1 199 154 351 1.60E-41 177.6 6596 cellular  
 organisms; Eukaryota; Opisthokonta; Metazoa; Eumetazoa; Bilateria; Protostomia; Spiralia; Lophotrochozoa; Mollusca; Bivalvia; Autobranchia; Heteroconchia; Euheterodonta; Imparidentia; Venerida; Veneroidea; Veneridae; Mercenaria; Mercenaria mercenaria  
 UdeM00000025739 7739 131.3 UdeM00000025739 XP\_035662552.1 63 92  
 34 0 21 112 775 866 7.50E-28 131.3 7739 cellular  
 organisms; Eukaryota; Opisthokonta; Metazoa; Eumetazoa; Bilateria; Deuterostomia; Chordata; Cephalochordata; Leptocardii; Amphioxiformes; Branchiostomidae; Branchiostoma; Branchiostoma floridae  
 UdeM00000025740 6565 86.3 UdeM00000025740 XP\_022300575.1 35.7 157  
 69 4 280 432 148 276 1.10E-13 86.3 6565 cellular  
 organisms; Eukaryota; Opisthokonta; Metazoa; Eumetazoa; Bilateria; Protostomia; Spiralia; Lophotrochozoa; Mollusca; Bivalvia; Autobranchia; Pteriomorpha; Ostreida; Ostreioidea; Ostreidae; Crassostrea; Crassostrea virginica  
 UdeM00000025741 6579 91.3 UdeM00000025741 XP\_033753599.1 55.6 81  
 36 0 3 83 9 89 6.90E-16 91.3 6579 cellular  
 organisms; Eukaryota; Opisthokonta; Metazoa; Eumetazoa; Bilateria; Protostomia; Spiralia; Lophotrochozoa; Mollusca; Bivalvia; Autobranchia; Pteriomorpha; Pectinida; Pectinoidea; Pectinidae; Pecten; Pecten maximus  
 UdeM00000025742 6573 152.5 UdeM00000025742 XP\_021373558.1 68.3 101  
 29 1 2 99 110 210 3.10E-34 152.5 6573 cellular  
 organisms; Eukaryota; Opisthokonta; Metazoa; Eumetazoa; Bilateria; Protostomia; Spiralia; Lophotrochozoa; Mollusca; Bivalvia; Autobranchia; Pteriomorpha; Pectinida; Pectinoidea; Pectinidae; Mizuhopecten; Mizuhopecten yessoensis

UdeM00000025743 6565 243.4 UdeM00000025743 XP\_022307464.1 74.8 155  
 39 0 2 156 212 366 1.90E-61 243.4 6565 cellular  
 organisms;Eukaryota;Opisthokonta;Metazoa;Eumetazoa;Bilateria;Protostomia;  
 Spiralia;Lophotrochozoa;Mollusca;Bivalvia;Autobranhia;Pteriormorphia;Ostr  
 eida;Ostreioidea;Ostreidae;Crassostrea;Crassostrea virginica  
 UdeM00000025744 29159 63.5 UdeM00000025744 XP\_019923784.2 34.3 102  
 64 1 1 102 57 155 2.40E-07 63.5 29159 cellular  
 organisms;Eukaryota;Opisthokonta;Metazoa;Eumetazoa;Bilateria;Protostomia;  
 Spiralia;Lophotrochozoa;Mollusca;Bivalvia;Autobranhia;Pteriormorphia;Ostr  
 eida;Ostreioidea;Ostreidae;Crassostrea;Crassostrea gigas  
 UdeM00000025745 37621 198 UdeM00000025745 XP\_014676916.1 37.1 307  
 188 3 35 339 44 347 2.20E-47 198 37621 cellular  
 organisms;Eukaryota;Opisthokonta;Metazoa;Eumetazoa;Bilateria;Protostomia;  
 Ecdysozoa;Scalidophora;Priapulida;Priapulimorpha;Priapulimorphida;Priapul  
 idae;Priapulid;Priapulid caudatus  
 UdeM00000025749 7574 589 UdeM00000025749 XP\_013382110.1 48.2 589  
 286 7 14 601 45 615 7.00E-165 589 7574 cellular  
 organisms;Eukaryota;Opisthokonta;Metazoa;Eumetazoa;Bilateria;Protostomia;  
 Spiralia;Lophotrochozoa;Brachiopoda;Linguliformea;Lingulata;Lingulida;Lin  
 guloidea;Lingulidae;Lingula;Lingula anatina  
 UdeM00000025750 7574 646.7 UdeM00000025750 XP\_013384628.1 60.4 538  
 187 4 1 522 33 560 2.50E-182 646.7 7574 cellular  
 organisms;Eukaryota;Opisthokonta;Metazoa;Eumetazoa;Bilateria;Protostomia;  
 Spiralia;Lophotrochozoa;Brachiopoda;Linguliformea;Lingulata;Lingulida;Lin  
 guloidea;Lingulidae;Lingula;Lingula anatina  
 UdeM00000025755 9606 63.2 UdeM00000025755 XP\_016881635.1 27.8 255  
 160 13 91 327 199 447 1.10E-06 63.2 9606 cellular  
 organisms;Eukaryota;Opisthokonta;Metazoa;Eumetazoa;Bilateria;Deuterostomi  
 a;Chordata;Craniata;Vertebrata;Gnathostomata;Teleostomi;Euteleostomi;Sarc  
 opterygii;Dipnotetrapodomorpha;Tetrapoda;Amniota;Mammalia;Theria;Eutheria  
 ;Boreoeutheria;Euarchontoglires;Primates;Haplorrhini;Simiiformes;Catarri  
 ni;Hominoidea;Hominidae;Homininae;Homo;Homo sapiens  
 UdeM00000025756 6596 128.3 UdeM00000025756 XP\_045209589.1 26.2 423  
 265 19 90 470 94 511 4.50E-26 128.3 6596 cellular  
 organisms;Eukaryota;Opisthokonta;Metazoa;Eumetazoa;Bilateria;Protostomia;  
 Spiralia;Lophotrochozoa;Mollusca;Bivalvia;Autobranhia;Heteroconchia;Euhe  
 terodonta;Imparidentia;Venerida;Veneroidea;Veneridae;Mercenaria;Mercenari  
 a mercenaria  
 UdeM00000025757 6596 148.3 UdeM00000025757 XP\_045210442.1 46.9 162  
 85 1 33 193 2021 2182 1.20E-32 148.3 6596 cellular  
 organisms;Eukaryota;Opisthokonta;Metazoa;Eumetazoa;Bilateria;Protostomia;  
 Spiralia;Lophotrochozoa;Mollusca;Bivalvia;Autobranhia;Heteroconchia;Euhe  
 terodonta;Imparidentia;Venerida;Veneroidea;Veneridae;Mercenaria;Mercenari  
 a mercenaria  
 UdeM00000025758 6596 1483.4 UdeM00000025758 XP\_045210442.1 41  
 2076 984 43 1 1872 2443 4481 0.00E+00 1483.4 6596  
 cellular  
 organisms;Eukaryota;Opisthokonta;Metazoa;Eumetazoa;Bilateria;Protostomia;  
 Spiralia;Lophotrochozoa;Mollusca;Bivalvia;Autobranhia;Heteroconchia;Euhe  
 terodonta;Imparidentia;Venerida;Veneroidea;Veneridae;Mercenaria;Mercenari  
 a mercenaria  
 UdeM00000025759 1047088 84 UdeM00000025759 XP\_038194407.1 25.9  
 313 197 14 87 378 105 403 6.80E-13 84 1047088  
 cellular

organisms;Eukaryota;Opisthokonta;Metazoa;Eumetazoa;Bilateria;Deuterostomi  
a;Chordata;Craniata;Vertebrata;Gnathostomata;Teleostomi;Euteleostomi;Sarc  
opterygii;Dipnotetrapodomorpha;Tetrapoda;Amniota;Mammalia;Theria;Eutheria  
;Boreoeutheria;Euarchontoglires;Glires;Rodentia;Myomorpha;Muroidea;Cricet  
idae;Arvicolinae;Arvicola;Arvicola amphibius

UdeM00000025765 194408 58.9 UdeM00000025765 XP\_029428437.1 35.6  
87 55 1 87 172 481 567 7.50E-06 58.9 194408  
cellular

organisms;Eukaryota;Opisthokonta;Metazoa;Eumetazoa;Bilateria;Deuterostomi  
a;Chordata;Craniata;Vertebrata;Gnathostomata;Teleostomi;Euteleostomi;Sarc  
opterygii;Dipnotetrapodomorpha;Tetrapoda;Amphibia;Gymnophiona;Rhinatrema  
idae;Rhinatrema;Rhinatrema bivittatum

UdeM00000025768 1735272 144.1 UdeM00000025768 XP\_041369952.1 45.9  
159 82 3 74 231 184 339 2.30E-31 144.1 1735272  
cellular

organisms;Eukaryota;Opisthokonta;Metazoa;Eumetazoa;Bilateria;Protostomia;  
Spiralia;Lophotrochozoa;Mollusca;Gastropoda;Neomphalina;Neomphaloidea;Pel  
tospiridae;Gigantopelta;Gigantopelta aegis

UdeM00000025769 45264 391.3 UdeM00000025769 XP\_044165535.1 49.3 367  
182 1 1 363 158 524 1.30E-105 391.3 45264 cellular

organisms;Eukaryota;Opisthokonta;Metazoa;Eumetazoa;Cnidaria;Anthozoa;Hexa  
corallia;Scleractinia;Astrocoeniina;Acroporidae;Acropora;Acropora  
millepora

UdeM00000025773 6579 93.6 UdeM00000025773 XP\_033747087.1 58.1 74  
31 0 1 74 380 453 1.20E-16 93.6 6579 cellular

organisms;Eukaryota;Opisthokonta;Metazoa;Eumetazoa;Bilateria;Protostomia;  
Spiralia;Lophotrochozoa;Mollusca;Bivalvia;Autobranchia;Pteriormorphia;Pect  
inida;Pectinoidea;Pectinidae;Pecten;Pecten maximus

UdeM00000025776 6596 122.1 UdeM00000025776 XP\_045180427.1 49.2 177  
87 2 76 250 98 273 1.10E-24 122.1 6596 cellular

organisms;Eukaryota;Opisthokonta;Metazoa;Eumetazoa;Bilateria;Protostomia;  
Spiralia;Lophotrochozoa;Mollusca;Bivalvia;Autobranchia;Heteroconchia;Euhe  
terodonta;Imparidentia;Venerida;Veneroidea;Veneridae;Mercenaria;Mercenari  
a mercenaria

UdeM00000025781 6596 64.3 UdeM00000025781 XP\_045192251.1 43.5 85  
46 2 141 224 337 420 2.30E-07 64.3 6596 cellular

organisms;Eukaryota;Opisthokonta;Metazoa;Eumetazoa;Bilateria;Protostomia;  
Spiralia;Lophotrochozoa;Mollusca;Bivalvia;Autobranchia;Heteroconchia;Euhe  
terodonta;Imparidentia;Venerida;Veneroidea;Veneridae;Mercenaria;Mercenari  
a mercenaria

UdeM00000025782 6565 162.9 UdeM00000025782 XP\_022299727.1 44.4 187  
102 1 1 185 46 232 3.90E-37 162.9 6565 cellular

organisms;Eukaryota;Opisthokonta;Metazoa;Eumetazoa;Bilateria;Protostomia;  
Spiralia;Lophotrochozoa;Mollusca;Bivalvia;Autobranchia;Pteriormorphia;Ostr  
eida;Ostreoidea;Ostreidae;Crassostrea;Crassostrea virginica

UdeM00000025783 6596 79.3 UdeM00000025783 XP\_045162193.1 39.1 110  
61 3 171 275 456 564 8.50E-12 79.3 6596 cellular

organisms;Eukaryota;Opisthokonta;Metazoa;Eumetazoa;Bilateria;Protostomia;  
Spiralia;Lophotrochozoa;Mollusca;Bivalvia;Autobranchia;Heteroconchia;Euhe  
terodonta;Imparidentia;Venerida;Veneroidea;Veneridae;Mercenaria;Mercenari  
a mercenaria

UdeM00000025785 6596 75.1 UdeM00000025785 XP\_045209147.1 30 227  
135 10 60 262 105 331 2.50E-10 75.1 6596 cellular

organisms;Eukaryota;Opisthokonta;Metazoa;Eumetazoa;Bilateria;Protostomia;

Spiralia;Lophotrochozoa;Mollusca;Bivalvia;Autobranchia;Heteroconchia;Euherodonta;Imparidentia;Venerida;Veneroidea;Veneridae;Mercenaria;Mercenaria mercenaria

UdeM00000025786 202533 192.2 UdeM00000025786 XP\_035207656.1 40.1  
269 113 5 1 223 40 306 7.20E-46 192.2 202533  
cellular

organisms;Eukaryota;Opisthokonta;Metazoa;Eumetazoa;Bilateria;Protostomia;Ecdysozoa;Panarthropoda;Arthropoda;Chelicerata;Arachnida;Araneae;Araneomorphae;Entelegynae;Eresoidea;Eresidae;Stegodyphus;Stegodyphus dumicola

UdeM00000025793 260615 124.4 UdeM00000025793 XP\_039385216.1 46.1  
180 9 1 1 92 347 526 7.60E-26 124.4 260615  
cellular

organisms;Eukaryota;Opisthokonta;Metazoa;Eumetazoa;Bilateria;Deuterostomia;Chordata;Craniata;Vertebrata;Gnathostomata;Teleostomi;Euteleostomi;Sarcopterygii;Dipnotetrapodomorpha;Tetrapoda;Amniota;Sauropsida;Sauria;Archelosauria;Testudinata;Testudines;Cryptodira;Durocryptodira;Testudinoidea;Geoemydidae;Geoemydinae;Mauremys;Mauremys reevesii

UdeM00000025796 1735272 83.6 UdeM00000025796 XP\_041373383.1 30.6  
180 113 5 2 177 131 302 4.20E-13 83.6 1735272  
cellular

organisms;Eukaryota;Opisthokonta;Metazoa;Eumetazoa;Bilateria;Protostomia;Spiralia;Lophotrochozoa;Mollusca;Gastropoda;Neomphalina;Neomphaloidea;Peltospiridae;Gigantopelta;Gigantopelta aegis

UdeM00000025804 6596 84 UdeM00000025804 XP\_045162193.1 40 110  
59 3 43 146 456 564 5.70E-13 84 6596 cellular

organisms;Eukaryota;Opisthokonta;Metazoa;Eumetazoa;Bilateria;Protostomia;Spiralia;Lophotrochozoa;Mollusca;Bivalvia;Autobranchia;Heteroconchia;Euherodonta;Imparidentia;Venerida;Veneroidea;Veneridae;Mercenaria;Mercenaria mercenaria

UdeM00000025805 1529436 145.6 UdeM00000025805 XP\_033096403.1 29.5  
370 172 9 3 287 97 462 1.00E-31 145.6 1529436  
cellular

organisms;Eukaryota;Opisthokonta;Metazoa;Eumetazoa;Bilateria;Deuterostomia;Echinodermata;Pelmatozoa;Crinoidea;Articulata;Comatulida;Comatulidae;Comatulinae;Anneissia;Anneissia japonica

UdeM00000025808 13164 211.8 UdeM00000025808 XP\_022180657.1 46.5 217  
110 3 2 214 72 286 8.30E-52 211.8 13164 cellular

organisms;Eukaryota;Opisthokonta;Metazoa;Eumetazoa;Bilateria;Protostomia;Ecdysozoa;Panarthropoda;Arthropoda;Mandibulata;Pancrustacea;Hexapoda;Insecta;Dicondylia;Pterygota;Neoptera;Paraneoptera;Hemiptera;Sternorrhyncha;Aphidomorpha;Aphidoidea;Aphididae;Aphidinae;Macrosiphini;Myzus;Myzus persicae

UdeM00000025809 72036 100.9 UdeM00000025809 XP\_040576246.1 39.1 179  
75 4 1 147 1 177 1.50E-18 100.9 72036 cellular

organisms;Eukaryota;Opisthokonta;Metazoa;Eumetazoa;Bilateria;Protostomia;Ecdysozoa;Panarthropoda;Arthropoda;Mandibulata;Pancrustacea;Crustacea;Multicrustacea;Hexanauplia;Copepoda;Neocopepoda;Podoplea;Siphonostomatoida;Caligidae;Lepeophtheirus;Lepeophtheirus salmonis

UdeM00000025812 6596 131.7 UdeM00000025812 XP\_045180427.1 37.6 274  
116 4 1 220 1 273 1.20E-27 131.7 6596 cellular

organisms;Eukaryota;Opisthokonta;Metazoa;Eumetazoa;Bilateria;Protostomia;Spiralia;Lophotrochozoa;Mollusca;Bivalvia;Autobranchia;Heteroconchia;Euherodonta;Imparidentia;Venerida;Veneroidea;Veneridae;Mercenaria;Mercenaria mercenaria

UdeM00000025815 6573 219.2 UdeM00000025815 XP\_021346189.1 57.1 189  
 75 2 1 187 22 206 4.70E-54 219.2 6573 cellular  
 organisms;Eukaryota;Opisthokonta;Metazoa;Eumetazoa;Bilateria;Protostomia;  
 Spiralia;Lophotrochozoa;Mollusca;Bivalvia;Autobranchia;Pteriomorpha;Pecti  
 nida;Pectinoidea;Pectinidae;Mizuhopecten;Mizuhopecten yessoensis  
 UdeM00000025818 7918 69.3 UdeM00000025818 XP\_015206749.1 42.1 76  
 39 1 327 402 398 468 1.30E-08 69.3 7918 cellular  
 organisms;Eukaryota;Opisthokonta;Metazoa;Eumetazoa;Bilateria;Deuterostomi  
 a;Chordata;Craniata;Vertebrata;Gnathostomata;Teleostomi;Euteleostomi;Acti  
 nopterygii;Actinopteri;Neopterygii;Holostei;Semionotiformes;Lepisosteidae  
 ;Lepisosteus;Lepisosteus oculatus  
 UdeM00000025819 7957 120.9 UdeM00000025819 XP\_026107243.1 22.9 611  
 414 21 36 629 463 1033 7.40E-24 120.9 7957 cellular  
 organisms;Eukaryota;Opisthokonta;Metazoa;Eumetazoa;Bilateria;Deuterostomi  
 a;Chordata;Craniata;Vertebrata;Gnathostomata;Teleostomi;Euteleostomi;Acti  
 nopterygii;Actinopteri;Neopterygii;Teleostei;Osteoglossocephalai;Clupeoce  
 phala;Otomorpha;Ostariophysi;Otophysi;Cypriniphysae;Cypriniiformes;Cyprino  
 idei;Cyprinidae;Cyprininae;Carassius;Carassius auratus  
 UdeM00000025822 1529436 68.6 UdeM00000025822 XP\_033105453.1 41.1  
 73 42 1 322 393 385 457 2.10E-08 68.6 1529436  
 cellular  
 organisms;Eukaryota;Opisthokonta;Metazoa;Eumetazoa;Bilateria;Deuterostomi  
 a;Echinodermata;Pelmatozoa;Crinoidea;Articulata;Comatulida;Comatulidae;Co  
 matulinae;Anneissia;Anneissia japonica  
 UdeM00000025825 1676925 79 UdeM00000025825 XP\_023686311.1 43.2  
 74 42 0 230 303 466 539 1.20E-11 79 1676925  
 cellular  
 organisms;Eukaryota;Opisthokonta;Metazoa;Eumetazoa;Bilateria;Deuterostomi  
 a;Chordata;Craniata;Vertebrata;Gnathostomata;Teleostomi;Euteleostomi;Acti  
 nopterygii;Actinopteri;Neopterygii;Teleostei;Osteoglossocephalai;Osteoglo  
 ssocephala;Osteoglossomorpha;Osteoglossiformes;Mormyridae;Paramormyrops;P  
 aramormyrops kingsleyae  
 UdeM00000025826 7957 97.4 UdeM00000025826 XP\_026107243.1 23.5 409  
 280 12 154 554 623 1006 8.60E-17 97.4 7957 cellular  
 organisms;Eukaryota;Opisthokonta;Metazoa;Eumetazoa;Bilateria;Deuterostomi  
 a;Chordata;Craniata;Vertebrata;Gnathostomata;Teleostomi;Euteleostomi;Acti  
 nopterygii;Actinopteri;Neopterygii;Teleostei;Osteoglossocephalai;Clupeoce  
 phala;Otomorpha;Ostariophysi;Otophysi;Cypriniphysae;Cypriniiformes;Cyprino  
 idei;Cyprinidae;Cyprininae;Carassius;Carassius auratus  
 UdeM00000025830 202533 298.5 UdeM00000025830 XP\_035218899.1 38.2  
 406 233 5 7 394 61 466 1.20E-77 298.5 202533  
 cellular  
 organisms;Eukaryota;Opisthokonta;Metazoa;Eumetazoa;Bilateria;Protostomia;  
 Ecdysozoa;Panarthropoda;Arthropoda;Chelicerata;Arachnida;Araneae;Araneomo  
 rphae;Entelegynae;Eresoidea;Eresidae;Stegodyphus;Stegodyphus dumicola  
 UdeM00000025832 42526 72.4 UdeM00000025832 XP\_036431265.1 40.6 101  
 56 3 37 135 54 152 6.30E-10 72.4 42526 cellular  
 organisms;Eukaryota;Opisthokonta;Metazoa;Eumetazoa;Bilateria;Deuterostomi  
 a;Chordata;Craniata;Vertebrata;Gnathostomata;Teleostomi;Euteleostomi;Acti  
 nopterygii;Actinopteri;Neopterygii;Teleostei;Osteoglossocephalai;Clupeoce  
 phala;Otomorpha;Ostariophysi;Otophysi;Characiphysae;Characiiformes;Characo  
 idei;Serrasalminidae;Colossoma;Colossoma macropomum  
 UdeM00000025833 400727 156.4 UdeM00000025833 XP\_025100004.1 25.3  
 704 456 32 49 722 413 1076 1.80E-34 156.4 400727

cellular  
organisms;Eukaryota;Opisthokonta;Metazoa;Eumetazoa;Bilateria;Protostomia;  
Spiralia;Lophotrochozoa;Mollusca;Gastropoda;Caenogastropoda;Architaenioglossa;  
Ampullarioidea;Ampullariidae;Pomacea;Pomacea canaliculata

UdeM00000025834 225164 97.8 UdeM00000025834 XP\_009054127.1 27.5  
284 186 10 72 348 38 308 4.40E-17 97.8 225164

cellular  
organisms;Eukaryota;Opisthokonta;Metazoa;Eumetazoa;Bilateria;Protostomia;  
Spiralia;Lophotrochozoa;Mollusca;Gastropoda;Patellogastropoda;Lottioidae;  
Lottiidae;Lottia;Lottia gigantea

UdeM00000025836 6596 71.6 UdeM00000025836 XP\_045202067.1 35.9 92  
56 2 303 394 154 242 2.50E-09 71.6 6596 cellular

organisms;Eukaryota;Opisthokonta;Metazoa;Eumetazoa;Bilateria;Protostomia;  
Spiralia;Lophotrochozoa;Mollusca;Bivalvia;Autobranchia;Heteroconchia;Euheterodonta;  
Imparidentia;Venerida;Veneroidea;Veneridae;Mercenaria;Mercenaria mercenaria

UdeM00000025839 8869 71.2 UdeM00000025839 XP\_040431567.1 33.7 101  
64 2 70 167 234 334 1.40E-09 71.2 8869 cellular

organisms;Eukaryota;Opisthokonta;Metazoa;Eumetazoa;Bilateria;Deuterostomia;  
Chordata;Craniata;Vertebrata;Gnathostomata;Teleostomi;Euteleostomi;Sarcopterygii;  
Dipnotetrapodomorpha;Tetrapoda;Amniota;Sauropsida;Sauria;Archelosauria;  
Archosauria;Dinosauria;Saurischia;Theropoda;Coelurosauria;Aves;Neognathae;  
Galloanserae;Anseriformes;Anatidae;Anserinae;Cygnus;Cygnus olor

UdeM00000025840 7957 118.6 UdeM00000025840 XP\_026107245.1 23.3 579  
354 22 103 634 280 815 4.20E-23 118.6 7957 cellular

organisms;Eukaryota;Opisthokonta;Metazoa;Eumetazoa;Bilateria;Deuterostomia;  
Chordata;Craniata;Vertebrata;Gnathostomata;Teleostomi;Euteleostomi;Actinopterygii;  
Actinopteri;Neopterygii;Teleostei;Osteoglossocephalai;Clupeocephala;  
Otomorpha;Ostariophysi;Otophysi;Cypriniphysae;Cypriniformes;Cyprinoidae;  
Cyprinidae;Cyprininae;Carassius;Carassius auratus

UdeM00000025843 6596 65.1 UdeM00000025843 XP\_045202067.1 34.7 118  
67 4 325 435 123 237 2.60E-07 65.1 6596 cellular

organisms;Eukaryota;Opisthokonta;Metazoa;Eumetazoa;Bilateria;Protostomia;  
Spiralia;Lophotrochozoa;Mollusca;Bivalvia;Autobranchia;Heteroconchia;Euheterodonta;  
Imparidentia;Venerida;Veneroidea;Veneridae;Mercenaria;Mercenaria mercenaria

UdeM00000025844 40690 97.8 UdeM00000025844 XP\_033979827.1 25.1 374  
261 10 106 467 133 499 4.60E-17 97.8 40690 cellular

organisms;Eukaryota;Opisthokonta;Metazoa;Eumetazoa;Bilateria;Deuterostomia;  
Chordata;Craniata;Vertebrata;Gnathostomata;Teleostomi;Euteleostomi;Actinopterygii;  
Actinopteri;Neopterygii;Teleostei;Osteoglossocephalai;Clupeocephala;  
Euteleosteomorpha;Neoteleostei;Eurypterygia;Ctenosquamata;Acanthomorpha;  
Euacanthomorpha;Percomorphaceae;Eupercaria;Perciformes;Notothenioidae;  
Nototheniidae;Trematomus;Trematomus bernacchii

UdeM00000025847 6596 78.2 UdeM00000025847 XP\_045202067.1 38.4 112  
66 2 299 409 133 242 2.80E-11 78.2 6596 cellular

organisms;Eukaryota;Opisthokonta;Metazoa;Eumetazoa;Bilateria;Protostomia;  
Spiralia;Lophotrochozoa;Mollusca;Bivalvia;Autobranchia;Heteroconchia;Euheterodonta;  
Imparidentia;Venerida;Veneroidea;Veneridae;Mercenaria;Mercenaria mercenaria

UdeM00000025848 1735272 164.1 UdeM00000025848 XP\_041372995.1 25.8  
535 325 24 250 755 898 1389 1.00E-36 164.1 1735272

cellular  
organisms;Eukaryota;Opisthokonta;Metazoa;Eumetazoa;Bilateria;Protostomia;

Spiralia;Lophotrochozoa;Mollusca;Gastropoda;Neomphalina;Neomphaloidea;Pel  
tospiridae;Gigantopelta;Gigantopelta aegis  
UdeM00000015374 1735272 723.4 UdeM00000015374 XP\_041355741.1 53.9  
635 290 3 1 635 1 632 2.80E-205 723.4 1735272  
cellular

organisms;Eukaryota;Opisthokonta;Metazoa;Eumetazoa;Bilateria;Protostomia;  
Spiralia;Lophotrochozoa;Mollusca;Gastropoda;Neomphalina;Neomphaloidea;Pel  
tospiridae;Gigantopelta;Gigantopelta aegis  
UdeM00000015375 6579 489.2 UdeM00000015375 XP\_033728575.1 48.6 512  
253 5 1 508 186 691 6.50E-135 489.2 6579 cellular

organisms;Eukaryota;Opisthokonta;Metazoa;Eumetazoa;Bilateria;Protostomia;  
Spiralia;Lophotrochozoa;Mollusca;Bivalvia;Autobranchia;Pteriormorphia;Pect  
inida;Pectinoidea;Pectinidae;Pecten;Pecten maximus  
UdeM00000015376 6573 480.7 UdeM00000015376 XP\_021366122.1 61.8 390  
120 5 6 380 6 381 1.80E-132 480.7 6573 cellular

organisms;Eukaryota;Opisthokonta;Metazoa;Eumetazoa;Bilateria;Protostomia;  
Spiralia;Lophotrochozoa;Mollusca;Bivalvia;Autobranchia;Pteriormorphia;Pect  
inida;Pectinoidea;Pectinidae;Mizuhopecten;Mizuhopecten yessoensis  
UdeM00000015378 6596 359.4 UdeM00000015378 XP\_045178182.1 73 233  
57 2 8 239 345 572 3.70E-96 359.4 6596 cellular

organisms;Eukaryota;Opisthokonta;Metazoa;Eumetazoa;Bilateria;Protostomia;  
Spiralia;Lophotrochozoa;Mollusca;Bivalvia;Autobranchia;Heteroconchia;Euhe  
terodonta;Imparidentia;Venerida;Veneroidea;Veneridae;Mercenaria;Mercenari  
a mercenaria

UdeM00000015377 6596 615.9 UdeM00000015377 XP\_045178182.1 74.1 382  
93 2 8 388 345 721 3.50E-173 615.9 6596 cellular  
organisms;Eukaryota;Opisthokonta;Metazoa;Eumetazoa;Bilateria;Protostomia;  
Spiralia;Lophotrochozoa;Mollusca;Bivalvia;Autobranchia;Heteroconchia;Euhe  
terodonta;Imparidentia;Venerida;Veneroidea;Veneridae;Mercenaria;Mercenari  
a mercenaria

UdeM00000015379 6596 256.5 UdeM00000015379 XP\_045178182.1 78.2 142  
31 0 1 142 580 721 2.00E-65 256.5 6596 cellular  
organisms;Eukaryota;Opisthokonta;Metazoa;Eumetazoa;Bilateria;Protostomia;  
Spiralia;Lophotrochozoa;Mollusca;Bivalvia;Autobranchia;Heteroconchia;Euhe  
terodonta;Imparidentia;Venerida;Veneroidea;Veneridae;Mercenaria;Mercenari  
a mercenaria

UdeM00000015380 7574 136.3 UdeM00000015380 XP\_013398822.1 54.6 108  
49 0 36 143 56 163 3.60E-29 136.3 7574 cellular  
organisms;Eukaryota;Opisthokonta;Metazoa;Eumetazoa;Bilateria;Protostomia;  
Spiralia;Lophotrochozoa;Brachiopoda;Linguliformea;Lingulata;Lingulida;Lin  
guloidea;Lingulidae;Lingula;Lingula anatina

UdeM00000015381 6526 98.6 UdeM00000015381 XP\_013089687.1 39.5 129  
72 3 395 523 14 136 2.50E-17 98.6 6526 cellular  
organisms;Eukaryota;Opisthokonta;Metazoa;Eumetazoa;Bilateria;Protostomia;  
Spiralia;Lophotrochozoa;Mollusca;Gastropoda;Heterobranchia;Euthyneura;Pan  
pulmonata;Hygrophila;Lymnaeioidea;Planorbidae;Biomphalaria;Biomphalaria  
glabrata

UdeM00000015383 160734 140.2 UdeM00000015383 XP\_042343012.1 37.1  
197 119 2 34 230 33 224 5.20E-30 140.2 160734  
cellular

organisms;Eukaryota;Opisthokonta;Metazoa;Eumetazoa;Bilateria;Deuterostomi  
a;Chordata;Craniata;Vertebrata;Gnathostomata;Teleostomi;Euteleostomi;Acti  
nopterygii;Actinopteri;Neopterygii;Teleostei;Osteoglossocephalai;Clupeoce  
phala;Euteleosteomorpha;Neoteleostei;Eurypterygia;Ctenosquamata;Acanthomo



rphata;Euacanthomorpha;Percomorphaceae;Eupercaria;Perciformes;Serranoides;Serranidae;Epinephelinae;Epinephelini;Plectropomus;Plectropomus leopardus

UdeM00000015384 27687 77 UdeM00000015384 XP\_028675435.1 34.8 132  
80 2 56 184 248 376 2.80E-11 77 27687 cellular

organisms;Eukaryota;Opisthokonta;Metazoa;Eumetazoa;Bilateria;Deuterostomia;Chordata;Craniata;Vertebrata;Gnathostomata;Teleostomi;Euteleostomi;Actinopterygii;Cladistia;Polypteriformes;Polypteridae;Erpetoichthys;Erpetoichthys calabaricus

UdeM00000015385 1825980 86.3 UdeM00000015385 XP\_030397425.1 30.9  
181 124 1 80 259 266 446 1.60E-13 86.3 1825980  
cellular

organisms;Eukaryota;Opisthokonta;Metazoa;Eumetazoa;Bilateria;Deuterostomia;Chordata;Craniata;Vertebrata;Gnathostomata;Teleostomi;Euteleostomi;Sarcopterygii;Dipnotetrapodomorpha;Tetrapoda;Amniota;Sauropsida;Sauria;Archelosauria;Testudinata;Testudines;Cryptodira;Durocryptodira;Testudinoidea;Testudinidae;Gopherus;Gopherus evgoodei

UdeM00000015387 6105 82.4 UdeM00000015387 XP\_031551840.1 39.2 125  
70 2 13 131 120 244 4.70E-13 82.4 6105 cellular

organisms;Eukaryota;Opisthokonta;Metazoa;Eumetazoa;Cnidaria;Anthozoa;Hexacorallia;Actiniaria;Actiniidae;Actinia;Actinia tenebrosa

UdeM00000015388 6596 112.8 UdeM00000015388 XP\_045180427.1 39 177  
105 2 12 186 98 273 4.90E-22 112.8 6596 cellular

organisms;Eukaryota;Opisthokonta;Metazoa;Eumetazoa;Bilateria;Protostomia;Spiralia;Lophotrochozoa;Mollusca;Bivalvia;Autobranchia;Heteroconchia;Euheterodonta;Imparidentia;Venerida;Veneroidea;Veneridae;Mercenaria;Mercenaria mercenaria

UdeM00000015389 29159 80.9 UdeM00000015389 XP\_034307341.1 35 143  
67 2 2 124 48 184 1.30E-12 80.9 29159 cellular

organisms;Eukaryota;Opisthokonta;Metazoa;Eumetazoa;Bilateria;Protostomia;Spiralia;Lophotrochozoa;Mollusca;Bivalvia;Autobranchia;Pteriormorphia;Ostreida;Ostreioidea;Ostreidae;Crassostrea;Crassostrea gigas

UdeM00000015390 29159 95.5 UdeM00000015390 XP\_034307341.1 41.8 110  
54 1 9 108 230 339 9.10E-17 95.5 29159 cellular

organisms;Eukaryota;Opisthokonta;Metazoa;Eumetazoa;Bilateria;Protostomia;Spiralia;Lophotrochozoa;Mollusca;Bivalvia;Autobranchia;Pteriormorphia;Ostreida;Ostreioidea;Ostreidae;Crassostrea;Crassostrea gigas

UdeM00000015391 6596 346.3 UdeM00000015391 XP\_045177776.1 36.5 633  
272 15 9 627 397 913 8.60E-92 346.3 6596 cellular

organisms;Eukaryota;Opisthokonta;Metazoa;Eumetazoa;Bilateria;Protostomia;Spiralia;Lophotrochozoa;Mollusca;Bivalvia;Autobranchia;Heteroconchia;Euheterodonta;Imparidentia;Venerida;Veneroidea;Veneridae;Mercenaria;Mercenaria mercenaria

UdeM00000015392 6596 337.8 UdeM00000015392 XP\_045177776.1 36.3 625  
268 15 1 611 405 913 3.00E-89 337.8 6596 cellular

organisms;Eukaryota;Opisthokonta;Metazoa;Eumetazoa;Bilateria;Protostomia;Spiralia;Lophotrochozoa;Mollusca;Bivalvia;Autobranchia;Heteroconchia;Euheterodonta;Imparidentia;Venerida;Veneroidea;Veneridae;Mercenaria;Mercenaria mercenaria

UdeM00000015393 46731 89 UdeM00000015393 XP\_027057405.1 32.2 205  
108 6 2 188 6 197 8.30E-15 89 46731 cellular

organisms;Eukaryota;Opisthokonta;Metazoa;Eumetazoa;Cnidaria;Anthozoa;Hexacorallia;Scleractinia;Astrocoeniina;Pocilloporidae;Pocillopora;Pocillopora damicornis

UdeM00000015396 5762 88.2 UdeM00000015396 XP\_002670566.1 29 255  
 164 7 78 316 80 333 2.30E-14 88.2 5762 cellular  
 organisms;Eukaryota;Discoba;Heterolobosea;Tetramitida;Eutetramitida;Vahlkampfiidae;Naegleria;Naegleria gruberi  
 UdeM00000015397 59861 135.6 UdeM00000015397 XP\_045075958.1 42.1 178  
 100 2 5 181 17 192 1.00E-28 135.6 59861 cellular  
 organisms;Eukaryota;Opisthokonta;Metazoa;Eumetazoa;Bilateria;Deuterostomia;Chordata;Craniata;Vertebrata;Gnathostomata;Teleostomi;Euteleostomi;Actinopterygii;Actinopteri;Neopterygii;Teleostei;Osteoglossocephalai;Clupeocephala;Euteleostei;Protacanthopterygii;Salmoniformes;Salmonidae;Coregoninae;Coregonus;Coregonus clupeaformis  
 UdeM00000015398 6596 199.5 UdeM00000015398 XP\_045177373.1 32.8 344  
 212 8 124 454 215 552 9.10E-48 199.5 6596 cellular  
 organisms;Eukaryota;Opisthokonta;Metazoa;Eumetazoa;Bilateria;Protostomia;Spiralia;Lophotrochozoa;Mollusca;Bivalvia;Autobranchia;Heteroconchia;Euheterodonta;Imparidentia;Venerida;Veneroidea;Veneridae;Mercenaria;Mercenaria mercenaria  
 UdeM00000015399 225164 87 UdeM00000015399 XP\_009059347.1 39.8  
 128 69 4 12 139 125 244 2.10E-14 87 225164  
 cellular  
 organisms;Eukaryota;Opisthokonta;Metazoa;Eumetazoa;Bilateria;Protostomia;Spiralia;Lophotrochozoa;Mollusca;Gastropoda;Patellogastropoda;Lottioidea;Lottiidae;Lottia;Lottia gigantea  
 UdeM00000015400 6596 136.3 UdeM00000015400 XP\_045211970.1 46.1 154  
 75 2 11 159 3 153 3.60E-29 136.3 6596 cellular  
 organisms;Eukaryota;Opisthokonta;Metazoa;Eumetazoa;Bilateria;Protostomia;Spiralia;Lophotrochozoa;Mollusca;Bivalvia;Autobranchia;Heteroconchia;Euheterodonta;Imparidentia;Venerida;Veneroidea;Veneridae;Mercenaria;Mercenaria mercenaria  
 UdeM00000015401 225164 98.6 UdeM00000015401 XP\_009059347.1 43  
 128 65 4 576 703 125 244 3.40E-17 98.6 225164  
 cellular  
 organisms;Eukaryota;Opisthokonta;Metazoa;Eumetazoa;Bilateria;Protostomia;Spiralia;Lophotrochozoa;Mollusca;Gastropoda;Patellogastropoda;Lottioidea;Lottiidae;Lottia;Lottia gigantea  
 UdeM00000015402 75366 82 UdeM00000015402 XP\_016088032.1 38.7 119  
 63 4 17 134 146 255 1.30E-12 82 75366 cellular  
 organisms;Eukaryota;Opisthokonta;Metazoa;Eumetazoa;Bilateria;Deuterostomia;Chordata;Craniata;Vertebrata;Gnathostomata;Teleostomi;Euteleostomi;Actinopterygii;Actinopteri;Neopterygii;Teleostei;Osteoglossocephalai;Clupeocephala;Otomorpha;Ostariophysi;Otophysi;Cypriniphysae;Cypriniformes;Cyprinidae;Cyprininae;Sinocyclocheilus;Sinocyclocheilus grahami  
 UdeM00000015403 6596 229.9 UdeM00000015403 XP\_045177779.1 31.9 514  
 225 9 9 506 89 493 8.80E-57 229.9 6596 cellular  
 organisms;Eukaryota;Opisthokonta;Metazoa;Eumetazoa;Bilateria;Protostomia;Spiralia;Lophotrochozoa;Mollusca;Bivalvia;Autobranchia;Heteroconchia;Euheterodonta;Imparidentia;Venerida;Veneroidea;Veneridae;Mercenaria;Mercenaria mercenaria  
 UdeM00000015404 6596 108.6 UdeM00000015404 XP\_045177695.1 44.2 138  
 75 2 14 150 244 380 8.40E-21 108.6 6596 cellular  
 organisms;Eukaryota;Opisthokonta;Metazoa;Eumetazoa;Bilateria;Protostomia;Spiralia;Lophotrochozoa;Mollusca;Bivalvia;Autobranchia;Heteroconchia;Euheterodonta;Imparidentia;Venerida;Veneroidea;Veneridae;Mercenaria;Mercenaria mercenaria

UdeM00000015405 46731 89.7 UdeM00000015405 XP\_027057405.1 32.2 205  
 108 6 2 188 6 197 4.90E-15 89.7 46731 cellular  
 organisms;Eukaryota;Opisthokonta;Metazoa;Eumetazoa;Cnidaria;Anthozoa;Hexa  
 corallia;Scleractinia;Astrocoeniina;Pocilloporidae;Pocillopora;Pocillopor  
 a damicornis  
 UdeM00000015408 5762 89.7 UdeM00000015408 XP\_002670566.1 29.4 255  
 163 7 78 316 80 333 7.80E-15 89.7 5762 cellular  
 organisms;Eukaryota;Discoba;Heterolobosea;Tetramitua;Eutetramitua;Vahlkam  
 pfiidae;Naegleria;Naegleria gruberi  
 UdeM00000015409 9305 129.8 UdeM00000015409 XP\_031795232.1 34.9 212  
 134 3 2 212 722 930 5.50E-27 129.8 9305 cellular  
 organisms;Eukaryota;Opisthokonta;Metazoa;Eumetazoa;Bilateria;Deuterostomi  
 a;Chordata;Craniata;Vertebrata;Gnathostomata;Teleostomi;Euteleostomi;Sarc  
 opterygii;Dipnotetrapodomorpha;Tetrapoda;Amniota;Mammalia;Theria;Metather  
 ia;Dasyuromorphia;Dasyuridae;Sarcophilus;Sarcophilus harrisii  
 UdeM00000015410 6596 239.6 UdeM00000015410 XP\_045177372.1 29.4 574  
 357 17 12 565 8 553 9.90E-60 239.6 6596 cellular  
 organisms;Eukaryota;Opisthokonta;Metazoa;Eumetazoa;Bilateria;Protostomia;  
 Spiralia;Lophotrochozoa;Mollusca;Bivalvia;Autobranchia;Heteroconchia;Euhe  
 terodonta;Imparidentia;Venerida;Veneroidea;Veneridae;Mercenaria;Mercenari  
 a mercenaria  
 UdeM00000015411 6596 1347.8 UdeM00000015411 XP\_045180064.1 57.9  
 1152 478 7 1 1150 1 1147 0.00E+00 1347.8 6596  
 cellular  
 organisms;Eukaryota;Opisthokonta;Metazoa;Eumetazoa;Bilateria;Protostomia;  
 Spiralia;Lophotrochozoa;Mollusca;Bivalvia;Autobranchia;Heteroconchia;Euhe  
 terodonta;Imparidentia;Venerida;Veneroidea;Veneridae;Mercenaria;Mercenari  
 a mercenaria  
 UdeM00000015412 400727 209.5 UdeM00000015412 XP\_025096605.1 52.4  
 229 98 4 223 441 184 411 8.50E-51 209.5 400727  
 cellular  
 organisms;Eukaryota;Opisthokonta;Metazoa;Eumetazoa;Bilateria;Protostomia;  
 Spiralia;Lophotrochozoa;Mollusca;Gastropoda;Caenogastropoda;Architaeniogl  
 ossa;Ampullarioidea;Ampullariidae;Pomacea;Pomacea canaliculata  
 UdeM00000015414 6500 127.5 UdeM00000015414 XP\_005097528.2 79.3 82  
 16 1 1 82 5 85 9.60E-27 127.5 6500 cellular  
 organisms;Eukaryota;Opisthokonta;Metazoa;Eumetazoa;Bilateria;Protostomia;  
 Spiralia;Lophotrochozoa;Mollusca;Gastropoda;Heterobranchia;Euthyneura;Tec  
 tipleura;Aplysiida;Aplysioidea;Aplysiidae;Aplysia;Aplysia californica  
 UdeM00000015415 6565 77.8 UdeM00000015415 XP\_022337731.1 57.6 66  
 27 1 20 85 145 209 7.60E-12 77.8 6565 cellular  
 organisms;Eukaryota;Opisthokonta;Metazoa;Eumetazoa;Bilateria;Protostomia;  
 Spiralia;Lophotrochozoa;Mollusca;Bivalvia;Autobranchia;Pteriomorphia;Ostr  
 eida;Ostreoidea;Ostreidae;Crassostrea;Crassostrea virginica  
 UdeM00000015416 6596 333.2 UdeM00000015416 XP\_045169901.1 38.7 489  
 262 8 205 680 46 509 7.90E-88 333.2 6596 cellular  
 organisms;Eukaryota;Opisthokonta;Metazoa;Eumetazoa;Bilateria;Protostomia;  
 Spiralia;Lophotrochozoa;Mollusca;Bivalvia;Autobranchia;Heteroconchia;Euhe  
 terodonta;Imparidentia;Venerida;Veneroidea;Veneridae;Mercenaria;Mercenari  
 a mercenaria  
 UdeM00000015417 6596 485 UdeM00000015417 XP\_045211460.1 48.3 493  
 247 5 17 507 9 495 1.20E-133 485 6596 cellular  
 organisms;Eukaryota;Opisthokonta;Metazoa;Eumetazoa;Bilateria;Protostomia;  
 Spiralia;Lophotrochozoa;Mollusca;Bivalvia;Autobranchia;Heteroconchia;Euhe

terodonta;Imparidentia;Venerida;Veneroidea;Veneridae;Mercenaria;Mercenaria mercenaria  
 UdeM00000015418 6596 230.7 UdeM00000015418 XP\_045211460.1 49.3 227  
 113 1 1 227 224 448 1.90E-57 230.7 6596 cellular  
 organisms;Eukaryota;Opisthokonta;Metazoa;Eumetazoa;Bilateria;Protostomia;Spiralia;Lophotrochozoa;Mollusca;Bivalvia;Autobranchia;Heteroconchia;Euheterodonta;Imparidentia;Venerida;Veneroidea;Veneridae;Mercenaria;Mercenaria mercenaria  
 UdeM00000015419 6596 477.6 UdeM00000015419 XP\_045211460.1 47.1 499  
 258 4 10 507 2 495 1.90E-131 477.6 6596 cellular  
 organisms;Eukaryota;Opisthokonta;Metazoa;Eumetazoa;Bilateria;Protostomia;Spiralia;Lophotrochozoa;Mollusca;Bivalvia;Autobranchia;Heteroconchia;Euheterodonta;Imparidentia;Venerida;Veneroidea;Veneridae;Mercenaria;Mercenaria mercenaria  
 UdeM00000015420 6579 619 UdeM00000015420 XP\_033727993.1 54.4 623  
 261 4 6 628 10 609 6.60E-174 619 6579 cellular  
 organisms;Eukaryota;Opisthokonta;Metazoa;Eumetazoa;Bilateria;Protostomia;Spiralia;Lophotrochozoa;Mollusca;Bivalvia;Autobranchia;Pteriomorphia;Pectinida;Pectinoidea;Pectinidae;Pecten;Pecten maximus  
 UdeM00000015421 2652724 168.3 UdeM00000015421 XP\_020903442.1 44.9  
 205 89 1 9 189 2 206 9.80E-39 168.3 2652724  
 cellular  
 organisms;Eukaryota;Opisthokonta;Metazoa;Eumetazoa;Cnidaria;Anthozoa;Hexacorallia;Actiniaria;Aiptasiidae;Exaiptasia;Exaiptasia diaphana  
 UdeM00000015422 105023 218.8 UdeM00000015422 XP\_015826526.1 29.5  
 597 169 8 1 348 77 670 1.50E-53 218.8 105023  
 cellular  
 organisms;Eukaryota;Opisthokonta;Metazoa;Eumetazoa;Bilateria;Deuterostomia;Chordata;Craniata;Vertebrata;Gnathostomata;Teleostomi;Euteleostomi;Actinopterygii;Actinopteri;Neopterygii;Teleostei;Osteoglossocephalai;Clupeocephala;Euteleostei;Neoteleostei;Eurypterygia;Ctenosquamata;Acanthomorphata;Euacanthomorphacea;Percomorphaceae;Ovalentaria;Atherinomorphae;Cypselodontiformes;Aplocheiloidei;Nothobranchiidae;Nothobranchius;Nothobranchius furzeri  
 UdeM00000015423 6596 190.7 UdeM00000015423 XP\_045174362.1 44 275  
 135 5 1 259 1 272 2.60E-45 190.7 6596 cellular  
 organisms;Eukaryota;Opisthokonta;Metazoa;Eumetazoa;Bilateria;Protostomia;Spiralia;Lophotrochozoa;Mollusca;Bivalvia;Autobranchia;Heteroconchia;Euheterodonta;Imparidentia;Venerida;Veneroidea;Veneridae;Mercenaria;Mercenaria mercenaria  
 UdeM00000015424 6573 87.4 UdeM00000015424 XP\_021372908.1 53.1 81  
 38 0 1 81 263 343 1.30E-14 87.4 6573 cellular  
 organisms;Eukaryota;Opisthokonta;Metazoa;Eumetazoa;Bilateria;Protostomia;Spiralia;Lophotrochozoa;Mollusca;Bivalvia;Autobranchia;Pteriomorphia;Pectinida;Pectinoidea;Pectinidae;Mizuhopecten;Mizuhopecten yessoensis  
 UdeM00000015425 6596 477.2 UdeM00000015425 XP\_045179232.1 58.6 432  
 156 8 3 416 2 428 2.10E-131 477.2 6596 cellular  
 organisms;Eukaryota;Opisthokonta;Metazoa;Eumetazoa;Bilateria;Protostomia;Spiralia;Lophotrochozoa;Mollusca;Bivalvia;Autobranchia;Heteroconchia;Euheterodonta;Imparidentia;Venerida;Veneroidea;Veneridae;Mercenaria;Mercenaria mercenaria  
 UdeM00000015426 6596 477.2 UdeM00000015426 XP\_045178995.1 63.6 401  
 126 11 1 395 22 408 2.00E-131 477.2 6596 cellular  
 organisms;Eukaryota;Opisthokonta;Metazoa;Eumetazoa;Bilateria;Protostomia;

Spiralia;Lophotrochozoa;Mollusca;Bivalvia;Autobranchia;Heteroconchia;Euherodonta;Imparidentia;Venerida;Veneroidea;Veneridae;Mercenaria;Mercenaria mercenaria

UdeM00000015427 6596 109.8 UdeM00000015427 XP\_045179808.1 43.5 138  
75 1 8 145 18 152 3.00E-21 109.8 6596 cellular

organisms;Eukaryota;Opisthokonta;Metazoa;Eumetazoa;Bilateria;Protostomia;Spiralia;Lophotrochozoa;Mollusca;Bivalvia;Autobranchia;Heteroconchia;Euherodonta;Imparidentia;Venerida;Veneroidea;Veneridae;Mercenaria;Mercenaria mercenaria

UdeM00000015428 6596 126.3 UdeM00000015428 XP\_045177564.1 24.9 358  
231 6 54 400 183 513 8.60E-26 126.3 6596 cellular

organisms;Eukaryota;Opisthokonta;Metazoa;Eumetazoa;Bilateria;Protostomia;Spiralia;Lophotrochozoa;Mollusca;Bivalvia;Autobranchia;Heteroconchia;Euherodonta;Imparidentia;Venerida;Veneroidea;Veneridae;Mercenaria;Mercenaria mercenaria

UdeM00000015429 38674 262.3 UdeM00000015429 XP\_036026894.1 42.1 299  
147 3 74 372 247 519 9.80E-67 262.3 38674 cellular

organisms;Eukaryota;Opisthokonta;Metazoa;Eumetazoa;Bilateria;Deuterostomia;Chordata;Craniata;Vertebrata;Gnathostomata;Teleostomi;Euteleostomi;Sarcopterygii;Dipnotetrapodomorpha;Tetrapoda;Amniota;Mammalia;Theria;Eutheria;Boreoeutheria;Euarchontoglires;Glires;Rodentia;Myomorpha;Muroidea;Cricetidae;Neotominae;Onychomys;Onychomys torridus

UdeM00000015430 6596 65.5 UdeM00000015430 XP\_045177564.1 27.1 188  
124 4 37 219 332 511 1.00E-07 65.5 6596 cellular

organisms;Eukaryota;Opisthokonta;Metazoa;Eumetazoa;Bilateria;Protostomia;Spiralia;Lophotrochozoa;Mollusca;Bivalvia;Autobranchia;Heteroconchia;Euherodonta;Imparidentia;Venerida;Veneroidea;Veneridae;Mercenaria;Mercenaria mercenaria

UdeM00000015431 6596 354.8 UdeM00000015431 XP\_045178126.1 40 472  
270 3 1 460 43 513 1.70E-94 354.8 6596 cellular

organisms;Eukaryota;Opisthokonta;Metazoa;Eumetazoa;Bilateria;Protostomia;Spiralia;Lophotrochozoa;Mollusca;Bivalvia;Autobranchia;Heteroconchia;Euherodonta;Imparidentia;Venerida;Veneroidea;Veneridae;Mercenaria;Mercenaria mercenaria

UdeM00000015433 6565 122.9 UdeM00000015433 XP\_022299727.1 32.9 234  
79 4 1 158 46 277 4.90E-25 122.9 6565 cellular

organisms;Eukaryota;Opisthokonta;Metazoa;Eumetazoa;Bilateria;Protostomia;Spiralia;Lophotrochozoa;Mollusca;Bivalvia;Autobranchia;Pteriomorpha;Ostreida;Ostreoidea;Ostreidae;Crassostrea;Crassostrea virginica

UdeM00000015434 6565 97.1 UdeM00000015434 XP\_022299727.1 41.8 122  
68 2 1 120 46 166 1.70E-17 97.1 6565 cellular

organisms;Eukaryota;Opisthokonta;Metazoa;Eumetazoa;Bilateria;Protostomia;Spiralia;Lophotrochozoa;Mollusca;Bivalvia;Autobranchia;Pteriomorpha;Ostreida;Ostreoidea;Ostreidae;Crassostrea;Crassostrea virginica

UdeM00000015437 6596 210.7 UdeM00000015437 XP\_045178126.1 33.8 334  
208 3 142 463 181 513 4.00E-51 210.7 6596 cellular

organisms;Eukaryota;Opisthokonta;Metazoa;Eumetazoa;Bilateria;Protostomia;Spiralia;Lophotrochozoa;Mollusca;Bivalvia;Autobranchia;Heteroconchia;Euherodonta;Imparidentia;Venerida;Veneroidea;Veneridae;Mercenaria;Mercenaria mercenaria

UdeM00000015438 6596 142.9 UdeM00000015438 XP\_045177564.1 52.5 139  
66 0 1 139 43 181 3.10E-31 142.9 6596 cellular

organisms;Eukaryota;Opisthokonta;Metazoa;Eumetazoa;Bilateria;Protostomia;Spiralia;Lophotrochozoa;Mollusca;Bivalvia;Autobranchia;Heteroconchia;Euherodonta;Imparidentia;Venerida;Veneroidea;Veneridae;Mercenaria;Mercenaria mercenaria

terodonta;Imparidentia;Venerida;Veneroidea;Veneridae;Mercenaria;Mercenari  
 a mercenaria  
 UdeM00000015440 37621 202.6 UdeM00000015440 XP\_014676916.1 35.4 381  
 196 7 100 434 18 394 1.10E-48 202.6 37621 cellular  
 organisms;Eukaryota;Opisthokonta;Metazoa;Eumetazoa;Bilateria;Protostomia;  
 Ecdysozoa;Scalidophora;Priapulida;Priapulimorpha;Priapulimorphida;Priapul  
 idae;Priapulus;Priapulus caudatus  
 UdeM00000015441 6596 1464.9 UdeM00000015441 XP\_045189469.1 43.3  
 1883 917 23 31 1816 14 1843 0.00E+00 1464.9 6596  
 cellular  
 organisms;Eukaryota;Opisthokonta;Metazoa;Eumetazoa;Bilateria;Protostomia;  
 Spiralia;Lophotrochozoa;Mollusca;Bivalvia;Autobranchia;Heteroconchia;Euhe  
 terodonta;Imparidentia;Venerida;Veneroidea;Veneridae;Mercenaria;Mercenari  
 a mercenaria  
 UdeM00000015442 6596 1439.5 UdeM00000015442 XP\_045189469.1 42.9  
 1875 921 23 31 1808 14 1835 0.00E+00 1439.5 6596  
 cellular  
 organisms;Eukaryota;Opisthokonta;Metazoa;Eumetazoa;Bilateria;Protostomia;  
 Spiralia;Lophotrochozoa;Mollusca;Bivalvia;Autobranchia;Heteroconchia;Euhe  
 terodonta;Imparidentia;Venerida;Veneroidea;Veneridae;Mercenaria;Mercenari  
 a mercenaria  
 UdeM00000015443 6596 404.8 UdeM00000015443 XP\_045189470.1 46.4 459  
 232 5 151 603 271 721 1.90E-109 404.8 6596 cellular  
 organisms;Eukaryota;Opisthokonta;Metazoa;Eumetazoa;Bilateria;Protostomia;  
 Spiralia;Lophotrochozoa;Mollusca;Bivalvia;Autobranchia;Heteroconchia;Euhe  
 terodonta;Imparidentia;Venerida;Veneroidea;Veneridae;Mercenaria;Mercenari  
 a mercenaria  
 UdeM00000015445 6596 134 UdeM00000015445 XP\_045180032.1 46.4 153  
 81 1 156 308 424 575 3.20E-28 134 6596 cellular  
 organisms;Eukaryota;Opisthokonta;Metazoa;Eumetazoa;Bilateria;Protostomia;  
 Spiralia;Lophotrochozoa;Mollusca;Bivalvia;Autobranchia;Heteroconchia;Euhe  
 terodonta;Imparidentia;Venerida;Veneroidea;Veneridae;Mercenaria;Mercenari  
 a mercenaria  
 UdeM00000015444 6596 309.3 UdeM00000015444 XP\_045180034.1 39.9 424  
 233 4 122 535 157 568 9.60E-81 309.3 6596 cellular  
 organisms;Eukaryota;Opisthokonta;Metazoa;Eumetazoa;Bilateria;Protostomia;  
 Spiralia;Lophotrochozoa;Mollusca;Bivalvia;Autobranchia;Heteroconchia;Euhe  
 terodonta;Imparidentia;Venerida;Veneroidea;Veneridae;Mercenaria;Mercenari  
 a mercenaria  
 UdeM00000015447 6596 167.9 UdeM00000015447 XP\_045180032.1 42.3 196  
 102 1 21 216 226 410 1.40E-38 167.9 6596 cellular  
 organisms;Eukaryota;Opisthokonta;Metazoa;Eumetazoa;Bilateria;Protostomia;  
 Spiralia;Lophotrochozoa;Mollusca;Bivalvia;Autobranchia;Heteroconchia;Euhe  
 terodonta;Imparidentia;Venerida;Veneroidea;Veneridae;Mercenaria;Mercenari  
 a mercenaria  
 UdeM00000015446 29159 67.4 UdeM00000015446 XP\_034334906.1 35.8 106  
 53 3 5 95 60 165 1.20E-08 67.4 29159 cellular  
 organisms;Eukaryota;Opisthokonta;Metazoa;Eumetazoa;Bilateria;Protostomia;  
 Spiralia;Lophotrochozoa;Mollusca;Bivalvia;Autobranchia;Pteriomorpha;Ostr  
 eida;Ostreoidea;Ostreidae;Crassostrea;Crassostrea gigas  
 UdeM00000015448 6596 387.5 UdeM00000015448 XP\_045162063.1 44.8 467  
 219 6 14 448 6 465 2.30E-104 387.5 6596 cellular  
 organisms;Eukaryota;Opisthokonta;Metazoa;Eumetazoa;Bilateria;Protostomia;  
 Spiralia;Lophotrochozoa;Mollusca;Bivalvia;Autobranchia;Heteroconchia;Euhe

terodonta;Imparidentia;Venerida;Veneroidea;Veneridae;Mercenaria;Mercenari  
 a mercenaria  
 UdeM00000015449 6596 172.6 UdeM00000015449 XP\_045215484.1 30.6 307  
 203 5 1 302 8 309 8.00E-40 172.6 6596 cellular  
 organisms;Eukaryota;Opisthokonta;Metazoa;Eumetazoa;Bilateria;Protostomia;  
 Spiralia;Lophotrochozoa;Mollusca;Bivalvia;Autobranhia;Heteroconchia;Euhe  
 terodonta;Imparidentia;Venerida;Veneroidea;Veneridae;Mercenaria;Mercenari  
 a mercenaria  
 UdeM00000015450 6596 171.8 UdeM00000015450 XP\_045215484.1 30.6 307  
 203 5 27 328 8 309 1.50E-39 171.8 6596 cellular  
 organisms;Eukaryota;Opisthokonta;Metazoa;Eumetazoa;Bilateria;Protostomia;  
 Spiralia;Lophotrochozoa;Mollusca;Bivalvia;Autobranhia;Heteroconchia;Euhe  
 terodonta;Imparidentia;Venerida;Veneroidea;Veneridae;Mercenaria;Mercenari  
 a mercenaria  
 UdeM00000015451 6596 100.5 UdeM00000015451 XP\_045179937.1 40.8 130  
 72 4 93 219 302 429 2.80E-18 100.5 6596 cellular  
 organisms;Eukaryota;Opisthokonta;Metazoa;Eumetazoa;Bilateria;Protostomia;  
 Spiralia;Lophotrochozoa;Mollusca;Bivalvia;Autobranhia;Heteroconchia;Euhe  
 terodonta;Imparidentia;Venerida;Veneroidea;Veneridae;Mercenaria;Mercenari  
 a mercenaria  
 UdeM00000015452 6565 96.3 UdeM00000015452 XP\_022319897.1 44.2 113  
 59 4 5 115 206 316 2.80E-17 96.3 6565 cellular  
 organisms;Eukaryota;Opisthokonta;Metazoa;Eumetazoa;Bilateria;Protostomia;  
 Spiralia;Lophotrochozoa;Mollusca;Bivalvia;Autobranhia;Pteriormorphia;Ostr  
 eida;Ostreoidea;Ostreidae;Crassostrea;Crassostrea virginica  
 UdeM00000015454 6596 104.4 UdeM00000015454 XP\_045178377.1 39.7 136  
 74 3 53 183 534 666 1.60E-19 104.4 6596 cellular  
 organisms;Eukaryota;Opisthokonta;Metazoa;Eumetazoa;Bilateria;Protostomia;  
 Spiralia;Lophotrochozoa;Mollusca;Bivalvia;Autobranhia;Heteroconchia;Euhe  
 terodonta;Imparidentia;Venerida;Veneroidea;Veneridae;Mercenaria;Mercenari  
 a mercenaria  
 UdeM00000015455 6565 262.7 UdeM00000015455 XP\_022327962.1 60.1 218  
 87 0 9 226 197 414 4.40E-67 262.7 6565 cellular  
 organisms;Eukaryota;Opisthokonta;Metazoa;Eumetazoa;Bilateria;Protostomia;  
 Spiralia;Lophotrochozoa;Mollusca;Bivalvia;Autobranhia;Pteriormorphia;Ostr  
 eida;Ostreoidea;Ostreidae;Crassostrea;Crassostrea virginica  
 UdeM00000015456 6565 110.5 UdeM00000015456 XP\_022287645.1 46.8 94  
 50 0 1 94 266 359 2.00E-21 110.5 6565 cellular  
 organisms;Eukaryota;Opisthokonta;Metazoa;Eumetazoa;Bilateria;Protostomia;  
 Spiralia;Lophotrochozoa;Mollusca;Bivalvia;Autobranhia;Pteriormorphia;Ostr  
 eida;Ostreoidea;Ostreidae;Crassostrea;Crassostrea virginica  
 UdeM00000015457 6596 95.9 UdeM00000015457 XP\_045179680.1 34.1 167  
 101 5 14 175 210 372 5.50E-17 95.9 6596 cellular  
 organisms;Eukaryota;Opisthokonta;Metazoa;Eumetazoa;Bilateria;Protostomia;  
 Spiralia;Lophotrochozoa;Mollusca;Bivalvia;Autobranhia;Heteroconchia;Euhe  
 terodonta;Imparidentia;Venerida;Veneroidea;Veneridae;Mercenaria;Mercenari  
 a mercenaria  
 UdeM00000015458 6565 95.9 UdeM00000015458 XP\_022319897.1 40.3 129  
 73 4 4 130 189 315 4.10E-17 95.9 6565 cellular  
 organisms;Eukaryota;Opisthokonta;Metazoa;Eumetazoa;Bilateria;Protostomia;  
 Spiralia;Lophotrochozoa;Mollusca;Bivalvia;Autobranhia;Pteriormorphia;Ostr  
 eida;Ostreoidea;Ostreidae;Crassostrea;Crassostrea virginica  
 UdeM00000015459 6596 101.7 UdeM00000015459 XP\_045179939.1 38 142  
 81 4 3 140 241 379 8.00E-19 101.7 6596 cellular

organisms;Eukaryota;Opisthokonta;Metazoa;Eumetazoa;Bilateria;Protostomia;Spiralia;Lophotrochozoa;Mollusca;Bivalvia;Autobranchia;Heteroconchia;Euherodonta;Imparidentia;Venerida;Veneroidea;Veneridae;Mercenaria;Mercenaria mercenaria

UdeM00000015460 6596 199.5 UdeM00000015460 XP\_045185878.1 37.3 284  
175 3 5 288 31 311 8.20E-48 199.5 6596 cellular

organisms;Eukaryota;Opisthokonta;Metazoa;Eumetazoa;Bilateria;Protostomia;Spiralia;Lophotrochozoa;Mollusca;Bivalvia;Autobranchia;Heteroconchia;Euherodonta;Imparidentia;Venerida;Veneroidea;Veneridae;Mercenaria;Mercenaria mercenaria

UdeM00000015461 6596 187.6 UdeM00000015461 XP\_045187884.1 34.2 348  
206 7 3 344 45 375 3.10E-44 187.6 6596 cellular

organisms;Eukaryota;Opisthokonta;Metazoa;Eumetazoa;Bilateria;Protostomia;Spiralia;Lophotrochozoa;Mollusca;Bivalvia;Autobranchia;Heteroconchia;Euherodonta;Imparidentia;Venerida;Veneroidea;Veneridae;Mercenaria;Mercenaria mercenaria

UdeM00000015464 29159 112.1 UdeM00000015464 XP\_034305577.1 41.2 119  
62 3 9 119 6 124 6.10E-22 112.1 29159 cellular

organisms;Eukaryota;Opisthokonta;Metazoa;Eumetazoa;Bilateria;Protostomia;Spiralia;Lophotrochozoa;Mollusca;Bivalvia;Autobranchia;Pteriomorphia;Ostreida;Ostreoidea;Ostreidae;Crassostrea;Crassostrea gigas

UdeM00000015466 6596 1316.6 UdeM00000015466 XP\_045179564.1 76  
893 188 5 70 957 21 892 0.00E+00 1316.6 6596  
cellular

organisms;Eukaryota;Opisthokonta;Metazoa;Eumetazoa;Bilateria;Protostomia;Spiralia;Lophotrochozoa;Mollusca;Bivalvia;Autobranchia;Heteroconchia;Euherodonta;Imparidentia;Venerida;Veneroidea;Veneridae;Mercenaria;Mercenaria mercenaria

UdeM00000015467 7741 137.1 UdeM00000015467 XP\_019613955.1 74 96  
22 2 1 95 1 94 1.20E-29 137.1 7741 cellular

organisms;Eukaryota;Opisthokonta;Metazoa;Eumetazoa;Bilateria;Deuterostomia;Chordata;Cephalochordata;Leptocardii;Amphioxiformes;Branchiostomidae;Branchiostoma;Branchiostoma belcheri

UdeM00000015468 6596 189.1 UdeM00000015468 XP\_045204432.1 32.9 295  
189 3 1 287 1 294 1.10E-44 189.1 6596 cellular

organisms;Eukaryota;Opisthokonta;Metazoa;Eumetazoa;Bilateria;Protostomia;Spiralia;Lophotrochozoa;Mollusca;Bivalvia;Autobranchia;Heteroconchia;Euherodonta;Imparidentia;Venerida;Veneroidea;Veneridae;Mercenaria;Mercenaria mercenaria

UdeM00000015469 225164 94.7 UdeM00000015469 XP\_009064742.1 32.3  
201 85 6 19 218 21 171 3.00E-16 94.7 225164  
cellular

organisms;Eukaryota;Opisthokonta;Metazoa;Eumetazoa;Bilateria;Protostomia;Spiralia;Lophotrochozoa;Mollusca;Gastropoda;Patellogastropoda;Lottiidae;Lottia;Lottia gigantea

UdeM00000015470 225164 94.7 UdeM00000015470 XP\_009064742.1 32.3  
201 85 6 19 218 21 171 3.00E-16 94.7 225164  
cellular

organisms;Eukaryota;Opisthokonta;Metazoa;Eumetazoa;Bilateria;Protostomia;Spiralia;Lophotrochozoa;Mollusca;Gastropoda;Patellogastropoda;Lottiidae;Lottia;Lottia gigantea

UdeM00000015472 6573 87.4 UdeM00000015472 XP\_021341113.1 29.8 218  
138 6 66 277 17 225 3.10E-14 87.4 6573 cellular

organisms;Eukaryota;Opisthokonta;Metazoa;Eumetazoa;Bilateria;Protostomia;



Spiralia;Lophotrochozoa;Mollusca;Bivalvia;Autobranchia;Pteriomorphia;Pectinida;Pectinoidea;Pectinidae;Mizuhopecten;Mizuhopecten yessoensis  
UdeM00000015473 7741 288.9 UdeM00000015473 XP\_019622111.1 51.8 280  
132 3 5 283 1 278 7.10E-75 288.9 7741 cellular  
organisms;Eukaryota;Opisthokonta;Metazoa;Eumetazoa;Bilateria;Deuterostomia;Chordata;Cephalochordata;Leptocardii;Amphioxiformes;Branchiostomidae;Branchiostoma;Branchiostoma belcheri  
UdeM00000015476 7957 160.2 UdeM00000015476 XP\_026080032.1 48.5 163  
80 2 110 272 371 529 3.80E-36 160.2 7957 cellular  
organisms;Eukaryota;Opisthokonta;Metazoa;Eumetazoa;Bilateria;Deuterostomia;Chordata;Craniata;Vertebrata;Gnathostomata;Teleostomi;Euteleostomi;Actinopterygii;Actinopteri;Neopterygii;Teleostei;Osteoglossocephalai;Clupeocephala;Otomorpha;Ostariophysi;Otophysi;Cypriniphysae;Cypriniiformes;Cyprinoidi;Cyprinidae;Cyprininae;Carassius;Carassius auratus  
UdeM00000015475 7957 160.2 UdeM00000015475 XP\_026080032.1 48.5 163  
80 2 124 286 371 529 4.00E-36 160.2 7957 cellular  
organisms;Eukaryota;Opisthokonta;Metazoa;Eumetazoa;Bilateria;Deuterostomia;Chordata;Craniata;Vertebrata;Gnathostomata;Teleostomi;Euteleostomi;Actinopterygii;Actinopteri;Neopterygii;Teleostei;Osteoglossocephalai;Clupeocephala;Otomorpha;Ostariophysi;Otophysi;Cypriniphysae;Cypriniiformes;Cyprinoidi;Cyprinidae;Cyprininae;Carassius;Carassius auratus  
UdeM00000015477 6596 160.6 UdeM00000015477 XP\_045177778.1 32.6 374  
154 10 1 359 405 695 4.60E-36 160.6 6596 cellular  
organisms;Eukaryota;Opisthokonta;Metazoa;Eumetazoa;Bilateria;Protostomia;Spiralia;Lophotrochozoa;Mollusca;Bivalvia;Autobranchia;Heteroconchia;Euheterodonta;Imparidentia;Venerida;Veneroidea;Veneridae;Mercenaria;Mercenaria mercenaria  
UdeM00000015478 6596 202.2 UdeM00000015478 XP\_045177776.1 45.3 223  
117 3 8 229 705 923 7.60E-49 202.2 6596 cellular  
organisms;Eukaryota;Opisthokonta;Metazoa;Eumetazoa;Bilateria;Protostomia;Spiralia;Lophotrochozoa;Mollusca;Bivalvia;Autobranchia;Heteroconchia;Euheterodonta;Imparidentia;Venerida;Veneroidea;Veneridae;Mercenaria;Mercenaria mercenaria  
UdeM00000015479 45351 84.7 UdeM00000015479 XP\_001623471.2 30.1 206  
111 6 10 194 12 205 1.50E-13 84.7 45351 cellular  
organisms;Eukaryota;Opisthokonta;Metazoa;Eumetazoa;Cnidaria;Anthozoa;Hexacorallia;Actiniaria;Edwardsiidae;Nematostella;Nematostella vectensis  
UdeM00000015480 6573 105.5 UdeM00000015480 XP\_021341113.1 33.3 222  
124 9 7 217 17 225 8.60E-20 105.5 6573 cellular  
organisms;Eukaryota;Opisthokonta;Metazoa;Eumetazoa;Bilateria;Protostomia;Spiralia;Lophotrochozoa;Mollusca;Bivalvia;Autobranchia;Pteriomorphia;Pectinida;Pectinoidea;Pectinidae;Mizuhopecten;Mizuhopecten yessoensis  
UdeM00000015481 6596 59.3 UdeM00000015481 XP\_045202346.1 37.5 96  
56 2 6 100 16 108 3.80E-06 59.3 6596 cellular  
organisms;Eukaryota;Opisthokonta;Metazoa;Eumetazoa;Bilateria;Protostomia;Spiralia;Lophotrochozoa;Mollusca;Bivalvia;Autobranchia;Heteroconchia;Euheterodonta;Imparidentia;Venerida;Veneroidea;Veneridae;Mercenaria;Mercenaria mercenaria  
UdeM00000015482 6596 84.3 UdeM00000015482 XP\_045178051.1 26.8 441  
231 21 163 533 292 710 5.70E-13 84.3 6596 cellular  
organisms;Eukaryota;Opisthokonta;Metazoa;Eumetazoa;Bilateria;Protostomia;Spiralia;Lophotrochozoa;Mollusca;Bivalvia;Autobranchia;Heteroconchia;Euheterodonta;Imparidentia;Venerida;Veneroidea;Veneridae;Mercenaria;Mercenaria mercenaria

UdeM00000015483 6596 1347.4 UdeM00000015483 XP\_045178051.1 57.8  
 1650 538 31 44 1593 920 2510 0.00E+00 1347.4 6596  
 cellular  
 organisms;Eukaryota;Opisthokonta;Metazoa;Eumetazoa;Bilateria;Protostomia;  
 Spiralia;Lophotrochozoa;Mollusca;Bivalvia;Autobranhia;Heteroconchia;Euhe  
 terodonta;Imparidentia;Venerida;Veneroidea;Veneridae;Mercenaria;Mercenari  
 a mercenaria  
 UdeM00000015484 6596 1334.7 UdeM00000015484 XP\_045178051.1 56.1  
 1750 572 36 44 1755 920 2510 0.00E+00 1334.7 6596  
 cellular  
 organisms;Eukaryota;Opisthokonta;Metazoa;Eumetazoa;Bilateria;Protostomia;  
 Spiralia;Lophotrochozoa;Mollusca;Bivalvia;Autobranhia;Heteroconchia;Euhe  
 terodonta;Imparidentia;Venerida;Veneroidea;Veneridae;Mercenaria;Mercenari  
 a mercenaria  
 UdeM00000015485 6596 1385.5 UdeM00000015485 XP\_045178051.1 57.8  
 1651 541 31 44 1598 920 2510 0.00E+00 1385.5 6596  
 cellular  
 organisms;Eukaryota;Opisthokonta;Metazoa;Eumetazoa;Bilateria;Protostomia;  
 Spiralia;Lophotrochozoa;Mollusca;Bivalvia;Autobranhia;Heteroconchia;Euhe  
 terodonta;Imparidentia;Venerida;Veneroidea;Veneridae;Mercenaria;Mercenari  
 a mercenaria  
 UdeM00000015486 6596 181.8 UdeM00000015486 XP\_045183079.1 56.8 148  
 63 1 43 190 24 170 8.40E-43 181.8 6596 cellular  
 organisms;Eukaryota;Opisthokonta;Metazoa;Eumetazoa;Bilateria;Protostomia;  
 Spiralia;Lophotrochozoa;Mollusca;Bivalvia;Autobranhia;Heteroconchia;Euhe  
 terodonta;Imparidentia;Venerida;Veneroidea;Veneridae;Mercenaria;Mercenari  
 a mercenaria  
 UdeM00000015487 29159 204.9 UdeM00000015487 XP\_011442511.2 63.1 141  
 52 0 65 205 26 166 9.80E-50 204.9 29159 cellular  
 organisms;Eukaryota;Opisthokonta;Metazoa;Eumetazoa;Bilateria;Protostomia;  
 Spiralia;Lophotrochozoa;Mollusca;Bivalvia;Autobranhia;Pteriomorphia;Ostr  
 eida;Ostreoidea;Ostreidae;Crassostrea;Crassostrea gigas  
 UdeM00000015488 29159 204.9 UdeM00000015488 XP\_011442511.2 63.1 141  
 52 0 23 163 26 166 7.80E-50 204.9 29159 cellular  
 organisms;Eukaryota;Opisthokonta;Metazoa;Eumetazoa;Bilateria;Protostomia;  
 Spiralia;Lophotrochozoa;Mollusca;Bivalvia;Autobranhia;Pteriomorphia;Ostr  
 eida;Ostreoidea;Ostreidae;Crassostrea;Crassostrea gigas  
 UdeM00000015489 6596 93.6 UdeM00000015489 XP\_045179937.1 38 137  
 79 4 149 282 297 430 4.30E-16 93.6 6596 cellular  
 organisms;Eukaryota;Opisthokonta;Metazoa;Eumetazoa;Bilateria;Protostomia;  
 Spiralia;Lophotrochozoa;Mollusca;Bivalvia;Autobranhia;Heteroconchia;Euhe  
 terodonta;Imparidentia;Venerida;Veneroidea;Veneridae;Mercenaria;Mercenari  
 a mercenaria  
 UdeM00000015490 6596 115.2 UdeM00000015490 XP\_045179940.1 26.7 360  
 220 13 56 386 31 375 1.90E-22 115.2 6596 cellular  
 organisms;Eukaryota;Opisthokonta;Metazoa;Eumetazoa;Bilateria;Protostomia;  
 Spiralia;Lophotrochozoa;Mollusca;Bivalvia;Autobranhia;Heteroconchia;Euhe  
 terodonta;Imparidentia;Venerida;Veneroidea;Veneridae;Mercenaria;Mercenari  
 a mercenaria  
 UdeM00000015493 400727 216.5 UdeM00000015493 XP\_025116054.1 31.4  
 458 257 10 54 478 453 886 8.20E-53 216.5 400727  
 cellular  
 organisms;Eukaryota;Opisthokonta;Metazoa;Eumetazoa;Bilateria;Protostomia;

Spiralia; Lophotrochozoa; Mollusca; Gastropoda; Caenogastropoda; Architaenioglossa; Ampullarioidea; Ampullariidae; Pomacea; Pomacea canaliculata  
UdeM00000015494 400727 256.5 UdeM00000015494 XP\_025116054.1 33.2  
482 268 9 42 491 427 886 7.30E-65 256.5 400727  
cellular  
organisms; Eukaryota; Opisthokonta; Metazoa; Eumetazoa; Bilateria; Protostomia; Spiralia; Lophotrochozoa; Mollusca; Gastropoda; Caenogastropoda; Architaenioglossa; Ampullarioidea; Ampullariidae; Pomacea; Pomacea canaliculata  
UdeM00000015495 400727 310.5 UdeM00000015495 XP\_025116054.1 33.7  
575 321 10 42 569 325 886 4.90E-81 310.5 400727  
cellular  
organisms; Eukaryota; Opisthokonta; Metazoa; Eumetazoa; Bilateria; Protostomia; Spiralia; Lophotrochozoa; Mollusca; Gastropoda; Caenogastropoda; Architaenioglossa; Ampullarioidea; Ampullariidae; Pomacea; Pomacea canaliculata  
UdeM00000015496 7739 583.2 UdeM00000015496 XP\_035696678.1 57.2 481  
203 1 2 479 423 903 3.30E-163 583.2 7739 cellular  
organisms; Eukaryota; Opisthokonta; Metazoa; Eumetazoa; Bilateria; Deuterostomia; Chordata; Cephalochordata; Leptocardii; Amphioxiformes; Branchiostomidae; Branchiostoma; Branchiostoma floridae  
UdeM00000015498 6596 901.4 UdeM00000015498 XP\_045178142.1 60.5 731  
262 8 39 763 116 825 8.10E-259 901.4 6596 cellular  
organisms; Eukaryota; Opisthokonta; Metazoa; Eumetazoa; Bilateria; Protostomia; Spiralia; Lophotrochozoa; Mollusca; Bivalvia; Autobranchia; Heteroconchia; Euheterodonta; Imparidentia; Venerida; Veneroidea; Veneridae; Mercenaria; Mercenaria mercenaria  
UdeM00000015500 6596 456.1 UdeM00000015500 XP\_045178256.1 38.7 782  
392 23 132 870 47 784 1.00E-124 456.1 6596 cellular  
organisms; Eukaryota; Opisthokonta; Metazoa; Eumetazoa; Bilateria; Protostomia; Spiralia; Lophotrochozoa; Mollusca; Bivalvia; Autobranchia; Heteroconchia; Euheterodonta; Imparidentia; Venerida; Veneroidea; Veneridae; Mercenaria; Mercenaria mercenaria  
UdeM00000015502 6579 1761.1 UdeM00000015502 XP\_033728584.1 53.4  
1790 664 31 2 1656 12 1766 0.00E+00 1761.1 6579  
cellular  
organisms; Eukaryota; Opisthokonta; Metazoa; Eumetazoa; Bilateria; Protostomia; Spiralia; Lophotrochozoa; Mollusca; Bivalvia; Autobranchia; Pteriomorphia; Pectinida; Pectinoidea; Pectinidae; Pecten; Pecten maximus  
UdeM00000015503 29159 1902.9 UdeM00000015503 XP\_034301310.1 58.8  
1715 643 28 1 1688 11 1689 0.00E+00 1902.9  
29159 cellular  
organisms; Eukaryota; Opisthokonta; Metazoa; Eumetazoa; Bilateria; Protostomia; Spiralia; Lophotrochozoa; Mollusca; Bivalvia; Autobranchia; Pteriomorphia; Ostreida; Ostreoidea; Ostreidae; Crassostrea; Crassostrea gigas  
UdeM00000015504 45351 89.7 UdeM00000015504 XP\_001623471.2 29.5 220  
122 6 10 208 12 219 4.60E-15 89.7 45351 cellular  
organisms; Eukaryota; Opisthokonta; Metazoa; Eumetazoa; Cnidaria; Anthozoa; Hexacorallia; Actiniaria; Edwardsiidae; Nematostella; Nematostella vectensis  
UdeM00000015505 6596 196.4 UdeM00000015505 XP\_045177776.1 45.2 228  
120 3 28 254 700 923 4.90E-47 196.4 6596 cellular  
organisms; Eukaryota; Opisthokonta; Metazoa; Eumetazoa; Bilateria; Protostomia; Spiralia; Lophotrochozoa; Mollusca; Bivalvia; Autobranchia; Heteroconchia; Euheterodonta; Imparidentia; Venerida; Veneroidea; Veneridae; Mercenaria; Mercenaria mercenaria

UdeM00000015506 6596 170.6 UdeM00000015506 XP\_045177778.1 37.7 316  
 152 9 1 285 405 706 3.20E-39 170.6 6596 cellular  
 organisms;Eukaryota;Opisthokonta;Metazoa;Eumetazoa;Bilateria;Protostomia;  
 Spiralia;Lophotrochozoa;Mollusca;Bivalvia;Autobranhia;Heteroconchia;Euhe  
 terodonta;Imparidentia;Venerida;Veneroidea;Veneridae;Mercenaria;Mercenari  
 a mercenaria

UdeM00000015507 6596 246.9 UdeM00000015507 XP\_045176664.1 32.8 543  
 312 15 44 556 32 551 6.20E-62 246.9 6596 cellular  
 organisms;Eukaryota;Opisthokonta;Metazoa;Eumetazoa;Bilateria;Protostomia;  
 Spiralia;Lophotrochozoa;Mollusca;Bivalvia;Autobranhia;Heteroconchia;Euhe  
 terodonta;Imparidentia;Venerida;Veneroidea;Veneridae;Mercenaria;Mercenari  
 a mercenaria

UdeM00000015508 151771 742.7 UdeM00000015508 XP\_028414839.1 39.3  
 1072 576 24 142 1171 115 1153 7.60E-211 742.7 151771  
 cellular  
 organisms;Eukaryota;Opisthokonta;Metazoa;Eumetazoa;Cnidaria;Anthozoa;Octo  
 corallia;Alcyonacea;Alcyoniina;Nephtheidae;Dendronephthya;Dendronephthya  
 gigantea

UdeM00000015509 63436 206.8 UdeM00000015509 XP\_043469808.1 31.3 386  
 225 8 131 486 43 418 6.90E-50 206.8 63436 cellular  
 organisms;Eukaryota;Opisthokonta;Metazoa;Eumetazoa;Bilateria;Protostomia;  
 Ecdysozoa;Panarthropoda;Arthropoda;Mandibulata;Pancrustacea;Hexapoda;Inse  
 cta;Dicondylia;Pterygota;Neoptera;Endopterygota;Hymenoptera;Apocrita;Para  
 sitoida;Cynipoidea;Figitidae;Eucoilinae;Leptopilina;Leptopilina  
 heterotoma

UdeM00000015511 6596 115.9 UdeM00000015511 XP\_045176094.1 42.3 137  
 78 1 15 151 81 216 5.20E-23 115.9 6596 cellular  
 organisms;Eukaryota;Opisthokonta;Metazoa;Eumetazoa;Bilateria;Protostomia;  
 Spiralia;Lophotrochozoa;Mollusca;Bivalvia;Autobranhia;Heteroconchia;Euhe  
 terodonta;Imparidentia;Venerida;Veneroidea;Veneridae;Mercenaria;Mercenari  
 a mercenaria

UdeM00000015512 6596 144.1 UdeM00000015512 XP\_045177053.1 39.1 192  
 111 3 12 200 188 376 2.30E-31 144.1 6596 cellular  
 organisms;Eukaryota;Opisthokonta;Metazoa;Eumetazoa;Bilateria;Protostomia;  
 Spiralia;Lophotrochozoa;Mollusca;Bivalvia;Autobranhia;Heteroconchia;Euhe  
 terodonta;Imparidentia;Venerida;Veneroidea;Veneridae;Mercenaria;Mercenari  
 a mercenaria

UdeM00000015513 6596 151.4 UdeM00000015513 XP\_045176664.1 42.6 188  
 101 4 17 200 381 565 1.20E-33 151.4 6596 cellular  
 organisms;Eukaryota;Opisthokonta;Metazoa;Eumetazoa;Bilateria;Protostomia;  
 Spiralia;Lophotrochozoa;Mollusca;Bivalvia;Autobranhia;Heteroconchia;Euhe  
 terodonta;Imparidentia;Venerida;Veneroidea;Veneridae;Mercenaria;Mercenari  
 a mercenaria

UdeM00000015514 6596 229.2 UdeM00000015514 XP\_045176664.1 31.4 506  
 293 13 44 518 32 514 1.80E-56 229.2 6596 cellular  
 organisms;Eukaryota;Opisthokonta;Metazoa;Eumetazoa;Bilateria;Protostomia;  
 Spiralia;Lophotrochozoa;Mollusca;Bivalvia;Autobranhia;Heteroconchia;Euhe  
 terodonta;Imparidentia;Venerida;Veneroidea;Veneridae;Mercenaria;Mercenari  
 a mercenaria

UdeM00000015515 29159 325.9 UdeM00000015515 XP\_034303626.1 52.9 314  
 67 3 9 242 73 385 4.90E-86 325.9 29159 cellular  
 organisms;Eukaryota;Opisthokonta;Metazoa;Eumetazoa;Bilateria;Protostomia;  
 Spiralia;Lophotrochozoa;Mollusca;Bivalvia;Autobranhia;Pteriomorphia;Ostr  
 eida;Ostreoidea;Ostreidae;Crassostrea;Crassostrea gigas

UdeM00000015516 29159 621.3 UdeM00000015516 XP\_034303626.1 73.1 390  
 103 2 1 389 8 396 1.50E-174 621.3 29159 cellular  
 organisms;Eukaryota;Opisthokonta;Metazoa;Eumetazoa;Bilateria;Protostomia;  
 Spiralia;Lophotrochozoa;Mollusca;Bivalvia;Autobranchia;Pteriormorphia;Ostr  
 eida;Ostreoidea;Ostreidae;Crassostrea;Crassostrea gigas  
 UdeM00000015517 6596 1535 UdeM00000015517 XP\_045180107.1 52.4 1554  
 665 20 26 1531 38 1564 0.00E+00 1535 6596 cellular  
 organisms;Eukaryota;Opisthokonta;Metazoa;Eumetazoa;Bilateria;Protostomia;  
 Spiralia;Lophotrochozoa;Mollusca;Bivalvia;Autobranchia;Heteroconchia;Euhe  
 terodonta;Imparidentia;Venerida;Veneroidea;Veneridae;Mercenaria;Mercenari  
 a mercenaria  
 UdeM00000015518 6596 172.6 UdeM00000015518 XP\_045204903.1 43.3 233  
 109 6 32 247 7 233 6.50E-40 172.6 6596 cellular  
 organisms;Eukaryota;Opisthokonta;Metazoa;Eumetazoa;Bilateria;Protostomia;  
 Spiralia;Lophotrochozoa;Mollusca;Bivalvia;Autobranchia;Heteroconchia;Euhe  
 terodonta;Imparidentia;Venerida;Veneroidea;Veneridae;Mercenaria;Mercenari  
 a mercenaria  
 UdeM00000015519 6596 172.6 UdeM00000015519 XP\_045204903.1 43.3 233  
 109 6 32 247 7 233 6.50E-40 172.6 6596 cellular  
 organisms;Eukaryota;Opisthokonta;Metazoa;Eumetazoa;Bilateria;Protostomia;  
 Spiralia;Lophotrochozoa;Mollusca;Bivalvia;Autobranchia;Heteroconchia;Euhe  
 terodonta;Imparidentia;Venerida;Veneroidea;Veneridae;Mercenaria;Mercenari  
 a mercenaria  
 UdeM00000015520 6573 154.8 UdeM00000015520 XP\_021354137.1 39.9 208  
 113 2 38 233 26 233 1.30E-34 154.8 6573 cellular  
 organisms;Eukaryota;Opisthokonta;Metazoa;Eumetazoa;Bilateria;Protostomia;  
 Spiralia;Lophotrochozoa;Mollusca;Bivalvia;Autobranchia;Pteriormorphia;Pect  
 inida;Pectinoidea;Pectinidae;Mizuhopecten;Mizuhopecten yessoensis  
 UdeM00000015521 6573 157.5 UdeM00000015521 XP\_021354137.1 45.8 177  
 92 2 64 236 20 196 2.30E-35 157.5 6573 cellular  
 organisms;Eukaryota;Opisthokonta;Metazoa;Eumetazoa;Bilateria;Protostomia;  
 Spiralia;Lophotrochozoa;Mollusca;Bivalvia;Autobranchia;Pteriormorphia;Pect  
 inida;Pectinoidea;Pectinidae;Mizuhopecten;Mizuhopecten yessoensis  
 UdeM00000015522 6596 297 UdeM00000015522 XP\_045192227.1 42 381  
 166 4 19 346 59 437 3.20E-77 297 6596 cellular  
 organisms;Eukaryota;Opisthokonta;Metazoa;Eumetazoa;Bilateria;Protostomia;  
 Spiralia;Lophotrochozoa;Mollusca;Bivalvia;Autobranchia;Heteroconchia;Euhe  
 terodonta;Imparidentia;Venerida;Veneroidea;Veneridae;Mercenaria;Mercenari  
 a mercenaria  
 UdeM00000015523 36300 102.8 UdeM00000015523 XP\_009484969.1 47.2 108  
 56 1 5 112 69 175 2.90E-19 102.8 36300 cellular  
 organisms;Eukaryota;Opisthokonta;Metazoa;Eumetazoa;Bilateria;Deuterostomi  
 a;Chordata;Craniata;Vertebrata;Gnathostomata;Teleostomi;Euteleostomi;Sarc  
 opterygii;Dipnotetrapodomorpha;Tetrapoda;Amniota;Sauropsida;Sauria;Archel  
 osauria;Archosauria;Dinosauria;Saurischia;Theropoda;Coelurosauria;Aves;Ne  
 ognathae;Pelecaniformes;Pelecanidae;Pelecanus;Pelecanus crispus  
 UdeM00000015524 6573 183 UdeM00000015524 XP\_021354137.1 44.8 232  
 119 4 50 272 2 233 5.30E-43 183 6573 cellular  
 organisms;Eukaryota;Opisthokonta;Metazoa;Eumetazoa;Bilateria;Protostomia;  
 Spiralia;Lophotrochozoa;Mollusca;Bivalvia;Autobranchia;Pteriormorphia;Pect  
 inida;Pectinoidea;Pectinidae;Mizuhopecten;Mizuhopecten yessoensis  
 UdeM00000015525 6573 443 UdeM00000015525 XP\_021365807.1 39.7 619  
 330 11 39 642 42 632 7.70E-121 443 6573 cellular  
 organisms;Eukaryota;Opisthokonta;Metazoa;Eumetazoa;Bilateria;Protostomia;

Spiralia; Lophotrochozoa; Mollusca; Bivalvia; Autobranchia; Pteriomorpha; Pectinida; Pectinoidea; Pectinidae; Mizuhopecten; Mizuhopecten yessoensis  
 UdeM00000015526 6573 446 UdeM00000015526 XP\_021365807.1 40.4 627  
 319 14 39 644 42 634 8.80E-122 446 6573 cellular  
 organisms; Eukaryota; Opisthokonta; Metazoa; Eumetazoa; Bilateria; Protostomia; Spiralia; Lophotrochozoa; Mollusca; Bivalvia; Autobranchia; Pteriomorpha; Pectinida; Pectinoidea; Pectinidae; Mizuhopecten; Mizuhopecten yessoensis  
 UdeM00000015527 6573 448 UdeM00000015527 XP\_021365807.1 40 625  
 330 13 25 636 42 634 2.30E-122 448 6573 cellular  
 organisms; Eukaryota; Opisthokonta; Metazoa; Eumetazoa; Bilateria; Protostomia; Spiralia; Lophotrochozoa; Mollusca; Bivalvia; Autobranchia; Pteriomorpha; Pectinida; Pectinoidea; Pectinidae; Mizuhopecten; Mizuhopecten yessoensis  
 UdeM00000015528 6573 449.9 UdeM00000015528 XP\_021365807.1 40.4 621  
 327 11 39 644 42 634 1.50E-122 449.9 6573 cellular  
 organisms; Eukaryota; Opisthokonta; Metazoa; Eumetazoa; Bilateria; Protostomia; Spiralia; Lophotrochozoa; Mollusca; Bivalvia; Autobranchia; Pteriomorpha; Pectinida; Pectinoidea; Pectinidae; Mizuhopecten; Mizuhopecten yessoensis  
 UdeM00000015529 6565 225.3 UdeM00000015529 XP\_022324363.1 47.3 243  
 110 3 100 336 206 436 1.10E-55 225.3 6565 cellular  
 organisms; Eukaryota; Opisthokonta; Metazoa; Eumetazoa; Bilateria; Protostomia; Spiralia; Lophotrochozoa; Mollusca; Bivalvia; Autobranchia; Pteriomorpha; Ostracoda; Ostreidae; Crassostrea; Crassostrea virginica  
 UdeM00000015530 6565 225.3 UdeM00000015530 XP\_022324363.1 47.3 243  
 110 3 228 464 206 436 1.60E-55 225.3 6565 cellular  
 organisms; Eukaryota; Opisthokonta; Metazoa; Eumetazoa; Bilateria; Protostomia; Spiralia; Lophotrochozoa; Mollusca; Bivalvia; Autobranchia; Pteriomorpha; Ostracoda; Ostreidae; Crassostrea; Crassostrea virginica  
 UdeM00000015531 6596 66.2 UdeM00000015531 XP\_045189898.1 33.5 158  
 93 3 43 199 2145 2291 6.20E-08 66.2 6596 cellular  
 organisms; Eukaryota; Opisthokonta; Metazoa; Eumetazoa; Bilateria; Protostomia; Spiralia; Lophotrochozoa; Mollusca; Bivalvia; Autobranchia; Heteroconcha; Euheterodonta; Imparidentia; Venerida; Veneroidea; Veneridae; Mercenaria; Mercenaria mercenaria  
 UdeM00000015532 7574 85.1 UdeM00000015532 XP\_013410773.1 35.9 145  
 80 4 105 245 117 252 1.60E-13 85.1 7574 cellular  
 organisms; Eukaryota; Opisthokonta; Metazoa; Eumetazoa; Bilateria; Protostomia; Spiralia; Lophotrochozoa; Brachiopoda; Linguliformea; Lingulata; Lingulida; Linguloidea; Lingulidae; Lingula; Lingula anatina  
 UdeM00000015533 6573 344.7 UdeM00000015533 XP\_021365807.1 34.9 624  
 288 15 39 577 42 632 2.20E-91 344.7 6573 cellular  
 organisms; Eukaryota; Opisthokonta; Metazoa; Eumetazoa; Bilateria; Protostomia; Spiralia; Lophotrochozoa; Mollusca; Bivalvia; Autobranchia; Pteriomorpha; Pectinida; Pectinoidea; Pectinidae; Mizuhopecten; Mizuhopecten yessoensis  
 UdeM00000015534 6573 321.2 UdeM00000015534 XP\_021365807.1 35 594  
 278 15 39 557 42 602 2.60E-84 321.2 6573 cellular  
 organisms; Eukaryota; Opisthokonta; Metazoa; Eumetazoa; Bilateria; Protostomia; Spiralia; Lophotrochozoa; Mollusca; Bivalvia; Autobranchia; Pteriomorpha; Pectinida; Pectinoidea; Pectinidae; Mizuhopecten; Mizuhopecten yessoensis  
 UdeM00000015535 6579 287.7 UdeM00000015535 XP\_033728164.1 34.4 584  
 252 17 48 520 47 610 3.00E-74 287.7 6579 cellular  
 organisms; Eukaryota; Opisthokonta; Metazoa; Eumetazoa; Bilateria; Protostomia; Spiralia; Lophotrochozoa; Mollusca; Bivalvia; Autobranchia; Pteriomorpha; Pectinida; Pectinoidea; Pectinidae; Pecten; Pecten maximus

UdeM00000015536 6573 193.7 UdeM00000015536 XP\_021365807.1 33.5 394  
 173 8 23 333 97 484 4.00E-46 193.7 6573 cellular  
 organisms;Eukaryota;Opisthokonta;Metazoa;Eumetazoa;Bilateria;Protostomia;  
 Spiralia;Lophotrochozoa;Mollusca;Bivalvia;Autobranchia;Pteriomorpha;Pect  
 inida;Pectinoidea;Pectinidae;Mizuhopecten;Mizuhopecten yessoensis  
 UdeM00000015537 6579 100.5 UdeM00000015537 XP\_033728164.1 29.8 252  
 145 7 36 270 40 276 4.10E-18 100.5 6579 cellular  
 organisms;Eukaryota;Opisthokonta;Metazoa;Eumetazoa;Bilateria;Protostomia;  
 Spiralia;Lophotrochozoa;Mollusca;Bivalvia;Autobranchia;Pteriomorpha;Pect  
 inida;Pectinoidea;Pectinidae;Pecten;Pecten maximus  
 UdeM00000015538 6573 361.3 UdeM00000015538 XP\_021365807.1 36.9 591  
 296 16 37 580 42 602 2.30E-96 361.3 6573 cellular  
 organisms;Eukaryota;Opisthokonta;Metazoa;Eumetazoa;Bilateria;Protostomia;  
 Spiralia;Lophotrochozoa;Mollusca;Bivalvia;Autobranchia;Pteriomorpha;Pect  
 inida;Pectinoidea;Pectinidae;Mizuhopecten;Mizuhopecten yessoensis  
 UdeM00000015539 34632 90.1 UdeM00000015539 XP\_037501585.1 38.2 170  
 92 5 68 235 105 263 4.80E-15 90.1 34632 cellular  
 organisms;Eukaryota;Opisthokonta;Metazoa;Eumetazoa;Bilateria;Protostomia;  
 Ecdysozoa;Panarthropoda;Arthropoda;Chelicerata;Arachnida;Acari;Parasitifo  
 rmes;Ixodida;Ixodoidea;Ixodidae;Rhipicephalinae;Rhipicephalus;Rhipicephal  
 us;Rhipicephalus sanguineus group;Rhipicephalus sanguineus  
 UdeM00000015540 6573 304.3 UdeM00000015540 XP\_021365807.1 35.8 536  
 262 12 39 519 42 550 3.00E-79 304.3 6573 cellular  
 organisms;Eukaryota;Opisthokonta;Metazoa;Eumetazoa;Bilateria;Protostomia;  
 Spiralia;Lophotrochozoa;Mollusca;Bivalvia;Autobranchia;Pteriomorpha;Pect  
 inida;Pectinoidea;Pectinidae;Mizuhopecten;Mizuhopecten yessoensis  
 UdeM00000015541 6565 183.7 UdeM00000015541 XP\_022324363.1 32.6 374  
 192 8 10 363 102 435 4.10E-43 183.7 6565 cellular  
 organisms;Eukaryota;Opisthokonta;Metazoa;Eumetazoa;Bilateria;Protostomia;  
 Spiralia;Lophotrochozoa;Mollusca;Bivalvia;Autobranchia;Pteriomorpha;Ostr  
 eida;Ostreoidea;Ostreidae;Crassostrea;Crassostrea virginica  
 UdeM00000015542 6573 85.5 UdeM00000015542 XP\_021365807.1 29.4 214  
 130 3 15 222 81 279 9.50E-14 85.5 6573 cellular  
 organisms;Eukaryota;Opisthokonta;Metazoa;Eumetazoa;Bilateria;Protostomia;  
 Spiralia;Lophotrochozoa;Mollusca;Bivalvia;Autobranchia;Pteriomorpha;Pect  
 inida;Pectinoidea;Pectinidae;Mizuhopecten;Mizuhopecten yessoensis  
 UdeM00000015543 34632 90.1 UdeM00000015543 XP\_037501585.1 37.6 170  
 93 5 32 199 105 263 4.20E-15 90.1 34632 cellular  
 organisms;Eukaryota;Opisthokonta;Metazoa;Eumetazoa;Bilateria;Protostomia;  
 Ecdysozoa;Panarthropoda;Arthropoda;Chelicerata;Arachnida;Acari;Parasitifo  
 rmes;Ixodida;Ixodoidea;Ixodidae;Rhipicephalinae;Rhipicephalus;Rhipicephal  
 us;Rhipicephalus sanguineus group;Rhipicephalus sanguineus  
 UdeM00000015544 6573 358.2 UdeM00000015544 XP\_021365807.1 36.9 591  
 283 14 39 569 42 602 1.90E-95 358.2 6573 cellular  
 organisms;Eukaryota;Opisthokonta;Metazoa;Eumetazoa;Bilateria;Protostomia;  
 Spiralia;Lophotrochozoa;Mollusca;Bivalvia;Autobranchia;Pteriomorpha;Pect  
 inida;Pectinoidea;Pectinidae;Mizuhopecten;Mizuhopecten yessoensis  
 UdeM00000015545 6565 181.4 UdeM00000015545 XP\_022324363.1 32.1 374  
 194 8 10 363 102 435 2.00E-42 181.4 6565 cellular  
 organisms;Eukaryota;Opisthokonta;Metazoa;Eumetazoa;Bilateria;Protostomia;  
 Spiralia;Lophotrochozoa;Mollusca;Bivalvia;Autobranchia;Pteriomorpha;Ostr  
 eida;Ostreoidea;Ostreidae;Crassostrea;Crassostrea virginica  
 UdeM00000015546 6573 97.1 UdeM00000015546 XP\_021365807.1 28.9 242  
 150 4 37 271 42 268 4.50E-17 97.1 6573 cellular

organisms;Eukaryota;Opisthokonta;Metazoa;Eumetazoa;Bilateria;Protostomia;  
Spiralia;Lophotrochozoa;Mollusca;Bivalvia;Autobranhia;Pteriomorphia;Pect  
inida;Pectinoidea;Pectinidae;Mizuhopecten;Mizuhopecten yessoensis  
UdeM00000015547 6573 304.3 UdeM00000015547 XP\_021365807.1 35.8 536  
262 12 39 519 42 550 3.00E-79 304.3 6573 cellular  
organisms;Eukaryota;Opisthokonta;Metazoa;Eumetazoa;Bilateria;Protostomia;  
Spiralia;Lophotrochozoa;Mollusca;Bivalvia;Autobranhia;Pteriomorphia;Pect  
inida;Pectinoidea;Pectinidae;Mizuhopecten;Mizuhopecten yessoensis  
UdeM00000015548 6565 148.7 UdeM00000015548 XP\_022324395.1 30.4 365  
173 7 5 325 107 434 1.30E-32 148.7 6565 cellular  
organisms;Eukaryota;Opisthokonta;Metazoa;Eumetazoa;Bilateria;Protostomia;  
Spiralia;Lophotrochozoa;Mollusca;Bivalvia;Autobranhia;Pteriomorphia;Ostr  
eida;Ostreoidea;Ostreidae;Crassostrea;Crassostrea virginica  
UdeM00000015549 6596 65.1 UdeM00000015549 XP\_045208737.1 26.9 186  
112 6 47 223 32 202 1.30E-07 65.1 6596 cellular  
organisms;Eukaryota;Opisthokonta;Metazoa;Eumetazoa;Bilateria;Protostomia;  
Spiralia;Lophotrochozoa;Mollusca;Bivalvia;Autobranhia;Heteroconchia;Euhe  
terodonta;Imparidentia;Venerida;Veneroidea;Veneridae;Mercenaria;Mercenari  
a mercenaria  
UdeM00000015550 34632 90.1 UdeM00000015550 XP\_037501585.1 37.6 170  
93 5 68 235 105 263 4.80E-15 90.1 34632 cellular  
organisms;Eukaryota;Opisthokonta;Metazoa;Eumetazoa;Bilateria;Protostomia;  
Ecdysozoa;Panarthropoda;Arthropoda;Chelicerata;Arachnida;Acari;Parasitifo  
rmes;Ixodida;Ixodoidea;Ixodidae;Rhipicephalinae;Rhipicephalus;Rhipicephal  
us;Rhipicephalus sanguineus group;Rhipicephalus sanguineus  
UdeM00000015551 6573 403.3 UdeM00000015551 XP\_021365807.1 39.6 591  
306 14 39 608 42 602 5.60E-109 403.3 6573 cellular  
organisms;Eukaryota;Opisthokonta;Metazoa;Eumetazoa;Bilateria;Protostomia;  
Spiralia;Lophotrochozoa;Mollusca;Bivalvia;Autobranhia;Pteriomorphia;Pect  
inida;Pectinoidea;Pectinidae;Mizuhopecten;Mizuhopecten yessoensis  
UdeM00000015552 6565 183 UdeM00000015552 XP\_022324363.1 32.4 374  
193 8 10 363 102 435 7.00E-43 183 6565 cellular  
organisms;Eukaryota;Opisthokonta;Metazoa;Eumetazoa;Bilateria;Protostomia;  
Spiralia;Lophotrochozoa;Mollusca;Bivalvia;Autobranhia;Pteriomorphia;Ostr  
eida;Ostreoidea;Ostreidae;Crassostrea;Crassostrea virginica  
UdeM00000015553 6573 99 UdeM00000015553 XP\_021365807.1 28.9 253  
158 4 17 262 42 279 9.80E-18 99 6573 cellular  
organisms;Eukaryota;Opisthokonta;Metazoa;Eumetazoa;Bilateria;Protostomia;  
Spiralia;Lophotrochozoa;Mollusca;Bivalvia;Autobranhia;Pteriomorphia;Pect  
inida;Pectinoidea;Pectinidae;Mizuhopecten;Mizuhopecten yessoensis  
UdeM00000015554 34632 90.1 UdeM00000015554 XP\_037501585.1 37.6 170  
93 5 32 199 105 263 4.20E-15 90.1 34632 cellular  
organisms;Eukaryota;Opisthokonta;Metazoa;Eumetazoa;Bilateria;Protostomia;  
Ecdysozoa;Panarthropoda;Arthropoda;Chelicerata;Arachnida;Acari;Parasitifo  
rmes;Ixodida;Ixodoidea;Ixodidae;Rhipicephalinae;Rhipicephalus;Rhipicephal  
us;Rhipicephalus sanguineus group;Rhipicephalus sanguineus  
UdeM00000015555 6573 360.9 UdeM00000015555 XP\_021365807.1 37.2 591  
294 16 39 582 42 602 3.10E-96 360.9 6573 cellular  
organisms;Eukaryota;Opisthokonta;Metazoa;Eumetazoa;Bilateria;Protostomia;  
Spiralia;Lophotrochozoa;Mollusca;Bivalvia;Autobranhia;Pteriomorphia;Pect  
inida;Pectinoidea;Pectinidae;Mizuhopecten;Mizuhopecten yessoensis  
UdeM00000015556 6565 150.2 UdeM00000015556 XP\_022324395.1 29.9 374  
181 7 10 339 98 434 4.70E-33 150.2 6565 cellular  
organisms;Eukaryota;Opisthokonta;Metazoa;Eumetazoa;Bilateria;Protostomia;



Spiralia; Lophotrochozoa; Mollusca; Bivalvia; Autobranchia; Pteriomorpha; Ostr  
 eida; Ostreoidae; Ostreidae; Crassostrea; Crassostrea virginica  
 UdeM00000015557 6573 97.1 UdeM00000015557 XP\_021365807.1 28.9 242  
 150 4 37 271 42 268 4.50E-17 97.1 6573 cellular  
 organisms; Eukaryota; Opisthokonta; Metazoa; Eumetazoa; Bilateria; Protostomia;  
 Spiralia; Lophotrochozoa; Mollusca; Bivalvia; Autobranchia; Pteriomorpha; Pect  
 inida; Pectinoidea; Pectinidae; Mizuhopecten; Mizuhopecten yessoensis  
 UdeM00000015558 6573 304.3 UdeM00000015558 XP\_021365807.1 35.8 536  
 262 12 39 519 42 550 3.00E-79 304.3 6573 cellular  
 organisms; Eukaryota; Opisthokonta; Metazoa; Eumetazoa; Bilateria; Protostomia;  
 Spiralia; Lophotrochozoa; Mollusca; Bivalvia; Autobranchia; Pteriomorpha; Pect  
 inida; Pectinoidea; Pectinidae; Mizuhopecten; Mizuhopecten yessoensis  
 UdeM00000015559 6579 161.4 UdeM00000015559 XP\_033728164.1 28.7 439  
 199 8 34 364 59 491 2.40E-36 161.4 6579 cellular  
 organisms; Eukaryota; Opisthokonta; Metazoa; Eumetazoa; Bilateria; Protostomia;  
 Spiralia; Lophotrochozoa; Mollusca; Bivalvia; Autobranchia; Pteriomorpha; Pect  
 inida; Pectinoidea; Pectinidae; Pecten; Pecten maximus  
 UdeM00000015560 6579 99.4 UdeM00000015560 XP\_033728164.1 31 245  
 135 7 26 251 47 276 7.50E-18 99.4 6579 cellular  
 organisms; Eukaryota; Opisthokonta; Metazoa; Eumetazoa; Bilateria; Protostomia;  
 Spiralia; Lophotrochozoa; Mollusca; Bivalvia; Autobranchia; Pteriomorpha; Pect  
 inida; Pectinoidea; Pectinidae; Pecten; Pecten maximus  
 UdeM00000015561 34632 68.6 UdeM00000015561 XP\_037501585.1 32.9 170  
 94 5 68 228 105 263 1.50E-08 68.6 34632 cellular  
 organisms; Eukaryota; Opisthokonta; Metazoa; Eumetazoa; Bilateria; Protostomia;  
 Ecdysozoa; Panarthropoda; Arthropoda; Chelicerata; Arachnida; Acari; Parasitifo  
 rmes; Ixodida; Ixodoidea; Ixodidae; Rhipicephalinae; Rhipicephalus; Rhipicephal  
 us; Rhipicephalus sanguineus group; Rhipicephalus sanguineus  
 UdeM00000015562 6573 403.3 UdeM00000015562 XP\_021365807.1 39.6 591  
 306 14 39 608 42 602 5.60E-109 403.3 6573 cellular  
 organisms; Eukaryota; Opisthokonta; Metazoa; Eumetazoa; Bilateria; Protostomia;  
 Spiralia; Lophotrochozoa; Mollusca; Bivalvia; Autobranchia; Pteriomorpha; Pect  
 inida; Pectinoidea; Pectinidae; Mizuhopecten; Mizuhopecten yessoensis  
 UdeM00000015563 6565 183 UdeM00000015563 XP\_022324363.1 32.4 374  
 193 8 10 363 102 435 7.00E-43 183 6565 cellular  
 organisms; Eukaryota; Opisthokonta; Metazoa; Eumetazoa; Bilateria; Protostomia;  
 Spiralia; Lophotrochozoa; Mollusca; Bivalvia; Autobranchia; Pteriomorpha; Ostr  
 eida; Ostreoidae; Ostreidae; Crassostrea; Crassostrea virginica  
 UdeM00000015564 6573 98.6 UdeM00000015564 XP\_021365807.1 28.9 253  
 158 4 37 282 42 279 1.40E-17 98.6 6573 cellular  
 organisms; Eukaryota; Opisthokonta; Metazoa; Eumetazoa; Bilateria; Protostomia;  
 Spiralia; Lophotrochozoa; Mollusca; Bivalvia; Autobranchia; Pteriomorpha; Pect  
 inida; Pectinoidea; Pectinidae; Mizuhopecten; Mizuhopecten yessoensis  
 UdeM00000015566 27405 71.2 UdeM00000015566 XP\_042871187.1 29.8 151  
 89 5 8 148 60 203 1.50E-09 71.2 27405 cellular  
 organisms; Eukaryota; Opisthokonta; Metazoa; Eumetazoa; Bilateria; Protostomia;  
 Ecdysozoa; Panarthropoda; Arthropoda; Mandibulata; Pancrustacea; Crustacea; Mul  
 ticrustacea; Malacostraca; Eumalacostraca; Eucarida; Decapoda; Dendrobranchiat  
 a; Penaeoidea; Penaeidae; Penaeus; Penaeus japonicus  
 UdeM00000015567 6573 106.7 UdeM00000015567 XP\_021365807.1 45.9 109  
 50 3 8 110 497 602 2.20E-20 106.7 6573 cellular  
 organisms; Eukaryota; Opisthokonta; Metazoa; Eumetazoa; Bilateria; Protostomia;  
 Spiralia; Lophotrochozoa; Mollusca; Bivalvia; Autobranchia; Pteriomorpha; Pect  
 inida; Pectinoidea; Pectinidae; Mizuhopecten; Mizuhopecten yessoensis

UdeM00000015568 6565 202.2 UdeM00000015568 XP\_022324363.1 33.4 374  
 188 7 4 355 102 436 1.10E-48 202.2 6565 cellular  
 organisms;Eukaryota;Opisthokonta;Metazoa;Eumetazoa;Bilateria;Protostomia;  
 Spiralia;Lophotrochozoa;Mollusca;Bivalvia;Autobranchia;Pteriomorpha;Ostr  
 eida;Ostreoidea;Ostreidae;Crassostrea;Crassostrea virginica  
 UdeM00000015569 6573 435.3 UdeM00000015569 XP\_021365807.1 40 623  
 323 14 39 640 42 634 1.40E-118 435.3 6573 cellular  
 organisms;Eukaryota;Opisthokonta;Metazoa;Eumetazoa;Bilateria;Protostomia;  
 Spiralia;Lophotrochozoa;Mollusca;Bivalvia;Autobranchia;Pteriomorpha;Pect  
 inida;Pectinoidea;Pectinidae;Mizuhopecten;Mizuhopecten yessoensis  
 UdeM00000015570 6596 569.3 UdeM00000015570 XP\_045177776.1 39.8 810  
 451 12 120 925 166 942 9.80E-159 569.3 6596 cellular  
 organisms;Eukaryota;Opisthokonta;Metazoa;Eumetazoa;Bilateria;Protostomia;  
 Spiralia;Lophotrochozoa;Mollusca;Bivalvia;Autobranchia;Heteroconchia;Euhe  
 terodonta;Imparidentia;Venerida;Veneroidea;Veneridae;Mercenaria;Mercenari  
 a mercenaria  
 UdeM00000015571 225164 104.4 UdeM00000015571 XP\_009058199.1 52.3  
 107 44 2 1 107 1 100 9.40E-20 104.4 225164  
 cellular  
 organisms;Eukaryota;Opisthokonta;Metazoa;Eumetazoa;Bilateria;Protostomia;  
 Spiralia;Lophotrochozoa;Mollusca;Gastropoda;Patellogastropoda;Lottioidea;  
 Lottiidae;Lottia;Lottia gigantea  
 UdeM00000015572 225164 76.3 UdeM00000015572 XP\_009051767.1 39.3  
 140 72 6 12 141 5 141 3.90E-11 76.3 225164  
 cellular  
 organisms;Eukaryota;Opisthokonta;Metazoa;Eumetazoa;Bilateria;Protostomia;  
 Spiralia;Lophotrochozoa;Mollusca;Gastropoda;Patellogastropoda;Lottioidea;  
 Lottiidae;Lottia;Lottia gigantea  
 UdeM00000015573 225164 84.7 UdeM00000015573 XP\_009051767.1 36.1  
 133 82 3 526 655 11 143 5.70E-13 84.7 225164  
 cellular  
 organisms;Eukaryota;Opisthokonta;Metazoa;Eumetazoa;Bilateria;Protostomia;  
 Spiralia;Lophotrochozoa;Mollusca;Gastropoda;Patellogastropoda;Lottioidea;  
 Lottiidae;Lottia;Lottia gigantea  
 UdeM00000015575 1735272 268.9 UdeM00000015575 XP\_041374042.1 47.8  
 301 152 2 5 300 1 301 8.00E-69 268.9 1735272  
 cellular  
 organisms;Eukaryota;Opisthokonta;Metazoa;Eumetazoa;Bilateria;Protostomia;  
 Spiralia;Lophotrochozoa;Mollusca;Gastropoda;Neomphalina;Neomphaloidea;Pel  
 tospiridae;Gigantopelta;Gigantopelta aegis  
 UdeM00000015574 1735272 268.9 UdeM00000015574 XP\_041374042.1 47.8  
 301 152 2 43 338 1 301 9.00E-69 268.9 1735272  
 cellular  
 organisms;Eukaryota;Opisthokonta;Metazoa;Eumetazoa;Bilateria;Protostomia;  
 Spiralia;Lophotrochozoa;Mollusca;Gastropoda;Neomphalina;Neomphaloidea;Pel  
 tospiridae;Gigantopelta;Gigantopelta aegis  
 UdeM00000015576 6596 1136.7 UdeM00000015576 XP\_045179020.1 75.2  
 733 166 3 2 734 4 720 0.00E+00 1136.7 6596  
 cellular  
 organisms;Eukaryota;Opisthokonta;Metazoa;Eumetazoa;Bilateria;Protostomia;  
 Spiralia;Lophotrochozoa;Mollusca;Bivalvia;Autobranchia;Heteroconchia;Euhe  
 terodonta;Imparidentia;Venerida;Veneroidea;Veneridae;Mercenaria;Mercenari  
 a mercenaria

UdeM00000015577 6596 1147.1 UdeM00000015577 XP\_045179020.1 76.5  
 722 165 2 2 723 4 720 0.00E+00 1147.1 6596  
 cellular  
 organisms;Eukaryota;Opisthokonta;Metazoa;Eumetazoa;Bilateria;Protostomia;  
 Spiralia;Lophotrochozoa;Mollusca;Bivalvia;Autobranhia;Heteroconchia;Euhe  
 terodonta;Imparidentia;Venerida;Veneroidea;Veneridae;Mercenaria;Mercenari  
 a mercenaria  
 UdeM00000015578 6596 254.2 UdeM00000015578 XP\_045178590.1 52.7 264  
 117 4 13 272 13 272 1.90E-64 254.2 6596 cellular  
 organisms;Eukaryota;Opisthokonta;Metazoa;Eumetazoa;Bilateria;Protostomia;  
 Spiralia;Lophotrochozoa;Mollusca;Bivalvia;Autobranhia;Heteroconchia;Euhe  
 terodonta;Imparidentia;Venerida;Veneroidea;Veneridae;Mercenaria;Mercenari  
 a mercenaria  
 UdeM00000015579 6596 314.3 UdeM00000015579 XP\_045177957.1 45.6 450  
 199 9 1 415 81 519 2.40E-82 314.3 6596 cellular  
 organisms;Eukaryota;Opisthokonta;Metazoa;Eumetazoa;Bilateria;Protostomia;  
 Spiralia;Lophotrochozoa;Mollusca;Bivalvia;Autobranhia;Heteroconchia;Euhe  
 terodonta;Imparidentia;Venerida;Veneroidea;Veneridae;Mercenaria;Mercenari  
 a mercenaria  
 UdeM00000015580 6573 97.4 UdeM00000015580 XP\_021339625.1 37 146  
 89 2 65 209 257 400 2.40E-17 97.4 6573 cellular  
 organisms;Eukaryota;Opisthokonta;Metazoa;Eumetazoa;Bilateria;Protostomia;  
 Spiralia;Lophotrochozoa;Mollusca;Bivalvia;Autobranhia;Pteriormorphia;Pect  
 inida;Pectinoidea;Pectinidae;Mizuhopecten;Mizuhopecten yessoensis  
 UdeM00000015581 6565 130.6 UdeM00000015581 XP\_022334997.1 44.7 152  
 79 3 6 154 29 178 3.00E-27 130.6 6565 cellular  
 organisms;Eukaryota;Opisthokonta;Metazoa;Eumetazoa;Bilateria;Protostomia;  
 Spiralia;Lophotrochozoa;Mollusca;Bivalvia;Autobranhia;Pteriormorphia;Ostr  
 eida;Ostreoidea;Ostreidae;Crassostrea;Crassostrea virginica  
 UdeM00000015582 6565 98.6 UdeM00000015582 XP\_022334993.1 39.5 119  
 71 1 35 152 97 215 7.80E-18 98.6 6565 cellular  
 organisms;Eukaryota;Opisthokonta;Metazoa;Eumetazoa;Bilateria;Protostomia;  
 Spiralia;Lophotrochozoa;Mollusca;Bivalvia;Autobranhia;Pteriormorphia;Ostr  
 eida;Ostreoidea;Ostreidae;Crassostrea;Crassostrea virginica  
 UdeM00000015584 2607531 94.7 UdeM00000015584 XP\_029649883.1 36.3  
 237 96 11 365 586 757 953 4.80E-16 94.7 2607531  
 cellular  
 organisms;Eukaryota;Opisthokonta;Metazoa;Eumetazoa;Bilateria;Protostomia;  
 Spiralia;Lophotrochozoa;Mollusca;Cephalopoda;Coleoidea;Octopodiformes;Oct  
 opoda;Incirrata;Octopodidae;Octopus;Octopus sinensis  
 UdeM00000015585 7574 221.9 UdeM00000015585 XP\_023932112.1 41.3 271  
 150 3 5 266 1 271 1.00E-54 221.9 7574 cellular  
 organisms;Eukaryota;Opisthokonta;Metazoa;Eumetazoa;Bilateria;Protostomia;  
 Spiralia;Lophotrochozoa;Brachiopoda;Linguliformea;Lingulata;Lingulida;Lin  
 guloidea;Lingulidae;Lingula;Lingula anatina  
 UdeM00000015586 7574 122.9 UdeM00000015586 XP\_023932112.1 45 140  
 74 2 27 166 315 451 7.10E-25 122.9 7574 cellular  
 organisms;Eukaryota;Opisthokonta;Metazoa;Eumetazoa;Bilateria;Protostomia;  
 Spiralia;Lophotrochozoa;Brachiopoda;Linguliformea;Lingulata;Lingulida;Lin  
 guloidea;Lingulidae;Lingula;Lingula anatina  
 UdeM00000015587 7574 81.6 UdeM00000015587 XP\_023932112.1 42.4 99  
 54 2 1 99 356 451 1.40E-12 81.6 7574 cellular  
 organisms;Eukaryota;Opisthokonta;Metazoa;Eumetazoa;Bilateria;Protostomia;

Spiralia;Lophotrochozoa;Brachiopoda;Linguliformea;Lingulata;Lingulida;Linguloidea;Lingulidae;Lingula;Lingula anatina

UdeM00000015588 55291 134.8 UdeM00000015588 XP\_039595270.1 58.3 120  
40 3 124 235 136 253 1.40E-28 134.8 55291 cellular  
organisms;Eukaryota;Opisthokonta;Metazoa;Eumetazoa;Bilateria;Deuterostomia;Chordata;Craniata;Vertebrata;Gnathostomata;Teleostomi;Euteleostomi;Actinopterygii;Cladistia;Polypteriformes;Polypteridae;Polypterus;Polypterus senegalus

UdeM00000015589 55291 133.7 UdeM00000015589 XP\_039595270.1 58 119  
36 3 125 231 137 253 3.10E-28 133.7 55291 cellular  
organisms;Eukaryota;Opisthokonta;Metazoa;Eumetazoa;Bilateria;Deuterostomia;Chordata;Craniata;Vertebrata;Gnathostomata;Teleostomi;Euteleostomi;Actinopterygii;Cladistia;Polypteriformes;Polypteridae;Polypterus;Polypterus senegalus

UdeM00000015592 6596 170.2 UdeM00000015592 XP\_045183393.1 60.1 138  
53 1 64 199 19 156 2.60E-39 170.2 6596 cellular  
organisms;Eukaryota;Opisthokonta;Metazoa;Eumetazoa;Bilateria;Protostomia;Spiralia;Lophotrochozoa;Mollusca;Bivalvia;Autobranchia;Heteroconchia;Euheterodonta;Imparidentia;Venerida;Veneroidea;Veneridae;Mercenaria;Mercenaria mercenaria

UdeM00000015593 6596 149.1 UdeM00000015593 XP\_045198903.1 47.7 197  
94 4 10 200 7 200 6.30E-33 149.1 6596 cellular  
organisms;Eukaryota;Opisthokonta;Metazoa;Eumetazoa;Bilateria;Protostomia;Spiralia;Lophotrochozoa;Mollusca;Bivalvia;Autobranchia;Heteroconchia;Euheterodonta;Imparidentia;Venerida;Veneroidea;Veneridae;Mercenaria;Mercenaria mercenaria

UdeM00000015594 6596 149.1 UdeM00000015594 XP\_045198903.1 47.7 197  
94 4 3 193 7 200 6.10E-33 149.1 6596 cellular  
organisms;Eukaryota;Opisthokonta;Metazoa;Eumetazoa;Bilateria;Protostomia;Spiralia;Lophotrochozoa;Mollusca;Bivalvia;Autobranchia;Heteroconchia;Euheterodonta;Imparidentia;Venerida;Veneroidea;Veneridae;Mercenaria;Mercenaria mercenaria

UdeM00000015595 6596 738 UdeM00000015595 XP\_045177732.1 55.4 626  
275 4 41 663 39 663 1.00E-209 738 6596 cellular  
organisms;Eukaryota;Opisthokonta;Metazoa;Eumetazoa;Bilateria;Protostomia;Spiralia;Lophotrochozoa;Mollusca;Bivalvia;Autobranchia;Heteroconchia;Euheterodonta;Imparidentia;Venerida;Veneroidea;Veneridae;Mercenaria;Mercenaria mercenaria

UdeM00000015596 6596 738 UdeM00000015596 XP\_045177732.1 55.4 626  
275 4 15 637 39 663 9.90E-210 738 6596 cellular  
organisms;Eukaryota;Opisthokonta;Metazoa;Eumetazoa;Bilateria;Protostomia;Spiralia;Lophotrochozoa;Mollusca;Bivalvia;Autobranchia;Heteroconchia;Euheterodonta;Imparidentia;Venerida;Veneroidea;Veneridae;Mercenaria;Mercenaria mercenaria

UdeM00000015597 6596 724.9 UdeM00000015597 XP\_045196444.1 46.9 772  
374 10 1 753 1 755 1.00E-205 724.9 6596 cellular  
organisms;Eukaryota;Opisthokonta;Metazoa;Eumetazoa;Bilateria;Protostomia;Spiralia;Lophotrochozoa;Mollusca;Bivalvia;Autobranchia;Heteroconchia;Euheterodonta;Imparidentia;Venerida;Veneroidea;Veneridae;Mercenaria;Mercenaria mercenaria

UdeM00000015598 6596 3594.7 UdeM00000015598 XP\_045179896.1 66.3  
2717 851 22 490 3159 22 2720 0.00E+00 3594.7 6596  
cellular  
organisms;Eukaryota;Opisthokonta;Metazoa;Eumetazoa;Bilateria;Protostomia;

Spiralia;Lophotrochozoa;Mollusca;Bivalvia;Autobranchia;Heteroconchia;Euherodonta;Imparidentia;Venerida;Veneroidea;Veneridae;Mercenaria;Mercenaria mercenaria

UdeM00000044337 6596 134 UdeM00000044337 XP\_045201815.1 31.5 327  
180 8 1 314 4 299 3.20E-28 134 6596 cellular

organisms;Eukaryota;Opisthokonta;Metazoa;Eumetazoa;Bilateria;Protostomia;Spiralia;Lophotrochozoa;Mollusca;Bivalvia;Autobranchia;Heteroconchia;Euherodonta;Imparidentia;Venerida;Veneroidea;Veneridae;Mercenaria;Mercenaria mercenaria

UdeM00000042602 8090 526.2 UdeM00000042602 XP\_023808293.1 42.8 664  
323 5 2 608 50 713 6.30E-146 526.2 8090 cellular

organisms;Eukaryota;Opisthokonta;Metazoa;Eumetazoa;Bilateria;Deuterostomia;Chordata;Craniata;Vertebrata;Gnathostomata;Teleostomi;Euteleostomi;Actinopterygii;Actinopteri;Neopterygii;Teleostei;Osteoglossocephalai;Clupeocephala;Euteleostei;Neoteleostei;Eurypterygia;Ctenosquamata;Acanthomorpha;Euacanthomorpha;Percomorphaceae;Ovalentaria;Atherinomorpha;Belontiiformes;Adrianichthyoidei;Adrianichthyidae;Oryziinae;Oryzias;Oryzias latipes

UdeM00000042605 2652724 108.6 UdeM00000042605 XP\_020914302.1 37.6  
181 109 3 1 178 7 186 1.60E-20 108.6 2652724  
cellular

organisms;Eukaryota;Opisthokonta;Metazoa;Eumetazoa;Cnidaria;Anthozoa;Hexacorallia;Actiniaria;Aiptasiidae;Exaiptasia;Exaiptasia diaphana

UdeM00000042606 6596 216.9 UdeM00000042606 XP\_045161905.1 54.3 184  
83 1 1 184 1 183 2.50E-53 216.9 6596 cellular

organisms;Eukaryota;Opisthokonta;Metazoa;Eumetazoa;Bilateria;Protostomia;Spiralia;Lophotrochozoa;Mollusca;Bivalvia;Autobranchia;Heteroconchia;Euherodonta;Imparidentia;Venerida;Veneroidea;Veneridae;Mercenaria;Mercenaria mercenaria

UdeM00000042607 6596 217.6 UdeM00000042607 XP\_045185723.1 36.7 362  
201 7 7 361 455 795 2.60E-53 217.6 6596 cellular

organisms;Eukaryota;Opisthokonta;Metazoa;Eumetazoa;Bilateria;Protostomia;Spiralia;Lophotrochozoa;Mollusca;Bivalvia;Autobranchia;Heteroconchia;Euherodonta;Imparidentia;Venerida;Veneroidea;Veneridae;Mercenaria;Mercenaria mercenaria

UdeM00000042610 6596 366.3 UdeM00000042610 XP\_045197754.1 78.6 220  
47 0 3 222 252 471 3.00E-98 366.3 6596 cellular

organisms;Eukaryota;Opisthokonta;Metazoa;Eumetazoa;Bilateria;Protostomia;Spiralia;Lophotrochozoa;Mollusca;Bivalvia;Autobranchia;Heteroconchia;Euherodonta;Imparidentia;Venerida;Veneroidea;Veneridae;Mercenaria;Mercenaria mercenaria

UdeM00000042611 6596 364.8 UdeM00000042611 XP\_045197754.1 78.5 219  
47 0 7 225 253 471 8.80E-98 364.8 6596 cellular

organisms;Eukaryota;Opisthokonta;Metazoa;Eumetazoa;Bilateria;Protostomia;Spiralia;Lophotrochozoa;Mollusca;Bivalvia;Autobranchia;Heteroconchia;Euherodonta;Imparidentia;Venerida;Veneroidea;Veneridae;Mercenaria;Mercenaria mercenaria

UdeM00000042612 29159 250 UdeM00000042612 XP\_034307341.1 38 345  
195 5 3 332 5 345 5.00E-63 250 29159 cellular

organisms;Eukaryota;Opisthokonta;Metazoa;Eumetazoa;Bilateria;Protostomia;Spiralia;Lophotrochozoa;Mollusca;Bivalvia;Autobranchia;Pteriomorpha;Ostreida;Ostreoidea;Ostreidae;Crassostrea;Crassostrea gigas

UdeM00000042613 6596 59.7 UdeM00000042613 XP\_045185535.1 27.8 133  
89 3 6 131 73 205 3.30E-06 59.7 6596 cellular

organisms;Eukaryota;Opisthokonta;Metazoa;Eumetazoa;Bilateria;Protostomia;Spiralia;Lophotrochozoa;Mollusca;Bivalvia;Autobranchia;Heteroconchia;Euheterodonta;Imparidentia;Venerida;Veneroidea;Veneridae;Mercenaria;Mercenaria mercenaria

UdeM00000042614 70779 95.1 UdeM00000042614 XP\_015774235.1 52.2 92  
42 1 21 112 2579 2668 6.10E-17 95.1 70779 cellular

organisms;Eukaryota;Opisthokonta;Metazoa;Eumetazoa;Cnidaria;Anthozoa;Hexacorallia;Scleractinia;Astrocoeniina;Acroporidae;Acropora;Acropora digitifera

UdeM00000042615 29159 1770.4 UdeM00000042615 XP\_034324865.1 30.6  
4136 2579 111 2 4018 163 4127 0.00E+00 1770.4  
29159 cellular

organisms;Eukaryota;Opisthokonta;Metazoa;Eumetazoa;Bilateria;Protostomia;Spiralia;Lophotrochozoa;Mollusca;Bivalvia;Autobranchia;Pteriormorphia;Ostreida;Ostreoidea;Ostreidae;Crassostrea;Crassostrea gigas

UdeM00000042616 400727 164.1 UdeM00000042616 XP\_025088800.1 61.7  
120 42 1 85 200 11 130 1.90E-37 164.1 400727  
cellular

organisms;Eukaryota;Opisthokonta;Metazoa;Eumetazoa;Bilateria;Protostomia;Spiralia;Lophotrochozoa;Mollusca;Gastropoda;Caenogastropoda;Architaenioglossa;Ampullarioidea;Ampullariidae;Pomacea;Pomacea canaliculata

UdeM00000042617 2607531 155.6 UdeM00000042617 XP\_036366827.1 64.2  
106 38 0 4 109 78 183 3.60E-35 155.6 2607531  
cellular

organisms;Eukaryota;Opisthokonta;Metazoa;Eumetazoa;Bilateria;Protostomia;Spiralia;Lophotrochozoa;Mollusca;Cephalopoda;Coleoidea;Octopodiformes;Octopoda;Incirrata;Octopodidae;Octopus;Octopus sinensis

UdeM00000042619 6596 206.8 UdeM00000042619 XP\_045199522.1 50.8 185  
79 2 61 233 100 284 2.90E-50 206.8 6596 cellular

organisms;Eukaryota;Opisthokonta;Metazoa;Eumetazoa;Bilateria;Protostomia;Spiralia;Lophotrochozoa;Mollusca;Bivalvia;Autobranchia;Heteroconchia;Euheterodonta;Imparidentia;Venerida;Veneroidea;Veneridae;Mercenaria;Mercenaria mercenaria

UdeM00000042620 6596 208.8 UdeM00000042620 XP\_045199522.1 48.8 213  
98 3 14 222 79 284 7.30E-51 208.8 6596 cellular

organisms;Eukaryota;Opisthokonta;Metazoa;Eumetazoa;Bilateria;Protostomia;Spiralia;Lophotrochozoa;Mollusca;Bivalvia;Autobranchia;Heteroconchia;Euheterodonta;Imparidentia;Venerida;Veneroidea;Veneridae;Mercenaria;Mercenaria mercenaria

UdeM00000042621 6573 379.8 UdeM00000042621 XP\_021352618.1 51.6 401  
96 3 1 401 1 303 4.30E-102 379.8 6573 cellular

organisms;Eukaryota;Opisthokonta;Metazoa;Eumetazoa;Bilateria;Protostomia;Spiralia;Lophotrochozoa;Mollusca;Bivalvia;Autobranchia;Pteriormorphia;Pectinida;Pectinoidea;Pectinidae;Mizuhopecten;Mizuhopecten yessoensis

UdeM00000042622 6573 223.4 UdeM00000042622 XP\_021352618.1 68.5 149  
47 0 4 152 155 303 2.00E-55 223.4 6573 cellular

organisms;Eukaryota;Opisthokonta;Metazoa;Eumetazoa;Bilateria;Protostomia;Spiralia;Lophotrochozoa;Mollusca;Bivalvia;Autobranchia;Pteriormorphia;Pectinida;Pectinoidea;Pectinidae;Mizuhopecten;Mizuhopecten yessoensis

UdeM00000042623 6596 239.6 UdeM00000042623 XP\_045199522.1 55.7 185  
79 1 16 197 100 284 3.40E-60 239.6 6596 cellular

organisms;Eukaryota;Opisthokonta;Metazoa;Eumetazoa;Bilateria;Protostomia;Spiralia;Lophotrochozoa;Mollusca;Bivalvia;Autobranchia;Heteroconchia;Euheterodonta

terodonta;Imparidentia;Venerida;Veneroidea;Veneridae;Mercenaria;Mercenaria mercenaria

UdeM00000042625 6579 521.2 UdeM00000042625 XP\_033741126.1 55.6 480  
168 7 3 463 333 786 1.60E-144 521.2 6579 cellular

organisms;Eukaryota;Opisthokonta;Metazoa;Eumetazoa;Bilateria;Protostomia;Spiralia;Lophotrochozoa;Mollusca;Bivalvia;Autobranhia;Pteriomorphia;Pectinida;Pectinoidea;Pectinidae;Pecten;Pecten maximus

UdeM00000042626 37653 105.1 UdeM00000042626 XP\_014770921.1 76.6 64  
15 0 1 64 790 853 3.60E-20 105.1 37653 cellular

organisms;Eukaryota;Opisthokonta;Metazoa;Eumetazoa;Bilateria;Protostomia;Spiralia;Lophotrochozoa;Mollusca;Cephalopoda;Coleoidea;Octopodiformes;Octopoda;Incirrata;Octopodidae;Octopus;Octopus bimaculoides

UdeM00000042627 1735272 836.6 UdeM00000042627 XP\_041351723.1 72  
568 140 2 6 557 11 575 1.80E-239 836.6 1735272  
cellular

organisms;Eukaryota;Opisthokonta;Metazoa;Eumetazoa;Bilateria;Protostomia;Spiralia;Lophotrochozoa;Mollusca;Gastropoda;Neomphalina;Neomphaloidea;Peltospiridae;Gigantopelta;Gigantopelta aegis

UdeM00000042628 6596 131 UdeM00000042628 XP\_045196901.1 63 92  
34 0 1 92 7 98 1.20E-27 131 6596 cellular

organisms;Eukaryota;Opisthokonta;Metazoa;Eumetazoa;Bilateria;Protostomia;Spiralia;Lophotrochozoa;Mollusca;Bivalvia;Autobranhia;Heteroconchia;Euheterodonta;Imparidentia;Venerida;Veneroidea;Veneridae;Mercenaria;Mercenaria mercenaria

UdeM00000042631 6596 208.4 UdeM00000042631 XP\_045196901.1 47.2 229  
91 1 26 254 205 403 1.10E-50 208.4 6596 cellular

organisms;Eukaryota;Opisthokonta;Metazoa;Eumetazoa;Bilateria;Protostomia;Spiralia;Lophotrochozoa;Mollusca;Bivalvia;Autobranhia;Heteroconchia;Euheterodonta;Imparidentia;Venerida;Veneroidea;Veneridae;Mercenaria;Mercenaria mercenaria

UdeM00000042630 6596 307 UdeM00000042630 XP\_045196901.1 52.4 288  
107 1 26 313 205 462 2.80E-80 307 6596 cellular

organisms;Eukaryota;Opisthokonta;Metazoa;Eumetazoa;Bilateria;Protostomia;Spiralia;Lophotrochozoa;Mollusca;Bivalvia;Autobranhia;Heteroconchia;Euheterodonta;Imparidentia;Venerida;Veneroidea;Veneridae;Mercenaria;Mercenaria mercenaria

UdeM00000042632 29159 431.4 UdeM00000042632 XP\_011435683.2 58.8 369  
140 3 1 362 1 364 1.30E-117 431.4 29159 cellular

organisms;Eukaryota;Opisthokonta;Metazoa;Eumetazoa;Bilateria;Protostomia;Spiralia;Lophotrochozoa;Mollusca;Bivalvia;Autobranhia;Pteriomorphia;Ostreida;Ostreoidea;Ostreidae;Crassostrea;Crassostrea gigas

UdeM00000042633 6596 241.1 UdeM00000042633 XP\_045196892.1 88.3 128  
15 0 1 128 39 166 7.70E-61 241.1 6596 cellular

organisms;Eukaryota;Opisthokonta;Metazoa;Eumetazoa;Bilateria;Protostomia;Spiralia;Lophotrochozoa;Mollusca;Bivalvia;Autobranhia;Heteroconchia;Euheterodonta;Imparidentia;Venerida;Veneroidea;Veneridae;Mercenaria;Mercenaria mercenaria

UdeM00000042634 6565 232.6 UdeM00000042634 XP\_022293175.1 43.9 278  
143 3 12 287 9 275 6.20E-58 232.6 6565 cellular

organisms;Eukaryota;Opisthokonta;Metazoa;Eumetazoa;Bilateria;Protostomia;Spiralia;Lophotrochozoa;Mollusca;Bivalvia;Autobranhia;Pteriomorphia;Ostreida;Ostreoidea;Ostreidae;Crassostrea;Crassostrea virginica

UdeM00000042635 6565 232.6 UdeM00000042635 XP\_022293175.1 43.9 278  
143 3 44 319 9 275 6.90E-58 232.6 6565 cellular

organisms;Eukaryota;Opisthokonta;Metazoa;Eumetazoa;Bilateria;Protostomia;Spiralia;Lophotrochozoa;Mollusca;Bivalvia;Autobranchia;Pteriormorphia;Ostreida;Ostreoidea;Ostreidae;Crassostrea;Crassostrea virginica  
UdeM00000042637 6596 132.5 UdeM00000042637 XP\_045177976.1 25.3 332  
233 9 16 338 5 330 1.00E-27 132.5 6596 cellular

organisms;Eukaryota;Opisthokonta;Metazoa;Eumetazoa;Bilateria;Protostomia;Spiralia;Lophotrochozoa;Mollusca;Bivalvia;Autobranchia;Heteroconchia;Euheterodonta;Imparidentia;Venerida;Veneroidea;Veneridae;Mercenaria;Mercenaria mercenaria  
UdeM00000042639 6573 184.9 UdeM00000042639 XP\_021352638.1 28.1 700  
414 21 33 684 68 726 3.50E-43 184.9 6573 cellular

organisms;Eukaryota;Opisthokonta;Metazoa;Eumetazoa;Bilateria;Protostomia;Spiralia;Lophotrochozoa;Mollusca;Bivalvia;Autobranchia;Pteriormorphia;Pectinida;Pectinoidea;Pectinidae;Mizuhopecten;Mizuhopecten yessoensis  
UdeM00000042640 6565 213.4 UdeM00000042640 XP\_022289238.1 31.3 504  
267 12 2 443 19 505 6.00E-52 213.4 6565 cellular

organisms;Eukaryota;Opisthokonta;Metazoa;Eumetazoa;Bilateria;Protostomia;Spiralia;Lophotrochozoa;Mollusca;Bivalvia;Autobranchia;Pteriormorphia;Ostreida;Ostreoidea;Ostreidae;Crassostrea;Crassostrea virginica  
UdeM00000042641 6596 177.2 UdeM00000042641 XP\_045196450.1 58.6 145  
51 2 174 318 728 863 3.40E-41 177.2 6596 cellular

organisms;Eukaryota;Opisthokonta;Metazoa;Eumetazoa;Bilateria;Protostomia;Spiralia;Lophotrochozoa;Mollusca;Bivalvia;Autobranchia;Heteroconchia;Euheterodonta;Imparidentia;Venerida;Veneroidea;Veneridae;Mercenaria;Mercenaria mercenaria  
UdeM00000042642 6596 146 UdeM00000042642 XP\_045196450.1 48.1 183  
80 3 111 279 402 583 7.30E-32 146 6596 cellular

organisms;Eukaryota;Opisthokonta;Metazoa;Eumetazoa;Bilateria;Protostomia;Spiralia;Lophotrochozoa;Mollusca;Bivalvia;Autobranchia;Heteroconchia;Euheterodonta;Imparidentia;Venerida;Veneroidea;Veneridae;Mercenaria;Mercenaria mercenaria  
UdeM00000042645 6596 552 UdeM00000042645 XP\_045195357.1 50.9 505  
246 2 4 507 46 549 8.60E-154 552 6596 cellular

organisms;Eukaryota;Opisthokonta;Metazoa;Eumetazoa;Bilateria;Protostomia;Spiralia;Lophotrochozoa;Mollusca;Bivalvia;Autobranchia;Heteroconchia;Euheterodonta;Imparidentia;Venerida;Veneroidea;Veneridae;Mercenaria;Mercenaria mercenaria  
UdeM00000042646 6596 208 UdeM00000042646 XP\_045195357.1 26.3 552  
166 4 4 330 46 581 1.90E-50 208 6596 cellular

organisms;Eukaryota;Opisthokonta;Metazoa;Eumetazoa;Bilateria;Protostomia;Spiralia;Lophotrochozoa;Mollusca;Bivalvia;Autobranchia;Heteroconchia;Euheterodonta;Imparidentia;Venerida;Veneroidea;Veneridae;Mercenaria;Mercenaria mercenaria  
UdeM00000042647 6596 242.7 UdeM00000042647 XP\_045195422.1 32.6 399  
247 8 23 412 131 516 8.50E-61 242.7 6596 cellular

organisms;Eukaryota;Opisthokonta;Metazoa;Eumetazoa;Bilateria;Protostomia;Spiralia;Lophotrochozoa;Mollusca;Bivalvia;Autobranchia;Heteroconchia;Euheterodonta;Imparidentia;Venerida;Veneroidea;Veneridae;Mercenaria;Mercenaria mercenaria  
UdeM00000040859 6596 133.7 UdeM00000040859 XP\_045201952.1 40.8 196  
106 7 22 210 601 793 2.80E-28 133.7 6596 cellular

organisms;Eukaryota;Opisthokonta;Metazoa;Eumetazoa;Bilateria;Protostomia;Spiralia;Lophotrochozoa;Mollusca;Bivalvia;Autobranchia;Heteroconchia;Euheterodonta;Imparidentia;Venerida;Veneroidea;Veneridae;Mercenaria;Mercenaria mercenaria



terodonta;Imparidentia;Venerida;Veneroidea;Veneridae;Mercenaria;Mercenaria mercenaria

UdeM00000040860 6596 81.6 UdeM00000040860 XP\_045204915.1 37.1 132  
67 4 4 120 491 621 1.40E-12 81.6 6596 cellular

organisms;Eukaryota;Opisthokonta;Metazoa;Eumetazoa;Bilateria;Protostomia;Spiralia;Lophotrochozoa;Mollusca;Bivalvia;Autobranchia;Heteroconchia;Euheterodonta;Imparidentia;Venerida;Veneroidea;Veneridae;Mercenaria;Mercenaria mercenaria

UdeM00000040861 6105 80.1 UdeM00000040861 XP\_031574328.1 41.7 96  
48 2 1 88 54 149 2.10E-12 80.1 6105 cellular

organisms;Eukaryota;Opisthokonta;Metazoa;Eumetazoa;Cnidaria;Anthozoa;Hexacorallia;Actiniaria;Actiniidae;Actinia;Actinia tenebrosa

UdeM00000040862 6596 87.4 UdeM00000040862 XP\_045201952.1 42.7 117  
54 4 132 240 681 792 2.70E-14 87.4 6596 cellular

organisms;Eukaryota;Opisthokonta;Metazoa;Eumetazoa;Bilateria;Protostomia;Spiralia;Lophotrochozoa;Mollusca;Bivalvia;Autobranchia;Heteroconchia;Euheterodonta;Imparidentia;Venerida;Veneroidea;Veneridae;Mercenaria;Mercenaria mercenaria

UdeM00000040863 1735272 337.8 UdeM00000040863 XP\_041373377.1 38.8  
412 248 2 1 410 1 410 2.00E-89 337.8 1735272

cellular

organisms;Eukaryota;Opisthokonta;Metazoa;Eumetazoa;Bilateria;Protostomia;Spiralia;Lophotrochozoa;Mollusca;Gastropoda;Neomphalina;Neomphaloidea;Peltopspiridae;Gigantopelta;Gigantopelta aegis

UdeM00000040864 6596 424.9 UdeM00000040864 XP\_045208439.1 60.8 314  
121 1 3 316 28 339 9.90E-116 424.9 6596 cellular

organisms;Eukaryota;Opisthokonta;Metazoa;Eumetazoa;Bilateria;Protostomia;Spiralia;Lophotrochozoa;Mollusca;Bivalvia;Autobranchia;Heteroconchia;Euheterodonta;Imparidentia;Venerida;Veneroidea;Veneridae;Mercenaria;Mercenaria mercenaria

UdeM00000040865 6579 147.9 UdeM00000040865 XP\_033758606.1 61.2 103  
36 1 5 103 396 498 7.20E-33 147.9 6579 cellular

organisms;Eukaryota;Opisthokonta;Metazoa;Eumetazoa;Bilateria;Protostomia;Spiralia;Lophotrochozoa;Mollusca;Bivalvia;Autobranchia;Pteriomorphia;Pectinida;Pectinoidea;Pectinidae;Pecten;Pecten maximus

UdeM00000040866 29159 89.4 UdeM00000040866 XP\_034329650.1 47.2 72  
38 0 2 73 307 378 2.10E-15 89.4 29159 cellular

organisms;Eukaryota;Opisthokonta;Metazoa;Eumetazoa;Bilateria;Protostomia;Spiralia;Lophotrochozoa;Mollusca;Bivalvia;Autobranchia;Pteriomorphia;Ostreida;Ostreoidea;Ostreidae;Crassostrea;Crassostrea gigas

UdeM00000040867 6579 159.1 UdeM00000040867 XP\_033731739.1 68.6 105  
33 0 1 105 188 292 3.20E-36 159.1 6579 cellular

organisms;Eukaryota;Opisthokonta;Metazoa;Eumetazoa;Bilateria;Protostomia;Spiralia;Lophotrochozoa;Mollusca;Bivalvia;Autobranchia;Pteriomorphia;Pectinida;Pectinoidea;Pectinidae;Pecten;Pecten maximus

UdeM00000040868 6573 101.7 UdeM00000040868 XP\_021352044.1 64.8 71  
25 0 1 71 1 71 4.10E-19 101.7 6573 cellular

organisms;Eukaryota;Opisthokonta;Metazoa;Eumetazoa;Bilateria;Protostomia;Spiralia;Lophotrochozoa;Mollusca;Bivalvia;Autobranchia;Pteriomorphia;Pectinida;Pectinoidea;Pectinidae;Mizuhopecten;Mizuhopecten yessoensis

UdeM00000040869 1735272 209.9 UdeM00000040869 XP\_041373846.1 34.6  
358 153 3 10 318 13 338 4.70E-51 209.9 1735272

cellular

organisms;Eukaryota;Opisthokonta;Metazoa;Eumetazoa;Bilateria;Protostomia;

Spiralia;Lophotrochozoa;Mollusca;Gastropoda;Neomphalina;Neomphaloidea;Pel  
tospiridae;Gigantopelta;Gigantopelta aegis  
UdeM00000040870 6596 560.8 UdeM00000040870 XP\_045209189.1 53.6 511  
203 5 13 499 22 522 1.70E-156 560.8 6596 cellular  
organisms;Eukaryota;Opisthokonta;Metazoa;Eumetazoa;Bilateria;Protostomia;  
Spiralia;Lophotrochozoa;Mollusca;Bivalvia;Autobranchia;Heteroconchia;Euhe  
terodonta;Imparidentia;Venerida;Veneroidea;Veneridae;Mercenaria;Mercenari  
a mercenaria  
UdeM00000040871 6596 558.9 UdeM00000040871 XP\_045209189.1 55.2 484  
190 6 34 515 64 522 6.70E-156 558.9 6596 cellular  
organisms;Eukaryota;Opisthokonta;Metazoa;Eumetazoa;Bilateria;Protostomia;  
Spiralia;Lophotrochozoa;Mollusca;Bivalvia;Autobranchia;Heteroconchia;Euhe  
terodonta;Imparidentia;Venerida;Veneroidea;Veneridae;Mercenaria;Mercenari  
a mercenaria  
UdeM00000040872 6565 158.7 UdeM00000040872 XP\_022328252.1 44.5 211  
99 5 1 193 1105 1315 7.50E-36 158.7 6565 cellular  
organisms;Eukaryota;Opisthokonta;Metazoa;Eumetazoa;Bilateria;Protostomia;  
Spiralia;Lophotrochozoa;Mollusca;Bivalvia;Autobranchia;Pteriormorphia;Ostr  
eida;Ostreoidea;Ostreidae;Crassostrea;Crassostrea virginica  
UdeM00000040873 6596 538.9 UdeM00000040873 XP\_045209189.1 54 483  
191 6 35 511 65 522 7.10E-150 538.9 6596 cellular  
organisms;Eukaryota;Opisthokonta;Metazoa;Eumetazoa;Bilateria;Protostomia;  
Spiralia;Lophotrochozoa;Mollusca;Bivalvia;Autobranchia;Heteroconchia;Euhe  
terodonta;Imparidentia;Venerida;Veneroidea;Veneridae;Mercenaria;Mercenari  
a mercenaria  
UdeM00000040875 260995 84.7 UdeM00000040875 XP\_033812940.1 51.3  
78 37 1 1 78 1 77 6.80E-14 84.7 260995  
cellular  
organisms;Eukaryota;Opisthokonta;Metazoa;Eumetazoa;Bilateria;Deuterostomi  
a;Chordata;Craniata;Vertebrata;Gnathostomata;Teleostomi;Euteleostomi;Sarc  
opterygii;Dipnotetrapodomorpha;Tetrapoda;Amphibia;Gymnophiona;Dermophiida  
e;Geotrypetes;Geotrypetes seraphini  
UdeM00000040874 1415580 204.1 UdeM00000040874 XP\_030075314.1 44.4  
252 90 4 1 203 1 251 1.60E-49 204.1 1415580  
cellular  
organisms;Eukaryota;Opisthokonta;Metazoa;Eumetazoa;Bilateria;Deuterostomi  
a;Chordata;Craniata;Vertebrata;Gnathostomata;Teleostomi;Euteleostomi;Sarc  
opterygii;Dipnotetrapodomorpha;Tetrapoda;Amphibia;Gymnophiona;Siphonopida  
e;Microcaecilia;Microcaecilia unicolor  
UdeM00000040876 1415580 280.8 UdeM00000040876 XP\_030075314.1 48.1  
324 141 4 3 323 326 625 2.20E-72 280.8 1415580  
cellular  
organisms;Eukaryota;Opisthokonta;Metazoa;Eumetazoa;Bilateria;Deuterostomi  
a;Chordata;Craniata;Vertebrata;Gnathostomata;Teleostomi;Euteleostomi;Sarc  
opterygii;Dipnotetrapodomorpha;Tetrapoda;Amphibia;Gymnophiona;Siphonopida  
e;Microcaecilia;Microcaecilia unicolor  
UdeM00000040877 1735272 1023.8 UdeM00000040877 XP\_041372826.1  
52.5 908 412 8 11 915 28 919 1.30E-295 1023.8  
1735272 cellular  
organisms;Eukaryota;Opisthokonta;Metazoa;Eumetazoa;Bilateria;Protostomia;  
Spiralia;Lophotrochozoa;Mollusca;Gastropoda;Neomphalina;Neomphaloidea;Pel  
tospiridae;Gigantopelta;Gigantopelta aegis  
UdeM00000040878 6596 632.9 UdeM00000040878 XP\_045207290.1 71.4 433  
124 0 23 455 203 635 3.30E-178 632.9 6596 cellular

organisms;Eukaryota;Opisthokonta;Metazoa;Eumetazoa;Bilateria;Protostomia;Spiralia;Lophotrochozoa;Mollusca;Bivalvia;Autobranchia;Heteroconchia;Euherodonta;Imparidentia;Venerida;Veneroidea;Veneridae;Mercenaria;Mercenaria mercenaria

UdeM00000040879 6596 924.1 UdeM00000040879 XP\_045207290.1 73.1 625  
161 3 15 637 16 635 1.00E-265 924.1 6596 cellular

organisms;Eukaryota;Opisthokonta;Metazoa;Eumetazoa;Bilateria;Protostomia;Spiralia;Lophotrochozoa;Mollusca;Bivalvia;Autobranchia;Heteroconchia;Euherodonta;Imparidentia;Venerida;Veneroidea;Veneridae;Mercenaria;Mercenaria mercenaria

UdeM00000040880 6579 391.7 UdeM00000040880 XP\_033758448.1 40.5 481  
248 7 31 501 3 455 1.40E-105 391.7 6579 cellular

organisms;Eukaryota;Opisthokonta;Metazoa;Eumetazoa;Bilateria;Protostomia;Spiralia;Lophotrochozoa;Mollusca;Bivalvia;Autobranchia;Pteriormorphia;Pectinida;Pectinoidea;Pectinidae;Pecten;Pecten maximus

UdeM00000040881 6573 171.8 UdeM00000040881 XP\_021367145.1 34 312  
156 9 73 369 47 323 1.60E-39 171.8 6573 cellular

organisms;Eukaryota;Opisthokonta;Metazoa;Eumetazoa;Bilateria;Protostomia;Spiralia;Lophotrochozoa;Mollusca;Bivalvia;Autobranchia;Pteriormorphia;Pectinida;Pectinoidea;Pectinidae;Mizuhopecten;Mizuhopecten yessoensis

UdeM00000040882 6565 88.2 UdeM00000040882 XP\_022328322.1 31.2 189  
106 6 1 181 1 173 1.20E-14 88.2 6565 cellular

organisms;Eukaryota;Opisthokonta;Metazoa;Eumetazoa;Bilateria;Protostomia;Spiralia;Lophotrochozoa;Mollusca;Bivalvia;Autobranchia;Pteriormorphia;Ostreida;Ostreoidea;Ostreidae;Crassostrea;Crassostrea virginica

UdeM00000040883 6596 486.1 UdeM00000040883 XP\_045208432.1 49.2 772  
269 8 177 945 14 665 1.00E-133 486.1 6596 cellular

organisms;Eukaryota;Opisthokonta;Metazoa;Eumetazoa;Bilateria;Protostomia;Spiralia;Lophotrochozoa;Mollusca;Bivalvia;Autobranchia;Heteroconchia;Euherodonta;Imparidentia;Venerida;Veneroidea;Veneridae;Mercenaria;Mercenaria mercenaria

UdeM00000040884 6596 441.4 UdeM00000040884 XP\_045208431.1 47.1 433  
224 4 48 477 163 593 1.40E-120 441.4 6596 cellular

organisms;Eukaryota;Opisthokonta;Metazoa;Eumetazoa;Bilateria;Protostomia;Spiralia;Lophotrochozoa;Mollusca;Bivalvia;Autobranchia;Heteroconchia;Euherodonta;Imparidentia;Venerida;Veneroidea;Veneridae;Mercenaria;Mercenaria mercenaria

UdeM00000040885 6596 127.1 UdeM00000040885 XP\_045208431.1 53.3 120  
50 1 10 129 9 122 1.90E-26 127.1 6596 cellular

organisms;Eukaryota;Opisthokonta;Metazoa;Eumetazoa;Bilateria;Protostomia;Spiralia;Lophotrochozoa;Mollusca;Bivalvia;Autobranchia;Heteroconchia;Euherodonta;Imparidentia;Venerida;Veneroidea;Veneridae;Mercenaria;Mercenaria mercenaria

UdeM00000040886 6596 699.5 UdeM00000040886 XP\_045208432.1 64.5 668  
214 8 9 660 5 665 4.00E-198 699.5 6596 cellular

organisms;Eukaryota;Opisthokonta;Metazoa;Eumetazoa;Bilateria;Protostomia;Spiralia;Lophotrochozoa;Mollusca;Bivalvia;Autobranchia;Heteroconchia;Euherodonta;Imparidentia;Venerida;Veneroidea;Veneridae;Mercenaria;Mercenaria mercenaria

UdeM00000040887 6596 223.4 UdeM00000040887 XP\_045207507.1 54.3 199  
91 0 1 199 28 226 2.70E-55 223.4 6596 cellular

organisms;Eukaryota;Opisthokonta;Metazoa;Eumetazoa;Bilateria;Protostomia;Spiralia;Lophotrochozoa;Mollusca;Bivalvia;Autobranchia;Heteroconchia;Euherodonta;Imparidentia;Venerida;Veneroidea;Veneridae;Mercenaria;Mercenaria mercenaria

terodonta;Imparidentia;Venerida;Veneroidea;Veneridae;Mercenaria;Mercenari  
 a mercenaria  
 UdeM00000042815 6596 197.2 UdeM00000042815 XP\_045177500.1 64.6 161  
 49 4 29 184 70 227 1.80E-47 197.2 6596 cellular  
 organisms;Eukaryota;Opisthokonta;Metazoa;Eumetazoa;Bilateria;Protostomia;  
 Spiralia;Lophotrochozoa;Mollusca;Bivalvia;Autobranhia;Heteroconchia;Euhe  
 terodonta;Imparidentia;Venerida;Veneroidea;Veneridae;Mercenaria;Mercenari  
 a mercenaria  
 UdeM00000042816 6596 260.4 UdeM00000042816 XP\_045177500.1 66.2 210  
 63 4 13 217 21 227 2.10E-66 260.4 6596 cellular  
 organisms;Eukaryota;Opisthokonta;Metazoa;Eumetazoa;Bilateria;Protostomia;  
 Spiralia;Lophotrochozoa;Mollusca;Bivalvia;Autobranhia;Heteroconchia;Euhe  
 terodonta;Imparidentia;Venerida;Veneroidea;Veneridae;Mercenaria;Mercenari  
 a mercenaria  
 UdeM00000042818 6573 194.9 UdeM00000042818 XP\_021346189.1 53.1 179  
 78 2 1 177 34 208 8.80E-47 194.9 6573 cellular  
 organisms;Eukaryota;Opisthokonta;Metazoa;Eumetazoa;Bilateria;Protostomia;  
 Spiralia;Lophotrochozoa;Mollusca;Bivalvia;Autobranhia;Pteriomorphia;Pect  
 inida;Pectinoidea;Pectinidae;Mizuhopecten;Mizuhopecten yessoensis  
 UdeM00000042819 6573 218 UdeM00000042819 XP\_021346189.1 55.5 191  
 79 2 1 189 22 208 1.00E-53 218 6573 cellular  
 organisms;Eukaryota;Opisthokonta;Metazoa;Eumetazoa;Bilateria;Protostomia;  
 Spiralia;Lophotrochozoa;Mollusca;Bivalvia;Autobranhia;Pteriomorphia;Pect  
 inida;Pectinoidea;Pectinidae;Mizuhopecten;Mizuhopecten yessoensis  
 UdeM00000042817 6573 249.2 UdeM00000042817 XP\_021346189.1 57.5 212  
 84 2 51 260 1 208 5.80E-63 249.2 6573 cellular  
 organisms;Eukaryota;Opisthokonta;Metazoa;Eumetazoa;Bilateria;Protostomia;  
 Spiralia;Lophotrochozoa;Mollusca;Bivalvia;Autobranhia;Pteriomorphia;Pect  
 inida;Pectinoidea;Pectinidae;Mizuhopecten;Mizuhopecten yessoensis  
 UdeM00000042824 6596 443.7 UdeM00000042824 XP\_045178416.1 45.3 541  
 279 8 1235 1761 7 544 1.20E-120 443.7 6596 cellular  
 organisms;Eukaryota;Opisthokonta;Metazoa;Eumetazoa;Bilateria;Protostomia;  
 Spiralia;Lophotrochozoa;Mollusca;Bivalvia;Autobranhia;Heteroconchia;Euhe  
 terodonta;Imparidentia;Venerida;Veneroidea;Veneridae;Mercenaria;Mercenari  
 a mercenaria  
 UdeM00000042825 6596 98.2 UdeM00000042825 XP\_045162203.1 57.7 78  
 33 0 13 90 1435 1512 5.80E-18 98.2 6596 cellular  
 organisms;Eukaryota;Opisthokonta;Metazoa;Eumetazoa;Bilateria;Protostomia;  
 Spiralia;Lophotrochozoa;Mollusca;Bivalvia;Autobranhia;Heteroconchia;Euhe  
 terodonta;Imparidentia;Venerida;Veneroidea;Veneridae;Mercenaria;Mercenari  
 a mercenaria  
 UdeM00000042827 6579 652.1 UdeM00000042827 XP\_033728194.1 51.2 637  
 302 3 19 646 334 970 7.60E-184 652.1 6579 cellular  
 organisms;Eukaryota;Opisthokonta;Metazoa;Eumetazoa;Bilateria;Protostomia;  
 Spiralia;Lophotrochozoa;Mollusca;Bivalvia;Autobranhia;Pteriomorphia;Pect  
 inida;Pectinoidea;Pectinidae;Pecten;Pecten maximus  
 UdeM00000042828 215358 85.9 UdeM00000042828 XP\_010732894.1 51.9  
 77 37 0 38 114 230 306 7.10E-14 85.9 215358  
 cellular  
 organisms;Eukaryota;Opisthokonta;Metazoa;Eumetazoa;Bilateria;Deuterostomi  
 a;Chordata;Craniata;Vertebrata;Gnathostomata;Teleostomi;Euteleostomi;Acti  
 nopterygii;Actinopteri;Neopterygii;Teleostei;Osteoglossocephalai;Clupeoce  
 phala;Euteleosteomorpha;Neoteleostei;Eurypterygia;Ctenosquamata;Acanthomo

rphata;Euacanthomorpha;Percomorphaceae;Eupercaria;Eupercaria incertae sedis;Sciaenidae;Larimichthys;Larimichthys crocea

UdeM00000042830 29159 471.1 UdeM00000042830 XP\_034303986.1 66.4 333  
110 2 2 333 239 570 1.20E-129 471.1 29159 cellular  
organisms;Eukaryota;Opisthokonta;Metazoa;Eumetazoa;Bilateria;Protostomia;Spiralia;Lophotrochozoa;Mollusca;Bivalvia;Autobranchia;Pteriormorphia;Ostreida;Ostreoidea;Ostreidae;Crassostrea;Crassostrea gigas

UdeM00000042831 6596 351.3 UdeM00000042831 XP\_045177776.1 38.5 551  
302 10 38 562 397 936 3.20E-93 351.3 6596 cellular  
organisms;Eukaryota;Opisthokonta;Metazoa;Eumetazoa;Bilateria;Protostomia;Spiralia;Lophotrochozoa;Mollusca;Bivalvia;Autobranchia;Heteroconchia;Euheterodonta;Imparidentia;Venerida;Veneroidea;Veneridae;Mercenaria;Mercenaria mercenaria

UdeM00000042832 6579 677.2 UdeM00000042832 XP\_033727988.1 59.6 572  
223 4 1 569 1 567 1.90E-191 677.2 6579 cellular  
organisms;Eukaryota;Opisthokonta;Metazoa;Eumetazoa;Bilateria;Protostomia;Spiralia;Lophotrochozoa;Mollusca;Bivalvia;Autobranchia;Pteriormorphia;Pectinida;Pectinoidea;Pectinidae;Pecten;Pecten maximus

UdeM00000042833 6596 161 UdeM00000042833 XP\_045215232.1 58.8 131  
53 1 2 132 342 471 1.50E-36 161 6596 cellular  
organisms;Eukaryota;Opisthokonta;Metazoa;Eumetazoa;Bilateria;Protostomia;Spiralia;Lophotrochozoa;Mollusca;Bivalvia;Autobranchia;Heteroconchia;Euheterodonta;Imparidentia;Venerida;Veneroidea;Veneridae;Mercenaria;Mercenaria mercenaria

UdeM00000042834 6596 128.6 UdeM00000042834 XP\_045215232.1 44 150  
81 2 6 153 160 308 6.70E-27 128.6 6596 cellular  
organisms;Eukaryota;Opisthokonta;Metazoa;Eumetazoa;Bilateria;Protostomia;Spiralia;Lophotrochozoa;Mollusca;Bivalvia;Autobranchia;Heteroconchia;Euheterodonta;Imparidentia;Venerida;Veneroidea;Veneridae;Mercenaria;Mercenaria mercenaria

UdeM00000042835 29159 181 UdeM00000042835 XP\_034330943.1 49.4 174  
79 4 6 179 16 180 1.30E-42 181 29159 cellular  
organisms;Eukaryota;Opisthokonta;Metazoa;Eumetazoa;Bilateria;Protostomia;Spiralia;Lophotrochozoa;Mollusca;Bivalvia;Autobranchia;Pteriormorphia;Ostreida;Ostreoidea;Ostreidae;Crassostrea;Crassostrea gigas

UdeM00000042840 6596 228.8 UdeM00000042840 XP\_045177779.1 30.8 483  
227 6 14 477 89 483 1.50E-56 228.8 6596 cellular  
organisms;Eukaryota;Opisthokonta;Metazoa;Eumetazoa;Bilateria;Protostomia;Spiralia;Lophotrochozoa;Mollusca;Bivalvia;Autobranchia;Heteroconchia;Euheterodonta;Imparidentia;Venerida;Veneroidea;Veneridae;Mercenaria;Mercenaria mercenaria

UdeM00000042841 6596 114 UdeM00000042841 XP\_045177776.1 44.1 136  
71 3 214 348 792 923 4.00E-22 114 6596 cellular  
organisms;Eukaryota;Opisthokonta;Metazoa;Eumetazoa;Bilateria;Protostomia;Spiralia;Lophotrochozoa;Mollusca;Bivalvia;Autobranchia;Heteroconchia;Euheterodonta;Imparidentia;Venerida;Veneroidea;Veneridae;Mercenaria;Mercenaria mercenaria

UdeM00000042842 45351 85.9 UdeM00000042842 XP\_001623471.2 29.7 219  
117 6 10 208 12 213 6.80E-14 85.9 45351 cellular  
organisms;Eukaryota;Opisthokonta;Metazoa;Eumetazoa;Cnidaria;Anthozoa;Hexacorallia;Actiniaria;Edwardsiidae;Nematostella;Nematostella vectensis

UdeM00000042843 45351 88.2 UdeM00000042843 XP\_001623471.2 30.7 205  
108 5 10 191 12 205 1.40E-14 88.2 45351 cellular

organisms;Eukaryota;Opisthokonta;Metazoa;Eumetazoa;Cnidaria;Anthozoa;Hexa  
corallia;Actiniaria;Edwardsiidae;Nematostella;Nematostella vectensis  
UdeM00000042844 6579 291.2 UdeM00000042844 XP\_033728980.1 55 269  
115 3 8 270 5 273 1.40E-75 291.2 6579 cellular  
organisms;Eukaryota;Opisthokonta;Metazoa;Eumetazoa;Bilateria;Protostomia;  
Spiralia;Lophotrochozoa;Mollusca;Bivalvia;Autobranchia;Pteriormorphia;Pect  
inida;Pectinoidea;Pectinidae;Pecten;Pecten maximus  
UdeM00000042845 6596 447.6 UdeM00000042845 XP\_045208070.1 38.1 614  
352 10 43 633 39 647 2.70E-122 447.6 6596 cellular  
organisms;Eukaryota;Opisthokonta;Metazoa;Eumetazoa;Bilateria;Protostomia;  
Spiralia;Lophotrochozoa;Mollusca;Bivalvia;Autobranchia;Heteroconchia;Euhe  
terodonta;Imparidentia;Venerida;Veneroidea;Veneridae;Mercenaria;Mercenari  
a mercenaria  
UdeM00000042846 6573 843.2 UdeM00000042846 XP\_021351883.1 69.6 598  
173 3 1 589 10 607 2.80E-241 843.2 6573 cellular  
organisms;Eukaryota;Opisthokonta;Metazoa;Eumetazoa;Bilateria;Protostomia;  
Spiralia;Lophotrochozoa;Mollusca;Bivalvia;Autobranchia;Pteriormorphia;Pect  
inida;Pectinoidea;Pectinidae;Mizuhopecten;Mizuhopecten yessoensis  
UdeM00000042847 6573 843.2 UdeM00000042847 XP\_021351883.1 69.6 598  
173 3 1 589 10 607 2.70E-241 843.2 6573 cellular  
organisms;Eukaryota;Opisthokonta;Metazoa;Eumetazoa;Bilateria;Protostomia;  
Spiralia;Lophotrochozoa;Mollusca;Bivalvia;Autobranchia;Pteriormorphia;Pect  
inida;Pectinoidea;Pectinidae;Mizuhopecten;Mizuhopecten yessoensis  
UdeM00000042848 6596 828.6 UdeM00000042848 XP\_045179990.1 67.6 621  
174 2 1 594 10 630 6.70E-237 828.6 6596 cellular  
organisms;Eukaryota;Opisthokonta;Metazoa;Eumetazoa;Bilateria;Protostomia;  
Spiralia;Lophotrochozoa;Mollusca;Bivalvia;Autobranchia;Heteroconchia;Euhe  
terodonta;Imparidentia;Venerida;Veneroidea;Veneridae;Mercenaria;Mercenari  
a mercenaria  
UdeM00000042849 6573 104.4 UdeM00000042849 XP\_021351893.1 51.2 121  
57 1 11 131 15 133 1.30E-19 104.4 6573 cellular  
organisms;Eukaryota;Opisthokonta;Metazoa;Eumetazoa;Bilateria;Protostomia;  
Spiralia;Lophotrochozoa;Mollusca;Bivalvia;Autobranchia;Pteriormorphia;Pect  
inida;Pectinoidea;Pectinidae;Mizuhopecten;Mizuhopecten yessoensis  
UdeM00000042850 6596 1941.4 UdeM00000042850 XP\_045179945.1 75.4  
1260 308 2 2 1259 132 1391 0.00E+00 1941.4 6596  
cellular  
organisms;Eukaryota;Opisthokonta;Metazoa;Eumetazoa;Bilateria;Protostomia;  
Spiralia;Lophotrochozoa;Mollusca;Bivalvia;Autobranchia;Heteroconchia;Euhe  
terodonta;Imparidentia;Venerida;Veneroidea;Veneridae;Mercenaria;Mercenari  
a mercenaria  
UdeM00000042851 6596 439.5 UdeM00000042851 XP\_045204802.1 64 331  
118 1 59 389 54 383 4.40E-120 439.5 6596 cellular  
organisms;Eukaryota;Opisthokonta;Metazoa;Eumetazoa;Bilateria;Protostomia;  
Spiralia;Lophotrochozoa;Mollusca;Bivalvia;Autobranchia;Heteroconchia;Euhe  
terodonta;Imparidentia;Venerida;Veneroidea;Veneridae;Mercenaria;Mercenari  
a mercenaria  
UdeM00000042852 6573 148.7 UdeM00000042852 XP\_021367848.1 40.8 213  
112 7 20 228 24 226 9.20E-33 148.7 6573 cellular  
organisms;Eukaryota;Opisthokonta;Metazoa;Eumetazoa;Bilateria;Protostomia;  
Spiralia;Lophotrochozoa;Mollusca;Bivalvia;Autobranchia;Pteriormorphia;Pect  
inida;Pectinoidea;Pectinidae;Mizuhopecten;Mizuhopecten yessoensis  
UdeM00000042853 6596 753.4 UdeM00000042853 XP\_045178052.1 33.9 2184  
1065 77 1 2014 162 2137 7.20E-214 753.4 6596 cellular

organisms;Eukaryota;Opisthokonta;Metazoa;Eumetazoa;Bilateria;Protostomia;Spiralia;Lophotrochozoa;Mollusca;Bivalvia;Autobranchia;Heteroconchia;Euheterodonta;Imparidentia;Venerida;Veneroidea;Veneridae;Mercenaria;Mercenaria mercenaria

UdeM00000042854 6579 69.3 UdeM00000042854 XP\_033749334.1 46.9 64  
34 0 43 106 19 82 3.30E-09 69.3 6579 cellular

organisms;Eukaryota;Opisthokonta;Metazoa;Eumetazoa;Bilateria;Protostomia;Spiralia;Lophotrochozoa;Mollusca;Bivalvia;Autobranchia;Pteriormorphia;Pectinida;Pectinoidea;Pectinidae;Pecten;Pecten maximus

UdeM00000042855 6596 207.6 UdeM00000042855 XP\_045178372.1 66.4 143  
48 0 1 143 1 143 1.10E-50 207.6 6596 cellular

organisms;Eukaryota;Opisthokonta;Metazoa;Eumetazoa;Bilateria;Protostomia;Spiralia;Lophotrochozoa;Mollusca;Bivalvia;Autobranchia;Heteroconchia;Euheterodonta;Imparidentia;Venerida;Veneroidea;Veneridae;Mercenaria;Mercenaria mercenaria

UdeM00000042856 6565 626.7 UdeM00000042856 XP\_022325836.1 78.1 397  
86 1 1 397 1 396 2.00E-176 626.7 6565 cellular

organisms;Eukaryota;Opisthokonta;Metazoa;Eumetazoa;Bilateria;Protostomia;Spiralia;Lophotrochozoa;Mollusca;Bivalvia;Autobranchia;Pteriormorphia;Ostreida;Ostreoidea;Ostreidae;Crassostrea;Crassostrea virginica

UdeM00000042857 1735272 478.8 UdeM00000042857 XP\_041374629.1 57.4  
425 173 3 28 452 7 423 7.80E-132 478.8 1735272  
cellular

organisms;Eukaryota;Opisthokonta;Metazoa;Eumetazoa;Bilateria;Protostomia;Spiralia;Lophotrochozoa;Mollusca;Gastropoda;Neomphalina;Neomphaloidea;Peltospiridae;Gigantopelta;Gigantopelta aegis

UdeM00000042859 6596 113.2 UdeM00000042859 XP\_045174482.1 27.5 396  
226 17 5 353 2 383 6.60E-22 113.2 6596 cellular

organisms;Eukaryota;Opisthokonta;Metazoa;Eumetazoa;Bilateria;Protostomia;Spiralia;Lophotrochozoa;Mollusca;Bivalvia;Autobranchia;Heteroconchia;Euheterodonta;Imparidentia;Venerida;Veneroidea;Veneridae;Mercenaria;Mercenaria mercenaria

UdeM00000042860 6596 167.5 UdeM00000042860 XP\_045181277.1 33.6 289  
174 8 130 406 139 421 3.40E-38 167.5 6596 cellular

organisms;Eukaryota;Opisthokonta;Metazoa;Eumetazoa;Bilateria;Protostomia;Spiralia;Lophotrochozoa;Mollusca;Bivalvia;Autobranchia;Heteroconchia;Euheterodonta;Imparidentia;Venerida;Veneroidea;Veneridae;Mercenaria;Mercenaria mercenaria

UdeM00000024221 225164 97.8 UdeM00000024221 XP\_009054455.1 20.7  
468 343 7 1 463 95 539 3.90E-17 97.8 225164  
cellular

organisms;Eukaryota;Opisthokonta;Metazoa;Eumetazoa;Bilateria;Protostomia;Spiralia;Lophotrochozoa;Mollusca;Gastropoda;Patellogastropoda;Lottiidae;Lottia;Lottia gigantea

UdeM00000024222 225164 97.8 UdeM00000024222 XP\_009054455.1 20.7  
468 343 7 1 463 95 539 3.90E-17 97.8 225164  
cellular

organisms;Eukaryota;Opisthokonta;Metazoa;Eumetazoa;Bilateria;Protostomia;Spiralia;Lophotrochozoa;Mollusca;Gastropoda;Patellogastropoda;Lottiidae;Lottia;Lottia gigantea

UdeM00000024223 1735272 104 UdeM00000024223 XP\_041350837.1 28.5  
284 185 8 9 291 184 450 3.50E-19 104 1735272  
cellular

organisms;Eukaryota;Opisthokonta;Metazoa;Eumetazoa;Bilateria;Protostomia;

Spiralia;Lophotrochozoa;Mollusca;Gastropoda;Neomphalina;Neomphaloidea;Pel  
tospiridae;Gigantopelta;Gigantopelta aegis

UdeM00000024224 225164 97.8 UdeM00000024224 XP\_009054455.1 20.7  
468 343 7 1 463 95 539 3.90E-17 97.8 225164  
cellular

organisms;Eukaryota;Opisthokonta;Metazoa;Eumetazoa;Bilateria;Protostomia;  
Spiralia;Lophotrochozoa;Mollusca;Gastropoda;Patellogastropoda;Lottioidea;  
Lottiidae;Lottia;Lottia gigantea

UdeM00000024226 225164 59.3 UdeM00000024226 XP\_009051961.1 27.5  
153 103 2 1 153 23 167 8.90E-06 59.3 225164  
cellular

organisms;Eukaryota;Opisthokonta;Metazoa;Eumetazoa;Bilateria;Protostomia;  
Spiralia;Lophotrochozoa;Mollusca;Gastropoda;Patellogastropoda;Lottioidea;  
Lottiidae;Lottia;Lottia gigantea

UdeM00000024225 225164 97.8 UdeM00000024225 XP\_009054455.1 20.7  
468 343 7 1 463 95 539 3.90E-17 97.8 225164  
cellular

organisms;Eukaryota;Opisthokonta;Metazoa;Eumetazoa;Bilateria;Protostomia;  
Spiralia;Lophotrochozoa;Mollusca;Gastropoda;Patellogastropoda;Lottioidea;  
Lottiidae;Lottia;Lottia gigantea

UdeM00000024227 225164 97.8 UdeM00000024227 XP\_009054455.1 20.7  
468 343 7 1 463 95 539 3.90E-17 97.8 225164  
cellular

organisms;Eukaryota;Opisthokonta;Metazoa;Eumetazoa;Bilateria;Protostomia;  
Spiralia;Lophotrochozoa;Mollusca;Gastropoda;Patellogastropoda;Lottioidea;  
Lottiidae;Lottia;Lottia gigantea

UdeM00000024230 6579 419.5 UdeM00000024230 XP\_033748359.1 39.8 598  
339 9 317 894 100 696 1.30E-113 419.5 6579 cellular

organisms;Eukaryota;Opisthokonta;Metazoa;Eumetazoa;Bilateria;Protostomia;  
Spiralia;Lophotrochozoa;Mollusca;Bivalvia;Autobranchia;Pteriormorphia;Pect  
inida;Pectinoidea;Pectinidae;Pecten;Pecten maximus

UdeM00000024232 6579 122.9 UdeM00000024232 XP\_033742811.1 44.6 121  
65 2 17 137 6 124 3.30E-25 122.9 6579 cellular

organisms;Eukaryota;Opisthokonta;Metazoa;Eumetazoa;Bilateria;Protostomia;  
Spiralia;Lophotrochozoa;Mollusca;Bivalvia;Autobranchia;Pteriormorphia;Pect  
inida;Pectinoidea;Pectinidae;Pecten;Pecten maximus

UdeM00000024233 6573 482.6 UdeM00000024233 XP\_021361309.1 44.2 541  
281 12 1 526 183 717 6.40E-133 482.6 6573 cellular

organisms;Eukaryota;Opisthokonta;Metazoa;Eumetazoa;Bilateria;Protostomia;  
Spiralia;Lophotrochozoa;Mollusca;Bivalvia;Autobranchia;Pteriormorphia;Pect  
inida;Pectinoidea;Pectinidae;Mizuhopecten;Mizuhopecten yessoensis

UdeM00000024234 6596 256.9 UdeM00000024234 XP\_045204791.1 31.6 632  
346 13 140 715 141 742 7.50E-65 256.9 6596 cellular

organisms;Eukaryota;Opisthokonta;Metazoa;Eumetazoa;Bilateria;Protostomia;  
Spiralia;Lophotrochozoa;Mollusca;Bivalvia;Autobranchia;Heteroconchia;Euhe  
terodonta;Imparidentia;Venerida;Veneroidea;Veneridae;Mercenaria;Mercenari  
a mercenaria

UdeM00000024235 6565 147.5 UdeM00000024235 XP\_022325593.1 47.3 129  
68 0 11 139 584 712 1.30E-32 147.5 6565 cellular

organisms;Eukaryota;Opisthokonta;Metazoa;Eumetazoa;Bilateria;Protostomia;  
Spiralia;Lophotrochozoa;Mollusca;Bivalvia;Autobranchia;Pteriormorphia;Ostr  
eida;Ostreoidea;Ostreidae;Crassostrea;Crassostrea virginica

UdeM00000024236 6579 287.7 UdeM00000024236 XP\_033742805.1 43 379  
189 6 1 362 1 369 2.10E-74 287.7 6579 cellular



organisms;Eukaryota;Opisthokonta;Metazoa;Eumetazoa;Bilateria;Protostomia; Spiralia;Lophotrochozoa;Mollusca;Bivalvia;Autobranhia;Pteriormorphia;Pect inida;Pectinoidea;Pectinidae;Pecten;Pecten maximus

UdeM00000024237 6573 73.2 UdeM00000024237 XP\_021338963.1 29.9 204  
123 10 215 409 152 344 9.10E-10 73.2 6573 cellular

organisms;Eukaryota;Opisthokonta;Metazoa;Eumetazoa;Bilateria;Protostomia; Spiralia;Lophotrochozoa;Mollusca;Bivalvia;Autobranhia;Pteriormorphia;Pect inida;Pectinoidea;Pectinidae;Mizuhopecten;Mizuhopecten yessoensis

UdeM00000024238 6579 1223.8 UdeM00000024238 XP\_033742010.1 45.8  
1490 736 21 4 1443 28 1496 0.00E+00 1223.8 6579  
cellular

organisms;Eukaryota;Opisthokonta;Metazoa;Eumetazoa;Bilateria;Protostomia; Spiralia;Lophotrochozoa;Mollusca;Bivalvia;Autobranhia;Pteriormorphia;Pect inida;Pectinoidea;Pectinidae;Pecten;Pecten maximus

UdeM00000024241 6579 383.3 UdeM00000024241 XP\_033742008.1 35.9 691  
399 7 2 649 5 694 6.40E-103 383.3 6579 cellular

organisms;Eukaryota;Opisthokonta;Metazoa;Eumetazoa;Bilateria;Protostomia; Spiralia;Lophotrochozoa;Mollusca;Bivalvia;Autobranhia;Pteriormorphia;Pect inida;Pectinoidea;Pectinidae;Pecten;Pecten maximus

UdeM00000024242 6565 370.5 UdeM00000024242 XP\_022321693.1 36.6 620  
366 9 1 614 7 605 4.00E-99 370.5 6565 cellular

organisms;Eukaryota;Opisthokonta;Metazoa;Eumetazoa;Bilateria;Protostomia; Spiralia;Lophotrochozoa;Mollusca;Bivalvia;Autobranhia;Pteriormorphia;Ostr eida;Ostreoidea;Ostreidae;Crassostrea;Crassostrea virginica

UdeM00000024244 29159 326.6 UdeM00000024244 XP\_034322590.1 46.3 382  
166 10 5 353 7 382 4.00E-86 326.6 29159 cellular

organisms;Eukaryota;Opisthokonta;Metazoa;Eumetazoa;Bilateria;Protostomia; Spiralia;Lophotrochozoa;Mollusca;Bivalvia;Autobranhia;Pteriormorphia;Ostr eida;Ostreoidea;Ostreidae;Crassostrea;Crassostrea gigas

UdeM00000024245 6565 633.3 UdeM00000024245 XP\_022321699.1 43.5 780  
411 13 19 794 676 1429 4.30E-178 633.3 6565 cellular

organisms;Eukaryota;Opisthokonta;Metazoa;Eumetazoa;Bilateria;Protostomia; Spiralia;Lophotrochozoa;Mollusca;Bivalvia;Autobranhia;Pteriormorphia;Ostr eida;Ostreoidea;Ostreidae;Crassostrea;Crassostrea virginica

UdeM00000024246 6565 1099.3 UdeM00000024246 XP\_022321699.1 41.2  
1470 769 25 5 1422 3 1429 0.00E+00 1099.3 6565  
cellular

organisms;Eukaryota;Opisthokonta;Metazoa;Eumetazoa;Bilateria;Protostomia; Spiralia;Lophotrochozoa;Mollusca;Bivalvia;Autobranhia;Pteriormorphia;Ostr eida;Ostreoidea;Ostreidae;Crassostrea;Crassostrea virginica

UdeM00000024247 1735272 381.3 UdeM00000024247 XP\_041358190.1 60.5  
610 240 1 101 710 192 800 2.90E-102 381.3 1735272  
cellular

organisms;Eukaryota;Opisthokonta;Metazoa;Eumetazoa;Bilateria;Protostomia; Spiralia;Lophotrochozoa;Mollusca;Gastropoda;Neomphalina;Neomphaloidea;Pel tospiridae;Gigantopelta;Gigantopelta aegis

UdeM00000024248 6596 991.5 UdeM00000024248 XP\_045203680.1 54.4 991  
367 10 1 973 1 924 7.60E-286 991.5 6596 cellular

organisms;Eukaryota;Opisthokonta;Metazoa;Eumetazoa;Bilateria;Protostomia; Spiralia;Lophotrochozoa;Mollusca;Bivalvia;Autobranhia;Heteroconchia;Euhe terodonta;Imparidentia;Venerida;Veneroidea;Veneridae;Mercenaria;Mercenari a mercenaria

UdeM00000024249 6565 1649 UdeM00000024249 XP\_022320863.1 81.7 1039  
157 9 85 1116 14 1026 0.00E+00 1649 6565 cellular

organisms;Eukaryota;Opisthokonta;Metazoa;Eumetazoa;Bilateria;Protostomia;Spiralia;Lophotrochozoa;Mollusca;Bivalvia;Autobranchia;Pteriomorphia;Ostreida;Ostreoidea;Ostreidae;Crassostrea;Crassostrea virginica

UdeM00000024250 105023 280.4 UdeM00000024250 XP\_015828284.1 35.5  
468 272 8 40 491 122 575 4.40E-72 280.4 105023

cellular

organisms;Eukaryota;Opisthokonta;Metazoa;Eumetazoa;Bilateria;Deuterostomia;Chordata;Craniata;Vertebrata;Gnathostomata;Teleostomi;Euteleostomi;Actinopterygii;Actinopteri;Neopterygii;Teleostei;Osteoglossocephalai;Clupeocephala;Euteleostei;Neoteleostei;Eurypterygia;Ctenosquamata;Acanthomorpha;Euacanthomorpha;Percomorphaceae;Ovalentaria;Atherinomorpha;Cypriodontiformes;Aplocheiloidei;Nothobranchiidae;Nothobranchius;Nothobranchius furzeri

UdeM00000024251 6596 318.5 UdeM00000024251 XP\_045211214.1 31.3 712  
428 15 36 698 31 730 2.10E-83 318.5 6596 cellular

organisms;Eukaryota;Opisthokonta;Metazoa;Eumetazoa;Bilateria;Protostomia;Spiralia;Lophotrochozoa;Mollusca;Bivalvia;Autobranchia;Heteroconchia;Euheterodonta;Imparidentia;Venerida;Veneroidea;Veneridae;Mercenaria;Mercenaria mercenaria

UdeM00000024252 400727 94 UdeM00000024252 XP\_025108466.1 51.2  
82 40 0 45 126 102 183 1.90E-16 94 400727

cellular

organisms;Eukaryota;Opisthokonta;Metazoa;Eumetazoa;Bilateria;Protostomia;Spiralia;Lophotrochozoa;Mollusca;Gastropoda;Caenogastropoda;Architaenioglossa;Ampullarioidea;Ampullariidae;Pomacea;Pomacea canaliculata

UdeM00000024253 6596 207.2 UdeM00000024253 XP\_045211214.1 37.3 308  
171 7 50 343 31 330 3.30E-50 207.2 6596 cellular

organisms;Eukaryota;Opisthokonta;Metazoa;Eumetazoa;Bilateria;Protostomia;Spiralia;Lophotrochozoa;Mollusca;Bivalvia;Autobranchia;Heteroconchia;Euheterodonta;Imparidentia;Venerida;Veneroidea;Veneridae;Mercenaria;Mercenaria mercenaria

UdeM00000024254 6596 85.1 UdeM00000024254 XP\_045211214.1 28.3 212  
129 6 82 271 530 740 1.50E-13 85.1 6596 cellular

organisms;Eukaryota;Opisthokonta;Metazoa;Eumetazoa;Bilateria;Protostomia;Spiralia;Lophotrochozoa;Mollusca;Bivalvia;Autobranchia;Heteroconchia;Euheterodonta;Imparidentia;Venerida;Veneroidea;Veneridae;Mercenaria;Mercenaria mercenaria

UdeM00000024258 48498 281.2 UdeM00000024258 XP\_020613056.1 43.5 317  
170 3 31 344 34 344 1.90E-72 281.2 48498 cellular

organisms;Eukaryota;Opisthokonta;Metazoa;Eumetazoa;Cnidaria;Anthozoa;Hexacorallia;Scleractinia;Faviina;Merulinidae;Orbicella;Orbicella faveolata

UdeM00000024259 7668 77.8 UdeM00000024259 XP\_030841875.1 51.6 64  
30 1 3 66 71 133 9.70E-12 77.8 7668 cellular

organisms;Eukaryota;Opisthokonta;Metazoa;Eumetazoa;Bilateria;Deuterostomia;Echinodermata;Eleutherozoa;Echinozoa;Echinoidea;Euechinoidea;Echinacea;Camarodonta;Echinidea;Strongylocentrotidae;Strongylocentrotus;Strongylocentrotus purpuratus

UdeM00000024261 6596 309.3 UdeM00000024261 XP\_045205082.1 70.5 224  
64 2 67 288 175 398 5.20E-81 309.3 6596 cellular

organisms;Eukaryota;Opisthokonta;Metazoa;Eumetazoa;Bilateria;Protostomia;Spiralia;Lophotrochozoa;Mollusca;Bivalvia;Autobranchia;Heteroconchia;Euheterodonta;Imparidentia;Venerida;Veneroidea;Veneridae;Mercenaria;Mercenaria mercenaria

UdeM00000024260 6596 369 UdeM00000024260 XP\_045205083.1 56.7 367  
 142 9 52 403 22 386 7.70E-99 369 6596 cellular  
 organisms;Eukaryota;Opisthokonta;Metazoa;Eumetazoa;Bilateria;Protostomia;  
 Spiralia;Lophotrochozoa;Mollusca;Bivalvia;Autobranhia;Heteroconchia;Euhe  
 terodonta;Imparidentia;Venerida;Veneroidea;Veneridae;Mercenaria;Mercenari  
 a mercenaria  
 UdeM00000024262 6573 70.1 UdeM00000024262 XP\_021364087.1 48.6 74  
 36 2 46 118 97 169 2.50E-09 70.1 6573 cellular  
 organisms;Eukaryota;Opisthokonta;Metazoa;Eumetazoa;Bilateria;Protostomia;  
 Spiralia;Lophotrochozoa;Mollusca;Bivalvia;Autobranhia;Pteriormorphia;Pect  
 inida;Pectinoidea;Pectinidae;Mizuhopecten;Mizuhopecten yessoensis  
 UdeM00000024263 6573 903.7 UdeM00000024263 XP\_021365573.1 54.1 886  
 377 12 1 869 1 873 1.90E-259 903.7 6573 cellular  
 organisms;Eukaryota;Opisthokonta;Metazoa;Eumetazoa;Bilateria;Protostomia;  
 Spiralia;Lophotrochozoa;Mollusca;Bivalvia;Autobranhia;Pteriormorphia;Pect  
 inida;Pectinoidea;Pectinidae;Mizuhopecten;Mizuhopecten yessoensis  
 UdeM00000024264 6596 116.7 UdeM00000024264 XP\_045205677.1 60.2 88  
 35 0 1 88 1 88 2.60E-23 116.7 6596 cellular  
 organisms;Eukaryota;Opisthokonta;Metazoa;Eumetazoa;Bilateria;Protostomia;  
 Spiralia;Lophotrochozoa;Mollusca;Bivalvia;Autobranhia;Heteroconchia;Euhe  
 terodonta;Imparidentia;Venerida;Veneroidea;Veneridae;Mercenaria;Mercenari  
 a mercenaria  
 UdeM00000024267 6573 311.6 UdeM00000024267 XP\_021365623.1 55.7 802  
 298 16 56 826 326 1101 3.00E-81 311.6 6573 cellular  
 organisms;Eukaryota;Opisthokonta;Metazoa;Eumetazoa;Bilateria;Protostomia;  
 Spiralia;Lophotrochozoa;Mollusca;Bivalvia;Autobranhia;Pteriormorphia;Pect  
 inida;Pectinoidea;Pectinidae;Mizuhopecten;Mizuhopecten yessoensis  
 UdeM00000024268 6573 377.1 UdeM00000024268 XP\_021365644.1 61 336  
 129 1 1 334 1 336 2.40E-101 377.1 6573 cellular  
 organisms;Eukaryota;Opisthokonta;Metazoa;Eumetazoa;Bilateria;Protostomia;  
 Spiralia;Lophotrochozoa;Mollusca;Bivalvia;Autobranhia;Pteriormorphia;Pect  
 inida;Pectinoidea;Pectinidae;Mizuhopecten;Mizuhopecten yessoensis  
 UdeM00000024269 6573 262.7 UdeM00000024269 XP\_021365644.1 64.1 206  
 74 0 1 206 1 206 4.20E-67 262.7 6573 cellular  
 organisms;Eukaryota;Opisthokonta;Metazoa;Eumetazoa;Bilateria;Protostomia;  
 Spiralia;Lophotrochozoa;Mollusca;Bivalvia;Autobranhia;Pteriormorphia;Pect  
 inida;Pectinoidea;Pectinidae;Mizuhopecten;Mizuhopecten yessoensis  
 UdeM00000024270 6596 181.4 UdeM00000024270 XP\_045205678.1 69.3 114  
 35 0 1 114 1 114 1.20E-42 181.4 6596 cellular  
 organisms;Eukaryota;Opisthokonta;Metazoa;Eumetazoa;Bilateria;Protostomia;  
 Spiralia;Lophotrochozoa;Mollusca;Bivalvia;Autobranhia;Heteroconchia;Euhe  
 terodonta;Imparidentia;Venerida;Veneroidea;Veneridae;Mercenaria;Mercenari  
 a mercenaria  
 UdeM00000024271 6596 252.7 UdeM00000024271 XP\_045205678.1 35.8 847  
 381 21 1 803 1 728 2.50E-63 252.7 6596 cellular  
 organisms;Eukaryota;Opisthokonta;Metazoa;Eumetazoa;Bilateria;Protostomia;  
 Spiralia;Lophotrochozoa;Mollusca;Bivalvia;Autobranhia;Heteroconchia;Euhe  
 terodonta;Imparidentia;Venerida;Veneroidea;Veneridae;Mercenaria;Mercenari  
 a mercenaria  
 UdeM00000024273 29159 94.7 UdeM00000024273 XP\_011427008.1 43.4 122  
 66 3 3 124 24 142 9.90E-17 94.7 29159 cellular  
 organisms;Eukaryota;Opisthokonta;Metazoa;Eumetazoa;Bilateria;Protostomia;  
 Spiralia;Lophotrochozoa;Mollusca;Bivalvia;Autobranhia;Pteriormorphia;Ostr  
 eida;Ostreoidea;Ostreidae;Crassostrea;Crassostrea gigas

UdeM00000024272 29159 94.7 UdeM00000024272 XP\_011427008.1 43.4 122  
 66 3 35 156 24 142 1.20E-16 94.7 29159 cellular  
 organisms;Eukaryota;Opisthokonta;Metazoa;Eumetazoa;Bilateria;Protostomia;  
 Spiralia;Lophotrochozoa;Mollusca;Bivalvia;Autobranchia;Pteriormorphia;Ostr  
 eida;Ostreoidea;Ostreidae;Crassostrea;Crassostrea gigas  
 UdeM00000024274 1676925 99.8 UdeM00000024274 XP\_023659896.1 43.4  
 145 78 3 4 145 13 156 3.30E-18 99.8 1676925  
 cellular  
 organisms;Eukaryota;Opisthokonta;Metazoa;Eumetazoa;Bilateria;Deuterostomi  
 a;Chordata;Craniata;Vertebrata;Gnathostomata;Teleostomi;Euteleostomi;Acti  
 nopterygii;Actinopteri;Neopterygii;Teleostei;Osteoglossoccephalai;Osteoglo  
 ssocephala;Osteoglossomorpha;Osteoglossiformes;Mormyridae;Paramormyrops;P  
 aramormyrops kingsleyae  
 UdeM00000024275 6412 119.8 UdeM00000024275 XP\_009013108.1 39.9 148  
 86 3 3 150 6 150 3.00E-24 119.8 6412 cellular  
 organisms;Eukaryota;Opisthokonta;Metazoa;Eumetazoa;Bilateria;Protostomia;  
 Spiralia;Lophotrochozoa;Annelida;Clitellata;Hirudinea;Rhynchobdellida;Glo  
 ssiphoniidae;Helobdella;Helobdella robusta  
 UdeM00000024279 6573 299.3 UdeM00000024279 XP\_021360273.1 70.3 185  
 55 0 344 528 249 433 9.90E-78 299.3 6573 cellular  
 organisms;Eukaryota;Opisthokonta;Metazoa;Eumetazoa;Bilateria;Protostomia;  
 Spiralia;Lophotrochozoa;Mollusca;Bivalvia;Autobranchia;Pteriormorphia;Pect  
 inida;Pectinoidea;Pectinidae;Mizuhopecten;Mizuhopecten yessoensis  
 UdeM00000024280 6596 312 UdeM00000024280 XP\_045203338.1 66.1 227  
 56 4 736 955 41 253 2.70E-81 312 6596 cellular  
 organisms;Eukaryota;Opisthokonta;Metazoa;Eumetazoa;Bilateria;Protostomia;  
 Spiralia;Lophotrochozoa;Mollusca;Bivalvia;Autobranchia;Heteroconchia;Euhe  
 terodonta;Imparidentia;Venerida;Veneroidea;Veneridae;Mercenaria;Mercenari  
 a mercenaria  
 UdeM00000024282 7574 442.2 UdeM00000024282 XP\_013411263.1 72.5 284  
 73 2 1 284 53 331 5.20E-121 442.2 7574 cellular  
 organisms;Eukaryota;Opisthokonta;Metazoa;Eumetazoa;Bilateria;Protostomia;  
 Spiralia;Lophotrochozoa;Brachiopoda;Linguliformea;Lingulata;Lingulida;Lin  
 guloidea;Lingulidae;Lingula;Lingula anatina  
 UdeM00000024283 29159 67.4 UdeM00000024283 XP\_034302502.1 50.7 69  
 29 1 102 170 453 516 2.10E-08 67.4 29159 cellular  
 organisms;Eukaryota;Opisthokonta;Metazoa;Eumetazoa;Bilateria;Protostomia;  
 Spiralia;Lophotrochozoa;Mollusca;Bivalvia;Autobranchia;Pteriormorphia;Ostr  
 eida;Ostreoidea;Ostreidae;Crassostrea;Crassostrea gigas  
 UdeM00000024284 6596 381.3 UdeM00000024284 XP\_045205661.1 53.8 340  
 154 3 74 413 142 478 1.50E-102 381.3 6596 cellular  
 organisms;Eukaryota;Opisthokonta;Metazoa;Eumetazoa;Bilateria;Protostomia;  
 Spiralia;Lophotrochozoa;Mollusca;Bivalvia;Autobranchia;Heteroconchia;Euhe  
 terodonta;Imparidentia;Venerida;Veneroidea;Veneridae;Mercenaria;Mercenari  
 a mercenaria  
 UdeM00000024285 6596 363.6 UdeM00000024285 XP\_045205661.1 50 350  
 171 3 30 377 126 473 3.00E-97 363.6 6596 cellular  
 organisms;Eukaryota;Opisthokonta;Metazoa;Eumetazoa;Bilateria;Protostomia;  
 Spiralia;Lophotrochozoa;Mollusca;Bivalvia;Autobranchia;Heteroconchia;Euhe  
 terodonta;Imparidentia;Venerida;Veneroidea;Veneridae;Mercenaria;Mercenari  
 a mercenaria  
 UdeM00000024286 6596 342.8 UdeM00000024286 XP\_045205661.1 50.8 329  
 159 2 74 400 149 476 5.90E-91 342.8 6596 cellular  
 organisms;Eukaryota;Opisthokonta;Metazoa;Eumetazoa;Bilateria;Protostomia;

Spiralia;Lophotrochozoa;Mollusca;Bivalvia;Autobranchia;Heteroconchia;Euherodonta;Imparidentia;Venerida;Veneroidea;Veneridae;Mercenaria;Mercenaria mercenaria

UdeM00000024288 6596 479.9 UdeM00000024288 XP\_045203971.1 65.2 339  
116 1 8 346 4 340 2.90E-132 479.9 6596 cellular

organisms;Eukaryota;Opisthokonta;Metazoa;Eumetazoa;Bilateria;Protostomia;Spiralia;Lophotrochozoa;Mollusca;Bivalvia;Autobranchia;Heteroconchia;Euherodonta;Imparidentia;Venerida;Veneroidea;Veneridae;Mercenaria;Mercenaria mercenaria

UdeM00000024287 6596 479.2 UdeM00000024287 XP\_045203971.1 65.2 339  
116 1 8 346 4 340 5.00E-132 479.2 6596 cellular

organisms;Eukaryota;Opisthokonta;Metazoa;Eumetazoa;Bilateria;Protostomia;Spiralia;Lophotrochozoa;Mollusca;Bivalvia;Autobranchia;Heteroconchia;Euherodonta;Imparidentia;Venerida;Veneroidea;Veneridae;Mercenaria;Mercenaria mercenaria

UdeM00000024289 70779 68.6 UdeM00000024289 XP\_015759381.1 34.4 93  
61 0 1 93 450 542 6.30E-09 68.6 70779 cellular

organisms;Eukaryota;Opisthokonta;Metazoa;Eumetazoa;Cnidaria;Anthozoa;Hexacorallia;Scleractinia;Astrocoeniina;Acroporidae;Acropora;Acropora digitifera

UdeM00000024290 48498 113.2 UdeM00000024290 XP\_020610409.1 38.4 172  
100 4 1 171 474 640 3.30E-22 113.2 48498 cellular

organisms;Eukaryota;Opisthokonta;Metazoa;Eumetazoa;Cnidaria;Anthozoa;Hexacorallia;Scleractinia;Faviina;Merulinidae;Orbicella;Orbicella faveolata

UdeM00000024291 6596 136.7 UdeM00000024291 XP\_045205379.1 37.4 211  
114 4 20 218 101 305 7.10E-29 136.7 6596 cellular

organisms;Eukaryota;Opisthokonta;Metazoa;Eumetazoa;Bilateria;Protostomia;Spiralia;Lophotrochozoa;Mollusca;Bivalvia;Autobranchia;Heteroconchia;Euherodonta;Imparidentia;Venerida;Veneroidea;Veneridae;Mercenaria;Mercenaria mercenaria

UdeM00000024292 400727 981.5 UdeM00000024292 XP\_025077533.1 74.6  
627 158 1 9 635 10 635 5.10E-283 981.5 400727  
cellular

organisms;Eukaryota;Opisthokonta;Metazoa;Eumetazoa;Bilateria;Protostomia;Spiralia;Lophotrochozoa;Mollusca;Gastropoda;Caenogastropoda;Architaenioglossa;Ampullarioidea;Ampullariidae;Pomacea;Pomacea canaliculata

UdeM00000024293 225164 87 UdeM00000024293 XP\_009056717.1 29.3  
198 114 6 12 187 11 204 4.90E-14 87 225164  
cellular

organisms;Eukaryota;Opisthokonta;Metazoa;Eumetazoa;Bilateria;Protostomia;Spiralia;Lophotrochozoa;Mollusca;Gastropoda;Patellogastropoda;Lottiidae;Lottia;Lottia gigantea

UdeM00000024295 7739 243.4 UdeM00000024295 XP\_035659254.1 38.7 362  
203 6 1 353 579 930 4.30E-61 243.4 7739 cellular

organisms;Eukaryota;Opisthokonta;Metazoa;Eumetazoa;Bilateria;Deuterostomia;Chordata;Cephalochordata;Leptocardii;Amphioxiformes;Branchiostomidae;Branchiostoma;Branchiostoma floridae

UdeM00000024297 6596 88.2 UdeM00000024297 XP\_045171063.1 45.6 90  
48 1 8 96 3 92 7.20E-15 88.2 6596 cellular

organisms;Eukaryota;Opisthokonta;Metazoa;Eumetazoa;Bilateria;Protostomia;Spiralia;Lophotrochozoa;Mollusca;Bivalvia;Autobranchia;Heteroconchia;Euherodonta;Imparidentia;Venerida;Veneroidea;Veneridae;Mercenaria;Mercenaria mercenaria

UdeM00000024299 46514 101.7 UdeM00000024299 XP\_038075930.1 28.6 252  
 154 6 76 309 563 806 1.70E-18 101.7 46514 cellular  
 organisms;Eukaryota;Opisthokonta;Metazoa;Eumetazoa;Bilateria;Deuterostomi  
 a;Echinodermata;Eleutherozoa;Asterozoa;Asteroidea;Valvatacea;Valvatida;As  
 terinidae;Patiria;Patiria miniata  
 UdeM00000024301 225164 83.2 UdeM00000024301 XP\_009056717.1 30  
 210 123 7 11 208 11 208 6.80E-13 83.2 225164  
 cellular  
 organisms;Eukaryota;Opisthokonta;Metazoa;Eumetazoa;Bilateria;Protostomia;  
 Spiralia;Lophotrochozoa;Mollusca;Gastropoda;Patellogastropoda;Lottioidea;  
 Lottiidae;Lottia;Lottia gigantea  
 UdeM00000024300 225164 83.2 UdeM00000024300 XP\_009056717.1 30  
 210 123 7 11 208 11 208 7.00E-13 83.2 225164  
 cellular  
 organisms;Eukaryota;Opisthokonta;Metazoa;Eumetazoa;Bilateria;Protostomia;  
 Spiralia;Lophotrochozoa;Mollusca;Gastropoda;Patellogastropoda;Lottioidea;  
 Lottiidae;Lottia;Lottia gigantea  
 UdeM00000024307 6579 87 UdeM00000024307 XP\_033744254.1 30.4 431  
 247 13 1 417 1 392 6.00E-14 87 6579 cellular  
 organisms;Eukaryota;Opisthokonta;Metazoa;Eumetazoa;Bilateria;Protostomia;  
 Spiralia;Lophotrochozoa;Mollusca;Bivalvia;Autobranchia;Pteriormorphia;Pect  
 inida;Pectinoidea;Pectinidae;Pecten;Pecten maximus  
 UdeM00000024308 6579 291.2 UdeM00000024308 XP\_033743450.1 29.2 833  
 490 23 1 784 39 820 4.00E-75 291.2 6579 cellular  
 organisms;Eukaryota;Opisthokonta;Metazoa;Eumetazoa;Bilateria;Protostomia;  
 Spiralia;Lophotrochozoa;Mollusca;Bivalvia;Autobranchia;Pteriormorphia;Pect  
 inida;Pectinoidea;Pectinidae;Pecten;Pecten maximus  
 UdeM00000024309 6596 358.6 UdeM00000024309 XP\_045205408.1 72.3 220  
 57 1 13 232 708 923 6.10E-96 358.6 6596 cellular  
 organisms;Eukaryota;Opisthokonta;Metazoa;Eumetazoa;Bilateria;Protostomia;  
 Spiralia;Lophotrochozoa;Mollusca;Bivalvia;Autobranchia;Heteroconchia;Euhe  
 terodonta;Imparidentia;Venerida;Veneroidea;Veneridae;Mercenaria;Mercenari  
 a mercenaria  
 UdeM00000024310 6596 721.5 UdeM00000024310 XP\_045205408.1 60.3 716  
 253 10 35 737 21 718 1.50E-204 721.5 6596 cellular  
 organisms;Eukaryota;Opisthokonta;Metazoa;Eumetazoa;Bilateria;Protostomia;  
 Spiralia;Lophotrochozoa;Mollusca;Bivalvia;Autobranchia;Heteroconchia;Euhe  
 terodonta;Imparidentia;Venerida;Veneroidea;Veneridae;Mercenaria;Mercenari  
 a mercenaria  
 UdeM00000024311 225164 112.1 UdeM00000024311 XP\_009059898.1 42.7  
 211 113 4 3 208 5 212 8.70E-22 112.1 225164  
 cellular  
 organisms;Eukaryota;Opisthokonta;Metazoa;Eumetazoa;Bilateria;Protostomia;  
 Spiralia;Lophotrochozoa;Mollusca;Gastropoda;Patellogastropoda;Lottioidea;  
 Lottiidae;Lottia;Lottia gigantea  
 UdeM00000024312 1735272 783.5 UdeM00000024312 XP\_041356757.1 53.2  
 739 332 4 14 745 14 745 2.50E-223 783.5 1735272  
 cellular  
 organisms;Eukaryota;Opisthokonta;Metazoa;Eumetazoa;Bilateria;Protostomia;  
 Spiralia;Lophotrochozoa;Mollusca;Gastropoda;Neomphalina;Neomphaloidea;Pel  
 tospiridae;Gigantopelta;Gigantopelta aegis  
 UdeM00000024313 6596 811.2 UdeM00000024313 XP\_045204173.1 78.7 511  
 105 2 4 511 2 511 7.60E-232 811.2 6596 cellular  
 organisms;Eukaryota;Opisthokonta;Metazoa;Eumetazoa;Bilateria;Protostomia;

Spiralia;Lophotrochozoa;Mollusca;Bivalvia;Autobranchia;Heteroconchia;Euherodonta;Imparidentia;Venerida;Veneroidea;Veneridae;Mercenaria;Mercenaria mercenaria

UdeM00000024315 6596 568.2 UdeM00000024315 XP\_045204171.1 79.4 345  
69 2 8 352 9 351 7.60E-159 568.2 6596 cellular

organisms;Eukaryota;Opisthokonta;Metazoa;Eumetazoa;Bilateria;Protostomia;Spiralia;Lophotrochozoa;Mollusca;Bivalvia;Autobranchia;Heteroconchia;Euherodonta;Imparidentia;Venerida;Veneroidea;Veneridae;Mercenaria;Mercenaria mercenaria

UdeM00000024314 6596 808.1 UdeM00000024314 XP\_045204171.1 78 513  
108 3 8 517 9 519 6.50E-231 808.1 6596 cellular

organisms;Eukaryota;Opisthokonta;Metazoa;Eumetazoa;Bilateria;Protostomia;Spiralia;Lophotrochozoa;Mollusca;Bivalvia;Autobranchia;Heteroconchia;Euherodonta;Imparidentia;Venerida;Veneroidea;Veneridae;Mercenaria;Mercenaria mercenaria

UdeM00000024316 6565 60.8 UdeM00000024316 XP\_022299727.1 51.7 58  
28 0 1 58 261 318 8.90E-07 60.8 6565 cellular

organisms;Eukaryota;Opisthokonta;Metazoa;Eumetazoa;Bilateria;Protostomia;Spiralia;Lophotrochozoa;Mollusca;Bivalvia;Autobranchia;Pteriomorphia;Ostreida;Ostreoidea;Ostreidae;Crassostrea;Crassostrea virginica

UdeM00000024317 6565 140.6 UdeM00000024317 XP\_022299727.1 41.7 187  
88 2 1 166 46 232 1.80E-30 140.6 6565 cellular

organisms;Eukaryota;Opisthokonta;Metazoa;Eumetazoa;Bilateria;Protostomia;Spiralia;Lophotrochozoa;Mollusca;Bivalvia;Autobranchia;Pteriomorphia;Ostreida;Ostreoidea;Ostreidae;Crassostrea;Crassostrea virginica

UdeM00000024318 6596 393.7 UdeM00000024318 XP\_045184046.1 40.1 524  
292 7 19 531 23 535 4.10E-106 393.7 6596 cellular

organisms;Eukaryota;Opisthokonta;Metazoa;Eumetazoa;Bilateria;Protostomia;Spiralia;Lophotrochozoa;Mollusca;Bivalvia;Autobranchia;Heteroconchia;Euherodonta;Imparidentia;Venerida;Veneroidea;Veneridae;Mercenaria;Mercenaria mercenaria

UdeM00000024319 6579 412.1 UdeM00000024319 XP\_033743350.1 56.4 326  
134 4 3 321 4457 4781 6.30E-112 412.1 6579 cellular

organisms;Eukaryota;Opisthokonta;Metazoa;Eumetazoa;Bilateria;Protostomia;Spiralia;Lophotrochozoa;Mollusca;Bivalvia;Autobranchia;Pteriomorphia;Pectinida;Pectinoidea;Pectinidae;Pecten;Pecten maximus

UdeM00000024320 6579 406.8 UdeM00000024320 XP\_033743350.1 56.8 324  
133 4 4 320 4458 4781 2.60E-110 406.8 6579 cellular

organisms;Eukaryota;Opisthokonta;Metazoa;Eumetazoa;Bilateria;Protostomia;Spiralia;Lophotrochozoa;Mollusca;Bivalvia;Autobranchia;Pteriomorphia;Pectinida;Pectinoidea;Pectinidae;Pecten;Pecten maximus

UdeM00000024330 6565 540.4 UdeM00000024330 XP\_022326984.1 69.4 614  
154 8 1 594 1 600 2.80E-150 540.4 6565 cellular

organisms;Eukaryota;Opisthokonta;Metazoa;Eumetazoa;Bilateria;Protostomia;Spiralia;Lophotrochozoa;Mollusca;Bivalvia;Autobranchia;Pteriomorphia;Ostreida;Ostreoidea;Ostreidae;Crassostrea;Crassostrea virginica

UdeM00000024332 1735272 332.8 UdeM00000024332 XP\_041357317.1 55.1  
285 127 1 27 311 452 735 4.70E-88 332.8 1735272

cellular

organisms;Eukaryota;Opisthokonta;Metazoa;Eumetazoa;Bilateria;Protostomia;Spiralia;Lophotrochozoa;Mollusca;Gastropoda;Neomphalina;Neomphaloidea;Peltopiridae;Gigantopelta;Gigantopelta aegis

UdeM00000024331 29159 746.9 UdeM00000024331 XP\_011422427.2 57.4 617  
258 2 1190 1805 120 732 6.00E-212 746.9 29159 cellular

organisms;Eukaryota;Opisthokonta;Metazoa;Eumetazoa;Bilateria;Protostomia;Spiralia;Lophotrochozoa;Mollusca;Bivalvia;Autobranchia;Pteriomorpha;Ostreida;Ostreoidea;Ostreidae;Crassostrea;Crassostrea gigas  
UdeM00000024331 29159 164.1 UdeM00000024331 XP\_011422427.2 59.8 122  
49 0 15 136 3 124 1.70E-36 164.1 29159 cellular  
organisms;Eukaryota;Opisthokonta;Metazoa;Eumetazoa;Bilateria;Protostomia;Spiralia;Lophotrochozoa;Mollusca;Bivalvia;Autobranchia;Pteriomorpha;Ostreida;Ostreoidea;Ostreidae;Crassostrea;Crassostrea gigas  
UdeM00000024334 29159 454.5 UdeM00000024334 XP\_011422421.2 45.7 556  
221 7 3 548 5 489 2.00E-124 454.5 29159 cellular  
organisms;Eukaryota;Opisthokonta;Metazoa;Eumetazoa;Bilateria;Protostomia;Spiralia;Lophotrochozoa;Mollusca;Bivalvia;Autobranchia;Pteriomorpha;Ostreida;Ostreoidea;Ostreidae;Crassostrea;Crassostrea gigas  
UdeM00000024337 6596 856.3 UdeM00000024337 XP\_045203227.1 71.8 570  
158 3 1 569 2 569 2.30E-245 856.3 6596 cellular  
organisms;Eukaryota;Opisthokonta;Metazoa;Eumetazoa;Bilateria;Protostomia;Spiralia;Lophotrochozoa;Mollusca;Bivalvia;Autobranchia;Heteroconchia;Euheterodonta;Imparidentia;Venerida;Veneroidea;Veneridae;Mercenaria;Mercenaria mercenaria  
UdeM00000024338 6526 532.3 UdeM00000024338 XP\_013075347.1 79.7 311  
63 0 1 311 35 345 4.20E-148 532.3 6526 cellular  
organisms;Eukaryota;Opisthokonta;Metazoa;Eumetazoa;Bilateria;Protostomia;Spiralia;Lophotrochozoa;Mollusca;Gastropoda;Heterobranchia;Euthyneura;Panpulmonata;Hygrophila;Lymnaeoidea;Planorbidae;Biomphalaria;Biomphalaria glabrata  
UdeM00000024339 6596 105.5 UdeM00000024339 XP\_045203622.1 27.4 525  
317 8 238 756 348 814 3.60E-19 105.5 6596 cellular  
organisms;Eukaryota;Opisthokonta;Metazoa;Eumetazoa;Bilateria;Protostomia;Spiralia;Lophotrochozoa;Mollusca;Bivalvia;Autobranchia;Heteroconchia;Euheterodonta;Imparidentia;Venerida;Veneroidea;Veneridae;Mercenaria;Mercenaria mercenaria  
UdeM00000024341 6579 164.9 UdeM00000024341 XP\_033742664.1 48.6 216  
95 4 7 222 959 1158 1.30E-37 164.9 6579 cellular  
organisms;Eukaryota;Opisthokonta;Metazoa;Eumetazoa;Bilateria;Protostomia;Spiralia;Lophotrochozoa;Mollusca;Bivalvia;Autobranchia;Pteriomorpha;Pectinida;Pectinoidea;Pectinidae;Pecten;Pecten maximus  
UdeM00000024342 6573 161.8 UdeM00000024342 XP\_021360219.1 50.5 192  
82 3 56 247 974 1152 1.20E-36 161.8 6573 cellular  
organisms;Eukaryota;Opisthokonta;Metazoa;Eumetazoa;Bilateria;Protostomia;Spiralia;Lophotrochozoa;Mollusca;Bivalvia;Autobranchia;Pteriomorpha;Pectinida;Pectinoidea;Pectinidae;Mizuhopecten;Mizuhopecten yessoensis  
UdeM00000024343 29159 302 UdeM00000024343 XP\_011431769.1 78.5 177  
37 1 7 183 22 197 5.60E-79 302 29159 cellular  
organisms;Eukaryota;Opisthokonta;Metazoa;Eumetazoa;Bilateria;Protostomia;Spiralia;Lophotrochozoa;Mollusca;Bivalvia;Autobranchia;Pteriomorpha;Ostreida;Ostreoidea;Ostreidae;Crassostrea;Crassostrea gigas  
UdeM00000024344 6596 244.6 UdeM00000024344 XP\_045204569.1 66.3 184  
62 0 1 184 1 184 1.00E-61 244.6 6596 cellular  
organisms;Eukaryota;Opisthokonta;Metazoa;Eumetazoa;Bilateria;Protostomia;Spiralia;Lophotrochozoa;Mollusca;Bivalvia;Autobranchia;Heteroconchia;Euheterodonta;Imparidentia;Venerida;Veneroidea;Veneridae;Mercenaria;Mercenaria mercenaria  
UdeM00000024345 6596 339.3 UdeM00000024345 XP\_045204566.1 60.1 263  
105 0 1 263 1 263 4.20E-90 339.3 6596 cellular



organisms;Eukaryota;Opisthokonta;Metazoa;Eumetazoa;Bilateria;Protostomia;Spiralia;Lophotrochozoa;Mollusca;Bivalvia;Autobranchia;Heteroconchia;Euherodonta;Imparidentia;Venerida;Veneroidea;Veneridae;Mercenaria;Mercenaria mercenaria

UdeM00000024347 6596 446 UdeM00000024347 XP\_045203781.1 34.3 752  
430 15 2 695 94 839 8.50E-122 446 6596 cellular

organisms;Eukaryota;Opisthokonta;Metazoa;Eumetazoa;Bilateria;Protostomia;Spiralia;Lophotrochozoa;Mollusca;Bivalvia;Autobranchia;Heteroconchia;Euherodonta;Imparidentia;Venerida;Veneroidea;Veneridae;Mercenaria;Mercenaria mercenaria

UdeM00000024348 45264 236.5 UdeM00000024348 XP\_044180638.1 41.4 295  
145 5 415 685 84 374 1.00E-58 236.5 45264 cellular

organisms;Eukaryota;Opisthokonta;Metazoa;Eumetazoa;Cnidaria;Anthozoa;Hexacorallia;Scleractinia;Astrocoeniina;Acroporidae;Acropora;Acropora millepora

UdeM00000024349 6596 602.1 UdeM00000024349 XP\_045203781.1 44.2 722  
356 11 14 691 123 841 9.20E-169 602.1 6596 cellular

organisms;Eukaryota;Opisthokonta;Metazoa;Eumetazoa;Bilateria;Protostomia;Spiralia;Lophotrochozoa;Mollusca;Bivalvia;Autobranchia;Heteroconchia;Euherodonta;Imparidentia;Venerida;Veneroidea;Veneridae;Mercenaria;Mercenaria mercenaria

UdeM00000024351 6596 144.4 UdeM00000024351 XP\_045203725.1 40.7 162  
96 0 36 197 24 185 1.60E-31 144.4 6596 cellular

organisms;Eukaryota;Opisthokonta;Metazoa;Eumetazoa;Bilateria;Protostomia;Spiralia;Lophotrochozoa;Mollusca;Bivalvia;Autobranchia;Heteroconchia;Euherodonta;Imparidentia;Venerida;Veneroidea;Veneridae;Mercenaria;Mercenaria mercenaria

UdeM00000024353 6596 125.2 UdeM00000024353 XP\_045203724.1 37.6 173  
106 2 1 171 1 173 8.20E-26 125.2 6596 cellular

organisms;Eukaryota;Opisthokonta;Metazoa;Eumetazoa;Bilateria;Protostomia;Spiralia;Lophotrochozoa;Mollusca;Bivalvia;Autobranchia;Heteroconchia;Euherodonta;Imparidentia;Venerida;Veneroidea;Veneridae;Mercenaria;Mercenaria mercenaria

UdeM00000024352 6596 142.9 UdeM00000024352 XP\_045203724.1 36.8 204  
127 2 1 202 1 204 4.60E-31 142.9 6596 cellular

organisms;Eukaryota;Opisthokonta;Metazoa;Eumetazoa;Bilateria;Protostomia;Spiralia;Lophotrochozoa;Mollusca;Bivalvia;Autobranchia;Heteroconchia;Euherodonta;Imparidentia;Venerida;Veneroidea;Veneridae;Mercenaria;Mercenaria mercenaria

UdeM00000024354 29159 102.4 UdeM00000024354 XP\_034339171.1 29.6 223  
128 8 92 296 424 635 1.00E-18 102.4 29159 cellular

organisms;Eukaryota;Opisthokonta;Metazoa;Eumetazoa;Bilateria;Protostomia;Spiralia;Lophotrochozoa;Mollusca;Bivalvia;Autobranchia;Pteriomorphia;Ostreida;Ostreoidea;Ostreidae;Crassostrea;Crassostrea gigas

UdeM00000024355 29159 187.6 UdeM00000024355 XP\_034331441.1 38.7 266  
155 6 3 266 591 850 2.10E-44 187.6 29159 cellular

organisms;Eukaryota;Opisthokonta;Metazoa;Eumetazoa;Bilateria;Protostomia;Spiralia;Lophotrochozoa;Mollusca;Bivalvia;Autobranchia;Pteriomorphia;Ostreida;Ostreoidea;Ostreidae;Crassostrea;Crassostrea gigas

UdeM00000024367 6565 84.3 UdeM00000024367 XP\_022320112.1 41.7 132  
68 5 1 132 189 311 1.20E-13 84.3 6565 cellular

organisms;Eukaryota;Opisthokonta;Metazoa;Eumetazoa;Bilateria;Protostomia;Spiralia;Lophotrochozoa;Mollusca;Bivalvia;Autobranchia;Pteriomorphia;Ostreida;Ostreoidea;Ostreidae;Crassostrea;Crassostrea virginica

UdeM00000024368 6565 82 UdeM00000024368 XP\_022320112.1 40 130  
 65 5 1 129 189 306 6.30E-13 82 6565 cellular  
 organisms;Eukaryota;Opisthokonta;Metazoa;Eumetazoa;Bilateria;Protostomia;  
 Spiralia;Lophotrochozoa;Mollusca;Bivalvia;Autobranhia;Pteriomorphia;Ostr  
 eida;Ostreoidea;Ostreidae;Crassostrea;Crassostrea virginica  
 UdeM00000024370 7054 211.8 UdeM00000024370 XP\_031328250.1 44.8 261  
 140 3 1 259 1 259 1.00E-51 211.8 7054 cellular  
 organisms;Eukaryota;Opisthokonta;Metazoa;Eumetazoa;Bilateria;Protostomia;  
 Ecdysozoa;Panarthropoda;Arthropoda;Mandibulata;Pancrustacea;Hexapoda;Inse  
 cta;Dicondylia;Pterygota;Neoptera;Endopterygota;Coleoptera;Polyphaga;Elat  
 eriformia;Elateroidea;Lampyridae;Lampyrinae;Photinus;Photinus pyralis  
 UdeM00000024371 6573 219.2 UdeM00000024371 XP\_021362144.1 81.6 125  
 23 0 40 164 1 125 4.00E-54 219.2 6573 cellular  
 organisms;Eukaryota;Opisthokonta;Metazoa;Eumetazoa;Bilateria;Protostomia;  
 Spiralia;Lophotrochozoa;Mollusca;Bivalvia;Autobranhia;Pteriomorphia;Pect  
 inida;Pectinoidea;Pectinidae;Mizuhopecten;Mizuhopecten yessoensis  
 UdeM00000024372 6596 820.1 UdeM00000024372 XP\_045205734.1 56.8 660  
 282 2 1 660 1 657 2.10E-234 820.1 6596 cellular  
 organisms;Eukaryota;Opisthokonta;Metazoa;Eumetazoa;Bilateria;Protostomia;  
 Spiralia;Lophotrochozoa;Mollusca;Bivalvia;Autobranhia;Heteroconchia;Euhe  
 terodonta;Imparidentia;Venerida;Veneroidea;Veneridae;Mercenaria;Mercenari  
 a mercenaria  
 UdeM00000003991 6596 792.3 UdeM00000003991 XP\_045164179.1 84.7 476  
 67 5 1 472 40 513 3.30E-226 792.3 6596 cellular  
 organisms;Eukaryota;Opisthokonta;Metazoa;Eumetazoa;Bilateria;Protostomia;  
 Spiralia;Lophotrochozoa;Mollusca;Bivalvia;Autobranhia;Heteroconchia;Euhe  
 terodonta;Imparidentia;Venerida;Veneroidea;Veneridae;Mercenaria;Mercenari  
 a mercenaria  
 UdeM00000003992 118141 419.1 UdeM00000003992 XP\_036376299.1 66.9  
 314 103 1 1 313 1 314 5.20E-114 419.1 118141  
 cellular  
 organisms;Eukaryota;Opisthokonta;Metazoa;Eumetazoa;Bilateria;Deuterostomi  
 a;Chordata;Craniata;Vertebrata;Gnathostomata;Teleostomi;Euteleostomi;Acti  
 nopterygii;Actinopteri;Neopterygii;Teleostei;Elopocephalai;Elopocephala;E  
 lopomorpha;Elopiformes;Megalopidae;Megalops;Megalops cyprinoides  
 UdeM00000003993 6565 302.4 UdeM00000003993 XP\_022300351.1 58.5 289  
 89 6 163 450 198 456 9.80E-79 302.4 6565 cellular  
 organisms;Eukaryota;Opisthokonta;Metazoa;Eumetazoa;Bilateria;Protostomia;  
 Spiralia;Lophotrochozoa;Mollusca;Bivalvia;Autobranhia;Pteriomorphia;Ostr  
 eida;Ostreoidea;Ostreidae;Crassostrea;Crassostrea virginica  
 UdeM00000004008 6573 449.5 UdeM00000004008 XP\_021376498.1 46.5 441  
 217 4 98 531 27 455 5.90E-123 449.5 6573 cellular  
 organisms;Eukaryota;Opisthokonta;Metazoa;Eumetazoa;Bilateria;Protostomia;  
 Spiralia;Lophotrochozoa;Mollusca;Bivalvia;Autobranhia;Pteriomorphia;Pect  
 inida;Pectinoidea;Pectinidae;Mizuhopecten;Mizuhopecten yessoensis  
 UdeM00000004009 6596 362.5 UdeM00000004009 XP\_045166618.1 46.6 539  
 234 15 4 501 863 1388 8.90E-97 362.5 6596 cellular  
 organisms;Eukaryota;Opisthokonta;Metazoa;Eumetazoa;Bilateria;Protostomia;  
 Spiralia;Lophotrochozoa;Mollusca;Bivalvia;Autobranhia;Heteroconchia;Euhe  
 terodonta;Imparidentia;Venerida;Veneroidea;Veneridae;Mercenaria;Mercenari  
 a mercenaria  
 UdeM00000004010 6565 205.3 UdeM00000004010 XP\_022297382.1 46.3 910  
 356 15 1 823 1 864 3.10E-49 205.3 6565 cellular  
 organisms;Eukaryota;Opisthokonta;Metazoa;Eumetazoa;Bilateria;Protostomia;

Spiralia; Lophotrochozoa; Mollusca; Bivalvia; Autobranchia; Pteriomorpha; Ostreida; Ostreioidea; Ostreidae; Crassostrea; Crassostrea virginica  
UdeM00000004011 6596 589.3 UdeM00000004011 XP\_045178236.1 41.5 833  
402 22 8 773 251 1065 7.20E-165 589.3 6596 cellular  
organisms; Eukaryota; Opisthokonta; Metazoa; Eumetazoa; Bilateria; Protostomia; Spiralia; Lophotrochozoa; Mollusca; Bivalvia; Autobranchia; Heteroconchia; Euheterodonta; Imparidentia; Venerida; Veneroidea; Veneridae; Mercenaria; Mercenaria mercenaria  
UdeM00000004012 6596 154.1 UdeM00000004012 XP\_045178233.1 47.4 154  
78 1 22 172 86 239 1.80E-34 154.1 6596 cellular  
organisms; Eukaryota; Opisthokonta; Metazoa; Eumetazoa; Bilateria; Protostomia; Spiralia; Lophotrochozoa; Mollusca; Bivalvia; Autobranchia; Heteroconchia; Euheterodonta; Imparidentia; Venerida; Veneroidea; Veneridae; Mercenaria; Mercenaria mercenaria  
UdeM00000004014 6565 518.1 UdeM00000004014 XP\_022306197.1 45.1 697  
294 14 9 646 16 682 1.60E-143 518.1 6565 cellular  
organisms; Eukaryota; Opisthokonta; Metazoa; Eumetazoa; Bilateria; Protostomia; Spiralia; Lophotrochozoa; Mollusca; Bivalvia; Autobranchia; Pteriomorpha; Ostreida; Ostreioidea; Ostreidae; Crassostrea; Crassostrea virginica  
UdeM00000004016 7757 482.3 UdeM00000004016 XP\_032817105.1 92.2 257  
20 0 1 257 120 376 4.00E-133 482.3 7757 cellular  
organisms; Eukaryota; Opisthokonta; Metazoa; Eumetazoa; Bilateria; Deuterostomia; Chordata; Craniata; Vertebrata; Cyclostomata; Hyperoartia; Petromyzontiformes; Petromyzontidae; Petromyzon; Petromyzon marinus  
UdeM00000004017 7739 113.6 UdeM00000004017 XP\_035689070.1 77.8 72  
16 0 1 72 1 72 1.30E-22 113.6 7739 cellular  
organisms; Eukaryota; Opisthokonta; Metazoa; Eumetazoa; Bilateria; Deuterostomia; Chordata; Cephalochordata; Leptocardii; Amphioxiformes; Branchiostomidae; Branchiostoma; Branchiostoma floridae  
UdeM00000004029 6596 119.4 UdeM00000004029 XP\_045167332.1 60.7 107  
37 1 50 151 490 596 4.10E-24 119.4 6596 cellular  
organisms; Eukaryota; Opisthokonta; Metazoa; Eumetazoa; Bilateria; Protostomia; Spiralia; Lophotrochozoa; Mollusca; Bivalvia; Autobranchia; Heteroconchia; Euheterodonta; Imparidentia; Venerida; Veneroidea; Veneridae; Mercenaria; Mercenaria mercenaria  
UdeM00000004030 6596 366.7 UdeM00000004030 XP\_045167332.1 41.2 804  
378 19 44 790 13 778 7.40E-98 366.7 6596 cellular  
organisms; Eukaryota; Opisthokonta; Metazoa; Eumetazoa; Bilateria; Protostomia; Spiralia; Lophotrochozoa; Mollusca; Bivalvia; Autobranchia; Heteroconchia; Euheterodonta; Imparidentia; Venerida; Veneroidea; Veneridae; Mercenaria; Mercenaria mercenaria  
UdeM00000004031 6596 253.4 UdeM00000004031 XP\_045167332.1 49.4 312  
123 5 3 281 469 778 3.30E-64 253.4 6596 cellular  
organisms; Eukaryota; Opisthokonta; Metazoa; Eumetazoa; Bilateria; Protostomia; Spiralia; Lophotrochozoa; Mollusca; Bivalvia; Autobranchia; Heteroconchia; Euheterodonta; Imparidentia; Venerida; Veneroidea; Veneridae; Mercenaria; Mercenaria mercenaria  
UdeM00000004032 6579 1268.8 UdeM00000004032 XP\_033745775.1 48.4  
1482 668 25 1 1462 1 1406 0.00E+00 1268.8 6579  
cellular  
organisms; Eukaryota; Opisthokonta; Metazoa; Eumetazoa; Bilateria; Protostomia; Spiralia; Lophotrochozoa; Mollusca; Bivalvia; Autobranchia; Pteriomorpha; Pectinida; Pectinoidea; Pectinidae; Pecten; Pecten maximus

UdeM00000004033 6596 59.7 UdeM00000004033 XP\_045191304.1 24.6 317  
 198 8 1 296 1 297 8.80E-06 59.7 6596 cellular  
 organisms;Eukaryota;Opisthokonta;Metazoa;Eumetazoa;Bilateria;Protostomia;  
 Spiralia;Lophotrochozoa;Mollusca;Bivalvia;Autobranchia;Heteroconchia;Euhe  
 terodonta;Imparidentia;Venerida;Veneroidea;Veneridae;Mercenaria;Mercenari  
 a mercenaria  
 UdeM00000004035 1735272 131.3 UdeM00000004035 XP\_041360711.1 34.7  
 199 117 3 2 198 3 190 1.50E-27 131.3 1735272  
 cellular  
 organisms;Eukaryota;Opisthokonta;Metazoa;Eumetazoa;Bilateria;Protostomia;  
 Spiralia;Lophotrochozoa;Mollusca;Gastropoda;Neomphalina;Neomphaloidea;Pel  
 tospiridae;Gigantopelta;Gigantopelta aegis  
 UdeM00000004036 6565 101.3 UdeM00000004036 XP\_022297828.1 40.1 147  
 77 5 1 139 1 144 1.10E-18 101.3 6565 cellular  
 organisms;Eukaryota;Opisthokonta;Metazoa;Eumetazoa;Bilateria;Protostomia;  
 Spiralia;Lophotrochozoa;Mollusca;Bivalvia;Autobranchia;Pteriormorphia;Ostr  
 eida;Ostreoidea;Ostreidae;Crassostrea;Crassostrea virginica  
 UdeM00000004037 6573 787.3 UdeM00000004037 XP\_021372396.1 27.3 2565  
 1560 73 10 2373 11 2472 5.30E-224 787.3 6573 cellular  
 organisms;Eukaryota;Opisthokonta;Metazoa;Eumetazoa;Bilateria;Protostomia;  
 Spiralia;Lophotrochozoa;Mollusca;Bivalvia;Autobranchia;Pteriormorphia;Pect  
 inida;Pectinoidea;Pectinidae;Mizuhopecten;Mizuhopecten yessoensis  
 UdeM00000004038 6579 575.1 UdeM00000004038 XP\_033761495.1 78.3 336  
 73 0 36 371 24 359 1.10E-160 575.1 6579 cellular  
 organisms;Eukaryota;Opisthokonta;Metazoa;Eumetazoa;Bilateria;Protostomia;  
 Spiralia;Lophotrochozoa;Mollusca;Bivalvia;Autobranchia;Pteriormorphia;Pect  
 inida;Pectinoidea;Pectinidae;Pecten;Pecten maximus  
 UdeM00000004039 45351 109.4 UdeM00000004039 XP\_001639687.2 38.9 190  
 84 10 83 246 432 615 1.30E-20 109.4 45351 cellular  
 organisms;Eukaryota;Opisthokonta;Metazoa;Eumetazoa;Cnidaria;Anthozoa;Hexa  
 corallia;Actiniaria;Edwardsiidae;Nematostella;Nematostella vectensis  
 UdeM00000004041 45351 151 UdeM00000004041 XP\_001639687.2 35.6 303  
 152 6 79 341 432 731 4.80E-33 151 45351 cellular  
 organisms;Eukaryota;Opisthokonta;Metazoa;Eumetazoa;Cnidaria;Anthozoa;Hexa  
 corallia;Actiniaria;Edwardsiidae;Nematostella;Nematostella vectensis  
 UdeM00000004042 45351 148.7 UdeM00000004042 XP\_001639687.2 36.5 288  
 143 5 10 257 621 908 2.00E-32 148.7 45351 cellular  
 organisms;Eukaryota;Opisthokonta;Metazoa;Eumetazoa;Cnidaria;Anthozoa;Hexa  
 corallia;Actiniaria;Edwardsiidae;Nematostella;Nematostella vectensis  
 UdeM00000004051 6596 188 UdeM00000004051 XP\_045165600.1 31.2 560  
 304 21 12 523 19 545 3.30E-44 188 6596 cellular  
 organisms;Eukaryota;Opisthokonta;Metazoa;Eumetazoa;Bilateria;Protostomia;  
 Spiralia;Lophotrochozoa;Mollusca;Bivalvia;Autobranchia;Heteroconchia;Euhe  
 terodonta;Imparidentia;Venerida;Veneroidea;Veneridae;Mercenaria;Mercenari  
 a mercenaria  
 UdeM00000004053 6596 111.3 UdeM00000004053 XP\_045165600.1 26.4 588  
 305 28 4 526 11 535 3.80E-21 111.3 6596 cellular  
 organisms;Eukaryota;Opisthokonta;Metazoa;Eumetazoa;Bilateria;Protostomia;  
 Spiralia;Lophotrochozoa;Mollusca;Bivalvia;Autobranchia;Heteroconchia;Euhe  
 terodonta;Imparidentia;Venerida;Veneroidea;Veneridae;Mercenaria;Mercenari  
 a mercenaria  
 UdeM00000004054 6596 71.2 UdeM00000004054 XP\_045165600.1 29.5 241  
 152 8 23 248 89 326 2.70E-09 71.2 6596 cellular  
 organisms;Eukaryota;Opisthokonta;Metazoa;Eumetazoa;Bilateria;Protostomia;

Spiralia;Lophotrochozoa;Mollusca;Bivalvia;Autobranchia;Heteroconchia;Euherodonta;Imparidentia;Venerida;Veneroidea;Veneridae;Mercenaria;Mercenaria mercenaria

UdeM00000004055 6596 109.4 UdeM00000004055 XP\_045165600.1 27.6 588  
290 27 4 518 11 535 1.40E-20 109.4 6596 cellular

organisms;Eukaryota;Opisthokonta;Metazoa;Eumetazoa;Bilateria;Protostomia;Spiralia;Lophotrochozoa;Mollusca;Bivalvia;Autobranchia;Heteroconchia;Euherodonta;Imparidentia;Venerida;Veneroidea;Veneridae;Mercenaria;Mercenaria mercenaria

UdeM00000004056 6596 82.4 UdeM00000004056 XP\_045165600.1 26.8 321  
168 10 4 262 11 326 1.20E-12 82.4 6596 cellular

organisms;Eukaryota;Opisthokonta;Metazoa;Eumetazoa;Bilateria;Protostomia;Spiralia;Lophotrochozoa;Mollusca;Bivalvia;Autobranchia;Heteroconchia;Euherodonta;Imparidentia;Venerida;Veneroidea;Veneridae;Mercenaria;Mercenaria mercenaria

UdeM00000004057 6596 97.4 UdeM00000004057 XP\_045165600.1 26 489  
273 20 32 487 103 535 5.20E-17 97.4 6596 cellular

organisms;Eukaryota;Opisthokonta;Metazoa;Eumetazoa;Bilateria;Protostomia;Spiralia;Lophotrochozoa;Mollusca;Bivalvia;Autobranchia;Heteroconchia;Euherodonta;Imparidentia;Venerida;Veneroidea;Veneridae;Mercenaria;Mercenaria mercenaria

UdeM00000004059 6579 106.7 UdeM00000004059 XP\_033744278.1 46.4 110  
46 1 1 97 726 835 2.70E-20 106.7 6579 cellular

organisms;Eukaryota;Opisthokonta;Metazoa;Eumetazoa;Bilateria;Protostomia;Spiralia;Lophotrochozoa;Mollusca;Bivalvia;Autobranchia;Pteriomorphia;Pectinida;Pectinoidea;Pectinidae;Pecten;Pecten maximus

UdeM00000004061 29159 326.2 UdeM00000004061 XP\_011451264.1 52.6 365  
152 8 1 354 248 602 5.00E-86 326.2 29159 cellular

organisms;Eukaryota;Opisthokonta;Metazoa;Eumetazoa;Bilateria;Protostomia;Spiralia;Lophotrochozoa;Mollusca;Bivalvia;Autobranchia;Pteriomorphia;Ostreida;Ostreoidea;Ostreidae;Crassostrea;Crassostrea gigas

UdeM00000004062 6596 537.7 UdeM00000004062 XP\_045165666.1 64.7 385  
136 0 2 386 7 391 1.20E-149 537.7 6596 cellular

organisms;Eukaryota;Opisthokonta;Metazoa;Eumetazoa;Bilateria;Protostomia;Spiralia;Lophotrochozoa;Mollusca;Bivalvia;Autobranchia;Heteroconchia;Euherodonta;Imparidentia;Venerida;Veneroidea;Veneridae;Mercenaria;Mercenaria mercenaria

UdeM00000004063 6596 195.7 UdeM00000004063 XP\_045165256.1 65.9 129  
42 1 1 129 1 127 3.80E-47 195.7 6596 cellular

organisms;Eukaryota;Opisthokonta;Metazoa;Eumetazoa;Bilateria;Protostomia;Spiralia;Lophotrochozoa;Mollusca;Bivalvia;Autobranchia;Heteroconchia;Euherodonta;Imparidentia;Venerida;Veneroidea;Veneridae;Mercenaria;Mercenaria mercenaria

UdeM00000004065 6596 213 UdeM00000004065 XP\_045165256.1 71.3 129  
35 1 1 129 1 127 2.30E-52 213 6596 cellular

organisms;Eukaryota;Opisthokonta;Metazoa;Eumetazoa;Bilateria;Protostomia;Spiralia;Lophotrochozoa;Mollusca;Bivalvia;Autobranchia;Heteroconchia;Euherodonta;Imparidentia;Venerida;Veneroidea;Veneridae;Mercenaria;Mercenaria mercenaria

UdeM00000004066 6596 223.8 UdeM00000004066 XP\_045165256.1 76 129  
29 1 1 129 1 127 1.30E-55 223.8 6596 cellular

organisms;Eukaryota;Opisthokonta;Metazoa;Eumetazoa;Bilateria;Protostomia;Spiralia;Lophotrochozoa;Mollusca;Bivalvia;Autobranchia;Heteroconchia;Euherodonta;Imparidentia;Venerida;Veneroidea;Veneridae;Mercenaria;Mercenaria mercenaria

terodonta;Imparidentia;Venerida;Veneroidea;Veneridae;Mercenaria;Mercenaria mercenaria

UdeM00000004067 225164 211.5 UdeM00000004067 XP\_009065699.1 70.3  
128 36 1 1 128 1 126 6.50E-52 211.5 225164  
cellular

organisms;Eukaryota;Opisthokonta;Metazoa;Eumetazoa;Bilateria;Protostomia;Spiralia;Lophotrochozoa;Mollusca;Gastropoda;Patellogastropoda;Lottioidea;Lottiidae;Lottia;Lottia gigantea

UdeM00000004068 1529436 143.7 UdeM00000004068 XP\_033118623.1 48.4  
128 66 0 52 179 62 189 2.50E-31 143.7 1529436  
cellular

organisms;Eukaryota;Opisthokonta;Metazoa;Eumetazoa;Bilateria;Deuterostomia;Echinodermata;Pelmatozoa;Crinoidea;Articulata;Comatulida;Comatulidae;Comatulinae;Anneissia;Anneissia japonica

UdeM00000004069 6573 172.6 UdeM00000004069 XP\_021343345.1 56.7 127  
55 0 3 129 2 128 3.40E-40 172.6 6573 cellular

organisms;Eukaryota;Opisthokonta;Metazoa;Eumetazoa;Bilateria;Protostomia;Spiralia;Lophotrochozoa;Mollusca;Bivalvia;Autobranchia;Pteriomorphia;Pectinida;Pectinoidea;Pectinidae;Mizuhopecten;Mizuhopecten yessoensis

UdeM00000004070 29159 179.9 UdeM00000004070 XP\_034308282.1 60.3 126  
50 0 3 128 7 132 2.10E-42 179.9 29159 cellular

organisms;Eukaryota;Opisthokonta;Metazoa;Eumetazoa;Bilateria;Protostomia;Spiralia;Lophotrochozoa;Mollusca;Bivalvia;Autobranchia;Pteriomorphia;Ostreida;Ostreoidea;Ostreidae;Crassostrea;Crassostrea gigas

UdeM00000004071 1735272 201.4 UdeM00000004071 XP\_041378581.1 68.2  
129 41 0 1 129 1 129 6.80E-49 201.4 1735272  
cellular

organisms;Eukaryota;Opisthokonta;Metazoa;Eumetazoa;Bilateria;Protostomia;Spiralia;Lophotrochozoa;Mollusca;Gastropoda;Neomphalina;Neomphaloidea;Peltospiridae;Gigantopelta;Gigantopelta aegis

UdeM00000004072 6573 193 UdeM00000004072 XP\_021343304.1 64.3 126  
45 0 3 128 8 133 2.40E-46 193 6573 cellular

organisms;Eukaryota;Opisthokonta;Metazoa;Eumetazoa;Bilateria;Protostomia;Spiralia;Lophotrochozoa;Mollusca;Bivalvia;Autobranchia;Pteriomorphia;Pectinida;Pectinoidea;Pectinidae;Mizuhopecten;Mizuhopecten yessoensis

UdeM00000004073 6573 193 UdeM00000004073 XP\_021343304.1 64.3 126  
45 0 3 128 8 133 2.40E-46 193 6573 cellular

organisms;Eukaryota;Opisthokonta;Metazoa;Eumetazoa;Bilateria;Protostomia;Spiralia;Lophotrochozoa;Mollusca;Bivalvia;Autobranchia;Pteriomorphia;Pectinida;Pectinoidea;Pectinidae;Mizuhopecten;Mizuhopecten yessoensis

UdeM00000004074 1735272 194.9 UdeM00000004074 XP\_041378581.1 65.1  
129 45 0 1 129 1 129 6.40E-47 194.9 1735272  
cellular

organisms;Eukaryota;Opisthokonta;Metazoa;Eumetazoa;Bilateria;Protostomia;Spiralia;Lophotrochozoa;Mollusca;Gastropoda;Neomphalina;Neomphaloidea;Peltospiridae;Gigantopelta;Gigantopelta aegis

UdeM00000004075 1735272 196.1 UdeM00000004075 XP\_041378581.1 65.1  
129 45 0 1 129 1 129 2.90E-47 196.1 1735272  
cellular

organisms;Eukaryota;Opisthokonta;Metazoa;Eumetazoa;Bilateria;Protostomia;Spiralia;Lophotrochozoa;Mollusca;Gastropoda;Neomphalina;Neomphaloidea;Peltospiridae;Gigantopelta;Gigantopelta aegis

UdeM00000004076 1735272 191.4 UdeM00000004076 XP\_041378581.1 62  
129 49 0 1 129 1 129 7.00E-46 191.4 1735272

cellular  
organisms;Eukaryota;Opisthokonta;Metazoa;Eumetazoa;Bilateria;Protostomia;  
Spiralia;Lophotrochozoa;Mollusca;Gastropoda;Neomphalina;Neomphaloidea;Pel  
tospiridae;Gigantopelta;Gigantopelta aegis

UdeM00000004078 1735272 192.6 UdeM00000004078 XP\_041378581.1 64.3  
129 46 0 1 129 1 129 3.20E-46 192.6 1735272

cellular  
organisms;Eukaryota;Opisthokonta;Metazoa;Eumetazoa;Bilateria;Protostomia;  
Spiralia;Lophotrochozoa;Mollusca;Gastropoda;Neomphalina;Neomphaloidea;Pel  
tospiridae;Gigantopelta;Gigantopelta aegis

UdeM00000004080 29159 183.3 UdeM00000004080 XP\_034308282.1 62.2 127  
48 0 3 129 6 132 2.00E-43 183.3 29159 cellular

organisms;Eukaryota;Opisthokonta;Metazoa;Eumetazoa;Bilateria;Protostomia;  
Spiralia;Lophotrochozoa;Mollusca;Bivalvia;Autobranchia;Pteriormorphia;Ostr  
eida;Ostreoidea;Ostreidae;Crassostrea;Crassostrea gigas

UdeM00000004081 29159 180.3 UdeM00000004081 XP\_034308282.1 62.2 127  
48 0 3 129 6 132 1.70E-42 180.3 29159 cellular

organisms;Eukaryota;Opisthokonta;Metazoa;Eumetazoa;Bilateria;Protostomia;  
Spiralia;Lophotrochozoa;Mollusca;Bivalvia;Autobranchia;Pteriormorphia;Ostr  
eida;Ostreoidea;Ostreidae;Crassostrea;Crassostrea gigas

UdeM00000004082 29159 179.1 UdeM00000004082 XP\_034308282.1 60.6 127  
50 0 3 129 6 132 3.70E-42 179.1 29159 cellular

organisms;Eukaryota;Opisthokonta;Metazoa;Eumetazoa;Bilateria;Protostomia;  
Spiralia;Lophotrochozoa;Mollusca;Bivalvia;Autobranchia;Pteriormorphia;Ostr  
eida;Ostreoidea;Ostreidae;Crassostrea;Crassostrea gigas

UdeM00000004083 6596 181.4 UdeM00000004083 XP\_045164742.1 58.5 123  
51 0 11 133 8 130 7.60E-43 181.4 6596 cellular

organisms;Eukaryota;Opisthokonta;Metazoa;Eumetazoa;Bilateria;Protostomia;  
Spiralia;Lophotrochozoa;Mollusca;Bivalvia;Autobranchia;Heteroconchia;Euhe  
terodonta;Imparidentia;Venerida;Veneroidea;Veneridae;Mercenaria;Mercenari  
a mercenaria

UdeM00000004084 1735272 179.1 UdeM00000004084 XP\_041378581.1 62.3  
122 46 0 1 122 1 122 3.50E-42 179.1 1735272

cellular  
organisms;Eukaryota;Opisthokonta;Metazoa;Eumetazoa;Bilateria;Protostomia;  
Spiralia;Lophotrochozoa;Mollusca;Gastropoda;Neomphalina;Neomphaloidea;Pel  
tospiridae;Gigantopelta;Gigantopelta aegis

UdeM00000004085 6573 184.1 UdeM00000004085 XP\_021343351.1 63.5 126  
46 0 3 128 5 130 1.10E-43 184.1 6573 cellular

organisms;Eukaryota;Opisthokonta;Metazoa;Eumetazoa;Bilateria;Protostomia;  
Spiralia;Lophotrochozoa;Mollusca;Bivalvia;Autobranchia;Pteriormorphia;Pect  
inida;Pectinoidea;Pectinidae;Mizuhopecten;Mizuhopecten yessoensis

UdeM00000004086 6579 184.9 UdeM00000004086 XP\_033745937.1 63.3 128  
47 0 1 128 6 133 6.50E-44 184.9 6579 cellular

organisms;Eukaryota;Opisthokonta;Metazoa;Eumetazoa;Bilateria;Protostomia;  
Spiralia;Lophotrochozoa;Mollusca;Bivalvia;Autobranchia;Pteriormorphia;Pect  
inida;Pectinoidea;Pectinidae;Pecten;Pecten maximus

UdeM00000004087 6579 182.2 UdeM00000004087 XP\_033745937.1 62.2 127  
48 0 3 129 7 133 4.60E-43 182.2 6579 cellular

organisms;Eukaryota;Opisthokonta;Metazoa;Eumetazoa;Bilateria;Protostomia;  
Spiralia;Lophotrochozoa;Mollusca;Bivalvia;Autobranchia;Pteriormorphia;Pect  
inida;Pectinoidea;Pectinidae;Pecten;Pecten maximus

UdeM00000004088 6579 182.6 UdeM00000004088 XP\_033745937.1 62.2 127  
48 0 3 129 7 133 3.30E-43 182.6 6579 cellular

organisms;Eukaryota;Opisthokonta;Metazoa;Eumetazoa;Bilateria;Protostomia;Spiralia;Lophotrochozoa;Mollusca;Bivalvia;Autobranhia;Pteriomorphia;Pectinida;Pectinoidea;Pectinidae;Pecten;Pecten maximus

UdeM00000004089 6579 194.5 UdeM00000004089 XP\_033745936.1 66.1 124  
42 0 4 127 10 133 8.20E-47 194.5 6579 cellular

organisms;Eukaryota;Opisthokonta;Metazoa;Eumetazoa;Bilateria;Protostomia;Spiralia;Lophotrochozoa;Mollusca;Bivalvia;Autobranhia;Pteriomorphia;Pectinida;Pectinoidea;Pectinidae;Pecten;Pecten maximus

UdeM00000004090 6596 228.4 UdeM00000004090 XP\_045164204.1 38.7 318  
179 5 1 316 104 407 1.30E-56 228.4 6596 cellular

organisms;Eukaryota;Opisthokonta;Metazoa;Eumetazoa;Bilateria;Protostomia;Spiralia;Lophotrochozoa;Mollusca;Bivalvia;Autobranhia;Heteroconchia;Euheterodonta;Imparidentia;Venerida;Veneroidea;Veneridae;Mercenaria;Mercenaria mercenaria

UdeM00000004091 6573 200.3 UdeM00000004091 XP\_021343311.1 64.5 155  
55 0 1 155 1 155 1.80E-48 200.3 6573 cellular

organisms;Eukaryota;Opisthokonta;Metazoa;Eumetazoa;Bilateria;Protostomia;Spiralia;Lophotrochozoa;Mollusca;Bivalvia;Autobranhia;Pteriomorphia;Pectinida;Pectinoidea;Pectinidae;Mizuhopecten;Mizuhopecten yessoensis

UdeM00000004092 29159 316.6 UdeM00000004092 XP\_034317111.1 55.8 283  
124 1 2 283 171 453 3.20E-83 316.6 29159 cellular

organisms;Eukaryota;Opisthokonta;Metazoa;Eumetazoa;Bilateria;Protostomia;Spiralia;Lophotrochozoa;Mollusca;Bivalvia;Autobranhia;Pteriomorphia;Ostreida;Ostreoidea;Ostreidae;Crassostrea;Crassostrea gigas

UdeM00000004093 400727 361.7 UdeM00000004093 XP\_025106704.1 83.4  
205 34 0 10 214 51 255 6.50E-97 361.7 400727  
cellular

organisms;Eukaryota;Opisthokonta;Metazoa;Eumetazoa;Bilateria;Protostomia;Spiralia;Lophotrochozoa;Mollusca;Gastropoda;Caenogastropoda;Architaenioglossa;Ampullarioidea;Ampullariidae;Pomacea;Pomacea canaliculata

UdeM00000004094 6596 629.4 UdeM00000004094 XP\_045165961.1 79.6 363  
73 1 9 370 9 371 2.90E-177 629.4 6596 cellular

organisms;Eukaryota;Opisthokonta;Metazoa;Eumetazoa;Bilateria;Protostomia;Spiralia;Lophotrochozoa;Mollusca;Bivalvia;Autobranhia;Heteroconchia;Euheterodonta;Imparidentia;Venerida;Veneroidea;Veneridae;Mercenaria;Mercenaria mercenaria

UdeM00000004095 6596 636 UdeM00000004095 XP\_045165960.1 76.5 400  
94 0 7 406 4 403 3.50E-179 636 6596 cellular

organisms;Eukaryota;Opisthokonta;Metazoa;Eumetazoa;Bilateria;Protostomia;Spiralia;Lophotrochozoa;Mollusca;Bivalvia;Autobranhia;Heteroconchia;Euheterodonta;Imparidentia;Venerida;Veneroidea;Veneridae;Mercenaria;Mercenaria mercenaria

UdeM00000004097 9244 66.2 UdeM00000004097 XP\_030315266.1 38.2 102  
59 1 63 164 142 239 4.80E-08 66.2 9244 cellular

organisms;Eukaryota;Opisthokonta;Metazoa;Eumetazoa;Bilateria;Deuterostomia;Chordata;Craniata;Vertebrata;Gnathostomata;Teleostomi;Euteleostomi;Sarcopterygii;Dipnotetrapodomorpha;Tetrapoda;Amniota;Sauropsida;Sauria;Archelosauria;Archosauria;Dinosauria;Saurischia;Theropoda;Coelurosauria;Aves;Neognathae;Caprimulgimorphae;Apodiformes;Trochilidae;Calypte;Calypte anna

UdeM00000004098 586833 70.9 UdeM00000004098 XP\_029917460.1 38.9  
90 53 1 82 171 160 247 2.20E-09 70.9 586833  
cellular

organisms;Eukaryota;Opisthokonta;Metazoa;Eumetazoa;Bilateria;Deuterostomia;Chordata;Craniata;Vertebrata;Gnathostomata;Teleostomi;Euteleostomi;Acti



nopterygii;Actinopteri;Neopterygii;Teleostei;Osteoglossocephalai;Clupeocephala;Euteleostei;Neoteleostei;Eurypterygia;Ctenosquamata;Acanthomorphata;Euacanthomorphacea;Holocentrimorphaceae;Holocentriformes;Holocentridae;Myripristinae;Myripristis;Myripristis murdjan

UdeM00000004099 29159 426.8 UdeM00000004099 XP\_011444398.2 45.9 529  
254 11 1 517 1 509 4.10E-116 426.8 29159 cellular

organisms;Eukaryota;Opisthokonta;Metazoa;Eumetazoa;Bilateria;Protostomia;Spiralia;Lophotrochozoa;Mollusca;Bivalvia;Autobranchia;Pteriormorphia;Ostreida;Ostreoidea;Ostreidae;Crassostrea;Crassostrea gigas

UdeM00000004100 1735272 199.1 UdeM00000004100 XP\_041348532.1 66.7  
135 45 0 19 153 9 143 4.10E-48 199.1 1735272  
cellular

organisms;Eukaryota;Opisthokonta;Metazoa;Eumetazoa;Bilateria;Protostomia;Spiralia;Lophotrochozoa;Mollusca;Gastropoda;Neomphalina;Neomphaloidea;Peltospiridae;Gigantopelta;Gigantopelta aegis

UdeM00000004101 1735272 198.7 UdeM00000004101 XP\_041348532.1 67.2  
134 44 0 1 134 10 143 4.70E-48 198.7 1735272  
cellular

organisms;Eukaryota;Opisthokonta;Metazoa;Eumetazoa;Bilateria;Protostomia;Spiralia;Lophotrochozoa;Mollusca;Gastropoda;Neomphalina;Neomphaloidea;Peltospiridae;Gigantopelta;Gigantopelta aegis

UdeM00000004102 6596 1219.5 UdeM00000004102 XP\_045164464.1 59.9  
1051 339 9 1 1011 1 1009 0.00E+00 1219.5 6596  
cellular

organisms;Eukaryota;Opisthokonta;Metazoa;Eumetazoa;Bilateria;Protostomia;Spiralia;Lophotrochozoa;Mollusca;Bivalvia;Autobranchia;Heteroconchia;Euheterodonta;Imparidentia;Venerida;Veneroidea;Veneridae;Mercenaria;Mercenaria mercenaria

UdeM00000004103 1735272 503.8 UdeM00000004103 XP\_041378793.1 53.1  
463 203 3 3 462 2 453 2.30E-139 503.8 1735272  
cellular

organisms;Eukaryota;Opisthokonta;Metazoa;Eumetazoa;Bilateria;Protostomia;Spiralia;Lophotrochozoa;Mollusca;Gastropoda;Neomphalina;Neomphaloidea;Peltospiridae;Gigantopelta;Gigantopelta aegis

UdeM00000004104 1735272 130.2 UdeM00000004104 XP\_041378771.1 80.8  
73 14 0 3 75 2 74 1.50E-27 130.2 1735272  
cellular

organisms;Eukaryota;Opisthokonta;Metazoa;Eumetazoa;Bilateria;Protostomia;Spiralia;Lophotrochozoa;Mollusca;Gastropoda;Neomphalina;Neomphaloidea;Peltospiridae;Gigantopelta;Gigantopelta aegis

UdeM00000004105 1735272 505.4 UdeM00000004105 XP\_041378793.1 52.9  
463 204 3 3 462 2 453 7.90E-140 505.4 1735272  
cellular

organisms;Eukaryota;Opisthokonta;Metazoa;Eumetazoa;Bilateria;Protostomia;Spiralia;Lophotrochozoa;Mollusca;Gastropoda;Neomphalina;Neomphaloidea;Peltospiridae;Gigantopelta;Gigantopelta aegis

UdeM00000004106 1735272 505.4 UdeM00000004106 XP\_041378793.1 52.9  
463 204 3 3 462 2 453 7.90E-140 505.4 1735272  
cellular

organisms;Eukaryota;Opisthokonta;Metazoa;Eumetazoa;Bilateria;Protostomia;Spiralia;Lophotrochozoa;Mollusca;Gastropoda;Neomphalina;Neomphaloidea;Peltospiridae;Gigantopelta;Gigantopelta aegis

UdeM00000004107 1735272 505.4 UdeM00000004107 XP\_041378793.1 52.9  
463 204 3 3 462 2 453 7.90E-140 505.4 1735272

cellular  
organisms;Eukaryota;Opisthokonta;Metazoa;Eumetazoa;Bilateria;Protostomia;  
Spiralia;Lophotrochozoa;Mollusca;Gastropoda;Neomphalina;Neomphaloidea;Pel  
tospiridae;Gigantopelta;Gigantopelta aegis

UdeM00000004108 1735272 505.4 UdeM00000004108 XP\_041378793.1 52.9  
463 204 3 3 462 2 453 7.90E-140 505.4 1735272

cellular  
organisms;Eukaryota;Opisthokonta;Metazoa;Eumetazoa;Bilateria;Protostomia;  
Spiralia;Lophotrochozoa;Mollusca;Gastropoda;Neomphalina;Neomphaloidea;Pel  
tospiridae;Gigantopelta;Gigantopelta aegis

UdeM00000004109 1735272 505 UdeM00000004109 XP\_041378793.1 52.9  
463 204 3 3 462 2 453 1.00E-139 505 1735272

cellular  
organisms;Eukaryota;Opisthokonta;Metazoa;Eumetazoa;Bilateria;Protostomia;  
Spiralia;Lophotrochozoa;Mollusca;Gastropoda;Neomphalina;Neomphaloidea;Pel  
tospiridae;Gigantopelta;Gigantopelta aegis

UdeM00000004110 6596 405.6 UdeM00000004110 XP\_045165597.1 47.3 491  
236 9 1 474 38 522 8.90E-110 405.6 6596 cellular

organisms;Eukaryota;Opisthokonta;Metazoa;Eumetazoa;Bilateria;Protostomia;  
Spiralia;Lophotrochozoa;Mollusca;Bivalvia;Autobranchia;Heteroconchia;Euhe  
terodonta;Imparidentia;Venerida;Veneroidea;Veneridae;Mercenaria;Mercenari  
a mercenaria

UdeM00000004111 6596 295.8 UdeM00000004111 XP\_045165597.1 63.3 218  
78 1 1 218 50 265 4.60E-77 295.8 6596 cellular

organisms;Eukaryota;Opisthokonta;Metazoa;Eumetazoa;Bilateria;Protostomia;  
Spiralia;Lophotrochozoa;Mollusca;Bivalvia;Autobranchia;Heteroconchia;Euhe  
terodonta;Imparidentia;Venerida;Veneroidea;Veneridae;Mercenaria;Mercenari  
a mercenaria

UdeM00000004112 6596 59.3 UdeM00000004112 XP\_045165597.1 66.7 42  
14 0 1 42 481 522 1.90E-06 59.3 6596 cellular

organisms;Eukaryota;Opisthokonta;Metazoa;Eumetazoa;Bilateria;Protostomia;  
Spiralia;Lophotrochozoa;Mollusca;Bivalvia;Autobranchia;Heteroconchia;Euhe  
terodonta;Imparidentia;Venerida;Veneroidea;Veneridae;Mercenaria;Mercenari  
a mercenaria

UdeM00000004113 6596 486.9 UdeM00000004113 XP\_045165597.1 51.7 526  
226 12 7 512 5 522 3.30E-134 486.9 6596 cellular

organisms;Eukaryota;Opisthokonta;Metazoa;Eumetazoa;Bilateria;Protostomia;  
Spiralia;Lophotrochozoa;Mollusca;Bivalvia;Autobranchia;Heteroconchia;Euhe  
terodonta;Imparidentia;Venerida;Veneroidea;Veneridae;Mercenaria;Mercenari  
a mercenaria

UdeM00000004114 6596 214.9 UdeM00000004114 XP\_045165597.1 40.5 341  
178 8 3 322 186 522 1.50E-52 214.9 6596 cellular

organisms;Eukaryota;Opisthokonta;Metazoa;Eumetazoa;Bilateria;Protostomia;  
Spiralia;Lophotrochozoa;Mollusca;Bivalvia;Autobranchia;Heteroconchia;Euhe  
terodonta;Imparidentia;Venerida;Veneroidea;Veneridae;Mercenaria;Mercenari  
a mercenaria

UdeM00000004115 7906 332 UdeM00000004115 XP\_034763505.1 47.7 386  
91 3 1 282 1 379 7.30E-88 332 7906 cellular

organisms;Eukaryota;Opisthokonta;Metazoa;Eumetazoa;Bilateria;Deuterostomi  
a;Chordata;Craniata;Vertebrata;Gnathostomata;Teleostomi;Euteleostomi;Acti  
nopterygii;Actinopteri;Chondrostei;Acipenseriformes;Acipenseroides;Acipen  
seridae;Acipenserinae;Acipenserini;Acipenser;Acipenser ruthenus

UdeM00000004116 6596 235.3 UdeM00000004116 XP\_045165597.1 59.9 187  
72 2 5 191 3 186 6.50E-59 235.3 6596 cellular

organisms;Eukaryota;Opisthokonta;Metazoa;Eumetazoa;Bilateria;Protostomia; Spiralia;Lophotrochozoa;Mollusca;Bivalvia;Autobranchia;Heteroconchia;Euherodonta;Imparidentia;Venerida;Veneroidea;Veneridae;Mercenaria;Mercenaria mercenaria

UdeM00000004117 6596 172.6 UdeM00000004117 XP\_045165597.1 36.9 350  
170 11 3 314 186 522 8.60E-40 172.6 6596 cellular

organisms;Eukaryota;Opisthokonta;Metazoa;Eumetazoa;Bilateria;Protostomia; Spiralia;Lophotrochozoa;Mollusca;Bivalvia;Autobranchia;Heteroconchia;Euherodonta;Imparidentia;Venerida;Veneroidea;Veneridae;Mercenaria;Mercenaria mercenaria

UdeM00000004118 7913 270.4 UdeM00000004118 XP\_041082893.1 71.4 185  
53 0 1 185 1 185 1.80E-69 270.4 7913 cellular

organisms;Eukaryota;Opisthokonta;Metazoa;Eumetazoa;Bilateria;Deuterostomia;Chordata;Craniata;Vertebrata;Gnathostomata;Teleostomi;Euteleostomi;Actinopterygii;Actinopteri;Chondrostei;Acipenseriformes;Acipenseroidei;Polyodontidae;Polyodontinae;Polyodontini;Polyodon;Polyodon spathula

UdeM00000004119 7913 155.2 UdeM00000004119 XP\_041082893.1 70.1 107  
32 0 1 107 205 311 5.10E-35 155.2 7913 cellular

organisms;Eukaryota;Opisthokonta;Metazoa;Eumetazoa;Bilateria;Deuterostomia;Chordata;Craniata;Vertebrata;Gnathostomata;Teleostomi;Euteleostomi;Actinopterygii;Actinopteri;Chondrostei;Acipenseriformes;Acipenseroidei;Polyodontidae;Polyodontinae;Polyodontini;Polyodon;Polyodon spathula

UdeM00000004121 6596 138.7 UdeM00000004121 XP\_045165597.1 46.8 154  
73 2 1 147 35 186 6.50E-30 138.7 6596 cellular

organisms;Eukaryota;Opisthokonta;Metazoa;Eumetazoa;Bilateria;Protostomia; Spiralia;Lophotrochozoa;Mollusca;Bivalvia;Autobranchia;Heteroconchia;Euherodonta;Imparidentia;Venerida;Veneroidea;Veneridae;Mercenaria;Mercenaria mercenaria

UdeM00000004120 6596 173.7 UdeM00000004120 XP\_045165597.1 48.7 187  
86 3 5 184 3 186 2.30E-40 173.7 6596 cellular

organisms;Eukaryota;Opisthokonta;Metazoa;Eumetazoa;Bilateria;Protostomia; Spiralia;Lophotrochozoa;Mollusca;Bivalvia;Autobranchia;Heteroconchia;Euherodonta;Imparidentia;Venerida;Veneroidea;Veneridae;Mercenaria;Mercenaria mercenaria

UdeM00000004122 6596 179.9 UdeM00000004122 XP\_045165597.1 37.5 341  
171 10 3 305 186 522 5.20E-42 179.9 6596 cellular

organisms;Eukaryota;Opisthokonta;Metazoa;Eumetazoa;Bilateria;Protostomia; Spiralia;Lophotrochozoa;Mollusca;Bivalvia;Autobranchia;Heteroconchia;Euherodonta;Imparidentia;Venerida;Veneroidea;Veneridae;Mercenaria;Mercenaria mercenaria

UdeM00000004123 7913 271.2 UdeM00000004123 XP\_041082893.1 71.4 185  
53 0 1 185 1 185 1.00E-69 271.2 7913 cellular

organisms;Eukaryota;Opisthokonta;Metazoa;Eumetazoa;Bilateria;Deuterostomia;Chordata;Craniata;Vertebrata;Gnathostomata;Teleostomi;Euteleostomi;Actinopterygii;Actinopteri;Chondrostei;Acipenseriformes;Acipenseroidei;Polyodontidae;Polyodontinae;Polyodontini;Polyodon;Polyodon spathula

UdeM00000004124 7913 155.2 UdeM00000004124 XP\_041082893.1 70.1 107  
32 0 1 107 205 311 5.10E-35 155.2 7913 cellular

organisms;Eukaryota;Opisthokonta;Metazoa;Eumetazoa;Bilateria;Deuterostomia;Chordata;Craniata;Vertebrata;Gnathostomata;Teleostomi;Euteleostomi;Actinopterygii;Actinopteri;Chondrostei;Acipenseriformes;Acipenseroidei;Polyodontidae;Polyodontinae;Polyodontini;Polyodon;Polyodon spathula

UdeM00000004125 6596 174.1 UdeM00000004125 XP\_045165597.1 48.7 187  
86 3 5 184 3 186 1.70E-40 174.1 6596 cellular

organisms;Eukaryota;Opisthokonta;Metazoa;Eumetazoa;Bilateria;Protostomia;Spiralia;Lophotrochozoa;Mollusca;Bivalvia;Autobranchia;Heteroconchia;Euherodonta;Imparidentia;Venerida;Veneroidea;Veneridae;Mercenaria;Mercenaria mercenaria

UdeM00000004126 6565 193.7 UdeM00000004126 XP\_022295767.1 44.7 257  
134 7 9 261 276 528 3.20E-46 193.7 6565 cellular

organisms;Eukaryota;Opisthokonta;Metazoa;Eumetazoa;Bilateria;Protostomia;Spiralia;Lophotrochozoa;Mollusca;Bivalvia;Autobranchia;Pteriormorphia;Ostreida;Ostreoidea;Ostreidae;Crassostrea;Crassostrea virginica

UdeM00000004130 6945 85.1 UdeM00000004130 XP\_040069682.2 26.2 187  
120 4 6 181 37 216 1.70E-13 85.1 6945 cellular

organisms;Eukaryota;Opisthokonta;Metazoa;Eumetazoa;Bilateria;Protostomia;Ecdysozoa;Panarthropoda;Arthropoda;Chelicerata;Arachnida;Acari;Parasitiformes;Ixodida;Ixodoidea;Ixodidae;Ixodinae;Ixodes;Ixodes scapularis

UdeM00000004131 69820 86.3 UdeM00000004131 XP\_022832055.1 51.4 70  
34 0 2 71 1 70 1.80E-14 86.3 69820 cellular

organisms;Eukaryota;Opisthokonta;Metazoa;Eumetazoa;Bilateria;Protostomia;Ecdysozoa;Panarthropoda;Arthropoda;Mandibulata;Pancrustacea;Hexapoda;Insecta;Dicondylia;Pterygota;Neoptera;Endopterygota;Amphiesmenoptera;Lepidoptera;Glossata;Neolepidoptera;Heteroneura;Ditrysia;Obtectomera;Noctuoidea;Noctuidae;Amphipyrrinae;Spodoptera;Spodoptera litura

UdeM00000004132 6573 104.4 UdeM00000004132 XP\_021365166.1 51 100  
48 1 1 100 605 703 9.60E-20 104.4 6573 cellular

organisms;Eukaryota;Opisthokonta;Metazoa;Eumetazoa;Bilateria;Protostomia;Spiralia;Lophotrochozoa;Mollusca;Bivalvia;Autobranchia;Pteriormorphia;Pectinida;Pectinoidea;Pectinidae;Mizuhopecten;Mizuhopecten yessoensis

UdeM00000004133 2607531 374.4 UdeM00000004133 XP\_029634809.1 44.3  
431 237 2 42 472 53 480 2.10E-100 374.4 2607531  
cellular

organisms;Eukaryota;Opisthokonta;Metazoa;Eumetazoa;Bilateria;Protostomia;Spiralia;Lophotrochozoa;Mollusca;Cephalopoda;Coleoidea;Octopodiformes;Octopoda;Incirrata;Octopodidae;Octopus;Octopus sinensis

UdeM00000004134 7604 137.9 UdeM00000004134 XP\_033647171.1 54.3 105  
48 0 74 178 73 177 1.30E-29 137.9 7604 cellular

organisms;Eukaryota;Opisthokonta;Metazoa;Eumetazoa;Bilateria;Deuterostomia;Echinodermata;Eleutherozoa;Asterozoa;Asteroidea;Forcipulatacea;Forcipulatacida;Asteroidea;Asteroidea;Asterias;Asterias rubens

UdeM00000004135 29159 68.2 UdeM00000004135 XP\_034329456.1 49.3 71  
31 1 23 93 451 516 7.00E-09 68.2 29159 cellular

organisms;Eukaryota;Opisthokonta;Metazoa;Eumetazoa;Bilateria;Protostomia;Spiralia;Lophotrochozoa;Mollusca;Bivalvia;Autobranchia;Pteriormorphia;Ostreida;Ostreoidea;Ostreidae;Crassostrea;Crassostrea gigas

UdeM00000004136 6596 373.6 UdeM00000004136 XP\_045164966.1 59.1 318  
121 4 5 316 2 316 2.40E-100 373.6 6596 cellular

organisms;Eukaryota;Opisthokonta;Metazoa;Eumetazoa;Bilateria;Protostomia;Spiralia;Lophotrochozoa;Mollusca;Bivalvia;Autobranchia;Heteroconchia;Euherodonta;Imparidentia;Venerida;Veneroidea;Veneridae;Mercenaria;Mercenaria mercenaria

UdeM00000004137 6596 912.5 UdeM00000004137 XP\_045164972.1 67.8 633  
204 0 45 677 41 673 3.10E-262 912.5 6596 cellular

organisms;Eukaryota;Opisthokonta;Metazoa;Eumetazoa;Bilateria;Protostomia;Spiralia;Lophotrochozoa;Mollusca;Bivalvia;Autobranchia;Heteroconchia;Euherodonta;Imparidentia;Venerida;Veneroidea;Veneridae;Mercenaria;Mercenaria mercenaria

UdeM00000004138 6579 1126.7 UdeM00000004138 XP\_033744964.1 73.3  
 709 174 5 11 706 10 716 0.00E+00 1126.7 6579  
 cellular  
 organisms;Eukaryota;Opisthokonta;Metazoa;Eumetazoa;Bilateria;Protostomia;  
 Spiralia;Lophotrochozoa;Mollusca;Bivalvia;Autobranchia;Pteriormorphia;Pect  
 inida;Pectinoidea;Pectinidae;Pecten;Pecten maximus  
 UdeM00000004139 6596 194.9 UdeM00000004139 XP\_045164977.1 70.1 127  
 38 0 1 127 495 621 6.30E-47 194.9 6596 cellular  
 organisms;Eukaryota;Opisthokonta;Metazoa;Eumetazoa;Bilateria;Protostomia;  
 Spiralia;Lophotrochozoa;Mollusca;Bivalvia;Autobranchia;Heteroconchia;Euhe  
 terodonta;Imparidentia;Venerida;Veneroidea;Veneridae;Mercenaria;Mercenari  
 a mercenaria  
 UdeM00000004140 6596 963.8 UdeM00000004140 XP\_045164527.1 66.9 724  
 227 5 28 748 13 726 1.30E-277 963.8 6596 cellular  
 organisms;Eukaryota;Opisthokonta;Metazoa;Eumetazoa;Bilateria;Protostomia;  
 Spiralia;Lophotrochozoa;Mollusca;Bivalvia;Autobranchia;Heteroconchia;Euhe  
 terodonta;Imparidentia;Venerida;Veneroidea;Veneridae;Mercenaria;Mercenari  
 a mercenaria  
 UdeM00000004141 1735272 613.6 UdeM00000004141 XP\_041350390.1 44.3  
 734 372 12 9 731 7 714 3.50E-172 613.6 1735272  
 cellular  
 organisms;Eukaryota;Opisthokonta;Metazoa;Eumetazoa;Bilateria;Protostomia;  
 Spiralia;Lophotrochozoa;Mollusca;Gastropoda;Neomphalina;Neomphaloidea;Pel  
 tospiridae;Gigantopelta;Gigantopelta aegis  
 UdeM00000004146 6596 156 UdeM00000004146 XP\_045165177.1 54.8 177  
 75 4 1 176 1 173 4.50E-35 156 6596 cellular  
 organisms;Eukaryota;Opisthokonta;Metazoa;Eumetazoa;Bilateria;Protostomia;  
 Spiralia;Lophotrochozoa;Mollusca;Bivalvia;Autobranchia;Heteroconchia;Euhe  
 terodonta;Imparidentia;Venerida;Veneroidea;Veneridae;Mercenaria;Mercenari  
 a mercenaria  
 UdeM00000004147 6579 516.5 UdeM00000004147 XP\_033745928.1 52.5 512  
 230 4 1 512 774 1272 3.80E-143 516.5 6579 cellular  
 organisms;Eukaryota;Opisthokonta;Metazoa;Eumetazoa;Bilateria;Protostomia;  
 Spiralia;Lophotrochozoa;Mollusca;Bivalvia;Autobranchia;Pteriormorphia;Pect  
 inida;Pectinoidea;Pectinidae;Pecten;Pecten maximus  
 UdeM00000004148 6596 1323.9 UdeM00000004148 XP\_045165040.1 81  
 752 135 2 1 751 1 745 0.00E+00 1323.9 6596  
 cellular  
 organisms;Eukaryota;Opisthokonta;Metazoa;Eumetazoa;Bilateria;Protostomia;  
 Spiralia;Lophotrochozoa;Mollusca;Bivalvia;Autobranchia;Heteroconchia;Euhe  
 terodonta;Imparidentia;Venerida;Veneroidea;Veneridae;Mercenaria;Mercenari  
 a mercenaria  
 UdeM00000004149 6596 133.7 UdeM00000004149 XP\_045164463.1 82.4 74  
 13 0 1 74 1 74 1.00E-28 133.7 6596 cellular  
 organisms;Eukaryota;Opisthokonta;Metazoa;Eumetazoa;Bilateria;Protostomia;  
 Spiralia;Lophotrochozoa;Mollusca;Bivalvia;Autobranchia;Heteroconchia;Euhe  
 terodonta;Imparidentia;Venerida;Veneroidea;Veneridae;Mercenaria;Mercenari  
 a mercenaria  
 UdeM00000004150 6596 618.6 UdeM00000004150 XP\_045165697.1 85.2 351  
 49 1 1 348 4 354 5.00E-174 618.6 6596 cellular  
 organisms;Eukaryota;Opisthokonta;Metazoa;Eumetazoa;Bilateria;Protostomia;  
 Spiralia;Lophotrochozoa;Mollusca;Bivalvia;Autobranchia;Heteroconchia;Euhe  
 terodonta;Imparidentia;Venerida;Veneroidea;Veneridae;Mercenaria;Mercenari  
 a mercenaria

UdeM00000004151 6573 771.2 UdeM00000004151 XP\_021343325.1 59 786  
 270 15 1 760 1 760 1.30E-219 771.2 6573 cellular  
 organisms;Eukaryota;Opisthokonta;Metazoa;Eumetazoa;Bilateria;Protostomia;  
 Spiralia;Lophotrochozoa;Mollusca;Bivalvia;Autobranchia;Pteriomorpha;Pect  
 inida;Pectinoidea;Pectinidae;Mizuhopecten;Mizuhopecten yessoensis  
 UdeM00000004152 6596 567 UdeM00000004152 XP\_045166528.1 75.4 350  
 84 2 6 355 4 351 1.70E-158 567 6596 cellular  
 organisms;Eukaryota;Opisthokonta;Metazoa;Eumetazoa;Bilateria;Protostomia;  
 Spiralia;Lophotrochozoa;Mollusca;Bivalvia;Autobranchia;Heteroconchia;Euhe  
 terodonta;Imparidentia;Venerida;Veneroidea;Veneridae;Mercenaria;Mercenari  
 a mercenaria  
 UdeM00000004153 6579 297 UdeM00000004153 XP\_033745415.1 45.3 360  
 176 8 30 376 135 486 3.50E-77 297 6579 cellular  
 organisms;Eukaryota;Opisthokonta;Metazoa;Eumetazoa;Bilateria;Protostomia;  
 Spiralia;Lophotrochozoa;Mollusca;Bivalvia;Autobranchia;Pteriomorpha;Pect  
 inida;Pectinoidea;Pectinidae;Pecten;Pecten maximus  
 UdeM00000004154 6579 312 UdeM00000004154 XP\_033745415.1 42.8 421  
 212 11 49 450 76 486 1.20E-81 312 6579 cellular  
 organisms;Eukaryota;Opisthokonta;Metazoa;Eumetazoa;Bilateria;Protostomia;  
 Spiralia;Lophotrochozoa;Mollusca;Bivalvia;Autobranchia;Pteriomorpha;Pect  
 inida;Pectinoidea;Pectinidae;Pecten;Pecten maximus  
 UdeM00000004155 400727 410.6 UdeM00000004155 XP\_025107430.1 76.5  
 260 61 0 1 260 1 260 1.50E-111 410.6 400727  
 cellular  
 organisms;Eukaryota;Opisthokonta;Metazoa;Eumetazoa;Bilateria;Protostomia;  
 Spiralia;Lophotrochozoa;Mollusca;Gastropoda;Caenogastropoda;Architaeniogl  
 ossa;Ampullarioidea;Ampullariidae;Pomacea;Pomacea canaliculata  
 UdeM00000004156 6596 317 UdeM00000004156 XP\_045165388.1 72.9 218  
 56 2 1 215 1 218 3.00E-83 317 6596 cellular  
 organisms;Eukaryota;Opisthokonta;Metazoa;Eumetazoa;Bilateria;Protostomia;  
 Spiralia;Lophotrochozoa;Mollusca;Bivalvia;Autobranchia;Heteroconchia;Euhe  
 terodonta;Imparidentia;Venerida;Veneroidea;Veneridae;Mercenaria;Mercenari  
 a mercenaria  
 UdeM00000004157 8154 105.5 UdeM00000004157 XP\_026015163.1 52.6 95  
 45 0 1 95 1 95 5.60E-20 105.5 8154 cellular  
 organisms;Eukaryota;Opisthokonta;Metazoa;Eumetazoa;Bilateria;Deuterostomi  
 a;Chordata;Craniata;Vertebrata;Gnathostomata;Teleostomi;Euteleostomi;Acti  
 nopterygii;Actinopteri;Neopterygii;Teleostei;Osteoglossocephalai;Clupeoce  
 phala;Euteleosteomorpha;Neoteleostei;Eurypterygia;Ctenosquamata;Acanthomo  
 rphata;Euacanthomorphacea;Percomorphaceae;Ovalentaria;Cichlomorphae;Cichl  
 iformes;Cichlidae;African  
 cichlids;Pseudocrenilabrinae;Haplochromini;Astatotilapia;Astatotilapia  
 calliptera  
 UdeM00000004159 6579 687.6 UdeM00000004159 XP\_033757810.1 66.9 540  
 164 8 1 536 1 529 1.30E-194 687.6 6579 cellular  
 organisms;Eukaryota;Opisthokonta;Metazoa;Eumetazoa;Bilateria;Protostomia;  
 Spiralia;Lophotrochozoa;Mollusca;Bivalvia;Autobranchia;Pteriomorpha;Pect  
 inida;Pectinoidea;Pectinidae;Pecten;Pecten maximus  
 UdeM00000004160 6579 657.9 UdeM00000004160 XP\_033757810.1 65.9 536  
 168 10 1 528 1 529 1.10E-185 657.9 6579 cellular  
 organisms;Eukaryota;Opisthokonta;Metazoa;Eumetazoa;Bilateria;Protostomia;  
 Spiralia;Lophotrochozoa;Mollusca;Bivalvia;Autobranchia;Pteriomorpha;Pect  
 inida;Pectinoidea;Pectinidae;Pecten;Pecten maximus

UdeM00000004161 6579 439.1 UdeM00000004161 XP\_033746229.1 90.9 241  
 22 0 1 241 1 241 3.60E-120 439.1 6579 cellular  
 organisms;Eukaryota;Opisthokonta;Metazoa;Eumetazoa;Bilateria;Protostomia;  
 Spiralia;Lophotrochozoa;Mollusca;Bivalvia;Autobranchia;Pteriormorphia;Pect  
 inida;Pectinoidea;Pectinidae;Pecten;Pecten maximus  
 UdeM00000004162 6596 260.4 UdeM00000004162 XP\_045166298.1 56.2 260  
 101 6 1 258 1 249 2.50E-66 260.4 6596 cellular  
 organisms;Eukaryota;Opisthokonta;Metazoa;Eumetazoa;Bilateria;Protostomia;  
 Spiralia;Lophotrochozoa;Mollusca;Bivalvia;Autobranchia;Heteroconchia;Euhe  
 terodonta;Imparidentia;Venerida;Veneroidea;Veneridae;Mercenaria;Mercenari  
 a mercenaria  
 UdeM00000004163 6596 203.4 UdeM00000004163 XP\_045165661.1 52 202  
 97 0 26 227 2 203 3.10E-49 203.4 6596 cellular  
 organisms;Eukaryota;Opisthokonta;Metazoa;Eumetazoa;Bilateria;Protostomia;  
 Spiralia;Lophotrochozoa;Mollusca;Bivalvia;Autobranchia;Heteroconchia;Euhe  
 terodonta;Imparidentia;Venerida;Veneroidea;Veneridae;Mercenaria;Mercenari  
 a mercenaria  
 UdeM00000004164 6596 199.9 UdeM00000004164 XP\_045165661.1 51 202  
 99 0 3 204 2 203 3.10E-48 199.9 6596 cellular  
 organisms;Eukaryota;Opisthokonta;Metazoa;Eumetazoa;Bilateria;Protostomia;  
 Spiralia;Lophotrochozoa;Mollusca;Bivalvia;Autobranchia;Heteroconchia;Euhe  
 terodonta;Imparidentia;Venerida;Veneroidea;Veneridae;Mercenaria;Mercenari  
 a mercenaria  
 UdeM00000004165 6596 196.8 UdeM00000004165 XP\_045165661.1 50.5 202  
 100 0 3 204 2 203 2.60E-47 196.8 6596 cellular  
 organisms;Eukaryota;Opisthokonta;Metazoa;Eumetazoa;Bilateria;Protostomia;  
 Spiralia;Lophotrochozoa;Mollusca;Bivalvia;Autobranchia;Heteroconchia;Euhe  
 terodonta;Imparidentia;Venerida;Veneroidea;Veneridae;Mercenaria;Mercenari  
 a mercenaria  
 UdeM00000004166 6596 201.4 UdeM00000004166 XP\_045165661.1 51.5 202  
 98 0 3 204 2 203 1.10E-48 201.4 6596 cellular  
 organisms;Eukaryota;Opisthokonta;Metazoa;Eumetazoa;Bilateria;Protostomia;  
 Spiralia;Lophotrochozoa;Mollusca;Bivalvia;Autobranchia;Heteroconchia;Euhe  
 terodonta;Imparidentia;Venerida;Veneroidea;Veneridae;Mercenaria;Mercenari  
 a mercenaria  
 UdeM00000004167 29159 185.7 UdeM00000004167 XP\_011444849.1 50.2 203  
 97 3 4 204 3 203 1.30E-43 185.7 29159 cellular  
 organisms;Eukaryota;Opisthokonta;Metazoa;Eumetazoa;Bilateria;Protostomia;  
 Spiralia;Lophotrochozoa;Mollusca;Bivalvia;Autobranchia;Pteriormorphia;Ostr  
 eida;Ostreoidea;Ostreidae;Crassostrea;Crassostrea gigas  
 UdeM00000004168 225164 567.8 UdeM00000004168 XP\_009065715.1 58.7  
 489 147 9 1 456 1 467 1.30E-158 567.8 225164  
 cellular  
 organisms;Eukaryota;Opisthokonta;Metazoa;Eumetazoa;Bilateria;Protostomia;  
 Spiralia;Lophotrochozoa;Mollusca;Gastropoda;Patellogastropoda;Lottioida;  
 Lottiidae;Lottia;Lottia gigantea  
 UdeM00000004170 6596 255 UdeM00000004170 XP\_045165952.1 60.7 214  
 75 2 1 205 1 214 8.20E-65 255 6596 cellular  
 organisms;Eukaryota;Opisthokonta;Metazoa;Eumetazoa;Bilateria;Protostomia;  
 Spiralia;Lophotrochozoa;Mollusca;Bivalvia;Autobranchia;Heteroconchia;Euhe  
 terodonta;Imparidentia;Venerida;Veneroidea;Veneridae;Mercenaria;Mercenari  
 a mercenaria  
 UdeM00000004171 6573 461.1 UdeM00000004171 XP\_021360731.1 58 388  
 161 2 68 453 12 399 1.70E-126 461.1 6573 cellular

organisms;Eukaryota;Opisthokonta;Metazoa;Eumetazoa;Bilateria;Protostomia;  
Spiralia;Lophotrochozoa;Mollusca;Bivalvia;Autobranhia;Pteriormorphia;Pect  
inida;Pectinoidea;Pectinidae;Mizuhopecten;Mizuhopecten yessoensis  
UdeM00000004172 46514 72.8 UdeM00000004172 XP\_038073135.1 36.1 97  
56 1 1 97 393 483 2.70E-10 72.8 46514 cellular  
organisms;Eukaryota;Opisthokonta;Metazoa;Eumetazoa;Bilateria;Deuterostomi  
a;Echinodermata;Eleutherozoa;Asterozoa;Asteroidea;Valvatacea;Valvatida;As  
terinidae;Patiria;Patiria miniata  
UdeM00000004173 6573 454.1 UdeM00000004173 XP\_021360731.1 56.1 387  
165 2 31 416 17 399 1.90E-124 454.1 6573 cellular  
organisms;Eukaryota;Opisthokonta;Metazoa;Eumetazoa;Bilateria;Protostomia;  
Spiralia;Lophotrochozoa;Mollusca;Bivalvia;Autobranhia;Pteriormorphia;Pect  
inida;Pectinoidea;Pectinidae;Mizuhopecten;Mizuhopecten yessoensis  
UdeM00000004174 6573 466.1 UdeM00000004174 XP\_021360731.1 59.7 387  
148 4 40 422 17 399 4.80E-128 466.1 6573 cellular  
organisms;Eukaryota;Opisthokonta;Metazoa;Eumetazoa;Bilateria;Protostomia;  
Spiralia;Lophotrochozoa;Mollusca;Bivalvia;Autobranhia;Pteriormorphia;Pect  
inida;Pectinoidea;Pectinidae;Mizuhopecten;Mizuhopecten yessoensis  
UdeM00000004175 6579 206.8 UdeM00000004175 XP\_033746397.1 40 245  
145 1 1 243 1 245 3.30E-50 206.8 6579 cellular  
organisms;Eukaryota;Opisthokonta;Metazoa;Eumetazoa;Bilateria;Protostomia;  
Spiralia;Lophotrochozoa;Mollusca;Bivalvia;Autobranhia;Pteriormorphia;Pect  
inida;Pectinoidea;Pectinidae;Pecten;Pecten maximus  
UdeM00000004176 6579 205.3 UdeM00000004176 XP\_033746397.1 40.4 245  
144 1 1 243 1 245 9.30E-50 205.3 6579 cellular  
organisms;Eukaryota;Opisthokonta;Metazoa;Eumetazoa;Bilateria;Protostomia;  
Spiralia;Lophotrochozoa;Mollusca;Bivalvia;Autobranhia;Pteriormorphia;Pect  
inida;Pectinoidea;Pectinidae;Pecten;Pecten maximus  
UdeM00000004177 6579 209.1 UdeM00000004177 XP\_033746397.1 39.3 242  
147 0 4 245 4 245 6.80E-51 209.1 6579 cellular  
organisms;Eukaryota;Opisthokonta;Metazoa;Eumetazoa;Bilateria;Protostomia;  
Spiralia;Lophotrochozoa;Mollusca;Bivalvia;Autobranhia;Heteroconchia;Euhe  
terodonta;Imparidentia;Venerida;Veneroidea;Veneridae;Mercenaria;Mercenari  
a mercenaria  
UdeM00000004179 6596 402.9 UdeM00000004179 XP\_045189775.1 50.2 438  
199 5 1 423 1 434 5.40E-109 402.9 6596 cellular  
organisms;Eukaryota;Opisthokonta;Metazoa;Eumetazoa;Bilateria;Protostomia;  
Spiralia;Lophotrochozoa;Mollusca;Bivalvia;Autobranhia;Heteroconchia;Euhe  
terodonta;Imparidentia;Venerida;Veneroidea;Veneridae;Mercenaria;Mercenari  
a mercenaria  
UdeM00000004180 6596 231.9 UdeM00000004180 XP\_045166212.1 72.8 147  
40 0 4 150 6 152 5.50E-58 231.9 6596 cellular  
organisms;Eukaryota;Opisthokonta;Metazoa;Eumetazoa;Bilateria;Protostomia;  
Spiralia;Lophotrochozoa;Mollusca;Bivalvia;Autobranhia;Heteroconchia;Euhe  
terodonta;Imparidentia;Venerida;Veneroidea;Veneridae;Mercenaria;Mercenari  
a mercenaria  
UdeM00000004182 6596 392.5 UdeM00000004182 XP\_045164803.1 56.5 345  
126 2 157 501 45 365 8.00E-106 392.5 6596 cellular  
organisms;Eukaryota;Opisthokonta;Metazoa;Eumetazoa;Bilateria;Protostomia;



Spiralia;Lophotrochozoa;Mollusca;Bivalvia;Autobranchia;Heteroconchia;Euherodonta;Imparidentia;Venerida;Veneroidea;Veneridae;Mercenaria;Mercenaria mercenaria

UdeM00000004183 1735272 634.4 UdeM00000004183 XP\_041356266.1 53.4  
581 261 4 12 589 35 608 1.40E-178 634.4 1735272  
cellular

organisms;Eukaryota;Opisthokonta;Metazoa;Eumetazoa;Bilateria;Protostomia;Spiralia;Lophotrochozoa;Mollusca;Gastropoda;Neomphalina;Neomphaloidea;Peltospiridae;Gigantopelta;Gigantopelta aegis

UdeM00000004184 6596 154.5 UdeM00000004184 XP\_045185048.1 35 260  
129 5 7 250 8 243 2.10E-34 154.5 6596 cellular

organisms;Eukaryota;Opisthokonta;Metazoa;Eumetazoa;Bilateria;Protostomia;Spiralia;Lophotrochozoa;Mollusca;Bivalvia;Autobranchia;Heteroconchia;Euherodonta;Imparidentia;Venerida;Veneroidea;Veneridae;Mercenaria;Mercenaria mercenaria

UdeM00000004185 6596 389 UdeM00000004185 XP\_045166628.1 64.7 306  
108 0 9 314 13 318 6.00E-105 389 6596 cellular

organisms;Eukaryota;Opisthokonta;Metazoa;Eumetazoa;Bilateria;Protostomia;Spiralia;Lophotrochozoa;Mollusca;Bivalvia;Autobranchia;Heteroconchia;Euherodonta;Imparidentia;Venerida;Veneroidea;Veneridae;Mercenaria;Mercenaria mercenaria

UdeM00000004186 1735272 260 UdeM00000004186 XP\_041374634.1 67.2  
177 53 2 1 172 1 177 2.10E-66 260 1735272

cellular  
organisms;Eukaryota;Opisthokonta;Metazoa;Eumetazoa;Bilateria;Protostomia;Spiralia;Lophotrochozoa;Mollusca;Gastropoda;Neomphalina;Neomphaloidea;Peltospiridae;Gigantopelta;Gigantopelta aegis

UdeM00000004187 6596 573.2 UdeM00000004187 XP\_045165415.1 62 432  
162 1 8 437 32 463 3.00E-160 573.2 6596 cellular

organisms;Eukaryota;Opisthokonta;Metazoa;Eumetazoa;Bilateria;Protostomia;Spiralia;Lophotrochozoa;Mollusca;Bivalvia;Autobranchia;Heteroconchia;Euherodonta;Imparidentia;Venerida;Veneroidea;Veneridae;Mercenaria;Mercenaria mercenaria

UdeM00000004188 6565 172.6 UdeM00000004188 XP\_022301338.1 60.9 133  
48 2 11 142 8 137 5.30E-40 172.6 6565 cellular

organisms;Eukaryota;Opisthokonta;Metazoa;Eumetazoa;Bilateria;Protostomia;Spiralia;Lophotrochozoa;Mollusca;Bivalvia;Autobranchia;Pteriomorphia;Ostreida;Ostreoidea;Ostreidae;Crassostrea;Crassostrea virginica

UdeM00000004189 6596 112.5 UdeM00000004189 XP\_045165831.1 58.6 99  
34 2 1 93 240 337 7.10E-22 112.5 6596 cellular

organisms;Eukaryota;Opisthokonta;Metazoa;Eumetazoa;Bilateria;Protostomia;Spiralia;Lophotrochozoa;Mollusca;Bivalvia;Autobranchia;Heteroconchia;Euherodonta;Imparidentia;Venerida;Veneroidea;Veneridae;Mercenaria;Mercenaria mercenaria

UdeM00000004191 6596 194.9 UdeM00000004191 XP\_045164596.1 44.9 245  
111 6 1914 2148 760 990 1.10E-45 194.9 6596 cellular

organisms;Eukaryota;Opisthokonta;Metazoa;Eumetazoa;Bilateria;Protostomia;Spiralia;Lophotrochozoa;Mollusca;Bivalvia;Autobranchia;Heteroconchia;Euherodonta;Imparidentia;Venerida;Veneroidea;Veneridae;Mercenaria;Mercenaria mercenaria

UdeM00000004192 6596 404.4 UdeM00000004192 XP\_045164596.1 51.5 406  
173 6 1914 2309 760 1151 9.40E-109 404.4 6596 cellular

organisms;Eukaryota;Opisthokonta;Metazoa;Eumetazoa;Bilateria;Protostomia;Spiralia;Lophotrochozoa;Mollusca;Bivalvia;Autobranchia;Heteroconchia;Euherodonta;Imparidentia;Venerida;Veneroidea;Veneridae;Mercenaria;Mercenaria mercenaria

terodonta;Imparidentia;Venerida;Veneroidea;Veneridae;Mercenaria;Mercenari  
 a mercenaria  
 UdeM00000004193 6596 115.5 UdeM00000004193 XP\_045164597.1 41.1 141  
 70 1 2 142 3 130 1.80E-22 115.5 6596 cellular  
 organisms;Eukaryota;Opisthokonta;Metazoa;Eumetazoa;Bilateria;Protostomia;  
 Spiralia;Lophotrochozoa;Mollusca;Bivalvia;Autobranchia;Heteroconchia;Euhe  
 terodonta;Imparidentia;Venerida;Veneroidea;Veneridae;Mercenaria;Mercenari  
 a mercenaria  
 UdeM00000004199 6579 798.1 UdeM00000004199 XP\_033745763.1 71.2 535  
 153 1 10 543 11 545 6.90E-228 798.1 6579 cellular  
 organisms;Eukaryota;Opisthokonta;Metazoa;Eumetazoa;Bilateria;Protostomia;  
 Spiralia;Lophotrochozoa;Mollusca;Bivalvia;Autobranchia;Pteriormorphia;Pect  
 inida;Pectinoidea;Pectinidae;Pecten;Pecten maximus  
 UdeM00000004200 6596 145.6 UdeM00000004200 XP\_045167175.1 88 83  
 10 0 1 83 1 83 4.40E-32 145.6 6596 cellular  
 organisms;Eukaryota;Opisthokonta;Metazoa;Eumetazoa;Bilateria;Protostomia;  
 Spiralia;Lophotrochozoa;Mollusca;Bivalvia;Autobranchia;Heteroconchia;Euhe  
 terodonta;Imparidentia;Venerida;Veneroidea;Veneridae;Mercenaria;Mercenari  
 a mercenaria  
 UdeM00000004201 400727 1090.1 UdeM00000004201 XP\_025107859.1  
 79.3 721 131 9 1 713 1 711 0.00E+00 1090.1  
 400727 cellular  
 organisms;Eukaryota;Opisthokonta;Metazoa;Eumetazoa;Bilateria;Protostomia;  
 Spiralia;Lophotrochozoa;Mollusca;Gastropoda;Caenogastropoda;Architaeniogl  
 ossa;Ampullarioidea;Ampullariidae;Pomacea;Pomacea canaliculata  
 UdeM00000004202 6596 598.6 UdeM00000004202 XP\_045165418.1 77.5 383  
 86 0 90 472 50 432 7.40E-168 598.6 6596 cellular  
 organisms;Eukaryota;Opisthokonta;Metazoa;Eumetazoa;Bilateria;Protostomia;  
 Spiralia;Lophotrochozoa;Mollusca;Bivalvia;Autobranchia;Heteroconchia;Euhe  
 terodonta;Imparidentia;Venerida;Veneroidea;Veneridae;Mercenaria;Mercenari  
 a mercenaria  
 UdeM00000004203 45264 410.2 UdeM00000004203 XP\_044165143.1 64.7 289  
 102 0 119 407 137 425 3.00E-111 410.2 45264 cellular  
 organisms;Eukaryota;Opisthokonta;Metazoa;Eumetazoa;Cnidaria;Anthozoa;Hexa  
 corallia;Scleractinia;Astrocoeniina;Acroporidae;Acropora;Acropora  
 millepora  
 UdeM00000004204 45264 172.9 UdeM00000004204 XP\_044184031.1 48.7 191  
 88 5 1 185 300 486 3.70E-40 172.9 45264 cellular  
 organisms;Eukaryota;Opisthokonta;Metazoa;Eumetazoa;Cnidaria;Anthozoa;Hexa  
 corallia;Scleractinia;Astrocoeniina;Acroporidae;Acropora;Acropora  
 millepora  
 UdeM00000004206 6596 97.1 UdeM00000004206 XP\_045180326.1 39.6 144  
 82 1 11 154 32 170 2.80E-17 97.1 6596 cellular  
 organisms;Eukaryota;Opisthokonta;Metazoa;Eumetazoa;Bilateria;Protostomia;  
 Spiralia;Lophotrochozoa;Mollusca;Bivalvia;Autobranchia;Heteroconchia;Euhe  
 terodonta;Imparidentia;Venerida;Veneroidea;Veneridae;Mercenaria;Mercenari  
 a mercenaria  
 UdeM00000004207 6596 58.9 UdeM00000004207 XP\_045215232.1 48.2 56  
 27 2 4 58 7 61 3.10E-06 58.9 6596 cellular  
 organisms;Eukaryota;Opisthokonta;Metazoa;Eumetazoa;Bilateria;Protostomia;  
 Spiralia;Lophotrochozoa;Mollusca;Bivalvia;Autobranchia;Heteroconchia;Euhe  
 terodonta;Imparidentia;Venerida;Veneroidea;Veneridae;Mercenaria;Mercenari  
 a mercenaria

UdeM00000004209 6596 979.2 UdeM00000004209 XP\_045166520.1 60.2 866  
 305 10 31 859 128 990 3.40E-282 979.2 6596 cellular  
 organisms;Eukaryota;Opisthokonta;Metazoa;Eumetazoa;Bilateria;Protostomia;  
 Spiralia;Lophotrochozoa;Mollusca;Bivalvia;Autobranhia;Heteroconchia;Euhe  
 terodonta;Imparidentia;Venerida;Veneroidea;Veneridae;Mercenaria;Mercenari  
 a mercenaria  
 UdeM00000004210 6596 300.8 UdeM00000004210 XP\_045164479.1 39.7 469  
 260 13 50 513 54 504 3.30E-78 300.8 6596 cellular  
 organisms;Eukaryota;Opisthokonta;Metazoa;Eumetazoa;Bilateria;Protostomia;  
 Spiralia;Lophotrochozoa;Mollusca;Bivalvia;Autobranhia;Heteroconchia;Euhe  
 terodonta;Imparidentia;Venerida;Veneroidea;Veneridae;Mercenaria;Mercenari  
 a mercenaria  
 UdeM00000004211 6596 124.8 UdeM00000004211 XP\_045166480.1 25.6 430  
 258 10 16 392 10 430 2.60E-25 124.8 6596 cellular  
 organisms;Eukaryota;Opisthokonta;Metazoa;Eumetazoa;Bilateria;Protostomia;  
 Spiralia;Lophotrochozoa;Mollusca;Bivalvia;Autobranhia;Heteroconchia;Euhe  
 terodonta;Imparidentia;Venerida;Veneroidea;Veneridae;Mercenaria;Mercenari  
 a mercenaria  
 UdeM00000004212 6596 318.5 UdeM00000004212 XP\_045164951.1 43.6 463  
 215 10 8 446 6 446 1.50E-83 318.5 6596 cellular  
 organisms;Eukaryota;Opisthokonta;Metazoa;Eumetazoa;Bilateria;Protostomia;  
 Spiralia;Lophotrochozoa;Mollusca;Bivalvia;Autobranhia;Heteroconchia;Euhe  
 terodonta;Imparidentia;Venerida;Veneroidea;Veneridae;Mercenaria;Mercenari  
 a mercenaria  
 UdeM00000004213 6596 146 UdeM00000004213 XP\_045164967.1 51.7 116  
 56 0 8 123 10 125 3.80E-32 146 6596 cellular  
 organisms;Eukaryota;Opisthokonta;Metazoa;Eumetazoa;Bilateria;Protostomia;  
 Spiralia;Lophotrochozoa;Mollusca;Bivalvia;Autobranhia;Heteroconchia;Euhe  
 terodonta;Imparidentia;Venerida;Veneroidea;Veneridae;Mercenaria;Mercenari  
 a mercenaria  
 UdeM00000004214 6596 108.6 UdeM00000004214 XP\_045176269.1 26.3 289  
 207 5 215 497 87 375 2.30E-20 108.6 6596 cellular  
 organisms;Eukaryota;Opisthokonta;Metazoa;Eumetazoa;Bilateria;Protostomia;  
 Spiralia;Lophotrochozoa;Mollusca;Bivalvia;Autobranhia;Heteroconchia;Euhe  
 terodonta;Imparidentia;Venerida;Veneroidea;Veneridae;Mercenaria;Mercenari  
 a mercenaria  
 UdeM00000004215 6596 150.2 UdeM00000004215 XP\_045204491.1 27.7 361  
 247 7 9 365 14 364 6.10E-33 150.2 6596 cellular  
 organisms;Eukaryota;Opisthokonta;Metazoa;Eumetazoa;Bilateria;Protostomia;  
 Spiralia;Lophotrochozoa;Mollusca;Bivalvia;Autobranhia;Heteroconchia;Euhe  
 terodonta;Imparidentia;Venerida;Veneroidea;Veneridae;Mercenaria;Mercenari  
 a mercenaria  
 UdeM00000004216 29159 155.6 UdeM00000004216 XP\_034310284.1 35.4 223  
 127 6 3 218 10 222 1.50E-34 155.6 29159 cellular  
 organisms;Eukaryota;Opisthokonta;Metazoa;Eumetazoa;Bilateria;Protostomia;  
 Spiralia;Lophotrochozoa;Mollusca;Bivalvia;Autobranhia;Pteriomorphia;Ostr  
 eida;Ostreoidea;Ostreidae;Crassostrea;Crassostrea gigas  
 UdeM00000004217 6596 142.5 UdeM00000004217 XP\_045201254.1 24.1 374  
 275 5 14 381 17 387 1.20E-30 142.5 6596 cellular  
 organisms;Eukaryota;Opisthokonta;Metazoa;Eumetazoa;Bilateria;Protostomia;  
 Spiralia;Lophotrochozoa;Mollusca;Bivalvia;Autobranhia;Heteroconchia;Euhe  
 terodonta;Imparidentia;Venerida;Veneroidea;Veneridae;Mercenaria;Mercenari  
 a mercenaria

UdeM00000004218 6565 159.1 UdeM00000004218 XP\_022297250.1 26.1 345  
 239 7 21 357 7 343 1.30E-35 159.1 6565 cellular  
 organisms;Eukaryota;Opisthokonta;Metazoa;Eumetazoa;Bilateria;Protostomia;  
 Spiralia;Lophotrochozoa;Mollusca;Bivalvia;Autobranchia;Pteriomorphia;Ostr  
 eida;Ostreoidea;Ostreidae;Crassostrea;Crassostrea virginica  
 UdeM00000004219 400727 278.5 UdeM00000004219 XP\_025082235.1 60.3  
 310 109 3 1 296 1 310 1.00E-71 278.5 400727  
 cellular  
 organisms;Eukaryota;Opisthokonta;Metazoa;Eumetazoa;Bilateria;Protostomia;  
 Spiralia;Lophotrochozoa;Mollusca;Gastropoda;Caenogastropoda;Architaeniogl  
 ossa;Ampullarioidea;Ampullariidae;Pomacea;Pomacea canaliculata  
 UdeM00000004220 6596 344 UdeM00000004220 XP\_045166324.1 73.3 236  
 63 0 1 236 94 329 1.60E-91 344 6596 cellular  
 organisms;Eukaryota;Opisthokonta;Metazoa;Eumetazoa;Bilateria;Protostomia;  
 Spiralia;Lophotrochozoa;Mollusca;Bivalvia;Autobranchia;Heteroconchia;Euhe  
 terodonta;Imparidentia;Venerida;Veneroidea;Veneridae;Mercenaria;Mercenari  
 a mercenaria  
 UdeM00000004221 6596 115.2 UdeM00000004221 XP\_045173436.1 43.3 150  
 70 2 14 158 71 210 2.30E-22 115.2 6596 cellular  
 organisms;Eukaryota;Opisthokonta;Metazoa;Eumetazoa;Bilateria;Protostomia;  
 Spiralia;Lophotrochozoa;Mollusca;Bivalvia;Autobranchia;Heteroconchia;Euhe  
 terodonta;Imparidentia;Venerida;Veneroidea;Veneridae;Mercenaria;Mercenari  
 a mercenaria  
 UdeM00000004223 6596 545 UdeM00000004223 XP\_045164752.1 73.5 385  
 96 4 1 383 1 381 7.40E-152 545 6596 cellular  
 organisms;Eukaryota;Opisthokonta;Metazoa;Eumetazoa;Bilateria;Protostomia;  
 Spiralia;Lophotrochozoa;Mollusca;Bivalvia;Autobranchia;Heteroconchia;Euhe  
 terodonta;Imparidentia;Venerida;Veneroidea;Veneridae;Mercenaria;Mercenari  
 a mercenaria  
 UdeM00000004224 6945 84.3 UdeM00000004224 XP\_040065097.1 28.5 193  
 112 4 59 225 85 277 2.90E-13 84.3 6945 cellular  
 organisms;Eukaryota;Opisthokonta;Metazoa;Eumetazoa;Bilateria;Protostomia;  
 Ecdysozoa;Panarthropoda;Arthropoda;Chelicerata;Arachnida;Acari;Parasitifo  
 rmes;Ixodida;Ixodoidea;Ixodidae;Ixodinae;Ixodes;Ixodes scapularis  
 UdeM00000004225 6573 564.3 UdeM00000004225 XP\_021369873.1 66.7 393  
 128 2 5 397 4 393 1.20E-157 564.3 6573 cellular  
 organisms;Eukaryota;Opisthokonta;Metazoa;Eumetazoa;Bilateria;Protostomia;  
 Spiralia;Lophotrochozoa;Mollusca;Bivalvia;Autobranchia;Pteriomorphia;Pect  
 inida;Pectinoidea;Pectinidae;Mizuhopecten;Mizuhopecten yessoensis  
 UdeM00000004226 6596 77 UdeM00000004226 XP\_045164863.1 40.9 171  
 95 2 1 166 8 177 2.60E-11 77 6596 cellular  
 organisms;Eukaryota;Opisthokonta;Metazoa;Eumetazoa;Bilateria;Protostomia;  
 Spiralia;Lophotrochozoa;Mollusca;Bivalvia;Autobranchia;Heteroconchia;Euhe  
 terodonta;Imparidentia;Venerida;Veneroidea;Veneridae;Mercenaria;Mercenari  
 a mercenaria  
 UdeM00000004227 6596 79 UdeM00000004227 XP\_045164863.1 40.8 174  
 97 2 4 172 5 177 7.10E-12 79 6596 cellular  
 organisms;Eukaryota;Opisthokonta;Metazoa;Eumetazoa;Bilateria;Protostomia;  
 Spiralia;Lophotrochozoa;Mollusca;Bivalvia;Autobranchia;Heteroconchia;Euhe  
 terodonta;Imparidentia;Venerida;Veneroidea;Veneridae;Mercenaria;Mercenari  
 a mercenaria  
 UdeM00000004228 6579 132.9 UdeM00000004228 XP\_033746043.1 91.2 68  
 6 0 1 68 5 72 1.60E-28 132.9 6579 cellular  
 organisms;Eukaryota;Opisthokonta;Metazoa;Eumetazoa;Bilateria;Protostomia;

Spiralia;Lophotrochozoa;Mollusca;Bivalvia;Autobranchia;Pteriormorphia;Pectinida;Pectinoidea;Pectinidae;Pecten;Pecten maximus

UdeM00000004229 6596 157.9 UdeM00000004229 XP\_045164854.1 52.2 157  
65 1 13 159 20 176 1.60E-35 157.9 6596 cellular  
organisms;Eukaryota;Opisthokonta;Metazoa;Eumetazoa;Bilateria;Protostomia;  
Spiralia;Lophotrochozoa;Mollusca;Bivalvia;Autobranchia;Heteroconchia;Euherodonta;Imparidentia;Venerida;Veneroidea;Veneridae;Mercenaria;Mercenaria mercenaria

UdeM00000004230 6596 297 UdeM00000004230 XP\_045164854.1 61 392  
146 2 85 476 178 562 4.40E-77 297 6596 cellular  
organisms;Eukaryota;Opisthokonta;Metazoa;Eumetazoa;Bilateria;Protostomia;  
Spiralia;Lophotrochozoa;Mollusca;Bivalvia;Autobranchia;Heteroconchia;Euherodonta;Imparidentia;Venerida;Veneroidea;Veneridae;Mercenaria;Mercenaria mercenaria

UdeM00000004231 6596 270 UdeM00000004231 XP\_045164390.1 44.8 705  
309 12 1 633 1 697 7.60E-69 270 6596 cellular  
organisms;Eukaryota;Opisthokonta;Metazoa;Eumetazoa;Bilateria;Protostomia;  
Spiralia;Lophotrochozoa;Mollusca;Bivalvia;Autobranchia;Heteroconchia;Euherodonta;Imparidentia;Venerida;Veneroidea;Veneridae;Mercenaria;Mercenaria mercenaria

UdeM00000004232 6596 241.9 UdeM00000004232 XP\_045165390.1 39 687  
284 24 253 908 12 594 3.20E-60 241.9 6596 cellular  
organisms;Eukaryota;Opisthokonta;Metazoa;Eumetazoa;Bilateria;Protostomia;  
Spiralia;Lophotrochozoa;Mollusca;Bivalvia;Autobranchia;Heteroconchia;Euherodonta;Imparidentia;Venerida;Veneroidea;Veneridae;Mercenaria;Mercenaria mercenaria

UdeM00000004233 6596 329.7 UdeM00000004233 XP\_045164514.1 89.5 190  
15 2 1 187 1 188 2.40E-87 329.7 6596 cellular  
organisms;Eukaryota;Opisthokonta;Metazoa;Eumetazoa;Bilateria;Protostomia;  
Spiralia;Lophotrochozoa;Mollusca;Bivalvia;Autobranchia;Heteroconchia;Euherodonta;Imparidentia;Venerida;Veneroidea;Veneridae;Mercenaria;Mercenaria mercenaria

UdeM00000004234 29159 1155.6 UdeM00000004234 XP\_034304860.1 65.4  
887 270 9 65 919 293 1174 0.00E+00 1155.6  
29159 cellular  
organisms;Eukaryota;Opisthokonta;Metazoa;Eumetazoa;Bilateria;Protostomia;  
Spiralia;Lophotrochozoa;Mollusca;Bivalvia;Autobranchia;Pteriormorphia;Ostreida;Ostreoidea;Ostreidae;Crassostrea;Crassostrea gigas

UdeM00000004235 6579 769.2 UdeM00000004235 XP\_033746194.1 88.2 399  
47 0 1 399 1 399 5.30E-219 769.2 6579 cellular  
organisms;Eukaryota;Opisthokonta;Metazoa;Eumetazoa;Bilateria;Protostomia;  
Spiralia;Lophotrochozoa;Mollusca;Bivalvia;Autobranchia;Pteriormorphia;Pectinida;Pectinoidea;Pectinidae;Pecten;Pecten maximus

UdeM00000004236 6596 1370.9 UdeM00000004236 XP\_045164932.1 86  
774 105 3 1 772 455 1227 0.00E+00 1370.9 6596  
cellular  
organisms;Eukaryota;Opisthokonta;Metazoa;Eumetazoa;Bilateria;Protostomia;  
Spiralia;Lophotrochozoa;Mollusca;Bivalvia;Autobranchia;Heteroconchia;Euherodonta;Imparidentia;Venerida;Veneroidea;Veneridae;Mercenaria;Mercenaria mercenaria

UdeM00000004237 6579 511.5 UdeM00000004237 XP\_033746198.1 56.5 448  
194 1 1 447 60 507 1.10E-141 511.5 6579 cellular  
organisms;Eukaryota;Opisthokonta;Metazoa;Eumetazoa;Bilateria;Protostomia;

Spiralia;Lophotrochozoa;Mollusca;Bivalvia;Autobranchia;Pteriormorphia;Pectinida;Pectinoidea;Pectinidae;Pecten;Pecten maximus  
UdeM00000004238 6565 175.6 UdeM00000004238 XP\_022299190.1 53.9 167  
77 0 10 176 11 177 5.40E-41 175.6 6565 cellular  
organisms;Eukaryota;Opisthokonta;Metazoa;Eumetazoa;Bilateria;Protostomia;  
Spiralia;Lophotrochozoa;Mollusca;Bivalvia;Autobranchia;Pteriormorphia;Ostr  
eida;Ostreoidea;Ostreidae;Crassostrea;Crassostrea virginica  
UdeM00000004239 6565 167.2 UdeM00000004239 XP\_022299190.1 53.8 160  
74 0 1 160 18 177 1.80E-38 167.2 6565 cellular  
organisms;Eukaryota;Opisthokonta;Metazoa;Eumetazoa;Bilateria;Protostomia;  
Spiralia;Lophotrochozoa;Mollusca;Bivalvia;Autobranchia;Pteriormorphia;Ostr  
eida;Ostreoidea;Ostreidae;Crassostrea;Crassostrea virginica  
UdeM00000004240 10224 567.4 UdeM00000004240 XP\_006823495.1 60.7 468  
182 2 3 469 4 470 1.70E-158 567.4 10224 cellular  
organisms;Eukaryota;Opisthokonta;Metazoa;Eumetazoa;Bilateria;Deuterostomi  
a;Hemichordata;Enteropneusta;Harrimaniidae;Saccoglossus;Saccoglossus  
kowalevskii  
UdeM00000004241 10224 561.2 UdeM00000004241 XP\_006823495.1 60.5 468  
182 3 3 468 4 470 1.20E-156 561.2 10224 cellular  
organisms;Eukaryota;Opisthokonta;Metazoa;Eumetazoa;Bilateria;Deuterostomi  
a;Hemichordata;Enteropneusta;Harrimaniidae;Saccoglossus;Saccoglossus  
kowalevskii  
UdeM00000004243 6596 444.1 UdeM00000004243 XP\_045165918.1 63.3 313  
102 2 3 302 20 332 1.70E-121 444.1 6596 cellular  
organisms;Eukaryota;Opisthokonta;Metazoa;Eumetazoa;Bilateria;Protostomia;  
Spiralia;Lophotrochozoa;Mollusca;Bivalvia;Autobranchia;Heteroconchia;Euhe  
terodonta;Imparidentia;Venerida;Veneroidea;Veneridae;Mercenaria;Mercenari  
a mercenaria  
UdeM00000004244 6565 137.9 UdeM00000004244 XP\_022296377.1 55.8 113  
48 1 6 116 28 140 8.60E-30 137.9 6565 cellular  
organisms;Eukaryota;Opisthokonta;Metazoa;Eumetazoa;Bilateria;Protostomia;  
Spiralia;Lophotrochozoa;Mollusca;Bivalvia;Autobranchia;Pteriormorphia;Ostr  
eida;Ostreoidea;Ostreidae;Crassostrea;Crassostrea virginica  
UdeM00000004245 6596 1253 UdeM00000004245 XP\_045167157.1 29 3612  
2165 73 35 3335 716 4239 0.00E+00 1253 6596 cellular  
organisms;Eukaryota;Opisthokonta;Metazoa;Eumetazoa;Bilateria;Protostomia;  
Spiralia;Lophotrochozoa;Mollusca;Bivalvia;Autobranchia;Heteroconchia;Euhe  
terodonta;Imparidentia;Venerida;Veneroidea;Veneridae;Mercenaria;Mercenari  
a mercenaria  
UdeM00000004246 6526 196.4 UdeM00000004246 XP\_013096006.1 33.6 444  
261 13 14 434 481 913 7.50E-47 196.4 6526 cellular  
organisms;Eukaryota;Opisthokonta;Metazoa;Eumetazoa;Bilateria;Protostomia;  
Spiralia;Lophotrochozoa;Mollusca;Gastropoda;Heterobranchia;Euthyneura;Pan  
pulmonata;Hygrophila;Lymnaeioidea;Planorbidae;Biomphalaria;Biomphalaria  
glabrata  
UdeM00000004247 1735272 216.1 UdeM00000004247 XP\_041349527.1 33.9  
410 255 9 14 417 25 424 9.50E-53 216.1 1735272  
cellular  
organisms;Eukaryota;Opisthokonta;Metazoa;Eumetazoa;Bilateria;Protostomia;  
Spiralia;Lophotrochozoa;Mollusca;Gastropoda;Neomphalina;Neomphaloidea;Pel  
tospiridae;Gigantopelta;Gigantopelta aegis  
UdeM00000004248 10224 243.4 UdeM00000004248 XP\_006825998.1 30.9 653  
407 22 39 658 1194 1835 8.30E-61 243.4 10224 cellular  
organisms;Eukaryota;Opisthokonta;Metazoa;Eumetazoa;Bilateria;Deuterostomi

a; Hemichordata; Enteropneusta; Harrimaniidae; Saccoglossus; Saccoglossus kowalevskii

UdeM00000004250 29159 160.6 UdeM00000004250 XP\_034307341.1 36.2 254  
146 4 15 253 56 308 2.60E-36 160.6 29159 cellular  
organisms; Eukaryota; Opisthokonta; Metazoa; Eumetazoa; Bilateria; Protostomia; Spiralia; Lophotrochozoa; Mollusca; Bivalvia; Autobranchia; Pteriomorpha; Ostreida; Ostreioidea; Ostreidae; Crassostrea; Crassostrea gigas

UdeM00000004251 29159 193 UdeM00000004251 XP\_011423066.2 28.8 473  
313 10 24 489 26 481 9.10E-46 193 29159 cellular  
organisms; Eukaryota; Opisthokonta; Metazoa; Eumetazoa; Bilateria; Protostomia; Spiralia; Lophotrochozoa; Mollusca; Bivalvia; Autobranchia; Pteriomorpha; Ostreida; Ostreioidea; Ostreidae; Crassostrea; Crassostrea gigas

UdeM00000004252 29159 194.1 UdeM00000004252 XP\_011423066.2 28.8 473  
313 9 24 489 26 481 4.10E-46 194.1 29159 cellular  
organisms; Eukaryota; Opisthokonta; Metazoa; Eumetazoa; Bilateria; Protostomia; Spiralia; Lophotrochozoa; Mollusca; Bivalvia; Autobranchia; Pteriomorpha; Ostreida; Ostreioidea; Ostreidae; Crassostrea; Crassostrea gigas

UdeM00000004254 29159 199.1 UdeM00000004254 XP\_011423066.2 27.8 482  
320 10 16 494 25 481 1.30E-47 199.1 29159 cellular  
organisms; Eukaryota; Opisthokonta; Metazoa; Eumetazoa; Bilateria; Protostomia; Spiralia; Lophotrochozoa; Mollusca; Bivalvia; Autobranchia; Pteriomorpha; Ostreida; Ostreioidea; Ostreidae; Crassostrea; Crassostrea gigas

UdeM00000004257 6579 430.6 UdeM00000004257 XP\_033746838.1 29 1019  
643 26 30 1019 29 996 7.50E-117 430.6 6579 cellular  
organisms; Eukaryota; Opisthokonta; Metazoa; Eumetazoa; Bilateria; Protostomia; Spiralia; Lophotrochozoa; Mollusca; Bivalvia; Autobranchia; Pteriomorpha; Pectinida; Pectinoidea; Pectinidae; Pecten; Pecten maximus

UdeM00000004258 6579 426 UdeM00000004258 XP\_033746838.1 29.1 1012  
638 26 4 986 36 996 1.80E-115 426 6579 cellular  
organisms; Eukaryota; Opisthokonta; Metazoa; Eumetazoa; Bilateria; Protostomia; Spiralia; Lophotrochozoa; Mollusca; Bivalvia; Autobranchia; Pteriomorpha; Pectinida; Pectinoidea; Pectinidae; Pecten; Pecten maximus

UdeM00000004266 133434 453.4 UdeM00000004266 XP\_022094946.1 38.2  
663 375 10 32 670 33 684 5.60E-124 453.4 133434  
cellular  
organisms; Eukaryota; Opisthokonta; Metazoa; Eumetazoa; Bilateria; Deuterostomia; Echinodermata; Eleutherozoa; Asterozoa; Asteroidea; Valvatacea; Valvatida; Acanthasteridae; Acanthaster; Acanthaster planci

UdeM00000004267 6579 520.4 UdeM00000004267 XP\_033745069.1 59.2 578  
208 7 5 556 3 578 2.80E-144 520.4 6579 cellular  
organisms; Eukaryota; Opisthokonta; Metazoa; Eumetazoa; Bilateria; Protostomia; Spiralia; Lophotrochozoa; Mollusca; Bivalvia; Autobranchia; Pteriomorpha; Pectinida; Pectinoidea; Pectinidae; Pecten; Pecten maximus

UdeM00000004268 6596 197.2 UdeM00000004268 XP\_045164930.1 96.1 103  
4 0 1 103 1 103 1.00E-47 197.2 6596 cellular  
organisms; Eukaryota; Opisthokonta; Metazoa; Eumetazoa; Bilateria; Protostomia; Spiralia; Lophotrochozoa; Mollusca; Bivalvia; Autobranchia; Heteroconchia; Euheterodonta; Imparidentia; Venerida; Veneroidea; Veneridae; Mercenaria; Mercenaria mercenaria

UdeM00000004269 6596 90.9 UdeM00000004269 XP\_045164632.1 51.2 84  
41 0 2 85 18 101 8.60E-16 90.9 6596 cellular  
organisms; Eukaryota; Opisthokonta; Metazoa; Eumetazoa; Bilateria; Protostomia; Spiralia; Lophotrochozoa; Mollusca; Bivalvia; Autobranchia; Heteroconchia; Euheterodonta

terodonta;Imparidentia;Venerida;Veneroidea;Veneridae;Mercenaria;Mercenari  
 a mercenaria  
 UdeM00000004270 6596 159.8 UdeM00000004270 XP\_045164634.1 38.4 258  
 123 9 1 241 1 239 9.70E-36 159.8 6596 cellular  
 organisms;Eukaryota;Opisthokonta;Metazoa;Eumetazoa;Bilateria;Protostomia;  
 Spiralia;Lophotrochozoa;Mollusca;Bivalvia;Autobranchia;Heteroconchia;Euhe  
 terodonta;Imparidentia;Venerida;Veneroidea;Veneridae;Mercenaria;Mercenari  
 a mercenaria  
 UdeM00000004271 29159 316.2 UdeM00000004271 XP\_011447845.2 29.5 882  
 398 16 79 957 171 831 1.40E-82 316.2 29159 cellular  
 organisms;Eukaryota;Opisthokonta;Metazoa;Eumetazoa;Bilateria;Protostomia;  
 Spiralia;Lophotrochozoa;Mollusca;Bivalvia;Autobranchia;Pteriormorphia;Ostr  
 eida;Ostreoidea;Ostreidae;Crassostrea;Crassostrea gigas  
 UdeM00000004272 29159 316.2 UdeM00000004272 XP\_011447845.2 29.5 882  
 398 16 59 937 171 831 1.40E-82 316.2 29159 cellular  
 organisms;Eukaryota;Opisthokonta;Metazoa;Eumetazoa;Bilateria;Protostomia;  
 Spiralia;Lophotrochozoa;Mollusca;Bivalvia;Autobranchia;Pteriormorphia;Ostr  
 eida;Ostreoidea;Ostreidae;Crassostrea;Crassostrea gigas  
 UdeM00000004273 29159 406.8 UdeM00000004273 XP\_011447847.2 36.7 777  
 385 16 7 776 5 681 6.40E-110 406.8 29159 cellular  
 organisms;Eukaryota;Opisthokonta;Metazoa;Eumetazoa;Bilateria;Protostomia;  
 Spiralia;Lophotrochozoa;Mollusca;Bivalvia;Autobranchia;Pteriormorphia;Ostr  
 eida;Ostreoidea;Ostreidae;Crassostrea;Crassostrea gigas  
 UdeM00000004274 29159 59.7 UdeM00000004274 XP\_011447847.2 34.2 187  
 102 6 3 181 508 681 4.50E-06 59.7 29159 cellular  
 organisms;Eukaryota;Opisthokonta;Metazoa;Eumetazoa;Bilateria;Protostomia;  
 Spiralia;Lophotrochozoa;Mollusca;Bivalvia;Autobranchia;Pteriormorphia;Ostr  
 eida;Ostreoidea;Ostreidae;Crassostrea;Crassostrea gigas  
 UdeM00000004276 400727 412.1 UdeM00000004276 XP\_025106178.1 71.4  
 252 70 1 2 253 75 324 5.00E-112 412.1 400727  
 cellular  
 organisms;Eukaryota;Opisthokonta;Metazoa;Eumetazoa;Bilateria;Protostomia;  
 Spiralia;Lophotrochozoa;Mollusca;Gastropoda;Caenogastropoda;Architaeniogl  
 ossa;Ampullarioidea;Ampullariidae;Pomacea;Pomacea canaliculata  
 UdeM00000004275 29159 474.9 UdeM00000004275 XP\_011441346.2 67.5 326  
 103 2 1 323 1 326 8.10E-131 474.9 29159 cellular  
 organisms;Eukaryota;Opisthokonta;Metazoa;Eumetazoa;Bilateria;Protostomia;  
 Spiralia;Lophotrochozoa;Mollusca;Bivalvia;Autobranchia;Pteriormorphia;Ostr  
 eida;Ostreoidea;Ostreidae;Crassostrea;Crassostrea gigas  
 UdeM00000004277 6579 570.5 UdeM00000004277 XP\_033762712.1 27.7 1528  
 993 42 13 1487 13 1481 8.00E-159 570.5 6579 cellular  
 organisms;Eukaryota;Opisthokonta;Metazoa;Eumetazoa;Bilateria;Protostomia;  
 Spiralia;Lophotrochozoa;Mollusca;Bivalvia;Autobranchia;Pteriormorphia;Pect  
 inida;Pectinoidea;Pectinidae;Pecten;Pecten maximus  
 UdeM00000004279 6579 444.9 UdeM00000004279 XP\_033762712.1 30.1 1019  
 655 26 1 996 360 1344 2.80E-121 444.9 6579 cellular  
 organisms;Eukaryota;Opisthokonta;Metazoa;Eumetazoa;Bilateria;Protostomia;  
 Spiralia;Lophotrochozoa;Mollusca;Bivalvia;Autobranchia;Pteriormorphia;Pect  
 inida;Pectinoidea;Pectinidae;Pecten;Pecten maximus  
 UdeM00000004280 6579 443 UdeM00000004280 XP\_033762712.1 30.8 958  
 612 23 1 937 360 1287 1.10E-120 443 6579 cellular  
 organisms;Eukaryota;Opisthokonta;Metazoa;Eumetazoa;Bilateria;Protostomia;  
 Spiralia;Lophotrochozoa;Mollusca;Bivalvia;Autobranchia;Pteriormorphia;Pect  
 inida;Pectinoidea;Pectinidae;Pecten;Pecten maximus



UdeM00000004281 6596 146 UdeM00000004281 XP\_045176225.1 30.9 269  
 177 4 5 271 9 270 7.20E-32 146 6596 cellular  
 organisms;Eukaryota;Opisthokonta;Metazoa;Eumetazoa;Bilateria;Protostomia;  
 Spiralia;Lophotrochozoa;Mollusca;Bivalvia;Autobranchia;Heteroconchia;Euhe  
 terodonta;Imparidentia;Venerida;Veneroidea;Veneridae;Mercenaria;Mercenari  
 a mercenaria  
 UdeM00000004282 6596 387.1 UdeM00000004282 XP\_045164671.1 68.8 282  
 86 1 21 302 20 299 2.00E-104 387.1 6596 cellular  
 organisms;Eukaryota;Opisthokonta;Metazoa;Eumetazoa;Bilateria;Protostomia;  
 Spiralia;Lophotrochozoa;Mollusca;Bivalvia;Autobranchia;Heteroconchia;Euhe  
 terodonta;Imparidentia;Venerida;Veneroidea;Veneridae;Mercenaria;Mercenari  
 a mercenaria  
 UdeM00000004283 6596 131 UdeM00000004283 XP\_045164670.1 62.1 95  
 36 0 1 95 42 136 8.30E-28 131 6596 cellular  
 organisms;Eukaryota;Opisthokonta;Metazoa;Eumetazoa;Bilateria;Protostomia;  
 Spiralia;Lophotrochozoa;Mollusca;Bivalvia;Autobranchia;Heteroconchia;Euhe  
 terodonta;Imparidentia;Venerida;Veneroidea;Veneridae;Mercenaria;Mercenari  
 a mercenaria  
 UdeM00000004284 6596 393.7 UdeM00000004284 XP\_045164670.1 58.6 333  
 114 2 2 334 148 456 2.80E-106 393.7 6596 cellular  
 organisms;Eukaryota;Opisthokonta;Metazoa;Eumetazoa;Bilateria;Protostomia;  
 Spiralia;Lophotrochozoa;Mollusca;Bivalvia;Autobranchia;Heteroconchia;Euhe  
 terodonta;Imparidentia;Venerida;Veneroidea;Veneridae;Mercenaria;Mercenari  
 a mercenaria  
 UdeM00000004285 6565 375.9 UdeM00000004285 XP\_022299906.1 63.9 280  
 98 2 1 277 1 280 4.50E-101 375.9 6565 cellular  
 organisms;Eukaryota;Opisthokonta;Metazoa;Eumetazoa;Bilateria;Protostomia;  
 Spiralia;Lophotrochozoa;Mollusca;Bivalvia;Autobranchia;Pteriormorphia;Ostr  
 eida;Ostreoidea;Ostreidae;Crassostrea;Crassostrea virginica  
 UdeM00000004286 6500 434.1 UdeM00000004286 XP\_005100381.1 56.7 367  
 132 2 1 340 1 367 1.60E-118 434.1 6500 cellular  
 organisms;Eukaryota;Opisthokonta;Metazoa;Eumetazoa;Bilateria;Protostomia;  
 Spiralia;Lophotrochozoa;Mollusca;Gastropoda;Heterobranchia;Euthyneura;Tec  
 tipleura;Aplysiida;Aplysioidea;Aplysiidae;Aplysia;Aplysia californica  
 UdeM00000004287 37653 112.8 UdeM00000004287 XP\_014789472.1 56.4 110  
 43 3 15 120 316 424 3.00E-22 112.8 37653 cellular  
 organisms;Eukaryota;Opisthokonta;Metazoa;Eumetazoa;Bilateria;Protostomia;  
 Spiralia;Lophotrochozoa;Mollusca;Cephalopoda;Coleoidea;Octopodiformes;Oct  
 opoda;Incirrata;Octopodidae;Octopus;Octopus bimaculoides  
 UdeM00000004288 6596 171.8 UdeM00000004288 XP\_045165261.1 58.9 158  
 59 3 11 165 241 395 7.90E-40 171.8 6596 cellular  
 organisms;Eukaryota;Opisthokonta;Metazoa;Eumetazoa;Bilateria;Protostomia;  
 Spiralia;Lophotrochozoa;Mollusca;Bivalvia;Autobranchia;Heteroconchia;Euhe  
 terodonta;Imparidentia;Venerida;Veneroidea;Veneridae;Mercenaria;Mercenari  
 a mercenaria  
 UdeM00000004289 441366 386.3 UdeM00000004289 XP\_028296753.1 39.1  
 596 333 13 6 593 32 605 6.90E-104 386.3 441366  
 cellular  
 organisms;Eukaryota;Opisthokonta;Metazoa;Eumetazoa;Bilateria;Deuterostomi  
 a;Chordata;Craniata;Vertebrata;Gnathostomata;Teleostomi;Euteleostomi;Acti  
 nopterygii;Actinopteri;Neopterygii;Teleostei;Osteoglossocephalai;Clupeoce  
 phala;Euteleosteomorpha;Neoteleostei;Eurypterygia;Ctenosquamata;Acanthomo  
 rphata;Euacanthomorpha;Percomorphaceae;Ovalentaria;Blenniimorphae;Blen

niiformes;Gobiesocoidei;Gobiesocidae;Gobiesocinae;Gouania;Gouania  
 willdenowi  
 UdeM00000004290 46514 323.6 UdeM00000004290 XP\_038075667.1 38.7 488  
 247 10 14 466 94 564 4.30E-85 323.6 46514 cellular  
 organisms;Eukaryota;Opisthokonta;Metazoa;Eumetazoa;Bilateria;Deuterostomi  
 a;Echinodermata;Eleutherozoa;Asterozoa;Asteroidea;Valvatacea;Valvatida;As  
 terinidae;Patiria;Patiria miniata  
 UdeM00000004291 1735272 257.7 UdeM00000004291 XP\_041350021.1 68.4  
 196 58 1 60 251 33 228 1.60E-65 257.7 1735272  
 cellular  
 organisms;Eukaryota;Opisthokonta;Metazoa;Eumetazoa;Bilateria;Protostomia;  
 Spiralia;Lophotrochozoa;Mollusca;Gastropoda;Neomphalina;Neomphaloidea;Pel  
 tospiridae;Gigantopelta;Gigantopelta aegis  
 UdeM00000004292 6573 426 UdeM00000004292 XP\_021371690.1 40.6 668  
 332 13 1 620 1 651 1.30E-115 426 6573 cellular  
 organisms;Eukaryota;Opisthokonta;Metazoa;Eumetazoa;Bilateria;Protostomia;  
 Spiralia;Lophotrochozoa;Mollusca;Bivalvia;Autobranchia;Pteriormorphia;Pect  
 inida;Pectinoidea;Pectinidae;Mizuhopecten;Mizuhopecten yessoensis  
 UdeM00000004293 6579 420.2 UdeM00000004293 XP\_033746137.1 38.9 599  
 352 6 161 752 12 603 5.40E-114 420.2 6579 cellular  
 organisms;Eukaryota;Opisthokonta;Metazoa;Eumetazoa;Bilateria;Protostomia;  
 Spiralia;Lophotrochozoa;Mollusca;Bivalvia;Autobranchia;Pteriormorphia;Pect  
 inida;Pectinoidea;Pectinidae;Pecten;Pecten maximus  
 UdeM00000004294 29159 388.3 UdeM00000004294 XP\_034322771.1 36.2 640  
 320 12 6 638 24 582 1.90E-104 388.3 29159 cellular  
 organisms;Eukaryota;Opisthokonta;Metazoa;Eumetazoa;Bilateria;Protostomia;  
 Spiralia;Lophotrochozoa;Mollusca;Bivalvia;Autobranchia;Pteriormorphia;Ostr  
 eida;Ostreoidea;Ostreidae;Crassostrea;Crassostrea gigas  
 UdeM00000004295 1735272 376.3 UdeM00000004295 XP\_041348497.1 37.7  
 557 332 6 395 947 503 1048 1.10E-100 376.3 1735272  
 cellular  
 organisms;Eukaryota;Opisthokonta;Metazoa;Eumetazoa;Bilateria;Protostomia;  
 Spiralia;Lophotrochozoa;Mollusca;Gastropoda;Neomphalina;Neomphaloidea;Pel  
 tospiridae;Gigantopelta;Gigantopelta aegis  
 UdeM00000004296 6596 62 UdeM00000004296 XP\_045189070.1 43.8 89  
 43 4 2 86 1 86 4.30E-07 62 6596 cellular  
 organisms;Eukaryota;Opisthokonta;Metazoa;Eumetazoa;Bilateria;Protostomia;  
 Spiralia;Lophotrochozoa;Mollusca;Bivalvia;Autobranchia;Heteroconchia;Euhe  
 terodonta;Imparidentia;Venerida;Veneroidea;Veneridae;Mercenaria;Mercenari  
 a mercenaria  
 UdeM00000004297 29159 676 UdeM00000004297 XP\_011433349.2 65.9 454  
 152 2 8 461 12 462 3.40E-191 676 29159 cellular  
 organisms;Eukaryota;Opisthokonta;Metazoa;Eumetazoa;Bilateria;Protostomia;  
 Spiralia;Lophotrochozoa;Mollusca;Bivalvia;Autobranchia;Pteriormorphia;Ostr  
 eida;Ostreoidea;Ostreidae;Crassostrea;Crassostrea gigas  
 UdeM00000004298 1735272 122.9 UdeM00000004298 XP\_041375701.1 51  
 100 49 0 54 153 1 100 3.70E-25 122.9 1735272  
 cellular  
 organisms;Eukaryota;Opisthokonta;Metazoa;Eumetazoa;Bilateria;Protostomia;  
 Spiralia;Lophotrochozoa;Mollusca;Gastropoda;Neomphalina;Neomphaloidea;Pel  
 tospiridae;Gigantopelta;Gigantopelta aegis  
 UdeM00000004299 1735272 133.7 UdeM00000004299 XP\_041375701.1 55  
 100 45 0 102 201 1 100 2.70E-28 133.7 1735272  
 cellular

organisms;Eukaryota;Opisthokonta;Metazoa;Eumetazoa;Bilateria;Protostomia;Spiralia;Lophotrochozoa;Mollusca;Gastropoda;Neomphalina;Neomphaloidea;Peltospiridae;Gigantopelta;Gigantopelta aegis

UdeM00000004300 225164 87 UdeM00000004300 XP\_009055924.1 51.4  
70 34 0 136 205 330 399 3.00E-14 87 225164

cellular

organisms;Eukaryota;Opisthokonta;Metazoa;Eumetazoa;Bilateria;Protostomia;Spiralia;Lophotrochozoa;Mollusca;Gastropoda;Patellogastropoda;Lottioidea;Lottiidae;Lottia;Lottia gigantea

UdeM00000004301 29159 653.7 UdeM00000004301 XP\_011419679.2 63.9 441  
156 2 60 500 37 474 1.90E-184 653.7 29159 cellular

organisms;Eukaryota;Opisthokonta;Metazoa;Eumetazoa;Bilateria;Protostomia;Spiralia;Lophotrochozoa;Mollusca;Bivalvia;Autobranchia;Pteriormorphia;Ostreida;Ostreioidea;Ostreidae;Crassostrea;Crassostrea gigas

UdeM00000004303 225164 567 UdeM00000004303 XP\_009058775.1 66.8  
364 120 1 16 379 18 380 1.80E-158 567 225164

cellular

organisms;Eukaryota;Opisthokonta;Metazoa;Eumetazoa;Bilateria;Protostomia;Spiralia;Lophotrochozoa;Mollusca;Gastropoda;Patellogastropoda;Lottioidea;Lottiidae;Lottia;Lottia gigantea

UdeM00000004304 6579 636.7 UdeM00000004304 XP\_033746823.1 60.9 465  
175 3 1 465 1 458 2.30E-179 636.7 6579 cellular

organisms;Eukaryota;Opisthokonta;Metazoa;Eumetazoa;Bilateria;Protostomia;Spiralia;Lophotrochozoa;Mollusca;Bivalvia;Autobranchia;Pteriormorphia;Pectinida;Pectinoidea;Pectinidae;Pecten;Pecten maximus

UdeM00000004302 6579 622.5 UdeM00000004302 XP\_033746823.1 60 463  
177 4 1 462 1 456 4.50E-175 622.5 6579 cellular

organisms;Eukaryota;Opisthokonta;Metazoa;Eumetazoa;Bilateria;Protostomia;Spiralia;Lophotrochozoa;Mollusca;Bivalvia;Autobranchia;Pteriormorphia;Pectinida;Pectinoidea;Pectinidae;Pecten;Pecten maximus

UdeM00000004305 6565 203.8 UdeM00000004305 XP\_022302764.1 68.3 142  
45 0 58 199 8 149 2.10E-49 203.8 6565 cellular

organisms;Eukaryota;Opisthokonta;Metazoa;Eumetazoa;Bilateria;Protostomia;Spiralia;Lophotrochozoa;Mollusca;Bivalvia;Autobranchia;Pteriormorphia;Ostreida;Ostreioidea;Ostreidae;Crassostrea;Crassostrea virginica

UdeM00000044431 29159 103.6 UdeM00000044431 XP\_034317565.1 32 169  
108 5 26 194 1188 1349 5.40E-19 103.6 29159 cellular

organisms;Eukaryota;Opisthokonta;Metazoa;Eumetazoa;Bilateria;Protostomia;Spiralia;Lophotrochozoa;Mollusca;Bivalvia;Autobranchia;Pteriormorphia;Ostreida;Ostreioidea;Ostreidae;Crassostrea;Crassostrea gigas

UdeM00000044432 6579 116.7 UdeM00000044432 XP\_033744257.1 41.4 140  
82 0 1 140 154 293 2.60E-23 116.7 6579 cellular

organisms;Eukaryota;Opisthokonta;Metazoa;Eumetazoa;Bilateria;Protostomia;Spiralia;Lophotrochozoa;Mollusca;Bivalvia;Autobranchia;Pteriormorphia;Pectinida;Pectinoidea;Pectinidae;Pecten;Pecten maximus

UdeM00000028854 1735272 411.8 UdeM00000028854 XP\_041372570.1 52  
356 168 1 8 363 28 380 9.30E-112 411.8 1735272

cellular

organisms;Eukaryota;Opisthokonta;Metazoa;Eumetazoa;Bilateria;Protostomia;Spiralia;Lophotrochozoa;Mollusca;Gastropoda;Neomphalina;Neomphaloidea;Peltospiridae;Gigantopelta;Gigantopelta aegis

UdeM00000028855 6596 75.9 UdeM00000028855 XP\_045186033.1 27.8 158  
112 2 207 364 23 178 1.30E-10 75.9 6596 cellular

organisms;Eukaryota;Opisthokonta;Metazoa;Eumetazoa;Bilateria;Protostomia;

Spiralia;Lophotrochozoa;Mollusca;Bivalvia;Autobranchia;Heteroconchia;Euherodonta;Imparidentia;Venerida;Veneroidea;Veneridae;Mercenaria;Mercenaria mercenaria

UdeM00000028856 6565 540.4 UdeM00000028856 XP\_022345813.1 76.6 364  
56 3 2 365 5 339 2.00E-150 540.4 6565 cellular

organisms;Eukaryota;Opisthokonta;Metazoa;Eumetazoa;Bilateria;Protostomia;Spiralia;Lophotrochozoa;Mollusca;Bivalvia;Autobranchia;Pteriormorphia;Ostreida;Ostreioidea;Ostreidae;Crassostrea;Crassostrea virginica

UdeM00000028858 1735272 255.8 UdeM00000028858 XP\_041361083.1 93.2  
133 8 1 3 135 1 132 3.30E-65 255.8 1735272  
cellular

organisms;Eukaryota;Opisthokonta;Metazoa;Eumetazoa;Bilateria;Protostomia;Spiralia;Lophotrochozoa;Mollusca;Gastropoda;Neomphalina;Neomphaloidea;Peltospiridae;Gigantopelta;Gigantopelta aegis

UdeM00000028857 46514 150.6 UdeM00000028857 XP\_038075667.1 34.6 260  
144 6 1 244 309 558 2.60E-33 150.6 46514 cellular

organisms;Eukaryota;Opisthokonta;Metazoa;Eumetazoa;Bilateria;Deuterostomia;Echinodermata;Eleutherozoa;Asterozoa;Asteroidea;Valvatacea;Valvatida;Asterinidae;Patiria;Patiria miniata

UdeM00000028859 6579 204.9 UdeM00000028859 XP\_033761983.1 35.8 341  
212 4 5 344 235 569 1.60E-49 204.9 6579 cellular

organisms;Eukaryota;Opisthokonta;Metazoa;Eumetazoa;Bilateria;Protostomia;Spiralia;Lophotrochozoa;Mollusca;Bivalvia;Autobranchia;Pteriormorphia;Pectinida;Pectinoidea;Pectinidae;Pecten;Pecten maximus

UdeM00000028860 6579 205.7 UdeM00000028860 XP\_033761983.1 35.2 355  
222 5 29 381 221 569 1.10E-49 205.7 6579 cellular

organisms;Eukaryota;Opisthokonta;Metazoa;Eumetazoa;Bilateria;Protostomia;Spiralia;Lophotrochozoa;Mollusca;Bivalvia;Autobranchia;Pteriormorphia;Pectinida;Pectinoidea;Pectinidae;Pecten;Pecten maximus

UdeM00000028862 6565 340.9 UdeM00000028862 XP\_022345813.1 58.2 311  
123 4 1 307 185 492 2.70E-90 340.9 6565 cellular

organisms;Eukaryota;Opisthokonta;Metazoa;Eumetazoa;Bilateria;Protostomia;Spiralia;Lophotrochozoa;Mollusca;Bivalvia;Autobranchia;Pteriormorphia;Ostreida;Ostreioidea;Ostreidae;Crassostrea;Crassostrea virginica

UdeM00000028861 6565 350.1 UdeM00000028861 XP\_022345813.1 57.8 322  
129 4 115 432 174 492 5.50E-93 350.1 6565 cellular

organisms;Eukaryota;Opisthokonta;Metazoa;Eumetazoa;Bilateria;Protostomia;Spiralia;Lophotrochozoa;Mollusca;Bivalvia;Autobranchia;Pteriormorphia;Ostreida;Ostreioidea;Ostreidae;Crassostrea;Crassostrea virginica

UdeM00000028864 6596 376.3 UdeM00000028864 XP\_045177776.1 40 525  
291 10 1 517 405 913 6.20E-101 376.3 6596 cellular

organisms;Eukaryota;Opisthokonta;Metazoa;Eumetazoa;Bilateria;Protostomia;Spiralia;Lophotrochozoa;Mollusca;Bivalvia;Autobranchia;Heteroconchia;Euherodonta;Imparidentia;Venerida;Veneroidea;Veneridae;Mercenaria;Mercenaria mercenaria

UdeM00000028863 6596 375.9 UdeM00000028863 XP\_045177776.1 40 525  
291 10 1 517 405 913 1.00E-100 375.9 6596 cellular

organisms;Eukaryota;Opisthokonta;Metazoa;Eumetazoa;Bilateria;Protostomia;Spiralia;Lophotrochozoa;Mollusca;Bivalvia;Autobranchia;Heteroconchia;Euherodonta;Imparidentia;Venerida;Veneroidea;Veneridae;Mercenaria;Mercenaria mercenaria

UdeM00000028865 6596 109.8 UdeM00000028865 XP\_045191793.1 30.8 237  
142 7 3 233 785 1005 5.90E-21 109.8 6596 cellular

organisms;Eukaryota;Opisthokonta;Metazoa;Eumetazoa;Bilateria;Protostomia;

Spiralia;Lophotrochozoa;Mollusca;Bivalvia;Autobranchia;Heteroconchia;Euherodonta;Imparidentia;Venerida;Veneroidea;Veneridae;Mercenaria;Mercenaria mercenaria

UdeM00000028866 105023 250 UdeM00000028866 XP\_015828284.1 36.8  
391 225 6 6 382 151 533 4.90E-63 250 105023

cellular

organisms;Eukaryota;Opisthokonta;Metazoa;Eumetazoa;Bilateria;Deuterostomia;Chordata;Craniata;Vertebrata;Gnathostomata;Teleostomi;Euteleostomi;Actinopterygii;Actinopteri;Neopterygii;Teleostei;Osteoglossocephalai;Clupeocephala;Euteleostei;Neoteleostei;Eurypterygia;Ctenosquamata;Acanthomorpha;Euacanthomorpha;Percomorphaceae;Ovalentaria;Atherinomorpha;Cypriodontiformes;Aplocheiloidei;Nothobranchiidae;Nothobranchius;Nothobranchius furzeri

UdeM00000028867 6565 122.1 UdeM00000028867 XP\_022299602.1 46.2 132  
68 3 53 183 2 131 2.80E-24 122.1 6565 cellular

organisms;Eukaryota;Opisthokonta;Metazoa;Eumetazoa;Bilateria;Protostomia;Spiralia;Lophotrochozoa;Mollusca;Bivalvia;Autobranchia;Pteriormorphia;Ostreida;Ostreoidea;Ostreidae;Crassostrea;Crassostrea virginica

UdeM00000028869 29159 64.3 UdeM00000028869 XP\_034315424.1 36.1 108  
60 3 12 116 213 314 2.20E-07 64.3 29159 cellular

organisms;Eukaryota;Opisthokonta;Metazoa;Eumetazoa;Bilateria;Protostomia;Spiralia;Lophotrochozoa;Mollusca;Bivalvia;Autobranchia;Pteriormorphia;Ostreida;Ostreoidea;Ostreidae;Crassostrea;Crassostrea gigas

UdeM00000028870 6596 192.2 UdeM00000028870 XP\_045177776.1 36.9 317  
178 9 1 312 405 704 1.90E-45 192.2 6596 cellular

organisms;Eukaryota;Opisthokonta;Metazoa;Eumetazoa;Bilateria;Protostomia;Spiralia;Lophotrochozoa;Mollusca;Bivalvia;Autobranchia;Heteroconchia;Euherodonta;Imparidentia;Venerida;Veneroidea;Veneridae;Mercenaria;Mercenaria mercenaria

UdeM00000028871 6596 109.8 UdeM00000028871 XP\_045188183.1 40.9 159  
87 5 2 158 85 238 8.40E-21 109.8 6596 cellular

organisms;Eukaryota;Opisthokonta;Metazoa;Eumetazoa;Bilateria;Protostomia;Spiralia;Lophotrochozoa;Mollusca;Bivalvia;Autobranchia;Heteroconchia;Euherodonta;Imparidentia;Venerida;Veneroidea;Veneridae;Mercenaria;Mercenaria mercenaria

UdeM00000028872 6565 73.2 UdeM00000028872 XP\_022308598.1 39.6 106  
61 2 14 119 67 169 2.90E-10 73.2 6565 cellular

organisms;Eukaryota;Opisthokonta;Metazoa;Eumetazoa;Bilateria;Protostomia;Spiralia;Lophotrochozoa;Mollusca;Bivalvia;Autobranchia;Pteriormorphia;Ostreida;Ostreoidea;Ostreidae;Crassostrea;Crassostrea virginica

UdeM00000028873 37653 84.3 UdeM00000028873 XP\_014767494.1 83.3 48  
8 0 9 56 1001 1048 7.10E-14 84.3 37653 cellular

organisms;Eukaryota;Opisthokonta;Metazoa;Eumetazoa;Bilateria;Protostomia;Spiralia;Lophotrochozoa;Mollusca;Cephalopoda;Coleoidea;Octopodiformes;Octopoda;Incirrata;Octopodidae;Octopus;Octopus bimaculoides

UdeM00000028874 6596 465.3 UdeM00000028874 XP\_045177776.1 33.8 799  
427 16 11 798 398 1105 2.00E-127 465.3 6596 cellular

organisms;Eukaryota;Opisthokonta;Metazoa;Eumetazoa;Bilateria;Protostomia;Spiralia;Lophotrochozoa;Mollusca;Bivalvia;Autobranchia;Heteroconchia;Euherodonta;Imparidentia;Venerida;Veneroidea;Veneridae;Mercenaria;Mercenaria mercenaria

UdeM00000028875 6596 358.2 UdeM00000028875 XP\_045177776.1 35.4 608  
308 12 11 613 398 925 2.90E-95 358.2 6596 cellular

organisms;Eukaryota;Opisthokonta;Metazoa;Eumetazoa;Bilateria;Protostomia;

Spiralia;Lophotrochozoa;Mollusca;Bivalvia;Autobranchia;Heteroconchia;Euherodonta;Imparidentia;Venerida;Veneroidea;Veneridae;Mercenaria;Mercenaria mercenaria

UdeM00000028876 46514 81.6 UdeM00000028876 XP\_038062873.1 54.8 73  
33 0 1 73 21 93 5.60E-13 81.6 46514 cellular

organisms;Eukaryota;Opisthokonta;Metazoa;Eumetazoa;Bilateria;Deuterostomia;Echinodermata;Eleutherozoa;Asterozoa;Asteroidea;Valvatacea;Valvatida;Asterinidae;Patiria;Patiria miniata

UdeM00000028877 1735272 249.2 UdeM00000028877 XP\_041372570.1 54.6  
207 89 2 2 206 149 352 4.50E-63 249.2 1735272  
cellular

organisms;Eukaryota;Opisthokonta;Metazoa;Eumetazoa;Bilateria;Protostomia;Spiralia;Lophotrochozoa;Mollusca;Gastropoda;Neomphalina;Neomphaloidea;Peltospiridae;Gigantopelta;Gigantopelta aegis

UdeM00000028878 6565 421.8 UdeM00000028878 XP\_022345813.1 79.3 276  
45 3 7 276 70 339 1.20E-114 421.8 6565 cellular

organisms;Eukaryota;Opisthokonta;Metazoa;Eumetazoa;Bilateria;Protostomia;Spiralia;Lophotrochozoa;Mollusca;Bivalvia;Autobranchia;Pteriormorphia;Ostreida;Ostreoidea;Ostreidae;Crassostrea;Crassostrea virginica

UdeM00000028879 6596 369.4 UdeM00000028879 XP\_045177776.1 39.3 524  
298 10 1 519 405 913 1.50E-98 369.4 6596 cellular

organisms;Eukaryota;Opisthokonta;Metazoa;Eumetazoa;Bilateria;Protostomia;Spiralia;Lophotrochozoa;Mollusca;Bivalvia;Autobranchia;Heteroconchia;Euherodonta;Imparidentia;Venerida;Veneroidea;Veneridae;Mercenaria;Mercenaria mercenaria

UdeM00000028880 6596 285.4 UdeM00000028880 XP\_045182820.1 75.8 178  
43 0 55 232 183 360 6.40E-74 285.4 6596 cellular

organisms;Eukaryota;Opisthokonta;Metazoa;Eumetazoa;Bilateria;Protostomia;Spiralia;Lophotrochozoa;Mollusca;Bivalvia;Autobranchia;Heteroconchia;Euherodonta;Imparidentia;Venerida;Veneroidea;Veneridae;Mercenaria;Mercenaria mercenaria

UdeM00000028881 6596 124.4 UdeM00000028881 XP\_045182818.1 27.1 380  
141 3 1 245 1 379 2.00E-25 124.4 6596 cellular

organisms;Eukaryota;Opisthokonta;Metazoa;Eumetazoa;Bilateria;Protostomia;Spiralia;Lophotrochozoa;Mollusca;Bivalvia;Autobranchia;Heteroconchia;Euherodonta;Imparidentia;Venerida;Veneroidea;Veneridae;Mercenaria;Mercenaria mercenaria

UdeM00000028882 45264 246.9 UdeM00000028882 XP\_044176443.1 36.3 402  
136 4 28 317 87 480 3.50E-62 246.9 45264 cellular

organisms;Eukaryota;Opisthokonta;Metazoa;Eumetazoa;Cnidaria;Anthozoa;Hexacorallia;Scleractinia;Astrocoeniina;Acroporidae;Acropora;Acropora millepora

UdeM00000028883 8049 132.9 UdeM00000028883 XP\_030193753.1 27.9 348  
167 9 3 285 50 378 6.70E-28 132.9 8049 cellular

organisms;Eukaryota;Opisthokonta;Metazoa;Eumetazoa;Bilateria;Deuterostomia;Chordata;Craniata;Vertebrata;Gnathostomata;Teleostomi;Euteleostomi;Actinopterygii;Actinopteri;Neopterygii;Teleostei;Osteoglossocephalai;Clupeocephala;Euteleostei;Neoteleostei;Eurypterygia;Ctenosquamata;Acanthopterygii;Paracanthopterygii;Zeiogadaria;Gadariae;Gadiformes;Gadoidei;Gadidae;Gadus;Gadus morhua

UdeM00000028884 6565 224.6 UdeM00000028884 XP\_022342298.1 32.9 517  
149 10 1 333 1 503 2.70E-55 224.6 6565 cellular

organisms;Eukaryota;Opisthokonta;Metazoa;Eumetazoa;Bilateria;Protostomia;

Spiralia;Lophotrochozoa;Mollusca;Bivalvia;Autobranchia;Pteriormorphia;Ostr  
eida;Ostreoidea;Ostreidae;Crassostrea;Crassostrea virginica  
UdeM00000028885 6596 343.6 UdeM00000028885 XP\_045177776.1 40.6 520  
288 9 1 515 405 908 4.50E-91 343.6 6596 cellular  
organisms;Eukaryota;Opisthokonta;Metazoa;Eumetazoa;Bilateria;Protostomia;  
Spiralia;Lophotrochozoa;Mollusca;Bivalvia;Autobranchia;Heteroconchia;Euhe  
terodonta;Imparidentia;Venerida;Veneroidea;Veneridae;Mercenaria;Mercenari  
a mercenaria  
UdeM00000028886 6596 312 UdeM00000028886 XP\_045177779.1 38.5 491  
282 9 1 482 97 576 1.70E-81 312 6596 cellular  
organisms;Eukaryota;Opisthokonta;Metazoa;Eumetazoa;Bilateria;Protostomia;  
Spiralia;Lophotrochozoa;Mollusca;Bivalvia;Autobranchia;Heteroconchia;Euhe  
terodonta;Imparidentia;Venerida;Veneroidea;Veneridae;Mercenaria;Mercenari  
a mercenaria  
UdeM00000028887 6596 312 UdeM00000028887 XP\_045177779.1 38.5 491  
282 9 1 482 97 576 1.80E-81 312 6596 cellular  
organisms;Eukaryota;Opisthokonta;Metazoa;Eumetazoa;Bilateria;Protostomia;  
Spiralia;Lophotrochozoa;Mollusca;Bivalvia;Autobranchia;Heteroconchia;Euhe  
terodonta;Imparidentia;Venerida;Veneroidea;Veneridae;Mercenaria;Mercenari  
a mercenaria  
UdeM00000028888 6579 144.8 UdeM00000028888 XP\_033732676.1 33.2 280  
161 9 106 375 141 404 2.20E-31 144.8 6579 cellular  
organisms;Eukaryota;Opisthokonta;Metazoa;Eumetazoa;Bilateria;Protostomia;  
Spiralia;Lophotrochozoa;Mollusca;Bivalvia;Autobranchia;Pteriormorphia;Pect  
inida;Pectinoidea;Pectinidae;Pecten;Pecten maximus  
UdeM00000028889 6596 375.2 UdeM00000028889 XP\_045177776.1 36.7 622  
343 15 1 611 405 986 2.00E-100 375.2 6596 cellular  
organisms;Eukaryota;Opisthokonta;Metazoa;Eumetazoa;Bilateria;Protostomia;  
Spiralia;Lophotrochozoa;Mollusca;Bivalvia;Autobranchia;Heteroconchia;Euhe  
terodonta;Imparidentia;Venerida;Veneroidea;Veneridae;Mercenaria;Mercenari  
a mercenaria  
UdeM00000028890 6596 331.3 UdeM00000028890 XP\_045177776.1 38.4 487  
280 10 1 482 405 876 2.40E-87 331.3 6596 cellular  
organisms;Eukaryota;Opisthokonta;Metazoa;Eumetazoa;Bilateria;Protostomia;  
Spiralia;Lophotrochozoa;Mollusca;Bivalvia;Autobranchia;Heteroconchia;Euhe  
terodonta;Imparidentia;Venerida;Veneroidea;Veneridae;Mercenaria;Mercenari  
a mercenaria  
UdeM00000028891 6596 113.2 UdeM00000028891 XP\_045191793.1 36.3 171  
97 4 3 170 785 946 5.30E-22 113.2 6596 cellular  
organisms;Eukaryota;Opisthokonta;Metazoa;Eumetazoa;Bilateria;Protostomia;  
Spiralia;Lophotrochozoa;Mollusca;Bivalvia;Autobranchia;Heteroconchia;Euhe  
terodonta;Imparidentia;Venerida;Veneroidea;Veneridae;Mercenaria;Mercenari  
a mercenaria  
UdeM00000028892 6565 122.1 UdeM00000028892 XP\_022299602.1 46.2 132  
68 3 53 183 2 131 2.80E-24 122.1 6565 cellular  
organisms;Eukaryota;Opisthokonta;Metazoa;Eumetazoa;Bilateria;Protostomia;  
Spiralia;Lophotrochozoa;Mollusca;Bivalvia;Autobranchia;Pteriormorphia;Ostr  
eida;Ostreoidea;Ostreidae;Crassostrea;Crassostrea virginica  
UdeM00000028894 29159 60.1 UdeM00000028894 XP\_034315424.1 35.2 108  
61 3 12 116 213 314 4.20E-06 60.1 29159 cellular  
organisms;Eukaryota;Opisthokonta;Metazoa;Eumetazoa;Bilateria;Protostomia;  
Spiralia;Lophotrochozoa;Mollusca;Bivalvia;Autobranchia;Pteriormorphia;Ostr  
eida;Ostreoidea;Ostreidae;Crassostrea;Crassostrea gigas

UdeM00000028895 6596 351.3 UdeM00000028895 XP\_045177776.1 35.4 601  
 300 14 1 595 405 923 3.50E-93 351.3 6596 cellular  
 organisms;Eukaryota;Opisthokonta;Metazoa;Eumetazoa;Bilateria;Protostomia;  
 Spiralia;Lophotrochozoa;Mollusca;Bivalvia;Autobranchia;Heteroconchia;Euhe  
 terodonta;Imparidentia;Venerida;Veneroidea;Veneridae;Mercenaria;Mercenari  
 a mercenaria  
 UdeM00000028897 29159 466.1 UdeM00000028897 XP\_034303860.1 45.9 534  
 258 11 5 522 21 539 6.10E-128 466.1 29159 cellular  
 organisms;Eukaryota;Opisthokonta;Metazoa;Eumetazoa;Bilateria;Protostomia;  
 Spiralia;Lophotrochozoa;Mollusca;Bivalvia;Autobranchia;Pteriormorphia;Ostr  
 eida;Ostreoidea;Ostreidae;Crassostrea;Crassostrea gigas  
 UdeM00000028898 6565 102.1 UdeM00000028898 XP\_022312527.1 46.1 102  
 54 1 92 192 70 171 9.00E-19 102.1 6565 cellular  
 organisms;Eukaryota;Opisthokonta;Metazoa;Eumetazoa;Bilateria;Protostomia;  
 Spiralia;Lophotrochozoa;Mollusca;Bivalvia;Autobranchia;Pteriormorphia;Ostr  
 eida;Ostreoidea;Ostreidae;Crassostrea;Crassostrea virginica  
 UdeM00000028899 6596 282.3 UdeM00000028899 XP\_045177779.1 39.9 441  
 235 10 1 426 97 522 1.00E-72 282.3 6596 cellular  
 organisms;Eukaryota;Opisthokonta;Metazoa;Eumetazoa;Bilateria;Protostomia;  
 Spiralia;Lophotrochozoa;Mollusca;Bivalvia;Autobranchia;Heteroconchia;Euhe  
 terodonta;Imparidentia;Venerida;Veneroidea;Veneridae;Mercenaria;Mercenari  
 a mercenaria  
 UdeM00000028900 6596 125.9 UdeM00000028900 XP\_045177779.1 31.2 215  
 136 5 24 234 619 825 1.30E-25 125.9 6596 cellular  
 organisms;Eukaryota;Opisthokonta;Metazoa;Eumetazoa;Bilateria;Protostomia;  
 Spiralia;Lophotrochozoa;Mollusca;Bivalvia;Autobranchia;Heteroconchia;Euhe  
 terodonta;Imparidentia;Venerida;Veneroidea;Veneridae;Mercenaria;Mercenari  
 a mercenaria  
 UdeM00000028901 6579 114.4 UdeM00000028901 XP\_033750136.1 29.6 216  
 140 6 52 265 8 213 2.30E-22 114.4 6579 cellular  
 organisms;Eukaryota;Opisthokonta;Metazoa;Eumetazoa;Bilateria;Protostomia;  
 Spiralia;Lophotrochozoa;Mollusca;Bivalvia;Autobranchia;Pteriormorphia;Pect  
 inida;Pectinoidea;Pectinidae;Pecten;Pecten maximus  
 UdeM00000028902 6573 215.7 UdeM00000028902 XP\_021343397.1 68.5 178  
 35 3 12 168 1061 1238 4.50E-53 215.7 6573 cellular  
 organisms;Eukaryota;Opisthokonta;Metazoa;Eumetazoa;Bilateria;Protostomia;  
 Spiralia;Lophotrochozoa;Mollusca;Bivalvia;Autobranchia;Pteriormorphia;Pect  
 inida;Pectinoidea;Pectinidae;Mizuhopecten;Mizuhopecten yessoensis  
 UdeM00000028903 6596 343.6 UdeM00000028903 XP\_045177779.1 37.5 517  
 311 8 1 509 97 609 4.50E-91 343.6 6596 cellular  
 organisms;Eukaryota;Opisthokonta;Metazoa;Eumetazoa;Bilateria;Protostomia;  
 Spiralia;Lophotrochozoa;Mollusca;Bivalvia;Autobranchia;Heteroconchia;Euhe  
 terodonta;Imparidentia;Venerida;Veneroidea;Veneridae;Mercenaria;Mercenari  
 a mercenaria  
 UdeM00000028904 6573 193 UdeM00000028904 XP\_021359687.1 33.8 396  
 229 13 351 723 296 681 1.40E-45 193 6573 cellular  
 organisms;Eukaryota;Opisthokonta;Metazoa;Eumetazoa;Bilateria;Protostomia;  
 Spiralia;Lophotrochozoa;Mollusca;Bivalvia;Autobranchia;Pteriormorphia;Pect  
 inida;Pectinoidea;Pectinidae;Mizuhopecten;Mizuhopecten yessoensis  
 UdeM00000028905 6565 137.9 UdeM00000028905 XP\_022341861.1 75.8 95  
 15 1 2 96 976 1062 7.00E-30 137.9 6565 cellular  
 organisms;Eukaryota;Opisthokonta;Metazoa;Eumetazoa;Bilateria;Protostomia;  
 Spiralia;Lophotrochozoa;Mollusca;Bivalvia;Autobranchia;Pteriormorphia;Ostr  
 eida;Ostreoidea;Ostreidae;Crassostrea;Crassostrea virginica



UdeM00000028907 6565 131 UdeM00000028907 XP\_022310266.1 48.6 148  
 71 1 146 293 184 326 2.60E-27 131 6565 cellular  
 organisms;Eukaryota;Opisthokonta;Metazoa;Eumetazoa;Bilateria;Protostomia;  
 Spiralia;Lophotrochozoa;Mollusca;Bivalvia;Autobranchia;Pteriomorpha;Ostr  
 eida;Ostreoidea;Ostreidae;Crassostrea;Crassostrea virginica  
 UdeM00000028906 6565 146.7 UdeM00000028906 XP\_022310266.1 33.6 354  
 190 11 354 690 1 326 1.10E-31 146.7 6565 cellular  
 organisms;Eukaryota;Opisthokonta;Metazoa;Eumetazoa;Bilateria;Protostomia;  
 Spiralia;Lophotrochozoa;Mollusca;Bivalvia;Autobranchia;Pteriomorpha;Ostr  
 eida;Ostreoidea;Ostreidae;Crassostrea;Crassostrea virginica  
 UdeM00000028908 6596 178.3 UdeM00000028908 XP\_045177779.1 33.3 294  
 182 7 20 310 527 809 5.00E-41 178.3 6596 cellular  
 organisms;Eukaryota;Opisthokonta;Metazoa;Eumetazoa;Bilateria;Protostomia;  
 Spiralia;Lophotrochozoa;Mollusca;Bivalvia;Autobranchia;Heteroconchia;Euhe  
 terodonta;Imparidentia;Venerida;Veneroidea;Veneridae;Mercenaria;Mercenari  
 a mercenaria  
 UdeM00000028909 6565 120.9 UdeM00000028909 XP\_022299602.1 40 175  
 100 4 97 270 2 172 6.80E-24 120.9 6565 cellular  
 organisms;Eukaryota;Opisthokonta;Metazoa;Eumetazoa;Bilateria;Protostomia;  
 Spiralia;Lophotrochozoa;Mollusca;Bivalvia;Autobranchia;Pteriomorpha;Ostr  
 eida;Ostreoidea;Ostreidae;Crassostrea;Crassostrea virginica  
 UdeM00000028912 6596 461.5 UdeM00000028912 XP\_045177776.1 34.1 794  
 414 19 1 781 405 1102 2.80E-126 461.5 6596 cellular  
 organisms;Eukaryota;Opisthokonta;Metazoa;Eumetazoa;Bilateria;Protostomia;  
 Spiralia;Lophotrochozoa;Mollusca;Bivalvia;Autobranchia;Heteroconchia;Euhe  
 terodonta;Imparidentia;Venerida;Veneroidea;Veneridae;Mercenaria;Mercenari  
 a mercenaria  
 UdeM00000028913 6596 350.9 UdeM00000028913 XP\_045177776.1 35 602  
 301 13 1 595 405 923 4.50E-93 350.9 6596 cellular  
 organisms;Eukaryota;Opisthokonta;Metazoa;Eumetazoa;Bilateria;Protostomia;  
 Spiralia;Lophotrochozoa;Mollusca;Bivalvia;Autobranchia;Heteroconchia;Euhe  
 terodonta;Imparidentia;Venerida;Veneroidea;Veneridae;Mercenaria;Mercenari  
 a mercenaria  
 UdeM00000028914 7741 560.5 UdeM00000028914 XP\_019618826.1 55.1 506  
 188 2 20 486 5 510 2.90E-156 560.5 7741 cellular  
 organisms;Eukaryota;Opisthokonta;Metazoa;Eumetazoa;Bilateria;Deuterostomi  
 a;Chordata;Cephalochordata;Leptocardii;Amphioxiformes;Branchiostomidae;Br  
 anchiostoma;Branchiostoma belcheri  
 UdeM00000028915 6596 372.5 UdeM00000028915 XP\_045177776.1 39.4 563  
 326 8 1 556 405 959 1.30E-99 372.5 6596 cellular  
 organisms;Eukaryota;Opisthokonta;Metazoa;Eumetazoa;Bilateria;Protostomia;  
 Spiralia;Lophotrochozoa;Mollusca;Bivalvia;Autobranchia;Heteroconchia;Euhe  
 terodonta;Imparidentia;Venerida;Veneroidea;Veneridae;Mercenaria;Mercenari  
 a mercenaria  
 UdeM00000028916 6596 473.4 UdeM00000028916 XP\_045177779.1 36.9 713  
 423 10 1 698 97 797 6.50E-130 473.4 6596 cellular  
 organisms;Eukaryota;Opisthokonta;Metazoa;Eumetazoa;Bilateria;Protostomia;  
 Spiralia;Lophotrochozoa;Mollusca;Bivalvia;Autobranchia;Heteroconchia;Euhe  
 terodonta;Imparidentia;Venerida;Veneroidea;Veneridae;Mercenaria;Mercenari  
 a mercenaria  
 UdeM00000028917 6596 73.2 UdeM00000028917 XP\_045180710.1 47.7 107  
 42 5 1 101 326 424 5.20E-10 73.2 6596 cellular  
 organisms;Eukaryota;Opisthokonta;Metazoa;Eumetazoa;Bilateria;Protostomia;  
 Spiralia;Lophotrochozoa;Mollusca;Bivalvia;Autobranchia;Heteroconchia;Euhe

terodonta;Imparidentia;Venerida;Veneroidea;Veneridae;Mercenaria;Mercenari  
 a mercenaria  
 UdeM00000028918 6596 357.5 UdeM00000028918 XP\_045177776.1 41.6 507  
 286 6 1 500 405 908 2.90E-95 357.5 6596 cellular  
 organisms;Eukaryota;Opisthokonta;Metazoa;Eumetazoa;Bilateria;Protostomia;  
 Spiralia;Lophotrochozoa;Mollusca;Bivalvia;Autobranchia;Heteroconchia;Euhe  
 terodonta;Imparidentia;Venerida;Veneroidea;Veneridae;Mercenaria;Mercenari  
 a mercenaria  
 UdeM00000028919 6565 123.2 UdeM00000028919 XP\_022299602.1 44.2 138  
 74 3 97 233 2 137 4.60E-25 123.2 6565 cellular  
 organisms;Eukaryota;Opisthokonta;Metazoa;Eumetazoa;Bilateria;Protostomia;  
 Spiralia;Lophotrochozoa;Mollusca;Bivalvia;Autobranchia;Pteriormorphia;Ostr  
 eida;Ostreoidea;Ostreidae;Crassostrea;Crassostrea virginica  
 UdeM00000028920 6596 81.6 UdeM00000028920 XP\_045186033.1 29.1 158  
 110 2 234 391 23 178 2.60E-12 81.6 6596 cellular  
 organisms;Eukaryota;Opisthokonta;Metazoa;Eumetazoa;Bilateria;Protostomia;  
 Spiralia;Lophotrochozoa;Mollusca;Bivalvia;Autobranchia;Heteroconchia;Euhe  
 terodonta;Imparidentia;Venerida;Veneroidea;Veneridae;Mercenaria;Mercenari  
 a mercenaria  
 UdeM00000028922 6596 479.9 UdeM00000028922 XP\_045177776.1 38.1 732  
 424 13 1 725 405 1114 7.20E-132 479.9 6596 cellular  
 organisms;Eukaryota;Opisthokonta;Metazoa;Eumetazoa;Bilateria;Protostomia;  
 Spiralia;Lophotrochozoa;Mollusca;Bivalvia;Autobranchia;Heteroconchia;Euhe  
 terodonta;Imparidentia;Venerida;Veneroidea;Veneridae;Mercenaria;Mercenari  
 a mercenaria  
 UdeM00000028923 6596 391 UdeM00000028923 XP\_045177776.1 40.4 562  
 317 8 1 559 405 951 3.80E-105 391 6596 cellular  
 organisms;Eukaryota;Opisthokonta;Metazoa;Eumetazoa;Bilateria;Protostomia;  
 Spiralia;Lophotrochozoa;Mollusca;Bivalvia;Autobranchia;Heteroconchia;Euhe  
 terodonta;Imparidentia;Venerida;Veneroidea;Veneridae;Mercenaria;Mercenari  
 a mercenaria  
 UdeM00000028924 6573 232.6 UdeM00000028924 XP\_021343397.1 52.7 264  
 32 3 4 174 931 1194 3.80E-58 232.6 6573 cellular  
 organisms;Eukaryota;Opisthokonta;Metazoa;Eumetazoa;Bilateria;Protostomia;  
 Spiralia;Lophotrochozoa;Mollusca;Bivalvia;Autobranchia;Pteriormorphia;Pect  
 inida;Pectinoidea;Pectinidae;Mizuhopecten;Mizuhopecten yessoensis  
 UdeM00000028925 1735272 257.3 UdeM00000028925 XP\_041356271.1 49.2  
 238 94 3 1 214 89 323 1.70E-65 257.3 1735272  
 cellular  
 organisms;Eukaryota;Opisthokonta;Metazoa;Eumetazoa;Bilateria;Protostomia;  
 Spiralia;Lophotrochozoa;Mollusca;Gastropoda;Neomphalina;Neomphaloidea;Pel  
 tospiridae;Gigantopelta;Gigantopelta aegis  
 UdeM00000028926 37621 519.2 UdeM00000028926 XP\_014679850.1 78.9 322  
 68 0 1 322 189 510 3.70E-144 519.2 37621 cellular  
 organisms;Eukaryota;Opisthokonta;Metazoa;Eumetazoa;Bilateria;Protostomia;  
 Ecdysozoa;Scalidophora;Priapulida;Priapulimorpha;Priapulimorphida;Priapul  
 idae;Priapululus;Priapululus caudatus  
 UdeM00000028927 37621 78.6 UdeM00000028927 XP\_014679850.1 60.6 66  
 26 0 1 66 189 254 3.70E-12 78.6 37621 cellular  
 organisms;Eukaryota;Opisthokonta;Metazoa;Eumetazoa;Bilateria;Protostomia;  
 Ecdysozoa;Scalidophora;Priapulida;Priapulimorpha;Priapulimorphida;Priapul  
 idae;Priapululus;Priapululus caudatus  
 UdeM00000028928 37621 267.7 UdeM00000028928 XP\_014679849.1 54.9 215  
 90 3 1 208 409 623 1.20E-68 267.7 37621 cellular

organisms;Eukaryota;Opisthokonta;Metazoa;Eumetazoa;Bilateria;Protostomia;  
Ecdysozoa;Scalidophora;Priapulida;Priapulimorpha;Priapulimorphida;Priapul  
idae;Priapulus;Priapulus caudatus  
UdeM00000028929 37621 194.5 UdeM00000028929 XP\_014679849.1 55.6 187  
82 1 38 223 190 376 1.40E-46 194.5 37621 cellular  
organisms;Eukaryota;Opisthokonta;Metazoa;Eumetazoa;Bilateria;Protostomia;  
Ecdysozoa;Scalidophora;Priapulida;Priapulimorpha;Priapulimorphida;Priapul  
idae;Priapulus;Priapulus caudatus  
UdeM00000028930 6565 691 UdeM00000028930 XP\_022345813.1 65.3 585  
97 8 2 577 5 492 2.90E-195 691 6565 cellular  
organisms;Eukaryota;Opisthokonta;Metazoa;Eumetazoa;Bilateria;Protostomia;  
Spiralia;Lophotrochozoa;Mollusca;Bivalvia;Autobranchia;Pteriomorpha;Ostr  
eida;Ostreoidea;Ostreidae;Crassostrea;Crassostrea virginica  
UdeM00000028931 6565 120.2 UdeM00000028931 XP\_022299602.1 44.7 132  
70 3 97 227 2 131 3.90E-24 120.2 6565 cellular  
organisms;Eukaryota;Opisthokonta;Metazoa;Eumetazoa;Bilateria;Protostomia;  
Spiralia;Lophotrochozoa;Mollusca;Bivalvia;Autobranchia;Pteriomorpha;Ostr  
eida;Ostreoidea;Ostreidae;Crassostrea;Crassostrea virginica  
UdeM00000028932 6596 81.6 UdeM00000028932 XP\_045186033.1 29.1 158  
110 2 246 403 23 178 2.70E-12 81.6 6596 cellular  
organisms;Eukaryota;Opisthokonta;Metazoa;Eumetazoa;Bilateria;Protostomia;  
Spiralia;Lophotrochozoa;Mollusca;Bivalvia;Autobranchia;Heteroconchia;Euhe  
terodonta;Imparidentia;Venerida;Veneroidea;Veneridae;Mercenaria;Mercenari  
a mercenaria  
UdeM00000028934 6565 65.5 UdeM00000028934 XP\_022334339.1 22.3 251  
176 8 30 271 517 757 1.30E-07 65.5 6565 cellular  
organisms;Eukaryota;Opisthokonta;Metazoa;Eumetazoa;Bilateria;Protostomia;  
Spiralia;Lophotrochozoa;Mollusca;Bivalvia;Autobranchia;Pteriomorpha;Ostr  
eida;Ostreoidea;Ostreidae;Crassostrea;Crassostrea virginica  
UdeM00000028935 6579 125.6 UdeM00000028935 XP\_033744347.1 27.3 454  
255 15 11 398 3 447 1.50E-25 125.6 6579 cellular  
organisms;Eukaryota;Opisthokonta;Metazoa;Eumetazoa;Bilateria;Protostomia;  
Spiralia;Lophotrochozoa;Mollusca;Bivalvia;Autobranchia;Pteriomorpha;Pect  
inida;Pectinoidea;Pectinidae;Pecten;Pecten maximus  
UdeM00000028936 6579 566.6 UdeM00000028936 XP\_033743002.1 39.7 807  
425 12 113 868 10 805 5.40E-158 566.6 6579 cellular  
organisms;Eukaryota;Opisthokonta;Metazoa;Eumetazoa;Bilateria;Protostomia;  
Spiralia;Lophotrochozoa;Mollusca;Bivalvia;Autobranchia;Pteriomorpha;Pect  
inida;Pectinoidea;Pectinidae;Pecten;Pecten maximus  
UdeM00000028939 6596 160.2 UdeM00000028939 XP\_045177776.1 36.6 265  
156 6 1 262 405 660 3.60E-36 160.2 6596 cellular  
organisms;Eukaryota;Opisthokonta;Metazoa;Eumetazoa;Bilateria;Protostomia;  
Spiralia;Lophotrochozoa;Mollusca;Bivalvia;Autobranchia;Heteroconchia;Euhe  
terodonta;Imparidentia;Venerida;Veneroidea;Veneridae;Mercenaria;Mercenari  
a mercenaria  
UdeM00000028940 6596 189.5 UdeM00000028940 XP\_045177776.1 39.9 233  
134 4 212 442 695 923 1.40E-44 189.5 6596 cellular  
organisms;Eukaryota;Opisthokonta;Metazoa;Eumetazoa;Bilateria;Protostomia;  
Spiralia;Lophotrochozoa;Mollusca;Bivalvia;Autobranchia;Heteroconchia;Euhe  
terodonta;Imparidentia;Venerida;Veneroidea;Veneridae;Mercenaria;Mercenari  
a mercenaria  
UdeM00000028942 37653 84.7 UdeM00000028942 XP\_014767494.1 83.3 48  
8 0 4 51 1001 1048 5.10E-14 84.7 37653 cellular  
organisms;Eukaryota;Opisthokonta;Metazoa;Eumetazoa;Bilateria;Protostomia;

Spiralia; Lophotrochozoa; Mollusca; Cephalopoda; Coleoidea; Octopodiformes; Octopoda; Incirrata; Octopodidae; Octopus; Octopus bimaculoides

UdeM00000028941 37653 84.3 UdeM00000028941 XP\_014767494.1 83.3 48  
8 0 9 56 1001 1048 7.10E-14 84.3 37653 cellular  
organisms; Eukaryota; Opisthokonta; Metazoa; Eumetazoa; Bilateria; Protostomia; Spiralia; Lophotrochozoa; Mollusca; Cephalopoda; Coleoidea; Octopodiformes; Octopoda; Incirrata; Octopodidae; Octopus; Octopus bimaculoides

UdeM00000028943 6596 280 UdeM00000028943 XP\_045177779.1 39.7 441  
236 10 1 426 97 522 5.00E-72 280 6596 cellular  
organisms; Eukaryota; Opisthokonta; Metazoa; Eumetazoa; Bilateria; Protostomia; Spiralia; Lophotrochozoa; Mollusca; Bivalvia; Autobranchia; Heteroconchia; Euheterodonta; Imparidentia; Venerida; Veneroidea; Veneridae; Mercenaria; Mercenaria mercenaria

UdeM00000028944 6579 112.1 UdeM00000028944 XP\_033750136.1 29.2 216  
141 6 52 265 8 213 1.10E-21 112.1 6579 cellular  
organisms; Eukaryota; Opisthokonta; Metazoa; Eumetazoa; Bilateria; Protostomia; Spiralia; Lophotrochozoa; Mollusca; Bivalvia; Autobranchia; Pteriomorpha; Pectinida; Pectinoidea; Pectinidae; Pecten; Pecten maximus

UdeM00000028945 6596 342.8 UdeM00000028945 XP\_045177776.1 35.3 586  
297 11 1 581 405 913 8.60E-91 342.8 6596 cellular  
organisms; Eukaryota; Opisthokonta; Metazoa; Eumetazoa; Bilateria; Protostomia; Spiralia; Lophotrochozoa; Mollusca; Bivalvia; Autobranchia; Heteroconchia; Euheterodonta; Imparidentia; Venerida; Veneroidea; Veneridae; Mercenaria; Mercenaria mercenaria

UdeM00000028946 6596 112.5 UdeM00000028946 XP\_045191793.1 36.1 191  
107 6 3 187 785 966 9.10E-22 112.5 6596 cellular  
organisms; Eukaryota; Opisthokonta; Metazoa; Eumetazoa; Bilateria; Protostomia; Spiralia; Lophotrochozoa; Mollusca; Bivalvia; Autobranchia; Heteroconchia; Euheterodonta; Imparidentia; Venerida; Veneroidea; Veneridae; Mercenaria; Mercenaria mercenaria

UdeM00000028947 105023 255.8 UdeM00000028947 XP\_015828284.1 40.2  
341 192 4 6 342 151 483 8.10E-65 255.8 105023  
cellular  
organisms; Eukaryota; Opisthokonta; Metazoa; Eumetazoa; Bilateria; Deuterostomia; Chordata; Craniata; Vertebrata; Gnathostomata; Teleostomi; Euteleostomi; Actinopterygii; Actinopteri; Neopterygii; Teleostei; Osteoglossocephalai; Clupeocephala; Euteleostei; Neoteleostei; Eurypterygia; Ctenosquamata; Acanthomorpha; Euacanthomorpha; Percomorphaceae; Ovalentaria; Atherinomorpha; Cyprinodontiformes; Aplocheiloidei; Nothobranchiidae; Nothobranchius; Nothobranchius furzeri

UdeM00000028948 6565 120.2 UdeM00000028948 XP\_022299602.1 43.4 143  
78 3 53 194 2 142 7.00E-24 120.2 6565 cellular  
organisms; Eukaryota; Opisthokonta; Metazoa; Eumetazoa; Bilateria; Protostomia; Spiralia; Lophotrochozoa; Mollusca; Bivalvia; Autobranchia; Pteriomorpha; Ostreida; Ostreidae; Crassostrea; Crassostrea virginica

UdeM00000028949 6579 110.9 UdeM00000028949 XP\_033750135.1 35.3 156  
95 4 16 170 8 158 2.30E-21 110.9 6579 cellular  
organisms; Eukaryota; Opisthokonta; Metazoa; Eumetazoa; Bilateria; Protostomia; Spiralia; Lophotrochozoa; Mollusca; Bivalvia; Autobranchia; Pteriomorpha; Pectinida; Pectinoidea; Pectinidae; Pecten; Pecten maximus

UdeM00000028950 6573 193.4 UdeM00000028950 XP\_021341731.1 23.2 686  
483 14 14 663 2 679 9.50E-46 193.4 6573 cellular  
organisms; Eukaryota; Opisthokonta; Metazoa; Eumetazoa; Bilateria; Protostomia;

Spiralia; Lophotrochozoa; Mollusca; Bivalvia; Autobranchia; Pteriomorpha; Pectinida; Pectinoidea; Pectinidae; Mizuhopecten; Mizuhopecten yessoensis  
UdeM00000028951 6573 152.1 UdeM00000028951 XP\_021368347.1 24 667  
443 21 26 665 26 655 2.40E-33 152.1 6573 cellular  
organisms; Eukaryota; Opisthokonta; Metazoa; Eumetazoa; Bilateria; Protostomia; Spiralia; Lophotrochozoa; Mollusca; Bivalvia; Autobranchia; Pteriomorpha; Pectinida; Pectinoidea; Pectinidae; Mizuhopecten; Mizuhopecten yessoensis  
UdeM00000028953 7654 79.7 UdeM00000028953 XP\_041473734.1 45.1 91  
48 1 18 106 654 744 2.50E-12 79.7 7654 cellular  
organisms; Eukaryota; Opisthokonta; Metazoa; Eumetazoa; Bilateria; Deuterostomia; Echinodermata; Eleutherozoa; Echinozoa; Echinoidea; Euechinoidea; Echinacea; Temnopleuroidea; Toxopneustidae; Lytechinus; Lytechinus variegatus  
UdeM00000028954 6596 358.6 UdeM00000028954 XP\_045177776.1 35.7 607  
303 14 11 611 398 923 2.20E-95 358.6 6596 cellular  
organisms; Eukaryota; Opisthokonta; Metazoa; Eumetazoa; Bilateria; Protostomia; Spiralia; Lophotrochozoa; Mollusca; Bivalvia; Autobranchia; Heteroconchia; Euheterodonta; Imparidentia; Venerida; Veneroidea; Veneridae; Mercenaria; Mercenaria mercenaria  
UdeM00000028955 6596 78.2 UdeM00000028955 XP\_045179120.1 56.9 65  
27 1 1 65 1 64 2.40E-11 78.2 6596 cellular  
organisms; Eukaryota; Opisthokonta; Metazoa; Eumetazoa; Bilateria; Protostomia; Spiralia; Lophotrochozoa; Mollusca; Bivalvia; Autobranchia; Heteroconchia; Euheterodonta; Imparidentia; Venerida; Veneroidea; Veneridae; Mercenaria; Mercenaria mercenaria  
UdeM00000028956 6596 78.2 UdeM00000028956 XP\_045179120.1 56.9 65  
27 1 1 65 1 64 2.10E-11 78.2 6596 cellular  
organisms; Eukaryota; Opisthokonta; Metazoa; Eumetazoa; Bilateria; Protostomia; Spiralia; Lophotrochozoa; Mollusca; Bivalvia; Autobranchia; Heteroconchia; Euheterodonta; Imparidentia; Venerida; Veneroidea; Veneridae; Mercenaria; Mercenaria mercenaria  
UdeM00000028957 1529436 114.4 UdeM00000028957 XP\_033102039.1 40  
140 78 3 31 169 295 429 1.50E-22 114.4 1529436  
cellular  
organisms; Eukaryota; Opisthokonta; Metazoa; Eumetazoa; Bilateria; Deuterostomia; Echinodermata; Pelmatozoa; Crinoidea; Articulata; Comatulida; Comatulidae; Comatulinae; Anneissia; Anneissia japonica  
UdeM00000028958 70779 90.9 UdeM00000028958 XP\_015774642.1 41.7 108  
60 3 32 138 613 718 2.00E-15 90.9 70779 cellular  
organisms; Eukaryota; Opisthokonta; Metazoa; Eumetazoa; Cnidaria; Anthozoa; Hexacorallia; Scleractinia; Astrocoeniina; Acroporidae; Acropora; Acropora digitifera  
UdeM00000028959 6596 186.8 UdeM00000028959 XP\_045177779.1 39.2 316  
164 8 1 302 97 398 4.10E-44 186.8 6596 cellular  
organisms; Eukaryota; Opisthokonta; Metazoa; Eumetazoa; Bilateria; Protostomia; Spiralia; Lophotrochozoa; Mollusca; Bivalvia; Autobranchia; Heteroconchia; Euheterodonta; Imparidentia; Venerida; Veneroidea; Veneridae; Mercenaria; Mercenaria mercenaria  
UdeM00000028960 6596 103.2 UdeM00000028960 XP\_045177792.1 42.6 122  
69 1 96 216 4 125 4.20E-19 103.2 6596 cellular  
organisms; Eukaryota; Opisthokonta; Metazoa; Eumetazoa; Bilateria; Protostomia; Spiralia; Lophotrochozoa; Mollusca; Bivalvia; Autobranchia; Heteroconchia; Euheterodonta; Imparidentia; Venerida; Veneroidea; Veneridae; Mercenaria; Mercenaria mercenaria

UdeM00000028961 6579 110.2 UdeM00000028961 XP\_033750136.1 34.6 156  
 96 4 52 206 8 158 3.90E-21 110.2 6579 cellular  
 organisms;Eukaryota;Opisthokonta;Metazoa;Eumetazoa;Bilateria;Protostomia;  
 Spiralia;Lophotrochozoa;Mollusca;Bivalvia;Autobranchia;Pteriormorphia;Pecti  
 inida;Pectinoidea;Pectinidae;Pecten;Pecten maximus  
 UdeM00000028962 6596 392.9 UdeM00000028962 XP\_045177776.1 39.8 563  
 321 8 1 550 405 962 9.60E-106 392.9 6596 cellular  
 organisms;Eukaryota;Opisthokonta;Metazoa;Eumetazoa;Bilateria;Protostomia;  
 Spiralia;Lophotrochozoa;Mollusca;Bivalvia;Autobranchia;Heteroconchia;Euhe  
 terodonta;Imparidentia;Venerida;Veneroidea;Veneridae;Mercenaria;Mercenari  
 a mercenaria  
 UdeM00000028963 6596 391.7 UdeM00000028963 XP\_045177776.1 40.4 552  
 311 8 1 539 405 951 2.20E-105 391.7 6596 cellular  
 organisms;Eukaryota;Opisthokonta;Metazoa;Eumetazoa;Bilateria;Protostomia;  
 Spiralia;Lophotrochozoa;Mollusca;Bivalvia;Autobranchia;Heteroconchia;Euhe  
 terodonta;Imparidentia;Venerida;Veneroidea;Veneridae;Mercenaria;Mercenari  
 a mercenaria  
 UdeM00000028964 1735272 248.8 UdeM00000028964 XP\_041360629.1 56.5  
 239 41 1 12 187 906 1144 5.40E-63 248.8 1735272  
 cellular  
 organisms;Eukaryota;Opisthokonta;Metazoa;Eumetazoa;Bilateria;Protostomia;  
 Spiralia;Lophotrochozoa;Mollusca;Gastropoda;Neomphalina;Neomphaloidea;Pel  
 tospiridae;Gigantopelta;Gigantopelta aegis  
 UdeM00000028965 6596 76.6 UdeM00000028965 XP\_045179120.1 52.2 67  
 31 1 1 67 1 66 1.40E-11 76.6 6596 cellular  
 organisms;Eukaryota;Opisthokonta;Metazoa;Eumetazoa;Bilateria;Protostomia;  
 Spiralia;Lophotrochozoa;Mollusca;Bivalvia;Autobranchia;Heteroconchia;Euhe  
 terodonta;Imparidentia;Venerida;Veneroidea;Veneridae;Mercenaria;Mercenari  
 a mercenaria  
 UdeM00000028966 1735272 334 UdeM00000028966 XP\_041372570.1 55.6  
 270 113 2 1 270 90 352 1.80E-88 334 1735272  
 cellular  
 organisms;Eukaryota;Opisthokonta;Metazoa;Eumetazoa;Bilateria;Protostomia;  
 Spiralia;Lophotrochozoa;Mollusca;Gastropoda;Neomphalina;Neomphaloidea;Pel  
 tospiridae;Gigantopelta;Gigantopelta aegis  
 UdeM00000028967 37621 162.2 UdeM00000028967 XP\_014679850.1 61.7 128  
 39 3 1 120 1 126 4.30E-37 162.2 37621 cellular  
 organisms;Eukaryota;Opisthokonta;Metazoa;Eumetazoa;Bilateria;Protostomia;  
 Ecdysozoa;Scalidophora;Priapulida;Priapulimorpha;Priapulimorphida;Priapul  
 idae;Priapulid;Priapulid caudatus  
 UdeM00000028968 37621 78.6 UdeM00000028968 XP\_014679850.1 60.6 66  
 26 0 1 66 189 254 3.70E-12 78.6 37621 cellular  
 organisms;Eukaryota;Opisthokonta;Metazoa;Eumetazoa;Bilateria;Protostomia;  
 Ecdysozoa;Scalidophora;Priapulida;Priapulimorpha;Priapulimorphida;Priapul  
 idae;Priapulid;Priapulid caudatus  
 UdeM00000028969 37621 267.7 UdeM00000028969 XP\_014679849.1 54.9 215  
 90 3 1 208 409 623 1.20E-68 267.7 37621 cellular  
 organisms;Eukaryota;Opisthokonta;Metazoa;Eumetazoa;Bilateria;Protostomia;  
 Ecdysozoa;Scalidophora;Priapulida;Priapulimorpha;Priapulimorphida;Priapul  
 idae;Priapulid;Priapulid caudatus  
 UdeM00000028970 37621 291.2 UdeM00000028970 XP\_014679849.1 44.4 374  
 130 2 1 296 3 376 1.50E-75 291.2 37621 cellular  
 organisms;Eukaryota;Opisthokonta;Metazoa;Eumetazoa;Bilateria;Protostomia;

Ecdysozoa; Scalidophora; Priapulida; Priapulimorpha; Priapulimorphida; Priapulidae; Priapululus; Priapululus caudatus

UdeM00000028971 6565 123.6 UdeM00000028971 XP\_022345813.1 90.9 66  
5 1 2 67 5 69 1.10E-25 123.6 6565 cellular  
organisms; Eukaryota; Opisthokonta; Metazoa; Eumetazoa; Bilateria; Protostomia; Spiralia; Lophotrochozoa; Mollusca; Bivalvia; Autobranchia; Pteriomorpha; Ostracida; Ostreidae; Crassostrea; Crassostrea virginica

UdeM00000028972 6565 559.3 UdeM00000028972 XP\_022345788.1 73.7 388  
100 2 168 554 196 582 8.90E-156 559.3 6565 cellular  
organisms; Eukaryota; Opisthokonta; Metazoa; Eumetazoa; Bilateria; Protostomia; Spiralia; Lophotrochozoa; Mollusca; Bivalvia; Autobranchia; Pteriomorpha; Ostracida; Ostreidae; Crassostrea; Crassostrea virginica

UdeM00000028973 6596 192.6 UdeM00000028973 XP\_045177779.1 38.9 311  
172 6 1 302 97 398 7.50E-46 192.6 6596 cellular  
organisms; Eukaryota; Opisthokonta; Metazoa; Eumetazoa; Bilateria; Protostomia; Spiralia; Lophotrochozoa; Mollusca; Bivalvia; Autobranchia; Heteroconchia; Euheterodonta; Imparidentia; Venerida; Veneroidea; Veneridae; Mercenaria; Mercenaria mercenaria

UdeM00000028974 6596 103.6 UdeM00000028974 XP\_045180775.1 36 175  
101 5 47 217 1302 1469 3.20E-19 103.6 6596 cellular  
organisms; Eukaryota; Opisthokonta; Metazoa; Eumetazoa; Bilateria; Protostomia; Spiralia; Lophotrochozoa; Mollusca; Bivalvia; Autobranchia; Heteroconchia; Euheterodonta; Imparidentia; Venerida; Veneroidea; Veneridae; Mercenaria; Mercenaria mercenaria

UdeM00000028975 6579 114 UdeM00000028975 XP\_033750136.1 29.2 216  
141 6 52 265 8 213 3.00E-22 114 6579 cellular  
organisms; Eukaryota; Opisthokonta; Metazoa; Eumetazoa; Bilateria; Protostomia; Spiralia; Lophotrochozoa; Mollusca; Bivalvia; Autobranchia; Pteriomorpha; Pectinida; Pectinoidea; Pectinidae; Pecten; Pecten maximus

UdeM00000028976 1735272 228 UdeM00000028976 XP\_041360629.1 50.2  
269 42 3 25 208 883 1144 1.10E-56 228 1735272  
cellular  
organisms; Eukaryota; Opisthokonta; Metazoa; Eumetazoa; Bilateria; Protostomia; Spiralia; Lophotrochozoa; Mollusca; Gastropoda; Neomphalina; Neomphaloidea; Peltospiridae; Gigantopelta; Gigantopelta aegis

UdeM00000028977 1735272 257.3 UdeM00000028977 XP\_041356271.1 49.2  
238 94 3 1 214 89 323 1.70E-65 257.3 1735272  
cellular  
organisms; Eukaryota; Opisthokonta; Metazoa; Eumetazoa; Bilateria; Protostomia; Spiralia; Lophotrochozoa; Mollusca; Gastropoda; Neomphalina; Neomphaloidea; Peltospiridae; Gigantopelta; Gigantopelta aegis

UdeM00000028978 37621 163.7 UdeM00000028978 XP\_014679850.1 62.5 128  
38 3 1 120 1 126 1.50E-37 163.7 37621 cellular  
organisms; Eukaryota; Opisthokonta; Metazoa; Eumetazoa; Bilateria; Protostomia; Ecdysozoa; Scalidophora; Priapulida; Priapulimorpha; Priapulimorphida; Priapulidae; Priapululus; Priapululus caudatus

UdeM00000028979 37621 79 UdeM00000028979 XP\_014679850.1 60.6 66  
26 0 1 66 189 254 2.80E-12 79 37621 cellular  
organisms; Eukaryota; Opisthokonta; Metazoa; Eumetazoa; Bilateria; Protostomia; Ecdysozoa; Scalidophora; Priapulida; Priapulimorpha; Priapulimorphida; Priapulidae; Priapululus; Priapululus caudatus

UdeM00000028980 37621 515.8 UdeM00000028980 XP\_014679850.1 78.6 322  
69 0 1 322 189 510 4.00E-143 515.8 37621 cellular  
organisms; Eukaryota; Opisthokonta; Metazoa; Eumetazoa; Bilateria; Protostomia;

Ecdysozoa; Scalidophora; Priapulida; Priapulimorpha; Priapulimorphida; Priapulidae; Priapululus; Priapululus caudatus

UdeM00000028981 37621 255 UdeM00000028981 XP\_014679849.1 54 211  
84 3 1 201 416 623 8.10E-65 255 37621 cellular  
organisms; Eukaryota; Opisthokonta; Metazoa; Eumetazoa; Bilateria; Protostomia;  
Ecdysozoa; Scalidophora; Priapulida; Priapulimorpha; Priapulimorphida; Priapulidae; Priapululus; Priapululus caudatus

UdeM00000028982 37621 164.5 UdeM00000028982 XP\_014679849.1 53.5 155  
72 0 2 156 222 376 1.10E-37 164.5 37621 cellular  
organisms; Eukaryota; Opisthokonta; Metazoa; Eumetazoa; Bilateria; Protostomia;  
Ecdysozoa; Scalidophora; Priapulida; Priapulimorpha; Priapulimorphida; Priapulidae; Priapululus; Priapululus caudatus

UdeM00000028983 6565 123.6 UdeM00000028983 XP\_022345813.1 90.9 66  
5 1 2 67 5 69 9.70E-26 123.6 6565 cellular  
organisms; Eukaryota; Opisthokonta; Metazoa; Eumetazoa; Bilateria; Protostomia;  
Spiralia; Lophotrochozoa; Mollusca; Bivalvia; Autobranchia; Pteriomorpha; Ostr  
eida; Ostreidae; Crassostrea; Crassostrea virginica

UdeM00000028985 6565 435.3 UdeM00000028985 XP\_022345813.1 84 262  
41 1 7 267 70 331 5.90E-119 435.3 6565 cellular  
organisms; Eukaryota; Opisthokonta; Metazoa; Eumetazoa; Bilateria; Protostomia;  
Spiralia; Lophotrochozoa; Mollusca; Bivalvia; Autobranchia; Pteriomorpha; Ostr  
eida; Ostreidae; Crassostrea; Crassostrea virginica

UdeM00000028984 6565 591.3 UdeM00000028984 XP\_022345813.1 80.4 387  
68 5 7 386 70 455 1.60E-165 591.3 6565 cellular  
organisms; Eukaryota; Opisthokonta; Metazoa; Eumetazoa; Bilateria; Protostomia;  
Spiralia; Lophotrochozoa; Mollusca; Bivalvia; Autobranchia; Pteriomorpha; Ostr  
eida; Ostreidae; Crassostrea; Crassostrea virginica

UdeM00000028986 29159 109.8 UdeM00000028986 XP\_034305547.1 30.8 224  
138 6 110 321 21 239 6.70E-21 109.8 29159 cellular  
organisms; Eukaryota; Opisthokonta; Metazoa; Eumetazoa; Bilateria; Protostomia;  
Spiralia; Lophotrochozoa; Mollusca; Bivalvia; Autobranchia; Pteriomorpha; Ostr  
eida; Ostreidae; Crassostrea; Crassostrea gigas

UdeM00000028987 29159 109.8 UdeM00000028987 XP\_034305547.1 30.8 224  
138 6 37 248 21 239 5.20E-21 109.8 29159 cellular  
organisms; Eukaryota; Opisthokonta; Metazoa; Eumetazoa; Bilateria; Protostomia;  
Spiralia; Lophotrochozoa; Mollusca; Bivalvia; Autobranchia; Pteriomorpha; Ostr  
eida; Ostreidae; Crassostrea; Crassostrea gigas

UdeM00000028988 6573 149.1 UdeM00000028988 XP\_021368347.1 24.4 657  
429 22 26 653 26 643 2.10E-32 149.1 6573 cellular  
organisms; Eukaryota; Opisthokonta; Metazoa; Eumetazoa; Bilateria; Protostomia;  
Spiralia; Lophotrochozoa; Mollusca; Bivalvia; Autobranchia; Pteriomorpha; Pect  
inida; Pectinoidea; Pectinidae; Mizuhopecten; Mizuhopecten yessoensis

UdeM00000028989 6596 390.2 UdeM00000028989 XP\_045177776.1 39.3 572  
331 7 1 570 405 962 6.40E-105 390.2 6596 cellular  
organisms; Eukaryota; Opisthokonta; Metazoa; Eumetazoa; Bilateria; Protostomia;  
Spiralia; Lophotrochozoa; Mollusca; Bivalvia; Autobranchia; Heteroconchia; Euhe  
terodonta; Imparidentia; Venerida; Veneroidea; Veneridae; Mercenaria; Mercenari  
a mercenaria

UdeM00000028990 6579 154.1 UdeM00000028990 XP\_033752808.1 24.5 658  
428 23 26 652 27 646 6.40E-34 154.1 6579 cellular  
organisms; Eukaryota; Opisthokonta; Metazoa; Eumetazoa; Bilateria; Protostomia;  
Spiralia; Lophotrochozoa; Mollusca; Bivalvia; Autobranchia; Pteriomorpha; Pect  
inida; Pectinoidea; Pectinidae; Pecten; Pecten maximus



UdeM00000028992 7654 79.7 UdeM00000028992 XP\_041473734.1 45.1 91  
 48 1 18 106 654 744 2.50E-12 79.7 7654 cellular  
 organisms;Eukaryota;Opisthokonta;Metazoa;Eumetazoa;Bilateria;Deuterostomi  
 a;Echinodermata;Eleutherozoa;Echinozoa;Echinoidea;Euechinoidea;Echinacea;  
 Temnopleuroidea;Toxopneustidae;Lytechinus;Lytechinus variegatus  
 UdeM00000028993 6596 199.5 UdeM00000028993 XP\_045191793.1 39.6 308  
 159 7 1 305 258 541 6.30E-48 199.5 6596 cellular  
 organisms;Eukaryota;Opisthokonta;Metazoa;Eumetazoa;Bilateria;Protostomia;  
 Spiralia;Lophotrochozoa;Mollusca;Bivalvia;Autobranchia;Heteroconchia;Euhe  
 terodonta;Imparidentia;Venerida;Veneroidea;Veneridae;Mercenaria;Mercenari  
 a mercenaria  
 UdeM00000028994 6596 358.2 UdeM00000028994 XP\_045177776.1 35 609  
 311 12 1 604 405 933 2.90E-95 358.2 6596 cellular  
 organisms;Eukaryota;Opisthokonta;Metazoa;Eumetazoa;Bilateria;Protostomia;  
 Spiralia;Lophotrochozoa;Mollusca;Bivalvia;Autobranchia;Heteroconchia;Euhe  
 terodonta;Imparidentia;Venerida;Veneroidea;Veneridae;Mercenaria;Mercenari  
 a mercenaria  
 UdeM00000028995 29159 76.3 UdeM00000028995 XP\_019928965.2 44.1 127  
 60 3 41 162 293 413 7.70E-11 76.3 29159 cellular  
 organisms;Eukaryota;Opisthokonta;Metazoa;Eumetazoa;Bilateria;Protostomia;  
 Spiralia;Lophotrochozoa;Mollusca;Bivalvia;Autobranchia;Pteriormorphia;Ostr  
 eida;Ostreoidea;Ostreidae;Crassostrea;Crassostrea gigas  
 UdeM00000028996 6596 449.9 UdeM00000028996 XP\_045177776.1 33.1 788  
 432 16 1 780 405 1105 8.50E-123 449.9 6596 cellular  
 organisms;Eukaryota;Opisthokonta;Metazoa;Eumetazoa;Bilateria;Protostomia;  
 Spiralia;Lophotrochozoa;Mollusca;Bivalvia;Autobranchia;Heteroconchia;Euhe  
 terodonta;Imparidentia;Venerida;Veneroidea;Veneridae;Mercenaria;Mercenari  
 a mercenaria  
 UdeM00000028997 6579 97.8 UdeM00000028997 XP\_033750136.1 30.4 168  
 108 4 18 184 55 214 1.50E-17 97.8 6579 cellular  
 organisms;Eukaryota;Opisthokonta;Metazoa;Eumetazoa;Bilateria;Protostomia;  
 Spiralia;Lophotrochozoa;Mollusca;Bivalvia;Autobranchia;Pteriormorphia;Pect  
 inida;Pectinoidea;Pectinidae;Pecten;Pecten maximus  
 UdeM00000028998 2607531 322.4 UdeM00000028998 XP\_036358341.1 79.1  
 206 35 1 10 215 52 249 4.70E-85 322.4 2607531  
 cellular  
 organisms;Eukaryota;Opisthokonta;Metazoa;Eumetazoa;Bilateria;Protostomia;  
 Spiralia;Lophotrochozoa;Mollusca;Cephalopoda;Coleoidea;Octopodiformes;Oct  
 opoda;Incirrata;Octopodidae;Octopus;Octopus sinensis  
 UdeM00000028999 6596 216.5 UdeM00000028999 XP\_045185323.1 35 403  
 255 4 8 410 12 407 9.80E-53 216.5 6596 cellular  
 organisms;Eukaryota;Opisthokonta;Metazoa;Eumetazoa;Bilateria;Protostomia;  
 Spiralia;Lophotrochozoa;Mollusca;Bivalvia;Autobranchia;Heteroconchia;Euhe  
 terodonta;Imparidentia;Venerida;Veneroidea;Veneridae;Mercenaria;Mercenari  
 a mercenaria  
 UdeM00000029001 6596 63.5 UdeM00000029001 XP\_045185321.1 36.3 91  
 58 0 372 462 581 671 1.30E-06 63.5 6596 cellular  
 organisms;Eukaryota;Opisthokonta;Metazoa;Eumetazoa;Bilateria;Protostomia;  
 Spiralia;Lophotrochozoa;Mollusca;Bivalvia;Autobranchia;Heteroconchia;Euhe  
 terodonta;Imparidentia;Venerida;Veneroidea;Veneridae;Mercenaria;Mercenari  
 a mercenaria  
 UdeM00000029003 37653 389 UdeM00000029003 XP\_014787177.1 87.7 228  
 28 0 3 230 1 228 5.00E-105 389 37653 cellular  
 organisms;Eukaryota;Opisthokonta;Metazoa;Eumetazoa;Bilateria;Protostomia;

Spiralia; Lophotrochozoa; Mollusca; Cephalopoda; Coleoidea; Octopodiformes; Octopoda; Incirrata; Octopodidae; Octopus; Octopus bimaculoides  
UdeM00000029004 1735272 189.9 UdeM00000029004 XP\_041360769.1 66.2  
139 42 2 1 138 459 593 3.00E-45 189.9 1735272  
cellular  
organisms; Eukaryota; Opisthokonta; Metazoa; Eumetazoa; Bilateria; Protostomia; Spiralia; Lophotrochozoa; Mollusca; Gastropoda; Neomphalina; Neomphaloidea; Peltospiridae; Gigantopelta; Gigantopelta aegis  
UdeM00000029005 6565 137.9 UdeM00000029005 XP\_022327962.1 53.1 128  
58 1 9 134 591 718 9.60E-30 137.9 6565 cellular  
organisms; Eukaryota; Opisthokonta; Metazoa; Eumetazoa; Bilateria; Protostomia; Spiralia; Lophotrochozoa; Mollusca; Bivalvia; Autobranchia; Pteriomorpha; Ostreida; Ostreidae; Crassostrea; Crassostrea virginica  
UdeM00000029006 37653 1271.1 UdeM00000029006 XP\_014787241.1 48.5  
1710 615 30 1 1616 1 1539 0.00E+00 1271.1  
37653 cellular  
organisms; Eukaryota; Opisthokonta; Metazoa; Eumetazoa; Bilateria; Protostomia; Spiralia; Lophotrochozoa; Mollusca; Cephalopoda; Coleoidea; Octopodiformes; Octopoda; Incirrata; Octopodidae; Octopus; Octopus bimaculoides  
UdeM00000029007 6596 191 UdeM00000029007 XP\_045206702.1 24.1 744  
494 13 77 794 37 735 5.80E-45 191 6596 cellular  
organisms; Eukaryota; Opisthokonta; Metazoa; Eumetazoa; Bilateria; Protostomia; Spiralia; Lophotrochozoa; Mollusca; Bivalvia; Autobranchia; Heteroconchia; Euheterodonta; Imparidentia; Venerida; Veneroidea; Veneridae; Mercenaria; Mercenaria mercenaria  
UdeM00000029008 6596 142.5 UdeM00000029008 XP\_045182112.1 28 372  
217 5 2 369 418 742 1.10E-30 142.5 6596 cellular  
organisms; Eukaryota; Opisthokonta; Metazoa; Eumetazoa; Bilateria; Protostomia; Spiralia; Lophotrochozoa; Mollusca; Bivalvia; Autobranchia; Heteroconchia; Euheterodonta; Imparidentia; Venerida; Veneroidea; Veneridae; Mercenaria; Mercenaria mercenaria  
UdeM00000029009 441366 201.8 UdeM00000029009 XP\_028326620.1 45.6  
252 127 5 1 251 48 290 1.10E-48 201.8 441366  
cellular  
organisms; Eukaryota; Opisthokonta; Metazoa; Eumetazoa; Bilateria; Deuterostomia; Chordata; Craniata; Vertebrata; Gnathostomata; Teleostomi; Euteleostomi; Actinopterygii; Actinopteri; Neopterygii; Teleostei; Osteoglossocephalai; Clupeocephala; Euteleostei; Neoteleostei; Eurypterygia; Ctenosquamata; Acanthomorphata; Euacanthomorphacea; Percomorphaceae; Ovalentaria; Blenniiformes; Blenniiformes; Gobiesocidae; Gobiesocinae; Gouania; Gouania willdenowi  
UdeM00000029011 6596 164.5 UdeM00000029011 XP\_045206702.1 22.6 747  
501 14 38 755 37 735 5.60E-37 164.5 6596 cellular  
organisms; Eukaryota; Opisthokonta; Metazoa; Eumetazoa; Bilateria; Protostomia; Spiralia; Lophotrochozoa; Mollusca; Bivalvia; Autobranchia; Heteroconchia; Euheterodonta; Imparidentia; Venerida; Veneroidea; Veneridae; Mercenaria; Mercenaria mercenaria  
UdeM00000029012 6596 193.4 UdeM00000029012 XP\_045215724.1 25.2 735  
437 23 95 785 70 735 1.20E-45 193.4 6596 cellular  
organisms; Eukaryota; Opisthokonta; Metazoa; Eumetazoa; Bilateria; Protostomia; Spiralia; Lophotrochozoa; Mollusca; Bivalvia; Autobranchia; Heteroconchia; Euheterodonta; Imparidentia; Venerida; Veneroidea; Veneridae; Mercenaria; Mercenaria mercenaria

UdeM00000029013 6565 120.6 UdeM00000029013 XP\_022327962.1 53.1 113  
 53 0 9 121 197 309 1.40E-24 120.6 6565 cellular  
 organisms;Eukaryota;Opisthokonta;Metazoa;Eumetazoa;Bilateria;Protostomia;  
 Spiralia;Lophotrochozoa;Mollusca;Bivalvia;Autobranchia;Pteriomorphia;Ostr  
 eida;Ostreoidea;Ostreidae;Crassostrea;Crassostrea virginica  
 UdeM00000029016 6596 79.7 UdeM00000029016 XP\_045166601.1 22.7 581  
 381 21 38 583 191 738 1.40E-11 79.7 6596 cellular  
 organisms;Eukaryota;Opisthokonta;Metazoa;Eumetazoa;Bilateria;Protostomia;  
 Spiralia;Lophotrochozoa;Mollusca;Bivalvia;Autobranchia;Heteroconchia;Euhe  
 terodonta;Imparidentia;Venerida;Veneroidea;Veneridae;Mercenaria;Mercenari  
 a mercenaria  
 UdeM00000029017 6596 197.2 UdeM00000029017 XP\_045206702.1 24.3 745  
 487 16 71 787 40 735 8.00E-47 197.2 6596 cellular  
 organisms;Eukaryota;Opisthokonta;Metazoa;Eumetazoa;Bilateria;Protostomia;  
 Spiralia;Lophotrochozoa;Mollusca;Bivalvia;Autobranchia;Heteroconchia;Euhe  
 terodonta;Imparidentia;Venerida;Veneroidea;Veneridae;Mercenaria;Mercenari  
 a mercenaria  
 UdeM00000029018 6579 84.3 UdeM00000029018 XP\_033730826.1 32.3 161  
 84 3 86 232 215 364 2.20E-13 84.3 6579 cellular  
 organisms;Eukaryota;Opisthokonta;Metazoa;Eumetazoa;Bilateria;Protostomia;  
 Spiralia;Lophotrochozoa;Mollusca;Bivalvia;Autobranchia;Pteriomorphia;Pect  
 inida;Pectinoidea;Pectinidae;Pecten;Pecten maximus  
 UdeM00000029019 1735272 62.8 UdeM00000029019 XP\_041350990.1 45.2  
 62 34 0 303 364 461 522 1.10E-06 62.8 1735272  
 cellular  
 organisms;Eukaryota;Opisthokonta;Metazoa;Eumetazoa;Bilateria;Protostomia;  
 Spiralia;Lophotrochozoa;Mollusca;Gastropoda;Neomphalina;Neomphaloidea;Pel  
 tospiridae;Gigantopelta;Gigantopelta aegis  
 UdeM00000029020 1735272 62.8 UdeM00000029020 XP\_041350990.1 45.2  
 62 34 0 178 239 461 522 7.00E-07 62.8 1735272  
 cellular  
 organisms;Eukaryota;Opisthokonta;Metazoa;Eumetazoa;Bilateria;Protostomia;  
 Spiralia;Lophotrochozoa;Mollusca;Gastropoda;Neomphalina;Neomphaloidea;Pel  
 tospiridae;Gigantopelta;Gigantopelta aegis  
 UdeM00000029021 6579 84.3 UdeM00000029021 XP\_033730826.1 32.3 161  
 84 3 86 232 215 364 2.20E-13 84.3 6579 cellular  
 organisms;Eukaryota;Opisthokonta;Metazoa;Eumetazoa;Bilateria;Protostomia;  
 Spiralia;Lophotrochozoa;Mollusca;Bivalvia;Autobranchia;Pteriomorphia;Pect  
 inida;Pectinoidea;Pectinidae;Pecten;Pecten maximus  
 UdeM00000029022 1735272 62.8 UdeM00000029022 XP\_041350990.1 45.2  
 62 34 0 303 364 461 522 1.10E-06 62.8 1735272  
 cellular  
 organisms;Eukaryota;Opisthokonta;Metazoa;Eumetazoa;Bilateria;Protostomia;  
 Spiralia;Lophotrochozoa;Mollusca;Gastropoda;Neomphalina;Neomphaloidea;Pel  
 tospiridae;Gigantopelta;Gigantopelta aegis  
 UdeM00000029023 1735272 62.8 UdeM00000029023 XP\_041350990.1 45.2  
 62 34 0 178 239 461 522 7.00E-07 62.8 1735272  
 cellular  
 organisms;Eukaryota;Opisthokonta;Metazoa;Eumetazoa;Bilateria;Protostomia;  
 Spiralia;Lophotrochozoa;Mollusca;Gastropoda;Neomphalina;Neomphaloidea;Pel  
 tospiridae;Gigantopelta;Gigantopelta aegis  
 UdeM00000029024 6596 374 UdeM00000029024 XP\_045177776.1 40.5 538  
 307 7 1 531 405 936 4.80E-10 374 6596 cellular  
 organisms;Eukaryota;Opisthokonta;Metazoa;Eumetazoa;Bilateria;Protostomia;

Spiralia; Lophotrochozoa; Mollusca; Bivalvia; Autobranchia; Heteroconchia; Euheterodonta; Imparidentia; Venerida; Veneroidea; Veneridae; Mercenaria; Mercenaria mercenaria

UdeM00000029025 6596 355.9 UdeM00000029025 XP\_045177776.1 41.2 507  
288 6 1 500 405 908 8.60E-95 355.9 6596 cellular  
organisms; Eukaryota; Opisthokonta; Metazoa; Eumetazoa; Bilateria; Protostomia; Spiralia; Lophotrochozoa; Mollusca; Bivalvia; Autobranchia; Heteroconchia; Euheterodonta; Imparidentia; Venerida; Veneroidea; Veneridae; Mercenaria; Mercenaria mercenaria

UdeM00000029026 50390 261.9 UdeM00000029026 XP\_028148951.1 55.6 198  
88 0 3 200 470 667 6.60E-67 261.9 50390 cellular  
organisms; Eukaryota; Opisthokonta; Metazoa; Eumetazoa; Bilateria; Protostomia; Ecdysozoa; Panarthropoda; Arthropoda; Mandibulata; Pancrustacea; Hexapoda; Insecta; Dicondylia; Pterygota; Neoptera; Endopterygota; Coleoptera; Polyphaga; Cucujiformia; Chrysomeloidea; Chrysomelidae; Galerucinae; Luperini; Diabroticina; Diabroticites; Diabrotica; Diabrotica virgifera; Diabrotica virgifera virgifera

UdeM00000029027 6565 92.8 UdeM00000029027 XP\_022308193.1 40.6 128  
65 2 5 132 12 128 4.20E-16 92.8 6565 cellular  
organisms; Eukaryota; Opisthokonta; Metazoa; Eumetazoa; Bilateria; Protostomia; Spiralia; Lophotrochozoa; Mollusca; Bivalvia; Autobranchia; Pteriomorpha; Ostreida; Ostreoidea; Ostreidae; Crassostrea; Crassostrea virginica

UdeM00000029028 6573 209.9 UdeM00000029028 XP\_021373558.1 50.2 239  
95 5 26 242 109 345 4.30E-51 209.9 6573 cellular  
organisms; Eukaryota; Opisthokonta; Metazoa; Eumetazoa; Bilateria; Protostomia; Spiralia; Lophotrochozoa; Mollusca; Bivalvia; Autobranchia; Pteriomorpha; Pectinida; Pectinoidea; Pectinidae; Mizuhopecten; Mizuhopecten yessoensis

UdeM00000029029 6573 251.1 UdeM00000029029 XP\_021373558.1 50.9 271  
109 5 1 249 77 345 1.70E-63 251.1 6573 cellular  
organisms; Eukaryota; Opisthokonta; Metazoa; Eumetazoa; Bilateria; Protostomia; Spiralia; Lophotrochozoa; Mollusca; Bivalvia; Autobranchia; Pteriomorpha; Pectinida; Pectinoidea; Pectinidae; Mizuhopecten; Mizuhopecten yessoensis

UdeM00000029030 6573 209.9 UdeM00000029030 XP\_021373558.1 50.2 239  
95 5 26 242 109 345 4.30E-51 209.9 6573 cellular  
organisms; Eukaryota; Opisthokonta; Metazoa; Eumetazoa; Bilateria; Protostomia; Spiralia; Lophotrochozoa; Mollusca; Bivalvia; Autobranchia; Pteriomorpha; Pectinida; Pectinoidea; Pectinidae; Mizuhopecten; Mizuhopecten yessoensis

UdeM00000029031 6573 251.1 UdeM00000029031 XP\_021373558.1 50.9 271  
109 5 1 249 77 345 1.70E-63 251.1 6573 cellular  
organisms; Eukaryota; Opisthokonta; Metazoa; Eumetazoa; Bilateria; Protostomia; Spiralia; Lophotrochozoa; Mollusca; Bivalvia; Autobranchia; Pteriomorpha; Pectinida; Pectinoidea; Pectinidae; Mizuhopecten; Mizuhopecten yessoensis

UdeM00000029033 29159 177.6 UdeM00000029033 XP\_034312908.1 26.1 651  
314 19 5 523 6 621 4.30E-41 177.6 29159 cellular  
organisms; Eukaryota; Opisthokonta; Metazoa; Eumetazoa; Bilateria; Protostomia; Spiralia; Lophotrochozoa; Mollusca; Bivalvia; Autobranchia; Pteriomorpha; Ostreida; Ostreoidea; Ostreidae; Crassostrea; Crassostrea gigas

UdeM00000029034 6596 322.4 UdeM00000029034 XP\_045177776.1 38.3 478  
259 6 1 476 405 848 1.40E-84 322.4 6596 cellular  
organisms; Eukaryota; Opisthokonta; Metazoa; Eumetazoa; Bilateria; Protostomia; Spiralia; Lophotrochozoa; Mollusca; Bivalvia; Autobranchia; Heteroconchia; Euheterodonta; Imparidentia; Venerida; Veneroidea; Veneridae; Mercenaria; Mercenaria mercenaria

UdeM00000029035 29159 126.7 UdeM00000029035 XP\_034339171.1 37.4 182  
 107 5 7 185 564 741 3.20E-26 126.7 29159 cellular  
 organisms;Eukaryota;Opisthokonta;Metazoa;Eumetazoa;Bilateria;Protostomia;  
 Spiralia;Lophotrochozoa;Mollusca;Bivalvia;Autobranchia;Pteriomorphia;Ostr  
 eida;Ostreoidea;Ostreidae;Crassostrea;Crassostrea gigas  
 UdeM00000029036 6565 67.8 UdeM00000029036 XP\_022297409.1 32 122  
 63 2 1 103 289 409 9.70E-09 67.8 6565 cellular  
 organisms;Eukaryota;Opisthokonta;Metazoa;Eumetazoa;Bilateria;Protostomia;  
 Spiralia;Lophotrochozoa;Mollusca;Bivalvia;Autobranchia;Pteriomorphia;Ostr  
 eida;Ostreoidea;Ostreidae;Crassostrea;Crassostrea virginica  
 UdeM00000029037 7725 59.3 UdeM00000029037 XP\_039258759.1 44.1 59  
 33 0 12 70 139 197 5.60E-06 59.3 7725 cellular  
 organisms;Eukaryota;Opisthokonta;Metazoa;Eumetazoa;Bilateria;Deuterostomi  
 a;Chordata;Tunicata;Ascidiacea;Stolidobranchia;Styelidae;Styela;Styela  
 clava  
 UdeM00000029039 50390 144.8 UdeM00000029039 XP\_028130731.1 56.3 103  
 45 0 1 103 93 195 7.10E-32 144.8 50390 cellular  
 organisms;Eukaryota;Opisthokonta;Metazoa;Eumetazoa;Bilateria;Protostomia;  
 Ecdysozoa;Panarthropoda;Arthropoda;Mandibulata;Pancrustacea;Hexapoda;Inse  
 cta;Dicondylia;Pterygota;Neoptera;Endopterygota;Coleoptera;Polyphaga;Cucu  
 jiformia;Chrysomeloidea;Chrysomelidae;Galerucinae;Luperini;Diabroticina;D  
 iabroticites;Diabrotica;Diabrotica virgifera;Diabrotica virgifera  
 virgifera  
 UdeM00000029038 225164 228.8 UdeM00000029038 XP\_009062376.1 52.5  
 181 83 1 3 183 379 556 6.20E-57 228.8 225164  
 cellular  
 organisms;Eukaryota;Opisthokonta;Metazoa;Eumetazoa;Bilateria;Protostomia;  
 Spiralia;Lophotrochozoa;Mollusca;Gastropoda;Patellogastropoda;Lottioidea;  
 Lottiidae;Lottia;Lottia gigantea  
 UdeM00000029040 50390 339.7 UdeM00000029040 XP\_028152422.1 53.8 253  
 117 0 4 256 161 413 3.20E-90 339.7 50390 cellular  
 organisms;Eukaryota;Opisthokonta;Metazoa;Eumetazoa;Bilateria;Protostomia;  
 Ecdysozoa;Panarthropoda;Arthropoda;Mandibulata;Pancrustacea;Hexapoda;Inse  
 cta;Dicondylia;Pterygota;Neoptera;Endopterygota;Coleoptera;Polyphaga;Cucu  
 jiformia;Chrysomeloidea;Chrysomelidae;Galerucinae;Luperini;Diabroticina;D  
 iabroticites;Diabrotica;Diabrotica virgifera;Diabrotica virgifera  
 virgifera  
 UdeM00000029041 6579 102.8 UdeM00000029041 XP\_033758968.1 32.5 157  
 96 4 26 172 13 169 4.50E-19 102.8 6579 cellular  
 organisms;Eukaryota;Opisthokonta;Metazoa;Eumetazoa;Bilateria;Protostomia;  
 Spiralia;Lophotrochozoa;Mollusca;Bivalvia;Autobranchia;Pteriomorphia;Pect  
 inida;Pectinoidea;Pectinidae;Pecten;Pecten maximus  
 UdeM00000029042 6573 479.2 UdeM00000029042 XP\_021365195.1 68.6 341  
 102 4 1 337 1 340 4.40E-132 479.2 6573 cellular  
 organisms;Eukaryota;Opisthokonta;Metazoa;Eumetazoa;Bilateria;Protostomia;  
 Spiralia;Lophotrochozoa;Mollusca;Bivalvia;Autobranchia;Pteriomorphia;Pect  
 inida;Pectinoidea;Pectinidae;Mizuhopecten;Mizuhopecten yessoensis  
 UdeM00000029043 13686 396.7 UdeM00000029043 XP\_011170408.3 41.4 507  
 288 4 1 500 372 876 4.30E-107 396.7 13686 cellular  
 organisms;Eukaryota;Opisthokonta;Metazoa;Eumetazoa;Bilateria;Protostomia;  
 Ecdysozoa;Panarthropoda;Arthropoda;Mandibulata;Pancrustacea;Hexapoda;Inse  
 cta;Dicondylia;Pterygota;Neoptera;Endopterygota;Hymenoptera;Apocrita;Acul  
 eata;Formicoidea;Formicidae;Myrmicinae;Solenopsidini;Solenopsis;Solenopsi  
 s invicta

UdeM00000029044 13164 68.2 UdeM00000029044 XP\_022160023.1 43 107  
 51 4 100 201 26 127 1.40E-08 68.2 13164 cellular  
 organisms;Eukaryota;Opisthokonta;Metazoa;Eumetazoa;Bilateria;Protostomia;  
 Ecdysozoa;Panarthropoda;Arthropoda;Mandibulata;Pancrustacea;Hexapoda;Inse  
 cta;Dicondylia;Pterygota;Neoptera;Paraneoptera;Hemiptera;Sternorrhyncha;A  
 phidomorpha;Aphidoidea;Aphididae;Aphidinae;Macrosiphini;Myzus;Myzus  
 persicae  
 UdeM00000029045 6565 241.1 UdeM00000029045 XP\_022309566.1 39.2 306  
 176 7 27 327 682 982 2.00E-60 241.1 6565 cellular  
 organisms;Eukaryota;Opisthokonta;Metazoa;Eumetazoa;Bilateria;Protostomia;  
 Spiralia;Lophotrochozoa;Mollusca;Bivalvia;Autobranhia;Pteriomorpha;Ostr  
 eida;Ostreoidea;Ostreidae;Crassostrea;Crassostrea virginica  
 UdeM00000033596 6596 755 UdeM00000033596 XP\_045169657.1 48.4 920  
 352 17 11 876 62 912 1.30E-214 755 6596 cellular  
 organisms;Eukaryota;Opisthokonta;Metazoa;Eumetazoa;Bilateria;Protostomia;  
 Spiralia;Lophotrochozoa;Mollusca;Bivalvia;Autobranhia;Heteroconchia;Euhe  
 terodonta;Imparidentia;Venerida;Veneroidea;Veneridae;Mercenaria;Mercenari  
 a mercenaria  
 UdeM00000033597 37621 132.5 UdeM00000033597 XP\_014676916.1 41.4 169  
 96 1 18 186 187 352 6.00E-28 132.5 37621 cellular  
 organisms;Eukaryota;Opisthokonta;Metazoa;Eumetazoa;Bilateria;Protostomia;  
 Ecdysozoa;Scalidophora;Priapulida;Priapulimorpha;Priapulimorphida;Priapul  
 idae;Priapululus;Priapululus caudatus  
 UdeM00000033598 29159 206.5 UdeM00000033598 XP\_011429098.1 59.9 302  
 106 8 1 290 1 299 4.70E-50 206.5 29159 cellular  
 organisms;Eukaryota;Opisthokonta;Metazoa;Eumetazoa;Bilateria;Protostomia;  
 Spiralia;Lophotrochozoa;Mollusca;Bivalvia;Autobranhia;Pteriomorpha;Ostr  
 eida;Ostreoidea;Ostreidae;Crassostrea;Crassostrea gigas  
 UdeM00000033599 29159 210.7 UdeM00000033599 XP\_011429099.1 60.5 301  
 106 7 1 291 1 298 2.50E-51 210.7 29159 cellular  
 organisms;Eukaryota;Opisthokonta;Metazoa;Eumetazoa;Bilateria;Protostomia;  
 Spiralia;Lophotrochozoa;Mollusca;Bivalvia;Autobranhia;Pteriomorpha;Ostr  
 eida;Ostreoidea;Ostreidae;Crassostrea;Crassostrea gigas  
 UdeM00000033600 6596 493.4 UdeM00000033600 XP\_045170245.1 64.1 393  
 132 4 1 390 76 462 2.60E-136 493.4 6596 cellular  
 organisms;Eukaryota;Opisthokonta;Metazoa;Eumetazoa;Bilateria;Protostomia;  
 Spiralia;Lophotrochozoa;Mollusca;Bivalvia;Autobranhia;Heteroconchia;Euhe  
 terodonta;Imparidentia;Venerida;Veneroidea;Veneridae;Mercenaria;Mercenari  
 a mercenaria  
 UdeM00000033601 29159 156.4 UdeM00000033601 XP\_034305523.1 49 145  
 73 1 2 145 771 915 3.20E-35 156.4 29159 cellular  
 organisms;Eukaryota;Opisthokonta;Metazoa;Eumetazoa;Bilateria;Protostomia;  
 Spiralia;Lophotrochozoa;Mollusca;Bivalvia;Autobranhia;Pteriomorpha;Ostr  
 eida;Ostreoidea;Ostreidae;Crassostrea;Crassostrea gigas  
 UdeM00000033602 42100 201.1 UdeM00000033602 XP\_032477828.1 60.4 154  
 61 0 138 291 7 160 2.00E-48 201.1 42100 cellular  
 organisms;Eukaryota;Opisthokonta;Metazoa;Eumetazoa;Bilateria;Deuterostomi  
 a;Chordata;Craniata;Vertebrata;Gnathostomata;Teleostomi;Euteleostomi;Sarc  
 opterygii;Dipnotetrapodomorpha;Tetrapoda;Amniota;Mammalia;Theria;Eutheria  
 ;Boreoeutheria;Laurasiatheria;Artiodactyla;Whippomorpha;Cetacea;Odontocet  
 i;Phocoenidae;Phocoena;Phocoena sinus  
 UdeM00000033603 6579 380.6 UdeM00000033603 XP\_033734887.1 69 268  
 83 0 20 287 214 481 1.80E-102 380.6 6579 cellular  
 organisms;Eukaryota;Opisthokonta;Metazoa;Eumetazoa;Bilateria;Protostomia;

Spiralia; Lophotrochozoa; Mollusca; Bivalvia; Autobranchia; Pteriomorpha; Pectinida; Pectinoidea; Pectinidae; Pecten; Pecten maximus

UdeM00000033605 6565 115.9 UdeM00000033605 XP\_022331839.1 53.3 105  
49 0 1 105 503 607 3.40E-23 115.9 6565 cellular  
organisms; Eukaryota; Opisthokonta; Metazoa; Eumetazoa; Bilateria; Protostomia; Spiralia; Lophotrochozoa; Mollusca; Bivalvia; Autobranchia; Pteriomorpha; Ostracida; Ostreidae; Crassostrea; Crassostrea virginica

UdeM00000033604 6565 156.8 UdeM00000033604 XP\_022331839.1 54.3 140  
62 1 111 250 470 607 3.90E-35 156.8 6565 cellular  
organisms; Eukaryota; Opisthokonta; Metazoa; Eumetazoa; Bilateria; Protostomia; Spiralia; Lophotrochozoa; Mollusca; Bivalvia; Autobranchia; Pteriomorpha; Ostracida; Ostreidae; Crassostrea; Crassostrea virginica

UdeM00000033606 6596 638.6 UdeM00000033606 XP\_045213300.1 66.7 490  
144 11 1 483 1 478 6.30E-180 638.6 6596 cellular  
organisms; Eukaryota; Opisthokonta; Metazoa; Eumetazoa; Bilateria; Protostomia; Spiralia; Lophotrochozoa; Mollusca; Bivalvia; Autobranchia; Heteroconchia; Euheterodonta; Imparidentia; Venerida; Veneroidea; Veneridae; Mercenaria; Mercenaria mercenaria

UdeM00000033607 6579 464.5 UdeM00000033607 XP\_033734885.1 49 502  
165 3 1 502 485 895 1.80E-127 464.5 6579 cellular  
organisms; Eukaryota; Opisthokonta; Metazoa; Eumetazoa; Bilateria; Protostomia; Spiralia; Lophotrochozoa; Mollusca; Bivalvia; Autobranchia; Pteriomorpha; Pectinida; Pectinoidea; Pectinidae; Pecten; Pecten maximus

UdeM00000033608 6596 1491.5 UdeM00000033608 XP\_045213300.1 72.1  
995 247 3 1 993 934 1899 0.00E+00 1491.5 6596  
cellular  
organisms; Eukaryota; Opisthokonta; Metazoa; Eumetazoa; Bilateria; Protostomia; Spiralia; Lophotrochozoa; Mollusca; Bivalvia; Autobranchia; Heteroconchia; Euheterodonta; Imparidentia; Venerida; Veneroidea; Veneridae; Mercenaria; Mercenaria mercenaria

UdeM00000033609 6596 283.5 UdeM00000033609 XP\_045187768.1 58 212  
89 0 1 212 6 217 2.20E-73 283.5 6596 cellular  
organisms; Eukaryota; Opisthokonta; Metazoa; Eumetazoa; Bilateria; Protostomia; Spiralia; Lophotrochozoa; Mollusca; Bivalvia; Autobranchia; Heteroconchia; Euheterodonta; Imparidentia; Venerida; Veneroidea; Veneridae; Mercenaria; Mercenaria mercenaria

UdeM00000033610 7604 450.3 UdeM00000033610 XP\_033641066.1 55.6 378  
168 0 4 381 3 380 2.50E-123 450.3 7604 cellular  
organisms; Eukaryota; Opisthokonta; Metazoa; Eumetazoa; Bilateria; Deuterostomia; Echinodermata; Eleutherozoa; Asterozoa; Asteroidea; Forcipulatacea; Forcipulatacida; Asteroidea; Asterias; Asterias rubens

UdeM00000033611 6579 535.4 UdeM00000033611 XP\_033752673.1 44.6 689  
282 11 1 626 1 652 9.60E-149 535.4 6579 cellular  
organisms; Eukaryota; Opisthokonta; Metazoa; Eumetazoa; Bilateria; Protostomia; Spiralia; Lophotrochozoa; Mollusca; Bivalvia; Autobranchia; Pteriomorpha; Pectinida; Pectinoidea; Pectinidae; Pecten; Pecten maximus

UdeM00000033613 6579 324.3 UdeM00000033613 XP\_033735141.1 89.7 175  
17 1 1 175 216 389 9.70E-86 324.3 6579 cellular  
organisms; Eukaryota; Opisthokonta; Metazoa; Eumetazoa; Bilateria; Protostomia; Spiralia; Lophotrochozoa; Mollusca; Bivalvia; Autobranchia; Pteriomorpha; Pectinida; Pectinoidea; Pectinidae; Pecten; Pecten maximus

UdeM00000033612 6565 722.6 UdeM00000033612 XP\_022333143.1 91 390  
34 1 1 390 1 389 2.70E-205 722.6 6565 cellular  
organisms; Eukaryota; Opisthokonta; Metazoa; Eumetazoa; Bilateria; Protostomia;

Spiralia;Lophotrochozoa;Mollusca;Bivalvia;Autobranchia;Pteriormorphia;Ostr  
eida;Ostreoidea;Ostreidae;Crassostrea;Crassostrea virginica  
UdeM00000033614 6596 127.1 UdeM00000033614 XP\_045183969.1 55 109  
47 1 3 111 6 112 1.50E-26 127.1 6596 cellular  
organisms;Eukaryota;Opisthokonta;Metazoa;Eumetazoa;Bilateria;Protostomia;  
Spiralia;Lophotrochozoa;Mollusca;Bivalvia;Autobranchia;Heteroconchia;Euhe  
terodonta;Imparidentia;Venerida;Veneroidea;Veneridae;Mercenaria;Mercenari  
a mercenaria  
UdeM00000033616 6596 162.5 UdeM00000033616 XP\_045183969.1 53.1 145  
66 1 3 147 6 148 5.80E-37 162.5 6596 cellular  
organisms;Eukaryota;Opisthokonta;Metazoa;Eumetazoa;Bilateria;Protostomia;  
Spiralia;Lophotrochozoa;Mollusca;Bivalvia;Autobranchia;Heteroconchia;Euhe  
terodonta;Imparidentia;Venerida;Veneroidea;Veneridae;Mercenaria;Mercenari  
a mercenaria  
UdeM00000033615 6596 180.3 UdeM00000033615 XP\_045183969.1 53.5 157  
71 1 3 159 6 160 2.00E-42 180.3 6596 cellular  
organisms;Eukaryota;Opisthokonta;Metazoa;Eumetazoa;Bilateria;Protostomia;  
Spiralia;Lophotrochozoa;Mollusca;Bivalvia;Autobranchia;Heteroconchia;Euhe  
terodonta;Imparidentia;Venerida;Veneroidea;Veneridae;Mercenaria;Mercenari  
a mercenaria  
UdeM00000033617 1735272 763.1 UdeM00000033617 XP\_041352857.1 94.5  
399 22 0 1 399 1 399 1.80E-217 763.1 1735272  
cellular  
organisms;Eukaryota;Opisthokonta;Metazoa;Eumetazoa;Bilateria;Protostomia;  
Spiralia;Lophotrochozoa;Mollusca;Gastropoda;Neomphalina;Neomphaloidea;Pel  
tospiridae;Gigantopelta;Gigantopelta aegis  
UdeM00000033618 29159 70.5 UdeM00000033618 XP\_034325325.1 43.2 88  
50 0 19 106 9 96 2.30E-09 70.5 29159 cellular  
organisms;Eukaryota;Opisthokonta;Metazoa;Eumetazoa;Bilateria;Protostomia;  
Spiralia;Lophotrochozoa;Mollusca;Bivalvia;Autobranchia;Pteriormorphia;Ostr  
eida;Ostreoidea;Ostreidae;Crassostrea;Crassostrea gigas  
UdeM00000033619 1735272 172.9 UdeM00000033619 XP\_041353640.1 46.3  
190 93 4 18 202 143 328 6.10E-40 172.9 1735272  
cellular  
organisms;Eukaryota;Opisthokonta;Metazoa;Eumetazoa;Bilateria;Protostomia;  
Spiralia;Lophotrochozoa;Mollusca;Gastropoda;Neomphalina;Neomphaloidea;Pel  
tospiridae;Gigantopelta;Gigantopelta aegis  
UdeM00000033620 6596 150.2 UdeM00000033620 XP\_045183694.1 79.8 84  
17 0 14 97 81 164 3.50E-33 150.2 6596 cellular  
organisms;Eukaryota;Opisthokonta;Metazoa;Eumetazoa;Bilateria;Protostomia;  
Spiralia;Lophotrochozoa;Mollusca;Bivalvia;Autobranchia;Heteroconchia;Euhe  
terodonta;Imparidentia;Venerida;Veneroidea;Veneridae;Mercenaria;Mercenari  
a mercenaria  
UdeM00000027952 6596 87 UdeM00000027952 XP\_045181277.1 36.2 105  
64 1 26 127 268 372 2.20E-14 87 6596 cellular  
organisms;Eukaryota;Opisthokonta;Metazoa;Eumetazoa;Bilateria;Protostomia;  
Spiralia;Lophotrochozoa;Mollusca;Bivalvia;Autobranchia;Heteroconchia;Euhe  
terodonta;Imparidentia;Venerida;Veneroidea;Veneridae;Mercenaria;Mercenari  
a mercenaria  
UdeM00000027953 6596 185.3 UdeM00000027953 XP\_045176664.1 29.9 452  
267 12 45 458 32 471 1.80E-43 185.3 6596 cellular  
organisms;Eukaryota;Opisthokonta;Metazoa;Eumetazoa;Bilateria;Protostomia;  
Spiralia;Lophotrochozoa;Mollusca;Bivalvia;Autobranchia;Heteroconchia;Euhe



terodonta;Imparidentia;Venerida;Veneroidea;Veneridae;Mercenaria;Mercenari  
 a mercenaria  
 UdeM00000027954 6706 98.2 UdeM00000027954 XP\_042235765.1 36.5 159  
 99 2 1 159 1 157 1.00E-17 98.2 6706 cellular  
 organisms;Eukaryota;Opisthokonta;Metazoa;Eumetazoa;Bilateria;Protostomia;  
 Ecdysozoa;Panarthropoda;Arthropoda;Mandibulata;Pancrustacea;Crustacea;Mul  
 ticrustacea;Malacostraca;Eumalacostraca;Eucarida;Decapoda;Pleocyemata;Ast  
 acidea;Nephropoidea;Nephropidae;Homarus;Homarus americanus  
 UdeM00000027955 6596 79 UdeM00000027955 XP\_045174069.1 31.6 133  
 88 1 1 130 3 135 3.00E-11 79 6596 cellular  
 organisms;Eukaryota;Opisthokonta;Metazoa;Eumetazoa;Bilateria;Protostomia;  
 Spiralia;Lophotrochozoa;Mollusca;Bivalvia;Autobranchia;Heteroconchia;Euhe  
 terodonta;Imparidentia;Venerida;Veneroidea;Veneridae;Mercenaria;Mercenari  
 a mercenaria  
 UdeM00000027956 6596 90.9 UdeM00000027956 XP\_045174069.1 27 337  
 177 8 8 275 7 343 3.00E-15 90.9 6596 cellular  
 organisms;Eukaryota;Opisthokonta;Metazoa;Eumetazoa;Bilateria;Protostomia;  
 Spiralia;Lophotrochozoa;Mollusca;Bivalvia;Autobranchia;Heteroconchia;Euhe  
 terodonta;Imparidentia;Venerida;Veneroidea;Veneridae;Mercenaria;Mercenari  
 a mercenaria  
 UdeM00000027957 6596 201.8 UdeM00000027957 XP\_045174069.1 32.1 554  
 282 19 8 487 7 540 2.00E-48 201.8 6596 cellular  
 organisms;Eukaryota;Opisthokonta;Metazoa;Eumetazoa;Bilateria;Protostomia;  
 Spiralia;Lophotrochozoa;Mollusca;Bivalvia;Autobranchia;Heteroconchia;Euhe  
 terodonta;Imparidentia;Venerida;Veneroidea;Veneridae;Mercenaria;Mercenari  
 a mercenaria  
 UdeM00000027958 6596 391 UdeM00000027958 XP\_045174093.1 48.6 486  
 201 11 1 456 1 467 2.20E-105 391 6596 cellular  
 organisms;Eukaryota;Opisthokonta;Metazoa;Eumetazoa;Bilateria;Protostomia;  
 Spiralia;Lophotrochozoa;Mollusca;Bivalvia;Autobranchia;Heteroconchia;Euhe  
 terodonta;Imparidentia;Venerida;Veneroidea;Veneridae;Mercenaria;Mercenari  
 a mercenaria  
 UdeM00000027959 29159 104.4 UdeM00000027959 XP\_034336486.1 47 115  
 60 1 416 530 659 772 4.60E-19 104.4 29159 cellular  
 organisms;Eukaryota;Opisthokonta;Metazoa;Eumetazoa;Bilateria;Protostomia;  
 Spiralia;Lophotrochozoa;Mollusca;Bivalvia;Autobranchia;Pteriomorphia;Ostr  
 eida;Ostreoidea;Ostreidae;Crassostrea;Crassostrea gigas  
 UdeM00000027960 29159 104.4 UdeM00000027960 XP\_034336486.1 47 115  
 60 1 493 607 659 772 5.30E-19 104.4 29159 cellular  
 organisms;Eukaryota;Opisthokonta;Metazoa;Eumetazoa;Bilateria;Protostomia;  
 Spiralia;Lophotrochozoa;Mollusca;Bivalvia;Autobranchia;Pteriomorphia;Ostr  
 eida;Ostreoidea;Ostreidae;Crassostrea;Crassostrea gigas  
 UdeM00000027961 1735272 154.8 UdeM00000027961 XP\_041378517.1 28.1  
 466 281 14 1 435 1 443 2.70E-34 154.8 1735272  
 cellular  
 organisms;Eukaryota;Opisthokonta;Metazoa;Eumetazoa;Bilateria;Protostomia;  
 Spiralia;Lophotrochozoa;Mollusca;Gastropoda;Neomphalina;Neomphaloidea;Pel  
 tospiridae;Gigantopelta;Gigantopelta aegis  
 UdeM00000027963 29159 710.3 UdeM00000027963 XP\_011435747.2 34.1 1212  
 682 30 64 1209 172 1332 4.20E-201 710.3 29159 cellular  
 organisms;Eukaryota;Opisthokonta;Metazoa;Eumetazoa;Bilateria;Protostomia;  
 Spiralia;Lophotrochozoa;Mollusca;Bivalvia;Autobranchia;Pteriomorphia;Ostr  
 eida;Ostreoidea;Ostreidae;Crassostrea;Crassostrea gigas

UdeM00000027964 1735272 375.9 UdeM00000027964 XP\_041366865.1 27.6  
 969 449 23 136 865 492 1446 1.30E-100 375.9 1735272  
 cellular  
 organisms;Eukaryota;Opisthokonta;Metazoa;Eumetazoa;Bilateria;Protostomia;  
 Spiralia;Lophotrochozoa;Mollusca;Gastropoda;Neomphalina;Neomphaloidea;Pel  
 tospiridae;Gigantopelta;Gigantopelta aegis  
 UdeM00000027965 1735272 77.8 UdeM00000027965 XP\_041366865.1 39.4  
 104 57 3 12 115 1455 1552 1.00E-11 77.8 1735272  
 cellular  
 organisms;Eukaryota;Opisthokonta;Metazoa;Eumetazoa;Bilateria;Protostomia;  
 Spiralia;Lophotrochozoa;Mollusca;Gastropoda;Neomphalina;Neomphaloidea;Pel  
 tospiridae;Gigantopelta;Gigantopelta aegis  
 UdeM00000027966 29159 682.2 UdeM00000027966 XP\_011435747.2 33.1 1201  
 661 27 182 1279 172 1332 1.30E-192 682.2 29159 cellular  
 organisms;Eukaryota;Opisthokonta;Metazoa;Eumetazoa;Bilateria;Protostomia;  
 Spiralia;Lophotrochozoa;Mollusca;Bivalvia;Autobranchia;Pteriormorphia;Ostr  
 eida;Ostreoidea;Ostreidae;Crassostrea;Crassostrea gigas  
 UdeM00000027967 29159 682.2 UdeM00000027967 XP\_011435747.2 33.1 1201  
 661 27 114 1211 172 1332 1.20E-192 682.2 29159 cellular  
 organisms;Eukaryota;Opisthokonta;Metazoa;Eumetazoa;Bilateria;Protostomia;  
 Spiralia;Lophotrochozoa;Mollusca;Bivalvia;Autobranchia;Pteriormorphia;Ostr  
 eida;Ostreoidea;Ostreidae;Crassostrea;Crassostrea gigas  
 UdeM00000027968 1735272 111.3 UdeM00000027968 XP\_041366865.1 40.5  
 148 78 4 6 149 1411 1552 1.10E-21 111.3 1735272  
 cellular  
 organisms;Eukaryota;Opisthokonta;Metazoa;Eumetazoa;Bilateria;Protostomia;  
 Spiralia;Lophotrochozoa;Mollusca;Gastropoda;Neomphalina;Neomphaloidea;Pel  
 tospiridae;Gigantopelta;Gigantopelta aegis  
 UdeM00000027969 29159 582.4 UdeM00000027969 XP\_011435747.2 31.2 1188  
 581 29 172 1163 185 1332 1.30E-162 582.4 29159 cellular  
 organisms;Eukaryota;Opisthokonta;Metazoa;Eumetazoa;Bilateria;Protostomia;  
 Spiralia;Lophotrochozoa;Mollusca;Bivalvia;Autobranchia;Pteriormorphia;Ostr  
 eida;Ostreoidea;Ostreidae;Crassostrea;Crassostrea gigas  
 UdeM00000027970 29159 642.5 UdeM00000027970 XP\_011435747.2 32.7 1188  
 607 29 127 1162 185 1332 1.00E-180 642.5 29159 cellular  
 organisms;Eukaryota;Opisthokonta;Metazoa;Eumetazoa;Bilateria;Protostomia;  
 Spiralia;Lophotrochozoa;Mollusca;Bivalvia;Autobranchia;Pteriormorphia;Ostr  
 eida;Ostreoidea;Ostreidae;Crassostrea;Crassostrea gigas  
 UdeM00000027971 6596 79.3 UdeM00000027971 XP\_045171492.1 26 123  
 90 1 32 153 54 176 4.80E-12 79.3 6596 cellular  
 organisms;Eukaryota;Opisthokonta;Metazoa;Eumetazoa;Bilateria;Protostomia;  
 Spiralia;Lophotrochozoa;Mollusca;Bivalvia;Autobranchia;Heteroconchia;Euhe  
 terodonta;Imparidentia;Venerida;Veneroidea;Veneridae;Mercenaria;Mercenari  
 a mercenaria  
 UdeM00000027972 6596 104 UdeM00000027972 XP\_045173497.1 52.7 91  
 42 1 44 133 32 122 2.10E-19 104 6596 cellular  
 organisms;Eukaryota;Opisthokonta;Metazoa;Eumetazoa;Bilateria;Protostomia;  
 Spiralia;Lophotrochozoa;Mollusca;Bivalvia;Autobranchia;Heteroconchia;Euhe  
 terodonta;Imparidentia;Venerida;Veneroidea;Veneridae;Mercenaria;Mercenari  
 a mercenaria  
 UdeM00000027973 6596 452.6 UdeM00000027973 XP\_045172051.1 69.2 315  
 96 1 1 314 1 315 4.20E-124 452.6 6596 cellular  
 organisms;Eukaryota;Opisthokonta;Metazoa;Eumetazoa;Bilateria;Protostomia;  
 Spiralia;Lophotrochozoa;Mollusca;Bivalvia;Autobranchia;Heteroconchia;Euhe

terodonta;Imparidentia;Venerida;Veneroidea;Veneridae;Mercenaria;Mercenaria mercenaria

UdeM00000027975 680683 121.3 UdeM00000027975 XP\_013184004.1 50  
112 53 1 106 217 12 120 1.50E-24 121.3 680683  
cellular

organisms;Eukaryota;Opisthokonta;Metazoa;Eumetazoa;Bilateria;Protostomia;Ecdysozoa;Panarthropoda;Arthropoda;Mandibulata;Pancrustacea;Hexapoda;Insecta;Dicondylia;Pterygota;Neoptera;Endopterygota;Amphiesmenoptera;Lepidoptera;Glossata;Neolepidoptera;Heteroneura;Ditrysia;Obtectomera;Pyraloidea;Pyralidae;Phycitinae;Amyelois;Amyelois transitella

UdeM00000027974 680683 120.2 UdeM00000027974 XP\_013184004.1 50  
112 53 1 106 217 12 120 3.80E-24 120.2 680683  
cellular

organisms;Eukaryota;Opisthokonta;Metazoa;Eumetazoa;Bilateria;Protostomia;Ecdysozoa;Panarthropoda;Arthropoda;Mandibulata;Pancrustacea;Hexapoda;Insecta;Dicondylia;Pterygota;Neoptera;Endopterygota;Amphiesmenoptera;Lepidoptera;Glossata;Neolepidoptera;Heteroneura;Ditrysia;Obtectomera;Pyraloidea;Pyralidae;Phycitinae;Amyelois;Amyelois transitella

UdeM00000027976 6579 80.9 UdeM00000027976 XP\_033748647.1 25.6 347  
211 10 627 942 900 1230 9.80E-12 80.9 6579 cellular

organisms;Eukaryota;Opisthokonta;Metazoa;Eumetazoa;Bilateria;Protostomia;Spiralia;Lophotrochozoa;Mollusca;Bivalvia;Autobranchia;Pteriormorphia;Pectinida;Pectinoidea;Pectinidae;Pecten;Pecten maximus

UdeM00000027977 6579 80.9 UdeM00000027977 XP\_033748647.1 25.6 347  
211 10 612 927 900 1230 9.60E-12 80.9 6579 cellular

organisms;Eukaryota;Opisthokonta;Metazoa;Eumetazoa;Bilateria;Protostomia;Spiralia;Lophotrochozoa;Mollusca;Bivalvia;Autobranchia;Pteriormorphia;Pectinida;Pectinoidea;Pectinidae;Pecten;Pecten maximus

UdeM00000027978 6596 328.9 UdeM00000027978 XP\_045173210.1 61 267  
97 4 1 264 3 265 5.80E-87 328.9 6596 cellular

organisms;Eukaryota;Opisthokonta;Metazoa;Eumetazoa;Bilateria;Protostomia;Spiralia;Lophotrochozoa;Mollusca;Bivalvia;Autobranchia;Heteroconchia;Euterodonta;Imparidentia;Venerida;Veneroidea;Veneridae;Mercenaria;Mercenaria mercenaria

UdeM00000027979 6565 118.2 UdeM00000027979 XP\_022336752.1 39.9 153  
89 1 78 230 57 206 1.50E-23 118.2 6565 cellular

organisms;Eukaryota;Opisthokonta;Metazoa;Eumetazoa;Bilateria;Protostomia;Spiralia;Lophotrochozoa;Mollusca;Bivalvia;Autobranchia;Pteriormorphia;Ostreida;Ostreoidea;Ostreidae;Crassostrea;Crassostrea virginica

UdeM00000027980 29159 171.4 UdeM00000027980 XP\_034324494.1 54.7 161  
72 1 11 170 293 453 1.00E-39 171.4 29159 cellular

organisms;Eukaryota;Opisthokonta;Metazoa;Eumetazoa;Bilateria;Protostomia;Spiralia;Lophotrochozoa;Mollusca;Bivalvia;Autobranchia;Pteriormorphia;Ostreida;Ostreoidea;Ostreidae;Crassostrea;Crassostrea gigas

UdeM00000027981 6573 223.4 UdeM00000027981 XP\_021342692.1 56.2 203  
80 3 1 201 77 272 3.80E-55 223.4 6573 cellular

organisms;Eukaryota;Opisthokonta;Metazoa;Eumetazoa;Bilateria;Protostomia;Spiralia;Lophotrochozoa;Mollusca;Bivalvia;Autobranchia;Pteriormorphia;Pectinida;Pectinoidea;Pectinidae;Mizuhopecten;Mizuhopecten yessoensis

UdeM00000027982 6573 317.8 UdeM00000027982 XP\_021342692.1 58.1 279  
108 3 1 277 1 272 1.80E-83 317.8 6573 cellular

organisms;Eukaryota;Opisthokonta;Metazoa;Eumetazoa;Bilateria;Protostomia;Spiralia;Lophotrochozoa;Mollusca;Bivalvia;Autobranchia;Pteriormorphia;Pectinida;Pectinoidea;Pectinidae;Mizuhopecten;Mizuhopecten yessoensis

UdeM00000027983 6573 322 UdeM00000027983 XP\_021342692.1 58.8 279  
 106 3 1 277 1 272 9.80E-85 322 6573 cellular  
 organisms;Eukaryota;Opisthokonta;Metazoa;Eumetazoa;Bilateria;Protostomia;  
 Spiralia;Lophotrochozoa;Mollusca;Bivalvia;Autobranchia;Pteriomorpha;Pect  
 inida;Pectinoidea;Pectinidae;Mizuhopecten;Mizuhopecten yessoensis  
 UdeM00000027984 6573 320.9 UdeM00000027984 XP\_021342692.1 58.8 279  
 106 3 1 277 1 272 2.20E-84 320.9 6573 cellular  
 organisms;Eukaryota;Opisthokonta;Metazoa;Eumetazoa;Bilateria;Protostomia;  
 Spiralia;Lophotrochozoa;Mollusca;Bivalvia;Autobranchia;Pteriomorpha;Pect  
 inida;Pectinoidea;Pectinidae;Mizuhopecten;Mizuhopecten yessoensis  
 UdeM00000027985 6573 320.9 UdeM00000027985 XP\_021342692.1 58.8 279  
 106 3 1 277 1 272 2.20E-84 320.9 6573 cellular  
 organisms;Eukaryota;Opisthokonta;Metazoa;Eumetazoa;Bilateria;Protostomia;  
 Spiralia;Lophotrochozoa;Mollusca;Bivalvia;Autobranchia;Pteriomorpha;Pect  
 inida;Pectinoidea;Pectinidae;Mizuhopecten;Mizuhopecten yessoensis  
 UdeM00000027986 6573 320.9 UdeM00000027986 XP\_021342692.1 58.8 279  
 106 3 1 277 1 272 2.20E-84 320.9 6573 cellular  
 organisms;Eukaryota;Opisthokonta;Metazoa;Eumetazoa;Bilateria;Protostomia;  
 Spiralia;Lophotrochozoa;Mollusca;Bivalvia;Autobranchia;Pteriomorpha;Pect  
 inida;Pectinoidea;Pectinidae;Mizuhopecten;Mizuhopecten yessoensis  
 UdeM00000027987 6573 320.9 UdeM00000027987 XP\_021342692.1 58.8 279  
 106 3 1 277 1 272 2.20E-84 320.9 6573 cellular  
 organisms;Eukaryota;Opisthokonta;Metazoa;Eumetazoa;Bilateria;Protostomia;  
 Spiralia;Lophotrochozoa;Mollusca;Bivalvia;Autobranchia;Pteriomorpha;Pect  
 inida;Pectinoidea;Pectinidae;Mizuhopecten;Mizuhopecten yessoensis  
 UdeM00000027988 6573 320.9 UdeM00000027988 XP\_021342692.1 58.8 279  
 106 3 1 277 1 272 2.20E-84 320.9 6573 cellular  
 organisms;Eukaryota;Opisthokonta;Metazoa;Eumetazoa;Bilateria;Protostomia;  
 Spiralia;Lophotrochozoa;Mollusca;Bivalvia;Autobranchia;Pteriomorpha;Pect  
 inida;Pectinoidea;Pectinidae;Mizuhopecten;Mizuhopecten yessoensis  
 UdeM00000027989 6573 320.9 UdeM00000027989 XP\_021342692.1 58.8 279  
 106 3 1 277 1 272 2.20E-84 320.9 6573 cellular  
 organisms;Eukaryota;Opisthokonta;Metazoa;Eumetazoa;Bilateria;Protostomia;  
 Spiralia;Lophotrochozoa;Mollusca;Bivalvia;Autobranchia;Pteriomorpha;Pect  
 inida;Pectinoidea;Pectinidae;Mizuhopecten;Mizuhopecten yessoensis  
 UdeM00000027990 6573 320.9 UdeM00000027990 XP\_021342692.1 58.8 279  
 106 3 1 277 1 272 2.20E-84 320.9 6573 cellular  
 organisms;Eukaryota;Opisthokonta;Metazoa;Eumetazoa;Bilateria;Protostomia;  
 Spiralia;Lophotrochozoa;Mollusca;Bivalvia;Autobranchia;Pteriomorpha;Pect  
 inida;Pectinoidea;Pectinidae;Mizuhopecten;Mizuhopecten yessoensis  
 UdeM00000027991 6573 322 UdeM00000027991 XP\_021342692.1 58.8 279  
 106 3 1 277 1 272 9.80E-85 322 6573 cellular  
 organisms;Eukaryota;Opisthokonta;Metazoa;Eumetazoa;Bilateria;Protostomia;  
 Spiralia;Lophotrochozoa;Mollusca;Bivalvia;Autobranchia;Pteriomorpha;Pect  
 inida;Pectinoidea;Pectinidae;Mizuhopecten;Mizuhopecten yessoensis  
 UdeM00000027992 6573 320.9 UdeM00000027992 XP\_021342692.1 58.8 279  
 106 3 1 277 1 272 2.20E-84 320.9 6573 cellular  
 organisms;Eukaryota;Opisthokonta;Metazoa;Eumetazoa;Bilateria;Protostomia;  
 Spiralia;Lophotrochozoa;Mollusca;Bivalvia;Autobranchia;Pteriomorpha;Pect  
 inida;Pectinoidea;Pectinidae;Mizuhopecten;Mizuhopecten yessoensis  
 UdeM00000027993 6573 320.9 UdeM00000027993 XP\_021342692.1 58.4 279  
 107 3 1 277 1 272 2.20E-84 320.9 6573 cellular  
 organisms;Eukaryota;Opisthokonta;Metazoa;Eumetazoa;Bilateria;Protostomia;

Spiralia; Lophotrochozoa; Mollusca; Bivalvia; Autobranchia; Pteriomorpha; Pectinida; Pectinoidea; Pectinidae; Mizuhopecten; Mizuhopecten yessoensis  
UdeM00000027994 6579 249.2 UdeM00000027994 XP\_033739209.1 49.6 258  
114 2 9 261 2 248 5.80E-63 249.2 6579 cellular  
organisms; Eukaryota; Opisthokonta; Metazoa; Eumetazoa; Bilateria; Protostomia; Spiralia; Lophotrochozoa; Mollusca; Bivalvia; Autobranchia; Pteriomorpha; Pectinida; Pectinoidea; Pectinidae; Pecten; Pecten maximus  
UdeM00000027995 6596 99.8 UdeM00000027995 XP\_045188277.1 28.9 201  
133 3 2 201 79 270 7.00E-18 99.8 6596 cellular  
organisms; Eukaryota; Opisthokonta; Metazoa; Eumetazoa; Bilateria; Protostomia; Spiralia; Lophotrochozoa; Mollusca; Bivalvia; Autobranchia; Heteroconchia; Euheterodonta; Imparidentia; Venerida; Veneroidea; Veneridae; Mercenaria; Mercenaria mercenaria  
UdeM00000027996 6573 319.3 UdeM00000027996 XP\_021342692.1 58.4 279  
107 3 1 277 1 272 6.30E-84 319.3 6573 cellular  
organisms; Eukaryota; Opisthokonta; Metazoa; Eumetazoa; Bilateria; Protostomia; Spiralia; Lophotrochozoa; Mollusca; Bivalvia; Autobranchia; Pteriomorpha; Pectinida; Pectinoidea; Pectinidae; Mizuhopecten; Mizuhopecten yessoensis  
UdeM00000027997 6596 259.2 UdeM00000027997 XP\_045172013.1 76.5 498  
116 1 1 498 1 497 1.10E-65 259.2 6596 cellular  
organisms; Eukaryota; Opisthokonta; Metazoa; Eumetazoa; Bilateria; Protostomia; Spiralia; Lophotrochozoa; Mollusca; Bivalvia; Autobranchia; Heteroconchia; Euheterodonta; Imparidentia; Venerida; Veneroidea; Veneridae; Mercenaria; Mercenaria mercenaria  
UdeM00000027998 6596 795.8 UdeM00000027998 XP\_045171228.1 52 812  
369 9 37 843 17 812 5.30E-227 795.8 6596 cellular  
organisms; Eukaryota; Opisthokonta; Metazoa; Eumetazoa; Bilateria; Protostomia; Spiralia; Lophotrochozoa; Mollusca; Bivalvia; Autobranchia; Heteroconchia; Euheterodonta; Imparidentia; Venerida; Veneroidea; Veneridae; Mercenaria; Mercenaria mercenaria  
UdeM00000027999 6596 291.6 UdeM00000027999 XP\_045171297.1 46.2 639  
291 16 1 621 1 604 2.70E-75 291.6 6596 cellular  
organisms; Eukaryota; Opisthokonta; Metazoa; Eumetazoa; Bilateria; Protostomia; Spiralia; Lophotrochozoa; Mollusca; Bivalvia; Autobranchia; Heteroconchia; Euheterodonta; Imparidentia; Venerida; Veneroidea; Veneridae; Mercenaria; Mercenaria mercenaria  
UdeM00000028000 37653 405.6 UdeM00000028000 XP\_014786776.1 76.3 257  
50 1 10 266 18 263 5.00E-110 405.6 37653 cellular  
organisms; Eukaryota; Opisthokonta; Metazoa; Eumetazoa; Bilateria; Protostomia; Spiralia; Lophotrochozoa; Mollusca; Cephalopoda; Coleoidea; Octopodiformes; Octopoda; Incirrata; Octopodidae; Octopus; Octopus bimaculoides  
UdeM00000028001 6565 580.1 UdeM00000028001 XP\_022340530.1 76.1 402  
96 0 1 402 1 402 2.20E-162 580.1 6565 cellular  
organisms; Eukaryota; Opisthokonta; Metazoa; Eumetazoa; Bilateria; Protostomia; Spiralia; Lophotrochozoa; Mollusca; Bivalvia; Autobranchia; Pteriomorpha; Ostreida; Ostreoidea; Ostreidae; Crassostrea; Crassostrea virginica  
UdeM00000028002 6596 609.8 UdeM00000028002 XP\_045172739.1 56.1 513  
225 0 1 513 103 615 3.30E-171 609.8 6596 cellular  
organisms; Eukaryota; Opisthokonta; Metazoa; Eumetazoa; Bilateria; Protostomia; Spiralia; Lophotrochozoa; Mollusca; Bivalvia; Autobranchia; Heteroconchia; Euheterodonta; Imparidentia; Venerida; Veneroidea; Veneridae; Mercenaria; Mercenaria mercenaria  
UdeM00000028004 6596 602.8 UdeM00000028004 XP\_045172739.1 47.6 611  
313 1 3 606 5 615 4.70E-169 602.8 6596 cellular

organisms;Eukaryota;Opisthokonta;Metazoa;Eumetazoa;Bilateria;Protostomia;Spiralia;Lophotrochozoa;Mollusca;Bivalvia;Autobranhia;Heteroconchia;Euherodonta;Imparidentia;Venerida;Veneroidea;Veneridae;Mercenaria;Mercenaria mercenaria

UdeM00000028005 6596 94 UdeM00000028005 XP\_045172739.1 49.5 93  
47 0 4 96 388 480 1.40E-16 94 6596 cellular

organisms;Eukaryota;Opisthokonta;Metazoa;Eumetazoa;Bilateria;Protostomia;Spiralia;Lophotrochozoa;Mollusca;Bivalvia;Autobranhia;Heteroconchia;Euherodonta;Imparidentia;Venerida;Veneroidea;Veneridae;Mercenaria;Mercenaria mercenaria

UdeM00000028006 6596 166.4 UdeM00000028006 XP\_045175219.1 42.6 230  
120 6 1 221 73 299 4.10E-38 166.4 6596 cellular

organisms;Eukaryota;Opisthokonta;Metazoa;Eumetazoa;Bilateria;Protostomia;Spiralia;Lophotrochozoa;Mollusca;Bivalvia;Autobranhia;Heteroconchia;Euherodonta;Imparidentia;Venerida;Veneroidea;Veneridae;Mercenaria;Mercenaria mercenaria

UdeM00000028007 6596 218.4 UdeM00000028007 XP\_045175219.1 45 271  
137 6 37 298 32 299 1.20E-53 218.4 6596 cellular

organisms;Eukaryota;Opisthokonta;Metazoa;Eumetazoa;Bilateria;Protostomia;Spiralia;Lophotrochozoa;Mollusca;Bivalvia;Autobranhia;Heteroconchia;Euherodonta;Imparidentia;Venerida;Veneroidea;Veneridae;Mercenaria;Mercenaria mercenaria

UdeM00000028008 6596 174.9 UdeM00000028008 XP\_045162526.1 43.2 229  
118 5 1 221 70 294 1.20E-40 174.9 6596 cellular

organisms;Eukaryota;Opisthokonta;Metazoa;Eumetazoa;Bilateria;Protostomia;Spiralia;Lophotrochozoa;Mollusca;Bivalvia;Autobranhia;Heteroconchia;Euherodonta;Imparidentia;Venerida;Veneroidea;Veneridae;Mercenaria;Mercenaria mercenaria

UdeM00000028010 6596 174.9 UdeM00000028010 XP\_045162526.1 43.2 229  
118 5 1 221 70 294 1.20E-40 174.9 6596 cellular

organisms;Eukaryota;Opisthokonta;Metazoa;Eumetazoa;Bilateria;Protostomia;Spiralia;Lophotrochozoa;Mollusca;Bivalvia;Autobranhia;Heteroconchia;Euherodonta;Imparidentia;Venerida;Veneroidea;Veneridae;Mercenaria;Mercenaria mercenaria

UdeM00000028012 6596 174.9 UdeM00000028012 XP\_045162526.1 43.2 229  
118 5 1 221 70 294 1.20E-40 174.9 6596 cellular

organisms;Eukaryota;Opisthokonta;Metazoa;Eumetazoa;Bilateria;Protostomia;Spiralia;Lophotrochozoa;Mollusca;Bivalvia;Autobranhia;Heteroconchia;Euherodonta;Imparidentia;Venerida;Veneroidea;Veneridae;Mercenaria;Mercenaria mercenaria

UdeM00000028013 6596 213.8 UdeM00000028013 XP\_045172998.1 42.9 259  
135 6 56 304 40 295 3.10E-52 213.8 6596 cellular

organisms;Eukaryota;Opisthokonta;Metazoa;Eumetazoa;Bilateria;Protostomia;Spiralia;Lophotrochozoa;Mollusca;Bivalvia;Autobranhia;Heteroconchia;Euherodonta;Imparidentia;Venerida;Veneroidea;Veneridae;Mercenaria;Mercenaria mercenaria

UdeM00000028014 6596 213.4 UdeM00000028014 XP\_045176915.1 42.1 271  
144 6 73 333 33 300 4.40E-52 213.4 6596 cellular

organisms;Eukaryota;Opisthokonta;Metazoa;Eumetazoa;Bilateria;Protostomia;Spiralia;Lophotrochozoa;Mollusca;Bivalvia;Autobranhia;Heteroconchia;Euherodonta;Imparidentia;Venerida;Veneroidea;Veneridae;Mercenaria;Mercenaria mercenaria

UdeM00000028015 10224 63.2 UdeM00000028015 XP\_006815309.1 52.9 51  
24 0 16 66 116 166 1.50E-07 63.2 10224 cellular

organisms;Eukaryota;Opisthokonta;Metazoa;Eumetazoa;Bilateria;Deuterostomi  
a;Hemichordata;Enteropneusta;Harrimaniidae;Saccoglossus;Saccoglossus  
kowalevskii

UdeM00000028016 6596 217.6 UdeM00000028016 XP\_045172998.1 37.4 297  
169 6 17 304 7 295 2.20E-53 217.6 6596 cellular

organisms;Eukaryota;Opisthokonta;Metazoa;Eumetazoa;Bilateria;Protostomia;  
Spiralia;Lophotrochozoa;Mollusca;Bivalvia;Autobranhia;Heteroconchia;Euhe  
terodonta;Imparidentia;Venerida;Veneroidea;Veneridae;Mercenaria;Mercenari  
a mercenaria

UdeM00000028018 6579 214.9 UdeM00000028018 XP\_033748589.1 86.3 117  
15 1 1 116 21 137 5.40E-53 214.9 6579 cellular

organisms;Eukaryota;Opisthokonta;Metazoa;Eumetazoa;Bilateria;Protostomia;  
Spiralia;Lophotrochozoa;Mollusca;Bivalvia;Autobranhia;Pteriormorphia;Pect  
inida;Pectinoidea;Pectinidae;Pecten;Pecten maximus

UdeM00000028019 6596 734.6 UdeM00000028019 XP\_045173880.1 53 719  
324 4 1 710 1 714 1.20E-208 734.6 6596 cellular

organisms;Eukaryota;Opisthokonta;Metazoa;Eumetazoa;Bilateria;Protostomia;  
Spiralia;Lophotrochozoa;Mollusca;Bivalvia;Autobranhia;Heteroconchia;Euhe  
terodonta;Imparidentia;Venerida;Veneroidea;Veneridae;Mercenaria;Mercenari  
a mercenaria

UdeM00000028020 6579 245.4 UdeM00000028020 XP\_033748591.1 61.9 189  
71 1 64 251 730 918 8.50E-62 245.4 6579 cellular

organisms;Eukaryota;Opisthokonta;Metazoa;Eumetazoa;Bilateria;Protostomia;  
Spiralia;Lophotrochozoa;Mollusca;Bivalvia;Autobranhia;Pteriormorphia;Pect  
inida;Pectinoidea;Pectinidae;Pecten;Pecten maximus

UdeM00000028021 6565 815.1 UdeM00000028021 XP\_022339096.1 55.3 771  
324 4 110 866 937 1700 8.70E-233 815.1 6565 cellular

organisms;Eukaryota;Opisthokonta;Metazoa;Eumetazoa;Bilateria;Protostomia;  
Spiralia;Lophotrochozoa;Mollusca;Bivalvia;Autobranhia;Pteriormorphia;Ostr  
eida;Ostreioidea;Ostreidae;Crassostrea;Crassostrea virginica

UdeM00000028022 6565 648.7 UdeM00000028022 XP\_022339096.1 35.8 1191  
324 5 110 1286 937 1700 1.60E-182 648.7 6565 cellular

organisms;Eukaryota;Opisthokonta;Metazoa;Eumetazoa;Bilateria;Protostomia;  
Spiralia;Lophotrochozoa;Mollusca;Bivalvia;Autobranhia;Pteriormorphia;Ostr  
eida;Ostreioidea;Ostreidae;Crassostrea;Crassostrea virginica

UdeM00000028023 29159 191.8 UdeM00000028023 XP\_019929068.2 22.6 712  
470 17 280 972 7 656 4.90E-45 191.8 29159 cellular

organisms;Eukaryota;Opisthokonta;Metazoa;Eumetazoa;Bilateria;Protostomia;  
Spiralia;Lophotrochozoa;Mollusca;Bivalvia;Autobranhia;Pteriormorphia;Ostr  
eida;Ostreioidea;Ostreidae;Crassostrea;Crassostrea gigas

UdeM00000028024 6596 218 UdeM00000028024 XP\_045173993.1 60 175  
65 2 26 196 96 269 1.10E-53 218 6596 cellular

organisms;Eukaryota;Opisthokonta;Metazoa;Eumetazoa;Bilateria;Protostomia;  
Spiralia;Lophotrochozoa;Mollusca;Bivalvia;Autobranhia;Heteroconchia;Euhe  
terodonta;Imparidentia;Venerida;Veneroidea;Veneridae;Mercenaria;Mercenari  
a mercenaria

UdeM00000028025 6596 320.1 UdeM00000028025 XP\_045173056.1 49.7 360  
158 6 21 364 10 362 8.10E-84 320.1 6596 cellular

organisms;Eukaryota;Opisthokonta;Metazoa;Eumetazoa;Bilateria;Protostomia;  
Spiralia;Lophotrochozoa;Mollusca;Bivalvia;Autobranhia;Heteroconchia;Euhe  
terodonta;Imparidentia;Venerida;Veneroidea;Veneridae;Mercenaria;Mercenari  
a mercenaria

UdeM00000028026 225164 728.8 UdeM00000028026 XP\_009053754.1 58.6  
659 58 1 1 659 262 705 6.20E-207 728.8 225164

cellular  
organisms;Eukaryota;Opisthokonta;Metazoa;Eumetazoa;Bilateria;Protostomia;  
Spiralia;Lophotrochozoa;Mollusca;Gastropoda;Patellogastropoda;Lottioidea;  
Lottiidae;Lottia;Lottia gigantea

UdeM00000028027 225164 131.3 UdeM00000028027 XP\_009053754.1 100  
63 0 0 1 63 192 254 4.60E-28 131.3 225164

cellular  
organisms;Eukaryota;Opisthokonta;Metazoa;Eumetazoa;Bilateria;Protostomia;  
Spiralia;Lophotrochozoa;Mollusca;Gastropoda;Patellogastropoda;Lottioidea;  
Lottiidae;Lottia;Lottia gigantea

UdeM00000035758 1735272 162.5 UdeM00000035758 XP\_041366813.1 47.9  
142 74 0 6 147 42 183 5.50E-37 162.5 1735272

cellular  
organisms;Eukaryota;Opisthokonta;Metazoa;Eumetazoa;Bilateria;Protostomia;  
Spiralia;Lophotrochozoa;Mollusca;Gastropoda;Neomphalina;Neomphaloidea;Pel  
tospiridae;Gigantopelta;Gigantopelta aegis

UdeM00000035759 50390 127.9 UdeM00000035759 XP\_028152353.1 37.7 151  
83 2 55 203 3 144 1.50E-26 127.9 50390 cellular

organisms;Eukaryota;Opisthokonta;Metazoa;Eumetazoa;Bilateria;Protostomia;  
Ecdysozoa;Panarthropoda;Arthropoda;Mandibulata;Pancrustacea;Hexapoda;Inse  
cta;Dicondylia;Pterygota;Neoptera;Endopterygota;Coleoptera;Polyphaga;Cucu  
jiformia;Chrysomeloidea;Chrysomelidae;Galerucinae;Luperini;Diabroticina;D  
iabroticites;Diabrotica;Diabrotica virgifera;Diabrotica virgifera  
virgifera

UdeM00000035760 7130 116.7 UdeM00000035760 XP\_037292574.1 46.6 116  
52 3 63 177 56 162 3.00E-23 116.7 7130 cellular

organisms;Eukaryota;Opisthokonta;Metazoa;Eumetazoa;Bilateria;Protostomia;  
Ecdysozoa;Panarthropoda;Arthropoda;Mandibulata;Pancrustacea;Hexapoda;Inse  
cta;Dicondylia;Pterygota;Neoptera;Endopterygota;Amphiesmenoptera;Lepidopt  
era;Glossata;Neolepidoptera;Heteroneura;Ditrysia;Obtectomera;Bombycoidea;  
Sphingidae;Sphinginae;Sphingini;Manduca;Manduca sexta

UdeM00000035761 29159 528.5 UdeM00000035761 XP\_019926413.2 70.7 379  
103 4 1 379 239 609 7.90E-147 528.5 29159 cellular

organisms;Eukaryota;Opisthokonta;Metazoa;Eumetazoa;Bilateria;Protostomia;  
Spiralia;Lophotrochozoa;Mollusca;Bivalvia;Autobranchia;Pteriormorphia;Ostr  
eida;Ostreoidea;Ostreidae;Crassostrea;Crassostrea gigas

UdeM00000035762 166361 127.9 UdeM00000035762 XP\_022900320.1 36.6  
172 82 3 46 199 18 180 1.50E-26 127.9 166361

cellular  
organisms;Eukaryota;Opisthokonta;Metazoa;Eumetazoa;Bilateria;Protostomia;  
Ecdysozoa;Panarthropoda;Arthropoda;Mandibulata;Pancrustacea;Hexapoda;Inse  
cta;Dicondylia;Pterygota;Neoptera;Endopterygota;Coleoptera;Polyphaga;Scar  
abaeiformia;Scarabaeoidea;Scarabaeidae;Scarabaeinae;Scarabaeinae incertae  
sedis;Onthophagus;Onthophagus taurus

UdeM00000035763 7137 116.7 UdeM00000035763 XP\_026755150.1 46.4 125  
55 4 67 190 46 159 3.30E-23 116.7 7137 cellular

organisms;Eukaryota;Opisthokonta;Metazoa;Eumetazoa;Bilateria;Protostomia;  
Ecdysozoa;Panarthropoda;Arthropoda;Mandibulata;Pancrustacea;Hexapoda;Inse  
cta;Dicondylia;Pterygota;Neoptera;Endopterygota;Amphiesmenoptera;Lepidopt  
era;Glossata;Neolepidoptera;Heteroneura;Ditrysia;Obtectomera;Pyraloidea;P  
yralidae;Galleriinae;Galleria;Galleria mellonella

UdeM00000035764 29159 171.8 UdeM00000035764 XP\_034331549.1 44.5 238  
110 6 7 228 221 452 1.00E-39 171.8 29159 cellular

organisms;Eukaryota;Opisthokonta;Metazoa;Eumetazoa;Bilateria;Protostomia;



Spiralia; Lophotrochozoa; Mollusca; Bivalvia; Autobranchia; Pteriomorphia; Ostr  
eida; Ostreoidea; Ostreidae; Crassostrea; Crassostrea gigas  
UdeM00000035765 90988 153.3 UdeM00000035765 XP\_039535825.1 58.7 121  
50 0 1 121 111 231 2.00E-34 153.3 90988 cellular  
organisms; Eukaryota; Opisthokonta; Metazoa; Eumetazoa; Bilateria; Deuterostomi  
a; Chordata; Craniata; Vertebrata; Gnathostomata; Teleostomi; Euteleostomi; Acti  
nopterygii; Actinopteri; Neopterygii; Teleostei; Osteoglossocephalai; Clupeoce  
phala; Otomorpha; Ostariophysi; Otophysi; Cypriniphysae; Cypriniformes; Cyprino  
idei; Leuciscidae; Pogonichthyinae; Pimephales; Pimephales promelas  
UdeM00000035766 166361 119.8 UdeM00000035766 XP\_022900320.1 45  
111 52 1 62 172 51 152 3.60E-24 119.8 166361  
cellular  
organisms; Eukaryota; Opisthokonta; Metazoa; Eumetazoa; Bilateria; Protostomia;  
Ecdysozoa; Panarthropoda; Arthropoda; Mandibulata; Pancrustacea; Hexapoda; Inse  
cta; Dicondylia; Pterygota; Neoptera; Endopterygota; Coleoptera; Polyphaga; Scar  
abaeiformia; Scarabaeoidea; Scarabaeidae; Scarabaeinae; Scarabaeinae incertae  
sedis; Onthophagus; Onthophagus taurus  
UdeM00000035767 7130 118.6 UdeM00000035767 XP\_037292574.1 41.4 128  
65 2 51 177 44 162 7.90E-24 118.6 7130 cellular  
organisms; Eukaryota; Opisthokonta; Metazoa; Eumetazoa; Bilateria; Protostomia;  
Ecdysozoa; Panarthropoda; Arthropoda; Mandibulata; Pancrustacea; Hexapoda; Inse  
cta; Dicondylia; Pterygota; Neoptera; Endopterygota; Amphiesmenoptera; Lepidopt  
era; Glossata; Neolepidoptera; Heteroneura; Ditrysia; Obtectomera; Bombycoidea;  
Sphingidae; Sphinginae; Sphingini; Manduca; Manduca sexta  
UdeM00000035769 7130 120.2 UdeM00000035769 XP\_037292574.1 41.4 128  
65 2 51 177 44 162 2.70E-24 120.2 7130 cellular  
organisms; Eukaryota; Opisthokonta; Metazoa; Eumetazoa; Bilateria; Protostomia;  
Ecdysozoa; Panarthropoda; Arthropoda; Mandibulata; Pancrustacea; Hexapoda; Inse  
cta; Dicondylia; Pterygota; Neoptera; Endopterygota; Amphiesmenoptera; Lepidopt  
era; Glossata; Neolepidoptera; Heteroneura; Ditrysia; Obtectomera; Bombycoidea;  
Sphingidae; Sphinginae; Sphingini; Manduca; Manduca sexta  
UdeM00000035768 50390 134 UdeM00000035768 XP\_028152353.1 37.9 153  
84 2 53 203 1 144 2.10E-28 134 50390 cellular  
organisms; Eukaryota; Opisthokonta; Metazoa; Eumetazoa; Bilateria; Protostomia;  
Ecdysozoa; Panarthropoda; Arthropoda; Mandibulata; Pancrustacea; Hexapoda; Inse  
cta; Dicondylia; Pterygota; Neoptera; Endopterygota; Coleoptera; Polyphaga; Cucu  
jiformia; Chrysomeloidea; Chrysomelidae; Galerucinae; Luperini; Diabroticina; D  
iabroticites; Diabrotica; Diabrotica virgifera; Diabrotica virgifera  
virgifera  
UdeM00000035772 6596 602.8 UdeM00000035772 XP\_045173500.1 68.8 468  
128 14 1 459 1 459 3.60E-169 602.8 6596 cellular  
organisms; Eukaryota; Opisthokonta; Metazoa; Eumetazoa; Bilateria; Protostomia;  
Spiralia; Lophotrochozoa; Mollusca; Bivalvia; Autobranchia; Heteroconchia; Eue  
terodonta; Imparidentia; Venerida; Veneroidea; Veneridae; Mercenaria; Mercenari  
a mercenaria  
UdeM00000035773 6596 189.5 UdeM00000035773 XP\_045173500.1 61.5 169  
59 4 1 167 1 165 3.50E-45 189.5 6596 cellular  
organisms; Eukaryota; Opisthokonta; Metazoa; Eumetazoa; Bilateria; Protostomia;  
Spiralia; Lophotrochozoa; Mollusca; Bivalvia; Autobranchia; Heteroconchia; Eue  
terodonta; Imparidentia; Venerida; Veneroidea; Veneridae; Mercenaria; Mercenari  
a mercenaria  
UdeM00000035774 6596 360.1 UdeM00000035774 XP\_045171891.1 44.1 404  
220 2 3 406 1233 1630 3.90E-96 360.1 6596 cellular  
organisms; Eukaryota; Opisthokonta; Metazoa; Eumetazoa; Bilateria; Protostomia;

Spiralia;Lophotrochozoa;Mollusca;Bivalvia;Autobranchia;Heteroconchia;Euherodonta;Imparidentia;Venerida;Veneroidea;Veneridae;Mercenaria;Mercenaria mercenaria

UdeM00000035775 6596 365.2 UdeM00000035775 XP\_045171891.1 43.3 423  
234 2 11 433 1214 1630 1.30E-97 365.2 6596 cellular

organisms;Eukaryota;Opisthokonta;Metazoa;Eumetazoa;Bilateria;Protostomia;Spiralia;Lophotrochozoa;Mollusca;Bivalvia;Autobranchia;Heteroconchia;Euherodonta;Imparidentia;Venerida;Veneroidea;Veneridae;Mercenaria;Mercenaria mercenaria

UdeM00000035776 6596 365.5 UdeM00000035776 XP\_045171891.1 43.4 422  
234 2 11 432 1214 1630 9.80E-98 365.5 6596 cellular

organisms;Eukaryota;Opisthokonta;Metazoa;Eumetazoa;Bilateria;Protostomia;Spiralia;Lophotrochozoa;Mollusca;Bivalvia;Autobranchia;Heteroconchia;Euherodonta;Imparidentia;Venerida;Veneroidea;Veneridae;Mercenaria;Mercenaria mercenaria

UdeM00000035777 6596 268.9 UdeM00000035777 XP\_045171891.1 45.8 286  
153 1 11 296 1214 1497 1.20E-68 268.9 6596 cellular

organisms;Eukaryota;Opisthokonta;Metazoa;Eumetazoa;Bilateria;Protostomia;Spiralia;Lophotrochozoa;Mollusca;Bivalvia;Autobranchia;Heteroconchia;Euherodonta;Imparidentia;Venerida;Veneroidea;Veneridae;Mercenaria;Mercenaria mercenaria

UdeM00000035779 6596 1447.2 UdeM00000035779 XP\_045171891.1 60.1  
1166 442 9 14 1171 18 1168 0.00E+00 1447.2 6596  
cellular

organisms;Eukaryota;Opisthokonta;Metazoa;Eumetazoa;Bilateria;Protostomia;Spiralia;Lophotrochozoa;Mollusca;Bivalvia;Autobranchia;Heteroconchia;Euherodonta;Imparidentia;Venerida;Veneroidea;Veneridae;Mercenaria;Mercenaria mercenaria

UdeM00000035780 1735272 68.2 UdeM00000035780 XP\_041378866.1 46.7  
75 35 2 1 75 1 70 6.10E-09 68.2 1735272  
cellular

organisms;Eukaryota;Opisthokonta;Metazoa;Eumetazoa;Bilateria;Protostomia;Spiralia;Lophotrochozoa;Mollusca;Gastropoda;Neomphalina;Neomphaloidea;Peltospiridae;Gigantopelta;Gigantopelta aegis

UdeM00000035781 6596 299.7 UdeM00000035781 XP\_045202427.1 32.6 717  
437 16 13 695 11 715 9.90E-78 299.7 6596 cellular

organisms;Eukaryota;Opisthokonta;Metazoa;Eumetazoa;Bilateria;Protostomia;Spiralia;Lophotrochozoa;Mollusca;Bivalvia;Autobranchia;Heteroconchia;Euherodonta;Imparidentia;Venerida;Veneroidea;Veneridae;Mercenaria;Mercenaria mercenaria

UdeM00000035782 6596 596.7 UdeM00000035782 XP\_045172794.1 56.7 529  
214 4 1 524 140 658 3.30E-167 596.7 6596 cellular

organisms;Eukaryota;Opisthokonta;Metazoa;Eumetazoa;Bilateria;Protostomia;Spiralia;Lophotrochozoa;Mollusca;Bivalvia;Autobranchia;Heteroconchia;Euherodonta;Imparidentia;Venerida;Veneroidea;Veneridae;Mercenaria;Mercenaria mercenaria

UdeM00000035783 6596 197.6 UdeM00000035783 XP\_045172794.1 73.4 109  
29 0 46 154 19 127 1.20E-47 197.6 6596 cellular

organisms;Eukaryota;Opisthokonta;Metazoa;Eumetazoa;Bilateria;Protostomia;Spiralia;Lophotrochozoa;Mollusca;Bivalvia;Autobranchia;Heteroconchia;Euherodonta;Imparidentia;Venerida;Veneroidea;Veneridae;Mercenaria;Mercenaria mercenaria

UdeM00000035785 6596 339 UdeM00000035785 XP\_045211867.1 45.5 378  
179 7 167 537 92 449 1.10E-89 339 6596 cellular

organisms;Eukaryota;Opisthokonta;Metazoa;Eumetazoa;Bilateria;Protostomia;  
Spiralia;Lophotrochozoa;Mollusca;Bivalvia;Autobranchia;Heteroconchia;Euhe  
terodonta;Imparidentia;Venerida;Veneroidea;Veneridae;Mercenaria;Mercenari  
a mercenaria  
UdeM00000035786 29159 150.2 UdeM00000035786 XP\_011456886.2 31 310  
186 5 11 317 445 729 4.40E-33 150.2 29159 cellular  
organisms;Eukaryota;Opisthokonta;Metazoa;Eumetazoa;Bilateria;Protostomia;  
Spiralia;Lophotrochozoa;Mollusca;Bivalvia;Autobranchia;Pteriormorphia;Ostr  
eida;Ostreoidea;Ostreidae;Crassostrea;Crassostrea gigas  
UdeM00000035789 29159 76.3 UdeM00000035789 XP\_011456886.2 31 158  
97 3 56 201 572 729 5.10E-11 76.3 29159 cellular  
organisms;Eukaryota;Opisthokonta;Metazoa;Eumetazoa;Bilateria;Protostomia;  
Spiralia;Lophotrochozoa;Mollusca;Bivalvia;Autobranchia;Pteriormorphia;Ostr  
eida;Ostreoidea;Ostreidae;Crassostrea;Crassostrea gigas  
UdeM00000035790 29159 164.9 UdeM00000035790 XP\_011456886.2 53.7 136  
63 0 1 136 398 533 8.50E-38 164.9 29159 cellular  
organisms;Eukaryota;Opisthokonta;Metazoa;Eumetazoa;Bilateria;Protostomia;  
Spiralia;Lophotrochozoa;Mollusca;Bivalvia;Autobranchia;Pteriormorphia;Ostr  
eida;Ostreoidea;Ostreidae;Crassostrea;Crassostrea gigas  
UdeM00000035791 6596 243 UdeM00000035791 XP\_045211867.1 46.1 271  
133 5 260 529 92 350 8.60E-61 243 6596 cellular  
organisms;Eukaryota;Opisthokonta;Metazoa;Eumetazoa;Bilateria;Protostomia;  
Spiralia;Lophotrochozoa;Mollusca;Bivalvia;Autobranchia;Heteroconchia;Euhe  
terodonta;Imparidentia;Venerida;Veneroidea;Veneridae;Mercenaria;Mercenari  
a mercenaria  
UdeM00000035792 6596 177.6 UdeM00000035792 XP\_045211867.1 37.7 297  
153 8 131 417 22 296 3.40E-41 177.6 6596 cellular  
organisms;Eukaryota;Opisthokonta;Metazoa;Eumetazoa;Bilateria;Protostomia;  
Spiralia;Lophotrochozoa;Mollusca;Bivalvia;Autobranchia;Heteroconchia;Euhe  
terodonta;Imparidentia;Venerida;Veneroidea;Veneridae;Mercenaria;Mercenari  
a mercenaria  
UdeM00000035793 29159 160.6 UdeM00000035793 XP\_011456886.2 45.5 178  
93 2 1 174 398 575 2.60E-36 160.6 29159 cellular  
organisms;Eukaryota;Opisthokonta;Metazoa;Eumetazoa;Bilateria;Protostomia;  
Spiralia;Lophotrochozoa;Mollusca;Bivalvia;Autobranchia;Pteriormorphia;Ostr  
eida;Ostreoidea;Ostreidae;Crassostrea;Crassostrea gigas  
UdeM00000016546 6579 534.3 UdeM00000016546 XP\_033761704.1 59.8 450  
161 3 30 479 30 459 1.90E-148 534.3 6579 cellular  
organisms;Eukaryota;Opisthokonta;Metazoa;Eumetazoa;Bilateria;Protostomia;  
Spiralia;Lophotrochozoa;Mollusca;Bivalvia;Autobranchia;Pteriormorphia;Pect  
inida;Pectinoidea;Pectinidae;Pecten;Pecten maximus  
UdeM00000016547 6596 605.5 UdeM00000016547 XP\_045167578.1 44.8 724  
383 10 37 747 738 1457 9.00E-170 605.5 6596 cellular  
organisms;Eukaryota;Opisthokonta;Metazoa;Eumetazoa;Bilateria;Protostomia;  
Spiralia;Lophotrochozoa;Mollusca;Bivalvia;Autobranchia;Heteroconchia;Euhe  
terodonta;Imparidentia;Venerida;Veneroidea;Veneridae;Mercenaria;Mercenari  
a mercenaria  
UdeM00000016548 6596 223.8 UdeM00000016548 XP\_045167578.1 51.3 232  
110 2 4 234 1228 1457 2.30E-55 223.8 6596 cellular  
organisms;Eukaryota;Opisthokonta;Metazoa;Eumetazoa;Bilateria;Protostomia;  
Spiralia;Lophotrochozoa;Mollusca;Bivalvia;Autobranchia;Heteroconchia;Euhe  
terodonta;Imparidentia;Venerida;Veneroidea;Veneridae;Mercenaria;Mercenari  
a mercenaria

UdeM00000016549 29159 563.1 UdeM00000016549 XP\_034317596.1 54 513  
 231 2 7 519 70 577 3.60E-157 563.1 29159 cellular  
 organisms;Eukaryota;Opisthokonta;Metazoa;Eumetazoa;Bilateria;Protostomia;  
 Spiralia;Lophotrochozoa;Mollusca;Bivalvia;Autobranchia;Pteriomorphia;Ostr  
 eida;Ostreoidea;Ostreidae;Crassostrea;Crassostrea gigas  
 UdeM00000016550 29159 532.7 UdeM00000016550 XP\_034317596.1 45.3 632  
 249 4 13 643 42 577 6.50E-148 532.7 29159 cellular  
 organisms;Eukaryota;Opisthokonta;Metazoa;Eumetazoa;Bilateria;Protostomia;  
 Spiralia;Lophotrochozoa;Mollusca;Bivalvia;Autobranchia;Pteriomorphia;Ostr  
 eida;Ostreoidea;Ostreidae;Crassostrea;Crassostrea gigas  
 UdeM00000016551 29159 565.1 UdeM00000016551 XP\_034317596.1 51.6 554  
 249 4 13 565 42 577 1.00E-157 565.1 29159 cellular  
 organisms;Eukaryota;Opisthokonta;Metazoa;Eumetazoa;Bilateria;Protostomia;  
 Spiralia;Lophotrochozoa;Mollusca;Bivalvia;Autobranchia;Pteriomorphia;Ostr  
 eida;Ostreoidea;Ostreidae;Crassostrea;Crassostrea gigas  
 UdeM00000016552 6596 76.3 UdeM00000016552 XP\_045161632.1 28.6 161  
 105 5 4 157 4 161 4.80E-11 76.3 6596 cellular  
 organisms;Eukaryota;Opisthokonta;Metazoa;Eumetazoa;Bilateria;Protostomia;  
 Spiralia;Lophotrochozoa;Mollusca;Bivalvia;Autobranchia;Heteroconchia;Euhe  
 terodonta;Imparidentia;Venerida;Veneroidea;Veneridae;Mercenaria;Mercenari  
 a mercenaria  
 UdeM00000016554 8049 260.8 UdeM00000016554 XP\_030193753.1 36.2 376  
 224 4 134 504 17 381 3.70E-66 260.8 8049 cellular  
 organisms;Eukaryota;Opisthokonta;Metazoa;Eumetazoa;Bilateria;Deuterostomi  
 a;Chordata;Craniata;Vertebrata;Gnathostomata;Teleostomi;Euteleostomi;Acti  
 nopterygii;Actinopteri;Neopterygii;Teleostei;Osteoglossocephalai;Clupeoce  
 phala;Euteleosteomorpha;Neoteleostei;Eurypterygia;Ctenosquamata;Acanthomo  
 rphata;Paracanthopterygii;Zeiogadaria;Gadariae;Gadiformes;Gadoidei;Gadida  
 e;Gadus;Gadus morhua  
 UdeM00000016555 6573 183.3 UdeM00000016555 XP\_021376239.1 50.3 193  
 83 5 1 183 1 190 3.10E-43 183.3 6573 cellular  
 organisms;Eukaryota;Opisthokonta;Metazoa;Eumetazoa;Bilateria;Protostomia;  
 Spiralia;Lophotrochozoa;Mollusca;Bivalvia;Autobranchia;Pteriomorphia;Pect  
 inida;Pectinoidea;Pectinidae;Mizuhopecten;Mizuhopecten yessoensis  
 UdeM00000016556 6596 77.8 UdeM00000016556 XP\_045161632.1 28.6 161  
 105 5 4 157 4 161 1.60E-11 77.8 6596 cellular  
 organisms;Eukaryota;Opisthokonta;Metazoa;Eumetazoa;Bilateria;Protostomia;  
 Spiralia;Lophotrochozoa;Mollusca;Bivalvia;Autobranchia;Heteroconchia;Euhe  
 terodonta;Imparidentia;Venerida;Veneroidea;Veneridae;Mercenaria;Mercenari  
 a mercenaria  
 UdeM00000016557 6579 1410.2 UdeM00000016557 XP\_033761697.1 61.6  
 1185 422 15 1 1169 1 1168 0.00E+00 1410.2 6579  
 cellular  
 organisms;Eukaryota;Opisthokonta;Metazoa;Eumetazoa;Bilateria;Protostomia;  
 Spiralia;Lophotrochozoa;Mollusca;Bivalvia;Autobranchia;Pteriomorphia;Pect  
 inida;Pectinoidea;Pectinidae;Pecten;Pecten maximus  
 UdeM00000016558 6596 167.5 UdeM00000016558 XP\_045167794.1 79 100  
 21 0 16 115 1439 1538 1.00E-38 167.5 6596 cellular  
 organisms;Eukaryota;Opisthokonta;Metazoa;Eumetazoa;Bilateria;Protostomia;  
 Spiralia;Lophotrochozoa;Mollusca;Bivalvia;Autobranchia;Heteroconchia;Euhe  
 terodonta;Imparidentia;Venerida;Veneroidea;Veneridae;Mercenaria;Mercenari  
 a mercenaria  
 UdeM00000016559 6596 716.5 UdeM00000016559 XP\_045167402.1 47.8 1016  
 450 17 11 989 6 978 4.80E-203 716.5 6596 cellular

organisms;Eukaryota;Opisthokonta;Metazoa;Eumetazoa;Bilateria;Protostomia;Spiralia;Lophotrochozoa;Mollusca;Bivalvia;Autobranchia;Heteroconchia;Euheterodonta;Imparidentia;Venerida;Veneroidea;Veneridae;Mercenaria;Mercenaria mercenaria

UdeM00000016560 7574 310.8 UdeM00000016560 XP\_013416998.1 64 225  
78 1 48 269 26 250 1.70E-81 310.8 7574 cellular

organisms;Eukaryota;Opisthokonta;Metazoa;Eumetazoa;Bilateria;Protostomia;Spiralia;Lophotrochozoa;Brachiopoda;Linguliformea;Lingulata;Lingulida;Linguloidea;Lingulidae;Lingula;Lingula anatina

UdeM00000016561 6579 490.3 UdeM00000016561 XP\_033762035.1 66.5 340  
113 1 4 343 7 345 2.00E-135 490.3 6579 cellular

organisms;Eukaryota;Opisthokonta;Metazoa;Eumetazoa;Bilateria;Protostomia;Spiralia;Lophotrochozoa;Mollusca;Bivalvia;Autobranchia;Pteriomorpha;Pectinida;Pectinoidea;Pectinidae;Pecten;Pecten maximus

UdeM00000016562 6565 80.5 UdeM00000016562 XP\_022303168.1 52.9 68  
32 0 1 68 210 277 1.00E-12 80.5 6565 cellular

organisms;Eukaryota;Opisthokonta;Metazoa;Eumetazoa;Bilateria;Protostomia;Spiralia;Lophotrochozoa;Mollusca;Bivalvia;Autobranchia;Pteriomorpha;Ostreida;Ostreoidea;Ostreidae;Crassostrea;Crassostrea virginica

UdeM00000016563 6596 347.8 UdeM00000016563 XP\_045216346.1 63 270  
99 1 21 289 2 271 1.40E-92 347.8 6596 cellular

organisms;Eukaryota;Opisthokonta;Metazoa;Eumetazoa;Bilateria;Protostomia;Spiralia;Lophotrochozoa;Mollusca;Bivalvia;Autobranchia;Heteroconchia;Euheterodonta;Imparidentia;Venerida;Veneroidea;Veneridae;Mercenaria;Mercenaria mercenaria

UdeM00000016564 6596 553.9 UdeM00000016564 XP\_045169715.1 52.5 516  
235 4 5 510 3 518 2.20E-154 553.9 6596 cellular

organisms;Eukaryota;Opisthokonta;Metazoa;Eumetazoa;Bilateria;Protostomia;Spiralia;Lophotrochozoa;Mollusca;Bivalvia;Autobranchia;Heteroconchia;Euheterodonta;Imparidentia;Venerida;Veneroidea;Veneridae;Mercenaria;Mercenaria mercenaria

UdeM00000016565 6596 550.1 UdeM00000016565 XP\_045169715.1 52.1 516  
237 4 5 510 3 518 3.10E-153 550.1 6596 cellular

organisms;Eukaryota;Opisthokonta;Metazoa;Eumetazoa;Bilateria;Protostomia;Spiralia;Lophotrochozoa;Mollusca;Bivalvia;Autobranchia;Heteroconchia;Euheterodonta;Imparidentia;Venerida;Veneroidea;Veneridae;Mercenaria;Mercenaria mercenaria

UdeM00000016566 6596 367.9 UdeM00000016566 XP\_045169747.1 52.7 351  
158 4 22 371 140 483 1.60E-98 367.9 6596 cellular

organisms;Eukaryota;Opisthokonta;Metazoa;Eumetazoa;Bilateria;Protostomia;Spiralia;Lophotrochozoa;Mollusca;Bivalvia;Autobranchia;Heteroconchia;Euheterodonta;Imparidentia;Venerida;Veneroidea;Veneridae;Mercenaria;Mercenaria mercenaria

UdeM00000016567 6596 149.8 UdeM00000016567 XP\_045169747.1 47.7 149  
70 3 1 149 1 141 2.70E-33 149.8 6596 cellular

organisms;Eukaryota;Opisthokonta;Metazoa;Eumetazoa;Bilateria;Protostomia;Spiralia;Lophotrochozoa;Mollusca;Bivalvia;Autobranchia;Heteroconchia;Euheterodonta;Imparidentia;Venerida;Veneroidea;Veneridae;Mercenaria;Mercenaria mercenaria

UdeM00000044326 6596 275.4 UdeM00000044326 XP\_045182881.1 66.8 217  
66 4 10 226 1743 1953 6.50E-71 275.4 6596 cellular

organisms;Eukaryota;Opisthokonta;Metazoa;Eumetazoa;Bilateria;Protostomia;Spiralia;Lophotrochozoa;Mollusca;Bivalvia;Autobranchia;Heteroconchia;Euheterodonta;Imparidentia;Venerida;Veneroidea;Veneridae;Mercenaria;Mercenaria mercenaria

terodonta;Imparidentia;Venerida;Veneroidea;Veneridae;Mercenaria;Mercenari  
 a mercenaria  
 UdeM00000044250 6596 206.8 UdeM00000044250 XP\_045166864.1 34.4 326  
 201 5 24 348 35 348 4.40E-50 206.8 6596 cellular  
 organisms;Eukaryota;Opisthokonta;Metazoa;Eumetazoa;Bilateria;Protostomia;  
 Spiralia;Lophotrochozoa;Mollusca;Bivalvia;Autobranchia;Heteroconchia;Euhe  
 terodonta;Imparidentia;Venerida;Veneroidea;Veneridae;Mercenaria;Mercenari  
 a mercenaria  
 UdeM00000044251 6596 115.2 UdeM00000044251 XP\_045166864.1 42.1 114  
 64 1 24 135 35 148 8.10E-23 115.2 6596 cellular  
 organisms;Eukaryota;Opisthokonta;Metazoa;Eumetazoa;Bilateria;Protostomia;  
 Spiralia;Lophotrochozoa;Mollusca;Bivalvia;Autobranchia;Heteroconchia;Euhe  
 terodonta;Imparidentia;Venerida;Veneroidea;Veneridae;Mercenaria;Mercenari  
 a mercenaria  
 UdeM00000044252 6596 125.6 UdeM00000044252 XP\_045176830.1 45.3 150  
 71 3 53 191 2 151 7.10E-26 125.6 6596 cellular  
 organisms;Eukaryota;Opisthokonta;Metazoa;Eumetazoa;Bilateria;Protostomia;  
 Spiralia;Lophotrochozoa;Mollusca;Bivalvia;Autobranchia;Heteroconchia;Euhe  
 terodonta;Imparidentia;Venerida;Veneroidea;Veneridae;Mercenaria;Mercenari  
 a mercenaria  
 UdeM00000044253 6596 386.3 UdeM00000044253 XP\_045174506.1 44.7 432  
 223 6 14 433 90 517 5.10E-104 386.3 6596 cellular  
 organisms;Eukaryota;Opisthokonta;Metazoa;Eumetazoa;Bilateria;Protostomia;  
 Spiralia;Lophotrochozoa;Mollusca;Bivalvia;Autobranchia;Heteroconchia;Euhe  
 terodonta;Imparidentia;Venerida;Veneroidea;Veneridae;Mercenaria;Mercenari  
 a mercenaria  
 UdeM00000044254 6596 915.6 UdeM00000044254 XP\_045163820.1 65 672  
 231 3 50 719 376 1045 5.50E-263 915.6 6596 cellular  
 organisms;Eukaryota;Opisthokonta;Metazoa;Eumetazoa;Bilateria;Protostomia;  
 Spiralia;Lophotrochozoa;Mollusca;Bivalvia;Autobranchia;Heteroconchia;Euhe  
 terodonta;Imparidentia;Venerida;Veneroidea;Veneridae;Mercenaria;Mercenari  
 a mercenaria  
 UdeM00000033900 6596 553.9 UdeM00000033900 XP\_045190086.1 51.6 554  
 254 5 40 587 60 605 2.40E-154 553.9 6596 cellular  
 organisms;Eukaryota;Opisthokonta;Metazoa;Eumetazoa;Bilateria;Protostomia;  
 Spiralia;Lophotrochozoa;Mollusca;Bivalvia;Autobranchia;Heteroconchia;Euhe  
 terodonta;Imparidentia;Venerida;Veneroidea;Veneridae;Mercenaria;Mercenari  
 a mercenaria  
 UdeM00000033901 6596 423.7 UdeM00000033901 XP\_045190086.1 51.6 436  
 199 4 40 471 178 605 3.10E-115 423.7 6596 cellular  
 organisms;Eukaryota;Opisthokonta;Metazoa;Eumetazoa;Bilateria;Protostomia;  
 Spiralia;Lophotrochozoa;Mollusca;Bivalvia;Autobranchia;Heteroconchia;Euhe  
 terodonta;Imparidentia;Venerida;Veneroidea;Veneridae;Mercenaria;Mercenari  
 a mercenaria  
 UdeM00000033903 1415580 301.6 UdeM00000033903 XP\_030075314.1 51.3  
 316 135 4 3 315 326 625 1.20E-78 301.6 1415580  
 cellular  
 organisms;Eukaryota;Opisthokonta;Metazoa;Eumetazoa;Bilateria;Deuterostomi  
 a;Chordata;Craniata;Vertebrata;Gnathostomata;Teleostomi;Euteleostomi;Sarc  
 opterygii;Dipnotetrapodomorpha;Tetrapoda;Amphibia;Gymnophiona;Siphonopida  
 e;Microcaecilia;Microcaecilia unicolor  
 UdeM00000033904 7757 241.5 UdeM00000033904 XP\_032835197.1 81.2 138  
 26 0 75 212 1 138 9.80E-61 241.5 7757 cellular  
 organisms;Eukaryota;Opisthokonta;Metazoa;Eumetazoa;Bilateria;Deuterostomi

a;Chordata;Craniata;Vertebrata;Cyclostomata;Hyperoartia;Petromyzontiformes;Petromyzontidae;Petromyzon;Petromyzon marinus

UdeM00000033905 6596 476.9 UdeM00000033905 XP\_045200630.1 57.3 405  
172 1 58 462 1 404 3.50E-131 476.9 6596 cellular  
organisms;Eukaryota;Opisthokonta;Metazoa;Eumetazoa;Bilateria;Protostomia;  
Spiralia;Lophotrochozoa;Mollusca;Bivalvia;Autobranchia;Heteroconchia;Euhe-  
terodonta;Imparidentia;Venerida;Veneroidea;Veneridae;Mercenaria;Mercenari-  
a mercenaria

UdeM00000033907 6573 186.4 UdeM00000033907 XP\_021355115.1 49.8 428  
145 10 76 483 477 854 8.40E-44 186.4 6573 cellular  
organisms;Eukaryota;Opisthokonta;Metazoa;Eumetazoa;Bilateria;Protostomia;  
Spiralia;Lophotrochozoa;Mollusca;Bivalvia;Autobranchia;Pteriormorphia;Pect-  
inida;Pectinoidea;Pectinidae;Mizuhopecten;Mizuhopecten yessoensis

UdeM00000033908 6573 186.8 UdeM00000033908 XP\_021355115.1 48.1 418  
170 10 76 486 477 854 6.50E-44 186.8 6573 cellular  
organisms;Eukaryota;Opisthokonta;Metazoa;Eumetazoa;Bilateria;Protostomia;  
Spiralia;Lophotrochozoa;Mollusca;Bivalvia;Autobranchia;Pteriormorphia;Pect-  
inida;Pectinoidea;Pectinidae;Mizuhopecten;Mizuhopecten yessoensis

UdeM00000033909 6596 280.8 UdeM00000033909 XP\_045202271.1 49.9 341  
147 6 1 333 1 325 2.70E-72 280.8 6596 cellular  
organisms;Eukaryota;Opisthokonta;Metazoa;Eumetazoa;Bilateria;Protostomia;  
Spiralia;Lophotrochozoa;Mollusca;Bivalvia;Autobranchia;Heteroconchia;Euhe-  
terodonta;Imparidentia;Venerida;Veneroidea;Veneridae;Mercenaria;Mercenari-  
a mercenaria

UdeM00000033910 6596 280.8 UdeM00000033910 XP\_045202271.1 50 342  
146 6 1 334 1 325 2.70E-72 280.8 6596 cellular  
organisms;Eukaryota;Opisthokonta;Metazoa;Eumetazoa;Bilateria;Protostomia;  
Spiralia;Lophotrochozoa;Mollusca;Bivalvia;Autobranchia;Heteroconchia;Euhe-  
terodonta;Imparidentia;Venerida;Veneroidea;Veneridae;Mercenaria;Mercenari-  
a mercenaria

UdeM00000033911 6526 619 UdeM00000033911 XP\_013084021.1 63.1 485  
177 2 11 493 42 526 5.20E-174 619 6526 cellular  
organisms;Eukaryota;Opisthokonta;Metazoa;Eumetazoa;Bilateria;Protostomia;  
Spiralia;Lophotrochozoa;Mollusca;Gastropoda;Heterobranchia;Euthyneura;Pan-  
pulmonata;Hygrophila;Lymnaeioidea;Planorbidae;Biomphalaria;Biomphalaria  
glabrata

UdeM00000033912 6596 72.4 UdeM00000033912 XP\_045199732.1 34.1 132  
83 2 159 287 329 459 1.30E-09 72.4 6596 cellular  
organisms;Eukaryota;Opisthokonta;Metazoa;Eumetazoa;Bilateria;Protostomia;  
Spiralia;Lophotrochozoa;Mollusca;Bivalvia;Autobranchia;Heteroconchia;Euhe-  
terodonta;Imparidentia;Venerida;Veneroidea;Veneridae;Mercenaria;Mercenari-  
a mercenaria

UdeM00000033913 6573 327.8 UdeM00000033913 XP\_021362990.1 27.7 874  
507 20 4 762 7 870 4.20E-86 327.8 6573 cellular  
organisms;Eukaryota;Opisthokonta;Metazoa;Eumetazoa;Bilateria;Protostomia;  
Spiralia;Lophotrochozoa;Mollusca;Bivalvia;Autobranchia;Pteriormorphia;Pect-  
inida;Pectinoidea;Pectinidae;Mizuhopecten;Mizuhopecten yessoensis

UdeM00000033914 400727 214.9 UdeM00000033914 XP\_025106831.1 30.3  
575 356 14 1 544 351 911 3.00E-52 214.9 400727  
cellular  
organisms;Eukaryota;Opisthokonta;Metazoa;Eumetazoa;Bilateria;Protostomia;  
Spiralia;Lophotrochozoa;Mollusca;Gastropoda;Caenogastropoda;Architaeniogla-  
ssa;Ampullarioidea;Ampullariidae;Pomacea;Pomacea canaliculata

UdeM00000033915 7574 211.8 UdeM00000033915 XP\_023930431.1 36.6 331  
 195 7 21 344 16 338 1.40E-51 211.8 7574 cellular  
 organisms;Eukaryota;Opisthokonta;Metazoa;Eumetazoa;Bilateria;Protostomia;  
 Spiralia;Lophotrochozoa;Brachiopoda;Linguliformea;Lingulata;Lingulida;Lin  
 guloidea;Lingulidae;Lingula;Lingula anatina  
 UdeM00000033916 7741 281.6 UdeM00000033916 XP\_019622111.1 50.9 275  
 133 2 5 278 1 274 1.10E-72 281.6 7741 cellular  
 organisms;Eukaryota;Opisthokonta;Metazoa;Eumetazoa;Bilateria;Deuterostomi  
 a;Chordata;Cephalochordata;Leptocardii;Amphioxiformes;Branchiostomidae;Br  
 anchiostoma;Branchiostoma belcheri  
 UdeM00000033917 6596 197.6 UdeM00000033917 XP\_045199418.1 35.8 338  
 191 10 1 330 1 320 2.70E-47 197.6 6596 cellular  
 organisms;Eukaryota;Opisthokonta;Metazoa;Eumetazoa;Bilateria;Protostomia;  
 Spiralia;Lophotrochozoa;Mollusca;Bivalvia;Autobranchia;Heteroconchia;Euhe  
 terodonta;Imparidentia;Venerida;Veneroidea;Veneridae;Mercenaria;Mercenari  
 a mercenaria  
 UdeM00000033918 30608 164.5 UdeM00000033918 XP\_012602988.1 31.2 465  
 281 12 2 434 424 881 4.60E-37 164.5 30608 cellular  
 organisms;Eukaryota;Opisthokonta;Metazoa;Eumetazoa;Bilateria;Deuterostomi  
 a;Chordata;Craniata;Vertebrata;Gnathostomata;Teleostomi;Euteleostomi;Sarc  
 opterygii;Dipnotetrapodomorpha;Tetrapoda;Amniota;Mammalia;Theria;Eutheria  
 ;Boreoeutheria;Euarchontoglires;Primates;Strepsirrhini;Lemuriformes;Cheir  
 ogaleidae;Microcebus;Microcebus murinus  
 UdeM00000033920 591936 111.7 UdeM00000033920 XP\_023062827.1 42.7  
 131 73 2 19 149 47 175 8.30E-22 111.7 591936  
 cellular  
 organisms;Eukaryota;Opisthokonta;Metazoa;Eumetazoa;Bilateria;Deuterostomi  
 a;Chordata;Craniata;Vertebrata;Gnathostomata;Teleostomi;Euteleostomi;Sarc  
 opterygii;Dipnotetrapodomorpha;Tetrapoda;Amniota;Mammalia;Theria;Eutheria  
 ;Boreoeutheria;Euarchontoglires;Primates;Haplorrhini;Simiiformes;Catarri  
 ni;Cercopithecoidea;Cercopithecidae;Colobinae;Piliocolobus;Piliocolobus  
 tephrosceles  
 UdeM00000033921 6596 266.5 UdeM00000033921 XP\_045161521.1 33.2 614  
 362 19 5 598 195 780 8.70E-68 266.5 6596 cellular  
 organisms;Eukaryota;Opisthokonta;Metazoa;Eumetazoa;Bilateria;Protostomia;  
 Spiralia;Lophotrochozoa;Mollusca;Bivalvia;Autobranchia;Heteroconchia;Euhe  
 terodonta;Imparidentia;Venerida;Veneroidea;Veneridae;Mercenaria;Mercenari  
 a mercenaria  
 UdeM00000033922 6596 413.7 UdeM00000033922 XP\_045201007.1 54.6 346  
 154 2 1 344 820 1164 2.30E-112 413.7 6596 cellular  
 organisms;Eukaryota;Opisthokonta;Metazoa;Eumetazoa;Bilateria;Protostomia;  
 Spiralia;Lophotrochozoa;Mollusca;Bivalvia;Autobranchia;Heteroconchia;Euhe  
 terodonta;Imparidentia;Venerida;Veneroidea;Veneridae;Mercenaria;Mercenari  
 a mercenaria  
 UdeM00000033923 6596 290 UdeM00000033923 XP\_045201007.1 51.8 253  
 119 2 1 251 820 1071 2.90E-75 290 6596 cellular  
 organisms;Eukaryota;Opisthokonta;Metazoa;Eumetazoa;Bilateria;Protostomia;  
 Spiralia;Lophotrochozoa;Mollusca;Bivalvia;Autobranchia;Heteroconchia;Euhe  
 terodonta;Imparidentia;Venerida;Veneroidea;Veneridae;Mercenaria;Mercenari  
 a mercenaria  
 UdeM00000033924 6596 162.5 UdeM00000033924 XP\_045201007.1 41.8 196  
 111 2 16 211 560 752 6.60E-37 162.5 6596 cellular  
 organisms;Eukaryota;Opisthokonta;Metazoa;Eumetazoa;Bilateria;Protostomia;  
 Spiralia;Lophotrochozoa;Mollusca;Bivalvia;Autobranchia;Heteroconchia;Euhe



terodonta;Imparidentia;Venerida;Veneroidea;Veneridae;Mercenaria;Mercenaria mercenaria

UdeM00000033929 225164 196.1 UdeM00000033929 XP\_009058200.1 45.7  
230 98 3 1 230 1 203 5.10E-47 196.1 225164  
cellular

organisms;Eukaryota;Opisthokonta;Metazoa;Eumetazoa;Bilateria;Protostomia;Spiralia;Lophotrochozoa;Mollusca;Gastropoda;Patellogastropoda;Lottioidea;Lottiidae;Lottia;Lottia gigantea

UdeM00000033930 6579 137.1 UdeM00000033930 XP\_033752673.1 48.8 160  
58 2 1 136 493 652 1.70E-29 137.1 6579 cellular

organisms;Eukaryota;Opisthokonta;Metazoa;Eumetazoa;Bilateria;Protostomia;Spiralia;Lophotrochozoa;Mollusca;Bivalvia;Autobranchia;Pteriormorphia;Pectinida;Pectinoidea;Pectinidae;Pecten;Pecten maximus

UdeM00000033931 225164 254.2 UdeM00000033931 XP\_009058199.1 39.6  
414 224 9 1 408 1 394 2.80E-64 254.2 225164  
cellular

organisms;Eukaryota;Opisthokonta;Metazoa;Eumetazoa;Bilateria;Protostomia;Spiralia;Lophotrochozoa;Mollusca;Gastropoda;Patellogastropoda;Lottioidea;Lottiidae;Lottia;Lottia gigantea

UdeM00000033932 46514 118.6 UdeM00000033932 XP\_038073135.1 41.9 148  
79 2 1 148 393 533 6.90E-24 118.6 46514 cellular

organisms;Eukaryota;Opisthokonta;Metazoa;Eumetazoa;Bilateria;Deuterostomia;Echinodermata;Eleutherozoa;Asterozoa;Asteroidea;Valvatataceae;Valvatida;Asterinidae;Patiria;Patiria miniata

UdeM00000033933 1735272 90.9 UdeM00000033933 XP\_041360299.1 63.6  
66 24 0 38 103 1857 1922 1.10E-15 90.9 1735272  
cellular

organisms;Eukaryota;Opisthokonta;Metazoa;Eumetazoa;Bilateria;Protostomia;Spiralia;Lophotrochozoa;Mollusca;Gastropoda;Neomphalina;Neomphaloidea;Peltospiridae;Gigantopelta;Gigantopelta aegis

UdeM00000033934 6579 137.5 UdeM00000033934 XP\_033757476.1 53 132  
54 2 23 146 93 224 1.40E-29 137.5 6579 cellular

organisms;Eukaryota;Opisthokonta;Metazoa;Eumetazoa;Bilateria;Protostomia;Spiralia;Lophotrochozoa;Mollusca;Bivalvia;Autobranchia;Pteriormorphia;Pectinida;Pectinoidea;Pectinidae;Pecten;Pecten maximus

UdeM00000033935 6596 157.9 UdeM00000033935 XP\_045199433.1 28.4 563  
287 18 1 458 210 761 3.50E-35 157.9 6596 cellular

organisms;Eukaryota;Opisthokonta;Metazoa;Eumetazoa;Bilateria;Protostomia;Spiralia;Lophotrochozoa;Mollusca;Bivalvia;Autobranchia;Heteroconchia;Euheterodonta;Imparidentia;Venerida;Veneroidea;Veneridae;Mercenaria;Mercenaria mercenaria

UdeM00000033936 6596 153.7 UdeM00000033936 XP\_045199433.1 28.3 562  
273 19 1 442 210 761 6.50E-34 153.7 6596 cellular

organisms;Eukaryota;Opisthokonta;Metazoa;Eumetazoa;Bilateria;Protostomia;Spiralia;Lophotrochozoa;Mollusca;Bivalvia;Autobranchia;Heteroconchia;Euheterodonta;Imparidentia;Venerida;Veneroidea;Veneridae;Mercenaria;Mercenaria mercenaria

UdeM00000033937 7574 199.1 UdeM00000033937 XP\_023930431.1 37.5 299  
162 10 4 288 14 301 7.90E-48 199.1 7574 cellular

organisms;Eukaryota;Opisthokonta;Metazoa;Eumetazoa;Bilateria;Protostomia;Spiralia;Lophotrochozoa;Brachiopoda;Linguliformea;Lingulata;Lingulida;Linguloidea;Lingulidae;Lingula;Lingula anatina

UdeM00000033938 133434 207.2 UdeM00000033938 XP\_022112073.1 29.9  
622 373 20 6 583 353 955 5.60E-50 207.2 133434

cellular  
organisms;Eukaryota;Opisthokonta;Metazoa;Eumetazoa;Bilateria;Deuterostomi  
a;Echinodermata;Eleutherozoa;Asterozoa;Asteroidea;Valvatacea;Valvatida;Ac  
anthasteridae;Acanthaster;Acanthaster planci  
UdeM00000033939 7574 236.1 UdeM00000033939 XP\_023930431.1 41.4 321  
165 10 18 325 28 338 6.60E-59 236.1 7574 cellular  
organisms;Eukaryota;Opisthokonta;Metazoa;Eumetazoa;Bilateria;Protostomia;  
Spiralia;Lophotrochozoa;Brachiopoda;Linguliformea;Lingulata;Lingulida;Lin  
guloidea;Lingulidae;Lingula;Lingula anatina  
UdeM00000033942 6596 216.5 UdeM00000033942 XP\_045199433.1 33.3 571  
347 17 1 556 210 761 1.10E-52 216.5 6596 cellular  
organisms;Eukaryota;Opisthokonta;Metazoa;Eumetazoa;Bilateria;Protostomia;  
Spiralia;Lophotrochozoa;Mollusca;Bivalvia;Autobranhia;Heteroconchia;Euhe  
terodonta;Imparidentia;Venerida;Veneroidea;Veneridae;Mercenaria;Mercenari  
a mercenaria  
UdeM00000033943 6573 419.5 UdeM00000033943 XP\_021362990.1 32.4 884  
550 20 19 890 23 870 1.20E-113 419.5 6573 cellular  
organisms;Eukaryota;Opisthokonta;Metazoa;Eumetazoa;Bilateria;Protostomia;  
Spiralia;Lophotrochozoa;Mollusca;Bivalvia;Autobranhia;Pteriormorphia;Pect  
inida;Pectinoidea;Pectinidae;Mizuhopecten;Mizuhopecten yessoensis  
UdeM00000033944 6565 571.2 UdeM00000033944 XP\_022343426.1 65.5 472  
144 5 2 464 3 464 1.30E-159 571.2 6565 cellular  
organisms;Eukaryota;Opisthokonta;Metazoa;Eumetazoa;Bilateria;Protostomia;  
Spiralia;Lophotrochozoa;Mollusca;Bivalvia;Autobranhia;Pteriormorphia;Ostr  
eida;Ostreoidea;Ostreidae;Crassostrea;Crassostrea virginica  
UdeM00000033945 29159 490 UdeM00000033945 XP\_011442135.2 76.4 284  
66 1 1 284 23 305 2.10E-135 490 29159 cellular  
organisms;Eukaryota;Opisthokonta;Metazoa;Eumetazoa;Bilateria;Protostomia;  
Spiralia;Lophotrochozoa;Mollusca;Bivalvia;Autobranhia;Pteriormorphia;Ostr  
eida;Ostreoidea;Ostreidae;Crassostrea;Crassostrea gigas  
UdeM00000033946 6596 715.3 UdeM00000033946 XP\_045201325.1 63.7 512  
179 4 38 545 28 536 6.20E-203 715.3 6596 cellular  
organisms;Eukaryota;Opisthokonta;Metazoa;Eumetazoa;Bilateria;Protostomia;  
Spiralia;Lophotrochozoa;Mollusca;Bivalvia;Autobranhia;Heteroconchia;Euhe  
terodonta;Imparidentia;Venerida;Veneroidea;Veneridae;Mercenaria;Mercenari  
a mercenaria  
UdeM00000033947 6596 265.4 UdeM00000033947 XP\_045201753.1 73 159  
43 0 12 170 7 165 6.00E-68 265.4 6596 cellular  
organisms;Eukaryota;Opisthokonta;Metazoa;Eumetazoa;Bilateria;Protostomia;  
Spiralia;Lophotrochozoa;Mollusca;Bivalvia;Autobranhia;Heteroconchia;Euhe  
terodonta;Imparidentia;Venerida;Veneroidea;Veneridae;Mercenaria;Mercenari  
a mercenaria  
UdeM00000033948 6596 1119.4 UdeM00000033948 XP\_045200068.1 67.8  
888 252 8 1 870 1 872 0.00E+00 1119.4 6596  
cellular  
organisms;Eukaryota;Opisthokonta;Metazoa;Eumetazoa;Bilateria;Protostomia;  
Spiralia;Lophotrochozoa;Mollusca;Bivalvia;Autobranhia;Heteroconchia;Euhe  
terodonta;Imparidentia;Venerida;Veneroidea;Veneridae;Mercenaria;Mercenari  
a mercenaria  
UdeM00000033949 1735272 400.6 UdeM00000033949 XP\_041358548.1 39.4  
786 423 23 10 768 2 761 4.50E-108 400.6 1735272  
cellular  
organisms;Eukaryota;Opisthokonta;Metazoa;Eumetazoa;Bilateria;Protostomia;

Spiralia; Lophotrochozoa; Mollusca; Gastropoda; Neomphalina; Neomphaloidea; Pelto-  
 tospiridae; Gigantopelta; Gigantopelta aegis

UdeM00000033950 6565 136.7 UdeM00000033950 XP\_022337267.1 26.2 634  
 365 20 1 592 1 573 9.40E-29 136.7 6565 cellular  
 organisms; Eukaryota; Opisthokonta; Metazoa; Eumetazoa; Bilateria; Protostomia;  
 Spiralia; Lophotrochozoa; Mollusca; Bivalvia; Autobranchia; Pteriomorpha; Ostr-  
 eida; Ostreidae; Crassostrea; Crassostrea virginica

UdeM00000033953 6579 309.7 UdeM00000033953 XP\_033760510.1 53 247  
 116 0 7 253 5 251 3.50E-81 309.7 6579 cellular  
 organisms; Eukaryota; Opisthokonta; Metazoa; Eumetazoa; Bilateria; Protostomia;  
 Spiralia; Lophotrochozoa; Mollusca; Bivalvia; Autobranchia; Pteriomorpha; Pect-  
 inida; Pectinoidea; Pectinidae; Pecten; Pecten maximus

UdeM00000033954 6596 186.8 UdeM00000033954 XP\_045200213.1 30.7 319  
 212 4 1 317 27 338 4.70E-44 186.8 6596 cellular  
 organisms; Eukaryota; Opisthokonta; Metazoa; Eumetazoa; Bilateria; Protostomia;  
 Spiralia; Lophotrochozoa; Mollusca; Bivalvia; Autobranchia; Heteroconchia; Euhe-  
 terodonta; Imparidentia; Venerida; Veneroidea; Veneridae; Mercenaria; Mercenari-  
 a mercenaria

UdeM00000033955 6596 422.2 UdeM00000033955 XP\_045199316.1 62.5 312  
 116 1 1 311 1 312 5.90E-115 422.2 6596 cellular  
 organisms; Eukaryota; Opisthokonta; Metazoa; Eumetazoa; Bilateria; Protostomia;  
 Spiralia; Lophotrochozoa; Mollusca; Bivalvia; Autobranchia; Heteroconchia; Euhe-  
 terodonta; Imparidentia; Venerida; Veneroidea; Veneridae; Mercenaria; Mercenari-  
 a mercenaria

UdeM00000033956 225164 94.7 UdeM00000033956 XP\_009065504.1 49.5  
 95 46 2 41 133 14 108 9.60E-17 94.7 225164  
 cellular  
 organisms; Eukaryota; Opisthokonta; Metazoa; Eumetazoa; Bilateria; Protostomia;  
 Spiralia; Lophotrochozoa; Mollusca; Gastropoda; Patellogastropoda; Lottioidea;  
 Lottiidae; Lottia; Lottia gigantea

UdeM00000033957 6579 446.8 UdeM00000033957 XP\_033760044.1 38.1 755  
 436 13 23 758 23 765 5.40E-122 446.8 6579 cellular  
 organisms; Eukaryota; Opisthokonta; Metazoa; Eumetazoa; Bilateria; Protostomia;  
 Spiralia; Lophotrochozoa; Mollusca; Bivalvia; Autobranchia; Pteriomorpha; Pect-  
 inida; Pectinoidea; Pectinidae; Pecten; Pecten maximus

UdeM00000033958 6596 288.1 UdeM00000033958 XP\_045201904.1 86.5 155  
 21 0 8 162 5 159 6.90E-75 288.1 6596 cellular  
 organisms; Eukaryota; Opisthokonta; Metazoa; Eumetazoa; Bilateria; Protostomia;  
 Spiralia; Lophotrochozoa; Mollusca; Bivalvia; Autobranchia; Heteroconchia; Euhe-  
 terodonta; Imparidentia; Venerida; Veneroidea; Veneridae; Mercenaria; Mercenari-  
 a mercenaria

UdeM00000033959 6596 187.6 UdeM00000033959 XP\_045199613.1 91.4 93  
 8 0 1 93 67 159 7.30E-45 187.6 6596 cellular  
 organisms; Eukaryota; Opisthokonta; Metazoa; Eumetazoa; Bilateria; Protostomia;  
 Spiralia; Lophotrochozoa; Mollusca; Bivalvia; Autobranchia; Heteroconchia; Euhe-  
 terodonta; Imparidentia; Venerida; Veneroidea; Veneridae; Mercenaria; Mercenari-  
 a mercenaria

UdeM00000033970 6596 527.7 UdeM00000033970 XP\_045199418.1 35.9 932  
 554 24 1 905 1 916 2.90E-146 527.7 6596 cellular  
 organisms; Eukaryota; Opisthokonta; Metazoa; Eumetazoa; Bilateria; Protostomia;  
 Spiralia; Lophotrochozoa; Mollusca; Bivalvia; Autobranchia; Heteroconchia; Euhe-  
 terodonta; Imparidentia; Venerida; Veneroidea; Veneridae; Mercenaria; Mercenari-  
 a mercenaria

UdeM00000033971 6596 515 UdeM00000033971 XP\_045200341.1 51.6 457  
 219 2 16 471 20 475 1.00E-142 515 6596 cellular  
 organisms;Eukaryota;Opisthokonta;Metazoa;Eumetazoa;Bilateria;Protostomia;  
 Spiralia;Lophotrochozoa;Mollusca;Bivalvia;Autobranchia;Heteroconchia;Euhe  
 terodonta;Imparidentia;Venerida;Veneroidea;Veneridae;Mercenaria;Mercenari  
 a mercenaria  
 UdeM00000033972 6573 485.7 UdeM00000033972 XP\_021351466.1 54.9 430  
 184 3 8 435 33 454 6.10E-134 485.7 6573 cellular  
 organisms;Eukaryota;Opisthokonta;Metazoa;Eumetazoa;Bilateria;Protostomia;  
 Spiralia;Lophotrochozoa;Mollusca;Bivalvia;Autobranchia;Pteriormorphia;Pect  
 inida;Pectinoidea;Pectinidae;Mizuhopecten;Mizuhopecten yessoensis  
 UdeM00000033973 6573 609 UdeM00000033973 XP\_021377716.1 50 686  
 304 14 1 670 166 828 7.90E-171 609 6573 cellular  
 organisms;Eukaryota;Opisthokonta;Metazoa;Eumetazoa;Bilateria;Protostomia;  
 Spiralia;Lophotrochozoa;Mollusca;Bivalvia;Autobranchia;Pteriormorphia;Pect  
 inida;Pectinoidea;Pectinidae;Mizuhopecten;Mizuhopecten yessoensis  
 UdeM00000033974 6596 128.6 UdeM00000033974 XP\_045200612.1 49.6 123  
 62 0 24 146 54 176 7.00E-27 128.6 6596 cellular  
 organisms;Eukaryota;Opisthokonta;Metazoa;Eumetazoa;Bilateria;Protostomia;  
 Spiralia;Lophotrochozoa;Mollusca;Bivalvia;Autobranchia;Heteroconchia;Euhe  
 terodonta;Imparidentia;Venerida;Veneroidea;Veneridae;Mercenaria;Mercenari  
 a mercenaria  
 UdeM00000033975 400727 106.3 UdeM00000033975 XP\_025079366.1 41.4  
 140 79 2 11 150 267 403 3.70E-20 106.3 400727  
 cellular  
 organisms;Eukaryota;Opisthokonta;Metazoa;Eumetazoa;Bilateria;Protostomia;  
 Spiralia;Lophotrochozoa;Mollusca;Gastropoda;Caenogastropoda;Architaeniogl  
 ossa;Ampullarioidea;Ampullariidae;Pomacea;Pomacea canaliculata  
 UdeM00000016046 6596 299.3 UdeM00000016046 XP\_045202470.1 67.8 233  
 73 2 43 274 97 328 2.60E-77 299.3 6596 cellular  
 organisms;Eukaryota;Opisthokonta;Metazoa;Eumetazoa;Bilateria;Protostomia;  
 Spiralia;Lophotrochozoa;Mollusca;Bivalvia;Autobranchia;Heteroconchia;Euhe  
 terodonta;Imparidentia;Venerida;Veneroidea;Veneridae;Mercenaria;Mercenari  
 a mercenaria  
 UdeM00000016047 6596 845.1 UdeM00000016047 XP\_045202470.1 75 559  
 134 3 92 646 494 1050 5.90E-242 845.1 6596 cellular  
 organisms;Eukaryota;Opisthokonta;Metazoa;Eumetazoa;Bilateria;Protostomia;  
 Spiralia;Lophotrochozoa;Mollusca;Bivalvia;Autobranchia;Heteroconchia;Euhe  
 terodonta;Imparidentia;Venerida;Veneroidea;Veneridae;Mercenaria;Mercenari  
 a mercenaria  
 UdeM00000016048 6596 852.4 UdeM00000016048 XP\_045202470.1 75.7 559  
 130 3 92 646 494 1050 3.70E-244 852.4 6596 cellular  
 organisms;Eukaryota;Opisthokonta;Metazoa;Eumetazoa;Bilateria;Protostomia;  
 Spiralia;Lophotrochozoa;Mollusca;Bivalvia;Autobranchia;Heteroconchia;Euhe  
 terodonta;Imparidentia;Venerida;Veneroidea;Veneridae;Mercenaria;Mercenari  
 a mercenaria  
 UdeM00000016049 6596 85.9 UdeM00000016049 XP\_045200554.1 44.4 90  
 50 0 14 103 32 121 3.50E-14 85.9 6596 cellular  
 organisms;Eukaryota;Opisthokonta;Metazoa;Eumetazoa;Bilateria;Protostomia;  
 Spiralia;Lophotrochozoa;Mollusca;Bivalvia;Autobranchia;Heteroconchia;Euhe  
 terodonta;Imparidentia;Venerida;Veneroidea;Veneridae;Mercenaria;Mercenari  
 a mercenaria  
 UdeM00000016050 6596 205.3 UdeM00000016050 XP\_045200840.1 38.4 489  
 231 20 1 443 1 465 1.60E-49 205.3 6596 cellular

organisms;Eukaryota;Opisthokonta;Metazoa;Eumetazoa;Bilateria;Protostomia;Spiralia;Lophotrochozoa;Mollusca;Bivalvia;Autobranchia;Heteroconchia;Euherodonta;Imparidentia;Venerida;Veneroidea;Veneridae;Mercenaria;Mercenaria mercenaria

UdeM00000016052 77115 190.3 UdeM00000016052 XP\_038133414.1 41.6 245  
128 4 12 248 145 382 3.10E-45 190.3 77115 cellular

organisms;Eukaryota;Opisthokonta;Metazoa;Eumetazoa;Bilateria;Deuterostomia;Chordata;Craniata;Vertebrata;Gnathostomata;Teleostomi;Euteleostomi;Actinopterygii;Actinopteri;Neopterygii;Teleostei;Osteoglossocephalai;Clupeocephala;Euteleostei;Neoteleostei;Eurypterygia;Ctenosquamata;Acanthomorphata;Euacanthomorphacea;Percomorphaceae;Ovalentaria;Atherinomorphae;Cyprinodontiformes;Cyprinodontoides;Cyprinodontidae;Cyprinodontinae;Cyprinodontini;Cyprinodon;Cyprinodon tularosa

UdeM00000016051 40690 252.3 UdeM00000016051 XP\_034006674.1 39.9 373  
212 6 2 371 4 367 1.00E-63 252.3 40690 cellular

organisms;Eukaryota;Opisthokonta;Metazoa;Eumetazoa;Bilateria;Deuterostomia;Chordata;Craniata;Vertebrata;Gnathostomata;Teleostomi;Euteleostomi;Actinopterygii;Actinopteri;Neopterygii;Teleostei;Osteoglossocephalai;Clupeocephala;Euteleostei;Neoteleostei;Eurypterygia;Ctenosquamata;Acanthomorphata;Euacanthomorphacea;Percomorphaceae;Eupercaria;Perciformes;Notothenioides;Nototheniidae;Trematomus;Trematomus bernacchii

UdeM00000016053 2607531 113.2 UdeM00000016053 XP\_029640350.1 70.3  
91 24 1 47 137 506 593 2.70E-22 113.2 2607531

cellular

organisms;Eukaryota;Opisthokonta;Metazoa;Eumetazoa;Bilateria;Protostomia;Spiralia;Lophotrochozoa;Mollusca;Cephalopoda;Coleoidea;Octopodiformes;Octopoda;Incirrata;Octopodidae;Octopus;Octopus sinensis

UdeM00000016054 225164 149.1 UdeM00000016054 XP\_009062950.1 73.4  
94 25 0 6 99 329 422 3.10E-33 149.1 225164

cellular

organisms;Eukaryota;Opisthokonta;Metazoa;Eumetazoa;Bilateria;Protostomia;Spiralia;Lophotrochozoa;Mollusca;Gastropoda;Patellogastropoda;Lottioides;Lottiidae;Lottia;Lottia gigantea

UdeM00000016055 6596 256.5 UdeM00000016055 XP\_045183440.1 52.9 240  
108 3 2 240 145 380 4.10E-65 256.5 6596 cellular

organisms;Eukaryota;Opisthokonta;Metazoa;Eumetazoa;Bilateria;Protostomia;Spiralia;Lophotrochozoa;Mollusca;Bivalvia;Autobranchia;Heteroconchia;Euherodonta;Imparidentia;Venerida;Veneroidea;Veneridae;Mercenaria;Mercenaria mercenaria

UdeM00000016056 6596 258.5 UdeM00000016056 XP\_045183440.1 52.4 246  
112 3 1 245 139 380 1.10E-65 258.5 6596 cellular

organisms;Eukaryota;Opisthokonta;Metazoa;Eumetazoa;Bilateria;Protostomia;Spiralia;Lophotrochozoa;Mollusca;Bivalvia;Autobranchia;Heteroconchia;Euherodonta;Imparidentia;Venerida;Veneroidea;Veneridae;Mercenaria;Mercenaria mercenaria

UdeM00000016057 6596 87.4 UdeM00000016057 XP\_045202346.1 39.4 104  
59 2 12 114 35 135 1.30E-14 87.4 6596 cellular

organisms;Eukaryota;Opisthokonta;Metazoa;Eumetazoa;Bilateria;Protostomia;Spiralia;Lophotrochozoa;Mollusca;Bivalvia;Autobranchia;Heteroconchia;Euherodonta;Imparidentia;Venerida;Veneroidea;Veneridae;Mercenaria;Mercenaria mercenaria

UdeM00000016058 6579 123.2 UdeM00000016058 XP\_033760576.1 63.9 97  
33 1 2 98 223 317 1.80E-25 123.2 6579 cellular

organisms;Eukaryota;Opisthokonta;Metazoa;Eumetazoa;Bilateria;Protostomia;

Spiralia; Lophotrochozoa; Mollusca; Bivalvia; Autobranchia; Pteriomorpha; Pectinida; Pectinoidea; Pectinidae; Pecten; Pecten maximus

UdeM00000016059 6579 287 UdeM00000016059 XP\_033760576.1 59.2 250  
98 2 5 252 70 317 2.40E-74 287 6579 cellular  
organisms; Eukaryota; Opisthokonta; Metazoa; Eumetazoa; Bilateria; Protostomia; Spiralia; Lophotrochozoa; Mollusca; Bivalvia; Autobranchia; Pteriomorpha; Pectinida; Pectinoidea; Pectinidae; Pecten; Pecten maximus

UdeM00000016060 6579 94 UdeM00000016060 XP\_033760770.1 72.1 68  
19 0 1 68 535 602 9.20E-17 94 6579 cellular  
organisms; Eukaryota; Opisthokonta; Metazoa; Eumetazoa; Bilateria; Protostomia; Spiralia; Lophotrochozoa; Mollusca; Bivalvia; Autobranchia; Pteriomorpha; Pectinida; Pectinoidea; Pectinidae; Pecten; Pecten maximus

UdeM00000016061 1735272 129.8 UdeM00000016061 XP\_041351531.1 51  
147 63 4 13 159 448 585 3.10E-27 129.8 1735272  
cellular  
organisms; Eukaryota; Opisthokonta; Metazoa; Eumetazoa; Bilateria; Protostomia; Spiralia; Lophotrochozoa; Mollusca; Gastropoda; Neomphalina; Neomphaloidea; Peltospiridae; Gigantopelta; Gigantopelta aegis

UdeM00000016062 6596 145.2 UdeM00000016062 XP\_045200476.1 29.6 538  
233 16 85 568 34 479 2.60E-31 145.2 6596 cellular  
organisms; Eukaryota; Opisthokonta; Metazoa; Eumetazoa; Bilateria; Protostomia; Spiralia; Lophotrochozoa; Mollusca; Bivalvia; Autobranchia; Heteroconchia; Euheterodonta; Imparidentia; Venerida; Veneroidea; Veneridae; Mercenaria; Mercenaria mercenaria

UdeM00000016063 6596 132.1 UdeM00000016063 XP\_045180427.1 39.4 274  
111 4 1 220 1 273 9.20E-28 132.1 6596 cellular  
organisms; Eukaryota; Opisthokonta; Metazoa; Eumetazoa; Bilateria; Protostomia; Spiralia; Lophotrochozoa; Mollusca; Bivalvia; Autobranchia; Heteroconchia; Euheterodonta; Imparidentia; Venerida; Veneroidea; Veneridae; Mercenaria; Mercenaria mercenaria

UdeM00000016064 6596 290.4 UdeM00000016064 XP\_045201501.1 86.6 157  
21 0 1 157 416 572 1.40E-75 290.4 6596 cellular  
organisms; Eukaryota; Opisthokonta; Metazoa; Eumetazoa; Bilateria; Protostomia; Spiralia; Lophotrochozoa; Mollusca; Bivalvia; Autobranchia; Heteroconchia; Euheterodonta; Imparidentia; Venerida; Veneroidea; Veneridae; Mercenaria; Mercenaria mercenaria

UdeM00000016065 6596 694.9 UdeM00000016065 XP\_045201501.1 72.8 478  
122 4 133 606 99 572 9.30E-197 694.9 6596 cellular  
organisms; Eukaryota; Opisthokonta; Metazoa; Eumetazoa; Bilateria; Protostomia; Spiralia; Lophotrochozoa; Mollusca; Bivalvia; Autobranchia; Heteroconchia; Euheterodonta; Imparidentia; Venerida; Veneroidea; Veneridae; Mercenaria; Mercenaria mercenaria

UdeM00000016066 6573 82.8 UdeM00000016066 XP\_021356325.1 42.4 99  
42 2 8 91 38 136 3.40E-13 82.8 6573 cellular  
organisms; Eukaryota; Opisthokonta; Metazoa; Eumetazoa; Bilateria; Protostomia; Spiralia; Lophotrochozoa; Mollusca; Bivalvia; Autobranchia; Pteriomorpha; Pectinida; Pectinoidea; Pectinidae; Mizuhopecten; Mizuhopecten yessoensis

UdeM00000016067 6596 82.8 UdeM00000016067 XP\_045201501.1 65.2 66  
21 1 1 64 1 66 3.50E-13 82.8 6596 cellular  
organisms; Eukaryota; Opisthokonta; Metazoa; Eumetazoa; Bilateria; Protostomia; Spiralia; Lophotrochozoa; Mollusca; Bivalvia; Autobranchia; Heteroconchia; Euheterodonta; Imparidentia; Venerida; Veneroidea; Veneridae; Mercenaria; Mercenaria mercenaria

UdeM00000016068 6596 374.8 UdeM00000016068 XP\_045201987.1 42.7 466  
 245 8 19 482 8 453 1.80E-100 374.8 6596 cellular  
 organisms;Eukaryota;Opisthokonta;Metazoa;Eumetazoa;Bilateria;Protostomia;  
 Spiralia;Lophotrochozoa;Mollusca;Bivalvia;Autobranchia;Heteroconchia;Euhe  
 terodonta;Imparidentia;Venerida;Veneroidea;Veneridae;Mercenaria;Mercenari  
 a mercenaria

UdeM00000016069 6596 352.8 UdeM00000016069 XP\_045201987.1 41.2 466  
 237 9 19 467 8 453 7.20E-94 352.8 6596 cellular  
 organisms;Eukaryota;Opisthokonta;Metazoa;Eumetazoa;Bilateria;Protostomia;  
 Spiralia;Lophotrochozoa;Mollusca;Bivalvia;Autobranchia;Heteroconchia;Euhe  
 terodonta;Imparidentia;Venerida;Veneroidea;Veneridae;Mercenaria;Mercenari  
 a mercenaria

UdeM00000016071 6596 361.3 UdeM00000016071 XP\_045201987.1 41.2 478  
 263 5 47 522 31 492 2.10E-96 361.3 6596 cellular  
 organisms;Eukaryota;Opisthokonta;Metazoa;Eumetazoa;Bilateria;Protostomia;  
 Spiralia;Lophotrochozoa;Mollusca;Bivalvia;Autobranchia;Heteroconchia;Euhe  
 terodonta;Imparidentia;Venerida;Veneroidea;Veneridae;Mercenaria;Mercenari  
 a mercenaria

UdeM00000016072 6596 223.4 UdeM00000016072 XP\_045192227.1 40.4 292  
 161 6 12 301 157 437 3.90E-55 223.4 6596 cellular  
 organisms;Eukaryota;Opisthokonta;Metazoa;Eumetazoa;Bilateria;Protostomia;  
 Spiralia;Lophotrochozoa;Mollusca;Bivalvia;Autobranchia;Heteroconchia;Euhe  
 terodonta;Imparidentia;Venerida;Veneroidea;Veneridae;Mercenaria;Mercenari  
 a mercenaria

UdeM00000016073 6596 229.9 UdeM00000016073 XP\_045192227.1 41.8 294  
 154 6 12 301 157 437 4.10E-57 229.9 6596 cellular  
 organisms;Eukaryota;Opisthokonta;Metazoa;Eumetazoa;Bilateria;Protostomia;  
 Spiralia;Lophotrochozoa;Mollusca;Bivalvia;Autobranchia;Heteroconchia;Euhe  
 terodonta;Imparidentia;Venerida;Veneroidea;Veneridae;Mercenaria;Mercenari  
 a mercenaria

UdeM00000016074 6596 226.5 UdeM00000016074 XP\_045192227.1 41.9 270  
 152 4 34 301 171 437 4.60E-56 226.5 6596 cellular  
 organisms;Eukaryota;Opisthokonta;Metazoa;Eumetazoa;Bilateria;Protostomia;  
 Spiralia;Lophotrochozoa;Mollusca;Bivalvia;Autobranchia;Heteroconchia;Euhe  
 terodonta;Imparidentia;Venerida;Veneroidea;Veneridae;Mercenaria;Mercenari  
 a mercenaria

UdeM00000016075 6579 432.2 UdeM00000016075 XP\_033743085.1 54.1 386  
 168 4 50 427 310 694 7.80E-118 432.2 6579 cellular  
 organisms;Eukaryota;Opisthokonta;Metazoa;Eumetazoa;Bilateria;Protostomia;  
 Spiralia;Lophotrochozoa;Mollusca;Bivalvia;Autobranchia;Pteriormorphia;Pect  
 inida;Pectinoidea;Pectinidae;Pecten;Pecten maximus

UdeM00000016077 6579 446.4 UdeM00000016077 XP\_033743085.1 55.4 386  
 163 4 50 427 310 694 4.00E-122 446.4 6579 cellular  
 organisms;Eukaryota;Opisthokonta;Metazoa;Eumetazoa;Bilateria;Protostomia;  
 Spiralia;Lophotrochozoa;Mollusca;Bivalvia;Autobranchia;Pteriormorphia;Pect  
 inida;Pectinoidea;Pectinidae;Pecten;Pecten maximus

UdeM00000016078 6596 219.9 UdeM00000016078 XP\_045201259.1 34.9 1009  
 488 21 1 892 787 1743 1.30E-53 219.9 6596 cellular  
 organisms;Eukaryota;Opisthokonta;Metazoa;Eumetazoa;Bilateria;Protostomia;  
 Spiralia;Lophotrochozoa;Mollusca;Bivalvia;Autobranchia;Heteroconchia;Euhe  
 terodonta;Imparidentia;Venerida;Veneroidea;Veneridae;Mercenaria;Mercenari  
 a mercenaria

UdeM00000016079 6565 107.8 UdeM00000016079 XP\_022338332.1 43.5 161  
 84 4 696 854 495 650 6.80E-20 107.8 6565 cellular

organisms;Eukaryota;Opisthokonta;Metazoa;Eumetazoa;Bilateria;Protostomia;Spiralia;Lophotrochozoa;Mollusca;Bivalvia;Autobranchia;Pteriormorphia;Ostr  
eida;Ostreoidea;Ostreidae;Crassostrea;Crassostrea virginica  
UdeM00000016081 6596 129.4 UdeM00000016081 XP\_045212482.1 44.8 134  
74 0 6 139 157 290 7.00E-27 129.4 6596 cellular  
organisms;Eukaryota;Opisthokonta;Metazoa;Eumetazoa;Bilateria;Protostomia;Spiralia;Lophotrochozoa;Mollusca;Bivalvia;Autobranchia;Heteroconchia;Euhe  
terodonta;Imparidentia;Venerida;Veneroidea;Veneridae;Mercenaria;Mercenari  
a mercenaria  
UdeM00000016082 6596 251.1 UdeM00000016082 XP\_045212482.1 45 300  
156 5 12 305 13 309 2.40E-63 251.1 6596 cellular  
organisms;Eukaryota;Opisthokonta;Metazoa;Eumetazoa;Bilateria;Protostomia;Spiralia;Lophotrochozoa;Mollusca;Bivalvia;Autobranchia;Heteroconchia;Euhe  
terodonta;Imparidentia;Venerida;Veneroidea;Veneridae;Mercenaria;Mercenari  
a mercenaria  
UdeM00000016083 6596 352.4 UdeM00000016083 XP\_045199842.1 42 426  
244 3 7 430 5 429 8.00E-94 352.4 6596 cellular  
organisms;Eukaryota;Opisthokonta;Metazoa;Eumetazoa;Bilateria;Protostomia;Spiralia;Lophotrochozoa;Mollusca;Bivalvia;Autobranchia;Heteroconchia;Euhe  
terodonta;Imparidentia;Venerida;Veneroidea;Veneridae;Mercenaria;Mercenari  
a mercenaria  
UdeM00000016084 6596 321.6 UdeM00000016084 XP\_045199842.1 40.4 426  
251 3 57 480 5 429 1.70E-84 321.6 6596 cellular  
organisms;Eukaryota;Opisthokonta;Metazoa;Eumetazoa;Bilateria;Protostomia;Spiralia;Lophotrochozoa;Mollusca;Bivalvia;Autobranchia;Heteroconchia;Euhe  
terodonta;Imparidentia;Venerida;Veneroidea;Veneridae;Mercenaria;Mercenari  
a mercenaria  
UdeM00000016085 6596 368.2 UdeM00000016085 XP\_045200210.1 58.9 280  
115 0 227 506 271 550 1.70E-98 368.2 6596 cellular  
organisms;Eukaryota;Opisthokonta;Metazoa;Eumetazoa;Bilateria;Protostomia;Spiralia;Lophotrochozoa;Mollusca;Bivalvia;Autobranchia;Heteroconchia;Euhe  
terodonta;Imparidentia;Venerida;Veneroidea;Veneridae;Mercenaria;Mercenari  
a mercenaria  
UdeM00000016086 6596 359.8 UdeM00000016086 XP\_045200211.1 65.2 319  
90 10 1 304 5 317 4.10E-96 359.8 6596 cellular  
organisms;Eukaryota;Opisthokonta;Metazoa;Eumetazoa;Bilateria;Protostomia;Spiralia;Lophotrochozoa;Mollusca;Bivalvia;Autobranchia;Heteroconchia;Euhe  
terodonta;Imparidentia;Venerida;Veneroidea;Veneridae;Mercenaria;Mercenari  
a mercenaria  
UdeM00000016087 6596 358.2 UdeM00000016087 XP\_045200211.1 65.5 316  
90 10 1 300 5 317 1.20E-95 358.2 6596 cellular  
organisms;Eukaryota;Opisthokonta;Metazoa;Eumetazoa;Bilateria;Protostomia;Spiralia;Lophotrochozoa;Mollusca;Bivalvia;Autobranchia;Heteroconchia;Euhe  
terodonta;Imparidentia;Venerida;Veneroidea;Veneridae;Mercenaria;Mercenari  
a mercenaria  
UdeM00000016088 6596 365.2 UdeM00000016088 XP\_045200211.1 65.8 316  
90 9 1 301 5 317 9.70E-98 365.2 6596 cellular  
organisms;Eukaryota;Opisthokonta;Metazoa;Eumetazoa;Bilateria;Protostomia;Spiralia;Lophotrochozoa;Mollusca;Bivalvia;Autobranchia;Heteroconchia;Euhe  
terodonta;Imparidentia;Venerida;Veneroidea;Veneridae;Mercenaria;Mercenari  
a mercenaria  
UdeM00000016089 2652724 90.1 UdeM00000016089 XP\_020913146.1 60  
70 28 0 16 85 177 246 1.50E-15 90.1 2652724  
cellular



organisms;Eukaryota;Opisthokonta;Metazoa;Eumetazoa;Cnidaria;Anthozoa;Hexa  
corallia;Actiniaria;Aiptasiidae;Exaiptasia;Exaiptasia diaphana  
UdeM00000016091 6526 139.4 UdeM00000016091 XP\_013067632.1 33.6 271  
133 10 20 268 29 274 6.90E-30 139.4 6526 cellular  
organisms;Eukaryota;Opisthokonta;Metazoa;Eumetazoa;Bilateria;Protostomia;  
Spiralia;Lophotrochozoa;Mollusca;Gastropoda;Heterobranchia;Euthyneura;Pan  
pulmonata;Hygrophila;Lymnaeidae;Planorbidae;Biophalarina;Biophalarina  
glabrata  
UdeM00000016092 6596 164.1 UdeM00000016092 XP\_045199366.1 57.5 113  
48 0 21 133 371 483 1.30E-37 164.1 6596 cellular  
organisms;Eukaryota;Opisthokonta;Metazoa;Eumetazoa;Bilateria;Protostomia;  
Spiralia;Lophotrochozoa;Mollusca;Bivalvia;Autobranchia;Heteroconchia;Euhe  
terodonta;Imparidentia;Venerida;Veneroidea;Veneridae;Mercenaria;Mercenari  
a mercenaria  
UdeM00000016094 114398 267.3 UdeM00000016094 XP\_042903861.1 36.7  
439 240 7 5 411 170 602 3.20E-68 267.3 114398  
cellular  
organisms;Eukaryota;Opisthokonta;Metazoa;Eumetazoa;Bilateria;Protostomia;  
Ecdysozoa;Panarthropoda;Arthropoda;Chelicerata;Arachnida;Araneae;Araneomo  
rphae;Entelegynae;Orbicularia;Aranezoidea;Theridiidae;Parasteatoda;Parast  
eatoda tepidariorum  
UdeM00000016095 6596 129.8 UdeM00000016095 XP\_045199507.1 32.9 228  
142 2 9 236 50 266 5.40E-27 129.8 6596 cellular  
organisms;Eukaryota;Opisthokonta;Metazoa;Eumetazoa;Bilateria;Protostomia;  
Spiralia;Lophotrochozoa;Mollusca;Bivalvia;Autobranchia;Heteroconchia;Euhe  
terodonta;Imparidentia;Venerida;Veneroidea;Veneridae;Mercenaria;Mercenari  
a mercenaria  
UdeM00000016096 29159 705.7 UdeM00000016096 XP\_019921825.2 58.1 573  
236 4 26 596 24 594 5.40E-200 705.7 29159 cellular  
organisms;Eukaryota;Opisthokonta;Metazoa;Eumetazoa;Bilateria;Protostomia;  
Spiralia;Lophotrochozoa;Mollusca;Bivalvia;Autobranchia;Pteriomorpha;Ostr  
eida;Ostrezoidea;Ostreidae;Crassostrea;Crassostrea gigas  
UdeM00000016097 1735272 106.7 UdeM00000016097 XP\_041359297.1 33.5  
221 117 5 3 223 48 238 4.20E-20 106.7 1735272  
cellular  
organisms;Eukaryota;Opisthokonta;Metazoa;Eumetazoa;Bilateria;Protostomia;  
Spiralia;Lophotrochozoa;Mollusca;Gastropoda;Neomphalina;Neomphaloidea;Pel  
tospiridae;Gigantopelta;Gigantopelta aegis  
UdeM00000016098 6596 159.1 UdeM00000016098 XP\_045200792.1 55.4 139  
62 0 3 141 762 900 4.30E-36 159.1 6596 cellular  
organisms;Eukaryota;Opisthokonta;Metazoa;Eumetazoa;Bilateria;Protostomia;  
Spiralia;Lophotrochozoa;Mollusca;Bivalvia;Autobranchia;Heteroconchia;Euhe  
terodonta;Imparidentia;Venerida;Veneroidea;Veneridae;Mercenaria;Mercenari  
a mercenaria  
UdeM00000016099 8175 471.9 UdeM00000016099 XP\_030282862.1 38.3 710  
401 10 9 706 3 687 2.20E-129 471.9 8175 cellular  
organisms;Eukaryota;Opisthokonta;Metazoa;Eumetazoa;Bilateria;Deuterostomi  
a;Chordata;Craniata;Vertebrata;Gnathostomata;Teleostomi;Euteleostomi;Acti  
nopterygii;Actinopteri;Neopterygii;Teleostei;Osteoglossocephalai;Clupeoce  
phala;Euteleostei;Neoteleostei;Eurypterygia;Ctenosquamata;Acanthomo  
rphata;Euacanthomorpha;Percomorphaceae;Eupercaria;Spariformes;Sparidae  
;Sparus;Sparus aurata  
UdeM00000016100 6596 937.2 UdeM00000016100 XP\_045200792.1 62.6 770  
270 6 1 761 1 761 1.30E-269 937.2 6596 cellular

organisms;Eukaryota;Opisthokonta;Metazoa;Eumetazoa;Bilateria;Protostomia;Spiralia;Lophotrochozoa;Mollusca;Bivalvia;Autobranchia;Heteroconchia;Euherodonta;Imparidentia;Venerida;Veneroidea;Veneridae;Mercenaria;Mercenaria mercenaria

UdeM00000016102 6596 368.2 UdeM00000016102 XP\_045200793.1 68.2 280  
82 3 1 279 1 274 1.00E-98 368.2 6596 cellular

organisms;Eukaryota;Opisthokonta;Metazoa;Eumetazoa;Bilateria;Protostomia;Spiralia;Lophotrochozoa;Mollusca;Bivalvia;Autobranchia;Heteroconchia;Euherodonta;Imparidentia;Venerida;Veneroidea;Veneridae;Mercenaria;Mercenaria mercenaria

UdeM00000016103 150288 237.3 UdeM00000016103 XP\_020788097.1 67.3  
147 48 0 1 147 365 511 1.30E-59 237.3 150288  
cellular

organisms;Eukaryota;Opisthokonta;Metazoa;Eumetazoa;Bilateria;Deuterostomia;Chordata;Craniata;Vertebrata;Gnathostomata;Teleostomi;Euteleostomi;Actinopterygii;Actinopteri;Neopterygii;Teleostei;Osteoglossocephalai;Clupeocephala;Euteleostei;Neoteleostei;Eurypterygia;Ctenosquamata;Acanthomorpha;Euacanthomorpha;Percomorphaceae;Gobiaria;Gobiiformes;Gobioidei;Gobiidae;Oxudercinae;Boleophthalmus;Boleophthalmus pectinirostris

UdeM00000016104 50390 266.2 UdeM00000016104 XP\_028142380.1 61.7 175  
67 0 3 177 229 403 3.10E-68 266.2 50390 cellular

organisms;Eukaryota;Opisthokonta;Metazoa;Eumetazoa;Bilateria;Protostomia;Ecdysozoa;Panarthropoda;Arthropoda;Mandibulata;Pancrustacea;Hexapoda;Insecta;Dicondylia;Pterygota;Neoptera;Endopterygota;Coleoptera;Polyphaga;Cucujiformia;Chrysomeloidea;Chrysomelidae;Galerucinae;Luperini;Diabroticina;Diabroticites;Diabrotica;Diabrotica virgifera;Diabrotica virgifera virgifera

UdeM00000016105 50390 285.8 UdeM00000016105 XP\_028142380.1 65.1 175  
61 0 1 175 115 289 3.70E-74 285.8 50390 cellular

organisms;Eukaryota;Opisthokonta;Metazoa;Eumetazoa;Bilateria;Protostomia;Ecdysozoa;Panarthropoda;Arthropoda;Mandibulata;Pancrustacea;Hexapoda;Insecta;Dicondylia;Pterygota;Neoptera;Endopterygota;Coleoptera;Polyphaga;Cucujiformia;Chrysomeloidea;Chrysomelidae;Galerucinae;Luperini;Diabroticina;Diabroticites;Diabrotica;Diabrotica virgifera;Diabrotica virgifera virgifera

UdeM00000016106 151771 107.1 UdeM00000016106 XP\_028406815.1 38.2  
157 96 1 47 203 162 317 2.70E-20 107.1 151771  
cellular

organisms;Eukaryota;Opisthokonta;Metazoa;Eumetazoa;Cnidaria;Anthozoa;Octocorallia;Alcyonacea;Alcyoniina;Nephtheidae;Dendronephthya;Dendronephthya gigantea

UdeM00000016107 6596 264.6 UdeM00000016107 XP\_045213216.1 52.3 256  
119 3 1 254 337 591 1.30E-67 264.6 6596 cellular

organisms;Eukaryota;Opisthokonta;Metazoa;Eumetazoa;Bilateria;Protostomia;Spiralia;Lophotrochozoa;Mollusca;Bivalvia;Autobranchia;Heteroconchia;Euherodonta;Imparidentia;Venerida;Veneroidea;Veneridae;Mercenaria;Mercenaria mercenaria

UdeM00000016108 6596 167.5 UdeM00000016108 XP\_045213216.1 60.7 122  
48 0 1 122 60 181 1.20E-38 167.5 6596 cellular

organisms;Eukaryota;Opisthokonta;Metazoa;Eumetazoa;Bilateria;Protostomia;Spiralia;Lophotrochozoa;Mollusca;Bivalvia;Autobranchia;Heteroconchia;Euherodonta;Imparidentia;Venerida;Veneroidea;Veneridae;Mercenaria;Mercenaria mercenaria

UdeM00000016109 225164 1086.2 UdeM00000016109 XP\_009053272.1  
 69.2 779 224 5 1 770 1 772 0.00E+00 1086.2  
 225164 cellular  
 organisms;Eukaryota;Opisthokonta;Metazoa;Eumetazoa;Bilateria;Protostomia;  
 Spiralia;Lophotrochozoa;Mollusca;Gastropoda;Patellogastropoda;Lottioidea;  
 Lottiidae;Lottia;Lottia gigantea  
 UdeM00000016110 225164 1081.6 UdeM00000016110 XP\_009053272.1  
 69.1 780 224 6 1 771 1 772 0.00E+00 1081.6  
 225164 cellular  
 organisms;Eukaryota;Opisthokonta;Metazoa;Eumetazoa;Bilateria;Protostomia;  
 Spiralia;Lophotrochozoa;Mollusca;Gastropoda;Patellogastropoda;Lottioidea;  
 Lottiidae;Lottia;Lottia gigantea  
 UdeM00000016111 13397 68.6 UdeM00000016111 XP\_041036042.1 25.5 141  
 89 4 104 244 2 126 1.30E-08 68.6 13397 cellular  
 organisms;Eukaryota;Opisthokonta;Metazoa;Eumetazoa;Bilateria;Deuterostomi  
 a;Chordata;Craniata;Vertebrata;Gnathostomata;Chondrichthyes;Elasmobranchi  
 i;Selachii;Galeomorphii;Galeoidea;Lamniformes;Alopiidae;Lamninae;Carcharo  
 don;Carcharodon carcharias  
 UdeM00000016112 36176 77.8 UdeM00000016112 XP\_043550614.1 30.4 158  
 92 6 53 208 27 168 1.90E-11 77.8 36176 cellular  
 organisms;Eukaryota;Opisthokonta;Metazoa;Eumetazoa;Bilateria;Deuterostomi  
 a;Chordata;Craniata;Vertebrata;Gnathostomata;Chondrichthyes;Elasmobranchi  
 i;Selachii;Galeomorphii;Galeoidea;Orectolobiformes;Hemiscylliidae;Chilosc  
 yllium;Chiloscyllium plagiosum  
 UdeM00000016114 6579 906 UdeM00000016114 XP\_033760813.1 45 1350  
 617 42 32 1335 286 1555 5.80E-260 906 6579 cellular  
 organisms;Eukaryota;Opisthokonta;Metazoa;Eumetazoa;Bilateria;Protostomia;  
 Spiralia;Lophotrochozoa;Mollusca;Bivalvia;Autobranchia;Pteriormorphia;Pect  
 inida;Pectinoidea;Pectinidae;Pecten;Pecten maximus  
 UdeM00000016115 6596 219.9 UdeM00000016115 XP\_045200253.1 32.5 453  
 279 9 9 439 147 594 6.30E-54 219.9 6596 cellular  
 organisms;Eukaryota;Opisthokonta;Metazoa;Eumetazoa;Bilateria;Protostomia;  
 Spiralia;Lophotrochozoa;Mollusca;Bivalvia;Autobranchia;Heteroconchia;Euhe  
 terodonta;Imparidentia;Venerida;Veneroidea;Veneridae;Mercenaria;Mercenari  
 a mercenaria  
 UdeM00000016116 6596 280.4 UdeM00000016116 XP\_045200254.1 35.9 552  
 153 11 4 363 6 548 3.20E-72 280.4 6596 cellular  
 organisms;Eukaryota;Opisthokonta;Metazoa;Eumetazoa;Bilateria;Protostomia;  
 Spiralia;Lophotrochozoa;Mollusca;Bivalvia;Autobranchia;Heteroconchia;Euhe  
 terodonta;Imparidentia;Venerida;Veneroidea;Veneridae;Mercenaria;Mercenari  
 a mercenaria  
 UdeM00000016117 6596 254.2 UdeM00000016117 XP\_045199522.1 49.6 248  
 109 6 37 281 50 284 1.90E-64 254.2 6596 cellular  
 organisms;Eukaryota;Opisthokonta;Metazoa;Eumetazoa;Bilateria;Protostomia;  
 Spiralia;Lophotrochozoa;Mollusca;Bivalvia;Autobranchia;Heteroconchia;Euhe  
 terodonta;Imparidentia;Venerida;Veneroidea;Veneridae;Mercenaria;Mercenari  
 a mercenaria  
 UdeM00000016118 6596 243 UdeM00000016118 XP\_045199522.1 47 253  
 118 6 32 281 45 284 4.40E-61 243 6596 cellular  
 organisms;Eukaryota;Opisthokonta;Metazoa;Eumetazoa;Bilateria;Protostomia;  
 Spiralia;Lophotrochozoa;Mollusca;Bivalvia;Autobranchia;Heteroconchia;Euhe  
 terodonta;Imparidentia;Venerida;Veneroidea;Veneridae;Mercenaria;Mercenari  
 a mercenaria

UdeM00000044277 1735272 405.6 UdeM00000044277 XP\_041354926.1 62.7  
 308 114 1 41 348 57 363 6.40E-110 405.6 1735272  
 cellular  
 organisms;Eukaryota;Opisthokonta;Metazoa;Eumetazoa;Bilateria;Protostomia;  
 Spiralia;Lophotrochozoa;Mollusca;Gastropoda;Neomphalina;Neomphaloidea;Pel  
 tospiridae;Gigantopelta;Gigantopelta aegis  
 UdeM00000044278 6573 218 UdeM00000044278 XP\_021368888.1 68.2 148  
 46 1 1 147 213 360 8.00E-54 218 6573 cellular  
 organisms;Eukaryota;Opisthokonta;Metazoa;Eumetazoa;Bilateria;Protostomia;  
 Spiralia;Lophotrochozoa;Mollusca;Bivalvia;Autobranchia;Pteriormorphia;Pect  
 inida;Pectinoidea;Pectinidae;Mizuhopecten;Mizuhopecten yessoensis  
 UdeM00000044279 6087 103.2 UdeM00000044279 XP\_012560424.1 58 81  
 33 1 51 130 83 163 2.50E-19 103.2 6087 cellular  
 organisms;Eukaryota;Opisthokonta;Metazoa;Eumetazoa;Cnidaria;Hydrozoa;Hydr  
 oidolina;Anthoathecata;Aplanulata;Hydridae;Hydra;Hydra vulgaris  
 UdeM00000044280 29159 409.1 UdeM00000044280 XP\_034331235.1 56.7 363  
 139 5 1 348 1 360 5.80E-111 409.1 29159 cellular  
 organisms;Eukaryota;Opisthokonta;Metazoa;Eumetazoa;Bilateria;Protostomia;  
 Spiralia;Lophotrochozoa;Mollusca;Bivalvia;Autobranchia;Pteriormorphia;Ostr  
 eida;Ostreoidea;Ostreidae;Crassostrea;Crassostrea gigas  
 UdeM00000044281 29159 362.5 UdeM00000044281 XP\_034331235.1 64 267  
 91 4 44 308 97 360 5.50E-97 362.5 29159 cellular  
 organisms;Eukaryota;Opisthokonta;Metazoa;Eumetazoa;Bilateria;Protostomia;  
 Spiralia;Lophotrochozoa;Mollusca;Bivalvia;Autobranchia;Pteriormorphia;Ostr  
 eida;Ostreoidea;Ostreidae;Crassostrea;Crassostrea gigas  
 UdeM00000044282 1735272 405.6 UdeM00000044282 XP\_041354926.1 62.7  
 308 114 1 41 348 57 363 6.40E-110 405.6 1735272  
 cellular  
 organisms;Eukaryota;Opisthokonta;Metazoa;Eumetazoa;Bilateria;Protostomia;  
 Spiralia;Lophotrochozoa;Mollusca;Gastropoda;Neomphalina;Neomphaloidea;Pel  
 tospiridae;Gigantopelta;Gigantopelta aegis  
 UdeM00000044283 29159 320.9 UdeM00000044283 XP\_034331235.1 49.3 339  
 101 5 28 298 25 360 1.80E-84 320.9 29159 cellular  
 organisms;Eukaryota;Opisthokonta;Metazoa;Eumetazoa;Bilateria;Protostomia;  
 Spiralia;Lophotrochozoa;Mollusca;Bivalvia;Autobranchia;Pteriormorphia;Ostr  
 eida;Ostreoidea;Ostreidae;Crassostrea;Crassostrea gigas  
 UdeM00000044370 6596 382.1 UdeM00000044370 XP\_045161383.1 42 491  
 231 6 1 465 1 463 1.00E-102 382.1 6596 cellular  
 organisms;Eukaryota;Opisthokonta;Metazoa;Eumetazoa;Bilateria;Protostomia;  
 Spiralia;Lophotrochozoa;Mollusca;Bivalvia;Autobranchia;Heteroconchia;Euhe  
 terodonta;Imparidentia;Venerida;Veneroidea;Veneridae;Mercenaria;Mercenari  
 a mercenaria  
 UdeM00000044371 6573 238.4 UdeM00000044371 XP\_021375406.1 46.8 237  
 126 0 98 334 234 470 1.30E-59 238.4 6573 cellular  
 organisms;Eukaryota;Opisthokonta;Metazoa;Eumetazoa;Bilateria;Protostomia;  
 Spiralia;Lophotrochozoa;Mollusca;Bivalvia;Autobranchia;Pteriormorphia;Pect  
 inida;Pectinoidea;Pectinidae;Mizuhopecten;Mizuhopecten yessoensis  
 UdeM00000044372 6596 147.1 UdeM00000044372 XP\_045181714.1 28.6 343  
 233 6 16 352 16 352 5.60E-32 147.1 6596 cellular  
 organisms;Eukaryota;Opisthokonta;Metazoa;Eumetazoa;Bilateria;Protostomia;  
 Spiralia;Lophotrochozoa;Mollusca;Bivalvia;Autobranchia;Heteroconchia;Euhe  
 terodonta;Imparidentia;Venerida;Veneroidea;Veneridae;Mercenaria;Mercenari  
 a mercenaria

UdeM00000030157 6565 427.9 UdeM00000030157 XP\_022328252.1 49.3 454  
 211 6 2 437 863 1315 1.50E-116 427.9 6565 cellular  
 organisms;Eukaryota;Opisthokonta;Metazoa;Eumetazoa;Bilateria;Protostomia;  
 Spiralia;Lophotrochozoa;Mollusca;Bivalvia;Autobranchia;Pteriomorpha;Ostr  
 eida;Ostreoidea;Ostreidae;Crassostrea;Crassostrea virginica  
 UdeM00000030158 6565 109.4 UdeM00000030158 XP\_022314409.1 39.5 177  
 89 5 1 159 1139 1315 4.30E-21 109.4 6565 cellular  
 organisms;Eukaryota;Opisthokonta;Metazoa;Eumetazoa;Bilateria;Protostomia;  
 Spiralia;Lophotrochozoa;Mollusca;Bivalvia;Autobranchia;Pteriomorpha;Ostr  
 eida;Ostreoidea;Ostreidae;Crassostrea;Crassostrea virginica  
 UdeM00000030156 225164 542 UdeM00000030156 XP\_009062081.1 61.8  
 424 158 2 9 429 16 438 7.10E-151 542 225164  
 cellular  
 organisms;Eukaryota;Opisthokonta;Metazoa;Eumetazoa;Bilateria;Protostomia;  
 Spiralia;Lophotrochozoa;Mollusca;Gastropoda;Patellogastropoda;Lottioidea;  
 Lottiidae;Lottia;Lottia gigantea  
 UdeM00000030159 37653 228 UdeM00000030159 XP\_014776462.1 60.3 330  
 124 2 1 323 1 330 2.10E-56 228 37653 cellular  
 organisms;Eukaryota;Opisthokonta;Metazoa;Eumetazoa;Bilateria;Protostomia;  
 Spiralia;Lophotrochozoa;Mollusca;Cephalopoda;Coleoidea;Octopodiformes;Oct  
 opoda;Incirrata;Octopodidae;Octopus;Octopus bimaculoides  
 UdeM00000030160 37653 228 UdeM00000030160 XP\_014776462.1 60.3 330  
 124 2 1 323 1 330 2.00E-56 228 37653 cellular  
 organisms;Eukaryota;Opisthokonta;Metazoa;Eumetazoa;Bilateria;Protostomia;  
 Spiralia;Lophotrochozoa;Mollusca;Cephalopoda;Coleoidea;Octopodiformes;Oct  
 opoda;Incirrata;Octopodidae;Octopus;Octopus bimaculoides  
 UdeM00000030161 6596 93.6 UdeM00000030161 XP\_045212706.1 26.5 230  
 158 5 20 248 15 234 3.80E-16 93.6 6596 cellular  
 organisms;Eukaryota;Opisthokonta;Metazoa;Eumetazoa;Bilateria;Protostomia;  
 Spiralia;Lophotrochozoa;Mollusca;Bivalvia;Autobranchia;Heteroconchia;Euhe  
 terodonta;Imparidentia;Venerida;Veneroidea;Veneridae;Mercenaria;Mercenari  
 a mercenaria  
 UdeM00000030162 6596 252.3 UdeM00000030162 XP\_045212706.1 26.7 817  
 471 25 20 741 15 798 1.90E-63 252.3 6596 cellular  
 organisms;Eukaryota;Opisthokonta;Metazoa;Eumetazoa;Bilateria;Protostomia;  
 Spiralia;Lophotrochozoa;Mollusca;Bivalvia;Autobranchia;Heteroconchia;Euhe  
 terodonta;Imparidentia;Venerida;Veneroidea;Veneridae;Mercenaria;Mercenari  
 a mercenaria  
 UdeM00000030163 400727 87.4 UdeM00000030163 XP\_025090641.1 58.7  
 75 31 0 4 78 5 79 8.70E-15 87.4 400727  
 cellular  
 organisms;Eukaryota;Opisthokonta;Metazoa;Eumetazoa;Bilateria;Protostomia;  
 Spiralia;Lophotrochozoa;Mollusca;Gastropoda;Caenogastropoda;Architaeniogl  
 ossa;Ampullarioidea;Ampullariidae;Pomacea;Pomacea canaliculata  
 UdeM00000030164 29159 186.4 UdeM00000030164 XP\_011419612.2 52.8 178  
 82 1 19 196 25 200 3.50E-44 186.4 29159 cellular  
 organisms;Eukaryota;Opisthokonta;Metazoa;Eumetazoa;Bilateria;Protostomia;  
 Spiralia;Lophotrochozoa;Mollusca;Bivalvia;Autobranchia;Pteriomorpha;Ostr  
 eida;Ostreoidea;Ostreidae;Crassostrea;Crassostrea gigas  
 UdeM00000030167 6596 110.9 UdeM00000030167 XP\_045212501.1 96.4 56  
 2 0 77 132 417 472 1.20E-21 110.9 6596 cellular  
 organisms;Eukaryota;Opisthokonta;Metazoa;Eumetazoa;Bilateria;Protostomia;  
 Spiralia;Lophotrochozoa;Mollusca;Bivalvia;Autobranchia;Heteroconchia;Euhe

terodonta;Imparidentia;Venerida;Veneroidea;Veneridae;Mercenaria;Mercenari  
 a mercenaria  
 UdeM00000030168 6596 356.7 UdeM00000030168 XP\_045212502.1 93.3 193  
 13 0 2 194 57 249 1.90E-95 356.7 6596 cellular  
 organisms;Eukaryota;Opisthokonta;Metazoa;Eumetazoa;Bilateria;Protostomia;  
 Spiralia;Lophotrochozoa;Mollusca;Bivalvia;Autobranchia;Heteroconchia;Euhe  
 terodonta;Imparidentia;Venerida;Veneroidea;Veneridae;Mercenaria;Mercenari  
 a mercenaria  
 UdeM00000030170 2607531 402.1 UdeM00000030170 XP\_029637356.2 55.7  
 569 181 6 234 796 395 898 1.60E-108 402.1 2607531  
 cellular  
 organisms;Eukaryota;Opisthokonta;Metazoa;Eumetazoa;Bilateria;Protostomia;  
 Spiralia;Lophotrochozoa;Mollusca;Cephalopoda;Coleoidea;Octopodiformes;Oct  
 opoda;Incirrata;Octopodidae;Octopus;Octopus sinensis  
 UdeM00000030171 6596 2823.9 UdeM00000030171 XP\_045210913.1 46.3  
 3459 1697 46 5 3346 5988 9404 0.00E+00 2823.9 6596  
 cellular  
 organisms;Eukaryota;Opisthokonta;Metazoa;Eumetazoa;Bilateria;Protostomia;  
 Spiralia;Lophotrochozoa;Mollusca;Bivalvia;Autobranchia;Heteroconchia;Euhe  
 terodonta;Imparidentia;Venerida;Veneroidea;Veneridae;Mercenaria;Mercenari  
 a mercenaria  
 UdeM00000030172 6596 2822.7 UdeM00000030172 XP\_045210913.1 46.5  
 3438 1684 45 5 3328 5988 9383 0.00E+00 2822.7 6596  
 cellular  
 organisms;Eukaryota;Opisthokonta;Metazoa;Eumetazoa;Bilateria;Protostomia;  
 Spiralia;Lophotrochozoa;Mollusca;Bivalvia;Autobranchia;Heteroconchia;Euhe  
 terodonta;Imparidentia;Venerida;Veneroidea;Veneridae;Mercenaria;Mercenari  
 a mercenaria  
 UdeM00000030173 29159 100.1 UdeM00000030173 XP\_034312911.1 46.2 104  
 56 0 1 104 2808 2911 2.20E-18 100.1 29159 cellular  
 organisms;Eukaryota;Opisthokonta;Metazoa;Eumetazoa;Bilateria;Protostomia;  
 Spiralia;Lophotrochozoa;Mollusca;Bivalvia;Autobranchia;Pteriormorphia;Ostr  
 eida;Ostreoidea;Ostreidae;Crassostrea;Crassostrea gigas  
 UdeM00000030174 6565 2694.1 UdeM00000030174 XP\_022317156.1 46.6  
 3333 1569 35 2 3273 2777 5959 0.00E+00 2694.1 6565  
 cellular  
 organisms;Eukaryota;Opisthokonta;Metazoa;Eumetazoa;Bilateria;Protostomia;  
 Spiralia;Lophotrochozoa;Mollusca;Bivalvia;Autobranchia;Pteriormorphia;Ostr  
 eida;Ostreoidea;Ostreidae;Crassostrea;Crassostrea virginica  
 UdeM00000030175 6565 1717.6 UdeM00000030175 XP\_022317156.1 44.1  
 2314 1219 36 2476 4753 501 2775 0.00E+00 1717.6 6565  
 cellular  
 organisms;Eukaryota;Opisthokonta;Metazoa;Eumetazoa;Bilateria;Protostomia;  
 Spiralia;Lophotrochozoa;Mollusca;Bivalvia;Autobranchia;Pteriormorphia;Ostr  
 eida;Ostreoidea;Ostreidae;Crassostrea;Crassostrea virginica  
 UdeM00000030176 6573 80.5 UdeM00000030176 XP\_021357314.1 37.7 130  
 66 4 1 128 4 120 7.50E-12 80.5 6573 cellular  
 organisms;Eukaryota;Opisthokonta;Metazoa;Eumetazoa;Bilateria;Protostomia;  
 Spiralia;Lophotrochozoa;Mollusca;Bivalvia;Autobranchia;Pteriormorphia;Pect  
 inida;Pectinoidea;Pectinidae;Mizuhopecten;Mizuhopecten yessoensis  
 UdeM00000030177 6526 113.2 UdeM00000030177 XP\_013085977.1 48.5 132  
 62 3 4 135 2 127 2.60E-22 113.2 6526 cellular  
 organisms;Eukaryota;Opisthokonta;Metazoa;Eumetazoa;Bilateria;Protostomia;  
 Spiralia;Lophotrochozoa;Mollusca;Gastropoda;Heterobranchia;Euthyneura;Pan

pulmonata;Hygrophila;Lymnaeidae;Planorbidae;Biomphalaria;Biomphalaria glabrata

UdeM00000030178 7574 61.6 UdeM00000030178 XP\_013384015.1 54.7 64  
28 1 6 69 186 248 4.70E-07 61.6 7574 cellular  
organisms;Eukaryota;Opisthokonta;Metazoa;Eumetazoa;Bilateria;Protostomia;  
Spiralia;Lophotrochozoa;Brachiopoda;Linguliformea;Lingulata;Lingulida;Lin  
guloidea;Lingulidae;Lingula;Lingula anatina

UdeM00000030180 6573 110.2 UdeM00000030180 XP\_021363414.1 45.2 188  
73 5 4 186 31 193 3.00E-21 110.2 6573 cellular  
organisms;Eukaryota;Opisthokonta;Metazoa;Eumetazoa;Bilateria;Protostomia;  
Spiralia;Lophotrochozoa;Mollusca;Bivalvia;Autobranchia;Pteriormorphia;Pect  
inida;Pectinoidea;Pectinidae;Mizuhopecten;Mizuhopecten yessoensis

UdeM00000030181 6565 107.8 UdeM00000030181 XP\_022300575.1 51.9 108  
46 1 586 693 198 299 5.50E-20 107.8 6565 cellular  
organisms;Eukaryota;Opisthokonta;Metazoa;Eumetazoa;Bilateria;Protostomia;  
Spiralia;Lophotrochozoa;Mollusca;Bivalvia;Autobranchia;Pteriormorphia;Ostr  
eida;Ostreidae;Crassostrea;Crassostrea virginica

UdeM00000030182 29159 68.9 UdeM00000030182 XP\_034320570.1 48.1 77  
39 1 3 79 774 849 3.60E-09 68.9 29159 cellular  
organisms;Eukaryota;Opisthokonta;Metazoa;Eumetazoa;Bilateria;Protostomia;  
Spiralia;Lophotrochozoa;Mollusca;Bivalvia;Autobranchia;Pteriormorphia;Ostr  
eida;Ostreidae;Crassostrea;Crassostrea gigas

UdeM00000030183 29053 78.6 UdeM00000030183 XP\_023246665.1 45.3 106  
46 4 22 115 243 348 8.90E-12 78.6 29053 cellular  
organisms;Eukaryota;Opisthokonta;Metazoa;Eumetazoa;Bilateria;Protostomia;  
Ecdysozoa;Panarthropoda;Arthropoda;Mandibulata;Pancrustacea;Hexapoda;Inse  
cta;Dicondylia;Pterygota;Neoptera;Endopterygota;Hymenoptera;Apocrita;Para  
sitoida;Chalcidoidea;Encyrtidae;Encyrtinae;Copidosoma;Copidosoma

floridanum

UdeM00000030185 6596 1603.2 UdeM00000030185 XP\_045210815.1 59  
1326 520 9 10 1313 1649 2972 0.00E+00 1603.2 6596  
cellular  
organisms;Eukaryota;Opisthokonta;Metazoa;Eumetazoa;Bilateria;Protostomia;  
Spiralia;Lophotrochozoa;Mollusca;Bivalvia;Autobranchia;Heteroconchia;Euhe  
terodonta;Imparidentia;Venerida;Veneroidea;Veneridae;Mercenaria;Mercenari  
a mercenaria

UdeM00000030186 6596 349 UdeM00000030186 XP\_045210815.1 50.5 325  
152 3 10 325 1649 1973 7.70E-93 349 6596 cellular  
organisms;Eukaryota;Opisthokonta;Metazoa;Eumetazoa;Bilateria;Protostomia;  
Spiralia;Lophotrochozoa;Mollusca;Bivalvia;Autobranchia;Heteroconchia;Euhe  
terodonta;Imparidentia;Venerida;Veneroidea;Veneridae;Mercenaria;Mercenari  
a mercenaria

UdeM00000030187 6596 1031.6 UdeM00000030187 XP\_045210815.1 37.2  
1675 880 23 31 1585 28 1650 1.10E-297 1031.6 6596  
cellular  
organisms;Eukaryota;Opisthokonta;Metazoa;Eumetazoa;Bilateria;Protostomia;  
Spiralia;Lophotrochozoa;Mollusca;Bivalvia;Autobranchia;Heteroconchia;Euhe  
terodonta;Imparidentia;Venerida;Veneroidea;Veneridae;Mercenaria;Mercenari  
a mercenaria

UdeM00000030188 7574 183.3 UdeM00000030188 XP\_013382963.1 72.3 112  
31 0 1 112 937 1048 1.80E-43 183.3 7574 cellular  
organisms;Eukaryota;Opisthokonta;Metazoa;Eumetazoa;Bilateria;Protostomia;  
Spiralia;Lophotrochozoa;Brachiopoda;Linguliformea;Lingulata;Lingulida;Lin  
guloidea;Lingulidae;Lingula;Lingula anatina

UdeM00000030189 6579 350.9 UdeM00000030189 XP\_033734423.1 45 413  
 197 8 31 416 796 1205 2.20E-93 350.9 6579 cellular  
 organisms;Eukaryota;Opisthokonta;Metazoa;Eumetazoa;Bilateria;Protostomia;  
 Spiralia;Lophotrochozoa;Mollusca;Bivalvia;Autobranchia;Pteriomorphia;Pect  
 inida;Pectinoidea;Pectinidae;Pecten;Pecten maximus  
 UdeM00000030190 8005 504.2 UdeM00000030190 XP\_035380990.1 45.4 646  
 283 9 1 605 29 645 2.80E-139 504.2 8005 cellular  
 organisms;Eukaryota;Opisthokonta;Metazoa;Eumetazoa;Bilateria;Deuterostomi  
 a;Chordata;Craniata;Vertebrata;Gnathostomata;Teleostomi;Euteleostomi;Acti  
 nopterygii;Actinopteri;Neopterygii;Teleostei;Osteoglossocephalai;Clupeoce  
 phala;Otomorpha;Ostariophysi;Otophysi;Characiphysae;Gymnotiformes;Gymnoto  
 idei;Gymnotidae;Electrophorus;Electrophorus electricus  
 UdeM00000030192 6596 1218 UdeM00000030192 XP\_045214866.1 77 854  
 182 7 8 850 3 853 0.00E+00 1218 6596 cellular  
 organisms;Eukaryota;Opisthokonta;Metazoa;Eumetazoa;Bilateria;Protostomia;  
 Spiralia;Lophotrochozoa;Mollusca;Bivalvia;Autobranchia;Heteroconchia;Euhe  
 terodonta;Imparidentia;Venerida;Veneroidea;Veneridae;Mercenaria;Mercenari  
 a mercenaria  
 UdeM00000030193 6596 1220.3 UdeM00000030193 XP\_045214868.1 77.1  
 856 182 7 8 852 3 855 0.00E+00 1220.3 6596  
 cellular  
 organisms;Eukaryota;Opisthokonta;Metazoa;Eumetazoa;Bilateria;Protostomia;  
 Spiralia;Lophotrochozoa;Mollusca;Bivalvia;Autobranchia;Heteroconchia;Euhe  
 terodonta;Imparidentia;Venerida;Veneroidea;Veneridae;Mercenaria;Mercenari  
 a mercenaria  
 UdeM00000030194 6565 582 UdeM00000030194 XP\_022313681.1 73.3 390  
 103 1 7 396 8 396 5.60E-163 582 6565 cellular  
 organisms;Eukaryota;Opisthokonta;Metazoa;Eumetazoa;Bilateria;Protostomia;  
 Spiralia;Lophotrochozoa;Mollusca;Bivalvia;Autobranchia;Pteriomorphia;Ostr  
 eida;Ostreoidea;Ostreidae;Crassostrea;Crassostrea virginica  
 UdeM00000030195 6565 557 UdeM00000030195 XP\_022313681.1 74.3 370  
 94 1 7 376 8 376 2.30E-155 557 6565 cellular  
 organisms;Eukaryota;Opisthokonta;Metazoa;Eumetazoa;Bilateria;Protostomia;  
 Spiralia;Lophotrochozoa;Mollusca;Bivalvia;Autobranchia;Pteriomorphia;Ostr  
 eida;Ostreoidea;Ostreidae;Crassostrea;Crassostrea virginica  
 UdeM00000030196 6596 283.1 UdeM00000030196 XP\_045212522.1 61.4 223  
 84 1 1 221 26 248 3.00E-73 283.1 6596 cellular  
 organisms;Eukaryota;Opisthokonta;Metazoa;Eumetazoa;Bilateria;Protostomia;  
 Spiralia;Lophotrochozoa;Mollusca;Bivalvia;Autobranchia;Heteroconchia;Euhe  
 terodonta;Imparidentia;Venerida;Veneroidea;Veneridae;Mercenaria;Mercenari  
 a mercenaria  
 UdeM00000030197 6596 583.9 UdeM00000030197 XP\_045214535.1 66.7 417  
 129 2 3 416 4 413 1.60E-163 583.9 6596 cellular  
 organisms;Eukaryota;Opisthokonta;Metazoa;Eumetazoa;Bilateria;Protostomia;  
 Spiralia;Lophotrochozoa;Mollusca;Bivalvia;Autobranchia;Heteroconchia;Euhe  
 terodonta;Imparidentia;Venerida;Veneroidea;Veneridae;Mercenaria;Mercenari  
 a mercenaria  
 UdeM00000030201 218467 70.5 UdeM00000030201 XP\_023232316.1 33.1  
 127 83 2 20 144 59 185 2.80E-09 70.5 218467  
 cellular  
 organisms;Eukaryota;Opisthokonta;Metazoa;Eumetazoa;Bilateria;Protostomia;  
 Ecdysozoa;Panarthropoda;Arthropoda;Chelicerata;Arachnida;Scorpiones;Buthi  
 da;Buthoidea;Buthidae;Centruroides;Centruroides sculpturatus



UdeM00000030206 6945 88.2 UdeM00000030206 XP\_040070898.1 29 210  
 123 7 5 192 2 207 1.40E-14 88.2 6945 cellular  
 organisms;Eukaryota;Opisthokonta;Metazoa;Eumetazoa;Bilateria;Protostomia;  
 Ecdysozoa;Panarthropoda;Arthropoda;Chelicerata;Arachnida;Acari;Parasitifo  
 rmes;Ixodida;Ixodoidea;Ixodidae;Ixodinae;Ixodes;Ixodes scapularis  
 UdeM00000030209 218467 85.9 UdeM00000030209 XP\_023232316.1 32.9  
 170 102 3 23 181 17 185 1.00E-13 85.9 218467  
 cellular  
 organisms;Eukaryota;Opisthokonta;Metazoa;Eumetazoa;Bilateria;Protostomia;  
 Ecdysozoa;Panarthropoda;Arthropoda;Chelicerata;Arachnida;Scorpiones;Buthi  
 da;Buthoidea;Buthidae;Centruroides;Centruroides sculpturatus  
 UdeM00000030211 6579 90.1 UdeM00000030211 XP\_033727573.1 30.1 219  
 130 5 13 209 45 262 5.30E-15 90.1 6579 cellular  
 organisms;Eukaryota;Opisthokonta;Metazoa;Eumetazoa;Bilateria;Protostomia;  
 Spiralia;Lophotrochozoa;Mollusca;Bivalvia;Autobranchia;Pteriomorphia;Pect  
 inida;Pectinoidea;Pectinidae;Pecten;Pecten maximus  
 UdeM00000030212 218467 86.3 UdeM00000030212 XP\_023232316.1 31.8  
 170 104 4 23 181 17 185 7.60E-14 86.3 218467  
 cellular  
 organisms;Eukaryota;Opisthokonta;Metazoa;Eumetazoa;Bilateria;Protostomia;  
 Ecdysozoa;Panarthropoda;Arthropoda;Chelicerata;Arachnida;Scorpiones;Buthi  
 da;Buthoidea;Buthidae;Centruroides;Centruroides sculpturatus  
 UdeM00000030213 6579 90.9 UdeM00000030213 XP\_033727573.1 30.9 217  
 127 5 13 207 45 260 3.10E-15 90.9 6579 cellular  
 organisms;Eukaryota;Opisthokonta;Metazoa;Eumetazoa;Bilateria;Protostomia;  
 Spiralia;Lophotrochozoa;Mollusca;Bivalvia;Autobranchia;Pteriomorphia;Pect  
 inida;Pectinoidea;Pectinidae;Pecten;Pecten maximus  
 UdeM00000030214 6579 90.9 UdeM00000030214 XP\_033727573.1 30.9 217  
 127 5 13 207 45 260 3.10E-15 90.9 6579 cellular  
 organisms;Eukaryota;Opisthokonta;Metazoa;Eumetazoa;Bilateria;Protostomia;  
 Spiralia;Lophotrochozoa;Mollusca;Bivalvia;Autobranchia;Pteriomorphia;Pect  
 inida;Pectinoidea;Pectinidae;Pecten;Pecten maximus  
 UdeM00000030215 6579 93.6 UdeM00000030215 XP\_033727573.1 31.4 220  
 130 5 13 215 45 260 4.80E-16 93.6 6579 cellular  
 organisms;Eukaryota;Opisthokonta;Metazoa;Eumetazoa;Bilateria;Protostomia;  
 Spiralia;Lophotrochozoa;Mollusca;Bivalvia;Autobranchia;Pteriomorphia;Pect  
 inida;Pectinoidea;Pectinidae;Pecten;Pecten maximus  
 UdeM00000030216 218467 87 UdeM00000030216 XP\_023232316.1 35.8  
 151 86 3 42 181 35 185 4.60E-14 87 218467  
 cellular  
 organisms;Eukaryota;Opisthokonta;Metazoa;Eumetazoa;Bilateria;Protostomia;  
 Ecdysozoa;Panarthropoda;Arthropoda;Chelicerata;Arachnida;Scorpiones;Buthi  
 da;Buthoidea;Buthidae;Centruroides;Centruroides sculpturatus  
 UdeM00000030217 6579 87.8 UdeM00000030217 XP\_033727573.1 29.7 219  
 131 5 13 209 45 262 2.60E-14 87.8 6579 cellular  
 organisms;Eukaryota;Opisthokonta;Metazoa;Eumetazoa;Bilateria;Protostomia;  
 Spiralia;Lophotrochozoa;Mollusca;Bivalvia;Autobranchia;Pteriomorphia;Pect  
 inida;Pectinoidea;Pectinidae;Pecten;Pecten maximus  
 UdeM00000030218 6579 93.6 UdeM00000030218 XP\_033727573.1 31.4 220  
 130 5 13 215 45 260 4.80E-16 93.6 6579 cellular  
 organisms;Eukaryota;Opisthokonta;Metazoa;Eumetazoa;Bilateria;Protostomia;  
 Spiralia;Lophotrochozoa;Mollusca;Bivalvia;Autobranchia;Pteriomorphia;Pect  
 inida;Pectinoidea;Pectinidae;Pecten;Pecten maximus

UdeM00000039299 29159 65.5 UdeM00000039299 XP\_034302502.1 34.6 127  
 71 2 10 124 391 517 5.90E-08 65.5 29159 cellular  
 organisms;Eukaryota;Opisthokonta;Metazoa;Eumetazoa;Bilateria;Protostomia;  
 Spiralia;Lophotrochozoa;Mollusca;Bivalvia;Autobranhia;Pteriomorphia;Ostr  
 eida;Ostreoidea;Ostreidae;Crassostrea;Crassostrea gigas  
 UdeM00000039300 6565 124 UdeM00000039300 XP\_022299727.1 51.7 118  
 56 1 2 119 161 277 1.50E-25 124 6565 cellular  
 organisms;Eukaryota;Opisthokonta;Metazoa;Eumetazoa;Bilateria;Protostomia;  
 Spiralia;Lophotrochozoa;Mollusca;Bivalvia;Autobranhia;Pteriomorphia;Ostr  
 eida;Ostreoidea;Ostreidae;Crassostrea;Crassostrea virginica  
 UdeM00000039301 6596 60.5 UdeM00000039301 XP\_045197645.1 34.2 114  
 44 3 108 190 30 143 2.80E-06 60.5 6596 cellular  
 organisms;Eukaryota;Opisthokonta;Metazoa;Eumetazoa;Bilateria;Protostomia;  
 Spiralia;Lophotrochozoa;Mollusca;Bivalvia;Autobranhia;Heteroconchia;Euhe  
 terodonta;Imparidentia;Venerida;Veneroidea;Veneridae;Mercenaria;Mercenari  
 a mercenaria  
 UdeM00000039302 6596 349.7 UdeM00000039302 XP\_045181000.1 50.4 663  
 135 11 1 501 947 1577 6.10E-93 349.7 6596 cellular  
 organisms;Eukaryota;Opisthokonta;Metazoa;Eumetazoa;Bilateria;Protostomia;  
 Spiralia;Lophotrochozoa;Mollusca;Bivalvia;Autobranhia;Heteroconchia;Euhe  
 terodonta;Imparidentia;Venerida;Veneroidea;Veneridae;Mercenaria;Mercenari  
 a mercenaria  
 UdeM00000039303 6945 64.7 UdeM00000039303 XP\_042146206.1 29.1 151  
 91 2 37 171 88 238 1.70E-07 64.7 6945 cellular  
 organisms;Eukaryota;Opisthokonta;Metazoa;Eumetazoa;Bilateria;Protostomia;  
 Ecdysozoa;Panarthropoda;Arthropoda;Chelicerata;Arachnida;Acari;Parasitifo  
 rmes;Ixodida;Ixodoidea;Ixodidae;Ixodinae;Ixodes;Ixodes scapularis  
 UdeM00000039310 6596 58.5 UdeM00000039310 XP\_045201969.1 64.1 39  
 14 0 53 91 30 68 5.00E-06 58.5 6596 cellular  
 organisms;Eukaryota;Opisthokonta;Metazoa;Eumetazoa;Bilateria;Protostomia;  
 Spiralia;Lophotrochozoa;Mollusca;Bivalvia;Autobranhia;Heteroconchia;Euhe  
 terodonta;Imparidentia;Venerida;Veneroidea;Veneridae;Mercenaria;Mercenari  
 a mercenaria  
 UdeM00000039313 29159 629.4 UdeM00000039313 XP\_034322429.1 36.6 1176  
 583 19 6 1029 3 1168 8.00E-177 629.4 29159 cellular  
 organisms;Eukaryota;Opisthokonta;Metazoa;Eumetazoa;Bilateria;Protostomia;  
 Spiralia;Lophotrochozoa;Mollusca;Bivalvia;Autobranhia;Pteriomorphia;Ostr  
 eida;Ostreoidea;Ostreidae;Crassostrea;Crassostrea gigas  
 UdeM00000039314 1735272 120.2 UdeM00000039314 XP\_041356959.1 61.4  
 101 38 1 171 271 116 215 6.20E-24 120.2 1735272  
 cellular  
 organisms;Eukaryota;Opisthokonta;Metazoa;Eumetazoa;Bilateria;Protostomia;  
 Spiralia;Lophotrochozoa;Mollusca;Gastropoda;Neomphalina;Neomphaloidea;Pel  
 tospiridae;Gigantopelta;Gigantopelta aegis  
 UdeM00000039315 29159 66.2 UdeM00000039315 XP\_034307860.1 65.9 44  
 15 0 1 44 1 44 1.80E-08 66.2 29159 cellular  
 organisms;Eukaryota;Opisthokonta;Metazoa;Eumetazoa;Bilateria;Protostomia;  
 Spiralia;Lophotrochozoa;Mollusca;Bivalvia;Autobranhia;Pteriomorphia;Ostr  
 eida;Ostreoidea;Ostreidae;Crassostrea;Crassostrea gigas  
 UdeM00000039320 6596 481.1 UdeM00000039320 XP\_045187150.1 49.4 488  
 242 2 1 488 135 617 1.70E-132 481.1 6596 cellular  
 organisms;Eukaryota;Opisthokonta;Metazoa;Eumetazoa;Bilateria;Protostomia;  
 Spiralia;Lophotrochozoa;Mollusca;Bivalvia;Autobranhia;Heteroconchia;Euhe

terodonta;Imparidentia;Venerida;Veneroidea;Veneridae;Mercenaria;Mercenari  
 a mercenaria  
 UdeM00000039321 6596 62.4 UdeM00000039321 XP\_045210831.1 31.2 141  
 40 2 1 84 1 141 3.20E-07 62.4 6596 cellular  
 organisms;Eukaryota;Opisthokonta;Metazoa;Eumetazoa;Bilateria;Protostomia;  
 Spiralia;Lophotrochozoa;Mollusca;Bivalvia;Autobranchia;Heteroconchia;Euhe  
 terodonta;Imparidentia;Venerida;Veneroidea;Veneridae;Mercenaria;Mercenari  
 a mercenaria  
 UdeM00000044378 109280 168.7 UdeM00000044378 XP\_019729826.1 40.7  
 209 107 1 6 197 10 218 7.40E-39 168.7 109280  
 cellular  
 organisms;Eukaryota;Opisthokonta;Metazoa;Eumetazoa;Bilateria;Deuterostomi  
 a;Chordata;Craniata;Vertebrata;Gnathostomata;Teleostomi;Euteleostomi;Acti  
 nopterygii;Actinopteri;Neopterygii;Teleostei;Osteoglossocephalai;Clupeoce  
 phala;Euteleosteomorpha;Neoteleostei;Eurypterygia;Ctenosquamata;Acanthomo  
 rphata;Euacanthomorphacea;Percomorphaceae;Syngnathia;Syngnathiformes;S  
 yngnathoidei;Syngnathidae;Hippocampinae;Hippocampus;Hippocampus comes  
 UdeM00000022045 6596 122.5 UdeM00000022045 XP\_045208094.1 33.5 340  
 184 9 1 303 1 335 4.70E-24 122.5 6596 cellular  
 organisms;Eukaryota;Opisthokonta;Metazoa;Eumetazoa;Bilateria;Protostomia;  
 Spiralia;Lophotrochozoa;Mollusca;Bivalvia;Autobranchia;Heteroconchia;Euhe  
 terodonta;Imparidentia;Venerida;Veneroidea;Veneridae;Mercenaria;Mercenari  
 a mercenaria  
 UdeM00000022046 29159 703.4 UdeM00000022046 NP\_001292237.1 70.8 511  
 133 4 28 527 17 522 2.30E-199 703.4 29159 cellular  
 organisms;Eukaryota;Opisthokonta;Metazoa;Eumetazoa;Bilateria;Protostomia;  
 Spiralia;Lophotrochozoa;Mollusca;Bivalvia;Autobranchia;Pteriormorphia;Ostr  
 eida;Ostreoidea;Ostreidae;Crassostrea;Crassostrea gigas  
 UdeM00000022047 6579 624 UdeM00000022047 XP\_033732046.1 56.6 579  
 205 7 19 576 3 556 1.90E-175 624 6579 cellular  
 organisms;Eukaryota;Opisthokonta;Metazoa;Eumetazoa;Bilateria;Protostomia;  
 Spiralia;Lophotrochozoa;Mollusca;Bivalvia;Autobranchia;Pteriormorphia;Pect  
 inida;Pectinoidea;Pectinidae;Pecten;Pecten maximus  
 UdeM00000022048 6579 530.4 UdeM00000022048 XP\_033731861.1 86.2 298  
 41 0 1 298 1 298 1.50E-147 530.4 6579 cellular  
 organisms;Eukaryota;Opisthokonta;Metazoa;Eumetazoa;Bilateria;Protostomia;  
 Spiralia;Lophotrochozoa;Mollusca;Bivalvia;Autobranchia;Pteriormorphia;Pect  
 inida;Pectinoidea;Pectinidae;Pecten;Pecten maximus  
 UdeM00000022049 37653 137.9 UdeM00000022049 XP\_014776564.1 61.9 113  
 43 0 162 274 207 319 2.00E-29 137.9 37653 cellular  
 organisms;Eukaryota;Opisthokonta;Metazoa;Eumetazoa;Bilateria;Protostomia;  
 Spiralia;Lophotrochozoa;Mollusca;Cephalopoda;Coleoidea;Octopodiformes;Oct  
 opoda;Incirrata;Octopodidae;Octopus;Octopus bimaculoides  
 UdeM00000022050 6579 98.6 UdeM00000022050 XP\_033734370.1 38.2 165  
 92 4 61 222 161 318 1.10E-17 98.6 6579 cellular  
 organisms;Eukaryota;Opisthokonta;Metazoa;Eumetazoa;Bilateria;Protostomia;  
 Spiralia;Lophotrochozoa;Mollusca;Bivalvia;Autobranchia;Pteriormorphia;Pect  
 inida;Pectinoidea;Pectinidae;Pecten;Pecten maximus  
 UdeM00000022051 7741 99.4 UdeM00000022051 XP\_019615443.1 35.6 188  
 91 7 10 172 189 371 4.80E-18 99.4 7741 cellular  
 organisms;Eukaryota;Opisthokonta;Metazoa;Eumetazoa;Bilateria;Deuterostomi  
 a;Chordata;Cephalochordata;Leptocardii;Amphioxiformes;Branchiostomidae;Br  
 anchiostoma;Branchiostoma belcheri

UdeM00000022052 7741 99.4 UdeM00000022052 XP\_019615443.1 35.6 188  
 91 7 10 172 189 371 4.80E-18 99.4 7741 cellular  
 organisms;Eukaryota;Opisthokonta;Metazoa;Eumetazoa;Bilateria;Deuterostomi  
 a;Chordata;Cephalochordata;Leptocardii;Amphioxiformes;Branchiostomidae;Br  
 anchiostoma;Branchiostoma belcheri  
 UdeM00000022054 130454 62.4 UdeM00000022054 XP\_016199314.1 33.3  
 96 64 0 1 96 44 139 3.70E-07 62.4 130454  
 cellular  
 organisms;Eukaryota;Viridiplantae;Streptophyta;Streptophytina;Embryophyta  
 ;Tracheophyta;Euphyllophyta;Spermatophyta;Magnoliopsida;Mesangiospermae;e  
 udicotyledons;Gunneridae;Pentapetalae;rosids;fabids;Fabales;Fabaceae;Papi  
 lionoideae;50 kb inversion clade;dalbergioids sensu  
 lato;Dalbergieae;Pterocarpus clade;Arachis;Arachis ipaensis  
 UdeM00000022058 1735272 278.1 UdeM00000022058 XP\_041361646.1 38.8  
 379 220 2 59 437 33 399 1.90E-71 278.1 1735272  
 cellular  
 organisms;Eukaryota;Opisthokonta;Metazoa;Eumetazoa;Bilateria;Protostomia;  
 Spiralia;Lophotrochozoa;Mollusca;Gastropoda;Neomphalina;Neomphaloidea;Pel  
 tospiridae;Gigantopelta;Gigantopelta aegis  
 UdeM00000022059 6573 516.2 UdeM00000022059 XP\_021342730.1 29 1282  
 814 48 1 1249 308 1526 1.30E-142 516.2 6573 cellular  
 organisms;Eukaryota;Opisthokonta;Metazoa;Eumetazoa;Bilateria;Protostomia;  
 Spiralia;Lophotrochozoa;Mollusca;Bivalvia;Autobranchia;Pteriormorphia;Pect  
 inida;Pectinoidea;Pectinidae;Mizuhopecten;Mizuhopecten yessoensis  
 UdeM00000022060 6596 733.4 UdeM00000022060 XP\_045181024.1 40.5 1010  
 542 17 32 1000 33 1024 4.40E-208 733.4 6596 cellular  
 organisms;Eukaryota;Opisthokonta;Metazoa;Eumetazoa;Bilateria;Protostomia;  
 Spiralia;Lophotrochozoa;Mollusca;Bivalvia;Autobranchia;Heteroconchia;Euhe  
 terodonta;Imparidentia;Venerida;Veneroidea;Veneridae;Mercenaria;Mercenari  
 a mercenaria  
 UdeM00000022061 6596 740.3 UdeM00000022061 XP\_045181024.1 39.1 1036  
 584 18 9 1023 15 1024 3.90E-210 740.3 6596 cellular  
 organisms;Eukaryota;Opisthokonta;Metazoa;Eumetazoa;Bilateria;Protostomia;  
 Spiralia;Lophotrochozoa;Mollusca;Bivalvia;Autobranchia;Heteroconchia;Euhe  
 terodonta;Imparidentia;Venerida;Veneroidea;Veneridae;Mercenaria;Mercenari  
 a mercenaria  
 UdeM00000022062 6565 217.6 UdeM00000022062 XP\_022325549.1 79.3 140  
 28 1 1 140 1 139 4.20E-53 217.6 6565 cellular  
 organisms;Eukaryota;Opisthokonta;Metazoa;Eumetazoa;Bilateria;Protostomia;  
 Spiralia;Lophotrochozoa;Mollusca;Bivalvia;Autobranchia;Pteriormorphia;Ostr  
 eida;Ostreoidea;Ostreidae;Crassostrea;Crassostrea virginica  
 UdeM00000022063 27457 130.2 UdeM00000022063 XP\_029404141.1 38.6 236  
 143 1 26 259 21 256 6.00E-27 130.2 27457 cellular  
 organisms;Eukaryota;Opisthokonta;Metazoa;Eumetazoa;Bilateria;Protostomia;  
 Ecdysozoa;Panarthropoda;Arthropoda;Mandibulata;Pancrustacea;Hexapoda;Inse  
 cta;Dicondylia;Pterygota;Neoptera;Endopterygota;Diptera;Brachycera;Muscom  
 orpha;Eremoneura;Cyclorrhapha;Schizophora;Acalyptratae;Tephritoidea;Tephri  
 tidae;Dacinae;Dacini;Bactrocera;Bactrocera;Bactrocera dorsalis  
 complex;Bactrocera dorsalis  
 UdeM00000022064 6596 290.4 UdeM00000022064 XP\_045209474.1 71 248  
 67 3 27 273 697 940 2.30E-75 290.4 6596 cellular  
 organisms;Eukaryota;Opisthokonta;Metazoa;Eumetazoa;Bilateria;Protostomia;  
 Spiralia;Lophotrochozoa;Mollusca;Bivalvia;Autobranchia;Heteroconchia;Euhe

terodonta;Imparidentia;Venerida;Veneroidea;Veneridae;Mercenaria;Mercenaria mercenaria  
 UdeM00000022065 6565 186.4 UdeM00000022065 XP\_022298521.1 72.3 137  
 30 2 213 348 201 330 6.10E-44 186.4 6565 cellular  
 organisms;Eukaryota;Opisthokonta;Metazoa;Eumetazoa;Bilateria;Protostomia;  
 Spiralia;Lophotrochozoa;Mollusca;Bivalvia;Autobranhia;Pteriomorphia;Ostr  
 eida;Ostreoidea;Ostreidae;Crassostrea;Crassostrea virginica  
 UdeM00000022067 6596 71.2 UdeM00000022067 XP\_045202205.1 35 140  
 83 4 232 365 52 189 3.00E-09 71.2 6596 cellular  
 organisms;Eukaryota;Opisthokonta;Metazoa;Eumetazoa;Bilateria;Protostomia;  
 Spiralia;Lophotrochozoa;Mollusca;Bivalvia;Autobranhia;Heteroconchia;Euhe  
 terodonta;Imparidentia;Venerida;Veneroidea;Veneridae;Mercenaria;Mercenari  
 a mercenaria  
 UdeM00000022068 6596 71.2 UdeM00000022068 XP\_045202205.1 32.5 166  
 99 6 206 365 31 189 3.00E-09 71.2 6596 cellular  
 organisms;Eukaryota;Opisthokonta;Metazoa;Eumetazoa;Bilateria;Protostomia;  
 Spiralia;Lophotrochozoa;Mollusca;Bivalvia;Autobranhia;Heteroconchia;Euhe  
 terodonta;Imparidentia;Venerida;Veneroidea;Veneridae;Mercenaria;Mercenari  
 a mercenaria  
 UdeM00000022069 6596 71.6 UdeM00000022069 XP\_045202205.1 35.7 140  
 82 4 231 364 52 189 2.30E-09 71.6 6596 cellular  
 organisms;Eukaryota;Opisthokonta;Metazoa;Eumetazoa;Bilateria;Protostomia;  
 Spiralia;Lophotrochozoa;Mollusca;Bivalvia;Autobranhia;Heteroconchia;Euhe  
 terodonta;Imparidentia;Venerida;Veneroidea;Veneridae;Mercenaria;Mercenari  
 a mercenaria  
 UdeM00000022070 6565 105.9 UdeM00000022070 XP\_022336327.1 38.8 116  
 69 1 17 132 623 736 4.10E-20 105.9 6565 cellular  
 organisms;Eukaryota;Opisthokonta;Metazoa;Eumetazoa;Bilateria;Protostomia;  
 Spiralia;Lophotrochozoa;Mollusca;Bivalvia;Autobranhia;Pteriomorphia;Ostr  
 eida;Ostreoidea;Ostreidae;Crassostrea;Crassostrea virginica  
 UdeM00000022071 6579 197.6 UdeM00000022071 XP\_033731831.1 32 372  
 203 11 27 354 371 736 3.30E-47 197.6 6579 cellular  
 organisms;Eukaryota;Opisthokonta;Metazoa;Eumetazoa;Bilateria;Protostomia;  
 Spiralia;Lophotrochozoa;Mollusca;Bivalvia;Autobranhia;Pteriomorphia;Pect  
 inida;Pectinoidea;Pectinidae;Pecten;Pecten maximus  
 UdeM00000022072 386614 293.1 UdeM00000022072 XP\_032871159.1 27.8  
 690 404 22 1 617 689 1357 9.10E-76 293.1 386614  
 cellular  
 organisms;Eukaryota;Opisthokonta;Metazoa;Eumetazoa;Bilateria;Deuterostomi  
 a;Chordata;Craniata;Vertebrata;Gnathostomata;Chondrichthyes;Elasmobranchi  
 i;Batoidea;Rajiformes;Rajidae;Amblyraja;Amblyraja radiata  
 UdeM00000022075 1529436 250 UdeM00000022075 XP\_033107416.1 25.9  
 731 431 24 48 686 973 1684 9.80E-63 250 1529436  
 cellular  
 organisms;Eukaryota;Opisthokonta;Metazoa;Eumetazoa;Bilateria;Deuterostomi  
 a;Echinodermata;Pelmatozoa;Crinoidea;Articulata;Comatulida;Comatulidae;Co  
 matulinae;Anneissia;Anneissia japonica  
 UdeM00000022076 6579 167.9 UdeM00000022076 XP\_033731831.1 35.8 271  
 148 7 31 280 465 730 2.30E-38 167.9 6579 cellular  
 organisms;Eukaryota;Opisthokonta;Metazoa;Eumetazoa;Bilateria;Protostomia;  
 Spiralia;Lophotrochozoa;Mollusca;Bivalvia;Autobranhia;Pteriomorphia;Pect  
 inida;Pectinoidea;Pectinidae;Pecten;Pecten maximus  
 UdeM00000022077 6579 167.5 UdeM00000022077 XP\_033731831.1 35.8 271  
 154 7 31 286 465 730 3.10E-38 167.5 6579 cellular

organisms;Eukaryota;Opisthokonta;Metazoa;Eumetazoa;Bilateria;Protostomia;  
Spiralia;Lophotrochozoa;Mollusca;Bivalvia;Autobranhia;Pteriomorphia;Pect  
inida;Pectinoidea;Pectinidae;Pecten;Pecten maximus  
UdeM00000022078 6573 177.9 UdeM00000022078 XP\_021354592.1 33.8 278  
163 6 31 291 606 879 2.40E-41 177.9 6573 cellular  
organisms;Eukaryota;Opisthokonta;Metazoa;Eumetazoa;Bilateria;Protostomia;  
Spiralia;Lophotrochozoa;Mollusca;Bivalvia;Autobranhia;Pteriomorphia;Pect  
inida;Pectinoidea;Pectinidae;Mizuhopecten;Mizuhopecten yessoensis  
UdeM00000022079 6596 167.9 UdeM00000022079 XP\_045209078.1 33.2 283  
158 6 34 285 1954 2236 2.40E-38 167.9 6596 cellular  
organisms;Eukaryota;Opisthokonta;Metazoa;Eumetazoa;Bilateria;Protostomia;  
Spiralia;Lophotrochozoa;Mollusca;Bivalvia;Autobranhia;Heteroconchia;Euhe  
terodonta;Imparidentia;Venerida;Veneroidea;Veneridae;Mercenaria;Mercenari  
a mercenaria  
UdeM00000022081 6573 154.5 UdeM00000022081 XP\_021354592.1 29.7 276  
158 5 31 272 609 882 2.60E-34 154.5 6573 cellular  
organisms;Eukaryota;Opisthokonta;Metazoa;Eumetazoa;Bilateria;Protostomia;  
Spiralia;Lophotrochozoa;Mollusca;Bivalvia;Autobranhia;Pteriomorphia;Pect  
inida;Pectinoidea;Pectinidae;Mizuhopecten;Mizuhopecten yessoensis  
UdeM00000022082 6596 1166 UdeM00000022082 XP\_045208111.1 59.3 932  
371 4 8 934 2 930 0.00E+00 1166 6596 cellular  
organisms;Eukaryota;Opisthokonta;Metazoa;Eumetazoa;Bilateria;Protostomia;  
Spiralia;Lophotrochozoa;Mollusca;Bivalvia;Autobranhia;Heteroconchia;Euhe  
terodonta;Imparidentia;Venerida;Veneroidea;Veneridae;Mercenaria;Mercenari  
a mercenaria  
UdeM00000022083 6573 236.9 UdeM00000022083 XP\_021380334.1 41.8 292  
160 7 5 292 11 296 3.40E-59 236.9 6573 cellular  
organisms;Eukaryota;Opisthokonta;Metazoa;Eumetazoa;Bilateria;Protostomia;  
Spiralia;Lophotrochozoa;Mollusca;Bivalvia;Autobranhia;Pteriomorphia;Pect  
inida;Pectinoidea;Pectinidae;Mizuhopecten;Mizuhopecten yessoensis  
UdeM00000022086 6596 356.7 UdeM00000022086 XP\_045207469.1 57.2 339  
105 4 1 337 1 301 3.70E-95 356.7 6596 cellular  
organisms;Eukaryota;Opisthokonta;Metazoa;Eumetazoa;Bilateria;Protostomia;  
Spiralia;Lophotrochozoa;Mollusca;Bivalvia;Autobranhia;Heteroconchia;Euhe  
terodonta;Imparidentia;Venerida;Veneroidea;Veneridae;Mercenaria;Mercenari  
a mercenaria  
UdeM00000022085 1735272 383.3 UdeM00000022085 XP\_041372312.1 50  
454 201 9 1 438 1 444 4.30E-103 383.3 1735272  
cellular  
organisms;Eukaryota;Opisthokonta;Metazoa;Eumetazoa;Bilateria;Protostomia;  
Spiralia;Lophotrochozoa;Mollusca;Gastropoda;Neomphalina;Neomphaloidea;Pel  
tospiridae;Gigantopelta;Gigantopelta aegis  
UdeM00000022087 37653 75.5 UdeM00000022087 XP\_014781739.1 54.9 71  
27 1 2 72 328 393 3.20E-11 75.5 37653 cellular  
organisms;Eukaryota;Opisthokonta;Metazoa;Eumetazoa;Bilateria;Protostomia;  
Spiralia;Lophotrochozoa;Mollusca;Cephalopoda;Coleoidea;Octopodiformes;Oct  
opoda;Incirrata;Octopodidae;Octopus;Octopus bimaculoides  
UdeM00000022088 6579 110.2 UdeM00000022088 XP\_033732828.1 61.4 83  
32 0 2 84 28 110 1.40E-21 110.2 6579 cellular  
organisms;Eukaryota;Opisthokonta;Metazoa;Eumetazoa;Bilateria;Protostomia;  
Spiralia;Lophotrochozoa;Mollusca;Bivalvia;Autobranhia;Pteriomorphia;Pect  
inida;Pectinoidea;Pectinidae;Pecten;Pecten maximus  
UdeM00000022089 37653 346.3 UdeM00000022089 XP\_014785886.1 54.2 306  
134 3 25 325 26 330 4.60E-92 346.3 37653 cellular

organisms;Eukaryota;Opisthokonta;Metazoa;Eumetazoa;Bilateria;Protostomia;Spiralia;Lophotrochozoa;Mollusca;Cephalopoda;Coleoidea;Octopodiformes;Octopoda;Incirrata;Octopodidae;Octopus;Octopus bimaculoides

UdeM00000022090 6596 568.5 UdeM00000022090 XP\_045207731.1 67.8 419  
133 1 1 419 1 417 6.90E-159 568.5 6596 cellular

organisms;Eukaryota;Opisthokonta;Metazoa;Eumetazoa;Bilateria;Protostomia;Spiralia;Lophotrochozoa;Mollusca;Bivalvia;Autobranchia;Heteroconchia;Euheterodonta;Imparidentia;Venerida;Veneroidea;Veneridae;Mercenaria;Mercenaria mercenaria

UdeM00000022091 6596 160.6 UdeM00000022091 XP\_045209105.1 62.2 148  
49 2 74 221 38 178 2.30E-36 160.6 6596 cellular

organisms;Eukaryota;Opisthokonta;Metazoa;Eumetazoa;Bilateria;Protostomia;Spiralia;Lophotrochozoa;Mollusca;Bivalvia;Autobranchia;Heteroconchia;Euheterodonta;Imparidentia;Venerida;Veneroidea;Veneridae;Mercenaria;Mercenaria mercenaria

UdeM00000022092 1735272 112.5 UdeM00000022092 XP\_041371786.1 42.1  
126 73 0 24 149 1203 1328 4.90E-22 112.5 1735272  
cellular

organisms;Eukaryota;Opisthokonta;Metazoa;Eumetazoa;Bilateria;Protostomia;Spiralia;Lophotrochozoa;Mollusca;Gastropoda;Neomphalina;Neomphaloidea;Peltopspiridae;Gigantopelta;Gigantopelta aegis

UdeM00000022093 6596 294.3 UdeM00000022093 XP\_045208831.1 64.2 204  
72 1 16 218 2040 2243 1.30E-76 294.3 6596 cellular

organisms;Eukaryota;Opisthokonta;Metazoa;Eumetazoa;Bilateria;Protostomia;Spiralia;Lophotrochozoa;Mollusca;Bivalvia;Autobranchia;Heteroconchia;Euheterodonta;Imparidentia;Venerida;Veneroidea;Veneridae;Mercenaria;Mercenaria mercenaria

UdeM00000022094 6596 420.2 UdeM00000022094 XP\_045208831.1 68.6 287  
84 2 15 297 2236 2520 2.30E-114 420.2 6596 cellular

organisms;Eukaryota;Opisthokonta;Metazoa;Eumetazoa;Bilateria;Protostomia;Spiralia;Lophotrochozoa;Mollusca;Bivalvia;Autobranchia;Heteroconchia;Euheterodonta;Imparidentia;Venerida;Veneroidea;Veneridae;Mercenaria;Mercenaria mercenaria

UdeM00000022095 6596 603.2 UdeM00000022095 XP\_045210140.1 70.2 413  
120 2 1 411 1 412 2.50E-169 603.2 6596 cellular

organisms;Eukaryota;Opisthokonta;Metazoa;Eumetazoa;Bilateria;Protostomia;Spiralia;Lophotrochozoa;Mollusca;Bivalvia;Autobranchia;Heteroconchia;Euheterodonta;Imparidentia;Venerida;Veneroidea;Veneridae;Mercenaria;Mercenaria mercenaria

UdeM00000022096 6573 247.3 UdeM00000022096 XP\_021341669.1 23.6 2132  
1163 62 496 2443 397 2247 2.00E-61 247.3 6573 cellular

organisms;Eukaryota;Opisthokonta;Metazoa;Eumetazoa;Bilateria;Protostomia;Spiralia;Lophotrochozoa;Mollusca;Bivalvia;Autobranchia;Pteriomorphia;Pectinida;Pectinoidea;Pectinidae;Mizuhopecten;Mizuhopecten yessoensis

UdeM00000022097 6596 293.9 UdeM00000022097 XP\_045207972.1 57.7 241  
96 2 3 243 63 297 1.90E-76 293.9 6596 cellular

organisms;Eukaryota;Opisthokonta;Metazoa;Eumetazoa;Bilateria;Protostomia;Spiralia;Lophotrochozoa;Mollusca;Bivalvia;Autobranchia;Heteroconchia;Euheterodonta;Imparidentia;Venerida;Veneroidea;Veneridae;Mercenaria;Mercenaria mercenaria

UdeM00000022098 6596 293.9 UdeM00000022098 XP\_045207972.1 57.7 241  
96 2 3 243 63 297 1.90E-76 293.9 6596 cellular

organisms;Eukaryota;Opisthokonta;Metazoa;Eumetazoa;Bilateria;Protostomia;Spiralia;Lophotrochozoa;Mollusca;Bivalvia;Autobranchia;Heteroconchia;Euheterodonta;Imparidentia;Venerida;Veneroidea;Veneridae;Mercenaria;Mercenaria mercenaria

terodonta;Imparidentia;Venerida;Veneroidea;Veneridae;Mercenaria;Mercenari  
 a mercenaria  
 UdeM00000022099 6596 633.3 UdeM00000022099 XP\_045207971.1 78.6 392  
 83 1 37 428 36 426 2.30E-178 633.3 6596 cellular  
 organisms;Eukaryota;Opisthokonta;Metazoa;Eumetazoa;Bilateria;Protostomia;  
 Spiralia;Lophotrochozoa;Mollusca;Bivalvia;Autobranhia;Heteroconchia;Euhe  
 terodonta;Imparidentia;Venerida;Veneroidea;Veneridae;Mercenaria;Mercenari  
 a mercenaria  
 UdeM00000022102 6579 270 UdeM00000022102 XP\_033732836.1 48.8 422  
 181 7 4 402 324 733 4.80E-69 270 6579 cellular  
 organisms;Eukaryota;Opisthokonta;Metazoa;Eumetazoa;Bilateria;Protostomia;  
 Spiralia;Lophotrochozoa;Mollusca;Bivalvia;Autobranhia;Pteriormorphia;Pect  
 inida;Pectinoidea;Pectinidae;Pecten;Pecten maximus  
 UdeM00000022100 6573 506.1 UdeM00000022100 XP\_021357035.1 55.1 755  
 289 15 1 727 1 733 7.20E-140 506.1 6573 cellular  
 organisms;Eukaryota;Opisthokonta;Metazoa;Eumetazoa;Bilateria;Protostomia;  
 Spiralia;Lophotrochozoa;Mollusca;Bivalvia;Autobranhia;Pteriormorphia;Pect  
 inida;Pectinoidea;Pectinidae;Mizuhopecten;Mizuhopecten yessoensis  
 UdeM00000022101 6573 508.8 UdeM00000022101 XP\_021357035.1 55.2 755  
 289 15 1 728 1 733 1.10E-140 508.8 6573 cellular  
 organisms;Eukaryota;Opisthokonta;Metazoa;Eumetazoa;Bilateria;Protostomia;  
 Spiralia;Lophotrochozoa;Mollusca;Bivalvia;Autobranhia;Pteriormorphia;Pect  
 inida;Pectinoidea;Pectinidae;Mizuhopecten;Mizuhopecten yessoensis  
 UdeM00000022103 6565 803.5 UdeM00000022103 XP\_022344301.1 58.8 844  
 267 7 5 846 3 767 2.60E-229 803.5 6565 cellular  
 organisms;Eukaryota;Opisthokonta;Metazoa;Eumetazoa;Bilateria;Protostomia;  
 Spiralia;Lophotrochozoa;Mollusca;Bivalvia;Autobranhia;Pteriormorphia;Ostr  
 eida;Ostreoidea;Ostreidae;Crassostrea;Crassostrea virginica  
 UdeM00000022104 6596 638.6 UdeM00000022104 XP\_045210129.1 63.6 473  
 171 1 1 473 1 472 7.10E-180 638.6 6596 cellular  
 organisms;Eukaryota;Opisthokonta;Metazoa;Eumetazoa;Bilateria;Protostomia;  
 Spiralia;Lophotrochozoa;Mollusca;Bivalvia;Autobranhia;Heteroconchia;Euhe  
 terodonta;Imparidentia;Venerida;Veneroidea;Veneridae;Mercenaria;Mercenari  
 a mercenaria  
 UdeM00000022105 1735272 188.3 UdeM00000022105 XP\_041371797.1 37.5  
 331 128 8 8 261 10 338 1.20E-44 188.3 1735272  
 cellular  
 organisms;Eukaryota;Opisthokonta;Metazoa;Eumetazoa;Bilateria;Protostomia;  
 Spiralia;Lophotrochozoa;Mollusca;Gastropoda;Neomphalina;Neomphaloidea;Pel  
 tospiridae;Gigantopelta;Gigantopelta aegis  
 UdeM00000022106 6596 636 UdeM00000022106 XP\_045207948.1 60 515  
 189 6 7 514 6 510 4.30E-179 636 6596 cellular  
 organisms;Eukaryota;Opisthokonta;Metazoa;Eumetazoa;Bilateria;Protostomia;  
 Spiralia;Lophotrochozoa;Mollusca;Bivalvia;Autobranhia;Heteroconchia;Euhe  
 terodonta;Imparidentia;Venerida;Veneroidea;Veneridae;Mercenaria;Mercenari  
 a mercenaria  
 UdeM00000022107 6573 101.7 UdeM00000022107 XP\_021347518.1 63.4 93  
 28 3 35 125 24 112 8.60E-19 101.7 6573 cellular  
 organisms;Eukaryota;Opisthokonta;Metazoa;Eumetazoa;Bilateria;Protostomia;  
 Spiralia;Lophotrochozoa;Mollusca;Bivalvia;Autobranhia;Pteriormorphia;Pect  
 inida;Pectinoidea;Pectinidae;Mizuhopecten;Mizuhopecten yessoensis  
 UdeM00000022108 6573 151.4 UdeM00000022108 XP\_021347518.1 54.7 214  
 61 6 35 244 24 205 2.20E-33 151.4 6573 cellular  
 organisms;Eukaryota;Opisthokonta;Metazoa;Eumetazoa;Bilateria;Protostomia;



Spiralia; Lophotrochozoa; Mollusca; Bivalvia; Autobranchia; Pteriomorpha; Pectinida; Pectinoidea; Pectinidae; Mizuhopecten; Mizuhopecten yessoensis  
UdeM00000022109 6573 75.5 UdeM00000022109 XP\_021347521.1 46.8 141  
44 3 46 185 2 112 1.30E-10 75.5 6573 cellular  
organisms; Eukaryota; Opisthokonta; Metazoa; Eumetazoa; Bilateria; Protostomia; Spiralia; Lophotrochozoa; Mollusca; Bivalvia; Autobranchia; Pteriomorpha; Pectinida; Pectinoidea; Pectinidae; Mizuhopecten; Mizuhopecten yessoensis  
UdeM00000022110 29159 452.6 UdeM00000022110 XP\_011420472.1 75.3 291  
70 2 120 410 307 595 5.40E-124 452.6 29159 cellular  
organisms; Eukaryota; Opisthokonta; Metazoa; Eumetazoa; Bilateria; Protostomia; Spiralia; Lophotrochozoa; Mollusca; Bivalvia; Autobranchia; Pteriomorpha; Ostracida; Ostreidae; Crassostrea; Crassostrea gigas  
UdeM00000022111 6596 286.6 UdeM00000022111 XP\_045208968.1 46.3 322  
165 5 21 336 1620 1939 4.20E-74 286.6 6596 cellular  
organisms; Eukaryota; Opisthokonta; Metazoa; Eumetazoa; Bilateria; Protostomia; Spiralia; Lophotrochozoa; Mollusca; Bivalvia; Autobranchia; Heteroconchia; Euheterodonta; Imparidentia; Venerida; Veneroidea; Veneridae; Mercenaria; Mercenaria mercenaria  
UdeM00000022112 6579 525 UdeM00000022112 XP\_033724844.1 41 770  
374 14 1 715 519 1263 1.60E-145 525 6579 cellular  
organisms; Eukaryota; Opisthokonta; Metazoa; Eumetazoa; Bilateria; Protostomia; Spiralia; Lophotrochozoa; Mollusca; Bivalvia; Autobranchia; Pteriomorpha; Pectinida; Pectinoidea; Pectinidae; Pecten; Pecten maximus  
UdeM00000022113 6579 582.4 UdeM00000022113 XP\_033724844.1 44.3 758  
354 12 1 703 519 1263 8.20E-163 582.4 6579 cellular  
organisms; Eukaryota; Opisthokonta; Metazoa; Eumetazoa; Bilateria; Protostomia; Spiralia; Lophotrochozoa; Mollusca; Bivalvia; Autobranchia; Pteriomorpha; Pectinida; Pectinoidea; Pectinidae; Pecten; Pecten maximus  
UdeM00000022114 70779 127.9 UdeM00000022114 XP\_015764363.1 34.4 279  
143 9 4 251 6 275 2.10E-26 127.9 70779 cellular  
organisms; Eukaryota; Opisthokonta; Metazoa; Eumetazoa; Cnidaria; Anthozoa; Hexacorallia; Scleractinia; Astrocoeniina; Acroporidae; Acropora; Acropora digitifera  
UdeM00000022115 1735272 374 UdeM00000022115 XP\_041372305.1 49.4  
407 196 6 14 417 52 451 2.50E-100 374 1735272  
cellular  
organisms; Eukaryota; Opisthokonta; Metazoa; Eumetazoa; Bilateria; Protostomia; Spiralia; Lophotrochozoa; Mollusca; Gastropoda; Neomphalina; Neomphaloidea; Peltospiridae; Gigantopelta; Gigantopelta aegis  
UdeM00000022117 6573 188.7 UdeM00000022117 XP\_021366217.1 24.8 654  
432 18 16 648 14 628 2.30E-44 188.7 6573 cellular  
organisms; Eukaryota; Opisthokonta; Metazoa; Eumetazoa; Bilateria; Protostomia; Spiralia; Lophotrochozoa; Mollusca; Bivalvia; Autobranchia; Pteriomorpha; Pectinida; Pectinoidea; Pectinidae; Mizuhopecten; Mizuhopecten yessoensis  
UdeM00000022118 6596 221.9 UdeM00000022118 XP\_045181714.1 25.8 662  
461 18 8 660 12 652 2.50E-54 221.9 6596 cellular  
organisms; Eukaryota; Opisthokonta; Metazoa; Eumetazoa; Bilateria; Protostomia; Spiralia; Lophotrochozoa; Mollusca; Bivalvia; Autobranchia; Heteroconchia; Euheterodonta; Imparidentia; Venerida; Veneroidea; Veneridae; Mercenaria; Mercenaria mercenaria  
UdeM00000022119 1735272 417.2 UdeM00000022119 XP\_041371937.1 51.2  
525 199 10 8 506 77 570 3.40E-113 417.2 1735272  
cellular  
organisms; Eukaryota; Opisthokonta; Metazoa; Eumetazoa; Bilateria; Protostomia;

Spiralia;Lophotrochozoa;Mollusca;Gastropoda;Neomphalina;Neomphaloidea;Pel  
tospiridae;Gigantopelta;Gigantopelta aegis  
UdeM00000022120 6596 732.6 UdeM00000022120 XP\_045208073.1 75.2 504  
117 3 7 508 6 503 3.30E-208 732.6 6596 cellular  
organisms;Eukaryota;Opisthokonta;Metazoa;Eumetazoa;Bilateria;Protostomia;  
Spiralia;Lophotrochozoa;Mollusca;Bivalvia;Autobranchia;Heteroconchia;Euhe  
terodonta;Imparidentia;Venerida;Veneroidea;Veneridae;Mercenaria;Mercenari  
a mercenaria  
UdeM00000022121 6573 1053.5 UdeM00000022121 XP\_021341671.1 74.9  
689 171 2 1 687 1 689 1.20E-304 1053.5 6573  
cellular  
organisms;Eukaryota;Opisthokonta;Metazoa;Eumetazoa;Bilateria;Protostomia;  
Spiralia;Lophotrochozoa;Mollusca;Bivalvia;Autobranchia;Pteriormorphia;Pect  
inida;Pectinoidea;Pectinidae;Mizuhopecten;Mizuhopecten yessoensis  
UdeM00000022122 6596 69.7 UdeM00000022122 XP\_045209203.1 24.9 285  
204 7 1 281 3087 3365 6.80E-09 69.7 6596 cellular  
organisms;Eukaryota;Opisthokonta;Metazoa;Eumetazoa;Bilateria;Protostomia;  
Spiralia;Lophotrochozoa;Mollusca;Bivalvia;Autobranchia;Heteroconchia;Euhe  
terodonta;Imparidentia;Venerida;Veneroidea;Veneridae;Mercenaria;Mercenari  
a mercenaria  
UdeM00000022123 6565 138.3 UdeM00000022123 XP\_022328252.1 48.3 149  
71 2 1 143 1105 1253 7.90E-30 138.3 6565 cellular  
organisms;Eukaryota;Opisthokonta;Metazoa;Eumetazoa;Bilateria;Protostomia;  
Spiralia;Lophotrochozoa;Mollusca;Bivalvia;Autobranchia;Pteriormorphia;Ostr  
eida;Ostreoidea;Ostreidae;Crassostrea;Crassostrea virginica  
UdeM00000022124 6596 1107.8 UdeM00000022124 XP\_045209202.1 37  
1624 869 32 374 1874 632 2224 0.00E+00 1107.8 6596  
cellular  
organisms;Eukaryota;Opisthokonta;Metazoa;Eumetazoa;Bilateria;Protostomia;  
Spiralia;Lophotrochozoa;Mollusca;Bivalvia;Autobranchia;Heteroconchia;Euhe  
terodonta;Imparidentia;Venerida;Veneroidea;Veneridae;Mercenaria;Mercenari  
a mercenaria  
UdeM00000022126 6526 158.3 UdeM00000022126 XP\_013096082.1 68.3 126  
25 3 48 171 6 118 9.00E-36 158.3 6526 cellular  
organisms;Eukaryota;Opisthokonta;Metazoa;Eumetazoa;Bilateria;Protostomia;  
Spiralia;Lophotrochozoa;Mollusca;Gastropoda;Heterobranchia;Euthyneura;Pan  
pulmonata;Hygrophila;Lymnaeioidea;Planorbidae;Biomphalaria;Biomphalaria  
glabrata  
UdeM00000022125 29159 453 UdeM00000022125 XP\_011418868.1 67.3 346  
80 6 52 384 1 326 4.10E-124 453 29159 cellular  
organisms;Eukaryota;Opisthokonta;Metazoa;Eumetazoa;Bilateria;Protostomia;  
Spiralia;Lophotrochozoa;Mollusca;Bivalvia;Autobranchia;Pteriormorphia;Ostr  
eida;Ostreoidea;Ostreidae;Crassostrea;Crassostrea gigas  
UdeM00000022128 6596 496.1 UdeM00000022128 XP\_045210063.1 55 456  
180 5 3 445 123 566 4.60E-137 496.1 6596 cellular  
organisms;Eukaryota;Opisthokonta;Metazoa;Eumetazoa;Bilateria;Protostomia;  
Spiralia;Lophotrochozoa;Mollusca;Bivalvia;Autobranchia;Heteroconchia;Euhe  
terodonta;Imparidentia;Venerida;Veneroidea;Veneridae;Mercenaria;Mercenari  
a mercenaria  
UdeM00000022129 6596 498.4 UdeM00000022129 XP\_045210063.1 55.8 446  
177 4 3 430 123 566 8.90E-138 498.4 6596 cellular  
organisms;Eukaryota;Opisthokonta;Metazoa;Eumetazoa;Bilateria;Protostomia;  
Spiralia;Lophotrochozoa;Mollusca;Bivalvia;Autobranchia;Heteroconchia;Euhe

terodonta;Imparidentia;Venerida;Veneroidea;Veneridae;Mercenaria;Mercenaria mercenaria  
 UdeM00000022127 90988 157.9 UdeM00000022127 XP\_039535825.1 56.8 132  
 57 0 1 132 111 242 8.80E-36 157.9 90988 cellular  
 organisms;Eukaryota;Opisthokonta;Metazoa;Eumetazoa;Bilateria;Deuterostomia;  
 Chordata;Craniata;Vertebrata;Gnathostomata;Teleostomi;Euteleostomi;Actinopterygii;  
 Actinopteri;Neopterygii;Teleostei;Osteoglossocephalai;Clupeocephala;Otomorpha;  
 Ostariophysi;Otophysi;Cypriniphysae;Cypriniiformes;Cyprinidae;Leuciscidae;  
 Pogonichthyinae;Pimephales;Pimephales promelas  
 UdeM00000022130 29159 564.7 UdeM00000022130 XP\_011453243.2 75.9 328  
 79 0 2 329 4 331 7.80E-158 564.7 29159 cellular  
 organisms;Eukaryota;Opisthokonta;Metazoa;Eumetazoa;Bilateria;Protostomia;  
 Spiralia;Lophotrochozoa;Mollusca;Bivalvia;Autobranchia;Pteriormorphia;Ostreida;  
 Ostreidae;Crassostrea;Crassostrea gigas  
 UdeM00000022131 29159 390.2 UdeM00000022131 XP\_011453243.2 58.2 328  
 65 1 2 257 4 331 2.10E-105 390.2 29159 cellular  
 organisms;Eukaryota;Opisthokonta;Metazoa;Eumetazoa;Bilateria;Protostomia;  
 Spiralia;Lophotrochozoa;Mollusca;Bivalvia;Autobranchia;Pteriormorphia;Ostreida;  
 Ostreidae;Crassostrea;Crassostrea gigas  
 UdeM00000022132 29159 121.7 UdeM00000022132 XP\_034307341.1 31.6 282  
 161 5 8 258 59 339 1.80E-24 121.7 29159 cellular  
 organisms;Eukaryota;Opisthokonta;Metazoa;Eumetazoa;Bilateria;Protostomia;  
 Spiralia;Lophotrochozoa;Mollusca;Bivalvia;Autobranchia;Pteriormorphia;Ostreida;  
 Ostreidae;Crassostrea;Crassostrea gigas  
 UdeM00000022133 6596 328.2 UdeM00000022133 XP\_045210058.1 75.6 205  
 47 1 6 207 53 257 7.70E-87 328.2 6596 cellular  
 organisms;Eukaryota;Opisthokonta;Metazoa;Eumetazoa;Bilateria;Protostomia;  
 Spiralia;Lophotrochozoa;Mollusca;Bivalvia;Autobranchia;Heteroconchia;Euheterodonta;  
 Imparidentia;Venerida;Veneroidea;Veneridae;Mercenaria;Mercenaria mercenaria  
 UdeM00000022134 6596 309.7 UdeM00000022134 XP\_045210058.1 71.5 207  
 46 1 2 195 51 257 2.70E-81 309.7 6596 cellular  
 organisms;Eukaryota;Opisthokonta;Metazoa;Eumetazoa;Bilateria;Protostomia;  
 Spiralia;Lophotrochozoa;Mollusca;Bivalvia;Autobranchia;Heteroconchia;Euheterodonta;  
 Imparidentia;Venerida;Veneroidea;Veneridae;Mercenaria;Mercenaria mercenaria  
 UdeM00000022135 6596 320.5 UdeM00000022135 XP\_045210058.1 78.1 192  
 42 0 2 193 51 242 1.70E-84 320.5 6596 cellular  
 organisms;Eukaryota;Opisthokonta;Metazoa;Eumetazoa;Bilateria;Protostomia;  
 Spiralia;Lophotrochozoa;Mollusca;Bivalvia;Autobranchia;Heteroconchia;Euheterodonta;  
 Imparidentia;Venerida;Veneroidea;Veneridae;Mercenaria;Mercenaria mercenaria  
 UdeM00000043703 6596 440.3 UdeM00000043703 XP\_045161383.1 47.3 480  
 235 6 1 479 1 463 3.30E-120 440.3 6596 cellular  
 organisms;Eukaryota;Opisthokonta;Metazoa;Eumetazoa;Bilateria;Protostomia;  
 Spiralia;Lophotrochozoa;Mollusca;Bivalvia;Autobranchia;Heteroconchia;Euheterodonta;  
 Imparidentia;Venerida;Veneroidea;Veneridae;Mercenaria;Mercenaria mercenaria  
 UdeM00000043704 6596 440.3 UdeM00000043704 XP\_045161383.1 47.3 480  
 235 6 1 479 1 463 3.30E-120 440.3 6596 cellular  
 organisms;Eukaryota;Opisthokonta;Metazoa;Eumetazoa;Bilateria;Protostomia;  
 Spiralia;Lophotrochozoa;Mollusca;Bivalvia;Autobranchia;Heteroconchia;Euheterodonta;  
 Imparidentia;Venerida;Veneroidea;Veneridae;Mercenaria;Mercenaria mercenaria

UdeM00000043705 6596 147.1 UdeM00000043705 XP\_045181714.1 28.6 343  
 233 6 16 352 16 352 5.60E-32 147.1 6596 cellular  
 organisms;Eukaryota;Opisthokonta;Metazoa;Eumetazoa;Bilateria;Protostomia;  
 Spiralia;Lophotrochozoa;Mollusca;Bivalvia;Autobranchia;Heteroconchia;Euhe  
 terodonta;Imparidentia;Venerida;Veneroidea;Veneridae;Mercenaria;Mercenari  
 a mercenaria  
 UdeM00000043706 6596 392.5 UdeM00000043706 XP\_045161383.1 42.6 491  
 242 6 1 479 1 463 7.80E-106 392.5 6596 cellular  
 organisms;Eukaryota;Opisthokonta;Metazoa;Eumetazoa;Bilateria;Protostomia;  
 Spiralia;Lophotrochozoa;Mollusca;Bivalvia;Autobranchia;Heteroconchia;Euhe  
 terodonta;Imparidentia;Venerida;Veneroidea;Veneridae;Mercenaria;Mercenari  
 a mercenaria  
 UdeM00000037111 6565 279.6 UdeM00000037111 XP\_022288938.1 42.1 382  
 146 7 1 316 197 569 5.20E-72 279.6 6565 cellular  
 organisms;Eukaryota;Opisthokonta;Metazoa;Eumetazoa;Bilateria;Protostomia;  
 Spiralia;Lophotrochozoa;Mollusca;Bivalvia;Autobranchia;Pteriormorphia;Ostr  
 eida;Ostreoidea;Ostreidae;Crassostrea;Crassostrea virginica  
 UdeM00000037112 6706 150.2 UdeM00000037112 XP\_042235765.1 43.3 157  
 89 0 1 157 1 157 2.20E-33 150.2 6706 cellular  
 organisms;Eukaryota;Opisthokonta;Metazoa;Eumetazoa;Bilateria;Protostomia;  
 Ecdysozoa;Panarthropoda;Arthropoda;Mandibulata;Pancrustacea;Crustacea;Mul  
 ticrustacea;Malacostraca;Eumalacostraca;Eucarida;Decapoda;Pleocyemata;Ast  
 acidea;Nephropoidea;Nephropidae;Homarus;Homarus americanus  
 UdeM00000037113 6573 356.3 UdeM00000037113 XP\_021359188.1 64.4 253  
 87 1 1 253 1 250 3.50E-95 356.3 6573 cellular  
 organisms;Eukaryota;Opisthokonta;Metazoa;Eumetazoa;Bilateria;Protostomia;  
 Spiralia;Lophotrochozoa;Mollusca;Bivalvia;Autobranchia;Pteriormorphia;Pect  
 inida;Pectinoidea;Pectinidae;Mizuhopecten;Mizuhopecten yessoensis  
 UdeM00000037114 2607531 542.7 UdeM00000037114 XP\_029642003.1 50.2  
 528 258 4 1 526 112 636 5.10E-151 542.7 2607531  
 cellular  
 organisms;Eukaryota;Opisthokonta;Metazoa;Eumetazoa;Bilateria;Protostomia;  
 Spiralia;Lophotrochozoa;Mollusca;Cephalopoda;Coleoidea;Octopodiformes;Oct  
 opoda;Incirrata;Octopodidae;Octopus;Octopus sinensis  
 UdeM00000037115 8049 82 UdeM00000037115 XP\_030193219.1 56.7 60  
 26 0 93 152 157 216 1.70E-12 82 8049 cellular  
 organisms;Eukaryota;Opisthokonta;Metazoa;Eumetazoa;Bilateria;Deuterostomi  
 a;Chordata;Craniata;Vertebrata;Gnathostomata;Teleostomi;Euteleostomi;Acti  
 nopterygii;Actinopteri;Neopterygii;Teleostei;Osteoglossocephalai;Clupeoce  
 phala;Euteleosteomorpha;Neoteleostei;Eurypterygia;Ctenosquamata;Acanthomo  
 rphata;Paracanthopterygii;Zeiogadaria;Gadariae;Gadiformes;Gadoidei;Gadida  
 e;Gadus;Gadus morhua  
 UdeM00000037116 6596 341.7 UdeM00000037116 XP\_045199278.1 53.7 322  
 133 3 4 319 129 440 1.10E-90 341.7 6596 cellular  
 organisms;Eukaryota;Opisthokonta;Metazoa;Eumetazoa;Bilateria;Protostomia;  
 Spiralia;Lophotrochozoa;Mollusca;Bivalvia;Autobranchia;Heteroconchia;Euhe  
 terodonta;Imparidentia;Venerida;Veneroidea;Veneridae;Mercenaria;Mercenari  
 a mercenaria  
 UdeM00000037117 2607531 102.8 UdeM00000037117 XP\_029642003.1 51.1  
 88 43 0 5 92 549 636 2.50E-19 102.8 2607531  
 cellular  
 organisms;Eukaryota;Opisthokonta;Metazoa;Eumetazoa;Bilateria;Protostomia;  
 Spiralia;Lophotrochozoa;Mollusca;Cephalopoda;Coleoidea;Octopodiformes;Oct  
 opoda;Incirrata;Octopodidae;Octopus;Octopus sinensis

UdeM00000037118 6596 226.1 UdeM00000037118 XP\_045161852.1 27.7 649  
 424 14 45 669 46 673 1.30E-55 226.1 6596 cellular  
 organisms;Eukaryota;Opisthokonta;Metazoa;Eumetazoa;Bilateria;Protostomia;  
 Spiralia;Lophotrochozoa;Mollusca;Bivalvia;Autobranchia;Heteroconchia;Euhe  
 terodonta;Imparidentia;Venerida;Veneroidea;Veneridae;Mercenaria;Mercenari  
 a mercenaria  
 UdeM00000037120 6579 97.8 UdeM00000037120 XP\_033737047.1 35.4 164  
 95 4 1 158 4254 4412 1.30E-17 97.8 6579 cellular  
 organisms;Eukaryota;Opisthokonta;Metazoa;Eumetazoa;Bilateria;Protostomia;  
 Spiralia;Lophotrochozoa;Mollusca;Bivalvia;Autobranchia;Pteriormorphia;Pect  
 inida;Pectinoidea;Pectinidae;Pecten;Pecten maximus  
 UdeM00000037121 6596 81.6 UdeM00000037121 XP\_045160921.1 47.9 71  
 37 0 1 71 3748 3818 4.30E-13 81.6 6596 cellular  
 organisms;Eukaryota;Opisthokonta;Metazoa;Eumetazoa;Bilateria;Protostomia;  
 Spiralia;Lophotrochozoa;Mollusca;Bivalvia;Autobranchia;Heteroconchia;Euhe  
 terodonta;Imparidentia;Venerida;Veneroidea;Veneridae;Mercenaria;Mercenari  
 a mercenaria  
 UdeM00000037122 6579 88.6 UdeM00000037122 XP\_033737047.1 35 160  
 96 4 5 163 3964 4116 9.10E-15 88.6 6579 cellular  
 organisms;Eukaryota;Opisthokonta;Metazoa;Eumetazoa;Bilateria;Protostomia;  
 Spiralia;Lophotrochozoa;Mollusca;Bivalvia;Autobranchia;Pteriormorphia;Pect  
 inida;Pectinoidea;Pectinidae;Pecten;Pecten maximus  
 UdeM00000037123 6579 128.3 UdeM00000037123 XP\_033737047.1 31.6 209  
 143 0 103 311 3661 3869 1.80E-26 128.3 6579 cellular  
 organisms;Eukaryota;Opisthokonta;Metazoa;Eumetazoa;Bilateria;Protostomia;  
 Spiralia;Lophotrochozoa;Mollusca;Bivalvia;Autobranchia;Pteriormorphia;Pect  
 inida;Pectinoidea;Pectinidae;Pecten;Pecten maximus  
 UdeM00000037124 6596 89 UdeM00000037124 XP\_045161852.1 30.2 222  
 138 6 45 257 46 259 1.20E-14 89 6596 cellular  
 organisms;Eukaryota;Opisthokonta;Metazoa;Eumetazoa;Bilateria;Protostomia;  
 Spiralia;Lophotrochozoa;Mollusca;Bivalvia;Autobranchia;Heteroconchia;Euhe  
 terodonta;Imparidentia;Venerida;Veneroidea;Veneridae;Mercenaria;Mercenari  
 a mercenaria  
 UdeM00000037125 217634 109 UdeM00000037125 XP\_018578351.1 53.6  
 84 39 0 121 204 59 142 1.40E-20 109 217634  
 cellular  
 organisms;Eukaryota;Opisthokonta;Metazoa;Eumetazoa;Bilateria;Protostomia;  
 Ecdysozoa;Panarthropoda;Arthropoda;Mandibulata;Pancrustacea;Hexapoda;Inse  
 cta;Dicondylia;Pterygota;Neoptera;Endopterygota;Coleoptera;Polyphaga;Cucu  
 jiformia;Chrysomeloidea;Cerambycidae;Lamiinae;Lamiini;Anoplophora;Anoplop  
 hora glabripennis  
 UdeM00000037130 6596 795 UdeM00000037130 XP\_045199267.1 85.2 492  
 67 3 1 488 1 490 9.30E-227 795 6596 cellular  
 organisms;Eukaryota;Opisthokonta;Metazoa;Eumetazoa;Bilateria;Protostomia;  
 Spiralia;Lophotrochozoa;Mollusca;Bivalvia;Autobranchia;Heteroconchia;Euhe  
 terodonta;Imparidentia;Venerida;Veneroidea;Veneridae;Mercenaria;Mercenari  
 a mercenaria  
 UdeM00000037131 1735272 585.9 UdeM00000037131 XP\_041349958.1 50.2  
 1057 399 20 1 1006 1 981 1.00E-163 585.9 1735272  
 cellular  
 organisms;Eukaryota;Opisthokonta;Metazoa;Eumetazoa;Bilateria;Protostomia;  
 Spiralia;Lophotrochozoa;Mollusca;Gastropoda;Neomphalina;Neomphaloidea;Pel  
 tospiridae;Gigantopelta;Gigantopelta aegis

UdeM00000037132 7574 391.3 UdeM00000037132 XP\_013382106.1 49.4 403  
 159 5 72 430 67 468 1.50E-105 391.3 7574 cellular  
 organisms;Eukaryota;Opisthokonta;Metazoa;Eumetazoa;Bilateria;Protostomia;  
 Spiralia;Lophotrochozoa;Brachiopoda;Linguliformea;Lingulata;Lingulida;Lin  
 guloidea;Lingulidae;Lingula;Lingula anatina  
 UdeM00000037133 7574 196.1 UdeM00000037133 XP\_013390083.1 51.2 201  
 93 1 1 201 1 196 1.10E-46 196.1 7574 cellular  
 organisms;Eukaryota;Opisthokonta;Metazoa;Eumetazoa;Bilateria;Protostomia;  
 Spiralia;Lophotrochozoa;Brachiopoda;Linguliformea;Lingulata;Lingulida;Lin  
 guloidea;Lingulidae;Lingula;Lingula anatina  
 UdeM00000037134 215358 63.5 UdeM00000037134 XP\_027138606.1 55.6  
 54 24 0 1 54 596 649 1.30E-07 63.5 215358  
 cellular  
 organisms;Eukaryota;Opisthokonta;Metazoa;Eumetazoa;Bilateria;Deuterostomi  
 a;Chordata;Craniata;Vertebrata;Gnathostomata;Teleostomi;Euteleostomi;Acti  
 nopterygii;Actinopteri;Neopterygii;Teleostei;Osteoglossocephalai;Clupeoce  
 phala;Euteleostei;Neoteleostei;Eurypterygia;Ctenosquamata;Acanthomo  
 rphata;Euacanthomorpha;Percomorphaceae;Eupercaria;Eupercaria incertae  
 sedis;Sciaenidae;Larimichthys;Larimichthys crocea  
 UdeM00000037136 29159 87.8 UdeM00000037136 XP\_034320259.1 26.9 201  
 135 5 6 204 8 198 1.70E-14 87.8 29159 cellular  
 organisms;Eukaryota;Opisthokonta;Metazoa;Eumetazoa;Bilateria;Protostomia;  
 Spiralia;Lophotrochozoa;Mollusca;Bivalvia;Autobranchia;Pteriormorphia;Ostr  
 eida;Ostreidae;Crassostrea;Crassostrea gigas  
 UdeM00000037137 6596 73.9 UdeM00000037137 XP\_045188965.1 28.3 219  
 136 8 71 273 94 307 6.00E-10 73.9 6596 cellular  
 organisms;Eukaryota;Opisthokonta;Metazoa;Eumetazoa;Bilateria;Protostomia;  
 Spiralia;Lophotrochozoa;Mollusca;Bivalvia;Autobranchia;Heteroconchia;Euhe  
 terodonta;Imparidentia;Venerida;Veneroidea;Veneridae;Mercenaria;Mercenari  
 a mercenaria  
 UdeM00000037138 6565 247.7 UdeM00000037138 XP\_022327962.1 47.4 268  
 138 2 66 330 451 718 2.10E-62 247.7 6565 cellular  
 organisms;Eukaryota;Opisthokonta;Metazoa;Eumetazoa;Bilateria;Protostomia;  
 Spiralia;Lophotrochozoa;Mollusca;Bivalvia;Autobranchia;Pteriormorphia;Ostr  
 eida;Ostreidae;Crassostrea;Crassostrea virginica  
 UdeM00000037140 29159 70.5 UdeM00000037140 XP\_011456839.2 28.9 114  
 78 1 7 117 235 348 5.10E-09 70.5 29159 cellular  
 organisms;Eukaryota;Opisthokonta;Metazoa;Eumetazoa;Bilateria;Protostomia;  
 Spiralia;Lophotrochozoa;Mollusca;Bivalvia;Autobranchia;Pteriormorphia;Ostr  
 eida;Ostreidae;Crassostrea;Crassostrea gigas  
 UdeM00000037144 6596 261.2 UdeM00000037144 XP\_045202624.1 39.8 322  
 163 3 62 352 20 341 2.00E-66 261.2 6596 cellular  
 organisms;Eukaryota;Opisthokonta;Metazoa;Eumetazoa;Bilateria;Protostomia;  
 Spiralia;Lophotrochozoa;Mollusca;Bivalvia;Autobranchia;Heteroconchia;Euhe  
 terodonta;Imparidentia;Venerida;Veneroidea;Veneridae;Mercenaria;Mercenari  
 a mercenaria  
 UdeM00000037145 6596 261.2 UdeM00000037145 XP\_045202624.1 39.8 322  
 163 3 38 328 20 341 1.80E-66 261.2 6596 cellular  
 organisms;Eukaryota;Opisthokonta;Metazoa;Eumetazoa;Bilateria;Protostomia;  
 Spiralia;Lophotrochozoa;Mollusca;Bivalvia;Autobranchia;Heteroconchia;Euhe  
 terodonta;Imparidentia;Venerida;Veneroidea;Veneridae;Mercenaria;Mercenari  
 a mercenaria  
 UdeM00000037146 6596 222.6 UdeM00000037146 XP\_045201124.1 34.1 440  
 248 10 1 419 1 419 9.20E-55 222.6 6596 cellular

organisms;Eukaryota;Opisthokonta;Metazoa;Eumetazoa;Bilateria;Protostomia;Spiralia;Lophotrochozoa;Mollusca;Bivalvia;Autobranchia;Heteroconchia;Euherodonta;Imparidentia;Venerida;Veneroidea;Veneridae;Mercenaria;Mercenaria mercenaria

UdeM00000037147 400727 1114.8 UdeM00000037147 XP\_025078553.1  
74.1 717 186 0 32 748 32 748 0.00E+00 1114.8  
400727 cellular

organisms;Eukaryota;Opisthokonta;Metazoa;Eumetazoa;Bilateria;Protostomia;Spiralia;Lophotrochozoa;Mollusca;Gastropoda;Caenogastropoda;Architaenioglossa;Ampullarioidea;Ampullariidae;Pomacea;Pomacea canaliculata

UdeM00000037148 6596 109 UdeM00000037148 XP\_045201668.1 40.3 159  
90 2 115 273 132 285 1.10E-20 109 6596 cellular

organisms;Eukaryota;Opisthokonta;Metazoa;Eumetazoa;Bilateria;Protostomia;Spiralia;Lophotrochozoa;Mollusca;Bivalvia;Autobranchia;Heteroconchia;Euherodonta;Imparidentia;Venerida;Veneroidea;Veneridae;Mercenaria;Mercenaria mercenaria

UdeM00000037149 6596 109 UdeM00000037149 XP\_045201668.1 40.3 159  
90 2 114 272 132 285 1.10E-20 109 6596 cellular

organisms;Eukaryota;Opisthokonta;Metazoa;Eumetazoa;Bilateria;Protostomia;Spiralia;Lophotrochozoa;Mollusca;Bivalvia;Autobranchia;Heteroconchia;Euherodonta;Imparidentia;Venerida;Veneroidea;Veneridae;Mercenaria;Mercenaria mercenaria

UdeM00000037150 6573 214.2 UdeM00000037150 XP\_021372176.1 39.5 332  
171 6 16 342 15 321 2.70E-52 214.2 6573 cellular

organisms;Eukaryota;Opisthokonta;Metazoa;Eumetazoa;Bilateria;Protostomia;Spiralia;Lophotrochozoa;Mollusca;Bivalvia;Autobranchia;Pteriomorpha;Pectinida;Pectinoidea;Pectinidae;Mizuhopecten;Mizuhopecten yessoensis

UdeM00000037151 6596 1104 UdeM00000037151 XP\_045201595.1 59.8 895  
359 1 25 919 20 913 0.00E+00 1104 6596 cellular

organisms;Eukaryota;Opisthokonta;Metazoa;Eumetazoa;Bilateria;Protostomia;Spiralia;Lophotrochozoa;Mollusca;Bivalvia;Autobranchia;Heteroconchia;Euherodonta;Imparidentia;Venerida;Veneroidea;Veneridae;Mercenaria;Mercenaria mercenaria

UdeM00000037152 6596 873.6 UdeM00000037152 XP\_045201595.1 80.2 524  
103 1 1 523 1002 1525 1.20E-250 873.6 6596 cellular

organisms;Eukaryota;Opisthokonta;Metazoa;Eumetazoa;Bilateria;Protostomia;Spiralia;Lophotrochozoa;Mollusca;Bivalvia;Autobranchia;Heteroconchia;Euherodonta;Imparidentia;Venerida;Veneroidea;Veneridae;Mercenaria;Mercenaria mercenaria

UdeM00000037153 6573 340.1 UdeM00000037153 XP\_021356125.1 69 261  
70 5 3 255 11 268 2.40E-90 340.1 6573 cellular

organisms;Eukaryota;Opisthokonta;Metazoa;Eumetazoa;Bilateria;Protostomia;Spiralia;Lophotrochozoa;Mollusca;Bivalvia;Autobranchia;Pteriomorpha;Pectinida;Pectinoidea;Pectinidae;Mizuhopecten;Mizuhopecten yessoensis

UdeM00000037154 6596 903.7 UdeM00000037154 XP\_045201588.1 58 792  
316 7 33 812 544 1330 1.70E-259 903.7 6596 cellular

organisms;Eukaryota;Opisthokonta;Metazoa;Eumetazoa;Bilateria;Protostomia;Spiralia;Lophotrochozoa;Mollusca;Bivalvia;Autobranchia;Heteroconchia;Euherodonta;Imparidentia;Venerida;Veneroidea;Veneridae;Mercenaria;Mercenaria mercenaria

UdeM00000037155 6565 501.9 UdeM00000037155 XP\_022293897.1 59.9 399  
148 3 10 396 20 418 7.60E-139 501.9 6565 cellular

organisms;Eukaryota;Opisthokonta;Metazoa;Eumetazoa;Bilateria;Protostomia;

Spiralia; Lophotrochozoa; Mollusca; Bivalvia; Autobranchia; Pteriomorpha; Ostr  
 eida; Ostreoida; Ostreidae; Crassostrea; Crassostrea virginica  
 UdeM00000037156 6596 233 UdeM00000037156 XP\_045201588.1 35.1 484  
 249 11 22 443 69 549 7.20E-58 233 6596 cellular  
 organisms; Eukaryota; Opisthokonta; Metazoa; Eumetazoa; Bilateria; Protostomia;  
 Spiralia; Lophotrochozoa; Mollusca; Bivalvia; Autobranchia; Heteroconchia; Eue  
 terodonta; Imparidentia; Venerida; Veneroidea; Veneridae; Mercenaria; Mercenari  
 a mercenaria  
 UdeM00000037157 6596 771.9 UdeM00000037157 XP\_045199354.1 39.7 1058  
 477 18 1 906 65 1113 8.80E-220 771.9 6596 cellular  
 organisms; Eukaryota; Opisthokonta; Metazoa; Eumetazoa; Bilateria; Protostomia;  
 Spiralia; Lophotrochozoa; Mollusca; Bivalvia; Autobranchia; Heteroconchia; Eue  
 terodonta; Imparidentia; Venerida; Veneroidea; Veneridae; Mercenaria; Mercenari  
 a mercenaria  
 UdeM00000037158 6596 208 UdeM00000037158 XP\_045200470.1 40 245  
 130 1 1 228 885 1129 1.40E-50 208 6596 cellular  
 organisms; Eukaryota; Opisthokonta; Metazoa; Eumetazoa; Bilateria; Protostomia;  
 Spiralia; Lophotrochozoa; Mollusca; Bivalvia; Autobranchia; Heteroconchia; Eue  
 terodonta; Imparidentia; Venerida; Veneroidea; Veneridae; Mercenaria; Mercenari  
 a mercenaria  
 UdeM00000037159 6596 727.2 UdeM00000037159 XP\_045200475.1 39.8 1032  
 467 10 1 1028 2 883 2.80E-206 727.2 6596 cellular  
 organisms; Eukaryota; Opisthokonta; Metazoa; Eumetazoa; Bilateria; Protostomia;  
 Spiralia; Lophotrochozoa; Mollusca; Bivalvia; Autobranchia; Heteroconchia; Eue  
 terodonta; Imparidentia; Venerida; Veneroidea; Veneridae; Mercenaria; Mercenari  
 a mercenaria  
 UdeM00000037160 6579 862.1 UdeM00000037160 XP\_033759936.1 56.5 766  
 285 4 29 748 17 780 5.40E-247 862.1 6579 cellular  
 organisms; Eukaryota; Opisthokonta; Metazoa; Eumetazoa; Bilateria; Protostomia;  
 Spiralia; Lophotrochozoa; Mollusca; Bivalvia; Autobranchia; Pteriomorpha; Pect  
 inida; Pectinoidea; Pectinidae; Pecten; Pecten maximus  
 UdeM00000037161 6565 137.1 UdeM00000037161 XP\_022338876.1 28.9 325  
 206 6 12 316 18 337 8.90E-29 137.1 6565 cellular  
 organisms; Eukaryota; Opisthokonta; Metazoa; Eumetazoa; Bilateria; Protostomia;  
 Spiralia; Lophotrochozoa; Mollusca; Bivalvia; Autobranchia; Pteriomorpha; Ostr  
 eida; Ostreoida; Ostreidae; Crassostrea; Crassostrea virginica  
 UdeM00000037162 6500 107.1 UdeM00000037162 NP\_001191663.1 46 113  
 61 0 1 113 54 166 1.70E-20 107.1 6500 cellular  
 organisms; Eukaryota; Opisthokonta; Metazoa; Eumetazoa; Bilateria; Protostomia;  
 Spiralia; Lophotrochozoa; Mollusca; Gastropoda; Heterobranchia; Euthyneura; Tec  
 tipleura; Aplysiida; Aplysioidea; Aplysiidae; Aplysia; Aplysia californica  
 UdeM00000037163 6596 146.7 UdeM00000037163 XP\_045200612.1 47.7 149  
 76 1 9 155 28 176 2.40E-32 146.7 6596 cellular  
 organisms; Eukaryota; Opisthokonta; Metazoa; Eumetazoa; Bilateria; Protostomia;  
 Spiralia; Lophotrochozoa; Mollusca; Bivalvia; Autobranchia; Heteroconchia; Eue  
 terodonta; Imparidentia; Venerida; Veneroidea; Veneridae; Mercenaria; Mercenari  
 a mercenaria  
 UdeM00000037164 6573 569.3 UdeM00000037164 XP\_021377716.1 43.2 760  
 370 19 1 730 169 896 7.00E-159 569.3 6573 cellular  
 organisms; Eukaryota; Opisthokonta; Metazoa; Eumetazoa; Bilateria; Protostomia;  
 Spiralia; Lophotrochozoa; Mollusca; Bivalvia; Autobranchia; Pteriomorpha; Pect  
 inida; Pectinoidea; Pectinidae; Mizuhopecten; Mizuhopecten yessoensis  
 UdeM00000037165 6596 602.4 UdeM00000037165 XP\_045200612.1 47.2 760  
 365 14 1 736 187 934 7.50E-169 602.4 6596 cellular



organisms;Eukaryota;Opisthokonta;Metazoa;Eumetazoa;Bilateria;Protostomia;Spiralia;Lophotrochozoa;Mollusca;Bivalvia;Autobranchia;Heteroconchia;Euherodonta;Imparidentia;Venerida;Veneroidea;Veneridae;Mercenaria;Mercenaria mercenaria

UdeM00000037166 6573 604.7 UdeM00000037166 XP\_021377716.1 46.8 746  
365 13 1 732 169 896 1.50E-169 604.7 6573 cellular

organisms;Eukaryota;Opisthokonta;Metazoa;Eumetazoa;Bilateria;Protostomia;Spiralia;Lophotrochozoa;Mollusca;Bivalvia;Autobranchia;Pteriormorphia;Pectinida;Pectinoidea;Pectinidae;Mizuhopecten;Mizuhopecten yessoensis

UdeM00000037167 1735272 107.5 UdeM00000037167 XP\_041358042.1 46.6  
118 61 2 3 120 38 153 1.70E-20 107.5 1735272  
cellular

organisms;Eukaryota;Opisthokonta;Metazoa;Eumetazoa;Bilateria;Protostomia;Spiralia;Lophotrochozoa;Mollusca;Gastropoda;Neomphalina;Neomphaloidea;Peltospiridae;Gigantopelta;Gigantopelta aegis

UdeM00000037168 7668 181.4 UdeM00000037168 XP\_011675926.1 58.4 149  
62 0 1 149 1 149 8.40E-43 181.4 7668 cellular

organisms;Eukaryota;Opisthokonta;Metazoa;Eumetazoa;Bilateria;Deuterostomia;Echinodermata;Eleutherozoa;Echinozoa;Echinoidea;Euechinoidea;Echinacea;Camarodonta;Echinidea;Strongylocentrotidae;Strongylocentrotus;Strongylocentrotus purpuratus

UdeM00000037169 46731 191.4 UdeM00000037169 XP\_027059160.1 62.3 151  
55 1 1 151 1 149 8.20E-46 191.4 46731 cellular

organisms;Eukaryota;Opisthokonta;Metazoa;Eumetazoa;Cnidaria;Anthozoa;Hexacorallia;Scleractinia;Astrocoeniina;Pocilloporidae;Pocillopora;Pocilloporadamicornis

UdeM00000037170 7574 236.5 UdeM00000037170 XP\_013381514.1 76.5 149  
35 0 1 149 1 149 2.20E-59 236.5 7574 cellular

organisms;Eukaryota;Opisthokonta;Metazoa;Eumetazoa;Bilateria;Protostomia;Spiralia;Lophotrochozoa;Brachiopoda;Linguliformea;Lingulata;Lingulida;Linguloidea;Lingulidae;Lingula;Lingula anatina

UdeM00000037171 7739 227.3 UdeM00000037171 XP\_035669437.1 74.3 148  
38 0 1 148 1 148 1.30E-56 227.3 7739 cellular

organisms;Eukaryota;Opisthokonta;Metazoa;Eumetazoa;Bilateria;Deuterostomia;Chordata;Cephalochordata;Leptocardii;Amphioxiformes;Branchiostomidae;Branchiostoma;Branchiostoma floridae

UdeM00000037172 225164 123.2 UdeM00000037172 XP\_009048417.1 47.2  
123 64 1 1 123 17 138 2.30E-25 123.2 225164  
cellular

organisms;Eukaryota;Opisthokonta;Metazoa;Eumetazoa;Bilateria;Protostomia;Spiralia;Lophotrochozoa;Mollusca;Gastropoda;Patellogastropoda;Lottioidae;Lottiidae;Lottia;Lottia gigantea

UdeM00000037173 29159 116.3 UdeM00000037173 XP\_034299474.1 34.8 187  
96 5 1 172 400 575 4.20E-23 116.3 29159 cellular

organisms;Eukaryota;Opisthokonta;Metazoa;Eumetazoa;Bilateria;Protostomia;Spiralia;Lophotrochozoa;Mollusca;Bivalvia;Autobranchia;Pteriormorphia;Ostreida;Ostreoidae;Ostreidae;Crassostrea;Crassostrea gigas

UdeM00000037174 6565 61.6 UdeM00000037174 XP\_022290343.1 75.7 37  
6 1 1 34 126 162 2.70E-07 61.6 6565 cellular

organisms;Eukaryota;Opisthokonta;Metazoa;Eumetazoa;Bilateria;Protostomia;Spiralia;Lophotrochozoa;Mollusca;Bivalvia;Autobranchia;Pteriormorphia;Ostreida;Ostreoidae;Ostreidae;Crassostrea;Crassostrea virginica

UdeM00000037175 29159 114.8 UdeM00000037175 XP\_034330911.1 52.5 101  
44 1 39 139 201 297 9.00E-23 114.8 29159 cellular

organisms;Eukaryota;Opisthokonta;Metazoa;Eumetazoa;Bilateria;Protostomia;Spiralia;Lophotrochozoa;Mollusca;Bivalvia;Autobranchia;Pteriormorphia;Ostr

UdeM00000037177 6596 80.9 UdeM00000037177 XP\_045205792.1 54.5 77  
35 0 1 77 216 292 8.30E-13 80.9 6596 cellular

organisms;Eukaryota;Opisthokonta;Metazoa;Eumetazoa;Bilateria;Protostomia;Spiralia;Lophotrochozoa;Mollusca;Bivalvia;Autobranchia;Heteroconchia;Euhe

UdeM00000037178 6596 117.9 UdeM00000037178 XP\_045200314.1 73.1 67  
18 0 2 68 403 469 5.50E-24 117.9 6596 cellular

organisms;Eukaryota;Opisthokonta;Metazoa;Eumetazoa;Bilateria;Protostomia;Spiralia;Lophotrochozoa;Mollusca;Bivalvia;Autobranchia;Heteroconchia;Euhe

UdeM00000037179 6596 336.3 UdeM00000037179 XP\_045200121.1 35.7 596  
359 8 42 618 51 641 8.60E-89 336.3 6596 cellular

organisms;Eukaryota;Opisthokonta;Metazoa;Eumetazoa;Bilateria;Protostomia;Spiralia;Lophotrochozoa;Mollusca;Bivalvia;Autobranchia;Heteroconchia;Euhe

UdeM00000037180 6596 276.6 UdeM00000037180 XP\_045200121.1 30.6 624  
376 10 34 618 44 649 8.00E-71 276.6 6596 cellular

organisms;Eukaryota;Opisthokonta;Metazoa;Eumetazoa;Bilateria;Protostomia;Spiralia;Lophotrochozoa;Mollusca;Bivalvia;Autobranchia;Heteroconchia;Euhe

UdeM00000037181 32391 123.2 UdeM00000037181 XP\_044587665.1 48.1 108  
56 0 28 135 117 224 2.90E-25 123.2 32391 cellular

organisms;Eukaryota;Opisthokonta;Metazoa;Eumetazoa;Bilateria;Protostomia;Ecdysozoa;Panarthropoda;Arthropoda;Mandibulata;Pancrustacea;Hexapoda;Inse

UdeM00000037182 32391 123.2 UdeM00000037182 XP\_044587665.1 48.1 108  
56 0 101 208 117 224 4.30E-25 123.2 32391 cellular

organisms;Eukaryota;Opisthokonta;Metazoa;Eumetazoa;Bilateria;Protostomia;Ecdysozoa;Panarthropoda;Arthropoda;Mandibulata;Pancrustacea;Hexapoda;Inse

UdeM00000037183 6596 121.3 UdeM00000037183 XP\_045161852.1 27.1 391  
256 10 45 414 46 428 2.90E-24 121.3 6596 cellular

organisms;Eukaryota;Opisthokonta;Metazoa;Eumetazoa;Bilateria;Protostomia;Spiralia;Lophotrochozoa;Mollusca;Bivalvia;Autobranchia;Heteroconchia;Euhe

UdeM00000037186 7574 147.5 UdeM00000037186 XP\_013401272.1 36.6 235  
141 4 6 233 8 241 2.90E-32 147.5 7574 cellular

organisms;Eukaryota;Opisthokonta;Metazoa;Eumetazoa;Bilateria;Protostomia;Spiralia;Lophotrochozoa;Brachiopoda;Linguliformea;Lingulata;Lingulida;Lin

UdeM00000037187 6596 1142.1 UdeM00000037187 XP\_045202248.1 68.5  
810 247 3 1 803 4 812 0.00E+00 1142.1 6596

cellular  
organisms;Eukaryota;Opisthokonta;Metazoa;Eumetazoa;Bilateria;Protostomia;  
Spiralia;Lophotrochozoa;Mollusca;Bivalvia;Autobranchia;Heteroconchia;Euhe  
terodonta;Imparidentia;Venerida;Veneroidea;Veneridae;Mercenaria;Mercenari  
a mercenaria  
UdeM00000037188 6596 451.1 UdeM00000037188 XP\_045199830.1 31.1 1002  
658 11 5455 6439 57 1043 2.40E-122 451.1 6596 cellular  
organisms;Eukaryota;Opisthokonta;Metazoa;Eumetazoa;Bilateria;Protostomia;  
Spiralia;Lophotrochozoa;Mollusca;Bivalvia;Autobranchia;Heteroconchia;Euhe  
terodonta;Imparidentia;Venerida;Veneroidea;Veneridae;Mercenaria;Mercenari  
a mercenaria  
UdeM00000037189 6596 233.4 UdeM00000037189 XP\_045199825.1 38.9 303  
176 7 324 624 631 926 7.80E-58 233.4 6596 cellular  
organisms;Eukaryota;Opisthokonta;Metazoa;Eumetazoa;Bilateria;Protostomia;  
Spiralia;Lophotrochozoa;Mollusca;Bivalvia;Autobranchia;Heteroconchia;Euhe  
terodonta;Imparidentia;Venerida;Veneroidea;Veneridae;Mercenaria;Mercenari  
a mercenaria  
UdeM00000037189 6596 88.6 UdeM00000037189 XP\_045199825.1 36.2 152  
86 4 10 158 7 150 3.10E-14 88.6 6596 cellular  
organisms;Eukaryota;Opisthokonta;Metazoa;Eumetazoa;Bilateria;Protostomia;  
Spiralia;Lophotrochozoa;Mollusca;Bivalvia;Autobranchia;Heteroconchia;Euhe  
terodonta;Imparidentia;Venerida;Veneroidea;Veneridae;Mercenaria;Mercenari  
a mercenaria  
UdeM00000037190 37653 177.2 UdeM00000037190 XP\_014780002.1 51.7 180  
81 4 1 179 80 254 2.20E-41 177.2 37653 cellular  
organisms;Eukaryota;Opisthokonta;Metazoa;Eumetazoa;Bilateria;Protostomia;  
Spiralia;Lophotrochozoa;Mollusca;Cephalopoda;Coleoidea;Octopodiformes;Oct  
opoda;Incirrata;Octopodidae;Octopus;Octopus bimaculoides  
UdeM00000037191 7741 185.3 UdeM00000037191 XP\_019613928.1 39.8 274  
131 8 21 267 21 287 1.10E-43 185.3 7741 cellular  
organisms;Eukaryota;Opisthokonta;Metazoa;Eumetazoa;Bilateria;Deuterostomi  
a;Chordata;Cephalochordata;Leptocardii;Amphioxiformes;Branchiostomidae;Br  
anchiostoma;Branchiostoma belcheri  
UdeM00000037192 37653 174.9 UdeM00000037192 XP\_014780002.1 50 182  
83 4 1 181 80 254 1.00E-40 174.9 37653 cellular  
organisms;Eukaryota;Opisthokonta;Metazoa;Eumetazoa;Bilateria;Protostomia;  
Spiralia;Lophotrochozoa;Mollusca;Cephalopoda;Coleoidea;Octopodiformes;Oct  
opoda;Incirrata;Octopodidae;Octopus;Octopus bimaculoides  
UdeM00000037193 6596 203.4 UdeM00000037193 XP\_045177655.1 38 279  
165 3 6 280 5 279 4.00E-49 203.4 6596 cellular  
organisms;Eukaryota;Opisthokonta;Metazoa;Eumetazoa;Bilateria;Protostomia;  
Spiralia;Lophotrochozoa;Mollusca;Bivalvia;Autobranchia;Heteroconchia;Euhe  
terodonta;Imparidentia;Venerida;Veneroidea;Veneridae;Mercenaria;Mercenari  
a mercenaria  
UdeM00000037194 6573 195.3 UdeM00000037194 XP\_021366707.1 39.6 270  
155 3 8 270 10 278 1.10E-46 195.3 6573 cellular  
organisms;Eukaryota;Opisthokonta;Metazoa;Eumetazoa;Bilateria;Protostomia;  
Spiralia;Lophotrochozoa;Mollusca;Bivalvia;Autobranchia;Pteriomorphia;Pect  
inida;Pectinoidea;Pectinidae;Mizuhopecten;Mizuhopecten yessoensis  
UdeM00000037195 6596 119 UdeM00000037195 XP\_045200132.1 63.5 85  
30 1 8 92 3 86 1.70E-23 119 6596 cellular  
organisms;Eukaryota;Opisthokonta;Metazoa;Eumetazoa;Bilateria;Protostomia;  
Spiralia;Lophotrochozoa;Mollusca;Bivalvia;Autobranchia;Heteroconchia;Euhe

terodonta;Imparidentia;Venerida;Veneroidea;Veneridae;Mercenaria;Mercenari  
 a mercenaria  
 UdeM00000037196 6596 119 UdeM00000037196 XP\_045200132.1 63.5 85  
 30 1 8 92 3 86 1.70E-23 119 6596 cellular  
 organisms;Eukaryota;Opisthokonta;Metazoa;Eumetazoa;Bilateria;Protostomia;  
 Spiralia;Lophotrochozoa;Mollusca;Bivalvia;Autobranhia;Heteroconchia;Euhe  
 terodonta;Imparidentia;Venerida;Veneroidea;Veneridae;Mercenaria;Mercenari  
 a mercenaria  
 UdeM00000037197 6573 454.1 UdeM00000037197 XP\_021349832.1 65.1 332  
 113 1 1 329 121 452 1.50E-124 454.1 6573 cellular  
 organisms;Eukaryota;Opisthokonta;Metazoa;Eumetazoa;Bilateria;Protostomia;  
 Spiralia;Lophotrochozoa;Mollusca;Bivalvia;Autobranhia;Pteriormorphia;Pect  
 inida;Pectinoidea;Pectinidae;Mizuhopecten;Mizuhopecten yessoensis  
 UdeM00000037198 6565 453.8 UdeM00000037198 XP\_022339098.1 67.8 329  
 102 1 1 329 119 443 1.90E-124 453.8 6565 cellular  
 organisms;Eukaryota;Opisthokonta;Metazoa;Eumetazoa;Bilateria;Protostomia;  
 Spiralia;Lophotrochozoa;Mollusca;Bivalvia;Autobranhia;Pteriormorphia;Ostr  
 eida;Ostreoidea;Ostreidae;Crassostrea;Crassostrea virginica  
 UdeM00000037200 6573 225.3 UdeM00000037200 XP\_021346475.1 33.4 629  
 349 21 127 734 57 636 2.50E-55 225.3 6573 cellular  
 organisms;Eukaryota;Opisthokonta;Metazoa;Eumetazoa;Bilateria;Protostomia;  
 Spiralia;Lophotrochozoa;Mollusca;Bivalvia;Autobranhia;Pteriormorphia;Pect  
 inida;Pectinoidea;Pectinidae;Mizuhopecten;Mizuhopecten yessoensis  
 UdeM00000037201 7574 302 UdeM00000037201 XP\_013416377.1 66.7 207  
 67 1 167 373 135 339 1.40E-78 302 7574 cellular  
 organisms;Eukaryota;Opisthokonta;Metazoa;Eumetazoa;Bilateria;Protostomia;  
 Spiralia;Lophotrochozoa;Brachiopoda;Linguliformea;Lingulata;Lingulida;Lin  
 guloidea;Lingulidae;Lingula;Lingula anatina  
 UdeM00000037202 29159 274.2 UdeM00000037202 XP\_011438574.1 65.1 209  
 69 2 11 217 51 257 1.40E-70 274.2 29159 cellular  
 organisms;Eukaryota;Opisthokonta;Metazoa;Eumetazoa;Bilateria;Protostomia;  
 Spiralia;Lophotrochozoa;Mollusca;Bivalvia;Autobranhia;Pteriormorphia;Ostr  
 eida;Ostreoidea;Ostreidae;Crassostrea;Crassostrea gigas  
 UdeM00000037204 6579 166.4 UdeM00000037204 XP\_033759790.1 65.8 117  
 40 0 3 119 1214 1330 2.20E-38 166.4 6579 cellular  
 organisms;Eukaryota;Opisthokonta;Metazoa;Eumetazoa;Bilateria;Protostomia;  
 Spiralia;Lophotrochozoa;Mollusca;Bivalvia;Autobranhia;Pteriormorphia;Pect  
 inida;Pectinoidea;Pectinidae;Pecten;Pecten maximus  
 UdeM00000037203 6596 438.3 UdeM00000037203 XP\_045201534.1 46.9 456  
 184 2 4 404 821 1273 1.00E-119 438.3 6596 cellular  
 organisms;Eukaryota;Opisthokonta;Metazoa;Eumetazoa;Bilateria;Protostomia;  
 Spiralia;Lophotrochozoa;Mollusca;Bivalvia;Autobranhia;Heteroconchia;Euhe  
 terodonta;Imparidentia;Venerida;Veneroidea;Veneridae;Mercenaria;Mercenari  
 a mercenaria  
 UdeM00000037205 6596 973 UdeM00000037205 XP\_045201528.1 59.1 822  
 302 6 38 852 24 818 2.50E-280 973 6596 cellular  
 organisms;Eukaryota;Opisthokonta;Metazoa;Eumetazoa;Bilateria;Protostomia;  
 Spiralia;Lophotrochozoa;Mollusca;Bivalvia;Autobranhia;Heteroconchia;Euhe  
 terodonta;Imparidentia;Venerida;Veneroidea;Veneridae;Mercenaria;Mercenari  
 a mercenaria  
 UdeM00000037206 6565 72.4 UdeM00000037206 XP\_022288856.1 48.8 82  
 35 2 82 163 96 170 6.00E-10 72.4 6565 cellular  
 organisms;Eukaryota;Opisthokonta;Metazoa;Eumetazoa;Bilateria;Protostomia;

Spiralia; Lophotrochozoa; Mollusca; Bivalvia; Autobranchia; Pteriomorpha; Ostr  
eida; Ostreidae; Crassostrea; Crassostrea virginica  
UdeM00000037207 6565 72.4 UdeM00000037207 XP\_022288856.1 48.8 82  
35 2 122 203 96 170 7.50E-10 72.4 6565 cellular  
organisms; Eukaryota; Opisthokonta; Metazoa; Eumetazoa; Bilateria; Protostomia;  
Spiralia; Lophotrochozoa; Mollusca; Bivalvia; Autobranchia; Pteriomorpha; Ostr  
eida; Ostreidae; Crassostrea; Crassostrea virginica  
UdeM00000037209 6596 191 UdeM00000037209 XP\_045167746.1 50.7 205  
90 3 1 205 1 194 1.50E-45 191 6596 cellular  
organisms; Eukaryota; Opisthokonta; Metazoa; Eumetazoa; Bilateria; Protostomia;  
Spiralia; Lophotrochozoa; Mollusca; Bivalvia; Autobranchia; Heteroconchia; Eue  
terodonta; Imparidentia; Venerida; Veneroidea; Veneridae; Mercenaria; Mercenari  
a mercenaria  
UdeM00000037210 29159 485.7 UdeM00000037210 XP\_011443560.2 53.6 440  
202 2 74 511 279 718 7.30E-134 485.7 29159 cellular  
organisms; Eukaryota; Opisthokonta; Metazoa; Eumetazoa; Bilateria; Protostomia;  
Spiralia; Lophotrochozoa; Mollusca; Bivalvia; Autobranchia; Pteriomorpha; Ostr  
eida; Ostreidae; Crassostrea; Crassostrea gigas  
UdeM00000037211 6596 184.5 UdeM00000037211 XP\_045202545.1 49 202  
77 5 10 186 10 210 1.20E-43 184.5 6596 cellular  
organisms; Eukaryota; Opisthokonta; Metazoa; Eumetazoa; Bilateria; Protostomia;  
Spiralia; Lophotrochozoa; Mollusca; Bivalvia; Autobranchia; Heteroconchia; Eue  
terodonta; Imparidentia; Venerida; Veneroidea; Veneridae; Mercenaria; Mercenari  
a mercenaria  
UdeM00000037212 6596 827.4 UdeM00000037212 XP\_045200288.1 53.9 874  
270 16 148 909 150 1002 1.80E-236 827.4 6596 cellular  
organisms; Eukaryota; Opisthokonta; Metazoa; Eumetazoa; Bilateria; Protostomia;  
Spiralia; Lophotrochozoa; Mollusca; Bivalvia; Autobranchia; Heteroconchia; Eue  
terodonta; Imparidentia; Venerida; Veneroidea; Veneridae; Mercenaria; Mercenari  
a mercenaria  
UdeM00000037213 6573 537.7 UdeM00000037213 XP\_021361862.1 68.1 417  
130 3 21 435 67 482 2.10E-149 537.7 6573 cellular  
organisms; Eukaryota; Opisthokonta; Metazoa; Eumetazoa; Bilateria; Protostomia;  
Spiralia; Lophotrochozoa; Mollusca; Bivalvia; Autobranchia; Pteriomorpha; Pect  
inida; Pectinoidea; Pectinidae; Mizuhopecten; Mizuhopecten yessoensis  
UdeM00000037214 6573 99.8 UdeM00000037214 XP\_021361862.1 70.2 94  
27 1 1 94 390 482 7.30E-18 99.8 6573 cellular  
organisms; Eukaryota; Opisthokonta; Metazoa; Eumetazoa; Bilateria; Protostomia;  
Spiralia; Lophotrochozoa; Mollusca; Bivalvia; Autobranchia; Pteriomorpha; Pect  
inida; Pectinoidea; Pectinidae; Mizuhopecten; Mizuhopecten yessoensis  
UdeM00000037215 6596 847 UdeM00000037215 XP\_045166966.1 43.4 1016  
517 17 85 1046 132 1143 2.50E-242 847 6596 cellular  
organisms; Eukaryota; Opisthokonta; Metazoa; Eumetazoa; Bilateria; Protostomia;  
Spiralia; Lophotrochozoa; Mollusca; Bivalvia; Autobranchia; Heteroconchia; Eue  
terodonta; Imparidentia; Venerida; Veneroidea; Veneridae; Mercenaria; Mercenari  
a mercenaria  
UdeM00000037216 1735272 275.4 UdeM00000037216 XP\_041354101.1 39  
426 194 7 1376 1768 1610 2002 5.60E-70 275.4 1735272  
cellular  
organisms; Eukaryota; Opisthokonta; Metazoa; Eumetazoa; Bilateria; Protostomia;  
Spiralia; Lophotrochozoa; Mollusca; Gastropoda; Neomphalina; Neomphaloidea; Pel  
tospiridae; Gigantopelta; Gigantopelta aegis  
UdeM00000037218 1735272 262.3 UdeM00000037218 XP\_041359761.1 45.5  
297 159 2 1 294 1 297 7.40E-67 262.3 1735272

cellular  
organisms;Eukaryota;Opisthokonta;Metazoa;Eumetazoa;Bilateria;Protostomia;  
Spiralia;Lophotrochozoa;Mollusca;Gastropoda;Neomphalina;Neomphaloidea;Pel  
tospiridae;Gigantopelta;Gigantopelta aegis

UdeM00000037219 6596 1182.2 UdeM00000037219 XP\_045179878.1 52.3  
1263 434 19 99 1215 74 1313 0.00E+00 1182.2 6596

cellular  
organisms;Eukaryota;Opisthokonta;Metazoa;Eumetazoa;Bilateria;Protostomia;  
Spiralia;Lophotrochozoa;Mollusca;Bivalvia;Autobranchia;Heteroconchia;Euhe  
terodonta;Imparidentia;Venerida;Veneroidea;Veneridae;Mercenaria;Mercenari  
a mercenaria

UdeM00000037220 6596 137.5 UdeM00000037220 XP\_045179847.1 72.6 84  
23 0 50 133 74 157 1.20E-29 137.5 6596 cellular

organisms;Eukaryota;Opisthokonta;Metazoa;Eumetazoa;Bilateria;Protostomia;  
Spiralia;Lophotrochozoa;Mollusca;Bivalvia;Autobranchia;Heteroconchia;Euhe  
terodonta;Imparidentia;Venerida;Veneroidea;Veneridae;Mercenaria;Mercenari  
a mercenaria

UdeM00000037221 400727 61.2 UdeM00000037221 XP\_025078658.1 86.2  
29 4 0 145 173 186 214 1.60E-06 61.2 400727

cellular  
organisms;Eukaryota;Opisthokonta;Metazoa;Eumetazoa;Bilateria;Protostomia;  
Spiralia;Lophotrochozoa;Mollusca;Gastropoda;Caenogastropoda;Architaeniogl  
ossa;Ampullarioidea;Ampullariidae;Pomacea;Pomacea canaliculata

UdeM00000037222 6596 1429.8 UdeM00000037222 XP\_045199557.1 68.1  
1122 336 8 1 1113 285 1393 0.00E+00 1429.8 6596

cellular  
organisms;Eukaryota;Opisthokonta;Metazoa;Eumetazoa;Bilateria;Protostomia;  
Spiralia;Lophotrochozoa;Mollusca;Bivalvia;Autobranchia;Heteroconchia;Euhe  
terodonta;Imparidentia;Venerida;Veneroidea;Veneridae;Mercenaria;Mercenari  
a mercenaria

UdeM00000037223 2607531 433 UdeM00000037223 XP\_029648219.1 67  
297 98 0 13 309 21 317 3.40E-118 433 2607531

cellular  
organisms;Eukaryota;Opisthokonta;Metazoa;Eumetazoa;Bilateria;Protostomia;  
Spiralia;Lophotrochozoa;Mollusca;Cephalopoda;Coleoidea;Octopodiformes;Oct  
opoda;Incirrata;Octopodidae;Octopus;Octopus sinensis

UdeM00000037224 6579 227.3 UdeM00000037224 XP\_033742115.1 42.2 308  
151 6 10 293 6 310 2.60E-56 227.3 6579 cellular

organisms;Eukaryota;Opisthokonta;Metazoa;Eumetazoa;Bilateria;Protostomia;  
Spiralia;Lophotrochozoa;Mollusca;Bivalvia;Autobranchia;Pteriomorphia;Pect  
inida;Pectinoidea;Pectinidae;Pecten;Pecten maximus

UdeM00000037228 6596 286.6 UdeM00000037228 XP\_045209328.1 35.7 462  
270 8 14 456 1735 2188 6.20E-74 286.6 6596 cellular

organisms;Eukaryota;Opisthokonta;Metazoa;Eumetazoa;Bilateria;Protostomia;  
Spiralia;Lophotrochozoa;Mollusca;Bivalvia;Autobranchia;Heteroconchia;Euhe  
terodonta;Imparidentia;Venerida;Veneroidea;Veneridae;Mercenaria;Mercenari  
a mercenaria

UdeM00000037229 6596 455.3 UdeM00000037229 XP\_045205491.1 56 407  
176 2 15 420 63 467 8.60E-125 455.3 6596 cellular

organisms;Eukaryota;Opisthokonta;Metazoa;Eumetazoa;Bilateria;Protostomia;  
Spiralia;Lophotrochozoa;Mollusca;Bivalvia;Autobranchia;Heteroconchia;Euhe  
terodonta;Imparidentia;Venerida;Veneroidea;Veneridae;Mercenaria;Mercenari  
a mercenaria

UdeM00000037230 6579 242.7 UdeM00000037230 XP\_033739209.1 49.2 254  
 113 2 3 251 6 248 5.20E-61 242.7 6579 cellular  
 organisms;Eukaryota;Opisthokonta;Metazoa;Eumetazoa;Bilateria;Protostomia;  
 Spiralia;Lophotrochozoa;Mollusca;Bivalvia;Autobranhia;Pteriomorpha;Pect  
 inida;Pectinoidea;Pectinidae;Pecten;Pecten maximus  
 UdeM00000037231 6596 100.5 UdeM00000037231 XP\_045188277.1 29.9 201  
 131 3 2 201 79 270 4.40E-18 100.5 6596 cellular  
 organisms;Eukaryota;Opisthokonta;Metazoa;Eumetazoa;Bilateria;Protostomia;  
 Spiralia;Lophotrochozoa;Mollusca;Bivalvia;Autobranhia;Heteroconchia;Euhe  
 terodonta;Imparidentia;Venerida;Veneroidea;Veneridae;Mercenaria;Mercenari  
 a mercenaria  
 UdeM00000037232 6573 452.6 UdeM00000037232 XP\_021346496.1 45.5 530  
 268 9 203 732 27 535 1.10E-123 452.6 6573 cellular  
 organisms;Eukaryota;Opisthokonta;Metazoa;Eumetazoa;Bilateria;Protostomia;  
 Spiralia;Lophotrochozoa;Mollusca;Bivalvia;Autobranhia;Pteriomorpha;Pect  
 inida;Pectinoidea;Pectinidae;Mizuhopecten;Mizuhopecten yessoensis  
 UdeM00000037233 6573 123.6 UdeM00000037233 XP\_021346496.1 47.2 127  
 63 1 12 134 409 535 3.10E-25 123.6 6573 cellular  
 organisms;Eukaryota;Opisthokonta;Metazoa;Eumetazoa;Bilateria;Protostomia;  
 Spiralia;Lophotrochozoa;Mollusca;Bivalvia;Autobranhia;Pteriomorpha;Pect  
 inida;Pectinoidea;Pectinidae;Mizuhopecten;Mizuhopecten yessoensis  
 UdeM00000037234 6596 230.3 UdeM00000037234 XP\_045205491.1 59.6 188  
 75 1 1 187 219 406 2.00E-57 230.3 6596 cellular  
 organisms;Eukaryota;Opisthokonta;Metazoa;Eumetazoa;Bilateria;Protostomia;  
 Spiralia;Lophotrochozoa;Mollusca;Bivalvia;Autobranhia;Heteroconchia;Euhe  
 terodonta;Imparidentia;Venerida;Veneroidea;Veneridae;Mercenaria;Mercenari  
 a mercenaria  
 UdeM00000037235 6579 167.9 UdeM00000037235 XP\_033753057.1 49.3 144  
 73 0 1 144 1 144 1.10E-38 167.9 6579 cellular  
 organisms;Eukaryota;Opisthokonta;Metazoa;Eumetazoa;Bilateria;Protostomia;  
 Spiralia;Lophotrochozoa;Mollusca;Bivalvia;Autobranhia;Pteriomorpha;Pect  
 inida;Pectinoidea;Pectinidae;Pecten;Pecten maximus  
 UdeM00000044475 6579 157.5 UdeM00000044475 XP\_033743219.1 39.6 217  
 114 6 26 237 34 238 2.10E-35 157.5 6579 cellular  
 organisms;Eukaryota;Opisthokonta;Metazoa;Eumetazoa;Bilateria;Protostomia;  
 Spiralia;Lophotrochozoa;Mollusca;Bivalvia;Autobranhia;Pteriomorpha;Pect  
 inida;Pectinoidea;Pectinidae;Pecten;Pecten maximus  
 UdeM00000030464 37653 209.9 UdeM00000030464 XP\_014767494.1 84 119  
 19 0 34 152 939 1057 2.20E-51 209.9 37653 cellular  
 organisms;Eukaryota;Opisthokonta;Metazoa;Eumetazoa;Bilateria;Protostomia;  
 Spiralia;Lophotrochozoa;Mollusca;Cephalopoda;Coleoidea;Octopodiformes;Oct  
 opoda;Incirrata;Octopodidae;Octopus;Octopus bimaculoides  
 UdeM00000030465 6596 159.5 UdeM00000030465 XP\_045177779.1 37 270  
 157 4 1 262 97 361 6.10E-36 159.5 6596 cellular  
 organisms;Eukaryota;Opisthokonta;Metazoa;Eumetazoa;Bilateria;Protostomia;  
 Spiralia;Lophotrochozoa;Mollusca;Bivalvia;Autobranhia;Heteroconchia;Euhe  
 terodonta;Imparidentia;Venerida;Veneroidea;Veneridae;Mercenaria;Mercenari  
 a mercenaria  
 UdeM00000030466 6596 207.6 UdeM00000030466 XP\_045177776.1 41.6 257  
 139 6 70 322 686 935 5.40E-50 207.6 6596 cellular  
 organisms;Eukaryota;Opisthokonta;Metazoa;Eumetazoa;Bilateria;Protostomia;  
 Spiralia;Lophotrochozoa;Mollusca;Bivalvia;Autobranhia;Heteroconchia;Euhe  
 terodonta;Imparidentia;Venerida;Veneroidea;Veneridae;Mercenaria;Mercenari  
 a mercenaria

UdeM00000030468 29159 162.5 UdeM00000030468 XP\_011449844.1 24.3 564  
 368 14 25 545 16 563 1.80E-36 162.5 29159 cellular  
 organisms;Eukaryota;Opisthokonta;Metazoa;Eumetazoa;Bilateria;Protostomia;  
 Spiralia;Lophotrochozoa;Mollusca;Bivalvia;Autobranchia;Pteriormorphia;Ostr  
 eida;Ostreoidea;Ostreidae;Crassostrea;Crassostrea gigas  
 UdeM00000030469 6596 778.5 UdeM00000030469 XP\_045164107.1 35.8 1434  
 798 26 14 1401 2662 4019 1.50E-221 778.5 6596 cellular  
 organisms;Eukaryota;Opisthokonta;Metazoa;Eumetazoa;Bilateria;Protostomia;  
 Spiralia;Lophotrochozoa;Mollusca;Bivalvia;Autobranchia;Heteroconchia;Euhe  
 terodonta;Imparidentia;Venerida;Veneroidea;Veneridae;Mercenaria;Mercenari  
 a mercenaria  
 UdeM00000030470 6596 925.2 UdeM00000030470 XP\_045164107.1 61.4 782  
 247 8 9 746 1883 2653 5.20E-266 925.2 6596 cellular  
 organisms;Eukaryota;Opisthokonta;Metazoa;Eumetazoa;Bilateria;Protostomia;  
 Spiralia;Lophotrochozoa;Mollusca;Bivalvia;Autobranchia;Heteroconchia;Euhe  
 terodonta;Imparidentia;Venerida;Veneroidea;Veneridae;Mercenaria;Mercenari  
 a mercenaria  
 UdeM00000030471 6596 207.6 UdeM00000030471 XP\_045164107.1 34.4 352  
 217 5 11 357 391 733 3.80E-50 207.6 6596 cellular  
 organisms;Eukaryota;Opisthokonta;Metazoa;Eumetazoa;Bilateria;Protostomia;  
 Spiralia;Lophotrochozoa;Mollusca;Bivalvia;Autobranchia;Heteroconchia;Euhe  
 terodonta;Imparidentia;Venerida;Veneroidea;Veneridae;Mercenaria;Mercenari  
 a mercenaria  
 UdeM00000030472 6565 229.6 UdeM00000030472 XP\_022327931.1 35.8 346  
 216 4 30 374 20 360 6.80E-57 229.6 6565 cellular  
 organisms;Eukaryota;Opisthokonta;Metazoa;Eumetazoa;Bilateria;Protostomia;  
 Spiralia;Lophotrochozoa;Mollusca;Bivalvia;Autobranchia;Pteriormorphia;Ostr  
 eida;Ostreoidea;Ostreidae;Crassostrea;Crassostrea virginica  
 UdeM00000030475 45351 89.7 UdeM00000030475 XP\_032236999.1 35.8 151  
 81 2 28 163 11 160 4.80E-15 89.7 45351 cellular  
 organisms;Eukaryota;Opisthokonta;Metazoa;Eumetazoa;Cnidaria;Anthozoa;Hexa  
 corallia;Actiniaria;Edwardsiidae;Nematostella;Nematostella vectensis  
 UdeM00000030476 6596 346.7 UdeM00000030476 XP\_045177776.1 40.4 513  
 295 9 1 506 405 913 5.20E-92 346.7 6596 cellular  
 organisms;Eukaryota;Opisthokonta;Metazoa;Eumetazoa;Bilateria;Protostomia;  
 Spiralia;Lophotrochozoa;Mollusca;Bivalvia;Autobranchia;Heteroconchia;Euhe  
 terodonta;Imparidentia;Venerida;Veneroidea;Veneridae;Mercenaria;Mercenari  
 a mercenaria  
 UdeM00000030477 7574 154.8 UdeM00000030477 XP\_013389395.1 39.7 224  
 120 7 2 217 749 965 1.30E-34 154.8 7574 cellular  
 organisms;Eukaryota;Opisthokonta;Metazoa;Eumetazoa;Bilateria;Protostomia;  
 Spiralia;Lophotrochozoa;Brachiopoda;Linguliformea;Lingulata;Lingulida;Lin  
 guloidea;Lingulidae;Lingula;Lingula anatina  
 UdeM00000030478 7739 123.2 UdeM00000030478 XP\_035696040.1 37.6 186  
 101 5 2 176 807 988 3.50E-25 123.2 7739 cellular  
 organisms;Eukaryota;Opisthokonta;Metazoa;Eumetazoa;Bilateria;Deuterostomi  
 a;Chordata;Cephalochordata;Leptocardii;Amphioxiformes;Branchiostomidae;Br  
 anchiostoma;Branchiostoma floridae  
 UdeM00000030479 7741 135.6 UdeM00000030479 XP\_019616671.1 37 211  
 120 5 11 212 819 1025 8.00E-29 135.6 7741 cellular  
 organisms;Eukaryota;Opisthokonta;Metazoa;Eumetazoa;Bilateria;Deuterostomi  
 a;Chordata;Cephalochordata;Leptocardii;Amphioxiformes;Branchiostomidae;Br  
 anchiostoma;Branchiostoma belcheri



UdeM00000030480 6596 162.5 UdeM00000030480 XP\_045188177.1 38.5 221  
 125 4 513 732 165 375 2.50E-36 162.5 6596 cellular  
 organisms;Eukaryota;Opisthokonta;Metazoa;Eumetazoa;Bilateria;Protostomia;  
 Spiralia;Lophotrochozoa;Mollusca;Bivalvia;Autobranchia;Heteroconchia;Euhe  
 terodonta;Imparidentia;Venerida;Veneroidea;Veneridae;Mercenaria;Mercenari  
 a mercenaria  
 UdeM00000030481 6596 655.2 UdeM00000030481 XP\_045164107.1 58.8 565  
 228 3 5 567 2416 2977 7.50E-185 655.2 6596 cellular  
 organisms;Eukaryota;Opisthokonta;Metazoa;Eumetazoa;Bilateria;Protostomia;  
 Spiralia;Lophotrochozoa;Mollusca;Bivalvia;Autobranchia;Heteroconchia;Euhe  
 terodonta;Imparidentia;Venerida;Veneroidea;Veneridae;Mercenaria;Mercenari  
 a mercenaria  
 UdeM00000030482 6596 215.3 UdeM00000030482 XP\_045164107.1 44.4 261  
 89 3 18 274 2159 2367 9.60E-53 215.3 6596 cellular  
 organisms;Eukaryota;Opisthokonta;Metazoa;Eumetazoa;Bilateria;Protostomia;  
 Spiralia;Lophotrochozoa;Mollusca;Bivalvia;Autobranchia;Heteroconchia;Euhe  
 terodonta;Imparidentia;Venerida;Veneroidea;Veneridae;Mercenaria;Mercenari  
 a mercenaria  
 UdeM00000030483 1735272 427.6 UdeM00000030483 XP\_041360663.1 38.9  
 714 343 19 94 750 1027 1704 3.50E-116 427.6 1735272  
 cellular  
 organisms;Eukaryota;Opisthokonta;Metazoa;Eumetazoa;Bilateria;Protostomia;  
 Spiralia;Lophotrochozoa;Mollusca;Gastropoda;Neomphalina;Neomphaloidea;Pel  
 tospiridae;Gigantopelta;Gigantopelta aegis  
 UdeM00000030485 6596 970.7 UdeM00000030485 XP\_045164107.1 59.8 806  
 309 3 17 818 2301 3095 1.20E-279 970.7 6596 cellular  
 organisms;Eukaryota;Opisthokonta;Metazoa;Eumetazoa;Bilateria;Protostomia;  
 Spiralia;Lophotrochozoa;Mollusca;Bivalvia;Autobranchia;Heteroconchia;Euhe  
 terodonta;Imparidentia;Venerida;Veneroidea;Veneridae;Mercenaria;Mercenari  
 a mercenaria  
 UdeM00000030486 59861 147.9 UdeM00000030486 XP\_045078191.1 57.9 126  
 52 1 2 127 23 147 1.00E-32 147.9 59861 cellular  
 organisms;Eukaryota;Opisthokonta;Metazoa;Eumetazoa;Bilateria;Deuterostomi  
 a;Chordata;Craniata;Vertebrata;Gnathostomata;Teleostomi;Euteleostomi;Acti  
 nopterygii;Actinopteri;Neopterygii;Teleostei;Osteoglossocephalai;Clupeoce  
 phala;Euteleosteomorpha;Protacanthopterygii;Salmoniformes;Salmonidae;Core  
 goninae;Coregonus;Coregonus clupeaformis  
 UdeM00000030488 6596 343.2 UdeM00000030488 XP\_045177776.1 37.4 540  
 293 13 1 531 405 908 8.50E-91 343.2 6596 cellular  
 organisms;Eukaryota;Opisthokonta;Metazoa;Eumetazoa;Bilateria;Protostomia;  
 Spiralia;Lophotrochozoa;Mollusca;Bivalvia;Autobranchia;Heteroconchia;Euhe  
 terodonta;Imparidentia;Venerida;Veneroidea;Veneridae;Mercenaria;Mercenari  
 a mercenaria  
 UdeM00000030489 6573 113.6 UdeM00000030489 XP\_021354477.1 43.2 132  
 75 0 10 141 1988 2119 2.10E-22 113.6 6573 cellular  
 organisms;Eukaryota;Opisthokonta;Metazoa;Eumetazoa;Bilateria;Protostomia;  
 Spiralia;Lophotrochozoa;Mollusca;Bivalvia;Autobranchia;Pteriomorpha;Pect  
 inida;Pectinoidea;Pectinidae;Mizuhopecten;Mizuhopecten yessoensis  
 UdeM00000030490 6596 1223.8 UdeM00000030490 XP\_045164107.1 40.7  
 1923 770 35 72 1714 1006 2837 0.00E+00 1223.8 6596  
 cellular  
 organisms;Eukaryota;Opisthokonta;Metazoa;Eumetazoa;Bilateria;Protostomia;  
 Spiralia;Lophotrochozoa;Mollusca;Bivalvia;Autobranchia;Heteroconchia;Euhe

terodonta;Imparidentia;Venerida;Veneroidea;Veneridae;Mercenaria;Mercenari  
a mercenaria

UdeM00000030491 6596 1219.5 UdeM00000030491 XP\_045164107.1 40.7  
1923 763 35 72 1707 1006 2837 0.00E+00 1219.5 6596  
cellular

organisms;Eukaryota;Opisthokonta;Metazoa;Eumetazoa;Bilateria;Protostomia;  
Spiralia;Lophotrochozoa;Mollusca;Bivalvia;Autobranchia;Heteroconchia;Euhe  
terodonta;Imparidentia;Venerida;Veneroidea;Veneridae;Mercenaria;Mercenari  
a mercenaria

UdeM00000030493 6573 141 UdeM00000030493 XP\_021354477.1 27.7 476  
273 12 1 469 2768 3179 4.10E-30 141 6573 cellular

organisms;Eukaryota;Opisthokonta;Metazoa;Eumetazoa;Bilateria;Protostomia;  
Spiralia;Lophotrochozoa;Mollusca;Bivalvia;Autobranchia;Pteriomorpha;Pect  
inida;Pectinoidea;Pectinidae;Mizuhopecten;Mizuhopecten yessoensis

UdeM00000006906 6565 822 UdeM00000006906 XP\_022300299.1 73.8 519  
135 1 3 520 2 520 6.10E-235 822 6565 cellular

organisms;Eukaryota;Opisthokonta;Metazoa;Eumetazoa;Bilateria;Protostomia;  
Spiralia;Lophotrochozoa;Mollusca;Bivalvia;Autobranchia;Pteriomorpha;Ostr  
eida;Ostreoidea;Ostreidae;Crassostrea;Crassostrea virginica

UdeM00000006907 6565 856.3 UdeM00000006907 XP\_022300299.1 69 580  
165 2 3 581 2 567 2.30E-245 856.3 6565 cellular

organisms;Eukaryota;Opisthokonta;Metazoa;Eumetazoa;Bilateria;Protostomia;  
Spiralia;Lophotrochozoa;Mollusca;Bivalvia;Autobranchia;Pteriomorpha;Ostr  
eida;Ostreoidea;Ostreidae;Crassostrea;Crassostrea virginica

UdeM00000006908 6596 322.4 UdeM00000006908 XP\_045164505.1 34.6 714  
394 21 1 677 28 705 1.90E-84 322.4 6596 cellular

organisms;Eukaryota;Opisthokonta;Metazoa;Eumetazoa;Bilateria;Protostomia;  
Spiralia;Lophotrochozoa;Mollusca;Bivalvia;Autobranchia;Heteroconchia;Euhe  
terodonta;Imparidentia;Venerida;Veneroidea;Veneridae;Mercenaria;Mercenari  
a mercenaria

UdeM00000006909 6596 326.6 UdeM00000006909 XP\_045164505.1 34.7 712  
394 20 1 675 28 705 1.00E-85 326.6 6596 cellular

organisms;Eukaryota;Opisthokonta;Metazoa;Eumetazoa;Bilateria;Protostomia;  
Spiralia;Lophotrochozoa;Mollusca;Bivalvia;Autobranchia;Heteroconchia;Euhe  
terodonta;Imparidentia;Venerida;Veneroidea;Veneridae;Mercenaria;Mercenari  
a mercenaria

UdeM00000006910 6596 492.7 UdeM00000006910 XP\_045164952.1 56.9 459  
158 8 2 458 15 435 5.20E-136 492.7 6596 cellular

organisms;Eukaryota;Opisthokonta;Metazoa;Eumetazoa;Bilateria;Protostomia;  
Spiralia;Lophotrochozoa;Mollusca;Bivalvia;Autobranchia;Heteroconchia;Euhe  
terodonta;Imparidentia;Venerida;Veneroidea;Veneridae;Mercenaria;Mercenari  
a mercenaria

UdeM00000006911 133434 120.2 UdeM00000006911 XP\_022111697.1 63.6  
88 32 0 157 244 134 221 3.80E-24 120.2 133434  
cellular

organisms;Eukaryota;Opisthokonta;Metazoa;Eumetazoa;Bilateria;Deuterostomi  
a;Echinodermata;Eleutherozoa;Asterozoa;Asteroidea;Valvatacea;Valvatida;Ac  
anthasteridae;Acanthaster;Acanthaster planci

UdeM00000006913 6596 1037.3 UdeM00000006913 XP\_045166353.1 43.7  
1293 535 19 42 1166 10 1277 1.50E-299 1037.3 6596  
cellular

organisms;Eukaryota;Opisthokonta;Metazoa;Eumetazoa;Bilateria;Protostomia;  
Spiralia;Lophotrochozoa;Mollusca;Bivalvia;Autobranchia;Heteroconchia;Euhe

terodonta;Imparidentia;Venerida;Veneroidea;Veneridae;Mercenaria;Mercenari  
a mercenaria

UdeM00000006912 6596 1649.4 UdeM00000006912 XP\_045166353.1 45.9  
1937 829 29 42 1792 10 1914 0.00E+00 1649.4 6596  
cellular

organisms;Eukaryota;Opisthokonta;Metazoa;Eumetazoa;Bilateria;Protostomia;  
Spiralia;Lophotrochozoa;Mollusca;Bivalvia;Autobranchia;Heteroconchia;Euhe  
terodonta;Imparidentia;Venerida;Veneroidea;Veneridae;Mercenaria;Mercenari  
a mercenaria

UdeM00000006914 6596 189.1 UdeM00000006914 XP\_045165607.1 62.8 148  
51 2 1 145 11 157 4.00E-45 189.1 6596 cellular

organisms;Eukaryota;Opisthokonta;Metazoa;Eumetazoa;Bilateria;Protostomia;  
Spiralia;Lophotrochozoa;Mollusca;Bivalvia;Autobranchia;Heteroconchia;Euhe  
terodonta;Imparidentia;Venerida;Veneroidea;Veneridae;Mercenaria;Mercenari  
a mercenaria

UdeM00000006917 6573 583.2 UdeM00000006917 XP\_021365971.1 32.5 1038  
650 15 9 1014 6 1024 6.60E-163 583.2 6573 cellular

organisms;Eukaryota;Opisthokonta;Metazoa;Eumetazoa;Bilateria;Protostomia;  
Spiralia;Lophotrochozoa;Mollusca;Bivalvia;Autobranchia;Pteriormorphia;Pect  
inida;Pectinoidea;Pectinidae;Mizuhopecten;Mizuhopecten yessoensis

UdeM00000006918 6565 799.7 UdeM00000006918 XP\_022301606.1 80.3 461  
91 0 8 468 6 466 2.10E-228 799.7 6565 cellular

organisms;Eukaryota;Opisthokonta;Metazoa;Eumetazoa;Bilateria;Protostomia;  
Spiralia;Lophotrochozoa;Mollusca;Bivalvia;Autobranchia;Pteriormorphia;Ostr  
eida;Ostreoidea;Ostreidae;Crassostrea;Crassostrea virginica

UdeM00000006919 6596 951 UdeM00000006919 XP\_045165065.1 64.2 925  
259 10 1 870 282 1189 1.10E-273 951 6596 cellular

organisms;Eukaryota;Opisthokonta;Metazoa;Eumetazoa;Bilateria;Protostomia;  
Spiralia;Lophotrochozoa;Mollusca;Bivalvia;Autobranchia;Heteroconchia;Euhe  
terodonta;Imparidentia;Venerida;Veneroidea;Veneridae;Mercenaria;Mercenari  
a mercenaria

UdeM00000006920 6596 211.5 UdeM00000006920 XP\_045165058.1 46.8 282  
129 9 1 278 1 265 1.50E-51 211.5 6596 cellular

organisms;Eukaryota;Opisthokonta;Metazoa;Eumetazoa;Bilateria;Protostomia;  
Spiralia;Lophotrochozoa;Mollusca;Bivalvia;Autobranchia;Heteroconchia;Euhe  
terodonta;Imparidentia;Venerida;Veneroidea;Veneridae;Mercenaria;Mercenari  
a mercenaria

UdeM00000006921 6596 256.5 UdeM00000006921 XP\_045166147.1 41.2 308  
174 3 2 308 4 305 4.20E-65 256.5 6596 cellular

organisms;Eukaryota;Opisthokonta;Metazoa;Eumetazoa;Bilateria;Protostomia;  
Spiralia;Lophotrochozoa;Mollusca;Bivalvia;Autobranchia;Heteroconchia;Euhe  
terodonta;Imparidentia;Venerida;Veneroidea;Veneridae;Mercenaria;Mercenari  
a mercenaria

UdeM00000006922 6596 516.5 UdeM00000006922 XP\_045166146.1 37.6 719  
413 9 181 895 134 820 6.60E-143 516.5 6596 cellular

organisms;Eukaryota;Opisthokonta;Metazoa;Eumetazoa;Bilateria;Protostomia;  
Spiralia;Lophotrochozoa;Mollusca;Bivalvia;Autobranchia;Heteroconchia;Euhe  
terodonta;Imparidentia;Venerida;Veneroidea;Veneridae;Mercenaria;Mercenari  
a mercenaria

UdeM00000006926 6596 108.2 UdeM00000006926 XP\_045166255.1 42.7 103  
49 1 33 125 13 115 7.80E-21 108.2 6596 cellular

organisms;Eukaryota;Opisthokonta;Metazoa;Eumetazoa;Bilateria;Protostomia;  
Spiralia;Lophotrochozoa;Mollusca;Bivalvia;Autobranchia;Heteroconchia;Euhe

terodonta;Imparidentia;Venerida;Veneroidea;Veneridae;Mercenaria;Mercenari  
 a mercenaria  
 UdeM00000006925 6596 119.8 UdeM00000006925 XP\_045166254.1 45.1 113  
 52 1 33 135 13 125 2.70E-24 119.8 6596 cellular  
 organisms;Eukaryota;Opisthokonta;Metazoa;Eumetazoa;Bilateria;Protostomia;  
 Spiralia;Lophotrochozoa;Mollusca;Bivalvia;Autobranhia;Heteroconchia;Euhe  
 terodonta;Imparidentia;Venerida;Veneroidea;Veneridae;Mercenaria;Mercenari  
 a mercenaria  
 UdeM00000006927 6596 829.7 UdeM00000006927 XP\_045166312.1 55.9 725  
 303 7 3 718 8 724 3.00E-237 829.7 6596 cellular  
 organisms;Eukaryota;Opisthokonta;Metazoa;Eumetazoa;Bilateria;Protostomia;  
 Spiralia;Lophotrochozoa;Mollusca;Bivalvia;Autobranhia;Heteroconchia;Euhe  
 terodonta;Imparidentia;Venerida;Veneroidea;Veneridae;Mercenaria;Mercenari  
 a mercenaria  
 UdeM00000006928 6596 593.2 UdeM00000006928 XP\_045164864.1 53.5 604  
 252 8 58 658 132 709 4.10E-166 593.2 6596 cellular  
 organisms;Eukaryota;Opisthokonta;Metazoa;Eumetazoa;Bilateria;Protostomia;  
 Spiralia;Lophotrochozoa;Mollusca;Bivalvia;Autobranhia;Heteroconchia;Euhe  
 terodonta;Imparidentia;Venerida;Veneroidea;Veneridae;Mercenaria;Mercenari  
 a mercenaria  
 UdeM00000006929 6596 340.1 UdeM00000006929 XP\_045165468.1 48.2 479  
 199 15 7 465 3 452 4.40E-90 340.1 6596 cellular  
 organisms;Eukaryota;Opisthokonta;Metazoa;Eumetazoa;Bilateria;Protostomia;  
 Spiralia;Lophotrochozoa;Mollusca;Bivalvia;Autobranhia;Heteroconchia;Euhe  
 terodonta;Imparidentia;Venerida;Veneroidea;Veneridae;Mercenaria;Mercenari  
 a mercenaria  
 UdeM00000006930 6596 608.6 UdeM00000006930 XP\_045164248.1 71.2 372  
 104 2 21 389 42 413 5.60E-171 608.6 6596 cellular  
 organisms;Eukaryota;Opisthokonta;Metazoa;Eumetazoa;Bilateria;Protostomia;  
 Spiralia;Lophotrochozoa;Mollusca;Bivalvia;Autobranhia;Heteroconchia;Euhe  
 terodonta;Imparidentia;Venerida;Veneroidea;Veneridae;Mercenaria;Mercenari  
 a mercenaria  
 UdeM00000006931 6596 931 UdeM00000006931 XP\_045166328.1 71.2 706  
 182 14 2 699 56 748 8.70E-268 931 6596 cellular  
 organisms;Eukaryota;Opisthokonta;Metazoa;Eumetazoa;Bilateria;Protostomia;  
 Spiralia;Lophotrochozoa;Mollusca;Bivalvia;Autobranhia;Heteroconchia;Euhe  
 terodonta;Imparidentia;Venerida;Veneroidea;Veneridae;Mercenaria;Mercenari  
 a mercenaria  
 UdeM00000006932 6596 4128.6 UdeM00000006932 XP\_045166219.1 76  
 2696 549 8 1 2607 1370 4056 0.00E+00 4128.6 6596  
 cellular  
 organisms;Eukaryota;Opisthokonta;Metazoa;Eumetazoa;Bilateria;Protostomia;  
 Spiralia;Lophotrochozoa;Mollusca;Bivalvia;Autobranhia;Heteroconchia;Euhe  
 terodonta;Imparidentia;Venerida;Veneroidea;Veneridae;Mercenaria;Mercenari  
 a mercenaria  
 UdeM00000006933 6596 4185.2 UdeM00000006933 XP\_045166219.1 76.8  
 2696 568 8 1 2648 1370 4056 0.00E+00 4185.2 6596  
 cellular  
 organisms;Eukaryota;Opisthokonta;Metazoa;Eumetazoa;Bilateria;Protostomia;  
 Spiralia;Lophotrochozoa;Mollusca;Bivalvia;Autobranhia;Heteroconchia;Euhe  
 terodonta;Imparidentia;Venerida;Veneroidea;Veneridae;Mercenaria;Mercenari  
 a mercenaria  
 UdeM00000006934 6596 760.8 UdeM00000006934 XP\_045166219.1 84 462  
 72 2 1 460 1371 1832 1.00E-216 760.8 6596 cellular

organisms;Eukaryota;Opisthokonta;Metazoa;Eumetazoa;Bilateria;Protostomia; Spiralia;Lophotrochozoa;Mollusca;Bivalvia;Autobranchia;Heteroconchia;Euherodonta;Imparidentia;Venerida;Veneroidea;Veneridae;Mercenaria;Mercenaria mercenaria

UdeM00000006935 6579 2133.2 UdeM00000006935 XP\_033744800.1 66.7  
1637 510 9 1 1628 1 1611 0.00E+00 2133.2 6579  
cellular

organisms;Eukaryota;Opisthokonta;Metazoa;Eumetazoa;Bilateria;Protostomia; Spiralia;Lophotrochozoa;Mollusca;Bivalvia;Autobranchia;Pteriomorpha;Pectinida;Pectinoidea;Pectinidae;Pecten;Pecten maximus

UdeM00000006936 6573 333.2 UdeM00000006936 XP\_021369900.1 51.4 292  
138 2 2 292 19 307 3.40E-88 333.2 6573 cellular

organisms;Eukaryota;Opisthokonta;Metazoa;Eumetazoa;Bilateria;Protostomia; Spiralia;Lophotrochozoa;Mollusca;Bivalvia;Autobranchia;Pteriomorpha;Pectinida;Pectinoidea;Pectinidae;Mizuhopecten;Mizuhopecten yessoensis

UdeM00000006937 6596 339.3 UdeM00000006937 XP\_045183362.1 47.8 358  
174 4 6 353 18 372 5.90E-90 339.3 6596 cellular

organisms;Eukaryota;Opisthokonta;Metazoa;Eumetazoa;Bilateria;Protostomia; Spiralia;Lophotrochozoa;Mollusca;Bivalvia;Autobranchia;Heteroconchia;Euherodonta;Imparidentia;Venerida;Veneroidea;Veneridae;Mercenaria;Mercenaria mercenaria

UdeM00000006938 6579 335.1 UdeM00000006938 XP\_033744551.1 49.4 348  
140 4 1 312 1 348 1.10E-88 335.1 6579 cellular

organisms;Eukaryota;Opisthokonta;Metazoa;Eumetazoa;Bilateria;Protostomia; Spiralia;Lophotrochozoa;Mollusca;Bivalvia;Autobranchia;Pteriomorpha;Pectinida;Pectinoidea;Pectinidae;Pecten;Pecten maximus

UdeM00000006939 1735272 259.2 UdeM00000006939 XP\_041349569.1 51.7  
242 111 2 19 255 77 317 6.40E-66 259.2 1735272  
cellular

organisms;Eukaryota;Opisthokonta;Metazoa;Eumetazoa;Bilateria;Protostomia; Spiralia;Lophotrochozoa;Mollusca;Gastropoda;Neomphalina;Neomphaloidea;Peltospiridae;Gigantopelta;Gigantopelta aegis

UdeM00000006945 6596 245.7 UdeM00000006945 XP\_045165268.1 34.3 455  
252 8 1 453 1 410 1.30E-61 245.7 6596 cellular

organisms;Eukaryota;Opisthokonta;Metazoa;Eumetazoa;Bilateria;Protostomia; Spiralia;Lophotrochozoa;Mollusca;Bivalvia;Autobranchia;Heteroconchia;Euherodonta;Imparidentia;Venerida;Veneroidea;Veneridae;Mercenaria;Mercenaria mercenaria

UdeM00000006946 6596 251.9 UdeM00000006946 XP\_045165999.1 42.9 315  
161 5 71 376 69 373 1.30E-63 251.9 6596 cellular

organisms;Eukaryota;Opisthokonta;Metazoa;Eumetazoa;Bilateria;Protostomia; Spiralia;Lophotrochozoa;Mollusca;Bivalvia;Autobranchia;Heteroconchia;Euherodonta;Imparidentia;Venerida;Veneroidea;Veneridae;Mercenaria;Mercenaria mercenaria

UdeM00000006947 6596 204.5 UdeM00000006947 XP\_045166006.1 54.6 183  
82 1 95 277 71 252 1.70E-49 204.5 6596 cellular

organisms;Eukaryota;Opisthokonta;Metazoa;Eumetazoa;Bilateria;Protostomia; Spiralia;Lophotrochozoa;Mollusca;Bivalvia;Autobranchia;Heteroconchia;Euherodonta;Imparidentia;Venerida;Veneroidea;Veneridae;Mercenaria;Mercenaria mercenaria

UdeM00000006948 6565 177.2 UdeM00000006948 XP\_022333862.1 45.6 204  
107 2 1 204 1 200 2.20E-41 177.2 6565 cellular

organisms;Eukaryota;Opisthokonta;Metazoa;Eumetazoa;Bilateria;Protostomia;

Spiralia;Lophotrochozoa;Mollusca;Bivalvia;Autobranchia;Pteriormorphia;Ostr  
eida;Ostreoidea;Ostreidae;Crassostrea;Crassostrea virginica  
UdeM00000006949 6526 86.3 UdeM00000006949 XP\_013096133.1 37.3 110  
67 1 6 115 20 127 2.80E-14 86.3 6526 cellular  
organisms;Eukaryota;Opisthokonta;Metazoa;Eumetazoa;Bilateria;Protostomia;  
Spiralia;Lophotrochozoa;Mollusca;Gastropoda;Heterobranchia;Euthyneura;Pan  
pulmonata;Hygrophila;Lymnaeoidea;Planorbidae;Biomphalaria;Biomphalaria  
glabrata  
UdeM00000006950 10224 104.8 UdeM00000006950 XP\_002731488.1 60.3 78  
29 1 1 76 1 78 5.20E-20 104.8 10224 cellular  
organisms;Eukaryota;Opisthokonta;Metazoa;Eumetazoa;Bilateria;Deuterostomi  
a;Hemichordata;Enteropneusta;Harrimaniidae;Saccoglossus;Saccoglossus  
kowalevskii  
UdeM00000006952 133434 184.9 UdeM00000006952 XP\_022080237.1 44.9  
205 110 1 1 205 1 202 1.00E-43 184.9 133434  
cellular  
organisms;Eukaryota;Opisthokonta;Metazoa;Eumetazoa;Bilateria;Deuterostomi  
a;Echinodermata;Eleutherozoa;Asterozoa;Asteroidea;Valvatataceae;Valvatida;Ac  
anthasteridae;Acanthaster;Acanthaster planci  
UdeM00000006951 133434 184.5 UdeM00000006951 XP\_022080237.1 44.9  
205 110 1 9 213 1 202 1.40E-43 184.5 133434  
cellular  
organisms;Eukaryota;Opisthokonta;Metazoa;Eumetazoa;Bilateria;Deuterostomi  
a;Echinodermata;Eleutherozoa;Asterozoa;Asteroidea;Valvatataceae;Valvatida;Ac  
anthasteridae;Acanthaster;Acanthaster planci  
UdeM00000006953 6596 176.8 UdeM00000006953 XP\_045166748.1 45.4 205  
109 2 1 205 1 202 2.90E-41 176.8 6596 cellular  
organisms;Eukaryota;Opisthokonta;Metazoa;Eumetazoa;Bilateria;Protostomia;  
Spiralia;Lophotrochozoa;Mollusca;Bivalvia;Autobranchia;Heteroconchia;Euhe  
terodonta;Imparidentia;Venerida;Veneroidea;Veneridae;Mercenaria;Mercenari  
a mercenaria  
UdeM00000006954 6596 388.7 UdeM00000006954 XP\_045169043.1 37.3 640  
356 17 5 620 24 642 1.40E-104 388.7 6596 cellular  
organisms;Eukaryota;Opisthokonta;Metazoa;Eumetazoa;Bilateria;Protostomia;  
Spiralia;Lophotrochozoa;Mollusca;Bivalvia;Autobranchia;Heteroconchia;Euhe  
terodonta;Imparidentia;Venerida;Veneroidea;Veneridae;Mercenaria;Mercenari  
a mercenaria  
UdeM00000006956 29159 87.4 UdeM00000006956 XP\_034304385.1 78.4 51  
11 0 1 51 292 342 9.70E-15 87.4 29159 cellular  
organisms;Eukaryota;Opisthokonta;Metazoa;Eumetazoa;Bilateria;Protostomia;  
Spiralia;Lophotrochozoa;Mollusca;Bivalvia;Autobranchia;Pteriormorphia;Ostr  
eida;Ostreoidea;Ostreidae;Crassostrea;Crassostrea gigas  
UdeM00000006957 6596 735.7 UdeM00000006957 XP\_045214572.1 78.4 422  
91 0 9 430 6 427 3.30E-209 735.7 6596 cellular  
organisms;Eukaryota;Opisthokonta;Metazoa;Eumetazoa;Bilateria;Protostomia;  
Spiralia;Lophotrochozoa;Mollusca;Bivalvia;Autobranchia;Heteroconchia;Euhe  
terodonta;Imparidentia;Venerida;Veneroidea;Veneridae;Mercenaria;Mercenari  
a mercenaria  
UdeM00000006958 6596 610.9 UdeM00000006958 XP\_045165740.1 81.8 358  
65 0 7 364 9 366 1.00E-171 610.9 6596 cellular  
organisms;Eukaryota;Opisthokonta;Metazoa;Eumetazoa;Bilateria;Protostomia;  
Spiralia;Lophotrochozoa;Mollusca;Bivalvia;Autobranchia;Heteroconchia;Euhe  
terodonta;Imparidentia;Venerida;Veneroidea;Veneridae;Mercenaria;Mercenari  
a mercenaria

UdeM00000006959 6596 601.7 UdeM00000006959 XP\_045165740.1 81.1 360  
 66 1 7 366 9 366 6.40E-169 601.7 6596 cellular  
 organisms;Eukaryota;Opisthokonta;Metazoa;Eumetazoa;Bilateria;Protostomia;  
 Spiralia;Lophotrochozoa;Mollusca;Bivalvia;Autobranchia;Heteroconchia;Euhe  
 terodonta;Imparidentia;Venerida;Veneroidea;Veneridae;Mercenaria;Mercenari  
 a mercenaria  
 UdeM00000006960 400727 321.6 UdeM00000006960 XP\_025106360.1 77.8  
 185 41 0 1 185 1 185 6.60E-85 321.6 400727  
 cellular  
 organisms;Eukaryota;Opisthokonta;Metazoa;Eumetazoa;Bilateria;Protostomia;  
 Spiralia;Lophotrochozoa;Mollusca;Gastropoda;Caenogastropoda;Architaeniogl  
 ossa;Ampullarioidea;Ampullariidae;Pomacea;Pomacea canaliculata  
 UdeM00000006961 6565 251.5 UdeM00000006961 XP\_022300979.1 49.5 289  
 133 5 1 284 1 281 5.90E-63 251.5 6565 cellular  
 organisms;Eukaryota;Opisthokonta;Metazoa;Eumetazoa;Bilateria;Protostomia;  
 Spiralia;Lophotrochozoa;Mollusca;Bivalvia;Autobranchia;Pteriormorphia;Ostr  
 eida;Ostreoidea;Ostreidae;Crassostrea;Crassostrea virginica  
 UdeM00000006961 6565 132.9 UdeM00000006961 XP\_022300979.1 67.5 80  
 24 1 1259 1338 1042 1119 3.10E-27 132.9 6565 cellular  
 organisms;Eukaryota;Opisthokonta;Metazoa;Eumetazoa;Bilateria;Protostomia;  
 Spiralia;Lophotrochozoa;Mollusca;Bivalvia;Autobranchia;Pteriormorphia;Ostr  
 eida;Ostreoidea;Ostreidae;Crassostrea;Crassostrea virginica  
 UdeM00000006964 6596 353.2 UdeM00000006964 XP\_045166590.1 37.5 618  
 296 13 215 828 203 734 9.10E-94 353.2 6596 cellular  
 organisms;Eukaryota;Opisthokonta;Metazoa;Eumetazoa;Bilateria;Protostomia;  
 Spiralia;Lophotrochozoa;Mollusca;Bivalvia;Autobranchia;Heteroconchia;Euhe  
 terodonta;Imparidentia;Venerida;Veneroidea;Veneridae;Mercenaria;Mercenari  
 a mercenaria  
 UdeM00000006965 6596 353.2 UdeM00000006965 XP\_045166590.1 37.5 618  
 296 13 199 812 203 734 8.90E-94 353.2 6596 cellular  
 organisms;Eukaryota;Opisthokonta;Metazoa;Eumetazoa;Bilateria;Protostomia;  
 Spiralia;Lophotrochozoa;Mollusca;Bivalvia;Autobranchia;Heteroconchia;Euhe  
 terodonta;Imparidentia;Venerida;Veneroidea;Veneridae;Mercenaria;Mercenari  
 a mercenaria  
 UdeM00000006966 6596 523.5 UdeM00000006966 XP\_045166583.1 67.6 349  
 110 1 1 346 27 375 2.10E-145 523.5 6596 cellular  
 organisms;Eukaryota;Opisthokonta;Metazoa;Eumetazoa;Bilateria;Protostomia;  
 Spiralia;Lophotrochozoa;Mollusca;Bivalvia;Autobranchia;Heteroconchia;Euhe  
 terodonta;Imparidentia;Venerida;Veneroidea;Veneridae;Mercenaria;Mercenari  
 a mercenaria  
 UdeM00000006968 29159 268.5 UdeM00000006968 XP\_019921284.2 58.6 215  
 87 2 1 214 1 214 7.90E-69 268.5 29159 cellular  
 organisms;Eukaryota;Opisthokonta;Metazoa;Eumetazoa;Bilateria;Protostomia;  
 Spiralia;Lophotrochozoa;Mollusca;Bivalvia;Autobranchia;Pteriormorphia;Ostr  
 eida;Ostreoidea;Ostreidae;Crassostrea;Crassostrea gigas  
 UdeM00000006969 6596 349.4 UdeM00000006969 XP\_045164372.1 67.7 266  
 85 1 40 304 1 266 7.70E-93 349.4 6596 cellular  
 organisms;Eukaryota;Opisthokonta;Metazoa;Eumetazoa;Bilateria;Protostomia;  
 Spiralia;Lophotrochozoa;Mollusca;Bivalvia;Autobranchia;Heteroconchia;Euhe  
 terodonta;Imparidentia;Venerida;Veneroidea;Veneridae;Mercenaria;Mercenari  
 a mercenaria  
 UdeM00000006970 1735272 610.9 UdeM00000006970 XP\_041348590.1 69.8  
 404 115 3 5 408 10 406 1.20E-171 610.9 1735272  
 cellular

organisms;Eukaryota;Opisthokonta;Metazoa;Eumetazoa;Bilateria;Protostomia;  
Spiralia;Lophotrochozoa;Mollusca;Gastropoda;Neomphalina;Neomphaloidea;Pel  
tospiridae;Gigantopelta;Gigantopelta aegis  
UdeM00000006971 7757 58.2 UdeM00000006971 XP\_032825000.1 57.5 40  
17 0 7 46 3 42 9.10E-06 58.2 7757 cellular  
organisms;Eukaryota;Opisthokonta;Metazoa;Eumetazoa;Bilateria;Deuterostomi  
a;Chordata;Craniata;Vertebrata;Cyclostomata;Hyperoartia;Petromyzontiforme  
s;Petromyzontidae;Petromyzon;Petromyzon marinus  
UdeM00000006973 6596 301.6 UdeM00000006973 XP\_045165588.1 62.8 223  
81 1 1 223 1 221 1.10E-78 301.6 6596 cellular  
organisms;Eukaryota;Opisthokonta;Metazoa;Eumetazoa;Bilateria;Protostomia;  
Spiralia;Lophotrochozoa;Mollusca;Bivalvia;Autobranchia;Heteroconchia;Euhe  
terodonta;Imparidentia;Venerida;Veneroidea;Veneridae;Mercenaria;Mercenari  
a mercenaria  
UdeM00000006974 1735272 118.6 UdeM00000006974 XP\_041347513.1 69.9  
73 22 0 1 73 1 73 4.10E-24 118.6 1735272  
cellular  
organisms;Eukaryota;Opisthokonta;Metazoa;Eumetazoa;Bilateria;Protostomia;  
Spiralia;Lophotrochozoa;Mollusca;Gastropoda;Neomphalina;Neomphaloidea;Pel  
tospiridae;Gigantopelta;Gigantopelta aegis  
UdeM00000006975 6596 165.6 UdeM00000006975 XP\_045165581.1 24.1 934  
461 25 1 802 1 818 2.60E-37 165.6 6596 cellular  
organisms;Eukaryota;Opisthokonta;Metazoa;Eumetazoa;Bilateria;Protostomia;  
Spiralia;Lophotrochozoa;Mollusca;Bivalvia;Autobranchia;Heteroconchia;Euhe  
terodonta;Imparidentia;Venerida;Veneroidea;Veneridae;Mercenaria;Mercenari  
a mercenaria  
UdeM00000006977 6579 714.5 UdeM00000006977 XP\_033746880.1 52.1 700  
306 8 26 696 789 1488 1.30E-202 714.5 6579 cellular  
organisms;Eukaryota;Opisthokonta;Metazoa;Eumetazoa;Bilateria;Protostomia;  
Spiralia;Lophotrochozoa;Mollusca;Bivalvia;Autobranchia;Pteriomorphia;Pect  
inida;Pectinoidea;Pectinidae;Pecten;Pecten maximus  
UdeM00000006978 6565 106.7 UdeM00000006978 XP\_022314409.1 39 177  
90 5 1 159 1139 1315 2.80E-20 106.7 6565 cellular  
organisms;Eukaryota;Opisthokonta;Metazoa;Eumetazoa;Bilateria;Protostomia;  
Spiralia;Lophotrochozoa;Mollusca;Bivalvia;Autobranchia;Pteriomorphia;Ostr  
eida;Ostreoidea;Ostreidae;Crassostrea;Crassostrea virginica  
UdeM00000006981 29159 63.2 UdeM00000006981 XP\_034300815.1 37.3 67  
42 0 158 224 133 199 5.00E-07 63.2 29159 cellular  
organisms;Eukaryota;Opisthokonta;Metazoa;Eumetazoa;Bilateria;Protostomia;  
Spiralia;Lophotrochozoa;Mollusca;Bivalvia;Autobranchia;Pteriomorphia;Ostr  
eida;Ostreoidea;Ostreidae;Crassostrea;Crassostrea gigas  
UdeM00000006983 29159 981.1 UdeM00000006983 XP\_011427761.1 76.5 625  
146 1 1 625 1 624 6.60E-283 981.1 29159 cellular  
organisms;Eukaryota;Opisthokonta;Metazoa;Eumetazoa;Bilateria;Protostomia;  
Spiralia;Lophotrochozoa;Mollusca;Bivalvia;Autobranchia;Pteriomorphia;Ostr  
eida;Ostreoidea;Ostreidae;Crassostrea;Crassostrea gigas  
UdeM00000006984 6579 256.5 UdeM00000006984 XP\_033746748.1 45.1 410  
176 17 1 381 4 393 5.90E-65 256.5 6579 cellular  
organisms;Eukaryota;Opisthokonta;Metazoa;Eumetazoa;Bilateria;Protostomia;  
Spiralia;Lophotrochozoa;Mollusca;Bivalvia;Autobranchia;Pteriomorphia;Pect  
inida;Pectinoidea;Pectinidae;Pecten;Pecten maximus  
UdeM00000006985 37653 288.9 UdeM00000006985 XP\_014770271.1 83.6 165  
26 1 1 165 1 164 4.20E-75 288.9 37653 cellular  
organisms;Eukaryota;Opisthokonta;Metazoa;Eumetazoa;Bilateria;Protostomia;



Spiralia;Lophotrochozoa;Mollusca;Cephalopoda;Coleoidea;Octopodiformes;Octopoda;Incirrata;Octopodidae;Octopus;Octopus bimaculoides

UdeM00000006986 6596 367.9 UdeM00000006986 XP\_045188938.1 54.4 329  
149 1 1 329 7 334 1.40E-98 367.9 6596 cellular  
organisms;Eukaryota;Opisthokonta;Metazoa;Eumetazoa;Bilateria;Protostomia;  
Spiralia;Lophotrochozoa;Mollusca;Bivalvia;Autobranchia;Heteroconchia;Euhe  
terodonta;Imparidentia;Venerida;Veneroidea;Veneridae;Mercenaria;Mercenari  
a mercenaria

UdeM00000006987 6565 660.2 UdeM00000006987 XP\_022296722.1 64.8 475  
167 0 1 475 1 475 2.00E-186 660.2 6565 cellular  
organisms;Eukaryota;Opisthokonta;Metazoa;Eumetazoa;Bilateria;Protostomia;  
Spiralia;Lophotrochozoa;Mollusca;Bivalvia;Autobranchia;Pteriormorphia;Ostr  
eida;Ostreoidea;Ostreidae;Crassostrea;Crassostrea virginica

UdeM00000006988 6596 508.1 UdeM00000006988 XP\_045165534.1 50.8 490  
237 3 36 523 14 501 1.40E-140 508.1 6596 cellular  
organisms;Eukaryota;Opisthokonta;Metazoa;Eumetazoa;Bilateria;Protostomia;  
Spiralia;Lophotrochozoa;Mollusca;Bivalvia;Autobranchia;Heteroconchia;Euhe  
terodonta;Imparidentia;Venerida;Veneroidea;Veneridae;Mercenaria;Mercenari  
a mercenaria

UdeM000000044453 29159 639.4 UdeM000000044453 XP\_034303860.1 46.7 751  
289 14 5 659 21 756 5.00E-180 639.4 29159 cellular  
organisms;Eukaryota;Opisthokonta;Metazoa;Eumetazoa;Bilateria;Protostomia;  
Spiralia;Lophotrochozoa;Mollusca;Bivalvia;Autobranchia;Pteriormorphia;Ostr  
eida;Ostreoidea;Ostreidae;Crassostrea;Crassostrea gigas

UdeM00000007289 6596 354.4 UdeM00000007289 XP\_045177776.1 36.6 588  
288 14 1 582 405 913 4.20E-94 354.4 6596 cellular  
organisms;Eukaryota;Opisthokonta;Metazoa;Eumetazoa;Bilateria;Protostomia;  
Spiralia;Lophotrochozoa;Mollusca;Bivalvia;Autobranchia;Heteroconchia;Euhe  
terodonta;Imparidentia;Venerida;Veneroidea;Veneridae;Mercenaria;Mercenari  
a mercenaria

UdeM00000007290 6596 472.2 UdeM00000007290 XP\_045177776.1 35.2 796  
409 21 1 784 405 1105 1.60E-129 472.2 6596 cellular  
organisms;Eukaryota;Opisthokonta;Metazoa;Eumetazoa;Bilateria;Protostomia;  
Spiralia;Lophotrochozoa;Mollusca;Bivalvia;Autobranchia;Heteroconchia;Euhe  
terodonta;Imparidentia;Venerida;Veneroidea;Veneridae;Mercenaria;Mercenari  
a mercenaria

UdeM00000007294 29159 459.9 UdeM00000007294 XP\_034311318.1 39.8 678  
352 16 157 792 1 664 7.10E-126 459.9 29159 cellular  
organisms;Eukaryota;Opisthokonta;Metazoa;Eumetazoa;Bilateria;Protostomia;  
Spiralia;Lophotrochozoa;Mollusca;Bivalvia;Autobranchia;Pteriormorphia;Ostr  
eida;Ostreoidea;Ostreidae;Crassostrea;Crassostrea gigas

UdeM00000007295 6579 182.6 UdeM00000007295 XP\_033736448.1 39.1 253  
143 5 1 244 29 279 1.10E-42 182.6 6579 cellular  
organisms;Eukaryota;Opisthokonta;Metazoa;Eumetazoa;Bilateria;Protostomia;  
Spiralia;Lophotrochozoa;Mollusca;Bivalvia;Autobranchia;Pteriormorphia;Pect  
inida;Pectinoidea;Pectinidae;Pecten;Pecten maximus

UdeM00000007296 6596 146.4 UdeM00000007296 XP\_045177776.1 33.5 251  
131 3 5 222 692 939 9.90E-32 146.4 6596 cellular  
organisms;Eukaryota;Opisthokonta;Metazoa;Eumetazoa;Bilateria;Protostomia;  
Spiralia;Lophotrochozoa;Mollusca;Bivalvia;Autobranchia;Heteroconchia;Euhe  
terodonta;Imparidentia;Venerida;Veneroidea;Veneridae;Mercenaria;Mercenari  
a mercenaria

UdeM00000007316 6579 603.2 UdeM00000007316 XP\_033744037.1 88.3 333  
39 0 1 333 1 333 2.00E-169 603.2 6579 cellular

organisms;Eukaryota;Opisthokonta;Metazoa;Eumetazoa;Bilateria;Protostomia; Spiralia;Lophotrochozoa;Mollusca;Bivalvia;Autobranchia;Pteriormorphia;Pect inida;Pectinoidea;Pectinidae;Pecten;Pecten maximus

UdeM00000007317 1735272 572 UdeM00000007317 XP\_041359605.1 62.6  
438 142 2 1 436 199 616 6.60E-160 572 1735272  
cellular

organisms;Eukaryota;Opisthokonta;Metazoa;Eumetazoa;Bilateria;Protostomia; Spiralia;Lophotrochozoa;Mollusca;Gastropoda;Neomphalina;Neomphaloidea;Pel tospiridae;Gigantopelta;Gigantopelta aegis

UdeM00000007318 6596 232.6 UdeM00000007318 XP\_045166112.1 32.2 541  
341 9 30 558 117 643 1.60E-57 232.6 6596 cellular

organisms;Eukaryota;Opisthokonta;Metazoa;Eumetazoa;Bilateria;Protostomia; Spiralia;Lophotrochozoa;Mollusca;Bivalvia;Autobranchia;Heteroconchia;Euhe terodonta;Imparidentia;Venerida;Veneroidea;Veneridae;Mercenaria;Mercenari a mercenaria

UdeM00000007319 1735272 216.1 UdeM00000007319 XP\_041359605.1 65.8  
158 52 1 1 156 459 616 3.30E-53 216.1 1735272  
cellular

organisms;Eukaryota;Opisthokonta;Metazoa;Eumetazoa;Bilateria;Protostomia; Spiralia;Lophotrochozoa;Mollusca;Gastropoda;Neomphalina;Neomphaloidea;Pel tospiridae;Gigantopelta;Gigantopelta aegis

UdeM00000007320 29159 362.5 UdeM00000007320 XP\_034303580.1 66.5 251  
84 0 11 261 239 489 4.70E-97 362.5 29159 cellular

organisms;Eukaryota;Opisthokonta;Metazoa;Eumetazoa;Bilateria;Protostomia; Spiralia;Lophotrochozoa;Mollusca;Bivalvia;Autobranchia;Pteriormorphia;Ostr eida;Ostreoidea;Ostreidae;Crassostrea;Crassostrea gigas

UdeM00000007321 6573 263.1 UdeM00000007321 XP\_021361115.1 29.8 682  
418 13 1 642 1 661 1.50E-66 263.1 6573 cellular

organisms;Eukaryota;Opisthokonta;Metazoa;Eumetazoa;Bilateria;Protostomia; Spiralia;Lophotrochozoa;Mollusca;Bivalvia;Autobranchia;Pteriormorphia;Pect inida;Pectinoidea;Pectinidae;Mizuhopecten;Mizuhopecten yessoensis

UdeM00000007322 1735272 301.6 UdeM00000007322 XP\_041359605.1 71.7  
191 54 0 34 224 4 194 9.20E-79 301.6 1735272  
cellular

organisms;Eukaryota;Opisthokonta;Metazoa;Eumetazoa;Bilateria;Protostomia; Spiralia;Lophotrochozoa;Mollusca;Gastropoda;Neomphalina;Neomphaloidea;Pel tospiridae;Gigantopelta;Gigantopelta aegis

UdeM00000007323 6573 1477.2 UdeM00000007323 XP\_021345477.1 58.3  
1594 532 30 3 1540 2 1519 0.00E+00 1477.2 6573  
cellular

organisms;Eukaryota;Opisthokonta;Metazoa;Eumetazoa;Bilateria;Protostomia; Spiralia;Lophotrochozoa;Mollusca;Bivalvia;Autobranchia;Pteriormorphia;Pect inida;Pectinoidea;Pectinidae;Mizuhopecten;Mizuhopecten yessoensis

UdeM00000007324 6573 1476.5 UdeM00000007324 XP\_021345477.1 58.1  
1599 534 31 3 1546 2 1519 0.00E+00 1476.5 6573  
cellular

organisms;Eukaryota;Opisthokonta;Metazoa;Eumetazoa;Bilateria;Protostomia; Spiralia;Lophotrochozoa;Mollusca;Bivalvia;Autobranchia;Pteriormorphia;Pect inida;Pectinoidea;Pectinidae;Mizuhopecten;Mizuhopecten yessoensis

UdeM00000007325 1735272 92.4 UdeM00000007325 XP\_041358458.1 39.6  
149 62 2 11 154 493 618 9.40E-16 92.4 1735272  
cellular

organisms;Eukaryota;Opisthokonta;Metazoa;Eumetazoa;Bilateria;Protostomia;

Spiralia;Lophotrochozoa;Mollusca;Gastropoda;Neomphalina;Neomphaloidea;Pel  
tospiridae;Gigantopelta;Gigantopelta aegis  
UdeM00000007326 6596 704.9 UdeM00000007326 XP\_045203628.1 67.1 535  
173 2 1 534 631 1163 7.80E-200 704.9 6596 cellular  
organisms;Eukaryota;Opisthokonta;Metazoa;Eumetazoa;Bilateria;Protostomia;  
Spiralia;Lophotrochozoa;Mollusca;Bivalvia;Autobranchia;Heteroconchia;Euhe  
terodonta;Imparidentia;Venerida;Veneroidea;Veneridae;Mercenaria;Mercenari  
a mercenaria  
UdeM00000007327 6579 1462.6 UdeM00000007327 XP\_033743941.1 65.9  
1482 397 18 360 1771 344 1786 0.00E+00 1462.6 6579  
cellular  
organisms;Eukaryota;Opisthokonta;Metazoa;Eumetazoa;Bilateria;Protostomia;  
Spiralia;Lophotrochozoa;Mollusca;Bivalvia;Autobranchia;Pteriormorphia;Pect  
inida;Pectinoidea;Pectinidae;Pecten;Pecten maximus  
UdeM00000007328 6596 272.7 UdeM00000007328 XP\_045204359.1 56.9 218  
94 0 40 257 42 259 4.80E-70 272.7 6596 cellular  
organisms;Eukaryota;Opisthokonta;Metazoa;Eumetazoa;Bilateria;Protostomia;  
Spiralia;Lophotrochozoa;Mollusca;Bivalvia;Autobranchia;Heteroconchia;Euhe  
terodonta;Imparidentia;Venerida;Veneroidea;Veneridae;Mercenaria;Mercenari  
a mercenaria  
UdeM00000007329 6579 373.2 UdeM00000007329 XP\_033736147.1 41.5 468  
256 5 29 483 41 503 4.90E-100 373.2 6579 cellular  
organisms;Eukaryota;Opisthokonta;Metazoa;Eumetazoa;Bilateria;Protostomia;  
Spiralia;Lophotrochozoa;Mollusca;Bivalvia;Autobranchia;Pteriormorphia;Pect  
inida;Pectinoidea;Pectinidae;Pecten;Pecten maximus  
UdeM00000007330 6596 649.8 UdeM00000007330 XP\_045204362.1 65.8 474  
161 1 5 477 43 516 2.70E-183 649.8 6596 cellular  
organisms;Eukaryota;Opisthokonta;Metazoa;Eumetazoa;Bilateria;Protostomia;  
Spiralia;Lophotrochozoa;Mollusca;Bivalvia;Autobranchia;Heteroconchia;Euhe  
terodonta;Imparidentia;Venerida;Veneroidea;Veneridae;Mercenaria;Mercenari  
a mercenaria  
UdeM00000007331 6596 1822.8 UdeM00000007331 XP\_045204361.1 66.1  
1454 438 15 12 1444 49 1468 0.00E+00 1822.8 6596  
cellular  
organisms;Eukaryota;Opisthokonta;Metazoa;Eumetazoa;Bilateria;Protostomia;  
Spiralia;Lophotrochozoa;Mollusca;Bivalvia;Autobranchia;Heteroconchia;Euhe  
terodonta;Imparidentia;Venerida;Veneroidea;Veneridae;Mercenaria;Mercenari  
a mercenaria  
UdeM00000007332 6596 349 UdeM00000007332 XP\_045204242.1 55.6 293  
124 2 2 289 36 327 5.90E-93 349 6596 cellular  
organisms;Eukaryota;Opisthokonta;Metazoa;Eumetazoa;Bilateria;Protostomia;  
Spiralia;Lophotrochozoa;Mollusca;Bivalvia;Autobranchia;Heteroconchia;Euhe  
terodonta;Imparidentia;Venerida;Veneroidea;Veneridae;Mercenaria;Mercenari  
a mercenaria  
UdeM00000007333 6565 242.3 UdeM00000007333 XP\_022342298.1 34.2 480  
114 6 1 278 1 480 7.50E-61 242.3 6565 cellular  
organisms;Eukaryota;Opisthokonta;Metazoa;Eumetazoa;Bilateria;Protostomia;  
Spiralia;Lophotrochozoa;Mollusca;Bivalvia;Autobranchia;Pteriormorphia;Ostr  
eida;Ostreoidea;Ostreidae;Crassostrea;Crassostrea virginica  
UdeM00000007334 6565 167.5 UdeM00000007334 XP\_022321385.1 26.3 426  
283 13 3 404 31 449 3.70E-38 167.5 6565 cellular  
organisms;Eukaryota;Opisthokonta;Metazoa;Eumetazoa;Bilateria;Protostomia;  
Spiralia;Lophotrochozoa;Mollusca;Bivalvia;Autobranchia;Pteriormorphia;Ostr  
eida;Ostreoidea;Ostreidae;Crassostrea;Crassostrea virginica

UdeM00000007335 29159 200.7 UdeM00000007335 XP\_011445438.1 28.1 445  
 293 10 13 435 9 448 4.20E-48 200.7 29159 cellular  
 organisms;Eukaryota;Opisthokonta;Metazoa;Eumetazoa;Bilateria;Protostomia;  
 Spiralia;Lophotrochozoa;Mollusca;Bivalvia;Autobranchia;Pteriomorpha;Ostr  
 eida;Ostreoidea;Ostreidae;Crassostrea;Crassostrea gigas  
 UdeM00000007336 6573 168.3 UdeM00000007336 XP\_021344699.1 43.5 209  
 100 2 1 195 192 396 1.10E-38 168.3 6573 cellular  
 organisms;Eukaryota;Opisthokonta;Metazoa;Eumetazoa;Bilateria;Protostomia;  
 Spiralia;Lophotrochozoa;Mollusca;Bivalvia;Autobranchia;Pteriomorpha;Pect  
 inida;Pectinoidea;Pectinidae;Mizuhopecten;Mizuhopecten yessoensis  
 UdeM00000007338 6579 190.3 UdeM00000007338 XP\_033744344.1 44.9 198  
 109 0 9 206 111 308 2.50E-45 190.3 6579 cellular  
 organisms;Eukaryota;Opisthokonta;Metazoa;Eumetazoa;Bilateria;Protostomia;  
 Spiralia;Lophotrochozoa;Mollusca;Bivalvia;Autobranchia;Pteriomorpha;Pect  
 inida;Pectinoidea;Pectinidae;Pecten;Pecten maximus  
 UdeM00000007337 6579 193.7 UdeM00000007337 XP\_033744344.1 49.7 167  
 84 0 54 220 142 308 2.40E-46 193.7 6579 cellular  
 organisms;Eukaryota;Opisthokonta;Metazoa;Eumetazoa;Bilateria;Protostomia;  
 Spiralia;Lophotrochozoa;Mollusca;Bivalvia;Autobranchia;Pteriomorpha;Pect  
 inida;Pectinoidea;Pectinidae;Pecten;Pecten maximus  
 UdeM00000007339 6579 93.6 UdeM00000007339 XP\_033744344.1 42.1 159  
 73 7 3 148 1 153 2.30E-16 93.6 6579 cellular  
 organisms;Eukaryota;Opisthokonta;Metazoa;Eumetazoa;Bilateria;Protostomia;  
 Spiralia;Lophotrochozoa;Mollusca;Bivalvia;Autobranchia;Pteriomorpha;Pect  
 inida;Pectinoidea;Pectinidae;Pecten;Pecten maximus  
 UdeM00000007343 6573 174.1 UdeM00000007343 XP\_021370310.1 31.2 362  
 229 9 5 356 8 359 5.50E-40 174.1 6573 cellular  
 organisms;Eukaryota;Opisthokonta;Metazoa;Eumetazoa;Bilateria;Protostomia;  
 Spiralia;Lophotrochozoa;Mollusca;Bivalvia;Autobranchia;Pteriomorpha;Pect  
 inida;Pectinoidea;Pectinidae;Mizuhopecten;Mizuhopecten yessoensis  
 UdeM00000007346 6579 427.9 UdeM00000007346 XP\_033743085.1 54.5 352  
 156 2 96 444 347 697 1.50E-116 427.9 6579 cellular  
 organisms;Eukaryota;Opisthokonta;Metazoa;Eumetazoa;Bilateria;Protostomia;  
 Spiralia;Lophotrochozoa;Mollusca;Bivalvia;Autobranchia;Pteriomorpha;Pect  
 inida;Pectinoidea;Pectinidae;Pecten;Pecten maximus  
 UdeM00000007347 6579 967.6 UdeM00000007347 XP\_033743768.1 75.4 650  
 157 3 3 651 6 653 7.80E-279 967.6 6579 cellular  
 organisms;Eukaryota;Opisthokonta;Metazoa;Eumetazoa;Bilateria;Protostomia;  
 Spiralia;Lophotrochozoa;Mollusca;Bivalvia;Autobranchia;Pteriomorpha;Pect  
 inida;Pectinoidea;Pectinidae;Pecten;Pecten maximus  
 UdeM00000007349 29159 178.7 UdeM00000007349 XP\_011451271.1 50 170  
 80 2 7 176 2 166 6.60E-42 178.7 29159 cellular  
 organisms;Eukaryota;Opisthokonta;Metazoa;Eumetazoa;Bilateria;Protostomia;  
 Spiralia;Lophotrochozoa;Mollusca;Bivalvia;Autobranchia;Pteriomorpha;Ostr  
 eida;Ostreoidea;Ostreidae;Crassostrea;Crassostrea gigas  
 UdeM00000007350 29159 132.9 UdeM00000007350 XP\_011451271.1 51.7 118  
 50 1 6 123 4 114 2.90E-28 132.9 29159 cellular  
 organisms;Eukaryota;Opisthokonta;Metazoa;Eumetazoa;Bilateria;Protostomia;  
 Spiralia;Lophotrochozoa;Mollusca;Bivalvia;Autobranchia;Pteriomorpha;Ostr  
 eida;Ostreoidea;Ostreidae;Crassostrea;Crassostrea gigas  
 UdeM00000007351 6565 91.7 UdeM00000007351 XP\_022344351.1 36.2 138  
 82 3 127 263 103 235 2.10E-15 91.7 6565 cellular  
 organisms;Eukaryota;Opisthokonta;Metazoa;Eumetazoa;Bilateria;Protostomia;

Spiralia;Lophotrochozoa;Mollusca;Bivalvia;Autobranchia;Pteriomorpha;Ostr  
eida;Ostreoidea;Ostreidae;Crassostrea;Crassostrea virginica

UdeM00000007353 6565 1006.9 UdeM00000007353 XP\_022325423.1 81.1  
597 112 1 14 609 289 885 1.10E-290 1006.9 6565  
cellular

organisms;Eukaryota;Opisthokonta;Metazoa;Eumetazoa;Bilateria;Protostomia;  
Spiralia;Lophotrochozoa;Mollusca;Bivalvia;Autobranchia;Pteriomorpha;Ostr  
eida;Ostreoidea;Ostreidae;Crassostrea;Crassostrea virginica

UdeM00000007354 29159 1112.4 UdeM00000007354 XP\_011449756.1 91.1  
597 53 0 13 609 15 611 0.00E+00 1112.4  
29159 cellular

organisms;Eukaryota;Opisthokonta;Metazoa;Eumetazoa;Bilateria;Protostomia;  
Spiralia;Lophotrochozoa;Mollusca;Bivalvia;Autobranchia;Pteriomorpha;Ostr  
eida;Ostreoidea;Ostreidae;Crassostrea;Crassostrea gigas

UdeM00000007355 400727 767.7 UdeM00000007355 XP\_025099196.1 43.7  
922 445 27 22 932 226 1084 1.70E-218 767.7 400727  
cellular

organisms;Eukaryota;Opisthokonta;Metazoa;Eumetazoa;Bilateria;Protostomia;  
Spiralia;Lophotrochozoa;Mollusca;Gastropoda;Caenogastropoda;Architaeniogl  
ossa;Ampullarioidea;Ampullariidae;Pomacea;Pomacea canaliculata

UdeM00000007356 400727 283.9 UdeM00000007356 XP\_025099196.1 46.7  
270 125 4 23 292 268 518 2.40E-73 283.9 400727  
cellular

organisms;Eukaryota;Opisthokonta;Metazoa;Eumetazoa;Bilateria;Protostomia;  
Spiralia;Lophotrochozoa;Mollusca;Gastropoda;Caenogastropoda;Architaeniogl  
ossa;Ampullarioidea;Ampullariidae;Pomacea;Pomacea canaliculata

UdeM00000007357 400727 376.7 UdeM00000007357 XP\_025099196.1 49.2  
362 159 8 21 382 182 518 3.60E-101 376.7 400727  
cellular

organisms;Eukaryota;Opisthokonta;Metazoa;Eumetazoa;Bilateria;Protostomia;  
Spiralia;Lophotrochozoa;Mollusca;Gastropoda;Caenogastropoda;Architaeniogl  
ossa;Ampullarioidea;Ampullariidae;Pomacea;Pomacea canaliculata

UdeM00000007358 116150 246.1 UdeM00000007358 XP\_039756688.1 43  
291 126 11 17 270 49 336 5.20E-62 246.1 116150  
cellular

organisms;Eukaryota;Opisthokonta;Metazoa;Eumetazoa;Bilateria;Protostomia;  
Ecdysozoa;Panarthropoda;Arthropoda;Mandibulata;Pancrustacea;Hexapoda;Inse  
cta;Dicondylia;Pterygota;Neoptera;Endopterygota;Amphiesmenoptera;Lepidopt  
era;Glossata;Neolepidoptera;Heteroneura;Ditrysia;Obtectomera;Papilionoide  
a;Nymphalidae;Satyrinae;Satyrini;Parargina;Pararge;Pararge aegeria

UdeM00000007359 400727 297.7 UdeM00000007359 XP\_025099196.1 52.2  
270 110 5 22 291 226 476 1.60E-77 297.7 400727  
cellular

organisms;Eukaryota;Opisthokonta;Metazoa;Eumetazoa;Bilateria;Protostomia;  
Spiralia;Lophotrochozoa;Mollusca;Gastropoda;Caenogastropoda;Architaeniogl  
ossa;Ampullarioidea;Ampullariidae;Pomacea;Pomacea canaliculata

UdeM00000007360 400727 285.8 UdeM00000007360 XP\_025099196.1 50.8  
264 116 6 22 285 226 475 6.20E-74 285.8 400727  
cellular

organisms;Eukaryota;Opisthokonta;Metazoa;Eumetazoa;Bilateria;Protostomia;  
Spiralia;Lophotrochozoa;Mollusca;Gastropoda;Caenogastropoda;Architaeniogl  
ossa;Ampullarioidea;Ampullariidae;Pomacea;Pomacea canaliculata

UdeM00000007362 6596 198 UdeM00000007362 XP\_045198712.1 48.6 181  
81 4 22 193 74 251 1.20E-47 198 6596 cellular

organisms;Eukaryota;Opisthokonta;Metazoa;Eumetazoa;Bilateria;Protostomia;Spiralia;Lophotrochozoa;Mollusca;Bivalvia;Autobranhia;Heteroconchia;Euherodonta;Imparidentia;Venerida;Veneroidea;Veneridae;Mercenaria;Mercenaria mercenaria

UdeM00000007363 116150 328.9 UdeM00000007363 XP\_039756688.1 47.9  
332 149 13 22 329 5 336 7.30E-87 328.9 116150  
cellular

organisms;Eukaryota;Opisthokonta;Metazoa;Eumetazoa;Bilateria;Protostomia;Ecdysozoa;Panarthropoda;Arthropoda;Mandibulata;Pancrustacea;Hexapoda;Insecta;Dicondylia;Pterygota;Neoptera;Endopterygota;Amphiesmenoptera;Lepidoptera;Glossata;Neolepidoptera;Heteroneura;Ditrysia;Obtectomera;Papilionoidea;Nymphalidae;Satyrinae;Satyrini;Parargina;Pararge;Pararge aegeria

UdeM00000007364 6565 620.9 UdeM00000007364 XP\_022314936.1 79.1 350  
73 0 1 350 1 350 1.00E-174 620.9 6565 cellular

organisms;Eukaryota;Opisthokonta;Metazoa;Eumetazoa;Bilateria;Protostomia;Spiralia;Lophotrochozoa;Mollusca;Bivalvia;Autobranhia;Pteriormorphia;Ostreida;Ostreoidea;Ostreidae;Crassostrea;Crassostrea virginica

UdeM00000007365 29159 106.3 UdeM00000007365 XP\_034312519.1 64.8 91  
31 1 3 93 236 325 2.30E-20 106.3 29159 cellular

organisms;Eukaryota;Opisthokonta;Metazoa;Eumetazoa;Bilateria;Protostomia;Spiralia;Lophotrochozoa;Mollusca;Bivalvia;Autobranhia;Pteriormorphia;Ostreida;Ostreoidea;Ostreidae;Crassostrea;Crassostrea gigas

UdeM00000007367 6565 201.8 UdeM00000007367 XP\_022299727.1 33.1 356  
161 5 2 291 282 626 1.20E-48 201.8 6565 cellular

organisms;Eukaryota;Opisthokonta;Metazoa;Eumetazoa;Bilateria;Protostomia;Spiralia;Lophotrochozoa;Mollusca;Bivalvia;Autobranhia;Pteriormorphia;Ostreida;Ostreoidea;Ostreidae;Crassostrea;Crassostrea virginica

UdeM00000007366 6565 291.2 UdeM00000007366 XP\_022299727.1 35.3 468  
218 9 2 399 282 734 2.00E-75 291.2 6565 cellular

organisms;Eukaryota;Opisthokonta;Metazoa;Eumetazoa;Bilateria;Protostomia;Spiralia;Lophotrochozoa;Mollusca;Bivalvia;Autobranhia;Pteriormorphia;Ostreida;Ostreoidea;Ostreidae;Crassostrea;Crassostrea virginica

UdeM00000007368 6565 86.7 UdeM00000007368 XP\_022299727.1 50 74  
37 0 1 74 661 734 1.50E-14 86.7 6565 cellular

organisms;Eukaryota;Opisthokonta;Metazoa;Eumetazoa;Bilateria;Protostomia;Spiralia;Lophotrochozoa;Mollusca;Bivalvia;Autobranhia;Pteriormorphia;Ostreida;Ostreoidea;Ostreidae;Crassostrea;Crassostrea virginica

UdeM00000007369 6565 610.1 UdeM00000007369 XP\_022314936.1 77.8 356  
73 1 1 356 1 350 1.90E-171 610.1 6565 cellular

organisms;Eukaryota;Opisthokonta;Metazoa;Eumetazoa;Bilateria;Protostomia;Spiralia;Lophotrochozoa;Mollusca;Bivalvia;Autobranhia;Pteriormorphia;Ostreida;Ostreoidea;Ostreidae;Crassostrea;Crassostrea virginica

UdeM00000007370 29159 144.4 UdeM00000007370 XP\_034339171.1 25.4 433  
221 10 9 346 120 545 3.30E-31 144.4 29159 cellular

organisms;Eukaryota;Opisthokonta;Metazoa;Eumetazoa;Bilateria;Protostomia;Spiralia;Lophotrochozoa;Mollusca;Bivalvia;Autobranhia;Heteroconchia;Euherodonta;Imparidentia;Venerida;Veneroidea;Veneridae;Mercenaria;Mercenaria mercenaria

UdeM00000007371 6596 162.2 UdeM00000007371 XP\_045206665.1 37.7 260  
138 5 121 374 60 301 1.70E-36 162.2 6596 cellular

organisms;Eukaryota;Opisthokonta;Metazoa;Eumetazoa;Bilateria;Protostomia;Spiralia;Lophotrochozoa;Mollusca;Bivalvia;Autobranhia;Heteroconchia;Euherodonta;Imparidentia;Venerida;Veneroidea;Veneridae;Mercenaria;Mercenaria mercenaria

UdeM00000007372 6565 196.8 UdeM00000007372 XP\_022326015.1 42.6 251  
 130 5 35 284 47 284 3.80E-47 196.8 6565 cellular  
 organisms;Eukaryota;Opisthokonta;Metazoa;Eumetazoa;Bilateria;Protostomia;  
 Spiralia;Lophotrochozoa;Mollusca;Bivalvia;Autobranchia;Pteriormorphia;Ostr  
 eida;Ostreoidea;Ostreidae;Crassostrea;Crassostrea virginica  
 UdeM00000007373 381198 373.6 UdeM00000007373 XP\_013028410.1 54.5  
 308 140 0 7 314 6 313 2.50E-100 373.6 381198  
 cellular  
 organisms;Eukaryota;Opisthokonta;Metazoa;Eumetazoa;Bilateria;Deuterostomi  
 a;Chordata;Craniata;Vertebrata;Gnathostomata;Teleostomi;Euteleostomi;Sarc  
 opterygii;Dipnotetrapodomorpha;Tetrapoda;Amniota;Sauropsida;Sauria;Archel  
 osauria;Archosauria;Dinosauria;Saurischia;Theropoda;Coelurosauria;Aves;Ne  
 ognathae;Galloanserae;Anseriformes;Anatidae;Anserinae;Anser;Anser  
 cygnoides;Anser cygnoides domesticus  
 UdeM00000007374 1735272 240 UdeM00000007374 XP\_041356986.1 55.5  
 218 86 3 6 222 26 233 3.00E-60 240 1735272  
 cellular  
 organisms;Eukaryota;Opisthokonta;Metazoa;Eumetazoa;Bilateria;Protostomia;  
 Spiralia;Lophotrochozoa;Mollusca;Gastropoda;Neomphalina;Neomphaloidea;Pel  
 tospiridae;Gigantopelta;Gigantopelta aegis  
 UdeM00000007375 143950 87.8 UdeM00000007375 XP\_025407409.1 50.7  
 73 35 1 1 73 70 141 8.50E-15 87.8 143950  
 cellular  
 organisms;Eukaryota;Opisthokonta;Metazoa;Eumetazoa;Bilateria;Protostomia;  
 Ecdysozoa;Panarthropoda;Arthropoda;Mandibulata;Pancrustacea;Hexapoda;Inse  
 cta;Dicondylia;Pterygota;Neoptera;Paraneoptera;Hemiptera;Sternorrhyncha;A  
 phidomorpha;Aphidoidea;Aphididae;Chaitophorinae;Sipha;Sipha flava  
 UdeM00000007376 6579 592.4 UdeM00000007376 XP\_033744086.1 51.5 565  
 250 7 5 557 247 799 7.20E-166 592.4 6579 cellular  
 organisms;Eukaryota;Opisthokonta;Metazoa;Eumetazoa;Bilateria;Protostomia;  
 Spiralia;Lophotrochozoa;Mollusca;Bivalvia;Autobranchia;Pteriormorphia;Pect  
 inida;Pectinoidea;Pectinidae;Pecten;Pecten maximus  
 UdeM00000007377 6573 784.6 UdeM00000007377 XP\_021364048.1 47.4 1004  
 464 9 5 972 960 1935 1.40E-223 784.6 6573 cellular  
 organisms;Eukaryota;Opisthokonta;Metazoa;Eumetazoa;Bilateria;Protostomia;  
 Spiralia;Lophotrochozoa;Mollusca;Bivalvia;Autobranchia;Pteriormorphia;Pect  
 inida;Pectinoidea;Pectinidae;Mizuhopecten;Mizuhopecten yessoensis  
 UdeM00000007378 6596 517.3 UdeM00000007378 XP\_045202824.1 60.6 373  
 145 1 1 371 31 403 1.70E-143 517.3 6596 cellular  
 organisms;Eukaryota;Opisthokonta;Metazoa;Eumetazoa;Bilateria;Protostomia;  
 Spiralia;Lophotrochozoa;Mollusca;Bivalvia;Autobranchia;Heteroconchia;Euhe  
 terodonta;Imparidentia;Venerida;Veneroidea;Veneridae;Mercenaria;Mercenari  
 a mercenaria  
 UdeM00000007379 6573 119.4 UdeM00000007379 XP\_021371839.1 28.7 300  
 165 10 8 282 3 278 7.80E-24 119.4 6573 cellular  
 organisms;Eukaryota;Opisthokonta;Metazoa;Eumetazoa;Bilateria;Protostomia;  
 Spiralia;Lophotrochozoa;Mollusca;Bivalvia;Autobranchia;Pteriormorphia;Pect  
 inida;Pectinoidea;Pectinidae;Mizuhopecten;Mizuhopecten yessoensis  
 UdeM00000007380 74940 60.5 UdeM00000007380 XP\_042169195.1 27.5 305  
 185 14 9 287 619 913 9.00E-06 60.5 74940 cellular  
 organisms;Eukaryota;Opisthokonta;Metazoa;Eumetazoa;Bilateria;Deuterostomi  
 a;Chordata;Craniata;Vertebrata;Gnathostomata;Teleostomi;Euteleostomi;Acti  
 nopterygii;Actinopteri;Neopterygii;Teleostei;Osteoglossoccephalai;Clupeoce

phala;Euteleosteomorpha;Protacanthopterygii;Salmoniformes;Salmonidae;Salmoninae;Oncorhynchus;Oncorhynchus tshawytscha

UdeM00000007381 6596 122.5 UdeM00000007381 XP\_045205583.1 24.5 695  
425 23 9 639 3 661 2.30E-24 122.5 6596 cellular

organisms;Eukaryota;Opisthokonta;Metazoa;Eumetazoa;Bilateria;Protostomia;Spiralia;Lophotrochozoa;Mollusca;Bivalvia;Autobranchia;Heteroconchia;Euherodonta;Imparidentia;Venerida;Veneroidea;Veneridae;Mercenaria;Mercenaria mercenaria

UdeM00000007382 6579 549.7 UdeM00000007382 XP\_033738649.1 62.5 421  
156 1 1 421 1 419 3.30E-153 549.7 6579 cellular

organisms;Eukaryota;Opisthokonta;Metazoa;Eumetazoa;Bilateria;Protostomia;Spiralia;Lophotrochozoa;Mollusca;Bivalvia;Autobranchia;Pteriomorpha;Pectinida;Pectinoidea;Pectinidae;Pecten;Pecten maximus

UdeM00000007383 6596 168.3 UdeM00000007383 XP\_045202239.1 26.9 542  
344 12 171 681 172 692 3.40E-38 168.3 6596 cellular

organisms;Eukaryota;Opisthokonta;Metazoa;Eumetazoa;Bilateria;Protostomia;Spiralia;Lophotrochozoa;Mollusca;Bivalvia;Autobranchia;Heteroconchia;Euherodonta;Imparidentia;Venerida;Veneroidea;Veneridae;Mercenaria;Mercenaria mercenaria

UdeM00000007384 6596 89 UdeM00000007384 XP\_045202239.1 22.2 441  
261 10 2 381 273 692 1.50E-14 89 6596 cellular

organisms;Eukaryota;Opisthokonta;Metazoa;Eumetazoa;Bilateria;Protostomia;Spiralia;Lophotrochozoa;Mollusca;Bivalvia;Autobranchia;Heteroconchia;Euherodonta;Imparidentia;Venerida;Veneroidea;Veneridae;Mercenaria;Mercenaria mercenaria

UdeM00000007385 29159 96.3 UdeM00000007385 XP\_034315421.1 38.2 173  
87 6 88 255 317 474 6.10E-17 96.3 29159 cellular

organisms;Eukaryota;Opisthokonta;Metazoa;Eumetazoa;Bilateria;Protostomia;Spiralia;Lophotrochozoa;Mollusca;Bivalvia;Autobranchia;Pteriomorpha;Ostreida;Ostreoidea;Ostreidae;Crassostrea;Crassostrea gigas

UdeM00000007388 6596 58.5 UdeM00000007388 XP\_045202346.1 39.8 93  
52 2 6 97 16 105 7.00E-06 58.5 6596 cellular

organisms;Eukaryota;Opisthokonta;Metazoa;Eumetazoa;Bilateria;Protostomia;Spiralia;Lophotrochozoa;Mollusca;Bivalvia;Autobranchia;Heteroconchia;Euherodonta;Imparidentia;Venerida;Veneroidea;Veneridae;Mercenaria;Mercenaria mercenaria

UdeM00000007389 6596 258.1 UdeM00000007389 XP\_045183440.1 52.1 240  
110 3 2 240 145 380 1.50E-65 258.1 6596 cellular

organisms;Eukaryota;Opisthokonta;Metazoa;Eumetazoa;Bilateria;Protostomia;Spiralia;Lophotrochozoa;Mollusca;Bivalvia;Autobranchia;Heteroconchia;Euherodonta;Imparidentia;Venerida;Veneroidea;Veneridae;Mercenaria;Mercenaria mercenaria

UdeM00000007390 29159 87.8 UdeM00000007390 XP\_034315421.1 41.5 130  
57 5 14 139 360 474 1.20E-14 87.8 29159 cellular

organisms;Eukaryota;Opisthokonta;Metazoa;Eumetazoa;Bilateria;Protostomia;Spiralia;Lophotrochozoa;Mollusca;Bivalvia;Autobranchia;Pteriomorpha;Ostreida;Ostreoidea;Ostreidae;Crassostrea;Crassostrea gigas

UdeM00000007391 29159 86.7 UdeM00000007391 XP\_034315421.1 49.5 97  
42 3 18 108 379 474 2.10E-14 86.7 29159 cellular

organisms;Eukaryota;Opisthokonta;Metazoa;Eumetazoa;Bilateria;Protostomia;Spiralia;Lophotrochozoa;Mollusca;Bivalvia;Autobranchia;Pteriomorpha;Ostreida;Ostreoidea;Ostreidae;Crassostrea;Crassostrea gigas

UdeM00000007392 6596 90.5 UdeM00000007392 XP\_045202239.1 25 440  
256 15 2 393 273 686 5.40E-15 90.5 6596 cellular



organisms;Eukaryota;Opisthokonta;Metazoa;Eumetazoa;Bilateria;Protostomia;Spiralia;Lophotrochozoa;Mollusca;Bivalvia;Autobranhia;Heteroconchia;Euheterodonta;Imparidentia;Venerida;Veneroidea;Veneridae;Mercenaria;Mercenaria mercenaria

UdeM00000007395 6573 173.7 UdeM00000007395 XP\_021370310.1 32.7 343  
207 10 5 336 8 337 8.10E-40 173.7 6573 cellular

organisms;Eukaryota;Opisthokonta;Metazoa;Eumetazoa;Bilateria;Protostomia;Spiralia;Lophotrochozoa;Mollusca;Bivalvia;Autobranhia;Pteriormorphia;Pectinida;Pectinoidea;Pectinidae;Mizuhopecten;Mizuhopecten yessoensis

UdeM00000007396 6596 122.9 UdeM00000007396 XP\_045205583.1 24.1 698  
418 22 12 639 6 661 1.80E-24 122.9 6596 cellular

organisms;Eukaryota;Opisthokonta;Metazoa;Eumetazoa;Bilateria;Protostomia;Spiralia;Lophotrochozoa;Mollusca;Bivalvia;Autobranhia;Heteroconchia;Euheterodonta;Imparidentia;Venerida;Veneroidea;Veneridae;Mercenaria;Mercenaria mercenaria

UdeM00000007400 6573 169.5 UdeM00000007400 XP\_021370310.1 31.9 339  
210 9 5 331 8 337 1.50E-38 169.5 6573 cellular

organisms;Eukaryota;Opisthokonta;Metazoa;Eumetazoa;Bilateria;Protostomia;Spiralia;Lophotrochozoa;Mollusca;Bivalvia;Autobranhia;Pteriormorphia;Pectinida;Pectinoidea;Pectinidae;Mizuhopecten;Mizuhopecten yessoensis

UdeM00000007401 6573 173.3 UdeM00000007401 XP\_021370310.1 33.5 343  
200 10 3 328 6 337 1.00E-39 173.3 6573 cellular

organisms;Eukaryota;Opisthokonta;Metazoa;Eumetazoa;Bilateria;Protostomia;Spiralia;Lophotrochozoa;Mollusca;Bivalvia;Autobranhia;Pteriormorphia;Pectinida;Pectinoidea;Pectinidae;Mizuhopecten;Mizuhopecten yessoensis

UdeM00000007402 6596 109.4 UdeM00000007402 XP\_045203365.1 94.4 54  
3 0 154 207 185 238 5.60E-21 109.4 6596 cellular

organisms;Eukaryota;Opisthokonta;Metazoa;Eumetazoa;Bilateria;Protostomia;Spiralia;Lophotrochozoa;Mollusca;Bivalvia;Autobranhia;Heteroconchia;Euheterodonta;Imparidentia;Venerida;Veneroidea;Veneridae;Mercenaria;Mercenaria mercenaria

UdeM00000007403 6596 122.1 UdeM00000007403 XP\_045165403.1 23.9 658  
394 22 39 635 33 644 3.00E-24 122.1 6596 cellular

organisms;Eukaryota;Opisthokonta;Metazoa;Eumetazoa;Bilateria;Protostomia;Spiralia;Lophotrochozoa;Mollusca;Bivalvia;Autobranhia;Heteroconchia;Euheterodonta;Imparidentia;Venerida;Veneroidea;Veneridae;Mercenaria;Mercenaria mercenaria

UdeM00000007404 6596 176.8 UdeM00000007404 XP\_045169933.1 27.4 563  
350 14 154 684 199 734 9.50E-41 176.8 6596 cellular

organisms;Eukaryota;Opisthokonta;Metazoa;Eumetazoa;Bilateria;Protostomia;Spiralia;Lophotrochozoa;Mollusca;Bivalvia;Autobranhia;Heteroconchia;Euheterodonta;Imparidentia;Venerida;Veneroidea;Veneridae;Mercenaria;Mercenaria mercenaria

UdeM00000007406 6596 60.8 UdeM00000007406 XP\_045169220.1 25.9 135  
99 1 1 135 278 411 2.10E-06 60.8 6596 cellular

organisms;Eukaryota;Opisthokonta;Metazoa;Eumetazoa;Bilateria;Protostomia;Spiralia;Lophotrochozoa;Mollusca;Bivalvia;Autobranhia;Heteroconchia;Euheterodonta;Imparidentia;Venerida;Veneroidea;Veneridae;Mercenaria;Mercenaria mercenaria

UdeM00000007407 6573 127.1 UdeM00000007407 XP\_021354151.1 31.7 246  
155 7 5 246 18 254 3.10E-26 127.1 6573 cellular

organisms;Eukaryota;Opisthokonta;Metazoa;Eumetazoa;Bilateria;Protostomia;Spiralia;Lophotrochozoa;Mollusca;Bivalvia;Autobranhia;Pteriormorphia;Pectinida;Pectinoidea;Pectinidae;Mizuhopecten;Mizuhopecten yessoensis

UdeM00000007408 6596 167.2 UdeM00000007408 XP\_045202239.1 26.1 568  
 336 14 161 681 162 692 7.50E-38 167.2 6596 cellular  
 organisms;Eukaryota;Opisthokonta;Metazoa;Eumetazoa;Bilateria;Protostomia;  
 Spiralia;Lophotrochozoa;Mollusca;Bivalvia;Autobranchia;Heteroconchia;Euhe  
 terodonta;Imparidentia;Venerida;Veneroidea;Veneridae;Mercenaria;Mercenari  
 a mercenaria  
 UdeM00000007409 6573 79 UdeM00000007409 XP\_021370310.1 28.6 248  
 142 9 5 230 8 242 1.50E-11 79 6573 cellular  
 organisms;Eukaryota;Opisthokonta;Metazoa;Eumetazoa;Bilateria;Protostomia;  
 Spiralia;Lophotrochozoa;Mollusca;Bivalvia;Autobranchia;Pteriormorphia;Pect  
 inida;Pectinoidea;Pectinidae;Mizuhopecten;Mizuhopecten yessoensis  
 UdeM00000007410 37621 140.6 UdeM00000007410 XP\_014679849.1 63 100  
 37 0 1 100 3 102 1.10E-30 140.6 37621 cellular  
 organisms;Eukaryota;Opisthokonta;Metazoa;Eumetazoa;Bilateria;Protostomia;  
 Ecdysozoa;Scalidophora;Priapulida;Priapulimorpha;Priapulimorphida;Priapul  
 idae;Priapulus;Priapulus caudatus  
 UdeM00000007411 37621 137.5 UdeM00000007411 XP\_014679849.1 34.3 233  
 64 4 2 148 394 623 1.40E-29 137.5 37621 cellular  
 organisms;Eukaryota;Opisthokonta;Metazoa;Eumetazoa;Bilateria;Protostomia;  
 Ecdysozoa;Scalidophora;Priapulida;Priapulimorpha;Priapulimorphida;Priapul  
 idae;Priapulus;Priapulus caudatus  
 UdeM00000007412 6565 132.1 UdeM00000007412 XP\_022297447.1 62.9 97  
 36 0 23 119 270 366 4.70E-28 132.1 6565 cellular  
 organisms;Eukaryota;Opisthokonta;Metazoa;Eumetazoa;Bilateria;Protostomia;  
 Spiralia;Lophotrochozoa;Mollusca;Bivalvia;Autobranchia;Pteriormorphia;Ostr  
 eida;Ostreoidea;Ostreidae;Crassostrea;Crassostrea virginica  
 UdeM00000007413 6596 270.8 UdeM00000007413 XP\_045203365.1 84 163  
 9 1 7 169 185 330 1.20E-69 270.8 6596 cellular  
 organisms;Eukaryota;Opisthokonta;Metazoa;Eumetazoa;Bilateria;Protostomia;  
 Spiralia;Lophotrochozoa;Mollusca;Bivalvia;Autobranchia;Heteroconchia;Euhe  
 terodonta;Imparidentia;Venerida;Veneroidea;Veneridae;Mercenaria;Mercenari  
 a mercenaria  
 UdeM00000007414 6573 171.8 UdeM00000007414 XP\_021370310.1 31.6 345  
 208 8 5 336 8 337 2.00E-39 171.8 6573 cellular  
 organisms;Eukaryota;Opisthokonta;Metazoa;Eumetazoa;Bilateria;Protostomia;  
 Spiralia;Lophotrochozoa;Mollusca;Bivalvia;Autobranchia;Pteriormorphia;Pect  
 inida;Pectinoidea;Pectinidae;Mizuhopecten;Mizuhopecten yessoensis  
 UdeM00000007415 6596 70.1 UdeM00000007415 XP\_045188022.1 26.1 226  
 136 8 2 215 103 309 3.90E-09 70.1 6596 cellular  
 organisms;Eukaryota;Opisthokonta;Metazoa;Eumetazoa;Bilateria;Protostomia;  
 Spiralia;Lophotrochozoa;Mollusca;Bivalvia;Autobranchia;Heteroconchia;Euhe  
 terodonta;Imparidentia;Venerida;Veneroidea;Veneridae;Mercenaria;Mercenari  
 a mercenaria  
 UdeM00000007417 6596 67 UdeM00000007417 XP\_045202427.1 28.7 181  
 95 4 103 268 555 716 4.10E-08 67 6596 cellular  
 organisms;Eukaryota;Opisthokonta;Metazoa;Eumetazoa;Bilateria;Protostomia;  
 Spiralia;Lophotrochozoa;Mollusca;Bivalvia;Autobranchia;Heteroconchia;Euhe  
 terodonta;Imparidentia;Venerida;Veneroidea;Veneridae;Mercenaria;Mercenari  
 a mercenaria  
 UdeM00000007419 6596 172.2 UdeM00000007419 XP\_045201791.1 25 551  
 359 9 168 685 66 595 2.30E-39 172.2 6596 cellular  
 organisms;Eukaryota;Opisthokonta;Metazoa;Eumetazoa;Bilateria;Protostomia;  
 Spiralia;Lophotrochozoa;Mollusca;Bivalvia;Autobranchia;Heteroconchia;Euhe

terodonta;Imparidentia;Venerida;Veneroidea;Veneridae;Mercenaria;Mercenari  
 a mercenaria  
 UdeM00000007420 6596 436 UdeM00000007420 XP\_045203365.1 88.1 243  
 27 1 1 241 121 363 3.10E-119 436 6596 cellular  
 organisms;Eukaryota;Opisthokonta;Metazoa;Eumetazoa;Bilateria;Protostomia;  
 Spiralia;Lophotrochozoa;Mollusca;Bivalvia;Autobranhia;Heteroconchia;Euhe  
 terodonta;Imparidentia;Venerida;Veneroidea;Veneridae;Mercenaria;Mercenari  
 a mercenaria  
 UdeM00000007421 6573 123.6 UdeM00000007421 XP\_021370310.1 30.5 246  
 148 7 5 242 8 238 3.40E-25 123.6 6573 cellular  
 organisms;Eukaryota;Opisthokonta;Metazoa;Eumetazoa;Bilateria;Protostomia;  
 Spiralia;Lophotrochozoa;Mollusca;Bivalvia;Autobranhia;Pteriormorphia;Pect  
 inida;Pectinoidea;Pectinidae;Mizuhopecten;Mizuhopecten yessoensis  
 UdeM00000007422 6596 71.2 UdeM00000007422 XP\_045169933.1 22.5 426  
 233 14 2 341 320 734 2.80E-09 71.2 6596 cellular  
 organisms;Eukaryota;Opisthokonta;Metazoa;Eumetazoa;Bilateria;Protostomia;  
 Spiralia;Lophotrochozoa;Mollusca;Bivalvia;Autobranhia;Heteroconchia;Euhe  
 terodonta;Imparidentia;Venerida;Veneroidea;Veneridae;Mercenaria;Mercenari  
 a mercenaria  
 UdeM00000007423 6596 83.6 UdeM00000007423 XP\_045165403.1 37.7 122  
 73 1 39 160 33 151 2.80E-13 83.6 6596 cellular  
 organisms;Eukaryota;Opisthokonta;Metazoa;Eumetazoa;Bilateria;Protostomia;  
 Spiralia;Lophotrochozoa;Mollusca;Bivalvia;Autobranhia;Heteroconchia;Euhe  
 terodonta;Imparidentia;Venerida;Veneroidea;Veneridae;Mercenaria;Mercenari  
 a mercenaria  
 UdeM00000007425 6565 97.1 UdeM00000007425 XP\_022342942.1 21.7 645  
 421 20 58 634 55 683 1.00E-16 97.1 6565 cellular  
 organisms;Eukaryota;Opisthokonta;Metazoa;Eumetazoa;Bilateria;Protostomia;  
 Spiralia;Lophotrochozoa;Mollusca;Bivalvia;Autobranhia;Pteriormorphia;Ostr  
 eida;Ostreoidea;Ostreidae;Crassostrea;Crassostrea virginica  
 UdeM00000007426 6596 171 UdeM00000007426 XP\_045169933.1 27.4 552  
 341 13 165 683 210 734 5.20E-39 171 6596 cellular  
 organisms;Eukaryota;Opisthokonta;Metazoa;Eumetazoa;Bilateria;Protostomia;  
 Spiralia;Lophotrochozoa;Mollusca;Bivalvia;Autobranhia;Heteroconchia;Euhe  
 terodonta;Imparidentia;Venerida;Veneroidea;Veneridae;Mercenaria;Mercenari  
 a mercenaria  
 UdeM00000007427 6596 88.6 UdeM00000007427 XP\_045169933.1 24.4 427  
 270 13 2 387 320 734 1.90E-14 88.6 6596 cellular  
 organisms;Eukaryota;Opisthokonta;Metazoa;Eumetazoa;Bilateria;Protostomia;  
 Spiralia;Lophotrochozoa;Mollusca;Bivalvia;Autobranhia;Heteroconchia;Euhe  
 terodonta;Imparidentia;Venerida;Veneroidea;Veneridae;Mercenaria;Mercenari  
 a mercenaria  
 UdeM00000007429 6596 665.2 UdeM00000007429 XP\_045203365.1 93.1 349  
 22 1 13 359 15 363 4.60E-188 665.2 6596 cellular  
 organisms;Eukaryota;Opisthokonta;Metazoa;Eumetazoa;Bilateria;Protostomia;  
 Spiralia;Lophotrochozoa;Mollusca;Bivalvia;Autobranhia;Heteroconchia;Euhe  
 terodonta;Imparidentia;Venerida;Veneroidea;Veneridae;Mercenaria;Mercenari  
 a mercenaria  
 UdeM00000007430 6596 223.8 UdeM00000007430 XP\_045203364.1 70.6 160  
 47 0 1 160 1 160 1.60E-55 223.8 6596 cellular  
 organisms;Eukaryota;Opisthokonta;Metazoa;Eumetazoa;Bilateria;Protostomia;  
 Spiralia;Lophotrochozoa;Mollusca;Bivalvia;Autobranhia;Heteroconchia;Euhe  
 terodonta;Imparidentia;Venerida;Veneroidea;Veneridae;Mercenaria;Mercenari  
 a mercenaria

|                                                                                                                                                                                                                                       |       |        |      |                 |                |          |                      |
|---------------------------------------------------------------------------------------------------------------------------------------------------------------------------------------------------------------------------------------|-------|--------|------|-----------------|----------------|----------|----------------------|
| UdeM00000007431                                                                                                                                                                                                                       | 6596  | 1313.5 |      | UdeM00000007431 | XP_045203363.1 | 60.6     |                      |
| 1359                                                                                                                                                                                                                                  | 414   | 20     | 1    | 1268            | 1              | 1328     | 0.00E+00 1313.5 6596 |
| cellular                                                                                                                                                                                                                              |       |        |      |                 |                |          |                      |
| organisms;Eukaryota;Opisthokonta;Metazoa;Eumetazoa;Bilateria;Protostomia;Spiralia;Lophotrochozoa;Mollusca;Bivalvia;Autobranchia;Heteroconchia;Euherodonta;Imparidentia;Venerida;Veneroidea;Veneridae;Mercenaria;Mercenaria mercenaria |       |        |      |                 |                |          |                      |
| UdeM00000007432                                                                                                                                                                                                                       | 6596  | 1322   |      | UdeM00000007432 | XP_045203363.1 | 61.2     | 1342                 |
| 416                                                                                                                                                                                                                                   | 19    | 1      | 1251 | 1               | 1328           | 0.00E+00 | 1322 6596 cellular   |
| organisms;Eukaryota;Opisthokonta;Metazoa;Eumetazoa;Bilateria;Protostomia;Spiralia;Lophotrochozoa;Mollusca;Bivalvia;Autobranchia;Heteroconchia;Euherodonta;Imparidentia;Venerida;Veneroidea;Veneridae;Mercenaria;Mercenaria mercenaria |       |        |      |                 |                |          |                      |
| UdeM00000007433                                                                                                                                                                                                                       | 6596  | 168.3  |      | UdeM00000007433 | XP_045206665.1 | 35.1     | 285                  |
| 160                                                                                                                                                                                                                                   | 5     | 359    | 634  | 29              | 297            | 3.20E-38 | 168.3 6596 cellular  |
| organisms;Eukaryota;Opisthokonta;Metazoa;Eumetazoa;Bilateria;Protostomia;Spiralia;Lophotrochozoa;Mollusca;Bivalvia;Autobranchia;Heteroconchia;Euherodonta;Imparidentia;Venerida;Veneroidea;Veneridae;Mercenaria;Mercenaria mercenaria |       |        |      |                 |                |          |                      |
| UdeM00000007434                                                                                                                                                                                                                       | 6596  | 89.4   |      | UdeM00000007434 | XP_045204729.1 | 26.5     | 287                  |
| 157                                                                                                                                                                                                                                   | 13    | 125    | 387  | 181             | 437            | 1.10E-14 | 89.4 6596 cellular   |
| organisms;Eukaryota;Opisthokonta;Metazoa;Eumetazoa;Bilateria;Protostomia;Spiralia;Lophotrochozoa;Mollusca;Bivalvia;Autobranchia;Heteroconchia;Euherodonta;Imparidentia;Venerida;Veneroidea;Veneridae;Mercenaria;Mercenaria mercenaria |       |        |      |                 |                |          |                      |
| UdeM00000007435                                                                                                                                                                                                                       | 6596  | 162.9  |      | UdeM00000007435 | XP_045206665.1 | 34.4     | 285                  |
| 162                                                                                                                                                                                                                                   | 5     | 668    | 943  | 29              | 297            | 2.00E-36 | 162.9 6596 cellular  |
| organisms;Eukaryota;Opisthokonta;Metazoa;Eumetazoa;Bilateria;Protostomia;Spiralia;Lophotrochozoa;Mollusca;Bivalvia;Autobranchia;Heteroconchia;Euherodonta;Imparidentia;Venerida;Veneroidea;Veneridae;Mercenaria;Mercenaria mercenaria |       |        |      |                 |                |          |                      |
| UdeM00000007436                                                                                                                                                                                                                       | 6596  | 92     |      | UdeM00000007436 | XP_045203857.1 | 25.2     | 254                  |
| 173                                                                                                                                                                                                                                   | 7     | 149    | 390  | 191             | 439            | 1.80E-15 | 92 6596 cellular     |
| organisms;Eukaryota;Opisthokonta;Metazoa;Eumetazoa;Bilateria;Protostomia;Spiralia;Lophotrochozoa;Mollusca;Bivalvia;Autobranchia;Heteroconchia;Euherodonta;Imparidentia;Venerida;Veneroidea;Veneridae;Mercenaria;Mercenaria mercenaria |       |        |      |                 |                |          |                      |
| UdeM00000007437                                                                                                                                                                                                                       | 29159 | 141.7  |      | UdeM00000007437 | XP_011418673.2 | 35.6     | 239                  |
| 137                                                                                                                                                                                                                                   | 5     | 198    | 431  | 33              | 259            | 2.20E-30 | 141.7 29159 cellular |
| organisms;Eukaryota;Opisthokonta;Metazoa;Eumetazoa;Bilateria;Protostomia;Spiralia;Lophotrochozoa;Mollusca;Bivalvia;Autobranchia;Pteriomorpha;Ostreida;Ostreoidea;Ostreidae;Crassostrea;Crassostrea gigas                              |       |        |      |                 |                |          |                      |
| UdeM00000007438                                                                                                                                                                                                                       | 6596  | 59.7   |      | UdeM00000007438 | XP_045204731.1 | 39.1     | 64                   |
| 37                                                                                                                                                                                                                                    | 2     | 2      | 64   | 381             | 443            | 1.70E-06 | 59.7 6596 cellular   |
| organisms;Eukaryota;Opisthokonta;Metazoa;Eumetazoa;Bilateria;Protostomia;Spiralia;Lophotrochozoa;Mollusca;Bivalvia;Autobranchia;Heteroconchia;Euherodonta;Imparidentia;Venerida;Veneroidea;Veneridae;Mercenaria;Mercenaria mercenaria |       |        |      |                 |                |          |                      |
| UdeM00000007441                                                                                                                                                                                                                       | 6596  | 159.5  |      | UdeM00000007441 | XP_045206665.1 | 31.8     | 280                  |
| 163                                                                                                                                                                                                                                   | 4     | 125    | 392  | 38              | 301            | 9.20E-36 | 159.5 6596 cellular  |
| organisms;Eukaryota;Opisthokonta;Metazoa;Eumetazoa;Bilateria;Protostomia;Spiralia;Lophotrochozoa;Mollusca;Bivalvia;Autobranchia;Heteroconchia;Euherodonta;Imparidentia;Venerida;Veneroidea;Veneridae;Mercenaria;Mercenaria mercenaria |       |        |      |                 |                |          |                      |

UdeM00000007442 6596 73.2 UdeM00000007442 XP\_045204729.1 24.4 271  
 158 9 102 331 174 438 7.20E-10 73.2 6596 cellular  
 organisms;Eukaryota;Opisthokonta;Metazoa;Eumetazoa;Bilateria;Protostomia;  
 Spiralia;Lophotrochozoa;Mollusca;Bivalvia;Autobranhia;Heteroconchia;Euhe  
 terodonta;Imparidentia;Venerida;Veneroidea;Veneridae;Mercenaria;Mercenari  
 a mercenaria  
 UdeM00000007443 6596 157.9 UdeM00000007443 XP\_045206665.1 32.1 274  
 142 4 216 455 38 301 3.10E-35 157.9 6596 cellular  
 organisms;Eukaryota;Opisthokonta;Metazoa;Eumetazoa;Bilateria;Protostomia;  
 Spiralia;Lophotrochozoa;Mollusca;Bivalvia;Autobranhia;Heteroconchia;Euhe  
 terodonta;Imparidentia;Venerida;Veneroidea;Veneridae;Mercenaria;Mercenari  
 a mercenaria  
 UdeM00000007444 6596 171.4 UdeM00000007444 XP\_045206665.1 33.2 280  
 162 4 354 624 38 301 3.70E-39 171.4 6596 cellular  
 organisms;Eukaryota;Opisthokonta;Metazoa;Eumetazoa;Bilateria;Protostomia;  
 Spiralia;Lophotrochozoa;Mollusca;Bivalvia;Autobranhia;Heteroconchia;Euhe  
 terodonta;Imparidentia;Venerida;Veneroidea;Veneridae;Mercenaria;Mercenari  
 a mercenaria  
 UdeM00000007446 6596 187.6 UdeM00000007446 XP\_045206665.1 35.3 289  
 165 6 40 325 37 306 4.30E-44 187.6 6596 cellular  
 organisms;Eukaryota;Opisthokonta;Metazoa;Eumetazoa;Bilateria;Protostomia;  
 Spiralia;Lophotrochozoa;Mollusca;Bivalvia;Autobranhia;Heteroconchia;Euhe  
 terodonta;Imparidentia;Venerida;Veneroidea;Veneridae;Mercenaria;Mercenari  
 a mercenaria  
 UdeM00000007445 6596 187.6 UdeM00000007445 XP\_045206665.1 35.3 289  
 165 6 97 382 37 306 4.70E-44 187.6 6596 cellular  
 organisms;Eukaryota;Opisthokonta;Metazoa;Eumetazoa;Bilateria;Protostomia;  
 Spiralia;Lophotrochozoa;Mollusca;Bivalvia;Autobranhia;Heteroconchia;Euhe  
 terodonta;Imparidentia;Venerida;Veneroidea;Veneridae;Mercenaria;Mercenari  
 a mercenaria  
 UdeM00000007447 6596 113.6 UdeM00000007447 XP\_045206665.1 43.6 156  
 78 3 94 239 26 181 5.10E-22 113.6 6596 cellular  
 organisms;Eukaryota;Opisthokonta;Metazoa;Eumetazoa;Bilateria;Protostomia;  
 Spiralia;Lophotrochozoa;Mollusca;Bivalvia;Autobranhia;Heteroconchia;Euhe  
 terodonta;Imparidentia;Venerida;Veneroidea;Veneridae;Mercenaria;Mercenari  
 a mercenaria  
 UdeM00000007448 6596 175.3 UdeM00000007448 XP\_045206665.1 32.3 282  
 165 4 136 408 38 302 1.70E-40 175.3 6596 cellular  
 organisms;Eukaryota;Opisthokonta;Metazoa;Eumetazoa;Bilateria;Protostomia;  
 Spiralia;Lophotrochozoa;Mollusca;Bivalvia;Autobranhia;Heteroconchia;Euhe  
 terodonta;Imparidentia;Venerida;Veneroidea;Veneridae;Mercenaria;Mercenari  
 a mercenaria  
 UdeM00000007449 6596 126.3 UdeM00000007449 XP\_045206665.1 29.3 283  
 164 7 34 297 36 301 6.40E-26 126.3 6596 cellular  
 organisms;Eukaryota;Opisthokonta;Metazoa;Eumetazoa;Bilateria;Protostomia;  
 Spiralia;Lophotrochozoa;Mollusca;Bivalvia;Autobranhia;Heteroconchia;Euhe  
 terodonta;Imparidentia;Venerida;Veneroidea;Veneridae;Mercenaria;Mercenari  
 a mercenaria  
 UdeM00000007450 6596 157.5 UdeM00000007450 XP\_045206816.1 35.7 238  
 137 6 103 336 101 326 3.20E-35 157.5 6596 cellular  
 organisms;Eukaryota;Opisthokonta;Metazoa;Eumetazoa;Bilateria;Protostomia;  
 Spiralia;Lophotrochozoa;Mollusca;Bivalvia;Autobranhia;Heteroconchia;Euhe  
 terodonta;Imparidentia;Venerida;Veneroidea;Veneridae;Mercenaria;Mercenari  
 a mercenaria

UdeM00000007451 6596 181.8 UdeM00000007451 XP\_045203861.1 23.8 747  
 479 22 131 851 140 822 3.70E-42 181.8 6596 cellular  
 organisms;Eukaryota;Opisthokonta;Metazoa;Eumetazoa;Bilateria;Protostomia;  
 Spiralia;Lophotrochozoa;Mollusca;Bivalvia;Autobranhia;Heteroconchia;Euhe  
 terodonta;Imparidentia;Venerida;Veneroidea;Veneridae;Mercenaria;Mercenari  
 a mercenaria

UdeM00000007452 6596 92.4 UdeM00000007452 XP\_045204839.1 49.4 81  
 39 1 17 95 543 623 3.40E-16 92.4 6596 cellular  
 organisms;Eukaryota;Opisthokonta;Metazoa;Eumetazoa;Bilateria;Protostomia;  
 Spiralia;Lophotrochozoa;Mollusca;Bivalvia;Autobranhia;Heteroconchia;Euhe  
 terodonta;Imparidentia;Venerida;Veneroidea;Veneridae;Mercenaria;Mercenari  
 a mercenaria

UdeM00000007453 6596 165.2 UdeM00000007453 XP\_045206661.1 39.3 234  
 128 4 274 501 106 331 2.10E-37 165.2 6596 cellular  
 organisms;Eukaryota;Opisthokonta;Metazoa;Eumetazoa;Bilateria;Protostomia;  
 Spiralia;Lophotrochozoa;Mollusca;Bivalvia;Autobranhia;Heteroconchia;Euhe  
 terodonta;Imparidentia;Venerida;Veneroidea;Veneridae;Mercenaria;Mercenari  
 a mercenaria

UdeM00000007454 6596 155.2 UdeM00000007454 XP\_045191019.1 34 282  
 164 5 72 351 49 310 1.50E-34 155.2 6596 cellular  
 organisms;Eukaryota;Opisthokonta;Metazoa;Eumetazoa;Bilateria;Protostomia;  
 Spiralia;Lophotrochozoa;Mollusca;Bivalvia;Autobranhia;Heteroconchia;Euhe  
 terodonta;Imparidentia;Venerida;Veneroidea;Veneridae;Mercenaria;Mercenari  
 a mercenaria

UdeM00000007455 218467 216.9 UdeM00000007455 XP\_023210958.1 43.3  
 291 141 6 237 520 279 552 6.30E-53 216.9 218467  
 cellular  
 organisms;Eukaryota;Opisthokonta;Metazoa;Eumetazoa;Bilateria;Protostomia;  
 Ecdysozoa;Panarthropoda;Arthropoda;Chelicerata;Arachnida;Scorpiones;Buthi  
 da;Buthoidea;Buthidae;Centruroides;Centruroides sculpturatus

UdeM00000007456 6596 92.8 UdeM00000007456 XP\_045204839.1 49.4 81  
 39 1 17 95 543 623 2.60E-16 92.8 6596 cellular  
 organisms;Eukaryota;Opisthokonta;Metazoa;Eumetazoa;Bilateria;Protostomia;  
 Spiralia;Lophotrochozoa;Mollusca;Bivalvia;Autobranhia;Heteroconchia;Euhe  
 terodonta;Imparidentia;Venerida;Veneroidea;Veneridae;Mercenaria;Mercenari  
 a mercenaria

UdeM00000007457 218467 204.5 UdeM00000007457 XP\_023220759.1 48.7  
 224 113 2 6 228 451 673 1.40E-49 204.5 218467  
 cellular  
 organisms;Eukaryota;Opisthokonta;Metazoa;Eumetazoa;Bilateria;Protostomia;  
 Ecdysozoa;Panarthropoda;Arthropoda;Chelicerata;Arachnida;Scorpiones;Buthi  
 da;Buthoidea;Buthidae;Centruroides;Centruroides sculpturatus

UdeM00000007458 114398 182.6 UdeM00000007458 XP\_042913023.1 51.1  
 184 85 2 1 179 123 306 5.30E-43 182.6 114398  
 cellular  
 organisms;Eukaryota;Opisthokonta;Metazoa;Eumetazoa;Bilateria;Protostomia;  
 Ecdysozoa;Panarthropoda;Arthropoda;Chelicerata;Arachnida;Araneae;Araneomo  
 rphae;Entelegynae;Orbiculariae;Araneoidea;Theridiidae;Parasteatoda;Parast  
 eatoda tepidariorum

UdeM00000007459 6596 99.8 UdeM00000007459 XP\_045191019.1 36.1 180  
 110 2 79 256 12 188 5.70E-18 99.8 6596 cellular  
 organisms;Eukaryota;Opisthokonta;Metazoa;Eumetazoa;Bilateria;Protostomia;  
 Spiralia;Lophotrochozoa;Mollusca;Bivalvia;Autobranhia;Heteroconchia;Euhe

terodonta;Imparidentia;Venerida;Veneroidea;Veneridae;Mercenaria;Mercenaria mercenaria  
 UdeM00000007461 6596 167.5 UdeM00000007461 XP\_045206665.1 34.6 301  
 159 6 703 993 23 295 8.40E-38 167.5 6596 cellular  
 organisms;Eukaryota;Opisthokonta;Metazoa;Eumetazoa;Bilateria;Protostomia;  
 Spiralia;Lophotrochozoa;Mollusca;Bivalvia;Autobranhia;Heteroconchia;Euhe  
 terodonta;Imparidentia;Venerida;Veneroidea;Veneridae;Mercenaria;Mercenari  
 a mercenaria  
 UdeM00000007462 6596 167.5 UdeM00000007462 XP\_045206665.1 34.6 301  
 159 6 705 995 23 295 8.40E-38 167.5 6596 cellular  
 organisms;Eukaryota;Opisthokonta;Metazoa;Eumetazoa;Bilateria;Protostomia;  
 Spiralia;Lophotrochozoa;Mollusca;Bivalvia;Autobranhia;Heteroconchia;Euhe  
 terodonta;Imparidentia;Venerida;Veneroidea;Veneridae;Mercenaria;Mercenari  
 a mercenaria  
 UdeM00000007463 6596 93.2 UdeM00000007463 XP\_045204839.1 50.6 81  
 38 1 17 95 543 623 2.00E-16 93.2 6596 cellular  
 organisms;Eukaryota;Opisthokonta;Metazoa;Eumetazoa;Bilateria;Protostomia;  
 Spiralia;Lophotrochozoa;Mollusca;Bivalvia;Autobranhia;Heteroconchia;Euhe  
 terodonta;Imparidentia;Venerida;Veneroidea;Veneridae;Mercenaria;Mercenari  
 a mercenaria  
 UdeM00000007465 6596 117.9 UdeM00000007465 XP\_045206665.1 34.7 245  
 134 5 3 244 8 229 2.20E-23 117.9 6596 cellular  
 organisms;Eukaryota;Opisthokonta;Metazoa;Eumetazoa;Bilateria;Protostomia;  
 Spiralia;Lophotrochozoa;Mollusca;Bivalvia;Autobranhia;Heteroconchia;Euhe  
 terodonta;Imparidentia;Venerida;Veneroidea;Veneridae;Mercenaria;Mercenari  
 a mercenaria  
 UdeM00000007466 29058 62.4 UdeM00000007466 XP\_021186066.1 52.3 44  
 21 0 50 93 107 150 3.60E-07 62.4 29058 cellular  
 organisms;Eukaryota;Opisthokonta;Metazoa;Eumetazoa;Bilateria;Protostomia;  
 Ecdysozoa;Panarthropoda;Arthropoda;Mandibulata;Pancrustacea;Hexapoda;Inse  
 cta;Dicondylia;Pterygota;Neoptera;Endopterygota;Amphiesmenoptera;Lepidopt  
 era;Glossata;Neolepidoptera;Heteroneura;Ditrysia;Obtectomera;Noctuoidea;N  
 octuidae;Heliothinae;Helicoverpa;Helicoverpa armigera  
 UdeM00000007467 29159 94.7 UdeM00000007467 XP\_011430214.2 32.1 196  
 116 4 1 188 395 581 2.60E-16 94.7 29159 cellular  
 organisms;Eukaryota;Opisthokonta;Metazoa;Eumetazoa;Bilateria;Protostomia;  
 Spiralia;Lophotrochozoa;Mollusca;Bivalvia;Autobranhia;Pteriormorphia;Ostr  
 eida;Ostreoidea;Ostreidae;Crassostrea;Crassostrea gigas  
 UdeM00000007468 7739 67.4 UdeM00000007468 XP\_035682907.1 46.7 75  
 40 0 1 75 29 103 2.00E-08 67.4 7739 cellular  
 organisms;Eukaryota;Opisthokonta;Metazoa;Eumetazoa;Bilateria;Deuterostomi  
 a;Chordata;Cephalochordata;Leptocardii;Amphioxiformes;Branchiostomidae;Br  
 anchiostoma;Branchiostoma floridae  
 UdeM00000007469 6565 109.8 UdeM00000007469 XP\_022327488.1 33 221  
 127 6 68 269 416 634 8.70E-21 109.8 6565 cellular  
 organisms;Eukaryota;Opisthokonta;Metazoa;Eumetazoa;Bilateria;Protostomia;  
 Spiralia;Lophotrochozoa;Mollusca;Bivalvia;Autobranhia;Pteriormorphia;Ostr  
 eida;Ostreoidea;Ostreidae;Crassostrea;Crassostrea virginica  
 UdeM00000007473 6596 126.3 UdeM00000007473 XP\_045206661.1 37.9 190  
 104 3 2 186 121 301 1.00E-25 126.3 6596 cellular  
 organisms;Eukaryota;Opisthokonta;Metazoa;Eumetazoa;Bilateria;Protostomia;  
 Spiralia;Lophotrochozoa;Mollusca;Bivalvia;Autobranhia;Heteroconchia;Euhe  
 terodonta;Imparidentia;Venerida;Veneroidea;Veneridae;Mercenaria;Mercenari  
 a mercenaria

UdeM00000007474 1735272 232.3 UdeM00000007474 XP\_041357535.1 48  
 221 111 3 5 223 106 324 6.20E-58 232.3 1735272  
 cellular  
 organisms;Eukaryota;Opisthokonta;Metazoa;Eumetazoa;Bilateria;Protostomia;  
 Spiralia;Lophotrochozoa;Mollusca;Gastropoda;Neomphalina;Neomphaloidea;Pel  
 tospiridae;Gigantopelta;Gigantopelta aegis  
 UdeM00000007476 6579 282 UdeM00000007476 XP\_033743247.1 52.1 267  
 118 3 14 279 8 265 8.70E-73 282 6579 cellular  
 organisms;Eukaryota;Opisthokonta;Metazoa;Eumetazoa;Bilateria;Protostomia;  
 Spiralia;Lophotrochozoa;Mollusca;Bivalvia;Autobranchia;Pteriormorphia;Pect  
 inida;Pectinoidea;Pectinidae;Pecten;Pecten maximus  
 UdeM00000007477 6565 91.3 UdeM00000007477 XP\_022323704.1 40.5 126  
 75 0 106 231 893 1018 2.70E-15 91.3 6565 cellular  
 organisms;Eukaryota;Opisthokonta;Metazoa;Eumetazoa;Bilateria;Protostomia;  
 Spiralia;Lophotrochozoa;Mollusca;Bivalvia;Autobranchia;Pteriormorphia;Ostr  
 eida;Ostreoidea;Ostreidae;Crassostrea;Crassostrea virginica  
 UdeM00000007478 6596 89.7 UdeM00000007478 XP\_045204839.1 49.4 81  
 39 1 17 95 543 623 2.20E-15 89.7 6596 cellular  
 organisms;Eukaryota;Opisthokonta;Metazoa;Eumetazoa;Bilateria;Protostomia;  
 Spiralia;Lophotrochozoa;Mollusca;Bivalvia;Autobranchia;Heteroconchia;Euhe  
 terodonta;Imparidentia;Venerida;Veneroidea;Veneridae;Mercenaria;Mercenari  
 a mercenaria  
 UdeM00000007479 218467 95.1 UdeM00000007479 XP\_023220759.1 52.1  
 96 41 1 203 298 583 673 1.60E-16 95.1 218467  
 cellular  
 organisms;Eukaryota;Opisthokonta;Metazoa;Eumetazoa;Bilateria;Protostomia;  
 Ecdysozoa;Panarthropoda;Arthropoda;Chelicerata;Arachnida;Scorpiones;Buthi  
 da;Buthoidea;Buthidae;Centruroides;Centruroides sculpturatus  
 UdeM00000007479 218467 84.7 UdeM00000007479 XP\_023220759.1 51.2  
 80 38 1 15 94 100 178 2.10E-13 84.7 218467  
 cellular  
 organisms;Eukaryota;Opisthokonta;Metazoa;Eumetazoa;Bilateria;Protostomia;  
 Ecdysozoa;Panarthropoda;Arthropoda;Chelicerata;Arachnida;Scorpiones;Buthi  
 da;Buthoidea;Buthidae;Centruroides;Centruroides sculpturatus  
 UdeM00000007480 572307 133.3 UdeM00000007480 XP\_003882944.1 49.6  
 119 58 1 18 136 402 518 2.40E-28 133.3 572307  
 cellular  
 organisms;Eukaryota;Sar;Alveolata;Apicomplexa;Conoidasida;Coccidia;Eucocc  
 idiorida;Eimeriorina;Sarcocystidae;Neospora;Neospora caninum;Neospora  
 caninum Liverpool  
 UdeM00000007481 6565 167.9 UdeM00000007481 XP\_022327488.1 40.6 239  
 116 5 99 328 413 634 5.50E-38 167.9 6565 cellular  
 organisms;Eukaryota;Opisthokonta;Metazoa;Eumetazoa;Bilateria;Protostomia;  
 Spiralia;Lophotrochozoa;Mollusca;Bivalvia;Autobranchia;Pteriormorphia;Ostr  
 eida;Ostreoidea;Ostreidae;Crassostrea;Crassostrea virginica  
 UdeM00000007482 6565 100.5 UdeM00000007482 XP\_022323704.1 37.9 161  
 100 0 67 227 858 1018 8.90E-18 100.5 6565 cellular  
 organisms;Eukaryota;Opisthokonta;Metazoa;Eumetazoa;Bilateria;Protostomia;  
 Spiralia;Lophotrochozoa;Mollusca;Bivalvia;Autobranchia;Pteriormorphia;Ostr  
 eida;Ostreoidea;Ostreidae;Crassostrea;Crassostrea virginica  
 UdeM00000007483 1735272 170.2 UdeM00000007483 XP\_041357535.1 36.7  
 281 125 5 13 242 46 324 3.10E-39 170.2 1735272  
 cellular  
 organisms;Eukaryota;Opisthokonta;Metazoa;Eumetazoa;Bilateria;Protostomia;



Spiralia;Lophotrochozoa;Mollusca;Gastropoda;Neomphalina;Neomphaloidea;Pel  
tospiridae;Gigantopelta;Gigantopelta aegis  
UdeM00000007485 1735272 127.1 UdeM00000007485 XP\_041357535.1 29.7  
276 74 3 29 186 51 324 2.30E-26 127.1 1735272  
cellular

organisms;Eukaryota;Opisthokonta;Metazoa;Eumetazoa;Bilateria;Protostomia;  
Spiralia;Lophotrochozoa;Mollusca;Gastropoda;Neomphalina;Neomphaloidea;Pel  
tospiridae;Gigantopelta;Gigantopelta aegis

UdeM00000007486 6579 119 UdeM00000007486 XP\_033743247.1 48.8 123  
50 3 2 111 194 316 4.00E-24 119 6579 cellular

organisms;Eukaryota;Opisthokonta;Metazoa;Eumetazoa;Bilateria;Protostomia;  
Spiralia;Lophotrochozoa;Mollusca;Bivalvia;Autobranchia;Pteriormorphia;Pect  
inida;Pectinoidea;Pectinidae;Pecten;Pecten maximus

UdeM00000007487 400727 81.3 UdeM00000007487 XP\_025088777.1 49.3  
75 37 1 14 87 12 86 1.00E-12 81.3 400727

cellular

organisms;Eukaryota;Opisthokonta;Metazoa;Eumetazoa;Bilateria;Protostomia;  
Spiralia;Lophotrochozoa;Mollusca;Gastropoda;Caenogastropoda;Architaeniogl  
ossa;Ampullarioidea;Ampullariidae;Pomacea;Pomacea canaliculata

UdeM00000007491 6596 163.7 UdeM00000007491 XP\_045206661.1 37.6 229  
129 3 330 553 109 328 1.20E-36 163.7 6596 cellular

organisms;Eukaryota;Opisthokonta;Metazoa;Eumetazoa;Bilateria;Protostomia;  
Spiralia;Lophotrochozoa;Mollusca;Bivalvia;Autobranchia;Heteroconchia;Euhe  
terodonta;Imparidentia;Venerida;Veneroidea;Veneridae;Mercenaria;Mercenari  
a mercenaria

UdeM00000007490 6596 100.5 UdeM00000007490 XP\_045206819.1 38.2 173  
96 2 137 307 99 262 8.60E-18 100.5 6596 cellular

organisms;Eukaryota;Opisthokonta;Metazoa;Eumetazoa;Bilateria;Protostomia;  
Spiralia;Lophotrochozoa;Mollusca;Bivalvia;Autobranchia;Heteroconchia;Euhe  
terodonta;Imparidentia;Venerida;Veneroidea;Veneridae;Mercenaria;Mercenari  
a mercenaria

UdeM00000007492 6579 352.1 UdeM00000007492 XP\_033743247.1 55 318  
132 4 14 329 8 316 8.00E-94 352.1 6579 cellular

organisms;Eukaryota;Opisthokonta;Metazoa;Eumetazoa;Bilateria;Protostomia;  
Spiralia;Lophotrochozoa;Mollusca;Bivalvia;Autobranchia;Pteriormorphia;Pect  
inida;Pectinoidea;Pectinidae;Pecten;Pecten maximus

UdeM00000007493 6596 602.8 UdeM00000007493 XP\_045205260.1 35 1223  
708 26 11 1194 9 1183 1.00E-168 602.8 6596 cellular

organisms;Eukaryota;Opisthokonta;Metazoa;Eumetazoa;Bilateria;Protostomia;  
Spiralia;Lophotrochozoa;Mollusca;Bivalvia;Autobranchia;Heteroconchia;Euhe  
terodonta;Imparidentia;Venerida;Veneroidea;Veneridae;Mercenaria;Mercenari  
a mercenaria

UdeM00000007494 6596 931.8 UdeM00000007494 XP\_045205259.1 47.8 1158  
525 15 83 1229 11 1100 9.00E-268 931.8 6596 cellular

organisms;Eukaryota;Opisthokonta;Metazoa;Eumetazoa;Bilateria;Protostomia;  
Spiralia;Lophotrochozoa;Mollusca;Bivalvia;Autobranchia;Heteroconchia;Euhe  
terodonta;Imparidentia;Venerida;Veneroidea;Veneridae;Mercenaria;Mercenari  
a mercenaria

UdeM00000007495 225164 117.1 UdeM00000007495 XP\_009052038.1 69.7  
76 23 0 8 83 196 271 1.20E-23 117.1 225164

cellular

organisms;Eukaryota;Opisthokonta;Metazoa;Eumetazoa;Bilateria;Protostomia;  
Spiralia;Lophotrochozoa;Mollusca;Gastropoda;Patellogastropoda;Lottioidea;  
Lottiidae;Lottia;Lottia gigantea

UdeM00000007496 6596 272.7 UdeM00000007496 XP\_045205257.1 62.9 205  
 75 1 1 204 1 205 4.00E-70 272.7 6596 cellular  
 organisms;Eukaryota;Opisthokonta;Metazoa;Eumetazoa;Bilateria;Protostomia;  
 Spiralia;Lophotrochozoa;Mollusca;Bivalvia;Autobranchia;Heteroconchia;Euhe  
 terodonta;Imparidentia;Venerida;Veneroidea;Veneridae;Mercenaria;Mercenari  
 a mercenaria  
 UdeM00000007497 6596 271.2 UdeM00000007497 XP\_045205257.1 63.2 204  
 74 1 1 203 1 204 1.10E-69 271.2 6596 cellular  
 organisms;Eukaryota;Opisthokonta;Metazoa;Eumetazoa;Bilateria;Protostomia;  
 Spiralia;Lophotrochozoa;Mollusca;Bivalvia;Autobranchia;Heteroconchia;Euhe  
 terodonta;Imparidentia;Venerida;Veneroidea;Veneridae;Mercenaria;Mercenari  
 a mercenaria  
 UdeM00000007498 6596 184.9 UdeM00000007498 XP\_045204565.1 36.4 302  
 179 4 2 291 3 303 1.50E-43 184.9 6596 cellular  
 organisms;Eukaryota;Opisthokonta;Metazoa;Eumetazoa;Bilateria;Protostomia;  
 Spiralia;Lophotrochozoa;Mollusca;Bivalvia;Autobranchia;Heteroconchia;Euhe  
 terodonta;Imparidentia;Venerida;Veneroidea;Veneridae;Mercenaria;Mercenari  
 a mercenaria  
 UdeM00000007499 6596 546.2 UdeM00000007499 XP\_045204129.1 49.2 699  
 313 16 103 777 1 681 1.00E-151 546.2 6596 cellular  
 organisms;Eukaryota;Opisthokonta;Metazoa;Eumetazoa;Bilateria;Protostomia;  
 Spiralia;Lophotrochozoa;Mollusca;Bivalvia;Autobranchia;Heteroconchia;Euhe  
 terodonta;Imparidentia;Venerida;Veneroidea;Veneridae;Mercenaria;Mercenari  
 a mercenaria  
 UdeM00000007500 6596 520.8 UdeM00000007500 XP\_045204673.1 50.7 536  
 233 6 1 511 48 577 2.00E-144 520.8 6596 cellular  
 organisms;Eukaryota;Opisthokonta;Metazoa;Eumetazoa;Bilateria;Protostomia;  
 Spiralia;Lophotrochozoa;Mollusca;Bivalvia;Autobranchia;Heteroconchia;Euhe  
 terodonta;Imparidentia;Venerida;Veneroidea;Veneridae;Mercenaria;Mercenari  
 a mercenaria  
 UdeM00000007501 6596 585.1 UdeM00000007501 XP\_045204674.1 50.5 576  
 275 6 1 572 1 570 9.70E-164 585.1 6596 cellular  
 organisms;Eukaryota;Opisthokonta;Metazoa;Eumetazoa;Bilateria;Protostomia;  
 Spiralia;Lophotrochozoa;Mollusca;Bivalvia;Autobranchia;Heteroconchia;Euhe  
 terodonta;Imparidentia;Venerida;Veneroidea;Veneridae;Mercenaria;Mercenari  
 a mercenaria  
 UdeM00000007502 29159 176.8 UdeM00000007502 XP\_011418174.2 46.7 184  
 97 1 1 184 400 582 2.60E-41 176.8 29159 cellular  
 organisms;Eukaryota;Opisthokonta;Metazoa;Eumetazoa;Bilateria;Protostomia;  
 Spiralia;Lophotrochozoa;Mollusca;Bivalvia;Autobranchia;Pteriomorphia;Ostr  
 eida;Ostreoidea;Ostreidae;Crassostrea;Crassostrea gigas  
 UdeM00000007503 6596 584.3 UdeM00000007503 XP\_045204271.1 51.1 581  
 270 6 22 591 3 580 1.70E-163 584.3 6596 cellular  
 organisms;Eukaryota;Opisthokonta;Metazoa;Eumetazoa;Bilateria;Protostomia;  
 Spiralia;Lophotrochozoa;Mollusca;Bivalvia;Autobranchia;Heteroconchia;Euhe  
 terodonta;Imparidentia;Venerida;Veneroidea;Veneridae;Mercenaria;Mercenari  
 a mercenaria  
 UdeM00000007504 6596 166 UdeM00000007504 XP\_045204106.1 62.5 128  
 46 1 2 129 58 183 3.20E-38 166 6596 cellular  
 organisms;Eukaryota;Opisthokonta;Metazoa;Eumetazoa;Bilateria;Protostomia;  
 Spiralia;Lophotrochozoa;Mollusca;Bivalvia;Autobranchia;Heteroconchia;Euhe  
 terodonta;Imparidentia;Venerida;Veneroidea;Veneridae;Mercenaria;Mercenari  
 a mercenaria

UdeM00000007505 6565 344 UdeM00000007505 XP\_022321199.1 47.1 365  
 188 2 6 368 214 575 2.40E-91 344 6565 cellular  
 organisms;Eukaryota;Opisthokonta;Metazoa;Eumetazoa;Bilateria;Protostomia;  
 Spiralia;Lophotrochozoa;Mollusca;Bivalvia;Autobranhia;Pteriomorphia;Ostr  
 eida;Ostreoidea;Ostreidae;Crassostrea;Crassostrea virginica  
 UdeM00000007506 6596 614.4 UdeM00000007506 XP\_045204674.1 52.4 582  
 269 5 1 580 1 576 1.50E-172 614.4 6596 cellular  
 organisms;Eukaryota;Opisthokonta;Metazoa;Eumetazoa;Bilateria;Protostomia;  
 Spiralia;Lophotrochozoa;Mollusca;Bivalvia;Autobranhia;Heteroconchia;Euhe  
 terodonta;Imparidentia;Venerida;Veneroidea;Veneridae;Mercenaria;Mercenari  
 a mercenaria  
 UdeM00000007507 6573 73.9 UdeM00000007507 XP\_021358586.1 30.6 134  
 89 2 92 224 116 246 2.80E-10 73.9 6573 cellular  
 organisms;Eukaryota;Opisthokonta;Metazoa;Eumetazoa;Bilateria;Protostomia;  
 Spiralia;Lophotrochozoa;Mollusca;Bivalvia;Autobranhia;Pteriomorphia;Pect  
 inida;Pectinoidea;Pectinidae;Mizuhopecten;Mizuhopecten yessoensis  
 UdeM00000007508 6565 86.7 UdeM00000007508 XP\_022345219.1 41 100  
 57 1 2 99 284 383 2.00E-14 86.7 6565 cellular  
 organisms;Eukaryota;Opisthokonta;Metazoa;Eumetazoa;Bilateria;Protostomia;  
 Spiralia;Lophotrochozoa;Mollusca;Bivalvia;Autobranhia;Pteriomorphia;Ostr  
 eida;Ostreoidea;Ostreidae;Crassostrea;Crassostrea virginica  
 UdeM00000007509 6565 111.3 UdeM00000007509 XP\_022345219.1 42.6 122  
 68 1 15 134 262 383 9.90E-22 111.3 6565 cellular  
 organisms;Eukaryota;Opisthokonta;Metazoa;Eumetazoa;Bilateria;Protostomia;  
 Spiralia;Lophotrochozoa;Mollusca;Bivalvia;Autobranhia;Pteriomorphia;Ostr  
 eida;Ostreoidea;Ostreidae;Crassostrea;Crassostrea virginica  
 UdeM00000007510 6596 459.9 UdeM00000007510 XP\_045204106.1 65 343  
 113 2 5 342 14 354 2.80E-126 459.9 6596 cellular  
 organisms;Eukaryota;Opisthokonta;Metazoa;Eumetazoa;Bilateria;Protostomia;  
 Spiralia;Lophotrochozoa;Mollusca;Bivalvia;Autobranhia;Heteroconchia;Euhe  
 terodonta;Imparidentia;Venerida;Veneroidea;Veneridae;Mercenaria;Mercenari  
 a mercenaria  
 UdeM00000007511 6579 202.6 UdeM00000007511 XP\_033742659.1 47.8 224  
 115 2 2 224 359 581 5.30E-49 202.6 6579 cellular  
 organisms;Eukaryota;Opisthokonta;Metazoa;Eumetazoa;Bilateria;Protostomia;  
 Spiralia;Lophotrochozoa;Mollusca;Bivalvia;Autobranhia;Pteriomorphia;Pect  
 inida;Pectinoidea;Pectinidae;Pecten;Pecten maximus  
 UdeM00000007512 6596 608.2 UdeM00000007512 XP\_045204673.1 53.3 583  
 262 8 1 579 1 577 1.10E-170 608.2 6596 cellular  
 organisms;Eukaryota;Opisthokonta;Metazoa;Eumetazoa;Bilateria;Protostomia;  
 Spiralia;Lophotrochozoa;Mollusca;Bivalvia;Autobranhia;Heteroconchia;Euhe  
 terodonta;Imparidentia;Venerida;Veneroidea;Veneridae;Mercenaria;Mercenari  
 a mercenaria  
 UdeM00000007514 6573 72.4 UdeM00000007514 XP\_021358586.1 31.3 134  
 88 2 65 197 116 246 7.30E-10 72.4 6573 cellular  
 organisms;Eukaryota;Opisthokonta;Metazoa;Eumetazoa;Bilateria;Protostomia;  
 Spiralia;Lophotrochozoa;Mollusca;Bivalvia;Autobranhia;Pteriomorphia;Pect  
 inida;Pectinoidea;Pectinidae;Mizuhopecten;Mizuhopecten yessoensis  
 UdeM00000007515 6565 389.8 UdeM00000007515 XP\_022345219.1 52.5 339  
 158 2 1 337 48 385 3.50E-105 389.8 6565 cellular  
 organisms;Eukaryota;Opisthokonta;Metazoa;Eumetazoa;Bilateria;Protostomia;  
 Spiralia;Lophotrochozoa;Mollusca;Bivalvia;Autobranhia;Pteriomorphia;Ostr  
 eida;Ostreoidea;Ostreidae;Crassostrea;Crassostrea virginica

UdeM00000007516 400727 80.1 UdeM00000007516 XP\_025088777.1 39.6  
 111 59 3 27 132 11 118 2.90E-12 80.1 400727  
 cellular  
 organisms;Eukaryota;Opisthokonta;Metazoa;Eumetazoa;Bilateria;Protostomia;  
 Spiralia;Lophotrochozoa;Mollusca;Gastropoda;Caenogastropoda;Architaenioglossa;  
 Ampullarioidea;Ampullariidae;Pomacea;Pomacea canaliculata  
 UdeM00000007517 6596 58.9 UdeM00000007517 XP\_045189070.1 41.4 87  
 49 2 1 86 1 86 4.00E-06 58.9 6596 cellular  
 organisms;Eukaryota;Opisthokonta;Metazoa;Eumetazoa;Bilateria;Protostomia;  
 Spiralia;Lophotrochozoa;Mollusca;Bivalvia;Autobranchia;Heteroconchia;Euheterodonta;  
 Imparidentia;Venerida;Veneroidea;Veneridae;Mercenaria;Mercenaria mercenaria  
 UdeM00000007520 6596 613.2 UdeM00000007520 XP\_045204674.1 52.6 582  
 268 5 1 580 1 576 3.40E-172 613.2 6596 cellular  
 organisms;Eukaryota;Opisthokonta;Metazoa;Eumetazoa;Bilateria;Protostomia;  
 Spiralia;Lophotrochozoa;Mollusca;Bivalvia;Autobranchia;Heteroconchia;Euheterodonta;  
 Imparidentia;Venerida;Veneroidea;Veneridae;Mercenaria;Mercenaria mercenaria  
 UdeM00000007521 6596 528.9 UdeM00000007521 XP\_045204674.1 49.9 535  
 260 5 1 533 48 576 7.60E-147 528.9 6596 cellular  
 organisms;Eukaryota;Opisthokonta;Metazoa;Eumetazoa;Bilateria;Protostomia;  
 Spiralia;Lophotrochozoa;Mollusca;Bivalvia;Autobranchia;Heteroconchia;Euheterodonta;  
 Imparidentia;Venerida;Veneroidea;Veneridae;Mercenaria;Mercenaria mercenaria  
 UdeM00000007522 6579 121.7 UdeM00000007522 XP\_033743247.1 37.2 218  
 66 4 2 153 107 319 8.20E-25 121.7 6579 cellular  
 organisms;Eukaryota;Opisthokonta;Metazoa;Eumetazoa;Bilateria;Protostomia;  
 Spiralia;Lophotrochozoa;Mollusca;Bivalvia;Autobranchia;Pteriormorphia;Pectinida;  
 Pectinoidea;Pectinidae;Pecten;Pecten maximus  
 UdeM00000007523 6596 528.9 UdeM00000007523 XP\_045204674.1 49.2 535  
 264 5 1 533 48 576 7.60E-147 528.9 6596 cellular  
 organisms;Eukaryota;Opisthokonta;Metazoa;Eumetazoa;Bilateria;Protostomia;  
 Spiralia;Lophotrochozoa;Mollusca;Bivalvia;Autobranchia;Heteroconchia;Euheterodonta;  
 Imparidentia;Venerida;Veneroidea;Veneridae;Mercenaria;Mercenaria mercenaria  
 UdeM00000007524 7739 455.7 UdeM00000007524 XP\_035696678.1 58 374  
 154 1 2 372 423 796 5.70E-125 455.7 7739 cellular  
 organisms;Eukaryota;Opisthokonta;Metazoa;Eumetazoa;Bilateria;Deuterostomia;  
 Chordata;Cephalochordata;Leptocardii;Amphioxiformes;Branchiostomidae;Branchiostoma;  
 Branchiostoma floridae  
 UdeM00000007525 7741 143.7 UdeM00000007525 XP\_019640655.1 49.7 145  
 72 1 5 148 1 145 1.90E-31 143.7 7741 cellular  
 organisms;Eukaryota;Opisthokonta;Metazoa;Eumetazoa;Bilateria;Deuterostomia;  
 Chordata;Cephalochordata;Leptocardii;Amphioxiformes;Branchiostomidae;Branchiostoma;  
 Branchiostoma belcheri  
 UdeM00000007526 6596 588.6 UdeM00000007526 XP\_045204674.1 53.3 533  
 244 4 1 531 1 530 8.10E-165 588.6 6596 cellular  
 organisms;Eukaryota;Opisthokonta;Metazoa;Eumetazoa;Bilateria;Protostomia;  
 Spiralia;Lophotrochozoa;Mollusca;Bivalvia;Autobranchia;Heteroconchia;Euheterodonta;  
 Imparidentia;Venerida;Veneroidea;Veneridae;Mercenaria;Mercenaria mercenaria  
 UdeM00000007527 6596 224.2 UdeM00000007527 XP\_045204106.1 61.1 175  
 66 1 42 216 10 182 1.70E-55 224.2 6596 cellular  
 organisms;Eukaryota;Opisthokonta;Metazoa;Eumetazoa;Bilateria;Protostomia;

Spiralia;Lophotrochozoa;Mollusca;Bivalvia;Autobranchia;Heteroconchia;Euherodonta;Imparidentia;Venerida;Veneroidea;Veneridae;Mercenaria;Mercenaria mercenaria

UdeM00000007528 6596 119.4 UdeM00000007528 XP\_045204106.1 55 111  
46 1 4 110 238 348 2.90E-24 119.4 6596 cellular

organisms;Eukaryota;Opisthokonta;Metazoa;Eumetazoa;Bilateria;Protostomia;Spiralia;Lophotrochozoa;Mollusca;Bivalvia;Autobranchia;Heteroconchia;Euherodonta;Imparidentia;Venerida;Veneroidea;Veneridae;Mercenaria;Mercenaria mercenaria

UdeM00000007529 6596 59.7 UdeM00000007529 XP\_045203280.1 55.6 45  
20 0 1 45 379 423 2.00E-06 59.7 6596 cellular

organisms;Eukaryota;Opisthokonta;Metazoa;Eumetazoa;Bilateria;Protostomia;Spiralia;Lophotrochozoa;Mollusca;Bivalvia;Autobranchia;Heteroconchia;Euherodonta;Imparidentia;Venerida;Veneroidea;Veneridae;Mercenaria;Mercenaria mercenaria

UdeM00000007530 6596 523.9 UdeM00000007530 XP\_045204271.1 50.5 537  
259 5 2 534 47 580 2.50E-145 523.9 6596 cellular

organisms;Eukaryota;Opisthokonta;Metazoa;Eumetazoa;Bilateria;Protostomia;Spiralia;Lophotrochozoa;Mollusca;Bivalvia;Autobranchia;Heteroconchia;Euherodonta;Imparidentia;Venerida;Veneroidea;Veneridae;Mercenaria;Mercenaria mercenaria

UdeM00000007532 6596 613.2 UdeM00000007532 XP\_045204674.1 52.6 582  
268 5 1 580 1 576 3.40E-172 613.2 6596 cellular

organisms;Eukaryota;Opisthokonta;Metazoa;Eumetazoa;Bilateria;Protostomia;Spiralia;Lophotrochozoa;Mollusca;Bivalvia;Autobranchia;Heteroconchia;Euherodonta;Imparidentia;Venerida;Veneroidea;Veneridae;Mercenaria;Mercenaria mercenaria

UdeM00000007533 6596 167.9 UdeM00000007533 XP\_045204106.1 63.4 134  
45 1 1 130 178 311 8.70E-39 167.9 6596 cellular

organisms;Eukaryota;Opisthokonta;Metazoa;Eumetazoa;Bilateria;Protostomia;Spiralia;Lophotrochozoa;Mollusca;Bivalvia;Autobranchia;Heteroconchia;Euherodonta;Imparidentia;Venerida;Veneroidea;Veneridae;Mercenaria;Mercenaria mercenaria

UdeM00000007534 6565 203.4 UdeM00000007534 XP\_022327372.1 45.1 233  
127 1 6 238 350 581 3.30E-49 203.4 6565 cellular

organisms;Eukaryota;Opisthokonta;Metazoa;Eumetazoa;Bilateria;Protostomia;Spiralia;Lophotrochozoa;Mollusca;Bivalvia;Autobranchia;Pteriomorphia;Ostreida;Ostreoidea;Ostreidae;Crassostrea;Crassostrea virginica

UdeM00000007535 6596 469.9 UdeM00000007535 XP\_045204674.1 46.5 527  
250 5 1 500 48 569 4.00E-129 469.9 6596 cellular

organisms;Eukaryota;Opisthokonta;Metazoa;Eumetazoa;Bilateria;Protostomia;Spiralia;Lophotrochozoa;Mollusca;Bivalvia;Autobranchia;Heteroconchia;Euherodonta;Imparidentia;Venerida;Veneroidea;Veneridae;Mercenaria;Mercenaria mercenaria

UdeM00000007537 6596 372.9 UdeM00000007537 XP\_045204106.1 57.2 320  
133 1 1 316 142 461 4.20E-100 372.9 6596 cellular

organisms;Eukaryota;Opisthokonta;Metazoa;Eumetazoa;Bilateria;Protostomia;Spiralia;Lophotrochozoa;Mollusca;Bivalvia;Autobranchia;Heteroconchia;Euherodonta;Imparidentia;Venerida;Veneroidea;Veneridae;Mercenaria;Mercenaria mercenaria

UdeM00000007538 6596 229.6 UdeM00000007538 XP\_045204106.1 61.3 191  
68 2 2 188 58 246 3.50E-57 229.6 6596 cellular

organisms;Eukaryota;Opisthokonta;Metazoa;Eumetazoa;Bilateria;Protostomia;Spiralia;Lophotrochozoa;Mollusca;Bivalvia;Autobranchia;Heteroconchia;Euherodonta;Imparidentia;Venerida;Veneroidea;Veneridae;Mercenaria;Mercenaria mercenaria

terodonta;Imparidentia;Venerida;Veneroidea;Veneridae;Mercenaria;Mercenari  
 a mercenaria  
 UdeM00000007539 6596 521.9 UdeM00000007539 XP\_045204271.1 50.5 537  
 259 5 2 534 47 580 9.30E-145 521.9 6596 cellular  
 organisms;Eukaryota;Opisthokonta;Metazoa;Eumetazoa;Bilateria;Protostomia;  
 Spiralia;Lophotrochozoa;Mollusca;Bivalvia;Autobranhia;Heteroconchia;Euhe  
 terodonta;Imparidentia;Venerida;Veneroidea;Veneridae;Mercenaria;Mercenari  
 a mercenaria  
 UdeM00000007540 6596 349.7 UdeM00000007540 XP\_045204106.1 56 332  
 95 4 5 295 14 335 3.70E-93 349.7 6596 cellular  
 organisms;Eukaryota;Opisthokonta;Metazoa;Eumetazoa;Bilateria;Protostomia;  
 Spiralia;Lophotrochozoa;Mollusca;Bivalvia;Autobranhia;Heteroconchia;Euhe  
 terodonta;Imparidentia;Venerida;Veneroidea;Veneridae;Mercenaria;Mercenari  
 a mercenaria  
 UdeM00000007541 6579 208 UdeM00000007541 XP\_033742659.1 47.3 224  
 116 2 2 224 359 581 1.30E-50 208 6579 cellular  
 organisms;Eukaryota;Opisthokonta;Metazoa;Eumetazoa;Bilateria;Protostomia;  
 Spiralia;Lophotrochozoa;Mollusca;Bivalvia;Autobranhia;Pteriormorphia;Pect  
 inida;Pectinoidea;Pectinidae;Pecten;Pecten maximus  
 UdeM00000007542 2652724 176.4 UdeM00000007542 XP\_020903442.1 44.2  
 199 111 0 9 207 2 200 4.10E-41 176.4 2652724  
 cellular  
 organisms;Eukaryota;Opisthokonta;Metazoa;Eumetazoa;Cnidaria;Anthozoa;Hexa  
 corallia;Actiniaria;Aiptasiidae;Exaiptasia;Exaiptasia diaphana  
 UdeM00000007543 6596 144.4 UdeM00000007543 XP\_045204106.1 66.3 98  
 31 1 5 102 14 109 8.80E-32 144.4 6596 cellular  
 organisms;Eukaryota;Opisthokonta;Metazoa;Eumetazoa;Bilateria;Protostomia;  
 Spiralia;Lophotrochozoa;Mollusca;Bivalvia;Autobranhia;Heteroconchia;Euhe  
 terodonta;Imparidentia;Venerida;Veneroidea;Veneridae;Mercenaria;Mercenari  
 a mercenaria  
 UdeM00000007544 6596 368.6 UdeM00000007544 XP\_045204674.1 42.7 478  
 208 4 2 413 99 576 1.00E-98 368.6 6596 cellular  
 organisms;Eukaryota;Opisthokonta;Metazoa;Eumetazoa;Bilateria;Protostomia;  
 Spiralia;Lophotrochozoa;Mollusca;Bivalvia;Autobranhia;Heteroconchia;Euhe  
 terodonta;Imparidentia;Venerida;Veneroidea;Veneridae;Mercenaria;Mercenari  
 a mercenaria  
 UdeM00000007545 6596 506.9 UdeM00000007545 XP\_045204274.1 48.6 537  
 266 7 2 531 47 580 3.10E-140 506.9 6596 cellular  
 organisms;Eukaryota;Opisthokonta;Metazoa;Eumetazoa;Bilateria;Protostomia;  
 Spiralia;Lophotrochozoa;Mollusca;Bivalvia;Autobranhia;Heteroconchia;Euhe  
 terodonta;Imparidentia;Venerida;Veneroidea;Veneridae;Mercenaria;Mercenari  
 a mercenaria  
 UdeM00000007546 6596 469.9 UdeM00000007546 XP\_045204673.1 46.8 536  
 261 8 1 518 48 577 4.10E-129 469.9 6596 cellular  
 organisms;Eukaryota;Opisthokonta;Metazoa;Eumetazoa;Bilateria;Protostomia;  
 Spiralia;Lophotrochozoa;Mollusca;Bivalvia;Autobranhia;Heteroconchia;Euhe  
 terodonta;Imparidentia;Venerida;Veneroidea;Veneridae;Mercenaria;Mercenari  
 a mercenaria  
 UdeM00000007547 6596 395.6 UdeM00000007547 XP\_045204674.1 41.5 535  
 258 7 1 486 48 576 9.20E-107 395.6 6596 cellular  
 organisms;Eukaryota;Opisthokonta;Metazoa;Eumetazoa;Bilateria;Protostomia;  
 Spiralia;Lophotrochozoa;Mollusca;Bivalvia;Autobranhia;Heteroconchia;Euhe  
 terodonta;Imparidentia;Venerida;Veneroidea;Veneridae;Mercenaria;Mercenari  
 a mercenaria

UdeM00000007548 6596 580.5 UdeM00000007548 XP\_045204274.1 50.5 582  
 278 7 5 580 3 580 2.40E-162 580.5 6596 cellular  
 organisms;Eukaryota;Opisthokonta;Metazoa;Eumetazoa;Bilateria;Protostomia;  
 Spiralia;Lophotrochozoa;Mollusca;Bivalvia;Autobranhia;Heteroconchia;Euhe  
 terodonta;Imparidentia;Venerida;Veneroidea;Veneridae;Mercenaria;Mercenari  
 a mercenaria

UdeM00000007549 6596 535 UdeM00000007549 XP\_045204274.1 51.4 537  
 254 5 2 534 47 580 1.10E-148 535 6596 cellular  
 organisms;Eukaryota;Opisthokonta;Metazoa;Eumetazoa;Bilateria;Protostomia;  
 Spiralia;Lophotrochozoa;Mollusca;Bivalvia;Autobranhia;Heteroconchia;Euhe  
 terodonta;Imparidentia;Venerida;Veneroidea;Veneridae;Mercenaria;Mercenari  
 a mercenaria

UdeM00000007550 6596 540 UdeM00000007550 XP\_045204674.1 50.7 535  
 255 5 1 532 48 576 3.30E-150 540 6596 cellular  
 organisms;Eukaryota;Opisthokonta;Metazoa;Eumetazoa;Bilateria;Protostomia;  
 Spiralia;Lophotrochozoa;Mollusca;Bivalvia;Autobranhia;Heteroconchia;Euhe  
 terodonta;Imparidentia;Venerida;Veneroidea;Veneridae;Mercenaria;Mercenari  
 a mercenaria

UdeM00000007551 6596 528.5 UdeM00000007551 XP\_045204271.1 50.5 537  
 259 4 2 534 47 580 1.00E-146 528.5 6596 cellular  
 organisms;Eukaryota;Opisthokonta;Metazoa;Eumetazoa;Bilateria;Protostomia;  
 Spiralia;Lophotrochozoa;Mollusca;Bivalvia;Autobranhia;Heteroconchia;Euhe  
 terodonta;Imparidentia;Venerida;Veneroidea;Veneridae;Mercenaria;Mercenari  
 a mercenaria

UdeM00000007552 6596 533.9 UdeM00000007552 XP\_045204271.1 50.3 537  
 260 4 2 534 47 580 2.40E-148 533.9 6596 cellular  
 organisms;Eukaryota;Opisthokonta;Metazoa;Eumetazoa;Bilateria;Protostomia;  
 Spiralia;Lophotrochozoa;Mollusca;Bivalvia;Autobranhia;Heteroconchia;Euhe  
 terodonta;Imparidentia;Venerida;Veneroidea;Veneridae;Mercenaria;Mercenari  
 a mercenaria

UdeM00000007554 6596 815.8 UdeM00000007554 XP\_045205309.1 76.1 506  
 120 1 111 616 167 671 3.60E-233 815.8 6596 cellular  
 organisms;Eukaryota;Opisthokonta;Metazoa;Eumetazoa;Bilateria;Protostomia;  
 Spiralia;Lophotrochozoa;Mollusca;Bivalvia;Autobranhia;Heteroconchia;Euhe  
 terodonta;Imparidentia;Venerida;Veneroidea;Veneridae;Mercenaria;Mercenari  
 a mercenaria

UdeM00000007555 6596 266.2 UdeM00000007555 XP\_045205309.1 74.7 166  
 40 1 1 164 1 166 3.20E-68 266.2 6596 cellular  
 organisms;Eukaryota;Opisthokonta;Metazoa;Eumetazoa;Bilateria;Protostomia;  
 Spiralia;Lophotrochozoa;Mollusca;Bivalvia;Autobranhia;Heteroconchia;Euhe  
 terodonta;Imparidentia;Venerida;Veneroidea;Veneridae;Mercenaria;Mercenari  
 a mercenaria

UdeM00000007556 225164 163.7 UdeM00000007556 XP\_009055317.1 49.4  
 154 75 1 6 156 12 165 2.10E-37 163.7 225164  
 cellular  
 organisms;Eukaryota;Opisthokonta;Metazoa;Eumetazoa;Bilateria;Protostomia;  
 Spiralia;Lophotrochozoa;Mollusca;Gastropoda;Patellogastropoda;Lottioidae;  
 Lottiidae;Lottia;Lottia gigantea

UdeM00000007557 6596 186.4 UdeM00000007557 XP\_045205309.1 54.8 155  
 67 1 73 224 12 166 4.50E-44 186.4 6596 cellular  
 organisms;Eukaryota;Opisthokonta;Metazoa;Eumetazoa;Bilateria;Protostomia;  
 Spiralia;Lophotrochozoa;Mollusca;Bivalvia;Autobranhia;Heteroconchia;Euhe  
 terodonta;Imparidentia;Venerida;Veneroidea;Veneridae;Mercenaria;Mercenari  
 a mercenaria

UdeM00000007558 29159 101.7 UdeM00000007558 XP\_034317111.1 57.3 75  
 32 0 1 75 1 75 4.60E-19 101.7 29159 cellular  
 organisms;Eukaryota;Opisthokonta;Metazoa;Eumetazoa;Bilateria;Protostomia;  
 Spiralia;Lophotrochozoa;Mollusca;Bivalvia;Autobranchia;Pteriomorphia;Ostr  
 eida;Ostreoidea;Ostreidae;Crassostrea;Crassostrea gigas  
 UdeM00000007560 29159 340.1 UdeM00000007560 XP\_034317111.1 48.3 383  
 187 5 2 376 171 550 3.60E-90 340.1 29159 cellular  
 organisms;Eukaryota;Opisthokonta;Metazoa;Eumetazoa;Bilateria;Protostomia;  
 Spiralia;Lophotrochozoa;Mollusca;Bivalvia;Autobranchia;Pteriomorphia;Ostr  
 eida;Ostreoidea;Ostreidae;Crassostrea;Crassostrea gigas  
 UdeM00000007559 29159 605.9 UdeM00000007559 XP\_034317111.1 42.6 847  
 471 10 2 840 171 1010 7.90E-170 605.9 29159 cellular  
 organisms;Eukaryota;Opisthokonta;Metazoa;Eumetazoa;Bilateria;Protostomia;  
 Spiralia;Lophotrochozoa;Mollusca;Bivalvia;Autobranchia;Pteriomorphia;Ostr  
 eida;Ostreoidea;Ostreidae;Crassostrea;Crassostrea gigas  
 UdeM00000007561 29159 170.6 UdeM00000007561 XP\_034317111.1 37.2 339  
 208 4 1 337 675 1010 3.50E-39 170.6 29159 cellular  
 organisms;Eukaryota;Opisthokonta;Metazoa;Eumetazoa;Bilateria;Protostomia;  
 Spiralia;Lophotrochozoa;Mollusca;Bivalvia;Autobranchia;Pteriomorphia;Ostr  
 eida;Ostreoidea;Ostreidae;Crassostrea;Crassostrea gigas  
 UdeM00000007563 1735272 76.3 UdeM00000007563 XP\_041370888.1 32.9  
 146 68 3 31 176 315 430 4.80E-11 76.3 1735272  
 cellular  
 organisms;Eukaryota;Opisthokonta;Metazoa;Eumetazoa;Bilateria;Protostomia;  
 Spiralia;Lophotrochozoa;Mollusca;Gastropoda;Neomphalina;Neomphaloidea;Pel  
 tospiridae;Gigantopelta;Gigantopelta aegis  
 UdeM00000007564 29159 64.3 UdeM00000007564 XP\_034329356.1 61.3 62  
 24 0 33 94 120 181 1.00E-07 64.3 29159 cellular  
 organisms;Eukaryota;Opisthokonta;Metazoa;Eumetazoa;Bilateria;Protostomia;  
 Spiralia;Lophotrochozoa;Mollusca;Bivalvia;Autobranchia;Pteriomorphia;Ostr  
 eida;Ostreoidea;Ostreidae;Crassostrea;Crassostrea gigas  
 UdeM00000007565 6565 82 UdeM00000007565 XP\_022308193.1 60.4 53  
 21 0 115 167 502 554 8.00E-13 82 6565 cellular  
 organisms;Eukaryota;Opisthokonta;Metazoa;Eumetazoa;Bilateria;Protostomia;  
 Spiralia;Lophotrochozoa;Mollusca;Bivalvia;Autobranchia;Pteriomorphia;Ostr  
 eida;Ostreoidea;Ostreidae;Crassostrea;Crassostrea virginica  
 UdeM00000007566 6565 128.3 UdeM00000007566 XP\_022326632.1 63.3 98  
 34 1 108 203 69 166 1.30E-26 128.3 6565 cellular  
 organisms;Eukaryota;Opisthokonta;Metazoa;Eumetazoa;Bilateria;Protostomia;  
 Spiralia;Lophotrochozoa;Mollusca;Bivalvia;Autobranchia;Pteriomorphia;Ostr  
 eida;Ostreoidea;Ostreidae;Crassostrea;Crassostrea virginica  
 UdeM00000007568 6565 100.5 UdeM00000007568 XP\_022298161.1 47.2 123  
 61 1 107 229 56 174 3.60E-18 100.5 6565 cellular  
 organisms;Eukaryota;Opisthokonta;Metazoa;Eumetazoa;Bilateria;Protostomia;  
 Spiralia;Lophotrochozoa;Mollusca;Bivalvia;Autobranchia;Pteriomorphia;Ostr  
 eida;Ostreoidea;Ostreidae;Crassostrea;Crassostrea virginica  
 UdeM00000007570 6596 588.6 UdeM00000007570 XP\_045205309.1 66.3 410  
 137 1 1 410 263 671 6.20E-165 588.6 6596 cellular  
 organisms;Eukaryota;Opisthokonta;Metazoa;Eumetazoa;Bilateria;Protostomia;  
 Spiralia;Lophotrochozoa;Mollusca;Bivalvia;Autobranchia;Heteroconchia;Euhe  
 terodonta;Imparidentia;Venerida;Veneroidea;Veneridae;Mercenaria;Mercenari  
 a mercenaria  
 UdeM00000007571 6573 240.4 UdeM00000007571 XP\_021366195.1 56 207  
 89 1 6 212 7 211 2.30E-60 240.4 6573 cellular



organisms;Eukaryota;Opisthokonta;Metazoa;Eumetazoa;Bilateria;Protostomia;  
Spiralia;Lophotrochozoa;Mollusca;Bivalvia;Autobranchia;Pteriomorpha;Pect  
inida;Pectinoidea;Pectinidae;Mizuhopecten;Mizuhopecten yessoensis  
UdeM00000007572 6596 543.5 UdeM00000007572 XP\_045205309.1 67.7 371  
119 1 2 372 302 671 2.10E-151 543.5 6596 cellular  
organisms;Eukaryota;Opisthokonta;Metazoa;Eumetazoa;Bilateria;Protostomia;  
Spiralia;Lophotrochozoa;Mollusca;Bivalvia;Autobranchia;Heteroconchia;Euhe  
terodonta;Imparidentia;Venerida;Veneroidea;Veneridae;Mercenaria;Mercenari  
a mercenaria  
UdeM00000007573 6596 352.1 UdeM00000007573 XP\_045205309.1 59.6 287  
112 1 1 283 7 293 7.00E-94 352.1 6596 cellular  
organisms;Eukaryota;Opisthokonta;Metazoa;Eumetazoa;Bilateria;Protostomia;  
Spiralia;Lophotrochozoa;Mollusca;Bivalvia;Autobranchia;Heteroconchia;Euhe  
terodonta;Imparidentia;Venerida;Veneroidea;Veneridae;Mercenaria;Mercenari  
a mercenaria  
UdeM00000007574 6579 131 UdeM00000007574 XP\_033742254.1 50.4 119  
58 1 2 119 1021 1139 1.10E-27 131 6579 cellular  
organisms;Eukaryota;Opisthokonta;Metazoa;Eumetazoa;Bilateria;Protostomia;  
Spiralia;Lophotrochozoa;Mollusca;Bivalvia;Autobranchia;Pteriomorpha;Pect  
inida;Pectinoidea;Pectinidae;Pecten;Pecten maximus  
UdeM00000007575 6579 114 UdeM00000007575 XP\_033742254.1 62.8 78  
29 0 1 78 1181 1258 8.70E-23 114 6579 cellular  
organisms;Eukaryota;Opisthokonta;Metazoa;Eumetazoa;Bilateria;Protostomia;  
Spiralia;Lophotrochozoa;Mollusca;Bivalvia;Autobranchia;Pteriomorpha;Pect  
inida;Pectinoidea;Pectinidae;Pecten;Pecten maximus  
UdeM00000007576 6596 92.4 UdeM00000007576 XP\_045205276.1 76.3 59  
14 0 65 123 2636 2694 4.20E-16 92.4 6596 cellular  
organisms;Eukaryota;Opisthokonta;Metazoa;Eumetazoa;Bilateria;Protostomia;  
Spiralia;Lophotrochozoa;Mollusca;Bivalvia;Autobranchia;Heteroconchia;Euhe  
terodonta;Imparidentia;Venerida;Veneroidea;Veneridae;Mercenaria;Mercenari  
a mercenaria  
UdeM00000007577 6596 736.1 UdeM00000007577 XP\_045205309.1 55.7 675  
271 8 1 657 7 671 3.90E-209 736.1 6596 cellular  
organisms;Eukaryota;Opisthokonta;Metazoa;Eumetazoa;Bilateria;Protostomia;  
Spiralia;Lophotrochozoa;Mollusca;Bivalvia;Autobranchia;Heteroconchia;Euhe  
terodonta;Imparidentia;Venerida;Veneroidea;Veneridae;Mercenaria;Mercenari  
a mercenaria  
UdeM00000007578 225164 107.5 UdeM00000007578 XP\_009055317.1 69.2  
65 20 0 1 65 300 364 7.40E-21 107.5 225164  
cellular  
organisms;Eukaryota;Opisthokonta;Metazoa;Eumetazoa;Bilateria;Protostomia;  
Spiralia;Lophotrochozoa;Mollusca;Gastropoda;Patellogastropoda;Lottioidea;  
Lottiidae;Lottia;Lottia gigantea  
UdeM00000007579 225164 141.7 UdeM00000007579 XP\_009055317.1 61.2  
103 40 0 1 103 262 364 5.40E-31 141.7 225164  
cellular  
organisms;Eukaryota;Opisthokonta;Metazoa;Eumetazoa;Bilateria;Protostomia;  
Spiralia;Lophotrochozoa;Mollusca;Gastropoda;Patellogastropoda;Lottioidea;  
Lottiidae;Lottia;Lottia gigantea  
UdeM00000007580 6573 237.3 UdeM00000007580 XP\_021366195.1 55.1 207  
91 1 6 212 7 211 2.20E-59 237.3 6573 cellular  
organisms;Eukaryota;Opisthokonta;Metazoa;Eumetazoa;Bilateria;Protostomia;  
Spiralia;Lophotrochozoa;Mollusca;Bivalvia;Autobranchia;Pteriomorpha;Pect  
inida;Pectinoidea;Pectinidae;Mizuhopecten;Mizuhopecten yessoensis

UdeM00000007581 6579 279.6 UdeM00000007581 XP\_033743190.1 63 211  
 74 1 8 214 503 713 3.20E-72 279.6 6579 cellular  
 organisms;Eukaryota;Opisthokonta;Metazoa;Eumetazoa;Bilateria;Protostomia;  
 Spiralia;Lophotrochozoa;Mollusca;Bivalvia;Autobranhia;Pteriormorphia;Pect  
 inida;Pectinoidea;Pectinidae;Pecten;Pecten maximus  
 UdeM00000007582 6565 141.7 UdeM00000007582 XP\_022324223.1 64 100  
 36 0 5 104 417 516 5.20E-31 141.7 6565 cellular  
 organisms;Eukaryota;Opisthokonta;Metazoa;Eumetazoa;Bilateria;Protostomia;  
 Spiralia;Lophotrochozoa;Mollusca;Bivalvia;Autobranhia;Pteriormorphia;Ostr  
 eida;Ostreoidea;Ostreidae;Crassostrea;Crassostrea virginica  
 UdeM00000007584 6565 582 UdeM00000007584 XP\_022324223.1 64.4 458  
 151 6 6 460 282 730 6.60E-163 582 6565 cellular  
 organisms;Eukaryota;Opisthokonta;Metazoa;Eumetazoa;Bilateria;Protostomia;  
 Spiralia;Lophotrochozoa;Mollusca;Bivalvia;Autobranhia;Pteriormorphia;Ostr  
 eida;Ostreoidea;Ostreidae;Crassostrea;Crassostrea virginica  
 UdeM00000007583 6596 759.6 UdeM00000007583 XP\_045205309.1 56.7 674  
 279 5 1 670 7 671 3.30E-216 759.6 6596 cellular  
 organisms;Eukaryota;Opisthokonta;Metazoa;Eumetazoa;Bilateria;Protostomia;  
 Spiralia;Lophotrochozoa;Mollusca;Bivalvia;Autobranhia;Heteroconchia;Euhe  
 terodonta;Imparidentia;Venerida;Veneroidea;Veneridae;Mercenaria;Mercenari  
 a mercenaria  
 UdeM00000007585 6579 195.3 UdeM00000007585 XP\_033743190.1 62.9 151  
 55 1 6 156 564 713 5.90E-47 195.3 6579 cellular  
 organisms;Eukaryota;Opisthokonta;Metazoa;Eumetazoa;Bilateria;Protostomia;  
 Spiralia;Lophotrochozoa;Mollusca;Bivalvia;Autobranhia;Pteriormorphia;Pect  
 inida;Pectinoidea;Pectinidae;Pecten;Pecten maximus  
 UdeM00000007586 6596 530.4 UdeM00000007586 XP\_045205309.1 61.8 414  
 153 2 1 414 263 671 2.00E-147 530.4 6596 cellular  
 organisms;Eukaryota;Opisthokonta;Metazoa;Eumetazoa;Bilateria;Protostomia;  
 Spiralia;Lophotrochozoa;Mollusca;Bivalvia;Autobranhia;Heteroconchia;Euhe  
 terodonta;Imparidentia;Venerida;Veneroidea;Veneridae;Mercenaria;Mercenari  
 a mercenaria  
 UdeM00000007587 29159 176.4 UdeM00000007587 XP\_034325257.1 50 164  
 82 0 150 313 96 259 5.70E-41 176.4 29159 cellular  
 organisms;Eukaryota;Opisthokonta;Metazoa;Eumetazoa;Bilateria;Protostomia;  
 Spiralia;Lophotrochozoa;Mollusca;Bivalvia;Autobranhia;Pteriormorphia;Ostr  
 eida;Ostreoidea;Ostreidae;Crassostrea;Crassostrea gigas  
 UdeM00000007588 225164 95.1 UdeM00000007588 XP\_009055317.1 50  
 84 42 0 2 85 79 162 5.10E-17 95.1 225164  
 cellular  
 organisms;Eukaryota;Opisthokonta;Metazoa;Eumetazoa;Bilateria;Protostomia;  
 Spiralia;Lophotrochozoa;Mollusca;Gastropoda;Patellogastropoda;Lottioidea;  
 Lottiidae;Lottia;Lottia gigantea  
 UdeM00000007589 6573 150.2 UdeM00000007589 XP\_021366184.1 55.6 153  
 48 3 320 453 564 715 6.30E-33 150.2 6573 cellular  
 organisms;Eukaryota;Opisthokonta;Metazoa;Eumetazoa;Bilateria;Protostomia;  
 Spiralia;Lophotrochozoa;Mollusca;Bivalvia;Autobranhia;Pteriormorphia;Pect  
 inida;Pectinoidea;Pectinidae;Mizuhopecten;Mizuhopecten yessoensis  
 UdeM00000007590 6579 84 UdeM00000007590 XP\_033750135.1 28.7 164  
 100 4 1 164 12 158 2.30E-13 84 6579 cellular  
 organisms;Eukaryota;Opisthokonta;Metazoa;Eumetazoa;Bilateria;Protostomia;  
 Spiralia;Lophotrochozoa;Mollusca;Bivalvia;Autobranhia;Pteriormorphia;Pect  
 inida;Pectinoidea;Pectinidae;Pecten;Pecten maximus

UdeM00000007592 6596 90.1 UdeM00000007592 XP\_045205309.1 34.1 170  
 35 1 26 118 163 332 2.80E-15 90.1 6596 cellular  
 organisms;Eukaryota;Opisthokonta;Metazoa;Eumetazoa;Bilateria;Protostomia;  
 Spiralia;Lophotrochozoa;Mollusca;Bivalvia;Autobranchia;Heteroconchia;Euhe  
 terodonta;Imparidentia;Venerida;Veneroidea;Veneridae;Mercenaria;Mercenari  
 a mercenaria

UdeM00000007593 6579 283.9 UdeM00000007593 XP\_033743190.1 64.2 212  
 75 1 8 219 503 713 1.80E-73 283.9 6579 cellular  
 organisms;Eukaryota;Opisthokonta;Metazoa;Eumetazoa;Bilateria;Protostomia;  
 Spiralia;Lophotrochozoa;Mollusca;Bivalvia;Autobranchia;Pteriormorphia;Pect  
 inida;Pectinoidea;Pectinidae;Pecten;Pecten maximus

UdeM00000007595 29159 71.6 UdeM00000007595 XP\_019922365.2 75 40  
 10 0 3 42 292 331 2.70E-10 71.6 29159 cellular  
 organisms;Eukaryota;Opisthokonta;Metazoa;Eumetazoa;Bilateria;Protostomia;  
 Spiralia;Lophotrochozoa;Mollusca;Bivalvia;Autobranchia;Pteriormorphia;Ostr  
 eida;Ostreoidea;Ostreidae;Crassostrea;Crassostrea gigas

UdeM00000007596 6596 830.1 UdeM00000007596 XP\_045205309.1 59.9 666  
 262 2 1 662 7 671 2.00E-237 830.1 6596 cellular  
 organisms;Eukaryota;Opisthokonta;Metazoa;Eumetazoa;Bilateria;Protostomia;  
 Spiralia;Lophotrochozoa;Mollusca;Bivalvia;Autobranchia;Heteroconchia;Euhe  
 terodonta;Imparidentia;Venerida;Veneroidea;Veneridae;Mercenaria;Mercenari  
 a mercenaria

UdeM00000007598 6596 285 UdeM00000007598 XP\_045205276.1 52.7 298  
 108 3 3 284 2561 2841 1.00E-73 285 6596 cellular  
 organisms;Eukaryota;Opisthokonta;Metazoa;Eumetazoa;Bilateria;Protostomia;  
 Spiralia;Lophotrochozoa;Mollusca;Bivalvia;Autobranchia;Heteroconchia;Euhe  
 terodonta;Imparidentia;Venerida;Veneroidea;Veneridae;Mercenaria;Mercenari  
 a mercenaria

UdeM00000007599 6526 87.8 UdeM00000007599 XP\_013086500.1 66.7 57  
 18 1 5 61 273 328 7.20E-15 87.8 6526 cellular  
 organisms;Eukaryota;Opisthokonta;Metazoa;Eumetazoa;Bilateria;Protostomia;  
 Spiralia;Lophotrochozoa;Mollusca;Gastropoda;Heterobranchia;Euthyneura;Pan  
 pulmonata;Hygrophila;Lymnaeioidea;Planorbidae;Biomphalaria;Biomphalaria  
 glabrata

UdeM00000007600 6596 161.8 UdeM00000007600 XP\_045205309.1 67.3 101  
 33 0 23 123 405 505 5.70E-37 161.8 6596 cellular  
 organisms;Eukaryota;Opisthokonta;Metazoa;Eumetazoa;Bilateria;Protostomia;  
 Spiralia;Lophotrochozoa;Mollusca;Bivalvia;Autobranchia;Heteroconchia;Euhe  
 terodonta;Imparidentia;Venerida;Veneroidea;Veneridae;Mercenaria;Mercenari  
 a mercenaria

UdeM00000007601 6596 426.8 UdeM00000007601 XP\_045205309.1 62.8 323  
 115 2 1 323 263 580 3.50E-116 426.8 6596 cellular  
 organisms;Eukaryota;Opisthokonta;Metazoa;Eumetazoa;Bilateria;Protostomia;  
 Spiralia;Lophotrochozoa;Mollusca;Bivalvia;Autobranchia;Heteroconchia;Euhe  
 terodonta;Imparidentia;Venerida;Veneroidea;Veneridae;Mercenaria;Mercenari  
 a mercenaria

UdeM00000007602 6573 156 UdeM00000007602 XP\_021366195.1 40.7 216  
 113 3 6 217 7 211 5.60E-35 156 6573 cellular  
 organisms;Eukaryota;Opisthokonta;Metazoa;Eumetazoa;Bilateria;Protostomia;  
 Spiralia;Lophotrochozoa;Mollusca;Bivalvia;Autobranchia;Pteriormorphia;Pect  
 inida;Pectinoidea;Pectinidae;Mizuhopecten;Mizuhopecten yessoensis

UdeM00000007603 6565 178.7 UdeM00000007603 XP\_022324223.1 59.2 147  
 37 1 6 152 390 513 5.80E-42 178.7 6565 cellular  
 organisms;Eukaryota;Opisthokonta;Metazoa;Eumetazoa;Bilateria;Protostomia;

Spiralia;Lophotrochozoa;Mollusca;Bivalvia;Autobranchia;Pteriormorphia;Ostr  
eida;Ostreoidea;Ostreidae;Crassostrea;Crassostrea virginica  
UdeM00000007604 6596 178.3 UdeM00000007604 XP\_045205309.1 50.3 183  
79 3 83 265 464 634 1.30E-41 178.3 6596 cellular  
organisms;Eukaryota;Opisthokonta;Metazoa;Eumetazoa;Bilateria;Protostomia;  
Spiralia;Lophotrochozoa;Mollusca;Bivalvia;Autobranchia;Heteroconchia;Euhe  
terodonta;Imparidentia;Venerida;Veneroidea;Veneridae;Mercenaria;Mercenari  
a mercenaria  
UdeM00000007605 6596 844.7 UdeM00000007605 XP\_045205309.1 61.3 666  
253 2 1 662 7 671 7.80E-242 844.7 6596 cellular  
organisms;Eukaryota;Opisthokonta;Metazoa;Eumetazoa;Bilateria;Protostomia;  
Spiralia;Lophotrochozoa;Mollusca;Bivalvia;Autobranchia;Heteroconchia;Euhe  
terodonta;Imparidentia;Venerida;Veneroidea;Veneridae;Mercenaria;Mercenari  
a mercenaria  
UdeM00000007606 6596 97.8 UdeM00000007606 XP\_045205276.1 43 142  
76 3 12 150 2456 2595 1.70E-17 97.8 6596 cellular  
organisms;Eukaryota;Opisthokonta;Metazoa;Eumetazoa;Bilateria;Protostomia;  
Spiralia;Lophotrochozoa;Mollusca;Bivalvia;Autobranchia;Heteroconchia;Euhe  
terodonta;Imparidentia;Venerida;Veneroidea;Veneridae;Mercenaria;Mercenari  
a mercenaria  
UdeM00000007607 1735272 81.3 UdeM00000007607 XP\_041356856.1 66.7  
54 18 0 1 54 2812 2865 5.60E-13 81.3 1735272  
cellular  
organisms;Eukaryota;Opisthokonta;Metazoa;Eumetazoa;Bilateria;Protostomia;  
Spiralia;Lophotrochozoa;Mollusca;Gastropoda;Neomphalina;Neomphaloidea;Pel  
tospiridae;Gigantopelta;Gigantopelta aegis  
UdeM00000007608 6579 183.3 UdeM00000007608 XP\_033743197.1 60 150  
59 1 8 157 515 663 2.30E-43 183.3 6579 cellular  
organisms;Eukaryota;Opisthokonta;Metazoa;Eumetazoa;Bilateria;Protostomia;  
Spiralia;Lophotrochozoa;Mollusca;Bivalvia;Autobranchia;Pteriormorphia;Pect  
inida;Pectinoidea;Pectinidae;Pecten;Pecten maximus  
UdeM00000007609 1735272 100.1 UdeM00000007609 XP\_041359498.1 45.6  
158 78 3 7 157 19 175 2.60E-18 100.1 1735272  
cellular  
organisms;Eukaryota;Opisthokonta;Metazoa;Eumetazoa;Bilateria;Protostomia;  
Spiralia;Lophotrochozoa;Mollusca;Gastropoda;Neomphalina;Neomphaloidea;Pel  
tospiridae;Gigantopelta;Gigantopelta aegis  
UdeM00000007610 2652724 123.2 UdeM00000007610 XP\_020896887.1 72.9  
70 19 0 2 71 175 244 2.80E-25 123.2 2652724  
cellular  
organisms;Eukaryota;Opisthokonta;Metazoa;Eumetazoa;Cnidaria;Anthozoa;Hexa  
corallia;Actiniaria;Aiptasiidae;Exaiptasia;Exaiptasia diaphana  
UdeM00000007611 1735272 426 UdeM00000007611 XP\_041357963.1 77.1  
245 55 1 1 245 1 244 4.30E-116 426 1735272  
cellular  
organisms;Eukaryota;Opisthokonta;Metazoa;Eumetazoa;Bilateria;Protostomia;  
Spiralia;Lophotrochozoa;Mollusca;Gastropoda;Neomphalina;Neomphaloidea;Pel  
tospiridae;Gigantopelta;Gigantopelta aegis  
UdeM00000007612 6941 75.5 UdeM00000007612 XP\_037289053.1 58.3 48  
20 0 1 48 127 174 4.50E-11 75.5 6941 cellular  
organisms;Eukaryota;Opisthokonta;Metazoa;Eumetazoa;Bilateria;Protostomia;  
Ecdysozoa;Panarthropoda;Arthropoda;Chelicerata;Arachnida;Acari;Parasitifo  
rmes;Ixodida;Ixodoidea;Ixodidae;Rhipicephalinae;Rhipicephalus;Boophilus;R  
hipicephalus microplus

UdeM00000007613 6596 124.8 UdeM00000007613 XP\_045205325.1 69.2 91  
 27 1 1 91 1 90 5.70E-26 124.8 6596 cellular  
 organisms;Eukaryota;Opisthokonta;Metazoa;Eumetazoa;Bilateria;Protostomia;  
 Spiralia;Lophotrochozoa;Mollusca;Bivalvia;Autobranchia;Heteroconchia;Euhe  
 terodonta;Imparidentia;Venerida;Veneroidea;Veneridae;Mercenaria;Mercenari  
 a mercenaria

UdeM00000007614 6596 580.1 UdeM00000007614 XP\_045205326.1 64.1 460  
 154 5 57 510 84 538 2.80E-162 580.1 6596 cellular  
 organisms;Eukaryota;Opisthokonta;Metazoa;Eumetazoa;Bilateria;Protostomia;  
 Spiralia;Lophotrochozoa;Mollusca;Bivalvia;Autobranchia;Heteroconchia;Euhe  
 terodonta;Imparidentia;Venerida;Veneroidea;Veneridae;Mercenaria;Mercenari  
 a mercenaria

UdeM00000007615 6596 508.1 UdeM00000007615 XP\_045205335.1 48.9 587  
 231 9 2 560 316 861 1.50E-140 508.1 6596 cellular  
 organisms;Eukaryota;Opisthokonta;Metazoa;Eumetazoa;Bilateria;Protostomia;  
 Spiralia;Lophotrochozoa;Mollusca;Bivalvia;Autobranchia;Heteroconchia;Euhe  
 terodonta;Imparidentia;Venerida;Veneroidea;Veneridae;Mercenaria;Mercenari  
 a mercenaria

UdeM00000007616 6596 203.8 UdeM00000007616 XP\_045205335.1 39.6 351  
 150 7 52 377 548 861 4.00E-49 203.8 6596 cellular  
 organisms;Eukaryota;Opisthokonta;Metazoa;Eumetazoa;Bilateria;Protostomia;  
 Spiralia;Lophotrochozoa;Mollusca;Bivalvia;Autobranchia;Heteroconchia;Euhe  
 terodonta;Imparidentia;Venerida;Veneroidea;Veneridae;Mercenaria;Mercenari  
 a mercenaria

UdeM00000007617 29159 898.7 UdeM00000007617 NP\_001292292.1 98.4 444  
 7 0 1 444 1 444 3.10E-258 898.7 29159 cellular  
 organisms;Eukaryota;Opisthokonta;Metazoa;Eumetazoa;Bilateria;Protostomia;  
 Spiralia;Lophotrochozoa;Mollusca;Bivalvia;Autobranchia;Pteriormorphia;Ostr  
 eida;Ostreoidea;Ostreidae;Crassostrea;Crassostrea gigas

UdeM00000007618 2607531 60.8 UdeM00000007618 XP\_029655782.1 28.1  
 139 83 4 136 258 171 308 3.00E-06 60.8 2607531  
 cellular  
 organisms;Eukaryota;Opisthokonta;Metazoa;Eumetazoa;Bilateria;Protostomia;  
 Spiralia;Lophotrochozoa;Mollusca;Cephalopoda;Coleoidea;Octopodiformes;Oct  
 opoda;Incirrata;Octopodidae;Octopus;Octopus sinensis

UdeM00000007620 2607531 60.8 UdeM00000007620 XP\_029655782.1 28.1  
 139 83 4 136 258 171 308 3.00E-06 60.8 2607531  
 cellular  
 organisms;Eukaryota;Opisthokonta;Metazoa;Eumetazoa;Bilateria;Protostomia;  
 Spiralia;Lophotrochozoa;Mollusca;Cephalopoda;Coleoidea;Octopodiformes;Oct  
 opoda;Incirrata;Octopodidae;Octopus;Octopus sinensis

UdeM00000007622 6596 556.6 UdeM00000007622 XP\_045206611.1 36.4 862  
 467 19 483 1316 293 1101 8.40E-155 556.6 6596 cellular  
 organisms;Eukaryota;Opisthokonta;Metazoa;Eumetazoa;Bilateria;Protostomia;  
 Spiralia;Lophotrochozoa;Mollusca;Bivalvia;Autobranchia;Heteroconchia;Euhe  
 terodonta;Imparidentia;Venerida;Veneroidea;Veneridae;Mercenaria;Mercenari  
 a mercenaria

UdeM00000007623 6596 557 UdeM00000007623 XP\_045206611.1 36.5 861  
 467 19 483 1315 293 1101 6.50E-155 557 6596 cellular  
 organisms;Eukaryota;Opisthokonta;Metazoa;Eumetazoa;Bilateria;Protostomia;  
 Spiralia;Lophotrochozoa;Mollusca;Bivalvia;Autobranchia;Heteroconchia;Euhe  
 terodonta;Imparidentia;Venerida;Veneroidea;Veneridae;Mercenaria;Mercenari  
 a mercenaria

UdeM00000007624 6596 557.8 UdeM00000007624 XP\_045206611.1 36.7 850  
 481 18 436 1269 293 1101 3.60E-155 557.8 6596 cellular  
 organisms;Eukaryota;Opisthokonta;Metazoa;Eumetazoa;Bilateria;Protostomia;  
 Spiralia;Lophotrochozoa;Mollusca;Bivalvia;Autobranchia;Heteroconchia;Euhe  
 terodonta;Imparidentia;Venerida;Veneroidea;Veneridae;Mercenaria;Mercenari  
 a mercenaria

UdeM00000007625 6596 277.3 UdeM00000007625 XP\_045204850.1 64.3 224  
 80 0 1 224 263 486 1.70E-71 277.3 6596 cellular  
 organisms;Eukaryota;Opisthokonta;Metazoa;Eumetazoa;Bilateria;Protostomia;  
 Spiralia;Lophotrochozoa;Mollusca;Bivalvia;Autobranchia;Heteroconchia;Euhe  
 terodonta;Imparidentia;Venerida;Veneroidea;Veneridae;Mercenaria;Mercenari  
 a mercenaria

UdeM00000007626 29159 195.3 UdeM00000007626 XP\_034301774.1 66.4 137  
 46 0 28 164 17 153 6.20E-47 195.3 29159 cellular  
 organisms;Eukaryota;Opisthokonta;Metazoa;Eumetazoa;Bilateria;Protostomia;  
 Spiralia;Lophotrochozoa;Mollusca;Bivalvia;Autobranchia;Pteriormorphia;Ostr  
 eida;Ostreoidea;Ostreidae;Crassostrea;Crassostrea gigas

UdeM00000007627 6596 615.5 UdeM00000007627 XP\_045204850.1 63.4 495  
 151 1 28 522 27 491 6.10E-173 615.5 6596 cellular  
 organisms;Eukaryota;Opisthokonta;Metazoa;Eumetazoa;Bilateria;Protostomia;  
 Spiralia;Lophotrochozoa;Mollusca;Bivalvia;Autobranchia;Heteroconchia;Euhe  
 terodonta;Imparidentia;Venerida;Veneroidea;Veneridae;Mercenaria;Mercenari  
 a mercenaria

UdeM00000007628 6565 228.4 UdeM00000007628 XP\_022324618.1 75.5 143  
 35 0 30 172 16 158 7.50E-57 228.4 6565 cellular  
 organisms;Eukaryota;Opisthokonta;Metazoa;Eumetazoa;Bilateria;Protostomia;  
 Spiralia;Lophotrochozoa;Mollusca;Bivalvia;Autobranchia;Pteriormorphia;Ostr  
 eida;Ostreoidea;Ostreidae;Crassostrea;Crassostrea virginica

UdeM00000007629 6596 3858.1 UdeM00000007629 XP\_045205276.1 69.1  
 2916 818 31 40 2918 14 2883 0.00E+00 3858.1 6596  
 cellular  
 organisms;Eukaryota;Opisthokonta;Metazoa;Eumetazoa;Bilateria;Protostomia;  
 Spiralia;Lophotrochozoa;Mollusca;Bivalvia;Autobranchia;Heteroconchia;Euhe  
 terodonta;Imparidentia;Venerida;Veneroidea;Veneridae;Mercenaria;Mercenari  
 a mercenaria

UdeM00000007630 6596 3863.9 UdeM00000007630 XP\_045205276.1 69.2  
 2908 824 29 40 2912 14 2883 0.00E+00 3863.9 6596  
 cellular  
 organisms;Eukaryota;Opisthokonta;Metazoa;Eumetazoa;Bilateria;Protostomia;  
 Spiralia;Lophotrochozoa;Mollusca;Bivalvia;Autobranchia;Heteroconchia;Euhe  
 terodonta;Imparidentia;Venerida;Veneroidea;Veneridae;Mercenaria;Mercenari  
 a mercenaria

UdeM00000007631 6596 3852.8 UdeM00000007631 XP\_045205276.1 69.2  
 2915 817 31 40 2917 14 2883 0.00E+00 3852.8 6596  
 cellular  
 organisms;Eukaryota;Opisthokonta;Metazoa;Eumetazoa;Bilateria;Protostomia;  
 Spiralia;Lophotrochozoa;Mollusca;Bivalvia;Autobranchia;Heteroconchia;Euhe  
 terodonta;Imparidentia;Venerida;Veneroidea;Veneridae;Mercenaria;Mercenari  
 a mercenaria

UdeM00000007632 6596 338.2 UdeM00000007632 XP\_045205276.1 63 265  
 96 1 1 263 2619 2883 9.40E-90 338.2 6596 cellular  
 organisms;Eukaryota;Opisthokonta;Metazoa;Eumetazoa;Bilateria;Protostomia;  
 Spiralia;Lophotrochozoa;Mollusca;Bivalvia;Autobranchia;Heteroconchia;Euhe

terodonta;Imparidentia;Venerida;Veneroidea;Veneridae;Mercenaria;Mercenaria mercenaria  
 UdeM00000007633 6579 914.8 UdeM00000007633 XP\_033742254.1 42.5 1209  
 464 24 182 1193 84 1258 1.10E-262 914.8 6579 cellular  
 organisms;Eukaryota;Opisthokonta;Metazoa;Eumetazoa;Bilateria;Protostomia;  
 Spiralia;Lophotrochozoa;Mollusca;Bivalvia;Autobranhia;Pteriomorphia;Pectinida;  
 Pectinoidea;Pectinidae;Pecten;Pecten maximus  
 UdeM00000007634 6596 409.5 UdeM00000007634 XP\_045205592.1 41 693  
 304 18 4 620 38 701 8.00E-111 409.5 6596 cellular  
 organisms;Eukaryota;Opisthokonta;Metazoa;Eumetazoa;Bilateria;Protostomia;  
 Spiralia;Lophotrochozoa;Mollusca;Bivalvia;Autobranhia;Heteroconchia;Euheterodonta;  
 Imparidentia;Venerida;Veneroidea;Veneridae;Mercenaria;Mercenaria mercenaria  
 UdeM00000007635 37653 498.8 UdeM00000007635 XP\_014775432.1 57.8 384  
 158 1 23 406 23 402 6.50E-138 498.8 37653 cellular  
 organisms;Eukaryota;Opisthokonta;Metazoa;Eumetazoa;Bilateria;Protostomia;  
 Spiralia;Lophotrochozoa;Mollusca;Cephalopoda;Coleoidea;Octopodiformes;Octopoda;  
 Incirrata;Octopodidae;Octopus;Octopus bimaculoides  
 UdeM00000007637 6573 488.8 UdeM00000007637 XP\_021366131.1 84.1 271  
 43 0 1 271 1 271 4.70E-135 488.8 6573 cellular  
 organisms;Eukaryota;Opisthokonta;Metazoa;Eumetazoa;Bilateria;Protostomia;  
 Spiralia;Lophotrochozoa;Mollusca;Bivalvia;Autobranhia;Pteriomorphia;Pectinida;  
 Pectinoidea;Pectinidae;Mizuhopecten;Mizuhopecten yessoensis  
 UdeM00000007638 6596 773.5 UdeM00000007638 XP\_045204079.1 70.4 557  
 159 3 75 626 79 634 2.10E-220 773.5 6596 cellular  
 organisms;Eukaryota;Opisthokonta;Metazoa;Eumetazoa;Bilateria;Protostomia;  
 Spiralia;Lophotrochozoa;Mollusca;Bivalvia;Autobranhia;Heteroconchia;Euheterodonta;  
 Imparidentia;Venerida;Veneroidea;Veneridae;Mercenaria;Mercenaria mercenaria  
 UdeM00000007639 6573 978.8 UdeM00000007639 XP\_021366190.1 50.5 1023  
 421 9 1 992 1 969 5.20E-282 978.8 6573 cellular  
 organisms;Eukaryota;Opisthokonta;Metazoa;Eumetazoa;Bilateria;Protostomia;  
 Spiralia;Lophotrochozoa;Mollusca;Bivalvia;Autobranhia;Pteriomorphia;Pectinida;  
 Pectinoidea;Pectinidae;Mizuhopecten;Mizuhopecten yessoensis  
 UdeM00000007640 72036 117.5 UdeM00000007640 XP\_040576246.1 42.6 162  
 87 3 4 163 6 163 1.60E-23 117.5 72036 cellular  
 organisms;Eukaryota;Opisthokonta;Metazoa;Eumetazoa;Bilateria;Protostomia;  
 Ecdysozoa;Panarthropoda;Arthropoda;Mandibulata;Pancrustacea;Crustacea;Multicrustacea;  
 Hexanauplia;Copepoda;Neocopepoda;Podoplea;Siphonostomatoida;Caligidae;Lepeophtheirus;  
 Lepeophtheirus salmonis  
 UdeM00000007641 1735272 144.8 UdeM00000007641 XP\_041349428.1 43.9  
 157 88 0 1 157 76 232 9.30E-32 144.8 1735272 cellular  
 organisms;Eukaryota;Opisthokonta;Metazoa;Eumetazoa;Bilateria;Protostomia;  
 Spiralia;Lophotrochozoa;Mollusca;Gastropoda;Neomphalina;Neomphaloidea;Peltospiridae;  
 Gigantopelta;Gigantopelta aegis  
 UdeM00000007643 50429 906 UdeM00000007643 XP\_022779498.1 99.1 446  
 4 0 1 446 1 446 1.90E-260 906 50429 cellular  
 organisms;Eukaryota;Opisthokonta;Metazoa;Eumetazoa;Cnidaria;Anthozoa;Hexacorallia;  
 Scleractinia;Astrocoeniina;Pocilloporidae;Stylophora;Stylophora pistillata  
 UdeM00000007644 7757 824.3 UdeM00000007644 XP\_032835470.1 88.9 442  
 49 0 1 442 1 442 7.40E-236 824.3 7757 cellular  
 organisms;Eukaryota;Opisthokonta;Metazoa;Eumetazoa;Bilateria;Deuterostomi

a;Chordata;Craniata;Vertebrata;Cyclostomata;Hyperoartia;Petromyzontiformes;Petromyzontidae;Petromyzon;Petromyzon marinus  
 UdeM00000007645 6596 552.4 UdeM00000007645 XP\_045205539.1 51.7 559  
 201 7 52 603 36 532 7.30E-154 552.4 6596 cellular  
 organisms;Eukaryota;Opisthokonta;Metazoa;Eumetazoa;Bilateria;Protostomia;Spiralia;Lophotrochozoa;Mollusca;Bivalvia;Autobranchia;Heteroconchia;Euherodonta;Imparidentia;Venerida;Veneroidea;Veneridae;Mercenaria;Mercenaria mercenaria  
 UdeM00000007646 6565 104 UdeM00000007646 XP\_022345797.1 45.8 107  
 57 1 102 208 14 119 2.40E-19 104 6565 cellular  
 organisms;Eukaryota;Opisthokonta;Metazoa;Eumetazoa;Bilateria;Protostomia;Spiralia;Lophotrochozoa;Mollusca;Bivalvia;Autobranchia;Pteriormorphia;Ostreida;Ostreoidea;Ostreidae;Crassostrea;Crassostrea virginica  
 UdeM00000007647 6579 336.3 UdeM00000007647 XP\_033743339.1 32.8 577  
 254 10 31 485 47 611 6.60E-89 336.3 6579 cellular  
 organisms;Eukaryota;Opisthokonta;Metazoa;Eumetazoa;Bilateria;Protostomia;Spiralia;Lophotrochozoa;Mollusca;Bivalvia;Autobranchia;Pteriormorphia;Pectinida;Pectinoidea;Pectinidae;Pecten;Pecten maximus  
 UdeM00000007648 6596 1922.5 UdeM00000007648 XP\_045203150.1 67.2  
 1401 400 7 120 1465 7 1402 0.00E+00 1922.5 6596  
 cellular  
 organisms;Eukaryota;Opisthokonta;Metazoa;Eumetazoa;Bilateria;Protostomia;Spiralia;Lophotrochozoa;Mollusca;Bivalvia;Autobranchia;Heteroconchia;Euherodonta;Imparidentia;Venerida;Veneroidea;Veneridae;Mercenaria;Mercenaria mercenaria  
 UdeM00000007649 6596 432.2 UdeM00000007649 XP\_045203151.1 49.5 529  
 235 15 1 522 1 504 9.50E-118 432.2 6596 cellular  
 organisms;Eukaryota;Opisthokonta;Metazoa;Eumetazoa;Bilateria;Protostomia;Spiralia;Lophotrochozoa;Mollusca;Bivalvia;Autobranchia;Heteroconchia;Euherodonta;Imparidentia;Venerida;Veneroidea;Veneridae;Mercenaria;Mercenaria mercenaria  
 UdeM00000007650 27687 162.5 UdeM00000007650 XP\_028673527.1 55.9 145  
 62 1 26 170 206 348 4.60E-37 162.5 27687 cellular  
 organisms;Eukaryota;Opisthokonta;Metazoa;Eumetazoa;Bilateria;Deuterostomia;Chordata;Craniata;Vertebrata;Gnathostomata;Teleostomi;Euteleostomi;Actinopterygii;Cladistia;Polypteriformes;Polypteridae;Erpetoichthys;Erpetoichthys calabaricus  
 UdeM00000007651 6596 70.9 UdeM00000007651 XP\_045203154.1 72.7 44  
 12 0 19 62 182 225 7.10E-10 70.9 6596 cellular  
 organisms;Eukaryota;Opisthokonta;Metazoa;Eumetazoa;Bilateria;Protostomia;Spiralia;Lophotrochozoa;Mollusca;Bivalvia;Autobranchia;Heteroconchia;Euherodonta;Imparidentia;Venerida;Veneroidea;Veneridae;Mercenaria;Mercenaria mercenaria  
 UdeM00000007652 6565 113.6 UdeM00000007652 XP\_022327962.1 40 150  
 90 0 42 191 169 318 2.80E-22 113.6 6565 cellular  
 organisms;Eukaryota;Opisthokonta;Metazoa;Eumetazoa;Bilateria;Protostomia;Spiralia;Lophotrochozoa;Mollusca;Bivalvia;Autobranchia;Pteriormorphia;Ostreida;Ostreoidea;Ostreidae;Crassostrea;Crassostrea virginica  
 UdeM00000007653 6565 274.2 UdeM00000007653 XP\_022327962.1 51.8 274  
 129 2 1 271 445 718 1.70E-70 274.2 6565 cellular  
 organisms;Eukaryota;Opisthokonta;Metazoa;Eumetazoa;Bilateria;Protostomia;Spiralia;Lophotrochozoa;Mollusca;Bivalvia;Autobranchia;Pteriormorphia;Ostreida;Ostreoidea;Ostreidae;Crassostrea;Crassostrea virginica



UdeM00000007654 6565 253.1 UdeM00000007654 XP\_022328361.1 61.8 186  
 68 1 6 188 4 189 2.90E-64 253.1 6565 cellular  
 organisms;Eukaryota;Opisthokonta;Metazoa;Eumetazoa;Bilateria;Protostomia;  
 Spiralia;Lophotrochozoa;Mollusca;Bivalvia;Autobranchia;Pteriomorphia;Ostr  
 eida;Ostreoidea;Ostreidae;Crassostrea;Crassostrea virginica  
 UdeM00000007655 6596 118.6 UdeM00000007655 XP\_045203153.1 52.9 104  
 48 1 1 103 94 197 5.30E-24 118.6 6596 cellular  
 organisms;Eukaryota;Opisthokonta;Metazoa;Eumetazoa;Bilateria;Protostomia;  
 Spiralia;Lophotrochozoa;Mollusca;Bivalvia;Autobranchia;Heteroconchia;Euhe  
 terodonta;Imparidentia;Venerida;Veneroidea;Veneridae;Mercenaria;Mercenari  
 a mercenaria  
 UdeM00000007656 6596 1159.8 UdeM00000007656 XP\_045203153.1 58.7  
 1167 411 17 67 1171 172 1329 0.00E+00 1159.8 6596  
 cellular  
 organisms;Eukaryota;Opisthokonta;Metazoa;Eumetazoa;Bilateria;Protostomia;  
 Spiralia;Lophotrochozoa;Mollusca;Bivalvia;Autobranchia;Heteroconchia;Euhe  
 terodonta;Imparidentia;Venerida;Veneroidea;Veneridae;Mercenaria;Mercenari  
 a mercenaria  
 UdeM00000007657 6596 662.1 UdeM00000007657 XP\_045203153.1 69.7 482  
 117 2 3 456 849 1329 4.90E-187 662.1 6596 cellular  
 organisms;Eukaryota;Opisthokonta;Metazoa;Eumetazoa;Bilateria;Protostomia;  
 Spiralia;Lophotrochozoa;Mollusca;Bivalvia;Autobranchia;Heteroconchia;Euhe  
 terodonta;Imparidentia;Venerida;Veneroidea;Veneridae;Mercenaria;Mercenari  
 a mercenaria  
 UdeM00000007658 6596 762.3 UdeM00000007658 XP\_045203523.1 77.6 482  
 98 1 1 472 1 482 3.70E-217 762.3 6596 cellular  
 organisms;Eukaryota;Opisthokonta;Metazoa;Eumetazoa;Bilateria;Protostomia;  
 Spiralia;Lophotrochozoa;Mollusca;Bivalvia;Autobranchia;Heteroconchia;Euhe  
 terodonta;Imparidentia;Venerida;Veneroidea;Veneridae;Mercenaria;Mercenari  
 a mercenaria  
 UdeM00000007659 6596 720.3 UdeM00000007659 XP\_045204688.1 54.1 691  
 300 5 1 674 1 691 2.30E-204 720.3 6596 cellular  
 organisms;Eukaryota;Opisthokonta;Metazoa;Eumetazoa;Bilateria;Protostomia;  
 Spiralia;Lophotrochozoa;Mollusca;Bivalvia;Autobranchia;Heteroconchia;Euhe  
 terodonta;Imparidentia;Venerida;Veneroidea;Veneridae;Mercenaria;Mercenari  
 a mercenaria  
 UdeM00000007660 80966 103.6 UdeM00000007660 XP\_022054011.1 34.8 135  
 85 3 89 222 24 156 3.40E-19 103.6 80966 cellular  
 organisms;Eukaryota;Opisthokonta;Metazoa;Eumetazoa;Bilateria;Deuterostomi  
 a;Chordata;Craniata;Vertebrata;Gnathostomata;Teleostomi;Euteleostomi;Acti  
 nopterygii;Actinopteri;Neopterygii;Teleostei;Osteoglossocephalai;Clupeoce  
 phala;Euteleosteomorpha;Neoteleostei;Eurypterygia;Ctenosquamata;Acanthomo  
 rphata;Euacanthomorphacea;Percomorphaceae;Ovalentaria;Ovalentaria  
 incertae sedis;Pomacentridae;Acanthochromis;Acanthochromis polyacanthus  
 UdeM00000007661 7741 99.8 UdeM00000007661 XP\_019639471.1 35.2 162  
 98 5 38 196 65 222 4.20E-18 99.8 7741 cellular  
 organisms;Eukaryota;Opisthokonta;Metazoa;Eumetazoa;Bilateria;Deuterostomi  
 a;Chordata;Cephalochordata;Leptocardii;Amphioxiformes;Branchiostomidae;Br  
 anchiostoma;Branchiostoma belcheri  
 UdeM00000007662 6500 102.8 UdeM00000007662 XP\_005097625.3 39.6 134  
 74 3 116 246 98 227 6.30E-19 102.8 6500 cellular  
 organisms;Eukaryota;Opisthokonta;Metazoa;Eumetazoa;Bilateria;Protostomia;  
 Spiralia;Lophotrochozoa;Mollusca;Gastropoda;Heterobranchia;Euthyneura;Tec  
 tipleura;Aplysiida;Aplysioidae;Aplysiidae;Aplysia;Aplysia californica

UdeM00000007663 6500 104 UdeM00000007663 XP\_005097625.3 37.6 141  
 83 4 88 225 87 225 2.60E-19 104 6500 cellular  
 organisms;Eukaryota;Opisthokonta;Metazoa;Eumetazoa;Bilateria;Protostomia;  
 Spiralia;Lophotrochozoa;Mollusca;Gastropoda;Heterobranchia;Euthyneura;Tec  
 tipleura;Aplysiida;Aplysioidea;Aplysiidae;Aplysia;Aplysia californica  
 UdeM00000007664 7741 96.7 UdeM00000007664 XP\_019638727.1 32.9 155  
 99 3 95 245 1 154 4.50E-17 96.7 7741 cellular  
 organisms;Eukaryota;Opisthokonta;Metazoa;Eumetazoa;Bilateria;Deuterostomi  
 a;Chordata;Cephalochordata;Leptocardii;Amphioxiformes;Branchiostomidae;Br  
 anchiostoma;Branchiostoma belcheri  
 UdeM00000007665 46514 101.3 UdeM00000007665 XP\_038076947.1 38 129  
 77 3 113 239 290 417 1.80E-18 101.3 46514 cellular  
 organisms;Eukaryota;Opisthokonta;Metazoa;Eumetazoa;Bilateria;Deuterostomi  
 a;Echinodermata;Eleutherozoa;Asterozoa;Asteroidea;Valvatacea;Valvatida;As  
 terinidae;Patiria;Patiria miniata  
 UdeM00000007666 113540 102.8 UdeM00000007666 XP\_029108920.1 36.2  
 141 82 4 83 221 10 144 5.70E-19 102.8 113540  
 cellular  
 organisms;Eukaryota;Opisthokonta;Metazoa;Eumetazoa;Bilateria;Deuterostomi  
 a;Chordata;Craniata;Vertebrata;Gnathostomata;Teleostomi;Euteleostomi;Acti  
 nopterygii;Actinopteri;Neopterygii;Teleostei;Osteoglossocephalai;Osteoglo  
 ssocephala;Osteoglossomorpha;Osteoglossiformes;Osteoglossidae;Scleropages  
 ;Scleropages formosus  
 UdeM00000007667 8090 92 UdeM00000007667 XP\_011487723.2 37.4 115  
 66 2 61 174 118 227 7.90E-16 92 8090 cellular  
 organisms;Eukaryota;Opisthokonta;Metazoa;Eumetazoa;Bilateria;Deuterostomi  
 a;Chordata;Craniata;Vertebrata;Gnathostomata;Teleostomi;Euteleostomi;Acti  
 nopterygii;Actinopteri;Neopterygii;Teleostei;Osteoglossocephalai;Clupeoce  
 phala;Euteleosteomorpha;Neoteleostei;Eurypterygia;Ctenosquamata;Acanthomo  
 rphata;Euacanthomorphacea;Percomorphaceae;Ovalentaria;Atherinomorphae;Bel  
 oniformes;Adrianichthyoidei;Adrianichthyidae;Oryziinae;Oryzias;Oryzias  
 latipes  
 UdeM00000007668 8090 92 UdeM00000007668 XP\_011487723.2 37.4 115  
 66 2 91 204 118 227 9.20E-16 92 8090 cellular  
 organisms;Eukaryota;Opisthokonta;Metazoa;Eumetazoa;Bilateria;Deuterostomi  
 a;Chordata;Craniata;Vertebrata;Gnathostomata;Teleostomi;Euteleostomi;Acti  
 nopterygii;Actinopteri;Neopterygii;Teleostei;Osteoglossocephalai;Clupeoce  
 phala;Euteleosteomorpha;Neoteleostei;Eurypterygia;Ctenosquamata;Acanthomo  
 rphata;Euacanthomorphacea;Percomorphaceae;Ovalentaria;Atherinomorphae;Bel  
 oniformes;Adrianichthyoidei;Adrianichthyidae;Oryziinae;Oryzias;Oryzias  
 latipes  
 UdeM00000007669 1250792 93.6 UdeM00000007669 XP\_041823013.1 34.1  
 123 73 2 89 203 33 155 3.20E-16 93.6 1250792  
 cellular  
 organisms;Eukaryota;Opisthokonta;Metazoa;Eumetazoa;Bilateria;Deuterostomi  
 a;Chordata;Craniata;Vertebrata;Gnathostomata;Teleostomi;Euteleostomi;Acti  
 nopterygii;Actinopteri;Neopterygii;Teleostei;Osteoglossocephalai;Clupeoce  
 phala;Euteleosteomorpha;Neoteleostei;Eurypterygia;Ctenosquamata;Acanthomo  
 rphata;Euacanthomorphacea;Percomorphaceae;Ovalentaria;Atherinomorphae;Ath  
 eriniformes;Melanotaeniidae;Melanotaenia;Melanotaenia boesemani  
 UdeM00000007670 1250792 82 UdeM00000007670 XP\_041823010.1 33.9  
 112 66 2 89 192 33 144 9.00E-13 82 1250792  
 cellular  
 organisms;Eukaryota;Opisthokonta;Metazoa;Eumetazoa;Bilateria;Deuterostomi

a;Chordata;Craniata;Vertebrata;Gnathostomata;Teleostomi;Euteleostomi;Actinopterygii;Actinopteri;Neopterygii;Teleostei;Osteoglossocephalai;Clupeocephala;Euteleostei;Neoteleostei;Eurypterygia;Ctenosquamata;Acanthomorpha;Euacanthomorpha;Percomorphaceae;Ovalentaria;Atherinomorpha;Atheriniformes;Melanotaeniidae;Melanotaenia;Melanotaenia boesemani

UdeM00000007671 6596 497.3 UdeM00000007671 XP\_045158043.1 42.3 622  
325 9 480 1091 184 781 5.00E-137 497.3 6596 cellular  
organisms;Eukaryota;Opisthokonta;Metazoa;Eumetazoa;Bilateria;Protostomia;  
Spiralia;Lophotrochozoa;Mollusca;Bivalvia;Autobranchia;Heteroconchia;Euhe-  
terodonta;Imparidentia;Venerida;Veneroidea;Veneridae;Mercenaria;Mercenari-  
a mercenaria

UdeM00000007672 6596 497.3 UdeM00000007672 XP\_045158043.1 42.3 622  
325 9 480 1091 184 781 5.00E-137 497.3 6596 cellular  
organisms;Eukaryota;Opisthokonta;Metazoa;Eumetazoa;Bilateria;Protostomia;  
Spiralia;Lophotrochozoa;Mollusca;Bivalvia;Autobranchia;Heteroconchia;Euhe-  
terodonta;Imparidentia;Venerida;Veneroidea;Veneridae;Mercenaria;Mercenari-  
a mercenaria

UdeM00000007674 6596 92 UdeM00000007674 XP\_045206721.1 38.6 176  
87 8 114 274 555 724 3.90E-15 92 6596 cellular  
organisms;Eukaryota;Opisthokonta;Metazoa;Eumetazoa;Bilateria;Protostomia;  
Spiralia;Lophotrochozoa;Mollusca;Bivalvia;Autobranchia;Heteroconchia;Euhe-  
terodonta;Imparidentia;Venerida;Veneroidea;Veneridae;Mercenaria;Mercenari-  
a mercenaria

UdeM00000007676 6596 89 UdeM00000007676 XP\_045209795.1 32.3 167  
107 3 46 208 1070 1234 2.00E-14 89 6596 cellular  
organisms;Eukaryota;Opisthokonta;Metazoa;Eumetazoa;Bilateria;Protostomia;  
Spiralia;Lophotrochozoa;Mollusca;Bivalvia;Autobranchia;Heteroconchia;Euhe-  
terodonta;Imparidentia;Venerida;Veneroidea;Veneridae;Mercenaria;Mercenari-  
a mercenaria

UdeM00000007677 6596 84 UdeM00000007677 XP\_045206721.1 41.4 152  
72 8 17 158 580 724 2.60E-13 84 6596 cellular  
organisms;Eukaryota;Opisthokonta;Metazoa;Eumetazoa;Bilateria;Protostomia;  
Spiralia;Lophotrochozoa;Mollusca;Bivalvia;Autobranchia;Heteroconchia;Euhe-  
terodonta;Imparidentia;Venerida;Veneroidea;Veneridae;Mercenaria;Mercenari-  
a mercenaria

UdeM00000007678 6945 77.8 UdeM00000007678 XP\_040070793.1 31.7 142  
85 2 2 133 572 711 1.20E-11 77.8 6945 cellular  
organisms;Eukaryota;Opisthokonta;Metazoa;Eumetazoa;Bilateria;Protostomia;  
Ecdysozoa;Panarthropoda;Arthropoda;Chelicerata;Arachnida;Acari;Parasitifo-  
rmes;Ixodida;Ixodoidea;Ixodidae;Ixodinae;Ixodes;Ixodes scapularis

UdeM00000007679 6565 506.9 UdeM00000007679 XP\_022315266.1 42.9 622  
323 10 210 820 539 1139 4.80E-140 506.9 6565 cellular  
organisms;Eukaryota;Opisthokonta;Metazoa;Eumetazoa;Bilateria;Protostomia;  
Spiralia;Lophotrochozoa;Mollusca;Bivalvia;Autobranchia;Pteriomorpha;Ostr-  
eida;Ostreoidea;Ostreidae;Crassostrea;Crassostrea virginica

UdeM00000007680 6565 464.5 UdeM00000007680 XP\_022315266.1 39.5 676  
322 15 93 708 490 1138 2.40E-127 464.5 6565 cellular  
organisms;Eukaryota;Opisthokonta;Metazoa;Eumetazoa;Bilateria;Protostomia;  
Spiralia;Lophotrochozoa;Mollusca;Bivalvia;Autobranchia;Pteriomorpha;Ostr-  
eida;Ostreoidea;Ostreidae;Crassostrea;Crassostrea virginica

UdeM00000007682 6565 134.4 UdeM00000007682 XP\_022287605.1 34.2 263  
137 9 5 250 102 345 2.20E-28 134.4 6565 cellular  
organisms;Eukaryota;Opisthokonta;Metazoa;Eumetazoa;Bilateria;Protostomia;

Spiralia;Lophotrochozoa;Mollusca;Bivalvia;Autobranchia;Pteriormorphia;Ostr  
eida;Ostreoidea;Ostreidae;Crassostrea;Crassostrea virginica  
UdeM00000007683 29159 155.2 UdeM00000007683 XP\_034307878.1 34.7 239  
147 3 111 344 13 247 1.70E-34 155.2 29159 cellular  
organisms;Eukaryota;Opisthokonta;Metazoa;Eumetazoa;Bilateria;Protostomia;  
Spiralia;Lophotrochozoa;Mollusca;Bivalvia;Autobranchia;Pteriormorphia;Ostr  
eida;Ostreoidea;Ostreidae;Crassostrea;Crassostrea gigas  
UdeM00000007684 6596 100.9 UdeM00000007684 XP\_045203692.1 69.4 72  
22 0 25 96 295 366 1.70E-18 100.9 6596 cellular  
organisms;Eukaryota;Opisthokonta;Metazoa;Eumetazoa;Bilateria;Protostomia;  
Spiralia;Lophotrochozoa;Mollusca;Bivalvia;Autobranchia;Heteroconchia;Euhe  
terodonta;Imparidentia;Venerida;Veneroidea;Veneridae;Mercenaria;Mercenari  
a mercenaria  
UdeM00000007685 6596 61.6 UdeM00000007685 XP\_045206721.1 31.2 173  
92 7 3 168 572 724 4.70E-06 61.6 6596 cellular  
organisms;Eukaryota;Opisthokonta;Metazoa;Eumetazoa;Bilateria;Protostomia;  
Spiralia;Lophotrochozoa;Mollusca;Bivalvia;Autobranchia;Heteroconchia;Euhe  
terodonta;Imparidentia;Venerida;Veneroidea;Veneridae;Mercenaria;Mercenari  
a mercenaria  
UdeM00000007686 1250792 98.6 UdeM00000007686 XP\_041823013.1 34.1  
123 73 2 89 203 33 155 9.90E-18 98.6 1250792  
cellular  
organisms;Eukaryota;Opisthokonta;Metazoa;Eumetazoa;Bilateria;Deuterostomi  
a;Chordata;Craniata;Vertebrata;Gnathostomata;Teleostomi;Euteleostomi;Acti  
nopterygii;Actinopteri;Neopterygii;Teleostei;Osteoglossocephalai;Clupeoce  
phala;Euteleosteomorpha;Neoteleostei;Eurypterygia;Ctenosquamata;Acanthomo  
rphata;Euacanthomorphacea;Percomorphaceae;Ovalentaria;Atherinomorphae;Ath  
eriniformes;Melanotaeniidae;Melanotaenia;Melanotaenia boesemani  
UdeM00000007687 6596 489.6 UdeM00000007687 XP\_045158043.1 41.4 637  
336 9 28 658 176 781 6.30E-135 489.6 6596 cellular  
organisms;Eukaryota;Opisthokonta;Metazoa;Eumetazoa;Bilateria;Protostomia;  
Spiralia;Lophotrochozoa;Mollusca;Bivalvia;Autobranchia;Heteroconchia;Euhe  
terodonta;Imparidentia;Venerida;Veneroidea;Veneridae;Mercenaria;Mercenari  
a mercenaria  
UdeM00000007688 6596 490.3 UdeM00000007688 XP\_045205438.1 38.3 732  
404 13 446 1170 736 1426 6.60E-135 490.3 6596 cellular  
organisms;Eukaryota;Opisthokonta;Metazoa;Eumetazoa;Bilateria;Protostomia;  
Spiralia;Lophotrochozoa;Mollusca;Bivalvia;Autobranchia;Heteroconchia;Euhe  
terodonta;Imparidentia;Venerida;Veneroidea;Veneridae;Mercenaria;Mercenari  
a mercenaria  
UdeM00000007689 6596 110.2 UdeM00000007689 XP\_045209796.1 31.3 632  
338 15 52 603 573 1188 1.80E-20 110.2 6596 cellular  
organisms;Eukaryota;Opisthokonta;Metazoa;Eumetazoa;Bilateria;Protostomia;  
Spiralia;Lophotrochozoa;Mollusca;Bivalvia;Autobranchia;Heteroconchia;Euhe  
terodonta;Imparidentia;Venerida;Veneroidea;Veneridae;Mercenaria;Mercenari  
a mercenaria  
UdeM00000007690 6596 453 UdeM00000007690 XP\_045158043.1 40.9 618  
334 10 439 1048 187 781 1.00E-123 453 6596 cellular  
organisms;Eukaryota;Opisthokonta;Metazoa;Eumetazoa;Bilateria;Protostomia;  
Spiralia;Lophotrochozoa;Mollusca;Bivalvia;Autobranchia;Heteroconchia;Euhe  
terodonta;Imparidentia;Venerida;Veneroidea;Veneridae;Mercenaria;Mercenari  
a mercenaria  
UdeM00000007691 6596 455.7 UdeM00000007691 XP\_045158043.1 40.7 632  
330 11 439 1062 187 781 1.60E-124 455.7 6596 cellular

organisms;Eukaryota;Opisthokonta;Metazoa;Eumetazoa;Bilateria;Protostomia;Spiralia;Lophotrochozoa;Mollusca;Bivalvia;Autobranchia;Heteroconchia;Euherodonta;Imparidentia;Venerida;Veneroidea;Veneridae;Mercenaria;Mercenaria mercenaria

UdeM00000007692 6565 494.6 UdeM00000007692 XP\_022315266.1 40.7 670  
343 13 93 729 490 1138 2.20E-136 494.6 6565 cellular

organisms;Eukaryota;Opisthokonta;Metazoa;Eumetazoa;Bilateria;Protostomia;Spiralia;Lophotrochozoa;Mollusca;Bivalvia;Autobranchia;Pteriormorphia;Ostreida;Ostreioidea;Ostreidae;Crassostrea;Crassostrea virginica

UdeM00000007696 6565 138.7 UdeM00000007696 XP\_022287605.1 32.9 286  
154 11 5 274 102 365 1.20E-29 138.7 6565 cellular

organisms;Eukaryota;Opisthokonta;Metazoa;Eumetazoa;Bilateria;Protostomia;Spiralia;Lophotrochozoa;Mollusca;Bivalvia;Autobranchia;Pteriormorphia;Ostreida;Ostreioidea;Ostreidae;Crassostrea;Crassostrea virginica

UdeM00000007697 29159 106.7 UdeM00000007697 XP\_034307878.1 33.3 174  
107 3 88 256 78 247 5.30E-20 106.7 29159 cellular

organisms;Eukaryota;Opisthokonta;Metazoa;Eumetazoa;Bilateria;Protostomia;Spiralia;Lophotrochozoa;Mollusca;Bivalvia;Autobranchia;Pteriormorphia;Ostreida;Ostreioidea;Ostreidae;Crassostrea;Crassostrea gigas

UdeM00000007698 6579 335.1 UdeM00000007698 XP\_033752673.1 52.9 314  
99 1 1 265 339 652 8.10E-89 335.1 6579 cellular

organisms;Eukaryota;Opisthokonta;Metazoa;Eumetazoa;Bilateria;Protostomia;Spiralia;Lophotrochozoa;Mollusca;Bivalvia;Autobranchia;Pteriormorphia;Pectinida;Pectinoidea;Pectinidae;Pecten;Pecten maximus

UdeM00000007699 6579 60.8 UdeM00000007699 XP\_033734087.1 44.4 72  
40 0 4 75 19 90 1.00E-06 60.8 6579 cellular

organisms;Eukaryota;Opisthokonta;Metazoa;Eumetazoa;Bilateria;Protostomia;Spiralia;Lophotrochozoa;Mollusca;Bivalvia;Autobranchia;Pteriormorphia;Pectinida;Pectinoidea;Pectinidae;Pecten;Pecten maximus

UdeM00000007700 6565 494.6 UdeM00000007700 XP\_022315266.1 40.7 668  
361 12 434 1088 494 1139 3.30E-136 494.6 6565 cellular

organisms;Eukaryota;Opisthokonta;Metazoa;Eumetazoa;Bilateria;Protostomia;Spiralia;Lophotrochozoa;Mollusca;Bivalvia;Autobranchia;Pteriormorphia;Ostreida;Ostreioidea;Ostreidae;Crassostrea;Crassostrea virginica

UdeM00000007701 29159 65.5 UdeM00000007701 XP\_034311339.1 30.6 183  
110 7 20 194 177 350 2.40E-07 65.5 29159 cellular

organisms;Eukaryota;Opisthokonta;Metazoa;Eumetazoa;Bilateria;Protostomia;Spiralia;Lophotrochozoa;Mollusca;Bivalvia;Autobranchia;Pteriormorphia;Ostreida;Ostreioidea;Ostreidae;Crassostrea;Crassostrea gigas

UdeM00000007704 6596 67.4 UdeM00000007704 XP\_045206721.1 35.8 151  
83 5 22 164 580 724 2.00E-08 67.4 6596 cellular

organisms;Eukaryota;Opisthokonta;Metazoa;Eumetazoa;Bilateria;Protostomia;Spiralia;Lophotrochozoa;Mollusca;Bivalvia;Autobranchia;Heteroconchia;Euherodonta;Imparidentia;Venerida;Veneroidea;Veneridae;Mercenaria;Mercenaria mercenaria

UdeM00000007705 6596 485.3 UdeM00000007705 XP\_045205438.1 40.7 631  
338 10 385 1007 824 1426 1.80E-133 485.3 6596 cellular

organisms;Eukaryota;Opisthokonta;Metazoa;Eumetazoa;Bilateria;Protostomia;Spiralia;Lophotrochozoa;Mollusca;Bivalvia;Autobranchia;Heteroconchia;Euherodonta;Imparidentia;Venerida;Veneroidea;Veneridae;Mercenaria;Mercenaria mercenaria

UdeM00000007706 1735272 62.8 UdeM00000007706 XP\_041379294.1 35.5  
93 57 2 356 445 9 101 1.60E-06 62.8 1735272

cellular

organisms;Eukaryota;Opisthokonta;Metazoa;Eumetazoa;Bilateria;Protostomia;Spiralia;Lophotrochozoa;Mollusca;Gastropoda;Neomphalina;Neomphaloidea;Peltospiridae;Gigantopelta;Gigantopelta aegis

UdeM00000007712 6565 478.8 UdeM00000007712 XP\_022315266.1 40.6 668  
359 13 241 893 494 1138 1.50E-131 478.8 6565 cellular

organisms;Eukaryota;Opisthokonta;Metazoa;Eumetazoa;Bilateria;Protostomia;Spiralia;Lophotrochozoa;Mollusca;Bivalvia;Autobranchia;Pteriomorpha;Ostreida;Ostreoidea;Ostreidae;Crassostrea;Crassostrea virginica

UdeM00000007713 6596 495 UdeM00000007713 XP\_045206611.1 37.3 748  
413 15 278 1008 392 1100 2.30E-136 495 6596 cellular

organisms;Eukaryota;Opisthokonta;Metazoa;Eumetazoa;Bilateria;Protostomia;Spiralia;Lophotrochozoa;Mollusca;Bivalvia;Autobranchia;Heteroconchia;Euheterodonta;Imparidentia;Venerida;Veneroidea;Veneridae;Mercenaria;Mercenaria mercenaria

UdeM00000007715 6596 74.3 UdeM00000007715 XP\_045206721.1 34.5 148  
89 3 22 164 580 724 5.00E-10 74.3 6596 cellular

organisms;Eukaryota;Opisthokonta;Metazoa;Eumetazoa;Bilateria;Protostomia;Spiralia;Lophotrochozoa;Mollusca;Bivalvia;Autobranchia;Heteroconchia;Euheterodonta;Imparidentia;Venerida;Veneroidea;Veneridae;Mercenaria;Mercenaria mercenaria

UdeM00000007716 6596 491.1 UdeM00000007716 XP\_045205438.1 41 631  
336 10 541 1163 824 1426 3.80E-135 491.1 6596 cellular

organisms;Eukaryota;Opisthokonta;Metazoa;Eumetazoa;Bilateria;Protostomia;Spiralia;Lophotrochozoa;Mollusca;Bivalvia;Autobranchia;Heteroconchia;Euheterodonta;Imparidentia;Venerida;Veneroidea;Veneridae;Mercenaria;Mercenaria mercenaria

UdeM00000043712 6596 293.1 UdeM00000043712 XP\_045189084.1 32.3 607  
296 12 1 597 1350 1851 1.10E-75 293.1 6596 cellular

organisms;Eukaryota;Opisthokonta;Metazoa;Eumetazoa;Bilateria;Protostomia;Spiralia;Lophotrochozoa;Mollusca;Bivalvia;Autobranchia;Heteroconchia;Euheterodonta;Imparidentia;Venerida;Veneroidea;Veneridae;Mercenaria;Mercenaria mercenaria

UdeM00000043713 6596 283.5 UdeM00000043713 XP\_045189084.1 29.9 669  
324 10 1 664 1350 1878 9.40E-73 283.5 6596 cellular

organisms;Eukaryota;Opisthokonta;Metazoa;Eumetazoa;Bilateria;Protostomia;Spiralia;Lophotrochozoa;Mollusca;Bivalvia;Autobranchia;Heteroconchia;Euheterodonta;Imparidentia;Venerida;Veneroidea;Veneridae;Mercenaria;Mercenaria mercenaria

UdeM00000043716 6596 247.3 UdeM00000043716 XP\_045189084.1 31.5 546  
268 8 1 542 1350 1793 6.50E-62 247.3 6596 cellular

organisms;Eukaryota;Opisthokonta;Metazoa;Eumetazoa;Bilateria;Protostomia;Spiralia;Lophotrochozoa;Mollusca;Bivalvia;Autobranchia;Heteroconchia;Euheterodonta;Imparidentia;Venerida;Veneroidea;Veneridae;Mercenaria;Mercenaria mercenaria

UdeM00000043717 1735272 176 UdeM00000043717 XP\_041378840.1 55.8  
147 64 1 118 264 2 147 6.30E-41 176 1735272  
cellular

organisms;Eukaryota;Opisthokonta;Metazoa;Eumetazoa;Bilateria;Protostomia;Spiralia;Lophotrochozoa;Mollusca;Gastropoda;Neomphalina;Neomphaloidea;Peltospiridae;Gigantopelta;Gigantopelta aegis

UdeM00000043718 1735272 184.5 UdeM00000043718 XP\_041378840.1 45  
200 84 2 1 200 303 476 1.30E-43 184.5 1735272  
cellular

organisms;Eukaryota;Opisthokonta;Metazoa;Eumetazoa;Bilateria;Protostomia;

Spiralia;Lophotrochozoa;Mollusca;Gastropoda;Neomphalina;Neomphaloidea;Pel  
tospiridae;Gigantopelta;Gigantopelta aegis  
UdeM00000043719 1735272 443.7 UdeM00000043719 XP\_041347065.1 56.8  
417 167 4 17 421 75 490 2.70E-121 443.7 1735272  
cellular  
organisms;Eukaryota;Opisthokonta;Metazoa;Eumetazoa;Bilateria;Protostomia;  
Spiralia;Lophotrochozoa;Mollusca;Gastropoda;Neomphalina;Neomphaloidea;Pel  
tospiridae;Gigantopelta;Gigantopelta aegis  
UdeM00000043720 6596 94.4 UdeM00000043720 XP\_045177779.1 32.5 243  
131 9 4 235 176 396 2.20E-16 94.4 6596 cellular  
organisms;Eukaryota;Opisthokonta;Metazoa;Eumetazoa;Bilateria;Protostomia;  
Spiralia;Lophotrochozoa;Mollusca;Bivalvia;Autobranchia;Heteroconchia;Euhe  
terodonta;Imparidentia;Venerida;Veneroidea;Veneridae;Mercenaria;Mercenari  
a mercenaria  
UdeM00000043744 6596 426.8 UdeM00000043744 XP\_045188970.1 56.9 343  
143 2 557 894 144 486 6.80E-116 426.8 6596 cellular  
organisms;Eukaryota;Opisthokonta;Metazoa;Eumetazoa;Bilateria;Protostomia;  
Spiralia;Lophotrochozoa;Mollusca;Bivalvia;Autobranchia;Heteroconchia;Euhe  
terodonta;Imparidentia;Venerida;Veneroidea;Veneridae;Mercenaria;Mercenari  
a mercenaria  
UdeM00000043745 225164 107.8 UdeM00000043745 XP\_009061451.1 63.6  
66 24 0 31 96 28 93 7.90E-21 107.8 225164  
cellular  
organisms;Eukaryota;Opisthokonta;Metazoa;Eumetazoa;Bilateria;Protostomia;  
Spiralia;Lophotrochozoa;Mollusca;Gastropoda;Patellogastropoda;Lottioidea;  
Lottiidae;Lottia;Lottia gigantea  
UdeM00000043746 6579 193.4 UdeM00000043746 XP\_033757489.1 57.2 152  
61 1 66 217 13 160 3.30E-46 193.4 6579 cellular  
organisms;Eukaryota;Opisthokonta;Metazoa;Eumetazoa;Bilateria;Protostomia;  
Spiralia;Lophotrochozoa;Mollusca;Bivalvia;Autobranchia;Pteriormorphia;Pect  
inida;Pectinoidea;Pectinidae;Pecten;Pecten maximus  
UdeM00000043747 6579 310.5 UdeM00000043747 XP\_033757358.1 77 200  
44 2 142 339 178 377 2.70E-81 310.5 6579 cellular  
organisms;Eukaryota;Opisthokonta;Metazoa;Eumetazoa;Bilateria;Protostomia;  
Spiralia;Lophotrochozoa;Mollusca;Bivalvia;Autobranchia;Pteriormorphia;Pect  
inida;Pectinoidea;Pectinidae;Pecten;Pecten maximus  
UdeM00000043748 6573 668.7 UdeM00000043748 XP\_021340985.1 73.8 435  
113 1 8 441 1 435 5.10E-189 668.7 6573 cellular  
organisms;Eukaryota;Opisthokonta;Metazoa;Eumetazoa;Bilateria;Protostomia;  
Spiralia;Lophotrochozoa;Mollusca;Bivalvia;Autobranchia;Pteriormorphia;Pect  
inida;Pectinoidea;Pectinidae;Mizuhopecten;Mizuhopecten yessoensis  
UdeM00000043750 6573 159.5 UdeM00000043750 XP\_021371916.1 30.5 338  
218 6 339 661 354 689 3.90E-35 159.5 6573 cellular  
organisms;Eukaryota;Opisthokonta;Metazoa;Eumetazoa;Bilateria;Protostomia;  
Spiralia;Lophotrochozoa;Mollusca;Bivalvia;Autobranchia;Pteriormorphia;Pect  
inida;Pectinoidea;Pectinidae;Mizuhopecten;Mizuhopecten yessoensis  
UdeM00000043751 6596 915.6 UdeM00000043751 XP\_045189234.1 50 1149  
494 24 17 1096 93 1230 6.00E-263 915.6 6596 cellular  
organisms;Eukaryota;Opisthokonta;Metazoa;Eumetazoa;Bilateria;Protostomia;  
Spiralia;Lophotrochozoa;Mollusca;Bivalvia;Autobranchia;Heteroconchia;Euhe  
terodonta;Imparidentia;Venerida;Veneroidea;Veneridae;Mercenaria;Mercenari  
a mercenaria  
UdeM00000043752 6596 409.8 UdeM00000043752 XP\_045189024.1 44.1 438  
237 5 31 463 31 465 4.60E-111 409.8 6596 cellular

organisms;Eukaryota;Opisthokonta;Metazoa;Eumetazoa;Bilateria;Protostomia; Spiralia;Lophotrochozoa;Mollusca;Bivalvia;Autobranchia;Heteroconchia;Euherodonta;Imparidentia;Venerida;Veneroidea;Veneridae;Mercenaria;Mercenaria mercenaria

UdeM00000043753 6596 335.5 UdeM00000043753 XP\_045189102.1 44.1 372  
195 5 1 360 1 371 1.20E-88 335.5 6596 cellular

organisms;Eukaryota;Opisthokonta;Metazoa;Eumetazoa;Bilateria;Protostomia; Spiralia;Lophotrochozoa;Mollusca;Bivalvia;Autobranchia;Heteroconchia;Euherodonta;Imparidentia;Venerida;Veneroidea;Veneridae;Mercenaria;Mercenaria mercenaria

UdeM00000043754 29159 330.5 UdeM00000043754 XP\_011423614.2 46.5 437  
207 12 21 438 36 464 3.30E-87 330.5 29159 cellular

organisms;Eukaryota;Opisthokonta;Metazoa;Eumetazoa;Bilateria;Protostomia; Spiralia;Lophotrochozoa;Mollusca;Bivalvia;Autobranchia;Pteriomorpha;Ostreida;Ostreoidea;Ostreidae;Crassostrea;Crassostrea gigas

UdeM00000043755 29159 328.9 UdeM00000043755 XP\_011423614.2 45.8 437  
209 11 21 437 36 464 9.50E-87 328.9 29159 cellular

organisms;Eukaryota;Opisthokonta;Metazoa;Eumetazoa;Bilateria;Protostomia; Spiralia;Lophotrochozoa;Mollusca;Bivalvia;Autobranchia;Pteriomorpha;Ostreida;Ostreoidea;Ostreidae;Crassostrea;Crassostrea gigas

UdeM00000043756 6596 349.4 UdeM00000043756 XP\_045190577.1 67.6 244  
76 2 1 241 33 276 3.80E-93 349.4 6596 cellular

organisms;Eukaryota;Opisthokonta;Metazoa;Eumetazoa;Bilateria;Protostomia; Spiralia;Lophotrochozoa;Mollusca;Bivalvia;Autobranchia;Heteroconchia;Euherodonta;Imparidentia;Venerida;Veneroidea;Veneridae;Mercenaria;Mercenaria mercenaria

UdeM00000043757 6238 69.7 UdeM00000043757 XP\_002630377.1 51.5 66  
29 1 22 87 24 86 1.20E-08 69.7 6238 cellular

organisms;Eukaryota;Opisthokonta;Metazoa;Eumetazoa;Bilateria;Protostomia; Ecdysozoa;Nematoda;Chromadorea;Rhabditida;Rhabditina;Rhabditomorpha;Rhabditoidea;Rhabditidae;Peloderinae;Caenorhabditis;Caenorhabditis briggsae

UdeM00000043759 45264 353.6 UdeM00000043759 XP\_044165143.1 48.3 389  
140 4 54 381 85 473 3.20E-94 353.6 45264 cellular

organisms;Eukaryota;Opisthokonta;Metazoa;Eumetazoa;Cnidaria;Anthozoa;Hexacorallia;Scleractinia;Astrocoeniina;Acroporidae;Acropora;Acropora millepora

UdeM00000043760 45264 92 UdeM00000043760 XP\_044165143.1 45.8 107  
56 2 2 106 367 473 5.20E-16 92 45264 cellular

organisms;Eukaryota;Opisthokonta;Metazoa;Eumetazoa;Cnidaria;Anthozoa;Hexacorallia;Scleractinia;Astrocoeniina;Acroporidae;Acropora;Acropora millepora

UdeM00000043761 45264 211.5 UdeM00000043761 XP\_044184031.1 43.4 281  
128 7 1 257 213 486 1.30E-51 211.5 45264 cellular

organisms;Eukaryota;Opisthokonta;Metazoa;Eumetazoa;Cnidaria;Anthozoa;Hexacorallia;Scleractinia;Astrocoeniina;Acroporidae;Acropora;Acropora millepora

UdeM00000043762 45264 97.8 UdeM00000043762 XP\_044184709.1 51.7 87  
42 0 38 124 55 141 2.20E-17 97.8 45264 cellular

organisms;Eukaryota;Opisthokonta;Metazoa;Eumetazoa;Cnidaria;Anthozoa;Hexacorallia;Scleractinia;Astrocoeniina;Acroporidae;Acropora;Acropora millepora

UdeM00000043764 6596 394.4 UdeM00000043764 XP\_045189151.1 45.5 510  
268 5 11 513 16 522 2.20E-106 394.4 6596 cellular

organisms;Eukaryota;Opisthokonta;Metazoa;Eumetazoa;Bilateria;Protostomia;



Spiralia;Lophotrochozoa;Mollusca;Bivalvia;Autobranchia;Heteroconchia;Euherodonta;Imparidentia;Venerida;Veneroidea;Veneridae;Mercenaria;Mercenaria mercenaria

UdeM00000043765 6579 647.5 UdeM00000043765 XP\_033756082.1 62.8 532  
180 4 1 518 1 528 1.40E-182 647.5 6579 cellular

organisms;Eukaryota;Opisthokonta;Metazoa;Eumetazoa;Bilateria;Protostomia;Spiralia;Lophotrochozoa;Mollusca;Bivalvia;Autobranchia;Pteriomorpha;Pectinida;Pectinoidea;Pectinidae;Pecten;Pecten maximus

UdeM00000043766 6579 374 UdeM00000043766 XP\_033756095.1 53 334  
148 2 143 476 32 356 2.90E-100 374 6579 cellular

organisms;Eukaryota;Opisthokonta;Metazoa;Eumetazoa;Bilateria;Protostomia;Spiralia;Lophotrochozoa;Mollusca;Bivalvia;Autobranchia;Pteriomorpha;Pectinida;Pectinoidea;Pectinidae;Pecten;Pecten maximus

UdeM00000043767 225164 444.9 UdeM00000043767 XP\_009064258.1 58.8  
357 147 0 1 357 1 357 1.00E-121 444.9 225164

cellular

organisms;Eukaryota;Opisthokonta;Metazoa;Eumetazoa;Bilateria;Protostomia;Spiralia;Lophotrochozoa;Mollusca;Gastropoda;Patellogastropoda;Lottioidea;Lottiidae;Lottia;Lottia gigantea

UdeM00000043768 225164 500.4 UdeM00000043768 XP\_009064258.1 65.2  
368 122 2 1 367 1 363 2.00E-138 500.4 225164

cellular

organisms;Eukaryota;Opisthokonta;Metazoa;Eumetazoa;Bilateria;Protostomia;Spiralia;Lophotrochozoa;Mollusca;Gastropoda;Patellogastropoda;Lottioidea;Lottiidae;Lottia;Lottia gigantea

UdeM00000043769 6596 178.7 UdeM00000043769 XP\_045189280.1 49.5 190  
91 3 333 521 364 549 1.90E-41 178.7 6596 cellular

organisms;Eukaryota;Opisthokonta;Metazoa;Eumetazoa;Bilateria;Protostomia;Spiralia;Lophotrochozoa;Mollusca;Bivalvia;Autobranchia;Heteroconchia;Euherodonta;Imparidentia;Venerida;Veneroidea;Veneridae;Mercenaria;Mercenaria mercenaria

UdeM00000043770 6596 65.9 UdeM00000043770 XP\_045189280.1 21 315  
215 8 20 310 580 884 1.10E-07 65.9 6596 cellular

organisms;Eukaryota;Opisthokonta;Metazoa;Eumetazoa;Bilateria;Protostomia;Spiralia;Lophotrochozoa;Mollusca;Bivalvia;Autobranchia;Heteroconchia;Euherodonta;Imparidentia;Venerida;Veneroidea;Veneridae;Mercenaria;Mercenaria mercenaria

UdeM00000043771 6596 462.2 UdeM00000043771 XP\_045180659.1 65.3 346  
113 2 14 357 15 355 5.90E-127 462.2 6596 cellular

organisms;Eukaryota;Opisthokonta;Metazoa;Eumetazoa;Bilateria;Protostomia;Spiralia;Lophotrochozoa;Mollusca;Bivalvia;Autobranchia;Heteroconchia;Euherodonta;Imparidentia;Venerida;Veneroidea;Veneridae;Mercenaria;Mercenaria mercenaria

UdeM00000043772 29159 71.2 UdeM00000043772 XP\_034299474.1 28.3 152  
95 4 29 177 439 579 1.50E-09 71.2 29159 cellular

organisms;Eukaryota;Opisthokonta;Metazoa;Eumetazoa;Bilateria;Protostomia;Spiralia;Lophotrochozoa;Mollusca;Bivalvia;Autobranchia;Pteriomorpha;Ostreida;Ostreoidea;Ostreidae;Crassostrea;Crassostrea gigas

UdeM00000043774 6596 464.9 UdeM00000043774 XP\_045180659.1 65.6 349  
113 2 11 357 12 355 9.20E-128 464.9 6596 cellular

organisms;Eukaryota;Opisthokonta;Metazoa;Eumetazoa;Bilateria;Protostomia;Spiralia;Lophotrochozoa;Mollusca;Bivalvia;Autobranchia;Heteroconchia;Euherodonta;Imparidentia;Venerida;Veneroidea;Veneridae;Mercenaria;Mercenaria mercenaria

UdeM00000043775 6579 287 UdeM00000043775 XP\_033756026.1 46.4 338  
 165 5 32 360 18 348 3.40E-74 287 6579 cellular  
 organisms;Eukaryota;Opisthokonta;Metazoa;Eumetazoa;Bilateria;Protostomia;  
 Spiralia;Lophotrochozoa;Mollusca;Bivalvia;Autobranhia;Pteriomorpha;Pect  
 inida;Pectinoidea;Pectinidae;Pecten;Pecten maximus  
 UdeM00000043776 6596 271.6 UdeM00000043776 XP\_045188401.1 51.3 261  
 120 3 165 419 65 324 1.70E-69 271.6 6596 cellular  
 organisms;Eukaryota;Opisthokonta;Metazoa;Eumetazoa;Bilateria;Protostomia;  
 Spiralia;Lophotrochozoa;Mollusca;Bivalvia;Autobranhia;Heteroconchia;Euhe  
 terodonta;Imparidentia;Venerida;Veneroidea;Veneridae;Mercenaria;Mercenari  
 a mercenaria  
 UdeM00000043777 6579 147.1 UdeM00000043777 XP\_033757310.1 38.8 232  
 96 3 66 255 121 348 3.00E-32 147.1 6579 cellular  
 organisms;Eukaryota;Opisthokonta;Metazoa;Eumetazoa;Bilateria;Protostomia;  
 Spiralia;Lophotrochozoa;Mollusca;Bivalvia;Autobranhia;Pteriomorpha;Pect  
 inida;Pectinoidea;Pectinidae;Pecten;Pecten maximus  
 UdeM00000043778 6579 89.7 UdeM00000043778 XP\_033757431.1 35.9 153  
 86 4 27 170 3 152 4.10E-15 89.7 6579 cellular  
 organisms;Eukaryota;Opisthokonta;Metazoa;Eumetazoa;Bilateria;Protostomia;  
 Spiralia;Lophotrochozoa;Mollusca;Bivalvia;Autobranhia;Pteriomorpha;Pect  
 inida;Pectinoidea;Pectinidae;Pecten;Pecten maximus  
 UdeM00000043779 6596 287.7 UdeM00000043779 XP\_045191101.1 52.7 277  
 118 4 64 338 44 309 1.90E-74 287.7 6596 cellular  
 organisms;Eukaryota;Opisthokonta;Metazoa;Eumetazoa;Bilateria;Protostomia;  
 Spiralia;Lophotrochozoa;Mollusca;Bivalvia;Autobranhia;Heteroconchia;Euhe  
 terodonta;Imparidentia;Venerida;Veneroidea;Veneridae;Mercenaria;Mercenari  
 a mercenaria  
 UdeM00000043780 6596 286.6 UdeM00000043780 XP\_045188400.1 46 337  
 150 5 4 340 5 309 4.20E-74 286.6 6596 cellular  
 organisms;Eukaryota;Opisthokonta;Metazoa;Eumetazoa;Bilateria;Protostomia;  
 Spiralia;Lophotrochozoa;Mollusca;Bivalvia;Autobranhia;Heteroconchia;Euhe  
 terodonta;Imparidentia;Venerida;Veneroidea;Veneridae;Mercenaria;Mercenari  
 a mercenaria  
 UdeM00000043781 7574 188 UdeM00000043781 XP\_013384628.1 59 161  
 57 2 1 161 33 184 1.00E-44 188 7574 cellular  
 organisms;Eukaryota;Opisthokonta;Metazoa;Eumetazoa;Bilateria;Protostomia;  
 Spiralia;Lophotrochozoa;Brachiopoda;Linguliformea;Lingulata;Lingulida;Lin  
 guloidea;Lingulidae;Lingula;Lingula anatina  
 UdeM00000043784 6596 159.8 UdeM00000043784 XP\_045166814.1 66.7 99  
 33 0 6 104 192 290 2.00E-36 159.8 6596 cellular  
 organisms;Eukaryota;Opisthokonta;Metazoa;Eumetazoa;Bilateria;Protostomia;  
 Spiralia;Lophotrochozoa;Mollusca;Bivalvia;Autobranhia;Heteroconchia;Euhe  
 terodonta;Imparidentia;Venerida;Veneroidea;Veneridae;Mercenaria;Mercenari  
 a mercenaria  
 UdeM00000043782 6596 267.3 UdeM00000043782 XP\_045188400.1 49.3 268  
 128 3 91 358 52 311 2.80E-68 267.3 6596 cellular  
 organisms;Eukaryota;Opisthokonta;Metazoa;Eumetazoa;Bilateria;Protostomia;  
 Spiralia;Lophotrochozoa;Mollusca;Bivalvia;Autobranhia;Heteroconchia;Euhe  
 terodonta;Imparidentia;Venerida;Veneroidea;Veneridae;Mercenaria;Mercenari  
 a mercenaria  
 UdeM00000043783 6596 266.9 UdeM00000043783 XP\_045188400.1 49.3 268  
 128 3 89 356 52 311 3.60E-68 266.9 6596 cellular  
 organisms;Eukaryota;Opisthokonta;Metazoa;Eumetazoa;Bilateria;Protostomia;  
 Spiralia;Lophotrochozoa;Mollusca;Bivalvia;Autobranhia;Heteroconchia;Euhe

terodonta;Imparidentia;Venerida;Veneroidea;Veneridae;Mercenaria;Mercenari  
 a mercenaria  
 UdeM00000043786 6579 266.9 UdeM00000043786 XP\_033756026.1 55.4 240  
 103 2 10 245 109 348 2.50E-68 266.9 6579 cellular  
 organisms;Eukaryota;Opisthokonta;Metazoa;Eumetazoa;Bilateria;Protostomia;  
 Spiralia;Lophotrochozoa;Mollusca;Bivalvia;Autobranhia;Pteriomorphia;Pect  
 inida;Pectinoidea;Pectinidae;Pecten;Pecten maximus  
 UdeM00000043787 6579 95.5 UdeM00000043787 XP\_033757183.1 29.7 273  
 165 9 36 299 59 313 1.20E-16 95.5 6579 cellular  
 organisms;Eukaryota;Opisthokonta;Metazoa;Eumetazoa;Bilateria;Protostomia;  
 Spiralia;Lophotrochozoa;Mollusca;Bivalvia;Autobranhia;Pteriomorphia;Pect  
 inida;Pectinoidea;Pectinidae;Pecten;Pecten maximus  
 UdeM00000043788 6596 230.3 UdeM00000043788 XP\_045197972.1 59.1 176  
 72 0 6 181 3 178 1.90E-57 230.3 6596 cellular  
 organisms;Eukaryota;Opisthokonta;Metazoa;Eumetazoa;Bilateria;Protostomia;  
 Spiralia;Lophotrochozoa;Mollusca;Bivalvia;Autobranhia;Heteroconchia;Euhe  
 terodonta;Imparidentia;Venerida;Veneroidea;Veneridae;Mercenaria;Mercenari  
 a mercenaria  
 UdeM00000038474 6596 225.3 UdeM00000038474 XP\_045175356.1 44.6 289  
 147 4 1 278 11 297 1.00E-55 225.3 6596 cellular  
 organisms;Eukaryota;Opisthokonta;Metazoa;Eumetazoa;Bilateria;Protostomia;  
 Spiralia;Lophotrochozoa;Mollusca;Bivalvia;Autobranhia;Heteroconchia;Euhe  
 terodonta;Imparidentia;Venerida;Veneroidea;Veneridae;Mercenaria;Mercenari  
 a mercenaria  
 UdeM00000038475 6596 1074.7 UdeM00000038475 XP\_045175356.1 54.8  
 1246 467 16 2 1199 390 1587 1.4e-310 1074.7 6596  
 cellular  
 organisms;Eukaryota;Opisthokonta;Metazoa;Eumetazoa;Bilateria;Protostomia;  
 Spiralia;Lophotrochozoa;Mollusca;Bivalvia;Autobranhia;Heteroconchia;Euhe  
 terodonta;Imparidentia;Venerida;Veneroidea;Veneridae;Mercenaria;Mercenari  
 a mercenaria  
 UdeM00000038476 6579 630.6 UdeM00000038476 XP\_033752416.1 44.2 731  
 379 11 15 730 15 731 2.60E-177 630.6 6579 cellular  
 organisms;Eukaryota;Opisthokonta;Metazoa;Eumetazoa;Bilateria;Protostomia;  
 Spiralia;Lophotrochozoa;Mollusca;Bivalvia;Autobranhia;Pteriomorphia;Pect  
 inida;Pectinoidea;Pectinidae;Pecten;Pecten maximus  
 UdeM00000038477 6573 273.9 UdeM00000038477 XP\_021371367.1 36.5 616  
 339 12 614 1227 514 1079 1.00E-69 273.9 6573 cellular  
 organisms;Eukaryota;Opisthokonta;Metazoa;Eumetazoa;Bilateria;Protostomia;  
 Spiralia;Lophotrochozoa;Mollusca;Bivalvia;Autobranhia;Pteriomorphia;Pect  
 inida;Pectinoidea;Pectinidae;Mizuhopecten;Mizuhopecten yessoensis  
 UdeM00000038478 225164 109 UdeM00000038478 XP\_009046908.1 56.3  
 126 50 3 568 691 582 704 2.40E-20 109 225164  
 cellular  
 organisms;Eukaryota;Opisthokonta;Metazoa;Eumetazoa;Bilateria;Protostomia;  
 Spiralia;Lophotrochozoa;Mollusca;Gastropoda;Patellogastropoda;Lottioidea;  
 Lottiidae;Lottia;Lottia gigantea  
 UdeM00000038479 29159 487.3 UdeM00000038479 XP\_034328053.1 79.6 324  
 50 3 11 327 15 329 1.60E-134 487.3 29159 cellular  
 organisms;Eukaryota;Opisthokonta;Metazoa;Eumetazoa;Bilateria;Protostomia;  
 Spiralia;Lophotrochozoa;Mollusca;Bivalvia;Autobranhia;Pteriomorphia;Ostr  
 eida;Ostreoidea;Ostreidae;Crassostrea;Crassostrea gigas  
 UdeM00000038502 6573 1156 UdeM00000038502 XP\_021358473.1 82.6 648  
 111 1 61 706 9 656 0.00E+00 1156 6573 cellular

organisms;Eukaryota;Opisthokonta;Metazoa;Eumetazoa;Bilateria;Protostomia;Spiralia;Lophotrochozoa;Mollusca;Bivalvia;Autobranchia;Pteriomorpha;Pectinida;Pectinoidea;Pectinidae;Mizuhopecten;Mizuhopecten yessoensis

UdeM00000038503 400727 161.4 UdeM00000038503 XP\_025087592.1 39.9  
263 137 5 250 504 471 720 5.00E-36 161.4 400727

cellular

organisms;Eukaryota;Opisthokonta;Metazoa;Eumetazoa;Bilateria;Protostomia;Spiralia;Lophotrochozoa;Mollusca;Gastropoda;Caenogastropoda;Architaenioglossa;Ampullarioidea;Ampullariidae;Pomacea;Pomacea canaliculata

UdeM00000038504 29159 87 UdeM00000038504 XP\_011430284.2 51.2 86  
41 1 328 413 291 375 6.30E-14 87 29159 cellular

organisms;Eukaryota;Opisthokonta;Metazoa;Eumetazoa;Bilateria;Protostomia;Spiralia;Lophotrochozoa;Mollusca;Bivalvia;Autobranchia;Pteriomorpha;Ostreida;Ostreioidea;Ostreidae;Crassostrea;Crassostrea gigas

UdeM00000038505 6565 372.1 UdeM00000038505 XP\_022330155.1 67.4 273  
81 2 5 275 6 272 6.30E-100 372.1 6565 cellular

organisms;Eukaryota;Opisthokonta;Metazoa;Eumetazoa;Bilateria;Protostomia;Spiralia;Lophotrochozoa;Mollusca;Bivalvia;Autobranchia;Pteriomorpha;Ostreida;Ostreioidea;Ostreidae;Crassostrea;Crassostrea virginica

UdeM00000038506 6565 323.2 UdeM00000038506 XP\_022308643.1 54.1 283  
130 0 121 403 76 358 5.00E-85 323.2 6565 cellular

organisms;Eukaryota;Opisthokonta;Metazoa;Eumetazoa;Bilateria;Protostomia;Spiralia;Lophotrochozoa;Mollusca;Bivalvia;Autobranchia;Pteriomorpha;Ostreida;Ostreioidea;Ostreidae;Crassostrea;Crassostrea virginica

UdeM00000038507 6579 335.9 UdeM00000038507 XP\_033751791.1 69.9 239  
71 1 1 238 1 239 4.20E-89 335.9 6579 cellular

organisms;Eukaryota;Opisthokonta;Metazoa;Eumetazoa;Bilateria;Protostomia;Spiralia;Lophotrochozoa;Mollusca;Bivalvia;Autobranchia;Pteriomorpha;Pectinida;Pectinoidea;Pectinidae;Pecten;Pecten maximus

UdeM00000038508 1735272 479.6 UdeM00000038508 XP\_041365194.1 36  
1090 504 27 30 1073 239 1180 1.10E-131 479.6 1735272

cellular

organisms;Eukaryota;Opisthokonta;Metazoa;Eumetazoa;Bilateria;Protostomia;Spiralia;Lophotrochozoa;Mollusca;Gastropoda;Neomphalina;Neomphaloidea;Peltospiridae;Gigantopelta;Gigantopelta aegis

UdeM00000038509 6565 281.2 UdeM00000038509 XP\_022294039.1 78.8 170  
36 0 1 170 1 170 9.00E-73 281.2 6565 cellular

organisms;Eukaryota;Opisthokonta;Metazoa;Eumetazoa;Bilateria;Protostomia;Spiralia;Lophotrochozoa;Mollusca;Bivalvia;Autobranchia;Pteriomorpha;Ostreida;Ostreioidea;Ostreidae;Crassostrea;Crassostrea virginica

UdeM00000038510 6579 561.2 UdeM00000038510 XP\_033751633.1 67.8 451  
121 6 1 441 1 437 1.20E-156 561.2 6579 cellular

organisms;Eukaryota;Opisthokonta;Metazoa;Eumetazoa;Bilateria;Protostomia;Spiralia;Lophotrochozoa;Mollusca;Bivalvia;Autobranchia;Pteriomorpha;Pectinida;Pectinoidea;Pectinidae;Pecten;Pecten maximus

UdeM00000038511 6596 454.1 UdeM00000038511 XP\_045176136.1 45.4 524  
279 3 1 523 1 518 2.30E-124 454.1 6596 cellular

organisms;Eukaryota;Opisthokonta;Metazoa;Eumetazoa;Bilateria;Protostomia;Spiralia;Lophotrochozoa;Mollusca;Bivalvia;Autobranchia;Heteroconchia;Euherodonta;Imparidentia;Venerida;Veneroidea;Veneridae;Mercenaria;Mercenaria mercenaria

UdeM00000038512 6596 1583.2 UdeM00000038512 XP\_045174631.1 59.8  
1468 438 23 1 1428 1 1356 0.00E+00 1583.2 6596

cellular

organisms;Eukaryota;Opisthokonta;Metazoa;Eumetazoa;Bilateria;Protostomia;Spiralia;Lophotrochozoa;Mollusca;Bivalvia;Autobranhia;Heteroconchia;Euherodonta;Imparidentia;Venerida;Veneroidea;Veneridae;Mercenaria;Mercenaria mercenaria

UdeM00000038513 6596 966.5 UdeM00000038513 XP\_045175493.1 78.2 600  
130 1 1 599 1 600 1.60E-278 966.5 6596 cellular

organisms;Eukaryota;Opisthokonta;Metazoa;Eumetazoa;Bilateria;Protostomia;Spiralia;Lophotrochozoa;Mollusca;Bivalvia;Autobranhia;Heteroconchia;Euherodonta;Imparidentia;Venerida;Veneroidea;Veneridae;Mercenaria;Mercenaria mercenaria

UdeM00000038514 6579 235.7 UdeM00000038514 XP\_033751630.1 51.1 262  
95 5 1 243 1 248 1.40E-58 235.7 6579 cellular

organisms;Eukaryota;Opisthokonta;Metazoa;Eumetazoa;Bilateria;Protostomia;Spiralia;Lophotrochozoa;Mollusca;Bivalvia;Autobranhia;Pteriormorphia;Pectinida;Pectinoidea;Pectinidae;Pecten;Pecten maximus

UdeM00000038515 6596 1129.4 UdeM00000038515 XP\_045176582.1 68.7  
868 211 9 3 845 106 937 0.00E+00 1129.4 6596  
cellular

organisms;Eukaryota;Opisthokonta;Metazoa;Eumetazoa;Bilateria;Protostomia;Spiralia;Lophotrochozoa;Mollusca;Bivalvia;Autobranhia;Heteroconchia;Euherodonta;Imparidentia;Venerida;Veneroidea;Veneridae;Mercenaria;Mercenaria mercenaria

UdeM00000038517 6596 364.4 UdeM00000038517 XP\_045192454.1 35.7 603  
378 8 39 639 34 628 3.10E-97 364.4 6596 cellular

organisms;Eukaryota;Opisthokonta;Metazoa;Eumetazoa;Bilateria;Protostomia;Spiralia;Lophotrochozoa;Mollusca;Bivalvia;Autobranhia;Heteroconchia;Euherodonta;Imparidentia;Venerida;Veneroidea;Veneridae;Mercenaria;Mercenaria mercenaria

UdeM00000038519 6596 852 UdeM00000038519 XP\_045174916.1 47 909  
459 9 4 896 12 913 6.60E-244 852 6596 cellular

organisms;Eukaryota;Opisthokonta;Metazoa;Eumetazoa;Bilateria;Protostomia;Spiralia;Lophotrochozoa;Mollusca;Bivalvia;Autobranhia;Heteroconchia;Euherodonta;Imparidentia;Venerida;Veneroidea;Veneridae;Mercenaria;Mercenaria mercenaria

UdeM00000038518 6596 842 UdeM00000038518 XP\_045174916.1 46.9 902  
456 9 4 889 12 906 7.10E-241 842 6596 cellular

organisms;Eukaryota;Opisthokonta;Metazoa;Eumetazoa;Bilateria;Protostomia;Spiralia;Lophotrochozoa;Mollusca;Bivalvia;Autobranhia;Heteroconchia;Euherodonta;Imparidentia;Venerida;Veneroidea;Veneridae;Mercenaria;Mercenaria mercenaria

UdeM00000038520 6596 388.7 UdeM00000038520 XP\_045192454.1 34.9 622  
384 8 96 714 25 628 1.70E-104 388.7 6596 cellular

organisms;Eukaryota;Opisthokonta;Metazoa;Eumetazoa;Bilateria;Protostomia;Spiralia;Lophotrochozoa;Mollusca;Bivalvia;Autobranhia;Heteroconchia;Euherodonta;Imparidentia;Venerida;Veneroidea;Veneridae;Mercenaria;Mercenaria mercenaria

UdeM00000038521 6596 394 UdeM00000038521 XP\_045177034.1 34.9 628  
398 7 84 704 7 630 3.90E-106 394 6596 cellular

organisms;Eukaryota;Opisthokonta;Metazoa;Eumetazoa;Bilateria;Protostomia;Spiralia;Lophotrochozoa;Mollusca;Bivalvia;Autobranhia;Heteroconchia;Euherodonta;Imparidentia;Venerida;Veneroidea;Veneridae;Mercenaria;Mercenaria mercenaria

UdeM00000038523 6596 210.3 UdeM00000038523 XP\_045181979.1 33.1 435  
168 6 1 313 1 434 3.70E-51 210.3 6596 cellular

organisms;Eukaryota;Opisthokonta;Metazoa;Eumetazoa;Bilateria;Protostomia;Spiralia;Lophotrochozoa;Mollusca;Bivalvia;Autobranchia;Heteroconchia;Euherodonta;Imparidentia;Venerida;Veneroidea;Veneridae;Mercenaria;Mercenaria mercenaria

UdeM00000038524 6596 209.1 UdeM00000038524 XP\_045181979.1 32.9 434  
168 6 1 312 1 433 7.90E-51 209.1 6596 cellular

organisms;Eukaryota;Opisthokonta;Metazoa;Eumetazoa;Bilateria;Protostomia;Spiralia;Lophotrochozoa;Mollusca;Bivalvia;Autobranchia;Heteroconchia;Euherodonta;Imparidentia;Venerida;Veneroidea;Veneridae;Mercenaria;Mercenaria mercenaria

UdeM00000038525 219594 68.9 UdeM00000038525 XP\_032053598.1 38.8  
85 49 2 22 105 21 103 4.40E-09 68.9 219594  
cellular

organisms;Eukaryota;Opisthokonta;Metazoa;Eumetazoa;Bilateria;Deuterostomia;Chordata;Craniata;Vertebrata;Gnathostomata;Teleostomi;Euteleostomi;Sarcopterygii;Dipnotetrapodomorpha;Tetrapoda;Amniota;Sauropsida;Sauria;Archelosauria;Archosauria;Dinosauria;Saurischia;Theropoda;Coelurosauria;Aves;Neognathae;Galloanserae;Anseriformes;Anatidae;Aythyinae;Aythya;Aythya fuligula

UdeM00000038526 29159 456.4 UdeM00000038526 XP\_034318418.1 47 511  
264 4 1 506 45 553 4.60E-125 456.4 29159 cellular

organisms;Eukaryota;Opisthokonta;Metazoa;Eumetazoa;Bilateria;Protostomia;Spiralia;Lophotrochozoa;Mollusca;Bivalvia;Autobranchia;Pteriormorphia;Ostreida;Ostreoidea;Ostreidae;Crassostrea;Crassostrea gigas

UdeM00000038527 29159 364.4 UdeM00000038527 XP\_034318418.1 49.4 387  
189 4 10 391 169 553 1.80E-97 364.4 29159 cellular

organisms;Eukaryota;Opisthokonta;Metazoa;Eumetazoa;Bilateria;Protostomia;Spiralia;Lophotrochozoa;Mollusca;Bivalvia;Autobranchia;Pteriormorphia;Ostreida;Ostreoidea;Ostreidae;Crassostrea;Crassostrea gigas

UdeM00000038528 29159 453 UdeM00000038528 XP\_034318418.1 47.7 511  
259 4 1 505 45 553 5.10E-124 453 29159 cellular

organisms;Eukaryota;Opisthokonta;Metazoa;Eumetazoa;Bilateria;Protostomia;Spiralia;Lophotrochozoa;Mollusca;Bivalvia;Autobranchia;Pteriormorphia;Ostreida;Ostreoidea;Ostreidae;Crassostrea;Crassostrea gigas

UdeM00000038529 6596 401 UdeM00000038529 XP\_045192454.1 36.2 611  
380 8 94 701 25 628 3.20E-108 401 6596 cellular

organisms;Eukaryota;Opisthokonta;Metazoa;Eumetazoa;Bilateria;Protostomia;Spiralia;Lophotrochozoa;Mollusca;Bivalvia;Autobranchia;Heteroconchia;Euherodonta;Imparidentia;Venerida;Veneroidea;Veneridae;Mercenaria;Mercenaria mercenaria

UdeM00000038530 8520 70.9 UdeM00000038530 XP\_042310960.1 33.8 136  
72 4 8 127 64 197 1.50E-09 70.9 8520 cellular

organisms;Eukaryota;Opisthokonta;Metazoa;Eumetazoa;Bilateria;Deuterostomia;Chordata;Craniata;Vertebrata;Gnathostomata;Teleostomi;Euteleostomi;Sarcopterygii;Dipnotetrapodomorpha;Tetrapoda;Amniota;Sauropsida;Sauria;Lepidosauria;Squamata;Bifurcata;Unidentata;Episquamata;Toxicofera;Iguania;Phrynosomatidae;Phrynosomatinae;Sceloporus;Sceloporus undulatus

UdeM00000038531 6596 1701 UdeM00000038531 XP\_045163820.1 60.6 1385  
518 7 7 1374 1044 2418 0.00E+00 1701 6596 cellular

organisms;Eukaryota;Opisthokonta;Metazoa;Eumetazoa;Bilateria;Protostomia;Spiralia;Lophotrochozoa;Mollusca;Bivalvia;Autobranchia;Heteroconchia;Euherodonta;Imparidentia;Venerida;Veneroidea;Veneridae;Mercenaria;Mercenaria mercenaria

UdeM00000036933 6596 202.6 UdeM00000036933 XP\_045189280.1 39.2 283  
 158 4 186 467 355 624 1.20E-48 202.6 6596 cellular  
 organisms;Eukaryota;Opisthokonta;Metazoa;Eumetazoa;Bilateria;Protostomia;  
 Spiralia;Lophotrochozoa;Mollusca;Bivalvia;Autobranchia;Heteroconchia;Euhe  
 terodonta;Imparidentia;Venerida;Veneroidea;Veneridae;Mercenaria;Mercenari  
 a mercenaria

UdeM00000036934 6596 201.1 UdeM00000036934 XP\_045189280.1 39.2 283  
 158 4 202 483 355 624 3.50E-48 201.1 6596 cellular  
 organisms;Eukaryota;Opisthokonta;Metazoa;Eumetazoa;Bilateria;Protostomia;  
 Spiralia;Lophotrochozoa;Mollusca;Bivalvia;Autobranchia;Heteroconchia;Euhe  
 terodonta;Imparidentia;Venerida;Veneroidea;Veneridae;Mercenaria;Mercenari  
 a mercenaria

UdeM00000036936 1735272 248.8 UdeM00000036936 XP\_041360734.1 59.6  
 188 73 3 6 191 642 828 5.60E-63 248.8 1735272  
 cellular  
 organisms;Eukaryota;Opisthokonta;Metazoa;Eumetazoa;Bilateria;Protostomia;  
 Spiralia;Lophotrochozoa;Mollusca;Gastropoda;Neomphalina;Neomphaloidea;Pel  
 tospiridae;Gigantopelta;Gigantopelta aegis

UdeM00000036938 1735272 70.5 UdeM00000036938 XP\_041369289.1 63  
 54 20 0 107 160 84 137 2.30E-09 70.5 1735272  
 cellular  
 organisms;Eukaryota;Opisthokonta;Metazoa;Eumetazoa;Bilateria;Protostomia;  
 Spiralia;Lophotrochozoa;Mollusca;Gastropoda;Neomphalina;Neomphaloidea;Pel  
 tospiridae;Gigantopelta;Gigantopelta aegis

UdeM00000036939 1735272 104.4 UdeM00000036939 XP\_041369289.1 74.6  
 67 17 0 107 173 84 150 1.50E-19 104.4 1735272  
 cellular  
 organisms;Eukaryota;Opisthokonta;Metazoa;Eumetazoa;Bilateria;Protostomia;  
 Spiralia;Lophotrochozoa;Mollusca;Gastropoda;Neomphalina;Neomphaloidea;Pel  
 tospiridae;Gigantopelta;Gigantopelta aegis

UdeM00000036942 6579 250.8 UdeM00000036942 XP\_033764133.1 30.1 698  
 433 21 180 837 462 1144 6.30E-63 250.8 6579 cellular  
 organisms;Eukaryota;Opisthokonta;Metazoa;Eumetazoa;Bilateria;Protostomia;  
 Spiralia;Lophotrochozoa;Mollusca;Bivalvia;Autobranchia;Pteriomorphia;Pect  
 inida;Pectinoidea;Pectinidae;Pecten;Pecten maximus

UdeM00000036943 215358 185.7 UdeM00000036943 XP\_010746537.1 69.5  
 128 39 0 1 128 72 199 3.90E-44 185.7 215358  
 cellular  
 organisms;Eukaryota;Opisthokonta;Metazoa;Eumetazoa;Bilateria;Deuterostomi  
 a;Chordata;Craniata;Vertebrata;Gnathostomata;Teleostomi;Euteleostomi;Acti  
 nopterygii;Actinopteri;Neopterygii;Teleostei;Osteoglossocephalai;Clupeoce  
 phala;Euteleosteomorpha;Neoteleostei;Eurypterygia;Ctenosquamata;Acanthomo  
 rphata;Euacanthomorphacea;Percomorphaceae;Eupercaria;Eupercaria incertae  
 sedis;Sciaenidae;Larimichthys;Larimichthys crocea

UdeM00000036944 6596 458.4 UdeM00000036944 XP\_045188486.1 37.4 827  
 454 18 753 1556 1765 2550 3.70E-125 458.4 6596 cellular  
 organisms;Eukaryota;Opisthokonta;Metazoa;Eumetazoa;Bilateria;Protostomia;  
 Spiralia;Lophotrochozoa;Mollusca;Bivalvia;Autobranchia;Heteroconchia;Euhe  
 terodonta;Imparidentia;Venerida;Veneroidea;Veneridae;Mercenaria;Mercenari  
 a mercenaria

UdeM00000041882 6596 416.8 UdeM00000041882 XP\_045200137.1 58.6 367  
 139 5 1 356 8 372 3.50E-113 416.8 6596 cellular  
 organisms;Eukaryota;Opisthokonta;Metazoa;Eumetazoa;Bilateria;Protostomia;  
 Spiralia;Lophotrochozoa;Mollusca;Bivalvia;Autobranchia;Heteroconchia;Euhe

terodonta;Imparidentia;Venerida;Veneroidea;Veneridae;Mercenaria;Mercenari  
 a mercenaria  
 UdeM00000041883 6596 952.6 UdeM00000041883 XP\_045201645.1 58.1 833  
 320 8 2 830 8 815 3.30E-274 952.6 6596 cellular  
 organisms;Eukaryota;Opisthokonta;Metazoa;Eumetazoa;Bilateria;Protostomia;  
 Spiralia;Lophotrochozoa;Mollusca;Bivalvia;Autobranhia;Heteroconchia;Euhe  
 terodonta;Imparidentia;Venerida;Veneroidea;Veneridae;Mercenaria;Mercenari  
 a mercenaria  
 UdeM00000041884 6596 94 UdeM00000041884 XP\_045202501.1 28 225  
 142 5 45 260 235 448 3.10E-16 94 6596 cellular  
 organisms;Eukaryota;Opisthokonta;Metazoa;Eumetazoa;Bilateria;Protostomia;  
 Spiralia;Lophotrochozoa;Mollusca;Bivalvia;Autobranhia;Heteroconchia;Euhe  
 terodonta;Imparidentia;Venerida;Veneroidea;Veneridae;Mercenaria;Mercenari  
 a mercenaria  
 UdeM00000041885 6596 262.7 UdeM00000041885 XP\_045199354.1 25.2 927  
 445 25 1 703 65 967 1.40E-66 262.7 6596 cellular  
 organisms;Eukaryota;Opisthokonta;Metazoa;Eumetazoa;Bilateria;Protostomia;  
 Spiralia;Lophotrochozoa;Mollusca;Bivalvia;Autobranhia;Heteroconchia;Euhe  
 terodonta;Imparidentia;Venerida;Veneroidea;Veneridae;Mercenaria;Mercenari  
 a mercenaria  
 UdeM00000041886 6596 264.6 UdeM00000041886 XP\_045199354.1 26.4 806  
 396 21 2 629 65 851 4.40E-67 264.6 6596 cellular  
 organisms;Eukaryota;Opisthokonta;Metazoa;Eumetazoa;Bilateria;Protostomia;  
 Spiralia;Lophotrochozoa;Mollusca;Bivalvia;Autobranhia;Heteroconchia;Euhe  
 terodonta;Imparidentia;Venerida;Veneroidea;Veneridae;Mercenaria;Mercenari  
 a mercenaria  
 UdeM00000041887 6596 372.9 UdeM00000041887 XP\_045199354.1 29.1 924  
 474 23 1 765 65 966 1.00E-99 372.9 6596 cellular  
 organisms;Eukaryota;Opisthokonta;Metazoa;Eumetazoa;Bilateria;Protostomia;  
 Spiralia;Lophotrochozoa;Mollusca;Bivalvia;Autobranhia;Heteroconchia;Euhe  
 terodonta;Imparidentia;Venerida;Veneroidea;Veneridae;Mercenaria;Mercenari  
 a mercenaria  
 UdeM00000041888 6596 347.1 UdeM00000041888 XP\_045199354.1 28.8 879  
 446 22 1 721 65 921 5.70E-92 347.1 6596 cellular  
 organisms;Eukaryota;Opisthokonta;Metazoa;Eumetazoa;Bilateria;Protostomia;  
 Spiralia;Lophotrochozoa;Mollusca;Bivalvia;Autobranhia;Heteroconchia;Euhe  
 terodonta;Imparidentia;Venerida;Veneroidea;Veneridae;Mercenaria;Mercenari  
 a mercenaria  
 UdeM00000041889 6565 237.3 UdeM00000041889 XP\_022341202.1 58.8 194  
 79 1 1 194 1 193 1.70E-59 237.3 6565 cellular  
 organisms;Eukaryota;Opisthokonta;Metazoa;Eumetazoa;Bilateria;Protostomia;  
 Spiralia;Lophotrochozoa;Mollusca;Bivalvia;Autobranhia;Pteriomorphia;Ostr  
 eida;Ostreoidea;Ostreidae;Crassostrea;Crassostrea virginica  
 UdeM00000041890 6596 203 UdeM00000041890 XP\_045199877.1 51.2 211  
 103 0 6 216 15 225 4.10E-49 203 6596 cellular  
 organisms;Eukaryota;Opisthokonta;Metazoa;Eumetazoa;Bilateria;Protostomia;  
 Spiralia;Lophotrochozoa;Mollusca;Bivalvia;Autobranhia;Heteroconchia;Euhe  
 terodonta;Imparidentia;Venerida;Veneroidea;Veneridae;Mercenaria;Mercenari  
 a mercenaria  
 UdeM00000041891 6573 70.5 UdeM00000041891 XP\_021339605.1 42.4 118  
 58 4 18 128 17 131 7.00E-09 70.5 6573 cellular  
 organisms;Eukaryota;Opisthokonta;Metazoa;Eumetazoa;Bilateria;Protostomia;  
 Spiralia;Lophotrochozoa;Mollusca;Bivalvia;Autobranhia;Pteriomorphia;Pect  
 inida;Pectinoidea;Pectinidae;Mizuhopecten;Mizuhopecten yessoensis



UdeM00000041892 29159 73.6 UdeM00000041892 XP\_034319609.1 55.2 58  
 26 0 45 102 897 954 1.70E-10 73.6 29159 cellular  
 organisms;Eukaryota;Opisthokonta;Metazoa;Eumetazoa;Bilateria;Protostomia;  
 Spiralia;Lophotrochozoa;Mollusca;Bivalvia;Autobranchia;Pteriormorphia;Ostr  
 eida;Ostreoidea;Ostreidae;Crassostrea;Crassostrea gigas  
 UdeM00000041892 29159 61.2 UdeM00000041892 XP\_034319609.1 65.1 43  
 15 0 2 44 376 418 8.80E-07 61.2 29159 cellular  
 organisms;Eukaryota;Opisthokonta;Metazoa;Eumetazoa;Bilateria;Protostomia;  
 Spiralia;Lophotrochozoa;Mollusca;Bivalvia;Autobranchia;Pteriormorphia;Ostr  
 eida;Ostreoidea;Ostreidae;Crassostrea;Crassostrea gigas  
 UdeM00000041895 29159 106.3 UdeM00000041895 XP\_034315421.1 42 138  
 77 2 16 153 238 372 3.60E-20 106.3 29159 cellular  
 organisms;Eukaryota;Opisthokonta;Metazoa;Eumetazoa;Bilateria;Protostomia;  
 Spiralia;Lophotrochozoa;Mollusca;Bivalvia;Autobranchia;Pteriormorphia;Ostr  
 eida;Ostreoidea;Ostreidae;Crassostrea;Crassostrea gigas  
 UdeM00000041896 7998 124.4 UdeM00000041896 XP\_017349415.1 75.3 73  
 18 0 2 74 25 97 6.30E-26 124.4 7998 cellular  
 organisms;Eukaryota;Opisthokonta;Metazoa;Eumetazoa;Bilateria;Deuterostomi  
 a;Chordata;Craniata;Vertebrata;Gnathostomata;Teleostomi;Euteleostomi;Acti  
 nopterygii;Actinopteri;Neopterygii;Teleostei;Osteoglossocephalai;Clupeoce  
 phala;Otomorpha;Ostariophysi;Otophysi;Characiphysae;Siluriformes;Siluroid  
 ei;Ictaluridae;Ictalurus;Ictalurus punctatus  
 UdeM00000041898 7998 154.1 UdeM00000041898 XP\_017334791.1 53.8 156  
 68 1 16 167 231 386 1.60E-34 154.1 7998 cellular  
 organisms;Eukaryota;Opisthokonta;Metazoa;Eumetazoa;Bilateria;Deuterostomi  
 a;Chordata;Craniata;Vertebrata;Gnathostomata;Teleostomi;Euteleostomi;Acti  
 nopterygii;Actinopteri;Neopterygii;Teleostei;Osteoglossocephalai;Clupeoce  
 phala;Otomorpha;Ostariophysi;Otophysi;Characiphysae;Siluriformes;Siluroid  
 ei;Ictaluridae;Ictalurus;Ictalurus punctatus  
 UdeM00000041897 7739 475.7 UdeM00000041897 XP\_035696678.1 59.5 390  
 155 1 60 446 336 725 7.60E-131 475.7 7739 cellular  
 organisms;Eukaryota;Opisthokonta;Metazoa;Eumetazoa;Bilateria;Deuterostomi  
 a;Chordata;Cephalochordata;Leptocardii;Amphioxiformes;Branchiostomidae;Br  
 anchiostoma;Branchiostoma floridae  
 UdeM00000041899 6596 357.8 UdeM00000041899 XP\_045195108.1 29.9 1229  
 559 22 77 1294 13 949 5.70E-95 357.8 6596 cellular  
 organisms;Eukaryota;Opisthokonta;Metazoa;Eumetazoa;Bilateria;Protostomia;  
 Spiralia;Lophotrochozoa;Mollusca;Bivalvia;Autobranchia;Heteroconchia;Euhe  
 terodonta;Imparidentia;Venerida;Veneroidea;Veneridae;Mercenaria;Mercenari  
 a mercenaria  
 UdeM00000041900 6579 416.8 UdeM00000041900 XP\_033760981.1 63.7 353  
 100 5 2 327 1 352 2.60E-113 416.8 6579 cellular  
 organisms;Eukaryota;Opisthokonta;Metazoa;Eumetazoa;Bilateria;Protostomia;  
 Spiralia;Lophotrochozoa;Mollusca;Bivalvia;Autobranchia;Pteriormorphia;Pect  
 inida;Pectinoidea;Pectinidae;Pecten;Pecten maximus  
 UdeM00000041903 10224 81.3 UdeM00000041903 XP\_002740528.1 46.2 93  
 42 2 2 94 106 190 7.90E-13 81.3 10224 cellular  
 organisms;Eukaryota;Opisthokonta;Metazoa;Eumetazoa;Bilateria;Deuterostomi  
 a;Hemichordata;Enteropneusta;Harrimaniidae;Saccoglossus;Saccoglossus  
 kowalevskii  
 UdeM00000041904 10224 191.8 UdeM00000041904 XP\_006822101.1 43.6 227  
 119 2 1 227 243 460 1.00E-45 191.8 10224 cellular  
 organisms;Eukaryota;Opisthokonta;Metazoa;Eumetazoa;Bilateria;Deuterostomi

a; Hemichordata; Enteropneusta; Harrimaniidae; Saccoglossus; Saccoglossus kowalevskii

UdeM00000041905 6596 988.8 UdeM00000041905 XP\_045200549.1 67 713  
233 2 5 715 311 1023 3.60E-285 988.8 6596 cellular  
organisms; Eukaryota; Opisthokonta; Metazoa; Eumetazoa; Bilateria; Protostomia; Spiralia; Lophotrochozoa; Mollusca; Bivalvia; Autobranchia; Heteroconchia; Euheterodonta; Imparidentia; Venerida; Veneroidea; Veneridae; Mercenaria; Mercenaria mercenaria

UdeM00000041906 6596 256.1 UdeM00000041906 XP\_045199877.1 61.8 217  
77 2 6 222 15 225 4.20E-65 256.1 6596 cellular  
organisms; Eukaryota; Opisthokonta; Metazoa; Eumetazoa; Bilateria; Protostomia; Spiralia; Lophotrochozoa; Mollusca; Bivalvia; Autobranchia; Heteroconchia; Euheterodonta; Imparidentia; Venerida; Veneroidea; Veneridae; Mercenaria; Mercenaria mercenaria

UdeM00000041907 6573 886.3 UdeM00000041907 XP\_021374124.1 86 507  
71 0 8 514 41 547 1.80E-254 886.3 6573 cellular  
organisms; Eukaryota; Opisthokonta; Metazoa; Eumetazoa; Bilateria; Protostomia; Spiralia; Lophotrochozoa; Mollusca; Bivalvia; Autobranchia; Pteriomorpha; Pectinida; Pectinoidea; Pectinidae; Mizuhopecten; Mizuhopecten yessoensis

UdeM00000041909 6596 503.4 UdeM00000041909 XP\_045195108.1 32.5 1436  
606 28 85 1510 13 1094 9.70E-139 503.4 6596 cellular  
organisms; Eukaryota; Opisthokonta; Metazoa; Eumetazoa; Bilateria; Protostomia; Spiralia; Lophotrochozoa; Mollusca; Bivalvia; Autobranchia; Heteroconchia; Euheterodonta; Imparidentia; Venerida; Veneroidea; Veneridae; Mercenaria; Mercenaria mercenaria

UdeM00000041910 6565 129.8 UdeM00000041910 XP\_022339327.1 30.7 313  
175 7 1 288 1 296 5.90E-27 129.8 6565 cellular  
organisms; Eukaryota; Opisthokonta; Metazoa; Eumetazoa; Bilateria; Protostomia; Spiralia; Lophotrochozoa; Mollusca; Bivalvia; Autobranchia; Pteriomorpha; Ostreida; Ostreioidea; Ostreidae; Crassostrea; Crassostrea virginica

UdeM00000041911 29159 114.8 UdeM00000041911 XP\_011415393.2 28.1 320  
187 9 99 393 1 302 2.50E-22 114.8 29159 cellular  
organisms; Eukaryota; Opisthokonta; Metazoa; Eumetazoa; Bilateria; Protostomia; Spiralia; Lophotrochozoa; Mollusca; Bivalvia; Autobranchia; Pteriomorpha; Ostreida; Ostreioidea; Ostreidae; Crassostrea; Crassostrea gigas

UdeM00000041912 29159 118.2 UdeM00000041912 XP\_011415393.2 28.8 320  
185 9 1 295 1 302 1.70E-23 118.2 29159 cellular  
organisms; Eukaryota; Opisthokonta; Metazoa; Eumetazoa; Bilateria; Protostomia; Spiralia; Lophotrochozoa; Mollusca; Bivalvia; Autobranchia; Pteriomorpha; Ostreida; Ostreioidea; Ostreidae; Crassostrea; Crassostrea gigas

UdeM00000041914 6596 527.7 UdeM00000041914 XP\_045199981.1 70.1 402  
120 0 2 403 3 404 1.30E-146 527.7 6596 cellular  
organisms; Eukaryota; Opisthokonta; Metazoa; Eumetazoa; Bilateria; Protostomia; Spiralia; Lophotrochozoa; Mollusca; Bivalvia; Autobranchia; Heteroconchia; Euheterodonta; Imparidentia; Venerida; Veneroidea; Veneridae; Mercenaria; Mercenaria mercenaria

UdeM00000041915 6596 750.4 UdeM00000041915 XP\_045199753.1 50.1 746  
326 13 18 726 24 760 2.20E-213 750.4 6596 cellular  
organisms; Eukaryota; Opisthokonta; Metazoa; Eumetazoa; Bilateria; Protostomia; Spiralia; Lophotrochozoa; Mollusca; Bivalvia; Autobranchia; Heteroconchia; Euheterodonta; Imparidentia; Venerida; Veneroidea; Veneridae; Mercenaria; Mercenaria mercenaria

UdeM00000041916 6596 260.8 UdeM00000041916 XP\_045199752.1 45.1 273  
144 4 1 269 515 785 2.00E-66 260.8 6596 cellular

organisms;Eukaryota;Opisthokonta;Metazoa;Eumetazoa;Bilateria;Protostomia;Spiralia;Lophotrochozoa;Mollusca;Bivalvia;Autobranchia;Heteroconchia;Euherodonta;Imparidentia;Venerida;Veneroidea;Veneridae;Mercenaria;Mercenaria mercenaria

UdeM00000041917 6596 860.1 UdeM00000041917 XP\_045199752.1 52.5 812  
334 11 1 787 1 785 2.10E-246 860.1 6596 cellular

organisms;Eukaryota;Opisthokonta;Metazoa;Eumetazoa;Bilateria;Protostomia;Spiralia;Lophotrochozoa;Mollusca;Bivalvia;Autobranchia;Heteroconchia;Euherodonta;Imparidentia;Venerida;Veneroidea;Veneridae;Mercenaria;Mercenaria mercenaria

UdeM00000041918 6596 507.3 UdeM00000041918 XP\_045195108.1 34.3 1436  
580 26 77 1502 13 1094 6.70E-140 507.3 6596 cellular

organisms;Eukaryota;Opisthokonta;Metazoa;Eumetazoa;Bilateria;Protostomia;Spiralia;Lophotrochozoa;Mollusca;Bivalvia;Autobranchia;Heteroconchia;Euherodonta;Imparidentia;Venerida;Veneroidea;Veneridae;Mercenaria;Mercenaria mercenaria

UdeM00000041919 6596 387.5 UdeM00000041919 XP\_045195108.1 45.4 467  
214 6 77 536 13 445 2.80E-104 387.5 6596 cellular

organisms;Eukaryota;Opisthokonta;Metazoa;Eumetazoa;Bilateria;Protostomia;Spiralia;Lophotrochozoa;Mollusca;Bivalvia;Autobranchia;Heteroconchia;Euherodonta;Imparidentia;Venerida;Veneroidea;Veneridae;Mercenaria;Mercenaria mercenaria

UdeM00000041920 6596 530.4 UdeM00000041920 XP\_045195108.1 33.3 1360  
621 32 77 1428 13 1094 7.00E-147 530.4 6596 cellular

organisms;Eukaryota;Opisthokonta;Metazoa;Eumetazoa;Bilateria;Protostomia;Spiralia;Lophotrochozoa;Mollusca;Bivalvia;Autobranchia;Heteroconchia;Euherodonta;Imparidentia;Venerida;Veneroidea;Veneridae;Mercenaria;Mercenaria mercenaria

UdeM00000041922 6596 444.5 UdeM00000041922 XP\_045199381.1 69.4 294  
89 1 4 297 15 307 1.10E-121 444.5 6596 cellular

organisms;Eukaryota;Opisthokonta;Metazoa;Eumetazoa;Bilateria;Protostomia;Spiralia;Lophotrochozoa;Mollusca;Bivalvia;Autobranchia;Heteroconchia;Euherodonta;Imparidentia;Venerida;Veneroidea;Veneridae;Mercenaria;Mercenaria mercenaria

UdeM00000041923 6596 182.2 UdeM00000041923 XP\_045199380.1 40.9 237  
116 2 1263 1483 994 1222 4.90E-42 182.2 6596 cellular

organisms;Eukaryota;Opisthokonta;Metazoa;Eumetazoa;Bilateria;Protostomia;Spiralia;Lophotrochozoa;Mollusca;Bivalvia;Autobranchia;Heteroconchia;Euherodonta;Imparidentia;Venerida;Veneroidea;Veneridae;Mercenaria;Mercenaria mercenaria

UdeM00000041924 6596 182.2 UdeM00000041924 XP\_045199380.1 40.9 237  
116 2 1263 1483 994 1222 4.90E-42 182.2 6596 cellular

organisms;Eukaryota;Opisthokonta;Metazoa;Eumetazoa;Bilateria;Protostomia;Spiralia;Lophotrochozoa;Mollusca;Bivalvia;Autobranchia;Heteroconchia;Euherodonta;Imparidentia;Venerida;Veneroidea;Veneridae;Mercenaria;Mercenaria mercenaria

UdeM00000041925 6565 129.4 UdeM00000041925 XP\_022327962.1 34.4 273  
64 2 52 210 226 497 6.40E-27 129.4 6565 cellular

organisms;Eukaryota;Opisthokonta;Metazoa;Eumetazoa;Bilateria;Protostomia;Spiralia;Lophotrochozoa;Mollusca;Bivalvia;Autobranchia;Pteriomorphia;Ostreida;Ostreoidea;Ostreidae;Crassostrea;Crassostrea virginica

UdeM00000041926 6596 291.6 UdeM00000041926 XP\_045199996.1 44.8 422  
181 8 1 370 109 530 1.50E-75 291.6 6596 cellular

organisms;Eukaryota;Opisthokonta;Metazoa;Eumetazoa;Bilateria;Protostomia;

Spiralia;Lophotrochozoa;Mollusca;Bivalvia;Autobranchia;Heteroconchia;Euherodonta;Imparidentia;Venerida;Veneroidea;Veneridae;Mercenaria;Mercenaria mercenaria

UdeM00000041927 6596 327 UdeM00000041927 XP\_045200212.1 51.3 378  
159 8 1 366 125 489 3.20E-86 327 6596 cellular

organisms;Eukaryota;Opisthokonta;Metazoa;Eumetazoa;Bilateria;Protostomia;Spiralia;Lophotrochozoa;Mollusca;Bivalvia;Autobranchia;Heteroconchia;Euherodonta;Imparidentia;Venerida;Veneroidea;Veneridae;Mercenaria;Mercenaria mercenaria

UdeM00000041928 6596 79.3 UdeM00000041928 XP\_045199433.1 29 231  
112 7 9 234 593 776 1.10E-11 79.3 6596 cellular

organisms;Eukaryota;Opisthokonta;Metazoa;Eumetazoa;Bilateria;Protostomia;Spiralia;Lophotrochozoa;Mollusca;Bivalvia;Autobranchia;Heteroconchia;Euherodonta;Imparidentia;Venerida;Veneroidea;Veneridae;Mercenaria;Mercenaria mercenaria

UdeM00000041929 6596 180.3 UdeM00000041929 XP\_045161521.1 35.4 291  
157 8 19 287 17 298 6.40E-42 180.3 6596 cellular

organisms;Eukaryota;Opisthokonta;Metazoa;Eumetazoa;Bilateria;Protostomia;Spiralia;Lophotrochozoa;Mollusca;Bivalvia;Autobranchia;Heteroconchia;Euherodonta;Imparidentia;Venerida;Veneroidea;Veneridae;Mercenaria;Mercenaria mercenaria

UdeM00000041930 400727 181.4 UdeM00000041930 XP\_025106831.1 35.8  
285 159 9 42 305 42 323 3.00E-42 181.4 400727  
cellular

organisms;Eukaryota;Opisthokonta;Metazoa;Eumetazoa;Bilateria;Protostomia;Spiralia;Lophotrochozoa;Mollusca;Gastropoda;Caenogastropoda;Architaenioglossa;Ampullarioidea;Ampullariidae;Pomacea;Pomacea canaliculata

UdeM00000041930 400727 73.2 UdeM00000041930 XP\_025106831.1 35.7  
115 66 3 414 520 616 730 1.10E-09 73.2 400727  
cellular

organisms;Eukaryota;Opisthokonta;Metazoa;Eumetazoa;Bilateria;Protostomia;Spiralia;Lophotrochozoa;Mollusca;Gastropoda;Caenogastropoda;Architaenioglossa;Ampullarioidea;Ampullariidae;Pomacea;Pomacea canaliculata

UdeM00000041931 6565 541.2 UdeM00000041931 XP\_022286115.1 65.7 394  
135 0 1 394 85 478 1.10E-150 541.2 6565 cellular

organisms;Eukaryota;Opisthokonta;Metazoa;Eumetazoa;Bilateria;Protostomia;Spiralia;Lophotrochozoa;Mollusca;Bivalvia;Autobranchia;Pteriomorphia;Ostreida;Ostreidae;Crassostrea;Crassostrea virginica

UdeM00000041932 29159 323.6 UdeM00000041932 XP\_011430850.2 44.9 332  
173 3 177 505 166 490 5.20E-85 323.6 29159 cellular

organisms;Eukaryota;Opisthokonta;Metazoa;Eumetazoa;Bilateria;Protostomia;Spiralia;Lophotrochozoa;Mollusca;Bivalvia;Autobranchia;Pteriomorphia;Ostreida;Ostreidae;Crassostrea;Crassostrea gigas

UdeM00000041933 6596 150.6 UdeM00000041933 XP\_045201103.1 60 125  
47 2 5 127 6 129 1.40E-33 150.6 6596 cellular

organisms;Eukaryota;Opisthokonta;Metazoa;Eumetazoa;Bilateria;Protostomia;Spiralia;Lophotrochozoa;Mollusca;Bivalvia;Autobranchia;Heteroconchia;Euherodonta;Imparidentia;Venerida;Veneroidea;Veneridae;Mercenaria;Mercenaria mercenaria

UdeM00000041934 1735272 150.6 UdeM00000041934 XP\_041357791.1 60  
125 49 1 2 125 3 127 1.40E-33 150.6 1735272  
cellular

organisms;Eukaryota;Opisthokonta;Metazoa;Eumetazoa;Bilateria;Protostomia;

Spiralia;Lophotrochozoa;Mollusca;Gastropoda;Neomphalina;Neomphaloidea;Pel  
tospiridae;Gigantopelta;Gigantopelta aegis

UdeM00000041935 6596 1248.4 UdeM00000041935 XP\_045201103.1 57.4  
1262 396 16 41 1289 130 1262 0.00E+00 1248.4 6596  
cellular

organisms;Eukaryota;Opisthokonta;Metazoa;Eumetazoa;Bilateria;Protostomia;  
Spiralia;Lophotrochozoa;Mollusca;Bivalvia;Autobranchia;Heteroconchia;Euhe  
terodonta;Imparidentia;Venerida;Veneroidea;Veneridae;Mercenaria;Mercenari  
a mercenaria

UdeM00000041936 6596 377.1 UdeM00000041936 XP\_045199274.1 39.3 585  
290 4 1 521 78 661 4.30E-101 377.1 6596 cellular

organisms;Eukaryota;Opisthokonta;Metazoa;Eumetazoa;Bilateria;Protostomia;  
Spiralia;Lophotrochozoa;Mollusca;Bivalvia;Autobranchia;Heteroconchia;Euhe  
terodonta;Imparidentia;Venerida;Veneroidea;Veneridae;Mercenaria;Mercenari  
a mercenaria

UdeM00000041937 29159 506.5 UdeM00000041937 XP\_034328020.1 47 613  
310 7 41 648 29 631 5.20E-140 506.5 29159 cellular

organisms;Eukaryota;Opisthokonta;Metazoa;Eumetazoa;Bilateria;Protostomia;  
Spiralia;Lophotrochozoa;Mollusca;Bivalvia;Autobranchia;Pteriormorphia;Ostr  
eida;Ostreoidea;Ostreidae;Crassostrea;Crassostrea gigas

UdeM00000041938 6596 459.5 UdeM00000041938 XP\_045199274.1 42.4 625  
348 6 39 655 77 697 7.00E-126 459.5 6596 cellular

organisms;Eukaryota;Opisthokonta;Metazoa;Eumetazoa;Bilateria;Protostomia;  
Spiralia;Lophotrochozoa;Mollusca;Bivalvia;Autobranchia;Heteroconchia;Euhe  
terodonta;Imparidentia;Venerida;Veneroidea;Veneridae;Mercenaria;Mercenari  
a mercenaria

UdeM00000041939 6596 73.9 UdeM00000041939 XP\_045199915.1 44.6 101  
46 3 2 95 302 399 1.40E-10 73.9 6596 cellular

organisms;Eukaryota;Opisthokonta;Metazoa;Eumetazoa;Bilateria;Protostomia;  
Spiralia;Lophotrochozoa;Mollusca;Bivalvia;Autobranchia;Heteroconchia;Euhe  
terodonta;Imparidentia;Venerida;Veneroidea;Veneridae;Mercenaria;Mercenari  
a mercenaria

UdeM00000041940 6596 303.5 UdeM00000041940 XP\_045199274.1 47.1 367  
191 2 3 368 60 424 3.70E-79 303.5 6596 cellular

organisms;Eukaryota;Opisthokonta;Metazoa;Eumetazoa;Bilateria;Protostomia;  
Spiralia;Lophotrochozoa;Mollusca;Bivalvia;Autobranchia;Heteroconchia;Euhe  
terodonta;Imparidentia;Venerida;Veneroidea;Veneridae;Mercenaria;Mercenari  
a mercenaria

UdeM00000041941 6596 450.7 UdeM00000041941 XP\_045202456.1 46.6 549  
239 10 281 794 18 547 4.10E-123 450.7 6596 cellular

organisms;Eukaryota;Opisthokonta;Metazoa;Eumetazoa;Bilateria;Protostomia;  
Spiralia;Lophotrochozoa;Mollusca;Bivalvia;Autobranchia;Heteroconchia;Euhe  
terodonta;Imparidentia;Venerida;Veneroidea;Veneridae;Mercenaria;Mercenari  
a mercenaria

UdeM00000041942 6579 654.8 UdeM00000041942 XP\_033761051.1 35.1 1593  
858 43 4 1508 8 1512 2.60E-184 654.8 6579 cellular

organisms;Eukaryota;Opisthokonta;Metazoa;Eumetazoa;Bilateria;Protostomia;  
Spiralia;Lophotrochozoa;Mollusca;Bivalvia;Autobranchia;Pteriormorphia;Pect  
inida;Pectinoidea;Pectinidae;Pecten;Pecten maximus

UdeM00000041944 6579 159.1 UdeM00000041944 XP\_033743219.1 40.6 217  
112 6 26 237 34 238 7.10E-36 159.1 6579 cellular

organisms;Eukaryota;Opisthokonta;Metazoa;Eumetazoa;Bilateria;Protostomia;  
Spiralia;Lophotrochozoa;Mollusca;Bivalvia;Autobranchia;Pteriormorphia;Pect  
inida;Pectinoidea;Pectinidae;Pecten;Pecten maximus

UdeM00000041948 411798 77.8 UdeM00000041948 XP\_011883029.1 43.3  
 97 52 2 3 99 4 97 8.70E-12 77.8 411798  
 cellular  
 organisms;Eukaryota;Opisthokonta;Metazoa;Eumetazoa;Bilateria;Protostomia;  
 Ecdysozoa;Panarthropoda;Arthropoda;Mandibulata;Pancrustacea;Hexapoda;Inse  
 cta;Dicondylia;Pterygota;Neoptera;Endopterygota;Hymenoptera;Apocrita;Acul  
 eata;Formicoidea;Formicidae;Myrmicinae;Stenammini;Vollenhovia;Vollenhovia  
 emeryi  
 UdeM00000041950 6596 77 UdeM00000041950 XP\_045179849.1 46.5 71  
 38 0 36 106 283 353 2.40E-11 77 6596 cellular  
 organisms;Eukaryota;Opisthokonta;Metazoa;Eumetazoa;Bilateria;Protostomia;  
 Spiralia;Lophotrochozoa;Mollusca;Bivalvia;Autobranhia;Heteroconchia;Euhe  
 terodonta;Imparidentia;Venerida;Veneroidea;Veneridae;Mercenaria;Mercenari  
 a mercenaria  
 UdeM00000041951 6565 235 UdeM00000041951 XP\_022289977.1 28.7 654  
 348 15 867 1519 322 858 6.50E-58 235 6565 cellular  
 organisms;Eukaryota;Opisthokonta;Metazoa;Eumetazoa;Bilateria;Protostomia;  
 Spiralia;Lophotrochozoa;Mollusca;Bivalvia;Autobranhia;Pteriormorphia;Ostr  
 eida;Ostreioidea;Ostreidae;Crassostrea;Crassostrea virginica  
 UdeM00000041952 6565 333.6 UdeM00000041952 XP\_022334993.1 43.1 450  
 88 2 14 295 420 869 2.60E-88 333.6 6565 cellular  
 organisms;Eukaryota;Opisthokonta;Metazoa;Eumetazoa;Bilateria;Protostomia;  
 Spiralia;Lophotrochozoa;Mollusca;Bivalvia;Autobranhia;Pteriormorphia;Ostr  
 eida;Ostreioidea;Ostreidae;Crassostrea;Crassostrea virginica  
 UdeM00000041953 6565 209.1 UdeM00000041953 XP\_022289977.1 30.1 627  
 342 16 676 1298 322 856 3.30E-50 209.1 6565 cellular  
 organisms;Eukaryota;Opisthokonta;Metazoa;Eumetazoa;Bilateria;Protostomia;  
 Spiralia;Lophotrochozoa;Mollusca;Bivalvia;Autobranhia;Pteriormorphia;Ostr  
 eida;Ostreioidea;Ostreidae;Crassostrea;Crassostrea virginica  
 UdeM00000041955 6573 376.7 UdeM00000041955 XP\_021372135.1 49.9 337  
 168 1 53 388 71 407 3.50E-101 376.7 6573 cellular  
 organisms;Eukaryota;Opisthokonta;Metazoa;Eumetazoa;Bilateria;Protostomia;  
 Spiralia;Lophotrochozoa;Mollusca;Bivalvia;Autobranhia;Pteriormorphia;Pect  
 inida;Pectinoidea;Pectinidae;Mizuhopecten;Mizuhopecten yessoensis  
 UdeM00000041956 6596 218.4 UdeM00000041956 XP\_045202119.1 63 162  
 60 0 97 258 43 204 1.10E-53 218.4 6596 cellular  
 organisms;Eukaryota;Opisthokonta;Metazoa;Eumetazoa;Bilateria;Protostomia;  
 Spiralia;Lophotrochozoa;Mollusca;Bivalvia;Autobranhia;Heteroconchia;Euhe  
 terodonta;Imparidentia;Venerida;Veneroidea;Veneridae;Mercenaria;Mercenari  
 a mercenaria  
 UdeM00000041957 6573 335.9 UdeM00000041957 XP\_021376764.1 70.6 238  
 61 6 1 233 58 291 5.60E-89 335.9 6573 cellular  
 organisms;Eukaryota;Opisthokonta;Metazoa;Eumetazoa;Bilateria;Protostomia;  
 Spiralia;Lophotrochozoa;Mollusca;Bivalvia;Autobranhia;Pteriormorphia;Pect  
 inida;Pectinoidea;Pectinidae;Mizuhopecten;Mizuhopecten yessoensis  
 UdeM00000041958 29159 145.6 UdeM00000041958 XP\_034299474.1 56.7 127  
 55 0 3 129 542 668 4.50E-32 145.6 29159 cellular  
 organisms;Eukaryota;Opisthokonta;Metazoa;Eumetazoa;Bilateria;Protostomia;  
 Spiralia;Lophotrochozoa;Mollusca;Bivalvia;Autobranhia;Pteriormorphia;Ostr  
 eida;Ostreioidea;Ostreidae;Crassostrea;Crassostrea gigas  
 UdeM00000041959 6565 266.5 UdeM00000041959 XP\_022322655.1 43.1 348  
 170 6 13 349 46 376 4.70E-68 266.5 6565 cellular  
 organisms;Eukaryota;Opisthokonta;Metazoa;Eumetazoa;Bilateria;Protostomia;

Spiralia; Lophotrochozoa; Mollusca; Bivalvia; Autobranchia; Pteriomorpha; Ostr  
eida; Ostreidae; Crassostrea; Crassostrea virginica  
UdeM00000041960 6565 250 UdeM00000041960 XP\_022322655.1 42.3 333  
165 6 13 320 46 376 4.20E-63 250 6565 cellular  
organisms; Eukaryota; Opisthokonta; Metazoa; Eumetazoa; Bilateria; Protostomia;  
Spiralia; Lophotrochozoa; Mollusca; Bivalvia; Autobranchia; Pteriomorpha; Ostr  
eida; Ostreidae; Crassostrea; Crassostrea virginica  
UdeM00000041962 6596 59.3 UdeM00000041962 XP\_045202599.1 32.4 74  
50 0 112 185 191 264 7.20E-06 59.3 6596 cellular  
organisms; Eukaryota; Opisthokonta; Metazoa; Eumetazoa; Bilateria; Protostomia;  
Spiralia; Lophotrochozoa; Mollusca; Bivalvia; Autobranchia; Heteroconchia; Eue  
terodonta; Imparidentia; Venerida; Veneroidea; Veneridae; Mercenaria; Mercenari  
a mercenaria  
UdeM00000041963 6596 287.7 UdeM00000041963 XP\_045202599.1 54 265  
117 2 15 279 256 515 2.50E-74 287.7 6596 cellular  
organisms; Eukaryota; Opisthokonta; Metazoa; Eumetazoa; Bilateria; Protostomia;  
Spiralia; Lophotrochozoa; Mollusca; Bivalvia; Autobranchia; Heteroconchia; Eue  
terodonta; Imparidentia; Venerida; Veneroidea; Veneridae; Mercenaria; Mercenari  
a mercenaria  
UdeM00000041964 6573 291.6 UdeM00000041964 XP\_021374128.1 76.1 176  
37 1 19 194 813 983 7.50E-76 291.6 6573 cellular  
organisms; Eukaryota; Opisthokonta; Metazoa; Eumetazoa; Bilateria; Protostomia;  
Spiralia; Lophotrochozoa; Mollusca; Bivalvia; Autobranchia; Pteriomorpha; Pect  
inida; Pectinoidea; Pectinidae; Mizuhopecten; Mizuhopecten yessoensis  
UdeM00000041965 6105 186.8 UdeM00000041965 XP\_031554707.1 28.3 459  
262 10 67 464 1 453 6.20E-44 186.8 6105 cellular  
organisms; Eukaryota; Opisthokonta; Metazoa; Eumetazoa; Cnidaria; Anthozoa; Hexa  
corallia; Actiniaria; Actiniidae; Actinia; Actinia tenebrosa  
UdeM00000041966 6596 99 UdeM00000041966 XP\_045202212.1 30.6 193  
124 4 30 217 187 374 8.00E-18 99 6596 cellular  
organisms; Eukaryota; Opisthokonta; Metazoa; Eumetazoa; Bilateria; Protostomia;  
Spiralia; Lophotrochozoa; Mollusca; Bivalvia; Autobranchia; Heteroconchia; Eue  
terodonta; Imparidentia; Venerida; Veneroidea; Veneridae; Mercenaria; Mercenari  
a mercenaria  
UdeM00000041967 29159 521.5 UdeM00000041967 XP\_034299860.1 52.5 501  
132 1 3 397 32 532 9.60E-145 521.5 29159 cellular  
organisms; Eukaryota; Opisthokonta; Metazoa; Eumetazoa; Bilateria; Protostomia;  
Spiralia; Lophotrochozoa; Mollusca; Bivalvia; Autobranchia; Pteriomorpha; Ostr  
eida; Ostreidae; Crassostrea; Crassostrea gigas  
UdeM00000041970 6596 2476 UdeM00000041970 XP\_045199519.1 76.4 1674  
380 8 5 1668 539 2207 0.00E+00 2476 6596 cellular  
organisms; Eukaryota; Opisthokonta; Metazoa; Eumetazoa; Bilateria; Protostomia;  
Spiralia; Lophotrochozoa; Mollusca; Bivalvia; Autobranchia; Heteroconchia; Eue  
terodonta; Imparidentia; Venerida; Veneroidea; Veneridae; Mercenaria; Mercenari  
a mercenaria  
UdeM00000041971 441366 150.2 UdeM00000041971 XP\_028326620.1 41.9  
217 116 5 1 216 48 255 3.00E-33 150.2 441366  
cellular  
organisms; Eukaryota; Opisthokonta; Metazoa; Eumetazoa; Bilateria; Deuterostomi  
a; Chordata; Craniata; Vertebrata; Gnathostomata; Teleostomi; Euteleostomi; Acti  
nopterygii; Actinopteri; Neopterygii; Teleostei; Osteoglossocephalai; Clupeoce  
phala; Euteleostei; Neoteleostei; Eurypterygia; Ctenosquamata; Acanthomo  
rphata; Euacanthomorpha; Percomorphaceae; Ovalentaria; Blenniimorphae; Blen

niiformes;Gobiesocoidei;Gobiesocidae;Gobiesocinae;Gouania;Gouania  
 willdenowi  
 UdeM00000041973 225164 238.4 UdeM00000041973 XP\_009064475.1 60.6  
 175 67 1 5 179 2 174 8.10E-60 238.4 225164  
 cellular  
 organisms;Eukaryota;Opisthokonta;Metazoa;Eumetazoa;Bilateria;Protostomia;  
 Spiralia;Lophotrochozoa;Mollusca;Gastropoda;Patellogastropoda;Lottioidea;  
 Lottiidae;Lottia;Lottia gigantea  
 UdeM00000041974 1735272 58.9 UdeM00000041974 XP\_041360711.1 38.6  
 70 43 0 3 72 44 113 5.00E-06 58.9 1735272  
 cellular  
 organisms;Eukaryota;Opisthokonta;Metazoa;Eumetazoa;Bilateria;Protostomia;  
 Spiralia;Lophotrochozoa;Mollusca;Gastropoda;Neomphalina;Neomphaloidea;Pel  
 tospiridae;Gigantopelta;Gigantopelta aegis  
 UdeM00000041975 6596 208 UdeM00000041975 XP\_045208259.1 46.9 213  
 111 2 3 215 276 486 1.20E-50 208 6596 cellular  
 organisms;Eukaryota;Opisthokonta;Metazoa;Eumetazoa;Bilateria;Protostomia;  
 Spiralia;Lophotrochozoa;Mollusca;Bivalvia;Autobranchia;Heteroconchia;Euhe  
 terodonta;Imparidentia;Venerida;Veneroidea;Veneridae;Mercenaria;Mercenari  
 a mercenaria  
 UdeM00000041976 6579 193 UdeM00000041976 XP\_033736448.1 38.9 270  
 138 6 5 247 10 279 8.70E-46 193 6579 cellular  
 organisms;Eukaryota;Opisthokonta;Metazoa;Eumetazoa;Bilateria;Protostomia;  
 Spiralia;Lophotrochozoa;Mollusca;Bivalvia;Autobranchia;Pteriomorpha;Pect  
 inida;Pectinoidea;Pectinidae;Pecten;Pecten maximus  
 UdeM00000041977 29159 466.8 UdeM00000041977 XP\_034311318.1 39.8 698  
 369 19 140 820 1 664 6.00E-128 466.8 29159 cellular  
 organisms;Eukaryota;Opisthokonta;Metazoa;Eumetazoa;Bilateria;Protostomia;  
 Spiralia;Lophotrochozoa;Mollusca;Bivalvia;Autobranchia;Pteriomorpha;Ostr  
 eida;Ostreoidea;Ostreidae;Crassostrea;Crassostrea gigas  
 UdeM00000041978 6596 181.8 UdeM00000041978 XP\_045214901.1 30.8 403  
 264 4 15 413 61 452 3.50E-42 181.8 6596 cellular  
 organisms;Eukaryota;Opisthokonta;Metazoa;Eumetazoa;Bilateria;Protostomia;  
 Spiralia;Lophotrochozoa;Mollusca;Bivalvia;Autobranchia;Heteroconchia;Euhe  
 terodonta;Imparidentia;Venerida;Veneroidea;Veneridae;Mercenaria;Mercenari  
 a mercenaria  
 UdeM00000041979 6565 211.1 UdeM00000041979 XP\_022315978.1 38.9 283  
 170 2 216 495 127 409 3.40E-51 211.1 6565 cellular  
 organisms;Eukaryota;Opisthokonta;Metazoa;Eumetazoa;Bilateria;Protostomia;  
 Spiralia;Lophotrochozoa;Mollusca;Bivalvia;Autobranchia;Pteriomorpha;Ostr  
 eida;Ostreoidea;Ostreidae;Crassostrea;Crassostrea virginica  
 UdeM00000041980 6596 511.1 UdeM00000041980 XP\_045171694.1 65.4 367  
 121 2 6 372 5 365 1.20E-141 511.1 6596 cellular  
 organisms;Eukaryota;Opisthokonta;Metazoa;Eumetazoa;Bilateria;Protostomia;  
 Spiralia;Lophotrochozoa;Mollusca;Bivalvia;Autobranchia;Heteroconchia;Euhe  
 terodonta;Imparidentia;Venerida;Veneroidea;Veneridae;Mercenaria;Mercenari  
 a mercenaria  
 UdeM00000041981 1735272 90.9 UdeM00000041981 XP\_041356288.1 37.4  
 131 79 2 1 128 4 134 1.60E-15 90.9 1735272  
 cellular  
 organisms;Eukaryota;Opisthokonta;Metazoa;Eumetazoa;Bilateria;Protostomia;  
 Spiralia;Lophotrochozoa;Mollusca;Gastropoda;Neomphalina;Neomphaloidea;Pel  
 tospiridae;Gigantopelta;Gigantopelta aegis



UdeM00000041982 6596 196.4 UdeM00000041982 XP\_045196125.1 38.9 283  
 165 2 24 300 127 407 5.10E-47 196.4 6596 cellular  
 organisms;Eukaryota;Opisthokonta;Metazoa;Eumetazoa;Bilateria;Protostomia;  
 Spiralia;Lophotrochozoa;Mollusca;Bivalvia;Autobranhia;Heteroconchia;Euhe  
 terodonta;Imparidentia;Venerida;Veneroidea;Veneridae;Mercenaria;Mercenari  
 a mercenaria  
 UdeM00000041983 6573 100.5 UdeM00000041983 XP\_021372170.1 34.4 160  
 98 5 11 164 901 1059 2.40E-18 100.5 6573 cellular  
 organisms;Eukaryota;Opisthokonta;Metazoa;Eumetazoa;Bilateria;Protostomia;  
 Spiralia;Lophotrochozoa;Mollusca;Bivalvia;Autobranhia;Pteriormorphia;Pect  
 inida;Pectinoidea;Pectinidae;Mizuhopecten;Mizuhopecten yessoensis  
 UdeM00000041984 6573 65.1 UdeM00000041984 XP\_021360016.1 51.6 62  
 26 3 30 90 1973 2031 1.10E-07 65.1 6573 cellular  
 organisms;Eukaryota;Opisthokonta;Metazoa;Eumetazoa;Bilateria;Protostomia;  
 Spiralia;Lophotrochozoa;Mollusca;Bivalvia;Autobranhia;Pteriormorphia;Pect  
 inida;Pectinoidea;Pectinidae;Mizuhopecten;Mizuhopecten yessoensis  
 UdeM00000041987 6596 118.2 UdeM00000041987 XP\_045200923.1 21 819  
 518 29 33 749 878 1669 4.50E-23 118.2 6596 cellular  
 organisms;Eukaryota;Opisthokonta;Metazoa;Eumetazoa;Bilateria;Protostomia;  
 Spiralia;Lophotrochozoa;Mollusca;Bivalvia;Autobranhia;Heteroconchia;Euhe  
 terodonta;Imparidentia;Venerida;Veneroidea;Veneridae;Mercenaria;Mercenari  
 a mercenaria  
 UdeM00000041988 6596 155.6 UdeM00000041988 XP\_045200918.1 21.3 1057  
 712 39 255 1234 940 1953 4.30E-34 155.6 6596 cellular  
 organisms;Eukaryota;Opisthokonta;Metazoa;Eumetazoa;Bilateria;Protostomia;  
 Spiralia;Lophotrochozoa;Mollusca;Bivalvia;Autobranhia;Heteroconchia;Euhe  
 terodonta;Imparidentia;Venerida;Veneroidea;Veneridae;Mercenaria;Mercenari  
 a mercenaria  
 UdeM00000041991 6596 119.8 UdeM00000041991 XP\_045202349.1 23.5 417  
 292 10 527 917 354 769 1.90E-23 119.8 6596 cellular  
 organisms;Eukaryota;Opisthokonta;Metazoa;Eumetazoa;Bilateria;Protostomia;  
 Spiralia;Lophotrochozoa;Mollusca;Bivalvia;Autobranhia;Heteroconchia;Euhe  
 terodonta;Imparidentia;Venerida;Veneroidea;Veneridae;Mercenaria;Mercenari  
 a mercenaria  
 UdeM00000041992 6573 197.2 UdeM00000041992 XP\_021339447.1 39.9 258  
 147 4 2 254 76 330 2.60E-47 197.2 6573 cellular  
 organisms;Eukaryota;Opisthokonta;Metazoa;Eumetazoa;Bilateria;Protostomia;  
 Spiralia;Lophotrochozoa;Mollusca;Bivalvia;Autobranhia;Pteriormorphia;Pect  
 inida;Pectinoidea;Pectinidae;Mizuhopecten;Mizuhopecten yessoensis  
 UdeM00000041995 6579 175.6 UdeM00000041995 XP\_033735065.1 38.8 232  
 128 6 2 225 313 538 7.10E-41 175.6 6579 cellular  
 organisms;Eukaryota;Opisthokonta;Metazoa;Eumetazoa;Bilateria;Protostomia;  
 Spiralia;Lophotrochozoa;Mollusca;Bivalvia;Autobranhia;Pteriormorphia;Pect  
 inida;Pectinoidea;Pectinidae;Pecten;Pecten maximus  
 UdeM00000041997 6596 180.3 UdeM00000041997 XP\_045200736.1 40.2 276  
 139 7 11 279 12 268 3.50E-42 180.3 6596 cellular  
 organisms;Eukaryota;Opisthokonta;Metazoa;Eumetazoa;Bilateria;Protostomia;  
 Spiralia;Lophotrochozoa;Mollusca;Bivalvia;Autobranhia;Heteroconchia;Euhe  
 terodonta;Imparidentia;Venerida;Veneroidea;Veneridae;Mercenaria;Mercenari  
 a mercenaria  
 UdeM00000041998 6596 147.1 UdeM00000041998 XP\_045200708.1 30.2 298  
 190 8 11 298 13 302 3.50E-32 147.1 6596 cellular  
 organisms;Eukaryota;Opisthokonta;Metazoa;Eumetazoa;Bilateria;Protostomia;  
 Spiralia;Lophotrochozoa;Mollusca;Bivalvia;Autobranhia;Heteroconchia;Euhe

terodonta;Imparidentia;Venerida;Veneroidea;Veneridae;Mercenaria;Mercenaria mercenaria

UdeM00000041999 29159 658.3 UdeM00000041999 XP\_034303860.1 46.3 730  
272 7 15 626 21 748 9.90E-186 658.3 29159 cellular

organisms;Eukaryota;Opisthokonta;Metazoa;Eumetazoa;Bilateria;Protostomia;Spiralia;Lophotrochozoa;Mollusca;Bivalvia;Autobranhia;Pteriomorphia;Ostreida;Ostreoidea;Ostreidae;Crassostrea;Crassostrea gigas

UdeM00000042000 6565 97.1 UdeM00000042000 XP\_022312527.1 44.1 102  
56 1 55 155 70 171 2.40E-17 97.1 6565 cellular

organisms;Eukaryota;Opisthokonta;Metazoa;Eumetazoa;Bilateria;Protostomia;Spiralia;Lophotrochozoa;Mollusca;Bivalvia;Autobranhia;Pteriomorphia;Ostreida;Ostreoidea;Ostreidae;Crassostrea;Crassostrea virginica

UdeM00000042003 6596 170.6 UdeM00000042003 XP\_045199619.1 30.9 350  
203 11 56 386 192 521 4.00E-39 170.6 6596 cellular

organisms;Eukaryota;Opisthokonta;Metazoa;Eumetazoa;Bilateria;Protostomia;Spiralia;Lophotrochozoa;Mollusca;Bivalvia;Autobranhia;Heteroconchia;Euheterodonta;Imparidentia;Venerida;Veneroidea;Veneridae;Mercenaria;Mercenaria mercenaria

UdeM00000042004 6596 63.9 UdeM00000042004 XP\_045199312.1 47.1 68  
33 1 8 72 3 70 2.20E-07 63.9 6596 cellular

organisms;Eukaryota;Opisthokonta;Metazoa;Eumetazoa;Bilateria;Protostomia;Spiralia;Lophotrochozoa;Mollusca;Bivalvia;Autobranhia;Heteroconchia;Euheterodonta;Imparidentia;Venerida;Veneroidea;Veneridae;Mercenaria;Mercenaria mercenaria

UdeM00000042006 6596 1380.9 UdeM00000042006 XP\_045200455.1 76  
920 211 7 2 918 6 918 0.00E+00 1380.9 6596  
cellular

organisms;Eukaryota;Opisthokonta;Metazoa;Eumetazoa;Bilateria;Protostomia;Spiralia;Lophotrochozoa;Mollusca;Bivalvia;Autobranhia;Heteroconchia;Euheterodonta;Imparidentia;Venerida;Veneroidea;Veneridae;Mercenaria;Mercenaria mercenaria

UdeM00000042007 6596 243 UdeM00000042007 XP\_045200455.1 64.2 215  
70 4 2 213 6 216 3.70E-61 243 6596 cellular

organisms;Eukaryota;Opisthokonta;Metazoa;Eumetazoa;Bilateria;Protostomia;Spiralia;Lophotrochozoa;Mollusca;Bivalvia;Autobranhia;Heteroconchia;Euheterodonta;Imparidentia;Venerida;Veneroidea;Veneridae;Mercenaria;Mercenaria mercenaria

UdeM00000042008 6850 155.2 UdeM00000042008 XP\_022249205.1 31.4 344  
223 5 30 367 246 582 1.80E-34 155.2 6850 cellular

organisms;Eukaryota;Opisthokonta;Metazoa;Eumetazoa;Bilateria;Protostomia;Ecdysozoa;Panarthropoda;Arthropoda;Chelicerata;Merostomata;Xiphosura;Limulidae;Limulus;Limulus polyphemus

UdeM00000042010 72036 70.9 UdeM00000042010 XP\_040576246.1 46.7 75  
34 2 1 75 1 69 8.30E-10 70.9 72036 cellular

organisms;Eukaryota;Opisthokonta;Metazoa;Eumetazoa;Bilateria;Protostomia;Ecdysozoa;Panarthropoda;Arthropoda;Mandibulata;Pancrustacea;Crustacea;Multicrustacea;Hexanauplia;Copepoda;Neocopepoda;Podoplea;Siphonostomatoida;Caligidae;Lepeophtheirus;Lepeophtheirus salmonis

UdeM00000042009 1437191 151.8 UdeM00000042009 XP\_029054816.1 27.2  
383 144 4 31 279 78 459 1.30E-33 151.8 1437191  
cellular

organisms;Eukaryota;Opisthokonta;Metazoa;Eumetazoa;Bilateria;Protostomia;Ecdysozoa;Panarthropoda;Arthropoda;Mandibulata;Pancrustacea;Hexapoda;Insecta;Dicondylia;Pterygota;Neoptera;Endopterygota;Hymenoptera;Apocrita;Aculeata

eata; Apoidea; Megachilidae; Megachilinae; Osmini; Osmia; Osmia bicornis; Osmia bicornis bicornis

UdeM00000042011 1437191 141.7 UdeM00000042011 XP\_029054816.1 27.2  
345 116 4 7 217 116 459 1.10E-30 141.7 1437191  
cellular

organisms; Eukaryota; Opisthokonta; Metazoa; Eumetazoa; Bilateria; Protostomia; Ecdysozoa; Panarthropoda; Arthropoda; Mandibulata; Pancrustacea; Hexapoda; Insecta; Dicondylia; Pterygota; Neoptera; Endopterygota; Hymenoptera; Apocrita; Aculeata; Apoidea; Megachilidae; Megachilinae; Osmini; Osmia; Osmia bicornis; Osmia bicornis bicornis

UdeM00000042012 6596 196.1 UdeM00000042012 XP\_045200233.1 45.7 304  
109 4 52 301 4 305 6.70E-47 196.1 6596 cellular

organisms; Eukaryota; Opisthokonta; Metazoa; Eumetazoa; Bilateria; Protostomia; Spiralia; Lophotrochozoa; Mollusca; Bivalvia; Autobranchia; Heteroconchia; Euheterodonta; Imparidentia; Venerida; Veneroidea; Veneridae; Mercenaria; Mercenaria mercenaria

UdeM00000042014 6596 165.6 UdeM00000042014 XP\_045200240.1 38.2 272  
137 7 1 265 468 715 1.10E-37 165.6 6596 cellular

organisms; Eukaryota; Opisthokonta; Metazoa; Eumetazoa; Bilateria; Protostomia; Spiralia; Lophotrochozoa; Mollusca; Bivalvia; Autobranchia; Heteroconchia; Euheterodonta; Imparidentia; Venerida; Veneroidea; Veneridae; Mercenaria; Mercenaria mercenaria

UdeM00000042015 1735272 308.1 UdeM00000042015 XP\_041354893.1 36.8  
451 242 5 7 424 15 455 1.70E-80 308.1 1735272  
cellular

organisms; Eukaryota; Opisthokonta; Metazoa; Eumetazoa; Bilateria; Protostomia; Spiralia; Lophotrochozoa; Mollusca; Gastropoda; Neomphalina; Neomphaloidea; Peltospiridae; Gigantopelta; Gigantopelta aegis

UdeM00000042016 1735272 327 UdeM00000042016 XP\_041354884.1 37.9  
459 242 5 7 432 15 463 3.60E-86 327 1735272  
cellular

organisms; Eukaryota; Opisthokonta; Metazoa; Eumetazoa; Bilateria; Protostomia; Spiralia; Lophotrochozoa; Mollusca; Gastropoda; Neomphalina; Neomphaloidea; Peltospiridae; Gigantopelta; Gigantopelta aegis

UdeM00000042017 29159 580.5 UdeM00000042017 XP\_034331610.1 44.1 709  
361 10 480 1185 446 1122 4.90E-162 580.5 29159 cellular

organisms; Eukaryota; Opisthokonta; Metazoa; Eumetazoa; Bilateria; Protostomia; Spiralia; Lophotrochozoa; Mollusca; Bivalvia; Autobranchia; Pteriomorphia; Ostreida; Ostreioidea; Ostreidae; Crassostrea; Crassostrea gigas

UdeM00000042018 225164 230.3 UdeM00000042018 XP\_009067178.1 45.7  
247 130 2 1 245 3 247 2.70E-57 230.3 225164  
cellular

organisms; Eukaryota; Opisthokonta; Metazoa; Eumetazoa; Bilateria; Protostomia; Spiralia; Lophotrochozoa; Mollusca; Gastropoda; Patellogastropoda; Lottioidea; Lottiidae; Lottia; Lottia gigantea

UdeM00000042019 6596 332.4 UdeM00000042019 XP\_045200420.1 40 530  
263 11 1 486 1 519 1.30E-87 332.4 6596 cellular

organisms; Eukaryota; Opisthokonta; Metazoa; Eumetazoa; Bilateria; Protostomia; Spiralia; Lophotrochozoa; Mollusca; Bivalvia; Autobranchia; Heteroconchia; Euheterodonta; Imparidentia; Venerida; Veneroidea; Veneridae; Mercenaria; Mercenaria mercenaria

UdeM00000042020 6596 328.2 UdeM00000042020 XP\_045200421.1 40.3 518  
254 11 1 474 1 507 2.50E-86 328.2 6596 cellular

organisms; Eukaryota; Opisthokonta; Metazoa; Eumetazoa; Bilateria; Protostomia;

Spiralia;Lophotrochozoa;Mollusca;Bivalvia;Autobranchia;Heteroconchia;Euherodonta;Imparidentia;Venerida;Veneroidea;Veneridae;Mercenaria;Mercenaria mercenaria

UdeM00000042021 6565 138.7 UdeM00000042021 XP\_022337040.1 52.6 152  
53 3 28 167 36 180 9.20E-30 138.7 6565 cellular

organisms;Eukaryota;Opisthokonta;Metazoa;Eumetazoa;Bilateria;Protostomia;Spiralia;Lophotrochozoa;Mollusca;Bivalvia;Autobranchia;Pteriormorphia;Ostreida;Ostreoidea;Ostreidae;Crassostrea;Crassostrea virginica

UdeM00000042022 1735272 239.6 UdeM00000042022 XP\_041355070.1 50.9  
222 106 2 15 234 1040 1260 4.10E-60 239.6 1735272  
cellular

organisms;Eukaryota;Opisthokonta;Metazoa;Eumetazoa;Bilateria;Protostomia;Spiralia;Lophotrochozoa;Mollusca;Gastropoda;Neomphalina;Neomphaloidea;Peltospiridae;Gigantopelta;Gigantopelta aegis

UdeM00000042023 1735272 1236.5 UdeM00000042023 XP\_041355070.1  
56.2 1112 321 3 2 1112 96 1042 0.00E+00 1236.5  
1735272 cellular

organisms;Eukaryota;Opisthokonta;Metazoa;Eumetazoa;Bilateria;Protostomia;Spiralia;Lophotrochozoa;Mollusca;Gastropoda;Neomphalina;Neomphaloidea;Peltospiridae;Gigantopelta;Gigantopelta aegis

UdeM00000042024 225164 151 UdeM00000042024 XP\_009062989.1 74.2  
93 24 0 5 97 4 96 8.40E-34 151 225164  
cellular

organisms;Eukaryota;Opisthokonta;Metazoa;Eumetazoa;Bilateria;Protostomia;Spiralia;Lophotrochozoa;Mollusca;Gastropoda;Patellogastropoda;Lottioidea;Lottiidae;Lottia;Lottia gigantea

UdeM00000042025 29159 239.2 UdeM00000042025 XP\_011451530.1 57.2 194  
80 2 102 292 72 265 6.70E-60 239.2 29159 cellular

organisms;Eukaryota;Opisthokonta;Metazoa;Eumetazoa;Bilateria;Protostomia;Spiralia;Lophotrochozoa;Mollusca;Bivalvia;Autobranchia;Pteriormorphia;Ostreida;Ostreoidea;Ostreidae;Crassostrea;Crassostrea gigas

UdeM00000042026 29159 279.3 UdeM00000042026 XP\_034322046.1 40.3 380  
138 4 1 295 151 526 6.50E-72 279.3 29159 cellular

organisms;Eukaryota;Opisthokonta;Metazoa;Eumetazoa;Bilateria;Protostomia;Spiralia;Lophotrochozoa;Mollusca;Bivalvia;Autobranchia;Pteriormorphia;Ostreida;Ostreoidea;Ostreidae;Crassostrea;Crassostrea gigas

UdeM00000042027 6596 164.9 UdeM00000042027 XP\_045193680.1 32.1 392  
215 9 1 364 32 400 2.30E-37 164.9 6596 cellular

organisms;Eukaryota;Opisthokonta;Metazoa;Eumetazoa;Bilateria;Protostomia;Spiralia;Lophotrochozoa;Mollusca;Bivalvia;Autobranchia;Heteroconchia;Euherodonta;Imparidentia;Venerida;Veneroidea;Veneridae;Mercenaria;Mercenaria mercenaria

UdeM00000042028 6596 406.4 UdeM00000042028 XP\_045202048.1 54.4 333  
152 0 81 413 12 344 4.40E-110 406.4 6596 cellular

organisms;Eukaryota;Opisthokonta;Metazoa;Eumetazoa;Bilateria;Protostomia;Spiralia;Lophotrochozoa;Mollusca;Bivalvia;Autobranchia;Heteroconchia;Euherodonta;Imparidentia;Venerida;Veneroidea;Veneridae;Mercenaria;Mercenaria mercenaria

UdeM00000042029 6596 210.7 UdeM00000042029 XP\_045193708.1 34.1 343  
213 3 6 335 16 358 3.90E-51 210.7 6596 cellular

organisms;Eukaryota;Opisthokonta;Metazoa;Eumetazoa;Bilateria;Protostomia;Spiralia;Lophotrochozoa;Mollusca;Bivalvia;Autobranchia;Heteroconchia;Euherodonta;Imparidentia;Venerida;Veneroidea;Veneridae;Mercenaria;Mercenaria mercenaria

UdeM00000042030 6596 282.7 UdeM00000042030 XP\_045202048.1 51.9 241  
 116 0 54 294 13 253 5.50E-73 282.7 6596 cellular  
 organisms;Eukaryota;Opisthokonta;Metazoa;Eumetazoa;Bilateria;Protostomia;  
 Spiralia;Lophotrochozoa;Mollusca;Bivalvia;Autobranchia;Heteroconchia;Euhe  
 terodonta;Imparidentia;Venerida;Veneroidea;Veneridae;Mercenaria;Mercenari  
 a mercenaria

UdeM00000042032 6596 294.3 UdeM00000042032 XP\_045200566.1 68 225  
 61 2 1 225 1 214 2.00E-76 294.3 6596 cellular  
 organisms;Eukaryota;Opisthokonta;Metazoa;Eumetazoa;Bilateria;Protostomia;  
 Spiralia;Lophotrochozoa;Mollusca;Bivalvia;Autobranchia;Heteroconchia;Euhe  
 terodonta;Imparidentia;Venerida;Veneroidea;Veneridae;Mercenaria;Mercenari  
 a mercenaria

UdeM00000042033 6596 319.7 UdeM00000042033 XP\_045200573.1 78.2 188  
 41 0 5 192 6 193 2.50E-84 319.7 6596 cellular  
 organisms;Eukaryota;Opisthokonta;Metazoa;Eumetazoa;Bilateria;Protostomia;  
 Spiralia;Lophotrochozoa;Mollusca;Bivalvia;Autobranchia;Heteroconchia;Euhe  
 terodonta;Imparidentia;Venerida;Veneroidea;Veneridae;Mercenaria;Mercenari  
 a mercenaria

UdeM00000042034 29159 839.7 UdeM00000042034 XP\_011412106.2 68.1 599  
 178 5 1 592 1 593 2.30E-240 839.7 29159 cellular  
 organisms;Eukaryota;Opisthokonta;Metazoa;Eumetazoa;Bilateria;Protostomia;  
 Spiralia;Lophotrochozoa;Mollusca;Bivalvia;Autobranchia;Pteriormorphia;Ostr  
 eida;Ostreoidea;Ostreidae;Crassostrea;Crassostrea gigas

UdeM00000042038 6579 525.4 UdeM00000042038 XP\_033760928.1 57.9 435  
 182 1 12 445 11 445 7.20E-146 525.4 6579 cellular  
 organisms;Eukaryota;Opisthokonta;Metazoa;Eumetazoa;Bilateria;Protostomia;  
 Spiralia;Lophotrochozoa;Mollusca;Bivalvia;Autobranchia;Pteriormorphia;Pect  
 inida;Pectinoidea;Pectinidae;Pecten;Pecten maximus

UdeM00000042039 6596 183.3 UdeM00000042039 XP\_045200568.1 58.7 172  
 61 2 14 176 17 187 3.30E-43 183.3 6596 cellular  
 organisms;Eukaryota;Opisthokonta;Metazoa;Eumetazoa;Bilateria;Protostomia;  
 Spiralia;Lophotrochozoa;Mollusca;Bivalvia;Autobranchia;Heteroconchia;Euhe  
 terodonta;Imparidentia;Venerida;Veneroidea;Veneridae;Mercenaria;Mercenari  
 a mercenaria

UdeM00000042040 6596 490 UdeM00000042040 XP\_045202563.1 47 585  
 261 11 1 553 1 568 4.10E-135 490 6596 cellular  
 organisms;Eukaryota;Opisthokonta;Metazoa;Eumetazoa;Bilateria;Protostomia;  
 Spiralia;Lophotrochozoa;Mollusca;Bivalvia;Autobranchia;Heteroconchia;Euhe  
 terodonta;Imparidentia;Venerida;Veneroidea;Veneridae;Mercenaria;Mercenari  
 a mercenaria

UdeM00000042041 6596 867.8 UdeM00000042041 XP\_045200589.1 67.6 602  
 185 3 1 592 1 602 7.70E-249 867.8 6596 cellular  
 organisms;Eukaryota;Opisthokonta;Metazoa;Eumetazoa;Bilateria;Protostomia;  
 Spiralia;Lophotrochozoa;Mollusca;Bivalvia;Autobranchia;Heteroconchia;Euhe  
 terodonta;Imparidentia;Venerida;Veneroidea;Veneridae;Mercenaria;Mercenari  
 a mercenaria

UdeM00000042042 6596 387.1 UdeM00000042042 XP\_045200590.1 78.7 239  
 51 0 1 239 1 239 1.60E-104 387.1 6596 cellular  
 organisms;Eukaryota;Opisthokonta;Metazoa;Eumetazoa;Bilateria;Protostomia;  
 Spiralia;Lophotrochozoa;Mollusca;Bivalvia;Autobranchia;Heteroconchia;Euhe  
 terodonta;Imparidentia;Venerida;Veneroidea;Veneridae;Mercenaria;Mercenari  
 a mercenaria

UdeM00000042043 6579 335.5 UdeM00000042043 XP\_033759719.1 42.9 429  
 209 9 93 518 109 504 1.20E-88 335.5 6579 cellular

organisms;Eukaryota;Opisthokonta;Metazoa;Eumetazoa;Bilateria;Protostomia;Spiralia;Lophotrochozoa;Mollusca;Bivalvia;Autobranhia;Pteriomorphia;Pectinida;Pectinoidea;Pectinidae;Pecten;Pecten maximus

UdeM00000042044 6596 588.2 UdeM00000042044 XP\_045200590.1 91.9 307  
25 0 12 318 239 545 6.30E-165 588.2 6596 cellular

organisms;Eukaryota;Opisthokonta;Metazoa;Eumetazoa;Bilateria;Protostomia;Spiralia;Lophotrochozoa;Mollusca;Bivalvia;Autobranhia;Heteroconchia;Euheterodonta;Imparidentia;Venerida;Veneroidea;Veneridae;Mercenaria;Mercenaria mercenaria

UdeM00000042047 29159 318.9 UdeM00000042047 XP\_034329290.1 59 261  
105 2 34 293 3 262 6.60E-84 318.9 29159 cellular

organisms;Eukaryota;Opisthokonta;Metazoa;Eumetazoa;Bilateria;Protostomia;Spiralia;Lophotrochozoa;Mollusca;Bivalvia;Autobranhia;Pteriomorphia;Ostreida;Ostreoidea;Ostreidae;Crassostrea;Crassostrea gigas

UdeM00000042048 1735272 308.1 UdeM00000042048 XP\_041353531.1 35.8  
489 307 7 16 499 23 509 2.00E-80 308.1 1735272  
cellular

organisms;Eukaryota;Opisthokonta;Metazoa;Eumetazoa;Bilateria;Protostomia;Spiralia;Lophotrochozoa;Mollusca;Gastropoda;Neomphalina;Neomphaloidea;Peltospiridae;Gigantopelta;Gigantopelta aegis

UdeM00000042049 6596 1568.5 UdeM00000042049 XP\_045200045.1 72.9  
1066 289 0 244 1309 28 1093 0.00E+00 1568.5 6596  
cellular

organisms;Eukaryota;Opisthokonta;Metazoa;Eumetazoa;Bilateria;Protostomia;Spiralia;Lophotrochozoa;Mollusca;Bivalvia;Autobranhia;Heteroconchia;Euheterodonta;Imparidentia;Venerida;Veneroidea;Veneridae;Mercenaria;Mercenaria mercenaria

UdeM00000042050 6596 264.2 UdeM00000042050 XP\_045200046.1 85.5 145  
21 0 24 168 40 184 1.10E-67 264.2 6596 cellular

organisms;Eukaryota;Opisthokonta;Metazoa;Eumetazoa;Bilateria;Protostomia;Spiralia;Lophotrochozoa;Mollusca;Bivalvia;Autobranhia;Heteroconchia;Euheterodonta;Imparidentia;Venerida;Veneroidea;Veneridae;Mercenaria;Mercenaria mercenaria

UdeM00000042051 6579 228.8 UdeM00000042051 XP\_033759847.1 86.2 116  
16 0 31 146 180 295 5.10E-57 228.8 6579 cellular

organisms;Eukaryota;Opisthokonta;Metazoa;Eumetazoa;Bilateria;Protostomia;Spiralia;Lophotrochozoa;Mollusca;Bivalvia;Autobranhia;Pteriomorphia;Pectinida;Pectinoidea;Pectinidae;Pecten;Pecten maximus

UdeM00000042052 6573 68.6 UdeM00000042052 XP\_021360024.1 68.3 41  
13 0 69 109 299 339 5.80E-09 68.6 6573 cellular

organisms;Eukaryota;Opisthokonta;Metazoa;Eumetazoa;Bilateria;Protostomia;Spiralia;Lophotrochozoa;Mollusca;Bivalvia;Autobranhia;Pteriomorphia;Pectinida;Pectinoidea;Pectinidae;Mizuhopecten;Mizuhopecten yessoensis

UdeM00000042053 6596 202.2 UdeM00000042053 XP\_045202018.1 70.6 136  
40 0 23 158 2 137 4.90E-49 202.2 6596 cellular

organisms;Eukaryota;Opisthokonta;Metazoa;Eumetazoa;Bilateria;Protostomia;Spiralia;Lophotrochozoa;Mollusca;Bivalvia;Autobranhia;Heteroconchia;Euheterodonta;Imparidentia;Venerida;Veneroidea;Veneridae;Mercenaria;Mercenaria mercenaria

UdeM00000042054 6596 633.6 UdeM00000042054 XP\_045200780.1 91.9 347  
28 0 1 347 312 658 1.40E-178 633.6 6596 cellular

organisms;Eukaryota;Opisthokonta;Metazoa;Eumetazoa;Bilateria;Protostomia;Spiralia;Lophotrochozoa;Mollusca;Bivalvia;Autobranhia;Heteroconchia;Euheterodonta

terodonta;Imparidentia;Venerida;Veneroidea;Veneridae;Mercenaria;Mercenari  
 a mercenaria  
 UdeM00000042055 6596 982.6 UdeM00000042055 XP\_045200780.1 78.7 616  
 124 5 15 624 44 658 2.30E-283 982.6 6596 cellular  
 organisms;Eukaryota;Opisthokonta;Metazoa;Eumetazoa;Bilateria;Protostomia;  
 Spiralia;Lophotrochozoa;Mollusca;Bivalvia;Autobranchia;Heteroconchia;Euhe  
 terodonta;Imparidentia;Venerida;Veneroidea;Veneridae;Mercenaria;Mercenari  
 a mercenaria  
 UdeM00000042056 7668 138.7 UdeM00000042056 XP\_011666894.1 39.7 204  
 107 4 2 194 95 293 8.10E-30 138.7 7668 cellular  
 organisms;Eukaryota;Opisthokonta;Metazoa;Eumetazoa;Bilateria;Deuterostomi  
 a;Echinodermata;Eleutherozoa;Echinozoa;Echinoidea;Euechinoidea;Echinacea;  
 Camarodonta;Echinidea;Strongylocentrotidae;Strongylocentrotus;Strongyloce  
 ntrotus purpuratus  
 UdeM00000042057 29159 1004.6 UdeM00000042057 XP\_011445854.2 74.6  
 638 158 2 13 647 14 650 6.50E-290 1004.6  
 29159 cellular  
 organisms;Eukaryota;Opisthokonta;Metazoa;Eumetazoa;Bilateria;Protostomia;  
 Spiralia;Lophotrochozoa;Mollusca;Bivalvia;Autobranchia;Pteriormorphia;Ostr  
 eida;Ostreoidea;Ostreidae;Crassostrea;Crassostrea gigas  
 UdeM00000042058 29159 314.7 UdeM00000042058 XP\_034327344.1 54.9 275  
 70 2 2 275 4 225 1.20E-82 314.7 29159 cellular  
 organisms;Eukaryota;Opisthokonta;Metazoa;Eumetazoa;Bilateria;Protostomia;  
 Spiralia;Lophotrochozoa;Mollusca;Bivalvia;Autobranchia;Pteriormorphia;Ostr  
 eida;Ostreoidea;Ostreidae;Crassostrea;Crassostrea gigas  
 UdeM00000042059 6526 87 UdeM00000042059 XP\_013068584.1 42.1 133  
 76 1 1 133 8 139 1.90E-14 87 6526 cellular  
 organisms;Eukaryota;Opisthokonta;Metazoa;Eumetazoa;Bilateria;Protostomia;  
 Spiralia;Lophotrochozoa;Mollusca;Gastropoda;Heterobranchia;Euthyneura;Pan  
 pulmonata;Hygrophila;Lymnaeioidea;Planorbidae;Biomphalaria;Biomphalaria  
 glabrata  
 UdeM00000042060 6596 146.4 UdeM00000042060 XP\_045199818.1 56.2 130  
 53 1 1 126 1 130 2.70E-32 146.4 6596 cellular  
 organisms;Eukaryota;Opisthokonta;Metazoa;Eumetazoa;Bilateria;Protostomia;  
 Spiralia;Lophotrochozoa;Mollusca;Bivalvia;Autobranchia;Heteroconchia;Euhe  
 terodonta;Imparidentia;Venerida;Veneroidea;Veneridae;Mercenaria;Mercenari  
 a mercenaria  
 UdeM00000042061 6596 146.7 UdeM00000042061 XP\_045199252.1 35.7 224  
 136 5 63 283 41 259 1.70E-31 146.7 6596 cellular  
 organisms;Eukaryota;Opisthokonta;Metazoa;Eumetazoa;Bilateria;Protostomia;  
 Spiralia;Lophotrochozoa;Mollusca;Bivalvia;Autobranchia;Heteroconchia;Euhe  
 terodonta;Imparidentia;Venerida;Veneroidea;Veneridae;Mercenaria;Mercenari  
 a mercenaria  
 UdeM00000042061 6596 124.8 UdeM00000042061 XP\_045199252.1 30.9 372  
 201 15 691 1025 261 613 7.10E-25 124.8 6596 cellular  
 organisms;Eukaryota;Opisthokonta;Metazoa;Eumetazoa;Bilateria;Protostomia;  
 Spiralia;Lophotrochozoa;Mollusca;Bivalvia;Autobranchia;Heteroconchia;Euhe  
 terodonta;Imparidentia;Venerida;Veneroidea;Veneridae;Mercenaria;Mercenari  
 a mercenaria  
 UdeM00000042062 6596 276.6 UdeM00000042062 XP\_045199252.1 34.4 555  
 309 17 43 561 41 576 9.40E-71 276.6 6596 cellular  
 organisms;Eukaryota;Opisthokonta;Metazoa;Eumetazoa;Bilateria;Protostomia;  
 Spiralia;Lophotrochozoa;Mollusca;Bivalvia;Autobranchia;Heteroconchia;Euhe

terodonta;Imparidentia;Venerida;Veneroidea;Veneridae;Mercenaria;Mercenari  
 a mercenaria  
 UdeM00000042063 6596 325.5 UdeM00000042063 XP\_045199497.1 40.9 491  
 209 8 5 456 5 453 1.10E-85 325.5 6596 cellular  
 organisms;Eukaryota;Opisthokonta;Metazoa;Eumetazoa;Bilateria;Protostomia;  
 Spiralia;Lophotrochozoa;Mollusca;Bivalvia;Autobranchia;Heteroconchia;Euhe  
 terodonta;Imparidentia;Venerida;Veneroidea;Veneridae;Mercenaria;Mercenari  
 a mercenaria  
 UdeM00000042064 6596 701.8 UdeM00000042064 XP\_045199497.1 41.8 1001  
 450 17 5 949 5 928 1.20E-198 701.8 6596 cellular  
 organisms;Eukaryota;Opisthokonta;Metazoa;Eumetazoa;Bilateria;Protostomia;  
 Spiralia;Lophotrochozoa;Mollusca;Bivalvia;Autobranchia;Heteroconchia;Euhe  
 terodonta;Imparidentia;Venerida;Veneroidea;Veneridae;Mercenaria;Mercenari  
 a mercenaria  
 UdeM00000042065 6596 121.3 UdeM00000042065 XP\_045199665.1 54.3 116  
 49 2 11 124 561 674 1.00E-24 121.3 6596 cellular  
 organisms;Eukaryota;Opisthokonta;Metazoa;Eumetazoa;Bilateria;Protostomia;  
 Spiralia;Lophotrochozoa;Mollusca;Bivalvia;Autobranchia;Heteroconchia;Euhe  
 terodonta;Imparidentia;Venerida;Veneroidea;Veneridae;Mercenaria;Mercenari  
 a mercenaria  
 UdeM00000042066 6596 120.9 UdeM00000042066 XP\_045199665.1 54.3 116  
 49 2 11 124 561 674 1.20E-24 120.9 6596 cellular  
 organisms;Eukaryota;Opisthokonta;Metazoa;Eumetazoa;Bilateria;Protostomia;  
 Spiralia;Lophotrochozoa;Mollusca;Bivalvia;Autobranchia;Heteroconchia;Euhe  
 terodonta;Imparidentia;Venerida;Veneroidea;Veneridae;Mercenaria;Mercenari  
 a mercenaria  
 UdeM00000042067 225164 359 UdeM00000042067 XP\_009050332.1 59  
 349 105 7 7 323 30 372 6.50E-96 359 225164  
 cellular  
 organisms;Eukaryota;Opisthokonta;Metazoa;Eumetazoa;Bilateria;Protostomia;  
 Spiralia;Lophotrochozoa;Mollusca;Gastropoda;Patellogastropoda;Lottioidea;  
 Lottiidae;Lottia;Lottia gigantea  
 UdeM00000042068 6596 389.4 UdeM00000042068 XP\_045156737.1 58.9 326  
 133 1 6 331 10 334 4.50E-105 389.4 6596 cellular  
 organisms;Eukaryota;Opisthokonta;Metazoa;Eumetazoa;Bilateria;Protostomia;  
 Spiralia;Lophotrochozoa;Mollusca;Bivalvia;Autobranchia;Heteroconchia;Euhe  
 terodonta;Imparidentia;Venerida;Veneroidea;Veneridae;Mercenaria;Mercenari  
 a mercenaria  
 UdeM00000042069 6596 863.2 UdeM00000042069 XP\_045200330.1 50.5 855  
 386 4 1 820 31 883 2.60E-247 863.2 6596 cellular  
 organisms;Eukaryota;Opisthokonta;Metazoa;Eumetazoa;Bilateria;Protostomia;  
 Spiralia;Lophotrochozoa;Mollusca;Bivalvia;Autobranchia;Heteroconchia;Euhe  
 terodonta;Imparidentia;Venerida;Veneroidea;Veneridae;Mercenaria;Mercenari  
 a mercenaria  
 UdeM00000042070 29159 74.3 UdeM00000042070 XP\_034308960.1 32.6 135  
 80 4 14 137 79 213 1.30E-10 74.3 29159 cellular  
 organisms;Eukaryota;Opisthokonta;Metazoa;Eumetazoa;Bilateria;Protostomia;  
 Spiralia;Lophotrochozoa;Mollusca;Bivalvia;Autobranchia;Pteriomorphia;Ostr  
 eida;Ostreoidea;Ostreidae;Crassostrea;Crassostrea gigas  
 UdeM00000042071 6565 147.1 UdeM00000042071 XP\_022302274.1 49.3 144  
 71 2 125 268 159 300 3.10E-32 147.1 6565 cellular  
 organisms;Eukaryota;Opisthokonta;Metazoa;Eumetazoa;Bilateria;Protostomia;  
 Spiralia;Lophotrochozoa;Mollusca;Bivalvia;Autobranchia;Pteriomorphia;Ostr  
 eida;Ostreoidea;Ostreidae;Crassostrea;Crassostrea virginica



UdeM00000042072 6596 355.5 UdeM00000042072 XP\_045201849.1 31.2 808  
 494 26 22 798 220 996 1.90E-94 355.5 6596 cellular  
 organisms;Eukaryota;Opisthokonta;Metazoa;Eumetazoa;Bilateria;Protostomia;  
 Spiralia;Lophotrochozoa;Mollusca;Bivalvia;Autobranchia;Heteroconchia;Euhe  
 terodonta;Imparidentia;Venerida;Veneroidea;Veneridae;Mercenaria;Mercenari  
 a mercenaria

UdeM00000042073 6579 71.6 UdeM00000042073 XP\_033761549.1 32.1 134  
 70 5 14 144 92 207 9.10E-10 71.6 6579 cellular  
 organisms;Eukaryota;Opisthokonta;Metazoa;Eumetazoa;Bilateria;Protostomia;  
 Spiralia;Lophotrochozoa;Mollusca;Bivalvia;Autobranchia;Pteriormorphia;Pect  
 inida;Pectinoidea;Pectinidae;Pecten;Pecten maximus

UdeM00000042074 6579 158.7 UdeM00000042074 XP\_033762813.1 49.1 167  
 74 5 1 159 373 536 6.30E-36 158.7 6579 cellular  
 organisms;Eukaryota;Opisthokonta;Metazoa;Eumetazoa;Bilateria;Protostomia;  
 Spiralia;Lophotrochozoa;Mollusca;Bivalvia;Autobranchia;Pteriormorphia;Pect  
 inida;Pectinoidea;Pectinidae;Pecten;Pecten maximus

UdeM00000042075 6596 136 UdeM00000042075 XP\_045201849.1 29.8 329  
 213 10 3 325 680 996 1.10E-28 136 6596 cellular  
 organisms;Eukaryota;Opisthokonta;Metazoa;Eumetazoa;Bilateria;Protostomia;  
 Spiralia;Lophotrochozoa;Mollusca;Bivalvia;Autobranchia;Heteroconchia;Euhe  
 terodonta;Imparidentia;Venerida;Veneroidea;Veneridae;Mercenaria;Mercenari  
 a mercenaria

UdeM00000042076 29159 450.7 UdeM00000042076 XP\_034311825.1 52.2 485  
 190 12 1 451 167 643 2.20E-123 450.7 29159 cellular  
 organisms;Eukaryota;Opisthokonta;Metazoa;Eumetazoa;Bilateria;Protostomia;  
 Spiralia;Lophotrochozoa;Mollusca;Bivalvia;Autobranchia;Pteriormorphia;Ostr  
 eida;Ostreoidea;Ostreidae;Crassostrea;Crassostrea gigas

UdeM00000042077 6565 293.9 UdeM00000042077 XP\_022305524.1 26.7 884  
 535 25 19 821 5 856 6.40E-76 293.9 6565 cellular  
 organisms;Eukaryota;Opisthokonta;Metazoa;Eumetazoa;Bilateria;Protostomia;  
 Spiralia;Lophotrochozoa;Mollusca;Bivalvia;Autobranchia;Pteriormorphia;Ostr  
 eida;Ostreoidea;Ostreidae;Crassostrea;Crassostrea virginica

UdeM00000042078 6596 394.8 UdeM00000042078 XP\_045201849.1 29 1001  
 609 32 16 970 52 996 3.40E-106 394.8 6596 cellular  
 organisms;Eukaryota;Opisthokonta;Metazoa;Eumetazoa;Bilateria;Protostomia;  
 Spiralia;Lophotrochozoa;Mollusca;Bivalvia;Autobranchia;Heteroconchia;Euhe  
 terodonta;Imparidentia;Venerida;Veneroidea;Veneridae;Mercenaria;Mercenari  
 a mercenaria

UdeM00000042079 29159 81.3 UdeM00000042079 XP\_034308960.1 37.1 97  
 61 0 19 115 35 131 1.60E-12 81.3 29159 cellular  
 organisms;Eukaryota;Opisthokonta;Metazoa;Eumetazoa;Bilateria;Protostomia;  
 Spiralia;Lophotrochozoa;Mollusca;Bivalvia;Autobranchia;Pteriormorphia;Ostr  
 eida;Ostreoidea;Ostreidae;Crassostrea;Crassostrea gigas

UdeM00000042080 6596 328.2 UdeM00000042080 XP\_045201849.1 30.2 785  
 473 28 27 769 275 1026 3.10E-86 328.2 6596 cellular  
 organisms;Eukaryota;Opisthokonta;Metazoa;Eumetazoa;Bilateria;Protostomia;  
 Spiralia;Lophotrochozoa;Mollusca;Bivalvia;Autobranchia;Heteroconchia;Euhe  
 terodonta;Imparidentia;Venerida;Veneroidea;Veneridae;Mercenaria;Mercenari  
 a mercenaria

UdeM00000042081 6579 86.7 UdeM00000042081 XP\_033761549.1 28.6 210  
 123 8 6 207 17 207 3.90E-14 86.7 6579 cellular  
 organisms;Eukaryota;Opisthokonta;Metazoa;Eumetazoa;Bilateria;Protostomia;  
 Spiralia;Lophotrochozoa;Mollusca;Bivalvia;Autobranchia;Pteriormorphia;Pect  
 inida;Pectinoidea;Pectinidae;Pecten;Pecten maximus

UdeM00000042082 6579 191.4 UdeM00000042082 XP\_033762813.1 38.5 322  
 168 13 6 310 275 583 1.70E-45 191.4 6579 cellular  
 organisms;Eukaryota;Opisthokonta;Metazoa;Eumetazoa;Bilateria;Protostomia;  
 Spiralia;Lophotrochozoa;Mollusca;Bivalvia;Autobranhia;Pteriomorphia;Pect  
 inida;Pectinoidea;Pectinidae;Pecten;Pecten maximus  
 UdeM00000042083 6596 144.4 UdeM00000042083 XP\_045201849.1 29.8 332  
 209 10 3 325 680 996 2.80E-31 144.4 6596 cellular  
 organisms;Eukaryota;Opisthokonta;Metazoa;Eumetazoa;Bilateria;Protostomia;  
 Spiralia;Lophotrochozoa;Mollusca;Bivalvia;Autobranhia;Heteroconchia;Euhe  
 terodonta;Imparidentia;Venerida;Veneroidea;Veneridae;Mercenaria;Mercenari  
 a mercenaria  
 UdeM00000042084 29159 158.7 UdeM00000042084 XP\_034319569.1 27.5 436  
 276 12 15 419 18 444 1.60E-35 158.7 29159 cellular  
 organisms;Eukaryota;Opisthokonta;Metazoa;Eumetazoa;Bilateria;Protostomia;  
 Spiralia;Lophotrochozoa;Mollusca;Bivalvia;Autobranhia;Pteriomorphia;Ostr  
 eida;Ostreoidea;Ostreidae;Crassostrea;Crassostrea gigas  
 UdeM00000042085 6596 135.6 UdeM00000042085 XP\_045201849.1 24.8 427  
 290 11 8 416 583 996 1.60E-28 135.6 6596 cellular  
 organisms;Eukaryota;Opisthokonta;Metazoa;Eumetazoa;Bilateria;Protostomia;  
 Spiralia;Lophotrochozoa;Mollusca;Bivalvia;Autobranhia;Heteroconchia;Euhe  
 terodonta;Imparidentia;Venerida;Veneroidea;Veneridae;Mercenaria;Mercenari  
 a mercenaria  
 UdeM00000042086 6596 383.3 UdeM00000042086 XP\_045201849.1 28.5 998  
 615 31 18 971 54 996 1.00E-102 383.3 6596 cellular  
 organisms;Eukaryota;Opisthokonta;Metazoa;Eumetazoa;Bilateria;Protostomia;  
 Spiralia;Lophotrochozoa;Mollusca;Bivalvia;Autobranhia;Heteroconchia;Euhe  
 terodonta;Imparidentia;Venerida;Veneroidea;Veneridae;Mercenaria;Mercenari  
 a mercenaria  
 UdeM00000042087 6596 385.2 UdeM00000042087 XP\_045201849.1 28.4 1022  
 625 33 31 1008 38 996 2.80E-103 385.2 6596 cellular  
 organisms;Eukaryota;Opisthokonta;Metazoa;Eumetazoa;Bilateria;Protostomia;  
 Spiralia;Lophotrochozoa;Mollusca;Bivalvia;Autobranhia;Heteroconchia;Euhe  
 terodonta;Imparidentia;Venerida;Veneroidea;Veneridae;Mercenaria;Mercenari  
 a mercenaria  
 UdeM00000042088 6596 187.2 UdeM00000042088 XP\_045201849.1 29.4 486  
 307 17 1 478 539 996 5.70E-44 187.2 6596 cellular  
 organisms;Eukaryota;Opisthokonta;Metazoa;Eumetazoa;Bilateria;Protostomia;  
 Spiralia;Lophotrochozoa;Mollusca;Bivalvia;Autobranhia;Heteroconchia;Euhe  
 terodonta;Imparidentia;Venerida;Veneroidea;Veneridae;Mercenaria;Mercenari  
 a mercenaria  
 UdeM00000042089 6596 317.8 UdeM00000042089 XP\_045201849.1 30.1 752  
 463 25 57 776 276 996 4.30E-83 317.8 6596 cellular  
 organisms;Eukaryota;Opisthokonta;Metazoa;Eumetazoa;Bilateria;Protostomia;  
 Spiralia;Lophotrochozoa;Mollusca;Bivalvia;Autobranhia;Heteroconchia;Euhe  
 terodonta;Imparidentia;Venerida;Veneroidea;Veneridae;Mercenaria;Mercenari  
 a mercenaria  
 UdeM00000042090 6596 681 UdeM00000042090 XP\_045199401.1 75.3 405  
 100 0 1 405 1 405 9.10E-193 681 6596 cellular  
 organisms;Eukaryota;Opisthokonta;Metazoa;Eumetazoa;Bilateria;Protostomia;  
 Spiralia;Lophotrochozoa;Mollusca;Bivalvia;Autobranhia;Heteroconchia;Euhe  
 terodonta;Imparidentia;Venerida;Veneroidea;Veneridae;Mercenaria;Mercenari  
 a mercenaria  
 UdeM00000042091 6596 167.9 UdeM00000042091 XP\_045199401.1 67 112  
 25 1 1 112 306 405 7.20E-39 167.9 6596 cellular

organisms;Eukaryota;Opisthokonta;Metazoa;Eumetazoa;Bilateria;Protostomia; Spiralia;Lophotrochozoa;Mollusca;Bivalvia;Autobranchia;Heteroconchia;Euherodonta;Imparidentia;Venerida;Veneroidea;Veneridae;Mercenaria;Mercenaria mercenaria

UdeM00000042092 1735272 648.7 UdeM00000042092 XP\_041352694.1 61.5  
501 193 0 1 501 1 501 6.40E-183 648.7 1735272  
cellular

organisms;Eukaryota;Opisthokonta;Metazoa;Eumetazoa;Bilateria;Protostomia; Spiralia;Lophotrochozoa;Mollusca;Gastropoda;Neomphalina;Neomphaloidea;Peltospiridae;Gigantopelta;Gigantopelta aegis

UdeM00000042093 29159 226.1 UdeM00000042093 XP\_034314314.1 33.3 375  
206 10 24 370 347 705 1.10E-55 226.1 29159 cellular

organisms;Eukaryota;Opisthokonta;Metazoa;Eumetazoa;Bilateria;Protostomia; Spiralia;Lophotrochozoa;Mollusca;Bivalvia;Autobranchia;Pteriormorphia;Ostreida;Ostreoidea;Ostreidae;Crassostrea;Crassostrea gigas

UdeM00000042094 29159 288.5 UdeM00000042094 XP\_034314303.1 33.3 456  
257 11 24 448 347 786 2.10E-74 288.5 29159 cellular

organisms;Eukaryota;Opisthokonta;Metazoa;Eumetazoa;Bilateria;Protostomia; Spiralia;Lophotrochozoa;Mollusca;Bivalvia;Autobranchia;Pteriormorphia;Ostreida;Ostreoidea;Ostreidae;Crassostrea;Crassostrea gigas

UdeM00000042095 29159 290 UdeM00000042095 XP\_034314303.1 33.1 456  
261 10 24 451 347 786 7.20E-75 290 29159 cellular

organisms;Eukaryota;Opisthokonta;Metazoa;Eumetazoa;Bilateria;Protostomia; Spiralia;Lophotrochozoa;Mollusca;Bivalvia;Autobranchia;Pteriormorphia;Ostreida;Ostreoidea;Ostreidae;Crassostrea;Crassostrea gigas

UdeM00000042096 6596 511.1 UdeM00000042096 XP\_045215998.1 63.9 366  
131 1 9 374 28 392 1.20E-141 511.1 6596 cellular

organisms;Eukaryota;Opisthokonta;Metazoa;Eumetazoa;Bilateria;Protostomia; Spiralia;Lophotrochozoa;Mollusca;Bivalvia;Autobranchia;Heteroconchia;Euherodonta;Imparidentia;Venerida;Veneroidea;Veneridae;Mercenaria;Mercenaria mercenaria

UdeM00000042097 6596 227.6 UdeM00000042097 XP\_045202260.1 51.5 200  
94 1 7 203 7 206 1.40E-56 227.6 6596 cellular

organisms;Eukaryota;Opisthokonta;Metazoa;Eumetazoa;Bilateria;Protostomia; Spiralia;Lophotrochozoa;Mollusca;Bivalvia;Autobranchia;Heteroconchia;Euherodonta;Imparidentia;Venerida;Veneroidea;Veneridae;Mercenaria;Mercenaria mercenaria

UdeM00000042098 6565 589.3 UdeM00000042098 XP\_022322954.1 50.8 539  
261 3 23 559 97 633 5.50E-165 589.3 6565 cellular

organisms;Eukaryota;Opisthokonta;Metazoa;Eumetazoa;Bilateria;Protostomia; Spiralia;Lophotrochozoa;Mollusca;Bivalvia;Autobranchia;Pteriormorphia;Ostreida;Ostreoidea;Ostreidae;Crassostrea;Crassostrea virginica

UdeM00000042099 6596 389.8 UdeM00000042099 XP\_045201849.1 27.5 1033  
664 30 1 991 7 996 1.10E-104 389.8 6596 cellular

organisms;Eukaryota;Opisthokonta;Metazoa;Eumetazoa;Bilateria;Protostomia; Spiralia;Lophotrochozoa;Mollusca;Bivalvia;Autobranchia;Heteroconchia;Euherodonta;Imparidentia;Venerida;Veneroidea;Veneridae;Mercenaria;Mercenaria mercenaria

UdeM00000042100 6565 428.3 UdeM00000042100 XP\_022325507.1 46.9 495  
253 8 99 585 73 565 2.00E-116 428.3 6565 cellular

organisms;Eukaryota;Opisthokonta;Metazoa;Eumetazoa;Bilateria;Protostomia; Spiralia;Lophotrochozoa;Mollusca;Bivalvia;Autobranchia;Pteriormorphia;Ostreida;Ostreoidea;Ostreidae;Crassostrea;Crassostrea virginica

UdeM00000042102 6596 221.5 UdeM00000042102 XP\_045166467.1 38.4 268  
 165 0 11 278 14 281 1.50E-54 221.5 6596 cellular  
 organisms;Eukaryota;Opisthokonta;Metazoa;Eumetazoa;Bilateria;Protostomia;  
 Spiralia;Lophotrochozoa;Mollusca;Bivalvia;Autobranchia;Heteroconchia;Euhe  
 terodonta;Imparidentia;Venerida;Veneroidea;Veneridae;Mercenaria;Mercenari  
 a mercenaria

UdeM00000042103 29159 236.5 UdeM00000042103 XP\_034324494.1 35.8 411  
 198 6 97 444 252 659 6.50E-59 236.5 29159 cellular  
 organisms;Eukaryota;Opisthokonta;Metazoa;Eumetazoa;Bilateria;Protostomia;  
 Spiralia;Lophotrochozoa;Mollusca;Bivalvia;Autobranchia;Pteriormorphia;Ostr  
 eida;Ostreoidea;Ostreidae;Crassostrea;Crassostrea gigas

UdeM00000042104 29159 80.1 UdeM00000042104 XP\_034317111.1 40.9 110  
 64 1 1 109 780 889 2.00E-12 80.1 29159 cellular  
 organisms;Eukaryota;Opisthokonta;Metazoa;Eumetazoa;Bilateria;Protostomia;  
 Spiralia;Lophotrochozoa;Mollusca;Bivalvia;Autobranchia;Pteriormorphia;Ostr  
 eida;Ostreoidea;Ostreidae;Crassostrea;Crassostrea gigas

UdeM00000042105 6565 61.2 UdeM00000042105 XP\_022299838.1 42.9 49  
 28 0 70 118 59 107 1.00E-06 61.2 6565 cellular  
 organisms;Eukaryota;Opisthokonta;Metazoa;Eumetazoa;Bilateria;Protostomia;  
 Spiralia;Lophotrochozoa;Mollusca;Bivalvia;Autobranchia;Pteriormorphia;Ostr  
 eida;Ostreoidea;Ostreidae;Crassostrea;Crassostrea virginica

UdeM00000042106 400727 167.5 UdeM00000042106 XP\_025080217.1 38.7  
 217 129 2 7 219 101 317 1.80E-38 167.5 400727  
 cellular  
 organisms;Eukaryota;Opisthokonta;Metazoa;Eumetazoa;Bilateria;Protostomia;  
 Spiralia;Lophotrochozoa;Mollusca;Gastropoda;Caenogastropoda;Architaeniogl  
 ossa;Ampullarioidea;Ampullariidae;Pomacea;Pomacea canaliculata

UdeM00000042109 6596 318.5 UdeM00000042109 XP\_045201581.1 49.5 321  
 160 2 4 322 7 327 9.50E-84 318.5 6596 cellular  
 organisms;Eukaryota;Opisthokonta;Metazoa;Eumetazoa;Bilateria;Protostomia;  
 Spiralia;Lophotrochozoa;Mollusca;Bivalvia;Autobranchia;Heteroconchia;Euhe  
 terodonta;Imparidentia;Venerida;Veneroidea;Veneridae;Mercenaria;Mercenari  
 a mercenaria

UdeM00000042110 6596 1030.4 UdeM00000042110 XP\_045201714.1 66.8  
 762 253 0 14 775 15 776 1.20E-297 1030.4 6596  
 cellular  
 organisms;Eukaryota;Opisthokonta;Metazoa;Eumetazoa;Bilateria;Protostomia;  
 Spiralia;Lophotrochozoa;Mollusca;Bivalvia;Autobranchia;Heteroconchia;Euhe  
 terodonta;Imparidentia;Venerida;Veneroidea;Veneridae;Mercenaria;Mercenari  
 a mercenaria

UdeM00000042111 6596 313.9 UdeM00000042111 XP\_045201713.1 76.4 199  
 47 0 1 199 1 199 1.40E-82 313.9 6596 cellular  
 organisms;Eukaryota;Opisthokonta;Metazoa;Eumetazoa;Bilateria;Protostomia;  
 Spiralia;Lophotrochozoa;Mollusca;Bivalvia;Autobranchia;Heteroconchia;Euhe  
 terodonta;Imparidentia;Venerida;Veneroidea;Veneridae;Mercenaria;Mercenari  
 a mercenaria

UdeM00000042112 6565 325.9 UdeM00000042112 XP\_022341837.1 36.5 750  
 445 5 17 738 20 766 1.40E-85 325.9 6565 cellular  
 organisms;Eukaryota;Opisthokonta;Metazoa;Eumetazoa;Bilateria;Protostomia;  
 Spiralia;Lophotrochozoa;Mollusca;Bivalvia;Autobranchia;Pteriormorphia;Ostr  
 eida;Ostreoidea;Ostreidae;Crassostrea;Crassostrea virginica

UdeM00000042114 6579 73.2 UdeM00000042114 XP\_033761565.1 50 70  
 31 1 61 126 197 266 3.40E-10 73.2 6579 cellular  
 organisms;Eukaryota;Opisthokonta;Metazoa;Eumetazoa;Bilateria;Protostomia;

Spiralia; Lophotrochozoa; Mollusca; Bivalvia; Autobranchia; Pteriomorpha; Pectinida; Pectinoidea; Pectinidae; Pecten; Pecten maximus  
UdeM00000042115 6596 149.8 UdeM00000042115 XP\_045202410.1 60.8 120  
45 2 6 123 120 239 2.30E-33 149.8 6596 cellular  
organisms; Eukaryota; Opisthokonta; Metazoa; Eumetazoa; Bilateria; Protostomia; Spiralia; Lophotrochozoa; Mollusca; Bivalvia; Autobranchia; Heteroconchia; Euheterodonta; Imparidentia; Venerida; Veneroidea; Veneridae; Mercenaria; Mercenaria mercenaria  
UdeM00000042116 6596 112.8 UdeM00000042116 XP\_045180427.1 39 177  
105 2 76 250 98 273 6.50E-22 112.8 6596 cellular  
organisms; Eukaryota; Opisthokonta; Metazoa; Eumetazoa; Bilateria; Protostomia; Spiralia; Lophotrochozoa; Mollusca; Bivalvia; Autobranchia; Heteroconchia; Euheterodonta; Imparidentia; Venerida; Veneroidea; Veneridae; Mercenaria; Mercenaria mercenaria  
UdeM00000042117 6573 186.4 UdeM00000042117 XP\_021346716.1 69.9 133  
39 1 3 134 4 136 5.00E-44 186.4 6573 cellular  
organisms; Eukaryota; Opisthokonta; Metazoa; Eumetazoa; Bilateria; Protostomia; Spiralia; Lophotrochozoa; Mollusca; Bivalvia; Autobranchia; Pteriomorpha; Pectinida; Pectinoidea; Pectinidae; Mizuhopecten; Mizuhopecten yessoensis  
UdeM00000042118 6579 122.1 UdeM00000042118 XP\_033760709.1 26.8 336  
213 8 3 314 14 340 1.30E-24 122.1 6579 cellular  
organisms; Eukaryota; Opisthokonta; Metazoa; Eumetazoa; Bilateria; Protostomia; Spiralia; Lophotrochozoa; Mollusca; Bivalvia; Autobranchia; Pteriomorpha; Pectinida; Pectinoidea; Pectinidae; Pecten; Pecten maximus  
UdeM00000042119 6579 124 UdeM00000042119 XP\_033760709.1 27.7 336  
213 9 3 317 14 340 3.40E-25 124 6579 cellular  
organisms; Eukaryota; Opisthokonta; Metazoa; Eumetazoa; Bilateria; Protostomia; Spiralia; Lophotrochozoa; Mollusca; Bivalvia; Autobranchia; Pteriomorpha; Pectinida; Pectinoidea; Pectinidae; Pecten; Pecten maximus  
UdeM00000042120 8154 84.7 UdeM00000042120 XP\_026010645.1 34.8 135  
80 3 82 215 214 341 1.60E-13 84.7 8154 cellular  
organisms; Eukaryota; Opisthokonta; Metazoa; Eumetazoa; Bilateria; Deuterostomia; Chordata; Craniata; Vertebrata; Gnathostomata; Teleostomi; Euteleostomi; Actinopterygii; Actinopteri; Neopterygii; Teleostei; Osteoglossocephalai; Clupeocephala; Euteleostei; Neoteleostei; Eurypterygia; Ctenosquamata; Acanthomorpha; Euacanthomorpha; Percomorphaceae; Ovalentaria; Cichlomorphae; Cichliformes; Cichlidae; African cichlids; Pseudocrenilabrinae; Haplochromini; Astatotilapia; Astatotilapia calliptera  
UdeM00000042129 6573 95.1 UdeM00000042129 XP\_021358477.1 27.5 229  
139 7 34 247 111 327 1.60E-16 95.1 6573 cellular  
organisms; Eukaryota; Opisthokonta; Metazoa; Eumetazoa; Bilateria; Protostomia; Spiralia; Lophotrochozoa; Mollusca; Bivalvia; Autobranchia; Pteriomorpha; Pectinida; Pectinoidea; Pectinidae; Mizuhopecten; Mizuhopecten yessoensis  
UdeM00000042130 6579 459.1 UdeM00000042130 XP\_033760827.1 52.2 464  
219 2 3 466 40 500 6.50E-126 459.1 6579 cellular  
organisms; Eukaryota; Opisthokonta; Metazoa; Eumetazoa; Bilateria; Protostomia; Spiralia; Lophotrochozoa; Mollusca; Bivalvia; Autobranchia; Pteriomorpha; Pectinida; Pectinoidea; Pectinidae; Pecten; Pecten maximus  
UdeM00000042131 6579 327.4 UdeM00000042131 XP\_033760827.1 50.7 349  
158 3 6 350 147 485 2.30E-86 327.4 6579 cellular  
organisms; Eukaryota; Opisthokonta; Metazoa; Eumetazoa; Bilateria; Protostomia; Spiralia; Lophotrochozoa; Mollusca; Bivalvia; Autobranchia; Pteriomorpha; Pectinida; Pectinoidea; Pectinidae; Pecten; Pecten maximus

UdeM00000042133 6579 450.3 UdeM00000042133 XP\_033760827.1 52.8 436  
 204 2 71 505 51 485 3.40E-123 450.3 6579 cellular  
 organisms;Eukaryota;Opisthokonta;Metazoa;Eumetazoa;Bilateria;Protostomia;  
 Spiralia;Lophotrochozoa;Mollusca;Bivalvia;Autobranhia;Pteriomorpha;Pect  
 inida;Pectinoidea;Pectinidae;Pecten;Pecten maximus  
 UdeM00000042136 6573 236.1 UdeM00000042136 XP\_021372134.1 54.2 214  
 97 1 1 213 1 214 4.10E-59 236.1 6573 cellular  
 organisms;Eukaryota;Opisthokonta;Metazoa;Eumetazoa;Bilateria;Protostomia;  
 Spiralia;Lophotrochozoa;Mollusca;Bivalvia;Autobranhia;Pteriomorpha;Pect  
 inida;Pectinoidea;Pectinidae;Mizuhopecten;Mizuhopecten yessoensis  
 UdeM00000042137 6596 915.6 UdeM00000042137 XP\_045200376.1 58.3 786  
 291 8 12 761 3 787 4.20E-263 915.6 6596 cellular  
 organisms;Eukaryota;Opisthokonta;Metazoa;Eumetazoa;Bilateria;Protostomia;  
 Spiralia;Lophotrochozoa;Mollusca;Bivalvia;Autobranhia;Heteroconchia;Euhe  
 terodonta;Imparidentia;Venerida;Veneroidea;Veneridae;Mercenaria;Mercenari  
 a mercenaria  
 UdeM00000042138 6596 1105.9 UdeM00000042138 XP\_045200376.1 61.9  
 951 293 13 1 911 4 925 0.00E+00 1105.9 6596  
 cellular  
 organisms;Eukaryota;Opisthokonta;Metazoa;Eumetazoa;Bilateria;Protostomia;  
 Spiralia;Lophotrochozoa;Mollusca;Bivalvia;Autobranhia;Heteroconchia;Euhe  
 terodonta;Imparidentia;Venerida;Veneroidea;Veneridae;Mercenaria;Mercenari  
 a mercenaria  
 UdeM00000042139 218467 235 UdeM00000042139 XP\_023228523.1 28  
 603 240 4 1 410 1 602 1.80E-58 235 218467  
 cellular  
 organisms;Eukaryota;Opisthokonta;Metazoa;Eumetazoa;Bilateria;Protostomia;  
 Ecdysozoa;Panarthropoda;Arthropoda;Chelicerata;Arachnida;Scorpiones;Buthi  
 da;Buthoidea;Buthidae;Centruroides;Centruroides sculpturatus  
 UdeM00000042140 114398 278.9 UdeM00000042140 XP\_042903861.1 33.3  
 508 265 5 1 437 1 505 1.10E-71 278.9 114398  
 cellular  
 organisms;Eukaryota;Opisthokonta;Metazoa;Eumetazoa;Bilateria;Protostomia;  
 Ecdysozoa;Panarthropoda;Arthropoda;Chelicerata;Arachnida;Araneae;Araneomo  
 rphae;Entelegynae;Orbiculariae;Araneoidea;Theridiidae;Parasteatoda;Parast  
 eatoda tepidariorum  
 UdeM00000042141 6596 297.4 UdeM00000042141 XP\_045200373.1 73 185  
 50 0 1 185 684 868 1.30E-77 297.4 6596 cellular  
 organisms;Eukaryota;Opisthokonta;Metazoa;Eumetazoa;Bilateria;Protostomia;  
 Spiralia;Lophotrochozoa;Mollusca;Bivalvia;Autobranhia;Heteroconchia;Euhe  
 terodonta;Imparidentia;Venerida;Veneroidea;Veneridae;Mercenaria;Mercenari  
 a mercenaria  
 UdeM00000042142 6596 290 UdeM00000042142 XP\_045200373.1 57.4 265  
 84 3 56 292 388 651 3.70E-75 290 6596 cellular  
 organisms;Eukaryota;Opisthokonta;Metazoa;Eumetazoa;Bilateria;Protostomia;  
 Spiralia;Lophotrochozoa;Mollusca;Bivalvia;Autobranhia;Heteroconchia;Euhe  
 terodonta;Imparidentia;Venerida;Veneroidea;Veneridae;Mercenaria;Mercenari  
 a mercenaria  
 UdeM00000042143 6596 404.8 UdeM00000042143 XP\_045200373.1 66.2 287  
 95 2 1 286 102 387 9.10E-110 404.8 6596 cellular  
 organisms;Eukaryota;Opisthokonta;Metazoa;Eumetazoa;Bilateria;Protostomia;  
 Spiralia;Lophotrochozoa;Mollusca;Bivalvia;Autobranhia;Heteroconchia;Euhe  
 terodonta;Imparidentia;Venerida;Veneroidea;Veneridae;Mercenaria;Mercenari  
 a mercenaria

UdeM00000042144 6596 1138.6 UdeM00000042144 XP\_045200373.1 61.2  
 999 306 14 29 982 45 1006 0.00E+00 1138.6 6596  
 cellular  
 organisms;Eukaryota;Opisthokonta;Metazoa;Eumetazoa;Bilateria;Protostomia;  
 Spiralia;Lophotrochozoa;Mollusca;Bivalvia;Autobranchia;Heteroconchia;Euhe  
 terodonta;Imparidentia;Venerida;Veneroidea;Veneridae;Mercenaria;Mercenari  
 a mercenaria  
 UdeM00000042145 1735272 229.2 UdeM00000042145 XP\_041355316.1 64.1  
 167 60 0 22 188 20 186 4.40E-57 229.2 1735272  
 cellular  
 organisms;Eukaryota;Opisthokonta;Metazoa;Eumetazoa;Bilateria;Protostomia;  
 Spiralia;Lophotrochozoa;Mollusca;Gastropoda;Neomphalina;Neomphaloidea;Pel  
 tospiridae;Gigantopelta;Gigantopelta aegis  
 UdeM00000042146 6573 247.7 UdeM00000042146 XP\_021377729.1 54.9 288  
 114 6 1 274 8 293 1.80E-62 247.7 6573 cellular  
 organisms;Eukaryota;Opisthokonta;Metazoa;Eumetazoa;Bilateria;Protostomia;  
 Spiralia;Lophotrochozoa;Mollusca;Bivalvia;Autobranchia;Pteriormorphia;Pect  
 inida;Pectinoidea;Pectinidae;Mizuhopecten;Mizuhopecten yessoensis  
 UdeM00000042147 6573 413.3 UdeM00000042147 XP\_021377729.1 75.5 261  
 59 3 19 277 282 539 2.40E-112 413.3 6573 cellular  
 organisms;Eukaryota;Opisthokonta;Metazoa;Eumetazoa;Bilateria;Protostomia;  
 Spiralia;Lophotrochozoa;Mollusca;Bivalvia;Autobranchia;Pteriormorphia;Pect  
 inida;Pectinoidea;Pectinidae;Mizuhopecten;Mizuhopecten yessoensis  
 UdeM00000042148 6579 172.6 UdeM00000042148 XP\_033760035.1 28.1 615  
 313 18 81 659 51 572 1.70E-39 172.6 6579 cellular  
 organisms;Eukaryota;Opisthokonta;Metazoa;Eumetazoa;Bilateria;Protostomia;  
 Spiralia;Lophotrochozoa;Mollusca;Bivalvia;Autobranchia;Pteriormorphia;Pect  
 inida;Pectinoidea;Pectinidae;Pecten;Pecten maximus  
 UdeM00000042149 29159 67 UdeM00000042149 XP\_034323040.1 30.7 163  
 101 5 1 156 1 158 3.00E-08 67 29159 cellular  
 organisms;Eukaryota;Opisthokonta;Metazoa;Eumetazoa;Bilateria;Protostomia;  
 Spiralia;Lophotrochozoa;Mollusca;Bivalvia;Autobranchia;Pteriormorphia;Ostr  
 eida;Ostreoidea;Ostreidae;Crassostrea;Crassostrea gigas  
 UdeM00000042155 6565 84 UdeM00000042155 XP\_022339328.1 29.8 272  
 170 7 4 258 1 268 3.30E-13 84 6565 cellular  
 organisms;Eukaryota;Opisthokonta;Metazoa;Eumetazoa;Bilateria;Protostomia;  
 Spiralia;Lophotrochozoa;Mollusca;Bivalvia;Autobranchia;Pteriormorphia;Ostr  
 eida;Ostreoidea;Ostreidae;Crassostrea;Crassostrea virginica  
 UdeM00000042156 6579 300.8 UdeM00000042156 XP\_033760735.1 76.1 180  
 43 0 1 180 6 185 3.80E-78 300.8 6579 cellular  
 organisms;Eukaryota;Opisthokonta;Metazoa;Eumetazoa;Bilateria;Protostomia;  
 Spiralia;Lophotrochozoa;Mollusca;Bivalvia;Autobranchia;Pteriormorphia;Pect  
 inida;Pectinoidea;Pectinidae;Pecten;Pecten maximus  
 UdeM00000042157 6596 229.9 UdeM00000042157 XP\_045201420.1 47.7 348  
 170 5 15 350 2 349 4.90E-57 229.9 6596 cellular  
 organisms;Eukaryota;Opisthokonta;Metazoa;Eumetazoa;Bilateria;Protostomia;  
 Spiralia;Lophotrochozoa;Mollusca;Bivalvia;Autobranchia;Heteroconchia;Euhe  
 terodonta;Imparidentia;Venerida;Veneroidea;Veneridae;Mercenaria;Mercenari  
 a mercenaria  
 UdeM00000042158 6596 1134.8 UdeM00000042158 XP\_045201298.1 54.6  
 976 427 9 116 1084 1 967 0.00E+00 1134.8 6596  
 cellular  
 organisms;Eukaryota;Opisthokonta;Metazoa;Eumetazoa;Bilateria;Protostomia;  
 Spiralia;Lophotrochozoa;Mollusca;Bivalvia;Autobranchia;Heteroconchia;Euhe

terodonta;Imparidentia;Venerida;Veneroidea;Veneridae;Mercenaria;Mercenaria mercenaria

UdeM00000042159 6596 604.4 UdeM00000042159 XP\_045201007.1 49.4 579  
282 4 30 604 597 1168 1.60E-169 604.4 6596 cellular

organisms;Eukaryota;Opisthokonta;Metazoa;Eumetazoa;Bilateria;Protostomia;Spiralia;Lophotrochozoa;Mollusca;Bivalvia;Autobranchia;Heteroconchia;Euheterodonta;Imparidentia;Venerida;Veneroidea;Veneridae;Mercenaria;Mercenaria mercenaria

UdeM00000042160 225164 324.3 UdeM00000042160 XP\_009048808.1 43.5  
375 210 2 30 402 10 384 2.20E-85 324.3 225164  
cellular

organisms;Eukaryota;Opisthokonta;Metazoa;Eumetazoa;Bilateria;Protostomia;Spiralia;Lophotrochozoa;Mollusca;Gastropoda;Patellogastropoda;Lottioidea;Lottiidae;Lottia;Lottia gigantea

UdeM00000042161 225164 324.3 UdeM00000042161 XP\_009048808.1 43.5  
375 210 2 110 482 10 384 2.60E-85 324.3 225164  
cellular

organisms;Eukaryota;Opisthokonta;Metazoa;Eumetazoa;Bilateria;Protostomia;Spiralia;Lophotrochozoa;Mollusca;Gastropoda;Patellogastropoda;Lottioidea;Lottiidae;Lottia;Lottia gigantea

UdeM00000042162 225164 324.7 UdeM00000042162 XP\_009048808.1 43.5  
375 210 2 12 384 10 384 1.60E-85 324.7 225164  
cellular

organisms;Eukaryota;Opisthokonta;Metazoa;Eumetazoa;Bilateria;Protostomia;Spiralia;Lophotrochozoa;Mollusca;Gastropoda;Patellogastropoda;Lottioidea;Lottiidae;Lottia;Lottia gigantea

UdeM00000042163 6579 274.2 UdeM00000042163 XP\_033759490.1 57.2 222  
89 2 3 219 407 627 1.40E-70 274.2 6579 cellular

organisms;Eukaryota;Opisthokonta;Metazoa;Eumetazoa;Bilateria;Protostomia;Spiralia;Lophotrochozoa;Mollusca;Bivalvia;Autobranchia;Pteriormorphia;Pectinida;Pectinoidea;Pectinidae;Pecten;Pecten maximus

UdeM00000042164 6596 275.8 UdeM00000042164 XP\_045201007.1 48.3 288  
144 2 3 288 765 1049 6.40E-71 275.8 6596 cellular

organisms;Eukaryota;Opisthokonta;Metazoa;Eumetazoa;Bilateria;Protostomia;Spiralia;Lophotrochozoa;Mollusca;Bivalvia;Autobranchia;Heteroconchia;Euheterodonta;Imparidentia;Venerida;Veneroidea;Veneridae;Mercenaria;Mercenaria mercenaria

UdeM00000042165 6579 124 UdeM00000042165 XP\_033759880.1 60.2 88  
35 0 2 89 502 589 1.30E-25 124 6579 cellular

organisms;Eukaryota;Opisthokonta;Metazoa;Eumetazoa;Bilateria;Protostomia;Spiralia;Lophotrochozoa;Mollusca;Bivalvia;Autobranchia;Pteriormorphia;Pectinida;Pectinoidea;Pectinidae;Pecten;Pecten maximus

UdeM00000042166 6596 540 UdeM00000042166 XP\_045201007.1 46.2 572  
262 5 30 555 597 1168 3.50E-150 540 6596 cellular

organisms;Eukaryota;Opisthokonta;Metazoa;Eumetazoa;Bilateria;Protostomia;Spiralia;Lophotrochozoa;Mollusca;Bivalvia;Autobranchia;Heteroconchia;Euheterodonta;Imparidentia;Venerida;Veneroidea;Veneridae;Mercenaria;Mercenaria mercenaria

UdeM00000042167 225164 765.4 UdeM00000042167 XP\_009056557.1 52.5  
668 290 6 20 664 19 682 6.20E-218 765.4 225164  
cellular

organisms;Eukaryota;Opisthokonta;Metazoa;Eumetazoa;Bilateria;Protostomia;Spiralia;Lophotrochozoa;Mollusca;Gastropoda;Patellogastropoda;Lottioidea;Lottiidae;Lottia;Lottia gigantea



UdeM00000042168 6596 288.1 UdeM00000042168 XP\_045201298.1 54.8 241  
 109 0 1 241 607 847 1.20E-74 288.1 6596 cellular  
 organisms;Eukaryota;Opisthokonta;Metazoa;Eumetazoa;Bilateria;Protostomia;  
 Spiralia;Lophotrochozoa;Mollusca;Bivalvia;Autobranchia;Heteroconchia;Euhe  
 terodonta;Imparidentia;Venerida;Veneroidea;Veneridae;Mercenaria;Mercenari  
 a mercenaria  
 UdeM00000042169 6579 272.3 UdeM00000042169 XP\_033759490.1 56.8 222  
 90 2 3 219 407 627 5.30E-70 272.3 6579 cellular  
 organisms;Eukaryota;Opisthokonta;Metazoa;Eumetazoa;Bilateria;Protostomia;  
 Spiralia;Lophotrochozoa;Mollusca;Bivalvia;Autobranchia;Pteriormorphia;Pect  
 inida;Pectinoidea;Pectinidae;Pecten;Pecten maximus  
 UdeM00000042171 225164 326.2 UdeM00000042171 XP\_009048808.1 43.7  
 375 209 2 12 384 10 384 5.40E-86 326.2 225164  
 cellular  
 organisms;Eukaryota;Opisthokonta;Metazoa;Eumetazoa;Bilateria;Protostomia;  
 Spiralia;Lophotrochozoa;Mollusca;Gastropoda;Patellogastropoda;Lottioidea;  
 Lottiidae;Lottia;Lottia gigantea  
 UdeM00000042170 225164 325.9 UdeM00000042170 XP\_009048808.1 43.7  
 375 209 2 110 482 10 384 8.90E-86 325.9 225164  
 cellular  
 organisms;Eukaryota;Opisthokonta;Metazoa;Eumetazoa;Bilateria;Protostomia;  
 Spiralia;Lophotrochozoa;Mollusca;Gastropoda;Patellogastropoda;Lottioidea;  
 Lottiidae;Lottia;Lottia gigantea  
 UdeM00000042172 225164 325.9 UdeM00000042172 XP\_009048808.1 43.7  
 375 209 2 30 402 10 384 7.40E-86 325.9 225164  
 cellular  
 organisms;Eukaryota;Opisthokonta;Metazoa;Eumetazoa;Bilateria;Protostomia;  
 Spiralia;Lophotrochozoa;Mollusca;Gastropoda;Patellogastropoda;Lottioidea;  
 Lottiidae;Lottia;Lottia gigantea  
 UdeM00000042174 6596 468.8 UdeM00000042174 XP\_045201007.1 51.8 446  
 211 2 3 444 754 1199 7.90E-129 468.8 6596 cellular  
 organisms;Eukaryota;Opisthokonta;Metazoa;Eumetazoa;Bilateria;Protostomia;  
 Spiralia;Lophotrochozoa;Mollusca;Bivalvia;Autobranchia;Heteroconchia;Euhe  
 terodonta;Imparidentia;Venerida;Veneroidea;Veneridae;Mercenaria;Mercenari  
 a mercenaria  
 UdeM00000042175 6596 745.7 UdeM00000042175 XP\_045201007.1 48 791  
 359 7 4 785 5 752 6.00E-212 745.7 6596 cellular  
 organisms;Eukaryota;Opisthokonta;Metazoa;Eumetazoa;Bilateria;Protostomia;  
 Spiralia;Lophotrochozoa;Mollusca;Bivalvia;Autobranchia;Heteroconchia;Euhe  
 terodonta;Imparidentia;Venerida;Veneroidea;Veneridae;Mercenaria;Mercenari  
 a mercenaria  
 UdeM00000042176 6579 418.7 UdeM00000042176 XP\_033760266.1 71.8 298  
 84 0 1 298 1 298 6.20E-114 418.7 6579 cellular  
 organisms;Eukaryota;Opisthokonta;Metazoa;Eumetazoa;Bilateria;Protostomia;  
 Spiralia;Lophotrochozoa;Mollusca;Bivalvia;Autobranchia;Pteriormorphia;Pect  
 inida;Pectinoidea;Pectinidae;Pecten;Pecten maximus  
 UdeM00000042177 6573 524.2 UdeM00000042177 XP\_021370645.1 61.6 424  
 159 2 1 421 1 423 6.60E-145 524.2 6573 cellular  
 organisms;Eukaryota;Opisthokonta;Metazoa;Eumetazoa;Bilateria;Protostomia;  
 Spiralia;Lophotrochozoa;Mollusca;Bivalvia;Autobranchia;Pteriormorphia;Pect  
 inida;Pectinoidea;Pectinidae;Mizuhopecten;Mizuhopecten yessoensis  
 UdeM00000042178 6573 548.1 UdeM00000042178 XP\_021365742.1 73.7 353  
 93 0 10 362 12 364 1.00E-152 548.1 6573 cellular  
 organisms;Eukaryota;Opisthokonta;Metazoa;Eumetazoa;Bilateria;Protostomia;

Spiralia;Lophotrochozoa;Mollusca;Bivalvia;Autobranchia;Pteriomorpha;Pectinida;Pectinoidea;Pectinidae;Mizuhopecten;Mizuhopecten yessoensis  
UdeM00000042180 6596 575.5 UdeM00000042180 XP\_045201007.1 47.5 602  
305 4 70 663 597 1195 8.90E-161 575.5 6596 cellular  
organisms;Eukaryota;Opisthokonta;Metazoa;Eumetazoa;Bilateria;Protostomia;  
Spiralia;Lophotrochozoa;Mollusca;Bivalvia;Autobranchia;Heteroconchia;Euherodonta;Imparidentia;Venerida;Veneroidea;Veneridae;Mercenaria;Mercenaria mercenaria  
UdeM00000042181 1735272 133.7 UdeM00000042181 XP\_041360080.1 40.8  
152 85 1 1 147 14 165 2.00E-28 133.7 1735272  
cellular  
organisms;Eukaryota;Opisthokonta;Metazoa;Eumetazoa;Bilateria;Protostomia;  
Spiralia;Lophotrochozoa;Mollusca;Gastropoda;Neomphalina;Neomphaloidea;Peltospiridae;Gigantopelta;Gigantopelta aegis  
UdeM00000042182 225164 162.5 UdeM00000042182 XP\_009051079.1 38.6  
251 119 4 36 254 126 373 7.00E-37 162.5 225164  
cellular  
organisms;Eukaryota;Opisthokonta;Metazoa;Eumetazoa;Bilateria;Protostomia;  
Spiralia;Lophotrochozoa;Mollusca;Gastropoda;Patellogastropoda;Lottioidea;Lottiidae;Lottia;Lottia gigantea  
UdeM00000042183 400727 79.3 UdeM00000042183 XP\_025095693.1 35.1  
131 64 4 67 197 2 111 6.00E-12 79.3 400727  
cellular  
organisms;Eukaryota;Opisthokonta;Metazoa;Eumetazoa;Bilateria;Protostomia;  
Spiralia;Lophotrochozoa;Mollusca;Gastropoda;Caenogastropoda;Architaenioglossa;Ampullarioidea;Ampullariidae;Pomacea;Pomacea canaliculata  
UdeM00000042184 6596 250.8 UdeM00000042184 XP\_045202624.1 39.7 307  
168 3 110 402 29 332 3.10E-63 250.8 6596 cellular  
organisms;Eukaryota;Opisthokonta;Metazoa;Eumetazoa;Bilateria;Protostomia;  
Spiralia;Lophotrochozoa;Mollusca;Bivalvia;Autobranchia;Heteroconchia;Euherodonta;Imparidentia;Venerida;Veneroidea;Veneridae;Mercenaria;Mercenaria mercenaria  
UdeM00000042185 6596 201.4 UdeM00000042185 XP\_045202624.1 42.9 212  
121 0 1 212 121 332 1.20E-48 201.4 6596 cellular  
organisms;Eukaryota;Opisthokonta;Metazoa;Eumetazoa;Bilateria;Protostomia;  
Spiralia;Lophotrochozoa;Mollusca;Bivalvia;Autobranchia;Heteroconchia;Euherodonta;Imparidentia;Venerida;Veneroidea;Veneridae;Mercenaria;Mercenaria mercenaria  
UdeM00000042186 6596 71.6 UdeM00000042186 XP\_045164819.1 57.9 57  
23 1 153 209 117 172 1.30E-09 71.6 6596 cellular  
organisms;Eukaryota;Opisthokonta;Metazoa;Eumetazoa;Bilateria;Protostomia;  
Spiralia;Lophotrochozoa;Mollusca;Bivalvia;Autobranchia;Heteroconchia;Euherodonta;Imparidentia;Venerida;Veneroidea;Veneridae;Mercenaria;Mercenaria mercenaria  
UdeM00000042187 225164 389 UdeM00000042187 XP\_009044447.1 96.1  
206 8 0 2 207 3 208 3.70E-105 389 225164  
cellular  
organisms;Eukaryota;Opisthokonta;Metazoa;Eumetazoa;Bilateria;Protostomia;  
Spiralia;Lophotrochozoa;Mollusca;Gastropoda;Patellogastropoda;Lottioidea;Lottiidae;Lottia;Lottia gigantea  
UdeM00000042188 6596 376.7 UdeM00000042188 XP\_045201467.1 92.2 205  
16 0 2 206 3 207 1.90E-101 376.7 6596 cellular  
organisms;Eukaryota;Opisthokonta;Metazoa;Eumetazoa;Bilateria;Protostomia;  
Spiralia;Lophotrochozoa;Mollusca;Bivalvia;Autobranchia;Heteroconchia;Euherodonta;Imparidentia;Venerida;Veneroidea;Veneridae;Mercenaria;Mercenaria mercenaria

terodonta;Imparidentia;Venerida;Veneroidea;Veneridae;Mercenaria;Mercenaria mercenaria  
 UdeM00000042189 59861 109.4 UdeM00000042189 XP\_041717262.1 29.7 290  
 175 7 60 327 76 358 1.00E-20 109.4 59861 cellular  
 organisms;Eukaryota;Opisthokonta;Metazoa;Eumetazoa;Bilateria;Deuterostomia;Chordata;Craniata;Vertebrata;Gnathostomata;Teleostomi;Euteleostomi;Actinopterygii;Actinopteri;Neopterygii;Teleostei;Osteoglossocephalai;Clupeocephala;Euteleostomorpha;Protacanthopterygii;Salmoniformes;Salmonidae;Coregoninae;Coregonus;Coregonus clupeaformis  
 UdeM00000042190 59861 109.4 UdeM00000042190 XP\_041717262.1 29.7 290  
 175 7 56 323 76 358 1.00E-20 109.4 59861 cellular  
 organisms;Eukaryota;Opisthokonta;Metazoa;Eumetazoa;Bilateria;Deuterostomia;Chordata;Craniata;Vertebrata;Gnathostomata;Teleostomi;Euteleostomi;Actinopterygii;Actinopteri;Neopterygii;Teleostei;Osteoglossocephalai;Clupeocephala;Euteleostomorpha;Protacanthopterygii;Salmoniformes;Salmonidae;Coregoninae;Coregonus;Coregonus clupeaformis  
 UdeM00000042191 59861 135.2 UdeM00000042191 XP\_041717262.1 30.4 349  
 213 8 56 382 76 416 1.80E-28 135.2 59861 cellular  
 organisms;Eukaryota;Opisthokonta;Metazoa;Eumetazoa;Bilateria;Deuterostomia;Chordata;Craniata;Vertebrata;Gnathostomata;Teleostomi;Euteleostomi;Actinopterygii;Actinopteri;Neopterygii;Teleostei;Osteoglossocephalai;Clupeocephala;Euteleostomorpha;Protacanthopterygii;Salmoniformes;Salmonidae;Coregoninae;Coregonus;Coregonus clupeaformis  
 UdeM00000042192 29159 213.8 UdeM00000042192 XP\_011450683.2 57.6 172  
 72 1 1 172 130 300 1.80E-52 213.8 29159 cellular  
 organisms;Eukaryota;Opisthokonta;Metazoa;Eumetazoa;Bilateria;Protostomia;Spiralia;Lophotrochozoa;Mollusca;Bivalvia;Autobranchia;Pteriomorpha;Ostreida;Ostreoidea;Ostreidae;Crassostrea;Crassostrea gigas  
 UdeM00000042193 6596 341.3 UdeM00000042193 XP\_045201370.1 56.1 278  
 120 2 3 279 28 304 1.20E-90 341.3 6596 cellular  
 organisms;Eukaryota;Opisthokonta;Metazoa;Eumetazoa;Bilateria;Protostomia;Spiralia;Lophotrochozoa;Mollusca;Bivalvia;Autobranchia;Heteroconchia;Euheterodonta;Imparidentia;Venerida;Veneroidea;Veneridae;Mercenaria;Mercenaria mercenaria  
 UdeM00000042194 29159 294.3 UdeM00000042194 XP\_034327418.1 69.3 212  
 62 2 1 210 1 211 1.30E-76 294.3 29159 cellular  
 organisms;Eukaryota;Opisthokonta;Metazoa;Eumetazoa;Bilateria;Protostomia;Spiralia;Lophotrochozoa;Mollusca;Bivalvia;Autobranchia;Pteriomorpha;Ostreida;Ostreoidea;Ostreidae;Crassostrea;Crassostrea gigas  
 UdeM00000042195 10224 187.6 UdeM00000042195 XP\_006820829.1 57.4 148  
 62 1 8 155 4 150 1.30E-44 187.6 10224 cellular  
 organisms;Eukaryota;Opisthokonta;Metazoa;Eumetazoa;Bilateria;Deuterostomia;Hemichordata;Enteropneusta;Harrimaniidae;Saccoglossus;Saccoglossus kowalevskii  
 UdeM00000042196 6596 104 UdeM00000042196 XP\_045213354.1 55.7 79  
 35 0 3 81 77 155 1.00E-19 104 6596 cellular  
 organisms;Eukaryota;Opisthokonta;Metazoa;Eumetazoa;Bilateria;Protostomia;Spiralia;Lophotrochozoa;Mollusca;Bivalvia;Autobranchia;Heteroconchia;Euheterodonta;Imparidentia;Venerida;Veneroidea;Veneridae;Mercenaria;Mercenaria mercenaria  
 UdeM00000042197 6573 703.7 UdeM00000042197 XP\_021358616.1 72.1 519  
 124 5 11 523 1 504 1.70E-199 703.7 6573 cellular  
 organisms;Eukaryota;Opisthokonta;Metazoa;Eumetazoa;Bilateria;Protostomia;

Spiralia; Lophotrochozoa; Mollusca; Bivalvia; Autobranchia; Pteriomorpha; Pectinida; Pectinoidea; Pectinidae; Mizuhopecten; Mizuhopecten yessoensis  
UdeM00000042198 6573 721.5 UdeM00000042198 XP\_021358616.1 73 519  
124 4 11 528 1 504 8.00E-205 721.5 6573 cellular  
organisms; Eukaryota; Opisthokonta; Metazoa; Eumetazoa; Bilateria; Protostomia; Spiralia; Lophotrochozoa; Mollusca; Bivalvia; Autobranchia; Pteriomorpha; Pectinida; Pectinoidea; Pectinidae; Mizuhopecten; Mizuhopecten yessoensis  
UdeM00000042199 6579 209.5 UdeM00000042199 XP\_033761201.1 52.1 432  
171 11 117 541 141 543 1.10E-50 209.5 6579 cellular  
organisms; Eukaryota; Opisthokonta; Metazoa; Eumetazoa; Bilateria; Protostomia; Spiralia; Lophotrochozoa; Mollusca; Bivalvia; Autobranchia; Pteriomorpha; Pectinida; Pectinoidea; Pectinidae; Pecten; Pecten maximus  
UdeM00000042201 32264 114 UdeM00000042201 XP\_015793242.1 36.4 162  
96 4 1 158 231 389 3.10E-22 114 32264 cellular  
organisms; Eukaryota; Opisthokonta; Metazoa; Eumetazoa; Bilateria; Protostomia; Ecdysozoa; Panarthropoda; Arthropoda; Chelicerata; Arachnida; Acari; Acariformes; Trombidiformes; Prostigmata; Eleutherengona; Raphignathae; Tetranychoidae; Tetranychidae; Tetranychus; Tetranychus urticae  
UdeM00000042202 6565 94 UdeM00000042202 XP\_022339127.1 58 81  
33 1 58 138 686 765 1.80E-16 94 6565 cellular  
organisms; Eukaryota; Opisthokonta; Metazoa; Eumetazoa; Bilateria; Protostomia; Spiralia; Lophotrochozoa; Mollusca; Bivalvia; Autobranchia; Pteriomorpha; Ostracida; Ostreoidae; Ostreidae; Crassostrea; Crassostrea virginica  
UdeM00000042203 6596 708 UdeM00000042203 XP\_045201573.1 68.7 521  
132 6 1 510 213 713 9.10E-201 708 6596 cellular  
organisms; Eukaryota; Opisthokonta; Metazoa; Eumetazoa; Bilateria; Protostomia; Spiralia; Lophotrochozoa; Mollusca; Bivalvia; Autobranchia; Heteroconchia; Euheterodonta; Imparidentia; Venerida; Veneroidea; Veneridae; Mercenaria; Mercenaria mercenaria  
UdeM00000042204 6596 99.8 UdeM00000042204 XP\_045201568.1 42.5 228  
97 7 1 219 1 203 4.80E-18 99.8 6596 cellular  
organisms; Eukaryota; Opisthokonta; Metazoa; Eumetazoa; Bilateria; Protostomia; Spiralia; Lophotrochozoa; Mollusca; Bivalvia; Autobranchia; Heteroconchia; Euheterodonta; Imparidentia; Venerida; Veneroidea; Veneridae; Mercenaria; Mercenaria mercenaria  
UdeM00000042206 6596 85.5 UdeM00000042206 XP\_045176798.1 32.4 216  
116 11 172 382 85 275 1.60E-13 85.5 6596 cellular  
organisms; Eukaryota; Opisthokonta; Metazoa; Eumetazoa; Bilateria; Protostomia; Spiralia; Lophotrochozoa; Mollusca; Bivalvia; Autobranchia; Heteroconchia; Euheterodonta; Imparidentia; Venerida; Veneroidea; Veneridae; Mercenaria; Mercenaria mercenaria  
UdeM00000042207 6565 252.3 UdeM00000042207 XP\_022298930.1 35.3 414  
165 7 26 340 10 419 9.70E-64 252.3 6565 cellular  
organisms; Eukaryota; Opisthokonta; Metazoa; Eumetazoa; Bilateria; Protostomia; Spiralia; Lophotrochozoa; Mollusca; Bivalvia; Autobranchia; Pteriomorpha; Ostracida; Ostreoidae; Ostreidae; Crassostrea; Crassostrea virginica  
UdeM00000033316 6565 439.1 UdeM00000033316 XP\_022339409.1 48.8 477  
225 7 94 566 6 467 8.50E-120 439.1 6565 cellular  
organisms; Eukaryota; Opisthokonta; Metazoa; Eumetazoa; Bilateria; Protostomia; Spiralia; Lophotrochozoa; Mollusca; Bivalvia; Autobranchia; Pteriomorpha; Ostracida; Ostreoidae; Ostreidae; Crassostrea; Crassostrea virginica  
UdeM00000033317 6565 437.6 UdeM00000033317 XP\_022339409.1 48.9 472  
224 6 12 480 6 463 2.10E-119 437.6 6565 cellular  
organisms; Eukaryota; Opisthokonta; Metazoa; Eumetazoa; Bilateria; Protostomia;

Spiralia; Lophotrochozoa; Mollusca; Bivalvia; Autobranchia; Pteriomorphia; Ostr  
 eida; Ostreoidae; Ostreidae; Crassostrea; Crassostrea virginica  
 UdeM00000033318 6596 308.5 UdeM00000033318 XP\_045157611.1 51.7 294  
 138 2 9 298 78 371 9.20E-81 308.5 6596 cellular  
 organisms; Eukaryota; Opisthokonta; Metazoa; Eumetazoa; Bilateria; Protostomia;  
 Spiralia; Lophotrochozoa; Mollusca; Bivalvia; Autobranchia; Heteroconchia; Eue  
 terodonta; Imparidentia; Venerida; Veneroidea; Veneridae; Mercenaria; Mercenari  
 a mercenaria  
 UdeM00000033319 6596 256.5 UdeM00000033319 XP\_045157611.1 51 257  
 122 2 182 434 78 334 6.20E-65 256.5 6596 cellular  
 organisms; Eukaryota; Opisthokonta; Metazoa; Eumetazoa; Bilateria; Protostomia;  
 Spiralia; Lophotrochozoa; Mollusca; Bivalvia; Autobranchia; Heteroconchia; Eue  
 terodonta; Imparidentia; Venerida; Veneroidea; Veneridae; Mercenaria; Mercenari  
 a mercenaria  
 UdeM00000033320 6596 113.2 UdeM00000033320 XP\_045170381.1 52.3 109  
 46 2 5 107 3 111 2.90E-22 113.2 6596 cellular  
 organisms; Eukaryota; Opisthokonta; Metazoa; Eumetazoa; Bilateria; Protostomia;  
 Spiralia; Lophotrochozoa; Mollusca; Bivalvia; Autobranchia; Heteroconchia; Eue  
 terodonta; Imparidentia; Venerida; Veneroidea; Veneridae; Mercenaria; Mercenari  
 a mercenaria  
 UdeM00000033321 6596 104.8 UdeM00000033321 XP\_045204471.1 47.7 111  
 53 1 2 107 10 120 1.00E-19 104.8 6596 cellular  
 organisms; Eukaryota; Opisthokonta; Metazoa; Eumetazoa; Bilateria; Protostomia;  
 Spiralia; Lophotrochozoa; Mollusca; Bivalvia; Autobranchia; Heteroconchia; Eue  
 terodonta; Imparidentia; Venerida; Veneroidea; Veneridae; Mercenaria; Mercenari  
 a mercenaria  
 UdeM00000044203 4565 81.3 UdeM00000044203 XP\_044455775.1 27 452  
 272 21 6 433 46 463 3.50E-12 81.3 4565 cellular  
 organisms; Eukaryota; Viridiplantae; Streptophyta; Streptophytina; Embryophyta  
 ; Tracheophyta; Euphyllophyta; Spermatophyta; Magnoliopsida; Mesangiospermae; L  
 iliopsida; Petrosaviidae; commelinids; Poales; Poaceae; BOP  
 clade; Pooideae; Triticoideae; Triticeae; Triticinae; Triticum; Triticum aestivum  
 UdeM00000044204 83332 268.5 UdeM00000044204 NP\_214736.1 58.6 249 102  
 1 5 253 14 261 8.90E-69 268.5 83332 cellular  
 organisms; Bacteria; Terrabacteria  
 group; Actinobacteria; Actinomycetia; Corynebacteriales; Mycobacteriaceae; Myc  
 obacterium; Mycobacterium tuberculosis complex; Mycobacterium  
 tuberculosis; Mycobacterium tuberculosis H37Rv  
 UdeM00000028810 8364 166 UdeM00000028810 XP\_004911053.2 30.8 428  
 259 10 2 415 635 1039 1.10E-37 166 8364 cellular  
 organisms; Eukaryota; Opisthokonta; Metazoa; Eumetazoa; Bilateria; Deuterostomi  
 a; Chordata; Craniata; Vertebrata; Gnathostomata; Teleostomi; Euteleostomi; Sarc  
 opterygii; Dipnotetrapodomorpha; Tetrapoda; Amphibia; Batrachia; Anura; Pipoide  
 a; Pipidae; Xenopodinae; Xenopus; Silurana; Xenopus tropicalis  
 UdeM00000028811 6579 134 UdeM00000028811 XP\_033735424.1 44.8 125  
 69 0 172 296 105 229 3.40E-28 134 6579 cellular  
 organisms; Eukaryota; Opisthokonta; Metazoa; Eumetazoa; Bilateria; Protostomia;  
 Spiralia; Lophotrochozoa; Mollusca; Bivalvia; Autobranchia; Pteriomorphia; Pect  
 inida; Pectinoidea; Pectinidae; Pecten; Pecten maximus  
 UdeM00000028812 6596 280.4 UdeM00000028812 XP\_045214564.1 38.8 397  
 157 11 18 402 93 415 4.30E-72 280.4 6596 cellular  
 organisms; Eukaryota; Opisthokonta; Metazoa; Eumetazoa; Bilateria; Protostomia;  
 Spiralia; Lophotrochozoa; Mollusca; Bivalvia; Autobranchia; Heteroconchia; Eue

terodonta;Imparidentia;Venerida;Veneroidea;Veneridae;Mercenaria;Mercenari  
 a mercenaria  
 UdeM00000028813 6596 342 UdeM00000028813 XP\_045214564.1 43.5 379  
 152 7 19 342 586 957 8.60E-91 342 6596 cellular  
 organisms;Eukaryota;Opisthokonta;Metazoa;Eumetazoa;Bilateria;Protostomia;  
 Spiralia;Lophotrochozoa;Mollusca;Bivalvia;Autobranhia;Heteroconchia;Euhe  
 terodonta;Imparidentia;Venerida;Veneroidea;Veneridae;Mercenaria;Mercenari  
 a mercenaria  
 UdeM00000028814 6596 716.8 UdeM00000028814 XP\_045214564.1 39.5 994  
 417 19 26 880 960 1908 3.30E-203 716.8 6596 cellular  
 organisms;Eukaryota;Opisthokonta;Metazoa;Eumetazoa;Bilateria;Protostomia;  
 Spiralia;Lophotrochozoa;Mollusca;Bivalvia;Autobranhia;Heteroconchia;Euhe  
 terodonta;Imparidentia;Venerida;Veneroidea;Veneridae;Mercenaria;Mercenari  
 a mercenaria  
 UdeM00000028815 6579 383.6 UdeM00000028815 XP\_033735424.1 40.4 505  
 235 9 2 472 1725 2197 3.70E-103 383.6 6579 cellular  
 organisms;Eukaryota;Opisthokonta;Metazoa;Eumetazoa;Bilateria;Protostomia;  
 Spiralia;Lophotrochozoa;Mollusca;Bivalvia;Autobranhia;Pteriormorphia;Pect  
 inida;Pectinoidea;Pectinidae;Pecten;Pecten maximus  
 UdeM00000028818 6596 89.7 UdeM00000028818 XP\_045168860.1 26 285  
 189 8 1 276 12 283 6.50E-15 89.7 6596 cellular  
 organisms;Eukaryota;Opisthokonta;Metazoa;Eumetazoa;Bilateria;Protostomia;  
 Spiralia;Lophotrochozoa;Mollusca;Bivalvia;Autobranhia;Heteroconchia;Euhe  
 terodonta;Imparidentia;Venerida;Veneroidea;Veneridae;Mercenaria;Mercenari  
 a mercenaria  
 UdeM00000028821 6565 94 UdeM00000028821 XP\_022331152.1 30.6 242  
 149 9 6 237 12 244 3.50E-16 94 6565 cellular  
 organisms;Eukaryota;Opisthokonta;Metazoa;Eumetazoa;Bilateria;Protostomia;  
 Spiralia;Lophotrochozoa;Mollusca;Bivalvia;Autobranhia;Pteriormorphia;Ostr  
 eida;Ostreoidea;Ostreidae;Crassostrea;Crassostrea virginica  
 UdeM00000028822 6596 1447.6 UdeM00000028822 XP\_045213811.1 68.9  
 1117 318 10 6 1110 7 1106 0.00E+00 1447.6 6596  
 cellular  
 organisms;Eukaryota;Opisthokonta;Metazoa;Eumetazoa;Bilateria;Protostomia;  
 Spiralia;Lophotrochozoa;Mollusca;Bivalvia;Autobranhia;Heteroconchia;Euhe  
 terodonta;Imparidentia;Venerida;Veneroidea;Veneridae;Mercenaria;Mercenari  
 a mercenaria  
 UdeM00000028823 1735272 551.2 UdeM00000028823 XP\_041352916.1 52.2  
 504 228 3 6 509 3 493 1.40E-153 551.2 1735272  
 cellular  
 organisms;Eukaryota;Opisthokonta;Metazoa;Eumetazoa;Bilateria;Protostomia;  
 Spiralia;Lophotrochozoa;Mollusca;Gastropoda;Neomphalina;Neomphaloidea;Pel  
 tospiridae;Gigantopelta;Gigantopelta aegis  
 UdeM00000028824 6596 578.9 UdeM00000028824 XP\_045166800.1 50.5 701  
 256 19 3 638 7 681 7.70E-162 578.9 6596 cellular  
 organisms;Eukaryota;Opisthokonta;Metazoa;Eumetazoa;Bilateria;Protostomia;  
 Spiralia;Lophotrochozoa;Mollusca;Bivalvia;Autobranhia;Heteroconchia;Euhe  
 terodonta;Imparidentia;Venerida;Veneroidea;Veneridae;Mercenaria;Mercenari  
 a mercenaria  
 UdeM00000028825 6596 113.2 UdeM00000028825 XP\_045187131.1 72.6 73  
 20 0 3 75 4 76 6.60E-22 113.2 6596 cellular  
 organisms;Eukaryota;Opisthokonta;Metazoa;Eumetazoa;Bilateria;Protostomia;  
 Spiralia;Lophotrochozoa;Mollusca;Bivalvia;Autobranhia;Heteroconchia;Euhe

terodonta;Imparidentia;Venerida;Veneroidea;Veneridae;Mercenaria;Mercenari  
 a mercenaria  
 UdeM00000028826 6596 772.3 UdeM00000028826 XP\_045187130.1 64.2 576  
 200 4 182 753 187 760 5.60E-220 772.3 6596 cellular  
 organisms;Eukaryota;Opisthokonta;Metazoa;Eumetazoa;Bilateria;Protostomia;  
 Spiralia;Lophotrochozoa;Mollusca;Bivalvia;Autobranhia;Heteroconchia;Euhe  
 terodonta;Imparidentia;Venerida;Veneroidea;Veneridae;Mercenaria;Mercenari  
 a mercenaria  
 UdeM00000028827 6596 776.2 UdeM00000028827 XP\_045187130.1 64.2 576  
 202 3 182 755 187 760 3.90E-221 776.2 6596 cellular  
 organisms;Eukaryota;Opisthokonta;Metazoa;Eumetazoa;Bilateria;Protostomia;  
 Spiralia;Lophotrochozoa;Mollusca;Bivalvia;Autobranhia;Heteroconchia;Euhe  
 terodonta;Imparidentia;Venerida;Veneroidea;Veneridae;Mercenaria;Mercenari  
 a mercenaria  
 UdeM00000028828 6596 362.8 UdeM00000028828 XP\_045187128.1 46.8 387  
 204 2 125 510 117 502 7.00E-97 362.8 6596 cellular  
 organisms;Eukaryota;Opisthokonta;Metazoa;Eumetazoa;Bilateria;Protostomia;  
 Spiralia;Lophotrochozoa;Mollusca;Bivalvia;Autobranhia;Heteroconchia;Euhe  
 terodonta;Imparidentia;Venerida;Veneroidea;Veneridae;Mercenaria;Mercenari  
 a mercenaria  
 UdeM00000028829 6573 94.7 UdeM00000028829 XP\_021365625.1 52.9 87  
 41 0 35 121 40 126 1.70E-16 94.7 6573 cellular  
 organisms;Eukaryota;Opisthokonta;Metazoa;Eumetazoa;Bilateria;Protostomia;  
 Spiralia;Lophotrochozoa;Mollusca;Bivalvia;Autobranhia;Pteriormorphia;Pect  
 inida;Pectinoidea;Pectinidae;Mizuhopecten;Mizuhopecten yessoensis  
 UdeM00000028830 6596 831.6 UdeM00000028830 XP\_045162916.1 73.6 553  
 144 1 1 553 1 551 5.70E-238 831.6 6596 cellular  
 organisms;Eukaryota;Opisthokonta;Metazoa;Eumetazoa;Bilateria;Protostomia;  
 Spiralia;Lophotrochozoa;Mollusca;Bivalvia;Autobranhia;Heteroconchia;Euhe  
 terodonta;Imparidentia;Venerida;Veneroidea;Veneridae;Mercenaria;Mercenari  
 a mercenaria  
 UdeM00000028832 6596 217.6 UdeM00000028832 XP\_045174020.1 49.4 253  
 108 5 2 253 36 269 1.80E-53 217.6 6596 cellular  
 organisms;Eukaryota;Opisthokonta;Metazoa;Eumetazoa;Bilateria;Protostomia;  
 Spiralia;Lophotrochozoa;Mollusca;Bivalvia;Autobranhia;Heteroconchia;Euhe  
 terodonta;Imparidentia;Venerida;Veneroidea;Veneridae;Mercenaria;Mercenari  
 a mercenaria  
 UdeM00000028834 6596 134.8 UdeM00000028834 XP\_045187678.1 66 103  
 31 2 6 104 1 103 6.40E-29 134.8 6596 cellular  
 organisms;Eukaryota;Opisthokonta;Metazoa;Eumetazoa;Bilateria;Protostomia;  
 Spiralia;Lophotrochozoa;Mollusca;Bivalvia;Autobranhia;Heteroconchia;Euhe  
 terodonta;Imparidentia;Venerida;Veneroidea;Veneridae;Mercenaria;Mercenari  
 a mercenaria  
 UdeM00000028835 6579 260.4 UdeM00000028835 XP\_033734333.1 61 277  
 96 3 3 279 102 366 2.70E-66 260.4 6579 cellular  
 organisms;Eukaryota;Opisthokonta;Metazoa;Eumetazoa;Bilateria;Protostomia;  
 Spiralia;Lophotrochozoa;Mollusca;Bivalvia;Autobranhia;Pteriormorphia;Pect  
 inida;Pectinoidea;Pectinidae;Pecten;Pecten maximus  
 UdeM00000028836 7574 290 UdeM00000028836 XP\_013385995.1 73.2 198  
 45 2 1 195 1 193 3.30E-75 290 7574 cellular  
 organisms;Eukaryota;Opisthokonta;Metazoa;Eumetazoa;Bilateria;Protostomia;  
 Spiralia;Lophotrochozoa;Brachiopoda;Linguliformea;Lingulata;Lingulida;Lin  
 guloidea;Lingulidae;Lingula;Lingula anatina

UdeM00000028838 6596 111.3 UdeM00000028838 XP\_045181277.1 37.3 161  
 93 5 162 318 249 405 2.40E-21 111.3 6596 cellular  
 organisms;Eukaryota;Opisthokonta;Metazoa;Eumetazoa;Bilateria;Protostomia;  
 Spiralia;Lophotrochozoa;Mollusca;Bivalvia;Autobranhia;Heteroconchia;Euhe  
 terodonta;Imparidentia;Venerida;Veneroidea;Veneridae;Mercenaria;Mercenari  
 a mercenaria  
 UdeM00000028840 6596 113.6 UdeM00000028840 XP\_045176664.1 45.4 130  
 66 3 25 150 340 468 2.60E-22 113.6 6596 cellular  
 organisms;Eukaryota;Opisthokonta;Metazoa;Eumetazoa;Bilateria;Protostomia;  
 Spiralia;Lophotrochozoa;Mollusca;Bivalvia;Autobranhia;Heteroconchia;Euhe  
 terodonta;Imparidentia;Venerida;Veneroidea;Veneridae;Mercenaria;Mercenari  
 a mercenaria  
 UdeM00000028841 6596 100.9 UdeM00000028841 XP\_045176094.1 52.9 87  
 40 1 27 113 85 170 1.20E-18 100.9 6596 cellular  
 organisms;Eukaryota;Opisthokonta;Metazoa;Eumetazoa;Bilateria;Protostomia;  
 Spiralia;Lophotrochozoa;Mollusca;Bivalvia;Autobranhia;Heteroconchia;Euhe  
 terodonta;Imparidentia;Venerida;Veneroidea;Veneridae;Mercenaria;Mercenari  
 a mercenaria  
 UdeM00000028842 6596 61.6 UdeM00000028842 XP\_045176664.1 31.5 127  
 82 3 176 298 239 364 1.90E-06 61.6 6596 cellular  
 organisms;Eukaryota;Opisthokonta;Metazoa;Eumetazoa;Bilateria;Protostomia;  
 Spiralia;Lophotrochozoa;Mollusca;Bivalvia;Autobranhia;Heteroconchia;Euhe  
 terodonta;Imparidentia;Venerida;Veneroidea;Veneridae;Mercenaria;Mercenari  
 a mercenaria  
 UdeM00000028843 6596 64.7 UdeM00000028843 XP\_045177373.1 22.1 222  
 166 5 1 220 22 238 1.70E-07 64.7 6596 cellular  
 organisms;Eukaryota;Opisthokonta;Metazoa;Eumetazoa;Bilateria;Protostomia;  
 Spiralia;Lophotrochozoa;Mollusca;Bivalvia;Autobranhia;Heteroconchia;Euhe  
 terodonta;Imparidentia;Venerida;Veneroidea;Veneridae;Mercenaria;Mercenari  
 a mercenaria  
 UdeM00000028844 6596 153.7 UdeM00000028844 XP\_045176094.1 40.5 200  
 112 5 38 234 57 252 3.80E-34 153.7 6596 cellular  
 organisms;Eukaryota;Opisthokonta;Metazoa;Eumetazoa;Bilateria;Protostomia;  
 Spiralia;Lophotrochozoa;Mollusca;Bivalvia;Autobranhia;Heteroconchia;Euhe  
 terodonta;Imparidentia;Venerida;Veneroidea;Veneridae;Mercenaria;Mercenari  
 a mercenaria  
 UdeM00000028845 6596 110.5 UdeM00000028845 XP\_045181277.1 39.3 140  
 80 3 14 149 181 319 2.20E-21 110.5 6596 cellular  
 organisms;Eukaryota;Opisthokonta;Metazoa;Eumetazoa;Bilateria;Protostomia;  
 Spiralia;Lophotrochozoa;Mollusca;Bivalvia;Autobranhia;Heteroconchia;Euhe  
 terodonta;Imparidentia;Venerida;Veneroidea;Veneridae;Mercenaria;Mercenari  
 a mercenaria  
 UdeM00000028846 7054 185.7 UdeM00000028846 XP\_031350379.1 39.3 290  
 155 7 1 270 1 289 8.20E-44 185.7 7054 cellular  
 organisms;Eukaryota;Opisthokonta;Metazoa;Eumetazoa;Bilateria;Protostomia;  
 Ecdysozoa;Panarthropoda;Arthropoda;Mandibulata;Pancrustacea;Hexapoda;Inse  
 cta;Dicondylia;Pterygota;Neoptera;Endopterygota;Coleoptera;Polyphaga;Elat  
 eriformia;Elateroidea;Lampyridae;Lampyrinae;Photinus;Photinus pyralis  
 UdeM00000028847 742174 89 UdeM00000028847 XP\_025199557.1 47.6  
 84 42 1 2 83 306 389 3.30E-15 89 742174  
 cellular  
 organisms;Eukaryota;Opisthokonta;Metazoa;Eumetazoa;Bilateria;Protostomia;  
 Ecdysozoa;Panarthropoda;Arthropoda;Mandibulata;Pancrustacea;Hexapoda;Inse  
 cta;Dicondylia;Pterygota;Neoptera;Paraneoptera;Hemiptera;Sternorrhyncha;A



phidomorpha;Aphidoidea;Aphididae;Aphidinae;Aphidini;Melanaphis;Melanaphis sacchari

UdeM00000028848 6596 96.3 UdeM00000028848 XP\_045176664.1 24 359  
220 12 19 331 13 364 7.90E-17 96.3 6596 cellular

organisms;Eukaryota;Opisthokonta;Metazoa;Eumetazoa;Bilateria;Protostomia;Spiralia;Lophotrochozoa;Mollusca;Bivalvia;Autobranchia;Heteroconchia;Euherodonta;Imparidentia;Venerida;Veneroidea;Veneridae;Mercenaria;Mercenaria mercenaria

UdeM00000028849 6596 89 UdeM00000028849 XP\_045177373.1 24.3 334  
199 11 1 287 22 348 1.10E-14 89 6596 cellular

organisms;Eukaryota;Opisthokonta;Metazoa;Eumetazoa;Bilateria;Protostomia;Spiralia;Lophotrochozoa;Mollusca;Bivalvia;Autobranchia;Heteroconchia;Euherodonta;Imparidentia;Venerida;Veneroidea;Veneridae;Mercenaria;Mercenaria mercenaria

UdeM00000028850 6596 82.4 UdeM00000028850 XP\_045176664.1 23.9 289  
169 8 19 270 90 364 9.60E-13 82.4 6596 cellular

organisms;Eukaryota;Opisthokonta;Metazoa;Eumetazoa;Bilateria;Protostomia;Spiralia;Lophotrochozoa;Mollusca;Bivalvia;Autobranchia;Heteroconchia;Euherodonta;Imparidentia;Venerida;Veneroidea;Veneridae;Mercenaria;Mercenaria mercenaria

UdeM00000028851 6596 84 UdeM00000028851 XP\_045181277.1 45 80  
43 1 34 113 235 313 1.40E-13 84 6596 cellular

organisms;Eukaryota;Opisthokonta;Metazoa;Eumetazoa;Bilateria;Protostomia;Spiralia;Lophotrochozoa;Mollusca;Bivalvia;Autobranchia;Heteroconchia;Euherodonta;Imparidentia;Venerida;Veneroidea;Veneridae;Mercenaria;Mercenaria mercenaria

UdeM00000028852 6596 146.7 UdeM00000028852 XP\_045214418.1 37.3 220  
123 5 13 227 64 273 3.50E-32 146.7 6596 cellular

organisms;Eukaryota;Opisthokonta;Metazoa;Eumetazoa;Bilateria;Protostomia;Spiralia;Lophotrochozoa;Mollusca;Bivalvia;Autobranchia;Heteroconchia;Euherodonta;Imparidentia;Venerida;Veneroidea;Veneridae;Mercenaria;Mercenaria mercenaria

UdeM00000027048 6579 126.3 UdeM00000027048 XP\_033753309.1 22.1 525  
234 5 20 373 229 749 8.00E-26 126.3 6579 cellular

organisms;Eukaryota;Opisthokonta;Metazoa;Eumetazoa;Bilateria;Protostomia;Spiralia;Lophotrochozoa;Mollusca;Bivalvia;Autobranchia;Pteriomorphia;Pectinida;Pectinoidea;Pectinidae;Pecten;Pecten maximus

UdeM00000027050 6596 1672.9 UdeM00000027050 XP\_045209328.1 34.7  
2905 1654 46 1 2786 40 2820 0.00E+00 1672.9 6596  
cellular

organisms;Eukaryota;Opisthokonta;Metazoa;Eumetazoa;Bilateria;Protostomia;Spiralia;Lophotrochozoa;Mollusca;Bivalvia;Autobranchia;Heteroconchia;Euherodonta;Imparidentia;Venerida;Veneroidea;Veneridae;Mercenaria;Mercenaria mercenaria

UdeM00000027051 6573 450.7 UdeM00000027051 XP\_021367768.1 31.9 833  
549 5 6 829 6 829 4.40E-123 450.7 6573 cellular

organisms;Eukaryota;Opisthokonta;Metazoa;Eumetazoa;Bilateria;Protostomia;Spiralia;Lophotrochozoa;Mollusca;Bivalvia;Autobranchia;Pteriomorphia;Pectinida;Pectinoidea;Pectinidae;Mizuhopecten;Mizuhopecten yessoensis

UdeM00000027052 6573 200.7 UdeM00000027052 XP\_021341123.1 67.9 137  
44 0 46 182 203 339 1.70E-48 200.7 6573 cellular

organisms;Eukaryota;Opisthokonta;Metazoa;Eumetazoa;Bilateria;Protostomia;Spiralia;Lophotrochozoa;Mollusca;Bivalvia;Autobranchia;Pteriomorphia;Pectinida;Pectinoidea;Pectinidae;Mizuhopecten;Mizuhopecten yessoensis

UdeM00000027053 6596 194.9 UdeM00000027053 XP\_045195642.1 54.4 158  
 70 1 2 159 430 585 7.80E-47 194.9 6596 cellular  
 organisms;Eukaryota;Opisthokonta;Metazoa;Eumetazoa;Bilateria;Protostomia;  
 Spiralia;Lophotrochozoa;Mollusca;Bivalvia;Autobranchia;Heteroconchia;Euhe  
 terodonta;Imparidentia;Venerida;Veneroidea;Veneridae;Mercenaria;Mercenari  
 a mercenaria

UdeM00000027054 6596 861.3 UdeM00000027054 XP\_045205494.1 52.8 862  
 401 6 6 864 30 888 1.10E-246 861.3 6596 cellular  
 organisms;Eukaryota;Opisthokonta;Metazoa;Eumetazoa;Bilateria;Protostomia;  
 Spiralia;Lophotrochozoa;Mollusca;Bivalvia;Autobranchia;Heteroconchia;Euhe  
 terodonta;Imparidentia;Venerida;Veneroidea;Veneridae;Mercenaria;Mercenari  
 a mercenaria

UdeM00000027055 6596 1676.4 UdeM00000027055 XP\_045209328.1 34.7  
 2899 1663 46 1 2786 40 2820 0.00E+00 1676.4 6596  
 cellular  
 organisms;Eukaryota;Opisthokonta;Metazoa;Eumetazoa;Bilateria;Protostomia;  
 Spiralia;Lophotrochozoa;Mollusca;Bivalvia;Autobranchia;Heteroconchia;Euhe  
 terodonta;Imparidentia;Venerida;Veneroidea;Veneridae;Mercenaria;Mercenari  
 a mercenaria

UdeM00000027056 6579 448 UdeM00000027056 XP\_033753309.1 32.1 833  
 548 7 6 829 6 829 2.80E-122 448 6579 cellular  
 organisms;Eukaryota;Opisthokonta;Metazoa;Eumetazoa;Bilateria;Protostomia;  
 Spiralia;Lophotrochozoa;Mollusca;Bivalvia;Autobranchia;Pteriormorphia;Pect  
 inida;Pectinoidea;Pectinidae;Pecten;Pecten maximus

UdeM00000027057 6596 1132.1 UdeM00000027057 XP\_045205946.1 54.4  
 1209 447 19 62 1195 254 1433 0.00E+00 1132.1 6596  
 cellular  
 organisms;Eukaryota;Opisthokonta;Metazoa;Eumetazoa;Bilateria;Protostomia;  
 Spiralia;Lophotrochozoa;Mollusca;Bivalvia;Autobranchia;Heteroconchia;Euhe  
 terodonta;Imparidentia;Venerida;Veneroidea;Veneridae;Mercenaria;Mercenari  
 a mercenaria

UdeM00000027058 6573 76.6 UdeM00000027058 XP\_021361537.1 48.5 103  
 41 5 36 138 56 146 2.70E-11 76.6 6573 cellular  
 organisms;Eukaryota;Opisthokonta;Metazoa;Eumetazoa;Bilateria;Protostomia;  
 Spiralia;Lophotrochozoa;Mollusca;Bivalvia;Autobranchia;Pteriormorphia;Pect  
 inida;Pectinoidea;Pectinidae;Mizuhopecten;Mizuhopecten yessoensis

UdeM00000027059 6596 129 UdeM00000027059 XP\_045205946.1 42.6 155  
 54 3 3 155 1 122 5.40E-27 129 6596 cellular  
 organisms;Eukaryota;Opisthokonta;Metazoa;Eumetazoa;Bilateria;Protostomia;  
 Spiralia;Lophotrochozoa;Mollusca;Bivalvia;Autobranchia;Heteroconchia;Euhe  
 terodonta;Imparidentia;Venerida;Veneroidea;Veneridae;Mercenaria;Mercenari  
 a mercenaria

UdeM00000027060 6596 854.4 UdeM00000027060 XP\_045195664.1 80.5 575  
 112 0 178 752 163 737 1.10E-244 854.4 6596 cellular  
 organisms;Eukaryota;Opisthokonta;Metazoa;Eumetazoa;Bilateria;Protostomia;  
 Spiralia;Lophotrochozoa;Mollusca;Bivalvia;Autobranchia;Heteroconchia;Euhe  
 terodonta;Imparidentia;Venerida;Veneroidea;Veneridae;Mercenaria;Mercenari  
 a mercenaria

UdeM00000027061 6596 156.8 UdeM00000027061 XP\_045173462.1 30.1 355  
 200 11 119 432 25 372 6.70E-35 156.8 6596 cellular  
 organisms;Eukaryota;Opisthokonta;Metazoa;Eumetazoa;Bilateria;Protostomia;  
 Spiralia;Lophotrochozoa;Mollusca;Bivalvia;Autobranchia;Heteroconchia;Euhe  
 terodonta;Imparidentia;Venerida;Veneroidea;Veneridae;Mercenaria;Mercenari  
 a mercenaria

UdeM00000027062 6596 157.1 UdeM00000027062 XP\_045211165.1 32.5 351  
 208 10 75 407 83 422 4.80E-35 157.1 6596 cellular  
 organisms;Eukaryota;Opisthokonta;Metazoa;Eumetazoa;Bilateria;Protostomia;  
 Spiralia;Lophotrochozoa;Mollusca;Bivalvia;Autobranchia;Heteroconchia;Euhe  
 terodonta;Imparidentia;Venerida;Veneroidea;Veneridae;Mercenaria;Mercenari  
 a mercenaria

UdeM00000027063 225164 230.3 UdeM00000027063 XP\_009064246.1 43.2  
 266 144 4 156 419 40 300 4.40E-57 230.3 225164  
 cellular  
 organisms;Eukaryota;Opisthokonta;Metazoa;Eumetazoa;Bilateria;Protostomia;  
 Spiralia;Lophotrochozoa;Mollusca;Gastropoda;Patellogastropoda;Lottioidea;  
 Lottiidae;Lottia;Lottia gigantea

UdeM00000027065 6596 67 UdeM00000027065 XP\_045183581.1 27.6 105  
 75 1 10 113 80 184 2.00E-08 67 6596 cellular  
 organisms;Eukaryota;Opisthokonta;Metazoa;Eumetazoa;Bilateria;Protostomia;  
 Spiralia;Lophotrochozoa;Mollusca;Bivalvia;Autobranchia;Heteroconchia;Euhe  
 terodonta;Imparidentia;Venerida;Veneroidea;Veneridae;Mercenaria;Mercenari  
 a mercenaria

UdeM00000027067 6596 150.6 UdeM00000027067 XP\_045211165.1 29.2 435  
 272 14 11 426 5 422 4.70E-33 150.6 6596 cellular  
 organisms;Eukaryota;Opisthokonta;Metazoa;Eumetazoa;Bilateria;Protostomia;  
 Spiralia;Lophotrochozoa;Mollusca;Bivalvia;Autobranchia;Heteroconchia;Euhe  
 terodonta;Imparidentia;Venerida;Veneroidea;Veneridae;Mercenaria;Mercenari  
 a mercenaria

UdeM00000027069 6596 223.8 UdeM00000027069 XP\_045194230.1 69.4 157  
 47 1 44 199 10 166 2.00E-55 223.8 6596 cellular  
 organisms;Eukaryota;Opisthokonta;Metazoa;Eumetazoa;Bilateria;Protostomia;  
 Spiralia;Lophotrochozoa;Mollusca;Bivalvia;Autobranchia;Heteroconchia;Euhe  
 terodonta;Imparidentia;Venerida;Veneroidea;Veneridae;Mercenaria;Mercenari  
 a mercenaria

UdeM00000027070 6573 141 UdeM00000027070 XP\_021340731.1 77.9 86  
 18 1 19 104 191 275 8.80E-31 141 6573 cellular  
 organisms;Eukaryota;Opisthokonta;Metazoa;Eumetazoa;Bilateria;Protostomia;  
 Spiralia;Lophotrochozoa;Mollusca;Bivalvia;Autobranchia;Pteriomorphia;Pect  
 inida;Pectinoidea;Pectinidae;Mizuhopecten;Mizuhopecten yessoensis

UdeM00000027071 1735272 238.4 UdeM00000027071 XP\_041368816.1 49.4  
 233 116 2 67 298 42 273 1.20E-59 238.4 1735272  
 cellular  
 organisms;Eukaryota;Opisthokonta;Metazoa;Eumetazoa;Bilateria;Protostomia;  
 Spiralia;Lophotrochozoa;Mollusca;Gastropoda;Neomphalina;Neomphaloidea;Pel  
 tospiridae;Gigantopelta;Gigantopelta aegis

UdeM00000027072 1735272 157.9 UdeM00000027072 XP\_041370767.1 69.2  
 117 36 0 5 121 3 119 8.70E-36 157.9 1735272  
 cellular  
 organisms;Eukaryota;Opisthokonta;Metazoa;Eumetazoa;Bilateria;Protostomia;  
 Spiralia;Lophotrochozoa;Mollusca;Gastropoda;Neomphalina;Neomphaloidea;Pel  
 tospiridae;Gigantopelta;Gigantopelta aegis

UdeM00000027073 6596 459.1 UdeM00000027073 XP\_045172573.1 36.3 702  
 318 5 58 756 5 580 1.10E-125 459.1 6596 cellular  
 organisms;Eukaryota;Opisthokonta;Metazoa;Eumetazoa;Bilateria;Protostomia;  
 Spiralia;Lophotrochozoa;Mollusca;Bivalvia;Autobranchia;Heteroconchia;Euhe  
 terodonta;Imparidentia;Venerida;Veneroidea;Veneridae;Mercenaria;Mercenari  
 a mercenaria

UdeM00000027074 6596 138.3 UdeM00000027074 XP\_045176606.1 56.7 120  
 51 1 8 127 8 126 7.00E-30 138.3 6596 cellular  
 organisms;Eukaryota;Opisthokonta;Metazoa;Eumetazoa;Bilateria;Protostomia;  
 Spiralia;Lophotrochozoa;Mollusca;Bivalvia;Autobranchia;Heteroconchia;Euhe  
 terodonta;Imparidentia;Venerida;Veneroidea;Veneridae;Mercenaria;Mercenari  
 a mercenaria

UdeM00000027075 6596 320.1 UdeM00000027075 XP\_045203759.1 34.2 558  
 241 6 8 564 159 591 5.70E-84 320.1 6596 cellular  
 organisms;Eukaryota;Opisthokonta;Metazoa;Eumetazoa;Bilateria;Protostomia;  
 Spiralia;Lophotrochozoa;Mollusca;Bivalvia;Autobranchia;Heteroconchia;Euhe  
 terodonta;Imparidentia;Venerida;Veneroidea;Veneridae;Mercenaria;Mercenari  
 a mercenaria

UdeM00000027076 6596 151 UdeM00000027076 XP\_045203144.1 48.8 170  
 83 2 3 171 422 588 1.40E-33 151 6596 cellular  
 organisms;Eukaryota;Opisthokonta;Metazoa;Eumetazoa;Bilateria;Protostomia;  
 Spiralia;Lophotrochozoa;Mollusca;Bivalvia;Autobranchia;Heteroconchia;Euhe  
 terodonta;Imparidentia;Venerida;Veneroidea;Veneridae;Mercenaria;Mercenari  
 a mercenaria

UdeM00000027077 6596 127.5 UdeM00000027077 XP\_045172573.1 50.4 123  
 57 1 1 119 220 342 1.30E-26 127.5 6596 cellular  
 organisms;Eukaryota;Opisthokonta;Metazoa;Eumetazoa;Bilateria;Protostomia;  
 Spiralia;Lophotrochozoa;Mollusca;Bivalvia;Autobranchia;Heteroconchia;Euhe  
 terodonta;Imparidentia;Venerida;Veneroidea;Veneridae;Mercenaria;Mercenari  
 a mercenaria

UdeM00000027078 6596 215.7 UdeM00000027078 XP\_045173653.1 52.2 186  
 89 0 6 191 6 191 5.20E-53 215.7 6596 cellular  
 organisms;Eukaryota;Opisthokonta;Metazoa;Eumetazoa;Bilateria;Protostomia;  
 Spiralia;Lophotrochozoa;Mollusca;Bivalvia;Autobranchia;Heteroconchia;Euhe  
 terodonta;Imparidentia;Venerida;Veneroidea;Veneridae;Mercenaria;Mercenari  
 a mercenaria

UdeM00000027079 6596 465.7 UdeM00000027079 XP\_045161350.1 39.3 699  
 294 6 8 704 6 576 1.10E-127 465.7 6596 cellular  
 organisms;Eukaryota;Opisthokonta;Metazoa;Eumetazoa;Bilateria;Protostomia;  
 Spiralia;Lophotrochozoa;Mollusca;Bivalvia;Autobranchia;Heteroconchia;Euhe  
 terodonta;Imparidentia;Venerida;Veneroidea;Veneridae;Mercenaria;Mercenari  
 a mercenaria

UdeM00000027082 6596 353.2 UdeM00000027082 XP\_045161350.1 37.5 557  
 221 5 5 560 6 436 6.00E-94 353.2 6596 cellular  
 organisms;Eukaryota;Opisthokonta;Metazoa;Eumetazoa;Bilateria;Protostomia;  
 Spiralia;Lophotrochozoa;Mollusca;Bivalvia;Autobranchia;Heteroconchia;Euhe  
 terodonta;Imparidentia;Venerida;Veneroidea;Veneridae;Mercenaria;Mercenari  
 a mercenaria

UdeM00000027083 6573 63.9 UdeM00000027083 XP\_021355916.1 40.7 86  
 50 1 4 89 499 583 1.20E-07 63.9 6573 cellular  
 organisms;Eukaryota;Opisthokonta;Metazoa;Eumetazoa;Bilateria;Protostomia;  
 Spiralia;Lophotrochozoa;Mollusca;Bivalvia;Autobranchia;Pteriomorphia;Pect  
 inida;Pectinoidea;Pectinidae;Mizuhopecten;Mizuhopecten yessoensis

UdeM00000027084 6596 349.4 UdeM00000027084 XP\_045204176.1 47 387  
 177 5 1 382 1 364 6.80E-93 349.4 6596 cellular  
 organisms;Eukaryota;Opisthokonta;Metazoa;Eumetazoa;Bilateria;Protostomia;  
 Spiralia;Lophotrochozoa;Mollusca;Bivalvia;Autobranchia;Heteroconchia;Euhe  
 terodonta;Imparidentia;Venerida;Veneroidea;Veneridae;Mercenaria;Mercenari  
 a mercenaria

UdeM00000027085 6596 182.6 UdeM00000027085 XP\_045203144.1 48.7 193  
 95 2 1 192 399 588 4.90E-43 182.6 6596 cellular  
 organisms;Eukaryota;Opisthokonta;Metazoa;Eumetazoa;Bilateria;Protostomia;  
 Spiralia;Lophotrochozoa;Mollusca;Bivalvia;Autobranchia;Heteroconchia;Euhe  
 terodonta;Imparidentia;Venerida;Veneroidea;Veneridae;Mercenaria;Mercenari  
 a mercenaria  
 UdeM00000027086 6573 259.2 UdeM00000027086 XP\_021347189.1 46.2 266  
 140 2 135 400 143 405 8.50E-66 259.2 6573 cellular  
 organisms;Eukaryota;Opisthokonta;Metazoa;Eumetazoa;Bilateria;Protostomia;  
 Spiralia;Lophotrochozoa;Mollusca;Bivalvia;Autobranchia;Pteriormorphia;Pect  
 inida;Pectinoidea;Pectinidae;Mizuhopecten;Mizuhopecten yessoensis  
 UdeM00000027087 7668 94.7 UdeM00000027087 XP\_030832292.1 35.1 154  
 85 5 2 148 257 402 1.00E-16 94.7 7668 cellular  
 organisms;Eukaryota;Opisthokonta;Metazoa;Eumetazoa;Bilateria;Deuterostomi  
 a;Echinodermata;Eleutherozoa;Echinozoa;Echinoidea;Euechinoidea;Echinacea;  
 Camarodonta;Echinidea;Strongylocentrotidae;Strongylocentrotus;Strongyloce  
 ntrotus purpuratus  
 UdeM00000027088 6596 221.9 UdeM00000027088 XP\_045216087.1 41 256  
 147 2 153 406 99 352 1.50E-54 221.9 6596 cellular  
 organisms;Eukaryota;Opisthokonta;Metazoa;Eumetazoa;Bilateria;Protostomia;  
 Spiralia;Lophotrochozoa;Mollusca;Bivalvia;Autobranchia;Heteroconchia;Euhe  
 terodonta;Imparidentia;Venerida;Veneroidea;Veneridae;Mercenaria;Mercenari  
 a mercenaria  
 UdeM00000027089 6596 201.4 UdeM00000027089 XP\_045184460.1 42.6 209  
 119 1 1 209 206 413 1.10E-48 201.4 6596 cellular  
 organisms;Eukaryota;Opisthokonta;Metazoa;Eumetazoa;Bilateria;Protostomia;  
 Spiralia;Lophotrochozoa;Mollusca;Bivalvia;Autobranchia;Heteroconchia;Euhe  
 terodonta;Imparidentia;Venerida;Veneroidea;Veneridae;Mercenaria;Mercenari  
 a mercenaria  
 UdeM00000027090 37653 224.9 UdeM00000027090 XP\_014782122.1 40.1 267  
 157 2 142 407 128 392 1.80E-55 224.9 37653 cellular  
 organisms;Eukaryota;Opisthokonta;Metazoa;Eumetazoa;Bilateria;Protostomia;  
 Spiralia;Lophotrochozoa;Mollusca;Cephalopoda;Coleoidea;Octopodiformes;Oct  
 opoda;Incirrata;Octopodidae;Octopus;Octopus bimaculoides  
 UdeM00000027091 6573 232.3 UdeM00000027091 XP\_021347189.1 41.3 281  
 161 3 120 400 129 405 1.10E-57 232.3 6573 cellular  
 organisms;Eukaryota;Opisthokonta;Metazoa;Eumetazoa;Bilateria;Protostomia;  
 Spiralia;Lophotrochozoa;Mollusca;Bivalvia;Autobranchia;Pteriormorphia;Pect  
 inida;Pectinoidea;Pectinidae;Mizuhopecten;Mizuhopecten yessoensis  
 UdeM00000027092 225164 226.1 UdeM00000027092 XP\_009064246.1 41.7  
 266 148 4 143 406 40 300 8.10E-56 226.1 225164  
 cellular  
 organisms;Eukaryota;Opisthokonta;Metazoa;Eumetazoa;Bilateria;Protostomia;  
 Spiralia;Lophotrochozoa;Mollusca;Gastropoda;Patellogastropoda;Lottioidea;  
 Lottiidae;Lottia;Lottia gigantea  
 UdeM00000027093 6596 229.6 UdeM00000027093 XP\_045184460.1 42.9 254  
 144 1 98 351 161 413 6.30E-57 229.6 6596 cellular  
 organisms;Eukaryota;Opisthokonta;Metazoa;Eumetazoa;Bilateria;Protostomia;  
 Spiralia;Lophotrochozoa;Mollusca;Bivalvia;Autobranchia;Heteroconchia;Euhe  
 terodonta;Imparidentia;Venerida;Veneroidea;Veneridae;Mercenaria;Mercenari  
 a mercenaria  
 UdeM00000027094 6596 441.8 UdeM00000027094 XP\_045172620.1 44.5 541  
 257 7 6 508 2 537 1.20E-120 441.8 6596 cellular  
 organisms;Eukaryota;Opisthokonta;Metazoa;Eumetazoa;Bilateria;Protostomia;

Spiralia;Lophotrochozoa;Mollusca;Bivalvia;Autobranchia;Heteroconchia;Euherodonta;Imparidentia;Venerida;Veneroidea;Veneridae;Mercenaria;Mercenaria mercenaria

UdeM00000027095 6596 412.5 UdeM00000027095 XP\_045172620.1 46.1 477  
241 7 2 464 105 579 7.00E-112 412.5 6596 cellular

organisms;Eukaryota;Opisthokonta;Metazoa;Eumetazoa;Bilateria;Protostomia;Spiralia;Lophotrochozoa;Mollusca;Bivalvia;Autobranchia;Heteroconchia;Euherodonta;Imparidentia;Venerida;Veneroidea;Veneridae;Mercenaria;Mercenaria mercenaria

UdeM00000027096 6596 488.8 UdeM00000027096 XP\_045172620.1 44.8 585  
308 9 4 579 1 579 9.50E-135 488.8 6596 cellular

organisms;Eukaryota;Opisthokonta;Metazoa;Eumetazoa;Bilateria;Protostomia;Spiralia;Lophotrochozoa;Mollusca;Bivalvia;Autobranchia;Heteroconchia;Euherodonta;Imparidentia;Venerida;Veneroidea;Veneridae;Mercenaria;Mercenaria mercenaria

UdeM00000027097 6596 516.9 UdeM00000027097 XP\_045172620.1 47.7 583  
288 9 6 576 2 579 3.30E-143 516.9 6596 cellular

organisms;Eukaryota;Opisthokonta;Metazoa;Eumetazoa;Bilateria;Protostomia;Spiralia;Lophotrochozoa;Mollusca;Bivalvia;Autobranchia;Heteroconchia;Euherodonta;Imparidentia;Venerida;Veneroidea;Veneridae;Mercenaria;Mercenaria mercenaria

UdeM00000027098 6596 355.1 UdeM00000027098 XP\_045161350.1 37.7 557  
220 5 5 560 6 436 1.60E-94 355.1 6596 cellular

organisms;Eukaryota;Opisthokonta;Metazoa;Eumetazoa;Bilateria;Protostomia;Spiralia;Lophotrochozoa;Mollusca;Bivalvia;Autobranchia;Heteroconchia;Euherodonta;Imparidentia;Venerida;Veneroidea;Veneridae;Mercenaria;Mercenaria mercenaria

UdeM00000027099 6573 63.9 UdeM00000027099 XP\_021355916.1 40.7 86  
50 1 4 89 499 583 1.20E-07 63.9 6573 cellular

organisms;Eukaryota;Opisthokonta;Metazoa;Eumetazoa;Bilateria;Protostomia;Spiralia;Lophotrochozoa;Mollusca;Bivalvia;Autobranchia;Pteriomorphia;Pectinida;Pectinoidea;Pectinidae;Mizuhopecten;Mizuhopecten yessoensis

UdeM00000027100 6596 350.9 UdeM00000027100 XP\_045172573.1 49.4 342  
168 3 1 337 1 342 2.30E-93 350.9 6596 cellular

organisms;Eukaryota;Opisthokonta;Metazoa;Eumetazoa;Bilateria;Protostomia;Spiralia;Lophotrochozoa;Mollusca;Bivalvia;Autobranchia;Heteroconchia;Euherodonta;Imparidentia;Venerida;Veneroidea;Veneridae;Mercenaria;Mercenaria mercenaria

UdeM00000027101 6596 182.6 UdeM00000027101 XP\_045203144.1 48.7 193  
95 2 1 192 399 588 4.90E-43 182.6 6596 cellular

organisms;Eukaryota;Opisthokonta;Metazoa;Eumetazoa;Bilateria;Protostomia;Spiralia;Lophotrochozoa;Mollusca;Bivalvia;Autobranchia;Heteroconchia;Euherodonta;Imparidentia;Venerida;Veneroidea;Veneridae;Mercenaria;Mercenaria mercenaria

UdeM00000027102 6573 264.2 UdeM00000027102 XP\_021347189.1 46.3 268  
141 2 133 400 141 405 2.60E-67 264.2 6573 cellular

organisms;Eukaryota;Opisthokonta;Metazoa;Eumetazoa;Bilateria;Protostomia;Spiralia;Lophotrochozoa;Mollusca;Bivalvia;Autobranchia;Pteriomorphia;Pectinida;Pectinoidea;Pectinidae;Mizuhopecten;Mizuhopecten yessoensis

UdeM00000027103 7668 205.3 UdeM00000027103 XP\_030828392.1 33.4 392  
228 11 1 389 125 486 1.40E-49 205.3 7668 cellular

organisms;Eukaryota;Opisthokonta;Metazoa;Eumetazoa;Bilateria;Deuterostomia;Echinodermata;Eleutherozoa;Echinozoa;Echinoidea;Euechinoidea;Echinacea;

Camarodonta;Echinidea;Strongylocentrotidae;Strongylocentrotus;Strongylocentrotus purpuratus

UdeM00000027104 6579 224.9 UdeM00000027104 XP\_033726097.1 42.2 263  
150 2 145 406 99 360 1.80E-55 224.9 6579 cellular

organisms;Eukaryota;Opisthokonta;Metazoa;Eumetazoa;Bilateria;Protostomia;Spiralia;Lophotrochozoa;Mollusca;Bivalvia;Autobranchia;Pteriormorphia;Pectinida;Pectinoidea;Pectinidae;Pecten;Pecten maximus

UdeM00000027105 6573 225.7 UdeM00000027105 XP\_021347144.1 39.7 300  
176 3 111 406 62 360 1.10E-55 225.7 6573 cellular

organisms;Eukaryota;Opisthokonta;Metazoa;Eumetazoa;Bilateria;Protostomia;Spiralia;Lophotrochozoa;Mollusca;Bivalvia;Autobranchia;Pteriormorphia;Pectinida;Pectinoidea;Pectinidae;Mizuhopecten;Mizuhopecten yessoensis

UdeM00000027106 6573 232.6 UdeM00000027106 XP\_021347189.1 40.8 282  
161 4 120 400 129 405 8.50E-58 232.6 6573 cellular

organisms;Eukaryota;Opisthokonta;Metazoa;Eumetazoa;Bilateria;Protostomia;Spiralia;Lophotrochozoa;Mollusca;Bivalvia;Autobranchia;Pteriormorphia;Pectinida;Pectinoidea;Pectinidae;Mizuhopecten;Mizuhopecten yessoensis

UdeM00000027107 225164 218 UdeM00000027107 XP\_009064246.1 42.1  
266 146 6 78 340 40 300 1.80E-53 218 225164

cellular

organisms;Eukaryota;Opisthokonta;Metazoa;Eumetazoa;Bilateria;Protostomia;Spiralia;Lophotrochozoa;Mollusca;Gastropoda;Patellogastropoda;Lottioidea;Lottiidae;Lottia;Lottia gigantea

UdeM00000027108 6596 126.7 UdeM00000027108 XP\_045216087.1 57 86  
35 1 75 160 269 352 2.70E-26 126.7 6596 cellular

organisms;Eukaryota;Opisthokonta;Metazoa;Eumetazoa;Bilateria;Protostomia;Spiralia;Lophotrochozoa;Mollusca;Bivalvia;Autobranchia;Heteroconchia;Euheterodonta;Imparidentia;Venerida;Veneroidea;Veneridae;Mercenaria;Mercenaria mercenaria

UdeM00000027109 6573 231.1 UdeM00000027109 XP\_021347189.1 41.3 288  
161 4 117 400 122 405 2.50E-57 231.1 6573 cellular

organisms;Eukaryota;Opisthokonta;Metazoa;Eumetazoa;Bilateria;Protostomia;Spiralia;Lophotrochozoa;Mollusca;Bivalvia;Autobranchia;Pteriormorphia;Pectinida;Pectinoidea;Pectinidae;Mizuhopecten;Mizuhopecten yessoensis

UdeM00000027110 225164 226.1 UdeM00000027110 XP\_009064246.1 41.7  
266 148 4 143 406 40 300 8.10E-56 226.1 225164

cellular

organisms;Eukaryota;Opisthokonta;Metazoa;Eumetazoa;Bilateria;Protostomia;Spiralia;Lophotrochozoa;Mollusca;Gastropoda;Patellogastropoda;Lottioidea;Lottiidae;Lottia;Lottia gigantea

UdeM00000027111 6596 218.4 UdeM00000027111 XP\_045216087.1 40.8 250  
144 2 1 248 105 352 1.00E-53 218.4 6596 cellular

organisms;Eukaryota;Opisthokonta;Metazoa;Eumetazoa;Bilateria;Protostomia;Spiralia;Lophotrochozoa;Mollusca;Bivalvia;Autobranchia;Heteroconchia;Euheterodonta;Imparidentia;Venerida;Veneroidea;Veneridae;Mercenaria;Mercenaria mercenaria

UdeM00000027112 37653 217.6 UdeM00000027112 XP\_014782122.1 38.6 267  
161 2 142 407 128 392 2.90E-53 217.6 37653 cellular

organisms;Eukaryota;Opisthokonta;Metazoa;Eumetazoa;Bilateria;Protostomia;Spiralia;Lophotrochozoa;Mollusca;Cephalopoda;Coleoidea;Octopodiformes;Octopoda;Incirrata;Octopodidae;Octopus;Octopus bimaculoides

UdeM00000027114 225164 195.7 UdeM00000027114 XP\_009064246.1 44.9  
205 106 4 2 204 101 300 5.90E-47 195.7 225164

cellular

organisms;Eukaryota;Opisthokonta;Metazoa;Eumetazoa;Bilateria;Protostomia; Spiralia;Lophotrochozoa;Mollusca;Gastropoda;Patellogastropoda;Lottioidea; Lottiidae;Lottia;Lottia gigantea

UdeM00000027115 6596 88.2 UdeM00000027115 XP\_045161352.1 57.7 78  
33 0 17 94 24 101 6.30E-15 88.2 6596 cellular

organisms;Eukaryota;Opisthokonta;Metazoa;Eumetazoa;Bilateria;Protostomia; Spiralia;Lophotrochozoa;Mollusca;Bivalvia;Autobranhia;Heteroconchia;Euhe terodonta;Imparidentia;Venerida;Veneroidea;Veneridae;Mercenaria;Mercenari a mercenaria

UdeM00000027116 6573 88.2 UdeM00000027116 XP\_021364052.1 47.6 82  
43 0 3 84 261 342 5.50E-15 88.2 6573 cellular

organisms;Eukaryota;Opisthokonta;Metazoa;Eumetazoa;Bilateria;Protostomia; Spiralia;Lophotrochozoa;Mollusca;Bivalvia;Autobranhia;Pteriormorphia;Pect inida;Pectinoidea;Pectinidae;Mizuhopecten;Mizuhopecten yessoensis

UdeM00000027117 6596 179.5 UdeM00000027117 XP\_045203144.1 41.6 219  
126 2 1 218 362 579 4.80E-42 179.5 6596 cellular

organisms;Eukaryota;Opisthokonta;Metazoa;Eumetazoa;Bilateria;Protostomia; Spiralia;Lophotrochozoa;Mollusca;Bivalvia;Autobranhia;Heteroconchia;Euhe terodonta;Imparidentia;Venerida;Veneroidea;Veneridae;Mercenaria;Mercenari a mercenaria

UdeM00000027118 225164 219.9 UdeM00000027118 XP\_009064246.1 39.5  
266 154 5 116 379 40 300 5.40E-54 219.9 225164  
cellular

organisms;Eukaryota;Opisthokonta;Metazoa;Eumetazoa;Bilateria;Protostomia; Spiralia;Lophotrochozoa;Mollusca;Gastropoda;Patellogastropoda;Lottioidea; Lottiidae;Lottia;Lottia gigantea

UdeM00000027119 6596 217.6 UdeM00000027119 XP\_045216087.1 40.7 263  
151 3 145 404 90 350 2.90E-53 217.6 6596 cellular

organisms;Eukaryota;Opisthokonta;Metazoa;Eumetazoa;Bilateria;Protostomia; Spiralia;Lophotrochozoa;Mollusca;Bivalvia;Autobranhia;Heteroconchia;Euhe terodonta;Imparidentia;Venerida;Veneroidea;Veneridae;Mercenaria;Mercenari a mercenaria

UdeM00000027120 6596 117.5 UdeM00000027120 XP\_045161352.1 49.6 123  
61 1 22 143 24 146 1.40E-23 117.5 6596 cellular

organisms;Eukaryota;Opisthokonta;Metazoa;Eumetazoa;Bilateria;Protostomia; Spiralia;Lophotrochozoa;Mollusca;Bivalvia;Autobranhia;Heteroconchia;Euhe terodonta;Imparidentia;Venerida;Veneroidea;Veneridae;Mercenaria;Mercenari a mercenaria

UdeM00000027121 6596 257.3 UdeM00000027121 XP\_045203144.1 39.7 330  
197 2 4 332 251 579 2.70E-65 257.3 6596 cellular

organisms;Eukaryota;Opisthokonta;Metazoa;Eumetazoa;Bilateria;Protostomia; Spiralia;Lophotrochozoa;Mollusca;Bivalvia;Autobranhia;Heteroconchia;Euhe terodonta;Imparidentia;Venerida;Veneroidea;Veneridae;Mercenaria;Mercenari a mercenaria

UdeM00000027122 225164 223.4 UdeM00000027122 XP\_009064246.1 40.2  
266 152 4 143 406 40 300 5.20E-55 223.4 225164  
cellular

organisms;Eukaryota;Opisthokonta;Metazoa;Eumetazoa;Bilateria;Protostomia; Spiralia;Lophotrochozoa;Mollusca;Gastropoda;Patellogastropoda;Lottioidea; Lottiidae;Lottia;Lottia gigantea

UdeM00000027123 37653 209.1 UdeM00000027123 XP\_014782122.1 38.3 266  
158 3 49 313 132 392 7.90E-51 209.1 37653 cellular

organisms;Eukaryota;Opisthokonta;Metazoa;Eumetazoa;Bilateria;Protostomia;



Spiralia;Lophotrochozoa;Mollusca;Cephalopoda;Coleoidea;Octopodiformes;Octopoda;Incirrata;Octopodidae;Octopus;Octopus bimaculoides

UdeM00000027124 6596 226.5 UdeM00000027124 XP\_045216087.1 42.2 256  
144 2 153 406 99 352 6.20E-56 226.5 6596 cellular  
organisms;Eukaryota;Opisthokonta;Metazoa;Eumetazoa;Bilateria;Protostomia;  
Spiralia;Lophotrochozoa;Mollusca;Bivalvia;Autobranchia;Heteroconchia;Euherodonta;Imparidentia;Venerida;Veneroidea;Veneridae;Mercenaria;Mercenaria mercenaria

UdeM00000027125 37653 231.9 UdeM00000027125 XP\_014782122.1 40.5 279  
163 2 75 352 116 392 1.30E-57 231.9 37653 cellular  
organisms;Eukaryota;Opisthokonta;Metazoa;Eumetazoa;Bilateria;Protostomia;  
Spiralia;Lophotrochozoa;Mollusca;Cephalopoda;Coleoidea;Octopodiformes;Octopoda;Incirrata;Octopodidae;Octopus;Octopus bimaculoides

UdeM00000027126 6596 404.1 UdeM00000027126 XP\_045172620.1 45.5 488  
254 7 1 476 92 579 2.60E-109 404.1 6596 cellular  
organisms;Eukaryota;Opisthokonta;Metazoa;Eumetazoa;Bilateria;Protostomia;  
Spiralia;Lophotrochozoa;Mollusca;Bivalvia;Autobranchia;Heteroconchia;Euherodonta;Imparidentia;Venerida;Veneroidea;Veneridae;Mercenaria;Mercenaria mercenaria

UdeM00000027127 6596 507.7 UdeM00000027127 XP\_045172620.1 46.5 583  
294 9 39 608 2 579 2.10E-140 507.7 6596 cellular  
organisms;Eukaryota;Opisthokonta;Metazoa;Eumetazoa;Bilateria;Protostomia;  
Spiralia;Lophotrochozoa;Mollusca;Bivalvia;Autobranchia;Heteroconchia;Euherodonta;Imparidentia;Venerida;Veneroidea;Veneridae;Mercenaria;Mercenaria mercenaria

UdeM00000027128 6596 500.7 UdeM00000027128 XP\_045172620.1 45.3 585  
305 9 14 589 1 579 2.50E-138 500.7 6596 cellular  
organisms;Eukaryota;Opisthokonta;Metazoa;Eumetazoa;Bilateria;Protostomia;  
Spiralia;Lophotrochozoa;Mollusca;Bivalvia;Autobranchia;Heteroconchia;Euherodonta;Imparidentia;Venerida;Veneroidea;Veneridae;Mercenaria;Mercenaria mercenaria

UdeM00000027129 6596 523.5 UdeM00000027129 XP\_045172620.1 47.9 583  
287 9 148 718 2 579 4.30E-145 523.5 6596 cellular  
organisms;Eukaryota;Opisthokonta;Metazoa;Eumetazoa;Bilateria;Protostomia;  
Spiralia;Lophotrochozoa;Mollusca;Bivalvia;Autobranchia;Heteroconchia;Euherodonta;Imparidentia;Venerida;Veneroidea;Veneridae;Mercenaria;Mercenaria mercenaria

UdeM00000027130 6500 92.8 UdeM00000027130 XP\_012944080.1 40.3 139  
80 3 258 395 306 442 1.10E-15 92.8 6500 cellular  
organisms;Eukaryota;Opisthokonta;Metazoa;Eumetazoa;Bilateria;Protostomia;  
Spiralia;Lophotrochozoa;Mollusca;Gastropoda;Heterobranchia;Euthyneura;Teptipleura;Aplysiida;Aplysioidea;Aplysiidae;Aplysia;Aplysia californica

UdeM00000027131 6596 486.5 UdeM00000027131 XP\_045172620.1 45 584  
304 9 101 672 1 579 5.50E-134 486.5 6596 cellular  
organisms;Eukaryota;Opisthokonta;Metazoa;Eumetazoa;Bilateria;Protostomia;  
Spiralia;Lophotrochozoa;Mollusca;Bivalvia;Autobranchia;Heteroconchia;Euherodonta;Imparidentia;Venerida;Veneroidea;Veneridae;Mercenaria;Mercenaria mercenaria

UdeM00000027132 6596 500 UdeM00000027132 XP\_045172730.1 45.2 586  
301 10 9 578 2 583 4.10E-138 500 6596 cellular  
organisms;Eukaryota;Opisthokonta;Metazoa;Eumetazoa;Bilateria;Protostomia;  
Spiralia;Lophotrochozoa;Mollusca;Bivalvia;Autobranchia;Heteroconchia;Euherodonta;Imparidentia;Venerida;Veneroidea;Veneridae;Mercenaria;Mercenaria mercenaria

UdeM00000027133 6596 464.2 UdeM00000027133 XP\_045172730.1 44.5 559  
 290 10 3 545 29 583 2.40E-127 464.2 6596 cellular  
 organisms;Eukaryota;Opisthokonta;Metazoa;Eumetazoa;Bilateria;Protostomia;  
 Spiralia;Lophotrochozoa;Mollusca;Bivalvia;Autobranchia;Heteroconchia;Euhe-  
 terodonta;Imparidentia;Venerida;Veneroidea;Veneridae;Mercenaria;Mercenari-  
 a mercenaria

UdeM00000027136 225164 98.2 UdeM00000027136 XP\_009058199.1 48.6  
 107 48 2 22 128 1 100 8.00E-18 98.2 225164  
 cellular  
 organisms;Eukaryota;Opisthokonta;Metazoa;Eumetazoa;Bilateria;Protostomia;  
 Spiralia;Lophotrochozoa;Mollusca;Gastropoda;Patellogastropoda;Lottioidea;  
 Lottiidae;Lottia;Lottia gigantea

UdeM00000027137 6579 89.7 UdeM00000027137 XP\_033752673.1 40.2 122  
 67 1 42 163 273 388 3.70E-15 89.7 6579 cellular  
 organisms;Eukaryota;Opisthokonta;Metazoa;Eumetazoa;Bilateria;Protostomia;  
 Spiralia;Lophotrochozoa;Mollusca;Bivalvia;Autobranchia;Pteriormorphia;Pect-  
 inida;Pectinoidea;Pectinidae;Pecten;Pecten maximus

UdeM00000027138 6579 89.7 UdeM00000027138 XP\_033752673.1 40.2 122  
 67 1 21 142 273 388 3.30E-15 89.7 6579 cellular  
 organisms;Eukaryota;Opisthokonta;Metazoa;Eumetazoa;Bilateria;Protostomia;  
 Spiralia;Lophotrochozoa;Mollusca;Bivalvia;Autobranchia;Pteriormorphia;Pect-  
 inida;Pectinoidea;Pectinidae;Pecten;Pecten maximus

UdeM00000027139 6579 118.6 UdeM00000027139 XP\_033752673.1 70 70  
 21 0 1 70 582 651 3.20E-24 118.6 6579 cellular  
 organisms;Eukaryota;Opisthokonta;Metazoa;Eumetazoa;Bilateria;Protostomia;  
 Spiralia;Lophotrochozoa;Mollusca;Bivalvia;Autobranchia;Pteriormorphia;Pect-  
 inida;Pectinoidea;Pectinidae;Pecten;Pecten maximus

UdeM00000027140 225164 117.5 UdeM00000027140 XP\_009058200.1 48.1  
 108 56 0 4 111 108 215 1.10E-23 117.5 225164  
 cellular  
 organisms;Eukaryota;Opisthokonta;Metazoa;Eumetazoa;Bilateria;Protostomia;  
 Spiralia;Lophotrochozoa;Mollusca;Gastropoda;Patellogastropoda;Lottioidea;  
 Lottiidae;Lottia;Lottia gigantea

UdeM00000027141 7604 137.5 UdeM00000027141 XP\_033641066.1 66.3 92  
 31 0 1 92 155 246 8.70E-30 137.5 7604 cellular  
 organisms;Eukaryota;Opisthokonta;Metazoa;Eumetazoa;Bilateria;Deuterostomi-  
 a;Echinodermata;Eleutherozoa;Asterozoa;Asteroidea;Forcipulatacea;Forcipul-  
 atida;Asteroiidae;Asteroidea;Asteroidea rubens

UdeM00000027142 7741 123.6 UdeM00000027142 XP\_019614484.1 26.2 381  
 229 13 5 368 3 348 5.70E-25 123.6 7741 cellular  
 organisms;Eukaryota;Opisthokonta;Metazoa;Eumetazoa;Bilateria;Deuterostomi-  
 a;Chordata;Cephalochordata;Leptocardii;Amphioxiformes;Branchiostomidae;Br-  
 anchiostoma;Branchiostoma belcheri

UdeM00000027143 6565 67.4 UdeM00000027143 XP\_022298930.1 36.6 112  
 55 2 2 113 533 628 1.40E-08 67.4 6565 cellular  
 organisms;Eukaryota;Opisthokonta;Metazoa;Eumetazoa;Bilateria;Protostomia;  
 Spiralia;Lophotrochozoa;Mollusca;Bivalvia;Autobranchia;Pteriormorphia;Ostr-  
 eida;Ostreidae;Crassostrea;Crassostrea virginica

UdeM00000027144 72036 313.5 UdeM00000027144 XP\_040576246.1 40 462  
 218 9 9 419 8 461 4.00E-82 313.5 72036 cellular  
 organisms;Eukaryota;Opisthokonta;Metazoa;Eumetazoa;Bilateria;Protostomia;  
 Ecdysozoa;Panarthropoda;Arthropoda;Mandibulata;Pancrustacea;Crustacea;Mul-  
 ticrustacea;Hexanauplia;Copepoda;Neocopepoda;Podoplea;Siphonostomatoida;C-  
 aligidae;Lepeophtheirus;Lepeophtheirus salmonis

UdeM00000027145 6596 124 UdeM00000027145 XP\_045193293.1 26.6 346  
 184 7 3 309 16 330 8.60E-25 124 6596 cellular  
 organisms;Eukaryota;Opisthokonta;Metazoa;Eumetazoa;Bilateria;Protostomia;  
 Spiralia;Lophotrochozoa;Mollusca;Bivalvia;Autobranhia;Heteroconchia;Euhe  
 terodonta;Imparidentia;Venerida;Veneroidea;Veneridae;Mercenaria;Mercenari  
 a mercenaria  
 UdeM00000027146 6596 485.7 UdeM00000027146 XP\_045211417.1 54.5 415  
 188 1 11 424 19 433 5.90E-134 485.7 6596 cellular  
 organisms;Eukaryota;Opisthokonta;Metazoa;Eumetazoa;Bilateria;Protostomia;  
 Spiralia;Lophotrochozoa;Mollusca;Bivalvia;Autobranhia;Heteroconchia;Euhe  
 terodonta;Imparidentia;Venerida;Veneroidea;Veneridae;Mercenaria;Mercenari  
 a mercenaria  
 UdeM00000027149 6565 577 UdeM00000027149 XP\_022326988.1 30.3 1165  
 705 24 420 1548 78 1171 1.20E-160 577 6565 cellular  
 organisms;Eukaryota;Opisthokonta;Metazoa;Eumetazoa;Bilateria;Protostomia;  
 Spiralia;Lophotrochozoa;Mollusca;Bivalvia;Autobranhia;Pteriormorphia;Ostr  
 eida;Ostreioidea;Ostreidae;Crassostrea;Crassostrea virginica  
 UdeM00000027148 6565 577 UdeM00000027148 XP\_022326988.1 30.3 1165  
 705 24 420 1548 78 1171 1.20E-160 577 6565 cellular  
 organisms;Eukaryota;Opisthokonta;Metazoa;Eumetazoa;Bilateria;Protostomia;  
 Spiralia;Lophotrochozoa;Mollusca;Bivalvia;Autobranhia;Pteriormorphia;Ostr  
 eida;Ostreioidea;Ostreidae;Crassostrea;Crassostrea virginica  
 UdeM00000027150 29159 432.6 UdeM00000027150 XP\_011412220.2 30.4 950  
 562 23 1 871 161 1090 1.40E-117 432.6 29159 cellular  
 organisms;Eukaryota;Opisthokonta;Metazoa;Eumetazoa;Bilateria;Protostomia;  
 Spiralia;Lophotrochozoa;Mollusca;Bivalvia;Autobranhia;Pteriormorphia;Ostr  
 eida;Ostreioidea;Ostreidae;Crassostrea;Crassostrea gigas  
 UdeM00000027151 6565 177.6 UdeM00000027151 XP\_022325431.1 29.7 370  
 186 12 25 335 997 1351 3.50E-41 177.6 6565 cellular  
 organisms;Eukaryota;Opisthokonta;Metazoa;Eumetazoa;Bilateria;Protostomia;  
 Spiralia;Lophotrochozoa;Mollusca;Bivalvia;Autobranhia;Pteriormorphia;Ostr  
 eida;Ostreioidea;Ostreidae;Crassostrea;Crassostrea virginica  
 UdeM00000027153 6573 108.2 UdeM00000027153 XP\_021367233.1 37.3 153  
 84 4 2 147 860 1007 1.70E-20 108.2 6573 cellular  
 organisms;Eukaryota;Opisthokonta;Metazoa;Eumetazoa;Bilateria;Protostomia;  
 Spiralia;Lophotrochozoa;Mollusca;Bivalvia;Autobranhia;Pteriormorphia;Pect  
 inida;Pectinoidea;Pectinidae;Mizuhopecten;Mizuhopecten yessoensis  
 UdeM00000027154 6565 377.9 UdeM00000027154 XP\_022322604.1 24.8 1189  
 703 27 1 1037 547 1696 4.20E-101 377.9 6565 cellular  
 organisms;Eukaryota;Opisthokonta;Metazoa;Eumetazoa;Bilateria;Protostomia;  
 Spiralia;Lophotrochozoa;Mollusca;Bivalvia;Autobranhia;Pteriormorphia;Ostr  
 eida;Ostreioidea;Ostreidae;Crassostrea;Crassostrea virginica  
 UdeM00000027155 6500 241.1 UdeM00000027155 XP\_005092247.1 55.7 210  
 84 7 6 212 9 212 2.00E-60 241.1 6500 cellular  
 organisms;Eukaryota;Opisthokonta;Metazoa;Eumetazoa;Bilateria;Protostomia;  
 Spiralia;Lophotrochozoa;Mollusca;Gastropoda;Heterobranhia;Euthyneura;Tec  
 tipleura;Aplysiida;Aplysioidea;Aplysiidae;Aplysia;Aplysia californica  
 UdeM00000027156 7574 238.4 UdeM00000027156 XP\_013418191.1 53.3 214  
 92 4 5 214 21 230 1.20E-59 238.4 7574 cellular  
 organisms;Eukaryota;Opisthokonta;Metazoa;Eumetazoa;Bilateria;Protostomia;  
 Spiralia;Lophotrochozoa;Brachiopoda;Linguliformea;Lingulata;Lingulida;Lin  
 guloidea;Lingulidae;Lingula;Lingula anatina  
 UdeM00000027157 50390 285 UdeM00000027157 XP\_028142380.1 51.9 235  
 111 1 29 263 1 233 9.70E-74 285 50390 cellular

organisms;Eukaryota;Opisthokonta;Metazoa;Eumetazoa;Bilateria;Protostomia;Ecdysozoa;Panarthropoda;Arthropoda;Mandibulata;Pancrustacea;Hexapoda;Insecta;Dicondylia;Pterygota;Neoptera;Endopterygota;Coleoptera;Polyphaga;Cucujiformia;Chrysomeloidea;Chrysomelidae;Galerucinae;Luperini;Diabroticina;Diabroticites;Diabrotica;Diabrotica virgifera;Diabrotica virgifera virgifera

UdeM00000027158 6596 248.1 UdeM00000027158 XP\_045158949.1 30.3 613  
321 16 13 533 7 605 2.60E-62 248.1 6596 cellular

organisms;Eukaryota;Opisthokonta;Metazoa;Eumetazoa;Bilateria;Protostomia;Spiralia;Lophotrochozoa;Mollusca;Bivalvia;Autobranchia;Heteroconchia;Euheterodonta;Imparidentia;Venerida;Veneroidea;Veneridae;Mercenaria;Mercenaria mercenaria

UdeM00000027159 1735272 59.3 UdeM00000027159 XP\_041350990.1 43.5  
62 35 0 178 239 461 522 7.70E-06 59.3 1735272  
cellular

organisms;Eukaryota;Opisthokonta;Metazoa;Eumetazoa;Bilateria;Protostomia;Spiralia;Lophotrochozoa;Mollusca;Gastropoda;Neomphalina;Neomphaloidea;Peltospiridae;Gigantopelta;Gigantopelta aegis

UdeM00000027160 6579 255.8 UdeM00000027160 XP\_033752164.1 40.8 368  
190 7 2 352 102 458 8.30E-65 255.8 6579 cellular

organisms;Eukaryota;Opisthokonta;Metazoa;Eumetazoa;Bilateria;Protostomia;Spiralia;Lophotrochozoa;Mollusca;Bivalvia;Autobranchia;Pteriormorphia;Pectinida;Pectinoidea;Pectinidae;Pecten;Pecten maximus

UdeM00000027161 6596 235.3 UdeM00000027161 XP\_045158949.1 29.7 616  
374 19 11 582 5 605 1.90E-58 235.3 6596 cellular

organisms;Eukaryota;Opisthokonta;Metazoa;Eumetazoa;Bilateria;Protostomia;Spiralia;Lophotrochozoa;Mollusca;Bivalvia;Autobranchia;Heteroconchia;Euheterodonta;Imparidentia;Venerida;Veneroidea;Veneridae;Mercenaria;Mercenaria mercenaria

UdeM00000027162 6596 393.7 UdeM00000027162 XP\_045205256.1 47.3 429  
215 5 1 424 1 423 3.10E-106 393.7 6596 cellular

organisms;Eukaryota;Opisthokonta;Metazoa;Eumetazoa;Bilateria;Protostomia;Spiralia;Lophotrochozoa;Mollusca;Bivalvia;Autobranchia;Heteroconchia;Euheterodonta;Imparidentia;Venerida;Veneroidea;Veneridae;Mercenaria;Mercenaria mercenaria

UdeM00000027165 6596 1281.2 UdeM00000027165 XP\_045201520.1 70.1  
910 227 8 7 876 62 966 0.00E+00 1281.2 6596  
cellular

organisms;Eukaryota;Opisthokonta;Metazoa;Eumetazoa;Bilateria;Protostomia;Spiralia;Lophotrochozoa;Mollusca;Bivalvia;Autobranchia;Heteroconchia;Euheterodonta;Imparidentia;Venerida;Veneroidea;Veneridae;Mercenaria;Mercenaria mercenaria

UdeM00000027166 2607531 65.1 UdeM00000027166 XP\_036368691.1 53.8  
65 27 2 1 62 1 65 7.50E-08 65.1 2607531  
cellular

organisms;Eukaryota;Opisthokonta;Metazoa;Eumetazoa;Bilateria;Protostomia;Spiralia;Lophotrochozoa;Mollusca;Cephalopoda;Coleoidea;Octopodiformes;Octopoda;Incirrata;Octopodidae;Octopus;Octopus sinensis

UdeM00000027168 29159 1092.8 UdeM00000027168 NP\_001292291.1 84.4  
662 95 3 5 662 4 661 0.00E+00 1092.8  
29159 cellular

organisms;Eukaryota;Opisthokonta;Metazoa;Eumetazoa;Bilateria;Protostomia;Spiralia;Lophotrochozoa;Mollusca;Bivalvia;Autobranchia;Pteriormorphia;Ostreida;Ostreoidea;Ostreidae;Crassostrea;Crassostrea gigas

UdeM00000027167 29159 1089.7 UdeM00000027167 NP\_001292291.1 84.2  
 660 100 2 7 664 4 661 0.00E+00 1089.7  
 29159 cellular  
 organisms;Eukaryota;Opisthokonta;Metazoa;Eumetazoa;Bilateria;Protostomia;  
 Spiralia;Lophotrochozoa;Mollusca;Bivalvia;Autobranhia;Pteriormorphia;Ostr  
 eida;Ostreoidea;Ostreidae;Crassostrea;Crassostrea gigas  
 UdeM00000027169 29159 441.8 UdeM00000027169 XP\_034302714.1 85.1 268  
 38 1 1 266 1 268 6.10E-121 441.8 29159 cellular  
 organisms;Eukaryota;Opisthokonta;Metazoa;Eumetazoa;Bilateria;Protostomia;  
 Spiralia;Lophotrochozoa;Mollusca;Bivalvia;Autobranhia;Pteriormorphia;Ostr  
 eida;Ostreoidea;Ostreidae;Crassostrea;Crassostrea gigas  
 UdeM00000027170 6596 215.7 UdeM00000027170 XP\_045177206.1 81.3 134  
 25 0 9 142 6 139 3.80E-53 215.7 6596 cellular  
 organisms;Eukaryota;Opisthokonta;Metazoa;Eumetazoa;Bilateria;Protostomia;  
 Spiralia;Lophotrochozoa;Mollusca;Bivalvia;Autobranhia;Heteroconchia;Euhe  
 terodonta;Imparidentia;Venerida;Veneroidea;Veneridae;Mercenaria;Mercenari  
 a mercenaria  
 UdeM00000027171 6565 765.4 UdeM00000027171 XP\_022324240.1 72.7 479  
 131 0 1 479 1 479 4.40E-218 765.4 6565 cellular  
 organisms;Eukaryota;Opisthokonta;Metazoa;Eumetazoa;Bilateria;Protostomia;  
 Spiralia;Lophotrochozoa;Mollusca;Bivalvia;Autobranhia;Pteriormorphia;Ostr  
 eida;Ostreoidea;Ostreidae;Crassostrea;Crassostrea virginica  
 UdeM00000027172 1735272 413.7 UdeM00000027172 XP\_041370676.1 44.5  
 526 279 6 3 518 29 551 3.50E-112 413.7 1735272  
 cellular  
 organisms;Eukaryota;Opisthokonta;Metazoa;Eumetazoa;Bilateria;Protostomia;  
 Spiralia;Lophotrochozoa;Mollusca;Gastropoda;Neomphalina;Neomphaloidea;Pel  
 tospiridae;Gigantopelta;Gigantopelta aegis  
 UdeM00000027173 6596 643.7 UdeM00000027173 XP\_045200864.1 29.3 1500  
 986 32 5 1479 81 1530 5.90E-181 643.7 6596 cellular  
 organisms;Eukaryota;Opisthokonta;Metazoa;Eumetazoa;Bilateria;Protostomia;  
 Spiralia;Lophotrochozoa;Mollusca;Bivalvia;Autobranhia;Heteroconchia;Euhe  
 terodonta;Imparidentia;Venerida;Veneroidea;Veneridae;Mercenaria;Mercenari  
 a mercenaria  
 UdeM00000027174 6596 348.2 UdeM00000027174 XP\_045180516.1 42.2 365  
 191 4 12 373 78 425 1.30E-92 348.2 6596 cellular  
 organisms;Eukaryota;Opisthokonta;Metazoa;Eumetazoa;Bilateria;Protostomia;  
 Spiralia;Lophotrochozoa;Mollusca;Bivalvia;Autobranhia;Heteroconchia;Euhe  
 terodonta;Imparidentia;Venerida;Veneroidea;Veneridae;Mercenaria;Mercenari  
 a mercenaria  
 UdeM00000027176 6596 144.8 UdeM00000027176 XP\_045200848.1 25.7 440  
 234 10 36 386 291 726 2.50E-31 144.8 6596 cellular  
 organisms;Eukaryota;Opisthokonta;Metazoa;Eumetazoa;Bilateria;Protostomia;  
 Spiralia;Lophotrochozoa;Mollusca;Bivalvia;Autobranhia;Heteroconchia;Euhe  
 terodonta;Imparidentia;Venerida;Veneroidea;Veneridae;Mercenaria;Mercenari  
 a mercenaria  
 UdeM00000027177 6565 387.5 UdeM00000027177 XP\_022330019.1 42.3 423  
 228 5 28 442 4 418 2.30E-104 387.5 6565 cellular  
 organisms;Eukaryota;Opisthokonta;Metazoa;Eumetazoa;Bilateria;Protostomia;  
 Spiralia;Lophotrochozoa;Mollusca;Bivalvia;Autobranhia;Pteriormorphia;Ostr  
 eida;Ostreoidea;Ostreidae;Crassostrea;Crassostrea virginica  
 UdeM00000027178 6565 386.7 UdeM00000027178 XP\_022330019.1 42.3 423  
 228 5 8 422 4 418 3.70E-104 386.7 6565 cellular  
 organisms;Eukaryota;Opisthokonta;Metazoa;Eumetazoa;Bilateria;Protostomia;

Spiralia;Lophotrochozoa;Mollusca;Bivalvia;Autobranchia;Pteriormorphia;Ostr  
eida;Ostreoidea;Ostreidae;Crassostrea;Crassostrea virginica  
UdeM00000027179 6565 516.2 UdeM00000027179 XP\_022333471.1 35.2 835  
492 20 5 814 13 823 7.90E-143 516.2 6565 cellular  
organisms;Eukaryota;Opisthokonta;Metazoa;Eumetazoa;Bilateria;Protostomia;  
Spiralia;Lophotrochozoa;Mollusca;Bivalvia;Autobranchia;Pteriormorphia;Ostr  
eida;Ostreoidea;Ostreidae;Crassostrea;Crassostrea virginica  
UdeM00000027180 6596 460.3 UdeM00000027180 XP\_045180513.1 39.7 599  
339 11 30 613 456 1047 4.30E-126 460.3 6596 cellular  
organisms;Eukaryota;Opisthokonta;Metazoa;Eumetazoa;Bilateria;Protostomia;  
Spiralia;Lophotrochozoa;Mollusca;Bivalvia;Autobranchia;Heteroconchia;Euhe  
terodonta;Imparidentia;Venerida;Veneroidea;Veneridae;Mercenaria;Mercenari  
a mercenaria  
UdeM00000027183 6596 159.5 UdeM00000027183 XP\_045161051.1 42.8 173  
99 0 190 362 226 398 8.50E-36 159.5 6596 cellular  
organisms;Eukaryota;Opisthokonta;Metazoa;Eumetazoa;Bilateria;Protostomia;  
Spiralia;Lophotrochozoa;Mollusca;Bivalvia;Autobranchia;Heteroconchia;Euhe  
terodonta;Imparidentia;Venerida;Veneroidea;Veneridae;Mercenaria;Mercenari  
a mercenaria  
UdeM00000027184 6596 223.4 UdeM00000027184 XP\_045161905.1 55.1 185  
82 1 1 184 1 185 2.60E-55 223.4 6596 cellular  
organisms;Eukaryota;Opisthokonta;Metazoa;Eumetazoa;Bilateria;Protostomia;  
Spiralia;Lophotrochozoa;Mollusca;Bivalvia;Autobranchia;Heteroconchia;Euhe  
terodonta;Imparidentia;Venerida;Veneroidea;Veneridae;Mercenaria;Mercenari  
a mercenaria  
UdeM00000027185 1735272 113.2 UdeM00000027185 XP\_041379412.1 37.1  
194 116 4 15 207 11 199 8.00E-22 113.2 1735272  
cellular  
organisms;Eukaryota;Opisthokonta;Metazoa;Eumetazoa;Bilateria;Protostomia;  
Spiralia;Lophotrochozoa;Mollusca;Gastropoda;Neomphalina;Neomphaloidea;Pel  
tospiridae;Gigantopelta;Gigantopelta aegis  
UdeM00000027186 6596 112.8 UdeM00000027186 XP\_045190753.1 34.9 189  
110 4 12 196 417 596 4.80E-22 112.8 6596 cellular  
organisms;Eukaryota;Opisthokonta;Metazoa;Eumetazoa;Bilateria;Protostomia;  
Spiralia;Lophotrochozoa;Mollusca;Bivalvia;Autobranchia;Heteroconchia;Euhe  
terodonta;Imparidentia;Venerida;Veneroidea;Veneridae;Mercenaria;Mercenari  
a mercenaria  
UdeM00000027187 6596 643.3 UdeM00000027187 XP\_045200864.1 29.3 1469  
969 31 78 1515 81 1511 7.90E-181 643.3 6596 cellular  
organisms;Eukaryota;Opisthokonta;Metazoa;Eumetazoa;Bilateria;Protostomia;  
Spiralia;Lophotrochozoa;Mollusca;Bivalvia;Autobranchia;Heteroconchia;Euhe  
terodonta;Imparidentia;Venerida;Veneroidea;Veneridae;Mercenaria;Mercenari  
a mercenaria  
UdeM00000027188 6573 268.1 UdeM00000027188 XP\_021348029.1 33.6 547  
330 16 8 541 278 804 2.50E-68 268.1 6573 cellular  
organisms;Eukaryota;Opisthokonta;Metazoa;Eumetazoa;Bilateria;Protostomia;  
Spiralia;Lophotrochozoa;Mollusca;Bivalvia;Autobranchia;Pteriormorphia;Pect  
inida;Pectinoidea;Pectinidae;Mizuhopecten;Mizuhopecten yessoensis  
UdeM00000027189 6596 150.2 UdeM00000027189 XP\_045180516.1 51.9 135  
60 2 2 133 171 303 2.30E-33 150.2 6596 cellular  
organisms;Eukaryota;Opisthokonta;Metazoa;Eumetazoa;Bilateria;Protostomia;  
Spiralia;Lophotrochozoa;Mollusca;Bivalvia;Autobranchia;Heteroconchia;Euhe  
terodonta;Imparidentia;Venerida;Veneroidea;Veneridae;Mercenaria;Mercenari  
a mercenaria

UdeM00000027190 6596 355.1 UdeM00000027190 XP\_045164611.1 44.6 388  
 212 3 164 550 77 462 1.60E-94 355.1 6596 cellular  
 organisms;Eukaryota;Opisthokonta;Metazoa;Eumetazoa;Bilateria;Protostomia;  
 Spiralia;Lophotrochozoa;Mollusca;Bivalvia;Autobranchia;Heteroconchia;Euhe  
 terodonta;Imparidentia;Venerida;Veneroidea;Veneridae;Mercenaria;Mercenari  
 a mercenaria  
 UdeM00000027191 6596 834.3 UdeM00000027191 XP\_045190753.1 68.4 605  
 176 4 53 653 6 599 1.00E-238 834.3 6596 cellular  
 organisms;Eukaryota;Opisthokonta;Metazoa;Eumetazoa;Bilateria;Protostomia;  
 Spiralia;Lophotrochozoa;Mollusca;Bivalvia;Autobranchia;Heteroconchia;Euhe  
 terodonta;Imparidentia;Venerida;Veneroidea;Veneridae;Mercenaria;Mercenari  
 a mercenaria  
 UdeM00000027192 6596 839.3 UdeM00000027192 XP\_045190753.1 68.6 605  
 175 4 53 653 6 599 3.20E-240 839.3 6596 cellular  
 organisms;Eukaryota;Opisthokonta;Metazoa;Eumetazoa;Bilateria;Protostomia;  
 Spiralia;Lophotrochozoa;Mollusca;Bivalvia;Autobranchia;Heteroconchia;Euhe  
 terodonta;Imparidentia;Venerida;Veneroidea;Veneridae;Mercenaria;Mercenari  
 a mercenaria  
 UdeM00000027193 6565 125.2 UdeM00000027193 XP\_022333471.1 46.7 122  
 65 0 37 158 702 823 8.00E-26 125.2 6565 cellular  
 organisms;Eukaryota;Opisthokonta;Metazoa;Eumetazoa;Bilateria;Protostomia;  
 Spiralia;Lophotrochozoa;Mollusca;Bivalvia;Autobranchia;Pteriormorphia;Ostr  
 eida;Ostreoidea;Ostreidae;Crassostrea;Crassostrea virginica  
 UdeM00000027194 6565 195.7 UdeM00000027194 XP\_022333471.1 26.2 469  
 202 6 27 351 157 625 1.10E-46 195.7 6565 cellular  
 organisms;Eukaryota;Opisthokonta;Metazoa;Eumetazoa;Bilateria;Protostomia;  
 Spiralia;Lophotrochozoa;Mollusca;Bivalvia;Autobranchia;Pteriormorphia;Ostr  
 eida;Ostreoidea;Ostreidae;Crassostrea;Crassostrea virginica  
 UdeM00000027195 6596 193 UdeM00000027195 XP\_045209807.1 50.6 174  
 86 0 6 179 6 179 3.80E-46 193 6596 cellular  
 organisms;Eukaryota;Opisthokonta;Metazoa;Eumetazoa;Bilateria;Protostomia;  
 Spiralia;Lophotrochozoa;Mollusca;Bivalvia;Autobranchia;Heteroconchia;Euhe  
 terodonta;Imparidentia;Venerida;Veneroidea;Veneridae;Mercenaria;Mercenari  
 a mercenaria  
 UdeM00000027196 6596 224.2 UdeM00000027196 XP\_045209807.1 57.1 182  
 73 1 1 182 1 177 1.60E-55 224.2 6596 cellular  
 organisms;Eukaryota;Opisthokonta;Metazoa;Eumetazoa;Bilateria;Protostomia;  
 Spiralia;Lophotrochozoa;Mollusca;Bivalvia;Autobranchia;Heteroconchia;Euhe  
 terodonta;Imparidentia;Venerida;Veneroidea;Veneridae;Mercenaria;Mercenari  
 a mercenaria  
 UdeM00000027197 6565 71.2 UdeM00000027197 XP\_022341899.1 38.8 98  
 58 2 8 103 63 160 9.80E-10 71.2 6565 cellular  
 organisms;Eukaryota;Opisthokonta;Metazoa;Eumetazoa;Bilateria;Protostomia;  
 Spiralia;Lophotrochozoa;Mollusca;Bivalvia;Autobranchia;Pteriormorphia;Ostr  
 eida;Ostreoidea;Ostreidae;Crassostrea;Crassostrea virginica  
 UdeM00000027198 6596 208.4 UdeM00000027198 XP\_045209807.1 56.4 165  
 72 0 1 165 1 165 7.90E-51 208.4 6596 cellular  
 organisms;Eukaryota;Opisthokonta;Metazoa;Eumetazoa;Bilateria;Protostomia;  
 Spiralia;Lophotrochozoa;Mollusca;Bivalvia;Autobranchia;Heteroconchia;Euhe  
 terodonta;Imparidentia;Venerida;Veneroidea;Veneridae;Mercenaria;Mercenari  
 a mercenaria  
 UdeM00000027199 6573 208.4 UdeM00000027199 XP\_021351165.1 59.7 159  
 64 0 6 164 8 166 7.80E-51 208.4 6573 cellular  
 organisms;Eukaryota;Opisthokonta;Metazoa;Eumetazoa;Bilateria;Protostomia;

Spiralia; Lophotrochozoa; Mollusca; Bivalvia; Autobranchia; Pteriomorpha; Pectinida; Pectinoidea; Pectinidae; Mizuhopecten; Mizuhopecten yessoensis

UdeM00000027200 6596 764.6 UdeM00000027200 XP\_045177588.1 60.5 640  
242 3 2 632 31 668 9.80E-218 764.6 6596 cellular  
organisms; Eukaryota; Opisthokonta; Metazoa; Eumetazoa; Bilateria; Protostomia; Spiralia; Lophotrochozoa; Mollusca; Bivalvia; Autobranchia; Heteroconchia; Euheterodonta; Imparidentia; Venerida; Veneroidea; Veneridae; Mercenaria; Mercenaria mercenaria

UdeM00000027201 6596 776.9 UdeM00000027201 XP\_045177588.1 58.8 679  
231 3 2 672 31 668 2.00E-221 776.9 6596 cellular  
organisms; Eukaryota; Opisthokonta; Metazoa; Eumetazoa; Bilateria; Protostomia; Spiralia; Lophotrochozoa; Mollusca; Bivalvia; Autobranchia; Heteroconchia; Euheterodonta; Imparidentia; Venerida; Veneroidea; Veneridae; Mercenaria; Mercenaria mercenaria

UdeM00000027202 6596 605.9 UdeM00000027202 XP\_045188727.1 67.3 446  
141 3 67 510 69 511 4.70E-170 605.9 6596 cellular  
organisms; Eukaryota; Opisthokonta; Metazoa; Eumetazoa; Bilateria; Protostomia; Spiralia; Lophotrochozoa; Mollusca; Bivalvia; Autobranchia; Heteroconchia; Euheterodonta; Imparidentia; Venerida; Veneroidea; Veneridae; Mercenaria; Mercenaria mercenaria

UdeM00000027203 6596 589 UdeM00000027203 XP\_045190619.1 85 327  
49 0 1 327 1 327 3.80E-165 589 6596 cellular  
organisms; Eukaryota; Opisthokonta; Metazoa; Eumetazoa; Bilateria; Protostomia; Spiralia; Lophotrochozoa; Mollusca; Bivalvia; Autobranchia; Heteroconchia; Euheterodonta; Imparidentia; Venerida; Veneroidea; Veneridae; Mercenaria; Mercenaria mercenaria

UdeM00000027204 6596 623.6 UdeM00000027204 XP\_045200864.1 30.7 1279  
828 29 92 1340 138 1388 6.70E-175 623.6 6596 cellular  
organisms; Eukaryota; Opisthokonta; Metazoa; Eumetazoa; Bilateria; Protostomia; Spiralia; Lophotrochozoa; Mollusca; Bivalvia; Autobranchia; Heteroconchia; Euheterodonta; Imparidentia; Venerida; Veneroidea; Veneridae; Mercenaria; Mercenaria mercenaria

UdeM00000027205 6596 809.3 UdeM00000027205 XP\_045200908.1 34.9 1357  
812 33 134 1445 31 1360 8.20E-231 809.3 6596 cellular  
organisms; Eukaryota; Opisthokonta; Metazoa; Eumetazoa; Bilateria; Protostomia; Spiralia; Lophotrochozoa; Mollusca; Bivalvia; Autobranchia; Heteroconchia; Euheterodonta; Imparidentia; Venerida; Veneroidea; Veneridae; Mercenaria; Mercenaria mercenaria

UdeM00000027206 6565 379.4 UdeM00000027206 XP\_022319993.1 43.9 440  
229 7 236 673 56 479 9.50E-102 379.4 6565 cellular  
organisms; Eukaryota; Opisthokonta; Metazoa; Eumetazoa; Bilateria; Protostomia; Spiralia; Lophotrochozoa; Mollusca; Bivalvia; Autobranchia; Pteriomorpha; Ostreida; Ostreioidea; Ostreidae; Crassostrea; Crassostrea virginica

UdeM00000027207 6596 181 UdeM00000027207 XP\_045185004.1 36.8 223  
89 1 19 241 95 265 2.10E-42 181 6596 cellular  
organisms; Eukaryota; Opisthokonta; Metazoa; Eumetazoa; Bilateria; Protostomia; Spiralia; Lophotrochozoa; Mollusca; Bivalvia; Autobranchia; Heteroconchia; Euheterodonta; Imparidentia; Venerida; Veneroidea; Veneridae; Mercenaria; Mercenaria mercenaria

UdeM00000027208 29159 158.7 UdeM00000027208 XP\_011441056.2 38.9 211  
107 3 19 221 804 1000 8.60E-36 158.7 29159 cellular  
organisms; Eukaryota; Opisthokonta; Metazoa; Eumetazoa; Bilateria; Protostomia; Spiralia; Lophotrochozoa; Mollusca; Bivalvia; Autobranchia; Pteriomorpha; Ostreida; Ostreioidea; Ostreidae; Crassostrea; Crassostrea gigas



UdeM00000027209 6596 270.4 UdeM00000027209 XP\_045179772.1 34.4 410  
 205 4 1 410 31 376 4.20E-69 270.4 6596 cellular  
 organisms;Eukaryota;Opisthokonta;Metazoa;Eumetazoa;Bilateria;Protostomia;  
 Spiralia;Lophotrochozoa;Mollusca;Bivalvia;Autobranchia;Heteroconchia;Euhe  
 terodonta;Imparidentia;Venerida;Veneroidea;Veneridae;Mercenaria;Mercenari  
 a mercenaria  
 UdeM00000027210 7739 80.9 UdeM00000027210 XP\_035657358.1 50 80  
 33 2 3 76 551 629 7.90E-13 80.9 7739 cellular  
 organisms;Eukaryota;Opisthokonta;Metazoa;Eumetazoa;Bilateria;Deuterostomi  
 a;Chordata;Cephalochordata;Leptocardii;Amphioxiformes;Branchiostomidae;Br  
 anchiostoma;Branchiostoma floridae  
 UdeM00000027211 6596 137.1 UdeM00000027211 XP\_045185004.1 38.7 173  
 95 4 25 189 95 264 2.90E-29 137.1 6596 cellular  
 organisms;Eukaryota;Opisthokonta;Metazoa;Eumetazoa;Bilateria;Protostomia;  
 Spiralia;Lophotrochozoa;Mollusca;Bivalvia;Autobranchia;Heteroconchia;Euhe  
 terodonta;Imparidentia;Venerida;Veneroidea;Veneridae;Mercenaria;Mercenari  
 a mercenaria  
 UdeM00000027212 7739 136.3 UdeM00000027212 XP\_035657358.1 50.7 136  
 58 3 3 132 551 683 2.80E-29 136.3 7739 cellular  
 organisms;Eukaryota;Opisthokonta;Metazoa;Eumetazoa;Bilateria;Deuterostomi  
 a;Chordata;Cephalochordata;Leptocardii;Amphioxiformes;Branchiostomidae;Br  
 anchiostoma;Branchiostoma floridae  
 UdeM00000027213 6596 233.4 UdeM00000027213 XP\_045179772.1 35.6 371  
 179 3 7 377 66 376 5.20E-58 233.4 6596 cellular  
 organisms;Eukaryota;Opisthokonta;Metazoa;Eumetazoa;Bilateria;Protostomia;  
 Spiralia;Lophotrochozoa;Mollusca;Bivalvia;Autobranchia;Heteroconchia;Euhe  
 terodonta;Imparidentia;Venerida;Veneroidea;Veneridae;Mercenaria;Mercenari  
 a mercenaria  
 UdeM00000027214 6565 115.9 UdeM00000027214 XP\_022292890.1 42.6 136  
 68 2 3 132 91 222 3.90E-23 115.9 6565 cellular  
 organisms;Eukaryota;Opisthokonta;Metazoa;Eumetazoa;Bilateria;Protostomia;  
 Spiralia;Lophotrochozoa;Mollusca;Bivalvia;Autobranchia;Pteriormorphia;Ostr  
 eida;Ostreoidea;Ostreidae;Crassostrea;Crassostrea virginica  
 UdeM00000027215 6565 289.7 UdeM00000027215 XP\_022330900.1 38.2 516  
 259 13 1 483 1 489 7.10E-75 289.7 6565 cellular  
 organisms;Eukaryota;Opisthokonta;Metazoa;Eumetazoa;Bilateria;Protostomia;  
 Spiralia;Lophotrochozoa;Mollusca;Bivalvia;Autobranchia;Pteriormorphia;Ostr  
 eida;Ostreoidea;Ostreidae;Crassostrea;Crassostrea virginica  
 UdeM00000027216 6573 264.2 UdeM00000027216 XP\_021351637.1 65 183  
 64 0 230 412 1 183 2.70E-67 264.2 6573 cellular  
 organisms;Eukaryota;Opisthokonta;Metazoa;Eumetazoa;Bilateria;Protostomia;  
 Spiralia;Lophotrochozoa;Mollusca;Bivalvia;Autobranchia;Pteriormorphia;Pect  
 inida;Pectinoidea;Pectinidae;Mizuhopecten;Mizuhopecten yessoensis  
 UdeM00000027217 6579 129.8 UdeM00000027217 XP\_033756770.1 75 88  
 21 1 10 97 222 308 1.90E-27 129.8 6579 cellular  
 organisms;Eukaryota;Opisthokonta;Metazoa;Eumetazoa;Bilateria;Protostomia;  
 Spiralia;Lophotrochozoa;Mollusca;Bivalvia;Autobranchia;Pteriormorphia;Pect  
 inida;Pectinoidea;Pectinidae;Pecten;Pecten maximus  
 UdeM00000027218 7739 132.1 UdeM00000027218 XP\_035657358.1 48.5 136  
 61 3 3 132 551 683 5.20E-28 132.1 7739 cellular  
 organisms;Eukaryota;Opisthokonta;Metazoa;Eumetazoa;Bilateria;Deuterostomi  
 a;Chordata;Cephalochordata;Leptocardii;Amphioxiformes;Branchiostomidae;Br  
 anchiostoma;Branchiostoma floridae

UdeM00000027219 7739 80.9 UdeM00000027219 XP\_035657358.1 50 78  
 34 1 3 75 551 628 7.90E-13 80.9 7739 cellular  
 organisms;Eukaryota;Opisthokonta;Metazoa;Eumetazoa;Bilateria;Deuterostomi  
 a;Chordata;Cephalochordata;Leptocardii;Amphioxiformes;Branchiostomidae;Br  
 anchiostoma;Branchiostoma floridae  
 UdeM00000027220 1529436 58.9 UdeM00000027220 XP\_033114493.1 51.6  
 62 27 1 7 68 190 248 3.10E-06 58.9 1529436  
 cellular  
 organisms;Eukaryota;Opisthokonta;Metazoa;Eumetazoa;Bilateria;Deuterostomi  
 a;Echinodermata;Pelmatozoa;Crinoidea;Articulata;Comatulida;Comatulidae;Co  
 matulinae;Anneissia;Anneissia japonica  
 UdeM00000027221 103695 138.7 UdeM00000027221 XP\_020645409.1 53.5  
 114 52 1 8 121 156 268 5.10E-30 138.7 103695  
 cellular  
 organisms;Eukaryota;Opisthokonta;Metazoa;Eumetazoa;Bilateria;Deuterostomi  
 a;Chordata;Craniata;Vertebrata;Gnathostomata;Teleostomi;Euteleostomi;Sarc  
 opterygii;Dipnotetrapodomorpha;Tetrapoda;Amniota;Sauropsida;Sauria;Lepido  
 sauria;Squamata;Bifurcata;Unidentata;Episquamata;Toxicofera;Iguania;Acrod  
 onta;Agamidae;Amphibolurinae;Pogona;Pogona vitticeps  
 UdeM00000027222 7741 190.7 UdeM00000027222 XP\_019643716.1 52.3 174  
 80 2 101 273 215 386 3.50E-45 190.7 7741 cellular  
 organisms;Eukaryota;Opisthokonta;Metazoa;Eumetazoa;Bilateria;Deuterostomi  
 a;Chordata;Cephalochordata;Leptocardii;Amphioxiformes;Branchiostomidae;Br  
 anchiostoma;Branchiostoma belcheri  
 UdeM00000027223 45351 194.1 UdeM00000027223 XP\_001627828.2 49.4 178  
 87 2 68 245 656 830 2.90E-46 194.1 45351 cellular  
 organisms;Eukaryota;Opisthokonta;Metazoa;Eumetazoa;Cnidaria;Anthozoa;Hexa  
 corallia;Actiniaria;Edwardsiidae;Nematostella;Nematostella vectensis  
 UdeM00000027224 6596 220.7 UdeM00000027224 XP\_045191457.1 41.3 254  
 111 3 11 227 207 459 2.70E-54 220.7 6596 cellular  
 organisms;Eukaryota;Opisthokonta;Metazoa;Eumetazoa;Bilateria;Protostomia;  
 Spiralia;Lophotrochozoa;Mollusca;Bivalvia;Autobranchia;Heteroconchia;Euhe  
 terodonta;Imparidentia;Venerida;Veneroidea;Veneridae;Mercenaria;Mercenari  
 a mercenaria  
 UdeM00000027226 6500 303.9 UdeM00000027226 XP\_012944924.2 59.1 235  
 92 2 2 235 80 311 1.80E-79 303.9 6500 cellular  
 organisms;Eukaryota;Opisthokonta;Metazoa;Eumetazoa;Bilateria;Protostomia;  
 Spiralia;Lophotrochozoa;Mollusca;Gastropoda;Heterobranchia;Euthyneura;Tec  
 tipleura;Aplysiida;Aplysioidea;Aplysiidae;Aplysia;Aplysia californica  
 UdeM00000027225 6596 488 UdeM00000027225 XP\_045195309.1 54.7 435  
 182 4 1 433 1 422 1.20E-134 488 6596 cellular  
 organisms;Eukaryota;Opisthokonta;Metazoa;Eumetazoa;Bilateria;Protostomia;  
 Spiralia;Lophotrochozoa;Mollusca;Bivalvia;Autobranchia;Heteroconchia;Euhe  
 terodonta;Imparidentia;Venerida;Veneroidea;Veneridae;Mercenaria;Mercenari  
 a mercenaria  
 UdeM00000027227 6579 365.9 UdeM00000027227 XP\_033741736.1 59.1 286  
 117 0 53 338 347 632 5.60E-98 365.9 6579 cellular  
 organisms;Eukaryota;Opisthokonta;Metazoa;Eumetazoa;Bilateria;Protostomia;  
 Spiralia;Lophotrochozoa;Mollusca;Bivalvia;Autobranchia;Pteriomorphia;Pect  
 inida;Pectinoidea;Pectinidae;Pecten;Pecten maximus  
 UdeM00000027228 6596 1643.6 UdeM00000027228 XP\_045195218.1 69.1  
 1224 314 11 16 1181 41 1258 0.00E+00 1643.6 6596  
 cellular  
 organisms;Eukaryota;Opisthokonta;Metazoa;Eumetazoa;Bilateria;Protostomia;

Spiralia;Lophotrochozoa;Mollusca;Bivalvia;Autobranchia;Heteroconchia;Euherodonta;Imparidentia;Venerida;Veneroidea;Veneridae;Mercenaria;Mercenaria mercenaria

UdeM00000027235 6596 143.7 UdeM00000027235 XP\_045195218.1 53 151  
65 3 13 158 1109 1258 4.90E-31 143.7 6596 cellular

organisms;Eukaryota;Opisthokonta;Metazoa;Eumetazoa;Bilateria;Protostomia;Spiralia;Lophotrochozoa;Mollusca;Bivalvia;Autobranchia;Heteroconchia;Euherodonta;Imparidentia;Venerida;Veneroidea;Veneridae;Mercenaria;Mercenaria mercenaria

UdeM00000027236 29159 73.2 UdeM00000027236 XP\_034305914.1 31 158  
100 5 57 211 59 210 4.60E-10 73.2 29159 cellular

organisms;Eukaryota;Opisthokonta;Metazoa;Eumetazoa;Bilateria;Protostomia;Spiralia;Lophotrochozoa;Mollusca;Bivalvia;Autobranchia;Pteriomorpha;Ostreida;Ostreoidea;Ostreidae;Crassostrea;Crassostrea gigas

UdeM00000027237 37003 80.9 UdeM00000027237 XP\_017294281.1 28.8 146  
97 4 63 207 24 163 2.20E-12 80.9 37003 cellular

organisms;Eukaryota;Opisthokonta;Metazoa;Eumetazoa;Bilateria;Deuterostomia;Chordata;Craniata;Vertebrata;Gnathostomata;Teleostomi;Euteleostomi;Actinopterygii;Actinopteri;Neopterygii;Teleostei;Osteoglossocephalai;Clupeocephala;Euteleostei;Neoteleostei;Eurypterygia;Ctenosquamata;Acanthomorphata;Euacanthomorphacea;Percomorphaceae;Ovalentaria;Atherinomorphae;Cypriodontiformes;Aplocheiloidei;Rivulidae;Kryptolebias;Kryptolebias marmoratus

UdeM00000027238 6596 92.4 UdeM00000027238 XP\_045196130.1 28.8 299  
168 11 7 282 3 279 1.70E-15 92.4 6596 cellular

organisms;Eukaryota;Opisthokonta;Metazoa;Eumetazoa;Bilateria;Protostomia;Spiralia;Lophotrochozoa;Mollusca;Bivalvia;Autobranchia;Heteroconchia;Euherodonta;Imparidentia;Venerida;Veneroidea;Veneridae;Mercenaria;Mercenaria mercenaria

UdeM00000027239 1735272 367.1 UdeM00000027239 XP\_041371345.1 62.8  
274 102 0 1 274 12 285 2.00E-98 367.1 1735272  
cellular

organisms;Eukaryota;Opisthokonta;Metazoa;Eumetazoa;Bilateria;Protostomia;Spiralia;Lophotrochozoa;Mollusca;Gastropoda;Neomphalina;Neomphaloidea;Peltospiridae;Gigantopelta;Gigantopelta aegis

UdeM00000027240 6596 202.2 UdeM00000027240 XP\_045172545.1 25.9 499  
343 9 2 485 6 492 1.70E-48 202.2 6596 cellular

organisms;Eukaryota;Opisthokonta;Metazoa;Eumetazoa;Bilateria;Protostomia;Spiralia;Lophotrochozoa;Mollusca;Bivalvia;Autobranchia;Heteroconchia;Euherodonta;Imparidentia;Venerida;Veneroidea;Veneridae;Mercenaria;Mercenaria mercenaria

UdeM00000027241 6596 343.6 UdeM00000027241 XP\_045195578.1 33.8 755  
397 15 3 743 9 674 6.40E-91 343.6 6596 cellular

organisms;Eukaryota;Opisthokonta;Metazoa;Eumetazoa;Bilateria;Protostomia;Spiralia;Lophotrochozoa;Mollusca;Bivalvia;Autobranchia;Heteroconchia;Euherodonta;Imparidentia;Venerida;Veneroidea;Veneridae;Mercenaria;Mercenaria mercenaria

UdeM00000027243 6596 326.2 UdeM00000027243 XP\_045195557.1 45.3 316  
166 3 7 322 4 312 4.80E-86 326.2 6596 cellular

organisms;Eukaryota;Opisthokonta;Metazoa;Eumetazoa;Bilateria;Protostomia;Spiralia;Lophotrochozoa;Mollusca;Bivalvia;Autobranchia;Heteroconchia;Euherodonta;Imparidentia;Venerida;Veneroidea;Veneridae;Mercenaria;Mercenaria mercenaria

UdeM00000027242 6596 429.1 UdeM00000027242 XP\_045195557.1 43.1 476  
 254 6 7 477 4 467 7.50E-117 429.1 6596 cellular  
 organisms;Eukaryota;Opisthokonta;Metazoa;Eumetazoa;Bilateria;Protostomia;  
 Spiralia;Lophotrochozoa;Mollusca;Bivalvia;Autobranchia;Heteroconchia;Euhe-  
 terodonta;Imparidentia;Venerida;Veneroidea;Veneridae;Mercenaria;Mercenari-  
 a mercenaria  
 UdeM00000027244 6565 175.6 UdeM00000027244 XP\_022320110.1 30.3 567  
 385 7 15 575 17 579 1.80E-40 175.6 6565 cellular  
 organisms;Eukaryota;Opisthokonta;Metazoa;Eumetazoa;Bilateria;Protostomia;  
 Spiralia;Lophotrochozoa;Mollusca;Bivalvia;Autobranchia;Pteriormorphia;Ostr-  
 eida;Ostreoidea;Ostreidae;Crassostrea;Crassostrea virginica  
 UdeM00000027245 7725 59.7 UdeM00000027245 XP\_039269390.1 30.6 72  
 50 0 29 100 121 192 2.50E-06 59.7 7725 cellular  
 organisms;Eukaryota;Opisthokonta;Metazoa;Eumetazoa;Bilateria;Deuterostomi-  
 a;Chordata;Tunicata;Ascidiacea;Stolidobranchia;Styelidae;Styela;Styela  
 clava  
 UdeM00000027246 7725 59.7 UdeM00000027246 XP\_039269390.1 30.6 72  
 50 0 29 100 121 192 2.50E-06 59.7 7725 cellular  
 organisms;Eukaryota;Opisthokonta;Metazoa;Eumetazoa;Bilateria;Deuterostomi-  
 a;Chordata;Tunicata;Ascidiacea;Stolidobranchia;Styelidae;Styela;Styela  
 clava  
 UdeM00000027248 7668 77 UdeM00000027248 XP\_030848124.1 44 91  
 49 2 1 90 1027 1116 3.50E-11 77 7668 cellular  
 organisms;Eukaryota;Opisthokonta;Metazoa;Eumetazoa;Bilateria;Deuterostomi-  
 a;Echinodermata;Eleutherozoa;Echinozoa;Echinoidea;Euechinoidea;Echinacea;  
 Camarodonta;Echinidea;Strongylocentrotidae;Strongylocentrotus;Strongyloce-  
 ntrotus purpuratus  
 UdeM00000027251 29159 195.7 UdeM00000027251 XP\_019924327.2 42.5 285  
 144 6 56 331 329 602 9.60E-47 195.7 29159 cellular  
 organisms;Eukaryota;Opisthokonta;Metazoa;Eumetazoa;Bilateria;Protostomia;  
 Spiralia;Lophotrochozoa;Mollusca;Bivalvia;Autobranchia;Pteriormorphia;Ostr-  
 eida;Ostreoidea;Ostreidae;Crassostrea;Crassostrea gigas  
 UdeM00000027252 6579 113.2 UdeM00000027252 XP\_033732808.1 54.2 96  
 44 0 72 167 330 425 4.50E-22 113.2 6579 cellular  
 organisms;Eukaryota;Opisthokonta;Metazoa;Eumetazoa;Bilateria;Protostomia;  
 Spiralia;Lophotrochozoa;Mollusca;Bivalvia;Autobranchia;Pteriormorphia;Pect-  
 inida;Pectinoidea;Pectinidae;Pecten;Pecten maximus  
 UdeM00000027252 6579 59.7 UdeM00000027252 XP\_033732808.1 46.2 65  
 35 0 8 72 27 91 5.80E-06 59.7 6579 cellular  
 organisms;Eukaryota;Opisthokonta;Metazoa;Eumetazoa;Bilateria;Protostomia;  
 Spiralia;Lophotrochozoa;Mollusca;Bivalvia;Autobranchia;Pteriormorphia;Pect-  
 inida;Pectinoidea;Pectinidae;Pecten;Pecten maximus  
 UdeM00000027253 6573 77.4 UdeM00000027253 XP\_021367843.1 46.9 96  
 40 2 53 142 441 531 1.70E-11 77.4 6573 cellular  
 organisms;Eukaryota;Opisthokonta;Metazoa;Eumetazoa;Bilateria;Protostomia;  
 Spiralia;Lophotrochozoa;Mollusca;Bivalvia;Autobranchia;Pteriormorphia;Pect-  
 inida;Pectinoidea;Pectinidae;Mizuhopecten;Mizuhopecten yessoensis  
 UdeM00000027255 37653 448.7 UdeM00000027255 XP\_014787292.1 63.9 352  
 124 2 73 422 257 607 8.00E-123 448.7 37653 cellular  
 organisms;Eukaryota;Opisthokonta;Metazoa;Eumetazoa;Bilateria;Protostomia;  
 Spiralia;Lophotrochozoa;Mollusca;Cephalopoda;Coleoidea;Octopodiformes;Oct-  
 opoda;Incirrata;Octopodidae;Octopus;Octopus bimaculoides  
 UdeM00000027255 37653 61.6 UdeM00000027255 XP\_014787292.1 45.8 59  
 32 0 14 72 37 95 2.70E-06 61.6 37653 cellular

organisms;Eukaryota;Opisthokonta;Metazoa;Eumetazoa;Bilateria;Protostomia;Spiralia;Lophotrochozoa;Mollusca;Cephalopoda;Coleoidea;Octopodiformes;Octopoda;Incirrata;Octopodidae;Octopus;Octopus bimaculoides

UdeM00000037238 6596 63.5 UdeM00000037238 XP\_045189401.1 31.6 114  
72 4 72 181 87 198 3.20E-07 63.5 6596 cellular

organisms;Eukaryota;Opisthokonta;Metazoa;Eumetazoa;Bilateria;Protostomia;Spiralia;Lophotrochozoa;Mollusca;Bivalvia;Autobranchia;Heteroconchia;Euheterodonta;Imparidentia;Venerida;Veneroidea;Veneridae;Mercenaria;Mercenaria mercenaria

UdeM00000037239 400727 236.5 UdeM00000037239 XP\_025114872.1 64.1  
184 53 3 1 183 1 172 3.30E-59 236.5 400727  
cellular

organisms;Eukaryota;Opisthokonta;Metazoa;Eumetazoa;Bilateria;Protostomia;Spiralia;Lophotrochozoa;Mollusca;Gastropoda;Caenogastropoda;Architaenioglossa;Ampullarioidea;Ampullariidae;Pomacea;Pomacea canaliculata

UdeM00000037240 6596 556.6 UdeM00000037240 XP\_045193664.1 74.7 340  
86 0 1 340 6 345 2.20E-155 556.6 6596 cellular

organisms;Eukaryota;Opisthokonta;Metazoa;Eumetazoa;Bilateria;Protostomia;Spiralia;Lophotrochozoa;Mollusca;Bivalvia;Autobranchia;Heteroconchia;Euheterodonta;Imparidentia;Venerida;Veneroidea;Veneridae;Mercenaria;Mercenaria mercenaria

UdeM00000037241 6596 71.6 UdeM00000037241 XP\_045194032.1 38.5 130  
73 5 1 125 302 429 1.80E-09 71.6 6596 cellular

organisms;Eukaryota;Opisthokonta;Metazoa;Eumetazoa;Bilateria;Protostomia;Spiralia;Lophotrochozoa;Mollusca;Bivalvia;Autobranchia;Heteroconchia;Euheterodonta;Imparidentia;Venerida;Veneroidea;Veneridae;Mercenaria;Mercenaria mercenaria

UdeM00000037242 6565 2306.6 UdeM00000037242 XP\_022339324.1 69.3  
1662 499 6 1 1662 3 1652 0.00E+00 2306.6 6565  
cellular

organisms;Eukaryota;Opisthokonta;Metazoa;Eumetazoa;Bilateria;Protostomia;Spiralia;Lophotrochozoa;Mollusca;Bivalvia;Autobranchia;Pteriomorphia;Ostreida;Ostreoidea;Ostreidae;Crassostrea;Crassostrea virginica

UdeM00000037243 6573 420.2 UdeM00000037243 XP\_021358310.1 46.4 569  
198 18 36 553 103 615 4.00E-114 420.2 6573 cellular

organisms;Eukaryota;Opisthokonta;Metazoa;Eumetazoa;Bilateria;Protostomia;Spiralia;Lophotrochozoa;Mollusca;Bivalvia;Autobranchia;Pteriomorphia;Pectinida;Pectinoidea;Pectinidae;Mizuhopecten;Mizuhopecten yessoensis

UdeM00000037244 6596 360.9 UdeM00000037244 XP\_045191409.1 76.2 227  
48 4 16 238 25 249 1.20E-96 360.9 6596 cellular

organisms;Eukaryota;Opisthokonta;Metazoa;Eumetazoa;Bilateria;Protostomia;Spiralia;Lophotrochozoa;Mollusca;Bivalvia;Autobranchia;Heteroconchia;Euheterodonta;Imparidentia;Venerida;Veneroidea;Veneridae;Mercenaria;Mercenaria mercenaria

UdeM00000037245 6596 184.1 UdeM00000037245 XP\_045191959.1 65.1 129  
44 1 35 162 1 129 3.10E-43 184.1 6596 cellular

organisms;Eukaryota;Opisthokonta;Metazoa;Eumetazoa;Bilateria;Protostomia;Spiralia;Lophotrochozoa;Mollusca;Bivalvia;Autobranchia;Heteroconchia;Euheterodonta;Imparidentia;Venerida;Veneroidea;Veneridae;Mercenaria;Mercenaria mercenaria

UdeM00000037246 6596 321.2 UdeM00000037246 XP\_045192947.1 35.6 641  
358 17 1 630 2750 3346 2.90E-84 321.2 6596 cellular

organisms;Eukaryota;Opisthokonta;Metazoa;Eumetazoa;Bilateria;Protostomia;Spiralia;Lophotrochozoa;Mollusca;Bivalvia;Autobranchia;Heteroconchia;Euheterodonta;Imparidentia;Venerida;Veneroidea;Veneridae;Mercenaria;Mercenaria mercenaria

terodonta;Imparidentia;Venerida;Veneroidea;Veneridae;Mercenaria;Mercenaria mercenaria

UdeM00000037247 6596 1681 UdeM00000037247 XP\_045192947.1 49.2 1776  
813 16 1 1767 1029 2723 0.00E+00 1681 6596 cellular

organisms;Eukaryota;Opisthokonta;Metazoa;Eumetazoa;Bilateria;Protostomia;Spiralia;Lophotrochozoa;Mollusca;Bivalvia;Autobranhia;Heteroconchia;Euherodonta;Imparidentia;Venerida;Veneroidea;Veneridae;Mercenaria;Mercenaria mercenaria

UdeM00000037248 6573 308.9 UdeM00000037248 XP\_021342124.1 32.7 612  
317 9 285 841 174 745 2.10E-80 308.9 6573 cellular

organisms;Eukaryota;Opisthokonta;Metazoa;Eumetazoa;Bilateria;Protostomia;Spiralia;Lophotrochozoa;Mollusca;Bivalvia;Autobranhia;Pteriormorphia;Pectinida;Pectinoidea;Pectinidae;Mizuhopecten;Mizuhopecten yessoensis

UdeM00000037249 260995 86.3 UdeM00000037249 XP\_033812940.1 47.8  
90 46 1 4 93 4 92 2.70E-14 86.3 260995

cellular

organisms;Eukaryota;Opisthokonta;Metazoa;Eumetazoa;Bilateria;Deuterostomia;Chordata;Craniata;Vertebrata;Gnathostomata;Teleostomi;Euteleostomi;Sarcopterygii;Dipnotetrapodomorpha;Tetrapoda;Amphibia;Gymnophiona;Dermophiidae;Geotrypetes;Geotrypetes seraphini

UdeM00000037250 1415580 263.8 UdeM00000037250 XP\_030075314.1 46.8  
316 149 4 3 315 326 625 2.70E-67 263.8 1415580

cellular

organisms;Eukaryota;Opisthokonta;Metazoa;Eumetazoa;Bilateria;Deuterostomia;Chordata;Craniata;Vertebrata;Gnathostomata;Teleostomi;Euteleostomi;Sarcopterygii;Dipnotetrapodomorpha;Tetrapoda;Amphibia;Gymnophiona;Siphonopidae;Microcaecilia;Microcaecilia unicolor

UdeM00000037251 6596 2317 UdeM00000037251 XP\_045192947.1 46.2 2765  
1325 42 571 3303 713 3346 0.00E+00 2317 6596 cellular

organisms;Eukaryota;Opisthokonta;Metazoa;Eumetazoa;Bilateria;Protostomia;Spiralia;Lophotrochozoa;Mollusca;Bivalvia;Autobranhia;Heteroconchia;Euherodonta;Imparidentia;Venerida;Veneroidea;Veneridae;Mercenaria;Mercenaria mercenaria

UdeM00000037252 6596 2045.4 UdeM00000037252 XP\_045192947.1 48.7  
2199 1019 24 571 2746 713 2824 0.00E+00 2045.4 6596

cellular

organisms;Eukaryota;Opisthokonta;Metazoa;Eumetazoa;Bilateria;Protostomia;Spiralia;Lophotrochozoa;Mollusca;Bivalvia;Autobranhia;Heteroconchia;Euherodonta;Imparidentia;Venerida;Veneroidea;Veneridae;Mercenaria;Mercenaria mercenaria

UdeM00000037253 6596 2259.2 UdeM00000037253 XP\_045192947.1 45.8  
2707 1290 31 1030 3632 713 3346 0.00E+00 2259.2 6596

cellular

organisms;Eukaryota;Opisthokonta;Metazoa;Eumetazoa;Bilateria;Protostomia;Spiralia;Lophotrochozoa;Mollusca;Bivalvia;Autobranhia;Heteroconchia;Euherodonta;Imparidentia;Venerida;Veneroidea;Veneridae;Mercenaria;Mercenaria mercenaria

UdeM00000037254 45264 141.4 UdeM00000037254 XP\_044184028.1 48.2 168  
82 3 27 193 68 231 1.50E-30 141.4 45264 cellular

organisms;Eukaryota;Opisthokonta;Metazoa;Eumetazoa;Cnidaria;Anthozoa;Hexacorallia;Scleractinia;Astrocoeniina;Acroporidae;Acropora;Acropora millepora

UdeM00000037255 45264 91.7 UdeM00000037255 XP\_044165143.1 45.8 107  
56 2 2 106 367 473 6.80E-16 91.7 45264 cellular

organisms;Eukaryota;Opisthokonta;Metazoa;Eumetazoa;Cnidaria;Anthozoa;Hexa  
corallia;Scleractinia;Astrocoeniina;Acroporidae;Acropora;Acropora  
millepora

UdeM00000037256 45264 132.9 UdeM00000037256 XP\_044163837.1 44.9 147  
80 1 1 146 32 178 7.10E-28 132.9 45264 cellular

organisms;Eukaryota;Opisthokonta;Metazoa;Eumetazoa;Cnidaria;Anthozoa;Hexa  
corallia;Scleractinia;Astrocoeniina;Acroporidae;Acropora;Acropora  
millepora

UdeM00000037257 6596 247.7 UdeM00000037257 XP\_045193073.1 70.7 157  
46 0 1 157 13 169 1.00E-62 247.7 6596 cellular

organisms;Eukaryota;Opisthokonta;Metazoa;Eumetazoa;Bilateria;Protostomia;  
Spiralia;Lophotrochozoa;Mollusca;Bivalvia;Autobranchia;Heteroconchia;Euhe  
terodonta;Imparidentia;Venerida;Veneroidea;Veneridae;Mercenaria;Mercenari  
a mercenaria

UdeM00000037258 400727 212.6 UdeM00000037258 XP\_025076276.1 65.3  
147 51 0 87 233 43 189 5.30E-52 212.6 400727  
cellular

organisms;Eukaryota;Opisthokonta;Metazoa;Eumetazoa;Bilateria;Protostomia;  
Spiralia;Lophotrochozoa;Mollusca;Gastropoda;Caenogastropoda;Architaeniogl  
ossa;Ampullarioidea;Ampullariidae;Pomacea;Pomacea canaliculata

UdeM00000037259 400727 212.2 UdeM00000037259 XP\_025076276.1 65.3  
147 51 0 49 195 43 189 5.80E-52 212.2 400727  
cellular

organisms;Eukaryota;Opisthokonta;Metazoa;Eumetazoa;Bilateria;Protostomia;  
Spiralia;Lophotrochozoa;Mollusca;Gastropoda;Caenogastropoda;Architaeniogl  
ossa;Ampullarioidea;Ampullariidae;Pomacea;Pomacea canaliculata

UdeM00000037260 6565 78.2 UdeM00000037260 XP\_022299727.1 40.9 93  
53 1 1 91 46 138 6.10E-12 78.2 6565 cellular

organisms;Eukaryota;Opisthokonta;Metazoa;Eumetazoa;Bilateria;Protostomia;  
Spiralia;Lophotrochozoa;Mollusca;Bivalvia;Autobranchia;Pteriomorphia;Ostr  
eida;Ostreoidea;Ostreidae;Crassostrea;Crassostrea virginica

UdeM00000037261 29159 419.1 UdeM00000037261 XP\_011454493.1 63.6 363  
124 3 15 375 18 374 6.00E-114 419.1 29159 cellular

organisms;Eukaryota;Opisthokonta;Metazoa;Eumetazoa;Bilateria;Protostomia;  
Spiralia;Lophotrochozoa;Mollusca;Bivalvia;Autobranchia;Pteriomorphia;Ostr  
eida;Ostreoidea;Ostreidae;Crassostrea;Crassostrea gigas

UdeM00000037262 6565 109.8 UdeM00000037262 XP\_022327962.1 57 93  
38 1 3 93 626 718 1.90E-21 109.8 6565 cellular

organisms;Eukaryota;Opisthokonta;Metazoa;Eumetazoa;Bilateria;Protostomia;  
Spiralia;Lophotrochozoa;Mollusca;Bivalvia;Autobranchia;Pteriomorphia;Ostr  
eida;Ostreoidea;Ostreidae;Crassostrea;Crassostrea virginica

UdeM00000037263 6596 374.4 UdeM00000037263 XP\_045193943.1 57.3 330  
135 3 4 327 8 337 1.50E-100 374.4 6596 cellular

organisms;Eukaryota;Opisthokonta;Metazoa;Eumetazoa;Bilateria;Protostomia;  
Spiralia;Lophotrochozoa;Mollusca;Bivalvia;Autobranchia;Heteroconchia;Euhe  
terodonta;Imparidentia;Venerida;Veneroidea;Veneridae;Mercenaria;Mercenari  
a mercenaria

UdeM00000037264 6596 229.6 UdeM00000037264 XP\_045193934.1 72 143  
40 0 14 156 5 147 2.80E-57 229.6 6596 cellular

organisms;Eukaryota;Opisthokonta;Metazoa;Eumetazoa;Bilateria;Protostomia;  
Spiralia;Lophotrochozoa;Mollusca;Bivalvia;Autobranchia;Heteroconchia;Euhe  
terodonta;Imparidentia;Venerida;Veneroidea;Veneridae;Mercenaria;Mercenari  
a mercenaria

UdeM00000037266 6596 424.1 UdeM00000037266 XP\_045193934.1 64.8 307  
 101 3 7 311 5 306 2.90E-115 424.1 6596 cellular  
 organisms;Eukaryota;Opisthokonta;Metazoa;Eumetazoa;Bilateria;Protostomia;  
 Spiralia;Lophotrochozoa;Mollusca;Bivalvia;Autobranchia;Heteroconchia;Euhe  
 terodonta;Imparidentia;Venerida;Veneroidea;Veneridae;Mercenaria;Mercenari  
 a mercenaria

UdeM00000037267 6596 416.4 UdeM00000037267 XP\_045193934.1 63.9 305  
 105 3 7 309 5 306 5.90E-113 416.4 6596 cellular  
 organisms;Eukaryota;Opisthokonta;Metazoa;Eumetazoa;Bilateria;Protostomia;  
 Spiralia;Lophotrochozoa;Mollusca;Bivalvia;Autobranchia;Heteroconchia;Euhe  
 terodonta;Imparidentia;Venerida;Veneroidea;Veneridae;Mercenaria;Mercenari  
 a mercenaria

UdeM00000037265 6596 424.1 UdeM00000037265 XP\_045193934.1 64.8 307  
 101 3 7 311 5 306 2.80E-115 424.1 6596 cellular  
 organisms;Eukaryota;Opisthokonta;Metazoa;Eumetazoa;Bilateria;Protostomia;  
 Spiralia;Lophotrochozoa;Mollusca;Bivalvia;Autobranchia;Heteroconchia;Euhe  
 terodonta;Imparidentia;Venerida;Veneroidea;Veneridae;Mercenaria;Mercenari  
 a mercenaria

UdeM00000037268 6596 337.8 UdeM00000037268 XP\_045193921.1 40.4 468  
 237 11 8 458 81 523 2.20E-89 337.8 6596 cellular  
 organisms;Eukaryota;Opisthokonta;Metazoa;Eumetazoa;Bilateria;Protostomia;  
 Spiralia;Lophotrochozoa;Mollusca;Bivalvia;Autobranchia;Heteroconchia;Euhe  
 terodonta;Imparidentia;Venerida;Veneroidea;Veneridae;Mercenaria;Mercenari  
 a mercenaria

UdeM00000037270 1735272 490.3 UdeM00000037270 XP\_041375708.1 65.8  
 368 122 2 13 376 9 376 2.10E-135 490.3 1735272  
 cellular  
 organisms;Eukaryota;Opisthokonta;Metazoa;Eumetazoa;Bilateria;Protostomia;  
 Spiralia;Lophotrochozoa;Mollusca;Gastropoda;Neomphalina;Neomphaloidea;Pel  
 tospiridae;Gigantopelta;Gigantopelta aegis

UdeM00000037269 1735272 487.3 UdeM00000037269 XP\_041375708.1 67.5  
 351 113 1 43 392 26 376 1.90E-134 487.3 1735272  
 cellular  
 organisms;Eukaryota;Opisthokonta;Metazoa;Eumetazoa;Bilateria;Protostomia;  
 Spiralia;Lophotrochozoa;Mollusca;Gastropoda;Neomphalina;Neomphaloidea;Pel  
 tospiridae;Gigantopelta;Gigantopelta aegis

UdeM00000037271 1735272 438.3 UdeM00000037271 XP\_041376980.1 73  
 282 75 1 1 281 1 282 7.20E-120 438.3 1735272  
 cellular  
 organisms;Eukaryota;Opisthokonta;Metazoa;Eumetazoa;Bilateria;Protostomia;  
 Spiralia;Lophotrochozoa;Mollusca;Gastropoda;Neomphalina;Neomphaloidea;Pel  
 tospiridae;Gigantopelta;Gigantopelta aegis

UdeM00000037272 37653 812.8 UdeM00000037272 XP\_014779427.1 38.1 1306  
 665 28 2 1286 4 1186 7.10E-232 812.8 37653 cellular  
 organisms;Eukaryota;Opisthokonta;Metazoa;Eumetazoa;Bilateria;Protostomia;  
 Spiralia;Lophotrochozoa;Mollusca;Cephalopoda;Coleoidea;Octopodiformes;Oct  
 opoda;Incirrata;Octopodidae;Octopus;Octopus bimaculoides

UdeM00000037273 6596 668.3 UdeM00000037273 XP\_045192383.1 45.6 1074  
 479 33 623 1628 212 1248 2.50E-188 668.3 6596 cellular  
 organisms;Eukaryota;Opisthokonta;Metazoa;Eumetazoa;Bilateria;Protostomia;  
 Spiralia;Lophotrochozoa;Mollusca;Bivalvia;Autobranchia;Heteroconchia;Euhe  
 terodonta;Imparidentia;Venerida;Veneroidea;Veneridae;Mercenaria;Mercenari  
 a mercenaria



UdeM00000037274 6579 125.2 UdeM00000037274 XP\_033753729.1 63.6 99  
 36 0 1 99 1 99 5.40E-26 125.2 6579 cellular  
 organisms;Eukaryota;Opisthokonta;Metazoa;Eumetazoa;Bilateria;Protostomia;  
 Spiralia;Lophotrochozoa;Mollusca;Bivalvia;Autobranhia;Pteriomorphia;Pect  
 inida;Pectinoidea;Pectinidae;Pecten;Pecten maximus  
 UdeM00000037275 6579 123.6 UdeM00000037275 XP\_033753729.1 64.6 99  
 34 1 1 98 1 99 1.60E-25 123.6 6579 cellular  
 organisms;Eukaryota;Opisthokonta;Metazoa;Eumetazoa;Bilateria;Protostomia;  
 Spiralia;Lophotrochozoa;Mollusca;Bivalvia;Autobranhia;Pteriomorphia;Pect  
 inida;Pectinoidea;Pectinidae;Pecten;Pecten maximus  
 UdeM00000037276 37653 226.1 UdeM00000037276 XP\_014782512.1 55.5 422  
 147 7 516 932 488 873 2.00E-55 226.1 37653 cellular  
 organisms;Eukaryota;Opisthokonta;Metazoa;Eumetazoa;Bilateria;Protostomia;  
 Spiralia;Lophotrochozoa;Mollusca;Cephalopoda;Coleoidea;Octopodiformes;Oct  
 opoda;Incirrata;Octopodidae;Octopus;Octopus bimaculoides  
 UdeM00000037278 37653 226.1 UdeM00000037278 XP\_014782512.1 55.5 422  
 147 7 68 484 488 873 1.10E-55 226.1 37653 cellular  
 organisms;Eukaryota;Opisthokonta;Metazoa;Eumetazoa;Bilateria;Protostomia;  
 Spiralia;Lophotrochozoa;Mollusca;Cephalopoda;Coleoidea;Octopodiformes;Oct  
 opoda;Incirrata;Octopodidae;Octopus;Octopus bimaculoides  
 UdeM00000037279 6596 741.1 UdeM00000037279 XP\_045193463.1 55.8 683  
 248 9 9 686 10 643 1.30E-210 741.1 6596 cellular  
 organisms;Eukaryota;Opisthokonta;Metazoa;Eumetazoa;Bilateria;Protostomia;  
 Spiralia;Lophotrochozoa;Mollusca;Bivalvia;Autobranhia;Heteroconchia;Euhe  
 terodonta;Imparidentia;Venerida;Veneroidea;Veneridae;Mercenaria;Mercenari  
 a mercenaria  
 UdeM00000037282 6596 218.4 UdeM00000037282 XP\_045193463.1 69.2 146  
 43 2 1 145 103 247 6.10E-54 218.4 6596 cellular  
 organisms;Eukaryota;Opisthokonta;Metazoa;Eumetazoa;Bilateria;Protostomia;  
 Spiralia;Lophotrochozoa;Mollusca;Bivalvia;Autobranhia;Heteroconchia;Euhe  
 terodonta;Imparidentia;Venerida;Veneroidea;Veneridae;Mercenaria;Mercenari  
 a mercenaria  
 UdeM00000037280 6596 516.9 UdeM00000037280 XP\_045193463.1 61 415  
 154 5 1 410 103 514 2.30E-143 516.9 6596 cellular  
 organisms;Eukaryota;Opisthokonta;Metazoa;Eumetazoa;Bilateria;Protostomia;  
 Spiralia;Lophotrochozoa;Mollusca;Bivalvia;Autobranhia;Heteroconchia;Euhe  
 terodonta;Imparidentia;Venerida;Veneroidea;Veneridae;Mercenaria;Mercenari  
 a mercenaria  
 UdeM00000037281 6596 595.1 UdeM00000037281 XP\_045193463.1 58.6 500  
 195 7 1 493 103 597 8.10E-167 595.1 6596 cellular  
 organisms;Eukaryota;Opisthokonta;Metazoa;Eumetazoa;Bilateria;Protostomia;  
 Spiralia;Lophotrochozoa;Mollusca;Bivalvia;Autobranhia;Heteroconchia;Euhe  
 terodonta;Imparidentia;Venerida;Veneroidea;Veneridae;Mercenaria;Mercenari  
 a mercenaria  
 UdeM00000037284 6596 399.8 UdeM00000037284 XP\_045192478.1 59.8 321  
 128 1 13 333 1 320 3.30E-108 399.8 6596 cellular  
 organisms;Eukaryota;Opisthokonta;Metazoa;Eumetazoa;Bilateria;Protostomia;  
 Spiralia;Lophotrochozoa;Mollusca;Bivalvia;Autobranhia;Heteroconchia;Euhe  
 terodonta;Imparidentia;Venerida;Veneroidea;Veneridae;Mercenaria;Mercenari  
 a mercenaria  
 UdeM00000037285 6596 120.6 UdeM00000037285 XP\_045192487.1 24.2 603  
 375 22 1 561 1 563 6.80E-24 120.6 6596 cellular  
 organisms;Eukaryota;Opisthokonta;Metazoa;Eumetazoa;Bilateria;Protostomia;  
 Spiralia;Lophotrochozoa;Mollusca;Bivalvia;Autobranhia;Heteroconchia;Euhe

terodonta;Imparidentia;Venerida;Veneroidea;Veneridae;Mercenaria;Mercenari  
 a mercenaria  
 UdeM00000037286 6596 632.5 UdeM00000037286 XP\_045193463.1 63 476  
 172 2 57 530 124 597 4.90E-178 632.5 6596 cellular  
 organisms;Eukaryota;Opisthokonta;Metazoa;Eumetazoa;Bilateria;Protostomia;  
 Spiralia;Lophotrochozoa;Mollusca;Bivalvia;Autobranchia;Heteroconchia;Euhe  
 terodonta;Imparidentia;Venerida;Veneroidea;Veneridae;Mercenaria;Mercenari  
 a mercenaria  
 UdeM00000037287 6565 79.3 UdeM00000037287 XP\_022299727.1 50.8 63  
 31 0 3 65 657 719 2.00E-12 79.3 6565 cellular  
 organisms;Eukaryota;Opisthokonta;Metazoa;Eumetazoa;Bilateria;Protostomia;  
 Spiralia;Lophotrochozoa;Mollusca;Bivalvia;Autobranchia;Pteriormorphia;Ostr  
 eida;Ostreoidea;Ostreidae;Crassostrea;Crassostrea virginica  
 UdeM00000037289 6579 260.4 UdeM00000037289 XP\_033726657.1 56.4 236  
 102 1 1 235 223 458 2.30E-66 260.4 6579 cellular  
 organisms;Eukaryota;Opisthokonta;Metazoa;Eumetazoa;Bilateria;Protostomia;  
 Spiralia;Lophotrochozoa;Mollusca;Bivalvia;Autobranchia;Pteriormorphia;Pect  
 inida;Pectinoidea;Pectinidae;Pecten;Pecten maximus  
 UdeM00000037291 6596 266.2 UdeM00000037291 XP\_045181393.1 81.9 149  
 27 0 1 149 24 172 3.60E-68 266.2 6596 cellular  
 organisms;Eukaryota;Opisthokonta;Metazoa;Eumetazoa;Bilateria;Protostomia;  
 Spiralia;Lophotrochozoa;Mollusca;Bivalvia;Autobranchia;Heteroconchia;Euhe  
 terodonta;Imparidentia;Venerida;Veneroidea;Veneridae;Mercenaria;Mercenari  
 a mercenaria  
 UdeM00000037296 6596 1126.7 UdeM00000037296 XP\_045192445.1 75.1  
 762 182 3 1 759 1 757 0.00E+00 1126.7 6596  
 cellular  
 organisms;Eukaryota;Opisthokonta;Metazoa;Eumetazoa;Bilateria;Protostomia;  
 Spiralia;Lophotrochozoa;Mollusca;Bivalvia;Autobranchia;Heteroconchia;Euhe  
 terodonta;Imparidentia;Venerida;Veneroidea;Veneridae;Mercenaria;Mercenari  
 a mercenaria  
 UdeM00000037298 6565 845.1 UdeM00000037298 XP\_022340925.1 82.4 506  
 49 2 1 505 1 467 4.60E-242 845.1 6565 cellular  
 organisms;Eukaryota;Opisthokonta;Metazoa;Eumetazoa;Bilateria;Protostomia;  
 Spiralia;Lophotrochozoa;Mollusca;Bivalvia;Autobranchia;Pteriormorphia;Ostr  
 eida;Ostreoidea;Ostreidae;Crassostrea;Crassostrea virginica  
 UdeM00000037297 6579 2137.5 UdeM00000037297 XP\_033755427.1 83.1  
 1257 171 4 1 1256 1 1216 0.00E+00 2137.5 6579  
 cellular  
 organisms;Eukaryota;Opisthokonta;Metazoa;Eumetazoa;Bilateria;Protostomia;  
 Spiralia;Lophotrochozoa;Mollusca;Bivalvia;Autobranchia;Pteriormorphia;Pect  
 inida;Pectinoidea;Pectinidae;Pecten;Pecten maximus  
 UdeM00000037299 6573 1312.7 UdeM00000037299 XP\_021358273.1 83.9  
 757 120 2 1 757 462 1216 0.00E+00 1312.7 6573  
 cellular  
 organisms;Eukaryota;Opisthokonta;Metazoa;Eumetazoa;Bilateria;Protostomia;  
 Spiralia;Lophotrochozoa;Mollusca;Bivalvia;Autobranchia;Pteriormorphia;Pect  
 inida;Pectinoidea;Pectinidae;Mizuhopecten;Mizuhopecten yessoensis  
 UdeM00000037300 2607531 128.3 UdeM00000037300 XP\_036366743.1 35.4  
 257 83 7 57 306 307 487 1.70E-26 128.3 2607531  
 cellular  
 organisms;Eukaryota;Opisthokonta;Metazoa;Eumetazoa;Bilateria;Protostomia;  
 Spiralia;Lophotrochozoa;Mollusca;Cephalopoda;Coleoidea;Octopodiformes;Oct  
 opoda;Incirrata;Octopodidae;Octopus;Octopus sinensis

UdeM00000037301 6596 308.5 UdeM00000037301 XP\_045194012.1 31.4 821  
 403 25 18 746 1 753 2.30E-80 308.5 6596 cellular  
 organisms;Eukaryota;Opisthokonta;Metazoa;Eumetazoa;Bilateria;Protostomia;  
 Spiralia;Lophotrochozoa;Mollusca;Bivalvia;Autobranchia;Heteroconchia;Euhe  
 terodonta;Imparidentia;Venerida;Veneroidea;Veneridae;Mercenaria;Mercenari  
 a mercenaria  
 UdeM00000037302 6596 309.3 UdeM00000037302 XP\_045194012.1 31.4 821  
 403 25 1 729 1 753 1.30E-80 309.3 6596 cellular  
 organisms;Eukaryota;Opisthokonta;Metazoa;Eumetazoa;Bilateria;Protostomia;  
 Spiralia;Lophotrochozoa;Mollusca;Bivalvia;Autobranchia;Heteroconchia;Euhe  
 terodonta;Imparidentia;Venerida;Veneroidea;Veneridae;Mercenaria;Mercenari  
 a mercenaria  
 UdeM00000037303 6596 540.4 UdeM00000037303 XP\_045163368.1 55.1 494  
 213 3 26 512 7 498 2.70E-150 540.4 6596 cellular  
 organisms;Eukaryota;Opisthokonta;Metazoa;Eumetazoa;Bilateria;Protostomia;  
 Spiralia;Lophotrochozoa;Mollusca;Bivalvia;Autobranchia;Heteroconchia;Euhe  
 terodonta;Imparidentia;Venerida;Veneroidea;Veneridae;Mercenaria;Mercenari  
 a mercenaria  
 UdeM00000037304 6596 540 UdeM00000037304 XP\_045163368.1 55.1 494  
 213 3 16 502 7 498 3.40E-150 540 6596 cellular  
 organisms;Eukaryota;Opisthokonta;Metazoa;Eumetazoa;Bilateria;Protostomia;  
 Spiralia;Lophotrochozoa;Mollusca;Bivalvia;Autobranchia;Heteroconchia;Euhe  
 terodonta;Imparidentia;Venerida;Veneroidea;Veneridae;Mercenaria;Mercenari  
 a mercenaria  
 UdeM00000037310 6579 84 UdeM00000037310 XP\_033744239.1 63.2 57  
 21 0 1 57 188 244 1.00E-13 84 6579 cellular  
 organisms;Eukaryota;Opisthokonta;Metazoa;Eumetazoa;Bilateria;Protostomia;  
 Spiralia;Lophotrochozoa;Mollusca;Bivalvia;Autobranchia;Pteriormorphia;Pect  
 inida;Pectinoidea;Pectinidae;Pecten;Pecten maximus  
 UdeM00000037312 6596 331.3 UdeM00000037312 XP\_045212714.1 32.4 706  
 435 15 3 679 4 696 3.00E-87 331.3 6596 cellular  
 organisms;Eukaryota;Opisthokonta;Metazoa;Eumetazoa;Bilateria;Protostomia;  
 Spiralia;Lophotrochozoa;Mollusca;Bivalvia;Autobranchia;Heteroconchia;Euhe  
 terodonta;Imparidentia;Venerida;Veneroidea;Veneridae;Mercenaria;Mercenari  
 a mercenaria  
 UdeM00000037313 6596 68.2 UdeM00000037313 XP\_045183837.1 39.2 102  
 57 2 46 143 239 339 2.40E-08 68.2 6596 cellular  
 organisms;Eukaryota;Opisthokonta;Metazoa;Eumetazoa;Bilateria;Protostomia;  
 Spiralia;Lophotrochozoa;Mollusca;Bivalvia;Autobranchia;Heteroconchia;Euhe  
 terodonta;Imparidentia;Venerida;Veneroidea;Veneridae;Mercenaria;Mercenari  
 a mercenaria  
 UdeM00000037314 6596 454.1 UdeM00000037314 XP\_045192516.1 59.6 356  
 134 3 41 396 1178 1523 1.80E-124 454.1 6596 cellular  
 organisms;Eukaryota;Opisthokonta;Metazoa;Eumetazoa;Bilateria;Protostomia;  
 Spiralia;Lophotrochozoa;Mollusca;Bivalvia;Autobranchia;Heteroconchia;Euhe  
 terodonta;Imparidentia;Venerida;Veneroidea;Veneridae;Mercenaria;Mercenari  
 a mercenaria  
 UdeM00000037316 6596 514.6 UdeM00000037316 XP\_045192519.1 57.6 427  
 145 4 18 418 965 1381 1.20E-142 514.6 6596 cellular  
 organisms;Eukaryota;Opisthokonta;Metazoa;Eumetazoa;Bilateria;Protostomia;  
 Spiralia;Lophotrochozoa;Mollusca;Bivalvia;Autobranchia;Heteroconchia;Euhe  
 terodonta;Imparidentia;Venerida;Veneroidea;Veneridae;Mercenaria;Mercenari  
 a mercenaria

UdeM00000037318 6596 72 UdeM00000037318 XP\_045183837.1 39.4 104  
 58 2 46 145 239 341 1.10E-09 72 6596 cellular  
 organisms;Eukaryota;Opisthokonta;Metazoa;Eumetazoa;Bilateria;Protostomia;  
 Spiralia;Lophotrochozoa;Mollusca;Bivalvia;Autobranchia;Heteroconchia;Euhe  
 terodonta;Imparidentia;Venerida;Veneroidea;Veneridae;Mercenaria;Mercenari  
 a mercenaria

UdeM00000037320 6596 514.2 UdeM00000037320 XP\_045192516.1 57.7 426  
 144 4 2 401 1108 1523 1.50E-142 514.2 6596 cellular  
 organisms;Eukaryota;Opisthokonta;Metazoa;Eumetazoa;Bilateria;Protostomia;  
 Spiralia;Lophotrochozoa;Mollusca;Bivalvia;Autobranchia;Heteroconchia;Euhe  
 terodonta;Imparidentia;Venerida;Veneroidea;Veneridae;Mercenaria;Mercenari  
 a mercenaria

UdeM00000037321 6573 410.6 UdeM00000037321 XP\_021372380.1 53.5 439  
 189 7 1 434 1 429 2.50E-111 410.6 6573 cellular  
 organisms;Eukaryota;Opisthokonta;Metazoa;Eumetazoa;Bilateria;Protostomia;  
 Spiralia;Lophotrochozoa;Mollusca;Bivalvia;Autobranchia;Pteriormorphia;Pect  
 inida;Pectinoidea;Pectinidae;Mizuhopecten;Mizuhopecten yessoensis

UdeM00000037322 6596 736.5 UdeM00000037322 XP\_045192516.1 44 1131  
 479 26 1 1001 1 1107 4.50E-209 736.5 6596 cellular  
 organisms;Eukaryota;Opisthokonta;Metazoa;Eumetazoa;Bilateria;Protostomia;  
 Spiralia;Lophotrochozoa;Mollusca;Bivalvia;Autobranchia;Heteroconchia;Euhe  
 terodonta;Imparidentia;Venerida;Veneroidea;Veneridae;Mercenaria;Mercenari  
 a mercenaria

UdeM00000037325 6596 238.8 UdeM00000037325 XP\_045192989.1 42.5 308  
 172 3 27 331 61 366 1.00E-59 238.8 6596 cellular  
 organisms;Eukaryota;Opisthokonta;Metazoa;Eumetazoa;Bilateria;Protostomia;  
 Spiralia;Lophotrochozoa;Mollusca;Bivalvia;Autobranchia;Heteroconchia;Euhe  
 terodonta;Imparidentia;Venerida;Veneroidea;Veneridae;Mercenaria;Mercenari  
 a mercenaria

UdeM00000037326 6565 668.7 UdeM00000037326 XP\_022344574.1 59.4 864  
 298 13 14 874 18 831 1.00E-188 668.7 6565 cellular  
 organisms;Eukaryota;Opisthokonta;Metazoa;Eumetazoa;Bilateria;Protostomia;  
 Spiralia;Lophotrochozoa;Mollusca;Bivalvia;Autobranchia;Pteriormorphia;Ostr  
 eida;Ostreoidea;Ostreidae;Crassostrea;Crassostrea virginica

UdeM00000037327 6596 932.6 UdeM00000037327 XP\_045192992.1 69.5 630  
 190 2 119 747 166 794 3.20E-268 932.6 6596 cellular  
 organisms;Eukaryota;Opisthokonta;Metazoa;Eumetazoa;Bilateria;Protostomia;  
 Spiralia;Lophotrochozoa;Mollusca;Bivalvia;Autobranchia;Heteroconchia;Euhe  
 terodonta;Imparidentia;Venerida;Veneroidea;Veneridae;Mercenaria;Mercenari  
 a mercenaria

UdeM00000037328 6596 299.3 UdeM00000037328 XP\_045192628.1 53.8 327  
 141 4 54 377 22 341 7.00E-78 299.3 6596 cellular  
 organisms;Eukaryota;Opisthokonta;Metazoa;Eumetazoa;Bilateria;Protostomia;  
 Spiralia;Lophotrochozoa;Mollusca;Bivalvia;Autobranchia;Heteroconchia;Euhe  
 terodonta;Imparidentia;Venerida;Veneroidea;Veneridae;Mercenaria;Mercenari  
 a mercenaria

UdeM00000037329 6596 299.3 UdeM00000037329 XP\_045192628.1 53.8 327  
 141 4 115 438 22 341 8.10E-78 299.3 6596 cellular  
 organisms;Eukaryota;Opisthokonta;Metazoa;Eumetazoa;Bilateria;Protostomia;  
 Spiralia;Lophotrochozoa;Mollusca;Bivalvia;Autobranchia;Heteroconchia;Euhe  
 terodonta;Imparidentia;Venerida;Veneroidea;Veneridae;Mercenaria;Mercenari  
 a mercenaria

UdeM00000037331 6579 510.4 UdeM00000037331 XP\_033754533.1 81 311  
 58 1 75 385 61 370 2.10E-141 510.4 6579 cellular

organisms;Eukaryota;Opisthokonta;Metazoa;Eumetazoa;Bilateria;Protostomia; Spiralia;Lophotrochozoa;Mollusca;Bivalvia;Autobranchia;Pteriormorphia;Pect inida;Pectinoidea;Pectinidae;Pecten;Pecten maximus

UdeM00000037332 6500 1134.8 UdeM00000037332 XP\_035824706.1 79.7  
700 142 0 1 700 403 1102 0.00E+00 1134.8 6500  
cellular

organisms;Eukaryota;Opisthokonta;Metazoa;Eumetazoa;Bilateria;Protostomia; Spiralia;Lophotrochozoa;Mollusca;Gastropoda;Heterobranchia;Euthyneura;Tectipleura;Aplysiida;Aplysioidea;Aplysiidae;Aplysia;Aplysia californica

UdeM00000037333 6596 1437.9 UdeM00000037333 XP\_045193054.1 74.7  
1030 244 5 1 1020 1122 2144 0.00E+00 1437.9 6596  
cellular

organisms;Eukaryota;Opisthokonta;Metazoa;Eumetazoa;Bilateria;Protostomia; Spiralia;Lophotrochozoa;Mollusca;Bivalvia;Autobranchia;Heteroconchia;Euheterodonta;Imparidentia;Venerida;Veneroidea;Veneridae;Mercenaria;Mercenaria mercenaria

UdeM00000037334 6573 765.8 UdeM00000037334 XP\_021341779.1 62.2 688  
223 10 2 672 2162 2829 5.10E-218 765.8 6573 cellular

organisms;Eukaryota;Opisthokonta;Metazoa;Eumetazoa;Bilateria;Protostomia; Spiralia;Lophotrochozoa;Mollusca;Bivalvia;Autobranchia;Pteriormorphia;Pect inida;Pectinoidea;Pectinidae;Mizuhopecten;Mizuhopecten yessoensis

UdeM00000037335 6596 709.1 UdeM00000037335 XP\_045201495.1 74.4 453  
115 1 1 452 10 462 3.50E-201 709.1 6596 cellular

organisms;Eukaryota;Opisthokonta;Metazoa;Eumetazoa;Bilateria;Protostomia; Spiralia;Lophotrochozoa;Mollusca;Bivalvia;Autobranchia;Heteroconchia;Euheterodonta;Imparidentia;Venerida;Veneroidea;Veneridae;Mercenaria;Mercenaria mercenaria

UdeM00000037336 6596 70.1 UdeM00000037336 XP\_045183837.1 40.2 102  
56 2 46 143 239 339 4.70E-09 70.1 6596 cellular

organisms;Eukaryota;Opisthokonta;Metazoa;Eumetazoa;Bilateria;Protostomia; Spiralia;Lophotrochozoa;Mollusca;Bivalvia;Autobranchia;Heteroconchia;Euheterodonta;Imparidentia;Venerida;Veneroidea;Veneridae;Mercenaria;Mercenaria mercenaria

UdeM00000037337 6596 70.1 UdeM00000037337 XP\_045183837.1 40.2 102  
56 2 46 143 239 339 3.70E-09 70.1 6596 cellular

organisms;Eukaryota;Opisthokonta;Metazoa;Eumetazoa;Bilateria;Protostomia; Spiralia;Lophotrochozoa;Mollusca;Bivalvia;Autobranchia;Heteroconchia;Euheterodonta;Imparidentia;Venerida;Veneroidea;Veneridae;Mercenaria;Mercenaria mercenaria

UdeM00000037339 6596 69.3 UdeM00000037339 XP\_045183837.1 37.7 122  
68 4 27 143 221 339 9.00E-09 69.3 6596 cellular

organisms;Eukaryota;Opisthokonta;Metazoa;Eumetazoa;Bilateria;Protostomia; Spiralia;Lophotrochozoa;Mollusca;Bivalvia;Autobranchia;Heteroconchia;Euheterodonta;Imparidentia;Venerida;Veneroidea;Veneridae;Mercenaria;Mercenaria mercenaria

UdeM00000037341 6596 68.6 UdeM00000037341 XP\_045183837.1 39.4 104  
58 2 46 145 239 341 1.40E-08 68.6 6596 cellular

organisms;Eukaryota;Opisthokonta;Metazoa;Eumetazoa;Bilateria;Protostomia; Spiralia;Lophotrochozoa;Mollusca;Bivalvia;Autobranchia;Heteroconchia;Euheterodonta;Imparidentia;Venerida;Veneroidea;Veneridae;Mercenaria;Mercenaria mercenaria

UdeM00000037344 29159 219.9 UdeM00000037344 XP\_034339165.1 38 334  
193 8 1 331 186 508 4.70E-54 219.9 29159 cellular

organisms;Eukaryota;Opisthokonta;Metazoa;Eumetazoa;Bilateria;Protostomia;

Spiralia;Lophotrochozoa;Mollusca;Bivalvia;Autobranchia;Pteriormorphia;Ostr  
eida;Ostreoidea;Ostreidae;Crassostrea;Crassostrea gigas  
UdeM00000037345 29159 498.4 UdeM00000037345 XP\_034299474.1 43.7 607  
326 8 66 665 158 755 1.40E-137 498.4 29159 cellular  
organisms;Eukaryota;Opisthokonta;Metazoa;Eumetazoa;Bilateria;Protostomia;  
Spiralia;Lophotrochozoa;Mollusca;Bivalvia;Autobranchia;Pteriormorphia;Ostr  
eida;Ostreoidea;Ostreidae;Crassostrea;Crassostrea gigas  
UdeM00000037349 6596 69.3 UdeM00000037349 XP\_045183837.1 39.4 104  
58 2 46 145 239 341 6.20E-09 69.3 6596 cellular  
organisms;Eukaryota;Opisthokonta;Metazoa;Eumetazoa;Bilateria;Protostomia;  
Spiralia;Lophotrochozoa;Mollusca;Bivalvia;Autobranchia;Heteroconchia;Euhe  
terodonta;Imparidentia;Venerida;Veneroidea;Veneridae;Mercenaria;Mercenari  
a mercenaria  
UdeM00000037351 6596 66.2 UdeM00000037351 XP\_045183837.1 39.8 103  
55 3 46 143 239 339 7.60E-08 66.2 6596 cellular  
organisms;Eukaryota;Opisthokonta;Metazoa;Eumetazoa;Bilateria;Protostomia;  
Spiralia;Lophotrochozoa;Mollusca;Bivalvia;Autobranchia;Heteroconchia;Euhe  
terodonta;Imparidentia;Venerida;Veneroidea;Veneridae;Mercenaria;Mercenari  
a mercenaria  
UdeM00000037352 6596 69.3 UdeM00000037352 XP\_045183837.1 38.5 104  
59 2 46 145 239 341 5.90E-09 69.3 6596 cellular  
organisms;Eukaryota;Opisthokonta;Metazoa;Eumetazoa;Bilateria;Protostomia;  
Spiralia;Lophotrochozoa;Mollusca;Bivalvia;Autobranchia;Heteroconchia;Euhe  
terodonta;Imparidentia;Venerida;Veneroidea;Veneridae;Mercenaria;Mercenari  
a mercenaria  
UdeM00000037353 6596 61.6 UdeM00000037353 XP\_045183837.1 42.9 77  
40 1 46 118 239 315 2.10E-06 61.6 6596 cellular  
organisms;Eukaryota;Opisthokonta;Metazoa;Eumetazoa;Bilateria;Protostomia;  
Spiralia;Lophotrochozoa;Mollusca;Bivalvia;Autobranchia;Heteroconchia;Euhe  
terodonta;Imparidentia;Venerida;Veneroidea;Veneridae;Mercenaria;Mercenari  
a mercenaria  
UdeM00000037356 6596 168.7 UdeM00000037356 XP\_045194446.1 46.1 204  
102 2 1 196 260 463 8.00E-39 168.7 6596 cellular  
organisms;Eukaryota;Opisthokonta;Metazoa;Eumetazoa;Bilateria;Protostomia;  
Spiralia;Lophotrochozoa;Mollusca;Bivalvia;Autobranchia;Heteroconchia;Euhe  
terodonta;Imparidentia;Venerida;Veneroidea;Veneridae;Mercenaria;Mercenari  
a mercenaria  
UdeM00000037358 29159 89.7 UdeM00000037358 XP\_034331549.1 32.9 170  
93 3 7 163 221 382 3.70E-15 89.7 29159 cellular  
organisms;Eukaryota;Opisthokonta;Metazoa;Eumetazoa;Bilateria;Protostomia;  
Spiralia;Lophotrochozoa;Mollusca;Bivalvia;Autobranchia;Pteriormorphia;Ostr  
eida;Ostreoidea;Ostreidae;Crassostrea;Crassostrea gigas  
UdeM00000037359 50429 95.5 UdeM00000037359 XP\_022804186.1 33.1 178  
114 3 1 174 430 606 7.10E-17 95.5 50429 cellular  
organisms;Eukaryota;Opisthokonta;Metazoa;Eumetazoa;Cnidaria;Anthozoa;Hexa  
corallia;Scleractinia;Astrocoeniina;Pocilloporidae;Stylophora;Stylophora  
pistillata  
UdeM00000037360 80966 107.1 UdeM00000037360 XP\_022077561.1 65 80  
28 0 1 80 207 286 1.10E-20 107.1 80966 cellular  
organisms;Eukaryota;Opisthokonta;Metazoa;Eumetazoa;Bilateria;Deuterostomi  
a;Chordata;Craniata;Vertebrata;Gnathostomata;Teleostomi;Euteleostomi;Acti  
nopterygii;Actinopteri;Neopterygii;Teleostei;Osteoglossocephalai;Clupeoce  
phala;Euteleosteomorpha;Neoteleostei;Eurypterygia;Ctenosquamata;Acanthomo

rphata;Euacanthomorpha;Percomorphaceae;Ovalentaria;Ovalentaria  
 incertae sedis;Pomacentridae;Acanthochromis;Acanthochromis polyacanthus  
 UdeM00000037362 6565 121.7 UdeM00000037362 XP\_022302274.1 44.1 145  
 58 2 125 247 159 302 1.30E-24 121.7 6565 cellular  
 organisms;Eukaryota;Opisthokonta;Metazoa;Eumetazoa;Bilateria;Protostomia;  
 Spiralia;Lophotrochozoa;Mollusca;Bivalvia;Autobranchia;Pteriormorphia;Ostr  
 eida;Ostreoidea;Ostreidae;Crassostrea;Crassostrea virginica  
 UdeM00000037363 6573 206.1 UdeM00000037363 XP\_021349151.1 33.2 428  
 193 9 4 352 112 525 1.20E-49 206.1 6573 cellular  
 organisms;Eukaryota;Opisthokonta;Metazoa;Eumetazoa;Bilateria;Protostomia;  
 Spiralia;Lophotrochozoa;Mollusca;Bivalvia;Autobranchia;Pteriormorphia;Pect  
 inida;Pectinoidea;Pectinidae;Mizuhopecten;Mizuhopecten yessoensis  
 UdeM00000037364 6596 386 UdeM00000037364 XP\_045192784.1 47.5 421  
 196 8 20 429 19 425 6.50E-104 386 6596 cellular  
 organisms;Eukaryota;Opisthokonta;Metazoa;Eumetazoa;Bilateria;Protostomia;  
 Spiralia;Lophotrochozoa;Mollusca;Bivalvia;Autobranchia;Heteroconchia;Euhe  
 terodonta;Imparidentia;Venerida;Veneroidea;Veneridae;Mercenaria;Mercenari  
 a mercenaria  
 UdeM00000037365 6596 396.4 UdeM00000037365 XP\_045192786.1 44.7 461  
 200 6 15 469 14 425 5.30E-107 396.4 6596 cellular  
 organisms;Eukaryota;Opisthokonta;Metazoa;Eumetazoa;Bilateria;Protostomia;  
 Spiralia;Lophotrochozoa;Mollusca;Bivalvia;Autobranchia;Heteroconchia;Euhe  
 terodonta;Imparidentia;Venerida;Veneroidea;Veneridae;Mercenaria;Mercenari  
 a mercenaria  
 UdeM00000037366 6596 414.8 UdeM00000037366 XP\_045192786.1 49 418  
 201 5 15 426 14 425 1.30E-112 414.8 6596 cellular  
 organisms;Eukaryota;Opisthokonta;Metazoa;Eumetazoa;Bilateria;Protostomia;  
 Spiralia;Lophotrochozoa;Mollusca;Bivalvia;Autobranchia;Heteroconchia;Euhe  
 terodonta;Imparidentia;Venerida;Veneroidea;Veneridae;Mercenaria;Mercenari  
 a mercenaria  
 UdeM00000037368 6596 735.3 UdeM00000037368 XP\_045194438.1 69.7 492  
 148 1 1 492 1 491 5.00E-209 735.3 6596 cellular  
 organisms;Eukaryota;Opisthokonta;Metazoa;Eumetazoa;Bilateria;Protostomia;  
 Spiralia;Lophotrochozoa;Mollusca;Bivalvia;Autobranchia;Heteroconchia;Euhe  
 terodonta;Imparidentia;Venerida;Veneroidea;Veneridae;Mercenaria;Mercenari  
 a mercenaria  
 UdeM00000037369 1735272 407.1 UdeM00000037369 XP\_041376852.1 46.2  
 452 229 5 10 450 26 474 3.00E-110 407.1 1735272  
 cellular  
 organisms;Eukaryota;Opisthokonta;Metazoa;Eumetazoa;Bilateria;Protostomia;  
 Spiralia;Lophotrochozoa;Mollusca;Gastropoda;Neomphalina;Neomphaloidea;Pel  
 tospiridae;Gigantopelta;Gigantopelta aegis  
 UdeM00000037371 6412 91.7 UdeM00000037371 XP\_009016697.1 59.2 76  
 31 0 34 109 170 245 6.40E-16 91.7 6412 cellular  
 organisms;Eukaryota;Opisthokonta;Metazoa;Eumetazoa;Bilateria;Protostomia;  
 Spiralia;Lophotrochozoa;Annelida;Clitellata;Hirudinea;Rhynchobdellida;Glo  
 ssisphoniidae;Helobdella;Helobdella robusta  
 UdeM00000037372 6579 856.3 UdeM00000037372 XP\_033754625.1 45.6 1100  
 442 29 65 1114 10 1003 4.40E-245 856.3 6579 cellular  
 organisms;Eukaryota;Opisthokonta;Metazoa;Eumetazoa;Bilateria;Protostomia;  
 Spiralia;Lophotrochozoa;Mollusca;Bivalvia;Autobranchia;Pteriormorphia;Pect  
 inida;Pectinoidea;Pectinidae;Pecten;Pecten maximus  
 UdeM00000037373 6596 1652.5 UdeM00000037373 XP\_045191862.1 74.8  
 1074 236 9 7 1069 10 1059 0.00E+00 1652.5 6596

cellular  
organisms;Eukaryota;Opisthokonta;Metazoa;Eumetazoa;Bilateria;Protostomia;  
Spiralia;Lophotrochozoa;Mollusca;Bivalvia;Autobranchia;Heteroconchia;Euhe  
terodonta;Imparidentia;Venerida;Veneroidea;Veneridae;Mercenaria;Mercenari  
a mercenaria  
UdeM00000037374 6565 227.6 UdeM00000037374 XP\_022343015.1 52.9 242  
87 8 6 235 11 237 1.70E-56 227.6 6565 cellular  
organisms;Eukaryota;Opisthokonta;Metazoa;Eumetazoa;Bilateria;Protostomia;  
Spiralia;Lophotrochozoa;Mollusca;Bivalvia;Autobranchia;Pteriormorphia;Ostr  
eida;Ostreoidea;Ostreidae;Crassostrea;Crassostrea virginica  
UdeM00000037375 6573 478 UdeM00000037375 XP\_021357988.1 58.5 439  
166 8 842 1277 705 1130 3.70E-131 478 6573 cellular  
organisms;Eukaryota;Opisthokonta;Metazoa;Eumetazoa;Bilateria;Protostomia;  
Spiralia;Lophotrochozoa;Mollusca;Bivalvia;Autobranchia;Pteriormorphia;Pect  
inida;Pectinoidea;Pectinidae;Mizuhopecten;Mizuhopecten yessoensis  
UdeM00000037376 6596 1399.8 UdeM00000037376 XP\_045193477.1 62.6  
1088 404 3 2 1088 3 1088 0.00E+00 1399.8 6596  
cellular  
organisms;Eukaryota;Opisthokonta;Metazoa;Eumetazoa;Bilateria;Protostomia;  
Spiralia;Lophotrochozoa;Mollusca;Bivalvia;Autobranchia;Heteroconchia;Euhe  
terodonta;Imparidentia;Venerida;Veneroidea;Veneridae;Mercenaria;Mercenari  
a mercenaria  
UdeM00000037378 6565 588.6 UdeM00000037378 XP\_022344800.1 49 637  
298 3 97 715 9 636 1.10E-164 588.6 6565 cellular  
organisms;Eukaryota;Opisthokonta;Metazoa;Eumetazoa;Bilateria;Protostomia;  
Spiralia;Lophotrochozoa;Mollusca;Bivalvia;Autobranchia;Pteriormorphia;Ostr  
eida;Ostreoidea;Ostreidae;Crassostrea;Crassostrea virginica  
UdeM00000037377 6565 588.6 UdeM00000037377 XP\_022344800.1 49 637  
298 3 66 684 9 636 1.00E-164 588.6 6565 cellular  
organisms;Eukaryota;Opisthokonta;Metazoa;Eumetazoa;Bilateria;Protostomia;  
Spiralia;Lophotrochozoa;Mollusca;Bivalvia;Autobranchia;Pteriormorphia;Ostr  
eida;Ostreoidea;Ostreidae;Crassostrea;Crassostrea virginica  
UdeM00000037379 6565 120.6 UdeM00000037379 XP\_022308193.1 30.4 260  
43 1 1 122 295 554 1.50E-24 120.6 6565 cellular  
organisms;Eukaryota;Opisthokonta;Metazoa;Eumetazoa;Bilateria;Protostomia;  
Spiralia;Lophotrochozoa;Mollusca;Bivalvia;Autobranchia;Pteriormorphia;Ostr  
eida;Ostreoidea;Ostreidae;Crassostrea;Crassostrea virginica  
UdeM00000037380 400727 679.9 UdeM00000037380 XP\_025115161.1 66.8  
524 152 2 21 531 57 571 2.70E-192 679.9 400727  
cellular  
organisms;Eukaryota;Opisthokonta;Metazoa;Eumetazoa;Bilateria;Protostomia;  
Spiralia;Lophotrochozoa;Mollusca;Gastropoda;Caenogastropoda;Architaeniogl  
ossa;Ampullarioidea;Ampullariidae;Pomacea;Pomacea canaliculata  
UdeM00000037381 400727 654.4 UdeM00000037381 XP\_025115161.1 67.1  
505 147 2 27 519 58 555 1.40E-184 654.4 400727  
cellular  
organisms;Eukaryota;Opisthokonta;Metazoa;Eumetazoa;Bilateria;Protostomia;  
Spiralia;Lophotrochozoa;Mollusca;Gastropoda;Caenogastropoda;Architaeniogl  
ossa;Ampullarioidea;Ampullariidae;Pomacea;Pomacea canaliculata  
UdeM00000037382 400727 664.1 UdeM00000037382 XP\_025115161.1 72.1  
462 125 2 71 530 107 566 1.50E-187 664.1 400727  
cellular  
organisms;Eukaryota;Opisthokonta;Metazoa;Eumetazoa;Bilateria;Protostomia;



Spiralia;Lophotrochozoa;Mollusca;Gastropoda;Caenogastropoda;Architaenioglossa;Ampullarioidea;Ampullariidae;Pomacea;Pomacea canaliculata  
UdeM00000037383 400727 636.3 UdeM00000037383 XP\_025115161.1 67.9  
467 148 2 53 519 107 571 3.30E-179 636.3 400727  
cellular

organisms;Eukaryota;Opisthokonta;Metazoa;Eumetazoa;Bilateria;Protostomia;  
Spiralia;Lophotrochozoa;Mollusca;Gastropoda;Caenogastropoda;Architaenioglossa;Ampullarioidea;Ampullariidae;Pomacea;Pomacea canaliculata  
UdeM00000037384 6596 481.9 UdeM00000037384 XP\_045194148.1 51.7 468  
212 5 19 481 22 480 9.70E-133 481.9 6596 cellular

organisms;Eukaryota;Opisthokonta;Metazoa;Eumetazoa;Bilateria;Protostomia;  
Spiralia;Lophotrochozoa;Mollusca;Bivalvia;Autobranchia;Heteroconchia;Euheterodonta;Imparidentia;Venerida;Veneroidea;Veneridae;Mercenaria;Mercenaria mercenaria

UdeM00000037385 6596 811.2 UdeM00000037385 XP\_045194146.1 79.2 481  
100 0 25 505 30 510 7.30E-232 811.2 6596 cellular

organisms;Eukaryota;Opisthokonta;Metazoa;Eumetazoa;Bilateria;Protostomia;  
Spiralia;Lophotrochozoa;Mollusca;Bivalvia;Autobranchia;Heteroconchia;Euheterodonta;Imparidentia;Venerida;Veneroidea;Veneridae;Mercenaria;Mercenaria mercenaria

UdeM00000037394 6565 692.2 UdeM00000037394 XP\_022337869.1 63 575  
205 4 1 575 1 567 6.10E-196 692.2 6565 cellular

organisms;Eukaryota;Opisthokonta;Metazoa;Eumetazoa;Bilateria;Protostomia;  
Spiralia;Lophotrochozoa;Mollusca;Bivalvia;Autobranchia;Pteriormorphia;Ostreida;Ostreoidea;Ostreidae;Crassostrea;Crassostrea virginica

UdeM00000037395 6565 147.5 UdeM00000037395 XP\_022339326.1 51.7 431  
167 11 113 539 594 987 4.80E-32 147.5 6565 cellular

organisms;Eukaryota;Opisthokonta;Metazoa;Eumetazoa;Bilateria;Protostomia;  
Spiralia;Lophotrochozoa;Mollusca;Bivalvia;Autobranchia;Pteriormorphia;Ostreida;Ostreoidea;Ostreidae;Crassostrea;Crassostrea virginica

UdeM00000037396 6596 214.9 UdeM00000037396 XP\_045191431.1 50.2 285  
113 10 1 281 266 525 1.30E-52 214.9 6596 cellular

organisms;Eukaryota;Opisthokonta;Metazoa;Eumetazoa;Bilateria;Protostomia;  
Spiralia;Lophotrochozoa;Mollusca;Bivalvia;Autobranchia;Heteroconchia;Euheterodonta;Imparidentia;Venerida;Veneroidea;Veneridae;Mercenaria;Mercenaria mercenaria

UdeM00000037397 6596 662.9 UdeM00000037397 XP\_045191431.1 67.1 535  
147 10 1 531 16 525 3.40E-187 662.9 6596 cellular

organisms;Eukaryota;Opisthokonta;Metazoa;Eumetazoa;Bilateria;Protostomia;  
Spiralia;Lophotrochozoa;Mollusca;Bivalvia;Autobranchia;Heteroconchia;Euheterodonta;Imparidentia;Venerida;Veneroidea;Veneridae;Mercenaria;Mercenaria mercenaria

UdeM00000037398 6596 667.5 UdeM00000037398 XP\_045193633.1 56.1 581  
251 4 7 585 6 584 1.50E-188 667.5 6596 cellular

organisms;Eukaryota;Opisthokonta;Metazoa;Eumetazoa;Bilateria;Protostomia;  
Spiralia;Lophotrochozoa;Mollusca;Bivalvia;Autobranchia;Heteroconchia;Euheterodonta;Imparidentia;Venerida;Veneroidea;Veneridae;Mercenaria;Mercenaria mercenaria

UdeM00000037399 6596 657.1 UdeM00000037399 XP\_045193633.1 55.9 581  
252 4 7 585 6 584 2.00E-185 657.1 6596 cellular

organisms;Eukaryota;Opisthokonta;Metazoa;Eumetazoa;Bilateria;Protostomia;  
Spiralia;Lophotrochozoa;Mollusca;Bivalvia;Autobranchia;Heteroconchia;Euheterodonta;Imparidentia;Venerida;Veneroidea;Veneridae;Mercenaria;Mercenaria mercenaria

UdeM00000037400 6596 692.2 UdeM00000037400 XP\_045194286.1 62.7 584  
 195 3 1 562 1 583 6.00E-196 692.2 6596 cellular  
 organisms;Eukaryota;Opisthokonta;Metazoa;Eumetazoa;Bilateria;Protostomia;  
 Spiralia;Lophotrochozoa;Mollusca;Bivalvia;Autobranchia;Heteroconchia;Euhe  
 terodonta;Imparidentia;Venerida;Veneroidea;Veneridae;Mercenaria;Mercenari  
 a mercenaria

UdeM00000037401 6596 721.1 UdeM00000037401 XP\_045194286.1 66.1 584  
 189 3 1 576 1 583 1.30E-204 721.1 6596 cellular  
 organisms;Eukaryota;Opisthokonta;Metazoa;Eumetazoa;Bilateria;Protostomia;  
 Spiralia;Lophotrochozoa;Mollusca;Bivalvia;Autobranchia;Heteroconchia;Euhe  
 terodonta;Imparidentia;Venerida;Veneroidea;Veneridae;Mercenaria;Mercenari  
 a mercenaria

UdeM00000037402 6596 697.2 UdeM00000037402 XP\_045193322.1 60.3 648  
 234 9 1 646 1 627 2.00E-197 697.2 6596 cellular  
 organisms;Eukaryota;Opisthokonta;Metazoa;Eumetazoa;Bilateria;Protostomia;  
 Spiralia;Lophotrochozoa;Mollusca;Bivalvia;Autobranchia;Heteroconchia;Euhe  
 terodonta;Imparidentia;Venerida;Veneroidea;Veneridae;Mercenaria;Mercenari  
 a mercenaria

UdeM00000037403 6596 243 UdeM00000037403 XP\_045194271.1 70.8 161  
 47 0 3 163 2 162 2.90E-61 243 6596 cellular  
 organisms;Eukaryota;Opisthokonta;Metazoa;Eumetazoa;Bilateria;Protostomia;  
 Spiralia;Lophotrochozoa;Mollusca;Bivalvia;Autobranchia;Heteroconchia;Euhe  
 terodonta;Imparidentia;Venerida;Veneroidea;Veneridae;Mercenaria;Mercenari  
 a mercenaria

UdeM00000037404 6596 967.2 UdeM00000037404 XP\_045194271.1 76.9 615  
 142 0 1 615 193 807 1.70E-278 967.2 6596 cellular  
 organisms;Eukaryota;Opisthokonta;Metazoa;Eumetazoa;Bilateria;Protostomia;  
 Spiralia;Lophotrochozoa;Mollusca;Bivalvia;Autobranchia;Heteroconchia;Euhe  
 terodonta;Imparidentia;Venerida;Veneroidea;Veneridae;Mercenaria;Mercenari  
 a mercenaria

UdeM00000037405 29159 765.8 UdeM00000037405 XP\_034336164.1 75.2 492  
 111 2 3 490 818 1302 3.40E-218 765.8 29159 cellular  
 organisms;Eukaryota;Opisthokonta;Metazoa;Eumetazoa;Bilateria;Protostomia;  
 Spiralia;Lophotrochozoa;Mollusca;Bivalvia;Autobranchia;Pteriomorphia;Ostr  
 eida;Ostreoidea;Ostreidae;Crassostrea;Crassostrea gigas

UdeM00000037406 6596 1527.3 UdeM00000037406 XP\_045166071.1 55.3  
 1489 615 19 18 1479 610 2075 0.00E+00 1527.3 6596  
 cellular  
 organisms;Eukaryota;Opisthokonta;Metazoa;Eumetazoa;Bilateria;Protostomia;  
 Spiralia;Lophotrochozoa;Mollusca;Bivalvia;Autobranchia;Heteroconchia;Euhe  
 terodonta;Imparidentia;Venerida;Veneroidea;Veneridae;Mercenaria;Mercenari  
 a mercenaria

UdeM00000037407 45264 314.7 UdeM00000037407 XP\_044165143.1 56.9 274  
 113 2 42 314 35 304 1.30E-82 314.7 45264 cellular  
 organisms;Eukaryota;Opisthokonta;Metazoa;Eumetazoa;Cnidaria;Anthozoa;Hexa  
 corallia;Scleractinia;Astrocoeniina;Acroporidae;Acropora;Acropora  
 millepora

UdeM00000037408 45264 361.3 UdeM00000037408 XP\_044165143.1 45.6 443  
 175 6 27 407 35 473 1.60E-96 361.3 45264 cellular  
 organisms;Eukaryota;Opisthokonta;Metazoa;Eumetazoa;Cnidaria;Anthozoa;Hexa  
 corallia;Scleractinia;Astrocoeniina;Acroporidae;Acropora;Acropora  
 millepora

UdeM00000037409 45264 92 UdeM00000037409 XP\_044165143.1 45.8 107  
 56 2 2 106 367 473 5.20E-16 92 45264 cellular

organisms;Eukaryota;Opisthokonta;Metazoa;Eumetazoa;Cnidaria;Anthozoa;Hexa  
corallia;Scleractinia;Astrocoeniina;Acroporidae;Acropora;Acropora  
millepora

UdeM00000037410 45264 139.4 UdeM00000037410 XP\_044164583.1 51.7 149  
65 3 1 146 127 271 3.60E-30 139.4 45264 cellular

organisms;Eukaryota;Opisthokonta;Metazoa;Eumetazoa;Cnidaria;Anthozoa;Hexa  
corallia;Scleractinia;Astrocoeniina;Acroporidae;Acropora;Acropora  
millepora

UdeM00000037411 45264 129.4 UdeM00000037411 XP\_044163837.1 44.2 147  
81 1 1 146 32 178 6.70E-27 129.4 45264 cellular

organisms;Eukaryota;Opisthokonta;Metazoa;Eumetazoa;Cnidaria;Anthozoa;Hexa  
corallia;Scleractinia;Astrocoeniina;Acroporidae;Acropora;Acropora  
millepora

UdeM00000037413 6596 79.3 UdeM00000037413 XP\_045170098.1 67.7 133  
40 2 11 141 5 136 4.30E-12 79.3 6596 cellular

organisms;Eukaryota;Opisthokonta;Metazoa;Eumetazoa;Bilateria;Protostomia;  
Spiralia;Lophotrochozoa;Mollusca;Bivalvia;Autobranchia;Heteroconchia;Euhe  
terodonta;Imparidentia;Venerida;Veneroidea;Veneridae;Mercenaria;Mercenari  
a mercenaria

UdeM00000037415 6579 526.6 UdeM00000037415 XP\_033735567.1 89.4 284  
30 0 1 284 419 702 2.00E-146 526.6 6579 cellular

organisms;Eukaryota;Opisthokonta;Metazoa;Eumetazoa;Bilateria;Protostomia;  
Spiralia;Lophotrochozoa;Mollusca;Bivalvia;Autobranchia;Pteriormorphia;Pect  
inida;Pectinoidea;Pectinidae;Pecten;Pecten maximus

UdeM00000037414 6565 622.5 UdeM00000037414 XP\_022331792.1 70.4 720  
150 11 1 713 413 1076 6.80E-175 622.5 6565 cellular

organisms;Eukaryota;Opisthokonta;Metazoa;Eumetazoa;Bilateria;Protostomia;  
Spiralia;Lophotrochozoa;Mollusca;Bivalvia;Autobranchia;Pteriormorphia;Ostr  
eida;Ostreoidea;Ostreidae;Crassostrea;Crassostrea virginica

UdeM00000037416 6579 157.5 UdeM00000037416 XP\_033735567.1 66.1 118  
40 0 1 118 1 118 3.70E-35 157.5 6579 cellular

organisms;Eukaryota;Opisthokonta;Metazoa;Eumetazoa;Bilateria;Protostomia;  
Spiralia;Lophotrochozoa;Mollusca;Bivalvia;Autobranchia;Pteriormorphia;Pect  
inida;Pectinoidea;Pectinidae;Pecten;Pecten maximus

UdeM00000037417 1735272 257.3 UdeM00000037417 XP\_041352996.1 45.1  
315 162 4 66 371 11 323 3.60E-65 257.3 1735272

cellular

organisms;Eukaryota;Opisthokonta;Metazoa;Eumetazoa;Bilateria;Protostomia;  
Spiralia;Lophotrochozoa;Mollusca;Gastropoda;Neomphalina;Neomphaloidea;Pel  
tospiridae;Gigantopelta;Gigantopelta aegis

UdeM00000037418 1735272 646.4 UdeM00000037418 XP\_041351727.1 37.5  
1038 599 19 151 1157 149 1167 7.10E-182 646.4 1735272

cellular

organisms;Eukaryota;Opisthokonta;Metazoa;Eumetazoa;Bilateria;Protostomia;  
Spiralia;Lophotrochozoa;Mollusca;Gastropoda;Neomphalina;Neomphaloidea;Pel  
tospiridae;Gigantopelta;Gigantopelta aegis

UdeM00000037420 6573 81.3 UdeM00000037420 XP\_021348106.1 47.7 86  
43 1 1 84 1 86 6.70E-13 81.3 6573 cellular

organisms;Eukaryota;Opisthokonta;Metazoa;Eumetazoa;Bilateria;Protostomia;  
Spiralia;Lophotrochozoa;Mollusca;Bivalvia;Autobranchia;Pteriormorphia;Pect  
inida;Pectinoidea;Pectinidae;Mizuhopecten;Mizuhopecten yessoensis

UdeM00000037419 6596 323.2 UdeM00000037419 XP\_045173252.1 45.3 369  
197 2 4 372 6 369 4.50E-85 323.2 6596 cellular

organisms;Eukaryota;Opisthokonta;Metazoa;Eumetazoa;Bilateria;Protostomia;

Spiralia;Lophotrochozoa;Mollusca;Bivalvia;Autobranchia;Heteroconchia;Euherodonta;Imparidentia;Venerida;Veneroidea;Veneridae;Mercenaria;Mercenaria mercenaria

UdeM00000037421 6596 129.4 UdeM00000037421 XP\_045173349.1 31.1 325  
179 12 97 378 587 909 1.00E-26 129.4 6596 cellular

organisms;Eukaryota;Opisthokonta;Metazoa;Eumetazoa;Bilateria;Protostomia;Spiralia;Lophotrochozoa;Mollusca;Bivalvia;Autobranchia;Heteroconchia;Euherodonta;Imparidentia;Venerida;Veneroidea;Veneridae;Mercenaria;Mercenaria mercenaria

UdeM00000037422 6596 264.6 UdeM00000037422 XP\_045173349.1 26.2 981  
489 28 6 775 173 1129 4.60E-67 264.6 6596 cellular

organisms;Eukaryota;Opisthokonta;Metazoa;Eumetazoa;Bilateria;Protostomia;Spiralia;Lophotrochozoa;Mollusca;Bivalvia;Autobranchia;Heteroconchia;Euherodonta;Imparidentia;Venerida;Veneroidea;Veneridae;Mercenaria;Mercenaria mercenaria

UdeM00000037424 45351 85.5 UdeM00000037424 XP\_001623471.2 32.8 201  
105 7 10 187 12 205 8.50E-14 85.5 45351 cellular

organisms;Eukaryota;Opisthokonta;Metazoa;Eumetazoa;Cnidaria;Anthozoa;Hexacorallia;Actiniaria;Edwardsiidae;Nematostella;Nematostella vectensis

UdeM00000037425 6596 255.4 UdeM00000037425 XP\_045173349.1 25.6 963  
465 28 7 746 173 1107 2.30E-64 255.4 6596 cellular

organisms;Eukaryota;Opisthokonta;Metazoa;Eumetazoa;Bilateria;Protostomia;Spiralia;Lophotrochozoa;Mollusca;Bivalvia;Autobranchia;Heteroconchia;Euherodonta;Imparidentia;Venerida;Veneroidea;Veneridae;Mercenaria;Mercenaria mercenaria

UdeM00000037427 6579 1134 UdeM00000037427 XP\_033750824.1 53.6 1069  
450 11 1 1059 302 1334 0.00E+00 1134 6579 cellular

organisms;Eukaryota;Opisthokonta;Metazoa;Eumetazoa;Bilateria;Protostomia;Spiralia;Lophotrochozoa;Mollusca;Bivalvia;Autobranchia;Pteriomorpha;Pectinida;Pectinoidea;Pectinidae;Pecten;Pecten maximus

UdeM00000037428 6596 160.2 UdeM00000037428 XP\_045168479.1 33.7 312  
187 4 3 307 418 716 4.20E-36 160.2 6596 cellular

organisms;Eukaryota;Opisthokonta;Metazoa;Eumetazoa;Bilateria;Protostomia;Spiralia;Lophotrochozoa;Mollusca;Bivalvia;Autobranchia;Heteroconchia;Euherodonta;Imparidentia;Venerida;Veneroidea;Veneridae;Mercenaria;Mercenaria mercenaria

UdeM00000037429 6596 293.9 UdeM00000037429 XP\_045168479.1 43.2 333  
183 1 11 343 30 356 2.90E-76 293.9 6596 cellular

organisms;Eukaryota;Opisthokonta;Metazoa;Eumetazoa;Bilateria;Protostomia;Spiralia;Lophotrochozoa;Mollusca;Bivalvia;Autobranchia;Heteroconchia;Euherodonta;Imparidentia;Venerida;Veneroidea;Veneridae;Mercenaria;Mercenaria mercenaria

UdeM00000037430 6596 453.8 UdeM00000037430 XP\_045169256.1 35 709  
442 6 11 719 12 701 4.20E-124 453.8 6596 cellular

organisms;Eukaryota;Opisthokonta;Metazoa;Eumetazoa;Bilateria;Protostomia;Spiralia;Lophotrochozoa;Mollusca;Bivalvia;Autobranchia;Heteroconchia;Euherodonta;Imparidentia;Venerida;Veneroidea;Veneridae;Mercenaria;Mercenaria mercenaria

UdeM00000037433 6565 161.4 UdeM00000037433 XP\_022290343.1 51.9 158  
66 4 1 149 126 282 9.00E-37 161.4 6565 cellular

organisms;Eukaryota;Opisthokonta;Metazoa;Eumetazoa;Bilateria;Protostomia;Spiralia;Lophotrochozoa;Mollusca;Bivalvia;Autobranchia;Pteriomorpha;Ostreida;Ostreoidea;Ostreidae;Crassostrea;Crassostrea virginica

UdeM00000037434 6565 102.1 UdeM00000037434 XP\_022322655.1 48.5 99  
 51 0 2 100 650 748 4.40E-19 102.1 6565 cellular  
 organisms;Eukaryota;Opisthokonta;Metazoa;Eumetazoa;Bilateria;Protostomia;  
 Spiralia;Lophotrochozoa;Mollusca;Bivalvia;Autobranchia;Pteriormorphia;Ostr  
 eida;Ostreoidea;Ostreidae;Crassostrea;Crassostrea virginica  
 UdeM00000037435 6565 153.7 UdeM00000037435 XP\_022322655.1 37.4 246  
 104 5 1 199 417 659 2.80E-34 153.7 6565 cellular  
 organisms;Eukaryota;Opisthokonta;Metazoa;Eumetazoa;Bilateria;Protostomia;  
 Spiralia;Lophotrochozoa;Mollusca;Bivalvia;Autobranchia;Pteriormorphia;Ostr  
 eida;Ostreoidea;Ostreidae;Crassostrea;Crassostrea virginica  
 UdeM00000037438 29159 62 UdeM00000037438 XP\_011426086.2 25.2 139  
 99 3 3 137 35 172 1.50E-06 62 29159 cellular  
 organisms;Eukaryota;Opisthokonta;Metazoa;Eumetazoa;Bilateria;Protostomia;  
 Spiralia;Lophotrochozoa;Mollusca;Bivalvia;Autobranchia;Pteriormorphia;Ostr  
 eida;Ostreoidea;Ostreidae;Crassostrea;Crassostrea gigas  
 UdeM00000037437 29159 62 UdeM00000037437 XP\_011426086.2 25.2 139  
 99 3 3 137 35 172 1.30E-06 62 29159 cellular  
 organisms;Eukaryota;Opisthokonta;Metazoa;Eumetazoa;Bilateria;Protostomia;  
 Spiralia;Lophotrochozoa;Mollusca;Bivalvia;Autobranchia;Pteriormorphia;Ostr  
 eida;Ostreoidea;Ostreidae;Crassostrea;Crassostrea gigas  
 UdeM00000037443 29159 60.8 UdeM00000037443 XP\_011426086.2 27.4 135  
 93 3 3 133 35 168 5.30E-06 60.8 29159 cellular  
 organisms;Eukaryota;Opisthokonta;Metazoa;Eumetazoa;Bilateria;Protostomia;  
 Spiralia;Lophotrochozoa;Mollusca;Bivalvia;Autobranchia;Pteriormorphia;Ostr  
 eida;Ostreoidea;Ostreidae;Crassostrea;Crassostrea gigas  
 UdeM00000037446 37621 97.8 UdeM00000037446 XP\_014678940.1 44.5 128  
 67 3 8 132 829 955 1.20E-17 97.8 37621 cellular  
 organisms;Eukaryota;Opisthokonta;Metazoa;Eumetazoa;Bilateria;Protostomia;  
 Ecdysozoa;Scalidophora;Priapulida;Priapulimorpha;Priapulimorphida;Priapul  
 idae;Priapululus;Priapululus caudatus  
 UdeM00000037447 37621 143.7 UdeM00000037447 XP\_014673981.1 36.2 257  
 93 8 2 189 58 312 2.50E-31 143.7 37621 cellular  
 organisms;Eukaryota;Opisthokonta;Metazoa;Eumetazoa;Bilateria;Protostomia;  
 Ecdysozoa;Scalidophora;Priapulida;Priapulimorpha;Priapulimorphida;Priapul  
 idae;Priapululus;Priapululus caudatus  
 UdeM00000037448 37621 154.1 UdeM00000037448 XP\_014672571.1 44.9 187  
 97 3 113 293 1 187 4.10E-34 154.1 37621 cellular  
 organisms;Eukaryota;Opisthokonta;Metazoa;Eumetazoa;Bilateria;Protostomia;  
 Ecdysozoa;Scalidophora;Priapulida;Priapulimorpha;Priapulimorphida;Priapul  
 idae;Priapululus;Priapululus caudatus  
 UdeM00000037449 37621 154.1 UdeM00000037449 XP\_014672571.1 44.9 187  
 97 3 89 269 1 187 3.90E-34 154.1 37621 cellular  
 organisms;Eukaryota;Opisthokonta;Metazoa;Eumetazoa;Bilateria;Protostomia;  
 Ecdysozoa;Scalidophora;Priapulida;Priapulimorpha;Priapulimorphida;Priapul  
 idae;Priapululus;Priapululus caudatus  
 UdeM00000037450 7741 179.5 UdeM00000037450 XP\_019639752.1 27.5 513  
 327 14 42 532 37 526 1.30E-41 179.5 7741 cellular  
 organisms;Eukaryota;Opisthokonta;Metazoa;Eumetazoa;Bilateria;Deuterostomi  
 a;Chordata;Cephalochordata;Leptocardii;Amphioxiformes;Branchiostomidae;Br  
 anchiostoma;Branchiostoma belcheri  
 UdeM00000037451 48498 120.6 UdeM00000037451 XP\_020602329.1 31 261  
 160 10 73 316 1182 1439 4.10E-24 120.6 48498 cellular  
 organisms;Eukaryota;Opisthokonta;Metazoa;Eumetazoa;Cnidaria;Anthozoa;Hexa  
 corallia;Scleractinia;Faviina;Merulinidae;Orbicella;Orbicella faveolata

UdeM00000037454 6573 60.8 UdeM00000037454 XP\_021372800.1 22.5 262  
 161 11 4 235 111 360 3.20E-06 60.8 6573 cellular  
 organisms;Eukaryota;Opisthokonta;Metazoa;Eumetazoa;Bilateria;Protostomia;  
 Spiralia;Lophotrochozoa;Mollusca;Bivalvia;Autobranchia;Pteriomorpha;Pecti  
 nida;Pectinoidea;Pectinidae;Mizuhopecten;Mizuhopecten yessoensis  
 UdeM00000037458 1735272 269.2 UdeM00000037458 XP\_041357551.1 28.9  
 630 396 14 29 628 27 634 1.50E-68 269.2 1735272  
 cellular  
 organisms;Eukaryota;Opisthokonta;Metazoa;Eumetazoa;Bilateria;Protostomia;  
 Spiralia;Lophotrochozoa;Mollusca;Gastropoda;Neomphalina;Neomphaloidea;Pel  
 tospiridae;Gigantopelta;Gigantopelta aegis  
 UdeM00000037459 386614 120.6 UdeM00000037459 XP\_032900674.1 78.5  
 79 17 0 1 79 1 79 5.00E-24 120.6 386614  
 cellular  
 organisms;Eukaryota;Opisthokonta;Metazoa;Eumetazoa;Bilateria;Deuterostomi  
 a;Chordata;Craniata;Vertebrata;Gnathostomata;Chondrichthyes;Elasmobranchi  
 i;Batoidea;Rajiformes;Rajidae;Amblyraja;Amblyraja radiata  
 UdeM00000037460 386614 120.6 UdeM00000037460 XP\_032900674.1 78.5  
 79 17 0 1 79 1 79 6.60E-24 120.6 386614  
 cellular  
 organisms;Eukaryota;Opisthokonta;Metazoa;Eumetazoa;Bilateria;Deuterostomi  
 a;Chordata;Craniata;Vertebrata;Gnathostomata;Chondrichthyes;Elasmobranchi  
 i;Batoidea;Rajiformes;Rajidae;Amblyraja;Amblyraja radiata  
 UdeM00000037461 386614 120.6 UdeM00000037461 XP\_032900674.1 78.5  
 79 17 0 1 79 1 79 6.70E-24 120.6 386614  
 cellular  
 organisms;Eukaryota;Opisthokonta;Metazoa;Eumetazoa;Bilateria;Deuterostomi  
 a;Chordata;Craniata;Vertebrata;Gnathostomata;Chondrichthyes;Elasmobranchi  
 i;Batoidea;Rajiformes;Rajidae;Amblyraja;Amblyraja radiata  
 UdeM00000037465 29159 73.9 UdeM00000037465 XP\_011426086.2 26.9 186  
 129 4 8 186 3 188 2.60E-10 73.9 29159 cellular  
 organisms;Eukaryota;Opisthokonta;Metazoa;Eumetazoa;Bilateria;Protostomia;  
 Spiralia;Lophotrochozoa;Mollusca;Bivalvia;Autobranchia;Pteriomorpha;Ostr  
 eida;Ostreoidea;Ostreidae;Crassostrea;Crassostrea gigas  
 UdeM00000037467 29159 73.9 UdeM00000037467 XP\_011426086.2 26.9 186  
 129 4 8 186 3 188 2.60E-10 73.9 29159 cellular  
 organisms;Eukaryota;Opisthokonta;Metazoa;Eumetazoa;Bilateria;Protostomia;  
 Spiralia;Lophotrochozoa;Mollusca;Bivalvia;Autobranchia;Pteriomorpha;Ostr  
 eida;Ostreoidea;Ostreidae;Crassostrea;Crassostrea gigas  
 UdeM00000037474 29159 72.4 UdeM00000037474 XP\_011426086.2 23.4 304  
 209 10 33 327 35 323 2.00E-09 72.4 29159 cellular  
 organisms;Eukaryota;Opisthokonta;Metazoa;Eumetazoa;Bilateria;Protostomia;  
 Spiralia;Lophotrochozoa;Mollusca;Bivalvia;Autobranchia;Pteriomorpha;Ostr  
 eida;Ostreoidea;Ostreidae;Crassostrea;Crassostrea gigas  
 UdeM00000037475 29159 72 UdeM00000037475 XP\_011426086.2 23.4 304  
 208 10 33 326 35 323 2.50E-09 72 29159 cellular  
 organisms;Eukaryota;Opisthokonta;Metazoa;Eumetazoa;Bilateria;Protostomia;  
 Spiralia;Lophotrochozoa;Mollusca;Bivalvia;Autobranchia;Pteriomorpha;Ostr  
 eida;Ostreoidea;Ostreidae;Crassostrea;Crassostrea gigas  
 UdeM00000037476 1735272 70.9 UdeM00000037476 XP\_041364463.1 31.6  
 117 80 0 9 125 254 370 1.30E-09 70.9 1735272  
 cellular  
 organisms;Eukaryota;Opisthokonta;Metazoa;Eumetazoa;Bilateria;Protostomia;

Spiralia; Lophotrochozoa; Mollusca; Gastropoda; Neomphalina; Neomphaloidea; Peltospiridae; Gigantopelta; Gigantopelta aegis

UdeM00000037477 6565 293.5 UdeM00000037477 XP\_022287645.1 39.7 368  
204 5 56 408 428 792 4.20E-76 293.5 6565 cellular  
organisms; Eukaryota; Opisthokonta; Metazoa; Eumetazoa; Bilateria; Protostomia;  
Spiralia; Lophotrochozoa; Mollusca; Bivalvia; Autobranchia; Pteriormorphia; Ostr  
eida; Ostreioidea; Ostreidae; Crassostrea; Crassostrea virginica

UdeM00000037478 37621 73.2 UdeM00000037478 XP\_014672571.1 57.4 61  
26 0 7 67 127 187 1.90E-10 73.2 37621 cellular  
organisms; Eukaryota; Opisthokonta; Metazoa; Eumetazoa; Bilateria; Protostomia;  
Ecdysozoa; Scalidophora; Priapulida; Priapulimorpha; Priapulimorphida; Priapul  
idae; Priapulus; Priapulus caudatus

UdeM00000037479 37621 72.8 UdeM00000037479 XP\_014672571.1 41.5 94  
53 2 89 180 1 94 5.40E-10 72.8 37621 cellular  
organisms; Eukaryota; Opisthokonta; Metazoa; Eumetazoa; Bilateria; Protostomia;  
Ecdysozoa; Scalidophora; Priapulida; Priapulimorpha; Priapulimorphida; Priapul  
idae; Priapulus; Priapulus caudatus

UdeM00000037480 1735272 161.8 UdeM00000037480 XP\_041369837.1 35.2  
261 154 3 16 276 1877 2122 2.00E-36 161.8 1735272  
cellular  
organisms; Eukaryota; Opisthokonta; Metazoa; Eumetazoa; Bilateria; Protostomia;  
Spiralia; Lophotrochozoa; Mollusca; Gastropoda; Neomphalina; Neomphaloidea; Pel  
tospiridae; Gigantopelta; Gigantopelta aegis

UdeM00000044305 7574 129 UdeM00000044305 XP\_013388573.1 41.8 184  
91 5 96 278 349 517 1.30E-26 129 7574 cellular  
organisms; Eukaryota; Opisthokonta; Metazoa; Eumetazoa; Bilateria; Protostomia;  
Spiralia; Lophotrochozoa; Brachiopoda; Linguliformea; Lingulata; Lingulida; Lin  
guloidea; Lingulidae; Lingula; Lingula anatina

UdeM00000044306 37621 76.3 UdeM00000044306 XP\_014679100.1 35.5 124  
73 2 240 363 78 194 9.70E-11 76.3 37621 cellular  
organisms; Eukaryota; Opisthokonta; Metazoa; Eumetazoa; Bilateria; Protostomia;  
Ecdysozoa; Scalidophora; Priapulida; Priapulimorpha; Priapulimorphida; Priapul  
idae; Priapulus; Priapulus caudatus

UdeM00000044307 6596 75.5 UdeM00000044307 XP\_045186033.1 30.4 158  
108 2 6 163 23 178 8.70E-11 75.5 6596 cellular  
organisms; Eukaryota; Opisthokonta; Metazoa; Eumetazoa; Bilateria; Protostomia;  
Spiralia; Lophotrochozoa; Mollusca; Bivalvia; Autobranchia; Heteroconchia; Eue  
terodonta; Imparidentia; Venerida; Veneroidea; Veneridae; Mercenaria; Mercenari  
a mercenaria

UdeM00000044308 37621 141.4 UdeM00000044308 XP\_014679100.1 37.2 234  
133 7 329 557 78 302 3.60E-30 141.4 37621 cellular  
organisms; Eukaryota; Opisthokonta; Metazoa; Eumetazoa; Bilateria; Protostomia;  
Ecdysozoa; Scalidophora; Priapulida; Priapulimorpha; Priapulimorphida; Priapul  
idae; Priapulus; Priapulus caudatus

UdeM00000044457 574566 58.9 UdeM00000044457 XP\_005652268.1 43.3  
67 32 2 57 123 732 792 7.10E-06 58.9 574566  
cellular organisms; Eukaryota; Viridiplantae; Chlorophyta; core  
chlorophytes; Trebouxiophyceae; Trebouxiophyceae incertae  
sedis; Elliptochloris clade; Coccomyxa; Coccomyxa subellipsoidea; Coccomyxa  
subellipsoidea C-169

UdeM00000003583 6579 1358.6 UdeM00000003583 XP\_033750329.1 43.4  
1771 898 37 10 1741 21 1725 0.00E+00 1358.6 6579  
cellular  
organisms; Eukaryota; Opisthokonta; Metazoa; Eumetazoa; Bilateria; Protostomia;

Spiralia; Lophotrochozoa; Mollusca; Bivalvia; Autobranchia; Pteriomorpha; Pectinida; Pectinoidea; Pectinidae; Pecten; Pecten maximus

UdeM00000003584 6596 263.1 UdeM00000003584 XP\_045215229.1 44.1 322  
154 8 1 299 26 344 4.40E-67 263.1 6596 cellular  
organisms; Eukaryota; Opisthokonta; Metazoa; Eumetazoa; Bilateria; Protostomia; Spiralia; Lophotrochozoa; Mollusca; Bivalvia; Autobranchia; Heteroconchia; Euheterodonta; Imparidentia; Venerida; Veneroidea; Veneridae; Mercenaria; Mercenaria mercenaria

UdeM00000003586 6573 554.3 UdeM00000003586 XP\_021351697.1 37.8 930  
337 22 1 709 760 1669 2.30E-154 554.3 6573 cellular  
organisms; Eukaryota; Opisthokonta; Metazoa; Eumetazoa; Bilateria; Protostomia; Spiralia; Lophotrochozoa; Mollusca; Bivalvia; Autobranchia; Pteriomorpha; Pectinida; Pectinoidea; Pectinidae; Mizuhopecten; Mizuhopecten yessoensis

UdeM00000003587 6596 499.6 UdeM00000003587 XP\_045215229.1 39.1 737  
353 15 9 657 21 749 6.30E-138 499.6 6596 cellular  
organisms; Eukaryota; Opisthokonta; Metazoa; Eumetazoa; Bilateria; Protostomia; Spiralia; Lophotrochozoa; Mollusca; Bivalvia; Autobranchia; Heteroconchia; Euheterodonta; Imparidentia; Venerida; Veneroidea; Veneridae; Mercenaria; Mercenaria mercenaria

UdeM00000003588 6596 453 UdeM00000003588 XP\_045216256.1 57 372  
158 2 1 370 35 406 3.70E-124 453 6596 cellular  
organisms; Eukaryota; Opisthokonta; Metazoa; Eumetazoa; Bilateria; Protostomia; Spiralia; Lophotrochozoa; Mollusca; Bivalvia; Autobranchia; Heteroconchia; Euheterodonta; Imparidentia; Venerida; Veneroidea; Veneridae; Mercenaria; Mercenaria mercenaria

UdeM00000003589 6596 279.6 UdeM00000003589 XP\_045216256.1 54.3 243  
110 1 1 242 147 389 3.70E-72 279.6 6596 cellular  
organisms; Eukaryota; Opisthokonta; Metazoa; Eumetazoa; Bilateria; Protostomia; Spiralia; Lophotrochozoa; Mollusca; Bivalvia; Autobranchia; Heteroconchia; Euheterodonta; Imparidentia; Venerida; Veneroidea; Veneridae; Mercenaria; Mercenaria mercenaria

UdeM00000003590 6596 137.1 UdeM00000003590 XP\_045156592.1 75 88  
20 2 35 122 34 119 1.50E-29 137.1 6596 cellular  
organisms; Eukaryota; Opisthokonta; Metazoa; Eumetazoa; Bilateria; Protostomia; Spiralia; Lophotrochozoa; Mollusca; Bivalvia; Autobranchia; Heteroconchia; Euheterodonta; Imparidentia; Venerida; Veneroidea; Veneridae; Mercenaria; Mercenaria mercenaria

UdeM00000003591 6565 1250.7 UdeM00000003591 XP\_022330352.1 77.3  
790 179 0 1 790 1 790 0.00E+00 1250.7 6565  
cellular  
organisms; Eukaryota; Opisthokonta; Metazoa; Eumetazoa; Bilateria; Protostomia; Spiralia; Lophotrochozoa; Mollusca; Bivalvia; Autobranchia; Pteriomorpha; Ostreida; Ostreoidea; Ostreidae; Crassostrea; Crassostrea virginica

UdeM00000003592 6579 322.4 UdeM00000003592 XP\_033749402.1 79 205  
42 1 3 206 5 209 4.20E-85 322.4 6579 cellular  
organisms; Eukaryota; Opisthokonta; Metazoa; Eumetazoa; Bilateria; Protostomia; Spiralia; Lophotrochozoa; Mollusca; Bivalvia; Autobranchia; Pteriomorpha; Pectinida; Pectinoidea; Pectinidae; Pecten; Pecten maximus

UdeM00000003593 6596 806.6 UdeM00000003593 XP\_045216966.1 48.5 831  
394 12 2 818 41 851 2.90E-230 806.6 6596 cellular  
organisms; Eukaryota; Opisthokonta; Metazoa; Eumetazoa; Bilateria; Protostomia; Spiralia; Lophotrochozoa; Mollusca; Bivalvia; Autobranchia; Heteroconchia; Euheterodonta; Imparidentia; Venerida; Veneroidea; Veneridae; Mercenaria; Mercenaria mercenaria



UdeM00000003594 6565 70.5 UdeM00000003594 XP\_022333843.1 25.1 334  
 161 7 59 389 143 390 6.30E-09 70.5 6565 cellular  
 organisms;Eukaryota;Opisthokonta;Metazoa;Eumetazoa;Bilateria;Protostomia;  
 Spiralia;Lophotrochozoa;Mollusca;Bivalvia;Autobranhia;Pteriormorphia;Ostr  
 eida;Ostreoidea;Ostreidae;Crassostrea;Crassostrea virginica  
 UdeM00000003595 6573 289.7 UdeM00000003595 XP\_021357624.1 36.7 420  
 230 5 3 390 1 416 5.70E-75 289.7 6573 cellular  
 organisms;Eukaryota;Opisthokonta;Metazoa;Eumetazoa;Bilateria;Protostomia;  
 Spiralia;Lophotrochozoa;Mollusca;Bivalvia;Autobranhia;Pteriormorphia;Pect  
 inida;Pectinoidea;Pectinidae;Mizuhopecten;Mizuhopecten yessoensis  
 UdeM00000003596 6596 187.2 UdeM00000003596 XP\_045216623.1 37.8 283  
 163 5 727 997 757 1038 1.40E-43 187.2 6596 cellular  
 organisms;Eukaryota;Opisthokonta;Metazoa;Eumetazoa;Bilateria;Protostomia;  
 Spiralia;Lophotrochozoa;Mollusca;Bivalvia;Autobranhia;Heteroconchia;Euhe  
 terodonta;Imparidentia;Venerida;Veneroidea;Veneridae;Mercenaria;Mercenari  
 a mercenaria  
 UdeM00000003598 6596 650.6 UdeM00000003598 XP\_045216561.1 58.5 586  
 214 8 1 566 1 577 1.80E-183 650.6 6596 cellular  
 organisms;Eukaryota;Opisthokonta;Metazoa;Eumetazoa;Bilateria;Protostomia;  
 Spiralia;Lophotrochozoa;Mollusca;Bivalvia;Autobranhia;Heteroconchia;Euhe  
 terodonta;Imparidentia;Venerida;Veneroidea;Veneridae;Mercenaria;Mercenari  
 a mercenaria  
 UdeM00000003600 225164 152.5 UdeM00000003600 XP\_009049969.1 49.3  
 150 74 1 8 157 9 156 4.40E-34 152.5 225164  
 cellular  
 organisms;Eukaryota;Opisthokonta;Metazoa;Eumetazoa;Bilateria;Protostomia;  
 Spiralia;Lophotrochozoa;Mollusca;Gastropoda;Patellogastropoda;Lottioidea;  
 Lottiidae;Lottia;Lottia gigantea  
 UdeM00000003601 6596 162.2 UdeM00000003601 XP\_045215906.1 50 150  
 73 1 11 158 31 180 6.90E-37 162.2 6596 cellular  
 organisms;Eukaryota;Opisthokonta;Metazoa;Eumetazoa;Bilateria;Protostomia;  
 Spiralia;Lophotrochozoa;Mollusca;Bivalvia;Autobranhia;Heteroconchia;Euhe  
 terodonta;Imparidentia;Venerida;Veneroidea;Veneridae;Mercenaria;Mercenari  
 a mercenaria  
 UdeM00000003602 225164 151.4 UdeM00000003602 XP\_009049969.1 48  
 148 77 0 7 154 9 156 9.60E-34 151.4 225164  
 cellular  
 organisms;Eukaryota;Opisthokonta;Metazoa;Eumetazoa;Bilateria;Protostomia;  
 Spiralia;Lophotrochozoa;Mollusca;Gastropoda;Patellogastropoda;Lottioidea;  
 Lottiidae;Lottia;Lottia gigantea  
 UdeM00000003603 400727 144.1 UdeM00000003603 XP\_025106403.1 45.1  
 144 79 0 7 150 11 154 1.50E-31 144.1 400727  
 cellular  
 organisms;Eukaryota;Opisthokonta;Metazoa;Eumetazoa;Bilateria;Protostomia;  
 Spiralia;Lophotrochozoa;Mollusca;Gastropoda;Caenogastropoda;Architaeniogl  
 ossa;Ampullarioidea;Ampullariidae;Pomacea;Pomacea canaliculata  
 UdeM00000003605 6573 244.6 UdeM00000003605 XP\_021360552.1 43.5 262  
 147 1 400 660 447 708 3.60E-61 244.6 6573 cellular  
 organisms;Eukaryota;Opisthokonta;Metazoa;Eumetazoa;Bilateria;Protostomia;  
 Spiralia;Lophotrochozoa;Mollusca;Bivalvia;Autobranhia;Pteriormorphia;Pect  
 inida;Pectinoidea;Pectinidae;Mizuhopecten;Mizuhopecten yessoensis  
 UdeM00000003606 6573 244.6 UdeM00000003606 XP\_021360552.1 43.5 262  
 147 1 237 497 447 708 2.70E-61 244.6 6573 cellular  
 organisms;Eukaryota;Opisthokonta;Metazoa;Eumetazoa;Bilateria;Protostomia;

Spiralia;Lophotrochozoa;Mollusca;Bivalvia;Autobranchia;Pteriormorphia;Pectinida;Pectinoidea;Pectinidae;Mizuhopecten;Mizuhopecten yessoensis  
UdeM00000003607 6596 526.9 UdeM00000003607 XP\_045156810.1 47.2 678  
306 15 1 641 1 663 3.50E-146 526.9 6596 cellular  
organisms;Eukaryota;Opisthokonta;Metazoa;Eumetazoa;Bilateria;Protostomia;  
Spiralia;Lophotrochozoa;Mollusca;Bivalvia;Autobranchia;Heteroconchia;Euherodonta;Imparidentia;Venerida;Veneroidea;Veneridae;Mercenaria;Mercenaria mercenaria  
UdeM00000003609 6579 1185.2 UdeM00000003609 XP\_033750343.1 53.9  
1105 492 8 24 1116 76 1175 0.00E+00 1185.2 6579  
cellular  
organisms;Eukaryota;Opisthokonta;Metazoa;Eumetazoa;Bilateria;Protostomia;  
Spiralia;Lophotrochozoa;Mollusca;Bivalvia;Autobranchia;Pteriormorphia;Pectinida;Pectinoidea;Pectinidae;Pecten;Pecten maximus  
UdeM00000003610 7574 103.6 UdeM00000003610 XP\_013408299.1 28.8 430  
263 4 1 417 1 400 6.30E-19 103.6 7574 cellular  
organisms;Eukaryota;Opisthokonta;Metazoa;Eumetazoa;Bilateria;Protostomia;  
Spiralia;Lophotrochozoa;Brachiopoda;Linguliformea;Lingulata;Lingulida;Linguloidea;Lingulidae;Lingula;Lingula anatina  
UdeM00000003611 6596 389.8 UdeM00000003611 XP\_045215833.1 55 704  
296 4 19 705 39 738 7.60E-105 389.8 6596 cellular  
organisms;Eukaryota;Opisthokonta;Metazoa;Eumetazoa;Bilateria;Protostomia;  
Spiralia;Lophotrochozoa;Mollusca;Bivalvia;Autobranchia;Heteroconchia;Euherodonta;Imparidentia;Venerida;Veneroidea;Veneridae;Mercenaria;Mercenaria mercenaria  
UdeM00000003612 6596 359.4 UdeM00000003612 XP\_045215833.1 73.4 282  
75 0 1 282 457 738 4.70E-96 359.4 6596 cellular  
organisms;Eukaryota;Opisthokonta;Metazoa;Eumetazoa;Bilateria;Protostomia;  
Spiralia;Lophotrochozoa;Mollusca;Bivalvia;Autobranchia;Heteroconchia;Euherodonta;Imparidentia;Venerida;Veneroidea;Veneridae;Mercenaria;Mercenaria mercenaria  
UdeM00000003613 29159 80.9 UdeM00000003613 XP\_034324305.1 23.4 197  
143 2 187 375 123 319 3.90E-12 80.9 29159 cellular  
organisms;Eukaryota;Opisthokonta;Metazoa;Eumetazoa;Bilateria;Protostomia;  
Spiralia;Lophotrochozoa;Mollusca;Bivalvia;Autobranchia;Pteriormorphia;Ostreida;Ostreoidea;Ostreidae;Crassostrea;Crassostrea gigas  
UdeM00000003614 6596 121.7 UdeM00000003614 XP\_045156562.1 32 334  
195 11 22 351 12 317 2.90E-24 121.7 6596 cellular  
organisms;Eukaryota;Opisthokonta;Metazoa;Eumetazoa;Bilateria;Protostomia;  
Spiralia;Lophotrochozoa;Mollusca;Bivalvia;Autobranchia;Heteroconchia;Euherodonta;Imparidentia;Venerida;Veneroidea;Veneridae;Mercenaria;Mercenaria mercenaria  
UdeM00000003615 6596 528.5 UdeM00000003615 XP\_045215769.1 69.3 384  
85 4 7 361 97 476 6.80E-147 528.5 6596 cellular  
organisms;Eukaryota;Opisthokonta;Metazoa;Eumetazoa;Bilateria;Protostomia;  
Spiralia;Lophotrochozoa;Mollusca;Bivalvia;Autobranchia;Heteroconchia;Euherodonta;Imparidentia;Venerida;Veneroidea;Veneridae;Mercenaria;Mercenaria mercenaria  
UdeM00000003617 6596 443.4 UdeM00000003617 XP\_045216390.1 60.3 398  
150 4 1 396 133 524 3.10E-121 443.4 6596 cellular  
organisms;Eukaryota;Opisthokonta;Metazoa;Eumetazoa;Bilateria;Protostomia;  
Spiralia;Lophotrochozoa;Mollusca;Bivalvia;Autobranchia;Heteroconchia;Euherodonta;Imparidentia;Venerida;Veneroidea;Veneridae;Mercenaria;Mercenaria mercenaria

UdeM00000003616 6596 628.6 UdeM00000003616 XP\_045216390.1 63.6 522  
 182 4 6 525 9 524 7.00E-177 628.6 6596 cellular  
 organisms;Eukaryota;Opisthokonta;Metazoa;Eumetazoa;Bilateria;Protostomia;  
 Spiralia;Lophotrochozoa;Mollusca;Bivalvia;Autobranchia;Heteroconchia;Euhe  
 terodonta;Imparidentia;Venerida;Veneroidea;Veneridae;Mercenaria;Mercenari  
 a mercenaria  
 UdeM00000003618 6579 125.2 UdeM00000003618 XP\_033749627.1 28.4 436  
 215 16 23 402 9 403 1.90E-25 125.2 6579 cellular  
 organisms;Eukaryota;Opisthokonta;Metazoa;Eumetazoa;Bilateria;Protostomia;  
 Spiralia;Lophotrochozoa;Mollusca;Bivalvia;Autobranchia;Pteriomorpha;Pect  
 inida;Pectinoidea;Pectinidae;Pecten;Pecten maximus  
 UdeM00000003620 6596 531.9 UdeM00000003620 XP\_045190923.1 54.4 517  
 211 6 31 523 15 530 8.80E-148 531.9 6596 cellular  
 organisms;Eukaryota;Opisthokonta;Metazoa;Eumetazoa;Bilateria;Protostomia;  
 Spiralia;Lophotrochozoa;Mollusca;Bivalvia;Autobranchia;Heteroconchia;Euhe  
 terodonta;Imparidentia;Venerida;Veneroidea;Veneridae;Mercenaria;Mercenari  
 a mercenaria  
 UdeM00000003622 6596 126.7 UdeM00000003622 XP\_045216858.1 40.6 271  
 128 13 2 261 8 256 5.00E-26 126.7 6596 cellular  
 organisms;Eukaryota;Opisthokonta;Metazoa;Eumetazoa;Bilateria;Protostomia;  
 Spiralia;Lophotrochozoa;Mollusca;Bivalvia;Autobranchia;Heteroconchia;Euhe  
 terodonta;Imparidentia;Venerida;Veneroidea;Veneridae;Mercenaria;Mercenari  
 a mercenaria  
 UdeM00000003623 6596 183.7 UdeM00000003623 XP\_045156364.1 75 116  
 29 0 1 116 1 116 1.30E-43 183.7 6596 cellular  
 organisms;Eukaryota;Opisthokonta;Metazoa;Eumetazoa;Bilateria;Protostomia;  
 Spiralia;Lophotrochozoa;Mollusca;Bivalvia;Autobranchia;Heteroconchia;Euhe  
 terodonta;Imparidentia;Venerida;Veneroidea;Veneridae;Mercenaria;Mercenari  
 a mercenaria  
 UdeM00000003625 6579 90.1 UdeM00000003625 XP\_033750948.1 48.2 85  
 44 0 18 102 26 110 1.70E-15 90.1 6579 cellular  
 organisms;Eukaryota;Opisthokonta;Metazoa;Eumetazoa;Bilateria;Protostomia;  
 Spiralia;Lophotrochozoa;Mollusca;Bivalvia;Autobranchia;Pteriomorpha;Pect  
 inida;Pectinoidea;Pectinidae;Pecten;Pecten maximus  
 UdeM00000003624 6596 118.2 UdeM00000003624 XP\_045215677.1 43.9 148  
 47 4 22 138 15 157 8.60E-24 118.2 6596 cellular  
 organisms;Eukaryota;Opisthokonta;Metazoa;Eumetazoa;Bilateria;Protostomia;  
 Spiralia;Lophotrochozoa;Mollusca;Bivalvia;Autobranchia;Heteroconchia;Euhe  
 terodonta;Imparidentia;Venerida;Veneroidea;Veneridae;Mercenaria;Mercenari  
 a mercenaria  
 UdeM00000003626 6565 281.6 UdeM00000003626 XP\_022327962.1 51.1 274  
 131 2 1 271 445 718 1.10E-72 281.6 6565 cellular  
 organisms;Eukaryota;Opisthokonta;Metazoa;Eumetazoa;Bilateria;Protostomia;  
 Spiralia;Lophotrochozoa;Mollusca;Bivalvia;Autobranchia;Pteriomorpha;Ostr  
 eida;Ostreoidea;Ostreidae;Crassostrea;Crassostrea virginica  
 UdeM00000003627 6596 179.1 UdeM00000003627 XP\_045164125.1 70.8 120  
 35 0 1 120 169 288 3.40E-42 179.1 6596 cellular  
 organisms;Eukaryota;Opisthokonta;Metazoa;Eumetazoa;Bilateria;Protostomia;  
 Spiralia;Lophotrochozoa;Mollusca;Bivalvia;Autobranchia;Heteroconchia;Euhe  
 terodonta;Imparidentia;Venerida;Veneroidea;Veneridae;Mercenaria;Mercenari  
 a mercenaria  
 UdeM00000003628 6596 949.1 UdeM00000003628 XP\_045215677.1 65.8 795  
 256 7 1 789 167 951 3.60E-273 949.1 6596 cellular  
 organisms;Eukaryota;Opisthokonta;Metazoa;Eumetazoa;Bilateria;Protostomia;

Spiralia;Lophotrochozoa;Mollusca;Bivalvia;Autobranchia;Heteroconchia;Euherodonta;Imparidentia;Venerida;Veneroidea;Veneridae;Mercenaria;Mercenaria mercenaria

UdeM00000003629 6596 932.2 UdeM00000003629 XP\_045215677.1 62.9 833  
255 8 1 827 167 951 4.80E-268 932.2 6596 cellular

organisms;Eukaryota;Opisthokonta;Metazoa;Eumetazoa;Bilateria;Protostomia;Spiralia;Lophotrochozoa;Mollusca;Bivalvia;Autobranchia;Heteroconchia;Euherodonta;Imparidentia;Venerida;Veneroidea;Veneridae;Mercenaria;Mercenaria mercenaria

UdeM00000003630 6579 152.9 UdeM00000003630 XP\_033743219.1 39.2 217  
115 6 25 236 34 238 5.10E-34 152.9 6579 cellular

organisms;Eukaryota;Opisthokonta;Metazoa;Eumetazoa;Bilateria;Protostomia;Spiralia;Lophotrochozoa;Mollusca;Bivalvia;Autobranchia;Pteriomorphia;Pectinida;Pectinoidea;Pectinidae;Pecten;Pecten maximus

UdeM00000003632 2607531 241.9 UdeM00000003632 XP\_029643723.1 50.8  
299 132 7 15 303 1 294 1.10E-60 241.9 2607531  
cellular

organisms;Eukaryota;Opisthokonta;Metazoa;Eumetazoa;Bilateria;Protostomia;Spiralia;Lophotrochozoa;Mollusca;Cephalopoda;Coleoidea;Octopodiformes;Octopoda;Incirrata;Octopodidae;Octopus;Octopus sinensis

UdeM00000003633 6579 285.4 UdeM00000003633 XP\_033750689.1 45.8 371  
167 6 27 377 66 422 1.20E-73 285.4 6579 cellular

organisms;Eukaryota;Opisthokonta;Metazoa;Eumetazoa;Bilateria;Protostomia;Spiralia;Lophotrochozoa;Mollusca;Bivalvia;Autobranchia;Pteriomorphia;Pectinida;Pectinoidea;Pectinidae;Pecten;Pecten maximus

UdeM00000003634 6596 92 UdeM00000003634 XP\_045216698.1 52.9 85  
40 0 20 104 4 88 5.10E-16 92 6596 cellular

organisms;Eukaryota;Opisthokonta;Metazoa;Eumetazoa;Bilateria;Protostomia;Spiralia;Lophotrochozoa;Mollusca;Bivalvia;Autobranchia;Heteroconchia;Euherodonta;Imparidentia;Venerida;Veneroidea;Veneridae;Mercenaria;Mercenaria mercenaria

UdeM00000003635 6596 322.4 UdeM00000003635 XP\_045216696.1 60 270  
106 2 15 283 124 392 6.60E-85 322.4 6596 cellular

organisms;Eukaryota;Opisthokonta;Metazoa;Eumetazoa;Bilateria;Protostomia;Spiralia;Lophotrochozoa;Mollusca;Bivalvia;Autobranchia;Heteroconchia;Euherodonta;Imparidentia;Venerida;Veneroidea;Veneridae;Mercenaria;Mercenaria mercenaria

UdeM00000003636 7574 198.7 UdeM00000003636 XP\_013407187.1 45.3 247  
130 4 6 250 5 248 8.50E-48 198.7 7574 cellular

organisms;Eukaryota;Opisthokonta;Metazoa;Eumetazoa;Bilateria;Protostomia;Spiralia;Lophotrochozoa;Brachiopoda;Linguliformea;Lingulata;Lingulida;Linguloidea;Lingulidae;Lingula;Lingula anatina

UdeM00000003638 6573 80.5 UdeM00000003638 XP\_021372201.1 32 128  
79 3 2 121 8 135 1.70E-12 80.5 6573 cellular

organisms;Eukaryota;Opisthokonta;Metazoa;Eumetazoa;Bilateria;Protostomia;Spiralia;Lophotrochozoa;Mollusca;Bivalvia;Autobranchia;Pteriomorphia;Pectinida;Pectinoidea;Pectinidae;Mizuhopecten;Mizuhopecten yessoensis

UdeM00000003639 6573 65.1 UdeM00000003639 XP\_021372201.1 32.3 96  
61 2 13 104 40 135 6.30E-08 65.1 6573 cellular

organisms;Eukaryota;Opisthokonta;Metazoa;Eumetazoa;Bilateria;Protostomia;Spiralia;Lophotrochozoa;Mollusca;Bivalvia;Autobranchia;Pteriomorphia;Pectinida;Pectinoidea;Pectinidae;Mizuhopecten;Mizuhopecten yessoensis

UdeM00000003640 6573 86.7 UdeM00000003640 XP\_021372201.1 34.4 128  
76 3 2 121 8 135 2.30E-14 86.7 6573 cellular

organisms;Eukaryota;Opisthokonta;Metazoa;Eumetazoa;Bilateria;Protostomia;
Spiralia;Lophotrochozoa;Mollusca;Bivalvia;Autobranchia;Pteriomorpha;Pect
inida;Pectinoidea;Pectinidae;Mizuhopecten;Mizuhopecten yessoensis
UdeM00000003641 6573 70.1 UdeM00000003641 XP\_021372201.1 34.7 98
60 2 11 104 38 135 1.90E-09 70.1 6573 cellular
organisms;Eukaryota;Opisthokonta;Metazoa;Eumetazoa;Bilateria;Protostomia;
Spiralia;Lophotrochozoa;Mollusca;Bivalvia;Autobranchia;Pteriomorpha;Pect
inida;Pectinoidea;Pectinidae;Mizuhopecten;Mizuhopecten yessoensis
UdeM00000003642 6573 89.4 UdeM00000003642 XP\_021372201.1 37.2 121
72 2 2 118 8 128 3.60E-15 89.4 6573 cellular
organisms;Eukaryota;Opisthokonta;Metazoa;Eumetazoa;Bilateria;Protostomia;
Spiralia;Lophotrochozoa;Mollusca;Bivalvia;Autobranchia;Pteriomorpha;Pect
inida;Pectinoidea;Pectinidae;Mizuhopecten;Mizuhopecten yessoensis
UdeM00000003643 6105 59.3 UdeM00000003643 XP\_031568000.1 31 100
64 1 6 100 29 128 4.30E-06 59.3 6105 cellular
organisms;Eukaryota;Opisthokonta;Metazoa;Eumetazoa;Cnidaria;Anthozoa;Hexa
corallia;Actiniaria;Actiniidae;Actinia;Actinia tenebrosa
UdeM00000003644 6579 854.4 UdeM00000003644 XP\_033728194.1 50.3 858
407 7 1 844 282 1134 1.30E-244 854.4 6579 cellular
organisms;Eukaryota;Opisthokonta;Metazoa;Eumetazoa;Bilateria;Protostomia;
Spiralia;Lophotrochozoa;Mollusca;Bivalvia;Autobranchia;Pteriomorpha;Pect
inida;Pectinoidea;Pectinidae;Pecten;Pecten maximus
UdeM00000003646 6579 249.2 UdeM00000003646 XP\_033739239.1 44.9 314
148 8 125 417 79 388 9.80E-63 249.2 6579 cellular
organisms;Eukaryota;Opisthokonta;Metazoa;Eumetazoa;Bilateria;Protostomia;
Spiralia;Lophotrochozoa;Mollusca;Bivalvia;Autobranchia;Pteriomorpha;Pect
inida;Pectinoidea;Pectinidae;Pecten;Pecten maximus
UdeM00000003647 6573 85.5 UdeM00000003647 XP\_021372201.1 35.5 121
74 2 2 118 8 128 5.30E-14 85.5 6573 cellular
organisms;Eukaryota;Opisthokonta;Metazoa;Eumetazoa;Bilateria;Protostomia;
Spiralia;Lophotrochozoa;Mollusca;Bivalvia;Autobranchia;Pteriomorpha;Pect
inida;Pectinoidea;Pectinidae;Mizuhopecten;Mizuhopecten yessoensis
UdeM00000003649 6565 141 UdeM00000003649 XP\_022334093.1 48.9 133
68 0 1 133 1 133 1.10E-30 141 6565 cellular
organisms;Eukaryota;Opisthokonta;Metazoa;Eumetazoa;Bilateria;Protostomia;
Spiralia;Lophotrochozoa;Mollusca;Bivalvia;Autobranchia;Pteriomorpha;Ostr
eida;Ostreoidea;Ostreidae;Crassostrea;Crassostrea virginica
UdeM00000003650 6596 516.5 UdeM00000003650 XP\_045216722.1 36.9 862
324 10 25 884 43 686 6.50E-143 516.5 6596 cellular
organisms;Eukaryota;Opisthokonta;Metazoa;Eumetazoa;Bilateria;Protostomia;
Spiralia;Lophotrochozoa;Mollusca;Bivalvia;Autobranchia;Heteroconchia;Euhe
terodonta;Imparidentia;Venerida;Veneroidea;Veneridae;Mercenaria;Mercenari
a mercenaria
UdeM00000003651 29159 492.3 UdeM00000003651 XP\_011436400.1 79.7 301
61 0 1 301 1 301 4.50E-136 492.3 29159 cellular
organisms;Eukaryota;Opisthokonta;Metazoa;Eumetazoa;Bilateria;Protostomia;
Spiralia;Lophotrochozoa;Mollusca;Bivalvia;Autobranchia;Pteriomorpha;Ostr
eida;Ostreoidea;Ostreidae;Crassostrea;Crassostrea gigas
UdeM00000003652 6596 90.1 UdeM00000003652 XP\_045216522.1 29.4 177
122 1 93 269 1 174 4.70E-15 90.1 6596 cellular
organisms;Eukaryota;Opisthokonta;Metazoa;Eumetazoa;Bilateria;Protostomia;
Spiralia;Lophotrochozoa;Mollusca;Bivalvia;Autobranchia;Heteroconchia;Euhe
terodonta;Imparidentia;Venerida;Veneroidea;Veneridae;Mercenaria;Mercenari
a mercenaria

UdeM00000003653 6596 462.2 UdeM00000003653 XP\_045215344.1 43.1 592  
 285 9 2 569 196 759 9.50E-127 462.2 6596 cellular  
 organisms;Eukaryota;Opisthokonta;Metazoa;Eumetazoa;Bilateria;Protostomia;  
 Spiralia;Lophotrochozoa;Mollusca;Bivalvia;Autobranchia;Heteroconchia;Euhe  
 terodonta;Imparidentia;Venerida;Veneroidea;Veneridae;Mercenaria;Mercenari  
 a mercenaria  
 UdeM00000003654 6596 616.7 UdeM00000003654 XP\_045215344.1 45 735  
 352 9 35 745 53 759 3.90E-173 616.7 6596 cellular  
 organisms;Eukaryota;Opisthokonta;Metazoa;Eumetazoa;Bilateria;Protostomia;  
 Spiralia;Lophotrochozoa;Mollusca;Bivalvia;Autobranchia;Heteroconchia;Euhe  
 terodonta;Imparidentia;Venerida;Veneroidea;Veneridae;Mercenaria;Mercenari  
 a mercenaria  
 UdeM00000003655 6596 133.3 UdeM00000003655 XP\_045215344.1 51.2 121  
 59 0 35 155 53 173 2.70E-28 133.3 6596 cellular  
 organisms;Eukaryota;Opisthokonta;Metazoa;Eumetazoa;Bilateria;Protostomia;  
 Spiralia;Lophotrochozoa;Mollusca;Bivalvia;Autobranchia;Heteroconchia;Euhe  
 terodonta;Imparidentia;Venerida;Veneroidea;Veneridae;Mercenaria;Mercenari  
 a mercenaria  
 UdeM00000003657 6596 468.8 UdeM00000003657 XP\_045215344.1 43.8 592  
 281 10 2 569 196 759 1.00E-128 468.8 6596 cellular  
 organisms;Eukaryota;Opisthokonta;Metazoa;Eumetazoa;Bilateria;Protostomia;  
 Spiralia;Lophotrochozoa;Mollusca;Bivalvia;Autobranchia;Heteroconchia;Euhe  
 terodonta;Imparidentia;Venerida;Veneroidea;Veneridae;Mercenaria;Mercenari  
 a mercenaria  
 UdeM00000003658 6596 621.7 UdeM00000003658 XP\_045215344.1 44.8 750  
 362 10 10 735 38 759 1.20E-174 621.7 6596 cellular  
 organisms;Eukaryota;Opisthokonta;Metazoa;Eumetazoa;Bilateria;Protostomia;  
 Spiralia;Lophotrochozoa;Mollusca;Bivalvia;Autobranchia;Heteroconchia;Euhe  
 terodonta;Imparidentia;Venerida;Veneroidea;Veneridae;Mercenaria;Mercenari  
 a mercenaria  
 UdeM00000003659 6596 132.1 UdeM00000003659 XP\_045215344.1 46.3 136  
 73 0 10 145 38 173 5.70E-28 132.1 6596 cellular  
 organisms;Eukaryota;Opisthokonta;Metazoa;Eumetazoa;Bilateria;Protostomia;  
 Spiralia;Lophotrochozoa;Mollusca;Bivalvia;Autobranchia;Heteroconchia;Euhe  
 terodonta;Imparidentia;Venerida;Veneroidea;Veneridae;Mercenaria;Mercenari  
 a mercenaria  
 UdeM00000003661 6565 442.6 UdeM00000003661 XP\_022329914.1 55.9 381  
 160 1 37 417 116 488 5.60E-121 442.6 6565 cellular  
 organisms;Eukaryota;Opisthokonta;Metazoa;Eumetazoa;Bilateria;Protostomia;  
 Spiralia;Lophotrochozoa;Mollusca;Bivalvia;Autobranchia;Pteriomorphia;Ostr  
 eida;Ostreoidea;Ostreidae;Crassostrea;Crassostrea virginica  
 UdeM00000003662 6565 439.5 UdeM00000003662 XP\_022329914.1 56.1 380  
 156 2 1 377 117 488 4.30E-120 439.5 6565 cellular  
 organisms;Eukaryota;Opisthokonta;Metazoa;Eumetazoa;Bilateria;Protostomia;  
 Spiralia;Lophotrochozoa;Mollusca;Bivalvia;Autobranchia;Pteriomorphia;Ostr  
 eida;Ostreoidea;Ostreidae;Crassostrea;Crassostrea virginica  
 UdeM00000003663 29159 431.8 UdeM00000003663 XP\_011453191.2 55.5 382  
 162 1 30 411 113 486 9.90E-118 431.8 29159 cellular  
 organisms;Eukaryota;Opisthokonta;Metazoa;Eumetazoa;Bilateria;Protostomia;  
 Spiralia;Lophotrochozoa;Mollusca;Bivalvia;Autobranchia;Pteriomorphia;Ostr  
 eida;Ostreoidea;Ostreidae;Crassostrea;Crassostrea gigas  
 UdeM00000003665 29159 549.7 UdeM00000003665 XP\_011453191.2 55.5 494  
 211 2 1 493 1 486 3.90E-153 549.7 29159 cellular  
 organisms;Eukaryota;Opisthokonta;Metazoa;Eumetazoa;Bilateria;Protostomia;

Spiralia;Lophotrochozoa;Mollusca;Bivalvia;Autobranchia;Pteriormorphia;Ostr  
 eida;Ostreoidea;Ostreidae;Crassostrea;Crassostrea gigas  
 UdeM00000003666 29159 92 UdeM00000003666 XP\_034339171.1 32.7 156  
 93 4 1 144 452 607 7.30E-16 92 29159 cellular  
 organisms;Eukaryota;Opisthokonta;Metazoa;Eumetazoa;Bilateria;Protostomia;  
 Spiralia;Lophotrochozoa;Mollusca;Bivalvia;Autobranchia;Pteriormorphia;Ostr  
 eida;Ostreoidea;Ostreidae;Crassostrea;Crassostrea gigas  
 UdeM00000003669 6565 466.5 UdeM00000003669 XP\_022329914.1 52.3 444  
 203 2 2 444 52 487 3.90E-128 466.5 6565 cellular  
 organisms;Eukaryota;Opisthokonta;Metazoa;Eumetazoa;Bilateria;Protostomia;  
 Spiralia;Lophotrochozoa;Mollusca;Bivalvia;Autobranchia;Pteriormorphia;Ostr  
 eida;Ostreoidea;Ostreidae;Crassostrea;Crassostrea virginica  
 UdeM00000003670 29159 752.3 UdeM00000003670 XP\_011453191.2 72.4 486  
 134 0 1 486 1 486 3.90E-214 752.3 29159 cellular  
 organisms;Eukaryota;Opisthokonta;Metazoa;Eumetazoa;Bilateria;Protostomia;  
 Spiralia;Lophotrochozoa;Mollusca;Bivalvia;Autobranchia;Pteriormorphia;Ostr  
 eida;Ostreoidea;Ostreidae;Crassostrea;Crassostrea gigas  
 UdeM00000003673 6573 201.1 UdeM00000003673 XP\_021371670.1 28.2 634  
 398 19 9 614 298 902 4.30E-48 201.1 6573 cellular  
 organisms;Eukaryota;Opisthokonta;Metazoa;Eumetazoa;Bilateria;Protostomia;  
 Spiralia;Lophotrochozoa;Mollusca;Bivalvia;Autobranchia;Pteriormorphia;Pect  
 inida;Pectinoidea;Pectinidae;Mizuhopecten;Mizuhopecten yessoensis  
 UdeM00000003672 6573 258.5 UdeM00000003672 XP\_021371670.1 29.8 725  
 448 22 9 702 298 992 2.60E-65 258.5 6573 cellular  
 organisms;Eukaryota;Opisthokonta;Metazoa;Eumetazoa;Bilateria;Protostomia;  
 Spiralia;Lophotrochozoa;Mollusca;Bivalvia;Autobranchia;Pteriormorphia;Pect  
 inida;Pectinoidea;Pectinidae;Mizuhopecten;Mizuhopecten yessoensis  
 UdeM00000003674 6596 181 UdeM00000003674 XP\_045215195.1 40.7 226  
 121 2 17 242 285 497 1.80E-42 181 6596 cellular  
 organisms;Eukaryota;Opisthokonta;Metazoa;Eumetazoa;Bilateria;Protostomia;  
 Spiralia;Lophotrochozoa;Mollusca;Bivalvia;Autobranchia;Heteroconchia;Euhe  
 terodonta;Imparidentia;Venerida;Veneroidea;Veneridae;Mercenaria;Mercenari  
 a mercenaria  
 UdeM00000003675 29159 602.8 UdeM00000003675 XP\_034322944.1 61.3 496  
 164 5 26 509 29 508 4.00E-169 602.8 29159 cellular  
 organisms;Eukaryota;Opisthokonta;Metazoa;Eumetazoa;Bilateria;Protostomia;  
 Spiralia;Lophotrochozoa;Mollusca;Bivalvia;Autobranchia;Pteriormorphia;Ostr  
 eida;Ostreoidea;Ostreidae;Crassostrea;Crassostrea gigas  
 UdeM00000003677 6596 668.3 UdeM00000003677 XP\_045216595.1 66.7 508  
 149 9 11 512 7 500 7.70E-189 668.3 6596 cellular  
 organisms;Eukaryota;Opisthokonta;Metazoa;Eumetazoa;Bilateria;Protostomia;  
 Spiralia;Lophotrochozoa;Mollusca;Bivalvia;Autobranchia;Heteroconchia;Euhe  
 terodonta;Imparidentia;Venerida;Veneroidea;Veneridae;Mercenaria;Mercenari  
 a mercenaria  
 UdeM00000003678 6579 691.4 UdeM00000003678 XP\_033749540.1 72.5 484  
 129 3 23 505 19 499 8.60E-196 691.4 6579 cellular  
 organisms;Eukaryota;Opisthokonta;Metazoa;Eumetazoa;Bilateria;Protostomia;  
 Spiralia;Lophotrochozoa;Mollusca;Bivalvia;Autobranchia;Pteriormorphia;Pect  
 inida;Pectinoidea;Pectinidae;Pecten;Pecten maximus  
 UdeM00000003679 6596 634 UdeM00000003679 XP\_045216591.1 61.7 519  
 182 5 60 567 23 535 1.80E-178 634 6596 cellular  
 organisms;Eukaryota;Opisthokonta;Metazoa;Eumetazoa;Bilateria;Protostomia;  
 Spiralia;Lophotrochozoa;Mollusca;Bivalvia;Autobranchia;Heteroconchia;Euhe

terodonta;Imparidentia;Venerida;Veneroidea;Veneridae;Mercenaria;Mercenari  
 a mercenaria  
 UdeM00000003680 6596 652.1 UdeM00000003680 XP\_045156808.1 68 475  
 129 5 1 458 41 509 5.10E-184 652.1 6596 cellular  
 organisms;Eukaryota;Opisthokonta;Metazoa;Eumetazoa;Bilateria;Protostomia;  
 Spiralia;Lophotrochozoa;Mollusca;Bivalvia;Autobranhia;Heteroconchia;Euhe  
 terodonta;Imparidentia;Venerida;Veneroidea;Veneridae;Mercenaria;Mercenari  
 a mercenaria  
 UdeM00000003681 6579 517.3 UdeM00000003681 XP\_033749914.1 57.4 481  
 170 2 1 449 1 478 2.00E-143 517.3 6579 cellular  
 organisms;Eukaryota;Opisthokonta;Metazoa;Eumetazoa;Bilateria;Protostomia;  
 Spiralia;Lophotrochozoa;Mollusca;Bivalvia;Autobranhia;Pteriormorphia;Pect  
 inida;Pectinoidea;Pectinidae;Pecten;Pecten maximus  
 UdeM00000003682 6596 134.4 UdeM00000003682 XP\_045215918.1 56.3 103  
 45 0 3 105 39 141 8.90E-29 134.4 6596 cellular  
 organisms;Eukaryota;Opisthokonta;Metazoa;Eumetazoa;Bilateria;Protostomia;  
 Spiralia;Lophotrochozoa;Mollusca;Bivalvia;Autobranhia;Heteroconchia;Euhe  
 terodonta;Imparidentia;Venerida;Veneroidea;Veneridae;Mercenaria;Mercenari  
 a mercenaria  
 UdeM00000003683 6596 114.8 UdeM00000003683 XP\_045215923.1 51.3 119  
 52 1 8 120 152 270 1.00E-22 114.8 6596 cellular  
 organisms;Eukaryota;Opisthokonta;Metazoa;Eumetazoa;Bilateria;Protostomia;  
 Spiralia;Lophotrochozoa;Mollusca;Bivalvia;Autobranhia;Heteroconchia;Euhe  
 terodonta;Imparidentia;Venerida;Veneroidea;Veneridae;Mercenaria;Mercenari  
 a mercenaria  
 UdeM00000003685 6596 751.9 UdeM00000003685 XP\_045215747.1 58 617  
 243 3 1 601 9 625 6.30E-214 751.9 6596 cellular  
 organisms;Eukaryota;Opisthokonta;Metazoa;Eumetazoa;Bilateria;Protostomia;  
 Spiralia;Lophotrochozoa;Mollusca;Bivalvia;Autobranhia;Heteroconchia;Euhe  
 terodonta;Imparidentia;Venerida;Veneroidea;Veneridae;Mercenaria;Mercenari  
 a mercenaria  
 UdeM00000003686 6596 310.1 UdeM00000003686 XP\_045156315.1 40.6 404  
 214 8 50 436 907 1301 4.60E-81 310.1 6596 cellular  
 organisms;Eukaryota;Opisthokonta;Metazoa;Eumetazoa;Bilateria;Protostomia;  
 Spiralia;Lophotrochozoa;Mollusca;Bivalvia;Autobranhia;Heteroconchia;Euhe  
 terodonta;Imparidentia;Venerida;Veneroidea;Veneridae;Mercenaria;Mercenari  
 a mercenaria  
 UdeM00000003687 6596 425.6 UdeM00000003687 XP\_045156314.1 51 398  
 189 5 647 1040 907 1302 1.80E-115 425.6 6596 cellular  
 organisms;Eukaryota;Opisthokonta;Metazoa;Eumetazoa;Bilateria;Protostomia;  
 Spiralia;Lophotrochozoa;Mollusca;Bivalvia;Autobranhia;Heteroconchia;Euhe  
 terodonta;Imparidentia;Venerida;Veneroidea;Veneridae;Mercenaria;Mercenari  
 a mercenaria  
 UdeM00000003687 6596 88.2 UdeM00000003687 XP\_045156314.1 35.5 141  
 88 1 126 266 4 141 6.70E-14 88.2 6596 cellular  
 organisms;Eukaryota;Opisthokonta;Metazoa;Eumetazoa;Bilateria;Protostomia;  
 Spiralia;Lophotrochozoa;Mollusca;Bivalvia;Autobranhia;Heteroconchia;Euhe  
 terodonta;Imparidentia;Venerida;Veneroidea;Veneridae;Mercenaria;Mercenari  
 a mercenaria  
 UdeM00000003688 6596 449.5 UdeM00000003688 XP\_045156314.1 53 398  
 181 5 244 637 907 1302 7.00E-123 449.5 6596 cellular  
 organisms;Eukaryota;Opisthokonta;Metazoa;Eumetazoa;Bilateria;Protostomia;  
 Spiralia;Lophotrochozoa;Mollusca;Bivalvia;Autobranhia;Heteroconchia;Euhe



terodonta;Imparidentia;Venerida;Veneroidea;Veneridae;Mercenaria;Mercenari  
 a mercenaria  
 UdeM00000003689 6596 379 UdeM00000003689 XP\_045156316.1 34.9 587  
 266 7 4 479 6 587 8.80E-102 379 6596 cellular  
 organisms;Eukaryota;Opisthokonta;Metazoa;Eumetazoa;Bilateria;Protostomia;  
 Spiralia;Lophotrochozoa;Mollusca;Bivalvia;Autobranchia;Heteroconchia;Euhe  
 terodonta;Imparidentia;Venerida;Veneroidea;Veneridae;Mercenaria;Mercenari  
 a mercenaria  
 UdeM00000003690 6565 555.4 UdeM00000003690 XP\_022324874.1 78.5 340  
 69 2 1 336 2 341 4.80E-155 555.4 6565 cellular  
 organisms;Eukaryota;Opisthokonta;Metazoa;Eumetazoa;Bilateria;Protostomia;  
 Spiralia;Lophotrochozoa;Mollusca;Bivalvia;Autobranchia;Pteriormorphia;Ostr  
 eida;Ostreoidea;Ostreidae;Crassostrea;Crassostrea virginica  
 UdeM00000003691 7574 228.8 UdeM00000003691 XP\_013413451.1 57.5 193  
 67 6 8 187 63 253 7.30E-57 228.8 7574 cellular  
 organisms;Eukaryota;Opisthokonta;Metazoa;Eumetazoa;Bilateria;Protostomia;  
 Spiralia;Lophotrochozoa;Brachiopoda;Linguliformea;Lingulata;Lingulida;Lin  
 guloidea;Lingulidae;Lingula;Lingula anatina  
 UdeM00000003692 6596 552 UdeM00000003692 XP\_045156457.1 70.8 408  
 103 2 11 417 12 404 6.60E-154 552 6596 cellular  
 organisms;Eukaryota;Opisthokonta;Metazoa;Eumetazoa;Bilateria;Protostomia;  
 Spiralia;Lophotrochozoa;Mollusca;Bivalvia;Autobranchia;Heteroconchia;Euhe  
 terodonta;Imparidentia;Venerida;Veneroidea;Veneridae;Mercenaria;Mercenari  
 a mercenaria  
 UdeM00000003693 6596 532.3 UdeM00000003693 XP\_045156457.1 67.9 421  
 117 4 1 420 1 404 5.40E-148 532.3 6596 cellular  
 organisms;Eukaryota;Opisthokonta;Metazoa;Eumetazoa;Bilateria;Protostomia;  
 Spiralia;Lophotrochozoa;Mollusca;Bivalvia;Autobranchia;Heteroconchia;Euhe  
 terodonta;Imparidentia;Venerida;Veneroidea;Veneridae;Mercenaria;Mercenari  
 a mercenaria  
 UdeM00000003694 6596 505.4 UdeM00000003694 XP\_045156457.1 69 390  
 104 3 1 389 31 404 6.60E-140 505.4 6596 cellular  
 organisms;Eukaryota;Opisthokonta;Metazoa;Eumetazoa;Bilateria;Protostomia;  
 Spiralia;Lophotrochozoa;Mollusca;Bivalvia;Autobranchia;Heteroconchia;Euhe  
 terodonta;Imparidentia;Venerida;Veneroidea;Veneridae;Mercenaria;Mercenari  
 a mercenaria  
 UdeM00000003695 6596 327 UdeM00000003695 XP\_045156457.1 66 285  
 80 3 29 312 136 404 2.60E-86 327 6596 cellular  
 organisms;Eukaryota;Opisthokonta;Metazoa;Eumetazoa;Bilateria;Protostomia;  
 Spiralia;Lophotrochozoa;Mollusca;Bivalvia;Autobranchia;Heteroconchia;Euhe  
 terodonta;Imparidentia;Venerida;Veneroidea;Veneridae;Mercenaria;Mercenari  
 a mercenaria  
 UdeM00000003696 6573 278.9 UdeM00000003696 XP\_021372232.1 48.6 329  
 155 7 22 348 16 332 9.30E-72 278.9 6573 cellular  
 organisms;Eukaryota;Opisthokonta;Metazoa;Eumetazoa;Bilateria;Protostomia;  
 Spiralia;Lophotrochozoa;Mollusca;Bivalvia;Autobranchia;Pteriormorphia;Pect  
 inida;Pectinoidea;Pectinidae;Mizuhopecten;Mizuhopecten yessoensis  
 UdeM00000003697 6596 218 UdeM00000003697 XP\_045215562.1 47.9 305  
 128 7 5 295 3 290 1.60E-53 218 6596 cellular  
 organisms;Eukaryota;Opisthokonta;Metazoa;Eumetazoa;Bilateria;Protostomia;  
 Spiralia;Lophotrochozoa;Mollusca;Bivalvia;Autobranchia;Heteroconchia;Euhe  
 terodonta;Imparidentia;Venerida;Veneroidea;Veneridae;Mercenaria;Mercenari  
 a mercenaria

UdeM00000003698 6596 302.8 UdeM00000003698 XP\_045215564.1 47.7 344  
 122 6 23 355 31 327 1.30E-78 302.8 6596 cellular  
 organisms;Eukaryota;Opisthokonta;Metazoa;Eumetazoa;Bilateria;Protostomia;  
 Spiralia;Lophotrochozoa;Mollusca;Bivalvia;Autobranchia;Heteroconchia;Euhe  
 terodonta;Imparidentia;Venerida;Veneroidea;Veneridae;Mercenaria;Mercenari  
 a mercenaria  
 UdeM00000003699 6579 233.4 UdeM00000003699 XP\_033749701.1 40.6 330  
 158 6 23 317 22 348 4.10E-58 233.4 6579 cellular  
 organisms;Eukaryota;Opisthokonta;Metazoa;Eumetazoa;Bilateria;Protostomia;  
 Spiralia;Lophotrochozoa;Mollusca;Bivalvia;Autobranchia;Pteriormorphia;Pect  
 inida;Pectinoidea;Pectinidae;Pecten;Pecten maximus  
 UdeM00000003701 70779 84.3 UdeM00000003701 XP\_015764363.1 27.8 273  
 103 5 2 182 4 274 1.70E-13 84.3 70779 cellular  
 organisms;Eukaryota;Opisthokonta;Metazoa;Eumetazoa;Cnidaria;Anthozoa;Hexa  
 corallia;Scleractinia;Astrocoeniina;Acroporidae;Acropora;Acropora  
 digitifera  
 UdeM00000003702 1735272 860.1 UdeM00000003702 XP\_041368920.1 67.2  
 717 229 4 18 730 343 1057 2.00E-246 860.1 1735272  
 cellular  
 organisms;Eukaryota;Opisthokonta;Metazoa;Eumetazoa;Bilateria;Protostomia;  
 Spiralia;Lophotrochozoa;Mollusca;Gastropoda;Neomphalina;Neomphaloidea;Pel  
 tospiridae;Gigantopelta;Gigantopelta aegis  
 UdeM00000003704 6573 92 UdeM00000003704 XP\_021362174.1 25.3 296  
 212 7 147 438 228 518 2.00E-15 92 6573 cellular  
 organisms;Eukaryota;Opisthokonta;Metazoa;Eumetazoa;Bilateria;Protostomia;  
 Spiralia;Lophotrochozoa;Mollusca;Bivalvia;Autobranchia;Pteriormorphia;Pect  
 inida;Pectinoidea;Pectinidae;Mizuhopecten;Mizuhopecten yessoensis  
 UdeM00000003707 6596 523.5 UdeM00000003707 XP\_045215710.1 65.6 401  
 118 4 2 383 98 497 2.30E-145 523.5 6596 cellular  
 organisms;Eukaryota;Opisthokonta;Metazoa;Eumetazoa;Bilateria;Protostomia;  
 Spiralia;Lophotrochozoa;Mollusca;Bivalvia;Autobranchia;Heteroconchia;Euhe  
 terodonta;Imparidentia;Venerida;Veneroidea;Veneridae;Mercenaria;Mercenari  
 a mercenaria  
 UdeM00000003708 6596 674.5 UdeM00000003708 XP\_045216700.1 53.4 725  
 276 14 794 1504 11 687 3.20E-190 674.5 6596 cellular  
 organisms;Eukaryota;Opisthokonta;Metazoa;Eumetazoa;Bilateria;Protostomia;  
 Spiralia;Lophotrochozoa;Mollusca;Bivalvia;Autobranchia;Heteroconchia;Euhe  
 terodonta;Imparidentia;Venerida;Veneroidea;Veneridae;Mercenaria;Mercenari  
 a mercenaria  
 UdeM00000003709 6565 332.8 UdeM00000003709 XP\_022294587.1 30.5 737  
 469 17 1 720 1 711 1.20E-87 332.8 6565 cellular  
 organisms;Eukaryota;Opisthokonta;Metazoa;Eumetazoa;Bilateria;Protostomia;  
 Spiralia;Lophotrochozoa;Mollusca;Bivalvia;Autobranchia;Pteriormorphia;Ostr  
 eida;Ostreoidea;Ostreidae;Crassostrea;Crassostrea virginica  
 UdeM00000003710 2652724 110.5 UdeM00000003710 XP\_028513771.1 32.5  
 246 107 7 1 222 73 283 3.10E-21 110.5 2652724  
 cellular  
 organisms;Eukaryota;Opisthokonta;Metazoa;Eumetazoa;Cnidaria;Anthozoa;Hexa  
 corallia;Actiniaria;Aiptasiidae;Exaiptasia;Exaiptasia diaphana  
 UdeM00000003712 29159 98.2 UdeM00000003712 XP\_034325518.1 46.2 106  
 56 1 1 106 623 727 7.40E-18 98.2 29159 cellular  
 organisms;Eukaryota;Opisthokonta;Metazoa;Eumetazoa;Bilateria;Protostomia;  
 Spiralia;Lophotrochozoa;Mollusca;Bivalvia;Autobranchia;Pteriormorphia;Ostr  
 eida;Ostreoidea;Ostreidae;Crassostrea;Crassostrea gigas

UdeM00000003713 6565 128.3 UdeM00000003713 XP\_022332499.1 36.4 209  
 123 4 1 206 411 612 1.20E-26 128.3 6565 cellular  
 organisms;Eukaryota;Opisthokonta;Metazoa;Eumetazoa;Bilateria;Protostomia;  
 Spiralia;Lophotrochozoa;Mollusca;Bivalvia;Autobranchia;Pteriormorphia;Ostr  
 eida;Ostreoidea;Ostreidae;Crassostrea;Crassostrea virginica  
 UdeM00000003714 225164 201.4 UdeM00000003714 XP\_009048669.1 43.3  
 247 128 3 1 246 1 236 1.30E-48 201.4 225164  
 cellular  
 organisms;Eukaryota;Opisthokonta;Metazoa;Eumetazoa;Bilateria;Protostomia;  
 Spiralia;Lophotrochozoa;Mollusca;Gastropoda;Patellogastropoda;Lottioidea;  
 Lottiidae;Lottia;Lottia gigantea  
 UdeM00000003715 6565 449.1 UdeM00000003715 XP\_022332499.1 36.7 701  
 407 15 47 733 51 728 1.10E-122 449.1 6565 cellular  
 organisms;Eukaryota;Opisthokonta;Metazoa;Eumetazoa;Bilateria;Protostomia;  
 Spiralia;Lophotrochozoa;Mollusca;Bivalvia;Autobranchia;Pteriormorphia;Ostr  
 eida;Ostreoidea;Ostreidae;Crassostrea;Crassostrea virginica  
 UdeM00000003716 6596 263.1 UdeM00000003716 XP\_045156778.1 56 225  
 99 0 144 368 43 267 7.30E-67 263.1 6596 cellular  
 organisms;Eukaryota;Opisthokonta;Metazoa;Eumetazoa;Bilateria;Protostomia;  
 Spiralia;Lophotrochozoa;Mollusca;Bivalvia;Autobranchia;Heteroconchia;Euhe  
 terodonta;Imparidentia;Venerida;Veneroidea;Veneridae;Mercenaria;Mercenari  
 a mercenaria  
 UdeM00000003717 6596 138.3 UdeM00000003717 XP\_045156780.1 33.8 367  
 215 6 16 360 72 432 3.80E-29 138.3 6596 cellular  
 organisms;Eukaryota;Opisthokonta;Metazoa;Eumetazoa;Bilateria;Protostomia;  
 Spiralia;Lophotrochozoa;Mollusca;Bivalvia;Autobranchia;Heteroconchia;Euhe  
 terodonta;Imparidentia;Venerida;Veneroidea;Veneridae;Mercenaria;Mercenari  
 a mercenaria  
 UdeM00000003718 6579 437.2 UdeM00000003718 XP\_033750244.1 52.1 459  
 203 5 3 461 21 462 2.60E-119 437.2 6579 cellular  
 organisms;Eukaryota;Opisthokonta;Metazoa;Eumetazoa;Bilateria;Protostomia;  
 Spiralia;Lophotrochozoa;Mollusca;Bivalvia;Autobranchia;Pteriormorphia;Pect  
 inida;Pectinoidea;Pectinidae;Pecten;Pecten maximus  
 UdeM00000003719 29159 558.9 UdeM00000003719 XP\_034325609.1 55 515  
 222 5 6 516 79 587 6.80E-156 558.9 29159 cellular  
 organisms;Eukaryota;Opisthokonta;Metazoa;Eumetazoa;Bilateria;Protostomia;  
 Spiralia;Lophotrochozoa;Mollusca;Bivalvia;Autobranchia;Pteriormorphia;Ostr  
 eida;Ostreoidea;Ostreidae;Crassostrea;Crassostrea gigas  
 UdeM00000003720 6573 60.8 UdeM00000003720 XP\_021347436.1 58.8 51  
 20 1 43 93 28 77 1.00E-06 60.8 6573 cellular  
 organisms;Eukaryota;Opisthokonta;Metazoa;Eumetazoa;Bilateria;Protostomia;  
 Spiralia;Lophotrochozoa;Mollusca;Bivalvia;Autobranchia;Pteriormorphia;Pect  
 inida;Pectinoidea;Pectinidae;Mizuhopecten;Mizuhopecten yessoensis  
 UdeM00000003722 6596 702.6 UdeM00000003722 XP\_045156193.1 57.1 595  
 234 4 8 596 27 606 4.40E-199 702.6 6596 cellular  
 organisms;Eukaryota;Opisthokonta;Metazoa;Eumetazoa;Bilateria;Protostomia;  
 Spiralia;Lophotrochozoa;Mollusca;Bivalvia;Autobranchia;Heteroconchia;Euhe  
 terodonta;Imparidentia;Venerida;Veneroidea;Veneridae;Mercenaria;Mercenari  
 a mercenaria  
 UdeM00000003723 7574 99 UdeM00000003723 XP\_013410728.1 44.3 122  
 65 1 119 237 220 341 8.80E-18 99 7574 cellular  
 organisms;Eukaryota;Opisthokonta;Metazoa;Eumetazoa;Bilateria;Protostomia;  
 Spiralia;Lophotrochozoa;Brachiopoda;Linguliformea;Lingulata;Lingulida;Lin  
 guloidea;Lingulidae;Lingula;Lingula anatina

UdeM00000003724 6565 222.6 UdeM00000003724 XP\_022331338.1 70.6 153  
 44 1 31 182 562 714 4.10E-55 222.6 6565 cellular  
 organisms;Eukaryota;Opisthokonta;Metazoa;Eumetazoa;Bilateria;Protostomia;  
 Spiralia;Lophotrochozoa;Mollusca;Bivalvia;Autobranchia;Pteriormorphia;Ostr  
 eida;Ostreoidea;Ostreidae;Crassostrea;Crassostrea virginica  
 UdeM00000003725 6596 1478.4 UdeM00000003725 XP\_045156772.1 64.8  
 1207 386 10 1 1179 1 1196 0.00E+00 1478.4 6596  
 cellular  
 organisms;Eukaryota;Opisthokonta;Metazoa;Eumetazoa;Bilateria;Protostomia;  
 Spiralia;Lophotrochozoa;Mollusca;Bivalvia;Autobranchia;Heteroconchia;Euhe  
 terodonta;Imparidentia;Venerida;Veneroidea;Veneridae;Mercenaria;Mercenari  
 a mercenaria  
 UdeM00000003726 6596 1133.6 UdeM00000003726 XP\_045156772.1 65.7  
 926 299 9 6 923 282 1196 0.00E+00 1133.6 6596  
 cellular  
 organisms;Eukaryota;Opisthokonta;Metazoa;Eumetazoa;Bilateria;Protostomia;  
 Spiralia;Lophotrochozoa;Mollusca;Bivalvia;Autobranchia;Heteroconchia;Euhe  
 terodonta;Imparidentia;Venerida;Veneroidea;Veneridae;Mercenaria;Mercenari  
 a mercenaria  
 UdeM00000003727 30069 65.1 UdeM00000003727 XP\_035891545.1 25.4 118  
 88 0 21 138 224 341 1.00E-07 65.1 30069 cellular  
 organisms;Eukaryota;Opisthokonta;Metazoa;Eumetazoa;Bilateria;Protostomia;  
 Ecdysozoa;Panarthropoda;Arthropoda;Mandibulata;Pancrustacea;Hexapoda;Inse  
 cta;Dicondylia;Pterygota;Neoptera;Endopterygota;Diptera;Nematocera;Culico  
 morpha;Culicoidea;Culicidae;Anophelinae;Anopheles;Cellia;Neocellia;Anophe  
 les stephensi  
 UdeM00000003728 1735272 246.9 UdeM00000003728 XP\_041352813.1 54.8  
 210 91 1 7 216 1 206 2.40E-62 246.9 1735272  
 cellular  
 organisms;Eukaryota;Opisthokonta;Metazoa;Eumetazoa;Bilateria;Protostomia;  
 Spiralia;Lophotrochozoa;Mollusca;Gastropoda;Neomphalina;Neomphaloidea;Pel  
 tospiridae;Gigantopelta;Gigantopelta aegis  
 UdeM00000003729 72036 296.6 UdeM00000003729 XP\_040576246.1 39.6 419  
 212 7 15 392 43 461 4.70E-77 296.6 72036 cellular  
 organisms;Eukaryota;Opisthokonta;Metazoa;Eumetazoa;Bilateria;Protostomia;  
 Ecdysozoa;Panarthropoda;Arthropoda;Mandibulata;Pancrustacea;Crustacea;Mul  
 ticrustacea;Hexanauplia;Copepoda;Neocopepoda;Podoplea;Siphonostomatoida;C  
 aligidae;Lepeophtheirus;Lepeophtheirus salmonis  
 UdeM00000003732 6579 711.1 UdeM00000003732 XP\_033749783.1 91.2 441  
 28 5 1 435 1 436 8.90E-202 711.1 6579 cellular  
 organisms;Eukaryota;Opisthokonta;Metazoa;Eumetazoa;Bilateria;Protostomia;  
 Spiralia;Lophotrochozoa;Mollusca;Bivalvia;Autobranchia;Pteriormorphia;Pect  
 inida;Pectinoidea;Pectinidae;Pecten;Pecten maximus  
 UdeM00000003733 6596 713 UdeM00000003733 XP\_045216676.1 42.9 998  
 457 23 30 981 15 945 5.50E-202 713 6596 cellular  
 organisms;Eukaryota;Opisthokonta;Metazoa;Eumetazoa;Bilateria;Protostomia;  
 Spiralia;Lophotrochozoa;Mollusca;Bivalvia;Autobranchia;Heteroconchia;Euhe  
 terodonta;Imparidentia;Venerida;Veneroidea;Veneridae;Mercenaria;Mercenari  
 a mercenaria  
 UdeM00000003734 6596 547.7 UdeM00000003734 XP\_045216676.1 48.2 639  
 276 13 17 652 91 677 2.20E-152 547.7 6596 cellular  
 organisms;Eukaryota;Opisthokonta;Metazoa;Eumetazoa;Bilateria;Protostomia;  
 Spiralia;Lophotrochozoa;Mollusca;Bivalvia;Autobranchia;Heteroconchia;Euhe

terodonta;Imparidentia;Venerida;Veneroidea;Veneridae;Mercenaria;Mercenari  
 a mercenaria  
 UdeM00000003735 6596 66.6 UdeM00000003735 XP\_045202229.1 32.1 168  
 72 7 42 169 23 188 3.40E-08 66.6 6596 cellular  
 organisms;Eukaryota;Opisthokonta;Metazoa;Eumetazoa;Bilateria;Protostomia;  
 Spiralia;Lophotrochozoa;Mollusca;Bivalvia;Autobranhia;Heteroconchia;Euhe  
 terodonta;Imparidentia;Venerida;Veneroidea;Veneridae;Mercenaria;Mercenari  
 a mercenaria  
 UdeM00000003736 6579 845.5 UdeM00000003736 XP\_033763276.1 36.1 1436  
 835 27 41 1442 151 1537 1.00E-241 845.5 6579 cellular  
 organisms;Eukaryota;Opisthokonta;Metazoa;Eumetazoa;Bilateria;Protostomia;  
 Spiralia;Lophotrochozoa;Mollusca;Bivalvia;Autobranhia;Pteriormorphia;Pect  
 inida;Pectinoidea;Pectinidae;Pecten;Pecten maximus  
 UdeM00000003737 6500 131.3 UdeM00000003737 XP\_005109712.1 62 100  
 38 0 52 151 5 104 1.00E-27 131.3 6500 cellular  
 organisms;Eukaryota;Opisthokonta;Metazoa;Eumetazoa;Bilateria;Protostomia;  
 Spiralia;Lophotrochozoa;Mollusca;Gastropoda;Heterobranhia;Euthyneura;Tec  
 tipleura;Aplysiida;Aplysioidea;Aplysiidae;Aplysia;Aplysia californica  
 UdeM00000003738 1735272 901.7 UdeM00000003738 XP\_041347627.1 40.2  
 1249 702 22 235 1463 471 1694 1.20E-258 901.7 1735272  
 cellular  
 organisms;Eukaryota;Opisthokonta;Metazoa;Eumetazoa;Bilateria;Protostomia;  
 Spiralia;Lophotrochozoa;Mollusca;Gastropoda;Neomphalina;Neomphaloidea;Pel  
 tospiridae;Gigantopelta;Gigantopelta aegis  
 UdeM00000003739 29159 600.5 UdeM00000003739 XP\_011427002.2 42 786  
 415 12 84 855 7 765 3.30E-168 600.5 29159 cellular  
 organisms;Eukaryota;Opisthokonta;Metazoa;Eumetazoa;Bilateria;Protostomia;  
 Spiralia;Lophotrochozoa;Mollusca;Bivalvia;Autobranhia;Pteriormorphia;Ostr  
 eida;Ostreoidea;Ostreidae;Crassostrea;Crassostrea gigas  
 UdeM00000003740 6579 215.7 UdeM00000003740 XP\_033749757.1 29.8 631  
 376 13 9 608 22 616 1.60E-52 215.7 6579 cellular  
 organisms;Eukaryota;Opisthokonta;Metazoa;Eumetazoa;Bilateria;Protostomia;  
 Spiralia;Lophotrochozoa;Mollusca;Bivalvia;Autobranhia;Pteriormorphia;Pect  
 inida;Pectinoidea;Pectinidae;Pecten;Pecten maximus  
 UdeM00000003741 6573 305.4 UdeM00000003741 XP\_021362316.1 51.5 324  
 145 5 58 372 1 321 9.70E-80 305.4 6573 cellular  
 organisms;Eukaryota;Opisthokonta;Metazoa;Eumetazoa;Bilateria;Protostomia;  
 Spiralia;Lophotrochozoa;Mollusca;Bivalvia;Autobranhia;Pteriormorphia;Pect  
 inida;Pectinoidea;Pectinidae;Mizuhopecten;Mizuhopecten yessoensis  
 UdeM00000003743 6573 224.2 UdeM00000003743 XP\_021362316.1 53.9 232  
 96 4 1 224 93 321 1.70E-55 224.2 6573 cellular  
 organisms;Eukaryota;Opisthokonta;Metazoa;Eumetazoa;Bilateria;Protostomia;  
 Spiralia;Lophotrochozoa;Mollusca;Bivalvia;Autobranhia;Pteriormorphia;Pect  
 inida;Pectinoidea;Pectinidae;Mizuhopecten;Mizuhopecten yessoensis  
 UdeM00000003742 45264 84 UdeM00000003742 XP\_044164507.1 39.3 122  
 73 1 38 159 48 168 1.90E-13 84 45264 cellular  
 organisms;Eukaryota;Opisthokonta;Metazoa;Eumetazoa;Cnidaria;Anthozoa;Hexa  
 corallia;Scleractinia;Astrocoeniina;Acroporidae;Acropora;Acropora  
 millepora  
 UdeM00000003744 6596 484.6 UdeM00000003744 XP\_045216783.1 61.2 402  
 133 4 1 398 6 388 1.20E-133 484.6 6596 cellular  
 organisms;Eukaryota;Opisthokonta;Metazoa;Eumetazoa;Bilateria;Protostomia;  
 Spiralia;Lophotrochozoa;Mollusca;Bivalvia;Autobranhia;Heteroconchia;Euhe

terodonta;Imparidentia;Venerida;Veneroidea;Veneridae;Mercenaria;Mercenari  
 a mercenaria  
 UdeM00000003747 6565 175.3 UdeM00000003747 XP\_022332250.1 53.2 171  
 64 4 1 168 237 394 6.80E-41 175.3 6565 cellular  
 organisms;Eukaryota;Opisthokonta;Metazoa;Eumetazoa;Bilateria;Protostomia;  
 Spiralia;Lophotrochozoa;Mollusca;Bivalvia;Autobranhia;Pteriormorphia;Ostr  
 eida;Ostreoidea;Ostreidae;Crassostrea;Crassostrea virginica  
 UdeM00000003746 6596 504.6 UdeM00000003746 XP\_045216783.1 61.6 404  
 138 4 1 403 1 388 1.20E-139 504.6 6596 cellular  
 organisms;Eukaryota;Opisthokonta;Metazoa;Eumetazoa;Bilateria;Protostomia;  
 Spiralia;Lophotrochozoa;Mollusca;Bivalvia;Autobranhia;Heteroconchia;Euhe  
 terodonta;Imparidentia;Venerida;Veneroidea;Veneridae;Mercenaria;Mercenari  
 a mercenaria  
 UdeM00000003748 6596 328.6 UdeM00000003748 XP\_045216783.1 68.9 222  
 69 0 1 222 1 222 6.40E-87 328.6 6596 cellular  
 organisms;Eukaryota;Opisthokonta;Metazoa;Eumetazoa;Bilateria;Protostomia;  
 Spiralia;Lophotrochozoa;Mollusca;Bivalvia;Autobranhia;Heteroconchia;Euhe  
 terodonta;Imparidentia;Venerida;Veneroidea;Veneridae;Mercenaria;Mercenari  
 a mercenaria  
 UdeM00000003749 6596 262.7 UdeM00000003749 XP\_045216781.1 56.4 241  
 88 4 4 243 176 400 4.70E-67 262.7 6596 cellular  
 organisms;Eukaryota;Opisthokonta;Metazoa;Eumetazoa;Bilateria;Protostomia;  
 Spiralia;Lophotrochozoa;Mollusca;Bivalvia;Autobranhia;Heteroconchia;Euhe  
 terodonta;Imparidentia;Venerida;Veneroidea;Veneridae;Mercenaria;Mercenari  
 a mercenaria  
 UdeM00000003750 6596 166 UdeM00000003750 XP\_045216781.1 65.8 120  
 41 0 4 123 176 295 3.40E-38 166 6596 cellular  
 organisms;Eukaryota;Opisthokonta;Metazoa;Eumetazoa;Bilateria;Protostomia;  
 Spiralia;Lophotrochozoa;Mollusca;Bivalvia;Autobranhia;Heteroconchia;Euhe  
 terodonta;Imparidentia;Venerida;Veneroidea;Veneridae;Mercenaria;Mercenari  
 a mercenaria  
 UdeM00000003751 6596 171.8 UdeM00000003751 XP\_045216781.1 63.4 123  
 45 0 5 127 52 174 6.00E-40 171.8 6596 cellular  
 organisms;Eukaryota;Opisthokonta;Metazoa;Eumetazoa;Bilateria;Protostomia;  
 Spiralia;Lophotrochozoa;Mollusca;Bivalvia;Autobranhia;Heteroconchia;Euhe  
 terodonta;Imparidentia;Venerida;Veneroidea;Veneridae;Mercenaria;Mercenari  
 a mercenaria  
 UdeM00000003752 6596 400.6 UdeM00000003752 XP\_045156473.1 50.7 408  
 191 3 1 404 1 402 2.50E-108 400.6 6596 cellular  
 organisms;Eukaryota;Opisthokonta;Metazoa;Eumetazoa;Bilateria;Protostomia;  
 Spiralia;Lophotrochozoa;Mollusca;Bivalvia;Autobranhia;Heteroconchia;Euhe  
 terodonta;Imparidentia;Venerida;Veneroidea;Veneridae;Mercenaria;Mercenari  
 a mercenaria  
 UdeM00000003753 6565 227.3 UdeM00000003753 XP\_022330664.1 39.3 346  
 187 9 28 355 817 1157 3.20E-56 227.3 6565 cellular  
 organisms;Eukaryota;Opisthokonta;Metazoa;Eumetazoa;Bilateria;Protostomia;  
 Spiralia;Lophotrochozoa;Mollusca;Bivalvia;Autobranhia;Pteriormorphia;Ostr  
 eida;Ostreoidea;Ostreidae;Crassostrea;Crassostrea virginica  
 UdeM00000003755 7739 132.5 UdeM00000003755 XP\_035663420.1 27.5 364  
 158 5 2 261 161 522 7.80E-28 132.5 7739 cellular  
 organisms;Eukaryota;Opisthokonta;Metazoa;Eumetazoa;Bilateria;Deuterostomi  
 a;Chordata;Cephalochordata;Leptocardii;Amphioxiformes;Branchiostomidae;Br  
 anchiostoma;Branchiostoma floridae

UdeM00000003756 29159 80.1 UdeM00000003756 XP\_034331441.1 39.5 119  
 68 2 1 116 99 216 3.10E-12 80.1 29159 cellular  
 organisms;Eukaryota;Opisthokonta;Metazoa;Eumetazoa;Bilateria;Protostomia;  
 Spiralia;Lophotrochozoa;Mollusca;Bivalvia;Autobranhia;Pteriormorphia;Ostr  
 eida;Ostreoidea;Ostreidae;Crassostrea;Crassostrea gigas  
 UdeM00000003757 6579 408.3 UdeM00000003757 XP\_033750765.1 60.1 296  
 117 1 1 295 51 346 8.30E-11 408.3 6579 cellular  
 organisms;Eukaryota;Opisthokonta;Metazoa;Eumetazoa;Bilateria;Protostomia;  
 Spiralia;Lophotrochozoa;Mollusca;Bivalvia;Autobranhia;Pteriormorphia;Pect  
 inida;Pectinoidea;Pectinidae;Pecten;Pecten maximus  
 UdeM00000003759 37653 143.7 UdeM00000003759 XP\_014777387.1 75.3 85  
 21 0 1 85 1 85 1.30E-31 143.7 37653 cellular  
 organisms;Eukaryota;Opisthokonta;Metazoa;Eumetazoa;Bilateria;Protostomia;  
 Spiralia;Lophotrochozoa;Mollusca;Cephalopoda;Coleoidea;Octopodiformes;Oct  
 opoda;Incirrata;Octopodidae;Octopus;Octopus bimaculoides  
 UdeM00000003758 6579 869.8 UdeM00000003758 XP\_033750418.1 75.3 583  
 118 1 8 564 9 591 1.90E-249 869.8 6579 cellular  
 organisms;Eukaryota;Opisthokonta;Metazoa;Eumetazoa;Bilateria;Protostomia;  
 Spiralia;Lophotrochozoa;Mollusca;Bivalvia;Autobranhia;Pteriormorphia;Pect  
 inida;Pectinoidea;Pectinidae;Pecten;Pecten maximus  
 UdeM00000003760 6596 335.5 UdeM00000003760 XP\_045215924.1 50.8 492  
 169 11 203 661 187 638 1.50E-88 335.5 6596 cellular  
 organisms;Eukaryota;Opisthokonta;Metazoa;Eumetazoa;Bilateria;Protostomia;  
 Spiralia;Lophotrochozoa;Mollusca;Bivalvia;Autobranhia;Heteroconchia;Euhe  
 terodonta;Imparidentia;Venerida;Veneroidea;Veneridae;Mercenaria;Mercenari  
 a mercenaria  
 UdeM00000003761 6596 481.5 UdeM00000003761 XP\_045156534.1 55.9 560  
 213 12 2 555 11 542 1.50E-132 481.5 6596 cellular  
 organisms;Eukaryota;Opisthokonta;Metazoa;Eumetazoa;Bilateria;Protostomia;  
 Spiralia;Lophotrochozoa;Mollusca;Bivalvia;Autobranhia;Heteroconchia;Euhe  
 terodonta;Imparidentia;Venerida;Veneroidea;Veneridae;Mercenaria;Mercenari  
 a mercenaria  
 UdeM00000003762 6596 60.1 UdeM00000003762 XP\_045189070.1 42.7 89  
 44 4 2 86 1 86 2.50E-06 60.1 6596 cellular  
 organisms;Eukaryota;Opisthokonta;Metazoa;Eumetazoa;Bilateria;Protostomia;  
 Spiralia;Lophotrochozoa;Mollusca;Bivalvia;Autobranhia;Heteroconchia;Euhe  
 terodonta;Imparidentia;Venerida;Veneroidea;Veneridae;Mercenaria;Mercenari  
 a mercenaria  
 UdeM00000003763 260995 65.1 UdeM00000003763 XP\_033803390.1 50  
 64 32 0 1 64 301 364 4.60E-08 65.1 260995  
 cellular  
 organisms;Eukaryota;Opisthokonta;Metazoa;Eumetazoa;Bilateria;Deuterostomi  
 a;Chordata;Craniata;Vertebrata;Gnathostomata;Teleostomi;Euteleostomi;Sarc  
 opterygii;Dipnotetrapodomorpha;Tetrapoda;Amphibia;Gymnophiona;Dermophiida  
 e;Geotrypetes;Geotrypetes seraphini  
 UdeM00000003764 284591 313.9 UdeM00000003764 XP\_502566.2 41.1 382  
 207 4 9 385 7 375 2.80E-82 313.9 284591  
 cellular  
 organisms;Eukaryota;Opisthokonta;Fungi;Dikarya;Ascomycota;saccharomyceta;  
 Saccharomycotina;Saccharomycetes;Saccharomycetales;Dipodascaceae;Yarrowia  
 ;Yarrowia lipolytica;Yarrowia lipolytica CLIB122  
 UdeM00000003765 400727 382.1 UdeM00000003765 XP\_025076851.1 56.5  
 368 156 2 1 364 1 368 8.70E-103 382.1 400727  
 cellular

organisms;Eukaryota;Opisthokonta;Metazoa;Eumetazoa;Bilateria;Protostomia;  
Spiralia;Lophotrochozoa;Mollusca;Gastropoda;Caenogastropoda;Architaenioglossa;Ampullarioidea;Ampullariidae;Pomacea;Pomacea canaliculata  
UdeM00000003766 27405 147.9 UdeM00000003766 XP\_042875620.1 45.8 166  
88 1 1 164 1 166 1.40E-32 147.9 27405 cellular  
organisms;Eukaryota;Opisthokonta;Metazoa;Eumetazoa;Bilateria;Protostomia;  
Ecdysozoa;Panarthropoda;Arthropoda;Mandibulata;Pancrustacea;Crustacea;Multicrustacea;Malacostraca;Eumalacostraca;Eucarida;Decapoda;Dendrobranchiata;Penaeoidea;Penaeidae;Penaeus;Penaeus japonicus  
UdeM00000003767 6596 400.2 UdeM00000003767 XP\_045156532.1 66.9 278  
86 1 8 279 8 285 2.40E-108 400.2 6596 cellular  
organisms;Eukaryota;Opisthokonta;Metazoa;Eumetazoa;Bilateria;Protostomia;  
Spiralia;Lophotrochozoa;Mollusca;Bivalvia;Autobranchia;Heteroconchia;Euheterodonta;Imparidentia;Venerida;Veneroidea;Veneridae;Mercenaria;Mercenaria mercenaria  
UdeM00000003768 1735272 2208.3 UdeM00000003768 XP\_041373194.1  
67.1 1607 509 8 6 1603 719 2315 0.00E+00 2208.3  
1735272 cellular  
organisms;Eukaryota;Opisthokonta;Metazoa;Eumetazoa;Bilateria;Protostomia;  
Spiralia;Lophotrochozoa;Mollusca;Gastropoda;Neomphalina;Neomphaloidea;Peltospiridae;Gigantopelta;Gigantopelta aegis  
UdeM00000003769 6596 198 UdeM00000003769 XP\_045160246.1 65.9 164  
56 0 16 179 903 1066 1.20E-47 198 6596 cellular  
organisms;Eukaryota;Opisthokonta;Metazoa;Eumetazoa;Bilateria;Protostomia;  
Spiralia;Lophotrochozoa;Mollusca;Bivalvia;Autobranchia;Heteroconchia;Euheterodonta;Imparidentia;Venerida;Veneroidea;Veneridae;Mercenaria;Mercenaria mercenaria  
UdeM00000003770 6596 659.8 UdeM00000003770 XP\_045160246.1 40.2 905  
507 14 56 943 16 903 5.10E-186 659.8 6596 cellular  
organisms;Eukaryota;Opisthokonta;Metazoa;Eumetazoa;Bilateria;Protostomia;  
Spiralia;Lophotrochozoa;Mollusca;Bivalvia;Autobranchia;Pteriomorphia;Ostreida;Ostreoidea;Ostreidae;Crassostrea;Crassostrea virginica  
UdeM00000003771 6565 582 UdeM00000003771 XP\_022331369.1 48.7 830  
409 12 39 856 284 1108 1.20E-162 582 6565 cellular  
organisms;Eukaryota;Opisthokonta;Metazoa;Eumetazoa;Bilateria;Protostomia;  
Spiralia;Lophotrochozoa;Mollusca;Bivalvia;Autobranchia;Pteriomorphia;Ostreida;Ostreoidea;Ostreidae;Crassostrea;Crassostrea virginica  
UdeM00000003772 6565 6482.5 UdeM00000003772 XP\_022331369.1 56.3  
5782 2218 22 243 5964 1109 6640 0.00E+00 6482.5 6565  
cellular  
organisms;Eukaryota;Opisthokonta;Metazoa;Eumetazoa;Bilateria;Protostomia;  
Spiralia;Lophotrochozoa;Mollusca;Bivalvia;Autobranchia;Pteriomorphia;Ostreida;Ostreoidea;Ostreidae;Crassostrea;Crassostrea virginica  
UdeM00000003773 6500 1527.7 UdeM00000003773 XP\_005092384.1 51.9  
1481 694 7 9 1474 6149 7625 0.00E+00 1527.7 6500  
cellular  
organisms;Eukaryota;Opisthokonta;Metazoa;Eumetazoa;Bilateria;Protostomia;  
Spiralia;Lophotrochozoa;Mollusca;Gastropoda;Heterobranchia;Euthyneura;Teptipleura;Aplysiida;Aplysioidea;Aplysiidae;Aplysia;Aplysia californica  
UdeM00000003774 6573 1404 UdeM00000003774 XP\_021357584.1 53.2 2224  
992 24 1 2196 7634 9837 0.00E+00 1404 6573 cellular  
organisms;Eukaryota;Opisthokonta;Metazoa;Eumetazoa;Bilateria;Protostomia;



Spiralia;Lophotrochozoa;Mollusca;Bivalvia;Autobranchia;Pteriormorphia;Pectinida;Pectinoidea;Pectinidae;Mizuhopecten;Mizuhopecten yessoensis  
UdeM00000003776 151771 109.4 UdeM00000003776 XP\_028405874.1 53.1  
96 45 0 6 101 55 150 3.40E-21 109.4 151771  
cellular  
organisms;Eukaryota;Opisthokonta;Metazoa;Eumetazoa;Cnidaria;Anthozoa;Octocorallia;Alcyonacea;Alcyoniina;Nephtheidae;Dendronephthya;Dendronephthya gigantea  
UdeM00000003777 6573 665.6 UdeM00000003777 XP\_021368426.1 51.7 811  
336 17 13 797 877 1657 7.90E-188 665.6 6573 cellular  
organisms;Eukaryota;Opisthokonta;Metazoa;Eumetazoa;Bilateria;Protostomia;Spiralia;Lophotrochozoa;Mollusca;Bivalvia;Autobranchia;Pteriormorphia;Pectinida;Pectinoidea;Pectinidae;Mizuhopecten;Mizuhopecten yessoensis  
UdeM00000003778 6596 429.1 UdeM00000003778 XP\_045156698.1 59.5 365  
148 0 9 373 26 390 6.10E-117 429.1 6596 cellular  
organisms;Eukaryota;Opisthokonta;Metazoa;Eumetazoa;Bilateria;Protostomia;Spiralia;Lophotrochozoa;Mollusca;Bivalvia;Autobranchia;Heteroconchia;Euheterodonta;Imparidentia;Venerida;Veneroidea;Veneridae;Mercenaria;Mercenaria mercenaria  
UdeM00000003779 6596 1433.3 UdeM00000003779 XP\_045156696.1 82.8  
865 139 6 16 873 35 896 0.00E+00 1433.3 6596  
cellular  
organisms;Eukaryota;Opisthokonta;Metazoa;Eumetazoa;Bilateria;Protostomia;Spiralia;Lophotrochozoa;Mollusca;Bivalvia;Autobranchia;Heteroconchia;Euheterodonta;Imparidentia;Venerida;Veneroidea;Veneridae;Mercenaria;Mercenaria mercenaria  
UdeM00000003781 225164 131.3 UdeM00000003781 XP\_009047886.1 33.1  
344 158 9 1 315 3 303 2.20E-27 131.3 225164  
cellular  
organisms;Eukaryota;Opisthokonta;Metazoa;Eumetazoa;Bilateria;Protostomia;Spiralia;Lophotrochozoa;Mollusca;Gastropoda;Patellogastropoda;Lottioidae;Lottiidae;Lottia;Lottia gigantea  
UdeM00000003782 6573 840.5 UdeM00000003782 XP\_021351697.1 32 1724  
990 32 8 1705 5 1571 4.20E-240 840.5 6573 cellular  
organisms;Eukaryota;Opisthokonta;Metazoa;Eumetazoa;Bilateria;Protostomia;Spiralia;Lophotrochozoa;Mollusca;Bivalvia;Autobranchia;Pteriormorphia;Pectinida;Pectinoidea;Pectinidae;Mizuhopecten;Mizuhopecten yessoensis  
UdeM00000003783 1735272 765 UdeM00000003783 XP\_041367827.1 62.5  
558 193 2 1 558 285 826 6.70E-218 765 1735272  
cellular  
organisms;Eukaryota;Opisthokonta;Metazoa;Eumetazoa;Bilateria;Protostomia;Spiralia;Lophotrochozoa;Mollusca;Gastropoda;Neomphalina;Neomphaloidea;Peltospiridae;Gigantopelta;Gigantopelta aegis  
UdeM00000003784 6579 295.4 UdeM00000003784 XP\_033750220.1 66.5 203  
63 3 23 222 80 280 6.40E-77 295.4 6579 cellular  
organisms;Eukaryota;Opisthokonta;Metazoa;Eumetazoa;Bilateria;Protostomia;Spiralia;Lophotrochozoa;Mollusca;Bivalvia;Autobranchia;Pteriormorphia;Pectinida;Pectinoidea;Pectinidae;Pecten;Pecten maximus  
UdeM00000003785 6579 94 UdeM00000003785 XP\_033750220.1 71.7 53  
15 0 16 68 7 59 8.10E-17 94 6579 cellular  
organisms;Eukaryota;Opisthokonta;Metazoa;Eumetazoa;Bilateria;Protostomia;Spiralia;Lophotrochozoa;Mollusca;Bivalvia;Autobranchia;Pteriormorphia;Pectinida;Pectinoidea;Pectinidae;Pecten;Pecten maximus

UdeM00000003786 6596 249.6 UdeM00000003786 XP\_045215828.1 73.9 188  
 49 0 1 188 1 188 8.60E-63 249.6 6596 cellular  
 organisms;Eukaryota;Opisthokonta;Metazoa;Eumetazoa;Bilateria;Protostomia;  
 Spiralia;Lophotrochozoa;Mollusca;Bivalvia;Autobranhia;Heteroconchia;Euhe  
 terodonta;Imparidentia;Venerida;Veneroidea;Veneridae;Mercenaria;Mercenari  
 a mercenaria  
 UdeM00000003787 6596 224.2 UdeM00000003787 XP\_045215602.1 42.1 285  
 153 2 1 283 1 275 2.10E-55 224.2 6596 cellular  
 organisms;Eukaryota;Opisthokonta;Metazoa;Eumetazoa;Bilateria;Protostomia;  
 Spiralia;Lophotrochozoa;Mollusca;Bivalvia;Autobranhia;Heteroconchia;Euhe  
 terodonta;Imparidentia;Venerida;Veneroidea;Veneridae;Mercenaria;Mercenari  
 a mercenaria  
 UdeM00000003788 218467 120.2 UdeM00000003788 XP\_023219748.1 53.2  
 124 57 1 1 123 75 198 1.90E-24 120.2 218467  
 cellular  
 organisms;Eukaryota;Opisthokonta;Metazoa;Eumetazoa;Bilateria;Protostomia;  
 Ecdysozoa;Panarthropoda;Arthropoda;Chelicerata;Arachnida;Scorpiones;Buthi  
 da;Buthoidea;Buthidae;Centruroides;Centruroides sculpturatus  
 UdeM00000003789 166361 202.2 UdeM00000003789 XP\_022910137.1 46.6  
 232 100 3 8 217 109 338 6.70E-49 202.2 166361  
 cellular  
 organisms;Eukaryota;Opisthokonta;Metazoa;Eumetazoa;Bilateria;Protostomia;  
 Ecdysozoa;Panarthropoda;Arthropoda;Mandibulata;Pancrustacea;Hexapoda;Inse  
 cta;Dicondylia;Pterygota;Neoptera;Endopterygota;Coleoptera;Polyphaga;Scar  
 abaeiformia;Scarabaeoidea;Scarabaeidae;Scarabaeinae;Scarabaeinae incertae  
 sedis;Onthophagus;Onthophagus taurus  
 UdeM00000003790 6579 1365.9 UdeM00000003790 XP\_033750329.1 43.4  
 1765 904 30 21 1745 21 1730 0.00E+00 1365.9 6579  
 cellular  
 organisms;Eukaryota;Opisthokonta;Metazoa;Eumetazoa;Bilateria;Protostomia;  
 Spiralia;Lophotrochozoa;Mollusca;Bivalvia;Autobranhia;Pteriormorphia;Pect  
 inida;Pectinoidea;Pectinidae;Pecten;Pecten maximus  
 UdeM00000003791 6579 644.4 UdeM00000003791 XP\_033750329.1 50.3 730  
 336 16 4 717 1012 1730 1.70E-181 644.4 6579 cellular  
 organisms;Eukaryota;Opisthokonta;Metazoa;Eumetazoa;Bilateria;Protostomia;  
 Spiralia;Lophotrochozoa;Mollusca;Bivalvia;Autobranhia;Pteriormorphia;Pect  
 inida;Pectinoidea;Pectinidae;Pecten;Pecten maximus  
 UdeM00000003792 6579 1336.6 UdeM00000003792 XP\_033750329.1 42.8  
 1784 919 32 8 1747 4 1730 0.00E+00 1336.6 6579  
 cellular  
 organisms;Eukaryota;Opisthokonta;Metazoa;Eumetazoa;Bilateria;Protostomia;  
 Spiralia;Lophotrochozoa;Mollusca;Bivalvia;Autobranhia;Pteriormorphia;Pect  
 inida;Pectinoidea;Pectinidae;Pecten;Pecten maximus  
 UdeM00000003793 7913 170.6 UdeM00000003793 XP\_041082893.1 72.1 122  
 33 1 1 121 1 122 1.20E-39 170.6 7913 cellular  
 organisms;Eukaryota;Opisthokonta;Metazoa;Eumetazoa;Bilateria;Deuterostomi  
 a;Chordata;Craniata;Vertebrata;Gnathostomata;Teleostomi;Euteleostomi;Acti  
 nopterygii;Actinopteri;Chondrostei;Acipenseriformes;Acipenseroidi;Polyod  
 ontidae;Polyodontinae;Polyodontini;Polyodon;Polyodon spathula  
 UdeM00000003794 6579 360.5 UdeM00000003794 XP\_033750329.1 45 493  
 249 13 27 503 1244 1730 3.40E-96 360.5 6579 cellular  
 organisms;Eukaryota;Opisthokonta;Metazoa;Eumetazoa;Bilateria;Protostomia;  
 Spiralia;Lophotrochozoa;Mollusca;Bivalvia;Autobranhia;Pteriormorphia;Pect  
 inida;Pectinoidea;Pectinidae;Pecten;Pecten maximus

UdeM00000003795 6579 119 UdeM00000003795 XP\_033750329.1 34.7 248  
 68 6 16 171 1016 1261 6.20E-24 119 6579 cellular  
 organisms;Eukaryota;Opisthokonta;Metazoa;Eumetazoa;Bilateria;Protostomia;  
 Spiralia;Lophotrochozoa;Mollusca;Bivalvia;Autobranhia;Pteriormorphia;Pect  
 inida;Pectinoidea;Pectinidae;Pecten;Pecten maximus  
 UdeM00000003796 6579 916.4 UdeM00000003796 XP\_033750329.1 50.9 986  
 441 22 81 1036 758 1730 3.30E-263 916.4 6579 cellular  
 organisms;Eukaryota;Opisthokonta;Metazoa;Eumetazoa;Bilateria;Protostomia;  
 Spiralia;Lophotrochozoa;Mollusca;Bivalvia;Autobranhia;Pteriormorphia;Pect  
 inida;Pectinoidea;Pectinidae;Pecten;Pecten maximus  
 UdeM00000003797 225164 123.2 UdeM00000003797 XP\_009050652.1 47.6  
 143 65 3 14 148 565 705 2.80E-25 123.2 225164  
 cellular  
 organisms;Eukaryota;Opisthokonta;Metazoa;Eumetazoa;Bilateria;Protostomia;  
 Spiralia;Lophotrochozoa;Mollusca;Gastropoda;Patellogastropoda;Lottioidea;  
 Lottiidae;Lottia;Lottia gigantea  
 UdeM00000003798 6596 410.6 UdeM00000003798 XP\_045215229.1 42.5 543  
 286 11 19 539 20 558 3.70E-111 410.6 6596 cellular  
 organisms;Eukaryota;Opisthokonta;Metazoa;Eumetazoa;Bilateria;Protostomia;  
 Spiralia;Lophotrochozoa;Mollusca;Bivalvia;Autobranhia;Heteroconchia;Euhe  
 terodonta;Imparidentia;Venerida;Veneroidea;Veneridae;Mercenaria;Mercenari  
 a mercenaria  
 UdeM00000003799 6579 900.2 UdeM00000003799 XP\_033750329.1 50.5 988  
 449 21 1 963 758 1730 2.30E-258 900.2 6579 cellular  
 organisms;Eukaryota;Opisthokonta;Metazoa;Eumetazoa;Bilateria;Protostomia;  
 Spiralia;Lophotrochozoa;Mollusca;Bivalvia;Autobranhia;Pteriormorphia;Pect  
 inida;Pectinoidea;Pectinidae;Pecten;Pecten maximus  
 UdeM00000003800 6596 517.7 UdeM00000003800 XP\_045215229.1 42.1 796  
 408 18 15 786 12 778 2.60E-143 517.7 6596 cellular  
 organisms;Eukaryota;Opisthokonta;Metazoa;Eumetazoa;Bilateria;Protostomia;  
 Spiralia;Lophotrochozoa;Mollusca;Bivalvia;Autobranhia;Heteroconchia;Euhe  
 terodonta;Imparidentia;Venerida;Veneroidea;Veneridae;Mercenaria;Mercenari  
 a mercenaria  
 UdeM00000003801 6579 1306.2 UdeM00000003801 XP\_033750329.1 43  
 1773 862 35 8 1677 4 1730 0.00E+00 1306.2 6579  
 cellular  
 organisms;Eukaryota;Opisthokonta;Metazoa;Eumetazoa;Bilateria;Protostomia;  
 Spiralia;Lophotrochozoa;Mollusca;Bivalvia;Autobranhia;Pteriormorphia;Pect  
 inida;Pectinoidea;Pectinidae;Pecten;Pecten maximus  
 UdeM00000003802 6596 162.2 UdeM00000003802 XP\_045215229.1 41.7 228  
 115 6 15 224 12 239 8.40E-37 162.2 6596 cellular  
 organisms;Eukaryota;Opisthokonta;Metazoa;Eumetazoa;Bilateria;Protostomia;  
 Spiralia;Lophotrochozoa;Mollusca;Bivalvia;Autobranhia;Heteroconchia;Euhe  
 terodonta;Imparidentia;Venerida;Veneroidea;Veneridae;Mercenaria;Mercenari  
 a mercenaria  
 UdeM00000003803 6596 164.1 UdeM00000003803 XP\_045215229.1 40.9 237  
 122 6 15 233 12 248 2.20E-37 164.1 6596 cellular  
 organisms;Eukaryota;Opisthokonta;Metazoa;Eumetazoa;Bilateria;Protostomia;  
 Spiralia;Lophotrochozoa;Mollusca;Bivalvia;Autobranhia;Heteroconchia;Euhe  
 terodonta;Imparidentia;Venerida;Veneroidea;Veneridae;Mercenaria;Mercenari  
 a mercenaria  
 UdeM00000003804 6596 343.2 UdeM00000003804 XP\_045196631.1 51.9 347  
 140 3 30 349 53 399 4.20E-91 343.2 6596 cellular  
 organisms;Eukaryota;Opisthokonta;Metazoa;Eumetazoa;Bilateria;Protostomia;

Spiralia;Lophotrochozoa;Mollusca;Bivalvia;Autobranchia;Heteroconchia;Euherodonta;Imparidentia;Venerida;Veneroidea;Veneridae;Mercenaria;Mercenaria mercenaria

UdeM00000003805 6596 338.2 UdeM00000003805 XP\_045196631.1 66.7 246  
76 2 1 240 411 656 8.70E-90 338.2 6596 cellular

organisms;Eukaryota;Opisthokonta;Metazoa;Eumetazoa;Bilateria;Protostomia;Spiralia;Lophotrochozoa;Mollusca;Bivalvia;Autobranchia;Heteroconchia;Euherodonta;Imparidentia;Venerida;Veneroidea;Veneridae;Mercenaria;Mercenaria mercenaria

UdeM00000003806 6596 377.9 UdeM00000003806 XP\_045156702.1 78.2 216  
47 0 26 241 38 253 9.90E-102 377.9 6596 cellular

organisms;Eukaryota;Opisthokonta;Metazoa;Eumetazoa;Bilateria;Protostomia;Spiralia;Lophotrochozoa;Mollusca;Bivalvia;Autobranchia;Heteroconchia;Euherodonta;Imparidentia;Venerida;Veneroidea;Veneridae;Mercenaria;Mercenaria mercenaria

UdeM00000003807 6596 574.3 UdeM00000003807 XP\_045215770.1 32.2 1799  
964 56 9 1753 4 1600 5.20E-160 574.3 6596 cellular

organisms;Eukaryota;Opisthokonta;Metazoa;Eumetazoa;Bilateria;Protostomia;Spiralia;Lophotrochozoa;Mollusca;Bivalvia;Autobranchia;Heteroconchia;Euherodonta;Imparidentia;Venerida;Veneroidea;Veneridae;Mercenaria;Mercenaria mercenaria

UdeM00000003808 6596 1969.5 UdeM00000003808 XP\_045156658.1 43.4  
2451 1305 28 14 2439 23 2415 0.00E+00 1969.5 6596

cellular  
organisms;Eukaryota;Opisthokonta;Metazoa;Eumetazoa;Bilateria;Protostomia;Spiralia;Lophotrochozoa;Mollusca;Bivalvia;Autobranchia;Heteroconchia;Euherodonta;Imparidentia;Venerida;Veneroidea;Veneridae;Mercenaria;Mercenaria mercenaria

UdeM00000003809 1735272 178.3 UdeM00000003809 XP\_041367773.1 31  
393 242 9 26 409 37 409 2.00E-41 178.3 1735272

cellular  
organisms;Eukaryota;Opisthokonta;Metazoa;Eumetazoa;Bilateria;Protostomia;Spiralia;Lophotrochozoa;Mollusca;Gastropoda;Neomphalina;Neomphaloidea;Peltospiridae;Gigantopelta;Gigantopelta aegis

UdeM00000003810 1735272 449.5 UdeM00000003810 XP\_041363645.1 40.8  
605 339 5 27 624 647 1239 6.90E-123 449.5 1735272

cellular  
organisms;Eukaryota;Opisthokonta;Metazoa;Eumetazoa;Bilateria;Protostomia;Spiralia;Lophotrochozoa;Mollusca;Gastropoda;Neomphalina;Neomphaloidea;Peltospiridae;Gigantopelta;Gigantopelta aegis

UdeM00000003811 1735272 259.2 UdeM00000003811 XP\_041364550.1 32  
437 283 5 10 437 7 438 9.30E-66 259.2 1735272

cellular  
organisms;Eukaryota;Opisthokonta;Metazoa;Eumetazoa;Bilateria;Protostomia;Spiralia;Lophotrochozoa;Mollusca;Gastropoda;Neomphalina;Neomphaloidea;Peltospiridae;Gigantopelta;Gigantopelta aegis

UdeM00000003814 6579 244.2 UdeM00000003814 XP\_033749720.1 75.3 450  
85 3 1 449 1 425 3.20E-61 244.2 6579 cellular

organisms;Eukaryota;Opisthokonta;Metazoa;Eumetazoa;Bilateria;Protostomia;Spiralia;Lophotrochozoa;Mollusca;Bivalvia;Autobranchia;Pteriomorpha;Pectinida;Pectinoidea;Pectinidae;Pecten;Pecten maximus

UdeM00000003815 6579 246.1 UdeM00000003815 XP\_033749720.1 76.2 445  
85 3 1 444 1 425 8.20E-62 246.1 6579 cellular

organisms;Eukaryota;Opisthokonta;Metazoa;Eumetazoa;Bilateria;Protostomia;

Spiralia;Lophotrochozoa;Mollusca;Bivalvia;Autobranchia;Pteriormorphia;Pectinida;Pectinoidea;Pectinidae;Pecten;Pecten maximus

UdeM00000003816 1735272 322 UdeM00000003816 XP\_041375949.1 51.3  
318 154 1 5 322 12 328 8.90E-85 322 1735272  
cellular

organisms;Eukaryota;Opisthokonta;Metazoa;Eumetazoa;Bilateria;Protostomia;Spiralia;Lophotrochozoa;Mollusca;Gastropoda;Neomphalina;Neomphaloidea;Peltospiridae;Gigantopelta;Gigantopelta aegis

UdeM00000003817 29159 371.3 UdeM00000003817 XP\_034328543.1 51.1 378  
177 5 16 391 1 372 1.50E-99 371.3 29159 cellular

organisms;Eukaryota;Opisthokonta;Metazoa;Eumetazoa;Bilateria;Protostomia;Spiralia;Lophotrochozoa;Mollusca;Bivalvia;Autobranchia;Pteriormorphia;Ostreida;Ostreoidea;Ostreidae;Crassostrea;Crassostrea gigas

UdeM00000003818 29159 337.4 UdeM00000003818 XP\_034328543.1 48 379  
184 7 16 387 1 373 2.40E-89 337.4 29159 cellular

organisms;Eukaryota;Opisthokonta;Metazoa;Eumetazoa;Bilateria;Protostomia;Spiralia;Lophotrochozoa;Mollusca;Bivalvia;Autobranchia;Pteriormorphia;Ostreida;Ostreoidea;Ostreidae;Crassostrea;Crassostrea gigas

UdeM00000003819 29159 365.9 UdeM00000003819 XP\_034328543.1 49.9 379  
180 6 16 391 1 372 6.30E-98 365.9 29159 cellular

organisms;Eukaryota;Opisthokonta;Metazoa;Eumetazoa;Bilateria;Protostomia;Spiralia;Lophotrochozoa;Mollusca;Bivalvia;Autobranchia;Pteriormorphia;Ostreida;Ostreoidea;Ostreidae;Crassostrea;Crassostrea gigas

UdeM00000003820 6596 675.6 UdeM00000003820 XP\_045156417.1 48.6 889  
381 8 12 838 12 886 7.90E-191 675.6 6596 cellular

organisms;Eukaryota;Opisthokonta;Metazoa;Eumetazoa;Bilateria;Protostomia;Spiralia;Lophotrochozoa;Mollusca;Bivalvia;Autobranchia;Heteroconchia;Euheterodonta;Imparidentia;Venerida;Veneroidea;Veneridae;Mercenaria;Mercenaria mercenaria

UdeM00000003821 6596 250.4 UdeM00000003821 XP\_045215960.1 45.3 256  
140 0 1 256 1 256 2.60E-63 250.4 6596 cellular

organisms;Eukaryota;Opisthokonta;Metazoa;Eumetazoa;Bilateria;Protostomia;Spiralia;Lophotrochozoa;Mollusca;Bivalvia;Autobranchia;Heteroconchia;Euheterodonta;Imparidentia;Venerida;Veneroidea;Veneridae;Mercenaria;Mercenaria mercenaria

UdeM00000003822 6596 256.1 UdeM00000003822 XP\_045215960.1 47.3 256  
135 0 1 256 1 256 4.70E-65 256.1 6596 cellular

organisms;Eukaryota;Opisthokonta;Metazoa;Eumetazoa;Bilateria;Protostomia;Spiralia;Lophotrochozoa;Mollusca;Bivalvia;Autobranchia;Heteroconchia;Euheterodonta;Imparidentia;Venerida;Veneroidea;Veneridae;Mercenaria;Mercenaria mercenaria

UdeM00000003823 6573 404.1 UdeM00000003823 XP\_021371940.1 42.5 574  
289 9 2 544 73 636 3.00E-109 404.1 6573 cellular

organisms;Eukaryota;Opisthokonta;Metazoa;Eumetazoa;Bilateria;Protostomia;Spiralia;Lophotrochozoa;Mollusca;Bivalvia;Autobranchia;Pteriormorphia;Pectinida;Pectinoidea;Pectinidae;Mizuhopecten;Mizuhopecten yessoensis

UdeM00000003824 6573 405.2 UdeM00000003824 XP\_021371940.1 42.7 571  
289 9 2 541 73 636 1.30E-109 405.2 6573 cellular

organisms;Eukaryota;Opisthokonta;Metazoa;Eumetazoa;Bilateria;Protostomia;Spiralia;Lophotrochozoa;Mollusca;Bivalvia;Autobranchia;Pteriormorphia;Pectinida;Pectinoidea;Pectinidae;Mizuhopecten;Mizuhopecten yessoensis

UdeM00000003825 6596 669.5 UdeM00000003825 XP\_045168041.1 34.2 1273  
751 20 30 1237 74 1325 8.40E-189 669.5 6596 cellular

organisms;Eukaryota;Opisthokonta;Metazoa;Eumetazoa;Bilateria;Protostomia;

Spiralia;Lophotrochozoa;Mollusca;Bivalvia;Autobranchia;Heteroconchia;Euherodonta;Imparidentia;Venerida;Veneroidea;Veneridae;Mercenaria;Mercenaria mercenaria

UdeM00000003826 6596 417.2 UdeM00000003826 XP\_045215668.1 64 336  
114 3 33 366 23 353 2.20E-113 417.2 6596 cellular  
organisms;Eukaryota;Opisthokonta;Metazoa;Eumetazoa;Bilateria;Protostomia;Spiralia;Lophotrochozoa;Mollusca;Bivalvia;Autobranchia;Heteroconchia;Euherodonta;Imparidentia;Venerida;Veneroidea;Veneridae;Mercenaria;Mercenaria mercenaria

UdeM00000003827 6596 317.4 UdeM00000003827 XP\_045215764.1 50.9 340  
126 6 1 306 106 438 2.10E-83 317.4 6596 cellular  
organisms;Eukaryota;Opisthokonta;Metazoa;Eumetazoa;Bilateria;Protostomia;Spiralia;Lophotrochozoa;Mollusca;Bivalvia;Autobranchia;Heteroconchia;Euherodonta;Imparidentia;Venerida;Veneroidea;Veneridae;Mercenaria;Mercenaria mercenaria

UdeM00000003828 6596 329.7 UdeM00000003828 XP\_045215764.1 51.1 348  
129 6 1 314 98 438 4.10E-87 329.7 6596 cellular  
organisms;Eukaryota;Opisthokonta;Metazoa;Eumetazoa;Bilateria;Protostomia;Spiralia;Lophotrochozoa;Mollusca;Bivalvia;Autobranchia;Heteroconchia;Euherodonta;Imparidentia;Venerida;Veneroidea;Veneridae;Mercenaria;Mercenaria mercenaria

UdeM00000003829 6596 132.1 UdeM00000003829 XP\_045215764.1 75 84  
20 1 1 84 2 84 3.50E-28 132.1 6596 cellular  
organisms;Eukaryota;Opisthokonta;Metazoa;Eumetazoa;Bilateria;Protostomia;Spiralia;Lophotrochozoa;Mollusca;Bivalvia;Autobranchia;Heteroconchia;Euherodonta;Imparidentia;Venerida;Veneroidea;Veneridae;Mercenaria;Mercenaria mercenaria

UdeM00000003830 6596 325.1 UdeM00000003830 XP\_045215764.1 51.8 340  
125 6 1 308 106 438 9.90E-86 325.1 6596 cellular  
organisms;Eukaryota;Opisthokonta;Metazoa;Eumetazoa;Bilateria;Protostomia;Spiralia;Lophotrochozoa;Mollusca;Bivalvia;Autobranchia;Heteroconchia;Euherodonta;Imparidentia;Venerida;Veneroidea;Veneridae;Mercenaria;Mercenaria mercenaria

UdeM00000003833 6596 132.1 UdeM00000003833 XP\_045215764.1 78.5 79  
16 1 1 79 2 79 3.80E-28 132.1 6596 cellular  
organisms;Eukaryota;Opisthokonta;Metazoa;Eumetazoa;Bilateria;Protostomia;Spiralia;Lophotrochozoa;Mollusca;Bivalvia;Autobranchia;Heteroconchia;Euherodonta;Imparidentia;Venerida;Veneroidea;Veneridae;Mercenaria;Mercenaria mercenaria

UdeM00000003834 6596 294.7 UdeM00000003834 XP\_045215596.1 55.1 272  
122 0 1 272 1 272 1.20E-76 294.7 6596 cellular  
organisms;Eukaryota;Opisthokonta;Metazoa;Eumetazoa;Bilateria;Protostomia;Spiralia;Lophotrochozoa;Mollusca;Bivalvia;Autobranchia;Heteroconchia;Euherodonta;Imparidentia;Venerida;Veneroidea;Veneridae;Mercenaria;Mercenaria mercenaria

UdeM00000003836 6579 107.5 UdeM00000003836 XP\_033750148.1 51 100  
47 1 5 104 2 99 1.20E-20 107.5 6579 cellular  
organisms;Eukaryota;Opisthokonta;Metazoa;Eumetazoa;Bilateria;Protostomia;Spiralia;Lophotrochozoa;Mollusca;Bivalvia;Autobranchia;Pteriomorphia;Pectinida;Pectinoidea;Pectinidae;Pecten;Pecten maximus

UdeM00000003835 6565 108.2 UdeM00000003835 XP\_022331627.1 47.5 118  
58 2 1 116 1 116 7.30E-21 108.2 6565 cellular  
organisms;Eukaryota;Opisthokonta;Metazoa;Eumetazoa;Bilateria;Protostomia;

Spiralia; Lophotrochozoa; Mollusca; Bivalvia; Autobranchia; Pteriomorphia; Ostr  
eida; Ostreidae; Crassostrea; Crassostrea virginica  
UdeM00000003837 6579 60.1 UdeM00000003837 XP\_033750148.1 31.1 135  
72 3 4 132 150 269 2.60E-06 60.1 6579 cellular  
organisms; Eukaryota; Opisthokonta; Metazoa; Eumetazoa; Bilateria; Protostomia;  
Spiralia; Lophotrochozoa; Mollusca; Bivalvia; Autobranchia; Pteriomorphia; Pect  
inida; Pectinoidea; Pectinidae; Pecten; Pecten maximus  
UdeM00000003838 29159 108.2 UdeM00000003838 XP\_011448949.2 28 300  
194 7 666 962 443 723 6.80E-20 108.2 29159 cellular  
organisms; Eukaryota; Opisthokonta; Metazoa; Eumetazoa; Bilateria; Protostomia;  
Spiralia; Lophotrochozoa; Mollusca; Bivalvia; Autobranchia; Pteriomorphia; Ostr  
eida; Ostreidae; Crassostrea; Crassostrea gigas  
UdeM00000003839 1735272 58.9 UdeM00000003839 XP\_041367786.1 38.2  
76 47 0 8 83 713 788 3.80E-06 58.9 1735272  
cellular  
organisms; Eukaryota; Opisthokonta; Metazoa; Eumetazoa; Bilateria; Protostomia;  
Spiralia; Lophotrochozoa; Mollusca; Gastropoda; Neomphalina; Neomphaloidea; Pel  
tospiridae; Gigantopelta; Gigantopelta aegis  
UdeM00000003842 7574 224.2 UdeM00000003842 XP\_013391612.1 39.2 370  
196 7 56 405 180 540 3.10E-55 224.2 7574 cellular  
organisms; Eukaryota; Opisthokonta; Metazoa; Eumetazoa; Bilateria; Protostomia;  
Spiralia; Lophotrochozoa; Brachiopoda; Linguliformea; Lingulata; Lingulida; Lin  
guloidea; Lingulidae; Lingula; Lingula anatina  
UdeM00000003841 7574 225.7 UdeM00000003841 XP\_013391612.1 33.5 514  
286 12 1 467 36 540 1.20E-55 225.7 7574 cellular  
organisms; Eukaryota; Opisthokonta; Metazoa; Eumetazoa; Bilateria; Protostomia;  
Spiralia; Lophotrochozoa; Brachiopoda; Linguliformea; Lingulata; Lingulida; Lin  
guloidea; Lingulidae; Lingula; Lingula anatina  
UdeM00000003840 1735272 223 UdeM00000003840 XP\_041371889.1 30.5  
531 331 7 5 501 14 540 8.50E-55 223 1735272  
cellular  
organisms; Eukaryota; Opisthokonta; Metazoa; Eumetazoa; Bilateria; Protostomia;  
Spiralia; Lophotrochozoa; Mollusca; Gastropoda; Neomphalina; Neomphaloidea; Pel  
tospiridae; Gigantopelta; Gigantopelta aegis  
UdeM00000003843 441366 155.2 UdeM00000003843 XP\_028305670.1 56.7  
141 61 0 383 523 242 382 2.30E-34 155.2 441366  
cellular  
organisms; Eukaryota; Opisthokonta; Metazoa; Eumetazoa; Bilateria; Deuterostomi  
a; Chordata; Craniata; Vertebrata; Gnathostomata; Teleostomi; Euteleostomi; Acti  
nopterygii; Actinopteri; Neopterygii; Teleostei; Osteoglossocephalai; Clupeoce  
phala; Euteleostei; Neoteleostei; Eurypterygia; Ctenosquamata; Acanthomo  
rphata; Euacanthomorpha; Percomorphaceae; Ovalentaria; Blenniiformes; Blen  
niiformes; Gobiesocidae; Gobiesocinae; Gouania; Gouania  
willdenowi  
UdeM00000020119 50390 419.5 UdeM00000020119 XP\_028154228.1 61 290  
113 0 1 290 324 613 3.60E-114 419.5 50390 cellular  
organisms; Eukaryota; Opisthokonta; Metazoa; Eumetazoa; Bilateria; Protostomia;  
Ecdysozoa; Panarthropoda; Arthropoda; Mandibulata; Pancrustacea; Hexapoda; Inse  
cta; Dicondylia; Pterygota; Neoptera; Endopterygota; Coleoptera; Polyphaga; Cucu  
jiformia; Chrysomeloidea; Chrysomelidae; Galerucinae; Luperini; Diabroticina; D  
iabroticites; Diabrotica; Diabrotica virgifera; Diabrotica virgifera  
virgifera  
UdeM00000020120 29159 74.7 UdeM00000020120 XP\_011435380.2 55.7 61  
27 0 4 64 203 263 6.50E-11 74.7 29159 cellular

organisms;Eukaryota;Opisthokonta;Metazoa;Eumetazoa;Bilateria;Protostomia;Spiralia;Lophotrochozoa;Mollusca;Bivalvia;Autobranchia;Pteriomorphia;Ostr

UdeM00000020121 6596 337 UdeM00000020121 XP\_045171211.1 54.9 266  
116 2 37 300 25 288 2.70E-89 337 6596 cellular

organisms;Eukaryota;Opisthokonta;Metazoa;Eumetazoa;Bilateria;Protostomia;Spiralia;Lophotrochozoa;Mollusca;Bivalvia;Autobranchia;Heteroconchia;Euhe  
terodonta;Imparidentia;Venerida;Veneroidea;Veneridae;Mercenaria;Mercenari  
a mercenaria

UdeM00000020122 6596 349.4 UdeM00000020122 XP\_045171211.1 53.5 284  
128 2 4 285 7 288 5.10E-93 349.4 6596 cellular

organisms;Eukaryota;Opisthokonta;Metazoa;Eumetazoa;Bilateria;Protostomia;Spiralia;Lophotrochozoa;Mollusca;Bivalvia;Autobranchia;Heteroconchia;Euhe  
terodonta;Imparidentia;Venerida;Veneroidea;Veneridae;Mercenaria;Mercenari  
a mercenaria

UdeM00000020123 29159 258.1 UdeM00000020123 XP\_011435380.2 56.4 225  
88 2 4 227 97 312 1.10E-65 258.1 29159 cellular

organisms;Eukaryota;Opisthokonta;Metazoa;Eumetazoa;Bilateria;Protostomia;Spiralia;Lophotrochozoa;Mollusca;Bivalvia;Autobranchia;Pteriomorphia;Ostr  
eida;Ostreoidea;Ostreidae;Crassostrea;Crassostrea gigas

UdeM00000020124 6596 347.8 UdeM00000020124 XP\_045171211.1 54.3 282  
125 2 4 283 7 286 1.50E-92 347.8 6596 cellular

organisms;Eukaryota;Opisthokonta;Metazoa;Eumetazoa;Bilateria;Protostomia;Spiralia;Lophotrochozoa;Mollusca;Bivalvia;Autobranchia;Heteroconchia;Euhe  
terodonta;Imparidentia;Venerida;Veneroidea;Veneridae;Mercenaria;Mercenari  
a mercenaria

UdeM00000020125 6573 207.6 UdeM00000020125 XP\_021370223.1 85.8 120  
17 0 35 154 1 120 1.10E-50 207.6 6573 cellular

organisms;Eukaryota;Opisthokonta;Metazoa;Eumetazoa;Bilateria;Protostomia;Spiralia;Lophotrochozoa;Mollusca;Bivalvia;Autobranchia;Pteriomorphia;Pect  
inida;Pectinoidea;Pectinidae;Mizuhopecten;Mizuhopecten yessoensis

UdeM00000020129 29159 433.3 UdeM00000020129 XP\_034317111.1 58.9 350  
144 0 1 350 1 350 2.90E-118 433.3 29159 cellular

organisms;Eukaryota;Opisthokonta;Metazoa;Eumetazoa;Bilateria;Protostomia;Spiralia;Lophotrochozoa;Mollusca;Bivalvia;Autobranchia;Pteriomorphia;Ostr  
eida;Ostreoidea;Ostreidae;Crassostrea;Crassostrea gigas

UdeM00000020132 6596 542.3 UdeM00000020132 XP\_045171477.1 46.1 661  
257 5 23 598 3 649 7.60E-151 542.3 6596 cellular

organisms;Eukaryota;Opisthokonta;Metazoa;Eumetazoa;Bilateria;Protostomia;Spiralia;Lophotrochozoa;Mollusca;Bivalvia;Autobranchia;Heteroconchia;Euhe  
terodonta;Imparidentia;Venerida;Veneroidea;Veneridae;Mercenaria;Mercenari  
a mercenaria

UdeM00000020133 6596 589.3 UdeM00000020133 XP\_045171477.1 48.7 661  
269 4 23 627 3 649 5.70E-165 589.3 6596 cellular

organisms;Eukaryota;Opisthokonta;Metazoa;Eumetazoa;Bilateria;Protostomia;Spiralia;Lophotrochozoa;Mollusca;Bivalvia;Autobranchia;Heteroconchia;Euhe  
terodonta;Imparidentia;Venerida;Veneroidea;Veneridae;Mercenaria;Mercenari  
a mercenaria

UdeM00000020134 6596 355.5 UdeM00000020134 XP\_045171477.1 48.9 401  
149 3 16 360 8 408 8.30E-95 355.5 6596 cellular

organisms;Eukaryota;Opisthokonta;Metazoa;Eumetazoa;Bilateria;Protostomia;Spiralia;Lophotrochozoa;Mollusca;Bivalvia;Autobranchia;Heteroconchia;Euhe  
terodonta;Imparidentia;Venerida;Veneroidea;Veneridae;Mercenaria;Mercenari  
a mercenaria



UdeM00000020135 400727 203 UdeM00000020135 XP\_025091970.1 45.3  
 236 120 2 1 227 373 608 4.20E-49 203 400727  
 cellular  
 organisms;Eukaryota;Opisthokonta;Metazoa;Eumetazoa;Bilateria;Protostomia;  
 Spiralia;Lophotrochozoa;Mollusca;Gastropoda;Caenogastropoda;Architaenioglossa;  
 Ampullarioidea;Ampullariidae;Pomacea;Pomacea canaliculata  
 UdeM00000020136 6596 597 UdeM00000020136 XP\_045171477.1 51.1 653  
 232 8 33 622 33 661 2.70E-167 597 6596 cellular  
 organisms;Eukaryota;Opisthokonta;Metazoa;Eumetazoa;Bilateria;Protostomia;  
 Spiralia;Lophotrochozoa;Mollusca;Bivalvia;Autobranchia;Heteroconchia;Euheterodonta;  
 Imparidentia;Venerida;Veneroidea;Veneridae;Mercenaria;Mercenaria mercenaria  
 UdeM00000020137 6596 622.1 UdeM00000020137 XP\_045171477.1 51.3 679  
 251 8 1 617 1 661 7.70E-175 622.1 6596 cellular  
 organisms;Eukaryota;Opisthokonta;Metazoa;Eumetazoa;Bilateria;Protostomia;  
 Spiralia;Lophotrochozoa;Mollusca;Bivalvia;Autobranchia;Heteroconchia;Euheterodonta;  
 Imparidentia;Venerida;Veneroidea;Veneridae;Mercenaria;Mercenaria mercenaria  
 UdeM00000020139 29159 215.7 UdeM00000020139 XP\_034336502.1 32.1 720  
 378 31 409 1086 326 976 2.90E-52 215.7 29159 cellular  
 organisms;Eukaryota;Opisthokonta;Metazoa;Eumetazoa;Bilateria;Protostomia;  
 Spiralia;Lophotrochozoa;Mollusca;Bivalvia;Autobranchia;Pteriormorphia;Ostreida;  
 Ostreoidea;Ostreidae;Crassostrea;Crassostrea gigas  
 UdeM00000020140 6573 466.1 UdeM00000020140 XP\_021370387.1 37.2 761  
 427 15 32 749 41 793 8.50E-128 466.1 6573 cellular  
 organisms;Eukaryota;Opisthokonta;Metazoa;Eumetazoa;Bilateria;Protostomia;  
 Spiralia;Lophotrochozoa;Mollusca;Bivalvia;Autobranchia;Pteriormorphia;Pectinida;  
 Pectinoidea;Pectinidae;Mizuhopecten;Mizuhopecten yessoensis  
 UdeM00000020141 6596 131.3 UdeM00000020141 XP\_045173408.1 39.3 178  
 95 4 9 173 2 179 1.90E-27 131.3 6596 cellular  
 organisms;Eukaryota;Opisthokonta;Metazoa;Eumetazoa;Bilateria;Protostomia;  
 Spiralia;Lophotrochozoa;Mollusca;Bivalvia;Autobranchia;Heteroconchia;Euheterodonta;  
 Imparidentia;Venerida;Veneroidea;Veneridae;Mercenaria;Mercenaria mercenaria  
 UdeM00000020142 6596 135.6 UdeM00000020142 XP\_045173408.1 35.2 219  
 128 6 9 226 2 207 1.10E-28 135.6 6596 cellular  
 organisms;Eukaryota;Opisthokonta;Metazoa;Eumetazoa;Bilateria;Protostomia;  
 Spiralia;Lophotrochozoa;Mollusca;Bivalvia;Autobranchia;Heteroconchia;Euheterodonta;  
 Imparidentia;Venerida;Veneroidea;Veneridae;Mercenaria;Mercenaria mercenaria  
 UdeM00000020143 6565 371.3 UdeM00000020143 XP\_022314936.1 77.9 213  
 47 0 1 213 14 226 8.20E-100 371.3 6565 cellular  
 organisms;Eukaryota;Opisthokonta;Metazoa;Eumetazoa;Bilateria;Protostomia;  
 Spiralia;Lophotrochozoa;Mollusca;Bivalvia;Autobranchia;Pteriormorphia;Ostreida;  
 Ostreoidea;Ostreidae;Crassostrea;Crassostrea virginica  
 UdeM00000020144 400727 152.5 UdeM00000020144 XP\_025109299.1 68.5  
 111 29 3 1 107 241 349 3.10E-34 152.5 400727  
 cellular  
 organisms;Eukaryota;Opisthokonta;Metazoa;Eumetazoa;Bilateria;Protostomia;  
 Spiralia;Lophotrochozoa;Mollusca;Gastropoda;Caenogastropoda;Architaenioglossa;  
 Ampullarioidea;Ampullariidae;Pomacea;Pomacea canaliculata  
 UdeM00000020145 37653 63.2 UdeM00000020145 XP\_014773118.1 55.4 65  
 23 3 93 155 27 87 3.50E-07 63.2 37653 cellular  
 organisms;Eukaryota;Opisthokonta;Metazoa;Eumetazoa;Bilateria;Protostomia;

Spiralia;Lophotrochozoa;Mollusca;Cephalopoda;Coleoidea;Octopodiformes;Octopoda;Incirrata;Octopodidae;Octopus;Octopus bimaculoides

UdeM00000020146 6596 65.1 UdeM00000020146 XP\_045162959.1 30.5 151  
86 5 84 218 234 381 1.40E-07 65.1 6596 cellular  
organisms;Eukaryota;Opisthokonta;Metazoa;Eumetazoa;Bilateria;Protostomia;  
Spiralia;Lophotrochozoa;Mollusca;Bivalvia;Autobranchia;Heteroconchia;Euhe  
terodonta;Imparidentia;Venerida;Veneroidea;Veneridae;Mercenaria;Mercenari  
a mercenaria

UdeM00000020147 6596 86.7 UdeM00000020147 XP\_045206295.1 60 70  
22 1 3 72 243 306 2.30E-14 86.7 6596 cellular  
organisms;Eukaryota;Opisthokonta;Metazoa;Eumetazoa;Bilateria;Protostomia;  
Spiralia;Lophotrochozoa;Mollusca;Bivalvia;Autobranchia;Heteroconchia;Euhe  
terodonta;Imparidentia;Venerida;Veneroidea;Veneridae;Mercenaria;Mercenari  
a mercenaria

UdeM00000020148 6596 515 UdeM00000020148 XP\_045172074.1 60.9 376  
147 0 53 428 5 380 9.30E-143 515 6596 cellular  
organisms;Eukaryota;Opisthokonta;Metazoa;Eumetazoa;Bilateria;Protostomia;  
Spiralia;Lophotrochozoa;Mollusca;Bivalvia;Autobranchia;Heteroconchia;Euhe  
terodonta;Imparidentia;Venerida;Veneroidea;Veneridae;Mercenaria;Mercenari  
a mercenaria

UdeM00000020149 6596 511.5 UdeM00000020149 XP\_045172074.1 60.9 373  
146 0 7 379 8 380 9.10E-142 511.5 6596 cellular  
organisms;Eukaryota;Opisthokonta;Metazoa;Eumetazoa;Bilateria;Protostomia;  
Spiralia;Lophotrochozoa;Mollusca;Bivalvia;Autobranchia;Heteroconchia;Euhe  
terodonta;Imparidentia;Venerida;Veneroidea;Veneridae;Mercenaria;Mercenari  
a mercenaria

UdeM00000020150 37653 75.9 UdeM00000020150 XP\_014773118.1 58.5 65  
25 2 114 176 23 87 5.90E-11 75.9 37653 cellular  
organisms;Eukaryota;Opisthokonta;Metazoa;Eumetazoa;Bilateria;Protostomia;  
Spiralia;Lophotrochozoa;Mollusca;Cephalopoda;Coleoidea;Octopodiformes;Oct  
opoda;Incirrata;Octopodidae;Octopus;Octopus bimaculoides

UdeM00000020151 946362 74.7 UdeM00000020151 XP\_004994712.1 59.6  
57 22 1 124 179 106 162 1.30E-10 74.7 946362  
cellular  
organisms;Eukaryota;Opisthokonta;Choanoflagellata;Craspedida;Salpingoecid  
ae;Salpingoeca;Salpingoeca rosetta

UdeM00000020153 6596 581.6 UdeM00000020153 XP\_045172252.1 45.3 746  
340 9 1 686 378 1115 1.30E-162 581.6 6596 cellular  
organisms;Eukaryota;Opisthokonta;Metazoa;Eumetazoa;Bilateria;Protostomia;  
Spiralia;Lophotrochozoa;Mollusca;Bivalvia;Autobranchia;Heteroconchia;Euhe  
terodonta;Imparidentia;Venerida;Veneroidea;Veneridae;Mercenaria;Mercenari  
a mercenaria

UdeM00000020152 6596 581.6 UdeM00000020152 XP\_045172252.1 45.2 747  
341 9 2 688 377 1115 1.30E-162 581.6 6596 cellular  
organisms;Eukaryota;Opisthokonta;Metazoa;Eumetazoa;Bilateria;Protostomia;  
Spiralia;Lophotrochozoa;Mollusca;Bivalvia;Autobranchia;Heteroconchia;Euhe  
terodonta;Imparidentia;Venerida;Veneroidea;Veneridae;Mercenaria;Mercenari  
a mercenaria

UdeM00000020154 6596 287 UdeM00000020154 XP\_045172252.1 48.1 318  
157 3 14 329 49 360 3.30E-74 287 6596 cellular  
organisms;Eukaryota;Opisthokonta;Metazoa;Eumetazoa;Bilateria;Protostomia;  
Spiralia;Lophotrochozoa;Mollusca;Bivalvia;Autobranchia;Heteroconchia;Euhe  
terodonta;Imparidentia;Venerida;Veneroidea;Veneridae;Mercenaria;Mercenari  
a mercenaria

UdeM00000020155 6565 286.2 UdeM00000020155 XP\_022327962.1 51.5 291  
 138 2 1 288 428 718 4.70E-74 286.2 6565 cellular  
 organisms;Eukaryota;Opisthokonta;Metazoa;Eumetazoa;Bilateria;Protostomia;  
 Spiralia;Lophotrochozoa;Mollusca;Bivalvia;Autobranchia;Pteriormorphia;Ostr  
 eida;Ostreoidea;Ostreidae;Crassostrea;Crassostrea virginica  
 UdeM00000020156 225164 262.7 UdeM00000020156 XP\_009062390.1 64.2  
 187 67 0 3 189 4 190 3.90E-67 262.7 225164  
 cellular  
 organisms;Eukaryota;Opisthokonta;Metazoa;Eumetazoa;Bilateria;Protostomia;  
 Spiralia;Lophotrochozoa;Mollusca;Gastropoda;Patellogastropoda;Lottioidea;  
 Lottiidae;Lottia;Lottia gigantea  
 UdeM00000020159 6596 106.7 UdeM00000020159 XP\_045173120.1 60 90  
 32 2 91 179 100 186 3.20E-20 106.7 6596 cellular  
 organisms;Eukaryota;Opisthokonta;Metazoa;Eumetazoa;Bilateria;Protostomia;  
 Spiralia;Lophotrochozoa;Mollusca;Bivalvia;Autobranchia;Heteroconchia;Euhe  
 terodonta;Imparidentia;Venerida;Veneroidea;Veneridae;Mercenaria;Mercenari  
 a mercenaria  
 UdeM00000020160 29159 513.1 UdeM00000020160 XP\_034336897.1 58.5 472  
 151 5 13 453 171 628 3.70E-142 513.1 29159 cellular  
 organisms;Eukaryota;Opisthokonta;Metazoa;Eumetazoa;Bilateria;Protostomia;  
 Spiralia;Lophotrochozoa;Mollusca;Bivalvia;Autobranchia;Pteriormorphia;Ostr  
 eida;Ostreoidea;Ostreidae;Crassostrea;Crassostrea gigas  
 UdeM00000020163 225164 312.8 UdeM00000020163 XP\_009062390.1 63.4  
 227 83 0 3 229 4 230 3.80E-82 312.8 225164  
 cellular  
 organisms;Eukaryota;Opisthokonta;Metazoa;Eumetazoa;Bilateria;Protostomia;  
 Spiralia;Lophotrochozoa;Mollusca;Gastropoda;Patellogastropoda;Lottioidea;  
 Lottiidae;Lottia;Lottia gigantea  
 UdeM00000020164 6565 106.7 UdeM00000020164 XP\_022327962.1 54.8 93  
 40 1 3 93 626 718 1.70E-20 106.7 6565 cellular  
 organisms;Eukaryota;Opisthokonta;Metazoa;Eumetazoa;Bilateria;Protostomia;  
 Spiralia;Lophotrochozoa;Mollusca;Bivalvia;Autobranchia;Pteriormorphia;Ostr  
 eida;Ostreoidea;Ostreidae;Crassostrea;Crassostrea virginica  
 UdeM00000020165 6573 145.6 UdeM00000020165 XP\_021377622.1 53.7 162  
 68 2 5 166 457 611 5.80E-32 145.6 6573 cellular  
 organisms;Eukaryota;Opisthokonta;Metazoa;Eumetazoa;Bilateria;Protostomia;  
 Spiralia;Lophotrochozoa;Mollusca;Bivalvia;Autobranchia;Pteriormorphia;Pect  
 inida;Pectinoidea;Pectinidae;Mizuhopecten;Mizuhopecten yessoensis  
 UdeM00000020166 6596 173.7 UdeM00000020166 XP\_045173617.1 59.3 140  
 55 1 3 142 19 156 1.70E-40 173.7 6596 cellular  
 organisms;Eukaryota;Opisthokonta;Metazoa;Eumetazoa;Bilateria;Protostomia;  
 Spiralia;Lophotrochozoa;Mollusca;Bivalvia;Autobranchia;Heteroconchia;Euhe  
 terodonta;Imparidentia;Venerida;Veneroidea;Veneridae;Mercenaria;Mercenari  
 a mercenaria  
 UdeM00000020167 6596 85.9 UdeM00000020167 XP\_045171426.1 63.5 52  
 19 0 3141 3192 4020 4071 1.00E-12 85.9 6596 cellular  
 organisms;Eukaryota;Opisthokonta;Metazoa;Eumetazoa;Bilateria;Protostomia;  
 Spiralia;Lophotrochozoa;Mollusca;Bivalvia;Autobranchia;Heteroconchia;Euhe  
 terodonta;Imparidentia;Venerida;Veneroidea;Veneridae;Mercenaria;Mercenari  
 a mercenaria  
 UdeM00000020169 6573 649.8 UdeM00000020169 XP\_021353956.1 57.5 570  
 214 5 11 565 39 595 3.30E-183 649.8 6573 cellular  
 organisms;Eukaryota;Opisthokonta;Metazoa;Eumetazoa;Bilateria;Protostomia;

Spiralia; Lophotrochozoa; Mollusca; Bivalvia; Autobranchia; Pteriomorpha; Pectinida; Pectinoidea; Pectinidae; Mizuhopecten; Mizuhopecten yessoensis

UdeM00000020170 6596 680.6 UdeM00000020170 XP\_045170886.1 58.8 594  
230 6 1 587 1 586 1.80E-192 680.6 6596 cellular  
organisms; Eukaryota; Opisthokonta; Metazoa; Eumetazoa; Bilateria; Protostomia; Spiralia; Lophotrochozoa; Mollusca; Bivalvia; Autobranchia; Heteroconchia; Euheterodonta; Imparidentia; Venerida; Veneroidea; Veneridae; Mercenaria; Mercenaria mercenaria

UdeM00000020171 7725 91.7 UdeM00000020171 XP\_039265581.1 35.3 133  
83 1 1 130 225 357 7.70E-16 91.7 7725 cellular  
organisms; Eukaryota; Opisthokonta; Metazoa; Eumetazoa; Bilateria; Deuterostomia; Chordata; Tunicata; Ascidiacea; Stolidobranchia; Styelidae; Styela; Styela clava

UdeM00000020172 6596 706.8 UdeM00000020172 XP\_045171363.1 46.7 1204  
483 26 5 1082 4 1174 4.10E-200 706.8 6596 cellular  
organisms; Eukaryota; Opisthokonta; Metazoa; Eumetazoa; Bilateria; Protostomia; Spiralia; Lophotrochozoa; Mollusca; Bivalvia; Autobranchia; Heteroconchia; Euheterodonta; Imparidentia; Venerida; Veneroidea; Veneridae; Mercenaria; Mercenaria mercenaria

UdeM00000020173 400727 404.1 UdeM00000020173 XP\_025086573.1 71.1  
263 76 0 1 263 7 269 1.40E-109 404.1 400727  
cellular  
organisms; Eukaryota; Opisthokonta; Metazoa; Eumetazoa; Bilateria; Protostomia; Spiralia; Lophotrochozoa; Mollusca; Gastropoda; Caenogastropoda; Architaenioglossa; Ampullarioidea; Ampullariidae; Pomacea; Pomacea canaliculata

UdeM00000020174 6596 724.9 UdeM00000020174 XP\_045173499.1 55.5 1723  
668 24 60 1747 13 1672 2.40E-205 724.9 6596 cellular  
organisms; Eukaryota; Opisthokonta; Metazoa; Eumetazoa; Bilateria; Protostomia; Spiralia; Lophotrochozoa; Mollusca; Bivalvia; Autobranchia; Heteroconchia; Euheterodonta; Imparidentia; Venerida; Veneroidea; Veneridae; Mercenaria; Mercenaria mercenaria

UdeM00000020175 6596 162.5 UdeM00000020175 XP\_045171882.1 28 479  
296 13 18 466 20 479 3.30E-36 162.5 6596 cellular  
organisms; Eukaryota; Opisthokonta; Metazoa; Eumetazoa; Bilateria; Protostomia; Spiralia; Lophotrochozoa; Mollusca; Bivalvia; Autobranchia; Heteroconchia; Euheterodonta; Imparidentia; Venerida; Veneroidea; Veneridae; Mercenaria; Mercenaria mercenaria

UdeM00000020176 6596 162.5 UdeM00000020176 XP\_045171882.1 28 479  
296 13 18 466 20 479 3.30E-36 162.5 6596 cellular  
organisms; Eukaryota; Opisthokonta; Metazoa; Eumetazoa; Bilateria; Protostomia; Spiralia; Lophotrochozoa; Mollusca; Bivalvia; Autobranchia; Heteroconchia; Euheterodonta; Imparidentia; Venerida; Veneroidea; Veneridae; Mercenaria; Mercenaria mercenaria

UdeM00000020177 6596 993.4 UdeM00000020177 XP\_045171869.1 65 717  
243 4 2 710 5 721 1.50E-286 993.4 6596 cellular  
organisms; Eukaryota; Opisthokonta; Metazoa; Eumetazoa; Bilateria; Protostomia; Spiralia; Lophotrochozoa; Mollusca; Bivalvia; Autobranchia; Heteroconchia; Euheterodonta; Imparidentia; Venerida; Veneroidea; Veneridae; Mercenaria; Mercenaria mercenaria

UdeM00000020178 6596 995.7 UdeM00000020178 XP\_045171866.1 60.5 794  
287 6 2 768 6 799 3.20E-287 995.7 6596 cellular  
organisms; Eukaryota; Opisthokonta; Metazoa; Eumetazoa; Bilateria; Protostomia; Spiralia; Lophotrochozoa; Mollusca; Bivalvia; Autobranchia; Heteroconchia; Euheterodonta; Imparidentia; Venerida; Veneroidea; Veneridae; Mercenaria; Mercenaria mercenaria

terodonta;Imparidentia;Venerida;Veneroidea;Veneridae;Mercenaria;Mercenaria mercenaria  
 UdeM00000020179 6579 214.2 UdeM00000020179 XP\_033748337.1 52 196  
 93 1 131 325 80 275 2.50E-52 214.2 6579 cellular  
 organisms;Eukaryota;Opisthokonta;Metazoa;Eumetazoa;Bilateria;Protostomia;  
 Spiralia;Lophotrochozoa;Mollusca;Bivalvia;Autobranhia;Pteriormorphia;Pectinida;  
 Pectinoidea;Pectinidae;Pecten;Pecten maximus  
 UdeM00000020180 6579 488 UdeM00000020180 XP\_033748619.1 48.9 612  
 252 17 573 1156 180 758 3.20E-134 488 6579 cellular  
 organisms;Eukaryota;Opisthokonta;Metazoa;Eumetazoa;Bilateria;Protostomia;  
 Spiralia;Lophotrochozoa;Mollusca;Bivalvia;Autobranhia;Pteriormorphia;Pectinida;  
 Pectinoidea;Pectinidae;Pecten;Pecten maximus  
 UdeM00000020181 6579 493.4 UdeM00000020181 XP\_033748619.1 49.1 609  
 252 16 573 1153 180 758 7.70E-136 493.4 6579 cellular  
 organisms;Eukaryota;Opisthokonta;Metazoa;Eumetazoa;Bilateria;Protostomia;  
 Spiralia;Lophotrochozoa;Mollusca;Bivalvia;Autobranhia;Pteriormorphia;Pectinida;  
 Pectinoidea;Pectinidae;Pecten;Pecten maximus  
 UdeM00000020183 225164 796.2 UdeM00000020183 XP\_009051695.1 52.3  
 1004 421 10 1 979 1 971 4.70E-227 796.2 225164  
 cellular  
 organisms;Eukaryota;Opisthokonta;Metazoa;Eumetazoa;Bilateria;Protostomia;  
 Spiralia;Lophotrochozoa;Mollusca;Gastropoda;Patellogastropoda;Lottioidea;  
 Lottiidae;Lottia;Lottia gigantea  
 UdeM00000020184 6596 324.3 UdeM00000020184 XP\_045196470.1 31.2 711  
 432 16 5 669 4 703 3.60E-85 324.3 6596 cellular  
 organisms;Eukaryota;Opisthokonta;Metazoa;Eumetazoa;Bilateria;Protostomia;  
 Spiralia;Lophotrochozoa;Mollusca;Bivalvia;Autobranhia;Heteroconchia;Euhetero-  
 terodonta;Imparidentia;Venerida;Veneroidea;Veneridae;Mercenaria;Mercenaria  
 a mercenaria  
 UdeM00000020185 6596 228.8 UdeM00000020185 XP\_045173372.1 62.1 169  
 64 0 4 172 157 325 6.00E-57 228.8 6596 cellular  
 organisms;Eukaryota;Opisthokonta;Metazoa;Eumetazoa;Bilateria;Protostomia;  
 Spiralia;Lophotrochozoa;Mollusca;Bivalvia;Autobranhia;Heteroconchia;Euhetero-  
 terodonta;Imparidentia;Venerida;Veneroidea;Veneridae;Mercenaria;Mercenaria  
 a mercenaria  
 UdeM00000020186 46514 145.2 UdeM00000020186 XP\_038075930.1 47.4 152  
 77 2 65 213 62 213 1.30E-31 145.2 46514 cellular  
 organisms;Eukaryota;Opisthokonta;Metazoa;Eumetazoa;Bilateria;Deuterostomia;  
 Echinodermata;Eleutherozoa;Asterozoa;Asteroidea;Valvatacea;Valvatida;Asterinidae;  
 Patiria;Patiria miniata  
 UdeM00000020187 6596 96.7 UdeM00000020187 XP\_045173199.1 38.8 139  
 76 2 5 134 4 142 2.40E-17 96.7 6596 cellular  
 organisms;Eukaryota;Opisthokonta;Metazoa;Eumetazoa;Bilateria;Protostomia;  
 Spiralia;Lophotrochozoa;Mollusca;Bivalvia;Autobranhia;Heteroconchia;Euhetero-  
 terodonta;Imparidentia;Venerida;Veneroidea;Veneridae;Mercenaria;Mercenaria  
 a mercenaria  
 UdeM00000020188 6596 144.4 UdeM00000020188 XP\_045157494.1 28.1 402  
 248 9 1 364 298 696 2.80E-31 144.4 6596 cellular  
 organisms;Eukaryota;Opisthokonta;Metazoa;Eumetazoa;Bilateria;Protostomia;  
 Spiralia;Lophotrochozoa;Mollusca;Bivalvia;Autobranhia;Heteroconchia;Euhetero-  
 terodonta;Imparidentia;Venerida;Veneroidea;Veneridae;Mercenaria;Mercenaria  
 a mercenaria  
 UdeM00000020189 6596 509.6 UdeM00000020189 XP\_045170850.1 52.1 486  
 145 4 65 464 2323 2806 4.60E-141 509.6 6596 cellular

organisms;Eukaryota;Opisthokonta;Metazoa;Eumetazoa;Bilateria;Protostomia;Spiralia;Lophotrochozoa;Mollusca;Bivalvia;Autobranchia;Heteroconchia;Euherodonta;Imparidentia;Venerida;Veneroidea;Veneridae;Mercenaria;Mercenaria mercenaria

UdeM00000020190 6596 130.2 UdeM00000020190 XP\_045173923.1 45.9 122  
66 0 22 143 26 147 4.80E-27 130.2 6596 cellular

organisms;Eukaryota;Opisthokonta;Metazoa;Eumetazoa;Bilateria;Protostomia;Spiralia;Lophotrochozoa;Mollusca;Bivalvia;Autobranchia;Heteroconchia;Euherodonta;Imparidentia;Venerida;Veneroidea;Veneridae;Mercenaria;Mercenaria mercenaria

UdeM00000020191 6596 1170.2 UdeM00000020191 XP\_045173370.1 58.8  
950 360 11 40 985 23 945 0.00E+00 1170.2 6596  
cellular

organisms;Eukaryota;Opisthokonta;Metazoa;Eumetazoa;Bilateria;Protostomia;Spiralia;Lophotrochozoa;Mollusca;Bivalvia;Autobranchia;Heteroconchia;Euherodonta;Imparidentia;Venerida;Veneroidea;Veneridae;Mercenaria;Mercenaria mercenaria

UdeM00000020192 29159 679.9 UdeM00000020192 XP\_034336035.1 53.2 605  
277 6 2 603 75 676 3.30E-192 679.9 29159 cellular

organisms;Eukaryota;Opisthokonta;Metazoa;Eumetazoa;Bilateria;Protostomia;Spiralia;Lophotrochozoa;Mollusca;Bivalvia;Autobranchia;Pteriomorpha;Ostreida;Ostreoidea;Ostreidae;Crassostrea;Crassostrea gigas

UdeM00000020193 6596 2234.5 UdeM00000020193 XP\_045173388.1 58.2  
1795 717 16 2 1786 1555 3326 0.00E+00 2234.5 6596  
cellular

organisms;Eukaryota;Opisthokonta;Metazoa;Eumetazoa;Bilateria;Protostomia;Spiralia;Lophotrochozoa;Mollusca;Bivalvia;Autobranchia;Heteroconchia;Euherodonta;Imparidentia;Venerida;Veneroidea;Veneridae;Mercenaria;Mercenaria mercenaria

UdeM00000020194 415028 124 UdeM00000020194 XP\_027505847.1 39.2  
181 85 7 21 198 146 304 2.10E-25 124 415028  
cellular

organisms;Eukaryota;Opisthokonta;Metazoa;Eumetazoa;Bilateria;Deuterostomia;Chordata;Craniata;Vertebrata;Gnathostomata;Teleostomi;Euteleostomi;Sarcopterygii;Dipnotetrapodomorpha;Tetrapoda;Amniota;Sauropsida;Sauria;Archelosauria;Archosauria;Dinosauria;Saurischia;Theropoda;Coelurosauria;Aves;Neognathae;Passeriformes;Pipridae;Corapipo;Corapipo altera

UdeM00000020195 7897 132.1 UdeM00000020195 XP\_014344557.1 36.2 185  
100 5 17 200 261 428 7.90E-28 132.1 7897 cellular

organisms;Eukaryota;Opisthokonta;Metazoa;Eumetazoa;Bilateria;Deuterostomia;Chordata;Craniata;Vertebrata;Gnathostomata;Teleostomi;Euteleostomi;Sarcopterygii;Coelacanthimorpha;Coelacanthiformes;Coelacanthidae;Latimeria;Latimeria chalumnae

UdeM00000020196 6596 235.7 UdeM00000020196 XP\_045204432.1 35.6 362  
219 4 1 358 1 352 9.60E-59 235.7 6596 cellular

organisms;Eukaryota;Opisthokonta;Metazoa;Eumetazoa;Bilateria;Protostomia;Spiralia;Lophotrochozoa;Mollusca;Bivalvia;Autobranchia;Heteroconchia;Euherodonta;Imparidentia;Venerida;Veneroidea;Veneridae;Mercenaria;Mercenaria mercenaria

UdeM00000020197 6596 567 UdeM00000020197 XP\_045197440.1 65.1 435  
145 2 12 440 7 440 2.20E-158 567 6596 cellular

organisms;Eukaryota;Opisthokonta;Metazoa;Eumetazoa;Bilateria;Protostomia;Spiralia;Lophotrochozoa;Mollusca;Bivalvia;Autobranchia;Heteroconchia;Euherodonta;Imparidentia;Venerida;Veneroidea;Veneridae;Mercenaria;Mercenaria mercenaria

terodonta;Imparidentia;Venerida;Veneroidea;Veneridae;Mercenaria;Mercenaria mercenaria

UdeM00000020198 7739 124 UdeM00000020198 XP\_035674639.1 37.4 203  
111 6 87 280 27 222 3.30E-25 124 7739 cellular

organisms;Eukaryota;Opisthokonta;Metazoa;Eumetazoa;Bilateria;Deuterostomia;Chordata;Cephalochordata;Leptocardii;Amphioxiformes;Branchiostomidae;Branchiostoma;Branchiostoma floridae

UdeM00000020199 29159 380.6 UdeM00000020199 XP\_034336544.1 40.5 518  
255 4 52 567 16 482 3.70E-102 380.6 29159 cellular

organisms;Eukaryota;Opisthokonta;Metazoa;Eumetazoa;Bilateria;Protostomia;Spiralia;Lophotrochozoa;Mollusca;Bivalvia;Autobranchia;Pteriormorphia;Ostreida;Ostreoidea;Ostreidae;Crassostrea;Crassostrea gigas

UdeM00000020200 29159 163.7 UdeM00000020200 XP\_034336544.1 42.9 189  
108 0 5 193 294 482 2.50E-37 163.7 29159 cellular

organisms;Eukaryota;Opisthokonta;Metazoa;Eumetazoa;Bilateria;Protostomia;Spiralia;Lophotrochozoa;Mollusca;Bivalvia;Autobranchia;Pteriormorphia;Ostreida;Ostreoidea;Ostreidae;Crassostrea;Crassostrea gigas

UdeM00000020201 29159 117.5 UdeM00000020201 XP\_034336544.1 42.3 137  
79 0 3 139 346 482 1.50E-23 117.5 29159 cellular

organisms;Eukaryota;Opisthokonta;Metazoa;Eumetazoa;Bilateria;Protostomia;Spiralia;Lophotrochozoa;Mollusca;Bivalvia;Autobranchia;Pteriormorphia;Ostreida;Ostreoidea;Ostreidae;Crassostrea;Crassostrea gigas

UdeM00000020203 74940 67.4 UdeM00000020203 XP\_042162690.1 47.3 74  
38 1 1 74 145 217 2.80E-08 67.4 74940 cellular

organisms;Eukaryota;Opisthokonta;Metazoa;Eumetazoa;Bilateria;Deuterostomia;Chordata;Craniata;Vertebrata;Gnathostomata;Teleostomi;Euteleostomi;Actinopterygii;Actinopteri;Neopterygii;Teleostei;Osteoglossocephalai;Clupeocephala;Euteleosteomorpha;Protacanthopterygii;Salmoniformes;Salmonidae;Salmoninae;Oncorhynchus;Oncorhynchus tshawytscha

UdeM00000020204 1529436 63.2 UdeM00000020204 XP\_033097181.1 32.8  
122 78 2 1 122 166 283 2.80E-07 63.2 1529436

cellular

organisms;Eukaryota;Opisthokonta;Metazoa;Eumetazoa;Bilateria;Deuterostomia;Echinodermata;Pelmatozoa;Crinoidea;Articulata;Comatulida;Comatulidae;Comatulinae;Anneissia;Anneissia japonica

UdeM00000020205 6565 140.2 UdeM00000020205 XP\_022297409.1 42.2 154  
87 2 1 153 82 234 2.20E-30 140.2 6565 cellular

organisms;Eukaryota;Opisthokonta;Metazoa;Eumetazoa;Bilateria;Protostomia;Spiralia;Lophotrochozoa;Mollusca;Bivalvia;Autobranchia;Pteriormorphia;Ostreida;Ostreoidea;Ostreidae;Crassostrea;Crassostrea virginica

UdeM00000020209 43700 88.6 UdeM00000020209 XP\_020448280.1 40.9 110  
62 2 4 113 13 119 1.80E-14 88.6 43700 cellular

organisms;Eukaryota;Opisthokonta;Metazoa;Eumetazoa;Bilateria;Deuterostomia;Chordata;Craniata;Vertebrata;Gnathostomata;Teleostomi;Euteleostomi;Actinopterygii;Actinopteri;Neopterygii;Teleostei;Osteoglossocephalai;Clupeocephala;Euteleosteomorpha;Neoteleostei;Eurypterygia;Ctenosquamata;Acanthomorphata;Euacanthomorphacea;Percomorphaceae;Anabantaria;Synbranchiformes;Synbranchioidei;Synbranchidae;Monopterus;Monopterus albus

UdeM00000020208 43700 88.6 UdeM00000020208 XP\_020448280.1 40.9 110  
62 2 11 120 13 119 1.90E-14 88.6 43700 cellular

organisms;Eukaryota;Opisthokonta;Metazoa;Eumetazoa;Bilateria;Deuterostomia;Chordata;Craniata;Vertebrata;Gnathostomata;Teleostomi;Euteleostomi;Actinopterygii;Actinopteri;Neopterygii;Teleostei;Osteoglossocephalai;Clupeocephala;Euteleosteomorpha;Neoteleostei;Eurypterygia;Ctenosquamata;Acanthomorphata;Euacanthomorphacea;Percomorphaceae;Anabantaria;Synbranchiformes;Synbranchioidei;Synbranchidae;Monopterus;Monopterus albus

rphata;Euacanthomorpha;Percomorphaceae;Anabantaria;Synbranchiformes;Synbranchioidei;Synbranchidae;Monopterus;Monopterus albus

UdeM00000020210 29159 413.3 UdeM00000020210 XP\_034336544.1 43.8 516  
264 4 36 550 9 499 4.90E-112 413.3 29159 cellular  
organisms;Eukaryota;Opisthokonta;Metazoa;Eumetazoa;Bilateria;Protostomia;  
Spiralia;Lophotrochozoa;Mollusca;Bivalvia;Autobranchia;Pteriormorphia;Ostreida;  
Ostreoidea;Ostreidae;Crassostrea;Crassostrea gigas

UdeM00000020212 6596 247.3 UdeM00000020212 XP\_045173703.1 51.3 228  
107 2 37 261 23 249 2.20E-62 247.3 6596 cellular  
organisms;Eukaryota;Opisthokonta;Metazoa;Eumetazoa;Bilateria;Protostomia;  
Spiralia;Lophotrochozoa;Mollusca;Bivalvia;Autobranchia;Heteroconchia;Euheterodonta;  
Imparidentia;Venerida;Veneroidea;Veneridae;Mercenaria;Mercenaria mercenaria

UdeM00000020213 6596 89 UdeM00000020213 XP\_045186357.1 65.1 63  
22 0 30 92 523 585 3.50E-15 89 6596 cellular  
organisms;Eukaryota;Opisthokonta;Metazoa;Eumetazoa;Bilateria;Protostomia;  
Spiralia;Lophotrochozoa;Mollusca;Bivalvia;Autobranchia;Heteroconchia;Euheterodonta;  
Imparidentia;Venerida;Veneroidea;Veneridae;Mercenaria;Mercenaria mercenaria

UdeM00000020214 6596 343.2 UdeM00000020214 XP\_045173703.1 46.1 382  
183 6 3 381 2 363 4.30E-91 343.2 6596 cellular  
organisms;Eukaryota;Opisthokonta;Metazoa;Eumetazoa;Bilateria;Protostomia;  
Spiralia;Lophotrochozoa;Mollusca;Bivalvia;Autobranchia;Heteroconchia;Euheterodonta;  
Imparidentia;Venerida;Veneroidea;Veneridae;Mercenaria;Mercenaria mercenaria

UdeM00000020215 1735272 391.3 UdeM00000020215 XP\_041347380.1 57.3  
349 134 3 607 941 393 740 3.40E-105 391.3 1735272  
cellular  
organisms;Eukaryota;Opisthokonta;Metazoa;Eumetazoa;Bilateria;Protostomia;  
Spiralia;Lophotrochozoa;Mollusca;Gastropoda;Neomphalina;Neomphaloidea;Peltospiridae;  
Gigantopelta;Gigantopelta aegis

UdeM00000020216 8167 87.8 UdeM00000020216 XP\_028447363.1 29.9 147  
90 2 80 223 693 829 2.50E-14 87.8 8167 cellular  
organisms;Eukaryota;Opisthokonta;Metazoa;Eumetazoa;Bilateria;Deuterostomia;  
Chordata;Craniata;Vertebrata;Gnathostomata;Teleostomi;Euteleostomi;Actinopterygii;  
Actinopteri;Neopterygii;Teleostei;Osteoglossocephalai;Clupeocephala;Euteleostei;  
Neoteleostei;Eurypterygia;Ctenosquamata;Acanthomorpha;Euacanthomorpha;Percomorphaceae;  
Eupercaria;Perciformes;Percoidae;Percidae;Percinae;Perca;Perca flavescens

UdeM00000020217 225164 241.5 UdeM00000020217 XP\_009059846.1 56.5  
184 80 0 22 205 94 277 9.50E-61 241.5 225164  
cellular  
organisms;Eukaryota;Opisthokonta;Metazoa;Eumetazoa;Bilateria;Protostomia;  
Spiralia;Lophotrochozoa;Mollusca;Gastropoda;Patellogastropoda;Lottiidae;  
Lottia;Lottia gigantea

UdeM00000020218 6596 407.1 UdeM00000020218 XP\_045172179.1 39.3 608  
324 10 7 578 11 609 3.70E-110 407.1 6596 cellular  
organisms;Eukaryota;Opisthokonta;Metazoa;Eumetazoa;Bilateria;Protostomia;  
Spiralia;Lophotrochozoa;Mollusca;Bivalvia;Autobranchia;Heteroconchia;Euheterodonta;  
Imparidentia;Venerida;Veneroidea;Veneridae;Mercenaria;Mercenaria mercenaria

UdeM00000020220 6596 437.2 UdeM00000020220 XP\_045172756.1 59 334  
135 2 1 334 1 332 1.90E-119 437.2 6596 cellular  
organisms;Eukaryota;Opisthokonta;Metazoa;Eumetazoa;Bilateria;Protostomia;



Spiralia;Lophotrochozoa;Mollusca;Bivalvia;Autobranchia;Heteroconchia;Euherodonta;Imparidentia;Venerida;Veneroidea;Veneridae;Mercenaria;Mercenaria mercenaria

|                 |      |        |                 |                |    |     |          |        |      |
|-----------------|------|--------|-----------------|----------------|----|-----|----------|--------|------|
| UdeM00000020221 | 6579 | 1532.3 | UdeM00000020221 | XP_033747284.1 | 85 |     |          |        |      |
| 940             | 127  | 4      | 1               | 926            | 1  | 940 | 0.00E+00 | 1532.3 | 6579 |

cellular

organisms;Eukaryota;Opisthokonta;Metazoa;Eumetazoa;Bilateria;Protostomia;Spiralia;Lophotrochozoa;Mollusca;Bivalvia;Autobranchia;Pteriormorphia;Pectinida;Pectinoidea;Pectinidae;Pecten;Pecten maximus

|                 |      |       |                 |                |      |          |       |      |          |
|-----------------|------|-------|-----------------|----------------|------|----------|-------|------|----------|
| UdeM00000020222 | 6579 | 267.7 | UdeM00000020222 | XP_033760741.1 | 57.3 | 232      |       |      |          |
| 96              | 2    | 1     | 230             | 1              | 231  | 1.40E-68 | 267.7 | 6579 | cellular |

organisms;Eukaryota;Opisthokonta;Metazoa;Eumetazoa;Bilateria;Protostomia;Spiralia;Lophotrochozoa;Mollusca;Bivalvia;Autobranchia;Pteriormorphia;Pectinida;Pectinoidea;Pectinidae;Pecten;Pecten maximus

|                 |      |     |                 |                |      |          |     |      |          |
|-----------------|------|-----|-----------------|----------------|------|----------|-----|------|----------|
| UdeM00000020223 | 7574 | 129 | UdeM00000020223 | XP_013388171.1 | 48.1 | 133      |     |      |          |
| 61              | 5    | 167 | 298             | 1528           | 1653 | 9.90E-27 | 129 | 7574 | cellular |

organisms;Eukaryota;Opisthokonta;Metazoa;Eumetazoa;Bilateria;Protostomia;Spiralia;Lophotrochozoa;Brachiopoda;Linguliformea;Lingulata;Lingulida;Linguloidea;Lingulidae;Lingula;Lingula anatina

|                 |      |       |                 |                |     |          |       |      |          |
|-----------------|------|-------|-----------------|----------------|-----|----------|-------|------|----------|
| UdeM00000020224 | 6596 | 231.1 | UdeM00000020224 | XP_045173249.1 | 33  | 451      |       |      |          |
| 272             | 9    | 123   | 544             | 331            | 780 | 3.50E-57 | 231.1 | 6596 | cellular |

organisms;Eukaryota;Opisthokonta;Metazoa;Eumetazoa;Bilateria;Protostomia;Spiralia;Lophotrochozoa;Mollusca;Bivalvia;Autobranchia;Heteroconchia;Euherodonta;Imparidentia;Venerida;Veneroidea;Veneridae;Mercenaria;Mercenaria mercenaria

|                 |       |       |                 |                |      |          |       |       |          |
|-----------------|-------|-------|-----------------|----------------|------|----------|-------|-------|----------|
| UdeM00000020225 | 29159 | 232.6 | UdeM00000020225 | XP_034336072.1 | 31.6 | 478      |       |       |          |
| 307             | 11    | 155   | 626             | 1823           | 2286 | 1.30E-57 | 232.6 | 29159 | cellular |

organisms;Eukaryota;Opisthokonta;Metazoa;Eumetazoa;Bilateria;Protostomia;Spiralia;Lophotrochozoa;Mollusca;Bivalvia;Autobranchia;Pteriormorphia;Ostreida;Ostreioidea;Ostreidae;Crassostrea;Crassostrea gigas

|                 |       |       |                 |                |      |          |       |       |          |
|-----------------|-------|-------|-----------------|----------------|------|----------|-------|-------|----------|
| UdeM00000020226 | 46514 | 170.2 | UdeM00000020226 | XP_038073561.1 | 52.8 | 142      |       |       |          |
| 67              | 0     | 65    | 206             | 9              | 150  | 2.70E-39 | 170.2 | 46514 | cellular |

organisms;Eukaryota;Opisthokonta;Metazoa;Eumetazoa;Bilateria;Deuterostomia;Echinodermata;Eleutherozoa;Asterozoa;Asteroidea;Valvatacea;Valvatida;Asterinidae;Patiria;Patiria miniata

|                 |      |       |                 |                |      |          |       |      |          |
|-----------------|------|-------|-----------------|----------------|------|----------|-------|------|----------|
| UdeM00000020227 | 6565 | 231.5 | UdeM00000020227 | XP_022343207.1 | 31.7 | 492      |       |      |          |
| 304             | 17   | 19    | 492             | 23             | 500  | 2.70E-57 | 231.5 | 6565 | cellular |

organisms;Eukaryota;Opisthokonta;Metazoa;Eumetazoa;Bilateria;Protostomia;Spiralia;Lophotrochozoa;Mollusca;Bivalvia;Autobranchia;Pteriormorphia;Ostreida;Ostreioidea;Ostreidae;Crassostrea;Crassostrea virginica

|                 |      |       |                 |                |      |          |       |      |          |
|-----------------|------|-------|-----------------|----------------|------|----------|-------|------|----------|
| UdeM00000020228 | 6596 | 226.1 | UdeM00000020228 | XP_045173249.1 | 31.8 | 471      |       |      |          |
| 289             | 10   | 109   | 549             | 312            | 780  | 1.10E-55 | 226.1 | 6596 | cellular |

organisms;Eukaryota;Opisthokonta;Metazoa;Eumetazoa;Bilateria;Protostomia;Spiralia;Lophotrochozoa;Mollusca;Bivalvia;Autobranchia;Heteroconchia;Euherodonta;Imparidentia;Venerida;Veneroidea;Veneridae;Mercenaria;Mercenaria mercenaria

|                 |      |      |                 |                |      |          |      |      |          |
|-----------------|------|------|-----------------|----------------|------|----------|------|------|----------|
| UdeM00000020229 | 6596 | 89.4 | UdeM00000020229 | XP_045169650.1 | 28.3 | 223      |      |      |          |
| 154             | 5    | 3    | 220             | 311            | 532  | 6.40E-15 | 89.4 | 6596 | cellular |

organisms;Eukaryota;Opisthokonta;Metazoa;Eumetazoa;Bilateria;Protostomia;Spiralia;Lophotrochozoa;Mollusca;Bivalvia;Autobranchia;Heteroconchia;Euherodonta;Imparidentia;Venerida;Veneroidea;Veneridae;Mercenaria;Mercenaria mercenaria

|                 |       |       |                 |                |      |          |       |       |          |
|-----------------|-------|-------|-----------------|----------------|------|----------|-------|-------|----------|
| UdeM00000020230 | 29159 | 235.7 | UdeM00000020230 | XP_034336072.1 | 31.6 | 509      |       |       |          |
| 282             | 13    | 55    | 517             | 48             | 536  | 1.40E-58 | 235.7 | 29159 | cellular |

organisms;Eukaryota;Opisthokonta;Metazoa;Eumetazoa;Bilateria;Protostomia;  
Spiralia;Lophotrochozoa;Mollusca;Bivalvia;Autobranchia;Pteriormorphia;Ostr  
eida;Ostreoidea;Ostreidae;Crassostrea;Crassostrea gigas  
UdeM00000020231 6596 79.7 UdeM00000020231 XP\_045167059.1 37.6 93  
58 0 80 172 730 822 4.30E-12 79.7 6596 cellular  
organisms;Eukaryota;Opisthokonta;Metazoa;Eumetazoa;Bilateria;Protostomia;  
Spiralia;Lophotrochozoa;Mollusca;Bivalvia;Autobranchia;Heteroconchia;Euhe  
terodonta;Imparidentia;Venerida;Veneroidea;Veneridae;Mercenaria;Mercenari  
a mercenaria  
UdeM00000020232 6596 555.8 UdeM00000020232 XP\_045191538.1 57.9 428  
173 4 1 423 2 427 5.00E-155 555.8 6596 cellular  
organisms;Eukaryota;Opisthokonta;Metazoa;Eumetazoa;Bilateria;Protostomia;  
Spiralia;Lophotrochozoa;Mollusca;Bivalvia;Autobranchia;Heteroconchia;Euhe  
terodonta;Imparidentia;Venerida;Veneroidea;Veneridae;Mercenaria;Mercenari  
a mercenaria  
UdeM00000020233 6596 849.7 UdeM00000020233 XP\_045191531.1 39.4 1136  
648 11 3 1110 6 1129 4.10E-243 849.7 6596 cellular  
organisms;Eukaryota;Opisthokonta;Metazoa;Eumetazoa;Bilateria;Protostomia;  
Spiralia;Lophotrochozoa;Mollusca;Bivalvia;Autobranchia;Heteroconchia;Euhe  
terodonta;Imparidentia;Venerida;Veneroidea;Veneridae;Mercenaria;Mercenari  
a mercenaria  
UdeM00000020234 6596 75.1 UdeM00000020234 XP\_045171989.1 40 90  
53 1 40 128 869 958 7.50E-11 75.1 6596 cellular  
organisms;Eukaryota;Opisthokonta;Metazoa;Eumetazoa;Bilateria;Protostomia;  
Spiralia;Lophotrochozoa;Mollusca;Bivalvia;Autobranchia;Heteroconchia;Euhe  
terodonta;Imparidentia;Venerida;Veneroidea;Veneridae;Mercenaria;Mercenari  
a mercenaria  
UdeM00000020236 6596 168.3 UdeM00000020236 XP\_045173288.1 32.1 549  
347 8 42 574 1 539 2.90E-38 168.3 6596 cellular  
organisms;Eukaryota;Opisthokonta;Metazoa;Eumetazoa;Bilateria;Protostomia;  
Spiralia;Lophotrochozoa;Mollusca;Bivalvia;Autobranchia;Heteroconchia;Euhe  
terodonta;Imparidentia;Venerida;Veneroidea;Veneridae;Mercenaria;Mercenari  
a mercenaria  
UdeM00000020237 6596 156.8 UdeM00000020237 XP\_045173288.1 31.8 538  
341 8 40 561 12 539 8.40E-35 156.8 6596 cellular  
organisms;Eukaryota;Opisthokonta;Metazoa;Eumetazoa;Bilateria;Protostomia;  
Spiralia;Lophotrochozoa;Mollusca;Bivalvia;Autobranchia;Heteroconchia;Euhe  
terodonta;Imparidentia;Venerida;Veneroidea;Veneridae;Mercenaria;Mercenari  
a mercenaria  
UdeM00000020238 37653 641.7 UdeM00000020238 XP\_014769943.1 82.1 369  
62 2 10 378 8 372 5.70E-181 641.7 37653 cellular  
organisms;Eukaryota;Opisthokonta;Metazoa;Eumetazoa;Bilateria;Protostomia;  
Spiralia;Lophotrochozoa;Mollusca;Cephalopoda;Coleoidea;Octopodiformes;Oct  
opoda;Incirrata;Octopodidae;Octopus;Octopus bimaculoides  
UdeM00000020239 6596 284.6 UdeM00000020239 XP\_045200044.1 42 338  
180 4 57 389 70 396 1.80E-73 284.6 6596 cellular  
organisms;Eukaryota;Opisthokonta;Metazoa;Eumetazoa;Bilateria;Protostomia;  
Spiralia;Lophotrochozoa;Mollusca;Bivalvia;Autobranchia;Heteroconchia;Euhe  
terodonta;Imparidentia;Venerida;Veneroidea;Veneridae;Mercenaria;Mercenari  
a mercenaria  
UdeM00000020240 29159 563.5 UdeM00000020240 XP\_011438339.2 77.1 363  
83 0 1 363 1 363 1.90E-157 563.5 29159 cellular  
organisms;Eukaryota;Opisthokonta;Metazoa;Eumetazoa;Bilateria;Protostomia;

Spiralia;Lophotrochozoa;Mollusca;Bivalvia;Autobranchia;Pteriormorphia;Ostr  
eida;Ostreoidea;Ostreidae;Crassostrea;Crassostrea gigas  
UdeM00000020241 6596 579.7 UdeM00000020241 XP\_045172527.1 80.6 360  
69 1 4 362 30 389 2.60E-162 579.7 6596 cellular  
organisms;Eukaryota;Opisthokonta;Metazoa;Eumetazoa;Bilateria;Protostomia;  
Spiralia;Lophotrochozoa;Mollusca;Bivalvia;Autobranchia;Heteroconchia;Euhe  
terodonta;Imparidentia;Venerida;Veneroidea;Veneridae;Mercenaria;Mercenari  
a mercenaria  
UdeM00000020242 6596 1795.4 UdeM00000020242 XP\_045171838.1 49.9  
1791 865 11 3 1781 6 1775 0.00E+00 1795.4 6596  
cellular  
organisms;Eukaryota;Opisthokonta;Metazoa;Eumetazoa;Bilateria;Protostomia;  
Spiralia;Lophotrochozoa;Mollusca;Bivalvia;Autobranchia;Heteroconchia;Euhe  
terodonta;Imparidentia;Venerida;Veneroidea;Veneridae;Mercenaria;Mercenari  
a mercenaria  
UdeM00000020244 6596 401 UdeM00000020244 XP\_045192075.1 63.8 293  
102 3 1 293 1 289 1.30E-108 401 6596 cellular  
organisms;Eukaryota;Opisthokonta;Metazoa;Eumetazoa;Bilateria;Protostomia;  
Spiralia;Lophotrochozoa;Mollusca;Bivalvia;Autobranchia;Heteroconchia;Euhe  
terodonta;Imparidentia;Venerida;Veneroidea;Veneridae;Mercenaria;Mercenari  
a mercenaria  
UdeM00000020243 6596 295.4 UdeM00000020243 XP\_045192075.1 59.1 235  
92 3 48 282 59 289 7.60E-77 295.4 6596 cellular  
organisms;Eukaryota;Opisthokonta;Metazoa;Eumetazoa;Bilateria;Protostomia;  
Spiralia;Lophotrochozoa;Mollusca;Bivalvia;Autobranchia;Heteroconchia;Euhe  
terodonta;Imparidentia;Venerida;Veneroidea;Veneridae;Mercenaria;Mercenari  
a mercenaria  
UdeM00000020245 6565 611.7 UdeM00000020245 XP\_022343885.1 70.3 414  
122 1 1 414 75 487 7.00E-172 611.7 6565 cellular  
organisms;Eukaryota;Opisthokonta;Metazoa;Eumetazoa;Bilateria;Protostomia;  
Spiralia;Lophotrochozoa;Mollusca;Bivalvia;Autobranchia;Pteriormorphia;Ostr  
eida;Ostreoidea;Ostreidae;Crassostrea;Crassostrea virginica  
UdeM00000020246 2587831 67.8 UdeM00000020246 XP\_024050270.2 35.8  
109 61 4 40 148 98 197 5.60E-08 67.8 2587831  
cellular  
organisms;Eukaryota;Opisthokonta;Metazoa;Eumetazoa;Bilateria;Deuterostomi  
a;Chordata;Craniata;Vertebrata;Gnathostomata;Teleostomi;Euteleostomi;Sarc  
opterygii;Dipnotetrapodomorpha;Tetrapoda;Amniota;Sauropsida;Sauria;Archel  
osauria;Testudinata;Testudines;Cryptodira;Durocryptodira;Testudinoidea;Em  
ydididae;Terrapene;Terrapene carolina;Terrapene carolina triunguis  
UdeM00000020247 6596 101.7 UdeM00000020247 XP\_045171999.1 37.7 199  
92 8 23 219 11 179 1.30E-18 101.7 6596 cellular  
organisms;Eukaryota;Opisthokonta;Metazoa;Eumetazoa;Bilateria;Protostomia;  
Spiralia;Lophotrochozoa;Mollusca;Bivalvia;Autobranchia;Heteroconchia;Euhe  
terodonta;Imparidentia;Venerida;Veneroidea;Veneridae;Mercenaria;Mercenari  
a mercenaria  
UdeM00000020248 6596 312.4 UdeM00000020248 XP\_045171999.1 56.4 250  
107 1 1 248 166 415 5.20E-82 312.4 6596 cellular  
organisms;Eukaryota;Opisthokonta;Metazoa;Eumetazoa;Bilateria;Protostomia;  
Spiralia;Lophotrochozoa;Mollusca;Bivalvia;Autobranchia;Heteroconchia;Euhe  
terodonta;Imparidentia;Venerida;Veneroidea;Veneridae;Mercenaria;Mercenari  
a mercenaria  
UdeM00000020249 6596 969.1 UdeM00000020249 XP\_045173589.1 66.6 718  
227 7 1 714 1 709 3.00E-279 969.1 6596 cellular

organisms;Eukaryota;Opisthokonta;Metazoa;Eumetazoa;Bilateria;Protostomia;Spiralia;Lophotrochozoa;Mollusca;Bivalvia;Autobranchia;Heteroconchia;Euheterodonta;Imparidentia;Venerida;Veneroidea;Veneridae;Mercenaria;Mercenaria mercenaria

UdeM00000020250 6596 690.3 UdeM00000020250 XP\_045173589.1 70.9 492  
128 6 1 489 743 1222 1.90E-195 690.3 6596 cellular

organisms;Eukaryota;Opisthokonta;Metazoa;Eumetazoa;Bilateria;Protostomia;Spiralia;Lophotrochozoa;Mollusca;Bivalvia;Autobranchia;Heteroconchia;Euheterodonta;Imparidentia;Venerida;Veneroidea;Veneridae;Mercenaria;Mercenaria mercenaria

UdeM00000020252 6596 473 UdeM00000020252 XP\_045173589.1 64 372  
107 7 20 376 1199 1558 3.50E-130 473 6596 cellular

organisms;Eukaryota;Opisthokonta;Metazoa;Eumetazoa;Bilateria;Protostomia;Spiralia;Lophotrochozoa;Mollusca;Bivalvia;Autobranchia;Heteroconchia;Euheterodonta;Imparidentia;Venerida;Veneroidea;Veneridae;Mercenaria;Mercenaria mercenaria

UdeM00000020253 6573 384.8 UdeM00000020253 XP\_021357156.1 84.8 211  
32 0 1 211 1 211 7.10E-104 384.8 6573 cellular

organisms;Eukaryota;Opisthokonta;Metazoa;Eumetazoa;Bilateria;Protostomia;Spiralia;Lophotrochozoa;Mollusca;Bivalvia;Autobranchia;Pteriomorphia;Pectinida;Pectinoidea;Pectinidae;Mizuhopecten;Mizuhopecten yessoensis

UdeM00000020254 1735272 204.1 UdeM00000020254 XP\_041374927.1 67.6  
139 45 0 2 140 1215 1353 1.10E-49 204.1 1735272

cellular

organisms;Eukaryota;Opisthokonta;Metazoa;Eumetazoa;Bilateria;Protostomia;Spiralia;Lophotrochozoa;Mollusca;Gastropoda;Neomphalina;Neomphaloidea;Peltospiridae;Gigantopelta;Gigantopelta aegis

UdeM00000020255 6579 310.1 UdeM00000020255 XP\_033748920.1 58.2 249  
102 1 1 247 230 478 2.60E-81 310.1 6579 cellular

organisms;Eukaryota;Opisthokonta;Metazoa;Eumetazoa;Bilateria;Protostomia;Spiralia;Lophotrochozoa;Mollusca;Bivalvia;Autobranchia;Pteriomorphia;Pectinida;Pectinoidea;Pectinidae;Pecten;Pecten maximus

UdeM00000020256 6596 347.1 UdeM00000020256 XP\_045171083.1 69.4 235  
71 1 30 264 77 310 2.10E-92 347.1 6596 cellular

organisms;Eukaryota;Opisthokonta;Metazoa;Eumetazoa;Bilateria;Protostomia;Spiralia;Lophotrochozoa;Mollusca;Bivalvia;Autobranchia;Heteroconchia;Euheterodonta;Imparidentia;Venerida;Veneroidea;Veneridae;Mercenaria;Mercenaria mercenaria

UdeM00000020257 6596 514.6 UdeM00000020257 XP\_045173405.1 53.1 495  
198 7 1 469 1 487 1.30E-142 514.6 6596 cellular

organisms;Eukaryota;Opisthokonta;Metazoa;Eumetazoa;Bilateria;Protostomia;Spiralia;Lophotrochozoa;Mollusca;Bivalvia;Autobranchia;Heteroconchia;Euheterodonta;Imparidentia;Venerida;Veneroidea;Veneridae;Mercenaria;Mercenaria mercenaria

UdeM00000020258 6573 943.7 UdeM00000020258 XP\_021366042.1 45.8 1217  
517 25 4 1124 1 1170 2.10E-271 943.7 6573 cellular

organisms;Eukaryota;Opisthokonta;Metazoa;Eumetazoa;Bilateria;Protostomia;Spiralia;Lophotrochozoa;Mollusca;Bivalvia;Autobranchia;Pteriomorphia;Pectinida;Pectinoidea;Pectinidae;Mizuhopecten;Mizuhopecten yessoensis

UdeM00000020259 29159 130.6 UdeM00000020259 XP\_011415195.2 34.8 198  
123 4 51 246 54 247 4.70E-27 130.6 29159 cellular

organisms;Eukaryota;Opisthokonta;Metazoa;Eumetazoa;Bilateria;Protostomia;Spiralia;Lophotrochozoa;Mollusca;Bivalvia;Autobranchia;Pteriomorphia;Ostreida;Ostreoidea;Ostreidae;Crassostrea;Crassostrea gigas

UdeM00000020260 6579 64.7 UdeM00000020260 XP\_033758492.1 50.8 65  
 30 2 17 80 519 582 6.30E-08 64.7 6579 cellular  
 organisms;Eukaryota;Opisthokonta;Metazoa;Eumetazoa;Bilateria;Protostomia;  
 Spiralia;Lophotrochozoa;Mollusca;Bivalvia;Autobranchia;Pteriomorpha;Pect  
 inida;Pectinoidea;Pectinidae;Pecten;Pecten maximus  
 UdeM00000020261 6596 244.6 UdeM00000020261 XP\_045174032.1 37.3 448  
 194 9 18 406 20 439 2.20E-61 244.6 6596 cellular  
 organisms;Eukaryota;Opisthokonta;Metazoa;Eumetazoa;Bilateria;Protostomia;  
 Spiralia;Lophotrochozoa;Mollusca;Bivalvia;Autobranchia;Heteroconchia;Euhe  
 terodonta;Imparidentia;Venerida;Veneroidea;Veneridae;Mercenaria;Mercenari  
 a mercenaria  
 UdeM00000020262 6596 200.3 UdeM00000020262 XP\_045174032.1 35.1 419  
 185 9 1 360 49 439 4.20E-48 200.3 6596 cellular  
 organisms;Eukaryota;Opisthokonta;Metazoa;Eumetazoa;Bilateria;Protostomia;  
 Spiralia;Lophotrochozoa;Mollusca;Bivalvia;Autobranchia;Heteroconchia;Euhe  
 terodonta;Imparidentia;Venerida;Veneroidea;Veneridae;Mercenaria;Mercenari  
 a mercenaria  
 UdeM00000020263 6579 1517.7 UdeM00000020263 XP\_033748734.1 75.1  
 1073 225 14 3 1043 45 1107 0.00E+00 1517.7 6579  
 cellular  
 organisms;Eukaryota;Opisthokonta;Metazoa;Eumetazoa;Bilateria;Protostomia;  
 Spiralia;Lophotrochozoa;Mollusca;Bivalvia;Autobranchia;Pteriomorpha;Pect  
 inida;Pectinoidea;Pectinidae;Pecten;Pecten maximus  
 UdeM00000020264 6596 1520.4 UdeM00000020264 XP\_045173926.1 73.5  
 1100 232 12 3 1045 56 1152 0.00E+00 1520.4 6596  
 cellular  
 organisms;Eukaryota;Opisthokonta;Metazoa;Eumetazoa;Bilateria;Protostomia;  
 Spiralia;Lophotrochozoa;Mollusca;Bivalvia;Autobranchia;Heteroconchia;Euhe  
 terodonta;Imparidentia;Venerida;Veneroidea;Veneridae;Mercenaria;Mercenari  
 a mercenaria  
 UdeM00000020265 6579 1509.2 UdeM00000020265 XP\_033748734.1 74.9  
 1073 225 15 3 1041 45 1107 0.00E+00 1509.2 6579  
 cellular  
 organisms;Eukaryota;Opisthokonta;Metazoa;Eumetazoa;Bilateria;Protostomia;  
 Spiralia;Lophotrochozoa;Mollusca;Bivalvia;Autobranchia;Pteriomorpha;Pect  
 inida;Pectinoidea;Pectinidae;Pecten;Pecten maximus  
 UdeM00000020267 6579 861.3 UdeM00000020267 XP\_033748732.1 77.1 537  
 123 0 4 540 2 538 6.60E-247 861.3 6579 cellular  
 organisms;Eukaryota;Opisthokonta;Metazoa;Eumetazoa;Bilateria;Protostomia;  
 Spiralia;Lophotrochozoa;Mollusca;Bivalvia;Autobranchia;Pteriomorpha;Pect  
 inida;Pectinoidea;Pectinidae;Pecten;Pecten maximus  
 UdeM00000020266 6565 963.8 UdeM00000020266 XP\_022344839.1 77.3 608  
 135 1 8 615 6 610 1.10E-277 963.8 6565 cellular  
 organisms;Eukaryota;Opisthokonta;Metazoa;Eumetazoa;Bilateria;Protostomia;  
 Spiralia;Lophotrochozoa;Mollusca;Bivalvia;Autobranchia;Pteriomorpha;Ostr  
 eida;Ostreoidea;Ostreidae;Crassostrea;Crassostrea virginica  
 UdeM00000020268 2607531 59.7 UdeM00000020268 XP\_036360707.1 27.8  
 90 61 1 71 156 81 170 3.90E-06 59.7 2607531  
 cellular  
 organisms;Eukaryota;Opisthokonta;Metazoa;Eumetazoa;Bilateria;Protostomia;  
 Spiralia;Lophotrochozoa;Mollusca;Cephalopoda;Coleoidea;Octopodiformes;Oct  
 opoda;Incirrata;Octopodidae;Octopus;Octopus sinensis  
 UdeM00000020274 6850 274.2 UdeM00000020274 XP\_013772624.1 83.8 154  
 25 0 1 154 1 154 9.80E-71 274.2 6850 cellular

organisms;Eukaryota;Opisthokonta;Metazoa;Eumetazoa;Bilateria;Protostomia;Ecdysozoa;Panarthropoda;Arthropoda;Chelicerata;Merostomata;Xiphosura;Limulidae;Limulus;Limulus polyphemus

UdeM00000020275 6596 152.9 UdeM00000020275 XP\_045208329.1 32.9 286  
179 8 161 440 191 469 1.10E-33 152.9 6596 cellular

organisms;Eukaryota;Opisthokonta;Metazoa;Eumetazoa;Bilateria;Protostomia;Spiralia;Lophotrochozoa;Mollusca;Bivalvia;Autobranchia;Heteroconchia;Euheterodonta;Imparidentia;Venerida;Veneroidea;Veneridae;Mercenaria;Mercenaria mercenaria

UdeM00000020276 6596 1092.4 UdeM00000020276 XP\_045189898.1 32.5  
2024 1109 41 237 2044 287 2269 0.00E+00 1092.4 6596  
cellular

organisms;Eukaryota;Opisthokonta;Metazoa;Eumetazoa;Bilateria;Protostomia;Spiralia;Lophotrochozoa;Mollusca;Bivalvia;Autobranchia;Heteroconchia;Euheterodonta;Imparidentia;Venerida;Veneroidea;Veneridae;Mercenaria;Mercenaria mercenaria

UdeM00000020277 6596 1075.5 UdeM00000020277 XP\_045209202.1 37.2  
1620 902 31 241 1775 636 2225 0.00E+00 1075.5 6596  
cellular

organisms;Eukaryota;Opisthokonta;Metazoa;Eumetazoa;Bilateria;Protostomia;Spiralia;Lophotrochozoa;Mollusca;Bivalvia;Autobranchia;Heteroconchia;Euheterodonta;Imparidentia;Venerida;Veneroidea;Veneridae;Mercenaria;Mercenaria mercenaria

UdeM00000020278 6596 1268.4 UdeM00000020278 XP\_045189898.1 35.2  
2038 1152 43 270 2184 278 2269 0.00E+00 1268.4 6596  
cellular

organisms;Eukaryota;Opisthokonta;Metazoa;Eumetazoa;Bilateria;Protostomia;Spiralia;Lophotrochozoa;Mollusca;Bivalvia;Autobranchia;Heteroconchia;Euheterodonta;Imparidentia;Venerida;Veneroidea;Veneridae;Mercenaria;Mercenaria mercenaria

UdeM00000020279 6596 132.5 UdeM00000020279 XP\_045208329.1 31 287  
183 8 170 449 191 469 1.50E-27 132.5 6596 cellular

organisms;Eukaryota;Opisthokonta;Metazoa;Eumetazoa;Bilateria;Protostomia;Spiralia;Lophotrochozoa;Mollusca;Bivalvia;Autobranchia;Heteroconchia;Euheterodonta;Imparidentia;Venerida;Veneroidea;Veneridae;Mercenaria;Mercenaria mercenaria

UdeM00000020280 151771 179.1 UdeM00000020280 XP\_028406951.1 32  
353 157 6 3 275 148 497 8.10E-42 179.1 151771  
cellular

organisms;Eukaryota;Opisthokonta;Metazoa;Eumetazoa;Cnidaria;Anthozoa;Octocorallia;Alcyonacea;Alcyoniina;Nephtheidae;Dendronephthya;Dendronephthya gigantea

UdeM00000020281 1529436 146.7 UdeM00000020281 XP\_033095325.1 41.7  
175 99 2 6 180 41 212 2.80E-32 146.7 1529436  
cellular

organisms;Eukaryota;Opisthokonta;Metazoa;Eumetazoa;Bilateria;Deuterostomia;Echinodermata;Pelmatozoa;Crinoidea;Articulata;Comatulida;Comatulidae;Comatulinae;Anneissia;Anneissia japonica

UdeM00000020284 6596 923.3 UdeM00000020284 XP\_045172081.1 71.6 651  
168 5 1 651 1 634 1.70E-26 923.3 6596 cellular

organisms;Eukaryota;Opisthokonta;Metazoa;Eumetazoa;Bilateria;Protostomia;Spiralia;Lophotrochozoa;Mollusca;Bivalvia;Autobranchia;Heteroconchia;Euheterodonta;Imparidentia;Venerida;Veneroidea;Veneridae;Mercenaria;Mercenaria mercenaria

UdeM00000020285 29159 136.7 UdeM00000020285 XP\_034317366.1 59 122  
 48 1 16 137 1155 1274 3.80E-29 136.7 29159 cellular  
 organisms;Eukaryota;Opisthokonta;Metazoa;Eumetazoa;Bilateria;Protostomia;  
 Spiralia;Lophotrochozoa;Mollusca;Bivalvia;Autobranchia;Pteriormorphia;Ostr  
 eida;Ostreoidea;Ostreidae;Crassostrea;Crassostrea gigas  
 UdeM00000020286 6565 160.2 UdeM00000020286 XP\_022299727.1 39.5 233  
 96 3 1 189 46 277 2.90E-36 160.2 6565 cellular  
 organisms;Eukaryota;Opisthokonta;Metazoa;Eumetazoa;Bilateria;Protostomia;  
 Spiralia;Lophotrochozoa;Mollusca;Bivalvia;Autobranchia;Pteriormorphia;Ostr  
 eida;Ostreoidea;Ostreidae;Crassostrea;Crassostrea virginica  
 UdeM00000020288 6596 59.7 UdeM00000020288 XP\_045171879.1 34 141  
 70 3 1 118 3 143 5.00E-06 59.7 6596 cellular  
 organisms;Eukaryota;Opisthokonta;Metazoa;Eumetazoa;Bilateria;Protostomia;  
 Spiralia;Lophotrochozoa;Mollusca;Bivalvia;Autobranchia;Heteroconchia;Euhe  
 terodonta;Imparidentia;Venerida;Veneroidea;Veneridae;Mercenaria;Mercenari  
 a mercenaria  
 UdeM00000020289 6596 465.3 UdeM00000020289 XP\_045171879.1 47.2 709  
 340 6 1 685 3 701 1.30E-127 465.3 6596 cellular  
 organisms;Eukaryota;Opisthokonta;Metazoa;Eumetazoa;Bilateria;Protostomia;  
 Spiralia;Lophotrochozoa;Mollusca;Bivalvia;Autobranchia;Heteroconchia;Euhe  
 terodonta;Imparidentia;Venerida;Veneroidea;Veneridae;Mercenaria;Mercenari  
 a mercenaria  
 UdeM00000020290 6596 455.7 UdeM00000020290 XP\_045171879.1 52.7 471  
 213 2 237 707 241 701 1.10E-124 455.7 6596 cellular  
 organisms;Eukaryota;Opisthokonta;Metazoa;Eumetazoa;Bilateria;Protostomia;  
 Spiralia;Lophotrochozoa;Mollusca;Bivalvia;Autobranchia;Heteroconchia;Euhe  
 terodonta;Imparidentia;Venerida;Veneroidea;Veneridae;Mercenaria;Mercenari  
 a mercenaria  
 UdeM00000020291 6596 320.9 UdeM00000020291 XP\_045157494.1 31.5 711  
 432 16 6 676 5 700 4.00E-84 320.9 6596 cellular  
 organisms;Eukaryota;Opisthokonta;Metazoa;Eumetazoa;Bilateria;Protostomia;  
 Spiralia;Lophotrochozoa;Mollusca;Bivalvia;Autobranchia;Heteroconchia;Euhe  
 terodonta;Imparidentia;Venerida;Veneroidea;Veneridae;Mercenaria;Mercenari  
 a mercenaria  
 UdeM00000020292 6596 243 UdeM00000020292 XP\_045173413.1 45.2 292  
 144 4 429 705 63 353 1.10E-60 243 6596 cellular  
 organisms;Eukaryota;Opisthokonta;Metazoa;Eumetazoa;Bilateria;Protostomia;  
 Spiralia;Lophotrochozoa;Mollusca;Bivalvia;Autobranchia;Heteroconchia;Euhe  
 terodonta;Imparidentia;Venerida;Veneroidea;Veneridae;Mercenaria;Mercenari  
 a mercenaria  
 UdeM00000020292 6596 59.3 UdeM00000020292 XP\_045173413.1 41.3 63  
 37 0 1 63 1 63 2.30E-05 59.3 6596 cellular  
 organisms;Eukaryota;Opisthokonta;Metazoa;Eumetazoa;Bilateria;Protostomia;  
 Spiralia;Lophotrochozoa;Mollusca;Bivalvia;Autobranchia;Heteroconchia;Euhe  
 terodonta;Imparidentia;Venerida;Veneroidea;Veneridae;Mercenaria;Mercenari  
 a mercenaria  
 UdeM00000020293 6596 1655.6 UdeM00000020293 XP\_045174005.1 52.8  
 2370 971 23 6 2344 9 2262 0.00E+00 1655.6 6596  
 cellular  
 organisms;Eukaryota;Opisthokonta;Metazoa;Eumetazoa;Bilateria;Protostomia;  
 Spiralia;Lophotrochozoa;Mollusca;Bivalvia;Autobranchia;Heteroconchia;Euhe  
 terodonta;Imparidentia;Venerida;Veneroidea;Veneridae;Mercenaria;Mercenari  
 a mercenaria

UdeM00000020294 6596 503.8 UdeM00000020294 XP\_045172454.1 61.7 399  
 151 2 5 402 160 557 2.00E-139 503.8 6596 cellular  
 organisms;Eukaryota;Opisthokonta;Metazoa;Eumetazoa;Bilateria;Protostomia;  
 Spiralia;Lophotrochozoa;Mollusca;Bivalvia;Autobranchia;Heteroconchia;Euhe  
 terodonta;Imparidentia;Venerida;Veneroidea;Veneridae;Mercenaria;Mercenari  
 a mercenaria  
 UdeM00000020295 6596 707.6 UdeM00000020295 XP\_045172454.1 63.3 556  
 201 3 5 559 4 557 1.30E-200 707.6 6596 cellular  
 organisms;Eukaryota;Opisthokonta;Metazoa;Eumetazoa;Bilateria;Protostomia;  
 Spiralia;Lophotrochozoa;Mollusca;Bivalvia;Autobranchia;Heteroconchia;Euhe  
 terodonta;Imparidentia;Venerida;Veneroidea;Veneridae;Mercenaria;Mercenari  
 a mercenaria  
 UdeM00000020296 6596 110.9 UdeM00000020296 XP\_045172454.1 65.5 84  
 28 1 5 88 4 86 1.20E-21 110.9 6596 cellular  
 organisms;Eukaryota;Opisthokonta;Metazoa;Eumetazoa;Bilateria;Protostomia;  
 Spiralia;Lophotrochozoa;Mollusca;Bivalvia;Autobranchia;Heteroconchia;Euhe  
 terodonta;Imparidentia;Venerida;Veneroidea;Veneridae;Mercenaria;Mercenari  
 a mercenaria  
 UdeM00000020297 6579 359 UdeM00000020297 XP\_033748891.1 56.2 324  
 139 2 3 323 2 325 6.40E-96 359 6579 cellular  
 organisms;Eukaryota;Opisthokonta;Metazoa;Eumetazoa;Bilateria;Protostomia;  
 Spiralia;Lophotrochozoa;Mollusca;Bivalvia;Autobranchia;Pteriormorphia;Pect  
 inida;Pectinoidea;Pectinidae;Pecten;Pecten maximus  
 UdeM00000020298 6579 359 UdeM00000020298 XP\_033748891.1 56.2 324  
 139 2 34 354 2 325 7.00E-96 359 6579 cellular  
 organisms;Eukaryota;Opisthokonta;Metazoa;Eumetazoa;Bilateria;Protostomia;  
 Spiralia;Lophotrochozoa;Mollusca;Bivalvia;Autobranchia;Pteriormorphia;Pect  
 inida;Pectinoidea;Pectinidae;Pecten;Pecten maximus  
 UdeM00000020299 6565 193.4 UdeM00000020299 XP\_022336939.1 55.5 173  
 72 3 3 172 1 171 2.50E-46 193.4 6565 cellular  
 organisms;Eukaryota;Opisthokonta;Metazoa;Eumetazoa;Bilateria;Protostomia;  
 Spiralia;Lophotrochozoa;Mollusca;Bivalvia;Autobranchia;Pteriormorphia;Ostr  
 eida;Ostreoidea;Ostreidae;Crassostrea;Crassostrea virginica  
 UdeM00000020300 6596 78.6 UdeM00000020300 XP\_045171823.1 24.5 396  
 233 10 45 437 26 358 3.50E-11 78.6 6596 cellular  
 organisms;Eukaryota;Opisthokonta;Metazoa;Eumetazoa;Bilateria;Protostomia;  
 Spiralia;Lophotrochozoa;Mollusca;Bivalvia;Autobranchia;Heteroconchia;Euhe  
 terodonta;Imparidentia;Venerida;Veneroidea;Veneridae;Mercenaria;Mercenari  
 a mercenaria  
 UdeM00000020302 6579 723.8 UdeM00000020302 XP\_033748831.1 66.7 510  
 169 1 23 532 15 523 1.60E-205 723.8 6579 cellular  
 organisms;Eukaryota;Opisthokonta;Metazoa;Eumetazoa;Bilateria;Protostomia;  
 Spiralia;Lophotrochozoa;Mollusca;Bivalvia;Autobranchia;Pteriormorphia;Pect  
 inida;Pectinoidea;Pectinidae;Pecten;Pecten maximus  
 UdeM00000020303 6596 597.8 UdeM00000020303 XP\_045171834.1 70.9 419  
 105 6 1 417 1 404 1.00E-167 597.8 6596 cellular  
 organisms;Eukaryota;Opisthokonta;Metazoa;Eumetazoa;Bilateria;Protostomia;  
 Spiralia;Lophotrochozoa;Mollusca;Bivalvia;Autobranchia;Heteroconchia;Euhe  
 terodonta;Imparidentia;Venerida;Veneroidea;Veneridae;Mercenaria;Mercenari  
 a mercenaria  
 UdeM00000020304 6596 188.3 UdeM00000020304 XP\_045172907.1 36.8 266  
 159 4 1 265 1 258 1.20E-44 188.3 6596 cellular  
 organisms;Eukaryota;Opisthokonta;Metazoa;Eumetazoa;Bilateria;Protostomia;  
 Spiralia;Lophotrochozoa;Mollusca;Bivalvia;Autobranchia;Heteroconchia;Euhe



terodonta;Imparidentia;Venerida;Veneroidea;Veneridae;Mercenaria;Mercenari  
 a mercenaria  
 UdeM00000020311 46514 71.2 UdeM00000020311 XP\_038075987.1 41.4 70  
 40 1 54 123 633 701 1.10E-09 71.2 46514 cellular  
 organisms;Eukaryota;Opisthokonta;Metazoa;Eumetazoa;Bilateria;Deuterostomi  
 a;Echinodermata;Eleutherozoa;Asterozoa;Asteroidea;Valvatacea;Valvatida;As  
 terinidae;Patiria;Patiria miniata  
 UdeM00000020312 6596 241.9 UdeM00000020312 XP\_045173249.1 32.5 529  
 307 14 428 918 284 800 3.20E-60 241.9 6596 cellular  
 organisms;Eukaryota;Opisthokonta;Metazoa;Eumetazoa;Bilateria;Protostomia;  
 Spiralia;Lophotrochozoa;Mollusca;Bivalvia;Autobranchia;Heteroconchia;Euhe  
 terodonta;Imparidentia;Venerida;Veneroidea;Veneridae;Mercenaria;Mercenari  
 a mercenaria  
 UdeM00000020313 1735272 74.7 UdeM00000020313 XP\_041347591.1 40.7  
 81 46 1 102 182 75 153 1.40E-10 74.7 1735272  
 cellular  
 organisms;Eukaryota;Opisthokonta;Metazoa;Eumetazoa;Bilateria;Protostomia;  
 Spiralia;Lophotrochozoa;Mollusca;Gastropoda;Neomphalina;Neomphaloidea;Pel  
 tospiridae;Gigantopelta;Gigantopelta aegis  
 UdeM00000020316 29159 73.6 UdeM00000020316 XP\_034302097.1 39.6 96  
 54 1 2 97 533 624 1.80E-10 73.6 29159 cellular  
 organisms;Eukaryota;Opisthokonta;Metazoa;Eumetazoa;Bilateria;Protostomia;  
 Spiralia;Lophotrochozoa;Mollusca;Bivalvia;Autobranchia;Pteriormorphia;Ostr  
 eida;Ostreoidea;Ostreidae;Crassostrea;Crassostrea gigas  
 UdeM00000020317 6596 95.9 UdeM00000020317 XP\_045176140.1 45.1 113  
 55 2 4 109 16 128 5.80E-17 95.9 6596 cellular  
 organisms;Eukaryota;Opisthokonta;Metazoa;Eumetazoa;Bilateria;Protostomia;  
 Spiralia;Lophotrochozoa;Mollusca;Bivalvia;Autobranchia;Heteroconchia;Euhe  
 terodonta;Imparidentia;Venerida;Veneroidea;Veneridae;Mercenaria;Mercenari  
 a mercenaria  
 UdeM00000020319 6596 99.4 UdeM00000020319 XP\_045176140.1 42.9 126  
 64 3 2 119 4 129 4.30E-18 99.4 6596 cellular  
 organisms;Eukaryota;Opisthokonta;Metazoa;Eumetazoa;Bilateria;Protostomia;  
 Spiralia;Lophotrochozoa;Mollusca;Bivalvia;Autobranchia;Heteroconchia;Euhe  
 terodonta;Imparidentia;Venerida;Veneroidea;Veneridae;Mercenaria;Mercenari  
 a mercenaria  
 UdeM00000020320 29159 91.3 UdeM00000020320 XP\_034302097.1 37.7 138  
 79 2 2 139 533 663 1.20E-15 91.3 29159 cellular  
 organisms;Eukaryota;Opisthokonta;Metazoa;Eumetazoa;Bilateria;Protostomia;  
 Spiralia;Lophotrochozoa;Mollusca;Bivalvia;Autobranchia;Pteriormorphia;Ostr  
 eida;Ostreoidea;Ostreidae;Crassostrea;Crassostrea gigas  
 UdeM00000020322 6596 208.4 UdeM00000020322 XP\_045173249.1 40.7 280  
 154 4 114 381 331 610 1.70E-50 208.4 6596 cellular  
 organisms;Eukaryota;Opisthokonta;Metazoa;Eumetazoa;Bilateria;Protostomia;  
 Spiralia;Lophotrochozoa;Mollusca;Bivalvia;Autobranchia;Heteroconchia;Euhe  
 terodonta;Imparidentia;Venerida;Veneroidea;Veneridae;Mercenaria;Mercenari  
 a mercenaria  
 UdeM00000020323 6596 58.2 UdeM00000020323 XP\_045157494.1 42.7 75  
 37 1 6 74 5 79 5.60E-06 58.2 6596 cellular  
 organisms;Eukaryota;Opisthokonta;Metazoa;Eumetazoa;Bilateria;Protostomia;  
 Spiralia;Lophotrochozoa;Mollusca;Bivalvia;Autobranchia;Heteroconchia;Euhe  
 terodonta;Imparidentia;Venerida;Veneroidea;Veneridae;Mercenaria;Mercenari  
 a mercenaria

UdeM00000020324 6596 184.9 UdeM00000020324 XP\_045157317.1 32.9 346  
 210 4 5 333 190 530 1.70E-43 184.9 6596 cellular  
 organisms;Eukaryota;Opisthokonta;Metazoa;Eumetazoa;Bilateria;Protostomia;  
 Spiralia;Lophotrochozoa;Mollusca;Bivalvia;Autobranchia;Heteroconchia;Euhe  
 terodonta;Imparidentia;Venerida;Veneroidea;Veneridae;Mercenaria;Mercenari  
 a mercenaria  
 UdeM00000020325 6596 98.2 UdeM00000020325 XP\_045157494.1 26.9 238  
 150 3 1 218 298 531 1.40E-17 98.2 6596 cellular  
 organisms;Eukaryota;Opisthokonta;Metazoa;Eumetazoa;Bilateria;Protostomia;  
 Spiralia;Lophotrochozoa;Mollusca;Bivalvia;Autobranchia;Heteroconchia;Euhe  
 terodonta;Imparidentia;Venerida;Veneroidea;Veneridae;Mercenaria;Mercenari  
 a mercenaria  
 UdeM00000020326 6596 70.9 UdeM00000020326 XP\_045201869.1 35.1 114  
 71 2 1 111 584 697 1.30E-09 70.9 6596 cellular  
 organisms;Eukaryota;Opisthokonta;Metazoa;Eumetazoa;Bilateria;Protostomia;  
 Spiralia;Lophotrochozoa;Mollusca;Bivalvia;Autobranchia;Heteroconchia;Euhe  
 terodonta;Imparidentia;Venerida;Veneroidea;Veneridae;Mercenaria;Mercenari  
 a mercenaria  
 UdeM00000020327 6596 331.6 UdeM00000020327 XP\_045157311.1 32.1 691  
 420 14 6 656 5 686 2.20E-87 331.6 6596 cellular  
 organisms;Eukaryota;Opisthokonta;Metazoa;Eumetazoa;Bilateria;Protostomia;  
 Spiralia;Lophotrochozoa;Mollusca;Bivalvia;Autobranchia;Heteroconchia;Euhe  
 terodonta;Imparidentia;Venerida;Veneroidea;Veneridae;Mercenaria;Mercenari  
 a mercenaria  
 UdeM00000020328 6596 83.2 UdeM00000020328 XP\_045173729.1 41.2 97  
 54 2 8 104 84 177 2.50E-13 83.2 6596 cellular  
 organisms;Eukaryota;Opisthokonta;Metazoa;Eumetazoa;Bilateria;Protostomia;  
 Spiralia;Lophotrochozoa;Mollusca;Bivalvia;Autobranchia;Heteroconchia;Euhe  
 terodonta;Imparidentia;Venerida;Veneroidea;Veneridae;Mercenaria;Mercenari  
 a mercenaria  
 UdeM00000020330 225164 79 UdeM00000020330 XP\_009066057.1 34.6  
 127 70 5 100 224 72 187 9.00E-12 79 225164  
 cellular  
 organisms;Eukaryota;Opisthokonta;Metazoa;Eumetazoa;Bilateria;Protostomia;  
 Spiralia;Lophotrochozoa;Mollusca;Gastropoda;Patellogastropoda;Lottioidea;  
 Lottiidae;Lottia;Lottia gigantea  
 UdeM00000020332 1735272 79 UdeM00000020332 XP\_041346707.1 35.6  
 118 68 4 100 214 94 206 9.00E-12 79 1735272  
 cellular  
 organisms;Eukaryota;Opisthokonta;Metazoa;Eumetazoa;Bilateria;Protostomia;  
 Spiralia;Lophotrochozoa;Mollusca;Gastropoda;Neomphalina;Neomphaloidea;Pel  
 tospiridae;Gigantopelta;Gigantopelta aegis  
 UdeM00000020333 6596 84.7 UdeM00000020333 XP\_045173729.1 42.3 97  
 53 2 8 104 84 177 8.50E-14 84.7 6596 cellular  
 organisms;Eukaryota;Opisthokonta;Metazoa;Eumetazoa;Bilateria;Protostomia;  
 Spiralia;Lophotrochozoa;Mollusca;Bivalvia;Autobranchia;Heteroconchia;Euhe  
 terodonta;Imparidentia;Venerida;Veneroidea;Veneridae;Mercenaria;Mercenari  
 a mercenaria  
 UdeM00000020335 1735272 79.3 UdeM00000020335 XP\_041346707.1 35.6  
 118 68 4 65 179 94 206 5.80E-12 79.3 1735272  
 cellular  
 organisms;Eukaryota;Opisthokonta;Metazoa;Eumetazoa;Bilateria;Protostomia;  
 Spiralia;Lophotrochozoa;Mollusca;Gastropoda;Neomphalina;Neomphaloidea;Pel  
 tospiridae;Gigantopelta;Gigantopelta aegis

UdeM00000020336 6596 96.7 UdeM00000020336 XP\_045173729.1 36.7 177  
 97 6 8 181 13 177 3.60E-17 96.7 6596 cellular  
 organisms;Eukaryota;Opisthokonta;Metazoa;Eumetazoa;Bilateria;Protostomia;  
 Spiralia;Lophotrochozoa;Mollusca;Bivalvia;Autobranchia;Heteroconchia;Euhe  
 terodonta;Imparidentia;Venerida;Veneroidea;Veneridae;Mercenaria;Mercenari  
 a mercenaria  
 UdeM00000020338 225164 78.6 UdeM00000020338 XP\_009066057.1 33.9  
 127 71 5 100 224 72 187 1.20E-11 78.6 225164  
 cellular  
 organisms;Eukaryota;Opisthokonta;Metazoa;Eumetazoa;Bilateria;Protostomia;  
 Spiralia;Lophotrochozoa;Mollusca;Gastropoda;Patellogastropoda;Lottioidea;  
 Lottiidae;Lottia;Lottia gigantea  
 UdeM00000020339 6596 88.6 UdeM00000020339 XP\_045173729.1 34.9 186  
 100 8 3 181 6 177 9.70E-15 88.6 6596 cellular  
 organisms;Eukaryota;Opisthokonta;Metazoa;Eumetazoa;Bilateria;Protostomia;  
 Spiralia;Lophotrochozoa;Mollusca;Bivalvia;Autobranchia;Heteroconchia;Euhe  
 terodonta;Imparidentia;Venerida;Veneroidea;Veneridae;Mercenaria;Mercenari  
 a mercenaria  
 UdeM00000020340 6596 78.2 UdeM00000020340 XP\_045172412.1 30.4 194  
 80 6 38 197 23 195 1.30E-11 78.2 6596 cellular  
 organisms;Eukaryota;Opisthokonta;Metazoa;Eumetazoa;Bilateria;Protostomia;  
 Spiralia;Lophotrochozoa;Mollusca;Bivalvia;Autobranchia;Heteroconchia;Euhe  
 terodonta;Imparidentia;Venerida;Veneroidea;Veneridae;Mercenaria;Mercenari  
 a mercenaria  
 UdeM00000020341 1735272 77.4 UdeM00000020341 XP\_041347591.1 36.1  
 108 63 3 79 182 48 153 2.10E-11 77.4 1735272  
 cellular  
 organisms;Eukaryota;Opisthokonta;Metazoa;Eumetazoa;Bilateria;Protostomia;  
 Spiralia;Lophotrochozoa;Mollusca;Gastropoda;Neomphalina;Neomphaloidea;Pel  
 tospiridae;Gigantopelta;Gigantopelta aegis  
 UdeM00000020342 7739 81.3 UdeM00000020342 XP\_035667800.1 42.9 84  
 46 2 2 84 238 320 6.90E-13 81.3 7739 cellular  
 organisms;Eukaryota;Opisthokonta;Metazoa;Eumetazoa;Bilateria;Deuterostomi  
 a;Chordata;Cephalochordata;Leptocardii;Amphioxiformes;Branchiostomidae;Br  
 anchiostoma;Branchiostoma floridae  
 UdeM00000020343 6579 1380.2 UdeM00000020343 XP\_033749003.1 68.4  
 937 281 3 1 933 1 926 0.00E+00 1380.2 6579  
 cellular  
 organisms;Eukaryota;Opisthokonta;Metazoa;Eumetazoa;Bilateria;Protostomia;  
 Spiralia;Lophotrochozoa;Mollusca;Bivalvia;Autobranchia;Pteriomorphia;Pect  
 inida;Pectinoidea;Pectinidae;Pecten;Pecten maximus  
 UdeM00000020344 6579 221.1 UdeM00000020344 XP\_033749003.1 74.4 125  
 32 0 1 125 765 889 8.10E-55 221.1 6579 cellular  
 organisms;Eukaryota;Opisthokonta;Metazoa;Eumetazoa;Bilateria;Protostomia;  
 Spiralia;Lophotrochozoa;Mollusca;Bivalvia;Autobranchia;Pteriomorphia;Pect  
 inida;Pectinoidea;Pectinidae;Pecten;Pecten maximus  
 UdeM00000020345 6596 129.8 UdeM00000020345 XP\_045194227.1 47.9 140  
 71 2 1 139 1 139 3.50E-27 129.8 6596 cellular  
 organisms;Eukaryota;Opisthokonta;Metazoa;Eumetazoa;Bilateria;Protostomia;  
 Spiralia;Lophotrochozoa;Mollusca;Bivalvia;Autobranchia;Heteroconchia;Euhe  
 terodonta;Imparidentia;Venerida;Veneroidea;Veneridae;Mercenaria;Mercenari  
 a mercenaria  
 UdeM00000020346 6596 613.2 UdeM00000020346 XP\_045171761.1 48.1 653  
 310 9 6 645 21 657 3.70E-17 613.2 6596 cellular

organisms;Eukaryota;Opisthokonta;Metazoa;Eumetazoa;Bilateria;Protostomia;Spiralia;Lophotrochozoa;Mollusca;Bivalvia;Autobranchia;Heteroconchia;Euherodonta;Imparidentia;Venerida;Veneroidea;Veneridae;Mercenaria;Mercenaria mercenaria

UdeM00000020347 6596 569.3 UdeM00000020347 XP\_045172974.1 63.9 457  
133 4 42 467 61 516 4.50E-159 569.3 6596 cellular

organisms;Eukaryota;Opisthokonta;Metazoa;Eumetazoa;Bilateria;Protostomia;Spiralia;Lophotrochozoa;Mollusca;Bivalvia;Autobranchia;Heteroconchia;Euherodonta;Imparidentia;Venerida;Veneroidea;Veneridae;Mercenaria;Mercenaria mercenaria

UdeM00000020348 6596 354 UdeM00000020348 XP\_045171739.1 40.3 484  
258 6 28 509 126 580 3.20E-94 354 6596 cellular

organisms;Eukaryota;Opisthokonta;Metazoa;Eumetazoa;Bilateria;Protostomia;Spiralia;Lophotrochozoa;Mollusca;Bivalvia;Autobranchia;Heteroconchia;Euherodonta;Imparidentia;Venerida;Veneroidea;Veneridae;Mercenaria;Mercenaria mercenaria

UdeM00000020349 6596 678.3 UdeM00000020349 XP\_045197768.1 61.2 520  
196 3 27 541 34 552 7.90E-192 678.3 6596 cellular

organisms;Eukaryota;Opisthokonta;Metazoa;Eumetazoa;Bilateria;Protostomia;Spiralia;Lophotrochozoa;Mollusca;Bivalvia;Autobranchia;Heteroconchia;Euherodonta;Imparidentia;Venerida;Veneroidea;Veneridae;Mercenaria;Mercenaria mercenaria

UdeM00000020350 6596 272.3 UdeM00000020350 XP\_045157540.1 32.6 596  
356 13 7 569 6 588 1.40E-69 272.3 6596 cellular

organisms;Eukaryota;Opisthokonta;Metazoa;Eumetazoa;Bilateria;Protostomia;Spiralia;Lophotrochozoa;Mollusca;Bivalvia;Autobranchia;Heteroconchia;Euherodonta;Imparidentia;Venerida;Veneroidea;Veneridae;Mercenaria;Mercenaria mercenaria

UdeM00000020351 6596 88.2 UdeM00000020351 XP\_045173969.1 36.1 119  
70 2 4 116 3 121 7.50E-15 88.2 6596 cellular

organisms;Eukaryota;Opisthokonta;Metazoa;Eumetazoa;Bilateria;Protostomia;Spiralia;Lophotrochozoa;Mollusca;Bivalvia;Autobranchia;Heteroconchia;Euherodonta;Imparidentia;Venerida;Veneroidea;Veneridae;Mercenaria;Mercenaria mercenaria

UdeM00000020352 6565 58.5 UdeM00000020352 XP\_022307035.1 34.7 98  
62 1 1 96 301 398 8.10E-06 58.5 6565 cellular

organisms;Eukaryota;Opisthokonta;Metazoa;Eumetazoa;Bilateria;Protostomia;Spiralia;Lophotrochozoa;Mollusca;Bivalvia;Autobranchia;Pteriomorphia;Ostreida;Ostreoidea;Ostreidae;Crassostrea;Crassostrea virginica

UdeM00000020353 6596 351.3 UdeM00000020353 XP\_045171739.1 40.7 489  
256 6 22 509 125 580 2.10E-93 351.3 6596 cellular

organisms;Eukaryota;Opisthokonta;Metazoa;Eumetazoa;Bilateria;Protostomia;Spiralia;Lophotrochozoa;Mollusca;Bivalvia;Autobranchia;Heteroconchia;Euherodonta;Imparidentia;Venerida;Veneroidea;Veneridae;Mercenaria;Mercenaria mercenaria

UdeM00000020354 6596 667.9 UdeM00000020354 XP\_045197768.1 58.2 545  
218 3 1 541 14 552 1.10E-188 667.9 6596 cellular

organisms;Eukaryota;Opisthokonta;Metazoa;Eumetazoa;Bilateria;Protostomia;Spiralia;Lophotrochozoa;Mollusca;Bivalvia;Autobranchia;Heteroconchia;Euherodonta;Imparidentia;Venerida;Veneroidea;Veneridae;Mercenaria;Mercenaria mercenaria

UdeM00000020355 6596 88.2 UdeM00000020355 XP\_045212714.1 39.8 113  
63 2 4 111 3 115 9.20E-15 88.2 6596 cellular

organisms;Eukaryota;Opisthokonta;Metazoa;Eumetazoa;Bilateria;Protostomia;

Spiralia;Lophotrochozoa;Mollusca;Bivalvia;Autobranchia;Heteroconchia;Euherodonta;Imparidentia;Venerida;Veneroidea;Veneridae;Mercenaria;Mercenaria mercenaria

UdeM00000020356 6596 233.8 UdeM00000020356 XP\_045170739.1 27.9 699  
338 14 5 540 4 699 5.20E-58 233.8 6596 cellular

organisms;Eukaryota;Opisthokonta;Metazoa;Eumetazoa;Bilateria;Protostomia;Spiralia;Lophotrochozoa;Mollusca;Bivalvia;Autobranchia;Heteroconchia;Euherodonta;Imparidentia;Venerida;Veneroidea;Veneridae;Mercenaria;Mercenaria mercenaria

UdeM00000020357 6596 75.1 UdeM00000020357 XP\_045190162.1 44.9 69  
37 1 14 81 52 120 4.60E-11 75.1 6596 cellular

organisms;Eukaryota;Opisthokonta;Metazoa;Eumetazoa;Bilateria;Protostomia;Spiralia;Lophotrochozoa;Mollusca;Bivalvia;Autobranchia;Heteroconchia;Euherodonta;Imparidentia;Venerida;Veneroidea;Veneridae;Mercenaria;Mercenaria mercenaria

UdeM00000020358 6579 88.2 UdeM00000020358 XP\_033749197.1 45.6 90  
49 0 2 91 266 355 6.20E-15 88.2 6579 cellular

organisms;Eukaryota;Opisthokonta;Metazoa;Eumetazoa;Bilateria;Protostomia;Spiralia;Lophotrochozoa;Mollusca;Bivalvia;Autobranchia;Pteriormorphia;Pectinida;Pectinoidea;Pectinidae;Pecten;Pecten maximus

UdeM00000020359 6596 106.7 UdeM00000020359 XP\_045179230.1 32.3 263  
165 6 4 257 437 695 4.60E-20 106.7 6596 cellular

organisms;Eukaryota;Opisthokonta;Metazoa;Eumetazoa;Bilateria;Protostomia;Spiralia;Lophotrochozoa;Mollusca;Bivalvia;Autobranchia;Heteroconchia;Euherodonta;Imparidentia;Venerida;Veneroidea;Veneridae;Mercenaria;Mercenaria mercenaria

UdeM00000020360 6596 102.1 UdeM00000020360 XP\_045170739.1 33.5 218  
131 4 95 298 482 699 1.30E-18 102.1 6596 cellular

organisms;Eukaryota;Opisthokonta;Metazoa;Eumetazoa;Bilateria;Protostomia;Spiralia;Lophotrochozoa;Mollusca;Bivalvia;Autobranchia;Heteroconchia;Euherodonta;Imparidentia;Venerida;Veneroidea;Veneridae;Mercenaria;Mercenaria mercenaria

UdeM00000020361 6596 84 UdeM00000020361 XP\_045156343.1 29.5 258  
136 6 65 285 449 697 3.60E-13 84 6596 cellular

organisms;Eukaryota;Opisthokonta;Metazoa;Eumetazoa;Bilateria;Protostomia;Spiralia;Lophotrochozoa;Mollusca;Bivalvia;Autobranchia;Heteroconchia;Euherodonta;Imparidentia;Venerida;Veneroidea;Veneridae;Mercenaria;Mercenaria mercenaria

UdeM00000020362 6596 102.8 UdeM00000020362 XP\_045157539.1 27.5 375  
232 14 6 352 337 699 9.10E-19 102.8 6596 cellular

organisms;Eukaryota;Opisthokonta;Metazoa;Eumetazoa;Bilateria;Protostomia;Spiralia;Lophotrochozoa;Mollusca;Bivalvia;Autobranchia;Heteroconchia;Euherodonta;Imparidentia;Venerida;Veneroidea;Veneridae;Mercenaria;Mercenaria mercenaria

UdeM00000020363 6596 154.1 UdeM00000020363 XP\_045201869.1 35.2 247  
152 4 4 242 3 249 2.30E-34 154.1 6596 cellular

organisms;Eukaryota;Opisthokonta;Metazoa;Eumetazoa;Bilateria;Protostomia;Spiralia;Lophotrochozoa;Mollusca;Bivalvia;Autobranchia;Heteroconchia;Euherodonta;Imparidentia;Venerida;Veneroidea;Veneridae;Mercenaria;Mercenaria mercenaria

UdeM00000020364 6596 97.1 UdeM00000020364 XP\_045179230.1 33.1 242  
143 9 51 278 446 682 4.00E-17 97.1 6596 cellular

organisms;Eukaryota;Opisthokonta;Metazoa;Eumetazoa;Bilateria;Protostomia;Spiralia;Lophotrochozoa;Mollusca;Bivalvia;Autobranchia;Heteroconchia;Euherodonta;Imparidentia;Venerida;Veneroidea;Veneridae;Mercenaria;Mercenaria mercenaria

terodonta;Imparidentia;Venerida;Veneroidea;Veneridae;Mercenaria;Mercenari  
 a mercenaria  
 UdeM00000020365 6596 99.8 UdeM00000020365 XP\_045173969.1 36.8 133  
 78 2 4 130 3 135 2.80E-18 99.8 6596 cellular  
 organisms;Eukaryota;Opisthokonta;Metazoa;Eumetazoa;Bilateria;Protostomia;  
 Spiralia;Lophotrochozoa;Mollusca;Bivalvia;Autobranhia;Heteroconchia;Euhe  
 terodonta;Imparidentia;Venerida;Veneroidea;Veneridae;Mercenaria;Mercenari  
 a mercenaria  
 UdeM00000020366 6596 90.5 UdeM00000020366 XP\_045162336.1 44.3 97  
 52 1 56 150 38 134 2.10E-15 90.5 6596 cellular  
 organisms;Eukaryota;Opisthokonta;Metazoa;Eumetazoa;Bilateria;Protostomia;  
 Spiralia;Lophotrochozoa;Mollusca;Bivalvia;Autobranhia;Heteroconchia;Euhe  
 terodonta;Imparidentia;Venerida;Veneroidea;Veneridae;Mercenaria;Mercenari  
 a mercenaria  
 UdeM00000020367 6596 130.2 UdeM00000020367 XP\_045171739.1 48.9 135  
 65 3 28 160 126 258 2.40E-27 130.2 6596 cellular  
 organisms;Eukaryota;Opisthokonta;Metazoa;Eumetazoa;Bilateria;Protostomia;  
 Spiralia;Lophotrochozoa;Mollusca;Bivalvia;Autobranhia;Heteroconchia;Euhe  
 terodonta;Imparidentia;Venerida;Veneroidea;Veneridae;Mercenaria;Mercenari  
 a mercenaria  
 UdeM00000020370 6596 576.6 UdeM00000020370 XP\_045197768.1 58.5 477  
 194 2 3 475 76 552 2.80E-161 576.6 6596 cellular  
 organisms;Eukaryota;Opisthokonta;Metazoa;Eumetazoa;Bilateria;Protostomia;  
 Spiralia;Lophotrochozoa;Mollusca;Bivalvia;Autobranhia;Heteroconchia;Euhe  
 terodonta;Imparidentia;Venerida;Veneroidea;Veneridae;Mercenaria;Mercenari  
 a mercenaria  
 UdeM00000020371 6596 522.3 UdeM00000020371 XP\_045197768.1 60.5 418  
 163 1 1 416 135 552 5.60E-145 522.3 6596 cellular  
 organisms;Eukaryota;Opisthokonta;Metazoa;Eumetazoa;Bilateria;Protostomia;  
 Spiralia;Lophotrochozoa;Mollusca;Bivalvia;Autobranhia;Heteroconchia;Euhe  
 terodonta;Imparidentia;Venerida;Veneroidea;Veneridae;Mercenaria;Mercenari  
 a mercenaria  
 UdeM00000020372 6596 309.7 UdeM00000020372 XP\_045157540.1 32.2 714  
 420 19 7 678 6 697 9.30E-81 309.7 6596 cellular  
 organisms;Eukaryota;Opisthokonta;Metazoa;Eumetazoa;Bilateria;Protostomia;  
 Spiralia;Lophotrochozoa;Mollusca;Bivalvia;Autobranhia;Heteroconchia;Euhe  
 terodonta;Imparidentia;Venerida;Veneroidea;Veneridae;Mercenaria;Mercenari  
 a mercenaria  
 UdeM00000020373 6596 91.7 UdeM00000020373 XP\_045170739.1 41 117  
 64 2 5 116 4 120 6.80E-16 91.7 6596 cellular  
 organisms;Eukaryota;Opisthokonta;Metazoa;Eumetazoa;Bilateria;Protostomia;  
 Spiralia;Lophotrochozoa;Mollusca;Bivalvia;Autobranhia;Heteroconchia;Euhe  
 terodonta;Imparidentia;Venerida;Veneroidea;Veneridae;Mercenaria;Mercenari  
 a mercenaria  
 UdeM00000020376 6596 89.7 UdeM00000020376 XP\_045162336.1 45.4 97  
 51 1 56 150 38 134 3.60E-15 89.7 6596 cellular  
 organisms;Eukaryota;Opisthokonta;Metazoa;Eumetazoa;Bilateria;Protostomia;  
 Spiralia;Lophotrochozoa;Mollusca;Bivalvia;Autobranhia;Heteroconchia;Euhe  
 terodonta;Imparidentia;Venerida;Veneroidea;Veneridae;Mercenaria;Mercenari  
 a mercenaria  
 UdeM00000020377 6596 90.9 UdeM00000020377 XP\_045162336.1 43.3 97  
 53 1 90 184 38 134 2.00E-15 90.9 6596 cellular  
 organisms;Eukaryota;Opisthokonta;Metazoa;Eumetazoa;Bilateria;Protostomia;  
 Spiralia;Lophotrochozoa;Mollusca;Bivalvia;Autobranhia;Heteroconchia;Euhe

terodonta;Imparidentia;Venerida;Veneroidea;Veneridae;Mercenaria;Mercenari  
a mercenaria

UdeM00000020378 2607531 86.7 UdeM00000020378 XP\_029650009.1 30.9  
178 102 7 6 180 13 172 3.50E-14 86.7 2607531  
cellular

organisms;Eukaryota;Opisthokonta;Metazoa;Eumetazoa;Bilateria;Protostomia;  
Spiralia;Lophotrochozoa;Mollusca;Cephalopoda;Coleoidea;Octopodiformes;Oct  
opoda;Incirrata;Octopodidae;Octopus;Octopus sinensis

UdeM00000020379 6596 88.6 UdeM00000020379 XP\_045162336.1 42.4 99  
51 2 20 114 38 134 6.30E-15 88.6 6596 cellular

organisms;Eukaryota;Opisthokonta;Metazoa;Eumetazoa;Bilateria;Protostomia;  
Spiralia;Lophotrochozoa;Mollusca;Bivalvia;Autobranchia;Heteroconchia;Euhe  
terodonta;Imparidentia;Venerida;Veneroidea;Veneridae;Mercenaria;Mercenari  
a mercenaria

UdeM00000020380 6596 82.4 UdeM00000020380 XP\_045162336.1 39.2 97  
57 1 6 100 38 134 4.00E-13 82.4 6596 cellular

organisms;Eukaryota;Opisthokonta;Metazoa;Eumetazoa;Bilateria;Protostomia;  
Spiralia;Lophotrochozoa;Mollusca;Bivalvia;Autobranchia;Heteroconchia;Euhe  
terodonta;Imparidentia;Venerida;Veneroidea;Veneridae;Mercenaria;Mercenari  
a mercenaria

UdeM00000020381 6596 91.3 UdeM00000020381 XP\_045162336.1 43.3 97  
53 1 90 184 38 134 1.50E-15 91.3 6596 cellular

organisms;Eukaryota;Opisthokonta;Metazoa;Eumetazoa;Bilateria;Protostomia;  
Spiralia;Lophotrochozoa;Mollusca;Bivalvia;Autobranchia;Heteroconchia;Euhe  
terodonta;Imparidentia;Venerida;Veneroidea;Veneridae;Mercenaria;Mercenari  
a mercenaria

UdeM00000020382 2607531 86.7 UdeM00000020382 XP\_029650009.1 30.9  
178 102 7 6 180 13 172 3.50E-14 86.7 2607531  
cellular

organisms;Eukaryota;Opisthokonta;Metazoa;Eumetazoa;Bilateria;Protostomia;  
Spiralia;Lophotrochozoa;Mollusca;Cephalopoda;Coleoidea;Octopodiformes;Oct  
opoda;Incirrata;Octopodidae;Octopus;Octopus sinensis

UdeM00000020383 37653 82.8 UdeM00000020383 XP\_014769327.1 26.1 188  
122 5 1 187 34 205 5.10E-13 82.8 37653 cellular

organisms;Eukaryota;Opisthokonta;Metazoa;Eumetazoa;Bilateria;Protostomia;  
Spiralia;Lophotrochozoa;Mollusca;Cephalopoda;Coleoidea;Octopodiformes;Oct  
opoda;Incirrata;Octopodidae;Octopus;Octopus bimaculoides

UdeM00000020384 1735272 431.8 UdeM00000020384 XP\_041349689.1 70.8  
305 82 3 1 298 1 305 7.20E-118 431.8 1735272  
cellular

organisms;Eukaryota;Opisthokonta;Metazoa;Eumetazoa;Bilateria;Protostomia;  
Spiralia;Lophotrochozoa;Mollusca;Gastropoda;Neomphalina;Neomphaloidea;Pel  
tospiridae;Gigantopelta;Gigantopelta aegis

UdeM00000020385 441366 251.5 UdeM00000020385 XP\_028296753.1 43  
342 178 9 6 345 32 358 1.60E-63 251.5 441366  
cellular

organisms;Eukaryota;Opisthokonta;Metazoa;Eumetazoa;Bilateria;Deuterostomi  
a;Chordata;Craniata;Vertebrata;Gnathostomata;Teleostomi;Euteleostomi;Acti  
nopterygii;Actinopteri;Neopterygii;Teleostei;Osteoglossocephalai;Clupeoce  
phala;Euteleosteomorpha;Neoteleostei;Eurypterygia;Ctenosquamata;Acanthomo  
rphata;Euacanthomorphacea;Percomorphaceae;Ovalentaria;Blenniimorphae;Blen  
niiformes;Gobiesocoidei;Gobiesocidae;Gobiesocinae;Gouania;Gouania  
willdenowi

UdeM00000020386 105023 179.5 UdeM00000020386 XP\_015828284.1 46  
 215 104 4 7 217 151 357 4.80E-42 179.5 105023  
 cellular  
 organisms;Eukaryota;Opisthokonta;Metazoa;Eumetazoa;Bilateria;Deuterostomi  
 a;Chordata;Craniata;Vertebrata;Gnathostomata;Teleostomi;Euteleostomi;Acti  
 nopterygii;Actinopteri;Neopterygii;Teleostei;Osteoglossocephalai;Clupeoce  
 phala;Euteleostomorpha;Neoteleostei;Eurypterygia;Ctenosquamata;Acanthomo  
 rphata;Euacanthomorpha;Percomorphaceae;Ovalentaria;Atherinomorphae;Cyp  
 rinodontiformes;Aplocheiloidei;Nothobranchiidae;Nothobranchius;Nothbranc  
 hius furzeri  
 UdeM00000020387 6596 444.9 UdeM00000020387 XP\_045171756.1 72.5 306  
 84 0 1 306 1 306 8.30E-122 444.9 6596 cellular  
 organisms;Eukaryota;Opisthokonta;Metazoa;Eumetazoa;Bilateria;Protostomia;  
 Spiralia;Lophotrochozoa;Mollusca;Bivalvia;Autobranchia;Heteroconchia;Euhe  
 terodonta;Imparidentia;Venerida;Veneroidea;Veneridae;Mercenaria;Mercenari  
 a mercenaria  
 UdeM00000020388 6596 116.7 UdeM00000020388 XP\_045173969.1 33.9 218  
 129 7 4 211 3 215 3.60E-23 116.7 6596 cellular  
 organisms;Eukaryota;Opisthokonta;Metazoa;Eumetazoa;Bilateria;Protostomia;  
 Spiralia;Lophotrochozoa;Mollusca;Bivalvia;Autobranchia;Heteroconchia;Euhe  
 terodonta;Imparidentia;Venerida;Veneroidea;Veneridae;Mercenaria;Mercenari  
 a mercenaria  
 UdeM00000020389 6596 98.2 UdeM00000020389 XP\_045170739.1 31.5 248  
 150 5 2 235 458 699 1.50E-17 98.2 6596 cellular  
 organisms;Eukaryota;Opisthokonta;Metazoa;Eumetazoa;Bilateria;Protostomia;  
 Spiralia;Lophotrochozoa;Mollusca;Bivalvia;Autobranchia;Heteroconchia;Euhe  
 terodonta;Imparidentia;Venerida;Veneroidea;Veneridae;Mercenaria;Mercenari  
 a mercenaria  
 UdeM00000020390 6596 279.3 UdeM00000020390 XP\_045199387.1 31.8 601  
 354 13 4 566 3 585 1.20E-71 279.3 6596 cellular  
 organisms;Eukaryota;Opisthokonta;Metazoa;Eumetazoa;Bilateria;Protostomia;  
 Spiralia;Lophotrochozoa;Mollusca;Bivalvia;Autobranchia;Heteroconchia;Euhe  
 terodonta;Imparidentia;Venerida;Veneroidea;Veneridae;Mercenaria;Mercenari  
 a mercenaria  
 UdeM00000020391 400727 457.6 UdeM00000020391 XP\_025089219.1 73.4  
 308 77 3 1 305 1 306 1.20E-125 457.6 400727  
 cellular  
 organisms;Eukaryota;Opisthokonta;Metazoa;Eumetazoa;Bilateria;Protostomia;  
 Spiralia;Lophotrochozoa;Mollusca;Gastropoda;Caenogastropoda;Architaeniogl  
 ossa;Ampullarioidea;Ampullariidae;Pomacea;Pomacea canaliculata  
 UdeM00000020393 6596 416 UdeM00000020393 XP\_045166063.1 47 570  
 266 10 1 555 1 549 7.50E-113 416 6596 cellular  
 organisms;Eukaryota;Opisthokonta;Metazoa;Eumetazoa;Bilateria;Protostomia;  
 Spiralia;Lophotrochozoa;Mollusca;Bivalvia;Autobranchia;Heteroconchia;Euhe  
 terodonta;Imparidentia;Venerida;Veneroidea;Veneridae;Mercenaria;Mercenari  
 a mercenaria  
 UdeM00000020394 6573 446 UdeM00000020394 XP\_021359781.1 47.7 560  
 241 7 15 553 4 532 6.80E-122 446 6573 cellular  
 organisms;Eukaryota;Opisthokonta;Metazoa;Eumetazoa;Bilateria;Protostomia;  
 Spiralia;Lophotrochozoa;Mollusca;Bivalvia;Autobranchia;Pteriomorphia;Pect  
 inida;Pectinoidea;Pectinidae;Mizuhopecten;Mizuhopecten yessoensis  
 UdeM00000020395 6573 444.9 UdeM00000020395 XP\_021359781.1 47.9 560  
 240 7 15 553 4 532 1.50E-121 444.9 6573 cellular  
 organisms;Eukaryota;Opisthokonta;Metazoa;Eumetazoa;Bilateria;Protostomia;



Spiralia;Lophotrochozoa;Mollusca;Bivalvia;Autobranchia;Pteriormorphia;Pectinida;Pectinoidea;Pectinidae;Mizuhopecten;Mizuhopecten yessoensis  
UdeM00000020397 6596 59.3 UdeM00000020397 XP\_045173239.1 35.6 104  
66 1 8 110 493 596 3.70E-06 59.3 6596 cellular  
organisms;Eukaryota;Opisthokonta;Metazoa;Eumetazoa;Bilateria;Protostomia;  
Spiralia;Lophotrochozoa;Mollusca;Bivalvia;Autobranchia;Heteroconchia;Euhe  
terodonta;Imparidentia;Venerida;Veneroidea;Veneridae;Mercenaria;Mercenari  
a mercenaria  
UdeM00000020398 6596 255.4 UdeM00000020398 XP\_045157311.1 32.6 485  
299 10 6 468 5 483 1.50E-64 255.4 6596 cellular  
organisms;Eukaryota;Opisthokonta;Metazoa;Eumetazoa;Bilateria;Protostomia;  
Spiralia;Lophotrochozoa;Mollusca;Bivalvia;Autobranchia;Heteroconchia;Euhe  
terodonta;Imparidentia;Venerida;Veneroidea;Veneridae;Mercenaria;Mercenari  
a mercenaria  
UdeM00000020399 6579 247.7 UdeM00000020399 XP\_033747900.1 54.1 244  
105 2 1 237 5 248 1.60E-62 247.7 6579 cellular  
organisms;Eukaryota;Opisthokonta;Metazoa;Eumetazoa;Bilateria;Protostomia;  
Spiralia;Lophotrochozoa;Mollusca;Bivalvia;Autobranchia;Pteriormorphia;Pect  
inida;Pectinoidea;Pectinidae;Pecten;Pecten maximus  
UdeM00000020400 6579 263.8 UdeM00000020400 XP\_033747900.1 55.6 248  
103 2 1 241 5 252 2.20E-67 263.8 6579 cellular  
organisms;Eukaryota;Opisthokonta;Metazoa;Eumetazoa;Bilateria;Protostomia;  
Spiralia;Lophotrochozoa;Mollusca;Bivalvia;Autobranchia;Pteriormorphia;Pect  
inida;Pectinoidea;Pectinidae;Pecten;Pecten maximus  
UdeM00000020401 46514 144.4 UdeM00000020401 XP\_038075667.1 35.9 237  
131 5 2 227 340 566 2.20E-31 144.4 46514 cellular  
organisms;Eukaryota;Opisthokonta;Metazoa;Eumetazoa;Bilateria;Deuterostomi  
a;Echinodermata;Eleutherozoa;Asterozoa;Asteroidea;Valvatacea;Valvatida;As  
terinidae;Patiria;Patiria miniata  
UdeM00000020402 6579 251.5 UdeM00000020402 XP\_033747900.1 55.2 261  
113 3 1 258 5 264 1.20E-63 251.5 6579 cellular  
organisms;Eukaryota;Opisthokonta;Metazoa;Eumetazoa;Bilateria;Protostomia;  
Spiralia;Lophotrochozoa;Mollusca;Bivalvia;Autobranchia;Pteriormorphia;Pect  
inida;Pectinoidea;Pectinidae;Pecten;Pecten maximus  
UdeM00000020403 6596 94.4 UdeM00000020403 XP\_045166258.1 45 109  
55 2 12 120 154 257 1.10E-16 94.4 6596 cellular  
organisms;Eukaryota;Opisthokonta;Metazoa;Eumetazoa;Bilateria;Protostomia;  
Spiralia;Lophotrochozoa;Mollusca;Bivalvia;Autobranchia;Heteroconchia;Euhe  
terodonta;Imparidentia;Venerida;Veneroidea;Veneridae;Mercenaria;Mercenari  
a mercenaria  
UdeM00000020404 6596 114.4 UdeM00000020404 XP\_045166065.1 22.2 505  
275 10 44 437 1 498 3.80E-22 114.4 6596 cellular  
organisms;Eukaryota;Opisthokonta;Metazoa;Eumetazoa;Bilateria;Protostomia;  
Spiralia;Lophotrochozoa;Mollusca;Bivalvia;Autobranchia;Heteroconchia;Euhe  
terodonta;Imparidentia;Venerida;Veneroidea;Veneridae;Mercenaria;Mercenari  
a mercenaria  
UdeM00000020405 6596 114 UdeM00000020405 XP\_045166065.1 22.2 505  
275 10 1 394 1 498 4.50E-22 114 6596 cellular  
organisms;Eukaryota;Opisthokonta;Metazoa;Eumetazoa;Bilateria;Protostomia;  
Spiralia;Lophotrochozoa;Mollusca;Bivalvia;Autobranchia;Heteroconchia;Euhe  
terodonta;Imparidentia;Venerida;Veneroidea;Veneridae;Mercenaria;Mercenari  
a mercenaria  
UdeM00000020406 6565 84 UdeM00000020406 XP\_022288334.1 29.1 134  
94 1 32 165 483 615 2.20E-13 84 6565 cellular

organisms;Eukaryota;Opisthokonta;Metazoa;Eumetazoa;Bilateria;Protostomia;Spiralia;Lophotrochozoa;Mollusca;Bivalvia;Autobranchia;Pteriormorphia;Ostr

UdeM00000020407 6596 128.3 UdeM00000020407 XP\_045166065.1 23.3 506  
282 9 1 407 1 499 2.40E-26 128.3 6596 cellular

organisms;Eukaryota;Opisthokonta;Metazoa;Eumetazoa;Bilateria;Protostomia;Spiralia;Lophotrochozoa;Mollusca;Bivalvia;Autobranchia;Heteroconchia;Euhe

UdeM00000020408 6596 120.2 UdeM00000020408 XP\_045166065.1 22.1 503  
221 8 1 336 1 499 5.40E-24 120.2 6596 cellular

organisms;Eukaryota;Opisthokonta;Metazoa;Eumetazoa;Bilateria;Protostomia;Spiralia;Lophotrochozoa;Mollusca;Bivalvia;Autobranchia;Heteroconchia;Euhe

UdeM00000020409 29159 115.2 UdeM00000020409 XP\_019930309.2 49.1 106  
51 1 4 109 40 142 5.40E-23 115.2 29159 cellular

organisms;Eukaryota;Opisthokonta;Metazoa;Eumetazoa;Bilateria;Protostomia;Spiralia;Lophotrochozoa;Mollusca;Bivalvia;Autobranchia;Pteriormorphia;Ostr

UdeM00000020410 1735272 135.6 UdeM00000020410 XP\_041367601.1 51.5  
132 57 1 1 125 278 409 6.30E-29 135.6 1735272  
cellular

organisms;Eukaryota;Opisthokonta;Metazoa;Eumetazoa;Bilateria;Protostomia;Spiralia;Lophotrochozoa;Mollusca;Gastropoda;Neomphalina;Neomphaloidea;Pel

UdeM00000020412 6596 116.3 UdeM00000020412 XP\_045166065.1 21.9 503  
222 8 1 336 1 499 7.80E-23 116.3 6596 cellular

organisms;Eukaryota;Opisthokonta;Metazoa;Eumetazoa;Bilateria;Protostomia;Spiralia;Lophotrochozoa;Mollusca;Bivalvia;Autobranchia;Heteroconchia;Euhe

UdeM00000020413 29159 115.2 UdeM00000020413 XP\_019930309.2 49.1 106  
51 1 4 109 40 142 5.40E-23 115.2 29159 cellular

organisms;Eukaryota;Opisthokonta;Metazoa;Eumetazoa;Bilateria;Protostomia;Spiralia;Lophotrochozoa;Mollusca;Bivalvia;Autobranchia;Pteriormorphia;Ostr

UdeM00000020414 29159 106.3 UdeM00000020414 XP\_019930309.2 47.6 103  
51 1 4 106 40 139 2.80E-20 106.3 29159 cellular

organisms;Eukaryota;Opisthokonta;Metazoa;Eumetazoa;Bilateria;Protostomia;Spiralia;Lophotrochozoa;Mollusca;Bivalvia;Autobranchia;Pteriormorphia;Ostr

UdeM00000020416 1735272 57.8 UdeM00000020416 XP\_041367601.1 57.8  
45 19 0 1 45 278 322 7.00E-06 57.8 1735272  
cellular

organisms;Eukaryota;Opisthokonta;Metazoa;Eumetazoa;Bilateria;Protostomia;Spiralia;Lophotrochozoa;Mollusca;Gastropoda;Neomphalina;Neomphaloidea;Pel

UdeM00000020417 6596 306.6 UdeM00000020417 XP\_045166065.1 36 517  
312 5 1 516 1 499 6.10E-80 306.6 6596 cellular

organisms;Eukaryota;Opisthokonta;Metazoa;Eumetazoa;Bilateria;Protostomia;Spiralia;Lophotrochozoa;Mollusca;Bivalvia;Autobranchia;Heteroconchia;Euhe

UdeM00000020418 6573 470.7 UdeM00000020418 XP\_021346339.1 57.4 516  
 186 10 1 506 1 492 2.30E-129 470.7 6573 cellular  
 organisms;Eukaryota;Opisthokonta;Metazoa;Eumetazoa;Bilateria;Protostomia;  
 Spiralia;Lophotrochozoa;Mollusca;Bivalvia;Autobranhia;Pteriomorphia;Pect  
 inida;Pectinoidea;Pectinidae;Mizuhopecten;Mizuhopecten yessoensis  
 UdeM00000020419 29159 357.1 UdeM00000020419 XP\_011414172.1 92.3 182  
 14 0 1 182 1 182 1.40E-95 357.1 29159 cellular  
 organisms;Eukaryota;Opisthokonta;Metazoa;Eumetazoa;Bilateria;Protostomia;  
 Spiralia;Lophotrochozoa;Mollusca;Bivalvia;Autobranhia;Pteriomorphia;Ostr  
 eida;Ostreoidea;Ostreidae;Crassostrea;Crassostrea gigas  
 UdeM00000020421 50429 68.6 UdeM00000020421 XP\_022804186.1 42.2 83  
 45 1 1 80 430 512 5.60E-09 68.6 50429 cellular  
 organisms;Eukaryota;Opisthokonta;Metazoa;Eumetazoa;Cnidaria;Anthozoa;Hexa  
 corallia;Scleractinia;Astrocoeniina;Pocilloporidae;Stylophora;Stylophora  
 pistillata  
 UdeM00000020422 1608454 290 UdeM00000020422 XP\_016355543.1 58.1  
 241 101 0 1 241 114 354 2.70E-75 290 1608454  
 cellular  
 organisms;Eukaryota;Opisthokonta;Metazoa;Eumetazoa;Bilateria;Deuterostomi  
 a;Chordata;Craniata;Vertebrata;Gnathostomata;Teleostomi;Euteleostomi;Acti  
 nopterygii;Actinopteri;Neopterygii;Teleostei;Osteoglossocephalai;Clupeoce  
 phala;Otomorpha;Ostariophysi;Otophysi;Cypriniphysae;Cypriniiformes;Cyprino  
 ideii;Cyprinidae;Cyprininae;Sinocyclocheilus;Sinocyclocheilus anshuiensis  
 UdeM00000020424 6573 82.8 UdeM00000020424 XP\_021346340.1 41.9 129  
 64 5 23 141 141 268 1.00E-12 82.8 6573 cellular  
 organisms;Eukaryota;Opisthokonta;Metazoa;Eumetazoa;Bilateria;Protostomia;  
 Spiralia;Lophotrochozoa;Mollusca;Bivalvia;Autobranhia;Pteriomorphia;Pect  
 inida;Pectinoidea;Pectinidae;Mizuhopecten;Mizuhopecten yessoensis  
 UdeM00000020423 6573 203.8 UdeM00000020423 XP\_021346340.1 43.8 281  
 133 8 1 269 1 268 5.20E-49 203.8 6573 cellular  
 organisms;Eukaryota;Opisthokonta;Metazoa;Eumetazoa;Bilateria;Protostomia;  
 Spiralia;Lophotrochozoa;Mollusca;Bivalvia;Autobranhia;Pteriomorphia;Pect  
 inida;Pectinoidea;Pectinidae;Mizuhopecten;Mizuhopecten yessoensis  
 UdeM00000020425 6596 144.8 UdeM00000020425 XP\_045173552.1 53.6 138  
 54 3 1 132 1 134 9.40E-32 144.8 6596 cellular  
 organisms;Eukaryota;Opisthokonta;Metazoa;Eumetazoa;Bilateria;Protostomia;  
 Spiralia;Lophotrochozoa;Mollusca;Bivalvia;Autobranhia;Heteroconchia;Euhe  
 terodonta;Imparidentia;Venerida;Veneroidea;Veneridae;Mercenaria;Mercenari  
 a mercenaria  
 UdeM00000020430 6579 62.8 UdeM00000020430 XP\_033748706.1 33.1 139  
 82 5 6 134 134 271 1.40E-06 62.8 6579 cellular  
 organisms;Eukaryota;Opisthokonta;Metazoa;Eumetazoa;Bilateria;Protostomia;  
 Spiralia;Lophotrochozoa;Mollusca;Bivalvia;Autobranhia;Pteriomorphia;Pect  
 inida;Pectinoidea;Pectinidae;Pecten;Pecten maximus  
 UdeM00000020432 6596 1412.1 UdeM00000020432 XP\_045170938.1 64.8  
 1099 290 6 1 1016 1 1085 0.00E+00 1412.1 6596  
 cellular  
 organisms;Eukaryota;Opisthokonta;Metazoa;Eumetazoa;Bilateria;Protostomia;  
 Spiralia;Lophotrochozoa;Mollusca;Bivalvia;Autobranhia;Heteroconchia;Euhe  
 terodonta;Imparidentia;Venerida;Veneroidea;Veneridae;Mercenaria;Mercenari  
 a mercenaria  
 UdeM00000020433 6596 572.8 UdeM00000020433 XP\_045172557.1 56.6 555  
 216 8 2 541 5 549 4.80E-160 572.8 6596 cellular  
 organisms;Eukaryota;Opisthokonta;Metazoa;Eumetazoa;Bilateria;Protostomia;

Spiralia;Lophotrochozoa;Mollusca;Bivalvia;Autobranchia;Heteroconchia;Euherodonta;Imparidentia;Venerida;Veneroidea;Veneridae;Mercenaria;Mercenaria mercenaria

UdeM00000020434 6596 382.1 UdeM00000020434 XP\_045173415.1 63.7 281  
101 1 4 284 2 281 6.20E-103 382.1 6596 cellular

organisms;Eukaryota;Opisthokonta;Metazoa;Eumetazoa;Bilateria;Protostomia;Spiralia;Lophotrochozoa;Mollusca;Bivalvia;Autobranchia;Heteroconchia;Euherodonta;Imparidentia;Venerida;Veneroidea;Veneridae;Mercenaria;Mercenaria mercenaria

UdeM00000020435 6596 383.6 UdeM00000020435 XP\_045173414.1 63.8 282  
101 1 4 285 2 282 2.10E-103 383.6 6596 cellular

organisms;Eukaryota;Opisthokonta;Metazoa;Eumetazoa;Bilateria;Protostomia;Spiralia;Lophotrochozoa;Mollusca;Bivalvia;Autobranchia;Heteroconchia;Euherodonta;Imparidentia;Venerida;Veneroidea;Veneridae;Mercenaria;Mercenaria mercenaria

UdeM00000020436 6596 815.1 UdeM00000020436 XP\_045173995.1 74.7 530  
132 2 77 605 69 597 6.10E-233 815.1 6596 cellular

organisms;Eukaryota;Opisthokonta;Metazoa;Eumetazoa;Bilateria;Protostomia;Spiralia;Lophotrochozoa;Mollusca;Bivalvia;Autobranchia;Heteroconchia;Euherodonta;Imparidentia;Venerida;Veneroidea;Veneridae;Mercenaria;Mercenaria mercenaria

UdeM00000020437 6596 778.5 UdeM00000020437 XP\_045173995.1 64.7 612  
132 3 77 687 69 597 7.10E-222 778.5 6596 cellular

organisms;Eukaryota;Opisthokonta;Metazoa;Eumetazoa;Bilateria;Protostomia;Spiralia;Lophotrochozoa;Mollusca;Bivalvia;Autobranchia;Heteroconchia;Euherodonta;Imparidentia;Venerida;Veneroidea;Veneridae;Mercenaria;Mercenaria mercenaria

UdeM00000020438 6596 416.4 UdeM00000020438 XP\_045173995.1 67.3 315  
94 3 11 324 40 346 3.40E-113 416.4 6596 cellular

organisms;Eukaryota;Opisthokonta;Metazoa;Eumetazoa;Bilateria;Protostomia;Spiralia;Lophotrochozoa;Mollusca;Bivalvia;Autobranchia;Heteroconchia;Euherodonta;Imparidentia;Venerida;Veneroidea;Veneridae;Mercenaria;Mercenaria mercenaria

UdeM00000020439 6579 828.9 UdeM00000020439 XP\_033747701.1 70.9 561  
155 6 6 559 3 562 3.80E-237 828.9 6579 cellular

organisms;Eukaryota;Opisthokonta;Metazoa;Eumetazoa;Bilateria;Protostomia;Spiralia;Lophotrochozoa;Mollusca;Bivalvia;Autobranchia;Pteriomorpha;Pectinida;Pectinoidea;Pectinidae;Pecten;Pecten maximus

UdeM00000020440 6596 285.8 UdeM00000020440 XP\_045171108.1 50.9 265  
121 6 25 285 29 288 6.00E-74 285.8 6596 cellular

organisms;Eukaryota;Opisthokonta;Metazoa;Eumetazoa;Bilateria;Protostomia;Spiralia;Lophotrochozoa;Mollusca;Bivalvia;Autobranchia;Heteroconchia;Euherodonta;Imparidentia;Venerida;Veneroidea;Veneridae;Mercenaria;Mercenaria mercenaria

UdeM00000020447 1735272 209.9 UdeM00000020447 XP\_041347439.1 33.7  
344 205 5 718 1051 319 649 1.80E-50 209.9 1735272  
cellular

organisms;Eukaryota;Opisthokonta;Metazoa;Eumetazoa;Bilateria;Protostomia;Spiralia;Lophotrochozoa;Mollusca;Gastropoda;Neomphalina;Neomphaloidea;Peltospiridae;Gigantopelta;Gigantopelta aegis

UdeM00000020448 6579 224.2 UdeM00000020448 XP\_033748087.1 42 281  
161 2 1 281 129 407 2.10E-55 224.2 6579 cellular

organisms;Eukaryota;Opisthokonta;Metazoa;Eumetazoa;Bilateria;Protostomia;

Spiralia;Lophotrochozoa;Mollusca;Bivalvia;Autobranchia;Pteriomorpha;Pectinida;Pectinoidea;Pectinidae;Pecten;Pecten maximus  
UdeM00000020449 6579 251.1 UdeM00000020449 XP\_033739209.1 50.2 257  
112 2 9 260 2 247 1.50E-63 251.1 6579 cellular  
organisms;Eukaryota;Opisthokonta;Metazoa;Eumetazoa;Bilateria;Protostomia;Spiralia;Lophotrochozoa;Mollusca;Bivalvia;Autobranchia;Pteriomorpha;Pectinida;Pectinoidea;Pectinidae;Pecten;Pecten maximus  
UdeM00000020450 6596 114.4 UdeM00000020450 XP\_045188277.1 31.3 214  
137 3 2 214 79 283 1.80E-22 114.4 6596 cellular  
organisms;Eukaryota;Opisthokonta;Metazoa;Eumetazoa;Bilateria;Protostomia;Spiralia;Lophotrochozoa;Mollusca;Bivalvia;Autobranchia;Heteroconchia;Euheterodonta;Imparidentia;Venerida;Veneroidea;Veneridae;Mercenaria;Mercenaria mercenaria  
UdeM00000020451 6573 117.5 UdeM00000020451 XP\_021346496.1 52.5 101  
48 0 1 101 435 535 1.80E-23 117.5 6573 cellular  
organisms;Eukaryota;Opisthokonta;Metazoa;Eumetazoa;Bilateria;Protostomia;Spiralia;Lophotrochozoa;Mollusca;Bivalvia;Autobranchia;Pteriomorpha;Pectinida;Pectinoidea;Pectinidae;Mizuhopecten;Mizuhopecten yessoensis  
UdeM00000020452 6596 67.4 UdeM00000020452 XP\_045159777.1 48.7 78  
37 1 8 85 34 108 1.20E-08 67.4 6596 cellular  
organisms;Eukaryota;Opisthokonta;Metazoa;Eumetazoa;Bilateria;Protostomia;Spiralia;Lophotrochozoa;Mollusca;Bivalvia;Autobranchia;Heteroconchia;Euheterodonta;Imparidentia;Venerida;Veneroidea;Veneridae;Mercenaria;Mercenaria mercenaria  
UdeM00000020453 6596 209.9 UdeM00000020453 XP\_045173779.1 50.5 188  
90 1 4 191 15 199 3.00E-51 209.9 6596 cellular  
organisms;Eukaryota;Opisthokonta;Metazoa;Eumetazoa;Bilateria;Protostomia;Spiralia;Lophotrochozoa;Mollusca;Bivalvia;Autobranchia;Heteroconchia;Euheterodonta;Imparidentia;Venerida;Veneroidea;Veneridae;Mercenaria;Mercenaria mercenaria  
UdeM00000020456 6596 192.2 UdeM00000020456 XP\_045173779.1 48.6 183  
94 0 2 184 11 193 6.30E-46 192.2 6596 cellular  
organisms;Eukaryota;Opisthokonta;Metazoa;Eumetazoa;Bilateria;Protostomia;Spiralia;Lophotrochozoa;Mollusca;Bivalvia;Autobranchia;Heteroconchia;Euheterodonta;Imparidentia;Venerida;Veneroidea;Veneridae;Mercenaria;Mercenaria mercenaria  
UdeM00000020457 6596 522.3 UdeM00000020457 XP\_045172193.1 54 507  
126 5 14 518 7 408 6.90E-145 522.3 6596 cellular  
organisms;Eukaryota;Opisthokonta;Metazoa;Eumetazoa;Bilateria;Protostomia;Spiralia;Lophotrochozoa;Mollusca;Bivalvia;Autobranchia;Heteroconchia;Euheterodonta;Imparidentia;Venerida;Veneroidea;Veneridae;Mercenaria;Mercenaria mercenaria  
UdeM00000020458 6573 506.5 UdeM00000020458 XP\_021374391.1 38.7 654  
392 5 13 660 11 661 5.30E-140 506.5 6573 cellular  
organisms;Eukaryota;Opisthokonta;Metazoa;Eumetazoa;Bilateria;Protostomia;Spiralia;Lophotrochozoa;Mollusca;Bivalvia;Autobranchia;Pteriomorpha;Pectinida;Pectinoidea;Pectinidae;Mizuhopecten;Mizuhopecten yessoensis  
UdeM00000020459 6596 1027.3 UdeM00000020459 XP\_045171328.1 64.5  
798 271 5 37 822 30 827 1.10E-296 1027.3 6596  
cellular  
organisms;Eukaryota;Opisthokonta;Metazoa;Eumetazoa;Bilateria;Protostomia;Spiralia;Lophotrochozoa;Mollusca;Bivalvia;Autobranchia;Heteroconchia;Euheterodonta;Imparidentia;Venerida;Veneroidea;Veneridae;Mercenaria;Mercenaria mercenaria

UdeM00000020460 6596 86.3 UdeM00000020460 XP\_045171331.1 55 100  
 44 1 1 99 1 100 2.50E-14 86.3 6596 cellular  
 organisms;Eukaryota;Opisthokonta;Metazoa;Eumetazoa;Bilateria;Protostomia;  
 Spiralia;Lophotrochozoa;Mollusca;Bivalvia;Autobranchia;Heteroconchia;Euhe  
 terodonta;Imparidentia;Venerida;Veneroidea;Veneridae;Mercenaria;Mercenari  
 a mercenaria  
 UdeM00000020462 6596 776.9 UdeM00000020462 XP\_045171321.1 60.4 671  
 251 9 24 685 42 706 2.10E-221 776.9 6596 cellular  
 organisms;Eukaryota;Opisthokonta;Metazoa;Eumetazoa;Bilateria;Protostomia;  
 Spiralia;Lophotrochozoa;Mollusca;Bivalvia;Autobranchia;Heteroconchia;Euhe  
 terodonta;Imparidentia;Venerida;Veneroidea;Veneridae;Mercenaria;Mercenari  
 a mercenaria  
 UdeM00000020461 6596 1055.4 UdeM00000020461 XP\_045171326.1 60.7  
 903 335 12 24 915 42 935 4.00E-305 1055.4 6596  
 cellular  
 organisms;Eukaryota;Opisthokonta;Metazoa;Eumetazoa;Bilateria;Protostomia;  
 Spiralia;Lophotrochozoa;Mollusca;Bivalvia;Autobranchia;Heteroconchia;Euhe  
 terodonta;Imparidentia;Venerida;Veneroidea;Veneridae;Mercenaria;Mercenari  
 a mercenaria  
 UdeM00000020463 6596 87.8 UdeM00000020463 XP\_045157636.1 23.4 384  
 275 9 487 865 11 380 9.90E-14 87.8 6596 cellular  
 organisms;Eukaryota;Opisthokonta;Metazoa;Eumetazoa;Bilateria;Protostomia;  
 Spiralia;Lophotrochozoa;Mollusca;Bivalvia;Autobranchia;Heteroconchia;Euhe  
 terodonta;Imparidentia;Venerida;Veneroidea;Veneridae;Mercenaria;Mercenari  
 a mercenaria  
 UdeM00000020464 1735272 282.3 UdeM00000020464 XP\_041347899.1 47.1  
 272 136 2 1 272 11 274 6.40E-73 282.3 1735272  
 cellular  
 organisms;Eukaryota;Opisthokonta;Metazoa;Eumetazoa;Bilateria;Protostomia;  
 Spiralia;Lophotrochozoa;Mollusca;Gastropoda;Neomphalina;Neomphaloidea;Pel  
 tospiridae;Gigantopelta;Gigantopelta aegis  
 UdeM00000020465 225164 281.6 UdeM00000020465 XP\_009043655.1 49.1  
 273 127 4 1 272 1 262 1.10E-72 281.6 225164  
 cellular  
 organisms;Eukaryota;Opisthokonta;Metazoa;Eumetazoa;Bilateria;Protostomia;  
 Spiralia;Lophotrochozoa;Mollusca;Gastropoda;Patellogastropoda;Lottioidea;  
 Lottiidae;Lottia;Lottia gigantea  
 UdeM00000020466 6596 154.1 UdeM00000020466 XP\_045172793.1 59.3 118  
 48 0 38 155 70 187 1.50E-34 154.1 6596 cellular  
 organisms;Eukaryota;Opisthokonta;Metazoa;Eumetazoa;Bilateria;Protostomia;  
 Spiralia;Lophotrochozoa;Mollusca;Bivalvia;Autobranchia;Heteroconchia;Euhe  
 terodonta;Imparidentia;Venerida;Veneroidea;Veneridae;Mercenaria;Mercenari  
 a mercenaria  
 UdeM00000020467 1735272 297.4 UdeM00000020467 XP\_041347899.1 50.2  
 271 127 3 1 271 11 273 1.90E-77 297.4 1735272  
 cellular  
 organisms;Eukaryota;Opisthokonta;Metazoa;Eumetazoa;Bilateria;Protostomia;  
 Spiralia;Lophotrochozoa;Mollusca;Gastropoda;Neomphalina;Neomphaloidea;Pel  
 tospiridae;Gigantopelta;Gigantopelta aegis  
 UdeM00000020468 6596 369.8 UdeM00000020468 XP\_045172178.1 58.7 298  
 121 1 96 391 118 415 4.40E-99 369.8 6596 cellular  
 organisms;Eukaryota;Opisthokonta;Metazoa;Eumetazoa;Bilateria;Protostomia;  
 Spiralia;Lophotrochozoa;Mollusca;Bivalvia;Autobranchia;Heteroconchia;Euhe

terodonta;Imparidentia;Venerida;Veneroidea;Veneridae;Mercenaria;Mercenaria mercenaria

UdeM00000020470 6596 386 UdeM00000020470 XP\_045171199.1 63.1 282  
104 0 36 317 111 392 4.80E-104 386 6596 cellular

organisms;Eukaryota;Opisthokonta;Metazoa;Eumetazoa;Bilateria;Protostomia;Spiralia;Lophotrochozoa;Mollusca;Bivalvia;Autobranchia;Heteroconchia;Euheterodonta;Imparidentia;Venerida;Veneroidea;Veneridae;Mercenaria;Mercenaria mercenaria

UdeM00000020471 6596 377.5 UdeM00000020471 XP\_045171203.1 54.3 346  
154 1 60 405 37 378 2.20E-101 377.5 6596 cellular

organisms;Eukaryota;Opisthokonta;Metazoa;Eumetazoa;Bilateria;Protostomia;Spiralia;Lophotrochozoa;Mollusca;Bivalvia;Autobranchia;Heteroconchia;Euheterodonta;Imparidentia;Venerida;Veneroidea;Veneridae;Mercenaria;Mercenaria mercenaria

UdeM00000020472 400727 168.3 UdeM00000020472 XP\_025092779.1 59.1  
132 54 0 1 132 1 132 6.60E-39 168.3 400727  
cellular

organisms;Eukaryota;Opisthokonta;Metazoa;Eumetazoa;Bilateria;Protostomia;Spiralia;Lophotrochozoa;Mollusca;Gastropoda;Caenogastropoda;Architaenioglossa;Ampullarioidea;Ampullariidae;Pomacea;Pomacea canaliculata

UdeM00000020473 202533 149.8 UdeM00000020473 XP\_035218899.1 42.6  
169 93 1 1 165 298 466 3.00E-33 149.8 202533  
cellular

organisms;Eukaryota;Opisthokonta;Metazoa;Eumetazoa;Bilateria;Protostomia;Ecdysozoa;Panarthropoda;Arthropoda;Chelicerata;Arachnida;Araneae;Araneomorphae;Entelegynae;Eresoidea;Eresidae;Stegodyphus;Stegodyphus dumicola

UdeM00000020474 7054 162.9 UdeM00000020474 XP\_031350379.1 38.1 265  
144 6 1 245 1 265 5.10E-37 162.9 7054 cellular

organisms;Eukaryota;Opisthokonta;Metazoa;Eumetazoa;Bilateria;Protostomia;Ecdysozoa;Panarthropoda;Arthropoda;Mandibulata;Pancrustacea;Hexapoda;Insecta;Dicondylia;Pterygota;Neoptera;Endopterygota;Coleoptera;Polyphaga;Elateriformia;Elateroidea;Lampyridae;Lampyrinae;Photinus;Photinus pyralis

UdeM00000020475 1735272 420.6 UdeM00000020475 XP\_041374187.1 52.4  
424 181 7 4 426 55 458 2.30E-114 420.6 1735272  
cellular

organisms;Eukaryota;Opisthokonta;Metazoa;Eumetazoa;Bilateria;Protostomia;Spiralia;Lophotrochozoa;Mollusca;Gastropoda;Neomphalina;Neomphaloidea;Peltospiridae;Gigantopelta;Gigantopelta aegis

UdeM00000020476 6596 279.3 UdeM00000020476 XP\_045199387.1 29.2 739  
440 17 3 704 4 696 1.40E-71 279.3 6596 cellular

organisms;Eukaryota;Opisthokonta;Metazoa;Eumetazoa;Bilateria;Protostomia;Spiralia;Lophotrochozoa;Mollusca;Bivalvia;Autobranchia;Heteroconchia;Euheterodonta;Imparidentia;Venerida;Veneroidea;Veneridae;Mercenaria;Mercenaria mercenaria

UdeM00000020477 6565 142.1 UdeM00000020477 XP\_022314529.1 64.5 107  
34 1 4 106 5 111 5.40E-31 142.1 6565 cellular

organisms;Eukaryota;Opisthokonta;Metazoa;Eumetazoa;Bilateria;Protostomia;Spiralia;Lophotrochozoa;Mollusca;Bivalvia;Autobranchia;Pteriomorphia;Ostreida;Ostreoidea;Ostreidae;Crassostrea;Crassostrea virginica

UdeM00000020478 6565 77.4 UdeM00000020478 XP\_022314529.1 47.4 78  
37 1 4 77 5 82 8.90E-12 77.4 6565 cellular

organisms;Eukaryota;Opisthokonta;Metazoa;Eumetazoa;Bilateria;Protostomia;Spiralia;Lophotrochozoa;Mollusca;Bivalvia;Autobranchia;Pteriomorphia;Ostreida;Ostreoidea;Ostreidae;Crassostrea;Crassostrea virginica

UdeM00000020480 7604 242.7 UdeM00000020480 XP\_033641066.1 60.6 180  
 71 0 1 180 155 334 4.40E-61 242.7 7604 cellular  
 organisms;Eukaryota;Opisthokonta;Metazoa;Eumetazoa;Bilateria;Deuterostomi  
 a;Echinodermata;Eleutherozoa;Asterozoa;Asteroidea;Forcipulatacea;Forcipul  
 atida;Asteroidea;Asteroidea;Asteroidea;Asteroidea;Asteroidea;Asteroidea  
 UdeM00000020482 6579 158.3 UdeM00000020482 XP\_033752673.1 52.8 159  
 47 1 1 131 493 651 6.80E-36 158.3 6579 cellular  
 organisms;Eukaryota;Opisthokonta;Metazoa;Eumetazoa;Bilateria;Protostomia;  
 Spiralia;Lophotrochozoa;Mollusca;Bivalvia;Autobranchia;Pteriomorpha;Pect  
 inida;Pectinoidea;Pectinidae;Pecten;Pecten maximus  
 UdeM00000020481 6579 313.2 UdeM00000020481 XP\_033752673.1 56.2 276  
 93 1 4 251 376 651 3.10E-82 313.2 6579 cellular  
 organisms;Eukaryota;Opisthokonta;Metazoa;Eumetazoa;Bilateria;Protostomia;  
 Spiralia;Lophotrochozoa;Mollusca;Bivalvia;Autobranchia;Pteriomorpha;Pect  
 inida;Pectinoidea;Pectinidae;Pecten;Pecten maximus  
 UdeM00000020484 225164 100.9 UdeM00000020484 XP\_009058199.1 50.5  
 105 45 2 1 105 1 98 1.00E-18 100.9 225164  
 cellular  
 organisms;Eukaryota;Opisthokonta;Metazoa;Eumetazoa;Bilateria;Protostomia;  
 Spiralia;Lophotrochozoa;Mollusca;Gastropoda;Patellogastropoda;Lottioidea;  
 Lottiidae;Lottia;Lottia gigantea  
 UdeM00000020486 6596 60.5 UdeM00000020486 XP\_045185033.1 32.2 115  
 71 2 11 125 128 235 2.90E-06 60.5 6596 cellular  
 organisms;Eukaryota;Opisthokonta;Metazoa;Eumetazoa;Bilateria;Protostomia;  
 Spiralia;Lophotrochozoa;Mollusca;Bivalvia;Autobranchia;Heteroconchia;Euhe  
 terodonta;Imparidentia;Venerida;Veneroidea;Veneridae;Mercenaria;Mercenari  
 a mercenaria  
 UdeM00000020487 2652724 172.6 UdeM00000020487 XP\_020913146.1 49  
 194 98 1 166 359 177 369 1.20E-39 172.6 2652724  
 cellular  
 organisms;Eukaryota;Opisthokonta;Metazoa;Eumetazoa;Cnidaria;Anthozoa;Hexa  
 corallia;Actiniaria;Aiptasiidae;Exaiptasia;Exaiptasia diaphana  
 UdeM00000020488 400727 288.1 UdeM00000020488 XP\_025089561.1 48.7  
 300 146 5 11 304 16 313 1.40E-74 288.1 400727  
 cellular  
 organisms;Eukaryota;Opisthokonta;Metazoa;Eumetazoa;Bilateria;Protostomia;  
 Spiralia;Lophotrochozoa;Mollusca;Gastropoda;Caenogastropoda;Architaeniogl  
 ossa;Ampullarioidea;Ampullariidae;Pomacea;Pomacea canaliculata  
 UdeM00000020489 6596 351.3 UdeM00000020489 XP\_045171893.1 56.2 304  
 113 4 7 304 3 292 1.30E-93 351.3 6596 cellular  
 organisms;Eukaryota;Opisthokonta;Metazoa;Eumetazoa;Bilateria;Protostomia;  
 Spiralia;Lophotrochozoa;Mollusca;Bivalvia;Autobranchia;Heteroconchia;Euhe  
 terodonta;Imparidentia;Venerida;Veneroidea;Veneridae;Mercenaria;Mercenari  
 a mercenaria  
 UdeM00000020494 225164 97.8 UdeM00000020494 XP\_009053806.1 22.3  
 408 274 10 192 577 98 484 5.80E-17 97.8 225164  
 cellular  
 organisms;Eukaryota;Opisthokonta;Metazoa;Eumetazoa;Bilateria;Protostomia;  
 Spiralia;Lophotrochozoa;Mollusca;Gastropoda;Patellogastropoda;Lottioidea;  
 Lottiidae;Lottia;Lottia gigantea  
 UdeM00000020495 6573 107.1 UdeM00000020495 XP\_021350433.1 21.8 524  
 354 17 171 660 416 917 1.20E-19 107.1 6573 cellular  
 organisms;Eukaryota;Opisthokonta;Metazoa;Eumetazoa;Bilateria;Protostomia;



Spiralia;Lophotrochozoa;Mollusca;Bivalvia;Autobranchia;Pteriormorphia;Pectinida;Pectinoidea;Pectinidae;Mizuhopecten;Mizuhopecten yessoensis  
UdeM00000020496 225164 95.5 UdeM00000020496 XP\_009053806.1 21.1  
402 286 9 163 548 98 484 2.80E-16 95.5 225164  
cellular  
organisms;Eukaryota;Opisthokonta;Metazoa;Eumetazoa;Bilateria;Protostomia;  
Spiralia;Lophotrochozoa;Mollusca;Gastropoda;Patellogastropoda;Lottioidea;  
Lottiidae;Lottia;Lottia gigantea  
UdeM00000020497 6573 207.2 UdeM00000020497 XP\_021376918.1 64.6 161  
50 2 1 154 1 161 1.60E-50 207.2 6573 cellular  
organisms;Eukaryota;Opisthokonta;Metazoa;Eumetazoa;Bilateria;Protostomia;  
Spiralia;Lophotrochozoa;Mollusca;Bivalvia;Autobranchia;Pteriormorphia;Pectinida;Pectinoidea;Pectinidae;Mizuhopecten;Mizuhopecten yessoensis  
UdeM00000020498 10224 139.4 UdeM00000020498 XP\_006813844.1 43.8 160  
90 0 1 160 128 287 4.00E-30 139.4 10224 cellular  
organisms;Eukaryota;Opisthokonta;Metazoa;Eumetazoa;Bilateria;Deuterostomia;Hemichordata;Enteropneusta;Harrimaniidae;Saccoglossus;Saccoglossus kowalevskii  
UdeM00000020499 10224 141.4 UdeM00000020499 XP\_006813844.1 43.8 162  
91 0 2 163 126 287 1.10E-30 141.4 10224 cellular  
organisms;Eukaryota;Opisthokonta;Metazoa;Eumetazoa;Bilateria;Deuterostomia;Hemichordata;Enteropneusta;Harrimaniidae;Saccoglossus;Saccoglossus kowalevskii  
UdeM00000020500 6596 315.5 UdeM00000020500 XP\_045171119.1 81.5 195  
35 1 1 194 327 521 4.80E-83 315.5 6596 cellular  
organisms;Eukaryota;Opisthokonta;Metazoa;Eumetazoa;Bilateria;Protostomia;  
Spiralia;Lophotrochozoa;Mollusca;Bivalvia;Autobranchia;Heteroconchia;Euheterodonta;Imparidentia;Venerida;Veneroidea;Veneridae;Mercenaria;Mercenaria mercenaria  
UdeM00000020501 6579 125.9 UdeM00000020501 XP\_033736239.1 34.4 189  
78 2 1 145 69 255 4.10E-26 125.9 6579 cellular  
organisms;Eukaryota;Opisthokonta;Metazoa;Eumetazoa;Bilateria;Protostomia;  
Spiralia;Lophotrochozoa;Mollusca;Bivalvia;Autobranchia;Pteriormorphia;Pectinida;Pectinoidea;Pectinidae;Pecten;Pecten maximus  
UdeM00000020502 6565 134 UdeM00000020502 XP\_022299727.1 50 134  
66 1 29 162 145 277 1.90E-28 134 6565 cellular  
organisms;Eukaryota;Opisthokonta;Metazoa;Eumetazoa;Bilateria;Protostomia;  
Spiralia;Lophotrochozoa;Mollusca;Bivalvia;Autobranchia;Pteriormorphia;Ostreida;Ostreoidea;Ostreidae;Crassostrea;Crassostrea virginica  
UdeM00000020503 6596 1139 UdeM00000020503 XP\_045171990.1 50.7 1118  
540 6 1 1108 285 1401 0.00E+00 1139 6596 cellular  
organisms;Eukaryota;Opisthokonta;Metazoa;Eumetazoa;Bilateria;Protostomia;  
Spiralia;Lophotrochozoa;Mollusca;Bivalvia;Autobranchia;Heteroconchia;Euheterodonta;Imparidentia;Venerida;Veneroidea;Veneridae;Mercenaria;Mercenaria mercenaria  
UdeM00000020509 6573 273.5 UdeM00000020509 XP\_021374679.1 48.9 272  
133 4 1 271 1 267 3.00E-70 273.5 6573 cellular  
organisms;Eukaryota;Opisthokonta;Metazoa;Eumetazoa;Bilateria;Protostomia;  
Spiralia;Lophotrochozoa;Mollusca;Bivalvia;Autobranchia;Pteriormorphia;Pectinida;Pectinoidea;Pectinidae;Mizuhopecten;Mizuhopecten yessoensis  
UdeM00000020510 6596 578.9 UdeM00000020510 XP\_045156181.1 44.1 735  
373 16 32 749 28 741 9.10E-162 578.9 6596 cellular  
organisms;Eukaryota;Opisthokonta;Metazoa;Eumetazoa;Bilateria;Protostomia;  
Spiralia;Lophotrochozoa;Mollusca;Bivalvia;Autobranchia;Heteroconchia;Euheterodonta;Imparidentia;Venerida;Veneroidea;Veneridae;Mercenaria;Mercenaria mercenaria

terodonta;Imparidentia;Venerida;Veneroidea;Veneridae;Mercenaria;Mercenaria mercenaria  
 UdeM00000020511 6596 407.5 UdeM00000020511 XP\_045172179.1 37.1 630  
 331 10 3 595 9 610 2.90E-110 407.5 6596 cellular  
 organisms;Eukaryota;Opisthokonta;Metazoa;Eumetazoa;Bilateria;Protostomia;  
 Spiralia;Lophotrochozoa;Mollusca;Bivalvia;Autobranchia;Heteroconchia;Euhe  
 terodonta;Imparidentia;Venerida;Veneroidea;Veneridae;Mercenaria;Mercenari  
 a mercenaria  
 UdeM00000020512 1735272 324.7 UdeM00000020512 XP\_041350263.1 54.7  
 316 128 4 84 397 128 430 1.90E-85 324.7 1735272  
 cellular  
 organisms;Eukaryota;Opisthokonta;Metazoa;Eumetazoa;Bilateria;Protostomia;  
 Spiralia;Lophotrochozoa;Mollusca;Gastropoda;Neomphalina;Neomphaloidea;Pel  
 tospiridae;Gigantopelta;Gigantopelta aegis  
 UdeM00000020513 6596 408.3 UdeM00000020513 XP\_045172179.1 37.9 610  
 338 9 5 581 9 610 1.70E-110 408.3 6596 cellular  
 organisms;Eukaryota;Opisthokonta;Metazoa;Eumetazoa;Bilateria;Protostomia;  
 Spiralia;Lophotrochozoa;Mollusca;Bivalvia;Autobranchia;Heteroconchia;Euhe  
 terodonta;Imparidentia;Venerida;Veneroidea;Veneridae;Mercenaria;Mercenari  
 a mercenaria  
 UdeM00000020515 7574 154.1 UdeM00000020515 XP\_013419285.1 83.8 80  
 13 0 1 80 143 222 7.80E-35 154.1 7574 cellular  
 organisms;Eukaryota;Opisthokonta;Metazoa;Eumetazoa;Bilateria;Protostomia;  
 Spiralia;Lophotrochozoa;Brachiopoda;Linguliformea;Lingulata;Lingulida;Lin  
 guloidea;Lingulidae;Lingula;Lingula anatina  
 UdeM00000020516 158441 136.3 UdeM00000020516 XP\_021948043.1 40.6  
 175 96 4 1 169 160 332 4.40E-29 136.3 158441  
 cellular  
 organisms;Eukaryota;Opisthokonta;Metazoa;Eumetazoa;Bilateria;Protostomia;  
 Ecdysozoa;Panarthropoda;Arthropoda;Mandibulata;Pancrustacea;Hexapoda;Coll  
 embola;Entomobryomorpha;Isotomoidea;Isotomidae;Proisotominae;Folsomia;Fol  
 somia candida  
 UdeM00000020517 400682 59.3 UdeM00000020517 XP\_003390251.1 30.5  
 131 78 3 12 138 432 553 5.30E-06 59.3 400682  
 cellular  
 organisms;Eukaryota;Opisthokonta;Metazoa;Porifera;Demospongiae;Heteroscle  
 romorpha;Haplosclerida;Niphatidae;Amphimedon;Amphimedon queenslandica  
 UdeM00000020518 6596 183.7 UdeM00000020518 XP\_045174098.1 78.2 119  
 23 2 7 123 11 128 1.70E-43 183.7 6596 cellular  
 organisms;Eukaryota;Opisthokonta;Metazoa;Eumetazoa;Bilateria;Protostomia;  
 Spiralia;Lophotrochozoa;Mollusca;Bivalvia;Autobranchia;Heteroconchia;Euhe  
 terodonta;Imparidentia;Venerida;Veneroidea;Veneridae;Mercenaria;Mercenari  
 a mercenaria  
 UdeM00000020519 6596 372.5 UdeM00000020519 XP\_045213689.1 51 349  
 164 3 1 346 1 345 6.00E-100 372.5 6596 cellular  
 organisms;Eukaryota;Opisthokonta;Metazoa;Eumetazoa;Bilateria;Protostomia;  
 Spiralia;Lophotrochozoa;Mollusca;Bivalvia;Autobranchia;Heteroconchia;Euhe  
 terodonta;Imparidentia;Venerida;Veneroidea;Veneridae;Mercenaria;Mercenari  
 a mercenaria  
 UdeM00000020520 6596 369 UdeM00000020520 XP\_045213689.1 50.7 349  
 164 3 1 346 1 344 6.60E-99 369 6596 cellular  
 organisms;Eukaryota;Opisthokonta;Metazoa;Eumetazoa;Bilateria;Protostomia;  
 Spiralia;Lophotrochozoa;Mollusca;Bivalvia;Autobranchia;Heteroconchia;Euhe

terodonta;Imparidentia;Venerida;Veneroidea;Veneridae;Mercenaria;Mercenari  
a mercenaria

UdeM00000020521 6596 1112.4 UdeM00000020521 XP\_045175519.1 59.6  
1048 358 11 10 1037 13 1015 0.00E+00 1112.4 6596  
cellular

organisms;Eukaryota;Opisthokonta;Metazoa;Eumetazoa;Bilateria;Protostomia;  
Spiralia;Lophotrochozoa;Mollusca;Bivalvia;Autobranhia;Heteroconchia;Euhe  
terodonta;Imparidentia;Venerida;Veneroidea;Veneridae;Mercenaria;Mercenari  
a mercenaria

UdeM00000020523 6565 1068.5 UdeM00000020523 XP\_022305018.1 61.7  
989 315 13 10 976 5 951 0.00E+00 1068.5 6565  
cellular

organisms;Eukaryota;Opisthokonta;Metazoa;Eumetazoa;Bilateria;Protostomia;  
Spiralia;Lophotrochozoa;Mollusca;Bivalvia;Autobranhia;Pteriormorphia;Ostr  
eida;Ostreoidea;Ostreidae;Crassostrea;Crassostrea virginica

UdeM00000020524 6573 441.4 UdeM00000020524 XP\_021353952.1 57.6 340  
141 3 1 339 1 338 1.00E-120 441.4 6573 cellular

organisms;Eukaryota;Opisthokonta;Metazoa;Eumetazoa;Bilateria;Protostomia;  
Spiralia;Lophotrochozoa;Mollusca;Bivalvia;Autobranhia;Pteriormorphia;Pect  
inida;Pectinoidea;Pectinidae;Mizuhopecten;Mizuhopecten yessoensis

UdeM00000020525 6596 384 UdeM00000020525 XP\_045156247.1 37.8 596  
275 9 8 539 192 755 3.10E-103 384 6596 cellular

organisms;Eukaryota;Opisthokonta;Metazoa;Eumetazoa;Bilateria;Protostomia;  
Spiralia;Lophotrochozoa;Mollusca;Bivalvia;Autobranhia;Heteroconchia;Euhe  
terodonta;Imparidentia;Venerida;Veneroidea;Veneridae;Mercenaria;Mercenari  
a mercenaria

UdeM00000020526 6596 471.9 UdeM00000020526 XP\_045173472.1 56.8 405  
160 3 53 457 2 391 9.60E-130 471.9 6596 cellular

organisms;Eukaryota;Opisthokonta;Metazoa;Eumetazoa;Bilateria;Protostomia;  
Spiralia;Lophotrochozoa;Mollusca;Bivalvia;Autobranhia;Heteroconchia;Euhe  
terodonta;Imparidentia;Venerida;Veneroidea;Veneridae;Mercenaria;Mercenari  
a mercenaria

UdeM00000020527 6596 504.2 UdeM00000020527 XP\_045171685.1 54.2 474  
198 8 8 478 9 466 1.90E-139 504.2 6596 cellular

organisms;Eukaryota;Opisthokonta;Metazoa;Eumetazoa;Bilateria;Protostomia;  
Spiralia;Lophotrochozoa;Mollusca;Bivalvia;Autobranhia;Heteroconchia;Euhe  
terodonta;Imparidentia;Venerida;Veneroidea;Veneridae;Mercenaria;Mercenari  
a mercenaria

UdeM00000020528 6596 490.7 UdeM00000020528 XP\_045171685.1 56.2 416  
170 5 9 419 10 418 2.10E-135 490.7 6596 cellular

organisms;Eukaryota;Opisthokonta;Metazoa;Eumetazoa;Bilateria;Protostomia;  
Spiralia;Lophotrochozoa;Mollusca;Bivalvia;Autobranhia;Heteroconchia;Euhe  
terodonta;Imparidentia;Venerida;Veneroidea;Veneridae;Mercenaria;Mercenari  
a mercenaria

UdeM00000020529 6596 510.8 UdeM00000020529 XP\_045173472.1 60.5 400  
143 3 58 457 7 391 1.90E-141 510.8 6596 cellular

organisms;Eukaryota;Opisthokonta;Metazoa;Eumetazoa;Bilateria;Protostomia;  
Spiralia;Lophotrochozoa;Mollusca;Bivalvia;Autobranhia;Heteroconchia;Euhe  
terodonta;Imparidentia;Venerida;Veneroidea;Veneridae;Mercenaria;Mercenari  
a mercenaria

UdeM00000020530 6596 507.3 UdeM00000020530 XP\_045171412.1 55.2 471  
209 2 1 470 6 475 2.10E-140 507.3 6596 cellular

organisms;Eukaryota;Opisthokonta;Metazoa;Eumetazoa;Bilateria;Protostomia;  
Spiralia;Lophotrochozoa;Mollusca;Bivalvia;Autobranhia;Heteroconchia;Euhe

terodonta;Imparidentia;Venerida;Veneroidea;Veneridae;Mercenaria;Mercenari  
a mercenaria

UdeM00000020532 1735272 926.8 UdeM00000020532 XP\_041348001.1 51.9  
994 376 12 60 964 13 993 2.30E-266 926.8 1735272  
cellular

organisms;Eukaryota;Opisthokonta;Metazoa;Eumetazoa;Bilateria;Protostomia;  
Spiralia;Lophotrochozoa;Mollusca;Gastropoda;Neomphalina;Neomphaloidea;Pel  
tospiridae;Gigantopelta;Gigantopelta aegis

UdeM00000020533 6596 130.2 UdeM00000020533 XP\_045185797.1 20.2 1197  
653 38 1 1045 25 1071 2.10E-26 130.2 6596 cellular

organisms;Eukaryota;Opisthokonta;Metazoa;Eumetazoa;Bilateria;Protostomia;  
Spiralia;Lophotrochozoa;Mollusca;Bivalvia;Autobranchia;Heteroconchia;Euhe  
terodonta;Imparidentia;Venerida;Veneroidea;Veneridae;Mercenaria;Mercenari  
a mercenaria

UdeM00000020534 7888 119.8 UdeM00000020534 XP\_043909670.1 34.4 212  
120 7 52 253 1482 1684 5.30E-24 119.8 7888 cellular

organisms;Eukaryota;Opisthokonta;Metazoa;Eumetazoa;Bilateria;Deuterostomi  
a;Chordata;Craniata;Vertebrata;Gnathostomata;Teleostomi;Euteleostomi;Sarc  
opterygii;Dipnotetrapodomorpha;Dipnomorpha;Ceratodontae;Ceratodontiformes  
;Lepidosirenoidei;Protopteridae;Protopterus;Protopterus annectens

UdeM00000020535 7888 111.7 UdeM00000020535 XP\_043909670.1 31.9 207  
123 6 51 248 1487 1684 1.40E-21 111.7 7888 cellular

organisms;Eukaryota;Opisthokonta;Metazoa;Eumetazoa;Bilateria;Deuterostomi  
a;Chordata;Craniata;Vertebrata;Gnathostomata;Teleostomi;Euteleostomi;Sarc  
opterygii;Dipnotetrapodomorpha;Dipnomorpha;Ceratodontae;Ceratodontiformes  
;Lepidosirenoidei;Protopteridae;Protopterus;Protopterus annectens

UdeM00000020536 6596 887.9 UdeM00000020536 XP\_045172123.1 76.3 575  
135 1 1 575 1 574 7.00E-255 887.9 6596 cellular

organisms;Eukaryota;Opisthokonta;Metazoa;Eumetazoa;Bilateria;Protostomia;  
Spiralia;Lophotrochozoa;Mollusca;Bivalvia;Autobranchia;Heteroconchia;Euhe  
terodonta;Imparidentia;Venerida;Veneroidea;Veneridae;Mercenaria;Mercenari  
a mercenaria

UdeM00000020537 6596 709.5 UdeM00000020537 XP\_045172123.1 62.5 568  
210 2 10 577 10 574 3.40E-201 709.5 6596 cellular

organisms;Eukaryota;Opisthokonta;Metazoa;Eumetazoa;Bilateria;Protostomia;  
Spiralia;Lophotrochozoa;Mollusca;Bivalvia;Autobranchia;Heteroconchia;Euhe  
terodonta;Imparidentia;Venerida;Veneroidea;Veneridae;Mercenaria;Mercenari  
a mercenaria

UdeM00000020538 6579 229.9 UdeM00000020538 XP\_033748174.1 64.9 168  
59 0 5 172 12 179 2.40E-57 229.9 6579 cellular

organisms;Eukaryota;Opisthokonta;Metazoa;Eumetazoa;Bilateria;Protostomia;  
Spiralia;Lophotrochozoa;Mollusca;Bivalvia;Autobranchia;Pteriormorpha;Pect  
inida;Pectinoidea;Pectinidae;Pecten;Pecten maximus

UdeM00000020539 1735272 84 UdeM00000020539 XP\_041348879.1 39.5  
129 76 1 13 139 4 132 1.70E-13 84 1735272  
cellular

organisms;Eukaryota;Opisthokonta;Metazoa;Eumetazoa;Bilateria;Protostomia;  
Spiralia;Lophotrochozoa;Mollusca;Gastropoda;Neomphalina;Neomphaloidea;Pel  
tospiridae;Gigantopelta;Gigantopelta aegis

UdeM00000020540 6596 108.6 UdeM00000020540 XP\_045196439.1 22.3 750  
439 28 17 732 443 1082 5.10E-20 108.6 6596 cellular

organisms;Eukaryota;Opisthokonta;Metazoa;Eumetazoa;Bilateria;Protostomia;  
Spiralia;Lophotrochozoa;Mollusca;Bivalvia;Autobranchia;Heteroconchia;Euhe

terodonta;Imparidentia;Venerida;Veneroidea;Veneridae;Mercenaria;Mercenaria mercenaria

|                 |        |       |                 |                |      |     |          |       |        |
|-----------------|--------|-------|-----------------|----------------|------|-----|----------|-------|--------|
| UdeM00000020541 | 441366 | 142.9 | UdeM00000020541 | XP_028322868.1 | 28.7 |     |          |       |        |
| 408             | 242    | 11    | 119             | 507            | 193  | 570 | 1.30E-30 | 142.9 | 441366 |

cellular

organisms;Eukaryota;Opisthokonta;Metazoa;Eumetazoa;Bilateria;Deuterostomia;Chordata;Craniata;Vertebrata;Gnathostomata;Teleostomi;Euteleostomi;Actinopterygii;Actinopteri;Neopterygii;Teleostei;Osteoglossocephalai;Clupeocephala;Euteleostei;Neoteleostei;Eurypterygia;Ctenosquamata;Acanthomorpha;Euacanthomorpha;Percomorphaceae;Ovalentaria;Blenniiformes;Blenniiformes;Gobiesocidae;Gobiesocinae;Gouania;Gouania

willdenowi

|                 |        |       |                 |                |      |     |          |       |        |
|-----------------|--------|-------|-----------------|----------------|------|-----|----------|-------|--------|
| UdeM00000020542 | 225164 | 155.2 | UdeM00000020542 | XP_009051407.1 | 36.4 |     |          |       |        |
| 253             | 152    | 4     | 382             | 626            | 174  | 425 | 2.70E-34 | 155.2 | 225164 |

cellular

organisms;Eukaryota;Opisthokonta;Metazoa;Eumetazoa;Bilateria;Protostomia;Spiralia;Lophotrochozoa;Mollusca;Gastropoda;Patellogastropoda;Lottioidea;Lottiidae;Lottia;Lottia gigantea

|                 |         |    |                 |                |      |     |          |    |         |
|-----------------|---------|----|-----------------|----------------|------|-----|----------|----|---------|
| UdeM00000020543 | 2607531 | 67 | UdeM00000020543 | XP_029650987.1 | 46.9 |     |          |    |         |
| 64              | 34      | 0  | 108             | 171            | 355  | 418 | 2.60E-08 | 67 | 2607531 |

cellular

organisms;Eukaryota;Opisthokonta;Metazoa;Eumetazoa;Bilateria;Protostomia;Spiralia;Lophotrochozoa;Mollusca;Cephalopoda;Coleoidea;Octopodiformes;Octopoda;Incirrata;Octopodidae;Octopus;Octopus sinensis

|                 |      |       |                 |                |      |          |       |      |          |
|-----------------|------|-------|-----------------|----------------|------|----------|-------|------|----------|
| UdeM00000020544 | 6596 | 122.5 | UdeM00000020544 | XP_045171947.1 | 39.8 | 161      |       |      |          |
| 91              | 2    | 311   | 471             | 181            | 335  | 1.50E-24 | 122.5 | 6596 | cellular |

organisms;Eukaryota;Opisthokonta;Metazoa;Eumetazoa;Bilateria;Protostomia;Spiralia;Lophotrochozoa;Mollusca;Bivalvia;Autobranchia;Heteroconchia;Euheterodonta;Imparidentia;Venerida;Veneroidea;Veneridae;Mercenaria;Mercenaria mercenaria

|                 |         |       |                 |                |      |     |          |       |         |
|-----------------|---------|-------|-----------------|----------------|------|-----|----------|-------|---------|
| UdeM00000020546 | 1735272 | 163.7 | UdeM00000020546 | XP_041348869.1 | 41.3 |     |          |       |         |
| 252             | 131     | 8     | 119             | 358            | 184  | 430 | 4.40E-37 | 163.7 | 1735272 |

cellular

organisms;Eukaryota;Opisthokonta;Metazoa;Eumetazoa;Bilateria;Protostomia;Spiralia;Lophotrochozoa;Mollusca;Gastropoda;Neomphalina;Neomphaloidea;Peltospiridae;Gigantopelta;Gigantopelta aegis

|                 |      |      |                 |                |      |          |      |      |          |
|-----------------|------|------|-----------------|----------------|------|----------|------|------|----------|
| UdeM00000020547 | 6596 | 66.6 | UdeM00000020547 | XP_045173494.1 | 31.7 | 126      |      |      |          |
| 80              | 1    | 12   | 137             | 16             | 135  | 2.80E-08 | 66.6 | 6596 | cellular |

organisms;Eukaryota;Opisthokonta;Metazoa;Eumetazoa;Bilateria;Protostomia;Spiralia;Lophotrochozoa;Mollusca;Bivalvia;Autobranchia;Heteroconchia;Euheterodonta;Imparidentia;Venerida;Veneroidea;Veneridae;Mercenaria;Mercenaria mercenaria

|                 |         |       |                 |                |      |     |          |       |         |
|-----------------|---------|-------|-----------------|----------------|------|-----|----------|-------|---------|
| UdeM00000020548 | 1735272 | 131.7 | UdeM00000020548 | XP_041348869.1 | 38.5 |     |          |       |         |
| 208             | 120     | 6     | 5               | 209            | 227  | 429 | 1.10E-27 | 131.7 | 1735272 |

cellular

organisms;Eukaryota;Opisthokonta;Metazoa;Eumetazoa;Bilateria;Protostomia;Spiralia;Lophotrochozoa;Mollusca;Gastropoda;Neomphalina;Neomphaloidea;Peltospiridae;Gigantopelta;Gigantopelta aegis

|                 |        |       |                 |                |      |     |          |       |        |
|-----------------|--------|-------|-----------------|----------------|------|-----|----------|-------|--------|
| UdeM00000020549 | 409849 | 164.5 | UdeM00000020549 | XP_033833148.1 | 39.2 |     |          |       |        |
| 245             | 135    | 5     | 178             | 418            | 179  | 413 | 3.30E-37 | 164.5 | 409849 |

cellular

organisms;Eukaryota;Opisthokonta;Metazoa;Eumetazoa;Bilateria;Deuterostomia;Chordata;Craniata;Vertebrata;Gnathostomata;Teleostomi;Euteleostomi;Actinopterygii;Actinopteri;Neopterygii;Teleostei;Osteoglossocephalai;Clupeocephala

phala;Euteleosteomorpha;Neoteleostei;Eurypterygia;Ctenosquamata;Acanthomorphata;Euacanthomorphacea;Percomorphaceae;Gobiaria;Gobiiformes;Gobioidei;Gobiidae;Oxudercinae;Periophthalmus;Periophthalmus magnuspinnatus

UdeM00000020550 45264 424.9 UdeM00000020550 XP\_044165143.1 53.6 412  
168 5 42 451 35 425 1.30E-115 424.9 45264 cellular  
organisms;Eukaryota;Opisthokonta;Metazoa;Eumetazoa;Cnidaria;Anthozoa;Hexacorallia;Scleractinia;Astrocoeniina;Acroporidae;Acropora;Acropora millepora

UdeM00000020551 45264 172.9 UdeM00000020551 XP\_044184031.1 48.7 191  
88 5 1 185 300 486 3.70E-40 172.9 45264 cellular  
organisms;Eukaryota;Opisthokonta;Metazoa;Eumetazoa;Cnidaria;Anthozoa;Hexacorallia;Scleractinia;Astrocoeniina;Acroporidae;Acropora;Acropora millepora

UdeM00000020552 6573 140.2 UdeM00000020552 XP\_021379897.1 39.1 238  
135 5 150 385 180 409 6.10E-30 140.2 6573 cellular  
organisms;Eukaryota;Opisthokonta;Metazoa;Eumetazoa;Bilateria;Protostomia;Spiralia;Lophotrochozoa;Mollusca;Bivalvia;Autobranchia;Pteriormorphia;Pectinida;Pectinoidea;Pectinidae;Mizuhopecten;Mizuhopecten yessoensis

UdeM00000020553 6573 139.8 UdeM00000020553 XP\_021379897.1 38.8 242  
138 5 145 384 176 409 8.00E-30 139.8 6573 cellular  
organisms;Eukaryota;Opisthokonta;Metazoa;Eumetazoa;Bilateria;Protostomia;Spiralia;Lophotrochozoa;Mollusca;Bivalvia;Autobranchia;Pteriormorphia;Pectinida;Pectinoidea;Pectinidae;Mizuhopecten;Mizuhopecten yessoensis

UdeM00000020554 6596 829.3 UdeM00000020554 XP\_045171947.1 67.3 620  
192 2 1 619 1 610 3.20E-237 829.3 6596 cellular  
organisms;Eukaryota;Opisthokonta;Metazoa;Eumetazoa;Bilateria;Protostomia;Spiralia;Lophotrochozoa;Mollusca;Bivalvia;Autobranchia;Heteroconchia;Euheterodonta;Imparidentia;Venerida;Veneroidea;Veneridae;Mercenaria;Mercenaria mercenaria

UdeM00000020555 1735272 827 UdeM00000020555 XP\_041348869.1 65.5  
617 211 2 1 616 1 616 1.60E-236 827 1735272  
cellular  
organisms;Eukaryota;Opisthokonta;Metazoa;Eumetazoa;Bilateria;Protostomia;Spiralia;Lophotrochozoa;Mollusca;Gastropoda;Neomphalina;Neomphaloidea;Peltospiridae;Gigantopelta;Gigantopelta aegis

UdeM00000020556 6596 270 UdeM00000020556 XP\_045174115.1 70.2 188  
54 2 15 201 2 188 2.50E-69 270 6596 cellular  
organisms;Eukaryota;Opisthokonta;Metazoa;Eumetazoa;Bilateria;Protostomia;Spiralia;Lophotrochozoa;Mollusca;Bivalvia;Autobranchia;Heteroconchia;Euheterodonta;Imparidentia;Venerida;Veneroidea;Veneridae;Mercenaria;Mercenaria mercenaria

UdeM00000020558 6596 728.8 UdeM00000020558 XP\_045171833.1 72.7 510  
132 5 29 533 12 519 5.00E-207 728.8 6596 cellular  
organisms;Eukaryota;Opisthokonta;Metazoa;Eumetazoa;Bilateria;Protostomia;Spiralia;Lophotrochozoa;Mollusca;Bivalvia;Autobranchia;Heteroconchia;Euheterodonta;Imparidentia;Venerida;Veneroidea;Veneridae;Mercenaria;Mercenaria mercenaria

UdeM00000020557 6596 750.4 UdeM00000020557 XP\_045171833.1 73.3 521  
132 5 1 516 1 519 1.60E-213 750.4 6596 cellular  
organisms;Eukaryota;Opisthokonta;Metazoa;Eumetazoa;Bilateria;Protostomia;Spiralia;Lophotrochozoa;Mollusca;Bivalvia;Autobranchia;Heteroconchia;Euheterodonta;Imparidentia;Venerida;Veneroidea;Veneridae;Mercenaria;Mercenaria mercenaria

UdeM00000020559 37653 381.3 UdeM00000020559 XP\_014780090.1 54.2 369  
 137 7 157 518 146 489 3.90E-102 381.3 37653 cellular  
 organisms;Eukaryota;Opisthokonta;Metazoa;Eumetazoa;Bilateria;Protostomia;  
 Spiralia;Lophotrochozoa;Mollusca;Cephalopoda;Coleoidea;Octopodiformes;Oct  
 opoda;Incirrata;Octopodidae;Octopus;Octopus bimaculoides  
 UdeM00000020560 6579 214.9 UdeM00000020560 XP\_033731508.1 60.3 184  
 68 2 26 204 607 790 9.40E-53 214.9 6579 cellular  
 organisms;Eukaryota;Opisthokonta;Metazoa;Eumetazoa;Bilateria;Protostomia;  
 Spiralia;Lophotrochozoa;Mollusca;Bivalvia;Autobranchia;Pteriormorphia;Pect  
 inida;Pectinoidea;Pectinidae;Pecten;Pecten maximus  
 UdeM00000020561 6579 149.8 UdeM00000020561 XP\_033731508.1 57.6 139  
 54 2 1 134 652 790 2.50E-33 149.8 6579 cellular  
 organisms;Eukaryota;Opisthokonta;Metazoa;Eumetazoa;Bilateria;Protostomia;  
 Spiralia;Lophotrochozoa;Mollusca;Bivalvia;Autobranchia;Pteriormorphia;Pect  
 inida;Pectinoidea;Pectinidae;Pecten;Pecten maximus  
 UdeM00000020562 6573 411.4 UdeM00000020562 XP\_021370479.1 60.2 334  
 133 0 34 367 36 369 1.20E-111 411.4 6573 cellular  
 organisms;Eukaryota;Opisthokonta;Metazoa;Eumetazoa;Bilateria;Protostomia;  
 Spiralia;Lophotrochozoa;Mollusca;Bivalvia;Autobranchia;Pteriormorphia;Pect  
 inida;Pectinoidea;Pectinidae;Mizuhopecten;Mizuhopecten yessoensis  
 UdeM00000020563 6573 376.7 UdeM00000020563 XP\_021370479.1 49.3 408  
 137 3 25 421 36 384 3.80E-101 376.7 6573 cellular  
 organisms;Eukaryota;Opisthokonta;Metazoa;Eumetazoa;Bilateria;Protostomia;  
 Spiralia;Lophotrochozoa;Mollusca;Bivalvia;Autobranchia;Pteriormorphia;Pect  
 inida;Pectinoidea;Pectinidae;Mizuhopecten;Mizuhopecten yessoensis  
 UdeM00000020568 29159 154.1 UdeM00000020568 XP\_034339171.1 31 335  
 196 10 92 413 424 736 4.10E-34 154.1 29159 cellular  
 organisms;Eukaryota;Opisthokonta;Metazoa;Eumetazoa;Bilateria;Protostomia;  
 Spiralia;Lophotrochozoa;Mollusca;Bivalvia;Autobranchia;Pteriormorphia;Ostr  
 eida;Ostreoidea;Ostreidae;Crassostrea;Crassostrea gigas  
 UdeM00000020569 37653 301.2 UdeM00000020569 XP\_014780101.1 44.7 356  
 172 6 47 392 218 558 1.90E-78 301.2 37653 cellular  
 organisms;Eukaryota;Opisthokonta;Metazoa;Eumetazoa;Bilateria;Protostomia;  
 Spiralia;Lophotrochozoa;Mollusca;Cephalopoda;Coleoidea;Octopodiformes;Oct  
 opoda;Incirrata;Octopodidae;Octopus;Octopus bimaculoides  
 UdeM00000020570 6565 125.9 UdeM00000020570 XP\_022341811.1 42.4 139  
 78 2 5 142 3 140 4.00E-26 125.9 6565 cellular  
 organisms;Eukaryota;Opisthokonta;Metazoa;Eumetazoa;Bilateria;Protostomia;  
 Spiralia;Lophotrochozoa;Mollusca;Bivalvia;Autobranchia;Pteriormorphia;Ostr  
 eida;Ostreoidea;Ostreidae;Crassostrea;Crassostrea virginica  
 UdeM00000020571 29159 136.3 UdeM00000020571 XP\_034336637.1 44.8 134  
 70 1 31 160 8 141 3.40E-29 136.3 29159 cellular  
 organisms;Eukaryota;Opisthokonta;Metazoa;Eumetazoa;Bilateria;Protostomia;  
 Spiralia;Lophotrochozoa;Mollusca;Bivalvia;Autobranchia;Pteriormorphia;Ostr  
 eida;Ostreoidea;Ostreidae;Crassostrea;Crassostrea gigas  
 UdeM00000020572 6579 67.8 UdeM00000020572 XP\_033748524.1 37.4 99  
 62 0 73 171 317 415 1.60E-08 67.8 6579 cellular  
 organisms;Eukaryota;Opisthokonta;Metazoa;Eumetazoa;Bilateria;Protostomia;  
 Spiralia;Lophotrochozoa;Mollusca;Bivalvia;Autobranchia;Pteriormorphia;Pect  
 inida;Pectinoidea;Pectinidae;Pecten;Pecten maximus  
 UdeM00000020574 6596 557 UdeM00000020574 XP\_045171144.1 48.8 658  
 292 12 1 628 408 1050 3.10E-155 557 6596 cellular  
 organisms;Eukaryota;Opisthokonta;Metazoa;Eumetazoa;Bilateria;Protostomia;  
 Spiralia;Lophotrochozoa;Mollusca;Bivalvia;Autobranchia;Heteroconchia;Euhe

terodonta;Imparidentia;Venerida;Veneroidea;Veneridae;Mercenaria;Mercenari  
 a mercenaria  
 UdeM00000020573 6596 631.3 UdeM00000020573 XP\_045171144.1 49.7 722  
 317 13 1 691 344 1050 1.40E-177 631.3 6596 cellular  
 organisms;Eukaryota;Opisthokonta;Metazoa;Eumetazoa;Bilateria;Protostomia;  
 Spiralia;Lophotrochozoa;Mollusca;Bivalvia;Autobranhia;Heteroconchia;Euhe  
 terodonta;Imparidentia;Venerida;Veneroidea;Veneridae;Mercenaria;Mercenari  
 a mercenaria  
 UdeM00000020576 6596 337 UdeM00000020576 XP\_045171143.1 47.9 336  
 167 3 4 338 3 331 2.70E-89 337 6596 cellular  
 organisms;Eukaryota;Opisthokonta;Metazoa;Eumetazoa;Bilateria;Protostomia;  
 Spiralia;Lophotrochozoa;Mollusca;Bivalvia;Autobranhia;Heteroconchia;Euhe  
 terodonta;Imparidentia;Venerida;Veneroidea;Veneridae;Mercenaria;Mercenari  
 a mercenaria  
 UdeM00000020577 6596 557.8 UdeM00000020577 XP\_045171145.1 50.2 614  
 282 11 1 595 1 609 1.90E-155 557.8 6596 cellular  
 organisms;Eukaryota;Opisthokonta;Metazoa;Eumetazoa;Bilateria;Protostomia;  
 Spiralia;Lophotrochozoa;Mollusca;Bivalvia;Autobranhia;Heteroconchia;Euhe  
 terodonta;Imparidentia;Venerida;Veneroidea;Veneridae;Mercenaria;Mercenari  
 a mercenaria  
 UdeM00000020579 6579 643.3 UdeM00000020579 XP\_033747597.1 73.5 434  
 109 3 1 428 1 434 2.90E-181 643.3 6579 cellular  
 organisms;Eukaryota;Opisthokonta;Metazoa;Eumetazoa;Bilateria;Protostomia;  
 Spiralia;Lophotrochozoa;Mollusca;Bivalvia;Autobranhia;Pteriormorphia;Pect  
 inida;Pectinoidea;Pectinidae;Pecten;Pecten maximus  
 UdeM00000020578 6579 630.6 UdeM00000020578 XP\_033747593.1 71.4 441  
 118 4 1 433 1 441 2.00E-177 630.6 6579 cellular  
 organisms;Eukaryota;Opisthokonta;Metazoa;Eumetazoa;Bilateria;Protostomia;  
 Spiralia;Lophotrochozoa;Mollusca;Bivalvia;Autobranhia;Pteriormorphia;Pect  
 inida;Pectinoidea;Pectinidae;Pecten;Pecten maximus  
 UdeM00000020580 6573 89 UdeM00000020580 XP\_021340773.1 34.5 171  
 104 4 1 166 1 168 6.30E-15 89 6573 cellular  
 organisms;Eukaryota;Opisthokonta;Metazoa;Eumetazoa;Bilateria;Protostomia;  
 Spiralia;Lophotrochozoa;Mollusca;Bivalvia;Autobranhia;Pteriormorphia;Pect  
 inida;Pectinoidea;Pectinidae;Mizuhopecten;Mizuhopecten yessoensis  
 UdeM00000020581 6596 1050 UdeM00000020581 XP\_045171051.1 39.1 2893  
 1309 86 51 2686 19 2715 5.00E-303 1050 6596 cellular  
 organisms;Eukaryota;Opisthokonta;Metazoa;Eumetazoa;Bilateria;Protostomia;  
 Spiralia;Lophotrochozoa;Mollusca;Bivalvia;Autobranhia;Heteroconchia;Euhe  
 terodonta;Imparidentia;Venerida;Veneroidea;Veneridae;Mercenaria;Mercenari  
 a mercenaria  
 UdeM00000020582 6596 758.8 UdeM00000020582 XP\_045172300.1 65.1 558  
 187 4 1 551 1 557 4.80E-216 758.8 6596 cellular  
 organisms;Eukaryota;Opisthokonta;Metazoa;Eumetazoa;Bilateria;Protostomia;  
 Spiralia;Lophotrochozoa;Mollusca;Bivalvia;Autobranhia;Heteroconchia;Euhe  
 terodonta;Imparidentia;Venerida;Veneroidea;Veneridae;Mercenaria;Mercenari  
 a mercenaria  
 UdeM00000020583 6596 446 UdeM00000020583 XP\_045172299.1 74.3 284  
 68 1 4 282 277 560 3.60E-122 446 6596 cellular  
 organisms;Eukaryota;Opisthokonta;Metazoa;Eumetazoa;Bilateria;Protostomia;  
 Spiralia;Lophotrochozoa;Mollusca;Bivalvia;Autobranhia;Heteroconchia;Euhe  
 terodonta;Imparidentia;Venerida;Veneroidea;Veneridae;Mercenaria;Mercenari  
 a mercenaria



UdeM00000020584 6573 608.2 UdeM00000020584 XP\_021370497.1 66.9 456  
 135 6 1 452 1 444 1.00E-170 608.2 6573 cellular  
 organisms;Eukaryota;Opisthokonta;Metazoa;Eumetazoa;Bilateria;Protostomia;  
 Spiralia;Lophotrochozoa;Mollusca;Bivalvia;Autobranchia;Pteriomorpha;Pect  
 inida;Pectinoidea;Pectinidae;Mizuhopecten;Mizuhopecten yessoensis  
 UdeM00000020585 6565 533.5 UdeM00000020585 XP\_022341778.1 67.5 394  
 123 3 33 424 15 405 2.50E-148 533.5 6565 cellular  
 organisms;Eukaryota;Opisthokonta;Metazoa;Eumetazoa;Bilateria;Protostomia;  
 Spiralia;Lophotrochozoa;Mollusca;Bivalvia;Autobranchia;Pteriomorpha;Ostr  
 eida;Ostreoidea;Ostreidae;Crassostrea;Crassostrea virginica  
 UdeM00000020587 6579 112.5 UdeM00000020587 XP\_033748211.1 54.5 99  
 43 1 5 101 4 102 3.60E-22 112.5 6579 cellular  
 organisms;Eukaryota;Opisthokonta;Metazoa;Eumetazoa;Bilateria;Protostomia;  
 Spiralia;Lophotrochozoa;Mollusca;Bivalvia;Autobranchia;Pteriomorpha;Pect  
 inida;Pectinoidea;Pectinidae;Pecten;Pecten maximus  
 UdeM00000020586 6596 327.8 UdeM00000020586 XP\_045173624.1 64 242  
 85 1 7 246 8 249 1.30E-86 327.8 6596 cellular  
 organisms;Eukaryota;Opisthokonta;Metazoa;Eumetazoa;Bilateria;Protostomia;  
 Spiralia;Lophotrochozoa;Mollusca;Bivalvia;Autobranchia;Heteroconchia;Euhe  
 terodonta;Imparidentia;Venerida;Veneroidea;Veneridae;Mercenaria;Mercenari  
 a mercenaria  
 UdeM00000020588 400727 139.4 UdeM00000020588 XP\_025092219.1 41.8  
 158 91 1 6 162 5 162 4.60E-30 139.4 400727  
 cellular  
 organisms;Eukaryota;Opisthokonta;Metazoa;Eumetazoa;Bilateria;Protostomia;  
 Spiralia;Lophotrochozoa;Mollusca;Gastropoda;Caenogastropoda;Architaeniogl  
 ossa;Ampullarioidea;Ampullariidae;Pomacea;Pomacea canaliculata  
 UdeM00000020589 6500 232.3 UdeM00000020589 XP\_005093938.2 44.3 291  
 151 6 72 358 26 309 1.00E-57 232.3 6500 cellular  
 organisms;Eukaryota;Opisthokonta;Metazoa;Eumetazoa;Bilateria;Protostomia;  
 Spiralia;Lophotrochozoa;Mollusca;Gastropoda;Heterobranchia;Euthyneura;Tec  
 tipleura;Aplysiida;Aplysioidea;Aplysiidae;Aplysia;Aplysia californica  
 UdeM00000020590 1735272 553.9 UdeM00000020590 XP\_041349388.1 45.4  
 830 398 26 1 800 9 813 3.30E-154 553.9 1735272  
 cellular  
 organisms;Eukaryota;Opisthokonta;Metazoa;Eumetazoa;Bilateria;Protostomia;  
 Spiralia;Lophotrochozoa;Mollusca;Gastropoda;Neomphalina;Neomphaloidea;Pel  
 tospiridae;Gigantopelta;Gigantopelta aegis  
 UdeM00000020591 1735272 555.8 UdeM00000020591 XP\_041349388.1 45.2  
 837 404 26 1 807 2 813 8.80E-155 555.8 1735272  
 cellular  
 organisms;Eukaryota;Opisthokonta;Metazoa;Eumetazoa;Bilateria;Protostomia;  
 Spiralia;Lophotrochozoa;Mollusca;Gastropoda;Neomphalina;Neomphaloidea;Pel  
 tospiridae;Gigantopelta;Gigantopelta aegis  
 UdeM00000020592 6573 210.3 UdeM00000020592 XP\_021374706.1 43.7 318  
 160 9 6 313 42 350 3.50E-51 210.3 6573 cellular  
 organisms;Eukaryota;Opisthokonta;Metazoa;Eumetazoa;Bilateria;Protostomia;  
 Spiralia;Lophotrochozoa;Mollusca;Bivalvia;Autobranchia;Pteriomorpha;Pect  
 inida;Pectinoidea;Pectinidae;Mizuhopecten;Mizuhopecten yessoensis  
 UdeM00000020593 6596 640.2 UdeM00000020593 XP\_045173759.1 37.2 969  
 522 16 10 965 6 900 4.30E-180 640.2 6596 cellular  
 organisms;Eukaryota;Opisthokonta;Metazoa;Eumetazoa;Bilateria;Protostomia;  
 Spiralia;Lophotrochozoa;Mollusca;Bivalvia;Autobranchia;Heteroconchia;Euhe

terodonta;Imparidentia;Venerida;Veneroidea;Veneridae;Mercenaria;Mercenaria mercenaria

UdeM00000020594 6596 853.6 UdeM00000020594 XP\_045171288.1 42.4 1625  
877 23 1 1609 1 1582 4.10E-244 853.6 6596 cellular

organisms;Eukaryota;Opisthokonta;Metazoa;Eumetazoa;Bilateria;Protostomia;Spiralia;Lophotrochozoa;Mollusca;Bivalvia;Autobranhia;Heteroconchia;Euherodonta;Imparidentia;Venerida;Veneroidea;Veneridae;Mercenaria;Mercenaria mercenaria

UdeM00000020595 6596 664.1 UdeM00000020595 XP\_045172378.1 67.6 500  
156 2 7 505 10 504 1.40E-187 664.1 6596 cellular

organisms;Eukaryota;Opisthokonta;Metazoa;Eumetazoa;Bilateria;Protostomia;Spiralia;Lophotrochozoa;Mollusca;Bivalvia;Autobranhia;Heteroconchia;Euherodonta;Imparidentia;Venerida;Veneroidea;Veneridae;Mercenaria;Mercenaria mercenaria

UdeM00000020596 6565 281.6 UdeM00000020596 XP\_022340961.1 52 271  
127 2 52 322 40 307 1.30E-72 281.6 6565 cellular

organisms;Eukaryota;Opisthokonta;Metazoa;Eumetazoa;Bilateria;Protostomia;Spiralia;Lophotrochozoa;Mollusca;Bivalvia;Autobranhia;Pteriormorphia;Ostreida;Ostreioidea;Ostreidae;Crassostrea;Crassostrea virginica

UdeM00000020598 6596 363.2 UdeM00000020598 XP\_045171160.1 89.3 205  
21 1 1 204 1 205 2.10E-97 363.2 6596 cellular

organisms;Eukaryota;Opisthokonta;Metazoa;Eumetazoa;Bilateria;Protostomia;Spiralia;Lophotrochozoa;Mollusca;Bivalvia;Autobranhia;Heteroconchia;Euherodonta;Imparidentia;Venerida;Veneroidea;Veneridae;Mercenaria;Mercenaria mercenaria

UdeM00000020599 6596 451.8 UdeM00000020599 XP\_045172004.1 64.7 334  
113 2 1 333 1 330 7.40E-124 451.8 6596 cellular

organisms;Eukaryota;Opisthokonta;Metazoa;Eumetazoa;Bilateria;Protostomia;Spiralia;Lophotrochozoa;Mollusca;Bivalvia;Autobranhia;Heteroconchia;Euherodonta;Imparidentia;Venerida;Veneroidea;Veneridae;Mercenaria;Mercenaria mercenaria

UdeM00000020600 29159 900.2 UdeM00000020600 XP\_011434460.2 76.3 595  
127 4 1 589 1 587 1.40E-258 900.2 29159 cellular

organisms;Eukaryota;Opisthokonta;Metazoa;Eumetazoa;Bilateria;Protostomia;Spiralia;Lophotrochozoa;Mollusca;Bivalvia;Autobranhia;Pteriormorphia;Ostreida;Ostreioidea;Ostreidae;Crassostrea;Crassostrea gigas

UdeM00000020601 6565 902.5 UdeM00000020601 XP\_022339759.1 81.7 541  
94 2 9 547 49 586 2.60E-259 902.5 6565 cellular

organisms;Eukaryota;Opisthokonta;Metazoa;Eumetazoa;Bilateria;Protostomia;Spiralia;Lophotrochozoa;Mollusca;Bivalvia;Autobranhia;Pteriormorphia;Ostreida;Ostreioidea;Ostreidae;Crassostrea;Crassostrea virginica

UdeM00000020602 46514 362.1 UdeM00000020602 XP\_038075667.1 39.6 538  
272 11 2 504 45 564 1.20E-96 362.1 46514 cellular

organisms;Eukaryota;Opisthokonta;Metazoa;Eumetazoa;Bilateria;Deuterostomia;Echinodermata;Eleutherozoa;Asterozoa;Asteroidea;Valvatacea;Valvatida;Asterinidae;Patiria;Patiria miniata

UdeM00000020603 1735272 1025.8 UdeM00000020603 XP\_041348381.1  
66.9 777 235 7 6 761 633 1408 2.80E-296 1025.8  
1735272 cellular

organisms;Eukaryota;Opisthokonta;Metazoa;Eumetazoa;Bilateria;Protostomia;Spiralia;Lophotrochozoa;Mollusca;Gastropoda;Neomphalina;Neomphaloidea;Peltopspiridae;Gigantopelta;Gigantopelta aegis

UdeM00000020604 6596 468 UdeM00000020604 XP\_045171850.1 61.6 370  
140 2 1 369 1 369 2.10E-128 468 6596 cellular

organisms;Eukaryota;Opisthokonta;Metazoa;Eumetazoa;Bilateria;Protostomia;Spiralia;Lophotrochozoa;Mollusca;Bivalvia;Autobranchia;Heteroconchia;Euherodonta;Imparidentia;Venerida;Veneroidea;Veneridae;Mercenaria;Mercenaria mercenaria

UdeM00000020605 6596 763.8 UdeM00000020605 XP\_045171855.1 87.3 408  
51 1 1 408 1 407 1.10E-217 763.8 6596 cellular

organisms;Eukaryota;Opisthokonta;Metazoa;Eumetazoa;Bilateria;Protostomia;Spiralia;Lophotrochozoa;Mollusca;Bivalvia;Autobranchia;Heteroconchia;Euherodonta;Imparidentia;Venerida;Veneroidea;Veneridae;Mercenaria;Mercenaria mercenaria

UdeM00000020606 29159 1885.5 UdeM00000020606 XP\_034304056.1 34.9  
3191 1901 54 1 3103 374 3477 0.00E+00 1885.5  
29159 cellular

organisms;Eukaryota;Opisthokonta;Metazoa;Eumetazoa;Bilateria;Protostomia;Spiralia;Lophotrochozoa;Mollusca;Bivalvia;Autobranchia;Pteriomorphia;Ostreida;Ostreoidea;Ostreidae;Crassostrea;Crassostrea gigas

UdeM00000020607 6596 995.3 UdeM00000020607 XP\_045182304.1 47.4 1069  
534 12 311 1364 5 1060 7.40E-287 995.3 6596 cellular

organisms;Eukaryota;Opisthokonta;Metazoa;Eumetazoa;Bilateria;Protostomia;Spiralia;Lophotrochozoa;Mollusca;Bivalvia;Autobranchia;Heteroconchia;Euherodonta;Imparidentia;Venerida;Veneroidea;Veneridae;Mercenaria;Mercenaria mercenaria

UdeM00000020608 6596 653.3 UdeM00000020608 XP\_045180549.1 45.6 734  
357 5 15 723 118 834 3.60E-184 653.3 6596 cellular

organisms;Eukaryota;Opisthokonta;Metazoa;Eumetazoa;Bilateria;Protostomia;Spiralia;Lophotrochozoa;Mollusca;Bivalvia;Autobranchia;Heteroconchia;Euherodonta;Imparidentia;Venerida;Veneroidea;Veneridae;Mercenaria;Mercenaria mercenaria

UdeM00000020609 6596 3099.7 UdeM00000020609 XP\_045180549.1 44.8  
3617 1880 39 1332 4911 2355 5890 0.00E+00 3099.7 6596  
cellular

organisms;Eukaryota;Opisthokonta;Metazoa;Eumetazoa;Bilateria;Protostomia;Spiralia;Lophotrochozoa;Mollusca;Bivalvia;Autobranchia;Heteroconchia;Euherodonta;Imparidentia;Venerida;Veneroidea;Veneridae;Mercenaria;Mercenaria mercenaria

UdeM00000020610 6596 3102.8 UdeM00000020610 XP\_045180549.1 44.9  
3600 1882 38 1332 4894 2355 5890 0.00E+00 3102.8 6596  
cellular

organisms;Eukaryota;Opisthokonta;Metazoa;Eumetazoa;Bilateria;Protostomia;Spiralia;Lophotrochozoa;Mollusca;Bivalvia;Autobranchia;Heteroconchia;Euherodonta;Imparidentia;Venerida;Veneroidea;Veneridae;Mercenaria;Mercenaria mercenaria

UdeM00000020611 6565 1906 UdeM00000020611 XP\_022322780.1 35 3193  
1922 59 1 3119 61 3174 0.00E+00 1906 6565 cellular

organisms;Eukaryota;Opisthokonta;Metazoa;Eumetazoa;Bilateria;Protostomia;Spiralia;Lophotrochozoa;Mollusca;Bivalvia;Autobranchia;Pteriomorphia;Ostreida;Ostreoidea;Ostreidae;Crassostrea;Crassostrea virginica

UdeM00000020612 6579 246.5 UdeM00000020612 XP\_033747431.1 79.3 140  
29 0 1 140 98 237 2.00E-62 246.5 6579 cellular

organisms;Eukaryota;Opisthokonta;Metazoa;Eumetazoa;Bilateria;Protostomia;Spiralia;Lophotrochozoa;Mollusca;Bivalvia;Autobranchia;Pteriomorphia;Pectinida;Pectinoidea;Pectinidae;Pecten;Pecten maximus

UdeM00000020613 6596 901.4 UdeM00000020613 XP\_045182304.1 44.2 1069  
534 14 366 1385 5 1060 1.50E-258 901.4 6596 cellular

organisms;Eukaryota;Opisthokonta;Metazoa;Eumetazoa;Bilateria;Protostomia;Spiralia;Lophotrochozoa;Mollusca;Bivalvia;Autobranchia;Heteroconchia;Euherodonta;Imparidentia;Venerida;Veneroidea;Veneridae;Mercenaria;Mercenaria mercenaria

UdeM00000020614 6596 3628.6 UdeM00000020614 XP\_045180549.1 38.2  
5965 2753 54 120 5349 27 5793 0.00E+00 3628.6 6596  
cellular

organisms;Eukaryota;Opisthokonta;Metazoa;Eumetazoa;Bilateria;Protostomia;Spiralia;Lophotrochozoa;Mollusca;Bivalvia;Autobranchia;Heteroconchia;Euherodonta;Imparidentia;Venerida;Veneroidea;Veneridae;Mercenaria;Mercenaria mercenaria

UdeM00000020615 6596 786.6 UdeM00000020615 XP\_045164123.1 36 1255  
751 19 3 1218 99 1340 4.70E-224 786.6 6596 cellular

organisms;Eukaryota;Opisthokonta;Metazoa;Eumetazoa;Bilateria;Protostomia;Spiralia;Lophotrochozoa;Mollusca;Bivalvia;Autobranchia;Heteroconchia;Euherodonta;Imparidentia;Venerida;Veneroidea;Veneridae;Mercenaria;Mercenaria mercenaria

UdeM00000020616 29159 1130.9 UdeM00000020616 XP\_034304056.1 34.6  
1905 1131 36 1 1857 374 2211 0.00E+00 1130.9  
29159 cellular

organisms;Eukaryota;Opisthokonta;Metazoa;Eumetazoa;Bilateria;Protostomia;Spiralia;Lophotrochozoa;Mollusca;Bivalvia;Autobranchia;Pteriomorphia;Ostreida;Ostreoidea;Ostreidae;Crassostrea;Crassostrea gigas

UdeM00000020617 6573 438.3 UdeM00000020617 XP\_021373114.1 83.3 234  
39 0 2 235 4 237 6.00E-120 438.3 6573 cellular

organisms;Eukaryota;Opisthokonta;Metazoa;Eumetazoa;Bilateria;Protostomia;Spiralia;Lophotrochozoa;Mollusca;Bivalvia;Autobranchia;Pteriomorphia;Pectinida;Pectinoidea;Pectinidae;Mizuhopecten;Mizuhopecten yessoensis

UdeM00000020619 225164 62.4 UdeM00000020619 XP\_009053990.1 48.3  
60 31 0 14 73 1 60 2.90E-07 62.4 225164  
cellular

organisms;Eukaryota;Opisthokonta;Metazoa;Eumetazoa;Bilateria;Protostomia;Spiralia;Lophotrochozoa;Mollusca;Gastropoda;Patellogastropoda;Lottiidae;Lottia;Lottia gigantea

UdeM00000020620 6596 671 UdeM00000020620 XP\_045173785.1 62.2 524  
195 3 1 523 95 616 1.20E-189 671 6596 cellular

organisms;Eukaryota;Opisthokonta;Metazoa;Eumetazoa;Bilateria;Protostomia;Spiralia;Lophotrochozoa;Mollusca;Bivalvia;Autobranchia;Heteroconchia;Euherodonta;Imparidentia;Venerida;Veneroidea;Veneridae;Mercenaria;Mercenaria mercenaria

UdeM00000020621 6596 97.4 UdeM00000020621 XP\_045169614.1 24 371  
259 11 152 511 366 724 5.60E-17 97.4 6596 cellular

organisms;Eukaryota;Opisthokonta;Metazoa;Eumetazoa;Bilateria;Protostomia;Spiralia;Lophotrochozoa;Mollusca;Bivalvia;Autobranchia;Pteriomorphia;Pectinida;Pectinoidea;Pectinidae;Pecten;Pecten maximus

UdeM00000020623 6579 169.9 UdeM00000020623 XP\_033747727.1 37.1 280  
162 6 195 465 20 294 7.90E-39 169.9 6579 cellular

organisms;Eukaryota;Opisthokonta;Metazoa;Eumetazoa;Bilateria;Protostomia;Spiralia;Lophotrochozoa;Mollusca;Bivalvia;Autobranchia;Pteriomorphia;Pectinida;Pectinoidea;Pectinidae;Pecten;Pecten maximus

UdeM00000020624 29159 114.8 UdeM00000020624 XP\_011455035.3 49 100  
51 0 44 143 84 183 9.50E-23 114.8 29159 cellular

organisms;Eukaryota;Opisthokonta;Metazoa;Eumetazoa;Bilateria;Protostomia;

Spiralia;Lophotrochozoa;Mollusca;Bivalvia;Autobranchia;Pteriormorphia;Ostr  
 eida;Ostreoidea;Ostreidae;Crassostrea;Crassostrea gigas  
 UdeM00000020625 6579 327.4 UdeM00000020625 XP\_033747900.1 65.7 265  
 88 2 1 262 5 269 1.70E-86 327.4 6579 cellular  
 organisms;Eukaryota;Opisthokonta;Metazoa;Eumetazoa;Bilateria;Protostomia;  
 Spiralia;Lophotrochozoa;Mollusca;Bivalvia;Autobranchia;Pteriormorphia;Pect  
 inida;Pectinoidea;Pectinidae;Pecten;Pecten maximus  
 UdeM00000020626 6579 130.2 UdeM00000020626 XP\_033747899.1 68.5 92  
 28 1 1 92 1 91 3.30E-27 130.2 6579 cellular  
 organisms;Eukaryota;Opisthokonta;Metazoa;Eumetazoa;Bilateria;Protostomia;  
 Spiralia;Lophotrochozoa;Mollusca;Bivalvia;Autobranchia;Pteriormorphia;Pect  
 inida;Pectinoidea;Pectinidae;Pecten;Pecten maximus  
 UdeM00000020627 6579 134.8 UdeM00000020627 XP\_033747899.1 69.2 91  
 28 0 1 91 1 91 1.30E-28 134.8 6579 cellular  
 organisms;Eukaryota;Opisthokonta;Metazoa;Eumetazoa;Bilateria;Protostomia;  
 Spiralia;Lophotrochozoa;Mollusca;Bivalvia;Autobranchia;Pteriormorphia;Pect  
 inida;Pectinoidea;Pectinidae;Pecten;Pecten maximus  
 UdeM00000020628 7574 119 UdeM00000020628 XP\_023932112.1 55.3 103  
 45 1 3 105 236 337 6.20E-24 119 7574 cellular  
 organisms;Eukaryota;Opisthokonta;Metazoa;Eumetazoa;Bilateria;Protostomia;  
 Spiralia;Lophotrochozoa;Brachiopoda;Linguliformea;Lingulata;Lingulida;Lin  
 guloidea;Lingulidae;Lingula;Lingula anatina  
 UdeM00000020629 6573 221.1 UdeM00000020629 XP\_021364724.1 49.4 253  
 117 4 4 248 1 250 1.60E-54 221.1 6573 cellular  
 organisms;Eukaryota;Opisthokonta;Metazoa;Eumetazoa;Bilateria;Protostomia;  
 Spiralia;Lophotrochozoa;Mollusca;Bivalvia;Autobranchia;Pteriormorphia;Pect  
 inida;Pectinoidea;Pectinidae;Mizuhopecten;Mizuhopecten yessoensis  
 UdeM00000020630 6596 515 UdeM00000020630 XP\_045172358.1 56 423  
 184 1 8 428 11 433 9.20E-143 515 6596 cellular  
 organisms;Eukaryota;Opisthokonta;Metazoa;Eumetazoa;Bilateria;Protostomia;  
 Spiralia;Lophotrochozoa;Mollusca;Bivalvia;Autobranchia;Heteroconchia;Euhe  
 terodonta;Imparidentia;Venerida;Veneroidea;Veneridae;Mercenaria;Mercenari  
 a mercenaria  
 UdeM00000020631 6596 60.1 UdeM00000020631 XP\_045173453.1 28.3 173  
 103 7 52 210 467 632 6.60E-06 60.1 6596 cellular  
 organisms;Eukaryota;Opisthokonta;Metazoa;Eumetazoa;Bilateria;Protostomia;  
 Spiralia;Lophotrochozoa;Mollusca;Bivalvia;Autobranchia;Heteroconchia;Euhe  
 terodonta;Imparidentia;Venerida;Veneroidea;Veneridae;Mercenaria;Mercenari  
 a mercenaria  
 UdeM00000020632 6596 71.2 UdeM00000020632 XP\_045173453.1 25 216  
 151 6 62 272 455 664 3.50E-09 71.2 6596 cellular  
 organisms;Eukaryota;Opisthokonta;Metazoa;Eumetazoa;Bilateria;Protostomia;  
 Spiralia;Lophotrochozoa;Mollusca;Bivalvia;Autobranchia;Heteroconchia;Euhe  
 terodonta;Imparidentia;Venerida;Veneroidea;Veneridae;Mercenaria;Mercenari  
 a mercenaria  
 UdeM00000020633 6596 89.7 UdeM00000020633 XP\_045173453.1 46.5 101  
 40 1 1 87 13 113 2.90E-15 89.7 6596 cellular  
 organisms;Eukaryota;Opisthokonta;Metazoa;Eumetazoa;Bilateria;Protostomia;  
 Spiralia;Lophotrochozoa;Mollusca;Bivalvia;Autobranchia;Heteroconchia;Euhe  
 terodonta;Imparidentia;Venerida;Veneroidea;Veneridae;Mercenaria;Mercenari  
 a mercenaria  
 UdeM00000020634 6596 88.2 UdeM00000020634 XP\_045173453.1 43.2 139  
 41 5 1 114 13 138 3.30E-14 88.2 6596 cellular  
 organisms;Eukaryota;Opisthokonta;Metazoa;Eumetazoa;Bilateria;Protostomia;

Spiralia;Lophotrochozoa;Mollusca;Bivalvia;Autobranchia;Heteroconchia;Euherodonta;Imparidentia;Venerida;Veneroidea;Veneridae;Mercenaria;Mercenaria mercenaria

UdeM00000020635 6596 100.1 UdeM00000020635 XP\_045173453.1 53.1 98  
35 2 27 122 37 125 8.60E-18 100.1 6596 cellular

organisms;Eukaryota;Opisthokonta;Metazoa;Eumetazoa;Bilateria;Protostomia;Spiralia;Lophotrochozoa;Mollusca;Bivalvia;Autobranchia;Heteroconchia;Euherodonta;Imparidentia;Venerida;Veneroidea;Veneridae;Mercenaria;Mercenaria mercenaria

UdeM00000020636 6596 94.4 UdeM00000020636 XP\_045173453.1 56.8 81  
26 1 3 83 54 125 4.20E-16 94.4 6596 cellular

organisms;Eukaryota;Opisthokonta;Metazoa;Eumetazoa;Bilateria;Protostomia;Spiralia;Lophotrochozoa;Mollusca;Bivalvia;Autobranchia;Heteroconchia;Euherodonta;Imparidentia;Venerida;Veneroidea;Veneridae;Mercenaria;Mercenaria mercenaria

UdeM00000020637 6573 184.9 UdeM00000020637 XP\_021346336.1 87.4 103  
13 0 71 173 67 169 8.80E-44 184.9 6573 cellular

organisms;Eukaryota;Opisthokonta;Metazoa;Eumetazoa;Bilateria;Protostomia;Spiralia;Lophotrochozoa;Mollusca;Bivalvia;Autobranchia;Pteriomorphia;Pectinida;Pectinoidea;Pectinidae;Mizuhopecten;Mizuhopecten yessoensis

UdeM00000020638 29159 519.2 UdeM00000020638 XP\_011414296.2 59.5 484  
186 6 1 478 1 480 5.40E-144 519.2 29159 cellular

organisms;Eukaryota;Opisthokonta;Metazoa;Eumetazoa;Bilateria;Protostomia;Spiralia;Lophotrochozoa;Mollusca;Bivalvia;Autobranchia;Pteriomorphia;Ostreida;Ostreoidea;Ostreidae;Crassostrea;Crassostrea gigas

UdeM00000020639 6596 209.1 UdeM00000020639 XP\_045165713.1 32.5 403  
244 5 17 406 5 392 1.00E-50 209.1 6596 cellular

organisms;Eukaryota;Opisthokonta;Metazoa;Eumetazoa;Bilateria;Protostomia;Spiralia;Lophotrochozoa;Mollusca;Bivalvia;Autobranchia;Heteroconchia;Euherodonta;Imparidentia;Venerida;Veneroidea;Veneridae;Mercenaria;Mercenaria mercenaria

UdeM00000020640 6596 217.2 UdeM00000020640 XP\_045165713.1 33.7 404  
238 6 17 406 5 392 3.80E-53 217.2 6596 cellular

organisms;Eukaryota;Opisthokonta;Metazoa;Eumetazoa;Bilateria;Protostomia;Spiralia;Lophotrochozoa;Mollusca;Bivalvia;Autobranchia;Heteroconchia;Euherodonta;Imparidentia;Venerida;Veneroidea;Veneridae;Mercenaria;Mercenaria mercenaria

UdeM00000020641 6596 321.2 UdeM00000020641 XP\_045173661.1 50.3 300  
135 5 1 294 6 297 1.30E-84 321.2 6596 cellular

organisms;Eukaryota;Opisthokonta;Metazoa;Eumetazoa;Bilateria;Protostomia;Spiralia;Lophotrochozoa;Mollusca;Bivalvia;Autobranchia;Heteroconchia;Euherodonta;Imparidentia;Venerida;Veneroidea;Veneridae;Mercenaria;Mercenaria mercenaria

UdeM00000020642 6596 521.9 UdeM00000020642 XP\_045170742.1 56.6 807  
243 21 8 788 1685 2410 1.90E-144 521.9 6596 cellular

organisms;Eukaryota;Opisthokonta;Metazoa;Eumetazoa;Bilateria;Protostomia;Spiralia;Lophotrochozoa;Mollusca;Bivalvia;Autobranchia;Heteroconchia;Euherodonta;Imparidentia;Venerida;Veneroidea;Veneridae;Mercenaria;Mercenaria mercenaria

UdeM00000020643 6565 1644.8 UdeM00000020643 XP\_022342501.1 56.3  
2187 716 30 39 2129 10 2053 0.00E+00 1644.8 6565

cellular organisms;Eukaryota;Opisthokonta;Metazoa;Eumetazoa;Bilateria;Protostomia;

Spiralia;Lophotrochozoa;Mollusca;Bivalvia;Autobranchia;Pteriomorpha;Ostr  
eida;Ostreoidea;Ostreidae;Crassostrea;Crassostrea virginica  
UdeM00000020644 6579 562 UdeM00000020644 XP\_033747229.1 52.6 504  
237 1 13 514 12 515 7.80E-157 562 6579 cellular  
organisms;Eukaryota;Opisthokonta;Metazoa;Eumetazoa;Bilateria;Protostomia;  
Spiralia;Lophotrochozoa;Mollusca;Bivalvia;Autobranchia;Pteriomorpha;Pect  
inida;Pectinoidea;Pectinidae;Pecten;Pecten maximus  
UdeM00000020647 6596 194.1 UdeM00000020647 XP\_045173231.1 42.8 215  
119 3 25 235 5 219 2.00E-46 194.1 6596 cellular  
organisms;Eukaryota;Opisthokonta;Metazoa;Eumetazoa;Bilateria;Protostomia;  
Spiralia;Lophotrochozoa;Mollusca;Bivalvia;Autobranchia;Heteroconchia;Euhe  
terodonta;Imparidentia;Venerida;Veneroidea;Veneridae;Mercenaria;Mercenari  
a mercenaria  
UdeM00000020646 6596 247.3 UdeM00000020646 XP\_045173231.1 45.7 254  
134 3 25 274 5 258 2.40E-62 247.3 6596 cellular  
organisms;Eukaryota;Opisthokonta;Metazoa;Eumetazoa;Bilateria;Protostomia;  
Spiralia;Lophotrochozoa;Mollusca;Bivalvia;Autobranchia;Heteroconchia;Euhe  
terodonta;Imparidentia;Venerida;Veneroidea;Veneridae;Mercenaria;Mercenari  
a mercenaria  
UdeM00000020648 218467 177.2 UdeM00000020648 XP\_023220759.1 41.8  
256 114 4 1 224 421 673 2.40E-41 177.2 218467  
cellular  
organisms;Eukaryota;Opisthokonta;Metazoa;Eumetazoa;Bilateria;Protostomia;  
Ecdysozoa;Panarthropoda;Arthropoda;Chelicerata;Arachnida;Scorpiones;Buthi  
da;Buthoidea;Buthidae;Centruroides;Centruroides sculpturatus  
UdeM00000020649 37621 62 UdeM00000020649 XP\_014679680.1 54.2 48  
22 0 3 50 2 49 3.80E-07 62 37621 cellular  
organisms;Eukaryota;Opisthokonta;Metazoa;Eumetazoa;Bilateria;Protostomia;  
Ecdysozoa;Scalidophora;Priapulida;Priapulimorpha;Priapulimorphida;Priapul  
idae;Priapululus;Priapululus caudatus  
UdeM00000020650 6596 156 UdeM00000020650 XP\_045172728.1 33.4 314  
200 6 33 337 38 351 8.60E-35 156 6596 cellular  
organisms;Eukaryota;Opisthokonta;Metazoa;Eumetazoa;Bilateria;Protostomia;  
Spiralia;Lophotrochozoa;Mollusca;Bivalvia;Autobranchia;Heteroconchia;Euhe  
terodonta;Imparidentia;Venerida;Veneroidea;Veneridae;Mercenaria;Mercenari  
a mercenaria  
UdeM00000020651 6579 178.7 UdeM00000020651 XP\_033736448.1 39.4 251  
125 6 1 224 29 279 8.20E-42 178.7 6579 cellular  
organisms;Eukaryota;Opisthokonta;Metazoa;Eumetazoa;Bilateria;Protostomia;  
Spiralia;Lophotrochozoa;Mollusca;Bivalvia;Autobranchia;Pteriomorpha;Pect  
inida;Pectinoidea;Pectinidae;Pecten;Pecten maximus  
UdeM00000020652 29159 466.1 UdeM00000020652 XP\_034311318.1 39.5 684  
377 17 22 688 1 664 8.70E-128 466.1 29159 cellular  
organisms;Eukaryota;Opisthokonta;Metazoa;Eumetazoa;Bilateria;Protostomia;  
Spiralia;Lophotrochozoa;Mollusca;Bivalvia;Autobranchia;Pteriomorpha;Ostr  
eida;Ostreoidea;Ostreidae;Crassostrea;Crassostrea gigas  
UdeM00000020653 6596 1650.6 UdeM00000020653 XP\_045172072.1 69.4  
1116 336 3 1 1115 1 1112 0.00E+00 1650.6 6596  
cellular  
organisms;Eukaryota;Opisthokonta;Metazoa;Eumetazoa;Bilateria;Protostomia;  
Spiralia;Lophotrochozoa;Mollusca;Bivalvia;Autobranchia;Heteroconchia;Euhe  
terodonta;Imparidentia;Venerida;Veneroidea;Veneridae;Mercenaria;Mercenari  
a mercenaria

UdeM00000020654 6596 232.6 UdeM00000020654 XP\_045172136.1 60.4 187  
 73 1 1 187 1 186 4.00E-58 232.6 6596 cellular  
 organisms;Eukaryota;Opisthokonta;Metazoa;Eumetazoa;Bilateria;Protostomia;  
 Spiralia;Lophotrochozoa;Mollusca;Bivalvia;Autobranhia;Heteroconchia;Euhe  
 terodonta;Imparidentia;Venerida;Veneroidea;Veneridae;Mercenaria;Mercenari  
 a mercenaria  
 UdeM00000020655 6596 624.8 UdeM00000020655 XP\_045173257.1 69.3 436  
 122 1 12 447 39 462 8.60E-176 624.8 6596 cellular  
 organisms;Eukaryota;Opisthokonta;Metazoa;Eumetazoa;Bilateria;Protostomia;  
 Spiralia;Lophotrochozoa;Mollusca;Bivalvia;Autobranhia;Heteroconchia;Euhe  
 terodonta;Imparidentia;Venerida;Veneroidea;Veneridae;Mercenaria;Mercenari  
 a mercenaria  
 UdeM00000020656 7868 417.2 UdeM00000020656 XP\_007894695.1 84 262  
 34 2 1 262 1 254 1.60E-113 417.2 7868 cellular  
 organisms;Eukaryota;Opisthokonta;Metazoa;Eumetazoa;Bilateria;Deuterostomi  
 a;Chordata;Craniata;Vertebrata;Gnathostomata;Chondrichthyes;Holocephali;C  
 himaeriformes;Callorhinchidae;Callorhinchus;Callorhinchus milii  
 UdeM00000020657 7868 419.9 UdeM00000020657 XP\_007894695.1 85.2 257  
 35 1 1 257 1 254 2.40E-114 419.9 7868 cellular  
 organisms;Eukaryota;Opisthokonta;Metazoa;Eumetazoa;Bilateria;Deuterostomi  
 a;Chordata;Craniata;Vertebrata;Gnathostomata;Chondrichthyes;Holocephali;C  
 himaeriformes;Callorhinchidae;Callorhinchus;Callorhinchus milii  
 UdeM00000020658 114398 410.2 UdeM00000020658 XP\_015920196.1 85  
 254 30 2 1 246 1 254 1.80E-111 410.2 114398  
 cellular  
 organisms;Eukaryota;Opisthokonta;Metazoa;Eumetazoa;Bilateria;Protostomia;  
 Ecdysozoa;Panarthropoda;Arthropoda;Chelicerata;Arachnida;Araneae;Araneomo  
 rphae;Entelegynae;Orbiculariae;Araneoidea;Theridiidae;Parasteatoda;Parast  
 eatoda tepidariorum  
 UdeM00000020659 7868 384.4 UdeM00000020659 XP\_007894695.1 83.8 240  
 31 2 1 240 23 254 1.00E-103 384.4 7868 cellular  
 organisms;Eukaryota;Opisthokonta;Metazoa;Eumetazoa;Bilateria;Deuterostomi  
 a;Chordata;Craniata;Vertebrata;Gnathostomata;Chondrichthyes;Holocephali;C  
 himaeriformes;Callorhinchidae;Callorhinchus;Callorhinchus milii  
 UdeM00000020660 6596 693.3 UdeM00000020660 XP\_045173065.1 64.4 629  
 202 6 1 609 1 627 2.80E-196 693.3 6596 cellular  
 organisms;Eukaryota;Opisthokonta;Metazoa;Eumetazoa;Bilateria;Protostomia;  
 Spiralia;Lophotrochozoa;Mollusca;Bivalvia;Autobranhia;Heteroconchia;Euhe  
 terodonta;Imparidentia;Venerida;Veneroidea;Veneridae;Mercenaria;Mercenari  
 a mercenaria  
 UdeM00000020661 6596 695.3 UdeM00000020661 XP\_045173065.1 64.4 630  
 208 7 1 617 1 627 7.40E-197 695.3 6596 cellular  
 organisms;Eukaryota;Opisthokonta;Metazoa;Eumetazoa;Bilateria;Protostomia;  
 Spiralia;Lophotrochozoa;Mollusca;Bivalvia;Autobranhia;Heteroconchia;Euhe  
 terodonta;Imparidentia;Venerida;Veneroidea;Veneridae;Mercenaria;Mercenari  
 a mercenaria  
 UdeM00000020664 6596 138.7 UdeM00000020664 XP\_045170777.1 23.1 880  
 379 22 12 799 616 1289 3.70E-29 138.7 6596 cellular  
 organisms;Eukaryota;Opisthokonta;Metazoa;Eumetazoa;Bilateria;Protostomia;  
 Spiralia;Lophotrochozoa;Mollusca;Bivalvia;Autobranhia;Heteroconchia;Euhe  
 terodonta;Imparidentia;Venerida;Veneroidea;Veneridae;Mercenaria;Mercenari  
 a mercenaria  
 UdeM00000020665 400727 203.8 UdeM00000020665 XP\_025090249.1 77.7  
 121 26 1 1 121 2443 2562 1.30E-49 203.8 400727



cellular  
organisms;Eukaryota;Opisthokonta;Metazoa;Eumetazoa;Bilateria;Protostomia;  
Spiralia;Lophotrochozoa;Mollusca;Gastropoda;Caenogastropoda;Architaenioglossa;  
Ampullarioidea;Ampullariidae;Pomacea;Pomacea canaliculata  
UdeM00000020666 6596 145.6 UdeM00000020666 XP\_045171889.1 62.6 115  
40 2 2 114 433 546 5.50E-32 145.6 6596 cellular  
organisms;Eukaryota;Opisthokonta;Metazoa;Eumetazoa;Bilateria;Protostomia;  
Spiralia;Lophotrochozoa;Mollusca;Bivalvia;Autobranchia;Heteroconchia;Euherodonta;  
Imparidentia;Venerida;Veneroidea;Veneridae;Mercenaria;Mercenaria mercenaria  
UdeM00000020667 6596 859 UdeM00000020667 XP\_045171889.1 75.9 547  
129 2 1 545 1 546 3.60E-246 859 6596 cellular  
organisms;Eukaryota;Opisthokonta;Metazoa;Eumetazoa;Bilateria;Protostomia;  
Spiralia;Lophotrochozoa;Mollusca;Bivalvia;Autobranchia;Heteroconchia;Euherodonta;  
Imparidentia;Venerida;Veneroidea;Veneridae;Mercenaria;Mercenaria mercenaria  
UdeM00000020668 6579 602.1 UdeM00000020668 XP\_033747741.1 81.5 346  
63 1 11 355 20 365 5.00E-169 602.1 6579 cellular  
organisms;Eukaryota;Opisthokonta;Metazoa;Eumetazoa;Bilateria;Protostomia;  
Spiralia;Lophotrochozoa;Mollusca;Bivalvia;Autobranchia;Pteriormorphia;Pectinida;  
Pectinoidea;Pectinidae;Pecten;Pecten maximus  
UdeM00000020669 6579 597.4 UdeM00000020669 XP\_033747741.1 81.5 346  
62 2 11 354 20 365 1.20E-167 597.4 6579 cellular  
organisms;Eukaryota;Opisthokonta;Metazoa;Eumetazoa;Bilateria;Protostomia;  
Spiralia;Lophotrochozoa;Mollusca;Bivalvia;Autobranchia;Pteriormorphia;Pectinida;  
Pectinoidea;Pectinidae;Pecten;Pecten maximus  
UdeM00000020670 6596 245 UdeM00000020670 XP\_045171424.1 42.8 430  
205 10 14 418 308 721 1.70E-61 245 6596 cellular  
organisms;Eukaryota;Opisthokonta;Metazoa;Eumetazoa;Bilateria;Protostomia;  
Spiralia;Lophotrochozoa;Mollusca;Bivalvia;Autobranchia;Heteroconchia;Euherodonta;  
Imparidentia;Venerida;Veneroidea;Veneridae;Mercenaria;Mercenaria mercenaria  
UdeM00000020671 6596 67.4 UdeM00000020671 XP\_045172177.1 44.6 74  
34 2 114 182 67 138 2.20E-08 67.4 6596 cellular  
organisms;Eukaryota;Opisthokonta;Metazoa;Eumetazoa;Bilateria;Protostomia;  
Spiralia;Lophotrochozoa;Mollusca;Bivalvia;Autobranchia;Heteroconchia;Euherodonta;  
Imparidentia;Venerida;Veneroidea;Veneridae;Mercenaria;Mercenaria mercenaria  
UdeM00000020672 7739 140.2 UdeM00000020672 XP\_035661889.1 53 134  
57 3 1 133 155 283 2.10E-30 140.2 7739 cellular  
organisms;Eukaryota;Opisthokonta;Metazoa;Eumetazoa;Bilateria;Deuterostomia;  
Chordata;Cephalochordata;Leptocardii;Amphioxiformes;Branchiostomidae;Branchiostoma;  
Branchiostoma floridae  
UdeM00000020673 2607531 176 UdeM00000020673 XP\_029657877.2 42.4  
236 128 5 2 236 27 255 5.80E-41 176 2607531  
cellular  
organisms;Eukaryota;Opisthokonta;Metazoa;Eumetazoa;Bilateria;Protostomia;  
Spiralia;Lophotrochozoa;Mollusca;Cephalopoda;Coleoidea;Octopodiformes;Octopoda;  
Incirrata;Octopodidae;Octopus;Octopus sinensis  
UdeM00000020674 34638 171.4 UdeM00000020674 XP\_003739756.1 37.8 278  
141 10 13 265 4 274 1.60E-39 171.4 34638 cellular  
organisms;Eukaryota;Opisthokonta;Metazoa;Eumetazoa;Bilateria;Protostomia;  
Ecdysozoa;Panarthropoda;Arthropoda;Chelicerata;Arachnida;Acari;Parasitiformes

rmes;Mesostigmata;Monogynaspida;Gamasina;Phytoseioidea;Phytoseiidae;Typhlodrominae;Galendromus;Galendromus occidentalis

UdeM00000020675 108931 184.9 UdeM00000020675 XP\_039295486.1 39.7  
277 151 9 9 277 21 289 1.40E-43 184.9 108931  
cellular

organisms;Eukaryota;Opisthokonta;Metazoa;Eumetazoa;Bilateria;Protostomia;Ecdysozoa;Panarthropoda;Arthropoda;Mandibulata;Pancrustacea;Hexapoda;Insecta;Dicondylia;Pterygota;Neoptera;Paraneoptera;Hemiptera;Auchenorrhyncha;Fulgoromorpha;Fulgoroidea;Delphacidae;Delphacinae;Nilaparvata;Nilaparvatalugens

UdeM00000020676 310915 68.6 UdeM00000020676 XP\_026797117.2 37.4  
115 54 3 11 122 25 124 6.50E-09 68.6 310915  
cellular

organisms;Eukaryota;Opisthokonta;Metazoa;Eumetazoa;Bilateria;Deuterostomia;Chordata;Craniata;Vertebrata;Gnathostomata;Teleostomi;Euteleostomi;Actinopterygii;Actinopteri;Neopterygii;Teleostei;Osteoglossocephalai;Clupeocephala;Otomorpha;Ostariophysi;Otophysi;Characiphysae;Siluriformes;Siluridae;Pangasiidae;Pangasianodon;Pangasianodon hypophthalmus

UdeM00000020677 9031 145.2 UdeM00000020677 NP\_001006278.2 52.5 139  
57 3 8 141 126 260 6.80E-32 145.2 9031 cellular

organisms;Eukaryota;Opisthokonta;Metazoa;Eumetazoa;Bilateria;Deuterostomia;Chordata;Craniata;Vertebrata;Gnathostomata;Teleostomi;Euteleostomi;Sarcopterygii;Dipnotetrapodomorpha;Tetrapoda;Amniota;Sauropsida;Sauria;Archelosauria;Archosauria;Dinosauria;Saurischia;Theropoda;Coelurosauria;Aves;Neognathae;Galloanserae;Galliformes;Phasianidae;Phasianinae;Gallus;Gallus gallus

UdeM00000020678 108931 189.5 UdeM00000020678 XP\_039295486.1 40.4  
277 149 9 9 277 21 289 5.80E-45 189.5 108931  
cellular

organisms;Eukaryota;Opisthokonta;Metazoa;Eumetazoa;Bilateria;Protostomia;Ecdysozoa;Panarthropoda;Arthropoda;Mandibulata;Pancrustacea;Hexapoda;Insecta;Dicondylia;Pterygota;Neoptera;Paraneoptera;Hemiptera;Auchenorrhyncha;Fulgoromorpha;Fulgoroidea;Delphacidae;Delphacinae;Nilaparvata;Nilaparvatalugens

UdeM00000009668 6596 129.4 UdeM00000009668 XP\_045195413.1 30.7 257  
150 4 31 280 1163 1398 7.20E-27 129.4 6596 cellular

organisms;Eukaryota;Opisthokonta;Metazoa;Eumetazoa;Bilateria;Protostomia;Spiralia;Lophotrochozoa;Mollusca;Bivalvia;Autobranchia;Heteroconchia;Euheterodonta;Imparidentia;Venerida;Veneroidea;Veneridae;Mercenaria;Mercenaria mercenaria

UdeM00000009670 1735272 199.1 UdeM00000009670 XP\_041359638.1 37.6  
295 162 6 7 288 12 297 7.50E-48 199.1 1735272  
cellular

organisms;Eukaryota;Opisthokonta;Metazoa;Eumetazoa;Bilateria;Protostomia;Spiralia;Lophotrochozoa;Mollusca;Gastropoda;Neomphalina;Neomphaloidea;Peltospiridae;Gigantopelta;Gigantopelta aegis

UdeM00000009671 1735272 199.1 UdeM00000009671 XP\_041359638.1 37.6  
295 162 6 4 285 12 297 7.40E-48 199.1 1735272  
cellular

organisms;Eukaryota;Opisthokonta;Metazoa;Eumetazoa;Bilateria;Protostomia;Spiralia;Lophotrochozoa;Mollusca;Gastropoda;Neomphalina;Neomphaloidea;Peltospiridae;Gigantopelta;Gigantopelta aegis

UdeM00000009672 1735272 862.1 UdeM00000009672 XP\_041379319.1 55.7  
765 333 4 3 762 120 883 5.60E-247 862.1 1735272

cellular  
organisms;Eukaryota;Opisthokonta;Metazoa;Eumetazoa;Bilateria;Protostomia;  
Spiralia;Lophotrochozoa;Mollusca;Gastropoda;Neomphalina;Neomphaloidea;Pel  
tospiridae;Gigantopelta;Gigantopelta aegis  
UdeM00000009673 6596 132.1 UdeM00000009673 XP\_045198334.1 25.9 386  
247 14 105 477 572 931 1.90E-27 132.1 6596 cellular  
organisms;Eukaryota;Opisthokonta;Metazoa;Eumetazoa;Bilateria;Protostomia;  
Spiralia;Lophotrochozoa;Mollusca;Bivalvia;Autobranchia;Heteroconchia;Euhe  
terodonta;Imparidentia;Venerida;Veneroidea;Veneridae;Mercenaria;Mercenari  
a mercenaria  
UdeM00000009675 6565 58.5 UdeM00000009675 XP\_022287521.1 41.1 73  
43 0 2 74 313 385 5.40E-06 58.5 6565 cellular  
organisms;Eukaryota;Opisthokonta;Metazoa;Eumetazoa;Bilateria;Protostomia;  
Spiralia;Lophotrochozoa;Mollusca;Bivalvia;Autobranchia;Pteriormorphia;Ostr  
eida;Ostreoidea;Ostreidae;Crassostrea;Crassostrea virginica  
UdeM00000009676 6596 70.5 UdeM00000009676 XP\_045195413.1 27 315  
192 11 1 283 1 309 9.70E-09 70.5 6596 cellular  
organisms;Eukaryota;Opisthokonta;Metazoa;Eumetazoa;Bilateria;Protostomia;  
Spiralia;Lophotrochozoa;Mollusca;Bivalvia;Autobranchia;Heteroconchia;Euhe  
terodonta;Imparidentia;Venerida;Veneroidea;Veneridae;Mercenaria;Mercenari  
a mercenaria  
UdeM00000009677 6596 130.6 UdeM00000009677 XP\_045197117.1 52.4 126  
52 2 2 119 1 126 1.70E-27 130.6 6596 cellular  
organisms;Eukaryota;Opisthokonta;Metazoa;Eumetazoa;Bilateria;Protostomia;  
Spiralia;Lophotrochozoa;Mollusca;Bivalvia;Autobranchia;Heteroconchia;Euhe  
terodonta;Imparidentia;Venerida;Veneroidea;Veneridae;Mercenaria;Mercenari  
a mercenaria  
UdeM00000009678 6596 208.8 UdeM00000009678 XP\_045195413.1 48.3 236  
115 3 1 230 5427 5661 7.70E-51 208.8 6596 cellular  
organisms;Eukaryota;Opisthokonta;Metazoa;Eumetazoa;Bilateria;Protostomia;  
Spiralia;Lophotrochozoa;Mollusca;Bivalvia;Autobranchia;Heteroconchia;Euhe  
terodonta;Imparidentia;Venerida;Veneroidea;Veneridae;Mercenaria;Mercenari  
a mercenaria  
UdeM00000009679 6596 939.9 UdeM00000009679 XP\_045195413.1 48.6 1025  
488 14 2 996 4650 5665 2.70E-270 939.9 6596 cellular  
organisms;Eukaryota;Opisthokonta;Metazoa;Eumetazoa;Bilateria;Protostomia;  
Spiralia;Lophotrochozoa;Mollusca;Bivalvia;Autobranchia;Heteroconchia;Euhe  
terodonta;Imparidentia;Venerida;Veneroidea;Veneridae;Mercenaria;Mercenari  
a mercenaria  
UdeM00000009680 1735272 1110.9 UdeM00000009680 XP\_041373141.1  
50.2 1115 529 9 7 1105 12 1116 0.00E+00 1110.9  
1735272 cellular  
organisms;Eukaryota;Opisthokonta;Metazoa;Eumetazoa;Bilateria;Protostomia;  
Spiralia;Lophotrochozoa;Mollusca;Gastropoda;Neomphalina;Neomphaloidea;Pel  
tospiridae;Gigantopelta;Gigantopelta aegis  
UdeM00000009681 6596 585.5 UdeM00000009681 XP\_045195413.1 45.7 679  
338 11 34 695 3950 4614 9.00E-164 585.5 6596 cellular  
organisms;Eukaryota;Opisthokonta;Metazoa;Eumetazoa;Bilateria;Protostomia;  
Spiralia;Lophotrochozoa;Mollusca;Bivalvia;Autobranchia;Heteroconchia;Euhe  
terodonta;Imparidentia;Venerida;Veneroidea;Veneridae;Mercenaria;Mercenari  
a mercenaria  
UdeM00000009682 6596 2898.2 UdeM00000009682 XP\_045195413.1 53.1  
2818 1119 33 1 2652 1077 3858 0.00E+00 2898.2 6596  
cellular

organisms;Eukaryota;Opisthokonta;Metazoa;Eumetazoa;Bilateria;Protostomia;Spiralia;Lophotrochozoa;Mollusca;Bivalvia;Autobranhia;Heteroconchia;Euheterodonta;Imparidentia;Venerida;Veneroidea;Veneridae;Mercenaria;Mercenaria mercenaria

UdeM00000009683 6596 218.4 UdeM00000009683 XP\_045195418.1 29.8 493  
318 13 476 950 737 1219 4.00E-53 218.4 6596 cellular

organisms;Eukaryota;Opisthokonta;Metazoa;Eumetazoa;Bilateria;Protostomia;Spiralia;Lophotrochozoa;Mollusca;Bivalvia;Autobranhia;Heteroconchia;Euheterodonta;Imparidentia;Venerida;Veneroidea;Veneridae;Mercenaria;Mercenaria mercenaria

UdeM00000009684 6596 82.4 UdeM00000009684 XP\_045195419.1 27.8 248  
156 10 12 249 872 1106 8.90E-13 82.4 6596 cellular

organisms;Eukaryota;Opisthokonta;Metazoa;Eumetazoa;Bilateria;Protostomia;Spiralia;Lophotrochozoa;Mollusca;Bivalvia;Autobranhia;Heteroconchia;Euheterodonta;Imparidentia;Venerida;Veneroidea;Veneridae;Mercenaria;Mercenaria mercenaria

UdeM00000009685 6573 3082 UdeM00000009685 XP\_021363663.1 47.3 3674  
1565 57 557 4075 1995 5452 0.00E+00 3082 6573 cellular

organisms;Eukaryota;Opisthokonta;Metazoa;Eumetazoa;Bilateria;Protostomia;Spiralia;Lophotrochozoa;Mollusca;Bivalvia;Autobranhia;Pteriomorphia;Pectinida;Pectinoidea;Pectinidae;Mizuhopecten;Mizuhopecten yessoensis

UdeM00000009686 7574 115.5 UdeM00000009686 XP\_013410728.1 32.1 296  
155 7 228 487 56 341 1.90E-22 115.5 7574 cellular

organisms;Eukaryota;Opisthokonta;Metazoa;Eumetazoa;Bilateria;Protostomia;Spiralia;Lophotrochozoa;Brachiopoda;Linguliformea;Lingulata;Lingulida;Linguloidea;Lingulidae;Lingula;Lingula anatina

UdeM00000009687 7574 115.5 UdeM00000009687 XP\_013410728.1 32.1 296  
155 7 200 459 56 341 1.70E-22 115.5 7574 cellular

organisms;Eukaryota;Opisthokonta;Metazoa;Eumetazoa;Bilateria;Protostomia;Spiralia;Lophotrochozoa;Brachiopoda;Linguliformea;Lingulata;Lingulida;Linguloidea;Lingulidae;Lingula;Lingula anatina

UdeM00000009688 6573 576.6 UdeM00000009688 XP\_021363650.1 43.1 757  
395 11 22 767 1589 2320 4.70E-161 576.6 6573 cellular

organisms;Eukaryota;Opisthokonta;Metazoa;Eumetazoa;Bilateria;Protostomia;Spiralia;Lophotrochozoa;Mollusca;Bivalvia;Autobranhia;Pteriomorphia;Pectinida;Pectinoidea;Pectinidae;Mizuhopecten;Mizuhopecten yessoensis

UdeM00000009689 6596 129.4 UdeM00000009689 XP\_045195413.1 30.7 257  
150 4 31 280 1163 1398 7.20E-27 129.4 6596 cellular

organisms;Eukaryota;Opisthokonta;Metazoa;Eumetazoa;Bilateria;Protostomia;Spiralia;Lophotrochozoa;Mollusca;Bivalvia;Autobranhia;Heteroconchia;Euheterodonta;Imparidentia;Venerida;Veneroidea;Veneridae;Mercenaria;Mercenaria mercenaria

UdeM00000009691 1735272 199.1 UdeM00000009691 XP\_041359638.1 37.6  
295 162 6 7 288 12 297 7.50E-48 199.1 1735272 cellular

organisms;Eukaryota;Opisthokonta;Metazoa;Eumetazoa;Bilateria;Protostomia;Spiralia;Lophotrochozoa;Mollusca;Gastropoda;Neomphalina;Neomphaloidea;Peltospiridae;Gigantopelta;Gigantopelta aegis

UdeM00000009692 1735272 821.6 UdeM00000009692 XP\_041379319.1 58.2  
689 286 2 1 688 196 883 7.50E-235 821.6 1735272 cellular

organisms;Eukaryota;Opisthokonta;Metazoa;Eumetazoa;Bilateria;Protostomia;Spiralia;Lophotrochozoa;Mollusca;Gastropoda;Neomphalina;Neomphaloidea;Peltospiridae;Gigantopelta;Gigantopelta aegis

UdeM00000009693 6596 132.1 UdeM00000009693 XP\_045198334.1 25.9 386  
 247 14 105 477 572 931 1.90E-27 132.1 6596 cellular  
 organisms;Eukaryota;Opisthokonta;Metazoa;Eumetazoa;Bilateria;Protostomia;  
 Spiralia;Lophotrochozoa;Mollusca;Bivalvia;Autobranchia;Heteroconchia;Euhe  
 terodonta;Imparidentia;Venerida;Veneroidea;Veneridae;Mercenaria;Mercenari  
 a mercenaria  
 UdeM00000009695 6565 58.5 UdeM00000009695 XP\_022287521.1 41.1 73  
 43 0 2 74 313 385 5.40E-06 58.5 6565 cellular  
 organisms;Eukaryota;Opisthokonta;Metazoa;Eumetazoa;Bilateria;Protostomia;  
 Spiralia;Lophotrochozoa;Mollusca;Bivalvia;Autobranchia;Pteriormorphia;Ostr  
 eida;Ostreoidea;Ostreidae;Crassostrea;Crassostrea virginica  
 UdeM00000009696 6596 70.5 UdeM00000009696 XP\_045195413.1 27 315  
 192 11 1 283 1 309 9.70E-09 70.5 6596 cellular  
 organisms;Eukaryota;Opisthokonta;Metazoa;Eumetazoa;Bilateria;Protostomia;  
 Spiralia;Lophotrochozoa;Mollusca;Bivalvia;Autobranchia;Heteroconchia;Euhe  
 terodonta;Imparidentia;Venerida;Veneroidea;Veneridae;Mercenaria;Mercenari  
 a mercenaria  
 UdeM00000009697 6596 130.6 UdeM00000009697 XP\_045197117.1 52.4 126  
 52 2 2 119 1 126 1.70E-27 130.6 6596 cellular  
 organisms;Eukaryota;Opisthokonta;Metazoa;Eumetazoa;Bilateria;Protostomia;  
 Spiralia;Lophotrochozoa;Mollusca;Bivalvia;Autobranchia;Heteroconchia;Euhe  
 terodonta;Imparidentia;Venerida;Veneroidea;Veneridae;Mercenaria;Mercenari  
 a mercenaria  
 UdeM00000009698 6596 208.8 UdeM00000009698 XP\_045195413.1 48.3 236  
 115 3 1 230 5427 5661 7.70E-51 208.8 6596 cellular  
 organisms;Eukaryota;Opisthokonta;Metazoa;Eumetazoa;Bilateria;Protostomia;  
 Spiralia;Lophotrochozoa;Mollusca;Bivalvia;Autobranchia;Heteroconchia;Euhe  
 terodonta;Imparidentia;Venerida;Veneroidea;Veneridae;Mercenaria;Mercenari  
 a mercenaria  
 UdeM00000009699 6596 939.9 UdeM00000009699 XP\_045195413.1 48.6 1025  
 488 14 2 996 4650 5665 2.70E-270 939.9 6596 cellular  
 organisms;Eukaryota;Opisthokonta;Metazoa;Eumetazoa;Bilateria;Protostomia;  
 Spiralia;Lophotrochozoa;Mollusca;Bivalvia;Autobranchia;Heteroconchia;Euhe  
 terodonta;Imparidentia;Venerida;Veneroidea;Veneridae;Mercenaria;Mercenari  
 a mercenaria  
 UdeM00000009700 1735272 1110.9 UdeM00000009700 XP\_041373141.1  
 50.2 1115 529 9 7 1105 12 1116 0.00E+00 1110.9  
 1735272 cellular  
 organisms;Eukaryota;Opisthokonta;Metazoa;Eumetazoa;Bilateria;Protostomia;  
 Spiralia;Lophotrochozoa;Mollusca;Gastropoda;Neomphalina;Neomphaloidea;Pel  
 tospiridae;Gigantopelta;Gigantopelta aegis  
 UdeM00000009701 6596 585.5 UdeM00000009701 XP\_045195413.1 45.7 679  
 338 11 34 695 3950 4614 9.00E-164 585.5 6596 cellular  
 organisms;Eukaryota;Opisthokonta;Metazoa;Eumetazoa;Bilateria;Protostomia;  
 Spiralia;Lophotrochozoa;Mollusca;Bivalvia;Autobranchia;Heteroconchia;Euhe  
 terodonta;Imparidentia;Venerida;Veneroidea;Veneridae;Mercenaria;Mercenari  
 a mercenaria  
 UdeM00000009702 6596 2899.4 UdeM00000009702 XP\_045195413.1 53.2  
 2818 1118 33 1 2652 1077 3858 0.00E+00 2899.4 6596  
 cellular  
 organisms;Eukaryota;Opisthokonta;Metazoa;Eumetazoa;Bilateria;Protostomia;  
 Spiralia;Lophotrochozoa;Mollusca;Bivalvia;Autobranchia;Heteroconchia;Euhe  
 terodonta;Imparidentia;Venerida;Veneroidea;Veneridae;Mercenaria;Mercenari  
 a mercenaria

UdeM00000009703 6596 218.8 UdeM00000009703 XP\_045195418.1 29.8 493  
 318 13 476 950 737 1219 3.10E-53 218.8 6596 cellular  
 organisms;Eukaryota;Opisthokonta;Metazoa;Eumetazoa;Bilateria;Protostomia;  
 Spiralia;Lophotrochozoa;Mollusca;Bivalvia;Autobranchia;Heteroconchia;Euhe  
 terodonta;Imparidentia;Venerida;Veneroidea;Veneridae;Mercenaria;Mercenari  
 a mercenaria  
 UdeM00000009704 6596 218.8 UdeM00000009704 XP\_045195418.1 29.8 493  
 318 13 476 950 737 1219 3.10E-53 218.8 6596 cellular  
 organisms;Eukaryota;Opisthokonta;Metazoa;Eumetazoa;Bilateria;Protostomia;  
 Spiralia;Lophotrochozoa;Mollusca;Bivalvia;Autobranchia;Heteroconchia;Euhe  
 terodonta;Imparidentia;Venerida;Veneroidea;Veneridae;Mercenaria;Mercenari  
 a mercenaria  
 UdeM00000009706 6596 82.4 UdeM00000009706 XP\_045195419.1 27.8 248  
 156 10 12 249 872 1106 8.90E-13 82.4 6596 cellular  
 organisms;Eukaryota;Opisthokonta;Metazoa;Eumetazoa;Bilateria;Protostomia;  
 Spiralia;Lophotrochozoa;Mollusca;Bivalvia;Autobranchia;Heteroconchia;Euhe  
 terodonta;Imparidentia;Venerida;Veneroidea;Veneridae;Mercenaria;Mercenari  
 a mercenaria  
 UdeM00000009705 6596 109.4 UdeM00000009705 XP\_045198336.1 42.9 119  
 67 1 5 122 578 696 4.30E-21 109.4 6596 cellular  
 organisms;Eukaryota;Opisthokonta;Metazoa;Eumetazoa;Bilateria;Protostomia;  
 Spiralia;Lophotrochozoa;Mollusca;Bivalvia;Autobranchia;Heteroconchia;Euhe  
 terodonta;Imparidentia;Venerida;Veneroidea;Veneridae;Mercenaria;Mercenari  
 a mercenaria  
 UdeM00000009707 6596 2002.3 UdeM00000009707 XP\_045195413.1 45.3  
 2468 1177 44 7 2362 3258 5664 0.00E+00 2002.3 6596  
 cellular  
 organisms;Eukaryota;Opisthokonta;Metazoa;Eumetazoa;Bilateria;Protostomia;  
 Spiralia;Lophotrochozoa;Mollusca;Bivalvia;Autobranchia;Heteroconchia;Euhe  
 terodonta;Imparidentia;Venerida;Veneroidea;Veneridae;Mercenaria;Mercenari  
 a mercenaria  
 UdeM00000009708 6596 1335.5 UdeM00000009708 XP\_045198333.1 58.5  
 1152 383 9 1 1134 2181 3255 0.00E+00 1335.5 6596  
 cellular  
 organisms;Eukaryota;Opisthokonta;Metazoa;Eumetazoa;Bilateria;Protostomia;  
 Spiralia;Lophotrochozoa;Mollusca;Bivalvia;Autobranchia;Heteroconchia;Euhe  
 terodonta;Imparidentia;Venerida;Veneroidea;Veneridae;Mercenaria;Mercenari  
 a mercenaria  
 UdeM00000009709 6565 89.7 UdeM00000009709 XP\_022293483.1 59.4 69  
 28 0 9 77 2160 2228 2.60E-15 89.7 6565 cellular  
 organisms;Eukaryota;Opisthokonta;Metazoa;Eumetazoa;Bilateria;Protostomia;  
 Spiralia;Lophotrochozoa;Mollusca;Bivalvia;Autobranchia;Pteriomorphia;Ostr  
 eida;Ostreoidea;Ostreidae;Crassostrea;Crassostrea virginica  
 UdeM00000009710 215358 197.2 UdeM00000009710 XP\_027138606.1 47  
 202 101 3 71 268 206 405 2.70E-47 197.2 215358  
 cellular  
 organisms;Eukaryota;Opisthokonta;Metazoa;Eumetazoa;Bilateria;Deuterostomi  
 a;Chordata;Craniata;Vertebrata;Gnathostomata;Teleostomi;Euteleostomi;Acti  
 nopterygii;Actinopteri;Neopterygii;Teleostei;Osteoglossocephalai;Clupeoce  
 phala;Euteleostei;Neoteleostei;Eurypterygia;Ctenosquamata;Acanthomo  
 rphata;Euacanthomorphacea;Percomorphaceae;Eupercaria;Eupercaria incertae  
 sedis;Sciaenidae;Larimichthys;Larimichthys crocea  
 UdeM00000009711 6596 718.4 UdeM00000009711 XP\_045195413.1 32.4 1574  
 856 40 85 1512 587 2098 1.90E-203 718.4 6596 cellular

organisms;Eukaryota;Opisthokonta;Metazoa;Eumetazoa;Bilateria;Protostomia;Spiralia;Lophotrochozoa;Mollusca;Bivalvia;Autobranchia;Heteroconchia;Euherodonta;Imparidentia;Venerida;Veneroidea;Veneridae;Mercenaria;Mercenaria mercenaria

UdeM00000009712 6596 64.7 UdeM00000009712 XP\_045195413.1 25.6 238  
163 6 1 230 1 232 5.40E-07 64.7 6596 cellular

organisms;Eukaryota;Opisthokonta;Metazoa;Eumetazoa;Bilateria;Protostomia;Spiralia;Lophotrochozoa;Mollusca;Bivalvia;Autobranchia;Heteroconchia;Euherodonta;Imparidentia;Venerida;Veneroidea;Veneridae;Mercenaria;Mercenaria mercenaria

UdeM00000009713 6596 253.1 UdeM00000009713 XP\_045197117.1 54 248  
99 3 2 241 1 241 3.90E-64 253.1 6596 cellular

organisms;Eukaryota;Opisthokonta;Metazoa;Eumetazoa;Bilateria;Protostomia;Spiralia;Lophotrochozoa;Mollusca;Bivalvia;Autobranchia;Heteroconchia;Euherodonta;Imparidentia;Venerida;Veneroidea;Veneridae;Mercenaria;Mercenaria mercenaria

UdeM00000009715 6565 144.4 UdeM00000009715 XP\_022310266.1 32.8 345  
205 10 1 337 1 326 2.60E-31 144.4 6565 cellular

organisms;Eukaryota;Opisthokonta;Metazoa;Eumetazoa;Bilateria;Protostomia;Spiralia;Lophotrochozoa;Mollusca;Bivalvia;Autobranchia;Pteriomorphia;Ostreida;Ostreoidea;Ostreidae;Crassostrea;Crassostrea virginica

UdeM00000009714 6565 144.1 UdeM00000009714 XP\_022310266.1 32.8 345  
205 10 32 368 1 326 3.70E-31 144.1 6565 cellular

organisms;Eukaryota;Opisthokonta;Metazoa;Eumetazoa;Bilateria;Protostomia;Spiralia;Lophotrochozoa;Mollusca;Bivalvia;Autobranchia;Pteriomorphia;Ostreida;Ostreoidea;Ostreidae;Crassostrea;Crassostrea virginica

UdeM00000009716 6596 200.3 UdeM00000009716 XP\_045197116.1 37.5 277  
166 3 458 731 362 634 8.60E-48 200.3 6596 cellular

organisms;Eukaryota;Opisthokonta;Metazoa;Eumetazoa;Bilateria;Protostomia;Spiralia;Lophotrochozoa;Mollusca;Bivalvia;Autobranchia;Heteroconchia;Euherodonta;Imparidentia;Venerida;Veneroidea;Veneridae;Mercenaria;Mercenaria mercenaria

UdeM00000009717 6596 200.7 UdeM00000009717 XP\_045197116.1 37.5 277  
166 3 550 823 362 634 7.40E-48 200.7 6596 cellular

organisms;Eukaryota;Opisthokonta;Metazoa;Eumetazoa;Bilateria;Protostomia;Spiralia;Lophotrochozoa;Mollusca;Bivalvia;Autobranchia;Heteroconchia;Euherodonta;Imparidentia;Venerida;Veneroidea;Veneridae;Mercenaria;Mercenaria mercenaria

UdeM00000009719 6596 4144 UdeM00000009719 XP\_045198334.1 49.9 4438  
2048 64 635 4980 580 4932 0.00E+00 4144 6596 cellular

organisms;Eukaryota;Opisthokonta;Metazoa;Eumetazoa;Bilateria;Protostomia;Spiralia;Lophotrochozoa;Mollusca;Bivalvia;Autobranchia;Heteroconchia;Euherodonta;Imparidentia;Venerida;Veneroidea;Veneridae;Mercenaria;Mercenaria mercenaria

UdeM00000009718 6596 4753.3 UdeM00000009718 XP\_045198334.1 49.7  
5123 2370 72 635 5640 580 5612 0.00E+00 4753.3 6596  
cellular

organisms;Eukaryota;Opisthokonta;Metazoa;Eumetazoa;Bilateria;Protostomia;Spiralia;Lophotrochozoa;Mollusca;Bivalvia;Autobranchia;Heteroconchia;Euherodonta;Imparidentia;Venerida;Veneroidea;Veneridae;Mercenaria;Mercenaria mercenaria

UdeM00000009720 6596 660.2 UdeM00000009720 XP\_045195413.1 50.4 702  
318 8 3 679 4969 5665 2.80E-186 660.2 6596 cellular

organisms;Eukaryota;Opisthokonta;Metazoa;Eumetazoa;Bilateria;Protostomia;

Spiralia;Lophotrochozoa;Mollusca;Bivalvia;Autobranchia;Heteroconchia;Euherodonta;Imparidentia;Venerida;Veneroidea;Veneridae;Mercenaria;Mercenaria mercenaria

UdeM00000009721 6579 771.5 UdeM00000009721 XP\_033744278.1 53.3 720  
325 6 32 748 281 992 9.90E-220 771.5 6579 cellular

organisms;Eukaryota;Opisthokonta;Metazoa;Eumetazoa;Bilateria;Protostomia;Spiralia;Lophotrochozoa;Mollusca;Bivalvia;Autobranchia;Pteriomorpha;Pectinida;Pectinoidea;Pectinidae;Pecten;Pecten maximus

UdeM00000009722 6579 740.3 UdeM00000009722 XP\_033744278.1 52.7 698  
319 6 32 726 281 970 2.30E-210 740.3 6579 cellular

organisms;Eukaryota;Opisthokonta;Metazoa;Eumetazoa;Bilateria;Protostomia;Spiralia;Lophotrochozoa;Mollusca;Bivalvia;Autobranchia;Pteriomorpha;Pectinida;Pectinoidea;Pectinidae;Pecten;Pecten maximus

UdeM00000009723 6596 79 UdeM00000009723 XP\_045198290.1 39.2 97  
54 3 1 93 1 96 4.00E-12 79 6596 cellular

organisms;Eukaryota;Opisthokonta;Metazoa;Eumetazoa;Bilateria;Protostomia;Spiralia;Lophotrochozoa;Mollusca;Bivalvia;Autobranchia;Heteroconchia;Euherodonta;Imparidentia;Venerida;Veneroidea;Veneridae;Mercenaria;Mercenaria mercenaria

UdeM00000009725 6596 64.3 UdeM00000009725 XP\_045198334.1 29.2 192  
115 7 40 224 690 867 2.20E-07 64.3 6596 cellular

organisms;Eukaryota;Opisthokonta;Metazoa;Eumetazoa;Bilateria;Protostomia;Spiralia;Lophotrochozoa;Mollusca;Bivalvia;Autobranchia;Heteroconchia;Euherodonta;Imparidentia;Venerida;Veneroidea;Veneridae;Mercenaria;Mercenaria mercenaria

UdeM00000009727 6596 199.5 UdeM00000009727 XP\_045195413.1 56.8 183  
72 2 8 183 1646 1828 4.00E-48 199.5 6596 cellular

organisms;Eukaryota;Opisthokonta;Metazoa;Eumetazoa;Bilateria;Protostomia;Spiralia;Lophotrochozoa;Mollusca;Bivalvia;Autobranchia;Heteroconchia;Euherodonta;Imparidentia;Venerida;Veneroidea;Veneridae;Mercenaria;Mercenaria mercenaria

UdeM00000009728 6596 133.7 UdeM00000009728 XP\_045190091.1 37.1 237  
134 4 1 225 1 234 3.10E-28 133.7 6596 cellular

organisms;Eukaryota;Opisthokonta;Metazoa;Eumetazoa;Bilateria;Protostomia;Spiralia;Lophotrochozoa;Mollusca;Bivalvia;Autobranchia;Heteroconchia;Euherodonta;Imparidentia;Venerida;Veneroidea;Veneridae;Mercenaria;Mercenaria mercenaria

UdeM00000009729 6573 466.1 UdeM00000009729 XP\_021363663.1 42.7 620  
299 9 23 631 1688 2262 7.50E-128 466.1 6573 cellular

organisms;Eukaryota;Opisthokonta;Metazoa;Eumetazoa;Bilateria;Protostomia;Spiralia;Lophotrochozoa;Mollusca;Bivalvia;Autobranchia;Pteriomorpha;Pectinida;Pectinoidea;Pectinidae;Mizuhopecten;Mizuhopecten yessoensis

UdeM00000009730 6596 408.3 UdeM00000009730 XP\_045198333.1 56.4 360  
150 4 65 418 2396 2754 1.20E-110 408.3 6596 cellular

organisms;Eukaryota;Opisthokonta;Metazoa;Eumetazoa;Bilateria;Protostomia;Spiralia;Lophotrochozoa;Mollusca;Bivalvia;Autobranchia;Heteroconchia;Euherodonta;Imparidentia;Venerida;Veneroidea;Veneridae;Mercenaria;Mercenaria mercenaria

UdeM00000009732 6596 532.7 UdeM00000009732 XP\_045198334.1 56.1 488  
129 6 31 433 2849 3336 5.00E-148 532.7 6596 cellular

organisms;Eukaryota;Opisthokonta;Metazoa;Eumetazoa;Bilateria;Protostomia;Spiralia;Lophotrochozoa;Mollusca;Bivalvia;Autobranchia;Heteroconchia;Euherodonta;Imparidentia;Venerida;Veneroidea;Veneridae;Mercenaria;Mercenaria mercenaria



UdeM00000009734 29159 258.5 UdeM00000009734 XP\_034316161.1 44.1 290  
 161 1 1 289 718 1007 1.50E-65 258.5 29159 cellular  
 organisms;Eukaryota;Opisthokonta;Metazoa;Eumetazoa;Bilateria;Protostomia;  
 Spiralia;Lophotrochozoa;Mollusca;Bivalvia;Autobranchia;Pteriormorphia;Ostr  
 eida;Ostreoidea;Ostreidae;Crassostrea;Crassostrea gigas  
 UdeM00000009735 6596 109 UdeM00000009735 XP\_045180427.1 39 177  
 105 2 76 250 98 273 9.40E-21 109 6596 cellular  
 organisms;Eukaryota;Opisthokonta;Metazoa;Eumetazoa;Bilateria;Protostomia;  
 Spiralia;Lophotrochozoa;Mollusca;Bivalvia;Autobranchia;Heteroconchia;Euhe  
 terodonta;Imparidentia;Venerida;Veneroidea;Veneridae;Mercenaria;Mercenari  
 a mercenaria  
 UdeM00000009736 161013 60.8 UdeM00000009736 XP\_034253085.1 45.1  
 71 37 2 22 90 952 1022 1.00E-06 60.8 161013  
 cellular  
 organisms;Eukaryota;Opisthokonta;Metazoa;Eumetazoa;Bilateria;Protostomia;  
 Ecdysozoa;Panarthropoda;Arthropoda;Mandibulata;Pancrustacea;Hexapoda;Inse  
 cta;Dicondylia;Pterygota;Neoptera;Paraneoptera;Thysanoptera;Terebrantia;T  
 hripoidea;Thripidae;Thripinae;Thrips;Thrips palmi  
 UdeM00000009737 6596 616.3 UdeM00000009737 XP\_045195413.1 45 714  
 363 8 1 687 4911 5621 5.20E-173 616.3 6596 cellular  
 organisms;Eukaryota;Opisthokonta;Metazoa;Eumetazoa;Bilateria;Protostomia;  
 Spiralia;Lophotrochozoa;Mollusca;Bivalvia;Autobranchia;Heteroconchia;Euhe  
 terodonta;Imparidentia;Venerida;Veneroidea;Veneridae;Mercenaria;Mercenari  
 a mercenaria  
 UdeM00000009738 400727 67.8 UdeM00000009738 XP\_025098957.1 38.8  
 80 49 0 56 135 28 107 4.90E-08 67.8 400727  
 cellular  
 organisms;Eukaryota;Opisthokonta;Metazoa;Eumetazoa;Bilateria;Protostomia;  
 Spiralia;Lophotrochozoa;Mollusca;Gastropoda;Caenogastropoda;Architaeniogl  
 ossa;Ampullarioidea;Ampullariidae;Pomacea;Pomacea canaliculata  
 UdeM00000009739 6596 216.9 UdeM00000009739 XP\_045195418.1 29.9 465  
 292 12 21 460 736 1191 6.60E-53 216.9 6596 cellular  
 organisms;Eukaryota;Opisthokonta;Metazoa;Eumetazoa;Bilateria;Protostomia;  
 Spiralia;Lophotrochozoa;Mollusca;Bivalvia;Autobranchia;Heteroconchia;Euhe  
 terodonta;Imparidentia;Venerida;Veneroidea;Veneridae;Mercenaria;Mercenari  
 a mercenaria  
 UdeM00000009741 6596 518.5 UdeM00000009741 XP\_045195413.1 40.2 767  
 436 12 46 798 1072 1829 1.60E-143 518.5 6596 cellular  
 organisms;Eukaryota;Opisthokonta;Metazoa;Eumetazoa;Bilateria;Protostomia;  
 Spiralia;Lophotrochozoa;Mollusca;Bivalvia;Autobranchia;Heteroconchia;Euhe  
 terodonta;Imparidentia;Venerida;Veneroidea;Veneridae;Mercenaria;Mercenari  
 a mercenaria  
 UdeM00000009742 6579 425.2 UdeM00000009742 XP\_033741838.1 46.2 494  
 249 7 60 542 1179 1666 1.30E-115 425.2 6579 cellular  
 organisms;Eukaryota;Opisthokonta;Metazoa;Eumetazoa;Bilateria;Protostomia;  
 Spiralia;Lophotrochozoa;Mollusca;Bivalvia;Autobranchia;Pteriormorphia;Pect  
 inida;Pectinoidea;Pectinidae;Pecten;Pecten maximus  
 UdeM00000009744 6596 299.7 UdeM00000009744 XP\_045198333.1 54.3 276  
 125 1 81 356 2319 2593 5.00E-78 299.7 6596 cellular  
 organisms;Eukaryota;Opisthokonta;Metazoa;Eumetazoa;Bilateria;Protostomia;  
 Spiralia;Lophotrochozoa;Mollusca;Bivalvia;Autobranchia;Heteroconchia;Euhe  
 terodonta;Imparidentia;Venerida;Veneroidea;Veneridae;Mercenaria;Mercenari  
 a mercenaria

UdeM00000009743 6596 561.2 UdeM00000009743 XP\_045198333.1 59.1 479  
 190 3 81 555 2319 2795 1.50E-156 561.2 6596 cellular  
 organisms;Eukaryota;Opisthokonta;Metazoa;Eumetazoa;Bilateria;Protostomia;  
 Spiralia;Lophotrochozoa;Mollusca;Bivalvia;Autobranhia;Heteroconchia;Euhe  
 terodonta;Imparidentia;Venerida;Veneroidea;Veneridae;Mercenaria;Mercenari  
 a mercenaria  
 UdeM00000009745 6596 286.2 UdeM00000009745 XP\_045195413.1 76.1 184  
 38 1 18 195 2806 2989 3.20E-74 286.2 6596 cellular  
 organisms;Eukaryota;Opisthokonta;Metazoa;Eumetazoa;Bilateria;Protostomia;  
 Spiralia;Lophotrochozoa;Mollusca;Bivalvia;Autobranhia;Heteroconchia;Euhe  
 terodonta;Imparidentia;Venerida;Veneroidea;Veneridae;Mercenaria;Mercenari  
 a mercenaria  
 UdeM00000009747 6596 1048.1 UdeM00000009747 XP\_045195413.1 62.7  
 820 287 7 26 838 3051 3858 6.10E-303 1048.1 6596  
 cellular  
 organisms;Eukaryota;Opisthokonta;Metazoa;Eumetazoa;Bilateria;Protostomia;  
 Spiralia;Lophotrochozoa;Mollusca;Bivalvia;Autobranhia;Heteroconchia;Euhe  
 terodonta;Imparidentia;Venerida;Veneroidea;Veneridae;Mercenaria;Mercenari  
 a mercenaria  
 UdeM00000009748 6596 279.6 UdeM00000009748 XP\_045195413.1 39.4 396  
 217 8 44 420 3949 4340 6.60E-72 279.6 6596 cellular  
 organisms;Eukaryota;Opisthokonta;Metazoa;Eumetazoa;Bilateria;Protostomia;  
 Spiralia;Lophotrochozoa;Mollusca;Bivalvia;Autobranhia;Heteroconchia;Euhe  
 terodonta;Imparidentia;Venerida;Veneroidea;Veneridae;Mercenaria;Mercenari  
 a mercenaria  
 UdeM00000009749 6596 151.8 UdeM00000009749 XP\_045195413.1 32.3 260  
 159 5 12 255 4082 4340 1.30E-33 151.8 6596 cellular  
 organisms;Eukaryota;Opisthokonta;Metazoa;Eumetazoa;Bilateria;Protostomia;  
 Spiralia;Lophotrochozoa;Mollusca;Bivalvia;Autobranhia;Heteroconchia;Euhe  
 terodonta;Imparidentia;Venerida;Veneroidea;Veneridae;Mercenaria;Mercenari  
 a mercenaria  
 UdeM00000009750 6596 63.5 UdeM00000009750 XP\_045195419.1 44.6 65  
 35 1 2 66 4526 4589 1.10E-07 63.5 6596 cellular  
 organisms;Eukaryota;Opisthokonta;Metazoa;Eumetazoa;Bilateria;Protostomia;  
 Spiralia;Lophotrochozoa;Mollusca;Bivalvia;Autobranhia;Heteroconchia;Euhe  
 terodonta;Imparidentia;Venerida;Veneroidea;Veneridae;Mercenaria;Mercenari  
 a mercenaria  
 UdeM00000009751 6596 979.2 UdeM00000009751 XP\_045195413.1 46.7 1167  
 572 18 1 1130 4507 5660 4.50E-282 979.2 6596 cellular  
 organisms;Eukaryota;Opisthokonta;Metazoa;Eumetazoa;Bilateria;Protostomia;  
 Spiralia;Lophotrochozoa;Mollusca;Bivalvia;Autobranhia;Heteroconchia;Euhe  
 terodonta;Imparidentia;Venerida;Veneroidea;Veneridae;Mercenaria;Mercenari  
 a mercenaria  
 UdeM00000009752 6573 120.9 UdeM00000009752 XP\_021355657.1 56.3 103  
 45 0 18 120 4 106 1.30E-24 120.9 6573 cellular  
 organisms;Eukaryota;Opisthokonta;Metazoa;Eumetazoa;Bilateria;Protostomia;  
 Spiralia;Lophotrochozoa;Mollusca;Bivalvia;Autobranhia;Pteriomorphia;Pect  
 inida;Pectinoidea;Pectinidae;Mizuhopecten;Mizuhopecten yessoensis  
 UdeM00000009753 6596 93.6 UdeM00000009753 XP\_045198052.1 75.5 53  
 13 0 25 77 110 162 1.20E-16 93.6 6596 cellular  
 organisms;Eukaryota;Opisthokonta;Metazoa;Eumetazoa;Bilateria;Protostomia;  
 Spiralia;Lophotrochozoa;Mollusca;Bivalvia;Autobranhia;Heteroconchia;Euhe  
 terodonta;Imparidentia;Venerida;Veneroidea;Veneridae;Mercenaria;Mercenari  
 a mercenaria

UdeM00000009754 6596 742.7 UdeM00000009754 XP\_045197551.1 62.7 577  
 213 2 12 587 155 730 3.70E-211 742.7 6596 cellular  
 organisms;Eukaryota;Opisthokonta;Metazoa;Eumetazoa;Bilateria;Protostomia;  
 Spiralia;Lophotrochozoa;Mollusca;Bivalvia;Autobranhia;Heteroconchia;Euhe  
 terodonta;Imparidentia;Venerida;Veneroidea;Veneridae;Mercenaria;Mercenari  
 a mercenaria

UdeM00000009755 6596 961.8 UdeM00000009755 XP\_045195413.1 40.9 1350  
 646 24 21 1335 4434 5666 8.80E-277 961.8 6596 cellular  
 organisms;Eukaryota;Opisthokonta;Metazoa;Eumetazoa;Bilateria;Protostomia;  
 Spiralia;Lophotrochozoa;Mollusca;Bivalvia;Autobranhia;Heteroconchia;Euhe  
 terodonta;Imparidentia;Venerida;Veneroidea;Veneridae;Mercenaria;Mercenari  
 a mercenaria

UdeM00000009756 6596 3138.6 UdeM00000009756 XP\_045198334.1 45.6  
 3860 1884 63 862 4561 571 4375 0.00E+00 3138.6 6596  
 cellular  
 organisms;Eukaryota;Opisthokonta;Metazoa;Eumetazoa;Bilateria;Protostomia;  
 Spiralia;Lophotrochozoa;Mollusca;Bivalvia;Autobranhia;Heteroconchia;Euhe  
 terodonta;Imparidentia;Venerida;Veneroidea;Veneridae;Mercenaria;Mercenari  
 a mercenaria

UdeM00000009757 151771 469.9 UdeM00000009757 XP\_028419301.1 52.9  
 448 208 3 27 473 34 479 3.80E-129 469.9 151771  
 cellular  
 organisms;Eukaryota;Opisthokonta;Metazoa;Eumetazoa;Cnidaria;Anthozoa;Octo  
 corallia;Alcyonacea;Alcyoniina;Nephtheidae;Dendronephthya;Dendronephthya  
 gigantea

UdeM00000009758 6596 4308.4 UdeM00000009758 XP\_045195413.1 49.4  
 4633 2179 67 19 4547 1096 5666 0.00E+00 4308.4 6596  
 cellular  
 organisms;Eukaryota;Opisthokonta;Metazoa;Eumetazoa;Bilateria;Protostomia;  
 Spiralia;Lophotrochozoa;Mollusca;Bivalvia;Autobranhia;Heteroconchia;Euhe  
 terodonta;Imparidentia;Venerida;Veneroidea;Veneridae;Mercenaria;Mercenari  
 a mercenaria

UdeM00000009759 6596 164.1 UdeM00000009759 XP\_045195418.1 28.7 390  
 249 10 571 937 737 1120 8.70E-37 164.1 6596 cellular  
 organisms;Eukaryota;Opisthokonta;Metazoa;Eumetazoa;Bilateria;Protostomia;  
 Spiralia;Lophotrochozoa;Mollusca;Bivalvia;Autobranhia;Heteroconchia;Euhe  
 terodonta;Imparidentia;Venerida;Veneroidea;Veneridae;Mercenaria;Mercenari  
 a mercenaria

UdeM00000009760 6596 122.1 UdeM00000009760 XP\_045170977.1 52.9 104  
 47 1 2 103 370 473 4.20E-25 122.1 6596 cellular  
 organisms;Eukaryota;Opisthokonta;Metazoa;Eumetazoa;Bilateria;Protostomia;  
 Spiralia;Lophotrochozoa;Mollusca;Bivalvia;Autobranhia;Heteroconchia;Euhe  
 terodonta;Imparidentia;Venerida;Veneroidea;Veneridae;Mercenaria;Mercenari  
 a mercenaria

UdeM00000009762 6596 74.3 UdeM00000009762 XP\_045198049.1 41.8 177  
 97 1 23 199 19 189 2.10E-10 74.3 6596 cellular  
 organisms;Eukaryota;Opisthokonta;Metazoa;Eumetazoa;Bilateria;Protostomia;  
 Spiralia;Lophotrochozoa;Mollusca;Bivalvia;Autobranhia;Heteroconchia;Euhe  
 terodonta;Imparidentia;Venerida;Veneroidea;Veneridae;Mercenaria;Mercenari  
 a mercenaria

UdeM00000009763 6596 95.5 UdeM00000009763 XP\_045207685.1 34 147  
 95 2 59 203 230 376 8.40E-17 95.5 6596 cellular  
 organisms;Eukaryota;Opisthokonta;Metazoa;Eumetazoa;Bilateria;Protostomia;  
 Spiralia;Lophotrochozoa;Mollusca;Bivalvia;Autobranhia;Heteroconchia;Euhe

terodonta;Imparidentia;Venerida;Veneroidea;Veneridae;Mercenaria;Mercenari  
a mercenaria

UdeM00000009764 29159 141 UdeM00000009764 XP\_034318677.1 50 144  
61 3 5 148 13 145 1.20E-30 141 29159 cellular

organisms;Eukaryota;Opisthokonta;Metazoa;Eumetazoa;Bilateria;Protostomia;  
Spiralia;Lophotrochozoa;Mollusca;Bivalvia;Autobranhia;Pteriormorphia;Ostr  
eida;Ostreoidea;Ostreidae;Crassostrea;Crassostrea gigas

UdeM00000009766 6565 246.5 UdeM00000009766 XP\_022307464.1 76.1 155  
37 0 2 156 212 366 2.30E-62 246.5 6565 cellular

organisms;Eukaryota;Opisthokonta;Metazoa;Eumetazoa;Bilateria;Protostomia;  
Spiralia;Lophotrochozoa;Mollusca;Bivalvia;Autobranhia;Pteriormorphia;Ostr  
eida;Ostreoidea;Ostreidae;Crassostrea;Crassostrea virginica

UdeM00000009767 37653 333.2 UdeM00000009767 XP\_014784938.1 48.6 325  
154 3 119 431 39 362 5.10E-88 333.2 37653 cellular

organisms;Eukaryota;Opisthokonta;Metazoa;Eumetazoa;Bilateria;Protostomia;  
Spiralia;Lophotrochozoa;Mollusca;Cephalopoda;Coleoidea;Octopodiformes;Oct  
opoda;Incirrata;Octopodidae;Octopus;Octopus bimaculoides

UdeM00000009768 6596 90.5 UdeM00000009768 XP\_045207685.1 31.1 148  
100 2 181 327 230 376 4.30E-15 90.5 6596 cellular

organisms;Eukaryota;Opisthokonta;Metazoa;Eumetazoa;Bilateria;Protostomia;  
Spiralia;Lophotrochozoa;Mollusca;Bivalvia;Autobranhia;Heteroconchia;Euhe  
terodonta;Imparidentia;Venerida;Veneroidea;Veneridae;Mercenaria;Mercenari  
a mercenaria

UdeM00000009769 6596 90.5 UdeM00000009769 XP\_045207685.1 31.1 148  
100 2 95 241 230 376 3.20E-15 90.5 6596 cellular

organisms;Eukaryota;Opisthokonta;Metazoa;Eumetazoa;Bilateria;Protostomia;  
Spiralia;Lophotrochozoa;Mollusca;Bivalvia;Autobranhia;Heteroconchia;Euhe  
terodonta;Imparidentia;Venerida;Veneroidea;Veneridae;Mercenaria;Mercenari  
a mercenaria

UdeM00000009770 6579 354 UdeM00000009770 XP\_033739618.1 42.5 438  
218 6 48 483 336 741 3.10E-94 354 6579 cellular

organisms;Eukaryota;Opisthokonta;Metazoa;Eumetazoa;Bilateria;Protostomia;  
Spiralia;Lophotrochozoa;Mollusca;Bivalvia;Autobranhia;Pteriormorphia;Pect  
inida;Pectinoidea;Pectinidae;Pecten;Pecten maximus

UdeM00000009771 1735272 248.8 UdeM00000009771 XP\_041354099.1 76.4  
144 34 0 1 144 1 144 4.20E-63 248.8 1735272

cellular  
organisms;Eukaryota;Opisthokonta;Metazoa;Eumetazoa;Bilateria;Protostomia;  
Spiralia;Lophotrochozoa;Mollusca;Gastropoda;Neomphalina;Neomphaloidea;Pel  
tospiridae;Gigantopelta;Gigantopelta aegis

UdeM00000009772 6596 218 UdeM00000009772 XP\_045196208.1 75 140  
34 1 4 143 6 144 7.80E-54 218 6596 cellular

organisms;Eukaryota;Opisthokonta;Metazoa;Eumetazoa;Bilateria;Protostomia;  
Spiralia;Lophotrochozoa;Mollusca;Bivalvia;Autobranhia;Heteroconchia;Euhe  
terodonta;Imparidentia;Venerida;Veneroidea;Veneridae;Mercenaria;Mercenari  
a mercenaria

UdeM00000009773 6596 112.1 UdeM00000009773 XP\_045180427.1 39 177  
105 2 76 250 98 273 1.10E-21 112.1 6596 cellular

organisms;Eukaryota;Opisthokonta;Metazoa;Eumetazoa;Bilateria;Protostomia;  
Spiralia;Lophotrochozoa;Mollusca;Bivalvia;Autobranhia;Heteroconchia;Euhe  
terodonta;Imparidentia;Venerida;Veneroidea;Veneridae;Mercenaria;Mercenari  
a mercenaria

UdeM00000009774 6105 80.5 UdeM00000009774 XP\_031551840.1 45.7 94  
48 1 44 134 101 194 1.90E-12 80.5 6105 cellular

organisms;Eukaryota;Opisthokonta;Metazoa;Eumetazoa;Cnidaria;Anthozoa;Hexa  
corallia;Actiniaria;Actiniidae;Actinia;Actinia tenebrosa  
UdeM00000009775 6596 63.5 UdeM00000009775 XP\_045196207.1 34.7 118  
65 4 57 166 96 209 3.10E-07 63.5 6596 cellular  
organisms;Eukaryota;Opisthokonta;Metazoa;Eumetazoa;Bilateria;Protostomia;  
Spiralia;Lophotrochozoa;Mollusca;Bivalvia;Autobranchia;Heteroconchia;Euhe  
terodonta;Imparidentia;Venerida;Veneroidea;Veneridae;Mercenaria;Mercenari  
a mercenaria  
UdeM00000009776 6596 267.3 UdeM00000009776 XP\_045196207.1 45.2 334  
124 6 2 296 289 602 2.30E-68 267.3 6596 cellular  
organisms;Eukaryota;Opisthokonta;Metazoa;Eumetazoa;Bilateria;Protostomia;  
Spiralia;Lophotrochozoa;Mollusca;Bivalvia;Autobranchia;Heteroconchia;Euhe  
terodonta;Imparidentia;Venerida;Veneroidea;Veneridae;Mercenaria;Mercenari  
a mercenaria  
UdeM00000009777 1735272 164.1 UdeM00000009777 XP\_041347204.1 33.8  
305 178 11 2 302 207 491 3.20E-37 164.1 1735272  
cellular  
organisms;Eukaryota;Opisthokonta;Metazoa;Eumetazoa;Bilateria;Protostomia;  
Spiralia;Lophotrochozoa;Mollusca;Gastropoda;Neomphalina;Neomphaloidea;Pel  
tospiridae;Gigantopelta;Gigantopelta aegis  
UdeM00000009779 29159 124.8 UdeM00000009779 XP\_034300601.1 48.9 135  
65 1 37 167 105 239 1.10E-25 124.8 29159 cellular  
organisms;Eukaryota;Opisthokonta;Metazoa;Eumetazoa;Bilateria;Protostomia;  
Spiralia;Lophotrochozoa;Mollusca;Bivalvia;Autobranchia;Pteriormorphia;Ostr  
eida;Ostreoidea;Ostreidae;Crassostrea;Crassostrea gigas  
UdeM00000009780 29159 166 UdeM00000009780 XP\_011450566.2 52 202  
89 4 15 214 2 197 6.10E-38 166 29159 cellular  
organisms;Eukaryota;Opisthokonta;Metazoa;Eumetazoa;Bilateria;Protostomia;  
Spiralia;Lophotrochozoa;Mollusca;Bivalvia;Autobranchia;Pteriormorphia;Ostr  
eida;Ostreoidea;Ostreidae;Crassostrea;Crassostrea gigas  
UdeM00000009782 6596 411.4 UdeM00000009782 XP\_045198252.1 49.1 430  
208 5 11 433 26 451 1.60E-111 411.4 6596 cellular  
organisms;Eukaryota;Opisthokonta;Metazoa;Eumetazoa;Bilateria;Protostomia;  
Spiralia;Lophotrochozoa;Mollusca;Bivalvia;Autobranchia;Heteroconchia;Euhe  
terodonta;Imparidentia;Venerida;Veneroidea;Veneridae;Mercenaria;Mercenari  
a mercenaria  
UdeM00000009781 6573 411.8 UdeM00000009781 XP\_021354055.1 45.7 501  
251 10 12 498 12 505 1.30E-111 411.8 6573 cellular  
organisms;Eukaryota;Opisthokonta;Metazoa;Eumetazoa;Bilateria;Protostomia;  
Spiralia;Lophotrochozoa;Mollusca;Bivalvia;Autobranchia;Pteriormorphia;Pect  
inida;Pectinoidea;Pectinidae;Mizuhopecten;Mizuhopecten yessoensis  
UdeM00000009783 6596 478 UdeM00000009783 XP\_045195290.1 35.8 821  
481 14 5 814 22 807 2.40E-131 478 6596 cellular  
organisms;Eukaryota;Opisthokonta;Metazoa;Eumetazoa;Bilateria;Protostomia;  
Spiralia;Lophotrochozoa;Mollusca;Bivalvia;Autobranchia;Heteroconchia;Euhe  
terodonta;Imparidentia;Venerida;Veneroidea;Veneridae;Mercenaria;Mercenari  
a mercenaria  
UdeM00000009784 29159 2014.6 UdeM00000009784 XP\_034324858.1 31.5  
4486 2758 116 125 4470 25 4333 0.00E+00 2014.6  
29159 cellular  
organisms;Eukaryota;Opisthokonta;Metazoa;Eumetazoa;Bilateria;Protostomia;  
Spiralia;Lophotrochozoa;Mollusca;Bivalvia;Autobranchia;Pteriormorphia;Ostr  
eida;Ostreoidea;Ostreidae;Crassostrea;Crassostrea gigas

UdeM00000009785 6579 794.3 UdeM00000009785 XP\_033739423.1 51.5 904  
 300 13 1 785 1 885 1.40E-226 794.3 6579 cellular  
 organisms;Eukaryota;Opisthokonta;Metazoa;Eumetazoa;Bilateria;Protostomia;  
 Spiralia;Lophotrochozoa;Mollusca;Bivalvia;Autobranchia;Pteriormorphia;Pect  
 inida;Pectinoidea;Pectinidae;Pecten;Pecten maximus  
 UdeM00000009786 6579 1828.9 UdeM00000009786 XP\_033739423.1 58.1  
 1701 627 26 22 1649 890 2577 0.00E+00 1828.9 6579  
 cellular  
 organisms;Eukaryota;Opisthokonta;Metazoa;Eumetazoa;Bilateria;Protostomia;  
 Spiralia;Lophotrochozoa;Mollusca;Bivalvia;Autobranchia;Pteriormorphia;Pect  
 inida;Pectinoidea;Pectinidae;Pecten;Pecten maximus  
 UdeM00000009788 29159 516.2 UdeM00000009788 XP\_034332829.1 75.2 319  
 78 1 1 318 1 319 3.10E-143 516.2 29159 cellular  
 organisms;Eukaryota;Opisthokonta;Metazoa;Eumetazoa;Bilateria;Protostomia;  
 Spiralia;Lophotrochozoa;Mollusca;Bivalvia;Autobranchia;Pteriormorphia;Ostr  
 eida;Ostreoidea;Ostreidae;Crassostrea;Crassostrea gigas  
 UdeM00000009789 400727 202.6 UdeM00000009789 XP\_025098850.1 51.8  
 191 88 4 1 191 1 187 4.60E-49 202.6 400727  
 cellular  
 organisms;Eukaryota;Opisthokonta;Metazoa;Eumetazoa;Bilateria;Protostomia;  
 Spiralia;Lophotrochozoa;Mollusca;Gastropoda;Caenogastropoda;Architaeniogl  
 ossa;Ampullarioidea;Ampullariidae;Pomacea;Pomacea canaliculata  
 UdeM00000009790 6596 489.2 UdeM00000009790 XP\_045197982.1 54.2 461  
 198 4 9 467 30 479 5.90E-135 489.2 6596 cellular  
 organisms;Eukaryota;Opisthokonta;Metazoa;Eumetazoa;Bilateria;Protostomia;  
 Spiralia;Lophotrochozoa;Mollusca;Bivalvia;Autobranchia;Heteroconchia;Euhe  
 terodonta;Imparidentia;Venerida;Veneroidea;Veneridae;Mercenaria;Mercenari  
 a mercenaria  
 UdeM00000009791 6596 347.8 UdeM00000009791 XP\_045197985.1 63.9 277  
 95 2 28 304 7 278 1.40E-92 347.8 6596 cellular  
 organisms;Eukaryota;Opisthokonta;Metazoa;Eumetazoa;Bilateria;Protostomia;  
 Spiralia;Lophotrochozoa;Mollusca;Bivalvia;Autobranchia;Heteroconchia;Euhe  
 terodonta;Imparidentia;Venerida;Veneroidea;Veneridae;Mercenaria;Mercenari  
 a mercenaria  
 UdeM00000009792 6596 344 UdeM00000009792 XP\_045197985.1 63.3 278  
 96 2 28 305 7 278 2.00E-91 344 6596 cellular  
 organisms;Eukaryota;Opisthokonta;Metazoa;Eumetazoa;Bilateria;Protostomia;  
 Spiralia;Lophotrochozoa;Mollusca;Bivalvia;Autobranchia;Heteroconchia;Euhe  
 terodonta;Imparidentia;Venerida;Veneroidea;Veneridae;Mercenaria;Mercenari  
 a mercenaria  
 UdeM00000009793 6565 642.1 UdeM00000009793 XP\_022292187.1 65.6 491  
 157 6 3 492 2 481 5.80E-181 642.1 6565 cellular  
 organisms;Eukaryota;Opisthokonta;Metazoa;Eumetazoa;Bilateria;Protostomia;  
 Spiralia;Lophotrochozoa;Mollusca;Bivalvia;Autobranchia;Pteriormorphia;Ostr  
 eida;Ostreoidea;Ostreidae;Crassostrea;Crassostrea virginica  
 UdeM00000009794 6596 1276.9 UdeM00000009794 XP\_045198715.1 60.5  
 1036 385 9 2 1016 506 1538 0.00E+00 1276.9 6596  
 cellular  
 organisms;Eukaryota;Opisthokonta;Metazoa;Eumetazoa;Bilateria;Protostomia;  
 Spiralia;Lophotrochozoa;Mollusca;Bivalvia;Autobranchia;Heteroconchia;Euhe  
 terodonta;Imparidentia;Venerida;Veneroidea;Veneridae;Mercenaria;Mercenari  
 a mercenaria  
 UdeM00000009795 6573 1242.3 UdeM00000009795 XP\_021367369.1 65.9  
 946 315 3 1 946 1 938 0.00E+00 1242.3 6573

cellular  
organisms;Eukaryota;Opisthokonta;Metazoa;Eumetazoa;Bilateria;Protostomia;  
Spiralia;Lophotrochozoa;Mollusca;Bivalvia;Autobranhia;Pteriormorphia;Pect  
inida;Pectinoidea;Pectinidae;Mizuhopecten;Mizuhopecten yessoensis  
UdeM00000009796 6596 370.2 UdeM00000009796 XP\_045195727.1 74.9 366  
73 2 142 488 139 504 5.00E-99 370.2 6596 cellular  
organisms;Eukaryota;Opisthokonta;Metazoa;Eumetazoa;Bilateria;Protostomia;  
Spiralia;Lophotrochozoa;Mollusca;Bivalvia;Autobranhia;Heteroconchia;Euhe  
terodonta;Imparidentia;Venerida;Veneroidea;Veneridae;Mercenaria;Mercenari  
a mercenaria  
UdeM00000009797 6596 370.2 UdeM00000009797 XP\_045195727.1 74.9 366  
73 2 343 689 139 504 6.70E-99 370.2 6596 cellular  
organisms;Eukaryota;Opisthokonta;Metazoa;Eumetazoa;Bilateria;Protostomia;  
Spiralia;Lophotrochozoa;Mollusca;Bivalvia;Autobranhia;Heteroconchia;Euhe  
terodonta;Imparidentia;Venerida;Veneroidea;Veneridae;Mercenaria;Mercenari  
a mercenaria  
UdeM00000009798 6565 521.2 UdeM00000009798 XP\_022292889.1 54.7 508  
202 4 1 484 1 504 1.40E-144 521.2 6565 cellular  
organisms;Eukaryota;Opisthokonta;Metazoa;Eumetazoa;Bilateria;Protostomia;  
Spiralia;Lophotrochozoa;Mollusca;Bivalvia;Autobranhia;Pteriormorphia;Ostr  
eida;Ostreoidea;Ostreidae;Crassostrea;Crassostrea virginica  
UdeM00000009801 6565 444.9 UdeM00000009801 XP\_022327372.1 41.8 582  
323 10 15 587 7 581 1.60E-121 444.9 6565 cellular  
organisms;Eukaryota;Opisthokonta;Metazoa;Eumetazoa;Bilateria;Protostomia;  
Spiralia;Lophotrochozoa;Mollusca;Bivalvia;Autobranhia;Pteriormorphia;Ostr  
eida;Ostreoidea;Ostreidae;Crassostrea;Crassostrea virginica  
UdeM00000009802 6565 451.4 UdeM00000009802 XP\_022327372.1 42.1 585  
317 10 15 587 7 581 1.70E-123 451.4 6565 cellular  
organisms;Eukaryota;Opisthokonta;Metazoa;Eumetazoa;Bilateria;Protostomia;  
Spiralia;Lophotrochozoa;Mollusca;Bivalvia;Autobranhia;Pteriormorphia;Ostr  
eida;Ostreoidea;Ostreidae;Crassostrea;Crassostrea virginica  
UdeM00000009803 6565 443 UdeM00000009803 XP\_022326108.1 40.3 583  
330 9 7 581 439 1011 6.00E-121 443 6565 cellular  
organisms;Eukaryota;Opisthokonta;Metazoa;Eumetazoa;Bilateria;Protostomia;  
Spiralia;Lophotrochozoa;Mollusca;Bivalvia;Autobranhia;Pteriormorphia;Ostr  
eida;Ostreoidea;Ostreidae;Crassostrea;Crassostrea virginica  
UdeM00000009804 6579 75.1 UdeM00000009804 XP\_033740026.1 53.1 113  
42 4 54 157 254 364 9.00E-11 75.1 6579 cellular  
organisms;Eukaryota;Opisthokonta;Metazoa;Eumetazoa;Bilateria;Protostomia;  
Spiralia;Lophotrochozoa;Mollusca;Bivalvia;Autobranhia;Pteriormorphia;Pect  
inida;Pectinoidea;Pectinidae;Pecten;Pecten maximus  
UdeM00000009806 6573 289.7 UdeM00000009806 XP\_021359433.1 71.7 198  
56 0 76 273 73 270 4.20E-75 289.7 6573 cellular  
organisms;Eukaryota;Opisthokonta;Metazoa;Eumetazoa;Bilateria;Protostomia;  
Spiralia;Lophotrochozoa;Mollusca;Bivalvia;Autobranhia;Pteriormorphia;Pect  
inida;Pectinoidea;Pectinidae;Mizuhopecten;Mizuhopecten yessoensis  
UdeM00000009807 6596 224.2 UdeM00000009807 XP\_045197526.1 64.5 211  
74 1 5 215 1 210 1.60E-55 224.2 6596 cellular  
organisms;Eukaryota;Opisthokonta;Metazoa;Eumetazoa;Bilateria;Protostomia;  
Spiralia;Lophotrochozoa;Mollusca;Bivalvia;Autobranhia;Heteroconchia;Euhe  
terodonta;Imparidentia;Venerida;Veneroidea;Veneridae;Mercenaria;Mercenari  
a mercenaria  
UdeM00000009808 6596 295.4 UdeM00000009808 XP\_045197531.1 55.1 276  
116 4 1 270 1 274 7.20E-77 295.4 6596 cellular

organisms;Eukaryota;Opisthokonta;Metazoa;Eumetazoa;Bilateria;Protostomia;Spiralia;Lophotrochozoa;Mollusca;Bivalvia;Autobranhia;Heteroconchia;Euherodonta;Imparidentia;Venerida;Veneroidea;Veneridae;Mercenaria;Mercenaria mercenaria

UdeM00000009809 6596 652.1 UdeM00000009809 XP\_045197524.1 74.7 491  
117 2 6 496 1 484 5.60E-184 652.1 6596 cellular

organisms;Eukaryota;Opisthokonta;Metazoa;Eumetazoa;Bilateria;Protostomia;Spiralia;Lophotrochozoa;Mollusca;Bivalvia;Autobranhia;Heteroconchia;Euherodonta;Imparidentia;Venerida;Veneroidea;Veneridae;Mercenaria;Mercenaria mercenaria

UdeM00000009810 1735272 476.9 UdeM00000009810 XP\_041354459.1 49.8  
488 222 8 3 484 10 480 3.20E-131 476.9 1735272  
cellular

organisms;Eukaryota;Opisthokonta;Metazoa;Eumetazoa;Bilateria;Protostomia;Spiralia;Lophotrochozoa;Mollusca;Gastropoda;Neomphalina;Neomphaloidea;Peltospiridae;Gigantopelta;Gigantopelta aegis

UdeM00000009812 6596 176.8 UdeM00000009812 XP\_045196281.1 64.5 121  
41 1 22 142 1129 1247 2.00E-41 176.8 6596 cellular

organisms;Eukaryota;Opisthokonta;Metazoa;Eumetazoa;Bilateria;Protostomia;Spiralia;Lophotrochozoa;Mollusca;Bivalvia;Autobranhia;Heteroconchia;Euherodonta;Imparidentia;Venerida;Veneroidea;Veneridae;Mercenaria;Mercenaria mercenaria

UdeM00000009811 6596 1746.5 UdeM00000009811 XP\_045196281.1 76.1  
1252 293 3 1 1251 1 1247 0.00E+00 1746.5 6596  
cellular

organisms;Eukaryota;Opisthokonta;Metazoa;Eumetazoa;Bilateria;Protostomia;Spiralia;Lophotrochozoa;Mollusca;Bivalvia;Autobranhia;Heteroconchia;Euherodonta;Imparidentia;Venerida;Veneroidea;Veneridae;Mercenaria;Mercenaria mercenaria

UdeM00000009813 6596 1427.9 UdeM00000009813 XP\_045197701.1 44.7  
1772 722 18 1 1734 1 1552 0.00E+00 1427.9 6596  
cellular

organisms;Eukaryota;Opisthokonta;Metazoa;Eumetazoa;Bilateria;Protostomia;Spiralia;Lophotrochozoa;Mollusca;Bivalvia;Autobranhia;Heteroconchia;Euherodonta;Imparidentia;Venerida;Veneroidea;Veneridae;Mercenaria;Mercenaria mercenaria

UdeM00000009814 6565 201.4 UdeM00000009814 XP\_022294586.1 61.4 176  
56 3 1 174 1 166 9.30E-49 201.4 6565 cellular

organisms;Eukaryota;Opisthokonta;Metazoa;Eumetazoa;Bilateria;Protostomia;Spiralia;Lophotrochozoa;Mollusca;Bivalvia;Autobranhia;Pteriomorphia;Ostreida;Ostreoidea;Ostreidae;Crassostrea;Crassostrea virginica

UdeM00000009815 6565 252.3 UdeM00000009815 XP\_022294586.1 65.8 199  
56 3 1 197 1 189 5.10E-64 252.3 6565 cellular

organisms;Eukaryota;Opisthokonta;Metazoa;Eumetazoa;Bilateria;Protostomia;Spiralia;Lophotrochozoa;Mollusca;Bivalvia;Autobranhia;Pteriomorphia;Ostreida;Ostreoidea;Ostreidae;Crassostrea;Crassostrea virginica

UdeM00000009816 6596 316.6 UdeM00000009816 XP\_045196282.1 54.5 277  
126 0 5 281 97 373 3.90E-83 316.6 6596 cellular

organisms;Eukaryota;Opisthokonta;Metazoa;Eumetazoa;Bilateria;Protostomia;Spiralia;Lophotrochozoa;Mollusca;Bivalvia;Autobranhia;Heteroconchia;Euherodonta;Imparidentia;Venerida;Veneroidea;Veneridae;Mercenaria;Mercenaria mercenaria

UdeM00000009817 6579 120.6 UdeM00000009817 XP\_033740524.1 52.3 107  
51 0 1 107 176 282 1.90E-24 120.6 6579 cellular



organisms;Eukaryota;Opisthokonta;Metazoa;Eumetazoa;Bilateria;Protostomia;  
Spiralia;Lophotrochozoa;Mollusca;Bivalvia;Autobranchia;Pteriormorphia;Pect  
inida;Pectinoidea;Pectinidae;Pecten;Pecten maximus  
UdeM00000009818 6573 350.1 UdeM00000009818 XP\_021349310.1 51.3 355  
147 5 7 339 29 379 3.40E-93 350.1 6573 cellular  
organisms;Eukaryota;Opisthokonta;Metazoa;Eumetazoa;Bilateria;Protostomia;  
Spiralia;Lophotrochozoa;Mollusca;Bivalvia;Autobranchia;Pteriormorphia;Pect  
inida;Pectinoidea;Pectinidae;Mizuhopecten;Mizuhopecten yessoensis  
UdeM00000009819 6573 348.6 UdeM00000009819 XP\_021349310.1 59.9 279  
110 2 7 285 29 305 9.20E-93 348.6 6573 cellular  
organisms;Eukaryota;Opisthokonta;Metazoa;Eumetazoa;Bilateria;Protostomia;  
Spiralia;Lophotrochozoa;Mollusca;Bivalvia;Autobranchia;Pteriormorphia;Pect  
inida;Pectinoidea;Pectinidae;Mizuhopecten;Mizuhopecten yessoensis  
UdeM00000009820 6573 348.6 UdeM00000009820 XP\_021349310.1 59.9 279  
110 2 7 285 29 305 8.80E-93 348.6 6573 cellular  
organisms;Eukaryota;Opisthokonta;Metazoa;Eumetazoa;Bilateria;Protostomia;  
Spiralia;Lophotrochozoa;Mollusca;Bivalvia;Autobranchia;Pteriormorphia;Pect  
inida;Pectinoidea;Pectinidae;Mizuhopecten;Mizuhopecten yessoensis  
UdeM00000009822 7604 99.8 UdeM00000009822 XP\_033647591.1 65.8 73  
23 1 103 173 509 581 3.70E-18 99.8 7604 cellular  
organisms;Eukaryota;Opisthokonta;Metazoa;Eumetazoa;Bilateria;Deuterostomi  
a;Echinodermata;Eleutherozoa;Asterozoa;Asteroidea;Forcipulatacea;Forcipul  
atida;Asteroidea;Asteroidea;Asteroidea;Asteroidea;Asteroidea;Asteroidea  
UdeM00000009821 6565 603.2 UdeM00000009821 XP\_022293116.1 68.9 447  
132 5 1 443 1 444 2.60E-169 603.2 6565 cellular  
organisms;Eukaryota;Opisthokonta;Metazoa;Eumetazoa;Bilateria;Protostomia;  
Spiralia;Lophotrochozoa;Mollusca;Bivalvia;Autobranchia;Pteriormorphia;Ostr  
eida;Ostreidae;Ostreidae;Crassostrea;Crassostrea virginica  
UdeM00000009824 6596 179.5 UdeM00000009824 XP\_045196760.1 95.5 89  
4 0 335 423 567 655 9.00E-42 179.5 6596 cellular  
organisms;Eukaryota;Opisthokonta;Metazoa;Eumetazoa;Bilateria;Protostomia;  
Spiralia;Lophotrochozoa;Mollusca;Bivalvia;Autobranchia;Heteroconchia;Euhe  
terodonta;Imparidentia;Venerida;Veneroidea;Veneridae;Mercenaria;Mercenari  
a mercenaria  
UdeM00000009825 6596 179.5 UdeM00000009825 XP\_045196760.1 95.5 89  
4 0 334 422 567 655 9.00E-42 179.5 6596 cellular  
organisms;Eukaryota;Opisthokonta;Metazoa;Eumetazoa;Bilateria;Protostomia;  
Spiralia;Lophotrochozoa;Mollusca;Bivalvia;Autobranchia;Heteroconchia;Euhe  
terodonta;Imparidentia;Venerida;Veneroidea;Veneridae;Mercenaria;Mercenari  
a mercenaria  
UdeM00000009826 1735272 381.3 UdeM00000009826 XP\_041350787.1 82.7  
226 35 1 1 222 1 226 8.90E-103 381.3 1735272  
cellular  
organisms;Eukaryota;Opisthokonta;Metazoa;Eumetazoa;Bilateria;Protostomia;  
Spiralia;Lophotrochozoa;Mollusca;Gastropoda;Neomphalina;Neomphaloidea;Pel  
tospiridae;Gigantopelta;Gigantopelta aegis  
UdeM00000009827 6573 233.8 UdeM00000009827 XP\_021359408.1 58.4 233  
67 8 3 211 168 394 2.00E-58 233.8 6573 cellular  
organisms;Eukaryota;Opisthokonta;Metazoa;Eumetazoa;Bilateria;Protostomia;  
Spiralia;Lophotrochozoa;Mollusca;Bivalvia;Autobranchia;Pteriormorphia;Pect  
inida;Pectinoidea;Pectinidae;Mizuhopecten;Mizuhopecten yessoensis  
UdeM00000009828 6596 187.6 UdeM00000009828 XP\_045196759.1 66.9 127  
42 0 11 137 13 139 1.10E-44 187.6 6596 cellular  
organisms;Eukaryota;Opisthokonta;Metazoa;Eumetazoa;Bilateria;Protostomia;

Spiralia;Lophotrochozoa;Mollusca;Bivalvia;Autobranchia;Heteroconchia;Euherodonta;Imparidentia;Venerida;Veneroidea;Veneridae;Mercenaria;Mercenaria mercenaria

UdeM00000009829 6596 70.9 UdeM00000009829 XP\_045198377.1 50.8 61  
29 1 4 64 50 109 9.00E-10 70.9 6596 cellular

organisms;Eukaryota;Opisthokonta;Metazoa;Eumetazoa;Bilateria;Protostomia;Spiralia;Lophotrochozoa;Mollusca;Bivalvia;Autobranchia;Heteroconchia;Euherodonta;Imparidentia;Venerida;Veneroidea;Veneridae;Mercenaria;Mercenaria mercenaria

UdeM00000009830 6596 133.7 UdeM00000009830 XP\_045160075.1 47.9 117  
61 0 7 123 76 192 1.70E-28 133.7 6596 cellular

organisms;Eukaryota;Opisthokonta;Metazoa;Eumetazoa;Bilateria;Protostomia;Spiralia;Lophotrochozoa;Mollusca;Bivalvia;Autobranchia;Heteroconchia;Euherodonta;Imparidentia;Venerida;Veneroidea;Veneridae;Mercenaria;Mercenaria mercenaria

UdeM00000009831 6596 134.8 UdeM00000009831 XP\_045196567.1 52.1 117  
56 0 33 149 3 119 9.00E-29 134.8 6596 cellular

organisms;Eukaryota;Opisthokonta;Metazoa;Eumetazoa;Bilateria;Protostomia;Spiralia;Lophotrochozoa;Mollusca;Bivalvia;Autobranchia;Heteroconchia;Euherodonta;Imparidentia;Venerida;Veneroidea;Veneridae;Mercenaria;Mercenaria mercenaria

UdeM00000009832 225164 91.7 UdeM00000009832 XP\_009055934.1 53.7  
67 30 1 3 68 41 107 8.60E-16 91.7 225164

cellular

organisms;Eukaryota;Opisthokonta;Metazoa;Eumetazoa;Bilateria;Protostomia;Spiralia;Lophotrochozoa;Mollusca;Gastropoda;Patellogastropoda;Lottioidea;Lottiidae;Lottia;Lottia gigantea

UdeM00000009833 1735272 125.2 UdeM00000009833 XP\_041355030.1 55.8  
95 42 0 1 95 15 109 4.60E-26 125.2 1735272

cellular

organisms;Eukaryota;Opisthokonta;Metazoa;Eumetazoa;Bilateria;Protostomia;Spiralia;Lophotrochozoa;Mollusca;Gastropoda;Neomphalina;Neomphaloidea;Peltospiridae;Gigantopelta;Gigantopelta aegis

UdeM00000009834 29159 518.5 UdeM00000009834 XP\_011453102.2 76.7 511  
109 3 9 511 65 573 9.90E-144 518.5 29159 cellular

organisms;Eukaryota;Opisthokonta;Metazoa;Eumetazoa;Bilateria;Protostomia;Spiralia;Lophotrochozoa;Mollusca;Bivalvia;Autobranchia;Pteriomorphia;Ostreida;Ostreoidea;Ostreidae;Crassostrea;Crassostrea gigas

UdeM00000009835 13735 132.1 UdeM00000009835 XP\_006117305.1 93.8 64  
4 0 1 64 1 64 3.60E-28 132.1 13735 cellular

organisms;Eukaryota;Opisthokonta;Metazoa;Eumetazoa;Bilateria;Deuterostomia;Chordata;Craniata;Vertebrata;Gnathostomata;Teleostomi;Euteleostomi;Sarcopterygii;Dipnotetrapodomorpha;Tetrapoda;Amniota;Sauropsida;Sauria;Archelosauria;Testudinata;Testudines;Cryptodira;Trionychia;Trionychidae;Pelodiscus;Pelodiscus sinensis

UdeM00000009836 6596 154.5 UdeM00000009836 XP\_045195919.1 56.8 169  
55 4 12 178 150 302 2.30E-34 154.5 6596 cellular

organisms;Eukaryota;Opisthokonta;Metazoa;Eumetazoa;Bilateria;Protostomia;Spiralia;Lophotrochozoa;Mollusca;Bivalvia;Autobranchia;Heteroconchia;Euherodonta;Imparidentia;Venerida;Veneroidea;Veneridae;Mercenaria;Mercenaria mercenaria

UdeM00000009837 6596 151.8 UdeM00000009837 XP\_045195919.1 80.2 96  
19 0 42 137 53 148 7.20E-34 151.8 6596 cellular

organisms;Eukaryota;Opisthokonta;Metazoa;Eumetazoa;Bilateria;Protostomia;

Spiralia;Lophotrochozoa;Mollusca;Bivalvia;Autobranchia;Heteroconchia;Euherodonta;Imparidentia;Venerida;Veneroidea;Veneridae;Mercenaria;Mercenaria mercenaria

UdeM00000009838 6579 152.9 UdeM00000009838 XP\_033743219.1 39.4 216  
114 6 26 236 34 237 5.50E-34 152.9 6579 cellular

organisms;Eukaryota;Opisthokonta;Metazoa;Eumetazoa;Bilateria;Protostomia;Spiralia;Lophotrochozoa;Mollusca;Bivalvia;Autobranchia;Pteriormorphia;Pectinida;Pectinoidea;Pectinidae;Pecten;Pecten maximus

UdeM00000009839 400727 354 UdeM00000009839 XP\_025099604.1 73.1  
223 60 0 1 223 1 223 1.40E-94 354 400727  
cellular

organisms;Eukaryota;Opisthokonta;Metazoa;Eumetazoa;Bilateria;Protostomia;Spiralia;Lophotrochozoa;Mollusca;Gastropoda;Caenogastropoda;Architaenioglossa;Ampullarioidea;Ampullariidae;Pomacea;Pomacea canaliculata

UdeM00000009840 10224 228.4 UdeM00000009840 XP\_002730697.1 95.5 112  
5 0 3 114 2 113 4.60E-57 228.4 10224 cellular

organisms;Eukaryota;Opisthokonta;Metazoa;Eumetazoa;Bilateria;Deuterostomia;Hemichordata;Enteropneusta;Harrimaniidae;Saccoglossus;Saccoglossus kowalevskii

UdeM00000009841 400727 297.7 UdeM00000009841 XP\_025098259.1 49.7  
431 182 6 7 435 6 403 3.50E-77 297.7 400727  
cellular

organisms;Eukaryota;Opisthokonta;Metazoa;Eumetazoa;Bilateria;Protostomia;Spiralia;Lophotrochozoa;Mollusca;Gastropoda;Caenogastropoda;Architaenioglossa;Ampullarioidea;Ampullariidae;Pomacea;Pomacea canaliculata

UdeM00000009842 400727 285 UdeM00000009842 XP\_025098259.1 48.4  
432 187 6 7 436 6 403 2.30E-73 285 400727  
cellular

organisms;Eukaryota;Opisthokonta;Metazoa;Eumetazoa;Bilateria;Protostomia;Spiralia;Lophotrochozoa;Mollusca;Gastropoda;Caenogastropoda;Architaenioglossa;Ampullarioidea;Ampullariidae;Pomacea;Pomacea canaliculata

UdeM00000009843 6596 196.1 UdeM00000009843 XP\_045196322.1 60.4 164  
62 1 3 166 25 185 3.70E-47 196.1 6596 cellular

organisms;Eukaryota;Opisthokonta;Metazoa;Eumetazoa;Bilateria;Protostomia;Spiralia;Lophotrochozoa;Mollusca;Bivalvia;Autobranchia;Heteroconchia;Euherodonta;Imparidentia;Venerida;Veneroidea;Veneridae;Mercenaria;Mercenaria mercenaria

UdeM00000009845 6596 180.6 UdeM00000009845 XP\_045196334.1 36.5 381  
175 13 63 415 52 393 4.00E-42 180.6 6596 cellular

organisms;Eukaryota;Opisthokonta;Metazoa;Eumetazoa;Bilateria;Protostomia;Spiralia;Lophotrochozoa;Mollusca;Bivalvia;Autobranchia;Heteroconchia;Euherodonta;Imparidentia;Venerida;Veneroidea;Veneridae;Mercenaria;Mercenaria mercenaria

UdeM00000009846 1735272 100.1 UdeM00000009846 XP\_041354191.1 40.6  
128 63 4 13 134 28 148 2.30E-18 100.1 1735272  
cellular

organisms;Eukaryota;Opisthokonta;Metazoa;Eumetazoa;Bilateria;Protostomia;Spiralia;Lophotrochozoa;Mollusca;Gastropoda;Neomphalina;Neomphaloidea;Peltospiridae;Gigantopelta;Gigantopelta aegis

UdeM00000009847 225164 163.7 UdeM00000009847 XP\_009065075.1 27.6  
410 253 12 2 375 3 404 4.60E-37 163.7 225164  
cellular

organisms;Eukaryota;Opisthokonta;Metazoa;Eumetazoa;Bilateria;Protostomia;

Spiralia;Lophotrochozoa;Mollusca;Gastropoda;Patellogastropoda;Lottioidea;Lottiidae;Lottia;Lottia gigantea

UdeM00000009848 6596 547.7 UdeM00000009848 XP\_045196448.1 52.1 545  
239 6 8 531 7 550 1.60E-152 547.7 6596 cellular  
organisms;Eukaryota;Opisthokonta;Metazoa;Eumetazoa;Bilateria;Protostomia;Spiralia;Lophotrochozoa;Mollusca;Bivalvia;Autobranchia;Heteroconchia;Euherodonta;Imparidentia;Venerida;Veneroidea;Veneridae;Mercenaria;Mercenaria mercenaria

UdeM00000009849 6596 593.6 UdeM00000009849 XP\_045197847.1 69.7 416  
112 3 4 408 655 1067 1.90E-166 593.6 6596 cellular  
organisms;Eukaryota;Opisthokonta;Metazoa;Eumetazoa;Bilateria;Protostomia;Spiralia;Lophotrochozoa;Mollusca;Bivalvia;Autobranchia;Heteroconchia;Euherodonta;Imparidentia;Venerida;Veneroidea;Veneridae;Mercenaria;Mercenaria mercenaria

UdeM00000009850 6596 73.2 UdeM00000009850 XP\_045197853.1 48 102  
48 2 12 113 1 97 3.80E-09 73.2 6596 cellular  
organisms;Eukaryota;Opisthokonta;Metazoa;Eumetazoa;Bilateria;Protostomia;Spiralia;Lophotrochozoa;Mollusca;Bivalvia;Autobranchia;Heteroconchia;Euherodonta;Imparidentia;Venerida;Veneroidea;Veneridae;Mercenaria;Mercenaria mercenaria

UdeM00000009851 6596 73.2 UdeM00000009851 XP\_045197853.1 48 102  
48 2 12 113 1 97 9.30E-10 73.2 6596 cellular  
organisms;Eukaryota;Opisthokonta;Metazoa;Eumetazoa;Bilateria;Protostomia;Spiralia;Lophotrochozoa;Mollusca;Bivalvia;Autobranchia;Heteroconchia;Euherodonta;Imparidentia;Venerida;Veneroidea;Veneridae;Mercenaria;Mercenaria mercenaria

UdeM00000009852 6579 185.3 UdeM00000009852 XP\_033741029.1 61.9 139  
52 1 1 139 6 143 7.10E-44 185.3 6579 cellular  
organisms;Eukaryota;Opisthokonta;Metazoa;Eumetazoa;Bilateria;Protostomia;Spiralia;Lophotrochozoa;Mollusca;Bivalvia;Autobranchia;Pteriomorpha;Pectinida;Pectinoidea;Pectinidae;Pecten;Pecten maximus

UdeM00000009853 37653 870.2 UdeM00000009853 XP\_014784610.1 96.7 428  
12 2 1 428 1 426 1.10E-249 870.2 37653 cellular  
organisms;Eukaryota;Opisthokonta;Metazoa;Eumetazoa;Bilateria;Protostomia;Spiralia;Lophotrochozoa;Mollusca;Cephalopoda;Coleoidea;Octopodiformes;Octopoda;Incirrata;Octopodidae;Octopus;Octopus bimaculoides

UdeM00000009854 37653 874.8 UdeM00000009854 XP\_014784610.1 97 427  
12 1 1 427 1 426 4.50E-251 874.8 37653 cellular  
organisms;Eukaryota;Opisthokonta;Metazoa;Eumetazoa;Bilateria;Protostomia;Spiralia;Lophotrochozoa;Mollusca;Cephalopoda;Coleoidea;Octopodiformes;Octopoda;Incirrata;Octopodidae;Octopus;Octopus bimaculoides

UdeM00000009855 6573 450.7 UdeM00000009855 XP\_021341403.1 48.3 598  
188 15 452 941 142 726 4.70E-123 450.7 6573 cellular  
organisms;Eukaryota;Opisthokonta;Metazoa;Eumetazoa;Bilateria;Protostomia;Spiralia;Lophotrochozoa;Mollusca;Bivalvia;Autobranchia;Pteriomorpha;Pectinida;Pectinoidea;Pectinidae;Mizuhopecten;Mizuhopecten yessoensis

UdeM00000009856 6573 447.2 UdeM00000009856 XP\_021341403.1 48.3 598  
187 16 338 826 142 726 4.50E-122 447.2 6573 cellular  
organisms;Eukaryota;Opisthokonta;Metazoa;Eumetazoa;Bilateria;Protostomia;Spiralia;Lophotrochozoa;Mollusca;Bivalvia;Autobranchia;Pteriomorpha;Pectinida;Pectinoidea;Pectinidae;Mizuhopecten;Mizuhopecten yessoensis

UdeM00000009857 6573 450.7 UdeM00000009857 XP\_021341403.1 48.3 598  
188 15 338 827 142 726 4.10E-123 450.7 6573 cellular  
organisms;Eukaryota;Opisthokonta;Metazoa;Eumetazoa;Bilateria;Protostomia;

Spiralia;Lophotrochozoa;Mollusca;Bivalvia;Autobranchia;Pteriomorpha;Pectinida;Pectinoidea;Pectinidae;Mizuhopecten;Mizuhopecten yessoensis  
 UdeM00000009858 6596 333.2 UdeM00000009858 XP\_045198009.1 56.9 297  
 117 4 5 300 7 293 3.50E-88 333.2 6596 cellular  
 organisms;Eukaryota;Opisthokonta;Metazoa;Eumetazoa;Bilateria;Protostomia;Spiralia;Lophotrochozoa;Mollusca;Bivalvia;Autobranchia;Heteroconchia;Euherodonta;Imparidentia;Venerida;Veneroidea;Veneridae;Mercenaria;Mercenaria mercenaria  
 UdeM00000009859 6596 335.1 UdeM00000009859 XP\_045198009.1 59.2 287  
 104 5 5 280 7 291 9.50E-89 335.1 6596 cellular  
 organisms;Eukaryota;Opisthokonta;Metazoa;Eumetazoa;Bilateria;Protostomia;Spiralia;Lophotrochozoa;Mollusca;Bivalvia;Autobranchia;Heteroconchia;Euherodonta;Imparidentia;Venerida;Veneroidea;Veneridae;Mercenaria;Mercenaria mercenaria  
 UdeM00000009860 6573 616.3 UdeM00000009860 XP\_021375741.1 76.9 403  
 93 0 9 411 12 414 2.80E-173 616.3 6573 cellular  
 organisms;Eukaryota;Opisthokonta;Metazoa;Eumetazoa;Bilateria;Protostomia;Spiralia;Lophotrochozoa;Mollusca;Bivalvia;Autobranchia;Pteriomorpha;Pectinida;Pectinoidea;Pectinidae;Mizuhopecten;Mizuhopecten yessoensis  
 UdeM00000009861 6596 767.7 UdeM00000009861 XP\_045197652.1 40.2 1280  
 639 34 13 1255 36 1226 2.40E-218 767.7 6596 cellular  
 organisms;Eukaryota;Opisthokonta;Metazoa;Eumetazoa;Bilateria;Protostomia;Spiralia;Lophotrochozoa;Mollusca;Bivalvia;Autobranchia;Heteroconchia;Euherodonta;Imparidentia;Venerida;Veneroidea;Veneridae;Mercenaria;Mercenaria mercenaria  
 UdeM00000009862 37653 115.5 UdeM00000009862 XP\_014789801.1 75.4 65  
 16 0 1 65 139 203 2.50E-23 115.5 37653 cellular  
 organisms;Eukaryota;Opisthokonta;Metazoa;Eumetazoa;Bilateria;Protostomia;Spiralia;Lophotrochozoa;Mollusca;Cephalopoda;Coleoidea;Octopodiformes;Octopoda;Incirrata;Octopodidae;Octopus;Octopus bimaculoides  
 UdeM00000009863 29159 520.8 UdeM00000009863 XP\_034332028.1 64.9 370  
 126 3 1 368 1 368 1.50E-144 520.8 29159 cellular  
 organisms;Eukaryota;Opisthokonta;Metazoa;Eumetazoa;Bilateria;Protostomia;Spiralia;Lophotrochozoa;Mollusca;Bivalvia;Autobranchia;Pteriomorpha;Ostreida;Ostreoidea;Ostreidae;Crassostrea;Crassostrea gigas  
 UdeM00000009864 6596 213.4 UdeM00000009864 XP\_045198187.1 46 215  
 111 3 5 217 36 247 2.90E-52 213.4 6596 cellular  
 organisms;Eukaryota;Opisthokonta;Metazoa;Eumetazoa;Bilateria;Protostomia;Spiralia;Lophotrochozoa;Mollusca;Bivalvia;Autobranchia;Heteroconchia;Euherodonta;Imparidentia;Venerida;Veneroidea;Veneridae;Mercenaria;Mercenaria mercenaria  
 UdeM00000009865 6596 158.7 UdeM00000009865 XP\_045198181.1 64.3 129  
 42 2 18 142 788 916 5.90E-36 158.7 6596 cellular  
 organisms;Eukaryota;Opisthokonta;Metazoa;Eumetazoa;Bilateria;Protostomia;Spiralia;Lophotrochozoa;Mollusca;Bivalvia;Autobranchia;Heteroconchia;Euherodonta;Imparidentia;Venerida;Veneroidea;Veneridae;Mercenaria;Mercenaria mercenaria  
 UdeM00000009866 7111 173.3 UdeM00000009866 XP\_026736514.1 39.1 271  
 145 6 127 386 7 268 6.70E-40 173.3 7111 cellular  
 organisms;Eukaryota;Opisthokonta;Metazoa;Eumetazoa;Bilateria;Protostomia;Ecdysozoa;Panarthropoda;Arthropoda;Mandibulata;Pancrustacea;Hexapoda;Insecta;Dicondylia;Pterygota;Neoptera;Endopterygota;Amphiesmenoptera;Lepidoptera;Glossata;Neolepidoptera;Heteroneura;Ditrysia;Obtectomera;Noctuoidea;Noctuidae;Plusiinae;Trichoplusia;Trichoplusia ni

UdeM00000009867 6579 1069.7 UdeM00000009867 XP\_033741559.1 80.1  
 658 128 2 39 694 9 665 0.00E+00 1069.7 6579  
 cellular  
 organisms;Eukaryota;Opisthokonta;Metazoa;Eumetazoa;Bilateria;Protostomia;  
 Spiralia;Lophotrochozoa;Mollusca;Bivalvia;Autobranchia;Pteriomorpha;Pect  
 inida;Pectinoidea;Pectinidae;Pecten;Pecten maximus  
 UdeM00000009868 6579 1058.1 UdeM00000009868 XP\_033741559.1 79.5  
 659 131 3 39 695 9 665 4.80E-306 1058.1 6579  
 cellular  
 organisms;Eukaryota;Opisthokonta;Metazoa;Eumetazoa;Bilateria;Protostomia;  
 Spiralia;Lophotrochozoa;Mollusca;Bivalvia;Autobranchia;Pteriomorpha;Pect  
 inida;Pectinoidea;Pectinidae;Pecten;Pecten maximus  
 UdeM00000009869 29159 275 UdeM00000009869 XP\_011429807.1 85.1 161  
 24 0 1 161 1 161 6.00E-71 275 29159 cellular  
 organisms;Eukaryota;Opisthokonta;Metazoa;Eumetazoa;Bilateria;Protostomia;  
 Spiralia;Lophotrochozoa;Mollusca;Bivalvia;Autobranchia;Pteriomorpha;Ostr  
 eida;Ostreoidea;Ostreidae;Crassostrea;Crassostrea gigas  
 UdeM00000009870 6596 242.3 UdeM00000009870 XP\_045196687.1 41.1 409  
 188 12 171 558 266 642 1.50E-60 242.3 6596 cellular  
 organisms;Eukaryota;Opisthokonta;Metazoa;Eumetazoa;Bilateria;Protostomia;  
 Spiralia;Lophotrochozoa;Mollusca;Bivalvia;Autobranchia;Heteroconchia;Euhe  
 terodonta;Imparidentia;Venerida;Veneroidea;Veneridae;Mercenaria;Mercenari  
 a mercenaria  
 UdeM00000009871 6573 827.4 UdeM00000009871 XP\_021377367.1 54.2 746  
 330 6 39 780 190 927 1.50E-236 827.4 6573 cellular  
 organisms;Eukaryota;Opisthokonta;Metazoa;Eumetazoa;Bilateria;Protostomia;  
 Spiralia;Lophotrochozoa;Mollusca;Bivalvia;Autobranchia;Pteriomorpha;Pect  
 inida;Pectinoidea;Pectinidae;Mizuhopecten;Mizuhopecten yessoensis  
 UdeM00000009872 6579 198 UdeM00000009872 XP\_033740841.1 50 198  
 96 2 1 197 358 553 1.20E-47 198 6579 cellular  
 organisms;Eukaryota;Opisthokonta;Metazoa;Eumetazoa;Bilateria;Protostomia;  
 Spiralia;Lophotrochozoa;Mollusca;Bivalvia;Autobranchia;Pteriomorpha;Pect  
 inida;Pectinoidea;Pectinidae;Pecten;Pecten maximus  
 UdeM00000009873 6596 216.5 UdeM00000009873 XP\_045185723.1 37.9 346  
 192 6 7 345 455 784 7.90E-53 216.5 6596 cellular  
 organisms;Eukaryota;Opisthokonta;Metazoa;Eumetazoa;Bilateria;Protostomia;  
 Spiralia;Lophotrochozoa;Mollusca;Bivalvia;Autobranchia;Heteroconchia;Euhe  
 terodonta;Imparidentia;Venerida;Veneroidea;Veneridae;Mercenaria;Mercenari  
 a mercenaria  
 UdeM00000009876 6579 100.5 UdeM00000009876 XP\_033756126.1 58.1 86  
 34 1 4 89 156 239 1.20E-18 100.5 6579 cellular  
 organisms;Eukaryota;Opisthokonta;Metazoa;Eumetazoa;Bilateria;Protostomia;  
 Spiralia;Lophotrochozoa;Mollusca;Bivalvia;Autobranchia;Pteriomorpha;Pect  
 inida;Pectinoidea;Pectinidae;Pecten;Pecten maximus  
 UdeM00000009879 6573 195.7 UdeM00000009879 XP\_021365839.1 36.5 299  
 175 6 151 445 574 861 1.30E-46 195.7 6573 cellular  
 organisms;Eukaryota;Opisthokonta;Metazoa;Eumetazoa;Bilateria;Protostomia;  
 Spiralia;Lophotrochozoa;Mollusca;Bivalvia;Autobranchia;Pteriomorpha;Pect  
 inida;Pectinoidea;Pectinidae;Mizuhopecten;Mizuhopecten yessoensis  
 UdeM00000009880 6573 183 UdeM00000009880 XP\_021365839.1 32.4 318  
 195 8 133 442 555 860 8.70E-43 183 6573 cellular  
 organisms;Eukaryota;Opisthokonta;Metazoa;Eumetazoa;Bilateria;Protostomia;  
 Spiralia;Lophotrochozoa;Mollusca;Bivalvia;Autobranchia;Pteriomorpha;Pect  
 inida;Pectinoidea;Pectinidae;Mizuhopecten;Mizuhopecten yessoensis

UdeM00000009881 6596 1315.4 UdeM00000009881 XP\_045198147.1 85.2  
 785 115 1 33 817 171 954 0.00E+00 1315.4 6596  
 cellular  
 organisms;Eukaryota;Opisthokonta;Metazoa;Eumetazoa;Bilateria;Protostomia;  
 Spiralia;Lophotrochozoa;Mollusca;Bivalvia;Autobranhia;Heteroconchia;Euhe  
 terodonta;Imparidentia;Venerida;Veneroidea;Veneridae;Mercenaria;Mercenari  
 a mercenaria  
 UdeM00000009882 6596 1315.4 UdeM00000009882 XP\_045198147.1 85.2  
 785 115 1 52 836 171 954 0.00E+00 1315.4 6596  
 cellular  
 organisms;Eukaryota;Opisthokonta;Metazoa;Eumetazoa;Bilateria;Protostomia;  
 Spiralia;Lophotrochozoa;Mollusca;Bivalvia;Autobranhia;Heteroconchia;Euhe  
 terodonta;Imparidentia;Venerida;Veneroidea;Veneridae;Mercenaria;Mercenari  
 a mercenaria  
 UdeM00000009883 6573 239.2 UdeM00000009883 XP\_021365839.1 45.5 266  
 139 3 177 437 597 861 1.10E-59 239.2 6573 cellular  
 organisms;Eukaryota;Opisthokonta;Metazoa;Eumetazoa;Bilateria;Protostomia;  
 Spiralia;Lophotrochozoa;Mollusca;Bivalvia;Autobranhia;Pteriomorphia;Pect  
 inida;Pectinoidea;Pectinidae;Mizuhopecten;Mizuhopecten yessoensis  
 UdeM00000009884 6573 239.2 UdeM00000009884 XP\_021365839.1 45.5 266  
 139 3 132 392 597 861 9.80E-60 239.2 6573 cellular  
 organisms;Eukaryota;Opisthokonta;Metazoa;Eumetazoa;Bilateria;Protostomia;  
 Spiralia;Lophotrochozoa;Mollusca;Bivalvia;Autobranhia;Pteriomorphia;Pect  
 inida;Pectinoidea;Pectinidae;Mizuhopecten;Mizuhopecten yessoensis  
 UdeM00000009885 6573 239.2 UdeM00000009885 XP\_021365839.1 45.5 266  
 139 3 177 437 597 861 1.10E-59 239.2 6573 cellular  
 organisms;Eukaryota;Opisthokonta;Metazoa;Eumetazoa;Bilateria;Protostomia;  
 Spiralia;Lophotrochozoa;Mollusca;Bivalvia;Autobranhia;Pteriomorphia;Pect  
 inida;Pectinoidea;Pectinidae;Mizuhopecten;Mizuhopecten yessoensis  
 UdeM00000009886 6573 226.1 UdeM00000009886 XP\_021365839.1 43.4 265  
 144 3 178 437 598 861 9.50E-56 226.1 6573 cellular  
 organisms;Eukaryota;Opisthokonta;Metazoa;Eumetazoa;Bilateria;Protostomia;  
 Spiralia;Lophotrochozoa;Mollusca;Bivalvia;Autobranhia;Pteriomorphia;Pect  
 inida;Pectinoidea;Pectinidae;Mizuhopecten;Mizuhopecten yessoensis  
 UdeM00000009887 6573 226.1 UdeM00000009887 XP\_021365839.1 43.4 265  
 144 3 133 392 598 861 8.60E-56 226.1 6573 cellular  
 organisms;Eukaryota;Opisthokonta;Metazoa;Eumetazoa;Bilateria;Protostomia;  
 Spiralia;Lophotrochozoa;Mollusca;Bivalvia;Autobranhia;Pteriomorphia;Pect  
 inida;Pectinoidea;Pectinidae;Mizuhopecten;Mizuhopecten yessoensis  
 UdeM00000009888 6565 314.3 UdeM00000009888 XP\_022295702.1 92.6 163  
 12 0 2 164 3 165 9.10E-83 314.3 6565 cellular  
 organisms;Eukaryota;Opisthokonta;Metazoa;Eumetazoa;Bilateria;Protostomia;  
 Spiralia;Lophotrochozoa;Mollusca;Bivalvia;Autobranhia;Pteriomorphia;Ostr  
 eida;Ostreoidea;Ostreidae;Crassostrea;Crassostrea virginica  
 UdeM00000009889 6596 444.9 UdeM00000009889 XP\_045196588.1 46.9 488  
 244 7 9 490 50 528 1.40E-121 444.9 6596 cellular  
 organisms;Eukaryota;Opisthokonta;Metazoa;Eumetazoa;Bilateria;Protostomia;  
 Spiralia;Lophotrochozoa;Mollusca;Bivalvia;Autobranhia;Heteroconchia;Euhe  
 terodonta;Imparidentia;Venerida;Veneroidea;Veneridae;Mercenaria;Mercenari  
 a mercenaria  
 UdeM00000009890 6596 125.2 UdeM00000009890 XP\_045180427.1 49.6 115  
 56 1 80 192 159 273 9.90E-26 125.2 6596 cellular  
 organisms;Eukaryota;Opisthokonta;Metazoa;Eumetazoa;Bilateria;Protostomia;  
 Spiralia;Lophotrochozoa;Mollusca;Bivalvia;Autobranhia;Heteroconchia;Euhe

terodonta;Imparidentia;Venerida;Veneroidea;Veneridae;Mercenaria;Mercenaria mercenaria

UdeM00000009891 6579 302.4 UdeM00000009891 XP\_033740244.1 53.6 304  
136 4 44 344 27 328 7.60E-79 302.4 6579 cellular

organisms;Eukaryota;Opisthokonta;Metazoa;Eumetazoa;Bilateria;Protostomia;Spiralia;Lophotrochozoa;Mollusca;Bivalvia;Autobranhia;Pteriormorphia;Pectinida;Pectinoidea;Pectinidae;Pecten;Pecten maximus

UdeM00000009892 161013 161 UdeM00000009892 XP\_034253011.1 75.2  
101 25 0 26 126 54 154 1.00E-36 161 161013  
cellular

organisms;Eukaryota;Opisthokonta;Metazoa;Eumetazoa;Bilateria;Protostomia;Ecdysozoa;Panarthropoda;Arthropoda;Mandibulata;Pancrustacea;Hexapoda;Insecta;Dicondylia;Pterygota;Neoptera;Paraneoptera;Thysanoptera;Terebrantia;Thripidoidea;Thripidae;Thripinae;Thrips;Thrips palmi

UdeM00000009893 104421 231.1 UdeM00000009893 XP\_011253679.1 73.4  
154 39 2 1 153 1 153 9.60E-58 231.1 104421  
cellular

organisms;Eukaryota;Opisthokonta;Metazoa;Eumetazoa;Bilateria;Protostomia;Ecdysozoa;Panarthropoda;Arthropoda;Mandibulata;Pancrustacea;Hexapoda;Insecta;Dicondylia;Pterygota;Neoptera;Endopterygota;Hymenoptera;Apocrita;Aculeata;Formicoidea;Formicidae;Formicinae;Camponotini;Camponotus;Camponotus floridanus

UdeM00000009894 6596 121.3 UdeM00000009894 XP\_045205133.1 32.2 258  
108 10 170 415 175 377 2.90E-24 121.3 6596 cellular

organisms;Eukaryota;Opisthokonta;Metazoa;Eumetazoa;Bilateria;Protostomia;Spiralia;Lophotrochozoa;Mollusca;Bivalvia;Autobranhia;Heteroconchia;Euheterodonta;Imparidentia;Venerida;Veneroidea;Veneridae;Mercenaria;Mercenaria mercenaria

UdeM00000009895 400727 149.4 UdeM00000009895 XP\_025107620.1 51.6  
128 61 1 1 127 1 128 3.00E-33 149.4 400727  
cellular

organisms;Eukaryota;Opisthokonta;Metazoa;Eumetazoa;Bilateria;Protostomia;Spiralia;Lophotrochozoa;Mollusca;Gastropoda;Caenogastropoda;Architaenioglossa;Ampullarioidea;Ampullariidae;Pomacea;Pomacea canaliculata

UdeM00000009896 6579 719.9 UdeM00000009896 XP\_033741269.1 63.9 571  
193 9 5 574 7 565 2.50E-204 719.9 6579 cellular

organisms;Eukaryota;Opisthokonta;Metazoa;Eumetazoa;Bilateria;Protostomia;Spiralia;Lophotrochozoa;Mollusca;Bivalvia;Autobranhia;Pteriormorphia;Pectinida;Pectinoidea;Pectinidae;Pecten;Pecten maximus

UdeM00000009897 6596 627.5 UdeM00000009897 XP\_045197164.1 70.6 432  
126 1 78 508 1 432 1.70E-176 627.5 6596 cellular

organisms;Eukaryota;Opisthokonta;Metazoa;Eumetazoa;Bilateria;Protostomia;Spiralia;Lophotrochozoa;Mollusca;Bivalvia;Autobranhia;Heteroconchia;Euheterodonta;Imparidentia;Venerida;Veneroidea;Veneridae;Mercenaria;Mercenaria mercenaria

UdeM00000009898 6596 578.9 UdeM00000009898 XP\_045198372.1 74.2 368  
95 0 17 384 199 566 4.70E-162 578.9 6596 cellular

organisms;Eukaryota;Opisthokonta;Metazoa;Eumetazoa;Bilateria;Protostomia;Spiralia;Lophotrochozoa;Mollusca;Bivalvia;Autobranhia;Heteroconchia;Euheterodonta;Imparidentia;Venerida;Veneroidea;Veneridae;Mercenaria;Mercenaria mercenaria

UdeM00000009899 29159 587 UdeM00000009899 XP\_011457079.2 67.5 419  
132 3 1 419 164 578 1.90E-164 587 29159 cellular

organisms;Eukaryota;Opisthokonta;Metazoa;Eumetazoa;Bilateria;Protostomia;



Spiralia;Lophotrochozoa;Mollusca;Bivalvia;Autobranchia;Pteriormorphia;Ostr  
eida;Ostreoidea;Ostreidae;Crassostrea;Crassostrea gigas  
UdeM00000009902 6579 138.7 UdeM00000009902 XP\_033739729.1 77.3 88  
19 1 1 87 695 782 3.70E-30 138.7 6579 cellular  
organisms;Eukaryota;Opisthokonta;Metazoa;Eumetazoa;Bilateria;Protostomia;  
Spiralia;Lophotrochozoa;Mollusca;Bivalvia;Autobranchia;Pteriormorphia;Pect  
inida;Pectinoidea;Pectinidae;Pecten;Pecten maximus  
UdeM00000009901 29159 915.2 UdeM00000009901 XP\_011457079.2 60.6 746  
282 6 23 763 51 789 5.40E-263 915.2 29159 cellular  
organisms;Eukaryota;Opisthokonta;Metazoa;Eumetazoa;Bilateria;Protostomia;  
Spiralia;Lophotrochozoa;Mollusca;Bivalvia;Autobranchia;Pteriormorphia;Ostr  
eida;Ostreoidea;Ostreidae;Crassostrea;Crassostrea gigas  
UdeM00000009903 6596 121.7 UdeM00000009903 XP\_045180427.1 46.3 177  
92 2 76 250 98 273 1.40E-24 121.7 6596 cellular  
organisms;Eukaryota;Opisthokonta;Metazoa;Eumetazoa;Bilateria;Protostomia;  
Spiralia;Lophotrochozoa;Mollusca;Bivalvia;Autobranchia;Heteroconchia;Euhe  
terodonta;Imparidentia;Venerida;Veneroidea;Veneridae;Mercenaria;Mercenari  
a mercenaria  
UdeM00000009904 6579 210.7 UdeM00000009904 XP\_033731739.1 54.2 177  
81 0 1 177 202 378 1.50E-51 210.7 6579 cellular  
organisms;Eukaryota;Opisthokonta;Metazoa;Eumetazoa;Bilateria;Protostomia;  
Spiralia;Lophotrochozoa;Mollusca;Bivalvia;Autobranchia;Pteriormorphia;Pect  
inida;Pectinoidea;Pectinidae;Pecten;Pecten maximus  
UdeM00000009905 29159 893.6 UdeM00000009905 XP\_011457079.2 62 686  
251 6 102 781 108 789 1.70E-256 893.6 29159 cellular  
organisms;Eukaryota;Opisthokonta;Metazoa;Eumetazoa;Bilateria;Protostomia;  
Spiralia;Lophotrochozoa;Mollusca;Bivalvia;Autobranchia;Pteriormorphia;Ostr  
eida;Ostreoidea;Ostreidae;Crassostrea;Crassostrea gigas  
UdeM00000009906 6579 151 UdeM00000009906 XP\_033739729.1 64.3 112  
39 1 2 112 670 781 9.30E-34 151 6579 cellular  
organisms;Eukaryota;Opisthokonta;Metazoa;Eumetazoa;Bilateria;Protostomia;  
Spiralia;Lophotrochozoa;Mollusca;Bivalvia;Autobranchia;Pteriormorphia;Pect  
inida;Pectinoidea;Pectinidae;Pecten;Pecten maximus  
UdeM00000009907 29159 894.4 UdeM00000009907 XP\_011457079.2 61.7 687  
255 4 42 723 105 788 9.40E-257 894.4 29159 cellular  
organisms;Eukaryota;Opisthokonta;Metazoa;Eumetazoa;Bilateria;Protostomia;  
Spiralia;Lophotrochozoa;Mollusca;Bivalvia;Autobranchia;Pteriormorphia;Ostr  
eida;Ostreoidea;Ostreidae;Crassostrea;Crassostrea gigas  
UdeM00000009908 29159 863.6 UdeM00000009908 XP\_011457079.2 60 692  
261 5 45 731 108 788 1.80E-247 863.6 29159 cellular  
organisms;Eukaryota;Opisthokonta;Metazoa;Eumetazoa;Bilateria;Protostomia;  
Spiralia;Lophotrochozoa;Mollusca;Bivalvia;Autobranchia;Pteriormorphia;Ostr  
eida;Ostreoidea;Ostreidae;Crassostrea;Crassostrea gigas  
UdeM00000009909 6596 108.6 UdeM00000009909 XP\_045197794.1 30.2 268  
140 11 41 275 40 293 1.40E-20 108.6 6596 cellular  
organisms;Eukaryota;Opisthokonta;Metazoa;Eumetazoa;Bilateria;Protostomia;  
Spiralia;Lophotrochozoa;Mollusca;Bivalvia;Autobranchia;Heteroconchia;Euhe  
terodonta;Imparidentia;Venerida;Veneroidea;Veneridae;Mercenaria;Mercenari  
a mercenaria  
UdeM00000009910 6596 344.7 UdeM00000009910 XP\_045196551.1 65.3 294  
84 5 1 291 1 279 1.10E-91 344.7 6596 cellular  
organisms;Eukaryota;Opisthokonta;Metazoa;Eumetazoa;Bilateria;Protostomia;  
Spiralia;Lophotrochozoa;Mollusca;Bivalvia;Autobranchia;Heteroconchia;Euhe

terodonta;Imparidentia;Venerida;Veneroidea;Veneridae;Mercenaria;Mercenari  
 a mercenaria  
 UdeM00000009911 6596 476.5 UdeM00000009911 XP\_045196550.1 61.3 411  
 101 2 1 353 80 490 3.00E-131 476.5 6596 cellular  
 organisms;Eukaryota;Opisthokonta;Metazoa;Eumetazoa;Bilateria;Protostomia;  
 Spiralia;Lophotrochozoa;Mollusca;Bivalvia;Autobranhia;Heteroconchia;Euhe  
 terodonta;Imparidentia;Venerida;Veneroidea;Veneridae;Mercenaria;Mercenari  
 a mercenaria  
 UdeM00000009912 6596 579.7 UdeM00000009912 XP\_045196553.1 65.2 468  
 116 4 1 428 1 461 3.00E-162 579.7 6596 cellular  
 organisms;Eukaryota;Opisthokonta;Metazoa;Eumetazoa;Bilateria;Protostomia;  
 Spiralia;Lophotrochozoa;Mollusca;Bivalvia;Autobranhia;Heteroconchia;Euhe  
 terodonta;Imparidentia;Venerida;Veneroidea;Veneridae;Mercenaria;Mercenari  
 a mercenaria  
 UdeM00000009913 29159 646.4 UdeM00000009913 XP\_011437667.2 66.1 598  
 170 5 99 692 1 569 4.30E-182 646.4 29159 cellular  
 organisms;Eukaryota;Opisthokonta;Metazoa;Eumetazoa;Bilateria;Protostomia;  
 Spiralia;Lophotrochozoa;Mollusca;Bivalvia;Autobranhia;Pteriormorphia;Ostr  
 eida;Ostreoidea;Ostreidae;Crassostrea;Crassostrea gigas  
 UdeM00000009914 6596 144.4 UdeM00000009914 XP\_045172711.1 40 185  
 107 3 9 191 9 191 1.50E-31 144.4 6596 cellular  
 organisms;Eukaryota;Opisthokonta;Metazoa;Eumetazoa;Bilateria;Protostomia;  
 Spiralia;Lophotrochozoa;Mollusca;Bivalvia;Autobranhia;Heteroconchia;Euhe  
 terodonta;Imparidentia;Venerida;Veneroidea;Veneridae;Mercenaria;Mercenari  
 a mercenaria  
 UdeM00000009915 6573 176 UdeM00000009915 XP\_021375462.1 49.2 183  
 90 3 9 189 6 187 4.50E-41 176 6573 cellular  
 organisms;Eukaryota;Opisthokonta;Metazoa;Eumetazoa;Bilateria;Protostomia;  
 Spiralia;Lophotrochozoa;Mollusca;Bivalvia;Autobranhia;Pteriormorphia;Pect  
 inida;Pectinoidea;Pectinidae;Mizuhopecten;Mizuhopecten yessoensis  
 UdeM00000009916 6596 1025.4 UdeM00000009916 XP\_045198055.1 64.7  
 723 254 1 16 738 19 740 3.60E-296 1025.4 6596  
 cellular  
 organisms;Eukaryota;Opisthokonta;Metazoa;Eumetazoa;Bilateria;Protostomia;  
 Spiralia;Lophotrochozoa;Mollusca;Bivalvia;Autobranhia;Heteroconchia;Euhe  
 terodonta;Imparidentia;Venerida;Veneroidea;Veneridae;Mercenaria;Mercenari  
 a mercenaria  
 UdeM00000009917 6565 169.5 UdeM00000009917 XP\_022293190.1 52.5 158  
 75 0 1 158 589 746 3.50E-39 169.5 6565 cellular  
 organisms;Eukaryota;Opisthokonta;Metazoa;Eumetazoa;Bilateria;Protostomia;  
 Spiralia;Lophotrochozoa;Mollusca;Bivalvia;Autobranhia;Pteriormorphia;Ostr  
 eida;Ostreoidea;Ostreidae;Crassostrea;Crassostrea virginica  
 UdeM00000009918 6596 819.3 UdeM00000009918 XP\_045198055.1 65.6 570  
 188 1 5 574 19 580 3.10E-234 819.3 6596 cellular  
 organisms;Eukaryota;Opisthokonta;Metazoa;Eumetazoa;Bilateria;Protostomia;  
 Spiralia;Lophotrochozoa;Mollusca;Bivalvia;Autobranhia;Heteroconchia;Euhe  
 terodonta;Imparidentia;Venerida;Veneroidea;Veneridae;Mercenaria;Mercenari  
 a mercenaria  
 UdeM00000009919 6596 967.6 UdeM00000009919 XP\_045198055.1 63.5 723  
 263 1 18 740 19 740 8.90E-279 967.6 6596 cellular  
 organisms;Eukaryota;Opisthokonta;Metazoa;Eumetazoa;Bilateria;Protostomia;  
 Spiralia;Lophotrochozoa;Mollusca;Bivalvia;Autobranhia;Heteroconchia;Euhe  
 terodonta;Imparidentia;Venerida;Veneroidea;Veneridae;Mercenaria;Mercenari  
 a mercenaria

UdeM00000009920 6596 939.1 UdeM00000009920 XP\_045198055.1 64.7 679  
 240 0 18 696 19 697 3.30E-270 939.1 6596 cellular  
 organisms;Eukaryota;Opisthokonta;Metazoa;Eumetazoa;Bilateria;Protostomia;  
 Spiralia;Lophotrochozoa;Mollusca;Bivalvia;Autobranhia;Heteroconchia;Euhe  
 terodonta;Imparidentia;Venerida;Veneroidea;Veneridae;Mercenaria;Mercenari  
 a mercenaria  
 UdeM00000009921 6596 931 UdeM00000009921 XP\_045198051.1 60.4 742  
 288 4 9 746 2 741 9.30E-268 931 6596 cellular  
 organisms;Eukaryota;Opisthokonta;Metazoa;Eumetazoa;Bilateria;Protostomia;  
 Spiralia;Lophotrochozoa;Mollusca;Bivalvia;Autobranhia;Heteroconchia;Euhe  
 terodonta;Imparidentia;Venerida;Veneroidea;Veneridae;Mercenaria;Mercenari  
 a mercenaria  
 UdeM00000009922 6596 925.6 UdeM00000009922 XP\_045198051.1 59.6 742  
 297 3 5 745 2 741 3.90E-266 925.6 6596 cellular  
 organisms;Eukaryota;Opisthokonta;Metazoa;Eumetazoa;Bilateria;Protostomia;  
 Spiralia;Lophotrochozoa;Mollusca;Bivalvia;Autobranhia;Heteroconchia;Euhe  
 terodonta;Imparidentia;Venerida;Veneroidea;Veneridae;Mercenaria;Mercenari  
 a mercenaria  
 UdeM00000009923 6573 345.1 UdeM00000009923 XP\_021376833.1 71.3 223  
 64 0 2 224 32 254 6.60E-92 345.1 6573 cellular  
 organisms;Eukaryota;Opisthokonta;Metazoa;Eumetazoa;Bilateria;Protostomia;  
 Spiralia;Lophotrochozoa;Mollusca;Bivalvia;Autobranhia;Pteriormorphia;Pect  
 inida;Pectinoidea;Pectinidae;Mizuhopecten;Mizuhopecten yessoensis  
 UdeM00000009924 6596 342.4 UdeM00000009924 XP\_045198079.1 58.4 281  
 91 2 1 255 1 281 4.90E-91 342.4 6596 cellular  
 organisms;Eukaryota;Opisthokonta;Metazoa;Eumetazoa;Bilateria;Protostomia;  
 Spiralia;Lophotrochozoa;Mollusca;Bivalvia;Autobranhia;Heteroconchia;Euhe  
 terodonta;Imparidentia;Venerida;Veneroidea;Veneridae;Mercenaria;Mercenari  
 a mercenaria  
 UdeM00000009925 7574 1174.8 UdeM00000009925 XP\_013402434.1 68.7  
 796 245 2 1 795 343 1135 0.00E+00 1174.8 7574  
 cellular  
 organisms;Eukaryota;Opisthokonta;Metazoa;Eumetazoa;Bilateria;Protostomia;  
 Spiralia;Lophotrochozoa;Brachiopoda;Linguliformea;Lingulata;Lingulida;Lin  
 guloidea;Lingulidae;Lingula;Lingula anatina  
 UdeM00000009926 7574 461.1 UdeM00000009926 XP\_013402434.1 63.2 334  
 123 0 10 343 8 341 1.30E-126 461.1 7574 cellular  
 organisms;Eukaryota;Opisthokonta;Metazoa;Eumetazoa;Bilateria;Protostomia;  
 Spiralia;Lophotrochozoa;Brachiopoda;Linguliformea;Lingulata;Lingulida;Lin  
 guloidea;Lingulidae;Lingula;Lingula anatina  
 UdeM00000009927 6596 222.6 UdeM00000009927 XP\_045165867.1 45.5 286  
 148 2 1 278 501 786 7.90E-55 222.6 6596 cellular  
 organisms;Eukaryota;Opisthokonta;Metazoa;Eumetazoa;Bilateria;Protostomia;  
 Spiralia;Lophotrochozoa;Mollusca;Bivalvia;Autobranhia;Heteroconchia;Euhe  
 terodonta;Imparidentia;Venerida;Veneroidea;Veneridae;Mercenaria;Mercenari  
 a mercenaria  
 UdeM00000009928 6596 108.2 UdeM00000009928 XP\_045196569.1 45.2 115  
 62 1 11 125 5 118 7.60E-21 108.2 6596 cellular  
 organisms;Eukaryota;Opisthokonta;Metazoa;Eumetazoa;Bilateria;Protostomia;  
 Spiralia;Lophotrochozoa;Mollusca;Bivalvia;Autobranhia;Heteroconchia;Euhe  
 terodonta;Imparidentia;Venerida;Veneroidea;Veneridae;Mercenaria;Mercenari  
 a mercenaria  
 UdeM00000009929 6596 137.1 UdeM00000009929 XP\_045196567.1 55.9 111  
 48 1 36 146 10 119 1.80E-29 137.1 6596 cellular

organisms;Eukaryota;Opisthokonta;Metazoa;Eumetazoa;Bilateria;Protostomia;Spiralia;Lophotrochozoa;Mollusca;Bivalvia;Autobranhia;Heteroconchia;Euherodonta;Imparidentia;Venerida;Veneroidea;Veneridae;Mercenaria;Mercenaria mercenaria

UdeM00000009930 6596 139 UdeM00000009930 XP\_045196567.1 54.3 116  
52 1 10 125 5 119 4.00E-30 139 6596 cellular

organisms;Eukaryota;Opisthokonta;Metazoa;Eumetazoa;Bilateria;Protostomia;Spiralia;Lophotrochozoa;Mollusca;Bivalvia;Autobranhia;Heteroconchia;Euherodonta;Imparidentia;Venerida;Veneroidea;Veneridae;Mercenaria;Mercenaria mercenaria

UdeM00000009931 6565 309.7 UdeM00000009931 XP\_022317040.1 76.6 201  
47 0 32 232 30 230 3.20E-81 309.7 6565 cellular

organisms;Eukaryota;Opisthokonta;Metazoa;Eumetazoa;Bilateria;Protostomia;Spiralia;Lophotrochozoa;Mollusca;Bivalvia;Autobranhia;Pteriormorphia;Ostreida;Ostreoidea;Ostreidae;Crassostrea;Crassostrea virginica

UdeM00000009933 6706 238 UdeM00000009933 XP\_042228469.1 85.6 125  
18 0 62 186 1 125 9.40E-60 238 6706 cellular

organisms;Eukaryota;Opisthokonta;Metazoa;Eumetazoa;Bilateria;Protostomia;Ecdysozoa;Panarthropoda;Arthropoda;Mandibulata;Pancrustacea;Crustacea;Multicrustacea;Malacostraca;Eumalacostraca;Eucarida;Decapoda;Pleocyemata;Astacidea;Nephropoidea;Nephropidae;Homarus;Homarus americanus

UdeM00000009934 6596 827 UdeM00000009934 XP\_045197126.1 54.7 850  
311 13 1 800 243 1068 2.20E-236 827 6596 cellular

organisms;Eukaryota;Opisthokonta;Metazoa;Eumetazoa;Bilateria;Protostomia;Spiralia;Lophotrochozoa;Mollusca;Bivalvia;Autobranhia;Heteroconchia;Euherodonta;Imparidentia;Venerida;Veneroidea;Veneridae;Mercenaria;Mercenaria mercenaria

UdeM00000009935 40690 113.6 UdeM00000009935 XP\_034006674.1 36.4 176  
106 4 2 174 4 176 2.50E-22 113.6 40690 cellular

organisms;Eukaryota;Opisthokonta;Metazoa;Eumetazoa;Bilateria;Deuterostomia;Chordata;Craniata;Vertebrata;Gnathostomata;Teleostomi;Euteleostomi;Actinopterygii;Actinopteri;Neopterygii;Teleostei;Osteoglossocephalai;Clupeocephala;Euteleostei;Neoteleostei;Eurypterygia;Ctenosquamata;Acanthomorphata;Euacanthomorphacea;Percomorphaceae;Eupercaria;Perciformes;Notothenioidei;Nototheniidae;Trematomus;Trematomus bernacchii

UdeM00000009936 1735272 135.6 UdeM00000009936 XP\_041352271.1 59.8  
102 41 0 1 102 1 102 3.90E-29 135.6 1735272  
cellular

organisms;Eukaryota;Opisthokonta;Metazoa;Eumetazoa;Bilateria;Protostomia;Spiralia;Lophotrochozoa;Mollusca;Gastropoda;Neomphalina;Neomphaloidea;Peltospiridae;Gigantopelta;Gigantopelta aegis

UdeM00000009937 6596 1008.1 UdeM00000009937 XP\_045197567.1 67.1  
703 221 3 4 705 9 702 5.70E-291 1008.1 6596  
cellular

organisms;Eukaryota;Opisthokonta;Metazoa;Eumetazoa;Bilateria;Protostomia;Spiralia;Lophotrochozoa;Mollusca;Bivalvia;Autobranhia;Heteroconchia;Euherodonta;Imparidentia;Venerida;Veneroidea;Veneridae;Mercenaria;Mercenaria mercenaria

UdeM00000009938 6596 644.4 UdeM00000009938 XP\_045197563.1 44.4 927  
495 9 16 931 3 920 2.20E-181 644.4 6596 cellular

organisms;Eukaryota;Opisthokonta;Metazoa;Eumetazoa;Bilateria;Protostomia;Spiralia;Lophotrochozoa;Mollusca;Bivalvia;Autobranhia;Heteroconchia;Euherodonta;Imparidentia;Venerida;Veneroidea;Veneridae;Mercenaria;Mercenaria mercenaria

UdeM00000009939 6565 333.6 UdeM00000009939 XP\_022332424.1 32.9 820  
 373 20 7 795 4 677 7.00E-88 333.6 6565 cellular  
 organisms;Eukaryota;Opisthokonta;Metazoa;Eumetazoa;Bilateria;Protostomia;  
 Spiralia;Lophotrochozoa;Mollusca;Bivalvia;Autobranhia;Pteriomorphia;Ostr  
 eida;Ostreoidea;Ostreidae;Crassostrea;Crassostrea virginica  
 UdeM00000009941 6596 280.4 UdeM00000009941 XP\_045196329.1 44.4 315  
 166 6 36 349 2 308 3.10E-72 280.4 6596 cellular  
 organisms;Eukaryota;Opisthokonta;Metazoa;Eumetazoa;Bilateria;Protostomia;  
 Spiralia;Lophotrochozoa;Mollusca;Bivalvia;Autobranhia;Heteroconchia;Euhe  
 terodonta;Imparidentia;Venerida;Veneroidea;Veneridae;Mercenaria;Mercenari  
 a mercenaria  
 UdeM00000009942 6573 508.8 UdeM00000009942 XP\_021349268.1 48.8 502  
 239 9 1 496 55 544 7.70E-141 508.8 6573 cellular  
 organisms;Eukaryota;Opisthokonta;Metazoa;Eumetazoa;Bilateria;Protostomia;  
 Spiralia;Lophotrochozoa;Mollusca;Bivalvia;Autobranhia;Pteriomorphia;Pect  
 inida;Pectinoidea;Pectinidae;Mizuhopecten;Mizuhopecten yessoensis  
 UdeM00000009943 6573 522.7 UdeM00000009943 XP\_021354068.1 50.9 740  
 310 12 15 736 19 723 7.90E-145 522.7 6573 cellular  
 organisms;Eukaryota;Opisthokonta;Metazoa;Eumetazoa;Bilateria;Protostomia;  
 Spiralia;Lophotrochozoa;Mollusca;Bivalvia;Autobranhia;Pteriomorphia;Pect  
 inida;Pectinoidea;Pectinidae;Mizuhopecten;Mizuhopecten yessoensis  
 UdeM00000009944 1735272 197.6 UdeM00000009944 XP\_041351340.1 86.4  
 110 15 0 1 110 1 110 1.20E-47 197.6 1735272  
 cellular  
 organisms;Eukaryota;Opisthokonta;Metazoa;Eumetazoa;Bilateria;Protostomia;  
 Spiralia;Lophotrochozoa;Mollusca;Gastropoda;Neomphalina;Neomphaloidea;Pel  
 tospiridae;Gigantopelta;Gigantopelta aegis  
 UdeM00000009945 6596 246.5 UdeM00000009945 XP\_045197178.1 71.9 167  
 47 0 22 188 106 272 2.70E-62 246.5 6596 cellular  
 organisms;Eukaryota;Opisthokonta;Metazoa;Eumetazoa;Bilateria;Protostomia;  
 Spiralia;Lophotrochozoa;Mollusca;Bivalvia;Autobranhia;Heteroconchia;Euhe  
 terodonta;Imparidentia;Venerida;Veneroidea;Veneridae;Mercenaria;Mercenari  
 a mercenaria  
 UdeM00000009946 6596 849.4 UdeM00000009946 XP\_045197178.1 46.9 1429  
 624 47 38 1395 289 1653 6.70E-243 849.4 6596 cellular  
 organisms;Eukaryota;Opisthokonta;Metazoa;Eumetazoa;Bilateria;Protostomia;  
 Spiralia;Lophotrochozoa;Mollusca;Bivalvia;Autobranhia;Heteroconchia;Euhe  
 terodonta;Imparidentia;Venerida;Veneroidea;Veneridae;Mercenaria;Mercenari  
 a mercenaria  
 UdeM00000009947 6596 851.3 UdeM00000009947 XP\_045197178.1 45.2 1530  
 661 51 38 1496 289 1712 1.90E-243 851.3 6596 cellular  
 organisms;Eukaryota;Opisthokonta;Metazoa;Eumetazoa;Bilateria;Protostomia;  
 Spiralia;Lophotrochozoa;Mollusca;Bivalvia;Autobranhia;Heteroconchia;Euhe  
 terodonta;Imparidentia;Venerida;Veneroidea;Veneridae;Mercenaria;Mercenari  
 a mercenaria  
 UdeM00000009948 6573 289.7 UdeM00000009948 XP\_021353161.1 46 348  
 178 7 9 353 9 349 5.20E-75 289.7 6573 cellular  
 organisms;Eukaryota;Opisthokonta;Metazoa;Eumetazoa;Bilateria;Protostomia;  
 Spiralia;Lophotrochozoa;Mollusca;Bivalvia;Autobranhia;Pteriomorphia;Pect  
 inida;Pectinoidea;Pectinidae;Mizuhopecten;Mizuhopecten yessoensis  
 UdeM00000009949 6596 1305.8 UdeM00000009949 XP\_045196672.1 67.6  
 893 277 6 1 883 1 891 0.00E+00 1305.8 6596  
 cellular  
 organisms;Eukaryota;Opisthokonta;Metazoa;Eumetazoa;Bilateria;Protostomia;

Spiralia;Lophotrochozoa;Mollusca;Bivalvia;Autobranchia;Heteroconchia;Euherodonta;Imparidentia;Venerida;Veneroidea;Veneridae;Mercenaria;Mercenaria mercenaria

UdeM00000009950 6596 883.2 UdeM00000009950 XP\_045197023.1 78.3 544  
118 0 1 544 1 544 1.60E-253 883.2 6596 cellular

organisms;Eukaryota;Opisthokonta;Metazoa;Eumetazoa;Bilateria;Protostomia;Spiralia;Lophotrochozoa;Mollusca;Bivalvia;Autobranchia;Heteroconchia;Euherodonta;Imparidentia;Venerida;Veneroidea;Veneridae;Mercenaria;Mercenaria mercenaria

UdeM00000009951 6579 641.7 UdeM00000009951 XP\_033741338.1 60.7 634  
233 6 1 626 1 626 9.50E-181 641.7 6579 cellular

organisms;Eukaryota;Opisthokonta;Metazoa;Eumetazoa;Bilateria;Protostomia;Spiralia;Lophotrochozoa;Mollusca;Bivalvia;Autobranchia;Pteriomorphia;Pectinida;Pectinoidea;Pectinidae;Pecten;Pecten maximus

UdeM00000009952 6573 231.9 UdeM00000009952 XP\_021359250.1 55.8 226  
93 2 1 219 1 226 8.50E-58 231.9 6573 cellular

organisms;Eukaryota;Opisthokonta;Metazoa;Eumetazoa;Bilateria;Protostomia;Spiralia;Lophotrochozoa;Mollusca;Bivalvia;Autobranchia;Pteriomorphia;Pectinida;Pectinoidea;Pectinidae;Mizuhopecten;Mizuhopecten yessoensis

UdeM00000009953 6596 672.5 UdeM00000009953 XP\_045197578.1 76.5 405  
94 1 1 405 1 404 6.10E-190 672.5 6596 cellular

organisms;Eukaryota;Opisthokonta;Metazoa;Eumetazoa;Bilateria;Protostomia;Spiralia;Lophotrochozoa;Mollusca;Bivalvia;Autobranchia;Heteroconchia;Euherodonta;Imparidentia;Venerida;Veneroidea;Veneridae;Mercenaria;Mercenaria mercenaria

UdeM00000009954 400727 328.9 UdeM00000009954 XP\_025097977.1 60.4  
265 99 2 10 268 75 339 6.30E-87 328.9 400727  
cellular

organisms;Eukaryota;Opisthokonta;Metazoa;Eumetazoa;Bilateria;Protostomia;Spiralia;Lophotrochozoa;Mollusca;Gastropoda;Caenogastropoda;Architaenioglossa;Ampullarioidea;Ampullariidae;Pomacea;Pomacea canaliculata

UdeM00000009955 400727 100.9 UdeM00000009955 XP\_025097959.1 58.3  
432 166 5 27 457 1 419 8.60E-18 100.9 400727  
cellular

organisms;Eukaryota;Opisthokonta;Metazoa;Eumetazoa;Bilateria;Protostomia;Spiralia;Lophotrochozoa;Mollusca;Gastropoda;Caenogastropoda;Architaenioglossa;Ampullarioidea;Ampullariidae;Pomacea;Pomacea canaliculata

UdeM00000009956 6596 152.9 UdeM00000009956 XP\_045167510.1 33.2 292  
168 8 65 332 109 397 7.90E-34 152.9 6596 cellular

organisms;Eukaryota;Opisthokonta;Metazoa;Eumetazoa;Bilateria;Protostomia;Spiralia;Lophotrochozoa;Mollusca;Bivalvia;Autobranchia;Heteroconchia;Euherodonta;Imparidentia;Venerida;Veneroidea;Veneridae;Mercenaria;Mercenaria mercenaria

UdeM00000009957 6596 141 UdeM00000009957 XP\_045167510.1 32.3 285  
166 8 1 261 116 397 2.50E-30 141 6596 cellular

organisms;Eukaryota;Opisthokonta;Metazoa;Eumetazoa;Bilateria;Protostomia;Spiralia;Lophotrochozoa;Mollusca;Bivalvia;Autobranchia;Heteroconchia;Euherodonta;Imparidentia;Venerida;Veneroidea;Veneridae;Mercenaria;Mercenaria mercenaria

UdeM00000009958 6596 152.5 UdeM00000009958 XP\_045167510.1 33.9 292  
166 8 10 277 109 397 8.70E-34 152.5 6596 cellular

organisms;Eukaryota;Opisthokonta;Metazoa;Eumetazoa;Bilateria;Protostomia;Spiralia;Lophotrochozoa;Mollusca;Bivalvia;Autobranchia;Heteroconchia;Euherodonta;Imparidentia;Venerida;Veneroidea;Veneridae;Mercenaria;Mercenaria mercenaria

terodonta;Imparidentia;Venerida;Veneroidea;Veneridae;Mercenaria;Mercenari  
a mercenaria

UdeM00000009959 6596 294.3 UdeM00000009959 XP\_045195539.1 55.7 253  
109 1 3 255 146 395 1.50E-76 294.3 6596 cellular

organisms;Eukaryota;Opisthokonta;Metazoa;Eumetazoa;Bilateria;Protostomia;  
Spiralia;Lophotrochozoa;Mollusca;Bivalvia;Autobranhia;Heteroconchia;Euhe  
terodonta;Imparidentia;Venerida;Veneroidea;Veneridae;Mercenaria;Mercenari  
a mercenaria

UdeM00000009960 1735272 116.3 UdeM00000009960 XP\_041374221.1 35.6  
216 118 3 25 237 25 222 9.50E-23 116.3 1735272  
cellular

organisms;Eukaryota;Opisthokonta;Metazoa;Eumetazoa;Bilateria;Protostomia;  
Spiralia;Lophotrochozoa;Mollusca;Gastropoda;Neomphalina;Neomphaloidea;Pel  
tospiridae;Gigantopelta;Gigantopelta aegis

UdeM00000009961 6596 155.2 UdeM00000009961 XP\_045195540.1 53.7 136  
63 0 2 137 52 187 6.40E-35 155.2 6596 cellular

organisms;Eukaryota;Opisthokonta;Metazoa;Eumetazoa;Bilateria;Protostomia;  
Spiralia;Lophotrochozoa;Mollusca;Bivalvia;Autobranhia;Heteroconchia;Euhe  
terodonta;Imparidentia;Venerida;Veneroidea;Veneridae;Mercenaria;Mercenari  
a mercenaria

UdeM00000009962 6596 67 UdeM00000009962 XP\_045184079.1 42 88  
48 1 1 88 67 151 2.30E-08 67 6596 cellular

organisms;Eukaryota;Opisthokonta;Metazoa;Eumetazoa;Bilateria;Protostomia;  
Spiralia;Lophotrochozoa;Mollusca;Bivalvia;Autobranhia;Heteroconchia;Euhe  
terodonta;Imparidentia;Venerida;Veneroidea;Veneridae;Mercenaria;Mercenari  
a mercenaria

UdeM00000009963 6596 90.5 UdeM00000009963 XP\_045199124.1 47.7 88  
41 2 182 269 745 827 3.50E-15 90.5 6596 cellular

organisms;Eukaryota;Opisthokonta;Metazoa;Eumetazoa;Bilateria;Protostomia;  
Spiralia;Lophotrochozoa;Mollusca;Bivalvia;Autobranhia;Heteroconchia;Euhe  
terodonta;Imparidentia;Venerida;Veneroidea;Veneridae;Mercenaria;Mercenari  
a mercenaria

UdeM00000009964 1735272 117.5 UdeM00000009964 XP\_041374221.1 35.5  
200 113 1 9 208 9 192 2.10E-23 117.5 1735272  
cellular

organisms;Eukaryota;Opisthokonta;Metazoa;Eumetazoa;Bilateria;Protostomia;  
Spiralia;Lophotrochozoa;Mollusca;Gastropoda;Neomphalina;Neomphaloidea;Pel  
tospiridae;Gigantopelta;Gigantopelta aegis

UdeM00000009965 6596 241.9 UdeM00000009965 XP\_045195540.1 55.3 199  
89 0 38 236 51 249 8.30E-61 241.9 6596 cellular

organisms;Eukaryota;Opisthokonta;Metazoa;Eumetazoa;Bilateria;Protostomia;  
Spiralia;Lophotrochozoa;Mollusca;Bivalvia;Autobranhia;Heteroconchia;Euhe  
terodonta;Imparidentia;Venerida;Veneroidea;Veneridae;Mercenaria;Mercenari  
a mercenaria

UdeM00000009966 6596 245.7 UdeM00000009966 XP\_045195540.1 53.6 209  
97 0 38 246 51 259 6.30E-62 245.7 6596 cellular

organisms;Eukaryota;Opisthokonta;Metazoa;Eumetazoa;Bilateria;Protostomia;  
Spiralia;Lophotrochozoa;Mollusca;Bivalvia;Autobranhia;Heteroconchia;Euhe  
terodonta;Imparidentia;Venerida;Veneroidea;Veneridae;Mercenaria;Mercenari  
a mercenaria

UdeM00000009967 1735272 117.1 UdeM00000009967 XP\_041374221.1 36.7  
180 98 1 28 207 29 192 5.60E-23 117.1 1735272  
cellular

organisms;Eukaryota;Opisthokonta;Metazoa;Eumetazoa;Bilateria;Protostomia;

Spiralia;Lophotrochozoa;Mollusca;Gastropoda;Neomphalina;Neomphaloidea;Pel  
tospiridae;Gigantopelta;Gigantopelta aegis  
UdeM00000009968 6596 291.6 UdeM00000009968 XP\_045195540.1 49.1 277  
138 2 5 279 46 321 1.10E-75 291.6 6596 cellular  
organisms;Eukaryota;Opisthokonta;Metazoa;Eumetazoa;Bilateria;Protostomia;  
Spiralia;Lophotrochozoa;Mollusca;Bivalvia;Autobranchia;Heteroconchia;Euhe  
terodonta;Imparidentia;Venerida;Veneroidea;Veneridae;Mercenaria;Mercenari  
a mercenaria  
UdeM00000009970 6596 71.2 UdeM00000009970 XP\_045196982.1 29 210  
110 8 325 512 262 454 4.30E-09 71.2 6596 cellular  
organisms;Eukaryota;Opisthokonta;Metazoa;Eumetazoa;Bilateria;Protostomia;  
Spiralia;Lophotrochozoa;Mollusca;Bivalvia;Autobranchia;Heteroconchia;Euhe  
terodonta;Imparidentia;Venerida;Veneroidea;Veneridae;Mercenaria;Mercenari  
a mercenaria  
UdeM00000009971 6596 787.3 UdeM00000009971 XP\_045196981.1 60.2 706  
189 9 10 625 6 709 1.50E-224 787.3 6596 cellular  
organisms;Eukaryota;Opisthokonta;Metazoa;Eumetazoa;Bilateria;Protostomia;  
Spiralia;Lophotrochozoa;Mollusca;Bivalvia;Autobranchia;Heteroconchia;Euhe  
terodonta;Imparidentia;Venerida;Veneroidea;Veneridae;Mercenaria;Mercenari  
a mercenaria  
UdeM00000009972 6596 788.5 UdeM00000009972 XP\_045196981.1 60.1 709  
191 9 61 679 3 709 7.40E-225 788.5 6596 cellular  
organisms;Eukaryota;Opisthokonta;Metazoa;Eumetazoa;Bilateria;Protostomia;  
Spiralia;Lophotrochozoa;Mollusca;Bivalvia;Autobranchia;Heteroconchia;Euhe  
terodonta;Imparidentia;Venerida;Veneroidea;Veneridae;Mercenaria;Mercenari  
a mercenaria  
UdeM00000009973 225164 370.9 UdeM00000009973 XP\_009059969.1 62.4  
271 98 2 1 267 1 271 1.40E-99 370.9 225164  
cellular  
organisms;Eukaryota;Opisthokonta;Metazoa;Eumetazoa;Bilateria;Protostomia;  
Spiralia;Lophotrochozoa;Mollusca;Gastropoda;Patellogastropoda;Lottioidea;  
Lottiidae;Lottia;Lottia gigantea  
UdeM00000009975 6596 558.9 UdeM00000009975 XP\_045197348.1 75.3 368  
91 0 11 378 137 504 4.90E-156 558.9 6596 cellular  
organisms;Eukaryota;Opisthokonta;Metazoa;Eumetazoa;Bilateria;Protostomia;  
Spiralia;Lophotrochozoa;Mollusca;Bivalvia;Autobranchia;Heteroconchia;Euhe  
terodonta;Imparidentia;Venerida;Veneroidea;Veneridae;Mercenaria;Mercenari  
a mercenaria  
UdeM00000009976 1735272 474.2 UdeM00000009976 XP\_041353934.1 43.2  
546 297 3 1 543 1 536 2.40E-130 474.2 1735272  
cellular  
organisms;Eukaryota;Opisthokonta;Metazoa;Eumetazoa;Bilateria;Protostomia;  
Spiralia;Lophotrochozoa;Mollusca;Gastropoda;Neomphalina;Neomphaloidea;Pel  
tospiridae;Gigantopelta;Gigantopelta aegis  
UdeM00000009977 400727 72.4 UdeM00000009977 XP\_025113859.1 27.6  
293 163 13 25 296 54 318 1.10E-09 72.4 400727  
cellular  
organisms;Eukaryota;Opisthokonta;Metazoa;Eumetazoa;Bilateria;Protostomia;  
Spiralia;Lophotrochozoa;Mollusca;Gastropoda;Caenogastropoda;Architaeniogl  
ossa;Ampullarioidea;Ampullariidae;Pomacea;Pomacea canaliculata  
UdeM00000009978 6596 90.5 UdeM00000009978 XP\_045197794.1 27 289  
161 13 8 258 1 277 4.00E-15 90.5 6596 cellular  
organisms;Eukaryota;Opisthokonta;Metazoa;Eumetazoa;Bilateria;Protostomia;  
Spiralia;Lophotrochozoa;Mollusca;Bivalvia;Autobranchia;Heteroconchia;Euhe



terodonta;Imparidentia;Venerida;Veneroidea;Veneridae;Mercenaria;Mercenari  
 a mercenaria  
 UdeM00000009979 6579 76.6 UdeM00000009979 XP\_033729564.1 50 60  
 30 0 8 67 822 881 7.30E-11 76.6 6579 cellular  
 organisms;Eukaryota;Opisthokonta;Metazoa;Eumetazoa;Bilateria;Protostomia;  
 Spiralia;Lophotrochozoa;Mollusca;Bivalvia;Autobranhia;Pteriormorphia;Pect  
 inida;Pectinoidea;Pectinidae;Pecten;Pecten maximus  
 UdeM00000009980 6596 77.8 UdeM00000009980 XP\_045197787.1 27.8 263  
 147 9 32 258 53 308 2.70E-11 77.8 6596 cellular  
 organisms;Eukaryota;Opisthokonta;Metazoa;Eumetazoa;Bilateria;Protostomia;  
 Spiralia;Lophotrochozoa;Mollusca;Bivalvia;Autobranhia;Heteroconchia;Euhe  
 terodonta;Imparidentia;Venerida;Veneroidea;Veneridae;Mercenaria;Mercenari  
 a mercenaria  
 UdeM00000009981 6596 91.7 UdeM00000009981 XP\_045197792.1 26 289  
 166 11 10 259 4 283 1.80E-15 91.7 6596 cellular  
 organisms;Eukaryota;Opisthokonta;Metazoa;Eumetazoa;Bilateria;Protostomia;  
 Spiralia;Lophotrochozoa;Mollusca;Bivalvia;Autobranhia;Heteroconchia;Euhe  
 terodonta;Imparidentia;Venerida;Veneroidea;Veneridae;Mercenaria;Mercenari  
 a mercenaria  
 UdeM00000009982 6565 410.2 UdeM00000009982 XP\_022293691.1 54.6 379  
 169 2 22 399 9 385 3.00E-11 410.2 6565 cellular  
 organisms;Eukaryota;Opisthokonta;Metazoa;Eumetazoa;Bilateria;Protostomia;  
 Spiralia;Lophotrochozoa;Mollusca;Bivalvia;Autobranhia;Pteriormorphia;Ostr  
 eida;Ostreoidea;Ostreidae;Crassostrea;Crassostrea virginica  
 UdeM00000009985 1735272 563.1 UdeM00000009985 XP\_041353982.1 59.2  
 468 181 4 85 546 51 514 3.90E-157 563.1 1735272  
 cellular  
 organisms;Eukaryota;Opisthokonta;Metazoa;Eumetazoa;Bilateria;Protostomia;  
 Spiralia;Lophotrochozoa;Mollusca;Gastropoda;Neomphalina;Neomphaloidea;Pel  
 tospiridae;Gigantopelta;Gigantopelta aegis  
 UdeM00000009986 1735272 563.1 UdeM00000009986 XP\_041353982.1 59.2  
 468 181 4 59 520 51 514 3.70E-157 563.1 1735272  
 cellular  
 organisms;Eukaryota;Opisthokonta;Metazoa;Eumetazoa;Bilateria;Protostomia;  
 Spiralia;Lophotrochozoa;Mollusca;Gastropoda;Neomphalina;Neomphaloidea;Pel  
 tospiridae;Gigantopelta;Gigantopelta aegis  
 UdeM00000009987 1735272 553.9 UdeM00000009987 XP\_041353982.1 60.5  
 448 167 4 106 547 71 514 2.40E-154 553.9 1735272  
 cellular  
 organisms;Eukaryota;Opisthokonta;Metazoa;Eumetazoa;Bilateria;Protostomia;  
 Spiralia;Lophotrochozoa;Mollusca;Gastropoda;Neomphalina;Neomphaloidea;Pel  
 tospiridae;Gigantopelta;Gigantopelta aegis  
 UdeM00000009988 1735272 563.1 UdeM00000009988 XP\_041353982.1 59.2  
 468 181 4 70 531 51 514 3.80E-157 563.1 1735272  
 cellular  
 organisms;Eukaryota;Opisthokonta;Metazoa;Eumetazoa;Bilateria;Protostomia;  
 Spiralia;Lophotrochozoa;Mollusca;Gastropoda;Neomphalina;Neomphaloidea;Pel  
 tospiridae;Gigantopelta;Gigantopelta aegis  
 UdeM00000009990 6596 273.5 UdeM00000009990 XP\_045197568.1 46.5 299  
 145 4 3 288 2 298 3.20E-70 273.5 6596 cellular  
 organisms;Eukaryota;Opisthokonta;Metazoa;Eumetazoa;Bilateria;Protostomia;  
 Spiralia;Lophotrochozoa;Mollusca;Bivalvia;Autobranhia;Heteroconchia;Euhe  
 terodonta;Imparidentia;Venerida;Veneroidea;Veneridae;Mercenaria;Mercenari  
 a mercenaria

UdeM00000009991 1735272 138.3 UdeM00000009991 XP\_041354202.1 45.9  
 148 75 2 1 148 1 143 8.30E-30 138.3 1735272  
 cellular  
 organisms;Eukaryota;Opisthokonta;Metazoa;Eumetazoa;Bilateria;Protostomia;  
 Spiralia;Lophotrochozoa;Mollusca;Gastropoda;Neomphalina;Neomphaloidea;Pel  
 tospiridae;Gigantopelta;Gigantopelta aegis  
 UdeM00000009992 400727 240.4 UdeM00000009992 XP\_025098019.1 62.2  
 209 76 3 1 208 28 234 2.10E-60 240.4 400727  
 cellular  
 organisms;Eukaryota;Opisthokonta;Metazoa;Eumetazoa;Bilateria;Protostomia;  
 Spiralia;Lophotrochozoa;Mollusca;Gastropoda;Caenogastropoda;Architaeniogl  
 ossa;Ampullarioidea;Ampullariidae;Pomacea;Pomacea canaliculata  
 UdeM00000009993 6596 1180.2 UdeM00000009993 XP\_045198000.1 66.3  
 902 288 10 25 920 21 912 0.00E+00 1180.2 6596  
 cellular  
 organisms;Eukaryota;Opisthokonta;Metazoa;Eumetazoa;Bilateria;Protostomia;  
 Spiralia;Lophotrochozoa;Mollusca;Bivalvia;Autobranchia;Heteroconchia;Euhe  
 terodonta;Imparidentia;Venerida;Veneroidea;Veneridae;Mercenaria;Mercenari  
 a mercenaria  
 UdeM00000009994 6596 438.3 UdeM00000009994 XP\_045198000.1 52.8 422  
 190 8 25 441 21 438 1.10E-119 438.3 6596 cellular  
 organisms;Eukaryota;Opisthokonta;Metazoa;Eumetazoa;Bilateria;Protostomia;  
 Spiralia;Lophotrochozoa;Mollusca;Bivalvia;Autobranchia;Heteroconchia;Euhe  
 terodonta;Imparidentia;Venerida;Veneroidea;Veneridae;Mercenaria;Mercenari  
 a mercenaria  
 UdeM00000009995 6596 427.6 UdeM00000009995 XP\_045196606.1 54.5 492  
 94 3 1 363 1 491 1.70E-116 427.6 6596 cellular  
 organisms;Eukaryota;Opisthokonta;Metazoa;Eumetazoa;Bilateria;Protostomia;  
 Spiralia;Lophotrochozoa;Mollusca;Bivalvia;Autobranchia;Heteroconchia;Euhe  
 terodonta;Imparidentia;Venerida;Veneroidea;Veneridae;Mercenaria;Mercenari  
 a mercenaria  
 UdeM00000009996 29159 183 UdeM00000009996 XP\_034333380.1 80.9 115  
 22 0 1 115 415 529 2.30E-43 183 29159 cellular  
 organisms;Eukaryota;Opisthokonta;Metazoa;Eumetazoa;Bilateria;Protostomia;  
 Spiralia;Lophotrochozoa;Mollusca;Bivalvia;Autobranchia;Pteriomorphia;Ostr  
 eida;Ostreoidea;Ostreidae;Crassostrea;Crassostrea gigas  
 UdeM00000009998 6596 1147.1 UdeM00000009998 XP\_045197672.1 82.1  
 764 119 10 21 767 1673 2435 0.00E+00 1147.1 6596  
 cellular  
 organisms;Eukaryota;Opisthokonta;Metazoa;Eumetazoa;Bilateria;Protostomia;  
 Spiralia;Lophotrochozoa;Mollusca;Bivalvia;Autobranchia;Heteroconchia;Euhe  
 terodonta;Imparidentia;Venerida;Veneroidea;Veneridae;Mercenaria;Mercenari  
 a mercenaria  
 UdeM00000009999 6573 496.5 UdeM00000009999 XP\_021350247.1 55 642  
 219 25 8 614 1028 1634 5.30E-137 496.5 6573 cellular  
 organisms;Eukaryota;Opisthokonta;Metazoa;Eumetazoa;Bilateria;Protostomia;  
 Spiralia;Lophotrochozoa;Mollusca;Bivalvia;Autobranchia;Pteriomorphia;Pect  
 inida;Pectinoidea;Pectinidae;Mizuhopecten;Mizuhopecten yessoensis  
 UdeM00000010001 6596 626.3 UdeM00000010001 XP\_045197670.1 45 1023  
 390 36 18 983 21 927 6.70E-176 626.3 6596 cellular  
 organisms;Eukaryota;Opisthokonta;Metazoa;Eumetazoa;Bilateria;Protostomia;  
 Spiralia;Lophotrochozoa;Mollusca;Bivalvia;Autobranchia;Heteroconchia;Euhe  
 terodonta;Imparidentia;Venerida;Veneroidea;Veneridae;Mercenaria;Mercenari  
 a mercenaria

UdeM00000010002 29159 908.3 UdeM00000010002 XP\_011457079.2 62.7 706  
 253 6 46 745 88 789 6.50E-261 908.3 29159 cellular  
 organisms;Eukaryota;Opisthokonta;Metazoa;Eumetazoa;Bilateria;Protostomia;  
 Spiralia;Lophotrochozoa;Mollusca;Bivalvia;Autobranchia;Pteriormorphia;Ostr  
 eida;Ostreoidea;Ostreidae;Crassostrea;Crassostrea gigas  
 UdeM00000010003 6596 306.2 UdeM00000010003 XP\_045197669.1 42.2 422  
 216 8 7 420 6 407 6.30E-80 306.2 6596 cellular  
 organisms;Eukaryota;Opisthokonta;Metazoa;Eumetazoa;Bilateria;Protostomia;  
 Spiralia;Lophotrochozoa;Mollusca;Bivalvia;Autobranchia;Heteroconchia;Euhe  
 terodonta;Imparidentia;Venerida;Veneroidea;Veneridae;Mercenaria;Mercenari  
 a mercenaria  
 UdeM00000010004 6579 849.7 UdeM00000010004 XP\_033741100.1 62.2 788  
 279 11 1 775 1 782 2.80E-243 849.7 6579 cellular  
 organisms;Eukaryota;Opisthokonta;Metazoa;Eumetazoa;Bilateria;Protostomia;  
 Spiralia;Lophotrochozoa;Mollusca;Bivalvia;Autobranchia;Pteriormorphia;Pect  
 inida;Pectinoidea;Pectinidae;Pecten;Pecten maximus  
 UdeM00000010005 6579 517.3 UdeM00000010005 XP\_033741100.1 66.7 424  
 133 4 1 421 364 782 1.80E-143 517.3 6579 cellular  
 organisms;Eukaryota;Opisthokonta;Metazoa;Eumetazoa;Bilateria;Protostomia;  
 Spiralia;Lophotrochozoa;Mollusca;Bivalvia;Autobranchia;Pteriormorphia;Pect  
 inida;Pectinoidea;Pectinidae;Pecten;Pecten maximus  
 UdeM00000010006 45264 167.5 UdeM00000010006 XP\_044166166.1 49.3 150  
 75 1 1 149 667 816 1.50E-38 167.5 45264 cellular  
 organisms;Eukaryota;Opisthokonta;Metazoa;Eumetazoa;Cnidaria;Anthozoa;Hexa  
 corallia;Scleractinia;Astrocoeniina;Acroporidae;Acropora;Acropora  
 millepora  
 UdeM00000010007 29159 924.1 UdeM00000010007 XP\_011433097.1 87 538  
 66 3 1 536 5 540 8.20E-266 924.1 29159 cellular  
 organisms;Eukaryota;Opisthokonta;Metazoa;Eumetazoa;Bilateria;Protostomia;  
 Spiralia;Lophotrochozoa;Mollusca;Bivalvia;Autobranchia;Pteriormorphia;Ostr  
 eida;Ostreoidea;Ostreidae;Crassostrea;Crassostrea gigas  
 UdeM00000010008 7741 166 UdeM00000010008 XP\_019627842.1 60.3 136  
 54 0 9 144 8 143 3.70E-38 166 7741 cellular  
 organisms;Eukaryota;Opisthokonta;Metazoa;Eumetazoa;Bilateria;Deuterostomi  
 a;Chordata;Cephalochordata;Leptocardii;Amphioxiformes;Branchiostomidae;Br  
 anchiostoma;Branchiostoma belcheri  
 UdeM00000010009 8355 83.6 UdeM00000010009 NP\_001121239.1 40.5 121  
 64 2 27 147 36 148 2.50E-13 83.6 8355 cellular  
 organisms;Eukaryota;Opisthokonta;Metazoa;Eumetazoa;Bilateria;Deuterostomi  
 a;Chordata;Craniata;Vertebrata;Gnathostomata;Teleostomi;Euteleostomi;Sarc  
 opterygii;Dipnotetrapodomorpha;Tetrapoda;Amphibia;Batrachia;Anura;Pipoide  
 a;Pipidae;Xenopodinae;Xenopus;Xenopus;Xenopus laevis  
 UdeM00000010010 6596 626.3 UdeM00000010010 XP\_045195376.1 54.1 737  
 298 7 13 724 25 746 4.90E-176 626.3 6596 cellular  
 organisms;Eukaryota;Opisthokonta;Metazoa;Eumetazoa;Bilateria;Protostomia;  
 Spiralia;Lophotrochozoa;Mollusca;Bivalvia;Autobranchia;Heteroconchia;Euhe  
 terodonta;Imparidentia;Venerida;Veneroidea;Veneridae;Mercenaria;Mercenari  
 a mercenaria  
 UdeM00000010011 6565 176.8 UdeM00000010011 XP\_022299727.1 46 200  
 106 1 1 198 46 245 2.70E-41 176.8 6565 cellular  
 organisms;Eukaryota;Opisthokonta;Metazoa;Eumetazoa;Bilateria;Protostomia;  
 Spiralia;Lophotrochozoa;Mollusca;Bivalvia;Autobranchia;Pteriormorphia;Ostr  
 eida;Ostreoidea;Ostreidae;Crassostrea;Crassostrea virginica

UdeM00000010012 6573 992.6 UdeM00000010012 XP\_021352598.1 64.8 1132  
 329 15 203 1299 496 1593 4.50E-286 992.6 6573 cellular  
 organisms;Eukaryota;Opisthokonta;Metazoa;Eumetazoa;Bilateria;Protostomia;  
 Spiralia;Lophotrochozoa;Mollusca;Bivalvia;Autobranchia;Pteriomorpha;Pect  
 inida;Pectinoidea;Pectinidae;Mizuhopecten;Mizuhopecten yessoensis  
 UdeM00000010013 6596 374 UdeM00000010013 XP\_045197805.1 73.8 252  
 66 0 111 362 117 368 3.40E-100 374 6596 cellular  
 organisms;Eukaryota;Opisthokonta;Metazoa;Eumetazoa;Bilateria;Protostomia;  
 Spiralia;Lophotrochozoa;Mollusca;Bivalvia;Autobranchia;Heteroconchia;Euhe  
 terodonta;Imparidentia;Venerida;Veneroidea;Veneridae;Mercenaria;Mercenari  
 a mercenaria  
 UdeM00000010014 6596 374 UdeM00000010014 XP\_045197805.1 73.8 252  
 66 0 111 362 117 368 3.40E-100 374 6596 cellular  
 organisms;Eukaryota;Opisthokonta;Metazoa;Eumetazoa;Bilateria;Protostomia;  
 Spiralia;Lophotrochozoa;Mollusca;Bivalvia;Autobranchia;Heteroconchia;Euhe  
 terodonta;Imparidentia;Venerida;Veneroidea;Veneridae;Mercenaria;Mercenari  
 a mercenaria  
 UdeM00000010015 6596 374 UdeM00000010015 XP\_045197805.1 73.8 252  
 66 0 111 362 117 368 3.10E-100 374 6596 cellular  
 organisms;Eukaryota;Opisthokonta;Metazoa;Eumetazoa;Bilateria;Protostomia;  
 Spiralia;Lophotrochozoa;Mollusca;Bivalvia;Autobranchia;Heteroconchia;Euhe  
 terodonta;Imparidentia;Venerida;Veneroidea;Veneridae;Mercenaria;Mercenari  
 a mercenaria  
 UdeM00000010017 6596 320.9 UdeM00000010017 XP\_045196412.1 43.7 380  
 190 5 24 401 3 360 2.40E-84 320.9 6596 cellular  
 organisms;Eukaryota;Opisthokonta;Metazoa;Eumetazoa;Bilateria;Protostomia;  
 Spiralia;Lophotrochozoa;Mollusca;Bivalvia;Autobranchia;Heteroconchia;Euhe  
 terodonta;Imparidentia;Venerida;Veneroidea;Veneridae;Mercenaria;Mercenari  
 a mercenaria  
 UdeM00000010018 6596 270 UdeM00000010018 XP\_045197818.1 31.9 548  
 264 15 142 638 76 565 7.60E-69 270 6596 cellular  
 organisms;Eukaryota;Opisthokonta;Metazoa;Eumetazoa;Bilateria;Protostomia;  
 Spiralia;Lophotrochozoa;Mollusca;Bivalvia;Autobranchia;Heteroconchia;Euhe  
 terodonta;Imparidentia;Venerida;Veneroidea;Veneridae;Mercenaria;Mercenari  
 a mercenaria  
 UdeM00000010019 6596 220.3 UdeM00000010019 XP\_045203753.1 24.9 872  
 553 25 51 892 6 805 1.10E-53 220.3 6596 cellular  
 organisms;Eukaryota;Opisthokonta;Metazoa;Eumetazoa;Bilateria;Protostomia;  
 Spiralia;Lophotrochozoa;Mollusca;Bivalvia;Autobranchia;Heteroconchia;Euhe  
 terodonta;Imparidentia;Venerida;Veneroidea;Veneridae;Mercenaria;Mercenari  
 a mercenaria  
 UdeM00000010020 6596 197.2 UdeM00000010020 XP\_045203753.1 22.6 894  
 594 23 89 966 7 818 1.00E-46 197.2 6596 cellular  
 organisms;Eukaryota;Opisthokonta;Metazoa;Eumetazoa;Bilateria;Protostomia;  
 Spiralia;Lophotrochozoa;Mollusca;Bivalvia;Autobranchia;Heteroconchia;Euhe  
 terodonta;Imparidentia;Venerida;Veneroidea;Veneridae;Mercenaria;Mercenari  
 a mercenaria  
 UdeM00000010023 6596 207.6 UdeM00000010023 XP\_045203753.1 23.9 867  
 564 26 51 891 6 802 7.50E-50 207.6 6596 cellular  
 organisms;Eukaryota;Opisthokonta;Metazoa;Eumetazoa;Bilateria;Protostomia;  
 Spiralia;Lophotrochozoa;Mollusca;Bivalvia;Autobranchia;Heteroconchia;Euhe  
 terodonta;Imparidentia;Venerida;Veneroidea;Veneridae;Mercenaria;Mercenari  
 a mercenaria

UdeM00000010027 6596 206.5 UdeM00000010027 XP\_045203753.1 23.5 875  
 557 28 51 891 6 802 1.70E-49 206.5 6596 cellular  
 organisms;Eukaryota;Opisthokonta;Metazoa;Eumetazoa;Bilateria;Protostomia;  
 Spiralia;Lophotrochozoa;Mollusca;Bivalvia;Autobranhia;Heteroconchia;Euhe  
 terodonta;Imparidentia;Venerida;Veneroidea;Veneridae;Mercenaria;Mercenari  
 a mercenaria

UdeM00000010028 6596 188.3 UdeM00000010028 XP\_045196567.1 79.2 101  
 21 0 13 113 19 119 5.20E-45 188.3 6596 cellular  
 organisms;Eukaryota;Opisthokonta;Metazoa;Eumetazoa;Bilateria;Protostomia;  
 Spiralia;Lophotrochozoa;Mollusca;Bivalvia;Autobranhia;Heteroconchia;Euhe  
 terodonta;Imparidentia;Venerida;Veneroidea;Veneridae;Mercenaria;Mercenari  
 a mercenaria

UdeM00000010029 6596 193.4 UdeM00000010029 XP\_045196567.1 82.2 101  
 18 0 13 113 19 119 1.60E-46 193.4 6596 cellular  
 organisms;Eukaryota;Opisthokonta;Metazoa;Eumetazoa;Bilateria;Protostomia;  
 Spiralia;Lophotrochozoa;Mollusca;Bivalvia;Autobranhia;Heteroconchia;Euhe  
 terodonta;Imparidentia;Venerida;Veneroidea;Veneridae;Mercenaria;Mercenari  
 a mercenaria

UdeM00000010030 6596 819.3 UdeM00000010030 XP\_045198488.1 61.5 712  
 256 9 141 841 154 858 4.50E-234 819.3 6596 cellular  
 organisms;Eukaryota;Opisthokonta;Metazoa;Eumetazoa;Bilateria;Protostomia;  
 Spiralia;Lophotrochozoa;Mollusca;Bivalvia;Autobranhia;Heteroconchia;Euhe  
 terodonta;Imparidentia;Venerida;Veneroidea;Veneridae;Mercenaria;Mercenari  
 a mercenaria

UdeM00000010031 6573 786.6 UdeM00000010031 XP\_021360680.1 60.3 710  
 234 14 14 695 5 694 2.70E-224 786.6 6573 cellular  
 organisms;Eukaryota;Opisthokonta;Metazoa;Eumetazoa;Bilateria;Protostomia;  
 Spiralia;Lophotrochozoa;Mollusca;Bivalvia;Autobranhia;Pteriomorphia;Pect  
 inida;Pectinoidea;Pectinidae;Mizuhopecten;Mizuhopecten yessoensis

UdeM00000010032 400727 283.5 UdeM00000010032 XP\_025083450.1 61.6  
 203 74 2 30 232 133 331 2.40E-73 283.5 400727  
 cellular  
 organisms;Eukaryota;Opisthokonta;Metazoa;Eumetazoa;Bilateria;Protostomia;  
 Spiralia;Lophotrochozoa;Mollusca;Gastropoda;Caenogastropoda;Architaeniogl  
 ossa;Ampullarioidea;Ampullariidae;Pomacea;Pomacea canaliculata

UdeM00000010033 6596 147.5 UdeM00000010033 XP\_045198557.1 59 134  
 51 2 8 141 8 137 1.30E-32 147.5 6596 cellular  
 organisms;Eukaryota;Opisthokonta;Metazoa;Eumetazoa;Bilateria;Protostomia;  
 Spiralia;Lophotrochozoa;Mollusca;Bivalvia;Autobranhia;Heteroconchia;Euhe  
 terodonta;Imparidentia;Venerida;Veneroidea;Veneridae;Mercenaria;Mercenari  
 a mercenaria

UdeM00000010034 1529436 69.7 UdeM00000010034 XP\_033121705.1 46.5  
 71 36 1 24 92 49 119 7.70E-09 69.7 1529436  
 cellular  
 organisms;Eukaryota;Opisthokonta;Metazoa;Eumetazoa;Bilateria;Deuterostomi  
 a;Echinodermata;Pelmatozoa;Crinoidea;Articulata;Comatulida;Comatulidae;Co  
 matulinae;Anneissia;Anneissia japonica

UdeM00000010035 6526 226.5 UdeM00000010035 XP\_013061472.1 98.2 109  
 2 0 144 252 53 161 3.80E-56 226.5 6526 cellular  
 organisms;Eukaryota;Opisthokonta;Metazoa;Eumetazoa;Bilateria;Protostomia;  
 Spiralia;Lophotrochozoa;Mollusca;Gastropoda;Heterobranhia;Euthyneura;Pan  
 pulmonata;Hygrophila;Lymnaeioidea;Planorbidae;Biophalaria;Biophalaria  
 glabrata

UdeM00000010036 6596 362.1 UdeM00000010036 XP\_045197975.1 51.8 357  
 166 2 115 471 1516 1866 1.20E-96 362.1 6596 cellular  
 organisms;Eukaryota;Opisthokonta;Metazoa;Eumetazoa;Bilateria;Protostomia;  
 Spiralia;Lophotrochozoa;Mollusca;Bivalvia;Autobranchia;Heteroconchia;Euhe  
 terodonta;Imparidentia;Venerida;Veneroidea;Veneridae;Mercenaria;Mercenari  
 a mercenaria  
 UdeM00000010037 1735272 102.8 UdeM00000010037 XP\_041351593.1 24.4  
 377 264 11 119 481 826 1195 1.30E-18 102.8 1735272  
 cellular  
 organisms;Eukaryota;Opisthokonta;Metazoa;Eumetazoa;Bilateria;Protostomia;  
 Spiralia;Lophotrochozoa;Mollusca;Gastropoda;Neomphalina;Neomphaloidea;Pel  
 tospiridae;Gigantopelta;Gigantopelta aegis  
 UdeM00000010038 46514 69.3 UdeM00000010038 XP\_038058027.1 29.8 171  
 103 7 46 207 1365 1527 7.40E-09 69.3 46514 cellular  
 organisms;Eukaryota;Opisthokonta;Metazoa;Eumetazoa;Bilateria;Deuterostomi  
 a;Echinodermata;Eleutherozoa;Asterozoa;Asteroidea;Valvatacea;Valvatida;As  
 terinidae;Patiria;Patiria miniata  
 UdeM00000010039 7739 72 UdeM00000010039 XP\_035688627.1 32.5 123  
 73 4 23 144 312 425 2.50E-09 72 7739 cellular  
 organisms;Eukaryota;Opisthokonta;Metazoa;Eumetazoa;Bilateria;Deuterostomi  
 a;Chordata;Cephalochordata;Leptocardii;Amphioxiformes;Branchiostomidae;Br  
 anchiostoma;Branchiostoma floridae  
 UdeM00000010040 29159 76.3 UdeM00000010040 XP\_011456828.2 27.2 382  
 224 14 3 360 4 355 9.60E-11 76.3 29159 cellular  
 organisms;Eukaryota;Opisthokonta;Metazoa;Eumetazoa;Bilateria;Protostomia;  
 Spiralia;Lophotrochozoa;Mollusca;Bivalvia;Autobranchia;Pteriormorphia;Ostr  
 eida;Ostreoidea;Ostreidae;Crassostrea;Crassostrea gigas  
 UdeM00000010042 6573 241.9 UdeM00000010042 XP\_021357351.1 47.3 245  
 126 2 56 300 86 327 1.10E-60 241.9 6573 cellular  
 organisms;Eukaryota;Opisthokonta;Metazoa;Eumetazoa;Bilateria;Protostomia;  
 Spiralia;Lophotrochozoa;Mollusca;Bivalvia;Autobranchia;Pteriormorphia;Pect  
 inida;Pectinoidea;Pectinidae;Mizuhopecten;Mizuhopecten yessoensis  
 UdeM00000010043 6596 181.8 UdeM00000010043 XP\_045196988.1 30.6 676  
 317 28 6 582 51 673 2.60E-42 181.8 6596 cellular  
 organisms;Eukaryota;Opisthokonta;Metazoa;Eumetazoa;Bilateria;Protostomia;  
 Spiralia;Lophotrochozoa;Mollusca;Bivalvia;Autobranchia;Heteroconchia;Euhe  
 terodonta;Imparidentia;Venerida;Veneroidea;Veneridae;Mercenaria;Mercenari  
 a mercenaria  
 UdeM00000010044 1735272 531.9 UdeM00000010044 XP\_041350900.1 47.2  
 595 282 5 12 579 11 600 1.10E-147 531.9 1735272  
 cellular  
 organisms;Eukaryota;Opisthokonta;Metazoa;Eumetazoa;Bilateria;Protostomia;  
 Spiralia;Lophotrochozoa;Mollusca;Gastropoda;Neomphalina;Neomphaloidea;Pel  
 tospiridae;Gigantopelta;Gigantopelta aegis  
 UdeM00000010045 6596 226.1 UdeM00000010045 XP\_045186349.1 49.8 213  
 99 2 6 215 10 217 4.30E-56 226.1 6596 cellular  
 organisms;Eukaryota;Opisthokonta;Metazoa;Eumetazoa;Bilateria;Protostomia;  
 Spiralia;Lophotrochozoa;Mollusca;Bivalvia;Autobranchia;Heteroconchia;Euhe  
 terodonta;Imparidentia;Venerida;Veneroidea;Veneridae;Mercenaria;Mercenari  
 a mercenaria  
 UdeM00000010046 6596 221.9 UdeM00000010046 XP\_045186349.1 48.8 213  
 103 2 6 218 9 215 8.30E-55 221.9 6596 cellular  
 organisms;Eukaryota;Opisthokonta;Metazoa;Eumetazoa;Bilateria;Protostomia;  
 Spiralia;Lophotrochozoa;Mollusca;Bivalvia;Autobranchia;Heteroconchia;Euhe

terodonta;Imparidentia;Venerida;Veneroidea;Veneridae;Mercenaria;Mercenari  
 a mercenaria  
 UdeM00000010047 6596 231.9 UdeM00000010047 XP\_045186349.1 49.8 211  
 101 1 6 216 10 215 8.00E-58 231.9 6596 cellular  
 organisms;Eukaryota;Opisthokonta;Metazoa;Eumetazoa;Bilateria;Protostomia;  
 Spiralia;Lophotrochozoa;Mollusca;Bivalvia;Autobranchia;Heteroconchia;Euhe  
 terodonta;Imparidentia;Venerida;Veneroidea;Veneridae;Mercenaria;Mercenari  
 a mercenaria  
 UdeM00000010048 6596 228.8 UdeM00000010048 XP\_045186349.1 49.8 211  
 101 1 6 216 10 215 6.80E-57 228.8 6596 cellular  
 organisms;Eukaryota;Opisthokonta;Metazoa;Eumetazoa;Bilateria;Protostomia;  
 Spiralia;Lophotrochozoa;Mollusca;Bivalvia;Autobranchia;Heteroconchia;Euhe  
 terodonta;Imparidentia;Venerida;Veneroidea;Veneridae;Mercenaria;Mercenari  
 a mercenaria  
 UdeM00000010049 1735272 632.5 UdeM00000010049 XP\_041352142.1 79.8  
 431 82 2 41 466 1 431 4.30E-178 632.5 1735272  
 cellular  
 organisms;Eukaryota;Opisthokonta;Metazoa;Eumetazoa;Bilateria;Protostomia;  
 Spiralia;Lophotrochozoa;Mollusca;Gastropoda;Neomphalina;Neomphaloidea;Pel  
 tospiridae;Gigantopelta;Gigantopelta aegis  
 UdeM00000010050 1735272 613.6 UdeM00000010050 XP\_041352142.1 73  
 471 82 3 41 506 1 431 2.20E-172 613.6 1735272  
 cellular  
 organisms;Eukaryota;Opisthokonta;Metazoa;Eumetazoa;Bilateria;Protostomia;  
 Spiralia;Lophotrochozoa;Mollusca;Gastropoda;Neomphalina;Neomphaloidea;Pel  
 tospiridae;Gigantopelta;Gigantopelta aegis  
 UdeM00000010051 6596 486.1 UdeM00000010051 XP\_045195290.1 35.9 829  
 469 11 14 829 32 811 8.90E-134 486.1 6596 cellular  
 organisms;Eukaryota;Opisthokonta;Metazoa;Eumetazoa;Bilateria;Protostomia;  
 Spiralia;Lophotrochozoa;Mollusca;Bivalvia;Autobranchia;Heteroconchia;Euhe  
 terodonta;Imparidentia;Venerida;Veneroidea;Veneridae;Mercenaria;Mercenari  
 a mercenaria  
 UdeM00000010052 6596 280.4 UdeM00000010052 XP\_045195290.1 35.5 451  
 288 3 27 476 363 811 4.30E-72 280.4 6596 cellular  
 organisms;Eukaryota;Opisthokonta;Metazoa;Eumetazoa;Bilateria;Protostomia;  
 Spiralia;Lophotrochozoa;Mollusca;Bivalvia;Autobranchia;Heteroconchia;Euhe  
 terodonta;Imparidentia;Venerida;Veneroidea;Veneridae;Mercenaria;Mercenari  
 a mercenaria  
 UdeM00000010053 6579 1286.6 UdeM00000010053 XP\_033740095.1 51.8  
 1389 526 18 1 1376 1 1258 0.00E+00 1286.6 6579  
 cellular  
 organisms;Eukaryota;Opisthokonta;Metazoa;Eumetazoa;Bilateria;Protostomia;  
 Spiralia;Lophotrochozoa;Mollusca;Bivalvia;Autobranchia;Pteriomorphia;Pect  
 inida;Pectinoidea;Pectinidae;Pecten;Pecten maximus  
 UdeM00000010054 2607531 661.8 UdeM00000010054 XP\_029652523.1 45.3  
 880 321 15 58 871 1484 2269 1.30E-186 661.8 2607531  
 cellular  
 organisms;Eukaryota;Opisthokonta;Metazoa;Eumetazoa;Bilateria;Protostomia;  
 Spiralia;Lophotrochozoa;Mollusca;Cephalopoda;Coleoidea;Octopodiformes;Oct  
 opoda;Incirrata;Octopodidae;Octopus;Octopus sinensis  
 UdeM00000010055 6579 386 UdeM00000010055 XP\_033740100.1 65.6 279  
 93 1 4 282 1 276 4.40E-104 386 6579 cellular  
 organisms;Eukaryota;Opisthokonta;Metazoa;Eumetazoa;Bilateria;Protostomia;

Spiralia; Lophotrochozoa; Mollusca; Bivalvia; Autobranchia; Pteriomorpha; Pectinida; Pectinoidea; Pectinidae; Pecten; Pecten maximus  
UdeM00000010056 225164 115.2 UdeM00000010056 XP\_009058200.1 53.6  
110 51 0 1 110 1 110 5.70E-23 115.2 225164  
cellular  
organisms; Eukaryota; Opisthokonta; Metazoa; Eumetazoa; Bilateria; Protostomia; Spiralia; Lophotrochozoa; Mollusca; Gastropoda; Patellogastropoda; Lottioidea; Lottiidae; Lottia; Lottia gigantea  
UdeM00000010057 181472 156 UdeM00000010057 XP\_029975096.1 53.8  
130 60 0 12 141 255 384 3.60E-35 156 181472  
cellular  
organisms; Eukaryota; Opisthokonta; Metazoa; Eumetazoa; Bilateria; Deuterostomia; Chordata; Craniata; Vertebrata; Gnathostomata; Teleostomi; Euteleostomi; Actinopterygii; Actinopteri; Neopterygii; Teleostei; Osteoglossocephalai; Clupeocephala; Euteleostei; Neoteleostei; Eurypterygia; Ctenosquamata; Acanthomorpha; Euacanthomorpha; Percomorphaceae; Ovalentaria; Blenniiformes; Blennioidei; Blenniidae; Salariae; Salariae; Salariae fasciatus  
UdeM00000010058 6579 208 UdeM00000010058 XP\_033752673.1 53.8 197  
63 1 112 280 456 652 1.60E-50 208 6579 cellular  
organisms; Eukaryota; Opisthokonta; Metazoa; Eumetazoa; Bilateria; Protostomia; Spiralia; Lophotrochozoa; Mollusca; Bivalvia; Autobranchia; Pteriomorpha; Pectinida; Pectinoidea; Pectinidae; Pecten; Pecten maximus  
UdeM00000010059 6579 208 UdeM00000010059 XP\_033752673.1 53.8 197  
63 1 144 312 456 652 1.70E-50 208 6579 cellular  
organisms; Eukaryota; Opisthokonta; Metazoa; Eumetazoa; Bilateria; Protostomia; Spiralia; Lophotrochozoa; Mollusca; Bivalvia; Autobranchia; Pteriomorpha; Pectinida; Pectinoidea; Pectinidae; Pecten; Pecten maximus  
UdeM00000010060 225164 120.6 UdeM00000010060 XP\_009058199.1 53.5  
114 46 2 1 114 1 107 1.30E-24 120.6 225164  
cellular  
organisms; Eukaryota; Opisthokonta; Metazoa; Eumetazoa; Bilateria; Protostomia; Spiralia; Lophotrochozoa; Mollusca; Gastropoda; Patellogastropoda; Lottioidea; Lottiidae; Lottia; Lottia gigantea  
UdeM00000010062 6596 759.6 UdeM00000010062 XP\_045196001.1 72.6 500  
126 2 1 500 1 489 2.50E-216 759.6 6596 cellular  
organisms; Eukaryota; Opisthokonta; Metazoa; Eumetazoa; Bilateria; Protostomia; Spiralia; Lophotrochozoa; Mollusca; Bivalvia; Autobranchia; Heteroconchia; Euheterodonta; Imparidentia; Venerida; Veneroidea; Veneridae; Mercenaria; Mercenaria mercenaria  
UdeM00000010063 6596 854.7 UdeM00000010063 XP\_045196002.1 92.1 469  
36 1 1 469 1 468 5.40E-245 854.7 6596 cellular  
organisms; Eukaryota; Opisthokonta; Metazoa; Eumetazoa; Bilateria; Protostomia; Spiralia; Lophotrochozoa; Mollusca; Bivalvia; Autobranchia; Heteroconchia; Euheterodonta; Imparidentia; Venerida; Veneroidea; Veneridae; Mercenaria; Mercenaria mercenaria  
UdeM00000010064 6565 233.4 UdeM00000010064 XP\_022292021.1 75 160  
40 0 1 160 1 160 2.00E-58 233.4 6565 cellular  
organisms; Eukaryota; Opisthokonta; Metazoa; Eumetazoa; Bilateria; Protostomia; Spiralia; Lophotrochozoa; Mollusca; Bivalvia; Autobranchia; Pteriomorpha; Ostreida; Ostreidae; Crassostrea; Crassostrea virginica  
UdeM00000010065 6500 187.2 UdeM00000010065 XP\_012944080.1 75.4 118  
29 0 293 410 325 442 4.20E-44 187.2 6500 cellular  
organisms; Eukaryota; Opisthokonta; Metazoa; Eumetazoa; Bilateria; Protostomia;



Spiralia;Lophotrochozoa;Mollusca;Gastropoda;Heterobranchia;Euthyneura;Tectipleura;Aplysiida;Aplysioidea;Aplysiidae;Aplysia;Aplysia californica  
UdeM00000010067 7574 201.8 UdeM00000010067 XP\_013389944.1 57.4 162  
66 2 168 326 219 380 1.30E-48 201.8 7574 cellular  
organisms;Eukaryota;Opisthokonta;Metazoa;Eumetazoa;Bilateria;Protostomia;  
Spiralia;Lophotrochozoa;Brachiopoda;Linguliformea;Lingulata;Lingulida;Linguloidea;Lingulidae;Lingula;Lingula anatina  
UdeM00000010068 6596 261.5 UdeM00000010068 XP\_045197458.1 69.6 191  
54 2 1424 1614 242 428 6.90E-66 261.5 6596 cellular  
organisms;Eukaryota;Opisthokonta;Metazoa;Eumetazoa;Bilateria;Protostomia;  
Spiralia;Lophotrochozoa;Mollusca;Bivalvia;Autobranchia;Heteroconchia;Euheterodonta;Imparidentia;Venerida;Veneroidea;Veneridae;Mercenaria;Mercenaria mercenaria  
UdeM00000010068 6596 211.1 UdeM00000010068 XP\_045197458.1 59.4 219  
78 2 1 208 1 219 1.10E-50 211.1 6596 cellular  
organisms;Eukaryota;Opisthokonta;Metazoa;Eumetazoa;Bilateria;Protostomia;  
Spiralia;Lophotrochozoa;Mollusca;Bivalvia;Autobranchia;Heteroconchia;Euheterodonta;Imparidentia;Venerida;Veneroidea;Veneridae;Mercenaria;Mercenaria mercenaria  
UdeM00000010069 2652724 175.6 UdeM00000010069 XP\_020913146.1 49.5  
194 97 1 166 359 177 369 1.40E-40 175.6 2652724  
cellular  
organisms;Eukaryota;Opisthokonta;Metazoa;Eumetazoa;Cnidaria;Anthozoa;Hexacorallia;Actiniaria;Aiptasiidae;Exaiptasia;Exaiptasia diaphana  
UdeM00000010070 6579 63.2 UdeM00000010070 XP\_033729790.1 50 62  
31 0 10 71 17 78 1.60E-07 63.2 6579 cellular  
organisms;Eukaryota;Opisthokonta;Metazoa;Eumetazoa;Bilateria;Protostomia;  
Spiralia;Lophotrochozoa;Mollusca;Bivalvia;Autobranchia;Pteriomorphia;Pectinida;Pectinoidea;Pectinidae;Pecten;Pecten maximus  
UdeM00000010071 218467 211.1 UdeM00000010071 XP\_023239318.1 36.1  
391 170 10 52 391 6 367 2.80E-51 211.1 218467  
cellular  
organisms;Eukaryota;Opisthokonta;Metazoa;Eumetazoa;Bilateria;Protostomia;  
Ecdysozoa;Panarthropoda;Arthropoda;Chelicerata;Arachnida;Scorpiones;Buthida;Buthoidea;Buthidae;Centruroides;Centruroides sculpturatus  
UdeM00000010072 6596 554.3 UdeM00000010072 XP\_045197456.1 56.6 541  
214 7 1 528 1 533 1.70E-154 554.3 6596 cellular  
organisms;Eukaryota;Opisthokonta;Metazoa;Eumetazoa;Bilateria;Protostomia;  
Spiralia;Lophotrochozoa;Mollusca;Bivalvia;Autobranchia;Heteroconchia;Euheterodonta;Imparidentia;Venerida;Veneroidea;Veneridae;Mercenaria;Mercenaria mercenaria  
UdeM00000010073 6596 153.7 UdeM00000010073 XP\_045197462.1 78.9 90  
19 0 24 113 23 112 1.60E-34 153.7 6596 cellular  
organisms;Eukaryota;Opisthokonta;Metazoa;Eumetazoa;Bilateria;Protostomia;  
Spiralia;Lophotrochozoa;Mollusca;Bivalvia;Autobranchia;Heteroconchia;Euheterodonta;Imparidentia;Venerida;Veneroidea;Veneridae;Mercenaria;Mercenaria mercenaria  
UdeM00000010074 6579 369 UdeM00000010074 XP\_033741442.1 87.8 205  
25 0 2 206 3 207 7.80E-99 369 6579 cellular  
organisms;Eukaryota;Opisthokonta;Metazoa;Eumetazoa;Bilateria;Protostomia;  
Spiralia;Lophotrochozoa;Mollusca;Bivalvia;Autobranchia;Pteriomorphia;Pectinida;Pectinoidea;Pectinidae;Pecten;Pecten maximus  
UdeM00000010075 400727 334.7 UdeM00000010075 XP\_025112651.1 54  
298 128 3 7 297 9 304 1.20E-88 334.7 400727

cellular

organisms;Eukaryota;Opisthokonta;Metazoa;Eumetazoa;Bilateria;Protostomia;Spiralia;Lophotrochozoa;Mollusca;Gastropoda;Caenogastropoda;Architaenioglossa;Ampullarioidea;Ampullariidae;Pomacea;Pomacea canaliculata

UdeM00000010076 29159 169.5 UdeM00000010076 XP\_034334577.1 39.6 207  
118 3 10 213 20 222 5.20E-39 169.5 29159 cellular

organisms;Eukaryota;Opisthokonta;Metazoa;Eumetazoa;Bilateria;Protostomia;Spiralia;Lophotrochozoa;Mollusca;Bivalvia;Autobranchia;Pteriormorphia;Ostreida;Ostreioidea;Ostreidae;Crassostrea;Crassostrea gigas

UdeM00000010077 6573 107.1 UdeM00000010077 XP\_021349218.1 34.8 198  
102 6 5 187 2228 2413 2.50E-20 107.1 6573 cellular

organisms;Eukaryota;Opisthokonta;Metazoa;Eumetazoa;Bilateria;Protostomia;Spiralia;Lophotrochozoa;Mollusca;Bivalvia;Autobranchia;Pteriormorphia;Pectinida;Pectinoidea;Pectinidae;Mizuhopecten;Mizuhopecten yessoensis

UdeM00000010078 29159 895.6 UdeM00000010078 XP\_034331093.1 81.2 512  
95 1 1 512 1 511 3.00E-257 895.6 29159 cellular

organisms;Eukaryota;Opisthokonta;Metazoa;Eumetazoa;Bilateria;Protostomia;Spiralia;Lophotrochozoa;Mollusca;Bivalvia;Autobranchia;Pteriormorphia;Ostreida;Ostreioidea;Ostreidae;Crassostrea;Crassostrea gigas

UdeM00000010079 29159 867.8 UdeM00000010079 XP\_034331093.1 83 483  
82 0 1 483 1 483 6.80E-249 867.8 29159 cellular

organisms;Eukaryota;Opisthokonta;Metazoa;Eumetazoa;Bilateria;Protostomia;Spiralia;Lophotrochozoa;Mollusca;Bivalvia;Autobranchia;Pteriormorphia;Ostreida;Ostreioidea;Ostreidae;Crassostrea;Crassostrea gigas

UdeM00000010081 50429 111.7 UdeM00000010081 XP\_022783473.1 38.7 155  
91 2 8 159 9 162 4.30E-21 111.7 50429 cellular

organisms;Eukaryota;Opisthokonta;Metazoa;Eumetazoa;Cnidaria;Anthozoa;Hexacorallia;Scleractinia;Astrocoeniina;Pocilloporidae;Stylophora;Stylophora pistillata

UdeM00000010083 6579 703.7 UdeM00000010083 XP\_033728194.1 51.2 693  
325 5 1 684 282 970 2.20E-199 703.7 6579 cellular

organisms;Eukaryota;Opisthokonta;Metazoa;Eumetazoa;Bilateria;Protostomia;Spiralia;Lophotrochozoa;Mollusca;Bivalvia;Autobranchia;Pteriormorphia;Pectinida;Pectinoidea;Pectinidae;Pecten;Pecten maximus

UdeM00000010084 6596 389.8 UdeM00000010084 XP\_045197714.1 45 398  
210 4 402 791 547 943 8.40E-105 389.8 6596 cellular

organisms;Eukaryota;Opisthokonta;Metazoa;Eumetazoa;Bilateria;Protostomia;Spiralia;Lophotrochozoa;Mollusca;Bivalvia;Autobranchia;Heteroconchia;Euheterodonta;Imparidentia;Venerida;Veneroidea;Veneridae;Mercenaria;Mercenaria mercenaria

UdeM00000010085 6596 402.5 UdeM00000010085 XP\_045198137.1 67 388  
106 4 1 385 1 369 6.00E-109 402.5 6596 cellular

organisms;Eukaryota;Opisthokonta;Metazoa;Eumetazoa;Bilateria;Protostomia;Spiralia;Lophotrochozoa;Mollusca;Bivalvia;Autobranchia;Heteroconchia;Euheterodonta;Imparidentia;Venerida;Veneroidea;Veneridae;Mercenaria;Mercenaria mercenaria

UdeM00000010086 6596 144.1 UdeM00000010086 XP\_045196920.1 30.3 376  
191 13 433 771 271 612 8.20E-31 144.1 6596 cellular

organisms;Eukaryota;Opisthokonta;Metazoa;Eumetazoa;Bilateria;Protostomia;Spiralia;Lophotrochozoa;Mollusca;Bivalvia;Autobranchia;Heteroconchia;Euheterodonta;Imparidentia;Venerida;Veneroidea;Veneridae;Mercenaria;Mercenaria mercenaria

UdeM00000010087 6596 7651.6 UdeM00000010087 XP\_045198576.1 69.1  
5651 1303 40 1 5358 1 5500 0.00E+00 7651.6 6596

cellular  
organisms;Eukaryota;Opisthokonta;Metazoa;Eumetazoa;Bilateria;Protostomia;  
Spiralia;Lophotrochozoa;Mollusca;Bivalvia;Autobranchia;Heteroconchia;Euhe  
terodonta;Imparidentia;Venerida;Veneroidea;Veneridae;Mercenaria;Mercenari  
a mercenaria

|                 |      |        |   |                 |                |      |          |        |      |
|-----------------|------|--------|---|-----------------|----------------|------|----------|--------|------|
| UdeM00000010088 | 6579 | 1283.5 |   | UdeM00000010088 | XP_033740585.1 | 85.6 |          |        |      |
|                 | 731  | 105    | 0 |                 | 1              | 731  | 0.00E+00 | 1283.5 | 6579 |

cellular  
organisms;Eukaryota;Opisthokonta;Metazoa;Eumetazoa;Bilateria;Protostomia;  
Spiralia;Lophotrochozoa;Mollusca;Bivalvia;Autobranchia;Pteriormorphia;Pect  
inida;Pectinoidea;Pectinidae;Pecten;Pecten maximus

|                 |        |    |       |                 |                |      |     |     |           |       |        |
|-----------------|--------|----|-------|-----------------|----------------|------|-----|-----|-----------|-------|--------|
| UdeM00000010089 | 400727 |    | 451.1 | UdeM00000010089 | XP_025098629.1 | 70.6 |     |     |           |       |        |
|                 | 344    | 82 | 5     |                 | 79             | 422  | 217 | 541 | 1.60E-123 | 451.1 | 400727 |

cellular  
organisms;Eukaryota;Opisthokonta;Metazoa;Eumetazoa;Bilateria;Protostomia;  
Spiralia;Lophotrochozoa;Mollusca;Gastropoda;Caenogastropoda;Architaeniogl  
ossa;Ampullarioidea;Ampullariidae;Pomacea;Pomacea canaliculata

|                 |        |    |       |                 |                |      |    |     |          |       |        |
|-----------------|--------|----|-------|-----------------|----------------|------|----|-----|----------|-------|--------|
| UdeM00000010090 | 400727 |    | 231.1 | UdeM00000010090 | XP_025093082.1 | 52.1 |    |     |          |       |        |
|                 | 217    | 99 | 4     |                 | 17             | 232  | 40 | 252 | 1.70E-57 | 231.1 | 400727 |

cellular  
organisms;Eukaryota;Opisthokonta;Metazoa;Eumetazoa;Bilateria;Protostomia;  
Spiralia;Lophotrochozoa;Mollusca;Gastropoda;Caenogastropoda;Architaeniogl  
ossa;Ampullarioidea;Ampullariidae;Pomacea;Pomacea canaliculata

|                 |        |    |      |                 |                |      |    |     |          |      |        |
|-----------------|--------|----|------|-----------------|----------------|------|----|-----|----------|------|--------|
| UdeM00000010091 | 225164 |    | 91.3 | UdeM00000010091 | XP_009047066.1 | 42.9 |    |     |          |      |        |
|                 | 98     | 56 | 0    |                 | 26             | 123  | 48 | 145 | 9.40E-16 | 91.3 | 225164 |

cellular  
organisms;Eukaryota;Opisthokonta;Metazoa;Eumetazoa;Bilateria;Protostomia;  
Spiralia;Lophotrochozoa;Mollusca;Gastropoda;Patellogastropoda;Lottioidea;  
Lottiidae;Lottia;Lottia gigantea

|                 |      |      |    |                 |                |      |     |          |      |      |          |
|-----------------|------|------|----|-----------------|----------------|------|-----|----------|------|------|----------|
| UdeM00000010092 | 6579 | 90.1 |    | UdeM00000010092 | XP_033746378.1 | 50.5 | 97  |          |      |      |          |
|                 | 47   | 1    | 36 |                 | 132            | 55   | 150 | 2.30E-15 | 90.1 | 6579 | cellular |

organisms;Eukaryota;Opisthokonta;Metazoa;Eumetazoa;Bilateria;Protostomia;  
Spiralia;Lophotrochozoa;Mollusca;Bivalvia;Autobranchia;Pteriormorphia;Pect  
inida;Pectinoidea;Pectinidae;Pecten;Pecten maximus

|                 |      |       |     |                 |                |      |     |          |       |      |          |
|-----------------|------|-------|-----|-----------------|----------------|------|-----|----------|-------|------|----------|
| UdeM00000010093 | 6596 | 146.7 |     | UdeM00000010093 | XP_045196321.1 | 55.3 | 132 |          |       |      |          |
|                 | 52   | 2     | 654 |                 | 785            | 361  | 485 | 1.20E-31 | 146.7 | 6596 | cellular |

organisms;Eukaryota;Opisthokonta;Metazoa;Eumetazoa;Bilateria;Protostomia;  
Spiralia;Lophotrochozoa;Mollusca;Bivalvia;Autobranchia;Heteroconchia;Euhe  
terodonta;Imparidentia;Venerida;Veneroidea;Veneridae;Mercenaria;Mercenari  
a mercenaria

|                 |      |     |    |                 |                |      |     |          |     |      |          |
|-----------------|------|-----|----|-----------------|----------------|------|-----|----------|-----|------|----------|
| UdeM00000010094 | 6596 | 186 |    | UdeM00000010094 | XP_045191308.1 | 32.9 | 347 |          |     |      |          |
|                 | 217  | 6   | 22 |                 | 352            | 82   | 428 | 8.30E-44 | 186 | 6596 | cellular |

organisms;Eukaryota;Opisthokonta;Metazoa;Eumetazoa;Bilateria;Protostomia;  
Spiralia;Lophotrochozoa;Mollusca;Bivalvia;Autobranchia;Heteroconchia;Euhe  
terodonta;Imparidentia;Venerida;Veneroidea;Veneridae;Mercenaria;Mercenari  
a mercenaria

|                 |      |    |    |                 |                |      |     |          |    |      |          |
|-----------------|------|----|----|-----------------|----------------|------|-----|----------|----|------|----------|
| UdeM00000010095 | 7897 | 79 |    | UdeM00000010095 | XP_005987476.1 | 42.6 | 101 |          |    |      |          |
|                 | 50   | 3  | 72 |                 | 169            | 98   | 193 | 6.70E-12 | 79 | 7897 | cellular |

organisms;Eukaryota;Opisthokonta;Metazoa;Eumetazoa;Bilateria;Deuterostomi  
a;Chordata;Craniata;Vertebrata;Gnathostomata;Teleostomi;Euteleostomi;Sarc  
opterygii;Coelacanthimorpha;Coelacanthiformes;Coelacanthidae;Latimeria;La  
timeria chalumnae

|                 |      |      |   |                 |                |      |     |          |      |      |          |
|-----------------|------|------|---|-----------------|----------------|------|-----|----------|------|------|----------|
| UdeM00000010096 | 6596 | 87.4 |   | UdeM00000010096 | XP_045191308.1 | 33.6 | 134 |          |      |      |          |
|                 | 87   | 1    | 9 |                 | 140            | 295  | 428 | 1.70E-14 | 87.4 | 6596 | cellular |

organisms;Eukaryota;Opisthokonta;Metazoa;Eumetazoa;Bilateria;Protostomia;Spiralia;Lophotrochozoa;Mollusca;Bivalvia;Autobranchia;Heteroconchia;Euherodonta;Imparidentia;Venerida;Veneroidea;Veneridae;Mercenaria;Mercenaria mercenaria

UdeM00000010097 6596 190.7 UdeM00000010097 XP\_045189481.1 36.9 279  
165 6 78 348 164 439 3.30E-45 190.7 6596 cellular

organisms;Eukaryota;Opisthokonta;Metazoa;Eumetazoa;Bilateria;Protostomia;Spiralia;Lophotrochozoa;Mollusca;Bivalvia;Autobranchia;Heteroconchia;Euherodonta;Imparidentia;Venerida;Veneroidea;Veneridae;Mercenaria;Mercenaria mercenaria

UdeM00000010098 6596 185.3 UdeM00000010098 XP\_045189481.1 35.8 279  
168 6 78 348 164 439 1.40E-43 185.3 6596 cellular

organisms;Eukaryota;Opisthokonta;Metazoa;Eumetazoa;Bilateria;Protostomia;Spiralia;Lophotrochozoa;Mollusca;Bivalvia;Autobranchia;Heteroconchia;Euherodonta;Imparidentia;Venerida;Veneroidea;Veneridae;Mercenaria;Mercenaria mercenaria

UdeM00000010099 6596 354.4 UdeM00000010099 XP\_045198102.1 63.7 292  
93 3 19 301 98 385 1.90E-94 354.4 6596 cellular

organisms;Eukaryota;Opisthokonta;Metazoa;Eumetazoa;Bilateria;Protostomia;Spiralia;Lophotrochozoa;Mollusca;Bivalvia;Autobranchia;Heteroconchia;Euherodonta;Imparidentia;Venerida;Veneroidea;Veneridae;Mercenaria;Mercenaria mercenaria

UdeM00000010101 6596 328.6 UdeM00000010101 XP\_045199005.1 38 453  
264 5 1 437 17 468 1.20E-86 328.6 6596 cellular

organisms;Eukaryota;Opisthokonta;Metazoa;Eumetazoa;Bilateria;Protostomia;Spiralia;Lophotrochozoa;Mollusca;Bivalvia;Autobranchia;Heteroconchia;Euherodonta;Imparidentia;Venerida;Veneroidea;Veneridae;Mercenaria;Mercenaria mercenaria

UdeM00000010102 6596 455.7 UdeM00000010102 XP\_045195342.1 47.5 575  
273 7 20 591 45 593 9.10E-125 455.7 6596 cellular

organisms;Eukaryota;Opisthokonta;Metazoa;Eumetazoa;Bilateria;Protostomia;Spiralia;Lophotrochozoa;Mollusca;Bivalvia;Autobranchia;Heteroconchia;Euherodonta;Imparidentia;Venerida;Veneroidea;Veneridae;Mercenaria;Mercenaria mercenaria

UdeM00000010103 6596 456.1 UdeM00000010103 XP\_045195342.1 47.5 575  
273 7 10 581 45 593 6.90E-125 456.1 6596 cellular

organisms;Eukaryota;Opisthokonta;Metazoa;Eumetazoa;Bilateria;Protostomia;Spiralia;Lophotrochozoa;Mollusca;Bivalvia;Autobranchia;Heteroconchia;Euherodonta;Imparidentia;Venerida;Veneroidea;Veneridae;Mercenaria;Mercenaria mercenaria

UdeM00000010104 6579 192.6 UdeM00000010104 XP\_033739654.1 32.8 366  
121 6 13 328 67 357 8.30E-46 192.6 6579 cellular

organisms;Eukaryota;Opisthokonta;Metazoa;Eumetazoa;Bilateria;Protostomia;Spiralia;Lophotrochozoa;Mollusca;Bivalvia;Autobranchia;Pteriomorpha;Pectinida;Pectinoidea;Pectinidae;Pecten;Pecten maximus

UdeM00000010105 1735272 336.7 UdeM00000010105 XP\_041353928.1 56.9  
290 124 1 42 331 71 359 3.50E-89 336.7 1735272  
cellular

organisms;Eukaryota;Opisthokonta;Metazoa;Eumetazoa;Bilateria;Protostomia;Spiralia;Lophotrochozoa;Mollusca;Gastropoda;Neomphalina;Neomphaloidea;Peltospiridae;Gigantopelta;Gigantopelta aegis

UdeM00000010106 6596 112.8 UdeM00000010106 XP\_045196993.1 60.7 191  
70 4 1 189 1 188 2.60E-21 112.8 6596 cellular

organisms;Eukaryota;Opisthokonta;Metazoa;Eumetazoa;Bilateria;Protostomia;

Spiralia;Lophotrochozoa;Mollusca;Bivalvia;Autobranchia;Heteroconchia;Euherodonta;Imparidentia;Venerida;Veneroidea;Veneridae;Mercenaria;Mercenaria mercenaria

UdeM00000010107 6596 543.5 UdeM00000010107 XP\_045198474.1 36.8 1196  
573 23 1 1072 1 1137 6.10E-151 543.5 6596 cellular

organisms;Eukaryota;Opisthokonta;Metazoa;Eumetazoa;Bilateria;Protostomia;Spiralia;Lophotrochozoa;Mollusca;Bivalvia;Autobranchia;Heteroconchia;Euherodonta;Imparidentia;Venerida;Veneroidea;Veneridae;Mercenaria;Mercenaria mercenaria

UdeM00000010108 6596 543.9 UdeM00000010108 XP\_045198474.1 37 1194  
570 22 1 1069 1 1137 4.60E-151 543.9 6596 cellular

organisms;Eukaryota;Opisthokonta;Metazoa;Eumetazoa;Bilateria;Protostomia;Spiralia;Lophotrochozoa;Mollusca;Bivalvia;Autobranchia;Heteroconchia;Euherodonta;Imparidentia;Venerida;Veneroidea;Veneridae;Mercenaria;Mercenaria mercenaria

UdeM00000010109 6596 387.5 UdeM00000010109 XP\_045196240.1 63.8 290  
100 3 32 320 12 297 1.70E-104 387.5 6596 cellular

organisms;Eukaryota;Opisthokonta;Metazoa;Eumetazoa;Bilateria;Protostomia;Spiralia;Lophotrochozoa;Mollusca;Bivalvia;Autobranchia;Heteroconchia;Euherodonta;Imparidentia;Venerida;Veneroidea;Veneridae;Mercenaria;Mercenaria mercenaria

UdeM00000010110 6596 1407.5 UdeM00000010110 XP\_045196238.1 80.5  
825 155 1 2 826 3 821 0.00E+00 1407.5 6596

cellular  
organisms;Eukaryota;Opisthokonta;Metazoa;Eumetazoa;Bilateria;Protostomia;Spiralia;Lophotrochozoa;Mollusca;Bivalvia;Autobranchia;Heteroconchia;Euherodonta;Imparidentia;Venerida;Veneroidea;Veneridae;Mercenaria;Mercenaria mercenaria

UdeM00000010111 6579 94.7 UdeM00000010111 XP\_033739369.1 29.6 314  
193 9 942 1242 702 1000 8.60E-16 94.7 6579 cellular

organisms;Eukaryota;Opisthokonta;Metazoa;Eumetazoa;Bilateria;Protostomia;Spiralia;Lophotrochozoa;Mollusca;Bivalvia;Autobranchia;Pteriomorphia;Pectinida;Pectinoidea;Pectinidae;Pecten;Pecten maximus

UdeM00000010112 1735272 356.3 UdeM00000010112 XP\_041351654.1 79.6  
216 44 0 1 216 1 216 2.80E-95 356.3 1735272

cellular  
organisms;Eukaryota;Opisthokonta;Metazoa;Eumetazoa;Bilateria;Protostomia;Spiralia;Lophotrochozoa;Mollusca;Gastropoda;Neomphalina;Neomphaloidea;Peltospiridae;Gigantopelta;Gigantopelta aegis

UdeM00000010113 29159 117.5 UdeM00000010113 XP\_034317333.1 60 80  
32 0 1 80 1 80 9.70E-24 117.5 29159 cellular

organisms;Eukaryota;Opisthokonta;Metazoa;Eumetazoa;Bilateria;Protostomia;Spiralia;Lophotrochozoa;Mollusca;Bivalvia;Autobranchia;Pteriomorphia;Ostreida;Ostreoidea;Ostreidae;Crassostrea;Crassostrea gigas

UdeM00000010114 6579 1459.5 UdeM00000010114 XP\_033741047.1 56.5  
1375 514 21 8 1322 82 1432 0.00E+00 1459.5 6579

cellular  
organisms;Eukaryota;Opisthokonta;Metazoa;Eumetazoa;Bilateria;Protostomia;Spiralia;Lophotrochozoa;Mollusca;Bivalvia;Autobranchia;Pteriomorphia;Pectinida;Pectinoidea;Pectinidae;Pecten;Pecten maximus

UdeM00000010115 6579 1448.3 UdeM00000010115 XP\_033741047.1 56.3  
1375 514 21 8 1319 82 1432 0.00E+00 1448.3 6579

cellular  
organisms;Eukaryota;Opisthokonta;Metazoa;Eumetazoa;Bilateria;Protostomia;

Spiralia;Lophotrochozoa;Mollusca;Bivalvia;Autobranchia;Pteriormorphia;Pectinida;Pectinoidea;Pectinidae;Pecten;Pecten maximus

UdeM00000010117 6596 175.3 UdeM00000010117 XP\_045173138.1 21.3 803  
531 22 13 780 17 753 3.20E-40 175.3 6596 cellular  
organisms;Eukaryota;Opisthokonta;Metazoa;Eumetazoa;Bilateria;Protostomia;  
Spiralia;Lophotrochozoa;Mollusca;Bivalvia;Autobranchia;Heteroconchia;Euhe  
terodonta;Imparidentia;Venerida;Veneroidea;Veneridae;Mercenaria;Mercenari  
a mercenaria

UdeM00000010118 6596 176 UdeM00000010118 XP\_045206913.1 23.6 843  
506 24 8 808 4 750 2.00E-40 176 6596 cellular  
organisms;Eukaryota;Opisthokonta;Metazoa;Eumetazoa;Bilateria;Protostomia;  
Spiralia;Lophotrochozoa;Mollusca;Bivalvia;Autobranchia;Heteroconchia;Euhe  
terodonta;Imparidentia;Venerida;Veneroidea;Veneridae;Mercenaria;Mercenari  
a mercenaria

UdeM00000010119 6596 171.8 UdeM00000010119 XP\_045176264.1 22.7 886  
594 28 7 825 10 871 3.70E-39 171.8 6596 cellular  
organisms;Eukaryota;Opisthokonta;Metazoa;Eumetazoa;Bilateria;Protostomia;  
Spiralia;Lophotrochozoa;Mollusca;Bivalvia;Autobranchia;Heteroconchia;Euhe  
terodonta;Imparidentia;Venerida;Veneroidea;Veneridae;Mercenaria;Mercenari  
a mercenaria

UdeM00000010120 6596 172.2 UdeM00000010120 XP\_045176264.1 22.7 886  
594 28 7 825 10 871 2.80E-39 172.2 6596 cellular  
organisms;Eukaryota;Opisthokonta;Metazoa;Eumetazoa;Bilateria;Protostomia;  
Spiralia;Lophotrochozoa;Mollusca;Bivalvia;Autobranchia;Heteroconchia;Euhe  
terodonta;Imparidentia;Venerida;Veneroidea;Veneridae;Mercenaria;Mercenari  
a mercenaria

UdeM00000010121 6596 91.7 UdeM00000010121 XP\_045193425.1 31.5 165  
98 4 1 157 1 158 1.00E-15 91.7 6596 cellular  
organisms;Eukaryota;Opisthokonta;Metazoa;Eumetazoa;Bilateria;Protostomia;  
Spiralia;Lophotrochozoa;Mollusca;Bivalvia;Autobranchia;Heteroconchia;Euhe  
terodonta;Imparidentia;Venerida;Veneroidea;Veneridae;Mercenaria;Mercenari  
a mercenaria

UdeM00000010122 6596 129 UdeM00000010122 XP\_045176264.1 23.5 676  
430 23 19 638 172 816 2.30E-26 129 6596 cellular  
organisms;Eukaryota;Opisthokonta;Metazoa;Eumetazoa;Bilateria;Protostomia;  
Spiralia;Lophotrochozoa;Mollusca;Bivalvia;Autobranchia;Heteroconchia;Euhe  
terodonta;Imparidentia;Venerida;Veneroidea;Veneridae;Mercenaria;Mercenari  
a mercenaria

UdeM00000010123 6596 59.3 UdeM00000010123 XP\_045193425.1 39.2 97  
48 4 5 97 8 97 3.80E-06 59.3 6596 cellular  
organisms;Eukaryota;Opisthokonta;Metazoa;Eumetazoa;Bilateria;Protostomia;  
Spiralia;Lophotrochozoa;Mollusca;Bivalvia;Autobranchia;Heteroconchia;Euhe  
terodonta;Imparidentia;Venerida;Veneroidea;Veneridae;Mercenaria;Mercenari  
a mercenaria

UdeM00000010124 29159 350.9 UdeM00000010124 XP\_034335293.1 56.5 324  
99 4 99 397 811 1117 2.10E-93 350.9 29159 cellular  
organisms;Eukaryota;Opisthokonta;Metazoa;Eumetazoa;Bilateria;Protostomia;  
Spiralia;Lophotrochozoa;Mollusca;Bivalvia;Autobranchia;Pteriormorphia;Ostr  
eida;Ostreoidea;Ostreidae;Crassostrea;Crassostrea gigas

UdeM00000010125 6596 105.9 UdeM00000010125 XP\_045198795.1 67.1 70  
23 0 4 73 592 661 2.30E-20 105.9 6596 cellular  
organisms;Eukaryota;Opisthokonta;Metazoa;Eumetazoa;Bilateria;Protostomia;  
Spiralia;Lophotrochozoa;Mollusca;Bivalvia;Autobranchia;Heteroconchia;Euhe

terodonta;Imparidentia;Venerida;Veneroidea;Veneridae;Mercenaria;Mercenaria mercenaria

UdeM00000010126 6596 115.2 UdeM00000010126 XP\_045193425.1 25.6 355  
223 11 3 324 2 348 4.10E-22 115.2 6596 cellular

organisms;Eukaryota;Opisthokonta;Metazoa;Eumetazoa;Bilateria;Protostomia;Spiralia;Lophotrochozoa;Mollusca;Bivalvia;Autobranchia;Heteroconchia;Euheterodonta;Imparidentia;Venerida;Veneroidea;Veneridae;Mercenaria;Mercenaria mercenaria

UdeM00000010127 6596 145.2 UdeM00000010127 XP\_045173138.1 21.7 816  
511 18 13 794 16 737 3.70E-31 145.2 6596 cellular

organisms;Eukaryota;Opisthokonta;Metazoa;Eumetazoa;Bilateria;Protostomia;Spiralia;Lophotrochozoa;Mollusca;Bivalvia;Autobranchia;Heteroconchia;Euheterodonta;Imparidentia;Venerida;Veneroidea;Veneridae;Mercenaria;Mercenaria mercenaria

UdeM00000010128 1735272 341.7 UdeM00000010128 XP\_041353929.1 64.6  
271 94 2 1 270 1 270 1.30E-90 341.7 1735272  
cellular

organisms;Eukaryota;Opisthokonta;Metazoa;Eumetazoa;Bilateria;Protostomia;Spiralia;Lophotrochozoa;Mollusca;Gastropoda;Neomphalina;Neomphaloidea;Peltospiridae;Gigantopelta;Gigantopelta aegis

UdeM00000010129 6573 299.3 UdeM00000010129 XP\_021369337.1 68.2 223  
60 4 1 215 1 220 4.00E-78 299.3 6573 cellular

organisms;Eukaryota;Opisthokonta;Metazoa;Eumetazoa;Bilateria;Protostomia;Spiralia;Lophotrochozoa;Mollusca;Bivalvia;Autobranchia;Pteriormorphia;Pectinida;Pectinoidea;Pectinidae;Mizuhopecten;Mizuhopecten yessoensis

UdeM00000010130 30732 189.5 UdeM00000010130 XP\_024147527.1 50 208  
101 1 15 219 99 306 1.40E-44 189.5 30732 cellular

organisms;Eukaryota;Opisthokonta;Metazoa;Eumetazoa;Bilateria;Deuterostomia;Chordata;Craniata;Vertebrata;Gnathostomata;Teleostomi;Euteleostomi;Actinopterygii;Actinopteri;Neopterygii;Teleostei;Osteoglossocephalai;Clupeocephala;Euteleostei;Neoteleostei;Eurypterygia;Ctenosquamata;Acanthomorphata;Euacanthomorphacea;Percomorphaceae;Ovalentaria;Atherinomorphae;Belontiiformes;Adrianichthyoidei;Adrianichthyidae;Oryziinae;Oryzias;Oryzias melastigma

UdeM00000010131 6579 132.5 UdeM00000010131 XP\_033740558.1 59.5 111  
43 1 221 331 302 410 9.90E-28 132.5 6579 cellular

organisms;Eukaryota;Opisthokonta;Metazoa;Eumetazoa;Bilateria;Protostomia;Spiralia;Lophotrochozoa;Mollusca;Bivalvia;Autobranchia;Pteriormorphia;Pectinida;Pectinoidea;Pectinidae;Pecten;Pecten maximus

UdeM00000010132 1735272 236.9 UdeM00000010132 XP\_041351653.1 39.5  
309 186 1 1 308 563 871 3.50E-59 236.9 1735272  
cellular

organisms;Eukaryota;Opisthokonta;Metazoa;Eumetazoa;Bilateria;Protostomia;Spiralia;Lophotrochozoa;Mollusca;Gastropoda;Neomphalina;Neomphaloidea;Peltospiridae;Gigantopelta;Gigantopelta aegis

UdeM00000010134 225164 157.1 UdeM00000010134 XP\_009054440.1 46.9  
179 94 1 1 179 1 178 2.10E-35 157.1 225164  
cellular

organisms;Eukaryota;Opisthokonta;Metazoa;Eumetazoa;Bilateria;Protostomia;Spiralia;Lophotrochozoa;Mollusca;Gastropoda;Patellogastropoda;Lottiidae;Lottia;Lottia gigantea

UdeM00000010133 225164 156 UdeM00000010133 XP\_009054440.1 46.4  
179 95 1 26 204 1 178 5.30E-35 156 225164  
cellular

organisms;Eukaryota;Opisthokonta;Metazoa;Eumetazoa;Bilateria;Protostomia;Spiralia;Lophotrochozoa;Mollusca;Gastropoda;Patellogastropoda;Lottioidea;Lottiidae;Lottia;Lottia gigantea

UdeM00000010135 6596 1149.4 UdeM00000010135 XP\_045158723.1 66.2  
838 282 1 19 855 1 838 0.00E+00 1149.4 6596  
cellular

organisms;Eukaryota;Opisthokonta;Metazoa;Eumetazoa;Bilateria;Protostomia;Spiralia;Lophotrochozoa;Mollusca;Bivalvia;Autobranchia;Heteroconchia;Euheterodonta;Imparidentia;Venerida;Veneroidea;Veneridae;Mercenaria;Mercenaria mercenaria

UdeM00000010136 6579 90.9 UdeM00000010136 XP\_033740794.1 48.2 114  
55 2 1 110 1 114 1.10E-15 90.9 6579 cellular

organisms;Eukaryota;Opisthokonta;Metazoa;Eumetazoa;Bilateria;Protostomia;Spiralia;Lophotrochozoa;Mollusca;Bivalvia;Autobranchia;Pteriormorphia;Pectinida;Pectinoidea;Pectinidae;Pecten;Pecten maximus

UdeM00000010137 6573 422.2 UdeM00000010137 XP\_021377437.1 70.1 284  
58 2 16 273 114 396 6.20E-115 422.2 6573 cellular

organisms;Eukaryota;Opisthokonta;Metazoa;Eumetazoa;Bilateria;Protostomia;Spiralia;Lophotrochozoa;Mollusca;Bivalvia;Autobranchia;Pteriormorphia;Pectinida;Pectinoidea;Pectinidae;Mizuhopecten;Mizuhopecten yessoensis

UdeM00000010138 6579 1368.6 UdeM00000010138 XP\_033740800.1 61.6  
1435 476 20 77 1478 548 1940 0.00E+00 1368.6 6579  
cellular

organisms;Eukaryota;Opisthokonta;Metazoa;Eumetazoa;Bilateria;Protostomia;Spiralia;Lophotrochozoa;Mollusca;Bivalvia;Autobranchia;Pteriormorphia;Pectinida;Pectinoidea;Pectinidae;Pecten;Pecten maximus

UdeM00000010139 6579 131.3 UdeM00000010139 XP\_033739578.1 48.8 168  
70 3 28 193 12 165 1.30E-27 131.3 6579 cellular

organisms;Eukaryota;Opisthokonta;Metazoa;Eumetazoa;Bilateria;Protostomia;Spiralia;Lophotrochozoa;Mollusca;Bivalvia;Autobranchia;Pteriormorphia;Pectinida;Pectinoidea;Pectinidae;Pecten;Pecten maximus

UdeM00000010140 6596 214.9 UdeM00000010140 XP\_045199226.1 45.2 310  
161 2 49 358 4 304 1.70E-52 214.9 6596 cellular

organisms;Eukaryota;Opisthokonta;Metazoa;Eumetazoa;Bilateria;Protostomia;Spiralia;Lophotrochozoa;Mollusca;Bivalvia;Autobranchia;Heteroconchia;Euheterodonta;Imparidentia;Venerida;Veneroidea;Veneridae;Mercenaria;Mercenaria mercenaria

UdeM00000010141 6573 563.1 UdeM00000010141 XP\_021350208.1 52.3 593  
214 18 1 581 292 827 4.00E-157 563.1 6573 cellular

organisms;Eukaryota;Opisthokonta;Metazoa;Eumetazoa;Bilateria;Protostomia;Spiralia;Lophotrochozoa;Mollusca;Bivalvia;Autobranchia;Pteriormorphia;Pectinida;Pectinoidea;Pectinidae;Mizuhopecten;Mizuhopecten yessoensis

UdeM00000010142 29159 208.8 UdeM00000010142 XP\_011449831.2 82.6 115  
20 0 3 117 75 189 3.90E-51 208.8 29159 cellular

organisms;Eukaryota;Opisthokonta;Metazoa;Eumetazoa;Bilateria;Protostomia;Spiralia;Lophotrochozoa;Mollusca;Bivalvia;Autobranchia;Pteriormorphia;Ostreida;Ostreioidea;Ostreidae;Crassostrea;Crassostrea gigas

UdeM00000010143 6579 237.7 UdeM00000010143 XP\_033741536.1 65 214  
65 3 6 217 1 206 2.90E-59 237.7 6579 cellular

organisms;Eukaryota;Opisthokonta;Metazoa;Eumetazoa;Bilateria;Protostomia;Spiralia;Lophotrochozoa;Mollusca;Bivalvia;Autobranchia;Pteriormorphia;Pectinida;Pectinoidea;Pectinidae;Pecten;Pecten maximus

UdeM00000010144 10224 68.9 UdeM00000010144 XP\_006820186.1 47.5 61  
32 0 132 192 173 233 7.90E-09 68.9 10224 cellular



organisms;Eukaryota;Opisthokonta;Metazoa;Eumetazoa;Bilateria;Deuterostomi  
a;Hemichordata;Enteropneusta;Harrimaniidae;Saccoglossus;Saccoglossus  
kowalevskii

UdeM00000010145 6596 214.9 UdeM00000010145 XP\_045195343.1 65.7 143  
48 1 16 157 440 582 7.20E-53 214.9 6596 cellular

organisms;Eukaryota;Opisthokonta;Metazoa;Eumetazoa;Bilateria;Protostomia;  
Spiralia;Lophotrochozoa;Mollusca;Bivalvia;Autobranchia;Heteroconchia;Euhe  
terodonta;Imparidentia;Venerida;Veneroidea;Veneridae;Mercenaria;Mercenari  
a mercenaria

UdeM00000010146 6596 469.5 UdeM00000010146 XP\_045195343.1 58 412  
116 5 1 360 24 430 3.70E-129 469.5 6596 cellular

organisms;Eukaryota;Opisthokonta;Metazoa;Eumetazoa;Bilateria;Protostomia;  
Spiralia;Lophotrochozoa;Mollusca;Bivalvia;Autobranchia;Heteroconchia;Euhe  
terodonta;Imparidentia;Venerida;Veneroidea;Veneridae;Mercenaria;Mercenari  
a mercenaria

UdeM00000010147 6596 214.2 UdeM00000010147 XP\_045195422.1 32.4 410  
238 11 27 421 131 516 3.30E-52 214.2 6596 cellular

organisms;Eukaryota;Opisthokonta;Metazoa;Eumetazoa;Bilateria;Protostomia;  
Spiralia;Lophotrochozoa;Mollusca;Bivalvia;Autobranchia;Heteroconchia;Euhe  
terodonta;Imparidentia;Venerida;Veneroidea;Veneridae;Mercenaria;Mercenari  
a mercenaria

UdeM00000010148 6596 217.6 UdeM00000010148 XP\_045195422.1 32.8 409  
238 12 29 423 131 516 3.00E-53 217.6 6596 cellular

organisms;Eukaryota;Opisthokonta;Metazoa;Eumetazoa;Bilateria;Protostomia;  
Spiralia;Lophotrochozoa;Mollusca;Bivalvia;Autobranchia;Heteroconchia;Euhe  
terodonta;Imparidentia;Venerida;Veneroidea;Veneridae;Mercenaria;Mercenari  
a mercenaria

UdeM00000010149 6573 654.8 UdeM00000010149 XP\_021365183.1 79.3 411  
75 2 948 1350 137 545 2.30E-184 654.8 6573 cellular

organisms;Eukaryota;Opisthokonta;Metazoa;Eumetazoa;Bilateria;Protostomia;  
Spiralia;Lophotrochozoa;Mollusca;Bivalvia;Autobranchia;Pteriomorphia;Pect  
inida;Pectinoidea;Pectinidae;Mizuhopecten;Mizuhopecten yessoensis

UdeM00000010150 6573 649.4 UdeM00000010150 XP\_021365183.1 78.7 414  
75 3 898 1303 137 545 9.50E-183 649.4 6573 cellular

organisms;Eukaryota;Opisthokonta;Metazoa;Eumetazoa;Bilateria;Protostomia;  
Spiralia;Lophotrochozoa;Mollusca;Bivalvia;Autobranchia;Pteriomorphia;Pect  
inida;Pectinoidea;Pectinidae;Mizuhopecten;Mizuhopecten yessoensis

UdeM00000043815 37621 139.8 UdeM00000043815 XP\_014679100.1 37.1 232  
132 8 680 906 78 300 1.70E-29 139.8 37621 cellular

organisms;Eukaryota;Opisthokonta;Metazoa;Eumetazoa;Bilateria;Protostomia;  
Ecdysozoa;Scalidophora;Priapulida;Priapulimorpha;Priapulimorphida;Priapul  
idae;Priapululus;Priapululus caudatus

UdeM00000043612 400727 140.2 UdeM00000043612 XP\_025100004.1 26.5  
539 338 25 2 514 364 870 1.20E-29 140.2 400727  
cellular

organisms;Eukaryota;Opisthokonta;Metazoa;Eumetazoa;Bilateria;Protostomia;  
Spiralia;Lophotrochozoa;Mollusca;Gastropoda;Caenogastropoda;Architaeniogl  
ossa;Ampullarioidea;Ampullariidae;Pomacea;Pomacea canaliculata

UdeM00000043613 7739 585.5 UdeM00000043613 XP\_035696678.1 57.2 481  
203 1 2 479 423 903 6.60E-164 585.5 7739 cellular

organisms;Eukaryota;Opisthokonta;Metazoa;Eumetazoa;Bilateria;Deuterostomi  
a;Chordata;Cephalochordata;Leptocardii;Amphioxiformes;Branchiostomidae;Br  
anchiostoma;Branchiostoma floridae

UdeM00000043616 29159 201.8 UdeM00000043616 XP\_034318217.1 39.4 282  
 158 7 145 419 252 527 1.70E-48 201.8 29159 cellular  
 organisms;Eukaryota;Opisthokonta;Metazoa;Eumetazoa;Bilateria;Protostomia;  
 Spiralia;Lophotrochozoa;Mollusca;Bivalvia;Autobranchia;Pteriomorphia;Ostr  
 eida;Ostreoidea;Ostreidae;Crassostrea;Crassostrea gigas  
 UdeM00000043617 29159 201.8 UdeM00000043617 XP\_034318217.1 39.4 282  
 158 7 159 433 252 527 1.80E-48 201.8 29159 cellular  
 organisms;Eukaryota;Opisthokonta;Metazoa;Eumetazoa;Bilateria;Protostomia;  
 Spiralia;Lophotrochozoa;Mollusca;Bivalvia;Autobranchia;Pteriomorphia;Ostr  
 eida;Ostreoidea;Ostreidae;Crassostrea;Crassostrea gigas  
 UdeM00000043618 6596 263.5 UdeM00000043618 XP\_045216906.1 43.4 316  
 138 6 6 283 144 456 3.20E-67 263.5 6596 cellular  
 organisms;Eukaryota;Opisthokonta;Metazoa;Eumetazoa;Bilateria;Protostomia;  
 Spiralia;Lophotrochozoa;Mollusca;Bivalvia;Autobranchia;Heteroconchia;Euhe  
 terodonta;Imparidentia;Venerida;Veneroidea;Veneridae;Mercenaria;Mercenari  
 a mercenaria  
 UdeM00000043619 7741 91.3 UdeM00000043619 XP\_019629960.1 29.6 196  
 131 5 144 334 312 505 2.70E-15 91.3 7741 cellular  
 organisms;Eukaryota;Opisthokonta;Metazoa;Eumetazoa;Bilateria;Deuterostomi  
 a;Chordata;Cephalochordata;Leptocardii;Amphioxiformes;Branchiostomidae;Br  
 anchiostoma;Branchiostoma belcheri  
 UdeM00000043621 6596 109.4 UdeM00000043621 XP\_045195639.1 31.2 250  
 151 8 147 380 93 337 1.70E-20 109.4 6596 cellular  
 organisms;Eukaryota;Opisthokonta;Metazoa;Eumetazoa;Bilateria;Protostomia;  
 Spiralia;Lophotrochozoa;Mollusca;Bivalvia;Autobranchia;Heteroconchia;Euhe  
 terodonta;Imparidentia;Venerida;Veneroidea;Veneridae;Mercenaria;Mercenari  
 a mercenaria  
 UdeM00000042376 565050 201.1 UdeM00000042376 YP\_002517783.1 34.2  
 403 249 8 4 399 2 395 2.70E-48 201.1 565050  
 cellular  
 organisms;Bacteria;Proteobacteria;Alphaproteobacteria;Caulobacterales;Cau  
 lobacteraceae;Caulobacter;Caulobacter vibrioides;Caulobacter vibrioides  
 NA1000  
 UdeM00000006547 6596 90.9 UdeM00000006547 XP\_045214905.1 33 197  
 116 5 21 215 46 228 2.20E-15 90.9 6596 cellular  
 organisms;Eukaryota;Opisthokonta;Metazoa;Eumetazoa;Bilateria;Protostomia;  
 Spiralia;Lophotrochozoa;Mollusca;Bivalvia;Autobranchia;Heteroconchia;Euhe  
 terodonta;Imparidentia;Venerida;Veneroidea;Veneridae;Mercenaria;Mercenari  
 a mercenaria  
 UdeM00000006548 29159 75.1 UdeM00000006548 XP\_011425901.2 31.2 215  
 115 8 1 188 13 221 1.10E-10 75.1 29159 cellular  
 organisms;Eukaryota;Opisthokonta;Metazoa;Eumetazoa;Bilateria;Protostomia;  
 Spiralia;Lophotrochozoa;Mollusca;Bivalvia;Autobranchia;Pteriomorphia;Ostr  
 eida;Ostreoidea;Ostreidae;Crassostrea;Crassostrea gigas  
 UdeM00000006549 6565 323.2 UdeM00000006549 XP\_022296622.1 70.7 215  
 63 0 1 215 1 215 2.60E-85 323.2 6565 cellular  
 organisms;Eukaryota;Opisthokonta;Metazoa;Eumetazoa;Bilateria;Protostomia;  
 Spiralia;Lophotrochozoa;Mollusca;Bivalvia;Autobranchia;Pteriomorphia;Ostr  
 eida;Ostreoidea;Ostreidae;Crassostrea;Crassostrea virginica  
 UdeM00000006550 6565 316.2 UdeM00000006550 XP\_022296622.1 67.9 215  
 69 0 1 215 1 215 3.10E-83 316.2 6565 cellular  
 organisms;Eukaryota;Opisthokonta;Metazoa;Eumetazoa;Bilateria;Protostomia;  
 Spiralia;Lophotrochozoa;Mollusca;Bivalvia;Autobranchia;Pteriomorphia;Ostr  
 eida;Ostreoidea;Ostreidae;Crassostrea;Crassostrea virginica

UdeM00000006551 29159 303.9 UdeM00000006551 XP\_034307830.1 64.7 215  
 76 0 1 215 225 439 1.60E-79 303.9 29159 cellular  
 organisms;Eukaryota;Opisthokonta;Metazoa;Eumetazoa;Bilateria;Protostomia;  
 Spiralia;Lophotrochozoa;Mollusca;Bivalvia;Autobranchia;Pteriomorpha;Ostr  
 eida;Ostreoidea;Ostreidae;Crassostrea;Crassostrea gigas  
 UdeM00000006552 6526 839 UdeM00000006552 XP\_013096648.1 78.8 496  
 105 0 9 504 49 544 3.30E-240 839 6526 cellular  
 organisms;Eukaryota;Opisthokonta;Metazoa;Eumetazoa;Bilateria;Protostomia;  
 Spiralia;Lophotrochozoa;Mollusca;Gastropoda;Heterobranchia;Euthyneura;Pan  
 pulmonata;Hygrophila;Lymnaeidae;Planorbidae;Biomphalaria;Biomphalaria  
 glabrata  
 UdeM00000006553 6579 386.3 UdeM00000006553 XP\_033760330.1 65.9 308  
 88 4 1 292 1 307 4.30E-104 386.3 6579 cellular  
 organisms;Eukaryota;Opisthokonta;Metazoa;Eumetazoa;Bilateria;Protostomia;  
 Spiralia;Lophotrochozoa;Mollusca;Bivalvia;Autobranchia;Pteriomorpha;Pect  
 inida;Pectinoidea;Pectinidae;Pecten;Pecten maximus  
 UdeM00000006554 6573 308.9 UdeM00000006554 XP\_021341731.1 27.5 683  
 455 11 11 669 14 680 1.60E-80 308.9 6573 cellular  
 organisms;Eukaryota;Opisthokonta;Metazoa;Eumetazoa;Bilateria;Protostomia;  
 Spiralia;Lophotrochozoa;Mollusca;Bivalvia;Autobranchia;Pteriomorpha;Pect  
 inida;Pectinoidea;Pectinidae;Mizuhopecten;Mizuhopecten yessoensis  
 UdeM00000006557 6596 797 UdeM00000006557 XP\_045165173.1 49.5 1028  
 441 14 31 1020 37 1024 2.90E-227 797 6596 cellular  
 organisms;Eukaryota;Opisthokonta;Metazoa;Eumetazoa;Bilateria;Protostomia;  
 Spiralia;Lophotrochozoa;Mollusca;Bivalvia;Autobranchia;Heteroconchia;Euhe  
 terodonta;Imparidentia;Venerida;Veneroidea;Veneridae;Mercenaria;Mercenari  
 a mercenaria  
 UdeM00000006558 6596 125.9 UdeM00000006558 XP\_045176795.1 40.8 157  
 82 3 12 163 9 159 6.00E-26 125.9 6596 cellular  
 organisms;Eukaryota;Opisthokonta;Metazoa;Eumetazoa;Bilateria;Protostomia;  
 Spiralia;Lophotrochozoa;Mollusca;Bivalvia;Autobranchia;Heteroconchia;Euhe  
 terodonta;Imparidentia;Venerida;Veneroidea;Veneridae;Mercenaria;Mercenari  
 a mercenaria  
 UdeM00000006559 6596 312.4 UdeM00000006559 XP\_045165720.1 84.1 176  
 28 0 51 226 1 176 4.80E-82 312.4 6596 cellular  
 organisms;Eukaryota;Opisthokonta;Metazoa;Eumetazoa;Bilateria;Protostomia;  
 Spiralia;Lophotrochozoa;Mollusca;Bivalvia;Autobranchia;Heteroconchia;Euhe  
 terodonta;Imparidentia;Venerida;Veneroidea;Veneridae;Mercenaria;Mercenari  
 a mercenaria  
 UdeM00000006560 6596 265.4 UdeM00000006560 XP\_045165720.1 85.6 146  
 21 0 51 196 1 146 6.20E-68 265.4 6596 cellular  
 organisms;Eukaryota;Opisthokonta;Metazoa;Eumetazoa;Bilateria;Protostomia;  
 Spiralia;Lophotrochozoa;Mollusca;Bivalvia;Autobranchia;Heteroconchia;Euhe  
 terodonta;Imparidentia;Venerida;Veneroidea;Veneridae;Mercenaria;Mercenari  
 a mercenaria  
 UdeM00000006561 6579 153.3 UdeM00000006561 XP\_033744372.1 35.1 245  
 94 2 3 182 15 259 3.60E-34 153.3 6579 cellular  
 organisms;Eukaryota;Opisthokonta;Metazoa;Eumetazoa;Bilateria;Protostomia;  
 Spiralia;Lophotrochozoa;Mollusca;Bivalvia;Autobranchia;Pteriomorpha;Pect  
 inida;Pectinoidea;Pectinidae;Pecten;Pecten maximus  
 UdeM00000006562 6596 136.7 UdeM00000006562 XP\_045199200.1 32.3 334  
 212 5 175 501 16 342 7.90E-29 136.7 6596 cellular  
 organisms;Eukaryota;Opisthokonta;Metazoa;Eumetazoa;Bilateria;Protostomia;  
 Spiralia;Lophotrochozoa;Mollusca;Bivalvia;Autobranchia;Heteroconchia;Euhe

terodonta;Imparidentia;Venerida;Veneroidea;Veneridae;Mercenaria;Mercenari  
 a mercenaria  
 UdeM00000006563 6596 85.1 UdeM00000006563 XP\_045165888.1 24.5 474  
 305 13 1 432 1 463 3.70E-13 85.1 6596 cellular  
 organisms;Eukaryota;Opisthokonta;Metazoa;Eumetazoa;Bilateria;Protostomia;  
 Spiralia;Lophotrochozoa;Mollusca;Bivalvia;Autobranhia;Heteroconchia;Euhe  
 terodonta;Imparidentia;Venerida;Veneroidea;Veneridae;Mercenaria;Mercenari  
 a mercenaria  
 UdeM00000006565 6565 273.9 UdeM00000006565 XP\_022300340.1 52.8 229  
 108 0 52 280 150 378 2.30E-70 273.9 6565 cellular  
 organisms;Eukaryota;Opisthokonta;Metazoa;Eumetazoa;Bilateria;Protostomia;  
 Spiralia;Lophotrochozoa;Mollusca;Bivalvia;Autobranhia;Pteriormorphia;Ostr  
 eida;Ostreoidea;Ostreidae;Crassostrea;Crassostrea virginica  
 UdeM00000006564 6565 431.8 UdeM00000006564 XP\_022300341.1 56.7 365  
 149 1 3 358 1 365 8.50E-118 431.8 6565 cellular  
 organisms;Eukaryota;Opisthokonta;Metazoa;Eumetazoa;Bilateria;Protostomia;  
 Spiralia;Lophotrochozoa;Mollusca;Bivalvia;Autobranhia;Pteriormorphia;Ostr  
 eida;Ostreoidea;Ostreidae;Crassostrea;Crassostrea virginica  
 UdeM00000016120 6596 223.8 UdeM00000016120 XP\_045174504.1 60.6 142  
 56 0 7 148 107 248 1.50E-55 223.8 6596 cellular  
 organisms;Eukaryota;Opisthokonta;Metazoa;Eumetazoa;Bilateria;Protostomia;  
 Spiralia;Lophotrochozoa;Mollusca;Bivalvia;Autobranhia;Heteroconchia;Euhe  
 terodonta;Imparidentia;Venerida;Veneroidea;Veneridae;Mercenaria;Mercenari  
 a mercenaria  
 UdeM00000016119 6573 360.5 UdeM00000016119 XP\_021374474.1 54.6 280  
 122 1 210 489 356 630 3.30E-96 360.5 6573 cellular  
 organisms;Eukaryota;Opisthokonta;Metazoa;Eumetazoa;Bilateria;Protostomia;  
 Spiralia;Lophotrochozoa;Mollusca;Bivalvia;Autobranhia;Pteriormorphia;Pect  
 inida;Pectinoidea;Pectinidae;Mizuhopecten;Mizuhopecten yessoensis  
 UdeM00000016121 6596 109.4 UdeM00000016121 XP\_045174776.1 44.7 141  
 72 3 2 142 346 480 4.70E-21 109.4 6596 cellular  
 organisms;Eukaryota;Opisthokonta;Metazoa;Eumetazoa;Bilateria;Protostomia;  
 Spiralia;Lophotrochozoa;Mollusca;Bivalvia;Autobranhia;Heteroconchia;Euhe  
 terodonta;Imparidentia;Venerida;Veneroidea;Veneridae;Mercenaria;Mercenari  
 a mercenaria  
 UdeM00000016122 6596 122.5 UdeM00000016122 XP\_045174776.1 72.4 87  
 24 0 2 88 257 343 3.40E-25 122.5 6596 cellular  
 organisms;Eukaryota;Opisthokonta;Metazoa;Eumetazoa;Bilateria;Protostomia;  
 Spiralia;Lophotrochozoa;Mollusca;Bivalvia;Autobranhia;Heteroconchia;Euhe  
 terodonta;Imparidentia;Venerida;Veneroidea;Veneridae;Mercenaria;Mercenari  
 a mercenaria  
 UdeM00000016123 6573 178.3 UdeM00000016123 XP\_021353072.1 47.3 239  
 95 7 99 320 19 243 1.60E-41 178.3 6573 cellular  
 organisms;Eukaryota;Opisthokonta;Metazoa;Eumetazoa;Bilateria;Protostomia;  
 Spiralia;Lophotrochozoa;Mollusca;Bivalvia;Autobranhia;Pteriormorphia;Pect  
 inida;Pectinoidea;Pectinidae;Mizuhopecten;Mizuhopecten yessoensis  
 UdeM00000016125 29159 490.3 UdeM00000016125 XP\_019926412.2 50.8 494  
 232 7 1 490 1 487 2.90E-135 490.3 29159 cellular  
 organisms;Eukaryota;Opisthokonta;Metazoa;Eumetazoa;Bilateria;Protostomia;  
 Spiralia;Lophotrochozoa;Mollusca;Bivalvia;Autobranhia;Pteriormorphia;Ostr  
 eida;Ostreoidea;Ostreidae;Crassostrea;Crassostrea gigas  
 UdeM00000016126 6500 108.2 UdeM00000016126 XP\_012934855.1 48.5 136  
 43 3 1 109 106 241 7.30E-21 108.2 6500 cellular  
 organisms;Eukaryota;Opisthokonta;Metazoa;Eumetazoa;Bilateria;Protostomia;

Spiralia; Lophotrochozoa; Mollusca; Gastropoda; Heterobranchia; Euthyneura; Teptipleura; Aplysiida; Aplysioidea; Aplysiidae; Aplysia; Aplysia californica

UdeM00000016127 6596 604.4 UdeM00000016127 XP\_045174692.1 57.5 501  
210 3 118 616 740 1239 1.80E-169 604.4 6596 cellular  
organisms; Eukaryota; Opisthokonta; Metazoa; Eumetazoa; Bilateria; Protostomia; Spiralia; Lophotrochozoa; Mollusca; Bivalvia; Autobranchia; Heteroconchia; Euheterodonta; Imparidentia; Venerida; Veneroidea; Veneridae; Mercenaria; Mercenaria mercenaria

UdeM00000016129 77115 70.1 UdeM00000016129 XP\_038144245.1 44.4 72  
40 0 1 72 315 386 1.30E-09 70.1 77115 cellular  
organisms; Eukaryota; Opisthokonta; Metazoa; Eumetazoa; Bilateria; Deuterostomia; Chordata; Craniata; Vertebrata; Gnathostomata; Teleostomi; Euteleostomi; Actinopterygii; Actinopteri; Neopterygii; Teleostei; Osteoglossocephalai; Clupeocephala; Euteleostei; Neoteleostei; Eurypterygia; Ctenosquamata; Acanthomorphata; Euacanthomorphacea; Percomorphaceae; Ovalentaria; Atherinomorphae; Cyprinodontiformes; Cyprinodontoides; Cyprinodontidae; Cyprinodontinae; Cyprinodontini; Cyprinodon; Cyprinodon tularosa

UdeM00000016130 29159 182.2 UdeM00000016130 XP\_034334268.1 60.7 135  
50 1 59 193 129 260 6.40E-43 182.2 29159 cellular  
organisms; Eukaryota; Opisthokonta; Metazoa; Eumetazoa; Bilateria; Protostomia; Spiralia; Lophotrochozoa; Mollusca; Bivalvia; Autobranchia; Pteriormorphia; Ostreida; Ostreioidea; Ostreidae; Crassostrea; Crassostrea gigas

UdeM00000016131 6596 331.6 UdeM00000016131 XP\_045177159.1 45.9 436  
210 5 27 452 44 463 1.60E-87 331.6 6596 cellular  
organisms; Eukaryota; Opisthokonta; Metazoa; Eumetazoa; Bilateria; Protostomia; Spiralia; Lophotrochozoa; Mollusca; Bivalvia; Autobranchia; Heteroconchia; Euheterodonta; Imparidentia; Venerida; Veneroidea; Veneridae; Mercenaria; Mercenaria mercenaria

UdeM00000016133 6596 380.6 UdeM00000016133 XP\_045174831.1 54.8 438  
165 9 43 452 36 468 2.90E-102 380.6 6596 cellular  
organisms; Eukaryota; Opisthokonta; Metazoa; Eumetazoa; Bilateria; Protostomia; Spiralia; Lophotrochozoa; Mollusca; Bivalvia; Autobranchia; Heteroconchia; Euheterodonta; Imparidentia; Venerida; Veneroidea; Veneridae; Mercenaria; Mercenaria mercenaria

UdeM00000016134 6596 129.8 UdeM00000016134 XP\_045175618.1 44.3 131  
72 1 10 139 17 147 2.70E-27 129.8 6596 cellular  
organisms; Eukaryota; Opisthokonta; Metazoa; Eumetazoa; Bilateria; Protostomia; Spiralia; Lophotrochozoa; Mollusca; Bivalvia; Autobranchia; Heteroconchia; Euheterodonta; Imparidentia; Venerida; Veneroidea; Veneridae; Mercenaria; Mercenaria mercenaria

UdeM00000016135 6596 206.1 UdeM00000016135 XP\_045174893.1 67.8 143  
45 1 3 144 4 146 3.20E-50 206.1 6596 cellular  
organisms; Eukaryota; Opisthokonta; Metazoa; Eumetazoa; Bilateria; Protostomia; Spiralia; Lophotrochozoa; Mollusca; Bivalvia; Autobranchia; Heteroconchia; Euheterodonta; Imparidentia; Venerida; Veneroidea; Veneridae; Mercenaria; Mercenaria mercenaria

UdeM00000016136 6573 79.3 UdeM00000016136 XP\_021338900.1 24.1 370  
233 12 4222 4581 735 1066 1.50E-10 79.3 6573 cellular  
organisms; Eukaryota; Opisthokonta; Metazoa; Eumetazoa; Bilateria; Protostomia; Spiralia; Lophotrochozoa; Mollusca; Bivalvia; Autobranchia; Pteriormorphia; Pectinida; Pectinoidea; Pectinidae; Mizuhopecten; Mizuhopecten yessoensis

UdeM00000016138 6573 79.3 UdeM00000016138 XP\_021338900.1 24.1 370  
233 12 4222 4581 735 1066 1.60E-10 79.3 6573 cellular  
organisms; Eukaryota; Opisthokonta; Metazoa; Eumetazoa; Bilateria; Protostomia;

Spiralia; Lophotrochozoa; Mollusca; Bivalvia; Autobranchia; Pteriomorpha; Pectinida; Pectinoidea; Pectinidae; Mizuhopecten; Mizuhopecten yessoensis

UdeM00000016139 6596 861.7 UdeM00000016139 XP\_045174410.1 49.2 1017  
454 22 721 1705 707 1692 1.60E-246 861.7 6596 cellular  
organisms; Eukaryota; Opisthokonta; Metazoa; Eumetazoa; Bilateria; Protostomia; Spiralia; Lophotrochozoa; Mollusca; Bivalvia; Autobranchia; Heteroconchia; Euheterodonta; Imparidentia; Venerida; Veneroidea; Veneridae; Mercenaria; Mercenaria mercenaria

UdeM00000016140 6596 288.9 UdeM00000016140 XP\_045176445.1 71.9 199  
51 3 1 198 6 200 5.00E-75 288.9 6596 cellular  
organisms; Eukaryota; Opisthokonta; Metazoa; Eumetazoa; Bilateria; Protostomia; Spiralia; Lophotrochozoa; Mollusca; Bivalvia; Autobranchia; Heteroconchia; Euheterodonta; Imparidentia; Venerida; Veneroidea; Veneridae; Mercenaria; Mercenaria mercenaria

UdeM00000016141 6596 232.6 UdeM00000016141 XP\_045187536.1 72.8 162  
43 1 2 163 228 388 3.50E-58 232.6 6596 cellular  
organisms; Eukaryota; Opisthokonta; Metazoa; Eumetazoa; Bilateria; Protostomia; Spiralia; Lophotrochozoa; Mollusca; Bivalvia; Autobranchia; Heteroconchia; Euheterodonta; Imparidentia; Venerida; Veneroidea; Veneridae; Mercenaria; Mercenaria mercenaria

UdeM00000016142 6596 439.9 UdeM00000016142 XP\_045187536.1 65.3 331  
113 1 1 331 396 724 2.90E-120 439.9 6596 cellular  
organisms; Eukaryota; Opisthokonta; Metazoa; Eumetazoa; Bilateria; Protostomia; Spiralia; Lophotrochozoa; Mollusca; Bivalvia; Autobranchia; Heteroconchia; Euheterodonta; Imparidentia; Venerida; Veneroidea; Veneridae; Mercenaria; Mercenaria mercenaria

UdeM00000016143 6596 296.2 UdeM00000016143 XP\_045187536.1 61.5 231  
87 1 1 231 496 724 3.60E-77 296.2 6596 cellular  
organisms; Eukaryota; Opisthokonta; Metazoa; Eumetazoa; Bilateria; Protostomia; Spiralia; Lophotrochozoa; Mollusca; Bivalvia; Autobranchia; Heteroconchia; Euheterodonta; Imparidentia; Venerida; Veneroidea; Veneridae; Mercenaria; Mercenaria mercenaria

UdeM00000016144 6573 266.9 UdeM00000016144 XP\_021338931.1 56.1 237  
103 1 23 258 9 245 3.00E-68 266.9 6573 cellular  
organisms; Eukaryota; Opisthokonta; Metazoa; Eumetazoa; Bilateria; Protostomia; Spiralia; Lophotrochozoa; Mollusca; Bivalvia; Autobranchia; Pteriomorpha; Pectinida; Pectinoidea; Pectinidae; Mizuhopecten; Mizuhopecten yessoensis

UdeM00000016145 6596 262.7 UdeM00000016145 XP\_045176427.1 58.2 225  
86 3 6 228 3 221 4.60E-67 262.7 6596 cellular  
organisms; Eukaryota; Opisthokonta; Metazoa; Eumetazoa; Bilateria; Protostomia; Spiralia; Lophotrochozoa; Mollusca; Bivalvia; Autobranchia; Heteroconchia; Euheterodonta; Imparidentia; Venerida; Veneroidea; Veneridae; Mercenaria; Mercenaria mercenaria

UdeM00000016146 29159 399.1 UdeM00000016146 XP\_011441362.1 86.2 218  
30 0 4 221 3 220 3.90E-108 399.1 29159 cellular  
organisms; Eukaryota; Opisthokonta; Metazoa; Eumetazoa; Bilateria; Protostomia; Spiralia; Lophotrochozoa; Mollusca; Bivalvia; Autobranchia; Pteriomorpha; Ostreida; Ostreoidea; Ostreidae; Crassostrea; Crassostrea gigas

UdeM00000016147 1735272 338.6 UdeM00000016147 XP\_041365115.1 78.2  
211 39 1 89 292 1 211 8.10E-90 338.6 1735272  
cellular  
organisms; Eukaryota; Opisthokonta; Metazoa; Eumetazoa; Bilateria; Protostomia; Spiralia; Lophotrochozoa; Mollusca; Gastropoda; Neomphalina; Neomphaloidea; Peltopiridae; Gigantopelta; Gigantopelta aegis

UdeM00000016148 6573 276.9 UdeM00000016148 XP\_021353390.1 43.5 400  
 187 10 1 384 239 615 3.80E-71 276.9 6573 cellular  
 organisms;Eukaryota;Opisthokonta;Metazoa;Eumetazoa;Bilateria;Protostomia;  
 Spiralia;Lophotrochozoa;Mollusca;Bivalvia;Autobranhia;Pteriomorphia;Pect  
 inida;Pectinoidea;Pectinidae;Mizuhopecten;Mizuhopecten yessoensis  
 UdeM00000016149 6596 213 UdeM00000016149 XP\_045175651.1 36.2 459  
 218 15 6 419 527 955 1.30E-51 213 6596 cellular  
 organisms;Eukaryota;Opisthokonta;Metazoa;Eumetazoa;Bilateria;Protostomia;  
 Spiralia;Lophotrochozoa;Mollusca;Bivalvia;Autobranhia;Heteroconchia;Euhe  
 terodonta;Imparidentia;Venerida;Veneroidea;Veneridae;Mercenaria;Mercenari  
 a mercenaria  
 UdeM00000016150 6596 908.7 UdeM00000016150 XP\_045175651.1 54 943  
 343 16 1 898 59 955 8.20E-261 908.7 6596 cellular  
 organisms;Eukaryota;Opisthokonta;Metazoa;Eumetazoa;Bilateria;Protostomia;  
 Spiralia;Lophotrochozoa;Mollusca;Bivalvia;Autobranhia;Heteroconchia;Euhe  
 terodonta;Imparidentia;Venerida;Veneroidea;Veneridae;Mercenaria;Mercenari  
 a mercenaria  
 UdeM00000016151 29159 184.9 UdeM00000016151 XP\_034338782.1 52.6 173  
 75 2 113 284 67 233 1.40E-43 184.9 29159 cellular  
 organisms;Eukaryota;Opisthokonta;Metazoa;Eumetazoa;Bilateria;Protostomia;  
 Spiralia;Lophotrochozoa;Mollusca;Bivalvia;Autobranhia;Pteriomorphia;Ostr  
 eida;Ostreoidea;Ostreidae;Crassostrea;Crassostrea gigas  
 UdeM00000016152 7159 656 UdeM00000016152 XP\_021695061.1 35.5 951  
 611 2 524 1472 994 1944 1.10E-184 656 7159 cellular  
 organisms;Eukaryota;Opisthokonta;Metazoa;Eumetazoa;Bilateria;Protostomia;  
 Ecdysozoa;Panarthropoda;Arthropoda;Mandibulata;Pancrustacea;Hexapoda;Inse  
 cta;Dicondylia;Pterygota;Neoptera;Endopterygota;Diptera;Nematocera;Culico  
 morpha;Culicoidea;Culicidae;Culicinae;Aedini;Aedes;Stegomyia;Aedes  
 aegypti  
 UdeM00000016153 7159 656 UdeM00000016153 XP\_021695061.1 35.5 951  
 611 2 524 1472 994 1944 1.10E-184 656 7159 cellular  
 organisms;Eukaryota;Opisthokonta;Metazoa;Eumetazoa;Bilateria;Protostomia;  
 Ecdysozoa;Panarthropoda;Arthropoda;Mandibulata;Pancrustacea;Hexapoda;Inse  
 cta;Dicondylia;Pterygota;Neoptera;Endopterygota;Diptera;Nematocera;Culico  
 morpha;Culicoidea;Culicidae;Culicinae;Aedini;Aedes;Stegomyia;Aedes  
 aegypti  
 UdeM00000016154 7159 652.9 UdeM00000016154 XP\_021695061.1 34.7 948  
 614 3 479 1423 1031 1976 9.60E-184 652.9 7159 cellular  
 organisms;Eukaryota;Opisthokonta;Metazoa;Eumetazoa;Bilateria;Protostomia;  
 Ecdysozoa;Panarthropoda;Arthropoda;Mandibulata;Pancrustacea;Hexapoda;Inse  
 cta;Dicondylia;Pterygota;Neoptera;Endopterygota;Diptera;Nematocera;Culico  
 morpha;Culicoidea;Culicidae;Culicinae;Aedini;Aedes;Stegomyia;Aedes  
 aegypti  
 UdeM00000016155 6565 323.2 UdeM00000016155 XP\_022311595.1 36.2 854  
 398 29 38 831 66 832 9.90E-85 323.2 6565 cellular  
 organisms;Eukaryota;Opisthokonta;Metazoa;Eumetazoa;Bilateria;Protostomia;  
 Spiralia;Lophotrochozoa;Mollusca;Bivalvia;Autobranhia;Pteriomorphia;Ostr  
 eida;Ostreoidea;Ostreidae;Crassostrea;Crassostrea virginica  
 UdeM00000016156 1735272 97.8 UdeM00000016156 XP\_041367600.1 71.2  
 73 21 0 4 76 12 84 7.10E-18 97.8 1735272  
 cellular  
 organisms;Eukaryota;Opisthokonta;Metazoa;Eumetazoa;Bilateria;Protostomia;  
 Spiralia;Lophotrochozoa;Mollusca;Gastropoda;Neomphalina;Neomphaloidea;Pel  
 tospiridae;Gigantopelta;Gigantopelta aegis

UdeM00000016157 6596 93.6 UdeM00000016157 XP\_045174850.1 45.9 111  
 55 2 5 114 368 474 1.90E-16 93.6 6596 cellular  
 organisms;Eukaryota;Opisthokonta;Metazoa;Eumetazoa;Bilateria;Protostomia;  
 Spiralia;Lophotrochozoa;Mollusca;Bivalvia;Autobranchia;Heteroconchia;Euhe  
 terodonta;Imparidentia;Venerida;Veneroidea;Veneridae;Mercenaria;Mercenari  
 a mercenaria  
 UdeM00000016158 29159 466.5 UdeM00000016158 XP\_011436901.2 49.7 453  
 226 1 23 475 10 460 4.20E-128 466.5 29159 cellular  
 organisms;Eukaryota;Opisthokonta;Metazoa;Eumetazoa;Bilateria;Protostomia;  
 Spiralia;Lophotrochozoa;Mollusca;Bivalvia;Autobranchia;Pteriormorphia;Ostr  
 eida;Ostreoidea;Ostreidae;Crassostrea;Crassostrea gigas  
 UdeM00000016159 6579 1825.8 UdeM00000016159 XP\_033753517.1 61.1  
 1765 618 15 1 1751 270 1979 0.00E+00 1825.8 6579  
 cellular  
 organisms;Eukaryota;Opisthokonta;Metazoa;Eumetazoa;Bilateria;Protostomia;  
 Spiralia;Lophotrochozoa;Mollusca;Bivalvia;Autobranchia;Pteriormorphia;Pect  
 inida;Pectinoidea;Pectinidae;Pecten;Pecten maximus  
 UdeM00000016160 6500 357.5 UdeM00000016160 XP\_005107466.1 70.4 247  
 70 2 1 244 1 247 1.50E-95 357.5 6500 cellular  
 organisms;Eukaryota;Opisthokonta;Metazoa;Eumetazoa;Bilateria;Protostomia;  
 Spiralia;Lophotrochozoa;Mollusca;Gastropoda;Heterobranchia;Euthyneura;Tec  
 tipleura;Aplysiida;Aplysioidea;Aplysiidae;Aplysia;Aplysia californica  
 UdeM00000016161 6573 199.9 UdeM00000016161 XP\_021369017.1 45.8 192  
 104 0 4 195 3 194 5.10E-48 199.9 6573 cellular  
 organisms;Eukaryota;Opisthokonta;Metazoa;Eumetazoa;Bilateria;Protostomia;  
 Spiralia;Lophotrochozoa;Mollusca;Bivalvia;Autobranchia;Pteriormorphia;Pect  
 inida;Pectinoidea;Pectinidae;Mizuhopecten;Mizuhopecten yessoensis  
 UdeM00000016162 6573 343.6 UdeM00000016162 XP\_021369001.1 88.4 190  
 22 0 5 194 654 843 4.60E-91 343.6 6573 cellular  
 organisms;Eukaryota;Opisthokonta;Metazoa;Eumetazoa;Bilateria;Protostomia;  
 Spiralia;Lophotrochozoa;Mollusca;Bivalvia;Autobranchia;Pteriormorphia;Pect  
 inida;Pectinoidea;Pectinidae;Mizuhopecten;Mizuhopecten yessoensis  
 UdeM00000016163 6579 125.2 UdeM00000016163 XP\_033751642.1 36.5 197  
 119 2 256 451 158 349 2.20E-25 125.2 6579 cellular  
 organisms;Eukaryota;Opisthokonta;Metazoa;Eumetazoa;Bilateria;Protostomia;  
 Spiralia;Lophotrochozoa;Mollusca;Bivalvia;Autobranchia;Pteriormorphia;Pect  
 inida;Pectinoidea;Pectinidae;Pecten;Pecten maximus  
 UdeM00000016164 6579 216.9 UdeM00000016164 XP\_033751642.1 49 241  
 116 3 156 395 118 352 4.90E-53 216.9 6579 cellular  
 organisms;Eukaryota;Opisthokonta;Metazoa;Eumetazoa;Bilateria;Protostomia;  
 Spiralia;Lophotrochozoa;Mollusca;Bivalvia;Autobranchia;Pteriormorphia;Pect  
 inida;Pectinoidea;Pectinidae;Pecten;Pecten maximus  
 UdeM00000016165 6579 1217.2 UdeM00000016165 XP\_033751641.1 91.3  
 653 57 0 1 653 1 653 0.00E+00 1217.2 6579  
 cellular  
 organisms;Eukaryota;Opisthokonta;Metazoa;Eumetazoa;Bilateria;Protostomia;  
 Spiralia;Lophotrochozoa;Mollusca;Bivalvia;Autobranchia;Pteriormorphia;Pect  
 inida;Pectinoidea;Pectinidae;Pecten;Pecten maximus  
 UdeM00000016166 29159 255.4 UdeM00000016166 XP\_019926091.2 42.6 376  
 174 3 108 441 17 392 1.80E-64 255.4 29159 cellular  
 organisms;Eukaryota;Opisthokonta;Metazoa;Eumetazoa;Bilateria;Protostomia;  
 Spiralia;Lophotrochozoa;Mollusca;Bivalvia;Autobranchia;Pteriormorphia;Ostr  
 eida;Ostreoidea;Ostreidae;Crassostrea;Crassostrea gigas



UdeM00000016167 6596 433.7 UdeM00000016167 XP\_045190672.1 25.6 1506  
 965 43 475 1875 413 1868 1.20E-117 433.7 6596 cellular  
 organisms;Eukaryota;Opisthokonta;Metazoa;Eumetazoa;Bilateria;Protostomia;  
 Spiralia;Lophotrochozoa;Mollusca;Bivalvia;Autobranchia;Heteroconchia;Euhe  
 terodonta;Imparidentia;Venerida;Veneroidea;Veneridae;Mercenaria;Mercenari  
 a mercenaria  
 UdeM00000016168 109280 80.1 UdeM00000016168 XP\_019731430.1 36.4  
 140 79 4 10 149 12 141 2.80E-12 80.1 109280  
 cellular  
 organisms;Eukaryota;Opisthokonta;Metazoa;Eumetazoa;Bilateria;Deuterostomi  
 a;Chordata;Craniata;Vertebrata;Gnathostomata;Teleostomi;Euteleostomi;Acti  
 nopterygii;Actinopteri;Neopterygii;Teleostei;Osteoglossocephalai;Clupeoce  
 phala;Euteleosteomorpha;Neoteleostei;Eurypterygia;Ctenosquamata;Acanthomo  
 rphata;Euacanthomorphacea;Percomorphaceae;Syngnathiaria;Syngnathiformes;S  
 yngnathoidei;Syngnathidae;Hippocampinae;Hippocampus;Hippocampus comes  
 UdeM00000016169 1735272 148.7 UdeM00000016169 XP\_041366300.1 65.7  
 105 36 0 1 105 1 105 6.50E-33 148.7 1735272  
 cellular  
 organisms;Eukaryota;Opisthokonta;Metazoa;Eumetazoa;Bilateria;Protostomia;  
 Spiralia;Lophotrochozoa;Mollusca;Gastropoda;Neomphalina;Neomphaloidea;Pel  
 tospiridae;Gigantopelta;Gigantopelta aegis  
 UdeM00000016170 6596 874.4 UdeM00000016170 XP\_045175810.1 71 651  
 141 7 1 603 1 651 8.40E-251 874.4 6596 cellular  
 organisms;Eukaryota;Opisthokonta;Metazoa;Eumetazoa;Bilateria;Protostomia;  
 Spiralia;Lophotrochozoa;Mollusca;Bivalvia;Autobranchia;Heteroconchia;Euhe  
 terodonta;Imparidentia;Venerida;Veneroidea;Veneridae;Mercenaria;Mercenari  
 a mercenaria  
 UdeM00000016171 1735272 889.4 UdeM00000016171 XP\_041365074.1 61.4  
 720 254 5 1 718 1 698 4.10E-255 889.4 1735272  
 cellular  
 organisms;Eukaryota;Opisthokonta;Metazoa;Eumetazoa;Bilateria;Protostomia;  
 Spiralia;Lophotrochozoa;Mollusca;Gastropoda;Neomphalina;Neomphaloidea;Pel  
 tospiridae;Gigantopelta;Gigantopelta aegis  
 UdeM00000016173 6596 79.7 UdeM00000016173 XP\_045174622.1 55.4 56  
 25 0 188 243 52 107 6.00E-12 79.7 6596 cellular  
 organisms;Eukaryota;Opisthokonta;Metazoa;Eumetazoa;Bilateria;Protostomia;  
 Spiralia;Lophotrochozoa;Mollusca;Bivalvia;Autobranchia;Heteroconchia;Euhe  
 terodonta;Imparidentia;Venerida;Veneroidea;Veneridae;Mercenaria;Mercenari  
 a mercenaria  
 UdeM00000016174 6596 127.5 UdeM00000016174 XP\_045176900.1 29 411  
 257 12 332 727 292 682 7.00E-26 127.5 6596 cellular  
 organisms;Eukaryota;Opisthokonta;Metazoa;Eumetazoa;Bilateria;Protostomia;  
 Spiralia;Lophotrochozoa;Mollusca;Bivalvia;Autobranchia;Heteroconchia;Euhe  
 terodonta;Imparidentia;Venerida;Veneroidea;Veneridae;Mercenaria;Mercenari  
 a mercenaria  
 UdeM00000016175 6579 513.1 UdeM00000016175 XP\_033753321.1 49.4 638  
 293 8 4 633 6 621 5.20E-142 513.1 6579 cellular  
 organisms;Eukaryota;Opisthokonta;Metazoa;Eumetazoa;Bilateria;Protostomia;  
 Spiralia;Lophotrochozoa;Mollusca;Bivalvia;Autobranchia;Pteriomorphia;Pect  
 inida;Pectinoidea;Pectinidae;Pecten;Pecten maximus  
 UdeM00000016176 6596 318.2 UdeM00000016176 XP\_045174669.1 73.5 204  
 54 0 1 204 1 204 8.20E-84 318.2 6596 cellular  
 organisms;Eukaryota;Opisthokonta;Metazoa;Eumetazoa;Bilateria;Protostomia;  
 Spiralia;Lophotrochozoa;Mollusca;Bivalvia;Autobranchia;Heteroconchia;Euhe

terodonta;Imparidentia;Venerida;Veneroidea;Veneridae;Mercenaria;Mercenari  
 a mercenaria  
 UdeM00000016177 6500 964.5 UdeM00000016177 XP\_035826744.1 46.5 1069  
 534 10 70 1134 137 1171 1.20E-277 964.5 6500 cellular  
 organisms;Eukaryota;Opisthokonta;Metazoa;Eumetazoa;Bilateria;Protostomia;  
 Spiralia;Lophotrochozoa;Mollusca;Gastropoda;Heterobranchia;Euthyneura;Tec  
 tipleura;Aplysiida;Aplysioidea;Aplysiidae;Aplysia;Aplysia californica  
 UdeM00000016178 46514 117.9 UdeM00000016178 XP\_038047006.1 44.9 147  
 75 1 16 156 251 397 1.20E-23 117.9 46514 cellular  
 organisms;Eukaryota;Opisthokonta;Metazoa;Eumetazoa;Bilateria;Deuterostomi  
 a;Echinodermata;Eleutherozoa;Asterozoa;Asteroidea;Valvatacea;Valvatida;As  
 terinidae;Patiria;Patiria miniata  
 UdeM00000016179 6596 263.1 UdeM00000016179 XP\_045174669.1 60.8 199  
 75 2 1 196 402 600 2.90E-67 263.1 6596 cellular  
 organisms;Eukaryota;Opisthokonta;Metazoa;Eumetazoa;Bilateria;Protostomia;  
 Spiralia;Lophotrochozoa;Mollusca;Bivalvia;Autobranchia;Heteroconchia;Euhe  
 terodonta;Imparidentia;Venerida;Veneroidea;Veneridae;Mercenaria;Mercenari  
 a mercenaria  
 UdeM00000016180 6596 142.1 UdeM00000016180 XP\_045174775.1 51.3 119  
 58 0 3 121 9 127 4.60E-31 142.1 6596 cellular  
 organisms;Eukaryota;Opisthokonta;Metazoa;Eumetazoa;Bilateria;Protostomia;  
 Spiralia;Lophotrochozoa;Mollusca;Bivalvia;Autobranchia;Heteroconchia;Euhe  
 terodonta;Imparidentia;Venerida;Veneroidea;Veneridae;Mercenaria;Mercenari  
 a mercenaria  
 UdeM00000016181 6573 709.9 UdeM00000016181 XP\_021349478.1 62.6 553  
 194 7 111 658 98 642 3.00E-201 709.9 6573 cellular  
 organisms;Eukaryota;Opisthokonta;Metazoa;Eumetazoa;Bilateria;Protostomia;  
 Spiralia;Lophotrochozoa;Mollusca;Bivalvia;Autobranchia;Pteriomorphia;Pect  
 inida;Pectinoidea;Pectinidae;Mizuhopecten;Mizuhopecten yessoensis  
 UdeM00000016182 6579 643.7 UdeM00000016182 XP\_033752776.1 74.5 404  
 103 0 11 414 54 457 1.70E-181 643.7 6579 cellular  
 organisms;Eukaryota;Opisthokonta;Metazoa;Eumetazoa;Bilateria;Protostomia;  
 Spiralia;Lophotrochozoa;Mollusca;Bivalvia;Autobranchia;Pteriomorphia;Pect  
 inida;Pectinoidea;Pectinidae;Pecten;Pecten maximus  
 UdeM00000016183 29159 414.1 UdeM00000016183 XP\_011438219.2 56 348  
 148 3 16 359 42 388 1.80E-112 414.1 29159 cellular  
 organisms;Eukaryota;Opisthokonta;Metazoa;Eumetazoa;Bilateria;Protostomia;  
 Spiralia;Lophotrochozoa;Mollusca;Bivalvia;Autobranchia;Pteriomorphia;Ostr  
 eida;Ostreoidea;Ostreidae;Crassostrea;Crassostrea gigas  
 UdeM00000016184 6596 192.2 UdeM00000016184 XP\_045216476.1 45.6 228  
 120 3 801 1025 476 702 3.30E-45 192.2 6596 cellular  
 organisms;Eukaryota;Opisthokonta;Metazoa;Eumetazoa;Bilateria;Protostomia;  
 Spiralia;Lophotrochozoa;Mollusca;Bivalvia;Autobranchia;Heteroconchia;Euhe  
 terodonta;Imparidentia;Venerida;Veneroidea;Veneridae;Mercenaria;Mercenari  
 a mercenaria  
 UdeM00000016185 6596 585.1 UdeM00000016185 XP\_045175443.1 66 444  
 135 5 1 441 1 431 7.40E-164 585.1 6596 cellular  
 organisms;Eukaryota;Opisthokonta;Metazoa;Eumetazoa;Bilateria;Protostomia;  
 Spiralia;Lophotrochozoa;Mollusca;Bivalvia;Autobranchia;Heteroconchia;Euhe  
 terodonta;Imparidentia;Venerida;Veneroidea;Veneridae;Mercenaria;Mercenari  
 a mercenaria  
 UdeM00000016186 6596 224.2 UdeM00000016186 XP\_045175444.1 59.4 234  
 81 2 1 221 1 233 1.70E-55 224.2 6596 cellular  
 organisms;Eukaryota;Opisthokonta;Metazoa;Eumetazoa;Bilateria;Protostomia;

Spiralia;Lophotrochozoa;Mollusca;Bivalvia;Autobranchia;Heteroconchia;Euherodonta;Imparidentia;Venerida;Veneroidea;Veneridae;Mercenaria;Mercenaria mercenaria

UdeM00000016187 6596 454.1 UdeM00000016187 XP\_045176557.1 43.5 593  
304 11 1 588 1 567 2.60E-124 454.1 6596 cellular

organisms;Eukaryota;Opisthokonta;Metazoa;Eumetazoa;Bilateria;Protostomia;Spiralia;Lophotrochozoa;Mollusca;Bivalvia;Autobranchia;Heteroconchia;Euherodonta;Imparidentia;Venerida;Veneroidea;Veneridae;Mercenaria;Mercenaria mercenaria

UdeM00000016188 6579 703.4 UdeM00000016188 XP\_033751573.1 67.4 509  
161 3 1 505 1 508 2.30E-199 703.4 6579 cellular

organisms;Eukaryota;Opisthokonta;Metazoa;Eumetazoa;Bilateria;Protostomia;Spiralia;Lophotrochozoa;Mollusca;Bivalvia;Autobranchia;Pteriormorphia;Pectinida;Pectinoidea;Pectinidae;Pecten;Pecten maximus

UdeM00000016189 1735272 426 UdeM00000016189 XP\_041367058.1 42.5  
590 313 14 422 1003 106 677 1.30E-115 426 1735272  
cellular

organisms;Eukaryota;Opisthokonta;Metazoa;Eumetazoa;Bilateria;Protostomia;Spiralia;Lophotrochozoa;Mollusca;Gastropoda;Neomphalina;Neomphaloidea;Peltospiridae;Gigantopelta;Gigantopelta aegis

UdeM00000016190 1735272 411.4 UdeM00000016190 XP\_041367058.1 39.6  
627 317 13 422 1041 106 677 3.50E-111 411.4 1735272  
cellular

organisms;Eukaryota;Opisthokonta;Metazoa;Eumetazoa;Bilateria;Protostomia;Spiralia;Lophotrochozoa;Mollusca;Gastropoda;Neomphalina;Neomphaloidea;Peltospiridae;Gigantopelta;Gigantopelta aegis

UdeM00000016191 6579 274.2 UdeM00000016191 XP\_033752814.1 65.7 207  
56 3 1 199 1 200 1.30E-70 274.2 6579 cellular

organisms;Eukaryota;Opisthokonta;Metazoa;Eumetazoa;Bilateria;Protostomia;Spiralia;Lophotrochozoa;Mollusca;Bivalvia;Autobranchia;Pteriormorphia;Pectinida;Pectinoidea;Pectinidae;Pecten;Pecten maximus

UdeM00000016192 6596 253.4 UdeM00000016192 XP\_045176627.1 27.3 733  
432 23 71 754 64 744 8.90E-64 253.4 6596 cellular

organisms;Eukaryota;Opisthokonta;Metazoa;Eumetazoa;Bilateria;Protostomia;Spiralia;Lophotrochozoa;Mollusca;Bivalvia;Autobranchia;Heteroconchia;Euherodonta;Imparidentia;Venerida;Veneroidea;Veneridae;Mercenaria;Mercenaria mercenaria

UdeM00000016193 6596 128.3 UdeM00000016193 XP\_045174767.1 59.1 93  
38 0 74 166 139 231 9.40E-27 128.3 6596 cellular

organisms;Eukaryota;Opisthokonta;Metazoa;Eumetazoa;Bilateria;Protostomia;Spiralia;Lophotrochozoa;Mollusca;Bivalvia;Autobranchia;Heteroconchia;Euherodonta;Imparidentia;Venerida;Veneroidea;Veneridae;Mercenaria;Mercenaria mercenaria

UdeM00000016194 6596 251.1 UdeM00000016194 XP\_045174767.1 50.9 224  
110 0 10 233 8 231 1.30E-63 251.1 6596 cellular

organisms;Eukaryota;Opisthokonta;Metazoa;Eumetazoa;Bilateria;Protostomia;Spiralia;Lophotrochozoa;Mollusca;Bivalvia;Autobranchia;Heteroconchia;Euherodonta;Imparidentia;Venerida;Veneroidea;Veneridae;Mercenaria;Mercenaria mercenaria

UdeM00000016195 225164 144.1 UdeM00000016195 XP\_009062353.1 97  
67 2 0 1 67 1 67 6.70E-32 144.1 225164  
cellular

organisms;Eukaryota;Opisthokonta;Metazoa;Eumetazoa;Bilateria;Protostomia;

Spiralia;Lophotrochozoa;Mollusca;Gastropoda;Patellogastropoda;Lottioidea;Lottiidae;Lottia;Lottia gigantea

|                 |      |       |                 |                |      |          |
|-----------------|------|-------|-----------------|----------------|------|----------|
| UdeM00000016196 | 6596 | 103.2 | UdeM00000016196 | XP_045177172.1 | 65.9 | 123      |
| 31              | 4    | 1     | 117             | 36             | 153  | 3.70E-19 |

103.2 6596 cellular organisms;Eukaryota;Opisthokonta;Metazoa;Eumetazoa;Bilateria;Protostomia;Spiralia;Lophotrochozoa;Mollusca;Bivalvia;Autobranhia;Heteroconchia;Euherodonta;Imparidentia;Venerida;Veneroidea;Veneridae;Mercenaria;Mercenaria mercenaria

|                 |        |       |                 |                |      |     |
|-----------------|--------|-------|-----------------|----------------|------|-----|
| UdeM00000016197 | 400727 | 117.1 | UdeM00000016197 | XP_025108466.1 | 37.5 |     |
| 200             | 113    | 3     | 4               | 203            | 325  | 512 |

2.70E-23 117.1 400727 cellular organisms;Eukaryota;Opisthokonta;Metazoa;Eumetazoa;Bilateria;Protostomia;Spiralia;Lophotrochozoa;Mollusca;Gastropoda;Caenogastropoda;Architaenioglossa;Ampullarioidea;Ampullariidae;Pomacea;Pomacea canaliculata

|                 |      |        |                 |                |      |      |
|-----------------|------|--------|-----------------|----------------|------|------|
| UdeM00000016198 | 6596 | 1257.7 | UdeM00000016198 | XP_045174440.1 | 38.9 |      |
| 1718            | 809  | 36     | 46              | 1546           | 7    | 1701 |

0.00E+00 1257.7 6596 cellular organisms;Eukaryota;Opisthokonta;Metazoa;Eumetazoa;Bilateria;Protostomia;Spiralia;Lophotrochozoa;Mollusca;Bivalvia;Autobranhia;Heteroconchia;Euherodonta;Imparidentia;Venerida;Veneroidea;Veneridae;Mercenaria;Mercenaria mercenaria

|                 |      |       |                 |                |      |           |
|-----------------|------|-------|-----------------|----------------|------|-----------|
| UdeM00000016199 | 6596 | 919.8 | UdeM00000016199 | XP_045174440.1 | 36   | 1382      |
| 774             | 25   | 3     | 1277            | 9              | 1386 | 6.00E-264 |

919.8 6596 cellular organisms;Eukaryota;Opisthokonta;Metazoa;Eumetazoa;Bilateria;Protostomia;Spiralia;Lophotrochozoa;Mollusca;Bivalvia;Autobranhia;Heteroconchia;Euherodonta;Imparidentia;Venerida;Veneroidea;Veneridae;Mercenaria;Mercenaria mercenaria

|                 |       |     |                 |                |      |          |
|-----------------|-------|-----|-----------------|----------------|------|----------|
| UdeM00000016200 | 29159 | 89  | UdeM00000016200 | XP_011415166.2 | 22.6 | 402      |
| 279             | 12    | 266 | 648             | 235            | 623  | 2.50E-14 |

89 29159 cellular organisms;Eukaryota;Opisthokonta;Metazoa;Eumetazoa;Bilateria;Protostomia;Spiralia;Lophotrochozoa;Mollusca;Bivalvia;Autobranhia;Pteriomorphia;Ostreida;Ostreoidea;Ostreidae;Crassostrea;Crassostrea gigas

|                 |      |     |                 |                |      |          |
|-----------------|------|-----|-----------------|----------------|------|----------|
| UdeM00000016201 | 6596 | 275 | UdeM00000016201 | XP_045175769.1 | 95.2 | 146      |
| 7               | 0    | 1   | 146             | 1              | 146  | 5.50E-71 |

275 6596 cellular organisms;Eukaryota;Opisthokonta;Metazoa;Eumetazoa;Bilateria;Protostomia;Spiralia;Lophotrochozoa;Mollusca;Bivalvia;Autobranhia;Heteroconchia;Euherodonta;Imparidentia;Venerida;Veneroidea;Veneridae;Mercenaria;Mercenaria mercenaria

|                 |      |       |                 |                |      |          |
|-----------------|------|-------|-----------------|----------------|------|----------|
| UdeM00000016202 | 6596 | 358.2 | UdeM00000016202 | XP_045175769.1 | 92.9 | 197      |
| 14              | 0    | 1     | 197             | 1              | 197  | 6.60E-96 |

358.2 6596 cellular organisms;Eukaryota;Opisthokonta;Metazoa;Eumetazoa;Bilateria;Protostomia;Spiralia;Lophotrochozoa;Mollusca;Bivalvia;Autobranhia;Heteroconchia;Euherodonta;Imparidentia;Venerida;Veneroidea;Veneridae;Mercenaria;Mercenaria mercenaria

|                 |      |       |                 |                |      |           |
|-----------------|------|-------|-----------------|----------------|------|-----------|
| UdeM00000016203 | 6579 | 391.7 | UdeM00000016203 | XP_033753346.1 | 54.8 | 409       |
| 154             | 8    | 1     | 407             | 1              | 380  | 1.10E-105 |

391.7 6579 cellular organisms;Eukaryota;Opisthokonta;Metazoa;Eumetazoa;Bilateria;Protostomia;Spiralia;Lophotrochozoa;Mollusca;Bivalvia;Autobranhia;Pteriomorphia;Pectinida;Pectinoidea;Pectinidae;Pecten;Pecten maximus

|                 |      |       |                 |                |      |          |
|-----------------|------|-------|-----------------|----------------|------|----------|
| UdeM00000016205 | 6596 | 222.2 | UdeM00000016205 | XP_045175340.1 | 59.1 | 171      |
| 70              | 0    | 275   | 445             | 144            | 314  | 1.30E-54 |

222.2 6596 cellular organisms;Eukaryota;Opisthokonta;Metazoa;Eumetazoa;Bilateria;Protostomia;Spiralia;Lophotrochozoa;Mollusca;Bivalvia;Autobranhia;Heteroconchia;Euherodonta;Imparidentia;Venerida;Veneroidea;Veneridae;Mercenaria;Mercenaria mercenaria

terodonta;Imparidentia;Venerida;Veneroidea;Veneridae;Mercenaria;Mercenari  
a mercenaria

UdeM00000016204 6573 1044.6 UdeM00000016204 XP\_021368079.1 55.1  
1068 371 19 267 1271 458 1480 9.90E-302 1044.6 6573  
cellular

organisms;Eukaryota;Opisthokonta;Metazoa;Eumetazoa;Bilateria;Protostomia;  
Spiralia;Lophotrochozoa;Mollusca;Bivalvia;Autobranhia;Pteriormorphia;Pect  
inida;Pectinoidea;Pectinidae;Mizuhopecten;Mizuhopecten yessoensis

UdeM00000016206 6596 641.3 UdeM00000016206 XP\_045176658.1 63.4 495  
161 6 8 488 9 497 1.00E-180 641.3 6596 cellular

organisms;Eukaryota;Opisthokonta;Metazoa;Eumetazoa;Bilateria;Protostomia;  
Spiralia;Lophotrochozoa;Mollusca;Bivalvia;Autobranhia;Heteroconchia;Euhe  
terodonta;Imparidentia;Venerida;Veneroidea;Veneridae;Mercenaria;Mercenari  
a mercenaria

UdeM00000016207 6596 672.2 UdeM00000016207 XP\_045176658.1 64.8 495  
166 4 8 500 9 497 5.40E-190 672.2 6596 cellular

organisms;Eukaryota;Opisthokonta;Metazoa;Eumetazoa;Bilateria;Protostomia;  
Spiralia;Lophotrochozoa;Mollusca;Bivalvia;Autobranhia;Heteroconchia;Euhe  
terodonta;Imparidentia;Venerida;Veneroidea;Veneridae;Mercenaria;Mercenari  
a mercenaria

UdeM00000016208 6596 690.3 UdeM00000016208 XP\_045175490.1 59.1 596  
235 4 1 595 11 598 2.20E-195 690.3 6596 cellular

organisms;Eukaryota;Opisthokonta;Metazoa;Eumetazoa;Bilateria;Protostomia;  
Spiralia;Lophotrochozoa;Mollusca;Bivalvia;Autobranhia;Heteroconchia;Euhe  
terodonta;Imparidentia;Venerida;Veneroidea;Veneridae;Mercenaria;Mercenari  
a mercenaria

UdeM00000016209 6596 398.7 UdeM00000016209 XP\_045177161.1 83.7 221  
36 0 13 233 5 225 6.70E-108 398.7 6596 cellular

organisms;Eukaryota;Opisthokonta;Metazoa;Eumetazoa;Bilateria;Protostomia;  
Spiralia;Lophotrochozoa;Mollusca;Bivalvia;Autobranhia;Heteroconchia;Euhe  
terodonta;Imparidentia;Venerida;Veneroidea;Veneridae;Mercenaria;Mercenari  
a mercenaria

UdeM00000016210 6596 127.5 UdeM00000016210 XP\_045177161.1 73.8 84  
22 0 1 84 234 317 9.40E-27 127.5 6596 cellular

organisms;Eukaryota;Opisthokonta;Metazoa;Eumetazoa;Bilateria;Protostomia;  
Spiralia;Lophotrochozoa;Mollusca;Bivalvia;Autobranhia;Heteroconchia;Euhe  
terodonta;Imparidentia;Venerida;Veneroidea;Veneridae;Mercenaria;Mercenari  
a mercenaria

UdeM00000016211 6596 129 UdeM00000016211 XP\_045177161.1 70.8 89  
26 0 1 89 234 322 3.20E-27 129 6596 cellular

organisms;Eukaryota;Opisthokonta;Metazoa;Eumetazoa;Bilateria;Protostomia;  
Spiralia;Lophotrochozoa;Mollusca;Bivalvia;Autobranhia;Heteroconchia;Euhe  
terodonta;Imparidentia;Venerida;Veneroidea;Veneridae;Mercenaria;Mercenari  
a mercenaria

UdeM00000016212 1735272 122.9 UdeM00000016212 XP\_041365781.1 59.8  
97 33 2 26 116 406 502 4.20E-25 122.9 1735272  
cellular

organisms;Eukaryota;Opisthokonta;Metazoa;Eumetazoa;Bilateria;Protostomia;  
Spiralia;Lophotrochozoa;Mollusca;Gastropoda;Neomphalina;Neomphaloidea;Pel  
tospiridae;Gigantopelta;Gigantopelta aegis

UdeM00000016213 1735272 122.9 UdeM00000016213 XP\_041365781.1 59.8  
97 33 2 13 103 406 502 3.90E-25 122.9 1735272  
cellular

organisms;Eukaryota;Opisthokonta;Metazoa;Eumetazoa;Bilateria;Protostomia;

Spiralia; Lophotrochozoa; Mollusca; Gastropoda; Neomphalina; Neomphaloidea; Pelto-  
 tospiridae; Gigantopelta; Gigantopelta aegis  
 UdeM00000016215 29159 503.4 UdeM00000016215 XP\_019926412.2 51.8 494  
 227 7 1 490 1 487 3.30E-139 503.4 29159 cellular  
 organisms; Eukaryota; Opisthokonta; Metazoa; Eumetazoa; Bilateria; Protostomia;  
 Spiralia; Lophotrochozoa; Mollusca; Bivalvia; Autobranchia; Pteriomorpha; Ostr-  
 eida; Ostreidae; Crassostrea; Crassostrea gigas  
 UdeM00000016216 6579 201.4 UdeM00000016216 XP\_033752363.1 66.2 148  
 42 3 42 184 26 170 1.30E-48 201.4 6579 cellular  
 organisms; Eukaryota; Opisthokonta; Metazoa; Eumetazoa; Bilateria; Protostomia;  
 Spiralia; Lophotrochozoa; Mollusca; Bivalvia; Autobranchia; Pteriomorpha; Pect-  
 inida; Pectinoidea; Pectinidae; Pecten; Pecten maximus  
 UdeM00000016217 6596 460.3 UdeM00000016217 XP\_045176172.1 66.7 336  
 112 0 3 338 2 337 2.30E-126 460.3 6596 cellular  
 organisms; Eukaryota; Opisthokonta; Metazoa; Eumetazoa; Bilateria; Protostomia;  
 Spiralia; Lophotrochozoa; Mollusca; Bivalvia; Autobranchia; Heteroconchia; Eue-  
 terodonta; Imparidentia; Venerida; Veneroidea; Veneridae; Mercenaria; Mercenari-  
 a mercenaria  
 UdeM00000016218 70779 79.7 UdeM00000016218 XP\_015764363.1 28.5 284  
 168 10 4 269 6 272 7.10E-12 79.7 70779 cellular  
 organisms; Eukaryota; Opisthokonta; Metazoa; Eumetazoa; Cnidaria; Anthozoa; Hexa-  
 corallia; Scleractinia; Astrocoeniina; Acroporidae; Acropora; Acropora  
 digitifera  
 UdeM00000016219 400727 655.2 UdeM00000016219 XP\_025085515.1 41.2  
 770 426 14 18 766 22 785 5.80E-184 655.2 400727  
 cellular  
 organisms; Eukaryota; Opisthokonta; Metazoa; Eumetazoa; Bilateria; Protostomia;  
 Spiralia; Lophotrochozoa; Mollusca; Gastropoda; Caenogastropoda; Architaeniogl-  
 ossa; Ampullarioidea; Ampullariidae; Pomacea; Pomacea canaliculata  
 UdeM00000016220 400727 651 UdeM00000016220 XP\_025085515.1 41.2  
 771 400 15 18 767 22 760 1.10E-182 651 400727  
 cellular  
 organisms; Eukaryota; Opisthokonta; Metazoa; Eumetazoa; Bilateria; Protostomia;  
 Spiralia; Lophotrochozoa; Mollusca; Gastropoda; Caenogastropoda; Architaeniogl-  
 ossa; Ampullarioidea; Ampullariidae; Pomacea; Pomacea canaliculata  
 UdeM00000016221 6596 339.3 UdeM00000016221 XP\_045174346.1 52.7 315  
 146 1 19 330 8 322 5.30E-90 339.3 6596 cellular  
 organisms; Eukaryota; Opisthokonta; Metazoa; Eumetazoa; Bilateria; Protostomia;  
 Spiralia; Lophotrochozoa; Mollusca; Bivalvia; Autobranchia; Heteroconchia; Eue-  
 terodonta; Imparidentia; Venerida; Veneroidea; Veneridae; Mercenaria; Mercenari-  
 a mercenaria  
 UdeM00000016222 6596 349 UdeM00000016222 XP\_045177024.1 55.7 359  
 128 7 6 338 4 357 6.90E-93 349 6596 cellular  
 organisms; Eukaryota; Opisthokonta; Metazoa; Eumetazoa; Bilateria; Protostomia;  
 Spiralia; Lophotrochozoa; Mollusca; Bivalvia; Autobranchia; Heteroconchia; Eue-  
 terodonta; Imparidentia; Venerida; Veneroidea; Veneridae; Mercenaria; Mercenari-  
 a mercenaria  
 UdeM00000016223 6573 386.3 UdeM00000016223 XP\_021352974.1 46.6 513  
 214 14 7 509 5 467 6.00E-104 386.3 6573 cellular  
 organisms; Eukaryota; Opisthokonta; Metazoa; Eumetazoa; Bilateria; Protostomia;  
 Spiralia; Lophotrochozoa; Mollusca; Bivalvia; Autobranchia; Pteriomorpha; Pect-  
 inida; Pectinoidea; Pectinidae; Mizuhopecten; Mizuhopecten yessoensis  
 UdeM00000016224 6596 152.5 UdeM00000016224 XP\_045177189.1 55.8 129  
 56 1 1 128 175 303 4.70E-34 152.5 6596 cellular

organisms;Eukaryota;Opisthokonta;Metazoa;Eumetazoa;Bilateria;Protostomia;Spiralia;Lophotrochozoa;Mollusca;Bivalvia;Autobranchia;Heteroconchia;Euherodonta;Imparidentia;Venerida;Veneroidea;Veneridae;Mercenaria;Mercenaria mercenaria

UdeM00000016225 6596 313.2 UdeM00000016225 XP\_045177189.1 63.8 246  
88 1 1 245 58 303 3.50E-82 313.2 6596 cellular

organisms;Eukaryota;Opisthokonta;Metazoa;Eumetazoa;Bilateria;Protostomia;Spiralia;Lophotrochozoa;Mollusca;Bivalvia;Autobranchia;Heteroconchia;Euherodonta;Imparidentia;Venerida;Veneroidea;Veneridae;Mercenaria;Mercenaria mercenaria

UdeM00000016226 6596 123.2 UdeM00000016226 XP\_045177189.1 83.1 71  
12 0 1 71 58 128 1.40E-25 123.2 6596 cellular

organisms;Eukaryota;Opisthokonta;Metazoa;Eumetazoa;Bilateria;Protostomia;Spiralia;Lophotrochozoa;Mollusca;Bivalvia;Autobranchia;Heteroconchia;Euherodonta;Imparidentia;Venerida;Veneroidea;Veneridae;Mercenaria;Mercenaria mercenaria

UdeM00000016227 6596 241.5 UdeM00000016227 XP\_045176021.1 55.7 212  
88 3 101 309 72 280 1.40E-60 241.5 6596 cellular

organisms;Eukaryota;Opisthokonta;Metazoa;Eumetazoa;Bilateria;Protostomia;Spiralia;Lophotrochozoa;Mollusca;Bivalvia;Autobranchia;Heteroconchia;Euherodonta;Imparidentia;Venerida;Veneroidea;Veneridae;Mercenaria;Mercenaria mercenaria

UdeM00000016229 7574 205.3 UdeM00000016229 XP\_013400802.1 56.2 178  
73 2 1 175 119 294 6.40E-50 205.3 7574 cellular

organisms;Eukaryota;Opisthokonta;Metazoa;Eumetazoa;Bilateria;Protostomia;Spiralia;Lophotrochozoa;Brachiopoda;Linguliformea;Lingulata;Lingulida;Linguloidea;Lingulidae;Lingula;Lingula anatina

UdeM00000016230 7574 236.1 UdeM00000016230 XP\_013419822.1 52.8 216  
97 2 195 407 2 215 7.90E-59 236.1 7574 cellular

organisms;Eukaryota;Opisthokonta;Metazoa;Eumetazoa;Bilateria;Protostomia;Spiralia;Lophotrochozoa;Brachiopoda;Linguliformea;Lingulata;Lingulida;Linguloidea;Lingulidae;Lingula;Lingula anatina

UdeM00000016231 7574 208 UdeM00000016231 XP\_013400802.1 56.7 178  
72 2 1 175 119 294 9.90E-51 208 7574 cellular

organisms;Eukaryota;Opisthokonta;Metazoa;Eumetazoa;Bilateria;Protostomia;Spiralia;Lophotrochozoa;Brachiopoda;Linguliformea;Lingulata;Lingulida;Linguloidea;Lingulidae;Lingula;Lingula anatina

UdeM00000016232 7574 240 UdeM00000016232 XP\_013419822.1 53.2 216  
96 2 195 407 2 215 5.40E-60 240 7574 cellular

organisms;Eukaryota;Opisthokonta;Metazoa;Eumetazoa;Bilateria;Protostomia;Spiralia;Lophotrochozoa;Brachiopoda;Linguliformea;Lingulata;Lingulida;Linguloidea;Lingulidae;Lingula;Lingula anatina

UdeM00000016233 7574 208 UdeM00000016233 XP\_013400802.1 56.7 178  
72 2 1 175 119 294 9.90E-51 208 7574 cellular

organisms;Eukaryota;Opisthokonta;Metazoa;Eumetazoa;Bilateria;Protostomia;Spiralia;Lophotrochozoa;Brachiopoda;Linguliformea;Lingulata;Lingulida;Linguloidea;Lingulidae;Lingula;Lingula anatina

UdeM00000016234 7574 240 UdeM00000016234 XP\_013419822.1 53.2 216  
96 2 195 407 2 215 5.40E-60 240 7574 cellular

organisms;Eukaryota;Opisthokonta;Metazoa;Eumetazoa;Bilateria;Protostomia;Spiralia;Lophotrochozoa;Brachiopoda;Linguliformea;Lingulata;Lingulida;Linguloidea;Lingulidae;Lingula;Lingula anatina

UdeM00000016235 7574 208 UdeM00000016235 XP\_013400802.1 56.7 178  
72 2 1 175 119 294 9.90E-51 208 7574 cellular

organisms;Eukaryota;Opisthokonta;Metazoa;Eumetazoa;Bilateria;Protostomia;  
Spiralia;Lophotrochozoa;Brachiopoda;Linguliformea;Lingulata;Lingulida;Lin  
guloidea;Lingulidae;Lingula;Lingula anatina  
UdeM00000016236 7574 240 UdeM00000016236 XP\_013419822.1 53.2 216  
96 2 195 407 2 215 5.40E-60 240 7574 cellular  
organisms;Eukaryota;Opisthokonta;Metazoa;Eumetazoa;Bilateria;Protostomia;  
Spiralia;Lophotrochozoa;Brachiopoda;Linguliformea;Lingulata;Lingulida;Lin  
guloidea;Lingulidae;Lingula;Lingula anatina  
UdeM00000016237 7574 207.6 UdeM00000016237 XP\_013400802.1 56.7 178  
72 2 1 175 119 294 1.30E-50 207.6 7574 cellular  
organisms;Eukaryota;Opisthokonta;Metazoa;Eumetazoa;Bilateria;Protostomia;  
Spiralia;Lophotrochozoa;Brachiopoda;Linguliformea;Lingulata;Lingulida;Lin  
guloidea;Lingulidae;Lingula;Lingula anatina  
UdeM00000016238 6565 132.5 UdeM00000016238 XP\_022297037.1 40.6 187  
104 3 6 187 11 195 5.60E-28 132.5 6565 cellular  
organisms;Eukaryota;Opisthokonta;Metazoa;Eumetazoa;Bilateria;Protostomia;  
Spiralia;Lophotrochozoa;Mollusca;Bivalvia;Autobranchia;Pteriomorphia;Ostr  
eida;Ostreoidea;Ostreidae;Crassostrea;Crassostrea virginica  
UdeM00000016239 7739 288.9 UdeM00000016239 XP\_035685156.1 42.6 418  
199 11 1 381 122 535 9.60E-75 288.9 7739 cellular  
organisms;Eukaryota;Opisthokonta;Metazoa;Eumetazoa;Bilateria;Deuterostomi  
a;Chordata;Cephalochordata;Leptocardii;Amphioxiformes;Branchiostomidae;Br  
anchiostoma;Branchiostoma floridae  
UdeM00000016240 6596 240 UdeM00000016240 XP\_045176021.1 55.2 212  
89 3 208 416 72 280 5.60E-60 240 6596 cellular  
organisms;Eukaryota;Opisthokonta;Metazoa;Eumetazoa;Bilateria;Protostomia;  
Spiralia;Lophotrochozoa;Mollusca;Bivalvia;Autobranchia;Heteroconchia;Euhe  
terodonta;Imparidentia;Venerida;Veneroidea;Veneridae;Mercenaria;Mercenari  
a mercenaria  
UdeM00000016241 29159 1061.6 UdeM00000016241 XP\_011434353.2 40.1  
1781 906 28 6 1682 4 1727 1.00E-306 1061.6  
29159 cellular  
organisms;Eukaryota;Opisthokonta;Metazoa;Eumetazoa;Bilateria;Protostomia;  
Spiralia;Lophotrochozoa;Mollusca;Bivalvia;Autobranchia;Pteriomorphia;Ostr  
eida;Ostreoidea;Ostreidae;Crassostrea;Crassostrea gigas  
UdeM00000016242 6579 464.9 UdeM00000016242 XP\_033751691.1 65.9 314  
105 1 1 314 1 312 8.00E-128 464.9 6579 cellular  
organisms;Eukaryota;Opisthokonta;Metazoa;Eumetazoa;Bilateria;Protostomia;  
Spiralia;Lophotrochozoa;Mollusca;Bivalvia;Autobranchia;Pteriomorphia;Pect  
inida;Pectinoidea;Pectinidae;Pecten;Pecten maximus  
UdeM00000016243 6596 403.3 UdeM00000016243 XP\_045175808.1 39.8 505  
287 7 158 659 171 661 6.00E-109 403.3 6596 cellular  
organisms;Eukaryota;Opisthokonta;Metazoa;Eumetazoa;Bilateria;Protostomia;  
Spiralia;Lophotrochozoa;Mollusca;Bivalvia;Autobranchia;Heteroconchia;Euhe  
terodonta;Imparidentia;Venerida;Veneroidea;Veneridae;Mercenaria;Mercenari  
a mercenaria  
UdeM00000016244 6565 454.5 UdeM00000016244 XP\_022287405.1 76.5 370  
80 1 84 446 30 399 1.50E-124 454.5 6565 cellular  
organisms;Eukaryota;Opisthokonta;Metazoa;Eumetazoa;Bilateria;Protostomia;  
Spiralia;Lophotrochozoa;Mollusca;Bivalvia;Autobranchia;Pteriomorphia;Ostr  
eida;Ostreoidea;Ostreidae;Crassostrea;Crassostrea virginica  
UdeM00000016245 6596 218 UdeM00000016245 XP\_045176299.1 50 200  
100 0 1 200 128 327 1.50E-53 218 6596 cellular  
organisms;Eukaryota;Opisthokonta;Metazoa;Eumetazoa;Bilateria;Protostomia;



Spiralia;Lophotrochozoa;Mollusca;Bivalvia;Autobranchia;Heteroconchia;Euherodonta;Imparidentia;Venerida;Veneroidea;Veneridae;Mercenaria;Mercenaria mercenaria

UdeM00000016246 6596 276.6 UdeM00000016246 XP\_045176347.1 59.6 230  
82 5 20 246 39 260 3.20E-71 276.6 6596 cellular

organisms;Eukaryota;Opisthokonta;Metazoa;Eumetazoa;Bilateria;Protostomia;Spiralia;Lophotrochozoa;Mollusca;Bivalvia;Autobranchia;Heteroconchia;Euherodonta;Imparidentia;Venerida;Veneroidea;Veneridae;Mercenaria;Mercenaria mercenaria

UdeM00000016248 6596 565.1 UdeM00000016248 XP\_045176492.1 46.2 654  
286 11 14 635 154 773 1.20E-157 565.1 6596 cellular

organisms;Eukaryota;Opisthokonta;Metazoa;Eumetazoa;Bilateria;Protostomia;Spiralia;Lophotrochozoa;Mollusca;Bivalvia;Autobranchia;Heteroconchia;Euherodonta;Imparidentia;Venerida;Veneroidea;Veneridae;Mercenaria;Mercenaria mercenaria

UdeM00000016249 6579 1324.3 UdeM00000016249 XP\_033750824.1 55.2  
1206 494 11 1 1196 302 1471 0.00E+00 1324.3 6579  
cellular

organisms;Eukaryota;Opisthokonta;Metazoa;Eumetazoa;Bilateria;Protostomia;Spiralia;Lophotrochozoa;Mollusca;Bivalvia;Autobranchia;Pteriomorpha;Pectinida;Pectinoidea;Pectinidae;Pecten;Pecten maximus

UdeM00000016250 6596 484.6 UdeM00000016250 XP\_045174748.1 64 353  
126 1 1 352 1 353 1.10E-133 484.6 6596 cellular

organisms;Eukaryota;Opisthokonta;Metazoa;Eumetazoa;Bilateria;Protostomia;Spiralia;Lophotrochozoa;Mollusca;Bivalvia;Autobranchia;Heteroconchia;Euherodonta;Imparidentia;Venerida;Veneroidea;Veneridae;Mercenaria;Mercenaria mercenaria

UdeM00000016251 6596 1063.9 UdeM00000016251 XP\_045175829.1 73.5  
684 179 2 1 683 1 683 8.50E-308 1063.9 6596  
cellular

organisms;Eukaryota;Opisthokonta;Metazoa;Eumetazoa;Bilateria;Protostomia;Spiralia;Lophotrochozoa;Mollusca;Bivalvia;Autobranchia;Heteroconchia;Euherodonta;Imparidentia;Venerida;Veneroidea;Veneridae;Mercenaria;Mercenaria mercenaria

UdeM00000016252 6596 129.4 UdeM00000016252 XP\_045174749.1 52 125  
60 0 3 127 28 152 4.40E-27 129.4 6596 cellular

organisms;Eukaryota;Opisthokonta;Metazoa;Eumetazoa;Bilateria;Protostomia;Spiralia;Lophotrochozoa;Mollusca;Bivalvia;Autobranchia;Heteroconchia;Euherodonta;Imparidentia;Venerida;Veneroidea;Veneridae;Mercenaria;Mercenaria mercenaria

UdeM00000016253 1415580 128.6 UdeM00000016253 XP\_030063023.1 53.1  
113 53 0 1 113 26 138 5.00E-27 128.6 1415580  
cellular

organisms;Eukaryota;Opisthokonta;Metazoa;Eumetazoa;Bilateria;Deuterostomia;Chordata;Craniata;Vertebrata;Gnathostomata;Teleostomi;Euteleostomi;Sarcopterygii;Dipnotetrapodomorpha;Tetrapoda;Amphibia;Gymnophiona;Siphonopidae;Microcaecilia;Microcaecilia unicolor

UdeM00000016254 6596 1600.5 UdeM00000016254 XP\_045175407.1 63.2  
1330 434 14 1 1299 1 1306 0.00E+00 1600.5 6596  
cellular

organisms;Eukaryota;Opisthokonta;Metazoa;Eumetazoa;Bilateria;Protostomia;Spiralia;Lophotrochozoa;Mollusca;Bivalvia;Autobranchia;Heteroconchia;Euherodonta;Imparidentia;Venerida;Veneroidea;Veneridae;Mercenaria;Mercenaria mercenaria

UdeM00000016255 6596 640.2 UdeM00000016255 XP\_045176137.1 51.6 643  
 298 7 11 647 30 665 2.90E-180 640.2 6596 cellular  
 organisms;Eukaryota;Opisthokonta;Metazoa;Eumetazoa;Bilateria;Protostomia;  
 Spiralia;Lophotrochozoa;Mollusca;Bivalvia;Autobranhia;Heteroconchia;Euhe  
 terodonta;Imparidentia;Venerida;Veneroidea;Veneridae;Mercenaria;Mercenari  
 a mercenaria  
 UdeM00000016256 6596 1302.3 UdeM00000016256 XP\_045174191.1 60.4  
 1428 504 15 8 1383 9 1426 0.00E+00 1302.3 6596  
 cellular  
 organisms;Eukaryota;Opisthokonta;Metazoa;Eumetazoa;Bilateria;Protostomia;  
 Spiralia;Lophotrochozoa;Mollusca;Bivalvia;Autobranhia;Heteroconchia;Euhe  
 terodonta;Imparidentia;Venerida;Veneroidea;Veneridae;Mercenaria;Mercenari  
 a mercenaria  
 UdeM00000016257 6596 124.8 UdeM00000016257 XP\_045175813.1 48.3 151  
 63 3 5 141 99 248 8.80E-26 124.8 6596 cellular  
 organisms;Eukaryota;Opisthokonta;Metazoa;Eumetazoa;Bilateria;Protostomia;  
 Spiralia;Lophotrochozoa;Mollusca;Bivalvia;Autobranhia;Heteroconchia;Euhe  
 terodonta;Imparidentia;Venerida;Veneroidea;Veneridae;Mercenaria;Mercenari  
 a mercenaria  
 UdeM00000016258 6596 129 UdeM00000016258 XP\_045174849.1 56.9 130  
 46 4 1 125 1 125 4.20E-27 129 6596 cellular  
 organisms;Eukaryota;Opisthokonta;Metazoa;Eumetazoa;Bilateria;Protostomia;  
 Spiralia;Lophotrochozoa;Mollusca;Bivalvia;Autobranhia;Heteroconchia;Euhe  
 terodonta;Imparidentia;Venerida;Veneroidea;Veneridae;Mercenaria;Mercenari  
 a mercenaria  
 UdeM00000016259 6573 609.4 UdeM00000016259 XP\_021364689.1 62.2 484  
 179 3 6 487 28 509 4.30E-171 609.4 6573 cellular  
 organisms;Eukaryota;Opisthokonta;Metazoa;Eumetazoa;Bilateria;Protostomia;  
 Spiralia;Lophotrochozoa;Mollusca;Bivalvia;Autobranhia;Pteriomorphia;Pect  
 inida;Pectinoidea;Pectinidae;Mizuhopecten;Mizuhopecten yessoensis  
 UdeM00000016260 6596 355.9 UdeM00000016260 XP\_045176100.1 64.7 255  
 86 1 1 251 1 255 4.80E-95 355.9 6596 cellular  
 organisms;Eukaryota;Opisthokonta;Metazoa;Eumetazoa;Bilateria;Protostomia;  
 Spiralia;Lophotrochozoa;Mollusca;Bivalvia;Autobranhia;Heteroconchia;Euhe  
 terodonta;Imparidentia;Venerida;Veneroidea;Veneridae;Mercenaria;Mercenari  
 a mercenaria  
 UdeM00000016261 6565 528.1 UdeM00000016261 XP\_022293794.1 84.3 286  
 45 0 48 333 43 328 8.10E-147 528.1 6565 cellular  
 organisms;Eukaryota;Opisthokonta;Metazoa;Eumetazoa;Bilateria;Protostomia;  
 Spiralia;Lophotrochozoa;Mollusca;Bivalvia;Autobranhia;Pteriomorphia;Ostr  
 eida;Ostreoidea;Ostreidae;Crassostrea;Crassostrea virginica  
 UdeM00000016262 29159 273.9 UdeM00000016262 XP\_011450742.2 90.3 145  
 14 0 16 160 5 149 1.30E-70 273.9 29159 cellular  
 organisms;Eukaryota;Opisthokonta;Metazoa;Eumetazoa;Bilateria;Protostomia;  
 Spiralia;Lophotrochozoa;Mollusca;Bivalvia;Autobranhia;Pteriomorphia;Ostr  
 eida;Ostreoidea;Ostreidae;Crassostrea;Crassostrea gigas  
 UdeM00000016263 7574 174.1 UdeM00000016263 XP\_013396986.1 66.4 116  
 38 1 1 115 1 116 1.00E-40 174.1 7574 cellular  
 organisms;Eukaryota;Opisthokonta;Metazoa;Eumetazoa;Bilateria;Protostomia;  
 Spiralia;Lophotrochozoa;Brachiopoda;Linguliformea;Lingulata;Lingulida;Lin  
 guloidea;Lingulidae;Lingula;Lingula anatina  
 UdeM00000016265 7159 137.1 UdeM00000016265 XP\_021694571.1 21.5 526  
 341 15 23 487 42 556 6.20E-29 137.1 7159 cellular  
 organisms;Eukaryota;Opisthokonta;Metazoa;Eumetazoa;Bilateria;Protostomia;

Ecdysozoa; Panarthropoda; Arthropoda; Mandibulata; Pancrustacea; Hexapoda; Insecta; Dicondylia; Pterygota; Neoptera; Endopterygota; Diptera; Nematocera; Culicomorpha; Culicoidea; Culicidae; Culicinae; Aedini; Aedes; Stegomyia; Aedes aegypti

UdeM00000016266 37621 112.8 UdeM00000016266 XP\_014679849.1 68.5 73  
23 0 21 93 118 190 2.60E-22 112.8 37621 cellular

organisms; Eukaryota; Opisthokonta; Metazoa; Eumetazoa; Bilateria; Protostomia; Ecdysozoa; Scalidophora; Priapulida; Priapulimorpha; Priapulimorphida; Priapulidae; Priapululus; Priapululus caudatus

UdeM00000016267 37621 107.8 UdeM00000016267 XP\_014679849.1 50 92  
44 2 2 91 394 485 8.40E-21 107.8 37621 cellular

organisms; Eukaryota; Opisthokonta; Metazoa; Eumetazoa; Bilateria; Protostomia; Ecdysozoa; Scalidophora; Priapulida; Priapulimorpha; Priapulimorphida; Priapulidae; Priapululus; Priapululus caudatus

UdeM00000016268 6596 540.4 UdeM00000016268 XP\_045176801.1 56.8 470  
193 6 30 493 70 535 2.30E-150 540.4 6596 cellular

organisms; Eukaryota; Opisthokonta; Metazoa; Eumetazoa; Bilateria; Protostomia; Spiralia; Lophotrochozoa; Mollusca; Bivalvia; Autobranchia; Heteroconchia; Euheterodonta; Imparidentia; Venerida; Veneroidea; Veneridae; Mercenaria; Mercenaria mercenaria

UdeM00000016269 6596 636 UdeM00000016269 XP\_045175234.1 79.9 398  
77 2 29 424 34 430 3.50E-179 636 6596 cellular

organisms; Eukaryota; Opisthokonta; Metazoa; Eumetazoa; Bilateria; Protostomia; Spiralia; Lophotrochozoa; Mollusca; Bivalvia; Autobranchia; Heteroconchia; Euheterodonta; Imparidentia; Venerida; Veneroidea; Veneridae; Mercenaria; Mercenaria mercenaria

UdeM00000016270 1735272 350.1 UdeM00000016270 XP\_041367841.1 55.9  
299 129 1 1 296 1 299 2.70E-93 350.1 1735272  
cellular

organisms; Eukaryota; Opisthokonta; Metazoa; Eumetazoa; Bilateria; Protostomia; Spiralia; Lophotrochozoa; Mollusca; Gastropoda; Neomphalina; Neomphaloidea; Peltospiridae; Gigantopelta; Gigantopelta aegis

UdeM00000016271 6596 175.3 UdeM00000016271 XP\_045174452.1 64 125  
35 2 1 121 15 133 4.90E-41 175.3 6596 cellular

organisms; Eukaryota; Opisthokonta; Metazoa; Eumetazoa; Bilateria; Protostomia; Spiralia; Lophotrochozoa; Mollusca; Bivalvia; Autobranchia; Heteroconchia; Euheterodonta; Imparidentia; Venerida; Veneroidea; Veneridae; Mercenaria; Mercenaria mercenaria

UdeM00000016272 6579 764.6 UdeM00000016272 XP\_033751295.1 72.6 508  
136 2 8 513 137 643 8.00E-218 764.6 6579 cellular

organisms; Eukaryota; Opisthokonta; Metazoa; Eumetazoa; Bilateria; Protostomia; Spiralia; Lophotrochozoa; Mollusca; Bivalvia; Autobranchia; Pteriomorphia; Pectinida; Pectinoidea; Pectinidae; Pecten; Pecten maximus

UdeM00000016273 6573 453 UdeM00000016273 XP\_021342489.1 49.2 530  
203 6 1 508 1 486 5.10E-124 453 6573 cellular

organisms; Eukaryota; Opisthokonta; Metazoa; Eumetazoa; Bilateria; Protostomia; Spiralia; Lophotrochozoa; Mollusca; Bivalvia; Autobranchia; Pteriomorphia; Pectinida; Pectinoidea; Pectinidae; Mizuhopecten; Mizuhopecten yessoensis

UdeM00000016275 29159 65.1 UdeM00000016275 XP\_034331443.1 63.6 55  
20 0 1 55 37 91 4.70E-08 65.1 29159 cellular

organisms; Eukaryota; Opisthokonta; Metazoa; Eumetazoa; Bilateria; Protostomia; Spiralia; Lophotrochozoa; Mollusca; Bivalvia; Autobranchia; Pteriomorphia; Ostreida; Ostreoidea; Ostreidae; Crassostrea; Crassostrea gigas

UdeM00000016276 29159 225.7 UdeM00000016276 XP\_034331441.1 42 288  
 157 9 8 291 564 845 7.60E-56 225.7 29159 cellular  
 organisms;Eukaryota;Opisthokonta;Metazoa;Eumetazoa;Bilateria;Protostomia;  
 Spiralia;Lophotrochozoa;Mollusca;Bivalvia;Autobranchia;Pteriomorpha;Ostr  
 eida;Ostreoidea;Ostreidae;Crassostrea;Crassostrea gigas  
 UdeM00000016277 6596 260.4 UdeM00000016277 XP\_045192074.1 46.7 306  
 154 5 47 346 2119 2421 3.30E-66 260.4 6596 cellular  
 organisms;Eukaryota;Opisthokonta;Metazoa;Eumetazoa;Bilateria;Protostomia;  
 Spiralia;Lophotrochozoa;Mollusca;Bivalvia;Autobranchia;Heteroconchia;Euhe  
 terodonta;Imparidentia;Venerida;Veneroidea;Veneridae;Mercenaria;Mercenari  
 a mercenaria  
 UdeM00000016283 6596 114 UdeM00000016283 XP\_045175754.1 37.4 131  
 82 0 1 131 2 132 9.40E-22 114 6596 cellular  
 organisms;Eukaryota;Opisthokonta;Metazoa;Eumetazoa;Bilateria;Protostomia;  
 Spiralia;Lophotrochozoa;Mollusca;Bivalvia;Autobranchia;Heteroconchia;Euhe  
 terodonta;Imparidentia;Venerida;Veneroidea;Veneridae;Mercenaria;Mercenari  
 a mercenaria  
 UdeM00000016284 6596 395.2 UdeM00000016284 XP\_045176222.1 46.6 534  
 241 14 19 530 70 581 1.40E-106 395.2 6596 cellular  
 organisms;Eukaryota;Opisthokonta;Metazoa;Eumetazoa;Bilateria;Protostomia;  
 Spiralia;Lophotrochozoa;Mollusca;Bivalvia;Autobranchia;Heteroconchia;Euhe  
 terodonta;Imparidentia;Venerida;Veneroidea;Veneridae;Mercenaria;Mercenari  
 a mercenaria  
 UdeM00000016285 6596 240.7 UdeM00000016285 XP\_045174980.1 41.8 273  
 156 1 6 275 3 275 2.50E-60 240.7 6596 cellular  
 organisms;Eukaryota;Opisthokonta;Metazoa;Eumetazoa;Bilateria;Protostomia;  
 Spiralia;Lophotrochozoa;Mollusca;Bivalvia;Autobranchia;Heteroconchia;Euhe  
 terodonta;Imparidentia;Venerida;Veneroidea;Veneridae;Mercenaria;Mercenari  
 a mercenaria  
 UdeM00000016286 6573 622.9 UdeM00000016286 XP\_021350311.1 58.8 573  
 196 6 1 569 1 537 4.20E-175 622.9 6573 cellular  
 organisms;Eukaryota;Opisthokonta;Metazoa;Eumetazoa;Bilateria;Protostomia;  
 Spiralia;Lophotrochozoa;Mollusca;Bivalvia;Autobranchia;Pteriomorpha;Pect  
 inida;Pectinoidea;Pectinidae;Mizuhopecten;Mizuhopecten yessoensis  
 UdeM00000016287 6579 235.7 UdeM00000016287 XP\_033752230.1 74.5 439  
 105 4 7 445 5 436 1.10E-58 235.7 6579 cellular  
 organisms;Eukaryota;Opisthokonta;Metazoa;Eumetazoa;Bilateria;Protostomia;  
 Spiralia;Lophotrochozoa;Mollusca;Bivalvia;Autobranchia;Pteriomorpha;Pect  
 inida;Pectinoidea;Pectinidae;Pecten;Pecten maximus  
 UdeM00000016288 6573 240 UdeM00000016288 XP\_021365446.1 38.1 425  
 214 12 9 417 10 401 5.50E-60 240 6573 cellular  
 organisms;Eukaryota;Opisthokonta;Metazoa;Eumetazoa;Bilateria;Protostomia;  
 Spiralia;Lophotrochozoa;Mollusca;Bivalvia;Autobranchia;Pteriomorpha;Pect  
 inida;Pectinoidea;Pectinidae;Mizuhopecten;Mizuhopecten yessoensis  
 UdeM00000016289 6596 322 UdeM00000016289 XP\_045176077.1 57.7 527  
 192 9 1 502 92 612 1.30E-84 322 6596 cellular  
 organisms;Eukaryota;Opisthokonta;Metazoa;Eumetazoa;Bilateria;Protostomia;  
 Spiralia;Lophotrochozoa;Mollusca;Bivalvia;Autobranchia;Heteroconchia;Euhe  
 terodonta;Imparidentia;Venerida;Veneroidea;Veneridae;Mercenaria;Mercenari  
 a mercenaria  
 UdeM00000016290 6596 65.1 UdeM00000016290 XP\_045176075.1 50.8 63  
 31 0 1 63 1 63 4.30E-08 65.1 6596 cellular  
 organisms;Eukaryota;Opisthokonta;Metazoa;Eumetazoa;Bilateria;Protostomia;  
 Spiralia;Lophotrochozoa;Mollusca;Bivalvia;Autobranchia;Heteroconchia;Euhe

terodonta;Imparidentia;Venerida;Veneroidea;Veneridae;Mercenaria;Mercenari  
a mercenaria

UdeM00000016291 6596 226.1 UdeM00000016291 XP\_045174630.1 27.4 803  
427 28 8 766 9 699 1.50E-55 226.1 6596 cellular

organisms;Eukaryota;Opisthokonta;Metazoa;Eumetazoa;Bilateria;Protostomia;  
Spiralia;Lophotrochozoa;Mollusca;Bivalvia;Autobranhia;Heteroconchia;Euhe  
terodonta;Imparidentia;Venerida;Veneroidea;Veneridae;Mercenaria;Mercenari  
a mercenaria

UdeM00000016292 225164 514.2 UdeM00000016292 XP\_009066028.1 29.3  
1287 747 17 6 1162 7 1260 4.30E-142 514.2 225164  
cellular

organisms;Eukaryota;Opisthokonta;Metazoa;Eumetazoa;Bilateria;Protostomia;  
Spiralia;Lophotrochozoa;Mollusca;Gastropoda;Patellogastropoda;Lottioidea;  
Lottiidae;Lottia;Lottia gigantea

UdeM00000016293 6596 305.8 UdeM00000016293 XP\_045176431.1 45.5 387  
199 4 271 654 117 494 1.40E-79 305.8 6596 cellular

organisms;Eukaryota;Opisthokonta;Metazoa;Eumetazoa;Bilateria;Protostomia;  
Spiralia;Lophotrochozoa;Mollusca;Bivalvia;Autobranhia;Heteroconchia;Euhe  
terodonta;Imparidentia;Venerida;Veneroidea;Veneridae;Mercenaria;Mercenari  
a mercenaria

UdeM00000016294 6596 271.9 UdeM00000016294 XP\_045176545.1 58.3 300  
103 5 40 326 43 333 1.00E-69 271.9 6596 cellular

organisms;Eukaryota;Opisthokonta;Metazoa;Eumetazoa;Bilateria;Protostomia;  
Spiralia;Lophotrochozoa;Mollusca;Bivalvia;Autobranhia;Heteroconchia;Euhe  
terodonta;Imparidentia;Venerida;Veneroidea;Veneridae;Mercenaria;Mercenari  
a mercenaria

UdeM00000016295 6596 263.1 UdeM00000016295 XP\_045175564.1 45.8 286  
136 6 53 331 28 301 4.90E-67 263.1 6596 cellular

organisms;Eukaryota;Opisthokonta;Metazoa;Eumetazoa;Bilateria;Protostomia;  
Spiralia;Lophotrochozoa;Mollusca;Bivalvia;Autobranhia;Heteroconchia;Euhe  
terodonta;Imparidentia;Venerida;Veneroidea;Veneridae;Mercenaria;Mercenari  
a mercenaria

UdeM00000016296 6596 260 UdeM00000016296 XP\_045175564.1 45.5 286  
137 5 63 341 28 301 4.20E-66 260 6596 cellular

organisms;Eukaryota;Opisthokonta;Metazoa;Eumetazoa;Bilateria;Protostomia;  
Spiralia;Lophotrochozoa;Mollusca;Bivalvia;Autobranhia;Heteroconchia;Euhe  
terodonta;Imparidentia;Venerida;Veneroidea;Veneridae;Mercenaria;Mercenari  
a mercenaria

UdeM00000016297 6596 760 UdeM00000016297 XP\_045174770.1 52.3 773  
353 7 2 770 46 806 2.90E-216 760 6596 cellular

organisms;Eukaryota;Opisthokonta;Metazoa;Eumetazoa;Bilateria;Protostomia;  
Spiralia;Lophotrochozoa;Mollusca;Bivalvia;Autobranhia;Heteroconchia;Euhe  
terodonta;Imparidentia;Venerida;Veneroidea;Veneridae;Mercenaria;Mercenari  
a mercenaria

UdeM00000016298 6596 756.5 UdeM00000016298 XP\_045174770.1 50.9 798  
376 7 1 794 21 806 3.40E-215 756.5 6596 cellular

organisms;Eukaryota;Opisthokonta;Metazoa;Eumetazoa;Bilateria;Protostomia;  
Spiralia;Lophotrochozoa;Mollusca;Bivalvia;Autobranhia;Heteroconchia;Euhe  
terodonta;Imparidentia;Venerida;Veneroidea;Veneridae;Mercenaria;Mercenari  
a mercenaria

UdeM00000016299 1735272 286.2 UdeM00000016299 XP\_041366504.1 70.2  
198 58 1 4 201 2 198 3.30E-74 286.2 1735272  
cellular

organisms;Eukaryota;Opisthokonta;Metazoa;Eumetazoa;Bilateria;Protostomia;

Spiralia; Lophotrochozoa; Mollusca; Gastropoda; Neomphalina; Neomphaloidea; Pelto-  
 tospiridae; Gigantopelta; Gigantopelta aegis

UdeM00000016300 6579 273.1 UdeM00000016300 XP\_033751800.1 67.8 205  
 65 1 1 205 1 204 2.90E-70 273.1 6579 cellular  
 organisms; Eukaryota; Opisthokonta; Metazoa; Eumetazoa; Bilateria; Protostomia;  
 Spiralia; Lophotrochozoa; Mollusca; Bivalvia; Autobranchia; Pteriomorpha; Pect-  
 inida; Pectinoidea; Pectinidae; Pecten; Pecten maximus

UdeM00000016301 6579 428.3 UdeM00000016301 XP\_033751614.1 70.5 339  
 84 9 62 396 272 598 1.30E-116 428.3 6579 cellular  
 organisms; Eukaryota; Opisthokonta; Metazoa; Eumetazoa; Bilateria; Protostomia;  
 Spiralia; Lophotrochozoa; Mollusca; Bivalvia; Autobranchia; Pteriomorpha; Pect-  
 inida; Pectinoidea; Pectinidae; Pecten; Pecten maximus

UdeM00000016302 6579 411.4 UdeM00000016302 XP\_033751614.1 69 336  
 84 9 62 386 272 598 1.70E-111 411.4 6579 cellular  
 organisms; Eukaryota; Opisthokonta; Metazoa; Eumetazoa; Bilateria; Protostomia;  
 Spiralia; Lophotrochozoa; Mollusca; Bivalvia; Autobranchia; Pteriomorpha; Pect-  
 inida; Pectinoidea; Pectinidae; Pecten; Pecten maximus

UdeM00000016303 6573 109.4 UdeM00000016303 XP\_021368061.1 43.8 194  
 102 6 1 192 19 207 7.90E-21 109.4 6573 cellular  
 organisms; Eukaryota; Opisthokonta; Metazoa; Eumetazoa; Bilateria; Protostomia;  
 Spiralia; Lophotrochozoa; Mollusca; Bivalvia; Autobranchia; Pteriomorpha; Pect-  
 inida; Pectinoidea; Pectinidae; Mizuhopecten; Mizuhopecten yessoensis

UdeM00000016304 6596 2575.8 UdeM00000016304 XP\_045174710.1 70.6  
 1873 483 19 40 1867 253 2103 0.00E+00 2575.8 6596  
 cellular  
 organisms; Eukaryota; Opisthokonta; Metazoa; Eumetazoa; Bilateria; Protostomia;  
 Spiralia; Lophotrochozoa; Mollusca; Bivalvia; Autobranchia; Heteroconchia; Eue-  
 terodonta; Imparidentia; Venerida; Veneroidea; Veneridae; Mercenaria; Mercenari-  
 a mercenaria

UdeM00000016305 6565 322 UdeM00000016305 XP\_022319337.1 63.5 244  
 86 2 3 246 8 248 6.60E-85 322 6565 cellular  
 organisms; Eukaryota; Opisthokonta; Metazoa; Eumetazoa; Bilateria; Protostomia;  
 Spiralia; Lophotrochozoa; Mollusca; Bivalvia; Autobranchia; Pteriomorpha; Ostr-  
 eida; Ostreoidea; Ostreidae; Crassostrea; Crassostrea virginica

UdeM00000016308 29159 441 UdeM00000016308 XP\_034313077.1 63.8 323  
 117 0 1 323 1 323 1.30E-120 441 29159 cellular  
 organisms; Eukaryota; Opisthokonta; Metazoa; Eumetazoa; Bilateria; Protostomia;  
 Spiralia; Lophotrochozoa; Mollusca; Bivalvia; Autobranchia; Pteriomorpha; Ostr-  
 eida; Ostreoidea; Ostreidae; Crassostrea; Crassostrea gigas

UdeM00000016309 6596 158.3 UdeM00000016309 XP\_045187489.1 27.3 411  
 287 4 1 409 2 402 2.80E-35 158.3 6596 cellular  
 organisms; Eukaryota; Opisthokonta; Metazoa; Eumetazoa; Bilateria; Protostomia;  
 Spiralia; Lophotrochozoa; Mollusca; Bivalvia; Autobranchia; Heteroconchia; Eue-  
 terodonta; Imparidentia; Venerida; Veneroidea; Veneridae; Mercenaria; Mercenari-  
 a mercenaria

UdeM00000016313 8355 141 UdeM00000016313 XP\_018105792.1 52.7 146  
 68 1 5 150 508 652 1.30E-30 141 8355 cellular  
 organisms; Eukaryota; Opisthokonta; Metazoa; Eumetazoa; Bilateria; Deuterostomi-  
 a; Chordata; Craniata; Vertebrata; Gnathostomata; Teleostomi; Euteleostomi; Sarc-  
 opterygii; Dipnotetrapodomorpha; Tetrapoda; Amphibia; Batrachia; Anura; Pipoide-  
 a; Pipidae; Xenopodinae; Xenopus; Xenopus; Xenopus laevis

UdeM00000016314 6596 1089.3 UdeM00000016314 XP\_045176183.1 59.1  
 991 364 15 6 978 137 1104 0.00E+00 1089.3 6596  
 cellular

organisms;Eukaryota;Opisthokonta;Metazoa;Eumetazoa;Bilateria;Protostomia;Spiralia;Lophotrochozoa;Mollusca;Bivalvia;Autobranhia;Heteroconchia;Euherodonta;Imparidentia;Venerida;Veneroidea;Veneridae;Mercenaria;Mercenaria mercenaria

UdeM00000016317 6596 141 UdeM00000016317 XP\_045175211.1 60.2 123  
38 2 100 211 316 438 1.80E-30 141 6596 cellular

organisms;Eukaryota;Opisthokonta;Metazoa;Eumetazoa;Bilateria;Protostomia;Spiralia;Lophotrochozoa;Mollusca;Bivalvia;Autobranhia;Heteroconchia;Euherodonta;Imparidentia;Venerida;Veneroidea;Veneridae;Mercenaria;Mercenaria mercenaria

UdeM00000016316 6596 210.3 UdeM00000016316 XP\_045175211.1 66.2 160  
43 2 100 248 316 475 2.80E-51 210.3 6596 cellular

organisms;Eukaryota;Opisthokonta;Metazoa;Eumetazoa;Bilateria;Protostomia;Spiralia;Lophotrochozoa;Mollusca;Bivalvia;Autobranhia;Heteroconchia;Euherodonta;Imparidentia;Venerida;Veneroidea;Veneridae;Mercenaria;Mercenaria mercenaria

UdeM00000016320 41117 193.4 UdeM00000016320 XP\_037079402.1 30.1 428  
248 12 37 422 1 419 6.00E-46 193.4 41117 cellular

organisms;Eukaryota;Opisthokonta;Metazoa;Eumetazoa;Bilateria;Protostomia;Ecdysozoa;Panarthropoda;Arthropoda;Mandibulata;Pancrustacea;Crustacea;Multicrustacea;Hexanauplia;Thecostraca;Cirripedia;Thoracica;Pedunculata;Scalpellomorpha;Pollicipedidae;Pollicipes;Pollicipes pollicipes

UdeM00000016321 6573 171 UdeM00000016321 XP\_021350318.1 27.5 448  
301 7 1 433 1 439 3.30E-39 171 6573 cellular

organisms;Eukaryota;Opisthokonta;Metazoa;Eumetazoa;Bilateria;Protostomia;Spiralia;Lophotrochozoa;Mollusca;Bivalvia;Autobranhia;Pteriormorphia;Pectinida;Pectinoidea;Pectinidae;Mizuhopecten;Mizuhopecten yessoensis

UdeM00000016322 29159 1168.3 UdeM00000016322 XP\_011434285.2 77.6  
675 151 0 8 682 6 680 0.00E+00 1168.3  
29159 cellular

organisms;Eukaryota;Opisthokonta;Metazoa;Eumetazoa;Bilateria;Protostomia;Spiralia;Lophotrochozoa;Mollusca;Bivalvia;Autobranhia;Pteriormorphia;Ostreida;Ostreoidea;Ostreidae;Crassostrea;Crassostrea gigas

UdeM00000016323 6573 60.1 UdeM00000016323 XP\_021379754.1 38.7 75  
45 1 1 75 1 74 1.50E-06 60.1 6573 cellular

organisms;Eukaryota;Opisthokonta;Metazoa;Eumetazoa;Bilateria;Protostomia;Spiralia;Lophotrochozoa;Mollusca;Bivalvia;Autobranhia;Pteriormorphia;Pectinida;Pectinoidea;Pectinidae;Mizuhopecten;Mizuhopecten yessoensis

UdeM00000016324 6596 768.5 UdeM00000016324 XP\_045163439.1 41.8 998  
551 15 32 1019 40 1017 1.10E-218 768.5 6596 cellular

organisms;Eukaryota;Opisthokonta;Metazoa;Eumetazoa;Bilateria;Protostomia;Spiralia;Lophotrochozoa;Mollusca;Bivalvia;Autobranhia;Heteroconchia;Euherodonta;Imparidentia;Venerida;Veneroidea;Veneridae;Mercenaria;Mercenaria mercenaria

UdeM00000016325 225164 313.9 UdeM00000016325 XP\_009062338.1 38  
481 278 9 23 492 23 494 3.60E-82 313.9 225164  
cellular

organisms;Eukaryota;Opisthokonta;Metazoa;Eumetazoa;Bilateria;Protostomia;Spiralia;Lophotrochozoa;Mollusca;Gastropoda;Patellogastropoda;Lottioida;Lottiidae;Lottia;Lottia gigantea

UdeM00000016326 29159 268.9 UdeM00000016326 XP\_011455440.2 48.7 263  
126 5 11 271 9 264 7.30E-69 268.9 29159 cellular

organisms;Eukaryota;Opisthokonta;Metazoa;Eumetazoa;Bilateria;Protostomia;

Spiralia;Lophotrochozoa;Mollusca;Bivalvia;Autobranchia;Pteriomorphia;Ostr  
eida;Ostreoidea;Ostreidae;Crassostrea;Crassostrea gigas  
UdeM00000016328 37653 115.9 UdeM00000016328 XP\_014788895.1 41.6 125  
53 3 8 123 26 139 1.20E-22 115.9 37653 cellular  
organisms;Eukaryota;Opisthokonta;Metazoa;Eumetazoa;Bilateria;Protostomia;  
Spiralia;Lophotrochozoa;Mollusca;Cephalopoda;Coleoidea;Octopodiformes;Oct  
opoda;Incirrata;Octopodidae;Octopus;Octopus bimaculoides  
UdeM00000016329 6596 420.6 UdeM00000016329 XP\_045176424.1 40.4 599  
238 11 10 500 7 594 2.80E-114 420.6 6596 cellular  
organisms;Eukaryota;Opisthokonta;Metazoa;Eumetazoa;Bilateria;Protostomia;  
Spiralia;Lophotrochozoa;Mollusca;Bivalvia;Autobranchia;Heteroconchia;Euhe  
terodonta;Imparidentia;Venerida;Veneroidea;Veneridae;Mercenaria;Mercenari  
a mercenaria  
UdeM00000016330 6573 225.7 UdeM00000016330 XP\_021353061.1 46.6 253  
129 3 1 252 1 248 6.70E-56 225.7 6573 cellular  
organisms;Eukaryota;Opisthokonta;Metazoa;Eumetazoa;Bilateria;Protostomia;  
Spiralia;Lophotrochozoa;Mollusca;Bivalvia;Autobranchia;Pteriomorphia;Pect  
inida;Pectinoidea;Pectinidae;Mizuhopecten;Mizuhopecten yessoensis  
UdeM00000016331 6596 99.8 UdeM00000016331 XP\_045176324.1 34.7 147  
94 2 87 231 81 227 5.10E-18 99.8 6596 cellular  
organisms;Eukaryota;Opisthokonta;Metazoa;Eumetazoa;Bilateria;Protostomia;  
Spiralia;Lophotrochozoa;Mollusca;Bivalvia;Autobranchia;Heteroconchia;Euhe  
terodonta;Imparidentia;Venerida;Veneroidea;Veneridae;Mercenaria;Mercenari  
a mercenaria  
UdeM00000016332 6596 257.3 UdeM00000016332 XP\_045175944.1 52.5 265  
109 5 8 257 9 271 2.10E-65 257.3 6596 cellular  
organisms;Eukaryota;Opisthokonta;Metazoa;Eumetazoa;Bilateria;Protostomia;  
Spiralia;Lophotrochozoa;Mollusca;Bivalvia;Autobranchia;Heteroconchia;Euhe  
terodonta;Imparidentia;Venerida;Veneroidea;Veneridae;Mercenaria;Mercenari  
a mercenaria  
UdeM00000016333 6565 154.8 UdeM00000016333 XP\_022309454.1 84.2 95  
14 1 46 140 398 491 7.90E-35 154.8 6565 cellular  
organisms;Eukaryota;Opisthokonta;Metazoa;Eumetazoa;Bilateria;Protostomia;  
Spiralia;Lophotrochozoa;Mollusca;Bivalvia;Autobranchia;Pteriomorphia;Ostr  
eida;Ostreoidea;Ostreidae;Crassostrea;Crassostrea virginica  
UdeM00000016334 6573 363.6 UdeM00000016334 XP\_021349465.1 59.4 394  
110 13 1 362 1 376 2.90E-97 363.6 6573 cellular  
organisms;Eukaryota;Opisthokonta;Metazoa;Eumetazoa;Bilateria;Protostomia;  
Spiralia;Lophotrochozoa;Mollusca;Bivalvia;Autobranchia;Pteriomorphia;Pect  
inida;Pectinoidea;Pectinidae;Mizuhopecten;Mizuhopecten yessoensis  
UdeM00000016335 1735272 72.4 UdeM00000016335 XP\_041366120.1 43.1  
102 56 2 1 101 1 101 3.70E-10 72.4 1735272  
cellular  
organisms;Eukaryota;Opisthokonta;Metazoa;Eumetazoa;Bilateria;Protostomia;  
Spiralia;Lophotrochozoa;Mollusca;Gastropoda;Neomphalina;Neomphaloidea;Pel  
tospiridae;Gigantopelta;Gigantopelta aegis  
UdeM00000016336 6579 245.7 UdeM00000016336 XP\_033752221.1 43.6 305  
146 7 22 307 102 399 7.70E-62 245.7 6579 cellular  
organisms;Eukaryota;Opisthokonta;Metazoa;Eumetazoa;Bilateria;Protostomia;  
Spiralia;Lophotrochozoa;Mollusca;Bivalvia;Autobranchia;Pteriomorphia;Pect  
inida;Pectinoidea;Pectinidae;Pecten;Pecten maximus  
UdeM00000016337 225164 247.3 UdeM00000016337 XP\_009051427.1 33.3  
421 272 6 21 437 23 438 3.70E-62 247.3 225164  
cellular



organisms;Eukaryota;Opisthokonta;Metazoa;Eumetazoa;Bilateria;Protostomia; Spiralia;Lophotrochozoa;Mollusca;Gastropoda;Patellogastropoda;Lottioidea; Lottiidae;Lottia;Lottia gigantea

UdeM00000016338 6596 772.7 UdeM00000016338 XP\_045175317.1 69.2 581  
165 5 439 1015 3 573 5.80E-220 772.7 6596 cellular

organisms;Eukaryota;Opisthokonta;Metazoa;Eumetazoa;Bilateria;Protostomia; Spiralia;Lophotrochozoa;Mollusca;Bivalvia;Autobranchia;Heteroconchia;Euhe terodonta;Imparidentia;Venerida;Veneroidea;Veneridae;Mercenaria;Mercenari a mercenaria

UdeM00000016339 6596 75.1 UdeM00000016339 XP\_045169421.1 40.4 99  
46 1 106 191 30 128 1.30E-10 75.1 6596 cellular

organisms;Eukaryota;Opisthokonta;Metazoa;Eumetazoa;Bilateria;Protostomia; Spiralia;Lophotrochozoa;Mollusca;Bivalvia;Autobranchia;Heteroconchia;Euhe terodonta;Imparidentia;Venerida;Veneroidea;Veneridae;Mercenaria;Mercenari a mercenaria

UdeM00000016340 30732 102.8 UdeM00000016340 XP\_024136425.1 63.4 82  
30 0 25 106 138 219 2.80E-19 102.8 30732 cellular

organisms;Eukaryota;Opisthokonta;Metazoa;Eumetazoa;Bilateria;Deuterostomi a;Chordata;Craniata;Vertebrata;Gnathostomata;Teleostomi;Euteleostomi;Acti nopterygii;Actinopteri;Neopterygii;Teleostei;Osteoglossocephalai;Clupeoce phala;Euteleosteomorpha;Neoteleostei;Eurypterygia;Ctenosquamata;Acanthomo rphata;Euacanthomorphacea;Percomorphaceae;Ovalentaria;Atherinomorphae;Bel oniformes;Adrianichthyoidei;Adrianichthyidae;Oryziinae;Oryzias;Oryzias melastigma

UdeM00000016341 6596 132.5 UdeM00000016341 XP\_045182578.1 38.2 178  
68 1 38 173 115 292 5.20E-28 132.5 6596 cellular

organisms;Eukaryota;Opisthokonta;Metazoa;Eumetazoa;Bilateria;Protostomia; Spiralia;Lophotrochozoa;Mollusca;Bivalvia;Autobranchia;Heteroconchia;Euhe terodonta;Imparidentia;Venerida;Veneroidea;Veneridae;Mercenaria;Mercenari a mercenaria

UdeM00000016342 30732 129.4 UdeM00000016342 XP\_024136425.1 54.7 117  
53 0 160 276 141 257 7.20E-27 129.4 30732 cellular

organisms;Eukaryota;Opisthokonta;Metazoa;Eumetazoa;Bilateria;Deuterostomi a;Chordata;Craniata;Vertebrata;Gnathostomata;Teleostomi;Euteleostomi;Acti nopterygii;Actinopteri;Neopterygii;Teleostei;Osteoglossocephalai;Clupeoce phala;Euteleosteomorpha;Neoteleostei;Eurypterygia;Ctenosquamata;Acanthomo rphata;Euacanthomorphacea;Percomorphaceae;Ovalentaria;Atherinomorphae;Bel oniformes;Adrianichthyoidei;Adrianichthyidae;Oryziinae;Oryzias;Oryzias melastigma

UdeM00000016343 30732 129.4 UdeM00000016343 XP\_024136425.1 54.7 117  
53 0 124 240 141 257 6.30E-27 129.4 30732 cellular

organisms;Eukaryota;Opisthokonta;Metazoa;Eumetazoa;Bilateria;Deuterostomi a;Chordata;Craniata;Vertebrata;Gnathostomata;Teleostomi;Euteleostomi;Acti nopterygii;Actinopteri;Neopterygii;Teleostei;Osteoglossocephalai;Clupeoce phala;Euteleosteomorpha;Neoteleostei;Eurypterygia;Ctenosquamata;Acanthomo rphata;Euacanthomorphacea;Percomorphaceae;Ovalentaria;Atherinomorphae;Bel oniformes;Adrianichthyoidei;Adrianichthyidae;Oryziinae;Oryzias;Oryzias melastigma

UdeM00000016344 6596 139.8 UdeM00000016344 XP\_045215434.1 34.1 211  
139 0 73 283 15 225 5.70E-30 139.8 6596 cellular

organisms;Eukaryota;Opisthokonta;Metazoa;Eumetazoa;Bilateria;Protostomia; Spiralia;Lophotrochozoa;Mollusca;Bivalvia;Autobranchia;Heteroconchia;Euhe terodonta;Imparidentia;Venerida;Veneroidea;Veneridae;Mercenaria;Mercenari a mercenaria

UdeM00000016345 6565 523.1 UdeM00000016345 XP\_022345902.1 71.9 352  
 98 1 2 352 36 387 2.80E-145 523.1 6565 cellular  
 organisms;Eukaryota;Opisthokonta;Metazoa;Eumetazoa;Bilateria;Protostomia;  
 Spiralia;Lophotrochozoa;Mollusca;Bivalvia;Autobranhia;Pteriormorphia;Ostr  
 eida;Ostreoidea;Ostreidae;Crassostrea;Crassostrea virginica  
 UdeM00000016347 29159 124.4 UdeM00000016347 XP\_011447107.2 40.6 308  
 109 8 1620 1919 1608 1849 1.60E-24 124.4 29159 cellular  
 organisms;Eukaryota;Opisthokonta;Metazoa;Eumetazoa;Bilateria;Protostomia;  
 Spiralia;Lophotrochozoa;Mollusca;Bivalvia;Autobranhia;Pteriormorphia;Ostr  
 eida;Ostreoidea;Ostreidae;Crassostrea;Crassostrea gigas  
 UdeM00000016348 6579 263.5 UdeM00000016348 XP\_033752451.1 46.6 487  
 226 9 40 521 108 565 2.00E-66 263.5 6579 cellular  
 organisms;Eukaryota;Opisthokonta;Metazoa;Eumetazoa;Bilateria;Protostomia;  
 Spiralia;Lophotrochozoa;Mollusca;Bivalvia;Autobranhia;Pteriormorphia;Pect  
 inida;Pectinoidea;Pectinidae;Pecten;Pecten maximus  
 UdeM00000016348 6579 101.3 UdeM00000016348 XP\_033752451.1 29.6 504  
 262 23 1296 1736 1441 1914 1.30E-17 101.3 6579 cellular  
 organisms;Eukaryota;Opisthokonta;Metazoa;Eumetazoa;Bilateria;Protostomia;  
 Spiralia;Lophotrochozoa;Mollusca;Bivalvia;Autobranhia;Pteriormorphia;Pect  
 inida;Pectinoidea;Pectinidae;Pecten;Pecten maximus  
 UdeM00000016349 6596 751.1 UdeM00000016349 XP\_045176950.1 68.5 562  
 172 3 1 562 1 557 1.00E-213 751.1 6596 cellular  
 organisms;Eukaryota;Opisthokonta;Metazoa;Eumetazoa;Bilateria;Protostomia;  
 Spiralia;Lophotrochozoa;Mollusca;Bivalvia;Autobranhia;Heteroconchia;Euhe  
 terodonta;Imparidentia;Venerida;Veneroidea;Veneridae;Mercenaria;Mercenari  
 a mercenaria  
 UdeM00000016350 6596 717.2 UdeM00000016350 XP\_045176950.1 68.6 538  
 164 3 1 538 1 533 1.60E-203 717.2 6596 cellular  
 organisms;Eukaryota;Opisthokonta;Metazoa;Eumetazoa;Bilateria;Protostomia;  
 Spiralia;Lophotrochozoa;Mollusca;Bivalvia;Autobranhia;Heteroconchia;Euhe  
 terodonta;Imparidentia;Venerida;Veneroidea;Veneridae;Mercenaria;Mercenari  
 a mercenaria  
 UdeM00000016351 6596 332.8 UdeM00000016351 XP\_045175615.1 69.6 224  
 63 1 1 219 1 224 3.30E-88 332.8 6596 cellular  
 organisms;Eukaryota;Opisthokonta;Metazoa;Eumetazoa;Bilateria;Protostomia;  
 Spiralia;Lophotrochozoa;Mollusca;Bivalvia;Autobranhia;Heteroconchia;Euhe  
 terodonta;Imparidentia;Venerida;Veneroidea;Veneridae;Mercenaria;Mercenari  
 a mercenaria  
 UdeM00000016352 6596 1745.3 UdeM00000016352 XP\_045175913.1 78.4  
 1119 224 4 1 1114 36 1141 0.00E+00 1745.3 6596  
 cellular  
 organisms;Eukaryota;Opisthokonta;Metazoa;Eumetazoa;Bilateria;Protostomia;  
 Spiralia;Lophotrochozoa;Mollusca;Bivalvia;Autobranhia;Heteroconchia;Euhe  
 terodonta;Imparidentia;Venerida;Veneroidea;Veneridae;Mercenaria;Mercenari  
 a mercenaria  
 UdeM00000016353 6596 1399 UdeM00000016353 XP\_045175915.1 79.2 877  
 174 2 1 873 36 908 0.00E+00 1399 6596 cellular  
 organisms;Eukaryota;Opisthokonta;Metazoa;Eumetazoa;Bilateria;Protostomia;  
 Spiralia;Lophotrochozoa;Mollusca;Bivalvia;Autobranhia;Heteroconchia;Euhe  
 terodonta;Imparidentia;Venerida;Veneroidea;Veneridae;Mercenaria;Mercenari  
 a mercenaria  
 UdeM00000016354 6596 2819.3 UdeM00000016354 XP\_045175401.1 66.4  
 2110 624 15 7 2044 531 2628 0.00E+00 2819.3 6596  
 cellular

organisms;Eukaryota;Opisthokonta;Metazoa;Eumetazoa;Bilateria;Protostomia;Spiralia;Lophotrochozoa;Mollusca;Bivalvia;Autobranhia;Heteroconchia;Euherodonta;Imparidentia;Venerida;Veneroidea;Veneridae;Mercenaria;Mercenaria mercenaria

UdeM00000016355 6596 101.3 UdeM00000016355 XP\_045175394.1 21 700  
432 22 28 694 30 641 5.20E-18 101.3 6596 cellular

organisms;Eukaryota;Opisthokonta;Metazoa;Eumetazoa;Bilateria;Protostomia;Spiralia;Lophotrochozoa;Mollusca;Bivalvia;Autobranhia;Heteroconchia;Euherodonta;Imparidentia;Venerida;Veneroidea;Veneridae;Mercenaria;Mercenaria mercenaria

UdeM00000016356 6573 576.6 UdeM00000016356 XP\_021377278.1 56.9 494  
188 4 1 472 1 491 2.90E-161 576.6 6573 cellular

organisms;Eukaryota;Opisthokonta;Metazoa;Eumetazoa;Bilateria;Protostomia;Spiralia;Lophotrochozoa;Mollusca;Bivalvia;Autobranhia;Pteriomorphia;Pectinida;Pectinoidea;Pectinidae;Mizuhopecten;Mizuhopecten yessoensis

UdeM00000016357 6596 313.9 UdeM00000016357 XP\_045174408.1 31.6 1101  
559 43 28 1082 30 982 7.80E-82 313.9 6596 cellular

organisms;Eukaryota;Opisthokonta;Metazoa;Eumetazoa;Bilateria;Protostomia;Spiralia;Lophotrochozoa;Mollusca;Bivalvia;Autobranhia;Heteroconchia;Euherodonta;Imparidentia;Venerida;Veneroidea;Veneridae;Mercenaria;Mercenaria mercenaria

UdeM00000016358 6596 92 UdeM00000016358 XP\_045177390.1 30.7 254  
158 5 1 245 1 245 1.80E-15 92 6596 cellular

organisms;Eukaryota;Opisthokonta;Metazoa;Eumetazoa;Bilateria;Protostomia;Spiralia;Lophotrochozoa;Mollusca;Bivalvia;Autobranhia;Heteroconchia;Euherodonta;Imparidentia;Venerida;Veneroidea;Veneridae;Mercenaria;Mercenaria mercenaria

UdeM00000016359 6596 370.2 UdeM00000016359 XP\_045174900.1 53.8 372  
141 6 33 395 783 1132 3.50E-99 370.2 6596 cellular

organisms;Eukaryota;Opisthokonta;Metazoa;Eumetazoa;Bilateria;Protostomia;Spiralia;Lophotrochozoa;Mollusca;Bivalvia;Autobranhia;Heteroconchia;Euherodonta;Imparidentia;Venerida;Veneroidea;Veneridae;Mercenaria;Mercenaria mercenaria

UdeM00000016360 6579 129.4 UdeM00000016360 XP\_033751615.1 44.9 158  
86 1 44 200 22 179 7.30E-27 129.4 6579 cellular

organisms;Eukaryota;Opisthokonta;Metazoa;Eumetazoa;Bilateria;Protostomia;Spiralia;Lophotrochozoa;Mollusca;Bivalvia;Autobranhia;Pteriomorphia;Pectinida;Pectinoidea;Pectinidae;Pecten;Pecten maximus

UdeM00000016361 6579 944.5 UdeM00000016361 XP\_033751616.1 66.7 744  
222 13 1 738 1 724 8.20E-272 944.5 6579 cellular

organisms;Eukaryota;Opisthokonta;Metazoa;Eumetazoa;Bilateria;Protostomia;Spiralia;Lophotrochozoa;Mollusca;Bivalvia;Autobranhia;Pteriomorphia;Pectinida;Pectinoidea;Pectinidae;Pecten;Pecten maximus

UdeM00000016362 6579 909.4 UdeM00000016362 XP\_033751616.1 64.6 738  
187 10 1 678 1 724 2.70E-261 909.4 6579 cellular

organisms;Eukaryota;Opisthokonta;Metazoa;Eumetazoa;Bilateria;Protostomia;Spiralia;Lophotrochozoa;Mollusca;Bivalvia;Autobranhia;Pteriomorphia;Pectinida;Pectinoidea;Pectinidae;Pecten;Pecten maximus

UdeM00000016363 6573 493.4 UdeM00000016363 XP\_021350282.1 43.5 632  
311 12 11 601 36 662 4.10E-136 493.4 6573 cellular

organisms;Eukaryota;Opisthokonta;Metazoa;Eumetazoa;Bilateria;Protostomia;Spiralia;Lophotrochozoa;Mollusca;Bivalvia;Autobranhia;Pteriomorphia;Pectinida;Pectinoidea;Pectinidae;Mizuhopecten;Mizuhopecten yessoensis

UdeM00000016364 6596 217.2 UdeM00000016364 XP\_045176294.1 33.7 1177  
 520 38 427 1504 367 1382 1.40E-52 217.2 6596 cellular  
 organisms;Eukaryota;Opisthokonta;Metazoa;Eumetazoa;Bilateria;Protostomia;  
 Spiralia;Lophotrochozoa;Mollusca;Bivalvia;Autobranchia;Heteroconchia;Euhe  
 terodonta;Imparidentia;Venerida;Veneroidea;Veneridae;Mercenaria;Mercenari  
 a mercenaria

UdeM00000016365 6579 1181.4 UdeM00000016365 XP\_033751673.1 76.3  
 979 196 5 364 1309 93 1068 0.00E+00 1181.4 6579  
 cellular  
 organisms;Eukaryota;Opisthokonta;Metazoa;Eumetazoa;Bilateria;Protostomia;  
 Spiralia;Lophotrochozoa;Mollusca;Bivalvia;Autobranchia;Pteriormorphia;Pect  
 inida;Pectinoidea;Pectinidae;Pecten;Pecten maximus

UdeM00000016366 6579 1181.4 UdeM00000016366 XP\_033751673.1 76.3  
 979 196 5 101 1046 93 1068 0.00E+00 1181.4 6579  
 cellular  
 organisms;Eukaryota;Opisthokonta;Metazoa;Eumetazoa;Bilateria;Protostomia;  
 Spiralia;Lophotrochozoa;Mollusca;Bivalvia;Autobranchia;Pteriormorphia;Pect  
 inida;Pectinoidea;Pectinidae;Pecten;Pecten maximus

UdeM00000016367 225164 240.4 UdeM00000016367 XP\_009051427.1 33  
 421 275 5 21 439 23 438 4.60E-60 240.4 225164  
 cellular  
 organisms;Eukaryota;Opisthokonta;Metazoa;Eumetazoa;Bilateria;Protostomia;  
 Spiralia;Lophotrochozoa;Mollusca;Gastropoda;Patellogastropoda;Lottioidea;  
 Lottiidae;Lottia;Lottia gigantea

UdeM00000016368 151771 78.2 UdeM00000016368 XP\_028409260.1 33.1  
 148 96 1 6 153 59 203 1.30E-11 78.2 151771  
 cellular  
 organisms;Eukaryota;Opisthokonta;Metazoa;Eumetazoa;Cnidaria;Anthozoa;Octo  
 corallia;Alcyonacea;Alcyoniina;Nephtheidae;Dendronephthya;Dendronephthya  
 gigantea

UdeM00000016370 6596 667.5 UdeM00000016370 XP\_045174374.1 51.5 658  
 276 9 6 652 97 722 1.70E-188 667.5 6596 cellular  
 organisms;Eukaryota;Opisthokonta;Metazoa;Eumetazoa;Bilateria;Protostomia;  
 Spiralia;Lophotrochozoa;Mollusca;Bivalvia;Autobranchia;Heteroconchia;Euhe  
 terodonta;Imparidentia;Venerida;Veneroidea;Veneridae;Mercenaria;Mercenari  
 a mercenaria

UdeM00000016371 6596 92.4 UdeM00000016371 XP\_045194272.1 63.2 68  
 23 1 37 102 207 274 5.80E-16 92.4 6596 cellular  
 organisms;Eukaryota;Opisthokonta;Metazoa;Eumetazoa;Bilateria;Protostomia;  
 Spiralia;Lophotrochozoa;Mollusca;Bivalvia;Autobranchia;Heteroconchia;Euhe  
 terodonta;Imparidentia;Venerida;Veneroidea;Veneridae;Mercenaria;Mercenari  
 a mercenaria

UdeM00000016372 6596 348.6 UdeM00000016372 XP\_045174374.1 39.9 509  
 197 7 1 400 214 722 1.10E-92 348.6 6596 cellular  
 organisms;Eukaryota;Opisthokonta;Metazoa;Eumetazoa;Bilateria;Protostomia;  
 Spiralia;Lophotrochozoa;Mollusca;Bivalvia;Autobranchia;Heteroconchia;Euhe  
 terodonta;Imparidentia;Venerida;Veneroidea;Veneridae;Mercenaria;Mercenari  
 a mercenaria

UdeM00000016373 6596 269.2 UdeM00000016373 XP\_045174374.1 56.3 213  
 92 1 3 214 510 722 4.50E-69 269.2 6596 cellular  
 organisms;Eukaryota;Opisthokonta;Metazoa;Eumetazoa;Bilateria;Protostomia;  
 Spiralia;Lophotrochozoa;Mollusca;Bivalvia;Autobranchia;Heteroconchia;Euhe  
 terodonta;Imparidentia;Venerida;Veneroidea;Veneridae;Mercenaria;Mercenari  
 a mercenaria

UdeM00000016374 6596 1623.6 UdeM00000016374 XP\_045174627.1 41.9  
 2194 1077 34 6 2090 27 2131 0.00E+00 1623.6 6596  
 cellular  
 organisms;Eukaryota;Opisthokonta;Metazoa;Eumetazoa;Bilateria;Protostomia;  
 Spiralia;Lophotrochozoa;Mollusca;Bivalvia;Autobranhia;Heteroconchia;Euhe  
 terodonta;Imparidentia;Venerida;Veneroidea;Veneridae;Mercenaria;Mercenari  
 a mercenaria  
 UdeM00000016375 6596 1618.6 UdeM00000016375 XP\_045174627.1 41.7  
 2202 1077 35 6 2098 27 2131 0.00E+00 1618.6 6596  
 cellular  
 organisms;Eukaryota;Opisthokonta;Metazoa;Eumetazoa;Bilateria;Protostomia;  
 Spiralia;Lophotrochozoa;Mollusca;Bivalvia;Autobranhia;Heteroconchia;Euhe  
 terodonta;Imparidentia;Venerida;Veneroidea;Veneridae;Mercenaria;Mercenari  
 a mercenaria  
 UdeM00000016376 6596 657.5 UdeM00000016376 XP\_045174620.1 53.8 593  
 272 2 10 601 821 1412 1.60E-185 657.5 6596 cellular  
 organisms;Eukaryota;Opisthokonta;Metazoa;Eumetazoa;Bilateria;Protostomia;  
 Spiralia;Lophotrochozoa;Mollusca;Bivalvia;Autobranhia;Heteroconchia;Euhe  
 terodonta;Imparidentia;Venerida;Veneroidea;Veneridae;Mercenaria;Mercenari  
 a mercenaria  
 UdeM00000016377 6596 2031.5 UdeM00000016377 XP\_045174627.1 41.8  
 2727 1338 28 1 2669 365 2901 0.00E+00 2031.5 6596  
 cellular  
 organisms;Eukaryota;Opisthokonta;Metazoa;Eumetazoa;Bilateria;Protostomia;  
 Spiralia;Lophotrochozoa;Mollusca;Bivalvia;Autobranhia;Heteroconchia;Euhe  
 terodonta;Imparidentia;Venerida;Veneroidea;Veneridae;Mercenaria;Mercenari  
 a mercenaria  
 UdeM00000016378 6596 1751.5 UdeM00000016378 XP\_045174627.1 40.9  
 2452 1203 27 5 2399 640 2901 0.00E+00 1751.5 6596  
 cellular  
 organisms;Eukaryota;Opisthokonta;Metazoa;Eumetazoa;Bilateria;Protostomia;  
 Spiralia;Lophotrochozoa;Mollusca;Bivalvia;Autobranhia;Heteroconchia;Euhe  
 terodonta;Imparidentia;Venerida;Veneroidea;Veneridae;Mercenaria;Mercenari  
 a mercenaria  
 UdeM00000016384 6596 773.5 UdeM00000016384 XP\_045177083.1 51.8 771  
 369 3 43 811 644 1413 2.70E-220 773.5 6596 cellular  
 organisms;Eukaryota;Opisthokonta;Metazoa;Eumetazoa;Bilateria;Protostomia;  
 Spiralia;Lophotrochozoa;Mollusca;Bivalvia;Autobranhia;Heteroconchia;Euhe  
 terodonta;Imparidentia;Venerida;Veneroidea;Veneridae;Mercenaria;Mercenari  
 a mercenaria  
 UdeM00000016385 6596 1212.6 UdeM00000016385 XP\_045174627.1 40.9  
 1710 800 21 1 1563 795 2440 0.00E+00 1212.6 6596  
 cellular  
 organisms;Eukaryota;Opisthokonta;Metazoa;Eumetazoa;Bilateria;Protostomia;  
 Spiralia;Lophotrochozoa;Mollusca;Bivalvia;Autobranhia;Heteroconchia;Euhe  
 terodonta;Imparidentia;Venerida;Veneroidea;Veneridae;Mercenaria;Mercenari  
 a mercenaria  
 UdeM00000016386 7054 141 UdeM00000016386 XP\_031328250.1 38.4 224  
 86 1 1 172 1 224 1.50E-30 141 7054 cellular  
 organisms;Eukaryota;Opisthokonta;Metazoa;Eumetazoa;Bilateria;Protostomia;  
 Ecdysozoa;Panarthropoda;Arthropoda;Mandibulata;Pancrustacea;Hexapoda;Inse  
 cta;Dicondylia;Pterygota;Neoptera;Endopterygota;Coleoptera;Polyphaga;Elat  
 eriformia;Elateroidea;Lampyridae;Lampyrinae;Photinus;Photinus pyralis

UdeM00000016387 7054 151 UdeM00000016387 XP\_031328250.1 56.3 119  
 52 0 21 139 279 397 1.20E-33 151 7054 cellular  
 organisms;Eukaryota;Opisthokonta;Metazoa;Eumetazoa;Bilateria;Protostomia;  
 Ecdysozoa;Panarthropoda;Arthropoda;Mandibulata;Pancrustacea;Hexapoda;Inse  
 cta;Dicondylia;Pterygota;Neoptera;Endopterygota;Coleoptera;Polyphaga;Elat  
 eriformia;Elateroidea;Lampyridae;Lampyrinae;Photinus;Photinus pyralis  
 UdeM00000016388 7054 115.9 UdeM00000016388 XP\_031328250.1 52.6 97  
 46 0 1 97 301 397 2.90E-23 115.9 7054 cellular  
 organisms;Eukaryota;Opisthokonta;Metazoa;Eumetazoa;Bilateria;Protostomia;  
 Ecdysozoa;Panarthropoda;Arthropoda;Mandibulata;Pancrustacea;Hexapoda;Inse  
 cta;Dicondylia;Pterygota;Neoptera;Endopterygota;Coleoptera;Polyphaga;Elat  
 eriformia;Elateroidea;Lampyridae;Lampyrinae;Photinus;Photinus pyralis  
 UdeM00000016389 6596 687.2 UdeM00000016389 XP\_045176442.1 44.7 816  
 371 7 21 800 21 792 2.50E-194 687.2 6596 cellular  
 organisms;Eukaryota;Opisthokonta;Metazoa;Eumetazoa;Bilateria;Protostomia;  
 Spiralia;Lophotrochozoa;Mollusca;Bivalvia;Autobranchia;Heteroconchia;Euhe  
 terodonta;Imparidentia;Venerida;Veneroidea;Veneridae;Mercenaria;Mercenari  
 a mercenaria  
 UdeM00000016390 6596 179.5 UdeM00000016390 XP\_045175418.1 39.6 541  
 249 16 470 951 331 852 2.00E-41 179.5 6596 cellular  
 organisms;Eukaryota;Opisthokonta;Metazoa;Eumetazoa;Bilateria;Protostomia;  
 Spiralia;Lophotrochozoa;Mollusca;Bivalvia;Autobranchia;Heteroconchia;Euhe  
 terodonta;Imparidentia;Venerida;Veneroidea;Veneridae;Mercenaria;Mercenari  
 a mercenaria  
 UdeM00000016392 1735272 86.7 UdeM00000016392 XP\_041367482.1 82  
 50 9 0 10 59 1 50 1.40E-14 86.7 1735272  
 cellular  
 organisms;Eukaryota;Opisthokonta;Metazoa;Eumetazoa;Bilateria;Protostomia;  
 Spiralia;Lophotrochozoa;Mollusca;Gastropoda;Neomphalina;Neomphaloidea;Pel  
 tospiridae;Gigantopelta;Gigantopelta aegis  
 UdeM00000016393 6596 317.4 UdeM00000016393 XP\_045176784.1 72.6 201  
 55 0 7 207 1 201 1.40E-83 317.4 6596 cellular  
 organisms;Eukaryota;Opisthokonta;Metazoa;Eumetazoa;Bilateria;Protostomia;  
 Spiralia;Lophotrochozoa;Mollusca;Bivalvia;Autobranchia;Heteroconchia;Euhe  
 terodonta;Imparidentia;Venerida;Veneroidea;Veneridae;Mercenaria;Mercenari  
 a mercenaria  
 UdeM00000016394 1735272 74.3 UdeM00000016394 XP\_041375839.1 33.8  
 263 155 6 54 312 22 269 3.00E-10 74.3 1735272  
 cellular  
 organisms;Eukaryota;Opisthokonta;Metazoa;Eumetazoa;Bilateria;Protostomia;  
 Spiralia;Lophotrochozoa;Mollusca;Gastropoda;Neomphalina;Neomphaloidea;Pel  
 tospiridae;Gigantopelta;Gigantopelta aegis  
 UdeM00000016395 6596 116.7 UdeM00000016395 XP\_045176923.1 37 181  
 107 4 3 177 40 219 3.40E-23 116.7 6596 cellular  
 organisms;Eukaryota;Opisthokonta;Metazoa;Eumetazoa;Bilateria;Protostomia;  
 Spiralia;Lophotrochozoa;Mollusca;Bivalvia;Autobranchia;Heteroconchia;Euhe  
 terodonta;Imparidentia;Venerida;Veneroidea;Veneridae;Mercenaria;Mercenari  
 a mercenaria  
 UdeM00000016396 400727 251.5 UdeM00000016396 XP\_025087599.1 56.1  
 262 106 6 1 258 1 257 1.30E-63 251.5 400727  
 cellular  
 organisms;Eukaryota;Opisthokonta;Metazoa;Eumetazoa;Bilateria;Protostomia;  
 Spiralia;Lophotrochozoa;Mollusca;Gastropoda;Caenogastropoda;Architaeniogl  
 ossa;Ampullarioidea;Ampullariidae;Pomacea;Pomacea canaliculata

UdeM00000016397 400727 254.2 UdeM00000016397 XP\_025087599.1 56.5  
 260 104 6 1 256 1 255 1.80E-64 254.2 400727  
 cellular  
 organisms;Eukaryota;Opisthokonta;Metazoa;Eumetazoa;Bilateria;Protostomia;  
 Spiralia;Lophotrochozoa;Mollusca;Gastropoda;Caenogastropoda;Architaenioglossa;  
 Ampullarioidea;Ampullariidae;Pomacea;Pomacea canaliculata  
 UdeM00000016402 1735272 76.6 UdeM00000016402 XP\_041349006.1 27.2  
 173 117 2 6 178 46 209 9.20E-11 76.6 1735272  
 cellular  
 organisms;Eukaryota;Opisthokonta;Metazoa;Eumetazoa;Bilateria;Protostomia;  
 Spiralia;Lophotrochozoa;Mollusca;Gastropoda;Neomphalina;Neomphaloidea;Pel  
 tospiridae;Gigantopelta;Gigantopelta aegis  
 UdeM00000016406 7741 98.6 UdeM00000016406 XP\_019630366.1 32.7 199  
 122 5 101 295 75 265 1.50E-17 98.6 7741 cellular  
 organisms;Eukaryota;Opisthokonta;Metazoa;Eumetazoa;Bilateria;Deuterostomia;  
 Chordata;Cephalochordata;Leptocardii;Amphioxiformes;Branchiostomidae;Br  
 anchiostoma;Branchiostoma belcheri  
 UdeM00000016407 6596 158.7 UdeM00000016407 XP\_045175854.1 51 143  
 69 1 62 204 46 187 8.50E-36 158.7 6596 cellular  
 organisms;Eukaryota;Opisthokonta;Metazoa;Eumetazoa;Bilateria;Protostomia;  
 Spiralia;Lophotrochozoa;Mollusca;Bivalvia;Autobranchia;Heteroconchia;Euhe  
 terodonta;Imparidentia;Venerida;Veneroidea;Veneridae;Mercenaria;Mercenari  
 a mercenaria  
 UdeM00000016408 6573 244.6 UdeM00000016408 XP\_021371608.1 43 342  
 176 4 34 358 165 504 2.30E-61 244.6 6573 cellular  
 organisms;Eukaryota;Opisthokonta;Metazoa;Eumetazoa;Bilateria;Protostomia;  
 Spiralia;Lophotrochozoa;Mollusca;Bivalvia;Autobranchia;Pteriomorphia;Pect  
 inida;Pectinoidea;Pectinidae;Mizuhopecten;Mizuhopecten yessoensis  
 UdeM00000016409 6689 169.1 UdeM00000016409 XP\_027219324.1 41.9 198  
 100 5 1 188 201 393 5.60E-39 169.1 6689 cellular  
 organisms;Eukaryota;Opisthokonta;Metazoa;Eumetazoa;Bilateria;Protostomia;  
 Ecdysozoa;Panarthropoda;Arthropoda;Mandibulata;Pancrustacea;Crustacea;Mul  
 ticrustacea;Malacostraca;Eumalacostraca;Eucarida;Decapoda;Dendrobranchiat  
 a;Penaeoidea;Penaeidae;Penaeus;Penaeus vannamei  
 UdeM00000016410 6573 245.4 UdeM00000016410 XP\_021360882.1 67.3 214  
 54 6 1 214 1 198 6.80E-62 245.4 6573 cellular  
 organisms;Eukaryota;Opisthokonta;Metazoa;Eumetazoa;Bilateria;Protostomia;  
 Spiralia;Lophotrochozoa;Mollusca;Bivalvia;Autobranchia;Pteriomorphia;Pect  
 inida;Pectinoidea;Pectinidae;Mizuhopecten;Mizuhopecten yessoensis  
 UdeM00000016411 6596 256.1 UdeM00000016411 XP\_045192074.1 46.2 303  
 154 4 19 315 2122 2421 5.80E-65 256.1 6596 cellular  
 organisms;Eukaryota;Opisthokonta;Metazoa;Eumetazoa;Bilateria;Protostomia;  
 Spiralia;Lophotrochozoa;Mollusca;Bivalvia;Autobranchia;Heteroconchia;Euhe  
 terodonta;Imparidentia;Venerida;Veneroidea;Veneridae;Mercenaria;Mercenari  
 a mercenaria  
 UdeM00000016412 6596 253.8 UdeM00000016412 XP\_045192074.1 45.9 303  
 155 4 19 315 2122 2421 2.90E-64 253.8 6596 cellular  
 organisms;Eukaryota;Opisthokonta;Metazoa;Eumetazoa;Bilateria;Protostomia;  
 Spiralia;Lophotrochozoa;Mollusca;Bivalvia;Autobranchia;Heteroconchia;Euhe  
 terodonta;Imparidentia;Venerida;Veneroidea;Veneridae;Mercenaria;Mercenari  
 a mercenaria  
 UdeM00000016413 6596 253.8 UdeM00000016413 XP\_045192074.1 45.9 303  
 155 4 19 315 2122 2421 2.90E-64 253.8 6596 cellular  
 organisms;Eukaryota;Opisthokonta;Metazoa;Eumetazoa;Bilateria;Protostomia;

Spiralia;Lophotrochozoa;Mollusca;Bivalvia;Autobranchia;Heteroconchia;Euherodonta;Imparidentia;Venerida;Veneroidea;Veneridae;Mercenaria;Mercenaria mercenaria

UdeM00000016414 29159 243.8 UdeM00000016414 XP\_011415805.1 85.8 127  
18 0 1 127 100 226 1.20E-61 243.8 29159 cellular

organisms;Eukaryota;Opisthokonta;Metazoa;Eumetazoa;Bilateria;Protostomia;Spiralia;Lophotrochozoa;Mollusca;Bivalvia;Autobranchia;Pteriormorphia;Ostreida;Ostreoidea;Ostreidae;Crassostrea;Crassostrea gigas

UdeM00000016415 6596 113.2 UdeM00000016415 XP\_045174769.1 74.7 75  
19 0 1 75 1 75 2.40E-22 113.2 6596 cellular

organisms;Eukaryota;Opisthokonta;Metazoa;Eumetazoa;Bilateria;Protostomia;Spiralia;Lophotrochozoa;Mollusca;Bivalvia;Autobranchia;Heteroconchia;Euherodonta;Imparidentia;Venerida;Veneroidea;Veneridae;Mercenaria;Mercenaria mercenaria

UdeM00000016416 46514 100.1 UdeM00000016416 XP\_038075930.1 29.1 247  
149 6 81 309 568 806 7.00E-18 100.1 46514 cellular

organisms;Eukaryota;Opisthokonta;Metazoa;Eumetazoa;Bilateria;Deuterostomia;Echinodermata;Eleutherozoa;Asterozoa;Asteroidea;Valvatataceae;Valvatida;Asterinidae;Patiria;Patiria miniata

UdeM00000016417 46514 100.1 UdeM00000016417 XP\_038075930.1 29.1 247  
149 6 81 309 568 806 7.10E-18 100.1 46514 cellular

organisms;Eukaryota;Opisthokonta;Metazoa;Eumetazoa;Bilateria;Deuterostomia;Echinodermata;Eleutherozoa;Asterozoa;Asteroidea;Valvatataceae;Valvatida;Asterinidae;Patiria;Patiria miniata

UdeM00000016418 6596 109 UdeM00000016418 XP\_045176098.1 31.3 150  
103 0 26 175 61 210 9.50E-21 109 6596 cellular

organisms;Eukaryota;Opisthokonta;Metazoa;Eumetazoa;Bilateria;Protostomia;Spiralia;Lophotrochozoa;Mollusca;Bivalvia;Autobranchia;Heteroconchia;Euherodonta;Imparidentia;Venerida;Veneroidea;Veneridae;Mercenaria;Mercenaria mercenaria

UdeM00000016419 6596 142.9 UdeM00000016419 XP\_045158973.1 42.6 176  
87 3 14 189 60 221 4.30E-31 142.9 6596 cellular

organisms;Eukaryota;Opisthokonta;Metazoa;Eumetazoa;Bilateria;Protostomia;Spiralia;Lophotrochozoa;Mollusca;Bivalvia;Autobranchia;Heteroconchia;Euherodonta;Imparidentia;Venerida;Veneroidea;Veneridae;Mercenaria;Mercenaria mercenaria

UdeM00000016420 6945 159.5 UdeM00000016420 XP\_029838899.2 32.9 246  
145 4 6 241 10 245 7.30E-36 159.5 6945 cellular

organisms;Eukaryota;Opisthokonta;Metazoa;Eumetazoa;Bilateria;Protostomia;Ecdysozoa;Panarthropoda;Arthropoda;Chelicerata;Arachnida;Acari;Parasitiformes;Ixodida;Ixodoidea;Ixodidae;Ixodinae;Ixodes;Ixodes scapularis

UdeM00000016421 51031 92.8 UdeM00000016421 XP\_013298706.1 33.6 149  
80 4 1 145 117 250 4.50E-16 92.8 51031 cellular

organisms;Eukaryota;Opisthokonta;Metazoa;Eumetazoa;Bilateria;Protostomia;Ecdysozoa;Nematoda;Chromadorea;Strongylida;Ancylostomatoidea;Ancylostomatidae;Bunostominae;Necator;Necator americanus

UdeM00000016422 51031 150.6 UdeM00000016422 XP\_013298706.1 34.4 224  
128 4 25 244 42 250 2.90E-33 150.6 51031 cellular

organisms;Eukaryota;Opisthokonta;Metazoa;Eumetazoa;Bilateria;Protostomia;Ecdysozoa;Nematoda;Chromadorea;Strongylida;Ancylostomatoidea;Ancylostomatidae;Bunostominae;Necator;Necator americanus

UdeM00000016423 51031 150.6 UdeM00000016423 XP\_013298706.1 34.4 224  
128 4 23 242 42 250 2.80E-33 150.6 51031 cellular

organisms;Eukaryota;Opisthokonta;Metazoa;Eumetazoa;Bilateria;Protostomia;



Ecdysozoa;Nematoda;Chromadorea;Strongylida;Ancylostomatoidea;Ancylostomatidae;Bunostominae;Necator;Necator americanus

|                 |      |       |                 |                |      |          |
|-----------------|------|-------|-----------------|----------------|------|----------|
| UdeM00000016424 | 6565 | 126.3 | UdeM00000016424 | XP_022332557.1 | 38.4 | 146      |
| 81              | 2    | 2     | 147             | 78             | 214  | 3.50E-26 |

126.3 6565 cellular organisms;Eukaryota;Opisthokonta;Metazoa;Eumetazoa;Bilateria;Protostomia;Spiralia;Lophotrochozoa;Mollusca;Bivalvia;Autobranhia;Pteriomorphia;Ostreida;Ostreoidea;Ostreidae;Crassostrea;Crassostrea virginica

|                 |      |        |                 |                |      |     |
|-----------------|------|--------|-----------------|----------------|------|-----|
| UdeM00000016425 | 6596 | 1165.2 | UdeM00000016425 | XP_045174217.1 | 76.3 |     |
| 742             | 169  | 3      | 1               | 741            | 1    | 736 |

0.00E+00 1165.2 6596 cellular organisms;Eukaryota;Opisthokonta;Metazoa;Eumetazoa;Bilateria;Protostomia;Spiralia;Lophotrochozoa;Mollusca;Bivalvia;Autobranhia;Heteroconchia;Euherodonta;Imparidentia;Venerida;Veneroidea;Veneridae;Mercenaria;Mercenaria mercenaria

|                 |      |       |                 |                |      |           |
|-----------------|------|-------|-----------------|----------------|------|-----------|
| UdeM00000016426 | 6596 | 688.3 | UdeM00000016426 | XP_045174223.1 | 51.8 | 689       |
| 249             | 6    | 1     | 679             | 24             | 639  | 9.60E-195 |

688.3 6596 cellular organisms;Eukaryota;Opisthokonta;Metazoa;Eumetazoa;Bilateria;Protostomia;Spiralia;Lophotrochozoa;Mollusca;Bivalvia;Autobranhia;Heteroconchia;Euherodonta;Imparidentia;Venerida;Veneroidea;Veneridae;Mercenaria;Mercenaria mercenaria

|                 |      |     |                 |                |      |           |
|-----------------|------|-----|-----------------|----------------|------|-----------|
| UdeM00000016427 | 6596 | 401 | UdeM00000016427 | XP_045174219.1 | 81.2 | 229       |
| 43              | 0    | 19  | 247             | 441            | 669  | 1.10E-108 |

401 6596 cellular organisms;Eukaryota;Opisthokonta;Metazoa;Eumetazoa;Bilateria;Protostomia;Spiralia;Lophotrochozoa;Mollusca;Bivalvia;Autobranhia;Heteroconchia;Euherodonta;Imparidentia;Venerida;Veneroidea;Veneridae;Mercenaria;Mercenaria mercenaria

|                 |      |       |                 |                |      |          |
|-----------------|------|-------|-----------------|----------------|------|----------|
| UdeM00000016428 | 6573 | 268.5 | UdeM00000016428 | XP_021344982.1 | 41.7 | 372      |
| 187             | 7    | 15    | 377             | 7              | 357  | 1.40E-68 |

268.5 6573 cellular organisms;Eukaryota;Opisthokonta;Metazoa;Eumetazoa;Bilateria;Protostomia;Spiralia;Lophotrochozoa;Mollusca;Bivalvia;Autobranhia;Pteriomorphia;Pectinida;Pectinoidea;Pectinidae;Mizuhopecten;Mizuhopecten yessoensis

|                 |         |       |                 |                |      |     |
|-----------------|---------|-------|-----------------|----------------|------|-----|
| UdeM00000016429 | 1735272 | 302.8 | UdeM00000016429 | XP_041365597.1 | 61.1 |     |
| 239             | 93      | 0     | 1               | 239            | 47   | 285 |

4.00E-79 302.8 1735272 cellular organisms;Eukaryota;Opisthokonta;Metazoa;Eumetazoa;Bilateria;Protostomia;Spiralia;Lophotrochozoa;Mollusca;Gastropoda;Neomphalina;Neomphaloidea;Peltospiridae;Gigantopelta;Gigantopelta aegis

|                 |      |       |                 |                |      |          |
|-----------------|------|-------|-----------------|----------------|------|----------|
| UdeM00000016431 | 6596 | 122.9 | UdeM00000016431 | XP_045174350.1 | 35.5 | 282      |
| 100             | 7    | 5     | 283             | 453            | 655  | 6.70E-25 |

122.9 6596 cellular organisms;Eukaryota;Opisthokonta;Metazoa;Eumetazoa;Bilateria;Protostomia;Spiralia;Lophotrochozoa;Mollusca;Bivalvia;Autobranhia;Heteroconchia;Euherodonta;Imparidentia;Venerida;Veneroidea;Veneridae;Mercenaria;Mercenaria mercenaria

|                 |      |       |                 |                |      |           |
|-----------------|------|-------|-----------------|----------------|------|-----------|
| UdeM00000016432 | 6596 | 412.9 | UdeM00000016432 | XP_045174350.1 | 67.1 | 307       |
| 91              | 4    | 305   | 602             | 146            | 451  | 6.90E-112 |

412.9 6596 cellular organisms;Eukaryota;Opisthokonta;Metazoa;Eumetazoa;Bilateria;Protostomia;Spiralia;Lophotrochozoa;Mollusca;Bivalvia;Autobranhia;Heteroconchia;Euherodonta;Imparidentia;Venerida;Veneroidea;Veneridae;Mercenaria;Mercenaria mercenaria

|                 |      |       |                 |                |      |           |
|-----------------|------|-------|-----------------|----------------|------|-----------|
| UdeM00000016433 | 6596 | 556.6 | UdeM00000016433 | XP_045176947.1 | 86.9 | 320       |
| 42              | 0    | 1     | 320             | 296            | 615  | 2.10E-155 |

556.6 6596 cellular organisms;Eukaryota;Opisthokonta;Metazoa;Eumetazoa;Bilateria;Protostomia;Spiralia;Lophotrochozoa;Mollusca;Bivalvia;Autobranhia;Heteroconchia;Euherodonta;Imparidentia;Venerida;Veneroidea;Veneridae;Mercenaria;Mercenaria mercenaria

terodonta;Imparidentia;Venerida;Veneroidea;Veneridae;Mercenaria;Mercenaria mercenaria

UdeM00000016434 6579 325.5 UdeM00000016434 XP\_033751436.1 62 297  
98 4 5 286 3 299 6.90E-86 325.5 6579 cellular

organisms;Eukaryota;Opisthokonta;Metazoa;Eumetazoa;Bilateria;Protostomia;Spiralia;Lophotrochozoa;Mollusca;Bivalvia;Autobranchia;Pteriormorphia;Pectinida;Pectinoidea;Pectinidae;Pecten;Pecten maximus

UdeM00000016435 7574 231.9 UdeM00000016435 XP\_013390008.1 85.1 134  
20 0 1 134 1 134 4.90E-58 231.9 7574 cellular

organisms;Eukaryota;Opisthokonta;Metazoa;Eumetazoa;Bilateria;Protostomia;Spiralia;Lophotrochozoa;Brachiopoda;Linguliformea;Lingulata;Lingulida;Linguloidea;Lingulidae;Lingula;Lingula anatina

UdeM00000016437 6596 272.3 UdeM00000016437 XP\_045174796.1 54.3 243  
110 1 3 245 520 761 6.00E-70 272.3 6596 cellular

organisms;Eukaryota;Opisthokonta;Metazoa;Eumetazoa;Bilateria;Protostomia;Spiralia;Lophotrochozoa;Mollusca;Bivalvia;Autobranchia;Heteroconchia;Euheterodonta;Imparidentia;Venerida;Veneroidea;Veneridae;Mercenaria;Mercenaria mercenaria

UdeM00000016436 6596 651.7 UdeM00000016436 XP\_045174796.1 47.5 755  
363 11 2 739 23 761 1.10E-183 651.7 6596 cellular

organisms;Eukaryota;Opisthokonta;Metazoa;Eumetazoa;Bilateria;Protostomia;Spiralia;Lophotrochozoa;Mollusca;Bivalvia;Autobranchia;Heteroconchia;Euheterodonta;Imparidentia;Venerida;Veneroidea;Veneridae;Mercenaria;Mercenaria mercenaria

UdeM00000016438 6596 673.7 UdeM00000016438 XP\_045174308.1 61 567  
175 5 232 763 247 802 2.70E-190 673.7 6596 cellular

organisms;Eukaryota;Opisthokonta;Metazoa;Eumetazoa;Bilateria;Protostomia;Spiralia;Lophotrochozoa;Mollusca;Bivalvia;Autobranchia;Heteroconchia;Euheterodonta;Imparidentia;Venerida;Veneroidea;Veneridae;Mercenaria;Mercenaria mercenaria

UdeM00000016439 6596 673.7 UdeM00000016439 XP\_045174308.1 61 567  
175 5 231 762 247 802 2.70E-190 673.7 6596 cellular

organisms;Eukaryota;Opisthokonta;Metazoa;Eumetazoa;Bilateria;Protostomia;Spiralia;Lophotrochozoa;Mollusca;Bivalvia;Autobranchia;Heteroconchia;Euheterodonta;Imparidentia;Venerida;Veneroidea;Veneridae;Mercenaria;Mercenaria mercenaria

UdeM00000016440 1735272 693.7 UdeM00000016440 XP\_041365640.1 66.7  
499 155 5 1 490 1 497 1.70E-196 693.7 1735272  
cellular

organisms;Eukaryota;Opisthokonta;Metazoa;Eumetazoa;Bilateria;Protostomia;Spiralia;Lophotrochozoa;Mollusca;Gastropoda;Neomphalina;Neomphaloidea;Peltospiridae;Gigantopelta;Gigantopelta aegis

UdeM00000016441 1735272 739.6 UdeM00000016441 XP\_041365639.1 70  
506 145 3 1 501 1 504 2.80E-210 739.6 1735272

cellular  
organisms;Eukaryota;Opisthokonta;Metazoa;Eumetazoa;Bilateria;Protostomia;Spiralia;Lophotrochozoa;Mollusca;Gastropoda;Neomphalina;Neomphaloidea;Peltospiridae;Gigantopelta;Gigantopelta aegis

UdeM00000016442 6596 402.5 UdeM00000016442 XP\_045174994.1 58.5 311  
125 1 18 324 15 325 5.00E-109 402.5 6596 cellular

organisms;Eukaryota;Opisthokonta;Metazoa;Eumetazoa;Bilateria;Protostomia;Spiralia;Lophotrochozoa;Mollusca;Bivalvia;Autobranchia;Heteroconchia;Euheterodonta;Imparidentia;Venerida;Veneroidea;Veneridae;Mercenaria;Mercenaria mercenaria

UdeM00000016445 1735272 225.7 UdeM00000016445 XP\_041365526.1 60.1  
 188 73 1 13 200 220 405 5.20E-56 225.7 1735272  
 cellular  
 organisms;Eukaryota;Opisthokonta;Metazoa;Eumetazoa;Bilateria;Protostomia;  
 Spiralia;Lophotrochozoa;Mollusca;Gastropoda;Neomphalina;Neomphaloidea;Pel  
 tospiridae;Gigantopelta;Gigantopelta aegis  
 UdeM00000016446 6596 223.8 UdeM00000016446 XP\_045176819.1 58.7 206  
 74 7 10 209 268 468 2.10E-55 223.8 6596 cellular  
 organisms;Eukaryota;Opisthokonta;Metazoa;Eumetazoa;Bilateria;Protostomia;  
 Spiralia;Lophotrochozoa;Mollusca;Bivalvia;Autobranchia;Heteroconchia;Euhe  
 terodonta;Imparidentia;Venerida;Veneroidea;Veneridae;Mercenaria;Mercenari  
 a mercenaria  
 UdeM00000016444 1735272 221.5 UdeM00000016444 XP\_041365526.1 60.5  
 185 71 1 28 212 223 405 1.00E-54 221.5 1735272  
 cellular  
 organisms;Eukaryota;Opisthokonta;Metazoa;Eumetazoa;Bilateria;Protostomia;  
 Spiralia;Lophotrochozoa;Mollusca;Gastropoda;Neomphalina;Neomphaloidea;Pel  
 tospiridae;Gigantopelta;Gigantopelta aegis  
 UdeM00000016448 29159 124.4 UdeM00000016448 XP\_034313077.1 58.7 104  
 43 0 8 111 179 282 1.10E-25 124.4 29159 cellular  
 organisms;Eukaryota;Opisthokonta;Metazoa;Eumetazoa;Bilateria;Protostomia;  
 Spiralia;Lophotrochozoa;Mollusca;Bivalvia;Autobranchia;Pteriormorphia;Ostr  
 eida;Ostreoidea;Ostreidae;Crassostrea;Crassostrea gigas  
 UdeM00000016449 1735272 108.6 UdeM00000016449 XP\_041375019.1 58.4  
 89 37 0 1 89 33 121 4.30E-21 108.6 1735272  
 cellular  
 organisms;Eukaryota;Opisthokonta;Metazoa;Eumetazoa;Bilateria;Protostomia;  
 Spiralia;Lophotrochozoa;Mollusca;Gastropoda;Neomphalina;Neomphaloidea;Pel  
 tospiridae;Gigantopelta;Gigantopelta aegis  
 UdeM00000016452 1735272 261.9 UdeM00000016452 XP\_041365389.1 51.6  
 250 119 2 83 331 52 300 1.10E-66 261.9 1735272  
 cellular  
 organisms;Eukaryota;Opisthokonta;Metazoa;Eumetazoa;Bilateria;Protostomia;  
 Spiralia;Lophotrochozoa;Mollusca;Gastropoda;Neomphalina;Neomphaloidea;Pel  
 tospiridae;Gigantopelta;Gigantopelta aegis  
 UdeM00000016453 1735272 267.7 UdeM00000016453 XP\_041365389.1 47.4  
 291 140 5 12 299 12 292 1.80E-68 267.7 1735272  
 cellular  
 organisms;Eukaryota;Opisthokonta;Metazoa;Eumetazoa;Bilateria;Protostomia;  
 Spiralia;Lophotrochozoa;Mollusca;Gastropoda;Neomphalina;Neomphaloidea;Pel  
 tospiridae;Gigantopelta;Gigantopelta aegis  
 UdeM00000016454 1735272 206.8 UdeM00000016454 XP\_041365389.1 46.2  
 225 114 3 1 219 77 300 2.80E-50 206.8 1735272  
 cellular  
 organisms;Eukaryota;Opisthokonta;Metazoa;Eumetazoa;Bilateria;Protostomia;  
 Spiralia;Lophotrochozoa;Mollusca;Gastropoda;Neomphalina;Neomphaloidea;Pel  
 tospiridae;Gigantopelta;Gigantopelta aegis  
 UdeM00000016455 1735272 196.8 UdeM00000016455 XP\_041365389.1 45.1  
 204 111 1 11 214 90 292 2.90E-47 196.8 1735272  
 cellular  
 organisms;Eukaryota;Opisthokonta;Metazoa;Eumetazoa;Bilateria;Protostomia;  
 Spiralia;Lophotrochozoa;Mollusca;Gastropoda;Neomphalina;Neomphaloidea;Pel  
 tospiridae;Gigantopelta;Gigantopelta aegis

UdeM00000016456 6526 268.1 UdeM00000016456 XP\_013090135.1 47.3 275  
 139 2 25 299 29 297 1.40E-68 268.1 6526 cellular  
 organisms;Eukaryota;Opisthokonta;Metazoa;Eumetazoa;Bilateria;Protostomia;  
 Spiralia;Lophotrochozoa;Mollusca;Gastropoda;Heterobranchia;Euthyneura;Pan  
 pulmonata;Hygrophila;Lymnaeidae;Planorbidae;Biophalaria;Biophalaria  
 glabrata  
 UdeM00000016457 29159 119.8 UdeM00000016457 XP\_034330091.1 39.4 348  
 191 6 9 340 359 702 8.40E-24 119.8 29159 cellular  
 organisms;Eukaryota;Opisthokonta;Metazoa;Eumetazoa;Bilateria;Protostomia;  
 Spiralia;Lophotrochozoa;Mollusca;Bivalvia;Autobranchia;Pteriomorpha;Ostr  
 eida;Ostreidae;Crassostrea;Crassostrea gigas  
 UdeM00000016459 29159 226.5 UdeM00000016459 XP\_034315800.1 31.4 430  
 276 8 338 755 47 469 1.10E-55 226.5 29159 cellular  
 organisms;Eukaryota;Opisthokonta;Metazoa;Eumetazoa;Bilateria;Protostomia;  
 Spiralia;Lophotrochozoa;Mollusca;Bivalvia;Autobranchia;Pteriomorpha;Ostr  
 eida;Ostreidae;Crassostrea;Crassostrea gigas  
 UdeM00000016460 29159 399.4 UdeM00000016460 XP\_011430299.2 34.8 791  
 411 18 27 785 239 956 1.50E-107 399.4 29159 cellular  
 organisms;Eukaryota;Opisthokonta;Metazoa;Eumetazoa;Bilateria;Protostomia;  
 Spiralia;Lophotrochozoa;Mollusca;Bivalvia;Autobranchia;Pteriomorpha;Ostr  
 eida;Ostreidae;Crassostrea;Crassostrea gigas  
 UdeM00000044160 45351 344.4 UdeM00000044160 XP\_001617956.2 73.7 232  
 37 1 1 208 1 232 1.10E-91 344.4 45351 cellular  
 organisms;Eukaryota;Opisthokonta;Metazoa;Eumetazoa;Cnidaria;Anthozoa;Hexa  
 corallia;Actiniaria;Edwardsiidae;Nematostella;Nematostella vectensis  
 UdeM00000044161 10029 425.2 UdeM00000044161 XP\_035311397.1 55 380  
 168 2 13 390 48 426 8.70E-116 425.2 10029 cellular  
 organisms;Eukaryota;Opisthokonta;Metazoa;Eumetazoa;Bilateria;Deuterostomi  
 a;Chordata;Craniata;Vertebrata;Gnathostomata;Teleostomi;Euteleostomi;Sarc  
 opterygii;Dipnotetrapodomorpha;Tetrapoda;Amniota;Mammalia;Theria;Eutheria  
 ;Boreoeutheria;Euarchontoglires;Glires;Rodentia;Myomorpha;Muroidea;Cricet  
 idae;Cricetinae;Cricetulus;Cricetulus griseus  
 UdeM00000044162 69820 319.3 UdeM00000044162 XP\_022837014.1 71.5 207  
 59 0 1 207 1 207 3.70E-84 319.3 69820 cellular  
 organisms;Eukaryota;Opisthokonta;Metazoa;Eumetazoa;Bilateria;Protostomia;  
 Ecdysozoa;Panarthropoda;Arthropoda;Mandibulata;Pancrustacea;Hexapoda;Inse  
 cta;Dicondylia;Pterygota;Neoptera;Endopterygota;Amphiesmenoptera;Lepidopt  
 era;Glossata;Neolepidoptera;Heteroneura;Ditrysia;Obtectomera;Noctuoidea;N  
 octuidae;Amphipyrrinae;Spodoptera;Spodoptera litura  
 UdeM00000044236 6596 391.3 UdeM00000044236 XP\_045195031.1 54.3 352  
 150 4 66 415 314 656 1.50E-105 391.3 6596 cellular  
 organisms;Eukaryota;Opisthokonta;Metazoa;Eumetazoa;Bilateria;Protostomia;  
 Spiralia;Lophotrochozoa;Mollusca;Bivalvia;Autobranchia;Heteroconchia;Euhe  
 terodonta;Imparidentia;Venerida;Veneroidea;Veneridae;Mercenaria;Mercenari  
 a mercenaria  
 UdeM00000044237 6596 589.3 UdeM00000044237 XP\_045195040.1 45.4 735  
 334 18 72 763 30 740 6.80E-165 589.3 6596 cellular  
 organisms;Eukaryota;Opisthokonta;Metazoa;Eumetazoa;Bilateria;Protostomia;  
 Spiralia;Lophotrochozoa;Mollusca;Bivalvia;Autobranchia;Heteroconchia;Euhe  
 terodonta;Imparidentia;Venerida;Veneroidea;Veneridae;Mercenaria;Mercenari  
 a mercenaria  
 UdeM00000044238 6596 256.9 UdeM00000044238 XP\_045198757.1 51.4 276  
 105 6 1 258 242 506 2.90E-65 256.9 6596 cellular  
 organisms;Eukaryota;Opisthokonta;Metazoa;Eumetazoa;Bilateria;Protostomia;

Spiralia;Lophotrochozoa;Mollusca;Bivalvia;Autobranchia;Heteroconchia;Euherodonta;Imparidentia;Venerida;Veneroidea;Veneridae;Mercenaria;Mercenaria mercenaria

UdeM00000044239 6596 101.3 UdeM00000044239 XP\_045198757.1 71.9 64  
18 0 47 110 372 435 8.80E-19 101.3 6596 cellular

organisms;Eukaryota;Opisthokonta;Metazoa;Eumetazoa;Bilateria;Protostomia;Spiralia;Lophotrochozoa;Mollusca;Bivalvia;Autobranchia;Heteroconchia;Euherodonta;Imparidentia;Venerida;Veneroidea;Veneridae;Mercenaria;Mercenaria mercenaria

UdeM00000044240 6565 236.5 UdeM00000044240 XP\_022323722.1 52.9 221  
103 1 4 223 500 720 3.30E-59 236.5 6565 cellular

organisms;Eukaryota;Opisthokonta;Metazoa;Eumetazoa;Bilateria;Protostomia;Spiralia;Lophotrochozoa;Mollusca;Bivalvia;Autobranchia;Pteriomorpha;Ostreida;Ostreoidea;Ostreidae;Crassostrea;Crassostrea virginica

UdeM00000044241 6596 352.4 UdeM00000044241 XP\_045210908.1 69.9 246  
68 3 23 263 36 280 4.80E-94 352.4 6596 cellular

organisms;Eukaryota;Opisthokonta;Metazoa;Eumetazoa;Bilateria;Protostomia;Spiralia;Lophotrochozoa;Mollusca;Bivalvia;Autobranchia;Heteroconchia;Euherodonta;Imparidentia;Venerida;Veneroidea;Veneridae;Mercenaria;Mercenaria mercenaria

UdeM00000044242 6596 570.1 UdeM00000044242 XP\_045159635.1 57 477  
198 5 11 482 1 475 2.70E-159 570.1 6596 cellular

organisms;Eukaryota;Opisthokonta;Metazoa;Eumetazoa;Bilateria;Protostomia;Spiralia;Lophotrochozoa;Mollusca;Bivalvia;Autobranchia;Heteroconchia;Euherodonta;Imparidentia;Venerida;Veneroidea;Veneridae;Mercenaria;Mercenaria mercenaria

UdeM00000044243 400727 87 UdeM00000044243 XP\_025113247.1 37.9  
87 53 1 11 97 6 91 1.60E-14 87 400727

cellular

organisms;Eukaryota;Opisthokonta;Metazoa;Eumetazoa;Bilateria;Protostomia;Spiralia;Lophotrochozoa;Mollusca;Gastropoda;Caenogastropoda;Architaenioglossa;Ampullarioidea;Ampullariidae;Pomacea;Pomacea canaliculata

UdeM00000044245 7739 97.4 UdeM00000044245 XP\_035684184.1 39.8 113  
67 1 342 453 46 158 5.20E-17 97.4 7739 cellular

organisms;Eukaryota;Opisthokonta;Metazoa;Eumetazoa;Bilateria;Deuterostomia;Chordata;Cephalochordata;Leptocardii;Amphioxiformes;Branchiostomidae;Branchiostoma;Branchiostoma floridae

UdeM00000044246 3914 201.4 UdeM00000044246 XP\_017411387.1 27.7 647  
415 15 31 646 5 629 3.60E-48 201.4 3914 cellular

organisms;Eukaryota;Viridiplantae;Streptophyta;Streptophytina;Embryophyta;Tracheophyta;Euphyllophyta;Spermatophyta;Magnoliopsida;Mesangiospermae;Eudicotyledons;Gunneridae;Pentapetalae;rosids;fabids;Fabales;Fabaceae;Papilionoideae;50 kb inversion clade;NPAAA clade;indigoferoid/millettioid clade;Phaseoleae;Vigna;Vigna angularis

UdeM00000044249 6596 134 UdeM00000044249 XP\_045194453.1 31.5 241  
154 4 27 261 28 263 2.70E-28 134 6596 cellular

organisms;Eukaryota;Opisthokonta;Metazoa;Eumetazoa;Bilateria;Protostomia;Spiralia;Lophotrochozoa;Mollusca;Bivalvia;Autobranchia;Heteroconchia;Euherodonta;Imparidentia;Venerida;Veneroidea;Veneridae;Mercenaria;Mercenaria mercenaria

UdeM00000031671 6596 270.4 UdeM00000031671 XP\_045161065.1 51.5 400  
168 8 8 385 4 399 3.60E-69 270.4 6596 cellular

organisms;Eukaryota;Opisthokonta;Metazoa;Eumetazoa;Bilateria;Protostomia;Spiralia;Lophotrochozoa;Mollusca;Bivalvia;Autobranchia;Heteroconchia;Euherodonta

terodonta;Imparidentia;Venerida;Veneroidea;Veneridae;Mercenaria;Mercenari  
 a mercenaria  
 UdeM00000031674 50429 159.8 UdeM00000031674 XP\_022808032.1 47.8 157  
 78 2 1 153 556 712 5.70E-36 159.8 50429 cellular  
 organisms;Eukaryota;Opisthokonta;Metazoa;Eumetazoa;Cnidaria;Anthozoa;Hexa  
 corallia;Scleractinia;Astrocoeniina;Pocilloporidae;Stylophora;Stylophora  
 pistillata  
 UdeM00000031677 6596 114.8 UdeM00000031677 XP\_045207454.1 43 149  
 76 2 3 150 2 142 1.10E-22 114.8 6596 cellular  
 organisms;Eukaryota;Opisthokonta;Metazoa;Eumetazoa;Bilateria;Protostomia;  
 Spiralia;Lophotrochozoa;Mollusca;Bivalvia;Autobranchia;Heteroconchia;Euhe  
 terodonta;Imparidentia;Venerida;Veneroidea;Veneridae;Mercenaria;Mercenari  
 a mercenaria  
 UdeM00000031678 6596 179.9 UdeM00000031678 XP\_045182382.1 27.7 458  
 251 8 18 471 8 389 7.80E-42 179.9 6596 cellular  
 organisms;Eukaryota;Opisthokonta;Metazoa;Eumetazoa;Bilateria;Protostomia;  
 Spiralia;Lophotrochozoa;Mollusca;Bivalvia;Autobranchia;Heteroconchia;Euhe  
 terodonta;Imparidentia;Venerida;Veneroidea;Veneridae;Mercenaria;Mercenari  
 a mercenaria  
 UdeM00000031679 6596 78.2 UdeM00000031679 XP\_045182382.1 46.5 71  
 38 0 147 217 319 389 1.50E-11 78.2 6596 cellular  
 organisms;Eukaryota;Opisthokonta;Metazoa;Eumetazoa;Bilateria;Protostomia;  
 Spiralia;Lophotrochozoa;Mollusca;Bivalvia;Autobranchia;Heteroconchia;Euhe  
 terodonta;Imparidentia;Venerida;Veneroidea;Veneridae;Mercenaria;Mercenari  
 a mercenaria  
 UdeM00000031680 6596 180.3 UdeM00000031680 XP\_045182382.1 28.8 462  
 249 8 13 469 3 389 6.00E-42 180.3 6596 cellular  
 organisms;Eukaryota;Opisthokonta;Metazoa;Eumetazoa;Bilateria;Protostomia;  
 Spiralia;Lophotrochozoa;Mollusca;Bivalvia;Autobranchia;Heteroconchia;Euhe  
 terodonta;Imparidentia;Venerida;Veneroidea;Veneridae;Mercenaria;Mercenari  
 a mercenaria  
 UdeM00000031681 6596 224.2 UdeM00000031681 XP\_045182210.1 34.2 447  
 261 7 25 466 6 424 3.50E-55 224.2 6596 cellular  
 organisms;Eukaryota;Opisthokonta;Metazoa;Eumetazoa;Bilateria;Protostomia;  
 Spiralia;Lophotrochozoa;Mollusca;Bivalvia;Autobranchia;Heteroconchia;Euhe  
 terodonta;Imparidentia;Venerida;Veneroidea;Veneridae;Mercenaria;Mercenari  
 a mercenaria  
 UdeM00000031682 1735272 367.5 UdeM00000031682 XP\_041353727.1 41.1  
 474 271 4 1 468 1 472 2.70E-98 367.5 1735272  
 cellular  
 organisms;Eukaryota;Opisthokonta;Metazoa;Eumetazoa;Bilateria;Protostomia;  
 Spiralia;Lophotrochozoa;Mollusca;Gastropoda;Neomphalina;Neomphaloidea;Pel  
 tospiridae;Gigantopelta;Gigantopelta aegis  
 UdeM00000031683 6596 346.7 UdeM00000031683 XP\_045187202.1 49.9 357  
 174 2 1 354 1 355 3.70E-92 346.7 6596 cellular  
 organisms;Eukaryota;Opisthokonta;Metazoa;Eumetazoa;Bilateria;Protostomia;  
 Spiralia;Lophotrochozoa;Mollusca;Bivalvia;Autobranchia;Heteroconchia;Euhe  
 terodonta;Imparidentia;Venerida;Veneroidea;Veneridae;Mercenaria;Mercenari  
 a mercenaria  
 UdeM00000031684 29159 597.8 UdeM00000031684 XP\_011451589.2 54 528  
 242 1 1 527 14 541 1.40E-167 597.8 29159 cellular  
 organisms;Eukaryota;Opisthokonta;Metazoa;Eumetazoa;Bilateria;Protostomia;  
 Spiralia;Lophotrochozoa;Mollusca;Bivalvia;Autobranchia;Pteriomorphia;Ostr  
 eida;Ostreoidea;Ostreidae;Crassostrea;Crassostrea gigas

UdeM00000031685 6596 144.8 UdeM00000031685 XP\_045187207.1 32.7 263  
 172 4 10 269 7 267 1.60E-31 144.8 6596 cellular  
 organisms;Eukaryota;Opisthokonta;Metazoa;Eumetazoa;Bilateria;Protostomia;  
 Spiralia;Lophotrochozoa;Mollusca;Bivalvia;Autobranchia;Heteroconchia;Euhe  
 terodonta;Imparidentia;Venerida;Veneroidea;Veneridae;Mercenaria;Mercenari  
 a mercenaria  
 UdeM00000031686 6596 1055.8 UdeM00000031686 XP\_045187207.1 59  
 951 134 5 56 997 268 971 3.40E-305 1055.8 6596  
 cellular  
 organisms;Eukaryota;Opisthokonta;Metazoa;Eumetazoa;Bilateria;Protostomia;  
 Spiralia;Lophotrochozoa;Mollusca;Bivalvia;Autobranchia;Heteroconchia;Euhe  
 terodonta;Imparidentia;Venerida;Veneroidea;Veneridae;Mercenaria;Mercenari  
 a mercenaria  
 UdeM00000031687 6596 609.8 UdeM00000031687 XP\_045187213.1 50.2 687  
 319 9 1 669 75 756 4.30E-171 609.8 6596 cellular  
 organisms;Eukaryota;Opisthokonta;Metazoa;Eumetazoa;Bilateria;Protostomia;  
 Spiralia;Lophotrochozoa;Mollusca;Bivalvia;Autobranchia;Heteroconchia;Euhe  
 terodonta;Imparidentia;Venerida;Veneroidea;Veneridae;Mercenaria;Mercenari  
 a mercenaria  
 UdeM00000031688 6596 211.5 UdeM00000031688 XP\_045187214.1 71.9 146  
 41 0 9 154 3 148 7.80E-52 211.5 6596 cellular  
 organisms;Eukaryota;Opisthokonta;Metazoa;Eumetazoa;Bilateria;Protostomia;  
 Spiralia;Lophotrochozoa;Mollusca;Bivalvia;Autobranchia;Heteroconchia;Euhe  
 terodonta;Imparidentia;Venerida;Veneroidea;Veneridae;Mercenaria;Mercenari  
 a mercenaria  
 UdeM00000031689 6596 247.3 UdeM00000031689 XP\_045187216.1 81.8 148  
 27 0 2 149 24 171 1.20E-62 247.3 6596 cellular  
 organisms;Eukaryota;Opisthokonta;Metazoa;Eumetazoa;Bilateria;Protostomia;  
 Spiralia;Lophotrochozoa;Mollusca;Bivalvia;Autobranchia;Heteroconchia;Euhe  
 terodonta;Imparidentia;Venerida;Veneroidea;Veneridae;Mercenaria;Mercenari  
 a mercenaria  
 UdeM00000031690 591936 185.3 UdeM00000031690 XP\_023082638.1 64.4  
 146 51 1 41 186 5 149 8.40E-44 185.3 591936  
 cellular  
 organisms;Eukaryota;Opisthokonta;Metazoa;Eumetazoa;Bilateria;Deuterostomi  
 a;Chordata;Craniata;Vertebrata;Gnathostomata;Teleostomi;Euteleostomi;Sarc  
 opterygii;Dipnotetrapodomorpha;Tetrapoda;Amniota;Mammalia;Theria;Eutheria  
 ;Boreoeutheria;Euarchontoglires;Primates;Haplorrhini;Simiiformes;Catarri  
 ni;Cercopithecoidea;Cercopithecidae;Colobinae;Piliocolobus;Piliocolobus  
 tephrosceles  
 UdeM00000031691 6596 1083.9 UdeM00000031691 XP\_045169516.1 77.1  
 850 115 16 2 813 5 812 0.00E+00 1083.9 6596  
 cellular  
 organisms;Eukaryota;Opisthokonta;Metazoa;Eumetazoa;Bilateria;Protostomia;  
 Spiralia;Lophotrochozoa;Mollusca;Bivalvia;Autobranchia;Heteroconchia;Euhe  
 terodonta;Imparidentia;Venerida;Veneroidea;Veneridae;Mercenaria;Mercenari  
 a mercenaria  
 UdeM00000031692 6596 1091.3 UdeM00000031692 XP\_045169529.1 77.9  
 840 116 15 2 813 5 802 0.00E+00 1091.3 6596  
 cellular  
 organisms;Eukaryota;Opisthokonta;Metazoa;Eumetazoa;Bilateria;Protostomia;  
 Spiralia;Lophotrochozoa;Mollusca;Bivalvia;Autobranchia;Heteroconchia;Euhe  
 terodonta;Imparidentia;Venerida;Veneroidea;Veneridae;Mercenaria;Mercenari  
 a mercenaria

UdeM00000031693 6565 271.2 UdeM00000031693 XP\_022303100.1 24 1028  
 647 33 56 997 3 982 5.40E-69 271.2 6565 cellular  
 organisms;Eukaryota;Opisthokonta;Metazoa;Eumetazoa;Bilateria;Protostomia;  
 Spiralia;Lophotrochozoa;Mollusca;Bivalvia;Autobranhia;Pteriomorphia;Ostr  
 eida;Ostreoidea;Ostreidae;Crassostrea;Crassostrea virginica  
 UdeM00000031694 6596 1208.7 UdeM00000031694 XP\_045164449.1 39.4  
 1839 640 16 88 1895 5 1399 0.00E+00 1208.7 6596  
 cellular  
 organisms;Eukaryota;Opisthokonta;Metazoa;Eumetazoa;Bilateria;Protostomia;  
 Spiralia;Lophotrochozoa;Mollusca;Bivalvia;Autobranhia;Heteroconchia;Euhe  
 terodonta;Imparidentia;Venerida;Veneroidea;Veneridae;Mercenaria;Mercenari  
 a mercenaria  
 UdeM00000031696 6596 120.6 UdeM00000031696 XP\_045171507.1 67.4 86  
 25 2 165 248 194 278 3.00E-24 120.6 6596 cellular  
 organisms;Eukaryota;Opisthokonta;Metazoa;Eumetazoa;Bilateria;Protostomia;  
 Spiralia;Lophotrochozoa;Mollusca;Bivalvia;Autobranhia;Heteroconchia;Euhe  
 terodonta;Imparidentia;Venerida;Veneroidea;Veneridae;Mercenaria;Mercenari  
 a mercenaria  
 UdeM00000031697 6596 631.3 UdeM00000031697 XP\_045171421.1 70.7 433  
 127 0 114 546 608 1040 1.10E-177 631.3 6596 cellular  
 organisms;Eukaryota;Opisthokonta;Metazoa;Eumetazoa;Bilateria;Protostomia;  
 Spiralia;Lophotrochozoa;Mollusca;Bivalvia;Autobranhia;Heteroconchia;Euhe  
 terodonta;Imparidentia;Venerida;Veneroidea;Veneridae;Mercenaria;Mercenari  
 a mercenaria  
 UdeM00000031698 6573 397.5 UdeM00000031698 XP\_021365762.1 34.3 886  
 473 25 11 862 1 811 4.70E-107 397.5 6573 cellular  
 organisms;Eukaryota;Opisthokonta;Metazoa;Eumetazoa;Bilateria;Protostomia;  
 Spiralia;Lophotrochozoa;Mollusca;Bivalvia;Autobranhia;Pteriomorphia;Pect  
 inida;Pectinoidea;Pectinidae;Mizuhopecten;Mizuhopecten yessoensis  
 UdeM00000031699 6573 345.5 UdeM00000031699 XP\_021367596.1 83.2 197  
 33 0 1 197 1 197 4.40E-92 345.5 6573 cellular  
 organisms;Eukaryota;Opisthokonta;Metazoa;Eumetazoa;Bilateria;Protostomia;  
 Spiralia;Lophotrochozoa;Mollusca;Bivalvia;Autobranhia;Pteriomorphia;Pect  
 inida;Pectinoidea;Pectinidae;Mizuhopecten;Mizuhopecten yessoensis  
 UdeM00000031701 6573 343.2 UdeM00000031701 XP\_021367596.1 82.7 196  
 34 0 7 202 2 197 2.30E-91 343.2 6573 cellular  
 organisms;Eukaryota;Opisthokonta;Metazoa;Eumetazoa;Bilateria;Protostomia;  
 Spiralia;Lophotrochozoa;Mollusca;Bivalvia;Autobranhia;Pteriomorphia;Pect  
 inida;Pectinoidea;Pectinidae;Mizuhopecten;Mizuhopecten yessoensis  
 UdeM00000031700 45264 87.4 UdeM00000031700 XP\_044164507.1 36.6 145  
 91 1 50 194 25 168 2.10E-14 87.4 45264 cellular  
 organisms;Eukaryota;Opisthokonta;Metazoa;Eumetazoa;Cnidaria;Anthozoa;Hexa  
 corallia;Scleractinia;Astrocoeniina;Acroporidae;Acropora;Acropora  
 millepora  
 UdeM00000031702 554065 200.3 UdeM00000031702 XP\_005846307.1 51.8  
 195 90 2 1 191 10 204 2.20E-48 200.3 554065  
 cellular organisms;Eukaryota;Viridiplantae;Chlorophyta;core  
 chlorophytes;Trebouxiophyceae;Chlorellales;Chlorellaceae;Chlorella  
 clade;Chlorella;Chlorella variabilis  
 UdeM00000031703 554065 200.3 UdeM00000031703 XP\_005846307.1 51.8  
 195 90 2 160 350 10 204 4.10E-48 200.3 554065  
 cellular organisms;Eukaryota;Viridiplantae;Chlorophyta;core  
 chlorophytes;Trebouxiophyceae;Chlorellales;Chlorellaceae;Chlorella  
 clade;Chlorella;Chlorella variabilis



UdeM00000031704 31138 268.1 UdeM00000031704 XP\_034643024.1 48.5 237  
 116 2 55 291 25 255 1.30E-68 268.1 31138 cellular  
 organisms;Eukaryota;Opisthokonta;Metazoa;Eumetazoa;Bilateria;Deuterostomi  
 a;Chordata;Craniata;Vertebrata;Gnathostomata;Teleostomi;Euteleostomi;Sarc  
 opterygii;Dipnotetrapodomorpha;Tetrapoda;Amniota;Sauropsida;Sauria;Archel  
 osauria;Testudinata;Testudines;Cryptodira;Durocryptodira;Testudinoidea;Em  
 ydidae;Trachemys;Trachemys scripta;Trachemys scripta elegans  
 UdeM00000031705 31138 268.1 UdeM00000031705 XP\_034643024.1 48.5 237  
 116 2 39 275 25 255 1.30E-68 268.1 31138 cellular  
 organisms;Eukaryota;Opisthokonta;Metazoa;Eumetazoa;Bilateria;Deuterostomi  
 a;Chordata;Craniata;Vertebrata;Gnathostomata;Teleostomi;Euteleostomi;Sarc  
 opterygii;Dipnotetrapodomorpha;Tetrapoda;Amniota;Sauropsida;Sauria;Archel  
 osauria;Testudinata;Testudines;Cryptodira;Durocryptodira;Testudinoidea;Em  
 ydidae;Trachemys;Trachemys scripta;Trachemys scripta elegans  
 UdeM00000031706 574566 254.2 UdeM00000031706 XP\_005645719.1 62.1  
 198 73 2 17 213 6 202 1.50E-64 254.2 574566  
 cellular organisms;Eukaryota;Viridiplantae;Chlorophyta;core  
 chlorophytes;Trebouxiophyceae;Trebouxiophyceae incertae  
 sedis;Elliptochloris clade;Coccomyxa;Coccomyxa subellipsoidea;Coccomyxa  
 subellipsoidea C-169  
 UdeM00000031707 6596 587 UdeM00000031707 XP\_045212469.1 42.2 758  
 417 5 88 844 93 830 3.80E-164 587 6596 cellular  
 organisms;Eukaryota;Opisthokonta;Metazoa;Eumetazoa;Bilateria;Protostomia;  
 Spiralia;Lophotrochozoa;Mollusca;Bivalvia;Autobranchia;Heteroconchia;Euhe  
 terodonta;Imparidentia;Venerida;Veneroidea;Veneridae;Mercenaria;Mercenari  
 a mercenaria  
 UdeM00000031708 6596 174.1 UdeM00000031708 XP\_045187319.1 48.9 611  
 252 12 6 580 47 633 5.20E-40 174.1 6596 cellular  
 organisms;Eukaryota;Opisthokonta;Metazoa;Eumetazoa;Bilateria;Protostomia;  
 Spiralia;Lophotrochozoa;Mollusca;Bivalvia;Autobranchia;Heteroconchia;Euhe  
 terodonta;Imparidentia;Venerida;Veneroidea;Veneridae;Mercenaria;Mercenari  
 a mercenaria  
 UdeM00000031709 1735272 596.7 UdeM00000031709 XP\_041351315.1 27.2  
 2364 1340 68 6 2297 1 2055 1.30E-166 596.7 1735272  
 cellular  
 organisms;Eukaryota;Opisthokonta;Metazoa;Eumetazoa;Bilateria;Protostomia;  
 Spiralia;Lophotrochozoa;Mollusca;Gastropoda;Neomphalina;Neomphaloidea;Pel  
 tospiridae;Gigantopelta;Gigantopelta aegis  
 UdeM00000031710 29159 332.4 UdeM00000031710 XP\_011434570.1 52.2 343  
 156 3 1 337 1 341 6.60E-88 332.4 29159 cellular  
 organisms;Eukaryota;Opisthokonta;Metazoa;Eumetazoa;Bilateria;Protostomia;  
 Spiralia;Lophotrochozoa;Mollusca;Bivalvia;Autobranchia;Pteriomorphia;Ostr  
 eida;Ostreoidea;Ostreidae;Crassostrea;Crassostrea gigas  
 UdeM00000031711 37653 300.8 UdeM00000031711 XP\_014785294.1 37.9 509  
 279 16 17 509 88 575 3.30E-78 300.8 37653 cellular  
 organisms;Eukaryota;Opisthokonta;Metazoa;Eumetazoa;Bilateria;Protostomia;  
 Spiralia;Lophotrochozoa;Mollusca;Cephalopoda;Coleoidea;Octopodiformes;Oct  
 opoda;Incirrata;Octopodidae;Octopus;Octopus bimaculoides  
 UdeM00000031712 6596 1968.4 UdeM00000031712 XP\_045172808.1 91.8  
 1068 88 0 6 1073 7 1074 0.00E+00 1968.4 6596  
 cellular  
 organisms;Eukaryota;Opisthokonta;Metazoa;Eumetazoa;Bilateria;Protostomia;  
 Spiralia;Lophotrochozoa;Mollusca;Bivalvia;Autobranchia;Heteroconchia;Euhe

terodonta;Imparidentia;Venerida;Veneroidea;Veneridae;Mercenaria;Mercenari  
a mercenaria

UdeM00000031713 6596 1968 UdeM00000031713 XP\_045172808.1 91.8 1068  
88 0 1 1068 7 1074 0.00E+00 1968 6596 cellular

organisms;Eukaryota;Opisthokonta;Metazoa;Eumetazoa;Bilateria;Protostomia;  
Spiralia;Lophotrochozoa;Mollusca;Bivalvia;Autobranhia;Heteroconchia;Euhe  
terodonta;Imparidentia;Venerida;Veneroidea;Veneridae;Mercenaria;Mercenari  
a mercenaria

UdeM00000031715 6596 789.3 UdeM00000031715 XP\_045172890.1 66.4 608  
171 5 1 578 119 723 4.80E-225 789.3 6596 cellular

organisms;Eukaryota;Opisthokonta;Metazoa;Eumetazoa;Bilateria;Protostomia;  
Spiralia;Lophotrochozoa;Mollusca;Bivalvia;Autobranhia;Heteroconchia;Euhe  
terodonta;Imparidentia;Venerida;Veneroidea;Veneridae;Mercenaria;Mercenari  
a mercenaria

UdeM00000031717 1735272 147.1 UdeM00000031717 XP\_041351877.1 54.7  
128 57 1 17 144 1 127 1.70E-32 147.1 1735272  
cellular

organisms;Eukaryota;Opisthokonta;Metazoa;Eumetazoa;Bilateria;Protostomia;  
Spiralia;Lophotrochozoa;Mollusca;Gastropoda;Neomphalina;Neomphaloidea;Pel  
tospiridae;Gigantopelta;Gigantopelta aegis

UdeM00000031718 1735272 738.4 UdeM00000031718 XP\_041353564.1 56.6  
685 276 5 20 697 52 722 8.30E-210 738.4 1735272  
cellular

organisms;Eukaryota;Opisthokonta;Metazoa;Eumetazoa;Bilateria;Protostomia;  
Spiralia;Lophotrochozoa;Mollusca;Gastropoda;Neomphalina;Neomphaloidea;Pel  
tospiridae;Gigantopelta;Gigantopelta aegis

UdeM00000031720 6573 674.5 UdeM00000031720 XP\_021378743.1 54.2 664  
277 9 6 662 7 650 1.40E-190 674.5 6573 cellular

organisms;Eukaryota;Opisthokonta;Metazoa;Eumetazoa;Bilateria;Protostomia;  
Spiralia;Lophotrochozoa;Mollusca;Bivalvia;Autobranhia;Pteriomorphia;Pect  
inida;Pectinoidea;Pectinidae;Mizuhopecten;Mizuhopecten yessoensis

UdeM00000031721 1735272 432.6 UdeM00000031721 XP\_041351960.1 47.5  
467 233 6 44 500 74 538 7.10E-118 432.6 1735272  
cellular

organisms;Eukaryota;Opisthokonta;Metazoa;Eumetazoa;Bilateria;Protostomia;  
Spiralia;Lophotrochozoa;Mollusca;Gastropoda;Neomphalina;Neomphaloidea;Pel  
tospiridae;Gigantopelta;Gigantopelta aegis

UdeM00000031722 1735272 429.1 UdeM00000031722 XP\_041351960.1 48.4  
438 220 3 8 440 102 538 6.90E-117 429.1 1735272  
cellular

organisms;Eukaryota;Opisthokonta;Metazoa;Eumetazoa;Bilateria;Protostomia;  
Spiralia;Lophotrochozoa;Mollusca;Gastropoda;Neomphalina;Neomphaloidea;Pel  
tospiridae;Gigantopelta;Gigantopelta aegis

UdeM00000031723 6596 168.3 UdeM00000031723 XP\_045161029.1 52.3 153  
73 0 41 193 45 197 1.00E-38 168.3 6596 cellular

organisms;Eukaryota;Opisthokonta;Metazoa;Eumetazoa;Bilateria;Protostomia;  
Spiralia;Lophotrochozoa;Mollusca;Bivalvia;Autobranhia;Heteroconchia;Euhe  
terodonta;Imparidentia;Venerida;Veneroidea;Veneridae;Mercenaria;Mercenari  
a mercenaria

UdeM00000031724 6573 353.6 UdeM00000031724 XP\_021345424.1 36.1 987  
482 33 133 1049 102 1009 8.60E-94 353.6 6573 cellular

organisms;Eukaryota;Opisthokonta;Metazoa;Eumetazoa;Bilateria;Protostomia;  
Spiralia;Lophotrochozoa;Mollusca;Bivalvia;Autobranhia;Pteriomorphia;Pect  
inida;Pectinoidea;Pectinidae;Mizuhopecten;Mizuhopecten yessoensis

UdeM00000031725 6573 382.9 UdeM00000031725 XP\_021345425.1 63.6 294  
 106 1 1 294 1 293 3.70E-103 382.9 6573 cellular  
 organisms;Eukaryota;Opisthokonta;Metazoa;Eumetazoa;Bilateria;Protostomia;  
 Spiralia;Lophotrochozoa;Mollusca;Bivalvia;Autobranhia;Pteriomorphia;Pect  
 inida;Pectinoidea;Pectinidae;Mizuhopecten;Mizuhopecten yessoensis  
 UdeM00000031726 6596 333.6 UdeM00000031726 XP\_045175096.1 54.1 303  
 133 4 11 312 12 309 2.80E-88 333.6 6596 cellular  
 organisms;Eukaryota;Opisthokonta;Metazoa;Eumetazoa;Bilateria;Protostomia;  
 Spiralia;Lophotrochozoa;Mollusca;Bivalvia;Autobranhia;Heteroconchia;Euhe  
 terodonta;Imparidentia;Venerida;Veneroidea;Veneridae;Mercenaria;Mercenari  
 a mercenaria  
 UdeM00000031727 6573 261.2 UdeM00000031727 XP\_021351784.1 46.9 271  
 139 3 13 278 31 301 1.60E-66 261.2 6573 cellular  
 organisms;Eukaryota;Opisthokonta;Metazoa;Eumetazoa;Bilateria;Protostomia;  
 Spiralia;Lophotrochozoa;Mollusca;Bivalvia;Autobranhia;Pteriomorphia;Pect  
 inida;Pectinoidea;Pectinidae;Mizuhopecten;Mizuhopecten yessoensis  
 UdeM00000031728 6596 107.1 UdeM00000031728 XP\_045187808.1 27.8 496  
 289 16 9 453 1 478 7.70E-20 107.1 6596 cellular  
 organisms;Eukaryota;Opisthokonta;Metazoa;Eumetazoa;Bilateria;Protostomia;  
 Spiralia;Lophotrochozoa;Mollusca;Bivalvia;Autobranhia;Heteroconchia;Euhe  
 terodonta;Imparidentia;Venerida;Veneroidea;Veneridae;Mercenaria;Mercenari  
 a mercenaria  
 UdeM00000031731 6573 156.8 UdeM00000031731 XP\_021378423.1 44 209  
 114 2 26 232 11 218 4.80E-35 156.8 6573 cellular  
 organisms;Eukaryota;Opisthokonta;Metazoa;Eumetazoa;Bilateria;Protostomia;  
 Spiralia;Lophotrochozoa;Mollusca;Bivalvia;Autobranhia;Pteriomorphia;Pect  
 inida;Pectinoidea;Pectinidae;Mizuhopecten;Mizuhopecten yessoensis  
 UdeM00000031732 6579 503.8 UdeM00000031732 XP\_033733951.1 59.9 434  
 157 3 1483 1915 1537 1954 9.40E-139 503.8 6579 cellular  
 organisms;Eukaryota;Opisthokonta;Metazoa;Eumetazoa;Bilateria;Protostomia;  
 Spiralia;Lophotrochozoa;Mollusca;Bivalvia;Autobranhia;Pteriomorphia;Pect  
 inida;Pectinoidea;Pectinidae;Pecten;Pecten maximus  
 UdeM00000031733 29159 162.9 UdeM00000031733 XP\_019927344.1 80 100  
 16 1 10 105 181 280 2.40E-37 162.9 29159 cellular  
 organisms;Eukaryota;Opisthokonta;Metazoa;Eumetazoa;Bilateria;Protostomia;  
 Spiralia;Lophotrochozoa;Mollusca;Bivalvia;Autobranhia;Pteriomorphia;Ostr  
 eida;Ostreoidea;Ostreidae;Crassostrea;Crassostrea gigas  
 UdeM00000031734 6573 226.1 UdeM00000031734 XP\_021353739.1 57.6 229  
 70 6 15 231 65 278 5.00E-56 226.1 6573 cellular  
 organisms;Eukaryota;Opisthokonta;Metazoa;Eumetazoa;Bilateria;Protostomia;  
 Spiralia;Lophotrochozoa;Mollusca;Bivalvia;Autobranhia;Pteriomorphia;Pect  
 inida;Pectinoidea;Pectinidae;Mizuhopecten;Mizuhopecten yessoensis  
 UdeM00000031735 29159 266.2 UdeM00000031735 XP\_011448864.2 69.2 172  
 53 0 253 424 139 310 1.30E-67 266.2 29159 cellular  
 organisms;Eukaryota;Opisthokonta;Metazoa;Eumetazoa;Bilateria;Protostomia;  
 Spiralia;Lophotrochozoa;Mollusca;Bivalvia;Autobranhia;Pteriomorphia;Ostr  
 eida;Ostreoidea;Ostreidae;Crassostrea;Crassostrea gigas  
 UdeM00000031735 29159 86.7 UdeM00000031735 XP\_011448864.2 60.3 58  
 23 0 679 736 309 366 1.40E-13 86.7 29159 cellular  
 organisms;Eukaryota;Opisthokonta;Metazoa;Eumetazoa;Bilateria;Protostomia;  
 Spiralia;Lophotrochozoa;Mollusca;Bivalvia;Autobranhia;Pteriomorphia;Ostr  
 eida;Ostreoidea;Ostreidae;Crassostrea;Crassostrea gigas  
 UdeM00000031736 218467 112.8 UdeM00000031736 XP\_023242170.1 48.5  
 130 62 3 111 237 63 190 6.60E-22 112.8 218467

cellular  
organisms;Eukaryota;Opisthokonta;Metazoa;Eumetazoa;Bilateria;Protostomia;  
Ecdysozoa;Panarthropoda;Arthropoda;Chelicerata;Arachnida;Scorpiones;Buthi  
da;Buthoidea;Buthidae;Centruroides;Centruroides sculpturatus  
UdeM00000031737 6596 654.1 UdeM00000031737 XP\_045212210.1 55.1 555  
238 5 7 553 9 560 2.30E-184 654.1 6596 cellular  
organisms;Eukaryota;Opisthokonta;Metazoa;Eumetazoa;Bilateria;Protostomia;  
Spiralia;Lophotrochozoa;Mollusca;Bivalvia;Autobranchia;Heteroconchia;Euhe  
terodonta;Imparidentia;Venerida;Veneroidea;Veneridae;Mercenaria;Mercenari  
a mercenaria  
UdeM00000031738 6596 1968.7 UdeM00000031738 XP\_045156787.1 41.8  
2462 1252 25 16 2327 927 3356 0.00E+00 1968.7 6596  
cellular  
organisms;Eukaryota;Opisthokonta;Metazoa;Eumetazoa;Bilateria;Protostomia;  
Spiralia;Lophotrochozoa;Mollusca;Bivalvia;Autobranchia;Heteroconchia;Euhe  
terodonta;Imparidentia;Venerida;Veneroidea;Veneridae;Mercenaria;Mercenari  
a mercenaria  
UdeM00000031739 29159 536.6 UdeM00000031739 XP\_034301655.1 37.9 762  
448 11 474 1222 359 1108 8.40E-149 536.6 29159 cellular  
organisms;Eukaryota;Opisthokonta;Metazoa;Eumetazoa;Bilateria;Protostomia;  
Spiralia;Lophotrochozoa;Mollusca;Bivalvia;Autobranchia;Pteriormorphia;Ostr  
eida;Ostreoidea;Ostreidae;Crassostrea;Crassostrea gigas  
UdeM00000031740 6706 137.5 UdeM00000031740 XP\_042235765.1 42.7 157  
86 1 1 153 1 157 1.40E-29 137.5 6706 cellular  
organisms;Eukaryota;Opisthokonta;Metazoa;Eumetazoa;Bilateria;Protostomia;  
Ecdysozoa;Panarthropoda;Arthropoda;Mandibulata;Pancrustacea;Crustacea;Mul  
ticrustacea;Malacostraca;Eumalacostraca;Eucarida;Decapoda;Pleocyemata;Ast  
acidea;Nephropoidea;Nephropidae;Homarus;Homarus americanus  
UdeM00000031741 72036 121.3 UdeM00000031741 XP\_040576246.1 42 174  
95 3 58 229 26 195 1.60E-24 121.3 72036 cellular  
organisms;Eukaryota;Opisthokonta;Metazoa;Eumetazoa;Bilateria;Protostomia;  
Ecdysozoa;Panarthropoda;Arthropoda;Mandibulata;Pancrustacea;Crustacea;Mul  
ticrustacea;Hexanauplia;Copepoda;Neocopepoda;Podoplea;Siphonostomatoida;C  
aligidae;Lepeophtheirus;Lepeophtheirus salmonis  
UdeM00000031742 6573 312 UdeM00000031742 XP\_021353372.1 41.4 396  
225 5 9 404 27 415 1.10E-81 312 6573 cellular  
organisms;Eukaryota;Opisthokonta;Metazoa;Eumetazoa;Bilateria;Protostomia;  
Spiralia;Lophotrochozoa;Mollusca;Bivalvia;Autobranchia;Pteriormorphia;Pect  
inida;Pectinoidea;Pectinidae;Mizuhopecten;Mizuhopecten yessoensis  
UdeM00000031744 6573 435.6 UdeM00000031744 XP\_021353372.1 50.9 430  
209 2 42 469 439 868 7.80E-119 435.6 6573 cellular  
organisms;Eukaryota;Opisthokonta;Metazoa;Eumetazoa;Bilateria;Protostomia;  
Spiralia;Lophotrochozoa;Mollusca;Bivalvia;Autobranchia;Pteriormorphia;Pect  
inida;Pectinoidea;Pectinidae;Mizuhopecten;Mizuhopecten yessoensis  
UdeM00000031745 6596 4192.1 UdeM00000031745 XP\_045156859.1 35.2  
6059 3691 78 6 6001 860 6748 0.00E+00 4192.1 6596  
cellular  
organisms;Eukaryota;Opisthokonta;Metazoa;Eumetazoa;Bilateria;Protostomia;  
Spiralia;Lophotrochozoa;Mollusca;Bivalvia;Autobranchia;Heteroconchia;Euhe  
terodonta;Imparidentia;Venerida;Veneroidea;Veneridae;Mercenaria;Mercenari  
a mercenaria  
UdeM00000031746 225164 3654 UdeM00000031746 XP\_009066786.1 40.2  
4910 2669 65 1 4750 2456 7260 0.00E+00 3654 225164  
cellular

organisms;Eukaryota;Opisthokonta;Metazoa;Eumetazoa;Bilateria;Protostomia;Spiralia;Lophotrochozoa;Mollusca;Gastropoda;Patellogastropoda;Lottioidea;Lottiidae;Lottia;Lottia gigantea

UdeM00000031747 6596 222.2 UdeM00000031747 XP\_045187440.1 44.4 293  
110 8 7 264 6 280 7.80E-55 222.2 6596 cellular

organisms;Eukaryota;Opisthokonta;Metazoa;Eumetazoa;Bilateria;Protostomia;Spiralia;Lophotrochozoa;Mollusca;Bivalvia;Autobranchia;Heteroconchia;Euherodonta;Imparidentia;Venerida;Veneroidea;Veneridae;Mercenaria;Mercenaria mercenaria

UdeM00000031749 29159 472.6 UdeM00000031749 XP\_034301655.1 34 851  
492 22 13 824 11 830 1.00E-129 472.6 29159 cellular

organisms;Eukaryota;Opisthokonta;Metazoa;Eumetazoa;Bilateria;Protostomia;Spiralia;Lophotrochozoa;Mollusca;Bivalvia;Autobranchia;Pteriormorphia;Ostreida;Ostreoidea;Ostreidae;Crassostrea;Crassostrea gigas

UdeM00000031750 6596 212.2 UdeM00000031750 XP\_045206316.1 38.6 345  
156 5 2 308 197 523 9.20E-52 212.2 6596 cellular

organisms;Eukaryota;Opisthokonta;Metazoa;Eumetazoa;Bilateria;Protostomia;Spiralia;Lophotrochozoa;Mollusca;Bivalvia;Autobranchia;Heteroconchia;Euherodonta;Imparidentia;Venerida;Veneroidea;Veneridae;Mercenaria;Mercenaria mercenaria

UdeM00000031751 6596 63.2 UdeM00000031751 XP\_045202346.1 37 100  
59 2 6 104 16 112 2.50E-07 63.2 6596 cellular

organisms;Eukaryota;Opisthokonta;Metazoa;Eumetazoa;Bilateria;Protostomia;Spiralia;Lophotrochozoa;Mollusca;Bivalvia;Autobranchia;Heteroconchia;Euherodonta;Imparidentia;Venerida;Veneroidea;Veneridae;Mercenaria;Mercenaria mercenaria

UdeM00000031753 6596 983.4 UdeM00000031753 XP\_045156872.1 26.6 2738  
979 31 536 2274 3 2708 5.00E-283 983.4 6596 cellular

organisms;Eukaryota;Opisthokonta;Metazoa;Eumetazoa;Bilateria;Protostomia;Spiralia;Lophotrochozoa;Mollusca;Bivalvia;Autobranchia;Heteroconchia;Euherodonta;Imparidentia;Venerida;Veneroidea;Veneridae;Mercenaria;Mercenaria mercenaria

UdeM00000031754 6596 4357.7 UdeM00000031754 XP\_045156859.1 35.3  
6379 3847 81 3 6237 28 6272 0.00E+00 4357.7 6596  
cellular

organisms;Eukaryota;Opisthokonta;Metazoa;Eumetazoa;Bilateria;Protostomia;Spiralia;Lophotrochozoa;Mollusca;Bivalvia;Autobranchia;Heteroconchia;Euherodonta;Imparidentia;Venerida;Veneroidea;Veneridae;Mercenaria;Mercenaria mercenaria

UdeM00000031755 6565 129 UdeM00000031755 XP\_022302274.1 49.2 124  
62 1 154 277 159 281 9.60E-27 129 6565 cellular

organisms;Eukaryota;Opisthokonta;Metazoa;Eumetazoa;Bilateria;Protostomia;Spiralia;Lophotrochozoa;Mollusca;Bivalvia;Autobranchia;Pteriormorphia;Ostreida;Ostreoidea;Ostreidae;Crassostrea;Crassostrea virginica

UdeM00000031756 6596 308.9 UdeM00000031756 XP\_045156889.1 38.5 392  
231 3 41 430 2 385 1.00E-80 308.9 6596 cellular

organisms;Eukaryota;Opisthokonta;Metazoa;Eumetazoa;Bilateria;Protostomia;Spiralia;Lophotrochozoa;Mollusca;Bivalvia;Autobranchia;Heteroconchia;Euherodonta;Imparidentia;Venerida;Veneroidea;Veneridae;Mercenaria;Mercenaria mercenaria

UdeM00000031757 225164 569.3 UdeM00000031757 XP\_009066786.1 28.4  
1226 711 17 14 1081 2495 3711 1.10E-158 569.3 225164  
cellular

organisms;Eukaryota;Opisthokonta;Metazoa;Eumetazoa;Bilateria;Protostomia;

Spiralia;Lophotrochozoa;Mollusca;Gastropoda;Patellogastropoda;Lottioidea;Lottiidae;Lottia;Lottia gigantea

UdeM00000031758 218467 120.6 UdeM00000031758 XP\_023220759.1 56.5  
115 49 1 1 114 559 673 1.30E-24 120.6 218467  
cellular

organisms;Eukaryota;Opisthokonta;Metazoa;Eumetazoa;Bilateria;Protostomia;Ecdysozoa;Panarthropoda;Arthropoda;Chelicerata;Arachnida;Scorpiones;Buthida;Buthoidea;Buthidae;Centruroides;Centruroides sculpturatus

UdeM00000031759 218467 125.9 UdeM00000031759 XP\_023220759.1 46  
139 75 0 20 158 191 329 5.00E-26 125.9 218467  
cellular

organisms;Eukaryota;Opisthokonta;Metazoa;Eumetazoa;Bilateria;Protostomia;Ecdysozoa;Panarthropoda;Arthropoda;Chelicerata;Arachnida;Scorpiones;Buthida;Buthoidea;Buthidae;Centruroides;Centruroides sculpturatus

UdeM00000031760 114398 154.5 UdeM00000031760 XP\_042913023.1 50  
158 75 1 14 171 110 263 1.30E-34 154.5 114398  
cellular

organisms;Eukaryota;Opisthokonta;Metazoa;Eumetazoa;Bilateria;Protostomia;Ecdysozoa;Panarthropoda;Arthropoda;Chelicerata;Arachnida;Araneae;Araneomorphae;Entelegynae;Orbiculariae;Araneoidea;Theridiidae;Parasteatoda;Parasteatoda tepidariorum

UdeM00000031761 6596 139.4 UdeM00000031761 XP\_045156859.1 54.1 133  
61 0 7 139 8040 8172 3.60E-30 139.4 6596 cellular

organisms;Eukaryota;Opisthokonta;Metazoa;Eumetazoa;Bilateria;Protostomia;Spiralia;Lophotrochozoa;Mollusca;Bivalvia;Autobranchia;Heteroconchia;Euheterodonta;Imparidentia;Venerida;Veneroidea;Veneridae;Mercenaria;Mercenaria mercenaria

UdeM00000031762 6596 137.1 UdeM00000031762 XP\_045156859.1 54.8 124  
56 0 1 124 8049 8172 1.60E-29 137.1 6596 cellular

organisms;Eukaryota;Opisthokonta;Metazoa;Eumetazoa;Bilateria;Protostomia;Spiralia;Lophotrochozoa;Mollusca;Bivalvia;Autobranchia;Heteroconchia;Euheterodonta;Imparidentia;Venerida;Veneroidea;Veneridae;Mercenaria;Mercenaria mercenaria

UdeM00000031763 6596 1831.2 UdeM00000031763 XP\_045156859.1 43.6  
2174 1123 26 52 2207 9431 11519 0.00E+00 1831.2 6596  
cellular

organisms;Eukaryota;Opisthokonta;Metazoa;Eumetazoa;Bilateria;Protostomia;Spiralia;Lophotrochozoa;Mollusca;Bivalvia;Autobranchia;Heteroconchia;Euheterodonta;Imparidentia;Venerida;Veneroidea;Veneridae;Mercenaria;Mercenaria mercenaria

UdeM00000031764 6596 103.2 UdeM00000031764 XP\_045184228.1 54.1 111  
47 2 19 126 48 157 2.50E-19 103.2 6596 cellular

organisms;Eukaryota;Opisthokonta;Metazoa;Eumetazoa;Bilateria;Protostomia;Spiralia;Lophotrochozoa;Mollusca;Bivalvia;Autobranchia;Heteroconchia;Euheterodonta;Imparidentia;Venerida;Veneroidea;Veneridae;Mercenaria;Mercenaria mercenaria

UdeM00000031765 6596 2430.6 UdeM00000031765 XP\_045156872.1 42.2  
3019 1677 34 26 3018 1 2977 0.00E+00 2430.6 6596  
cellular

organisms;Eukaryota;Opisthokonta;Metazoa;Eumetazoa;Bilateria;Protostomia;Spiralia;Lophotrochozoa;Mollusca;Bivalvia;Autobranchia;Heteroconchia;Euheterodonta;Imparidentia;Venerida;Veneroidea;Veneridae;Mercenaria;Mercenaria mercenaria

UdeM00000031766 6596 65.1 UdeM00000031766 XP\_045156787.1 34.1 138  
 82 6 22 154 76 209 9.50E-08 65.1 6596 cellular  
 organisms;Eukaryota;Opisthokonta;Metazoa;Eumetazoa;Bilateria;Protostomia;  
 Spiralia;Lophotrochozoa;Mollusca;Bivalvia;Autobranhia;Heteroconchia;Euhe  
 terodonta;Imparidentia;Venerida;Veneroidea;Veneridae;Mercenaria;Mercenari  
 a mercenaria  
 UdeM00000031767 6573 283.5 UdeM00000031767 XP\_021353372.1 43.5 324  
 178 4 15 338 33 351 3.60E-73 283.5 6573 cellular  
 organisms;Eukaryota;Opisthokonta;Metazoa;Eumetazoa;Bilateria;Protostomia;  
 Spiralia;Lophotrochozoa;Mollusca;Bivalvia;Autobranhia;Pteriormorphia;Pect  
 inida;Pectinoidea;Pectinidae;Mizuhopecten;Mizuhopecten yessoensis  
 UdeM00000031768 6596 2200.6 UdeM00000031768 XP\_045156859.1 39.9  
 2726 1542 31 16 2708 360 3022 0.00E+00 2200.6 6596  
 cellular  
 organisms;Eukaryota;Opisthokonta;Metazoa;Eumetazoa;Bilateria;Protostomia;  
 Spiralia;Lophotrochozoa;Mollusca;Bivalvia;Autobranhia;Heteroconchia;Euhe  
 terodonta;Imparidentia;Venerida;Veneroidea;Veneridae;Mercenaria;Mercenari  
 a mercenaria  
 UdeM00000031769 6596 2189.5 UdeM00000031769 XP\_045156859.1 39.6  
 2746 1542 32 16 2728 360 3022 0.00E+00 2189.5 6596  
 cellular  
 organisms;Eukaryota;Opisthokonta;Metazoa;Eumetazoa;Bilateria;Protostomia;  
 Spiralia;Lophotrochozoa;Mollusca;Bivalvia;Autobranhia;Heteroconchia;Euhe  
 terodonta;Imparidentia;Venerida;Veneroidea;Veneridae;Mercenaria;Mercenari  
 a mercenaria  
 UdeM00000031770 6596 5999.1 UdeM00000031770 XP\_045156859.1 36.5  
 8743 5061 120 1 8530 3054 11519 0.00E+00 5999.1 6596  
 cellular  
 organisms;Eukaryota;Opisthokonta;Metazoa;Eumetazoa;Bilateria;Protostomia;  
 Spiralia;Lophotrochozoa;Mollusca;Bivalvia;Autobranhia;Heteroconchia;Euhe  
 terodonta;Imparidentia;Venerida;Veneroidea;Veneridae;Mercenaria;Mercenari  
 a mercenaria  
 UdeM00000031771 6596 172.2 UdeM00000031771 XP\_045156859.1 35.5 276  
 167 7 3 270 11247 11519 1.80E-39 172.2 6596 cellular  
 organisms;Eukaryota;Opisthokonta;Metazoa;Eumetazoa;Bilateria;Protostomia;  
 Spiralia;Lophotrochozoa;Mollusca;Bivalvia;Autobranhia;Heteroconchia;Euhe  
 terodonta;Imparidentia;Venerida;Veneroidea;Veneridae;Mercenaria;Mercenari  
 a mercenaria  
 UdeM00000031772 6596 241.5 UdeM00000031772 XP\_045187440.1 49.8 257  
 93 5 22 246 28 280 1.20E-60 241.5 6596 cellular  
 organisms;Eukaryota;Opisthokonta;Metazoa;Eumetazoa;Bilateria;Protostomia;  
 Spiralia;Lophotrochozoa;Mollusca;Bivalvia;Autobranhia;Heteroconchia;Euhe  
 terodonta;Imparidentia;Venerida;Veneroidea;Veneridae;Mercenaria;Mercenari  
 a mercenaria  
 UdeM00000031773 6596 195.7 UdeM00000031773 XP\_045184228.1 63.9 158  
 53 2 1 155 1 157 4.50E-47 195.7 6596 cellular  
 organisms;Eukaryota;Opisthokonta;Metazoa;Eumetazoa;Bilateria;Protostomia;  
 Spiralia;Lophotrochozoa;Mollusca;Bivalvia;Autobranhia;Heteroconchia;Euhe  
 terodonta;Imparidentia;Venerida;Veneroidea;Veneridae;Mercenaria;Mercenari  
 a mercenaria  
 UdeM00000031774 1735272 557.4 UdeM00000031774 XP\_041350671.1 48.5  
 555 282 3 8 558 214 768 2.10E-155 557.4 1735272  
 cellular  
 organisms;Eukaryota;Opisthokonta;Metazoa;Eumetazoa;Bilateria;Protostomia;

Spiralia;Lophotrochozoa;Mollusca;Gastropoda;Neomphalina;Neomphaloidea;Pel  
tospiridae;Gigantopelta;Gigantopelta aegis

UdeM00000031775 1735272 563.1 UdeM00000031775 XP\_041350671.1 50.3  
559 273 4 6 560 212 769 3.80E-157 563.1 1735272  
cellular

organisms;Eukaryota;Opisthokonta;Metazoa;Eumetazoa;Bilateria;Protostomia;  
Spiralia;Lophotrochozoa;Mollusca;Gastropoda;Neomphalina;Neomphaloidea;Pel  
tospiridae;Gigantopelta;Gigantopelta aegis

UdeM00000031778 1735272 220.7 UdeM00000031778 XP\_041355119.1 56.8  
185 77 2 1 182 125 309 1.50E-54 220.7 1735272  
cellular

organisms;Eukaryota;Opisthokonta;Metazoa;Eumetazoa;Bilateria;Protostomia;  
Spiralia;Lophotrochozoa;Mollusca;Gastropoda;Neomphalina;Neomphaloidea;Pel  
tospiridae;Gigantopelta;Gigantopelta aegis

UdeM00000031776 1735272 514.2 UdeM00000031776 XP\_041350671.1 46.6  
552 269 4 17 542 218 769 2.00E-142 514.2 1735272  
cellular

organisms;Eukaryota;Opisthokonta;Metazoa;Eumetazoa;Bilateria;Protostomia;  
Spiralia;Lophotrochozoa;Mollusca;Gastropoda;Neomphalina;Neomphaloidea;Pel  
tospiridae;Gigantopelta;Gigantopelta aegis

UdeM00000031777 1735272 553.1 UdeM00000031777 XP\_041350671.1 49.3  
552 276 3 17 564 218 769 4.00E-154 553.1 1735272  
cellular

organisms;Eukaryota;Opisthokonta;Metazoa;Eumetazoa;Bilateria;Protostomia;  
Spiralia;Lophotrochozoa;Mollusca;Gastropoda;Neomphalina;Neomphaloidea;Pel  
tospiridae;Gigantopelta;Gigantopelta aegis

UdeM00000031779 6573 186.4 UdeM00000031779 XP\_021365765.1 66.7 138  
45 1 9 146 16 152 2.60E-44 186.4 6573 cellular

organisms;Eukaryota;Opisthokonta;Metazoa;Eumetazoa;Bilateria;Protostomia;  
Spiralia;Lophotrochozoa;Mollusca;Bivalvia;Autobranchia;Pteriomorphia;Pect  
inida;Pectinoidea;Pectinidae;Mizuhopecten;Mizuhopecten yessoensis

UdeM00000028439 2607531 242.7 UdeM00000028439 XP\_036362074.1 83.8  
154 22 3 1 154 61 211 3.30E-61 242.7 2607531  
cellular

organisms;Eukaryota;Opisthokonta;Metazoa;Eumetazoa;Bilateria;Protostomia;  
Spiralia;Lophotrochozoa;Mollusca;Cephalopoda;Coleoidea;Octopodiformes;Oct  
opoda;Incirrata;Octopodidae;Octopus;Octopus sinensis

UdeM00000028440 6573 198 UdeM00000028440 XP\_021371175.1 49 198  
98 1 4 198 1 198 1.20E-47 198 6573 cellular

organisms;Eukaryota;Opisthokonta;Metazoa;Eumetazoa;Bilateria;Protostomia;  
Spiralia;Lophotrochozoa;Mollusca;Bivalvia;Autobranchia;Pteriomorphia;Pect  
inida;Pectinoidea;Pectinidae;Mizuhopecten;Mizuhopecten yessoensis

UdeM00000028441 6596 105.5 UdeM00000028441 XP\_045180053.1 37.3 153  
23 1 15 94 14 166 6.60E-20 105.5 6596 cellular

organisms;Eukaryota;Opisthokonta;Metazoa;Eumetazoa;Bilateria;Protostomia;  
Spiralia;Lophotrochozoa;Mollusca;Bivalvia;Autobranchia;Heteroconchia;Euhe  
terodonta;Imparidentia;Venerida;Veneroidea;Veneridae;Mercenaria;Mercenari  
a mercenaria

UdeM00000028442 6596 140.6 UdeM00000028442 XP\_045198761.1 40.8 184  
96 6 36 217 42 214 2.50E-30 140.6 6596 cellular

organisms;Eukaryota;Opisthokonta;Metazoa;Eumetazoa;Bilateria;Protostomia;  
Spiralia;Lophotrochozoa;Mollusca;Bivalvia;Autobranchia;Heteroconchia;Euhe  
terodonta;Imparidentia;Venerida;Veneroidea;Veneridae;Mercenaria;Mercenari  
a mercenaria



UdeM00000028444 6596 81.3 UdeM00000028444 XP\_045198761.1 35.9 117  
 65 3 146 262 101 207 2.30E-12 81.3 6596 cellular  
 organisms;Eukaryota;Opisthokonta;Metazoa;Eumetazoa;Bilateria;Protostomia;  
 Spiralia;Lophotrochozoa;Mollusca;Bivalvia;Autobranchia;Heteroconchia;Euhe  
 terodonta;Imparidentia;Venerida;Veneroidea;Veneridae;Mercenaria;Mercenari  
 a mercenaria  
 UdeM00000028445 6596 164.9 UdeM00000028445 XP\_045194535.1 65.9 123  
 40 1 18 140 22 142 7.60E-38 164.9 6596 cellular  
 organisms;Eukaryota;Opisthokonta;Metazoa;Eumetazoa;Bilateria;Protostomia;  
 Spiralia;Lophotrochozoa;Mollusca;Bivalvia;Autobranchia;Heteroconchia;Euhe  
 terodonta;Imparidentia;Venerida;Veneroidea;Veneridae;Mercenaria;Mercenari  
 a mercenaria  
 UdeM00000028446 7574 231.9 UdeM00000028446 XP\_013382154.1 58.6 198  
 82 0 135 332 166 363 1.20E-57 231.9 7574 cellular  
 organisms;Eukaryota;Opisthokonta;Metazoa;Eumetazoa;Bilateria;Protostomia;  
 Spiralia;Lophotrochozoa;Brachiopoda;Linguliformea;Lingulata;Lingulida;Lin  
 guloidea;Lingulidae;Lingula;Lingula anatina  
 UdeM00000028447 7574 183 UdeM00000028447 XP\_013382154.1 66.4 128  
 43 0 8 135 206 333 2.60E-43 183 7574 cellular  
 organisms;Eukaryota;Opisthokonta;Metazoa;Eumetazoa;Bilateria;Protostomia;  
 Spiralia;Lophotrochozoa;Brachiopoda;Linguliformea;Lingulata;Lingulida;Lin  
 guloidea;Lingulidae;Lingula;Lingula anatina  
 UdeM00000028448 6596 85.1 UdeM00000028448 XP\_045200064.1 52 75  
 36 0 11 85 18 92 5.70E-14 85.1 6596 cellular  
 organisms;Eukaryota;Opisthokonta;Metazoa;Eumetazoa;Bilateria;Protostomia;  
 Spiralia;Lophotrochozoa;Mollusca;Bivalvia;Autobranchia;Heteroconchia;Euhe  
 terodonta;Imparidentia;Venerida;Veneroidea;Veneridae;Mercenaria;Mercenari  
 a mercenaria  
 UdeM00000028449 6596 98.6 UdeM00000028449 XP\_045200064.1 48.5 97  
 49 1 11 107 18 113 6.80E-18 98.6 6596 cellular  
 organisms;Eukaryota;Opisthokonta;Metazoa;Eumetazoa;Bilateria;Protostomia;  
 Spiralia;Lophotrochozoa;Mollusca;Bivalvia;Autobranchia;Heteroconchia;Euhe  
 terodonta;Imparidentia;Venerida;Veneroidea;Veneridae;Mercenaria;Mercenari  
 a mercenaria  
 UdeM00000028450 6596 251.5 UdeM00000028450 XP\_045200073.1 44.5 344  
 136 8 1 306 112 438 1.40E-63 251.5 6596 cellular  
 organisms;Eukaryota;Opisthokonta;Metazoa;Eumetazoa;Bilateria;Protostomia;  
 Spiralia;Lophotrochozoa;Mollusca;Bivalvia;Autobranchia;Heteroconchia;Euhe  
 terodonta;Imparidentia;Venerida;Veneroidea;Veneridae;Mercenaria;Mercenari  
 a mercenaria  
 UdeM00000028451 6596 361.3 UdeM00000028451 XP\_045208539.1 73.1 238  
 59 2 55 287 22 259 1.10E-96 361.3 6596 cellular  
 organisms;Eukaryota;Opisthokonta;Metazoa;Eumetazoa;Bilateria;Protostomia;  
 Spiralia;Lophotrochozoa;Mollusca;Bivalvia;Autobranchia;Heteroconchia;Euhe  
 terodonta;Imparidentia;Venerida;Veneroidea;Veneridae;Mercenaria;Mercenari  
 a mercenaria  
 UdeM00000028452 6596 713.4 UdeM00000028452 XP\_045201203.1 67.7 480  
 150 3 24 499 20 498 2.00E-202 713.4 6596 cellular  
 organisms;Eukaryota;Opisthokonta;Metazoa;Eumetazoa;Bilateria;Protostomia;  
 Spiralia;Lophotrochozoa;Mollusca;Bivalvia;Autobranchia;Heteroconchia;Euhe  
 terodonta;Imparidentia;Venerida;Veneroidea;Veneridae;Mercenaria;Mercenari  
 a mercenaria  
 UdeM00000028453 6596 249.2 UdeM00000028453 XP\_045201203.1 68.7 163  
 50 1 1 162 244 406 3.60E-63 249.2 6596 cellular

organisms;Eukaryota;Opisthokonta;Metazoa;Eumetazoa;Bilateria;Protostomia;Spiralia;Lophotrochozoa;Mollusca;Bivalvia;Autobranchia;Heteroconchia;Euherodonta;Imparidentia;Venerida;Veneroidea;Veneridae;Mercenaria;Mercenaria mercenaria

UdeM00000028454 6565 232.6 UdeM00000028454 XP\_022321264.1 35.9 390  
224 12 31 407 29 405 8.60E-58 232.6 6565 cellular

organisms;Eukaryota;Opisthokonta;Metazoa;Eumetazoa;Bilateria;Protostomia;Spiralia;Lophotrochozoa;Mollusca;Bivalvia;Autobranchia;Pteriormorphia;Ostreida;Ostreoidea;Ostreidae;Crassostrea;Crassostrea virginica

UdeM00000028456 225164 68.6 UdeM00000028456 XP\_009047614.1 30.6  
170 111 5 2 167 408 574 9.70E-09 68.6 225164  
cellular

organisms;Eukaryota;Opisthokonta;Metazoa;Eumetazoa;Bilateria;Protostomia;Spiralia;Lophotrochozoa;Mollusca;Gastropoda;Patellogastropoda;Lottioida;Lottiidae;Lottia;Lottia gigantea

UdeM00000028457 6596 93.6 UdeM00000028457 XP\_045180427.1 32.3 251  
137 5 1 219 1 250 4.50E-16 93.6 6596 cellular

organisms;Eukaryota;Opisthokonta;Metazoa;Eumetazoa;Bilateria;Protostomia;Spiralia;Lophotrochozoa;Mollusca;Bivalvia;Autobranchia;Heteroconchia;Euherodonta;Imparidentia;Venerida;Veneroidea;Veneridae;Mercenaria;Mercenaria mercenaria

UdeM00000028458 6596 101.3 UdeM00000028458 XP\_045188250.1 52.5 118  
50 3 5 116 320 437 8.60E-19 101.3 6596 cellular

organisms;Eukaryota;Opisthokonta;Metazoa;Eumetazoa;Bilateria;Protostomia;Spiralia;Lophotrochozoa;Mollusca;Bivalvia;Autobranchia;Heteroconchia;Euherodonta;Imparidentia;Venerida;Veneroidea;Veneridae;Mercenaria;Mercenaria mercenaria

UdeM00000028459 6596 549.7 UdeM00000028459 XP\_045188240.1 60 473  
165 5 41 508 26 479 4.00E-153 549.7 6596 cellular

organisms;Eukaryota;Opisthokonta;Metazoa;Eumetazoa;Bilateria;Protostomia;Spiralia;Lophotrochozoa;Mollusca;Bivalvia;Autobranchia;Heteroconchia;Euherodonta;Imparidentia;Venerida;Veneroidea;Veneridae;Mercenaria;Mercenaria mercenaria

UdeM00000028460 1735272 175.3 UdeM00000028460 XP\_041369218.1 84.3  
102 16 0 1 102 1 102 6.70E-41 175.3 1735272  
cellular

organisms;Eukaryota;Opisthokonta;Metazoa;Eumetazoa;Bilateria;Protostomia;Spiralia;Lophotrochozoa;Mollusca;Gastropoda;Neomphalina;Neomphaloidea;Peltospiridae;Gigantopelta;Gigantopelta aegis

UdeM00000028461 1735272 77 UdeM00000028461 XP\_041369218.1 76.1  
46 11 0 1 46 57 102 1.70E-11 77 1735272

cellular

organisms;Eukaryota;Opisthokonta;Metazoa;Eumetazoa;Bilateria;Protostomia;Spiralia;Lophotrochozoa;Mollusca;Gastropoda;Neomphalina;Neomphaloidea;Peltospiridae;Gigantopelta;Gigantopelta aegis

UdeM00000028462 6579 219.9 UdeM00000028462 XP\_033759050.1 45.1 257  
128 4 6 250 4 259 5.30E-54 219.9 6579 cellular

organisms;Eukaryota;Opisthokonta;Metazoa;Eumetazoa;Bilateria;Protostomia;Spiralia;Lophotrochozoa;Mollusca;Bivalvia;Autobranchia;Pteriormorphia;Pectinida;Pectinoidea;Pectinidae;Pecten;Pecten maximus

UdeM00000028463 6573 244.6 UdeM00000028463 XP\_021339366.1 47.5 244  
120 1 32 267 59 302 1.40E-61 244.6 6573 cellular

organisms;Eukaryota;Opisthokonta;Metazoa;Eumetazoa;Bilateria;Protostomia;

Spiralia; Lophotrochozoa; Mollusca; Bivalvia; Autobranchia; Pteriomorpha; Pectinida; Pectinoidea; Pectinidae; Mizuhopecten; Mizuhopecten yessoensis  
UdeM00000028464 6573 243.8 UdeM00000028464 XP\_021339366.1 47.5 244  
120 1 32 267 59 302 2.50E-61 243.8 6573 cellular  
organisms; Eukaryota; Opisthokonta; Metazoa; Eumetazoa; Bilateria; Protostomia; Spiralia; Lophotrochozoa; Mollusca; Bivalvia; Autobranchia; Pteriomorpha; Pectinida; Pectinoidea; Pectinidae; Mizuhopecten; Mizuhopecten yessoensis  
UdeM00000028465 6573 243.8 UdeM00000028465 XP\_021339366.1 47.5 244  
120 1 32 267 59 302 2.50E-61 243.8 6573 cellular  
organisms; Eukaryota; Opisthokonta; Metazoa; Eumetazoa; Bilateria; Protostomia; Spiralia; Lophotrochozoa; Mollusca; Bivalvia; Autobranchia; Pteriomorpha; Pectinida; Pectinoidea; Pectinidae; Mizuhopecten; Mizuhopecten yessoensis  
UdeM00000028466 1735272 462.6 UdeM00000028466 XP\_041368752.1 53.1  
414 174 3 1 405 30 432 5.20E-127 462.6 1735272  
cellular  
organisms; Eukaryota; Opisthokonta; Metazoa; Eumetazoa; Bilateria; Protostomia; Spiralia; Lophotrochozoa; Mollusca; Gastropoda; Neomphalina; Neomphaloidea; Peltospiridae; Gigantopelta; Gigantopelta aegis  
UdeM00000028467 6573 95.9 UdeM00000028467 XP\_021343782.1 43.1 116  
64 2 160 274 326 440 8.70E-17 95.9 6573 cellular  
organisms; Eukaryota; Opisthokonta; Metazoa; Eumetazoa; Bilateria; Protostomia; Spiralia; Lophotrochozoa; Mollusca; Bivalvia; Autobranchia; Pteriomorpha; Pectinida; Pectinoidea; Pectinidae; Mizuhopecten; Mizuhopecten yessoensis  
UdeM00000028468 6500 237.3 UdeM00000028468 XP\_005092247.1 57.3 192  
74 6 1 189 26 212 2.60E-59 237.3 6500 cellular  
organisms; Eukaryota; Opisthokonta; Metazoa; Eumetazoa; Bilateria; Protostomia; Spiralia; Lophotrochozoa; Mollusca; Gastropoda; Heterobranchia; Euthyneura; Teptipleura; Aplysiida; Aplysioidea; Aplysiidae; Aplysia; Aplysia californica  
UdeM00000028469 6596 498.8 UdeM00000028469 XP\_045191716.1 62.2 394  
140 6 1 388 135 525 6.20E-138 498.8 6596 cellular  
organisms; Eukaryota; Opisthokonta; Metazoa; Eumetazoa; Bilateria; Protostomia; Spiralia; Lophotrochozoa; Mollusca; Bivalvia; Autobranchia; Heteroconchia; Euheterodonta; Imparidentia; Venerida; Veneroidea; Veneridae; Mercenaria; Mercenaria mercenaria  
UdeM00000028470 6596 178.7 UdeM00000028470 XP\_045188476.1 39.5 266  
128 4 2 235 143 407 8.60E-42 178.7 6596 cellular  
organisms; Eukaryota; Opisthokonta; Metazoa; Eumetazoa; Bilateria; Protostomia; Spiralia; Lophotrochozoa; Mollusca; Bivalvia; Autobranchia; Heteroconchia; Euheterodonta; Imparidentia; Venerida; Veneroidea; Veneridae; Mercenaria; Mercenaria mercenaria  
UdeM00000028471 6565 321.6 UdeM00000028471 XP\_022301022.1 27.3 722  
493 14 12 722 21 721 2.50E-84 321.6 6565 cellular  
organisms; Eukaryota; Opisthokonta; Metazoa; Eumetazoa; Bilateria; Protostomia; Spiralia; Lophotrochozoa; Mollusca; Bivalvia; Autobranchia; Pteriomorpha; Ostreida; Ostreoidea; Ostreidae; Crassostrea; Crassostrea virginica  
UdeM00000028474 6573 243.8 UdeM00000028474 XP\_021357283.1 38.2 476  
206 11 1694 2146 2329 2739 2.00E-60 243.8 6573 cellular  
organisms; Eukaryota; Opisthokonta; Metazoa; Eumetazoa; Bilateria; Protostomia; Spiralia; Lophotrochozoa; Mollusca; Bivalvia; Autobranchia; Pteriomorpha; Pectinida; Pectinoidea; Pectinidae; Mizuhopecten; Mizuhopecten yessoensis  
UdeM00000028474 6573 135.6 UdeM00000028474 XP\_021357283.1 62.9 116  
42 1 31 145 37 152 7.70E-28 135.6 6573 cellular  
organisms; Eukaryota; Opisthokonta; Metazoa; Eumetazoa; Bilateria; Protostomia;

Spiralia;Lophotrochozoa;Mollusca;Bivalvia;Autobranchia;Pteriormorphia;Pectinida;Pectinoidea;Pectinidae;Mizuhopecten;Mizuhopecten yessoensis  
UdeM00000028475 7574 122.9 UdeM00000028475 XP\_013384571.1 64.4 104  
32 2 1 103 51 150 3.90E-25 122.9 7574 cellular  
organisms;Eukaryota;Opisthokonta;Metazoa;Eumetazoa;Bilateria;Protostomia;  
Spiralia;Lophotrochozoa;Brachiopoda;Linguliformea;Lingulata;Lingulida;Linguloidea;Lingulidae;Lingula;Lingula anatina  
UdeM00000028476 1735272 372.1 UdeM00000028476 XP\_041367931.1 48.2  
419 167 5 1 377 49 459 8.50E-100 372.1 1735272  
cellular  
organisms;Eukaryota;Opisthokonta;Metazoa;Eumetazoa;Bilateria;Protostomia;  
Spiralia;Lophotrochozoa;Mollusca;Gastropoda;Neomphalina;Neomphaloidea;Peltospiridae;Gigantopelta;Gigantopelta aegis  
UdeM00000028477 6596 187.2 UdeM00000028477 XP\_045165359.1 36 325  
185 8 39 343 1056 1377 4.60E-44 187.2 6596 cellular  
organisms;Eukaryota;Opisthokonta;Metazoa;Eumetazoa;Bilateria;Protostomia;  
Spiralia;Lophotrochozoa;Mollusca;Bivalvia;Autobranchia;Heteroconchia;Euheterodonta;Imparidentia;Venerida;Veneroidea;Veneridae;Mercenaria;Mercenaria mercenaria  
UdeM00000028478 7159 93.6 UdeM00000028478 XP\_021694571.1 21.6 459  
297 14 23 425 42 493 6.80E-16 93.6 7159 cellular  
organisms;Eukaryota;Opisthokonta;Metazoa;Eumetazoa;Bilateria;Protostomia;  
Ecdysozoa;Panarthropoda;Arthropoda;Mandibulata;Pancrustacea;Hexapoda;Insecta;Dicondylia;Pterygota;Neoptera;Endopterygota;Diptera;Nematocera;Culicomorpha;Culicoidea;Culicidae;Culicinae;Aedini;Aedes;Stegomyia;Aedes aegypti  
UdeM00000028479 6565 78.2 UdeM00000028479 XP\_022314529.1 54 63  
25 1 16 74 21 83 5.50E-12 78.2 6565 cellular  
organisms;Eukaryota;Opisthokonta;Metazoa;Eumetazoa;Bilateria;Protostomia;  
Spiralia;Lophotrochozoa;Mollusca;Bivalvia;Autobranchia;Pteriormorphia;Ostreida;Ostreoidea;Ostreidae;Crassostrea;Crassostrea virginica  
UdeM00000028480 29159 212.2 UdeM00000028480 XP\_011412797.2 27.8 532  
348 16 5 520 178 689 1.80E-51 212.2 29159 cellular  
organisms;Eukaryota;Opisthokonta;Metazoa;Eumetazoa;Bilateria;Protostomia;  
Spiralia;Lophotrochozoa;Mollusca;Bivalvia;Autobranchia;Pteriormorphia;Ostreida;Ostreoidea;Ostreidae;Crassostrea;Crassostrea gigas  
UdeM00000028481 6596 851.7 UdeM00000028481 XP\_045164493.1 39.4 1303  
657 27 427 1623 351 1627 1.60E-243 851.7 6596 cellular  
organisms;Eukaryota;Opisthokonta;Metazoa;Eumetazoa;Bilateria;Protostomia;  
Spiralia;Lophotrochozoa;Mollusca;Bivalvia;Autobranchia;Heteroconchia;Euheterodonta;Imparidentia;Venerida;Veneroidea;Veneridae;Mercenaria;Mercenaria mercenaria  
UdeM00000028482 6596 143.7 UdeM00000028482 XP\_045196034.1 39.8 176  
96 1 88 263 64 229 3.90E-31 143.7 6596 cellular  
organisms;Eukaryota;Opisthokonta;Metazoa;Eumetazoa;Bilateria;Protostomia;  
Spiralia;Lophotrochozoa;Mollusca;Bivalvia;Autobranchia;Heteroconchia;Euheterodonta;Imparidentia;Venerida;Veneroidea;Veneridae;Mercenaria;Mercenaria mercenaria  
UdeM00000028483 6596 88.6 UdeM00000028483 XP\_045195932.1 62.3 61  
23 0 93 153 27 87 7.70E-15 88.6 6596 cellular  
organisms;Eukaryota;Opisthokonta;Metazoa;Eumetazoa;Bilateria;Protostomia;  
Spiralia;Lophotrochozoa;Mollusca;Bivalvia;Autobranchia;Heteroconchia;Euheterodonta;Imparidentia;Venerida;Veneroidea;Veneridae;Mercenaria;Mercenaria mercenaria

UdeM00000028484 6579 164.9 UdeM00000028484 XP\_033732418.1 76 100  
 22 1 1 98 41 140 6.20E-38 164.9 6579 cellular  
 organisms;Eukaryota;Opisthokonta;Metazoa;Eumetazoa;Bilateria;Protostomia;  
 Spiralia;Lophotrochozoa;Mollusca;Bivalvia;Autobranhia;Pteriomorphia;Pect  
 inida;Pectinoidea;Pectinidae;Pecten;Pecten maximus  
 UdeM00000028485 6573 76.3 UdeM00000028485 XP\_021370930.1 32.2 149  
 92 2 96 241 1209 1351 6.30E-11 76.3 6573 cellular  
 organisms;Eukaryota;Opisthokonta;Metazoa;Eumetazoa;Bilateria;Protostomia;  
 Spiralia;Lophotrochozoa;Mollusca;Bivalvia;Autobranhia;Pteriomorphia;Pect  
 inida;Pectinoidea;Pectinidae;Mizuhopecten;Mizuhopecten yessoensis  
 UdeM00000028486 225164 231.5 UdeM00000028486 XP\_009058112.1 26.6  
 623 360 17 62 609 366 966 2.90E-57 231.5 225164  
 cellular  
 organisms;Eukaryota;Opisthokonta;Metazoa;Eumetazoa;Bilateria;Protostomia;  
 Spiralia;Lophotrochozoa;Mollusca;Gastropoda;Patellogastropoda;Lottioidea;  
 Lottiidae;Lottia;Lottia gigantea  
 UdeM00000028488 6596 68.6 UdeM00000028488 XP\_045166426.1 24.6 199  
 144 4 9 207 580 772 1.40E-08 68.6 6596 cellular  
 organisms;Eukaryota;Opisthokonta;Metazoa;Eumetazoa;Bilateria;Protostomia;  
 Spiralia;Lophotrochozoa;Mollusca;Bivalvia;Autobranhia;Heteroconchia;Euhe  
 terodonta;Imparidentia;Venerida;Veneroidea;Veneridae;Mercenaria;Mercenari  
 a mercenaria  
 UdeM00000028489 2607531 933.7 UdeM00000028489 XP\_029646554.2 33.7  
 1891 1046 56 27 1779 29 1849 3.50E-268 933.7 2607531  
 cellular  
 organisms;Eukaryota;Opisthokonta;Metazoa;Eumetazoa;Bilateria;Protostomia;  
 Spiralia;Lophotrochozoa;Mollusca;Cephalopoda;Coleoidea;Octopodiformes;Oct  
 opoda;Incirrata;Octopodidae;Octopus;Octopus sinensis  
 UdeM00000028491 37621 92.8 UdeM00000028491 XP\_014679849.1 52.3 65  
 31 0 47 111 559 623 3.00E-16 92.8 37621 cellular  
 organisms;Eukaryota;Opisthokonta;Metazoa;Eumetazoa;Bilateria;Protostomia;  
 Ecdysozoa;Scalidophora;Priapulida;Priapulimorpha;Priapulimorphida;Priapul  
 idae;Priapululus;Priapululus caudatus  
 UdeM00000028492 6596 277.3 UdeM00000028492 XP\_045199293.1 33.7 564  
 242 11 20 462 33 585 3.50E-71 277.3 6596 cellular  
 organisms;Eukaryota;Opisthokonta;Metazoa;Eumetazoa;Bilateria;Protostomia;  
 Spiralia;Lophotrochozoa;Mollusca;Bivalvia;Autobranhia;Heteroconchia;Euhe  
 terodonta;Imparidentia;Venerida;Veneroidea;Veneridae;Mercenaria;Mercenari  
 a mercenaria  
 UdeM00000028493 29159 607.1 UdeM00000028493 XP\_011443565.1 81.2 330  
 62 0 1 330 1 330 1.40E-170 607.1 29159 cellular  
 organisms;Eukaryota;Opisthokonta;Metazoa;Eumetazoa;Bilateria;Protostomia;  
 Spiralia;Lophotrochozoa;Mollusca;Bivalvia;Autobranhia;Pteriomorphia;Ostr  
 eida;Ostreoidea;Ostreidae;Crassostrea;Crassostrea gigas  
 UdeM00000028494 6565 349.4 UdeM00000028494 XP\_022327478.1 89.3 169  
 18 0 1 169 1 169 2.70E-93 349.4 6565 cellular  
 organisms;Eukaryota;Opisthokonta;Metazoa;Eumetazoa;Bilateria;Protostomia;  
 Spiralia;Lophotrochozoa;Mollusca;Bivalvia;Autobranhia;Pteriomorphia;Ostr  
 eida;Ostreoidea;Ostreidae;Crassostrea;Crassostrea virginica  
 UdeM00000028495 481459 256.5 UdeM00000028495 XP\_040031014.1 35.4  
 381 230 4 75 450 84 453 6.20E-65 256.5 481459  
 cellular  
 organisms;Eukaryota;Opisthokonta;Metazoa;Eumetazoa;Bilateria;Deuterostomi  
 a;Chordata;Craniata;Vertebrata;Gnathostomata;Teleostomi;Euteleostomi;Acti

nopterygii;Actinopteri;Neopterygii;Teleostei;Osteoglossocephalai;Clupeocephala;Euteleostei;Neoteleostei;Eurypterygia;Ctenosquamata;Acanthomorphata;Euacanthomorphacea;Percomorphaceae;Eupercaria;Perciformes;Cottioidei;Gasterosteales;Gasterosteidae;Gasterosteus;Gasterosteus aculeatus;Gasterosteus aculeatus aculeatus

UdeM00000028496 45264 436.8 UdeM00000028496 XP\_044179186.1 47.7 482  
 226 7 16 475 3 480 3.50E-119 436.8 45264 cellular organisms;Eukaryota;Opisthokonta;Metazoa;Eumetazoa;Cnidaria;Anthozoa;Hexacorallia;Scleractinia;Astrocoeniina;Acroporidae;Acropora;Acropora millepora

UdeM00000028497 6596 464.9 UdeM00000028497 XP\_045196000.1 58.2 380  
 156 2 11 388 7 385 1.10E-127 464.9 6596 cellular organisms;Eukaryota;Opisthokonta;Metazoa;Eumetazoa;Bilateria;Protostomia;Spiralia;Lophotrochozoa;Mollusca;Bivalvia;Autobranchia;Heteroconchia;Euheterodonta;Imparidentia;Venerida;Veneroidea;Veneridae;Mercenaria;Mercenaria mercenaria

UdeM00000028498 6596 395.2 UdeM00000028498 XP\_045196000.1 60.6 312  
 120 2 16 325 75 385 9.00E-107 395.2 6596 cellular organisms;Eukaryota;Opisthokonta;Metazoa;Eumetazoa;Bilateria;Protostomia;Spiralia;Lophotrochozoa;Mollusca;Bivalvia;Autobranchia;Heteroconchia;Euheterodonta;Imparidentia;Venerida;Veneroidea;Veneridae;Mercenaria;Mercenaria mercenaria

UdeM00000028499 6596 261.2 UdeM00000028499 XP\_045195986.1 75.4 175  
 31 2 808 971 456 629 5.40E-66 261.2 6596 cellular organisms;Eukaryota;Opisthokonta;Metazoa;Eumetazoa;Bilateria;Protostomia;Spiralia;Lophotrochozoa;Mollusca;Bivalvia;Autobranchia;Heteroconchia;Euheterodonta;Imparidentia;Venerida;Veneroidea;Veneridae;Mercenaria;Mercenaria mercenaria

UdeM00000028500 6596 663.7 UdeM00000028500 XP\_045195986.1 61.9 651  
 209 7 1 634 1 629 2.40E-187 663.7 6596 cellular organisms;Eukaryota;Opisthokonta;Metazoa;Eumetazoa;Bilateria;Protostomia;Spiralia;Lophotrochozoa;Mollusca;Bivalvia;Autobranchia;Heteroconchia;Euheterodonta;Imparidentia;Venerida;Veneroidea;Veneridae;Mercenaria;Mercenaria mercenaria

UdeM00000028501 37653 349 UdeM00000028501 XP\_014787348.1 66 238  
 72 2 1 238 1 229 4.80E-93 349 37653 cellular organisms;Eukaryota;Opisthokonta;Metazoa;Eumetazoa;Bilateria;Protostomia;Spiralia;Lophotrochozoa;Mollusca;Cephalopoda;Coleoidea;Octopodiformes;Octopoda;Incirrata;Octopodidae;Octopus;Octopus bimaculoides

UdeM00000028502 37653 236.5 UdeM00000028502 XP\_014787348.1 63.6 165  
 51 2 16 180 74 229 2.70E-59 236.5 37653 cellular organisms;Eukaryota;Opisthokonta;Metazoa;Eumetazoa;Bilateria;Protostomia;Spiralia;Lophotrochozoa;Mollusca;Cephalopoda;Coleoidea;Octopodiformes;Octopoda;Incirrata;Octopodidae;Octopus;Octopus bimaculoides

UdeM00000028503 6596 871.3 UdeM00000028503 XP\_045198665.1 53.1 791  
 353 10 7 788 7 788 9.30E-250 871.3 6596 cellular organisms;Eukaryota;Opisthokonta;Metazoa;Eumetazoa;Bilateria;Protostomia;Spiralia;Lophotrochozoa;Mollusca;Bivalvia;Autobranchia;Heteroconchia;Euheterodonta;Imparidentia;Venerida;Veneroidea;Veneridae;Mercenaria;Mercenaria mercenaria

UdeM00000028504 6573 513.1 UdeM00000028504 XP\_021362385.1 38.5 737  
 415 7 8 735 6 713 6.10E-142 513.1 6573 cellular organisms;Eukaryota;Opisthokonta;Metazoa;Eumetazoa;Bilateria;Protostomia;

Spiralia;Lophotrochozoa;Mollusca;Bivalvia;Autobranchia;Pteriomorpha;Pectinida;Pectinoidea;Pectinidae;Mizuhopecten;Mizuhopecten yessoensis  
UdeM00000028505 6596 391 UdeM00000028505 XP\_045188626.1 36.8 557  
338 9 17 564 9 560 3.20E-105 391 6596 cellular  
organisms;Eukaryota;Opisthokonta;Metazoa;Eumetazoa;Bilateria;Protostomia;  
Spiralia;Lophotrochozoa;Mollusca;Bivalvia;Autobranchia;Heteroconchia;Euherodonta;Imparidentia;Venerida;Veneroidea;Veneridae;Mercenaria;Mercenaria mercenaria  
UdeM00000028506 7739 278.5 UdeM00000028506 XP\_035694373.1 41.9 334  
160 6 62 384 497 807 1.60E-71 278.5 7739 cellular  
organisms;Eukaryota;Opisthokonta;Metazoa;Eumetazoa;Bilateria;Deuterostomia;Chordata;Cephalochordata;Leptocardii;Amphioxiformes;Branchiostomidae;Branchiostoma;Branchiostoma floridae  
UdeM00000028507 6565 126.7 UdeM00000028507 XP\_022327159.1 76 75  
16 1 1 75 1 73 1.30E-26 126.7 6565 cellular  
organisms;Eukaryota;Opisthokonta;Metazoa;Eumetazoa;Bilateria;Protostomia;  
Spiralia;Lophotrochozoa;Mollusca;Bivalvia;Autobranchia;Pteriomorpha;Ostreida;Ostreoidea;Ostreidae;Crassostrea;Crassostrea virginica  
UdeM00000028508 1735272 364.4 UdeM00000028508 XP\_041369203.1 63.6  
261 85 3 1 259 259 511 1.20E-97 364.4 1735272  
cellular  
organisms;Eukaryota;Opisthokonta;Metazoa;Eumetazoa;Bilateria;Protostomia;  
Spiralia;Lophotrochozoa;Mollusca;Gastropoda;Neomphalina;Neomphaloidea;Peltospiridae;Gigantopelta;Gigantopelta aegis  
UdeM00000028509 1735272 707.6 UdeM00000028509 XP\_041369203.1 64.9  
518 155 6 4 503 3 511 1.10E-200 707.6 1735272  
cellular  
organisms;Eukaryota;Opisthokonta;Metazoa;Eumetazoa;Bilateria;Protostomia;  
Spiralia;Lophotrochozoa;Mollusca;Gastropoda;Neomphalina;Neomphaloidea;Peltospiridae;Gigantopelta;Gigantopelta aegis  
UdeM00000028510 6573 123.6 UdeM00000028510 XP\_021344746.1 34.4 247  
147 7 2 240 1 240 7.90E-25 123.6 6573 cellular  
organisms;Eukaryota;Opisthokonta;Metazoa;Eumetazoa;Bilateria;Protostomia;  
Spiralia;Lophotrochozoa;Mollusca;Bivalvia;Autobranchia;Pteriomorpha;Pectinida;Pectinoidea;Pectinidae;Mizuhopecten;Mizuhopecten yessoensis  
UdeM00000028511 6579 143.7 UdeM00000028511 XP\_033745120.1 30.5 328  
176 9 6 294 3 317 3.80E-31 143.7 6579 cellular  
organisms;Eukaryota;Opisthokonta;Metazoa;Eumetazoa;Bilateria;Protostomia;  
Spiralia;Lophotrochozoa;Mollusca;Bivalvia;Autobranchia;Pteriomorpha;Pectinida;Pectinoidea;Pectinidae;Pecten;Pecten maximus  
UdeM00000028512 6579 139.8 UdeM00000028512 XP\_033745120.1 26.2 469  
190 11 4 472 3 315 8.90E-30 139.8 6579 cellular  
organisms;Eukaryota;Opisthokonta;Metazoa;Eumetazoa;Bilateria;Protostomia;  
Spiralia;Lophotrochozoa;Mollusca;Bivalvia;Autobranchia;Pteriomorpha;Pectinida;Pectinoidea;Pectinidae;Pecten;Pecten maximus  
UdeM00000028513 6573 117.1 UdeM00000028513 XP\_021362072.1 45.2 126  
66 2 1 124 1 125 5.10E-23 117.1 6573 cellular  
organisms;Eukaryota;Opisthokonta;Metazoa;Eumetazoa;Bilateria;Protostomia;  
Spiralia;Lophotrochozoa;Mollusca;Bivalvia;Autobranchia;Pteriomorpha;Pectinida;Pectinoidea;Pectinidae;Mizuhopecten;Mizuhopecten yessoensis  
UdeM00000028514 6573 121.3 UdeM00000028514 XP\_021362102.1 54.2 118  
52 1 4 119 3 120 4.30E-24 121.3 6573 cellular  
organisms;Eukaryota;Opisthokonta;Metazoa;Eumetazoa;Bilateria;Protostomia;

Spiralia;Lophotrochozoa;Mollusca;Bivalvia;Autobranchia;Pteriomorpha;Pectinida;Pectinoidea;Pectinidae;Mizuhopecten;Mizuhopecten yessoensis  
UdeM00000028515 6596 126.7 UdeM00000028515 XP\_045204469.1 53.4 116  
54 0 4 119 3 118 8.10E-26 126.7 6596 cellular  
organisms;Eukaryota;Opisthokonta;Metazoa;Eumetazoa;Bilateria;Protostomia;  
Spiralia;Lophotrochozoa;Mollusca;Bivalvia;Autobranchia;Heteroconchia;Euherodonta;Imparidentia;Venerida;Veneroidea;Veneridae;Mercenaria;Mercenaria mercenaria  
UdeM00000028516 29159 129.4 UdeM00000028516 XP\_034329616.1 56.4 110  
46 1 4 111 3 112 8.40E-27 129.4 29159 cellular  
organisms;Eukaryota;Opisthokonta;Metazoa;Eumetazoa;Bilateria;Protostomia;  
Spiralia;Lophotrochozoa;Mollusca;Bivalvia;Autobranchia;Pteriomorpha;Ostreida;Ostreoidea;Ostreidae;Crassostrea;Crassostrea gigas  
UdeM00000028517 6565 174.5 UdeM00000028517 XP\_022326357.1 73.5 113  
29 1 11 122 62 174 8.40E-41 174.5 6565 cellular  
organisms;Eukaryota;Opisthokonta;Metazoa;Eumetazoa;Bilateria;Protostomia;  
Spiralia;Lophotrochozoa;Mollusca;Bivalvia;Autobranchia;Pteriomorpha;Ostreida;Ostreoidea;Ostreidae;Crassostrea;Crassostrea virginica  
UdeM00000028518 6596 182.2 UdeM00000028518 XP\_045196823.1 56.9 153  
59 4 1 151 1 148 5.50E-43 182.2 6596 cellular  
organisms;Eukaryota;Opisthokonta;Metazoa;Eumetazoa;Bilateria;Protostomia;  
Spiralia;Lophotrochozoa;Mollusca;Bivalvia;Autobranchia;Heteroconchia;Euherodonta;Imparidentia;Venerida;Veneroidea;Veneridae;Mercenaria;Mercenaria mercenaria  
UdeM00000028519 6596 132.5 UdeM00000028519 XP\_045206778.1 59.1 115  
45 1 4 116 3 117 9.90E-28 132.5 6596 cellular  
organisms;Eukaryota;Opisthokonta;Metazoa;Eumetazoa;Bilateria;Protostomia;  
Spiralia;Lophotrochozoa;Mollusca;Bivalvia;Autobranchia;Heteroconchia;Euherodonta;Imparidentia;Venerida;Veneroidea;Veneridae;Mercenaria;Mercenaria mercenaria  
UdeM00000028521 6565 176.8 UdeM00000028521 XP\_022326357.1 74.3 113  
28 1 11 122 62 174 1.70E-41 176.8 6565 cellular  
organisms;Eukaryota;Opisthokonta;Metazoa;Eumetazoa;Bilateria;Protostomia;  
Spiralia;Lophotrochozoa;Mollusca;Bivalvia;Autobranchia;Pteriomorpha;Ostreida;Ostreoidea;Ostreidae;Crassostrea;Crassostrea virginica  
UdeM00000028522 6596 179.9 UdeM00000028522 XP\_045196823.1 56.9 153  
59 4 1 151 1 148 2.70E-42 179.9 6596 cellular  
organisms;Eukaryota;Opisthokonta;Metazoa;Eumetazoa;Bilateria;Protostomia;  
Spiralia;Lophotrochozoa;Mollusca;Bivalvia;Autobranchia;Heteroconchia;Euherodonta;Imparidentia;Venerida;Veneroidea;Veneridae;Mercenaria;Mercenaria mercenaria  
UdeM00000028523 29159 227.3 UdeM00000028523 XP\_034321575.1 53.9 206  
89 4 1 201 2 206 1.90E-56 227.3 29159 cellular  
organisms;Eukaryota;Opisthokonta;Metazoa;Eumetazoa;Bilateria;Protostomia;  
Spiralia;Lophotrochozoa;Mollusca;Bivalvia;Autobranchia;Pteriomorpha;Ostreida;Ostreoidea;Ostreidae;Crassostrea;Crassostrea gigas  
UdeM00000028525 6596 331.6 UdeM00000028525 XP\_045196740.1 57.8 263  
109 2 5 266 4 265 9.10E-88 331.6 6596 cellular  
organisms;Eukaryota;Opisthokonta;Metazoa;Eumetazoa;Bilateria;Protostomia;  
Spiralia;Lophotrochozoa;Mollusca;Bivalvia;Autobranchia;Heteroconchia;Euherodonta;Imparidentia;Venerida;Veneroidea;Veneridae;Mercenaria;Mercenaria mercenaria  
UdeM00000028526 6596 332.8 UdeM00000028526 XP\_045196740.1 61.9 257  
86 5 97 350 18 265 5.40E-88 332.8 6596 cellular



organisms;Eukaryota;Opisthokonta;Metazoa;Eumetazoa;Bilateria;Protostomia;Spiralia;Lophotrochozoa;Mollusca;Bivalvia;Autobranchia;Heteroconchia;Euherodonta;Imparidentia;Venerida;Veneroidea;Veneridae;Mercenaria;Mercenaria mercenaria

UdeM00000028527 29159 353.2 UdeM00000028527 XP\_011420323.2 61.9 252  
92 2 20 271 24 271 3.00E-94 353.2 29159 cellular

organisms;Eukaryota;Opisthokonta;Metazoa;Eumetazoa;Bilateria;Protostomia;Spiralia;Lophotrochozoa;Mollusca;Bivalvia;Autobranchia;Pteriormorphia;Ostreida;Ostreoidea;Ostreidae;Crassostrea;Crassostrea gigas

UdeM00000028528 6573 149.4 UdeM00000028528 XP\_021348977.1 36.8 364  
181 15 1 353 297 622 8.70E-33 149.4 6573 cellular

organisms;Eukaryota;Opisthokonta;Metazoa;Eumetazoa;Bilateria;Protostomia;Spiralia;Lophotrochozoa;Mollusca;Bivalvia;Autobranchia;Pteriormorphia;Pectinida;Pectinoidea;Pectinidae;Mizuhopecten;Mizuhopecten yessoensis

UdeM00000028529 6596 1675.6 UdeM00000028529 XP\_045209328.1 34.7  
2879 1674 47 1 2771 40 2820 0.00E+00 1675.6 6596  
cellular

organisms;Eukaryota;Opisthokonta;Metazoa;Eumetazoa;Bilateria;Protostomia;Spiralia;Lophotrochozoa;Mollusca;Bivalvia;Autobranchia;Heteroconchia;Euherodonta;Imparidentia;Venerida;Veneroidea;Veneridae;Mercenaria;Mercenaria mercenaria

UdeM00000028530 37653 251.9 UdeM00000028530 XP\_014777914.1 93.7 127  
8 0 1 127 1 127 4.30E-64 251.9 37653 cellular

organisms;Eukaryota;Opisthokonta;Metazoa;Eumetazoa;Bilateria;Protostomia;Spiralia;Lophotrochozoa;Mollusca;Cephalopoda;Coleoidea;Octopodiformes;Octopoda;Incirrata;Octopodidae;Octopus;Octopus bimaculoides

UdeM00000028531 6596 813.1 UdeM00000028531 XP\_045199605.1 87.1 449  
55 1 40 485 130 578 1.80E-232 813.1 6596 cellular

organisms;Eukaryota;Opisthokonta;Metazoa;Eumetazoa;Bilateria;Protostomia;Spiralia;Lophotrochozoa;Mollusca;Bivalvia;Autobranchia;Heteroconchia;Euherodonta;Imparidentia;Venerida;Veneroidea;Veneridae;Mercenaria;Mercenaria mercenaria

UdeM00000028532 6596 828.9 UdeM00000028532 XP\_045205494.1 52.4 838  
394 5 8 842 30 865 5.90E-237 828.9 6596 cellular

organisms;Eukaryota;Opisthokonta;Metazoa;Eumetazoa;Bilateria;Protostomia;Spiralia;Lophotrochozoa;Mollusca;Bivalvia;Autobranchia;Heteroconchia;Euherodonta;Imparidentia;Venerida;Veneroidea;Veneridae;Mercenaria;Mercenaria mercenaria

UdeM00000028533 6573 443.4 UdeM00000028533 XP\_021367768.1 31.6 824  
546 5 15 829 15 829 7.00E-121 443.4 6573 cellular

organisms;Eukaryota;Opisthokonta;Metazoa;Eumetazoa;Bilateria;Protostomia;Spiralia;Lophotrochozoa;Mollusca;Bivalvia;Autobranchia;Pteriormorphia;Pectinida;Pectinoidea;Pectinidae;Mizuhopecten;Mizuhopecten yessoensis

UdeM00000028534 6596 649.4 UdeM00000028534 XP\_045195642.1 59.8 502  
200 1 14 515 86 585 3.70E-183 649.4 6596 cellular

organisms;Eukaryota;Opisthokonta;Metazoa;Eumetazoa;Bilateria;Protostomia;Spiralia;Lophotrochozoa;Mollusca;Bivalvia;Autobranchia;Heteroconchia;Euherodonta;Imparidentia;Venerida;Veneroidea;Veneridae;Mercenaria;Mercenaria mercenaria

UdeM00000028535 6579 136.3 UdeM00000028535 XP\_033753057.1 57.7 97  
41 0 1 97 1 97 2.10E-29 136.3 6579 cellular

organisms;Eukaryota;Opisthokonta;Metazoa;Eumetazoa;Bilateria;Protostomia;Spiralia;Lophotrochozoa;Mollusca;Bivalvia;Autobranchia;Pteriormorphia;Pectinida;Pectinoidea;Pectinidae;Pecten;Pecten maximus

UdeM00000028536 6596 776.2 UdeM00000028536 XP\_045195642.1 62.7 569  
 210 1 13 581 19 585 3.00E-221 776.2 6596 cellular  
 organisms;Eukaryota;Opisthokonta;Metazoa;Eumetazoa;Bilateria;Protostomia;  
 Spiralia;Lophotrochozoa;Mollusca;Bivalvia;Autobranchia;Heteroconchia;Euhe  
 terodonta;Imparidentia;Venerida;Veneroidea;Veneridae;Mercenaria;Mercenari  
 a mercenaria

UdeM00000028537 6596 359.8 UdeM00000028537 XP\_045183440.1 51.6 353  
 166 3 45 396 32 380 5.70E-96 359.8 6596 cellular  
 organisms;Eukaryota;Opisthokonta;Metazoa;Eumetazoa;Bilateria;Protostomia;  
 Spiralia;Lophotrochozoa;Mollusca;Bivalvia;Autobranchia;Heteroconchia;Euhe  
 terodonta;Imparidentia;Venerida;Veneroidea;Veneridae;Mercenaria;Mercenari  
 a mercenaria

UdeM00000028538 1735272 84.7 UdeM00000028538 XP\_041353177.1 48.1  
 79 41 0 1 79 148 226 1.20E-13 84.7 1735272  
 cellular  
 organisms;Eukaryota;Opisthokonta;Metazoa;Eumetazoa;Bilateria;Protostomia;  
 Spiralia;Lophotrochozoa;Mollusca;Gastropoda;Neomphalina;Neomphaloidea;Pel  
 tospiridae;Gigantopelta;Gigantopelta aegis

UdeM00000028539 6565 396.7 UdeM00000028539 XP\_022320668.1 53.6 371  
 131 1 104 433 420 790 3.90E-107 396.7 6565 cellular  
 organisms;Eukaryota;Opisthokonta;Metazoa;Eumetazoa;Bilateria;Protostomia;  
 Spiralia;Lophotrochozoa;Mollusca;Bivalvia;Autobranchia;Pteriormorphia;Ostr  
 eida;Ostreoidea;Ostreidae;Crassostrea;Crassostrea virginica

UdeM00000028540 6596 861.7 UdeM00000028540 XP\_045205494.1 53.5 848  
 389 5 3 847 27 872 8.10E-247 861.7 6596 cellular  
 organisms;Eukaryota;Opisthokonta;Metazoa;Eumetazoa;Bilateria;Protostomia;  
 Spiralia;Lophotrochozoa;Mollusca;Bivalvia;Autobranchia;Heteroconchia;Euhe  
 terodonta;Imparidentia;Venerida;Veneroidea;Veneridae;Mercenaria;Mercenari  
 a mercenaria

UdeM00000028541 6596 1676.4 UdeM00000028541 XP\_045209328.1 34.6  
 2905 1658 43 1 2786 40 2820 0.00E+00 1676.4 6596  
 cellular  
 organisms;Eukaryota;Opisthokonta;Metazoa;Eumetazoa;Bilateria;Protostomia;  
 Spiralia;Lophotrochozoa;Mollusca;Bivalvia;Autobranchia;Heteroconchia;Euhe  
 terodonta;Imparidentia;Venerida;Veneroidea;Veneridae;Mercenaria;Mercenari  
 a mercenaria

UdeM00000028543 6573 224.9 UdeM00000028543 XP\_021367768.1 31.9 404  
 268 2 27 424 347 749 1.90E-55 224.9 6573 cellular  
 organisms;Eukaryota;Opisthokonta;Metazoa;Eumetazoa;Bilateria;Protostomia;  
 Spiralia;Lophotrochozoa;Mollusca;Bivalvia;Autobranchia;Pteriormorphia;Pect  
 inida;Pectinoidea;Pectinidae;Mizuhopecten;Mizuhopecten yessoensis

UdeM00000028544 6579 130.6 UdeM00000028544 XP\_033752702.1 30.6 222  
 148 3 6 227 9 224 2.70E-27 130.6 6579 cellular  
 organisms;Eukaryota;Opisthokonta;Metazoa;Eumetazoa;Bilateria;Protostomia;  
 Spiralia;Lophotrochozoa;Mollusca;Bivalvia;Autobranchia;Pteriormorphia;Pect  
 inida;Pectinoidea;Pectinidae;Pecten;Pecten maximus

UdeM00000028546 6596 1672.9 UdeM00000028546 XP\_045209328.1 34.7  
 2905 1654 46 1 2786 40 2820 0.00E+00 1672.9 6596  
 cellular  
 organisms;Eukaryota;Opisthokonta;Metazoa;Eumetazoa;Bilateria;Protostomia;  
 Spiralia;Lophotrochozoa;Mollusca;Bivalvia;Autobranchia;Heteroconchia;Euhe  
 terodonta;Imparidentia;Venerida;Veneroidea;Veneridae;Mercenaria;Mercenari  
 a mercenaria

UdeM00000028547 6573 448.7 UdeM00000028547 XP\_021367768.1 31.9 833  
 549 5 6 829 6 829 1.70E-122 448.7 6573 cellular  
 organisms;Eukaryota;Opisthokonta;Metazoa;Eumetazoa;Bilateria;Protostomia;  
 Spiralia;Lophotrochozoa;Mollusca;Bivalvia;Autobranhia;Pteriomorphia;Pect  
 inida;Pectinoidea;Pectinidae;Mizuhopecten;Mizuhopecten yessoensis  
 UdeM00000028548 6596 213.4 UdeM00000028548 XP\_045195642.1 42.4 271  
 126 7 15 271 331 585 3.60E-52 213.4 6596 cellular  
 organisms;Eukaryota;Opisthokonta;Metazoa;Eumetazoa;Bilateria;Protostomia;  
 Spiralia;Lophotrochozoa;Mollusca;Bivalvia;Autobranhia;Heteroconchia;Euhe  
 terodonta;Imparidentia;Venerida;Veneroidea;Veneridae;Mercenaria;Mercenari  
 a mercenaria  
 UdeM00000028548 6596 68.2 UdeM00000028548 XP\_045195642.1 58.8 51  
 21 0 13 63 19 69 1.90E-08 68.2 6596 cellular  
 organisms;Eukaryota;Opisthokonta;Metazoa;Eumetazoa;Bilateria;Protostomia;  
 Spiralia;Lophotrochozoa;Mollusca;Bivalvia;Autobranhia;Heteroconchia;Euhe  
 terodonta;Imparidentia;Venerida;Veneroidea;Veneridae;Mercenaria;Mercenari  
 a mercenaria  
 UdeM00000028549 6596 867.8 UdeM00000028549 XP\_045205494.1 53 862  
 399 6 6 864 30 888 1.20E-248 867.8 6596 cellular  
 organisms;Eukaryota;Opisthokonta;Metazoa;Eumetazoa;Bilateria;Protostomia;  
 Spiralia;Lophotrochozoa;Mollusca;Bivalvia;Autobranhia;Heteroconchia;Euhe  
 terodonta;Imparidentia;Venerida;Veneroidea;Veneridae;Mercenaria;Mercenari  
 a mercenaria  
 UdeM00000028550 6596 1679.5 UdeM00000028550 XP\_045209328.1 34.7  
 2899 1662 46 1 2786 40 2820 0.00E+00 1679.5 6596  
 cellular  
 organisms;Eukaryota;Opisthokonta;Metazoa;Eumetazoa;Bilateria;Protostomia;  
 Spiralia;Lophotrochozoa;Mollusca;Bivalvia;Autobranhia;Heteroconchia;Euhe  
 terodonta;Imparidentia;Venerida;Veneroidea;Veneridae;Mercenaria;Mercenari  
 a mercenaria  
 UdeM00000028551 6573 453.8 UdeM00000028551 XP\_021367768.1 31.8 833  
 550 5 6 829 6 829 5.20E-124 453.8 6573 cellular  
 organisms;Eukaryota;Opisthokonta;Metazoa;Eumetazoa;Bilateria;Protostomia;  
 Spiralia;Lophotrochozoa;Mollusca;Bivalvia;Autobranhia;Pteriomorphia;Pect  
 inida;Pectinoidea;Pectinidae;Mizuhopecten;Mizuhopecten yessoensis  
 UdeM00000044075 50429 65.1 UdeM00000044075 XP\_022785721.1 38.7 93  
 54 1 1 90 365 457 1.90E-07 65.1 50429 cellular  
 organisms;Eukaryota;Opisthokonta;Metazoa;Eumetazoa;Cnidaria;Anthozoa;Hexa  
 corallia;Scleractinia;Astrocoeniina;Pocilloporidae;Stylophora;Stylophora  
 pistillata  
 UdeM00000044076 37621 152.1 UdeM00000044076 XP\_014677757.1 59.1 127  
 50 1 1 125 235 361 4.60E-34 152.1 37621 cellular  
 organisms;Eukaryota;Opisthokonta;Metazoa;Eumetazoa;Bilateria;Protostomia;  
 Ecdysozoa;Scalidophora;Priapulida;Priapulimorpha;Priapulimorphida;Priapul  
 idae;Priapulid;Priapulid caudatus  
 UdeM00000044078 7741 201.4 UdeM00000044078 XP\_019640655.1 49.7 193  
 96 1 65 256 1 193 1.30E-48 201.4 7741 cellular  
 organisms;Eukaryota;Opisthokonta;Metazoa;Eumetazoa;Bilateria;Deuterostomi  
 a;Chordata;Cephalochordata;Leptocardii;Amphioxiformes;Branchiostomidae;Br  
 anchiostoma;Branchiostoma belcheri  
 UdeM00000044079 6565 254.2 UdeM00000044079 XP\_022298930.1 35.5 414  
 164 7 26 340 10 419 2.60E-64 254.2 6565 cellular  
 organisms;Eukaryota;Opisthokonta;Metazoa;Eumetazoa;Bilateria;Protostomia;

Spiralia; Lophotrochozoa; Mollusca; Bivalvia; Autobranchia; Pteriomorpha; Ostr  
eida; Ostreidae; Crassostrea; Crassostrea virginica  
UdeM00000044080 6565 90.5 UdeM00000044080 XP\_022318775.1 46.4 110  
55 3 1 107 1 109 1.70E-15 90.5 6565 cellular  
organisms; Eukaryota; Opisthokonta; Metazoa; Eumetazoa; Bilateria; Protostomia;  
Spiralia; Lophotrochozoa; Mollusca; Bivalvia; Autobranchia; Pteriomorpha; Ostr  
eida; Ostreidae; Crassostrea; Crassostrea virginica  
UdeM00000044081 37621 259.6 UdeM00000044081 XP\_014673981.1 47.3 298  
138 8 5 286 18 312 4.70E-66 259.6 37621 cellular  
organisms; Eukaryota; Opisthokonta; Metazoa; Eumetazoa; Bilateria; Protostomia;  
Ecdysozoa; Scalidophora; Priapulida; Priapulimorpha; Priapulimorphida; Priapul  
idae; Priapulus; Priapulus caudatus  
UdeM00000002437 6526 177.6 UdeM00000002437 XP\_013068006.1 97.6 84  
2 0 1 84 1 84 6.90E-42 177.6 6526 cellular  
organisms; Eukaryota; Opisthokonta; Metazoa; Eumetazoa; Bilateria; Protostomia;  
Spiralia; Lophotrochozoa; Mollusca; Gastropoda; Heterobranchia; Euthyneura; Pan  
pulmonata; Hygrophila; Lymnaeoidea; Planorbidae; Biomphalaria; Biomphalaria  
glabrata  
UdeM00000002438 2607531 377.9 UdeM00000002438 XP\_029645662.1 90  
209 20 1 1 209 1 208 8.60E-102 377.9 2607531  
cellular  
organisms; Eukaryota; Opisthokonta; Metazoa; Eumetazoa; Bilateria; Protostomia;  
Spiralia; Lophotrochozoa; Mollusca; Cephalopoda; Coleoidea; Octopodiformes; Oct  
opoda; Incirrata; Octopodidae; Octopus; Octopus sinensis  
UdeM00000002439 2607531 302.8 UdeM00000002439 XP\_029645662.1 71.3  
209 58 2 1 208 1 208 3.50E-79 302.8 2607531  
cellular  
organisms; Eukaryota; Opisthokonta; Metazoa; Eumetazoa; Bilateria; Protostomia;  
Spiralia; Lophotrochozoa; Mollusca; Cephalopoda; Coleoidea; Octopodiformes; Oct  
opoda; Incirrata; Octopodidae; Octopus; Octopus sinensis  
UdeM00000002440 1735272 115.2 UdeM00000002440 XP\_041355669.1 59.8  
97 38 1 2 97 113 209 4.80E-23 115.2 1735272  
cellular  
organisms; Eukaryota; Opisthokonta; Metazoa; Eumetazoa; Bilateria; Protostomia;  
Spiralia; Lophotrochozoa; Mollusca; Gastropoda; Neomphalina; Neomphaloidea; Pel  
tospiridae; Gigantopelta; Gigantopelta aegis  
UdeM00000002441 6596 325.9 UdeM00000002441 XP\_045183814.1 77.6 223  
39 3 8 225 1 217 4.20E-86 325.9 6596 cellular  
organisms; Eukaryota; Opisthokonta; Metazoa; Eumetazoa; Bilateria; Protostomia;  
Spiralia; Lophotrochozoa; Mollusca; Bivalvia; Autobranchia; Heteroconchia; Eue  
terodonta; Imparidentia; Venerida; Veneroidea; Veneridae; Mercenaria; Mercenari  
a mercenaria  
UdeM00000002442 6573 213 UdeM00000002442 XP\_021359662.1 72.8 125  
34 0 1 125 1 125 2.20E-52 213 6573 cellular  
organisms; Eukaryota; Opisthokonta; Metazoa; Eumetazoa; Bilateria; Protostomia;  
Spiralia; Lophotrochozoa; Mollusca; Bivalvia; Autobranchia; Pteriomorpha; Pect  
inida; Pectinoidea; Pectinidae; Mizuhopecten; Mizuhopecten yessoensis  
UdeM00000002443 29159 295.8 UdeM00000002443 XP\_011417424.2 42.6 406  
214 10 19 414 28 424 8.50E-77 295.8 29159 cellular  
organisms; Eukaryota; Opisthokonta; Metazoa; Eumetazoa; Bilateria; Protostomia;  
Spiralia; Lophotrochozoa; Mollusca; Bivalvia; Autobranchia; Pteriomorpha; Ostr  
eida; Ostreidae; Crassostrea; Crassostrea gigas  
UdeM00000002444 2015173 83.6 UdeM00000002444 XP\_026829131.1 32.5  
160 104 4 1 159 1 157 2.60E-13 83.6 2015173

cellular  
organisms;Eukaryota;Opisthokonta;Metazoa;Eumetazoa;Bilateria;Protostomia;  
Ecdysozoa;Panarthropoda;Arthropoda;Mandibulata;Pancrustacea;Hexapoda;Inse  
cta;Dicondylia;Pterygota;Neoptera;Endopterygota;Hymenoptera;Apocrita;Acul  
eata;Formicoidea;Formicidae;Dorylinae;Ooceraea;Ooceraea biroi  
UdeM00000002445 6596 196.1 UdeM00000002445 XP\_045185140.1 48.7 226  
107 6 3 223 187 408 5.00E-47 196.1 6596 cellular  
organisms;Eukaryota;Opisthokonta;Metazoa;Eumetazoa;Bilateria;Protostomia;  
Spiralia;Lophotrochozoa;Mollusca;Bivalvia;Autobranchia;Heteroconchia;Euhe  
terodonta;Imparidentia;Venerida;Veneroidea;Veneridae;Mercenaria;Mercenari  
a mercenaria  
UdeM00000002447 6596 118.2 UdeM00000002447 XP\_045183607.1 45.1 133  
71 2 198 328 87 219 2.90E-23 118.2 6596 cellular  
organisms;Eukaryota;Opisthokonta;Metazoa;Eumetazoa;Bilateria;Protostomia;  
Spiralia;Lophotrochozoa;Mollusca;Bivalvia;Autobranchia;Heteroconchia;Euhe  
terodonta;Imparidentia;Venerida;Veneroidea;Veneridae;Mercenaria;Mercenari  
a mercenaria  
UdeM00000002446 1735272 210.7 UdeM00000002446 XP\_041356538.1 39.2  
291 163 6 1 286 418 699 3.90E-51 210.7 1735272  
cellular  
organisms;Eukaryota;Opisthokonta;Metazoa;Eumetazoa;Bilateria;Protostomia;  
Spiralia;Lophotrochozoa;Mollusca;Gastropoda;Neomphalina;Neomphaloidea;Pel  
tospiridae;Gigantopelta;Gigantopelta aegis  
UdeM00000002448 6596 174.1 UdeM00000002448 XP\_045185232.1 27.7 509  
198 10 20 517 44 393 4.70E-40 174.1 6596 cellular  
organisms;Eukaryota;Opisthokonta;Metazoa;Eumetazoa;Bilateria;Protostomia;  
Spiralia;Lophotrochozoa;Mollusca;Bivalvia;Autobranchia;Heteroconchia;Euhe  
terodonta;Imparidentia;Venerida;Veneroidea;Veneridae;Mercenaria;Mercenari  
a mercenaria  
UdeM00000002449 6596 346.3 UdeM00000002449 XP\_045183226.1 94.4 179  
10 0 4 182 3 181 2.40E-92 346.3 6596 cellular  
organisms;Eukaryota;Opisthokonta;Metazoa;Eumetazoa;Bilateria;Protostomia;  
Spiralia;Lophotrochozoa;Mollusca;Bivalvia;Autobranchia;Heteroconchia;Euhe  
terodonta;Imparidentia;Venerida;Veneroidea;Veneridae;Mercenaria;Mercenari  
a mercenaria  
UdeM00000002450 6596 169.9 UdeM00000002450 XP\_045183167.1 31.1 760  
378 28 2 669 165 870 1.60E-38 169.9 6596 cellular  
organisms;Eukaryota;Opisthokonta;Metazoa;Eumetazoa;Bilateria;Protostomia;  
Spiralia;Lophotrochozoa;Mollusca;Bivalvia;Autobranchia;Heteroconchia;Euhe  
terodonta;Imparidentia;Venerida;Veneroidea;Veneridae;Mercenaria;Mercenari  
a mercenaria  
UdeM00000002451 1735272 470.7 UdeM00000002451 XP\_041355824.1 45.3  
611 174 10 101 649 71 583 3.00E-129 470.7 1735272  
cellular  
organisms;Eukaryota;Opisthokonta;Metazoa;Eumetazoa;Bilateria;Protostomia;  
Spiralia;Lophotrochozoa;Mollusca;Gastropoda;Neomphalina;Neomphaloidea;Pel  
tospiridae;Gigantopelta;Gigantopelta aegis  
UdeM00000002452 29159 80.5 UdeM00000002452 XP\_011442751.2 34.2 155  
86 8 50 190 11 163 3.10E-12 80.5 29159 cellular  
organisms;Eukaryota;Opisthokonta;Metazoa;Eumetazoa;Bilateria;Protostomia;  
Spiralia;Lophotrochozoa;Mollusca;Bivalvia;Autobranchia;Pteriomorphia;Ostr  
eida;Ostreoidea;Ostreidae;Crassostrea;Crassostrea gigas  
UdeM00000002453 29159 75.1 UdeM00000002453 XP\_011442751.2 34.4 154  
87 8 50 190 11 163 1.30E-10 75.1 29159 cellular

organisms;Eukaryota;Opisthokonta;Metazoa;Eumetazoa;Bilateria;Protostomia;Spiralia;Lophotrochozoa;Mollusca;Bivalvia;Autobranhia;Pteriomorphia;Ostreida;Ostreoidea;Ostreidae;Crassostrea;Crassostrea gigas  
UdeM00000002458 29159 106.3 UdeM00000002458 XP\_034321135.1 49.3 136  
69 0 36 171 50 185 4.10E-20 106.3 29159 cellular  
organisms;Eukaryota;Opisthokonta;Metazoa;Eumetazoa;Bilateria;Protostomia;Spiralia;Lophotrochozoa;Mollusca;Bivalvia;Autobranhia;Pteriomorphia;Ostreida;Ostreoidea;Ostreidae;Crassostrea;Crassostrea gigas  
UdeM00000002459 6596 391 UdeM00000002459 XP\_045184247.1 69.6 247  
75 0 8 254 5 251 1.20E-105 391 6596 cellular  
organisms;Eukaryota;Opisthokonta;Metazoa;Eumetazoa;Bilateria;Protostomia;Spiralia;Lophotrochozoa;Mollusca;Bivalvia;Autobranhia;Heteroconchia;Euherodonta;Imparidentia;Venerida;Veneroidea;Veneridae;Mercenaria;Mercenaria mercenaria  
UdeM00000002460 6596 398.3 UdeM00000002460 XP\_045184247.1 70 250  
75 0 8 257 5 254 7.50E-108 398.3 6596 cellular  
organisms;Eukaryota;Opisthokonta;Metazoa;Eumetazoa;Bilateria;Protostomia;Spiralia;Lophotrochozoa;Mollusca;Bivalvia;Autobranhia;Heteroconchia;Euherodonta;Imparidentia;Venerida;Veneroidea;Veneridae;Mercenaria;Mercenaria mercenaria  
UdeM00000002461 6596 698 UdeM00000002461 XP\_045172625.1 34 1639  
860 48 1 1528 24 1552 2.70E-197 698 6596 cellular  
organisms;Eukaryota;Opisthokonta;Metazoa;Eumetazoa;Bilateria;Protostomia;Spiralia;Lophotrochozoa;Mollusca;Bivalvia;Autobranhia;Heteroconchia;Euherodonta;Imparidentia;Venerida;Veneroidea;Veneridae;Mercenaria;Mercenaria mercenaria  
UdeM00000002462 6596 689.5 UdeM00000002462 XP\_045172625.1 34 1631  
856 48 1 1520 32 1552 9.60E-195 689.5 6596 cellular  
organisms;Eukaryota;Opisthokonta;Metazoa;Eumetazoa;Bilateria;Protostomia;Spiralia;Lophotrochozoa;Mollusca;Bivalvia;Autobranhia;Heteroconchia;Euherodonta;Imparidentia;Venerida;Veneroidea;Veneridae;Mercenaria;Mercenaria mercenaria  
UdeM00000002463 7574 272.7 UdeM00000002463 XP\_023932827.1 63.3 207  
76 0 9 215 8 214 4.00E-70 272.7 7574 cellular  
organisms;Eukaryota;Opisthokonta;Metazoa;Eumetazoa;Bilateria;Protostomia;Spiralia;Lophotrochozoa;Brachiopoda;Linguliformea;Lingulata;Lingulida;Linguloidea;Lingulidae;Lingula;Lingula anatina  
UdeM00000002464 46514 89 UdeM00000002464 XP\_038073407.1 27 248  
168 4 15 249 2 249 1.10E-14 89 46514 cellular  
organisms;Eukaryota;Opisthokonta;Metazoa;Eumetazoa;Bilateria;Deuterostomia;Echinodermata;Eleutherozoa;Asterozoa;Asteroidea;Valvatacea;Valvatida;Asterinidae;Patiria;Patiria miniata  
UdeM00000002468 6565 176.8 UdeM00000002468 XP\_022305240.1 47.3 220  
89 5 1 205 430 637 2.80E-41 176.8 6565 cellular  
organisms;Eukaryota;Opisthokonta;Metazoa;Eumetazoa;Bilateria;Protostomia;Spiralia;Lophotrochozoa;Mollusca;Bivalvia;Autobranhia;Pteriomorphia;Ostreida;Ostreoidea;Ostreidae;Crassostrea;Crassostrea virginica  
UdeM00000002469 6596 188 UdeM00000002469 XP\_045183723.1 89.2 102  
11 0 1 102 1 102 6.40E-45 188 6596 cellular  
organisms;Eukaryota;Opisthokonta;Metazoa;Eumetazoa;Bilateria;Protostomia;Spiralia;Lophotrochozoa;Mollusca;Bivalvia;Autobranhia;Heteroconchia;Euherodonta;Imparidentia;Venerida;Veneroidea;Veneridae;Mercenaria;Mercenaria mercenaria

UdeM00000002470 6596 196.8 UdeM00000002470 XP\_045183125.1 48.1 241  
 103 5 6 228 4 240 2.90E-47 196.8 6596 cellular  
 organisms;Eukaryota;Opisthokonta;Metazoa;Eumetazoa;Bilateria;Protostomia;  
 Spiralia;Lophotrochozoa;Mollusca;Bivalvia;Autobranchia;Heteroconchia;Euhe  
 terodonta;Imparidentia;Venerida;Veneroidea;Veneridae;Mercenaria;Mercenari  
 a mercenaria  
 UdeM00000002472 6565 404.1 UdeM00000002472 XP\_022344771.1 56.1 328  
 144 0 3 330 2 329 1.80E-109 404.1 6565 cellular  
 organisms;Eukaryota;Opisthokonta;Metazoa;Eumetazoa;Bilateria;Protostomia;  
 Spiralia;Lophotrochozoa;Mollusca;Bivalvia;Autobranchia;Pteriormorphia;Ostr  
 eida;Ostreoidea;Ostreidae;Crassostrea;Crassostrea virginica  
 UdeM00000002473 6565 397.9 UdeM00000002473 XP\_022306667.1 58 312  
 127 3 23 333 20 328 1.30E-107 397.9 6565 cellular  
 organisms;Eukaryota;Opisthokonta;Metazoa;Eumetazoa;Bilateria;Protostomia;  
 Spiralia;Lophotrochozoa;Mollusca;Bivalvia;Autobranchia;Pteriormorphia;Ostr  
 eida;Ostreoidea;Ostreidae;Crassostrea;Crassostrea virginica  
 UdeM00000002474 6596 201.8 UdeM00000002474 XP\_045168118.1 51.9 185  
 78 4 2 175 69 253 2.50E-48 201.8 6596 cellular  
 organisms;Eukaryota;Opisthokonta;Metazoa;Eumetazoa;Bilateria;Protostomia;  
 Spiralia;Lophotrochozoa;Mollusca;Bivalvia;Autobranchia;Heteroconchia;Euhe  
 terodonta;Imparidentia;Venerida;Veneroidea;Veneridae;Mercenaria;Mercenari  
 a mercenaria  
 UdeM00000002475 400727 248.1 UdeM00000002475 XP\_025079408.1 52.1  
 219 97 4 15 232 13 224 3.80E-62 248.1 400727  
 cellular  
 organisms;Eukaryota;Opisthokonta;Metazoa;Eumetazoa;Bilateria;Protostomia;  
 Spiralia;Lophotrochozoa;Mollusca;Gastropoda;Caenogastropoda;Architaeniogl  
 ossa;Ampullarioidea;Ampullariidae;Pomacea;Pomacea canaliculata  
 UdeM00000002476 6596 214.2 UdeM00000002476 XP\_045183845.1 32.6 466  
 262 8 3 425 2 458 3.30E-52 214.2 6596 cellular  
 organisms;Eukaryota;Opisthokonta;Metazoa;Eumetazoa;Bilateria;Protostomia;  
 Spiralia;Lophotrochozoa;Mollusca;Bivalvia;Autobranchia;Heteroconchia;Euhe  
 terodonta;Imparidentia;Venerida;Veneroidea;Veneridae;Mercenaria;Mercenari  
 a mercenaria  
 UdeM00000002477 6596 214.2 UdeM00000002477 XP\_045183845.1 32.6 466  
 262 8 1 423 2 458 3.30E-52 214.2 6596 cellular  
 organisms;Eukaryota;Opisthokonta;Metazoa;Eumetazoa;Bilateria;Protostomia;  
 Spiralia;Lophotrochozoa;Mollusca;Bivalvia;Autobranchia;Heteroconchia;Euhe  
 terodonta;Imparidentia;Venerida;Veneroidea;Veneridae;Mercenaria;Mercenari  
 a mercenaria  
 UdeM00000002478 6573 143.3 UdeM00000002478 XP\_021372297.1 40.2 199  
 106 3 12 210 3259 3444 3.60E-31 143.3 6573 cellular  
 organisms;Eukaryota;Opisthokonta;Metazoa;Eumetazoa;Bilateria;Protostomia;  
 Spiralia;Lophotrochozoa;Mollusca;Bivalvia;Autobranchia;Pteriormorphia;Pect  
 inida;Pectinoidea;Pectinidae;Mizuhopecten;Mizuhopecten yessoensis  
 UdeM00000002479 6573 159.8 UdeM00000002479 XP\_021359097.1 43.3 187  
 86 3 104 270 175 361 4.80E-36 159.8 6573 cellular  
 organisms;Eukaryota;Opisthokonta;Metazoa;Eumetazoa;Bilateria;Protostomia;  
 Spiralia;Lophotrochozoa;Mollusca;Bivalvia;Autobranchia;Pteriormorphia;Pect  
 inida;Pectinoidea;Pectinidae;Mizuhopecten;Mizuhopecten yessoensis  
 UdeM00000002481 6596 158.7 UdeM00000002481 XP\_045162465.1 24.7 489  
 319 11 12 466 23 496 1.80E-35 158.7 6596 cellular  
 organisms;Eukaryota;Opisthokonta;Metazoa;Eumetazoa;Bilateria;Protostomia;  
 Spiralia;Lophotrochozoa;Mollusca;Bivalvia;Autobranchia;Heteroconchia;Euhe

terodonta;Imparidentia;Venerida;Veneroidea;Veneridae;Mercenaria;Mercenari  
 a mercenaria  
 UdeM00000002482 6596 77.8 UdeM00000002482 XP\_045176423.1 29.3 133  
 91 2 15 145 167 298 3.40E-11 77.8 6596 cellular  
 organisms;Eukaryota;Opisthokonta;Metazoa;Eumetazoa;Bilateria;Protostomia;  
 Spiralia;Lophotrochozoa;Mollusca;Bivalvia;Autobranchia;Heteroconchia;Euhe  
 terodonta;Imparidentia;Venerida;Veneroidea;Veneridae;Mercenaria;Mercenari  
 a mercenaria  
 UdeM00000002483 6596 99.4 UdeM00000002483 XP\_045162465.1 34.3 137  
 88 1 11 145 23 159 4.60E-18 99.4 6596 cellular  
 organisms;Eukaryota;Opisthokonta;Metazoa;Eumetazoa;Bilateria;Protostomia;  
 Spiralia;Lophotrochozoa;Mollusca;Bivalvia;Autobranchia;Heteroconchia;Euhe  
 terodonta;Imparidentia;Venerida;Veneroidea;Veneridae;Mercenaria;Mercenari  
 a mercenaria  
 UdeM00000002484 6596 169.5 UdeM00000002484 XP\_045162465.1 25.6 484  
 332 10 10 475 22 495 1.10E-38 169.5 6596 cellular  
 organisms;Eukaryota;Opisthokonta;Metazoa;Eumetazoa;Bilateria;Protostomia;  
 Spiralia;Lophotrochozoa;Mollusca;Bivalvia;Autobranchia;Heteroconchia;Euhe  
 terodonta;Imparidentia;Venerida;Veneroidea;Veneridae;Mercenaria;Mercenari  
 a mercenaria  
 UdeM00000002485 6596 173.7 UdeM00000002485 XP\_045176423.1 32.9 334  
 197 10 79 400 7 325 6.90E-40 173.7 6596 cellular  
 organisms;Eukaryota;Opisthokonta;Metazoa;Eumetazoa;Bilateria;Protostomia;  
 Spiralia;Lophotrochozoa;Mollusca;Bivalvia;Autobranchia;Heteroconchia;Euhe  
 terodonta;Imparidentia;Venerida;Veneroidea;Veneridae;Mercenaria;Mercenari  
 a mercenaria  
 UdeM00000002486 225164 149.8 UdeM00000002486 XP\_009054176.1 31.6  
 326 203 10 8 324 14 328 7.40E-33 149.8 225164  
 cellular  
 organisms;Eukaryota;Opisthokonta;Metazoa;Eumetazoa;Bilateria;Protostomia;  
 Spiralia;Lophotrochozoa;Mollusca;Gastropoda;Patellogastropoda;Lottioidea;  
 Lottiidae;Lottia;Lottia gigantea  
 UdeM00000002487 225164 112.8 UdeM00000002487 XP\_009058229.1 50.9  
 108 40 1 8 115 2 96 2.80E-22 112.8 225164  
 cellular  
 organisms;Eukaryota;Opisthokonta;Metazoa;Eumetazoa;Bilateria;Protostomia;  
 Spiralia;Lophotrochozoa;Mollusca;Gastropoda;Patellogastropoda;Lottioidea;  
 Lottiidae;Lottia;Lottia gigantea  
 UdeM00000002488 7574 92.8 UdeM00000002488 XP\_013380206.1 38.8 103  
 61 2 9 109 207 309 2.90E-16 92.8 7574 cellular  
 organisms;Eukaryota;Opisthokonta;Metazoa;Eumetazoa;Bilateria;Protostomia;  
 Spiralia;Lophotrochozoa;Brachiopoda;Linguliformea;Lingulata;Lingulida;Lin  
 guloidea;Lingulidae;Lingula;Lingula anatina  
 UdeM00000002489 6596 374.4 UdeM00000002489 XP\_045161678.1 63.6 286  
 104 0 1 286 130 415 1.40E-100 374.4 6596 cellular  
 organisms;Eukaryota;Opisthokonta;Metazoa;Eumetazoa;Bilateria;Protostomia;  
 Spiralia;Lophotrochozoa;Mollusca;Bivalvia;Autobranchia;Heteroconchia;Euhe  
 terodonta;Imparidentia;Venerida;Veneroidea;Veneridae;Mercenaria;Mercenari  
 a mercenaria  
 UdeM00000002490 6596 478.8 UdeM00000002490 XP\_045161678.1 63.8 367  
 133 0 1 367 130 496 6.50E-132 478.8 6596 cellular  
 organisms;Eukaryota;Opisthokonta;Metazoa;Eumetazoa;Bilateria;Protostomia;  
 Spiralia;Lophotrochozoa;Mollusca;Bivalvia;Autobranchia;Heteroconchia;Euhe



terodonta;Imparidentia;Venerida;Veneroidea;Veneridae;Mercenaria;Mercenaria mercenaria

UdeM00000002491 6565 323.9 UdeM00000002491 XP\_022309566.1 32.4 515  
317 10 466 974 521 1010 9.10E-85 323.9 6565 cellular

organisms;Eukaryota;Opisthokonta;Metazoa;Eumetazoa;Bilateria;Protostomia;Spiralia;Lophotrochozoa;Mollusca;Bivalvia;Autobranchia;Pteriormorphia;Ostreida;Ostreoidea;Ostreidae;Crassostrea;Crassostrea virginica

UdeM00000002492 6579 240 UdeM00000002492 XP\_033725677.1 58.9 202  
80 2 1 200 1 201 3.20E-60 240 6579 cellular

organisms;Eukaryota;Opisthokonta;Metazoa;Eumetazoa;Bilateria;Protostomia;Spiralia;Lophotrochozoa;Mollusca;Bivalvia;Autobranchia;Pteriormorphia;Pectinida;Pectinoidea;Pectinidae;Pecten;Pecten maximus

UdeM00000002493 6596 274.2 UdeM00000002493 XP\_045184727.1 49.8 279  
133 4 38 311 34 310 2.00E-70 274.2 6596 cellular

organisms;Eukaryota;Opisthokonta;Metazoa;Eumetazoa;Bilateria;Protostomia;Spiralia;Lophotrochozoa;Mollusca;Bivalvia;Autobranchia;Heteroconchia;Euheterodonta;Imparidentia;Venerida;Veneroidea;Veneridae;Mercenaria;Mercenaria mercenaria

UdeM00000002495 8128 71.2 UdeM00000002495 XP\_025753562.1 46.7 75  
40 0 1 75 240 314 9.10E-10 71.2 8128 cellular

organisms;Eukaryota;Opisthokonta;Metazoa;Eumetazoa;Bilateria;Deuterostomia;Chordata;Craniata;Vertebrata;Gnathostomata;Teleostomi;Euteleostomi;Actinopterygii;Actinopteri;Neopterygii;Teleostei;Osteoglossocephalai;Clupeocephala;Euteleostei;Neoteleostei;Eurypterygia;Ctenosquamata;Acanthomorphata;Euacanthomorphacea;Percomorphaceae;Ovalentaria;Cichlomorphae;Cichliformes;Cichlidae;African

cichlids;Pseudocrenilabrinae;Oreochromini;Oreochromis;Oreochromis niloticus

UdeM00000002496 218467 103.6 UdeM00000002496 XP\_023210553.1 34.5  
148 81 1 4 135 91 238 2.00E-19 103.6 218467

cellular

organisms;Eukaryota;Opisthokonta;Metazoa;Eumetazoa;Bilateria;Protostomia;Ecdysozoa;Panarthropoda;Arthropoda;Chelicerata;Arachnida;Scorpiones;Buthida;Buthoidea;Buthidae;Centruroides;Centruroides sculpturatus

UdeM00000002497 400727 84.3 UdeM00000002497 XP\_025081961.1 63.3  
60 21 1 6 65 6 64 1.10E-13 84.3 400727

cellular

organisms;Eukaryota;Opisthokonta;Metazoa;Eumetazoa;Bilateria;Protostomia;Spiralia;Lophotrochozoa;Mollusca;Gastropoda;Caenogastropoda;Architaenioglossa;Ampullarioidea;Ampullariidae;Pomacea;Pomacea canaliculata

UdeM00000002498 6596 386.7 UdeM00000002498 XP\_045184753.1 35.6 696  
380 14 5 649 10 688 5.70E-104 386.7 6596 cellular

organisms;Eukaryota;Opisthokonta;Metazoa;Eumetazoa;Bilateria;Protostomia;Spiralia;Lophotrochozoa;Mollusca;Bivalvia;Autobranchia;Heteroconchia;Euheterodonta;Imparidentia;Venerida;Veneroidea;Veneridae;Mercenaria;Mercenaria mercenaria

UdeM00000002499 6596 330.9 UdeM00000002499 XP\_045184753.1 37.1 591  
309 13 1 545 115 688 3.10E-87 330.9 6596 cellular

organisms;Eukaryota;Opisthokonta;Metazoa;Eumetazoa;Bilateria;Protostomia;Spiralia;Lophotrochozoa;Mollusca;Bivalvia;Autobranchia;Heteroconchia;Euheterodonta;Imparidentia;Venerida;Veneroidea;Veneridae;Mercenaria;Mercenaria mercenaria

UdeM00000002500 6579 512.3 UdeM00000002500 XP\_033725398.1 53.7 588  
227 14 1 572 1 559 7.90E-142 512.3 6579 cellular

organisms;Eukaryota;Opisthokonta;Metazoa;Eumetazoa;Bilateria;Protostomia;Spiralia;Lophotrochozoa;Mollusca;Bivalvia;Autobranchia;Pteriormorphia;Pectinida;Pectinoidea;Pectinidae;Pecten;Pecten maximus

UdeM00000002501 6596 426.8 UdeM00000002501 XP\_045184712.1 41.8 490  
280 2 12 496 18 507 3.80E-116 426.8 6596 cellular

organisms;Eukaryota;Opisthokonta;Metazoa;Eumetazoa;Bilateria;Protostomia;Spiralia;Lophotrochozoa;Mollusca;Bivalvia;Autobranchia;Heteroconchia;Euheterodonta;Imparidentia;Venerida;Veneroidea;Veneridae;Mercenaria;Mercenaria mercenaria

UdeM00000002504 6596 135.2 UdeM00000002504 XP\_045184589.1 75.3 77  
19 0 12 88 264 340 4.40E-29 135.2 6596 cellular

organisms;Eukaryota;Opisthokonta;Metazoa;Eumetazoa;Bilateria;Protostomia;Spiralia;Lophotrochozoa;Mollusca;Bivalvia;Autobranchia;Heteroconchia;Euheterodonta;Imparidentia;Venerida;Veneroidea;Veneridae;Mercenaria;Mercenaria mercenaria

UdeM00000002505 37653 188 UdeM00000002505 XP\_014780111.1 72.2 115  
32 0 12 126 173 287 7.70E-45 188 37653 cellular

organisms;Eukaryota;Opisthokonta;Metazoa;Eumetazoa;Bilateria;Protostomia;Spiralia;Lophotrochozoa;Mollusca;Cephalopoda;Coleoidea;Octopodiformes;Octopoda;Incirrata;Octopodidae;Octopus;Octopus bimaculoides

UdeM00000002506 2607531 185.3 UdeM00000002506 XP\_029639912.1 58.6  
145 59 1 3 146 8 152 5.70E-44 185.3 2607531  
cellular

organisms;Eukaryota;Opisthokonta;Metazoa;Eumetazoa;Bilateria;Protostomia;Spiralia;Lophotrochozoa;Mollusca;Cephalopoda;Coleoidea;Octopodiformes;Octopoda;Incirrata;Octopodidae;Octopus;Octopus sinensis

UdeM00000002507 6596 364 UdeM00000002507 XP\_045184896.1 50.4 351  
164 5 1 345 1 347 2.70E-97 364 6596 cellular

organisms;Eukaryota;Opisthokonta;Metazoa;Eumetazoa;Bilateria;Protostomia;Spiralia;Lophotrochozoa;Mollusca;Bivalvia;Autobranchia;Heteroconchia;Euheterodonta;Imparidentia;Venerida;Veneroidea;Veneridae;Mercenaria;Mercenaria mercenaria

UdeM00000002508 6596 146.7 UdeM00000002508 XP\_045183842.1 67.8 118  
38 0 1 118 1 118 1.80E-32 146.7 6596 cellular

organisms;Eukaryota;Opisthokonta;Metazoa;Eumetazoa;Bilateria;Protostomia;Spiralia;Lophotrochozoa;Mollusca;Bivalvia;Autobranchia;Heteroconchia;Euheterodonta;Imparidentia;Venerida;Veneroidea;Veneridae;Mercenaria;Mercenaria mercenaria

UdeM00000002509 6596 951.8 UdeM00000002509 XP\_045184129.1 71.5 662  
180 4 13 668 1 659 4.60E-274 951.8 6596 cellular

organisms;Eukaryota;Opisthokonta;Metazoa;Eumetazoa;Bilateria;Protostomia;Spiralia;Lophotrochozoa;Mollusca;Bivalvia;Autobranchia;Heteroconchia;Euheterodonta;Imparidentia;Venerida;Veneroidea;Veneridae;Mercenaria;Mercenaria mercenaria

UdeM00000002510 6596 973.4 UdeM00000002510 XP\_045167388.1 91.8 513  
42 0 1 513 1 513 1.10E-280 973.4 6596 cellular

organisms;Eukaryota;Opisthokonta;Metazoa;Eumetazoa;Bilateria;Protostomia;Spiralia;Lophotrochozoa;Mollusca;Bivalvia;Autobranchia;Heteroconchia;Euheterodonta;Imparidentia;Venerida;Veneroidea;Veneridae;Mercenaria;Mercenaria mercenaria

UdeM00000002511 400727 144.4 UdeM00000002511 XP\_025080870.1 62.7  
110 40 1 1 110 80 188 9.30E-32 144.4 400727  
cellular

organisms;Eukaryota;Opisthokonta;Metazoa;Eumetazoa;Bilateria;Protostomia;

Spiralia; Lophotrochozoa; Mollusca; Gastropoda; Caenogastropoda; Architaenioglossa; Ampullarioidea; Ampullariidae; Pomacea; Pomacea canaliculata

UdeM00000002512 6579 283.5 UdeM00000002512 XP\_033725273.1 56 241  
105 1 66 306 78 317 3.20E-73 283.5 6579 cellular  
organisms; Eukaryota; Opisthokonta; Metazoa; Eumetazoa; Bilateria; Protostomia; Spiralia; Lophotrochozoa; Mollusca; Bivalvia; Autobranchia; Pteriomorpha; Pectinida; Pectinoidea; Pectinidae; Pecten; Pecten maximus

UdeM00000002514 6579 149.8 UdeM00000002514 XP\_033725273.1 63.3 109  
40 0 22 130 84 192 2.40E-33 149.8 6579 cellular  
organisms; Eukaryota; Opisthokonta; Metazoa; Eumetazoa; Bilateria; Protostomia; Spiralia; Lophotrochozoa; Mollusca; Bivalvia; Autobranchia; Pteriomorpha; Pectinida; Pectinoidea; Pectinidae; Pecten; Pecten maximus

UdeM00000002513 6579 149.8 UdeM00000002513 XP\_033725273.1 63.3 109  
40 0 74 182 84 192 3.30E-33 149.8 6579 cellular  
organisms; Eukaryota; Opisthokonta; Metazoa; Eumetazoa; Bilateria; Protostomia; Spiralia; Lophotrochozoa; Mollusca; Bivalvia; Autobranchia; Pteriomorpha; Pectinida; Pectinoidea; Pectinidae; Pecten; Pecten maximus

UdeM00000002515 6579 279.6 UdeM00000002515 XP\_033725273.1 56.2 235  
102 1 72 306 84 317 4.60E-72 279.6 6579 cellular  
organisms; Eukaryota; Opisthokonta; Metazoa; Eumetazoa; Bilateria; Protostomia; Spiralia; Lophotrochozoa; Mollusca; Bivalvia; Autobranchia; Pteriomorpha; Pectinida; Pectinoidea; Pectinidae; Pecten; Pecten maximus

UdeM00000002516 29159 518.5 UdeM00000002516 XP\_019926413.2 70.6 371  
101 4 1 371 239 601 7.80E-144 518.5 29159 cellular  
organisms; Eukaryota; Opisthokonta; Metazoa; Eumetazoa; Bilateria; Protostomia; Spiralia; Lophotrochozoa; Mollusca; Bivalvia; Autobranchia; Pteriomorpha; Ostracoda; Ostreidae; Crassostrea; Crassostrea gigas

UdeM00000002517 6579 335.1 UdeM00000002517 XP\_033725273.1 54.7 285  
127 2 74 357 84 367 1.10E-88 335.1 6579 cellular  
organisms; Eukaryota; Opisthokonta; Metazoa; Eumetazoa; Bilateria; Protostomia; Spiralia; Lophotrochozoa; Mollusca; Bivalvia; Autobranchia; Pteriomorpha; Pectinida; Pectinoidea; Pectinidae; Pecten; Pecten maximus

UdeM00000002518 6579 282.3 UdeM00000002518 XP\_033725273.1 56.6 235  
101 1 72 306 84 317 7.20E-73 282.3 6579 cellular  
organisms; Eukaryota; Opisthokonta; Metazoa; Eumetazoa; Bilateria; Protostomia; Spiralia; Lophotrochozoa; Mollusca; Bivalvia; Autobranchia; Pteriomorpha; Pectinida; Pectinoidea; Pectinidae; Pecten; Pecten maximus

UdeM00000002519 1735272 320.1 UdeM00000002519 XP\_041356334.1 47.6  
334 167 5 21 351 14 342 3.60E-84 320.1 1735272  
cellular  
organisms; Eukaryota; Opisthokonta; Metazoa; Eumetazoa; Bilateria; Protostomia; Spiralia; Lophotrochozoa; Mollusca; Gastropoda; Neomphalina; Neomphaloidea; Peltospiridae; Gigantopelta; Gigantopelta aegis

UdeM00000002520 30732 179.5 UdeM00000002520 XP\_024118320.1 43.3 208  
116 2 14 221 409 614 4.70E-42 179.5 30732 cellular  
organisms; Eukaryota; Opisthokonta; Metazoa; Eumetazoa; Bilateria; Deuterostomia; Chordata; Craniata; Vertebrata; Gnathostomata; Teleostomi; Euteleostomi; Actinopterygii; Actinopteri; Neopterygii; Teleostei; Osteoglossocephalai; Clupeocephala; Euteleostei; Neoteleostei; Eurypterygia; Ctenosquamata; Acanthopterygii; Euacanthopterygii; Percomorphaceae; Ovalentaria; Atherinomorpha; Belontiiformes; Adrianichthyoidei; Adrianichthyidae; Oryziinae; Oryzias; Oryzias melastigma

UdeM00000002522 8236 120.2 UdeM00000002522 XP\_044216249.1 39 177  
102 2 31 207 100 270 3.20E-24 120.2 8236 cellular

organisms;Eukaryota;Opisthokonta;Metazoa;Eumetazoa;Bilateria;Deuterostomi  
a;Chordata;Craniata;Vertebrata;Gnathostomata;Teleostomi;Euteleostomi;Acti  
nopterygii;Actinopteri;Neopterygii;Teleostei;Osteoglossocephalai;Clupeoce  
phala;Euteleosteomorpha;Neoteleostei;Eurypterygia;Ctenosquamata;Acanthomo  
rphata;Euacanthomorphacea;Percomorphaceae;Pelagiaria;Scombriformes;Scombr  
idae;Scombrinae;Thunnini;Thunnus;Thunnus albacares

UdeM00000002521 8236 95.1 UdeM00000002521 XP\_044224186.1 35.5 152  
94 1 17 168 10 157 9.10E-17 95.1 8236 cellular

organisms;Eukaryota;Opisthokonta;Metazoa;Eumetazoa;Bilateria;Deuterostomi  
a;Chordata;Craniata;Vertebrata;Gnathostomata;Teleostomi;Euteleostomi;Acti  
nopterygii;Actinopteri;Neopterygii;Teleostei;Osteoglossocephalai;Clupeoce  
phala;Euteleosteomorpha;Neoteleostei;Eurypterygia;Ctenosquamata;Acanthomo  
rphata;Euacanthomorphacea;Percomorphaceae;Pelagiaria;Scombriformes;Scombr  
idae;Scombrinae;Thunnini;Thunnus;Thunnus albacares

UdeM00000002523 6579 244.2 UdeM00000002523 XP\_033731739.1 36.7 376  
103 1 2 242 3 378 1.70E-61 244.2 6579 cellular

organisms;Eukaryota;Opisthokonta;Metazoa;Eumetazoa;Bilateria;Protostomia;  
Spiralia;Lophotrochozoa;Mollusca;Bivalvia;Autobranchia;Pteriormorphia;Pect  
inida;Pectinoidea;Pectinidae;Pecten;Pecten maximus

UdeM00000002524 6573 61.2 UdeM00000002524 XP\_021341725.1 60.4 48  
19 0 1 48 1 48 7.80E-07 61.2 6573 cellular

organisms;Eukaryota;Opisthokonta;Metazoa;Eumetazoa;Bilateria;Protostomia;  
Spiralia;Lophotrochozoa;Mollusca;Bivalvia;Autobranchia;Pteriormorphia;Pect  
inida;Pectinoidea;Pectinidae;Mizuhopecten;Mizuhopecten yessoensis

UdeM00000002525 6596 306.2 UdeM00000002525 XP\_045192227.1 42.4 361  
193 4 8 356 75 432 5.50E-80 306.2 6596 cellular

organisms;Eukaryota;Opisthokonta;Metazoa;Eumetazoa;Bilateria;Protostomia;  
Spiralia;Lophotrochozoa;Mollusca;Bivalvia;Autobranchia;Heteroconchia;Euhe  
terodonta;Imparidentia;Venerida;Veneroidea;Veneridae;Mercenaria;Mercenari  
a mercenaria

UdeM00000002526 6596 306.2 UdeM00000002526 XP\_045192227.1 42.4 361  
193 4 8 356 75 432 5.50E-80 306.2 6596 cellular

organisms;Eukaryota;Opisthokonta;Metazoa;Eumetazoa;Bilateria;Protostomia;  
Spiralia;Lophotrochozoa;Mollusca;Bivalvia;Autobranchia;Heteroconchia;Euhe  
terodonta;Imparidentia;Venerida;Veneroidea;Veneridae;Mercenaria;Mercenari  
a mercenaria

UdeM00000002527 6596 320.5 UdeM00000002527 XP\_045192227.1 41.6 380  
199 4 9 370 58 432 2.90E-84 320.5 6596 cellular

organisms;Eukaryota;Opisthokonta;Metazoa;Eumetazoa;Bilateria;Protostomia;  
Spiralia;Lophotrochozoa;Mollusca;Bivalvia;Autobranchia;Heteroconchia;Euhe  
terodonta;Imparidentia;Venerida;Veneroidea;Veneridae;Mercenaria;Mercenari  
a mercenaria

UdeM00000002528 6596 326.2 UdeM00000002528 XP\_045192227.1 44.5 371  
190 4 110 468 66 432 6.70E-86 326.2 6596 cellular

organisms;Eukaryota;Opisthokonta;Metazoa;Eumetazoa;Bilateria;Protostomia;  
Spiralia;Lophotrochozoa;Mollusca;Bivalvia;Autobranchia;Heteroconchia;Euhe  
terodonta;Imparidentia;Venerida;Veneroidea;Veneridae;Mercenaria;Mercenari  
a mercenaria

UdeM00000002529 6596 327.4 UdeM00000002529 XP\_045173066.1 44.2 355  
189 6 48 399 6 354 2.50E-86 327.4 6596 cellular

organisms;Eukaryota;Opisthokonta;Metazoa;Eumetazoa;Bilateria;Protostomia;  
Spiralia;Lophotrochozoa;Mollusca;Bivalvia;Autobranchia;Heteroconchia;Euhe  
terodonta;Imparidentia;Venerida;Veneroidea;Veneridae;Mercenaria;Mercenari  
a mercenaria

UdeM00000002531 1735272 284.6 UdeM00000002531 XP\_041355659.1 55.3  
 302 72 7 8 284 71 334 1.50E-73 284.6 1735272  
 cellular  
 organisms;Eukaryota;Opisthokonta;Metazoa;Eumetazoa;Bilateria;Protostomia;  
 Spiralia;Lophotrochozoa;Mollusca;Gastropoda;Neomphalina;Neomphaloidea;Pel  
 tospiridae;Gigantopelta;Gigantopelta aegis  
 UdeM00000002532 6596 183.3 UdeM00000002532 XP\_045183494.1 71.6 134  
 33 1 5 133 204 337 2.30E-43 183.3 6596 cellular  
 organisms;Eukaryota;Opisthokonta;Metazoa;Eumetazoa;Bilateria;Protostomia;  
 Spiralia;Lophotrochozoa;Mollusca;Bivalvia;Autobranchia;Heteroconchia;Euhe  
 terodonta;Imparidentia;Venerida;Veneroidea;Veneridae;Mercenaria;Mercenari  
 a mercenaria  
 UdeM00000002533 6573 290.8 UdeM00000002533 XP\_021347459.1 29.2 706  
 471 16 84 778 507 1194 5.10E-75 290.8 6573 cellular  
 organisms;Eukaryota;Opisthokonta;Metazoa;Eumetazoa;Bilateria;Protostomia;  
 Spiralia;Lophotrochozoa;Mollusca;Bivalvia;Autobranchia;Pteriormorphia;Pect  
 inida;Pectinoidea;Pectinidae;Mizuhopecten;Mizuhopecten yessoensis  
 UdeM00000002534 6596 148.7 UdeM00000002534 XP\_045183740.1 27.2 519  
 330 17 129 617 25 525 2.50E-32 148.7 6596 cellular  
 organisms;Eukaryota;Opisthokonta;Metazoa;Eumetazoa;Bilateria;Protostomia;  
 Spiralia;Lophotrochozoa;Mollusca;Bivalvia;Autobranchia;Heteroconchia;Euhe  
 terodonta;Imparidentia;Venerida;Veneroidea;Veneridae;Mercenaria;Mercenari  
 a mercenaria  
 UdeM00000002536 6573 1286.6 UdeM00000002536 XP\_021359268.1 72.1  
 1093 287 5 1 1077 1 1091 0.00E+00 1286.6 6573  
 cellular  
 organisms;Eukaryota;Opisthokonta;Metazoa;Eumetazoa;Bilateria;Protostomia;  
 Spiralia;Lophotrochozoa;Mollusca;Bivalvia;Autobranchia;Pteriormorphia;Pect  
 inida;Pectinoidea;Pectinidae;Mizuhopecten;Mizuhopecten yessoensis  
 UdeM00000002537 400727 434.5 UdeM00000002537 XP\_025076618.1 85.6  
 264 35 1 1 264 1 261 1.00E-118 434.5 400727  
 cellular  
 organisms;Eukaryota;Opisthokonta;Metazoa;Eumetazoa;Bilateria;Protostomia;  
 Spiralia;Lophotrochozoa;Mollusca;Gastropoda;Caenogastropoda;Architaeniogl  
 ossa;Ampullarioidea;Ampullariidae;Pomacea;Pomacea canaliculata  
 UdeM00000002538 2607531 574.7 UdeM00000002538 XP\_029645852.1 53.2  
 707 236 19 447 1124 500 1140 2.80E-160 574.7 2607531  
 cellular  
 organisms;Eukaryota;Opisthokonta;Metazoa;Eumetazoa;Bilateria;Protostomia;  
 Spiralia;Lophotrochozoa;Mollusca;Cephalopoda;Coleoidea;Octopodiformes;Oct  
 opoda;Incirrata;Octopodidae;Octopus;Octopus sinensis  
 UdeM00000002539 6579 58.2 UdeM00000002539 XP\_033725779.1 57.7 52  
 10 2 15 66 8 47 6.80E-06 58.2 6579 cellular  
 organisms;Eukaryota;Opisthokonta;Metazoa;Eumetazoa;Bilateria;Protostomia;  
 Spiralia;Lophotrochozoa;Mollusca;Bivalvia;Autobranchia;Pteriormorphia;Pect  
 inida;Pectinoidea;Pectinidae;Pecten;Pecten maximus  
 UdeM00000002540 6596 2656.3 UdeM00000002540 XP\_045184308.1 39.1  
 3736 1973 79 75 3577 40 3704 0.00E+00 2656.3 6596  
 cellular  
 organisms;Eukaryota;Opisthokonta;Metazoa;Eumetazoa;Bilateria;Protostomia;  
 Spiralia;Lophotrochozoa;Mollusca;Bivalvia;Autobranchia;Heteroconchia;Euhe  
 terodonta;Imparidentia;Venerida;Veneroidea;Veneridae;Mercenaria;Mercenari  
 a mercenaria

UdeM00000002544 72036 207.2 UdeM00000002544 XP\_040576246.1 47.6 210  
 108 2 7 214 117 326 2.00E-50 207.2 72036 cellular  
 organisms;Eukaryota;Opisthokonta;Metazoa;Eumetazoa;Bilateria;Protostomia;  
 Ecdysozoa;Panarthropoda;Arthropoda;Mandibulata;Pancrustacea;Crustacea;Mul  
 ticrustacea;Hexanauplia;Copepoda;Neocopepoda;Podoplea;Siphonostomatoida;C  
 aligidae;Lepeophtheirus;Lepeophtheirus salmonis  
 UdeM00000002545 6596 119.4 UdeM00000002545 XP\_045184308.1 47.5 99  
 52 0 2 100 104 202 3.40E-24 119.4 6596 cellular  
 organisms;Eukaryota;Opisthokonta;Metazoa;Eumetazoa;Bilateria;Protostomia;  
 Spiralia;Lophotrochozoa;Mollusca;Bivalvia;Autobranchia;Heteroconchia;Euhe  
 terodonta;Imparidentia;Venerida;Veneroidea;Veneridae;Mercenaria;Mercenari  
 a mercenaria  
 UdeM00000002546 6596 200.7 UdeM00000002546 XP\_045184308.1 50.3 165  
 82 0 12 176 38 202 1.80E-48 200.7 6596 cellular  
 organisms;Eukaryota;Opisthokonta;Metazoa;Eumetazoa;Bilateria;Protostomia;  
 Spiralia;Lophotrochozoa;Mollusca;Bivalvia;Autobranchia;Heteroconchia;Euhe  
 terodonta;Imparidentia;Venerida;Veneroidea;Veneridae;Mercenaria;Mercenari  
 a mercenaria  
 UdeM00000002549 6596 98.6 UdeM00000002549 XP\_045189682.1 38.8 147  
 75 3 704 840 310 451 4.00E-17 98.6 6596 cellular  
 organisms;Eukaryota;Opisthokonta;Metazoa;Eumetazoa;Bilateria;Protostomia;  
 Spiralia;Lophotrochozoa;Mollusca;Bivalvia;Autobranchia;Heteroconchia;Euhe  
 terodonta;Imparidentia;Venerida;Veneroidea;Veneridae;Mercenaria;Mercenari  
 a mercenaria  
 UdeM00000002550 1735272 110.5 UdeM00000002550 XP\_041347231.1 45  
 129 70 1 335 462 6 134 5.80E-21 110.5 1735272  
 cellular  
 organisms;Eukaryota;Opisthokonta;Metazoa;Eumetazoa;Bilateria;Protostomia;  
 Spiralia;Lophotrochozoa;Mollusca;Gastropoda;Neomphalina;Neomphaloidea;Pel  
 tospiridae;Gigantopelta;Gigantopelta aegis  
 UdeM00000002551 6596 91.7 UdeM00000002551 XP\_045189098.1 27 226  
 147 4 263 483 5 217 2.80E-15 91.7 6596 cellular  
 organisms;Eukaryota;Opisthokonta;Metazoa;Eumetazoa;Bilateria;Protostomia;  
 Spiralia;Lophotrochozoa;Mollusca;Bivalvia;Autobranchia;Heteroconchia;Euhe  
 terodonta;Imparidentia;Venerida;Veneroidea;Veneridae;Mercenaria;Mercenari  
 a mercenaria  
 UdeM00000002552 417921 78.6 UdeM00000002552 XP\_034747423.1 29.2  
 185 123 5 286 462 495 679 2.40E-11 78.6 417921  
 cellular  
 organisms;Eukaryota;Opisthokonta;Metazoa;Eumetazoa;Bilateria;Deuterostomi  
 a;Chordata;Craniata;Vertebrata;Gnathostomata;Teleostomi;Euteleostomi;Acti  
 nopterygii;Actinopteri;Neopterygii;Teleostei;Osteoglossocephalai;Clupeoce  
 phala;Euteleosteomorpha;Neoteleostei;Eurypterygia;Ctenosquamata;Acanthomo  
 rphata;Euacanthomorphacea;Percomorphaceae;Eupercaria;Perciformes;Percoide  
 i;Percidae;Etheostomatinae;Etheostoma;Ozarka;Etheostoma cragini  
 UdeM00000002553 6596 119 UdeM00000002553 XP\_045189682.1 24.3 526  
 308 16 15 536 10 449 1.90E-23 119 6596 cellular  
 organisms;Eukaryota;Opisthokonta;Metazoa;Eumetazoa;Bilateria;Protostomia;  
 Spiralia;Lophotrochozoa;Mollusca;Bivalvia;Autobranchia;Heteroconchia;Euhe  
 terodonta;Imparidentia;Venerida;Veneroidea;Veneridae;Mercenaria;Mercenari  
 a mercenaria  
 UdeM00000002554 6565 68.2 UdeM00000002554 XP\_022305631.1 58.9 56  
 23 0 18 73 72 127 6.10E-09 68.2 6565 cellular  
 organisms;Eukaryota;Opisthokonta;Metazoa;Eumetazoa;Bilateria;Protostomia;

Spiralia;Lophotrochozoa;Mollusca;Bivalvia;Autobranchia;Pteriomorpha;Ostr  
eida;Ostreoidea;Ostreidae;Crassostrea;Crassostrea virginica  
UdeM00000002555 6596 385.6 UdeM00000002555 XP\_045183329.1 61.3 305  
116 2 2 305 731 1034 6.00E-104 385.6 6596 cellular  
organisms;Eukaryota;Opisthokonta;Metazoa;Eumetazoa;Bilateria;Protostomia;  
Spiralia;Lophotrochozoa;Mollusca;Bivalvia;Autobranchia;Heteroconchia;Euhe  
terodonta;Imparidentia;Venerida;Veneroidea;Veneridae;Mercenaria;Mercenari  
a mercenaria  
UdeM00000002556 6596 698 UdeM00000002556 XP\_045183325.1 69.9 479  
141 3 84 561 173 649 1.00E-197 698 6596 cellular  
organisms;Eukaryota;Opisthokonta;Metazoa;Eumetazoa;Bilateria;Protostomia;  
Spiralia;Lophotrochozoa;Mollusca;Bivalvia;Autobranchia;Heteroconchia;Euhe  
terodonta;Imparidentia;Venerida;Veneroidea;Veneridae;Mercenaria;Mercenari  
a mercenaria  
UdeM00000002557 6596 68.6 UdeM00000002557 XP\_045183325.1 41.6 89  
38 1 22 110 27 101 7.80E-09 68.6 6596 cellular  
organisms;Eukaryota;Opisthokonta;Metazoa;Eumetazoa;Bilateria;Protostomia;  
Spiralia;Lophotrochozoa;Mollusca;Bivalvia;Autobranchia;Heteroconchia;Euhe  
terodonta;Imparidentia;Venerida;Veneroidea;Veneridae;Mercenaria;Mercenari  
a mercenaria  
UdeM00000002558 6596 6762.2 UdeM00000002558 XP\_045184664.1 78.9  
4292 797 14 1 4257 1 4218 0.00E+00 6762.2 6596  
cellular  
organisms;Eukaryota;Opisthokonta;Metazoa;Eumetazoa;Bilateria;Protostomia;  
Spiralia;Lophotrochozoa;Mollusca;Bivalvia;Autobranchia;Heteroconchia;Euhe  
terodonta;Imparidentia;Venerida;Veneroidea;Veneridae;Mercenaria;Mercenari  
a mercenaria  
UdeM00000002560 1735272 127.1 UdeM00000002560 XP\_041359938.1 57.4  
108 43 2 12 118 27 132 1.60E-26 127.1 1735272  
cellular  
organisms;Eukaryota;Opisthokonta;Metazoa;Eumetazoa;Bilateria;Protostomia;  
Spiralia;Lophotrochozoa;Mollusca;Gastropoda;Neomphalina;Neomphaloidea;Pel  
tospiridae;Gigantopelta;Gigantopelta aegis  
UdeM00000002559 1735272 143.3 UdeM00000002559 XP\_041359938.1 56  
125 52 2 18 141 10 132 2.50E-31 143.3 1735272  
cellular  
organisms;Eukaryota;Opisthokonta;Metazoa;Eumetazoa;Bilateria;Protostomia;  
Spiralia;Lophotrochozoa;Mollusca;Gastropoda;Neomphalina;Neomphaloidea;Pel  
tospiridae;Gigantopelta;Gigantopelta aegis  
UdeM00000002561 6689 222.2 UdeM00000002561 XP\_027217198.1 43.3 321  
128 10 23 291 49 367 8.80E-55 222.2 6689 cellular  
organisms;Eukaryota;Opisthokonta;Metazoa;Eumetazoa;Bilateria;Protostomia;  
Ecdysozoa;Panarthropoda;Arthropoda;Mandibulata;Pancrustacea;Crustacea;Mul  
ticrustacea;Malacostraca;Eumalacostraca;Eucarida;Decapoda;Dendrobranchiat  
a;Penaeoidea;Penaeidae;Penaeus;Penaeus vannamei  
UdeM00000002562 6565 454.1 UdeM00000002562 XP\_022309040.1 70.6 337  
97 2 12 347 32 367 1.60E-124 454.1 6565 cellular  
organisms;Eukaryota;Opisthokonta;Metazoa;Eumetazoa;Bilateria;Protostomia;  
Spiralia;Lophotrochozoa;Mollusca;Bivalvia;Autobranchia;Pteriomorpha;Ostr  
eida;Ostreoidea;Ostreidae;Crassostrea;Crassostrea virginica  
UdeM00000002563 7739 119 UdeM00000002563 XP\_035677191.1 45.1 164  
78 3 2 157 203 362 6.00E-24 119 7739 cellular  
organisms;Eukaryota;Opisthokonta;Metazoa;Eumetazoa;Bilateria;Deuterostomi

a;Chordata;Cephalochordata;Leptocardii;Amphioxiformes;Branchiostomidae;Branchiostoma;Branchiostoma floridae

UdeM00000002565 210409 115.9 UdeM00000002565 XP\_045101169.1 33.7  
172 109 2 61 228 116 286 7.00E-23 115.9 210409  
cellular

organisms;Eukaryota;Opisthokonta;Metazoa;Eumetazoa;Bilateria;Protostomia;Ecdysozoa;Panarthropoda;Arthropoda;Mandibulata;Pancrustacea;Crustacea;Multicrustacea;Malacostraca;Eumalacostraca;Eucarida;Decapoda;Pleocyemata;Brachyura;Eubrachyura;Heterotremata;Portunoidea;Portunidae;Portunus;Portunus trituberculatus

UdeM00000002564 210409 156.8 UdeM00000002564 XP\_045101169.1 31.3  
262 172 4 61 317 116 374 4.80E-35 156.8 210409  
cellular

organisms;Eukaryota;Opisthokonta;Metazoa;Eumetazoa;Bilateria;Protostomia;Ecdysozoa;Panarthropoda;Arthropoda;Mandibulata;Pancrustacea;Crustacea;Multicrustacea;Malacostraca;Eumalacostraca;Eucarida;Decapoda;Pleocyemata;Brachyura;Eubrachyura;Heterotremata;Portunoidea;Portunidae;Portunus;Portunus trituberculatus

UdeM00000002568 6596 505.4 UdeM00000002568 XP\_045161411.1 54.5 475  
213 2 3 477 15 486 9.20E-140 505.4 6596 cellular

organisms;Eukaryota;Opisthokonta;Metazoa;Eumetazoa;Bilateria;Protostomia;Spiralia;Lophotrochozoa;Mollusca;Bivalvia;Autobranchia;Heteroconchia;Euheterodonta;Imparidentia;Venerida;Veneroidea;Veneridae;Mercenaria;Mercenaria mercenaria

UdeM00000002569 29159 107.5 UdeM00000002569 XP\_019926413.2 43.5 161  
18 3 1 88 292 452 9.60E-21 107.5 29159 cellular

organisms;Eukaryota;Opisthokonta;Metazoa;Eumetazoa;Bilateria;Protostomia;Spiralia;Lophotrochozoa;Mollusca;Bivalvia;Autobranchia;Pteriormorphia;Ostreida;Ostreoidea;Ostreidae;Crassostrea;Crassostrea gigas

UdeM00000002570 7574 84 UdeM00000002570 XP\_013401704.1 42.3 78  
45 0 3 80 754 831 1.00E-13 84 7574 cellular

organisms;Eukaryota;Opisthokonta;Metazoa;Eumetazoa;Bilateria;Protostomia;Spiralia;Lophotrochozoa;Brachiopoda;Linguliformea;Lingulata;Lingulida;Linguloidea;Lingulidae;Lingula;Lingula anatina

UdeM00000002572 6579 828.2 UdeM00000002572 XP\_033729588.1 47.9 918  
424 18 14 895 5 904 1.00E-236 828.2 6579 cellular

organisms;Eukaryota;Opisthokonta;Metazoa;Eumetazoa;Bilateria;Protostomia;Spiralia;Lophotrochozoa;Mollusca;Bivalvia;Autobranchia;Pteriormorphia;Pectinida;Pectinoidea;Pectinidae;Pecten;Pecten maximus

UdeM00000002573 6573 111.3 UdeM00000002573 XP\_021346496.1 37.3 169  
99 3 1 169 406 567 1.60E-21 111.3 6573 cellular

organisms;Eukaryota;Opisthokonta;Metazoa;Eumetazoa;Bilateria;Protostomia;Spiralia;Lophotrochozoa;Mollusca;Bivalvia;Autobranchia;Pteriormorphia;Pectinida;Pectinoidea;Pectinidae;Mizuhopecten;Mizuhopecten yessoensis

UdeM00000002574 6596 132.9 UdeM00000002574 XP\_045181000.1 70.5 88  
26 0 30 117 867 954 2.80E-28 132.9 6596 cellular

organisms;Eukaryota;Opisthokonta;Metazoa;Eumetazoa;Bilateria;Protostomia;Spiralia;Lophotrochozoa;Mollusca;Bivalvia;Autobranchia;Heteroconchia;Euheterodonta;Imparidentia;Venerida;Veneroidea;Veneridae;Mercenaria;Mercenaria mercenaria

UdeM00000002578 6706 152.5 UdeM00000002578 XP\_042235765.1 44.6 157  
87 0 1 157 1 157 4.50E-34 152.5 6706 cellular

organisms;Eukaryota;Opisthokonta;Metazoa;Eumetazoa;Bilateria;Protostomia;Ecdysozoa;Panarthropoda;Arthropoda;Mandibulata;Pancrustacea;Crustacea;Mul



ticrustacea;Malacostraca;Eumalacostraca;Eucarida;Decapoda;Pleocyemata;Ast  
 acidea;Nephropoidea;Nephropidae;Homarus;Homarus americanus  
 UdeM00000002579 7054 410.6 UdeM00000002579 XP\_031328250.1 45.6 467  
 218 4 1 431 1 467 2.50E-111 410.6 7054 cellular  
 organisms;Eukaryota;Opisthokonta;Metazoa;Eumetazoa;Bilateria;Protostomia;  
 Ecdysozoa;Panarthropoda;Arthropoda;Mandibulata;Pancrustacea;Hexapoda;Inse  
 cta;Dicondylia;Pterygota;Neoptera;Endopterygota;Coleoptera;Polyphaga;Elat  
 eriformia;Elateroidea;Lampyridae;Lampyrinae;Photinus;Photinus pyralis  
 UdeM00000002580 6596 466.5 UdeM00000002580 XP\_045182316.1 38 815  
 413 15 1 774 392 1155 6.80E-128 466.5 6596 cellular  
 organisms;Eukaryota;Opisthokonta;Metazoa;Eumetazoa;Bilateria;Protostomia;  
 Spiralia;Lophotrochozoa;Mollusca;Bivalvia;Autobranchia;Heteroconchia;Euhe  
 terodonta;Imparidentia;Venerida;Veneroidea;Veneridae;Mercenaria;Mercenari  
 a mercenaria  
 UdeM00000002581 218467 112.5 UdeM00000002581 XP\_023212120.1 39.4  
 137 83 0 1 137 16 152 7.60E-22 112.5 218467  
 cellular  
 organisms;Eukaryota;Opisthokonta;Metazoa;Eumetazoa;Bilateria;Protostomia;  
 Ecdysozoa;Panarthropoda;Arthropoda;Chelicerata;Arachnida;Scorpiones;Buthi  
 da;Buthoidea;Buthidae;Centruroides;Centruroides sculpturatus  
 UdeM00000002585 37621 152.1 UdeM00000002585 XP\_014677757.1 59.1 127  
 50 1 1 125 235 361 4.60E-34 152.1 37621 cellular  
 organisms;Eukaryota;Opisthokonta;Metazoa;Eumetazoa;Bilateria;Protostomia;  
 Ecdysozoa;Scalidophora;Priapulida;Priapulimorpha;Priapulimorphida;Priapul  
 idae;Priapululus;Priapululus caudatus  
 UdeM00000002586 50429 93.2 UdeM00000002586 XP\_022785721.1 33.2 211  
 128 4 1 199 365 574 4.90E-16 93.2 50429 cellular  
 organisms;Eukaryota;Opisthokonta;Metazoa;Eumetazoa;Cnidaria;Anthozoa;Hexa  
 corallia;Scleractinia;Astrocoeniina;Pocilloporidae;Stylophora;Stylophora  
 pistillata  
 UdeM00000002590 46514 138.7 UdeM00000002590 XP\_038073136.1 37.7 531  
 285 10 1 497 14 532 2.10E-29 138.7 46514 cellular  
 organisms;Eukaryota;Opisthokonta;Metazoa;Eumetazoa;Bilateria;Deuterostomi  
 a;Echinodermata;Eleutherozoa;Asterozoa;Asteroidea;Valvatacea;Valvatida;As  
 terinidae;Patiria;Patiria miniata  
 UdeM00000002591 46514 120.6 UdeM00000002591 XP\_038073135.1 42.6 148  
 78 2 1 148 393 533 1.80E-24 120.6 46514 cellular  
 organisms;Eukaryota;Opisthokonta;Metazoa;Eumetazoa;Bilateria;Deuterostomi  
 a;Echinodermata;Eleutherozoa;Asterozoa;Asteroidea;Valvatacea;Valvatida;As  
 terinidae;Patiria;Patiria miniata  
 UdeM00000002596 29159 121.7 UdeM00000002596 XP\_034330911.1 59.8 92  
 35 2 1 91 308 398 5.20E-25 121.7 29159 cellular  
 organisms;Eukaryota;Opisthokonta;Metazoa;Eumetazoa;Bilateria;Protostomia;  
 Spiralia;Lophotrochozoa;Mollusca;Bivalvia;Autobranchia;Pteriormorpha;Ostr  
 eida;Ostreoidea;Ostreidae;Crassostrea;Crassostrea gigas  
 UdeM00000002597 6565 90.1 UdeM00000002597 XP\_022322655.1 52.4 84  
 40 0 1 84 629 712 2.20E-15 90.1 6565 cellular  
 organisms;Eukaryota;Opisthokonta;Metazoa;Eumetazoa;Bilateria;Protostomia;  
 Spiralia;Lophotrochozoa;Mollusca;Bivalvia;Autobranchia;Pteriormorpha;Ostr  
 eida;Ostreoidea;Ostreidae;Crassostrea;Crassostrea virginica  
 UdeM00000002598 6565 177.2 UdeM00000002598 XP\_022322655.1 36.2 287  
 89 3 4 197 330 615 3.10E-41 177.2 6565 cellular  
 organisms;Eukaryota;Opisthokonta;Metazoa;Eumetazoa;Bilateria;Protostomia;

Spiralia; Lophotrochozoa; Mollusca; Bivalvia; Autobranchia; Pteriomorpha; Ostr  
 eida; Ostreoidae; Ostreidae; Crassostrea; Crassostrea virginica  
 UdeM00000002600 1735272 146.7 UdeM00000002600 XP\_041349428.1 46.2  
 158 83 2 1 157 76 232 2.40E-32 146.7 1735272  
 cellular  
 organisms; Eukaryota; Opisthokonta; Metazoa; Eumetazoa; Bilateria; Protostomia;  
 Spiralia; Lophotrochozoa; Mollusca; Gastropoda; Neomphalina; Neomphaloidea; Pel  
 tospiridae; Gigantopelta; Gigantopelta aegis  
 UdeM00000002601 6596 467.6 UdeM00000002601 XP\_045182316.1 38.6 814  
 410 16 1 774 392 1155 3.00E-128 467.6 6596 cellular  
 organisms; Eukaryota; Opisthokonta; Metazoa; Eumetazoa; Bilateria; Protostomia;  
 Spiralia; Lophotrochozoa; Mollusca; Bivalvia; Autobranchia; Heteroconchia; Eue  
 terodonta; Imparidentia; Venerida; Veneroidea; Veneridae; Mercenaria; Mercenari  
 a mercenaria  
 UdeM000000031563 6596 689.5 UdeM000000031563 XP\_045207279.1 82.3 396  
 70 0 33 428 30 425 2.70E-195 689.5 6596 cellular  
 organisms; Eukaryota; Opisthokonta; Metazoa; Eumetazoa; Bilateria; Protostomia;  
 Spiralia; Lophotrochozoa; Mollusca; Bivalvia; Autobranchia; Heteroconchia; Eue  
 terodonta; Imparidentia; Venerida; Veneroidea; Veneridae; Mercenaria; Mercenari  
 a mercenaria  
 UdeM000000031564 400727 218.4 UdeM000000031564 XP\_025082283.1 62.4  
 157 59 0 1 157 1 157 7.30E-54 218.4 400727  
 cellular  
 organisms; Eukaryota; Opisthokonta; Metazoa; Eumetazoa; Bilateria; Protostomia;  
 Spiralia; Lophotrochozoa; Mollusca; Gastropoda; Caenogastropoda; Architaeniogl  
 ossa; Ampullarioidea; Ampullariidae; Pomacea; Pomacea canaliculata  
 UdeM000000031565 8364 133.3 UdeM000000031565 XP\_031750186.1 56 109  
 48 0 5 113 181 289 2.10E-28 133.3 8364 cellular  
 organisms; Eukaryota; Opisthokonta; Metazoa; Eumetazoa; Bilateria; Deuterostomi  
 a; Chordata; Craniata; Vertebrata; Gnathostomata; Teleostomi; Euteleostomi; Sarc  
 opterygii; Dipnotetrapodomorpha; Tetrapoda; Amphibia; Batrachia; Anura; Pipoide  
 a; Pipidae; Xenopodinae; Xenopus; Silurana; Xenopus tropicalis  
 UdeM000000031566 7070 123.2 UdeM000000031566 XP\_008193100.1 48 125  
 63 1 5 127 1 125 2.30E-25 123.2 7070 cellular  
 organisms; Eukaryota; Opisthokonta; Metazoa; Eumetazoa; Bilateria; Protostomia;  
 Ecdysozoa; Panarthropoda; Arthropoda; Mandibulata; Pancrustacea; Hexapoda; Inse  
 cta; Dicondylia; Pterygota; Neoptera; Endopterygota; Coleoptera; Polyphaga; Cucu  
 jiformia; Tenebrionoidea; Tenebrionidae; Tenebrionidae incertae  
 sedis; Tribolium; Tribolium castaneum  
 UdeM000000031567 6596 559.7 UdeM000000031567 XP\_045207021.1 69.7 383  
 114 2 79 460 16 397 3.70E-156 559.7 6596 cellular  
 organisms; Eukaryota; Opisthokonta; Metazoa; Eumetazoa; Bilateria; Protostomia;  
 Spiralia; Lophotrochozoa; Mollusca; Bivalvia; Autobranchia; Heteroconchia; Eue  
 terodonta; Imparidentia; Venerida; Veneroidea; Veneridae; Mercenaria; Mercenari  
 a mercenaria  
 UdeM000000031569 6105 176.4 UdeM000000031569 XP\_031549116.1 62.5 136  
 46 2 1 132 8 142 2.40E-41 176.4 6105 cellular  
 organisms; Eukaryota; Opisthokonta; Metazoa; Eumetazoa; Cnidaria; Anthozoa; Hexa  
 corallia; Actiniaria; Actiniidae; Actinia; Actinia tenebrosa  
 UdeM000000031570 7739 580.9 UdeM000000031570 XP\_035696678.1 56.8 481  
 205 1 2 479 423 903 1.60E-162 580.9 7739 cellular  
 organisms; Eukaryota; Opisthokonta; Metazoa; Eumetazoa; Bilateria; Deuterostomi  
 a; Chordata; Cephalochordata; Leptocardii; Amphioxiformes; Branchiostomidae; Br  
 anchiostoma; Branchiostoma floridae

UdeM00000031572 6573 418.7 UdeM00000031572 XP\_021346042.1 38 616  
 365 9 73 675 77 688 1.50E-113 418.7 6573 cellular  
 organisms;Eukaryota;Opisthokonta;Metazoa;Eumetazoa;Bilateria;Protostomia;  
 Spiralia;Lophotrochozoa;Mollusca;Bivalvia;Autobranhia;Pteriormorphia;Pect  
 inida;Pectinoidea;Pectinidae;Mizuhopecten;Mizuhopecten yessoensis  
 UdeM00000031573 6573 394.4 UdeM00000031573 XP\_021346042.1 37.3 617  
 368 10 73 675 77 688 3.00E-106 394.4 6573 cellular  
 organisms;Eukaryota;Opisthokonta;Metazoa;Eumetazoa;Bilateria;Protostomia;  
 Spiralia;Lophotrochozoa;Mollusca;Bivalvia;Autobranhia;Pteriormorphia;Pect  
 inida;Pectinoidea;Pectinidae;Mizuhopecten;Mizuhopecten yessoensis  
 UdeM00000031574 6596 693.3 UdeM00000031574 XP\_045208160.1 69.9 479  
 135 2 1 479 1 470 2.10E-196 693.3 6596 cellular  
 organisms;Eukaryota;Opisthokonta;Metazoa;Eumetazoa;Bilateria;Protostomia;  
 Spiralia;Lophotrochozoa;Mollusca;Bivalvia;Autobranhia;Heteroconchia;Euhe  
 terodonta;Imparidentia;Venerida;Veneroidea;Veneridae;Mercenaria;Mercenari  
 a mercenaria  
 UdeM00000031575 6596 386.7 UdeM00000031575 XP\_045209665.1 50.6 385  
 173 3 56 435 62 434 7.90E-104 386.7 6596 cellular  
 organisms;Eukaryota;Opisthokonta;Metazoa;Eumetazoa;Bilateria;Protostomia;  
 Spiralia;Lophotrochozoa;Mollusca;Bivalvia;Autobranhia;Heteroconchia;Euhe  
 terodonta;Imparidentia;Venerida;Veneroidea;Veneridae;Mercenaria;Mercenari  
 a mercenaria  
 UdeM00000031576 6596 188.3 UdeM00000031576 XP\_045215823.1 40.4 245  
 139 2 7 244 9 253 1.20E-44 188.3 6596 cellular  
 organisms;Eukaryota;Opisthokonta;Metazoa;Eumetazoa;Bilateria;Protostomia;  
 Spiralia;Lophotrochozoa;Mollusca;Bivalvia;Autobranhia;Heteroconchia;Euhe  
 terodonta;Imparidentia;Venerida;Veneroidea;Veneridae;Mercenaria;Mercenari  
 a mercenaria  
 UdeM00000031577 1735272 123.6 UdeM00000031577 XP\_041371767.1 45.3  
 137 74 1 20 156 285 420 2.20E-25 123.6 1735272  
 cellular  
 organisms;Eukaryota;Opisthokonta;Metazoa;Eumetazoa;Bilateria;Protostomia;  
 Spiralia;Lophotrochozoa;Mollusca;Gastropoda;Neomphalina;Neomphaloidea;Pel  
 tospiridae;Gigantopelta;Gigantopelta aegis  
 UdeM00000031578 6596 162.5 UdeM00000031578 XP\_045207293.1 35.9 443  
 247 13 1 434 1 415 1.20E-36 162.5 6596 cellular  
 organisms;Eukaryota;Opisthokonta;Metazoa;Eumetazoa;Bilateria;Protostomia;  
 Spiralia;Lophotrochozoa;Mollusca;Bivalvia;Autobranhia;Heteroconchia;Euhe  
 terodonta;Imparidentia;Venerida;Veneroidea;Veneridae;Mercenaria;Mercenari  
 a mercenaria  
 UdeM00000031579 40690 136.7 UdeM00000031579 XP\_034006674.1 36.7 210  
 129 3 2 209 4 211 3.40E-29 136.7 40690 cellular  
 organisms;Eukaryota;Opisthokonta;Metazoa;Eumetazoa;Bilateria;Deuterostomi  
 a;Chordata;Craniata;Vertebrata;Gnathostomata;Teleostomi;Euteleostomi;Acti  
 nopterygii;Actinopteri;Neopterygii;Teleostei;Osteoglossocephalai;Clupeoce  
 phala;Euteleosteomorpha;Neoteleostei;Eurypterygia;Ctenosquamata;Acanthomo  
 rphata;Euacanthomorphacea;Percomorphaceae;Eupercaria;Perciformes;Notothen  
 ioidei;Nototheniidae;Trematomus;Trematomus bernacchii  
 UdeM00000031580 6596 257.3 UdeM00000031580 XP\_045207294.1 43.9 437  
 207 15 6 425 685 1100 3.40E-65 257.3 6596 cellular  
 organisms;Eukaryota;Opisthokonta;Metazoa;Eumetazoa;Bilateria;Protostomia;  
 Spiralia;Lophotrochozoa;Mollusca;Bivalvia;Autobranhia;Heteroconchia;Euhe  
 terodonta;Imparidentia;Venerida;Veneroidea;Veneridae;Mercenaria;Mercenari  
 a mercenaria

UdeM00000031581 45351 81.6 UdeM00000031581 XP\_032220815.1 27.3 183  
 106 5 28 195 7215 7385 1.20E-12 81.6 45351 cellular  
 organisms;Eukaryota;Opisthokonta;Metazoa;Eumetazoa;Cnidaria;Anthozoa;Hexa  
 corallia;Actiniaria;Edwardsiidae;Nematostella;Nematostella vectensis  
 UdeM00000031582 119488 94 UdeM00000031582 XP\_044077010.1 29.4  
 221 132 6 9 217 1822 2030 6.90E-16 94 119488  
 cellular  
 organisms;Eukaryota;Opisthokonta;Metazoa;Eumetazoa;Bilateria;Deuterostomi  
 a;Chordata;Craniata;Vertebrata;Gnathostomata;Teleostomi;Euteleostomi;Acti  
 nopterygii;Actinopteri;Neopterygii;Teleostei;Osteoglossocephalai;Clupeoce  
 phala;Euteleosteomorpha;Neoteleostei;Eurypterygia;Ctenosquamata;Acanthomo  
 rphata;Euacanthomorphacea;Percomorphaceae;Eupercaria;Centrarchiformes;Cen  
 trarchoidei;Sinipercidae;Siniperca;Siniperca chuatsi  
 UdeM00000031584 27405 161.8 UdeM00000031584 XP\_042891124.1 34.2 322  
 195 8 3 320 176 484 1.60E-36 161.8 27405 cellular  
 organisms;Eukaryota;Opisthokonta;Metazoa;Eumetazoa;Bilateria;Protostomia;  
 Ecdysozoa;Panarthropoda;Arthropoda;Mandibulata;Pancrustacea;Crustacea;Mul  
 ticrustacea;Malacostraca;Eumalacostraca;Eucarida;Decapoda;Dendrobranchiat  
 a;Penaeoidea;Penaeidae;Penaeus;Penaeus japonicus  
 UdeM00000031585 10228 64.3 UdeM00000031585 XP\_002115595.1 28.3 184  
 99 6 18 181 6 176 3.50E-07 64.3 10228 cellular  
 organisms;Eukaryota;Opisthokonta;Metazoa;Eumetazoa;Placozoa;Trichoplacida  
 e;Trichoplax;Trichoplax adhaerens  
 UdeM00000031586 8245 71.2 UdeM00000031586 XP\_039999701.1 29.6 216  
 118 8 9 197 362 570 2.30E-09 71.2 8245 cellular  
 organisms;Eukaryota;Opisthokonta;Metazoa;Eumetazoa;Bilateria;Deuterostomi  
 a;Chordata;Craniata;Vertebrata;Gnathostomata;Teleostomi;Euteleostomi;Acti  
 nopterygii;Actinopteri;Neopterygii;Teleostei;Osteoglossocephalai;Clupeoce  
 phala;Euteleosteomorpha;Neoteleostei;Eurypterygia;Ctenosquamata;Acanthomo  
 rphata;Euacanthomorphacea;Percomorphaceae;Carangaria;Istiophoriformes;Xip  
 hiidae;Xiphias;Xiphias gladius  
 UdeM00000031587 8245 71.2 UdeM00000031587 XP\_039999701.1 29.6 216  
 118 8 9 197 362 570 2.30E-09 71.2 8245 cellular  
 organisms;Eukaryota;Opisthokonta;Metazoa;Eumetazoa;Bilateria;Deuterostomi  
 a;Chordata;Craniata;Vertebrata;Gnathostomata;Teleostomi;Euteleostomi;Acti  
 nopterygii;Actinopteri;Neopterygii;Teleostei;Osteoglossocephalai;Clupeoce  
 phala;Euteleosteomorpha;Neoteleostei;Eurypterygia;Ctenosquamata;Acanthomo  
 rphata;Euacanthomorphacea;Percomorphaceae;Carangaria;Istiophoriformes;Xip  
 hiidae;Xiphias;Xiphias gladius  
 UdeM00000031590 7668 127.1 UdeM00000031590 XP\_030853861.1 33 224  
 129 5 2 224 196 399 3.20E-26 127.1 7668 cellular  
 organisms;Eukaryota;Opisthokonta;Metazoa;Eumetazoa;Bilateria;Deuterostomi  
 a;Echinodermata;Eleutherozoa;Echinozoa;Echinoidea;Euechinoidea;Echinacea;  
 Camarodonta;Echinidea;Strongylocentrotidae;Strongylocentrotus;Strongyloce  
 ntrotus purpuratus  
 UdeM00000031591 119488 94 UdeM00000031591 XP\_044077010.1 29.4  
 221 132 6 9 217 1822 2030 7.00E-16 94 119488  
 cellular  
 organisms;Eukaryota;Opisthokonta;Metazoa;Eumetazoa;Bilateria;Deuterostomi  
 a;Chordata;Craniata;Vertebrata;Gnathostomata;Teleostomi;Euteleostomi;Acti  
 nopterygii;Actinopteri;Neopterygii;Teleostei;Osteoglossocephalai;Clupeoce  
 phala;Euteleosteomorpha;Neoteleostei;Eurypterygia;Ctenosquamata;Acanthomo  
 rphata;Euacanthomorphacea;Percomorphaceae;Eupercaria;Centrarchiformes;Cen  
 trarchoidei;Sinipercidae;Siniperca;Siniperca chuatsi

UdeM00000031592 119488 84.7 UdeM00000031592 XP\_044077010.1 30.4  
 194 114 5 11 195 1849 2030 2.80E-13 84.7 119488  
 cellular  
 organisms;Eukaryota;Opisthokonta;Metazoa;Eumetazoa;Bilateria;Deuterostomi  
 a;Chordata;Craniata;Vertebrata;Gnathostomata;Teleostomi;Euteleostomi;Acti  
 nopterygii;Actinopteri;Neopterygii;Teleostei;Osteoglossocephalai;Clupeoce  
 phala;Euteleostomorpha;Neoteleostei;Eurypterygia;Ctenosquamata;Acanthomo  
 rphata;Euacanthomorpha;Percomorphaceae;Eupercaria;Centrarchiformes;Cen  
 trarchoidei;Siniperca;Siniperca chuatsi  
 UdeM00000031594 6573 187.2 UdeM00000031594 XP\_021358159.1 36.3 303  
 180 7 1 293 361 660 4.70E-44 187.2 6573 cellular  
 organisms;Eukaryota;Opisthokonta;Metazoa;Eumetazoa;Bilateria;Protostomia;  
 Spiralia;Lophotrochozoa;Mollusca;Bivalvia;Autobranhia;Pteriormorphia;Pect  
 inida;Pectinoidea;Pectinidae;Mizuhopecten;Mizuhopecten yessoensis  
 UdeM00000031595 7739 60.5 UdeM00000031595 XP\_035696427.1 27.4 135  
 95 3 44 176 148 281 2.60E-06 60.5 7739 cellular  
 organisms;Eukaryota;Opisthokonta;Metazoa;Eumetazoa;Bilateria;Deuterostomi  
 a;Chordata;Cephalochordata;Leptocardii;Amphioxiformes;Branchiostomidae;Br  
 anchiostoma;Branchiostoma floridae  
 UdeM00000031597 1735272 743.4 UdeM00000031597 XP\_041372090.1 54.9  
 748 320 8 1 738 1 741 2.70E-211 743.4 1735272  
 cellular  
 organisms;Eukaryota;Opisthokonta;Metazoa;Eumetazoa;Bilateria;Protostomia;  
 Spiralia;Lophotrochozoa;Mollusca;Gastropoda;Neomphalina;Neomphaloidea;Pel  
 tospiridae;Gigantopelta;Gigantopelta aegis  
 UdeM00000031599 6596 404.8 UdeM00000031599 XP\_045210294.1 71.4 259  
 74 0 12 270 76 334 8.70E-110 404.8 6596 cellular  
 organisms;Eukaryota;Opisthokonta;Metazoa;Eumetazoa;Bilateria;Protostomia;  
 Spiralia;Lophotrochozoa;Mollusca;Bivalvia;Autobranhia;Heteroconchia;Euhe  
 terodonta;Imparidentia;Venerida;Veneroidea;Veneridae;Mercenaria;Mercenari  
 a mercenaria  
 UdeM00000031600 6573 111.7 UdeM00000031600 XP\_021361941.1 94.4 54  
 3 0 1 54 384 437 7.20E-22 111.7 6573 cellular  
 organisms;Eukaryota;Opisthokonta;Metazoa;Eumetazoa;Bilateria;Protostomia;  
 Spiralia;Lophotrochozoa;Mollusca;Bivalvia;Autobranhia;Pteriormorphia;Pect  
 inida;Pectinoidea;Pectinidae;Mizuhopecten;Mizuhopecten yessoensis  
 UdeM00000031601 6596 350.9 UdeM00000031601 XP\_045207784.1 32.6 650  
 408 16 121 753 26 662 4.00E-93 350.9 6596 cellular  
 organisms;Eukaryota;Opisthokonta;Metazoa;Eumetazoa;Bilateria;Protostomia;  
 Spiralia;Lophotrochozoa;Mollusca;Bivalvia;Autobranhia;Heteroconchia;Euhe  
 terodonta;Imparidentia;Venerida;Veneroidea;Veneridae;Mercenaria;Mercenari  
 a mercenaria  
 UdeM00000031602 6596 684.5 UdeM00000031602 XP\_045209677.1 60 553  
 160 1 8 560 65 556 1.10E-193 684.5 6596 cellular  
 organisms;Eukaryota;Opisthokonta;Metazoa;Eumetazoa;Bilateria;Protostomia;  
 Spiralia;Lophotrochozoa;Mollusca;Bivalvia;Autobranhia;Heteroconchia;Euhe  
 terodonta;Imparidentia;Venerida;Veneroidea;Veneridae;Mercenaria;Mercenari  
 a mercenaria  
 UdeM00000031604 6596 83.6 UdeM00000031604 XP\_045206250.1 47.8 69  
 36 0 2 70 1 69 1.50E-13 83.6 6596 cellular  
 organisms;Eukaryota;Opisthokonta;Metazoa;Eumetazoa;Bilateria;Protostomia;  
 Spiralia;Lophotrochozoa;Mollusca;Bivalvia;Autobranhia;Heteroconchia;Euhe  
 terodonta;Imparidentia;Venerida;Veneroidea;Veneridae;Mercenaria;Mercenari  
 a mercenaria

UdeM00000031605 6596 109.4 UdeM00000031605 XP\_045206250.1 42 131  
 70 3 109 238 570 695 7.70E-21 109.4 6596 cellular  
 organisms;Eukaryota;Opisthokonta;Metazoa;Eumetazoa;Bilateria;Protostomia;  
 Spiralia;Lophotrochozoa;Mollusca;Bivalvia;Autobranchia;Heteroconchia;Euhe  
 terodonta;Imparidentia;Venerida;Veneroidea;Veneridae;Mercenaria;Mercenari  
 a mercenaria  
 UdeM00000031606 6596 667.2 UdeM00000031606 XP\_045208275.1 59 561  
 230 0 37 597 29 589 2.00E-188 667.2 6596 cellular  
 organisms;Eukaryota;Opisthokonta;Metazoa;Eumetazoa;Bilateria;Protostomia;  
 Spiralia;Lophotrochozoa;Mollusca;Bivalvia;Autobranchia;Heteroconchia;Euhe  
 terodonta;Imparidentia;Venerida;Veneroidea;Veneridae;Mercenaria;Mercenari  
 a mercenaria  
 UdeM00000031607 6596 129 UdeM00000031607 XP\_045210204.1 45.1 144  
 71 4 13 153 6 144 5.40E-27 129 6596 cellular  
 organisms;Eukaryota;Opisthokonta;Metazoa;Eumetazoa;Bilateria;Protostomia;  
 Spiralia;Lophotrochozoa;Mollusca;Bivalvia;Autobranchia;Heteroconchia;Euhe  
 terodonta;Imparidentia;Venerida;Veneroidea;Veneridae;Mercenaria;Mercenari  
 a mercenaria  
 UdeM00000031608 6596 400.6 UdeM00000031608 XP\_045169179.1 27 1219  
 373 8 25 1226 201 919 7.20E-108 400.6 6596 cellular  
 organisms;Eukaryota;Opisthokonta;Metazoa;Eumetazoa;Bilateria;Protostomia;  
 Spiralia;Lophotrochozoa;Mollusca;Bivalvia;Autobranchia;Heteroconchia;Euhe  
 terodonta;Imparidentia;Venerida;Veneroidea;Veneridae;Mercenaria;Mercenari  
 a mercenaria  
 UdeM00000044288 83332 497.3 UdeM00000044288 NP\_214848.1 81.5 287 53  
 0 1 287 1 287 1.30E-137 497.3 83332 cellular  
 organisms;Bacteria;Terrabacteria  
 group;Actinobacteria;Actinomycetia;Corynebacteriales;Mycobacteriaceae;Myc  
 obacterium;Mycobacterium tuberculosis complex;Mycobacterium  
 tuberculosis;Mycobacterium tuberculosis H37Rv  
 UdeM00000044163 400727 124.8 UdeM00000044163 XP\_025077214.1 71.1  
 83 24 0 1 83 2 84 5.50E-26 124.8 400727  
 cellular  
 organisms;Eukaryota;Opisthokonta;Metazoa;Eumetazoa;Bilateria;Protostomia;  
 Spiralia;Lophotrochozoa;Mollusca;Gastropoda;Caenogastropoda;Architaeniogl  
 ossa;Ampullarioidea;Ampullariidae;Pomacea;Pomacea canaliculata  
 UdeM00000044164 6573 127.9 UdeM00000044164 XP\_021372240.1 47.6 126  
 65 1 1 126 175 299 9.60E-27 127.9 6573 cellular  
 organisms;Eukaryota;Opisthokonta;Metazoa;Eumetazoa;Bilateria;Protostomia;  
 Spiralia;Lophotrochozoa;Mollusca;Bivalvia;Autobranchia;Pteriormorphia;Pect  
 inida;Pectinoidea;Pectinidae;Mizuhopecten;Mizuhopecten yessoensis  
 UdeM00000008110 6596 887.5 UdeM00000008110 XP\_045165907.1 65.9 595  
 202 1 1 595 43 636 9.60E-255 887.5 6596 cellular  
 organisms;Eukaryota;Opisthokonta;Metazoa;Eumetazoa;Bilateria;Protostomia;  
 Spiralia;Lophotrochozoa;Mollusca;Bivalvia;Autobranchia;Heteroconchia;Euhe  
 terodonta;Imparidentia;Venerida;Veneroidea;Veneridae;Mercenaria;Mercenari  
 a mercenaria  
 UdeM00000008111 6596 855.9 UdeM00000008111 XP\_045165907.1 61.8 613  
 233 1 1 613 43 654 3.20E-245 855.9 6596 cellular  
 organisms;Eukaryota;Opisthokonta;Metazoa;Eumetazoa;Bilateria;Protostomia;  
 Spiralia;Lophotrochozoa;Mollusca;Bivalvia;Autobranchia;Heteroconchia;Euhe  
 terodonta;Imparidentia;Venerida;Veneroidea;Veneridae;Mercenaria;Mercenari  
 a mercenaria

UdeM00000008112 6565 183 UdeM00000008112 XP\_022301391.1 27.7 668  
 341 24 62 724 120 650 1.40E-42 183 6565 cellular  
 organisms;Eukaryota;Opisthokonta;Metazoa;Eumetazoa;Bilateria;Protostomia;  
 Spiralia;Lophotrochozoa;Mollusca;Bivalvia;Autobranchia;Pteriormorphia;Ostr  
 eida;Ostreoidea;Ostreidae;Crassostrea;Crassostrea virginica  
 UdeM00000008113 6596 131.7 UdeM00000008113 XP\_045165824.1 54.5 121  
 54 1 4 124 2 121 6.70E-28 131.7 6596 cellular  
 organisms;Eukaryota;Opisthokonta;Metazoa;Eumetazoa;Bilateria;Protostomia;  
 Spiralia;Lophotrochozoa;Mollusca;Bivalvia;Autobranchia;Heteroconchia;Euhe  
 terodonta;Imparidentia;Venerida;Veneroidea;Veneridae;Mercenaria;Mercenari  
 a mercenaria  
 UdeM00000008115 6579 79.7 UdeM00000008115 XP\_033744385.1 36.2 138  
 77 6 20 155 52 180 1.10E-11 79.7 6579 cellular  
 organisms;Eukaryota;Opisthokonta;Metazoa;Eumetazoa;Bilateria;Protostomia;  
 Spiralia;Lophotrochozoa;Mollusca;Bivalvia;Autobranchia;Pteriormorphia;Pect  
 inida;Pectinoidea;Pectinidae;Pecten;Pecten maximus  
 UdeM00000008116 6565 278.5 UdeM00000008116 XP\_022341771.1 35.4 469  
 273 10 100 561 18 463 1.90E-71 278.5 6565 cellular  
 organisms;Eukaryota;Opisthokonta;Metazoa;Eumetazoa;Bilateria;Protostomia;  
 Spiralia;Lophotrochozoa;Mollusca;Bivalvia;Autobranchia;Pteriormorphia;Ostr  
 eida;Ostreoidea;Ostreidae;Crassostrea;Crassostrea virginica  
 UdeM00000008117 6596 873.2 UdeM00000008117 XP\_045164587.1 85.7 511  
 73 0 1 511 42 552 1.60E-250 873.2 6596 cellular  
 organisms;Eukaryota;Opisthokonta;Metazoa;Eumetazoa;Bilateria;Protostomia;  
 Spiralia;Lophotrochozoa;Mollusca;Bivalvia;Autobranchia;Heteroconchia;Euhe  
 terodonta;Imparidentia;Venerida;Veneroidea;Veneridae;Mercenaria;Mercenari  
 a mercenaria  
 UdeM00000008118 6596 617.8 UdeM00000008118 XP\_045164751.1 70.6 435  
 114 6 1 428 1 428 1.00E-173 617.8 6596 cellular  
 organisms;Eukaryota;Opisthokonta;Metazoa;Eumetazoa;Bilateria;Protostomia;  
 Spiralia;Lophotrochozoa;Mollusca;Bivalvia;Autobranchia;Heteroconchia;Euhe  
 terodonta;Imparidentia;Venerida;Veneroidea;Veneridae;Mercenaria;Mercenari  
 a mercenaria  
 UdeM00000008119 6596 600.5 UdeM00000008119 XP\_045164750.1 73.5 396  
 99 2 39 428 79 474 1.70E-168 600.5 6596 cellular  
 organisms;Eukaryota;Opisthokonta;Metazoa;Eumetazoa;Bilateria;Protostomia;  
 Spiralia;Lophotrochozoa;Mollusca;Bivalvia;Autobranchia;Heteroconchia;Euhe  
 terodonta;Imparidentia;Venerida;Veneroidea;Veneridae;Mercenaria;Mercenari  
 a mercenaria  
 UdeM00000008120 6596 602.8 UdeM00000008120 XP\_045164751.1 70.2 430  
 116 5 1 422 1 426 3.30E-169 602.8 6596 cellular  
 organisms;Eukaryota;Opisthokonta;Metazoa;Eumetazoa;Bilateria;Protostomia;  
 Spiralia;Lophotrochozoa;Mollusca;Bivalvia;Autobranchia;Heteroconchia;Euhe  
 terodonta;Imparidentia;Venerida;Veneroidea;Veneridae;Mercenaria;Mercenari  
 a mercenaria  
 UdeM00000008121 2607531 305.1 UdeM00000008121 XP\_029657462.1 56.3  
 277 121 0 92 368 7 283 1.30E-79 305.1 2607531  
 cellular  
 organisms;Eukaryota;Opisthokonta;Metazoa;Eumetazoa;Bilateria;Protostomia;  
 Spiralia;Lophotrochozoa;Mollusca;Cephalopoda;Coleoidea;Octopodiformes;Oct  
 opoda;Incirrata;Octopodidae;Octopus;Octopus sinensis  
 UdeM00000008122 7725 141.4 UdeM00000008122 XP\_039263221.1 62.5 112  
 41 1 48 158 9 120 1.30E-30 141.4 7725 cellular  
 organisms;Eukaryota;Opisthokonta;Metazoa;Eumetazoa;Bilateria;Deuterostomi

a;Chordata;Tunicata;Ascidiacea;Stolidobranchia;Styelidae;Styela;Styela  
clava  
UdeM00000008123 6596 1011.1 UdeM00000008123 XP\_045164746.1 66.5  
830 223 17 5 802 1335 2141 7.70E-292 1011.1 6596  
cellular  
organisms;Eukaryota;Opisthokonta;Metazoa;Eumetazoa;Bilateria;Protostomia;  
Spiralia;Lophotrochozoa;Mollusca;Bivalvia;Autobranchia;Heteroconchia;Euhe  
terodonta;Imparidentia;Venerida;Veneroidea;Veneridae;Mercenaria;Mercenari  
a mercenaria  
UdeM00000008124 6596 1023.1 UdeM00000008124 XP\_045164746.1 67.2  
830 215 17 5 800 1335 2141 1.90E-295 1023.1 6596  
cellular  
organisms;Eukaryota;Opisthokonta;Metazoa;Eumetazoa;Bilateria;Protostomia;  
Spiralia;Lophotrochozoa;Mollusca;Bivalvia;Autobranchia;Heteroconchia;Euhe  
terodonta;Imparidentia;Venerida;Veneroidea;Veneridae;Mercenaria;Mercenari  
a mercenaria  
UdeM00000008125 1735272 1233.8 UdeM00000008125 XP\_041350165.1  
77.1 946 203 5 11 946 222 1163 0.00E+00 1233.8  
1735272 cellular  
organisms;Eukaryota;Opisthokonta;Metazoa;Eumetazoa;Bilateria;Protostomia;  
Spiralia;Lophotrochozoa;Mollusca;Gastropoda;Neomphalina;Neomphaloidea;Pel  
tospiridae;Gigantopelta;Gigantopelta aegis  
UdeM00000008126 6596 250 UdeM00000008126 XP\_045164746.1 71.8 188  
50 2 1 185 186 373 2.90E-63 250 6596 cellular  
organisms;Eukaryota;Opisthokonta;Metazoa;Eumetazoa;Bilateria;Protostomia;  
Spiralia;Lophotrochozoa;Mollusca;Bivalvia;Autobranchia;Heteroconchia;Euhe  
terodonta;Imparidentia;Venerida;Veneroidea;Veneridae;Mercenaria;Mercenari  
a mercenaria  
UdeM00000008127 29159 169.9 UdeM00000008127 XP\_011452717.2 36.5 457  
190 15 28 473 119 486 8.10E-39 169.9 29159 cellular  
organisms;Eukaryota;Opisthokonta;Metazoa;Eumetazoa;Bilateria;Protostomia;  
Spiralia;Lophotrochozoa;Mollusca;Bivalvia;Autobranchia;Pteriormorphia;Ostr  
eida;Ostreoidea;Ostreidae;Crassostrea;Crassostrea gigas  
UdeM00000008129 1735272 136.7 UdeM00000008129 XP\_041346967.1 53  
100 47 0 2 101 72 171 1.60E-29 136.7 1735272  
cellular  
organisms;Eukaryota;Opisthokonta;Metazoa;Eumetazoa;Bilateria;Protostomia;  
Spiralia;Lophotrochozoa;Mollusca;Gastropoda;Neomphalina;Neomphaloidea;Pel  
tospiridae;Gigantopelta;Gigantopelta aegis  
UdeM00000008130 1735272 245.7 UdeM00000008130 XP\_041346967.1 59.1  
171 70 0 1 171 1 171 4.20E-62 245.7 1735272  
cellular  
organisms;Eukaryota;Opisthokonta;Metazoa;Eumetazoa;Bilateria;Protostomia;  
Spiralia;Lophotrochozoa;Mollusca;Gastropoda;Neomphalina;Neomphaloidea;Pel  
tospiridae;Gigantopelta;Gigantopelta aegis  
UdeM00000008131 6596 320.5 UdeM00000008131 XP\_045166360.1 52.3 363  
145 6 245 605 155 491 4.70E-84 320.5 6596 cellular  
organisms;Eukaryota;Opisthokonta;Metazoa;Eumetazoa;Bilateria;Protostomia;  
Spiralia;Lophotrochozoa;Mollusca;Bivalvia;Autobranchia;Heteroconchia;Euhe  
terodonta;Imparidentia;Venerida;Veneroidea;Veneridae;Mercenaria;Mercenari  
a mercenaria  
UdeM00000008132 6596 588.6 UdeM00000008132 XP\_045166363.1 63.9 501  
167 6 7 501 5 497 7.60E-165 588.6 6596 cellular  
organisms;Eukaryota;Opisthokonta;Metazoa;Eumetazoa;Bilateria;Protostomia;



Spiralia;Lophotrochozoa;Mollusca;Bivalvia;Autobranchia;Heteroconchia;Euherodonta;Imparidentia;Venerida;Veneroidea;Veneridae;Mercenaria;Mercenaria mercenaria

UdeM00000008133 1735272 293.5 UdeM00000008133 XP\_041347587.1 39.7  
406 232 5 66 465 61 459 4.80E-76 293.5 1735272  
cellular

organisms;Eukaryota;Opisthokonta;Metazoa;Eumetazoa;Bilateria;Protostomia;Spiralia;Lophotrochozoa;Mollusca;Gastropoda;Neomphalina;Neomphaloidea;Peltospiridae;Gigantopelta;Gigantopelta aegis

UdeM00000008134 441366 392.1 UdeM00000008134 XP\_028296753.1 39.1  
594 334 11 6 591 32 605 1.20E-105 392.1 441366  
cellular

organisms;Eukaryota;Opisthokonta;Metazoa;Eumetazoa;Bilateria;Deuterostomia;Chordata;Craniata;Vertebrata;Gnathostomata;Teleostomi;Euteleostomi;Actinopterygii;Actinopteri;Neopterygii;Teleostei;Osteoglossocephalai;Clupeocephala;Euteleostei;Neoteleostei;Eurypterygia;Ctenosquamata;Acanthomorpha;Euacanthomorpha;Percomorphaceae;Ovalentaria;Blenniiformes;Blenniiformes;Gobiesocidae;Gobiesocinae;Gouania;Gouania willdenowi

UdeM00000008135 29159 185.7 UdeM00000008135 XP\_011435143.2 32 316  
192 6 65 361 73 384 1.10E-43 185.7 29159 cellular

organisms;Eukaryota;Opisthokonta;Metazoa;Eumetazoa;Bilateria;Protostomia;Spiralia;Lophotrochozoa;Mollusca;Bivalvia;Autobranchia;Pteriomorpha;Ostreida;Ostreidae;Crassostrea;Crassostrea gigas

UdeM00000008136 29159 322.8 UdeM00000008136 XP\_011449154.2 72.4 196  
53 1 1 195 1 196 3.00E-85 322.8 29159 cellular

organisms;Eukaryota;Opisthokonta;Metazoa;Eumetazoa;Bilateria;Protostomia;Spiralia;Lophotrochozoa;Mollusca;Bivalvia;Autobranchia;Pteriomorpha;Ostreida;Ostreidae;Crassostrea;Crassostrea gigas

UdeM00000008137 6596 177.2 UdeM00000008137 XP\_045165288.1 96.4 84  
3 0 1 84 1 84 9.10E-42 177.2 6596 cellular

organisms;Eukaryota;Opisthokonta;Metazoa;Eumetazoa;Bilateria;Protostomia;Spiralia;Lophotrochozoa;Mollusca;Bivalvia;Autobranchia;Heteroconchia;Euherodonta;Imparidentia;Venerida;Veneroidea;Veneridae;Mercenaria;Mercenaria mercenaria

UdeM00000008138 6573 321.2 UdeM00000008138 XP\_021367512.1 90.6 181  
17 0 1 181 1 181 8.20E-85 321.2 6573 cellular

organisms;Eukaryota;Opisthokonta;Metazoa;Eumetazoa;Bilateria;Protostomia;Spiralia;Lophotrochozoa;Mollusca;Bivalvia;Autobranchia;Pteriomorpha;Pectinida;Pectinoidea;Pectinidae;Mizuhopecten;Mizuhopecten yessoensis

UdeM00000008139 6596 242.7 UdeM00000008139 XP\_045165270.1 33.2 461  
216 9 18 397 1 450 8.30E-61 242.7 6596 cellular

organisms;Eukaryota;Opisthokonta;Metazoa;Eumetazoa;Bilateria;Protostomia;Spiralia;Lophotrochozoa;Mollusca;Bivalvia;Autobranchia;Heteroconchia;Euherodonta;Imparidentia;Venerida;Veneroidea;Veneridae;Mercenaria;Mercenaria mercenaria

UdeM00000008140 6579 418.3 UdeM00000008140 XP\_033746082.1 50.7 361  
170 4 26 386 34 386 1.10E-113 418.3 6579 cellular

organisms;Eukaryota;Opisthokonta;Metazoa;Eumetazoa;Bilateria;Protostomia;Spiralia;Lophotrochozoa;Mollusca;Bivalvia;Autobranchia;Pteriomorpha;Pectinida;Pectinoidea;Pectinidae;Pecten;Pecten maximus

UdeM00000008141 6596 1148.3 UdeM00000008141 XP\_045164959.1 46.9  
1307 647 20 1 1276 1 1291 0.00E+00 1148.3 6596  
cellular

organisms;Eukaryota;Opisthokonta;Metazoa;Eumetazoa;Bilateria;Protostomia;Spiralia;Lophotrochozoa;Mollusca;Bivalvia;Autobranchia;Heteroconchia;Euheterodonta;Imparidentia;Venerida;Veneroidea;Veneridae;Mercenaria;Mercenaria mercenaria

UdeM00000008144 6500 463.8 UdeM00000008144 XP\_012939160.1 62 366  
137 2 1 366 1 364 2.10E-127 463.8 6500 cellular

organisms;Eukaryota;Opisthokonta;Metazoa;Eumetazoa;Bilateria;Protostomia;Spiralia;Lophotrochozoa;Mollusca;Gastropoda;Heterobranchia;Euthyneura;Tectipleura;Aplysiida;Aplysioidea;Aplysiidae;Aplysia;Aplysia californica

UdeM00000008145 6500 463.8 UdeM00000008145 XP\_012939160.1 62 366  
137 2 49 414 1 364 2.30E-127 463.8 6500 cellular

organisms;Eukaryota;Opisthokonta;Metazoa;Eumetazoa;Bilateria;Protostomia;Spiralia;Lophotrochozoa;Mollusca;Gastropoda;Heterobranchia;Euthyneura;Tectipleura;Aplysiida;Aplysioidea;Aplysiidae;Aplysia;Aplysia californica

UdeM00000008146 37653 380.2 UdeM00000008146 XP\_014780437.1 64.8 290  
102 0 1 290 1 290 2.40E-102 380.2 37653 cellular

organisms;Eukaryota;Opisthokonta;Metazoa;Eumetazoa;Bilateria;Protostomia;Spiralia;Lophotrochozoa;Mollusca;Cephalopoda;Coleoidea;Octopodiformes;Octopoda;Incirrata;Octopodidae;Octopus;Octopus bimaculoides

UdeM00000008147 1735272 351.3 UdeM00000008147 XP\_041350129.1 67  
264 87 0 1 264 30 293 1.10E-93 351.3 1735272

cellular

organisms;Eukaryota;Opisthokonta;Metazoa;Eumetazoa;Bilateria;Protostomia;Spiralia;Lophotrochozoa;Mollusca;Gastropoda;Neomphalina;Neomphaloidea;Peltospiridae;Gigantopelta;Gigantopelta aegis

UdeM00000008148 6596 671.4 UdeM00000008148 XP\_045166272.1 52.7 674  
264 9 415 1054 17 669 1.90E-189 671.4 6596 cellular

organisms;Eukaryota;Opisthokonta;Metazoa;Eumetazoa;Bilateria;Protostomia;Spiralia;Lophotrochozoa;Mollusca;Bivalvia;Autobranchia;Heteroconchia;Euheterodonta;Imparidentia;Venerida;Veneroidea;Veneridae;Mercenaria;Mercenaria mercenaria

UdeM00000008149 6573 661.4 UdeM00000008149 XP\_021369597.1 41.1 957  
463 19 21 906 143 1069 1.70E-186 661.4 6573 cellular

organisms;Eukaryota;Opisthokonta;Metazoa;Eumetazoa;Bilateria;Protostomia;Spiralia;Lophotrochozoa;Mollusca;Bivalvia;Autobranchia;Pteriomorphia;Pectinida;Pectinoidea;Pectinidae;Mizuhopecten;Mizuhopecten yessoensis

UdeM00000008150 29159 1508.8 UdeM00000008150 XP\_034307022.1 70.5  
1187 300 6 194 1371 221 1366 0.00E+00 1508.8

29159 cellular

organisms;Eukaryota;Opisthokonta;Metazoa;Eumetazoa;Bilateria;Protostomia;Spiralia;Lophotrochozoa;Mollusca;Bivalvia;Autobranchia;Pteriomorphia;Ostreida;Ostreoidea;Ostreidae;Crassostrea;Crassostrea gigas

UdeM00000008152 80966 184.5 UdeM00000008152 XP\_022077561.1 55.8 156  
69 0 1 156 116 271 1.00E-43 184.5 80966 cellular

organisms;Eukaryota;Opisthokonta;Metazoa;Eumetazoa;Bilateria;Deuterostomia;Chordata;Craniata;Vertebrata;Gnathostomata;Teleostomi;Euteleostomi;Actinopterygii;Actinopteri;Neopterygii;Teleostei;Osteoglossocephalai;Clupeocephala;Euteleostei;Neoteleostei;Eurypterygia;Ctenosquamata;Acanthomorphata;Euacanthomorphacea;Percomorphaceae;Ovalentaria;Ovalentaria incertae sedis;Pomacentridae;Acanthochromis;Acanthochromis polyacanthus

UdeM00000008153 6596 660.6 UdeM00000008153 XP\_045165900.1 58.1 589  
232 7 163 745 520 1099 2.40E-186 660.6 6596 cellular

organisms;Eukaryota;Opisthokonta;Metazoa;Eumetazoa;Bilateria;Protostomia;Spiralia;Lophotrochozoa;Mollusca;Bivalvia;Autobranchia;Heteroconchia;Euheterodonta

terodonta;Imparidentia;Venerida;Veneroidea;Veneridae;Mercenaria;Mercenaria mercenaria  
 UdeM00000008154 6596 587.4 UdeM00000008154 XP\_045166639.1 56.6 502  
 217 1 1 501 1 502 1.70E-164 587.4 6596 cellular  
 organisms;Eukaryota;Opisthokonta;Metazoa;Eumetazoa;Bilateria;Protostomia;  
 Spiralia;Lophotrochozoa;Mollusca;Bivalvia;Autobranhia;Heteroconchia;Euhe  
 terodonta;Imparidentia;Venerida;Veneroidea;Veneridae;Mercenaria;Mercenari  
 a mercenaria  
 UdeM00000008155 29159 220.7 UdeM00000008155 XP\_011447818.1 58.9 180  
 67 1 8 187 9 181 1.60E-54 220.7 29159 cellular  
 organisms;Eukaryota;Opisthokonta;Metazoa;Eumetazoa;Bilateria;Protostomia;  
 Spiralia;Lophotrochozoa;Mollusca;Bivalvia;Autobranhia;Pteriormorphia;Ostr  
 eida;Ostreoidea;Ostreidae;Crassostrea;Crassostrea gigas  
 UdeM00000008156 1735272 395.6 UdeM00000008156 XP\_041366909.1 31.8  
 804 495 14 33 799 1 788 1.50E-106 395.6 1735272  
 cellular  
 organisms;Eukaryota;Opisthokonta;Metazoa;Eumetazoa;Bilateria;Protostomia;  
 Spiralia;Lophotrochozoa;Mollusca;Gastropoda;Neomphalina;Neomphaloidea;Pel  
 tospiridae;Gigantopelta;Gigantopelta aegis  
 UdeM00000008157 1735272 370.2 UdeM00000008157 XP\_041366909.1 31  
 800 499 12 37 799 5 788 6.80E-99 370.2 1735272  
 cellular  
 organisms;Eukaryota;Opisthokonta;Metazoa;Eumetazoa;Bilateria;Protostomia;  
 Spiralia;Lophotrochozoa;Mollusca;Gastropoda;Neomphalina;Neomphaloidea;Pel  
 tospiridae;Gigantopelta;Gigantopelta aegis  
 UdeM00000008158 6500 93.6 UdeM00000008158 XP\_012939634.1 53.4 88  
 35 1 35 116 2200 2287 1.80E-16 93.6 6500 cellular  
 organisms;Eukaryota;Opisthokonta;Metazoa;Eumetazoa;Bilateria;Protostomia;  
 Spiralia;Lophotrochozoa;Mollusca;Gastropoda;Heterobranhia;Euthyneura;Tec  
 tipleura;Aplysiida;Aplysioidea;Aplysiidae;Aplysia;Aplysia californica  
 UdeM00000008159 400727 392.1 UdeM00000008159 XP\_025088349.1 31.1  
 847 519 13 2 803 733 1559 1.70E-105 392.1 400727  
 cellular  
 organisms;Eukaryota;Opisthokonta;Metazoa;Eumetazoa;Bilateria;Protostomia;  
 Spiralia;Lophotrochozoa;Mollusca;Gastropoda;Caenogastropoda;Architaeniogl  
 ossa;Ampullarioidea;Ampullariidae;Pomacea;Pomacea canaliculata  
 UdeM00000008161 6579 394.4 UdeM00000008161 XP\_033746771.1 32.2 833  
 513 16 54 860 59 865 3.70E-106 394.4 6579 cellular  
 organisms;Eukaryota;Opisthokonta;Metazoa;Eumetazoa;Bilateria;Protostomia;  
 Spiralia;Lophotrochozoa;Mollusca;Bivalvia;Autobranhia;Pteriormorphia;Pect  
 inida;Pectinoidea;Pectinidae;Pecten;Pecten maximus  
 UdeM00000008162 6526 105.9 UdeM00000008162 XP\_013090465.1 36.3 171  
 104 2 41 211 102 267 6.90E-20 105.9 6526 cellular  
 organisms;Eukaryota;Opisthokonta;Metazoa;Eumetazoa;Bilateria;Protostomia;  
 Spiralia;Lophotrochozoa;Mollusca;Gastropoda;Heterobranhia;Euthyneura;Pan  
 pulmonata;Hygrophila;Lymnaeoidea;Planorbidae;Biomphalaria;Biomphalaria  
 glabrata  
 UdeM00000008163 1735272 395.6 UdeM00000008163 XP\_041362996.1 29.8  
 865 548 15 114 938 44 889 1.80E-106 395.6 1735272  
 cellular  
 organisms;Eukaryota;Opisthokonta;Metazoa;Eumetazoa;Bilateria;Protostomia;  
 Spiralia;Lophotrochozoa;Mollusca;Gastropoda;Neomphalina;Neomphaloidea;Pel  
 tospiridae;Gigantopelta;Gigantopelta aegis

UdeM00000008166 1735272 392.1 UdeM00000008166 XP\_041366909.1 32.2  
 805 493 11 147 914 1 789 1.90E-105 392.1 1735272  
 cellular  
 organisms;Eukaryota;Opisthokonta;Metazoa;Eumetazoa;Bilateria;Protostomia;  
 Spiralia;Lophotrochozoa;Mollusca;Gastropoda;Neomphalina;Neomphaloidea;Pel  
 tospiridae;Gigantopelta;Gigantopelta aegis  
 UdeM00000008165 1735272 392.1 UdeM00000008165 XP\_041366909.1 32.2  
 805 493 11 131 898 1 789 1.90E-105 392.1 1735272  
 cellular  
 organisms;Eukaryota;Opisthokonta;Metazoa;Eumetazoa;Bilateria;Protostomia;  
 Spiralia;Lophotrochozoa;Mollusca;Gastropoda;Neomphalina;Neomphaloidea;Pel  
 tospiridae;Gigantopelta;Gigantopelta aegis  
 UdeM00000008167 6596 141.4 UdeM00000008167 XP\_045212236.1 41.9 172  
 88 5 1 170 261 422 1.10E-30 141.4 6596 cellular  
 organisms;Eukaryota;Opisthokonta;Metazoa;Eumetazoa;Bilateria;Protostomia;  
 Spiralia;Lophotrochozoa;Mollusca;Bivalvia;Autobranchia;Heteroconchia;Euhe  
 terodonta;Imparidentia;Venerida;Veneroidea;Veneridae;Mercenaria;Mercenari  
 a mercenaria  
 UdeM00000008168 6526 166.8 UdeM00000008168 XP\_013090465.1 34 303  
 196 3 2 302 121 421 4.90E-38 166.8 6526 cellular  
 organisms;Eukaryota;Opisthokonta;Metazoa;Eumetazoa;Bilateria;Protostomia;  
 Spiralia;Lophotrochozoa;Mollusca;Gastropoda;Heterobranchia;Euthyneura;Pan  
 pulmonata;Hygrophila;Lymnaeoidea;Planorbidae;Biomphalaria;Biomphalaria  
 glabrata  
 UdeM00000008169 6596 247.7 UdeM00000008169 XP\_045164487.1 40.7 413  
 214 15 14 409 17 415 3.60E-62 247.7 6596 cellular  
 organisms;Eukaryota;Opisthokonta;Metazoa;Eumetazoa;Bilateria;Protostomia;  
 Spiralia;Lophotrochozoa;Mollusca;Bivalvia;Autobranchia;Heteroconchia;Euhe  
 terodonta;Imparidentia;Venerida;Veneroidea;Veneridae;Mercenaria;Mercenari  
 a mercenaria  
 UdeM00000008170 6596 181.8 UdeM00000008170 XP\_045165924.1 64.7 150  
 49 2 1 150 1301 1446 6.50E-43 181.8 6596 cellular  
 organisms;Eukaryota;Opisthokonta;Metazoa;Eumetazoa;Bilateria;Protostomia;  
 Spiralia;Lophotrochozoa;Mollusca;Bivalvia;Autobranchia;Heteroconchia;Euhe  
 terodonta;Imparidentia;Venerida;Veneroidea;Veneridae;Mercenaria;Mercenari  
 a mercenaria  
 UdeM00000008171 6596 834.7 UdeM00000008171 XP\_045165924.1 54.6 810  
 354 7 1 802 643 1446 9.80E-239 834.7 6596 cellular  
 organisms;Eukaryota;Opisthokonta;Metazoa;Eumetazoa;Bilateria;Protostomia;  
 Spiralia;Lophotrochozoa;Mollusca;Bivalvia;Autobranchia;Heteroconchia;Euhe  
 terodonta;Imparidentia;Venerida;Veneroidea;Veneridae;Mercenaria;Mercenari  
 a mercenaria  
 UdeM00000008172 6579 546.2 UdeM00000008172 XP\_033731370.1 67.2 418  
 131 2 1 413 146 562 3.60E-152 546.2 6579 cellular  
 organisms;Eukaryota;Opisthokonta;Metazoa;Eumetazoa;Bilateria;Protostomia;  
 Spiralia;Lophotrochozoa;Mollusca;Bivalvia;Autobranchia;Pteriomorphia;Pect  
 inida;Pectinoidea;Pectinidae;Pecten;Pecten maximus  
 UdeM00000008173 6565 75.5 UdeM00000008173 XP\_022297746.1 45.8 96  
 41 3 1 96 1 85 9.60E-11 75.5 6565 cellular  
 organisms;Eukaryota;Opisthokonta;Metazoa;Eumetazoa;Bilateria;Protostomia;  
 Spiralia;Lophotrochozoa;Mollusca;Bivalvia;Autobranchia;Pteriomorphia;Ostr  
 eida;Ostreoidea;Ostreidae;Crassostrea;Crassostrea virginica  
 UdeM00000008174 6596 1078.5 UdeM00000008174 XP\_045165133.1 50.2  
 1133 518 16 8 1118 2 1110 0.00E+00 1078.5 6596

cellular  
organisms;Eukaryota;Opisthokonta;Metazoa;Eumetazoa;Bilateria;Protostomia;  
Spiralia;Lophotrochozoa;Mollusca;Bivalvia;Autobranchia;Heteroconchia;Euhe  
terodonta;Imparidentia;Venerida;Veneroidea;Veneridae;Mercenaria;Mercenari  
a mercenaria

UdeM00000008176 260615 529.3 UdeM00000008176 XP\_039342393.1 90.7  
290 26 1 110 398 185 474 5.50E-147 529.3 260615

cellular  
organisms;Eukaryota;Opisthokonta;Metazoa;Eumetazoa;Bilateria;Deuterostomi  
a;Chordata;Craniata;Vertebrata;Gnathostomata;Teleostomi;Euteleostomi;Sarc  
opterygii;Dipnotetrapodomorpha;Tetrapoda;Amniota;Sauropsida;Sauria;Archel  
osauria;Testudinata;Testudines;Cryptodira;Durocryptodira;Testudinoidea;Ge  
oemydidae;Geoemydinae;Mauremys;Mauremys reevesii

UdeM00000008177 6596 257.7 UdeM00000008177 XP\_045164112.1 57 230  
93 2 7 233 4 230 1.40E-65 257.7 6596 cellular

organisms;Eukaryota;Opisthokonta;Metazoa;Eumetazoa;Bilateria;Protostomia;  
Spiralia;Lophotrochozoa;Mollusca;Bivalvia;Autobranchia;Heteroconchia;Euhe  
terodonta;Imparidentia;Venerida;Veneroidea;Veneridae;Mercenaria;Mercenari  
a mercenaria

UdeM00000008178 6596 193.4 UdeM00000008178 XP\_045195740.1 56 166  
73 0 1 166 1 166 2.40E-46 193.4 6596 cellular

organisms;Eukaryota;Opisthokonta;Metazoa;Eumetazoa;Bilateria;Protostomia;  
Spiralia;Lophotrochozoa;Mollusca;Bivalvia;Autobranchia;Heteroconchia;Euhe  
terodonta;Imparidentia;Venerida;Veneroidea;Veneridae;Mercenaria;Mercenari  
a mercenaria

UdeM00000008180 6596 188 UdeM00000008180 XP\_045188305.1 57.8 161  
66 1 1 159 1 161 9.70E-45 188 6596 cellular

organisms;Eukaryota;Opisthokonta;Metazoa;Eumetazoa;Bilateria;Protostomia;  
Spiralia;Lophotrochozoa;Mollusca;Bivalvia;Autobranchia;Heteroconchia;Euhe  
terodonta;Imparidentia;Venerida;Veneroidea;Veneridae;Mercenaria;Mercenari  
a mercenaria

UdeM00000008181 400727 371.7 UdeM00000008181 XP\_025106301.1 95.7  
185 8 0 1 185 1 185 5.40E-100 371.7 400727

cellular  
organisms;Eukaryota;Opisthokonta;Metazoa;Eumetazoa;Bilateria;Protostomia;  
Spiralia;Lophotrochozoa;Mollusca;Gastropoda;Caenogastropoda;Architaeniogl  
ossa;Ampullarioidea;Ampullariidae;Pomacea;Pomacea canaliculata

UdeM00000008182 400727 295 UdeM00000008182 XP\_025106301.1 95.9  
147 6 0 1 147 1 147 5.10E-77 295 400727

cellular  
organisms;Eukaryota;Opisthokonta;Metazoa;Eumetazoa;Bilateria;Protostomia;  
Spiralia;Lophotrochozoa;Mollusca;Gastropoda;Caenogastropoda;Architaeniogl  
ossa;Ampullarioidea;Ampullariidae;Pomacea;Pomacea canaliculata

UdeM00000008184 6500 90.1 UdeM00000008184 XP\_005097619.2 40.8 98  
58 0 8 105 515 612 2.00E-15 90.1 6500 cellular

organisms;Eukaryota;Opisthokonta;Metazoa;Eumetazoa;Bilateria;Protostomia;  
Spiralia;Lophotrochozoa;Mollusca;Gastropoda;Heterobranchia;Euthyneura;Tec  
tipleura;Aplysiida;Aplysioidea;Aplysiidae;Aplysia;Aplysia californica

UdeM00000008185 6596 84 UdeM00000008185 XP\_045166890.1 34.4 151  
88 4 13 158 1016 1160 3.10E-13 84 6596 cellular

organisms;Eukaryota;Opisthokonta;Metazoa;Eumetazoa;Bilateria;Protostomia;  
Spiralia;Lophotrochozoa;Mollusca;Bivalvia;Autobranchia;Heteroconchia;Euhe  
terodonta;Imparidentia;Venerida;Veneroidea;Veneridae;Mercenaria;Mercenari  
a mercenaria

UdeM00000008186 29159 93.6 UdeM00000008186 XP\_011449680.2 35.6 160  
 93 5 37 190 20 175 3.50E-16 93.6 29159 cellular  
 organisms;Eukaryota;Opisthokonta;Metazoa;Eumetazoa;Bilateria;Protostomia;  
 Spiralia;Lophotrochozoa;Mollusca;Bivalvia;Autobranchia;Pteriormorphia;Ostr  
 eida;Ostreoidea;Ostreidae;Crassostrea;Crassostrea gigas  
 UdeM00000008187 6573 429.1 UdeM00000008187 XP\_021346977.1 33.4 809  
 485 19 1 771 190 982 1.40E-116 429.1 6573 cellular  
 organisms;Eukaryota;Opisthokonta;Metazoa;Eumetazoa;Bilateria;Protostomia;  
 Spiralia;Lophotrochozoa;Mollusca;Bivalvia;Autobranchia;Pteriormorphia;Pect  
 inida;Pectinoidea;Pectinidae;Mizuhopecten;Mizuhopecten yessoensis  
 UdeM00000008188 29159 385.6 UdeM00000008188 XP\_011450941.2 67.1 292  
 90 3 62 349 63 352 9.20E-104 385.6 29159 cellular  
 organisms;Eukaryota;Opisthokonta;Metazoa;Eumetazoa;Bilateria;Protostomia;  
 Spiralia;Lophotrochozoa;Mollusca;Bivalvia;Autobranchia;Pteriormorphia;Ostr  
 eida;Ostreoidea;Ostreidae;Crassostrea;Crassostrea gigas  
 UdeM00000008189 6596 612.8 UdeM00000008189 XP\_045167047.1 41.2 953  
 488 21 221 1142 26 937 8.70E-172 612.8 6596 cellular  
 organisms;Eukaryota;Opisthokonta;Metazoa;Eumetazoa;Bilateria;Protostomia;  
 Spiralia;Lophotrochozoa;Mollusca;Bivalvia;Autobranchia;Heteroconchia;Euhe  
 terodonta;Imparidentia;Venerida;Veneroidea;Veneridae;Mercenaria;Mercenari  
 a mercenaria  
 UdeM00000008190 6596 963.8 UdeM00000008190 XP\_045165190.1 69.9 655  
 186 4 5 657 13 658 1.10E-277 963.8 6596 cellular  
 organisms;Eukaryota;Opisthokonta;Metazoa;Eumetazoa;Bilateria;Protostomia;  
 Spiralia;Lophotrochozoa;Mollusca;Bivalvia;Autobranchia;Heteroconchia;Euhe  
 terodonta;Imparidentia;Venerida;Veneroidea;Veneridae;Mercenaria;Mercenari  
 a mercenaria  
 UdeM00000008191 1735272 711.8 UdeM00000008191 XP\_041350139.1 67.5  
 557 147 8 1 543 1 537 6.50E-202 711.8 1735272  
 cellular  
 organisms;Eukaryota;Opisthokonta;Metazoa;Eumetazoa;Bilateria;Protostomia;  
 Spiralia;Lophotrochozoa;Mollusca;Gastropoda;Neomphalina;Neomphaloidea;Pel  
 tospiridae;Gigantopelta;Gigantopelta aegis  
 UdeM00000008192 6565 1411 UdeM00000008192 XP\_022298165.1 55.4 1685  
 557 23 1 1668 1 1507 0.00E+00 1411 6565 cellular  
 organisms;Eukaryota;Opisthokonta;Metazoa;Eumetazoa;Bilateria;Protostomia;  
 Spiralia;Lophotrochozoa;Mollusca;Bivalvia;Autobranchia;Pteriormorphia;Ostr  
 eida;Ostreoidea;Ostreidae;Crassostrea;Crassostrea virginica  
 UdeM00000008193 6565 1411.7 UdeM00000008193 XP\_022298165.1 55.5  
 1679 556 23 1 1660 1 1507 0.00E+00 1411.7 6565  
 cellular  
 organisms;Eukaryota;Opisthokonta;Metazoa;Eumetazoa;Bilateria;Protostomia;  
 Spiralia;Lophotrochozoa;Mollusca;Bivalvia;Autobranchia;Pteriormorphia;Ostr  
 eida;Ostreoidea;Ostreidae;Crassostrea;Crassostrea virginica  
 UdeM00000008194 37653 782.7 UdeM00000008194 XP\_014790510.1 74 504  
 128 3 1 504 1 501 2.80E-223 782.7 37653 cellular  
 organisms;Eukaryota;Opisthokonta;Metazoa;Eumetazoa;Bilateria;Protostomia;  
 Spiralia;Lophotrochozoa;Mollusca;Cephalopoda;Coleoidea;Octopodiformes;Oct  
 opoda;Incirrata;Octopodidae;Octopus;Octopus bimaculoides  
 UdeM00000008195 6573 84.3 UdeM00000008195 XP\_021356963.1 31.2 154  
 91 4 10 162 13 152 1.50E-13 84.3 6573 cellular  
 organisms;Eukaryota;Opisthokonta;Metazoa;Eumetazoa;Bilateria;Protostomia;  
 Spiralia;Lophotrochozoa;Mollusca;Bivalvia;Autobranchia;Pteriormorphia;Pect  
 inida;Pectinoidea;Pectinidae;Mizuhopecten;Mizuhopecten yessoensis

UdeM00000008196 6596 1933.7 UdeM00000008196 XP\_045166953.1 54.1  
 1593 639 16 1 1515 378 1956 0.00E+00 1933.7 6596  
 cellular  
 organisms;Eukaryota;Opisthokonta;Metazoa;Eumetazoa;Bilateria;Protostomia;  
 Spiralia;Lophotrochozoa;Mollusca;Bivalvia;Autobranchia;Heteroconchia;Euhe  
 terodonta;Imparidentia;Venerida;Veneroidea;Veneridae;Mercenaria;Mercenari  
 a mercenaria  
 UdeM00000008197 225164 487.6 UdeM00000008197 XP\_009057908.1 65.9  
 328 112 0 21 348 35 362 1.30E-134 487.6 225164  
 cellular  
 organisms;Eukaryota;Opisthokonta;Metazoa;Eumetazoa;Bilateria;Protostomia;  
 Spiralia;Lophotrochozoa;Mollusca;Gastropoda;Patellogastropoda;Lottioidea;  
 Lottiidae;Lottia;Lottia gigantea  
 UdeM00000008198 6596 129.4 UdeM00000008198 XP\_045165126.1 50 132  
 53 3 1 119 1 132 5.20E-27 129.4 6596 cellular  
 organisms;Eukaryota;Opisthokonta;Metazoa;Eumetazoa;Bilateria;Protostomia;  
 Spiralia;Lophotrochozoa;Mollusca;Bivalvia;Autobranchia;Heteroconchia;Euhe  
 terodonta;Imparidentia;Venerida;Veneroidea;Veneridae;Mercenaria;Mercenari  
 a mercenaria  
 UdeM00000008199 6573 355.1 UdeM00000008199 XP\_021343983.1 39.8 533  
 269 7 1 481 1 533 1.50E-94 355.1 6573 cellular  
 organisms;Eukaryota;Opisthokonta;Metazoa;Eumetazoa;Bilateria;Protostomia;  
 Spiralia;Lophotrochozoa;Mollusca;Bivalvia;Autobranchia;Pteriormorphia;Pect  
 inida;Pectinoidea;Pectinidae;Mizuhopecten;Mizuhopecten yessoensis  
 UdeM00000008200 400727 209.5 UdeM00000008200 XP\_025106511.1 26.5  
 565 372 10 324 867 68 610 1.70E-50 209.5 400727  
 cellular  
 organisms;Eukaryota;Opisthokonta;Metazoa;Eumetazoa;Bilateria;Protostomia;  
 Spiralia;Lophotrochozoa;Mollusca;Gastropoda;Caenogastropoda;Architaeniogl  
 ossa;Ampullarioidea;Ampullariidae;Pomacea;Pomacea canaliculata  
 UdeM00000008201 2607531 232.6 UdeM00000008201 XP\_036364909.1 24.8  
 870 586 25 26 857 5 844 1.80E-57 232.6 2607531  
 cellular  
 organisms;Eukaryota;Opisthokonta;Metazoa;Eumetazoa;Bilateria;Protostomia;  
 Spiralia;Lophotrochozoa;Mollusca;Cephalopoda;Coleoidea;Octopodiformes;Oct  
 opoda;Incirrata;Octopodidae;Octopus;Octopus sinensis  
 UdeM00000008203 6573 439.1 UdeM00000008203 XP\_021370993.1 38.6 1694  
 949 9 1 1676 1 1621 2.50E-119 439.1 6573 cellular  
 organisms;Eukaryota;Opisthokonta;Metazoa;Eumetazoa;Bilateria;Protostomia;  
 Spiralia;Lophotrochozoa;Mollusca;Bivalvia;Autobranchia;Pteriormorphia;Pect  
 inida;Pectinoidea;Pectinidae;Mizuhopecten;Mizuhopecten yessoensis  
 UdeM00000008204 6579 233.4 UdeM00000008204 XP\_033744897.1 56.4 225  
 97 1 2 225 127 351 2.80E-58 233.4 6579 cellular  
 organisms;Eukaryota;Opisthokonta;Metazoa;Eumetazoa;Bilateria;Protostomia;  
 Spiralia;Lophotrochozoa;Mollusca;Bivalvia;Autobranchia;Pteriormorphia;Pect  
 inida;Pectinoidea;Pectinidae;Pecten;Pecten maximus  
 UdeM00000008205 6565 812 UdeM00000008205 XP\_022299885.1 79.9 507  
 94 2 1 507 1 499 4.30E-232 812 6565 cellular  
 organisms;Eukaryota;Opisthokonta;Metazoa;Eumetazoa;Bilateria;Protostomia;  
 Spiralia;Lophotrochozoa;Mollusca;Bivalvia;Autobranchia;Pteriormorphia;Ostr  
 eida;Ostreoidea;Ostreidae;Crassostrea;Crassostrea virginica  
 UdeM00000008206 6596 453.4 UdeM00000008206 XP\_045167224.1 36.1 883  
 448 23 10 854 9 813 7.80E-124 453.4 6596 cellular  
 organisms;Eukaryota;Opisthokonta;Metazoa;Eumetazoa;Bilateria;Protostomia;

Spiralia;Lophotrochozoa;Mollusca;Bivalvia;Autobranchia;Heteroconchia;Euherodonta;Imparidentia;Venerida;Veneroidea;Veneridae;Mercenaria;Mercenaria mercenaria

UdeM00000008208 6596 247.7 UdeM00000008208 XP\_045185726.1 26.6 842  
520 23 25 788 604 1425 5.10E-62 247.7 6596 cellular

organisms;Eukaryota;Opisthokonta;Metazoa;Eumetazoa;Bilateria;Protostomia;Spiralia;Lophotrochozoa;Mollusca;Bivalvia;Autobranchia;Heteroconchia;Euherodonta;Imparidentia;Venerida;Veneroidea;Veneridae;Mercenaria;Mercenaria mercenaria

UdeM00000008209 6596 89.4 UdeM00000008209 XP\_045161346.1 50.6 77  
38 0 51 127 433 509 3.80E-15 89.4 6596 cellular

organisms;Eukaryota;Opisthokonta;Metazoa;Eumetazoa;Bilateria;Protostomia;Spiralia;Lophotrochozoa;Mollusca;Bivalvia;Autobranchia;Heteroconchia;Euherodonta;Imparidentia;Venerida;Veneroidea;Veneridae;Mercenaria;Mercenaria mercenaria

UdeM00000008210 1529436 452.6 UdeM00000008210 XP\_033114642.1 47.7  
434 227 0 78 511 98 531 6.90E-124 452.6 1529436  
cellular

organisms;Eukaryota;Opisthokonta;Metazoa;Eumetazoa;Bilateria;Deuterostomia;Echinodermata;Pelmatozoa;Crinoidea;Articulata;Comatulida;Comatulidae;Comatulinae;Anneissia;Anneissia japonica

UdeM00000008211 400727 81.6 UdeM00000008211 XP\_025107998.1 38.6  
153 62 5 92 232 264 396 1.40E-12 81.6 400727

cellular

organisms;Eukaryota;Opisthokonta;Metazoa;Eumetazoa;Bilateria;Protostomia;Spiralia;Lophotrochozoa;Mollusca;Gastropoda;Caenogastropoda;Architaenioglossa;Ampullarioidea;Ampullariidae;Pomacea;Pomacea canaliculata

UdeM00000008214 6565 501.1 UdeM00000008214 XP\_022298175.1 41.1 547  
312 6 11 551 9 551 2.40E-138 501.1 6565 cellular

organisms;Eukaryota;Opisthokonta;Metazoa;Eumetazoa;Bilateria;Protostomia;Spiralia;Lophotrochozoa;Mollusca;Bivalvia;Autobranchia;Pteriormorphia;Ostracida;Ostreidae;Crassostrea;Crassostrea virginica

UdeM00000008215 400727 162.5 UdeM00000008215 XP\_025106973.1 50.3  
157 67 5 5 160 41 187 4.40E-37 162.5 400727

cellular

organisms;Eukaryota;Opisthokonta;Metazoa;Eumetazoa;Bilateria;Protostomia;Spiralia;Lophotrochozoa;Mollusca;Gastropoda;Caenogastropoda;Architaenioglossa;Ampullarioidea;Ampullariidae;Pomacea;Pomacea canaliculata

UdeM00000008216 6596 201.4 UdeM00000008216 XP\_045190752.1 41.9 284  
161 3 21 302 16 297 1.60E-48 201.4 6596 cellular

organisms;Eukaryota;Opisthokonta;Metazoa;Eumetazoa;Bilateria;Protostomia;Spiralia;Lophotrochozoa;Mollusca;Bivalvia;Autobranchia;Heteroconchia;Euherodonta;Imparidentia;Venerida;Veneroidea;Veneridae;Mercenaria;Mercenaria mercenaria

UdeM00000008217 6596 181.4 UdeM00000008217 XP\_045165910.1 34.7 259  
158 6 10 264 20 271 2.60E-42 181.4 6596 cellular

organisms;Eukaryota;Opisthokonta;Metazoa;Eumetazoa;Bilateria;Protostomia;Spiralia;Lophotrochozoa;Mollusca;Bivalvia;Autobranchia;Heteroconchia;Euherodonta;Imparidentia;Venerida;Veneroidea;Veneridae;Mercenaria;Mercenaria mercenaria

UdeM00000008218 6579 264.2 UdeM00000008218 XP\_033745014.1 69.3 192  
59 0 1 192 1 192 1.30E-67 264.2 6579 cellular

organisms;Eukaryota;Opisthokonta;Metazoa;Eumetazoa;Bilateria;Protostomia;



Spiralia;Lophotrochozoa;Mollusca;Bivalvia;Autobranchia;Pteriormorphia;Pectinida;Pectinoidea;Pectinidae;Pecten;Pecten maximus  
UdeM00000008219 6596 1409 UdeM00000008219 XP\_045165453.1 58.3 1243  
452 11 141 1372 159 1346 0.00E+00 1409 6596 cellular  
organisms;Eukaryota;Opisthokonta;Metazoa;Eumetazoa;Bilateria;Protostomia;  
Spiralia;Lophotrochozoa;Mollusca;Bivalvia;Autobranchia;Heteroconchia;Euherodonta;Imparidentia;Venerida;Veneroidea;Veneridae;Mercenaria;Mercenaria mercenaria  
UdeM00000008220 29159 122.9 UdeM00000008220 XP\_011415029.2 40.5 185  
69 3 228 408 386 533 9.80E-25 122.9 29159 cellular  
organisms;Eukaryota;Opisthokonta;Metazoa;Eumetazoa;Bilateria;Protostomia;  
Spiralia;Lophotrochozoa;Mollusca;Bivalvia;Autobranchia;Pteriormorphia;Ostreida;Ostreoidea;Ostreidae;Crassostrea;Crassostrea gigas  
UdeM00000008221 6579 663.3 UdeM00000008221 XP\_033744468.1 69.7 729  
167 7 1 698 1 706 3.40E-187 663.3 6579 cellular  
organisms;Eukaryota;Opisthokonta;Metazoa;Eumetazoa;Bilateria;Protostomia;  
Spiralia;Lophotrochozoa;Mollusca;Bivalvia;Autobranchia;Pteriormorphia;Pectinida;Pectinoidea;Pectinidae;Pecten;Pecten maximus  
UdeM00000008222 151771 137.1 UdeM00000008222 XP\_028415423.1 31.6  
323 208 7 4 325 7 317 3.90E-29 137.1 151771  
cellular  
organisms;Eukaryota;Opisthokonta;Metazoa;Eumetazoa;Cnidaria;Anthozoa;Octocorallia;Alcyonacea;Alcyoniina;Nephtheidae;Dendronephthya;Dendronephthya gigantea  
UdeM00000008223 6565 1177.2 UdeM00000008223 XP\_022299509.1 41  
1494 786 23 3 1435 1200 2659 0.00E+00 1177.2 6565  
cellular  
organisms;Eukaryota;Opisthokonta;Metazoa;Eumetazoa;Bilateria;Protostomia;  
Spiralia;Lophotrochozoa;Mollusca;Bivalvia;Autobranchia;Pteriormorphia;Ostreida;Ostreoidea;Ostreidae;Crassostrea;Crassostrea virginica  
UdeM00000008224 29159 246.9 UdeM00000008224 XP\_034306996.1 31.8 510  
292 15 806 1306 651 1113 1.50E-61 246.9 29159 cellular  
organisms;Eukaryota;Opisthokonta;Metazoa;Eumetazoa;Bilateria;Protostomia;  
Spiralia;Lophotrochozoa;Mollusca;Bivalvia;Autobranchia;Pteriormorphia;Ostreida;Ostreoidea;Ostreidae;Crassostrea;Crassostrea gigas  
UdeM00000008225 6596 336.7 UdeM00000008225 XP\_045165923.1 50 328  
154 2 1 322 1 324 3.70E-89 336.7 6596 cellular  
organisms;Eukaryota;Opisthokonta;Metazoa;Eumetazoa;Bilateria;Protostomia;  
Spiralia;Lophotrochozoa;Mollusca;Bivalvia;Autobranchia;Heteroconchia;Euherodonta;Imparidentia;Venerida;Veneroidea;Veneridae;Mercenaria;Mercenaria mercenaria  
UdeM00000008226 6596 344 UdeM00000008226 XP\_045165923.1 54.6 302  
131 2 18 313 23 324 2.20E-91 344 6596 cellular  
organisms;Eukaryota;Opisthokonta;Metazoa;Eumetazoa;Bilateria;Protostomia;  
Spiralia;Lophotrochozoa;Mollusca;Bivalvia;Autobranchia;Heteroconchia;Euherodonta;Imparidentia;Venerida;Veneroidea;Veneridae;Mercenaria;Mercenaria mercenaria  
UdeM00000008228 6596 389.8 UdeM00000008228 XP\_045181993.1 50 342  
165 1 349 690 425 760 7.20E-105 389.8 6596 cellular  
organisms;Eukaryota;Opisthokonta;Metazoa;Eumetazoa;Bilateria;Protostomia;  
Spiralia;Lophotrochozoa;Mollusca;Bivalvia;Autobranchia;Heteroconchia;Euherodonta;Imparidentia;Venerida;Veneroidea;Veneridae;Mercenaria;Mercenaria mercenaria

UdeM00000008229 6596 474.9 UdeM00000008229 XP\_045164530.1 67.8 345  
 109 1 1 345 1 343 9.10E-131 474.9 6596 cellular  
 organisms;Eukaryota;Opisthokonta;Metazoa;Eumetazoa;Bilateria;Protostomia;  
 Spiralia;Lophotrochozoa;Mollusca;Bivalvia;Autobranhia;Heteroconchia;Euhe  
 terodonta;Imparidentia;Venerida;Veneroidea;Veneridae;Mercenaria;Mercenari  
 a mercenaria  
 UdeM00000008230 6596 433.7 UdeM00000008230 XP\_045164530.1 69.6 306  
 91 1 23 328 40 343 2.20E-118 433.7 6596 cellular  
 organisms;Eukaryota;Opisthokonta;Metazoa;Eumetazoa;Bilateria;Protostomia;  
 Spiralia;Lophotrochozoa;Mollusca;Bivalvia;Autobranhia;Heteroconchia;Euhe  
 terodonta;Imparidentia;Venerida;Veneroidea;Veneridae;Mercenaria;Mercenari  
 a mercenaria  
 UdeM00000008231 6596 623.6 UdeM00000008231 XP\_045164530.1 50.5 689  
 308 9 1 672 354 1026 3.10E-175 623.6 6596 cellular  
 organisms;Eukaryota;Opisthokonta;Metazoa;Eumetazoa;Bilateria;Protostomia;  
 Spiralia;Lophotrochozoa;Mollusca;Bivalvia;Autobranhia;Heteroconchia;Euhe  
 terodonta;Imparidentia;Venerida;Veneroidea;Veneridae;Mercenaria;Mercenari  
 a mercenaria  
 UdeM00000008232 6596 558.5 UdeM00000008232 XP\_045164801.1 51.1 568  
 266 8 5 565 3 565 9.60E-156 558.5 6596 cellular  
 organisms;Eukaryota;Opisthokonta;Metazoa;Eumetazoa;Bilateria;Protostomia;  
 Spiralia;Lophotrochozoa;Mollusca;Bivalvia;Autobranhia;Heteroconchia;Euhe  
 terodonta;Imparidentia;Venerida;Veneroidea;Veneridae;Mercenaria;Mercenari  
 a mercenaria  
 UdeM00000008233 6596 545.4 UdeM00000008233 XP\_045164801.1 49.1 591  
 266 9 5 588 3 565 8.80E-152 545.4 6596 cellular  
 organisms;Eukaryota;Opisthokonta;Metazoa;Eumetazoa;Bilateria;Protostomia;  
 Spiralia;Lophotrochozoa;Mollusca;Bivalvia;Autobranhia;Heteroconchia;Euhe  
 terodonta;Imparidentia;Venerida;Veneroidea;Veneridae;Mercenaria;Mercenari  
 a mercenaria  
 UdeM00000008234 6596 870.9 UdeM00000008234 XP\_045166452.1 45.9 1010  
 527 10 13 1014 10 1008 1.60E-249 870.9 6596 cellular  
 organisms;Eukaryota;Opisthokonta;Metazoa;Eumetazoa;Bilateria;Protostomia;  
 Spiralia;Lophotrochozoa;Mollusca;Bivalvia;Autobranhia;Heteroconchia;Euhe  
 terodonta;Imparidentia;Venerida;Veneroidea;Veneridae;Mercenaria;Mercenari  
 a mercenaria  
 UdeM00000008235 7725 512.3 UdeM00000008235 XP\_039252219.1 29.1 1013  
 553 26 16 863 191 1203 1.20E-141 512.3 7725 cellular  
 organisms;Eukaryota;Opisthokonta;Metazoa;Eumetazoa;Bilateria;Deuterostomi  
 a;Chordata;Tunicata;Ascidiacea;Stolidobranhia;Styelidae;Styela;Styela  
 clava  
 UdeM00000008236 6596 169.9 UdeM00000008236 XP\_045164793.1 35.5 273  
 154 4 11 283 1606 1856 9.50E-39 169.9 6596 cellular  
 organisms;Eukaryota;Opisthokonta;Metazoa;Eumetazoa;Bilateria;Protostomia;  
 Spiralia;Lophotrochozoa;Mollusca;Bivalvia;Autobranhia;Heteroconchia;Euhe  
 terodonta;Imparidentia;Venerida;Veneroidea;Veneridae;Mercenaria;Mercenari  
 a mercenaria  
 UdeM00000008237 6596 503.4 UdeM00000008237 XP\_045164793.1 34.7 999  
 531 28 26 979 612 1534 6.40E-139 503.4 6596 cellular  
 organisms;Eukaryota;Opisthokonta;Metazoa;Eumetazoa;Bilateria;Protostomia;  
 Spiralia;Lophotrochozoa;Mollusca;Bivalvia;Autobranhia;Heteroconchia;Euhe  
 terodonta;Imparidentia;Venerida;Veneroidea;Veneridae;Mercenaria;Mercenari  
 a mercenaria

UdeM00000008238 6596 89.7 UdeM00000008238 XP\_045164793.1 53.8 91  
 35 2 4 87 1431 1521 2.30E-15 89.7 6596 cellular  
 organisms;Eukaryota;Opisthokonta;Metazoa;Eumetazoa;Bilateria;Protostomia;  
 Spiralia;Lophotrochozoa;Mollusca;Bivalvia;Autobranchia;Heteroconchia;Euhe  
 terodonta;Imparidentia;Venerida;Veneroidea;Veneridae;Mercenaria;Mercenari  
 a mercenaria  
 UdeM00000008239 6596 167.5 UdeM00000008239 XP\_045164793.1 27.9 469  
 262 12 26 465 612 1033 4.10E-38 167.5 6596 cellular  
 organisms;Eukaryota;Opisthokonta;Metazoa;Eumetazoa;Bilateria;Protostomia;  
 Spiralia;Lophotrochozoa;Mollusca;Bivalvia;Autobranchia;Heteroconchia;Euhe  
 terodonta;Imparidentia;Venerida;Veneroidea;Veneridae;Mercenaria;Mercenari  
 a mercenaria  
 UdeM00000008240 41117 156.8 UdeM00000008240 XP\_037069862.1 26.5 535  
 307 18 5 481 27 533 7.30E-35 156.8 41117 cellular  
 organisms;Eukaryota;Opisthokonta;Metazoa;Eumetazoa;Bilateria;Protostomia;  
 Ecdysozoa;Panarthropoda;Arthropoda;Mandibulata;Pancrustacea;Crustacea;Mul  
 ticrustacea;Hexanauplia;Thecostraca;Cirripedia;Thoracica;Pedunculata;Scal  
 pellomorpha;Pollicipedidae;Pollicipes;Pollicipes pollicipes  
 UdeM00000008241 6573 435.3 UdeM00000008241 XP\_021359532.1 35.9 710  
 367 16 2 690 4 646 1.50E-118 435.3 6573 cellular  
 organisms;Eukaryota;Opisthokonta;Metazoa;Eumetazoa;Bilateria;Protostomia;  
 Spiralia;Lophotrochozoa;Mollusca;Bivalvia;Autobranchia;Pteriormorphia;Pect  
 inida;Pectinoidea;Pectinidae;Mizuhopecten;Mizuhopecten yessoensis  
 UdeM00000008242 29159 312.4 UdeM00000008242 XP\_034317976.1 51.8 299  
 110 3 3 267 363 661 5.70E-82 312.4 29159 cellular  
 organisms;Eukaryota;Opisthokonta;Metazoa;Eumetazoa;Bilateria;Protostomia;  
 Spiralia;Lophotrochozoa;Mollusca;Bivalvia;Autobranchia;Pteriormorphia;Ostr  
 eida;Ostreoidea;Ostreidae;Crassostrea;Crassostrea gigas  
 UdeM00000008243 29159 118.2 UdeM00000008243 XP\_034317976.1 30 247  
 72 2 2 147 10 256 1.00E-23 118.2 29159 cellular  
 organisms;Eukaryota;Opisthokonta;Metazoa;Eumetazoa;Bilateria;Protostomia;  
 Spiralia;Lophotrochozoa;Mollusca;Bivalvia;Autobranchia;Pteriormorphia;Ostr  
 eida;Ostreoidea;Ostreidae;Crassostrea;Crassostrea gigas  
 UdeM00000008244 6579 326.6 UdeM00000008244 XP\_033758230.1 41.5 470  
 199 7 1 394 335 804 4.60E-86 326.6 6579 cellular  
 organisms;Eukaryota;Opisthokonta;Metazoa;Eumetazoa;Bilateria;Protostomia;  
 Spiralia;Lophotrochozoa;Mollusca;Bivalvia;Autobranchia;Pteriormorphia;Pect  
 inida;Pectinoidea;Pectinidae;Pecten;Pecten maximus  
 UdeM00000008245 6579 272.3 UdeM00000008245 XP\_033758230.1 53.5 260  
 118 1 16 272 545 804 7.30E-70 272.3 6579 cellular  
 organisms;Eukaryota;Opisthokonta;Metazoa;Eumetazoa;Bilateria;Protostomia;  
 Spiralia;Lophotrochozoa;Mollusca;Bivalvia;Autobranchia;Pteriormorphia;Pect  
 inida;Pectinoidea;Pectinidae;Pecten;Pecten maximus  
 UdeM00000008246 6573 467.2 UdeM00000008246 XP\_021346496.1 38.7 692  
 362 9 258 915 28 691 4.70E-128 467.2 6573 cellular  
 organisms;Eukaryota;Opisthokonta;Metazoa;Eumetazoa;Bilateria;Protostomia;  
 Spiralia;Lophotrochozoa;Mollusca;Bivalvia;Autobranchia;Pteriormorphia;Pect  
 inida;Pectinoidea;Pectinidae;Mizuhopecten;Mizuhopecten yessoensis  
 UdeM00000008247 6596 543.1 UdeM00000008247 XP\_045166462.1 48.4 597  
 291 9 36 620 39 630 4.60E-151 543.1 6596 cellular  
 organisms;Eukaryota;Opisthokonta;Metazoa;Eumetazoa;Bilateria;Protostomia;  
 Spiralia;Lophotrochozoa;Mollusca;Bivalvia;Autobranchia;Heteroconchia;Euhe  
 terodonta;Imparidentia;Venerida;Veneroidea;Veneridae;Mercenaria;Mercenari  
 a mercenaria

UdeM00000008248 6565 510.8 UdeM00000008248 XP\_022300592.1 39.5 782  
 313 12 1 779 9 633 3.20E-141 510.8 6565 cellular  
 organisms;Eukaryota;Opisthokonta;Metazoa;Eumetazoa;Bilateria;Protostomia;  
 Spiralia;Lophotrochozoa;Mollusca;Bivalvia;Autobranchia;Pteriomorpha;Ostr  
 eida;Ostreoidea;Ostreidae;Crassostrea;Crassostrea virginica  
 UdeM00000008250 6565 1006.9 UdeM00000008250 XP\_022300021.1 57.3  
 857 350 9 1 850 1 848 1.50E-290 1006.9 6565  
 cellular  
 organisms;Eukaryota;Opisthokonta;Metazoa;Eumetazoa;Bilateria;Protostomia;  
 Spiralia;Lophotrochozoa;Mollusca;Bivalvia;Autobranchia;Pteriomorpha;Ostr  
 eida;Ostreoidea;Ostreidae;Crassostrea;Crassostrea virginica  
 UdeM00000008251 6596 443 UdeM00000008251 XP\_045204253.1 63.9 360  
 107 1 12 371 7 343 4.00E-121 443 6596 cellular  
 organisms;Eukaryota;Opisthokonta;Metazoa;Eumetazoa;Bilateria;Protostomia;  
 Spiralia;Lophotrochozoa;Mollusca;Bivalvia;Autobranchia;Heteroconchia;Euhe  
 terodonta;Imparidentia;Venerida;Veneroidea;Veneridae;Mercenaria;Mercenari  
 a mercenaria  
 UdeM00000008252 6579 115.5 UdeM00000008252 XP\_033746734.1 58.7 92  
 38 0 2 93 4 95 3.60E-23 115.5 6579 cellular  
 organisms;Eukaryota;Opisthokonta;Metazoa;Eumetazoa;Bilateria;Protostomia;  
 Spiralia;Lophotrochozoa;Mollusca;Bivalvia;Autobranchia;Pteriomorpha;Pect  
 inida;Pectinoidea;Pectinidae;Pecten;Pecten maximus  
 UdeM00000008253 6579 489.6 UdeM00000008253 XP\_033746321.1 42.8 697  
 326 7 1 626 1 695 6.20E-135 489.6 6579 cellular  
 organisms;Eukaryota;Opisthokonta;Metazoa;Eumetazoa;Bilateria;Protostomia;  
 Spiralia;Lophotrochozoa;Mollusca;Bivalvia;Autobranchia;Pteriomorpha;Pect  
 inida;Pectinoidea;Pectinidae;Pecten;Pecten maximus  
 UdeM00000008255 6579 277.3 UdeM00000008255 XP\_033725469.1 37.8 413  
 233 7 1 389 1 413 3.00E-71 277.3 6579 cellular  
 organisms;Eukaryota;Opisthokonta;Metazoa;Eumetazoa;Bilateria;Protostomia;  
 Spiralia;Lophotrochozoa;Mollusca;Bivalvia;Autobranchia;Pteriomorpha;Pect  
 inida;Pectinoidea;Pectinidae;Pecten;Pecten maximus  
 UdeM00000008254 6579 1345.1 UdeM00000008254 XP\_033725469.1 47.1  
 1651 764 25 1 1560 1 1633 0.00E+00 1345.1 6579  
 cellular  
 organisms;Eukaryota;Opisthokonta;Metazoa;Eumetazoa;Bilateria;Protostomia;  
 Spiralia;Lophotrochozoa;Mollusca;Bivalvia;Autobranchia;Pteriomorpha;Pect  
 inida;Pectinoidea;Pectinidae;Pecten;Pecten maximus  
 UdeM00000008256 6573 792.3 UdeM00000008256 XP\_021365190.1 77 512  
 116 2 1 510 1 512 3.50E-226 792.3 6573 cellular  
 organisms;Eukaryota;Opisthokonta;Metazoa;Eumetazoa;Bilateria;Protostomia;  
 Spiralia;Lophotrochozoa;Mollusca;Bivalvia;Autobranchia;Pteriomorpha;Pect  
 inida;Pectinoidea;Pectinidae;Mizuhopecten;Mizuhopecten yessoensis  
 UdeM00000008257 6565 433 UdeM00000008257 XP\_022302301.1 28.7 981  
 599 14 48 935 86 1059 1.00E-117 433 6565 cellular  
 organisms;Eukaryota;Opisthokonta;Metazoa;Eumetazoa;Bilateria;Protostomia;  
 Spiralia;Lophotrochozoa;Mollusca;Bivalvia;Autobranchia;Pteriomorpha;Ostr  
 eida;Ostreoidea;Ostreidae;Crassostrea;Crassostrea virginica  
 UdeM00000008258 7654 94.4 UdeM00000008258 XP\_041484593.1 34.4 151  
 93 2 1 146 96 245 3.10E-16 94.4 7654 cellular  
 organisms;Eukaryota;Opisthokonta;Metazoa;Eumetazoa;Bilateria;Deuterostomi  
 a;Echinodermata;Eleutherozoa;Echinozoa;Echinoidea;Euechinoidea;Echinacea;  
 Temnopleuroidea;Toxopneustidae;Lytechinus;Lytechinus variegatus

UdeM00000008259 6596 320.1 UdeM00000008259 XP\_045198162.1 31.1 666  
 423 13 1 642 279 932 6.60E-84 320.1 6596 cellular  
 organisms;Eukaryota;Opisthokonta;Metazoa;Eumetazoa;Bilateria;Protostomia;  
 Spiralia;Lophotrochozoa;Mollusca;Bivalvia;Autobranhia;Heteroconchia;Euhe  
 terodonta;Imparidentia;Venerida;Veneroidea;Veneridae;Mercenaria;Mercenari  
 a mercenaria

UdeM00000008260 6596 420.6 UdeM00000008260 XP\_045198162.1 32.4 886  
 544 18 7 860 70 932 4.80E-114 420.6 6596 cellular  
 organisms;Eukaryota;Opisthokonta;Metazoa;Eumetazoa;Bilateria;Protostomia;  
 Spiralia;Lophotrochozoa;Mollusca;Bivalvia;Autobranhia;Heteroconchia;Euhe  
 terodonta;Imparidentia;Venerida;Veneroidea;Veneridae;Mercenaria;Mercenari  
 a mercenaria

UdeM00000008261 6565 424.1 UdeM00000008261 XP\_022302299.1 28.2 941  
 590 13 116 979 144 1075 4.90E-115 424.1 6565 cellular  
 organisms;Eukaryota;Opisthokonta;Metazoa;Eumetazoa;Bilateria;Protostomia;  
 Spiralia;Lophotrochozoa;Mollusca;Bivalvia;Autobranhia;Pteriormorphia;Ostr  
 eida;Ostreoidea;Ostreidae;Crassostrea;Crassostrea virginica

UdeM00000008262 6565 139.8 UdeM00000008262 XP\_022300127.1 77.8 81  
 18 0 11 91 14 94 1.70E-30 139.8 6565 cellular  
 organisms;Eukaryota;Opisthokonta;Metazoa;Eumetazoa;Bilateria;Protostomia;  
 Spiralia;Lophotrochozoa;Mollusca;Bivalvia;Autobranhia;Pteriormorphia;Ostr  
 eida;Ostreoidea;Ostreidae;Crassostrea;Crassostrea virginica

UdeM00000008263 6573 152.5 UdeM00000008263 XP\_021379641.1 44.8 192  
 101 2 2 193 3 189 5.40E-34 152.5 6573 cellular  
 organisms;Eukaryota;Opisthokonta;Metazoa;Eumetazoa;Bilateria;Protostomia;  
 Spiralia;Lophotrochozoa;Mollusca;Bivalvia;Autobranhia;Pteriormorphia;Pect  
 inida;Pectinoidea;Pectinidae;Mizuhopecten;Mizuhopecten yessoensis

UdeM00000008264 6526 133.3 UdeM00000008264 XP\_013065302.1 41.4 174  
 95 3 34 205 22 190 3.60E-28 133.3 6526 cellular  
 organisms;Eukaryota;Opisthokonta;Metazoa;Eumetazoa;Bilateria;Protostomia;  
 Spiralia;Lophotrochozoa;Mollusca;Gastropoda;Heterobranhia;Euthyneura;Pan  
 pulmonata;Hygrophila;Lymnaeioidea;Planorbidae;Biomphalaria;Biomphalaria  
 glabrata

UdeM00000008265 6596 173.3 UdeM00000008265 XP\_045164793.1 44.7 199  
 108 2 147 345 1608 1804 5.40E-40 173.3 6596 cellular  
 organisms;Eukaryota;Opisthokonta;Metazoa;Eumetazoa;Bilateria;Protostomia;  
 Spiralia;Lophotrochozoa;Mollusca;Bivalvia;Autobranhia;Heteroconchia;Euhe  
 terodonta;Imparidentia;Venerida;Veneroidea;Veneridae;Mercenaria;Mercenari  
 a mercenaria

UdeM00000008266 7739 256.9 UdeM00000008266 XP\_035696678.1 52.2 249  
 118 1 1 248 210 458 3.40E-65 256.9 7739 cellular  
 organisms;Eukaryota;Opisthokonta;Metazoa;Eumetazoa;Bilateria;Deuterostomi  
 a;Chordata;Cephalochordata;Leptocardii;Amphioxiformes;Branchiostomidae;Br  
 anchiostoma;Branchiostoma floridae

UdeM00000008268 6596 600.1 UdeM00000008268 XP\_045166049.1 38.7 754  
 446 8 495 1239 467 1213 6.30E-168 600.1 6596 cellular  
 organisms;Eukaryota;Opisthokonta;Metazoa;Eumetazoa;Bilateria;Protostomia;  
 Spiralia;Lophotrochozoa;Mollusca;Bivalvia;Autobranhia;Heteroconchia;Euhe  
 terodonta;Imparidentia;Venerida;Veneroidea;Veneridae;Mercenaria;Mercenari  
 a mercenaria

UdeM00000008267 6596 600.1 UdeM00000008267 XP\_045166049.1 38.7 754  
 446 8 508 1252 467 1213 6.30E-168 600.1 6596 cellular  
 organisms;Eukaryota;Opisthokonta;Metazoa;Eumetazoa;Bilateria;Protostomia;  
 Spiralia;Lophotrochozoa;Mollusca;Bivalvia;Autobranhia;Heteroconchia;Euhe

terodonta;Imparidentia;Venerida;Veneroidea;Veneridae;Mercenaria;Mercenaria mercenaria

UdeM00000008269 1735272 67.8 UdeM00000008269 XP\_041349080.1 37.3  
110 63 3 19 125 32 138 1.20E-08 67.8 1735272  
cellular

organisms;Eukaryota;Opisthokonta;Metazoa;Eumetazoa;Bilateria;Protostomia;Spiralia;Lophotrochozoa;Mollusca;Gastropoda;Neomphalina;Neomphaloidea;Peltospiridae;Gigantopelta;Gigantopelta aegis

UdeM00000008270 6596 503.1 UdeM00000008270 XP\_045164086.1 73.2 317  
85 0 1 317 1 317 2.70E-139 503.1 6596 cellular

organisms;Eukaryota;Opisthokonta;Metazoa;Eumetazoa;Bilateria;Protostomia;Spiralia;Lophotrochozoa;Mollusca;Bivalvia;Autobranchia;Heteroconchia;Euheterodonta;Imparidentia;Venerida;Veneroidea;Veneridae;Mercenaria;Mercenaria mercenaria

UdeM00000008271 151771 321.6 UdeM00000008271 XP\_028406951.1 34.8  
551 310 8 1 543 119 628 1.90E-84 321.6 151771  
cellular

organisms;Eukaryota;Opisthokonta;Metazoa;Eumetazoa;Cnidaria;Anthozoa;Octocorallia;Alcyonacea;Alcyoniina;Nephtheidae;Dendronephthya;Dendronephthya gigantea

UdeM00000008272 45264 165.2 UdeM00000008272 XP\_044184028.1 29.9 445  
135 6 41 312 67 507 1.30E-37 165.2 45264 cellular

organisms;Eukaryota;Opisthokonta;Metazoa;Eumetazoa;Cnidaria;Anthozoa;Hexacorallia;Scleractinia;Astrocoeniina;Acroporidae;Acropora;Acropora millepora

UdeM00000008273 6596 254.6 UdeM00000008273 XP\_045166815.1 47.6 275  
99 9 20 269 24 278 1.40E-64 254.6 6596 cellular

organisms;Eukaryota;Opisthokonta;Metazoa;Eumetazoa;Bilateria;Protostomia;Spiralia;Lophotrochozoa;Mollusca;Bivalvia;Autobranchia;Heteroconchia;Euheterodonta;Imparidentia;Venerida;Veneroidea;Veneridae;Mercenaria;Mercenaria mercenaria

UdeM00000008274 6596 253.4 UdeM00000008274 XP\_045166832.1 50.8 248  
110 4 1 246 1 238 3.00E-64 253.4 6596 cellular

organisms;Eukaryota;Opisthokonta;Metazoa;Eumetazoa;Bilateria;Protostomia;Spiralia;Lophotrochozoa;Mollusca;Bivalvia;Autobranchia;Heteroconchia;Euheterodonta;Imparidentia;Venerida;Veneroidea;Veneridae;Mercenaria;Mercenaria mercenaria

UdeM00000008275 7668 130.2 UdeM00000008275 XP\_030849476.1 30.8 276  
182 4 45 313 86 359 4.80E-27 130.2 7668 cellular

organisms;Eukaryota;Opisthokonta;Metazoa;Eumetazoa;Bilateria;Deuterostomia;Echinodermata;Eleutherozoa;Echinozoa;Echinoidea;Euechinoidea;Echinacea;Camarodonta;Echinidea;Strongylocentrotidae;Strongylocentrotus;Strongylocentrotus purpuratus

UdeM00000008276 655844 87 UdeM00000008276 XP\_007826663.1 40.1  
142 77 3 21 159 22 158 3.70E-14 87 655844  
cellular

organisms;Eukaryota;Opisthokonta;Fungi;Dikarya;Ascomycota;saccharomyceta;Pezizomycotina;leotiomyceta;sordariomyceta;Sordariomycetes;Hypocreomycetidae;Hypocreales;Clavicipitaceae;Metarhizium;Metarhizium

robertsii;Metarhizium robertsii ARSEF 23

UdeM00000008277 6565 204.5 UdeM00000008277 XP\_022300961.1 49 243  
99 9 91 327 745 968 2.00E-49 204.5 6565 cellular

organisms;Eukaryota;Opisthokonta;Metazoa;Eumetazoa;Bilateria;Protostomia;

Spiralia;Lophotrochozoa;Mollusca;Bivalvia;Autobranchia;Pteriormorphia;Ostr  
eida;Ostreoidea;Ostreidae;Crassostrea;Crassostrea virginica  
UdeM00000008278 6579 212.6 UdeM00000008278 XP\_033745459.1 43.4 228  
124 2 34 261 338 560 7.40E-52 212.6 6579 cellular  
organisms;Eukaryota;Opisthokonta;Metazoa;Eumetazoa;Bilateria;Protostomia;  
Spiralia;Lophotrochozoa;Mollusca;Bivalvia;Autobranchia;Pteriormorphia;Pect  
inida;Pectinoidea;Pectinidae;Pecten;Pecten maximus  
UdeM00000008280 6596 174.9 UdeM00000008280 XP\_045166816.1 53.5 185  
79 4 1 185 477 654 1.00E-40 174.9 6596 cellular  
organisms;Eukaryota;Opisthokonta;Metazoa;Eumetazoa;Bilateria;Protostomia;  
Spiralia;Lophotrochozoa;Mollusca;Bivalvia;Autobranchia;Heteroconchia;Euhe  
terodonta;Imparidentia;Venerida;Veneroidea;Veneridae;Mercenaria;Mercenari  
a mercenaria  
UdeM00000008281 6596 188.3 UdeM00000008281 XP\_045166828.1 49.5 394  
133 10 5 346 9 388 1.70E-44 188.3 6596 cellular  
organisms;Eukaryota;Opisthokonta;Metazoa;Eumetazoa;Bilateria;Protostomia;  
Spiralia;Lophotrochozoa;Mollusca;Bivalvia;Autobranchia;Heteroconchia;Euhe  
terodonta;Imparidentia;Venerida;Veneroidea;Veneridae;Mercenaria;Mercenari  
a mercenaria  
UdeM00000008282 6596 330.5 UdeM00000008282 XP\_045166533.1 49.5 394  
176 7 31 401 39 432 3.10E-87 330.5 6596 cellular  
organisms;Eukaryota;Opisthokonta;Metazoa;Eumetazoa;Bilateria;Protostomia;  
Spiralia;Lophotrochozoa;Mollusca;Bivalvia;Autobranchia;Heteroconchia;Euhe  
terodonta;Imparidentia;Venerida;Veneroidea;Veneridae;Mercenaria;Mercenari  
a mercenaria  
UdeM00000008283 6596 326.6 UdeM00000008283 XP\_045166533.1 49.2 394  
177 7 31 401 39 432 4.50E-86 326.6 6596 cellular  
organisms;Eukaryota;Opisthokonta;Metazoa;Eumetazoa;Bilateria;Protostomia;  
Spiralia;Lophotrochozoa;Mollusca;Bivalvia;Autobranchia;Heteroconchia;Euhe  
terodonta;Imparidentia;Venerida;Veneroidea;Veneridae;Mercenaria;Mercenari  
a mercenaria  
UdeM00000008284 6596 328.2 UdeM00000008284 XP\_045166533.1 49.2 394  
177 7 31 401 39 432 1.50E-86 328.2 6596 cellular  
organisms;Eukaryota;Opisthokonta;Metazoa;Eumetazoa;Bilateria;Protostomia;  
Spiralia;Lophotrochozoa;Mollusca;Bivalvia;Autobranchia;Heteroconchia;Euhe  
terodonta;Imparidentia;Venerida;Veneroidea;Veneridae;Mercenaria;Mercenari  
a mercenaria  
UdeM00000008286 1735272 358.6 UdeM00000008286 XP\_041350032.1 49.8  
414 185 2 1 408 76 472 1.00E-95 358.6 1735272  
cellular  
organisms;Eukaryota;Opisthokonta;Metazoa;Eumetazoa;Bilateria;Protostomia;  
Spiralia;Lophotrochozoa;Mollusca;Gastropoda;Neomphalina;Neomphaloidea;Pel  
tospiridae;Gigantopelta;Gigantopelta aegis  
UdeM00000008288 6596 651.7 UdeM00000008288 XP\_045164517.1 65 731  
239 6 5 723 4 729 1.10E-183 651.7 6596 cellular  
organisms;Eukaryota;Opisthokonta;Metazoa;Eumetazoa;Bilateria;Protostomia;  
Spiralia;Lophotrochozoa;Mollusca;Bivalvia;Autobranchia;Heteroconchia;Euhe  
terodonta;Imparidentia;Venerida;Veneroidea;Veneridae;Mercenaria;Mercenari  
a mercenaria  
UdeM00000008289 6596 685.3 UdeM00000008289 XP\_045164516.1 66.5 731  
236 5 5 733 20 743 8.80E-194 685.3 6596 cellular  
organisms;Eukaryota;Opisthokonta;Metazoa;Eumetazoa;Bilateria;Protostomia;  
Spiralia;Lophotrochozoa;Mollusca;Bivalvia;Autobranchia;Heteroconchia;Euhe

terodonta;Imparidentia;Venerida;Veneroidea;Veneridae;Mercenaria;Mercenari  
 a mercenaria  
 UdeM00000008290 6596 202.6 UdeM00000008290 XP\_045170680.1 41.7 264  
 144 4 2 258 29 289 6.10E-49 202.6 6596 cellular  
 organisms;Eukaryota;Opisthokonta;Metazoa;Eumetazoa;Bilateria;Protostomia;  
 Spiralia;Lophotrochozoa;Mollusca;Bivalvia;Autobranchia;Heteroconchia;Euhe  
 terodonta;Imparidentia;Venerida;Veneroidea;Veneridae;Mercenaria;Mercenari  
 a mercenaria  
 UdeM00000008291 29159 111.7 UdeM00000008291 XP\_034305753.1 58.3 103  
 39 2 27 128 149 248 9.60E-22 111.7 29159 cellular  
 organisms;Eukaryota;Opisthokonta;Metazoa;Eumetazoa;Bilateria;Protostomia;  
 Spiralia;Lophotrochozoa;Mollusca;Bivalvia;Autobranchia;Pteriormorphia;Ostr  
 eida;Ostreoidea;Ostreidae;Crassostrea;Crassostrea gigas  
 UdeM00000008293 6596 384 UdeM00000008293 XP\_045172179.1 36.2 632  
 336 10 3 597 9 610 3.40E-103 384 6596 cellular  
 organisms;Eukaryota;Opisthokonta;Metazoa;Eumetazoa;Bilateria;Protostomia;  
 Spiralia;Lophotrochozoa;Mollusca;Bivalvia;Autobranchia;Heteroconchia;Euhe  
 terodonta;Imparidentia;Venerida;Veneroidea;Veneridae;Mercenaria;Mercenari  
 a mercenaria  
 UdeM00000008294 6596 666 UdeM00000008294 XP\_045164216.1 48.4 766  
 312 8 1 710 1 739 5.30E-188 666 6596 cellular  
 organisms;Eukaryota;Opisthokonta;Metazoa;Eumetazoa;Bilateria;Protostomia;  
 Spiralia;Lophotrochozoa;Mollusca;Bivalvia;Autobranchia;Heteroconchia;Euhe  
 terodonta;Imparidentia;Venerida;Veneroidea;Veneridae;Mercenaria;Mercenari  
 a mercenaria  
 UdeM00000008295 2607531 607.1 UdeM00000008295 XP\_029646291.1 49.1  
 627 305 6 28 650 7 623 2.70E-170 607.1 2607531  
 cellular  
 organisms;Eukaryota;Opisthokonta;Metazoa;Eumetazoa;Bilateria;Protostomia;  
 Spiralia;Lophotrochozoa;Mollusca;Cephalopoda;Coleoidea;Octopodiformes;Oct  
 opoda;Incirrata;Octopodidae;Octopus;Octopus sinensis  
 UdeM00000008296 6565 3533.8 UdeM00000008296 XP\_022299045.1 65.6  
 2691 798 18 13 2581 229 2912 0.00E+00 3533.8 6565  
 cellular  
 organisms;Eukaryota;Opisthokonta;Metazoa;Eumetazoa;Bilateria;Protostomia;  
 Spiralia;Lophotrochozoa;Mollusca;Bivalvia;Autobranchia;Pteriormorphia;Ostr  
 eida;Ostreoidea;Ostreidae;Crassostrea;Crassostrea virginica  
 UdeM00000008297 6565 3554.2 UdeM00000008297 XP\_022299045.1 65.9  
 2691 788 18 13 2580 229 2912 0.00E+00 3554.2 6565  
 cellular  
 organisms;Eukaryota;Opisthokonta;Metazoa;Eumetazoa;Bilateria;Protostomia;  
 Spiralia;Lophotrochozoa;Mollusca;Bivalvia;Autobranchia;Pteriormorphia;Ostr  
 eida;Ostreoidea;Ostreidae;Crassostrea;Crassostrea virginica  
 UdeM00000008298 400727 235.7 UdeM00000008298 XP\_025106444.1 69.3  
 166 42 2 125 281 66 231 8.30E-59 235.7 400727  
 cellular  
 organisms;Eukaryota;Opisthokonta;Metazoa;Eumetazoa;Bilateria;Protostomia;  
 Spiralia;Lophotrochozoa;Mollusca;Gastropoda;Caenogastropoda;Architaeniogl  
 ossa;Ampullarioidea;Ampullariidae;Pomacea;Pomacea canaliculata  
 UdeM00000008299 29159 183.3 UdeM00000008299 XP\_019930801.2 80.7 114  
 21 1 3 115 2 115 2.00E-43 183.3 29159 cellular  
 organisms;Eukaryota;Opisthokonta;Metazoa;Eumetazoa;Bilateria;Protostomia;  
 Spiralia;Lophotrochozoa;Mollusca;Bivalvia;Autobranchia;Pteriormorphia;Ostr  
 eida;Ostreoidea;Ostreidae;Crassostrea;Crassostrea gigas



UdeM00000008300 6573 156.8 UdeM00000008300 XP\_021363293.1 59.4 155  
 49 1 203 343 765 919 5.10E-35 156.8 6573 cellular  
 organisms;Eukaryota;Opisthokonta;Metazoa;Eumetazoa;Bilateria;Protostomia;  
 Spiralia;Lophotrochozoa;Mollusca;Bivalvia;Autobranchia;Pteriormorphia;Pect  
 inida;Pectinoidea;Pectinidae;Mizuhopecten;Mizuhopecten yessoensis  
 UdeM00000008301 6596 478.4 UdeM00000008301 XP\_045166345.1 61.1 594  
 197 5 1 590 1 564 1.40E-131 478.4 6596 cellular  
 organisms;Eukaryota;Opisthokonta;Metazoa;Eumetazoa;Bilateria;Protostomia;  
 Spiralia;Lophotrochozoa;Mollusca;Bivalvia;Autobranchia;Heteroconchia;Euhe  
 terodonta;Imparidentia;Venerida;Veneroidea;Veneridae;Mercenaria;Mercenari  
 a mercenaria  
 UdeM00000008303 6596 516.9 UdeM00000008303 XP\_045164730.1 78.3 314  
 68 0 1 314 1 314 1.80E-143 516.9 6596 cellular  
 organisms;Eukaryota;Opisthokonta;Metazoa;Eumetazoa;Bilateria;Protostomia;  
 Spiralia;Lophotrochozoa;Mollusca;Bivalvia;Autobranchia;Heteroconchia;Euhe  
 terodonta;Imparidentia;Venerida;Veneroidea;Veneridae;Mercenaria;Mercenari  
 a mercenaria  
 UdeM00000008302 6596 932.9 UdeM00000008302 XP\_045164730.1 77.7 579  
 121 1 1 571 1 579 1.90E-268 932.9 6596 cellular  
 organisms;Eukaryota;Opisthokonta;Metazoa;Eumetazoa;Bilateria;Protostomia;  
 Spiralia;Lophotrochozoa;Mollusca;Bivalvia;Autobranchia;Heteroconchia;Euhe  
 terodonta;Imparidentia;Venerida;Veneroidea;Veneridae;Mercenaria;Mercenari  
 a mercenaria  
 UdeM00000008305 6579 124 UdeM00000008305 XP\_033735101.1 47.4 156  
 68 4 4 158 2 144 3.70E-25 124 6579 cellular  
 organisms;Eukaryota;Opisthokonta;Metazoa;Eumetazoa;Bilateria;Protostomia;  
 Spiralia;Lophotrochozoa;Mollusca;Bivalvia;Autobranchia;Pteriormorphia;Pect  
 inida;Pectinoidea;Pectinidae;Pecten;Pecten maximus  
 UdeM00000008307 6579 365.9 UdeM00000008307 XP\_033744908.1 60.9 271  
 104 2 3 271 112 382 4.40E-98 365.9 6579 cellular  
 organisms;Eukaryota;Opisthokonta;Metazoa;Eumetazoa;Bilateria;Protostomia;  
 Spiralia;Lophotrochozoa;Mollusca;Bivalvia;Autobranchia;Pteriormorphia;Pect  
 inida;Pectinoidea;Pectinidae;Pecten;Pecten maximus  
 UdeM00000008306 6579 402.1 UdeM00000008306 XP\_033744908.1 60.3 300  
 117 2 3 300 83 382 6.10E-109 402.1 6579 cellular  
 organisms;Eukaryota;Opisthokonta;Metazoa;Eumetazoa;Bilateria;Protostomia;  
 Spiralia;Lophotrochozoa;Mollusca;Bivalvia;Autobranchia;Pteriormorphia;Pect  
 inida;Pectinoidea;Pectinidae;Pecten;Pecten maximus  
 UdeM00000008308 6596 126.7 UdeM00000008308 XP\_045208367.1 62.3 106  
 39 1 186 291 34 138 5.10E-26 126.7 6596 cellular  
 organisms;Eukaryota;Opisthokonta;Metazoa;Eumetazoa;Bilateria;Protostomia;  
 Spiralia;Lophotrochozoa;Mollusca;Bivalvia;Autobranchia;Heteroconchia;Euhe  
 terodonta;Imparidentia;Venerida;Veneroidea;Veneridae;Mercenaria;Mercenari  
 a mercenaria  
 UdeM00000008310 6573 362.5 UdeM00000008310 XP\_021371798.1 32.5 745  
 450 22 29 746 34 752 1.30E-96 362.5 6573 cellular  
 organisms;Eukaryota;Opisthokonta;Metazoa;Eumetazoa;Bilateria;Protostomia;  
 Spiralia;Lophotrochozoa;Mollusca;Bivalvia;Autobranchia;Pteriormorphia;Pect  
 inida;Pectinoidea;Pectinidae;Mizuhopecten;Mizuhopecten yessoensis  
 UdeM00000008309 1735272 960.7 UdeM00000008309 XP\_041350016.1 39.9  
 1419 761 33 5 1371 6 1384 2.10E-276 960.7 1735272  
 cellular  
 organisms;Eukaryota;Opisthokonta;Metazoa;Eumetazoa;Bilateria;Protostomia;

Spiralia;Lophotrochozoa;Mollusca;Gastropoda;Neomphalina;Neomphaloidea;Pel  
 tospiridae;Gigantopelta;Gigantopelta aegis  
 UdeM00000008311 2607531 102.8 UdeM00000008311 XP\_029648741.1 25.8  
 364 239 13 1 349 36 383 9.00E-19 102.8 2607531  
 cellular  
 organisms;Eukaryota;Opisthokonta;Metazoa;Eumetazoa;Bilateria;Protostomia;  
 Spiralia;Lophotrochozoa;Mollusca;Cephalopoda;Coleoidea;Octopodiformes;Oct  
 opoda;Incirrata;Octopodidae;Octopus;Octopus sinensis  
 UdeM00000008312 6565 533.1 UdeM00000008312 XP\_022296970.1 29.7 1338  
 710 32 1 1136 61 1369 8.70E-148 533.1 6565 cellular  
 organisms;Eukaryota;Opisthokonta;Metazoa;Eumetazoa;Bilateria;Protostomia;  
 Spiralia;Lophotrochozoa;Mollusca;Bivalvia;Autobranchia;Pteriormorphia;Ostr  
 eida;Ostreoidea;Ostreidae;Crassostrea;Crassostrea virginica  
 UdeM00000008313 6565 590.5 UdeM00000008313 XP\_022296970.1 33.5 1342  
 742 36 1 1225 61 1369 4.90E-165 590.5 6565 cellular  
 organisms;Eukaryota;Opisthokonta;Metazoa;Eumetazoa;Bilateria;Protostomia;  
 Spiralia;Lophotrochozoa;Mollusca;Bivalvia;Autobranchia;Pteriormorphia;Ostr  
 eida;Ostreoidea;Ostreidae;Crassostrea;Crassostrea virginica  
 UdeM00000008314 6565 587.8 UdeM00000008314 XP\_022296970.1 33.5 1348  
 741 37 1 1231 61 1369 3.20E-164 587.8 6565 cellular  
 organisms;Eukaryota;Opisthokonta;Metazoa;Eumetazoa;Bilateria;Protostomia;  
 Spiralia;Lophotrochozoa;Mollusca;Bivalvia;Autobranchia;Pteriormorphia;Ostr  
 eida;Ostreoidea;Ostreidae;Crassostrea;Crassostrea virginica  
 UdeM00000008315 6596 572.4 UdeM00000008315 XP\_045164398.1 70.8 377  
 109 1 6 382 3 378 4.30E-160 572.4 6596 cellular  
 organisms;Eukaryota;Opisthokonta;Metazoa;Eumetazoa;Bilateria;Protostomia;  
 Spiralia;Lophotrochozoa;Mollusca;Bivalvia;Autobranchia;Heteroconchia;Euhe  
 terodonta;Imparidentia;Venerida;Veneroidea;Veneridae;Mercenaria;Mercenari  
 a mercenaria  
 UdeM00000008317 6596 132.9 UdeM00000008317 XP\_045206702.1 24.9 587  
 351 19 27 576 23 556 1.40E-27 132.9 6596 cellular  
 organisms;Eukaryota;Opisthokonta;Metazoa;Eumetazoa;Bilateria;Protostomia;  
 Spiralia;Lophotrochozoa;Mollusca;Bivalvia;Autobranchia;Heteroconchia;Euhe  
 terodonta;Imparidentia;Venerida;Veneroidea;Veneridae;Mercenaria;Mercenari  
 a mercenaria  
 UdeM00000008318 6596 118.6 UdeM00000008318 XP\_045211158.1 25.9 556  
 343 22 10 546 7 512 2.80E-23 118.6 6596 cellular  
 organisms;Eukaryota;Opisthokonta;Metazoa;Eumetazoa;Bilateria;Protostomia;  
 Spiralia;Lophotrochozoa;Mollusca;Bivalvia;Autobranchia;Heteroconchia;Euhe  
 terodonta;Imparidentia;Venerida;Veneroidea;Veneridae;Mercenaria;Mercenari  
 a mercenaria  
 UdeM00000008319 6500 639 UdeM00000008319 XP\_012939634.1 55.9 687  
 287 5 26 705 1610 2287 7.00E-180 639 6500 cellular  
 organisms;Eukaryota;Opisthokonta;Metazoa;Eumetazoa;Bilateria;Protostomia;  
 Spiralia;Lophotrochozoa;Mollusca;Gastropoda;Heterobranchia;Euthyneura;Tec  
 tipleura;Aplysiida;Aplysioidea;Aplysiidae;Aplysia;Aplysia californica  
 UdeM00000008320 6579 719.2 UdeM00000008320 XP\_033746880.1 51.4 700  
 312 6 13 684 789 1488 5.10E-204 719.2 6579 cellular  
 organisms;Eukaryota;Opisthokonta;Metazoa;Eumetazoa;Bilateria;Protostomia;  
 Spiralia;Lophotrochozoa;Mollusca;Bivalvia;Autobranchia;Pteriormorphia;Pect  
 inida;Pectinoidea;Pectinidae;Pecten;Pecten maximus  
 UdeM00000008321 6596 2009.6 UdeM00000008321 XP\_045166160.1 61.9  
 1621 593 10 1 1597 1 1620 0.00E+00 2009.6 6596  
 cellular

organisms;Eukaryota;Opisthokonta;Metazoa;Eumetazoa;Bilateria;Protostomia;Spiralia;Lophotrochozoa;Mollusca;Bivalvia;Autobranchia;Heteroconchia;Euherodonta;Imparidentia;Venerida;Veneroidea;Veneridae;Mercenaria;Mercenaria mercenaria

UdeM00000008322 6596 175.3 UdeM00000008322 XP\_045165166.1 43.3 254  
117 4 28 268 1 240 1.10E-40 175.3 6596 cellular

organisms;Eukaryota;Opisthokonta;Metazoa;Eumetazoa;Bilateria;Protostomia;Spiralia;Lophotrochozoa;Mollusca;Bivalvia;Autobranchia;Heteroconchia;Euherodonta;Imparidentia;Venerida;Veneroidea;Veneridae;Mercenaria;Mercenaria mercenaria

UdeM00000008323 6596 520.4 UdeM00000008323 XP\_045166858.1 55.7 522  
198 11 1 505 1 506 2.60E-144 520.4 6596 cellular

organisms;Eukaryota;Opisthokonta;Metazoa;Eumetazoa;Bilateria;Protostomia;Spiralia;Lophotrochozoa;Mollusca;Bivalvia;Autobranchia;Heteroconchia;Euherodonta;Imparidentia;Venerida;Veneroidea;Veneridae;Mercenaria;Mercenaria mercenaria

UdeM00000008324 6565 14463.5 UdeM00000008324 XP\_022297807.1 44.4  
21138 10898 250 234 20980 219 20902 0.00E+00 14463.5 6565  
cellular

organisms;Eukaryota;Opisthokonta;Metazoa;Eumetazoa;Bilateria;Protostomia;Spiralia;Lophotrochozoa;Mollusca;Bivalvia;Autobranchia;Pteriormorphia;Ostreida;Ostreioidea;Ostreidae;Crassostrea;Crassostrea virginica

UdeM00000008325 225164 493.4 UdeM00000008325 XP\_009050193.1 92.6  
256 19 0 27 282 99 354 1.90E-136 493.4 225164  
cellular

organisms;Eukaryota;Opisthokonta;Metazoa;Eumetazoa;Bilateria;Protostomia;Spiralia;Lophotrochozoa;Mollusca;Gastropoda;Patellogastropoda;Lottioidea;Lottiidae;Lottia;Lottia gigantea

UdeM00000008326 225164 661 UdeM00000008326 XP\_009050193.1 91.5  
354 30 0 1 354 1 354 8.60E-187 661 225164  
cellular

organisms;Eukaryota;Opisthokonta;Metazoa;Eumetazoa;Bilateria;Protostomia;Spiralia;Lophotrochozoa;Mollusca;Gastropoda;Patellogastropoda;Lottioidea;Lottiidae;Lottia;Lottia gigantea

UdeM00000008329 6579 746.1 UdeM00000008329 XP\_033746627.1 74.4 492  
122 1 3 494 2 489 2.80E-212 746.1 6579 cellular

organisms;Eukaryota;Opisthokonta;Metazoa;Eumetazoa;Bilateria;Protostomia;Spiralia;Lophotrochozoa;Mollusca;Bivalvia;Autobranchia;Pteriormorphia;Pectinida;Pectinoidea;Pectinidae;Pecten;Pecten maximus

UdeM00000008330 6565 233.4 UdeM00000008330 XP\_022288562.1 59.6 178  
72 0 1 178 10 187 3.50E-58 233.4 6565 cellular

organisms;Eukaryota;Opisthokonta;Metazoa;Eumetazoa;Bilateria;Protostomia;Spiralia;Lophotrochozoa;Mollusca;Bivalvia;Autobranchia;Pteriormorphia;Ostreida;Ostreioidea;Ostreidae;Crassostrea;Crassostrea virginica

UdeM00000008331 6596 332.8 UdeM00000008331 XP\_045165667.1 41 551  
263 17 165 701 1 503 1.10E-87 332.8 6596 cellular

organisms;Eukaryota;Opisthokonta;Metazoa;Eumetazoa;Bilateria;Protostomia;Spiralia;Lophotrochozoa;Mollusca;Bivalvia;Autobranchia;Heteroconchia;Euherodonta;Imparidentia;Venerida;Veneroidea;Veneridae;Mercenaria;Mercenaria mercenaria

UdeM00000008332 6579 1434.1 UdeM00000008332 XP\_033744661.1 84.9  
894 128 3 1 889 1 892 0.00E+00 1434.1 6579  
cellular

organisms;Eukaryota;Opisthokonta;Metazoa;Eumetazoa;Bilateria;Protostomia;

Spiralia; Lophotrochozoa; Mollusca; Bivalvia; Autobranchia; Pteriomorpha; Pectinida; Pectinoidea; Pectinidae; Pecten; Pecten maximus

UdeM00000008333 6596 126.3 UdeM00000008333 XP\_045173865.1 57.3 110  
46 1 20 129 24 132 2.90E-26 126.3 6596 cellular  
organisms; Eukaryota; Opisthokonta; Metazoa; Eumetazoa; Bilateria; Protostomia; Spiralia; Lophotrochozoa; Mollusca; Bivalvia; Autobranchia; Heteroconchia; Euheterodonta; Imparidentia; Venerida; Veneroidea; Veneridae; Mercenaria; Mercenaria mercenaria

UdeM00000008334 6596 211.8 UdeM00000008334 XP\_045204796.1 28.9 540  
321 12 1 507 25 534 2.00E-51 211.8 6596 cellular  
organisms; Eukaryota; Opisthokonta; Metazoa; Eumetazoa; Bilateria; Protostomia; Spiralia; Lophotrochozoa; Mollusca; Bivalvia; Autobranchia; Heteroconchia; Euheterodonta; Imparidentia; Venerida; Veneroidea; Veneridae; Mercenaria; Mercenaria mercenaria

UdeM00000008335 6596 144.1 UdeM00000008335 XP\_045166558.1 44.5 164  
88 2 1 163 1 162 2.80E-31 144.1 6596 cellular  
organisms; Eukaryota; Opisthokonta; Metazoa; Eumetazoa; Bilateria; Protostomia; Spiralia; Lophotrochozoa; Mollusca; Bivalvia; Autobranchia; Heteroconchia; Euheterodonta; Imparidentia; Venerida; Veneroidea; Veneridae; Mercenaria; Mercenaria mercenaria

UdeM00000008336 6596 537.3 UdeM00000008336 XP\_045206084.1 34.7 963  
592 21 332 1275 42 986 5.90E-149 537.3 6596 cellular  
organisms; Eukaryota; Opisthokonta; Metazoa; Eumetazoa; Bilateria; Protostomia; Spiralia; Lophotrochozoa; Mollusca; Bivalvia; Autobranchia; Heteroconchia; Euheterodonta; Imparidentia; Venerida; Veneroidea; Veneridae; Mercenaria; Mercenaria mercenaria

UdeM00000008337 29159 276.2 UdeM00000008337 XP\_034317576.1 33.3 504  
305 16 7 497 717 1202 1.00E-70 276.2 29159 cellular  
organisms; Eukaryota; Opisthokonta; Metazoa; Eumetazoa; Bilateria; Protostomia; Spiralia; Lophotrochozoa; Mollusca; Bivalvia; Autobranchia; Pteriomorpha; Ostreida; Ostreidae; Crassostrea; Crassostrea gigas

UdeM00000008338 6596 388.3 UdeM00000008338 XP\_045206055.1 34.7 680  
420 15 372 1039 76 743 3.20E-104 388.3 6596 cellular  
organisms; Eukaryota; Opisthokonta; Metazoa; Eumetazoa; Bilateria; Protostomia; Spiralia; Lophotrochozoa; Mollusca; Bivalvia; Autobranchia; Heteroconchia; Euheterodonta; Imparidentia; Venerida; Veneroidea; Veneridae; Mercenaria; Mercenaria mercenaria

UdeM00000008339 6596 388.3 UdeM00000008339 XP\_045206055.1 34.7 680  
420 15 381 1048 76 743 3.20E-104 388.3 6596 cellular  
organisms; Eukaryota; Opisthokonta; Metazoa; Eumetazoa; Bilateria; Protostomia; Spiralia; Lophotrochozoa; Mollusca; Bivalvia; Autobranchia; Heteroconchia; Euheterodonta; Imparidentia; Venerida; Veneroidea; Veneridae; Mercenaria; Mercenaria mercenaria

UdeM00000008340 29159 529.3 UdeM00000008340 XP\_011412220.2 28.9 1195  
732 28 193 1352 77 1188 1.60E-146 529.3 29159 cellular  
organisms; Eukaryota; Opisthokonta; Metazoa; Eumetazoa; Bilateria; Protostomia; Spiralia; Lophotrochozoa; Mollusca; Bivalvia; Autobranchia; Pteriomorpha; Ostreida; Ostreidae; Crassostrea; Crassostrea gigas

UdeM00000008341 72781 77.4 UdeM00000008341 XP\_029669596.1 43.8 89  
49 1 55 142 401 489 4.20E-11 77.4 72781 cellular  
organisms; Eukaryota; Opisthokonta; Metazoa; Eumetazoa; Bilateria; Protostomia; Ecdysozoa; Panarthropoda; Arthropoda; Mandibulata; Pancrustacea; Hexapoda; Insecta; Dicondylia; Pterygota; Neoptera; Endopterygota; Hymenoptera; Apocrita; Aculeata; Formicoidea; Formicidae; Formicinae; Formicini; Formica; Formica exsecta

UdeM00000008342 6596 319.3 UdeM00000008342 XP\_045206055.1 36.8 486  
 295 10 55 531 62 544 1.10E-83 319.3 6596 cellular  
 organisms;Eukaryota;Opisthokonta;Metazoa;Eumetazoa;Bilateria;Protostomia;  
 Spiralia;Lophotrochozoa;Mollusca;Bivalvia;Autobranchia;Heteroconchia;Euhe  
 terodonta;Imparidentia;Venerida;Veneroidea;Veneridae;Mercenaria;Mercenari  
 a mercenaria  
 UdeM00000008343 6565 583.9 UdeM00000008343 XP\_022326988.1 32.6 1095  
 684 27 71 1140 44 1109 4.80E-163 583.9 6565 cellular  
 organisms;Eukaryota;Opisthokonta;Metazoa;Eumetazoa;Bilateria;Protostomia;  
 Spiralia;Lophotrochozoa;Mollusca;Bivalvia;Autobranchia;Pteriormorphia;Ostr  
 eida;Ostreoidea;Ostreidae;Crassostrea;Crassostrea virginica  
 UdeM00000008344 1735272 61.2 UdeM00000008344 XP\_041368209.1 51.8  
 56 27 0 92 147 73 128 1.70E-06 61.2 1735272  
 cellular  
 organisms;Eukaryota;Opisthokonta;Metazoa;Eumetazoa;Bilateria;Protostomia;  
 Spiralia;Lophotrochozoa;Mollusca;Gastropoda;Neomphalina;Neomphaloidea;Pel  
 tospiridae;Gigantopelta;Gigantopelta aegis  
 UdeM00000008345 6596 546.2 UdeM00000008345 XP\_045164503.1 70.5 369  
 107 1 1 367 1 369 3.20E-152 546.2 6596 cellular  
 organisms;Eukaryota;Opisthokonta;Metazoa;Eumetazoa;Bilateria;Protostomia;  
 Spiralia;Lophotrochozoa;Mollusca;Bivalvia;Autobranchia;Heteroconchia;Euhe  
 terodonta;Imparidentia;Venerida;Veneroidea;Veneridae;Mercenaria;Mercenari  
 a mercenaria  
 UdeM00000008346 6565 153.3 UdeM00000008346 XP\_022310266.1 33.7 353  
 191 10 1 337 1 326 5.70E-34 153.3 6565 cellular  
 organisms;Eukaryota;Opisthokonta;Metazoa;Eumetazoa;Bilateria;Protostomia;  
 Spiralia;Lophotrochozoa;Mollusca;Bivalvia;Autobranchia;Pteriormorphia;Ostr  
 eida;Ostreoidea;Ostreidae;Crassostrea;Crassostrea virginica  
 UdeM00000008348 6596 649.4 UdeM00000008348 XP\_045165907.1 65.2 442  
 153 1 1 442 197 637 3.30E-183 649.4 6596 cellular  
 organisms;Eukaryota;Opisthokonta;Metazoa;Eumetazoa;Bilateria;Protostomia;  
 Spiralia;Lophotrochozoa;Mollusca;Bivalvia;Autobranchia;Heteroconchia;Euhe  
 terodonta;Imparidentia;Venerida;Veneroidea;Veneridae;Mercenaria;Mercenari  
 a mercenaria  
 UdeM00000008349 6596 177.9 UdeM00000008349 XP\_045165907.1 71.8 110  
 31 0 1 110 43 152 6.90E-42 177.9 6596 cellular  
 organisms;Eukaryota;Opisthokonta;Metazoa;Eumetazoa;Bilateria;Protostomia;  
 Spiralia;Lophotrochozoa;Mollusca;Bivalvia;Autobranchia;Heteroconchia;Euhe  
 terodonta;Imparidentia;Venerida;Veneroidea;Veneridae;Mercenaria;Mercenari  
 a mercenaria  
 UdeM00000008350 6596 429.1 UdeM00000008350 XP\_045164503.1 69.9 299  
 88 1 28 324 4 302 5.00E-117 429.1 6596 cellular  
 organisms;Eukaryota;Opisthokonta;Metazoa;Eumetazoa;Bilateria;Protostomia;  
 Spiralia;Lophotrochozoa;Mollusca;Bivalvia;Autobranchia;Heteroconchia;Euhe  
 terodonta;Imparidentia;Venerida;Veneroidea;Veneridae;Mercenaria;Mercenari  
 a mercenaria  
 UdeM00000008352 6573 166 UdeM00000008352 XP\_021352044.1 66.1 115  
 39 0 1 115 1 115 3.30E-38 166 6573 cellular  
 organisms;Eukaryota;Opisthokonta;Metazoa;Eumetazoa;Bilateria;Protostomia;  
 Spiralia;Lophotrochozoa;Mollusca;Bivalvia;Autobranchia;Pteriormorphia;Pect  
 inida;Pectinoidea;Pectinidae;Mizuhopecten;Mizuhopecten yessoensis  
 UdeM00000008353 6579 231.9 UdeM00000008353 XP\_033731739.1 57.1 177  
 76 0 1 177 202 378 6.40E-58 231.9 6579 cellular  
 organisms;Eukaryota;Opisthokonta;Metazoa;Eumetazoa;Bilateria;Protostomia;

Spiralia;Lophotrochozoa;Mollusca;Bivalvia;Autobranchia;Pteriormorphia;Pectinida;Pectinoidea;Pectinidae;Pecten;Pecten maximus  
UdeM00000008355 6596 318.5 UdeM00000008355 XP\_045164792.1 78.7 202  
43 0 1 202 1 202 6.00E-84 318.5 6596 cellular  
organisms;Eukaryota;Opisthokonta;Metazoa;Eumetazoa;Bilateria;Protostomia;  
Spiralia;Lophotrochozoa;Mollusca;Bivalvia;Autobranchia;Heteroconchia;Euherodonta;Imparidentia;Venerida;Veneroidea;Veneridae;Mercenaria;Mercenaria mercenaria  
UdeM00000008356 151771 144.4 UdeM00000008356 XP\_028408207.1 48.9  
133 67 1 2 134 280 411 1.10E-31 144.4 151771  
cellular  
organisms;Eukaryota;Opisthokonta;Metazoa;Eumetazoa;Cnidaria;Anthozoa;Octocorallia;Alcyonacea;Alcyoniina;Nephtheidae;Dendronephthya;Dendronephthya gigantea  
UdeM00000008359 6596 726.1 UdeM00000008359 XP\_045164196.1 62.8 532  
191 6 252 778 145 674 4.80E-206 726.1 6596 cellular  
organisms;Eukaryota;Opisthokonta;Metazoa;Eumetazoa;Bilateria;Protostomia;  
Spiralia;Lophotrochozoa;Mollusca;Bivalvia;Autobranchia;Heteroconchia;Euherodonta;Imparidentia;Venerida;Veneroidea;Veneridae;Mercenaria;Mercenaria mercenaria  
UdeM00000008360 6573 171.8 UdeM00000008360 XP\_021350975.1 64.4 132  
43 1 12 139 11 142 6.40E-40 171.8 6573 cellular  
organisms;Eukaryota;Opisthokonta;Metazoa;Eumetazoa;Bilateria;Protostomia;  
Spiralia;Lophotrochozoa;Mollusca;Bivalvia;Autobranchia;Pteriormorphia;Pectinida;Pectinoidea;Pectinidae;Mizuhopecten;Mizuhopecten yessoensis  
UdeM00000008361 6596 892.1 UdeM00000008361 XP\_045164195.1 58.3 763  
278 7 12 735 9 770 4.70E-256 892.1 6596 cellular  
organisms;Eukaryota;Opisthokonta;Metazoa;Eumetazoa;Bilateria;Protostomia;  
Spiralia;Lophotrochozoa;Mollusca;Bivalvia;Autobranchia;Heteroconchia;Euherodonta;Imparidentia;Venerida;Veneroidea;Veneridae;Mercenaria;Mercenaria mercenaria  
UdeM00000008363 37621 79 UdeM00000008363 XP\_014672567.1 42.5 80  
46 0 21 100 337 416 4.30E-12 79 37621 cellular  
organisms;Eukaryota;Opisthokonta;Metazoa;Eumetazoa;Bilateria;Protostomia;  
Ecdysozoa;Scalidophora;Priapulida;Priapulimorpha;Priapulimorphida;Priapulidae;Priapululus;Priapululus caudatus  
UdeM00000008364 29159 402.1 UdeM00000008364 XP\_034330259.1 40.1 563  
304 11 245 795 2 543 1.60E-108 402.1 29159 cellular  
organisms;Eukaryota;Opisthokonta;Metazoa;Eumetazoa;Bilateria;Protostomia;  
Spiralia;Lophotrochozoa;Mollusca;Bivalvia;Autobranchia;Pteriormorphia;Ostreida;Ostreoidea;Ostreidae;Crassostrea;Crassostrea gigas  
UdeM00000008365 6596 881.3 UdeM00000008365 XP\_045164196.1 62.4 675  
240 10 3 665 2 674 7.60E-253 881.3 6596 cellular  
organisms;Eukaryota;Opisthokonta;Metazoa;Eumetazoa;Bilateria;Protostomia;  
Spiralia;Lophotrochozoa;Mollusca;Bivalvia;Autobranchia;Heteroconchia;Euherodonta;Imparidentia;Venerida;Veneroidea;Veneridae;Mercenaria;Mercenaria mercenaria  
UdeM00000008366 6596 871.7 UdeM00000008366 XP\_045164195.1 59.4 726  
271 7 12 719 9 728 6.50E-250 871.7 6596 cellular  
organisms;Eukaryota;Opisthokonta;Metazoa;Eumetazoa;Bilateria;Protostomia;  
Spiralia;Lophotrochozoa;Mollusca;Bivalvia;Autobranchia;Heteroconchia;Euherodonta;Imparidentia;Venerida;Veneroidea;Veneridae;Mercenaria;Mercenaria mercenaria

UdeM00000008367 6596 79.3 UdeM00000008367 XP\_045164453.1 46.7 92  
 48 1 27 117 699 790 6.30E-12 79.3 6596 cellular  
 organisms;Eukaryota;Opisthokonta;Metazoa;Eumetazoa;Bilateria;Protostomia;  
 Spiralia;Lophotrochozoa;Mollusca;Bivalvia;Autobranchia;Heteroconchia;Euhe  
 terodonta;Imparidentia;Venerida;Veneroidea;Veneridae;Mercenaria;Mercenari  
 a mercenaria

UdeM00000008368 6596 867.1 UdeM00000008368 XP\_045164196.1 60 702  
 240 11 3 692 2 674 1.50E-248 867.1 6596 cellular  
 organisms;Eukaryota;Opisthokonta;Metazoa;Eumetazoa;Bilateria;Protostomia;  
 Spiralia;Lophotrochozoa;Mollusca;Bivalvia;Autobranchia;Heteroconchia;Euhe  
 terodonta;Imparidentia;Venerida;Veneroidea;Veneridae;Mercenaria;Mercenari  
 a mercenaria

UdeM00000008369 6596 842.8 UdeM00000008369 XP\_045164195.1 57.7 726  
 265 8 12 701 9 728 3.20E-241 842.8 6596 cellular  
 organisms;Eukaryota;Opisthokonta;Metazoa;Eumetazoa;Bilateria;Protostomia;  
 Spiralia;Lophotrochozoa;Mollusca;Bivalvia;Autobranchia;Heteroconchia;Euhe  
 terodonta;Imparidentia;Venerida;Veneroidea;Veneridae;Mercenaria;Mercenari  
 a mercenaria

UdeM00000008370 6596 875.5 UdeM00000008370 XP\_045164195.1 59.6 726  
 269 7 12 719 9 728 4.50E-251 875.5 6596 cellular  
 organisms;Eukaryota;Opisthokonta;Metazoa;Eumetazoa;Bilateria;Protostomia;  
 Spiralia;Lophotrochozoa;Mollusca;Bivalvia;Autobranchia;Heteroconchia;Euhe  
 terodonta;Imparidentia;Venerida;Veneroidea;Veneridae;Mercenaria;Mercenari  
 a mercenaria

UdeM00000008371 6596 77 UdeM00000008371 XP\_045164453.1 45.7 92  
 49 1 27 117 699 790 3.10E-11 77 6596 cellular  
 organisms;Eukaryota;Opisthokonta;Metazoa;Eumetazoa;Bilateria;Protostomia;  
 Spiralia;Lophotrochozoa;Mollusca;Bivalvia;Autobranchia;Heteroconchia;Euhe  
 terodonta;Imparidentia;Venerida;Veneroidea;Veneridae;Mercenaria;Mercenari  
 a mercenaria

UdeM00000008372 6596 884.8 UdeM00000008372 XP\_045164196.1 62.7 675  
 238 10 3 665 2 674 6.80E-254 884.8 6596 cellular  
 organisms;Eukaryota;Opisthokonta;Metazoa;Eumetazoa;Bilateria;Protostomia;  
 Spiralia;Lophotrochozoa;Mollusca;Bivalvia;Autobranchia;Heteroconchia;Euhe  
 terodonta;Imparidentia;Venerida;Veneroidea;Veneridae;Mercenaria;Mercenari  
 a mercenaria

UdeM00000008373 6596 918.3 UdeM00000008373 XP\_045164195.1 59.1 768  
 290 7 12 761 9 770 6.40E-264 918.3 6596 cellular  
 organisms;Eukaryota;Opisthokonta;Metazoa;Eumetazoa;Bilateria;Protostomia;  
 Spiralia;Lophotrochozoa;Mollusca;Bivalvia;Autobranchia;Heteroconchia;Euhe  
 terodonta;Imparidentia;Venerida;Veneroidea;Veneridae;Mercenaria;Mercenari  
 a mercenaria

UdeM00000008374 6596 446.4 UdeM00000008374 XP\_045164453.1 34 930  
 507 19 52 931 1 873 8.70E-122 446.4 6596 cellular  
 organisms;Eukaryota;Opisthokonta;Metazoa;Eumetazoa;Bilateria;Protostomia;  
 Spiralia;Lophotrochozoa;Mollusca;Bivalvia;Autobranchia;Heteroconchia;Euhe  
 terodonta;Imparidentia;Venerida;Veneroidea;Veneridae;Mercenaria;Mercenari  
 a mercenaria

UdeM00000008375 6596 451.8 UdeM00000008375 XP\_045164453.1 34 930  
 508 18 52 932 1 873 2.10E-123 451.8 6596 cellular  
 organisms;Eukaryota;Opisthokonta;Metazoa;Eumetazoa;Bilateria;Protostomia;  
 Spiralia;Lophotrochozoa;Mollusca;Bivalvia;Autobranchia;Heteroconchia;Euhe  
 terodonta;Imparidentia;Venerida;Veneroidea;Veneridae;Mercenaria;Mercenari  
 a mercenaria

UdeM00000008376 32264 87 UdeM00000008376 XP\_025017084.1 37.6 125  
 69 4 1 117 779 902 1.70E-14 87 32264 cellular  
 organisms;Eukaryota;Opisthokonta;Metazoa;Eumetazoa;Bilateria;Protostomia;  
 Ecdysozoa;Panarthropoda;Arthropoda;Chelicerata;Arachnida;Acari;Acariforme  
 s;Trombidiformes;Prostigmata;Eleutherengona;Raphignathae;Tetranychoida;T  
 etranychidae;Tetranychus;Tetranychus urticae  
 UdeM00000008377 6573 678.7 UdeM00000008377 XP\_021362978.1 53.5 662  
 231 12 5 601 3 652 6.70E-192 678.7 6573 cellular  
 organisms;Eukaryota;Opisthokonta;Metazoa;Eumetazoa;Bilateria;Protostomia;  
 Spiralia;Lophotrochozoa;Mollusca;Bivalvia;Autobranchia;Pteriomorpha;Pect  
 inida;Pectinoidea;Pectinidae;Mizuhopecten;Mizuhopecten yessoensis  
 UdeM00000008378 6596 704.1 UdeM00000008378 XP\_045166929.1 75.6 475  
 113 3 7 480 570 1042 1.20E-199 704.1 6596 cellular  
 organisms;Eukaryota;Opisthokonta;Metazoa;Eumetazoa;Bilateria;Protostomia;  
 Spiralia;Lophotrochozoa;Mollusca;Bivalvia;Autobranchia;Heteroconchia;Euhe  
 terodonta;Imparidentia;Venerida;Veneroidea;Veneridae;Mercenaria;Mercenari  
 a mercenaria  
 UdeM00000008379 6596 503.4 UdeM00000008379 XP\_045166934.1 61 533  
 179 14 59 578 7 523 3.70E-139 503.4 6596 cellular  
 organisms;Eukaryota;Opisthokonta;Metazoa;Eumetazoa;Bilateria;Protostomia;  
 Spiralia;Lophotrochozoa;Mollusca;Bivalvia;Autobranchia;Heteroconchia;Euhe  
 terodonta;Imparidentia;Venerida;Veneroidea;Veneridae;Mercenaria;Mercenari  
 a mercenaria  
 UdeM00000008380 2607531 141.7 UdeM00000008380 XP\_029642779.1 29.8  
 302 198 6 134 429 103 396 2.20E-30 141.7 2607531  
 cellular  
 organisms;Eukaryota;Opisthokonta;Metazoa;Eumetazoa;Bilateria;Protostomia;  
 Spiralia;Lophotrochozoa;Mollusca;Cephalopoda;Coleoidea;Octopodiformes;Oct  
 opoda;Incirrata;Octopodidae;Octopus;Octopus sinensis  
 UdeM00000008381 6850 100.1 UdeM00000008381 XP\_013791304.1 50.5 111  
 52 2 1 109 1 110 1.90E-18 100.1 6850 cellular  
 organisms;Eukaryota;Opisthokonta;Metazoa;Eumetazoa;Bilateria;Protostomia;  
 Ecdysozoa;Panarthropoda;Arthropoda;Chelicerata;Merostomata;Xiphosura;Limu  
 lidae;Limulus;Limulus polyphemus  
 UdeM00000008382 6579 752.7 UdeM00000008382 XP\_033746554.1 60.6 604  
 232 4 1 603 1 599 3.70E-214 752.7 6579 cellular  
 organisms;Eukaryota;Opisthokonta;Metazoa;Eumetazoa;Bilateria;Protostomia;  
 Spiralia;Lophotrochozoa;Mollusca;Bivalvia;Autobranchia;Pteriomorpha;Pect  
 inida;Pectinoidea;Pectinidae;Pecten;Pecten maximus  
 UdeM00000008383 1735272 154.1 UdeM00000008383 XP\_041348313.1 64.6  
 99 35 0 4 102 9 107 9.90E-35 154.1 1735272  
 cellular  
 organisms;Eukaryota;Opisthokonta;Metazoa;Eumetazoa;Bilateria;Protostomia;  
 Spiralia;Lophotrochozoa;Mollusca;Gastropoda;Neomphalina;Neomphaloidea;Pel  
 tospiridae;Gigantopelta;Gigantopelta aegis  
 UdeM00000008384 310915 493.8 UdeM00000008384 XP\_026778865.2 34.8  
 797 447 19 7 743 6 789 4.00E-136 493.8 310915  
 cellular  
 organisms;Eukaryota;Opisthokonta;Metazoa;Eumetazoa;Bilateria;Deuterostomi  
 a;Chordata;Craniata;Vertebrata;Gnathostomata;Teleostomi;Euteleostomi;Acti  
 nopterygii;Actinopteri;Neopterygii;Teleostei;Osteoglossocephalai;Clupeoce  
 phala;Otomorpha;Ostariophysi;Otophysi;Characiphysae;Siluriformes;Siluroid  
 ei;Pangasiidae;Pangasianodon;Pangasianodon hypophthalmus



UdeM00000008385 6596 300.1 UdeM00000008385 XP\_045166710.1 54.9 304  
 128 3 1 299 112 411 3.40E-78 300.1 6596 cellular  
 organisms;Eukaryota;Opisthokonta;Metazoa;Eumetazoa;Bilateria;Protostomia;  
 Spiralia;Lophotrochozoa;Mollusca;Bivalvia;Autobranchia;Heteroconchia;Euhe  
 terodonta;Imparidentia;Venerida;Veneroidea;Veneridae;Mercenaria;Mercenari  
 a mercenaria  
 UdeM00000008386 1735272 593.6 UdeM00000008386 XP\_041349523.1 44.9  
 639 337 10 52 685 643 1271 3.70E-166 593.6 1735272  
 cellular  
 organisms;Eukaryota;Opisthokonta;Metazoa;Eumetazoa;Bilateria;Protostomia;  
 Spiralia;Lophotrochozoa;Mollusca;Gastropoda;Neomphalina;Neomphaloidea;Pel  
 tospiridae;Gigantopelta;Gigantopelta aegis  
 UdeM00000008387 1735272 547.7 UdeM00000008387 XP\_041349523.1 45.4  
 586 307 9 2 582 694 1271 2.00E-152 547.7 1735272  
 cellular  
 organisms;Eukaryota;Opisthokonta;Metazoa;Eumetazoa;Bilateria;Protostomia;  
 Spiralia;Lophotrochozoa;Mollusca;Gastropoda;Neomphalina;Neomphaloidea;Pel  
 tospiridae;Gigantopelta;Gigantopelta aegis  
 UdeM00000008389 6500 107.1 UdeM00000008389 XP\_035825968.1 59.1 88  
 36 0 26 113 14 101 1.70E-20 107.1 6500 cellular  
 organisms;Eukaryota;Opisthokonta;Metazoa;Eumetazoa;Bilateria;Protostomia;  
 Spiralia;Lophotrochozoa;Mollusca;Gastropoda;Heterobranchia;Euthyneura;Tec  
 tipleura;Aplysiida;Aplysioidea;Aplysiidae;Aplysia;Aplysia californica  
 UdeM00000008390 29159 280.8 UdeM00000008390 XP\_011450995.2 48.2 332  
 159 4 17 347 91 410 2.50E-72 280.8 29159 cellular  
 organisms;Eukaryota;Opisthokonta;Metazoa;Eumetazoa;Bilateria;Protostomia;  
 Spiralia;Lophotrochozoa;Mollusca;Bivalvia;Autobranchia;Pteriormorphia;Ostr  
 eida;Ostreoidea;Ostreidae;Crassostrea;Crassostrea gigas  
 UdeM00000008391 6596 372.5 UdeM00000008391 XP\_045160128.1 51.9 416  
 185 6 27 436 44 450 7.50E-100 372.5 6596 cellular  
 organisms;Eukaryota;Opisthokonta;Metazoa;Eumetazoa;Bilateria;Protostomia;  
 Spiralia;Lophotrochozoa;Mollusca;Bivalvia;Autobranchia;Heteroconchia;Euhe  
 terodonta;Imparidentia;Venerida;Veneroidea;Veneridae;Mercenaria;Mercenari  
 a mercenaria  
 UdeM00000008392 6573 633.3 UdeM00000008392 XP\_021379636.1 44.4 878  
 390 16 4 805 12 867 4.30E-178 633.3 6573 cellular  
 organisms;Eukaryota;Opisthokonta;Metazoa;Eumetazoa;Bilateria;Protostomia;  
 Spiralia;Lophotrochozoa;Mollusca;Bivalvia;Autobranchia;Pteriormorphia;Pect  
 inida;Pectinoidea;Pectinidae;Mizuhopecten;Mizuhopecten yessoensis  
 UdeM00000008393 6596 137.1 UdeM00000008393 XP\_045164307.1 28 461  
 253 14 228 657 6 418 8.00E-29 137.1 6596 cellular  
 organisms;Eukaryota;Opisthokonta;Metazoa;Eumetazoa;Bilateria;Protostomia;  
 Spiralia;Lophotrochozoa;Mollusca;Bivalvia;Autobranchia;Heteroconchia;Euhe  
 terodonta;Imparidentia;Venerida;Veneroidea;Veneridae;Mercenaria;Mercenari  
 a mercenaria  
 UdeM00000008394 6596 124 UdeM00000008394 XP\_045164308.1 54.3 105  
 48 0 14 118 4 108 1.30E-25 124 6596 cellular  
 organisms;Eukaryota;Opisthokonta;Metazoa;Eumetazoa;Bilateria;Protostomia;  
 Spiralia;Lophotrochozoa;Mollusca;Bivalvia;Autobranchia;Heteroconchia;Euhe  
 terodonta;Imparidentia;Venerida;Veneroidea;Veneridae;Mercenaria;Mercenari  
 a mercenaria  
 UdeM00000008395 6596 70.9 UdeM00000008395 XP\_045164346.1 30.4 184  
 115 7 1 176 5 183 2.80E-09 70.9 6596 cellular  
 organisms;Eukaryota;Opisthokonta;Metazoa;Eumetazoa;Bilateria;Protostomia;

Spiralia;Lophotrochozoa;Mollusca;Bivalvia;Autobranchia;Heteroconchia;Euherodonta;Imparidentia;Venerida;Veneroidea;Veneridae;Mercenaria;Mercenaria mercenaria

UdeM00000008397 6596 138.3 UdeM00000008397 XP\_045164373.1 39.4 170  
98 3 1 165 4 173 1.30E-29 138.3 6596 cellular

organisms;Eukaryota;Opisthokonta;Metazoa;Eumetazoa;Bilateria;Protostomia;Spiralia;Lophotrochozoa;Mollusca;Bivalvia;Autobranchia;Heteroconchia;Euherodonta;Imparidentia;Venerida;Veneroidea;Veneridae;Mercenaria;Mercenaria mercenaria

UdeM00000008398 6596 135.2 UdeM00000008398 XP\_045164373.1 33.7 249  
142 6 1 244 4 234 1.20E-28 135.2 6596 cellular

organisms;Eukaryota;Opisthokonta;Metazoa;Eumetazoa;Bilateria;Protostomia;Spiralia;Lophotrochozoa;Mollusca;Bivalvia;Autobranchia;Heteroconchia;Euherodonta;Imparidentia;Venerida;Veneroidea;Veneridae;Mercenaria;Mercenaria mercenaria

UdeM00000008399 6565 109.8 UdeM00000008399 XP\_022314409.1 39.5 177  
89 5 1 159 1139 1315 3.30E-21 109.8 6565 cellular

organisms;Eukaryota;Opisthokonta;Metazoa;Eumetazoa;Bilateria;Protostomia;Spiralia;Lophotrochozoa;Mollusca;Bivalvia;Autobranchia;Pteriomorphia;Ostreida;Ostreoidea;Ostreidae;Crassostrea;Crassostrea virginica

UdeM00000008400 29159 333.6 UdeM00000008400 XP\_011447608.2 53.8 327  
128 4 4 313 3 323 2.90E-88 333.6 29159 cellular

organisms;Eukaryota;Opisthokonta;Metazoa;Eumetazoa;Bilateria;Protostomia;Spiralia;Lophotrochozoa;Mollusca;Bivalvia;Autobranchia;Pteriomorphia;Ostreida;Ostreoidea;Ostreidae;Crassostrea;Crassostrea gigas

UdeM00000008401 6596 328.9 UdeM00000008401 XP\_045196337.1 33.2 950  
534 20 47 922 61 983 2.00E-86 328.9 6596 cellular

organisms;Eukaryota;Opisthokonta;Metazoa;Eumetazoa;Bilateria;Protostomia;Spiralia;Lophotrochozoa;Mollusca;Bivalvia;Autobranchia;Heteroconchia;Euherodonta;Imparidentia;Venerida;Veneroidea;Veneridae;Mercenaria;Mercenaria mercenaria

UdeM00000008402 1735272 167.9 UdeM00000008402 XP\_041350539.1 51.7  
172 70 5 1 165 1 166 1.10E-38 167.9 1735272

cellular

organisms;Eukaryota;Opisthokonta;Metazoa;Eumetazoa;Bilateria;Protostomia;Spiralia;Lophotrochozoa;Mollusca;Gastropoda;Neomphalina;Neomphaloidea;Peltospiridae;Gigantopelta;Gigantopelta aegis

UdeM00000008404 6565 250.4 UdeM00000008404 XP\_022320668.1 70 160  
48 0 1 160 527 686 1.60E-63 250.4 6565 cellular

organisms;Eukaryota;Opisthokonta;Metazoa;Eumetazoa;Bilateria;Protostomia;Spiralia;Lophotrochozoa;Mollusca;Bivalvia;Autobranchia;Pteriomorphia;Ostreida;Ostreoidea;Ostreidae;Crassostrea;Crassostrea virginica

UdeM00000008405 6596 111.3 UdeM00000008405 XP\_045180427.1 37.8 180  
103 2 12 186 98 273 1.40E-21 111.3 6596 cellular

organisms;Eukaryota;Opisthokonta;Metazoa;Eumetazoa;Bilateria;Protostomia;Spiralia;Lophotrochozoa;Mollusca;Bivalvia;Autobranchia;Heteroconchia;Euherodonta;Imparidentia;Venerida;Veneroidea;Veneridae;Mercenaria;Mercenaria mercenaria

UdeM00000008407 6596 841.3 UdeM00000008407 XP\_045164383.1 59.4 757  
287 8 6 743 110 865 1.00E-240 841.3 6596 cellular

organisms;Eukaryota;Opisthokonta;Metazoa;Eumetazoa;Bilateria;Protostomia;Spiralia;Lophotrochozoa;Mollusca;Bivalvia;Autobranchia;Heteroconchia;Euherodonta;Imparidentia;Venerida;Veneroidea;Veneridae;Mercenaria;Mercenaria mercenaria

UdeM00000008408 6573 291.2 UdeM00000008408 XP\_021343207.1 50.2 265  
 132 0 46 310 7 271 1.60E-75 291.2 6573 cellular  
 organisms;Eukaryota;Opisthokonta;Metazoa;Eumetazoa;Bilateria;Protostomia;  
 Spiralia;Lophotrochozoa;Mollusca;Bivalvia;Autobranchia;Pteriomorpha;Pect  
 inida;Pectinoidea;Pectinidae;Mizuhopecten;Mizuhopecten yessoensis  
 UdeM00000008409 6573 1186 UdeM00000008409 XP\_021343209.1 49 1834  
 739 33 1 1733 1 1739 0.00E+00 1186 6573 cellular  
 organisms;Eukaryota;Opisthokonta;Metazoa;Eumetazoa;Bilateria;Protostomia;  
 Spiralia;Lophotrochozoa;Mollusca;Bivalvia;Autobranchia;Pteriomorpha;Pect  
 inida;Pectinoidea;Pectinidae;Mizuhopecten;Mizuhopecten yessoensis  
 UdeM00000008410 6573 1187.6 UdeM00000008410 XP\_021343209.1 49  
 1840 732 34 1 1734 1 1739 0.00E+00 1187.6 6573  
 cellular  
 organisms;Eukaryota;Opisthokonta;Metazoa;Eumetazoa;Bilateria;Protostomia;  
 Spiralia;Lophotrochozoa;Mollusca;Bivalvia;Autobranchia;Pteriomorpha;Pect  
 inida;Pectinoidea;Pectinidae;Mizuhopecten;Mizuhopecten yessoensis  
 UdeM00000008411 6596 411.8 UdeM00000008411 XP\_045165313.1 75 300  
 51 7 620 915 1437 1716 2.30E-111 411.8 6596 cellular  
 organisms;Eukaryota;Opisthokonta;Metazoa;Eumetazoa;Bilateria;Protostomia;  
 Spiralia;Lophotrochozoa;Mollusca;Bivalvia;Autobranchia;Heteroconchia;Euhe  
 terodonta;Imparidentia;Venerida;Veneroidea;Veneridae;Mercenaria;Mercenari  
 a mercenaria  
 UdeM00000008412 6596 945.3 UdeM00000008412 XP\_045165105.1 65.4 693  
 230 5 6 697 9 692 4.50E-272 945.3 6596 cellular  
 organisms;Eukaryota;Opisthokonta;Metazoa;Eumetazoa;Bilateria;Protostomia;  
 Spiralia;Lophotrochozoa;Mollusca;Bivalvia;Autobranchia;Heteroconchia;Euhe  
 terodonta;Imparidentia;Venerida;Veneroidea;Veneridae;Mercenaria;Mercenari  
 a mercenaria  
 UdeM00000008413 6596 956.4 UdeM00000008413 XP\_045164703.1 66.7 696  
 144 7 1 624 1 680 1.70E-275 956.4 6596 cellular  
 organisms;Eukaryota;Opisthokonta;Metazoa;Eumetazoa;Bilateria;Protostomia;  
 Spiralia;Lophotrochozoa;Mollusca;Bivalvia;Autobranchia;Heteroconchia;Euhe  
 terodonta;Imparidentia;Venerida;Veneroidea;Veneridae;Mercenaria;Mercenari  
 a mercenaria  
 UdeM00000008414 1735272 89 UdeM00000008414 XP\_041349566.1 56.1  
 82 36 0 17 98 5 86 4.00E-15 89 1735272  
 cellular  
 organisms;Eukaryota;Opisthokonta;Metazoa;Eumetazoa;Bilateria;Protostomia;  
 Spiralia;Lophotrochozoa;Mollusca;Gastropoda;Neomphalina;Neomphaloidea;Pel  
 tospiridae;Gigantopelta;Gigantopelta aegis  
 UdeM00000008415 45264 67.4 UdeM00000008415 XP\_044167811.1 51.3 76  
 34 1 115 190 16 88 2.40E-08 67.4 45264 cellular  
 organisms;Eukaryota;Opisthokonta;Metazoa;Eumetazoa;Cnidaria;Anthozoa;Hexa  
 corallia;Scleractinia;Astrocoeniina;Acroporidae;Acropora;Acropora  
 millepora  
 UdeM00000008416 1735272 90.1 UdeM00000008416 XP\_041349566.1 58.1  
 74 31 0 28 101 15 88 2.10E-15 90.1 1735272  
 cellular  
 organisms;Eukaryota;Opisthokonta;Metazoa;Eumetazoa;Bilateria;Protostomia;  
 Spiralia;Lophotrochozoa;Mollusca;Gastropoda;Neomphalina;Neomphaloidea;Pel  
 tospiridae;Gigantopelta;Gigantopelta aegis  
 UdeM00000008417 6579 232.6 UdeM00000008417 XP\_033744551.1 48.5 229  
 81 2 2 197 125 349 5.40E-58 232.6 6579 cellular  
 organisms;Eukaryota;Opisthokonta;Metazoa;Eumetazoa;Bilateria;Protostomia;

Spiralia;Lophotrochozoa;Mollusca;Bivalvia;Autobranchia;Pteriormorphia;Pectinida;Pectinoidea;Pectinidae;Pecten;Pecten maximus  
UdeM00000008418 6573 132.9 UdeM00000008418 XP\_021347047.1 30.4 309  
202 6 5 309 23 322 7.10E-28 132.9 6573 cellular  
organisms;Eukaryota;Opisthokonta;Metazoa;Eumetazoa;Bilateria;Protostomia;  
Spiralia;Lophotrochozoa;Mollusca;Bivalvia;Autobranchia;Pteriormorphia;Pectinida;Pectinoidea;Pectinidae;Mizuhopecten;Mizuhopecten yessoensis  
UdeM00000008419 6573 172.9 UdeM00000008419 XP\_021376519.1 37.7 239  
148 1 42 280 40 277 5.60E-40 172.9 6573 cellular  
organisms;Eukaryota;Opisthokonta;Metazoa;Eumetazoa;Bilateria;Protostomia;  
Spiralia;Lophotrochozoa;Mollusca;Bivalvia;Autobranchia;Pteriormorphia;Pectinida;Pectinoidea;Pectinidae;Mizuhopecten;Mizuhopecten yessoensis  
UdeM00000008420 1735272 169.9 UdeM00000008420 XP\_041348482.1 42.4  
203 114 1 21 220 12 214 4.70E-39 169.9 1735272  
cellular  
organisms;Eukaryota;Opisthokonta;Metazoa;Eumetazoa;Bilateria;Protostomia;  
Spiralia;Lophotrochozoa;Mollusca;Gastropoda;Neomphalina;Neomphaloidea;Peltospiridae;Gigantopelta;Gigantopelta aegis  
UdeM00000008421 29159 1181.4 UdeM00000008421 XP\_034307026.1 69.4  
834 200 4 1 832 1 781 0.00E+00 1181.4  
29159 cellular  
organisms;Eukaryota;Opisthokonta;Metazoa;Eumetazoa;Bilateria;Protostomia;  
Spiralia;Lophotrochozoa;Mollusca;Bivalvia;Autobranchia;Pteriormorphia;Ostreida;Ostreoidea;Ostreidae;Crassostrea;Crassostrea gigas  
UdeM00000008422 1735272 327.8 UdeM00000008422 XP\_041349886.1 71.8  
241 66 1 2 240 3 243 1.20E-86 327.8 1735272  
cellular  
organisms;Eukaryota;Opisthokonta;Metazoa;Eumetazoa;Bilateria;Protostomia;  
Spiralia;Lophotrochozoa;Mollusca;Gastropoda;Neomphalina;Neomphaloidea;Peltospiridae;Gigantopelta;Gigantopelta aegis  
UdeM00000008423 6596 502.7 UdeM00000008423 XP\_045164880.1 55.2 449  
195 3 1 445 1 447 6.00E-139 502.7 6596 cellular  
organisms;Eukaryota;Opisthokonta;Metazoa;Eumetazoa;Bilateria;Protostomia;  
Spiralia;Lophotrochozoa;Mollusca;Bivalvia;Autobranchia;Heteroconchia;Euheterodonta;Imparidentia;Venerida;Veneroidea;Veneridae;Mercenaria;Mercenaria mercenaria  
UdeM00000008424 7574 77.8 UdeM00000008424 XP\_013401704.1 30 273  
142 9 1 260 1 237 2.30E-11 77.8 7574 cellular  
organisms;Eukaryota;Opisthokonta;Metazoa;Eumetazoa;Bilateria;Protostomia;  
Spiralia;Lophotrochozoa;Brachiopoda;Linguliformea;Lingulata;Lingulida;Linguloidea;Lingulidae;Lingula;Lingula anatina  
UdeM00000008425 45264 481.1 UdeM00000008425 XP\_044165143.1 54.9 443  
193 4 42 481 35 473 1.70E-132 481.1 45264 cellular  
organisms;Eukaryota;Opisthokonta;Metazoa;Eumetazoa;Cnidaria;Anthozoa;Hexacorallia;Scleractinia;Astrocoeniina;Acroporidae;Acropora;Acropora millepora  
UdeM00000008427 1735272 542.3 UdeM00000008427 XP\_041350160.1 46.8  
632 285 8 47 655 58 661 8.30E-151 542.3 1735272  
cellular  
organisms;Eukaryota;Opisthokonta;Metazoa;Eumetazoa;Bilateria;Protostomia;  
Spiralia;Lophotrochozoa;Mollusca;Gastropoda;Neomphalina;Neomphaloidea;Peltospiridae;Gigantopelta;Gigantopelta aegis  
UdeM00000008428 1735272 542 UdeM00000008428 XP\_041350160.1 46.8  
632 285 8 6 614 58 661 1.00E-150 542 1735272

cellular  
organisms;Eukaryota;Opisthokonta;Metazoa;Eumetazoa;Bilateria;Protostomia;  
Spiralia;Lophotrochozoa;Mollusca;Gastropoda;Neomphalina;Neomphaloidea;Pel  
tospiridae;Gigantopelta;Gigantopelta aegis  
UdeM00000008429 6565 522.3 UdeM00000008429 XP\_022296760.1 69.8 358  
108 0 1 358 47 404 4.80E-145 522.3 6565 cellular  
organisms;Eukaryota;Opisthokonta;Metazoa;Eumetazoa;Bilateria;Protostomia;  
Spiralia;Lophotrochozoa;Mollusca;Bivalvia;Autobranchia;Pteriormorphia;Ostr  
eida;Ostreoidea;Ostreidae;Crassostrea;Crassostrea virginica  
UdeM00000008430 6565 129.8 UdeM00000008430 XP\_022302274.1 41.8 177  
80 2 84 238 127 302 4.60E-27 129.8 6565 cellular  
organisms;Eukaryota;Opisthokonta;Metazoa;Eumetazoa;Bilateria;Protostomia;  
Spiralia;Lophotrochozoa;Mollusca;Bivalvia;Autobranchia;Pteriormorphia;Ostr  
eida;Ostreoidea;Ostreidae;Crassostrea;Crassostrea virginica  
UdeM00000008431 6596 436 UdeM00000008431 XP\_045165307.1 69.5 384  
107 4 6 383 34 413 4.80E-119 436 6596 cellular  
organisms;Eukaryota;Opisthokonta;Metazoa;Eumetazoa;Bilateria;Protostomia;  
Spiralia;Lophotrochozoa;Mollusca;Bivalvia;Autobranchia;Heteroconchia;Euhe  
terodonta;Imparidentia;Venerida;Veneroidea;Veneridae;Mercenaria;Mercenari  
a mercenaria  
UdeM00000008432 6596 218.4 UdeM00000008432 XP\_045164462.1 65.4 159  
55 0 2 160 66 224 6.80E-54 218.4 6596 cellular  
organisms;Eukaryota;Opisthokonta;Metazoa;Eumetazoa;Bilateria;Protostomia;  
Spiralia;Lophotrochozoa;Mollusca;Bivalvia;Autobranchia;Heteroconchia;Euhe  
terodonta;Imparidentia;Venerida;Veneroidea;Veneridae;Mercenaria;Mercenari  
a mercenaria  
UdeM00000008434 6596 396 UdeM00000008434 XP\_045167015.1 45.4 425  
226 2 74 498 63 481 7.40E-107 396 6596 cellular  
organisms;Eukaryota;Opisthokonta;Metazoa;Eumetazoa;Bilateria;Protostomia;  
Spiralia;Lophotrochozoa;Mollusca;Bivalvia;Autobranchia;Heteroconchia;Euhe  
terodonta;Imparidentia;Venerida;Veneroidea;Veneridae;Mercenaria;Mercenari  
a mercenaria  
UdeM00000008435 6596 1402.1 UdeM00000008435 XP\_045164915.1 49.8  
1409 639 20 3 1361 225 1614 0.00E+00 1402.1 6596  
cellular  
organisms;Eukaryota;Opisthokonta;Metazoa;Eumetazoa;Bilateria;Protostomia;  
Spiralia;Lophotrochozoa;Mollusca;Bivalvia;Autobranchia;Heteroconchia;Euhe  
terodonta;Imparidentia;Venerida;Veneroidea;Veneridae;Mercenaria;Mercenari  
a mercenaria  
UdeM00000008437 1735272 170.2 UdeM00000008437 XP\_041361004.1 45.1  
182 99 1 3 184 22 202 2.60E-39 170.2 1735272  
cellular  
organisms;Eukaryota;Opisthokonta;Metazoa;Eumetazoa;Bilateria;Protostomia;  
Spiralia;Lophotrochozoa;Mollusca;Gastropoda;Neomphalina;Neomphaloidea;Pel  
tospiridae;Gigantopelta;Gigantopelta aegis  
UdeM00000008436 72036 174.1 UdeM00000008436 XP\_040576246.1 41.5 205  
116 3 2 203 237 440 1.90E-40 174.1 72036 cellular  
organisms;Eukaryota;Opisthokonta;Metazoa;Eumetazoa;Bilateria;Protostomia;  
Ecdysozoa;Panarthropoda;Arthropoda;Mandibulata;Pancrustacea;Crustacea;Mul  
ticrustacea;Hexanauplia;Copepoda;Neocopepoda;Podoplea;Siphonostomatoida;C  
aligidae;Lepeophtheirus;Lepeophtheirus salmonis  
UdeM00000008438 72036 144.4 UdeM00000008438 XP\_040576246.1 43 179  
96 3 1 177 1 175 1.40E-31 144.4 72036 cellular  
organisms;Eukaryota;Opisthokonta;Metazoa;Eumetazoa;Bilateria;Protostomia;

Ecdysozoa; Panarthropoda; Arthropoda; Mandibulata; Pancrustacea; Crustacea; Multicrustacea; Hexanauplia; Copepoda; Neocopepoda; Podoplea; Siphonostomatoida; Caligidae; Lepeophtheirus; Lepeophtheirus salmonis

UdeM00000008440 29159 111.7 UdeM00000008440 XP\_034338151.1 60 85  
33 1 2 86 268 351 6.20E-22 111.7 29159 cellular

organisms; Eukaryota; Opisthokonta; Metazoa; Eumetazoa; Bilateria; Protostomia; Spiralia; Lophotrochozoa; Mollusca; Bivalvia; Autobranchia; Pteriomorpha; Ostracida; Ostreidae; Crassostrea; Crassostrea gigas

UdeM00000008441 6573 73.9 UdeM00000008441 XP\_021369719.1 55.7 70  
29 1 1 68 299 368 1.00E-10 73.9 6573 cellular

organisms; Eukaryota; Opisthokonta; Metazoa; Eumetazoa; Bilateria; Protostomia; Spiralia; Lophotrochozoa; Mollusca; Bivalvia; Autobranchia; Pteriomorpha; Pectinida; Pectinoidea; Pectinidae; Mizuhopecten; Mizuhopecten yessoensis

UdeM00000008442 6596 1097.4 UdeM00000008442 XP\_045166970.1 53.1  
1178 461 19 83 1185 48 1208 0.00E+00 1097.4 6596

cellular

organisms; Eukaryota; Opisthokonta; Metazoa; Eumetazoa; Bilateria; Protostomia; Spiralia; Lophotrochozoa; Mollusca; Bivalvia; Autobranchia; Heteroconchia; Euheterodonta; Imparidentia; Venerida; Veneroidea; Veneridae; Mercenaria; Mercenaria mercenaria

UdeM00000008443 6573 345.5 UdeM00000008443 XP\_021361146.1 42.6 406  
224 6 9 411 7 406 9.20E-92 345.5 6573 cellular

organisms; Eukaryota; Opisthokonta; Metazoa; Eumetazoa; Bilateria; Protostomia; Spiralia; Lophotrochozoa; Mollusca; Bivalvia; Autobranchia; Pteriomorpha; Pectinida; Pectinoidea; Pectinidae; Mizuhopecten; Mizuhopecten yessoensis

UdeM00000008444 6596 223.4 UdeM00000008444 XP\_045167245.1 26.5 722  
253 7 18 467 151 866 6.10E-55 223.4 6596 cellular

organisms; Eukaryota; Opisthokonta; Metazoa; Eumetazoa; Bilateria; Protostomia; Spiralia; Lophotrochozoa; Mollusca; Bivalvia; Autobranchia; Heteroconchia; Euheterodonta; Imparidentia; Venerida; Veneroidea; Veneridae; Mercenaria; Mercenaria mercenaria

UdeM00000008445 6596 142.1 UdeM00000008445 XP\_045166458.1 52.2 136  
64 1 30 164 27 162 7.40E-31 142.1 6596 cellular

organisms; Eukaryota; Opisthokonta; Metazoa; Eumetazoa; Bilateria; Protostomia; Spiralia; Lophotrochozoa; Mollusca; Bivalvia; Autobranchia; Heteroconchia; Euheterodonta; Imparidentia; Venerida; Veneroidea; Veneridae; Mercenaria; Mercenaria mercenaria

UdeM00000008446 6596 394.8 UdeM00000008446 XP\_045166458.1 32.3 882  
315 15 1 608 2 875 2.00E-106 394.8 6596 cellular

organisms; Eukaryota; Opisthokonta; Metazoa; Eumetazoa; Bilateria; Protostomia; Spiralia; Lophotrochozoa; Mollusca; Bivalvia; Autobranchia; Heteroconchia; Euheterodonta; Imparidentia; Venerida; Veneroidea; Veneridae; Mercenaria; Mercenaria mercenaria

UdeM00000008447 6573 1591.2 UdeM00000008447 XP\_021376481.1 59  
1698 580 22 2 1596 4 1687 0.00E+00 1591.2 6573

cellular

organisms; Eukaryota; Opisthokonta; Metazoa; Eumetazoa; Bilateria; Protostomia; Spiralia; Lophotrochozoa; Mollusca; Bivalvia; Autobranchia; Pteriomorpha; Pectinida; Pectinoidea; Pectinidae; Mizuhopecten; Mizuhopecten yessoensis

UdeM00000008448 6596 2424.8 UdeM00000008448 XP\_045164065.1 49.9  
2331 1125 8 384 2690 283 2595 0.00E+00 2424.8 6596

cellular

organisms; Eukaryota; Opisthokonta; Metazoa; Eumetazoa; Bilateria; Protostomia; Spiralia; Lophotrochozoa; Mollusca; Bivalvia; Autobranchia; Heteroconchia; Euheterodonta

terodonta;Imparidentia;Venerida;Veneroidea;Veneridae;Mercenaria;Mercenari  
 a mercenaria  
 UdeM00000008449 6596 263.5 UdeM00000008449 XP\_045208517.1 39.5 382  
 213 7 59 434 13 382 4.90E-67 263.5 6596 cellular  
 organisms;Eukaryota;Opisthokonta;Metazoa;Eumetazoa;Bilateria;Protostomia;  
 Spiralia;Lophotrochozoa;Mollusca;Bivalvia;Autobranchia;Heteroconchia;Euhe  
 terodonta;Imparidentia;Venerida;Veneroidea;Veneridae;Mercenaria;Mercenari  
 a mercenaria  
 UdeM00000008450 6526 151.8 UdeM00000008450 XP\_013068581.1 65.8 117  
 39 1 1 117 1 116 5.60E-34 151.8 6526 cellular  
 organisms;Eukaryota;Opisthokonta;Metazoa;Eumetazoa;Bilateria;Protostomia;  
 Spiralia;Lophotrochozoa;Mollusca;Gastropoda;Heterobranchia;Euthyneura;Pan  
 pulmonata;Hygrophila;Lymnaeioidea;Planorbidae;Biomphalaria;Biomphalaria  
 glabrata  
 UdeM00000008451 6596 499.6 UdeM00000008451 XP\_045184723.1 70.8 346  
 98 1 1 343 1 346 3.30E-138 499.6 6596 cellular  
 organisms;Eukaryota;Opisthokonta;Metazoa;Eumetazoa;Bilateria;Protostomia;  
 Spiralia;Lophotrochozoa;Mollusca;Bivalvia;Autobranchia;Heteroconchia;Euhe  
 terodonta;Imparidentia;Venerida;Veneroidea;Veneridae;Mercenaria;Mercenari  
 a mercenaria  
 UdeM00000008452 6596 981.5 UdeM00000008452 XP\_045165412.1 33.3 2048  
 1072 38 1 1774 1 2028 1.40E-282 981.5 6596 cellular  
 organisms;Eukaryota;Opisthokonta;Metazoa;Eumetazoa;Bilateria;Protostomia;  
 Spiralia;Lophotrochozoa;Mollusca;Bivalvia;Autobranchia;Heteroconchia;Euhe  
 terodonta;Imparidentia;Venerida;Veneroidea;Veneridae;Mercenaria;Mercenari  
 a mercenaria  
 UdeM00000008453 6579 445.7 UdeM00000008453 XP\_033746068.1 51.7 458  
 203 8 13 464 42 487 7.70E-122 445.7 6579 cellular  
 organisms;Eukaryota;Opisthokonta;Metazoa;Eumetazoa;Bilateria;Protostomia;  
 Spiralia;Lophotrochozoa;Mollusca;Bivalvia;Autobranchia;Pteriomorphia;Pect  
 inida;Pectinoidea;Pectinidae;Pecten;Pecten maximus  
 UdeM00000008454 6596 114.8 UdeM00000008454 XP\_045165412.1 37 162  
 97 3 266 425 2329 2487 2.80E-22 114.8 6596 cellular  
 organisms;Eukaryota;Opisthokonta;Metazoa;Eumetazoa;Bilateria;Protostomia;  
 Spiralia;Lophotrochozoa;Mollusca;Bivalvia;Autobranchia;Heteroconchia;Euhe  
 terodonta;Imparidentia;Venerida;Veneroidea;Veneridae;Mercenaria;Mercenari  
 a mercenaria  
 UdeM00000008455 6573 81.3 UdeM00000008455 XP\_021365136.1 50.6 85  
 41 1 1 85 1 84 3.20E-12 81.3 6573 cellular  
 organisms;Eukaryota;Opisthokonta;Metazoa;Eumetazoa;Bilateria;Protostomia;  
 Spiralia;Lophotrochozoa;Mollusca;Bivalvia;Autobranchia;Pteriomorphia;Pect  
 inida;Pectinoidea;Pectinidae;Mizuhopecten;Mizuhopecten yessoensis  
 UdeM00000008457 6596 129.8 UdeM00000008457 XP\_045164786.1 47.3 283  
 130 6 88 366 80 347 7.20E-27 129.8 6596 cellular  
 organisms;Eukaryota;Opisthokonta;Metazoa;Eumetazoa;Bilateria;Protostomia;  
 Spiralia;Lophotrochozoa;Mollusca;Bivalvia;Autobranchia;Heteroconchia;Euhe  
 terodonta;Imparidentia;Venerida;Veneroidea;Veneridae;Mercenaria;Mercenari  
 a mercenaria  
 UdeM00000008459 6579 703 UdeM00000008459 XP\_033728194.1 51.1 693  
 326 5 1 684 282 970 3.80E-199 703 6579 cellular  
 organisms;Eukaryota;Opisthokonta;Metazoa;Eumetazoa;Bilateria;Protostomia;  
 Spiralia;Lophotrochozoa;Mollusca;Bivalvia;Autobranchia;Pteriomorphia;Pect  
 inida;Pectinoidea;Pectinidae;Pecten;Pecten maximus

UdeM00000008460 6596 209.1 UdeM00000008460 XP\_045164486.1 45.3 254  
 121 4 1 246 1 244 6.30E-51 209.1 6596 cellular  
 organisms;Eukaryota;Opisthokonta;Metazoa;Eumetazoa;Bilateria;Protostomia;  
 Spiralia;Lophotrochozoa;Mollusca;Bivalvia;Autobranchia;Heteroconchia;Euhe  
 terodonta;Imparidentia;Venerida;Veneroidea;Veneridae;Mercenaria;Mercenari  
 a mercenaria  
 UdeM00000008461 6596 203.8 UdeM00000008461 XP\_045164486.1 46.1 230  
 107 3 29 251 25 244 2.70E-49 203.8 6596 cellular  
 organisms;Eukaryota;Opisthokonta;Metazoa;Eumetazoa;Bilateria;Protostomia;  
 Spiralia;Lophotrochozoa;Mollusca;Bivalvia;Autobranchia;Heteroconchia;Euhe  
 terodonta;Imparidentia;Venerida;Veneroidea;Veneridae;Mercenaria;Mercenari  
 a mercenaria  
 UdeM00000008462 6596 153.3 UdeM00000008462 XP\_045165278.1 48.7 191  
 78 4 1 189 6 178 3.20E-34 153.3 6596 cellular  
 organisms;Eukaryota;Opisthokonta;Metazoa;Eumetazoa;Bilateria;Protostomia;  
 Spiralia;Lophotrochozoa;Mollusca;Bivalvia;Autobranchia;Heteroconchia;Euhe  
 terodonta;Imparidentia;Venerida;Veneroidea;Veneridae;Mercenaria;Mercenari  
 a mercenaria  
 UdeM00000008463 202533 189.5 UdeM00000008463 XP\_035226955.1 63.8  
 188 56 6 10 187 4 189 4.10E-45 189.5 202533  
 cellular  
 organisms;Eukaryota;Opisthokonta;Metazoa;Eumetazoa;Bilateria;Protostomia;  
 Ecdysozoa;Panarthropoda;Arthropoda;Chelicerata;Arachnida;Araneae;Araneomo  
 rphae;Entelegynae;Eresoidea;Eresidae;Stegodyphus;Stegodyphus dumicola  
 UdeM00000008464 1735272 164.9 UdeM00000008464 XP\_041349873.1 37.6  
 210 120 3 27 235 27 226 1.40E-37 164.9 1735272  
 cellular  
 organisms;Eukaryota;Opisthokonta;Metazoa;Eumetazoa;Bilateria;Protostomia;  
 Spiralia;Lophotrochozoa;Mollusca;Gastropoda;Neomphalina;Neomphaloidea;Pel  
 tospiridae;Gigantopelta;Gigantopelta aegis  
 UdeM00000008465 48701 62.4 UdeM00000008465 XP\_014826553.1 31.7 120  
 80 2 32 150 39 157 1.80E-06 62.4 48701 cellular  
 organisms;Eukaryota;Opisthokonta;Metazoa;Eumetazoa;Bilateria;Deuterostomi  
 a;Chordata;Craniata;Vertebrata;Gnathostomata;Teleostomi;Euteleostomi;Acti  
 nopterygii;Actinopteri;Neopterygii;Teleostei;Osteoglossocephalai;Clupeoce  
 phala;Euteleosteomorpha;Neoteleostei;Eurypterygia;Ctenosquamata;Acanthomo  
 rphata;Euacanthomorphacea;Percomorphaceae;Ovalentaria;Atherinomorphae;Cyp  
 rinodontiformes;Cyprinodontoidei;Poeciliidae;Poeciliinae;Poecilia;Poecili  
 a mexicana  
 UdeM00000008469 6565 62.8 UdeM00000008469 XP\_022298268.1 41.7 84  
 39 2 1 84 1 74 2.50E-07 62.8 6565 cellular  
 organisms;Eukaryota;Opisthokonta;Metazoa;Eumetazoa;Bilateria;Protostomia;  
 Spiralia;Lophotrochozoa;Mollusca;Bivalvia;Autobranchia;Pteriormorphia;Ostr  
 eida;Ostreoidea;Ostreidae;Crassostrea;Crassostrea virginica  
 UdeM00000008470 6596 256.9 UdeM00000008470 XP\_045165477.1 81.4 140  
 25 1 74 212 63 202 6.10E-65 256.9 6596 cellular  
 organisms;Eukaryota;Opisthokonta;Metazoa;Eumetazoa;Bilateria;Protostomia;  
 Spiralia;Lophotrochozoa;Mollusca;Bivalvia;Autobranchia;Heteroconchia;Euhe  
 terodonta;Imparidentia;Venerida;Veneroidea;Veneridae;Mercenaria;Mercenari  
 a mercenaria  
 UdeM00000008471 6596 1144 UdeM00000008471 XP\_045165435.1 52.7 1299  
 487 25 26 1287 22 1230 0.00E+00 1144 6596 cellular  
 organisms;Eukaryota;Opisthokonta;Metazoa;Eumetazoa;Bilateria;Protostomia;  
 Spiralia;Lophotrochozoa;Mollusca;Bivalvia;Autobranchia;Heteroconchia;Euhe



terodonta;Imparidentia;Venerida;Veneroidea;Veneridae;Mercenaria;Mercenari  
 a mercenaria  
 UdeM00000008472 6579 886.3 UdeM00000008472 XP\_033746045.1 52.5 917  
 288 10 36 814 382 1288 2.90E-254 886.3 6579 cellular  
 organisms;Eukaryota;Opisthokonta;Metazoa;Eumetazoa;Bilateria;Protostomia;  
 Spiralia;Lophotrochozoa;Mollusca;Bivalvia;Autobranchia;Pteriormorphia;Pect  
 inida;Pectinoidea;Pectinidae;Pecten;Pecten maximus  
 UdeM00000008473 6596 528.9 UdeM00000008473 XP\_045166542.1 71.7 371  
 96 4 1 366 1 367 5.20E-147 528.9 6596 cellular  
 organisms;Eukaryota;Opisthokonta;Metazoa;Eumetazoa;Bilateria;Protostomia;  
 Spiralia;Lophotrochozoa;Mollusca;Bivalvia;Autobranchia;Heteroconchia;Euhe  
 terodonta;Imparidentia;Venerida;Veneroidea;Veneridae;Mercenaria;Mercenari  
 a mercenaria  
 UdeM00000008474 6596 276.9 UdeM00000008474 XP\_045166542.1 64.1 223  
 72 3 1 219 149 367 2.20E-71 276.9 6596 cellular  
 organisms;Eukaryota;Opisthokonta;Metazoa;Eumetazoa;Bilateria;Protostomia;  
 Spiralia;Lophotrochozoa;Mollusca;Bivalvia;Autobranchia;Heteroconchia;Euhe  
 terodonta;Imparidentia;Venerida;Veneroidea;Veneridae;Mercenaria;Mercenari  
 a mercenaria  
 UdeM00000008475 6596 954.9 UdeM00000008475 XP\_045164299.1 67.5 723  
 210 4 106 804 359 1080 6.50E-275 954.9 6596 cellular  
 organisms;Eukaryota;Opisthokonta;Metazoa;Eumetazoa;Bilateria;Protostomia;  
 Spiralia;Lophotrochozoa;Mollusca;Bivalvia;Autobranchia;Heteroconchia;Euhe  
 terodonta;Imparidentia;Venerida;Veneroidea;Veneridae;Mercenaria;Mercenari  
 a mercenaria  
 UdeM00000008476 6596 256.1 UdeM00000008476 XP\_045160232.1 64.2 190  
 65 1 17 206 35 221 4.30E-65 256.1 6596 cellular  
 organisms;Eukaryota;Opisthokonta;Metazoa;Eumetazoa;Bilateria;Protostomia;  
 Spiralia;Lophotrochozoa;Mollusca;Bivalvia;Autobranchia;Heteroconchia;Euhe  
 terodonta;Imparidentia;Venerida;Veneroidea;Veneridae;Mercenaria;Mercenari  
 a mercenaria  
 UdeM00000008477 6596 1675.6 UdeM00000008477 XP\_045157681.1 52.3  
 1777 406 12 25 1786 26 1376 0.00E+00 1675.6 6596  
 cellular  
 organisms;Eukaryota;Opisthokonta;Metazoa;Eumetazoa;Bilateria;Protostomia;  
 Spiralia;Lophotrochozoa;Mollusca;Bivalvia;Autobranchia;Heteroconchia;Euhe  
 terodonta;Imparidentia;Venerida;Veneroidea;Veneridae;Mercenaria;Mercenari  
 a mercenaria  
 UdeM00000008478 6596 198 UdeM00000008478 XP\_045157681.1 58.2 158  
 66 0 3 160 1219 1376 9.30E-48 198 6596 cellular  
 organisms;Eukaryota;Opisthokonta;Metazoa;Eumetazoa;Bilateria;Protostomia;  
 Spiralia;Lophotrochozoa;Mollusca;Bivalvia;Autobranchia;Heteroconchia;Euhe  
 terodonta;Imparidentia;Venerida;Veneroidea;Veneridae;Mercenaria;Mercenari  
 a mercenaria  
 UdeM00000008480 2607531 78.6 UdeM00000008480 XP\_036354520.1 24.8  
 290 187 10 2 283 21 287 1.50E-11 78.6 2607531  
 cellular  
 organisms;Eukaryota;Opisthokonta;Metazoa;Eumetazoa;Bilateria;Protostomia;  
 Spiralia;Lophotrochozoa;Mollusca;Cephalopoda;Coleoidea;Octopodiformes;Oct  
 opoda;Incirrata;Octopodidae;Octopus;Octopus sinensis  
 UdeM00000008481 6565 89.4 UdeM00000008481 XP\_022301923.1 70 50  
 15 0 15 64 65 114 3.10E-15 89.4 6565 cellular  
 organisms;Eukaryota;Opisthokonta;Metazoa;Eumetazoa;Bilateria;Protostomia;

Spiralia;Lophotrochozoa;Mollusca;Bivalvia;Autobranchia;Pteriormorphia;Ostr  
eida;Ostreoidea;Ostreidae;Crassostrea;Crassostrea virginica  
UdeM00000008482 6596 276.6 UdeM00000008482 XP\_045212653.1 30.9 709  
428 19 13 675 11 703 8.80E-71 276.6 6596 cellular  
organisms;Eukaryota;Opisthokonta;Metazoa;Eumetazoa;Bilateria;Protostomia;  
Spiralia;Lophotrochozoa;Mollusca;Bivalvia;Autobranchia;Heteroconchia;Euhe  
terodonta;Imparidentia;Venerida;Veneroidea;Veneridae;Mercenaria;Mercenari  
a mercenaria  
UdeM00000008483 10224 65.9 UdeM00000008483 XP\_006820641.1 37 92  
56 1 19 110 51 140 5.70E-08 65.9 10224 cellular  
organisms;Eukaryota;Opisthokonta;Metazoa;Eumetazoa;Bilateria;Deuterostomi  
a;Hemichordata;Enteropneusta;Harrimaniidae;Saccoglossus;Saccoglossus  
kowalevskii  
UdeM00000008484 6596 129.4 UdeM00000008484 XP\_045168924.1 62.8 86  
30 1 78 163 28 111 4.20E-27 129.4 6596 cellular  
organisms;Eukaryota;Opisthokonta;Metazoa;Eumetazoa;Bilateria;Protostomia;  
Spiralia;Lophotrochozoa;Mollusca;Bivalvia;Autobranchia;Heteroconchia;Euhe  
terodonta;Imparidentia;Venerida;Veneroidea;Veneridae;Mercenaria;Mercenari  
a mercenaria  
UdeM00000008485 6565 99 UdeM00000008485 XP\_022314409.1 37.9 169  
87 5 1 151 1147 1315 5.60E-18 99 6565 cellular  
organisms;Eukaryota;Opisthokonta;Metazoa;Eumetazoa;Bilateria;Protostomia;  
Spiralia;Lophotrochozoa;Mollusca;Bivalvia;Autobranchia;Pteriormorphia;Ostr  
eida;Ostreoidea;Ostreidae;Crassostrea;Crassostrea virginica  
UdeM00000008486 6596 274.2 UdeM00000008486 XP\_045212653.1 30.9 706  
433 17 13 676 11 703 4.40E-70 274.2 6596 cellular  
organisms;Eukaryota;Opisthokonta;Metazoa;Eumetazoa;Bilateria;Protostomia;  
Spiralia;Lophotrochozoa;Mollusca;Bivalvia;Autobranchia;Heteroconchia;Euhe  
terodonta;Imparidentia;Venerida;Veneroidea;Veneridae;Mercenaria;Mercenari  
a mercenaria  
UdeM00000008488 7962 126.7 UdeM00000008488 XP\_042610821.1 55.9 93  
40 1 12 103 130 222 1.70E-26 126.7 7962 cellular  
organisms;Eukaryota;Opisthokonta;Metazoa;Eumetazoa;Bilateria;Deuterostomi  
a;Chordata;Craniata;Vertebrata;Gnathostomata;Teleostomi;Euteleostomi;Acti  
nopterygii;Actinopteri;Neopterygii;Teleostei;Osteoglossocephalai;Clupeoce  
phala;Otomorpha;Ostariophysi;Otophysi;Cypriniphysae;Cypriniformes;Cyprino  
idei;Cyprinidae;Cyprininae;Cyprinus;Cyprinus carpio  
UdeM00000008489 7739 103.6 UdeM00000008489 XP\_035671401.1 51.7 89  
41 2 23 109 96 184 2.50E-19 103.6 7739 cellular  
organisms;Eukaryota;Opisthokonta;Metazoa;Eumetazoa;Bilateria;Deuterostomi  
a;Chordata;Cephalochordata;Leptocardii;Amphioxiformes;Branchiostomidae;Br  
anchiostoma;Branchiostoma floridae  
UdeM00000008490 133434 116.7 UdeM00000008490 XP\_022088644.1 42  
143 82 1 18 159 269 411 2.80E-23 116.7 133434  
cellular  
organisms;Eukaryota;Opisthokonta;Metazoa;Eumetazoa;Bilateria;Deuterostomi  
a;Echinodermata;Eleutherozoa;Asterozoa;Asteroidea;Valvatacea;Valvatida;Ac  
anthasteridae;Acanthaster;Acanthaster planci  
UdeM00000008491 7962 111.3 UdeM00000008491 XP\_042613350.1 53.8 93  
40 1 20 112 40 129 1.20E-21 111.3 7962 cellular  
organisms;Eukaryota;Opisthokonta;Metazoa;Eumetazoa;Bilateria;Deuterostomi  
a;Chordata;Craniata;Vertebrata;Gnathostomata;Teleostomi;Euteleostomi;Acti  
nopterygii;Actinopteri;Neopterygii;Teleostei;Osteoglossocephalai;Clupeoce

phala;Otomorpha;Ostariophysii;Otophysii;Cypriniphysae;Cypriniiformes;Cyprinoidei;Cyprinidae;Cyprininae;Cyprinus;Cyprinus carpio  
UdeM00000008492 46514 136 UdeM00000008492 XP\_038066487.1 46.9 145  
68 3 16 159 1263 1399 5.60E-29 136 46514 cellular  
organisms;Eukaryota;Opisthokonta;Metazoa;Eumetazoa;Bilateria;Deuterostomia;  
a;Echinodermata;Eleutherozoa;Asterozoa;Asteroidea;Valvatacea;Valvatida;As  
terinidae;Patiria;Patiria miniata  
UdeM00000008493 29159 111.3 UdeM00000008493 XP\_011437363.1 74.3 74  
19 0 1 74 1 74 5.30E-22 111.3 29159 cellular  
organisms;Eukaryota;Opisthokonta;Metazoa;Eumetazoa;Bilateria;Protostomia;  
Spiralia;Lophotrochozoa;Mollusca;Bivalvia;Autobranchia;Pteriomorphia;Ostr  
eida;Ostreoidea;Ostreidae;Crassostrea;Crassostrea gigas  
UdeM00000008494 6596 552 UdeM00000008494 XP\_045157687.1 88.2 306  
36 0 1 306 1 306 4.80E-154 552 6596 cellular  
organisms;Eukaryota;Opisthokonta;Metazoa;Eumetazoa;Bilateria;Protostomia;  
Spiralia;Lophotrochozoa;Mollusca;Bivalvia;Autobranchia;Heteroconchia;Euhe  
terodonta;Imparidentia;Venerida;Veneroidea;Veneridae;Mercenaria;Mercenari  
a mercenaria  
UdeM00000008495 1735272 339.3 UdeM00000008495 XP\_041359871.1 56.5  
301 95 3 1 269 1 297 4.30E-90 339.3 1735272  
cellular  
organisms;Eukaryota;Opisthokonta;Metazoa;Eumetazoa;Bilateria;Protostomia;  
Spiralia;Lophotrochozoa;Mollusca;Gastropoda;Neomphalina;Neomphaloidea;Pel  
tospiridae;Gigantopelta;Gigantopelta aegis  
UdeM00000008496 6573 559.7 UdeM00000008496 XP\_021365923.1 68.3 398  
124 1 1 396 1 398 3.00E-156 559.7 6573 cellular  
organisms;Eukaryota;Opisthokonta;Metazoa;Eumetazoa;Bilateria;Protostomia;  
Spiralia;Lophotrochozoa;Mollusca;Bivalvia;Autobranchia;Pteriomorphia;Pect  
inida;Pectinoidea;Pectinidae;Mizuhopecten;Mizuhopecten yessoensis  
UdeM00000008497 6596 1283.5 UdeM00000008497 XP\_045160894.1 62.8  
1272 316 24 52 1284 613 1766 0.00E+00 1283.5 6596  
cellular  
organisms;Eukaryota;Opisthokonta;Metazoa;Eumetazoa;Bilateria;Protostomia;  
Spiralia;Lophotrochozoa;Mollusca;Bivalvia;Autobranchia;Heteroconchia;Euhe  
terodonta;Imparidentia;Venerida;Veneroidea;Veneridae;Mercenaria;Mercenari  
a mercenaria  
UdeM00000008498 1735272 130.6 UdeM00000008498 XP\_041358269.1 55.6  
144 51 6 22 157 23 161 2.10E-27 130.6 1735272  
cellular  
organisms;Eukaryota;Opisthokonta;Metazoa;Eumetazoa;Bilateria;Protostomia;  
Spiralia;Lophotrochozoa;Mollusca;Gastropoda;Neomphalina;Neomphaloidea;Pel  
tospiridae;Gigantopelta;Gigantopelta aegis  
UdeM00000008499 6596 153.7 UdeM00000008499 XP\_045160894.1 47.8 203  
85 5 212 396 231 430 5.00E-34 153.7 6596 cellular  
organisms;Eukaryota;Opisthokonta;Metazoa;Eumetazoa;Bilateria;Protostomia;  
Spiralia;Lophotrochozoa;Mollusca;Bivalvia;Autobranchia;Heteroconchia;Euhe  
terodonta;Imparidentia;Venerida;Veneroidea;Veneridae;Mercenaria;Mercenari  
a mercenaria  
UdeM00000008500 6596 373.2 UdeM00000008500 XP\_045159568.1 50.4 387  
171 6 1 380 57 429 4.40E-100 373.2 6596 cellular  
organisms;Eukaryota;Opisthokonta;Metazoa;Eumetazoa;Bilateria;Protostomia;  
Spiralia;Lophotrochozoa;Mollusca;Bivalvia;Autobranchia;Heteroconchia;Euhe  
terodonta;Imparidentia;Venerida;Veneroidea;Veneridae;Mercenaria;Mercenari  
a mercenaria

UdeM00000008501 1735272 113.2 UdeM00000008501 XP\_041350959.1 54.9  
 102 46 0 1 102 7 108 4.50E-22 113.2 1735272  
 cellular  
 organisms;Eukaryota;Opisthokonta;Metazoa;Eumetazoa;Bilateria;Protostomia;  
 Spiralia;Lophotrochozoa;Mollusca;Gastropoda;Neomphalina;Neomphaloidea;Pel  
 tospiridae;Gigantopelta;Gigantopelta aegis  
 UdeM00000008503 6596 258.1 UdeM00000008503 XP\_045159474.1 61.4 220  
 80 4 8 222 7 226 1.10E-65 258.1 6596 cellular  
 organisms;Eukaryota;Opisthokonta;Metazoa;Eumetazoa;Bilateria;Protostomia;  
 Spiralia;Lophotrochozoa;Mollusca;Bivalvia;Autobranchia;Heteroconchia;Euhe  
 terodonta;Imparidentia;Venerida;Veneroidea;Veneridae;Mercenaria;Mercenari  
 a mercenaria  
 UdeM00000008504 6565 458.8 UdeM00000008504 XP\_022312460.1 71.7 293  
 80 1 12 304 6 295 5.60E-126 458.8 6565 cellular  
 organisms;Eukaryota;Opisthokonta;Metazoa;Eumetazoa;Bilateria;Protostomia;  
 Spiralia;Lophotrochozoa;Mollusca;Bivalvia;Autobranchia;Pteriormorphia;Ostr  
 eida;Ostreoidea;Ostreidae;Crassostrea;Crassostrea virginica  
 UdeM00000008506 6579 388.7 UdeM00000008506 XP\_033736716.1 62.2 288  
 109 0 2 289 125 412 6.70E-105 388.7 6579 cellular  
 organisms;Eukaryota;Opisthokonta;Metazoa;Eumetazoa;Bilateria;Protostomia;  
 Spiralia;Lophotrochozoa;Mollusca;Bivalvia;Autobranchia;Pteriormorphia;Pect  
 inida;Pectinoidea;Pectinidae;Pecten;Pecten maximus  
 UdeM00000008505 6579 506.1 UdeM00000008505 XP\_033736716.1 57.5 412  
 175 0 1 412 1 412 4.10E-140 506.1 6579 cellular  
 organisms;Eukaryota;Opisthokonta;Metazoa;Eumetazoa;Bilateria;Protostomia;  
 Spiralia;Lophotrochozoa;Mollusca;Bivalvia;Autobranchia;Pteriormorphia;Pect  
 inida;Pectinoidea;Pectinidae;Pecten;Pecten maximus  
 UdeM00000008507 6596 400.2 UdeM00000008507 XP\_045188815.1 50.9 397  
 189 1 16 406 42 438 3.10E-108 400.2 6596 cellular  
 organisms;Eukaryota;Opisthokonta;Metazoa;Eumetazoa;Bilateria;Protostomia;  
 Spiralia;Lophotrochozoa;Mollusca;Bivalvia;Autobranchia;Heteroconchia;Euhe  
 terodonta;Imparidentia;Venerida;Veneroidea;Veneridae;Mercenaria;Mercenari  
 a mercenaria  
 UdeM00000008508 6579 194.1 UdeM00000008508 XP\_033729790.1 44.9 214  
 118 0 10 223 17 230 2.20E-46 194.1 6579 cellular  
 organisms;Eukaryota;Opisthokonta;Metazoa;Eumetazoa;Bilateria;Protostomia;  
 Spiralia;Lophotrochozoa;Mollusca;Bivalvia;Autobranchia;Pteriormorphia;Pect  
 inida;Pectinoidea;Pectinidae;Pecten;Pecten maximus  
 UdeM00000008509 2652724 175.6 UdeM00000008509 XP\_020913146.1 49.5  
 194 97 1 167 360 177 369 1.40E-40 175.6 2652724  
 cellular  
 organisms;Eukaryota;Opisthokonta;Metazoa;Eumetazoa;Cnidaria;Anthozoa;Hexa  
 corallia;Actiniaria;Aiptasiidae;Exaiptasia;Exaiptasia diaphana  
 UdeM00000008511 6573 116.7 UdeM00000008511 XP\_021345390.1 35.5 217  
 124 6 9 214 14 225 3.60E-23 116.7 6573 cellular  
 organisms;Eukaryota;Opisthokonta;Metazoa;Eumetazoa;Bilateria;Protostomia;  
 Spiralia;Lophotrochozoa;Mollusca;Bivalvia;Autobranchia;Pteriormorphia;Pect  
 inida;Pectinoidea;Pectinidae;Mizuhopecten;Mizuhopecten yessoensis  
 UdeM00000008513 6596 443.4 UdeM00000008513 XP\_045160515.1 73.5 283  
 75 0 1 283 1 283 2.30E-121 443.4 6596 cellular  
 organisms;Eukaryota;Opisthokonta;Metazoa;Eumetazoa;Bilateria;Protostomia;  
 Spiralia;Lophotrochozoa;Mollusca;Bivalvia;Autobranchia;Heteroconchia;Euhe  
 terodonta;Imparidentia;Venerida;Veneroidea;Veneridae;Mercenaria;Mercenari  
 a mercenaria

UdeM00000008514 6579 1175.2 UdeM00000008514 XP\_033739058.1 52.5  
 1553 579 19 6 1441 30 1540 0.00E+00 1175.2 6579  
 cellular  
 organisms;Eukaryota;Opisthokonta;Metazoa;Eumetazoa;Bilateria;Protostomia;  
 Spiralia;Lophotrochozoa;Mollusca;Bivalvia;Autobranhia;Pteriomorpha;Pect  
 inida;Pectinoidea;Pectinidae;Pecten;Pecten maximus  
 UdeM00000043306 6579 126.7 UdeM00000043306 XP\_033741736.1 52.9 119  
 54 1 1 117 723 841 2.10E-26 126.7 6579 cellular  
 organisms;Eukaryota;Opisthokonta;Metazoa;Eumetazoa;Bilateria;Protostomia;  
 Spiralia;Lophotrochozoa;Mollusca;Bivalvia;Autobranhia;Pteriomorpha;Pect  
 inida;Pectinoidea;Pectinidae;Pecten;Pecten maximus  
 UdeM00000043307 6579 327.8 UdeM00000043307 XP\_033724553.1 33.9 531  
 338 8 149 671 23 548 3.30E-86 327.8 6579 cellular  
 organisms;Eukaryota;Opisthokonta;Metazoa;Eumetazoa;Bilateria;Protostomia;  
 Spiralia;Lophotrochozoa;Mollusca;Bivalvia;Autobranhia;Pteriomorpha;Pect  
 inida;Pectinoidea;Pectinidae;Pecten;Pecten maximus  
 UdeM00000043308 6579 335.1 UdeM00000043308 XP\_033724553.1 33.9 531  
 340 7 149 673 23 548 2.00E-88 335.1 6579 cellular  
 organisms;Eukaryota;Opisthokonta;Metazoa;Eumetazoa;Bilateria;Protostomia;  
 Spiralia;Lophotrochozoa;Mollusca;Bivalvia;Autobranhia;Pteriomorpha;Pect  
 inida;Pectinoidea;Pectinidae;Pecten;Pecten maximus  
 UdeM00000043309 6573 1168.3 UdeM00000043309 XP\_021353290.1 28.5  
 2692 1707 58 4 2568 55 2655 0.00E+00 1168.3 6573  
 cellular  
 organisms;Eukaryota;Opisthokonta;Metazoa;Eumetazoa;Bilateria;Protostomia;  
 Spiralia;Lophotrochozoa;Mollusca;Bivalvia;Autobranhia;Pteriomorpha;Pect  
 inida;Pectinoidea;Pectinidae;Mizuhopecten;Mizuhopecten yessoensis  
 UdeM00000043310 6573 1895.9 UdeM00000043310 XP\_021353372.1 43.2  
 2358 1158 37 962 3169 61 2386 0.00E+00 1895.9 6573  
 cellular  
 organisms;Eukaryota;Opisthokonta;Metazoa;Eumetazoa;Bilateria;Protostomia;  
 Spiralia;Lophotrochozoa;Mollusca;Bivalvia;Autobranhia;Pteriomorpha;Pect  
 inida;Pectinoidea;Pectinidae;Mizuhopecten;Mizuhopecten yessoensis  
 UdeM00000043311 6565 217.6 UdeM00000043311 XP\_022287659.1 40.3 273  
 160 3 11 283 8 277 2.10E-53 217.6 6565 cellular  
 organisms;Eukaryota;Opisthokonta;Metazoa;Eumetazoa;Bilateria;Protostomia;  
 Spiralia;Lophotrochozoa;Mollusca;Bivalvia;Autobranhia;Pteriomorpha;Ostr  
 eida;Ostreidae;Crassostrea;Crassostrea virginica  
 UdeM00000043316 6565 206.1 UdeM00000043316 XP\_022297447.1 59 166  
 67 1 61 226 202 366 4.80E-50 206.1 6565 cellular  
 organisms;Eukaryota;Opisthokonta;Metazoa;Eumetazoa;Bilateria;Protostomia;  
 Spiralia;Lophotrochozoa;Mollusca;Bivalvia;Autobranhia;Pteriomorpha;Ostr  
 eida;Ostreidae;Crassostrea;Crassostrea virginica  
 UdeM00000044435 37621 141.4 UdeM00000044435 XP\_014679100.1 37.2 234  
 133 7 614 842 78 302 5.40E-30 141.4 37621 cellular  
 organisms;Eukaryota;Opisthokonta;Metazoa;Eumetazoa;Bilateria;Protostomia;  
 Ecdysozoa;Scalidophora;Priapulida;Priapulimorpha;Priapulimorphida;Priapul  
 idae;Priapulid;Priapulid caudatus  
 UdeM00000014620 6573 90.9 UdeM00000014620 XP\_021366565.1 41.1 112  
 62 2 52 159 57 168 1.70E-15 90.9 6573 cellular  
 organisms;Eukaryota;Opisthokonta;Metazoa;Eumetazoa;Bilateria;Protostomia;  
 Spiralia;Lophotrochozoa;Mollusca;Bivalvia;Autobranhia;Pteriomorpha;Pect  
 inida;Pectinoidea;Pectinidae;Mizuhopecten;Mizuhopecten yessoensis

UdeM00000014621 225164 65.5 UdeM00000014621 XP\_009053799.1 46.3  
 54 28 1 3 55 170 223 3.10E-08 65.5 225164  
 cellular  
 organisms;Eukaryota;Opisthokonta;Metazoa;Eumetazoa;Bilateria;Protostomia;  
 Spiralia;Lophotrochozoa;Mollusca;Gastropoda;Patellogastropoda;Lottioidea;  
 Lottiidae;Lottia;Lottia gigantea  
 UdeM00000014622 6596 270.8 UdeM00000014622 XP\_045212307.1 28.8 695  
 432 17 109 763 84 755 5.40E-69 270.8 6596 cellular  
 organisms;Eukaryota;Opisthokonta;Metazoa;Eumetazoa;Bilateria;Protostomia;  
 Spiralia;Lophotrochozoa;Mollusca;Bivalvia;Autobranchia;Heteroconchia;Euhe  
 terodonta;Imparidentia;Venerida;Veneroidea;Veneridae;Mercenaria;Mercenari  
 a mercenaria  
 UdeM00000014623 6596 260 UdeM00000014623 XP\_045212307.1 29.6 788  
 473 24 30 777 11 756 9.70E-66 260 6596 cellular  
 organisms;Eukaryota;Opisthokonta;Metazoa;Eumetazoa;Bilateria;Protostomia;  
 Spiralia;Lophotrochozoa;Mollusca;Bivalvia;Autobranchia;Heteroconchia;Euhe  
 terodonta;Imparidentia;Venerida;Veneroidea;Veneridae;Mercenaria;Mercenari  
 a mercenaria  
 UdeM00000014624 6596 249.6 UdeM00000014624 XP\_045212307.1 26.8 787  
 499 21 30 780 11 756 1.30E-62 249.6 6596 cellular  
 organisms;Eukaryota;Opisthokonta;Metazoa;Eumetazoa;Bilateria;Protostomia;  
 Spiralia;Lophotrochozoa;Mollusca;Bivalvia;Autobranchia;Heteroconchia;Euhe  
 terodonta;Imparidentia;Venerida;Veneroidea;Veneridae;Mercenaria;Mercenari  
 a mercenaria  
 UdeM00000014626 6596 231.1 UdeM00000014626 XP\_045189535.1 35.5 386  
 244 2 13 397 19 400 2.60E-57 231.1 6596 cellular  
 organisms;Eukaryota;Opisthokonta;Metazoa;Eumetazoa;Bilateria;Protostomia;  
 Spiralia;Lophotrochozoa;Mollusca;Bivalvia;Autobranchia;Heteroconchia;Euhe  
 terodonta;Imparidentia;Venerida;Veneroidea;Veneridae;Mercenaria;Mercenari  
 a mercenaria  
 UdeM00000014627 29159 441.8 UdeM00000014627 XP\_019926413.2 69.6 326  
 91 4 1 326 292 609 8.50E-121 441.8 29159 cellular  
 organisms;Eukaryota;Opisthokonta;Metazoa;Eumetazoa;Bilateria;Protostomia;  
 Spiralia;Lophotrochozoa;Mollusca;Bivalvia;Autobranchia;Pteriormorphia;Ostr  
 eida;Ostreoidea;Ostreidae;Crassostrea;Crassostrea gigas  
 UdeM00000014628 6500 81.6 UdeM00000014628 XP\_005091763.2 38.9 113  
 66 1 1 113 83 192 6.90E-13 81.6 6500 cellular  
 organisms;Eukaryota;Opisthokonta;Metazoa;Eumetazoa;Bilateria;Protostomia;  
 Spiralia;Lophotrochozoa;Mollusca;Gastropoda;Heterobranchia;Euthyneura;Tec  
 tipleura;Aplysiida;Aplysioidea;Aplysiidae;Aplysia;Aplysia californica  
 UdeM00000014629 1735272 221.5 UdeM00000014629 XP\_041347065.1 51.5  
 229 108 3 28 253 59 287 1.30E-54 221.5 1735272  
 cellular  
 organisms;Eukaryota;Opisthokonta;Metazoa;Eumetazoa;Bilateria;Protostomia;  
 Spiralia;Lophotrochozoa;Mollusca;Gastropoda;Neomphalina;Neomphaloidea;Pel  
 tospiridae;Gigantopelta;Gigantopelta aegis  
 UdeM00000014630 6596 235 UdeM00000014630 XP\_045208944.1 32.5 517  
 313 10 1 505 42 534 3.10E-58 235 6596 cellular  
 organisms;Eukaryota;Opisthokonta;Metazoa;Eumetazoa;Bilateria;Protostomia;  
 Spiralia;Lophotrochozoa;Mollusca;Bivalvia;Autobranchia;Heteroconchia;Euhe  
 terodonta;Imparidentia;Venerida;Veneroidea;Veneridae;Mercenaria;Mercenari  
 a mercenaria  
 UdeM00000014631 6596 660.6 UdeM00000014631 XP\_045159589.1 49.3 739  
 326 19 55 764 87 805 2.50E-186 660.6 6596 cellular

organisms;Eukaryota;Opisthokonta;Metazoa;Eumetazoa;Bilateria;Protostomia;Spiralia;Lophotrochozoa;Mollusca;Bivalvia;Autobranhia;Heteroconchia;Euherodonta;Imparidentia;Venerida;Veneroidea;Veneridae;Mercenaria;Mercenaria mercenaria

UdeM00000014632 6596 661.4 UdeM00000014632 XP\_045159589.1 45.4 821  
376 20 132 902 69 867 1.70E-186 661.4 6596 cellular

organisms;Eukaryota;Opisthokonta;Metazoa;Eumetazoa;Bilateria;Protostomia;Spiralia;Lophotrochozoa;Mollusca;Bivalvia;Autobranhia;Heteroconchia;Euherodonta;Imparidentia;Venerida;Veneroidea;Veneridae;Mercenaria;Mercenaria mercenaria

UdeM00000014634 6596 674.9 UdeM00000014634 XP\_045159589.1 49.1 746  
331 18 50 766 87 812 1.30E-190 674.9 6596 cellular

organisms;Eukaryota;Opisthokonta;Metazoa;Eumetazoa;Bilateria;Protostomia;Spiralia;Lophotrochozoa;Mollusca;Bivalvia;Autobranhia;Heteroconchia;Euherodonta;Imparidentia;Venerida;Veneroidea;Veneridae;Mercenaria;Mercenaria mercenaria

UdeM00000014635 6596 670.6 UdeM00000014635 XP\_045159589.1 48.9 746  
332 18 92 808 87 812 2.60E-189 670.6 6596 cellular

organisms;Eukaryota;Opisthokonta;Metazoa;Eumetazoa;Bilateria;Protostomia;Spiralia;Lophotrochozoa;Mollusca;Bivalvia;Autobranhia;Heteroconchia;Euherodonta;Imparidentia;Venerida;Veneroidea;Veneridae;Mercenaria;Mercenaria mercenaria

UdeM00000014636 6706 154.8 UdeM00000014636 XP\_042235765.1 45.2 157  
86 0 1 157 1 157 9.00E-35 154.8 6706 cellular

organisms;Eukaryota;Opisthokonta;Metazoa;Eumetazoa;Bilateria;Protostomia;Ecdysozoa;Panarthropoda;Arthropoda;Mandibulata;Pancrustacea;Crustacea;Multicrustacea;Malacostraca;Eumalacostraca;Eucarida;Decapoda;Pleocyemata;Astacidea;Nephropoidea;Nephropidae;Homarus;Homarus americanus

UdeM00000014637 6596 657.9 UdeM00000014637 XP\_045159589.1 48.1 736  
337 15 40 748 86 803 1.60E-185 657.9 6596 cellular

organisms;Eukaryota;Opisthokonta;Metazoa;Eumetazoa;Bilateria;Protostomia;Spiralia;Lophotrochozoa;Mollusca;Bivalvia;Autobranhia;Heteroconchia;Euherodonta;Imparidentia;Venerida;Veneroidea;Veneridae;Mercenaria;Mercenaria mercenaria

UdeM00000014638 6596 643.7 UdeM00000014638 XP\_045159589.1 50.4 678  
299 14 53 710 87 747 2.80E-181 643.7 6596 cellular

organisms;Eukaryota;Opisthokonta;Metazoa;Eumetazoa;Bilateria;Protostomia;Spiralia;Lophotrochozoa;Mollusca;Bivalvia;Autobranhia;Heteroconchia;Euherodonta;Imparidentia;Venerida;Veneroidea;Veneridae;Mercenaria;Mercenaria mercenaria

UdeM00000014639 6596 607.8 UdeM00000014639 XP\_045159589.1 46.1 722  
339 15 3 695 84 784 1.80E-170 607.8 6596 cellular

organisms;Eukaryota;Opisthokonta;Metazoa;Eumetazoa;Bilateria;Protostomia;Spiralia;Lophotrochozoa;Mollusca;Bivalvia;Autobranhia;Heteroconchia;Euherodonta;Imparidentia;Venerida;Veneroidea;Veneridae;Mercenaria;Mercenaria mercenaria

UdeM00000014640 6565 192.6 UdeM00000014640 XP\_022333704.1 63.4 142  
52 0 63 204 16 157 5.10E-46 192.6 6565 cellular

organisms;Eukaryota;Opisthokonta;Metazoa;Eumetazoa;Bilateria;Protostomia;Spiralia;Lophotrochozoa;Mollusca;Bivalvia;Autobranhia;Pteriomorphia;Ostreida;Ostreoidea;Ostreidae;Crassostrea;Crassostrea virginica

UdeM00000014641 6596 375.6 UdeM00000014641 XP\_045173464.1 39.4 531  
280 11 7 526 11 510 1.10E-100 375.6 6596 cellular

organisms;Eukaryota;Opisthokonta;Metazoa;Eumetazoa;Bilateria;Protostomia;

Spiralia;Lophotrochozoa;Mollusca;Bivalvia;Autobranchia;Heteroconchia;Euherodonta;Imparidentia;Venerida;Veneroidea;Veneridae;Mercenaria;Mercenaria mercenaria

UdeM00000014642 6596 218.4 UdeM00000014642 XP\_045173464.1 36.7 390  
204 12 1 382 156 510 1.60E-53 218.4 6596 cellular

organisms;Eukaryota;Opisthokonta;Metazoa;Eumetazoa;Bilateria;Protostomia;Spiralia;Lophotrochozoa;Mollusca;Bivalvia;Autobranchia;Heteroconchia;Euherodonta;Imparidentia;Venerida;Veneroidea;Veneridae;Mercenaria;Mercenaria mercenaria

UdeM00000014643 6596 162.5 UdeM00000014643 XP\_045173464.1 52.1 144  
67 2 7 148 11 154 4.00E-37 162.5 6596 cellular

organisms;Eukaryota;Opisthokonta;Metazoa;Eumetazoa;Bilateria;Protostomia;Spiralia;Lophotrochozoa;Mollusca;Bivalvia;Autobranchia;Heteroconchia;Euherodonta;Imparidentia;Venerida;Veneroidea;Veneridae;Mercenaria;Mercenaria mercenaria

UdeM00000014644 6596 246.1 UdeM00000014644 XP\_045209519.1 65.1 195  
66 2 126 318 1274 1468 5.90E-62 246.1 6596 cellular

organisms;Eukaryota;Opisthokonta;Metazoa;Eumetazoa;Bilateria;Protostomia;Spiralia;Lophotrochozoa;Mollusca;Bivalvia;Autobranchia;Heteroconchia;Euherodonta;Imparidentia;Venerida;Veneroidea;Veneridae;Mercenaria;Mercenaria mercenaria

UdeM00000014645 6596 281.6 UdeM00000014645 XP\_045209519.1 44.8 1032  
383 32 191 1148 296 1214 4.60E-72 281.6 6596 cellular

organisms;Eukaryota;Opisthokonta;Metazoa;Eumetazoa;Bilateria;Protostomia;Spiralia;Lophotrochozoa;Mollusca;Bivalvia;Autobranchia;Heteroconchia;Euherodonta;Imparidentia;Venerida;Veneroidea;Veneridae;Mercenaria;Mercenaria mercenaria

UdeM00000014646 29159 122.1 UdeM00000014646 XP\_019918668.1 46.8 139  
69 3 4 137 1 139 6.20E-25 122.1 29159 cellular

organisms;Eukaryota;Opisthokonta;Metazoa;Eumetazoa;Bilateria;Protostomia;Spiralia;Lophotrochozoa;Mollusca;Bivalvia;Autobranchia;Pteriomorphia;Ostreida;Ostreoidea;Ostreidae;Crassostrea;Crassostrea gigas

UdeM00000014656 6579 438 UdeM00000014656 XP\_033758830.1 69 300  
93 0 1 300 1 300 1.10E-119 438 6579 cellular

organisms;Eukaryota;Opisthokonta;Metazoa;Eumetazoa;Bilateria;Protostomia;Spiralia;Lophotrochozoa;Mollusca;Bivalvia;Autobranchia;Pteriomorphia;Pectinida;Pectinoidea;Pectinidae;Pecten;Pecten maximus

UdeM00000014660 6596 177.6 UdeM00000014660 XP\_045209091.1 53.1 179  
69 5 2 168 771 946 1.40E-41 177.6 6596 cellular

organisms;Eukaryota;Opisthokonta;Metazoa;Eumetazoa;Bilateria;Protostomia;Spiralia;Lophotrochozoa;Mollusca;Bivalvia;Autobranchia;Heteroconchia;Euherodonta;Imparidentia;Venerida;Veneroidea;Veneridae;Mercenaria;Mercenaria mercenaria

UdeM00000014659 6596 664.8 UdeM00000014659 XP\_045209091.1 50.7 732  
224 15 1 602 222 946 1.00E-187 664.8 6596 cellular

organisms;Eukaryota;Opisthokonta;Metazoa;Eumetazoa;Bilateria;Protostomia;Spiralia;Lophotrochozoa;Mollusca;Bivalvia;Autobranchia;Heteroconchia;Euherodonta;Imparidentia;Venerida;Veneroidea;Veneridae;Mercenaria;Mercenaria mercenaria

UdeM00000014661 6596 270 UdeM00000014661 XP\_045209091.1 73.7 175  
43 2 1 174 222 394 2.20E-69 270 6596 cellular

organisms;Eukaryota;Opisthokonta;Metazoa;Eumetazoa;Bilateria;Protostomia;Spiralia;Lophotrochozoa;Mollusca;Bivalvia;Autobranchia;Heteroconchia;Euherodonta;Imparidentia;Venerida;Veneroidea;Veneridae;Mercenaria;Mercenaria mercenaria



terodonta;Imparidentia;Venerida;Veneroidea;Veneridae;Mercenaria;Mercenari  
 a mercenaria  
 UdeM00000014663 6596 475.3 UdeM00000014663 XP\_045208121.1 65.7 437  
 85 4 3 439 2 373 8.50E-131 475.3 6596 cellular  
 organisms;Eukaryota;Opisthokonta;Metazoa;Eumetazoa;Bilateria;Protostomia;  
 Spiralia;Lophotrochozoa;Mollusca;Bivalvia;Autobranchia;Heteroconchia;Euhe  
 terodonta;Imparidentia;Venerida;Veneroidea;Veneridae;Mercenaria;Mercenari  
 a mercenaria  
 UdeM00000014664 1735272 191.4 UdeM00000014664 XP\_041373734.1 62.3  
 547 188 9 1 534 1 542 2.90E-45 191.4 1735272  
 cellular  
 organisms;Eukaryota;Opisthokonta;Metazoa;Eumetazoa;Bilateria;Protostomia;  
 Spiralia;Lophotrochozoa;Mollusca;Gastropoda;Neomphalina;Neomphaloidea;Pel  
 tospiridae;Gigantopelta;Gigantopelta aegis  
 UdeM00000014665 1735272 961.4 UdeM00000014665 XP\_041373563.1 62.6  
 922 313 4 3 913 8 908 8.50E-277 961.4 1735272  
 cellular  
 organisms;Eukaryota;Opisthokonta;Metazoa;Eumetazoa;Bilateria;Protostomia;  
 Spiralia;Lophotrochozoa;Mollusca;Gastropoda;Neomphalina;Neomphaloidea;Pel  
 tospiridae;Gigantopelta;Gigantopelta aegis  
 UdeM00000014667 6565 342 UdeM00000014667 XP\_022337291.1 32.5 867  
 508 28 4 821 8 846 2.30E-90 342 6565 cellular  
 organisms;Eukaryota;Opisthokonta;Metazoa;Eumetazoa;Bilateria;Protostomia;  
 Spiralia;Lophotrochozoa;Mollusca;Bivalvia;Autobranchia;Pteriormorphia;Ostr  
 eida;Ostreoidea;Ostreidae;Crassostrea;Crassostrea virginica  
 UdeM00000014671 6596 739.6 UdeM00000014671 XP\_045208797.1 53.8 767  
 308 9 5 764 3 730 4.10E-210 739.6 6596 cellular  
 organisms;Eukaryota;Opisthokonta;Metazoa;Eumetazoa;Bilateria;Protostomia;  
 Spiralia;Lophotrochozoa;Mollusca;Bivalvia;Autobranchia;Heteroconchia;Euhe  
 terodonta;Imparidentia;Venerida;Veneroidea;Veneridae;Mercenaria;Mercenari  
 a mercenaria  
 UdeM00000014672 6596 518.8 UdeM00000014672 XP\_045209196.1 55.8 500  
 187 14 1 479 47 533 7.10E-144 518.8 6596 cellular  
 organisms;Eukaryota;Opisthokonta;Metazoa;Eumetazoa;Bilateria;Protostomia;  
 Spiralia;Lophotrochozoa;Mollusca;Bivalvia;Autobranchia;Heteroconchia;Euhe  
 terodonta;Imparidentia;Venerida;Veneroidea;Veneridae;Mercenaria;Mercenari  
 a mercenaria  
 UdeM00000014673 6565 131.7 UdeM00000014673 XP\_022337267.1 60.2 118  
 35 2 55 160 449 566 8.60E-28 131.7 6565 cellular  
 organisms;Eukaryota;Opisthokonta;Metazoa;Eumetazoa;Bilateria;Protostomia;  
 Spiralia;Lophotrochozoa;Mollusca;Bivalvia;Autobranchia;Pteriormorphia;Ostr  
 eida;Ostreoidea;Ostreidae;Crassostrea;Crassostrea virginica  
 UdeM00000014674 2607531 366.7 UdeM00000014674 XP\_036359065.1 54.8  
 361 133 12 48 388 63 413 3.70E-98 366.7 2607531  
 cellular  
 organisms;Eukaryota;Opisthokonta;Metazoa;Eumetazoa;Bilateria;Protostomia;  
 Spiralia;Lophotrochozoa;Mollusca;Cephalopoda;Coleoidea;Octopodiformes;Oct  
 opoda;Incirrata;Octopodidae;Octopus;Octopus sinensis  
 UdeM00000014675 2607531 333.2 UdeM00000014675 XP\_036359065.1 51  
 355 134 11 34 357 68 413 4.10E-88 333.2 2607531  
 cellular  
 organisms;Eukaryota;Opisthokonta;Metazoa;Eumetazoa;Bilateria;Protostomia;  
 Spiralia;Lophotrochozoa;Mollusca;Cephalopoda;Coleoidea;Octopodiformes;Oct  
 opoda;Incirrata;Octopodidae;Octopus;Octopus sinensis

UdeM00000014676 225164 606.7 UdeM00000014676 XP\_009055369.1 63.7  
 502 180 1 1 500 1 502 2.90E-170 606.7 225164  
 cellular  
 organisms;Eukaryota;Opisthokonta;Metazoa;Eumetazoa;Bilateria;Protostomia;  
 Spiralia;Lophotrochozoa;Mollusca;Gastropoda;Patellogastropoda;Lottioidea;  
 Lottiidae;Lottia;Lottia gigantea  
 UdeM00000014677 2607531 273.5 UdeM00000014677 XP\_036359063.1 43.1  
 383 151 14 22 346 68 441 3.80E-70 273.5 2607531  
 cellular  
 organisms;Eukaryota;Opisthokonta;Metazoa;Eumetazoa;Bilateria;Protostomia;  
 Spiralia;Lophotrochozoa;Mollusca;Cephalopoda;Coleoidea;Octopodiformes;Oct  
 opoda;Incirrata;Octopodidae;Octopus;Octopus sinensis  
 UdeM00000014678 29159 68.6 UdeM00000014678 XP\_034307341.1 38.2 89  
 54 1 3 91 5 92 7.00E-09 68.6 29159 cellular  
 organisms;Eukaryota;Opisthokonta;Metazoa;Eumetazoa;Bilateria;Protostomia;  
 Spiralia;Lophotrochozoa;Mollusca;Bivalvia;Autobranchia;Pteriormorphia;Ostr  
 eida;Ostreoidea;Ostreidae;Crassostrea;Crassostrea gigas  
 UdeM00000014679 37653 494.2 UdeM00000014679 XP\_014784609.1 58.6 423  
 137 7 1 385 1 423 1.50E-136 494.2 37653 cellular  
 organisms;Eukaryota;Opisthokonta;Metazoa;Eumetazoa;Bilateria;Protostomia;  
 Spiralia;Lophotrochozoa;Mollusca;Cephalopoda;Coleoidea;Octopodiformes;Oct  
 opoda;Incirrata;Octopodidae;Octopus;Octopus bimaculoides  
 UdeM00000014680 29159 72.4 UdeM00000014680 XP\_034307341.1 28.9 135  
 54 1 11 103 211 345 6.30E-10 72.4 29159 cellular  
 organisms;Eukaryota;Opisthokonta;Metazoa;Eumetazoa;Bilateria;Protostomia;  
 Spiralia;Lophotrochozoa;Mollusca;Bivalvia;Autobranchia;Pteriormorphia;Ostr  
 eida;Ostreoidea;Ostreidae;Crassostrea;Crassostrea gigas  
 UdeM00000014681 37653 482.6 UdeM00000014681 XP\_014784609.1 57.4 423  
 141 7 1 384 1 423 4.60E-133 482.6 37653 cellular  
 organisms;Eukaryota;Opisthokonta;Metazoa;Eumetazoa;Bilateria;Protostomia;  
 Spiralia;Lophotrochozoa;Mollusca;Cephalopoda;Coleoidea;Octopodiformes;Oct  
 opoda;Incirrata;Octopodidae;Octopus;Octopus bimaculoides  
 UdeM00000014683 6945 87 UdeM00000014683 XP\_040065097.1 31.2 170  
 91 4 59 202 85 254 4.50E-14 87 6945 cellular  
 organisms;Eukaryota;Opisthokonta;Metazoa;Eumetazoa;Bilateria;Protostomia;  
 Ecdysozoa;Panarthropoda;Arthropoda;Chelicerata;Arachnida;Acari;Parasitifo  
 rmes;Ixodida;Ixodoidea;Ixodidae;Ixodinae;Ixodes;Ixodes scapularis  
 UdeM00000014684 6945 87 UdeM00000014684 XP\_040065097.1 31.2 170  
 91 4 59 202 85 254 4.50E-14 87 6945 cellular  
 organisms;Eukaryota;Opisthokonta;Metazoa;Eumetazoa;Bilateria;Protostomia;  
 Ecdysozoa;Panarthropoda;Arthropoda;Chelicerata;Arachnida;Acari;Parasitifo  
 rmes;Ixodida;Ixodoidea;Ixodidae;Ixodinae;Ixodes;Ixodes scapularis  
 UdeM00000043829 6596 185.7 UdeM00000043829 XP\_045161332.1 48.1 214  
 108 2 64 277 133 343 8.60E-44 185.7 6596 cellular  
 organisms;Eukaryota;Opisthokonta;Metazoa;Eumetazoa;Bilateria;Protostomia;  
 Spiralia;Lophotrochozoa;Mollusca;Bivalvia;Autobranchia;Heteroconchia;Euhe  
 terodonta;Imparidentia;Venerida;Veneroidea;Veneridae;Mercenaria;Mercenari  
 a mercenaria  
 UdeM00000043830 6596 191.8 UdeM00000043830 XP\_045161332.1 55.9 177  
 77 1 101 277 168 343 1.20E-45 191.8 6596 cellular  
 organisms;Eukaryota;Opisthokonta;Metazoa;Eumetazoa;Bilateria;Protostomia;  
 Spiralia;Lophotrochozoa;Mollusca;Bivalvia;Autobranchia;Heteroconchia;Euhe  
 terodonta;Imparidentia;Venerida;Veneroidea;Veneridae;Mercenaria;Mercenari  
 a mercenaria

UdeM00000043831 6596 188 UdeM00000043831 XP\_045161332.1 49.5 214  
 105 2 64 277 133 343 1.70E-44 188 6596 cellular  
 organisms;Eukaryota;Opisthokonta;Metazoa;Eumetazoa;Bilateria;Protostomia;  
 Spiralia;Lophotrochozoa;Mollusca;Bivalvia;Autobranchia;Heteroconchia;Euhe  
 terodonta;Imparidentia;Venerida;Veneroidea;Veneridae;Mercenaria;Mercenari  
 a mercenaria  
 UdeM00000043832 29159 267.7 UdeM00000043832 XP\_034317111.1 61.3 212  
 82 0 2 213 171 382 1.40E-68 267.7 29159 cellular  
 organisms;Eukaryota;Opisthokonta;Metazoa;Eumetazoa;Bilateria;Protostomia;  
 Spiralia;Lophotrochozoa;Mollusca;Bivalvia;Autobranchia;Pteriormorphia;Ostr  
 eida;Ostreoidea;Ostreidae;Crassostrea;Crassostrea gigas  
 UdeM00000043833 6596 337.8 UdeM00000043833 XP\_045174832.1 47.8 358  
 173 5 74 427 187 534 2.00E-89 337.8 6596 cellular  
 organisms;Eukaryota;Opisthokonta;Metazoa;Eumetazoa;Bilateria;Protostomia;  
 Spiralia;Lophotrochozoa;Mollusca;Bivalvia;Autobranchia;Heteroconchia;Euhe  
 terodonta;Imparidentia;Venerida;Veneroidea;Veneridae;Mercenaria;Mercenari  
 a mercenaria  
 UdeM00000043834 6596 263.5 UdeM00000043834 XP\_045170884.1 55.6 259  
 111 3 5 262 3 258 3.00E-67 263.5 6596 cellular  
 organisms;Eukaryota;Opisthokonta;Metazoa;Eumetazoa;Bilateria;Protostomia;  
 Spiralia;Lophotrochozoa;Mollusca;Bivalvia;Autobranchia;Heteroconchia;Euhe  
 terodonta;Imparidentia;Venerida;Veneroidea;Veneridae;Mercenaria;Mercenari  
 a mercenaria  
 UdeM00000043835 7739 108.6 UdeM00000043835 XP\_035678840.1 39.6 149  
 86 3 8 155 357 502 7.80E-21 108.6 7739 cellular  
 organisms;Eukaryota;Opisthokonta;Metazoa;Eumetazoa;Bilateria;Deuterostomi  
 a;Chordata;Cephalochordata;Leptocardii;Amphioxiformes;Branchiostomidae;Br  
 anchiostoma;Branchiostoma floridae  
 UdeM00000043836 6579 444.5 UdeM00000043836 XP\_033736287.1 63.6 335  
 122 0 1 335 1 335 1.20E-121 444.5 6579 cellular  
 organisms;Eukaryota;Opisthokonta;Metazoa;Eumetazoa;Bilateria;Protostomia;  
 Spiralia;Lophotrochozoa;Mollusca;Bivalvia;Autobranchia;Pteriormorphia;Pect  
 inida;Pectinoidea;Pectinidae;Pecten;Pecten maximus  
 UdeM00000043837 6596 125.6 UdeM00000043837 XP\_045170325.1 80.3 76  
 15 0 8 83 22 97 3.10E-26 125.6 6596 cellular  
 organisms;Eukaryota;Opisthokonta;Metazoa;Eumetazoa;Bilateria;Protostomia;  
 Spiralia;Lophotrochozoa;Mollusca;Bivalvia;Autobranchia;Heteroconchia;Euhe  
 terodonta;Imparidentia;Venerida;Veneroidea;Veneridae;Mercenaria;Mercenari  
 a mercenaria  
 UdeM00000043838 6500 684.5 UdeM00000043838 XP\_035829329.1 85.6 388  
 56 0 27 414 96 483 8.70E-194 684.5 6500 cellular  
 organisms;Eukaryota;Opisthokonta;Metazoa;Eumetazoa;Bilateria;Protostomia;  
 Spiralia;Lophotrochozoa;Mollusca;Gastropoda;Heterobranchia;Euthyneura;Tec  
 tipleura;Aplysiida;Aplysioidea;Aplysiidae;Aplysia;Aplysia californica  
 UdeM00000038618 225164 2295.8 UdeM00000038618 XP\_009066786.1  
 42.1 2816 1554 31 4 2793 4515 7280 0.00E+00 2295.8  
 225164 cellular  
 organisms;Eukaryota;Opisthokonta;Metazoa;Eumetazoa;Bilateria;Protostomia;  
 Spiralia;Lophotrochozoa;Mollusca;Gastropoda;Patellogastropoda;Lottioidae;  
 Lottiidae;Lottia;Lottia gigantea  
 UdeM00000034326 6596 979.5 UdeM00000034326 XP\_045207645.1 38.2 1395  
 763 28 230 1541 85 1463 5.60E-282 979.5 6596 cellular  
 organisms;Eukaryota;Opisthokonta;Metazoa;Eumetazoa;Bilateria;Protostomia;  
 Spiralia;Lophotrochozoa;Mollusca;Bivalvia;Autobranchia;Heteroconchia;Euhe

terodonta;Imparidentia;Venerida;Veneroidea;Veneridae;Mercenaria;Mercenari  
 a mercenaria  
 UdeM00000034327 6596 453.8 UdeM00000034327 XP\_045168541.1 46.6 586  
 292 14 1 574 1 577 5.30E-124 453.8 6596 cellular  
 organisms;Eukaryota;Opisthokonta;Metazoa;Eumetazoa;Bilateria;Protostomia;  
 Spiralia;Lophotrochozoa;Mollusca;Bivalvia;Autobranhia;Heteroconchia;Euhe  
 terodonta;Imparidentia;Venerida;Veneroidea;Veneridae;Mercenaria;Mercenari  
 a mercenaria  
 UdeM00000034328 6596 453.8 UdeM00000034328 XP\_045168541.1 46.6 586  
 292 14 1 574 1 577 4.30E-124 453.8 6596 cellular  
 organisms;Eukaryota;Opisthokonta;Metazoa;Eumetazoa;Bilateria;Protostomia;  
 Spiralia;Lophotrochozoa;Mollusca;Bivalvia;Autobranhia;Heteroconchia;Euhe  
 terodonta;Imparidentia;Venerida;Veneroidea;Veneridae;Mercenaria;Mercenari  
 a mercenaria  
 UdeM00000034329 6573 92.4 UdeM00000034329 XP\_021370232.1 37 154  
 65 2 7 158 71 194 5.60E-16 92.4 6573 cellular  
 organisms;Eukaryota;Opisthokonta;Metazoa;Eumetazoa;Bilateria;Protostomia;  
 Spiralia;Lophotrochozoa;Mollusca;Bivalvia;Autobranhia;Pteriormorphia;Pect  
 inida;Pectinoidea;Pectinidae;Mizuhopecten;Mizuhopecten yessoensis  
 UdeM00000034331 6596 248.8 UdeM00000034331 XP\_045170510.1 66 200  
 64 4 1 199 1 197 5.90E-63 248.8 6596 cellular  
 organisms;Eukaryota;Opisthokonta;Metazoa;Eumetazoa;Bilateria;Protostomia;  
 Spiralia;Lophotrochozoa;Mollusca;Bivalvia;Autobranhia;Heteroconchia;Euhe  
 terodonta;Imparidentia;Venerida;Veneroidea;Veneridae;Mercenaria;Mercenari  
 a mercenaria  
 UdeM00000034333 6596 132.1 UdeM00000034333 XP\_045161583.1 58 100  
 41 1 4 102 23 122 4.70E-28 132.1 6596 cellular  
 organisms;Eukaryota;Opisthokonta;Metazoa;Eumetazoa;Bilateria;Protostomia;  
 Spiralia;Lophotrochozoa;Mollusca;Bivalvia;Autobranhia;Heteroconchia;Euhe  
 terodonta;Imparidentia;Venerida;Veneroidea;Veneridae;Mercenaria;Mercenari  
 a mercenaria  
 UdeM00000034334 6596 121.7 UdeM00000034334 XP\_045169800.1 58 88  
 37 0 7 94 43 130 5.00E-25 121.7 6596 cellular  
 organisms;Eukaryota;Opisthokonta;Metazoa;Eumetazoa;Bilateria;Protostomia;  
 Spiralia;Lophotrochozoa;Mollusca;Bivalvia;Autobranhia;Heteroconchia;Euhe  
 terodonta;Imparidentia;Venerida;Veneroidea;Veneridae;Mercenaria;Mercenari  
 a mercenaria  
 UdeM00000034335 6596 146.7 UdeM00000034335 XP\_045169800.1 58 112  
 44 2 27 137 21 130 2.10E-32 146.7 6596 cellular  
 organisms;Eukaryota;Opisthokonta;Metazoa;Eumetazoa;Bilateria;Protostomia;  
 Spiralia;Lophotrochozoa;Mollusca;Bivalvia;Autobranhia;Heteroconchia;Euhe  
 terodonta;Imparidentia;Venerida;Veneroidea;Veneridae;Mercenaria;Mercenari  
 a mercenaria  
 UdeM00000034336 7574 117.9 UdeM00000034336 XP\_013401629.1 50 114  
 40 5 38 139 31 139 1.10E-23 117.9 7574 cellular  
 organisms;Eukaryota;Opisthokonta;Metazoa;Eumetazoa;Bilateria;Protostomia;  
 Spiralia;Lophotrochozoa;Brachiopoda;Linguliformea;Lingulata;Lingulida;Lin  
 guloidea;Lingulidae;Lingula;Lingula anatina  
 UdeM00000034337 6596 112.1 UdeM00000034337 XP\_045169800.1 43 135  
 57 5 1 123 3 129 5.20E-22 112.1 6596 cellular  
 organisms;Eukaryota;Opisthokonta;Metazoa;Eumetazoa;Bilateria;Protostomia;  
 Spiralia;Lophotrochozoa;Mollusca;Bivalvia;Autobranhia;Heteroconchia;Euhe  
 terodonta;Imparidentia;Venerida;Veneroidea;Veneridae;Mercenaria;Mercenari  
 a mercenaria

UdeM00000034338 6596 112.5 UdeM00000034338 XP\_045169800.1 43.1 137  
 60 5 1 129 3 129 4.20E-22 112.5 6596 cellular  
 organisms;Eukaryota;Opisthokonta;Metazoa;Eumetazoa;Bilateria;Protostomia;  
 Spiralia;Lophotrochozoa;Mollusca;Bivalvia;Autobranchia;Heteroconchia;Euhe  
 terodonta;Imparidentia;Venerida;Veneroidea;Veneridae;Mercenaria;Mercenari  
 a mercenaria  
 UdeM00000034340 1735272 213 UdeM00000034340 XP\_041367509.1 79.2  
 125 26 0 130 254 1 125 6.00E-52 213 1735272  
 cellular  
 organisms;Eukaryota;Opisthokonta;Metazoa;Eumetazoa;Bilateria;Protostomia;  
 Spiralia;Lophotrochozoa;Mollusca;Gastropoda;Neomphalina;Neomphaloidea;Pel  
 tospiridae;Gigantopelta;Gigantopelta aegis  
 UdeM00000034341 6596 271.9 UdeM00000034341 XP\_045201290.1 81.3 155  
 29 0 1 155 1 155 4.90E-70 271.9 6596 cellular  
 organisms;Eukaryota;Opisthokonta;Metazoa;Eumetazoa;Bilateria;Protostomia;  
 Spiralia;Lophotrochozoa;Mollusca;Bivalvia;Autobranchia;Heteroconchia;Euhe  
 terodonta;Imparidentia;Venerida;Veneroidea;Veneridae;Mercenaria;Mercenari  
 a mercenaria  
 UdeM00000034342 45351 172.2 UdeM00000034342 XP\_032231756.1 40.8 260  
 135 8 53 303 108 357 1.60E-39 172.2 45351 cellular  
 organisms;Eukaryota;Opisthokonta;Metazoa;Eumetazoa;Cnidaria;Anthozoa;Hexa  
 corallia;Actiniaria;Edwardsiidae;Nematostella;Nematostella vectensis  
 UdeM00000034343 29159 67.4 UdeM00000034343 XP\_034302502.1 50.7 69  
 29 1 62 130 453 516 1.60E-08 67.4 29159 cellular  
 organisms;Eukaryota;Opisthokonta;Metazoa;Eumetazoa;Bilateria;Protostomia;  
 Spiralia;Lophotrochozoa;Mollusca;Bivalvia;Autobranchia;Pteriormorphia;Ostr  
 eida;Ostreoidea;Ostreidae;Crassostrea;Crassostrea gigas  
 UdeM00000034346 6596 127.1 UdeM00000034346 XP\_045168689.1 27.2 382  
 251 9 370 734 19 390 1.80E-25 127.1 6596 cellular  
 organisms;Eukaryota;Opisthokonta;Metazoa;Eumetazoa;Bilateria;Protostomia;  
 Spiralia;Lophotrochozoa;Mollusca;Bivalvia;Autobranchia;Heteroconchia;Euhe  
 terodonta;Imparidentia;Venerida;Veneroidea;Veneridae;Mercenaria;Mercenari  
 a mercenaria  
 UdeM00000034347 6596 109 UdeM00000034347 XP\_045168689.1 32.1 274  
 161 7 33 290 14 278 2.00E-20 109 6596 cellular  
 organisms;Eukaryota;Opisthokonta;Metazoa;Eumetazoa;Bilateria;Protostomia;  
 Spiralia;Lophotrochozoa;Mollusca;Bivalvia;Autobranchia;Heteroconchia;Euhe  
 terodonta;Imparidentia;Venerida;Veneroidea;Veneridae;Mercenaria;Mercenari  
 a mercenaria  
 UdeM00000034348 6596 154.1 UdeM00000034348 XP\_045168688.1 27.6 417  
 268 8 13 408 18 421 3.90E-34 154.1 6596 cellular  
 organisms;Eukaryota;Opisthokonta;Metazoa;Eumetazoa;Bilateria;Protostomia;  
 Spiralia;Lophotrochozoa;Mollusca;Bivalvia;Autobranchia;Heteroconchia;Euhe  
 terodonta;Imparidentia;Venerida;Veneroidea;Veneridae;Mercenaria;Mercenari  
 a mercenaria  
 UdeM00000034349 6596 149.8 UdeM00000034349 XP\_045168688.1 29.6 388  
 239 10 40 407 48 421 7.40E-33 149.8 6596 cellular  
 organisms;Eukaryota;Opisthokonta;Metazoa;Eumetazoa;Bilateria;Protostomia;  
 Spiralia;Lophotrochozoa;Mollusca;Bivalvia;Autobranchia;Heteroconchia;Euhe  
 terodonta;Imparidentia;Venerida;Veneroidea;Veneridae;Mercenaria;Mercenari  
 a mercenaria  
 UdeM00000034350 6596 143.3 UdeM00000034350 XP\_045168689.1 27.8 413  
 259 10 16 405 23 419 6.90E-31 143.3 6596 cellular  
 organisms;Eukaryota;Opisthokonta;Metazoa;Eumetazoa;Bilateria;Protostomia;

Spiralia;Lophotrochozoa;Mollusca;Bivalvia;Autobranchia;Heteroconchia;Euherodonta;Imparidentia;Venerida;Veneroidea;Veneridae;Mercenaria;Mercenaria mercenaria

UdeM00000034354 225164 375.9 UdeM00000034354 XP\_009052112.1 85.9  
205 29 0 1 205 1 205 3.20E-101 375.9 225164  
cellular

organisms;Eukaryota;Opisthokonta;Metazoa;Eumetazoa;Bilateria;Protostomia;Spiralia;Lophotrochozoa;Mollusca;Gastropoda;Patellogastropoda;Lottioidea;Lottiidae;Lottia;Lottia gigantea

UdeM00000034355 6579 393.3 UdeM00000034355 XP\_033762842.1 70.6 286  
78 3 1 282 124 407 2.70E-106 393.3 6579 cellular

organisms;Eukaryota;Opisthokonta;Metazoa;Eumetazoa;Bilateria;Protostomia;Spiralia;Lophotrochozoa;Mollusca;Bivalvia;Autobranchia;Pteriormorphia;Pectinida;Pectinoidea;Pectinidae;Pecten;Pecten maximus

UdeM00000034357 6596 348.2 UdeM00000034357 XP\_045170529.1 58.5 311  
111 6 1 297 20 326 3.70E-92 348.2 6596 cellular

organisms;Eukaryota;Opisthokonta;Metazoa;Eumetazoa;Bilateria;Protostomia;Spiralia;Lophotrochozoa;Mollusca;Bivalvia;Autobranchia;Heteroconchia;Euherodonta;Imparidentia;Venerida;Veneroidea;Veneridae;Mercenaria;Mercenaria mercenaria

UdeM00000034358 110193 79 UdeM00000034358 XP\_017777214.1 40.2  
102 60 1 10 111 11 111 4.80E-12 79 110193  
cellular

organisms;Eukaryota;Opisthokonta;Metazoa;Eumetazoa;Bilateria;Protostomia;Ecdysozoa;Panarthropoda;Arthropoda;Mandibulata;Pancrustacea;Hexapoda;Insecta;Dicondylia;Pterygota;Neoptera;Endopterygota;Coleoptera;Polyphaga;Staphyliniformia;Staphylinioidea;Silphidae;Nicrophorinae;Nicrophorus;Nicrophorus vespilloides

UdeM00000034359 6596 339.7 UdeM00000034359 XP\_045168080.1 59 295  
117 3 37 329 1 293 7.20E-90 339.7 6596 cellular

organisms;Eukaryota;Opisthokonta;Metazoa;Eumetazoa;Bilateria;Protostomia;Spiralia;Lophotrochozoa;Mollusca;Bivalvia;Autobranchia;Heteroconchia;Euherodonta;Imparidentia;Venerida;Veneroidea;Veneridae;Mercenaria;Mercenaria mercenaria

UdeM00000034361 6596 375.9 UdeM00000034361 XP\_045169983.1 55.7 357  
140 7 3 353 6 350 8.30E-101 375.9 6596 cellular

organisms;Eukaryota;Opisthokonta;Metazoa;Eumetazoa;Bilateria;Protostomia;Spiralia;Lophotrochozoa;Mollusca;Bivalvia;Autobranchia;Heteroconchia;Euherodonta;Imparidentia;Venerida;Veneroidea;Veneridae;Mercenaria;Mercenaria mercenaria

UdeM00000034363 6596 327.8 UdeM00000034363 XP\_045206316.1 51.4 329  
157 2 26 353 123 449 2.40E-86 327.8 6596 cellular

organisms;Eukaryota;Opisthokonta;Metazoa;Eumetazoa;Bilateria;Protostomia;Spiralia;Lophotrochozoa;Mollusca;Bivalvia;Autobranchia;Heteroconchia;Euherodonta;Imparidentia;Venerida;Veneroidea;Veneridae;Mercenaria;Mercenaria mercenaria

UdeM00000034364 6573 1318.5 UdeM00000034364 XP\_021358991.1 35.8  
2920 1423 56 1 2615 3 2776 0.00E+00 1318.5 6573  
cellular

organisms;Eukaryota;Opisthokonta;Metazoa;Eumetazoa;Bilateria;Protostomia;Spiralia;Lophotrochozoa;Mollusca;Bivalvia;Autobranchia;Pteriormorphia;Pectinida;Pectinoidea;Pectinidae;Mizuhopecten;Mizuhopecten yessoensis

UdeM00000034365 6596 887.1 UdeM00000034365 XP\_045168412.1 56.9 778  
324 5 15 789 12 781 1.60E-254 887.1 6596 cellular

organisms;Eukaryota;Opisthokonta;Metazoa;Eumetazoa;Bilateria;Protostomia;Spiralia;Lophotrochozoa;Mollusca;Bivalvia;Autobranchia;Heteroconchia;Euherodonta;Imparidentia;Venerida;Veneroidea;Veneridae;Mercenaria;Mercenaria mercenaria

UdeM00000034366 6573 153.7 UdeM00000034366 XP\_021377794.1 38.8 260  
144 7 19 269 37 290 3.90E-34 153.7 6573 cellular

organisms;Eukaryota;Opisthokonta;Metazoa;Eumetazoa;Bilateria;Protostomia;Spiralia;Lophotrochozoa;Mollusca;Bivalvia;Autobranchia;Pteriormorphia;Pectinida;Pectinoidea;Pectinidae;Mizuhopecten;Mizuhopecten yessoensis

UdeM00000034371 36176 417.9 UdeM00000034371 XP\_043561655.1 56.9 355  
153 0 8 362 5 359 1.30E-113 417.9 36176 cellular

organisms;Eukaryota;Opisthokonta;Metazoa;Eumetazoa;Bilateria;Deuterostomia;Chordata;Craniata;Vertebrata;Gnathostomata;Chondrichthyes;Elasmobranchii;Selachii;Galeomorphii;Galeoidea;Orectolobiformes;Hemiscylliidae;Chiloscyllium;Chiloscyllium plagiosum

UdeM00000034372 6596 134.8 UdeM00000034372 XP\_045176140.1 52.2 136  
64 1 11 145 6 141 1.00E-28 134.8 6596 cellular

organisms;Eukaryota;Opisthokonta;Metazoa;Eumetazoa;Bilateria;Protostomia;Spiralia;Lophotrochozoa;Mollusca;Bivalvia;Autobranchia;Heteroconchia;Euherodonta;Imparidentia;Venerida;Veneroidea;Veneridae;Mercenaria;Mercenaria mercenaria

UdeM00000034373 29159 147.5 UdeM00000034373 XP\_034304235.1 53.3 150  
67 3 7 154 4 152 1.50E-32 147.5 29159 cellular

organisms;Eukaryota;Opisthokonta;Metazoa;Eumetazoa;Bilateria;Protostomia;Spiralia;Lophotrochozoa;Mollusca;Bivalvia;Autobranchia;Pteriormorphia;Ostreida;Ostreoidea;Ostreidae;Crassostrea;Crassostrea gigas

UdeM00000034374 6596 1345.5 UdeM00000034374 XP\_045167979.1 59.9  
1253 390 16 5 1176 2 1223 0.00E+00 1345.5 6596  
cellular

organisms;Eukaryota;Opisthokonta;Metazoa;Eumetazoa;Bilateria;Protostomia;Spiralia;Lophotrochozoa;Mollusca;Bivalvia;Autobranchia;Heteroconchia;Euherodonta;Imparidentia;Venerida;Veneroidea;Veneridae;Mercenaria;Mercenaria mercenaria

UdeM00000034375 6579 374 UdeM00000034375 XP\_033761942.1 83.7 215  
34 1 1 215 1 214 2.90E-100 374 6579 cellular

organisms;Eukaryota;Opisthokonta;Metazoa;Eumetazoa;Bilateria;Protostomia;Spiralia;Lophotrochozoa;Mollusca;Bivalvia;Autobranchia;Pteriormorphia;Pectinida;Pectinoidea;Pectinidae;Pecten;Pecten maximus

UdeM00000034376 6596 283.5 UdeM00000034376 XP\_045168038.1 49.3 280  
131 5 21 291 15 292 3.10E-73 283.5 6596 cellular

organisms;Eukaryota;Opisthokonta;Metazoa;Eumetazoa;Bilateria;Protostomia;Spiralia;Lophotrochozoa;Mollusca;Bivalvia;Autobranchia;Heteroconchia;Euherodonta;Imparidentia;Venerida;Veneroidea;Veneridae;Mercenaria;Mercenaria mercenaria

UdeM00000034377 6596 280.8 UdeM00000034377 XP\_045168038.1 50.6 267  
121 5 4 261 28 292 1.80E-72 280.8 6596 cellular

organisms;Eukaryota;Opisthokonta;Metazoa;Eumetazoa;Bilateria;Protostomia;Spiralia;Lophotrochozoa;Mollusca;Bivalvia;Autobranchia;Heteroconchia;Euherodonta;Imparidentia;Venerida;Veneroidea;Veneridae;Mercenaria;Mercenaria mercenaria

UdeM00000038872 29159 446.4 UdeM00000038872 XP\_034322046.1 39.2 640  
251 11 3 525 58 676 4.90E-122 446.4 29159 cellular

organisms;Eukaryota;Opisthokonta;Metazoa;Eumetazoa;Bilateria;Protostomia;

Spiralia; Lophotrochozoa; Mollusca; Bivalvia; Autobranchia; Pteriomorpha; Ostr  
eida; Ostreidae; Crassostrea; Crassostrea gigas  
UdeM00000038873 6565 102.1 UdeM00000038873 XP\_022312780.1 62.2 74  
28 0 1 74 5 78 3.40E-19 102.1 6565 cellular  
organisms; Eukaryota; Opisthokonta; Metazoa; Eumetazoa; Bilateria; Protostomia;  
Spiralia; Lophotrochozoa; Mollusca; Bivalvia; Autobranchia; Pteriomorpha; Ostr  
eida; Ostreidae; Crassostrea; Crassostrea virginica  
UdeM00000038874 6500 74.7 UdeM00000038874 XP\_012943737.1 72.9 48  
13 0 27 74 137 184 5.60E-11 74.7 6500 cellular  
organisms; Eukaryota; Opisthokonta; Metazoa; Eumetazoa; Bilateria; Protostomia;  
Spiralia; Lophotrochozoa; Mollusca; Gastropoda; Heterobranchia; Euthyneura; Tec  
tipleura; Aplysiida; Aplysiidae; Aplysia; Aplysia californica  
UdeM00000038875 37621 68.6 UdeM00000038875 XP\_014678940.1 43.7 71  
40 0 4 74 6 76 4.40E-09 68.6 37621 cellular  
organisms; Eukaryota; Opisthokonta; Metazoa; Eumetazoa; Bilateria; Protostomia;  
Ecdysozoa; Scalidophora; Priapulida; Priapulimorpha; Priapulimorphida; Priapul  
idae; Priapulid; Priapulid caudatus  
UdeM00000038876 6573 501.1 UdeM00000038876 XP\_021355349.1 60.8 395  
154 1 5 399 5 398 1.30E-138 501.1 6573 cellular  
organisms; Eukaryota; Opisthokonta; Metazoa; Eumetazoa; Bilateria; Protostomia;  
Spiralia; Lophotrochozoa; Mollusca; Bivalvia; Autobranchia; Pteriomorpha; Pect  
inida; Pectinoidea; Pectinidae; Mizuhopecten; Mizuhopecten yessoensis  
UdeM00000038877 6596 83.6 UdeM00000038877 XP\_045206770.1 38.7 142  
82 3 136 274 134 273 4.40E-13 83.6 6596 cellular  
organisms; Eukaryota; Opisthokonta; Metazoa; Eumetazoa; Bilateria; Protostomia;  
Spiralia; Lophotrochozoa; Mollusca; Bivalvia; Autobranchia; Heteroconchia; Eue  
terodonta; Imparidentia; Venerida; Veneroidea; Veneridae; Mercenaria; Mercenari  
a mercenaria  
UdeM00000038878 6565 72 UdeM00000038878 XP\_022308983.1 31.3 201  
121 9 3 190 26 222 9.10E-10 72 6565 cellular  
organisms; Eukaryota; Opisthokonta; Metazoa; Eumetazoa; Bilateria; Protostomia;  
Spiralia; Lophotrochozoa; Mollusca; Bivalvia; Autobranchia; Pteriomorpha; Ostr  
eida; Ostreidae; Crassostrea; Crassostrea virginica  
UdeM00000038879 6565 70.1 UdeM00000038879 XP\_022308983.1 29.5 210  
128 9 18 214 20 222 3.90E-09 70.1 6565 cellular  
organisms; Eukaryota; Opisthokonta; Metazoa; Eumetazoa; Bilateria; Protostomia;  
Spiralia; Lophotrochozoa; Mollusca; Bivalvia; Autobranchia; Pteriomorpha; Ostr  
eida; Ostreidae; Crassostrea; Crassostrea virginica  
UdeM00000038881 6579 583.6 UdeM00000038881 XP\_033740954.1 71 500  
108 8 31 497 26 521 2.40E-163 583.6 6579 cellular  
organisms; Eukaryota; Opisthokonta; Metazoa; Eumetazoa; Bilateria; Protostomia;  
Spiralia; Lophotrochozoa; Mollusca; Bivalvia; Autobranchia; Pteriomorpha; Pect  
inida; Pectinoidea; Pectinidae; Pecten; Pecten maximus  
UdeM00000038882 6579 513.1 UdeM00000038882 XP\_033740950.1 81.6 294  
54 0 68 361 299 592 2.90E-142 513.1 6579 cellular  
organisms; Eukaryota; Opisthokonta; Metazoa; Eumetazoa; Bilateria; Protostomia;  
Spiralia; Lophotrochozoa; Mollusca; Bivalvia; Autobranchia; Pteriomorpha; Pect  
inida; Pectinoidea; Pectinidae; Pecten; Pecten maximus  
UdeM00000038883 6565 96.7 UdeM00000038883 XP\_022336942.1 27.5 280  
166 11 1 273 9 258 5.00E-17 96.7 6565 cellular  
organisms; Eukaryota; Opisthokonta; Metazoa; Eumetazoa; Bilateria; Protostomia;  
Spiralia; Lophotrochozoa; Mollusca; Bivalvia; Autobranchia; Pteriomorpha; Ostr  
eida; Ostreidae; Crassostrea; Crassostrea virginica



UdeM00000038884 7741 263.5 UdeM00000038884 XP\_019622111.1 48.2 280  
 124 3 5 265 1 278 3.00E-67 263.5 7741 cellular  
 organisms;Eukaryota;Opisthokonta;Metazoa;Eumetazoa;Bilateria;Deuterostomi  
 a;Chordata;Cephalochordata;Leptocardii;Amphioxiformes;Branchiostomidae;Br  
 anchiostoma;Branchiostoma belcheri  
 UdeM00000038885 6596 105.1 UdeM00000038885 XP\_045206250.1 35.7 168  
 95 5 7 173 539 694 1.10E-19 105.1 6596 cellular  
 organisms;Eukaryota;Opisthokonta;Metazoa;Eumetazoa;Bilateria;Protostomia;  
 Spiralia;Lophotrochozoa;Mollusca;Bivalvia;Autobranhia;Heteroconchia;Euhe  
 terodonta;Imparidentia;Venerida;Veneroidea;Veneridae;Mercenaria;Mercenari  
 a mercenaria  
 UdeM00000038886 6565 157.9 UdeM00000038886 XP\_022287605.1 36.8 242  
 130 7 5 242 102 324 1.70E-35 157.9 6565 cellular  
 organisms;Eukaryota;Opisthokonta;Metazoa;Eumetazoa;Bilateria;Protostomia;  
 Spiralia;Lophotrochozoa;Mollusca;Bivalvia;Autobranhia;Pteriormorphia;Ostr  
 eida;Ostreoidea;Ostreidae;Crassostrea;Crassostrea virginica  
 UdeM00000038888 6573 146.4 UdeM00000038888 XP\_021341280.1 44.4 153  
 83 1 117 269 1 151 6.70E-32 146.4 6573 cellular  
 organisms;Eukaryota;Opisthokonta;Metazoa;Eumetazoa;Bilateria;Protostomia;  
 Spiralia;Lophotrochozoa;Mollusca;Bivalvia;Autobranhia;Pteriormorphia;Pect  
 inida;Pectinoidea;Pectinidae;Mizuhopecten;Mizuhopecten yessoensis  
 UdeM00000038889 6565 84.7 UdeM00000038889 XP\_022338472.1 55.1 69  
 31 0 27 95 116 184 1.50E-13 84.7 6565 cellular  
 organisms;Eukaryota;Opisthokonta;Metazoa;Eumetazoa;Bilateria;Protostomia;  
 Spiralia;Lophotrochozoa;Mollusca;Bivalvia;Autobranhia;Pteriormorphia;Ostr  
 eida;Ostreoidea;Ostreidae;Crassostrea;Crassostrea virginica  
 UdeM00000038890 7574 89.7 UdeM00000038890 XP\_013401798.1 38.8 116  
 68 1 165 277 50 165 6.20E-15 89.7 7574 cellular  
 organisms;Eukaryota;Opisthokonta;Metazoa;Eumetazoa;Bilateria;Protostomia;  
 Spiralia;Lophotrochozoa;Brachiopoda;Linguliformea;Lingulata;Lingulida;Lin  
 guloidea;Lingulidae;Lingula;Lingula anatina  
 UdeM00000038891 6596 92 UdeM00000038891 XP\_045211430.1 31.2 218  
 128 7 59 263 45 253 1.20E-15 92 6596 cellular  
 organisms;Eukaryota;Opisthokonta;Metazoa;Eumetazoa;Bilateria;Protostomia;  
 Spiralia;Lophotrochozoa;Mollusca;Bivalvia;Autobranhia;Heteroconchia;Euhe  
 terodonta;Imparidentia;Venerida;Veneroidea;Veneridae;Mercenaria;Mercenari  
 a mercenaria  
 UdeM00000038892 6573 84.7 UdeM00000038892 XP\_021347599.1 35.6 118  
 76 0 136 253 72 189 1.80E-13 84.7 6573 cellular  
 organisms;Eukaryota;Opisthokonta;Metazoa;Eumetazoa;Bilateria;Protostomia;  
 Spiralia;Lophotrochozoa;Mollusca;Bivalvia;Autobranhia;Pteriormorphia;Pect  
 inida;Pectinoidea;Pectinidae;Mizuhopecten;Mizuhopecten yessoensis  
 UdeM00000038894 6596 92 UdeM00000038894 XP\_045177345.1 28.5 256  
 164 6 28 275 80 324 1.30E-15 92 6596 cellular  
 organisms;Eukaryota;Opisthokonta;Metazoa;Eumetazoa;Bilateria;Protostomia;  
 Spiralia;Lophotrochozoa;Mollusca;Bivalvia;Autobranhia;Heteroconchia;Euhe  
 terodonta;Imparidentia;Venerida;Veneroidea;Veneridae;Mercenaria;Mercenari  
 a mercenaria  
 UdeM00000038895 6596 89 UdeM00000038895 XP\_045177394.1 30.5 187  
 124 3 21 202 112 297 7.90E-15 89 6596 cellular  
 organisms;Eukaryota;Opisthokonta;Metazoa;Eumetazoa;Bilateria;Protostomia;  
 Spiralia;Lophotrochozoa;Mollusca;Bivalvia;Autobranhia;Heteroconchia;Euhe  
 terodonta;Imparidentia;Venerida;Veneroidea;Veneridae;Mercenaria;Mercenari  
 a mercenaria

UdeM00000038896 7739 110.9 UdeM00000038896 XP\_035658037.1 54.9 102  
 40 1 1 96 419 520 1.50E-21 110.9 7739 cellular  
 organisms;Eukaryota;Opisthokonta;Metazoa;Eumetazoa;Bilateria;Deuterostomi  
 a;Chordata;Cephalochordata;Leptocardii;Amphioxiformes;Branchiostomidae;Br  
 anchiostoma;Branchiostoma floridae  
 UdeM00000038897 6596 90.5 UdeM00000038897 XP\_045177394.1 28 271  
 157 9 34 275 36 297 3.70E-15 90.5 6596 cellular  
 organisms;Eukaryota;Opisthokonta;Metazoa;Eumetazoa;Bilateria;Protostomia;  
 Spiralia;Lophotrochozoa;Mollusca;Bivalvia;Autobranhia;Heteroconchia;Euhe  
 terodonta;Imparidentia;Venerida;Veneroidea;Veneridae;Mercenaria;Mercenari  
 a mercenaria  
 UdeM00000038898 6579 89.4 UdeM00000038898 XP\_033725748.1 36.8 155  
 84 5 132 273 187 340 8.20E-15 89.4 6579 cellular  
 organisms;Eukaryota;Opisthokonta;Metazoa;Eumetazoa;Bilateria;Protostomia;  
 Spiralia;Lophotrochozoa;Mollusca;Bivalvia;Autobranhia;Pteriormorphia;Pect  
 inida;Pectinoidea;Pectinidae;Pecten;Pecten maximus  
 UdeM00000038899 6596 80.5 UdeM00000038899 XP\_045184492.1 33.6 125  
 80 2 166 288 77 200 3.90E-12 80.5 6596 cellular  
 organisms;Eukaryota;Opisthokonta;Metazoa;Eumetazoa;Bilateria;Protostomia;  
 Spiralia;Lophotrochozoa;Mollusca;Bivalvia;Autobranhia;Heteroconchia;Euhe  
 terodonta;Imparidentia;Venerida;Veneroidea;Veneridae;Mercenaria;Mercenari  
 a mercenaria  
 UdeM00000038900 6596 62.4 UdeM00000038900 XP\_045174446.1 32 122  
 78 2 6 122 14 135 4.70E-07 62.4 6596 cellular  
 organisms;Eukaryota;Opisthokonta;Metazoa;Eumetazoa;Bilateria;Protostomia;  
 Spiralia;Lophotrochozoa;Mollusca;Bivalvia;Autobranhia;Heteroconchia;Euhe  
 terodonta;Imparidentia;Venerida;Veneroidea;Veneridae;Mercenaria;Mercenari  
 a mercenaria  
 UdeM00000038902 6565 219.5 UdeM00000038902 XP\_022320668.1 31 565  
 195 12 37 425 140 685 8.70E-54 219.5 6565 cellular  
 organisms;Eukaryota;Opisthokonta;Metazoa;Eumetazoa;Bilateria;Protostomia;  
 Spiralia;Lophotrochozoa;Mollusca;Bivalvia;Autobranhia;Pteriormorphia;Ostr  
 eida;Ostreoidea;Ostreidae;Crassostrea;Crassostrea virginica  
 UdeM00000038903 6579 92.8 UdeM00000038903 XP\_033729305.1 34.6 156  
 91 6 120 269 62 212 7.20E-16 92.8 6579 cellular  
 organisms;Eukaryota;Opisthokonta;Metazoa;Eumetazoa;Bilateria;Protostomia;  
 Spiralia;Lophotrochozoa;Mollusca;Bivalvia;Autobranhia;Pteriormorphia;Pect  
 inida;Pectinoidea;Pectinidae;Pecten;Pecten maximus  
 UdeM00000038904 6579 92.8 UdeM00000038904 XP\_033729305.1 34.6 156  
 91 6 119 268 62 212 7.20E-16 92.8 6579 cellular  
 organisms;Eukaryota;Opisthokonta;Metazoa;Eumetazoa;Bilateria;Protostomia;  
 Spiralia;Lophotrochozoa;Mollusca;Bivalvia;Autobranhia;Pteriormorphia;Pect  
 inida;Pectinoidea;Pectinidae;Pecten;Pecten maximus  
 UdeM00000038905 6596 86.3 UdeM00000038905 XP\_045194692.1 28.3 219  
 138 5 62 274 27 232 6.90E-14 86.3 6596 cellular  
 organisms;Eukaryota;Opisthokonta;Metazoa;Eumetazoa;Bilateria;Protostomia;  
 Spiralia;Lophotrochozoa;Mollusca;Bivalvia;Autobranhia;Heteroconchia;Euhe  
 terodonta;Imparidentia;Venerida;Veneroidea;Veneridae;Mercenaria;Mercenari  
 a mercenaria  
 UdeM00000038906 6596 299.7 UdeM00000038906 XP\_045198720.1 40.5 412  
 206 8 43 449 23 400 1.30E-77 299.7 6596 cellular  
 organisms;Eukaryota;Opisthokonta;Metazoa;Eumetazoa;Bilateria;Protostomia;  
 Spiralia;Lophotrochozoa;Mollusca;Bivalvia;Autobranhia;Heteroconchia;Euhe

terodonta;Imparidentia;Venerida;Veneroidea;Veneridae;Mercenaria;Mercenaria mercenaria

UdeM00000038908 1735272 643.3 UdeM00000038908 XP\_041354859.1 61.8  
521 198 1 5 525 2 521 2.70E-181 643.3 1735272  
cellular

organisms;Eukaryota;Opisthokonta;Metazoa;Eumetazoa;Bilateria;Protostomia;Spiralia;Lophotrochozoa;Mollusca;Gastropoda;Neomphalina;Neomphaloidea;Peltospiridae;Gigantopelta;Gigantopelta aegis

UdeM00000038909 6596 470.3 UdeM00000038909 XP\_045198720.1 30.9 1174  
519 34 43 1104 23 1016 7.30E-129 470.3 6596 cellular

organisms;Eukaryota;Opisthokonta;Metazoa;Eumetazoa;Bilateria;Protostomia;Spiralia;Lophotrochozoa;Mollusca;Bivalvia;Autobranchia;Heteroconchia;Euheterodonta;Imparidentia;Venerida;Veneroidea;Veneridae;Mercenaria;Mercenaria mercenaria

UdeM00000038910 6579 1122.8 UdeM00000038910 XP\_033740657.1 60.7  
957 326 13 1 914 28 977 0.00E+00 1122.8 6579  
cellular

organisms;Eukaryota;Opisthokonta;Metazoa;Eumetazoa;Bilateria;Protostomia;Spiralia;Lophotrochozoa;Mollusca;Bivalvia;Autobranchia;Pteriormorphia;Pectinida;Pectinoidea;Pectinidae;Pecten;Pecten maximus

UdeM00000038911 6579 220.3 UdeM00000038911 XP\_033740656.1 33.2 488  
104 8 44 309 478 965 3.60E-54 220.3 6579 cellular

organisms;Eukaryota;Opisthokonta;Metazoa;Eumetazoa;Bilateria;Protostomia;Spiralia;Lophotrochozoa;Mollusca;Bivalvia;Autobranchia;Pteriormorphia;Pectinida;Pectinoidea;Pectinidae;Pecten;Pecten maximus

UdeM00000038912 6500 251.9 UdeM00000038912 XP\_012944847.2 48.6 457  
225 2 175 631 179 625 3.40E-62 251.9 6500 cellular

organisms;Eukaryota;Opisthokonta;Metazoa;Eumetazoa;Bilateria;Protostomia;Spiralia;Lophotrochozoa;Mollusca;Gastropoda;Heterobranchia;Euthyneura;Tectipleura;Aplysiida;Aplysioidea;Aplysiidae;Aplysia;Aplysia californica

UdeM00000038913 6596 271.9 UdeM00000038913 XP\_045196317.1 36.9 604  
310 17 1 584 1 553 1.90E-69 271.9 6596 cellular

organisms;Eukaryota;Opisthokonta;Metazoa;Eumetazoa;Bilateria;Protostomia;Spiralia;Lophotrochozoa;Mollusca;Bivalvia;Autobranchia;Heteroconchia;Euheterodonta;Imparidentia;Venerida;Veneroidea;Veneridae;Mercenaria;Mercenaria mercenaria

UdeM00000038914 1735272 287.3 UdeM00000038914 XP\_041354455.1 35.3  
419 271 0 2 420 17 435 3.10E-74 287.3 1735272  
cellular

organisms;Eukaryota;Opisthokonta;Metazoa;Eumetazoa;Bilateria;Protostomia;Spiralia;Lophotrochozoa;Mollusca;Gastropoda;Neomphalina;Neomphaloidea;Peltospiridae;Gigantopelta;Gigantopelta aegis

UdeM00000038915 6573 204.9 UdeM00000038915 XP\_021349248.1 41.2 345  
169 10 1 329 1 327 1.60E-49 204.9 6573 cellular

organisms;Eukaryota;Opisthokonta;Metazoa;Eumetazoa;Bilateria;Protostomia;Spiralia;Lophotrochozoa;Mollusca;Bivalvia;Autobranchia;Pteriormorphia;Pectinida;Pectinoidea;Pectinidae;Mizuhopecten;Mizuhopecten yessoensis

UdeM00000038917 400727 239.2 UdeM00000038917 XP\_025083272.1 53.8  
212 86 3 8 210 53 261 4.80E-60 239.2 400727  
cellular

organisms;Eukaryota;Opisthokonta;Metazoa;Eumetazoa;Bilateria;Protostomia;Spiralia;Lophotrochozoa;Mollusca;Gastropoda;Caenogastropoda;Architaenioglossa;Ampullarioidea;Ampullariidae;Pomacea;Pomacea canaliculata

UdeM00000038919 6573 159.8 UdeM00000038919 XP\_021354542.1 57.4 129  
 49 2 1 129 51 173 2.40E-36 159.8 6573 cellular  
 organisms;Eukaryota;Opisthokonta;Metazoa;Eumetazoa;Bilateria;Protostomia;  
 Spiralia;Lophotrochozoa;Mollusca;Bivalvia;Autobranchia;Pteriormorphia;Pect  
 inida;Pectinoidea;Pectinidae;Mizuhopecten;Mizuhopecten yessoensis  
 UdeM00000038920 6573 213.4 UdeM00000038920 XP\_021354542.1 58.5 164  
 62 2 1 164 51 208 2.20E-52 213.4 6573 cellular  
 organisms;Eukaryota;Opisthokonta;Metazoa;Eumetazoa;Bilateria;Protostomia;  
 Spiralia;Lophotrochozoa;Mollusca;Bivalvia;Autobranchia;Pteriormorphia;Pect  
 inida;Pectinoidea;Pectinidae;Mizuhopecten;Mizuhopecten yessoensis  
 UdeM00000038921 1735272 83.6 UdeM00000038921 XP\_041352499.1 37.3  
 204 112 6 11 213 11 199 3.50E-13 83.6 1735272  
 cellular  
 organisms;Eukaryota;Opisthokonta;Metazoa;Eumetazoa;Bilateria;Protostomia;  
 Spiralia;Lophotrochozoa;Mollusca;Gastropoda;Neomphalina;Neomphaloidea;Pel  
 tospiridae;Gigantopelta;Gigantopelta aegis  
 UdeM00000043721 6596 726.5 UdeM00000043721 XP\_045215347.1 50 1133  
 454 21 15 1128 1269 2308 5.30E-206 726.5 6596 cellular  
 organisms;Eukaryota;Opisthokonta;Metazoa;Eumetazoa;Bilateria;Protostomia;  
 Spiralia;Lophotrochozoa;Mollusca;Bivalvia;Autobranchia;Heteroconchia;Euhe  
 terodonta;Imparidentia;Venerida;Veneroidea;Veneridae;Mercenaria;Mercenari  
 a mercenaria  
 UdeM00000043722 6596 1079.3 UdeM00000043722 XP\_045215347.1 38.4  
 2417 966 45 5 2059 52 2308 0.00E+00 1079.3 6596  
 cellular  
 organisms;Eukaryota;Opisthokonta;Metazoa;Eumetazoa;Bilateria;Protostomia;  
 Spiralia;Lophotrochozoa;Mollusca;Bivalvia;Autobranchia;Heteroconchia;Euhe  
 terodonta;Imparidentia;Venerida;Veneroidea;Veneridae;Mercenaria;Mercenari  
 a mercenaria  
 UdeM00000043723 6596 1072 UdeM00000043723 XP\_045215347.1 38.3 2414  
 953 44 5 2038 52 2308 9.2e-310 1072 6596 cellular  
 organisms;Eukaryota;Opisthokonta;Metazoa;Eumetazoa;Bilateria;Protostomia;  
 Spiralia;Lophotrochozoa;Mollusca;Bivalvia;Autobranchia;Heteroconchia;Euhe  
 terodonta;Imparidentia;Venerida;Veneroidea;Veneridae;Mercenaria;Mercenari  
 a mercenaria  
 UdeM00000043724 6596 85.1 UdeM00000043724 XP\_045215347.1 62.3 61  
 23 0 137 197 1 61 1.10E-13 85.1 6596 cellular  
 organisms;Eukaryota;Opisthokonta;Metazoa;Eumetazoa;Bilateria;Protostomia;  
 Spiralia;Lophotrochozoa;Mollusca;Bivalvia;Autobranchia;Heteroconchia;Euhe  
 terodonta;Imparidentia;Venerida;Veneroidea;Veneridae;Mercenaria;Mercenari  
 a mercenaria  
 UdeM00000043725 6596 755.7 UdeM00000043725 XP\_045215344.1 49.1 797  
 342 11 1 764 1 766 5.50E-215 755.7 6596 cellular  
 organisms;Eukaryota;Opisthokonta;Metazoa;Eumetazoa;Bilateria;Protostomia;  
 Spiralia;Lophotrochozoa;Mollusca;Bivalvia;Autobranchia;Heteroconchia;Euhe  
 terodonta;Imparidentia;Venerida;Veneroidea;Veneridae;Mercenaria;Mercenari  
 a mercenaria  
 UdeM00000043726 10224 293.9 UdeM00000043726 XP\_002737779.1 58.7 225  
 93 0 1 225 371 595 1.80E-76 293.9 10224 cellular  
 organisms;Eukaryota;Opisthokonta;Metazoa;Eumetazoa;Bilateria;Deuterostomi  
 a;Hemichordata;Enteropneusta;Harrimaniidae;Saccoglossus;Saccoglossus  
 kowalevskii  
 UdeM00000043727 6565 104.8 UdeM00000043727 XP\_022286598.1 35.3 249  
 137 8 16 261 78 305 1.70E-19 104.8 6565 cellular

organisms;Eukaryota;Opisthokonta;Metazoa;Eumetazoa;Bilateria;Protostomia;  
Spiralia;Lophotrochozoa;Mollusca;Bivalvia;Autobranchia;Pteriormorphia;Ostr  
eida;Ostreoidea;Ostreidae;Crassostrea;Crassostrea virginica  
UdeM00000043728 6596 729.6 UdeM00000043728 XP\_045215344.1 50.1 736  
315 9 82 794 60 766 4.40E-207 729.6 6596 cellular  
organisms;Eukaryota;Opisthokonta;Metazoa;Eumetazoa;Bilateria;Protostomia;  
Spiralia;Lophotrochozoa;Mollusca;Bivalvia;Autobranchia;Heteroconchia;Euhe  
terodonta;Imparidentia;Venerida;Veneroidea;Veneridae;Mercenaria;Mercenari  
a mercenaria  
UdeM00000043729 6596 528.5 UdeM00000043729 XP\_045156501.1 48.8 520  
258 4 15 531 13 527 9.90E-147 528.5 6596 cellular  
organisms;Eukaryota;Opisthokonta;Metazoa;Eumetazoa;Bilateria;Protostomia;  
Spiralia;Lophotrochozoa;Mollusca;Bivalvia;Autobranchia;Heteroconchia;Euhe  
terodonta;Imparidentia;Venerida;Veneroidea;Veneridae;Mercenaria;Mercenari  
a mercenaria  
UdeM00000043730 6596 520.8 UdeM00000043730 XP\_045156501.1 48.8 504  
252 3 9 511 29 527 2.00E-144 520.8 6596 cellular  
organisms;Eukaryota;Opisthokonta;Metazoa;Eumetazoa;Bilateria;Protostomia;  
Spiralia;Lophotrochozoa;Mollusca;Bivalvia;Autobranchia;Heteroconchia;Euhe  
terodonta;Imparidentia;Venerida;Veneroidea;Veneridae;Mercenaria;Mercenari  
a mercenaria  
UdeM00000043731 6565 191 UdeM00000043731 XP\_022329081.1 44.7 199  
106 3 2 199 44 239 1.50E-45 191 6565 cellular  
organisms;Eukaryota;Opisthokonta;Metazoa;Eumetazoa;Bilateria;Protostomia;  
Spiralia;Lophotrochozoa;Mollusca;Bivalvia;Autobranchia;Pteriormorphia;Ostr  
eida;Ostreoidea;Ostreidae;Crassostrea;Crassostrea virginica  
UdeM00000043732 6565 126.7 UdeM00000043732 XP\_022329081.1 48.7 117  
58 2 2 117 44 159 1.90E-26 126.7 6565 cellular  
organisms;Eukaryota;Opisthokonta;Metazoa;Eumetazoa;Bilateria;Protostomia;  
Spiralia;Lophotrochozoa;Mollusca;Bivalvia;Autobranchia;Pteriormorphia;Ostr  
eida;Ostreoidea;Ostreidae;Crassostrea;Crassostrea virginica  
UdeM00000043733 6573 882.5 UdeM00000043733 XP\_021377155.1 64.5 648  
228 2 1 648 1 646 3.30E-253 882.5 6573 cellular  
organisms;Eukaryota;Opisthokonta;Metazoa;Eumetazoa;Bilateria;Protostomia;  
Spiralia;Lophotrochozoa;Mollusca;Bivalvia;Autobranchia;Pteriormorphia;Pect  
inida;Pectinoidea;Pectinidae;Mizuhopecten;Mizuhopecten yessoensis  
UdeM00000043734 6573 734.6 UdeM00000043734 XP\_021377155.1 59.1 614  
212 3 1 577 35 646 9.90E-209 734.6 6573 cellular  
organisms;Eukaryota;Opisthokonta;Metazoa;Eumetazoa;Bilateria;Protostomia;  
Spiralia;Lophotrochozoa;Mollusca;Bivalvia;Autobranchia;Pteriormorphia;Pect  
inida;Pectinoidea;Pectinidae;Mizuhopecten;Mizuhopecten yessoensis  
UdeM00000043735 6573 881.3 UdeM00000043735 XP\_021377155.1 64.9 647  
225 2 1 647 1 645 7.40E-253 881.3 6573 cellular  
organisms;Eukaryota;Opisthokonta;Metazoa;Eumetazoa;Bilateria;Protostomia;  
Spiralia;Lophotrochozoa;Mollusca;Bivalvia;Autobranchia;Pteriormorphia;Pect  
inida;Pectinoidea;Pectinidae;Mizuhopecten;Mizuhopecten yessoensis  
UdeM00000025582 6565 103.2 UdeM00000025582 XP\_022297447.1 54.8 84  
38 0 229 312 156 239 8.00E-19 103.2 6565 cellular  
organisms;Eukaryota;Opisthokonta;Metazoa;Eumetazoa;Bilateria;Protostomia;  
Spiralia;Lophotrochozoa;Mollusca;Bivalvia;Autobranchia;Pteriormorphia;Ostr  
eida;Ostreoidea;Ostreidae;Crassostrea;Crassostrea virginica  
UdeM00000025583 6596 138.7 UdeM00000025583 XP\_045182313.1 40.8 213  
102 7 19 217 574 776 9.10E-30 138.7 6596 cellular  
organisms;Eukaryota;Opisthokonta;Metazoa;Eumetazoa;Bilateria;Protostomia;

Spiralia;Lophotrochozoa;Mollusca;Bivalvia;Autobranchia;Heteroconchia;Euherodonta;Imparidentia;Venerida;Veneroidea;Veneridae;Mercenaria;Mercenaria mercenaria

UdeM00000025586 6596 375.6 UdeM00000025586 XP\_045182316.1 31.1 1028  
392 24 1 976 392 1155 2.00E-100 375.6 6596 cellular

organisms;Eukaryota;Opisthokonta;Metazoa;Eumetazoa;Bilateria;Protostomia;Spiralia;Lophotrochozoa;Mollusca;Bivalvia;Autobranchia;Heteroconchia;Euherodonta;Imparidentia;Venerida;Veneroidea;Veneridae;Mercenaria;Mercenaria mercenaria

UdeM00000025587 6596 134 UdeM00000025587 XP\_045181000.1 70.5 88  
26 0 48 135 867 954 1.40E-28 134 6596 cellular

organisms;Eukaryota;Opisthokonta;Metazoa;Eumetazoa;Bilateria;Protostomia;Spiralia;Lophotrochozoa;Mollusca;Bivalvia;Autobranchia;Heteroconchia;Euherodonta;Imparidentia;Venerida;Veneroidea;Veneridae;Mercenaria;Mercenaria mercenaria

UdeM00000025590 1437191 226.9 UdeM00000025590 XP\_029054816.1 48  
252 131 0 1 252 1 252 3.00E-56 226.9 1437191  
cellular

organisms;Eukaryota;Opisthokonta;Metazoa;Eumetazoa;Bilateria;Protostomia;Ecdysozoa;Panarthropoda;Arthropoda;Mandibulata;Pancrustacea;Hexapoda;Insecta;Dicondylia;Pterygota;Neoptera;Endopterygota;Hymenoptera;Apocrita;Aculeata;Apoidea;Megachilidae;Megachilinae;Osmiini;Osmia;Osmia bicornis;Osmia bicornis bicornis

UdeM00000025591 7719 199.1 UdeM00000025591 XP\_004227365.1 53.4 161  
75 0 6 166 2 162 4.30E-48 199.1 7719 cellular

organisms;Eukaryota;Opisthokonta;Metazoa;Eumetazoa;Bilateria;Deuterostomia;Chordata;Tunicata;Ascidiacea;Phlebobranchia;Cionidae;Ciona;Ciona intestinalis

UdeM00000025594 29159 101.3 UdeM00000025594 XP\_034311318.1 50.6 89  
44 0 2 90 13 101 6.70E-19 101.3 29159 cellular

organisms;Eukaryota;Opisthokonta;Metazoa;Eumetazoa;Bilateria;Protostomia;Spiralia;Lophotrochozoa;Mollusca;Bivalvia;Autobranchia;Pteriormorphia;Ostreida;Ostreioidea;Ostreidae;Crassostrea;Crassostrea gigas

UdeM00000025595 6565 229.9 UdeM00000025595 XP\_022337267.1 34.5 571  
262 18 1 464 1 566 6.50E-57 229.9 6565 cellular

organisms;Eukaryota;Opisthokonta;Metazoa;Eumetazoa;Bilateria;Protostomia;Spiralia;Lophotrochozoa;Mollusca;Bivalvia;Autobranchia;Pteriormorphia;Ostreida;Ostreioidea;Ostreidae;Crassostrea;Crassostrea virginica

UdeM00000025599 7998 170.6 UdeM00000025599 XP\_017334791.1 68.1 113  
36 0 1 113 62 174 1.10E-39 170.6 7998 cellular

organisms;Eukaryota;Opisthokonta;Metazoa;Eumetazoa;Bilateria;Deuterostomia;Chordata;Craniata;Vertebrata;Gnathostomata;Teleostomi;Euteleostomi;Actinopterygii;Actinopteri;Neopterygii;Teleostei;Osteoglossocephalai;Clupeocephala;Otomorpha;Ostariophysi;Otophysi;Characiphysae;Siluriformes;Siluroidae;Ictaluridae;Ictalurus;Ictalurus punctatus

UdeM00000025600 6596 421.8 UdeM00000025600 XP\_045182313.1 38.2 773  
418 15 3 753 479 1213 1.90E-114 421.8 6596 cellular

organisms;Eukaryota;Opisthokonta;Metazoa;Eumetazoa;Bilateria;Protostomia;Spiralia;Lophotrochozoa;Mollusca;Bivalvia;Autobranchia;Heteroconchia;Euherodonta;Imparidentia;Venerida;Veneroidea;Veneridae;Mercenaria;Mercenaria mercenaria

UdeM00000025601 7054 202.6 UdeM00000025601 XP\_031328250.1 48.7 224  
114 1 1 223 1 224 5.30E-49 202.6 7054 cellular

organisms;Eukaryota;Opisthokonta;Metazoa;Eumetazoa;Bilateria;Protostomia;

Ecdysozoa; Panarthropoda; Arthropoda; Mandibulata; Pancrustacea; Hexapoda; Insecta; Dicondylia; Pterygota; Neoptera; Endopterygota; Coleoptera; Polyphaga; Elateriformia; Elateroidea; Lampyridae; Lampyrinae; Photinus; Photinus pyralis

UdeM00000025602 7054 266.2 UdeM00000025602 XP\_031350480.1 53.4 219  
101 1 1 218 249 467 3.80E-68 266.2 7054 cellular  
organisms; Eukaryota; Opisthokonta; Metazoa; Eumetazoa; Bilateria; Protostomia; Ecdysozoa; Panarthropoda; Arthropoda; Mandibulata; Pancrustacea; Hexapoda; Insecta; Dicondylia; Pterygota; Neoptera; Endopterygota; Coleoptera; Polyphaga; Elateriformia; Elateroidea; Lampyridae; Lampyrinae; Photinus; Photinus pyralis

UdeM00000025603 7719 194.5 UdeM00000025603 XP\_004227365.1 53.4 161  
75 0 6 166 2 162 1.10E-46 194.5 7719 cellular  
organisms; Eukaryota; Opisthokonta; Metazoa; Eumetazoa; Bilateria; Deuterostomia; Chordata; Tunicata; Ascidiacea; Phlebobranchia; Cionidae; Ciona; Ciona intestinalis

UdeM00000025611 6596 65.9 UdeM00000025611 XP\_045215232.1 50.9 53  
25 1 4 56 7 58 6.00E-08 65.9 6596 cellular  
organisms; Eukaryota; Opisthokonta; Metazoa; Eumetazoa; Bilateria; Protostomia; Spiralia; Lophotrochozoa; Mollusca; Bivalvia; Autobranchia; Heteroconchia; Euheterodonta; Imparidentia; Venerida; Veneroidea; Veneridae; Mercenaria; Mercenaria mercenaria

UdeM00000025612 6596 200.7 UdeM00000025612 XP\_045182316.1 34.6 381  
191 7 64 436 361 691 3.90E-48 200.7 6596 cellular  
organisms; Eukaryota; Opisthokonta; Metazoa; Eumetazoa; Bilateria; Protostomia; Spiralia; Lophotrochozoa; Mollusca; Bivalvia; Autobranchia; Heteroconchia; Euheterodonta; Imparidentia; Venerida; Veneroidea; Veneridae; Mercenaria; Mercenaria mercenaria

UdeM00000025613 6596 233.8 UdeM00000025613 XP\_045182313.1 37.4 465  
242 10 2 457 789 1213 4.40E-58 233.8 6596 cellular  
organisms; Eukaryota; Opisthokonta; Metazoa; Eumetazoa; Bilateria; Protostomia; Spiralia; Lophotrochozoa; Mollusca; Bivalvia; Autobranchia; Heteroconchia; Euheterodonta; Imparidentia; Venerida; Veneroidea; Veneridae; Mercenaria; Mercenaria mercenaria

UdeM00000025619 6596 206.1 UdeM00000025619 XP\_045214422.1 33 449  
255 16 329 766 94 507 1.60E-49 206.1 6596 cellular  
organisms; Eukaryota; Opisthokonta; Metazoa; Eumetazoa; Bilateria; Protostomia; Spiralia; Lophotrochozoa; Mollusca; Bivalvia; Autobranchia; Heteroconchia; Euheterodonta; Imparidentia; Venerida; Veneroidea; Veneridae; Mercenaria; Mercenaria mercenaria

UdeM00000025620 6596 438.7 UdeM00000025620 XP\_045187536.1 64 331  
117 1 1 331 396 724 6.50E-120 438.7 6596 cellular  
organisms; Eukaryota; Opisthokonta; Metazoa; Eumetazoa; Bilateria; Protostomia; Spiralia; Lophotrochozoa; Mollusca; Bivalvia; Autobranchia; Heteroconchia; Euheterodonta; Imparidentia; Venerida; Veneroidea; Veneridae; Mercenaria; Mercenaria mercenaria

UdeM00000025621 6596 672.9 UdeM00000025621 XP\_045187536.1 66.8 500  
163 2 2 501 228 724 3.10E-190 672.9 6596 cellular  
organisms; Eukaryota; Opisthokonta; Metazoa; Eumetazoa; Bilateria; Protostomia; Spiralia; Lophotrochozoa; Mollusca; Bivalvia; Autobranchia; Heteroconchia; Euheterodonta; Imparidentia; Venerida; Veneroidea; Veneridae; Mercenaria; Mercenaria mercenaria

UdeM00000025623 1735272 88.2 UdeM00000025623 XP\_041362151.1 38.9  
113 68 1 9 120 563 675 8.50E-15 88.2 1735272  
cellular  
organisms; Eukaryota; Opisthokonta; Metazoa; Eumetazoa; Bilateria; Protostomia;

Spiralia;Lophotrochozoa;Mollusca;Gastropoda;Neomphalina;Neomphaloidea;Pel  
tospiridae;Gigantopelta;Gigantopelta aegis  
UdeM00000025626 6579 262.7 UdeM00000025626 XP\_033761495.1 66.3 184  
59 1 36 219 24 204 4.20E-67 262.7 6579 cellular  
organisms;Eukaryota;Opisthokonta;Metazoa;Eumetazoa;Bilateria;Protostomia;  
Spiralia;Lophotrochozoa;Mollusca;Bivalvia;Autobranchia;Pteriormorphia;Pect  
inida;Pectinoidea;Pectinidae;Pecten;Pecten maximus  
UdeM00000025627 29159 281.2 UdeM00000025627 XP\_034330259.1 45.3 307  
155 5 20 324 411 706 1.90E-72 281.2 29159 cellular  
organisms;Eukaryota;Opisthokonta;Metazoa;Eumetazoa;Bilateria;Protostomia;  
Spiralia;Lophotrochozoa;Mollusca;Bivalvia;Autobranchia;Pteriormorphia;Ostr  
eida;Ostreidae;Crassostrea;Crassostrea gigas  
UdeM00000025628 29159 184.1 UdeM00000025628 XP\_034312908.1 27.3 631  
381 18 3 568 6 623 4.90E-43 184.1 29159 cellular  
organisms;Eukaryota;Opisthokonta;Metazoa;Eumetazoa;Bilateria;Protostomia;  
Spiralia;Lophotrochozoa;Mollusca;Bivalvia;Autobranchia;Pteriormorphia;Ostr  
eida;Ostreidae;Crassostrea;Crassostrea gigas  
UdeM00000025629 29159 184.9 UdeM00000025629 XP\_034312908.1 27.3 631  
381 18 3 568 6 623 2.90E-43 184.9 29159 cellular  
organisms;Eukaryota;Opisthokonta;Metazoa;Eumetazoa;Bilateria;Protostomia;  
Spiralia;Lophotrochozoa;Mollusca;Bivalvia;Autobranchia;Pteriormorphia;Ostr  
eida;Ostreidae;Crassostrea;Crassostrea gigas  
UdeM00000025630 6596 230.3 UdeM00000025630 XP\_045216945.1 33.7 419  
216 8 170 586 9 367 1.10E-56 230.3 6596 cellular  
organisms;Eukaryota;Opisthokonta;Metazoa;Eumetazoa;Bilateria;Protostomia;  
Spiralia;Lophotrochozoa;Mollusca;Bivalvia;Autobranchia;Heteroconchia;Euhe  
terodonta;Imparidentia;Venerida;Veneroidea;Veneridae;Mercenaria;Mercenari  
a mercenaria  
UdeM00000025631 6565 205.3 UdeM00000025631 XP\_022287659.1 40.5 259  
151 3 11 269 8 263 1.10E-49 205.3 6565 cellular  
organisms;Eukaryota;Opisthokonta;Metazoa;Eumetazoa;Bilateria;Protostomia;  
Spiralia;Lophotrochozoa;Mollusca;Bivalvia;Autobranchia;Pteriormorphia;Ostr  
eida;Ostreidae;Crassostrea;Crassostrea virginica  
UdeM00000025633 6596 109.4 UdeM00000025633 XP\_045162203.1 61.2 80  
31 0 26 105 1435 1514 2.90E-21 109.4 6596 cellular  
organisms;Eukaryota;Opisthokonta;Metazoa;Eumetazoa;Bilateria;Protostomia;  
Spiralia;Lophotrochozoa;Mollusca;Bivalvia;Autobranchia;Heteroconchia;Euhe  
terodonta;Imparidentia;Venerida;Veneroidea;Veneridae;Mercenaria;Mercenari  
a mercenaria  
UdeM00000025636 6596 196.1 UdeM00000025636 XP\_045182316.1 44.3 253  
128 4 1 244 392 640 6.40E-47 196.1 6596 cellular  
organisms;Eukaryota;Opisthokonta;Metazoa;Eumetazoa;Bilateria;Protostomia;  
Spiralia;Lophotrochozoa;Mollusca;Bivalvia;Autobranchia;Heteroconchia;Euhe  
terodonta;Imparidentia;Venerida;Veneroidea;Veneridae;Mercenaria;Mercenari  
a mercenaria  
UdeM00000013593 29159 95.5 UdeM00000013593 XP\_011423587.2 30.1 229  
141 7 167 386 76 294 1.60E-16 95.5 29159 cellular  
organisms;Eukaryota;Opisthokonta;Metazoa;Eumetazoa;Bilateria;Protostomia;  
Spiralia;Lophotrochozoa;Mollusca;Bivalvia;Autobranchia;Pteriormorphia;Ostr  
eida;Ostreidae;Crassostrea;Crassostrea gigas  
UdeM00000013594 7574 147.1 UdeM00000013594 XP\_013396733.1 39.9 228  
134 3 74 299 22 248 3.50E-32 147.1 7574 cellular  
organisms;Eukaryota;Opisthokonta;Metazoa;Eumetazoa;Bilateria;Protostomia;



Spiralia;Lophotrochozoa;Brachiopoda;Linguliformea;Lingulata;Lingulida;Linguloidea;Lingulidae;Lingula;Lingula anatina  
UdeM00000013595 6596 562.8 UdeM00000013595 XP\_045175062.1 51.9 543  
259 2 9 550 8 549 5.00E-157 562.8 6596 cellular  
organisms;Eukaryota;Opisthokonta;Metazoa;Eumetazoa;Bilateria;Protostomia;  
Spiralia;Lophotrochozoa;Mollusca;Bivalvia;Autobranchia;Heteroconchia;Euherodonta;Imparidentia;Venerida;Veneroidea;Veneridae;Mercenaria;Mercenaria mercenaria  
UdeM00000013597 29159 72.4 UdeM00000013597 XP\_011424333.2 25.7 280  
176 9 246 511 14 275 1.90E-09 72.4 29159 cellular  
organisms;Eukaryota;Opisthokonta;Metazoa;Eumetazoa;Bilateria;Protostomia;  
Spiralia;Lophotrochozoa;Mollusca;Bivalvia;Autobranchia;Pteriomorphia;Ostreida;Ostreoidea;Ostreidae;Crassostrea;Crassostrea gigas  
UdeM00000013598 29159 87.4 UdeM00000013598 XP\_011424333.2 28 275  
166 10 130 390 21 277 4.30E-14 87.4 29159 cellular  
organisms;Eukaryota;Opisthokonta;Metazoa;Eumetazoa;Bilateria;Protostomia;  
Spiralia;Lophotrochozoa;Mollusca;Bivalvia;Autobranchia;Pteriomorphia;Ostreida;Ostreoidea;Ostreidae;Crassostrea;Crassostrea gigas  
UdeM00000013601 6087 169.9 UdeM00000013601 XP\_012565456.1 60.6 127  
48 1 4 128 890 1016 2.20E-39 169.9 6087 cellular  
organisms;Eukaryota;Opisthokonta;Metazoa;Eumetazoa;Cnidaria;Hydrozoa;Hydrozoa;Anthoathecata;Aplanulata;Hydridae;Hydra;Hydra vulgaris  
UdeM00000013602 1735272 83.6 UdeM00000013602 XP\_041379274.1 35.2  
122 77 2 2 122 245 365 2.00E-13 83.6 1735272  
cellular  
organisms;Eukaryota;Opisthokonta;Metazoa;Eumetazoa;Bilateria;Protostomia;  
Spiralia;Lophotrochozoa;Mollusca;Gastropoda;Neomphalina;Neomphaloidea;Peltospiridae;Gigantopelta;Gigantopelta aegis  
UdeM00000013603 6945 65.1 UdeM00000013603 XP\_040078187.1 30.8 117  
80 1 49 164 38 154 2.60E-07 65.1 6945 cellular  
organisms;Eukaryota;Opisthokonta;Metazoa;Eumetazoa;Bilateria;Protostomia;  
Ecdysozoa;Panarthropoda;Arthropoda;Chelicerata;Arachnida;Acari;Parasitiformes;Ixodida;Ixodoidea;Ixodidae;Ixodinae;Ixodes;Ixodes scapularis  
UdeM00000013604 29159 97.1 UdeM00000013604 XP\_011423587.2 30.5 220  
144 6 167 378 76 294 5.30E-17 97.1 29159 cellular  
organisms;Eukaryota;Opisthokonta;Metazoa;Eumetazoa;Bilateria;Protostomia;  
Spiralia;Lophotrochozoa;Mollusca;Bivalvia;Autobranchia;Pteriomorphia;Ostreida;Ostreoidea;Ostreidae;Crassostrea;Crassostrea gigas  
UdeM00000013605 29159 95.1 UdeM00000013605 XP\_011423587.2 29.4 228  
144 6 167 386 76 294 2.10E-16 95.1 29159 cellular  
organisms;Eukaryota;Opisthokonta;Metazoa;Eumetazoa;Bilateria;Protostomia;  
Spiralia;Lophotrochozoa;Mollusca;Bivalvia;Autobranchia;Pteriomorphia;Ostreida;Ostreoidea;Ostreidae;Crassostrea;Crassostrea gigas  
UdeM00000013606 6596 503.8 UdeM00000013606 XP\_045175062.1 51.5 487  
234 2 9 494 8 493 2.40E-139 503.8 6596 cellular  
organisms;Eukaryota;Opisthokonta;Metazoa;Eumetazoa;Bilateria;Protostomia;  
Spiralia;Lophotrochozoa;Mollusca;Bivalvia;Autobranchia;Heteroconchia;Euherodonta;Imparidentia;Venerida;Veneroidea;Veneridae;Mercenaria;Mercenaria mercenaria  
UdeM00000013607 6596 572.8 UdeM00000013607 XP\_045175062.1 52.7 543  
255 2 9 550 8 549 4.80E-160 572.8 6596 cellular  
organisms;Eukaryota;Opisthokonta;Metazoa;Eumetazoa;Bilateria;Protostomia;  
Spiralia;Lophotrochozoa;Mollusca;Bivalvia;Autobranchia;Heteroconchia;Euherodonta;Imparidentia;Venerida;Veneroidea;Veneridae;Mercenaria;Mercenaria mercenaria

terodonta;Imparidentia;Venerida;Veneroidea;Veneridae;Mercenaria;Mercenari  
 a mercenaria  
 UdeM00000013608 6596 572 UdeM00000013608 XP\_045175062.1 52.8 551  
 257 3 1 550 1 549 8.20E-160 572 6596 cellular  
 organisms;Eukaryota;Opisthokonta;Metazoa;Eumetazoa;Bilateria;Protostomia;  
 Spiralia;Lophotrochozoa;Mollusca;Bivalvia;Autobranhia;Heteroconchia;Euhe  
 terodonta;Imparidentia;Venerida;Veneroidea;Veneridae;Mercenaria;Mercenari  
 a mercenaria  
 UdeM00000013610 29159 426.8 UdeM00000013610 XP\_011435860.2 36.6 688  
 381 12 82 752 28 677 5.80E-116 426.8 29159 cellular  
 organisms;Eukaryota;Opisthokonta;Metazoa;Eumetazoa;Bilateria;Protostomia;  
 Spiralia;Lophotrochozoa;Mollusca;Bivalvia;Autobranhia;Pteriormorphia;Ostr  
 eida;Ostreioidea;Ostreidae;Crassostrea;Crassostrea gigas  
 UdeM00000013611 6596 144.1 UdeM00000013611 XP\_045216641.1 37.9 211  
 116 3 24 223 89 295 2.50E-31 144.1 6596 cellular  
 organisms;Eukaryota;Opisthokonta;Metazoa;Eumetazoa;Bilateria;Protostomia;  
 Spiralia;Lophotrochozoa;Mollusca;Bivalvia;Autobranhia;Heteroconchia;Euhe  
 terodonta;Imparidentia;Venerida;Veneroidea;Veneridae;Mercenaria;Mercenari  
 a mercenaria  
 UdeM00000013612 6565 308.1 UdeM00000013612 XP\_022330882.1 40.5 432  
 212 8 1 422 273 669 1.70E-80 308.1 6565 cellular  
 organisms;Eukaryota;Opisthokonta;Metazoa;Eumetazoa;Bilateria;Protostomia;  
 Spiralia;Lophotrochozoa;Mollusca;Bivalvia;Autobranhia;Pteriormorphia;Ostr  
 eida;Ostreioidea;Ostreidae;Crassostrea;Crassostrea virginica  
 UdeM00000013613 6565 62.4 UdeM00000013613 XP\_022327714.1 38.6 114  
 63 1 5 111 11 124 5.60E-07 62.4 6565 cellular  
 organisms;Eukaryota;Opisthokonta;Metazoa;Eumetazoa;Bilateria;Protostomia;  
 Spiralia;Lophotrochozoa;Mollusca;Bivalvia;Autobranhia;Pteriormorphia;Ostr  
 eida;Ostreioidea;Ostreidae;Crassostrea;Crassostrea virginica  
 UdeM00000013614 7668 110.9 UdeM00000013614 XP\_030839940.1 27.8 295  
 183 8 2 288 90 362 3.10E-21 110.9 7668 cellular  
 organisms;Eukaryota;Opisthokonta;Metazoa;Eumetazoa;Bilateria;Deuterostomi  
 a;Echinodermata;Eleutherozoa;Echinozoa;Echinoidea;Euechinoidea;Echinacea;  
 Camarodonta;Echinidea;Strongylocentrotidae;Strongylocentrotus;Strongyloce  
 ntrotus purpuratus  
 UdeM00000013615 6596 495.7 UdeM00000013615 XP\_045175062.1 48.9 548  
 277 3 1 547 1 546 7.60E-137 495.7 6596 cellular  
 organisms;Eukaryota;Opisthokonta;Metazoa;Eumetazoa;Bilateria;Protostomia;  
 Spiralia;Lophotrochozoa;Mollusca;Bivalvia;Autobranhia;Heteroconchia;Euhe  
 terodonta;Imparidentia;Venerida;Veneroidea;Veneridae;Mercenaria;Mercenari  
 a mercenaria  
 UdeM00000013616 1735272 196.8 UdeM00000013616 XP\_041376757.1 33.4  
 338 181 7 18 326 17 339 4.20E-47 196.8 1735272  
 cellular  
 organisms;Eukaryota;Opisthokonta;Metazoa;Eumetazoa;Bilateria;Protostomia;  
 Spiralia;Lophotrochozoa;Mollusca;Gastropoda;Neomphalina;Neomphaloidea;Pel  
 tospiridae;Gigantopelta;Gigantopelta aegis  
 UdeM00000013617 6579 195.3 UdeM00000013617 XP\_033744417.1 43.6 236  
 109 6 11 241 4 220 9.40E-47 195.3 6579 cellular  
 organisms;Eukaryota;Opisthokonta;Metazoa;Eumetazoa;Bilateria;Protostomia;  
 Spiralia;Lophotrochozoa;Mollusca;Bivalvia;Autobranhia;Pteriormorphia;Pect  
 inida;Pectinoidea;Pectinidae;Pecten;Pecten maximus  
 UdeM00000013618 1735272 199.1 UdeM00000013618 XP\_041376757.1 34.6  
 338 182 4 14 324 13 338 8.50E-48 199.1 1735272

cellular  
organisms;Eukaryota;Opisthokonta;Metazoa;Eumetazoa;Bilateria;Protostomia;  
Spiralia;Lophotrochozoa;Mollusca;Gastropoda;Neomphalina;Neomphaloidea;Pel  
tospiridae;Gigantopelta;Gigantopelta aegis  
UdeM00000013619 6596 104.8 UdeM00000013619 XP\_045203526.1 47.1 119  
63 0 1 119 227 345 1.20E-19 104.8 6596 cellular  
organisms;Eukaryota;Opisthokonta;Metazoa;Eumetazoa;Bilateria;Protostomia;  
Spiralia;Lophotrochozoa;Mollusca;Bivalvia;Autobranchia;Heteroconchia;Euhe  
terodonta;Imparidentia;Venerida;Veneroidea;Veneridae;Mercenaria;Mercenari  
a mercenaria  
UdeM00000013620 6596 377.1 UdeM00000013620 XP\_045216641.1 36.3 641  
351 13 13 623 89 702 4.40E-101 377.1 6596 cellular  
organisms;Eukaryota;Opisthokonta;Metazoa;Eumetazoa;Bilateria;Protostomia;  
Spiralia;Lophotrochozoa;Mollusca;Bivalvia;Autobranchia;Heteroconchia;Euhe  
terodonta;Imparidentia;Venerida;Veneroidea;Veneridae;Mercenaria;Mercenari  
a mercenaria  
UdeM00000013621 29159 375.2 UdeM00000013621 XP\_011435860.2 34.7 651  
381 10 2 627 47 678 1.70E-100 375.2 29159 cellular  
organisms;Eukaryota;Opisthokonta;Metazoa;Eumetazoa;Bilateria;Protostomia;  
Spiralia;Lophotrochozoa;Mollusca;Bivalvia;Autobranchia;Pteriormorphia;Ostr  
eida;Ostreoidea;Ostreidae;Crassostrea;Crassostrea gigas  
UdeM00000013622 6579 213.4 UdeM00000013622 XP\_033750309.1 48.3 230  
99 3 29 243 493 717 3.30E-52 213.4 6579 cellular  
organisms;Eukaryota;Opisthokonta;Metazoa;Eumetazoa;Bilateria;Protostomia;  
Spiralia;Lophotrochozoa;Mollusca;Bivalvia;Autobranchia;Pteriormorphia;Pect  
inida;Pectinoidea;Pectinidae;Pecten;Pecten maximus  
UdeM00000013623 6579 328.9 UdeM00000013623 XP\_033750309.1 36.7 537  
296 9 41 561 126 634 1.30E-86 328.9 6579 cellular  
organisms;Eukaryota;Opisthokonta;Metazoa;Eumetazoa;Bilateria;Protostomia;  
Spiralia;Lophotrochozoa;Mollusca;Bivalvia;Autobranchia;Pteriormorphia;Pect  
inida;Pectinoidea;Pectinidae;Pecten;Pecten maximus  
UdeM00000013624 6596 208.8 UdeM00000013624 XP\_045216641.1 30.8 442  
264 8 13 441 89 501 1.50E-50 208.8 6596 cellular  
organisms;Eukaryota;Opisthokonta;Metazoa;Eumetazoa;Bilateria;Protostomia;  
Spiralia;Lophotrochozoa;Mollusca;Bivalvia;Autobranchia;Heteroconchia;Euhe  
terodonta;Imparidentia;Venerida;Veneroidea;Veneridae;Mercenaria;Mercenari  
a mercenaria  
UdeM00000013626 6573 414.5 UdeM00000013626 XP\_021346025.1 36.7 682  
382 12 4 668 82 730 2.60E-112 414.5 6573 cellular  
organisms;Eukaryota;Opisthokonta;Metazoa;Eumetazoa;Bilateria;Protostomia;  
Spiralia;Lophotrochozoa;Mollusca;Bivalvia;Autobranchia;Pteriormorphia;Pect  
inida;Pectinoidea;Pectinidae;Mizuhopecten;Mizuhopecten yessoensis  
UdeM00000013625 6573 414.8 UdeM00000013625 XP\_021346025.1 36.7 682  
382 12 58 722 82 730 2.20E-112 414.8 6573 cellular  
organisms;Eukaryota;Opisthokonta;Metazoa;Eumetazoa;Bilateria;Protostomia;  
Spiralia;Lophotrochozoa;Mollusca;Bivalvia;Autobranchia;Pteriormorphia;Pect  
inida;Pectinoidea;Pectinidae;Mizuhopecten;Mizuhopecten yessoensis  
UdeM00000013627 6596 250.8 UdeM00000013627 XP\_045193371.1 50.2 207  
103 0 53 259 303 509 2.00E-63 250.8 6596 cellular  
organisms;Eukaryota;Opisthokonta;Metazoa;Eumetazoa;Bilateria;Protostomia;  
Spiralia;Lophotrochozoa;Mollusca;Bivalvia;Autobranchia;Heteroconchia;Euhe  
terodonta;Imparidentia;Venerida;Veneroidea;Veneridae;Mercenaria;Mercenari  
a mercenaria

UdeM00000013628 6596 251.9 UdeM00000013628 XP\_045193371.1 44.6 303  
 163 5 1 300 1 301 1.00E-63 251.9 6596 cellular  
 organisms;Eukaryota;Opisthokonta;Metazoa;Eumetazoa;Bilateria;Protostomia;  
 Spiralia;Lophotrochozoa;Mollusca;Bivalvia;Autobranhia;Heteroconchia;Euhe  
 terodonta;Imparidentia;Venerida;Veneroidea;Veneridae;Mercenaria;Mercenari  
 a mercenaria  
 UdeM00000013629 6573 492.7 UdeM00000013629 XP\_021349146.1 39.4 751  
 292 18 16 622 3 734 7.20E-136 492.7 6573 cellular  
 organisms;Eukaryota;Opisthokonta;Metazoa;Eumetazoa;Bilateria;Protostomia;  
 Spiralia;Lophotrochozoa;Mollusca;Bivalvia;Autobranhia;Pteriormorphia;Pect  
 inida;Pectinoidea;Pectinidae;Mizuhopecten;Mizuhopecten yessoensis  
 UdeM00000013630 29159 123.2 UdeM00000013630 XP\_034329616.1 56 109  
 43 1 5 108 3 111 2.90E-25 123.2 29159 cellular  
 organisms;Eukaryota;Opisthokonta;Metazoa;Eumetazoa;Bilateria;Protostomia;  
 Spiralia;Lophotrochozoa;Mollusca;Bivalvia;Autobranhia;Pteriormorphia;Ostr  
 eida;Ostreoidea;Ostreidae;Crassostrea;Crassostrea gigas  
 UdeM00000013631 6596 111.7 UdeM00000013631 XP\_045179675.1 50 102  
 51 0 1 102 1 102 6.90E-22 111.7 6596 cellular  
 organisms;Eukaryota;Opisthokonta;Metazoa;Eumetazoa;Bilateria;Protostomia;  
 Spiralia;Lophotrochozoa;Mollusca;Bivalvia;Autobranhia;Heteroconchia;Euhe  
 terodonta;Imparidentia;Venerida;Veneroidea;Veneridae;Mercenaria;Mercenari  
 a mercenaria  
 UdeM00000013632 6596 119.8 UdeM00000013632 XP\_045178940.1 50.9 106  
 52 0 3 108 1 106 3.30E-24 119.8 6596 cellular  
 organisms;Eukaryota;Opisthokonta;Metazoa;Eumetazoa;Bilateria;Protostomia;  
 Spiralia;Lophotrochozoa;Mollusca;Bivalvia;Autobranhia;Heteroconchia;Euhe  
 terodonta;Imparidentia;Venerida;Veneroidea;Veneridae;Mercenaria;Mercenari  
 a mercenaria  
 UdeM00000013633 6596 112.5 UdeM00000013633 XP\_045178940.1 48.5 103  
 53 0 1 103 1 103 5.10E-22 112.5 6596 cellular  
 organisms;Eukaryota;Opisthokonta;Metazoa;Eumetazoa;Bilateria;Protostomia;  
 Spiralia;Lophotrochozoa;Mollusca;Bivalvia;Autobranhia;Heteroconchia;Euhe  
 terodonta;Imparidentia;Venerida;Veneroidea;Veneridae;Mercenaria;Mercenari  
 a mercenaria  
 UdeM00000013635 6500 375.9 UdeM00000013635 XP\_005109613.2 53.4 335  
 151 2 17 351 16 345 5.50E-101 375.9 6500 cellular  
 organisms;Eukaryota;Opisthokonta;Metazoa;Eumetazoa;Bilateria;Protostomia;  
 Spiralia;Lophotrochozoa;Mollusca;Gastropoda;Heterobranhia;Euthyneura;Tec  
 tipleura;Aplysiida;Aplysioidea;Aplysiidae;Aplysia;Aplysia californica  
 UdeM00000013636 6579 372.1 UdeM00000013636 XP\_033754408.1 36.3 608  
 365 6 11 610 28 621 2.00E-99 372.1 6579 cellular  
 organisms;Eukaryota;Opisthokonta;Metazoa;Eumetazoa;Bilateria;Protostomia;  
 Spiralia;Lophotrochozoa;Mollusca;Bivalvia;Autobranhia;Pteriormorphia;Pect  
 inida;Pectinoidea;Pectinidae;Pecten;Pecten maximus  
 UdeM00000013637 13686 291.6 UdeM00000013637 XP\_011170408.3 42.1 385  
 218 3 1 382 471 853 1.50E-75 291.6 13686 cellular  
 organisms;Eukaryota;Opisthokonta;Metazoa;Eumetazoa;Bilateria;Protostomia;  
 Ecdysozoa;Panarthropoda;Arthropoda;Mandibulata;Pancrustacea;Hexapoda;Inse  
 cta;Dicondylia;Pterygota;Neoptera;Endopterygota;Hymenoptera;Apocrita;Acul  
 eata;Formicoidea;Formicidae;Myrmicinae;Solenopsidini;Solenopsis;Solenopsi  
 s invicta  
 UdeM00000013638 37653 1152.9 UdeM00000013638 XP\_014783789.1 52.6  
 1094 488 16 86 1160 83 1164 0.00E+00 1152.9  
 37653 cellular

organisms;Eukaryota;Opisthokonta;Metazoa;Eumetazoa;Bilateria;Protostomia;  
Spiralia;Lophotrochozoa;Mollusca;Cephalopoda;Coleoidea;Octopodiformes;Oct  
opoda;Incirrata;Octopodidae;Octopus;Octopus bimaculoides  
UdeM00000013639 37653 508.1 UdeM00000013639 XP\_014783789.1 50.8 520  
223 7 2 494 640 1153 1.30E-140 508.1 37653 cellular  
organisms;Eukaryota;Opisthokonta;Metazoa;Eumetazoa;Bilateria;Protostomia;  
Spiralia;Lophotrochozoa;Mollusca;Cephalopoda;Coleoidea;Octopodiformes;Oct  
opoda;Incirrata;Octopodidae;Octopus;Octopus bimaculoides  
UdeM00000013640 6579 561.2 UdeM00000013640 XP\_033755348.1 46 639  
271 11 43 612 34 667 1.60E-156 561.2 6579 cellular  
organisms;Eukaryota;Opisthokonta;Metazoa;Eumetazoa;Bilateria;Protostomia;  
Spiralia;Lophotrochozoa;Mollusca;Bivalvia;Autobranchia;Pteriomorphia;Pect  
inida;Pectinoidea;Pectinidae;Pecten;Pecten maximus  
UdeM00000013641 6596 481.1 UdeM00000013641 XP\_045192716.1 60.9 394  
152 2 1 394 47 438 1.40E-132 481.1 6596 cellular  
organisms;Eukaryota;Opisthokonta;Metazoa;Eumetazoa;Bilateria;Protostomia;  
Spiralia;Lophotrochozoa;Mollusca;Bivalvia;Autobranchia;Heteroconchia;Euhe  
terodonta;Imparidentia;Venerida;Veneroidea;Veneridae;Mercenaria;Mercenari  
a mercenaria  
UdeM00000013642 6573 282.3 UdeM00000013642 XP\_021350160.1 63.7 267  
97 0 1 267 251 517 6.50E-73 282.3 6573 cellular  
organisms;Eukaryota;Opisthokonta;Metazoa;Eumetazoa;Bilateria;Protostomia;  
Spiralia;Lophotrochozoa;Mollusca;Bivalvia;Autobranchia;Pteriomorphia;Pect  
inida;Pectinoidea;Pectinidae;Mizuhopecten;Mizuhopecten yessoensis  
UdeM00000013643 6573 144.1 UdeM00000013643 XP\_021350152.1 40.1 242  
135 5 13 251 11 245 2.50E-31 144.1 6573 cellular  
organisms;Eukaryota;Opisthokonta;Metazoa;Eumetazoa;Bilateria;Protostomia;  
Spiralia;Lophotrochozoa;Mollusca;Bivalvia;Autobranchia;Pteriomorphia;Pect  
inida;Pectinoidea;Pectinidae;Mizuhopecten;Mizuhopecten yessoensis  
UdeM00000013644 6596 627.1 UdeM00000013644 XP\_045194093.1 50.7 605  
283 9 35 627 50 651 2.60E-176 627.1 6596 cellular  
organisms;Eukaryota;Opisthokonta;Metazoa;Eumetazoa;Bilateria;Protostomia;  
Spiralia;Lophotrochozoa;Mollusca;Bivalvia;Autobranchia;Heteroconchia;Euhe  
terodonta;Imparidentia;Venerida;Veneroidea;Veneridae;Mercenaria;Mercenari  
a mercenaria  
UdeM00000013645 6565 377.1 UdeM00000013645 XP\_022337692.1 36 625  
362 13 128 742 1 597 6.00E-101 377.1 6565 cellular  
organisms;Eukaryota;Opisthokonta;Metazoa;Eumetazoa;Bilateria;Protostomia;  
Spiralia;Lophotrochozoa;Mollusca;Bivalvia;Autobranchia;Pteriomorphia;Ostr  
eida;Ostreoidea;Ostreidae;Crassostrea;Crassostrea virginica  
UdeM00000013646 6579 117.1 UdeM00000013646 XP\_033755178.1 36.5 200  
83 4 12 210 60 216 2.80E-23 117.1 6579 cellular  
organisms;Eukaryota;Opisthokonta;Metazoa;Eumetazoa;Bilateria;Protostomia;  
Spiralia;Lophotrochozoa;Mollusca;Bivalvia;Autobranchia;Pteriomorphia;Pect  
inida;Pectinoidea;Pectinidae;Pecten;Pecten maximus  
UdeM00000013647 6573 87.8 UdeM00000013647 XP\_021371298.1 38.2 136  
74 2 11 140 3 134 1.20E-14 87.8 6573 cellular  
organisms;Eukaryota;Opisthokonta;Metazoa;Eumetazoa;Bilateria;Protostomia;  
Spiralia;Lophotrochozoa;Mollusca;Bivalvia;Autobranchia;Pteriomorphia;Pect  
inida;Pectinoidea;Pectinidae;Mizuhopecten;Mizuhopecten yessoensis  
UdeM00000013648 6596 918.7 UdeM00000013648 XP\_045192874.1 80.5 563  
105 4 2 561 225 785 3.60E-264 918.7 6596 cellular  
organisms;Eukaryota;Opisthokonta;Metazoa;Eumetazoa;Bilateria;Protostomia;  
Spiralia;Lophotrochozoa;Mollusca;Bivalvia;Autobranchia;Heteroconchia;Euhe

terodonta;Imparidentia;Venerida;Veneroidea;Veneridae;Mercenaria;Mercenari  
 a mercenaria  
 UdeM00000013649 6579 249.2 UdeM00000013649 XP\_033755020.1 68.5 162  
 51 0 17 178 55 216 5.60E-63 249.2 6579 cellular  
 organisms;Eukaryota;Opisthokonta;Metazoa;Eumetazoa;Bilateria;Protostomia;  
 Spiralia;Lophotrochozoa;Mollusca;Bivalvia;Autobranchia;Pteriormorphia;Pect  
 inida;Pectinoidea;Pectinidae;Pecten;Pecten maximus  
 UdeM00000013650 6596 386.3 UdeM00000013650 XP\_045192873.1 74.8 242  
 59 1 26 265 30 271 3.70E-104 386.3 6596 cellular  
 organisms;Eukaryota;Opisthokonta;Metazoa;Eumetazoa;Bilateria;Protostomia;  
 Spiralia;Lophotrochozoa;Mollusca;Bivalvia;Autobranchia;Heteroconchia;Euhe  
 terodonta;Imparidentia;Venerida;Veneroidea;Veneridae;Mercenaria;Mercenari  
 a mercenaria  
 UdeM00000013651 6596 485.3 UdeM00000013651 XP\_045205714.1 81 290  
 55 0 1 290 1 290 5.30E-134 485.3 6596 cellular  
 organisms;Eukaryota;Opisthokonta;Metazoa;Eumetazoa;Bilateria;Protostomia;  
 Spiralia;Lophotrochozoa;Mollusca;Bivalvia;Autobranchia;Heteroconchia;Euhe  
 terodonta;Imparidentia;Venerida;Veneroidea;Veneridae;Mercenaria;Mercenari  
 a mercenaria  
 UdeM00000013652 6596 337.8 UdeM00000013652 XP\_045193591.1 60.8 273  
 107 0 1 273 32 304 1.30E-89 337.8 6596 cellular  
 organisms;Eukaryota;Opisthokonta;Metazoa;Eumetazoa;Bilateria;Protostomia;  
 Spiralia;Lophotrochozoa;Mollusca;Bivalvia;Autobranchia;Heteroconchia;Euhe  
 terodonta;Imparidentia;Venerida;Veneroidea;Veneridae;Mercenaria;Mercenari  
 a mercenaria  
 UdeM00000013653 6565 423.3 UdeM00000013653 XP\_022325149.1 31 825  
 552 11 20 836 49 864 7.10E-115 423.3 6565 cellular  
 organisms;Eukaryota;Opisthokonta;Metazoa;Eumetazoa;Bilateria;Protostomia;  
 Spiralia;Lophotrochozoa;Mollusca;Bivalvia;Autobranchia;Pteriormorphia;Ostr  
 eida;Ostreoidea;Ostreidae;Crassostrea;Crassostrea virginica  
 UdeM00000013655 6596 161.8 UdeM00000013655 XP\_045203760.1 26 416  
 295 6 2 407 44 456 1.90E-36 161.8 6596 cellular  
 organisms;Eukaryota;Opisthokonta;Metazoa;Eumetazoa;Bilateria;Protostomia;  
 Spiralia;Lophotrochozoa;Mollusca;Bivalvia;Autobranchia;Heteroconchia;Euhe  
 terodonta;Imparidentia;Venerida;Veneroidea;Veneridae;Mercenaria;Mercenari  
 a mercenaria  
 UdeM00000013656 6596 132.5 UdeM00000013656 XP\_045204674.1 37.4 182  
 109 2 2 180 278 457 6.10E-28 132.5 6596 cellular  
 organisms;Eukaryota;Opisthokonta;Metazoa;Eumetazoa;Bilateria;Protostomia;  
 Spiralia;Lophotrochozoa;Mollusca;Bivalvia;Autobranchia;Heteroconchia;Euhe  
 terodonta;Imparidentia;Venerida;Veneroidea;Veneridae;Mercenaria;Mercenari  
 a mercenaria  
 UdeM00000013657 6579 74.3 UdeM00000013657 XP\_033753962.1 55.2 67  
 28 1 5 71 175 239 6.90E-11 74.3 6579 cellular  
 organisms;Eukaryota;Opisthokonta;Metazoa;Eumetazoa;Bilateria;Protostomia;  
 Spiralia;Lophotrochozoa;Mollusca;Bivalvia;Autobranchia;Pteriormorphia;Pect  
 inida;Pectinoidea;Pectinidae;Pecten;Pecten maximus  
 UdeM00000013658 6596 162.9 UdeM00000013658 XP\_045202954.1 27.1 414  
 289 6 2 407 47 455 8.50E-37 162.9 6596 cellular  
 organisms;Eukaryota;Opisthokonta;Metazoa;Eumetazoa;Bilateria;Protostomia;  
 Spiralia;Lophotrochozoa;Mollusca;Bivalvia;Autobranchia;Heteroconchia;Euhe  
 terodonta;Imparidentia;Venerida;Veneroidea;Veneridae;Mercenaria;Mercenari  
 a mercenaria

UdeM00000013659 6596 382.5 UdeM00000013659 XP\_045193632.1 45.1 448  
 241 5 59 503 2 447 8.50E-103 382.5 6596 cellular  
 organisms;Eukaryota;Opisthokonta;Metazoa;Eumetazoa;Bilateria;Protostomia;  
 Spiralia;Lophotrochozoa;Mollusca;Bivalvia;Autobranchia;Heteroconchia;Euhe  
 terodonta;Imparidentia;Venerida;Veneroidea;Veneridae;Mercenaria;Mercenari  
 a mercenaria  
 UdeM00000013661 6596 163.7 UdeM00000013661 XP\_045193635.1 26.7 393  
 272 8 26 407 50 437 5.00E-37 163.7 6596 cellular  
 organisms;Eukaryota;Opisthokonta;Metazoa;Eumetazoa;Bilateria;Protostomia;  
 Spiralia;Lophotrochozoa;Mollusca;Bivalvia;Autobranchia;Heteroconchia;Euhe  
 terodonta;Imparidentia;Venerida;Veneroidea;Veneridae;Mercenaria;Mercenari  
 a mercenaria  
 UdeM00000013662 6596 233.4 UdeM00000013662 XP\_045193635.1 44 293  
 157 5 6 292 156 447 3.70E-58 233.4 6596 cellular  
 organisms;Eukaryota;Opisthokonta;Metazoa;Eumetazoa;Bilateria;Protostomia;  
 Spiralia;Lophotrochozoa;Mollusca;Bivalvia;Autobranchia;Heteroconchia;Euhe  
 terodonta;Imparidentia;Venerida;Veneroidea;Veneridae;Mercenaria;Mercenari  
 a mercenaria  
 UdeM00000013663 6596 159.8 UdeM00000013663 XP\_045193641.1 41.6 202  
 109 5 10 207 5 201 4.00E-36 159.8 6596 cellular  
 organisms;Eukaryota;Opisthokonta;Metazoa;Eumetazoa;Bilateria;Protostomia;  
 Spiralia;Lophotrochozoa;Mollusca;Bivalvia;Autobranchia;Heteroconchia;Euhe  
 terodonta;Imparidentia;Venerida;Veneroidea;Veneridae;Mercenaria;Mercenari  
 a mercenaria  
 UdeM00000013664 6596 154.5 UdeM00000013664 XP\_045215574.1 44.7 150  
 79 1 19 164 17 166 1.20E-34 154.5 6596 cellular  
 organisms;Eukaryota;Opisthokonta;Metazoa;Eumetazoa;Bilateria;Protostomia;  
 Spiralia;Lophotrochozoa;Mollusca;Bivalvia;Autobranchia;Heteroconchia;Euhe  
 terodonta;Imparidentia;Venerida;Veneroidea;Veneridae;Mercenaria;Mercenari  
 a mercenaria  
 UdeM00000013665 225164 411.8 UdeM00000013665 XP\_009050890.1 31.4  
 907 534 16 10 907 8 835 2.30E-111 411.8 225164  
 cellular  
 organisms;Eukaryota;Opisthokonta;Metazoa;Eumetazoa;Bilateria;Protostomia;  
 Spiralia;Lophotrochozoa;Mollusca;Gastropoda;Patellogastropoda;Lottioidea;  
 Lottiidae;Lottia;Lottia gigantea  
 UdeM00000013666 29159 344.7 UdeM00000013666 XP\_019928194.2 61.6 268  
 99 3 58 323 19 284 1.30E-91 344.7 29159 cellular  
 organisms;Eukaryota;Opisthokonta;Metazoa;Eumetazoa;Bilateria;Protostomia;  
 Spiralia;Lophotrochozoa;Mollusca;Bivalvia;Autobranchia;Pteriomorphia;Ostr  
 eida;Ostreoidea;Ostreidae;Crassostrea;Crassostrea gigas  
 UdeM00000013667 6596 544.7 UdeM00000013667 XP\_045192971.1 61.6 463  
 169 4 1 456 39 499 1.20E-151 544.7 6596 cellular  
 organisms;Eukaryota;Opisthokonta;Metazoa;Eumetazoa;Bilateria;Protostomia;  
 Spiralia;Lophotrochozoa;Mollusca;Bivalvia;Autobranchia;Heteroconchia;Euhe  
 terodonta;Imparidentia;Venerida;Veneroidea;Veneridae;Mercenaria;Mercenari  
 a mercenaria  
 UdeM00000013673 6596 90.5 UdeM00000013673 XP\_045157539.1 29 221  
 143 4 4 213 478 695 2.90E-15 90.5 6596 cellular  
 organisms;Eukaryota;Opisthokonta;Metazoa;Eumetazoa;Bilateria;Protostomia;  
 Spiralia;Lophotrochozoa;Mollusca;Bivalvia;Autobranchia;Heteroconchia;Euhe  
 terodonta;Imparidentia;Venerida;Veneroidea;Veneridae;Mercenaria;Mercenari  
 a mercenaria

UdeM00000013674 6596 224.6 UdeM00000013674 XP\_045199387.1 33.3 402  
 250 8 4 395 3 396 2.50E-55 224.6 6596 cellular  
 organisms;Eukaryota;Opisthokonta;Metazoa;Eumetazoa;Bilateria;Protostomia;  
 Spiralia;Lophotrochozoa;Mollusca;Bivalvia;Autobranchia;Heteroconchia;Euhe  
 terodonta;Imparidentia;Venerida;Veneroidea;Veneridae;Mercenaria;Mercenari  
 a mercenaria  
 UdeM00000013676 29159 117.5 UdeM00000013676 XP\_019926412.2 43.7 142  
 77 1 1 139 1 142 1.50E-23 117.5 29159 cellular  
 organisms;Eukaryota;Opisthokonta;Metazoa;Eumetazoa;Bilateria;Protostomia;  
 Spiralia;Lophotrochozoa;Mollusca;Bivalvia;Autobranchia;Pteriormorphia;Ostr  
 eida;Ostreoidea;Ostreidae;Crassostrea;Crassostrea gigas  
 UdeM00000013679 6596 70.9 UdeM00000013679 XP\_045161599.1 25.6 277  
 177 7 1 255 7 276 3.40E-09 70.9 6596 cellular  
 organisms;Eukaryota;Opisthokonta;Metazoa;Eumetazoa;Bilateria;Protostomia;  
 Spiralia;Lophotrochozoa;Mollusca;Bivalvia;Autobranchia;Heteroconchia;Euhe  
 terodonta;Imparidentia;Venerida;Veneroidea;Veneridae;Mercenaria;Mercenari  
 a mercenaria  
 UdeM00000013681 6596 750 UdeM00000013681 XP\_045192740.1 68.7 559  
 171 2 29 584 37 594 2.40E-213 750 6596 cellular  
 organisms;Eukaryota;Opisthokonta;Metazoa;Eumetazoa;Bilateria;Protostomia;  
 Spiralia;Lophotrochozoa;Mollusca;Bivalvia;Autobranchia;Heteroconchia;Euhe  
 terodonta;Imparidentia;Venerida;Veneroidea;Veneridae;Mercenaria;Mercenari  
 a mercenaria  
 UdeM00000013682 6596 357.8 UdeM00000013682 XP\_045192741.1 68.3 252  
 80 0 1 252 8 259 1.10E-95 357.8 6596 cellular  
 organisms;Eukaryota;Opisthokonta;Metazoa;Eumetazoa;Bilateria;Protostomia;  
 Spiralia;Lophotrochozoa;Mollusca;Bivalvia;Autobranchia;Heteroconchia;Euhe  
 terodonta;Imparidentia;Venerida;Veneroidea;Veneridae;Mercenaria;Mercenari  
 a mercenaria  
 UdeM00000013683 6596 895.2 UdeM00000013683 XP\_045191853.1 70.3 566  
 168 0 18 583 4 569 4.50E-257 895.2 6596 cellular  
 organisms;Eukaryota;Opisthokonta;Metazoa;Eumetazoa;Bilateria;Protostomia;  
 Spiralia;Lophotrochozoa;Mollusca;Bivalvia;Autobranchia;Heteroconchia;Euhe  
 terodonta;Imparidentia;Venerida;Veneroidea;Veneridae;Mercenaria;Mercenari  
 a mercenaria  
 UdeM00000013684 6596 234.2 UdeM00000013684 XP\_045193383.1 43.8 256  
 143 1 1 256 44 298 2.50E-58 234.2 6596 cellular  
 organisms;Eukaryota;Opisthokonta;Metazoa;Eumetazoa;Bilateria;Protostomia;  
 Spiralia;Lophotrochozoa;Mollusca;Bivalvia;Autobranchia;Heteroconchia;Euhe  
 terodonta;Imparidentia;Venerida;Veneroidea;Veneridae;Mercenaria;Mercenari  
 a mercenaria  
 UdeM00000013686 6565 477.2 UdeM00000013686 XP\_022335540.1 54.5 462  
 204 2 1 459 30 488 2.30E-131 477.2 6565 cellular  
 organisms;Eukaryota;Opisthokonta;Metazoa;Eumetazoa;Bilateria;Protostomia;  
 Spiralia;Lophotrochozoa;Mollusca;Bivalvia;Autobranchia;Pteriormorphia;Ostr  
 eida;Ostreoidea;Ostreidae;Crassostrea;Crassostrea virginica  
 UdeM00000013688 441366 402.9 UdeM00000013688 XP\_028318212.1 29.7  
 822 500 15 340 1128 139 915 1.30E-108 402.9 441366  
 cellular  
 organisms;Eukaryota;Opisthokonta;Metazoa;Eumetazoa;Bilateria;Deuterostomi  
 a;Chordata;Craniata;Vertebrata;Gnathostomata;Teleostomi;Euteleostomi;Acti  
 nopterygii;Actinopteri;Neopterygii;Teleostei;Osteoglossocephalai;Clupeoce  
 phala;Euteleosteomorpha;Neoteleostei;Eurypterygia;Ctenosquamata;Acanthomo  
 rphata;Euacanthomorpha;Percomorphaceae;Ovalentaria;Blenniimorphae;Blen



niiformes;Gobiesocoidei;Gobiesocidae;Gobiesocinae;Gouania;Gouania  
 willdenowi  
 UdeM00000013689 29159 407.9 UdeM00000013689 XP\_034338405.1 30.6 1351  
 729 28 3 1337 104 1262 5.00E-110 407.9 29159 cellular  
 organisms;Eukaryota;Opisthokonta;Metazoa;Eumetazoa;Bilateria;Protostomia;  
 Spiralia;Lophotrochozoa;Mollusca;Bivalvia;Autobranchia;Pteriormorphia;Ostr  
 eida;Ostreoidea;Ostreidae;Crassostrea;Crassostrea gigas  
 UdeM00000013690 29159 412.5 UdeM00000013690 XP\_034338404.1 33.5 1345  
 687 32 3 1311 104 1277 2.00E-111 412.5 29159 cellular  
 organisms;Eukaryota;Opisthokonta;Metazoa;Eumetazoa;Bilateria;Protostomia;  
 Spiralia;Lophotrochozoa;Mollusca;Bivalvia;Autobranchia;Pteriormorphia;Ostr  
 eida;Ostreoidea;Ostreidae;Crassostrea;Crassostrea gigas  
 UdeM00000013691 6573 444.1 UdeM00000013691 XP\_021343810.1 88.2 245  
 29 0 1 245 1 245 1.10E-121 444.1 6573 cellular  
 organisms;Eukaryota;Opisthokonta;Metazoa;Eumetazoa;Bilateria;Protostomia;  
 Spiralia;Lophotrochozoa;Mollusca;Bivalvia;Autobranchia;Pteriormorphia;Pect  
 inida;Pectinoidea;Pectinidae;Mizuhopecten;Mizuhopecten yessoensis  
 UdeM00000013692 6596 430.3 UdeM00000013692 XP\_045191903.1 85.8 246  
 35 0 1 246 1 246 1.70E-117 430.3 6596 cellular  
 organisms;Eukaryota;Opisthokonta;Metazoa;Eumetazoa;Bilateria;Protostomia;  
 Spiralia;Lophotrochozoa;Mollusca;Bivalvia;Autobranchia;Heteroconchia;Euhe  
 terodonta;Imparidentia;Venerida;Veneroidea;Veneridae;Mercenaria;Mercenari  
 a mercenaria  
 UdeM00000013693 37653 1198 UdeM00000013693 XP\_014781977.1 50.5 1341  
 501 25 1 1233 1 1286 0.00E+00 1198 37653 cellular  
 organisms;Eukaryota;Opisthokonta;Metazoa;Eumetazoa;Bilateria;Protostomia;  
 Spiralia;Lophotrochozoa;Mollusca;Cephalopoda;Coleoidea;Octopodiformes;Oct  
 opoda;Incirrata;Octopodidae;Octopus;Octopus bimaculoides  
 UdeM00000013694 6565 493.4 UdeM00000013694 XP\_022344356.1 54.5 415  
 184 3 12 423 14 426 2.80E-136 493.4 6565 cellular  
 organisms;Eukaryota;Opisthokonta;Metazoa;Eumetazoa;Bilateria;Protostomia;  
 Spiralia;Lophotrochozoa;Mollusca;Bivalvia;Autobranchia;Pteriormorphia;Ostr  
 eida;Ostreoidea;Ostreidae;Crassostrea;Crassostrea virginica  
 UdeM00000013695 6565 514.6 UdeM00000013695 XP\_022344356.1 57 416  
 174 3 12 424 14 427 1.20E-142 514.6 6565 cellular  
 organisms;Eukaryota;Opisthokonta;Metazoa;Eumetazoa;Bilateria;Protostomia;  
 Spiralia;Lophotrochozoa;Mollusca;Bivalvia;Autobranchia;Pteriormorphia;Ostr  
 eida;Ostreoidea;Ostreidae;Crassostrea;Crassostrea virginica  
 UdeM00000013696 29159 634 UdeM00000013696 XP\_034317562.1 31 1203  
 776 23 8 1197 75 1236 4.30E-178 634 29159 cellular  
 organisms;Eukaryota;Opisthokonta;Metazoa;Eumetazoa;Bilateria;Protostomia;  
 Spiralia;Lophotrochozoa;Mollusca;Bivalvia;Autobranchia;Pteriormorphia;Ostr  
 eida;Ostreoidea;Ostreidae;Crassostrea;Crassostrea gigas  
 UdeM00000013697 7574 107.8 UdeM00000013697 XP\_013401045.1 48.4 93  
 47 1 22 114 158 249 9.20E-21 107.8 7574 cellular  
 organisms;Eukaryota;Opisthokonta;Metazoa;Eumetazoa;Bilateria;Protostomia;  
 Spiralia;Lophotrochozoa;Brachiopoda;Linguliformea;Lingulata;Lingulida;Lin  
 guloidea;Lingulidae;Lingula;Lingula anatina  
 UdeM00000013698 7574 95.9 UdeM00000013698 XP\_013401045.1 46.6 88  
 46 1 22 109 158 244 3.40E-17 95.9 7574 cellular  
 organisms;Eukaryota;Opisthokonta;Metazoa;Eumetazoa;Bilateria;Protostomia;  
 Spiralia;Lophotrochozoa;Brachiopoda;Linguliformea;Lingulata;Lingulida;Lin  
 guloidea;Lingulidae;Lingula;Lingula anatina

UdeM00000013699 29159 471.5 UdeM00000013699 XP\_034317566.1 27.7 1162  
 705 27 216 1277 52 1178 3.80E-129 471.5 29159 cellular  
 organisms;Eukaryota;Opisthokonta;Metazoa;Eumetazoa;Bilateria;Protostomia;  
 Spiralia;Lophotrochozoa;Mollusca;Bivalvia;Autobranhia;Pteriomorphia;Ostr  
 eida;Ostreoidea;Ostreidae;Crassostrea;Crassostrea gigas  
 UdeM00000013700 29159 195.3 UdeM00000013700 XP\_034299028.1 42.8 215  
 119 3 20 232 24 236 8.70E-47 195.3 29159 cellular  
 organisms;Eukaryota;Opisthokonta;Metazoa;Eumetazoa;Bilateria;Protostomia;  
 Spiralia;Lophotrochozoa;Mollusca;Bivalvia;Autobranhia;Pteriomorphia;Ostr  
 eida;Ostreoidea;Ostreidae;Crassostrea;Crassostrea gigas  
 UdeM00000013701 6596 555.1 UdeM00000013701 XP\_045206065.1 34.8 924  
 577 16 136 1044 76 989 2.40E-154 555.1 6596 cellular  
 organisms;Eukaryota;Opisthokonta;Metazoa;Eumetazoa;Bilateria;Protostomia;  
 Spiralia;Lophotrochozoa;Mollusca;Bivalvia;Autobranhia;Heteroconchia;Euhe  
 terodonta;Imparidentia;Venerida;Veneroidea;Veneridae;Mercenaria;Mercenari  
 a mercenaria  
 UdeM00000013702 6565 71.2 UdeM00000013702 XP\_022337361.1 48.7 119  
 57 4 8 125 10 125 1.00E-09 71.2 6565 cellular  
 organisms;Eukaryota;Opisthokonta;Metazoa;Eumetazoa;Bilateria;Protostomia;  
 Spiralia;Lophotrochozoa;Mollusca;Bivalvia;Autobranhia;Pteriomorphia;Ostr  
 eida;Ostreoidea;Ostreidae;Crassostrea;Crassostrea virginica  
 UdeM00000013704 6596 138.7 UdeM00000013704 XP\_045191451.1 46.9 143  
 76 0 1 143 153 295 6.70E-30 138.7 6596 cellular  
 organisms;Eukaryota;Opisthokonta;Metazoa;Eumetazoa;Bilateria;Protostomia;  
 Spiralia;Lophotrochozoa;Mollusca;Bivalvia;Autobranhia;Heteroconchia;Euhe  
 terodonta;Imparidentia;Venerida;Veneroidea;Veneridae;Mercenaria;Mercenari  
 a mercenaria  
 UdeM00000013703 6596 245.4 UdeM00000013703 XP\_045191451.1 42.2 294  
 168 1 43 336 4 295 1.10E-61 245.4 6596 cellular  
 organisms;Eukaryota;Opisthokonta;Metazoa;Eumetazoa;Bilateria;Protostomia;  
 Spiralia;Lophotrochozoa;Mollusca;Bivalvia;Autobranhia;Heteroconchia;Euhe  
 terodonta;Imparidentia;Venerida;Veneroidea;Veneridae;Mercenaria;Mercenari  
 a mercenaria  
 UdeM00000013706 29159 247.3 UdeM00000013706 XP\_034316161.1 42.6 289  
 165 1 1 288 645 933 2.40E-62 247.3 29159 cellular  
 organisms;Eukaryota;Opisthokonta;Metazoa;Eumetazoa;Bilateria;Protostomia;  
 Spiralia;Lophotrochozoa;Mollusca;Bivalvia;Autobranhia;Pteriomorphia;Ostr  
 eida;Ostreoidea;Ostreidae;Crassostrea;Crassostrea gigas  
 UdeM00000013707 6573 2010.3 UdeM00000013707 XP\_021358282.1 60.8  
 1607 609 14 1 1598 1 1595 0.00E+00 2010.3 6573  
 cellular  
 organisms;Eukaryota;Opisthokonta;Metazoa;Eumetazoa;Bilateria;Protostomia;  
 Spiralia;Lophotrochozoa;Mollusca;Bivalvia;Autobranhia;Pteriomorphia;Pect  
 inida;Pectinoidea;Pectinidae;Mizuhopecten;Mizuhopecten yessoensis  
 UdeM00000013708 6596 459.1 UdeM00000013708 XP\_045192146.1 70.2 299  
 88 1 13 310 7 305 4.40E-126 459.1 6596 cellular  
 organisms;Eukaryota;Opisthokonta;Metazoa;Eumetazoa;Bilateria;Protostomia;  
 Spiralia;Lophotrochozoa;Mollusca;Bivalvia;Autobranhia;Heteroconchia;Euhe  
 terodonta;Imparidentia;Venerida;Veneroidea;Veneridae;Mercenaria;Mercenari  
 a mercenaria  
 UdeM00000013709 29159 70.1 UdeM00000013709 XP\_034316161.1 44.1 68  
 38 0 21 88 703 770 1.70E-09 70.1 29159 cellular  
 organisms;Eukaryota;Opisthokonta;Metazoa;Eumetazoa;Bilateria;Protostomia;

Spiralia;Lophotrochozoa;Mollusca;Bivalvia;Autobranchia;Pteriormorphia;Ostr  
eida;Ostreoidea;Ostreidae;Crassostrea;Crassostrea gigas  
UdeM00000013711 1735272 238.8 UdeM00000013711 XP\_041376510.1 43.8  
304 162 4 113 414 266 562 1.30E-59 238.8 1735272  
cellular  
organisms;Eukaryota;Opisthokonta;Metazoa;Eumetazoa;Bilateria;Protostomia;  
Spiralia;Lophotrochozoa;Mollusca;Gastropoda;Neomphalina;Neomphaloidea;Pel  
tospiridae;Gigantopelta;Gigantopelta aegis  
UdeM00000013710 1735272 238.8 UdeM00000013710 XP\_041376510.1 43.8  
304 162 4 217 518 266 562 1.60E-59 238.8 1735272  
cellular  
organisms;Eukaryota;Opisthokonta;Metazoa;Eumetazoa;Bilateria;Protostomia;  
Spiralia;Lophotrochozoa;Mollusca;Gastropoda;Neomphalina;Neomphaloidea;Pel  
tospiridae;Gigantopelta;Gigantopelta aegis  
UdeM00000013712 6596 4299.6 UdeM00000013712 XP\_045194265.1 55.7  
4705 1820 60 5 4633 5 4523 0.00E+00 4299.6 6596  
cellular  
organisms;Eukaryota;Opisthokonta;Metazoa;Eumetazoa;Bilateria;Protostomia;  
Spiralia;Lophotrochozoa;Mollusca;Bivalvia;Autobranchia;Heteroconchia;Euhe  
terodonta;Imparidentia;Venerida;Veneroidea;Veneridae;Mercenaria;Mercenari  
a mercenaria  
UdeM00000013713 45264 82.8 UdeM00000013713 XP\_044168162.1 27.8 227  
157 3 364 585 73 297 1.60E-12 82.8 45264 cellular  
organisms;Eukaryota;Opisthokonta;Metazoa;Eumetazoa;Cnidaria;Anthozoa;Hexa  
corallia;Scleractinia;Astrocoeniina;Acroporidae;Acropora;Acropora  
millepora  
UdeM00000013714 6596 1075.5 UdeM00000013714 XP\_045194958.1 54.1  
1171 395 19 35 1171 999 2061 0.00E+00 1075.5 6596  
cellular  
organisms;Eukaryota;Opisthokonta;Metazoa;Eumetazoa;Bilateria;Protostomia;  
Spiralia;Lophotrochozoa;Mollusca;Bivalvia;Autobranchia;Heteroconchia;Euhe  
terodonta;Imparidentia;Venerida;Veneroidea;Veneridae;Mercenaria;Mercenari  
a mercenaria  
UdeM00000013715 6596 1048.9 UdeM00000013715 XP\_045194958.1 64.3  
866 288 3 286 1134 24 885 4.70E-303 1048.9 6596  
cellular  
organisms;Eukaryota;Opisthokonta;Metazoa;Eumetazoa;Bilateria;Protostomia;  
Spiralia;Lophotrochozoa;Mollusca;Bivalvia;Autobranchia;Heteroconchia;Euhe  
terodonta;Imparidentia;Venerida;Veneroidea;Veneridae;Mercenaria;Mercenari  
a mercenaria  
UdeM00000013716 6596 224.9 UdeM00000013716 XP\_045194958.1 56.1 196  
67 2 34 211 1870 2064 9.50E-56 224.9 6596 cellular  
organisms;Eukaryota;Opisthokonta;Metazoa;Eumetazoa;Bilateria;Protostomia;  
Spiralia;Lophotrochozoa;Mollusca;Bivalvia;Autobranchia;Heteroconchia;Euhe  
terodonta;Imparidentia;Venerida;Veneroidea;Veneridae;Mercenaria;Mercenari  
a mercenaria  
UdeM00000013717 6573 258.5 UdeM00000013717 XP\_021364449.1 61.4 210  
81 0 7 216 6 215 8.40E-66 258.5 6573 cellular  
organisms;Eukaryota;Opisthokonta;Metazoa;Eumetazoa;Bilateria;Protostomia;  
Spiralia;Lophotrochozoa;Mollusca;Bivalvia;Autobranchia;Pteriormorphia;Pect  
inida;Pectinoidea;Pectinidae;Mizuhopecten;Mizuhopecten yessoensis  
UdeM00000013718 6579 234.2 UdeM00000013718 XP\_033755073.1 64.6 178  
63 0 1 178 38 215 1.40E-58 234.2 6579 cellular  
organisms;Eukaryota;Opisthokonta;Metazoa;Eumetazoa;Bilateria;Protostomia;

Spiralia;Lophotrochozoa;Mollusca;Bivalvia;Autobranchia;Pteriormorphia;Pectinida;Pectinoidea;Pectinidae;Pecten;Pecten maximus  
UdeM00000013719 6579 229.2 UdeM00000013719 XP\_033755073.1 64.4 177  
63 0 1 177 38 214 9.30E-57 229.2 6579 cellular  
organisms;Eukaryota;Opisthokonta;Metazoa;Eumetazoa;Bilateria;Protostomia;Spiralia;Lophotrochozoa;Mollusca;Bivalvia;Autobranchia;Pteriormorphia;Pectinida;Pectinoidea;Pectinidae;Pecten;Pecten maximus  
UdeM00000013720 6573 253.4 UdeM00000013720 XP\_021364449.1 60.7 214  
84 0 1 214 1 214 5.00E-64 253.4 6573 cellular  
organisms;Eukaryota;Opisthokonta;Metazoa;Eumetazoa;Bilateria;Protostomia;Spiralia;Lophotrochozoa;Mollusca;Bivalvia;Autobranchia;Pteriormorphia;Pectinida;Pectinoidea;Pectinidae;Mizuhopecten;Mizuhopecten yessoensis  
UdeM00000013720 6573 182.6 UdeM00000013720 XP\_021364449.1 50.5 196  
77 1 238 433 2053 2228 1.10E-42 182.6 6573 cellular  
organisms;Eukaryota;Opisthokonta;Metazoa;Eumetazoa;Bilateria;Protostomia;Spiralia;Lophotrochozoa;Mollusca;Bivalvia;Autobranchia;Pteriormorphia;Pectinida;Pectinoidea;Pectinidae;Mizuhopecten;Mizuhopecten yessoensis  
UdeM00000013721 6596 2299.2 UdeM00000013721 XP\_045194958.1 59.6  
2160 748 22 4 2138 4 2064 0.00E+00 2299.2 6596  
cellular  
organisms;Eukaryota;Opisthokonta;Metazoa;Eumetazoa;Bilateria;Protostomia;Spiralia;Lophotrochozoa;Mollusca;Bivalvia;Autobranchia;Heteroconchia;Euheterodonta;Imparidentia;Venerida;Veneroidea;Veneridae;Mercenaria;Mercenaria mercenaria  
UdeM00000013722 6596 341.3 UdeM00000013722 XP\_045192708.1 52.3 310  
132 3 12 320 206 500 1.40E-90 341.3 6596 cellular  
organisms;Eukaryota;Opisthokonta;Metazoa;Eumetazoa;Bilateria;Protostomia;Spiralia;Lophotrochozoa;Mollusca;Bivalvia;Autobranchia;Heteroconchia;Euheterodonta;Imparidentia;Venerida;Veneroidea;Veneridae;Mercenaria;Mercenaria mercenaria  
UdeM00000013723 6596 243 UdeM00000013723 XP\_045192708.1 52.4 208  
98 1 30 237 1 207 4.50E-61 243 6596 cellular  
organisms;Eukaryota;Opisthokonta;Metazoa;Eumetazoa;Bilateria;Protostomia;Spiralia;Lophotrochozoa;Mollusca;Bivalvia;Autobranchia;Heteroconchia;Euheterodonta;Imparidentia;Venerida;Veneroidea;Veneridae;Mercenaria;Mercenaria mercenaria  
UdeM00000013724 6596 1411 UdeM00000013724 XP\_045193727.1 58.2 2052  
719 25 1 2000 6 1970 0.00E+00 1411 6596 cellular  
organisms;Eukaryota;Opisthokonta;Metazoa;Eumetazoa;Bilateria;Protostomia;Spiralia;Lophotrochozoa;Mollusca;Bivalvia;Autobranchia;Heteroconchia;Euheterodonta;Imparidentia;Venerida;Veneroidea;Veneridae;Mercenaria;Mercenaria mercenaria  
UdeM00000013725 6596 119.8 UdeM00000013725 XP\_045193503.1 57.4 108  
44 1 1 108 1 106 3.50E-24 119.8 6596 cellular  
organisms;Eukaryota;Opisthokonta;Metazoa;Eumetazoa;Bilateria;Protostomia;Spiralia;Lophotrochozoa;Mollusca;Bivalvia;Autobranchia;Heteroconchia;Euheterodonta;Imparidentia;Venerida;Veneroidea;Veneridae;Mercenaria;Mercenaria mercenaria  
UdeM00000013726 6596 613.6 UdeM00000013726 XP\_045164844.1 50.2 634  
291 7 40 663 110 728 2.90E-172 613.6 6596 cellular  
organisms;Eukaryota;Opisthokonta;Metazoa;Eumetazoa;Bilateria;Protostomia;Spiralia;Lophotrochozoa;Mollusca;Bivalvia;Autobranchia;Heteroconchia;Euheterodonta;Imparidentia;Venerida;Veneroidea;Veneridae;Mercenaria;Mercenaria mercenaria

UdeM00000013727 2607531 129.4 UdeM00000013727 XP\_029647410.1 37.7  
 212 116 8 4 203 3 210 1.70E-26 129.4 2607531  
 cellular  
 organisms;Eukaryota;Opisthokonta;Metazoa;Eumetazoa;Bilateria;Protostomia;  
 Spiralia;Lophotrochozoa;Mollusca;Cephalopoda;Coleoidea;Octopodiformes;Oct  
 opoda;Incirrata;Octopodidae;Octopus;Octopus sinensis  
 UdeM00000013728 6596 1073.9 UdeM00000013728 XP\_045194992.1 41.5  
 1429 785 25 43 1447 792 2193 1.6e-310 1073.9 6596  
 cellular  
 organisms;Eukaryota;Opisthokonta;Metazoa;Eumetazoa;Bilateria;Protostomia;  
 Spiralia;Lophotrochozoa;Mollusca;Bivalvia;Autobranchia;Heteroconchia;Euhe  
 terodonta;Imparidentia;Venerida;Veneroidea;Veneridae;Mercenaria;Mercenari  
 a mercenaria  
 UdeM00000013729 6573 796.2 UdeM00000013729 XP\_021353856.1 81.3 471  
 87 1 2 472 58 527 2.30E-227 796.2 6573 cellular  
 organisms;Eukaryota;Opisthokonta;Metazoa;Eumetazoa;Bilateria;Protostomia;  
 Spiralia;Lophotrochozoa;Mollusca;Bivalvia;Autobranchia;Pteriormorphia;Pect  
 inida;Pectinoidea;Pectinidae;Mizuhopecten;Mizuhopecten yessoensis  
 UdeM00000013730 6579 247.7 UdeM00000013730 XP\_033739209.1 49.6 258  
 114 2 9 261 2 248 1.70E-62 247.7 6579 cellular  
 organisms;Eukaryota;Opisthokonta;Metazoa;Eumetazoa;Bilateria;Protostomia;  
 Spiralia;Lophotrochozoa;Mollusca;Bivalvia;Autobranchia;Pteriormorphia;Pect  
 inida;Pectinoidea;Pectinidae;Pecten;Pecten maximus  
 UdeM00000013732 7574 140.6 UdeM00000013732 XP\_013405563.1 34.6 266  
 138 5 1 263 146 378 2.90E-30 140.6 7574 cellular  
 organisms;Eukaryota;Opisthokonta;Metazoa;Eumetazoa;Bilateria;Protostomia;  
 Spiralia;Lophotrochozoa;Brachiopoda;Linguliformea;Lingulata;Lingulida;Lin  
 guloidea;Lingulidae;Lingula;Lingula anatina  
 UdeM00000013733 400727 301.6 UdeM00000013733 XP\_025115014.1 75.8  
 190 41 1 51 235 15 204 9.00E-79 301.6 400727  
 cellular  
 organisms;Eukaryota;Opisthokonta;Metazoa;Eumetazoa;Bilateria;Protostomia;  
 Spiralia;Lophotrochozoa;Mollusca;Gastropoda;Caenogastropoda;Architaeniogl  
 ossa;Ampullarioidea;Ampullariidae;Pomacea;Pomacea canaliculata  
 UdeM00000013734 6596 679.9 UdeM00000013734 XP\_045191617.1 52.3 612  
 274 5 7 603 7 615 3.10E-192 679.9 6596 cellular  
 organisms;Eukaryota;Opisthokonta;Metazoa;Eumetazoa;Bilateria;Protostomia;  
 Spiralia;Lophotrochozoa;Mollusca;Bivalvia;Autobranchia;Heteroconchia;Euhe  
 terodonta;Imparidentia;Venerida;Veneroidea;Veneridae;Mercenaria;Mercenari  
 a mercenaria  
 UdeM00000013735 6596 717.2 UdeM00000013735 XP\_045191617.1 54.8 613  
 272 3 1 611 8 617 1.80E-203 717.2 6596 cellular  
 organisms;Eukaryota;Opisthokonta;Metazoa;Eumetazoa;Bilateria;Protostomia;  
 Spiralia;Lophotrochozoa;Mollusca;Bivalvia;Autobranchia;Heteroconchia;Euhe  
 terodonta;Imparidentia;Venerida;Veneroidea;Veneridae;Mercenaria;Mercenari  
 a mercenaria  
 UdeM00000013736 6596 137.9 UdeM00000013736 XP\_045198987.1 32 353  
 215 9 24 374 25 354 3.70E-29 137.9 6596 cellular  
 organisms;Eukaryota;Opisthokonta;Metazoa;Eumetazoa;Bilateria;Protostomia;  
 Spiralia;Lophotrochozoa;Mollusca;Bivalvia;Autobranchia;Heteroconchia;Euhe  
 terodonta;Imparidentia;Venerida;Veneroidea;Veneridae;Mercenaria;Mercenari  
 a mercenaria  
 UdeM00000013737 6596 339.3 UdeM00000013737 XP\_045192050.1 63.2 228  
 84 0 20 247 30 257 4.10E-90 339.3 6596 cellular

organisms;Eukaryota;Opisthokonta;Metazoa;Eumetazoa;Bilateria;Protostomia;Spiralia;Lophotrochozoa;Mollusca;Bivalvia;Autobranchia;Heteroconchia;Euherodonta;Imparidentia;Venerida;Veneroidea;Veneridae;Mercenaria;Mercenaria mercenaria

UdeM00000013738 6596 295 UdeM00000013738 XP\_045191221.1 38.9 419  
241 4 10 427 9 413 1.50E-76 295 6596 cellular

organisms;Eukaryota;Opisthokonta;Metazoa;Eumetazoa;Bilateria;Protostomia;Spiralia;Lophotrochozoa;Mollusca;Bivalvia;Autobranchia;Heteroconchia;Euherodonta;Imparidentia;Venerida;Veneroidea;Veneridae;Mercenaria;Mercenaria mercenaria

UdeM00000013740 6596 292.4 UdeM00000013740 XP\_045191221.1 39.9 419  
237 4 10 427 9 413 9.70E-76 292.4 6596 cellular

organisms;Eukaryota;Opisthokonta;Metazoa;Eumetazoa;Bilateria;Protostomia;Spiralia;Lophotrochozoa;Mollusca;Bivalvia;Autobranchia;Heteroconchia;Euherodonta;Imparidentia;Venerida;Veneroidea;Veneridae;Mercenaria;Mercenaria mercenaria

UdeM00000013741 6596 109.4 UdeM00000013741 XP\_045187825.1 36.7 177  
92 2 1 177 185 341 5.10E-21 109.4 6596 cellular

organisms;Eukaryota;Opisthokonta;Metazoa;Eumetazoa;Bilateria;Protostomia;Spiralia;Lophotrochozoa;Mollusca;Bivalvia;Autobranchia;Heteroconchia;Euherodonta;Imparidentia;Venerida;Veneroidea;Veneridae;Mercenaria;Mercenaria mercenaria

UdeM00000013742 6596 179.9 UdeM00000013742 XP\_045187824.1 48.6 181  
89 1 19 199 3 179 3.30E-42 179.9 6596 cellular

organisms;Eukaryota;Opisthokonta;Metazoa;Eumetazoa;Bilateria;Protostomia;Spiralia;Lophotrochozoa;Mollusca;Bivalvia;Autobranchia;Heteroconchia;Euherodonta;Imparidentia;Venerida;Veneroidea;Veneridae;Mercenaria;Mercenaria mercenaria

UdeM00000013743 2607531 518.8 UdeM00000013743 XP\_029638185.1 46.6  
611 315 7 1 603 1 608 8.90E-144 518.8 2607531  
cellular

organisms;Eukaryota;Opisthokonta;Metazoa;Eumetazoa;Bilateria;Protostomia;Spiralia;Lophotrochozoa;Mollusca;Cephalopoda;Coleoidea;Octopodiformes;Octopoda;Incirrata;Octopodidae;Octopus;Octopus sinensis

UdeM00000013745 6596 1479.5 UdeM00000013745 XP\_045191521.1 59.9  
1188 315 12 15 1046 185 1367 0.00E+00 1479.5 6596  
cellular

organisms;Eukaryota;Opisthokonta;Metazoa;Eumetazoa;Bilateria;Protostomia;Spiralia;Lophotrochozoa;Mollusca;Bivalvia;Autobranchia;Heteroconchia;Euherodonta;Imparidentia;Venerida;Veneroidea;Veneridae;Mercenaria;Mercenaria mercenaria

UdeM00000013746 6596 1562.4 UdeM00000013746 XP\_045191520.1 39.5  
2448 1094 53 10 2148 2 2372 0.00E+00 1562.4 6596  
cellular

organisms;Eukaryota;Opisthokonta;Metazoa;Eumetazoa;Bilateria;Protostomia;Spiralia;Lophotrochozoa;Mollusca;Bivalvia;Autobranchia;Heteroconchia;Euherodonta;Imparidentia;Venerida;Veneroidea;Veneridae;Mercenaria;Mercenaria mercenaria

UdeM00000013747 6579 652.9 UdeM00000013747 XP\_033755023.1 52.6 588  
276 2 1 585 1 588 3.90E-184 652.9 6579 cellular

organisms;Eukaryota;Opisthokonta;Metazoa;Eumetazoa;Bilateria;Protostomia;Spiralia;Lophotrochozoa;Mollusca;Bivalvia;Autobranchia;Pteriomorpha;Pectinida;Pectinoidea;Pectinidae;Pecten;Pecten maximus

UdeM00000013748 6573 414.1 UdeM00000013748 XP\_021356901.1 39 625  
 327 14 11 614 23 614 5.70E-112 414.1 6573 cellular  
 organisms;Eukaryota;Opisthokonta;Metazoa;Eumetazoa;Bilateria;Protostomia;  
 Spiralia;Lophotrochozoa;Mollusca;Bivalvia;Autobranhia;Pteriomorphia;Pect  
 inida;Pectinoidea;Pectinidae;Mizuhopecten;Mizuhopecten yessoensis  
 UdeM00000013749 6596 216.5 UdeM00000013749 XP\_045181142.1 40.6 323  
 168 7 40 344 57 373 5.40E-53 216.5 6596 cellular  
 organisms;Eukaryota;Opisthokonta;Metazoa;Eumetazoa;Bilateria;Protostomia;  
 Spiralia;Lophotrochozoa;Mollusca;Bivalvia;Autobranhia;Heteroconchia;Euhe  
 terodonta;Imparidentia;Venerida;Veneroidea;Veneridae;Mercenaria;Mercenari  
 a mercenaria  
 UdeM00000013750 45264 90.5 UdeM00000013750 XP\_044176443.1 44.3 106  
 57 2 28 132 87 191 2.00E-15 90.5 45264 cellular  
 organisms;Eukaryota;Opisthokonta;Metazoa;Eumetazoa;Cnidaria;Anthozoa;Hexa  
 corallia;Scleractinia;Astrocoeniina;Acroporidae;Acropora;Acropora  
 millepora  
 UdeM00000013751 6579 289.3 UdeM00000013751 XP\_033739131.1 67 200  
 65 1 1 200 1171 1369 3.90E-75 289.3 6579 cellular  
 organisms;Eukaryota;Opisthokonta;Metazoa;Eumetazoa;Bilateria;Protostomia;  
 Spiralia;Lophotrochozoa;Mollusca;Bivalvia;Autobranhia;Pteriomorphia;Pect  
 inida;Pectinoidea;Pectinidae;Pecten;Pecten maximus  
 UdeM00000013753 6596 112.5 UdeM00000013753 XP\_045192817.1 48.3 116  
 53 5 17 130 32 142 5.10E-22 112.5 6596 cellular  
 organisms;Eukaryota;Opisthokonta;Metazoa;Eumetazoa;Bilateria;Protostomia;  
 Spiralia;Lophotrochozoa;Mollusca;Bivalvia;Autobranhia;Heteroconchia;Euhe  
 terodonta;Imparidentia;Venerida;Veneroidea;Veneridae;Mercenaria;Mercenari  
 a mercenaria  
 UdeM00000013754 6596 604 UdeM00000013754 XP\_045192817.1 73.1 387  
 100 3 45 430 306 689 2.00E-169 604 6596 cellular  
 organisms;Eukaryota;Opisthokonta;Metazoa;Eumetazoa;Bilateria;Protostomia;  
 Spiralia;Lophotrochozoa;Mollusca;Bivalvia;Autobranhia;Heteroconchia;Euhe  
 terodonta;Imparidentia;Venerida;Veneroidea;Veneridae;Mercenaria;Mercenari  
 a mercenaria  
 UdeM00000013755 6596 719.9 UdeM00000013755 XP\_045192817.1 56.3 581  
 246 5 31 608 709 1284 2.70E-204 719.9 6596 cellular  
 organisms;Eukaryota;Opisthokonta;Metazoa;Eumetazoa;Bilateria;Protostomia;  
 Spiralia;Lophotrochozoa;Mollusca;Bivalvia;Autobranhia;Heteroconchia;Euhe  
 terodonta;Imparidentia;Venerida;Veneroidea;Veneridae;Mercenaria;Mercenari  
 a mercenaria  
 UdeM00000013756 6596 519.2 UdeM00000013756 XP\_045194014.1 58.4 476  
 174 3 1 476 1 452 5.40E-144 519.2 6596 cellular  
 organisms;Eukaryota;Opisthokonta;Metazoa;Eumetazoa;Bilateria;Protostomia;  
 Spiralia;Lophotrochozoa;Mollusca;Bivalvia;Autobranhia;Heteroconchia;Euhe  
 terodonta;Imparidentia;Venerida;Veneroidea;Veneridae;Mercenaria;Mercenari  
 a mercenaria  
 UdeM00000013757 6573 316.2 UdeM00000013757 XP\_021372379.1 55.8 283  
 113 2 2 274 1 281 4.00E-83 316.2 6573 cellular  
 organisms;Eukaryota;Opisthokonta;Metazoa;Eumetazoa;Bilateria;Protostomia;  
 Spiralia;Lophotrochozoa;Mollusca;Bivalvia;Autobranhia;Pteriomorphia;Pect  
 inida;Pectinoidea;Pectinidae;Mizuhopecten;Mizuhopecten yessoensis  
 UdeM00000013758 6579 118.2 UdeM00000013758 XP\_033730751.1 61.7 81  
 31 0 25 105 179 259 6.20E-24 118.2 6579 cellular  
 organisms;Eukaryota;Opisthokonta;Metazoa;Eumetazoa;Bilateria;Protostomia;

Spiralia;Lophotrochozoa;Mollusca;Bivalvia;Autobranchia;Pteriormorphia;Pectinida;Pectinoidea;Pectinidae;Pecten;Pecten maximus  
UdeM00000013759 6573 342.8 UdeM00000013759 XP\_021358283.1 63.6 264  
91 2 20 278 27 290 4.20E-91 342.8 6573 cellular  
organisms;Eukaryota;Opisthokonta;Metazoa;Eumetazoa;Bilateria;Protostomia;  
Spiralia;Lophotrochozoa;Mollusca;Bivalvia;Autobranchia;Pteriormorphia;Pectinida;Pectinoidea;Pectinidae;Mizuhopecten;Mizuhopecten yessoensis  
UdeM00000013760 6596 1316.6 UdeM00000013760 XP\_045193420.1 62.3  
1084 400 5 1 1078 1 1081 0.00E+00 1316.6 6596  
cellular  
organisms;Eukaryota;Opisthokonta;Metazoa;Eumetazoa;Bilateria;Protostomia;  
Spiralia;Lophotrochozoa;Mollusca;Bivalvia;Autobranchia;Heteroconchia;Euherodonta;Imparidentia;Venerida;Veneroidea;Veneridae;Mercenaria;Mercenaria mercenaria  
UdeM00000013761 6596 330.1 UdeM00000013761 XP\_045192942.1 46.7 398  
120 4 1 383 1 321 3.70E-87 330.1 6596 cellular  
organisms;Eukaryota;Opisthokonta;Metazoa;Eumetazoa;Bilateria;Protostomia;  
Spiralia;Lophotrochozoa;Mollusca;Bivalvia;Autobranchia;Heteroconchia;Euherodonta;Imparidentia;Venerida;Veneroidea;Veneridae;Mercenaria;Mercenaria mercenaria  
UdeM00000013762 6596 467.2 UdeM00000013762 XP\_045194642.1 64.1 407  
127 9 10 402 9 410 2.10E-128 467.2 6596 cellular  
organisms;Eukaryota;Opisthokonta;Metazoa;Eumetazoa;Bilateria;Protostomia;  
Spiralia;Lophotrochozoa;Mollusca;Bivalvia;Autobranchia;Heteroconchia;Euherodonta;Imparidentia;Venerida;Veneroidea;Veneridae;Mercenaria;Mercenaria mercenaria  
UdeM00000033219 6596 58.9 UdeM00000033219 XP\_045189070.1 40 95  
55 2 1 94 1 94 4.00E-06 58.9 6596 cellular  
organisms;Eukaryota;Opisthokonta;Metazoa;Eumetazoa;Bilateria;Protostomia;  
Spiralia;Lophotrochozoa;Mollusca;Bivalvia;Autobranchia;Heteroconchia;Euherodonta;Imparidentia;Venerida;Veneroidea;Veneridae;Mercenaria;Mercenaria mercenaria  
UdeM00000033220 37621 429.5 UdeM00000033220 XP\_014672567.1 45 478  
243 7 35 497 46 518 6.40E-117 429.5 37621 cellular  
organisms;Eukaryota;Opisthokonta;Metazoa;Eumetazoa;Bilateria;Protostomia;  
Ecdysozoa;Scalidophora;Priapulida;Priapulimorpha;Priapulimorphida;Priapulidae;Priapululus;Priapululus caudatus  
UdeM00000033221 6596 159.1 UdeM00000033221 XP\_045169414.1 45.7 219  
105 6 16 223 13 228 7.00E-36 159.1 6596 cellular  
organisms;Eukaryota;Opisthokonta;Metazoa;Eumetazoa;Bilateria;Protostomia;  
Spiralia;Lophotrochozoa;Mollusca;Bivalvia;Autobranchia;Heteroconchia;Euherodonta;Imparidentia;Venerida;Veneroidea;Veneridae;Mercenaria;Mercenaria mercenaria  
UdeM00000033222 6596 202.2 UdeM00000033222 XP\_045168367.1 73.5 136  
35 1 7 141 7 142 4.40E-49 202.2 6596 cellular  
organisms;Eukaryota;Opisthokonta;Metazoa;Eumetazoa;Bilateria;Protostomia;  
Spiralia;Lophotrochozoa;Mollusca;Bivalvia;Autobranchia;Heteroconchia;Euherodonta;Imparidentia;Venerida;Veneroidea;Veneridae;Mercenaria;Mercenaria mercenaria  
UdeM00000033223 8049 112.1 UdeM00000033223 XP\_030224918.1 64.9 74  
26 0 1 74 78 151 3.10E-22 112.1 8049 cellular  
organisms;Eukaryota;Opisthokonta;Metazoa;Eumetazoa;Bilateria;Deuterostomia;Chordata;Craniata;Vertebrata;Gnathostomata;Teleostomi;Euteleostomi;Actinopterygii;Actinopteri;Neopterygii;Teleostei;Osteoglossoccephalai;Clupeocea



phala;Euteleosteomorpha;Neoteleostei;Eurypterygia;Ctenosquamata;Acanthomorphata;Paracanthopterygii;Zeiogadaria;Gadariae;Gadiformes;Gadoidei;Gadidae;Gadus;Gadus morhua

UdeM00000033224 8364 131 UdeM00000033224 XP\_031750186.1 55 109  
48 1 5 112 181 289 1.00E-27 131 8364 cellular

organisms;Eukaryota;Opisthokonta;Metazoa;Eumetazoa;Bilateria;Deuterostomia;Chordata;Craniata;Vertebrata;Gnathostomata;Teleostomi;Euteleostomi;Sarcopterygii;Dipnotetrapodomorpha;Tetrapoda;Amphibia;Batrachia;Anura;Pipoidea;Pipidae;Xenopodinae;Xenopus;Silurana;Xenopus tropicalis

UdeM00000033225 6565 214.2 UdeM00000033225 XP\_022309126.1 63.9 158  
55 2 7 162 8 165 1.30E-52 214.2 6565 cellular

organisms;Eukaryota;Opisthokonta;Metazoa;Eumetazoa;Bilateria;Protostomia;Spiralia;Lophotrochozoa;Mollusca;Bivalvia;Autobranchia;Pteriomorpha;Ostreida;Ostreoidea;Ostreidae;Crassostrea;Crassostrea virginica

UdeM00000033226 6596 734.6 UdeM00000033226 XP\_045168035.1 72.3 494  
136 1 19 511 24 517 8.80E-209 734.6 6596 cellular

organisms;Eukaryota;Opisthokonta;Metazoa;Eumetazoa;Bilateria;Protostomia;Spiralia;Lophotrochozoa;Mollusca;Bivalvia;Autobranchia;Heteroconchia;Euheterodonta;Imparidentia;Venerida;Veneroidea;Veneridae;Mercenaria;Mercenaria mercenaria

UdeM00000033228 6579 152.9 UdeM00000033228 XP\_033759278.1 37.8 238  
120 5 58 292 63 275 6.20E-34 152.9 6579 cellular

organisms;Eukaryota;Opisthokonta;Metazoa;Eumetazoa;Bilateria;Protostomia;Spiralia;Lophotrochozoa;Mollusca;Bivalvia;Autobranchia;Pteriomorpha;Pectinida;Pectinoidea;Pectinidae;Pecten;Pecten maximus

UdeM00000033229 6579 157.1 UdeM00000033229 XP\_033761321.1 28.3 357  
241 6 1 349 30 379 5.00E-35 157.1 6579 cellular

organisms;Eukaryota;Opisthokonta;Metazoa;Eumetazoa;Bilateria;Protostomia;Spiralia;Lophotrochozoa;Mollusca;Bivalvia;Autobranchia;Pteriomorpha;Pectinida;Pectinoidea;Pectinidae;Pecten;Pecten maximus

UdeM00000033230 6579 168.7 UdeM00000033230 XP\_033761321.1 28.6 371  
250 6 4 366 16 379 1.70E-38 168.7 6579 cellular

organisms;Eukaryota;Opisthokonta;Metazoa;Eumetazoa;Bilateria;Protostomia;Spiralia;Lophotrochozoa;Mollusca;Bivalvia;Autobranchia;Pteriomorpha;Pectinida;Pectinoidea;Pectinidae;Pecten;Pecten maximus

UdeM00000033232 6573 666.8 UdeM00000033232 XP\_021373560.1 67.4 470  
149 2 1 466 1 470 2.10E-188 666.8 6573 cellular

organisms;Eukaryota;Opisthokonta;Metazoa;Eumetazoa;Bilateria;Protostomia;Spiralia;Lophotrochozoa;Mollusca;Bivalvia;Autobranchia;Pteriomorpha;Pectinida;Pectinoidea;Pectinidae;Mizuhopecten;Mizuhopecten yessoensis

UdeM00000033231 6573 637.1 UdeM00000033231 XP\_021373560.1 67.3 446  
142 2 2 443 25 470 1.70E-179 637.1 6573 cellular

organisms;Eukaryota;Opisthokonta;Metazoa;Eumetazoa;Bilateria;Protostomia;Spiralia;Lophotrochozoa;Mollusca;Bivalvia;Autobranchia;Pteriomorpha;Pectinida;Pectinoidea;Pectinidae;Mizuhopecten;Mizuhopecten yessoensis

UdeM00000033233 6573 686.8 UdeM00000033233 XP\_021376417.1 62.5 507  
188 2 3 508 2 507 2.10E-194 686.8 6573 cellular

organisms;Eukaryota;Opisthokonta;Metazoa;Eumetazoa;Bilateria;Protostomia;Spiralia;Lophotrochozoa;Mollusca;Bivalvia;Autobranchia;Pteriomorpha;Pectinida;Pectinoidea;Pectinidae;Mizuhopecten;Mizuhopecten yessoensis

UdeM00000033235 6596 217.6 UdeM00000033235 XP\_045169281.1 51.7 207  
87 2 75 281 122 315 5.40E-53 217.6 6596 cellular

organisms;Eukaryota;Opisthokonta;Metazoa;Eumetazoa;Bilateria;Protostomia;Spiralia;Lophotrochozoa;Mollusca;Bivalvia;Autobranchia;Heteroconchia;Euheterodonta

terodonta;Imparidentia;Venerida;Veneroidea;Veneridae;Mercenaria;Mercenaria mercenaria

UdeM00000033236 6573 167.5 UdeM00000033236 XP\_021369937.1 32.2 382  
218 13 406 751 334 710 9.60E-38 167.5 6573 cellular

organisms;Eukaryota;Opisthokonta;Metazoa;Eumetazoa;Bilateria;Protostomia;Spiralia;Lophotrochozoa;Mollusca;Bivalvia;Autobranhia;Pteriomorphia;Pectinida;Pectinoidea;Pectinidae;Mizuhopecten;Mizuhopecten yessoensis

UdeM00000033237 6596 85.5 UdeM00000033237 XP\_045200724.1 31.9 135  
82 2 4 136 126 252 8.30E-14 85.5 6596 cellular

organisms;Eukaryota;Opisthokonta;Metazoa;Eumetazoa;Bilateria;Protostomia;Spiralia;Lophotrochozoa;Mollusca;Bivalvia;Autobranhia;Heteroconchia;Euheterodonta;Imparidentia;Venerida;Veneroidea;Veneridae;Mercenaria;Mercenaria mercenaria

UdeM00000033238 6596 65.9 UdeM00000033238 XP\_045209337.1 35.7 98  
58 3 4 101 25 117 3.50E-08 65.9 6596 cellular

organisms;Eukaryota;Opisthokonta;Metazoa;Eumetazoa;Bilateria;Protostomia;Spiralia;Lophotrochozoa;Mollusca;Bivalvia;Autobranhia;Heteroconchia;Euheterodonta;Imparidentia;Venerida;Veneroidea;Veneridae;Mercenaria;Mercenaria mercenaria

UdeM00000033241 29159 162.2 UdeM00000033241 XP\_011447732.1 63.8 116  
42 0 4 119 3 118 4.20E-37 162.2 29159 cellular

organisms;Eukaryota;Opisthokonta;Metazoa;Eumetazoa;Bilateria;Protostomia;Spiralia;Lophotrochozoa;Mollusca;Bivalvia;Autobranhia;Pteriomorphia;Ostreida;Ostreoidea;Ostreidae;Crassostrea;Crassostrea gigas

UdeM00000033242 6596 140.6 UdeM00000033242 XP\_045170362.1 48.4 182  
78 5 1 167 1 181 6.00E-30 140.6 6596 cellular

organisms;Eukaryota;Opisthokonta;Metazoa;Eumetazoa;Bilateria;Protostomia;Spiralia;Lophotrochozoa;Mollusca;Bivalvia;Autobranhia;Heteroconchia;Euheterodonta;Imparidentia;Venerida;Veneroidea;Veneridae;Mercenaria;Mercenaria mercenaria

UdeM00000033243 6565 219.9 UdeM00000033243 XP\_022327962.1 44.5 274  
119 3 1 241 445 718 3.40E-54 219.9 6565 cellular

organisms;Eukaryota;Opisthokonta;Metazoa;Eumetazoa;Bilateria;Protostomia;Spiralia;Lophotrochozoa;Mollusca;Bivalvia;Autobranhia;Pteriomorphia;Ostreida;Ostreoidea;Ostreidae;Crassostrea;Crassostrea virginica

UdeM00000033244 6596 117.9 UdeM00000033244 XP\_045164125.1 72.7 77  
21 0 40 116 212 288 9.00E-24 117.9 6596 cellular

organisms;Eukaryota;Opisthokonta;Metazoa;Eumetazoa;Bilateria;Protostomia;Spiralia;Lophotrochozoa;Mollusca;Bivalvia;Autobranhia;Heteroconchia;Euheterodonta;Imparidentia;Venerida;Veneroidea;Veneridae;Mercenaria;Mercenaria mercenaria

UdeM00000033245 6579 915.6 UdeM00000033245 XP\_033761713.1 80 525  
104 1 54 578 686 1209 3.30E-263 915.6 6579 cellular

organisms;Eukaryota;Opisthokonta;Metazoa;Eumetazoa;Bilateria;Protostomia;Spiralia;Lophotrochozoa;Mollusca;Bivalvia;Autobranhia;Pteriomorphia;Pectinida;Pectinoidea;Pectinidae;Pecten;Pecten maximus

UdeM00000033247 1735272 243.8 UdeM00000033247 XP\_041365992.1 57.9  
195 81 1 17 210 90 284 2.00E-61 243.8 1735272

cellular  
organisms;Eukaryota;Opisthokonta;Metazoa;Eumetazoa;Bilateria;Protostomia;Spiralia;Lophotrochozoa;Mollusca;Gastropoda;Neomphalina;Neomphaloidea;Peltopiridae;Gigantopelta;Gigantopelta aegis

UdeM00000033248 1735272 319.3 UdeM00000033248 XP\_041365992.1 53.8  
292 125 4 1 290 1 284 5.20E-84 319.3 1735272

cellular  
organisms;Eukaryota;Opisthokonta;Metazoa;Eumetazoa;Bilateria;Protostomia;  
Spiralia;Lophotrochozoa;Mollusca;Gastropoda;Neomphalina;Neomphaloidea;Pel  
tospiridae;Gigantopelta;Gigantopelta aegis  
UdeM00000044361 225164 162.5 UdeM00000044361 XP\_009051079.1 38.6  
251 119 4 36 254 126 373 7.00E-37 162.5 225164  
cellular  
organisms;Eukaryota;Opisthokonta;Metazoa;Eumetazoa;Bilateria;Protostomia;  
Spiralia;Lophotrochozoa;Mollusca;Gastropoda;Patellogastropoda;Lottioidea;  
Lottiidae;Lottia;Lottia gigantea  
UdeM00000044362 400727 79.3 UdeM00000044362 XP\_025095693.1 35.1  
131 64 4 67 197 2 111 6.00E-12 79.3 400727  
cellular  
organisms;Eukaryota;Opisthokonta;Metazoa;Eumetazoa;Bilateria;Protostomia;  
Spiralia;Lophotrochozoa;Mollusca;Gastropoda;Caenogastropoda;Architaeniogl  
ossa;Ampullarioidea;Ampullariidae;Pomacea;Pomacea canaliculata  
UdeM00000044363 6596 250.8 UdeM00000044363 XP\_045202624.1 39.7 307  
168 3 110 402 29 332 3.10E-63 250.8 6596 cellular  
organisms;Eukaryota;Opisthokonta;Metazoa;Eumetazoa;Bilateria;Protostomia;  
Spiralia;Lophotrochozoa;Mollusca;Bivalvia;Autobranchia;Heteroconchia;Euhe  
terodonta;Imparidentia;Venerida;Veneroidea;Veneridae;Mercenaria;Mercenari  
a mercenaria  
UdeM00000044364 6596 214.2 UdeM00000044364 XP\_045202624.1 39.1 261  
145 1 11 257 72 332 2.10E-52 214.2 6596 cellular  
organisms;Eukaryota;Opisthokonta;Metazoa;Eumetazoa;Bilateria;Protostomia;  
Spiralia;Lophotrochozoa;Mollusca;Bivalvia;Autobranchia;Heteroconchia;Euhe  
terodonta;Imparidentia;Venerida;Veneroidea;Veneridae;Mercenaria;Mercenari  
a mercenaria  
UdeM00000042862 6596 76.3 UdeM00000042862 XP\_045207642.1 24.4 369  
238 10 4 341 652 1010 8.70E-11 76.3 6596 cellular  
organisms;Eukaryota;Opisthokonta;Metazoa;Eumetazoa;Bilateria;Protostomia;  
Spiralia;Lophotrochozoa;Mollusca;Bivalvia;Autobranchia;Heteroconchia;Euhe  
terodonta;Imparidentia;Venerida;Veneroidea;Veneridae;Mercenaria;Mercenari  
a mercenaria  
UdeM00000042863 6596 81.6 UdeM00000042863 XP\_045209928.1 29.6 169  
112 4 1 167 1 164 1.10E-12 81.6 6596 cellular  
organisms;Eukaryota;Opisthokonta;Metazoa;Eumetazoa;Bilateria;Protostomia;  
Spiralia;Lophotrochozoa;Mollusca;Bivalvia;Autobranchia;Heteroconchia;Euhe  
terodonta;Imparidentia;Venerida;Veneroidea;Veneridae;Mercenaria;Mercenari  
a mercenaria  
UdeM00000042865 6596 227.3 UdeM00000042865 XP\_045207787.1 78.4 139  
30 0 42 180 716 854 1.70E-56 227.3 6596 cellular  
organisms;Eukaryota;Opisthokonta;Metazoa;Eumetazoa;Bilateria;Protostomia;  
Spiralia;Lophotrochozoa;Mollusca;Bivalvia;Autobranchia;Heteroconchia;Euhe  
terodonta;Imparidentia;Venerida;Veneroidea;Veneridae;Mercenaria;Mercenari  
a mercenaria  
UdeM00000042866 6596 194.5 UdeM00000042866 XP\_045207787.1 76.5 132  
29 1 2 131 584 715 8.40E-47 194.5 6596 cellular  
organisms;Eukaryota;Opisthokonta;Metazoa;Eumetazoa;Bilateria;Protostomia;  
Spiralia;Lophotrochozoa;Mollusca;Bivalvia;Autobranchia;Heteroconchia;Euhe  
terodonta;Imparidentia;Venerida;Veneroidea;Veneridae;Mercenaria;Mercenari  
a mercenaria  
UdeM00000042867 6596 337.8 UdeM00000042867 XP\_045207787.1 42.9 450  
236 5 1 441 1 438 2.10E-89 337.8 6596 cellular

organisms;Eukaryota;Opisthokonta;Metazoa;Eumetazoa;Bilateria;Protostomia;Spiralia;Lophotrochozoa;Mollusca;Bivalvia;Autobranchia;Heteroconchia;Euheterodonta;Imparidentia;Venerida;Veneroidea;Veneridae;Mercenaria;Mercenaria mercenaria

UdeM00000042868 6579 332 UdeM00000042868 XP\_033725828.1 56 284  
123 1 1 282 1 284 8.80E-88 332 6579 cellular

organisms;Eukaryota;Opisthokonta;Metazoa;Eumetazoa;Bilateria;Protostomia;Spiralia;Lophotrochozoa;Mollusca;Bivalvia;Autobranchia;Pteriormorphia;Pectinida;Pectinoidea;Pectinidae;Pecten;Pecten maximus

UdeM00000032405 6596 62.4 UdeM00000032405 XP\_045210831.1 31.2 141  
40 2 1 84 1 141 3.20E-07 62.4 6596 cellular

organisms;Eukaryota;Opisthokonta;Metazoa;Eumetazoa;Bilateria;Protostomia;Spiralia;Lophotrochozoa;Mollusca;Bivalvia;Autobranchia;Heteroconchia;Euheterodonta;Imparidentia;Venerida;Veneroidea;Veneridae;Mercenaria;Mercenaria mercenaria

UdeM00000032406 6596 481.1 UdeM00000032406 XP\_045187150.1 49.4 488  
242 2 1 488 135 617 1.70E-132 481.1 6596 cellular

organisms;Eukaryota;Opisthokonta;Metazoa;Eumetazoa;Bilateria;Protostomia;Spiralia;Lophotrochozoa;Mollusca;Bivalvia;Autobranchia;Heteroconchia;Euheterodonta;Imparidentia;Venerida;Veneroidea;Veneridae;Mercenaria;Mercenaria mercenaria

UdeM00000032407 6579 144.8 UdeM00000032407 XP\_033748473.1 37.8 217  
131 3 29 243 524 738 1.40E-31 144.8 6579 cellular

organisms;Eukaryota;Opisthokonta;Metazoa;Eumetazoa;Bilateria;Protostomia;Spiralia;Lophotrochozoa;Mollusca;Bivalvia;Autobranchia;Pteriormorphia;Pectinida;Pectinoidea;Pectinidae;Pecten;Pecten maximus

UdeM00000032410 6579 132.9 UdeM00000032410 XP\_033740904.1 55.8 104  
46 0 355 458 25 128 1.10E-27 132.9 6579 cellular

organisms;Eukaryota;Opisthokonta;Metazoa;Eumetazoa;Bilateria;Protostomia;Spiralia;Lophotrochozoa;Mollusca;Bivalvia;Autobranchia;Pteriormorphia;Pectinida;Pectinoidea;Pectinidae;Pecten;Pecten maximus

UdeM00000032411 7054 271.9 UdeM00000032411 XP\_031350480.1 53.9 219  
100 1 1 218 249 467 6.90E-70 271.9 7054 cellular

organisms;Eukaryota;Opisthokonta;Metazoa;Eumetazoa;Bilateria;Protostomia;Ecdysozoa;Panarthropoda;Arthropoda;Mandibulata;Pancrustacea;Hexapoda;Insecta;Dicondylia;Pterygota;Neoptera;Endopterygota;Coleoptera;Polyphaga;Elateriformia;Elateroidea;Lampyridae;Lampyrinae;Photinus;Photinus pyralis

UdeM00000032412 7054 209.1 UdeM00000032412 XP\_031328250.1 49.6 224  
112 1 1 223 1 224 5.60E-51 209.1 7054 cellular

organisms;Eukaryota;Opisthokonta;Metazoa;Eumetazoa;Bilateria;Protostomia;Ecdysozoa;Panarthropoda;Arthropoda;Mandibulata;Pancrustacea;Hexapoda;Insecta;Dicondylia;Pterygota;Neoptera;Endopterygota;Coleoptera;Polyphaga;Elateriformia;Elateroidea;Lampyridae;Lampyrinae;Photinus;Photinus pyralis

UdeM00000032415 6565 252.7 UdeM00000032415 XP\_022298930.1 35.5 414  
164 7 26 340 10 419 6.80E-64 252.7 6565 cellular

organisms;Eukaryota;Opisthokonta;Metazoa;Eumetazoa;Bilateria;Protostomia;Spiralia;Lophotrochozoa;Mollusca;Bivalvia;Autobranchia;Pteriormorphia;Ostreida;Ostreoidea;Ostreidae;Crassostrea;Crassostrea virginica

UdeM00000032416 6565 100.9 UdeM00000032416 XP\_022316733.1 60.6 71  
27 1 54 124 188 257 1.50E-18 100.9 6565 cellular

organisms;Eukaryota;Opisthokonta;Metazoa;Eumetazoa;Bilateria;Protostomia;Spiralia;Lophotrochozoa;Mollusca;Bivalvia;Autobranchia;Pteriormorphia;Ostreida;Ostreoidea;Ostreidae;Crassostrea;Crassostrea virginica

UdeM00000032419 1676925 183.7 UdeM00000032419 XP\_023657625.1 45.1  
 224 116 2 2 224 99 316 2.50E-43 183.7 1676925  
 cellular  
 organisms;Eukaryota;Opisthokonta;Metazoa;Eumetazoa;Bilateria;Deuterostomi  
 a;Chordata;Craniata;Vertebrata;Gnathostomata;Teleostomi;Euteleostomi;Acti  
 nopterygii;Actinopteri;Neopterygii;Teleostei;Osteoglossocephalai;Osteoglo  
 ssocephala;Osteoglossomorpha;Osteoglossiformes;Mormyridae;Paramormyrops;P  
 aramormyrops kingsleyae  
 UdeM00000032420 400682 72 UdeM00000032420 XP\_003390251.1 32.2  
 152 87 4 12 159 432 571 1.00E-09 72 400682  
 cellular  
 organisms;Eukaryota;Opisthokonta;Metazoa;Porifera;Demospongiae;Heteroscle  
 romorpha;Haplosclerida;Niphatidae;Amphimedon;Amphimedon queenslandica  
 UdeM00000032422 6596 451.1 UdeM00000032422 XP\_045181000.1 81.7 278  
 51 0 93 370 1339 1616 1.40E-123 451.1 6596 cellular  
 organisms;Eukaryota;Opisthokonta;Metazoa;Eumetazoa;Bilateria;Protostomia;  
 Spiralia;Lophotrochozoa;Mollusca;Bivalvia;Autobranchia;Heteroconchia;Euhe  
 terodonta;Imparidentia;Venerida;Veneroidea;Veneridae;Mercenaria;Mercenari  
 a mercenaria  
 UdeM00000032423 6596 188.3 UdeM00000032423 XP\_045169782.1 47.1 191  
 100 1 1 190 56 246 8.70E-45 188.3 6596 cellular  
 organisms;Eukaryota;Opisthokonta;Metazoa;Eumetazoa;Bilateria;Protostomia;  
 Spiralia;Lophotrochozoa;Mollusca;Bivalvia;Autobranchia;Heteroconchia;Euhe  
 terodonta;Imparidentia;Venerida;Veneroidea;Veneridae;Mercenaria;Mercenari  
 a mercenaria  
 UdeM00000032425 6565 498 UdeM00000032425 XP\_022320668.1 61.1 393  
 139 1 1 379 398 790 1.10E-137 498 6565 cellular  
 organisms;Eukaryota;Opisthokonta;Metazoa;Eumetazoa;Bilateria;Protostomia;  
 Spiralia;Lophotrochozoa;Mollusca;Bivalvia;Autobranchia;Pteriomorphia;Ostr  
 eida;Ostreoidea;Ostreidae;Crassostrea;Crassostrea virginica  
 UdeM00000032427 6565 100.9 UdeM00000032427 XP\_022316733.1 60.6 71  
 27 1 54 124 188 257 1.50E-18 100.9 6565 cellular  
 organisms;Eukaryota;Opisthokonta;Metazoa;Eumetazoa;Bilateria;Protostomia;  
 Spiralia;Lophotrochozoa;Mollusca;Bivalvia;Autobranchia;Pteriomorphia;Ostr  
 eida;Ostreoidea;Ostreidae;Crassostrea;Crassostrea virginica  
 UdeM00000032432 6565 64.7 UdeM00000032432 XP\_022316733.1 39.4 71  
 43 0 1 71 259 329 1.90E-07 64.7 6565 cellular  
 organisms;Eukaryota;Opisthokonta;Metazoa;Eumetazoa;Bilateria;Protostomia;  
 Spiralia;Lophotrochozoa;Mollusca;Bivalvia;Autobranchia;Pteriomorphia;Ostr  
 eida;Ostreoidea;Ostreidae;Crassostrea;Crassostrea virginica  
 UdeM00000032433 6596 116.3 UdeM00000032433 XP\_045182313.1 27.5 298  
 121 4 3 205 479 776 4.60E-23 116.3 6596 cellular  
 organisms;Eukaryota;Opisthokonta;Metazoa;Eumetazoa;Bilateria;Protostomia;  
 Spiralia;Lophotrochozoa;Mollusca;Bivalvia;Autobranchia;Heteroconchia;Euhe  
 terodonta;Imparidentia;Venerida;Veneroidea;Veneridae;Mercenaria;Mercenari  
 a mercenaria  
 UdeM00000032434 6565 128.6 UdeM00000032434 XP\_022297447.1 34.1 211  
 76 1 355 502 156 366 2.20E-26 128.6 6565 cellular  
 organisms;Eukaryota;Opisthokonta;Metazoa;Eumetazoa;Bilateria;Protostomia;  
 Spiralia;Lophotrochozoa;Mollusca;Bivalvia;Autobranchia;Pteriomorphia;Ostr  
 eida;Ostreoidea;Ostreidae;Crassostrea;Crassostrea virginica  
 UdeM00000032435 6565 82.8 UdeM00000032435 XP\_022299727.1 40.4 104  
 58 2 1 100 46 149 5.90E-13 82.8 6565 cellular  
 organisms;Eukaryota;Opisthokonta;Metazoa;Eumetazoa;Bilateria;Protostomia;

Spiralia;Lophotrochozoa;Mollusca;Bivalvia;Autobranchia;Pteriormorphia;Ostr  
 eida;Ostreoidea;Ostreidae;Crassostrea;Crassostrea virginica  
 UdeM00000032437 6565 165.6 UdeM00000032437 XP\_022334993.1 77.2 92  
 21 0 76 167 722 813 5.30E-38 165.6 6565 cellular  
 organisms;Eukaryota;Opisthokonta;Metazoa;Eumetazoa;Bilateria;Protostomia;  
 Spiralia;Lophotrochozoa;Mollusca;Bivalvia;Autobranchia;Pteriormorphia;Ostr  
 eida;Ostreoidea;Ostreidae;Crassostrea;Crassostrea virginica  
 UdeM00000032437 6565 65.5 UdeM00000032437 XP\_022334993.1 46.1 76  
 39 1 1 74 481 556 7.50E-08 65.5 6565 cellular  
 organisms;Eukaryota;Opisthokonta;Metazoa;Eumetazoa;Bilateria;Protostomia;  
 Spiralia;Lophotrochozoa;Mollusca;Bivalvia;Autobranchia;Pteriormorphia;Ostr  
 eida;Ostreoidea;Ostreidae;Crassostrea;Crassostrea virginica  
 UdeM00000032436 6565 153.7 UdeM00000032436 XP\_022334993.1 77 87  
 20 0 76 162 722 808 2.10E-34 153.7 6565 cellular  
 organisms;Eukaryota;Opisthokonta;Metazoa;Eumetazoa;Bilateria;Protostomia;  
 Spiralia;Lophotrochozoa;Mollusca;Bivalvia;Autobranchia;Pteriormorphia;Ostr  
 eida;Ostreoidea;Ostreidae;Crassostrea;Crassostrea virginica  
 UdeM00000032436 6565 65.5 UdeM00000032436 XP\_022334993.1 46.1 76  
 39 1 1 74 481 556 7.50E-08 65.5 6565 cellular  
 organisms;Eukaryota;Opisthokonta;Metazoa;Eumetazoa;Bilateria;Protostomia;  
 Spiralia;Lophotrochozoa;Mollusca;Bivalvia;Autobranchia;Pteriormorphia;Ostr  
 eida;Ostreoidea;Ostreidae;Crassostrea;Crassostrea virginica  
 UdeM00000032438 6945 68.9 UdeM00000032438 XP\_040062109.1 37.3 102  
 61 2 29 127 116 217 8.00E-09 68.9 6945 cellular  
 organisms;Eukaryota;Opisthokonta;Metazoa;Eumetazoa;Bilateria;Protostomia;  
 Ecdysozoa;Panarthropoda;Arthropoda;Chelicerata;Arachnida;Acari;Parasitifo  
 rmes;Ixodida;Ixodoidea;Ixodidae;Ixodinae;Ixodes;Ixodes scapularis  
 UdeM00000032439 6579 250.4 UdeM00000032439 XP\_033739209.1 50 258  
 113 2 9 261 2 248 2.60E-63 250.4 6579 cellular  
 organisms;Eukaryota;Opisthokonta;Metazoa;Eumetazoa;Bilateria;Protostomia;  
 Spiralia;Lophotrochozoa;Mollusca;Bivalvia;Autobranchia;Pteriormorphia;Pect  
 inida;Pectinoidea;Pectinidae;Pecten;Pecten maximus  
 UdeM00000032440 48498 259.2 UdeM00000032440 XP\_020629946.1 37.1 421  
 237 8 2 419 1050 1445 9.10E-66 259.2 48498 cellular  
 organisms;Eukaryota;Opisthokonta;Metazoa;Eumetazoa;Cnidaria;Anthozoa;Hexa  
 corallia;Scleractinia;Faviina;Merulinidae;Orbicella;Orbicella faveolata  
 UdeM00000032441 6565 176 UdeM00000032441 XP\_022305704.1 34.5 290  
 150 3 1 290 208 457 6.90E-41 176 6565 cellular  
 organisms;Eukaryota;Opisthokonta;Metazoa;Eumetazoa;Bilateria;Protostomia;  
 Spiralia;Lophotrochozoa;Mollusca;Bivalvia;Autobranchia;Pteriormorphia;Ostr  
 eida;Ostreoidea;Ostreidae;Crassostrea;Crassostrea virginica  
 UdeM00000032444 6565 198 UdeM00000032444 XP\_022333382.1 52 173  
 82 1 1 173 189 360 2.00E-47 198 6565 cellular  
 organisms;Eukaryota;Opisthokonta;Metazoa;Eumetazoa;Bilateria;Protostomia;  
 Spiralia;Lophotrochozoa;Mollusca;Bivalvia;Autobranchia;Pteriormorphia;Ostr  
 eida;Ostreoidea;Ostreidae;Crassostrea;Crassostrea virginica  
 UdeM00000032445 46514 115.5 UdeM00000032445 XP\_038071378.1 56.5 108  
 47 0 7 114 6 113 4.40E-23 115.5 46514 cellular  
 organisms;Eukaryota;Opisthokonta;Metazoa;Eumetazoa;Bilateria;Deuterostomi  
 a;Echinodermata;Eleutherozoa;Asterozoa;Asteroidea;Valvatacea;Valvatida;As  
 terinidae;Patiria;Patiria miniata  
 UdeM00000032447 6596 447.2 UdeM00000032447 XP\_045187536.1 68.3 334  
 103 2 2 335 228 558 1.90E-122 447.2 6596 cellular  
 organisms;Eukaryota;Opisthokonta;Metazoa;Eumetazoa;Bilateria;Protostomia;

Spiralia;Lophotrochozoa;Mollusca;Bivalvia;Autobranchia;Heteroconchia;Euherodonta;Imparidentia;Venerida;Veneroidea;Veneridae;Mercenaria;Mercenaria mercenaria

UdeM00000032448 6596 438.7 UdeM00000032448 XP\_045187536.1 64 331  
117 1 1 331 396 724 6.50E-120 438.7 6596 cellular

organisms;Eukaryota;Opisthokonta;Metazoa;Eumetazoa;Bilateria;Protostomia;Spiralia;Lophotrochozoa;Mollusca;Bivalvia;Autobranchia;Heteroconchia;Euherodonta;Imparidentia;Venerida;Veneroidea;Veneridae;Mercenaria;Mercenaria mercenaria

UdeM00000032450 7906 65.1 UdeM00000032450 XP\_034778845.1 39.2 74  
45 0 73 146 387 460 9.10E-08 65.1 7906 cellular

organisms;Eukaryota;Opisthokonta;Metazoa;Eumetazoa;Bilateria;Deuterostomia;Chordata;Craniata;Vertebrata;Gnathostomata;Teleostomi;Euteleostomi;Actinopterygii;Actinopteri;Chondrostei;Acipenseriformes;Acipenseridae;Acipenserinae;Acipenserini;Acipenser;Acipenser ruthenus

UdeM00000032453 7574 221.1 UdeM00000032453 XP\_013399039.1 48.2 247  
116 4 3 243 4 244 1.60E-54 221.1 7574 cellular

organisms;Eukaryota;Opisthokonta;Metazoa;Eumetazoa;Bilateria;Protostomia;Spiralia;Lophotrochozoa;Brachiopoda;Linguliformea;Lingulata;Lingulida;Linguloidea;Lingulidae;Lingula;Lingula anatina

UdeM00000032454 7574 336.3 UdeM00000032454 XP\_013384628.1 80.9 194  
37 0 1 194 367 560 2.70E-89 336.3 7574 cellular

organisms;Eukaryota;Opisthokonta;Metazoa;Eumetazoa;Bilateria;Protostomia;Spiralia;Lophotrochozoa;Brachiopoda;Linguliformea;Lingulata;Lingulida;Linguloidea;Lingulidae;Lingula;Lingula anatina

UdeM00000032455 7574 255.8 UdeM00000032455 XP\_013382110.1 47.4 234  
119 2 3 236 386 615 5.50E-65 255.8 7574 cellular

organisms;Eukaryota;Opisthokonta;Metazoa;Eumetazoa;Bilateria;Protostomia;Spiralia;Lophotrochozoa;Brachiopoda;Linguliformea;Lingulata;Lingulida;Linguloidea;Lingulidae;Lingula;Lingula anatina

UdeM00000032457 7574 258.8 UdeM00000032457 XP\_013382110.1 61.3 194  
75 0 14 207 45 238 5.80E-66 258.8 7574 cellular

organisms;Eukaryota;Opisthokonta;Metazoa;Eumetazoa;Bilateria;Protostomia;Spiralia;Lophotrochozoa;Brachiopoda;Linguliformea;Lingulata;Lingulida;Linguloidea;Lingulidae;Lingula;Lingula anatina

UdeM00000032456 7574 258.5 UdeM00000032456 XP\_013382110.1 59.1 208  
79 1 1 208 37 238 7.60E-66 258.5 7574 cellular

organisms;Eukaryota;Opisthokonta;Metazoa;Eumetazoa;Bilateria;Protostomia;Spiralia;Lophotrochozoa;Brachiopoda;Linguliformea;Lingulata;Lingulida;Linguloidea;Lingulidae;Lingula;Lingula anatina

UdeM00000032460 29159 85.1 UdeM00000032460 XP\_034299474.1 39.6 91  
53 1 1 91 415 503 5.10E-14 85.1 29159 cellular

organisms;Eukaryota;Opisthokonta;Metazoa;Eumetazoa;Bilateria;Protostomia;Spiralia;Lophotrochozoa;Mollusca;Bivalvia;Autobranchia;Pteriomorpha;Ostreida;Ostreoidea;Ostreidae;Crassostrea;Crassostrea gigas

UdeM00000032461 55291 70.5 UdeM00000032461 XP\_039625496.1 48.6 72  
34 2 7 75 5 76 1.30E-09 70.5 55291 cellular

organisms;Eukaryota;Opisthokonta;Metazoa;Eumetazoa;Bilateria;Deuterostomia;Chordata;Craniata;Vertebrata;Gnathostomata;Teleostomi;Euteleostomi;Actinopterygii;Cladistia;Polypteriformes;Polypteridae;Polypterus;Polypterus senegalus

UdeM00000032462 7994 248.1 UdeM00000032462 XP\_022519279.1 54.2 216  
99 0 1 216 114 329 1.10E-62 248.1 7994 cellular

organisms;Eukaryota;Opisthokonta;Metazoa;Eumetazoa;Bilateria;Deuterostomia

a;Chordata;Craniata;Vertebrata;Gnathostomata;Teleostomi;Euteleostomi;Acti  
nopterygii;Actinopteri;Neopterygii;Teleostei;Osteoglossocephalai;Clupeoce  
phala;Otomorpha;Ostariophysi;Otophysi;Characiphysae;Characiiformes;Characo  
idei;Characidae;Stethaprioninae;Astyanax;Astyanax mexicanus  
UdeM00000032463 50429 68.2 UdeM00000032463 XP\_022804186.1 39.8 93  
53 1 1 90 430 522 8.80E-09 68.2 50429 cellular  
organisms;Eukaryota;Opisthokonta;Metazoa;Eumetazoa;Cnidaria;Anthozoa;Hexa  
corallia;Scleractinia;Astrocoeniina;Pocilloporidae;Stylophora;Stylophora  
pistillata  
UdeM00000032464 50429 67.4 UdeM00000032464 XP\_022804186.1 41.7 72  
42 0 1 72 430 501 1.50E-08 67.4 50429 cellular  
organisms;Eukaryota;Opisthokonta;Metazoa;Eumetazoa;Cnidaria;Anthozoa;Hexa  
corallia;Scleractinia;Astrocoeniina;Pocilloporidae;Stylophora;Stylophora  
pistillata  
UdeM00000032467 6596 246.5 UdeM00000032467 XP\_045181000.1 52.8 439  
113 4 2 347 1140 1577 5.10E-62 246.5 6596 cellular  
organisms;Eukaryota;Opisthokonta;Metazoa;Eumetazoa;Bilateria;Protostomia;  
Spiralia;Lophotrochozoa;Mollusca;Bivalvia;Autobranchia;Heteroconchia;Euhe  
terodonta;Imparidentia;Venerida;Veneroidea;Veneridae;Mercenaria;Mercenari  
a mercenaria  
UdeM00000032469 7906 101.7 UdeM00000032469 XP\_034778848.1 36.2 138  
88 0 54 191 387 524 1.60E-18 101.7 7906 cellular  
organisms;Eukaryota;Opisthokonta;Metazoa;Eumetazoa;Bilateria;Deuterostomi  
a;Chordata;Craniata;Vertebrata;Gnathostomata;Teleostomi;Euteleostomi;Acti  
nopterygii;Actinopteri;Chondrostei;Acipenseriformes;Acipenseroidei;Acipen  
seridae;Acipenserinae;Acipenserini;Acipenser;Acipenser ruthenus  
UdeM00000032473 7574 239.2 UdeM00000032473 XP\_013409676.1 50.7 268  
115 5 1 261 1 258 6.00E-60 239.2 7574 cellular  
organisms;Eukaryota;Opisthokonta;Metazoa;Eumetazoa;Bilateria;Protostomia;  
Spiralia;Lophotrochozoa;Brachiopoda;Linguliformea;Lingulata;Lingulida;Lin  
guloidea;Lingulidae;Lingula;Lingula anatina  
UdeM00000032474 7574 202.6 UdeM00000032474 XP\_013399038.1 67.2 137  
45 0 25 161 63 199 3.80E-49 202.6 7574 cellular  
organisms;Eukaryota;Opisthokonta;Metazoa;Eumetazoa;Bilateria;Protostomia;  
Spiralia;Lophotrochozoa;Brachiopoda;Linguliformea;Lingulata;Lingulida;Lin  
guloidea;Lingulidae;Lingula;Lingula anatina  
UdeM00000032478 6573 253.4 UdeM00000032478 XP\_021354853.1 48.9 268  
125 4 185 449 147 405 5.20E-64 253.4 6573 cellular  
organisms;Eukaryota;Opisthokonta;Metazoa;Eumetazoa;Bilateria;Protostomia;  
Spiralia;Lophotrochozoa;Mollusca;Bivalvia;Autobranchia;Pteriomorphia;Pect  
inida;Pectinoidea;Pectinidae;Mizuhopecten;Mizuhopecten yessoensis  
UdeM00000032479 6573 399.8 UdeM00000032479 XP\_021372025.1 50.4 405  
190 5 5 401 3 404 4.00E-108 399.8 6573 cellular  
organisms;Eukaryota;Opisthokonta;Metazoa;Eumetazoa;Bilateria;Protostomia;  
Spiralia;Lophotrochozoa;Mollusca;Bivalvia;Autobranchia;Pteriomorphia;Pect  
inida;Pectinoidea;Pectinidae;Mizuhopecten;Mizuhopecten yessoensis  
UdeM00000032480 6596 131.7 UdeM00000032480 XP\_045206152.1 57.1 119  
45 2 1 119 437 549 6.30E-28 131.7 6596 cellular  
organisms;Eukaryota;Opisthokonta;Metazoa;Eumetazoa;Bilateria;Protostomia;  
Spiralia;Lophotrochozoa;Mollusca;Bivalvia;Autobranchia;Heteroconchia;Euhe  
terodonta;Imparidentia;Venerida;Veneroidea;Veneridae;Mercenaria;Mercenari  
a mercenaria  
UdeM00000032485 6596 136 UdeM00000032485 XP\_045182313.1 50 146  
71 2 18 161 1068 1213 4.50E-29 136 6596 cellular



organisms;Eukaryota;Opisthokonta;Metazoa;Eumetazoa;Bilateria;Protostomia;Spiralia;Lophotrochozoa;Mollusca;Bivalvia;Autobranchia;Heteroconchia;Euheterodonta;Imparidentia;Venerida;Veneroidea;Veneridae;Mercenaria;Mercenaria mercenaria

UdeM00000032486 6596 316.2 UdeM00000032486 XP\_045182316.1 34.8 699  
312 18 43 713 408 990 1.10E-82 316.2 6596 cellular

organisms;Eukaryota;Opisthokonta;Metazoa;Eumetazoa;Bilateria;Protostomia;Spiralia;Lophotrochozoa;Mollusca;Bivalvia;Autobranchia;Heteroconchia;Euheterodonta;Imparidentia;Venerida;Veneroidea;Veneridae;Mercenaria;Mercenaria mercenaria

UdeM00000032487 6565 124.8 UdeM00000032487 XP\_022299727.1 47.8 134  
69 1 29 162 145 277 1.20E-25 124.8 6565 cellular

organisms;Eukaryota;Opisthokonta;Metazoa;Eumetazoa;Bilateria;Protostomia;Spiralia;Lophotrochozoa;Mollusca;Bivalvia;Autobranchia;Pteriormorphia;Ostreida;Ostreoidea;Ostreidae;Crassostrea;Crassostrea virginica

UdeM00000032490 6596 235 UdeM00000032490 XP\_045181000.1 56.6 244  
51 2 131 320 1302 1544 1.40E-58 235 6596 cellular

organisms;Eukaryota;Opisthokonta;Metazoa;Eumetazoa;Bilateria;Protostomia;Spiralia;Lophotrochozoa;Mollusca;Bivalvia;Autobranchia;Heteroconchia;Euheterodonta;Imparidentia;Venerida;Veneroidea;Veneridae;Mercenaria;Mercenaria mercenaria

UdeM00000032491 1735272 236.5 UdeM00000032491 XP\_041347279.1 33.9  
436 227 10 1 382 1 429 5.70E-59 236.5 1735272

cellular

organisms;Eukaryota;Opisthokonta;Metazoa;Eumetazoa;Bilateria;Protostomia;Spiralia;Lophotrochozoa;Mollusca;Gastropoda;Neomphalina;Neomphaloidea;Peltospiridae;Gigantopelta;Gigantopelta aegis

UdeM00000032495 6565 117.9 UdeM00000032495 XP\_022317084.1 35.8 176  
88 3 4 154 49 224 1.50E-23 117.9 6565 cellular

organisms;Eukaryota;Opisthokonta;Metazoa;Eumetazoa;Bilateria;Protostomia;Spiralia;Lophotrochozoa;Mollusca;Bivalvia;Autobranchia;Pteriormorphia;Ostreida;Ostreoidea;Ostreidae;Crassostrea;Crassostrea virginica

UdeM00000032496 6565 359.4 UdeM00000032496 XP\_022316307.1 38.4 570  
320 10 1 550 5 563 1.10E-95 359.4 6565 cellular

organisms;Eukaryota;Opisthokonta;Metazoa;Eumetazoa;Bilateria;Protostomia;Spiralia;Lophotrochozoa;Mollusca;Bivalvia;Autobranchia;Pteriormorphia;Ostreida;Ostreoidea;Ostreidae;Crassostrea;Crassostrea virginica

UdeM00000032497 6596 484.2 UdeM00000032497 XP\_045182316.1 39 849  
387 24 2 774 362 1155 3.10E-133 484.2 6596 cellular

organisms;Eukaryota;Opisthokonta;Metazoa;Eumetazoa;Bilateria;Protostomia;Spiralia;Lophotrochozoa;Mollusca;Bivalvia;Autobranchia;Heteroconchia;Euheterodonta;Imparidentia;Venerida;Veneroidea;Veneridae;Mercenaria;Mercenaria mercenaria

UdeM00000032498 7998 171.8 UdeM00000032498 XP\_017334791.1 66.4 116  
39 0 1 116 62 177 5.20E-40 171.8 7998 cellular

organisms;Eukaryota;Opisthokonta;Metazoa;Eumetazoa;Bilateria;Deuterostomia;Chordata;Craniata;Vertebrata;Gnathostomata;Teleostomi;Euteleostomi;Actinopterygii;Actinopteri;Neopterygii;Teleostei;Osteoglossocephalai;Clupeocephala;Otomorpha;Ostariophysi;Otophysi;Characiphysae;Siluriformes;Siluridae;Ictaluridae;Ictalurus;Ictalurus punctatus

UdeM00000032499 6596 144.8 UdeM00000032499 XP\_045169297.1 50.7 152  
73 2 354 505 22 171 3.00E-31 144.8 6596 cellular

organisms;Eukaryota;Opisthokonta;Metazoa;Eumetazoa;Bilateria;Protostomia;Spiralia;Lophotrochozoa;Mollusca;Bivalvia;Autobranchia;Heteroconchia;Euheterodonta;Imparidentia;Venerida;Veneroidea;Veneridae;Mercenaria;Mercenaria mercenaria

terodonta;Imparidentia;Venerida;Veneroidea;Veneridae;Mercenaria;Mercenari  
 a mercenaria  
 UdeM00000032500 6596 126.3 UdeM00000032500 XP\_045169297.1 45.8 153  
 80 3 185 337 22 171 7.30E-26 126.3 6596 cellular  
 organisms;Eukaryota;Opisthokonta;Metazoa;Eumetazoa;Bilateria;Protostomia;  
 Spiralia;Lophotrochozoa;Mollusca;Bivalvia;Autobranhia;Heteroconchia;Euhe  
 terodonta;Imparidentia;Venerida;Veneroidea;Veneridae;Mercenaria;Mercenari  
 a mercenaria  
 UdeM00000032501 6596 164.1 UdeM00000032501 XP\_045212369.1 57.8 147  
 60 2 1 147 9 153 1.40E-37 164.1 6596 cellular  
 organisms;Eukaryota;Opisthokonta;Metazoa;Eumetazoa;Bilateria;Protostomia;  
 Spiralia;Lophotrochozoa;Mollusca;Bivalvia;Autobranhia;Heteroconchia;Euhe  
 terodonta;Imparidentia;Venerida;Veneroidea;Veneridae;Mercenaria;Mercenari  
 a mercenaria  
 UdeM00000032502 6596 110.2 UdeM00000032502 XP\_045169297.1 44 141  
 78 1 604 744 32 171 1.20E-20 110.2 6596 cellular  
 organisms;Eukaryota;Opisthokonta;Metazoa;Eumetazoa;Bilateria;Protostomia;  
 Spiralia;Lophotrochozoa;Mollusca;Bivalvia;Autobranhia;Heteroconchia;Euhe  
 terodonta;Imparidentia;Venerida;Veneroidea;Veneridae;Mercenaria;Mercenari  
 a mercenaria  
 UdeM00000032503 6596 115.2 UdeM00000032503 XP\_045169297.1 44 134  
 74 1 154 287 39 171 1.40E-22 115.2 6596 cellular  
 organisms;Eukaryota;Opisthokonta;Metazoa;Eumetazoa;Bilateria;Protostomia;  
 Spiralia;Lophotrochozoa;Mollusca;Bivalvia;Autobranhia;Heteroconchia;Euhe  
 terodonta;Imparidentia;Venerida;Veneroidea;Veneridae;Mercenaria;Mercenari  
 a mercenaria  
 UdeM00000032504 6596 115.2 UdeM00000032504 XP\_045169297.1 44 134  
 74 1 151 284 39 171 1.40E-22 115.2 6596 cellular  
 organisms;Eukaryota;Opisthokonta;Metazoa;Eumetazoa;Bilateria;Protostomia;  
 Spiralia;Lophotrochozoa;Mollusca;Bivalvia;Autobranhia;Heteroconchia;Euhe  
 terodonta;Imparidentia;Venerida;Veneroidea;Veneridae;Mercenaria;Mercenari  
 a mercenaria  
 UdeM00000032505 6573 186 UdeM00000032505 XP\_021376911.1 34.4 302  
 163 3 1 291 1 278 7.00E-44 186 6573 cellular  
 organisms;Eukaryota;Opisthokonta;Metazoa;Eumetazoa;Bilateria;Protostomia;  
 Spiralia;Lophotrochozoa;Mollusca;Bivalvia;Autobranhia;Pteriomorphia;Pect  
 inida;Pectinoidea;Pectinidae;Mizuhopecten;Mizuhopecten yessoensis  
 UdeM00000032506 6596 121.3 UdeM00000032506 XP\_045173355.1 42 193  
 91 8 1 176 60 248 1.30E-24 121.3 6596 cellular  
 organisms;Eukaryota;Opisthokonta;Metazoa;Eumetazoa;Bilateria;Protostomia;  
 Spiralia;Lophotrochozoa;Mollusca;Bivalvia;Autobranhia;Heteroconchia;Euhe  
 terodonta;Imparidentia;Venerida;Veneroidea;Veneridae;Mercenaria;Mercenari  
 a mercenaria  
 UdeM00000032507 6596 154.8 UdeM00000032507 XP\_045173355.1 40.7 248  
 118 9 3 225 5 248 1.30E-34 154.8 6596 cellular  
 organisms;Eukaryota;Opisthokonta;Metazoa;Eumetazoa;Bilateria;Protostomia;  
 Spiralia;Lophotrochozoa;Mollusca;Bivalvia;Autobranhia;Heteroconchia;Euhe  
 terodonta;Imparidentia;Venerida;Veneroidea;Veneridae;Mercenaria;Mercenari  
 a mercenaria  
 UdeM00000032508 225164 204.1 UdeM00000032508 XP\_009051557.1 64.9  
 134 47 0 2 135 57 190 1.10E-49 204.1 225164  
 cellular  
 organisms;Eukaryota;Opisthokonta;Metazoa;Eumetazoa;Bilateria;Protostomia;

Spiralia; Lophotrochozoa; Mollusca; Gastropoda; Patellogastropoda; Lottioidae; Lottiidae; Lottia; Lottia gigantea

UdeM00000032509 37653 266.2 UdeM00000032509 XP\_014783795.1 51 255  
122 2 10 263 255 507 4.70E-68 266.2 37653 cellular  
organisms; Eukaryota; Opisthokonta; Metazoa; Eumetazoa; Bilateria; Protostomia; Spiralia; Lophotrochozoa; Mollusca; Cephalopoda; Coleoidea; Octopodiformes; Octopoda; Incirrata; Octopodidae; Octopus; Octopus bimaculoides

UdeM00000032510 6573 218 UdeM00000032510 XP\_021364934.1 51 204  
94 2 4 207 3 200 1.10E-53 218 6573 cellular  
organisms; Eukaryota; Opisthokonta; Metazoa; Eumetazoa; Bilateria; Protostomia; Spiralia; Lophotrochozoa; Mollusca; Bivalvia; Autobranchia; Pteriomorpha; Pectinida; Pectinoidea; Pectinidae; Mizuhopecten; Mizuhopecten yessoensis

UdeM00000032512 6573 105.1 UdeM00000032512 XP\_021369507.1 44.4 232  
100 9 4 219 3 221 1.10E-19 105.1 6573 cellular  
organisms; Eukaryota; Opisthokonta; Metazoa; Eumetazoa; Bilateria; Protostomia; Spiralia; Lophotrochozoa; Mollusca; Bivalvia; Autobranchia; Pteriomorpha; Pectinida; Pectinoidea; Pectinidae; Mizuhopecten; Mizuhopecten yessoensis

UdeM00000032513 6596 387.1 UdeM00000032513 XP\_045173628.1 51.6 417  
186 5 1 404 3 416 2.80E-104 387.1 6596 cellular  
organisms; Eukaryota; Opisthokonta; Metazoa; Eumetazoa; Bilateria; Protostomia; Spiralia; Lophotrochozoa; Mollusca; Bivalvia; Autobranchia; Heteroconchia; Euheterodonta; Imparidentia; Venerida; Veneroidea; Veneridae; Mercenaria; Mercenaria mercenaria

UdeM00000032514 6596 910.2 UdeM00000032514 XP\_045171716.1 55.2 985  
357 12 49 966 51 1018 2.20E-261 910.2 6596 cellular  
organisms; Eukaryota; Opisthokonta; Metazoa; Eumetazoa; Bilateria; Protostomia; Spiralia; Lophotrochozoa; Mollusca; Bivalvia; Autobranchia; Heteroconchia; Euheterodonta; Imparidentia; Venerida; Veneroidea; Veneridae; Mercenaria; Mercenaria mercenaria

UdeM00000032515 6596 691 UdeM00000032515 XP\_045202894.1 62.9 545  
197 2 42 583 41 583 1.30E-195 691 6596 cellular  
organisms; Eukaryota; Opisthokonta; Metazoa; Eumetazoa; Bilateria; Protostomia; Spiralia; Lophotrochozoa; Mollusca; Bivalvia; Autobranchia; Heteroconchia; Euheterodonta; Imparidentia; Venerida; Veneroidea; Veneridae; Mercenaria; Mercenaria mercenaria

UdeM00000032516 6596 122.5 UdeM00000032516 XP\_045174006.1 72.6 84  
22 1 1 84 1 83 2.70E-25 122.5 6596 cellular  
organisms; Eukaryota; Opisthokonta; Metazoa; Eumetazoa; Bilateria; Protostomia; Spiralia; Lophotrochozoa; Mollusca; Bivalvia; Autobranchia; Heteroconchia; Euheterodonta; Imparidentia; Venerida; Veneroidea; Veneridae; Mercenaria; Mercenaria mercenaria

UdeM00000032517 6565 1128.2 UdeM00000032517 XP\_022343206.1 78.9  
673 140 2 1 672 1 672 0.00E+00 1128.2 6565  
cellular  
organisms; Eukaryota; Opisthokonta; Metazoa; Eumetazoa; Bilateria; Protostomia; Spiralia; Lophotrochozoa; Mollusca; Bivalvia; Autobranchia; Pteriomorpha; Ostreida; Ostreoidae; Ostreidae; Crassostrea; Crassostrea virginica

UdeM00000032518 29159 902.5 UdeM00000032518 XP\_011426919.1 85.9 531  
75 0 1 531 1 531 2.50E-259 902.5 29159 cellular  
organisms; Eukaryota; Opisthokonta; Metazoa; Eumetazoa; Bilateria; Protostomia; Spiralia; Lophotrochozoa; Mollusca; Bivalvia; Autobranchia; Pteriomorpha; Ostreida; Ostreoidae; Ostreidae; Crassostrea; Crassostrea gigas

UdeM00000032519 29159 401.4 UdeM00000032519 XP\_011446272.1 54.2 493  
206 5 7 498 2 475 1.80E-108 401.4 29159 cellular

organisms;Eukaryota;Opisthokonta;Metazoa;Eumetazoa;Bilateria;Protostomia; Spiralia;Lophotrochozoa;Mollusca;Bivalvia;Autobranchia;Pteriomorphia;Ostr eida;Ostreoidea;Ostreidae;Crassostrea;Crassostrea gigas

UdeM00000032520 6596 3095.1 UdeM00000032520 XP\_045172538.1 69.3  
2421 646 27 34 2421 118 2474 0.00E+00 3095.1 6596  
cellular

organisms;Eukaryota;Opisthokonta;Metazoa;Eumetazoa;Bilateria;Protostomia; Spiralia;Lophotrochozoa;Mollusca;Bivalvia;Autobranchia;Heteroconchia;Euhe terodonta;Imparidentia;Venerida;Veneroidea;Veneridae;Mercenaria;Mercenari a mercenaria

UdeM00000032521 6596 782.7 UdeM00000032521 XP\_045172127.1 58.8 709  
262 13 1 693 15 709 3.90E-223 782.7 6596 cellular

organisms;Eukaryota;Opisthokonta;Metazoa;Eumetazoa;Bilateria;Protostomia; Spiralia;Lophotrochozoa;Mollusca;Bivalvia;Autobranchia;Heteroconchia;Euhe terodonta;Imparidentia;Venerida;Veneroidea;Veneridae;Mercenaria;Mercenari a mercenaria

UdeM00000032522 6596 338.6 UdeM00000032522 XP\_045172126.1 78 200  
44 0 11 210 385 584 5.80E-90 338.6 6596 cellular

organisms;Eukaryota;Opisthokonta;Metazoa;Eumetazoa;Bilateria;Protostomia; Spiralia;Lophotrochozoa;Mollusca;Bivalvia;Autobranchia;Heteroconchia;Euhe terodonta;Imparidentia;Venerida;Veneroidea;Veneridae;Mercenaria;Mercenari a mercenaria

UdeM00000032523 225164 177.2 UdeM00000032523 XP\_009051860.1 42.2  
251 125 4 682 932 1215 1445 1.00E-40 177.2 225164  
cellular

organisms;Eukaryota;Opisthokonta;Metazoa;Eumetazoa;Bilateria;Protostomia; Spiralia;Lophotrochozoa;Mollusca;Gastropoda;Patellogastropoda;Lottioidea; Lottiidae;Lottia;Lottia gigantea

UdeM00000032524 6565 374.4 UdeM00000032524 XP\_022342368.1 62.1 285  
101 3 7 291 43 320 1.30E-100 374.4 6565 cellular

organisms;Eukaryota;Opisthokonta;Metazoa;Eumetazoa;Bilateria;Protostomia; Spiralia;Lophotrochozoa;Mollusca;Bivalvia;Autobranchia;Pteriomorphia;Ostr eida;Ostreoidea;Ostreidae;Crassostrea;Crassostrea virginica

UdeM00000032525 1735272 334.3 UdeM00000032525 XP\_041350337.1 70.1  
231 69 0 20 250 20 250 1.30E-88 334.3 1735272  
cellular

organisms;Eukaryota;Opisthokonta;Metazoa;Eumetazoa;Bilateria;Protostomia; Spiralia;Lophotrochozoa;Mollusca;Gastropoda;Neomphalina;Neomphaloidea;Pel tospiridae;Gigantopelta;Gigantopelta aegis

UdeM00000032526 2607531 844 UdeM00000032526 XP\_036362849.1 44.4  
1020 443 18 4 1006 2 914 2.20E-241 844 2607531  
cellular

organisms;Eukaryota;Opisthokonta;Metazoa;Eumetazoa;Bilateria;Protostomia; Spiralia;Lophotrochozoa;Mollusca;Cephalopoda;Coleoidea;Octopodiformes;Oct opoda;Incirrata;Octopodidae;Octopus;Octopus sinensis

UdeM00000032527 6565 397.9 UdeM00000032527 XP\_022338373.1 33.8 618  
403 5 10 625 11 624 2.40E-107 397.9 6565 cellular

organisms;Eukaryota;Opisthokonta;Metazoa;Eumetazoa;Bilateria;Protostomia; Spiralia;Lophotrochozoa;Mollusca;Bivalvia;Autobranchia;Pteriomorphia;Ostr eida;Ostreoidea;Ostreidae;Crassostrea;Crassostrea virginica

UdeM00000032529 2607531 196.1 UdeM00000032529 XP\_036362849.1 56.4  
165 70 2 1 164 544 707 3.60E-47 196.1 2607531  
cellular

organisms;Eukaryota;Opisthokonta;Metazoa;Eumetazoa;Bilateria;Protostomia;

Spiralia;Lophotrochozoa;Mollusca;Cephalopoda;Coleoidea;Octopodiformes;Octopoda;Incirrata;Octopodidae;Octopus;Octopus sinensis  
UdeM00000032530 2607531 533.5 UdeM00000032530 XP\_036362849.1 61.5  
421 160 2 1 420 544 963 2.50E-148 533.5 2607531  
cellular

organisms;Eukaryota;Opisthokonta;Metazoa;Eumetazoa;Bilateria;Protostomia;  
Spiralia;Lophotrochozoa;Mollusca;Cephalopoda;Coleoidea;Octopodiformes;Octopoda;Incirrata;Octopodidae;Octopus;Octopus sinensis  
UdeM00000032531 6596 342 UdeM00000032531 XP\_045173166.1 69.5 239  
73 0 1 239 429 667 6.20E-91 342 6596 cellular

organisms;Eukaryota;Opisthokonta;Metazoa;Eumetazoa;Bilateria;Protostomia;  
Spiralia;Lophotrochozoa;Mollusca;Bivalvia;Autobranchia;Heteroconchia;Euheterodonta;Imparidentia;Venerida;Veneroidea;Veneridae;Mercenaria;Mercenaria mercenaria

UdeM00000032532 37653 713.4 UdeM00000032532 XP\_014777527.1 60.7 603  
156 3 35 565 64 657 2.40E-202 713.4 37653 cellular

organisms;Eukaryota;Opisthokonta;Metazoa;Eumetazoa;Bilateria;Protostomia;  
Spiralia;Lophotrochozoa;Mollusca;Cephalopoda;Coleoidea;Octopodiformes;Octopoda;Incirrata;Octopodidae;Octopus;Octopus bimaculoides

UdeM00000032533 1735272 716.1 UdeM00000032533 XP\_041371300.1 58  
597 244 5 18 612 23 614 3.90E-203 716.1 1735272  
cellular

organisms;Eukaryota;Opisthokonta;Metazoa;Eumetazoa;Bilateria;Protostomia;  
Spiralia;Lophotrochozoa;Mollusca;Gastropoda;Neomphalina;Neomphaloidea;Peltospiridae;Gigantopelta;Gigantopelta aegis

UdeM00000032534 2607531 138.7 UdeM00000032534 XP\_029651260.1 52.3  
130 54 3 1 128 1 124 2.50E-29 138.7 2607531  
cellular

organisms;Eukaryota;Opisthokonta;Metazoa;Eumetazoa;Bilateria;Protostomia;  
Spiralia;Lophotrochozoa;Mollusca;Cephalopoda;Coleoidea;Octopodiformes;Octopoda;Incirrata;Octopodidae;Octopus;Octopus sinensis

UdeM00000032535 2607531 138.3 UdeM00000032535 XP\_029651260.1 52.7  
129 53 3 1 127 1 123 3.30E-29 138.3 2607531  
cellular

organisms;Eukaryota;Opisthokonta;Metazoa;Eumetazoa;Bilateria;Protostomia;  
Spiralia;Lophotrochozoa;Mollusca;Cephalopoda;Coleoidea;Octopodiformes;Octopoda;Incirrata;Octopodidae;Octopus;Octopus sinensis

UdeM00000032536 7574 670.6 UdeM00000032536 XP\_013408166.1 71.1 461  
123 3 1 461 1 451 1.90E-189 670.6 7574 cellular

organisms;Eukaryota;Opisthokonta;Metazoa;Eumetazoa;Bilateria;Protostomia;  
Spiralia;Lophotrochozoa;Brachiopoda;Linguliformea;Lingulata;Lingulida;Linguloidea;Lingulidae;Lingula;Lingula anatina

UdeM00000032537 6596 181.4 UdeM00000032537 XP\_045205524.1 45.4 194  
91 4 18 197 27 219 1.10E-42 181.4 6596 cellular

organisms;Eukaryota;Opisthokonta;Metazoa;Eumetazoa;Bilateria;Protostomia;  
Spiralia;Lophotrochozoa;Mollusca;Bivalvia;Autobranchia;Heteroconchia;Euheterodonta;Imparidentia;Venerida;Veneroidea;Veneridae;Mercenaria;Mercenaria mercenaria

UdeM00000032538 6596 176.8 UdeM00000032538 XP\_045205524.1 40.7 209  
113 3 1 198 11 219 2.80E-41 176.8 6596 cellular

organisms;Eukaryota;Opisthokonta;Metazoa;Eumetazoa;Bilateria;Protostomia;  
Spiralia;Lophotrochozoa;Mollusca;Bivalvia;Autobranchia;Heteroconchia;Euheterodonta;Imparidentia;Venerida;Veneroidea;Veneridae;Mercenaria;Mercenaria mercenaria

UdeM00000032539 6596 193 UdeM00000032539 XP\_045205524.1 47.2 197  
 90 3 17 200 21 216 4.70E-46 193 6596 cellular  
 organisms;Eukaryota;Opisthokonta;Metazoa;Eumetazoa;Bilateria;Protostomia;  
 Spiralia;Lophotrochozoa;Mollusca;Bivalvia;Autobranchia;Heteroconchia;Euhe  
 terodonta;Imparidentia;Venerida;Veneroidea;Veneridae;Mercenaria;Mercenari  
 a mercenaria  
 UdeM00000032540 400727 91.7 UdeM00000032540 XP\_025089816.1 43.9  
 107 58 1 1 105 71 177 6.20E-16 91.7 400727  
 cellular  
 organisms;Eukaryota;Opisthokonta;Metazoa;Eumetazoa;Bilateria;Protostomia;  
 Spiralia;Lophotrochozoa;Mollusca;Gastropoda;Caenogastropoda;Architaeniogl  
 ossa;Ampullarioidea;Ampullariidae;Pomacea;Pomacea canaliculata  
 UdeM00000032541 6596 722.2 UdeM00000032541 XP\_045171580.1 80 400  
 80 0 1 400 18 417 3.50E-205 722.2 6596 cellular  
 organisms;Eukaryota;Opisthokonta;Metazoa;Eumetazoa;Bilateria;Protostomia;  
 Spiralia;Lophotrochozoa;Mollusca;Bivalvia;Autobranchia;Heteroconchia;Euhe  
 terodonta;Imparidentia;Venerida;Veneroidea;Veneridae;Mercenaria;Mercenari  
 a mercenaria  
 UdeM00000032542 6596 717.2 UdeM00000032542 XP\_045171580.1 79.8 401  
 80 1 1 401 18 417 1.10E-203 717.2 6596 cellular  
 organisms;Eukaryota;Opisthokonta;Metazoa;Eumetazoa;Bilateria;Protostomia;  
 Spiralia;Lophotrochozoa;Mollusca;Bivalvia;Autobranchia;Heteroconchia;Euhe  
 terodonta;Imparidentia;Venerida;Veneroidea;Veneridae;Mercenaria;Mercenari  
 a mercenaria  
 UdeM00000032543 6596 111.3 UdeM00000032543 XP\_045186195.1 60 75  
 30 0 1 75 1 75 5.70E-22 111.3 6596 cellular  
 organisms;Eukaryota;Opisthokonta;Metazoa;Eumetazoa;Bilateria;Protostomia;  
 Spiralia;Lophotrochozoa;Mollusca;Bivalvia;Autobranchia;Heteroconchia;Euhe  
 terodonta;Imparidentia;Venerida;Veneroidea;Veneridae;Mercenaria;Mercenari  
 a mercenaria  
 UdeM00000032544 29159 174.9 UdeM00000032544 XP\_034338305.1 62 129  
 49 0 17 145 11 139 7.90E-41 174.9 29159 cellular  
 organisms;Eukaryota;Opisthokonta;Metazoa;Eumetazoa;Bilateria;Protostomia;  
 Spiralia;Lophotrochozoa;Mollusca;Bivalvia;Autobranchia;Pteriomorphia;Ostr  
 eida;Ostreoidea;Ostreidae;Crassostrea;Crassostrea gigas  
 UdeM00000032545 6573 315.1 UdeM00000032545 XP\_021361447.1 52.3 298  
 140 1 367 664 913 1208 2.20E-82 315.1 6573 cellular  
 organisms;Eukaryota;Opisthokonta;Metazoa;Eumetazoa;Bilateria;Protostomia;  
 Spiralia;Lophotrochozoa;Mollusca;Bivalvia;Autobranchia;Pteriomorphia;Pect  
 inida;Pectinoidea;Pectinidae;Mizuhopecten;Mizuhopecten yessoensis  
 UdeM00000032546 6579 797 UdeM00000032546 XP\_033748078.1 49.4 857  
 406 9 198 1036 92 938 3.10E-227 797 6579 cellular  
 organisms;Eukaryota;Opisthokonta;Metazoa;Eumetazoa;Bilateria;Protostomia;  
 Spiralia;Lophotrochozoa;Mollusca;Bivalvia;Autobranchia;Pteriomorphia;Pect  
 inida;Pectinoidea;Pectinidae;Pecten;Pecten maximus  
 UdeM00000032547 6573 351.3 UdeM00000032547 XP\_021361447.1 57.5 280  
 119 0 19 298 527 806 1.20E-93 351.3 6573 cellular  
 organisms;Eukaryota;Opisthokonta;Metazoa;Eumetazoa;Bilateria;Protostomia;  
 Spiralia;Lophotrochozoa;Mollusca;Bivalvia;Autobranchia;Pteriomorphia;Pect  
 inida;Pectinoidea;Pectinidae;Mizuhopecten;Mizuhopecten yessoensis  
 UdeM00000032549 6596 76.3 UdeM00000032549 XP\_045171970.1 27 263  
 147 7 547 766 827 1087 2.70E-10 76.3 6596 cellular  
 organisms;Eukaryota;Opisthokonta;Metazoa;Eumetazoa;Bilateria;Protostomia;  
 Spiralia;Lophotrochozoa;Mollusca;Bivalvia;Autobranchia;Heteroconchia;Euhe

terodonta;Imparidentia;Venerida;Veneroidea;Veneridae;Mercenaria;Mercenaria mercenaria

UdeM00000032550 6596 397.1 UdeM00000032550 XP\_045173284.1 81.6 250  
46 0 3 252 5 254 1.60E-107 397.1 6596 cellular

organisms;Eukaryota;Opisthokonta;Metazoa;Eumetazoa;Bilateria;Protostomia;Spiralia;Lophotrochozoa;Mollusca;Bivalvia;Autobranhia;Heteroconchia;Euheterodonta;Imparidentia;Venerida;Veneroidea;Veneridae;Mercenaria;Mercenaria mercenaria

UdeM00000032551 166361 135.6 UdeM00000032551 XP\_022900320.1 45.4  
141 65 2 109 246 51 182 9.00E-29 135.6 166361  
cellular

organisms;Eukaryota;Opisthokonta;Metazoa;Eumetazoa;Bilateria;Protostomia;Ecdysozoa;Panarthropoda;Arthropoda;Mandibulata;Pancrustacea;Hexapoda;Insecta;Dicondylia;Pterygota;Neoptera;Endopterygota;Coleoptera;Polyphaga;Scarabaeiformia;Scarabaeoidea;Scarabaeidae;Scarabaeinae;Scarabaeinae incertae sedis;Onthophagus;Onthophagus taurus

UdeM00000032552 202533 143.3 UdeM00000032552 XP\_035218899.1 42.1  
164 89 2 2 159 303 466 2.70E-31 143.3 202533  
cellular

organisms;Eukaryota;Opisthokonta;Metazoa;Eumetazoa;Bilateria;Protostomia;Ecdysozoa;Panarthropoda;Arthropoda;Chelicerata;Arachnida;Araneae;Araneomorphae;Entelegynae;Eresoidea;Eresidae;Stegodyphus;Stegodyphus dumicola

UdeM00000032553 1735272 132.5 UdeM00000032553 XP\_041377189.1 39.5  
185 90 5 51 231 80 246 7.50E-28 132.5 1735272  
cellular

organisms;Eukaryota;Opisthokonta;Metazoa;Eumetazoa;Bilateria;Protostomia;Spiralia;Lophotrochozoa;Mollusca;Gastropoda;Neomphalina;Neomphaloidea;Peltospiridae;Gigantopelta;Gigantopelta aegis

UdeM00000032554 6596 983 UdeM00000032554 XP\_045190532.1 54.4 960  
275 7 15 907 550 1413 2.50E-283 983 6596 cellular

organisms;Eukaryota;Opisthokonta;Metazoa;Eumetazoa;Bilateria;Protostomia;Spiralia;Lophotrochozoa;Mollusca;Bivalvia;Autobranhia;Heteroconchia;Euheterodonta;Imparidentia;Venerida;Veneroidea;Veneridae;Mercenaria;Mercenaria mercenaria

UdeM00000032556 166361 114.4 UdeM00000032556 XP\_022900320.1 47  
117 52 3 99 214 52 159 2.30E-22 114.4 166361  
cellular

organisms;Eukaryota;Opisthokonta;Metazoa;Eumetazoa;Bilateria;Protostomia;Ecdysozoa;Panarthropoda;Arthropoda;Mandibulata;Pancrustacea;Hexapoda;Insecta;Dicondylia;Pterygota;Neoptera;Endopterygota;Coleoptera;Polyphaga;Scarabaeiformia;Scarabaeoidea;Scarabaeidae;Scarabaeinae;Scarabaeinae incertae sedis;Onthophagus;Onthophagus taurus

UdeM00000032558 166361 114.4 UdeM00000032558 XP\_022900320.1 47  
117 52 3 99 214 52 159 2.30E-22 114.4 166361  
cellular

organisms;Eukaryota;Opisthokonta;Metazoa;Eumetazoa;Bilateria;Protostomia;Ecdysozoa;Panarthropoda;Arthropoda;Mandibulata;Pancrustacea;Hexapoda;Insecta;Dicondylia;Pterygota;Neoptera;Endopterygota;Coleoptera;Polyphaga;Scarabaeiformia;Scarabaeoidea;Scarabaeidae;Scarabaeinae;Scarabaeinae incertae sedis;Onthophagus;Onthophagus taurus

UdeM00000032560 6596 100.5 UdeM00000032560 XP\_045173349.1 33.5 212  
133 4 5 215 734 938 4.40E-18 100.5 6596 cellular

organisms;Eukaryota;Opisthokonta;Metazoa;Eumetazoa;Bilateria;Protostomia;Spiralia;Lophotrochozoa;Mollusca;Bivalvia;Autobranhia;Heteroconchia;Euheterodonta

terodonta;Imparidentia;Venerida;Veneroidea;Veneridae;Mercenaria;Mercenari  
 a mercenaria  
 UdeM00000032561 6596 335.1 UdeM00000032561 XP\_045208720.1 34.1 733  
 428 23 9 712 33 739 2.20E-88 335.1 6596 cellular  
 organisms;Eukaryota;Opisthokonta;Metazoa;Eumetazoa;Bilateria;Protostomia;  
 Spiralia;Lophotrochozoa;Mollusca;Bivalvia;Autobranhia;Heteroconchia;Euhe  
 terodonta;Imparidentia;Venerida;Veneroidea;Veneridae;Mercenaria;Mercenari  
 a mercenaria  
 UdeM00000032562 6596 256.5 UdeM00000032562 XP\_045208720.1 35.7 516  
 291 15 9 505 33 526 7.30E-65 256.5 6596 cellular  
 organisms;Eukaryota;Opisthokonta;Metazoa;Eumetazoa;Bilateria;Protostomia;  
 Spiralia;Lophotrochozoa;Mollusca;Bivalvia;Autobranhia;Heteroconchia;Euhe  
 terodonta;Imparidentia;Venerida;Veneroidea;Veneridae;Mercenaria;Mercenari  
 a mercenaria  
 UdeM00000032564 6596 256.1 UdeM00000032564 XP\_045173349.1 35.6 481  
 284 14 79 549 53 517 1.00E-64 256.1 6596 cellular  
 organisms;Eukaryota;Opisthokonta;Metazoa;Eumetazoa;Bilateria;Protostomia;  
 Spiralia;Lophotrochozoa;Mollusca;Bivalvia;Autobranhia;Heteroconchia;Euhe  
 terodonta;Imparidentia;Venerida;Veneroidea;Veneridae;Mercenaria;Mercenari  
 a mercenaria  
 UdeM00000032565 6596 194.5 UdeM00000032565 XP\_045208720.1 35.1 379  
 226 10 7 372 559 930 2.50E-46 194.5 6596 cellular  
 organisms;Eukaryota;Opisthokonta;Metazoa;Eumetazoa;Bilateria;Protostomia;  
 Spiralia;Lophotrochozoa;Mollusca;Bivalvia;Autobranhia;Heteroconchia;Euhe  
 terodonta;Imparidentia;Venerida;Veneroidea;Veneridae;Mercenaria;Mercenari  
 a mercenaria  
 UdeM00000032566 6596 66.2 UdeM00000032566 XP\_045208696.1 42.1 114  
 56 4 30 141 290 395 3.80E-08 66.2 6596 cellular  
 organisms;Eukaryota;Opisthokonta;Metazoa;Eumetazoa;Bilateria;Protostomia;  
 Spiralia;Lophotrochozoa;Mollusca;Bivalvia;Autobranhia;Heteroconchia;Euhe  
 terodonta;Imparidentia;Venerida;Veneroidea;Veneridae;Mercenaria;Mercenari  
 a mercenaria  
 UdeM00000032574 6596 66.2 UdeM00000032574 XP\_045208696.1 42.1 114  
 56 4 30 141 290 395 3.80E-08 66.2 6596 cellular  
 organisms;Eukaryota;Opisthokonta;Metazoa;Eumetazoa;Bilateria;Protostomia;  
 Spiralia;Lophotrochozoa;Mollusca;Bivalvia;Autobranhia;Heteroconchia;Euhe  
 terodonta;Imparidentia;Venerida;Veneroidea;Veneridae;Mercenaria;Mercenari  
 a mercenaria  
 UdeM00000032575 6596 66.2 UdeM00000032575 XP\_045208696.1 42.1 114  
 56 4 30 141 290 395 3.80E-08 66.2 6596 cellular  
 organisms;Eukaryota;Opisthokonta;Metazoa;Eumetazoa;Bilateria;Protostomia;  
 Spiralia;Lophotrochozoa;Mollusca;Bivalvia;Autobranhia;Heteroconchia;Euhe  
 terodonta;Imparidentia;Venerida;Veneroidea;Veneridae;Mercenaria;Mercenari  
 a mercenaria  
 UdeM00000039209 6596 1649 UdeM00000039209 XP\_045197016.1 55.5 1700  
 678 30 1 1645 1 1676 0.00E+00 1649 6596 cellular  
 organisms;Eukaryota;Opisthokonta;Metazoa;Eumetazoa;Bilateria;Protostomia;  
 Spiralia;Lophotrochozoa;Mollusca;Bivalvia;Autobranhia;Heteroconchia;Euhe  
 terodonta;Imparidentia;Venerida;Veneroidea;Veneridae;Mercenaria;Mercenari  
 a mercenaria  
 UdeM00000039210 400727 329.7 UdeM00000039210 XP\_025096865.1 73  
 215 54 1 1 215 1 211 5.60E-87 329.7 400727  
 cellular  
 organisms;Eukaryota;Opisthokonta;Metazoa;Eumetazoa;Bilateria;Protostomia;



Spiralia;Lophotrochozoa;Mollusca;Gastropoda;Caenogastropoda;Architaenioglossa;Ampullarioidea;Ampullariidae;Pomacea;Pomacea canaliculata  
UdeM00000039211 6565 405.2 UdeM00000039211 XP\_022294149.1 44.5 474  
229 5 27 493 36 482 1.20E-109 405.2 6565 cellular  
organisms;Eukaryota;Opisthokonta;Metazoa;Eumetazoa;Bilateria;Protostomia;  
Spiralia;Lophotrochozoa;Mollusca;Bivalvia;Autobranchia;Pteriormorphia;Ostreida;  
Ostreoidea;Ostreidae;Crassostrea;Crassostrea virginica  
UdeM00000039212 1735272 392.9 UdeM00000039212 XP\_041354362.1 46.4  
457 206 6 1 457 33 450 5.60E-106 392.9 1735272  
cellular  
organisms;Eukaryota;Opisthokonta;Metazoa;Eumetazoa;Bilateria;Protostomia;  
Spiralia;Lophotrochozoa;Mollusca;Gastropoda;Neomphalina;Neomphaloidea;Pel  
tospiridae;Gigantopelta;Gigantopelta aegis  
UdeM00000039213 6596 604.4 UdeM00000039213 XP\_045197118.1 63.4 432  
158 0 6 437 4 435 1.20E-169 604.4 6596 cellular  
organisms;Eukaryota;Opisthokonta;Metazoa;Eumetazoa;Bilateria;Protostomia;  
Spiralia;Lophotrochozoa;Mollusca;Bivalvia;Autobranchia;Heteroconchia;Euhe  
terodonta;Imparidentia;Venerida;Veneroidea;Veneridae;Mercenaria;Mercenari  
a mercenaria  
UdeM00000039214 747089 177.2 UdeM00000039214 XP\_025171917.1 33.2  
331 192 9 34 356 40 349 3.80E-41 177.2 747089  
cellular organisms;Eukaryota;Opisthokonta;Fungi;Fungi incertae  
sedis;Mucoromycota;Glomeromycotina;Glomeromycetes;Glomerales;Glomeraceae;  
Rhizophagus;Rhizophagus irregularis;Rhizophagus irregularis DAOM  
181602=DAOM 197198  
UdeM00000039215 6573 388.3 UdeM00000039215 XP\_021346792.1 59.9 327  
128 1 1 324 102 428 2.20E-104 388.3 6573 cellular  
organisms;Eukaryota;Opisthokonta;Metazoa;Eumetazoa;Bilateria;Protostomia;  
Spiralia;Lophotrochozoa;Mollusca;Bivalvia;Autobranchia;Pteriormorphia;Pect  
inida;Pectinoidea;Pectinidae;Mizuhopecten;Mizuhopecten yessoensis  
UdeM00000039216 45264 111.7 UdeM00000039216 XP\_044163963.1 38.3 154  
79 2 4 141 417 570 1.10E-21 111.7 45264 cellular  
organisms;Eukaryota;Opisthokonta;Metazoa;Eumetazoa;Cnidaria;Anthozoa;Hexa  
corallia;Scleractinia;Astrocoeniina;Acroporidae;Acropora;Acropora  
millepora  
UdeM00000039217 6579 567.4 UdeM00000039217 XP\_033741209.1 66.2 423  
138 5 1 419 3 424 1.50E-158 567.4 6579 cellular  
organisms;Eukaryota;Opisthokonta;Metazoa;Eumetazoa;Bilateria;Protostomia;  
Spiralia;Lophotrochozoa;Mollusca;Bivalvia;Autobranchia;Pteriormorphia;Pect  
inida;Pectinoidea;Pectinidae;Pecten;Pecten maximus  
UdeM00000039219 6596 198 UdeM00000039219 XP\_045198073.1 71.2 156  
41 2 1 155 1 153 9.00E-48 198 6596 cellular  
organisms;Eukaryota;Opisthokonta;Metazoa;Eumetazoa;Bilateria;Protostomia;  
Spiralia;Lophotrochozoa;Mollusca;Bivalvia;Autobranchia;Heteroconchia;Euhe  
terodonta;Imparidentia;Venerida;Veneroidea;Veneridae;Mercenaria;Mercenari  
a mercenaria  
UdeM00000039218 6596 634.4 UdeM00000039218 XP\_045198073.1 78.3 411  
85 2 1 410 1 408 9.90E-179 634.4 6596 cellular  
organisms;Eukaryota;Opisthokonta;Metazoa;Eumetazoa;Bilateria;Protostomia;  
Spiralia;Lophotrochozoa;Mollusca;Bivalvia;Autobranchia;Heteroconchia;Euhe  
terodonta;Imparidentia;Venerida;Veneroidea;Veneridae;Mercenaria;Mercenari  
a mercenaria  
UdeM00000039220 6596 444.5 UdeM00000039220 XP\_045198073.1 82.8 256  
44 0 6 261 153 408 9.30E-122 444.5 6596 cellular

organisms;Eukaryota;Opisthokonta;Metazoa;Eumetazoa;Bilateria;Protostomia;Spiralia;Lophotrochozoa;Mollusca;Bivalvia;Autobranchia;Heteroconchia;Euherodonta;Imparidentia;Venerida;Veneroidea;Veneridae;Mercenaria;Mercenaria mercenaria

UdeM00000039221 6596 311.6 UdeM00000039221 XP\_045209649.1 31.9 728  
451 20 49 748 42 752 2.80E-81 311.6 6596 cellular

organisms;Eukaryota;Opisthokonta;Metazoa;Eumetazoa;Bilateria;Protostomia;Spiralia;Lophotrochozoa;Mollusca;Bivalvia;Autobranchia;Heteroconchia;Euherodonta;Imparidentia;Venerida;Veneroidea;Veneridae;Mercenaria;Mercenaria mercenaria

UdeM00000039222 6596 1052 UdeM00000039222 XP\_045197998.1 52.6 1115  
479 19 21 1095 223 1327 5.30E-304 1052 6596 cellular

organisms;Eukaryota;Opisthokonta;Metazoa;Eumetazoa;Bilateria;Protostomia;Spiralia;Lophotrochozoa;Mollusca;Bivalvia;Autobranchia;Heteroconchia;Euherodonta;Imparidentia;Venerida;Veneroidea;Veneridae;Mercenaria;Mercenaria mercenaria

UdeM00000039223 6596 340.9 UdeM00000039223 XP\_045197998.1 76 208  
50 0 16 223 14 221 1.30E-90 340.9 6596 cellular

organisms;Eukaryota;Opisthokonta;Metazoa;Eumetazoa;Bilateria;Protostomia;Spiralia;Lophotrochozoa;Mollusca;Bivalvia;Autobranchia;Heteroconchia;Euherodonta;Imparidentia;Venerida;Veneroidea;Veneridae;Mercenaria;Mercenaria mercenaria

UdeM00000039224 77115 367.5 UdeM00000039224 XP\_038133904.1 61.9 273  
102 1 9 281 11 281 1.60E-98 367.5 77115 cellular

organisms;Eukaryota;Opisthokonta;Metazoa;Eumetazoa;Bilateria;Deuterostomia;Chordata;Craniata;Vertebrata;Gnathostomata;Teleostomi;Euteleostomi;Actinopterygii;Actinopteri;Neopterygii;Teleostei;Osteoglossocephalai;Clupeocephala;Euteleosteomorpha;Neoteleostei;Eurypterygia;Ctenosquamata;Acanthomorphata;Euacanthomorphacea;Percomorphaceae;Ovalentaria;Atherinomorphae;Cyprinodontiformes;Cyprinodontoides;Cyprinodontidae;Cyprinodontinae;Cyprinodontini;Cyprinodon;Cyprinodon tularosa

UdeM00000039225 1250792 95.9 UdeM00000039225 XP\_041861569.1 57.5  
73 31 0 2 74 595 667 2.30E-17 95.9 1250792

cellular

organisms;Eukaryota;Opisthokonta;Metazoa;Eumetazoa;Bilateria;Deuterostomia;Chordata;Craniata;Vertebrata;Gnathostomata;Teleostomi;Euteleostomi;Actinopterygii;Actinopteri;Neopterygii;Teleostei;Osteoglossocephalai;Clupeocephala;Euteleosteomorpha;Neoteleostei;Eurypterygia;Ctenosquamata;Acanthomorphata;Euacanthomorphacea;Percomorphaceae;Ovalentaria;Atherinomorphae;Atheriniformes;Melanotaeniidae;Melanotaenia;Melanotaenia boesemani

UdeM00000039226 1735272 179.9 UdeM00000039226 XP\_041373683.1 42.3  
241 130 6 11 250 225 457 5.00E-42 179.9 1735272

cellular

organisms;Eukaryota;Opisthokonta;Metazoa;Eumetazoa;Bilateria;Protostomia;Spiralia;Lophotrochozoa;Mollusca;Gastropoda;Neomphalina;Neomphaloidea;Peltopiridae;Gigantopelta;Gigantopelta aegis

UdeM00000039227 77115 136 UdeM00000039227 XP\_038136846.1 45.9 172  
72 4 6 174 8 161 4.70E-29 136 77115 cellular

organisms;Eukaryota;Opisthokonta;Metazoa;Eumetazoa;Bilateria;Deuterostomia;Chordata;Craniata;Vertebrata;Gnathostomata;Teleostomi;Euteleostomi;Actinopterygii;Actinopteri;Neopterygii;Teleostei;Osteoglossocephalai;Clupeocephala;Euteleosteomorpha;Neoteleostei;Eurypterygia;Ctenosquamata;Acanthomorphata;Euacanthomorphacea;Percomorphaceae;Ovalentaria;Atherinomorphae;Cyp

rinodontiformes;Cyprinodontoidei;Cyprinodontidae;Cyprinodontinae;Cyprinodontini;Cyprinodon;Cyprinodon tularosa

UdeM00000039228 400727 109 UdeM00000039228 XP\_025091185.1 37.3  
158 77 4 4 160 9 145 5.90E-21 109 400727  
cellular

organisms;Eukaryota;Opisthokonta;Metazoa;Eumetazoa;Bilateria;Protostomia;Spiralia;Lophotrochozoa;Mollusca;Gastropoda;Caenogastropoda;Architaenioglossa;Ampullarioidea;Ampullariidae;Pomacea;Pomacea canaliculata

UdeM00000039229 6565 105.1 UdeM00000039229 XP\_022343545.1 50.5 111  
44 3 89 198 57 157 1.00E-19 105.1 6565 cellular

organisms;Eukaryota;Opisthokonta;Metazoa;Eumetazoa;Bilateria;Protostomia;Spiralia;Lophotrochozoa;Mollusca;Bivalvia;Autobranchia;Pteriormorphia;Ostreida;Ostreioidea;Ostreidae;Crassostrea;Crassostrea virginica

UdeM00000039232 6565 115.2 UdeM00000039232 XP\_022343545.1 52.3 111  
42 2 65 174 57 157 9.00E-23 115.2 6565 cellular

organisms;Eukaryota;Opisthokonta;Metazoa;Eumetazoa;Bilateria;Protostomia;Spiralia;Lophotrochozoa;Mollusca;Bivalvia;Autobranchia;Pteriormorphia;Ostreida;Ostreioidea;Ostreidae;Crassostrea;Crassostrea virginica

UdeM00000039234 6565 108.6 UdeM00000039234 XP\_022338254.1 51.4 105  
41 2 48 152 78 172 7.40E-21 108.6 6565 cellular

organisms;Eukaryota;Opisthokonta;Metazoa;Eumetazoa;Bilateria;Protostomia;Spiralia;Lophotrochozoa;Mollusca;Bivalvia;Autobranchia;Pteriormorphia;Ostreida;Ostreioidea;Ostreidae;Crassostrea;Crassostrea virginica

UdeM00000039235 6565 115.2 UdeM00000039235 XP\_022343545.1 52.3 111  
42 2 65 174 57 157 9.00E-23 115.2 6565 cellular

organisms;Eukaryota;Opisthokonta;Metazoa;Eumetazoa;Bilateria;Protostomia;Spiralia;Lophotrochozoa;Mollusca;Bivalvia;Autobranchia;Pteriormorphia;Ostreida;Ostreioidea;Ostreidae;Crassostrea;Crassostrea virginica

UdeM00000039237 29159 77.4 UdeM00000039237 XP\_011432637.2 44.9 89  
38 2 40 127 64 142 2.50E-11 77.4 29159 cellular

organisms;Eukaryota;Opisthokonta;Metazoa;Eumetazoa;Bilateria;Protostomia;Spiralia;Lophotrochozoa;Mollusca;Bivalvia;Autobranchia;Pteriormorphia;Ostreida;Ostreioidea;Ostreidae;Crassostrea;Crassostrea gigas

UdeM00000039239 6565 107.5 UdeM00000039239 XP\_022343545.1 50 110  
44 2 43 151 57 156 1.60E-20 107.5 6565 cellular

organisms;Eukaryota;Opisthokonta;Metazoa;Eumetazoa;Bilateria;Protostomia;Spiralia;Lophotrochozoa;Mollusca;Bivalvia;Autobranchia;Pteriormorphia;Ostreida;Ostreioidea;Ostreidae;Crassostrea;Crassostrea virginica

UdeM00000039240 6565 113.6 UdeM00000039240 XP\_022343545.1 51.4 111  
43 2 65 174 57 157 2.60E-22 113.6 6565 cellular

organisms;Eukaryota;Opisthokonta;Metazoa;Eumetazoa;Bilateria;Protostomia;Spiralia;Lophotrochozoa;Mollusca;Bivalvia;Autobranchia;Pteriormorphia;Ostreida;Ostreioidea;Ostreidae;Crassostrea;Crassostrea virginica

UdeM00000039241 29159 156 UdeM00000039241 XP\_034315972.1 32.7 321  
205 7 122 436 10 325 1.10E-34 156 29159 cellular

organisms;Eukaryota;Opisthokonta;Metazoa;Eumetazoa;Bilateria;Protostomia;Spiralia;Lophotrochozoa;Mollusca;Bivalvia;Autobranchia;Pteriormorphia;Ostreida;Ostreioidea;Ostreidae;Crassostrea;Crassostrea gigas

UdeM00000039242 6596 1224.9 UdeM00000039242 XP\_045196464.1 65.4  
951 309 9 5 944 7 948 0.00E+00 1224.9 6596  
cellular

organisms;Eukaryota;Opisthokonta;Metazoa;Eumetazoa;Bilateria;Protostomia;Spiralia;Lophotrochozoa;Mollusca;Bivalvia;Autobranchia;Heteroconchia;Euhe

terodonta;Imparidentia;Venerida;Veneroidea;Veneridae;Mercenaria;Mercenaria mercenaria

|                 |         |       |                 |                |      |     |          |       |         |
|-----------------|---------|-------|-----------------|----------------|------|-----|----------|-------|---------|
| UdeM00000039247 | 1529436 | 153.3 | UdeM00000039247 | XP_033095325.1 | 39.3 |     |          |       |         |
| 191             | 114     | 2     | 9               | 198            | 11   | 200 | 3.30E-34 | 153.3 | 1529436 |

cellular

organisms;Eukaryota;Opisthokonta;Metazoa;Eumetazoa;Bilateria;Deuterostomia;Echinodermata;Pelmatozoa;Crinoidea;Articulata;Comatulida;Comatulidae;Comatulinae;Anneissia;Anneissia japonica

|                 |      |        |                 |                |      |      |          |        |      |
|-----------------|------|--------|-----------------|----------------|------|------|----------|--------|------|
| UdeM00000039248 | 6596 | 1508.8 | UdeM00000039248 | XP_045198292.1 | 45.6 |      |          |        |      |
| 1762            | 909  | 20     | 1               | 1744           | 1    | 1731 | 0.00E+00 | 1508.8 | 6596 |

cellular

organisms;Eukaryota;Opisthokonta;Metazoa;Eumetazoa;Bilateria;Protostomia;Spiralia;Lophotrochozoa;Mollusca;Bivalvia;Autobranchia;Heteroconchia;Euheterodonta;Imparidentia;Venerida;Veneroidea;Veneridae;Mercenaria;Mercenaria mercenaria

|                 |      |       |                 |                |     |           |       |      |          |
|-----------------|------|-------|-----------------|----------------|-----|-----------|-------|------|----------|
| UdeM00000039249 | 6579 | 442.6 | UdeM00000039249 | XP_033740699.1 | 71  | 290       |       |      |          |
| 84              | 0    | 1     | 290             | 1              | 290 | 4.10E-121 | 442.6 | 6579 | cellular |

organisms;Eukaryota;Opisthokonta;Metazoa;Eumetazoa;Bilateria;Protostomia;Spiralia;Lophotrochozoa;Mollusca;Bivalvia;Autobranchia;Pteriormorphia;Pectinida;Pectinoidea;Pectinidae;Pecten;Pecten maximus

|                 |       |      |                 |                |      |          |      |       |          |
|-----------------|-------|------|-----------------|----------------|------|----------|------|-------|----------|
| UdeM00000039250 | 29159 | 75.9 | UdeM00000039250 | XP_034310118.1 | 49.3 | 69       |      |       |          |
| 35              | 0     | 519  | 587             | 502            | 570  | 2.00E-10 | 75.9 | 29159 | cellular |

organisms;Eukaryota;Opisthokonta;Metazoa;Eumetazoa;Bilateria;Protostomia;Spiralia;Lophotrochozoa;Mollusca;Bivalvia;Autobranchia;Pteriormorphia;Ostreida;Ostreoidea;Ostreidae;Crassostrea;Crassostrea gigas

|                 |       |      |                 |                |      |          |      |       |          |
|-----------------|-------|------|-----------------|----------------|------|----------|------|-------|----------|
| UdeM00000039251 | 29159 | 75.9 | UdeM00000039251 | XP_034310118.1 | 49.3 | 69       |      |       |          |
| 35              | 0     | 504  | 572             | 502            | 570  | 2.00E-10 | 75.9 | 29159 | cellular |

organisms;Eukaryota;Opisthokonta;Metazoa;Eumetazoa;Bilateria;Protostomia;Spiralia;Lophotrochozoa;Mollusca;Bivalvia;Autobranchia;Pteriormorphia;Ostreida;Ostreoidea;Ostreidae;Crassostrea;Crassostrea gigas

|                 |       |      |                 |                |      |          |      |       |          |
|-----------------|-------|------|-----------------|----------------|------|----------|------|-------|----------|
| UdeM00000039252 | 29159 | 75.9 | UdeM00000039252 | XP_034310118.1 | 49.3 | 69       |      |       |          |
| 35              | 0     | 526  | 594             | 502            | 570  | 2.00E-10 | 75.9 | 29159 | cellular |

organisms;Eukaryota;Opisthokonta;Metazoa;Eumetazoa;Bilateria;Protostomia;Spiralia;Lophotrochozoa;Mollusca;Bivalvia;Autobranchia;Pteriormorphia;Ostreida;Ostreoidea;Ostreidae;Crassostrea;Crassostrea gigas

|                 |      |       |                 |                |     |           |       |      |          |
|-----------------|------|-------|-----------------|----------------|-----|-----------|-------|------|----------|
| UdeM00000039254 | 6596 | 433.7 | UdeM00000039254 | XP_045198456.1 | 68  | 487       |       |      |          |
| 94              | 1    | 3     | 427             | 2              | 488 | 2.70E-118 | 433.7 | 6596 | cellular |

organisms;Eukaryota;Opisthokonta;Metazoa;Eumetazoa;Bilateria;Protostomia;Spiralia;Lophotrochozoa;Mollusca;Bivalvia;Autobranchia;Heteroconchia;Euheterodonta;Imparidentia;Venerida;Veneroidea;Veneridae;Mercenaria;Mercenaria mercenaria

|                 |        |      |                 |                |      |     |          |      |        |
|-----------------|--------|------|-----------------|----------------|------|-----|----------|------|--------|
| UdeM00000039255 | 586833 | 77.4 | UdeM00000039255 | XP_029912506.1 | 27.5 |     |          |      |        |
| 229             | 139    | 9    | 54              | 280            | 164  | 367 | 3.20E-11 | 77.4 | 586833 |

cellular

organisms;Eukaryota;Opisthokonta;Metazoa;Eumetazoa;Bilateria;Deuterostomia;Chordata;Craniata;Vertebrata;Gnathostomata;Teleostomi;Euteleostomi;Actinopterygii;Actinopteri;Neopterygii;Teleostei;Osteoglossocephalai;Clupeocephala;Euteleostei;Neoteleostei;Eurypterygia;Ctenosquamata;Acanthomorphata;Euacanthomorphacea;Holocentrimorphaceae;Holocentriformes;Holocentridae;Myripristinae;Myripristis;Myripristis murdjan

|                 |        |      |                 |                |      |     |          |      |        |
|-----------------|--------|------|-----------------|----------------|------|-----|----------|------|--------|
| UdeM00000039256 | 586833 | 77.4 | UdeM00000039256 | XP_029912506.1 | 27.5 |     |          |      |        |
| 229             | 139    | 9    | 54              | 280            | 164  | 367 | 3.20E-11 | 77.4 | 586833 |

cellular

organisms;Eukaryota;Opisthokonta;Metazoa;Eumetazoa;Bilateria;Deuterostomi

a;Chordata;Craniata;Vertebrata;Gnathostomata;Teleostomi;Euteleostomi;Acti  
 nopterygii;Actinopteri;Neopterygii;Teleostei;Osteoglossocephalai;Clupeocephala;  
 Euteleostei;Neoteleostei;Eurypterygia;Ctenosquamata;Acanthomorpha;  
 Euacanthomorpha;Holocentrimorphaceae;Holocentriformes;Holocentridae;  
 Myripristinae;Myripristis;Myripristis murdjan  
 UdeM00000039257 6579 73.9 UdeM00000039257 XP\_033753397.1 38.3 94  
 51 1 486 579 499 585 7.60E-10 73.9 6579 cellular  
 organisms;Eukaryota;Opisthokonta;Metazoa;Eumetazoa;Bilateria;Protostomia;  
 Spiralia;Lophotrochozoa;Mollusca;Bivalvia;Autobranchia;Pteriormorphia;Pect  
 inida;Pectinoidea;Pectinidae;Pecten;Pecten maximus  
 UdeM00000039258 29159 74.3 UdeM00000039258 XP\_034310118.1 49.3 69  
 35 0 497 565 502 570 5.70E-10 74.3 29159 cellular  
 organisms;Eukaryota;Opisthokonta;Metazoa;Eumetazoa;Bilateria;Protostomia;  
 Spiralia;Lophotrochozoa;Mollusca;Bivalvia;Autobranchia;Pteriormorphia;Ostr  
 eida;Ostreoidea;Ostreidae;Crassostrea;Crassostrea gigas  
 UdeM00000039259 29159 57.8 UdeM00000039259 XP\_034312908.1 56.4 39  
 17 0 3 41 6 44 6.70E-06 57.8 29159 cellular  
 organisms;Eukaryota;Opisthokonta;Metazoa;Eumetazoa;Bilateria;Protostomia;  
 Spiralia;Lophotrochozoa;Mollusca;Bivalvia;Autobranchia;Pteriormorphia;Ostr  
 eida;Ostreoidea;Ostreidae;Crassostrea;Crassostrea gigas  
 UdeM00000039260 6579 99.4 UdeM00000039260 XP\_033731721.1 38.8 160  
 86 5 93 249 498 648 7.10E-18 99.4 6579 cellular  
 organisms;Eukaryota;Opisthokonta;Metazoa;Eumetazoa;Bilateria;Protostomia;  
 Spiralia;Lophotrochozoa;Mollusca;Bivalvia;Autobranchia;Pteriormorphia;Pect  
 inida;Pectinoidea;Pectinidae;Pecten;Pecten maximus  
 UdeM00000039261 6565 70.9 UdeM00000039261 XP\_022299013.1 52 75  
 34 1 109 181 130 204 2.00E-09 70.9 6565 cellular  
 organisms;Eukaryota;Opisthokonta;Metazoa;Eumetazoa;Bilateria;Protostomia;  
 Spiralia;Lophotrochozoa;Mollusca;Bivalvia;Autobranchia;Pteriormorphia;Ostr  
 eida;Ostreoidea;Ostreidae;Crassostrea;Crassostrea virginica  
 UdeM00000039262 41895 63.2 UdeM00000039262 XP\_044262134.1 55 60  
 26 1 420 478 539 598 1.10E-06 63.2 41895 cellular  
 organisms;Eukaryota;Opisthokonta;Metazoa;Eumetazoa;Bilateria;Protostomia;  
 Ecdysozoa;Panarthropoda;Arthropoda;Mandibulata;Pancrustacea;Hexapoda;Inse  
 cta;Dicondylia;Pterygota;Neoptera;Endopterygota;Coleoptera;Polyphaga;Cucu  
 jiformia;Tenebrionoidea;Tenebrionidae;Tenebrionidae incertae  
 sedis;Tribolium;Tribolium madens  
 UdeM00000039263 6596 230.3 UdeM00000039263 XP\_045216699.1 66.1 168  
 56 1 10 176 4 171 2.80E-57 230.3 6596 cellular  
 organisms;Eukaryota;Opisthokonta;Metazoa;Eumetazoa;Bilateria;Protostomia;  
 Spiralia;Lophotrochozoa;Mollusca;Bivalvia;Autobranchia;Heteroconchia;Euhe  
 terodonta;Imparidentia;Venerida;Veneroidea;Veneridae;Mercenaria;Mercenari  
 a mercenaria  
 UdeM00000039264 6596 411.4 UdeM00000039264 XP\_045197183.1 36.6 1270  
 667 31 1 1203 1 1199 4.10E-111 411.4 6596 cellular  
 organisms;Eukaryota;Opisthokonta;Metazoa;Eumetazoa;Bilateria;Protostomia;  
 Spiralia;Lophotrochozoa;Mollusca;Bivalvia;Autobranchia;Heteroconchia;Euhe  
 terodonta;Imparidentia;Venerida;Veneroidea;Veneridae;Mercenaria;Mercenari  
 a mercenaria  
 UdeM00000039265 6596 366.3 UdeM00000039265 XP\_045196944.1 60.6 279  
 110 0 1 279 74 352 3.50E-98 366.3 6596 cellular  
 organisms;Eukaryota;Opisthokonta;Metazoa;Eumetazoa;Bilateria;Protostomia;  
 Spiralia;Lophotrochozoa;Mollusca;Bivalvia;Autobranchia;Heteroconchia;Euhe

terodonta;Imparidentia;Venerida;Veneroidea;Veneridae;Mercenaria;Mercenari  
 a mercenaria  
 UdeM00000039266 6596 396.4 UdeM00000039266 XP\_045196944.1 57.5 320  
 136 0 62 381 33 352 4.30E-107 396.4 6596 cellular  
 organisms;Eukaryota;Opisthokonta;Metazoa;Eumetazoa;Bilateria;Protostomia;  
 Spiralia;Lophotrochozoa;Mollusca;Bivalvia;Autobranchia;Heteroconchia;Euhe  
 terodonta;Imparidentia;Venerida;Veneroidea;Veneridae;Mercenaria;Mercenari  
 a mercenaria  
 UdeM00000039267 6596 417.5 UdeM00000039267 XP\_045196944.1 59.1 340  
 135 1 12 347 13 352 1.60E-113 417.5 6596 cellular  
 organisms;Eukaryota;Opisthokonta;Metazoa;Eumetazoa;Bilateria;Protostomia;  
 Spiralia;Lophotrochozoa;Mollusca;Bivalvia;Autobranchia;Heteroconchia;Euhe  
 terodonta;Imparidentia;Venerida;Veneroidea;Veneridae;Mercenaria;Mercenari  
 a mercenaria  
 UdeM00000028028 6565 490 UdeM00000028028 XP\_022315266.1 41.1 669  
 354 14 438 1090 494 1138 8.00E-135 490 6565 cellular  
 organisms;Eukaryota;Opisthokonta;Metazoa;Eumetazoa;Bilateria;Protostomia;  
 Spiralia;Lophotrochozoa;Mollusca;Bivalvia;Autobranchia;Pteriormorphia;Ostr  
 eida;Ostreoidea;Ostreidae;Crassostrea;Crassostrea virginica  
 UdeM00000028029 6565 490 UdeM00000028029 XP\_022315266.1 41.1 669  
 354 14 435 1087 494 1138 8.00E-135 490 6565 cellular  
 organisms;Eukaryota;Opisthokonta;Metazoa;Eumetazoa;Bilateria;Protostomia;  
 Spiralia;Lophotrochozoa;Mollusca;Bivalvia;Autobranchia;Pteriormorphia;Ostr  
 eida;Ostreoidea;Ostreidae;Crassostrea;Crassostrea virginica  
 UdeM00000028030 6596 76.3 UdeM00000028030 XP\_045206721.1 30.3 201  
 131 4 9 204 569 765 1.80E-10 76.3 6596 cellular  
 organisms;Eukaryota;Opisthokonta;Metazoa;Eumetazoa;Bilateria;Protostomia;  
 Spiralia;Lophotrochozoa;Mollusca;Bivalvia;Autobranchia;Heteroconchia;Euhe  
 terodonta;Imparidentia;Venerida;Veneroidea;Veneridae;Mercenaria;Mercenari  
 a mercenaria  
 UdeM00000028031 6596 76.3 UdeM00000028031 XP\_045206721.1 30.3 201  
 131 4 9 204 569 765 1.00E-10 76.3 6596 cellular  
 organisms;Eukaryota;Opisthokonta;Metazoa;Eumetazoa;Bilateria;Protostomia;  
 Spiralia;Lophotrochozoa;Mollusca;Bivalvia;Autobranchia;Heteroconchia;Euhe  
 terodonta;Imparidentia;Venerida;Veneroidea;Veneridae;Mercenaria;Mercenari  
 a mercenaria  
 UdeM00000028034 29159 110.2 UdeM00000028034 XP\_034331441.1 34.5 223  
 114 6 1 195 1 219 4.50E-21 110.2 29159 cellular  
 organisms;Eukaryota;Opisthokonta;Metazoa;Eumetazoa;Bilateria;Protostomia;  
 Spiralia;Lophotrochozoa;Mollusca;Bivalvia;Autobranchia;Pteriormorphia;Ostr  
 eida;Ostreoidea;Ostreidae;Crassostrea;Crassostrea gigas  
 UdeM00000028036 6596 92 UdeM00000028036 XP\_045209795.1 35 183  
 110 4 13 190 1070 1248 3.10E-15 92 6596 cellular  
 organisms;Eukaryota;Opisthokonta;Metazoa;Eumetazoa;Bilateria;Protostomia;  
 Spiralia;Lophotrochozoa;Mollusca;Bivalvia;Autobranchia;Heteroconchia;Euhe  
 terodonta;Imparidentia;Venerida;Veneroidea;Veneridae;Mercenaria;Mercenari  
 a mercenaria  
 UdeM00000028037 6596 92 UdeM00000028037 XP\_045209795.1 35 183  
 110 4 13 190 1070 1248 2.80E-15 92 6596 cellular  
 organisms;Eukaryota;Opisthokonta;Metazoa;Eumetazoa;Bilateria;Protostomia;  
 Spiralia;Lophotrochozoa;Mollusca;Bivalvia;Autobranchia;Heteroconchia;Euhe  
 terodonta;Imparidentia;Venerida;Veneroidea;Veneridae;Mercenaria;Mercenari  
 a mercenaria

UdeM00000028038 6596 92 UdeM00000028038 XP\_045209795.1 35 183  
 110 4 13 190 1070 1248 1.80E-15 92 6596 cellular  
 organisms;Eukaryota;Opisthokonta;Metazoa;Eumetazoa;Bilateria;Protostomia;  
 Spiralia;Lophotrochozoa;Mollusca;Bivalvia;Autobranchia;Heteroconchia;Euhe  
 terodonta;Imparidentia;Venerida;Veneroidea;Veneridae;Mercenaria;Mercenari  
 a mercenaria  
 UdeM00000028040 6596 155.2 UdeM00000028040 XP\_045171063.1 34.7 259  
 154 6 2 249 41 295 1.80E-34 155.2 6596 cellular  
 organisms;Eukaryota;Opisthokonta;Metazoa;Eumetazoa;Bilateria;Protostomia;  
 Spiralia;Lophotrochozoa;Mollusca;Bivalvia;Autobranchia;Heteroconchia;Euhe  
 terodonta;Imparidentia;Venerida;Veneroidea;Veneridae;Mercenaria;Mercenari  
 a mercenaria  
 UdeM00000028041 29159 78.2 UdeM00000028041 XP\_034339171.1 36.2 116  
 70 3 7 119 564 678 8.00E-12 78.2 29159 cellular  
 organisms;Eukaryota;Opisthokonta;Metazoa;Eumetazoa;Bilateria;Protostomia;  
 Spiralia;Lophotrochozoa;Mollusca;Bivalvia;Autobranchia;Pteriormorphia;Ostr  
 eida;Ostreoidea;Ostreidae;Crassostrea;Crassostrea gigas  
 UdeM00000028042 1529436 58.2 UdeM00000028042 XP\_033097181.1 31.1  
 122 80 2 1 122 166 283 9.00E-06 58.2 1529436  
 cellular  
 organisms;Eukaryota;Opisthokonta;Metazoa;Eumetazoa;Bilateria;Deuterostomi  
 a;Echinodermata;Pelmatozoa;Crinoidea;Articulata;Comatulida;Comatulidae;Co  
 matulinae;Anneissia;Anneissia japonica  
 UdeM00000028046 6596 88.6 UdeM00000028046 XP\_045209795.1 33 185  
 119 4 10 191 1063 1245 3.20E-14 88.6 6596 cellular  
 organisms;Eukaryota;Opisthokonta;Metazoa;Eumetazoa;Bilateria;Protostomia;  
 Spiralia;Lophotrochozoa;Mollusca;Bivalvia;Autobranchia;Heteroconchia;Euhe  
 terodonta;Imparidentia;Venerida;Veneroidea;Veneridae;Mercenaria;Mercenari  
 a mercenaria  
 UdeM00000028047 6596 473 UdeM00000028047 XP\_045205438.1 39.3 659  
 336 11 494 1144 824 1426 1.10E-129 473 6596 cellular  
 organisms;Eukaryota;Opisthokonta;Metazoa;Eumetazoa;Bilateria;Protostomia;  
 Spiralia;Lophotrochozoa;Mollusca;Bivalvia;Autobranchia;Heteroconchia;Euhe  
 terodonta;Imparidentia;Venerida;Veneroidea;Veneridae;Mercenaria;Mercenari  
 a mercenaria  
 UdeM00000028048 6596 381.7 UdeM00000028048 XP\_045205438.1 40.2 532  
 258 9 447 972 824 1301 2.80E-102 381.7 6596 cellular  
 organisms;Eukaryota;Opisthokonta;Metazoa;Eumetazoa;Bilateria;Protostomia;  
 Spiralia;Lophotrochozoa;Mollusca;Bivalvia;Autobranchia;Heteroconchia;Euhe  
 terodonta;Imparidentia;Venerida;Veneroidea;Veneridae;Mercenaria;Mercenari  
 a mercenaria  
 UdeM00000028052 6565 520.4 UdeM00000028052 XP\_022306197.1 45.2 699  
 299 14 9 655 16 682 3.30E-144 520.4 6565 cellular  
 organisms;Eukaryota;Opisthokonta;Metazoa;Eumetazoa;Bilateria;Protostomia;  
 Spiralia;Lophotrochozoa;Mollusca;Bivalvia;Autobranchia;Pteriormorphia;Ostr  
 eida;Ostreoidea;Ostreidae;Crassostrea;Crassostrea virginica  
 UdeM00000028053 6596 483.4 UdeM00000028053 XP\_045206611.1 40.6 609  
 337 10 399 997 507 1100 6.90E-133 483.4 6596 cellular  
 organisms;Eukaryota;Opisthokonta;Metazoa;Eumetazoa;Bilateria;Protostomia;  
 Spiralia;Lophotrochozoa;Mollusca;Bivalvia;Autobranchia;Heteroconchia;Euhe  
 terodonta;Imparidentia;Venerida;Veneroidea;Veneridae;Mercenaria;Mercenari  
 a mercenaria  
 UdeM00000028057 6565 487.3 UdeM00000028057 XP\_022315266.1 39.1 672  
 352 11 559 1201 496 1139 5.70E-134 487.3 6565 cellular

organisms;Eukaryota;Opisthokonta;Metazoa;Eumetazoa;Bilateria;Protostomia;Spiralia;Lophotrochozoa;Mollusca;Bivalvia;Autobranchia;Pteriomorphia;Ostreida;Ostreoidea;Ostreidae;Crassostrea;Crassostrea virginica  
UdeM00000028061 6596 88.2 UdeM00000028061 XP\_045209795.1 29.3 181  
125 1 20 197 1068 1248 3.20E-14 88.2 6596 cellular  
organisms;Eukaryota;Opisthokonta;Metazoa;Eumetazoa;Bilateria;Protostomia;Spiralia;Lophotrochozoa;Mollusca;Bivalvia;Autobranchia;Heteroconchia;Euherodonta;Imparidentia;Venerida;Veneroidea;Veneridae;Mercenaria;Mercenaria mercenaria  
UdeM00000028063 6596 82 UdeM00000028063 XP\_045209795.1 39.6 139  
73 5 11 145 191 322 2.60E-12 82 6596 cellular  
organisms;Eukaryota;Opisthokonta;Metazoa;Eumetazoa;Bilateria;Protostomia;Spiralia;Lophotrochozoa;Mollusca;Bivalvia;Autobranchia;Heteroconchia;Euherodonta;Imparidentia;Venerida;Veneroidea;Veneridae;Mercenaria;Mercenaria mercenaria  
UdeM00000028065 6596 948 UdeM00000028065 XP\_045204866.1 61.7 998  
303 9 3 986 186 1118 9.80E-273 948 6596 cellular  
organisms;Eukaryota;Opisthokonta;Metazoa;Eumetazoa;Bilateria;Protostomia;Spiralia;Lophotrochozoa;Mollusca;Bivalvia;Autobranchia;Heteroconchia;Euherodonta;Imparidentia;Venerida;Veneroidea;Veneridae;Mercenaria;Mercenaria mercenaria  
UdeM00000028066 6596 118.2 UdeM00000028066 XP\_045171063.1 39.9 163  
94 4 15 176 7 166 2.00E-23 118.2 6596 cellular  
organisms;Eukaryota;Opisthokonta;Metazoa;Eumetazoa;Bilateria;Protostomia;Spiralia;Lophotrochozoa;Mollusca;Bivalvia;Autobranchia;Heteroconchia;Euherodonta;Imparidentia;Venerida;Veneroidea;Veneridae;Mercenaria;Mercenaria mercenaria  
UdeM00000028068 29159 114.4 UdeM00000028068 XP\_034331441.1 44.5 119  
64 2 1 118 674 791 1.00E-22 114.4 29159 cellular  
organisms;Eukaryota;Opisthokonta;Metazoa;Eumetazoa;Bilateria;Protostomia;Spiralia;Lophotrochozoa;Mollusca;Bivalvia;Autobranchia;Pteriomorphia;Ostreida;Ostreoidea;Ostreidae;Crassostrea;Crassostrea gigas  
UdeM00000028071 6579 150.6 UdeM00000028071 XP\_033743434.1 36.2 265  
149 8 74 327 386 641 3.50E-33 150.6 6579 cellular  
organisms;Eukaryota;Opisthokonta;Metazoa;Eumetazoa;Bilateria;Protostomia;Spiralia;Lophotrochozoa;Mollusca;Bivalvia;Autobranchia;Pteriomorphia;Pectinida;Pectinoidea;Pectinidae;Pecten;Pecten maximus  
UdeM00000028072 6565 150.2 UdeM00000028072 XP\_022325835.1 38 271  
145 7 29 288 4 262 4.90E-33 150.2 6565 cellular  
organisms;Eukaryota;Opisthokonta;Metazoa;Eumetazoa;Bilateria;Protostomia;Spiralia;Lophotrochozoa;Mollusca;Bivalvia;Autobranchia;Pteriomorphia;Ostreida;Ostreoidea;Ostreidae;Crassostrea;Crassostrea virginica  
UdeM00000028073 6596 144.4 UdeM00000028073 XP\_045203134.1 32.4 287  
162 5 49 333 538 794 3.10E-31 144.4 6596 cellular  
organisms;Eukaryota;Opisthokonta;Metazoa;Eumetazoa;Bilateria;Protostomia;Spiralia;Lophotrochozoa;Mollusca;Bivalvia;Autobranchia;Heteroconchia;Euherodonta;Imparidentia;Venerida;Veneroidea;Veneridae;Mercenaria;Mercenaria mercenaria  
UdeM00000028074 6573 85.1 UdeM00000028074 XP\_021371198.1 41.5 94  
55 0 51 144 347 440 8.20E-14 85.1 6573 cellular  
organisms;Eukaryota;Opisthokonta;Metazoa;Eumetazoa;Bilateria;Protostomia;Spiralia;Lophotrochozoa;Mollusca;Bivalvia;Autobranchia;Pteriomorphia;Pectinida;Pectinoidea;Pectinidae;Mizuhopecten;Mizuhopecten yessoensis



UdeM00000028075 6565 154.5 UdeM00000028075 XP\_022326035.1 37.8 249  
 133 5 64 303 159 394 2.30E-34 154.5 6565 cellular  
 organisms;Eukaryota;Opisthokonta;Metazoa;Eumetazoa;Bilateria;Protostomia;  
 Spiralia;Lophotrochozoa;Mollusca;Bivalvia;Autobranchia;Pteriomorphia;Ostr  
 eida;Ostreoidea;Ostreidae;Crassostrea;Crassostrea virginica  
 UdeM00000028076 225164 126.3 UdeM00000028076 XP\_009055444.1 54  
 126 57 1 149 273 2 127 6.00E-26 126.3 225164  
 cellular  
 organisms;Eukaryota;Opisthokonta;Metazoa;Eumetazoa;Bilateria;Protostomia;  
 Spiralia;Lophotrochozoa;Mollusca;Gastropoda;Patellogastropoda;Lottioidea;  
 Lottiidae;Lottia;Lottia gigantea  
 UdeM00000028077 6565 209.1 UdeM00000028077 XP\_022326322.1 65.4 159  
 55 0 1 159 1 159 2.20E-50 209.1 6565 cellular  
 organisms;Eukaryota;Opisthokonta;Metazoa;Eumetazoa;Bilateria;Protostomia;  
 Spiralia;Lophotrochozoa;Mollusca;Bivalvia;Autobranchia;Pteriomorphia;Ostr  
 eida;Ostreoidea;Ostreidae;Crassostrea;Crassostrea virginica  
 UdeM00000028078 6573 1696.4 UdeM00000028078 XP\_021346210.1 69.4  
 1201 350 6 8 1195 4 1200 0.00E+00 1696.4 6573  
 cellular  
 organisms;Eukaryota;Opisthokonta;Metazoa;Eumetazoa;Bilateria;Protostomia;  
 Spiralia;Lophotrochozoa;Mollusca;Bivalvia;Autobranchia;Pteriomorphia;Pect  
 inida;Pectinoidea;Pectinidae;Mizuhopecten;Mizuhopecten yessoensis  
 UdeM00000028079 6573 771.5 UdeM00000028079 XP\_021346213.1 53.1 757  
 295 10 1 745 2 710 9.50E-220 771.5 6573 cellular  
 organisms;Eukaryota;Opisthokonta;Metazoa;Eumetazoa;Bilateria;Protostomia;  
 Spiralia;Lophotrochozoa;Mollusca;Bivalvia;Autobranchia;Pteriomorphia;Pect  
 inida;Pectinoidea;Pectinidae;Mizuhopecten;Mizuhopecten yessoensis  
 UdeM00000028080 6596 237.7 UdeM00000028080 XP\_045202769.1 43.5 283  
 158 2 7 288 20 301 1.90E-59 237.7 6596 cellular  
 organisms;Eukaryota;Opisthokonta;Metazoa;Eumetazoa;Bilateria;Protostomia;  
 Spiralia;Lophotrochozoa;Mollusca;Bivalvia;Autobranchia;Heteroconchia;Euhe  
 terodonta;Imparidentia;Venerida;Veneroidea;Veneridae;Mercenaria;Mercenari  
 a mercenaria  
 UdeM00000028081 6596 550.8 UdeM00000028081 XP\_045202768.1 81.7 323  
 57 1 9 331 10 330 1.20E-153 550.8 6596 cellular  
 organisms;Eukaryota;Opisthokonta;Metazoa;Eumetazoa;Bilateria;Protostomia;  
 Spiralia;Lophotrochozoa;Mollusca;Bivalvia;Autobranchia;Heteroconchia;Euhe  
 terodonta;Imparidentia;Venerida;Veneroidea;Veneridae;Mercenaria;Mercenari  
 a mercenaria  
 UdeM00000028082 6596 308.1 UdeM00000028082 XP\_045206528.1 55 278  
 123 1 5 282 2 277 1.10E-80 308.1 6596 cellular  
 organisms;Eukaryota;Opisthokonta;Metazoa;Eumetazoa;Bilateria;Protostomia;  
 Spiralia;Lophotrochozoa;Mollusca;Bivalvia;Autobranchia;Heteroconchia;Euhe  
 terodonta;Imparidentia;Venerida;Veneroidea;Veneridae;Mercenaria;Mercenari  
 a mercenaria  
 UdeM00000028083 6579 297.4 UdeM00000028083 XP\_033741736.1 55.3 244  
 109 0 82 325 347 590 2.30E-77 297.4 6579 cellular  
 organisms;Eukaryota;Opisthokonta;Metazoa;Eumetazoa;Bilateria;Protostomia;  
 Spiralia;Lophotrochozoa;Mollusca;Bivalvia;Autobranchia;Pteriomorphia;Pect  
 inida;Pectinoidea;Pectinidae;Pecten;Pecten maximus  
 UdeM00000028084 6579 559.7 UdeM00000028084 XP\_033739131.1 64.6 396  
 138 2 2 396 975 1369 3.00E-156 559.7 6579 cellular  
 organisms;Eukaryota;Opisthokonta;Metazoa;Eumetazoa;Bilateria;Protostomia;

Spiralia; Lophotrochozoa; Mollusca; Bivalvia; Autobranchia; Pteriomorpha; Pectinida; Pectinoidea; Pectinidae; Pecten; Pecten maximus  
UdeM00000028085 6579 775.8 UdeM00000028085 XP\_033743667.1 60.8 605  
236 1 36 640 38 641 4.40E-221 775.8 6579 cellular  
organisms; Eukaryota; Opisthokonta; Metazoa; Eumetazoa; Bilateria; Protostomia; Spiralia; Lophotrochozoa; Mollusca; Bivalvia; Autobranchia; Pteriomorpha; Pectinida; Pectinoidea; Pectinidae; Pecten; Pecten maximus  
UdeM00000028086 6596 254.2 UdeM00000028086 XP\_045203393.1 55.1 243  
104 2 47 289 11 248 2.00E-64 254.2 6596 cellular  
organisms; Eukaryota; Opisthokonta; Metazoa; Eumetazoa; Bilateria; Protostomia; Spiralia; Lophotrochozoa; Mollusca; Bivalvia; Autobranchia; Heteroconchia; Euheterodonta; Imparidentia; Venerida; Veneroidea; Veneridae; Mercenaria; Mercenaria mercenaria  
UdeM00000028087 6596 7137 UdeM00000028087 XP\_045206387.1 72.5 5027  
1226 29 2 4996 23 4927 0.00E+00 7137 6596 cellular  
organisms; Eukaryota; Opisthokonta; Metazoa; Eumetazoa; Bilateria; Protostomia; Spiralia; Lophotrochozoa; Mollusca; Bivalvia; Autobranchia; Heteroconchia; Euheterodonta; Imparidentia; Venerida; Veneroidea; Veneridae; Mercenaria; Mercenaria mercenaria  
UdeM00000028088 7739 102.4 UdeM00000028088 XP\_035690387.1 42.6 122  
64 2 60 175 12 133 9.20E-19 102.4 7739 cellular  
organisms; Eukaryota; Opisthokonta; Metazoa; Eumetazoa; Bilateria; Deuterostomia; Chordata; Cephalochordata; Leptocardii; Amphioxiformes; Branchiostomidae; Branchiostoma; Branchiostoma floridae  
UdeM00000028089 7574 287.3 UdeM00000028089 XP\_013388573.1 36.4 489  
262 13 84 542 349 818 3.90E-74 287.3 7574 cellular  
organisms; Eukaryota; Opisthokonta; Metazoa; Eumetazoa; Bilateria; Protostomia; Spiralia; Lophotrochozoa; Brachiopoda; Linguliformea; Lingulata; Lingulida; Linguloidea; Lingulidae; Lingula; Lingula anatina  
UdeM00000028090 29159 156 UdeM00000028090 XP\_034320422.1 72.8 92  
25 0 835 926 133 224 2.40E-34 156 29159 cellular  
organisms; Eukaryota; Opisthokonta; Metazoa; Eumetazoa; Bilateria; Protostomia; Spiralia; Lophotrochozoa; Mollusca; Bivalvia; Autobranchia; Pteriomorpha; Ostreida; Ostreioidea; Ostreidae; Crassostrea; Crassostrea gigas  
UdeM00000028091 6573 94.7 UdeM00000028091 XP\_021365625.1 49 96  
49 0 55 150 31 126 1.90E-16 94.7 6573 cellular  
organisms; Eukaryota; Opisthokonta; Metazoa; Eumetazoa; Bilateria; Protostomia; Spiralia; Lophotrochozoa; Mollusca; Bivalvia; Autobranchia; Pteriomorpha; Pectinida; Pectinoidea; Pectinidae; Mizuhopecten; Mizuhopecten yessoensis  
UdeM00000028092 400727 226.1 UdeM00000028092 XP\_025085226.1 32.4  
442 212 10 55 477 80 453 9.50E-56 226.1 400727  
cellular  
organisms; Eukaryota; Opisthokonta; Metazoa; Eumetazoa; Bilateria; Protostomia; Spiralia; Lophotrochozoa; Mollusca; Gastropoda; Caenogastropoda; Architaenioglossa; Ampullarioidea; Ampullariidae; Pomacea; Pomacea canaliculata  
UdeM00000028093 6596 416 UdeM00000028093 XP\_045203481.1 44.5 470  
246 7 1 460 211 675 6.20E-113 416 6596 cellular  
organisms; Eukaryota; Opisthokonta; Metazoa; Eumetazoa; Bilateria; Protostomia; Spiralia; Lophotrochozoa; Mollusca; Bivalvia; Autobranchia; Heteroconchia; Euheterodonta; Imparidentia; Venerida; Veneroidea; Veneridae; Mercenaria; Mercenaria mercenaria  
UdeM00000028094 6596 421 UdeM00000028094 XP\_045203481.1 44.9 470  
244 7 1 460 211 675 1.90E-114 421 6596 cellular  
organisms; Eukaryota; Opisthokonta; Metazoa; Eumetazoa; Bilateria; Protostomia;

Spiralia;Lophotrochozoa;Mollusca;Bivalvia;Autobranchia;Heteroconchia;Euherodonta;Imparidentia;Venerida;Veneroidea;Veneridae;Mercenaria;Mercenaria mercenaria

UdeM00000028095 6579 156.8 UdeM00000028095 XP\_033742438.1 52.3 155  
63 1 2 145 109 263 4.30E-35 156.8 6579 cellular

organisms;Eukaryota;Opisthokonta;Metazoa;Eumetazoa;Bilateria;Protostomia;Spiralia;Lophotrochozoa;Mollusca;Bivalvia;Autobranchia;Pteriormorphia;Pectinida;Pectinoidea;Pectinidae;Pecten;Pecten maximus

UdeM00000028096 6596 401.4 UdeM00000028096 XP\_045203481.1 43.8 470  
249 7 1 460 211 675 1.60E-108 401.4 6596 cellular

organisms;Eukaryota;Opisthokonta;Metazoa;Eumetazoa;Bilateria;Protostomia;Spiralia;Lophotrochozoa;Mollusca;Bivalvia;Autobranchia;Heteroconchia;Euherodonta;Imparidentia;Venerida;Veneroidea;Veneridae;Mercenaria;Mercenaria mercenaria

UdeM00000028097 6596 270.4 UdeM00000028097 XP\_045203481.1 35.6 404  
206 5 1 355 277 675 3.30E-69 270.4 6596 cellular

organisms;Eukaryota;Opisthokonta;Metazoa;Eumetazoa;Bilateria;Protostomia;Spiralia;Lophotrochozoa;Mollusca;Bivalvia;Autobranchia;Heteroconchia;Euherodonta;Imparidentia;Venerida;Veneroidea;Veneridae;Mercenaria;Mercenaria mercenaria

UdeM00000028098 6596 118.2 UdeM00000028098 XP\_045203481.1 53.9 115  
48 2 1 110 211 325 6.60E-24 118.2 6596 cellular

organisms;Eukaryota;Opisthokonta;Metazoa;Eumetazoa;Bilateria;Protostomia;Spiralia;Lophotrochozoa;Mollusca;Bivalvia;Autobranchia;Heteroconchia;Euherodonta;Imparidentia;Venerida;Veneroidea;Veneridae;Mercenaria;Mercenaria mercenaria

UdeM00000028099 6596 294.7 UdeM00000028099 XP\_045203481.1 41 354  
199 5 10 358 327 675 1.60E-76 294.7 6596 cellular

organisms;Eukaryota;Opisthokonta;Metazoa;Eumetazoa;Bilateria;Protostomia;Spiralia;Lophotrochozoa;Mollusca;Bivalvia;Autobranchia;Heteroconchia;Euherodonta;Imparidentia;Venerida;Veneroidea;Veneridae;Mercenaria;Mercenaria mercenaria

UdeM00000028100 6596 149.8 UdeM00000028100 XP\_045203740.1 81 84  
16 0 17 100 962 1045 4.10E-33 149.8 6596 cellular

organisms;Eukaryota;Opisthokonta;Metazoa;Eumetazoa;Bilateria;Protostomia;Spiralia;Lophotrochozoa;Mollusca;Bivalvia;Autobranchia;Heteroconchia;Euherodonta;Imparidentia;Venerida;Veneroidea;Veneridae;Mercenaria;Mercenaria mercenaria

UdeM00000028101 6596 336.7 UdeM00000028101 XP\_045203481.1 42.1 442  
195 8 1 384 211 649 4.00E-89 336.7 6596 cellular

organisms;Eukaryota;Opisthokonta;Metazoa;Eumetazoa;Bilateria;Protostomia;Spiralia;Lophotrochozoa;Mollusca;Bivalvia;Autobranchia;Heteroconchia;Euherodonta;Imparidentia;Venerida;Veneroidea;Veneridae;Mercenaria;Mercenaria mercenaria

UdeM00000028102 6596 786.9 UdeM00000028102 XP\_045203740.1 52.8 1023  
344 22 61 1028 122 1060 3.40E-224 786.9 6596 cellular

organisms;Eukaryota;Opisthokonta;Metazoa;Eumetazoa;Bilateria;Protostomia;Spiralia;Lophotrochozoa;Mollusca;Bivalvia;Autobranchia;Heteroconchia;Euherodonta;Imparidentia;Venerida;Veneroidea;Veneridae;Mercenaria;Mercenaria mercenaria

UdeM00000028103 7668 147.1 UdeM00000028103 XP\_030839940.1 30.8 315  
188 8 2 315 90 375 3.80E-32 147.1 7668 cellular

organisms;Eukaryota;Opisthokonta;Metazoa;Eumetazoa;Bilateria;Deuterostomia;Echinodermata;Eleutherozoa;Echinozoa;Echinoidea;Euechinoidea;Echinacea;

Camarodonta;Echinidea;Strongylocentrotidae;Strongylocentrotus;Strongylocentrotus purpuratus

UdeM00000028104 30732 188.7 UdeM00000028104 XP\_024118320.1 44.7 208  
113 2 14 221 409 614 7.80E-45 188.7 30732 cellular

organisms;Eukaryota;Opisthokonta;Metazoa;Eumetazoa;Bilateria;Deuterostomia;Chordata;Craniata;Vertebrata;Gnathostomata;Teleostomi;Euteleostomi;Actinopterygii;Actinopteri;Neopterygii;Teleostei;Osteoglossocephalai;Clupeocephala;Euteleostei;Neoteleostei;Eurypterygia;Ctenosquamata;Acanthomorphata;Euacanthomorphacea;Percomorphaceae;Ovalentaria;Atherinomorphae;Beloniformes;Adrianichthyoidei;Adrianichthyidae;Oryziinae;Oryzias;Oryzias melastigma

UdeM00000028106 77115 136 UdeM00000028106 XP\_038136846.1 45.9 172  
72 4 6 174 8 161 4.70E-29 136 77115 cellular

organisms;Eukaryota;Opisthokonta;Metazoa;Eumetazoa;Bilateria;Deuterostomia;Chordata;Craniata;Vertebrata;Gnathostomata;Teleostomi;Euteleostomi;Actinopterygii;Actinopteri;Neopterygii;Teleostei;Osteoglossocephalai;Clupeocephala;Euteleostei;Neoteleostei;Eurypterygia;Ctenosquamata;Acanthomorphata;Euacanthomorphacea;Percomorphaceae;Ovalentaria;Atherinomorphae;Cyprinodontiformes;Cyprinodontoidei;Cyprinodontidae;Cyprinodontinae;Cyprinodontini;Cyprinodon;Cyprinodon tularosa

UdeM00000028107 6565 1302.7 UdeM00000028107 XP\_022326163.1 81.9  
767 128 5 1 757 1 766 0.00E+00 1302.7 6565  
cellular

organisms;Eukaryota;Opisthokonta;Metazoa;Eumetazoa;Bilateria;Protostomia;Spiralia;Lophotrochozoa;Mollusca;Bivalvia;Autobranchia;Pteriormorphia;Ostreida;Ostreoidea;Ostreidae;Crassostrea;Crassostrea virginica

UdeM00000028108 6596 245.7 UdeM00000028108 XP\_045203745.1 57.1 219  
86 1 1 219 1 211 5.40E-62 245.7 6596 cellular

organisms;Eukaryota;Opisthokonta;Metazoa;Eumetazoa;Bilateria;Protostomia;Spiralia;Lophotrochozoa;Mollusca;Bivalvia;Autobranchia;Heteroconchia;Euheterodonta;Imparidentia;Venerida;Veneroidea;Veneridae;Mercenaria;Mercenaria mercenaria

UdeM00000028109 400727 566.2 UdeM00000028109 XP\_025084839.1 55.1  
546 206 9 1 516 1 537 4.20E-158 566.2 400727  
cellular

organisms;Eukaryota;Opisthokonta;Metazoa;Eumetazoa;Bilateria;Protostomia;Spiralia;Lophotrochozoa;Mollusca;Gastropoda;Caenogastropoda;Architaenioglossa;Ampullarioidea;Ampullariidae;Pomacea;Pomacea canaliculata

UdeM00000028111 6596 647.5 UdeM00000028111 XP\_045203733.1 58.4 666  
241 11 1 656 15 654 1.90E-182 647.5 6596 cellular

organisms;Eukaryota;Opisthokonta;Metazoa;Eumetazoa;Bilateria;Protostomia;Spiralia;Lophotrochozoa;Mollusca;Bivalvia;Autobranchia;Heteroconchia;Euheterodonta;Imparidentia;Venerida;Veneroidea;Veneridae;Mercenaria;Mercenaria mercenaria

UdeM00000028110 6596 907.1 UdeM00000028110 XP\_045203739.1 57.7 967  
343 23 1 945 15 937 1.80E-260 907.1 6596 cellular

organisms;Eukaryota;Opisthokonta;Metazoa;Eumetazoa;Bilateria;Protostomia;Spiralia;Lophotrochozoa;Mollusca;Bivalvia;Autobranchia;Heteroconchia;Euheterodonta;Imparidentia;Venerida;Veneroidea;Veneridae;Mercenaria;Mercenaria mercenaria

UdeM00000028112 6596 550.1 UdeM00000028112 XP\_045203351.1 62.9 402  
144 2 20 418 10 409 2.50E-153 550.1 6596 cellular

organisms;Eukaryota;Opisthokonta;Metazoa;Eumetazoa;Bilateria;Protostomia;Spiralia;Lophotrochozoa;Mollusca;Bivalvia;Autobranchia;Heteroconchia;Euheterodonta

terodonta;Imparidentia;Venerida;Veneroidea;Veneridae;Mercenaria;Mercenari  
a mercenaria

UdeM00000028113 6596 456.4 UdeM00000028113 XP\_045203351.1 39.3 643  
147 2 20 662 10 409 6.00E-125 456.4 6596 cellular

organisms;Eukaryota;Opisthokonta;Metazoa;Eumetazoa;Bilateria;Protostomia;  
Spiralia;Lophotrochozoa;Mollusca;Bivalvia;Autobranhia;Heteroconchia;Euhe  
terodonta;Imparidentia;Venerida;Veneroidea;Veneridae;Mercenaria;Mercenari  
a mercenaria

UdeM00000028115 6596 1158.7 UdeM00000028115 XP\_045202943.1 43.1  
1749 761 34 1 1589 32 1705 0.00E+00 1158.7 6596  
cellular

organisms;Eukaryota;Opisthokonta;Metazoa;Eumetazoa;Bilateria;Protostomia;  
Spiralia;Lophotrochozoa;Mollusca;Bivalvia;Autobranhia;Heteroconchia;Euhe  
terodonta;Imparidentia;Venerida;Veneroidea;Veneridae;Mercenaria;Mercenari  
a mercenaria

UdeM00000028116 6579 238.4 UdeM00000028116 XP\_033742571.1 61 223  
75 8 1 213 1 221 8.30E-60 238.4 6579 cellular

organisms;Eukaryota;Opisthokonta;Metazoa;Eumetazoa;Bilateria;Protostomia;  
Spiralia;Lophotrochozoa;Mollusca;Bivalvia;Autobranhia;Pteriormorphia;Pect  
inida;Pectinoidea;Pectinidae;Pecten;Pecten maximus

UdeM00000028117 6596 252.3 UdeM00000028117 XP\_045204092.1 61.9 226  
66 10 1 208 1 224 5.40E-64 252.3 6596 cellular

organisms;Eukaryota;Opisthokonta;Metazoa;Eumetazoa;Bilateria;Protostomia;  
Spiralia;Lophotrochozoa;Mollusca;Bivalvia;Autobranhia;Heteroconchia;Euhe  
terodonta;Imparidentia;Venerida;Veneroidea;Veneridae;Mercenaria;Mercenari  
a mercenaria

UdeM00000028118 6596 318.5 UdeM00000028118 XP\_045204093.1 55.4 278  
122 2 5 280 12 289 8.40E-84 318.5 6596 cellular

organisms;Eukaryota;Opisthokonta;Metazoa;Eumetazoa;Bilateria;Protostomia;  
Spiralia;Lophotrochozoa;Mollusca;Bivalvia;Autobranhia;Heteroconchia;Euhe  
terodonta;Imparidentia;Venerida;Veneroidea;Veneridae;Mercenaria;Mercenari  
a mercenaria

UdeM00000028119 6596 221.1 UdeM00000028119 XP\_045204491.1 23.6 658  
474 10 16 655 16 662 4.20E-54 221.1 6596 cellular

organisms;Eukaryota;Opisthokonta;Metazoa;Eumetazoa;Bilateria;Protostomia;  
Spiralia;Lophotrochozoa;Mollusca;Bivalvia;Autobranhia;Heteroconchia;Euhe  
terodonta;Imparidentia;Venerida;Veneroidea;Veneridae;Mercenaria;Mercenari  
a mercenaria

UdeM00000028120 6596 117.5 UdeM00000028120 XP\_045204491.1 35.4 192  
114 5 1 188 1 186 2.10E-23 117.5 6596 cellular

organisms;Eukaryota;Opisthokonta;Metazoa;Eumetazoa;Bilateria;Protostomia;  
Spiralia;Lophotrochozoa;Mollusca;Bivalvia;Autobranhia;Heteroconchia;Euhe  
terodonta;Imparidentia;Venerida;Veneroidea;Veneridae;Mercenaria;Mercenari  
a mercenaria

UdeM00000028121 6596 62.4 UdeM00000028121 XP\_045162054.1 28.8 125  
87 1 1 125 434 556 4.80E-07 62.4 6596 cellular

organisms;Eukaryota;Opisthokonta;Metazoa;Eumetazoa;Bilateria;Protostomia;  
Spiralia;Lophotrochozoa;Mollusca;Bivalvia;Autobranhia;Heteroconchia;Euhe  
terodonta;Imparidentia;Venerida;Veneroidea;Veneridae;Mercenaria;Mercenari  
a mercenaria

UdeM00000028122 6596 203.8 UdeM00000028122 XP\_045204491.1 24.8 678  
480 12 1 662 1 664 7.00E-49 203.8 6596 cellular

organisms;Eukaryota;Opisthokonta;Metazoa;Eumetazoa;Bilateria;Protostomia;  
Spiralia;Lophotrochozoa;Mollusca;Bivalvia;Autobranhia;Heteroconchia;Euhe

terodonta;Imparidentia;Venerida;Veneroidea;Veneridae;Mercenaria;Mercenari  
a mercenaria

UdeM00000028123 6596 1030.4 UdeM00000028123 XP\_045204094.1 66.9  
887 251 9 1336 2193 1448 2320 3.50E-297 1030.4 6596  
cellular

organisms;Eukaryota;Opisthokonta;Metazoa;Eumetazoa;Bilateria;Protostomia;  
Spiralia;Lophotrochozoa;Mollusca;Bivalvia;Autobranhia;Heteroconchia;Euhe  
terodonta;Imparidentia;Venerida;Veneroidea;Veneridae;Mercenaria;Mercenari  
a mercenaria

UdeM00000028124 6579 323.9 UdeM00000028124 XP\_033742758.1 65.6 250  
84 2 19 267 4 252 1.90E-85 323.9 6579 cellular

organisms;Eukaryota;Opisthokonta;Metazoa;Eumetazoa;Bilateria;Protostomia;  
Spiralia;Lophotrochozoa;Mollusca;Bivalvia;Autobranhia;Pteriormorphia;Pect  
inida;Pectinoidea;Pectinidae;Pecten;Pecten maximus

UdeM00000028125 6579 324.7 UdeM00000028125 XP\_033742758.1 65.6 250  
84 2 5 253 4 252 1.10E-85 324.7 6579 cellular

organisms;Eukaryota;Opisthokonta;Metazoa;Eumetazoa;Bilateria;Protostomia;  
Spiralia;Lophotrochozoa;Mollusca;Bivalvia;Autobranhia;Pteriormorphia;Pect  
inida;Pectinoidea;Pectinidae;Pecten;Pecten maximus

UdeM00000028126 6573 1144.4 UdeM00000028126 XP\_021348265.1 65.7  
1181 377 7 10 1176 106 1272 0.00E+00 1144.4 6573  
cellular

organisms;Eukaryota;Opisthokonta;Metazoa;Eumetazoa;Bilateria;Protostomia;  
Spiralia;Lophotrochozoa;Mollusca;Bivalvia;Autobranhia;Pteriormorphia;Pect  
inida;Pectinoidea;Pectinidae;Mizuhopecten;Mizuhopecten yessoensis

UdeM00000028127 6596 162.9 UdeM00000028127 XP\_045204448.1 77.9 104  
23 0 3 106 2 105 2.30E-37 162.9 6596 cellular

organisms;Eukaryota;Opisthokonta;Metazoa;Eumetazoa;Bilateria;Protostomia;  
Spiralia;Lophotrochozoa;Mollusca;Bivalvia;Autobranhia;Heteroconchia;Euhe  
terodonta;Imparidentia;Venerida;Veneroidea;Veneridae;Mercenaria;Mercenari  
a mercenaria

UdeM00000028128 1735272 479.9 UdeM00000028128 XP\_041357227.1 38.6  
699 318 10 1 697 1 590 7.20E-132 479.9 1735272  
cellular

organisms;Eukaryota;Opisthokonta;Metazoa;Eumetazoa;Bilateria;Protostomia;  
Spiralia;Lophotrochozoa;Mollusca;Gastropoda;Neomphalina;Neomphaloidea;Pel  
tospiridae;Gigantopelta;Gigantopelta aegis

UdeM00000028129 6596 369.8 UdeM00000028129 XP\_045204446.1 54.5 279  
125 1 340 616 325 603 9.40E-99 369.8 6596 cellular

organisms;Eukaryota;Opisthokonta;Metazoa;Eumetazoa;Bilateria;Protostomia;  
Spiralia;Lophotrochozoa;Mollusca;Bivalvia;Autobranhia;Heteroconchia;Euhe  
terodonta;Imparidentia;Venerida;Veneroidea;Veneridae;Mercenaria;Mercenari  
a mercenaria

UdeM00000028130 6596 400.2 UdeM00000028130 XP\_045204446.1 59.2 282  
113 1 389 668 329 610 6.70E-108 400.2 6596 cellular

organisms;Eukaryota;Opisthokonta;Metazoa;Eumetazoa;Bilateria;Protostomia;  
Spiralia;Lophotrochozoa;Mollusca;Bivalvia;Autobranhia;Heteroconchia;Euhe  
terodonta;Imparidentia;Venerida;Veneroidea;Veneridae;Mercenaria;Mercenari  
a mercenaria

UdeM00000028131 6596 400.2 UdeM00000028131 XP\_045204446.1 59.2 282  
113 1 390 669 329 610 6.70E-108 400.2 6596 cellular

organisms;Eukaryota;Opisthokonta;Metazoa;Eumetazoa;Bilateria;Protostomia;  
Spiralia;Lophotrochozoa;Mollusca;Bivalvia;Autobranhia;Heteroconchia;Euhe

terodonta;Imparidentia;Venerida;Veneroidea;Veneridae;Mercenaria;Mercenaria mercenaria  
 UdeM00000028133 29159 209.5 UdeM00000028133 XP\_011440927.2 32.1 499  
 254 13 7 470 61 509 1.80E-50 209.5 29159 cellular  
 organisms;Eukaryota;Opisthokonta;Metazoa;Eumetazoa;Bilateria;Protostomia;  
 Spiralia;Lophotrochozoa;Mollusca;Bivalvia;Autobranchia;Pteriormorphia;Ostr  
 eida;Ostreoidea;Ostreidae;Crassostrea;Crassostrea gigas  
 UdeM00000028133 29159 65.1 UdeM00000028133 XP\_011440927.2 60.5 43  
 17 0 873 915 625 667 5.40E-07 65.1 29159 cellular  
 organisms;Eukaryota;Opisthokonta;Metazoa;Eumetazoa;Bilateria;Protostomia;  
 Spiralia;Lophotrochozoa;Mollusca;Bivalvia;Autobranchia;Pteriormorphia;Ostr  
 eida;Ostreoidea;Ostreidae;Crassostrea;Crassostrea gigas  
 UdeM00000028134 6596 231.5 UdeM00000028134 XP\_045176520.1 54.6 185  
 79 3 27 211 41 220 1.00E-57 231.5 6596 cellular  
 organisms;Eukaryota;Opisthokonta;Metazoa;Eumetazoa;Bilateria;Protostomia;  
 Spiralia;Lophotrochozoa;Mollusca;Bivalvia;Autobranchia;Heteroconchia;Euhe  
 terodonta;Imparidentia;Venerida;Veneroidea;Veneridae;Mercenaria;Mercenari  
 a mercenaria  
 UdeM00000028136 6596 230.3 UdeM00000028136 XP\_045169996.1 49.2 242  
 111 5 87 321 48 284 3.40E-57 230.3 6596 cellular  
 organisms;Eukaryota;Opisthokonta;Metazoa;Eumetazoa;Bilateria;Protostomia;  
 Spiralia;Lophotrochozoa;Mollusca;Bivalvia;Autobranchia;Heteroconchia;Euhe  
 terodonta;Imparidentia;Venerida;Veneroidea;Veneridae;Mercenaria;Mercenari  
 a mercenaria  
 UdeM00000033740 6565 193 UdeM00000033740 XP\_022343794.1 82.1 123  
 21 1 259 381 312 433 7.10E-46 193 6565 cellular  
 organisms;Eukaryota;Opisthokonta;Metazoa;Eumetazoa;Bilateria;Protostomia;  
 Spiralia;Lophotrochozoa;Mollusca;Bivalvia;Autobranchia;Pteriormorphia;Ostr  
 eida;Ostreoidea;Ostreidae;Crassostrea;Crassostrea virginica  
 UdeM00000033741 6596 657.5 UdeM00000033741 XP\_045200102.1 54.1 796  
 338 11 3 779 2 789 2.10E-185 657.5 6596 cellular  
 organisms;Eukaryota;Opisthokonta;Metazoa;Eumetazoa;Bilateria;Protostomia;  
 Spiralia;Lophotrochozoa;Mollusca;Bivalvia;Autobranchia;Heteroconchia;Euhe  
 terodonta;Imparidentia;Venerida;Veneroidea;Veneridae;Mercenaria;Mercenari  
 a mercenaria  
 UdeM00000033742 6596 659.8 UdeM00000033742 XP\_045200102.1 54.4 794  
 337 11 3 777 2 789 4.20E-186 659.8 6596 cellular  
 organisms;Eukaryota;Opisthokonta;Metazoa;Eumetazoa;Bilateria;Protostomia;  
 Spiralia;Lophotrochozoa;Mollusca;Bivalvia;Autobranchia;Heteroconchia;Euhe  
 terodonta;Imparidentia;Venerida;Veneroidea;Veneridae;Mercenaria;Mercenari  
 a mercenaria  
 UdeM00000033743 6596 198 UdeM00000033743 XP\_045199597.1 79.4 131  
 26 1 1 130 1 131 7.90E-48 198 6596 cellular  
 organisms;Eukaryota;Opisthokonta;Metazoa;Eumetazoa;Bilateria;Protostomia;  
 Spiralia;Lophotrochozoa;Mollusca;Bivalvia;Autobranchia;Heteroconchia;Euhe  
 terodonta;Imparidentia;Venerida;Veneroidea;Veneridae;Mercenaria;Mercenari  
 a mercenaria  
 UdeM00000033744 1735272 872.1 UdeM00000033744 XP\_041358344.1 71.1  
 606 174 1 9 613 21 626 4.20E-250 872.1 1735272  
 cellular  
 organisms;Eukaryota;Opisthokonta;Metazoa;Eumetazoa;Bilateria;Protostomia;  
 Spiralia;Lophotrochozoa;Mollusca;Gastropoda;Neomphalina;Neomphaloidea;Pel  
 tospiridae;Gigantopelta;Gigantopelta aegis

UdeM00000033745 6596 857.1 UdeM00000033745 XP\_045201009.1 50.2 922  
 422 14 73 965 53 966 2.20E-245 857.1 6596 cellular  
 organisms;Eukaryota;Opisthokonta;Metazoa;Eumetazoa;Bilateria;Protostomia;  
 Spiralia;Lophotrochozoa;Mollusca;Bivalvia;Autobranchia;Heteroconchia;Euhe  
 terodonta;Imparidentia;Venerida;Veneroidea;Veneridae;Mercenaria;Mercenari  
 a mercenaria  
 UdeM00000033746 6579 186.4 UdeM00000033746 XP\_033729790.1 40.3 248  
 143 2 10 257 17 259 5.20E-44 186.4 6579 cellular  
 organisms;Eukaryota;Opisthokonta;Metazoa;Eumetazoa;Bilateria;Protostomia;  
 Spiralia;Lophotrochozoa;Mollusca;Bivalvia;Autobranchia;Pteriormorphia;Pect  
 inida;Pectinoidea;Pectinidae;Pecten;Pecten maximus  
 UdeM00000033748 2652724 170.6 UdeM00000033748 XP\_020913146.1 53.6  
 166 77 0 166 331 177 342 3.80E-39 170.6 2652724  
 cellular  
 organisms;Eukaryota;Opisthokonta;Metazoa;Eumetazoa;Cnidaria;Anthozoa;Hexa  
 corallia;Actiniaria;Aiptasiidae;Exaiptasia;Exaiptasia diaphana  
 UdeM00000033749 6579 100.5 UdeM00000033749 XP\_033760905.1 52.3 109  
 39 3 5 107 983 1084 2.90E-18 100.5 6579 cellular  
 organisms;Eukaryota;Opisthokonta;Metazoa;Eumetazoa;Bilateria;Protostomia;  
 Spiralia;Lophotrochozoa;Mollusca;Bivalvia;Autobranchia;Pteriormorphia;Pect  
 inida;Pectinoidea;Pectinidae;Pecten;Pecten maximus  
 UdeM00000033750 225164 430.3 UdeM00000033750 XP\_009050565.1 74.1  
 270 70 0 25 294 71 340 2.10E-117 430.3 225164  
 cellular  
 organisms;Eukaryota;Opisthokonta;Metazoa;Eumetazoa;Bilateria;Protostomia;  
 Spiralia;Lophotrochozoa;Mollusca;Gastropoda;Patellogastropoda;Lottioidea;  
 Lottiidae;Lottia;Lottia gigantea  
 UdeM00000033751 6596 168.3 UdeM00000033751 XP\_045200667.1 40.1 207  
 118 3 45 247 16 220 1.20E-38 168.3 6596 cellular  
 organisms;Eukaryota;Opisthokonta;Metazoa;Eumetazoa;Bilateria;Protostomia;  
 Spiralia;Lophotrochozoa;Mollusca;Bivalvia;Autobranchia;Heteroconchia;Euhe  
 terodonta;Imparidentia;Venerida;Veneroidea;Veneridae;Mercenaria;Mercenari  
 a mercenaria  
 UdeM00000033752 6579 72.8 UdeM00000033752 XP\_033759690.1 39 123  
 53 3 247 368 265 366 1.00E-09 72.8 6579 cellular  
 organisms;Eukaryota;Opisthokonta;Metazoa;Eumetazoa;Bilateria;Protostomia;  
 Spiralia;Lophotrochozoa;Mollusca;Bivalvia;Autobranchia;Pteriormorphia;Pect  
 inida;Pectinoidea;Pectinidae;Pecten;Pecten maximus  
 UdeM00000033753 6573 438.7 UdeM00000033753 XP\_021349795.1 76.2 298  
 63 6 1 292 1 296 6.00E-120 438.7 6573 cellular  
 organisms;Eukaryota;Opisthokonta;Metazoa;Eumetazoa;Bilateria;Protostomia;  
 Spiralia;Lophotrochozoa;Mollusca;Bivalvia;Autobranchia;Pteriormorphia;Pect  
 inida;Pectinoidea;Pectinidae;Mizuhopecten;Mizuhopecten yessoensis  
 UdeM00000033754 6579 486.1 UdeM00000033754 XP\_033760193.1 77.1 323  
 66 5 1 317 1 321 3.40E-134 486.1 6579 cellular  
 organisms;Eukaryota;Opisthokonta;Metazoa;Eumetazoa;Bilateria;Protostomia;  
 Spiralia;Lophotrochozoa;Mollusca;Bivalvia;Autobranchia;Pteriormorphia;Pect  
 inida;Pectinoidea;Pectinidae;Pecten;Pecten maximus  
 UdeM00000033755 6596 1470.3 UdeM00000033755 XP\_045200451.1 56.2  
 1170 505 6 236 1403 3 1167 0.00E+00 1470.3 6596  
 cellular  
 organisms;Eukaryota;Opisthokonta;Metazoa;Eumetazoa;Bilateria;Protostomia;  
 Spiralia;Lophotrochozoa;Mollusca;Bivalvia;Autobranchia;Heteroconchia;Euhe



terodonta;Imparidentia;Venerida;Veneroidea;Veneridae;Mercenaria;Mercenaria mercenaria  
 UdeM00000033756 7574 137.9 UdeM00000033756 XP\_013388573.1 37.6 229  
 124 7 96 322 349 560 2.40E-29 137.9 7574 cellular  
 organisms;Eukaryota;Opisthokonta;Metazoa;Eumetazoa;Bilateria;Protostomia;  
 Spiralia;Lophotrochozoa;Brachiopoda;Linguliformea;Lingulata;Lingulida;Linguloidea;  
 Lingulidae;Lingula;Lingula anatina  
 UdeM00000033757 6596 235 UdeM00000033757 XP\_045200451.1 69.9 146  
 43 1 49 194 1189 1333 8.50E-59 235 6596 cellular  
 organisms;Eukaryota;Opisthokonta;Metazoa;Eumetazoa;Bilateria;Protostomia;  
 Spiralia;Lophotrochozoa;Mollusca;Bivalvia;Autobranchia;Heteroconchia;Euheterodonta;  
 Imparidentia;Venerida;Veneroidea;Veneridae;Mercenaria;Mercenaria mercenaria  
 UdeM00000033758 46514 66.2 UdeM00000033758 XP\_038049704.1 49.1 53  
 27 0 24 76 1092 1144 4.10E-08 66.2 46514 cellular  
 organisms;Eukaryota;Opisthokonta;Metazoa;Eumetazoa;Bilateria;Deuterostomia;  
 Echinodermata;Eleutherozoa;Asterozoa;Asteroidea;Valvatataceae;Valvatida;Asterinidae;  
 Patiria;Patiria miniata  
 UdeM00000033760 6596 271.2 UdeM00000033760 XP\_045192533.1 65.8 187  
 64 0 1 187 310 496 1.00E-69 271.2 6596 cellular  
 organisms;Eukaryota;Opisthokonta;Metazoa;Eumetazoa;Bilateria;Protostomia;  
 Spiralia;Lophotrochozoa;Mollusca;Bivalvia;Autobranchia;Heteroconchia;Euheterodonta;  
 Imparidentia;Venerida;Veneroidea;Veneridae;Mercenaria;Mercenaria mercenaria  
 UdeM00000033759 6596 672.9 UdeM00000033759 XP\_045192533.1 65.2 486  
 166 2 15 498 12 496 3.10E-190 672.9 6596 cellular  
 organisms;Eukaryota;Opisthokonta;Metazoa;Eumetazoa;Bilateria;Protostomia;  
 Spiralia;Lophotrochozoa;Mollusca;Bivalvia;Autobranchia;Heteroconchia;Euheterodonta;  
 Imparidentia;Venerida;Veneroidea;Veneridae;Mercenaria;Mercenaria mercenaria  
 UdeM00000033762 37653 337.4 UdeM00000033762 XP\_014780771.1 63.2 315  
 88 11 1 310 1 292 1.90E-89 337.4 37653 cellular  
 organisms;Eukaryota;Opisthokonta;Metazoa;Eumetazoa;Bilateria;Protostomia;  
 Spiralia;Lophotrochozoa;Mollusca;Cephalopoda;Coleoidea;Octopodiformes;Octopoda;  
 Incirrata;Octopodidae;Octopus;Octopus bimaculoides  
 UdeM00000033763 6596 396.4 UdeM00000033763 XP\_045199906.1 58.2 342  
 136 2 9 350 10 344 3.90E-107 396.4 6596 cellular  
 organisms;Eukaryota;Opisthokonta;Metazoa;Eumetazoa;Bilateria;Protostomia;  
 Spiralia;Lophotrochozoa;Mollusca;Bivalvia;Autobranchia;Heteroconchia;Euheterodonta;  
 Imparidentia;Venerida;Veneroidea;Veneridae;Mercenaria;Mercenaria mercenaria  
 UdeM00000033764 6579 1245 UdeM00000033764 XP\_033759336.1 77 829  
 167 4 1 828 1 806 0.00E+00 1245 6579 cellular  
 organisms;Eukaryota;Opisthokonta;Metazoa;Eumetazoa;Bilateria;Protostomia;  
 Spiralia;Lophotrochozoa;Mollusca;Bivalvia;Autobranchia;Pteriomorpha;Pectinida;  
 Pectinoidea;Pectinidae;Pecten;Pecten maximus  
 UdeM00000033765 400682 90.5 UdeM00000033765 XP\_019848718.1 25.9  
 359 201 10 499 847 373 676 1.10E-14 90.5 400682  
 cellular  
 organisms;Eukaryota;Opisthokonta;Metazoa;Porifera;Demospongiae;Heteroscleromorpha;  
 Haplosclerida;Niphatidae;Amphimedon;Amphimedon queenslandica  
 UdeM00000033766 6596 217.2 UdeM00000033766 XP\_045172484.1 25.6 648  
 451 12 14 646 78 709 6.10E-53 217.2 6596 cellular  
 organisms;Eukaryota;Opisthokonta;Metazoa;Eumetazoa;Bilateria;Protostomia;

Spiralia; Lophotrochozoa; Mollusca; Bivalvia; Autobranchia; Heteroconchia; Euheterodonta; Imparidentia; Venerida; Veneroidea; Veneridae; Mercenaria; Mercenaria mercenaria

|                 |         |    |                 |                |      |    |          |    |         |
|-----------------|---------|----|-----------------|----------------|------|----|----------|----|---------|
| UdeM00000033767 | 1735272 | 82 | UdeM00000033767 | XP_041357572.1 | 54.2 |    |          |    |         |
| 72              | 32      | 1  | 1               | 71             | 1    | 72 | 3.60E-13 | 82 | 1735272 |

cellular

organisms; Eukaryota; Opisthokonta; Metazoa; Eumetazoa; Bilateria; Protostomia; Spiralia; Lophotrochozoa; Mollusca; Gastropoda; Neomphalina; Neomphaloidea; Peltospiridae; Gigantopelta; Gigantopelta aegis

|                 |      |       |                 |                |      |          |       |      |          |
|-----------------|------|-------|-----------------|----------------|------|----------|-------|------|----------|
| UdeM00000033768 | 6596 | 263.8 | UdeM00000033768 | XP_045202366.1 | 73.3 | 176      |       |      |          |
| 47              | 0    | 10    | 185             | 14             | 189  | 4.80E-67 | 263.8 | 6596 | cellular |

organisms; Eukaryota; Opisthokonta; Metazoa; Eumetazoa; Bilateria; Protostomia; Spiralia; Lophotrochozoa; Mollusca; Bivalvia; Autobranchia; Heteroconchia; Euheterodonta; Imparidentia; Venerida; Veneroidea; Veneridae; Mercenaria; Mercenaria mercenaria

|                 |      |       |                 |                |     |           |       |      |          |
|-----------------|------|-------|-----------------|----------------|-----|-----------|-------|------|----------|
| UdeM00000033769 | 7574 | 446.8 | UdeM00000033769 | XP_013387554.1 | 45  | 573       |       |      |          |
| 271             | 22   | 2     | 543             | 1              | 560 | 3.90E-122 | 446.8 | 7574 | cellular |

organisms; Eukaryota; Opisthokonta; Metazoa; Eumetazoa; Bilateria; Protostomia; Spiralia; Lophotrochozoa; Brachiopoda; Linguliformea; Lingulata; Lingulida; Linguloidea; Lingulidae; Lingula; Lingula anatina

|                 |      |     |                 |                |      |          |     |      |          |
|-----------------|------|-----|-----------------|----------------|------|----------|-----|------|----------|
| UdeM00000033771 | 6596 | 186 | UdeM00000033771 | XP_045201663.1 | 65.1 | 126      |     |      |          |
| 44              | 0    | 1   | 126             | 124            | 249  | 3.00E-44 | 186 | 6596 | cellular |

organisms; Eukaryota; Opisthokonta; Metazoa; Eumetazoa; Bilateria; Protostomia; Spiralia; Lophotrochozoa; Mollusca; Bivalvia; Autobranchia; Heteroconchia; Euheterodonta; Imparidentia; Venerida; Veneroidea; Veneridae; Mercenaria; Mercenaria mercenaria

|                 |      |       |                 |                |      |          |       |      |          |
|-----------------|------|-------|-----------------|----------------|------|----------|-------|------|----------|
| UdeM00000033770 | 6596 | 248.1 | UdeM00000033770 | XP_045201663.1 | 66.9 | 166      |       |      |          |
| 55              | 0    | 33    | 198             | 84             | 249  | 1.00E-62 | 248.1 | 6596 | cellular |

organisms; Eukaryota; Opisthokonta; Metazoa; Eumetazoa; Bilateria; Protostomia; Spiralia; Lophotrochozoa; Mollusca; Bivalvia; Autobranchia; Heteroconchia; Euheterodonta; Imparidentia; Venerida; Veneroidea; Veneridae; Mercenaria; Mercenaria mercenaria

|                 |       |     |                 |                |      |          |     |       |          |
|-----------------|-------|-----|-----------------|----------------|------|----------|-----|-------|----------|
| UdeM00000033772 | 10224 | 344 | UdeM00000033772 | XP_002736880.1 | 57.8 | 282      |     |       |          |
| 117             | 2     | 33  | 312             | 36             | 317  | 2.50E-91 | 344 | 10224 | cellular |

organisms; Eukaryota; Opisthokonta; Metazoa; Eumetazoa; Bilateria; Deuterostomia; Hemichordata; Enteropneusta; Harrimaniidae; Saccoglossus; Saccoglossus kowalevskii

|                 |        |      |                 |                |      |    |          |      |        |
|-----------------|--------|------|-----------------|----------------|------|----|----------|------|--------|
| UdeM00000033773 | 225164 | 60.5 | UdeM00000033773 | XP_009048402.1 | 70.7 |    |          |      |        |
| 41              | 12     | 0    | 4               | 44             | 7    | 47 | 4.40E-06 | 60.5 | 225164 |

cellular

organisms; Eukaryota; Opisthokonta; Metazoa; Eumetazoa; Bilateria; Protostomia; Spiralia; Lophotrochozoa; Mollusca; Gastropoda; Patellogastropoda; Lottiidae; Lottia; Lottia gigantea

|                 |      |     |                 |                |      |           |     |      |          |
|-----------------|------|-----|-----------------|----------------|------|-----------|-----|------|----------|
| UdeM00000033774 | 6596 | 433 | UdeM00000033774 | XP_045199400.1 | 63.2 | 326       |     |      |          |
| 116             | 1    | 1   | 326             | 1              | 322  | 3.60E-118 | 433 | 6596 | cellular |

organisms; Eukaryota; Opisthokonta; Metazoa; Eumetazoa; Bilateria; Protostomia; Spiralia; Lophotrochozoa; Mollusca; Bivalvia; Autobranchia; Heteroconchia; Euheterodonta; Imparidentia; Venerida; Veneroidea; Veneridae; Mercenaria; Mercenaria mercenaria

|                 |       |     |                 |                |      |          |     |       |          |
|-----------------|-------|-----|-----------------|----------------|------|----------|-----|-------|----------|
| UdeM00000033775 | 37621 | 131 | UdeM00000033775 | XP_014678336.1 | 44.7 | 159      |     |       |          |
| 80              | 4     | 32  | 187             | 28             | 181  | 1.70E-27 | 131 | 37621 | cellular |

organisms; Eukaryota; Opisthokonta; Metazoa; Eumetazoa; Bilateria; Protostomia; Ecdysozoa; Scalidophora; Priapulida; Priapulimorpha; Priapulimorphida; Priapulidae; Priapululus; Priapululus caudatus

UdeM00000033776 6596 661.4 UdeM00000033776 XP\_045201655.1 60.5 615  
 173 13 8 613 38 591 1.10E-186 661.4 6596 cellular  
 organisms;Eukaryota;Opisthokonta;Metazoa;Eumetazoa;Bilateria;Protostomia;  
 Spiralia;Lophotrochozoa;Mollusca;Bivalvia;Autobranhia;Heteroconchia;Euhe  
 terodonta;Imparidentia;Venerida;Veneroidea;Veneridae;Mercenaria;Mercenari  
 a mercenaria

UdeM00000033777 6596 260.4 UdeM00000033777 XP\_045192533.1 43.6 280  
 153 3 6 284 221 496 2.70E-66 260.4 6596 cellular  
 organisms;Eukaryota;Opisthokonta;Metazoa;Eumetazoa;Bilateria;Protostomia;  
 Spiralia;Lophotrochozoa;Mollusca;Bivalvia;Autobranhia;Heteroconchia;Euhe  
 terodonta;Imparidentia;Venerida;Veneroidea;Veneridae;Mercenaria;Mercenari  
 a mercenaria

UdeM00000033778 6596 234.2 UdeM00000033778 XP\_045192533.1 58.7 189  
 75 3 24 211 22 208 1.60E-58 234.2 6596 cellular  
 organisms;Eukaryota;Opisthokonta;Metazoa;Eumetazoa;Bilateria;Protostomia;  
 Spiralia;Lophotrochozoa;Mollusca;Bivalvia;Autobranhia;Heteroconchia;Euhe  
 terodonta;Imparidentia;Venerida;Veneroidea;Veneridae;Mercenaria;Mercenari  
 a mercenaria

UdeM00000033779 6596 499.6 UdeM00000033779 XP\_045192533.1 48.5 480  
 237 7 1 479 26 496 4.50E-138 499.6 6596 cellular  
 organisms;Eukaryota;Opisthokonta;Metazoa;Eumetazoa;Bilateria;Protostomia;  
 Spiralia;Lophotrochozoa;Mollusca;Bivalvia;Autobranhia;Heteroconchia;Euhe  
 terodonta;Imparidentia;Venerida;Veneroidea;Veneridae;Mercenaria;Mercenari  
 a mercenaria

UdeM00000033780 6596 305.8 UdeM00000033780 XP\_045159519.1 41 390  
 228 2 14 403 18 405 8.10E-80 305.8 6596 cellular  
 organisms;Eukaryota;Opisthokonta;Metazoa;Eumetazoa;Bilateria;Protostomia;  
 Spiralia;Lophotrochozoa;Mollusca;Bivalvia;Autobranhia;Heteroconchia;Euhe  
 terodonta;Imparidentia;Venerida;Veneroidea;Veneridae;Mercenaria;Mercenari  
 a mercenaria

UdeM00000033781 6596 486.9 UdeM00000033781 XP\_045192533.1 49 471  
 230 7 1 470 35 496 2.90E-134 486.9 6596 cellular  
 organisms;Eukaryota;Opisthokonta;Metazoa;Eumetazoa;Bilateria;Protostomia;  
 Spiralia;Lophotrochozoa;Mollusca;Bivalvia;Autobranhia;Heteroconchia;Euhe  
 terodonta;Imparidentia;Venerida;Veneroidea;Veneridae;Mercenaria;Mercenari  
 a mercenaria

UdeM00000033782 6596 190.7 UdeM00000033782 XP\_045198056.1 27.1 547  
 180 7 52 382 31 574 3.60E-45 190.7 6596 cellular  
 organisms;Eukaryota;Opisthokonta;Metazoa;Eumetazoa;Bilateria;Protostomia;  
 Spiralia;Lophotrochozoa;Mollusca;Bivalvia;Autobranhia;Heteroconchia;Euhe  
 terodonta;Imparidentia;Venerida;Veneroidea;Veneridae;Mercenaria;Mercenari  
 a mercenaria

UdeM00000033783 6596 452.2 UdeM00000033783 XP\_045198056.1 44.3 531  
 270 6 12 519 7 534 9.20E-124 452.2 6596 cellular  
 organisms;Eukaryota;Opisthokonta;Metazoa;Eumetazoa;Bilateria;Protostomia;  
 Spiralia;Lophotrochozoa;Mollusca;Bivalvia;Autobranhia;Heteroconchia;Euhe  
 terodonta;Imparidentia;Venerida;Veneroidea;Veneridae;Mercenaria;Mercenari  
 a mercenaria

UdeM00000033784 6596 201.8 UdeM00000033784 XP\_045203895.1 56.6 159  
 67 1 2 160 26 182 6.40E-49 201.8 6596 cellular  
 organisms;Eukaryota;Opisthokonta;Metazoa;Eumetazoa;Bilateria;Protostomia;  
 Spiralia;Lophotrochozoa;Mollusca;Bivalvia;Autobranhia;Heteroconchia;Euhe  
 terodonta;Imparidentia;Venerida;Veneroidea;Veneridae;Mercenaria;Mercenari  
 a mercenaria

UdeM00000033785 6579 324.3 UdeM00000033785 XP\_033761118.1 65.9 223  
 76 0 9 231 16 238 1.20E-85 324.3 6579 cellular  
 organisms;Eukaryota;Opisthokonta;Metazoa;Eumetazoa;Bilateria;Protostomia;  
 Spiralia;Lophotrochozoa;Mollusca;Bivalvia;Autobranchia;Pteriormorphia;Pect  
 inida;Pectinoidea;Pectinidae;Pecten;Pecten maximus  
 UdeM00000033786 7029 67 UdeM00000033786 XP\_008182687.1 54.5 66  
 22 3 3 61 4 68 1.10E-08 67 7029 cellular  
 organisms;Eukaryota;Opisthokonta;Metazoa;Eumetazoa;Bilateria;Protostomia;  
 Ecdysozoa;Panarthropoda;Arthropoda;Mandibulata;Pancrustacea;Hexapoda;Inse  
 cta;Dicondylia;Pterygota;Neoptera;Paraneoptera;Hemiptera;Sternorrhyncha;A  
 phidomorpha;Aphidoidea;Aphididae;Aphidinae;Macrosiphini;Acyrtosiphon;Acy  
 rthosiphon pisum  
 UdeM00000033787 400727 94.4 UdeM00000033787 XP\_025078573.1 33.2  
 184 83 3 42 188 1784 1964 1.70E-16 94.4 400727  
 cellular  
 organisms;Eukaryota;Opisthokonta;Metazoa;Eumetazoa;Bilateria;Protostomia;  
 Spiralia;Lophotrochozoa;Mollusca;Gastropoda;Caenogastropoda;Architaeniogl  
 ossa;Ampullarioidea;Ampullariidae;Pomacea;Pomacea canaliculata  
 UdeM00000033788 400727 94.7 UdeM00000033788 XP\_025078573.1 32.7  
 205 92 4 13 174 1763 1964 1.20E-16 94.7 400727  
 cellular  
 organisms;Eukaryota;Opisthokonta;Metazoa;Eumetazoa;Bilateria;Protostomia;  
 Spiralia;Lophotrochozoa;Mollusca;Gastropoda;Caenogastropoda;Architaeniogl  
 ossa;Ampullarioidea;Ampullariidae;Pomacea;Pomacea canaliculata  
 UdeM00000033789 29159 163.3 UdeM00000033789 XP\_011435143.2 33.2 271  
 166 6 4 265 119 383 4.30E-37 163.3 29159 cellular  
 organisms;Eukaryota;Opisthokonta;Metazoa;Eumetazoa;Bilateria;Protostomia;  
 Spiralia;Lophotrochozoa;Mollusca;Bivalvia;Autobranchia;Pteriormorphia;Ostr  
 eida;Ostreoidea;Ostreidae;Crassostrea;Crassostrea gigas  
 UdeM00000033790 6596 241.1 UdeM00000033790 XP\_045201086.1 31.4 481  
 319 6 21 501 34 503 3.10E-60 241.1 6596 cellular  
 organisms;Eukaryota;Opisthokonta;Metazoa;Eumetazoa;Bilateria;Protostomia;  
 Spiralia;Lophotrochozoa;Mollusca;Bivalvia;Autobranchia;Heteroconchia;Euhe  
 terodonta;Imparidentia;Venerida;Veneroidea;Veneridae;Mercenaria;Mercenari  
 a mercenaria  
 UdeM00000033791 6565 193.7 UdeM00000033791 XP\_022336074.1 46.7 225  
 97 4 2 211 3 219 2.30E-46 193.7 6565 cellular  
 organisms;Eukaryota;Opisthokonta;Metazoa;Eumetazoa;Bilateria;Protostomia;  
 Spiralia;Lophotrochozoa;Mollusca;Bivalvia;Autobranchia;Pteriormorphia;Ostr  
 eida;Ostreoidea;Ostreidae;Crassostrea;Crassostrea virginica  
 UdeM00000033793 6573 327 UdeM00000033793 XP\_021374282.1 63.9 338  
 106 6 3 335 40 366 3.00E-86 327 6573 cellular  
 organisms;Eukaryota;Opisthokonta;Metazoa;Eumetazoa;Bilateria;Protostomia;  
 Spiralia;Lophotrochozoa;Mollusca;Bivalvia;Autobranchia;Pteriormorphia;Pect  
 inida;Pectinoidea;Pectinidae;Mizuhopecten;Mizuhopecten yessoensis  
 UdeM00000033792 6579 902.1 UdeM00000033792 XP\_033760049.1 66.3 872  
 257 12 3 862 40 886 5.70E-259 902.1 6579 cellular  
 organisms;Eukaryota;Opisthokonta;Metazoa;Eumetazoa;Bilateria;Protostomia;  
 Spiralia;Lophotrochozoa;Mollusca;Bivalvia;Autobranchia;Pteriormorphia;Pect  
 inida;Pectinoidea;Pectinidae;Pecten;Pecten maximus  
 UdeM00000021695 6596 97.1 UdeM00000021695 XP\_045179815.1 43 121  
 65 1 82 198 135 255 2.90E-17 97.1 6596 cellular  
 organisms;Eukaryota;Opisthokonta;Metazoa;Eumetazoa;Bilateria;Protostomia;  
 Spiralia;Lophotrochozoa;Mollusca;Bivalvia;Autobranchia;Heteroconchia;Euhe

terodonta;Imparidentia;Venerida;Veneroidea;Veneridae;Mercenaria;Mercenari  
 a mercenaria  
 UdeM00000021696 6596 100.1 UdeM00000021696 XP\_045164335.1 22.7 278  
 152 1 5 282 279 493 7.50E-18 100.1 6596 cellular  
 organisms;Eukaryota;Opisthokonta;Metazoa;Eumetazoa;Bilateria;Protostomia;  
 Spiralia;Lophotrochozoa;Mollusca;Bivalvia;Autobranchia;Heteroconchia;Euhe  
 terodonta;Imparidentia;Venerida;Veneroidea;Veneridae;Mercenaria;Mercenari  
 a mercenaria  
 UdeM00000021697 6573 102.4 UdeM00000021697 XP\_021348968.1 44.1 102  
 53 1 112 209 3072 3173 1.30E-18 102.4 6573 cellular  
 organisms;Eukaryota;Opisthokonta;Metazoa;Eumetazoa;Bilateria;Protostomia;  
 Spiralia;Lophotrochozoa;Mollusca;Bivalvia;Autobranchia;Pteriormorphia;Pect  
 inida;Pectinoidea;Pectinidae;Mizuhopecten;Mizuhopecten yessoensis  
 UdeM00000021700 46731 100.9 UdeM00000021700 XP\_027060110.1 32.4 170  
 102 3 8 173 1416 1576 2.80E-18 100.9 46731 cellular  
 organisms;Eukaryota;Opisthokonta;Metazoa;Eumetazoa;Cnidaria;Anthozoa;Hexa  
 corallia;Scleractinia;Astrocoeniina;Pocilloporidae;Pocillopora;Pocillopor  
 a damicornis  
 UdeM00000021701 46731 99.4 UdeM00000021701 XP\_027060110.1 32.8 177  
 95 6 8 166 1416 1586 4.90E-18 99.4 46731 cellular  
 organisms;Eukaryota;Opisthokonta;Metazoa;Eumetazoa;Cnidaria;Anthozoa;Hexa  
 corallia;Scleractinia;Astrocoeniina;Pocilloporidae;Pocillopora;Pocillopor  
 a damicornis  
 UdeM00000021702 2652724 134.4 UdeM00000021702 XP\_028512668.1 37.3  
 193 111 4 40 227 205 392 3.10E-28 134.4 2652724  
 cellular  
 organisms;Eukaryota;Opisthokonta;Metazoa;Eumetazoa;Cnidaria;Anthozoa;Hexa  
 corallia;Actiniaria;Aiptasiidae;Exaiptasia;Exaiptasia diaphana  
 UdeM00000021703 2652724 158.7 UdeM00000021703 XP\_028512668.1 37.4  
 214 122 5 21 227 184 392 1.50E-35 158.7 2652724  
 cellular  
 organisms;Eukaryota;Opisthokonta;Metazoa;Eumetazoa;Cnidaria;Anthozoa;Hexa  
 corallia;Actiniaria;Aiptasiidae;Exaiptasia;Exaiptasia diaphana  
 UdeM00000021704 2652724 159.8 UdeM00000021704 XP\_028512668.1 34.6  
 257 156 5 78 327 141 392 8.60E-36 159.8 2652724  
 cellular  
 organisms;Eukaryota;Opisthokonta;Metazoa;Eumetazoa;Cnidaria;Anthozoa;Hexa  
 corallia;Actiniaria;Aiptasiidae;Exaiptasia;Exaiptasia diaphana  
 UdeM00000021707 30069 127.5 UdeM00000021707 XP\_035913094.1 48.3 120  
 59 2 105 223 317 434 2.40E-26 127.5 30069 cellular  
 organisms;Eukaryota;Opisthokonta;Metazoa;Eumetazoa;Bilateria;Protostomia;  
 Ecdysozoa;Panarthropoda;Arthropoda;Mandibulata;Pancrustacea;Hexapoda;Inse  
 cta;Dicondylia;Pterygota;Neoptera;Endopterygota;Diptera;Nematocera;Culico  
 morpha;Culicoidea;Culicidae;Anophelinae;Anopheles;Cellia;Neocellia;Anophe  
 les stephensi  
 UdeM00000021708 6565 541.2 UdeM00000021708 XP\_022343964.1 52.8 544  
 240 5 1 529 682 1223 1.50E-150 541.2 6565 cellular  
 organisms;Eukaryota;Opisthokonta;Metazoa;Eumetazoa;Bilateria;Protostomia;  
 Spiralia;Lophotrochozoa;Mollusca;Bivalvia;Autobranchia;Pteriormorphia;Ostr  
 eida;Ostreoidea;Ostreidae;Crassostrea;Crassostrea virginica  
 UdeM00000021717 6596 447.2 UdeM00000021717 XP\_045208259.1 51.5 439  
 209 4 1 438 110 545 2.50E-122 447.2 6596 cellular  
 organisms;Eukaryota;Opisthokonta;Metazoa;Eumetazoa;Bilateria;Protostomia;  
 Spiralia;Lophotrochozoa;Mollusca;Bivalvia;Autobranchia;Heteroconchia;Euhe

terodonta;Imparidentia;Venerida;Veneroidea;Veneridae;Mercenaria;Mercenaria mercenaria

UdeM00000021730 7741 75.5 UdeM00000021730 XP\_019638973.1 31.8 170  
103 4 67 223 128 297 1.10E-10 75.5 7741 cellular

organisms;Eukaryota;Opisthokonta;Metazoa;Eumetazoa;Bilateria;Deuterostomia;Chordata;Cephalochordata;Leptocardii;Amphioxiformes;Branchiostomidae;Branchiostoma;Branchiostoma belcheri

UdeM00000021732 6573 83.6 UdeM00000021732 XP\_021358581.1 32.1 137  
85 3 190 322 614 746 7.80E-13 83.6 6573 cellular

organisms;Eukaryota;Opisthokonta;Metazoa;Eumetazoa;Bilateria;Protostomia;Spiralia;Lophotrochozoa;Mollusca;Bivalvia;Autobranhia;Pteriormorphia;Pectinida;Pectinoidea;Pectinidae;Mizuhopecten;Mizuhopecten yessoensis

UdeM00000021733 42254 63.5 UdeM00000021733 XP\_004619559.1 27.7 188  
110 6 134 314 55 223 5.50E-07 63.5 42254 cellular

organisms;Eukaryota;Opisthokonta;Metazoa;Eumetazoa;Bilateria;Deuterostomia;Chordata;Craniata;Vertebrata;Gnathostomata;Teleostomi;Euteleostomi;Sarcopterygii;Dipnotetrapodomorpha;Tetrapoda;Amniota;Mammalia;Theria;Eutheria;Boreoeutheria;Laurasiatheria;Eulipotyphla;Soricidae;Soricinae;Sorex;Sorex araneus

UdeM00000021734 6573 79 UdeM00000021734 XP\_021354371.1 32.6 138  
74 3 178 311 246 368 1.50E-11 79 6573 cellular

organisms;Eukaryota;Opisthokonta;Metazoa;Eumetazoa;Bilateria;Protostomia;Spiralia;Lophotrochozoa;Mollusca;Bivalvia;Autobranhia;Pteriormorphia;Pectinida;Pectinoidea;Pectinidae;Mizuhopecten;Mizuhopecten yessoensis

UdeM00000021735 6573 79 UdeM00000021735 XP\_021354371.1 32.6 138  
74 3 178 311 246 368 1.40E-11 79 6573 cellular

organisms;Eukaryota;Opisthokonta;Metazoa;Eumetazoa;Bilateria;Protostomia;Spiralia;Lophotrochozoa;Mollusca;Bivalvia;Autobranhia;Pteriormorphia;Pectinida;Pectinoidea;Pectinidae;Mizuhopecten;Mizuhopecten yessoensis

UdeM00000021736 6596 107.8 UdeM00000021736 XP\_045209449.1 29 238  
145 8 66 293 295 518 3.90E-20 107.8 6596 cellular

organisms;Eukaryota;Opisthokonta;Metazoa;Eumetazoa;Bilateria;Protostomia;Spiralia;Lophotrochozoa;Mollusca;Bivalvia;Autobranhia;Heteroconchia;Euheterodonta;Imparidentia;Venerida;Veneroidea;Veneridae;Mercenaria;Mercenaria mercenaria

UdeM00000021737 6596 107.8 UdeM00000021737 XP\_045209449.1 29 238  
145 8 66 293 295 518 4.00E-20 107.8 6596 cellular

organisms;Eukaryota;Opisthokonta;Metazoa;Eumetazoa;Bilateria;Protostomia;Spiralia;Lophotrochozoa;Mollusca;Bivalvia;Autobranhia;Heteroconchia;Euheterodonta;Imparidentia;Venerida;Veneroidea;Veneridae;Mercenaria;Mercenaria mercenaria

UdeM00000021738 400727 224.6 UdeM00000021738 XP\_025079408.1 42.5  
294 143 10 11 298 2 275 4.30E-55 224.6 400727 cellular

organisms;Eukaryota;Opisthokonta;Metazoa;Eumetazoa;Bilateria;Protostomia;Spiralia;Lophotrochozoa;Mollusca;Gastropoda;Caenogastropoda;Architaenioglossa;Ampullarioidea;Ampullariidae;Pomacea;Pomacea canaliculata

UdeM00000021740 6596 1075.8 UdeM00000021740 XP\_045184898.1 67.6  
743 240 1 17 759 285 1026 0.00E+00 1075.8 6596 cellular

organisms;Eukaryota;Opisthokonta;Metazoa;Eumetazoa;Bilateria;Protostomia;Spiralia;Lophotrochozoa;Mollusca;Bivalvia;Autobranhia;Heteroconchia;Euheterodonta;Imparidentia;Venerida;Veneroidea;Veneridae;Mercenaria;Mercenaria mercenaria

UdeM00000021741 6596 123.2 UdeM00000021741 XP\_045184898.1 30.8 237  
 145 5 2 219 47 283 4.00E-25 123.2 6596 cellular  
 organisms;Eukaryota;Opisthokonta;Metazoa;Eumetazoa;Bilateria;Protostomia;  
 Spiralia;Lophotrochozoa;Mollusca;Bivalvia;Autobranchia;Heteroconchia;Euhe  
 terodonta;Imparidentia;Venerida;Veneroidea;Veneridae;Mercenaria;Mercenari  
 a mercenaria  
 UdeM00000021742 2607531 92.4 UdeM00000021742 XP\_029634328.1 33.2  
 238 119 8 41 265 54 264 9.10E-16 92.4 2607531  
 cellular  
 organisms;Eukaryota;Opisthokonta;Metazoa;Eumetazoa;Bilateria;Protostomia;  
 Spiralia;Lophotrochozoa;Mollusca;Cephalopoda;Coleoidea;Octopodiformes;Oct  
 opoda;Incirrata;Octopodidae;Octopus;Octopus sinensis  
 UdeM00000021743 6596 97.1 UdeM00000021743 XP\_045183763.1 41.9 93  
 54 0 10 102 35 127 2.10E-17 97.1 6596 cellular  
 organisms;Eukaryota;Opisthokonta;Metazoa;Eumetazoa;Bilateria;Protostomia;  
 Spiralia;Lophotrochozoa;Mollusca;Bivalvia;Autobranchia;Heteroconchia;Euhe  
 terodonta;Imparidentia;Venerida;Veneroidea;Veneridae;Mercenaria;Mercenari  
 a mercenaria  
 UdeM00000021744 6412 78.2 UdeM00000021744 XP\_009012286.1 34.5 119  
 74 2 2 117 3 120 7.90E-12 78.2 6412 cellular  
 organisms;Eukaryota;Opisthokonta;Metazoa;Eumetazoa;Bilateria;Protostomia;  
 Spiralia;Lophotrochozoa;Annelida;Clitellata;Hirudinea;Rhynchobdellida;Glo  
 ssiphoniidae;Helobdella;Helobdella robusta  
 UdeM00000021745 202533 251.1 UdeM00000021745 XP\_035218899.1 40.5  
 304 176 3 1 299 165 468 1.70E-63 251.1 202533  
 cellular  
 organisms;Eukaryota;Opisthokonta;Metazoa;Eumetazoa;Bilateria;Protostomia;  
 Ecdysozoa;Panarthropoda;Arthropoda;Chelicerata;Arachnida;Araneae;Araneomo  
 rphae;Entelegynae;Eresoidea;Eresidae;Stegodyphus;Stegodyphus dumicola  
 UdeM00000021747 6579 501.9 UdeM00000021747 XP\_033725536.1 62.7 373  
 124 3 1 358 639 1011 6.70E-139 501.9 6579 cellular  
 organisms;Eukaryota;Opisthokonta;Metazoa;Eumetazoa;Bilateria;Protostomia;  
 Spiralia;Lophotrochozoa;Mollusca;Bivalvia;Autobranchia;Pteriomorphia;Pect  
 inida;Pectinoidea;Pectinidae;Pecten;Pecten maximus  
 UdeM00000021748 29159 451.4 UdeM00000021748 XP\_034322015.1 66 353  
 117 1 321 670 225 577 1.90E-123 451.4 29159 cellular  
 organisms;Eukaryota;Opisthokonta;Metazoa;Eumetazoa;Bilateria;Protostomia;  
 Spiralia;Lophotrochozoa;Mollusca;Bivalvia;Autobranchia;Pteriomorphia;Ostr  
 eida;Ostreoidea;Ostreidae;Crassostrea;Crassostrea gigas  
 UdeM00000021749 6596 238.4 UdeM00000021749 XP\_045183144.1 36.2 505  
 257 14 3 477 62 531 1.80E-59 238.4 6596 cellular  
 organisms;Eukaryota;Opisthokonta;Metazoa;Eumetazoa;Bilateria;Protostomia;  
 Spiralia;Lophotrochozoa;Mollusca;Bivalvia;Autobranchia;Heteroconchia;Euhe  
 terodonta;Imparidentia;Venerida;Veneroidea;Veneridae;Mercenaria;Mercenari  
 a mercenaria  
 UdeM00000021750 6579 884.8 UdeM00000021750 XP\_033725536.1 58.1 756  
 306 5 130 877 259 1011 9.00E-254 884.8 6579 cellular  
 organisms;Eukaryota;Opisthokonta;Metazoa;Eumetazoa;Bilateria;Protostomia;  
 Spiralia;Lophotrochozoa;Mollusca;Bivalvia;Autobranchia;Pteriomorphia;Pect  
 inida;Pectinoidea;Pectinidae;Pecten;Pecten maximus  
 UdeM00000021752 6596 309.3 UdeM00000021752 XP\_045183396.1 70.3 202  
 59 1 1 202 539 739 3.60E-81 309.3 6596 cellular  
 organisms;Eukaryota;Opisthokonta;Metazoa;Eumetazoa;Bilateria;Protostomia;  
 Spiralia;Lophotrochozoa;Mollusca;Bivalvia;Autobranchia;Heteroconchia;Euhe

terodonta;Imparidentia;Venerida;Veneroidea;Veneridae;Mercenaria;Mercenaria mercenaria  
 UdeM00000021751 6579 926.8 UdeM00000021751 XP\_033725535.1 61.7 749  
 273 5 133 869 285 1031 2.00E-266 926.8 6579 cellular  
 organisms;Eukaryota;Opisthokonta;Metazoa;Eumetazoa;Bilateria;Protostomia;  
 Spiralia;Lophotrochozoa;Mollusca;Bivalvia;Autobranchia;Pteriomorpha;Pectinida;  
 Pectinoidea;Pectinidae;Pecten;Pecten maximus  
 UdeM00000021753 6579 926 UdeM00000021753 XP\_033725535.1 61.5 749  
 272 5 26 761 286 1031 3.10E-266 926 6579 cellular  
 organisms;Eukaryota;Opisthokonta;Metazoa;Eumetazoa;Bilateria;Protostomia;  
 Spiralia;Lophotrochozoa;Mollusca;Bivalvia;Autobranchia;Pteriomorpha;Pectinida;  
 Pectinoidea;Pectinidae;Pecten;Pecten maximus  
 UdeM00000021755 6573 567 UdeM00000021755 XP\_021341211.1 62.9 466  
 137 4 33 491 39 475 2.30E-158 567 6573 cellular  
 organisms;Eukaryota;Opisthokonta;Metazoa;Eumetazoa;Bilateria;Protostomia;  
 Spiralia;Lophotrochozoa;Mollusca;Bivalvia;Autobranchia;Pteriomorpha;Pectinida;  
 Pectinoidea;Pectinidae;Mizuhopecten;Mizuhopecten yessoensis  
 UdeM00000021756 6596 331.6 UdeM00000021756 XP\_045183782.1 50.2 311  
 150 4 83 389 74 383 1.30E-87 331.6 6596 cellular  
 organisms;Eukaryota;Opisthokonta;Metazoa;Eumetazoa;Bilateria;Protostomia;  
 Spiralia;Lophotrochozoa;Mollusca;Bivalvia;Autobranchia;Heteroconchia;Euheterodonta;  
 Imparidentia;Venerida;Veneroidea;Veneridae;Mercenaria;Mercenaria mercenaria  
 UdeM00000021759 29159 65.1 UdeM00000021759 XP\_034329457.1 44.4 72  
 35 1 52 123 451 517 7.70E-08 65.1 29159 cellular  
 organisms;Eukaryota;Opisthokonta;Metazoa;Eumetazoa;Bilateria;Protostomia;  
 Spiralia;Lophotrochozoa;Mollusca;Bivalvia;Autobranchia;Pteriomorpha;Ostreida;  
 Ostreoidea;Ostreidae;Crassostrea;Crassostrea gigas  
 UdeM00000021760 6596 167.5 UdeM00000021760 XP\_045157080.1 53.3 150  
 70 0 91 240 93 242 2.30E-38 167.5 6596 cellular  
 organisms;Eukaryota;Opisthokonta;Metazoa;Eumetazoa;Bilateria;Protostomia;  
 Spiralia;Lophotrochozoa;Mollusca;Bivalvia;Autobranchia;Heteroconchia;Euheterodonta;  
 Imparidentia;Venerida;Veneroidea;Veneridae;Mercenaria;Mercenaria mercenaria  
 UdeM00000021762 6596 97.1 UdeM00000021762 XP\_045210122.1 35.2 145  
 86 5 11 150 43 184 2.20E-17 97.1 6596 cellular  
 organisms;Eukaryota;Opisthokonta;Metazoa;Eumetazoa;Bilateria;Protostomia;  
 Spiralia;Lophotrochozoa;Mollusca;Bivalvia;Autobranchia;Heteroconchia;Euheterodonta;  
 Imparidentia;Venerida;Veneroidea;Veneridae;Mercenaria;Mercenaria mercenaria  
 UdeM00000021763 6579 148.3 UdeM00000021763 XP\_033747151.1 41.8 182  
 98 3 1081 1258 35 212 6.60E-32 148.3 6579 cellular  
 organisms;Eukaryota;Opisthokonta;Metazoa;Eumetazoa;Bilateria;Protostomia;  
 Spiralia;Lophotrochozoa;Mollusca;Bivalvia;Autobranchia;Pteriomorpha;Pectinida;  
 Pectinoidea;Pectinidae;Pecten;Pecten maximus  
 UdeM00000021764 6579 154.5 UdeM00000021764 XP\_033747151.1 43.2 183  
 94 4 144 321 35 212 2.40E-34 154.5 6579 cellular  
 organisms;Eukaryota;Opisthokonta;Metazoa;Eumetazoa;Bilateria;Protostomia;  
 Spiralia;Lophotrochozoa;Mollusca;Bivalvia;Autobranchia;Pteriomorpha;Pectinida;  
 Pectinoidea;Pectinidae;Pecten;Pecten maximus  
 UdeM00000021765 6579 154.5 UdeM00000021765 XP\_033747151.1 43.2 183  
 94 4 113 290 35 212 2.20E-34 154.5 6579 cellular  
 organisms;Eukaryota;Opisthokonta;Metazoa;Eumetazoa;Bilateria;Protostomia;



Spiralia;Lophotrochozoa;Mollusca;Bivalvia;Autobranchia;Pteriomorpha;Pectinida;Pectinoidea;Pectinidae;Pecten;Pecten maximus

UdeM00000028350 6596 128.6 UdeM00000028350 XP\_045166864.1 45.3 117  
64 0 24 140 35 151 1.00E-26 128.6 6596 cellular  
organisms;Eukaryota;Opisthokonta;Metazoa;Eumetazoa;Bilateria;Protostomia;  
Spiralia;Lophotrochozoa;Mollusca;Bivalvia;Autobranchia;Heteroconchia;Euhe  
terodonta;Imparidentia;Venerida;Veneroidea;Veneridae;Mercenaria;Mercenari  
a mercenaria

UdeM00000028353 6596 79.7 UdeM00000028353 XP\_045166864.1 40.7 108  
52 4 2 99 296 401 2.40E-12 79.7 6596 cellular  
organisms;Eukaryota;Opisthokonta;Metazoa;Eumetazoa;Bilateria;Protostomia;  
Spiralia;Lophotrochozoa;Mollusca;Bivalvia;Autobranchia;Heteroconchia;Euhe  
terodonta;Imparidentia;Venerida;Veneroidea;Veneridae;Mercenaria;Mercenari  
a mercenaria

UdeM00000028356 6596 522.3 UdeM00000028356 XP\_045174854.1 67.1 377  
124 0 1 377 1 377 5.20E-145 522.3 6596 cellular  
organisms;Eukaryota;Opisthokonta;Metazoa;Eumetazoa;Bilateria;Protostomia;  
Spiralia;Lophotrochozoa;Mollusca;Bivalvia;Autobranchia;Heteroconchia;Euhe  
terodonta;Imparidentia;Venerida;Veneroidea;Veneridae;Mercenaria;Mercenari  
a mercenaria

UdeM00000028357 6596 503.8 UdeM00000028357 XP\_045174854.1 67.2 363  
119 0 2 364 15 377 1.80E-139 503.8 6596 cellular  
organisms;Eukaryota;Opisthokonta;Metazoa;Eumetazoa;Bilateria;Protostomia;  
Spiralia;Lophotrochozoa;Mollusca;Bivalvia;Autobranchia;Heteroconchia;Euhe  
terodonta;Imparidentia;Venerida;Veneroidea;Veneridae;Mercenaria;Mercenari  
a mercenaria

UdeM00000028358 6596 85.9 UdeM00000028358 XP\_045174627.1 33.2 193  
96 7 9 195 7 172 6.60E-14 85.9 6596 cellular  
organisms;Eukaryota;Opisthokonta;Metazoa;Eumetazoa;Bilateria;Protostomia;  
Spiralia;Lophotrochozoa;Mollusca;Bivalvia;Autobranchia;Heteroconchia;Euhe  
terodonta;Imparidentia;Venerida;Veneroidea;Veneridae;Mercenaria;Mercenari  
a mercenaria

UdeM00000028359 6596 447.2 UdeM00000028359 XP\_045174619.1 33.4 908  
445 12 2 893 300 1063 5.30E-122 447.2 6596 cellular  
organisms;Eukaryota;Opisthokonta;Metazoa;Eumetazoa;Bilateria;Protostomia;  
Spiralia;Lophotrochozoa;Mollusca;Bivalvia;Autobranchia;Heteroconchia;Euhe  
terodonta;Imparidentia;Venerida;Veneroidea;Veneridae;Mercenaria;Mercenari  
a mercenaria

UdeM00000028360 6596 1272.3 UdeM00000028360 XP\_045174627.1 41.1  
1873 988 26 3 1858 1126 2900 0.00E+00 1272.3 6596  
cellular  
organisms;Eukaryota;Opisthokonta;Metazoa;Eumetazoa;Bilateria;Protostomia;  
Spiralia;Lophotrochozoa;Mollusca;Bivalvia;Autobranchia;Heteroconchia;Euhe  
terodonta;Imparidentia;Venerida;Veneroidea;Veneridae;Mercenaria;Mercenari  
a mercenaria

UdeM00000028361 45264 114.8 UdeM00000028361 XP\_044175508.1 31.9 354  
144 9 5 270 9 353 1.90E-22 114.8 45264 cellular  
organisms;Eukaryota;Opisthokonta;Metazoa;Eumetazoa;Cnidaria;Anthozoa;Hexa  
corallia;Scleractinia;Astrocoeniina;Acroporidae;Acropora;Acropora  
millepora

UdeM00000028362 6579 688 UdeM00000028362 XP\_033753287.1 69.6 474  
140 2 26 498 71 541 1.20E-194 688 6579 cellular  
organisms;Eukaryota;Opisthokonta;Metazoa;Eumetazoa;Bilateria;Protostomia;

Spiralia;Lophotrochozoa;Mollusca;Bivalvia;Autobranchia;Pteriormorphia;Pectinida;Pectinoidea;Pectinidae;Pecten;Pecten maximus  
UdeM00000028363 7574 223.4 UdeM00000028363 XP\_013401431.1 63 184  
68 0 21 204 558 741 2.70E-55 223.4 7574 cellular  
organisms;Eukaryota;Opisthokonta;Metazoa;Eumetazoa;Bilateria;Protostomia;  
Spiralia;Lophotrochozoa;Brachiopoda;Linguliformea;Lingulata;Lingulida;Linguloidea;Lingulidae;Lingula;Lingula anatina  
UdeM00000028364 6596 426.4 UdeM00000028364 XP\_045177169.1 63.6 313  
108 3 52 359 41 352 3.90E-116 426.4 6596 cellular  
organisms;Eukaryota;Opisthokonta;Metazoa;Eumetazoa;Bilateria;Protostomia;  
Spiralia;Lophotrochozoa;Mollusca;Bivalvia;Autobranchia;Heteroconchia;Euheterodonta;Imparidentia;Venerida;Veneroidea;Veneridae;Mercenaria;Mercenaria mercenaria  
UdeM00000028365 6596 976.5 UdeM00000028365 XP\_045174896.1 72.4 680  
171 7 15 692 8 672 1.80E-281 976.5 6596 cellular  
organisms;Eukaryota;Opisthokonta;Metazoa;Eumetazoa;Bilateria;Protostomia;  
Spiralia;Lophotrochozoa;Mollusca;Bivalvia;Autobranchia;Heteroconchia;Euheterodonta;Imparidentia;Venerida;Veneroidea;Veneridae;Mercenaria;Mercenaria mercenaria  
UdeM00000028366 29159 64.3 UdeM00000028366 XP\_011453142.2 43.5 92  
43 2 1 83 246 337 1.20E-07 64.3 29159 cellular  
organisms;Eukaryota;Opisthokonta;Metazoa;Eumetazoa;Bilateria;Protostomia;  
Spiralia;Lophotrochozoa;Mollusca;Bivalvia;Autobranchia;Pteriormorphia;Ostreida;Ostreoidea;Ostreidae;Crassostrea;Crassostrea gigas  
UdeM00000028367 6596 327.8 UdeM00000028367 XP\_045175083.1 66.4 241  
74 4 1 239 1 236 1.20E-86 327.8 6596 cellular  
organisms;Eukaryota;Opisthokonta;Metazoa;Eumetazoa;Bilateria;Protostomia;  
Spiralia;Lophotrochozoa;Mollusca;Bivalvia;Autobranchia;Heteroconchia;Euheterodonta;Imparidentia;Venerida;Veneroidea;Veneridae;Mercenaria;Mercenaria mercenaria  
UdeM00000028368 6596 162.2 UdeM00000028368 XP\_045175083.1 70.2 104  
31 0 5 108 48 151 4.40E-37 162.2 6596 cellular  
organisms;Eukaryota;Opisthokonta;Metazoa;Eumetazoa;Bilateria;Protostomia;  
Spiralia;Lophotrochozoa;Mollusca;Bivalvia;Autobranchia;Heteroconchia;Euheterodonta;Imparidentia;Venerida;Veneroidea;Veneridae;Mercenaria;Mercenaria mercenaria  
UdeM00000028369 6579 204.9 UdeM00000028369 XP\_033746484.1 40.7 285  
153 7 29 308 28 301 1.50E-49 204.9 6579 cellular  
organisms;Eukaryota;Opisthokonta;Metazoa;Eumetazoa;Bilateria;Protostomia;  
Spiralia;Lophotrochozoa;Mollusca;Bivalvia;Autobranchia;Pteriormorphia;Pectinida;Pectinoidea;Pectinidae;Pecten;Pecten maximus  
UdeM00000028370 29159 104 UdeM00000028370 XP\_011414701.2 29.1 350  
195 11 3 307 1 342 3.70E-19 104 29159 cellular  
organisms;Eukaryota;Opisthokonta;Metazoa;Eumetazoa;Bilateria;Protostomia;  
Spiralia;Lophotrochozoa;Mollusca;Bivalvia;Autobranchia;Pteriormorphia;Ostreida;Ostreoidea;Ostreidae;Crassostrea;Crassostrea gigas  
UdeM00000028371 6596 345.1 UdeM00000028371 XP\_045174871.1 89.4 180  
18 1 1 179 90 269 5.30E-92 345.1 6596 cellular  
organisms;Eukaryota;Opisthokonta;Metazoa;Eumetazoa;Bilateria;Protostomia;  
Spiralia;Lophotrochozoa;Mollusca;Bivalvia;Autobranchia;Heteroconchia;Euheterodonta;Imparidentia;Venerida;Veneroidea;Veneridae;Mercenaria;Mercenaria mercenaria  
UdeM00000028372 6573 422.2 UdeM00000028372 XP\_021348000.1 55.6 376  
94 2 477 851 49 352 1.60E-114 422.2 6573 cellular

organisms;Eukaryota;Opisthokonta;Metazoa;Eumetazoa;Bilateria;Protostomia;Spiralia;Lophotrochozoa;Mollusca;Bivalvia;Autobranchia;Pteriormorphia;Pectinida;Pectinoidea;Pectinidae;Mizuhopecten;Mizuhopecten yessoensis

UdeM00000028373 400727 112.8 UdeM00000028373 XP\_025108466.1 53.6  
110 50 1 3 112 235 343 4.00E-22 112.8 400727

cellular

organisms;Eukaryota;Opisthokonta;Metazoa;Eumetazoa;Bilateria;Protostomia;Spiralia;Lophotrochozoa;Mollusca;Gastropoda;Caenogastropoda;Architaenioglossa;Ampullarioidea;Ampullariidae;Pomacea;Pomacea canaliculata

UdeM00000028374 10224 70.1 UdeM00000028374 XP\_006813844.1 41.1 90  
53 0 1 90 128 217 1.70E-09 70.1 10224 cellular

organisms;Eukaryota;Opisthokonta;Metazoa;Eumetazoa;Bilateria;Deuterostomia;Hemichordata;Enteropneusta;Harrimaniidae;Saccoglossus;Saccoglossus

kowalevskii

UdeM00000028375 1735272 280 UdeM00000028375 XP\_041356130.1 32.8  
473 282 8 106 549 865 1330 6.60E-72 280 1735272

cellular

organisms;Eukaryota;Opisthokonta;Metazoa;Eumetazoa;Bilateria;Protostomia;Spiralia;Lophotrochozoa;Mollusca;Gastropoda;Neomphalina;Neomphaloidea;Peltospiridae;Gigantopelta;Gigantopelta aegis

UdeM00000028376 6596 900.6 UdeM00000028376 XP\_045174915.1 47.5 972  
484 9 30 993 36 989 1.80E-258 900.6 6596 cellular

organisms;Eukaryota;Opisthokonta;Metazoa;Eumetazoa;Bilateria;Protostomia;Spiralia;Lophotrochozoa;Mollusca;Bivalvia;Autobranchia;Heteroconchia;Euheterodonta;Imparidentia;Venerida;Veneroidea;Veneridae;Mercenaria;Mercenaria mercenaria

UdeM00000028377 6596 792.7 UdeM00000028377 XP\_045174915.1 46.8 884  
448 7 1 879 123 989 4.70E-226 792.7 6596 cellular

organisms;Eukaryota;Opisthokonta;Metazoa;Eumetazoa;Bilateria;Protostomia;Spiralia;Lophotrochozoa;Mollusca;Bivalvia;Autobranchia;Heteroconchia;Euheterodonta;Imparidentia;Venerida;Veneroidea;Veneridae;Mercenaria;Mercenaria mercenaria

UdeM00000028378 210409 96.3 UdeM00000028378 XP\_045122094.1 73.6  
53 14 0 99 151 333 385 3.60E-17 96.3 210409

cellular

organisms;Eukaryota;Opisthokonta;Metazoa;Eumetazoa;Bilateria;Protostomia;Ecdysozoa;Panarthropoda;Arthropoda;Mandibulata;Pancrustacea;Crustacea;Multicrustacea;Malacostraca;Eumalacostraca;Eucarida;Decapoda;Pleocyemata;Brachyura;Eubrachyura;Heterotremata;Portunoidea;Portunidae;Portunus;Portunus trituberculatus

UdeM00000028379 6579 583.9 UdeM00000028379 XP\_033751467.1 71.8 387  
103 1 9 389 10 396 1.60E-163 583.9 6579 cellular

organisms;Eukaryota;Opisthokonta;Metazoa;Eumetazoa;Bilateria;Protostomia;Spiralia;Lophotrochozoa;Mollusca;Bivalvia;Autobranchia;Pteriormorphia;Pectinida;Pectinoidea;Pectinidae;Pecten;Pecten maximus

UdeM00000028380 6565 153.3 UdeM00000028380 XP\_022297447.1 53 132  
61 1 1 131 150 281 2.20E-34 153.3 6565 cellular

organisms;Eukaryota;Opisthokonta;Metazoa;Eumetazoa;Bilateria;Protostomia;Spiralia;Lophotrochozoa;Mollusca;Bivalvia;Autobranchia;Pteriormorphia;Ostreida;Ostreoidea;Ostreidae;Crassostrea;Crassostrea virginica

UdeM00000028381 6596 392.1 UdeM00000028381 XP\_045197974.1 36.1 778  
333 18 1 756 1 636 1.60E-105 392.1 6596 cellular

organisms;Eukaryota;Opisthokonta;Metazoa;Eumetazoa;Bilateria;Protostomia;Spiralia;Lophotrochozoa;Mollusca;Bivalvia;Autobranchia;Heteroconchia;Euheterodonta

terodonta;Imparidentia;Venerida;Veneroidea;Veneridae;Mercenaria;Mercenaria mercenaria

UdeM00000028382 1735272 68.6 UdeM00000028382 XP\_041367400.1 51.2  
84 39 2 1 84 1 82 4.80E-09 68.6 1735272  
cellular

organisms;Eukaryota;Opisthokonta;Metazoa;Eumetazoa;Bilateria;Protostomia;Spiralia;Lophotrochozoa;Mollusca;Gastropoda;Neomphalina;Neomphaloidea;Peltospiridae;Gigantopelta;Gigantopelta aegis

UdeM00000028383 6596 181.4 UdeM00000028383 XP\_045175452.1 66.2 136  
42 3 214 346 208 342 2.90E-42 181.4 6596 cellular

organisms;Eukaryota;Opisthokonta;Metazoa;Eumetazoa;Bilateria;Protostomia;Spiralia;Lophotrochozoa;Mollusca;Bivalvia;Autobranchia;Heteroconchia;Euheterodonta;Imparidentia;Venerida;Veneroidea;Veneridae;Mercenaria;Mercenaria mercenaria

UdeM00000028384 6596 224.9 UdeM00000028384 XP\_045177247.1 66.7 159  
52 1 8 165 106 264 7.30E-56 224.9 6596 cellular

organisms;Eukaryota;Opisthokonta;Metazoa;Eumetazoa;Bilateria;Protostomia;Spiralia;Lophotrochozoa;Mollusca;Bivalvia;Autobranchia;Heteroconchia;Euheterodonta;Imparidentia;Venerida;Veneroidea;Veneridae;Mercenaria;Mercenaria mercenaria

UdeM00000028385 6596 114.4 UdeM00000028385 XP\_045177247.1 62.5 96  
34 1 11 104 10 105 1.00E-22 114.4 6596 cellular

organisms;Eukaryota;Opisthokonta;Metazoa;Eumetazoa;Bilateria;Protostomia;Spiralia;Lophotrochozoa;Mollusca;Bivalvia;Autobranchia;Heteroconchia;Euheterodonta;Imparidentia;Venerida;Veneroidea;Veneridae;Mercenaria;Mercenaria mercenaria

UdeM00000028386 37653 161.8 UdeM00000028386 XP\_014784652.1 72 118  
17 2 1 118 1 102 1.20E-36 161.8 37653 cellular

organisms;Eukaryota;Opisthokonta;Metazoa;Eumetazoa;Bilateria;Protostomia;Spiralia;Lophotrochozoa;Mollusca;Cephalopoda;Coleoidea;Octopodiformes;Octopoda;Incirrata;Octopodidae;Octopus;Octopus bimaculoides

UdeM00000028387 6573 473 UdeM00000028387 XP\_021345838.1 83.3 258  
43 0 22 279 121 378 2.60E-130 473 6573 cellular

organisms;Eukaryota;Opisthokonta;Metazoa;Eumetazoa;Bilateria;Protostomia;Spiralia;Lophotrochozoa;Mollusca;Bivalvia;Autobranchia;Pteriomorphia;Pectinida;Pectinoidea;Pectinidae;Mizuhopecten;Mizuhopecten yessoensis

UdeM00000028388 37653 224.9 UdeM00000028388 XP\_014789154.1 78.4 134  
23 2 1 134 1 128 1.10E-55 224.9 37653 cellular

organisms;Eukaryota;Opisthokonta;Metazoa;Eumetazoa;Bilateria;Protostomia;Spiralia;Lophotrochozoa;Mollusca;Cephalopoda;Coleoidea;Octopodiformes;Octopoda;Incirrata;Octopodidae;Octopus;Octopus bimaculoides

UdeM00000028389 6565 86.3 UdeM00000028389 XP\_022297447.1 28 250  
73 6 1 143 117 366 3.60E-14 86.3 6565 cellular

organisms;Eukaryota;Opisthokonta;Metazoa;Eumetazoa;Bilateria;Protostomia;Spiralia;Lophotrochozoa;Mollusca;Bivalvia;Autobranchia;Pteriomorphia;Ostreida;Ostreoidea;Ostreidae;Crassostrea;Crassostrea virginica

UdeM00000028390 7739 85.5 UdeM00000028390 XP\_035686596.1 27.5 262  
132 8 1 213 1 253 9.30E-14 85.5 7739 cellular

organisms;Eukaryota;Opisthokonta;Metazoa;Eumetazoa;Bilateria;Deuterostomia;Chordata;Cephalochordata;Leptocardii;Amphioxiformes;Branchiostomidae;Branchiostoma;Branchiostoma floridae

UdeM00000028391 225164 318.9 UdeM00000028391 XP\_009051441.1 88.3  
180 20 1 1 179 1 180 4.00E-84 318.9 225164  
cellular

organisms;Eukaryota;Opisthokonta;Metazoa;Eumetazoa;Bilateria;Protostomia; Spiralia;Lophotrochozoa;Mollusca;Gastropoda;Patellogastropoda;Lottioidea; Lottiidae;Lottia;Lottia gigantea

UdeM00000028392 6579 370.9 UdeM00000028392 XP\_033751567.1 49.8 412  
187 7 8 415 99 494 2.10E-99 370.9 6579 cellular

organisms;Eukaryota;Opisthokonta;Metazoa;Eumetazoa;Bilateria;Protostomia; Spiralia;Lophotrochozoa;Mollusca;Bivalvia;Autobranchia;Pteriomorpha;Pect inida;Pectinoidea;Pectinidae;Pecten;Pecten maximus

UdeM00000028393 6579 379.8 UdeM00000028393 XP\_033751567.1 49 433  
200 8 88 516 79 494 5.60E-102 379.8 6579 cellular

organisms;Eukaryota;Opisthokonta;Metazoa;Eumetazoa;Bilateria;Protostomia; Spiralia;Lophotrochozoa;Mollusca;Bivalvia;Autobranchia;Pteriomorpha;Pect inida;Pectinoidea;Pectinidae;Pecten;Pecten maximus

UdeM00000036822 6596 142.5 UdeM00000036822 XP\_045201962.1 42.2 185  
83 4 103 263 73 257 9.90E-31 142.5 6596 cellular

organisms;Eukaryota;Opisthokonta;Metazoa;Eumetazoa;Bilateria;Protostomia; Spiralia;Lophotrochozoa;Mollusca;Bivalvia;Autobranchia;Heteroconchia;Euhe terodonta;Imparidentia;Venerida;Veneroidea;Veneridae;Mercenaria;Mercenari a mercenaria

UdeM00000036823 6565 149.1 UdeM00000036823 XP\_022321780.1 47.3 146  
75 2 5 148 6 151 5.00E-33 149.1 6565 cellular

organisms;Eukaryota;Opisthokonta;Metazoa;Eumetazoa;Bilateria;Protostomia; Spiralia;Lophotrochozoa;Mollusca;Bivalvia;Autobranchia;Pteriomorpha;Ostr eida;Ostreoidea;Ostreidae;Crassostrea;Crassostrea virginica

UdeM00000036824 6565 152.5 UdeM00000036824 XP\_022321780.1 45.7 173  
81 4 4 163 5 177 4.60E-34 152.5 6565 cellular

organisms;Eukaryota;Opisthokonta;Metazoa;Eumetazoa;Bilateria;Protostomia; Spiralia;Lophotrochozoa;Mollusca;Bivalvia;Autobranchia;Pteriomorpha;Ostr eida;Ostreoidea;Ostreidae;Crassostrea;Crassostrea virginica

UdeM00000036825 7574 152.9 UdeM00000036825 XP\_013421302.1 44.1 170  
84 4 2 162 3 170 3.50E-34 152.9 7574 cellular

organisms;Eukaryota;Opisthokonta;Metazoa;Eumetazoa;Bilateria;Protostomia; Spiralia;Lophotrochozoa;Brachiopoda;Linguliformea;Lingulata;Lingulida;Lin guloidea;Lingulidae;Lingula;Lingula anatina

UdeM00000036826 6579 149.1 UdeM00000036826 XP\_033750443.1 44.2 154  
85 1 2 154 3 156 5.00E-33 149.1 6579 cellular

organisms;Eukaryota;Opisthokonta;Metazoa;Eumetazoa;Bilateria;Protostomia; Spiralia;Lophotrochozoa;Mollusca;Bivalvia;Autobranchia;Pteriomorpha;Pect inida;Pectinoidea;Pectinidae;Pecten;Pecten maximus

UdeM00000036827 6579 151.8 UdeM00000036827 XP\_033750443.1 44.8 154  
84 1 2 154 3 156 7.80E-34 151.8 6579 cellular

organisms;Eukaryota;Opisthokonta;Metazoa;Eumetazoa;Bilateria;Protostomia; Spiralia;Lophotrochozoa;Mollusca;Bivalvia;Autobranchia;Pteriomorpha;Pect inida;Pectinoidea;Pectinidae;Pecten;Pecten maximus

UdeM00000036828 6579 145.2 UdeM00000036828 XP\_033750443.1 43.5 154  
86 1 2 154 3 156 7.30E-32 145.2 6579 cellular

organisms;Eukaryota;Opisthokonta;Metazoa;Eumetazoa;Bilateria;Protostomia; Spiralia;Lophotrochozoa;Mollusca;Bivalvia;Autobranchia;Pteriomorpha;Pect inida;Pectinoidea;Pectinidae;Pecten;Pecten maximus

UdeM00000036829 6579 145.2 UdeM00000036829 XP\_033750443.1 43.5 154  
86 1 2 154 3 156 7.30E-32 145.2 6579 cellular

organisms;Eukaryota;Opisthokonta;Metazoa;Eumetazoa;Bilateria;Protostomia; Spiralia;Lophotrochozoa;Mollusca;Bivalvia;Autobranchia;Pteriomorpha;Pect inida;Pectinoidea;Pectinidae;Pecten;Pecten maximus

UdeM00000036830 6579 145.2 UdeM00000036830 XP\_033750443.1 43.5 154  
 86 1 2 154 3 156 7.30E-32 145.2 6579 cellular  
 organisms;Eukaryota;Opisthokonta;Metazoa;Eumetazoa;Bilateria;Protostomia;  
 Spiralia;Lophotrochozoa;Mollusca;Bivalvia;Autobranchia;Pteriormorphia;Pect  
 inida;Pectinoidea;Pectinidae;Pecten;Pecten maximus  
 UdeM00000036831 7574 149.4 UdeM00000036831 XP\_013421302.1 43.9 164  
 82 3 2 156 3 165 3.90E-33 149.4 7574 cellular  
 organisms;Eukaryota;Opisthokonta;Metazoa;Eumetazoa;Bilateria;Protostomia;  
 Spiralia;Lophotrochozoa;Brachiopoda;Linguliformea;Lingulata;Lingulida;Lin  
 guloidea;Lingulidae;Lingula;Lingula anatina  
 UdeM00000036832 1735272 80.5 UdeM00000036832 XP\_041347671.1 25.9  
 266 173 7 16 273 16 265 3.90E-12 80.5 1735272  
 cellular  
 organisms;Eukaryota;Opisthokonta;Metazoa;Eumetazoa;Bilateria;Protostomia;  
 Spiralia;Lophotrochozoa;Mollusca;Gastropoda;Neomphalina;Neomphaloidea;Pel  
 tospiridae;Gigantopelta;Gigantopelta aegis  
 UdeM00000036833 6596 716.1 UdeM00000036833 XP\_045209932.1 58.7 566  
 222 5 36 597 84 641 3.80E-203 716.1 6596 cellular  
 organisms;Eukaryota;Opisthokonta;Metazoa;Eumetazoa;Bilateria;Protostomia;  
 Spiralia;Lophotrochozoa;Mollusca;Bivalvia;Autobranchia;Heteroconchia;Euhe  
 terodonta;Imparidentia;Venerida;Veneroidea;Veneridae;Mercenaria;Mercenari  
 a mercenaria  
 UdeM00000036834 29159 356.7 UdeM00000036834 XP\_011455099.1 82.8 227  
 30 3 1 225 1 220 2.20E-95 356.7 29159 cellular  
 organisms;Eukaryota;Opisthokonta;Metazoa;Eumetazoa;Bilateria;Protostomia;  
 Spiralia;Lophotrochozoa;Mollusca;Bivalvia;Autobranchia;Pteriormorphia;Ostr  
 eida;Ostreoidea;Ostreidae;Crassostrea;Crassostrea gigas  
 UdeM00000036835 6596 62.8 UdeM00000036835 XP\_045201869.1 43.7 71  
 40 0 11 81 622 692 2.90E-07 62.8 6596 cellular  
 organisms;Eukaryota;Opisthokonta;Metazoa;Eumetazoa;Bilateria;Protostomia;  
 Spiralia;Lophotrochozoa;Mollusca;Bivalvia;Autobranchia;Heteroconchia;Euhe  
 terodonta;Imparidentia;Venerida;Veneroidea;Veneridae;Mercenaria;Mercenari  
 a mercenaria  
 UdeM00000036837 6596 301.6 UdeM00000036837 XP\_045201869.1 30.7 709  
 452 12 11 699 10 699 2.60E-78 301.6 6596 cellular  
 organisms;Eukaryota;Opisthokonta;Metazoa;Eumetazoa;Bilateria;Protostomia;  
 Spiralia;Lophotrochozoa;Mollusca;Bivalvia;Autobranchia;Heteroconchia;Euhe  
 terodonta;Imparidentia;Venerida;Veneroidea;Veneridae;Mercenaria;Mercenari  
 a mercenaria  
 UdeM00000036838 6596 187.6 UdeM00000036838 XP\_045156697.1 31.7 454  
 275 9 1 439 269 702 3.60E-44 187.6 6596 cellular  
 organisms;Eukaryota;Opisthokonta;Metazoa;Eumetazoa;Bilateria;Protostomia;  
 Spiralia;Lophotrochozoa;Mollusca;Bivalvia;Autobranchia;Heteroconchia;Euhe  
 terodonta;Imparidentia;Venerida;Veneroidea;Veneridae;Mercenaria;Mercenari  
 a mercenaria  
 UdeM00000036839 6596 110.2 UdeM00000036839 XP\_045158373.1 31.7 227  
 139 6 8 223 7 228 3.70E-21 110.2 6596 cellular  
 organisms;Eukaryota;Opisthokonta;Metazoa;Eumetazoa;Bilateria;Protostomia;  
 Spiralia;Lophotrochozoa;Mollusca;Bivalvia;Autobranchia;Heteroconchia;Euhe  
 terodonta;Imparidentia;Venerida;Veneroidea;Veneridae;Mercenaria;Mercenari  
 a mercenaria  
 UdeM00000036840 6596 125.9 UdeM00000036840 XP\_045156924.1 33.6 232  
 140 3 92 317 464 687 9.40E-26 125.9 6596 cellular  
 organisms;Eukaryota;Opisthokonta;Metazoa;Eumetazoa;Bilateria;Protostomia;

Spiralia;Lophotrochozoa;Mollusca;Bivalvia;Autobranchia;Heteroconchia;Euherodonta;Imparidentia;Venerida;Veneroidea;Veneridae;Mercenaria;Mercenaria mercenaria

UdeM00000036841 6596 105.5 UdeM00000036841 XP\_045171977.1 33.7 202  
127 4 4 201 3 201 7.90E-20 105.5 6596 cellular

organisms;Eukaryota;Opisthokonta;Metazoa;Eumetazoa;Bilateria;Protostomia;Spiralia;Lophotrochozoa;Mollusca;Bivalvia;Autobranchia;Heteroconchia;Euherodonta;Imparidentia;Venerida;Veneroidea;Veneridae;Mercenaria;Mercenaria mercenaria

UdeM00000036842 6596 313.5 UdeM00000036842 XP\_045201869.1 31.8 717  
448 10 4 699 3 699 6.70E-82 313.5 6596 cellular

organisms;Eukaryota;Opisthokonta;Metazoa;Eumetazoa;Bilateria;Protostomia;Spiralia;Lophotrochozoa;Mollusca;Bivalvia;Autobranchia;Heteroconchia;Euherodonta;Imparidentia;Venerida;Veneroidea;Veneridae;Mercenaria;Mercenaria mercenaria

UdeM00000036843 6596 298.1 UdeM00000036843 XP\_045201869.1 31.2 718  
437 17 11 699 10 699 2.90E-77 298.1 6596 cellular

organisms;Eukaryota;Opisthokonta;Metazoa;Eumetazoa;Bilateria;Protostomia;Spiralia;Lophotrochozoa;Mollusca;Bivalvia;Autobranchia;Heteroconchia;Euherodonta;Imparidentia;Venerida;Veneroidea;Veneridae;Mercenaria;Mercenaria mercenaria

UdeM00000036844 6596 268.9 UdeM00000036844 XP\_045201222.1 75.8 182  
44 0 5 186 8 189 7.10E-69 268.9 6596 cellular

organisms;Eukaryota;Opisthokonta;Metazoa;Eumetazoa;Bilateria;Protostomia;Spiralia;Lophotrochozoa;Mollusca;Bivalvia;Autobranchia;Heteroconchia;Euherodonta;Imparidentia;Venerida;Veneroidea;Veneridae;Mercenaria;Mercenaria mercenaria

UdeM00000036845 1735272 349 UdeM00000036845 XP\_041352378.1 63.7  
259 93 1 1 259 1 258 5.30E-93 349 1735272  
cellular

organisms;Eukaryota;Opisthokonta;Metazoa;Eumetazoa;Bilateria;Protostomia;Spiralia;Lophotrochozoa;Mollusca;Gastropoda;Neomphalina;Neomphaloidea;Peltospiridae;Gigantopelta;Gigantopelta aegis

UdeM00000036846 6596 707.2 UdeM00000036846 XP\_045199863.1 70.8 586  
142 5 1 567 1 576 1.80E-200 707.2 6596 cellular

organisms;Eukaryota;Opisthokonta;Metazoa;Eumetazoa;Bilateria;Protostomia;Spiralia;Lophotrochozoa;Mollusca;Bivalvia;Autobranchia;Heteroconchia;Euherodonta;Imparidentia;Venerida;Veneroidea;Veneridae;Mercenaria;Mercenaria mercenaria

UdeM00000036847 6596 706.1 UdeM00000036847 XP\_045199863.1 71 582  
144 5 1 563 1 576 4.10E-200 706.1 6596 cellular

organisms;Eukaryota;Opisthokonta;Metazoa;Eumetazoa;Bilateria;Protostomia;Spiralia;Lophotrochozoa;Mollusca;Bivalvia;Autobranchia;Heteroconchia;Euherodonta;Imparidentia;Venerida;Veneroidea;Veneridae;Mercenaria;Mercenaria mercenaria

UdeM00000036849 6596 750.7 UdeM00000036849 XP\_045199863.1 77.3 493  
83 5 12 483 623 1107 1.10E-213 750.7 6596 cellular

organisms;Eukaryota;Opisthokonta;Metazoa;Eumetazoa;Bilateria;Protostomia;Spiralia;Lophotrochozoa;Mollusca;Bivalvia;Autobranchia;Heteroconchia;Euherodonta;Imparidentia;Venerida;Veneroidea;Veneridae;Mercenaria;Mercenaria mercenaria

UdeM00000036853 225164 481.1 UdeM00000036853 XP\_009050498.1 40  
605 336 6 32 615 23 621 2.10E-132 481.1 225164  
cellular

organisms;Eukaryota;Opisthokonta;Metazoa;Eumetazoa;Bilateria;Protostomia; Spiralia;Lophotrochozoa;Mollusca;Gastropoda;Patellogastropoda;Lottioidea; Lottiidae;Lottia;Lottia gigantea

UdeM00000036857 6596 436 UdeM00000036857 XP\_045200044.1 55.8 387  
167 3 14 399 16 399 5.00E-119 436 6596 cellular

organisms;Eukaryota;Opisthokonta;Metazoa;Eumetazoa;Bilateria;Protostomia; Spiralia;Lophotrochozoa;Mollusca;Bivalvia;Autobranchia;Heteroconchia;Euhe terodonta;Imparidentia;Venerida;Veneroidea;Veneridae;Mercenaria;Mercenari a mercenaria

UdeM00000036858 6596 466.5 UdeM00000036858 XP\_045200044.1 56.9 406  
162 6 1 400 1 399 3.50E-128 466.5 6596 cellular

organisms;Eukaryota;Opisthokonta;Metazoa;Eumetazoa;Bilateria;Protostomia; Spiralia;Lophotrochozoa;Mollusca;Bivalvia;Autobranchia;Heteroconchia;Euhe terodonta;Imparidentia;Venerida;Veneroidea;Veneridae;Mercenaria;Mercenari a mercenaria

UdeM00000036860 1735272 248.1 UdeM00000036860 XP\_041372570.1 54.7  
201 78 1 1 188 94 294 9.20E-63 248.1 1735272  
cellular

organisms;Eukaryota;Opisthokonta;Metazoa;Eumetazoa;Bilateria;Protostomia; Spiralia;Lophotrochozoa;Mollusca;Gastropoda;Neomphalina;Neomphaloidea;Pel tospiridae;Gigantopelta;Gigantopelta aegis

UdeM00000036861 259920 146.7 UdeM00000036861 XP\_020388871.1 60.2  
98 39 0 3 100 161 258 1.50E-32 146.7 259920

cellular

organisms;Eukaryota;Opisthokonta;Metazoa;Eumetazoa;Bilateria;Deuterostomi a;Chordata;Craniata;Vertebrata;Gnathostomata;Chondrichthyes;Elasmobranchi i;Selachii;Galeomorphii;Galeoidea;Orectolobiformes;Rhincodontidae;Rhincod on;Rhincodon typus

UdeM00000036862 441366 126.7 UdeM00000036862 XP\_028318793.1 53.5  
101 47 0 2 102 657 757 1.70E-26 126.7 441366

cellular

organisms;Eukaryota;Opisthokonta;Metazoa;Eumetazoa;Bilateria;Deuterostomi a;Chordata;Craniata;Vertebrata;Gnathostomata;Teleostomi;Euteleostomi;Acti nopterygii;Actinopteri;Neopterygii;Teleostei;Osteoglossocephalai;Clupeoce phala;Euteleosteomorpha;Neoteleostei;Eurypterygia;Ctenosquamata;Acanthomo rphata;Euacanthomorphacea;Percomorphaceae;Ovalentaria;Blenniimorphae;Blen niiformes;Gobiesocoidei;Gobiesocidae;Gobiesocinae;Gouania;Gouania willdenowi

UdeM00000036863 6573 284.3 UdeM00000036863 XP\_021339447.1 37.8 410  
240 8 158 559 5 407 3.40E-73 284.3 6573 cellular

organisms;Eukaryota;Opisthokonta;Metazoa;Eumetazoa;Bilateria;Protostomia; Spiralia;Lophotrochozoa;Mollusca;Bivalvia;Autobranchia;Pteriormorphia;Pect inida;Pectinoidea;Pectinidae;Mizuhopecten;Mizuhopecten yessoensis

UdeM00000036864 1735272 1927.5 UdeM00000036864 XP\_041350117.1  
35.8 3481 1797 70 692 3857 39 3396 0.00E+00 1927.5

1735272 cellular

organisms;Eukaryota;Opisthokonta;Metazoa;Eumetazoa;Bilateria;Protostomia; Spiralia;Lophotrochozoa;Mollusca;Gastropoda;Neomphalina;Neomphaloidea;Pel tospiridae;Gigantopelta;Gigantopelta aegis

UdeM00000036865 6596 395.2 UdeM00000036865 XP\_045163590.1 34.9 743  
443 15 156 878 23 744 4.70E-106 395.2 6596 cellular

organisms;Eukaryota;Opisthokonta;Metazoa;Eumetazoa;Bilateria;Protostomia; Spiralia;Lophotrochozoa;Mollusca;Bivalvia;Autobranchia;Heteroconchia;Euhe



terodonta;Imparidentia;Venerida;Veneroidea;Veneridae;Mercenaria;Mercenaria mercenaria

UdeM00000036866 1735272 1770 UdeM00000036866 XP\_041350117.1 46.6  
2061 1041 26 14 2054 1376 3396 0.00E+00 1770 1735272  
cellular

organisms;Eukaryota;Opisthokonta;Metazoa;Eumetazoa;Bilateria;Protostomia;Spiralia;Lophotrochozoa;Mollusca;Gastropoda;Neomphalina;Neomphaloidea;Peltospiridae;Gigantopelta;Gigantopelta aegis

UdeM00000036867 6596 235.7 UdeM00000036867 XP\_045163590.1 31.3 549  
344 15 1 529 209 744 1.80E-58 235.7 6596 cellular

organisms;Eukaryota;Opisthokonta;Metazoa;Eumetazoa;Bilateria;Protostomia;Spiralia;Lophotrochozoa;Mollusca;Bivalvia;Autobranchia;Heteroconchia;Euheterodonta;Imparidentia;Venerida;Veneroidea;Veneridae;Mercenaria;Mercenaria mercenaria

UdeM00000036869 6596 389 UdeM00000036869 XP\_045163590.1 34.5 743  
442 14 18 738 25 744 3.10E-104 389 6596 cellular

organisms;Eukaryota;Opisthokonta;Metazoa;Eumetazoa;Bilateria;Protostomia;Spiralia;Lophotrochozoa;Mollusca;Bivalvia;Autobranchia;Heteroconchia;Euheterodonta;Imparidentia;Venerida;Veneroidea;Veneridae;Mercenaria;Mercenaria mercenaria

UdeM00000036870 10224 595.1 UdeM00000036870 XP\_006822956.1 25 2384  
1425 68 24 2308 274 2394 3.80E-166 595.1 10224 cellular

organisms;Eukaryota;Opisthokonta;Metazoa;Eumetazoa;Bilateria;Deuterostomia;Hemichordata;Enteropneusta;Harrimaniidae;Saccoglossus;Saccoglossus kowalevskii

UdeM00000036871 1735272 1694.5 UdeM00000036871 XP\_041350117.1  
45.4 2042 1008 29 33 2009 1397 3396 0.00E+00 1694.5  
1735272 cellular

organisms;Eukaryota;Opisthokonta;Metazoa;Eumetazoa;Bilateria;Protostomia;Spiralia;Lophotrochozoa;Mollusca;Gastropoda;Neomphalina;Neomphaloidea;Peltospiridae;Gigantopelta;Gigantopelta aegis

UdeM00000036872 400682 64.7 UdeM00000036872 XP\_003390251.1 27.7  
202 50 3 12 117 432 633 9.00E-08 64.7 400682  
cellular

organisms;Eukaryota;Opisthokonta;Metazoa;Porifera;Demospongiae;Heteroscleromorpha;Haplosclerida;Niphatidae;Amphimedon;Amphimedon queenslandica

UdeM00000036873 400682 58.5 UdeM00000036873 XP\_003390251.1 37  
92 55 2 12 101 432 522 5.70E-06 58.5 400682  
cellular

organisms;Eukaryota;Opisthokonta;Metazoa;Porifera;Demospongiae;Heteroscleromorpha;Haplosclerida;Niphatidae;Amphimedon;Amphimedon queenslandica

UdeM00000036874 158441 129 UdeM00000036874 XP\_021948043.1 39.4  
155 94 0 1 155 160 314 6.00E-27 129 158441  
cellular

organisms;Eukaryota;Opisthokonta;Metazoa;Eumetazoa;Bilateria;Protostomia;Ecdysozoa;Panarthropoda;Arthropoda;Mandibulata;Pancrustacea;Hexapoda;Collembola;Entomobryomorpha;Isotomoidea;Isotomidae;Proisotominae;Folsomia;Folsomia candida

UdeM00000036875 77115 58.2 UdeM00000036875 XP\_038157148.1 45.8 59  
30 1 7 65 2 58 6.60E-06 58.2 77115 cellular

organisms;Eukaryota;Opisthokonta;Metazoa;Eumetazoa;Bilateria;Deuterostomia;Chordata;Craniata;Vertebrata;Gnathostomata;Teleostomi;Euteleostomi;Actinopterygii;Actinopteri;Neopterygii;Teleostei;Osteoglossocephalai;Clupeocephala;Euteleostei;Neoteleostei;Eurypterygia;Ctenosquamata;Acanthomo

rphata;Euacanthomorphae;Percomorphaceae;Ovalentaria;Atherinomorphae;Cyp  
rinodontiformes;Cyprinodontoidei;Cyprinodontidae;Cyprinodontinae;Cyprinod  
ontini;Cyprinodon;Cyprinodon tularosa  
UdeM00000036876 10224 60.5 UdeM00000036876 XP\_006816028.1 42 69  
38 1 17 83 23 91 1.20E-06 60.5 10224 cellular  
organisms;Eukaryota;Opisthokonta;Metazoa;Eumetazoa;Bilateria;Deuterostomi  
a;Hemichordata;Enteropneusta;Harrimaniidae;Saccoglossus;Saccoglossus  
kowalevskii  
UdeM00000036877 6596 178.7 UdeM00000036877 XP\_045206316.1 54.5 156  
70 1 26 180 123 278 6.60E-42 178.7 6596 cellular  
organisms;Eukaryota;Opisthokonta;Metazoa;Eumetazoa;Bilateria;Protostomia;  
Spiralia;Lophotrochozoa;Mollusca;Bivalvia;Autobranchia;Heteroconchia;Euhe  
terodonta;Imparidentia;Venerida;Veneroidea;Veneridae;Mercenaria;Mercenari  
a mercenaria  
UdeM00000036878 6596 246.9 UdeM00000036878 XP\_045163590.1 30.6 569  
361 12 21 566 183 740 1.40E-61 246.9 6596 cellular  
organisms;Eukaryota;Opisthokonta;Metazoa;Eumetazoa;Bilateria;Protostomia;  
Spiralia;Lophotrochozoa;Mollusca;Bivalvia;Autobranchia;Heteroconchia;Euhe  
terodonta;Imparidentia;Venerida;Veneroidea;Veneridae;Mercenaria;Mercenari  
a mercenaria  
UdeM00000036880 1735272 948 UdeM00000036880 XP\_041350117.1 38  
1520 767 21 16 1375 1185 2689 1.40E-272 948 1735272  
cellular  
organisms;Eukaryota;Opisthokonta;Metazoa;Eumetazoa;Bilateria;Protostomia;  
Spiralia;Lophotrochozoa;Mollusca;Gastropoda;Neomphalina;Neomphaloidea;Pel  
tospiridae;Gigantopelta;Gigantopelta aegis  
UdeM00000036881 1735272 698 UdeM00000036881 XP\_041350117.1 53.5  
695 269 12 23 686 2725 3396 1.70E-197 698 1735272  
cellular  
organisms;Eukaryota;Opisthokonta;Metazoa;Eumetazoa;Bilateria;Protostomia;  
Spiralia;Lophotrochozoa;Mollusca;Gastropoda;Neomphalina;Neomphaloidea;Pel  
tospiridae;Gigantopelta;Gigantopelta aegis  
UdeM00000036882 13397 74.7 UdeM00000036882 XP\_041063318.1 23.7 274  
187 7 3 272 974 1229 2.70E-10 74.7 13397 cellular  
organisms;Eukaryota;Opisthokonta;Metazoa;Eumetazoa;Bilateria;Deuterostomi  
a;Chordata;Craniata;Vertebrata;Gnathostomata;Chondrichthyes;Elasmobranchi  
i;Selachii;Galeomorphii;Galeoidea;Lamniformes;Alopiidae;Lamninae;Carcharo  
don;Carcharodon carcharias  
UdeM00000036883 6579 73.9 UdeM00000036883 XP\_033728465.1 25.7 202  
132 6 345 534 311 506 8.30E-10 73.9 6579 cellular  
organisms;Eukaryota;Opisthokonta;Metazoa;Eumetazoa;Bilateria;Protostomia;  
Spiralia;Lophotrochozoa;Mollusca;Bivalvia;Autobranchia;Pteriormorphia;Pect  
inida;Pectinoidea;Pectinidae;Pecten;Pecten maximus  
UdeM00000036884 6596 157.5 UdeM00000036884 XP\_045160398.1 74.3 101  
26 0 1 101 1 101 9.10E-36 157.5 6596 cellular  
organisms;Eukaryota;Opisthokonta;Metazoa;Eumetazoa;Bilateria;Protostomia;  
Spiralia;Lophotrochozoa;Mollusca;Bivalvia;Autobranchia;Heteroconchia;Euhe  
terodonta;Imparidentia;Venerida;Veneroidea;Veneridae;Mercenaria;Mercenari  
a mercenaria  
UdeM00000036886 6596 585.1 UdeM00000036886 XP\_045200985.1 72.4 406  
96 6 7 400 49 450 6.70E-164 585.1 6596 cellular  
organisms;Eukaryota;Opisthokonta;Metazoa;Eumetazoa;Bilateria;Protostomia;  
Spiralia;Lophotrochozoa;Mollusca;Bivalvia;Autobranchia;Heteroconchia;Euhe

terodonta;Imparidentia;Venerida;Veneroidea;Veneridae;Mercenaria;Mercenari  
 a mercenaria  
 UdeM00000036887 7574 154.8 UdeM00000036887 XP\_013412365.1 45.2 188  
 102 1 37 224 38 224 1.30E-34 154.8 7574 cellular  
 organisms;Eukaryota;Opisthokonta;Metazoa;Eumetazoa;Bilateria;Protostomia;  
 Spiralia;Lophotrochozoa;Brachiopoda;Linguliformea;Lingulata;Lingulida;Lin  
 guloidea;Lingulidae;Lingula;Lingula anatina  
 UdeM00000036889 29159 682.2 UdeM00000036889 XP\_034329951.1 71.7 417  
 118 0 2 418 16 432 4.20E-193 682.2 29159 cellular  
 organisms;Eukaryota;Opisthokonta;Metazoa;Eumetazoa;Bilateria;Protostomia;  
 Spiralia;Lophotrochozoa;Mollusca;Bivalvia;Autobranchia;Pteriormorphia;Ostr  
 eida;Ostreoidea;Ostreidae;Crassostrea;Crassostrea gigas  
 UdeM00000036888 225164 772.3 UdeM00000036888 XP\_009050439.1 73.3  
 479 125 3 1 478 1 477 3.60E-220 772.3 225164  
 cellular  
 organisms;Eukaryota;Opisthokonta;Metazoa;Eumetazoa;Bilateria;Protostomia;  
 Spiralia;Lophotrochozoa;Mollusca;Gastropoda;Patellogastropoda;Lottioidea;  
 Lottiidae;Lottia;Lottia gigantea  
 UdeM00000036890 6596 247.3 UdeM00000036890 XP\_045201951.1 46.7 285  
 141 4 11 286 7 289 2.40E-62 247.3 6596 cellular  
 organisms;Eukaryota;Opisthokonta;Metazoa;Eumetazoa;Bilateria;Protostomia;  
 Spiralia;Lophotrochozoa;Mollusca;Bivalvia;Autobranchia;Heteroconchia;Euhe  
 terodonta;Imparidentia;Venerida;Veneroidea;Veneridae;Mercenaria;Mercenari  
 a mercenaria  
 UdeM00000036891 7604 677.9 UdeM00000036891 XP\_033647599.1 30.4 2196  
 1334 67 695 2768 323 2446 5.40E-191 677.9 7604 cellular  
 organisms;Eukaryota;Opisthokonta;Metazoa;Eumetazoa;Bilateria;Deuterostomi  
 a;Echinodermata;Eleutherozoa;Asterozoa;Asteroidea;Forcipulatacea;Forcipul  
 atida;Asteriidae;Asterias;Asterias rubens  
 UdeM00000036892 7604 694.9 UdeM00000036892 XP\_033647599.1 31 2190  
 1302 68 710 2768 335 2446 4.30E-196 694.9 7604 cellular  
 organisms;Eukaryota;Opisthokonta;Metazoa;Eumetazoa;Bilateria;Deuterostomi  
 a;Echinodermata;Eleutherozoa;Asterozoa;Asteroidea;Forcipulatacea;Forcipul  
 atida;Asteriidae;Asterias;Asterias rubens  
 UdeM00000036895 6105 60.5 UdeM00000036895 XP\_031570589.1 32.1 106  
 67 3 87 191 97 198 3.60E-06 60.5 6105 cellular  
 organisms;Eukaryota;Opisthokonta;Metazoa;Eumetazoa;Cnidaria;Anthozoa;Hexa  
 corallia;Actiniaria;Actiniidae;Actinia;Actinia tenebrosa  
 UdeM00000036896 6573 155.2 UdeM00000036896 XP\_021360016.1 22.1 972  
 609 33 97 996 1134 2029 7.30E-34 155.2 6573 cellular  
 organisms;Eukaryota;Opisthokonta;Metazoa;Eumetazoa;Bilateria;Protostomia;  
 Spiralia;Lophotrochozoa;Mollusca;Bivalvia;Autobranchia;Pteriormorphia;Pect  
 inida;Pectinoidea;Pectinidae;Mizuhopecten;Mizuhopecten yessoensis  
 UdeM00000036897 7604 649 UdeM00000036897 XP\_033647599.1 29.6 2186  
 1336 67 638 2697 337 2446 2.60E-182 649 7604 cellular  
 organisms;Eukaryota;Opisthokonta;Metazoa;Eumetazoa;Bilateria;Deuterostomi  
 a;Echinodermata;Eleutherozoa;Asterozoa;Asteroidea;Forcipulatacea;Forcipul  
 atida;Asteriidae;Asterias;Asterias rubens  
 UdeM00000036902 6596 494.6 UdeM00000036902 XP\_045200585.1 66.5 430  
 138 2 1 430 10 433 1.30E-136 494.6 6596 cellular  
 organisms;Eukaryota;Opisthokonta;Metazoa;Eumetazoa;Bilateria;Protostomia;  
 Spiralia;Lophotrochozoa;Mollusca;Bivalvia;Autobranchia;Heteroconchia;Euhe  
 terodonta;Imparidentia;Venerida;Veneroidea;Veneridae;Mercenaria;Mercenari  
 a mercenaria

UdeM00000036903 6565 474.6 UdeM00000036903 XP\_022344763.1 75.5 294  
 72 0 1 294 1 294 9.40E-131 474.6 6565 cellular  
 organisms;Eukaryota;Opisthokonta;Metazoa;Eumetazoa;Bilateria;Protostomia;  
 Spiralia;Lophotrochozoa;Mollusca;Bivalvia;Autobranchia;Pteriormorphia;Ostr  
 eida;Ostreoidea;Ostreidae;Crassostrea;Crassostrea virginica  
 UdeM00000036904 400727 178.7 UdeM00000036904 XP\_025091735.1 36.8  
 272 161 3 1 261 1 272 9.60E-42 178.7 400727  
 cellular  
 organisms;Eukaryota;Opisthokonta;Metazoa;Eumetazoa;Bilateria;Protostomia;  
 Spiralia;Lophotrochozoa;Mollusca;Gastropoda;Caenogastropoda;Architaeniogl  
 ossa;Ampullarioidea;Ampullariidae;Pomacea;Pomacea canaliculata  
 UdeM00000036905 29159 294.3 UdeM00000036905 XP\_034316161.1 44.6 332  
 183 1 1 331 645 976 3.70E-76 294.3 29159 cellular  
 organisms;Eukaryota;Opisthokonta;Metazoa;Eumetazoa;Bilateria;Protostomia;  
 Spiralia;Lophotrochozoa;Mollusca;Bivalvia;Autobranchia;Pteriormorphia;Ostr  
 eida;Ostreoidea;Ostreidae;Crassostrea;Crassostrea gigas  
 UdeM00000036906 6596 2594.3 UdeM00000036906 XP\_045200664.1 75.6  
 1761 398 11 1 1742 1 1749 0.00E+00 2594.3 6596  
 cellular  
 organisms;Eukaryota;Opisthokonta;Metazoa;Eumetazoa;Bilateria;Protostomia;  
 Spiralia;Lophotrochozoa;Mollusca;Bivalvia;Autobranchia;Heteroconchia;Euhe  
 terodonta;Imparidentia;Venerida;Veneroidea;Veneridae;Mercenaria;Mercenari  
 a mercenaria  
 UdeM00000036907 6596 2556.2 UdeM00000036907 XP\_045200664.1 74.7  
 1761 414 11 1 1742 1 1749 0.00E+00 2556.2 6596  
 cellular  
 organisms;Eukaryota;Opisthokonta;Metazoa;Eumetazoa;Bilateria;Protostomia;  
 Spiralia;Lophotrochozoa;Mollusca;Bivalvia;Autobranchia;Heteroconchia;Euhe  
 terodonta;Imparidentia;Venerida;Veneroidea;Veneridae;Mercenaria;Mercenari  
 a mercenaria  
 UdeM00000036910 6596 94 UdeM00000036910 XP\_045169614.1 21.3 506  
 339 14 191 650 406 898 7.70E-16 94 6596 cellular  
 organisms;Eukaryota;Opisthokonta;Metazoa;Eumetazoa;Bilateria;Protostomia;  
 Spiralia;Lophotrochozoa;Mollusca;Bivalvia;Autobranchia;Heteroconchia;Euhe  
 terodonta;Imparidentia;Venerida;Veneroidea;Veneridae;Mercenaria;Mercenari  
 a mercenaria  
 UdeM00000036911 6596 90.1 UdeM00000036911 XP\_045169614.1 20.5 507  
 340 12 144 602 407 898 1.00E-14 90.1 6596 cellular  
 organisms;Eukaryota;Opisthokonta;Metazoa;Eumetazoa;Bilateria;Protostomia;  
 Spiralia;Lophotrochozoa;Mollusca;Bivalvia;Autobranchia;Heteroconchia;Euhe  
 terodonta;Imparidentia;Venerida;Veneroidea;Veneridae;Mercenaria;Mercenari  
 a mercenaria  
 UdeM00000036917 6579 540.8 UdeM00000036917 XP\_033760433.1 49 621  
 289 11 3 607 281 889 2.30E-150 540.8 6579 cellular  
 organisms;Eukaryota;Opisthokonta;Metazoa;Eumetazoa;Bilateria;Protostomia;  
 Spiralia;Lophotrochozoa;Mollusca;Bivalvia;Autobranchia;Pteriormorphia;Pect  
 inida;Pectinoidea;Pectinidae;Pecten;Pecten maximus  
 UdeM00000036918 6579 110.5 UdeM00000036918 XP\_033759967.1 48.9 131  
 46 6 89 215 49 162 5.00E-21 110.5 6579 cellular  
 organisms;Eukaryota;Opisthokonta;Metazoa;Eumetazoa;Bilateria;Protostomia;  
 Spiralia;Lophotrochozoa;Mollusca;Bivalvia;Autobranchia;Pteriormorphia;Pect  
 inida;Pectinoidea;Pectinidae;Pecten;Pecten maximus  
 UdeM00000036919 7955 239.6 UdeM00000036919 XP\_005171336.1 53.8 210  
 93 2 112 320 1039 1245 5.60E-60 239.6 7955 cellular

organisms;Eukaryota;Opisthokonta;Metazoa;Eumetazoa;Bilateria;Deuterostomi  
a;Chordata;Craniata;Vertebrata;Gnathostomata;Teleostomi;Euteleostomi;Acti  
nopterygii;Actinopteri;Neopterygii;Teleostei;Osteoglossocephalai;Clupeoce  
phala;Otomorpha;Ostariophysi;Otophysi;Cypriniphysae;Cypriniformes;Cyprino  
idei;Danionidae;Danioninae;Danio;Danio rerio

UdeM00000036920 45264 156.4 UdeM00000036920 XP\_044165918.1 32.6 316  
133 9 23 264 45 354 5.10E-35 156.4 45264 cellular

organisms;Eukaryota;Opisthokonta;Metazoa;Eumetazoa;Cnidaria;Anthozoa;Hexa  
corallia;Scleractinia;Astrocoeniina;Acroporidae;Acropora;Acropora  
millepora

UdeM00000036921 7955 235 UdeM00000036921 XP\_005171336.1 53.8 210  
93 2 112 320 1039 1245 1.40E-58 235 7955 cellular

organisms;Eukaryota;Opisthokonta;Metazoa;Eumetazoa;Bilateria;Deuterostomi  
a;Chordata;Craniata;Vertebrata;Gnathostomata;Teleostomi;Euteleostomi;Acti  
nopterygii;Actinopteri;Neopterygii;Teleostei;Osteoglossocephalai;Clupeoce  
phala;Otomorpha;Ostariophysi;Otophysi;Cypriniphysae;Cypriniformes;Cyprino  
idei;Danionidae;Danioninae;Danio;Danio rerio

UdeM00000036922 6596 236.5 UdeM00000036922 XP\_045185790.1 55 209  
91 2 32 240 103 308 3.50E-59 236.5 6596 cellular

organisms;Eukaryota;Opisthokonta;Metazoa;Eumetazoa;Bilateria;Protostomia;  
Spiralia;Lophotrochozoa;Mollusca;Bivalvia;Autobranchia;Heteroconchia;Euhe  
terodonta;Imparidentia;Venerida;Veneroidea;Veneridae;Mercenaria;Mercenari  
a mercenaria

UdeM00000036923 6596 416.8 UdeM00000036923 XP\_045200137.1 58.6 367  
139 5 1 356 8 372 3.50E-113 416.8 6596 cellular

organisms;Eukaryota;Opisthokonta;Metazoa;Eumetazoa;Bilateria;Protostomia;  
Spiralia;Lophotrochozoa;Mollusca;Bivalvia;Autobranchia;Heteroconchia;Euhe  
terodonta;Imparidentia;Venerida;Veneroidea;Veneridae;Mercenaria;Mercenari  
a mercenaria

UdeM00000044461 6573 250 UdeM00000044461 XP\_021361303.1 79.9 154  
31 0 20 173 274 427 2.70E-63 250 6573 cellular

organisms;Eukaryota;Opisthokonta;Metazoa;Eumetazoa;Bilateria;Protostomia;  
Spiralia;Lophotrochozoa;Mollusca;Bivalvia;Autobranchia;Pteriomorphia;Pect  
inida;Pectinoidea;Pectinidae;Mizuhopecten;Mizuhopecten yessoensis

UdeM00000035990 6596 620.2 UdeM00000035990 XP\_045207931.1 57.1 714  
232 12 35 702 28 713 3.30E-174 620.2 6596 cellular

organisms;Eukaryota;Opisthokonta;Metazoa;Eumetazoa;Bilateria;Protostomia;  
Spiralia;Lophotrochozoa;Mollusca;Bivalvia;Autobranchia;Heteroconchia;Euhe  
terodonta;Imparidentia;Venerida;Veneroidea;Veneridae;Mercenaria;Mercenari  
a mercenaria

UdeM00000035991 6579 103.6 UdeM00000035991 XP\_033731721.1 39.2 158  
88 3 130 286 498 648 4.40E-19 103.6 6579 cellular

organisms;Eukaryota;Opisthokonta;Metazoa;Eumetazoa;Bilateria;Protostomia;  
Spiralia;Lophotrochozoa;Mollusca;Bivalvia;Autobranchia;Pteriomorphia;Pect  
inida;Pectinoidea;Pectinidae;Pecten;Pecten maximus

UdeM00000035992 6565 94 UdeM00000035992 XP\_022287605.1 29.4 204  
117 6 1 186 126 320 2.40E-16 94 6565 cellular

organisms;Eukaryota;Opisthokonta;Metazoa;Eumetazoa;Bilateria;Protostomia;  
Spiralia;Lophotrochozoa;Mollusca;Bivalvia;Autobranchia;Pteriomorphia;Ostr  
eida;Ostreoidea;Ostreidae;Crassostrea;Crassostrea virginica

UdeM00000035993 215358 122.1 UdeM00000035993 XP\_027132200.1 41  
166 88 4 1 165 36 192 7.00E-25 122.1 215358  
cellular

organisms;Eukaryota;Opisthokonta;Metazoa;Eumetazoa;Bilateria;Deuterostomi

a;Chordata;Craniata;Vertebrata;Gnathostomata;Teleostomi;Euteleostomi;Actinopterygii;Actinopteri;Neopterygii;Teleostei;Osteoglossocephalai;Clupeocephala;Euteleostei;Neoteleostei;Eurypterygia;Ctenosquamata;Acanthomorphata;Euacanthomorphacea;Percomorphaceae;Eupercaria;Eupercaria incertae sedis;Sciaenidae;Larimichthys;Larimichthys crocea

UdeM00000035994 30732 178.7 UdeM00000035994 XP\_024118320.1 40.9 235  
130 5 2 235 321 547 8.60E-42 178.7 30732 cellular

organisms;Eukaryota;Opisthokonta;Metazoa;Eumetazoa;Bilateria;Deuterostomia;Chordata;Craniata;Vertebrata;Gnathostomata;Teleostomi;Euteleostomi;Actinopterygii;Actinopteri;Neopterygii;Teleostei;Osteoglossocephalai;Clupeocephala;Euteleostei;Neoteleostei;Eurypterygia;Ctenosquamata;Acanthomorphata;Euacanthomorphacea;Percomorphaceae;Ovalentaria;Atherinomorphae;Beloniformes;Adrianichthyoidei;Adrianichthyidae;Oryziinae;Oryzias;Oryzias melastigma

UdeM00000035995 1250792 79.3 UdeM00000035995 XP\_041861567.1 52.4  
63 30 0 28 90 606 668 2.70E-12 79.3 1250792  
cellular

organisms;Eukaryota;Opisthokonta;Metazoa;Eumetazoa;Bilateria;Deuterostomia;Chordata;Craniata;Vertebrata;Gnathostomata;Teleostomi;Euteleostomi;Actinopterygii;Actinopteri;Neopterygii;Teleostei;Osteoglossocephalai;Clupeocephala;Euteleostei;Neoteleostei;Eurypterygia;Ctenosquamata;Acanthomorphata;Euacanthomorphacea;Percomorphaceae;Ovalentaria;Atherinomorphae;Atheriniformes;Melanotaeniidae;Melanotaenia;Melanotaenia boesemani

UdeM00000035996 77115 310.5 UdeM00000035996 XP\_038133904.1 55.5 272  
94 2 11 257 13 282 2.10E-81 310.5 77115 cellular

organisms;Eukaryota;Opisthokonta;Metazoa;Eumetazoa;Bilateria;Deuterostomia;Chordata;Craniata;Vertebrata;Gnathostomata;Teleostomi;Euteleostomi;Actinopterygii;Actinopteri;Neopterygii;Teleostei;Osteoglossocephalai;Clupeocephala;Euteleostei;Neoteleostei;Eurypterygia;Ctenosquamata;Acanthomorphata;Euacanthomorphacea;Percomorphaceae;Ovalentaria;Atherinomorphae;Cyprinodontiformes;Cyprinodontoidei;Cyprinodontidae;Cyprinodontinae;Cyprinodontini;Cyprinodon;Cyprinodon tularosa

UdeM00000035999 6596 1245 UdeM00000035999 XP\_045208754.1 51.8 1107  
472 14 15 1083 469 1551 0.00E+00 1245 6596 cellular

organisms;Eukaryota;Opisthokonta;Metazoa;Eumetazoa;Bilateria;Protostomia;Spiralia;Lophotrochozoa;Mollusca;Bivalvia;Autobranchia;Heteroconchia;Euheterodonta;Imparidentia;Venerida;Veneroidea;Veneridae;Mercenaria;Mercenaria mercenaria

UdeM00000036000 6596 403.3 UdeM00000036000 XP\_045208754.1 54.3 311  
138 3 4 311 1130 1439 2.90E-109 403.3 6596 cellular

organisms;Eukaryota;Opisthokonta;Metazoa;Eumetazoa;Bilateria;Protostomia;Spiralia;Lophotrochozoa;Mollusca;Bivalvia;Autobranchia;Heteroconchia;Euheterodonta;Imparidentia;Venerida;Veneroidea;Veneridae;Mercenaria;Mercenaria mercenaria

UdeM00000036003 6596 216.5 UdeM00000036003 XP\_045185723.1 37.9 346  
192 6 7 345 455 784 7.90E-53 216.5 6596 cellular

organisms;Eukaryota;Opisthokonta;Metazoa;Eumetazoa;Bilateria;Protostomia;Spiralia;Lophotrochozoa;Mollusca;Bivalvia;Autobranchia;Heteroconchia;Euheterodonta;Imparidentia;Venerida;Veneroidea;Veneridae;Mercenaria;Mercenaria mercenaria

UdeM00000036004 6596 460.7 UdeM00000036004 XP\_045208754.1 49.3 430  
197 6 10 420 43 470 2.30E-126 460.7 6596 cellular

organisms;Eukaryota;Opisthokonta;Metazoa;Eumetazoa;Bilateria;Protostomia;Spiralia;Lophotrochozoa;Mollusca;Bivalvia;Autobranchia;Heteroconchia;Euheterodonta

terodonta;Imparidentia;Venerida;Veneroidea;Veneridae;Mercenaria;Mercenaria mercenaria  
 UdeM00000036005 29159 103.2 UdeM00000036005 XP\_034315421.1 54.7 106  
 43 2 145 246 370 474 4.80E-19 103.2 29159 cellular  
 organisms;Eukaryota;Opisthokonta;Metazoa;Eumetazoa;Bilateria;Protostomia;  
 Spiralia;Lophotrochozoa;Mollusca;Bivalvia;Autobranhia;Pteriormorphia;Ostr  
 eida;Ostreoidea;Ostreidae;Crassostrea;Crassostrea gigas  
 UdeM00000036006 6565 226.1 UdeM00000036006 XP\_022306954.1 40.3 303  
 144 6 165 435 651 948 8.70E-56 226.1 6565 cellular  
 organisms;Eukaryota;Opisthokonta;Metazoa;Eumetazoa;Bilateria;Protostomia;  
 Spiralia;Lophotrochozoa;Mollusca;Bivalvia;Autobranhia;Pteriormorphia;Ostr  
 eida;Ostreoidea;Ostreidae;Crassostrea;Crassostrea virginica  
 UdeM00000036006 6565 120.2 UdeM00000036006 XP\_022306954.1 33.5 227  
 118 4 1 214 4 210 6.70E-24 120.2 6565 cellular  
 organisms;Eukaryota;Opisthokonta;Metazoa;Eumetazoa;Bilateria;Protostomia;  
 Spiralia;Lophotrochozoa;Mollusca;Bivalvia;Autobranhia;Pteriormorphia;Ostr  
 eida;Ostreoidea;Ostreidae;Crassostrea;Crassostrea virginica  
 UdeM00000036008 29159 563.9 UdeM00000036008 XP\_034322147.1 55.8 473  
 207 1 1 471 481 953 1.90E-157 563.9 29159 cellular  
 organisms;Eukaryota;Opisthokonta;Metazoa;Eumetazoa;Bilateria;Protostomia;  
 Spiralia;Lophotrochozoa;Mollusca;Bivalvia;Autobranhia;Pteriormorphia;Ostr  
 eida;Ostreoidea;Ostreidae;Crassostrea;Crassostrea gigas  
 UdeM00000036011 29159 140.6 UdeM00000036011 XP\_011440692.3 42.8 194  
 95 5 68 256 271 453 2.80E-30 140.6 29159 cellular  
 organisms;Eukaryota;Opisthokonta;Metazoa;Eumetazoa;Bilateria;Protostomia;  
 Spiralia;Lophotrochozoa;Mollusca;Bivalvia;Autobranhia;Pteriormorphia;Ostr  
 eida;Ostreoidea;Ostreidae;Crassostrea;Crassostrea gigas  
 UdeM00000036012 6596 152.1 UdeM00000036012 XP\_045209135.1 54 139  
 64 0 1 139 1 139 3.90E-33 152.1 6596 cellular  
 organisms;Eukaryota;Opisthokonta;Metazoa;Eumetazoa;Bilateria;Protostomia;  
 Spiralia;Lophotrochozoa;Mollusca;Bivalvia;Autobranhia;Heteroconchia;Euhe  
 terodonta;Imparidentia;Venerida;Veneroidea;Veneridae;Mercenaria;Mercenari  
 a mercenaria  
 UdeM00000036013 2607531 110.9 UdeM00000036013 XP\_029635723.1 55.6  
 90 40 0 10 99 26 115 9.40E-22 110.9 2607531  
 cellular  
 organisms;Eukaryota;Opisthokonta;Metazoa;Eumetazoa;Bilateria;Protostomia;  
 Spiralia;Lophotrochozoa;Mollusca;Cephalopoda;Coleoidea;Octopodiformes;Oct  
 opoda;Incirrata;Octopodidae;Octopus;Octopus sinensis  
 UdeM00000036014 6579 685.3 UdeM00000036014 XP\_033732622.1 33.4 1609  
 826 42 12 1503 12 1492 1.80E-193 685.3 6579 cellular  
 organisms;Eukaryota;Opisthokonta;Metazoa;Eumetazoa;Bilateria;Protostomia;  
 Spiralia;Lophotrochozoa;Mollusca;Bivalvia;Autobranhia;Pteriormorphia;Pect  
 inida;Pectinoidea;Pectinidae;Pecten;Pecten maximus  
 UdeM00000036016 6579 182.2 UdeM00000036016 XP\_033731819.1 55.4 166  
 71 3 3 165 169 334 1.00E-42 182.2 6579 cellular  
 organisms;Eukaryota;Opisthokonta;Metazoa;Eumetazoa;Bilateria;Protostomia;  
 Spiralia;Lophotrochozoa;Mollusca;Bivalvia;Autobranhia;Pteriormorphia;Pect  
 inida;Pectinoidea;Pectinidae;Pecten;Pecten maximus  
 UdeM00000036017 6596 186 UdeM00000036017 XP\_045207908.1 36.1 355  
 211 6 8 354 116 462 8.10E-44 186 6596 cellular  
 organisms;Eukaryota;Opisthokonta;Metazoa;Eumetazoa;Bilateria;Protostomia;  
 Spiralia;Lophotrochozoa;Mollusca;Bivalvia;Autobranhia;Heteroconchia;Euhe

terodonta;Imparidentia;Venerida;Veneroidea;Veneridae;Mercenaria;Mercenari  
 a mercenaria  
 UdeM00000036019 6579 186.4 UdeM00000036019 XP\_033731819.1 47.9 215  
 102 5 8 218 126 334 6.30E-44 186.4 6579 cellular  
 organisms;Eukaryota;Opisthokonta;Metazoa;Eumetazoa;Bilateria;Protostomia;  
 Spiralia;Lophotrochozoa;Mollusca;Bivalvia;Autobranchia;Pteriormorphia;Pect  
 inida;Pectinoidea;Pectinidae;Pecten;Pecten maximus  
 UdeM00000036018 6596 296.6 UdeM00000036018 XP\_045207908.1 40 465  
 258 8 7 460 8 462 5.50E-77 296.6 6596 cellular  
 organisms;Eukaryota;Opisthokonta;Metazoa;Eumetazoa;Bilateria;Protostomia;  
 Spiralia;Lophotrochozoa;Mollusca;Bivalvia;Autobranchia;Heteroconchia;Euhe  
 terodonta;Imparidentia;Venerida;Veneroidea;Veneridae;Mercenaria;Mercenari  
 a mercenaria  
 UdeM00000036020 6596 127.1 UdeM00000036020 XP\_045207910.1 50 128  
 59 2 4 128 5 130 2.20E-26 127.1 6596 cellular  
 organisms;Eukaryota;Opisthokonta;Metazoa;Eumetazoa;Bilateria;Protostomia;  
 Spiralia;Lophotrochozoa;Mollusca;Bivalvia;Autobranchia;Heteroconchia;Euhe  
 terodonta;Imparidentia;Venerida;Veneroidea;Veneridae;Mercenaria;Mercenari  
 a mercenaria  
 UdeM00000036021 6596 117.9 UdeM00000036021 XP\_045207909.1 50.9 110  
 49 2 7 113 8 115 8.90E-24 117.9 6596 cellular  
 organisms;Eukaryota;Opisthokonta;Metazoa;Eumetazoa;Bilateria;Protostomia;  
 Spiralia;Lophotrochozoa;Mollusca;Bivalvia;Autobranchia;Heteroconchia;Euhe  
 terodonta;Imparidentia;Venerida;Veneroidea;Veneridae;Mercenaria;Mercenari  
 a mercenaria  
 UdeM00000036022 6596 312.4 UdeM00000036022 XP\_045207908.1 46.9 416  
 187 12 5 409 1 393 1.00E-81 312.4 6596 cellular  
 organisms;Eukaryota;Opisthokonta;Metazoa;Eumetazoa;Bilateria;Protostomia;  
 Spiralia;Lophotrochozoa;Mollusca;Bivalvia;Autobranchia;Heteroconchia;Euhe  
 terodonta;Imparidentia;Venerida;Veneroidea;Veneridae;Mercenaria;Mercenari  
 a mercenaria  
 UdeM00000036024 6596 196.4 UdeM00000036024 XP\_045207908.1 55 180  
 78 3 22 199 147 325 3.80E-47 196.4 6596 cellular  
 organisms;Eukaryota;Opisthokonta;Metazoa;Eumetazoa;Bilateria;Protostomia;  
 Spiralia;Lophotrochozoa;Mollusca;Bivalvia;Autobranchia;Heteroconchia;Euhe  
 terodonta;Imparidentia;Venerida;Veneroidea;Veneridae;Mercenaria;Mercenari  
 a mercenaria  
 UdeM00000036025 6596 86.7 UdeM00000036025 XP\_045207910.1 47.8 92  
 45 1 9 97 5 96 3.00E-14 86.7 6596 cellular  
 organisms;Eukaryota;Opisthokonta;Metazoa;Eumetazoa;Bilateria;Protostomia;  
 Spiralia;Lophotrochozoa;Mollusca;Bivalvia;Autobranchia;Heteroconchia;Euhe  
 terodonta;Imparidentia;Venerida;Veneroidea;Veneridae;Mercenaria;Mercenari  
 a mercenaria  
 UdeM00000036027 6565 118.6 UdeM00000036027 XP\_022287605.1 38.9 167  
 82 5 7 169 123 273 7.60E-24 118.6 6565 cellular  
 organisms;Eukaryota;Opisthokonta;Metazoa;Eumetazoa;Bilateria;Protostomia;  
 Spiralia;Lophotrochozoa;Mollusca;Bivalvia;Autobranchia;Pteriormorphia;Ostr  
 eida;Ostreoidea;Ostreidae;Crassostrea;Crassostrea virginica  
 UdeM00000036028 6596 201.8 UdeM00000036028 XP\_045207816.1 60.7 168  
 63 1 2 169 6 170 7.10E-49 201.8 6596 cellular  
 organisms;Eukaryota;Opisthokonta;Metazoa;Eumetazoa;Bilateria;Protostomia;  
 Spiralia;Lophotrochozoa;Mollusca;Bivalvia;Autobranchia;Heteroconchia;Euhe  
 terodonta;Imparidentia;Venerida;Veneroidea;Veneridae;Mercenaria;Mercenari  
 a mercenaria



UdeM00000036029 6596 377.1 UdeM00000036029 XP\_045207816.1 61.6 302  
 113 1 2 303 6 304 2.20E-101 377.1 6596 cellular  
 organisms;Eukaryota;Opisthokonta;Metazoa;Eumetazoa;Bilateria;Protostomia;  
 Spiralia;Lophotrochozoa;Mollusca;Bivalvia;Autobranchia;Heteroconchia;Euhe  
 terodonta;Imparidentia;Venerida;Veneroidea;Veneridae;Mercenaria;Mercenari  
 a mercenaria

UdeM00000036030 29159 99.4 UdeM00000036030 XP\_011422687.2 34.1 170  
 67 5 4 132 5 170 3.80E-18 99.4 29159 cellular  
 organisms;Eukaryota;Opisthokonta;Metazoa;Eumetazoa;Bilateria;Protostomia;  
 Spiralia;Lophotrochozoa;Mollusca;Bivalvia;Autobranchia;Pteriormorphia;Ostr  
 eida;Ostreoidea;Ostreidae;Crassostrea;Crassostrea gigas

UdeM00000036031 6596 286.2 UdeM00000036031 XP\_045209457.1 39.1 376  
 184 7 1 340 1 367 5.50E-74 286.2 6596 cellular  
 organisms;Eukaryota;Opisthokonta;Metazoa;Eumetazoa;Bilateria;Protostomia;  
 Spiralia;Lophotrochozoa;Mollusca;Bivalvia;Autobranchia;Heteroconchia;Euhe  
 terodonta;Imparidentia;Venerida;Veneroidea;Veneridae;Mercenaria;Mercenari  
 a mercenaria

UdeM00000036032 6596 1234.9 UdeM00000036032 XP\_045209360.1 51.4  
 1188 555 11 86 1262 54 1230 0.00E+00 1234.9 6596  
 cellular  
 organisms;Eukaryota;Opisthokonta;Metazoa;Eumetazoa;Bilateria;Protostomia;  
 Spiralia;Lophotrochozoa;Mollusca;Bivalvia;Autobranchia;Heteroconchia;Euhe  
 terodonta;Imparidentia;Venerida;Veneroidea;Veneridae;Mercenaria;Mercenari  
 a mercenaria

UdeM00000041790 6596 195.3 UdeM00000041790 XP\_045209743.1 31.6 475  
 261 15 49 464 73 542 1.70E-46 195.3 6596 cellular  
 organisms;Eukaryota;Opisthokonta;Metazoa;Eumetazoa;Bilateria;Protostomia;  
 Spiralia;Lophotrochozoa;Mollusca;Bivalvia;Autobranchia;Heteroconchia;Euhe  
 terodonta;Imparidentia;Venerida;Veneroidea;Veneridae;Mercenaria;Mercenari  
 a mercenaria

UdeM00000041791 6596 132.5 UdeM00000041791 XP\_045209743.1 31.7 309  
 162 7 20 281 236 542 8.50E-28 132.5 6596 cellular  
 organisms;Eukaryota;Opisthokonta;Metazoa;Eumetazoa;Bilateria;Protostomia;  
 Spiralia;Lophotrochozoa;Mollusca;Bivalvia;Autobranchia;Heteroconchia;Euhe  
 terodonta;Imparidentia;Venerida;Veneroidea;Veneridae;Mercenaria;Mercenari  
 a mercenaria

UdeM00000041792 6573 1722.2 UdeM00000041792 XP\_021353973.1 41  
 2539 1182 51 15 2368 7 2413 0.00E+00 1722.2 6573  
 cellular  
 organisms;Eukaryota;Opisthokonta;Metazoa;Eumetazoa;Bilateria;Protostomia;  
 Spiralia;Lophotrochozoa;Mollusca;Bivalvia;Autobranchia;Pteriormorphia;Pect  
 inida;Pectinoidea;Pectinidae;Mizuhopecten;Mizuhopecten yessoensis

UdeM00000041793 6579 1767.7 UdeM00000041793 XP\_033733062.1 43.8  
 2581 1175 41 1 2555 85 2416 0.00E+00 1767.7 6579  
 cellular  
 organisms;Eukaryota;Opisthokonta;Metazoa;Eumetazoa;Bilateria;Protostomia;  
 Spiralia;Lophotrochozoa;Mollusca;Bivalvia;Autobranchia;Pteriormorphia;Pect  
 inida;Pectinoidea;Pectinidae;Pecten;Pecten maximus

UdeM00000041794 6579 64.3 UdeM00000041794 XP\_033733062.1 62.5 48  
 18 0 18 65 4 51 8.10E-08 64.3 6579 cellular  
 organisms;Eukaryota;Opisthokonta;Metazoa;Eumetazoa;Bilateria;Protostomia;  
 Spiralia;Lophotrochozoa;Mollusca;Bivalvia;Autobranchia;Pteriormorphia;Pect  
 inida;Pectinoidea;Pectinidae;Pecten;Pecten maximus

UdeM00000041795 7739 63.2 UdeM00000041795 XP\_035699356.1 30.1 136  
 88 5 54 186 910 1041 4.20E-07 63.2 7739 cellular  
 organisms;Eukaryota;Opisthokonta;Metazoa;Eumetazoa;Bilateria;Deuterostomi  
 a;Chordata;Cephalochordata;Leptocardii;Amphioxiformes;Branchiostomidae;Br  
 anchiostoma;Branchiostoma floridae  
 UdeM00000041799 6596 79.3 UdeM00000041799 XP\_045208815.1 29.6 274  
 142 11 1 239 2177 2434 7.50E-12 79.3 6596 cellular  
 organisms;Eukaryota;Opisthokonta;Metazoa;Eumetazoa;Bilateria;Protostomia;  
 Spiralia;Lophotrochozoa;Mollusca;Bivalvia;Autobranhia;Heteroconchia;Euhe  
 terodonta;Imparidentia;Venerida;Veneroidea;Veneridae;Mercenaria;Mercenari  
 a mercenaria  
 UdeM00000041800 6573 101.3 UdeM00000041800 XP\_021353973.1 43.4 113  
 60 1 50 162 2021 2129 1.20E-18 101.3 6573 cellular  
 organisms;Eukaryota;Opisthokonta;Metazoa;Eumetazoa;Bilateria;Protostomia;  
 Spiralia;Lophotrochozoa;Mollusca;Bivalvia;Autobranhia;Pteriormorphia;Pect  
 inida;Pectinoidea;Pectinidae;Mizuhopecten;Mizuhopecten yessoensis  
 UdeM00000041801 6565 660.2 UdeM00000041801 XP\_022301680.1 65.5 502  
 171 2 221 721 980 1480 3.10E-186 660.2 6565 cellular  
 organisms;Eukaryota;Opisthokonta;Metazoa;Eumetazoa;Bilateria;Protostomia;  
 Spiralia;Lophotrochozoa;Mollusca;Bivalvia;Autobranhia;Pteriormorphia;Ostr  
 eida;Ostreoidea;Ostreidae;Crassostrea;Crassostrea virginica  
 UdeM00000041801 6565 68.9 UdeM00000041801 XP\_022301680.1 53.3 60  
 28 0 150 209 365 424 3.00E-08 68.9 6565 cellular  
 organisms;Eukaryota;Opisthokonta;Metazoa;Eumetazoa;Bilateria;Protostomia;  
 Spiralia;Lophotrochozoa;Mollusca;Bivalvia;Autobranhia;Pteriormorphia;Ostr  
 eida;Ostreoidea;Ostreidae;Crassostrea;Crassostrea virginica  
 UdeM00000041805 6573 886.3 UdeM00000041805 XP\_021353973.1 49.7 974  
 408 11 106 1057 1363 2276 3.70E-254 886.3 6573 cellular  
 organisms;Eukaryota;Opisthokonta;Metazoa;Eumetazoa;Bilateria;Protostomia;  
 Spiralia;Lophotrochozoa;Mollusca;Bivalvia;Autobranhia;Pteriormorphia;Pect  
 inida;Pectinoidea;Pectinidae;Mizuhopecten;Mizuhopecten yessoensis  
 UdeM00000041807 6596 75.9 UdeM00000041807 XP\_045208818.1 47.5 118  
 52 4 120 232 820 932 7.80E-11 75.9 6596 cellular  
 organisms;Eukaryota;Opisthokonta;Metazoa;Eumetazoa;Bilateria;Protostomia;  
 Spiralia;Lophotrochozoa;Mollusca;Bivalvia;Autobranhia;Heteroconchia;Euhe  
 terodonta;Imparidentia;Venerida;Veneroidea;Veneridae;Mercenaria;Mercenari  
 a mercenaria  
 UdeM00000041808 6596 138.7 UdeM00000041808 XP\_045208815.1 59.3 118  
 48 0 16 133 332 449 8.50E-30 138.7 6596 cellular  
 organisms;Eukaryota;Opisthokonta;Metazoa;Eumetazoa;Bilateria;Protostomia;  
 Spiralia;Lophotrochozoa;Mollusca;Bivalvia;Autobranhia;Heteroconchia;Euhe  
 terodonta;Imparidentia;Venerida;Veneroidea;Veneridae;Mercenaria;Mercenari  
 a mercenaria  
 UdeM00000041810 7574 63.5 UdeM00000041810 XP\_013383008.1 29.5 139  
 80 5 51 182 1197 1324 3.20E-07 63.5 7574 cellular  
 organisms;Eukaryota;Opisthokonta;Metazoa;Eumetazoa;Bilateria;Protostomia;  
 Spiralia;Lophotrochozoa;Brachiopoda;Linguliformea;Lingulata;Lingulida;Lin  
 guloidea;Lingulidae;Lingula;Lingula anatina  
 UdeM00000041811 29159 63.5 UdeM00000041811 XP\_034307860.1 57.4 54  
 23 0 1 54 1 54 1.30E-07 63.5 29159 cellular  
 organisms;Eukaryota;Opisthokonta;Metazoa;Eumetazoa;Bilateria;Protostomia;  
 Spiralia;Lophotrochozoa;Mollusca;Bivalvia;Autobranhia;Pteriormorphia;Ostr  
 eida;Ostreoidea;Ostreidae;Crassostrea;Crassostrea gigas

UdeM00000041812 7574 63.9 UdeM00000041812 XP\_013383008.1 29.5 139  
 80 5 51 182 1197 1324 2.40E-07 63.9 7574 cellular  
 organisms;Eukaryota;Opisthokonta;Metazoa;Eumetazoa;Bilateria;Protostomia;  
 Spiralia;Lophotrochozoa;Brachiopoda;Linguliformea;Lingulata;Lingulida;Lin  
 guloidea;Lingulidae;Lingula;Lingula anatina  
 UdeM00000041813 6573 1892.5 UdeM00000041813 XP\_021353973.1 45.3  
 2565 1201 41 21 2532 7 2423 0.00E+00 1892.5 6573  
 cellular  
 organisms;Eukaryota;Opisthokonta;Metazoa;Eumetazoa;Bilateria;Protostomia;  
 Spiralia;Lophotrochozoa;Mollusca;Bivalvia;Autobranchia;Pteriormorphia;Pect  
 inida;Pectinoidea;Pectinidae;Mizuhopecten;Mizuhopecten yessoensis  
 UdeM00000041815 6596 682.6 UdeM00000041815 XP\_045208818.1 49 741  
 361 7 7 741 9 738 8.80E-193 682.6 6596 cellular  
 organisms;Eukaryota;Opisthokonta;Metazoa;Eumetazoa;Bilateria;Protostomia;  
 Spiralia;Lophotrochozoa;Mollusca;Bivalvia;Autobranchia;Heteroconchia;Euhe  
 terodonta;Imparidentia;Venerida;Veneroidea;Veneridae;Mercenaria;Mercenari  
 a mercenaria  
 UdeM00000041816 6596 649.8 UdeM00000041816 XP\_045208818.1 48.2 734  
 345 6 7 714 9 733 6.20E-183 649.8 6596 cellular  
 organisms;Eukaryota;Opisthokonta;Metazoa;Eumetazoa;Bilateria;Protostomia;  
 Spiralia;Lophotrochozoa;Mollusca;Bivalvia;Autobranchia;Heteroconchia;Euhe  
 terodonta;Imparidentia;Venerida;Veneroidea;Veneridae;Mercenaria;Mercenari  
 a mercenaria  
 UdeM00000041817 6596 679.1 UdeM00000041817 XP\_045208818.1 48.3 744  
 373 5 7 746 9 744 1.00E-191 679.1 6596 cellular  
 organisms;Eukaryota;Opisthokonta;Metazoa;Eumetazoa;Bilateria;Protostomia;  
 Spiralia;Lophotrochozoa;Mollusca;Bivalvia;Autobranchia;Heteroconchia;Euhe  
 terodonta;Imparidentia;Venerida;Veneroidea;Veneridae;Mercenaria;Mercenari  
 a mercenaria  
 UdeM00000041818 6573 688.7 UdeM00000041818 XP\_021380358.1 60.9 575  
 177 4 60 618 32 574 6.80E-195 688.7 6573 cellular  
 organisms;Eukaryota;Opisthokonta;Metazoa;Eumetazoa;Bilateria;Protostomia;  
 Spiralia;Lophotrochozoa;Mollusca;Bivalvia;Autobranchia;Pteriormorphia;Pect  
 inida;Pectinoidea;Pectinidae;Mizuhopecten;Mizuhopecten yessoensis  
 UdeM00000041819 1735272 103.2 UdeM00000041819 XP\_041372365.1 59.3  
 81 32 1 1 80 1 81 1.60E-19 103.2 1735272  
 cellular  
 organisms;Eukaryota;Opisthokonta;Metazoa;Eumetazoa;Bilateria;Protostomia;  
 Spiralia;Lophotrochozoa;Mollusca;Gastropoda;Neomphalina;Neomphaloidea;Pel  
 tospiridae;Gigantopelta;Gigantopelta aegis  
 UdeM00000041820 1735272 102.4 UdeM00000041820 XP\_041372365.1 59.3  
 81 32 1 1 80 1 81 3.20E-19 102.4 1735272  
 cellular  
 organisms;Eukaryota;Opisthokonta;Metazoa;Eumetazoa;Bilateria;Protostomia;  
 Spiralia;Lophotrochozoa;Mollusca;Gastropoda;Neomphalina;Neomphaloidea;Pel  
 tospiridae;Gigantopelta;Gigantopelta aegis  
 UdeM00000041821 6565 107.1 UdeM00000041821 XP\_022302274.1 42.4 139  
 79 1 122 260 127 264 3.80E-20 107.1 6565 cellular  
 organisms;Eukaryota;Opisthokonta;Metazoa;Eumetazoa;Bilateria;Protostomia;  
 Spiralia;Lophotrochozoa;Mollusca;Bivalvia;Autobranchia;Pteriormorphia;Ostr  
 eida;Ostreoidea;Ostreidae;Crassostrea;Crassostrea virginica  
 UdeM00000041823 6573 232.3 UdeM00000041823 XP\_021367508.1 18 1025  
 811 6 181 1191 39 1047 3.90E-57 232.3 6573 cellular  
 organisms;Eukaryota;Opisthokonta;Metazoa;Eumetazoa;Bilateria;Protostomia;

Spiralia; Lophotrochozoa; Mollusca; Bivalvia; Autobranchia; Pteriomorpha; Pectinida; Pectinoidea; Pectinidae; Mizuhopecten; Mizuhopecten yessoensis

UdeM00000041824 6596 328.9 UdeM00000041824 XP\_045209362.1 50.6 352  
166 2 1 344 1 352 7.50E-87 328.9 6596 cellular  
organisms; Eukaryota; Opisthokonta; Metazoa; Eumetazoa; Bilateria; Protostomia; Spiralia; Lophotrochozoa; Mollusca; Bivalvia; Autobranchia; Heteroconchia; Euheterodonta; Imparidentia; Venerida; Veneroidea; Veneridae; Mercenaria; Mercenaria mercenaria

UdeM00000041825 6105 205.3 UdeM00000041825 XP\_031564011.1 33.5 397  
224 11 15 398 84 453 1.50E-49 205.3 6105 cellular  
organisms; Eukaryota; Opisthokonta; Metazoa; Eumetazoa; Cnidaria; Anthozoa; Hexacorallia; Actiniaria; Actiniidae; Actinia; Actinia tenebrosa

UdeM00000041826 6596 84.3 UdeM00000041826 XP\_045203158.1 32.1 131  
88 1 1 130 685 815 1.50E-13 84.3 6596 cellular  
organisms; Eukaryota; Opisthokonta; Metazoa; Eumetazoa; Bilateria; Protostomia; Spiralia; Lophotrochozoa; Mollusca; Bivalvia; Autobranchia; Heteroconchia; Euheterodonta; Imparidentia; Venerida; Veneroidea; Veneridae; Mercenaria; Mercenaria mercenaria

UdeM00000041827 6596 276.2 UdeM00000041827 XP\_045192805.1 43.9 287  
161 0 9 295 46 332 5.00E-71 276.2 6596 cellular  
organisms; Eukaryota; Opisthokonta; Metazoa; Eumetazoa; Bilateria; Protostomia; Spiralia; Lophotrochozoa; Mollusca; Bivalvia; Autobranchia; Heteroconchia; Euheterodonta; Imparidentia; Venerida; Veneroidea; Veneridae; Mercenaria; Mercenaria mercenaria

UdeM00000041828 6596 282.3 UdeM00000041828 XP\_045192805.1 46.8 297  
157 1 9 305 37 332 7.20E-73 282.3 6596 cellular  
organisms; Eukaryota; Opisthokonta; Metazoa; Eumetazoa; Bilateria; Protostomia; Spiralia; Lophotrochozoa; Mollusca; Bivalvia; Autobranchia; Heteroconchia; Euheterodonta; Imparidentia; Venerida; Veneroidea; Veneridae; Mercenaria; Mercenaria mercenaria

UdeM00000041829 6596 317.8 UdeM00000041829 XP\_045201815.1 31.5 759  
443 18 77 795 64 785 4.00E-83 317.8 6596 cellular  
organisms; Eukaryota; Opisthokonta; Metazoa; Eumetazoa; Bilateria; Protostomia; Spiralia; Lophotrochozoa; Mollusca; Bivalvia; Autobranchia; Heteroconchia; Euheterodonta; Imparidentia; Venerida; Veneroidea; Veneridae; Mercenaria; Mercenaria mercenaria

UdeM00000041830 6596 126.3 UdeM00000041830 XP\_045192805.1 42.2 147  
61 1 42 188 37 159 4.00E-26 126.3 6596 cellular  
organisms; Eukaryota; Opisthokonta; Metazoa; Eumetazoa; Bilateria; Protostomia; Spiralia; Lophotrochozoa; Mollusca; Bivalvia; Autobranchia; Heteroconchia; Euheterodonta; Imparidentia; Venerida; Veneroidea; Veneridae; Mercenaria; Mercenaria mercenaria

UdeM00000041831 6596 134 UdeM00000041831 XP\_045201815.1 31.5 327  
180 8 1 314 4 299 3.20E-28 134 6596 cellular  
organisms; Eukaryota; Opisthokonta; Metazoa; Eumetazoa; Bilateria; Protostomia; Spiralia; Lophotrochozoa; Mollusca; Bivalvia; Autobranchia; Heteroconchia; Euheterodonta; Imparidentia; Venerida; Veneroidea; Veneridae; Mercenaria; Mercenaria mercenaria

UdeM00000041833 6596 263.5 UdeM00000041833 XP\_045192805.1 45.3 289  
157 1 6 294 45 332 3.40E-67 263.5 6596 cellular  
organisms; Eukaryota; Opisthokonta; Metazoa; Eumetazoa; Bilateria; Protostomia; Spiralia; Lophotrochozoa; Mollusca; Bivalvia; Autobranchia; Heteroconchia; Euheterodonta; Imparidentia; Venerida; Veneroidea; Veneridae; Mercenaria; Mercenaria mercenaria

UdeM00000044448 225164 97.8 UdeM00000044448 XP\_009054455.1 20.7  
 468 343 7 1 463 95 539 3.90E-17 97.8 225164  
 cellular  
 organisms;Eukaryota;Opisthokonta;Metazoa;Eumetazoa;Bilateria;Protostomia;  
 Spiralia;Lophotrochozoa;Mollusca;Gastropoda;Patellogastropoda;Lottioidea;  
 Lottiidae;Lottia;Lottia gigantea  
 UdeM00000036924 6596 94.7 UdeM00000036924 XP\_045156585.1 49.5 105  
 48 1 1 100 1 105 1.10E-16 94.7 6596 cellular  
 organisms;Eukaryota;Opisthokonta;Metazoa;Eumetazoa;Bilateria;Protostomia;  
 Spiralia;Lophotrochozoa;Mollusca;Bivalvia;Autobranchia;Heteroconchia;Euhe  
 terodonta;Imparidentia;Venerida;Veneroidea;Veneridae;Mercenaria;Mercenari  
 a mercenaria  
 UdeM00000036925 6579 728.4 UdeM00000036925 XP\_033750062.1 44.6 1153  
 598 15 315 1440 166 1304 1.80E-206 728.4 6579 cellular  
 organisms;Eukaryota;Opisthokonta;Metazoa;Eumetazoa;Bilateria;Protostomia;  
 Spiralia;Lophotrochozoa;Mollusca;Bivalvia;Autobranchia;Pteriomorpha;Pect  
 inida;Pectinoidea;Pectinidae;Pecten;Pecten maximus  
 UdeM00000036926 6565 76.3 UdeM00000036926 XP\_022333700.1 52.6 76  
 36 0 11 86 56 131 2.20E-11 76.3 6565 cellular  
 organisms;Eukaryota;Opisthokonta;Metazoa;Eumetazoa;Bilateria;Protostomia;  
 Spiralia;Lophotrochozoa;Mollusca;Bivalvia;Autobranchia;Pteriomorpha;Ostr  
 eida;Ostreoidea;Ostreidae;Crassostrea;Crassostrea virginica  
 UdeM00000036927 6579 721.5 UdeM00000036927 XP\_033749611.1 46.9 1023  
 432 19 6 968 38 1009 1.50E-204 721.5 6579 cellular  
 organisms;Eukaryota;Opisthokonta;Metazoa;Eumetazoa;Bilateria;Protostomia;  
 Spiralia;Lophotrochozoa;Mollusca;Bivalvia;Autobranchia;Pteriomorpha;Pect  
 inida;Pectinoidea;Pectinidae;Pecten;Pecten maximus  
 UdeM00000036928 6596 419.9 UdeM00000036928 XP\_045215947.1 59.7 340  
 135 2 12 350 1 339 3.30E-114 419.9 6596 cellular  
 organisms;Eukaryota;Opisthokonta;Metazoa;Eumetazoa;Bilateria;Protostomia;  
 Spiralia;Lophotrochozoa;Mollusca;Bivalvia;Autobranchia;Heteroconchia;Euhe  
 terodonta;Imparidentia;Venerida;Veneroidea;Veneridae;Mercenaria;Mercenari  
 a mercenaria  
 UdeM00000036929 6596 675.2 UdeM00000036929 XP\_045216714.1 64.5 515  
 174 4 18 532 9 514 6.60E-191 675.2 6596 cellular  
 organisms;Eukaryota;Opisthokonta;Metazoa;Eumetazoa;Bilateria;Protostomia;  
 Spiralia;Lophotrochozoa;Mollusca;Bivalvia;Autobranchia;Heteroconchia;Euhe  
 terodonta;Imparidentia;Venerida;Veneroidea;Veneridae;Mercenaria;Mercenari  
 a mercenaria  
 UdeM00000036930 6596 360.5 UdeM00000036930 XP\_045216765.1 48.9 405  
 182 8 25 418 25 415 2.80E-96 360.5 6596 cellular  
 organisms;Eukaryota;Opisthokonta;Metazoa;Eumetazoa;Bilateria;Protostomia;  
 Spiralia;Lophotrochozoa;Mollusca;Bivalvia;Autobranchia;Heteroconchia;Euhe  
 terodonta;Imparidentia;Venerida;Veneroidea;Veneridae;Mercenaria;Mercenari  
 a mercenaria  
 UdeM00000036931 6596 320.9 UdeM00000036931 XP\_045216765.1 53 296  
 134 4 27 317 26 321 2.50E-84 320.9 6596 cellular  
 organisms;Eukaryota;Opisthokonta;Metazoa;Eumetazoa;Bilateria;Protostomia;  
 Spiralia;Lophotrochozoa;Mollusca;Bivalvia;Autobranchia;Heteroconchia;Euhe  
 terodonta;Imparidentia;Venerida;Veneroidea;Veneridae;Mercenaria;Mercenari  
 a mercenaria  
 UdeM00000036932 6579 84.7 UdeM00000036932 XP\_033732676.1 36.9 103  
 64 1 1 102 304 406 7.30E-14 84.7 6579 cellular  
 organisms;Eukaryota;Opisthokonta;Metazoa;Eumetazoa;Bilateria;Protostomia;

Spiralia; Lophotrochozoa; Mollusca; Bivalvia; Autobranchia; Pteriomorpha; Pectinida; Pectinoidea; Pectinidae; Pecten; Pecten maximus  
UdeM00000042764 6596 168.3 UdeM00000042764 XP\_045202576.1 55.1 167  
66 3 2 160 45 210 1.20E-38 168.3 6596 cellular  
organisms; Eukaryota; Opisthokonta; Metazoa; Eumetazoa; Bilateria; Protostomia; Spiralia; Lophotrochozoa; Mollusca; Bivalvia; Autobranchia; Heteroconchia; Euheterodonta; Imparidentia; Venerida; Veneroidea; Veneridae; Mercenaria; Mercenaria mercenaria  
UdeM00000042765 6596 167.5 UdeM00000042765 XP\_045206316.1 55 140  
63 0 2 141 128 267 1.20E-38 167.5 6596 cellular  
organisms; Eukaryota; Opisthokonta; Metazoa; Eumetazoa; Bilateria; Protostomia; Spiralia; Lophotrochozoa; Mollusca; Bivalvia; Autobranchia; Heteroconchia; Euheterodonta; Imparidentia; Venerida; Veneroidea; Veneridae; Mercenaria; Mercenaria mercenaria  
UdeM00000042766 6573 114.8 UdeM00000042766 XP\_021375729.1 37.6 173  
79 2 17 161 73 244 1.20E-22 114.8 6573 cellular  
organisms; Eukaryota; Opisthokonta; Metazoa; Eumetazoa; Bilateria; Protostomia; Spiralia; Lophotrochozoa; Mollusca; Bivalvia; Autobranchia; Pteriomorpha; Pectinida; Pectinoidea; Pectinidae; Mizuhopecten; Mizuhopecten yessoensis  
UdeM00000042767 2607531 156 UdeM00000042767 XP\_036366820.1 55.6  
133 51 2 56 180 68 200 4.60E-35 156 2607531  
cellular  
organisms; Eukaryota; Opisthokonta; Metazoa; Eumetazoa; Bilateria; Protostomia; Spiralia; Lophotrochozoa; Mollusca; Cephalopoda; Coleoidea; Octopodiformes; Octopoda; Incirrata; Octopodidae; Octopus; Octopus sinensis  
UdeM00000042768 6579 223.8 UdeM00000042768 XP\_033758968.1 24.7 636  
460 8 17 635 15 648 6.60E-55 223.8 6579 cellular  
organisms; Eukaryota; Opisthokonta; Metazoa; Eumetazoa; Bilateria; Protostomia; Spiralia; Lophotrochozoa; Mollusca; Bivalvia; Autobranchia; Pteriomorpha; Pectinida; Pectinoidea; Pectinidae; Pecten; Pecten maximus  
UdeM00000042769 6573 159.8 UdeM00000042769 XP\_021371841.1 25.8 383  
273 6 12 390 23 398 6.90E-36 159.8 6573 cellular  
organisms; Eukaryota; Opisthokonta; Metazoa; Eumetazoa; Bilateria; Protostomia; Spiralia; Lophotrochozoa; Mollusca; Bivalvia; Autobranchia; Pteriomorpha; Pectinida; Pectinoidea; Pectinidae; Mizuhopecten; Mizuhopecten yessoensis  
UdeM00000042770 6579 253.8 UdeM00000042770 XP\_033758968.1 24.7 679  
481 7 6 660 7 679 5.90E-64 253.8 6579 cellular  
organisms; Eukaryota; Opisthokonta; Metazoa; Eumetazoa; Bilateria; Protostomia; Spiralia; Lophotrochozoa; Mollusca; Bivalvia; Autobranchia; Pteriomorpha; Pectinida; Pectinoidea; Pectinidae; Pecten; Pecten maximus  
UdeM00000042771 6565 256.1 UdeM00000042771 XP\_022321940.1 24.9 666  
456 10 20 651 27 682 1.20E-64 256.1 6565 cellular  
organisms; Eukaryota; Opisthokonta; Metazoa; Eumetazoa; Bilateria; Protostomia; Spiralia; Lophotrochozoa; Mollusca; Bivalvia; Autobranchia; Pteriomorpha; Ostreida; Ostreidae; Crassostrea; Crassostrea virginica  
UdeM00000042772 6565 155.2 UdeM00000042772 XP\_022333999.1 27.5 375  
250 9 16 378 114 478 1.70E-34 155.2 6565 cellular  
organisms; Eukaryota; Opisthokonta; Metazoa; Eumetazoa; Bilateria; Protostomia; Spiralia; Lophotrochozoa; Mollusca; Bivalvia; Autobranchia; Pteriomorpha; Ostreida; Ostreidae; Crassostrea; Crassostrea virginica  
UdeM00000042773 6596 122.1 UdeM00000042773 XP\_045168991.1 38.7 186  
97 5 1 173 37 218 1.10E-24 122.1 6596 cellular  
organisms; Eukaryota; Opisthokonta; Metazoa; Eumetazoa; Bilateria; Protostomia; Spiralia; Lophotrochozoa; Mollusca; Bivalvia; Autobranchia; Heteroconchia; Euheterodonta

terodonta;Imparidentia;Venerida;Veneroidea;Veneridae;Mercenaria;Mercenari  
 a mercenaria  
 UdeM00000042774 6596 124.4 UdeM00000042774 XP\_045168991.1 38.8 188  
 98 5 29 203 35 218 2.40E-25 124.4 6596 cellular  
 organisms;Eukaryota;Opisthokonta;Metazoa;Eumetazoa;Bilateria;Protostomia;  
 Spiralia;Lophotrochozoa;Mollusca;Bivalvia;Autobranhia;Heteroconchia;Euhe  
 terodonta;Imparidentia;Venerida;Veneroidea;Veneridae;Mercenaria;Mercenari  
 a mercenaria  
 UdeM00000042776 6596 110.9 UdeM00000042776 XP\_045169258.1 25.1 255  
 183 4 159 405 479 733 3.80E-21 110.9 6596 cellular  
 organisms;Eukaryota;Opisthokonta;Metazoa;Eumetazoa;Bilateria;Protostomia;  
 Spiralia;Lophotrochozoa;Mollusca;Bivalvia;Autobranhia;Heteroconchia;Euhe  
 terodonta;Imparidentia;Venerida;Veneroidea;Veneridae;Mercenaria;Mercenari  
 a mercenaria  
 UdeM00000042778 2607531 224.2 UdeM00000042778 XP\_036366570.1 52.9  
 189 88 1 147 334 58 246 2.50E-55 224.2 2607531  
 cellular  
 organisms;Eukaryota;Opisthokonta;Metazoa;Eumetazoa;Bilateria;Protostomia;  
 Spiralia;Lophotrochozoa;Mollusca;Cephalopoda;Coleoidea;Octopodiformes;Oct  
 opoda;Incirrata;Octopodidae;Octopus;Octopus sinensis  
 UdeM00000042916 400727 229.6 UdeM00000042916 XP\_025093584.1 78.8  
 146 31 0 1 146 1 146 3.70E-57 229.6 400727  
 cellular  
 organisms;Eukaryota;Opisthokonta;Metazoa;Eumetazoa;Bilateria;Protostomia;  
 Spiralia;Lophotrochozoa;Mollusca;Gastropoda;Caenogastropoda;Architaeniogl  
 ossa;Ampullarioidea;Ampullariidae;Pomacea;Pomacea canaliculata  
 UdeM00000042921 6596 510 UdeM00000042921 XP\_045189688.1 46.9 627  
 300 10 60 677 154 756 4.70E-141 510 6596 cellular  
 organisms;Eukaryota;Opisthokonta;Metazoa;Eumetazoa;Bilateria;Protostomia;  
 Spiralia;Lophotrochozoa;Mollusca;Bivalvia;Autobranhia;Heteroconchia;Euhe  
 terodonta;Imparidentia;Venerida;Veneroidea;Veneridae;Mercenaria;Mercenari  
 a mercenaria  
 UdeM00000042922 6565 131.3 UdeM00000042922 XP\_022345648.1 44.4 189  
 93 3 136 323 126 303 2.30E-27 131.3 6565 cellular  
 organisms;Eukaryota;Opisthokonta;Metazoa;Eumetazoa;Bilateria;Protostomia;  
 Spiralia;Lophotrochozoa;Mollusca;Bivalvia;Autobranhia;Pteriomorphia;Ostr  
 eida;Ostreoidea;Ostreidae;Crassostrea;Crassostrea virginica  
 UdeM00000042923 6596 156.4 UdeM00000042923 XP\_045189050.1 72.9 96  
 26 0 4 99 1 96 2.00E-35 156.4 6596 cellular  
 organisms;Eukaryota;Opisthokonta;Metazoa;Eumetazoa;Bilateria;Protostomia;  
 Spiralia;Lophotrochozoa;Mollusca;Bivalvia;Autobranhia;Heteroconchia;Euhe  
 terodonta;Imparidentia;Venerida;Veneroidea;Veneridae;Mercenaria;Mercenari  
 a mercenaria  
 UdeM00000042924 6596 550.4 UdeM00000042924 XP\_045189050.1 63.3 442  
 145 1 3 427 99 540 2.00E-153 550.4 6596 cellular  
 organisms;Eukaryota;Opisthokonta;Metazoa;Eumetazoa;Bilateria;Protostomia;  
 Spiralia;Lophotrochozoa;Mollusca;Bivalvia;Autobranhia;Heteroconchia;Euhe  
 terodonta;Imparidentia;Venerida;Veneroidea;Veneridae;Mercenaria;Mercenari  
 a mercenaria  
 UdeM00000042925 6596 719.9 UdeM00000042925 XP\_045190493.1 60.2 591  
 230 2 18 608 5 590 2.80E-204 719.9 6596 cellular  
 organisms;Eukaryota;Opisthokonta;Metazoa;Eumetazoa;Bilateria;Protostomia;  
 Spiralia;Lophotrochozoa;Mollusca;Bivalvia;Autobranhia;Heteroconchia;Euhe

terodonta;Imparidentia;Venerida;Veneroidea;Veneridae;Mercenaria;Mercenari  
a mercenaria

UdeM00000042926 400727 613.6 UdeM00000042926 XP\_025093615.1 69.2  
428 131 1 6 433 4 430 1.90E-172 613.6 400727  
cellular

organisms;Eukaryota;Opisthokonta;Metazoa;Eumetazoa;Bilateria;Protostomia;  
Spiralia;Lophotrochozoa;Mollusca;Gastropoda;Caenogastropoda;Architaeniogl  
ossa;Ampullarioidea;Ampullariidae;Pomacea;Pomacea canaliculata

UdeM00000042927 6579 109 UdeM00000042927 XP\_033756971.1 66.2 77  
26 0 30 106 23 99 3.80E-21 109 6579 cellular

organisms;Eukaryota;Opisthokonta;Metazoa;Eumetazoa;Bilateria;Protostomia;  
Spiralia;Lophotrochozoa;Mollusca;Bivalvia;Autobranchia;Pteriormorphia;Pect  
inida;Pectinoidea;Pectinidae;Pecten;Pecten maximus

UdeM00000042928 6596 580.5 UdeM00000042928 XP\_045188495.1 61.5 475  
170 4 21 486 131 601 2.10E-162 580.5 6596 cellular

organisms;Eukaryota;Opisthokonta;Metazoa;Eumetazoa;Bilateria;Protostomia;  
Spiralia;Lophotrochozoa;Mollusca;Bivalvia;Autobranchia;Heteroconchia;Euhe  
terodonta;Imparidentia;Venerida;Veneroidea;Veneridae;Mercenaria;Mercenari  
a mercenaria

UdeM00000042929 6596 713 UdeM00000042929 XP\_045188495.1 61.4 581  
210 4 61 627 13 593 3.40E-202 713 6596 cellular

organisms;Eukaryota;Opisthokonta;Metazoa;Eumetazoa;Bilateria;Protostomia;  
Spiralia;Lophotrochozoa;Mollusca;Bivalvia;Autobranchia;Heteroconchia;Euhe  
terodonta;Imparidentia;Venerida;Veneroidea;Veneridae;Mercenaria;Mercenari  
a mercenaria

UdeM00000042930 6596 718 UdeM00000042930 XP\_045188495.1 62.8 575  
202 3 54 616 19 593 1.00E-203 718 6596 cellular

organisms;Eukaryota;Opisthokonta;Metazoa;Eumetazoa;Bilateria;Protostomia;  
Spiralia;Lophotrochozoa;Mollusca;Bivalvia;Autobranchia;Heteroconchia;Euhe  
terodonta;Imparidentia;Venerida;Veneroidea;Veneridae;Mercenaria;Mercenari  
a mercenaria

UdeM00000042932 29159 209.9 UdeM00000042932 XP\_034334600.1 28.2 627  
343 15 461 1023 429 1012 1.50E-50 209.9 29159 cellular

organisms;Eukaryota;Opisthokonta;Metazoa;Eumetazoa;Bilateria;Protostomia;  
Spiralia;Lophotrochozoa;Mollusca;Bivalvia;Autobranchia;Pteriormorphia;Ostr  
eida;Ostreioidea;Ostreidae;Crassostrea;Crassostrea gigas

UdeM00000042931 29159 205.7 UdeM00000042931 XP\_034334600.1 28 618  
347 14 505 1058 429 1012 2.90E-49 205.7 29159 cellular

organisms;Eukaryota;Opisthokonta;Metazoa;Eumetazoa;Bilateria;Protostomia;  
Spiralia;Lophotrochozoa;Mollusca;Bivalvia;Autobranchia;Pteriormorphia;Ostr  
eida;Ostreioidea;Ostreidae;Crassostrea;Crassostrea gigas

UdeM00000042933 29159 209.9 UdeM00000042933 XP\_034334600.1 28.2 627  
343 15 505 1067 429 1012 1.60E-50 209.9 29159 cellular

organisms;Eukaryota;Opisthokonta;Metazoa;Eumetazoa;Bilateria;Protostomia;  
Spiralia;Lophotrochozoa;Mollusca;Bivalvia;Autobranchia;Pteriormorphia;Ostr  
eida;Ostreioidea;Ostreidae;Crassostrea;Crassostrea gigas

UdeM00000042934 6596 227.3 UdeM00000042934 XP\_045191077.1 74.5 149  
38 0 1 149 1 149 1.30E-56 227.3 6596 cellular

organisms;Eukaryota;Opisthokonta;Metazoa;Eumetazoa;Bilateria;Protostomia;  
Spiralia;Lophotrochozoa;Mollusca;Bivalvia;Autobranchia;Heteroconchia;Euhe  
terodonta;Imparidentia;Venerida;Veneroidea;Veneridae;Mercenaria;Mercenari  
a mercenaria

UdeM00000042935 6579 102.4 UdeM00000042935 XP\_033744293.1 24.6 394  
228 9 110 453 5 379 1.70E-18 102.4 6579 cellular



organisms;Eukaryota;Opisthokonta;Metazoa;Eumetazoa;Bilateria;Protostomia;  
Spiralia;Lophotrochozoa;Mollusca;Bivalvia;Autobranchia;Pteriormorphia;Pect  
inida;Pectinoidea;Pectinidae;Pecten;Pecten maximus  
UdeM00000042936 6579 142.5 UdeM00000042936 XP\_033744293.1 27 444  
281 11 96 519 5 425 1.60E-30 142.5 6579 cellular  
organisms;Eukaryota;Opisthokonta;Metazoa;Eumetazoa;Bilateria;Protostomia;  
Spiralia;Lophotrochozoa;Mollusca;Bivalvia;Autobranchia;Pteriormorphia;Pect  
inida;Pectinoidea;Pectinidae;Pecten;Pecten maximus  
UdeM00000042937 6579 116.3 UdeM00000042937 XP\_033744293.1 26.1 398  
226 10 96 445 5 382 1.10E-22 116.3 6579 cellular  
organisms;Eukaryota;Opisthokonta;Metazoa;Eumetazoa;Bilateria;Protostomia;  
Spiralia;Lophotrochozoa;Mollusca;Bivalvia;Autobranchia;Pteriormorphia;Pect  
inida;Pectinoidea;Pectinidae;Pecten;Pecten maximus  
UdeM00000042939 9103 75.5 UdeM00000042939 XP\_010717288.1 38.3 107  
58 2 61 167 149 247 7.50E-11 75.5 9103 cellular  
organisms;Eukaryota;Opisthokonta;Metazoa;Eumetazoa;Bilateria;Deuterostomi  
a;Chordata;Craniata;Vertebrata;Gnathostomata;Teleostomi;Euteleostomi;Sarc  
opterygii;Dipnotetrapodomorpha;Tetrapoda;Amniota;Sauropsida;Sauria;Archel  
osauria;Archosauria;Dinosauria;Saurischia;Theropoda;Coelurosauria;Aves;Ne  
ognathae;Galloanserae;Galliformes;Phasianidae;Meleagridinae;Meleagris;Mel  
eagris gallopavo  
UdeM00000042940 6596 79.3 UdeM00000042940 XP\_045191040.1 36.8 87  
55 0 182 268 242 328 8.20E-12 79.3 6596 cellular  
organisms;Eukaryota;Opisthokonta;Metazoa;Eumetazoa;Bilateria;Protostomia;  
Spiralia;Lophotrochozoa;Mollusca;Bivalvia;Autobranchia;Heteroconchia;Euhe  
terodonta;Imparidentia;Venerida;Veneroidea;Veneridae;Mercenaria;Mercenari  
a mercenaria  
UdeM00000042941 1735272 92.4 UdeM00000042941 XP\_041360121.1 43.7  
87 46 3 319 404 275 359 1.40E-15 92.4 1735272  
cellular  
organisms;Eukaryota;Opisthokonta;Metazoa;Eumetazoa;Bilateria;Protostomia;  
Spiralia;Lophotrochozoa;Mollusca;Gastropoda;Neomphalina;Neomphaloidea;Pel  
tospiridae;Gigantopelta;Gigantopelta aegis  
UdeM00000042942 6596 481.9 UdeM00000042942 XP\_045190172.1 62.8 393  
140 3 6 396 8 396 8.00E-133 481.9 6596 cellular  
organisms;Eukaryota;Opisthokonta;Metazoa;Eumetazoa;Bilateria;Protostomia;  
Spiralia;Lophotrochozoa;Mollusca;Bivalvia;Autobranchia;Heteroconchia;Euhe  
terodonta;Imparidentia;Venerida;Veneroidea;Veneridae;Mercenaria;Mercenari  
a mercenaria  
UdeM00000042943 6596 484.6 UdeM00000042943 XP\_045190172.1 62.6 393  
141 3 6 396 8 396 1.20E-133 484.6 6596 cellular  
organisms;Eukaryota;Opisthokonta;Metazoa;Eumetazoa;Bilateria;Protostomia;  
Spiralia;Lophotrochozoa;Mollusca;Bivalvia;Autobranchia;Heteroconchia;Euhe  
terodonta;Imparidentia;Venerida;Veneroidea;Veneridae;Mercenaria;Mercenari  
a mercenaria  
UdeM00000044491 7668 115.2 UdeM00000044491 XP\_030847080.1 40.9 149  
81 3 1 147 1 144 8.30E-23 115.2 7668 cellular  
organisms;Eukaryota;Opisthokonta;Metazoa;Eumetazoa;Bilateria;Deuterostomi  
a;Echinodermata;Eleutherozoa;Echinozoa;Echinoidea;Euechinoidea;Echinacea;  
Camarodonta;Echinidea;Strongylocentrotidae;Strongylocentrotus;Strongyloce  
ntrotus purpuratus  
UdeM00000044327 83332 407.1 UdeM00000044327 NP\_217487.1 76.7 262 61  
0 1 262 21 282 1.60E-110 407.1 83332 cellular  
organisms;Bacteria;Terrabacteria

group;Actinobacteria;Actinomycetia;Corynebacteriales;Mycobacteriaceae;Mycobacterium;Mycobacterium tuberculosis complex;Mycobacterium tuberculosis;Mycobacterium tuberculosis H37Rv

UdeM00000044328 326968 137.1 UdeM00000044328 XP\_015870965.1 37  
289 140 8 4 272 6 272 3.40E-29 137.1 326968  
cellular

organisms;Eukaryota;Viridiplantae;Streptophyta;Streptophytina;Embryophyta;Tracheophyta;Euphyllophyta;Spermatophyta;Magnoliopsida;Mesangiospermae;eudicotyledons;Gunneridae;Pentapetalae;rosids;fabids;Rosales;Rhamnaceae;Palmae;Ziziphus;Ziziphus jujuba

UdeM00000007921 6596 134.8 UdeM00000007921 XP\_045201952.1 40.3 206  
111 8 14 210 591 793 1.30E-28 134.8 6596 cellular

organisms;Eukaryota;Opisthokonta;Metazoa;Eumetazoa;Bilateria;Protostomia;Spiralia;Lophotrochozoa;Mollusca;Bivalvia;Autobranchia;Heteroconchia;Euheterodonta;Imparidentia;Venerida;Veneroidea;Veneridae;Mercenaria;Mercenaria mercenaria

UdeM00000007922 6596 100.9 UdeM00000007922 XP\_045208184.1 60.7 84  
32 1 3 85 1 84 8.90E-19 100.9 6596 cellular

organisms;Eukaryota;Opisthokonta;Metazoa;Eumetazoa;Bilateria;Protostomia;Spiralia;Lophotrochozoa;Mollusca;Bivalvia;Autobranchia;Heteroconchia;Euheterodonta;Imparidentia;Venerida;Veneroidea;Veneridae;Mercenaria;Mercenaria mercenaria

UdeM00000007923 45264 390.6 UdeM00000007923 XP\_044165535.1 49.3 367  
182 1 1 363 158 524 2.90E-105 390.6 45264 cellular

organisms;Eukaryota;Opisthokonta;Metazoa;Eumetazoa;Cnidaria;Anthozoa;Hexacorallia;Scleractinia;Astrocoeniina;Acroporidae;Acropora;Acropora millepora

UdeM00000007924 6596 548.1 UdeM00000007924 XP\_045207396.1 45 722  
359 12 1 703 1 703 1.60E-152 548.1 6596 cellular

organisms;Eukaryota;Opisthokonta;Metazoa;Eumetazoa;Bilateria;Protostomia;Spiralia;Lophotrochozoa;Mollusca;Bivalvia;Autobranchia;Heteroconchia;Euheterodonta;Imparidentia;Venerida;Veneroidea;Veneridae;Mercenaria;Mercenaria mercenaria

UdeM00000007925 6573 705.3 UdeM00000007925 XP\_021372017.1 52.3 761  
280 10 3 758 5 687 8.80E-200 705.3 6573 cellular

organisms;Eukaryota;Opisthokonta;Metazoa;Eumetazoa;Bilateria;Protostomia;Spiralia;Lophotrochozoa;Mollusca;Bivalvia;Autobranchia;Pteriomorphia;Pectinida;Pectinoidea;Pectinidae;Mizuhopecten;Mizuhopecten yessoensis

UdeM00000007926 6579 595.9 UdeM00000007926 XP\_033759184.1 53.6 599  
238 10 16 599 13 586 5.80E-167 595.9 6579 cellular

organisms;Eukaryota;Opisthokonta;Metazoa;Eumetazoa;Bilateria;Protostomia;Spiralia;Lophotrochozoa;Mollusca;Bivalvia;Autobranchia;Pteriomorphia;Pectinida;Pectinoidea;Pectinidae;Pecten;Pecten maximus

UdeM00000007927 6596 118.6 UdeM00000007927 XP\_045209337.1 28.5 242  
162 7 30 266 29 264 1.30E-23 118.6 6596 cellular

organisms;Eukaryota;Opisthokonta;Metazoa;Eumetazoa;Bilateria;Protostomia;Spiralia;Lophotrochozoa;Mollusca;Bivalvia;Autobranchia;Heteroconchia;Euheterodonta;Imparidentia;Venerida;Veneroidea;Veneridae;Mercenaria;Mercenaria mercenaria

UdeM00000007928 6596 297.7 UdeM00000007928 XP\_045210434.1 59.4 288  
112 4 129 413 161 446 2.70E-77 297.7 6596 cellular

organisms;Eukaryota;Opisthokonta;Metazoa;Eumetazoa;Bilateria;Protostomia;Spiralia;Lophotrochozoa;Mollusca;Bivalvia;Autobranchia;Heteroconchia;Euheterodonta

terodonta;Imparidentia;Venerida;Veneroidea;Veneridae;Mercenaria;Mercenari  
 a mercenaria  
 UdeM00000007929 6596 633.6 UdeM00000007929 XP\_045210423.1 55.1 621  
 250 6 1 599 73 686 2.50E-178 633.6 6596 cellular  
 organisms;Eukaryota;Opisthokonta;Metazoa;Eumetazoa;Bilateria;Protostomia;  
 Spiralia;Lophotrochozoa;Mollusca;Bivalvia;Autobranhia;Heteroconchia;Euhe  
 terodonta;Imparidentia;Venerida;Veneroidea;Veneridae;Mercenaria;Mercenari  
 a mercenaria  
 UdeM00000007930 7574 225.7 UdeM00000007930 XP\_013414953.1 82.4 131  
 23 0 617 747 211 341 1.90E-55 225.7 7574 cellular  
 organisms;Eukaryota;Opisthokonta;Metazoa;Eumetazoa;Bilateria;Protostomia;  
 Spiralia;Lophotrochozoa;Brachiopoda;Linguliformea;Lingulata;Lingulida;Lin  
 guloidea;Lingulidae;Lingula;Lingula anatina  
 UdeM00000007931 6579 448.4 UdeM00000007931 XP\_033751332.1 29.3 1866  
 1138 77 16 1768 1424 3220 4.90E-122 448.4 6579 cellular  
 organisms;Eukaryota;Opisthokonta;Metazoa;Eumetazoa;Bilateria;Protostomia;  
 Spiralia;Lophotrochozoa;Mollusca;Bivalvia;Autobranhia;Pteriormorphia;Pect  
 inida;Pectinoidea;Pectinidae;Pecten;Pecten maximus  
 UdeM00000007937 6596 195.3 UdeM00000007937 XP\_045183414.1 30.3 416  
 253 7 11 415 12 401 2.40E-46 195.3 6596 cellular  
 organisms;Eukaryota;Opisthokonta;Metazoa;Eumetazoa;Bilateria;Protostomia;  
 Spiralia;Lophotrochozoa;Mollusca;Bivalvia;Autobranhia;Heteroconchia;Euhe  
 terodonta;Imparidentia;Venerida;Veneroidea;Veneridae;Mercenaria;Mercenari  
 a mercenaria  
 UdeM00000007939 6596 208 UdeM00000007939 XP\_045183414.1 30.1 425  
 266 6 11 430 12 410 2.90E-50 208 6596 cellular  
 organisms;Eukaryota;Opisthokonta;Metazoa;Eumetazoa;Bilateria;Protostomia;  
 Spiralia;Lophotrochozoa;Mollusca;Bivalvia;Autobranhia;Heteroconchia;Euhe  
 terodonta;Imparidentia;Venerida;Veneroidea;Veneridae;Mercenaria;Mercenari  
 a mercenaria  
 UdeM00000007942 6596 266.5 UdeM00000007942 XP\_045183414.1 28.5 759  
 436 17 28 737 12 712 9.80E-68 266.5 6596 cellular  
 organisms;Eukaryota;Opisthokonta;Metazoa;Eumetazoa;Bilateria;Protostomia;  
 Spiralia;Lophotrochozoa;Mollusca;Bivalvia;Autobranhia;Heteroconchia;Euhe  
 terodonta;Imparidentia;Venerida;Veneroidea;Veneridae;Mercenaria;Mercenari  
 a mercenaria  
 UdeM00000007944 7741 74.7 UdeM00000007944 XP\_019622189.1 46.5 71  
 38 0 4 74 15 85 5.50E-11 74.7 7741 cellular  
 organisms;Eukaryota;Opisthokonta;Metazoa;Eumetazoa;Bilateria;Deuterostomi  
 a;Chordata;Cephalochordata;Leptocardii;Amphioxiformes;Branchiostomidae;Br  
 anchiostoma;Branchiostoma belcheri  
 UdeM00000007945 6596 60.8 UdeM00000007945 XP\_045200365.1 34.6 78  
 50 1 57 133 75 152 1.50E-06 60.8 6596 cellular  
 organisms;Eukaryota;Opisthokonta;Metazoa;Eumetazoa;Bilateria;Protostomia;  
 Spiralia;Lophotrochozoa;Mollusca;Bivalvia;Autobranhia;Heteroconchia;Euhe  
 terodonta;Imparidentia;Venerida;Veneroidea;Veneridae;Mercenaria;Mercenari  
 a mercenaria  
 UdeM00000007946 6596 117.9 UdeM00000007946 XP\_045199277.1 50.8 130  
 59 2 1 126 1 129 9.70E-24 117.9 6596 cellular  
 organisms;Eukaryota;Opisthokonta;Metazoa;Eumetazoa;Bilateria;Protostomia;  
 Spiralia;Lophotrochozoa;Mollusca;Bivalvia;Autobranhia;Heteroconchia;Euhe  
 terodonta;Imparidentia;Venerida;Veneroidea;Veneridae;Mercenaria;Mercenari  
 a mercenaria

UdeM00000007947 94835 71.6 UdeM00000007947 XP\_019365841.1 25.1 203  
 126 6 16 211 2613 2796 2.00E-09 71.6 94835 cellular  
 organisms;Eukaryota;Opisthokonta;Metazoa;Eumetazoa;Bilateria;Deuterostomi  
 a;Chordata;Craniata;Vertebrata;Gnathostomata;Teleostomi;Euteleostomi;Sarc  
 opterygii;Dipnotetrapodomorpha;Tetrapoda;Amniota;Sauropsida;Sauria;Archel  
 osauria;Archosauria;Crocodylia;Longirostres;Gavialidae;Gavialinae;Gaviali  
 s;Gavialis gangeticus

UdeM00000007948 6596 465.3 UdeM00000007948 XP\_045210487.1 45.1 638  
 282 15 112 703 184 799 1.40E-127 465.3 6596 cellular  
 organisms;Eukaryota;Opisthokonta;Metazoa;Eumetazoa;Bilateria;Protostomia;  
 Spiralia;Lophotrochozoa;Mollusca;Bivalvia;Autobranchia;Heteroconchia;Euhe  
 terodonta;Imparidentia;Venerida;Veneroidea;Veneridae;Mercenaria;Mercenari  
 a mercenaria

UdeM00000007949 6596 465.3 UdeM00000007949 XP\_045210487.1 45.1 638  
 282 15 62 653 184 799 1.30E-127 465.3 6596 cellular  
 organisms;Eukaryota;Opisthokonta;Metazoa;Eumetazoa;Bilateria;Protostomia;  
 Spiralia;Lophotrochozoa;Mollusca;Bivalvia;Autobranchia;Heteroconchia;Euhe  
 terodonta;Imparidentia;Venerida;Veneroidea;Veneridae;Mercenaria;Mercenari  
 a mercenaria

UdeM00000007951 6573 134.4 UdeM00000007951 XP\_021349366.1 36.4 195  
 122 2 52 245 3 196 2.20E-28 134.4 6573 cellular  
 organisms;Eukaryota;Opisthokonta;Metazoa;Eumetazoa;Bilateria;Protostomia;  
 Spiralia;Lophotrochozoa;Mollusca;Bivalvia;Autobranchia;Pteriormorphia;Pect  
 inida;Pectinoidea;Pectinidae;Mizuhopecten;Mizuhopecten yessoensis

UdeM00000007952 6596 1188.3 UdeM00000007952 XP\_045207916.1 55.6  
 1184 422 20 1 1111 1 1153 0.00E+00 1188.3 6596  
 cellular  
 organisms;Eukaryota;Opisthokonta;Metazoa;Eumetazoa;Bilateria;Protostomia;  
 Spiralia;Lophotrochozoa;Mollusca;Bivalvia;Autobranchia;Heteroconchia;Euhe  
 terodonta;Imparidentia;Venerida;Veneroidea;Veneridae;Mercenaria;Mercenari  
 a mercenaria

UdeM00000007953 6596 387.1 UdeM00000007953 XP\_045207917.1 76.7 245  
 57 0 1 245 1 245 1.70E-104 387.1 6596 cellular  
 organisms;Eukaryota;Opisthokonta;Metazoa;Eumetazoa;Bilateria;Protostomia;  
 Spiralia;Lophotrochozoa;Mollusca;Bivalvia;Autobranchia;Heteroconchia;Euhe  
 terodonta;Imparidentia;Venerida;Veneroidea;Veneridae;Mercenaria;Mercenari  
 a mercenaria

UdeM00000007954 6565 338.6 UdeM00000007954 XP\_022323349.1 95.1 183  
 9 0 2 184 269 451 5.20E-90 338.6 6565 cellular  
 organisms;Eukaryota;Opisthokonta;Metazoa;Eumetazoa;Bilateria;Protostomia;  
 Spiralia;Lophotrochozoa;Mollusca;Bivalvia;Autobranchia;Pteriormorphia;Ostr  
 eida;Ostreoidea;Ostreidae;Crassostrea;Crassostrea virginica

UdeM00000007955 1735272 247.3 UdeM00000007955 XP\_041373718.1 47.8  
 274 134 4 1 269 1 270 2.30E-62 247.3 1735272  
 cellular  
 organisms;Eukaryota;Opisthokonta;Metazoa;Eumetazoa;Bilateria;Protostomia;  
 Spiralia;Lophotrochozoa;Mollusca;Gastropoda;Neomphalina;Neomphaloidea;Pel  
 tospiridae;Gigantopelta;Gigantopelta aegis

UdeM00000007956 6596 194.1 UdeM00000007956 XP\_045210329.1 44.3 230  
 114 4 39 263 1 221 2.20E-46 194.1 6596 cellular  
 organisms;Eukaryota;Opisthokonta;Metazoa;Eumetazoa;Bilateria;Protostomia;  
 Spiralia;Lophotrochozoa;Mollusca;Bivalvia;Autobranchia;Heteroconchia;Euhe  
 terodonta;Imparidentia;Venerida;Veneroidea;Veneridae;Mercenaria;Mercenari  
 a mercenaria

UdeM00000007957 6596 1159.1 UdeM00000007957 XP\_045207375.1 71  
 814 198 5 2 790 4 804 0.00E+00 1159.1 6596  
 cellular  
 organisms;Eukaryota;Opisthokonta;Metazoa;Eumetazoa;Bilateria;Protostomia;  
 Spiralia;Lophotrochozoa;Mollusca;Bivalvia;Autobranhia;Heteroconchia;Euhe  
 terodonta;Imparidentia;Venerida;Veneroidea;Veneridae;Mercenaria;Mercenari  
 a mercenaria  
 UdeM00000007958 6596 1170.6 UdeM00000007958 XP\_045207375.1 70.5  
 827 218 6 2 828 4 804 0.00E+00 1170.6 6596  
 cellular  
 organisms;Eukaryota;Opisthokonta;Metazoa;Eumetazoa;Bilateria;Protostomia;  
 Spiralia;Lophotrochozoa;Mollusca;Bivalvia;Autobranhia;Heteroconchia;Euhe  
 terodonta;Imparidentia;Venerida;Veneroidea;Veneridae;Mercenaria;Mercenari  
 a mercenaria  
 UdeM00000007959 6596 1174.5 UdeM00000007959 XP\_045209499.1 92  
 622 50 0 1 622 1 622 0.00E+00 1174.5 6596  
 cellular  
 organisms;Eukaryota;Opisthokonta;Metazoa;Eumetazoa;Bilateria;Protostomia;  
 Spiralia;Lophotrochozoa;Mollusca;Bivalvia;Autobranhia;Heteroconchia;Euhe  
 terodonta;Imparidentia;Venerida;Veneroidea;Veneridae;Mercenaria;Mercenari  
 a mercenaria  
 UdeM00000007960 6596 302 UdeM00000007960 XP\_045208042.1 87 169  
 21 1 1 168 1 169 4.80E-79 302 6596 cellular  
 organisms;Eukaryota;Opisthokonta;Metazoa;Eumetazoa;Bilateria;Protostomia;  
 Spiralia;Lophotrochozoa;Mollusca;Bivalvia;Autobranhia;Heteroconchia;Euhe  
 terodonta;Imparidentia;Venerida;Veneroidea;Veneridae;Mercenaria;Mercenari  
 a mercenaria  
 UdeM00000007961 6596 488 UdeM00000007961 XP\_045210314.1 54.1 479  
 206 6 81 549 22 496 1.50E-134 488 6596 cellular  
 organisms;Eukaryota;Opisthokonta;Metazoa;Eumetazoa;Bilateria;Protostomia;  
 Spiralia;Lophotrochozoa;Mollusca;Bivalvia;Autobranhia;Heteroconchia;Euhe  
 terodonta;Imparidentia;Venerida;Veneroidea;Veneridae;Mercenaria;Mercenari  
 a mercenaria  
 UdeM00000007962 6596 365.9 UdeM00000007962 XP\_045210314.1 58.3 333  
 131 2 3 327 152 484 5.30E-98 365.9 6596 cellular  
 organisms;Eukaryota;Opisthokonta;Metazoa;Eumetazoa;Bilateria;Protostomia;  
 Spiralia;Lophotrochozoa;Mollusca;Bivalvia;Autobranhia;Heteroconchia;Euhe  
 terodonta;Imparidentia;Venerida;Veneroidea;Veneridae;Mercenaria;Mercenari  
 a mercenaria  
 UdeM00000007963 6596 535 UdeM00000007963 XP\_045210314.1 56.3 483  
 179 8 77 554 60 515 1.10E-148 535 6596 cellular  
 organisms;Eukaryota;Opisthokonta;Metazoa;Eumetazoa;Bilateria;Protostomia;  
 Spiralia;Lophotrochozoa;Mollusca;Bivalvia;Autobranhia;Heteroconchia;Euhe  
 terodonta;Imparidentia;Venerida;Veneroidea;Veneridae;Mercenaria;Mercenari  
 a mercenaria  
 UdeM00000007964 6596 223.4 UdeM00000007964 XP\_045208606.1 33.4 344  
 226 3 5 345 4 347 8.10E-55 223.4 6596 cellular  
 organisms;Eukaryota;Opisthokonta;Metazoa;Eumetazoa;Bilateria;Protostomia;  
 Spiralia;Lophotrochozoa;Mollusca;Bivalvia;Autobranhia;Heteroconchia;Euhe  
 terodonta;Imparidentia;Venerida;Veneroidea;Veneridae;Mercenaria;Mercenari  
 a mercenaria  
 UdeM00000007965 6565 772.3 UdeM00000007965 XP\_022327319.1 76.3 486  
 114 1 14 498 10 495 3.80E-220 772.3 6565 cellular  
 organisms;Eukaryota;Opisthokonta;Metazoa;Eumetazoa;Bilateria;Protostomia;

Spiralia;Lophotrochozoa;Mollusca;Bivalvia;Autobranchia;Pteriormorphia;Ostr  
eida;Ostreoidea;Ostreidae;Crassostrea;Crassostrea virginica  
UdeM00000007966 6596 750.7 UdeM00000007966 XP\_045209655.1 56.5 634  
268 2 1 634 1 626 1.50E-213 750.7 6596 cellular  
organisms;Eukaryota;Opisthokonta;Metazoa;Eumetazoa;Bilateria;Protostomia;  
Spiralia;Lophotrochozoa;Mollusca;Bivalvia;Autobranchia;Heteroconchia;Euhe  
terodonta;Imparidentia;Venerida;Veneroidea;Veneridae;Mercenaria;Mercenari  
a mercenaria  
UdeM00000007967 6596 260.8 UdeM00000007967 XP\_045207318.1 47.9 326  
141 6 1 305 1 318 2.30E-66 260.8 6596 cellular  
organisms;Eukaryota;Opisthokonta;Metazoa;Eumetazoa;Bilateria;Protostomia;  
Spiralia;Lophotrochozoa;Mollusca;Bivalvia;Autobranchia;Heteroconchia;Euhe  
terodonta;Imparidentia;Venerida;Veneroidea;Veneridae;Mercenaria;Mercenari  
a mercenaria  
UdeM00000007968 6596 207.2 UdeM00000007968 XP\_045207722.1 43.2 273  
135 6 55 310 51 320 3.30E-50 207.2 6596 cellular  
organisms;Eukaryota;Opisthokonta;Metazoa;Eumetazoa;Bilateria;Protostomia;  
Spiralia;Lophotrochozoa;Mollusca;Bivalvia;Autobranchia;Heteroconchia;Euhe  
terodonta;Imparidentia;Venerida;Veneroidea;Veneridae;Mercenaria;Mercenari  
a mercenaria  
UdeM00000007969 1529436 253.8 UdeM00000007969 XP\_033096781.1 98.4  
128 2 0 1 128 1 128 1.10E-64 253.8 1529436  
cellular  
organisms;Eukaryota;Opisthokonta;Metazoa;Eumetazoa;Bilateria;Deuterostomi  
a;Echinodermata;Pelmatozoa;Crinoidea;Articulata;Comatulida;Comatulidae;Co  
matulinae;Anneissia;Anneissia japonica  
UdeM00000007970 6596 1035 UdeM00000007970 XP\_045209822.1 47.9 1327  
566 38 21 1275 152 1425 8.00E-299 1035 6596 cellular  
organisms;Eukaryota;Opisthokonta;Metazoa;Eumetazoa;Bilateria;Protostomia;  
Spiralia;Lophotrochozoa;Mollusca;Bivalvia;Autobranchia;Heteroconchia;Euhe  
terodonta;Imparidentia;Venerida;Veneroidea;Veneridae;Mercenaria;Mercenari  
a mercenaria  
UdeM00000007971 6579 293.1 UdeM00000007971 XP\_033757902.1 55.3 246  
100 1 9 244 1 246 3.60E-76 293.1 6579 cellular  
organisms;Eukaryota;Opisthokonta;Metazoa;Eumetazoa;Bilateria;Protostomia;  
Spiralia;Lophotrochozoa;Mollusca;Bivalvia;Autobranchia;Pteriormorphia;Pect  
inida;Pectinoidea;Pectinidae;Pecten;Pecten maximus  
UdeM00000007972 29159 228 UdeM00000007972 XP\_011436344.2 67.8 174  
54 1 9 180 374 547 9.40E-57 228 29159 cellular  
organisms;Eukaryota;Opisthokonta;Metazoa;Eumetazoa;Bilateria;Protostomia;  
Spiralia;Lophotrochozoa;Mollusca;Bivalvia;Autobranchia;Pteriormorphia;Ostr  
eida;Ostreoidea;Ostreidae;Crassostrea;Crassostrea gigas  
UdeM00000007973 6596 623.2 UdeM00000007973 XP\_045209096.1 77.6 380  
73 1 11 390 8 375 2.20E-175 623.2 6596 cellular  
organisms;Eukaryota;Opisthokonta;Metazoa;Eumetazoa;Bilateria;Protostomia;  
Spiralia;Lophotrochozoa;Mollusca;Bivalvia;Autobranchia;Heteroconchia;Euhe  
terodonta;Imparidentia;Venerida;Veneroidea;Veneridae;Mercenaria;Mercenari  
a mercenaria  
UdeM00000007974 6596 378.6 UdeM00000007974 XP\_045207008.1 45.6 608  
305 10 1 601 1 589 1.50E-101 378.6 6596 cellular  
organisms;Eukaryota;Opisthokonta;Metazoa;Eumetazoa;Bilateria;Protostomia;  
Spiralia;Lophotrochozoa;Mollusca;Bivalvia;Autobranchia;Heteroconchia;Euhe  
terodonta;Imparidentia;Venerida;Veneroidea;Veneridae;Mercenaria;Mercenari  
a mercenaria

UdeM00000007975 1735272 474.2 UdeM00000007975 XP\_041373744.1 34.5  
 785 441 21 412 1167 172 912 4.90E-130 474.2 1735272  
 cellular  
 organisms;Eukaryota;Opisthokonta;Metazoa;Eumetazoa;Bilateria;Protostomia;  
 Spiralia;Lophotrochozoa;Mollusca;Gastropoda;Neomphalina;Neomphaloidea;Pel  
 tospiridae;Gigantopelta;Gigantopelta aegis  
 UdeM00000007976 6573 620.5 UdeM00000007976 XP\_021346440.1 57.6 583  
 201 9 1 579 1 541 2.10E-174 620.5 6573 cellular  
 organisms;Eukaryota;Opisthokonta;Metazoa;Eumetazoa;Bilateria;Protostomia;  
 Spiralia;Lophotrochozoa;Mollusca;Bivalvia;Autobranchia;Pteriormorphia;Pect  
 inida;Pectinoidea;Pectinidae;Mizuhopecten;Mizuhopecten yessoensis  
 UdeM00000007978 6596 2231.4 UdeM00000007978 XP\_045207325.1 73.5  
 1695 443 4 1 1690 388 2080 0.00E+00 2231.4 6596  
 cellular  
 organisms;Eukaryota;Opisthokonta;Metazoa;Eumetazoa;Bilateria;Protostomia;  
 Spiralia;Lophotrochozoa;Mollusca;Bivalvia;Autobranchia;Heteroconchia;Euhe  
 terodonta;Imparidentia;Venerida;Veneroidea;Veneridae;Mercenaria;Mercenari  
 a mercenaria  
 UdeM00000007979 6596 2223.4 UdeM00000007979 XP\_045207325.1 73.5  
 1689 440 4 1 1684 394 2080 0.00E+00 2223.4 6596  
 cellular  
 organisms;Eukaryota;Opisthokonta;Metazoa;Eumetazoa;Bilateria;Protostomia;  
 Spiralia;Lophotrochozoa;Mollusca;Bivalvia;Autobranchia;Heteroconchia;Euhe  
 terodonta;Imparidentia;Venerida;Veneroidea;Veneridae;Mercenaria;Mercenari  
 a mercenaria  
 UdeM00000007980 6596 165.6 UdeM00000007980 XP\_045160385.1 24.6 753  
 443 21 12 673 10 728 4.30E-37 165.6 6596 cellular  
 organisms;Eukaryota;Opisthokonta;Metazoa;Eumetazoa;Bilateria;Protostomia;  
 Spiralia;Lophotrochozoa;Mollusca;Bivalvia;Autobranchia;Heteroconchia;Euhe  
 terodonta;Imparidentia;Venerida;Veneroidea;Veneridae;Mercenaria;Mercenari  
 a mercenaria  
 UdeM00000007981 6579 147.9 UdeM00000007981 XP\_033763705.1 51.9 154  
 72 2 38 189 101 254 1.40E-32 147.9 6579 cellular  
 organisms;Eukaryota;Opisthokonta;Metazoa;Eumetazoa;Bilateria;Protostomia;  
 Spiralia;Lophotrochozoa;Mollusca;Bivalvia;Autobranchia;Pteriormorphia;Pect  
 inida;Pectinoidea;Pectinidae;Pecten;Pecten maximus  
 UdeM00000007982 37653 513.8 UdeM00000007982 XP\_014784610.1 60.8 408  
 147 4 2 397 3 409 1.90E-142 513.8 37653 cellular  
 organisms;Eukaryota;Opisthokonta;Metazoa;Eumetazoa;Bilateria;Protostomia;  
 Spiralia;Lophotrochozoa;Mollusca;Cephalopoda;Coleoidea;Octopodiformes;Oct  
 opoda;Incirrata;Octopodidae;Octopus;Octopus bimaculoides  
 UdeM00000007983 37653 417.9 UdeM00000007983 XP\_014784610.1 56.2 381  
 121 5 9 344 33 412 1.20E-113 417.9 37653 cellular  
 organisms;Eukaryota;Opisthokonta;Metazoa;Eumetazoa;Bilateria;Protostomia;  
 Spiralia;Lophotrochozoa;Mollusca;Cephalopoda;Coleoidea;Octopodiformes;Oct  
 opoda;Incirrata;Octopodidae;Octopus;Octopus bimaculoides  
 UdeM00000007984 37653 291.6 UdeM00000007984 XP\_014784610.1 49.8 325  
 108 5 1 270 1 325 1.10E-75 291.6 37653 cellular  
 organisms;Eukaryota;Opisthokonta;Metazoa;Eumetazoa;Bilateria;Protostomia;  
 Spiralia;Lophotrochozoa;Mollusca;Cephalopoda;Coleoidea;Octopodiformes;Oct  
 opoda;Incirrata;Octopodidae;Octopus;Octopus bimaculoides  
 UdeM00000007985 37653 488.8 UdeM00000007985 XP\_014784610.1 58.6 408  
 153 4 2 394 3 409 6.50E-135 488.8 37653 cellular  
 organisms;Eukaryota;Opisthokonta;Metazoa;Eumetazoa;Bilateria;Protostomia;

Spiralia;Lophotrochozoa;Mollusca;Cephalopoda;Coleoidea;Octopodiformes;Octopoda;Incirrata;Octopodidae;Octopus;Octopus bimaculoides  
 UdeM00000007986 6565 513.8 UdeM00000007986 XP\_022293897.1 64.4 382  
 118 3 9 372 40 421 1.80E-142 513.8 6565 cellular  
 organisms;Eukaryota;Opisthokonta;Metazoa;Eumetazoa;Bilateria;Protostomia;Spiralia;Lophotrochozoa;Mollusca;Bivalvia;Autobranchia;Pteriomorphia;Ostreida;Ostreoidea;Ostreidae;Crassostrea;Crassostrea virginica  
 UdeM00000007987 37653 522.7 UdeM00000007987 XP\_014784610.1 61.2 410  
 147 3 1 399 1 409 4.20E-145 522.7 37653 cellular  
 organisms;Eukaryota;Opisthokonta;Metazoa;Eumetazoa;Bilateria;Protostomia;Spiralia;Lophotrochozoa;Mollusca;Cephalopoda;Coleoidea;Octopodiformes;Octopoda;Incirrata;Octopodidae;Octopus;Octopus bimaculoides  
 UdeM00000007988 1735272 449.1 UdeM00000007988 XP\_041373019.1 93.6  
 235 15 0 92 326 83 317 4.70E-123 449.1 1735272  
 cellular  
 organisms;Eukaryota;Opisthokonta;Metazoa;Eumetazoa;Bilateria;Protostomia;Spiralia;Lophotrochozoa;Mollusca;Gastropoda;Neomphalina;Neomphaloidea;Peltospiridae;Gigantopelta;Gigantopelta aegis  
 UdeM00000007989 37653 510.4 UdeM00000007989 XP\_014784610.1 63.9 382  
 119 4 10 374 33 412 2.00E-141 510.4 37653 cellular  
 organisms;Eukaryota;Opisthokonta;Metazoa;Eumetazoa;Bilateria;Protostomia;Spiralia;Lophotrochozoa;Mollusca;Cephalopoda;Coleoidea;Octopodiformes;Octopoda;Incirrata;Octopodidae;Octopus;Octopus bimaculoides  
 UdeM00000007990 37653 523.5 UdeM00000007990 XP\_014784610.1 61.8 408  
 144 3 2 398 3 409 2.40E-145 523.5 37653 cellular  
 organisms;Eukaryota;Opisthokonta;Metazoa;Eumetazoa;Bilateria;Protostomia;Spiralia;Lophotrochozoa;Mollusca;Cephalopoda;Coleoidea;Octopodiformes;Octopoda;Incirrata;Octopodidae;Octopus;Octopus bimaculoides  
 UdeM00000007992 6579 438.3 UdeM00000007992 XP\_033759088.1 64.2 349  
 108 5 87 430 128 464 1.10E-119 438.3 6579 cellular  
 organisms;Eukaryota;Opisthokonta;Metazoa;Eumetazoa;Bilateria;Protostomia;Spiralia;Lophotrochozoa;Mollusca;Bivalvia;Autobranchia;Pteriomorphia;Pectinida;Pectinoidea;Pectinidae;Pecten;Pecten maximus  
 UdeM00000007991 6579 438.3 UdeM00000007991 XP\_033759088.1 64.2 349  
 108 5 94 437 128 464 1.10E-119 438.3 6579 cellular  
 organisms;Eukaryota;Opisthokonta;Metazoa;Eumetazoa;Bilateria;Protostomia;Spiralia;Lophotrochozoa;Mollusca;Bivalvia;Autobranchia;Pteriomorphia;Pectinida;Pectinoidea;Pectinidae;Pecten;Pecten maximus  
 UdeM00000007998 6573 77 UdeM00000007998 XP\_021345496.1 32.4 170  
 108 4 15 178 538 706 2.80E-11 77 6573 cellular  
 organisms;Eukaryota;Opisthokonta;Metazoa;Eumetazoa;Bilateria;Protostomia;Spiralia;Lophotrochozoa;Mollusca;Bivalvia;Autobranchia;Pteriomorphia;Pectinida;Pectinoidea;Pectinidae;Mizuhopecten;Mizuhopecten yessoensis  
 UdeM00000007999 6579 229.6 UdeM00000007999 XP\_033751405.1 32.1 645  
 369 22 35 645 1858 2467 1.50E-56 229.6 6579 cellular  
 organisms;Eukaryota;Opisthokonta;Metazoa;Eumetazoa;Bilateria;Protostomia;Spiralia;Lophotrochozoa;Mollusca;Bivalvia;Autobranchia;Pteriomorphia;Pectinida;Pectinoidea;Pectinidae;Pecten;Pecten maximus  
 UdeM00000008002 6565 146.4 UdeM00000008002 XP\_022325035.1 27 396  
 262 11 30 411 1091 1473 8.40E-32 146.4 6565 cellular  
 organisms;Eukaryota;Opisthokonta;Metazoa;Eumetazoa;Bilateria;Protostomia;Spiralia;Lophotrochozoa;Mollusca;Bivalvia;Autobranchia;Pteriomorphia;Ostreida;Ostreoidea;Ostreidae;Crassostrea;Crassostrea virginica



UdeM00000008003 1234273 74.7 UdeM00000008003 XP\_026998426.1 24.2  
 165 120 1 6 165 1618 1782 2.50E-10 74.7 1234273  
 cellular  
 organisms;Eukaryota;Opisthokonta;Metazoa;Eumetazoa;Bilateria;Deuterostomi  
 a;Chordata;Craniata;Vertebrata;Gnathostomata;Teleostomi;Euteleostomi;Acti  
 nopterygii;Actinopteri;Neopterygii;Teleostei;Osteoglossocephalai;Clupeoce  
 phala;Otomorpha;Ostariophysi;Otophysi;Characiphysae;Siluriformes;Siluroid  
 ei;Bagridae;Tachysurus;Tachysurus fulvidraco  
 UdeM00000008004 7213 61.2 UdeM00000008004 XP\_020714027.1 25.7 183  
 120 4 50 217 97 278 2.80E-06 61.2 7213 cellular  
 organisms;Eukaryota;Opisthokonta;Metazoa;Eumetazoa;Bilateria;Protostomia;  
 Ecdysozoa;Panarthropoda;Arthropoda;Mandibulata;Pancrustacea;Hexapoda;Inse  
 cta;Dicondylia;Pterygota;Neoptera;Endopterygota;Diptera;Brachycera;Muscom  
 orpha;Eremoneura;Cyclorrhapha;Schizophora;Acalyptratae;Tephritoidea;Tephr  
 itidae;Dacinae;Ceratitidini;Ceratitis;Ceratitis;Ceratitis capitata  
 UdeM00000008007 29159 164.9 UdeM00000008007 XP\_034331610.1 36.6 292  
 168 7 3 283 822 1107 1.50E-37 164.9 29159 cellular  
 organisms;Eukaryota;Opisthokonta;Metazoa;Eumetazoa;Bilateria;Protostomia;  
 Spiralia;Lophotrochozoa;Mollusca;Bivalvia;Autobranchia;Pteriormorphia;Ostr  
 eida;Ostreoidea;Ostreidae;Crassostrea;Crassostrea gigas  
 UdeM00000008009 6565 149.8 UdeM00000008009 XP\_022337267.1 28.2 575  
 352 14 1 523 1 566 9.90E-33 149.8 6565 cellular  
 organisms;Eukaryota;Opisthokonta;Metazoa;Eumetazoa;Bilateria;Protostomia;  
 Spiralia;Lophotrochozoa;Mollusca;Bivalvia;Autobranchia;Pteriormorphia;Ostr  
 eida;Ostreoidea;Ostreidae;Crassostrea;Crassostrea virginica  
 UdeM00000008010 29159 129.8 UdeM00000008010 XP\_034318141.1 29.1 598  
 288 17 1 471 2 590 9.60E-27 129.8 29159 cellular  
 organisms;Eukaryota;Opisthokonta;Metazoa;Eumetazoa;Bilateria;Protostomia;  
 Spiralia;Lophotrochozoa;Mollusca;Bivalvia;Autobranchia;Pteriormorphia;Ostr  
 eida;Ostreoidea;Ostreidae;Crassostrea;Crassostrea gigas  
 UdeM00000008012 6596 89.7 UdeM00000008012 XP\_045169519.1 47.1 85  
 40 1 17 101 1 80 2.30E-15 89.7 6596 cellular  
 organisms;Eukaryota;Opisthokonta;Metazoa;Eumetazoa;Bilateria;Protostomia;  
 Spiralia;Lophotrochozoa;Mollusca;Bivalvia;Autobranchia;Heteroconchia;Euhe  
 terodonta;Imparidentia;Venerida;Veneroidea;Veneridae;Mercenaria;Mercenari  
 a mercenaria  
 UdeM00000008013 48498 267.3 UdeM00000008013 XP\_020608165.1 32.8 622  
 370 17 35 644 459 1044 6.00E-68 267.3 48498 cellular  
 organisms;Eukaryota;Opisthokonta;Metazoa;Eumetazoa;Cnidaria;Anthozoa;Hexa  
 corallia;Scleractinia;Faviina;Merulinidae;Orbicella;Orbicella faveolata  
 UdeM00000008014 6596 3675.6 UdeM00000008014 XP\_045210442.1 44.4  
 4548 2353 72 53 4525 32 4479 0.00E+00 3675.6 6596  
 cellular  
 organisms;Eukaryota;Opisthokonta;Metazoa;Eumetazoa;Bilateria;Protostomia;  
 Spiralia;Lophotrochozoa;Mollusca;Bivalvia;Autobranchia;Heteroconchia;Euhe  
 terodonta;Imparidentia;Venerida;Veneroidea;Veneridae;Mercenaria;Mercenari  
 a mercenaria  
 UdeM00000008015 6565 72.8 UdeM00000008015 XP\_022313998.1 22.6 301  
 218 6 1 298 1 289 1.00E-09 72.8 6565 cellular  
 organisms;Eukaryota;Opisthokonta;Metazoa;Eumetazoa;Bilateria;Protostomia;  
 Spiralia;Lophotrochozoa;Mollusca;Bivalvia;Autobranchia;Pteriormorphia;Ostr  
 eida;Ostreoidea;Ostreidae;Crassostrea;Crassostrea virginica  
 UdeM00000008016 29159 244.2 UdeM00000008016 XP\_034322429.1 35.1 490  
 189 9 1 365 148 633 2.90E-61 244.2 29159 cellular

organisms;Eukaryota;Opisthokonta;Metazoa;Eumetazoa;Bilateria;Protostomia;Spiralia;Lophotrochozoa;Mollusca;Bivalvia;Autobranhia;Pteriomorphia;Ostreida;Ostreoidea;Ostreidae;Crassostrea;Crassostrea gigas

UdeM00000008020 6596 3350.1 UdeM00000008020 XP\_045210442.1 42.2  
4563 2393 83 27 4454 32 4483 0.00E+00 3350.1 6596  
cellular

organisms;Eukaryota;Opisthokonta;Metazoa;Eumetazoa;Bilateria;Protostomia;Spiralia;Lophotrochozoa;Mollusca;Bivalvia;Autobranhia;Heteroconchia;Euheterodonta;Imparidentia;Venerida;Veneroidea;Veneridae;Mercenaria;Mercenaria mercenaria

UdeM00000008021 37621 127.1 UdeM00000008021 XP\_014672571.1 38.9 203  
98 3 10 186 1 203 3.00E-26 127.1 37621 cellular

organisms;Eukaryota;Opisthokonta;Metazoa;Eumetazoa;Bilateria;Protostomia;Ecdysozoa;Scalidophora;Priapulida;Priapulimorpha;Priapulimorphida;Priapulidae;Priapululus;Priapululus caudatus

UdeM00000008022 7668 202.6 UdeM00000008022 XP\_003729577.2 38.5 314  
158 5 2 280 313 626 7.10E-49 202.6 7668 cellular

organisms;Eukaryota;Opisthokonta;Metazoa;Eumetazoa;Bilateria;Deuterostomia;Echinodermata;Eleutherozoa;Echinozoa;Echinoidea;Euechinoidea;Echinacea;Camarodonta;Echinidea;Strongylocentrotidae;Strongylocentrotus;Strongylocentrotus purpuratus

UdeM00000008023 7668 83.2 UdeM00000008023 XP\_003729577.2 68 50  
16 0 14 63 717 766 2.30E-13 83.2 7668 cellular

organisms;Eukaryota;Opisthokonta;Metazoa;Eumetazoa;Bilateria;Deuterostomia;Echinodermata;Eleutherozoa;Echinozoa;Echinoidea;Euechinoidea;Echinacea;Camarodonta;Echinidea;Strongylocentrotidae;Strongylocentrotus;Strongylocentrotus purpuratus

UdeM00000008024 29159 435.6 UdeM00000008024 XP\_034321382.1 49.2 657  
249 19 17 655 20 609 1.10E-118 435.6 29159 cellular

organisms;Eukaryota;Opisthokonta;Metazoa;Eumetazoa;Bilateria;Protostomia;Spiralia;Lophotrochozoa;Mollusca;Bivalvia;Autobranhia;Pteriomorphia;Ostreida;Ostreoidea;Ostreidae;Crassostrea;Crassostrea gigas

UdeM00000008025 29159 326.2 UdeM00000008025 XP\_034319300.1 59.3 1489  
377 27 1 1290 3 1461 1.80E-85 326.2 29159 cellular

organisms;Eukaryota;Opisthokonta;Metazoa;Eumetazoa;Bilateria;Protostomia;Spiralia;Lophotrochozoa;Mollusca;Bivalvia;Autobranhia;Pteriomorphia;Ostreida;Ostreoidea;Ostreidae;Crassostrea;Crassostrea gigas

UdeM00000008026 29159 108.6 UdeM00000008026 XP\_011448393.2 30.6 291  
133 8 11 240 35 317 1.10E-20 108.6 29159 cellular

organisms;Eukaryota;Opisthokonta;Metazoa;Eumetazoa;Bilateria;Protostomia;Spiralia;Lophotrochozoa;Mollusca;Bivalvia;Autobranhia;Pteriomorphia;Ostreida;Ostreoidea;Ostreidae;Crassostrea;Crassostrea gigas

UdeM00000008030 6596 305.4 UdeM00000008030 XP\_045184565.1 44.9 354  
191 2 1 354 5 354 9.90E-80 305.4 6596 cellular

organisms;Eukaryota;Opisthokonta;Metazoa;Eumetazoa;Bilateria;Protostomia;Spiralia;Lophotrochozoa;Mollusca;Bivalvia;Autobranhia;Heteroconchia;Euheterodonta;Imparidentia;Venerida;Veneroidea;Veneridae;Mercenaria;Mercenaria mercenaria

UdeM00000008031 6596 425.2 UdeM00000008031 XP\_045176363.1 60.6 436  
136 12 1 421 1 415 1.00E-115 425.2 6596 cellular

organisms;Eukaryota;Opisthokonta;Metazoa;Eumetazoa;Bilateria;Protostomia;Spiralia;Lophotrochozoa;Mollusca;Bivalvia;Autobranhia;Heteroconchia;Euheterodonta;Imparidentia;Venerida;Veneroidea;Veneridae;Mercenaria;Mercenaria mercenaria

UdeM00000008032 6565 869.4 UdeM00000008032 XP\_022306135.1 63.1 1216  
 374 11 8 1219 5 1149 5.40E-249 869.4 6565 cellular  
 organisms;Eukaryota;Opisthokonta;Metazoa;Eumetazoa;Bilateria;Protostomia;  
 Spiralia;Lophotrochozoa;Mollusca;Bivalvia;Autobranchia;Pteriormorphia;Ostr  
 eida;Ostreoidea;Ostreidae;Crassostrea;Crassostrea virginica  
 UdeM00000008033 29159 94.7 UdeM00000008033 XP\_034339165.1 47.2 89  
 46 1 16 104 233 320 7.50E-17 94.7 29159 cellular  
 organisms;Eukaryota;Opisthokonta;Metazoa;Eumetazoa;Bilateria;Protostomia;  
 Spiralia;Lophotrochozoa;Mollusca;Bivalvia;Autobranchia;Pteriormorphia;Ostr  
 eida;Ostreoidea;Ostreidae;Crassostrea;Crassostrea gigas  
 UdeM00000008034 6565 115.9 UdeM00000008034 XP\_022290343.1 73.9 69  
 17 1 1 68 126 194 2.00E-23 115.9 6565 cellular  
 organisms;Eukaryota;Opisthokonta;Metazoa;Eumetazoa;Bilateria;Protostomia;  
 Spiralia;Lophotrochozoa;Mollusca;Bivalvia;Autobranchia;Pteriormorphia;Ostr  
 eida;Ostreoidea;Ostreidae;Crassostrea;Crassostrea virginica  
 UdeM00000008035 6596 638.6 UdeM00000008035 XP\_045183622.1 63.1 509  
 153 7 103 582 739 1241 7.50E-180 638.6 6596 cellular  
 organisms;Eukaryota;Opisthokonta;Metazoa;Eumetazoa;Bilateria;Protostomia;  
 Spiralia;Lophotrochozoa;Mollusca;Bivalvia;Autobranchia;Heteroconchia;Euhe  
 terodonta;Imparidentia;Venerida;Veneroidea;Veneridae;Mercenaria;Mercenari  
 a mercenaria  
 UdeM00000008036 400727 624.4 UdeM00000008036 XP\_025080633.1 64.7  
 476 155 6 638 1106 778 1247 2.80E-175 624.4 400727  
 cellular  
 organisms;Eukaryota;Opisthokonta;Metazoa;Eumetazoa;Bilateria;Protostomia;  
 Spiralia;Lophotrochozoa;Mollusca;Gastropoda;Caenogastropoda;Architaeniogl  
 ossa;Ampullarioidea;Ampullariidae;Pomacea;Pomacea canaliculata  
 UdeM00000008037 45351 64.3 UdeM00000008037 XP\_001639127.2 32.8 116  
 72 3 35 149 287 397 1.60E-07 64.3 45351 cellular  
 organisms;Eukaryota;Opisthokonta;Metazoa;Eumetazoa;Cnidaria;Anthozoa;Hexa  
 corallia;Actiniaria;Edwardsiidae;Nematostella;Nematostella vectensis  
 UdeM00000008039 6596 586.3 UdeM00000008039 XP\_045189705.1 50.2 625  
 290 5 2 617 20 632 4.70E-164 586.3 6596 cellular  
 organisms;Eukaryota;Opisthokonta;Metazoa;Eumetazoa;Bilateria;Protostomia;  
 Spiralia;Lophotrochozoa;Mollusca;Bivalvia;Autobranchia;Heteroconchia;Euhe  
 terodonta;Imparidentia;Venerida;Veneroidea;Veneridae;Mercenaria;Mercenari  
 a mercenaria  
 UdeM00000008038 6596 596.3 UdeM00000008038 XP\_045189705.1 49.4 644  
 305 5 3 637 1 632 4.70E-167 596.3 6596 cellular  
 organisms;Eukaryota;Opisthokonta;Metazoa;Eumetazoa;Bilateria;Protostomia;  
 Spiralia;Lophotrochozoa;Mollusca;Bivalvia;Autobranchia;Heteroconchia;Euhe  
 terodonta;Imparidentia;Venerida;Veneroidea;Veneridae;Mercenaria;Mercenari  
 a mercenaria  
 UdeM00000008040 29159 310.8 UdeM00000008040 XP\_011439834.1 95.8 167  
 7 0 1 167 1 167 1.00E-81 310.8 29159 cellular  
 organisms;Eukaryota;Opisthokonta;Metazoa;Eumetazoa;Bilateria;Protostomia;  
 Spiralia;Lophotrochozoa;Mollusca;Bivalvia;Autobranchia;Pteriormorphia;Ostr  
 eida;Ostreoidea;Ostreidae;Crassostrea;Crassostrea gigas  
 UdeM00000008041 6579 133.3 UdeM00000008041 XP\_033726174.1 38.8 170  
 85 6 38 204 22 175 5.20E-28 133.3 6579 cellular  
 organisms;Eukaryota;Opisthokonta;Metazoa;Eumetazoa;Bilateria;Protostomia;  
 Spiralia;Lophotrochozoa;Mollusca;Bivalvia;Autobranchia;Pteriormorphia;Pect  
 inida;Pectinoidea;Pectinidae;Pecten;Pecten maximus

UdeM00000008042 48498 126.3 UdeM00000008042 XP\_020632435.1 39 187  
 99 7 2 184 570 745 4.20E-26 126.3 48498 cellular  
 organisms;Eukaryota;Opisthokonta;Metazoa;Eumetazoa;Cnidaria;Anthozoa;Hexa  
 corallia;Scleractinia;Faviina;Merulinidae;Orbicella;Orbicella faveolata  
 UdeM00000008043 6596 76.6 UdeM00000008043 XP\_045184349.1 35.1 111  
 58 3 3 108 47 148 3.40E-11 76.6 6596 cellular  
 organisms;Eukaryota;Opisthokonta;Metazoa;Eumetazoa;Bilateria;Protostomia;  
 Spiralia;Lophotrochozoa;Mollusca;Bivalvia;Autobranchia;Heteroconchia;Euhe  
 terodonta;Imparidentia;Venerida;Veneroidea;Veneridae;Mercenaria;Mercenari  
 a mercenaria  
 UdeM00000008044 299321 69.3 UdeM00000008044 XP\_028823701.1 46.9  
 64 34 0 31 94 4625 4688 1.00E-08 69.3 299321  
 cellular  
 organisms;Eukaryota;Opisthokonta;Metazoa;Eumetazoa;Bilateria;Deuterostomi  
 a;Chordata;Craniata;Vertebrata;Gnathostomata;Teleostomi;Euteleostomi;Acti  
 nopterygii;Actinopteri;Neopterygii;Teleostei;Osteoglossocephalai;Clupeoce  
 phala;Otomorpha;Clupei;Clupeiformes;Denticipitoidei;Denticipitidae;Dentic  
 eps;Denticeps clupeoides  
 UdeM00000008045 7741 429.1 UdeM00000008045 XP\_019627143.1 51.2 406  
 187 11 195 594 134 534 1.60E-116 429.1 7741 cellular  
 organisms;Eukaryota;Opisthokonta;Metazoa;Eumetazoa;Bilateria;Deuterostomi  
 a;Chordata;Cephalochordata;Leptocardii;Amphioxiformes;Branchiostomidae;Br  
 anchiostoma;Branchiostoma belcheri  
 UdeM00000008046 48498 271.2 UdeM00000008046 XP\_020605241.1 40.4 334  
 189 3 125 453 231 559 2.60E-69 271.2 48498 cellular  
 organisms;Eukaryota;Opisthokonta;Metazoa;Eumetazoa;Cnidaria;Anthozoa;Hexa  
 corallia;Scleractinia;Faviina;Merulinidae;Orbicella;Orbicella faveolata  
 UdeM00000008047 6596 173.7 UdeM00000008047 XP\_045209343.1 30.6 333  
 165 11 22 316 24 328 5.00E-40 173.7 6596 cellular  
 organisms;Eukaryota;Opisthokonta;Metazoa;Eumetazoa;Bilateria;Protostomia;  
 Spiralia;Lophotrochozoa;Mollusca;Bivalvia;Autobranchia;Heteroconchia;Euhe  
 terodonta;Imparidentia;Venerida;Veneroidea;Veneridae;Mercenaria;Mercenari  
 a mercenaria  
 UdeM00000008048 6565 77 UdeM00000008048 XP\_022307436.1 43.5 85  
 46 1 43 125 97 181 1.90E-11 77 6565 cellular  
 organisms;Eukaryota;Opisthokonta;Metazoa;Eumetazoa;Bilateria;Protostomia;  
 Spiralia;Lophotrochozoa;Mollusca;Bivalvia;Autobranchia;Pteriomorphia;Ostr  
 eida;Ostreoidea;Ostreidae;Crassostrea;Crassostrea virginica  
 UdeM00000008049 6596 64.3 UdeM00000008049 XP\_045184378.1 47.1 51  
 27 0 38 88 80 130 1.20E-07 64.3 6596 cellular  
 organisms;Eukaryota;Opisthokonta;Metazoa;Eumetazoa;Bilateria;Protostomia;  
 Spiralia;Lophotrochozoa;Mollusca;Bivalvia;Autobranchia;Heteroconchia;Euhe  
 terodonta;Imparidentia;Venerida;Veneroidea;Veneridae;Mercenaria;Mercenari  
 a mercenaria  
 UdeM00000008050 6596 164.9 UdeM00000008050 XP\_045209345.1 29.6 321  
 169 7 35 322 24 320 2.30E-37 164.9 6596 cellular  
 organisms;Eukaryota;Opisthokonta;Metazoa;Eumetazoa;Bilateria;Protostomia;  
 Spiralia;Lophotrochozoa;Mollusca;Bivalvia;Autobranchia;Heteroconchia;Euhe  
 terodonta;Imparidentia;Venerida;Veneroidea;Veneridae;Mercenaria;Mercenari  
 a mercenaria  
 UdeM00000008051 6596 164.9 UdeM00000008051 XP\_045209345.1 29.6 321  
 169 7 5 292 24 320 2.10E-37 164.9 6596 cellular  
 organisms;Eukaryota;Opisthokonta;Metazoa;Eumetazoa;Bilateria;Protostomia;  
 Spiralia;Lophotrochozoa;Mollusca;Bivalvia;Autobranchia;Heteroconchia;Euhe

terodonta;Imparidentia;Venerida;Veneroidea;Veneridae;Mercenaria;Mercenari  
 a mercenaria  
 UdeM00000008052 29159 70.1 UdeM00000008052 XP\_034319472.1 54.2 48  
 22 0 24 71 28 75 1.40E-09 70.1 29159 cellular  
 organisms;Eukaryota;Opisthokonta;Metazoa;Eumetazoa;Bilateria;Protostomia;  
 Spiralia;Lophotrochozoa;Mollusca;Bivalvia;Autobranhia;Pteriormorphia;Ostr  
 eida;Ostreoidea;Ostreidae;Crassostrea;Crassostrea gigas  
 UdeM00000008054 6596 89.7 UdeM00000008054 XP\_045184528.1 33.5 170  
 96 6 26 186 285 446 5.20E-15 89.7 6596 cellular  
 organisms;Eukaryota;Opisthokonta;Metazoa;Eumetazoa;Bilateria;Protostomia;  
 Spiralia;Lophotrochozoa;Mollusca;Bivalvia;Autobranhia;Heteroconchia;Euhe  
 terodonta;Imparidentia;Venerida;Veneroidea;Veneridae;Mercenaria;Mercenari  
 a mercenaria  
 UdeM00000008055 45264 70.9 UdeM00000008055 XP\_044166631.1 41.2 85  
 42 2 17 100 191 268 1.60E-09 70.9 45264 cellular  
 organisms;Eukaryota;Opisthokonta;Metazoa;Eumetazoa;Cnidaria;Anthozoa;Hexa  
 corallia;Scleractinia;Astrocoeniina;Acroporidae;Acropora;Acropora  
 millepora  
 UdeM00000008056 6579 88.6 UdeM00000008056 XP\_033726174.1 36.7 128  
 61 4 4 128 59 169 7.10E-15 88.6 6579 cellular  
 organisms;Eukaryota;Opisthokonta;Metazoa;Eumetazoa;Bilateria;Protostomia;  
 Spiralia;Lophotrochozoa;Mollusca;Bivalvia;Autobranhia;Pteriormorphia;Pect  
 inida;Pectinoidea;Pectinidae;Pecten;Pecten maximus  
 UdeM00000008057 6596 141.4 UdeM00000008057 XP\_045209343.1 30 293  
 142 9 1 257 54 319 2.10E-30 141.4 6596 cellular  
 organisms;Eukaryota;Opisthokonta;Metazoa;Eumetazoa;Bilateria;Protostomia;  
 Spiralia;Lophotrochozoa;Mollusca;Bivalvia;Autobranhia;Heteroconchia;Euhe  
 terodonta;Imparidentia;Venerida;Veneroidea;Veneridae;Mercenaria;Mercenari  
 a mercenaria  
 UdeM00000008058 6596 162.9 UdeM00000008058 XP\_045209343.1 29.1 323  
 166 9 24 310 24 319 7.90E-37 162.9 6596 cellular  
 organisms;Eukaryota;Opisthokonta;Metazoa;Eumetazoa;Bilateria;Protostomia;  
 Spiralia;Lophotrochozoa;Mollusca;Bivalvia;Autobranhia;Heteroconchia;Euhe  
 terodonta;Imparidentia;Venerida;Veneroidea;Veneridae;Mercenaria;Mercenari  
 a mercenaria  
 UdeM00000008059 7574 276.9 UdeM00000008059 XP\_013380319.1 72.7 165  
 45 0 1 165 104 268 5.30E-71 276.9 7574 cellular  
 organisms;Eukaryota;Opisthokonta;Metazoa;Eumetazoa;Bilateria;Protostomia;  
 Spiralia;Lophotrochozoa;Brachiopoda;Linguliformea;Lingulata;Lingulida;Lin  
 guloidea;Lingulidae;Lingula;Lingula anatina  
 UdeM00000008060 7574 109.4 UdeM00000008060 XP\_013410728.1 32.7 297  
 126 8 276 505 55 344 1.40E-20 109.4 7574 cellular  
 organisms;Eukaryota;Opisthokonta;Metazoa;Eumetazoa;Bilateria;Protostomia;  
 Spiralia;Lophotrochozoa;Brachiopoda;Linguliformea;Lingulata;Lingulida;Lin  
 guloidea;Lingulidae;Lingula;Lingula anatina  
 UdeM00000008061 6596 77.8 UdeM00000008061 XP\_045207044.1 31.3 147  
 100 1 1 147 1 146 1.70E-11 77.8 6596 cellular  
 organisms;Eukaryota;Opisthokonta;Metazoa;Eumetazoa;Bilateria;Protostomia;  
 Spiralia;Lophotrochozoa;Mollusca;Bivalvia;Autobranhia;Heteroconchia;Euhe  
 terodonta;Imparidentia;Venerida;Veneroidea;Veneridae;Mercenaria;Mercenari  
 a mercenaria  
 UdeM00000008064 6596 149.4 UdeM00000008064 XP\_045174611.1 36.2 254  
 147 8 21 265 374 621 6.30E-33 149.4 6596 cellular  
 organisms;Eukaryota;Opisthokonta;Metazoa;Eumetazoa;Bilateria;Protostomia;

Spiralia;Lophotrochozoa;Mollusca;Bivalvia;Autobranchia;Heteroconchia;Euherodonta;Imparidentia;Venerida;Veneroidea;Veneridae;Mercenaria;Mercenaria mercenaria

UdeM00000008066 6596 76.6 UdeM00000008066 XP\_045177317.1 43.7 87  
45 1 8 94 73 155 3.90E-11 76.6 6596 cellular

organisms;Eukaryota;Opisthokonta;Metazoa;Eumetazoa;Bilateria;Protostomia;Spiralia;Lophotrochozoa;Mollusca;Bivalvia;Autobranchia;Heteroconchia;Euherodonta;Imparidentia;Venerida;Veneroidea;Veneridae;Mercenaria;Mercenaria mercenaria

UdeM00000008067 6596 76.6 UdeM00000008067 XP\_045177317.1 43.7 87  
45 1 8 94 73 155 2.80E-11 76.6 6596 cellular

organisms;Eukaryota;Opisthokonta;Metazoa;Eumetazoa;Bilateria;Protostomia;Spiralia;Lophotrochozoa;Mollusca;Bivalvia;Autobranchia;Heteroconchia;Euherodonta;Imparidentia;Venerida;Veneroidea;Veneridae;Mercenaria;Mercenaria mercenaria

UdeM00000008068 6596 164.1 UdeM00000008068 XP\_045174611.1 38.6 272  
151 9 28 292 359 621 2.70E-37 164.1 6596 cellular

organisms;Eukaryota;Opisthokonta;Metazoa;Eumetazoa;Bilateria;Protostomia;Spiralia;Lophotrochozoa;Mollusca;Bivalvia;Autobranchia;Heteroconchia;Euherodonta;Imparidentia;Venerida;Veneroidea;Veneridae;Mercenaria;Mercenaria mercenaria

UdeM00000008071 29159 72 UdeM00000008071 XP\_034329457.1 47.2 72  
33 1 119 190 451 517 9.50E-10 72 29159 cellular

organisms;Eukaryota;Opisthokonta;Metazoa;Eumetazoa;Bilateria;Protostomia;Spiralia;Lophotrochozoa;Mollusca;Bivalvia;Autobranchia;Pteriormorphia;Ostreida;Ostreioidea;Ostreidae;Crassostrea;Crassostrea gigas

UdeM00000008072 70779 227.3 UdeM00000008072 XP\_015759403.1 42.2 268  
104 1 1 217 156 423 2.10E-56 227.3 70779 cellular

organisms;Eukaryota;Opisthokonta;Metazoa;Eumetazoa;Cnidaria;Anthozoa;Hexacorallia;Scleractinia;Astrocoeniina;Acroporidae;Acropora;Acropora digitifera

UdeM00000008073 6596 83.2 UdeM00000008073 XP\_045187600.1 41.2 114  
60 3 13 121 250 361 2.70E-13 83.2 6596 cellular

organisms;Eukaryota;Opisthokonta;Metazoa;Eumetazoa;Bilateria;Protostomia;Spiralia;Lophotrochozoa;Mollusca;Bivalvia;Autobranchia;Heteroconchia;Euherodonta;Imparidentia;Venerida;Veneroidea;Veneridae;Mercenaria;Mercenaria mercenaria

UdeM00000008077 400727 95.1 UdeM00000008077 XP\_025109413.1 38.8  
160 82 4 156 304 56 210 1.60E-16 95.1 400727

cellular organisms;Eukaryota;Opisthokonta;Metazoa;Eumetazoa;Bilateria;Protostomia;Spiralia;Lophotrochozoa;Mollusca;Gastropoda;Caenogastropoda;Architaenioglossa;Ampullarioidea;Ampullariidae;Pomacea;Pomacea canaliculata

UdeM00000008078 6596 80.1 UdeM00000008078 XP\_045179438.1 36.5 126  
77 3 28 150 93 218 2.80E-12 80.1 6596 cellular

organisms;Eukaryota;Opisthokonta;Metazoa;Eumetazoa;Bilateria;Protostomia;Spiralia;Lophotrochozoa;Mollusca;Bivalvia;Autobranchia;Heteroconchia;Euherodonta;Imparidentia;Venerida;Veneroidea;Veneridae;Mercenaria;Mercenaria mercenaria

UdeM00000008082 400727 92.4 UdeM00000008082 XP\_025088536.1 37.2  
148 88 2 41 183 56 203 6.50E-16 92.4 400727

cellular organisms;Eukaryota;Opisthokonta;Metazoa;Eumetazoa;Bilateria;Protostomia;

Spiralia;Lophotrochozoa;Mollusca;Gastropoda;Caenogastropoda;Architaenioglossa;Ampullarioidea;Ampullariidae;Pomacea;Pomacea canaliculata  
UdeM00000008083 6596 95.1 UdeM00000008083 XP\_045175388.1 41.4 133  
71 4 306 432 257 388 2.30E-16 95.1 6596 cellular  
organisms;Eukaryota;Opisthokonta;Metazoa;Eumetazoa;Bilateria;Protostomia;  
Spiralia;Lophotrochozoa;Mollusca;Bivalvia;Autobranchia;Heteroconchia;Euherodonta;Imparidentia;Venerida;Veneroidea;Veneridae;Mercenaria;Mercenaria mercenaria  
UdeM00000008085 400727 94 UdeM00000008085 XP\_025088536.1 36.7  
150 90 2 163 307 57 206 3.70E-16 94 400727  
cellular  
organisms;Eukaryota;Opisthokonta;Metazoa;Eumetazoa;Bilateria;Protostomia;  
Spiralia;Lophotrochozoa;Mollusca;Gastropoda;Caenogastropoda;Architaenioglossa;Ampullarioidea;Ampullariidae;Pomacea;Pomacea canaliculata  
UdeM00000008086 6596 94 UdeM00000008086 XP\_045175388.1 33.7 187  
108 6 122 302 212 388 3.70E-16 94 6596 cellular  
organisms;Eukaryota;Opisthokonta;Metazoa;Eumetazoa;Bilateria;Protostomia;  
Spiralia;Lophotrochozoa;Mollusca;Bivalvia;Autobranchia;Heteroconchia;Euherodonta;Imparidentia;Venerida;Veneroidea;Veneridae;Mercenaria;Mercenaria mercenaria  
UdeM00000008087 6596 92.8 UdeM00000008087 XP\_045207937.1 88.9 45  
4 1 195 238 222 266 6.30E-16 92.8 6596 cellular  
organisms;Eukaryota;Opisthokonta;Metazoa;Eumetazoa;Bilateria;Protostomia;  
Spiralia;Lophotrochozoa;Mollusca;Bivalvia;Autobranchia;Heteroconchia;Euherodonta;Imparidentia;Venerida;Veneroidea;Veneridae;Mercenaria;Mercenaria mercenaria  
UdeM00000008088 6573 1602.4 UdeM00000008088 XP\_021377283.1 40.4  
2275 1235 47 6 2230 14 2216 0.00E+00 1602.4 6573  
cellular  
organisms;Eukaryota;Opisthokonta;Metazoa;Eumetazoa;Bilateria;Protostomia;  
Spiralia;Lophotrochozoa;Mollusca;Bivalvia;Autobranchia;Pteriomorphia;Pectinida;Pectinoidea;Pectinidae;Mizuhopecten;Mizuhopecten yessoensis  
UdeM00000008089 29159 575.1 UdeM00000008089 XP\_034304086.1 49.5 556  
277 4 1 555 1 553 9.70E-161 575.1 29159 cellular  
organisms;Eukaryota;Opisthokonta;Metazoa;Eumetazoa;Bilateria;Protostomia;  
Spiralia;Lophotrochozoa;Mollusca;Bivalvia;Autobranchia;Pteriomorphia;Ostreida;Ostreoidea;Ostreidae;Crassostrea;Crassostrea gigas  
UdeM00000008091 6565 236.1 UdeM00000008091 XP\_022322789.1 51.1 221  
108 0 1 221 4 224 4.30E-59 236.1 6565 cellular  
organisms;Eukaryota;Opisthokonta;Metazoa;Eumetazoa;Bilateria;Protostomia;  
Spiralia;Lophotrochozoa;Mollusca;Bivalvia;Autobranchia;Pteriomorphia;Ostreida;Ostreoidea;Ostreidae;Crassostrea;Crassostrea virginica  
UdeM00000008101 29159 330.5 UdeM00000008101 XP\_034304086.1 48.8 330  
160 6 2 326 234 559 2.40E-87 330.5 29159 cellular  
organisms;Eukaryota;Opisthokonta;Metazoa;Eumetazoa;Bilateria;Protostomia;  
Spiralia;Lophotrochozoa;Mollusca;Bivalvia;Autobranchia;Pteriomorphia;Ostreida;Ostreoidea;Ostreidae;Crassostrea;Crassostrea gigas  
UdeM00000008103 6596 100.5 UdeM00000008103 XP\_045209622.1 31.5 302  
176 9 1 277 25 320 3.50E-18 100.5 6596 cellular  
organisms;Eukaryota;Opisthokonta;Metazoa;Eumetazoa;Bilateria;Protostomia;  
Spiralia;Lophotrochozoa;Mollusca;Bivalvia;Autobranchia;Heteroconchia;Euherodonta;Imparidentia;Venerida;Veneroidea;Veneridae;Mercenaria;Mercenaria mercenaria

UdeM00000008104 6596 336.7 UdeM00000008104 XP\_045216057.1 53.8 286  
 128 3 56 339 71 354 3.60E-89 336.7 6596 cellular  
 organisms;Eukaryota;Opisthokonta;Metazoa;Eumetazoa;Bilateria;Protostomia;  
 Spiralia;Lophotrochozoa;Mollusca;Bivalvia;Autobranhia;Heteroconchia;Euhe  
 terodonta;Imparidentia;Venerida;Veneroidea;Veneridae;Mercenaria;Mercenari  
 a mercenaria  
 UdeM00000008105 6573 226.5 UdeM00000008105 XP\_021341057.1 64.2 151  
 53 1 4 153 2 152 2.30E-56 226.5 6573 cellular  
 organisms;Eukaryota;Opisthokonta;Metazoa;Eumetazoa;Bilateria;Protostomia;  
 Spiralia;Lophotrochozoa;Mollusca;Bivalvia;Autobranhia;Pteriormorphia;Pect  
 inida;Pectinoidea;Pectinidae;Mizuhopecten;Mizuhopecten yessoensis  
 UdeM00000008106 6596 548.1 UdeM00000008106 XP\_045208907.1 48.1 781  
 327 25 158 887 27 780 2.00E-152 548.1 6596 cellular  
 organisms;Eukaryota;Opisthokonta;Metazoa;Eumetazoa;Bilateria;Protostomia;  
 Spiralia;Lophotrochozoa;Mollusca;Bivalvia;Autobranhia;Heteroconchia;Euhe  
 terodonta;Imparidentia;Venerida;Veneroidea;Veneridae;Mercenaria;Mercenari  
 a mercenaria  
 UdeM00000008107 6596 834.3 UdeM00000008107 XP\_045208907.1 49.9 1659  
 627 41 136 1748 824 2324 2.90E-238 834.3 6596 cellular  
 organisms;Eukaryota;Opisthokonta;Metazoa;Eumetazoa;Bilateria;Protostomia;  
 Spiralia;Lophotrochozoa;Mollusca;Bivalvia;Autobranhia;Heteroconchia;Euhe  
 terodonta;Imparidentia;Venerida;Veneroidea;Veneridae;Mercenaria;Mercenari  
 a mercenaria  
 UdeM00000008108 29159 211.8 UdeM00000008108 XP\_011431082.1 89.2 111  
 12 0 1 111 1 111 4.30E-52 211.8 29159 cellular  
 organisms;Eukaryota;Opisthokonta;Metazoa;Eumetazoa;Bilateria;Protostomia;  
 Spiralia;Lophotrochozoa;Mollusca;Bivalvia;Autobranhia;Pteriormorphia;Ostr  
 eida;Ostreoidea;Ostreidae;Crassostrea;Crassostrea gigas  
 UdeM00000008109 29159 285.8 UdeM00000008109 XP\_011431082.1 91.3 149  
 13 0 1 149 1 149 3.20E-74 285.8 29159 cellular  
 organisms;Eukaryota;Opisthokonta;Metazoa;Eumetazoa;Bilateria;Protostomia;  
 Spiralia;Lophotrochozoa;Mollusca;Bivalvia;Autobranhia;Pteriormorphia;Ostr  
 eida;Ostreoidea;Ostreidae;Crassostrea;Crassostrea gigas  
 UdeM00000044392 6945 87 UdeM00000044392 XP\_040065097.1 31.2 170  
 91 4 59 202 85 254 4.50E-14 87 6945 cellular  
 organisms;Eukaryota;Opisthokonta;Metazoa;Eumetazoa;Bilateria;Protostomia;  
 Ecdysozoa;Panarthropoda;Arthropoda;Chelicerata;Arachnida;Acari;Parasitifo  
 rmes;Ixodida;Ixodoidea;Ixodidae;Ixodinae;Ixodes;Ixodes scapularis  
 UdeM00000040008 6579 540 UdeM00000040008 XP\_033739920.1 49.7 537  
 239 5 1 507 1 536 3.30E-150 540 6579 cellular  
 organisms;Eukaryota;Opisthokonta;Metazoa;Eumetazoa;Bilateria;Protostomia;  
 Spiralia;Lophotrochozoa;Mollusca;Bivalvia;Autobranhia;Pteriormorphia;Pect  
 inida;Pectinoidea;Pectinidae;Pecten;Pecten maximus  
 UdeM00000040010 6565 151.8 UdeM00000040010 XP\_022310266.1 33.4 353  
 192 10 1 337 1 326 1.60E-33 151.8 6565 cellular  
 organisms;Eukaryota;Opisthokonta;Metazoa;Eumetazoa;Bilateria;Protostomia;  
 Spiralia;Lophotrochozoa;Mollusca;Bivalvia;Autobranhia;Pteriormorphia;Ostr  
 eida;Ostreoidea;Ostreidae;Crassostrea;Crassostrea virginica  
 UdeM00000040011 6596 634.8 UdeM00000040011 XP\_045198045.1 61.6 497  
 188 2 9 503 48 543 9.70E-179 634.8 6596 cellular  
 organisms;Eukaryota;Opisthokonta;Metazoa;Eumetazoa;Bilateria;Protostomia;  
 Spiralia;Lophotrochozoa;Mollusca;Bivalvia;Autobranhia;Heteroconchia;Euhe  
 terodonta;Imparidentia;Venerida;Veneroidea;Veneridae;Mercenaria;Mercenari  
 a mercenaria



UdeM00000040012 6579 259.2 UdeM00000040012 XP\_033731739.1 57.7 201  
 85 0 8 208 178 378 4.40E-66 259.2 6579 cellular  
 organisms;Eukaryota;Opisthokonta;Metazoa;Eumetazoa;Bilateria;Protostomia;  
 Spiralia;Lophotrochozoa;Mollusca;Bivalvia;Autobranchia;Pteriormorphia;Pect  
 inida;Pectinoidea;Pectinidae;Pecten;Pecten maximus  
 UdeM00000040013 6579 252.3 UdeM00000040013 XP\_033731739.1 59.2 191  
 78 0 1 191 188 378 5.00E-64 252.3 6579 cellular  
 organisms;Eukaryota;Opisthokonta;Metazoa;Eumetazoa;Bilateria;Protostomia;  
 Spiralia;Lophotrochozoa;Mollusca;Bivalvia;Autobranchia;Pteriormorphia;Pect  
 inida;Pectinoidea;Pectinidae;Pecten;Pecten maximus  
 UdeM00000040014 6573 61.2 UdeM00000040014 XP\_021341725.1 60.4 48  
 19 0 1 48 1 48 7.80E-07 61.2 6573 cellular  
 organisms;Eukaryota;Opisthokonta;Metazoa;Eumetazoa;Bilateria;Protostomia;  
 Spiralia;Lophotrochozoa;Mollusca;Bivalvia;Autobranchia;Pteriormorphia;Pect  
 inida;Pectinoidea;Pectinidae;Mizuhopecten;Mizuhopecten yessoensis  
 UdeM00000040015 6579 63.5 UdeM00000040015 XP\_033761099.1 22.8 276  
 188 8 124 377 40 312 6.70E-07 63.5 6579 cellular  
 organisms;Eukaryota;Opisthokonta;Metazoa;Eumetazoa;Bilateria;Protostomia;  
 Spiralia;Lophotrochozoa;Mollusca;Bivalvia;Autobranchia;Pteriormorphia;Pect  
 inida;Pectinoidea;Pectinidae;Pecten;Pecten maximus  
 UdeM00000040016 6596 723.8 UdeM00000040016 XP\_045198045.1 64.2 544  
 192 2 1 542 1 543 1.70E-205 723.8 6596 cellular  
 organisms;Eukaryota;Opisthokonta;Metazoa;Eumetazoa;Bilateria;Protostomia;  
 Spiralia;Lophotrochozoa;Mollusca;Bivalvia;Autobranchia;Heteroconchia;Euhe  
 terodonta;Imparidentia;Venerida;Veneroidea;Veneridae;Mercenaria;Mercenari  
 a mercenaria  
 UdeM00000040017 6579 543.5 UdeM00000040017 XP\_033740119.1 49.9 535  
 232 4 1 502 1 532 3.00E-151 543.5 6579 cellular  
 organisms;Eukaryota;Opisthokonta;Metazoa;Eumetazoa;Bilateria;Protostomia;  
 Spiralia;Lophotrochozoa;Mollusca;Bivalvia;Autobranchia;Pteriormorphia;Pect  
 inida;Pectinoidea;Pectinidae;Pecten;Pecten maximus  
 UdeM00000040018 6596 633.3 UdeM00000040018 XP\_045198045.1 61.6 497  
 188 2 9 503 48 543 2.80E-178 633.3 6596 cellular  
 organisms;Eukaryota;Opisthokonta;Metazoa;Eumetazoa;Bilateria;Protostomia;  
 Spiralia;Lophotrochozoa;Mollusca;Bivalvia;Autobranchia;Heteroconchia;Euhe  
 terodonta;Imparidentia;Venerida;Veneroidea;Veneridae;Mercenaria;Mercenari  
 a mercenaria  
 UdeM00000040019 109280 168.7 UdeM00000040019 XP\_019729826.1 40.7  
 209 107 1 6 197 10 218 7.40E-39 168.7 109280  
 cellular  
 organisms;Eukaryota;Opisthokonta;Metazoa;Eumetazoa;Bilateria;Deuterostomi  
 a;Chordata;Craniata;Vertebrata;Gnathostomata;Teleostomi;Euteleostomi;Acti  
 nopterygii;Actinopteri;Neopterygii;Teleostei;Osteoglossocephalai;Clupeoce  
 phala;Euteleosteomorpha;Neoteleostei;Eurypterygia;Ctenosquamata;Acanthomo  
 rphata;Euacanthomorphacea;Percomorphaceae;Syngnathiaria;Syngnathiformes;S  
 yngnathoidei;Syngnathidae;Hippocampinae;Hippocampus;Hippocampus comes  
 UdeM00000040020 6573 61.2 UdeM00000040020 XP\_021341725.1 60.4 48  
 19 0 1 48 1 48 7.80E-07 61.2 6573 cellular  
 organisms;Eukaryota;Opisthokonta;Metazoa;Eumetazoa;Bilateria;Protostomia;  
 Spiralia;Lophotrochozoa;Mollusca;Bivalvia;Autobranchia;Pteriormorphia;Pect  
 inida;Pectinoidea;Pectinidae;Mizuhopecten;Mizuhopecten yessoensis  
 UdeM00000040021 6579 60.1 UdeM00000040021 XP\_033761099.1 22.4 321  
 214 10 79 377 5 312 7.40E-06 60.1 6579 cellular  
 organisms;Eukaryota;Opisthokonta;Metazoa;Eumetazoa;Bilateria;Protostomia;

Spiralia; Lophotrochozoa; Mollusca; Bivalvia; Autobranchia; Pteriomorpha; Pectinida; Pectinoidea; Pectinidae; Pecten; Pecten maximus

UdeM00000040022 6596 722.6 UdeM00000040022 XP\_045198045.1 64.2 544  
192 2 1 542 1 543 3.80E-205 722.6 6596 cellular  
organisms; Eukaryota; Opisthokonta; Metazoa; Eumetazoa; Bilateria; Protostomia; Spiralia; Lophotrochozoa; Mollusca; Bivalvia; Autobranchia; Heteroconchia; Euheterodonta; Imparidentia; Venerida; Veneroidea; Veneridae; Mercenaria; Mercenaria mercenaria

UdeM00000040023 29159 572.8 UdeM00000040023 XP\_011428614.2 51.5 550  
253 4 1 542 1 544 4.70E-160 572.8 29159 cellular  
organisms; Eukaryota; Opisthokonta; Metazoa; Eumetazoa; Bilateria; Protostomia; Spiralia; Lophotrochozoa; Mollusca; Bivalvia; Autobranchia; Pteriomorpha; Ostreida; Ostreidae; Crassostrea; Crassostrea gigas

UdeM00000040024 6596 199.5 UdeM00000040024 XP\_045198045.1 62.1 145  
55 0 1 145 399 543 3.30E-48 199.5 6596 cellular  
organisms; Eukaryota; Opisthokonta; Metazoa; Eumetazoa; Bilateria; Protostomia; Spiralia; Lophotrochozoa; Mollusca; Bivalvia; Autobranchia; Heteroconchia; Euheterodonta; Imparidentia; Venerida; Veneroidea; Veneridae; Mercenaria; Mercenaria mercenaria

UdeM00000040025 6596 391 UdeM00000040025 XP\_045198045.1 57.7 331  
137 2 1 329 35 364 1.50E-105 391 6596 cellular  
organisms; Eukaryota; Opisthokonta; Metazoa; Eumetazoa; Bilateria; Protostomia; Spiralia; Lophotrochozoa; Mollusca; Bivalvia; Autobranchia; Heteroconchia; Euheterodonta; Imparidentia; Venerida; Veneroidea; Veneridae; Mercenaria; Mercenaria mercenaria

UdeM00000040026 6579 259.2 UdeM00000040026 XP\_033731739.1 57.7 201  
85 0 8 208 178 378 4.40E-66 259.2 6579 cellular  
organisms; Eukaryota; Opisthokonta; Metazoa; Eumetazoa; Bilateria; Protostomia; Spiralia; Lophotrochozoa; Mollusca; Bivalvia; Autobranchia; Pteriomorpha; Pectinida; Pectinoidea; Pectinidae; Pecten; Pecten maximus

UdeM00000040027 6579 252.3 UdeM00000040027 XP\_033731739.1 59.2 191  
78 0 1 191 188 378 5.00E-64 252.3 6579 cellular  
organisms; Eukaryota; Opisthokonta; Metazoa; Eumetazoa; Bilateria; Protostomia; Spiralia; Lophotrochozoa; Mollusca; Bivalvia; Autobranchia; Pteriomorpha; Pectinida; Pectinoidea; Pectinidae; Pecten; Pecten maximus

UdeM00000040028 6573 61.2 UdeM00000040028 XP\_021341725.1 60.4 48  
19 0 1 48 1 48 7.80E-07 61.2 6573 cellular  
organisms; Eukaryota; Opisthokonta; Metazoa; Eumetazoa; Bilateria; Protostomia; Spiralia; Lophotrochozoa; Mollusca; Bivalvia; Autobranchia; Pteriomorpha; Pectinida; Pectinoidea; Pectinidae; Mizuhopecten; Mizuhopecten yessoensis

UdeM00000040029 6579 72 UdeM00000040029 XP\_033761099.1 23 204  
137 5 12 198 112 312 1.00E-09 72 6579 cellular  
organisms; Eukaryota; Opisthokonta; Metazoa; Eumetazoa; Bilateria; Protostomia; Spiralia; Lophotrochozoa; Mollusca; Bivalvia; Autobranchia; Pteriomorpha; Pectinida; Pectinoidea; Pectinidae; Pecten; Pecten maximus

UdeM00000040030 6596 722.6 UdeM00000040030 XP\_045198045.1 64.2 544  
192 2 1 542 1 543 3.80E-205 722.6 6596 cellular  
organisms; Eukaryota; Opisthokonta; Metazoa; Eumetazoa; Bilateria; Protostomia; Spiralia; Lophotrochozoa; Mollusca; Bivalvia; Autobranchia; Heteroconchia; Euheterodonta; Imparidentia; Venerida; Veneroidea; Veneridae; Mercenaria; Mercenaria mercenaria

UdeM00000040031 29159 573.2 UdeM00000040031 XP\_011428614.2 51.5 550  
253 4 1 542 1 544 3.60E-160 573.2 29159 cellular  
organisms; Eukaryota; Opisthokonta; Metazoa; Eumetazoa; Bilateria; Protostomia;

Spiralia;Lophotrochozoa;Mollusca;Bivalvia;Autobranchia;Pteriormorphia;Ostr  
eida;Ostreoidea;Ostreidae;Crassostrea;Crassostrea gigas  
UdeM00000042268 1735272 145.6 UdeM00000042268 XP\_041372805.1 29.6  
341 224 6 41 371 350 684 1.30E-31 145.6 1735272  
cellular  
organisms;Eukaryota;Opisthokonta;Metazoa;Eumetazoa;Bilateria;Protostomia;  
Spiralia;Lophotrochozoa;Mollusca;Gastropoda;Neomphalina;Neomphaloidea;Pel  
tospiridae;Gigantopelta;Gigantopelta aegis  
UdeM00000042269 1735272 808.5 UdeM00000042269 XP\_041347279.1 46.8  
876 436 9 1 849 1 873 8.00E-231 808.5 1735272  
cellular  
organisms;Eukaryota;Opisthokonta;Metazoa;Eumetazoa;Bilateria;Protostomia;  
Spiralia;Lophotrochozoa;Mollusca;Gastropoda;Neomphalina;Neomphaloidea;Pel  
tospiridae;Gigantopelta;Gigantopelta aegis  
UdeM00000042270 1735272 79.3 UdeM00000042270 XP\_041379277.1 27.8  
241 158 9 2 231 35 270 7.90E-12 79.3 1735272  
cellular  
organisms;Eukaryota;Opisthokonta;Metazoa;Eumetazoa;Bilateria;Protostomia;  
Spiralia;Lophotrochozoa;Mollusca;Gastropoda;Neomphalina;Neomphaloidea;Pel  
tospiridae;Gigantopelta;Gigantopelta aegis  
UdeM00000042271 6579 208 UdeM00000042271 XP\_033758269.1 28.2 748  
429 29 412 1127 4 675 6.60E-50 208 6579 cellular  
organisms;Eukaryota;Opisthokonta;Metazoa;Eumetazoa;Bilateria;Protostomia;  
Spiralia;Lophotrochozoa;Mollusca;Bivalvia;Autobranchia;Pteriormorphia;Pect  
inida;Pectinoidea;Pectinidae;Pecten;Pecten maximus  
UdeM00000042273 7054 483.8 UdeM00000042273 XP\_031328250.1 50.1 467  
231 2 1 465 1 467 2.50E-133 483.8 7054 cellular  
organisms;Eukaryota;Opisthokonta;Metazoa;Eumetazoa;Bilateria;Protostomia;  
Ecdysozoa;Panarthropoda;Arthropoda;Mandibulata;Pancrustacea;Hexapoda;Inse  
cta;Dicondylia;Pterygota;Neoptera;Endopterygota;Coleoptera;Polyphaga;Elat  
eriformia;Elateroidea;Lampyridae;Lampyrinae;Photinus;Photinus pyralis  
UdeM00000042274 45264 144.8 UdeM00000042274 XP\_044184031.1 43.5 191  
85 5 1 172 300 486 1.00E-31 144.8 45264 cellular  
organisms;Eukaryota;Opisthokonta;Metazoa;Eumetazoa;Cnidaria;Anthozoa;Hexa  
corallia;Scleractinia;Astrocoeniina;Acroporidae;Acropora;Acropora  
millepora  
UdeM00000042275 6565 105.5 UdeM00000042275 XP\_022323483.1 30.2 288  
167 11 6 277 174 443 1.10E-19 105.5 6565 cellular  
organisms;Eukaryota;Opisthokonta;Metazoa;Eumetazoa;Bilateria;Protostomia;  
Spiralia;Lophotrochozoa;Mollusca;Bivalvia;Autobranchia;Pteriormorphia;Ostr  
eida;Ostreoidea;Ostreidae;Crassostrea;Crassostrea virginica  
UdeM00000042276 6596 148.7 UdeM00000042276 XP\_045209241.1 28.9 425  
271 14 3 413 603 1010 1.80E-32 148.7 6596 cellular  
organisms;Eukaryota;Opisthokonta;Metazoa;Eumetazoa;Bilateria;Protostomia;  
Spiralia;Lophotrochozoa;Mollusca;Bivalvia;Autobranchia;Heteroconchia;Euhe  
terodonta;Imparidentia;Venerida;Veneroidea;Veneridae;Mercenaria;Mercenari  
a mercenaria  
UdeM00000042277 6596 148.7 UdeM00000042277 XP\_045209241.1 28.9 425  
271 14 3 413 603 1010 1.80E-32 148.7 6596 cellular  
organisms;Eukaryota;Opisthokonta;Metazoa;Eumetazoa;Bilateria;Protostomia;  
Spiralia;Lophotrochozoa;Mollusca;Bivalvia;Autobranchia;Heteroconchia;Euhe  
terodonta;Imparidentia;Venerida;Veneroidea;Veneridae;Mercenaria;Mercenari  
a mercenaria

UdeM00000042278 6579 62 UdeM00000042278 XP\_033725862.1 40.8 76  
 45 0 70 145 215 290 7.40E-07 62 6579 cellular  
 organisms;Eukaryota;Opisthokonta;Metazoa;Eumetazoa;Bilateria;Protostomia;  
 Spiralia;Lophotrochozoa;Mollusca;Bivalvia;Autobranchia;Pteriomorphia;Pect  
 inida;Pectinoidea;Pectinidae;Pecten;Pecten maximus  
 UdeM00000042280 37621 105.5 UdeM00000042280 XP\_014667591.1 24.8 432  
 244 13 7 415 480 853 2.50E-19 105.5 37621 cellular  
 organisms;Eukaryota;Opisthokonta;Metazoa;Eumetazoa;Bilateria;Protostomia;  
 Ecdysozoa;Scalidophora;Priapulida;Priapulimorpha;Priapulimorphida;Priapul  
 idae;Priapulus;Priapulus caudatus  
 UdeM00000042281 6596 105.9 UdeM00000042281 XP\_045181571.1 23.3 645  
 393 21 14 579 339 960 1.90E-19 105.9 6596 cellular  
 organisms;Eukaryota;Opisthokonta;Metazoa;Eumetazoa;Bilateria;Protostomia;  
 Spiralia;Lophotrochozoa;Mollusca;Bivalvia;Autobranchia;Heteroconchia;Euhe  
 terodonta;Imparidentia;Venerida;Veneroidea;Veneridae;Mercenaria;Mercenari  
 a mercenaria  
 UdeM00000042283 218467 99.4 UdeM00000042283 XP\_023213810.1 33.3  
 171 110 3 28 198 4 170 5.70E-18 99.4 218467  
 cellular  
 organisms;Eukaryota;Opisthokonta;Metazoa;Eumetazoa;Bilateria;Protostomia;  
 Ecdysozoa;Panarthropoda;Arthropoda;Chelicerata;Arachnida;Scorpiones;Buthi  
 da;Buthoidea;Buthidae;Centruroides;Centruroides sculpturatus  
 UdeM00000042284 6596 156.4 UdeM00000042284 XP\_045208734.1 33.4 329  
 204 12 48 367 6 328 7.10E-35 156.4 6596 cellular  
 organisms;Eukaryota;Opisthokonta;Metazoa;Eumetazoa;Bilateria;Protostomia;  
 Spiralia;Lophotrochozoa;Mollusca;Bivalvia;Autobranchia;Heteroconchia;Euhe  
 terodonta;Imparidentia;Venerida;Veneroidea;Veneridae;Mercenaria;Mercenari  
 a mercenaria  
 UdeM00000042286 400727 253.1 UdeM00000042286 XP\_025108466.1 45.7  
 302 156 3 60 361 145 438 5.60E-64 253.1 400727  
 cellular  
 organisms;Eukaryota;Opisthokonta;Metazoa;Eumetazoa;Bilateria;Protostomia;  
 Spiralia;Lophotrochozoa;Mollusca;Gastropoda;Caenogastropoda;Architaeniogl  
 ossa;Ampullarioidea;Ampullariidae;Pomacea;Pomacea canaliculata  
 UdeM00000042287 151771 287.7 UdeM00000042287 XP\_028408207.1 42.7  
 337 148 4 2 303 280 606 1.70E-74 287.7 151771  
 cellular  
 organisms;Eukaryota;Opisthokonta;Metazoa;Eumetazoa;Cnidaria;Anthozoa;Octo  
 corallia;Alcyonacea;Alcyoniina;Nephtheidae;Dendronephthya;Dendronephthya  
 gigantea  
 UdeM00000042288 451745 95.1 UdeM00000042288 XP\_037553707.1 45.1  
 91 50 0 3 93 545 635 5.00E-17 95.1 451745  
 cellular  
 organisms;Eukaryota;Opisthokonta;Metazoa;Eumetazoa;Bilateria;Deuterostomi  
 a;Chordata;Craniata;Vertebrata;Gnathostomata;Teleostomi;Euteleostomi;Acti  
 nopterygii;Actinopteri;Neopterygii;Teleostei;Osteoglossocephalai;Clupeoce  
 phala;Euteleosteomorpha;Neoteleostei;Eurypterygia;Ctenosquamata;Acanthomo  
 rphata;Euacanthomorphacea;Percomorphaceae;Ovalentaria;Atherinomorphae;Cyp  
 rinodontiformes;Aplocheiloidei;Rivulidae;Nematolebias;Nematolebias whitei  
 UdeM00000042289 7739 80.1 UdeM00000042289 XP\_035677667.1 44.7 85  
 46 1 4 88 7 90 2.20E-12 80.1 7739 cellular  
 organisms;Eukaryota;Opisthokonta;Metazoa;Eumetazoa;Bilateria;Deuterostomi  
 a;Chordata;Cephalochordata;Leptocardii;Amphioxiformes;Branchiostomidae;Br  
 anchiostoma;Branchiostoma floridae

UdeM00000042292 6087 276.9 UdeM00000042292 XP\_012565456.1 44.6 325  
 163 8 54 375 706 1016 3.70E-71 276.9 6087 cellular  
 organisms;Eukaryota;Opisthokonta;Metazoa;Eumetazoa;Cnidaria;Hydrozoa;Hydr  
 oidolina;Anthoathecata;Aplanulata;Hydridae;Hydra;Hydra vulgaris  
 UdeM00000042293 6579 80.9 UdeM00000042293 XP\_033730094.1 39.3 112  
 63 3 234 343 9 117 4.20E-12 80.9 6579 cellular  
 organisms;Eukaryota;Opisthokonta;Metazoa;Eumetazoa;Bilateria;Protostomia;  
 Spiralia;Lophotrochozoa;Mollusca;Bivalvia;Autobranhia;Pteriormorphia;Pect  
 inida;Pectinoidea;Pectinidae;Pecten;Pecten maximus  
 UdeM00000042294 6579 142.5 UdeM00000042294 XP\_033747958.1 56.4 101  
 44 0 1 101 57 157 4.60E-31 142.5 6579 cellular  
 organisms;Eukaryota;Opisthokonta;Metazoa;Eumetazoa;Bilateria;Protostomia;  
 Spiralia;Lophotrochozoa;Mollusca;Bivalvia;Autobranhia;Pteriormorphia;Pect  
 inida;Pectinoidea;Pectinidae;Pecten;Pecten maximus  
 UdeM00000042295 1735272 125.2 UdeM00000042295 XP\_041361861.1 32.1  
 221 55 2 1 126 1 221 6.20E-26 125.2 1735272  
 cellular  
 organisms;Eukaryota;Opisthokonta;Metazoa;Eumetazoa;Bilateria;Protostomia;  
 Spiralia;Lophotrochozoa;Mollusca;Gastropoda;Neomphalina;Neomphaloidea;Pel  
 tospiridae;Gigantopelta;Gigantopelta aegis  
 UdeM00000042296 1735272 195.7 UdeM00000042296 XP\_041374187.1 43.3  
 261 125 9 1 247 1 252 7.90E-47 195.7 1735272  
 cellular  
 organisms;Eukaryota;Opisthokonta;Metazoa;Eumetazoa;Bilateria;Protostomia;  
 Spiralia;Lophotrochozoa;Mollusca;Gastropoda;Neomphalina;Neomphaloidea;Pel  
 tospiridae;Gigantopelta;Gigantopelta aegis  
 UdeM00000042297 400727 248.1 UdeM00000042297 XP\_025100004.1 27.5  
 796 496 29 285 1042 770 1522 5.40E-62 248.1 400727  
 cellular  
 organisms;Eukaryota;Opisthokonta;Metazoa;Eumetazoa;Bilateria;Protostomia;  
 Spiralia;Lophotrochozoa;Mollusca;Gastropoda;Caenogastropoda;Architaeniogl  
 ossa;Ampullarioidea;Ampullariidae;Pomacea;Pomacea canaliculata  
 UdeM00000042300 6596 75.5 UdeM00000042300 XP\_045208720.1 32.4 250  
 122 11 22 240 1055 1288 1.10E-10 75.5 6596 cellular  
 organisms;Eukaryota;Opisthokonta;Metazoa;Eumetazoa;Bilateria;Protostomia;  
 Spiralia;Lophotrochozoa;Mollusca;Bivalvia;Autobranhia;Heteroconchia;Euhe  
 terodonta;Imparidentia;Venerida;Veneroidea;Veneridae;Mercenaria;Mercenari  
 a mercenaria  
 UdeM00000042301 6565 125.6 UdeM00000042301 XP\_022287370.1 26.3 533  
 336 25 156 676 8 495 2.80E-25 125.6 6565 cellular  
 organisms;Eukaryota;Opisthokonta;Metazoa;Eumetazoa;Bilateria;Protostomia;  
 Spiralia;Lophotrochozoa;Mollusca;Bivalvia;Autobranhia;Pteriormorphia;Ostr  
 eida;Ostreoidea;Ostreidae;Crassostrea;Crassostrea virginica  
 UdeM00000042302 1735272 157.9 UdeM00000042302 XP\_041366048.1 27.1  
 468 156 5 36 318 18 485 2.10E-35 157.9 1735272  
 cellular  
 organisms;Eukaryota;Opisthokonta;Metazoa;Eumetazoa;Bilateria;Protostomia;  
 Spiralia;Lophotrochozoa;Mollusca;Gastropoda;Neomphalina;Neomphaloidea;Pel  
 tospiridae;Gigantopelta;Gigantopelta aegis  
 UdeM00000042303 37621 65.5 UdeM00000042303 XP\_014670827.1 44.3 115  
 49 6 563 672 52 156 3.10E-07 65.5 37621 cellular  
 organisms;Eukaryota;Opisthokonta;Metazoa;Eumetazoa;Bilateria;Protostomia;  
 Ecdysozoa;Scalidophora;Priapulida;Priapulimorpha;Priapulimorphida;Priapul  
 idae;Priapulid;Priapulid caudatus

UdeM00000042305 46514 65.5 UdeM00000042305 XP\_038045891.1 33.6 110  
 57 2 1 94 299 408 6.00E-08 65.5 46514 cellular  
 organisms;Eukaryota;Opisthokonta;Metazoa;Eumetazoa;Bilateria;Deuterostomi  
 a;Echinodermata;Eleutherozoa;Asterozoa;Asterozoa;Asterozoa;Asterozoa;Asterozoa;Valvatacea;Valvatida;As  
 terinidae;Patiria;Patiria miniata  
 UdeM00000042306 7739 265.4 UdeM00000042306 XP\_035665616.1 60.4 202  
 80 0 1 202 480 681 6.80E-68 265.4 7739 cellular  
 organisms;Eukaryota;Opisthokonta;Metazoa;Eumetazoa;Bilateria;Deuterostomi  
 a;Chordata;Cephalochordata;Leptocardii;Amphioxiformes;Branchiostomidae;Br  
 anchiostoma;Branchiostoma floridae  
 UdeM00000042307 1735272 77.8 UdeM00000042307 XP\_041366048.1 37  
 119 62 2 6 111 7 125 1.00E-11 77.8 1735272  
 cellular  
 organisms;Eukaryota;Opisthokonta;Metazoa;Eumetazoa;Bilateria;Protostomia;  
 Spiralia;Lophotrochozoa;Mollusca;Gastropoda;Neomphalina;Neomphaloidea;Pel  
 tospiridae;Gigantopelta;Gigantopelta aegis  
 UdeM00000042308 37621 70.1 UdeM00000042308 XP\_014670827.1 42.7 96  
 51 2 5 99 118 210 2.30E-09 70.1 37621 cellular  
 organisms;Eukaryota;Opisthokonta;Metazoa;Eumetazoa;Bilateria;Protostomia;  
 Ecdysozoa;Scalidophora;Priapulida;Priapulimorpha;Priapulimorphida;Priapul  
 idae;Priapulus;Priapulus caudatus  
 UdeM00000042309 37621 118.2 UdeM00000042309 XP\_014677368.1 50.9 114  
 50 3 1 108 1 114 6.40E-24 118.2 37621 cellular  
 organisms;Eukaryota;Opisthokonta;Metazoa;Eumetazoa;Bilateria;Protostomia;  
 Ecdysozoa;Scalidophora;Priapulida;Priapulimorpha;Priapulimorphida;Priapul  
 idae;Priapulus;Priapulus caudatus  
 UdeM00000042310 6565 136 UdeM00000042310 XP\_022339536.1 29.3 311  
 203 8 34 339 299 597 1.10E-28 136 6565 cellular  
 organisms;Eukaryota;Opisthokonta;Metazoa;Eumetazoa;Bilateria;Protostomia;  
 Spiralia;Lophotrochozoa;Mollusca;Bivalvia;Autobranchia;Pteriomorpha;Ostr  
 eida;Ostreoidea;Ostreidae;Crassostrea;Crassostrea virginica  
 UdeM00000042311 6579 69.3 UdeM00000042311 XP\_033726360.1 34.2 111  
 61 2 16 123 488 589 7.90E-09 69.3 6579 cellular  
 organisms;Eukaryota;Opisthokonta;Metazoa;Eumetazoa;Bilateria;Protostomia;  
 Spiralia;Lophotrochozoa;Mollusca;Bivalvia;Autobranchia;Pteriomorpha;Pect  
 inida;Pectinoidea;Pectinidae;Pecten;Pecten maximus  
 UdeM00000042312 1735272 105.1 UdeM00000042312 XP\_041347279.1 29.1  
 285 96 7 23 203 219 501 1.10E-19 105.1 1735272  
 cellular  
 organisms;Eukaryota;Opisthokonta;Metazoa;Eumetazoa;Bilateria;Protostomia;  
 Spiralia;Lophotrochozoa;Mollusca;Gastropoda;Neomphalina;Neomphaloidea;Pel  
 tospiridae;Gigantopelta;Gigantopelta aegis  
 UdeM00000042315 1735272 132.9 UdeM00000042315 XP\_041379632.1 31.7  
 334 207 11 42 367 173 493 1.20E-27 132.9 1735272  
 cellular  
 organisms;Eukaryota;Opisthokonta;Metazoa;Eumetazoa;Bilateria;Protostomia;  
 Spiralia;Lophotrochozoa;Mollusca;Gastropoda;Neomphalina;Neomphaloidea;Pel  
 tospiridae;Gigantopelta;Gigantopelta aegis  
 UdeM00000042316 6565 99.8 UdeM00000042316 XP\_022287370.1 30.1 306  
 184 12 151 453 2 280 1.00E-17 99.8 6565 cellular  
 organisms;Eukaryota;Opisthokonta;Metazoa;Eumetazoa;Bilateria;Protostomia;  
 Spiralia;Lophotrochozoa;Mollusca;Bivalvia;Autobranchia;Pteriomorpha;Ostr  
 eida;Ostreoidea;Ostreidae;Crassostrea;Crassostrea virginica

UdeM00000042318 7574 82.8 UdeM00000042318 XP\_013388573.1 40.9 110  
 58 3 98 206 351 454 6.00E-13 82.8 7574 cellular  
 organisms;Eukaryota;Opisthokonta;Metazoa;Eumetazoa;Bilateria;Protostomia;  
 Spiralia;Lophotrochozoa;Brachiopoda;Linguliformea;Lingulata;Lingulida;Lin  
 guloidea;Lingulidae;Lingula;Lingula anatina  
 UdeM00000042319 6596 87.8 UdeM00000042319 XP\_045171063.1 45.6 90  
 48 1 8 96 3 92 9.80E-15 87.8 6596 cellular  
 organisms;Eukaryota;Opisthokonta;Metazoa;Eumetazoa;Bilateria;Protostomia;  
 Spiralia;Lophotrochozoa;Mollusca;Bivalvia;Autobranchia;Heteroconchia;Euhe  
 terodonta;Imparidentia;Venerida;Veneroidea;Veneridae;Mercenaria;Mercenari  
 a mercenaria  
 UdeM00000042323 1735272 151.8 UdeM00000042323 XP\_041372788.1 30  
 426 254 11 4 415 982 1377 2.10E-33 151.8 1735272  
 cellular  
 organisms;Eukaryota;Opisthokonta;Metazoa;Eumetazoa;Bilateria;Protostomia;  
 Spiralia;Lophotrochozoa;Mollusca;Gastropoda;Neomphalina;Neomphaloidea;Pel  
 tospiridae;Gigantopelta;Gigantopelta aegis  
 UdeM00000042325 6596 370.2 UdeM00000042325 XP\_045156248.1 35 625  
 288 9 4 541 7 600 4.60E-99 370.2 6596 cellular  
 organisms;Eukaryota;Opisthokonta;Metazoa;Eumetazoa;Bilateria;Protostomia;  
 Spiralia;Lophotrochozoa;Mollusca;Bivalvia;Autobranchia;Heteroconchia;Euhe  
 terodonta;Imparidentia;Venerida;Veneroidea;Veneridae;Mercenaria;Mercenari  
 a mercenaria  
 UdeM00000042326 7906 189.1 UdeM00000042326 XP\_033853648.2 27.7 411  
 205 7 30 352 368 774 9.50E-45 189.1 7906 cellular  
 organisms;Eukaryota;Opisthokonta;Metazoa;Eumetazoa;Bilateria;Deuterostomi  
 a;Chordata;Craniata;Vertebrata;Gnathostomata;Teleostomi;Euteleostomi;Acti  
 nopterygii;Actinopteri;Chondrostei;Acipenseriformes;Acipenseroides;Acipen  
 seridae;Acipenserinae;Acipenserini;Acipenser;Acipenser ruthenus  
 UdeM00000042328 7574 124.8 UdeM00000042328 XP\_013388573.1 40.9 186  
 92 6 25 209 349 517 1.30E-25 124.8 7574 cellular  
 organisms;Eukaryota;Opisthokonta;Metazoa;Eumetazoa;Bilateria;Protostomia;  
 Spiralia;Lophotrochozoa;Brachiopoda;Linguliformea;Lingulata;Lingulida;Lin  
 guloidea;Lingulidae;Lingula;Lingula anatina  
 UdeM00000042329 29159 64.7 UdeM00000042329 XP\_034315424.1 36.1 108  
 60 3 12 116 213 314 9.90E-08 64.7 29159 cellular  
 organisms;Eukaryota;Opisthokonta;Metazoa;Eumetazoa;Bilateria;Protostomia;  
 Spiralia;Lophotrochozoa;Mollusca;Bivalvia;Autobranchia;Pteriomorphia;Ostr  
 eida;Ostreoidea;Ostreidae;Crassostrea;Crassostrea gigas  
 UdeM00000042331 6579 134 UdeM00000042331 XP\_033758288.1 31.4 290  
 176 8 143 424 153 427 4.60E-28 134 6579 cellular  
 organisms;Eukaryota;Opisthokonta;Metazoa;Eumetazoa;Bilateria;Protostomia;  
 Spiralia;Lophotrochozoa;Mollusca;Bivalvia;Autobranchia;Pteriomorphia;Pect  
 inida;Pectinoidea;Pectinidae;Pecten;Pecten maximus  
 UdeM00000042332 6565 57.8 UdeM00000042332 XP\_022287521.1 43.5 62  
 35 0 2 63 313 374 9.10E-06 57.8 6565 cellular  
 organisms;Eukaryota;Opisthokonta;Metazoa;Eumetazoa;Bilateria;Protostomia;  
 Spiralia;Lophotrochozoa;Mollusca;Bivalvia;Autobranchia;Pteriomorphia;Ostr  
 eida;Ostreoidea;Ostreidae;Crassostrea;Crassostrea virginica  
 UdeM00000042333 1735272 131 UdeM00000042333 XP\_041379632.1 30.3  
 360 218 10 83 429 173 512 5.00E-27 131 1735272  
 cellular  
 organisms;Eukaryota;Opisthokonta;Metazoa;Eumetazoa;Bilateria;Protostomia;

Spiralia; Lophotrochozoa; Mollusca; Gastropoda; Neomphalina; Neomphaloidea; Peltospiridae; Gigantopelta; Gigantopelta aegis

UdeM00000027725 50390 304.3 UdeM00000027725 XP\_028145157.1 55.9 229  
93 1 3 223 379 607 1.30E-79 304.3 50390 cellular  
organisms; Eukaryota; Opisthokonta; Metazoa; Eumetazoa; Bilateria; Protostomia; Ecdysozoa; Panarthropoda; Arthropoda; Mandibulata; Pancrustacea; Hexapoda; Insecta; Dicondylia; Pterygota; Neoptera; Endopterygota; Coleoptera; Polyphaga; Cucujiformia; Chrysomeloidea; Chrysomelidae; Galerucinae; Luperini; Diabroticina; Diabroticites; Diabrotica; Diabrotica virgifera; Diabrotica virgifera virgifera

UdeM00000027726 8208 80.1 UdeM00000027726 XP\_010779273.1 58.6 70  
26 1 14 83 2 68 2.00E-12 80.1 8208 cellular  
organisms; Eukaryota; Opisthokonta; Metazoa; Eumetazoa; Bilateria; Deuterostomia; Chordata; Craniata; Vertebrata; Gnathostomata; Teleostomi; Euteleostomi; Actinopterygii; Actinopteri; Neopterygii; Teleostei; Osteoglossocephalai; Clupeocephala; Euteleostomorpha; Neoteleostei; Eurypterygia; Ctenosquamata; Acanthomorpha; Euacanthomorpha; Percomorphaceae; Eupercaria; Perciformes; Notothenioidei; Nototheniidae; Notothenia; Notothenia coriiceps

UdeM00000027728 7739 60.5 UdeM00000027728 XP\_035659254.1 34.9 109  
68 1 15 120 73 181 1.80E-06 60.5 7739 cellular  
organisms; Eukaryota; Opisthokonta; Metazoa; Eumetazoa; Bilateria; Deuterostomia; Chordata; Cephalochordata; Leptocardii; Amphioxiformes; Branchiostomidae; Branchiostoma; Branchiostoma floridae

UdeM00000027729 105023 191.8 UdeM00000027729 XP\_015796939.1 61.3  
119 46 0 2 120 182 300 8.30E-46 191.8 105023  
cellular  
organisms; Eukaryota; Opisthokonta; Metazoa; Eumetazoa; Bilateria; Deuterostomia; Chordata; Craniata; Vertebrata; Gnathostomata; Teleostomi; Euteleostomi; Actinopterygii; Actinopteri; Neopterygii; Teleostei; Osteoglossocephalai; Clupeocephala; Euteleostomorpha; Neoteleostei; Eurypterygia; Ctenosquamata; Acanthomorpha; Euacanthomorpha; Percomorphaceae; Ovalentaria; Atherinomorphae; Cyprinodontiformes; Aplocheiloidei; Nothobranchiidae; Nothobranchius; Nothobranchius furzeri

UdeM00000027733 6573 292 UdeM00000027733 XP\_021359218.1 63.2 220  
80 1 31 250 419 637 8.20E-76 292 6573 cellular  
organisms; Eukaryota; Opisthokonta; Metazoa; Eumetazoa; Bilateria; Protostomia; Spiralia; Lophotrochozoa; Mollusca; Bivalvia; Autobranchia; Pteriomorphia; Pectinida; Pectinoidea; Pectinidae; Mizuhopecten; Mizuhopecten yessoensis

UdeM00000027732 6573 292 UdeM00000027732 XP\_021359218.1 63.2 220  
80 1 15 234 419 637 7.80E-76 292 6573 cellular  
organisms; Eukaryota; Opisthokonta; Metazoa; Eumetazoa; Bilateria; Protostomia; Spiralia; Lophotrochozoa; Mollusca; Bivalvia; Autobranchia; Pteriomorphia; Pectinida; Pectinoidea; Pectinidae; Mizuhopecten; Mizuhopecten yessoensis

UdeM00000027734 50390 500 UdeM00000027734 XP\_028142380.1 56.5 347  
151 0 1 347 3 349 2.50E-138 500 50390 cellular  
organisms; Eukaryota; Opisthokonta; Metazoa; Eumetazoa; Bilateria; Protostomia; Ecdysozoa; Panarthropoda; Arthropoda; Mandibulata; Pancrustacea; Hexapoda; Insecta; Dicondylia; Pterygota; Neoptera; Endopterygota; Coleoptera; Polyphaga; Cucujiformia; Chrysomeloidea; Chrysomelidae; Galerucinae; Luperini; Diabroticina; Diabroticites; Diabrotica; Diabrotica virgifera; Diabrotica virgifera virgifera

UdeM00000027736 7719 184.5 UdeM00000027736 XP\_004227365.1 50.9 161  
79 0 6 166 2 162 1.10E-43 184.5 7719 cellular  
organisms; Eukaryota; Opisthokonta; Metazoa; Eumetazoa; Bilateria; Deuterostomia



a;Chordata;Tunicata;Ascidiacea;Phlebobranchia;Cionidae;Ciona;Ciona intestinalis

|                 |         |      |                 |                |          |
|-----------------|---------|------|-----------------|----------------|----------|
| UdeM00000027737 | 1735272 | 61.2 | UdeM00000027737 | XP_041350990.1 | 43.5     |
| 62              | 35      | 0    | 125             | 186            | 461      |
|                 |         |      |                 |                | 522      |
|                 |         |      |                 |                | 1.60E-06 |
|                 |         |      |                 |                | 61.2     |
|                 |         |      |                 |                | 1735272  |

cellular

organisms;Eukaryota;Opisthokonta;Metazoa;Eumetazoa;Bilateria;Protostomia;Spiralia;Lophotrochozoa;Mollusca;Gastropoda;Neomphalina;Neomphaloidea;Peltospiridae;Gigantopelta;Gigantopelta aegis

|                 |       |     |                 |                |      |           |
|-----------------|-------|-----|-----------------|----------------|------|-----------|
| UdeM00000027738 | 50390 | 520 | UdeM00000027738 | XP_028154228.1 | 56.3 | 375       |
| 164             | 0     | 1   | 375             | 154            | 528  | 2.50E-144 |
|                 |       |     |                 |                | 520  | 50390     |

cellular

organisms;Eukaryota;Opisthokonta;Metazoa;Eumetazoa;Bilateria;Protostomia;Ecdysozoa;Panarthropoda;Arthropoda;Mandibulata;Pancrustacea;Hexapoda;Insecta;Dicondylia;Pterygota;Neoptera;Endopterygota;Coleoptera;Polyphaga;Cucujiformia;Chrysomeloidea;Chrysomelidae;Galerucinae;Luperini;Diabroticina;Diabroticites;Diabrotica;Diabrotica virgifera;Diabrotica virgifera virgifera

|                 |      |       |                 |                |       |          |
|-----------------|------|-------|-----------------|----------------|-------|----------|
| UdeM00000027739 | 6565 | 338.6 | UdeM00000027739 | XP_022327962.1 | 40.5  | 472      |
| 170             | 3    | 1     | 361             | 247            | 718   | 9.90E-90 |
|                 |      |       |                 |                | 338.6 | 6565     |

cellular

organisms;Eukaryota;Opisthokonta;Metazoa;Eumetazoa;Bilateria;Protostomia;Spiralia;Lophotrochozoa;Mollusca;Bivalvia;Autobranchia;Pteriormorphia;Ostreida;Ostreoidea;Ostreidae;Crassostrea;Crassostrea virginica

|                 |      |       |                 |                |       |           |
|-----------------|------|-------|-----------------|----------------|-------|-----------|
| UdeM00000027740 | 6596 | 410.6 | UdeM00000027740 | XP_045187536.1 | 41.3  | 596       |
| 135             | 3    | 4     | 386             | 131            | 724   | 2.20E-111 |
|                 |      |       |                 |                | 410.6 | 6596      |

cellular

organisms;Eukaryota;Opisthokonta;Metazoa;Eumetazoa;Bilateria;Protostomia;Spiralia;Lophotrochozoa;Mollusca;Bivalvia;Autobranchia;Heteroconchia;Euheterodonta;Imparidentia;Venerida;Veneroidea;Veneridae;Mercenaria;Mercenaria mercenaria

|                 |      |      |                 |                |      |          |
|-----------------|------|------|-----------------|----------------|------|----------|
| UdeM00000027741 | 6596 | 91.3 | UdeM00000027741 | XP_045190923.1 | 69.1 | 68       |
| 21              | 0    | 84   | 151             | 463            | 530  | 1.20E-15 |
|                 |      |      |                 |                | 91.3 | 6596     |

cellular

organisms;Eukaryota;Opisthokonta;Metazoa;Eumetazoa;Bilateria;Protostomia;Spiralia;Lophotrochozoa;Mollusca;Bivalvia;Autobranchia;Heteroconchia;Euheterodonta;Imparidentia;Venerida;Veneroidea;Veneridae;Mercenaria;Mercenaria mercenaria

|                 |       |       |                 |                |       |          |
|-----------------|-------|-------|-----------------|----------------|-------|----------|
| UdeM00000027742 | 36176 | 303.9 | UdeM00000027742 | XP_043534371.1 | 58.1  | 227      |
| 94              | 1     | 3     | 228             | 112            | 338   | 1.70E-79 |
|                 |       |       |                 |                | 303.9 | 36176    |

cellular

organisms;Eukaryota;Opisthokonta;Metazoa;Eumetazoa;Bilateria;Deuterostomia;Chordata;Craniata;Vertebrata;Gnathostomata;Chondrichthyes;Elasmobranchii;Selachii;Galeomorphii;Galeoidea;Orectolobiformes;Hemiscylliidae;Chiloscyllium;Chiloscyllium plagiosum

|                 |       |       |                 |                |       |           |
|-----------------|-------|-------|-----------------|----------------|-------|-----------|
| UdeM00000027743 | 50390 | 446.8 | UdeM00000027743 | XP_028142380.1 | 55.4  | 316       |
| 139             | 1     | 1     | 316             | 59             | 372   | 2.30E-122 |
|                 |       |       |                 |                | 446.8 | 50390     |

cellular

organisms;Eukaryota;Opisthokonta;Metazoa;Eumetazoa;Bilateria;Protostomia;Ecdysozoa;Panarthropoda;Arthropoda;Mandibulata;Pancrustacea;Hexapoda;Insecta;Dicondylia;Pterygota;Neoptera;Endopterygota;Coleoptera;Polyphaga;Cucujiformia;Chrysomeloidea;Chrysomelidae;Galerucinae;Luperini;Diabroticina;Diabroticites;Diabrotica;Diabrotica virgifera;Diabrotica virgifera virgifera

|                 |        |       |                 |                |          |       |
|-----------------|--------|-------|-----------------|----------------|----------|-------|
| UdeM00000027744 | 150288 | 279.6 | UdeM00000027744 | XP_020788097.1 | 63.9     |       |
| 180             | 65     | 0     | 1               | 180            | 365      | 544   |
|                 |        |       |                 |                | 2.70E-72 | 279.6 |
|                 |        |       |                 |                | 150288   |       |

cellular

organisms;Eukaryota;Opisthokonta;Metazoa;Eumetazoa;Bilateria;Deuterostomia;Chordata;Craniata;Vertebrata;Gnathostomata;Teleostomi;Euteleostomi;Actinopterygii;Actinopteri;Neopterygii;Teleostei;Osteoglossocephalai;Clupeocephala;Euteleostei;Neoteleostei;Eurypterygia;Ctenosquamata;Acanthomo

rphata;Euacanthomorpha;Percomorphaceae;Gobiaria;Gobiiformes;Gobioidei;Gobiidae;Oxudercinae;Boleophthalmus;Boleophthalmus pectinirostris  
UdeM00000027746 6579 99.8 UdeM00000027746 XP\_033725148.1 60.4 91  
33 2 68 158 281 368 3.50E-18 99.8 6579 cellular  
organisms;Eukaryota;Opisthokonta;Metazoa;Eumetazoa;Bilateria;Protostomia;Spiralia;Lophotrochozoa;Mollusca;Bivalvia;Autobranchia;Pteriormorphia;Pectinida;Pectinoidea;Pectinidae;Pecten;Pecten maximus  
UdeM00000027748 150288 282.7 UdeM00000027748 XP\_020788097.1 61.6  
190 72 1 1 189 365 554 3.40E-73 282.7 150288  
cellular  
organisms;Eukaryota;Opisthokonta;Metazoa;Eumetazoa;Bilateria;Deuterostomia;Chordata;Craniata;Vertebrata;Gnathostomata;Teleostomi;Euteleostomi;Actinopterygii;Actinopteri;Neopterygii;Teleostei;Osteoglossocephalai;Clupeocephala;Euteleostei;Neoteleostei;Eurypterygia;Ctenosquamata;Acanthomorpha;Euacanthomorpha;Percomorphaceae;Gobiaria;Gobiiformes;Gobioidei;Gobiidae;Oxudercinae;Boleophthalmus;Boleophthalmus pectinirostris  
UdeM00000027749 133901 246.1 UdeM00000027749 XP\_026275386.1 62.7  
166 62 0 6 171 77 242 3.40E-62 246.1 133901  
cellular  
organisms;Eukaryota;Opisthokonta;Metazoa;Eumetazoa;Bilateria;Protostomia;Ecdysozoa;Panarthropoda;Arthropoda;Mandibulata;Pancrustacea;Hexapoda;Insecta;Dicondylia;Pterygota;Neoptera;Paraneoptera;Thysanoptera;Terebrantia;Thripidae;Thripinae;Frankliniella;Frankliniella occidentalis  
UdeM00000027750 29159 138.3 UdeM00000027750 XP\_034331441.1 46.5 142  
76 0 1 142 1 142 1.90E-29 138.3 29159 cellular  
organisms;Eukaryota;Opisthokonta;Metazoa;Eumetazoa;Bilateria;Protostomia;Spiralia;Lophotrochozoa;Mollusca;Bivalvia;Autobranchia;Pteriormorphia;Ostreida;Ostreidae;Crassostrea;Crassostrea gigas  
UdeM00000027752 6596 156.8 UdeM00000027752 XP\_045171063.1 32.6 285  
174 6 5 274 39 320 6.00E-35 156.8 6596 cellular  
organisms;Eukaryota;Opisthokonta;Metazoa;Eumetazoa;Bilateria;Protostomia;Spiralia;Lophotrochozoa;Mollusca;Bivalvia;Autobranchia;Heteroconchia;Euheterodonta;Imparidentia;Venerida;Veneroidea;Veneridae;Mercenaria;Mercenaria mercenaria  
UdeM00000027753 6596 58.2 UdeM00000027753 XP\_045202117.1 55.6 45  
20 0 1 45 19 63 5.10E-06 58.2 6596 cellular  
organisms;Eukaryota;Opisthokonta;Metazoa;Eumetazoa;Bilateria;Protostomia;Spiralia;Lophotrochozoa;Mollusca;Bivalvia;Autobranchia;Heteroconchia;Euheterodonta;Imparidentia;Venerida;Veneroidea;Veneridae;Mercenaria;Mercenaria mercenaria  
UdeM00000027754 278856 629.4 UdeM00000027754 XP\_032528088.1 58.6  
449 186 0 6 454 293 741 3.70E-177 629.4 278856  
cellular  
organisms;Eukaryota;Opisthokonta;Metazoa;Eumetazoa;Bilateria;Protostomia;Ecdysozoa;Panarthropoda;Arthropoda;Mandibulata;Pancrustacea;Hexapoda;Insecta;Dicondylia;Pterygota;Neoptera;Endopterygota;Amphiesmenoptera;Lepidoptera;Glossata;Neolepidoptera;Heteroneura;Ditrysia;Obtectomera;Papilionoidea;Nymphalidae;Danainae;Danaini;Danaina;Danaus;Danaus;Danaus plexippus;Danaus plexippus plexippus  
UdeM00000027755 50390 422.9 UdeM00000027755 XP\_028154228.1 53.9 330  
146 1 83 406 192 521 4.60E-115 422.9 50390 cellular  
organisms;Eukaryota;Opisthokonta;Metazoa;Eumetazoa;Bilateria;Protostomia;Ecdysozoa;Panarthropoda;Arthropoda;Mandibulata;Pancrustacea;Hexapoda;Insecta;Dicondylia;Pterygota;Neoptera;Endopterygota;Coleoptera;Polyphaga;Cucuc

jiformia;Chrysomeloidea;Chrysomelidae;Galerucinae;Luperini;Diabroticina;Diabroticites;Diabrotica;Diabrotica virgifera;Diabrotica virgifera virgifera

UdeM00000027756 29159 117.9 UdeM00000027756 XP\_034307341.1 35.4 192  
109 3 25 202 62 252 1.60E-23 117.9 29159 cellular

organisms;Eukaryota;Opisthokonta;Metazoa;Eumetazoa;Bilateria;Protostomia;Spiralia;Lophotrochozoa;Mollusca;Bivalvia;Autobranhia;Pteriormorphia;Ostreida;Ostreoidea;Ostreidae;Crassostrea;Crassostrea gigas

UdeM00000027757 7739 97.4 UdeM00000027757 XP\_035659254.1 40.5 148  
79 5 6 147 37 181 1.60E-17 97.4 7739 cellular

organisms;Eukaryota;Opisthokonta;Metazoa;Eumetazoa;Bilateria;Deuterostomia;Chordata;Cephalochordata;Leptocardii;Amphioxiformes;Branchiostomidae;Branchiostoma;Branchiostoma floridae

UdeM00000027758 225164 362.8 UdeM00000027758 XP\_009062376.1 65.5  
232 80 0 1 232 314 545 3.20E-97 362.8 225164

cellular

organisms;Eukaryota;Opisthokonta;Metazoa;Eumetazoa;Bilateria;Protostomia;Spiralia;Lophotrochozoa;Mollusca;Gastropoda;Patellogastropoda;Lottioidea;Lottiidae;Lottia;Lottia gigantea

UdeM00000027759 150288 275.8 UdeM00000027759 XP\_020788097.1 61.1  
185 72 0 1 185 365 549 4.10E-71 275.8 150288

cellular

organisms;Eukaryota;Opisthokonta;Metazoa;Eumetazoa;Bilateria;Deuterostomia;Chordata;Craniata;Vertebrata;Gnathostomata;Teleostomi;Euteleostomi;Actinopterygii;Actinopteri;Neopterygii;Teleostei;Osteoglossocephalai;Clupeocephala;Euteleosteomorpha;Neoteleostei;Eurypterygia;Ctenosquamata;Acanthomorphata;Euacanthomorphacea;Percomorphaceae;Gobiaria;Gobiiformes;Gobioidei;Gobiidae;Oxudercinae;Boleophthalmus;Boleophthalmus pectinirostris

UdeM00000027760 50390 387.1 UdeM00000027760 XP\_028147518.1 60.2 261  
104 0 1 261 40 300 1.80E-104 387.1 50390 cellular

organisms;Eukaryota;Opisthokonta;Metazoa;Eumetazoa;Bilateria;Protostomia;Ecdysozoa;Panarthropoda;Arthropoda;Mandibulata;Pancrustacea;Hexapoda;Insecta;Dicondylia;Pterygota;Neoptera;Endopterygota;Coleoptera;Polyphaga;Cucujiformia;Chrysomeloidea;Chrysomelidae;Galerucinae;Luperini;Diabroticina;Diabroticites;Diabrotica;Diabrotica virgifera;Diabrotica virgifera virgifera

UdeM00000027761 278856 558.5 UdeM00000027761 XP\_032528089.1 59.1  
406 157 1 1 406 178 574 6.90E-156 558.5 278856

cellular

organisms;Eukaryota;Opisthokonta;Metazoa;Eumetazoa;Bilateria;Protostomia;Ecdysozoa;Panarthropoda;Arthropoda;Mandibulata;Pancrustacea;Hexapoda;Insecta;Dicondylia;Pterygota;Neoptera;Endopterygota;Amphiesmenoptera;Lepidoptera;Glossata;Neolepidoptera;Heteroneura;Ditrysia;Obtectomera;Papilionoidea;Nymphalidae;Danainae;Danaini;Danaina;Danaus;Danaus;Danaus plexippus;Danaus plexippus plexippus

UdeM00000027762 6596 394.4 UdeM00000027762 XP\_045160375.1 58.4 329  
131 6 1 326 1 326 1.40E-106 394.4 6596 cellular

organisms;Eukaryota;Opisthokonta;Metazoa;Eumetazoa;Bilateria;Protostomia;Spiralia;Lophotrochozoa;Mollusca;Bivalvia;Autobranhia;Heteroconchia;Euheterodonta;Imparidentia;Venerida;Veneroidea;Veneridae;Mercenaria;Mercenaria mercenaria

UdeM00000027763 6596 200.7 UdeM00000027763 XP\_045176664.1 28.3 561  
275 14 47 505 35 570 4.50E-48 200.7 6596 cellular

organisms;Eukaryota;Opisthokonta;Metazoa;Eumetazoa;Bilateria;Protostomia;

Spiralia;Lophotrochozoa;Mollusca;Bivalvia;Autobranchia;Heteroconchia;Euherodonta;Imparidentia;Venerida;Veneroidea;Veneridae;Mercenaria;Mercenaria mercenaria

UdeM00000027765 278856 616.7 UdeM00000027765 XP\_032528088.1 55.8  
473 196 1 1 473 147 606 2.50E-173 616.7 278856

cellular

organisms;Eukaryota;Opisthokonta;Metazoa;Eumetazoa;Bilateria;Protostomia;Ecdysozoa;Panarthropoda;Arthropoda;Mandibulata;Pancrustacea;Hexapoda;Insecta;Dicondylia;Pterygota;Neoptera;Endopterygota;Amphiesmenoptera;Lepidoptera;Glossata;Neolepidoptera;Heteroneura;Ditrysia;Obtectomera;Papilionoidea;Nymphalidae;Danainae;Danaini;Danaina;Danaus;Danaus;Danaus

plexippus;Danaus plexippus plexippus

UdeM00000027766 6565 164.1 UdeM00000027766 XP\_022327962.1 47.6 164  
84 1 2 163 555 718 1.50E-37 164.1 6565 cellular

organisms;Eukaryota;Opisthokonta;Metazoa;Eumetazoa;Bilateria;Protostomia;Spiralia;Lophotrochozoa;Mollusca;Bivalvia;Autobranchia;Pteriormorphia;Ostreida;Ostreoidea;Ostreidae;Crassostrea;Crassostrea virginica

UdeM00000027767 6565 252.3 UdeM00000027767 XP\_022297447.1 50.8 248  
106 2 1 232 117 364 6.10E-64 252.3 6565 cellular

organisms;Eukaryota;Opisthokonta;Metazoa;Eumetazoa;Bilateria;Protostomia;Spiralia;Lophotrochozoa;Mollusca;Bivalvia;Autobranchia;Pteriormorphia;Ostreida;Ostreoidea;Ostreidae;Crassostrea;Crassostrea virginica

UdeM00000027768 90988 114.4 UdeM00000027768 XP\_039535825.1 60.5 86  
34 0 1 86 111 196 7.50E-23 114.4 90988 cellular

organisms;Eukaryota;Opisthokonta;Metazoa;Eumetazoa;Bilateria;Deuterostomia;Chordata;Craniata;Vertebrata;Gnathostomata;Teleostomi;Euteleostomi;Actinopterygii;Actinopteri;Neopterygii;Teleostei;Osteoglossocephalai;Clupeocephala;Otomorpha;Ostariophysi;Otophysi;Cypriniphysae;Cypriniformes;Cyprinidae;Leuciscidae;Pogonichthyinae;Pimephales;Pimephales promelas

UdeM00000027769 29159 160.2 UdeM00000027769 XP\_034331549.1 43.8 240  
115 6 7 234 221 452 3.20E-36 160.2 29159 cellular

organisms;Eukaryota;Opisthokonta;Metazoa;Eumetazoa;Bilateria;Protostomia;Spiralia;Lophotrochozoa;Mollusca;Bivalvia;Autobranchia;Pteriormorphia;Ostreida;Ostreoidea;Ostreidae;Crassostrea;Crassostrea gigas

UdeM00000027770 278856 561.2 UdeM00000027770 XP\_032528089.1 59.2  
400 163 0 1 400 178 577 1.00E-156 561.2 278856

cellular

organisms;Eukaryota;Opisthokonta;Metazoa;Eumetazoa;Bilateria;Protostomia;Ecdysozoa;Panarthropoda;Arthropoda;Mandibulata;Pancrustacea;Hexapoda;Insecta;Dicondylia;Pterygota;Neoptera;Endopterygota;Amphiesmenoptera;Lepidoptera;Glossata;Neolepidoptera;Heteroneura;Ditrysia;Obtectomera;Papilionoidea;Nymphalidae;Danainae;Danaini;Danaina;Danaus;Danaus;Danaus

plexippus;Danaus plexippus plexippus

UdeM00000027771 105023 411 UdeM00000027771 XP\_015798255.1 56.1  
314 131 1 6 319 131 437 1.40E-111 411 105023

cellular

organisms;Eukaryota;Opisthokonta;Metazoa;Eumetazoa;Bilateria;Deuterostomia;Chordata;Craniata;Vertebrata;Gnathostomata;Teleostomi;Euteleostomi;Actinopterygii;Actinopteri;Neopterygii;Teleostei;Osteoglossocephalai;Clupeocephala;Euteleosteomorpha;Neoteleostei;Eurypterygia;Ctenosquamata;Acanthomorpha;Euacanthomorpha;Percomorphaceae;Ovalentaria;Atherinomorpha;Cyprinodontiformes;Aplocheiloidei;Nothobranchiidae;Nothobranchius;Nothobranchius furzeri

UdeM00000027772 6596 77.8 UdeM00000027772 XP\_045216906.1 57.1 56  
 24 0 1 56 297 352 5.00E-12 77.8 6596 cellular  
 organisms;Eukaryota;Opisthokonta;Metazoa;Eumetazoa;Bilateria;Protostomia;  
 Spiralia;Lophotrochozoa;Mollusca;Bivalvia;Autobranchia;Heteroconchia;Euhe-  
 terodonta;Imparidentia;Venerida;Veneroidea;Veneridae;Mercenaria;Mercenari-  
 a mercenaria

UdeM00000027773 105023 293.1 UdeM00000027773 XP\_015798255.1 59.6  
 203 82 0 1 203 123 325 2.70E-76 293.1 105023  
 cellular  
 organisms;Eukaryota;Opisthokonta;Metazoa;Eumetazoa;Bilateria;Deuterostomi-  
 a;Chordata;Craniata;Vertebrata;Gnathostomata;Teleostomi;Euteleostomi;Acti-  
 nopterygii;Actinopteri;Neopterygii;Teleostei;Osteoglossocephalai;Clupeoce-  
 phala;Euteleosteomorpha;Neoteleostei;Eurypterygia;Ctenosquamata;Acanthomo-  
 rphata;Euacanthomorphacea;Percomorphaceae;Ovalentaria;Atherinomorphae;Cyp-  
 rinodontiformes;Aplocheiloidei;Nothobranchiidae;Nothobranchius;Nothbranc-  
 hius furzeri

UdeM00000027774 105023 414.5 UdeM00000027774 XP\_015798255.1 55.6  
 320 135 1 1 320 125 437 1.30E-112 414.5 105023  
 cellular  
 organisms;Eukaryota;Opisthokonta;Metazoa;Eumetazoa;Bilateria;Deuterostomi-  
 a;Chordata;Craniata;Vertebrata;Gnathostomata;Teleostomi;Euteleostomi;Acti-  
 nopterygii;Actinopteri;Neopterygii;Teleostei;Osteoglossocephalai;Clupeoce-  
 phala;Euteleosteomorpha;Neoteleostei;Eurypterygia;Ctenosquamata;Acanthomo-  
 rphata;Euacanthomorphacea;Percomorphaceae;Ovalentaria;Atherinomorphae;Cyp-  
 rinodontiformes;Aplocheiloidei;Nothobranchiidae;Nothobranchius;Nothbranc-  
 hius furzeri

UdeM00000027775 46514 86.3 UdeM00000027775 XP\_038049677.1 59.4 69  
 28 0 1 69 1 69 1.80E-14 86.3 46514 cellular  
 organisms;Eukaryota;Opisthokonta;Metazoa;Eumetazoa;Bilateria;Deuterostomi-  
 a;Echinodermata;Eleutherozoa;Asterozoa;Asteroidea;Valvatacea;Valvatida;As-  
 terinidae;Patiria;Patiria miniata

UdeM00000027776 6565 108.6 UdeM00000027776 XP\_022290306.1 55.7 79  
 35 0 1 79 101 179 7.00E-21 108.6 6565 cellular  
 organisms;Eukaryota;Opisthokonta;Metazoa;Eumetazoa;Bilateria;Protostomia;  
 Spiralia;Lophotrochozoa;Mollusca;Bivalvia;Autobranchia;Pteriormorphia;Ostr-  
 eida;Ostreoidea;Ostreidae;Crassostrea;Crassostrea virginica

UdeM00000027779 50390 479.6 UdeM00000027779 XP\_028154228.1 53.1 358  
 167 1 5 362 215 571 3.60E-132 479.6 50390 cellular  
 organisms;Eukaryota;Opisthokonta;Metazoa;Eumetazoa;Bilateria;Protostomia;  
 Ecdysozoa;Panarthropoda;Arthropoda;Mandibulata;Pancrustacea;Hexapoda;Inse-  
 cta;Dicondylia;Pterygota;Neoptera;Endopterygota;Coleoptera;Polyphaga;Cucu-  
 jiformia;Chrysomeloidea;Chrysomelidae;Galerucinae;Luperini;Diabroticina;D-  
 iabroticites;Diabrotica;Diabrotica virgifera;Diabrotica virgifera  
 virgifera

UdeM00000027780 150288 141.7 UdeM00000027780 XP\_020788097.1 63.8  
 94 32 1 1 94 449 540 4.90E-31 141.7 150288  
 cellular  
 organisms;Eukaryota;Opisthokonta;Metazoa;Eumetazoa;Bilateria;Deuterostomi-  
 a;Chordata;Craniata;Vertebrata;Gnathostomata;Teleostomi;Euteleostomi;Acti-  
 nopterygii;Actinopteri;Neopterygii;Teleostei;Osteoglossocephalai;Clupeoce-  
 phala;Euteleosteomorpha;Neoteleostei;Eurypterygia;Ctenosquamata;Acanthomo-  
 rphata;Euacanthomorphacea;Percomorphaceae;Gobiaria;Gobiiformes;Gobioidei;  
 Gobiidae;Oxudercinae;Boleophthalmus;Boleophthalmus pectinirostris

UdeM00000027782 133901 280.8 UdeM00000027782 XP\_026276565.1 52.7  
 220 104 0 2 221 75 294 1.50E-72 280.8 133901  
 cellular  
 organisms;Eukaryota;Opisthokonta;Metazoa;Eumetazoa;Bilateria;Protostomia;  
 Ecdysozoa;Panarthropoda;Arthropoda;Mandibulata;Pancrustacea;Hexapoda;Inse  
 cta;Dicondylia;Pterygota;Neoptera;Paraneoptera;Thysanoptera;Terebrantia;T  
 hripoidea;Thripidae;Thripinae;Frankliniella;Frankliniella occidentalis  
 UdeM00000027784 205130 119.4 UdeM00000027784 XP\_026168408.1 33.9  
 186 102 5 6 191 9 173 1.60E-23 119.4 205130  
 cellular  
 organisms;Eukaryota;Opisthokonta;Metazoa;Eumetazoa;Bilateria;Deuterostomi  
 a;Chordata;Craniata;Vertebrata;Gnathostomata;Teleostomi;Euteleostomi;Acti  
 nopterygii;Actinopteri;Neopterygii;Teleostei;Osteoglossocephalai;Clupeoce  
 phala;Euteleosteomorpha;Neoteleostei;Eurypterygia;Ctenosquamata;Acanthomo  
 rphata;Euacanthomorphacea;Percomorphaceae;Anabantaria;Synbranchiformes;Ma  
 stacembeloidei;Mastacembelidae;Mastacembelus;Mastacembelus armatus  
 UdeM00000027788 29159 817.4 UdeM00000027788 XP\_034313473.1 25.4 3455  
 1947 121 246 3343 1847 5027 3.80E-232 817.4 29159 cellular  
 organisms;Eukaryota;Opisthokonta;Metazoa;Eumetazoa;Bilateria;Protostomia;  
 Spiralia;Lophotrochozoa;Mollusca;Bivalvia;Autobranchia;Pteriormorphia;Ostr  
 eida;Ostreoidea;Ostreidae;Crassostrea;Crassostrea gigas  
 UdeM00000027789 29159 161.8 UdeM00000027789 XP\_034313418.1 24.2 753  
 442 29 61 731 3998 4703 4.40E-36 161.8 29159 cellular  
 organisms;Eukaryota;Opisthokonta;Metazoa;Eumetazoa;Bilateria;Protostomia;  
 Spiralia;Lophotrochozoa;Mollusca;Bivalvia;Autobranchia;Pteriormorphia;Ostr  
 eida;Ostreoidea;Ostreidae;Crassostrea;Crassostrea gigas  
 UdeM00000027790 6573 377.5 UdeM00000027790 XP\_021356201.1 27.2 1185  
 703 35 4 1110 2576 3678 5.90E-101 377.5 6573 cellular  
 organisms;Eukaryota;Opisthokonta;Metazoa;Eumetazoa;Bilateria;Protostomia;  
 Spiralia;Lophotrochozoa;Mollusca;Bivalvia;Autobranchia;Pteriormorphia;Pect  
 inida;Pectinoidea;Pectinidae;Mizuhopecten;Mizuhopecten yessoensis  
 UdeM00000027791 6565 341.3 UdeM00000027791 XP\_022305712.1 34.5 655  
 379 25 75 706 77 704 3.00E-90 341.3 6565 cellular  
 organisms;Eukaryota;Opisthokonta;Metazoa;Eumetazoa;Bilateria;Protostomia;  
 Spiralia;Lophotrochozoa;Mollusca;Bivalvia;Autobranchia;Pteriormorphia;Ostr  
 eida;Ostreoidea;Ostreidae;Crassostrea;Crassostrea virginica  
 UdeM00000027792 29159 345.5 UdeM00000027792 XP\_034313418.1 33.1 701  
 401 25 69 744 4788 5445 1.70E-91 345.5 29159 cellular  
 organisms;Eukaryota;Opisthokonta;Metazoa;Eumetazoa;Bilateria;Protostomia;  
 Spiralia;Lophotrochozoa;Mollusca;Bivalvia;Autobranchia;Pteriormorphia;Ostr  
 eida;Ostreoidea;Ostreidae;Crassostrea;Crassostrea gigas  
 UdeM00000027793 29159 152.5 UdeM00000027793 XP\_034313418.1 25.6 543  
 319 24 280 775 2380 2884 3.00E-33 152.5 29159 cellular  
 organisms;Eukaryota;Opisthokonta;Metazoa;Eumetazoa;Bilateria;Protostomia;  
 Spiralia;Lophotrochozoa;Mollusca;Bivalvia;Autobranchia;Pteriormorphia;Ostr  
 eida;Ostreoidea;Ostreidae;Crassostrea;Crassostrea gigas  
 UdeM00000027794 2607531 166 UdeM00000027794 XP\_029632986.1 24  
 595 375 19 21 560 358 930 1.40E-37 166 2607531  
 cellular  
 organisms;Eukaryota;Opisthokonta;Metazoa;Eumetazoa;Bilateria;Protostomia;  
 Spiralia;Lophotrochozoa;Mollusca;Cephalopoda;Coleoidea;Octopodiformes;Oct  
 opoda;Incirrata;Octopodidae;Octopus;Octopus sinensis  
 UdeM00000027795 2607531 173.7 UdeM00000027795 XP\_029632986.1 24.8  
 589 377 20 21 559 358 930 6.50E-40 173.7 2607531

cellular

organisms;Eukaryota;Opisthokonta;Metazoa;Eumetazoa;Bilateria;Protostomia;Spiralia;Lophotrochozoa;Mollusca;Cephalopoda;Coleoidea;Octopodiformes;Octopoda;Incirrata;Octopodidae;Octopus;Octopus sinensis

UdeM00000027796 29159 329.3 UdeM00000027796 XP\_034313418.1 30.7 863  
521 32 2 848 4365 5166 1.40E-86 329.3 29159 cellular

organisms;Eukaryota;Opisthokonta;Metazoa;Eumetazoa;Bilateria;Protostomia;Spiralia;Lophotrochozoa;Mollusca;Bivalvia;Autobranchia;Pteriormorphia;Ostreida;Ostreoidea;Ostreidae;Crassostrea;Crassostrea gigas

UdeM00000027797 6596 115.5 UdeM00000027797 XP\_045194988.1 32.4 213  
136 4 16 223 1194 1403 8.60E-23 115.5 6596 cellular

organisms;Eukaryota;Opisthokonta;Metazoa;Eumetazoa;Bilateria;Protostomia;Spiralia;Lophotrochozoa;Mollusca;Bivalvia;Autobranchia;Heteroconchia;Euheterodonta;Imparidentia;Venerida;Veneroidea;Veneridae;Mercenaria;Mercenaria mercenaria

UdeM00000027798 29159 323.2 UdeM00000027798 XP\_034313418.1 30.2 767  
411 23 170 841 4708 5445 1.00E-84 323.2 29159 cellular

organisms;Eukaryota;Opisthokonta;Metazoa;Eumetazoa;Bilateria;Protostomia;Spiralia;Lophotrochozoa;Mollusca;Bivalvia;Autobranchia;Pteriormorphia;Ostreida;Ostreoidea;Ostreidae;Crassostrea;Crassostrea gigas

UdeM00000027799 29159 335.9 UdeM00000027799 XP\_034313418.1 31.1 768  
447 24 170 885 4708 5445 1.60E-88 335.9 29159 cellular

organisms;Eukaryota;Opisthokonta;Metazoa;Eumetazoa;Bilateria;Protostomia;Spiralia;Lophotrochozoa;Mollusca;Bivalvia;Autobranchia;Pteriormorphia;Ostreida;Ostreoidea;Ostreidae;Crassostrea;Crassostrea gigas

UdeM00000027800 6596 213.8 UdeM00000027800 XP\_045194988.1 27.5 509  
337 10 35 528 626 1117 5.40E-52 213.8 6596 cellular

organisms;Eukaryota;Opisthokonta;Metazoa;Eumetazoa;Bilateria;Protostomia;Spiralia;Lophotrochozoa;Mollusca;Bivalvia;Autobranchia;Heteroconchia;Euheterodonta;Imparidentia;Venerida;Veneroidea;Veneridae;Mercenaria;Mercenaria mercenaria

UdeM00000027801 29159 160.2 UdeM00000027801 XP\_034313418.1 31.8 280  
169 7 14 283 5171 5438 3.90E-36 160.2 29159 cellular

organisms;Eukaryota;Opisthokonta;Metazoa;Eumetazoa;Bilateria;Protostomia;Spiralia;Lophotrochozoa;Mollusca;Bivalvia;Autobranchia;Pteriormorphia;Ostreida;Ostreoidea;Ostreidae;Crassostrea;Crassostrea gigas

UdeM00000027802 6596 370.2 UdeM00000027802 XP\_045193405.1 31.6 831  
463 28 52 827 1686 2466 7.10E-99 370.2 6596 cellular

organisms;Eukaryota;Opisthokonta;Metazoa;Eumetazoa;Bilateria;Protostomia;Spiralia;Lophotrochozoa;Mollusca;Bivalvia;Autobranchia;Heteroconchia;Euheterodonta;Imparidentia;Venerida;Veneroidea;Veneridae;Mercenaria;Mercenaria mercenaria

UdeM00000027803 6579 69.3 UdeM00000027803 XP\_033726800.1 29.2 113  
78 1 63 173 5791 5903 7.80E-09 69.3 6579 cellular

organisms;Eukaryota;Opisthokonta;Metazoa;Eumetazoa;Bilateria;Protostomia;Spiralia;Lophotrochozoa;Mollusca;Bivalvia;Autobranchia;Pteriormorphia;Pectinida;Pectinoidea;Pectinidae;Pecten;Pecten maximus

UdeM00000027804 6596 359.8 UdeM00000027804 XP\_045194988.1 29.6 812  
487 27 77 843 626 1397 9.80E-96 359.8 6596 cellular

organisms;Eukaryota;Opisthokonta;Metazoa;Eumetazoa;Bilateria;Protostomia;Spiralia;Lophotrochozoa;Mollusca;Bivalvia;Autobranchia;Heteroconchia;Euheterodonta;Imparidentia;Venerida;Veneroidea;Veneridae;Mercenaria;Mercenaria mercenaria

UdeM00000027805 6596 77.4 UdeM00000027805 XP\_045194988.1 30.1 146  
 96 3 4 143 998 1143 3.00E-11 77.4 6596 cellular  
 organisms;Eukaryota;Opisthokonta;Metazoa;Eumetazoa;Bilateria;Protostomia;  
 Spiralia;Lophotrochozoa;Mollusca;Bivalvia;Autobranchia;Heteroconchia;Euhe  
 terodonta;Imparidentia;Venerida;Veneroidea;Veneridae;Mercenaria;Mercenari  
 a mercenaria

UdeM00000027806 29159 271.6 UdeM00000027806 XP\_034313418.1 30.7 600  
 376 20 9 593 4807 5381 2.50E-69 271.6 29159 cellular  
 organisms;Eukaryota;Opisthokonta;Metazoa;Eumetazoa;Bilateria;Protostomia;  
 Spiralia;Lophotrochozoa;Mollusca;Bivalvia;Autobranchia;Pteriormorphia;Ostr  
 eida;Ostreoidea;Ostreidae;Crassostrea;Crassostrea gigas

UdeM00000027807 29159 310.1 UdeM00000027807 XP\_034313418.1 31.4 665  
 414 22 9 656 4807 5446 6.90E-81 310.1 29159 cellular  
 organisms;Eukaryota;Opisthokonta;Metazoa;Eumetazoa;Bilateria;Protostomia;  
 Spiralia;Lophotrochozoa;Mollusca;Bivalvia;Autobranchia;Pteriormorphia;Ostr  
 eida;Ostreoidea;Ostreidae;Crassostrea;Crassostrea gigas

UdeM00000027808 6596 357.8 UdeM00000027808 XP\_045193405.1 30.2 819  
 483 25 52 825 1692 2466 3.60E-95 357.8 6596 cellular  
 organisms;Eukaryota;Opisthokonta;Metazoa;Eumetazoa;Bilateria;Protostomia;  
 Spiralia;Lophotrochozoa;Mollusca;Bivalvia;Autobranchia;Heteroconchia;Euhe  
 terodonta;Imparidentia;Venerida;Veneroidea;Veneridae;Mercenaria;Mercenari  
 a mercenaria

UdeM00000027809 29159 375.6 UdeM00000027809 XP\_034313418.1 31.9 836  
 486 30 18 831 4671 5445 1.70E-100 375.6 29159 cellular  
 organisms;Eukaryota;Opisthokonta;Metazoa;Eumetazoa;Bilateria;Protostomia;  
 Spiralia;Lophotrochozoa;Mollusca;Bivalvia;Autobranchia;Pteriormorphia;Ostr  
 eida;Ostreoidea;Ostreidae;Crassostrea;Crassostrea gigas

UdeM00000027810 7741 138.7 UdeM00000027810 XP\_019641868.1 26.5 457  
 256 14 83 521 973 1367 2.50E-29 138.7 7741 cellular  
 organisms;Eukaryota;Opisthokonta;Metazoa;Eumetazoa;Bilateria;Deuterostomi  
 a;Chordata;Cephalochordata;Leptocardii;Amphioxiformes;Branchiostomidae;Br  
 anchiostoma;Branchiostoma belcheri

UdeM00000027811 6565 319.7 UdeM00000027811 XP\_022305712.1 32.7 652  
 401 20 67 702 75 704 9.30E-84 319.7 6565 cellular  
 organisms;Eukaryota;Opisthokonta;Metazoa;Eumetazoa;Bilateria;Protostomia;  
 Spiralia;Lophotrochozoa;Mollusca;Bivalvia;Autobranchia;Pteriormorphia;Ostr  
 eida;Ostreoidea;Ostreidae;Crassostrea;Crassostrea virginica

UdeM00000027812 6565 313.5 UdeM00000027812 XP\_022305712.1 32.1 685  
 416 23 29 691 47 704 6.60E-82 313.5 6565 cellular  
 organisms;Eukaryota;Opisthokonta;Metazoa;Eumetazoa;Bilateria;Protostomia;  
 Spiralia;Lophotrochozoa;Mollusca;Bivalvia;Autobranchia;Pteriormorphia;Ostr  
 eida;Ostreoidea;Ostreidae;Crassostrea;Crassostrea virginica

UdeM00000027813 6596 359.8 UdeM00000027813 XP\_045194988.1 28.8 834  
 535 20 18 823 601 1403 9.50E-96 359.8 6596 cellular  
 organisms;Eukaryota;Opisthokonta;Metazoa;Eumetazoa;Bilateria;Protostomia;  
 Spiralia;Lophotrochozoa;Mollusca;Bivalvia;Autobranchia;Heteroconchia;Euhe  
 terodonta;Imparidentia;Venerida;Veneroidea;Veneridae;Mercenaria;Mercenari  
 a mercenaria

UdeM00000027814 6596 278.9 UdeM00000027814 XP\_045194988.1 26.4 807  
 460 18 52 753 626 1403 2.00E-71 278.9 6596 cellular  
 organisms;Eukaryota;Opisthokonta;Metazoa;Eumetazoa;Bilateria;Protostomia;  
 Spiralia;Lophotrochozoa;Mollusca;Bivalvia;Autobranchia;Heteroconchia;Euhe  
 terodonta;Imparidentia;Venerida;Veneroidea;Veneridae;Mercenaria;Mercenari  
 a mercenaria



UdeM00000027815 6596 112.8 UdeM00000027815 XP\_045174482.1 27.6 398  
 223 17 5 353 2 383 8.70E-22 112.8 6596 cellular  
 organisms;Eukaryota;Opisthokonta;Metazoa;Eumetazoa;Bilateria;Protostomia;  
 Spiralia;Lophotrochozoa;Mollusca;Bivalvia;Autobranhia;Heteroconchia;Euhe  
 terodonta;Imparidentia;Venerida;Veneroidea;Veneridae;Mercenaria;Mercenari  
 a mercenaria  
 UdeM00000027816 6596 167.2 UdeM00000027816 XP\_045181277.1 33.6 289  
 174 8 130 406 139 421 4.50E-38 167.2 6596 cellular  
 organisms;Eukaryota;Opisthokonta;Metazoa;Eumetazoa;Bilateria;Protostomia;  
 Spiralia;Lophotrochozoa;Mollusca;Bivalvia;Autobranhia;Heteroconchia;Euhe  
 terodonta;Imparidentia;Venerida;Veneroidea;Veneridae;Mercenaria;Mercenari  
 a mercenaria  
 UdeM00000027820 6596 86.3 UdeM00000027820 XP\_045185032.1 54.8 73  
 33 0 38 110 1 73 5.30E-14 86.3 6596 cellular  
 organisms;Eukaryota;Opisthokonta;Metazoa;Eumetazoa;Bilateria;Protostomia;  
 Spiralia;Lophotrochozoa;Mollusca;Bivalvia;Autobranhia;Heteroconchia;Euhe  
 terodonta;Imparidentia;Venerida;Veneroidea;Veneridae;Mercenaria;Mercenari  
 a mercenaria  
 UdeM00000027821 6565 674.5 UdeM00000027821 XP\_022322857.1 67.7 470  
 143 1 12 472 37 506 1.00E-190 674.5 6565 cellular  
 organisms;Eukaryota;Opisthokonta;Metazoa;Eumetazoa;Bilateria;Protostomia;  
 Spiralia;Lophotrochozoa;Mollusca;Bivalvia;Autobranhia;Pteriormorphia;Ostr  
 eida;Ostreoidea;Ostreidae;Crassostrea;Crassostrea virginica  
 UdeM00000027822 6573 405.2 UdeM00000027822 XP\_021374920.1 44.4 462  
 240 3 13 457 24 485 1.20E-109 405.2 6573 cellular  
 organisms;Eukaryota;Opisthokonta;Metazoa;Eumetazoa;Bilateria;Protostomia;  
 Spiralia;Lophotrochozoa;Mollusca;Bivalvia;Autobranhia;Pteriormorphia;Pect  
 inida;Pectinoidea;Pectinidae;Mizuhopecten;Mizuhopecten yessoensis  
 UdeM00000027823 6596 786.2 UdeM00000027823 XP\_045214304.1 56.2 694  
 291 9 20 708 12 697 3.60E-224 786.2 6596 cellular  
 organisms;Eukaryota;Opisthokonta;Metazoa;Eumetazoa;Bilateria;Protostomia;  
 Spiralia;Lophotrochozoa;Mollusca;Bivalvia;Autobranhia;Heteroconchia;Euhe  
 terodonta;Imparidentia;Venerida;Veneroidea;Veneridae;Mercenaria;Mercenari  
 a mercenaria  
 UdeM00000027824 6573 327 UdeM00000027824 XP\_021377525.1 39.7 574  
 225 16 1 497 87 616 4.10E-86 327 6573 cellular  
 organisms;Eukaryota;Opisthokonta;Metazoa;Eumetazoa;Bilateria;Protostomia;  
 Spiralia;Lophotrochozoa;Mollusca;Bivalvia;Autobranhia;Pteriormorphia;Pect  
 inida;Pectinoidea;Pectinidae;Mizuhopecten;Mizuhopecten yessoensis  
 UdeM00000027825 6596 627.1 UdeM00000027825 XP\_045182563.1 41.3 1069  
 536 22 18 1051 58 1070 4.10E-176 627.1 6596 cellular  
 organisms;Eukaryota;Opisthokonta;Metazoa;Eumetazoa;Bilateria;Protostomia;  
 Spiralia;Lophotrochozoa;Mollusca;Bivalvia;Autobranhia;Heteroconchia;Euhe  
 terodonta;Imparidentia;Venerida;Veneroidea;Veneridae;Mercenaria;Mercenari  
 a mercenaria  
 UdeM00000027826 6596 161 UdeM00000027826 XP\_045171063.1 35.5 259  
 152 6 2 249 41 295 2.50E-36 161 6596 cellular  
 organisms;Eukaryota;Opisthokonta;Metazoa;Eumetazoa;Bilateria;Protostomia;  
 Spiralia;Lophotrochozoa;Mollusca;Bivalvia;Autobranhia;Heteroconchia;Euhe  
 terodonta;Imparidentia;Venerida;Veneroidea;Veneridae;Mercenaria;Mercenari  
 a mercenaria  
 UdeM00000027827 29159 73.2 UdeM00000027827 XP\_034339171.1 36.3 102  
 59 2 1 96 452 553 2.20E-10 73.2 29159 cellular  
 organisms;Eukaryota;Opisthokonta;Metazoa;Eumetazoa;Bilateria;Protostomia;

Spiralia; Lophotrochozoa; Mollusca; Bivalvia; Autobranchia; Pteriomorpha; Ostr  
eida; Ostreioidea; Ostreidae; Crassostrea; Crassostrea gigas  
UdeM00000027828 29159 232.6 UdeM00000027828 XP\_034339171.1 38.8 325  
182 8 1 312 452 772 6.70E-58 232.6 29159 cellular  
organisms; Eukaryota; Opisthokonta; Metazoa; Eumetazoa; Bilateria; Protostomia;  
Spiralia; Lophotrochozoa; Mollusca; Bivalvia; Autobranchia; Pteriomorpha; Ostr  
eida; Ostreioidea; Ostreidae; Crassostrea; Crassostrea gigas  
UdeM00000027829 29159 85.5 UdeM00000027829 XP\_034331441.1 46.2 91  
47 2 1 90 722 811 3.90E-14 85.5 29159 cellular  
organisms; Eukaryota; Opisthokonta; Metazoa; Eumetazoa; Bilateria; Protostomia;  
Spiralia; Lophotrochozoa; Mollusca; Bivalvia; Autobranchia; Pteriomorpha; Ostr  
eida; Ostreioidea; Ostreidae; Crassostrea; Crassostrea gigas  
UdeM00000027830 6573 125.9 UdeM00000027830 XP\_021364238.1 49.3 136  
61 2 5 132 26 161 3.70E-26 125.9 6573 cellular  
organisms; Eukaryota; Opisthokonta; Metazoa; Eumetazoa; Bilateria; Protostomia;  
Spiralia; Lophotrochozoa; Mollusca; Bivalvia; Autobranchia; Pteriomorpha; Pect  
inida; Pectinoidea; Pectinidae; Mizuhopecten; Mizuhopecten yessoensis  
UdeM00000027831 6579 73.6 UdeM00000027831 XP\_033744278.1 55.9 59  
24 1 61 119 989 1045 2.20E-10 73.6 6579 cellular  
organisms; Eukaryota; Opisthokonta; Metazoa; Eumetazoa; Bilateria; Protostomia;  
Spiralia; Lophotrochozoa; Mollusca; Bivalvia; Autobranchia; Pteriomorpha; Pect  
inida; Pectinoidea; Pectinidae; Pecten; Pecten maximus  
UdeM00000027832 6579 100.5 UdeM00000027832 XP\_033741736.1 62 71  
27 0 67 137 700 770 2.20E-18 100.5 6579 cellular  
organisms; Eukaryota; Opisthokonta; Metazoa; Eumetazoa; Bilateria; Protostomia;  
Spiralia; Lophotrochozoa; Mollusca; Bivalvia; Autobranchia; Pteriomorpha; Pect  
inida; Pectinoidea; Pectinidae; Pecten; Pecten maximus  
UdeM00000027833 6596 472.2 UdeM00000027833 XP\_045181551.1 73 318  
80 1 17 334 209 520 5.40E-130 472.2 6596 cellular  
organisms; Eukaryota; Opisthokonta; Metazoa; Eumetazoa; Bilateria; Protostomia;  
Spiralia; Lophotrochozoa; Mollusca; Bivalvia; Autobranchia; Heteroconchia; Eue  
terodonta; Imparidentia; Venerida; Veneroidea; Veneridae; Mercenaria; Mercenari  
a mercenaria  
UdeM00000027834 6596 479.2 UdeM00000027834 XP\_045181551.1 74.4 312  
80 0 17 328 209 520 4.40E-132 479.2 6596 cellular  
organisms; Eukaryota; Opisthokonta; Metazoa; Eumetazoa; Bilateria; Protostomia;  
Spiralia; Lophotrochozoa; Mollusca; Bivalvia; Autobranchia; Heteroconchia; Eue  
terodonta; Imparidentia; Venerida; Veneroidea; Veneridae; Mercenaria; Mercenari  
a mercenaria  
UdeM00000027835 400727 255.4 UdeM00000027835 XP\_025092029.1 60.7  
244 78 5 15 247 568 804 1.50E-64 255.4 400727  
cellular  
organisms; Eukaryota; Opisthokonta; Metazoa; Eumetazoa; Bilateria; Protostomia;  
Spiralia; Lophotrochozoa; Mollusca; Gastropoda; Caenogastropoda; Architaeniogl  
ossa; Ampullarioidea; Ampullariidae; Pomacea; Pomacea canaliculata  
UdeM00000027836 6526 324.3 UdeM00000027836 XP\_013068480.1 86.7 181  
23 1 1 181 1 180 9.70E-86 324.3 6526 cellular  
organisms; Eukaryota; Opisthokonta; Metazoa; Eumetazoa; Bilateria; Protostomia;  
Spiralia; Lophotrochozoa; Mollusca; Gastropoda; Heterobranchia; Euthyneura; Pan  
pulmonata; Hygrophila; Lymnaeioidea; Planorbidae; Biomphalaria; Biomphalaria  
glabrata  
UdeM00000027837 6579 753.1 UdeM00000027837 XP\_033727266.1 65.9 742  
240 4 1 730 1 741 3.40E-214 753.1 6579 cellular  
organisms; Eukaryota; Opisthokonta; Metazoa; Eumetazoa; Bilateria; Protostomia;

Spiralia; Lophotrochozoa; Mollusca; Bivalvia; Autobranchia; Pteriomorpha; Pectinida; Pectinoidea; Pectinidae; Pecten; Pecten maximus

UdeM00000027838 6565 417.9 UdeM00000027838 XP\_022309566.1 50.3 342  
170 0 7 348 558 899 1.20E-113 417.9 6565 cellular  
organisms; Eukaryota; Opisthokonta; Metazoa; Eumetazoa; Bilateria; Protostomia; Spiralia; Lophotrochozoa; Mollusca; Bivalvia; Autobranchia; Pteriomorpha; Ostracida; Ostreidae; Crassostrea; Crassostrea virginica

UdeM00000027839 6596 321.2 UdeM00000027839 XP\_045171211.1 47.9 284  
146 1 8 289 3 286 1.30E-84 321.2 6596 cellular  
organisms; Eukaryota; Opisthokonta; Metazoa; Eumetazoa; Bilateria; Protostomia; Spiralia; Lophotrochozoa; Mollusca; Bivalvia; Autobranchia; Heteroconchia; Euheterodonta; Imparidentia; Venerida; Veneroidea; Veneridae; Mercenaria; Mercenaria mercenaria

UdeM00000027840 6596 262.7 UdeM00000027840 XP\_045171211.1 46.7 261  
134 3 10 265 24 284 5.20E-67 262.7 6596 cellular  
organisms; Eukaryota; Opisthokonta; Metazoa; Eumetazoa; Bilateria; Protostomia; Spiralia; Lophotrochozoa; Mollusca; Bivalvia; Autobranchia; Heteroconchia; Euheterodonta; Imparidentia; Venerida; Veneroidea; Veneridae; Mercenaria; Mercenaria mercenaria

UdeM00000027841 6596 96.7 UdeM00000027841 XP\_045180326.1 43.5 124  
63 2 27 150 54 170 3.40E-17 96.7 6596 cellular  
organisms; Eukaryota; Opisthokonta; Metazoa; Eumetazoa; Bilateria; Protostomia; Spiralia; Lophotrochozoa; Mollusca; Bivalvia; Autobranchia; Heteroconchia; Euheterodonta; Imparidentia; Venerida; Veneroidea; Veneridae; Mercenaria; Mercenaria mercenaria

UdeM00000027843 6596 259.2 UdeM00000027843 XP\_045171211.1 49.3 229  
114 1 2 228 58 286 4.90E-66 259.2 6596 cellular  
organisms; Eukaryota; Opisthokonta; Metazoa; Eumetazoa; Bilateria; Protostomia; Spiralia; Lophotrochozoa; Mollusca; Bivalvia; Autobranchia; Heteroconchia; Euheterodonta; Imparidentia; Venerida; Veneroidea; Veneridae; Mercenaria; Mercenaria mercenaria

UdeM00000027842 6596 318.5 UdeM00000027842 XP\_045171211.1 47.5 284  
147 1 8 289 3 286 8.70E-84 318.5 6596 cellular  
organisms; Eukaryota; Opisthokonta; Metazoa; Eumetazoa; Bilateria; Protostomia; Spiralia; Lophotrochozoa; Mollusca; Bivalvia; Autobranchia; Heteroconchia; Euheterodonta; Imparidentia; Venerida; Veneroidea; Veneridae; Mercenaria; Mercenaria mercenaria

UdeM00000027844 30611 390.6 UdeM00000027844 XP\_023364769.1 58.4 296  
123 0 3 298 59 354 1.80E-105 390.6 30611 cellular  
organisms; Eukaryota; Opisthokonta; Metazoa; Eumetazoa; Bilateria; Deuterostomia; Chordata; Craniata; Vertebrata; Gnathostomata; Teleostomi; Euteleostomi; Sarcopterygii; Dipnotetrapodomorpha; Tetrapoda; Amniota; Mammalia; Theria; Eutheria; Boreoeutheria; Euarchontoglires; Primates; Strepsirrhini; Lorisiformes; Galagidae; Otolemur; Otolemur garnettii

UdeM00000027845 6565 409.5 UdeM00000027845 XP\_022309566.1 52.9 329  
155 0 2 330 717 1045 4.20E-111 409.5 6565 cellular  
organisms; Eukaryota; Opisthokonta; Metazoa; Eumetazoa; Bilateria; Protostomia; Spiralia; Lophotrochozoa; Mollusca; Bivalvia; Autobranchia; Pteriomorpha; Ostracida; Ostreidae; Crassostrea; Crassostrea virginica

UdeM00000027846 6565 159.8 UdeM00000027846 XP\_022328252.1 44.5 211  
99 5 1 193 1105 1315 3.40E-36 159.8 6565 cellular  
organisms; Eukaryota; Opisthokonta; Metazoa; Eumetazoa; Bilateria; Protostomia; Spiralia; Lophotrochozoa; Mollusca; Bivalvia; Autobranchia; Pteriomorpha; Ostracida; Ostreidae; Crassostrea; Crassostrea virginica

UdeM00000027847 6565 407.5 UdeM00000027847 XP\_022328252.1 49.5 432  
 199 6 18 431 885 1315 2.10E-110 407.5 6565 cellular  
 organisms;Eukaryota;Opisthokonta;Metazoa;Eumetazoa;Bilateria;Protostomia;  
 Spiralia;Lophotrochozoa;Mollusca;Bivalvia;Autobranhia;Pteriomorphia;Ostr  
 eida;Ostreoidea;Ostreidae;Crassostrea;Crassostrea virginica  
 UdeM00000027848 6565 466.1 UdeM00000027848 XP\_022309566.1 54.3 357  
 163 0 2 358 689 1045 4.10E-128 466.1 6565 cellular  
 organisms;Eukaryota;Opisthokonta;Metazoa;Eumetazoa;Bilateria;Protostomia;  
 Spiralia;Lophotrochozoa;Mollusca;Bivalvia;Autobranhia;Pteriomorphia;Ostr  
 eida;Ostreoidea;Ostreidae;Crassostrea;Crassostrea virginica  
 UdeM00000027849 6945 62.8 UdeM00000027849 XP\_042150637.1 35.7 112  
 70 1 315 424 205 316 1.30E-06 62.8 6945 cellular  
 organisms;Eukaryota;Opisthokonta;Metazoa;Eumetazoa;Bilateria;Protostomia;  
 Ecdysozoa;Panarthropoda;Arthropoda;Chelicerata;Arachnida;Acari;Parasitifo  
 rmes;Ixodida;Ixodoidea;Ixodidae;Ixodinae;Ixodes;Ixodes scapularis  
 UdeM00000027851 6596 199.5 UdeM00000027851 XP\_045209410.1 51.1 178  
 81 1 11 188 10 181 3.80E-48 199.5 6596 cellular  
 organisms;Eukaryota;Opisthokonta;Metazoa;Eumetazoa;Bilateria;Protostomia;  
 Spiralia;Lophotrochozoa;Mollusca;Bivalvia;Autobranhia;Heteroconchia;Euhe  
 terodonta;Imparidentia;Venerida;Veneroidea;Veneridae;Mercenaria;Mercenari  
 a mercenaria  
 UdeM00000027852 6573 258.8 UdeM00000027852 XP\_021377592.1 64.4 202  
 70 2 3 202 7 208 5.60E-66 258.8 6573 cellular  
 organisms;Eukaryota;Opisthokonta;Metazoa;Eumetazoa;Bilateria;Protostomia;  
 Spiralia;Lophotrochozoa;Mollusca;Bivalvia;Autobranhia;Pteriomorphia;Pect  
 inida;Pectinoidea;Pectinidae;Mizuhopecten;Mizuhopecten yessoensis  
 UdeM00000027853 6596 68.6 UdeM00000027853 XP\_045177843.1 31.2 144  
 74 4 17 152 37 163 1.10E-08 68.6 6596 cellular  
 organisms;Eukaryota;Opisthokonta;Metazoa;Eumetazoa;Bilateria;Protostomia;  
 Spiralia;Lophotrochozoa;Mollusca;Bivalvia;Autobranhia;Heteroconchia;Euhe  
 terodonta;Imparidentia;Venerida;Veneroidea;Veneridae;Mercenaria;Mercenari  
 a mercenaria  
 UdeM00000027854 35525 117.5 UdeM00000027854 XP\_032791024.2 50.4 123  
 61 0 6 128 4 126 1.30E-23 117.5 35525 cellular  
 organisms;Eukaryota;Opisthokonta;Metazoa;Eumetazoa;Bilateria;Protostomia;  
 Ecdysozoa;Panarthropoda;Arthropoda;Mandibulata;Pancrustacea;Crustacea;Bra  
 nchiopoda;Phyllozoa;Diplostraca;Cladocera;Anomopoda;Daphniidae;Daphnia;D  
 aphnia magna  
 UdeM00000027855 396416 201.1 UdeM00000027855 XP\_043585883.1 45.8  
 238 127 1 7 242 5 242 1.70E-48 201.1 396416  
 cellular  
 organisms;Eukaryota;Opisthokonta;Metazoa;Eumetazoa;Bilateria;Protostomia;  
 Ecdysozoa;Panarthropoda;Arthropoda;Mandibulata;Pancrustacea;Hexapoda;Inse  
 cta;Dicondylia;Pterygota;Neoptera;Endopterygota;Hymenoptera;Apocrita;Acul  
 eata;Apoidea;Apidae;Apinae;Bombini;Bombus;Melanobombus;Bombus pyrosoma  
 UdeM00000027856 6596 1016.1 UdeM00000027856 XP\_045209404.1 68.8  
 720 222 3 2 720 5 722 2.10E-293 1016.1 6596  
 cellular  
 organisms;Eukaryota;Opisthokonta;Metazoa;Eumetazoa;Bilateria;Protostomia;  
 Spiralia;Lophotrochozoa;Mollusca;Bivalvia;Autobranhia;Heteroconchia;Euhe  
 terodonta;Imparidentia;Venerida;Veneroidea;Veneridae;Mercenaria;Mercenari  
 a mercenaria  
 UdeM00000027857 6596 1020 UdeM00000027857 XP\_045209404.1 68.8 724  
 223 3 1 723 1 722 1.50E-294 1020 6596 cellular

organisms;Eukaryota;Opisthokonta;Metazoa;Eumetazoa;Bilateria;Protostomia; Spiralia;Lophotrochozoa;Mollusca;Bivalvia;Autobranchia;Heteroconchia;Euherodonta;Imparidentia;Venerida;Veneroidea;Veneridae;Mercenaria;Mercenaria mercenaria

UdeM00000027859 1735272 170.2 UdeM00000027859 XP\_041361652.1 33.2  
391 237 6 16 387 30 415 5.00E-39 170.2 1735272  
cellular

organisms;Eukaryota;Opisthokonta;Metazoa;Eumetazoa;Bilateria;Protostomia; Spiralia;Lophotrochozoa;Mollusca;Gastropoda;Neomphalina;Neomphaloidea;Peltospiridae;Gigantopelta;Gigantopelta aegis

UdeM00000027861 6596 316.2 UdeM00000027861 XP\_045202349.1 34.5 988  
533 16 1 921 1 941 1.40E-82 316.2 6596 cellular

organisms;Eukaryota;Opisthokonta;Metazoa;Eumetazoa;Bilateria;Protostomia; Spiralia;Lophotrochozoa;Mollusca;Bivalvia;Autobranchia;Heteroconchia;Euherodonta;Imparidentia;Venerida;Veneroidea;Veneridae;Mercenaria;Mercenaria mercenaria

UdeM00000027862 1735272 159.8 UdeM00000027862 XP\_041370779.1 31.6  
358 238 4 16 368 22 377 6.60E-36 159.8 1735272  
cellular

organisms;Eukaryota;Opisthokonta;Metazoa;Eumetazoa;Bilateria;Protostomia; Spiralia;Lophotrochozoa;Mollusca;Gastropoda;Neomphalina;Neomphaloidea;Peltospiridae;Gigantopelta;Gigantopelta aegis

UdeM00000027864 1735272 174.9 UdeM00000027864 XP\_041370779.1 32.2  
370 231 4 16 381 22 375 2.00E-40 174.9 1735272  
cellular

organisms;Eukaryota;Opisthokonta;Metazoa;Eumetazoa;Bilateria;Protostomia; Spiralia;Lophotrochozoa;Mollusca;Gastropoda;Neomphalina;Neomphaloidea;Peltospiridae;Gigantopelta;Gigantopelta aegis

UdeM00000027865 6596 145.6 UdeM00000027865 XP\_045165713.1 29.3 382  
246 5 19 379 10 388 1.30E-31 145.6 6596 cellular

organisms;Eukaryota;Opisthokonta;Metazoa;Eumetazoa;Bilateria;Protostomia; Spiralia;Lophotrochozoa;Mollusca;Bivalvia;Autobranchia;Heteroconchia;Euherodonta;Imparidentia;Venerida;Veneroidea;Veneridae;Mercenaria;Mercenaria mercenaria

UdeM00000027866 6565 169.5 UdeM00000027866 XP\_022321425.1 51 157  
77 0 3 159 16 172 3.60E-39 169.5 6565 cellular

organisms;Eukaryota;Opisthokonta;Metazoa;Eumetazoa;Bilateria;Protostomia; Spiralia;Lophotrochozoa;Mollusca;Bivalvia;Autobranchia;Pteriomorphia;Ostreida;Ostreoidea;Ostreidae;Crassostrea;Crassostrea virginica

UdeM00000027867 29159 153.7 UdeM00000027867 XP\_011445141.2 40.8 184  
107 1 1 182 179 362 2.30E-34 153.7 29159 cellular

organisms;Eukaryota;Opisthokonta;Metazoa;Eumetazoa;Bilateria;Protostomia; Spiralia;Lophotrochozoa;Mollusca;Bivalvia;Autobranchia;Pteriomorphia;Ostreida;Ostreoidea;Ostreidae;Crassostrea;Crassostrea gigas

UdeM00000027868 6596 268.5 UdeM00000027868 XP\_045193365.1 65.3 176  
61 0 81 256 70 245 9.00E-69 268.5 6596 cellular

organisms;Eukaryota;Opisthokonta;Metazoa;Eumetazoa;Bilateria;Protostomia; Spiralia;Lophotrochozoa;Mollusca;Bivalvia;Autobranchia;Heteroconchia;Euherodonta;Imparidentia;Venerida;Veneroidea;Veneridae;Mercenaria;Mercenaria mercenaria

UdeM00000027869 6596 265.8 UdeM00000027869 XP\_045194144.1 53.4 234  
106 2 57 289 38 269 8.90E-68 265.8 6596 cellular

organisms;Eukaryota;Opisthokonta;Metazoa;Eumetazoa;Bilateria;Protostomia; Spiralia;Lophotrochozoa;Mollusca;Bivalvia;Autobranchia;Heteroconchia;Euherodonta

terodonta;Imparidentia;Venerida;Veneroidea;Veneridae;Mercenaria;Mercenari  
 a mercenaria  
 UdeM00000027870 6596 338.2 UdeM00000027870 XP\_045202349.1 40.6 991  
 517 16 1 969 1 941 3.60E-89 338.2 6596 cellular  
 organisms;Eukaryota;Opisthokonta;Metazoa;Eumetazoa;Bilateria;Protostomia;  
 Spiralia;Lophotrochozoa;Mollusca;Bivalvia;Autobranhia;Heteroconchia;Euhe  
 terodonta;Imparidentia;Venerida;Veneroidea;Veneridae;Mercenaria;Mercenari  
 a mercenaria  
 UdeM00000027871 6596 343.6 UdeM00000027871 XP\_045202349.1 31.9 658  
 428 9 224 871 304 951 7.60E-91 343.6 6596 cellular  
 organisms;Eukaryota;Opisthokonta;Metazoa;Eumetazoa;Bilateria;Protostomia;  
 Spiralia;Lophotrochozoa;Mollusca;Bivalvia;Autobranhia;Heteroconchia;Euhe  
 terodonta;Imparidentia;Venerida;Veneroidea;Veneridae;Mercenaria;Mercenari  
 a mercenaria  
 UdeM00000027872 6596 338.2 UdeM00000027872 XP\_045202351.1 34.8 954  
 558 11 1 896 1 948 3.30E-89 338.2 6596 cellular  
 organisms;Eukaryota;Opisthokonta;Metazoa;Eumetazoa;Bilateria;Protostomia;  
 Spiralia;Lophotrochozoa;Mollusca;Bivalvia;Autobranhia;Heteroconchia;Euhe  
 terodonta;Imparidentia;Venerida;Veneroidea;Veneridae;Mercenaria;Mercenari  
 a mercenaria  
 UdeM00000027873 6596 75.5 UdeM00000027873 XP\_045201970.1 30.3 175  
 115 4 85 256 306 476 1.20E-10 75.5 6596 cellular  
 organisms;Eukaryota;Opisthokonta;Metazoa;Eumetazoa;Bilateria;Protostomia;  
 Spiralia;Lophotrochozoa;Mollusca;Bivalvia;Autobranhia;Heteroconchia;Euhe  
 terodonta;Imparidentia;Venerida;Veneroidea;Veneridae;Mercenaria;Mercenari  
 a mercenaria  
 UdeM00000027874 6596 73.9 UdeM00000027874 XP\_045201970.1 30.2 162  
 109 3 5 163 316 476 2.40E-10 73.9 6596 cellular  
 organisms;Eukaryota;Opisthokonta;Metazoa;Eumetazoa;Bilateria;Protostomia;  
 Spiralia;Lophotrochozoa;Mollusca;Bivalvia;Autobranhia;Heteroconchia;Euhe  
 terodonta;Imparidentia;Venerida;Veneroidea;Veneridae;Mercenaria;Mercenari  
 a mercenaria  
 UdeM00000027876 6596 330.1 UdeM00000027876 XP\_045202349.1 32.9 633  
 410 9 61 683 314 941 7.00E-87 330.1 6596 cellular  
 organisms;Eukaryota;Opisthokonta;Metazoa;Eumetazoa;Bilateria;Protostomia;  
 Spiralia;Lophotrochozoa;Mollusca;Bivalvia;Autobranhia;Heteroconchia;Euhe  
 terodonta;Imparidentia;Venerida;Veneroidea;Veneridae;Mercenaria;Mercenari  
 a mercenaria  
 UdeM00000027877 6596 322.4 UdeM00000027877 XP\_045202349.1 33.1 608  
 395 8 2 602 339 941 1.30E-84 322.4 6596 cellular  
 organisms;Eukaryota;Opisthokonta;Metazoa;Eumetazoa;Bilateria;Protostomia;  
 Spiralia;Lophotrochozoa;Mollusca;Bivalvia;Autobranhia;Heteroconchia;Euhe  
 terodonta;Imparidentia;Venerida;Veneroidea;Veneridae;Mercenaria;Mercenari  
 a mercenaria  
 UdeM00000027879 400727 106.3 UdeM00000027879 XP\_025103735.1 47.2  
 106 53 3 131 233 321 426 5.40E-20 106.3 400727  
 cellular  
 organisms;Eukaryota;Opisthokonta;Metazoa;Eumetazoa;Bilateria;Protostomia;  
 Spiralia;Lophotrochozoa;Mollusca;Gastropoda;Caenogastropoda;Architaeniogl  
 ossa;Ampullarioidea;Ampullariidae;Pomacea;Pomacea canaliculata  
 UdeM00000027880 7176 106.3 UdeM00000027880 XP\_038109987.1 44.9 127  
 64 4 103 223 391 517 5.10E-20 106.3 7176 cellular  
 organisms;Eukaryota;Opisthokonta;Metazoa;Eumetazoa;Bilateria;Protostomia;  
 Ecdysozoa;Panarthropoda;Arthropoda;Mandibulata;Pancrustacea;Hexapoda;Inse

cta;Dicondylia;Pterygota;Neoptera;Endopterygota;Diptera;Nematocera;Culicomorpha;Culicoidea;Culicidae;Culicinae;Culicini;Culex;Culex;Culex pipiens complex;Culex quinquefasciatus

UdeM00000027881 7668 63.2 UdeM00000027881 XP\_030833544.1 45.9 61  
33 0 6 66 891 951 2.80E-07 63.2 7668 cellular

organisms;Eukaryota;Opisthokonta;Metazoa;Eumetazoa;Bilateria;Deuterostomia;Echinodermata;Eleutherozoa;Echinozoa;Echinoidea;Euechinoidea;Echinacea;Camarodonta;Echinidea;Strongylocentrotidae;Strongylocentrotus;Strongylocentrotus purpuratus

UdeM00000027883 29159 158.3 UdeM00000027883 XP\_034329456.1 48.5 171  
86 2 3 172 219 388 9.90E-36 158.3 29159 cellular

organisms;Eukaryota;Opisthokonta;Metazoa;Eumetazoa;Bilateria;Protostomia;Spiralia;Lophotrochozoa;Mollusca;Bivalvia;Autobranchia;Pteriormorphia;Ostreida;Ostreioidea;Ostreidae;Crassostrea;Crassostrea gigas

UdeM00000027884 29159 201.1 UdeM00000027884 XP\_034331610.1 39.8 289  
127 5 105 352 446 728 2.60E-48 201.1 29159 cellular

organisms;Eukaryota;Opisthokonta;Metazoa;Eumetazoa;Bilateria;Protostomia;Spiralia;Lophotrochozoa;Mollusca;Bivalvia;Autobranchia;Pteriormorphia;Ostreida;Ostreioidea;Ostreidae;Crassostrea;Crassostrea gigas

UdeM00000027886 6596 446 UdeM00000027886 XP\_045181000.1 58.3 606  
135 13 6 515 1033 1616 6.30E-122 446 6596 cellular

organisms;Eukaryota;Opisthokonta;Metazoa;Eumetazoa;Bilateria;Protostomia;Spiralia;Lophotrochozoa;Mollusca;Bivalvia;Autobranchia;Heteroconchia;Euheterodonta;Imparidentia;Venerida;Veneroidea;Veneridae;Mercenaria;Mercenaria mercenaria

UdeM00000027889 6596 578.2 UdeM00000027889 XP\_045182316.1 41.4 884  
423 16 6 883 361 1155 1.80E-161 578.2 6596 cellular

organisms;Eukaryota;Opisthokonta;Metazoa;Eumetazoa;Bilateria;Protostomia;Spiralia;Lophotrochozoa;Mollusca;Bivalvia;Autobranchia;Heteroconchia;Euheterodonta;Imparidentia;Venerida;Veneroidea;Veneridae;Mercenaria;Mercenaria mercenaria

UdeM00000027890 29159 285 UdeM00000027890 XP\_011428124.2 53.9 256  
117 1 1 255 1 256 9.40E-74 285 29159 cellular

organisms;Eukaryota;Opisthokonta;Metazoa;Eumetazoa;Bilateria;Protostomia;Spiralia;Lophotrochozoa;Mollusca;Bivalvia;Autobranchia;Pteriormorphia;Ostreida;Ostreioidea;Ostreidae;Crassostrea;Crassostrea gigas

UdeM00000027891 29159 284.6 UdeM00000027891 XP\_011428124.2 54.4 252  
114 1 4 254 5 256 1.20E-73 284.6 29159 cellular

organisms;Eukaryota;Opisthokonta;Metazoa;Eumetazoa;Bilateria;Protostomia;Spiralia;Lophotrochozoa;Mollusca;Bivalvia;Autobranchia;Pteriormorphia;Ostreida;Ostreioidea;Ostreidae;Crassostrea;Crassostrea gigas

UdeM00000027893 29159 117.5 UdeM00000027893 XP\_011428125.2 62.8 94  
35 0 8 101 4 97 1.40E-23 117.5 29159 cellular

organisms;Eukaryota;Opisthokonta;Metazoa;Eumetazoa;Bilateria;Protostomia;Spiralia;Lophotrochozoa;Mollusca;Bivalvia;Autobranchia;Pteriormorphia;Ostreida;Ostreioidea;Ostreidae;Crassostrea;Crassostrea gigas

UdeM00000027894 29159 114.8 UdeM00000027894 XP\_011428125.2 53.5 114  
50 1 6 119 4 114 1.00E-22 114.8 29159 cellular

organisms;Eukaryota;Opisthokonta;Metazoa;Eumetazoa;Bilateria;Protostomia;Spiralia;Lophotrochozoa;Mollusca;Bivalvia;Autobranchia;Pteriormorphia;Ostreida;Ostreioidea;Ostreidae;Crassostrea;Crassostrea gigas

UdeM00000027895 29159 116.7 UdeM00000027895 XP\_034315479.1 46.4 110  
50 3 4 112 8 109 2.20E-23 116.7 29159 cellular

organisms;Eukaryota;Opisthokonta;Metazoa;Eumetazoa;Bilateria;Protostomia;

Spiralia;Lophotrochozoa;Mollusca;Bivalvia;Autobranchia;Pteriormorphia;Ostr  
eida;Ostreoidea;Ostreidae;Crassostrea;Crassostrea gigas

UdeM00000027896 400727 174.1 UdeM00000027896 XP\_025089754.1 41.9  
234 122 5 50 275 42 269 2.60E-40 174.1 400727  
cellular

organisms;Eukaryota;Opisthokonta;Metazoa;Eumetazoa;Bilateria;Protostomia;  
Spiralia;Lophotrochozoa;Mollusca;Gastropoda;Caenogastropoda;Architaeniogl  
ossa;Ampullarioidea;Ampullariidae;Pomacea;Pomacea canaliculata

UdeM00000027897 6596 265.4 UdeM00000027897 XP\_045194144.1 48.8 281  
132 6 16 292 8 280 8.60E-68 265.4 6596 cellular

organisms;Eukaryota;Opisthokonta;Metazoa;Eumetazoa;Bilateria;Protostomia;  
Spiralia;Lophotrochozoa;Mollusca;Bivalvia;Autobranchia;Heteroconchia;Euhe  
terodonta;Imparidentia;Venerida;Veneroidea;Veneridae;Mercenaria;Mercenari  
a mercenaria

UdeM00000027899 6596 141.4 UdeM00000027899 XP\_045158582.1 29.7 249  
132 2 3 209 89 336 1.40E-30 141.4 6596 cellular

organisms;Eukaryota;Opisthokonta;Metazoa;Eumetazoa;Bilateria;Protostomia;  
Spiralia;Lophotrochozoa;Mollusca;Bivalvia;Autobranchia;Heteroconchia;Euhe  
terodonta;Imparidentia;Venerida;Veneroidea;Veneridae;Mercenaria;Mercenari  
a mercenaria

UdeM00000027901 6596 163.7 UdeM00000027901 XP\_045186396.1 31.2 256  
142 3 5 227 64 318 2.80E-37 163.7 6596 cellular

organisms;Eukaryota;Opisthokonta;Metazoa;Eumetazoa;Bilateria;Protostomia;  
Spiralia;Lophotrochozoa;Mollusca;Bivalvia;Autobranchia;Heteroconchia;Euhe  
terodonta;Imparidentia;Venerida;Veneroidea;Veneridae;Mercenaria;Mercenari  
a mercenaria

UdeM00000027902 6596 103.6 UdeM00000027902 XP\_045164611.1 28.1 224  
137 8 79 291 70 280 5.20E-19 103.6 6596 cellular

organisms;Eukaryota;Opisthokonta;Metazoa;Eumetazoa;Bilateria;Protostomia;  
Spiralia;Lophotrochozoa;Mollusca;Bivalvia;Autobranchia;Heteroconchia;Euhe  
terodonta;Imparidentia;Venerida;Veneroidea;Veneridae;Mercenaria;Mercenari  
a mercenaria

UdeM00000027903 6596 270 UdeM00000027903 XP\_045194144.1 49.5 279  
133 4 16 292 8 280 3.50E-69 270 6596 cellular

organisms;Eukaryota;Opisthokonta;Metazoa;Eumetazoa;Bilateria;Protostomia;  
Spiralia;Lophotrochozoa;Mollusca;Bivalvia;Autobranchia;Heteroconchia;Euhe  
terodonta;Imparidentia;Venerida;Veneroidea;Veneridae;Mercenaria;Mercenari  
a mercenaria

UdeM00000027904 412133 181.4 UdeM00000027904 XP\_001301365.1 29  
483 281 10 158 635 239 664 6.70E-42 181.4 412133  
cellular

organisms;Eukaryota;Metamonada;Parabasalia;Trichomonadida;Trichomonadidae  
;Trichomonas;Trichomonas vaginalis;Trichomonas vaginalis G3

UdeM00000027906 48498 194.9 UdeM00000027906 XP\_020626127.1 24.4 634  
410 13 387 978 104 710 5.80E-46 194.9 48498 cellular

organisms;Eukaryota;Opisthokonta;Metazoa;Eumetazoa;Cnidaria;Anthozoa;Hexa  
corallia;Scleractinia;Faviina;Merulinidae;Orbicella;Orbicella faveolata

UdeM00000027907 6565 101.7 UdeM00000027907 XP\_022311947.1 43.6 110  
60 2 10 118 815 923 8.10E-19 101.7 6565 cellular

organisms;Eukaryota;Opisthokonta;Metazoa;Eumetazoa;Bilateria;Protostomia;  
Spiralia;Lophotrochozoa;Mollusca;Bivalvia;Autobranchia;Pteriormorphia;Ostr  
eida;Ostreoidea;Ostreidae;Crassostrea;Crassostrea virginica

UdeM00000027910 6596 331.6 UdeM00000027910 XP\_045206316.1 50.1 337  
164 2 45 380 84 417 1.50E-87 331.6 6596 cellular



organisms;Eukaryota;Opisthokonta;Metazoa;Eumetazoa;Bilateria;Protostomia;Spiralia;Lophotrochozoa;Mollusca;Bivalvia;Autobranchia;Heteroconchia;Euherodonta;Imparidentia;Venerida;Veneroidea;Veneridae;Mercenaria;Mercenaria mercenaria

UdeM00000027911 7668 106.3 UdeM00000027911 XP\_011661625.2 38.6 145  
77 3 2 137 1092 1233 3.20E-20 106.3 7668 cellular

organisms;Eukaryota;Opisthokonta;Metazoa;Eumetazoa;Bilateria;Deuterostomia;Echinodermata;Eleutherozoa;Echinozoa;Echinoidea;Euechinoidea;Echinacea;Camarodonta;Echinidea;Strongylocentrotidae;Strongylocentrotus;Strongylocentrotus purpuratus

UdeM00000027916 50390 186 UdeM00000027916 XP\_028154718.1 67.6 142  
38 2 8 141 78 219 3.30E-44 186 50390 cellular

organisms;Eukaryota;Opisthokonta;Metazoa;Eumetazoa;Bilateria;Protostomia;Ecdysozoa;Panarthropoda;Arthropoda;Mandibulata;Pancrustacea;Hexapoda;Insecta;Dicondylia;Pterygota;Neoptera;Endopterygota;Coleoptera;Polyphaga;Cucujiformia;Chrysomeloidea;Chrysomelidae;Galerucinae;Luperini;Diabroticina;Diabroticites;Diabrotica;Diabrotica virgifera;Diabrotica virgifera virgifera

UdeM00000027917 6596 589 UdeM00000027917 XP\_045197768.1 54.3 505  
228 2 1 502 48 552 5.90E-165 589 6596 cellular

organisms;Eukaryota;Opisthokonta;Metazoa;Eumetazoa;Bilateria;Protostomia;Spiralia;Lophotrochozoa;Mollusca;Bivalvia;Autobranchia;Heteroconchia;Euherodonta;Imparidentia;Venerida;Veneroidea;Veneridae;Mercenaria;Mercenaria mercenaria

UdeM00000027918 6596 602.4 UdeM00000027918 XP\_045197768.1 54.1 519  
235 2 33 548 34 552 5.60E-169 602.4 6596 cellular

organisms;Eukaryota;Opisthokonta;Metazoa;Eumetazoa;Bilateria;Protostomia;Spiralia;Lophotrochozoa;Mollusca;Bivalvia;Autobranchia;Heteroconchia;Euherodonta;Imparidentia;Venerida;Veneroidea;Veneridae;Mercenaria;Mercenaria mercenaria

UdeM00000027922 6596 142.9 UdeM00000027922 XP\_045197768.1 46.4 140  
75 0 1 140 413 552 3.10E-31 142.9 6596 cellular

organisms;Eukaryota;Opisthokonta;Metazoa;Eumetazoa;Bilateria;Protostomia;Spiralia;Lophotrochozoa;Mollusca;Bivalvia;Autobranchia;Heteroconchia;Euherodonta;Imparidentia;Venerida;Veneroidea;Veneridae;Mercenaria;Mercenaria mercenaria

UdeM00000027923 6596 303.9 UdeM00000027923 XP\_045197768.1 62.4 221  
83 0 4 224 132 352 1.80E-79 303.9 6596 cellular

organisms;Eukaryota;Opisthokonta;Metazoa;Eumetazoa;Bilateria;Protostomia;Spiralia;Lophotrochozoa;Mollusca;Bivalvia;Autobranchia;Heteroconchia;Euherodonta;Imparidentia;Venerida;Veneroidea;Veneridae;Mercenaria;Mercenaria mercenaria

UdeM00000027924 6596 306.2 UdeM00000027924 XP\_045197768.1 62.6 222  
83 0 4 225 132 353 3.60E-80 306.2 6596 cellular

organisms;Eukaryota;Opisthokonta;Metazoa;Eumetazoa;Bilateria;Protostomia;Spiralia;Lophotrochozoa;Mollusca;Bivalvia;Autobranchia;Heteroconchia;Euherodonta;Imparidentia;Venerida;Veneroidea;Veneridae;Mercenaria;Mercenaria mercenaria

UdeM00000027925 6596 86.7 UdeM00000027925 XP\_045188836.1 52.5 59  
28 0 129 187 29 87 3.80E-14 86.7 6596 cellular

organisms;Eukaryota;Opisthokonta;Metazoa;Eumetazoa;Bilateria;Protostomia;Spiralia;Lophotrochozoa;Mollusca;Bivalvia;Autobranchia;Heteroconchia;Euherodonta;Imparidentia;Venerida;Veneroidea;Veneridae;Mercenaria;Mercenaria mercenaria

UdeM00000027927 6596 232.6 UdeM00000027927 XP\_045206987.1 46.6 249  
 128 4 1 244 122 370 5.20E-58 232.6 6596 cellular  
 organisms;Eukaryota;Opisthokonta;Metazoa;Eumetazoa;Bilateria;Protostomia;  
 Spiralia;Lophotrochozoa;Mollusca;Bivalvia;Autobranchia;Heteroconchia;Euhe  
 terodonta;Imparidentia;Venerida;Veneroidea;Veneridae;Mercenaria;Mercenari  
 a mercenaria  
 UdeM00000027928 6596 290 UdeM00000027928 XP\_045197768.1 61.4 223  
 81 2 28 245 26 248 2.90E-75 290 6596 cellular  
 organisms;Eukaryota;Opisthokonta;Metazoa;Eumetazoa;Bilateria;Protostomia;  
 Spiralia;Lophotrochozoa;Mollusca;Bivalvia;Autobranchia;Heteroconchia;Euhe  
 terodonta;Imparidentia;Venerida;Veneroidea;Veneridae;Mercenaria;Mercenari  
 a mercenaria  
 UdeM00000027929 6596 100.9 UdeM00000027929 XP\_045181290.1 45.6 114  
 57 1 29 137 36 149 1.40E-18 100.9 6596 cellular  
 organisms;Eukaryota;Opisthokonta;Metazoa;Eumetazoa;Bilateria;Protostomia;  
 Spiralia;Lophotrochozoa;Mollusca;Bivalvia;Autobranchia;Heteroconchia;Euhe  
 terodonta;Imparidentia;Venerida;Veneroidea;Veneridae;Mercenaria;Mercenari  
 a mercenaria  
 UdeM00000027931 6596 178.3 UdeM00000027931 XP\_045181290.1 58.4 149  
 62 0 1 149 1 149 7.50E-42 178.3 6596 cellular  
 organisms;Eukaryota;Opisthokonta;Metazoa;Eumetazoa;Bilateria;Protostomia;  
 Spiralia;Lophotrochozoa;Mollusca;Bivalvia;Autobranchia;Heteroconchia;Euhe  
 terodonta;Imparidentia;Venerida;Veneroidea;Veneridae;Mercenaria;Mercenari  
 a mercenaria  
 UdeM00000027932 6596 112.8 UdeM00000027932 XP\_045180427.1 39 177  
 105 2 76 250 98 273 6.50E-22 112.8 6596 cellular  
 organisms;Eukaryota;Opisthokonta;Metazoa;Eumetazoa;Bilateria;Protostomia;  
 Spiralia;Lophotrochozoa;Mollusca;Bivalvia;Autobranchia;Heteroconchia;Euhe  
 terodonta;Imparidentia;Venerida;Veneroidea;Veneridae;Mercenaria;Mercenari  
 a mercenaria  
 UdeM00000027933 6573 134.8 UdeM00000027933 XP\_021365376.1 51.6 128  
 57 4 11 136 20 144 1.60E-28 134.8 6573 cellular  
 organisms;Eukaryota;Opisthokonta;Metazoa;Eumetazoa;Bilateria;Protostomia;  
 Spiralia;Lophotrochozoa;Mollusca;Bivalvia;Autobranchia;Pteriomorphia;Pect  
 inida;Pectinoidea;Pectinidae;Mizuhopecten;Mizuhopecten yessoensis  
 UdeM00000027934 6596 157.5 UdeM00000027934 XP\_045215574.1 45.5 145  
 77 1 202 346 15 157 4.50E-35 157.5 6596 cellular  
 organisms;Eukaryota;Opisthokonta;Metazoa;Eumetazoa;Bilateria;Protostomia;  
 Spiralia;Lophotrochozoa;Mollusca;Bivalvia;Autobranchia;Heteroconchia;Euhe  
 terodonta;Imparidentia;Venerida;Veneroidea;Veneridae;Mercenaria;Mercenari  
 a mercenaria  
 UdeM00000027935 8049 72.8 UdeM00000027935 XP\_030197744.1 29.9 127  
 76 3 25 151 140 253 4.30E-10 72.8 8049 cellular  
 organisms;Eukaryota;Opisthokonta;Metazoa;Eumetazoa;Bilateria;Deuterostomi  
 a;Chordata;Craniata;Vertebrata;Gnathostomata;Teleostomi;Euteleostomi;Acti  
 nopterygii;Actinopteri;Neopterygii;Teleostei;Osteoglossocephalai;Clupeoce  
 phala;Euteleosteomorpha;Neoteleostei;Eurypterygia;Ctenosquamata;Acanthomo  
 rphata;Paracanthopterygii;Zeiogadaria;Gadariae;Gadiformes;Gadoidei;Gadida  
 e;Gadus;Gadus morhua  
 UdeM00000027937 69319 122.1 UdeM00000027937 XP\_014297673.1 38.5 200  
 98 3 3 177 95 294 7.30E-25 122.1 69319 cellular  
 organisms;Eukaryota;Opisthokonta;Metazoa;Eumetazoa;Bilateria;Protostomia;  
 Ecdysozoa;Panarthropoda;Arthropoda;Mandibulata;Pancrustacea;Hexapoda;Inse  
 cta;Dicondylia;Pterygota;Neoptera;Endopterygota;Hymenoptera;Apocrita;Para

sitoida; Ichneumonoidea; Braconidae; Microgastrinae; Microplitis; Microplitis demolitor  
 UdeM00000027939 69319 122.1 UdeM00000027939 XP\_014297673.1 38.5 200  
 98 3 3 177 95 294 7.30E-25 122.1 69319 cellular  
 organisms; Eukaryota; Opisthokonta; Metazoa; Eumetazoa; Bilateria; Protostomia;  
 Ecdysozoa; Panarthropoda; Arthropoda; Mandibulata; Pancrustacea; Hexapoda; Inse  
 cta; Dicondylia; Pterygota; Neoptera; Endopterygota; Hymenoptera; Apocrita; Para  
 sitoida; Ichneumonoidea; Braconidae; Microgastrinae; Microplitis; Microplitis  
 demolitor  
 UdeM00000027940 69319 122.1 UdeM00000027940 XP\_014297673.1 38.5 200  
 98 3 3 177 95 294 7.30E-25 122.1 69319 cellular  
 organisms; Eukaryota; Opisthokonta; Metazoa; Eumetazoa; Bilateria; Protostomia;  
 Ecdysozoa; Panarthropoda; Arthropoda; Mandibulata; Pancrustacea; Hexapoda; Inse  
 cta; Dicondylia; Pterygota; Neoptera; Endopterygota; Hymenoptera; Apocrita; Para  
 sitoida; Ichneumonoidea; Braconidae; Microgastrinae; Microplitis; Microplitis  
 demolitor  
 UdeM00000027941 29159 193 UdeM00000027941 XP\_019926413.2 58.1 167  
 63 3 41 207 441 600 4.30E-46 193 29159 cellular  
 organisms; Eukaryota; Opisthokonta; Metazoa; Eumetazoa; Bilateria; Protostomia;  
 Spiralia; Lophotrochozoa; Mollusca; Bivalvia; Autobranchia; Pteriomorpha; Ostr  
 eida; Ostreoida; Ostreidae; Crassostrea; Crassostrea gigas  
 UdeM00000027941 29159 73.2 UdeM00000027941 XP\_019926413.2 89.2 37  
 4 0 1 37 292 328 5.00E-10 73.2 29159 cellular  
 organisms; Eukaryota; Opisthokonta; Metazoa; Eumetazoa; Bilateria; Protostomia;  
 Spiralia; Lophotrochozoa; Mollusca; Bivalvia; Autobranchia; Pteriomorpha; Ostr  
 eida; Ostreoida; Ostreidae; Crassostrea; Crassostrea gigas  
 UdeM00000027942 6596 186 UdeM00000027942 XP\_045202387.1 25.4 658  
 413 16 133 753 77 693 1.70E-43 186 6596 cellular  
 organisms; Eukaryota; Opisthokonta; Metazoa; Eumetazoa; Bilateria; Protostomia;  
 Spiralia; Lophotrochozoa; Mollusca; Bivalvia; Autobranchia; Heteroconchia; Eue  
 terodonta; Imparidentia; Venerida; Veneroidea; Veneridae; Mercenaria; Mercenari  
 a mercenaria  
 UdeM00000027944 6596 68.6 UdeM00000027944 XP\_045205668.1 26.6 143  
 87 2 17 141 591 733 7.80E-09 68.6 6596 cellular  
 organisms; Eukaryota; Opisthokonta; Metazoa; Eumetazoa; Bilateria; Protostomia;  
 Spiralia; Lophotrochozoa; Mollusca; Bivalvia; Autobranchia; Heteroconchia; Eue  
 terodonta; Imparidentia; Venerida; Veneroidea; Veneridae; Mercenaria; Mercenari  
 a mercenaria  
 UdeM00000027945 6596 181.4 UdeM00000027945 XP\_045203959.1 25.7 734  
 480 16 44 753 32 724 4.30E-42 181.4 6596 cellular  
 organisms; Eukaryota; Opisthokonta; Metazoa; Eumetazoa; Bilateria; Protostomia;  
 Spiralia; Lophotrochozoa; Mollusca; Bivalvia; Autobranchia; Heteroconchia; Eue  
 terodonta; Imparidentia; Venerida; Veneroidea; Veneridae; Mercenaria; Mercenari  
 a mercenaria  
 UdeM00000027946 6596 181.4 UdeM00000027946 XP\_045203959.1 25.6 735  
 480 19 44 753 32 724 4.30E-42 181.4 6596 cellular  
 organisms; Eukaryota; Opisthokonta; Metazoa; Eumetazoa; Bilateria; Protostomia;  
 Spiralia; Lophotrochozoa; Mollusca; Bivalvia; Autobranchia; Heteroconchia; Eue  
 terodonta; Imparidentia; Venerida; Veneroidea; Veneridae; Mercenaria; Mercenari  
 a mercenaria  
 UdeM00000027948 6596 98.6 UdeM00000027948 XP\_045215606.1 23.7 392  
 200 8 62 356 313 702 1.70E-17 98.6 6596 cellular  
 organisms; Eukaryota; Opisthokonta; Metazoa; Eumetazoa; Bilateria; Protostomia;  
 Spiralia; Lophotrochozoa; Mollusca; Bivalvia; Autobranchia; Heteroconchia; Eue

terodonta;Imparidentia;Venerida;Veneroidea;Veneridae;Mercenaria;Mercenari  
 a mercenaria  
 UdeM00000027949 6596 59.7 UdeM00000027949 XP\_045181029.1 38.3 107  
 61 3 114 216 104 209 7.80E-06 59.7 6596 cellular  
 organisms;Eukaryota;Opisthokonta;Metazoa;Eumetazoa;Bilateria;Protostomia;  
 Spiralia;Lophotrochozoa;Mollusca;Bivalvia;Autobranhia;Heteroconchia;Euhe  
 terodonta;Imparidentia;Venerida;Veneroidea;Veneridae;Mercenaria;Mercenari  
 a mercenaria  
 UdeM00000027950 6596 145.6 UdeM00000027950 XP\_045170933.1 25.7 424  
 268 9 1 413 348 735 1.40E-31 145.6 6596 cellular  
 organisms;Eukaryota;Opisthokonta;Metazoa;Eumetazoa;Bilateria;Protostomia;  
 Spiralia;Lophotrochozoa;Mollusca;Bivalvia;Autobranhia;Heteroconchia;Euhe  
 terodonta;Imparidentia;Venerida;Veneroidea;Veneridae;Mercenaria;Mercenari  
 a mercenaria  
 UdeM00000027951 6596 186.4 UdeM00000027951 XP\_045170933.1 24.3 752  
 490 21 46 759 25 735 1.30E-43 186.4 6596 cellular  
 organisms;Eukaryota;Opisthokonta;Metazoa;Eumetazoa;Bilateria;Protostomia;  
 Spiralia;Lophotrochozoa;Mollusca;Bivalvia;Autobranhia;Heteroconchia;Euhe  
 terodonta;Imparidentia;Venerida;Veneroidea;Veneridae;Mercenaria;Mercenari  
 a mercenaria  
 UdeM00000034971 6579 110.5 UdeM00000034971 XP\_033734341.1 39.6 154  
 85 3 3 156 4 149 1.90E-21 110.5 6579 cellular  
 organisms;Eukaryota;Opisthokonta;Metazoa;Eumetazoa;Bilateria;Protostomia;  
 Spiralia;Lophotrochozoa;Mollusca;Bivalvia;Autobranhia;Pteriormorphia;Pect  
 inida;Pectinoidea;Pectinidae;Pecten;Pecten maximus  
 UdeM00000034972 29159 177.9 UdeM00000034972 XP\_034311318.1 46.8 203  
 91 8 4 193 127 325 1.50E-41 177.9 29159 cellular  
 organisms;Eukaryota;Opisthokonta;Metazoa;Eumetazoa;Bilateria;Protostomia;  
 Spiralia;Lophotrochozoa;Mollusca;Bivalvia;Autobranhia;Pteriormorphia;Ostr  
 eida;Ostreoidea;Ostreidae;Crassostrea;Crassostrea gigas  
 UdeM00000034974 6565 67 UdeM00000034974 XP\_022316733.1 40.8 71  
 42 0 1 71 259 329 2.90E-08 67 6565 cellular  
 organisms;Eukaryota;Opisthokonta;Metazoa;Eumetazoa;Bilateria;Protostomia;  
 Spiralia;Lophotrochozoa;Mollusca;Bivalvia;Autobranhia;Pteriormorphia;Ostr  
 eida;Ostreoidea;Ostreidae;Crassostrea;Crassostrea virginica  
 UdeM00000034975 6565 177.2 UdeM00000034975 XP\_022322655.1 36.2 287  
 89 3 4 197 330 615 3.10E-41 177.2 6565 cellular  
 organisms;Eukaryota;Opisthokonta;Metazoa;Eumetazoa;Bilateria;Protostomia;  
 Spiralia;Lophotrochozoa;Mollusca;Bivalvia;Autobranhia;Pteriormorphia;Ostr  
 eida;Ostreoidea;Ostreidae;Crassostrea;Crassostrea virginica  
 UdeM00000034976 6565 77 UdeM00000034976 XP\_022322655.1 50 76  
 38 0 1 76 629 704 1.30E-11 77 6565 cellular  
 organisms;Eukaryota;Opisthokonta;Metazoa;Eumetazoa;Bilateria;Protostomia;  
 Spiralia;Lophotrochozoa;Mollusca;Bivalvia;Autobranhia;Pteriormorphia;Ostr  
 eida;Ostreoidea;Ostreidae;Crassostrea;Crassostrea virginica  
 UdeM00000034977 29159 124 UdeM00000034977 XP\_034330911.1 60.9 92  
 34 2 1 91 308 398 1.00E-25 124 29159 cellular  
 organisms;Eukaryota;Opisthokonta;Metazoa;Eumetazoa;Bilateria;Protostomia;  
 Spiralia;Lophotrochozoa;Mollusca;Bivalvia;Autobranhia;Pteriormorphia;Ostr  
 eida;Ostreoidea;Ostreidae;Crassostrea;Crassostrea gigas  
 UdeM00000034981 46514 134.8 UdeM00000034981 XP\_038073135.1 44.2 156  
 80 2 325 480 380 528 3.20E-28 134.8 46514 cellular  
 organisms;Eukaryota;Opisthokonta;Metazoa;Eumetazoa;Bilateria;Deuterostomi

a;Echinodermata;Eleutherozoa;Asterozoa;Asteroidea;Valvatacea;Valvatida;As  
terinidae;Patiria;Patiria miniata  
UdeM00000034983 46514 120.6 UdeM00000034983 XP\_038073135.1 42.6 148  
78 2 1 148 393 533 1.80E-24 120.6 46514 cellular  
organisms;Eukaryota;Opisthokonta;Metazoa;Eumetazoa;Bilateria;Deuterostomi  
a;Echinodermata;Eleutherozoa;Asterozoa;Asteroidea;Valvatacea;Valvatida;As  
terinidae;Patiria;Patiria miniata  
UdeM00000034987 29159 108.2 UdeM00000034987 XP\_034315421.1 55.7 106  
42 2 145 246 370 474 1.50E-20 108.2 29159 cellular  
organisms;Eukaryota;Opisthokonta;Metazoa;Eumetazoa;Bilateria;Protostomia;  
Spiralia;Lophotrochozoa;Mollusca;Bivalvia;Autobranhia;Pteriormorphia;Ostr  
eida;Ostreoidea;Ostreidae;Crassostrea;Crassostrea gigas  
UdeM00000034988 29159 1035.8 UdeM00000034988 XP\_034322147.1 52  
975 417 5 1 948 3 953 3.40E-299 1035.8  
29159 cellular  
organisms;Eukaryota;Opisthokonta;Metazoa;Eumetazoa;Bilateria;Protostomia;  
Spiralia;Lophotrochozoa;Mollusca;Bivalvia;Autobranhia;Pteriormorphia;Ostr  
eida;Ostreoidea;Ostreidae;Crassostrea;Crassostrea gigas  
UdeM00000034989 225164 104 UdeM00000034989 XP\_009046685.1 68.1  
69 22 0 83 151 167 235 1.70E-19 104 225164  
cellular  
organisms;Eukaryota;Opisthokonta;Metazoa;Eumetazoa;Bilateria;Protostomia;  
Spiralia;Lophotrochozoa;Mollusca;Gastropoda;Patellogastropoda;Lottioidea;  
Lottiidae;Lottia;Lottia gigantea  
UdeM00000034990 6565 82 UdeM00000034990 XP\_022322206.1 42.4 92  
52 1 6 96 106 197 7.30E-13 82 6565 cellular  
organisms;Eukaryota;Opisthokonta;Metazoa;Eumetazoa;Bilateria;Protostomia;  
Spiralia;Lophotrochozoa;Mollusca;Bivalvia;Autobranhia;Pteriormorphia;Ostr  
eida;Ostreoidea;Ostreidae;Crassostrea;Crassostrea virginica  
UdeM00000034991 7054 85.5 UdeM00000034991 XP\_031356742.1 44 84  
47 0 23 106 344 427 5.10E-14 85.5 7054 cellular  
organisms;Eukaryota;Opisthokonta;Metazoa;Eumetazoa;Bilateria;Protostomia;  
Ecdysozoa;Panarthropoda;Arthropoda;Mandibulata;Pancrustacea;Hexapoda;Inse  
cta;Dicondylia;Pterygota;Neoptera;Endopterygota;Coleoptera;Polyphaga;Elat  
eriformia;Elateroidea;Lampyridae;Lampyrinae;Photinus;Photinus pyralis  
UdeM00000034993 29159 75.5 UdeM00000034993 XP\_034315421.1 36.2 116  
71 2 40 155 221 333 6.80E-11 75.5 29159 cellular  
organisms;Eukaryota;Opisthokonta;Metazoa;Eumetazoa;Bilateria;Protostomia;  
Spiralia;Lophotrochozoa;Mollusca;Bivalvia;Autobranhia;Pteriormorphia;Ostr  
eida;Ostreoidea;Ostreidae;Crassostrea;Crassostrea gigas  
UdeM00000034996 29159 483.4 UdeM00000034996 XP\_034322147.1 67.8 326  
105 0 1 326 374 699 2.30E-133 483.4 29159 cellular  
organisms;Eukaryota;Opisthokonta;Metazoa;Eumetazoa;Bilateria;Protostomia;  
Spiralia;Lophotrochozoa;Mollusca;Bivalvia;Autobranhia;Pteriormorphia;Ostr  
eida;Ostreoidea;Ostreidae;Crassostrea;Crassostrea gigas  
UdeM00000034997 6565 197.2 UdeM00000034997 XP\_022306954.1 44.3 212  
116 1 1 210 737 948 2.10E-47 197.2 6565 cellular  
organisms;Eukaryota;Opisthokonta;Metazoa;Eumetazoa;Bilateria;Protostomia;  
Spiralia;Lophotrochozoa;Mollusca;Bivalvia;Autobranhia;Pteriormorphia;Ostr  
eida;Ostreoidea;Ostreidae;Crassostrea;Crassostrea virginica  
UdeM00000035000 6596 131.7 UdeM00000035000 XP\_045181000.1 69.3 88  
27 0 29 116 867 954 6.10E-28 131.7 6596 cellular  
organisms;Eukaryota;Opisthokonta;Metazoa;Eumetazoa;Bilateria;Protostomia;  
Spiralia;Lophotrochozoa;Mollusca;Bivalvia;Autobranhia;Heteroconchia;Euhe

terodonta;Imparidentia;Venerida;Veneroidea;Veneridae;Mercenaria;Mercenaria mercenaria  
 UdeM00000035001 6573 110.5 UdeM00000035001 XP\_021346496.1 37.3 169  
 99 3 1 169 406 567 2.60E-21 110.5 6573 cellular  
 organisms;Eukaryota;Opisthokonta;Metazoa;Eumetazoa;Bilateria;Protostomia;  
 Spiralia;Lophotrochozoa;Mollusca;Bivalvia;Autobranchia;Pteriomorphia;Pectinida;  
 Pectinoidea;Pectinidae;Mizuhopecten;Mizuhopecten yessoensis  
 UdeM00000038532 50390 166.4 UdeM00000038532 XP\_028151694.1 24.1 685  
 410 23 138 783 250 863 1.50E-37 166.4 50390 cellular  
 organisms;Eukaryota;Opisthokonta;Metazoa;Eumetazoa;Bilateria;Protostomia;  
 Ecdysozoa;Panarthropoda;Arthropoda;Mandibulata;Pancrustacea;Hexapoda;Insecta;  
 Dicondylia;Pterygota;Neoptera;Endopterygota;Coleoptera;Polyphaga;Cucujiformia;  
 Chrysomeloidea;Chrysomelidae;Galerucinae;Luperini;Diabroticina;Diabroticites;  
 Diabrotica;Diabrotica virgifera;Diabrotica virgifera virgifera  
 UdeM00000038534 6573 411 UdeM00000038534 XP\_021369526.1 55.3 338  
 147 2 4 340 10 344 1.50E-111 411 6573 cellular  
 organisms;Eukaryota;Opisthokonta;Metazoa;Eumetazoa;Bilateria;Protostomia;  
 Spiralia;Lophotrochozoa;Mollusca;Bivalvia;Autobranchia;Pteriomorphia;Pectinida;  
 Pectinoidea;Pectinidae;Mizuhopecten;Mizuhopecten yessoensis  
 UdeM00000038535 37653 145.6 UdeM00000038535 XP\_014774078.1 47.1 136  
 71 1 6 140 7 142 5.20E-32 145.6 37653 cellular  
 organisms;Eukaryota;Opisthokonta;Metazoa;Eumetazoa;Bilateria;Protostomia;  
 Spiralia;Lophotrochozoa;Mollusca;Cephalopoda;Coleoidea;Octopodiformes;Octopoda;  
 Incirrata;Octopodidae;Octopus;Octopus bimaculoides  
 UdeM00000038536 6573 869 UdeM00000038536 XP\_021374219.1 73 555  
 144 2 1 555 1 549 3.20E-249 869 6573 cellular  
 organisms;Eukaryota;Opisthokonta;Metazoa;Eumetazoa;Bilateria;Protostomia;  
 Spiralia;Lophotrochozoa;Mollusca;Bivalvia;Autobranchia;Pteriomorphia;Pectinida;  
 Pectinoidea;Pectinidae;Mizuhopecten;Mizuhopecten yessoensis  
 UdeM00000038537 6596 98.2 UdeM00000038537 XP\_045172529.1 52.7 112  
 42 2 8 108 6 117 6.80E-18 98.2 6596 cellular  
 organisms;Eukaryota;Opisthokonta;Metazoa;Eumetazoa;Bilateria;Protostomia;  
 Spiralia;Lophotrochozoa;Mollusca;Bivalvia;Autobranchia;Heteroconchia;Euheterodonta;  
 Imparidentia;Venerida;Veneroidea;Veneridae;Mercenaria;Mercenaria mercenaria  
 UdeM00000038538 6596 1047.7 UdeM00000038538 XP\_045172405.1 68.7  
 767 222 6 1 762 1 754 7.00E-303 1047.7 6596  
 cellular  
 organisms;Eukaryota;Opisthokonta;Metazoa;Eumetazoa;Bilateria;Protostomia;  
 Spiralia;Lophotrochozoa;Mollusca;Bivalvia;Autobranchia;Heteroconchia;Euheterodonta;  
 Imparidentia;Venerida;Veneroidea;Veneridae;Mercenaria;Mercenaria mercenaria  
 UdeM00000038539 29159 115.9 UdeM00000038539 XP\_034338978.1 31.5 308  
 190 9 94 386 41 342 1.10E-22 115.9 29159 cellular  
 organisms;Eukaryota;Opisthokonta;Metazoa;Eumetazoa;Bilateria;Protostomia;  
 Spiralia;Lophotrochozoa;Mollusca;Bivalvia;Autobranchia;Pteriomorphia;Ostreida;  
 Ostreidae;Crassostrea;Crassostrea gigas  
 UdeM00000038540 29159 120.9 UdeM00000038540 XP\_034338978.1 31.5 308  
 191 8 94 387 41 342 3.60E-24 120.9 29159 cellular  
 organisms;Eukaryota;Opisthokonta;Metazoa;Eumetazoa;Bilateria;Protostomia;  
 Spiralia;Lophotrochozoa;Mollusca;Bivalvia;Autobranchia;Pteriomorphia;Ostreida;  
 Ostreidae;Crassostrea;Crassostrea gigas

UdeM00000038541 400727 119 UdeM00000038541 XP\_025089279.1 56  
 109 40 4 1 105 1 105 3.70E-24 119 400727  
 cellular  
 organisms;Eukaryota;Opisthokonta;Metazoa;Eumetazoa;Bilateria;Protostomia;  
 Spiralia;Lophotrochozoa;Mollusca;Gastropoda;Caenogastropoda;Architaenioglossa;  
 Ampullarioidea;Ampullariidae;Pomacea;Pomacea canaliculata  
 UdeM00000038542 6596 642.9 UdeM00000038542 XP\_045171233.1 48.3 667  
 311 9 10 651 6 663 4.40E-181 642.9 6596 cellular  
 organisms;Eukaryota;Opisthokonta;Metazoa;Eumetazoa;Bilateria;Protostomia;  
 Spiralia;Lophotrochozoa;Mollusca;Bivalvia;Autobranchia;Heteroconchia;Euheterodonta;  
 Imparidentia;Venerida;Veneroidea;Veneridae;Mercenaria;Mercenaria mercenaria  
 UdeM00000038545 6573 328.2 UdeM00000038545 XP\_021373130.1 50.9 330  
 155 4 1 328 54 378 1.20E-86 328.2 6573 cellular  
 organisms;Eukaryota;Opisthokonta;Metazoa;Eumetazoa;Bilateria;Protostomia;  
 Spiralia;Lophotrochozoa;Mollusca;Bivalvia;Autobranchia;Pteriormorphia;Pectinida;  
 Pectinoidea;Pectinidae;Mizuhopecten;Mizuhopecten yessoensis  
 UdeM00000038546 202533 80.5 UdeM00000038546 XP\_035227235.1 62.7  
 67 23 2 5 69 106 172 9.40E-13 80.5 202533  
 cellular  
 organisms;Eukaryota;Opisthokonta;Metazoa;Eumetazoa;Bilateria;Protostomia;  
 Ecdysozoa;Panarthropoda;Arthropoda;Chelicerata;Arachnida;Araneae;Araneomorphae;  
 Entelegynae;Eresoidea;Eresidae;Stegodyphus;Stegodyphus dumicola  
 UdeM00000038547 1735272 178.3 UdeM00000038547 XP\_041350219.1 66.7  
 165 48 4 59 218 154 316 1.60E-41 178.3 1735272  
 cellular  
 organisms;Eukaryota;Opisthokonta;Metazoa;Eumetazoa;Bilateria;Protostomia;  
 Spiralia;Lophotrochozoa;Mollusca;Gastropoda;Neomphalina;Neomphaloidea;Peltospiridae;  
 Gigantopelta;Gigantopelta aegis  
 UdeM00000038548 6579 438.3 UdeM00000038548 XP\_033748241.1 70.5 315  
 88 3 1 310 3 317 1.10E-119 438.3 6579 cellular  
 organisms;Eukaryota;Opisthokonta;Metazoa;Eumetazoa;Bilateria;Protostomia;  
 Spiralia;Lophotrochozoa;Mollusca;Bivalvia;Autobranchia;Pteriormorphia;Pectinida;  
 Pectinoidea;Pectinidae;Pecten;Pecten maximus  
 UdeM00000038552 195615 333.6 UdeM00000038552 XP\_035017619.1 51  
 312 151 1 15 324 9 320 2.90E-88 333.6 195615  
 cellular  
 organisms;Eukaryota;Opisthokonta;Metazoa;Eumetazoa;Bilateria;Deuterostomia;  
 Chordata;Craniata;Vertebrata;Gnathostomata;Teleostomi;Euteleostomi;Actinopterygii;  
 Actinopteri;Neopterygii;Teleostei;Osteoglossocephalai;Clupeocephala;Euteleostei;  
 Neoteleostei;Eurypterygia;Ctenosquamata;Acanthomorphata;Euacanthomorphacea;  
 Percomorphaceae;Carangaria;Pleuronectiformes;Pleuronectoidei;Pleuronectidae;  
 Hippoglossus;Hippoglossus stenolepis  
 UdeM00000044442 133901 82.4 UdeM00000044442 XP\_026284932.1 61.9  
 63 24 0 1 63 1 63 2.50E-13 82.4 133901  
 cellular  
 organisms;Eukaryota;Opisthokonta;Metazoa;Eumetazoa;Bilateria;Protostomia;  
 Ecdysozoa;Panarthropoda;Arthropoda;Mandibulata;Pancrustacea;Hexapoda;Insecta;  
 Dicondylia;Pterygota;Neoptera;Paraneoptera;Thysanoptera;Terebrantia;Thripidae;  
 Thripidae;Thripinae;Frankliniella;Frankliniella occidentalis  
 UdeM00000005481 6596 70.5 UdeM00000005481 XP\_045165709.1 28.9 187  
 110 9 54 235 1470 1638 7.70E-09 70.5 6596 cellular  
 organisms;Eukaryota;Opisthokonta;Metazoa;Eumetazoa;Bilateria;Protostomia;  
 Spiralia;Lophotrochozoa;Mollusca;Bivalvia;Autobranchia;Heteroconchia;Euheterodonta

terodonta;Imparidentia;Venerida;Veneroidea;Veneridae;Mercenaria;Mercenaria mercenaria  
 UdeM00000005482 6596 70.5 UdeM00000005482 XP\_045165709.1 28.9 187  
 110 9 54 235 1470 1638 7.10E-09 70.5 6596 cellular  
 organisms;Eukaryota;Opisthokonta;Metazoa;Eumetazoa;Bilateria;Protostomia;Spiralia;Lophotrochozoa;Mollusca;Bivalvia;Autobranchia;Heteroconchia;Euheterodonta;Imparidentia;Venerida;Veneroidea;Veneridae;Mercenaria;Mercenaria mercenaria  
 UdeM00000005483 6596 312.4 UdeM00000005483 XP\_045161502.1 72.2 209  
 56 2 1 208 1 208 5.00E-82 312.4 6596 cellular  
 organisms;Eukaryota;Opisthokonta;Metazoa;Eumetazoa;Bilateria;Protostomia;Spiralia;Lophotrochozoa;Mollusca;Bivalvia;Autobranchia;Heteroconchia;Euheterodonta;Imparidentia;Venerida;Veneroidea;Veneridae;Mercenaria;Mercenaria mercenaria  
 UdeM00000005484 2607531 71.2 UdeM00000005484 XP\_029643184.1 33.6  
 137 77 3 1 129 1 131 1.80E-09 71.2 2607531  
 cellular  
 organisms;Eukaryota;Opisthokonta;Metazoa;Eumetazoa;Bilateria;Protostomia;Spiralia;Lophotrochozoa;Mollusca;Cephalopoda;Coleoidea;Octopodiformes;Octopoda;Incirrata;Octopodidae;Octopus;Octopus sinensis  
 UdeM00000005485 1735272 330.5 UdeM00000005485 XP\_041353423.1 38.8  
 485 274 7 3 476 60 532 4.60E-87 330.5 1735272  
 cellular  
 organisms;Eukaryota;Opisthokonta;Metazoa;Eumetazoa;Bilateria;Protostomia;Spiralia;Lophotrochozoa;Mollusca;Gastropoda;Neomphalina;Neomphaloidea;Peltospiridae;Gigantopelta;Gigantopelta aegis  
 UdeM00000005486 6565 181.8 UdeM00000005486 XP\_022295065.1 59.3 145  
 59 0 1 145 187 331 6.40E-43 181.8 6565 cellular  
 organisms;Eukaryota;Opisthokonta;Metazoa;Eumetazoa;Bilateria;Protostomia;Spiralia;Lophotrochozoa;Mollusca;Bivalvia;Autobranchia;Pteriomorpha;Ostreida;Ostreoidea;Ostreidae;Crassostrea;Crassostrea virginica  
 UdeM00000005487 29159 269.6 UdeM00000005487 XP\_034313077.1 66.5 191  
 64 0 2 192 107 297 5.40E-69 269.6 29159 cellular  
 organisms;Eukaryota;Opisthokonta;Metazoa;Eumetazoa;Bilateria;Protostomia;Spiralia;Lophotrochozoa;Mollusca;Bivalvia;Autobranchia;Pteriomorpha;Ostreida;Ostreoidea;Ostreidae;Crassostrea;Crassostrea gigas  
 UdeM00000005488 6500 323.6 UdeM00000005488 XP\_005108212.1 45.6 388  
 193 5 4 385 130 505 4.20E-85 323.6 6500 cellular  
 organisms;Eukaryota;Opisthokonta;Metazoa;Eumetazoa;Bilateria;Protostomia;Spiralia;Lophotrochozoa;Mollusca;Gastropoda;Heterobranchia;Euthyneura;Tectipleura;Aplysiida;Aplysioidea;Aplysiidae;Aplysia;Aplysia californica  
 UdeM00000005489 6565 314.3 UdeM00000005489 XP\_022329962.1 61.3 292  
 94 5 1 292 1 273 1.60E-82 314.3 6565 cellular  
 organisms;Eukaryota;Opisthokonta;Metazoa;Eumetazoa;Bilateria;Protostomia;Spiralia;Lophotrochozoa;Mollusca;Bivalvia;Autobranchia;Pteriomorpha;Ostreida;Ostreoidea;Ostreidae;Crassostrea;Crassostrea virginica  
 UdeM00000005491 29159 485.7 UdeM00000005491 XP\_011449697.1 72.7 333  
 90 1 1 332 1 333 4.60E-134 485.7 29159 cellular  
 organisms;Eukaryota;Opisthokonta;Metazoa;Eumetazoa;Bilateria;Protostomia;Spiralia;Lophotrochozoa;Mollusca;Bivalvia;Autobranchia;Pteriomorpha;Ostreida;Ostreoidea;Ostreidae;Crassostrea;Crassostrea gigas  
 UdeM00000005492 6596 284.3 UdeM00000005492 XP\_045184976.1 56.8 206  
 89 0 1 206 1 206 1.30E-73 284.3 6596 cellular  
 organisms;Eukaryota;Opisthokonta;Metazoa;Eumetazoa;Bilateria;Protostomia;



Spiralia;Lophotrochozoa;Mollusca;Bivalvia;Autobranchia;Heteroconchia;Euherodonta;Imparidentia;Venerida;Veneroidea;Veneridae;Mercenaria;Mercenaria mercenaria

UdeM00000005493 6596 640.6 UdeM00000005493 XP\_045184976.1 60.2 548  
183 8 1 524 218 754 1.80E-180 640.6 6596 cellular

organisms;Eukaryota;Opisthokonta;Metazoa;Eumetazoa;Bilateria;Protostomia;Spiralia;Lophotrochozoa;Mollusca;Bivalvia;Autobranchia;Heteroconchia;Euherodonta;Imparidentia;Venerida;Veneroidea;Veneridae;Mercenaria;Mercenaria mercenaria

UdeM00000005494 400727 164.5 UdeM00000005494 XP\_025104772.1 46.2  
160 86 0 35 194 30 189 1.40E-37 164.5 400727  
cellular

organisms;Eukaryota;Opisthokonta;Metazoa;Eumetazoa;Bilateria;Protostomia;Spiralia;Lophotrochozoa;Mollusca;Gastropoda;Caenogastropoda;Architaenioglossa;Ampullarioidea;Ampullariidae;Pomacea;Pomacea canaliculata

UdeM00000005495 6565 101.3 UdeM00000005495 XP\_022329838.1 38.5 182  
100 7 1 181 1 171 1.80E-18 101.3 6565 cellular

organisms;Eukaryota;Opisthokonta;Metazoa;Eumetazoa;Bilateria;Protostomia;Spiralia;Lophotrochozoa;Mollusca;Bivalvia;Autobranchia;Pteriormorphia;Ostreida;Ostreoidea;Ostreidae;Crassostrea;Crassostrea virginica

UdeM00000005497 9244 78.6 UdeM00000005497 XP\_030321995.1 38.4 125  
56 6 2 126 1043 1146 1.70E-11 78.6 9244 cellular

organisms;Eukaryota;Opisthokonta;Metazoa;Eumetazoa;Bilateria;Deuterostomia;Chordata;Craniata;Vertebrata;Gnathostomata;Teleostomi;Euteleostomi;Sarcopterygii;Dipnotetrapodomorpha;Tetrapoda;Amniota;Sauropsida;Sauria;Archelosauria;Archosauria;Dinosauria;Saurischia;Theropoda;Coelurosauria;Aves;Neognathae;Caprimulgimorphae;Apodiformes;Trochilidae;Calypte;Calypte anna

UdeM00000005498 6596 809.7 UdeM00000005498 XP\_045162023.1 57.2 680  
281 5 20 693 5 680 2.90E-231 809.7 6596 cellular

organisms;Eukaryota;Opisthokonta;Metazoa;Eumetazoa;Bilateria;Protostomia;Spiralia;Lophotrochozoa;Mollusca;Bivalvia;Autobranchia;Heteroconchia;Euherodonta;Imparidentia;Venerida;Veneroidea;Veneridae;Mercenaria;Mercenaria mercenaria

UdeM00000005499 6596 310.1 UdeM00000005499 XP\_045185533.1 44.3 379  
199 8 52 425 22 393 4.50E-81 310.1 6596 cellular

organisms;Eukaryota;Opisthokonta;Metazoa;Eumetazoa;Bilateria;Protostomia;Spiralia;Lophotrochozoa;Mollusca;Bivalvia;Autobranchia;Heteroconchia;Euherodonta;Imparidentia;Venerida;Veneroidea;Veneridae;Mercenaria;Mercenaria mercenaria

UdeM00000005500 6596 328.9 UdeM00000005500 XP\_045185527.1 44.8 359  
192 3 24 378 3 359 8.30E-87 328.9 6596 cellular

organisms;Eukaryota;Opisthokonta;Metazoa;Eumetazoa;Bilateria;Protostomia;Spiralia;Lophotrochozoa;Mollusca;Bivalvia;Autobranchia;Heteroconchia;Euherodonta;Imparidentia;Venerida;Veneroidea;Veneridae;Mercenaria;Mercenaria mercenaria

UdeM00000005501 6596 467.2 UdeM00000005501 XP\_045185496.1 86.8 265  
35 0 1 265 1 265 1.40E-128 467.2 6596 cellular

organisms;Eukaryota;Opisthokonta;Metazoa;Eumetazoa;Bilateria;Protostomia;Spiralia;Lophotrochozoa;Mollusca;Bivalvia;Autobranchia;Heteroconchia;Euherodonta;Imparidentia;Venerida;Veneroidea;Veneridae;Mercenaria;Mercenaria mercenaria

UdeM00000005502 6596 475.7 UdeM00000005502 XP\_045166271.1 68.7 332  
103 1 1 331 1 332 6.70E-131 475.7 6596 cellular

organisms;Eukaryota;Opisthokonta;Metazoa;Eumetazoa;Bilateria;Protostomia;

Spiralia;Lophotrochozoa;Mollusca;Bivalvia;Autobranchia;Heteroconchia;Euherodonta;Imparidentia;Venerida;Veneroidea;Veneridae;Mercenaria;Mercenaria mercenaria

UdeM00000005503 6596 523.1 UdeM00000005503 XP\_045190303.1 53.4 485  
223 3 6 487 11 495 3.80E-145 523.1 6596 cellular

organisms;Eukaryota;Opisthokonta;Metazoa;Eumetazoa;Bilateria;Protostomia;Spiralia;Lophotrochozoa;Mollusca;Bivalvia;Autobranchia;Heteroconchia;Euherodonta;Imparidentia;Venerida;Veneroidea;Veneridae;Mercenaria;Mercenaria mercenaria

UdeM00000005504 6596 526.2 UdeM00000005504 XP\_045190303.1 53.4 485  
223 3 6 487 11 495 4.50E-146 526.2 6596 cellular

organisms;Eukaryota;Opisthokonta;Metazoa;Eumetazoa;Bilateria;Protostomia;Spiralia;Lophotrochozoa;Mollusca;Bivalvia;Autobranchia;Heteroconchia;Euherodonta;Imparidentia;Venerida;Veneroidea;Veneridae;Mercenaria;Mercenaria mercenaria

UdeM00000005505 6596 533.5 UdeM00000005505 XP\_045190303.1 54.3 484  
218 3 6 487 13 495 2.80E-148 533.5 6596 cellular

organisms;Eukaryota;Opisthokonta;Metazoa;Eumetazoa;Bilateria;Protostomia;Spiralia;Lophotrochozoa;Mollusca;Bivalvia;Autobranchia;Heteroconchia;Euherodonta;Imparidentia;Venerida;Veneroidea;Veneridae;Mercenaria;Mercenaria mercenaria

UdeM00000005506 1606681 92.8 UdeM00000005506 XP\_043081525.1 53.2  
79 37 0 16 94 378 456 2.60E-16 92.8 1606681

cellular

organisms;Eukaryota;Opisthokonta;Metazoa;Eumetazoa;Bilateria;Deuterostomia;Chordata;Craniata;Vertebrata;Gnathostomata;Teleostomi;Euteleostomi;Actinopterygii;Actinopteri;Neopterygii;Teleostei;Osteoglossocephalai;Clupeocephala;Otomorpha;Ostariophysi;Otophysi;Cypriniphysae;Cypriniformes;Cyprinidae;Cyprinidae;Smiliogastrinae;Puntigrus;Puntigrus tetrazona

UdeM00000005507 6596 89 UdeM00000005507 XP\_045190303.1 59.1 66  
27 0 13 78 430 495 3.00E-15 89 6596 cellular

organisms;Eukaryota;Opisthokonta;Metazoa;Eumetazoa;Bilateria;Protostomia;Spiralia;Lophotrochozoa;Mollusca;Bivalvia;Autobranchia;Heteroconchia;Euherodonta;Imparidentia;Venerida;Veneroidea;Veneridae;Mercenaria;Mercenaria mercenaria

UdeM00000005508 6596 490.7 UdeM00000005508 XP\_045190303.1 49.4 484  
241 3 6 486 13 495 2.10E-135 490.7 6596 cellular

organisms;Eukaryota;Opisthokonta;Metazoa;Eumetazoa;Bilateria;Protostomia;Spiralia;Lophotrochozoa;Mollusca;Bivalvia;Autobranchia;Heteroconchia;Euherodonta;Imparidentia;Venerida;Veneroidea;Veneridae;Mercenaria;Mercenaria mercenaria

UdeM00000005509 6579 219.2 UdeM00000005509 XP\_033735923.1 67.9 165  
53 0 19 183 7 171 5.90E-54 219.2 6579 cellular

organisms;Eukaryota;Opisthokonta;Metazoa;Eumetazoa;Bilateria;Protostomia;Spiralia;Lophotrochozoa;Mollusca;Bivalvia;Autobranchia;Pteriomorphia;Pectinida;Pectinoidea;Pectinidae;Pecten;Pecten maximus

UdeM00000005510 29159 172.6 UdeM00000005510 XP\_034312908.1 25.9 649  
318 18 5 523 6 621 1.40E-39 172.6 29159 cellular

organisms;Eukaryota;Opisthokonta;Metazoa;Eumetazoa;Bilateria;Protostomia;Spiralia;Lophotrochozoa;Mollusca;Bivalvia;Autobranchia;Pteriomorphia;Ostreida;Ostreoidea;Ostreidae;Crassostrea;Crassostrea gigas

UdeM00000005511 6579 241.9 UdeM00000005511 XP\_033735922.1 36.1 382  
220 3 11 391 14 372 1.40E-60 241.9 6579 cellular

organisms;Eukaryota;Opisthokonta;Metazoa;Eumetazoa;Bilateria;Protostomia;

Spiralia;Lophotrochozoa;Mollusca;Bivalvia;Autobranchia;Pteriomorpha;Pectinida;Pectinoidea;Pectinidae;Pecten;Pecten maximus  
UdeM00000005512 6596 200.3 UdeM00000005512 XP\_045176668.1 52 348  
141 14 49 383 2 336 4.50E-48 200.3 6596 cellular  
organisms;Eukaryota;Opisthokonta;Metazoa;Eumetazoa;Bilateria;Protostomia;  
Spiralia;Lophotrochozoa;Mollusca;Bivalvia;Autobranchia;Heteroconchia;Euherodonta;Imparidentia;Venerida;Veneroidea;Veneridae;Mercenaria;Mercenaria mercenaria  
UdeM00000005514 6596 443.7 UdeM00000005514 XP\_045172355.1 86.3 255  
34 1 1 254 1 255 1.50E-121 443.7 6596 cellular  
organisms;Eukaryota;Opisthokonta;Metazoa;Eumetazoa;Bilateria;Protostomia;  
Spiralia;Lophotrochozoa;Mollusca;Bivalvia;Autobranchia;Heteroconchia;Euherodonta;Imparidentia;Venerida;Veneroidea;Veneridae;Mercenaria;Mercenaria mercenaria  
UdeM00000005515 6579 251.5 UdeM00000005515 XP\_033736320.1 57.9 214  
88 2 2 214 3 215 9.50E-64 251.5 6579 cellular  
organisms;Eukaryota;Opisthokonta;Metazoa;Eumetazoa;Bilateria;Protostomia;  
Spiralia;Lophotrochozoa;Mollusca;Bivalvia;Autobranchia;Pteriomorpha;Pectinida;Pectinoidea;Pectinidae;Pecten;Pecten maximus  
UdeM00000005516 6596 251.5 UdeM00000005516 XP\_045187784.1 46.9 258  
136 1 6 262 7 264 1.20E-63 251.5 6596 cellular  
organisms;Eukaryota;Opisthokonta;Metazoa;Eumetazoa;Bilateria;Protostomia;  
Spiralia;Lophotrochozoa;Mollusca;Bivalvia;Autobranchia;Heteroconchia;Euherodonta;Imparidentia;Venerida;Veneroidea;Veneridae;Mercenaria;Mercenaria mercenaria  
UdeM00000005517 6596 354.4 UdeM00000005517 XP\_045187784.1 41.4 461  
225 6 6 465 7 423 3.80E-94 354.4 6596 cellular  
organisms;Eukaryota;Opisthokonta;Metazoa;Eumetazoa;Bilateria;Protostomia;  
Spiralia;Lophotrochozoa;Mollusca;Bivalvia;Autobranchia;Heteroconchia;Euherodonta;Imparidentia;Venerida;Veneroidea;Veneridae;Mercenaria;Mercenaria mercenaria  
UdeM00000005518 6596 66.2 UdeM00000005518 XP\_045187784.1 66.7 45  
15 0 126 170 379 423 1.30E-07 66.2 6596 cellular  
organisms;Eukaryota;Opisthokonta;Metazoa;Eumetazoa;Bilateria;Protostomia;  
Spiralia;Lophotrochozoa;Mollusca;Bivalvia;Autobranchia;Heteroconchia;Euherodonta;Imparidentia;Venerida;Veneroidea;Veneridae;Mercenaria;Mercenaria mercenaria  
UdeM00000005519 6596 511.9 UdeM00000005519 XP\_045187705.1 58.5 463  
149 11 1 432 4 454 7.90E-142 511.9 6596 cellular  
organisms;Eukaryota;Opisthokonta;Metazoa;Eumetazoa;Bilateria;Protostomia;  
Spiralia;Lophotrochozoa;Mollusca;Bivalvia;Autobranchia;Heteroconchia;Euherodonta;Imparidentia;Venerida;Veneroidea;Veneridae;Mercenaria;Mercenaria mercenaria  
UdeM00000005520 37621 60.8 UdeM00000005520 XP\_014669305.1 46.1 76  
30 4 16 88 3840 3907 1.10E-06 60.8 37621 cellular  
organisms;Eukaryota;Opisthokonta;Metazoa;Eumetazoa;Bilateria;Protostomia;  
Ecdysozoa;Scalidophora;Priapulida;Priapulimorpha;Priapulimorphida;Priapulidae;Priapululus;Priapululus caudatus  
UdeM00000005521 6573 64.7 UdeM00000005521 XP\_021341942.1 26.5 287  
177 11 77 342 4717 4990 3.10E-07 64.7 6573 cellular  
organisms;Eukaryota;Opisthokonta;Metazoa;Eumetazoa;Bilateria;Protostomia;  
Spiralia;Lophotrochozoa;Mollusca;Bivalvia;Autobranchia;Pteriomorpha;Pectinida;Pectinoidea;Pectinidae;Mizuhopecten;Mizuhopecten yessoensis

UdeM00000005522 7574 122.9 UdeM00000005522 XP\_013386504.1 60.6 94  
 37 0 1 94 486 579 9.30E-25 122.9 7574 cellular  
 organisms;Eukaryota;Opisthokonta;Metazoa;Eumetazoa;Bilateria;Protostomia;  
 Spiralia;Lophotrochozoa;Brachiopoda;Linguliformea;Lingulata;Lingulida;Lin  
 guloidea;Lingulidae;Lingula;Lingula anatina  
 UdeM00000005524 6596 589.3 UdeM00000005524 XP\_045216363.1 25.4 6502  
 2905 205 1 6135 305 5226 5.50E-164 589.3 6596 cellular  
 organisms;Eukaryota;Opisthokonta;Metazoa;Eumetazoa;Bilateria;Protostomia;  
 Spiralia;Lophotrochozoa;Mollusca;Bivalvia;Autobranchia;Heteroconchia;Euhe  
 terodonta;Imparidentia;Venerida;Veneroidea;Veneridae;Mercenaria;Mercenari  
 a mercenaria  
 UdeM00000005525 29159 335.9 UdeM00000005525 XP\_034318058.1 73.2 220  
 59 0 1 220 78 297 3.90E-89 335.9 29159 cellular  
 organisms;Eukaryota;Opisthokonta;Metazoa;Eumetazoa;Bilateria;Protostomia;  
 Spiralia;Lophotrochozoa;Mollusca;Bivalvia;Autobranchia;Pteriormorphia;Ostr  
 eida;Ostreoidea;Ostreidae;Crassostrea;Crassostrea gigas  
 UdeM00000005526 6573 574.7 UdeM00000005526 XP\_021341930.1 58 550  
 213 4 6 553 9 542 1.30E-160 574.7 6573 cellular  
 organisms;Eukaryota;Opisthokonta;Metazoa;Eumetazoa;Bilateria;Protostomia;  
 Spiralia;Lophotrochozoa;Mollusca;Bivalvia;Autobranchia;Pteriormorphia;Pect  
 inida;Pectinoidea;Pectinidae;Mizuhopecten;Mizuhopecten yessoensis  
 UdeM00000005530 7574 89 UdeM00000005530 XP\_013400039.1 34.8 161  
 101 2 1 161 1 157 6.20E-15 89 7574 cellular  
 organisms;Eukaryota;Opisthokonta;Metazoa;Eumetazoa;Bilateria;Protostomia;  
 Spiralia;Lophotrochozoa;Brachiopoda;Linguliformea;Lingulata;Lingulida;Lin  
 guloidea;Lingulidae;Lingula;Lingula anatina  
 UdeM00000005531 6596 1754.2 UdeM00000005531 XP\_045174101.1 60.1  
 1473 538 14 7 1441 6 1467 0.00E+00 1754.2 6596  
 cellular  
 organisms;Eukaryota;Opisthokonta;Metazoa;Eumetazoa;Bilateria;Protostomia;  
 Spiralia;Lophotrochozoa;Mollusca;Bivalvia;Autobranchia;Heteroconchia;Euhe  
 terodonta;Imparidentia;Venerida;Veneroidea;Veneridae;Mercenaria;Mercenari  
 a mercenaria  
 UdeM00000005534 6573 582 UdeM00000005534 XP\_021341940.1 68.3 394  
 125 0 1 394 994 1387 5.60E-163 582 6573 cellular  
 organisms;Eukaryota;Opisthokonta;Metazoa;Eumetazoa;Bilateria;Protostomia;  
 Spiralia;Lophotrochozoa;Mollusca;Bivalvia;Autobranchia;Pteriormorphia;Pect  
 inida;Pectinoidea;Pectinidae;Mizuhopecten;Mizuhopecten yessoensis  
 UdeM00000005535 6596 372.9 UdeM00000005535 XP\_045172941.1 48.3 511  
 192 14 1 506 291 734 1.10E-99 372.9 6596 cellular  
 organisms;Eukaryota;Opisthokonta;Metazoa;Eumetazoa;Bilateria;Protostomia;  
 Spiralia;Lophotrochozoa;Mollusca;Bivalvia;Autobranchia;Heteroconchia;Euhe  
 terodonta;Imparidentia;Venerida;Veneroidea;Veneridae;Mercenaria;Mercenari  
 a mercenaria  
 UdeM00000005536 6596 311.6 UdeM00000005536 XP\_045172941.1 58.7 259  
 97 2 25 273 28 286 1.30E-81 311.6 6596 cellular  
 organisms;Eukaryota;Opisthokonta;Metazoa;Eumetazoa;Bilateria;Protostomia;  
 Spiralia;Lophotrochozoa;Mollusca;Bivalvia;Autobranchia;Heteroconchia;Euhe  
 terodonta;Imparidentia;Venerida;Veneroidea;Veneridae;Mercenaria;Mercenari  
 a mercenaria  
 UdeM00000005537 6596 486.5 UdeM00000005537 XP\_045172951.1 65.4 356  
 120 2 1 356 1 353 3.80E-134 486.5 6596 cellular  
 organisms;Eukaryota;Opisthokonta;Metazoa;Eumetazoa;Bilateria;Protostomia;  
 Spiralia;Lophotrochozoa;Mollusca;Bivalvia;Autobranchia;Heteroconchia;Euhe

terodonta;Imparidentia;Venerida;Veneroidea;Veneridae;Mercenaria;Mercenari  
 a mercenaria  
 UdeM00000005538 6596 657.9 UdeM00000005538 XP\_045172970.1 75.1 417  
 104 0 1 417 1 417 8.60E-186 657.9 6596 cellular  
 organisms;Eukaryota;Opisthokonta;Metazoa;Eumetazoa;Bilateria;Protostomia;  
 Spiralia;Lophotrochozoa;Mollusca;Bivalvia;Autobranhia;Heteroconchia;Euhe  
 terodonta;Imparidentia;Venerida;Veneroidea;Veneridae;Mercenaria;Mercenari  
 a mercenaria  
 UdeM00000005539 6579 804.3 UdeM00000005539 XP\_033747726.1 50.7 773  
 356 7 1 772 3 751 1.40E-229 804.3 6579 cellular  
 organisms;Eukaryota;Opisthokonta;Metazoa;Eumetazoa;Bilateria;Protostomia;  
 Spiralia;Lophotrochozoa;Mollusca;Bivalvia;Autobranhia;Pteriormorphia;Pect  
 inida;Pectinoidea;Pectinidae;Pecten;Pecten maximus  
 UdeM00000005540 6596 471.5 UdeM00000005540 XP\_045181100.1 71.2 302  
 87 0 1 302 1 302 8.20E-130 471.5 6596 cellular  
 organisms;Eukaryota;Opisthokonta;Metazoa;Eumetazoa;Bilateria;Protostomia;  
 Spiralia;Lophotrochozoa;Mollusca;Bivalvia;Autobranhia;Heteroconchia;Euhe  
 terodonta;Imparidentia;Venerida;Veneroidea;Veneridae;Mercenaria;Mercenari  
 a mercenaria  
 UdeM00000005541 6596 873.6 UdeM00000005541 XP\_045161126.1 65.9 633  
 214 2 1 631 1 633 1.50E-250 873.6 6596 cellular  
 organisms;Eukaryota;Opisthokonta;Metazoa;Eumetazoa;Bilateria;Protostomia;  
 Spiralia;Lophotrochozoa;Mollusca;Bivalvia;Autobranhia;Heteroconchia;Euhe  
 terodonta;Imparidentia;Venerida;Veneroidea;Veneridae;Mercenaria;Mercenari  
 a mercenaria  
 UdeM00000005542 6596 671 UdeM00000005542 XP\_045187145.1 72.7 440  
 120 0 6 445 7 446 1.00E-189 671 6596 cellular  
 organisms;Eukaryota;Opisthokonta;Metazoa;Eumetazoa;Bilateria;Protostomia;  
 Spiralia;Lophotrochozoa;Mollusca;Bivalvia;Autobranhia;Heteroconchia;Euhe  
 terodonta;Imparidentia;Venerida;Veneroidea;Veneridae;Mercenaria;Mercenari  
 a mercenaria  
 UdeM00000005543 29159 359 UdeM00000005543 XP\_011415824.1 84.6 195  
 30 0 1 195 1 195 3.80E-96 359 29159 cellular  
 organisms;Eukaryota;Opisthokonta;Metazoa;Eumetazoa;Bilateria;Protostomia;  
 Spiralia;Lophotrochozoa;Mollusca;Bivalvia;Autobranhia;Pteriormorphia;Ostr  
 eida;Ostreoidea;Ostreidae;Crassostrea;Crassostrea gigas  
 UdeM00000005544 6596 68.2 UdeM00000005544 XP\_045188034.1 38.2 102  
 51 1 6 95 84 185 7.20E-09 68.2 6596 cellular  
 organisms;Eukaryota;Opisthokonta;Metazoa;Eumetazoa;Bilateria;Protostomia;  
 Spiralia;Lophotrochozoa;Mollusca;Bivalvia;Autobranhia;Heteroconchia;Euhe  
 terodonta;Imparidentia;Venerida;Veneroidea;Veneridae;Mercenaria;Mercenari  
 a mercenaria  
 UdeM00000005545 6596 517.7 UdeM00000005545 XP\_045210495.1 50.9 686  
 308 7 84 768 117 774 2.50E-143 517.7 6596 cellular  
 organisms;Eukaryota;Opisthokonta;Metazoa;Eumetazoa;Bilateria;Protostomia;  
 Spiralia;Lophotrochozoa;Mollusca;Bivalvia;Autobranhia;Heteroconchia;Euhe  
 terodonta;Imparidentia;Venerida;Veneroidea;Veneridae;Mercenaria;Mercenari  
 a mercenaria  
 UdeM00000005546 6596 192.6 UdeM00000005546 XP\_045187378.1 67.4 135  
 44 0 6 140 5 139 1.10E-45 192.6 6596 cellular  
 organisms;Eukaryota;Opisthokonta;Metazoa;Eumetazoa;Bilateria;Protostomia;  
 Spiralia;Lophotrochozoa;Mollusca;Bivalvia;Autobranhia;Heteroconchia;Euhe  
 terodonta;Imparidentia;Venerida;Veneroidea;Veneridae;Mercenaria;Mercenari  
 a mercenaria

UdeM00000005547 29159 226.1 UdeM00000005547 XP\_034325278.1 52.7 364  
 157 4 1 358 1 355 7.10E-56 226.1 29159 cellular  
 organisms;Eukaryota;Opisthokonta;Metazoa;Eumetazoa;Bilateria;Protostomia;  
 Spiralia;Lophotrochozoa;Mollusca;Bivalvia;Autobranchia;Pteriomorphia;Ostr  
 eida;Ostreoidea;Ostreidae;Crassostrea;Crassostrea gigas  
 UdeM00000005548 6596 1417.5 UdeM00000005548 XP\_045185726.1 54.6  
 1362 555 16 2 1342 357 1676 0.00E+00 1417.5 6596  
 cellular  
 organisms;Eukaryota;Opisthokonta;Metazoa;Eumetazoa;Bilateria;Protostomia;  
 Spiralia;Lophotrochozoa;Mollusca;Bivalvia;Autobranchia;Heteroconchia;Euhe  
 terodonta;Imparidentia;Venerida;Veneroidea;Veneridae;Mercenaria;Mercenari  
 a mercenaria  
 UdeM00000005549 7739 616.7 UdeM00000005549 XP\_035665106.1 65.6 465  
 158 1 11 475 3 465 2.50E-173 616.7 7739 cellular  
 organisms;Eukaryota;Opisthokonta;Metazoa;Eumetazoa;Bilateria;Deuterostomi  
 a;Chordata;Cephalochordata;Leptocardii;Amphioxiformes;Branchiostomidae;Br  
 anchiostoma;Branchiostoma floridae  
 UdeM00000005551 6596 180.6 UdeM00000005551 XP\_045157471.1 41.6 231  
 115 2 21 249 15 227 2.40E-42 180.6 6596 cellular  
 organisms;Eukaryota;Opisthokonta;Metazoa;Eumetazoa;Bilateria;Protostomia;  
 Spiralia;Lophotrochozoa;Mollusca;Bivalvia;Autobranchia;Heteroconchia;Euhe  
 terodonta;Imparidentia;Venerida;Veneroidea;Veneridae;Mercenaria;Mercenari  
 a mercenaria  
 UdeM00000005550 6573 406 UdeM00000005550 XP\_021371146.1 46.8 417  
 222 0 74 490 46 462 6.90E-110 406 6573 cellular  
 organisms;Eukaryota;Opisthokonta;Metazoa;Eumetazoa;Bilateria;Protostomia;  
 Spiralia;Lophotrochozoa;Mollusca;Bivalvia;Autobranchia;Pteriomorphia;Pect  
 inida;Pectinoidea;Pectinidae;Mizuhopecten;Mizuhopecten yessoensis  
 UdeM00000005552 6573 258.1 UdeM00000005552 XP\_021371146.1 53.4 223  
 104 0 3 225 240 462 1.10E-65 258.1 6573 cellular  
 organisms;Eukaryota;Opisthokonta;Metazoa;Eumetazoa;Bilateria;Protostomia;  
 Spiralia;Lophotrochozoa;Mollusca;Bivalvia;Autobranchia;Pteriomorphia;Pect  
 inida;Pectinoidea;Pectinidae;Mizuhopecten;Mizuhopecten yessoensis  
 UdeM00000005554 6596 311.6 UdeM00000005554 XP\_045175380.1 43.6 431  
 236 4 1 428 16 442 1.60E-81 311.6 6596 cellular  
 organisms;Eukaryota;Opisthokonta;Metazoa;Eumetazoa;Bilateria;Protostomia;  
 Spiralia;Lophotrochozoa;Mollusca;Bivalvia;Autobranchia;Heteroconchia;Euhe  
 terodonta;Imparidentia;Venerida;Veneroidea;Veneridae;Mercenaria;Mercenari  
 a mercenaria  
 UdeM00000005555 6596 315.8 UdeM00000005555 XP\_045175380.1 43.9 433  
 236 4 26 455 14 442 8.90E-83 315.8 6596 cellular  
 organisms;Eukaryota;Opisthokonta;Metazoa;Eumetazoa;Bilateria;Protostomia;  
 Spiralia;Lophotrochozoa;Mollusca;Bivalvia;Autobranchia;Heteroconchia;Euhe  
 terodonta;Imparidentia;Venerida;Veneroidea;Veneridae;Mercenaria;Mercenari  
 a mercenaria  
 UdeM00000005556 6596 2072.4 UdeM00000005556 XP\_045186863.1 61.1  
 1808 651 18 4 1792 6 1779 0.00E+00 2072.4 6596  
 cellular  
 organisms;Eukaryota;Opisthokonta;Metazoa;Eumetazoa;Bilateria;Protostomia;  
 Spiralia;Lophotrochozoa;Mollusca;Bivalvia;Autobranchia;Heteroconchia;Euhe  
 terodonta;Imparidentia;Venerida;Veneroidea;Veneridae;Mercenaria;Mercenari  
 a mercenaria  
 UdeM00000005557 6596 866.7 UdeM00000005557 XP\_045186863.1 64.9 664  
 211 4 1 662 975 1618 1.90E-248 866.7 6596 cellular

organisms;Eukaryota;Opisthokonta;Metazoa;Eumetazoa;Bilateria;Protostomia;Spiralia;Lophotrochozoa;Mollusca;Bivalvia;Autobranchia;Heteroconchia;Euherodonta;Imparidentia;Venerida;Veneroidea;Veneridae;Mercenaria;Mercenaria mercenaria

UdeM00000005561 6596 555.1 UdeM00000005561 XP\_045190527.1 47.3 598  
289 3 1 576 36 629 1.10E-154 555.1 6596 cellular

organisms;Eukaryota;Opisthokonta;Metazoa;Eumetazoa;Bilateria;Protostomia;Spiralia;Lophotrochozoa;Mollusca;Bivalvia;Autobranchia;Heteroconchia;Euherodonta;Imparidentia;Venerida;Veneroidea;Veneridae;Mercenaria;Mercenaria mercenaria

UdeM00000005562 6573 566.6 UdeM00000005562 XP\_021344408.1 51.3 571  
262 10 25 579 28 598 3.60E-158 566.6 6573 cellular

organisms;Eukaryota;Opisthokonta;Metazoa;Eumetazoa;Bilateria;Protostomia;Spiralia;Lophotrochozoa;Mollusca;Bivalvia;Autobranchia;Pteriomorphia;Pectinida;Pectinoidea;Pectinidae;Mizuhopecten;Mizuhopecten yessoensis

UdeM00000005563 6596 423.3 UdeM00000005563 XP\_045162799.1 50 478  
219 4 10 487 13 470 4.30E-115 423.3 6596 cellular

organisms;Eukaryota;Opisthokonta;Metazoa;Eumetazoa;Bilateria;Protostomia;Spiralia;Lophotrochozoa;Mollusca;Bivalvia;Autobranchia;Heteroconchia;Euherodonta;Imparidentia;Venerida;Veneroidea;Veneridae;Mercenaria;Mercenaria mercenaria

UdeM00000005564 6579 99.4 UdeM00000005564 XP\_033734292.1 53.6 110  
38 4 183 289 205 304 8.10E-18 99.4 6579 cellular

organisms;Eukaryota;Opisthokonta;Metazoa;Eumetazoa;Bilateria;Protostomia;Spiralia;Lophotrochozoa;Mollusca;Bivalvia;Autobranchia;Pteriomorphia;Pectinida;Pectinoidea;Pectinidae;Pecten;Pecten maximus

UdeM00000005565 6565 1140.9 UdeM00000005565 XP\_022332033.1 86.8  
728 89 3 1 728 1 721 0.00E+00 1140.9 6565  
cellular

organisms;Eukaryota;Opisthokonta;Metazoa;Eumetazoa;Bilateria;Protostomia;Spiralia;Lophotrochozoa;Mollusca;Bivalvia;Autobranchia;Pteriomorphia;Ostreida;Ostreoidea;Ostreidae;Crassostrea;Crassostrea virginica

UdeM00000005567 6565 1135.9 UdeM00000005567 XP\_022332033.1 86.2  
724 93 3 1 720 1 721 0.00E+00 1135.9 6565  
cellular

organisms;Eukaryota;Opisthokonta;Metazoa;Eumetazoa;Bilateria;Protostomia;Spiralia;Lophotrochozoa;Mollusca;Bivalvia;Autobranchia;Pteriomorphia;Ostreida;Ostreoidea;Ostreidae;Crassostrea;Crassostrea virginica

UdeM00000005566 6565 1135.9 UdeM00000005566 XP\_022332033.1 86.2  
724 93 3 2 721 1 721 0.00E+00 1135.9 6565  
cellular

organisms;Eukaryota;Opisthokonta;Metazoa;Eumetazoa;Bilateria;Protostomia;Spiralia;Lophotrochozoa;Mollusca;Bivalvia;Autobranchia;Pteriomorphia;Ostreida;Ostreoidea;Ostreidae;Crassostrea;Crassostrea virginica

UdeM00000005568 6596 897.5 UdeM00000005568 XP\_045162779.1 73.5 593  
135 6 1 590 1 574 9.20E-258 897.5 6596 cellular

organisms;Eukaryota;Opisthokonta;Metazoa;Eumetazoa;Bilateria;Protostomia;Spiralia;Lophotrochozoa;Mollusca;Bivalvia;Autobranchia;Heteroconchia;Euherodonta;Imparidentia;Venerida;Veneroidea;Veneridae;Mercenaria;Mercenaria mercenaria

UdeM00000005569 6596 655.6 UdeM00000005569 XP\_045162751.1 56 587  
245 3 1 578 1 583 5.90E-185 655.6 6596 cellular

organisms;Eukaryota;Opisthokonta;Metazoa;Eumetazoa;Bilateria;Protostomia;Spiralia;Lophotrochozoa;Mollusca;Bivalvia;Autobranchia;Heteroconchia;Euherodonta

terodonta;Imparidentia;Venerida;Veneroidea;Veneridae;Mercenaria;Mercenari  
 a mercenaria  
 UdeM00000005570 6596 648.3 UdeM00000005570 XP\_045162751.1 55.4 587  
 249 3 1 578 1 583 9.40E-183 648.3 6596 cellular  
 organisms;Eukaryota;Opisthokonta;Metazoa;Eumetazoa;Bilateria;Protostomia;  
 Spiralia;Lophotrochozoa;Mollusca;Bivalvia;Autobranhia;Heteroconchia;Euhe  
 terodonta;Imparidentia;Venerida;Veneroidea;Veneridae;Mercenaria;Mercenari  
 a mercenaria  
 UdeM00000005571 6596 123.2 UdeM00000005571 XP\_045187190.1 39.2 143  
 87 0 3 145 4 146 2.70E-25 123.2 6596 cellular  
 organisms;Eukaryota;Opisthokonta;Metazoa;Eumetazoa;Bilateria;Protostomia;  
 Spiralia;Lophotrochozoa;Mollusca;Bivalvia;Autobranhia;Heteroconchia;Euhe  
 terodonta;Imparidentia;Venerida;Veneroidea;Veneridae;Mercenaria;Mercenari  
 a mercenaria  
 UdeM00000005572 6596 114.4 UdeM00000005572 XP\_045187190.1 37.1 143  
 87 1 3 142 4 146 1.20E-22 114.4 6596 cellular  
 organisms;Eukaryota;Opisthokonta;Metazoa;Eumetazoa;Bilateria;Protostomia;  
 Spiralia;Lophotrochozoa;Mollusca;Bivalvia;Autobranhia;Heteroconchia;Euhe  
 terodonta;Imparidentia;Venerida;Veneroidea;Veneridae;Mercenaria;Mercenari  
 a mercenaria  
 UdeM00000005573 6596 119 UdeM00000005573 XP\_045179362.1 41.6 149  
 84 3 12 158 64 211 5.60E-24 119 6596 cellular  
 organisms;Eukaryota;Opisthokonta;Metazoa;Eumetazoa;Bilateria;Protostomia;  
 Spiralia;Lophotrochozoa;Mollusca;Bivalvia;Autobranhia;Heteroconchia;Euhe  
 terodonta;Imparidentia;Venerida;Veneroidea;Veneridae;Mercenaria;Mercenari  
 a mercenaria  
 UdeM00000005574 6596 119 UdeM00000005574 XP\_045187191.1 39.2 143  
 87 0 3 145 4 146 5.10E-24 119 6596 cellular  
 organisms;Eukaryota;Opisthokonta;Metazoa;Eumetazoa;Bilateria;Protostomia;  
 Spiralia;Lophotrochozoa;Mollusca;Bivalvia;Autobranhia;Heteroconchia;Euhe  
 terodonta;Imparidentia;Venerida;Veneroidea;Veneridae;Mercenaria;Mercenari  
 a mercenaria  
 UdeM00000005576 400727 84 UdeM00000005576 XP\_025095657.1 44  
 91 39 2 169 252 1117 1202 6.10E-13 84 400727  
 cellular  
 organisms;Eukaryota;Opisthokonta;Metazoa;Eumetazoa;Bilateria;Protostomia;  
 Spiralia;Lophotrochozoa;Mollusca;Gastropoda;Caenogastropoda;Architaeniogl  
 ossa;Ampullarioidea;Ampullariidae;Pomacea;Pomacea canaliculata  
 UdeM00000005577 6596 180.6 UdeM00000005577 XP\_045187601.1 51.6 184  
 88 1 1 184 3 185 2.60E-42 180.6 6596 cellular  
 organisms;Eukaryota;Opisthokonta;Metazoa;Eumetazoa;Bilateria;Protostomia;  
 Spiralia;Lophotrochozoa;Mollusca;Bivalvia;Autobranhia;Heteroconchia;Euhe  
 terodonta;Imparidentia;Venerida;Veneroidea;Veneridae;Mercenaria;Mercenari  
 a mercenaria  
 UdeM00000005578 6596 749.2 UdeM00000005578 XP\_045163165.1 60.5 602  
 238 0 1 602 1 602 4.10E-213 749.2 6596 cellular  
 organisms;Eukaryota;Opisthokonta;Metazoa;Eumetazoa;Bilateria;Protostomia;  
 Spiralia;Lophotrochozoa;Mollusca;Bivalvia;Autobranhia;Heteroconchia;Euhe  
 terodonta;Imparidentia;Venerida;Veneroidea;Veneridae;Mercenaria;Mercenari  
 a mercenaria  
 UdeM00000005579 6596 117.1 UdeM00000005579 XP\_045186953.1 24.4 541  
 361 17 28 557 1 504 9.90E-23 117.1 6596 cellular  
 organisms;Eukaryota;Opisthokonta;Metazoa;Eumetazoa;Bilateria;Protostomia;  
 Spiralia;Lophotrochozoa;Mollusca;Bivalvia;Autobranhia;Heteroconchia;Euhe



terodonta;Imparidentia;Venerida;Veneroidea;Veneridae;Mercenaria;Mercenaria mercenaria  
 UdeM00000005580 6579 172.9 UdeM00000005580 XP\_033735009.1 50.2 207  
 98 4 203 408 170 372 8.30E-40 172.9 6579 cellular  
 organisms;Eukaryota;Opisthokonta;Metazoa;Eumetazoa;Bilateria;Protostomia;  
 Spiralia;Lophotrochozoa;Mollusca;Bivalvia;Autobranhia;Pteriormorphia;Pectinida;  
 Pectinoidea;Pectinidae;Pecten;Pecten maximus  
 UdeM00000005581 225164 62.4 UdeM00000005581 XP\_009055795.1 39.4  
 71 43 0 7 77 3 73 3.10E-07 62.4 225164  
 cellular  
 organisms;Eukaryota;Opisthokonta;Metazoa;Eumetazoa;Bilateria;Protostomia;  
 Spiralia;Lophotrochozoa;Mollusca;Gastropoda;Patellogastropoda;Lottioidea;  
 Lottiidae;Lottia;Lottia gigantea  
 UdeM00000005582 1735272 370.2 UdeM00000005582 XP\_041352026.1 85.9  
 249 30 3 1 246 1 247 2.10E-99 370.2 1735272  
 cellular  
 organisms;Eukaryota;Opisthokonta;Metazoa;Eumetazoa;Bilateria;Protostomia;  
 Spiralia;Lophotrochozoa;Mollusca;Gastropoda;Neomphalina;Neomphaloidea;Pel  
 tospiridae;Gigantopelta;Gigantopelta aegis  
 UdeM00000005583 400727 125.6 UdeM00000005583 XP\_025105878.1 37.6  
 194 103 5 9 192 11 196 7.00E-26 125.6 400727  
 cellular  
 organisms;Eukaryota;Opisthokonta;Metazoa;Eumetazoa;Bilateria;Protostomia;  
 Spiralia;Lophotrochozoa;Mollusca;Gastropoda;Caenogastropoda;Architaeniogl  
 ossa;Ampullarioidea;Ampullariidae;Pomacea;Pomacea canaliculata  
 UdeM00000005584 6596 1212.2 UdeM00000005584 XP\_045173723.1 84.2  
 836 128 3 9 843 6 838 0.00E+00 1212.2 6596  
 cellular  
 organisms;Eukaryota;Opisthokonta;Metazoa;Eumetazoa;Bilateria;Protostomia;  
 Spiralia;Lophotrochozoa;Mollusca;Bivalvia;Autobranhia;Heteroconchia;Euhe  
 terodonta;Imparidentia;Venerida;Veneroidea;Veneridae;Mercenaria;Mercenari  
 a mercenaria  
 UdeM00000005585 2607531 1163.7 UdeM00000005585 XP\_029642674.1  
 74.4 886 165 7 1 880 3 832 0.00E+00 1163.7  
 2607531 cellular  
 organisms;Eukaryota;Opisthokonta;Metazoa;Eumetazoa;Bilateria;Protostomia;  
 Spiralia;Lophotrochozoa;Mollusca;Cephalopoda;Coleoidea;Octopodiformes;Oct  
 opoda;Incirrata;Octopodidae;Octopus;Octopus sinensis  
 UdeM00000005589 6850 63.5 UdeM00000005589 XP\_022241012.1 42 81  
 43 1 37 113 219 299 2.60E-07 63.5 6850 cellular  
 organisms;Eukaryota;Opisthokonta;Metazoa;Eumetazoa;Bilateria;Protostomia;  
 Ecdysozoa;Panarthropoda;Arthropoda;Chelicerata;Merostomata;Xiphosura;Limu  
 lidae;Limulus;Limulus polyphemus  
 UdeM00000005590 7719 200.3 UdeM00000005590 XP\_004227365.1 53.4 161  
 75 0 6 166 2 162 1.90E-48 200.3 7719 cellular  
 organisms;Eukaryota;Opisthokonta;Metazoa;Eumetazoa;Bilateria;Deuterostomi  
 a;Chordata;Tunicata;Ascidiacea;Phlebobranhia;Cionidae;Ciona;Ciona  
 intestinalis  
 UdeM00000005591 7054 270.4 UdeM00000005591 XP\_031350480.1 53.4 219  
 101 1 1 218 249 467 2.00E-69 270.4 7054 cellular  
 organisms;Eukaryota;Opisthokonta;Metazoa;Eumetazoa;Bilateria;Protostomia;  
 Ecdysozoa;Panarthropoda;Arthropoda;Mandibulata;Pancrustacea;Hexapoda;Inse  
 cta;Dicondylia;Pterygota;Neoptera;Endopterygota;Coleoptera;Polyphaga;Elat  
 eriformia;Elateroidea;Lampyridae;Lampyrinae;Photinus;Photinus pyralis

UdeM00000005592 110368 154.8 UdeM00000005592 XP\_023937102.1 32.6  
 313 199 7 18 321 34 343 2.20E-34 154.8 110368  
 cellular  
 organisms;Eukaryota;Opisthokonta;Metazoa;Eumetazoa;Bilateria;Protostomia;  
 Ecdysozoa;Panarthropoda;Arthropoda;Mandibulata;Pancrustacea;Hexapoda;Inse  
 cta;Dicondylia;Pterygota;Neoptera;Endopterygota;Amphiesmenoptera;Lepidopt  
 era;Glossata;Neolepidoptera;Heteroneura;Ditrysia;Obtectomera;Papilionoide  
 a;Nymphalidae;Satyrinae;Satyrini;Mycalesina;Bicyclus;Bicyclus anynana  
 UdeM00000005593 110368 163.3 UdeM00000005593 XP\_023937102.1 32.5  
 335 214 7 114 439 12 343 7.50E-37 163.3 110368  
 cellular  
 organisms;Eukaryota;Opisthokonta;Metazoa;Eumetazoa;Bilateria;Protostomia;  
 Ecdysozoa;Panarthropoda;Arthropoda;Mandibulata;Pancrustacea;Hexapoda;Inse  
 cta;Dicondylia;Pterygota;Neoptera;Endopterygota;Amphiesmenoptera;Lepidopt  
 era;Glossata;Neolepidoptera;Heteroneura;Ditrysia;Obtectomera;Papilionoide  
 a;Nymphalidae;Satyrinae;Satyrini;Mycalesina;Bicyclus;Bicyclus anynana  
 UdeM00000005594 7054 445.3 UdeM00000005594 XP\_031328250.1 47.4 468  
 219 3 1 442 1 467 9.20E-122 445.3 7054 cellular  
 organisms;Eukaryota;Opisthokonta;Metazoa;Eumetazoa;Bilateria;Protostomia;  
 Ecdysozoa;Panarthropoda;Arthropoda;Mandibulata;Pancrustacea;Hexapoda;Inse  
 cta;Dicondylia;Pterygota;Neoptera;Endopterygota;Coleoptera;Polyphaga;Elat  
 eriformia;Elateroidea;Lampyridae;Lampyrinae;Photinus;Photinus pyralis  
 UdeM00000005595 6596 185.3 UdeM00000005595 XP\_045163472.1 46.6 208  
 106 2 2 209 20 222 8.20E-44 185.3 6596 cellular  
 organisms;Eukaryota;Opisthokonta;Metazoa;Eumetazoa;Bilateria;Protostomia;  
 Spiralia;Lophotrochozoa;Mollusca;Bivalvia;Autobranchia;Heteroconchia;Euhe  
 terodonta;Imparidentia;Venerida;Veneroidea;Veneridae;Mercenaria;Mercenari  
 a mercenaria  
 UdeM00000005596 400727 892.1 UdeM00000005596 XP\_025089151.1 89.5  
 505 52 1 1 505 1 504 3.30E-256 892.1 400727  
 cellular  
 organisms;Eukaryota;Opisthokonta;Metazoa;Eumetazoa;Bilateria;Protostomia;  
 Spiralia;Lophotrochozoa;Mollusca;Gastropoda;Caenogastropoda;Architaeniogl  
 ossa;Ampullarioidea;Ampullariidae;Pomacea;Pomacea canaliculata  
 UdeM00000005597 6596 579.3 UdeM00000005597 XP\_045176703.1 76.8 397  
 61 7 31 410 357 739 3.80E-162 579.3 6596 cellular  
 organisms;Eukaryota;Opisthokonta;Metazoa;Eumetazoa;Bilateria;Protostomia;  
 Spiralia;Lophotrochozoa;Mollusca;Bivalvia;Autobranchia;Heteroconchia;Euhe  
 terodonta;Imparidentia;Venerida;Veneroidea;Veneridae;Mercenaria;Mercenari  
 a mercenaria  
 UdeM00000005598 6596 570.5 UdeM00000005598 XP\_045176713.1 80.3 370  
 52 7 31 383 357 722 1.60E-159 570.5 6596 cellular  
 organisms;Eukaryota;Opisthokonta;Metazoa;Eumetazoa;Bilateria;Protostomia;  
 Spiralia;Lophotrochozoa;Mollusca;Bivalvia;Autobranchia;Heteroconchia;Euhe  
 terodonta;Imparidentia;Venerida;Veneroidea;Veneridae;Mercenaria;Mercenari  
 a mercenaria  
 UdeM00000005599 29159 77 UdeM00000005599 XP\_011451629.2 38.8 121  
 71 3 7 126 13 131 1.90E-11 77 29159 cellular  
 organisms;Eukaryota;Opisthokonta;Metazoa;Eumetazoa;Bilateria;Protostomia;  
 Spiralia;Lophotrochozoa;Mollusca;Bivalvia;Autobranchia;Pteriomorphia;Ostr  
 eida;Ostreoidea;Ostreidae;Crassostrea;Crassostrea gigas  
 UdeM00000005600 29159 77 UdeM00000005600 XP\_011451629.2 38.8 121  
 71 3 3 122 13 131 1.90E-11 77 29159 cellular  
 organisms;Eukaryota;Opisthokonta;Metazoa;Eumetazoa;Bilateria;Protostomia;

Spiralia; Lophotrochozoa; Mollusca; Bivalvia; Autobranchia; Pteriomorpha; Ostr  
eida; Ostreoida; Ostreidae; Crassostrea; Crassostrea gigas  
UdeM00000005601 6596 66.6 UdeM00000005601 XP\_045193083.1 32.1 131  
83 2 1 127 1 129 2.60E-08 66.6 6596 cellular  
organisms; Eukaryota; Opisthokonta; Metazoa; Eumetazoa; Bilateria; Protostomia;  
Spiralia; Lophotrochozoa; Mollusca; Bivalvia; Autobranchia; Heteroconchia; Eue  
terodonta; Imparidentia; Venerida; Veneroidea; Veneridae; Mercenaria; Mercenari  
a mercenaria  
UdeM00000005602 29159 75.1 UdeM00000005602 XP\_011451629.2 39.7 121  
70 3 7 126 13 131 7.30E-11 75.1 29159 cellular  
organisms; Eukaryota; Opisthokonta; Metazoa; Eumetazoa; Bilateria; Protostomia;  
Spiralia; Lophotrochozoa; Mollusca; Bivalvia; Autobranchia; Pteriomorpha; Ostr  
eida; Ostreoida; Ostreidae; Crassostrea; Crassostrea gigas  
UdeM00000005603 6596 69.7 UdeM00000005603 XP\_045214773.1 33.3 126  
84 0 1 126 1 126 3.10E-09 69.7 6596 cellular  
organisms; Eukaryota; Opisthokonta; Metazoa; Eumetazoa; Bilateria; Protostomia;  
Spiralia; Lophotrochozoa; Mollusca; Bivalvia; Autobranchia; Heteroconchia; Eue  
terodonta; Imparidentia; Venerida; Veneroidea; Veneridae; Mercenaria; Mercenari  
a mercenaria  
UdeM00000005604 6579 68.2 UdeM00000005604 XP\_033732683.1 35.8 120  
74 1 3 122 13 129 8.60E-09 68.2 6579 cellular  
organisms; Eukaryota; Opisthokonta; Metazoa; Eumetazoa; Bilateria; Protostomia;  
Spiralia; Lophotrochozoa; Mollusca; Bivalvia; Autobranchia; Pteriomorpha; Pect  
inida; Pectinoidea; Pectinidae; Pecten; Pecten maximus  
UdeM00000005605 6596 72 UdeM00000005605 XP\_045214773.1 34.1 126  
83 0 1 126 1 126 6.20E-10 72 6596 cellular  
organisms; Eukaryota; Opisthokonta; Metazoa; Eumetazoa; Bilateria; Protostomia;  
Spiralia; Lophotrochozoa; Mollusca; Bivalvia; Autobranchia; Heteroconchia; Eue  
terodonta; Imparidentia; Venerida; Veneroidea; Veneridae; Mercenaria; Mercenari  
a mercenaria  
UdeM00000005606 29159 71.6 UdeM00000005606 XP\_011451629.2 38.5 122  
70 4 3 122 13 131 7.80E-10 71.6 29159 cellular  
organisms; Eukaryota; Opisthokonta; Metazoa; Eumetazoa; Bilateria; Protostomia;  
Spiralia; Lophotrochozoa; Mollusca; Bivalvia; Autobranchia; Pteriomorpha; Ostr  
eida; Ostreoida; Ostreidae; Crassostrea; Crassostrea gigas  
UdeM00000005607 6579 436 UdeM00000005607 XP\_033733997.1 61.9 362  
102 6 1 356 1 332 4.70E-119 436 6579 cellular  
organisms; Eukaryota; Opisthokonta; Metazoa; Eumetazoa; Bilateria; Protostomia;  
Spiralia; Lophotrochozoa; Mollusca; Bivalvia; Autobranchia; Pteriomorpha; Pect  
inida; Pectinoidea; Pectinidae; Pecten; Pecten maximus  
UdeM00000005608 29159 172.2 UdeM00000005608 XP\_011449844.1 23.1 711  
477 20 8 688 5 675 2.40E-39 172.2 29159 cellular  
organisms; Eukaryota; Opisthokonta; Metazoa; Eumetazoa; Bilateria; Protostomia;  
Spiralia; Lophotrochozoa; Mollusca; Bivalvia; Autobranchia; Pteriomorpha; Ostr  
eida; Ostreoida; Ostreidae; Crassostrea; Crassostrea gigas  
UdeM00000005611 29159 100.9 UdeM00000005611 XP\_034308868.1 30.5 167  
113 1 21 187 20 183 4.80E-18 100.9 29159 cellular  
organisms; Eukaryota; Opisthokonta; Metazoa; Eumetazoa; Bilateria; Protostomia;  
Spiralia; Lophotrochozoa; Mollusca; Bivalvia; Autobranchia; Pteriomorpha; Ostr  
eida; Ostreoida; Ostreidae; Crassostrea; Crassostrea gigas  
UdeM00000005613 6596 436.8 UdeM00000005613 XP\_045161383.1 45.6 485  
236 5 1 485 1 457 3.70E-119 436.8 6596 cellular  
organisms; Eukaryota; Opisthokonta; Metazoa; Eumetazoa; Bilateria; Protostomia;  
Spiralia; Lophotrochozoa; Mollusca; Bivalvia; Autobranchia; Heteroconchia; Eue

terodonta;Imparidentia;Venerida;Veneroidea;Veneridae;Mercenaria;Mercenari  
 a mercenaria  
 UdeM00000005614 6579 257.3 UdeM00000005614 XP\_033735746.1 39 554  
 251 15 309 854 337 811 6.90E-65 257.3 6579 cellular  
 organisms;Eukaryota;Opisthokonta;Metazoa;Eumetazoa;Bilateria;Protostomia;  
 Spiralia;Lophotrochozoa;Mollusca;Bivalvia;Autobranhia;Pteriormorphia;Pect  
 inida;Pectinoidea;Pectinidae;Pecten;Pecten maximus  
 UdeM00000005615 6596 291.6 UdeM00000005615 XP\_045187156.1 80.9 178  
 34 0 1 178 1 178 6.90E-76 291.6 6596 cellular  
 organisms;Eukaryota;Opisthokonta;Metazoa;Eumetazoa;Bilateria;Protostomia;  
 Spiralia;Lophotrochozoa;Mollusca;Bivalvia;Autobranhia;Heteroconchia;Euhe  
 terodonta;Imparidentia;Venerida;Veneroidea;Veneridae;Mercenaria;Mercenari  
 a mercenaria  
 UdeM00000005616 6596 525 UdeM00000005616 XP\_045187156.1 70.3 357  
 105 1 15 371 188 543 4.50E-145 525 6596 cellular  
 organisms;Eukaryota;Opisthokonta;Metazoa;Eumetazoa;Bilateria;Protostomia;  
 Spiralia;Lophotrochozoa;Mollusca;Bivalvia;Autobranhia;Heteroconchia;Euhe  
 terodonta;Imparidentia;Venerida;Veneroidea;Veneridae;Mercenaria;Mercenari  
 a mercenaria  
 UdeM00000005616 6596 273.5 UdeM00000005616 XP\_045187156.1 78.4 167  
 36 0 2010 2176 547 713 2.40E-69 273.5 6596 cellular  
 organisms;Eukaryota;Opisthokonta;Metazoa;Eumetazoa;Bilateria;Protostomia;  
 Spiralia;Lophotrochozoa;Mollusca;Bivalvia;Autobranhia;Heteroconchia;Euhe  
 terodonta;Imparidentia;Venerida;Veneroidea;Veneridae;Mercenaria;Mercenari  
 a mercenaria  
 UdeM00000005617 6596 82 UdeM00000005617 XP\_045187159.1 31.2 237  
 125 7 107 339 96 298 2.10E-12 82 6596 cellular  
 organisms;Eukaryota;Opisthokonta;Metazoa;Eumetazoa;Bilateria;Protostomia;  
 Spiralia;Lophotrochozoa;Mollusca;Bivalvia;Autobranhia;Heteroconchia;Euhe  
 terodonta;Imparidentia;Venerida;Veneroidea;Veneridae;Mercenaria;Mercenari  
 a mercenaria  
 UdeM00000005618 6596 975.7 UdeM00000005618 XP\_045187162.1 55.8 1015  
 348 28 1 958 1 971 4.20E-281 975.7 6596 cellular  
 organisms;Eukaryota;Opisthokonta;Metazoa;Eumetazoa;Bilateria;Protostomia;  
 Spiralia;Lophotrochozoa;Mollusca;Bivalvia;Autobranhia;Heteroconchia;Euhe  
 terodonta;Imparidentia;Venerida;Veneroidea;Veneridae;Mercenaria;Mercenari  
 a mercenaria  
 UdeM00000005619 6596 1219.9 UdeM00000005619 XP\_045187161.1 38.1  
 1902 1048 33 23 1880 20 1836 0.00E+00 1219.9 6596  
 cellular  
 organisms;Eukaryota;Opisthokonta;Metazoa;Eumetazoa;Bilateria;Protostomia;  
 Spiralia;Lophotrochozoa;Mollusca;Bivalvia;Autobranhia;Heteroconchia;Euhe  
 terodonta;Imparidentia;Venerida;Veneroidea;Veneridae;Mercenaria;Mercenari  
 a mercenaria  
 UdeM00000005620 6596 1206.8 UdeM00000005620 XP\_045187161.1 37.9  
 1902 1045 34 23 1873 20 1836 0.00E+00 1206.8 6596  
 cellular  
 organisms;Eukaryota;Opisthokonta;Metazoa;Eumetazoa;Bilateria;Protostomia;  
 Spiralia;Lophotrochozoa;Mollusca;Bivalvia;Autobranhia;Heteroconchia;Euhe  
 terodonta;Imparidentia;Venerida;Veneroidea;Veneridae;Mercenaria;Mercenari  
 a mercenaria  
 UdeM00000005621 6596 856.3 UdeM00000005621 XP\_045187163.1 61.9 666  
 246 4 1 658 1 666 2.70E-245 856.3 6596 cellular  
 organisms;Eukaryota;Opisthokonta;Metazoa;Eumetazoa;Bilateria;Protostomia;

Spiralia;Lophotrochozoa;Mollusca;Bivalvia;Autobranchia;Heteroconchia;Euherodonta;Imparidentia;Venerida;Veneroidea;Veneridae;Mercenaria;Mercenaria mercenaria

UdeM00000005622 400727 270.4 UdeM00000005622 XP\_025105951.1 32.7  
502 321 12 77 569 92 585 5.40E-69 270.4 400727  
cellular

organisms;Eukaryota;Opisthokonta;Metazoa;Eumetazoa;Bilateria;Protostomia;Spiralia;Lophotrochozoa;Mollusca;Gastropoda;Caenogastropoda;Architaenioglossa;Ampullarioidea;Ampullariidae;Pomacea;Pomacea canaliculata

UdeM00000005623 6596 578.9 UdeM00000005623 XP\_045187173.1 66.9 444  
142 2 58 500 14 453 6.10E-162 578.9 6596 cellular

organisms;Eukaryota;Opisthokonta;Metazoa;Eumetazoa;Bilateria;Protostomia;Spiralia;Lophotrochozoa;Mollusca;Bivalvia;Autobranchia;Heteroconchia;Euherodonta;Imparidentia;Venerida;Veneroidea;Veneridae;Mercenaria;Mercenaria mercenaria

UdeM00000005624 1735272 451.1 UdeM00000005624 XP\_041355157.1 87.8  
246 30 0 1 246 1 246 9.40E-124 451.1 1735272  
cellular

organisms;Eukaryota;Opisthokonta;Metazoa;Eumetazoa;Bilateria;Protostomia;Spiralia;Lophotrochozoa;Mollusca;Gastropoda;Neomphalina;Neomphaloidea;Peltospiridae;Gigantopelta;Gigantopelta aegis

UdeM00000005625 6596 684.5 UdeM00000005625 XP\_045187176.1 76.7 604  
99 7 1 578 1 588 1.20E-193 684.5 6596 cellular

organisms;Eukaryota;Opisthokonta;Metazoa;Eumetazoa;Bilateria;Protostomia;Spiralia;Lophotrochozoa;Mollusca;Bivalvia;Autobranchia;Heteroconchia;Euherodonta;Imparidentia;Venerida;Veneroidea;Veneridae;Mercenaria;Mercenaria mercenaria

UdeM00000005626 6596 682.6 UdeM00000005626 XP\_045187175.1 76.4 609  
100 8 1 581 1 593 4.50E-193 682.6 6596 cellular

organisms;Eukaryota;Opisthokonta;Metazoa;Eumetazoa;Bilateria;Protostomia;Spiralia;Lophotrochozoa;Mollusca;Bivalvia;Autobranchia;Heteroconchia;Euherodonta;Imparidentia;Venerida;Veneroidea;Veneridae;Mercenaria;Mercenaria mercenaria

UdeM00000005627 7574 110.2 UdeM00000005627 XP\_013408026.1 32.9 164  
98 4 392 543 415 578 8.70E-21 110.2 7574 cellular

organisms;Eukaryota;Opisthokonta;Metazoa;Eumetazoa;Bilateria;Protostomia;Spiralia;Lophotrochozoa;Brachiopoda;Linguliformea;Lingulata;Lingulida;Linguloidea;Lingulidae;Lingula;Lingula anatina

UdeM00000005628 6573 146.4 UdeM00000005628 XP\_021377785.1 27.4 343  
213 6 40 354 15 349 7.10E-32 146.4 6573 cellular

organisms;Eukaryota;Opisthokonta;Metazoa;Eumetazoa;Bilateria;Protostomia;Spiralia;Lophotrochozoa;Mollusca;Bivalvia;Autobranchia;Pteriomorphia;Pectinida;Pectinoidea;Pectinidae;Mizuhopecten;Mizuhopecten yessoensis

UdeM00000005629 37621 151.4 UdeM00000005629 XP\_014678815.1 36 261  
144 5 47 293 38 289 1.80E-33 151.4 37621 cellular

organisms;Eukaryota;Opisthokonta;Metazoa;Eumetazoa;Bilateria;Protostomia;Ecdysozoa;Scalidophora;Priapulida;Priapulimorpha;Priapulimorphida;Priapulidae;Priapululus;Priapululus caudatus

UdeM00000005630 2652724 233.8 UdeM00000005630 XP\_020903442.1 41.7  
300 153 5 10 301 290 575 3.00E-58 233.8 2652724  
cellular

organisms;Eukaryota;Opisthokonta;Metazoa;Eumetazoa;Cnidaria;Anthozoa;Hexacorallia;Actiniaria;Aiptasiidae;Exaiptasia;Exaiptasia diaphana

UdeM00000005631 2652724 155.2 UdeM00000005631 XP\_020903442.1 43.7  
 199 88 1 9 183 2 200 1.00E-34 155.2 2652724  
 cellular  
 organisms;Eukaryota;Opisthokonta;Metazoa;Eumetazoa;Cnidaria;Anthozoa;Hexa  
 corallia;Actiniaria;Aiptasiidae;Exaiptasia;Exaiptasia diaphana  
 UdeM00000005632 7741 234.2 UdeM00000005632 XP\_019636537.1 24.7 960  
 622 29 120 1017 65 985 7.50E-58 234.2 7741 cellular  
 organisms;Eukaryota;Opisthokonta;Metazoa;Eumetazoa;Bilateria;Deuterostomi  
 a;Chordata;Cephalochordata;Leptocardii;Amphioxiformes;Branchiostomidae;Br  
 anchiostoma;Branchiostoma belcheri  
 UdeM00000005633 7739 110.2 UdeM00000005633 XP\_035666835.1 33.7 163  
 96 5 54 204 368 530 3.40E-21 110.2 7739 cellular  
 organisms;Eukaryota;Opisthokonta;Metazoa;Eumetazoa;Bilateria;Deuterostomi  
 a;Chordata;Cephalochordata;Leptocardii;Amphioxiformes;Branchiostomidae;Br  
 anchiostoma;Branchiostoma floridae  
 UdeM00000005634 7739 110.2 UdeM00000005634 XP\_035666835.1 33.7 163  
 96 5 164 314 368 530 5.20E-21 110.2 7739 cellular  
 organisms;Eukaryota;Opisthokonta;Metazoa;Eumetazoa;Bilateria;Deuterostomi  
 a;Chordata;Cephalochordata;Leptocardii;Amphioxiformes;Branchiostomidae;Br  
 anchiostoma;Branchiostoma floridae  
 UdeM00000005635 10224 165.6 UdeM00000005635 XP\_006813734.1 28.8 333  
 224 7 122 445 69 397 1.50E-37 165.6 10224 cellular  
 organisms;Eukaryota;Opisthokonta;Metazoa;Eumetazoa;Bilateria;Deuterostomi  
 a;Hemichordata;Enteropneusta;Harrimaniidae;Saccoglossus;Saccoglossus  
 kowalevskii  
 UdeM00000005636 45264 108.6 UdeM00000005636 XP\_044165179.1 34.5 174  
 111 2 1 172 239 411 9.30E-21 108.6 45264 cellular  
 organisms;Eukaryota;Opisthokonta;Metazoa;Eumetazoa;Cnidaria;Anthozoa;Hexa  
 corallia;Scleractinia;Astrocoeniina;Acroporidae;Acropora;Acropora  
 millepora  
 UdeM00000005637 2652724 164.1 UdeM00000005637 XP\_020903442.1 42.7  
 199 113 1 9 206 2 200 2.10E-37 164.1 2652724  
 cellular  
 organisms;Eukaryota;Opisthokonta;Metazoa;Eumetazoa;Cnidaria;Anthozoa;Hexa  
 corallia;Actiniaria;Aiptasiidae;Exaiptasia;Exaiptasia diaphana  
 UdeM00000005638 7741 197.2 UdeM00000005638 XP\_019640989.1 21.6 916  
 558 28 119 893 102 998 8.90E-47 197.2 7741 cellular  
 organisms;Eukaryota;Opisthokonta;Metazoa;Eumetazoa;Bilateria;Deuterostomi  
 a;Chordata;Cephalochordata;Leptocardii;Amphioxiformes;Branchiostomidae;Br  
 anchiostoma;Branchiostoma belcheri  
 UdeM00000005640 7574 99.8 UdeM00000005640 XP\_013408026.1 32.4 148  
 91 3 1 139 431 578 3.20E-18 99.8 7574 cellular  
 organisms;Eukaryota;Opisthokonta;Metazoa;Eumetazoa;Bilateria;Protostomia;  
 Spiralia;Lophotrochozoa;Brachiopoda;Linguliformea;Lingulata;Lingulida;Lin  
 guloidea;Lingulidae;Lingula;Lingula anatina  
 UdeM00000005641 7741 191 UdeM00000005641 XP\_019640989.1 22.2 863  
 592 24 1 805 157 998 5.80E-45 191 7741 cellular  
 organisms;Eukaryota;Opisthokonta;Metazoa;Eumetazoa;Bilateria;Deuterostomi  
 a;Chordata;Cephalochordata;Leptocardii;Amphioxiformes;Branchiostomidae;Br  
 anchiostoma;Branchiostoma belcheri  
 UdeM00000005642 6596 602.4 UdeM00000005642 XP\_045187175.1 76.3 548  
 110 7 69 612 62 593 6.20E-169 602.4 6596 cellular  
 organisms;Eukaryota;Opisthokonta;Metazoa;Eumetazoa;Bilateria;Protostomia;  
 Spiralia;Lophotrochozoa;Mollusca;Bivalvia;Autobranchia;Heteroconchia;Euhe

terodonta;Imparidentia;Venerida;Veneroidea;Veneridae;Mercenaria;Mercenaria mercenaria  
 UdeM00000005643 7741 171.8 UdeM00000005643 XP\_019640989.1 25.2 433  
 292 11 107 512 110 537 3.10E-39 171.8 7741 cellular  
 organisms;Eukaryota;Opisthokonta;Metazoa;Eumetazoa;Bilateria;Deuterostomia;Chordata;Cephalochordata;Leptocardii;Amphioxiformes;Branchiostomidae;Branchiostoma;Branchiostoma belcheri  
 UdeM00000005644 6596 79.3 UdeM00000005644 XP\_045181558.1 36 136  
 86 1 21 155 4 139 5.50E-12 79.3 6596 cellular  
 organisms;Eukaryota;Opisthokonta;Metazoa;Eumetazoa;Bilateria;Protostomia;Spiralia;Lophotrochozoa;Mollusca;Bivalvia;Autobranchia;Heteroconchia;Euheterodonta;Imparidentia;Venerida;Veneroidea;Veneridae;Mercenaria;Mercenaria mercenaria  
 UdeM000000044445 50429 156.4 UdeM000000044445 XP\_022809021.1 74.8 107  
 27 0 6 112 243 349 2.80E-35 156.4 50429 cellular  
 organisms;Eukaryota;Opisthokonta;Metazoa;Eumetazoa;Cnidaria;Anthozoa;Hexacorallia;Scleractinia;Astrocoeniina;Pocilloporidae;Stylophora;Stylophora pistillata  
 UdeM000000044446 69820 532.3 UdeM000000044446 XP\_022835978.1 71.2 368  
 106 0 2 369 20 387 4.80E-148 532.3 69820 cellular  
 organisms;Eukaryota;Opisthokonta;Metazoa;Eumetazoa;Bilateria;Protostomia;Ecdysozoa;Panarthropoda;Arthropoda;Mandibulata;Pancrustacea;Hexapoda;Insecta;Dicondylia;Pterygota;Neoptera;Endopterygota;Amphiesmenoptera;Lepidoptera;Glossata;Neolepidoptera;Heteroneura;Ditrysia;Obtectomera;Noctuoidea;Noctuidae;Amphipyrrinae;Spodoptera;Spodoptera litura  
 UdeM000000044447 116153 99 UdeM000000044447 XP\_019872652.1 43  
 100 55 1 2 99 204 303 3.70E-18 99 116153  
 cellular  
 organisms;Eukaryota;Opisthokonta;Metazoa;Eumetazoa;Bilateria;Protostomia;Ecdysozoa;Panarthropoda;Arthropoda;Mandibulata;Pancrustacea;Hexapoda;Insecta;Dicondylia;Pterygota;Neoptera;Endopterygota;Coleoptera;Polyphaga;Cucujiformia;Cucujoidea;Nitidulidae;Nitidulinae;Aethina;Aethina tumida  
 UdeM00000010422 6596 124.4 UdeM00000010422 XP\_045206291.1 41.1 175  
 92 2 32 199 111 281 1.70E-25 124.4 6596 cellular  
 organisms;Eukaryota;Opisthokonta;Metazoa;Eumetazoa;Bilateria;Protostomia;Spiralia;Lophotrochozoa;Mollusca;Bivalvia;Autobranchia;Heteroconchia;Euheterodonta;Imparidentia;Venerida;Veneroidea;Veneridae;Mercenaria;Mercenaria mercenaria  
 UdeM00000010423 6596 190.3 UdeM00000010423 XP\_045169782.1 41.8 225  
 110 2 1 204 56 280 2.60E-45 190.3 6596 cellular  
 organisms;Eukaryota;Opisthokonta;Metazoa;Eumetazoa;Bilateria;Protostomia;Spiralia;Lophotrochozoa;Mollusca;Bivalvia;Autobranchia;Heteroconchia;Euheterodonta;Imparidentia;Venerida;Veneroidea;Veneridae;Mercenaria;Mercenaria mercenaria  
 UdeM00000010424 50390 450.3 UdeM00000010424 XP\_028142380.1 58.3 324  
 135 0 2 325 77 400 2.30E-123 450.3 50390 cellular  
 organisms;Eukaryota;Opisthokonta;Metazoa;Eumetazoa;Bilateria;Protostomia;Ecdysozoa;Panarthropoda;Arthropoda;Mandibulata;Pancrustacea;Hexapoda;Insecta;Dicondylia;Pterygota;Neoptera;Endopterygota;Coleoptera;Polyphaga;Cucujiformia;Chrysomeloidea;Chrysomelidae;Galerucinae;Luperini;Diabroticina;Diabroticites;Diabrotica;Diabrotica virgifera;Diabrotica virgifera  
 UdeM00000010426 6565 66.2 UdeM00000010426 XP\_022299602.1 40.2 92  
 47 3 1 92 80 163 1.30E-07 66.2 6565 cellular

organisms;Eukaryota;Opisthokonta;Metazoa;Eumetazoa;Bilateria;Protostomia;  
Spiralia;Lophotrochozoa;Mollusca;Bivalvia;Autobranchia;Pteriormorphia;Ostr  
eida;Ostreoidea;Ostreidae;Crassostrea;Crassostrea virginica  
UdeM00000010427 6596 214.5 UdeM00000010427 XP\_045177776.1 41.6 262  
147 3 182 442 700 956 3.60E-52 214.5 6596 cellular  
organisms;Eukaryota;Opisthokonta;Metazoa;Eumetazoa;Bilateria;Protostomia;  
Spiralia;Lophotrochozoa;Mollusca;Bivalvia;Autobranchia;Heteroconchia;Euhe  
terodonta;Imparidentia;Venerida;Veneroidea;Veneridae;Mercenaria;Mercenari  
a mercenaria  
UdeM00000010428 6573 117.9 UdeM00000010428 XP\_021371412.1 52.6 97  
45 1 2 98 1012 1107 9.10E-24 117.9 6573 cellular  
organisms;Eukaryota;Opisthokonta;Metazoa;Eumetazoa;Bilateria;Protostomia;  
Spiralia;Lophotrochozoa;Mollusca;Bivalvia;Autobranchia;Pteriormorphia;Pect  
inida;Pectinoidea;Pectinidae;Mizuhopecten;Mizuhopecten yessoensis  
UdeM00000010429 6565 126.3 UdeM00000010429 XP\_022297447.1 39.3 183  
55 2 40 166 38 220 5.50E-26 126.3 6565 cellular  
organisms;Eukaryota;Opisthokonta;Metazoa;Eumetazoa;Bilateria;Protostomia;  
Spiralia;Lophotrochozoa;Mollusca;Bivalvia;Autobranchia;Pteriormorphia;Ostr  
eida;Ostreoidea;Ostreidae;Crassostrea;Crassostrea virginica  
UdeM00000010430 50390 440.3 UdeM00000010430 XP\_028154228.1 54.4 344  
142 1 2 345 228 556 2.30E-120 440.3 50390 cellular  
organisms;Eukaryota;Opisthokonta;Metazoa;Eumetazoa;Bilateria;Protostomia;  
Ecdysozoa;Panarthropoda;Arthropoda;Mandibulata;Pancrustacea;Hexapoda;Inse  
cta;Dicondylia;Pterygota;Neoptera;Endopterygota;Coleoptera;Polyphaga;Cucu  
jiformia;Chrysomeloidea;Chrysomelidae;Galerucinae;Luperini;Diabroticina;D  
iabroticites;Diabrotica;Diabrotica virgifera;Diabrotica virgifera  
virgifera  
UdeM00000010431 50390 204.1 UdeM00000010431 XP\_028153657.1 68.8 128  
40 0 2 129 34 161 1.00E-49 204.1 50390 cellular  
organisms;Eukaryota;Opisthokonta;Metazoa;Eumetazoa;Bilateria;Protostomia;  
Ecdysozoa;Panarthropoda;Arthropoda;Mandibulata;Pancrustacea;Hexapoda;Inse  
cta;Dicondylia;Pterygota;Neoptera;Endopterygota;Coleoptera;Polyphaga;Cucu  
jiformia;Chrysomeloidea;Chrysomelidae;Galerucinae;Luperini;Diabroticina;D  
iabroticites;Diabrotica;Diabrotica virgifera;Diabrotica virgifera  
virgifera  
UdeM00000010432 50390 533.5 UdeM00000010432 XP\_028148951.1 56.8 410  
177 0 2 411 400 809 2.40E-148 533.5 50390 cellular  
organisms;Eukaryota;Opisthokonta;Metazoa;Eumetazoa;Bilateria;Protostomia;  
Ecdysozoa;Panarthropoda;Arthropoda;Mandibulata;Pancrustacea;Hexapoda;Inse  
cta;Dicondylia;Pterygota;Neoptera;Endopterygota;Coleoptera;Polyphaga;Cucu  
jiformia;Chrysomeloidea;Chrysomelidae;Galerucinae;Luperini;Diabroticina;D  
iabroticites;Diabrotica;Diabrotica virgifera;Diabrotica virgifera  
virgifera  
UdeM00000010433 29159 209.1 UdeM00000010433 XP\_034313077.1 77.3 119  
27 0 1 119 1 119 4.50E-51 209.1 29159 cellular  
organisms;Eukaryota;Opisthokonta;Metazoa;Eumetazoa;Bilateria;Protostomia;  
Spiralia;Lophotrochozoa;Mollusca;Bivalvia;Autobranchia;Pteriormorphia;Ostr  
eida;Ostreoidea;Ostreidae;Crassostrea;Crassostrea gigas  
UdeM00000010434 29159 60.1 UdeM00000010434 XP\_034319277.1 44.2 77  
38 1 1 72 42 118 1.70E-06 60.1 29159 cellular  
organisms;Eukaryota;Opisthokonta;Metazoa;Eumetazoa;Bilateria;Protostomia;  
Spiralia;Lophotrochozoa;Mollusca;Bivalvia;Autobranchia;Pteriormorphia;Ostr  
eida;Ostreoidea;Ostreidae;Crassostrea;Crassostrea gigas



UdeM00000010435 6565 125.9 UdeM00000010435 XP\_022306621.1 77.5 71  
 16 0 1 71 1 71 2.00E-26 125.9 6565 cellular  
 organisms;Eukaryota;Opisthokonta;Metazoa;Eumetazoa;Bilateria;Protostomia;  
 Spiralia;Lophotrochozoa;Mollusca;Bivalvia;Autobranchia;Pteriormorphia;Ostr  
 eida;Ostreoidea;Ostreidae;Crassostrea;Crassostrea virginica  
 UdeM00000010436 50390 562.8 UdeM00000010436 XP\_028142380.1 59 388  
 159 0 2 389 49 436 3.50E-157 562.8 50390 cellular  
 organisms;Eukaryota;Opisthokonta;Metazoa;Eumetazoa;Bilateria;Protostomia;  
 Ecdysozoa;Panarthropoda;Arthropoda;Mandibulata;Pancrustacea;Hexapoda;Inse  
 cta;Dicondylia;Pterygota;Neoptera;Endopterygota;Coleoptera;Polyphaga;Cucu  
 jiformia;Chrysomeloidea;Chrysomelidae;Galerucinae;Luperini;Diabroticina;D  
 iabroticites;Diabrotica;Diabrotica virgifera;Diabrotica virgifera  
 virgifera  
 UdeM00000010437 29159 441 UdeM00000010437 XP\_034313077.1 63.5 323  
 118 0 1 323 1 323 1.30E-120 441 29159 cellular  
 organisms;Eukaryota;Opisthokonta;Metazoa;Eumetazoa;Bilateria;Protostomia;  
 Spiralia;Lophotrochozoa;Mollusca;Bivalvia;Autobranchia;Pteriormorphia;Ostr  
 eida;Ostreoidea;Ostreidae;Crassostrea;Crassostrea gigas  
 UdeM00000010439 1735272 410.2 UdeM00000010439 XP\_041372570.1 57.8  
 313 131 1 1 312 94 406 2.30E-111 410.2 1735272  
 cellular  
 organisms;Eukaryota;Opisthokonta;Metazoa;Eumetazoa;Bilateria;Protostomia;  
 Spiralia;Lophotrochozoa;Mollusca;Gastropoda;Neomphalina;Neomphaloidea;Pel  
 tospiridae;Gigantopelta;Gigantopelta aegis  
 UdeM00000010440 50390 509.2 UdeM00000010440 XP\_028154228.1 60.2 354  
 141 0 2 355 116 469 4.20E-141 509.2 50390 cellular  
 organisms;Eukaryota;Opisthokonta;Metazoa;Eumetazoa;Bilateria;Protostomia;  
 Ecdysozoa;Panarthropoda;Arthropoda;Mandibulata;Pancrustacea;Hexapoda;Inse  
 cta;Dicondylia;Pterygota;Neoptera;Endopterygota;Coleoptera;Polyphaga;Cucu  
 jiformia;Chrysomeloidea;Chrysomelidae;Galerucinae;Luperini;Diabroticina;D  
 iabroticites;Diabrotica;Diabrotica virgifera;Diabrotica virgifera  
 virgifera  
 UdeM00000010442 1735272 152.1 UdeM00000010442 XP\_041366822.1 39.2  
 232 134 3 354 579 3 233 4.10E-33 152.1 1735272  
 cellular  
 organisms;Eukaryota;Opisthokonta;Metazoa;Eumetazoa;Bilateria;Protostomia;  
 Spiralia;Lophotrochozoa;Mollusca;Gastropoda;Neomphalina;Neomphaloidea;Pel  
 tospiridae;Gigantopelta;Gigantopelta aegis  
 UdeM00000010443 6565 472.6 UdeM00000010443 XP\_022309566.1 61.2 348  
 132 2 1 346 643 989 4.20E-130 472.6 6565 cellular  
 organisms;Eukaryota;Opisthokonta;Metazoa;Eumetazoa;Bilateria;Protostomia;  
 Spiralia;Lophotrochozoa;Mollusca;Bivalvia;Autobranchia;Pteriormorphia;Ostr  
 eida;Ostreoidea;Ostreidae;Crassostrea;Crassostrea virginica  
 UdeM00000010444 6087 271.6 UdeM00000010444 XP\_012565456.1 49.6 272  
 123 6 4 272 756 1016 1.10E-69 271.6 6087 cellular  
 organisms;Eukaryota;Opisthokonta;Metazoa;Eumetazoa;Cnidaria;Hydrozoa;Hydr  
 oidolina;Anthoathecata;Aplanulata;Hydridae;Hydra;Hydra vulgaris  
 UdeM00000010445 150288 300.4 UdeM00000010445 XP\_020788097.1 61.5  
 208 80 0 1 208 365 572 1.70E-78 300.4 150288  
 cellular  
 organisms;Eukaryota;Opisthokonta;Metazoa;Eumetazoa;Bilateria;Deuterostomi  
 a;Chordata;Craniata;Vertebrata;Gnathostomata;Teleostomi;Euteleostomi;Acti  
 nopterygii;Actinopteri;Neopterygii;Teleostei;Osteoglossocephalai;Clupeoce  
 phala;Euteleosteomorpha;Neoteleostei;Eurypterygia;Ctenosquamata;Acanthomo

rphata;Euacanthomorpha;Percomorphaceae;Gobiaria;Gobiiformes;Gobioidei;
 Gobiidae;Oxudercinae;Boleophthalmus;Boleophthalmus pectinirostris
 UdeM00000010446 150288 247.7 UdeM00000010446 XP\_020788097.1 66
 159 54 0 2 160 383 541 1.00E-62 247.7 150288
 cellular
 organisms;Eukaryota;Opisthokonta;Metazoa;Eumetazoa;Bilateria;Deuterostomi
 a;Chordata;Craniata;Vertebrata;Gnathostomata;Teleostomi;Euteleostomi;Acti
 nopterygii;Actinopteri;Neopterygii;Teleostei;Osteoglossocephalai;Clupeoce
 phala;Euteleostei;Neoteleostei;Eurypterygia;Ctenosquamata;Acanthomo
 rphata;Euacanthomorpha;Percomorphaceae;Gobiaria;Gobiiformes;Gobioidei;
 Gobiidae;Oxudercinae;Boleophthalmus;Boleophthalmus pectinirostris
 UdeM00000010447 50390 641 UdeM00000010447 XP\_028142380.1 59.6 436
 176 0 2 437 21 456 1.20E-180 641 50390 cellular
 organisms;Eukaryota;Opisthokonta;Metazoa;Eumetazoa;Bilateria;Protostomia;
 Ecdysozoa;Panarthropoda;Arthropoda;Mandibulata;Pancrustacea;Hexapoda;Inse
 cta;Dicondylia;Pterygota;Neoptera;Endopterygota;Coleoptera;Polyphaga;Cucu
 jiformia;Chrysomeloidea;Chrysomelidae;Galerucinae;Luperini;Diabroticina;D
 iabroticites;Diabrotica;Diabrotica virgifera;Diabrotica virgifera
 virgifera
 UdeM00000010448 6565 387.1 UdeM00000010448 XP\_022309566.1 61.7 261
 99 1 2 262 605 864 1.80E-104 387.1 6565 cellular
 organisms;Eukaryota;Opisthokonta;Metazoa;Eumetazoa;Bilateria;Protostomia;
 Spiralia;Lophotrochozoa;Mollusca;Bivalvia;Autobranchia;Pteriormorphia;Ostr
 eida;Ostreoidea;Ostreidae;Crassostrea;Crassostrea virginica
 UdeM00000010449 50390 371.7 UdeM00000010449 XP\_028142380.1 57.4 270
 114 1 2 270 77 346 8.00E-100 371.7 50390 cellular
 organisms;Eukaryota;Opisthokonta;Metazoa;Eumetazoa;Bilateria;Protostomia;
 Ecdysozoa;Panarthropoda;Arthropoda;Mandibulata;Pancrustacea;Hexapoda;Inse
 cta;Dicondylia;Pterygota;Neoptera;Endopterygota;Coleoptera;Polyphaga;Cucu
 jiformia;Chrysomeloidea;Chrysomelidae;Galerucinae;Luperini;Diabroticina;D
 iabroticites;Diabrotica;Diabrotica virgifera;Diabrotica virgifera
 virgifera
 UdeM00000010450 6087 272.3 UdeM00000010450 XP\_012565456.1 49.4 271
 125 7 46 314 756 1016 7.70E-70 272.3 6087 cellular
 organisms;Eukaryota;Opisthokonta;Metazoa;Eumetazoa;Cnidaria;Hydrozoa;Hydr
 oidolina;Anthoathecata;Aplanulata;Hydridae;Hydra;Hydra vulgaris
 UdeM00000010451 7739 77.8 UdeM00000010451 XP\_035659254.1 37.4 99
 57 1 2 95 824 922 8.50E-12 77.8 7739 cellular
 organisms;Eukaryota;Opisthokonta;Metazoa;Eumetazoa;Bilateria;Deuterostomi
 a;Chordata;Cephalochordata;Leptocardii;Amphioxiformes;Branchiostomidae;Br
 anchiostoma;Branchiostoma floridae
 UdeM00000010452 7574 73.9 UdeM00000010452 XP\_013388573.1 41.2 114
 64 2 1 113 828 939 1.50E-10 73.9 7574 cellular
 organisms;Eukaryota;Opisthokonta;Metazoa;Eumetazoa;Bilateria;Protostomia;
 Spiralia;Lophotrochozoa;Brachiopoda;Linguliformea;Lingulata;Lingulida;Lin
 guloidea;Lingulidae;Lingula;Lingula anatina
 UdeM00000010453 50390 290.8 UdeM00000010453 XP\_028149219.1 55 238
 96 2 3 230 146 382 1.60E-75 290.8 50390 cellular
 organisms;Eukaryota;Opisthokonta;Metazoa;Eumetazoa;Bilateria;Protostomia;
 Ecdysozoa;Panarthropoda;Arthropoda;Mandibulata;Pancrustacea;Hexapoda;Inse
 cta;Dicondylia;Pterygota;Neoptera;Endopterygota;Coleoptera;Polyphaga;Cucu
 jiformia;Chrysomeloidea;Chrysomelidae;Galerucinae;Luperini;Diabroticina;D
 iabroticites;Diabrotica;Diabrotica virgifera;Diabrotica virgifera
 virgifera

UdeM00000010454 6565 152.5 UdeM00000010454 XP\_022309566.1 69.9 93  
 28 0 1 93 615 707 2.60E-34 152.5 6565 cellular  
 organisms;Eukaryota;Opisthokonta;Metazoa;Eumetazoa;Bilateria;Protostomia;  
 Spiralia;Lophotrochozoa;Mollusca;Bivalvia;Autobranchia;Pteriomorphia;Ostr  
 eida;Ostreoidea;Ostreidae;Crassostrea;Crassostrea virginica  
 UdeM00000010455 1250792 166 UdeM00000010455 XP\_041857892.1 69.9  
 103 30 1 2 104 377 478 2.90E-38 166 1250792  
 cellular  
 organisms;Eukaryota;Opisthokonta;Metazoa;Eumetazoa;Bilateria;Deuterostomi  
 a;Chordata;Craniata;Vertebrata;Gnathostomata;Teleostomi;Euteleostomi;Acti  
 nopterygii;Actinopteri;Neopterygii;Teleostei;Osteoglossocephalai;Clupeoce  
 phala;Euteleosteomorpha;Neoteleostei;Eurypterygia;Ctenosquamata;Acanthomo  
 rphata;Euacanthomorphacea;Percomorphaceae;Ovalentaria;Atherinomorphae;Ath  
 eriniformes;Melanotaeniidae;Melanotaenia;Melanotaenia boesemani  
 UdeM00000010457 1250792 211.8 UdeM00000010457 XP\_041858049.1 62.6  
 147 54 1 1 147 69 214 5.70E-52 211.8 1250792  
 cellular  
 organisms;Eukaryota;Opisthokonta;Metazoa;Eumetazoa;Bilateria;Deuterostomi  
 a;Chordata;Craniata;Vertebrata;Gnathostomata;Teleostomi;Euteleostomi;Acti  
 nopterygii;Actinopteri;Neopterygii;Teleostei;Osteoglossocephalai;Clupeoce  
 phala;Euteleosteomorpha;Neoteleostei;Eurypterygia;Ctenosquamata;Acanthomo  
 rphata;Euacanthomorphacea;Percomorphaceae;Ovalentaria;Atherinomorphae;Ath  
 eriniformes;Melanotaeniidae;Melanotaenia;Melanotaenia boesemani  
 UdeM00000010456 6565 355.1 UdeM00000010456 XP\_022309566.1 60.8 260  
 101 1 2 261 754 1012 7.40E-95 355.1 6565 cellular  
 organisms;Eukaryota;Opisthokonta;Metazoa;Eumetazoa;Bilateria;Protostomia;  
 Spiralia;Lophotrochozoa;Mollusca;Bivalvia;Autobranchia;Pteriomorphia;Ostr  
 eida;Ostreoidea;Ostreidae;Crassostrea;Crassostrea virginica  
 UdeM00000010458 6105 107.1 UdeM00000010458 XP\_031561747.1 52.3 86  
 41 0 1 86 1 86 1.50E-20 107.1 6105 cellular  
 organisms;Eukaryota;Opisthokonta;Metazoa;Eumetazoa;Cnidaria;Anthozoa;Hexa  
 corallia;Actiniaria;Actiniidae;Actinia;Actinia tenebrosa  
 UdeM00000010460 6596 62.4 UdeM00000010460 XP\_045177022.1 54.2 48  
 22 0 1 48 20 67 4.80E-07 62.4 6596 cellular  
 organisms;Eukaryota;Opisthokonta;Metazoa;Eumetazoa;Bilateria;Protostomia;  
 Spiralia;Lophotrochozoa;Mollusca;Bivalvia;Autobranchia;Heteroconchia;Euhe  
 terodonta;Imparidentia;Venerida;Veneroidea;Veneridae;Mercenaria;Mercenari  
 a mercenaria  
 UdeM00000010461 50390 529.6 UdeM00000010461 XP\_028142380.1 58.8 369  
 152 0 2 370 49 417 3.10E-147 529.6 50390 cellular  
 organisms;Eukaryota;Opisthokonta;Metazoa;Eumetazoa;Bilateria;Protostomia;  
 Ecdysozoa;Panarthropoda;Arthropoda;Mandibulata;Pancrustacea;Hexapoda;Inse  
 cta;Dicondylia;Pterygota;Neoptera;Endopterygota;Coleoptera;Polyphaga;Cucu  
 jiformia;Chrysomeloidea;Chrysomelidae;Galerucinae;Luperini;Diabroticina;D  
 iabroticites;Diabrotica;Diabrotica virgifera;Diabrotica virgifera  
 virgifera  
 UdeM00000010462 8218 355.1 UdeM00000010462 XP\_034089596.1 55 291  
 89 3 1 252 451 738 7.20E-95 355.1 8218 cellular  
 organisms;Eukaryota;Opisthokonta;Metazoa;Eumetazoa;Bilateria;Deuterostomi  
 a;Chordata;Craniata;Vertebrata;Gnathostomata;Teleostomi;Euteleostomi;Acti  
 nopterygii;Actinopteri;Neopterygii;Teleostei;Osteoglossocephalai;Clupeoce  
 phala;Euteleosteomorpha;Neoteleostei;Eurypterygia;Ctenosquamata;Acanthomo  
 rphata;Euacanthomorphacea;Percomorphaceae;Eupercaria;Perciformes;Notothen  
 ioidei;Bathydraconidae;Gymnodraco;Gymnodraco acuticeps

UdeM00000010463 52239 351.7 UdeM00000010463 XP\_033949456.1 64.5 231  
 81 1 1 231 1 230 7.30E-94 351.7 52239 cellular  
 organisms;Eukaryota;Opisthokonta;Metazoa;Eumetazoa;Bilateria;Deuterostomi  
 a;Chordata;Craniata;Vertebrata;Gnathostomata;Teleostomi;Euteleostomi;Acti  
 nopterygii;Actinopteri;Neopterygii;Teleostei;Osteoglossocephalai;Clupeoce  
 phala;Euteleosteomorpha;Neoteleostei;Eurypterygia;Ctenosquamata;Acanthomo  
 rphata;Euacanthomorphacea;Percomorphaceae;Eupercaria;Perciformes;Notothen  
 ioidei;Channichthyidae;Pseudochaenichthys;Pseudochaenichthys georgianus  
 UdeM00000010464 150288 290.8 UdeM00000010464 XP\_020788097.1 60.8  
 204 80 0 1 204 365 568 1.40E-75 290.8 150288  
 cellular  
 organisms;Eukaryota;Opisthokonta;Metazoa;Eumetazoa;Bilateria;Deuterostomi  
 a;Chordata;Craniata;Vertebrata;Gnathostomata;Teleostomi;Euteleostomi;Acti  
 nopterygii;Actinopteri;Neopterygii;Teleostei;Osteoglossocephalai;Clupeoce  
 phala;Euteleosteomorpha;Neoteleostei;Eurypterygia;Ctenosquamata;Acanthomo  
 rphata;Euacanthomorphacea;Percomorphaceae;Gobiaria;Gobiiformes;Gobioidei;  
 Gobiidae;Oxudercinae;Boleophthalmus;Boleophthalmus pectinirostris  
 UdeM00000010465 441366 288.9 UdeM00000010465 XP\_028318794.1 61.7  
 206 79 0 1 206 482 687 5.20E-75 288.9 441366  
 cellular  
 organisms;Eukaryota;Opisthokonta;Metazoa;Eumetazoa;Bilateria;Deuterostomi  
 a;Chordata;Craniata;Vertebrata;Gnathostomata;Teleostomi;Euteleostomi;Acti  
 nopterygii;Actinopteri;Neopterygii;Teleostei;Osteoglossocephalai;Clupeoce  
 phala;Euteleosteomorpha;Neoteleostei;Eurypterygia;Ctenosquamata;Acanthomo  
 rphata;Euacanthomorphacea;Percomorphaceae;Ovalentaria;Blenniimorphae;Blen  
 niiformes;Gobiesocoidei;Gobiesocidae;Gobiesocinae;Gouania;Gouania  
 willdenowi  
 UdeM00000010466 441366 194.9 UdeM00000010466 XP\_028309546.1 68.5  
 124 39 0 1 124 271 394 6.10E-47 194.9 441366  
 cellular  
 organisms;Eukaryota;Opisthokonta;Metazoa;Eumetazoa;Bilateria;Deuterostomi  
 a;Chordata;Craniata;Vertebrata;Gnathostomata;Teleostomi;Euteleostomi;Acti  
 nopterygii;Actinopteri;Neopterygii;Teleostei;Osteoglossocephalai;Clupeoce  
 phala;Euteleosteomorpha;Neoteleostei;Eurypterygia;Ctenosquamata;Acanthomo  
 rphata;Euacanthomorphacea;Percomorphaceae;Ovalentaria;Blenniimorphae;Blen  
 niiformes;Gobiesocoidei;Gobiesocidae;Gobiesocinae;Gouania;Gouania  
 willdenowi  
 UdeM00000010467 441366 288.1 UdeM00000010467 XP\_028318794.1 61.7  
 206 79 0 1 206 482 687 8.80E-75 288.1 441366  
 cellular  
 organisms;Eukaryota;Opisthokonta;Metazoa;Eumetazoa;Bilateria;Deuterostomi  
 a;Chordata;Craniata;Vertebrata;Gnathostomata;Teleostomi;Euteleostomi;Acti  
 nopterygii;Actinopteri;Neopterygii;Teleostei;Osteoglossocephalai;Clupeoce  
 phala;Euteleosteomorpha;Neoteleostei;Eurypterygia;Ctenosquamata;Acanthomo  
 rphata;Euacanthomorphacea;Percomorphaceae;Ovalentaria;Blenniimorphae;Blen  
 niiformes;Gobiesocoidei;Gobiesocidae;Gobiesocinae;Gouania;Gouania  
 willdenowi  
 UdeM00000010468 441366 194.9 UdeM00000010468 XP\_028309546.1 68.5  
 124 39 0 1 124 271 394 6.10E-47 194.9 441366  
 cellular  
 organisms;Eukaryota;Opisthokonta;Metazoa;Eumetazoa;Bilateria;Deuterostomi  
 a;Chordata;Craniata;Vertebrata;Gnathostomata;Teleostomi;Euteleostomi;Acti  
 nopterygii;Actinopteri;Neopterygii;Teleostei;Osteoglossocephalai;Clupeoce  
 phala;Euteleosteomorpha;Neoteleostei;Eurypterygia;Ctenosquamata;Acanthomo

rphata;Euacanthomorphacea;Percomorphaceae;Ovalentaria;Blenniimorphae;Blenniiformes;Gobiesocoidei;Gobiesocidae;Gobiesocinae;Gouania;Gouania willdenowi

UdeM00000010469 441366 288.9 UdeM00000010469 XP\_028318794.1 62.1  
206 78 0 1 206 482 687 5.20E-75 288.9 441366  
cellular

organisms;Eukaryota;Opisthokonta;Metazoa;Eumetazoa;Bilateria;Deuterostomia;Chordata;Craniata;Vertebrata;Gnathostomata;Teleostomi;Euteleostomi;Actinopterygii;Actinopteri;Neopterygii;Teleostei;Osteoglossocephalai;Clupeocephala;Euteleosteomorpha;Neoteleostei;Eurypterygia;Ctenosquamata;Acanthomorphata;Euacanthomorphacea;Percomorphaceae;Ovalentaria;Blenniimorphae;Blenniiformes;Gobiesocoidei;Gobiesocidae;Gobiesocinae;Gouania;Gouania willdenowi

UdeM00000010470 441366 196.4 UdeM00000010470 XP\_028309546.1 69.4  
124 38 0 1 124 271 394 2.10E-47 196.4 441366  
cellular

organisms;Eukaryota;Opisthokonta;Metazoa;Eumetazoa;Bilateria;Deuterostomia;Chordata;Craniata;Vertebrata;Gnathostomata;Teleostomi;Euteleostomi;Actinopterygii;Actinopteri;Neopterygii;Teleostei;Osteoglossocephalai;Clupeocephala;Euteleosteomorpha;Neoteleostei;Eurypterygia;Ctenosquamata;Acanthomorphata;Euacanthomorphacea;Percomorphaceae;Ovalentaria;Blenniimorphae;Blenniiformes;Gobiesocoidei;Gobiesocidae;Gobiesocinae;Gouania;Gouania willdenowi

UdeM00000010471 13397 91.7 UdeM00000010471 XP\_041069283.1 43.4 113  
58 2 2 109 48 159 6.90E-16 91.7 13397 cellular

organisms;Eukaryota;Opisthokonta;Metazoa;Eumetazoa;Bilateria;Deuterostomia;Chordata;Craniata;Vertebrata;Gnathostomata;Chondrichthyes;Elasmobranchii;Selachii;Galeomorphii;Galeoidea;Lamniformes;Alopiidae;Lamninae;Carcharodon;Carcharodon carcharias

UdeM00000010472 150288 221.5 UdeM00000010472 XP\_020788097.1 63.8  
149 53 1 1 149 421 568 7.50E-55 221.5 150288  
cellular

organisms;Eukaryota;Opisthokonta;Metazoa;Eumetazoa;Bilateria;Deuterostomia;Chordata;Craniata;Vertebrata;Gnathostomata;Teleostomi;Euteleostomi;Actinopterygii;Actinopteri;Neopterygii;Teleostei;Osteoglossocephalai;Clupeocephala;Euteleosteomorpha;Neoteleostei;Eurypterygia;Ctenosquamata;Acanthomorphata;Euacanthomorphacea;Percomorphaceae;Gobiaria;Gobiiformes;Gobioidei;Gobiidae;Oxudercinae;Boleophthalmus;Boleophthalmus pectinirostris

UdeM00000010473 52239 173.7 UdeM00000010473 XP\_033948871.1 64.2 120  
43 0 1 120 98 217 1.50E-40 173.7 52239 cellular

organisms;Eukaryota;Opisthokonta;Metazoa;Eumetazoa;Bilateria;Deuterostomia;Chordata;Craniata;Vertebrata;Gnathostomata;Teleostomi;Euteleostomi;Actinopterygii;Actinopteri;Neopterygii;Teleostei;Osteoglossocephalai;Clupeocephala;Euteleosteomorpha;Neoteleostei;Eurypterygia;Ctenosquamata;Acanthomorphata;Euacanthomorphacea;Percomorphaceae;Eupercaria;Perciformes;Notothenioidei;Channichthyidae;Pseudochaenichthys;Pseudochaenichthys georgianus

UdeM00000010474 1735272 213.4 UdeM00000010474 XP\_041372570.1 64.8  
145 51 0 1 145 1005 1149 2.00E-52 213.4 1735272  
cellular

organisms;Eukaryota;Opisthokonta;Metazoa;Eumetazoa;Bilateria;Protostomia;Spiralia;Lophotrochozoa;Mollusca;Gastropoda;Neomphalina;Neomphaloidea;Peltospiridae;Gigantopelta;Gigantopelta aegis

UdeM00000010475 8218 152.5 UdeM00000010475 XP\_034088853.1 70.5 95  
28 0 1 95 275 369 2.70E-34 152.5 8218 cellular

organisms;Eukaryota;Opisthokonta;Metazoa;Eumetazoa;Bilateria;Deuterostomi  
a;Chordata;Craniata;Vertebrata;Gnathostomata;Teleostomi;Euteleostomi;Acti  
nopterygii;Actinopteri;Neopterygii;Teleostei;Osteoglossocephalai;Clupeoce  
phala;Euteleosteomorpha;Neoteleostei;Eurypterygia;Ctenosquamata;Acanthomo  
rphata;Euacanthomorpha;Percomorphaceae;Eupercaria;Perciformes;Notothen  
ioidei;Bathdraconidae;Gymnodraco;Gymnodraco acuticeps

UdeM00000010476 50390 243.8 UdeM00000010476 XP\_028154228.1 64.5 152  
54 0 1 152 126 277 1.40E-61 243.8 50390 cellular

organisms;Eukaryota;Opisthokonta;Metazoa;Eumetazoa;Bilateria;Protostomia;  
Ecdysozoa;Panarthropoda;Arthropoda;Mandibulata;Pancrustacea;Hexapoda;Inse  
cta;Dicondylia;Pterygota;Neoptera;Endopterygota;Coleoptera;Polyphaga;Cucu  
jiformia;Chrysomeloidea;Chrysomelidae;Galerucinae;Luperini;Diabroticina;D  
iabroticites;Diabrotica;Diabrotica virgifera;Diabrotica virgifera  
virgifera

UdeM00000010477 6565 229.9 UdeM00000010477 XP\_022309566.1 68.4 152  
46 2 1 152 643 792 4.50E-57 229.9 6565 cellular

organisms;Eukaryota;Opisthokonta;Metazoa;Eumetazoa;Bilateria;Protostomia;  
Spiralia;Lophotrochozoa;Mollusca;Bivalvia;Autobranchia;Pteriormorphia;Ostr  
eida;Ostreioidea;Ostreidae;Crassostrea;Crassostrea virginica

UdeM00000010478 1735272 138.3 UdeM00000010478 XP\_041347065.1 64.9  
97 34 0 1 97 1 97 6.20E-30 138.3 1735272

cellular

organisms;Eukaryota;Opisthokonta;Metazoa;Eumetazoa;Bilateria;Protostomia;  
Spiralia;Lophotrochozoa;Mollusca;Gastropoda;Neomphalina;Neomphaloidea;Pel  
tospiridae;Gigantopelta;Gigantopelta aegis

UdeM00000010479 6565 559.3 UdeM00000010479 XP\_022309566.1 61.2 400  
155 0 1 400 643 1042 4.00E-156 559.3 6565 cellular

organisms;Eukaryota;Opisthokonta;Metazoa;Eumetazoa;Bilateria;Protostomia;  
Spiralia;Lophotrochozoa;Mollusca;Bivalvia;Autobranchia;Pteriormorphia;Ostr  
eida;Ostreioidea;Ostreidae;Crassostrea;Crassostrea virginica

UdeM00000010480 6596 66.6 UdeM00000010480 XP\_045170483.1 42.3 71  
40 1 1 70 8 78 2.00E-08 66.6 6596 cellular

organisms;Eukaryota;Opisthokonta;Metazoa;Eumetazoa;Bilateria;Protostomia;  
Spiralia;Lophotrochozoa;Mollusca;Bivalvia;Autobranchia;Heteroconchia;Euhe  
terodonta;Imparidentia;Venerida;Veneroidea;Veneridae;Mercenaria;Mercenari  
a mercenaria

UdeM00000010482 50390 531.2 UdeM00000010482 XP\_028142380.1 58.8 369  
152 0 2 370 49 417 1.10E-147 531.2 50390 cellular

organisms;Eukaryota;Opisthokonta;Metazoa;Eumetazoa;Bilateria;Protostomia;  
Ecdysozoa;Panarthropoda;Arthropoda;Mandibulata;Pancrustacea;Hexapoda;Inse  
cta;Dicondylia;Pterygota;Neoptera;Endopterygota;Coleoptera;Polyphaga;Cucu  
jiformia;Chrysomeloidea;Chrysomelidae;Galerucinae;Luperini;Diabroticina;D  
iabroticites;Diabrotica;Diabrotica virgifera;Diabrotica virgifera  
virgifera

UdeM00000010483 6565 94.4 UdeM00000010483 XP\_022322655.1 35 197  
93 8 48 220 561 746 2.00E-16 94.4 6565 cellular

organisms;Eukaryota;Opisthokonta;Metazoa;Eumetazoa;Bilateria;Protostomia;  
Spiralia;Lophotrochozoa;Mollusca;Bivalvia;Autobranchia;Pteriormorphia;Ostr  
eida;Ostreioidea;Ostreidae;Crassostrea;Crassostrea virginica

UdeM00000010484 29159 144.1 UdeM00000010484 XP\_034299474.1 52 148  
64 3 1 141 329 476 2.80E-31 144.1 29159 cellular

organisms;Eukaryota;Opisthokonta;Metazoa;Eumetazoa;Bilateria;Protostomia;  
Spiralia;Lophotrochozoa;Mollusca;Bivalvia;Autobranchia;Pteriormorphia;Ostr  
eida;Ostreioidea;Ostreidae;Crassostrea;Crassostrea gigas

UdeM00000010485 6596 93.2 UdeM00000010485 XP\_045193669.1 30.9 191  
 95 4 1 157 740 927 3.20E-16 93.2 6596 cellular  
 organisms;Eukaryota;Opisthokonta;Metazoa;Eumetazoa;Bilateria;Protostomia;  
 Spiralia;Lophotrochozoa;Mollusca;Bivalvia;Autobranchia;Heteroconchia;Euhe  
 terodonta;Imparidentia;Venerida;Veneroidea;Veneridae;Mercenaria;Mercenari  
 a mercenaria  
 UdeM00000010486 441366 182.2 UdeM00000010486 XP\_028318793.1 63.8  
 127 37 1 2 128 654 771 4.30E-43 182.2 441366  
 cellular  
 organisms;Eukaryota;Opisthokonta;Metazoa;Eumetazoa;Bilateria;Deuterostomi  
 a;Chordata;Craniata;Vertebrata;Gnathostomata;Teleostomi;Euteleostomi;Acti  
 nopterygii;Actinopteri;Neopterygii;Teleostei;Osteoglossocephalai;Clupeoce  
 phala;Euteleosteomorpha;Neoteleostei;Eurypterygia;Ctenosquamata;Acanthomo  
 rphata;Euacanthomorphacea;Percomorphaceae;Ovalentaria;Blenniimorphae;Blen  
 niiformes;Gobiesocoidei;Gobiesocidae;Gobiesocinae;Gouania;Gouania  
 willdenowi  
 UdeM00000010487 6565 62 UdeM00000010487 XP\_022299023.1 48.5 68  
 34 1 1 68 148 214 3.60E-07 62 6565 cellular  
 organisms;Eukaryota;Opisthokonta;Metazoa;Eumetazoa;Bilateria;Protostomia;  
 Spiralia;Lophotrochozoa;Mollusca;Bivalvia;Autobranchia;Pteriormorphia;Ostr  
 eida;Ostreoidea;Ostreidae;Crassostrea;Crassostrea virginica  
 UdeM00000010488 7574 102.4 UdeM00000010488 XP\_013388573.1 40.8 147  
 85 1 1 147 795 939 5.00E-19 102.4 7574 cellular  
 organisms;Eukaryota;Opisthokonta;Metazoa;Eumetazoa;Bilateria;Protostomia;  
 Spiralia;Lophotrochozoa;Brachiopoda;Linguliformea;Lingulata;Lingulida;Lin  
 guloidea;Lingulidae;Lingula;Lingula anatina  
 UdeM00000010489 8218 507.3 UdeM00000010489 XP\_034089596.1 63 354  
 131 0 2 355 441 794 1.60E-140 507.3 8218 cellular  
 organisms;Eukaryota;Opisthokonta;Metazoa;Eumetazoa;Bilateria;Deuterostomi  
 a;Chordata;Craniata;Vertebrata;Gnathostomata;Teleostomi;Euteleostomi;Acti  
 nopterygii;Actinopteri;Neopterygii;Teleostei;Osteoglossocephalai;Clupeoce  
 phala;Euteleosteomorpha;Neoteleostei;Eurypterygia;Ctenosquamata;Acanthomo  
 rphata;Euacanthomorphacea;Percomorphaceae;Eupercaria;Perciformes;Notothen  
 ioidei;Bathydraconidae;Gymnodraco;Gymnodraco acuticeps  
 UdeM00000010490 6596 79 UdeM00000010490 XP\_045207454.1 45.7 94  
 42 2 3 96 2 86 4.20E-12 79 6596 cellular  
 organisms;Eukaryota;Opisthokonta;Metazoa;Eumetazoa;Bilateria;Protostomia;  
 Spiralia;Lophotrochozoa;Mollusca;Bivalvia;Autobranchia;Heteroconchia;Euhe  
 terodonta;Imparidentia;Venerida;Veneroidea;Veneridae;Mercenaria;Mercenari  
 a mercenaria  
 UdeM00000010491 441366 420.6 UdeM00000010491 XP\_028309546.1 64.2  
 293 105 0 1 293 243 535 1.60E-114 420.6 441366  
 cellular  
 organisms;Eukaryota;Opisthokonta;Metazoa;Eumetazoa;Bilateria;Deuterostomi  
 a;Chordata;Craniata;Vertebrata;Gnathostomata;Teleostomi;Euteleostomi;Acti  
 nopterygii;Actinopteri;Neopterygii;Teleostei;Osteoglossocephalai;Clupeoce  
 phala;Euteleosteomorpha;Neoteleostei;Eurypterygia;Ctenosquamata;Acanthomo  
 rphata;Euacanthomorphacea;Percomorphaceae;Ovalentaria;Blenniimorphae;Blen  
 niiformes;Gobiesocoidei;Gobiesocidae;Gobiesocinae;Gouania;Gouania  
 willdenowi  
 UdeM00000010493 7092 100.9 UdeM00000010493 XP\_028032122.1 69.8 63  
 19 0 2 64 307 369 1.20E-18 100.9 7092 cellular  
 organisms;Eukaryota;Opisthokonta;Metazoa;Eumetazoa;Bilateria;Protostomia;  
 Ecdysozoa;Panarthropoda;Arthropoda;Mandibulata;Pancrustacea;Hexapoda;Inse

cta;Dicondylia;Pterygota;Neoptera;Endopterygota;Amphiesmenoptera;Lepidoptera;Glossata;Neolepidoptera;Heteroneura;Ditrysia;Obtectomera;Bombycoidea;Bombycidae;Bombycinae;Bombyx;Bombyx mandarina

UdeM00000010494 6596 374 UdeM00000010494 XP\_045177779.1 40.2 517  
287 8 1 500 97 608 3.80E-100 374 6596 cellular

organisms;Eukaryota;Opisthokonta;Metazoa;Eumetazoa;Bilateria;Protostomia;Spiralia;Lophotrochozoa;Mollusca;Bivalvia;Autobranchia;Heteroconchia;Euherodonta;Imparidentia;Venerida;Veneroidea;Veneridae;Mercenaria;Mercenaria mercenaria

UdeM00000010496 6596 349.7 UdeM00000010496 XP\_045182627.1 66.1 319  
91 7 1 311 1 310 3.70E-93 349.7 6596 cellular

organisms;Eukaryota;Opisthokonta;Metazoa;Eumetazoa;Bilateria;Protostomia;Spiralia;Lophotrochozoa;Mollusca;Bivalvia;Autobranchia;Heteroconchia;Euherodonta;Imparidentia;Venerida;Veneroidea;Veneridae;Mercenaria;Mercenaria mercenaria

UdeM00000010497 6596 226.9 UdeM00000010497 XP\_045182444.1 44.7 282  
140 6 1 268 171 450 3.40E-56 226.9 6596 cellular

organisms;Eukaryota;Opisthokonta;Metazoa;Eumetazoa;Bilateria;Protostomia;Spiralia;Lophotrochozoa;Mollusca;Bivalvia;Autobranchia;Heteroconchia;Euherodonta;Imparidentia;Venerida;Veneroidea;Veneridae;Mercenaria;Mercenaria mercenaria

UdeM00000010498 6596 430.6 UdeM00000010498 XP\_045182444.1 46.9 473  
230 8 25 482 14 480 2.60E-117 430.6 6596 cellular

organisms;Eukaryota;Opisthokonta;Metazoa;Eumetazoa;Bilateria;Protostomia;Spiralia;Lophotrochozoa;Mollusca;Bivalvia;Autobranchia;Heteroconchia;Euherodonta;Imparidentia;Venerida;Veneroidea;Veneridae;Mercenaria;Mercenaria mercenaria

UdeM00000010499 6596 832.4 UdeM00000010499 XP\_045180373.1 59.9 666  
265 2 1 664 1 666 4.00E-238 832.4 6596 cellular

organisms;Eukaryota;Opisthokonta;Metazoa;Eumetazoa;Bilateria;Protostomia;Spiralia;Lophotrochozoa;Mollusca;Bivalvia;Autobranchia;Heteroconchia;Euherodonta;Imparidentia;Venerida;Veneroidea;Veneridae;Mercenaria;Mercenaria mercenaria

UdeM00000010501 6596 197.6 UdeM00000010501 XP\_045182148.1 29.6 678  
393 28 22 660 20 652 5.30E-47 197.6 6596 cellular

organisms;Eukaryota;Opisthokonta;Metazoa;Eumetazoa;Bilateria;Protostomia;Spiralia;Lophotrochozoa;Mollusca;Bivalvia;Autobranchia;Heteroconchia;Euherodonta;Imparidentia;Venerida;Veneroidea;Veneridae;Mercenaria;Mercenaria mercenaria

UdeM00000010502 6596 205.3 UdeM00000010502 XP\_045176768.1 35.5 290  
183 2 4 292 34 320 1.30E-49 205.3 6596 cellular

organisms;Eukaryota;Opisthokonta;Metazoa;Eumetazoa;Bilateria;Protostomia;Spiralia;Lophotrochozoa;Mollusca;Bivalvia;Autobranchia;Heteroconchia;Euherodonta;Imparidentia;Venerida;Veneroidea;Veneridae;Mercenaria;Mercenaria mercenaria

UdeM00000010503 29159 200.3 UdeM00000010503 XP\_011413207.2 83.9 118  
19 0 105 222 29 146 4.10E-48 200.3 29159 cellular

organisms;Eukaryota;Opisthokonta;Metazoa;Eumetazoa;Bilateria;Protostomia;Spiralia;Lophotrochozoa;Mollusca;Bivalvia;Autobranchia;Pteriomorphia;Ostreida;Ostreoidea;Ostreidae;Crassostrea;Crassostrea gigas

UdeM00000010506 6596 97.4 UdeM00000010506 XP\_045188065.1 28.7 209  
145 2 2 206 159 367 2.50E-17 97.4 6596 cellular

organisms;Eukaryota;Opisthokonta;Metazoa;Eumetazoa;Bilateria;Protostomia;Spiralia;Lophotrochozoa;Mollusca;Bivalvia;Autobranchia;Heteroconchia;Euherodonta



terodonta;Imparidentia;Venerida;Veneroidea;Veneridae;Mercenaria;Mercenari  
 a mercenaria  
 UdeM00000010507 6596 120.9 UdeM00000010507 XP\_045206702.1 27 452  
 305 9 47 477 37 484 4.40E-24 120.9 6596 cellular  
 organisms;Eukaryota;Opisthokonta;Metazoa;Eumetazoa;Bilateria;Protostomia;  
 Spiralia;Lophotrochozoa;Mollusca;Bivalvia;Autobranchia;Heteroconchia;Euhe  
 terodonta;Imparidentia;Venerida;Veneroidea;Veneridae;Mercenaria;Mercenari  
 a mercenaria  
 UdeM00000010508 50390 464.2 UdeM00000010508 XP\_028154228.1 52 342  
 164 0 4 345 267 608 1.50E-127 464.2 50390 cellular  
 organisms;Eukaryota;Opisthokonta;Metazoa;Eumetazoa;Bilateria;Protostomia;  
 Ecdysozoa;Panarthropoda;Arthropoda;Mandibulata;Pancrustacea;Hexapoda;Inse  
 cta;Dicondylia;Pterygota;Neoptera;Endopterygota;Coleoptera;Polyphaga;Cucu  
 jiformia;Chrysomeloidea;Chrysomelidae;Galerucinae;Luperini;Diabroticina;D  
 iabroticites;Diabrotica;Diabrotica virgifera;Diabrotica virgifera  
 virgifera  
 UdeM00000010509 6596 139.8 UdeM00000010509 XP\_045200918.1 21.8 1103  
 687 43 471 1475 914 1939 2.90E-29 139.8 6596 cellular  
 organisms;Eukaryota;Opisthokonta;Metazoa;Eumetazoa;Bilateria;Protostomia;  
 Spiralia;Lophotrochozoa;Mollusca;Bivalvia;Autobranchia;Heteroconchia;Euhe  
 terodonta;Imparidentia;Venerida;Veneroidea;Veneridae;Mercenaria;Mercenari  
 a mercenaria  
 UdeM00000010510 6596 139.8 UdeM00000010510 XP\_045200918.1 21.8 1103  
 687 43 506 1510 914 1939 3.00E-29 139.8 6596 cellular  
 organisms;Eukaryota;Opisthokonta;Metazoa;Eumetazoa;Bilateria;Protostomia;  
 Spiralia;Lophotrochozoa;Mollusca;Bivalvia;Autobranchia;Heteroconchia;Euhe  
 terodonta;Imparidentia;Venerida;Veneroidea;Veneridae;Mercenaria;Mercenari  
 a mercenaria  
 UdeM00000010511 50390 566.6 UdeM00000010511 XP\_028148951.1 58.5 407  
 169 0 1 407 410 816 2.50E-158 566.6 50390 cellular  
 organisms;Eukaryota;Opisthokonta;Metazoa;Eumetazoa;Bilateria;Protostomia;  
 Ecdysozoa;Panarthropoda;Arthropoda;Mandibulata;Pancrustacea;Hexapoda;Inse  
 cta;Dicondylia;Pterygota;Neoptera;Endopterygota;Coleoptera;Polyphaga;Cucu  
 jiformia;Chrysomeloidea;Chrysomelidae;Galerucinae;Luperini;Diabroticina;D  
 iabroticites;Diabrotica;Diabrotica virgifera;Diabrotica virgifera  
 virgifera  
 UdeM00000010512 40690 115.2 UdeM00000010512 XP\_033989749.1 59.6 89  
 35 1 1 88 839 927 4.40E-23 115.2 40690 cellular  
 organisms;Eukaryota;Opisthokonta;Metazoa;Eumetazoa;Bilateria;Deuterostomi  
 a;Chordata;Craniata;Vertebrata;Gnathostomata;Teleostomi;Euteleostomi;Acti  
 nopterygii;Actinopteri;Neopterygii;Teleostei;Osteoglossocephalai;Clupeoce  
 phala;Euteleosteomorpha;Neoteleostei;Eurypterygia;Ctenosquamata;Acanthomo  
 rphata;Euacanthomorphacea;Percomorphaceae;Eupercaria;Perciformes;Notothen  
 ioidei;Nototheniidae;Trematomus;Trematomus bernacchii  
 UdeM00000010513 50390 327.8 UdeM00000010513 XP\_028148913.1 57.4 235  
 99 1 1 235 555 788 1.10E-86 327.8 50390 cellular  
 organisms;Eukaryota;Opisthokonta;Metazoa;Eumetazoa;Bilateria;Protostomia;  
 Ecdysozoa;Panarthropoda;Arthropoda;Mandibulata;Pancrustacea;Hexapoda;Inse  
 cta;Dicondylia;Pterygota;Neoptera;Endopterygota;Coleoptera;Polyphaga;Cucu  
 jiformia;Chrysomeloidea;Chrysomelidae;Galerucinae;Luperini;Diabroticina;D  
 iabroticites;Diabrotica;Diabrotica virgifera;Diabrotica virgifera  
 virgifera  
 UdeM00000010514 6565 174.9 UdeM00000010514 XP\_022291128.1 55.4 148  
 66 0 168 315 94 241 1.70E-40 174.9 6565 cellular

organisms;Eukaryota;Opisthokonta;Metazoa;Eumetazoa;Bilateria;Protostomia;  
Spiralia;Lophotrochozoa;Mollusca;Bivalvia;Autobranchia;Pteriomorpha;Ostr  
eida;Ostreoidea;Ostreidae;Crassostrea;Crassostrea virginica  
UdeM00000010515 6565 435.3 UdeM00000010515 XP\_022345219.1 51.8 384  
182 2 1 382 1 383 8.30E-119 435.3 6565 cellular  
organisms;Eukaryota;Opisthokonta;Metazoa;Eumetazoa;Bilateria;Protostomia;  
Spiralia;Lophotrochozoa;Mollusca;Bivalvia;Autobranchia;Pteriomorpha;Ostr  
eida;Ostreoidea;Ostreidae;Crassostrea;Crassostrea virginica  
UdeM00000010516 6596 74.7 UdeM00000010516 XP\_045215643.1 44.4 81  
42 1 1 78 1 81 5.80E-11 74.7 6596 cellular  
organisms;Eukaryota;Opisthokonta;Metazoa;Eumetazoa;Bilateria;Protostomia;  
Spiralia;Lophotrochozoa;Mollusca;Bivalvia;Autobranchia;Heteroconchia;Euhe  
terodonta;Imparidentia;Venerida;Veneroidea;Veneridae;Mercenaria;Mercenari  
a mercenaria  
UdeM00000010518 6565 101.3 UdeM00000010518 XP\_022299602.1 41.7 132  
70 4 78 204 2 131 1.50E-18 101.3 6565 cellular  
organisms;Eukaryota;Opisthokonta;Metazoa;Eumetazoa;Bilateria;Protostomia;  
Spiralia;Lophotrochozoa;Mollusca;Bivalvia;Autobranchia;Pteriomorpha;Ostr  
eida;Ostreoidea;Ostreidae;Crassostrea;Crassostrea virginica  
UdeM00000010519 6596 73.6 UdeM00000010519 XP\_045192981.1 25.9 189  
130 4 6 191 23 204 3.30E-10 73.6 6596 cellular  
organisms;Eukaryota;Opisthokonta;Metazoa;Eumetazoa;Bilateria;Protostomia;  
Spiralia;Lophotrochozoa;Mollusca;Bivalvia;Autobranchia;Heteroconchia;Euhe  
terodonta;Imparidentia;Venerida;Veneroidea;Veneridae;Mercenaria;Mercenari  
a mercenaria  
UdeM00000010520 29159 67.8 UdeM00000010520 XP\_034329354.1 59.3 54  
21 1 16 68 190 243 6.40E-09 67.8 29159 cellular  
organisms;Eukaryota;Opisthokonta;Metazoa;Eumetazoa;Bilateria;Protostomia;  
Spiralia;Lophotrochozoa;Mollusca;Bivalvia;Autobranchia;Pteriomorpha;Ostr  
eida;Ostreoidea;Ostreidae;Crassostrea;Crassostrea gigas  
UdeM00000010521 6596 89.4 UdeM00000010521 XP\_045208792.1 41.5 135  
73 2 1 129 1 135 8.40E-15 89.4 6596 cellular  
organisms;Eukaryota;Opisthokonta;Metazoa;Eumetazoa;Bilateria;Protostomia;  
Spiralia;Lophotrochozoa;Mollusca;Bivalvia;Autobranchia;Heteroconchia;Euhe  
terodonta;Imparidentia;Venerida;Veneroidea;Veneridae;Mercenaria;Mercenari  
a mercenaria  
UdeM00000010522 1735272 175.3 UdeM00000010522 XP\_041363079.1 68.7  
131 40 1 17 146 132 262 5.90E-41 175.3 1735272  
cellular  
organisms;Eukaryota;Opisthokonta;Metazoa;Eumetazoa;Bilateria;Protostomia;  
Spiralia;Lophotrochozoa;Mollusca;Gastropoda;Neomphalina;Neomphaloidea;Pel  
tospiridae;Gigantopelta;Gigantopelta aegis  
UdeM00000010523 8078 166 UdeM00000010523 XP\_036002885.1 42.3 213  
98 3 1 191 1 210 4.80E-38 166 8078 cellular  
organisms;Eukaryota;Opisthokonta;Metazoa;Eumetazoa;Bilateria;Deuterostomi  
a;Chordata;Craniata;Vertebrata;Gnathostomata;Teleostomi;Euteleostomi;Acti  
nopterygii;Actinopteri;Neopterygii;Teleostei;Osteoglossocephalai;Clupeoce  
phala;Euteleosteomorpha;Neoteleostei;Eurypterygia;Ctenosquamata;Acanthomo  
rphata;Euacanthomorphacea;Percomorphaceae;Ovalentaria;Atherinomorphae;Cyp  
rinodontiformes;Cyprinodontoides;Fundulidae;Fundulus;Fundulus  
heteroclitus  
UdeM00000010524 6596 375.9 UdeM00000010524 XP\_045177779.1 39 521  
306 7 1 518 97 608 1.30E-100 375.9 6596 cellular  
organisms;Eukaryota;Opisthokonta;Metazoa;Eumetazoa;Bilateria;Protostomia;

Spiralia;Lophotrochozoa;Mollusca;Bivalvia;Autobranchia;Heteroconchia;Euherodonta;Imparidentia;Venerida;Veneroidea;Veneridae;Mercenaria;Mercenaria mercenaria

UdeM00000010525 6596 380.6 UdeM00000010525 XP\_045177779.1 39.1 519  
306 6 1 516 97 608 5.40E-102 380.6 6596 cellular

organisms;Eukaryota;Opisthokonta;Metazoa;Eumetazoa;Bilateria;Protostomia;Spiralia;Lophotrochozoa;Mollusca;Bivalvia;Autobranchia;Heteroconchia;Euherodonta;Imparidentia;Venerida;Veneroidea;Veneridae;Mercenaria;Mercenaria mercenaria

UdeM00000010526 6596 323.2 UdeM00000010526 XP\_045177779.1 36.6 503  
307 6 1 497 97 593 8.10E-85 323.2 6596 cellular

organisms;Eukaryota;Opisthokonta;Metazoa;Eumetazoa;Bilateria;Protostomia;Spiralia;Lophotrochozoa;Mollusca;Bivalvia;Autobranchia;Heteroconchia;Euherodonta;Imparidentia;Venerida;Veneroidea;Veneridae;Mercenaria;Mercenaria mercenaria

UdeM00000010527 6596 123.2 UdeM00000010527 XP\_045187052.1 58.7 104  
41 2 38 140 186 288 2.70E-25 123.2 6596 cellular

organisms;Eukaryota;Opisthokonta;Metazoa;Eumetazoa;Bilateria;Protostomia;Spiralia;Lophotrochozoa;Mollusca;Bivalvia;Autobranchia;Heteroconchia;Euherodonta;Imparidentia;Venerida;Veneroidea;Veneridae;Mercenaria;Mercenaria mercenaria

UdeM00000010528 6596 88.6 UdeM00000010528 XP\_045202576.1 56 91  
32 2 1 83 124 214 8.40E-15 88.6 6596 cellular

organisms;Eukaryota;Opisthokonta;Metazoa;Eumetazoa;Bilateria;Protostomia;Spiralia;Lophotrochozoa;Mollusca;Bivalvia;Autobranchia;Heteroconchia;Euherodonta;Imparidentia;Venerida;Veneroidea;Veneridae;Mercenaria;Mercenaria mercenaria

UdeM00000010529 6596 84 UdeM00000010529 XP\_045202576.1 57.7 78  
26 1 10 80 137 214 2.00E-13 84 6596 cellular

organisms;Eukaryota;Opisthokonta;Metazoa;Eumetazoa;Bilateria;Protostomia;Spiralia;Lophotrochozoa;Mollusca;Bivalvia;Autobranchia;Heteroconchia;Euherodonta;Imparidentia;Venerida;Veneroidea;Veneridae;Mercenaria;Mercenaria mercenaria

UdeM00000010530 6596 283.1 UdeM00000010530 XP\_045177779.1 40.2 361  
209 6 95 449 273 632 8.40E-73 283.1 6596 cellular

organisms;Eukaryota;Opisthokonta;Metazoa;Eumetazoa;Bilateria;Protostomia;Spiralia;Lophotrochozoa;Mollusca;Bivalvia;Autobranchia;Heteroconchia;Euherodonta;Imparidentia;Venerida;Veneroidea;Veneridae;Mercenaria;Mercenaria mercenaria

UdeM00000010531 29159 114 UdeM00000010531 XP\_034307341.1 32.5 197  
96 3 3 162 5 201 2.90E-22 114 29159 cellular

organisms;Eukaryota;Opisthokonta;Metazoa;Eumetazoa;Bilateria;Protostomia;Spiralia;Lophotrochozoa;Mollusca;Bivalvia;Autobranchia;Pteriomorpha;Ostreida;Ostreoidea;Ostreidae;Crassostrea;Crassostrea gigas

UdeM00000010532 441366 438 UdeM00000010532 XP\_028309531.1 55  
382 172 0 2 383 264 645 1.30E-119 438 441366  
cellular

organisms;Eukaryota;Opisthokonta;Metazoa;Eumetazoa;Bilateria;Deuterostomia;Chordata;Craniata;Vertebrata;Gnathostomata;Teleostomi;Euteleostomi;Actinopterygii;Actinopteri;Neopterygii;Teleostei;Osteoglossocephalai;Clupeocephala;Euteleostei;Neoteleostei;Eurypterygia;Ctenosquamata;Acanthopterygii;Euacanthopterygii;Percomorphaceae;Ovalentaria;Blenniiformes;Blenniiformes;Gobiesocidae;Gobiesocinae;Gouania;Gouania willdenowi

UdeM00000010534 50390 550.1 UdeM00000010534 XP\_028142380.1 59.2 382  
 156 0 2 383 49 430 2.30E-153 550.1 50390 cellular  
 organisms;Eukaryota;Opisthokonta;Metazoa;Eumetazoa;Bilateria;Protostomia;  
 Ecdysozoa;Panarthropoda;Arthropoda;Mandibulata;Pancrustacea;Hexapoda;Inse  
 cta;Dicondylia;Pterygota;Neoptera;Endopterygota;Coleoptera;Polyphaga;Cucu  
 jiformia;Chrysomeloidea;Chrysomelidae;Galerucinae;Luperini;Diabroticina;D  
 iabroticites;Diabrotica;Diabrotica virgifera;Diabrotica virgifera  
 virgifera

UdeM00000010536 6596 142.1 UdeM00000010536 XP\_045216906.1 35 223  
 103 4 120 302 176 396 1.20E-30 142.1 6596 cellular  
 organisms;Eukaryota;Opisthokonta;Metazoa;Eumetazoa;Bilateria;Protostomia;  
 Spiralia;Lophotrochozoa;Mollusca;Bivalvia;Autobranchia;Heteroconchia;Euhe  
 terodonta;Imparidentia;Venerida;Veneroidea;Veneridae;Mercenaria;Mercenari  
 a mercenaria

UdeM00000010537 8218 277.7 UdeM00000010537 XP\_034089596.1 58.2 225  
 92 2 1 225 535 757 1.40E-71 277.7 8218 cellular  
 organisms;Eukaryota;Opisthokonta;Metazoa;Eumetazoa;Bilateria;Deuterostomi  
 a;Chordata;Craniata;Vertebrata;Gnathostomata;Teleostomi;Euteleostomi;Acti  
 nopterygii;Actinopteri;Neopterygii;Teleostei;Osteoglossocephalai;Clupeoce  
 phala;Euteleosteomorpha;Neoteleostei;Eurypterygia;Ctenosquamata;Acanthomo  
 rphata;Euacanthomorphacea;Percomorphaceae;Eupercaria;Perciformes;Notothen  
 ioidei;Bathydraconidae;Gymnodraco;Gymnodraco acuticeps

UdeM00000010538 1250792 366.7 UdeM00000010538 XP\_041857893.1 60.1  
 263 105 0 2 264 209 471 2.50E-98 366.7 1250792  
 cellular  
 organisms;Eukaryota;Opisthokonta;Metazoa;Eumetazoa;Bilateria;Deuterostomi  
 a;Chordata;Craniata;Vertebrata;Gnathostomata;Teleostomi;Euteleostomi;Acti  
 nopterygii;Actinopteri;Neopterygii;Teleostei;Osteoglossocephalai;Clupeoce  
 phala;Euteleosteomorpha;Neoteleostei;Eurypterygia;Ctenosquamata;Acanthomo  
 rphata;Euacanthomorphacea;Percomorphaceae;Ovalentaria;Atherinomorphae;Ath  
 eriniformes;Melanotaeniidae;Melanotaenia;Melanotaenia boesemani

UdeM00000010539 150288 260.4 UdeM00000010539 XP\_020788097.1 61.9  
 181 68 1 1 181 365 544 1.70E-66 260.4 150288  
 cellular  
 organisms;Eukaryota;Opisthokonta;Metazoa;Eumetazoa;Bilateria;Deuterostomi  
 a;Chordata;Craniata;Vertebrata;Gnathostomata;Teleostomi;Euteleostomi;Acti  
 nopterygii;Actinopteri;Neopterygii;Teleostei;Osteoglossocephalai;Clupeoce  
 phala;Euteleosteomorpha;Neoteleostei;Eurypterygia;Ctenosquamata;Acanthomo  
 rphata;Euacanthomorphacea;Percomorphaceae;Gobiaria;Gobiiformes;Gobioidei;  
 Gobiidae;Oxudercinae;Boleophthalmus;Boleophthalmus pectinirostris

UdeM00000010542 1735272 305.1 UdeM00000010542 XP\_041347017.1 50  
 312 121 3 8 286 90 399 1.00E-79 305.1 1735272  
 cellular  
 organisms;Eukaryota;Opisthokonta;Metazoa;Eumetazoa;Bilateria;Protostomia;  
 Spiralia;Lophotrochozoa;Mollusca;Gastropoda;Neomphalina;Neomphaloidea;Pel  
 tospiridae;Gigantopelta;Gigantopelta aegis

UdeM00000010543 6579 204.5 UdeM00000010543 XP\_033743002.1 44.1 220  
 121 2 113 330 10 229 2.10E-49 204.5 6579 cellular  
 organisms;Eukaryota;Opisthokonta;Metazoa;Eumetazoa;Bilateria;Protostomia;  
 Spiralia;Lophotrochozoa;Mollusca;Bivalvia;Autobranchia;Pteriormorphia;Pect  
 inida;Pectinoidea;Pectinidae;Pecten;Pecten maximus

UdeM00000010544 7739 195.3 UdeM00000010544 XP\_035659254.1 38.1 307  
 176 5 1 303 579 875 1.10E-46 195.3 7739 cellular  
 organisms;Eukaryota;Opisthokonta;Metazoa;Eumetazoa;Bilateria;Deuterostomi

a;Chordata;Cephalochordata;Leptocardii;Amphioxiformes;Branchiostomidae;Branchiostoma;Branchiostoma floridae

UdeM00000010545 50390 80.9 UdeM00000010545 XP\_028135830.1 37.9 103  
52 1 1 91 201 303 9.60E-13 80.9 50390 cellular  
organisms;Eukaryota;Opisthokonta;Metazoa;Eumetazoa;Bilateria;Protostomia;  
Ecdysozoa;Panarthropoda;Arthropoda;Mandibulata;Pancrustacea;Hexapoda;Insecta;  
Dicondylia;Pterygota;Neoptera;Endopterygota;Coleoptera;Polyphaga;Cucujiformia;  
Chrysomeloidea;Chrysomelidae;Galerucinae;Luperini;Diabroticina;Diabroticites;  
Diabrotica;Diabrotica virgifera;Diabrotica virgifera virgifera

UdeM00000010546 29159 82.8 UdeM00000010546 XP\_034331441.1 38.7 119  
71 1 1 117 883 1001 3.20E-13 82.8 29159 cellular  
organisms;Eukaryota;Opisthokonta;Metazoa;Eumetazoa;Bilateria;Protostomia;  
Spiralia;Lophotrochozoa;Mollusca;Bivalvia;Autobranchia;Pteriormorphia;Ostreida;  
Ostreoidea;Ostreidae;Crassostrea;Crassostrea gigas

UdeM00000010548 6596 226.5 UdeM00000010548 XP\_045216906.1 41.3 271  
131 5 1 269 154 398 5.50E-56 226.5 6596 cellular  
organisms;Eukaryota;Opisthokonta;Metazoa;Eumetazoa;Bilateria;Protostomia;  
Spiralia;Lophotrochozoa;Mollusca;Bivalvia;Autobranchia;Heteroconchia;Euheterodonta;  
Imparidentia;Venerida;Veneroidea;Veneridae;Mercenaria;Mercenaria mercenaria

UdeM00000010549 6573 62.4 UdeM00000010549 XP\_021339675.1 38.1 97  
56 2 5 97 81 177 5.80E-07 62.4 6573 cellular  
organisms;Eukaryota;Opisthokonta;Metazoa;Eumetazoa;Bilateria;Protostomia;  
Spiralia;Lophotrochozoa;Mollusca;Bivalvia;Autobranchia;Pteriormorphia;Pectinida;  
Pectinoidea;Pectinidae;Mizuhopecten;Mizuhopecten yessoensis

UdeM00000010550 29159 161.8 UdeM00000010550 XP\_034319609.1 52.3 132  
63 0 44 175 823 954 8.10E-37 161.8 29159 cellular  
organisms;Eukaryota;Opisthokonta;Metazoa;Eumetazoa;Bilateria;Protostomia;  
Spiralia;Lophotrochozoa;Mollusca;Bivalvia;Autobranchia;Pteriormorphia;Ostreida;  
Ostreoidea;Ostreidae;Crassostrea;Crassostrea gigas

UdeM00000010551 29159 96.3 UdeM00000010551 XP\_034315421.1 52.8 108  
45 3 3 106 364 469 2.60E-17 96.3 29159 cellular  
organisms;Eukaryota;Opisthokonta;Metazoa;Eumetazoa;Bilateria;Protostomia;  
Spiralia;Lophotrochozoa;Mollusca;Bivalvia;Autobranchia;Pteriormorphia;Ostreida;  
Ostreoidea;Ostreidae;Crassostrea;Crassostrea gigas

UdeM00000010552 150288 258.8 UdeM00000010552 XP\_020788097.1 60.2  
181 71 1 1 181 393 572 5.00E-66 258.8 150288  
cellular  
organisms;Eukaryota;Opisthokonta;Metazoa;Eumetazoa;Bilateria;Deuterostomia;  
Chordata;Craniata;Vertebrata;Gnathostomata;Teleostomi;Euteleostomi;Actinopterygii;  
Actinopteri;Neopterygii;Teleostei;Osteoglossocephalai;Clupeocephala;Euteleostei;  
Neoteleostei;Eurypterygia;Ctenosquamata;Acanthopterygii;Euacanthopterygii;  
Percomorphaceae;Gobiaria;Gobiiformes;Gobioidei;Gobiidae;Oxudercinae;Boleophthalmus;  
Boleophthalmus pectinirostris

UdeM00000010554 6579 58.2 UdeM00000010554 XP\_033752164.1 40 65  
33 1 4 68 400 458 5.10E-06 58.2 6579 cellular  
organisms;Eukaryota;Opisthokonta;Metazoa;Eumetazoa;Bilateria;Protostomia;  
Spiralia;Lophotrochozoa;Mollusca;Bivalvia;Autobranchia;Pteriormorphia;Pectinida;  
Pectinoidea;Pectinidae;Pecten;Pecten maximus

UdeM00000010557 8218 91.3 UdeM00000010557 XP\_034052687.1 60.3 68  
27 0 2 69 341 408 5.30E-16 91.3 8218 cellular  
organisms;Eukaryota;Opisthokonta;Metazoa;Eumetazoa;Bilateria;Deuterostomia;  
Chordata;Craniata;Vertebrata;Gnathostomata;Teleostomi;Euteleostomi;Actinopterygii;

nopterygii;Actinopteri;Neopterygii;Teleostei;Osteoglossocephalai;Clupeocephala;Euteleostei;Neoteleostei;Eurypterygia;Ctenosquamata;Acanthomorphata;Euacanthomorphacea;Percomorphaceae;Eupercaria;Perciformes;Notothenioidei;Bathydraconidae;Gymnodraco;Gymnodraco acuticeps

UdeM00000010558 150288 285.4 UdeM00000010558 XP\_020788097.1 60.3  
199 79 0 2 200 383 581 5.60E-74 285.4 150288  
cellular

organisms;Eukaryota;Opisthokonta;Metazoa;Eumetazoa;Bilateria;Deuterostomia;Chordata;Craniata;Vertebrata;Gnathostomata;Teleostomi;Euteleostomi;Actinopterygii;Actinopteri;Neopterygii;Teleostei;Osteoglossocephalai;Clupeocephala;Euteleostei;Neoteleostei;Eurypterygia;Ctenosquamata;Acanthomorphata;Euacanthomorphacea;Percomorphaceae;Gobiaria;Gobiiformes;Gobioidei;Gobiidae;Oxudercinae;Boleophthalmus;Boleophthalmus pectinirostris

UdeM00000010559 6500 397.5 UdeM00000010559 XP\_035826907.1 40.5 571  
322 8 253 818 120 677 4.50E-107 397.5 6500 cellular

organisms;Eukaryota;Opisthokonta;Metazoa;Eumetazoa;Bilateria;Protostomia;Spiralia;Lophotrochozoa;Mollusca;Gastropoda;Heterobranchia;Euthyneura;Tectipleura;Aplysiida;Aplysioidae;Aplysiidae;Aplysia;Aplysia californica

UdeM00000010560 7739 84.3 UdeM00000010560 XP\_035659254.1 41.2 131  
70 4 14 138 43 172 1.40E-13 84.3 7739 cellular

organisms;Eukaryota;Opisthokonta;Metazoa;Eumetazoa;Bilateria;Deuterostomia;Chordata;Cephalochordata;Leptocardii;Amphioxiformes;Branchiostomidae;Branchiostoma;Branchiostoma floridae

UdeM00000010561 6596 60.1 UdeM00000010561 XP\_045184751.1 37.8 74  
45 1 14 86 207 280 1.80E-06 60.1 6596 cellular

organisms;Eukaryota;Opisthokonta;Metazoa;Eumetazoa;Bilateria;Protostomia;Spiralia;Lophotrochozoa;Mollusca;Bivalvia;Autobranchia;Heteroconchia;Euheterodonta;Imparidentia;Venerida;Veneroidea;Veneridae;Mercenaria;Mercenaria mercenaria

UdeM00000010562 37621 60.8 UdeM00000010562 XP\_014678256.1 49.1 55  
25 1 1 52 114 168 1.00E-06 60.8 37621 cellular

organisms;Eukaryota;Opisthokonta;Metazoa;Eumetazoa;Bilateria;Protostomia;Ecdysozoa;Scalidophora;Priapulida;Priapulimorpha;Priapulimorphida;Priapulidae;Priapululus;Priapululus caudatus

UdeM00000010563 441366 345.5 UdeM00000010563 XP\_028318792.1 62.9  
237 88 0 1 237 538 774 5.40E-92 345.5 441366  
cellular

organisms;Eukaryota;Opisthokonta;Metazoa;Eumetazoa;Bilateria;Deuterostomia;Chordata;Craniata;Vertebrata;Gnathostomata;Teleostomi;Euteleostomi;Actinopterygii;Actinopteri;Neopterygii;Teleostei;Osteoglossocephalai;Clupeocephala;Euteleostei;Neoteleostei;Eurypterygia;Ctenosquamata;Acanthomorphata;Euacanthomorphacea;Percomorphaceae;Ovalentaria;Blenniimorphae;Blenniiformes;Gobiesocoidae;Gobiesocidae;Gobiesocinae;Gouania;Gouania willdenowi

UdeM00000010564 7574 461.1 UdeM00000010564 XP\_023932112.1 49.1 454  
226 4 353 804 1 451 3.40E-126 461.1 7574 cellular

organisms;Eukaryota;Opisthokonta;Metazoa;Eumetazoa;Bilateria;Protostomia;Spiralia;Lophotrochozoa;Brachiopoda;Linguliformea;Lingulata;Lingulida;Linguloidea;Lingulidae;Lingula;Lingula anatina

UdeM00000010566 6596 106.3 UdeM00000010566 XP\_045177674.1 60.8 79  
31 0 1 79 328 406 2.40E-20 106.3 6596 cellular

organisms;Eukaryota;Opisthokonta;Metazoa;Eumetazoa;Bilateria;Protostomia;Spiralia;Lophotrochozoa;Mollusca;Bivalvia;Autobranchia;Heteroconchia;Euheterodonta

terodonta;Imparidentia;Venerida;Veneroidea;Veneridae;Mercenaria;Mercenari  
 a mercenaria  
 UdeM00000010567 6596 125.2 UdeM00000010567 XP\_045189229.1 47.6 126  
 65 1 120 244 154 279 1.20E-25 125.2 6596 cellular  
 organisms;Eukaryota;Opisthokonta;Metazoa;Eumetazoa;Bilateria;Protostomia;  
 Spiralia;Lophotrochozoa;Mollusca;Bivalvia;Autobranchia;Heteroconchia;Euhe  
 terodonta;Imparidentia;Venerida;Veneroidea;Veneridae;Mercenaria;Mercenari  
 a mercenaria  
 UdeM00000010568 6573 100.9 UdeM00000010568 XP\_021371412.1 43 107  
 60 1 2 107 1126 1232 1.00E-18 100.9 6573 cellular  
 organisms;Eukaryota;Opisthokonta;Metazoa;Eumetazoa;Bilateria;Protostomia;  
 Spiralia;Lophotrochozoa;Mollusca;Bivalvia;Autobranchia;Pteriormorphia;Pect  
 inida;Pectinoidea;Pectinidae;Mizuhopecten;Mizuhopecten yessoensis  
 UdeM00000010569 10224 344 UdeM00000010569 XP\_006820181.1 40.2 503  
 239 5 2 443 92 593 3.00E-91 344 10224 cellular  
 organisms;Eukaryota;Opisthokonta;Metazoa;Eumetazoa;Bilateria;Deuterostomi  
 a;Hemichordata;Enteropneusta;Harrimaniidae;Saccoglossus;Saccoglossus  
 kowalevskii  
 UdeM00000010570 6596 97.8 UdeM00000010570 XP\_045179269.1 47.6 105  
 48 2 13 117 373 470 2.50E-17 97.8 6596 cellular  
 organisms;Eukaryota;Opisthokonta;Metazoa;Eumetazoa;Bilateria;Protostomia;  
 Spiralia;Lophotrochozoa;Mollusca;Bivalvia;Autobranchia;Heteroconchia;Euhe  
 terodonta;Imparidentia;Venerida;Veneroidea;Veneridae;Mercenaria;Mercenari  
 a mercenaria  
 UdeM00000010571 6596 199.9 UdeM00000010571 XP\_045177776.1 35.6 289  
 180 2 5 293 818 1100 6.70E-48 199.9 6596 cellular  
 organisms;Eukaryota;Opisthokonta;Metazoa;Eumetazoa;Bilateria;Protostomia;  
 Spiralia;Lophotrochozoa;Mollusca;Bivalvia;Autobranchia;Heteroconchia;Euhe  
 terodonta;Imparidentia;Venerida;Veneroidea;Veneridae;Mercenaria;Mercenari  
 a mercenaria  
 UdeM00000010572 133434 70.5 UdeM00000010572 XP\_022111405.1 37  
 92 54 3 79 167 19 109 4.30E-09 70.5 133434  
 cellular  
 organisms;Eukaryota;Opisthokonta;Metazoa;Eumetazoa;Bilateria;Deuterostomi  
 a;Echinodermata;Eleutherozoa;Asterozoa;Asteroidea;Valvatacea;Valvatida;Ac  
 anthasteridae;Acanthaster;Acanthaster planci  
 UdeM00000010573 133434 71.6 UdeM00000010573 XP\_022111405.1 36.5  
 96 57 3 79 171 19 113 1.50E-09 71.6 133434  
 cellular  
 organisms;Eukaryota;Opisthokonta;Metazoa;Eumetazoa;Bilateria;Deuterostomi  
 a;Echinodermata;Eleutherozoa;Asterozoa;Asteroidea;Valvatacea;Valvatida;Ac  
 anthasteridae;Acanthaster;Acanthaster planci  
 UdeM00000010574 6565 122.5 UdeM00000010574 XP\_022322655.1 51.7 118  
 55 1 6 123 422 537 3.80E-25 122.5 6565 cellular  
 organisms;Eukaryota;Opisthokonta;Metazoa;Eumetazoa;Bilateria;Protostomia;  
 Spiralia;Lophotrochozoa;Mollusca;Bivalvia;Autobranchia;Pteriormorphia;Ostr  
 eida;Ostreoidea;Ostreidae;Crassostrea;Crassostrea virginica  
 UdeM00000010575 6565 133.7 UdeM00000010575 XP\_022322655.1 50.3 145  
 55 2 2 129 225 369 1.80E-28 133.7 6565 cellular  
 organisms;Eukaryota;Opisthokonta;Metazoa;Eumetazoa;Bilateria;Protostomia;  
 Spiralia;Lophotrochozoa;Mollusca;Bivalvia;Autobranchia;Pteriormorphia;Ostr  
 eida;Ostreoidea;Ostreidae;Crassostrea;Crassostrea virginica  
 UdeM00000010576 29159 220.7 UdeM00000010576 XP\_034339165.1 38.3 334  
 192 8 1 331 186 508 2.80E-54 220.7 29159 cellular

organisms;Eukaryota;Opisthokonta;Metazoa;Eumetazoa;Bilateria;Protostomia;Spiralia;Lophotrochozoa;Mollusca;Bivalvia;Autobranchia;Pteriormorphia;Ostreida;Ostreoidea;Ostreidae;Crassostrea;Crassostrea gigas  
UdeM00000010578 29159 419.5 UdeM00000010578 XP\_034299474.1 43.7 526  
281 7 3 522 239 755 6.40E-114 419.5 29159 cellular

organisms;Eukaryota;Opisthokonta;Metazoa;Eumetazoa;Bilateria;Protostomia;Spiralia;Lophotrochozoa;Mollusca;Bivalvia;Autobranchia;Pteriormorphia;Ostreida;Ostreoidea;Ostreidae;Crassostrea;Crassostrea gigas  
UdeM00000010577 29159 485.7 UdeM00000010577 XP\_034299474.1 42.9 606  
330 8 32 630 159 755 8.80E-134 485.7 29159 cellular

organisms;Eukaryota;Opisthokonta;Metazoa;Eumetazoa;Bilateria;Protostomia;Spiralia;Lophotrochozoa;Mollusca;Bivalvia;Autobranchia;Pteriormorphia;Ostreida;Ostreoidea;Ostreidae;Crassostrea;Crassostrea gigas  
UdeM00000010579 7574 105.1 UdeM00000010579 XP\_013388573.1 42.2 147  
83 1 1 147 795 939 7.70E-20 105.1 7574 cellular

organisms;Eukaryota;Opisthokonta;Metazoa;Eumetazoa;Bilateria;Protostomia;Spiralia;Lophotrochozoa;Brachiopoda;Linguliformea;Lingulata;Lingulida;Linguloidea;Lingulidae;Lingula;Lingula anatina  
UdeM00000010580 7739 123.2 UdeM00000010580 XP\_035685260.1 37.1 210  
122 5 1 206 586 789 4.10E-25 123.2 7739 cellular

organisms;Eukaryota;Opisthokonta;Metazoa;Eumetazoa;Bilateria;Deuterostomia;Chordata;Cephalochordata;Leptocardii;Amphioxiformes;Branchiostomidae;Branchiostoma;Branchiostoma floridae  
UdeM00000010581 6596 476.1 UdeM00000010581 XP\_045177779.1 35.6 765  
416 12 1 752 97 797 1.00E-130 476.1 6596 cellular

organisms;Eukaryota;Opisthokonta;Metazoa;Eumetazoa;Bilateria;Protostomia;Spiralia;Lophotrochozoa;Mollusca;Bivalvia;Autobranchia;Heteroconchia;Euheterodonta;Imparidentia;Venerida;Veneroidea;Veneridae;Mercenaria;Mercenaria mercenaria  
UdeM00000010582 6596 351.7 UdeM00000010582 XP\_045177779.1 34.1 634  
320 10 1 622 97 644 2.40E-93 351.7 6596 cellular

organisms;Eukaryota;Opisthokonta;Metazoa;Eumetazoa;Bilateria;Protostomia;Spiralia;Lophotrochozoa;Mollusca;Bivalvia;Autobranchia;Heteroconchia;Euheterodonta;Imparidentia;Venerida;Veneroidea;Veneridae;Mercenaria;Mercenaria mercenaria  
UdeM00000010584 6596 207.2 UdeM00000010584 XP\_045179269.1 38.8 273  
159 2 35 306 244 509 4.60E-50 207.2 6596 cellular

organisms;Eukaryota;Opisthokonta;Metazoa;Eumetazoa;Bilateria;Protostomia;Spiralia;Lophotrochozoa;Mollusca;Bivalvia;Autobranchia;Pteriormorphia;Ostreida;Ostreoidea;Ostreidae;Crassostrea;Crassostrea gigas  
UdeM00000010585 29159 104.4 UdeM00000010585 XP\_034318217.1 43 114  
57 2 1 106 414 527 9.70E-20 104.4 29159 cellular

organisms;Eukaryota;Opisthokonta;Metazoa;Eumetazoa;Bilateria;Protostomia;Spiralia;Lophotrochozoa;Mollusca;Bivalvia;Autobranchia;Heteroconchia;Euheterodonta;Imparidentia;Venerida;Veneroidea;Veneridae;Mercenaria;Mercenaria mercenaria  
UdeM00000010586 6596 212.2 UdeM00000010586 XP\_045216906.1 45.1 226  
119 4 9 232 176 398 9.70E-52 212.2 6596 cellular

organisms;Eukaryota;Opisthokonta;Metazoa;Eumetazoa;Bilateria;Protostomia;Spiralia;Lophotrochozoa;Mollusca;Bivalvia;Autobranchia;Heteroconchia;Euheterodonta;Imparidentia;Venerida;Veneroidea;Veneridae;Mercenaria;Mercenaria mercenaria  
UdeM00000010587 6565 66.2 UdeM00000010587 XP\_022334997.1 41.2 80  
41 1 9 88 121 194 4.80E-08 66.2 6565 cellular



organisms;Eukaryota;Opisthokonta;Metazoa;Eumetazoa;Bilateria;Protostomia;Spiralia;Lophotrochozoa;Mollusca;Bivalvia;Autobranchia;Pteriormorphia;Ostr

UdeM00000010588 1735272 141 UdeM00000010588 XP\_041373491.1 61.3  
93 36 0 2 94 252 344 8.30E-31 141 1735272

cellular

organisms;Eukaryota;Opisthokonta;Metazoa;Eumetazoa;Bilateria;Protostomia;Spiralia;Lophotrochozoa;Mollusca;Gastropoda;Neomphalina;Neomphaloidea;Pel

UdeM00000010590 70779 69.7 UdeM00000010590 XP\_015778628.1 49.4 81  
40 1 1 80 1 81 2.00E-09 69.7 70779 cellular

organisms;Eukaryota;Opisthokonta;Metazoa;Eumetazoa;Cnidaria;Anthozoa;Hexa  
corallia;Scleractinia;Astrocoeniina;Acroporidae;Acropora;Acropora  
digitifera

UdeM00000010593 181472 156 UdeM00000010593 XP\_029958384.1 49.7  
151 75 1 2 151 62 212 4.10E-35 156 181472

cellular

organisms;Eukaryota;Opisthokonta;Metazoa;Eumetazoa;Bilateria;Deuterostomi  
a;Chordata;Craniata;Vertebrata;Gnathostomata;Teleostomi;Euteleostomi;Acti  
nopterygii;Actinopteri;Neopterygii;Teleostei;Osteoglossocephalai;Clupeoce  
phala;Euteleosteomorpha;Neoteleostei;Eurypterygia;Ctenosquamata;Acanthomo  
rphata;Euacanthomorphacea;Percomorphaceae;Ovalentaria;Blenniimorphae;Blen  
niiformes;Blennioidei;Blenniidae;Salariinae;Salarias;Salarias fasciatus

UdeM00000010594 6573 142.9 UdeM00000010594 XP\_021375729.1 40 190  
97 3 1 173 442 631 4.10E-31 142.9 6573 cellular

organisms;Eukaryota;Opisthokonta;Metazoa;Eumetazoa;Bilateria;Protostomia;Spiralia;Lophotrochozoa;Mollusca;Bivalvia;Autobranchia;Pteriormorphia;Pect

UdeM00000010595 1676925 89.7 UdeM00000010595 XP\_023670281.1 47.1  
87 44 1 1 85 14 100 1.90E-15 89.7 1676925

cellular

organisms;Eukaryota;Opisthokonta;Metazoa;Eumetazoa;Bilateria;Deuterostomi  
a;Chordata;Craniata;Vertebrata;Gnathostomata;Teleostomi;Euteleostomi;Acti  
nopterygii;Actinopteri;Neopterygii;Teleostei;Osteoglossocephalai;Osteoglo  
ssocephala;Osteoglossomorpha;Osteoglossiformes;Mormyridae;Paramormyrops;P  
aramormyrops kingsleyae

UdeM00000010597 50390 352.4 UdeM00000010597 XP\_028142380.1 59.5 242  
98 0 2 243 49 290 4.50E-94 352.4 50390 cellular

organisms;Eukaryota;Opisthokonta;Metazoa;Eumetazoa;Bilateria;Protostomia;Ecdysozoa;Panarthropoda;Arthropoda;Mandibulata;Pancrustacea;Hexapoda;Inse

UdeM00000010598 8218 433.3 UdeM00000010598 XP\_034089596.1 59.1 330  
135 0 1 330 451 780 2.70E-118 433.3 8218 cellular

organisms;Eukaryota;Opisthokonta;Metazoa;Eumetazoa;Bilateria;Deuterostomi  
a;Chordata;Craniata;Vertebrata;Gnathostomata;Teleostomi;Euteleostomi;Acti  
nopterygii;Actinopteri;Neopterygii;Teleostei;Osteoglossocephalai;Clupeoce  
phala;Euteleosteomorpha;Neoteleostei;Eurypterygia;Ctenosquamata;Acanthomo  
rphata;Euacanthomorphacea;Percomorphaceae;Eupercaria;Perciformes;Notothen  
ioidei;Bathydraconidae;Gymnodraco;Gymnodraco acuticeps

UdeM00000010599 41875 190.7 UdeM00000010599 XP\_007513533.1 63.8 127  
39 1 1 127 157 276 1.20E-45 190.7 41875 cellular

organisms;Eukaryota;Viridiplantae;Chlorophyta;Mamiellophyceae;Mamiellales  
;Bathycoccaceae;Bathycoccus;Bathycoccus prasinos  
UdeM00000010600 29159 128.3 UdeM00000010600 XP\_034338992.1 39.3 196  
100 2 4 180 111 306 1.00E-26 128.3 29159 cellular  
organisms;Eukaryota;Opisthokonta;Metazoa;Eumetazoa;Bilateria;Protostomia;  
Spiralia;Lophotrochozoa;Mollusca;Bivalvia;Autobranchia;Pteriormorphia;Ostr  
eida;Ostreoidea;Ostreidae;Crassostrea;Crassostrea gigas  
UdeM00000010601 6579 65.9 UdeM00000010601 XP\_033739317.1 35.3 119  
72 3 4 121 199 313 6.80E-08 65.9 6579 cellular  
organisms;Eukaryota;Opisthokonta;Metazoa;Eumetazoa;Bilateria;Protostomia;  
Spiralia;Lophotrochozoa;Mollusca;Bivalvia;Autobranchia;Pteriormorphia;Pect  
inida;Pectinoidea;Pectinidae;Pecten;Pecten maximus  
UdeM00000010602 45264 188.3 UdeM00000010602 XP\_044175508.1 33.9 357  
211 8 6 349 9 353 1.60E-44 188.3 45264 cellular  
organisms;Eukaryota;Opisthokonta;Metazoa;Eumetazoa;Cnidaria;Anthozoa;Hexa  
corallia;Scleractinia;Astrocoeniina;Acroporidae;Acropora;Acropora  
millepora  
UdeM00000010604 50390 334 UdeM00000010604 XP\_028147518.1 60.7 224  
88 0 1 224 72 295 1.60E-88 334 50390 cellular  
organisms;Eukaryota;Opisthokonta;Metazoa;Eumetazoa;Bilateria;Protostomia;  
Ecdysozoa;Panarthropoda;Arthropoda;Mandibulata;Pancrustacea;Hexapoda;Inse  
cta;Dicondylia;Pterygota;Neoptera;Endopterygota;Coleoptera;Polyphaga;Cucu  
jiformia;Chrysomeloidea;Chrysomelidae;Galerucinae;Luperini;Diabroticina;D  
iabroticites;Diabrotica;Diabrotica virgifera;Diabrotica virgifera  
virgifera  
UdeM00000010605 6579 69.3 UdeM00000010605 XP\_033752164.1 33.6 146  
74 5 68 197 320 458 6.20E-09 69.3 6579 cellular  
organisms;Eukaryota;Opisthokonta;Metazoa;Eumetazoa;Bilateria;Protostomia;  
Spiralia;Lophotrochozoa;Mollusca;Bivalvia;Autobranchia;Pteriormorphia;Pect  
inida;Pectinoidea;Pectinidae;Pecten;Pecten maximus  
UdeM00000010606 6579 69.7 UdeM00000010606 XP\_033752164.1 33.6 146  
74 5 16 145 320 458 3.50E-09 69.7 6579 cellular  
organisms;Eukaryota;Opisthokonta;Metazoa;Eumetazoa;Bilateria;Protostomia;  
Spiralia;Lophotrochozoa;Mollusca;Bivalvia;Autobranchia;Pteriormorphia;Pect  
inida;Pectinoidea;Pectinidae;Pecten;Pecten maximus  
UdeM00000010607 8218 389 UdeM00000010607 XP\_034089596.1 61.1 285  
111 0 1 285 479 763 5.10E-105 389 8218 cellular  
organisms;Eukaryota;Opisthokonta;Metazoa;Eumetazoa;Bilateria;Deuterostomi  
a;Chordata;Craniata;Vertebrata;Gnathostomata;Teleostomi;Euteleostomi;Acti  
nopterygii;Actinopteri;Neopterygii;Teleostei;Osteoglossocephalai;Clupeoce  
phala;Euteleosteomorpha;Neoteleostei;Eurypterygia;Ctenosquamata;Acanthomo  
rphata;Euacanthomorphacea;Percomorphaceae;Eupercaria;Perciformes;Notothen  
ioidei;Bathydraconidae;Gymnodraco;Gymnodraco acuticeps  
UdeM00000010608 50390 241.9 UdeM00000010608 XP\_028142380.1 62 158  
60 0 2 159 273 430 5.60E-61 241.9 50390 cellular  
organisms;Eukaryota;Opisthokonta;Metazoa;Eumetazoa;Bilateria;Protostomia;  
Ecdysozoa;Panarthropoda;Arthropoda;Mandibulata;Pancrustacea;Hexapoda;Inse  
cta;Dicondylia;Pterygota;Neoptera;Endopterygota;Coleoptera;Polyphaga;Cucu  
jiformia;Chrysomeloidea;Chrysomelidae;Galerucinae;Luperini;Diabroticina;D  
iabroticites;Diabrotica;Diabrotica virgifera;Diabrotica virgifera  
virgifera  
UdeM00000010609 7830 108.6 UdeM00000010609 XP\_038671297.1 55.4 74  
33 0 3 76 700 773 3.60E-21 108.6 7830 cellular  
organisms;Eukaryota;Opisthokonta;Metazoa;Eumetazoa;Bilateria;Deuterostomi

a;Chordata;Craniata;Vertebrata;Gnathostomata;Chondrichthyes;Elasmobranchii;Selachii;Galeomorphii;Galeoidea;Carcharhiniformes;Scyliorhinidae;Scyliorhinus;Scyliorhinus canicula

UdeM00000010610 6579 149.4 UdeM00000010610 XP\_033758276.1 50.3 145  
70 1 1 143 32 176 5.10E-33 149.4 6579 cellular

organisms;Eukaryota;Opisthokonta;Metazoa;Eumetazoa;Bilateria;Protostomia;Spiralia;Lophotrochozoa;Mollusca;Bivalvia;Autobranchia;Pteriormorphia;Pectinida;Pectinoidea;Pectinidae;Pecten;Pecten maximus

UdeM00000010611 29159 142.5 UdeM00000010611 XP\_034339168.1 53.4 133  
62 0 1 133 879 1011 3.90E-31 142.5 29159 cellular

organisms;Eukaryota;Opisthokonta;Metazoa;Eumetazoa;Bilateria;Protostomia;Spiralia;Lophotrochozoa;Mollusca;Bivalvia;Autobranchia;Pteriormorphia;Ostreida;Ostreoidea;Ostreidae;Crassostrea;Crassostrea gigas

UdeM00000010612 150288 258.8 UdeM00000010612 XP\_020788097.1 59.4  
175 71 0 1 175 365 539 5.30E-66 258.8 150288

cellular

organisms;Eukaryota;Opisthokonta;Metazoa;Eumetazoa;Bilateria;Deuterostomia;Chordata;Craniata;Vertebrata;Gnathostomata;Teleostomi;Euteleostomi;Actinopterygii;Actinopteri;Neopterygii;Teleostei;Osteoglossocephalai;Clupeocephala;Euteleosteomorpha;Neoteleostei;Eurypterygia;Ctenosquamata;Acanthomorphata;Euacanthomorphacea;Percomorphaceae;Gobiaria;Gobiiformes;Gobioidei;Gobiidae;Oxudercinae;Boleophthalmus;Boleophthalmus pectinirostris

UdeM00000010613 6573 110.5 UdeM00000010613 XP\_021346189.1 35.2 210  
113 4 173 363 1 206 4.60E-21 110.5 6573 cellular

organisms;Eukaryota;Opisthokonta;Metazoa;Eumetazoa;Bilateria;Protostomia;Spiralia;Lophotrochozoa;Mollusca;Bivalvia;Autobranchia;Pteriormorphia;Pectinida;Pectinoidea;Pectinidae;Mizuhopecten;Mizuhopecten yessoensis

UdeM00000010615 278856 645.6 UdeM00000010615 XP\_032528088.1 55.1  
481 216 0 1 481 287 767 5.10E-182 645.6 278856

cellular

organisms;Eukaryota;Opisthokonta;Metazoa;Eumetazoa;Bilateria;Protostomia;Ecdysozoa;Panarthropoda;Arthropoda;Mandibulata;Pancrustacea;Hexapoda;Insecta;Dicondylia;Pterygota;Neoptera;Endopterygota;Amphiesmenoptera;Lepidoptera;Glossata;Neolepidoptera;Heteroneura;Ditrysia;Obtectomera;Papilionoidea;Nymphalidae;Danainae;Danaini;Danaina;Danaus;Danaus;Danaus

plexippus;Danaus plexippus plexippus

UdeM00000010616 50390 469.2 UdeM00000010616 XP\_028142380.1 58.7 332  
136 1 1 331 31 362 4.50E-129 469.2 50390 cellular

organisms;Eukaryota;Opisthokonta;Metazoa;Eumetazoa;Bilateria;Protostomia;Ecdysozoa;Panarthropoda;Arthropoda;Mandibulata;Pancrustacea;Hexapoda;Insecta;Dicondylia;Pterygota;Neoptera;Endopterygota;Coleoptera;Polyphaga;Cucujiformia;Chrysomeloidea;Chrysomelidae;Galerucinae;Luperini;Diabroticina;Diabroticites;Diabrotica;Diabrotica virgifera;Diabrotica virgifera virgifera

UdeM00000010617 441366 276.9 UdeM00000010617 XP\_028320243.1 55.8  
226 98 1 1 224 509 734 2.30E-71 276.9 441366

cellular

organisms;Eukaryota;Opisthokonta;Metazoa;Eumetazoa;Bilateria;Deuterostomia;Chordata;Craniata;Vertebrata;Gnathostomata;Teleostomi;Euteleostomi;Actinopterygii;Actinopteri;Neopterygii;Teleostei;Osteoglossocephalai;Clupeocephala;Euteleosteomorpha;Neoteleostei;Eurypterygia;Ctenosquamata;Acanthomorphata;Euacanthomorphacea;Percomorphaceae;Ovalentaria;Blenniimorphae;Blenniiformes;Gobiesocoidae;Gobiesocidae;Gobiesocinae;Gouania;Gouania

willdenowi

UdeM00000010618 1529436 438 UdeM00000010618 XP\_033101539.1 31.3  
 1031 518 23 15 867 5 1023 2.90E-119 438 1529436  
 cellular  
 organisms;Eukaryota;Opisthokonta;Metazoa;Eumetazoa;Bilateria;Deuterostomi  
 a;Echinodermata;Pelmatozoa;Crinoidea;Articulata;Comatulida;Comatulidae;Co  
 matulinae;Anneissia;Anneissia japonica  
 UdeM00000010619 6579 265.4 UdeM00000010619 XP\_033730606.1 43.9 358  
 184 8 1 347 1 352 1.00E-67 265.4 6579 cellular  
 organisms;Eukaryota;Opisthokonta;Metazoa;Eumetazoa;Bilateria;Protostomia;  
 Spiralia;Lophotrochozoa;Mollusca;Bivalvia;Autobranchia;Pteriormorphia;Pect  
 inida;Pectinoidea;Pectinidae;Pecten;Pecten maximus  
 UdeM00000010622 6579 76.6 UdeM00000010622 XP\_033761504.1 50 64  
 32 0 1 64 1135 1198 1.80E-11 76.6 6579 cellular  
 organisms;Eukaryota;Opisthokonta;Metazoa;Eumetazoa;Bilateria;Protostomia;  
 Spiralia;Lophotrochozoa;Mollusca;Bivalvia;Autobranchia;Pteriormorphia;Pect  
 inida;Pectinoidea;Pectinidae;Pecten;Pecten maximus  
 UdeM00000010623 29159 63.2 UdeM00000010623 XP\_034307878.1 39.4 94  
 48 2 5 89 174 267 3.00E-07 63.2 29159 cellular  
 organisms;Eukaryota;Opisthokonta;Metazoa;Eumetazoa;Bilateria;Protostomia;  
 Spiralia;Lophotrochozoa;Mollusca;Bivalvia;Autobranchia;Pteriormorphia;Ostr  
 eida;Ostreoidea;Ostreidae;Crassostrea;Crassostrea gigas  
 UdeM00000010626 50390 470.7 UdeM00000010626 XP\_028142380.1 55 360  
 157 2 1 360 3 357 1.90E-129 470.7 50390 cellular  
 organisms;Eukaryota;Opisthokonta;Metazoa;Eumetazoa;Bilateria;Protostomia;  
 Ecdysozoa;Panarthropoda;Arthropoda;Mandibulata;Pancrustacea;Hexapoda;Inse  
 cta;Dicondylia;Pterygota;Neoptera;Endopterygota;Coleoptera;Polyphaga;Cucu  
 jiformia;Chrysomeloidea;Chrysomelidae;Galerucinae;Luperini;Diabroticina;D  
 iabroticites;Diabrotica;Diabrotica virgifera;Diabrotica virgifera  
 virgifera  
 UdeM00000010627 6412 64.7 UdeM00000010627 XP\_009017867.1 46.5 71  
 35 2 1 69 302 371 7.30E-08 64.7 6412 cellular  
 organisms;Eukaryota;Opisthokonta;Metazoa;Eumetazoa;Bilateria;Protostomia;  
 Spiralia;Lophotrochozoa;Annelida;Clitellata;Hirudinea;Rhynchobdellida;Glo  
 ssiphoniidae;Helobdella;Helobdella robusta  
 UdeM00000010628 50390 496.1 UdeM00000010628 XP\_028142380.1 54.2 382  
 173 2 2 381 21 402 3.90E-137 496.1 50390 cellular  
 organisms;Eukaryota;Opisthokonta;Metazoa;Eumetazoa;Bilateria;Protostomia;  
 Ecdysozoa;Panarthropoda;Arthropoda;Mandibulata;Pancrustacea;Hexapoda;Inse  
 cta;Dicondylia;Pterygota;Neoptera;Endopterygota;Coleoptera;Polyphaga;Cucu  
 jiformia;Chrysomeloidea;Chrysomelidae;Galerucinae;Luperini;Diabroticina;D  
 iabroticites;Diabrotica;Diabrotica virgifera;Diabrotica virgifera  
 virgifera  
 UdeM00000010629 2607531 308.1 UdeM00000010629 XP\_029657462.1 56.3  
 277 121 0 92 368 7 283 1.80E-80 308.1 2607531  
 cellular  
 organisms;Eukaryota;Opisthokonta;Metazoa;Eumetazoa;Bilateria;Protostomia;  
 Spiralia;Lophotrochozoa;Mollusca;Cephalopoda;Coleoidea;Octopodiformes;Oct  
 opoda;Incirrata;Octopodidae;Octopus;Octopus sinensis  
 UdeM00000010630 50390 467.2 UdeM00000010630 XP\_028142380.1 55.4 341  
 152 0 1 341 59 399 1.70E-128 467.2 50390 cellular  
 organisms;Eukaryota;Opisthokonta;Metazoa;Eumetazoa;Bilateria;Protostomia;  
 Ecdysozoa;Panarthropoda;Arthropoda;Mandibulata;Pancrustacea;Hexapoda;Inse  
 cta;Dicondylia;Pterygota;Neoptera;Endopterygota;Coleoptera;Polyphaga;Cucu  
 jiformia;Chrysomeloidea;Chrysomelidae;Galerucinae;Luperini;Diabroticina;D

iabroticites;Diabrotica;Diabrotica virgifera;Diabrotica virgifera  
 virgifera  
 UdeM00000010631 6412 64.7 UdeM00000010631 XP\_009017867.1 39.1 87  
 50 2 1 85 302 387 8.20E-08 64.7 6412 cellular  
 organisms;Eukaryota;Opisthokonta;Metazoa;Eumetazoa;Bilateria;Protostomia;  
 Spiralia;Lophotrochozoa;Annelida;Clitellata;Hirudinea;Rhynchobdellida;Glo  
 ssisphoniidae;Helobdella;Helobdella robusta  
 UdeM00000010632 441366 342.4 UdeM00000010632 XP\_028317970.1 62.7  
 241 90 0 2 242 138 378 4.60E-91 342.4 441366  
 cellular  
 organisms;Eukaryota;Opisthokonta;Metazoa;Eumetazoa;Bilateria;Deuterostomi  
 a;Chordata;Craniata;Vertebrata;Gnathostomata;Teleostomi;Euteleostomi;Acti  
 nopterygii;Actinopteri;Neopterygii;Teleostei;Osteoglossocephalai;Clupeoce  
 phala;Euteleosteomorpha;Neoteleostei;Eurypterygia;Ctenosquamata;Acanthomo  
 rphata;Euacanthomorphacea;Percomorphaceae;Ovalentaria;Blenniimorphae;Blen  
 niiformes;Gobiesocoidei;Gobiesocidae;Gobiesocinae;Gouania;Gouania  
 willdenowi  
 UdeM00000010633 6579 87.4 UdeM00000010633 XP\_033743002.1 27.7 282  
 178 7 19 276 528 807 3.20E-14 87.4 6579 cellular  
 organisms;Eukaryota;Opisthokonta;Metazoa;Eumetazoa;Bilateria;Protostomia;  
 Spiralia;Lophotrochozoa;Mollusca;Bivalvia;Autobranchia;Pteriormorphia;Pect  
 inida;Pectinoidea;Pectinidae;Pecten;Pecten maximus  
 UdeM00000010634 1735272 324.3 UdeM00000010634 XP\_041347016.1 60.5  
 256 90 3 1 249 1 252 1.30E-85 324.3 1735272  
 cellular  
 organisms;Eukaryota;Opisthokonta;Metazoa;Eumetazoa;Bilateria;Protostomia;  
 Spiralia;Lophotrochozoa;Mollusca;Gastropoda;Neomphalina;Neomphaloidea;Pel  
 tospiridae;Gigantopelta;Gigantopelta aegis  
 UdeM00000010635 6596 68.2 UdeM00000010635 XP\_045191827.1 34.7 101  
 59 3 44 142 68 163 1.00E-08 68.2 6596 cellular  
 organisms;Eukaryota;Opisthokonta;Metazoa;Eumetazoa;Bilateria;Protostomia;  
 Spiralia;Lophotrochozoa;Mollusca;Bivalvia;Autobranchia;Heteroconchia;Euhe  
 terodonta;Imparidentia;Venerida;Veneroidea;Veneridae;Mercenaria;Mercenari  
 a mercenaria  
 UdeM00000010636 441366 583.2 UdeM00000010636 XP\_028318212.1 60  
 422 169 0 2 423 148 569 2.70E-163 583.2 441366  
 cellular  
 organisms;Eukaryota;Opisthokonta;Metazoa;Eumetazoa;Bilateria;Deuterostomi  
 a;Chordata;Craniata;Vertebrata;Gnathostomata;Teleostomi;Euteleostomi;Acti  
 nopterygii;Actinopteri;Neopterygii;Teleostei;Osteoglossocephalai;Clupeoce  
 phala;Euteleosteomorpha;Neoteleostei;Eurypterygia;Ctenosquamata;Acanthomo  
 rphata;Euacanthomorphacea;Percomorphaceae;Ovalentaria;Blenniimorphae;Blen  
 niiformes;Gobiesocoidei;Gobiesocidae;Gobiesocinae;Gouania;Gouania  
 willdenowi  
 UdeM00000010637 441366 270 UdeM00000010637 XP\_028309551.1 62  
 187 70 1 1 186 296 482 2.30E-69 270 441366  
 cellular  
 organisms;Eukaryota;Opisthokonta;Metazoa;Eumetazoa;Bilateria;Deuterostomi  
 a;Chordata;Craniata;Vertebrata;Gnathostomata;Teleostomi;Euteleostomi;Acti  
 nopterygii;Actinopteri;Neopterygii;Teleostei;Osteoglossocephalai;Clupeoce  
 phala;Euteleosteomorpha;Neoteleostei;Eurypterygia;Ctenosquamata;Acanthomo  
 rphata;Euacanthomorphacea;Percomorphaceae;Ovalentaria;Blenniimorphae;Blen  
 niiformes;Gobiesocoidei;Gobiesocidae;Gobiesocinae;Gouania;Gouania  
 willdenowi

UdeM00000010638 441366 156 UdeM00000010638 XP\_028318793.1 71.7  
92 26 0 1 92 599 690 2.40E-35 156 441366  
cellular

organisms;Eukaryota;Opisthokonta;Metazoa;Eumetazoa;Bilateria;Deuterostomi  
a;Chordata;Craniata;Vertebrata;Gnathostomata;Teleostomi;Euteleostomi;Acti  
nopterygii;Actinopteri;Neopterygii;Teleostei;Osteoglossocephalai;Clupeoce  
phala;Euteleosteomorpha;Neoteleostei;Eurypterygia;Ctenosquamata;Acanthomo  
rphata;Euacanthomorphacea;Percomorphaceae;Ovalentaria;Blenniimorphae;Blen  
niiformes;Gobiesocoidei;Gobiesocidae;Gobiesocinae;Gouania;Gouania  
willdenowi

UdeM00000010639 225164 91.3 UdeM00000010639 XP\_009062398.1 54.8  
73 28 1 1 73 28 95 5.60E-16 91.3 225164  
cellular

organisms;Eukaryota;Opisthokonta;Metazoa;Eumetazoa;Bilateria;Protostomia;  
Spiralia;Lophotrochozoa;Mollusca;Gastropoda;Patellogastropoda;Lottioidea;  
Lottiidae;Lottia;Lottia gigantea

UdeM00000010640 225164 200.7 UdeM00000010640 XP\_009064447.1 58.8  
153 58 1 3 150 336 488 1.40E-48 200.7 225164  
cellular

organisms;Eukaryota;Opisthokonta;Metazoa;Eumetazoa;Bilateria;Protostomia;  
Spiralia;Lophotrochozoa;Mollusca;Gastropoda;Patellogastropoda;Lottioidea;  
Lottiidae;Lottia;Lottia gigantea

UdeM00000010641 441366 157.5 UdeM00000010641 XP\_028318799.1 63.2  
106 35 1 2 103 411 516 9.00E-36 157.5 441366  
cellular

organisms;Eukaryota;Opisthokonta;Metazoa;Eumetazoa;Bilateria;Deuterostomi  
a;Chordata;Craniata;Vertebrata;Gnathostomata;Teleostomi;Euteleostomi;Acti  
nopterygii;Actinopteri;Neopterygii;Teleostei;Osteoglossocephalai;Clupeoce  
phala;Euteleosteomorpha;Neoteleostei;Eurypterygia;Ctenosquamata;Acanthomo  
rphata;Euacanthomorphacea;Percomorphaceae;Ovalentaria;Blenniimorphae;Blen  
niiformes;Gobiesocoidei;Gobiesocidae;Gobiesocinae;Gouania;Gouania  
willdenowi

UdeM00000010642 441366 94 UdeM00000010642 XP\_028291048.1 64.7  
68 24 0 8 75 311 378 8.90E-17 94 441366  
cellular

organisms;Eukaryota;Opisthokonta;Metazoa;Eumetazoa;Bilateria;Deuterostomi  
a;Chordata;Craniata;Vertebrata;Gnathostomata;Teleostomi;Euteleostomi;Acti  
nopterygii;Actinopteri;Neopterygii;Teleostei;Osteoglossocephalai;Clupeoce  
phala;Euteleosteomorpha;Neoteleostei;Eurypterygia;Ctenosquamata;Acanthomo  
rphata;Euacanthomorphacea;Percomorphaceae;Ovalentaria;Blenniimorphae;Blen  
niiformes;Gobiesocoidei;Gobiesocidae;Gobiesocinae;Gouania;Gouania  
willdenowi

UdeM00000010644 278856 924.9 UdeM00000010644 XP\_032528088.1 56.4  
686 299 0 2 687 137 822 6.20E-266 924.9 278856  
cellular

organisms;Eukaryota;Opisthokonta;Metazoa;Eumetazoa;Bilateria;Protostomia;  
Ecdysozoa;Panarthropoda;Arthropoda;Mandibulata;Pancrustacea;Hexapoda;Inse  
cta;Dicondylia;Pterygota;Neoptera;Endopterygota;Amphiesmenoptera;Lepidopt  
era;Glossata;Neolepidoptera;Heteroneura;Ditrysia;Obtectomera;Papilionoide  
a;Nymphalidae;Danainae;Danaini;Danaina;Danaus;Danaus;Danaus  
plexippus;Danaus plexippus plexippus

UdeM00000010645 278856 776.9 UdeM00000010645 XP\_032528088.1 56.2  
585 249 1 2 586 221 798 1.80E-221 776.9 278856  
cellular

organisms;Eukaryota;Opisthokonta;Metazoa;Eumetazoa;Bilateria;Protostomia;Ecdysozoa;Panarthropoda;Arthropoda;Mandibulata;Pancrustacea;Hexapoda;Insecta;Dicondylia;Pterygota;Neoptera;Endopterygota;Amphiesmenoptera;Lepidoptera;Glossata;Neolepidoptera;Heteroneura;Ditrysia;Obtectomera;Papilionoidea;Nymphalidae;Danainae;Danaini;Danaina;Danaus;Danaus;Danaus

plexippus;Danaus plexippus plexippus  
UdeM00000010646 6689 65.1 UdeM00000010646 XP\_027214905.1 42.9 84  
45 3 36 117 40 122 1.10E-07 65.1 6689 cellular

organisms;Eukaryota;Opisthokonta;Metazoa;Eumetazoa;Bilateria;Protostomia;Ecdysozoa;Panarthropoda;Arthropoda;Mandibulata;Pancrustacea;Crustacea;Multicrustacea;Malacostraca;Eumalacostraca;Eucarida;Decapoda;Dendrobranchiata;Penaeoidea;Penaeidae;Penaeus;Penaeus vannamei

UdeM00000010647 278856 813.5 UdeM00000010647 XP\_032528088.1 57  
602 259 0 2 603 137 738 1.80E-232 813.5 278856  
cellular

organisms;Eukaryota;Opisthokonta;Metazoa;Eumetazoa;Bilateria;Protostomia;Ecdysozoa;Panarthropoda;Arthropoda;Mandibulata;Pancrustacea;Hexapoda;Insecta;Dicondylia;Pterygota;Neoptera;Endopterygota;Amphiesmenoptera;Lepidoptera;Glossata;Neolepidoptera;Heteroneura;Ditrysia;Obtectomera;Papilionoidea;Nymphalidae;Danainae;Danaini;Danaina;Danaus;Danaus;Danaus

plexippus;Danaus plexippus plexippus  
UdeM00000010648 278856 552.7 UdeM00000010648 XP\_032528088.1 57  
407 175 0 2 408 137 543 3.80E-154 552.7 278856  
cellular

organisms;Eukaryota;Opisthokonta;Metazoa;Eumetazoa;Bilateria;Protostomia;Ecdysozoa;Panarthropoda;Arthropoda;Mandibulata;Pancrustacea;Hexapoda;Insecta;Dicondylia;Pterygota;Neoptera;Endopterygota;Amphiesmenoptera;Lepidoptera;Glossata;Neolepidoptera;Heteroneura;Ditrysia;Obtectomera;Papilionoidea;Nymphalidae;Danainae;Danaini;Danaina;Danaus;Danaus;Danaus

plexippus;Danaus plexippus plexippus  
UdeM00000010649 6579 105.5 UdeM00000010649 XP\_033758276.1 61.7 81  
29 1 2 80 1 81 3.40E-20 105.5 6579 cellular

organisms;Eukaryota;Opisthokonta;Metazoa;Eumetazoa;Bilateria;Protostomia;Spiralia;Lophotrochozoa;Mollusca;Bivalvia;Autobranchia;Pteriomorphia;Pectinida;Pectinoidea;Pectinidae;Pecten;Pecten maximus

UdeM00000010650 29159 205.3 UdeM00000010650 XP\_034339171.1 39.6 255  
147 5 7 258 564 814 9.90E-50 205.3 29159 cellular

organisms;Eukaryota;Opisthokonta;Metazoa;Eumetazoa;Bilateria;Protostomia;Spiralia;Lophotrochozoa;Mollusca;Bivalvia;Autobranchia;Pteriomorphia;Ostreida;Ostreoidea;Ostreidae;Crassostrea;Crassostrea gigas

UdeM00000010651 29159 137.1 UdeM00000010651 XP\_034331441.1 37.8 222  
131 5 1 219 1 218 3.90E-29 137.1 29159 cellular

organisms;Eukaryota;Opisthokonta;Metazoa;Eumetazoa;Bilateria;Protostomia;Spiralia;Lophotrochozoa;Mollusca;Bivalvia;Autobranchia;Pteriomorphia;Ostreida;Ostreoidea;Ostreidae;Crassostrea;Crassostrea gigas

UdeM00000010652 6596 148.7 UdeM00000010652 XP\_045171063.1 34.4 259  
155 6 2 249 41 295 1.40E-32 148.7 6596 cellular

organisms;Eukaryota;Opisthokonta;Metazoa;Eumetazoa;Bilateria;Protostomia;Spiralia;Lophotrochozoa;Mollusca;Bivalvia;Autobranchia;Heteroconchia;Euheterodonta;Imparidentia;Venerida;Veneroidea;Veneridae;Mercenaria;Mercenaria mercenaria

UdeM00000010655 7668 98.2 UdeM00000010655 XP\_030842965.1 50 100  
49 1 1 100 628 726 9.80E-18 98.2 7668 cellular

organisms;Eukaryota;Opisthokonta;Metazoa;Eumetazoa;Bilateria;Deuterostomi

a;Echinodermata;Eleutherozoa;Echinozoa;Echinoidea;Euechinoidea;Echinacea; Camarodonta;Echinidea;Strongylocentrotidae;Strongylocentrotus;Strongylocentrotus purpuratus

UdeM00000010656 202533 126.7 UdeM00000010656 XP\_035231949.1 45.2  
126 68 1 1 125 318 443 2.10E-26 126.7 202533  
cellular

organisms;Eukaryota;Opisthokonta;Metazoa;Eumetazoa;Bilateria;Protostomia; Ecdysozoa;Panarthropoda;Arthropoda;Chelicerata;Arachnida;Araneae;Araneomorphae;Entelegynae;Eresoidea;Eresidae;Stegodyphus;Stegodyphus dumicola

UdeM00000010657 50390 438 UdeM00000010657 XP\_028154228.1 52.2 339  
162 0 22 360 212 550 1.20E-119 438 50390 cellular

organisms;Eukaryota;Opisthokonta;Metazoa;Eumetazoa;Bilateria;Protostomia; Ecdysozoa;Panarthropoda;Arthropoda;Mandibulata;Pancrustacea;Hexapoda;Insecta;Dicondylia;Pterygota;Neoptera;Endopterygota;Coleoptera;Polyphaga;Cucujiformia;Chrysomeloidea;Chrysomelidae;Galerucinae;Luperini;Diabroticina;Diabroticites;Diabrotica;Diabrotica virgifera;Diabrotica virgifera virgifera

UdeM00000010658 70779 84.3 UdeM00000010658 XP\_015777172.1 38.3 94  
58 0 12 105 44 137 1.10E-13 84.3 70779 cellular

organisms;Eukaryota;Opisthokonta;Metazoa;Eumetazoa;Cnidaria;Anthozoa;Hexacorallia;Scleractinia;Astrocoeniina;Acroporidae;Acropora;Acropora digitifera

UdeM00000010659 6565 108.2 UdeM00000010659 XP\_022288562.1 44.3 115  
64 0 1 115 73 187 1.20E-20 108.2 6565 cellular

organisms;Eukaryota;Opisthokonta;Metazoa;Eumetazoa;Bilateria;Protostomia; Spiralia;Lophotrochozoa;Mollusca;Bivalvia;Autobranchia;Pteriormorphia;Ostreida;Ostreoidea;Ostreidae;Crassostrea;Crassostrea virginica

UdeM00000010660 8083 80.9 UdeM00000010660 XP\_023194722.1 44 109  
51 3 1 105 903 1005 1.20E-12 80.9 8083 cellular

organisms;Eukaryota;Opisthokonta;Metazoa;Eumetazoa;Bilateria;Deuterostomia;Chordata;Craniata;Vertebrata;Gnathostomata;Teleostomi;Euteleostomi;Actinopterygii;Actinopteri;Neopterygii;Teleostei;Osteoglossocephalai;Clupeocephala;Euteleosteomorpha;Neoteleostei;Eurypterygia;Ctenosquamata;Acanthomorphata;Euacanthomorphacea;Percomorphaceae;Ovalentaria;Atherinomorphae;Cyprinodontiformes;Cyprinodontoidei;Poeciliidae;Poeciliinae;Xiphophorus;Xiphophorus maculatus

UdeM00000010661 441366 476.5 UdeM00000010661 XP\_028318212.1 46.1  
486 249 6 2 478 157 638 4.00E-131 476.5 441366  
cellular

organisms;Eukaryota;Opisthokonta;Metazoa;Eumetazoa;Bilateria;Deuterostomia;Chordata;Craniata;Vertebrata;Gnathostomata;Teleostomi;Euteleostomi;Actinopterygii;Actinopteri;Neopterygii;Teleostei;Osteoglossocephalai;Clupeocephala;Euteleosteomorpha;Neoteleostei;Eurypterygia;Ctenosquamata;Acanthomorphata;Euacanthomorphacea;Percomorphaceae;Ovalentaria;Blenniimorphae;Blenniiformes;Gobiesocoidei;Gobiesocidae;Gobiesocinae;Gouania;Gouania willdenowi

UdeM00000010662 50390 477.6 UdeM00000010662 XP\_028135826.1 51.4 401  
193 2 9 407 192 592 1.60E-131 477.6 50390 cellular

organisms;Eukaryota;Opisthokonta;Metazoa;Eumetazoa;Bilateria;Protostomia; Ecdysozoa;Panarthropoda;Arthropoda;Mandibulata;Pancrustacea;Hexapoda;Insecta;Dicondylia;Pterygota;Neoptera;Endopterygota;Coleoptera;Polyphaga;Cucujiformia;Chrysomeloidea;Chrysomelidae;Galerucinae;Luperini;Diabroticina;Diabroticites;Diabrotica;Diabrotica virgifera;Diabrotica virgifera virgifera



UdeM00000010663 6596 369 UdeM00000010663 XP\_045177776.1 39.3 529  
 294 8 1 522 405 913 1.30E-98 369 6596 cellular  
 organisms;Eukaryota;Opisthokonta;Metazoa;Eumetazoa;Bilateria;Protostomia;  
 Spiralia;Lophotrochozoa;Mollusca;Bivalvia;Autobranchia;Heteroconchia;Euhe  
 terodonta;Imparidentia;Venerida;Veneroidea;Veneridae;Mercenaria;Mercenari  
 a mercenaria  
 UdeM00000010664 6596 288.9 UdeM00000010664 XP\_045179269.1 44 327  
 180 3 138 461 128 454 1.60E-74 288.9 6596 cellular  
 organisms;Eukaryota;Opisthokonta;Metazoa;Eumetazoa;Bilateria;Protostomia;  
 Spiralia;Lophotrochozoa;Mollusca;Bivalvia;Autobranchia;Heteroconchia;Euhe  
 terodonta;Imparidentia;Venerida;Veneroidea;Veneridae;Mercenaria;Mercenari  
 a mercenaria  
 UdeM00000010665 46514 124.4 UdeM00000010665 XP\_038052832.1 45.2 135  
 67 1 27 161 35 162 1.30E-25 124.4 46514 cellular  
 organisms;Eukaryota;Opisthokonta;Metazoa;Eumetazoa;Bilateria;Deuterostomi  
 a;Echinodermata;Eleutherozoa;Asterozoa;Asteroidea;Valvatacea;Valvatida;As  
 terinidae;Patiria;Patiria miniata  
 UdeM00000010666 1735272 229.6 UdeM00000010666 XP\_041378840.1 46.2  
 240 103 2 2 241 263 476 4.40E-57 229.6 1735272  
 cellular  
 organisms;Eukaryota;Opisthokonta;Metazoa;Eumetazoa;Bilateria;Protostomia;  
 Spiralia;Lophotrochozoa;Mollusca;Gastropoda;Neomphalina;Neomphaloidea;Pel  
 tospiridae;Gigantopelta;Gigantopelta aegis  
 UdeM00000010667 1735272 322.8 UdeM00000010667 XP\_041347065.1 46.4  
 416 161 5 17 370 75 490 5.80E-85 322.8 1735272  
 cellular  
 organisms;Eukaryota;Opisthokonta;Metazoa;Eumetazoa;Bilateria;Protostomia;  
 Spiralia;Lophotrochozoa;Mollusca;Gastropoda;Neomphalina;Neomphaloidea;Pel  
 tospiridae;Gigantopelta;Gigantopelta aegis  
 UdeM00000010668 6596 264.6 UdeM00000010668 XP\_045177776.1 35.1 464  
 217 9 68 529 552 933 3.90E-67 264.6 6596 cellular  
 organisms;Eukaryota;Opisthokonta;Metazoa;Eumetazoa;Bilateria;Protostomia;  
 Spiralia;Lophotrochozoa;Mollusca;Bivalvia;Autobranchia;Heteroconchia;Euhe  
 terodonta;Imparidentia;Venerida;Veneroidea;Veneridae;Mercenaria;Mercenari  
 a mercenaria  
 UdeM00000010669 6573 213.8 UdeM00000010669 XP\_021371412.1 41.9 265  
 148 5 82 342 970 1232 3.50E-52 213.8 6573 cellular  
 organisms;Eukaryota;Opisthokonta;Metazoa;Eumetazoa;Bilateria;Protostomia;  
 Spiralia;Lophotrochozoa;Mollusca;Bivalvia;Autobranchia;Pteriomorphia;Pect  
 inida;Pectinoidea;Pectinidae;Mizuhopecten;Mizuhopecten yessoensis  
 UdeM00000010670 6565 85.1 UdeM00000010670 XP\_022317389.1 38.5 104  
 62 1 15 116 816 919 2.10E-13 85.1 6565 cellular  
 organisms;Eukaryota;Opisthokonta;Metazoa;Eumetazoa;Bilateria;Protostomia;  
 Spiralia;Lophotrochozoa;Mollusca;Bivalvia;Autobranchia;Pteriomorphia;Ostr  
 eida;Ostreoidea;Ostreidae;Crassostrea;Crassostrea virginica  
 UdeM00000010671 6689 193.7 UdeM00000010671 XP\_027230835.1 47.2 195  
 92 3 10 196 179 370 2.80E-46 193.7 6689 cellular  
 organisms;Eukaryota;Opisthokonta;Metazoa;Eumetazoa;Bilateria;Protostomia;  
 Ecdysozoa;Panarthropoda;Arthropoda;Mandibulata;Pancrustacea;Crustacea;Mul  
 ticrustacea;Malacostraca;Eumalacostraca;Eucarida;Decapoda;Dendrobranchiat  
 a;Penaeoidea;Penaeidae;Penaeus;Penaeus vannamei  
 UdeM00000010676 6573 146 UdeM00000010676 XP\_021365376.1 42.7 164  
 89 3 8 169 3 163 4.60E-32 146 6573 cellular  
 organisms;Eukaryota;Opisthokonta;Metazoa;Eumetazoa;Bilateria;Protostomia;

Spiralia; Lophotrochozoa; Mollusca; Bivalvia; Autobranchia; Pteriomorpha; Pectinida; Pectinoidea; Pectinidae; Mizuhopecten; Mizuhopecten yessoensis  
UdeM00000010677 6573 133.7 UdeM00000010677 XP\_021365376.1 39.6 164  
94 3 8 169 3 163 2.40E-28 133.7 6573 cellular  
organisms; Eukaryota; Opisthokonta; Metazoa; Eumetazoa; Bilateria; Protostomia; Spiralia; Lophotrochozoa; Mollusca; Bivalvia; Autobranchia; Pteriomorpha; Pectinida; Pectinoidea; Pectinidae; Mizuhopecten; Mizuhopecten yessoensis  
UdeM00000010678 6573 73.6 UdeM00000010678 XP\_021380144.1 26.4 178  
116 7 15 183 47 218 3.40E-10 73.6 6573 cellular  
organisms; Eukaryota; Opisthokonta; Metazoa; Eumetazoa; Bilateria; Protostomia; Spiralia; Lophotrochozoa; Mollusca; Bivalvia; Autobranchia; Pteriomorpha; Pectinida; Pectinoidea; Pectinidae; Mizuhopecten; Mizuhopecten yessoensis  
UdeM00000010679 29159 236.9 UdeM00000010679 XP\_034301796.1 59 244  
93 1 1 244 1 237 2.80E-59 236.9 29159 cellular  
organisms; Eukaryota; Opisthokonta; Metazoa; Eumetazoa; Bilateria; Protostomia; Spiralia; Lophotrochozoa; Mollusca; Bivalvia; Autobranchia; Pteriomorpha; Ostracida; Ostreidae; Crassostrea; Crassostrea gigas  
UdeM00000010680 6596 671 UdeM00000010680 XP\_045212788.1 46.1 816  
386 9 7 773 13 823 1.80E-189 671 6596 cellular  
organisms; Eukaryota; Opisthokonta; Metazoa; Eumetazoa; Bilateria; Protostomia; Spiralia; Lophotrochozoa; Mollusca; Bivalvia; Autobranchia; Heteroconchia; Euheterodonta; Imparidentia; Venerida; Veneroidea; Veneridae; Mercenaria; Mercenaria mercenaria  
UdeM00000010681 29159 74.7 UdeM00000010681 XP\_034302682.1 38.1 105  
62 1 70 174 726 827 1.30E-10 74.7 29159 cellular  
organisms; Eukaryota; Opisthokonta; Metazoa; Eumetazoa; Bilateria; Protostomia; Spiralia; Lophotrochozoa; Mollusca; Bivalvia; Autobranchia; Pteriomorpha; Ostracida; Ostreidae; Crassostrea; Crassostrea gigas  
UdeM00000010682 6596 633.6 UdeM00000010682 XP\_045212787.1 44.8 828  
378 12 6 756 13 838 3.10E-178 633.6 6596 cellular  
organisms; Eukaryota; Opisthokonta; Metazoa; Eumetazoa; Bilateria; Protostomia; Spiralia; Lophotrochozoa; Mollusca; Bivalvia; Autobranchia; Heteroconchia; Euheterodonta; Imparidentia; Venerida; Veneroidea; Veneridae; Mercenaria; Mercenaria mercenaria  
UdeM00000010683 6596 635.2 UdeM00000010683 XP\_045212787.1 43.4 859  
427 11 7 839 13 838 1.20E-178 635.2 6596 cellular  
organisms; Eukaryota; Opisthokonta; Metazoa; Eumetazoa; Bilateria; Protostomia; Spiralia; Lophotrochozoa; Mollusca; Bivalvia; Autobranchia; Heteroconchia; Euheterodonta; Imparidentia; Venerida; Veneroidea; Veneridae; Mercenaria; Mercenaria mercenaria  
UdeM00000010684 6596 219.9 UdeM00000010684 XP\_045212788.1 37 433  
198 8 1 367 357 780 5.50E-54 219.9 6596 cellular  
organisms; Eukaryota; Opisthokonta; Metazoa; Eumetazoa; Bilateria; Protostomia; Spiralia; Lophotrochozoa; Mollusca; Bivalvia; Autobranchia; Heteroconchia; Euheterodonta; Imparidentia; Venerida; Veneroidea; Veneridae; Mercenaria; Mercenaria mercenaria  
UdeM00000010685 6596 288.5 UdeM00000010685 XP\_045212787.1 47.2 335  
114 3 7 279 13 346 9.10E-75 288.5 6596 cellular  
organisms; Eukaryota; Opisthokonta; Metazoa; Eumetazoa; Bilateria; Protostomia; Spiralia; Lophotrochozoa; Mollusca; Bivalvia; Autobranchia; Heteroconchia; Euheterodonta; Imparidentia; Venerida; Veneroidea; Veneridae; Mercenaria; Mercenaria mercenaria  
UdeM00000010686 6596 642.1 UdeM00000010686 XP\_045212788.1 45.9 815  
383 11 6 766 13 823 8.90E-181 642.1 6596 cellular

organisms;Eukaryota;Opisthokonta;Metazoa;Eumetazoa;Bilateria;Protostomia;Spiralia;Lophotrochozoa;Mollusca;Bivalvia;Autobranhia;Heteroconchia;Euherodonta;Imparidentia;Venerida;Veneroidea;Veneridae;Mercenaria;Mercenaria mercenaria

UdeM00000010687 6596 618.6 UdeM00000010687 XP\_045212787.1 43.8 837  
385 10 6 763 13 843 1.00E-173 618.6 6596 cellular

organisms;Eukaryota;Opisthokonta;Metazoa;Eumetazoa;Bilateria;Protostomia;Spiralia;Lophotrochozoa;Mollusca;Bivalvia;Autobranhia;Heteroconchia;Euherodonta;Imparidentia;Venerida;Veneroidea;Veneridae;Mercenaria;Mercenaria mercenaria

UdeM00000010688 6596 141 UdeM00000010688 XP\_045177095.1 44 159  
84 2 438 591 649 807 5.00E-30 141 6596 cellular

organisms;Eukaryota;Opisthokonta;Metazoa;Eumetazoa;Bilateria;Protostomia;Spiralia;Lophotrochozoa;Mollusca;Bivalvia;Autobranhia;Heteroconchia;Euherodonta;Imparidentia;Venerida;Veneroidea;Veneridae;Mercenaria;Mercenaria mercenaria

UdeM00000010689 6573 244.6 UdeM00000010689 XP\_021356453.1 49.8 263  
122 6 2 259 9 266 1.40E-61 244.6 6573 cellular

organisms;Eukaryota;Opisthokonta;Metazoa;Eumetazoa;Bilateria;Protostomia;Spiralia;Lophotrochozoa;Mollusca;Bivalvia;Autobranhia;Pteriormorphia;Pectinida;Pectinoidea;Pectinidae;Mizuhopecten;Mizuhopecten yessoensis

UdeM00000010690 6596 72.4 UdeM00000010690 XP\_045181185.1 42 81  
47 0 1 81 138 218 3.60E-10 72.4 6596 cellular

organisms;Eukaryota;Opisthokonta;Metazoa;Eumetazoa;Bilateria;Protostomia;Spiralia;Lophotrochozoa;Mollusca;Bivalvia;Autobranhia;Heteroconchia;Euherodonta;Imparidentia;Venerida;Veneroidea;Veneridae;Mercenaria;Mercenaria mercenaria

UdeM00000010691 6596 98.6 UdeM00000010691 XP\_045181185.1 56.8 74  
32 0 1 74 308 381 3.60E-18 98.6 6596 cellular

organisms;Eukaryota;Opisthokonta;Metazoa;Eumetazoa;Bilateria;Protostomia;Spiralia;Lophotrochozoa;Mollusca;Bivalvia;Autobranhia;Heteroconchia;Euherodonta;Imparidentia;Venerida;Veneroidea;Veneridae;Mercenaria;Mercenaria mercenaria

UdeM00000010692 6596 129.8 UdeM00000010692 XP\_045198374.1 43.3 171  
83 4 1 167 1 161 3.30E-27 129.8 6596 cellular

organisms;Eukaryota;Opisthokonta;Metazoa;Eumetazoa;Bilateria;Protostomia;Spiralia;Lophotrochozoa;Mollusca;Bivalvia;Autobranhia;Heteroconchia;Euherodonta;Imparidentia;Venerida;Veneroidea;Veneridae;Mercenaria;Mercenaria mercenaria

UdeM00000010693 6565 166.8 UdeM00000010693 XP\_022327962.1 48.8 164  
82 1 2 163 555 718 2.30E-38 166.8 6565 cellular

organisms;Eukaryota;Opisthokonta;Metazoa;Eumetazoa;Bilateria;Protostomia;Spiralia;Lophotrochozoa;Mollusca;Bivalvia;Autobranhia;Pteriormorphia;Ostreida;Ostreoidea;Ostreidae;Crassostrea;Crassostrea virginica

UdeM00000010694 6596 261.9 UdeM00000010694 XP\_045181185.1 52.2 245  
115 2 1 244 138 381 8.00E-67 261.9 6596 cellular

organisms;Eukaryota;Opisthokonta;Metazoa;Eumetazoa;Bilateria;Protostomia;Spiralia;Lophotrochozoa;Mollusca;Bivalvia;Autobranhia;Heteroconchia;Euherodonta;Imparidentia;Venerida;Veneroidea;Veneridae;Mercenaria;Mercenaria mercenaria

UdeM00000010695 6565 135.6 UdeM00000010695 XP\_022327962.1 51.8 137  
62 1 9 141 208 344 5.40E-29 135.6 6565 cellular

organisms;Eukaryota;Opisthokonta;Metazoa;Eumetazoa;Bilateria;Protostomia;

Spiralia;Lophotrochozoa;Mollusca;Bivalvia;Autobranchia;Pteriormorphia;Ostr  
eida;Ostreoidea;Ostreidae;Crassostrea;Crassostrea virginica  
UdeM00000010696 6565 210.7 UdeM00000010696 XP\_022327962.1 51.2 211  
102 1 1 210 445 655 2.00E-51 210.7 6565 cellular  
organisms;Eukaryota;Opisthokonta;Metazoa;Eumetazoa;Bilateria;Protostomia;  
Spiralia;Lophotrochozoa;Mollusca;Bivalvia;Autobranchia;Pteriormorphia;Ostr  
eida;Ostreoidea;Ostreidae;Crassostrea;Crassostrea virginica  
UdeM00000010697 6565 175.3 UdeM00000010697 XP\_022327962.1 50.8 177  
86 1 1 176 445 621 7.80E-41 175.3 6565 cellular  
organisms;Eukaryota;Opisthokonta;Metazoa;Eumetazoa;Bilateria;Protostomia;  
Spiralia;Lophotrochozoa;Mollusca;Bivalvia;Autobranchia;Pteriormorphia;Ostr  
eida;Ostreoidea;Ostreidae;Crassostrea;Crassostrea virginica  
UdeM00000010698 6596 251.9 UdeM00000010698 XP\_045198374.1 39.8 410  
132 5 1 302 1 403 1.00E-63 251.9 6596 cellular  
organisms;Eukaryota;Opisthokonta;Metazoa;Eumetazoa;Bilateria;Protostomia;  
Spiralia;Lophotrochozoa;Mollusca;Bivalvia;Autobranchia;Heteroconchia;Euhe  
terodonta;Imparidentia;Venerida;Veneroidea;Veneridae;Mercenaria;Mercenari  
a mercenaria  
UdeM00000010699 6565 275.8 UdeM00000010699 XP\_022327962.1 51.8 274  
129 2 1 271 445 718 5.90E-71 275.8 6565 cellular  
organisms;Eukaryota;Opisthokonta;Metazoa;Eumetazoa;Bilateria;Protostomia;  
Spiralia;Lophotrochozoa;Mollusca;Bivalvia;Autobranchia;Pteriormorphia;Ostr  
eida;Ostreoidea;Ostreidae;Crassostrea;Crassostrea virginica  
UdeM00000010700 6579 552.4 UdeM00000010700 XP\_033746357.1 68.5 378  
117 1 1 378 116 491 4.60E-154 552.4 6579 cellular  
organisms;Eukaryota;Opisthokonta;Metazoa;Eumetazoa;Bilateria;Protostomia;  
Spiralia;Lophotrochozoa;Mollusca;Bivalvia;Autobranchia;Pteriormorphia;Pect  
inida;Pectinoidea;Pectinidae;Pecten;Pecten maximus  
UdeM00000010701 6596 1986.5 UdeM00000010701 XP\_045182638.1 86.8  
1212 159 1 1 1212 25 1235 0.00E+00 1986.5 6596  
cellular  
organisms;Eukaryota;Opisthokonta;Metazoa;Eumetazoa;Bilateria;Protostomia;  
Spiralia;Lophotrochozoa;Mollusca;Bivalvia;Autobranchia;Heteroconchia;Euhe  
terodonta;Imparidentia;Venerida;Veneroidea;Veneridae;Mercenaria;Mercenari  
a mercenaria  
UdeM00000010702 6596 412.1 UdeM00000010702 XP\_045181185.1 56.1 358  
148 3 5 354 25 381 6.90E-112 412.1 6596 cellular  
organisms;Eukaryota;Opisthokonta;Metazoa;Eumetazoa;Bilateria;Protostomia;  
Spiralia;Lophotrochozoa;Mollusca;Bivalvia;Autobranchia;Heteroconchia;Euhe  
terodonta;Imparidentia;Venerida;Veneroidea;Veneridae;Mercenaria;Mercenari  
a mercenaria  
UdeM00000010703 6596 385.6 UdeM00000010703 XP\_045177779.1 39.1 562  
324 8 1 548 80 637 1.60E-103 385.6 6596 cellular  
organisms;Eukaryota;Opisthokonta;Metazoa;Eumetazoa;Bilateria;Protostomia;  
Spiralia;Lophotrochozoa;Mollusca;Bivalvia;Autobranchia;Heteroconchia;Euhe  
terodonta;Imparidentia;Venerida;Veneroidea;Veneridae;Mercenaria;Mercenari  
a mercenaria  
UdeM00000010704 225164 163.3 UdeM00000010704 XP\_009058199.1 54.4  
149 61 2 1 149 31 172 2.40E-37 163.3 225164  
cellular  
organisms;Eukaryota;Opisthokonta;Metazoa;Eumetazoa;Bilateria;Protostomia;  
Spiralia;Lophotrochozoa;Mollusca;Gastropoda;Patellogastropoda;Lottioida;  
Lottiidae;Lottia;Lottia gigantea

UdeM00000010705 6579 109.8 UdeM00000010705 XP\_033752673.1 43.3 150  
 73 5 54 199 274 415 4.40E-21 109.8 6579 cellular  
 organisms;Eukaryota;Opisthokonta;Metazoa;Eumetazoa;Bilateria;Protostomia;  
 Spiralia;Lophotrochozoa;Mollusca;Bivalvia;Autobranchia;Pteriomorphia;Pect  
 inida;Pectinoidea;Pectinidae;Pecten;Pecten maximus  
 UdeM00000010706 6579 189.9 UdeM00000010706 XP\_033752673.1 50.2 203  
 90 4 22 221 274 468 3.80E-45 189.9 6579 cellular  
 organisms;Eukaryota;Opisthokonta;Metazoa;Eumetazoa;Bilateria;Protostomia;  
 Spiralia;Lophotrochozoa;Mollusca;Bivalvia;Autobranchia;Pteriomorphia;Pect  
 inida;Pectinoidea;Pectinidae;Pecten;Pecten maximus  
 UdeM00000010707 109280 201.4 UdeM00000010707 XP\_019729826.1 41.5  
 217 114 1 6 222 8 211 1.20E-48 201.4 109280  
 cellular  
 organisms;Eukaryota;Opisthokonta;Metazoa;Eumetazoa;Bilateria;Deuterostomi  
 a;Chordata;Craniata;Vertebrata;Gnathostomata;Teleostomi;Euteleostomi;Acti  
 nopterygii;Actinopteri;Neopterygii;Teleostei;Osteoglossocephalai;Clupeoce  
 phala;Euteleosteomorpha;Neoteleostei;Eurypterygia;Ctenosquamata;Acanthomo  
 rphata;Euacanthomorphacea;Percomorphaceae;Syngnathiaria;Syngnathiformes;S  
 yngnathoidei;Syngnathidae;Hippocampinae;Hippocampus;Hippocampus comes  
 UdeM00000010711 6565 115.9 UdeM00000010711 XP\_022299602.1 39.9 158  
 90 4 78 234 2 155 2.00E-22 115.9 6565 cellular  
 organisms;Eukaryota;Opisthokonta;Metazoa;Eumetazoa;Bilateria;Protostomia;  
 Spiralia;Lophotrochozoa;Mollusca;Bivalvia;Autobranchia;Pteriomorphia;Ostr  
 eida;Ostreoidea;Ostreidae;Crassostrea;Crassostrea virginica  
 UdeM00000010710 6596 373.6 UdeM00000010710 XP\_045177779.1 38.9 571  
 324 10 1 561 97 652 9.80E-100 373.6 6596 cellular  
 organisms;Eukaryota;Opisthokonta;Metazoa;Eumetazoa;Bilateria;Protostomia;  
 Spiralia;Lophotrochozoa;Mollusca;Bivalvia;Autobranchia;Heteroconchia;Euhe  
 terodonta;Imparidentia;Venerida;Veneroidea;Veneridae;Mercenaria;Mercenari  
 a mercenaria  
 UdeM00000010712 6565 97.4 UdeM00000010712 XP\_022336926.1 28.8 240  
 159 7 137 370 516 749 4.10E-17 97.4 6565 cellular  
 organisms;Eukaryota;Opisthokonta;Metazoa;Eumetazoa;Bilateria;Protostomia;  
 Spiralia;Lophotrochozoa;Mollusca;Bivalvia;Autobranchia;Pteriomorphia;Ostr  
 eida;Ostreoidea;Ostreidae;Crassostrea;Crassostrea virginica  
 UdeM00000010713 6565 75.1 UdeM00000010713 XP\_022337018.1 36.8 76  
 48 0 27 102 27 102 6.00E-11 75.1 6565 cellular  
 organisms;Eukaryota;Opisthokonta;Metazoa;Eumetazoa;Bilateria;Protostomia;  
 Spiralia;Lophotrochozoa;Mollusca;Bivalvia;Autobranchia;Pteriomorphia;Ostr  
 eida;Ostreoidea;Ostreidae;Crassostrea;Crassostrea virginica  
 UdeM00000010714 6596 170.2 UdeM00000010714 XP\_045181185.1 57.2 138  
 52 1 5 135 25 162 1.80E-39 170.2 6596 cellular  
 organisms;Eukaryota;Opisthokonta;Metazoa;Eumetazoa;Bilateria;Protostomia;  
 Spiralia;Lophotrochozoa;Mollusca;Bivalvia;Autobranchia;Heteroconchia;Euhe  
 terodonta;Imparidentia;Venerida;Veneroidea;Veneridae;Mercenaria;Mercenari  
 a mercenaria  
 UdeM00000010715 6596 105.5 UdeM00000010715 XP\_045181185.1 59.5 74  
 30 0 1 74 308 381 2.90E-20 105.5 6596 cellular  
 organisms;Eukaryota;Opisthokonta;Metazoa;Eumetazoa;Bilateria;Protostomia;  
 Spiralia;Lophotrochozoa;Mollusca;Bivalvia;Autobranchia;Heteroconchia;Euhe  
 terodonta;Imparidentia;Venerida;Veneroidea;Veneridae;Mercenaria;Mercenari  
 a mercenaria  
 UdeM00000010716 151771 82.4 UdeM00000010716 XP\_028412185.1 29.6  
 189 118 4 13 188 371 557 8.00E-13 82.4 151771

cellular  
organisms;Eukaryota;Opisthokonta;Metazoa;Eumetazoa;Cnidaria;Anthozoa;Octo  
corallia;Alcyonacea;Alcyoniina;Nephtheidae;Dendronephthya;Dendronephthya  
gigantea  
UdeM00000010717 6596 375.9 UdeM00000010717 XP\_045177776.1 42.9 522  
285 8 58 571 397 913 9.00E-101 375.9 6596 cellular  
organisms;Eukaryota;Opisthokonta;Metazoa;Eumetazoa;Bilateria;Protostomia;  
Spiralia;Lophotrochozoa;Mollusca;Bivalvia;Autobranchia;Heteroconchia;Euhe  
terodonta;Imparidentia;Venerida;Veneroidea;Veneridae;Mercenaria;Mercenari  
a mercenaria  
UdeM00000010718 6596 104 UdeM00000010718 XP\_045182638.1 68.8 80  
20 1 49 128 848 922 1.50E-19 104 6596 cellular  
organisms;Eukaryota;Opisthokonta;Metazoa;Eumetazoa;Bilateria;Protostomia;  
Spiralia;Lophotrochozoa;Mollusca;Bivalvia;Autobranchia;Heteroconchia;Euhe  
terodonta;Imparidentia;Venerida;Veneroidea;Veneridae;Mercenaria;Mercenari  
a mercenaria  
UdeM00000010719 6579 292.4 UdeM00000010719 XP\_033744239.1 45.7 339  
178 3 22 360 78 410 8.60E-76 292.4 6579 cellular  
organisms;Eukaryota;Opisthokonta;Metazoa;Eumetazoa;Bilateria;Protostomia;  
Spiralia;Lophotrochozoa;Mollusca;Bivalvia;Autobranchia;Pteriormorphia;Pect  
inida;Pectinoidea;Pectinidae;Pecten;Pecten maximus  
UdeM00000010720 6596 143.3 UdeM00000010720 XP\_045206702.1 25.1 383  
241 5 20 400 398 736 7.20E-31 143.3 6596 cellular  
organisms;Eukaryota;Opisthokonta;Metazoa;Eumetazoa;Bilateria;Protostomia;  
Spiralia;Lophotrochozoa;Mollusca;Bivalvia;Autobranchia;Heteroconchia;Euhe  
terodonta;Imparidentia;Venerida;Veneroidea;Veneridae;Mercenaria;Mercenari  
a mercenaria  
UdeM00000010722 6565 128.3 UdeM00000010722 XP\_022341861.1 78.2 78  
17 0 474 551 986 1063 3.20E-26 128.3 6565 cellular  
organisms;Eukaryota;Opisthokonta;Metazoa;Eumetazoa;Bilateria;Protostomia;  
Spiralia;Lophotrochozoa;Mollusca;Bivalvia;Autobranchia;Pteriormorphia;Ostr  
eida;Ostreoidea;Ostreidae;Crassostrea;Crassostrea virginica  
UdeM00000010723 6596 324.3 UdeM00000010723 XP\_045177779.1 31.7 720  
336 14 1 692 97 688 4.60E-85 324.3 6596 cellular  
organisms;Eukaryota;Opisthokonta;Metazoa;Eumetazoa;Bilateria;Protostomia;  
Spiralia;Lophotrochozoa;Mollusca;Bivalvia;Autobranchia;Heteroconchia;Euhe  
terodonta;Imparidentia;Venerida;Veneroidea;Veneridae;Mercenaria;Mercenari  
a mercenaria  
UdeM00000010724 63155 147.9 UdeM00000010724 XP\_030575909.1 42.8 229  
68 5 78 244 515 742 1.80E-32 147.9 63155 cellular  
organisms;Eukaryota;Opisthokonta;Metazoa;Eumetazoa;Bilateria;Deuterostomi  
a;Chordata;Craniata;Vertebrata;Gnathostomata;Teleostomi;Euteleostomi;Acti  
nopterygii;Actinopteri;Neopterygii;Teleostei;Osteoglossocephalai;Clupeoce  
phala;Euteleosteomorpha;Neoteleostei;Eurypterygia;Ctenosquamata;Acanthomo  
rphata;Euacanthomorphacea;Percomorphaceae;Ovalentaria;Cichlomorphae;Cichl  
iformes;Cichlidae;New World  
cichlids;Cichlasomatinae;Heroini;Archocentrus;Archocentrus centrarchus  
UdeM00000010725 1735272 92.4 UdeM00000010725 XP\_041360121.1 43.7  
87 46 3 93 178 275 359 6.30E-16 92.4 1735272  
cellular  
organisms;Eukaryota;Opisthokonta;Metazoa;Eumetazoa;Bilateria;Protostomia;  
Spiralia;Lophotrochozoa;Mollusca;Gastropoda;Neomphalina;Neomphaloidea;Pel  
tospiridae;Gigantopelta;Gigantopelta aegis

UdeM00000010726 6596 221.5 UdeM00000010726 XP\_045203959.1 26.2 767  
 487 21 26 772 32 739 3.90E-54 221.5 6596 cellular  
 organisms;Eukaryota;Opisthokonta;Metazoa;Eumetazoa;Bilateria;Protostomia;  
 Spiralia;Lophotrochozoa;Mollusca;Bivalvia;Autobranhia;Heteroconchia;Euhe  
 terodonta;Imparidentia;Venerida;Veneroidea;Veneridae;Mercenaria;Mercenari  
 a mercenaria

UdeM00000010727 6596 216.9 UdeM00000010727 XP\_045182997.1 59 173  
 66 2 8 178 48 217 2.20E-53 216.9 6596 cellular  
 organisms;Eukaryota;Opisthokonta;Metazoa;Eumetazoa;Bilateria;Protostomia;  
 Spiralia;Lophotrochozoa;Mollusca;Bivalvia;Autobranhia;Heteroconchia;Euhe  
 terodonta;Imparidentia;Venerida;Veneroidea;Veneridae;Mercenaria;Mercenari  
 a mercenaria

UdeM00000010728 6596 208.8 UdeM00000010728 XP\_045182997.1 57.8 180  
 72 3 1 178 41 218 5.90E-51 208.8 6596 cellular  
 organisms;Eukaryota;Opisthokonta;Metazoa;Eumetazoa;Bilateria;Protostomia;  
 Spiralia;Lophotrochozoa;Mollusca;Bivalvia;Autobranhia;Heteroconchia;Euhe  
 terodonta;Imparidentia;Venerida;Veneroidea;Veneridae;Mercenaria;Mercenari  
 a mercenaria

UdeM00000010729 6596 115.2 UdeM00000010729 XP\_045182997.1 53.3 105  
 46 1 1 105 104 205 5.30E-23 115.2 6596 cellular  
 organisms;Eukaryota;Opisthokonta;Metazoa;Eumetazoa;Bilateria;Protostomia;  
 Spiralia;Lophotrochozoa;Mollusca;Bivalvia;Autobranhia;Heteroconchia;Euhe  
 terodonta;Imparidentia;Venerida;Veneroidea;Veneridae;Mercenaria;Mercenari  
 a mercenaria

UdeM00000010730 6596 73.6 UdeM00000010730 XP\_045182997.1 49.3 73  
 34 1 3 75 136 205 1.30E-10 73.6 6596 cellular  
 organisms;Eukaryota;Opisthokonta;Metazoa;Eumetazoa;Bilateria;Protostomia;  
 Spiralia;Lophotrochozoa;Mollusca;Bivalvia;Autobranhia;Heteroconchia;Euhe  
 terodonta;Imparidentia;Venerida;Veneroidea;Veneridae;Mercenaria;Mercenari  
 a mercenaria

UdeM00000010731 6596 123.6 UdeM00000010731 XP\_045181560.1 27 460  
 299 11 6 439 11 459 7.30E-25 123.6 6596 cellular  
 organisms;Eukaryota;Opisthokonta;Metazoa;Eumetazoa;Bilateria;Protostomia;  
 Spiralia;Lophotrochozoa;Mollusca;Bivalvia;Autobranhia;Heteroconchia;Euhe  
 terodonta;Imparidentia;Venerida;Veneroidea;Veneridae;Mercenaria;Mercenari  
 a mercenaria

UdeM00000010732 6596 216.9 UdeM00000010732 XP\_045182997.1 59.5 173  
 65 2 8 178 48 217 2.20E-53 216.9 6596 cellular  
 organisms;Eukaryota;Opisthokonta;Metazoa;Eumetazoa;Bilateria;Protostomia;  
 Spiralia;Lophotrochozoa;Mollusca;Bivalvia;Autobranhia;Heteroconchia;Euhe  
 terodonta;Imparidentia;Venerida;Veneroidea;Veneridae;Mercenaria;Mercenari  
 a mercenaria

UdeM00000010733 6596 206.5 UdeM00000010733 XP\_045182997.1 57.2 180  
 73 3 1 178 41 218 2.90E-50 206.5 6596 cellular  
 organisms;Eukaryota;Opisthokonta;Metazoa;Eumetazoa;Bilateria;Protostomia;  
 Spiralia;Lophotrochozoa;Mollusca;Bivalvia;Autobranhia;Heteroconchia;Euhe  
 terodonta;Imparidentia;Venerida;Veneroidea;Veneridae;Mercenaria;Mercenari  
 a mercenaria

UdeM00000010735 6596 112.1 UdeM00000010735 XP\_045182997.1 53.3 105  
 46 1 1 105 104 205 4.50E-22 112.1 6596 cellular  
 organisms;Eukaryota;Opisthokonta;Metazoa;Eumetazoa;Bilateria;Protostomia;  
 Spiralia;Lophotrochozoa;Mollusca;Bivalvia;Autobranhia;Heteroconchia;Euhe  
 terodonta;Imparidentia;Venerida;Veneroidea;Veneridae;Mercenaria;Mercenari  
 a mercenaria

UdeM00000010734 6596 69.7 UdeM00000010734 XP\_045182997.1 47.9 73  
 35 1 3 75 136 205 1.80E-09 69.7 6596 cellular  
 organisms;Eukaryota;Opisthokonta;Metazoa;Eumetazoa;Bilateria;Protostomia;  
 Spiralia;Lophotrochozoa;Mollusca;Bivalvia;Autobranchia;Heteroconchia;Euhe  
 terodonta;Imparidentia;Venerida;Veneroidea;Veneridae;Mercenaria;Mercenari  
 a mercenaria

UdeM00000010736 6596 204.9 UdeM00000010736 XP\_045182997.1 57.2 180  
 73 3 1 178 41 218 8.50E-50 204.9 6596 cellular  
 organisms;Eukaryota;Opisthokonta;Metazoa;Eumetazoa;Bilateria;Protostomia;  
 Spiralia;Lophotrochozoa;Mollusca;Bivalvia;Autobranchia;Heteroconchia;Euhe  
 terodonta;Imparidentia;Venerida;Veneroidea;Veneridae;Mercenaria;Mercenari  
 a mercenaria

UdeM00000010737 6596 127.5 UdeM00000010737 XP\_045182997.1 51.7 118  
 52 2 1 116 104 218 1.10E-26 127.5 6596 cellular  
 organisms;Eukaryota;Opisthokonta;Metazoa;Eumetazoa;Bilateria;Protostomia;  
 Spiralia;Lophotrochozoa;Mollusca;Bivalvia;Autobranchia;Heteroconchia;Euhe  
 terodonta;Imparidentia;Venerida;Veneroidea;Veneridae;Mercenaria;Mercenari  
 a mercenaria

UdeM00000010738 6596 206.1 UdeM00000010738 XP\_045182997.1 57.2 180  
 73 3 1 178 41 218 3.80E-50 206.1 6596 cellular  
 organisms;Eukaryota;Opisthokonta;Metazoa;Eumetazoa;Bilateria;Protostomia;  
 Spiralia;Lophotrochozoa;Mollusca;Bivalvia;Autobranchia;Heteroconchia;Euhe  
 terodonta;Imparidentia;Venerida;Veneroidea;Veneridae;Mercenaria;Mercenari  
 a mercenaria

UdeM00000010739 6596 223 UdeM00000010739 XP\_045182997.1 59.1 181  
 69 3 1 179 41 218 3.00E-55 223 6596 cellular  
 organisms;Eukaryota;Opisthokonta;Metazoa;Eumetazoa;Bilateria;Protostomia;  
 Spiralia;Lophotrochozoa;Mollusca;Bivalvia;Autobranchia;Heteroconchia;Euhe  
 terodonta;Imparidentia;Venerida;Veneroidea;Veneridae;Mercenaria;Mercenari  
 a mercenaria

UdeM00000010740 6596 2726.4 UdeM00000010740 XP\_045164107.1 40  
 4312 2013 63 28 4069 38 4044 0.00E+00 2726.4 6596  
 cellular  
 organisms;Eukaryota;Opisthokonta;Metazoa;Eumetazoa;Bilateria;Protostomia;  
 Spiralia;Lophotrochozoa;Mollusca;Bivalvia;Autobranchia;Heteroconchia;Euhe  
 terodonta;Imparidentia;Venerida;Veneroidea;Veneridae;Mercenaria;Mercenari  
 a mercenaria

UdeM00000010741 6596 196.8 UdeM00000010741 XP\_045177779.1 37.4 348  
 182 10 9 350 90 407 8.10E-47 196.8 6596 cellular  
 organisms;Eukaryota;Opisthokonta;Metazoa;Eumetazoa;Bilateria;Protostomia;  
 Spiralia;Lophotrochozoa;Mollusca;Bivalvia;Autobranchia;Heteroconchia;Euhe  
 terodonta;Imparidentia;Venerida;Veneroidea;Veneridae;Mercenaria;Mercenari  
 a mercenaria

UdeM00000010743 7574 471.9 UdeM00000010743 XP\_013380319.1 69.7 297  
 90 0 1 297 38 334 2.60E-129 471.9 7574 cellular  
 organisms;Eukaryota;Opisthokonta;Metazoa;Eumetazoa;Bilateria;Protostomia;  
 Spiralia;Lophotrochozoa;Brachiopoda;Linguliformea;Lingulata;Lingulida;Lin  
 guloidea;Lingulidae;Lingula;Lingula anatina

UdeM00000010744 7574 471.9 UdeM00000010744 XP\_013380319.1 69.7 297  
 90 0 1 297 38 334 2.30E-129 471.9 7574 cellular  
 organisms;Eukaryota;Opisthokonta;Metazoa;Eumetazoa;Bilateria;Protostomia;  
 Spiralia;Lophotrochozoa;Brachiopoda;Linguliformea;Lingulata;Lingulida;Lin  
 guloidea;Lingulidae;Lingula;Lingula anatina



UdeM00000010745 2652724 82 UdeM00000010745 XP\_020913146.1 50.7  
 73 36 0 53 125 177 249 6.30E-13 82 2652724  
 cellular  
 organisms;Eukaryota;Opisthokonta;Metazoa;Eumetazoa;Cnidaria;Anthozoa;Hexa  
 corallia;Actiniaria;Aiptasiidae;Exaiptasia;Exaiptasia diaphana  
 UdeM00000010746 6596 193.7 UdeM00000010746 XP\_045200973.1 25.1 678  
 445 19 114 764 103 744 8.40E-46 193.7 6596 cellular  
 organisms;Eukaryota;Opisthokonta;Metazoa;Eumetazoa;Bilateria;Protostomia;  
 Spiralia;Lophotrochozoa;Mollusca;Bivalvia;Autobranchia;Heteroconchia;Euhe  
 terodonta;Imparidentia;Venerida;Veneroidea;Veneridae;Mercenaria;Mercenari  
 a mercenaria  
 UdeM00000010748 6596 184.5 UdeM00000010748 XP\_045203906.1 29.5 413  
 275 6 366 769 15 420 5.10E-43 184.5 6596 cellular  
 organisms;Eukaryota;Opisthokonta;Metazoa;Eumetazoa;Bilateria;Protostomia;  
 Spiralia;Lophotrochozoa;Mollusca;Bivalvia;Autobranchia;Heteroconchia;Euhe  
 terodonta;Imparidentia;Venerida;Veneroidea;Veneridae;Mercenaria;Mercenari  
 a mercenaria  
 UdeM00000010749 6596 179.1 UdeM00000010749 XP\_045203906.1 28.8 413  
 278 6 364 767 15 420 2.20E-41 179.1 6596 cellular  
 organisms;Eukaryota;Opisthokonta;Metazoa;Eumetazoa;Bilateria;Protostomia;  
 Spiralia;Lophotrochozoa;Mollusca;Bivalvia;Autobranchia;Heteroconchia;Euhe  
 terodonta;Imparidentia;Venerida;Veneroidea;Veneridae;Mercenaria;Mercenari  
 a mercenaria  
 UdeM00000010750 29159 85.9 UdeM00000010750 XP\_034331086.1 23.6 487  
 283 16 1 416 2 470 1.30E-13 85.9 29159 cellular  
 organisms;Eukaryota;Opisthokonta;Metazoa;Eumetazoa;Bilateria;Protostomia;  
 Spiralia;Lophotrochozoa;Mollusca;Bivalvia;Autobranchia;Pteriormorphia;Ostr  
 eida;Ostreoidea;Ostreidae;Crassostrea;Crassostrea gigas  
 UdeM00000010751 29159 86.3 UdeM00000010751 XP\_034331085.1 22.8 495  
 280 14 1 419 2 470 1.00E-13 86.3 29159 cellular  
 organisms;Eukaryota;Opisthokonta;Metazoa;Eumetazoa;Bilateria;Protostomia;  
 Spiralia;Lophotrochozoa;Mollusca;Bivalvia;Autobranchia;Pteriormorphia;Ostr  
 eida;Ostreoidea;Ostreidae;Crassostrea;Crassostrea gigas  
 UdeM00000010752 29159 86.7 UdeM00000010752 XP\_034331085.1 22.8 495  
 278 14 1 417 2 470 7.90E-14 86.7 29159 cellular  
 organisms;Eukaryota;Opisthokonta;Metazoa;Eumetazoa;Bilateria;Protostomia;  
 Spiralia;Lophotrochozoa;Mollusca;Bivalvia;Autobranchia;Pteriormorphia;Ostr  
 eida;Ostreoidea;Ostreidae;Crassostrea;Crassostrea gigas  
 UdeM00000010753 6596 241.9 UdeM00000010753 XP\_045215628.1 45.5 255  
 110 2 22 272 99 328 9.70E-61 241.9 6596 cellular  
 organisms;Eukaryota;Opisthokonta;Metazoa;Eumetazoa;Bilateria;Protostomia;  
 Spiralia;Lophotrochozoa;Mollusca;Bivalvia;Autobranchia;Heteroconchia;Euhe  
 terodonta;Imparidentia;Venerida;Veneroidea;Veneridae;Mercenaria;Mercenari  
 a mercenaria  
 UdeM00000010754 6596 161.4 UdeM00000010754 XP\_045200973.1 25.6 542  
 312 16 156 679 276 744 4.10E-36 161.4 6596 cellular  
 organisms;Eukaryota;Opisthokonta;Metazoa;Eumetazoa;Bilateria;Protostomia;  
 Spiralia;Lophotrochozoa;Mollusca;Bivalvia;Autobranchia;Heteroconchia;Euhe  
 terodonta;Imparidentia;Venerida;Veneroidea;Veneridae;Mercenaria;Mercenari  
 a mercenaria  
 UdeM00000010755 6596 196.8 UdeM00000010755 XP\_045177779.1 37.4 348  
 182 10 9 350 90 407 8.40E-47 196.8 6596 cellular  
 organisms;Eukaryota;Opisthokonta;Metazoa;Eumetazoa;Bilateria;Protostomia;  
 Spiralia;Lophotrochozoa;Mollusca;Bivalvia;Autobranchia;Heteroconchia;Euhe

terodonta;Imparidentia;Venerida;Veneroidea;Veneridae;Mercenaria;Mercenaria mercenaria

UdeM00000010757 7574 470.3 UdeM00000010757 XP\_013380319.1 69.8 298  
89 1 1 298 38 334 6.80E-129 470.3 7574 cellular

organisms;Eukaryota;Opisthokonta;Metazoa;Eumetazoa;Bilateria;Protostomia;Spiralia;Lophotrochozoa;Brachiopoda;Linguliformea;Lingulata;Lingulida;Linguloidea;Lingulidae;Lingula;Lingula anatina

UdeM00000010758 2652724 77 UdeM00000010758 XP\_020913146.1 50.7  
73 35 1 53 124 177 249 2.00E-11 77 2652724  
cellular

organisms;Eukaryota;Opisthokonta;Metazoa;Eumetazoa;Cnidaria;Anthozoa;Hexacorallia;Actiniaria;Aiptasiidae;Exaiptasia;Exaiptasia diaphana

UdeM00000010759 6596 185.7 UdeM00000010759 XP\_045200973.1 28.1 427  
269 8 356 767 341 744 2.30E-43 185.7 6596 cellular

organisms;Eukaryota;Opisthokonta;Metazoa;Eumetazoa;Bilateria;Protostomia;Spiralia;Lophotrochozoa;Mollusca;Bivalvia;Autobranchia;Heteroconchia;Euheterodonta;Imparidentia;Venerida;Veneroidea;Veneridae;Mercenaria;Mercenaria mercenaria

UdeM00000010760 225164 102.1 UdeM00000010760 XP\_009057378.1 38.8  
129 78 1 2 129 30 158 6.30E-19 102.1 225164  
cellular

organisms;Eukaryota;Opisthokonta;Metazoa;Eumetazoa;Bilateria;Protostomia;Spiralia;Lophotrochozoa;Mollusca;Gastropoda;Patellogastropoda;Lottioidea;Lottiidae;Lottia;Lottia gigantea

UdeM00000010761 29159 95.1 UdeM00000010761 XP\_019926769.2 30.4 204  
131 4 339 541 332 525 2.90E-16 95.1 29159 cellular

organisms;Eukaryota;Opisthokonta;Metazoa;Eumetazoa;Bilateria;Protostomia;Spiralia;Lophotrochozoa;Mollusca;Bivalvia;Autobranchia;Pteriormorphia;Ostreida;Ostreoidea;Ostreidae;Crassostrea;Crassostrea gigas

UdeM00000010762 6596 183 UdeM00000010762 XP\_045203906.1 29.1 413  
277 6 249 652 15 420 1.30E-42 183 6596 cellular

organisms;Eukaryota;Opisthokonta;Metazoa;Eumetazoa;Bilateria;Protostomia;Spiralia;Lophotrochozoa;Mollusca;Bivalvia;Autobranchia;Heteroconchia;Euheterodonta;Imparidentia;Venerida;Veneroidea;Veneridae;Mercenaria;Mercenaria mercenaria

UdeM00000010763 6596 198.7 UdeM00000010763 XP\_045200973.1 25.4 678  
443 19 114 764 103 744 2.60E-47 198.7 6596 cellular

organisms;Eukaryota;Opisthokonta;Metazoa;Eumetazoa;Bilateria;Protostomia;Spiralia;Lophotrochozoa;Mollusca;Bivalvia;Autobranchia;Heteroconchia;Euheterodonta;Imparidentia;Venerida;Veneroidea;Veneridae;Mercenaria;Mercenaria mercenaria

UdeM00000010764 7888 201.8 UdeM00000010764 XP\_043944824.1 36 361  
213 5 21 368 769 1124 1.80E-48 201.8 7888 cellular

organisms;Eukaryota;Opisthokonta;Metazoa;Eumetazoa;Bilateria;Deuterostomia;Chordata;Craniata;Vertebrata;Gnathostomata;Teleostomi;Euteleostomi;Sarcopterygii;Dipnotetrapodomorpha;Dipnomorpha;Ceratodontae;Ceratodontiformes;Lepidosirenoidei;Protopterygidae;Protopterus;Protopterus annectens

UdeM00000010765 29159 81.6 UdeM00000010765 XP\_034331086.1 23.4 487  
307 16 1 439 2 470 2.70E-12 81.6 29159 cellular

organisms;Eukaryota;Opisthokonta;Metazoa;Eumetazoa;Bilateria;Protostomia;Spiralia;Lophotrochozoa;Mollusca;Bivalvia;Autobranchia;Pteriormorphia;Ostreida;Ostreoidea;Ostreidae;Crassostrea;Crassostrea gigas

UdeM00000010766 29159 80.5 UdeM00000010766 XP\_034331086.1 23.4 491  
305 17 1 442 2 470 6.00E-12 80.5 29159 cellular

organisms;Eukaryota;Opisthokonta;Metazoa;Eumetazoa;Bilateria;Protostomia;Spiralia;Lophotrochozoa;Mollusca;Bivalvia;Autobranhia;Pteriomorphia;Ostr

eida;Ostreoidea;Ostreidae;Crassostrea;Crassostrea gigas  
UdeM00000010767 29159 81.6 UdeM00000010767 XP\_034331086.1 23.4 487  
307 16 1 439 2 470 2.70E-12 81.6 29159 cellular

organisms;Eukaryota;Opisthokonta;Metazoa;Eumetazoa;Bilateria;Protostomia;Spiralia;Lophotrochozoa;Mollusca;Bivalvia;Autobranhia;Pteriomorphia;Ostr

eida;Ostreoidea;Ostreidae;Crassostrea;Crassostrea gigas  
UdeM00000010768 29159 79 UdeM00000010768 XP\_034331086.1 23.2 491  
307 16 1 443 2 470 1.70E-11 79 29159 cellular

organisms;Eukaryota;Opisthokonta;Metazoa;Eumetazoa;Bilateria;Protostomia;Spiralia;Lophotrochozoa;Mollusca;Bivalvia;Autobranhia;Pteriomorphia;Ostr

eida;Ostreoidea;Ostreidae;Crassostrea;Crassostrea gigas  
UdeM00000010769 6596 241.9 UdeM00000010769 XP\_045215628.1 45.5 255  
110 2 22 272 99 328 9.70E-61 241.9 6596 cellular

organisms;Eukaryota;Opisthokonta;Metazoa;Eumetazoa;Bilateria;Protostomia;Spiralia;Lophotrochozoa;Mollusca;Bivalvia;Autobranhia;Heteroconchia;Euhe

terodonta;Imparidentia;Venerida;Veneroidea;Veneridae;Mercenaria;Mercenari  
a mercenaria  
UdeM00000010770 6596 161.4 UdeM00000010770 XP\_045200973.1 25.6 542  
312 16 156 679 276 744 4.10E-36 161.4 6596 cellular

organisms;Eukaryota;Opisthokonta;Metazoa;Eumetazoa;Bilateria;Protostomia;Spiralia;Lophotrochozoa;Mollusca;Bivalvia;Autobranhia;Heteroconchia;Euhe

terodonta;Imparidentia;Venerida;Veneroidea;Veneridae;Mercenaria;Mercenari  
a mercenaria  
UdeM00000010771 6596 157.5 UdeM00000010771 XP\_045191793.1 34 315  
162 7 1 314 283 552 6.20E-35 157.5 6596 cellular

organisms;Eukaryota;Opisthokonta;Metazoa;Eumetazoa;Bilateria;Protostomia;Spiralia;Lophotrochozoa;Mollusca;Bivalvia;Autobranhia;Heteroconchia;Euhe

terodonta;Imparidentia;Venerida;Veneroidea;Veneridae;Mercenaria;Mercenari  
a mercenaria  
UdeM00000010772 29159 265.8 UdeM00000010772 XP\_034316161.1 45 291  
159 1 1 290 718 1008 6.60E-68 265.8 29159 cellular

organisms;Eukaryota;Opisthokonta;Metazoa;Eumetazoa;Bilateria;Protostomia;Spiralia;Lophotrochozoa;Mollusca;Bivalvia;Autobranhia;Pteriomorphia;Ostr

eida;Ostreoidea;Ostreidae;Crassostrea;Crassostrea gigas  
UdeM00000010773 6596 499.2 UdeM00000010773 XP\_045204106.1 50.3 497  
242 4 1 493 1 496 7.20E-138 499.2 6596 cellular

organisms;Eukaryota;Opisthokonta;Metazoa;Eumetazoa;Bilateria;Protostomia;Spiralia;Lophotrochozoa;Mollusca;Bivalvia;Autobranhia;Heteroconchia;Euhe

terodonta;Imparidentia;Venerida;Veneroidea;Veneridae;Mercenaria;Mercenari  
a mercenaria  
UdeM00000010774 1735272 365.9 UdeM00000010774 XP\_041362825.1 53.9  
330 143 3 71 395 344 669 6.30E-98 365.9 1735272

cellular  
organisms;Eukaryota;Opisthokonta;Metazoa;Eumetazoa;Bilateria;Protostomia;Spiralia;Lophotrochozoa;Mollusca;Gastropoda;Neomphalina;Neomphaloidea;Pel

tospiridae;Gigantopelta;Gigantopelta aegis  
UdeM00000010775 6596 494.6 UdeM00000010775 XP\_045204674.1 44.6 590  
307 10 12 598 4 576 1.80E-136 494.6 6596 cellular

organisms;Eukaryota;Opisthokonta;Metazoa;Eumetazoa;Bilateria;Protostomia;Spiralia;Lophotrochozoa;Mollusca;Bivalvia;Autobranhia;Heteroconchia;Euhe

terodonta;Imparidentia;Venerida;Veneroidea;Veneridae;Mercenaria;Mercenari  
a mercenaria

UdeM00000010776 225164 367.9 UdeM00000010776 XP\_009062152.1 50.4  
 363 168 4 38 395 330 685 1.70E-98 367.9 225164  
 cellular  
 organisms;Eukaryota;Opisthokonta;Metazoa;Eumetazoa;Bilateria;Protostomia;  
 Spiralia;Lophotrochozoa;Mollusca;Gastropoda;Patellogastropoda;Lottioidea;  
 Lottiidae;Lottia;Lottia gigantea  
 UdeM00000010777 7668 94 UdeM00000010777 XP\_030853395.1 27 267  
 163 9 46 304 1486 1728 4.40E-16 94 7668 cellular  
 organisms;Eukaryota;Opisthokonta;Metazoa;Eumetazoa;Bilateria;Deuterostomi  
 a;Echinodermata;Eleutherozoa;Echinozoa;Echinoidea;Euechinoidea;Echinacea;  
 Camarodonta;Echinidea;Strongylocentrotidae;Strongylocentrotus;Strongyloce  
 ntrotus purpuratus  
 UdeM00000010779 6596 474.9 UdeM00000010779 XP\_045204674.1 43 579  
 320 8 17 593 6 576 1.50E-130 474.9 6596 cellular  
 organisms;Eukaryota;Opisthokonta;Metazoa;Eumetazoa;Bilateria;Protostomia;  
 Spiralia;Lophotrochozoa;Mollusca;Bivalvia;Autobranchia;Heteroconchia;Euhe  
 terodonta;Imparidentia;Venerida;Veneroidea;Veneridae;Mercenaria;Mercenari  
 a mercenaria  
 UdeM00000010780 6596 164.5 UdeM00000010780 XP\_045210214.1 60.6 132  
 51 1 6 136 2 133 9.70E-38 164.5 6596 cellular  
 organisms;Eukaryota;Opisthokonta;Metazoa;Eumetazoa;Bilateria;Protostomia;  
 Spiralia;Lophotrochozoa;Mollusca;Bivalvia;Autobranchia;Heteroconchia;Euhe  
 terodonta;Imparidentia;Venerida;Veneroidea;Veneridae;Mercenaria;Mercenari  
 a mercenaria  
 UdeM00000010781 6579 86.7 UdeM00000010781 XP\_033743088.1 63.9 72  
 20 2 1 72 170 235 1.50E-14 86.7 6579 cellular  
 organisms;Eukaryota;Opisthokonta;Metazoa;Eumetazoa;Bilateria;Protostomia;  
 Spiralia;Lophotrochozoa;Mollusca;Bivalvia;Autobranchia;Pteriomorphia;Pect  
 inida;Pectinoidea;Pectinidae;Pecten;Pecten maximus  
 UdeM00000010783 6596 120.9 UdeM00000010783 XP\_045204106.1 50.4 113  
 55 1 1 113 258 369 1.20E-24 120.9 6596 cellular  
 organisms;Eukaryota;Opisthokonta;Metazoa;Eumetazoa;Bilateria;Protostomia;  
 Spiralia;Lophotrochozoa;Mollusca;Bivalvia;Autobranchia;Heteroconchia;Euhe  
 terodonta;Imparidentia;Venerida;Veneroidea;Veneridae;Mercenaria;Mercenari  
 a mercenaria  
 UdeM00000010784 225164 359.8 UdeM00000010784 XP\_009062152.1 53  
 328 145 3 73 395 362 685 4.50E-96 359.8 225164  
 cellular  
 organisms;Eukaryota;Opisthokonta;Metazoa;Eumetazoa;Bilateria;Protostomia;  
 Spiralia;Lophotrochozoa;Mollusca;Gastropoda;Patellogastropoda;Lottioidea;  
 Lottiidae;Lottia;Lottia gigantea  
 UdeM00000010785 6596 380.6 UdeM00000010785 XP\_045204674.1 42.7 468  
 260 6 1 467 116 576 2.90E-102 380.6 6596 cellular  
 organisms;Eukaryota;Opisthokonta;Metazoa;Eumetazoa;Bilateria;Protostomia;  
 Spiralia;Lophotrochozoa;Mollusca;Bivalvia;Autobranchia;Heteroconchia;Euhe  
 terodonta;Imparidentia;Venerida;Veneroidea;Veneridae;Mercenaria;Mercenari  
 a mercenaria  
 UdeM00000010786 1735272 366.3 UdeM00000010786 XP\_041362825.1 53.6  
 330 144 3 71 395 344 669 4.90E-98 366.3 1735272  
 cellular  
 organisms;Eukaryota;Opisthokonta;Metazoa;Eumetazoa;Bilateria;Protostomia;  
 Spiralia;Lophotrochozoa;Mollusca;Gastropoda;Neomphalina;Neomphaloidea;Pel  
 tospiridae;Gigantopelta;Gigantopelta aegis

UdeM00000010787 6596 490 UdeM00000010787 XP\_045204674.1 43.7 581  
 317 8 12 590 4 576 4.40E-135 490 6596 cellular  
 organisms;Eukaryota;Opisthokonta;Metazoa;Eumetazoa;Bilateria;Protostomia;  
 Spiralia;Lophotrochozoa;Mollusca;Bivalvia;Autobranchia;Heteroconchia;Euhe  
 terodonta;Imparidentia;Venerida;Veneroidea;Veneridae;Mercenaria;Mercenari  
 a mercenaria

UdeM00000010789 6596 494.2 UdeM00000010789 XP\_045204674.1 44.9 579  
 307 7 14 586 4 576 2.30E-136 494.2 6596 cellular  
 organisms;Eukaryota;Opisthokonta;Metazoa;Eumetazoa;Bilateria;Protostomia;  
 Spiralia;Lophotrochozoa;Mollusca;Bivalvia;Autobranchia;Heteroconchia;Euhe  
 terodonta;Imparidentia;Venerida;Veneroidea;Veneridae;Mercenaria;Mercenari  
 a mercenaria

UdeM00000010790 7998 316.2 UdeM00000010790 XP\_017339836.1 53.6 280  
 121 3 28 300 366 643 4.40E-83 316.2 7998 cellular  
 organisms;Eukaryota;Opisthokonta;Metazoa;Eumetazoa;Bilateria;Deuterostomi  
 a;Chordata;Craniata;Vertebrata;Gnathostomata;Teleostomi;Euteleostomi;Acti  
 nopterygii;Actinopteri;Neopterygii;Teleostei;Osteoglossocephalai;Clupeoce  
 phala;Otomorpha;Ostariophysi;Otophysi;Characiphysae;Siluriformes;Siluroid  
 ei;Ictaluridae;Ictalurus;Ictalurus punctatus

UdeM00000010792 6596 362.5 UdeM00000010792 XP\_045204176.1 53.5 325  
 142 2 12 329 2 324 5.80E-97 362.5 6596 cellular  
 organisms;Eukaryota;Opisthokonta;Metazoa;Eumetazoa;Bilateria;Protostomia;  
 Spiralia;Lophotrochozoa;Mollusca;Bivalvia;Autobranchia;Heteroconchia;Euhe  
 terodonta;Imparidentia;Venerida;Veneroidea;Veneridae;Mercenaria;Mercenari  
 a mercenaria

UdeM00000010793 6596 102.8 UdeM00000010793 XP\_045205238.1 42.1 121  
 69 1 1 121 373 492 3.10E-19 102.8 6596 cellular  
 organisms;Eukaryota;Opisthokonta;Metazoa;Eumetazoa;Bilateria;Protostomia;  
 Spiralia;Lophotrochozoa;Mollusca;Bivalvia;Autobranchia;Heteroconchia;Euhe  
 terodonta;Imparidentia;Venerida;Veneroidea;Veneridae;Mercenaria;Mercenari  
 a mercenaria

UdeM00000010794 225164 292.4 UdeM00000010794 XP\_009062152.1 55.4  
 251 110 1 73 323 362 610 7.30E-76 292.4 225164  
 cellular  
 organisms;Eukaryota;Opisthokonta;Metazoa;Eumetazoa;Bilateria;Protostomia;  
 Spiralia;Lophotrochozoa;Mollusca;Gastropoda;Patellogastropoda;Lottioidea;  
 Lottiidae;Lottia;Lottia gigantea

UdeM00000010795 6596 611.7 UdeM00000010795 XP\_045203343.1 67 469  
 142 5 2 462 4 467 8.60E-172 611.7 6596 cellular  
 organisms;Eukaryota;Opisthokonta;Metazoa;Eumetazoa;Bilateria;Protostomia;  
 Spiralia;Lophotrochozoa;Mollusca;Bivalvia;Autobranchia;Heteroconchia;Euhe  
 terodonta;Imparidentia;Venerida;Veneroidea;Veneridae;Mercenaria;Mercenari  
 a mercenaria

UdeM00000010796 6565 126.7 UdeM00000010796 XP\_022325237.1 72.8 92  
 24 1 1 91 1 92 1.60E-26 126.7 6565 cellular  
 organisms;Eukaryota;Opisthokonta;Metazoa;Eumetazoa;Bilateria;Protostomia;  
 Spiralia;Lophotrochozoa;Mollusca;Bivalvia;Autobranchia;Pteriomorphia;Ostr  
 eida;Ostreoidea;Ostreidae;Crassostrea;Crassostrea virginica

UdeM00000010797 6573 965.3 UdeM00000010797 XP\_021376944.1 57.6 922  
 325 20 1 892 1 886 5.40E-278 965.3 6573 cellular  
 organisms;Eukaryota;Opisthokonta;Metazoa;Eumetazoa;Bilateria;Protostomia;  
 Spiralia;Lophotrochozoa;Mollusca;Bivalvia;Autobranchia;Pteriomorphia;Pect  
 inida;Pectinoidea;Pectinidae;Mizuhopecten;Mizuhopecten yessoensis

UdeM00000010798 6596 204.9 UdeM00000010798 XP\_045205285.1 43.6 381  
 146 6 12 386 2 319 1.80E-49 204.9 6596 cellular  
 organisms;Eukaryota;Opisthokonta;Metazoa;Eumetazoa;Bilateria;Protostomia;  
 Spiralia;Lophotrochozoa;Mollusca;Bivalvia;Autobranchia;Heteroconchia;Euhe  
 terodonta;Imparidentia;Venerida;Veneroidea;Veneridae;Mercenaria;Mercenari  
 a mercenaria  
 UdeM00000010799 29159 706.8 UdeM00000010799 XP\_034301111.1 57.7 705  
 274 11 81 776 51 740 3.00E-200 706.8 29159 cellular  
 organisms;Eukaryota;Opisthokonta;Metazoa;Eumetazoa;Bilateria;Protostomia;  
 Spiralia;Lophotrochozoa;Mollusca;Bivalvia;Autobranchia;Pteriormorphia;Ostr  
 eida;Ostreoidea;Ostreidae;Crassostrea;Crassostrea gigas  
 UdeM00000010800 6596 308.5 UdeM00000010800 XP\_045203625.1 50.4 282  
 135 2 1 281 1 278 1.30E-80 308.5 6596 cellular  
 organisms;Eukaryota;Opisthokonta;Metazoa;Eumetazoa;Bilateria;Protostomia;  
 Spiralia;Lophotrochozoa;Mollusca;Bivalvia;Autobranchia;Heteroconchia;Euhe  
 terodonta;Imparidentia;Venerida;Veneroidea;Veneridae;Mercenaria;Mercenari  
 a mercenaria  
 UdeM00000010801 6596 470.7 UdeM00000010801 XP\_045205403.1 73.2 317  
 85 0 7 323 8 324 1.50E-129 470.7 6596 cellular  
 organisms;Eukaryota;Opisthokonta;Metazoa;Eumetazoa;Bilateria;Protostomia;  
 Spiralia;Lophotrochozoa;Mollusca;Bivalvia;Autobranchia;Heteroconchia;Euhe  
 terodonta;Imparidentia;Venerida;Veneroidea;Veneridae;Mercenaria;Mercenari  
 a mercenaria  
 UdeM00000010802 2607531 785 UdeM00000010802 XP\_029648709.1 64.5  
 617 174 6 17 602 309 911 6.70E-224 785 2607531  
 cellular  
 organisms;Eukaryota;Opisthokonta;Metazoa;Eumetazoa;Bilateria;Protostomia;  
 Spiralia;Lophotrochozoa;Mollusca;Cephalopoda;Coleoidea;Octopodiformes;Oct  
 opoda;Incirrata;Octopodidae;Octopus;Octopus sinensis  
 UdeM00000010803 6596 513.5 UdeM00000010803 XP\_045205403.1 77.6 304  
 67 1 1 304 421 723 1.90E-142 513.5 6596 cellular  
 organisms;Eukaryota;Opisthokonta;Metazoa;Eumetazoa;Bilateria;Protostomia;  
 Spiralia;Lophotrochozoa;Mollusca;Bivalvia;Autobranchia;Heteroconchia;Euhe  
 terodonta;Imparidentia;Venerida;Veneroidea;Veneridae;Mercenaria;Mercenari  
 a mercenaria  
 UdeM00000010804 6850 126.7 UdeM00000010804 NP\_001301020.1 44.7 179  
 79 6 4 175 758 923 2.90E-26 126.7 6850 cellular  
 organisms;Eukaryota;Opisthokonta;Metazoa;Eumetazoa;Bilateria;Protostomia;  
 Ecdysozoa;Panarthropoda;Arthropoda;Chelicerata;Merostomata;Xiphosura;Limu  
 lidae;Limulus;Limulus polyphemus  
 UdeM00000010805 29159 444.9 UdeM00000010805 XP\_011429627.2 86.9 252  
 33 0 13 264 292 543 7.20E-122 444.9 29159 cellular  
 organisms;Eukaryota;Opisthokonta;Metazoa;Eumetazoa;Bilateria;Protostomia;  
 Spiralia;Lophotrochozoa;Mollusca;Bivalvia;Autobranchia;Pteriormorphia;Ostr  
 eida;Ostreoidea;Ostreidae;Crassostrea;Crassostrea gigas  
 UdeM00000010806 6596 545 UdeM00000010806 XP\_045205723.1 50.2 821  
 388 9 11 820 6 816 1.80E-151 545 6596 cellular  
 organisms;Eukaryota;Opisthokonta;Metazoa;Eumetazoa;Bilateria;Protostomia;  
 Spiralia;Lophotrochozoa;Mollusca;Bivalvia;Autobranchia;Heteroconchia;Euhe  
 terodonta;Imparidentia;Venerida;Veneroidea;Veneridae;Mercenaria;Mercenari  
 a mercenaria  
 UdeM00000010807 6573 224.9 UdeM00000010807 XP\_021364076.1 39.2 385  
 158 10 1 378 15 330 1.70E-55 224.9 6573 cellular  
 organisms;Eukaryota;Opisthokonta;Metazoa;Eumetazoa;Bilateria;Protostomia;

Spiralia;Lophotrochozoa;Mollusca;Bivalvia;Autobranchia;Pteriomorpha;Pectinida;Pectinoidea;Pectinidae;Mizuhopecten;Mizuhopecten yessoensis

UdeM00000010808 6596 129.4 UdeM00000010808 XP\_045205379.1 32 331  
133 10 25 340 62 315 2.60E-26 129.4 6596 cellular  
organisms;Eukaryota;Opisthokonta;Metazoa;Eumetazoa;Bilateria;Protostomia;  
Spiralia;Lophotrochozoa;Mollusca;Bivalvia;Autobranchia;Heteroconchia;Euhe  
terodonta;Imparidentia;Venerida;Veneroidea;Veneridae;Mercenaria;Mercenari  
a mercenaria

UdeM00000010810 6596 1312.4 UdeM00000010810 XP\_045203354.1 63.3  
1124 311 18 31 1101 1442 2517 0.00E+00 1312.4 6596  
cellular  
organisms;Eukaryota;Opisthokonta;Metazoa;Eumetazoa;Bilateria;Protostomia;  
Spiralia;Lophotrochozoa;Mollusca;Bivalvia;Autobranchia;Heteroconchia;Euhe  
terodonta;Imparidentia;Venerida;Veneroidea;Veneridae;Mercenaria;Mercenari  
a mercenaria

UdeM00000010811 6596 146.4 UdeM00000010811 XP\_045203354.1 30.2 474  
250 15 321 727 914 1373 1.60E-31 146.4 6596 cellular  
organisms;Eukaryota;Opisthokonta;Metazoa;Eumetazoa;Bilateria;Protostomia;  
Spiralia;Lophotrochozoa;Mollusca;Bivalvia;Autobranchia;Heteroconchia;Euhe  
terodonta;Imparidentia;Venerida;Veneroidea;Veneridae;Mercenaria;Mercenari  
a mercenaria

UdeM00000010812 6596 1152.5 UdeM00000010812 XP\_045205986.1 72.7  
916 231 2 1 901 1 912 0.00E+00 1152.5 6596  
cellular  
organisms;Eukaryota;Opisthokonta;Metazoa;Eumetazoa;Bilateria;Protostomia;  
Spiralia;Lophotrochozoa;Mollusca;Bivalvia;Autobranchia;Heteroconchia;Euhe  
terodonta;Imparidentia;Venerida;Veneroidea;Veneridae;Mercenaria;Mercenari  
a mercenaria

UdeM00000010813 6596 273.9 UdeM00000010813 XP\_045205986.1 70.6 170  
50 0 32 201 743 912 1.70E-70 273.9 6596 cellular  
organisms;Eukaryota;Opisthokonta;Metazoa;Eumetazoa;Bilateria;Protostomia;  
Spiralia;Lophotrochozoa;Mollusca;Bivalvia;Autobranchia;Heteroconchia;Euhe  
terodonta;Imparidentia;Venerida;Veneroidea;Veneridae;Mercenaria;Mercenari  
a mercenaria

UdeM00000010814 6596 1048.9 UdeM00000010814 XP\_045205628.1 66.6  
770 254 2 27 794 32 800 3.30E-303 1048.9 6596  
cellular  
organisms;Eukaryota;Opisthokonta;Metazoa;Eumetazoa;Bilateria;Protostomia;  
Spiralia;Lophotrochozoa;Mollusca;Bivalvia;Autobranchia;Heteroconchia;Euhe  
terodonta;Imparidentia;Venerida;Veneroidea;Veneridae;Mercenaria;Mercenari  
a mercenaria

UdeM00000010815 6596 959.9 UdeM00000010815 XP\_045205627.1 56.7 855  
317 12 38 852 25 866 2.10E-276 959.9 6596 cellular  
organisms;Eukaryota;Opisthokonta;Metazoa;Eumetazoa;Bilateria;Protostomia;  
Spiralia;Lophotrochozoa;Mollusca;Bivalvia;Autobranchia;Heteroconchia;Euhe  
terodonta;Imparidentia;Venerida;Veneroidea;Veneridae;Mercenaria;Mercenari  
a mercenaria

UdeM00000010816 6596 959.9 UdeM00000010816 XP\_045205627.1 56.9 850  
316 12 38 845 25 866 2.10E-276 959.9 6596 cellular  
organisms;Eukaryota;Opisthokonta;Metazoa;Eumetazoa;Bilateria;Protostomia;  
Spiralia;Lophotrochozoa;Mollusca;Bivalvia;Autobranchia;Heteroconchia;Euhe  
terodonta;Imparidentia;Venerida;Veneroidea;Veneridae;Mercenaria;Mercenari  
a mercenaria

UdeM00000010817 6596 193.4 UdeM00000010817 XP\_045205627.1 58.6 152  
 63 0 2 153 133 284 2.90E-46 193.4 6596 cellular  
 organisms;Eukaryota;Opisthokonta;Metazoa;Eumetazoa;Bilateria;Protostomia;  
 Spiralia;Lophotrochozoa;Mollusca;Bivalvia;Autobranchia;Heteroconchia;Euhe  
 terodonta;Imparidentia;Venerida;Veneroidea;Veneridae;Mercenaria;Mercenari  
 a mercenaria  
 UdeM00000010818 6596 233.8 UdeM00000010818 XP\_045205892.1 50.9 285  
 131 4 1 283 1 278 2.90E-58 233.8 6596 cellular  
 organisms;Eukaryota;Opisthokonta;Metazoa;Eumetazoa;Bilateria;Protostomia;  
 Spiralia;Lophotrochozoa;Mollusca;Bivalvia;Autobranchia;Heteroconchia;Euhe  
 terodonta;Imparidentia;Venerida;Veneroidea;Veneridae;Mercenaria;Mercenari  
 a mercenaria  
 UdeM00000010819 6579 64.7 UdeM00000010819 XP\_033742737.1 47.8 67  
 33 1 1 67 1 65 7.00E-08 64.7 6579 cellular  
 organisms;Eukaryota;Opisthokonta;Metazoa;Eumetazoa;Bilateria;Protostomia;  
 Spiralia;Lophotrochozoa;Mollusca;Bivalvia;Autobranchia;Pteriormorphia;Pect  
 inida;Pectinoidea;Pectinidae;Pecten;Pecten maximus  
 UdeM00000010820 7574 63.9 UdeM00000010820 XP\_013412596.1 54 63  
 26 1 5 67 104 163 1.30E-07 63.9 7574 cellular  
 organisms;Eukaryota;Opisthokonta;Metazoa;Eumetazoa;Bilateria;Protostomia;  
 Spiralia;Lophotrochozoa;Brachiopoda;Linguliformea;Lingulata;Lingulida;Lin  
 guloidea;Lingulidae;Lingula;Lingula anatina  
 UdeM00000010821 6596 114.8 UdeM00000010821 XP\_045204842.1 30.2 255  
 139 9 297 522 333 577 3.40E-22 114.8 6596 cellular  
 organisms;Eukaryota;Opisthokonta;Metazoa;Eumetazoa;Bilateria;Protostomia;  
 Spiralia;Lophotrochozoa;Mollusca;Bivalvia;Autobranchia;Heteroconchia;Euhe  
 terodonta;Imparidentia;Venerida;Veneroidea;Veneridae;Mercenaria;Mercenari  
 a mercenaria  
 UdeM00000010822 6596 775.8 UdeM00000010822 XP\_045203675.1 58.2 627  
 258 3 1 625 58 682 4.20E-221 775.8 6596 cellular  
 organisms;Eukaryota;Opisthokonta;Metazoa;Eumetazoa;Bilateria;Protostomia;  
 Spiralia;Lophotrochozoa;Mollusca;Bivalvia;Autobranchia;Heteroconchia;Euhe  
 terodonta;Imparidentia;Venerida;Veneroidea;Veneridae;Mercenaria;Mercenari  
 a mercenaria  
 UdeM00000010823 6596 558.1 UdeM00000010823 XP\_045203675.1 47.2 576  
 301 3 2 574 72 647 1.30E-155 558.1 6596 cellular  
 organisms;Eukaryota;Opisthokonta;Metazoa;Eumetazoa;Bilateria;Protostomia;  
 Spiralia;Lophotrochozoa;Mollusca;Bivalvia;Autobranchia;Heteroconchia;Euhe  
 terodonta;Imparidentia;Venerida;Veneroidea;Veneridae;Mercenaria;Mercenari  
 a mercenaria  
 UdeM00000010824 6596 577 UdeM00000010824 XP\_045203675.1 48.4 576  
 294 3 2 574 72 647 2.60E-161 577 6596 cellular  
 organisms;Eukaryota;Opisthokonta;Metazoa;Eumetazoa;Bilateria;Protostomia;  
 Spiralia;Lophotrochozoa;Mollusca;Bivalvia;Autobranchia;Heteroconchia;Euhe  
 terodonta;Imparidentia;Venerida;Veneroidea;Veneridae;Mercenaria;Mercenari  
 a mercenaria  
 UdeM00000010825 6596 589 UdeM00000010825 XP\_045203675.1 49.7 590  
 287 6 1 581 58 646 6.80E-165 589 6596 cellular  
 organisms;Eukaryota;Opisthokonta;Metazoa;Eumetazoa;Bilateria;Protostomia;  
 Spiralia;Lophotrochozoa;Mollusca;Bivalvia;Autobranchia;Heteroconchia;Euhe  
 terodonta;Imparidentia;Venerida;Veneroidea;Veneridae;Mercenaria;Mercenari  
 a mercenaria  
 UdeM00000010827 7396 79.7 UdeM00000010827 XP\_037888883.1 61 59  
 23 0 1 59 1 59 1.60E-12 79.7 7396 cellular



organisms;Eukaryota;Opisthokonta;Metazoa;Eumetazoa;Bilateria;Protostomia;Ecdysozoa;Panarthropoda;Arthropoda;Mandibulata;Pancrustacea;Hexapoda;Insecta;Dicondylia;Pterygota;Neoptera;Endopterygota;Diptera;Brachycera;Muscomorpha;Eremoneura;Cyclorrhapha;Schizophora;Calyptratae;Hippoboscoidea;Glossinidae;Glossina;Nemorhina;Glossina fuscipes

UdeM00000010828 6573 245.7 UdeM00000010828 XP\_021360212.1 38 466  
228 13 3 459 33 446 1.10E-61 245.7 6573 cellular

organisms;Eukaryota;Opisthokonta;Metazoa;Eumetazoa;Bilateria;Protostomia;Spiralia;Lophotrochozoa;Mollusca;Bivalvia;Autobranhia;Pteriormorphia;Pectinida;Pectinoidea;Pectinidae;Mizuhopecten;Mizuhopecten yessoensis

UdeM00000010829 6596 440.3 UdeM00000010829 XP\_045211974.1 51.2 443  
201 7 62 496 4 439 3.40E-120 440.3 6596 cellular

organisms;Eukaryota;Opisthokonta;Metazoa;Eumetazoa;Bilateria;Protostomia;Spiralia;Lophotrochozoa;Mollusca;Bivalvia;Autobranhia;Heteroconchia;Euheterodonta;Imparidentia;Venerida;Veneroidea;Veneridae;Mercenaria;Mercenaria mercenaria

UdeM00000010830 6596 440.3 UdeM00000010830 XP\_045211974.1 51.2 443  
201 7 35 469 4 439 3.20E-120 440.3 6596 cellular

organisms;Eukaryota;Opisthokonta;Metazoa;Eumetazoa;Bilateria;Protostomia;Spiralia;Lophotrochozoa;Mollusca;Bivalvia;Autobranhia;Heteroconchia;Euheterodonta;Imparidentia;Venerida;Veneroidea;Veneridae;Mercenaria;Mercenaria mercenaria

UdeM00000010831 6596 174.1 UdeM00000010831 XP\_045211975.1 61.3 137  
53 0 1 137 457 593 1.40E-40 174.1 6596 cellular

organisms;Eukaryota;Opisthokonta;Metazoa;Eumetazoa;Bilateria;Protostomia;Spiralia;Lophotrochozoa;Mollusca;Bivalvia;Autobranhia;Heteroconchia;Euheterodonta;Imparidentia;Venerida;Veneroidea;Veneridae;Mercenaria;Mercenaria mercenaria

UdeM00000010832 6596 145.2 UdeM00000010832 XP\_045211975.1 65.7 105  
36 0 2 106 489 593 5.60E-32 145.2 6596 cellular

organisms;Eukaryota;Opisthokonta;Metazoa;Eumetazoa;Bilateria;Protostomia;Spiralia;Lophotrochozoa;Mollusca;Bivalvia;Autobranhia;Heteroconchia;Euheterodonta;Imparidentia;Venerida;Veneroidea;Veneridae;Mercenaria;Mercenaria mercenaria

UdeM00000010833 6573 90.1 UdeM00000010833 XP\_021354625.1 32.5 191  
117 5 26 207 41 228 3.50E-15 90.1 6573 cellular

organisms;Eukaryota;Opisthokonta;Metazoa;Eumetazoa;Bilateria;Protostomia;Spiralia;Lophotrochozoa;Mollusca;Bivalvia;Autobranhia;Pteriormorphia;Pectinida;Pectinoidea;Pectinidae;Mizuhopecten;Mizuhopecten yessoensis

UdeM00000010834 7574 679.5 UdeM00000010834 XP\_013392570.1 50.8 971  
381 12 1 942 1 903 6.20E-192 679.5 7574 cellular

organisms;Eukaryota;Opisthokonta;Metazoa;Eumetazoa;Bilateria;Protostomia;Spiralia;Lophotrochozoa;Brachiopoda;Linguliformea;Lingulata;Lingulida;Linguloidea;Lingulidae;Lingula;Lingula anatina

UdeM00000010835 6596 459.5 UdeM00000010835 XP\_045205412.1 67.7 439  
128 1 8 432 2 440 4.60E-126 459.5 6596 cellular

organisms;Eukaryota;Opisthokonta;Metazoa;Eumetazoa;Bilateria;Protostomia;Spiralia;Lophotrochozoa;Mollusca;Bivalvia;Autobranhia;Heteroconchia;Euheterodonta;Imparidentia;Venerida;Veneroidea;Veneridae;Mercenaria;Mercenaria mercenaria

UdeM00000010836 6596 459.5 UdeM00000010836 XP\_045205412.1 67.2 439  
128 1 8 430 2 440 4.60E-126 459.5 6596 cellular

organisms;Eukaryota;Opisthokonta;Metazoa;Eumetazoa;Bilateria;Protostomia;Spiralia;Lophotrochozoa;Mollusca;Bivalvia;Autobranhia;Heteroconchia;Euheterodonta;Imparidentia;Venerida;Veneroidea;Veneridae;Mercenaria;Mercenaria mercenaria

terodonta;Imparidentia;Venerida;Veneroidea;Veneridae;Mercenaria;Mercenaria mercenaria

UdeM00000010837 6579 676.8 UdeM00000010837 XP\_033742894.1 60.9 696  
269 2 41 734 2 696 3.10E-191 676.8 6579 cellular

organisms;Eukaryota;Opisthokonta;Metazoa;Eumetazoa;Bilateria;Protostomia;Spiralia;Lophotrochozoa;Mollusca;Bivalvia;Autobranhia;Pteriormorphia;Pectinida;Pectinoidea;Pectinidae;Pecten;Pecten maximus

UdeM00000010838 6579 659.1 UdeM00000010838 XP\_033742894.1 59.2 711  
272 3 41 749 2 696 6.90E-186 659.1 6579 cellular

organisms;Eukaryota;Opisthokonta;Metazoa;Eumetazoa;Bilateria;Protostomia;Spiralia;Lophotrochozoa;Mollusca;Bivalvia;Autobranhia;Pteriormorphia;Pectinida;Pectinoidea;Pectinidae;Pecten;Pecten maximus

UdeM00000010842 6573 810.8 UdeM00000010842 XP\_021346569.1 53.7 761  
295 8 1 706 1 759 1.30E-231 810.8 6573 cellular

organisms;Eukaryota;Opisthokonta;Metazoa;Eumetazoa;Bilateria;Protostomia;Spiralia;Lophotrochozoa;Mollusca;Bivalvia;Autobranhia;Pteriormorphia;Pectinida;Pectinoidea;Pectinidae;Mizuhopecten;Mizuhopecten yessoensis

UdeM00000010843 6596 133.3 UdeM00000010843 XP\_045200408.1 38.3 175  
101 2 12 179 3 177 3.10E-28 133.3 6596 cellular

organisms;Eukaryota;Opisthokonta;Metazoa;Eumetazoa;Bilateria;Protostomia;Spiralia;Lophotrochozoa;Mollusca;Bivalvia;Autobranhia;Heteroconchia;Euheterodonta;Imparidentia;Venerida;Veneroidea;Veneridae;Mercenaria;Mercenaria mercenaria

UdeM00000010845 225164 174.1 UdeM00000010845 XP\_009059786.1 43.1  
195 103 4 1 187 248 442 1.70E-40 174.1 225164

cellular

organisms;Eukaryota;Opisthokonta;Metazoa;Eumetazoa;Bilateria;Protostomia;Spiralia;Lophotrochozoa;Mollusca;Gastropoda;Patellogastropoda;Lottioidea;Lottiidae;Lottia;Lottia gigantea

UdeM00000010844 6596 243 UdeM00000010844 XP\_045204817.1 37 338  
185 8 131 450 225 552 7.30E-61 243 6596 cellular

organisms;Eukaryota;Opisthokonta;Metazoa;Eumetazoa;Bilateria;Protostomia;Spiralia;Lophotrochozoa;Mollusca;Bivalvia;Autobranhia;Heteroconchia;Euheterodonta;Imparidentia;Venerida;Veneroidea;Veneridae;Mercenaria;Mercenaria mercenaria

UdeM00000010847 29159 228 UdeM00000010847 XP\_019923390.1 45.9 305  
163 1 65 369 4 306 2.00E-56 228 29159 cellular

organisms;Eukaryota;Opisthokonta;Metazoa;Eumetazoa;Bilateria;Protostomia;Spiralia;Lophotrochozoa;Mollusca;Bivalvia;Autobranhia;Pteriormorphia;Ostreida;Ostreoidea;Ostreidae;Crassostrea;Crassostrea gigas

UdeM00000010848 400727 176.8 UdeM00000010848 XP\_025087031.1 46.4  
222 119 0 6 227 4 225 3.40E-41 176.8 400727

cellular

organisms;Eukaryota;Opisthokonta;Metazoa;Eumetazoa;Bilateria;Protostomia;Spiralia;Lophotrochozoa;Mollusca;Gastropoda;Caenogastropoda;Architaenioglossa;Ampullarioidea;Ampullariidae;Pomacea;Pomacea canaliculata

UdeM00000010849 6596 348.2 UdeM00000010849 XP\_045204967.1 81.9 221  
39 1 1 220 1 221 7.70E-93 348.2 6596 cellular

organisms;Eukaryota;Opisthokonta;Metazoa;Eumetazoa;Bilateria;Protostomia;Spiralia;Lophotrochozoa;Mollusca;Bivalvia;Autobranhia;Heteroconchia;Euheterodonta;Imparidentia;Venerida;Veneroidea;Veneridae;Mercenaria;Mercenaria mercenaria

UdeM00000010850 6596 625.2 UdeM00000010850 XP\_045183823.1 60.8 482  
183 1 7 488 5 480 8.30E-176 625.2 6596 cellular

organisms;Eukaryota;Opisthokonta;Metazoa;Eumetazoa;Bilateria;Protostomia; Spiralia;Lophotrochozoa;Mollusca;Bivalvia;Autobranchia;Heteroconchia;Euherodonta;Imparidentia;Venerida;Veneroidea;Veneridae;Mercenaria;Mercenaria mercenaria

UdeM00000010851 6596 302.8 UdeM00000010851 XP\_045185195.1 77.8 180  
40 0 1 180 1 180 3.00E-79 302.8 6596 cellular

organisms;Eukaryota;Opisthokonta;Metazoa;Eumetazoa;Bilateria;Protostomia; Spiralia;Lophotrochozoa;Mollusca;Bivalvia;Autobranchia;Heteroconchia;Euherodonta;Imparidentia;Venerida;Veneroidea;Veneridae;Mercenaria;Mercenaria mercenaria

UdeM00000010852 6596 471.5 UdeM00000010852 XP\_045202956.1 33.3 1237  
667 37 817 1964 463 1630 8.60E-129 471.5 6596 cellular

organisms;Eukaryota;Opisthokonta;Metazoa;Eumetazoa;Bilateria;Protostomia; Spiralia;Lophotrochozoa;Mollusca;Bivalvia;Autobranchia;Heteroconchia;Euherodonta;Imparidentia;Venerida;Veneroidea;Veneridae;Mercenaria;Mercenaria mercenaria

UdeM00000010852 6596 61.6 UdeM00000010852 XP\_045202956.1 30.9 204  
117 6 2741 2937 2275 2461 2.10E-05 61.6 6596 cellular

organisms;Eukaryota;Opisthokonta;Metazoa;Eumetazoa;Bilateria;Protostomia; Spiralia;Lophotrochozoa;Mollusca;Bivalvia;Autobranchia;Heteroconchia;Euherodonta;Imparidentia;Venerida;Veneroidea;Veneridae;Mercenaria;Mercenaria mercenaria

UdeM00000010853 6596 341.3 UdeM00000010853 XP\_045202958.1 68.5 248  
69 3 3 242 23 269 1.00E-90 341.3 6596 cellular

organisms;Eukaryota;Opisthokonta;Metazoa;Eumetazoa;Bilateria;Protostomia; Spiralia;Lophotrochozoa;Mollusca;Bivalvia;Autobranchia;Heteroconchia;Euherodonta;Imparidentia;Venerida;Veneroidea;Veneridae;Mercenaria;Mercenaria mercenaria

UdeM00000010854 6565 693.7 UdeM00000010854 XP\_022328400.1 77.6 419  
94 0 4 422 6 424 1.40E-196 693.7 6565 cellular

organisms;Eukaryota;Opisthokonta;Metazoa;Eumetazoa;Bilateria;Protostomia; Spiralia;Lophotrochozoa;Mollusca;Bivalvia;Autobranchia;Pteriomorphia;Ostreida;Ostreoidea;Ostreidae;Crassostrea;Crassostrea virginica

UdeM00000010855 6596 772.7 UdeM00000010855 XP\_045206449.1 72.9 513  
119 5 1 503 80 582 2.90E-220 772.7 6596 cellular

organisms;Eukaryota;Opisthokonta;Metazoa;Eumetazoa;Bilateria;Protostomia; Spiralia;Lophotrochozoa;Mollusca;Bivalvia;Autobranchia;Heteroconchia;Euherodonta;Imparidentia;Venerida;Veneroidea;Veneridae;Mercenaria;Mercenaria mercenaria

UdeM00000010856 6565 166.4 UdeM00000010856 XP\_022301960.1 69.4 108  
32 1 6 112 11 118 2.20E-38 166.4 6565 cellular

organisms;Eukaryota;Opisthokonta;Metazoa;Eumetazoa;Bilateria;Protostomia; Spiralia;Lophotrochozoa;Mollusca;Bivalvia;Autobranchia;Pteriomorphia;Ostreida;Ostreoidea;Ostreidae;Crassostrea;Crassostrea virginica

UdeM00000010857 6565 167.5 UdeM00000010857 XP\_022301960.1 69.4 108  
32 1 7 113 11 118 1.00E-38 167.5 6565 cellular

organisms;Eukaryota;Opisthokonta;Metazoa;Eumetazoa;Bilateria;Protostomia; Spiralia;Lophotrochozoa;Mollusca;Bivalvia;Autobranchia;Pteriomorphia;Ostreida;Ostreoidea;Ostreidae;Crassostrea;Crassostrea virginica

UdeM00000010858 6565 355.5 UdeM00000010858 XP\_022324796.1 84.2 203  
32 0 1 203 1 203 4.40E-95 355.5 6565 cellular

organisms;Eukaryota;Opisthokonta;Metazoa;Eumetazoa;Bilateria;Protostomia; Spiralia;Lophotrochozoa;Mollusca;Bivalvia;Autobranchia;Pteriomorphia;Ostreida;Ostreoidea;Ostreidae;Crassostrea;Crassostrea virginica

UdeM00000010859 6565 464.2 UdeM00000010859 XP\_022326557.1 65.6 352  
 121 0 70 421 67 418 1.80E-127 464.2 6565 cellular  
 organisms;Eukaryota;Opisthokonta;Metazoa;Eumetazoa;Bilateria;Protostomia;  
 Spiralia;Lophotrochozoa;Mollusca;Bivalvia;Autobranchia;Pteriormorphia;Ostr  
 eida;Ostreoidea;Ostreidae;Crassostrea;Crassostrea virginica  
 UdeM00000010860 6565 387.1 UdeM00000010860 XP\_022341267.1 45.7 376  
 190 3 11 373 151 525 2.60E-104 387.1 6565 cellular  
 organisms;Eukaryota;Opisthokonta;Metazoa;Eumetazoa;Bilateria;Protostomia;  
 Spiralia;Lophotrochozoa;Mollusca;Bivalvia;Autobranchia;Pteriormorphia;Ostr  
 eida;Ostreoidea;Ostreidae;Crassostrea;Crassostrea virginica  
 UdeM00000010861 6596 207.2 UdeM00000010861 XP\_045175162.1 62.3 151  
 55 2 6 154 25 175 1.50E-50 207.2 6596 cellular  
 organisms;Eukaryota;Opisthokonta;Metazoa;Eumetazoa;Bilateria;Protostomia;  
 Spiralia;Lophotrochozoa;Mollusca;Bivalvia;Autobranchia;Heteroconchia;Euhe  
 terodonta;Imparidentia;Venerida;Veneroidea;Veneridae;Mercenaria;Mercenari  
 a mercenaria  
 UdeM00000010862 6596 599 UdeM00000010862 XP\_045205280.1 61.2 464  
 172 3 53 514 50 507 5.80E-168 599 6596 cellular  
 organisms;Eukaryota;Opisthokonta;Metazoa;Eumetazoa;Bilateria;Protostomia;  
 Spiralia;Lophotrochozoa;Mollusca;Bivalvia;Autobranchia;Heteroconchia;Euhe  
 terodonta;Imparidentia;Venerida;Veneroidea;Veneridae;Mercenaria;Mercenari  
 a mercenaria  
 UdeM00000010863 225164 223.8 UdeM00000010863 XP\_009055264.1 64.7  
 368 112 3 8 375 5 354 3.80E-55 223.8 225164  
 cellular  
 organisms;Eukaryota;Opisthokonta;Metazoa;Eumetazoa;Bilateria;Protostomia;  
 Spiralia;Lophotrochozoa;Mollusca;Gastropoda;Patellogastropoda;Lottioidea;  
 Lottiidae;Lottia;Lottia gigantea  
 UdeM00000010864 6596 60.8 UdeM00000010864 XP\_045205281.1 23.2 435  
 222 15 28 404 34 414 4.70E-06 60.8 6596 cellular  
 organisms;Eukaryota;Opisthokonta;Metazoa;Eumetazoa;Bilateria;Protostomia;  
 Spiralia;Lophotrochozoa;Mollusca;Bivalvia;Autobranchia;Heteroconchia;Euhe  
 terodonta;Imparidentia;Venerida;Veneroidea;Veneridae;Mercenaria;Mercenari  
 a mercenaria  
 UdeM00000010867 151771 178.7 UdeM00000010867 XP\_028406951.1 27.4  
 507 239 9 1 386 119 617 1.40E-41 178.7 151771  
 cellular  
 organisms;Eukaryota;Opisthokonta;Metazoa;Eumetazoa;Cnidaria;Anthozoa;Octo  
 corallia;Alcyonacea;Alcyoniina;Nephtheidae;Dendronephthya;Dendronephthya  
 gigantea  
 UdeM00000010868 6596 486.1 UdeM00000010868 XP\_045204158.1 52.7 421  
 192 2 1 421 1 414 4.60E-134 486.1 6596 cellular  
 organisms;Eukaryota;Opisthokonta;Metazoa;Eumetazoa;Bilateria;Protostomia;  
 Spiralia;Lophotrochozoa;Mollusca;Bivalvia;Autobranchia;Heteroconchia;Euhe  
 terodonta;Imparidentia;Venerida;Veneroidea;Veneridae;Mercenaria;Mercenari  
 a mercenaria  
 UdeM00000010869 6596 83.6 UdeM00000010869 XP\_045189682.1 43.4 76  
 42 1 619 693 349 424 1.10E-12 83.6 6596 cellular  
 organisms;Eukaryota;Opisthokonta;Metazoa;Eumetazoa;Bilateria;Protostomia;  
 Spiralia;Lophotrochozoa;Mollusca;Bivalvia;Autobranchia;Heteroconchia;Euhe  
 terodonta;Imparidentia;Venerida;Veneroidea;Veneridae;Mercenaria;Mercenari  
 a mercenaria  
 UdeM00000010869 6596 70.9 UdeM00000010869 XP\_045189682.1 42.3 71  
 41 0 15 85 9 79 7.40E-09 70.9 6596 cellular

organisms;Eukaryota;Opisthokonta;Metazoa;Eumetazoa;Bilateria;Protostomia;Spiralia;Lophotrochozoa;Mollusca;Bivalvia;Autobranchia;Heteroconchia;Euherodonta;Imparidentia;Venerida;Veneroidea;Veneridae;Mercenaria;Mercenaria mercenaria

UdeM00000010870 6596 162.5 UdeM00000010870 XP\_045205319.1 30.7 398  
238 11 8 380 17 401 1.30E-36 162.5 6596 cellular

organisms;Eukaryota;Opisthokonta;Metazoa;Eumetazoa;Bilateria;Protostomia;Spiralia;Lophotrochozoa;Mollusca;Bivalvia;Autobranchia;Heteroconchia;Euherodonta;Imparidentia;Venerida;Veneroidea;Veneridae;Mercenaria;Mercenaria mercenaria

UdeM00000010871 6596 937.9 UdeM00000010871 XP\_045156491.1 36.8 1481  
787 20 91 1484 822 2240 1.50E-269 937.9 6596 cellular

organisms;Eukaryota;Opisthokonta;Metazoa;Eumetazoa;Bilateria;Protostomia;Spiralia;Lophotrochozoa;Mollusca;Bivalvia;Autobranchia;Heteroconchia;Euherodonta;Imparidentia;Venerida;Veneroidea;Veneridae;Mercenaria;Mercenaria mercenaria

UdeM00000010872 6596 959.1 UdeM00000010872 XP\_045202823.1 72.6 647  
170 1 1 640 1 647 2.70E-276 959.1 6596 cellular

organisms;Eukaryota;Opisthokonta;Metazoa;Eumetazoa;Bilateria;Protostomia;Spiralia;Lophotrochozoa;Mollusca;Bivalvia;Autobranchia;Heteroconchia;Euherodonta;Imparidentia;Venerida;Veneroidea;Veneridae;Mercenaria;Mercenaria mercenaria

UdeM00000010874 29159 120.6 UdeM00000010874 XP\_034311245.1 31.2 276  
157 9 7 273 15 266 3.30E-24 120.6 29159 cellular

organisms;Eukaryota;Opisthokonta;Metazoa;Eumetazoa;Bilateria;Protostomia;Spiralia;Lophotrochozoa;Mollusca;Bivalvia;Autobranchia;Pteriomorphia;Ostreida;Ostreoidea;Ostreidae;Crassostrea;Crassostrea gigas

UdeM00000010875 29159 142.9 UdeM00000010875 XP\_034315421.1 51.2 160  
72 3 122 277 271 428 6.20E-31 142.9 29159 cellular

organisms;Eukaryota;Opisthokonta;Metazoa;Eumetazoa;Bilateria;Protostomia;Spiralia;Lophotrochozoa;Mollusca;Bivalvia;Autobranchia;Pteriomorphia;Ostreida;Ostreoidea;Ostreidae;Crassostrea;Crassostrea gigas

UdeM00000010879 29159 366.7 UdeM00000010879 XP\_034318666.1 62.2 262  
99 0 1 262 482 743 2.50E-98 366.7 29159 cellular

organisms;Eukaryota;Opisthokonta;Metazoa;Eumetazoa;Bilateria;Protostomia;Spiralia;Lophotrochozoa;Mollusca;Bivalvia;Autobranchia;Pteriomorphia;Ostreida;Ostreoidea;Ostreidae;Crassostrea;Crassostrea gigas

UdeM00000010878 6565 197.6 UdeM00000010878 XP\_022306954.1 43.9 223  
117 4 4 221 729 948 1.70E-47 197.6 6565 cellular

organisms;Eukaryota;Opisthokonta;Metazoa;Eumetazoa;Bilateria;Protostomia;Spiralia;Lophotrochozoa;Mollusca;Bivalvia;Autobranchia;Pteriomorphia;Ostreida;Ostreoidea;Ostreidae;Crassostrea;Crassostrea virginica

UdeM00000010880 6565 186.8 UdeM00000010880 XP\_022306954.1 48.8 172  
88 0 2 173 777 948 2.30E-44 186.8 6565 cellular

organisms;Eukaryota;Opisthokonta;Metazoa;Eumetazoa;Bilateria;Protostomia;Spiralia;Lophotrochozoa;Mollusca;Bivalvia;Autobranchia;Pteriomorphia;Ostreida;Ostreoidea;Ostreidae;Crassostrea;Crassostrea virginica

UdeM00000010881 29159 142.9 UdeM00000010881 XP\_034315421.1 51.2 160  
72 3 122 277 271 428 6.20E-31 142.9 29159 cellular

organisms;Eukaryota;Opisthokonta;Metazoa;Eumetazoa;Bilateria;Protostomia;Spiralia;Lophotrochozoa;Mollusca;Bivalvia;Autobranchia;Pteriomorphia;Ostreida;Ostreoidea;Ostreidae;Crassostrea;Crassostrea gigas

UdeM00000010885 29159 370.2 UdeM00000010885 XP\_034318666.1 62.6 262  
98 0 1 262 482 743 2.30E-99 370.2 29159 cellular

organisms;Eukaryota;Opisthokonta;Metazoa;Eumetazoa;Bilateria;Protostomia;Spiralia;Lophotrochozoa;Mollusca;Bivalvia;Autobranchia;Pteriormorphia;Ostreida;Ostreoidea;Ostreidae;Crassostrea;Crassostrea gigas  
UdeM00000010884 6565 197.6 UdeM00000010884 XP\_022306954.1 43.9 223  
117 4 4 221 729 948 1.70E-47 197.6 6565 cellular  
organisms;Eukaryota;Opisthokonta;Metazoa;Eumetazoa;Bilateria;Protostomia;Spiralia;Lophotrochozoa;Mollusca;Bivalvia;Autobranchia;Pteriormorphia;Ostreida;Ostreoidea;Ostreidae;Crassostrea;Crassostrea virginica  
UdeM00000010886 6565 186.8 UdeM00000010886 XP\_022306954.1 48.8 172  
88 0 2 173 777 948 2.30E-44 186.8 6565 cellular  
organisms;Eukaryota;Opisthokonta;Metazoa;Eumetazoa;Bilateria;Protostomia;Spiralia;Lophotrochozoa;Mollusca;Bivalvia;Autobranchia;Pteriormorphia;Ostreida;Ostreoidea;Ostreidae;Crassostrea;Crassostrea virginica  
UdeM00000010888 6596 757.3 UdeM00000010888 XP\_045202826.1 62.2 569  
185 3 1 539 88 656 1.40E-215 757.3 6596 cellular  
organisms;Eukaryota;Opisthokonta;Metazoa;Eumetazoa;Bilateria;Protostomia;Spiralia;Lophotrochozoa;Mollusca;Bivalvia;Autobranchia;Heteroconchia;Euheterodonta;Imparidentia;Venerida;Veneroidea;Veneridae;Mercenaria;Mercenaria mercenaria  
UdeM00000010889 6596 357.1 UdeM00000010889 XP\_045202845.1 58.4 267  
109 1 13 277 8 274 2.10E-95 357.1 6596 cellular  
organisms;Eukaryota;Opisthokonta;Metazoa;Eumetazoa;Bilateria;Protostomia;Spiralia;Lophotrochozoa;Mollusca;Bivalvia;Autobranchia;Heteroconchia;Euheterodonta;Imparidentia;Venerida;Veneroidea;Veneridae;Mercenaria;Mercenaria mercenaria  
UdeM00000010890 6596 364.8 UdeM00000010890 XP\_045205870.1 57.7 293  
118 2 9 300 171 458 1.10E-97 364.8 6596 cellular  
organisms;Eukaryota;Opisthokonta;Metazoa;Eumetazoa;Bilateria;Protostomia;Spiralia;Lophotrochozoa;Mollusca;Bivalvia;Autobranchia;Heteroconchia;Euheterodonta;Imparidentia;Venerida;Veneroidea;Veneridae;Mercenaria;Mercenaria mercenaria  
UdeM00000010891 6596 149.1 UdeM00000010891 XP\_045205870.1 54.5 123  
51 1 2 124 341 458 3.90E-33 149.1 6596 cellular  
organisms;Eukaryota;Opisthokonta;Metazoa;Eumetazoa;Bilateria;Protostomia;Spiralia;Lophotrochozoa;Mollusca;Bivalvia;Autobranchia;Heteroconchia;Euheterodonta;Imparidentia;Venerida;Veneroidea;Veneridae;Mercenaria;Mercenaria mercenaria  
UdeM00000010892 6579 218 UdeM00000010892 XP\_033761565.1 29.4 496  
315 11 75 544 286 772 2.90E-53 218 6579 cellular  
organisms;Eukaryota;Opisthokonta;Metazoa;Eumetazoa;Bilateria;Protostomia;Spiralia;Lophotrochozoa;Mollusca;Bivalvia;Autobranchia;Pteriormorphia;Pectinida;Pectinoidea;Pectinidae;Pecten;Pecten maximus  
UdeM00000010893 29159 65.5 UdeM00000010893 XP\_034307878.1 42.7 82  
44 1 42 123 181 259 5.60E-08 65.5 29159 cellular  
organisms;Eukaryota;Opisthokonta;Metazoa;Eumetazoa;Bilateria;Protostomia;Spiralia;Lophotrochozoa;Mollusca;Bivalvia;Autobranchia;Pteriormorphia;Ostreida;Ostreoidea;Ostreidae;Crassostrea;Crassostrea gigas  
UdeM00000010894 6596 774.2 UdeM00000010894 XP\_045203695.1 56.9 666  
277 4 18 681 24 681 1.30E-220 774.2 6596 cellular  
organisms;Eukaryota;Opisthokonta;Metazoa;Eumetazoa;Bilateria;Protostomia;Spiralia;Lophotrochozoa;Mollusca;Bivalvia;Autobranchia;Heteroconchia;Euheterodonta;Imparidentia;Venerida;Veneroidea;Veneridae;Mercenaria;Mercenaria mercenaria

UdeM00000010897 6596 416.8 UdeM00000010897 XP\_045205204.1 73 259  
 70 0 1 259 335 593 2.10E-113 416.8 6596 cellular  
 organisms;Eukaryota;Opisthokonta;Metazoa;Eumetazoa;Bilateria;Protostomia;  
 Spiralia;Lophotrochozoa;Mollusca;Bivalvia;Autobranhia;Heteroconchia;Euhe  
 terodonta;Imparidentia;Venerida;Veneroidea;Veneridae;Mercenaria;Mercenari  
 a mercenaria  
 UdeM00000010898 6596 436.8 UdeM00000010898 XP\_045205204.1 73.2 269  
 72 0 76 344 325 593 2.60E-119 436.8 6596 cellular  
 organisms;Eukaryota;Opisthokonta;Metazoa;Eumetazoa;Bilateria;Protostomia;  
 Spiralia;Lophotrochozoa;Mollusca;Bivalvia;Autobranhia;Heteroconchia;Euhe  
 terodonta;Imparidentia;Venerida;Veneroidea;Veneridae;Mercenaria;Mercenari  
 a mercenaria  
 UdeM00000010895 6596 436.8 UdeM00000010895 XP\_045205204.1 73.2 269  
 72 0 203 471 325 593 3.50E-119 436.8 6596 cellular  
 organisms;Eukaryota;Opisthokonta;Metazoa;Eumetazoa;Bilateria;Protostomia;  
 Spiralia;Lophotrochozoa;Mollusca;Bivalvia;Autobranhia;Heteroconchia;Euhe  
 terodonta;Imparidentia;Venerida;Veneroidea;Veneridae;Mercenaria;Mercenari  
 a mercenaria  
 UdeM00000010896 6596 436 UdeM00000010896 XP\_045205204.1 72.8 272  
 74 0 120 391 322 593 5.00E-119 436 6596 cellular  
 organisms;Eukaryota;Opisthokonta;Metazoa;Eumetazoa;Bilateria;Protostomia;  
 Spiralia;Lophotrochozoa;Mollusca;Bivalvia;Autobranhia;Heteroconchia;Euhe  
 terodonta;Imparidentia;Venerida;Veneroidea;Veneridae;Mercenaria;Mercenari  
 a mercenaria  
 UdeM00000010899 6596 126.7 UdeM00000010899 XP\_045204749.1 50.4 131  
 61 2 1 128 1 130 2.70E-26 126.7 6596 cellular  
 organisms;Eukaryota;Opisthokonta;Metazoa;Eumetazoa;Bilateria;Protostomia;  
 Spiralia;Lophotrochozoa;Mollusca;Bivalvia;Autobranhia;Heteroconchia;Euhe  
 terodonta;Imparidentia;Venerida;Veneroidea;Veneridae;Mercenaria;Mercenari  
 a mercenaria  
 UdeM00000010900 6596 132.1 UdeM00000010900 XP\_045204749.1 52.2 134  
 57 3 1 128 1 133 6.30E-28 132.1 6596 cellular  
 organisms;Eukaryota;Opisthokonta;Metazoa;Eumetazoa;Bilateria;Protostomia;  
 Spiralia;Lophotrochozoa;Mollusca;Bivalvia;Autobranhia;Heteroconchia;Euhe  
 terodonta;Imparidentia;Venerida;Veneroidea;Veneridae;Mercenaria;Mercenari  
 a mercenaria  
 UdeM00000010902 6596 147.5 UdeM00000010902 XP\_045215469.1 41.4 169  
 98 1 1 168 27 195 1.60E-32 147.5 6596 cellular  
 organisms;Eukaryota;Opisthokonta;Metazoa;Eumetazoa;Bilateria;Protostomia;  
 Spiralia;Lophotrochozoa;Mollusca;Bivalvia;Autobranhia;Heteroconchia;Euhe  
 terodonta;Imparidentia;Venerida;Veneroidea;Veneridae;Mercenaria;Mercenari  
 a mercenaria  
 UdeM00000010904 6596 583.9 UdeM00000010904 XP\_045203144.1 48.3 613  
 282 4 1 613 11 588 2.30E-163 583.9 6596 cellular  
 organisms;Eukaryota;Opisthokonta;Metazoa;Eumetazoa;Bilateria;Protostomia;  
 Spiralia;Lophotrochozoa;Mollusca;Bivalvia;Autobranhia;Heteroconchia;Euhe  
 terodonta;Imparidentia;Venerida;Veneroidea;Veneridae;Mercenaria;Mercenari  
 a mercenaria  
 UdeM00000010905 116153 419.5 UdeM00000010905 XP\_019866035.1 60.1  
 386 151 1 1 383 526 911 4.70E-114 419.5 116153  
 cellular  
 organisms;Eukaryota;Opisthokonta;Metazoa;Eumetazoa;Bilateria;Protostomia;  
 Ecdysozoa;Panarthropoda;Arthropoda;Mandibulata;Pancrustacea;Hexapoda;Inse

cta;Dicondylia;Pterygota;Neoptera;Endopterygota;Coleoptera;Polyphaga;Cucujiformia;Cucujoidea;Nitidulidae;Nitidulinae;Aethina;Aethina tumida  
 UdeM00000010906 116153 422.9 UdeM00000010906 XP\_019866035.1 60.4  
 386 150 1 1 383 526 911 4.30E-115 422.9 116153  
 cellular  
 organisms;Eukaryota;Opisthokonta;Metazoa;Eumetazoa;Bilateria;Protostomia;Ecdysozoa;Panarthropoda;Arthropoda;Mandibulata;Pancrustacea;Hexapoda;Insecta;Dicondylia;Pterygota;Neoptera;Endopterygota;Coleoptera;Polyphaga;Cucujiformia;Cucujoidea;Nitidulidae;Nitidulinae;Aethina;Aethina tumida  
 UdeM00000010908 1735272 81.6 UdeM00000010908 XP\_041378228.1 80.4  
 46 9 0 67 112 111 156 9.40E-13 81.6 1735272  
 cellular  
 organisms;Eukaryota;Opisthokonta;Metazoa;Eumetazoa;Bilateria;Protostomia;Spiralia;Lophotrochozoa;Mollusca;Gastropoda;Neomphalina;Neomphaloidea;Peltospiridae;Gigantopelta;Gigantopelta aegis  
 UdeM00000010909 6596 150.6 UdeM00000010909 XP\_045158353.1 42.6 169  
 96 1 1 168 27 195 1.90E-33 150.6 6596 cellular  
 organisms;Eukaryota;Opisthokonta;Metazoa;Eumetazoa;Bilateria;Protostomia;Spiralia;Lophotrochozoa;Mollusca;Bivalvia;Autobranchia;Heteroconchia;Euheterodonta;Imparidentia;Venerida;Veneroidea;Veneridae;Mercenaria;Mercenaria mercenaria  
 UdeM00000010910 5762 97.8 UdeM00000010910 XP\_002670566.1 30.4 253  
 167 7 71 315 80 331 2.90E-17 97.8 5762 cellular  
 organisms;Eukaryota;Discoba;Heterolobosea;Tetramitida;Eutetramitida;Vahlkampfiidae;Naegleria;Naegleria gruberi  
 UdeM00000010911 6596 687.6 UdeM00000010911 XP\_045204976.1 61.6 536  
 191 4 5 540 7 527 1.30E-194 687.6 6596 cellular  
 organisms;Eukaryota;Opisthokonta;Metazoa;Eumetazoa;Bilateria;Protostomia;Spiralia;Lophotrochozoa;Mollusca;Bivalvia;Autobranchia;Heteroconchia;Euheterodonta;Imparidentia;Venerida;Veneroidea;Veneridae;Mercenaria;Mercenaria mercenaria  
 UdeM00000010912 6596 812.8 UdeM00000010912 XP\_045206315.1 46.2 1010  
 386 18 15 1007 9 878 5.00E-232 812.8 6596 cellular  
 organisms;Eukaryota;Opisthokonta;Metazoa;Eumetazoa;Bilateria;Protostomia;Spiralia;Lophotrochozoa;Mollusca;Bivalvia;Autobranchia;Heteroconchia;Euheterodonta;Imparidentia;Venerida;Veneroidea;Veneridae;Mercenaria;Mercenaria mercenaria  
 UdeM00000010913 6565 475.3 UdeM00000010913 XP\_022322855.1 41.9 749  
 339 14 4 748 261 917 1.40E-130 475.3 6565 cellular  
 organisms;Eukaryota;Opisthokonta;Metazoa;Eumetazoa;Bilateria;Protostomia;Spiralia;Lophotrochozoa;Mollusca;Bivalvia;Autobranchia;Pteriomorpha;Ostreida;Ostreioidea;Ostreidae;Crassostrea;Crassostrea virginica  
 UdeM00000010914 6565 578.2 UdeM00000010914 XP\_022327962.1 57.2 509  
 215 3 48 553 91 599 1.10E-161 578.2 6565 cellular  
 organisms;Eukaryota;Opisthokonta;Metazoa;Eumetazoa;Bilateria;Protostomia;Spiralia;Lophotrochozoa;Mollusca;Bivalvia;Autobranchia;Pteriomorpha;Ostreida;Ostreioidea;Ostreidae;Crassostrea;Crassostrea virginica  
 UdeM00000010915 6565 110.2 UdeM00000010915 XP\_022327962.1 58.1 93  
 37 1 3 93 626 718 1.50E-21 110.2 6565 cellular  
 organisms;Eukaryota;Opisthokonta;Metazoa;Eumetazoa;Bilateria;Protostomia;Spiralia;Lophotrochozoa;Mollusca;Bivalvia;Autobranchia;Pteriomorpha;Ostreida;Ostreioidea;Ostreidae;Crassostrea;Crassostrea virginica  
 UdeM00000010916 37653 91.7 UdeM00000010916 XP\_014780668.1 44.4 124  
 61 4 61 180 181 300 1.10E-15 91.7 37653 cellular



organisms;Eukaryota;Opisthokonta;Metazoa;Eumetazoa;Bilateria;Protostomia; Spiralia;Lophotrochozoa;Mollusca;Cephalopoda;Coleoidea;Octopodiformes;Octopoda;Incirrata;Octopodidae;Octopus;Octopus bimaculoides

UdeM00000010917 6565 198.4 UdeM00000010917 XP\_022326162.1 65.9 170  
51 2 3 165 6 175 7.70E-48 198.4 6565 cellular

organisms;Eukaryota;Opisthokonta;Metazoa;Eumetazoa;Bilateria;Protostomia; Spiralia;Lophotrochozoa;Mollusca;Bivalvia;Autobranchia;Pteriomorphia;Ostreida;Ostreoidea;Ostreidae;Crassostrea;Crassostrea virginica

UdeM00000010918 441366 244.6 UdeM00000010918 XP\_028326620.1 44.1  
306 161 5 1 305 48 344 1.70E-61 244.6 441366  
cellular

organisms;Eukaryota;Opisthokonta;Metazoa;Eumetazoa;Bilateria;Deuterostomia;Chordata;Craniata;Vertebrata;Gnathostomata;Teleostomi;Euteleostomi;Actinopterygii;Actinopteri;Neopterygii;Teleostei;Osteoglossocephalai;Clupeocephala;Euteleostei;Neoteleostei;Eurypterygia;Ctenosquamata;Acanthomorpha;Euacanthomorpha;Percomorphaceae;Ovalentaria;Blenniiformes;Blenniiformes;Gobiesocoidei;Gobiesocidae;Gobiesocinae;Gouania;Gouania willdenowi

UdeM00000010919 6596 166 UdeM00000010919 XP\_045203975.1 73.9 111  
29 0 3 113 181 291 2.80E-38 166 6596 cellular

organisms;Eukaryota;Opisthokonta;Metazoa;Eumetazoa;Bilateria;Protostomia; Spiralia;Lophotrochozoa;Mollusca;Bivalvia;Autobranchia;Heteroconchia;Euheterodonta;Imparidentia;Venerida;Veneroidea;Veneridae;Mercenaria;Mercenaria mercenaria

UdeM00000010920 6573 317 UdeM00000010920 XP\_021339215.1 78.4 185  
40 0 1 185 1 185 1.60E-83 317 6573 cellular

organisms;Eukaryota;Opisthokonta;Metazoa;Eumetazoa;Bilateria;Protostomia; Spiralia;Lophotrochozoa;Mollusca;Bivalvia;Autobranchia;Pteriomorphia;Pectinida;Pectinoidea;Pectinidae;Mizuhopecten;Mizuhopecten yessoensis

UdeM00000010921 6596 731.5 UdeM00000010921 XP\_045190097.1 36.6 1228  
680 25 7 1179 11 1195 1.70E-207 731.5 6596 cellular

organisms;Eukaryota;Opisthokonta;Metazoa;Eumetazoa;Bilateria;Protostomia; Spiralia;Lophotrochozoa;Mollusca;Bivalvia;Autobranchia;Heteroconchia;Euheterodonta;Imparidentia;Venerida;Veneroidea;Veneridae;Mercenaria;Mercenaria mercenaria

UdeM00000010922 6579 288.9 UdeM00000010922 XP\_033743357.1 43.9 353  
185 5 119 465 81 426 2.30E-74 288.9 6579 cellular

organisms;Eukaryota;Opisthokonta;Metazoa;Eumetazoa;Bilateria;Protostomia; Spiralia;Lophotrochozoa;Mollusca;Bivalvia;Autobranchia;Pteriomorphia;Pectinida;Pectinoidea;Pectinidae;Pecten;Pecten maximus

UdeM00000010923 6565 535.8 UdeM00000010923 XP\_022310570.1 59.1 491  
179 8 1 479 1 481 5.90E-149 535.8 6565 cellular

organisms;Eukaryota;Opisthokonta;Metazoa;Eumetazoa;Bilateria;Protostomia; Spiralia;Lophotrochozoa;Mollusca;Bivalvia;Autobranchia;Pteriomorphia;Ostreida;Ostreoidea;Ostreidae;Crassostrea;Crassostrea virginica

UdeM00000010925 6596 396.4 UdeM00000010925 XP\_045205116.1 54.2 382  
154 4 1 382 1 361 4.30E-107 396.4 6596 cellular

organisms;Eukaryota;Opisthokonta;Metazoa;Eumetazoa;Bilateria;Protostomia; Spiralia;Lophotrochozoa;Mollusca;Bivalvia;Autobranchia;Heteroconchia;Euheterodonta;Imparidentia;Venerida;Veneroidea;Veneridae;Mercenaria;Mercenaria mercenaria

UdeM00000010926 400727 97.8 UdeM00000010926 XP\_025085454.1 86.5  
52 7 0 29 80 1 52 6.60E-18 97.8 400727  
cellular

organisms;Eukaryota;Opisthokonta;Metazoa;Eumetazoa;Bilateria;Protostomia;  
Spiralia;Lophotrochozoa;Mollusca;Gastropoda;Caenogastropoda;Architaenioglossa;  
Ampullarioidea;Ampullariidae;Pomacea;Pomacea canaliculata  
UdeM00000010927 6573 415.6 UdeM00000010927 XP\_021339013.1 62.1 354  
122 6 89 438 55 400 7.80E-113 415.6 6573 cellular  
organisms;Eukaryota;Opisthokonta;Metazoa;Eumetazoa;Bilateria;Protostomia;  
Spiralia;Lophotrochozoa;Mollusca;Bivalvia;Autobranchia;Pteriormorphia;Pectinida;  
Pectinoidea;Pectinidae;Mizuhopecten;Mizuhopecten yessoensis  
UdeM00000010928 6573 221.1 UdeM00000010928 XP\_021354732.1 37.9 335  
192 6 20 346 8 334 2.20E-54 221.1 6573 cellular  
organisms;Eukaryota;Opisthokonta;Metazoa;Eumetazoa;Bilateria;Protostomia;  
Spiralia;Lophotrochozoa;Mollusca;Bivalvia;Autobranchia;Pteriormorphia;Pectinida;  
Pectinoidea;Pectinidae;Mizuhopecten;Mizuhopecten yessoensis  
UdeM00000010929 6596 688 UdeM00000010929 XP\_045205095.1 59.2 873  
318 16 1 856 1 852 1.80E-194 688 6596 cellular  
organisms;Eukaryota;Opisthokonta;Metazoa;Eumetazoa;Bilateria;Protostomia;  
Spiralia;Lophotrochozoa;Mollusca;Bivalvia;Autobranchia;Heteroconchia;Euheterodonta;  
Imparidentia;Venerida;Veneroidea;Veneridae;Mercenaria;Mercenaria mercenaria  
UdeM00000010930 6573 809.3 UdeM00000010930 XP\_021367074.1 55.2 759  
326 9 3 752 1 754 4.20E-231 809.3 6573 cellular  
organisms;Eukaryota;Opisthokonta;Metazoa;Eumetazoa;Bilateria;Protostomia;  
Spiralia;Lophotrochozoa;Mollusca;Bivalvia;Autobranchia;Pteriormorphia;Pectinida;  
Pectinoidea;Pectinidae;Mizuhopecten;Mizuhopecten yessoensis  
UdeM00000010931 6596 162.5 UdeM00000010931 XP\_045204312.1 41.6 202  
96 4 11 192 10 209 5.20E-37 162.5 6596 cellular  
organisms;Eukaryota;Opisthokonta;Metazoa;Eumetazoa;Bilateria;Protostomia;  
Spiralia;Lophotrochozoa;Mollusca;Bivalvia;Autobranchia;Heteroconchia;Euheterodonta;  
Imparidentia;Venerida;Veneroidea;Veneridae;Mercenaria;Mercenaria mercenaria  
UdeM00000010932 6500 161 UdeM00000010932 XP\_005110587.2 46.1 154  
81 2 36 188 54 206 1.50E-36 161 6500 cellular  
organisms;Eukaryota;Opisthokonta;Metazoa;Eumetazoa;Bilateria;Protostomia;  
Spiralia;Lophotrochozoa;Mollusca;Gastropoda;Heterobranchia;Euthyneura;Teptipleura;  
Aplysiida;Aplysioidea;Aplysiidae;Aplysia;Aplysia californica  
UdeM00000010934 29159 79.3 UdeM00000010934 XP\_034322899.1 36.4 88  
53 1 49 136 11 95 5.80E-12 79.3 29159 cellular  
organisms;Eukaryota;Opisthokonta;Metazoa;Eumetazoa;Bilateria;Protostomia;  
Spiralia;Lophotrochozoa;Mollusca;Bivalvia;Autobranchia;Pteriormorphia;Ostreida;  
Ostreoidea;Ostreidae;Crassostrea;Crassostrea gigas  
UdeM00000010935 6565 541.6 UdeM00000010935 XP\_022320668.1 41.3 778  
335 15 17 704 11 756 1.50E-150 541.6 6565 cellular  
organisms;Eukaryota;Opisthokonta;Metazoa;Eumetazoa;Bilateria;Protostomia;  
Spiralia;Lophotrochozoa;Mollusca;Bivalvia;Autobranchia;Pteriormorphia;Ostreida;  
Ostreoidea;Ostreidae;Crassostrea;Crassostrea virginica  
UdeM00000010936 45264 386 UdeM00000010936 XP\_044165535.1 48.3 373  
189 1 1 369 158 530 1.40E-103 386 45264 cellular  
organisms;Eukaryota;Opisthokonta;Metazoa;Eumetazoa;Cnidaria;Anthozoa;Hexacorallia;  
Scleractinia;Astrocoeniina;Acroporidae;Acropora;Acropora millepora  
UdeM00000010937 6596 1478.4 UdeM00000010937 XP\_045203193.1 71.5  
1019 286 2 1 1015 1 1019 0.00E+00 1478.4 6596 cellular  
organisms;Eukaryota;Opisthokonta;Metazoa;Eumetazoa;Bilateria;Protostomia;

Spiralia;Lophotrochozoa;Mollusca;Bivalvia;Autobranchia;Heteroconchia;Euherodonta;Imparidentia;Venerida;Veneroidea;Veneridae;Mercenaria;Mercenaria mercenaria

UdeM00000010939 6596 102.4 UdeM00000010939 XP\_045202793.1 23.5 907  
418 31 9 839 15 721 2.80E-18 102.4 6596 cellular

organisms;Eukaryota;Opisthokonta;Metazoa;Eumetazoa;Bilateria;Protostomia;Spiralia;Lophotrochozoa;Mollusca;Bivalvia;Autobranchia;Heteroconchia;Euherodonta;Imparidentia;Venerida;Veneroidea;Veneridae;Mercenaria;Mercenaria mercenaria

UdeM00000010938 6596 474.2 UdeM00000010938 XP\_045202793.1 24.8 2745  
1463 82 9 2619 15 2293 1.10E-129 474.2 6596 cellular

organisms;Eukaryota;Opisthokonta;Metazoa;Eumetazoa;Bilateria;Protostomia;Spiralia;Lophotrochozoa;Mollusca;Bivalvia;Autobranchia;Heteroconchia;Euherodonta;Imparidentia;Venerida;Veneroidea;Veneridae;Mercenaria;Mercenaria mercenaria

UdeM00000010940 6596 147.1 UdeM00000010940 XP\_045202793.1 21.3 1445  
871 42 1 1415 724 1932 1.70E-31 147.1 6596 cellular

organisms;Eukaryota;Opisthokonta;Metazoa;Eumetazoa;Bilateria;Protostomia;Spiralia;Lophotrochozoa;Mollusca;Bivalvia;Autobranchia;Heteroconchia;Euherodonta;Imparidentia;Venerida;Veneroidea;Veneridae;Mercenaria;Mercenaria mercenaria

UdeM00000010941 6579 271.6 UdeM00000010941 XP\_033743173.1 49.8 287  
140 1 54 336 2323 2609 1.40E-69 271.6 6579 cellular

organisms;Eukaryota;Opisthokonta;Metazoa;Eumetazoa;Bilateria;Protostomia;Spiralia;Lophotrochozoa;Mollusca;Bivalvia;Autobranchia;Pteriomorphia;Pectinida;Pectinoidea;Pectinidae;Pecten;Pecten maximus

UdeM00000010942 6596 876.7 UdeM00000010942 XP\_045205722.1 59.1 733  
290 6 13 742 102 827 2.10E-251 876.7 6596 cellular

organisms;Eukaryota;Opisthokonta;Metazoa;Eumetazoa;Bilateria;Protostomia;Spiralia;Lophotrochozoa;Mollusca;Bivalvia;Autobranchia;Heteroconchia;Euherodonta;Imparidentia;Venerida;Veneroidea;Veneridae;Mercenaria;Mercenaria mercenaria

UdeM00000010943 6596 119.4 UdeM00000010943 XP\_045205722.1 41.1 141  
76 3 1 135 1 140 4.20E-24 119.4 6596 cellular

organisms;Eukaryota;Opisthokonta;Metazoa;Eumetazoa;Bilateria;Protostomia;Spiralia;Lophotrochozoa;Mollusca;Bivalvia;Autobranchia;Heteroconchia;Euherodonta;Imparidentia;Venerida;Veneroidea;Veneridae;Mercenaria;Mercenaria mercenaria

UdeM00000010944 6573 550.1 UdeM00000010944 XP\_021348280.1 49.3 643  
307 8 21 651 23 658 3.90E-153 550.1 6573 cellular

organisms;Eukaryota;Opisthokonta;Metazoa;Eumetazoa;Bilateria;Protostomia;Spiralia;Lophotrochozoa;Mollusca;Bivalvia;Autobranchia;Pteriomorphia;Pectinida;Pectinoidea;Pectinidae;Mizuhopecten;Mizuhopecten yessoensis

UdeM00000010945 6573 217.6 UdeM00000010945 XP\_021348282.1 82.6 121  
21 0 1 121 1 121 8.60E-54 217.6 6573 cellular

organisms;Eukaryota;Opisthokonta;Metazoa;Eumetazoa;Bilateria;Protostomia;Spiralia;Lophotrochozoa;Mollusca;Bivalvia;Autobranchia;Pteriomorphia;Pectinida;Pectinoidea;Pectinidae;Mizuhopecten;Mizuhopecten yessoensis

UdeM00000010946 6596 480.3 UdeM00000010946 XP\_045203224.1 58.9 370  
148 1 1 370 1 366 2.30E-132 480.3 6596 cellular

organisms;Eukaryota;Opisthokonta;Metazoa;Eumetazoa;Bilateria;Protostomia;Spiralia;Lophotrochozoa;Mollusca;Bivalvia;Autobranchia;Heteroconchia;Euherodonta;Imparidentia;Venerida;Veneroidea;Veneridae;Mercenaria;Mercenaria mercenaria

UdeM00000010947 7222 339 UdeM00000010947 XP\_001991451.3 51.8 394  
 132 3 44 379 292 685 8.00E-90 339 7222 cellular  
 organisms;Eukaryota;Opisthokonta;Metazoa;Eumetazoa;Bilateria;Protostomia;  
 Ecdysozoa;Panarthropoda;Arthropoda;Mandibulata;Pancrustacea;Hexapoda;Inse  
 cta;Dicondylia;Pterygota;Neoptera;Endopterygota;Diptera;Brachycera;Muscom  
 orpha;Eremoneura;Cyclorrhapha;Schizophora;Acalyptratae;Ephydroidea;Drosop  
 hilidae;Drosophilinae;Drosophilini;Drosophila;Hawaiian Drosophila;picture  
 wing clade;grimshawi clade;grimshawi group;grimshawi subgroup;Drosophila  
 grimshawi  
 UdeM00000010950 747089 109.4 UdeM00000010950 XP\_025164949.1 51  
 96 45 2 1 94 723 818 2.60E-21 109.4 747089  
 cellular organisms;Eukaryota;Opisthokonta;Fungi;Fungi incertae  
 sedis;Mucoromycota;Glomeromycotina;Glomeromycetes;Glomerales;Glomeraceae;  
 Rhizophagus;Rhizophagus irregularis;Rhizophagus irregularis DAOM  
 181602=DAOM 197198  
 UdeM00000010951 2652724 89 UdeM00000010951 XP\_020895502.1 35.3  
 133 72 1 26 144 154 286 5.60E-15 89 2652724  
 cellular  
 organisms;Eukaryota;Opisthokonta;Metazoa;Eumetazoa;Cnidaria;Anthozoa;Hexa  
 corallia;Actiniaria;Aiptasiidae;Exaiptasia;Exaiptasia diaphana  
 UdeM00000010952 10228 63.2 UdeM00000010952 XP\_002118408.1 31.3 134  
 75 4 62 178 15 148 4.00E-07 63.2 10228 cellular  
 organisms;Eukaryota;Opisthokonta;Metazoa;Eumetazoa;Placozoa;Trichoplacida  
 e;Trichoplax;Trichoplax adhaerens  
 UdeM00000010953 9545 95.1 UdeM00000010953 XP\_011755562.2 54.1 85  
 39 0 1 85 1 85 7.40E-17 95.1 9545 cellular  
 organisms;Eukaryota;Opisthokonta;Metazoa;Eumetazoa;Bilateria;Deuterostomi  
 a;Chordata;Craniata;Vertebrata;Gnathostomata;Teleostomi;Euteleostomi;Sarc  
 opterygii;Dipnotetrapodomorpha;Tetrapoda;Amniota;Mammalia;Theria;Eutheria  
 ;Boreoeutheria;Euarchontoglires;Primates;Haplorrhini;Simiiformes;Catarri  
 ni;Cercopithecoidea;Cercopithecidae;Cercopithecinae;Macaca;Macaca  
 nemestrina  
 UdeM00000010954 29159 129 UdeM00000010954 XP\_011429494.2 73.3 86  
 23 0 23 108 1330 1415 3.60E-27 129 29159 cellular  
 organisms;Eukaryota;Opisthokonta;Metazoa;Eumetazoa;Bilateria;Protostomia;  
 Spiralia;Lophotrochozoa;Mollusca;Bivalvia;Autobranchia;Pteriormorphia;Ostr  
 eida;Ostreoidea;Ostreidae;Crassostrea;Crassostrea gigas  
 UdeM00000010955 45264 100.9 UdeM00000010955 XP\_044184343.1 32.2 202  
 101 6 4 171 6 205 1.80E-18 100.9 45264 cellular  
 organisms;Eukaryota;Opisthokonta;Metazoa;Eumetazoa;Cnidaria;Anthozoa;Hexa  
 corallia;Scleractinia;Astrocoeniina;Acroporidae;Acropora;Acropora  
 millepora  
 UdeM00000010957 6596 1161 UdeM00000010957 XP\_045205917.1 47.1 1391  
 522 12 1 1232 1 1336 0.00E+00 1161 6596 cellular  
 organisms;Eukaryota;Opisthokonta;Metazoa;Eumetazoa;Bilateria;Protostomia;  
 Spiralia;Lophotrochozoa;Mollusca;Bivalvia;Autobranchia;Heteroconchia;Euhe  
 terodonta;Imparidentia;Venerida;Veneroidea;Veneridae;Mercenaria;Mercenari  
 a mercenaria  
 UdeM00000010958 6596 909.1 UdeM00000010958 XP\_045205917.1 44.5 1195  
 449 12 1 1036 1 1140 5.30E-261 909.1 6596 cellular  
 organisms;Eukaryota;Opisthokonta;Metazoa;Eumetazoa;Bilateria;Protostomia;  
 Spiralia;Lophotrochozoa;Mollusca;Bivalvia;Autobranchia;Heteroconchia;Euhe  
 terodonta;Imparidentia;Venerida;Veneroidea;Veneridae;Mercenaria;Mercenari  
 a mercenaria

UdeM00000010959 6596 226.1 UdeM00000010959 XP\_045205525.1 48.9 235  
 117 2 12 244 11 244 5.50E-56 226.1 6596 cellular  
 organisms;Eukaryota;Opisthokonta;Metazoa;Eumetazoa;Bilateria;Protostomia;  
 Spiralia;Lophotrochozoa;Mollusca;Bivalvia;Autobranchia;Heteroconchia;Euhe  
 terodonta;Imparidentia;Venerida;Veneroidea;Veneridae;Mercenaria;Mercenari  
 a mercenaria

UdeM00000010960 6596 656.4 UdeM00000010960 XP\_045205525.1 49.2 675  
 340 2 12 684 11 684 4.10E-185 656.4 6596 cellular  
 organisms;Eukaryota;Opisthokonta;Metazoa;Eumetazoa;Bilateria;Protostomia;  
 Spiralia;Lophotrochozoa;Mollusca;Bivalvia;Autobranchia;Heteroconchia;Euhe  
 terodonta;Imparidentia;Venerida;Veneroidea;Veneridae;Mercenaria;Mercenari  
 a mercenaria

UdeM00000010961 6596 211.1 UdeM00000010961 XP\_045205525.1 44.4 239  
 133 0 3 241 446 684 1.60E-51 211.1 6596 cellular  
 organisms;Eukaryota;Opisthokonta;Metazoa;Eumetazoa;Bilateria;Protostomia;  
 Spiralia;Lophotrochozoa;Mollusca;Bivalvia;Autobranchia;Heteroconchia;Euhe  
 terodonta;Imparidentia;Venerida;Veneroidea;Veneridae;Mercenaria;Mercenari  
 a mercenaria

UdeM00000010962 6565 526.2 UdeM00000010962 XP\_022308439.1 48.3 580  
 286 7 298 874 604 1172 8.40E-146 526.2 6565 cellular  
 organisms;Eukaryota;Opisthokonta;Metazoa;Eumetazoa;Bilateria;Protostomia;  
 Spiralia;Lophotrochozoa;Mollusca;Bivalvia;Autobranchia;Pteriormorphia;Ostr  
 eida;Ostreoidea;Ostreidae;Crassostrea;Crassostrea virginica

UdeM00000010965 6596 241.9 UdeM00000010965 XP\_045216546.1 46.9 294  
 83 2 1 221 268 561 7.90E-61 241.9 6596 cellular  
 organisms;Eukaryota;Opisthokonta;Metazoa;Eumetazoa;Bilateria;Protostomia;  
 Spiralia;Lophotrochozoa;Mollusca;Bivalvia;Autobranchia;Heteroconchia;Euhe  
 terodonta;Imparidentia;Venerida;Veneroidea;Veneridae;Mercenaria;Mercenari  
 a mercenaria

UdeM00000010966 6596 103.6 UdeM00000010966 XP\_045169752.1 56.8 81  
 28 2 1 75 108 187 1.20E-19 103.6 6596 cellular  
 organisms;Eukaryota;Opisthokonta;Metazoa;Eumetazoa;Bilateria;Protostomia;  
 Spiralia;Lophotrochozoa;Mollusca;Bivalvia;Autobranchia;Heteroconchia;Euhe  
 terodonta;Imparidentia;Venerida;Veneroidea;Veneridae;Mercenaria;Mercenari  
 a mercenaria

UdeM00000010967 6596 634.8 UdeM00000010967 XP\_045216546.1 56.4 562  
 239 4 3 562 4 561 1.00E-178 634.8 6596 cellular  
 organisms;Eukaryota;Opisthokonta;Metazoa;Eumetazoa;Bilateria;Protostomia;  
 Spiralia;Lophotrochozoa;Mollusca;Bivalvia;Autobranchia;Heteroconchia;Euhe  
 terodonta;Imparidentia;Venerida;Veneroidea;Veneridae;Mercenaria;Mercenari  
 a mercenaria

UdeM00000010968 6596 72.8 UdeM00000010968 XP\_045216546.1 50 64  
 32 0 7 70 71 134 2.10E-10 72.8 6596 cellular  
 organisms;Eukaryota;Opisthokonta;Metazoa;Eumetazoa;Bilateria;Protostomia;  
 Spiralia;Lophotrochozoa;Mollusca;Bivalvia;Autobranchia;Heteroconchia;Euhe  
 terodonta;Imparidentia;Venerida;Veneroidea;Veneridae;Mercenaria;Mercenari  
 a mercenaria

UdeM00000010969 6596 238.8 UdeM00000010969 XP\_045216546.1 33.6 464  
 105 4 49 311 85 546 9.40E-60 238.8 6596 cellular  
 organisms;Eukaryota;Opisthokonta;Metazoa;Eumetazoa;Bilateria;Protostomia;  
 Spiralia;Lophotrochozoa;Mollusca;Bivalvia;Autobranchia;Heteroconchia;Euhe  
 terodonta;Imparidentia;Venerida;Veneroidea;Veneridae;Mercenaria;Mercenari  
 a mercenaria

UdeM00000010970 6596 644.4 UdeM00000010970 XP\_045216546.1 61.8 510  
 192 3 1 508 53 561 1.20E-181 644.4 6596 cellular  
 organisms;Eukaryota;Opisthokonta;Metazoa;Eumetazoa;Bilateria;Protostomia;  
 Spiralia;Lophotrochozoa;Mollusca;Bivalvia;Autobranhia;Heteroconchia;Euhe  
 terodonta;Imparidentia;Venerida;Veneroidea;Veneridae;Mercenaria;Mercenari  
 a mercenaria  
 UdeM00000010971 6596 650.2 UdeM00000010971 XP\_045216546.1 57.7 562  
 232 4 3 562 4 561 2.40E-183 650.2 6596 cellular  
 organisms;Eukaryota;Opisthokonta;Metazoa;Eumetazoa;Bilateria;Protostomia;  
 Spiralia;Lophotrochozoa;Mollusca;Bivalvia;Autobranhia;Heteroconchia;Euhe  
 terodonta;Imparidentia;Venerida;Veneroidea;Veneridae;Mercenaria;Mercenari  
 a mercenaria  
 UdeM00000010972 6596 650.2 UdeM00000010972 XP\_045216546.1 57.7 562  
 232 4 77 636 4 561 2.70E-183 650.2 6596 cellular  
 organisms;Eukaryota;Opisthokonta;Metazoa;Eumetazoa;Bilateria;Protostomia;  
 Spiralia;Lophotrochozoa;Mollusca;Bivalvia;Autobranhia;Heteroconchia;Euhe  
 terodonta;Imparidentia;Venerida;Veneroidea;Veneridae;Mercenaria;Mercenari  
 a mercenaria  
 UdeM00000010973 6596 648.3 UdeM00000010973 XP\_045216546.1 59.1 536  
 216 3 30 563 27 561 9.20E-183 648.3 6596 cellular  
 organisms;Eukaryota;Opisthokonta;Metazoa;Eumetazoa;Bilateria;Protostomia;  
 Spiralia;Lophotrochozoa;Mollusca;Bivalvia;Autobranhia;Heteroconchia;Euhe  
 terodonta;Imparidentia;Venerida;Veneroidea;Veneridae;Mercenaria;Mercenari  
 a mercenaria  
 UdeM00000010974 6596 632.9 UdeM00000010974 XP\_045189663.1 48.1 797  
 391 9 4 795 6 784 5.70E-178 632.9 6596 cellular  
 organisms;Eukaryota;Opisthokonta;Metazoa;Eumetazoa;Bilateria;Protostomia;  
 Spiralia;Lophotrochozoa;Mollusca;Bivalvia;Autobranhia;Heteroconchia;Euhe  
 terodonta;Imparidentia;Venerida;Veneroidea;Veneridae;Mercenaria;Mercenari  
 a mercenaria  
 UdeM00000010975 6596 1406 UdeM00000010975 XP\_045189684.1 58.3 1184  
 446 18 6 1161 60 1223 0.00E+00 1406 6596 cellular  
 organisms;Eukaryota;Opisthokonta;Metazoa;Eumetazoa;Bilateria;Protostomia;  
 Spiralia;Lophotrochozoa;Mollusca;Bivalvia;Autobranhia;Heteroconchia;Euhe  
 terodonta;Imparidentia;Venerida;Veneroidea;Veneridae;Mercenaria;Mercenari  
 a mercenaria  
 UdeM00000010976 6596 1429.5 UdeM00000010976 XP\_045189684.1 58.8  
 1182 448 17 6 1166 60 1223 0.00E+00 1429.5 6596  
 cellular  
 organisms;Eukaryota;Opisthokonta;Metazoa;Eumetazoa;Bilateria;Protostomia;  
 Spiralia;Lophotrochozoa;Mollusca;Bivalvia;Autobranhia;Heteroconchia;Euhe  
 terodonta;Imparidentia;Venerida;Veneroidea;Veneridae;Mercenaria;Mercenari  
 a mercenaria  
 UdeM00000010978 6579 595.5 UdeM00000010978 XP\_033756930.1 52 558  
 244 6 96 647 206 745 1.00E-166 595.5 6579 cellular  
 organisms;Eukaryota;Opisthokonta;Metazoa;Eumetazoa;Bilateria;Protostomia;  
 Spiralia;Lophotrochozoa;Mollusca;Bivalvia;Autobranhia;Pteriomorphia;Pect  
 inida;Pectinoidea;Pectinidae;Pecten;Pecten maximus  
 UdeM00000010977 6579 595.5 UdeM00000010977 XP\_033756930.1 52 558  
 244 6 108 659 206 745 1.00E-166 595.5 6579 cellular  
 organisms;Eukaryota;Opisthokonta;Metazoa;Eumetazoa;Bilateria;Protostomia;  
 Spiralia;Lophotrochozoa;Mollusca;Bivalvia;Autobranhia;Pteriomorphia;Pect  
 inida;Pectinoidea;Pectinidae;Pecten;Pecten maximus

UdeM00000010980 6596 465.3 UdeM00000010980 XP\_045211827.1 53.9 410  
 177 7 49 447 68 476 8.90E-128 465.3 6596 cellular  
 organisms;Eukaryota;Opisthokonta;Metazoa;Eumetazoa;Bilateria;Protostomia;  
 Spiralia;Lophotrochozoa;Mollusca;Bivalvia;Autobranchia;Heteroconchia;Euhe  
 terodonta;Imparidentia;Venerida;Veneroidea;Veneridae;Mercenaria;Mercenari  
 a mercenaria  
 UdeM00000010981 6596 74.3 UdeM00000010981 XP\_045189296.1 35.8 151  
 83 5 34 182 73 211 2.30E-10 74.3 6596 cellular  
 organisms;Eukaryota;Opisthokonta;Metazoa;Eumetazoa;Bilateria;Protostomia;  
 Spiralia;Lophotrochozoa;Mollusca;Bivalvia;Autobranchia;Heteroconchia;Euhe  
 terodonta;Imparidentia;Venerida;Veneroidea;Veneridae;Mercenaria;Mercenari  
 a mercenaria  
 UdeM00000010982 6596 174.5 UdeM00000010982 XP\_045189300.1 63 138  
 50 1 1 138 1 137 1.80E-40 174.5 6596 cellular  
 organisms;Eukaryota;Opisthokonta;Metazoa;Eumetazoa;Bilateria;Protostomia;  
 Spiralia;Lophotrochozoa;Mollusca;Bivalvia;Autobranchia;Heteroconchia;Euhe  
 terodonta;Imparidentia;Venerida;Veneroidea;Veneridae;Mercenaria;Mercenari  
 a mercenaria  
 UdeM00000010983 6596 174.5 UdeM00000010983 XP\_045189300.1 63 138  
 50 1 1 138 1 137 1.80E-40 174.5 6596 cellular  
 organisms;Eukaryota;Opisthokonta;Metazoa;Eumetazoa;Bilateria;Protostomia;  
 Spiralia;Lophotrochozoa;Mollusca;Bivalvia;Autobranchia;Heteroconchia;Euhe  
 terodonta;Imparidentia;Venerida;Veneroidea;Veneridae;Mercenaria;Mercenari  
 a mercenaria  
 UdeM00000010984 6596 342.8 UdeM00000010984 XP\_045189299.1 47.9 397  
 201 4 82 477 75 466 6.90E-91 342.8 6596 cellular  
 organisms;Eukaryota;Opisthokonta;Metazoa;Eumetazoa;Bilateria;Protostomia;  
 Spiralia;Lophotrochozoa;Mollusca;Bivalvia;Autobranchia;Heteroconchia;Euhe  
 terodonta;Imparidentia;Venerida;Veneroidea;Veneridae;Mercenaria;Mercenari  
 a mercenaria  
 UdeM00000010985 1735272 402.5 UdeM00000010985 XP\_041369377.1 49  
 382 191 3 9 388 51 430 6.00E-109 402.5 1735272  
 cellular  
 organisms;Eukaryota;Opisthokonta;Metazoa;Eumetazoa;Bilateria;Protostomia;  
 Spiralia;Lophotrochozoa;Mollusca;Gastropoda;Neomphalina;Neomphaloidea;Pel  
 tospiridae;Gigantopelta;Gigantopelta aegis  
 UdeM00000010986 6579 115.2 UdeM00000010986 XP\_033731051.1 53.8 93  
 38 1 16 108 64 151 5.90E-23 115.2 6579 cellular  
 organisms;Eukaryota;Opisthokonta;Metazoa;Eumetazoa;Bilateria;Protostomia;  
 Spiralia;Lophotrochozoa;Mollusca;Bivalvia;Autobranchia;Pteriormorphia;Pect  
 inida;Pectinoidea;Pectinidae;Pecten;Pecten maximus  
 UdeM00000010988 6596 1192.2 UdeM00000010988 XP\_045190532.1 68.2  
 878 272 4 199 1075 589 1460 0.00E+00 1192.2 6596  
 cellular  
 organisms;Eukaryota;Opisthokonta;Metazoa;Eumetazoa;Bilateria;Protostomia;  
 Spiralia;Lophotrochozoa;Mollusca;Bivalvia;Autobranchia;Heteroconchia;Euhe  
 terodonta;Imparidentia;Venerida;Veneroidea;Veneridae;Mercenaria;Mercenari  
 a mercenaria  
 UdeM00000010989 6596 1192.2 UdeM00000010989 XP\_045190532.1 68.2  
 878 272 4 200 1076 589 1460 0.00E+00 1192.2 6596  
 cellular  
 organisms;Eukaryota;Opisthokonta;Metazoa;Eumetazoa;Bilateria;Protostomia;  
 Spiralia;Lophotrochozoa;Mollusca;Bivalvia;Autobranchia;Heteroconchia;Euhe

terodonta;Imparidentia;Venerida;Veneroidea;Veneridae;Mercenaria;Mercenari  
 a mercenaria  
 UdeM00000010990 6596 360.9 UdeM00000010990 XP\_045190531.1 35.6 609  
 370 8 5 608 1 592 3.70E-96 360.9 6596 cellular  
 organisms;Eukaryota;Opisthokonta;Metazoa;Eumetazoa;Bilateria;Protostomia;  
 Spiralia;Lophotrochozoa;Mollusca;Bivalvia;Autobranchia;Heteroconchia;Euhe  
 terodonta;Imparidentia;Venerida;Veneroidea;Veneridae;Mercenaria;Mercenari  
 a mercenaria  
 UdeM00000010992 6596 1069.3 UdeM00000010992 XP\_045190576.1 62.1  
 900 296 5 15 910 14 872 0.00E+00 1069.3 6596  
 cellular  
 organisms;Eukaryota;Opisthokonta;Metazoa;Eumetazoa;Bilateria;Protostomia;  
 Spiralia;Lophotrochozoa;Mollusca;Bivalvia;Autobranchia;Heteroconchia;Euhe  
 terodonta;Imparidentia;Venerida;Veneroidea;Veneridae;Mercenaria;Mercenari  
 a mercenaria  
 UdeM00000010993 29159 186.4 UdeM00000010993 XP\_034328739.1 67.2 131  
 43 0 168 298 173 303 5.30E-44 186.4 29159 cellular  
 organisms;Eukaryota;Opisthokonta;Metazoa;Eumetazoa;Bilateria;Protostomia;  
 Spiralia;Lophotrochozoa;Mollusca;Bivalvia;Autobranchia;Pteriormorphia;Ostr  
 eida;Ostreoidea;Ostreidae;Crassostrea;Crassostrea gigas  
 UdeM00000010994 225164 154.8 UdeM00000010994 XP\_009066434.1 40.4  
 235 116 6 8 223 45 274 1.50E-34 154.8 225164  
 cellular  
 organisms;Eukaryota;Opisthokonta;Metazoa;Eumetazoa;Bilateria;Protostomia;  
 Spiralia;Lophotrochozoa;Mollusca;Gastropoda;Patellogastropoda;Lottioidea;  
 Lottiidae;Lottia;Lottia gigantea  
 UdeM00000010995 225164 162.9 UdeM00000010995 XP\_009066434.1 40.8  
 260 119 8 42 277 26 274 6.60E-37 162.9 225164  
 cellular  
 organisms;Eukaryota;Opisthokonta;Metazoa;Eumetazoa;Bilateria;Protostomia;  
 Spiralia;Lophotrochozoa;Mollusca;Gastropoda;Patellogastropoda;Lottioidea;  
 Lottiidae;Lottia;Lottia gigantea  
 UdeM00000010996 225164 162.9 UdeM00000010996 XP\_009066434.1 40.8  
 260 119 8 42 277 26 274 6.60E-37 162.9 225164  
 cellular  
 organisms;Eukaryota;Opisthokonta;Metazoa;Eumetazoa;Bilateria;Protostomia;  
 Spiralia;Lophotrochozoa;Mollusca;Gastropoda;Patellogastropoda;Lottioidea;  
 Lottiidae;Lottia;Lottia gigantea  
 UdeM00000010997 225164 159.8 UdeM00000010997 XP\_009066434.1 40  
 260 121 8 21 256 26 274 5.30E-36 159.8 225164  
 cellular  
 organisms;Eukaryota;Opisthokonta;Metazoa;Eumetazoa;Bilateria;Protostomia;  
 Spiralia;Lophotrochozoa;Mollusca;Gastropoda;Patellogastropoda;Lottioidea;  
 Lottiidae;Lottia;Lottia gigantea  
 UdeM00000010998 225164 148.7 UdeM00000010998 XP\_009066434.1 36.7  
 278 150 7 36 291 17 290 1.20E-32 148.7 225164  
 cellular  
 organisms;Eukaryota;Opisthokonta;Metazoa;Eumetazoa;Bilateria;Protostomia;  
 Spiralia;Lophotrochozoa;Mollusca;Gastropoda;Patellogastropoda;Lottioidea;  
 Lottiidae;Lottia;Lottia gigantea  
 UdeM00000010999 6596 273.1 UdeM00000010999 XP\_045190100.1 46.9 324  
 161 5 66 381 87 407 6.90E-70 273.1 6596 cellular  
 organisms;Eukaryota;Opisthokonta;Metazoa;Eumetazoa;Bilateria;Protostomia;  
 Spiralia;Lophotrochozoa;Mollusca;Bivalvia;Autobranchia;Heteroconchia;Euhe



terodonta;Imparidentia;Venerida;Veneroidea;Veneridae;Mercenaria;Mercenari  
 a mercenaria  
 UdeM00000011000 6596 273.1 UdeM00000011000 XP\_045190100.1 46.9 324  
 161 5 67 382 87 407 6.90E-70 273.1 6596 cellular  
 organisms;Eukaryota;Opisthokonta;Metazoa;Eumetazoa;Bilateria;Protostomia;  
 Spiralia;Lophotrochozoa;Mollusca;Bivalvia;Autobranhia;Heteroconchia;Euhe  
 terodonta;Imparidentia;Venerida;Veneroidea;Veneridae;Mercenaria;Mercenari  
 a mercenaria  
 UdeM00000011003 29159 86.3 UdeM00000011003 XP\_034302712.1 49 102  
 48 3 17 114 33 134 2.80E-14 86.3 29159 cellular  
 organisms;Eukaryota;Opisthokonta;Metazoa;Eumetazoa;Bilateria;Protostomia;  
 Spiralia;Lophotrochozoa;Mollusca;Bivalvia;Autobranhia;Pteriormorphia;Ostr  
 eida;Ostreoidea;Ostreidae;Crassostrea;Crassostrea gigas  
 UdeM00000011004 6596 424.9 UdeM00000011004 XP\_045189024.1 47.2 432  
 217 6 40 463 31 459 1.40E-115 424.9 6596 cellular  
 organisms;Eukaryota;Opisthokonta;Metazoa;Eumetazoa;Bilateria;Protostomia;  
 Spiralia;Lophotrochozoa;Mollusca;Bivalvia;Autobranhia;Heteroconchia;Euhe  
 terodonta;Imparidentia;Venerida;Veneroidea;Veneridae;Mercenaria;Mercenari  
 a mercenaria  
 UdeM00000011005 6565 196.4 UdeM00000011005 XP\_022343861.1 50 242  
 84 7 69 276 48 286 4.70E-47 196.4 6565 cellular  
 organisms;Eukaryota;Opisthokonta;Metazoa;Eumetazoa;Bilateria;Protostomia;  
 Spiralia;Lophotrochozoa;Mollusca;Bivalvia;Autobranhia;Pteriormorphia;Ostr  
 eida;Ostreoidea;Ostreidae;Crassostrea;Crassostrea virginica  
 UdeM00000011007 6596 248.1 UdeM00000011007 XP\_045189608.1 58.5 272  
 85 6 102 360 79 335 1.80E-62 248.1 6596 cellular  
 organisms;Eukaryota;Opisthokonta;Metazoa;Eumetazoa;Bilateria;Protostomia;  
 Spiralia;Lophotrochozoa;Mollusca;Bivalvia;Autobranhia;Heteroconchia;Euhe  
 terodonta;Imparidentia;Venerida;Veneroidea;Veneridae;Mercenaria;Mercenari  
 a mercenaria  
 UdeM00000011008 6596 248.1 UdeM00000011008 XP\_045189608.1 58.5 272  
 85 6 106 364 79 335 1.80E-62 248.1 6596 cellular  
 organisms;Eukaryota;Opisthokonta;Metazoa;Eumetazoa;Bilateria;Protostomia;  
 Spiralia;Lophotrochozoa;Mollusca;Bivalvia;Autobranhia;Heteroconchia;Euhe  
 terodonta;Imparidentia;Venerida;Veneroidea;Veneridae;Mercenaria;Mercenari  
 a mercenaria  
 UdeM00000011009 6565 579.3 UdeM00000011009 XP\_022343941.1 66.1 381  
 125 1 1 377 1 381 3.60E-162 579.3 6565 cellular  
 organisms;Eukaryota;Opisthokonta;Metazoa;Eumetazoa;Bilateria;Protostomia;  
 Spiralia;Lophotrochozoa;Mollusca;Bivalvia;Autobranhia;Pteriormorphia;Ostr  
 eida;Ostreoidea;Ostreidae;Crassostrea;Crassostrea virginica  
 UdeM00000011010 6565 276.9 UdeM00000011010 XP\_022343941.1 64.4 188  
 63 1 1 184 1 188 1.90E-71 276.9 6565 cellular  
 organisms;Eukaryota;Opisthokonta;Metazoa;Eumetazoa;Bilateria;Protostomia;  
 Spiralia;Lophotrochozoa;Mollusca;Bivalvia;Autobranhia;Pteriormorphia;Ostr  
 eida;Ostreoidea;Ostreidae;Crassostrea;Crassostrea virginica  
 UdeM00000011011 29159 155.6 UdeM00000011011 XP\_019927165.2 68 103  
 33 0 1 103 44 146 4.50E-35 155.6 29159 cellular  
 organisms;Eukaryota;Opisthokonta;Metazoa;Eumetazoa;Bilateria;Protostomia;  
 Spiralia;Lophotrochozoa;Mollusca;Bivalvia;Autobranhia;Pteriormorphia;Ostr  
 eida;Ostreoidea;Ostreidae;Crassostrea;Crassostrea gigas  
 UdeM00000011012 6596 491.5 UdeM00000011012 XP\_045190695.1 55.7 422  
 169 5 1 418 1 408 1.10E-135 491.5 6596 cellular  
 organisms;Eukaryota;Opisthokonta;Metazoa;Eumetazoa;Bilateria;Protostomia;

Spiralia;Lophotrochozoa;Mollusca;Bivalvia;Autobranchia;Heteroconchia;Euherodonta;Imparidentia;Venerida;Veneroidea;Veneridae;Mercenaria;Mercenaria mercenaria

UdeM00000011013 6596 1191.8 UdeM00000011013 XP\_045190790.1 53.8  
1764 609 36 1 1627 2 1696 0.00E+00 1191.8 6596  
cellular

organisms;Eukaryota;Opisthokonta;Metazoa;Eumetazoa;Bilateria;Protostomia;Spiralia;Lophotrochozoa;Mollusca;Bivalvia;Autobranchia;Heteroconchia;Euherodonta;Imparidentia;Venerida;Veneroidea;Veneridae;Mercenaria;Mercenaria mercenaria

UdeM00000011014 6500 127.1 UdeM00000011014 XP\_005094759.1 35.3 218  
98 5 3 183 8 219 2.30E-26 127.1 6500 cellular

organisms;Eukaryota;Opisthokonta;Metazoa;Eumetazoa;Bilateria;Protostomia;Spiralia;Lophotrochozoa;Mollusca;Gastropoda;Heterobranchia;Euthyneura;Tectipleura;Aplysiida;Aplysioidea;Aplysiidae;Aplysia;Aplysia californica

UdeM00000011015 6596 1013.1 UdeM00000011015 XP\_045189016.1 60.6  
865 329 6 3 859 6 866 2.10E-292 1013.1 6596  
cellular

organisms;Eukaryota;Opisthokonta;Metazoa;Eumetazoa;Bilateria;Protostomia;Spiralia;Lophotrochozoa;Mollusca;Bivalvia;Autobranchia;Heteroconchia;Euherodonta;Imparidentia;Venerida;Veneroidea;Veneridae;Mercenaria;Mercenaria mercenaria

UdeM00000011016 151771 340.9 UdeM00000011016 XP\_028406951.1 35.9  
591 326 9 1 581 119 666 3.20E-90 340.9 151771  
cellular

organisms;Eukaryota;Opisthokonta;Metazoa;Eumetazoa;Cnidaria;Anthozoa;Octocorallia;Alcyonacea;Alcyoniina;Nephtheidae;Dendronephthya;Dendronephthya gigantea

UdeM00000011017 45264 281.6 UdeM00000011017 XP\_044184028.1 37.4 476  
161 6 42 416 68 507 1.70E-72 281.6 45264 cellular

organisms;Eukaryota;Opisthokonta;Metazoa;Eumetazoa;Cnidaria;Anthozoa;Hexacorallia;Scleractinia;Astrocoeniina;Acroporidae;Acropora;Acropora millepora

UdeM00000011018 45264 288.1 UdeM00000011018 XP\_044184028.1 39.6 444  
157 6 42 378 68 507 1.60E-74 288.1 45264 cellular

organisms;Eukaryota;Opisthokonta;Metazoa;Eumetazoa;Cnidaria;Anthozoa;Hexacorallia;Scleractinia;Astrocoeniina;Acroporidae;Acropora;Acropora millepora

UdeM00000011019 1735272 425.2 UdeM00000011019 XP\_041369955.1 71.4  
280 80 0 96 375 163 442 8.50E-116 425.2 1735272  
cellular

organisms;Eukaryota;Opisthokonta;Metazoa;Eumetazoa;Bilateria;Protostomia;Spiralia;Lophotrochozoa;Mollusca;Gastropoda;Neomphalina;Neomphaloidea;Peltospiridae;Gigantopelta;Gigantopelta aegis

UdeM00000011020 29159 498.4 UdeM00000011020 XP\_034328224.1 57.5 440  
180 3 16 448 8 447 9.30E-138 498.4 29159 cellular

organisms;Eukaryota;Opisthokonta;Metazoa;Eumetazoa;Bilateria;Protostomia;Spiralia;Lophotrochozoa;Mollusca;Bivalvia;Autobranchia;Pteriomorphia;Ostreida;Ostreoidea;Ostreidae;Crassostrea;Crassostrea gigas

UdeM00000011021 6596 317 UdeM00000011021 XP\_045189505.1 66.9 254  
76 2 1 254 1 246 3.50E-83 317 6596 cellular

organisms;Eukaryota;Opisthokonta;Metazoa;Eumetazoa;Bilateria;Protostomia;Spiralia;Lophotrochozoa;Mollusca;Bivalvia;Autobranchia;Heteroconchia;Euherodonta

terodonta;Imparidentia;Venerida;Veneroidea;Veneridae;Mercenaria;Mercenaria mercenaria

UdeM00000011022 6579 160.6 UdeM00000011022 XP\_033756942.1 42.3 182  
94 4 24 200 69 244 2.10E-36 160.6 6579 cellular

organisms;Eukaryota;Opisthokonta;Metazoa;Eumetazoa;Bilateria;Protostomia;Spiralia;Lophotrochozoa;Mollusca;Bivalvia;Autobranchia;Pteriormorphia;Pectinida;Pectinoidea;Pectinidae;Pecten;Pecten maximus

UdeM00000011025 7739 265 UdeM00000011025 XP\_035669585.1 53.1 254  
105 6 42 290 80 324 1.10E-67 265 7739 cellular

organisms;Eukaryota;Opisthokonta;Metazoa;Eumetazoa;Bilateria;Deuterostomia;Chordata;Cephalochordata;Leptocardii;Amphioxiformes;Branchiostomidae;Branchiostoma;Branchiostoma floridae

UdeM00000011024 7739 265 UdeM00000011024 XP\_035669585.1 53.1 254  
105 6 43 291 80 324 1.10E-67 265 7739 cellular

organisms;Eukaryota;Opisthokonta;Metazoa;Eumetazoa;Bilateria;Deuterostomia;Chordata;Cephalochordata;Leptocardii;Amphioxiformes;Branchiostomidae;Branchiostoma;Branchiostoma floridae

UdeM00000011026 6596 261.9 UdeM00000011026 XP\_045188618.1 62.5 224  
83 1 1 224 1 223 7.40E-67 261.9 6596 cellular

organisms;Eukaryota;Opisthokonta;Metazoa;Eumetazoa;Bilateria;Protostomia;Spiralia;Lophotrochozoa;Mollusca;Bivalvia;Autobranchia;Heteroconchia;Euheterodonta;Imparidentia;Venerida;Veneroidea;Veneridae;Mercenaria;Mercenaria mercenaria

UdeM00000011027 6596 1305.4 UdeM00000011027 XP\_045190718.1 56.3  
1345 483 18 246 1498 257 1588 0.00E+00 1305.4 6596  
cellular

organisms;Eukaryota;Opisthokonta;Metazoa;Eumetazoa;Bilateria;Protostomia;Spiralia;Lophotrochozoa;Mollusca;Bivalvia;Autobranchia;Heteroconchia;Euheterodonta;Imparidentia;Venerida;Veneroidea;Veneridae;Mercenaria;Mercenaria mercenaria

UdeM00000011028 1735272 394 UdeM00000011028 XP\_041370606.1 64.8  
321 106 4 108 422 102 421 2.30E-106 394 1735272  
cellular

organisms;Eukaryota;Opisthokonta;Metazoa;Eumetazoa;Bilateria;Protostomia;Spiralia;Lophotrochozoa;Mollusca;Gastropoda;Neomphalina;Neomphaloidea;Peltospiridae;Gigantopelta;Gigantopelta aegis

UdeM00000011029 1735272 386 UdeM00000011029 XP\_041370606.1 60.7  
341 109 4 108 444 102 421 6.70E-104 386 1735272  
cellular

organisms;Eukaryota;Opisthokonta;Metazoa;Eumetazoa;Bilateria;Protostomia;Spiralia;Lophotrochozoa;Mollusca;Gastropoda;Neomphalina;Neomphaloidea;Peltospiridae;Gigantopelta;Gigantopelta aegis

UdeM00000011030 8520 216.5 UdeM00000011030 XP\_042335082.1 50.2 209  
100 2 113 320 1954 2159 5.00E-53 216.5 8520 cellular

organisms;Eukaryota;Opisthokonta;Metazoa;Eumetazoa;Bilateria;Deuterostomia;Chordata;Craniata;Vertebrata;Gnathostomata;Teleostomi;Euteleostomi;Sarcopterygii;Dipnotetrapodomorpha;Tetrapoda;Amniota;Sauropsida;Sauria;Lepidosauria;Squamata;Bifurcata;Unidentata;Episquamata;Toxicofera;Iguania;Phrynosomatidae;Phrynosomatinae;Sceloporus;Sceloporus undulatus

UdeM00000011031 400682 216.9 UdeM00000011031 XP\_019857924.1 49.5  
214 103 3 107 318 75 285 3.90E-53 216.9 400682  
cellular

organisms;Eukaryota;Opisthokonta;Metazoa;Porifera;Demospongiae;Heteroscleromorpha;Haplosclerida;Niphatidae;Amphimedon;Amphimedon queenslandica

UdeM00000011032 45264 226.5 UdeM00000011032 XP\_044169928.1 44.9 256  
 128 5 75 320 121 373 4.90E-56 226.5 45264 cellular  
 organisms;Eukaryota;Opisthokonta;Metazoa;Eumetazoa;Cnidaria;Anthozoa;Hexa  
 corallia;Scleractinia;Astrocoeniina;Acroporidae;Acropora;Acropora  
 millepora  
 UdeM00000011033 70779 132.9 UdeM00000011033 XP\_015768033.1 37.5 208  
 114 5 38 232 58 262 5.50E-28 132.9 70779 cellular  
 organisms;Eukaryota;Opisthokonta;Metazoa;Eumetazoa;Cnidaria;Anthozoa;Hexa  
 corallia;Scleractinia;Astrocoeniina;Acroporidae;Acropora;Acropora  
 digitifera  
 UdeM00000011034 6596 175.3 UdeM00000011034 XP\_045175897.1 43.8 210  
 95 3 79 267 9 216 1.10E-40 175.3 6596 cellular  
 organisms;Eukaryota;Opisthokonta;Metazoa;Eumetazoa;Bilateria;Protostomia;  
 Spiralia;Lophotrochozoa;Mollusca;Bivalvia;Autobranchia;Heteroconchia;Euhe  
 terodonta;Imparidentia;Venerida;Veneroidea;Veneridae;Mercenaria;Mercenari  
 a mercenaria  
 UdeM00000011035 400682 109 UdeM00000011035 XP\_019853420.1 58.1  
 105 37 4 1 101 110 211 3.80E-21 109 400682  
 cellular  
 organisms;Eukaryota;Opisthokonta;Metazoa;Porifera;Demospongiae;Heteroscle  
 romorpha;Haplosclerida;Niphatidae;Amphimedon;Amphimedon queenslandica  
 UdeM00000011036 80972 128.3 UdeM00000011036 XP\_035805796.1 51.3 113  
 54 1 1 112 275 387 6.60E-27 128.3 80972 cellular  
 organisms;Eukaryota;Opisthokonta;Metazoa;Eumetazoa;Bilateria;Deuterostomi  
 a;Chordata;Craniata;Vertebrata;Gnathostomata;Teleostomi;Euteleostomi;Acti  
 nopterygii;Actinopteri;Neopterygii;Teleostei;Osteoglossocephalai;Clupeoce  
 phala;Euteleosteomorpha;Neoteleostei;Eurypterygia;Ctenosquamata;Acanthomo  
 rphata;Euacanthomorphacea;Percomorphaceae;Ovalentaria;Ovalentaria  
 incertae sedis;Pomacentridae;Amphiprion;Amphiprion ocellaris  
 UdeM00000011037 400682 220.3 UdeM00000011037 XP\_019857924.1 50  
 214 102 3 107 318 75 285 3.50E-54 220.3 400682  
 cellular  
 organisms;Eukaryota;Opisthokonta;Metazoa;Porifera;Demospongiae;Heteroscle  
 romorpha;Haplosclerida;Niphatidae;Amphimedon;Amphimedon queenslandica  
 UdeM00000011038 45264 226.5 UdeM00000011038 XP\_044169928.1 44.9 256  
 128 5 75 320 121 373 4.90E-56 226.5 45264 cellular  
 organisms;Eukaryota;Opisthokonta;Metazoa;Eumetazoa;Cnidaria;Anthozoa;Hexa  
 corallia;Scleractinia;Astrocoeniina;Acroporidae;Acropora;Acropora  
 millepora  
 UdeM00000011039 176057 72.8 UdeM00000011039 XP\_010011306.1 40.9  
 93 31 2 1 69 83 175 2.00E-10 72.8 176057  
 cellular  
 organisms;Eukaryota;Opisthokonta;Metazoa;Eumetazoa;Bilateria;Deuterostomi  
 a;Chordata;Craniata;Vertebrata;Gnathostomata;Teleostomi;Euteleostomi;Sarc  
 opterygii;Dipnotetrapodomorpha;Tetrapoda;Amniota;Sauropsida;Sauria;Archel  
 osauria;Archosauria;Dinosauria;Saurischia;Theropoda;Coelurosauria;Aves;Ne  
 ognathae;Psittaciformes;Psittacidae;Nestor;Nestor notabilis  
 UdeM00000011040 45351 133.3 UdeM00000011040 XP\_001630422.2 56.1 114  
 48 1 54 167 32 143 3.40E-28 133.3 45351 cellular  
 organisms;Eukaryota;Opisthokonta;Metazoa;Eumetazoa;Cnidaria;Anthozoa;Hexa  
 corallia;Actiniaria;Edwardsiidae;Nematostella;Nematostella vectensis  
 UdeM00000011041 400682 109 UdeM00000011041 XP\_019853420.1 58.1  
 105 37 4 1 101 110 211 3.80E-21 109 400682  
 cellular

organisms;Eukaryota;Opisthokonta;Metazoa;Porifera;Demospongiae;Heteroscle  
romorpha;Haplosclerida;Niphatidae;Amphimedon;Amphimedon queenslandica  
UdeM00000011042 7604 387.9 UdeM00000011042 XP\_033641066.1 54.9 304  
137 0 1 304 79 382 1.20E-104 387.9 7604 cellular  
organisms;Eukaryota;Opisthokonta;Metazoa;Eumetazoa;Bilateria;Deuterostomi  
a;Echinodermata;Eleutherozoa;Asterozoa;Asteroidea;Forcipulatacea;Forcipul  
atida;Astериidae;Astериas;Astериas rubens  
UdeM00000011043 8078 407.1 UdeM00000011043 XP\_036001706.1 57.5 313  
131 1 4 316 75 385 2.00E-110 407.1 8078 cellular  
organisms;Eukaryota;Opisthokonta;Metazoa;Eumetazoa;Bilateria;Deuterostomi  
a;Chordata;Craniata;Vertebrata;Gnathostomata;Teleostomi;Euteleostomi;Acti  
nopterygii;Actinopteri;Neopterygii;Teleostei;Osteoglossocephalai;Clupeoce  
phala;Euteleosteomorpha;Neoteleostei;Eurypterygia;Ctenosquamata;Acanthomo  
rphata;Euacanthomorphacea;Percomorphaceae;Ovalentaria;Atherinomorphae;Cyp  
rinodontiformes;Cyprinodontoidei;Fundulidae;Fundulus;Fundulus  
heteroclitus  
UdeM00000011044 400682 220.3 UdeM00000011044 XP\_019857924.1 50  
214 102 3 107 318 75 285 3.50E-54 220.3 400682  
cellular  
organisms;Eukaryota;Opisthokonta;Metazoa;Porifera;Demospongiae;Heteroscle  
romorpha;Haplosclerida;Niphatidae;Amphimedon;Amphimedon queenslandica  
UdeM00000011045 45264 216.5 UdeM00000011045 XP\_044165397.1 44.1 256  
130 5 75 320 146 398 5.00E-53 216.5 45264 cellular  
organisms;Eukaryota;Opisthokonta;Metazoa;Eumetazoa;Cnidaria;Anthozoa;Hexa  
corallia;Scleractinia;Astrocoeniina;Acroporidae;Acropora;Acropora  
millepora  
UdeM00000011046 400682 210.7 UdeM00000011046 XP\_019853437.1 48.9  
223 106 6 101 318 68 287 2.70E-51 210.7 400682  
cellular  
organisms;Eukaryota;Opisthokonta;Metazoa;Porifera;Demospongiae;Heteroscle  
romorpha;Haplosclerida;Niphatidae;Amphimedon;Amphimedon queenslandica  
UdeM00000011047 45264 216.5 UdeM00000011047 XP\_044165397.1 44.1 256  
130 5 75 320 146 398 5.00E-53 216.5 45264 cellular  
organisms;Eukaryota;Opisthokonta;Metazoa;Eumetazoa;Cnidaria;Anthozoa;Hexa  
corallia;Scleractinia;Astrocoeniina;Acroporidae;Acropora;Acropora  
millepora  
UdeM00000011048 400682 210.7 UdeM00000011048 XP\_019853437.1 48.9  
223 106 6 101 318 68 287 2.70E-51 210.7 400682  
cellular  
organisms;Eukaryota;Opisthokonta;Metazoa;Porifera;Demospongiae;Heteroscle  
romorpha;Haplosclerida;Niphatidae;Amphimedon;Amphimedon queenslandica  
UdeM00000011049 400682 171 UdeM00000011049 XP\_019861602.1 59  
134 53 1 1 134 57 188 1.10E-39 171 400682  
cellular  
organisms;Eukaryota;Opisthokonta;Metazoa;Porifera;Demospongiae;Heteroscle  
romorpha;Haplosclerida;Niphatidae;Amphimedon;Amphimedon queenslandica  
UdeM00000011050 6596 172.9 UdeM00000011050 XP\_045185790.1 40.7 231  
108 2 88 291 80 308 5.80E-40 172.9 6596 cellular  
organisms;Eukaryota;Opisthokonta;Metazoa;Eumetazoa;Bilateria;Protostomia;  
Spiralia;Lophotrochozoa;Mollusca;Bivalvia;Autobranchia;Heteroconchia;Euhe  
terodonta;Imparidentia;Venerida;Veneroidea;Veneridae;Mercenaria;Mercenari  
a mercenaria  
UdeM00000011051 6596 466.8 UdeM00000011051 XP\_045189461.1 58.9 394  
156 4 1 388 1 394 2.60E-128 466.8 6596 cellular

organisms;Eukaryota;Opisthokonta;Metazoa;Eumetazoa;Bilateria;Protostomia;Spiralia;Lophotrochozoa;Mollusca;Bivalvia;Autobranhia;Heteroconchia;Euherodonta;Imparidentia;Venerida;Veneroidea;Veneridae;Mercenaria;Mercenaria mercenaria

UdeM00000011052 6596 225.3 UdeM00000011052 XP\_045189805.1 66.7 168  
56 0 7 174 208 375 7.10E-56 225.3 6596 cellular

organisms;Eukaryota;Opisthokonta;Metazoa;Eumetazoa;Bilateria;Protostomia;Spiralia;Lophotrochozoa;Mollusca;Bivalvia;Autobranhia;Heteroconchia;Euherodonta;Imparidentia;Venerida;Veneroidea;Veneridae;Mercenaria;Mercenaria mercenaria

UdeM00000011053 6596 166 UdeM00000011053 XP\_045189802.1 81.5 92  
17 0 1 92 120 211 2.90E-38 166 6596 cellular

organisms;Eukaryota;Opisthokonta;Metazoa;Eumetazoa;Bilateria;Protostomia;Spiralia;Lophotrochozoa;Mollusca;Bivalvia;Autobranhia;Heteroconchia;Euherodonta;Imparidentia;Venerida;Veneroidea;Veneridae;Mercenaria;Mercenaria mercenaria

UdeM00000011054 6573 648.3 UdeM00000011054 XP\_021371934.1 63.2 668  
228 2 1 667 4 654 1.10E-182 648.3 6573 cellular

organisms;Eukaryota;Opisthokonta;Metazoa;Eumetazoa;Bilateria;Protostomia;Spiralia;Lophotrochozoa;Mollusca;Bivalvia;Autobranhia;Pteriomorphia;Pectinida;Pectinoidea;Pectinidae;Mizuhopecten;Mizuhopecten yessoensis

UdeM00000011055 6596 946.8 UdeM00000011055 XP\_045189810.1 80.7 564  
109 0 1 564 1 564 1.20E-272 946.8 6596 cellular

organisms;Eukaryota;Opisthokonta;Metazoa;Eumetazoa;Bilateria;Protostomia;Spiralia;Lophotrochozoa;Mollusca;Bivalvia;Autobranhia;Heteroconchia;Euherodonta;Imparidentia;Venerida;Veneroidea;Veneridae;Mercenaria;Mercenaria mercenaria

UdeM00000011056 6573 455.7 UdeM00000011056 XP\_021375222.1 57.9 416  
157 11 23 427 222 630 6.60E-125 455.7 6573 cellular

organisms;Eukaryota;Opisthokonta;Metazoa;Eumetazoa;Bilateria;Protostomia;Spiralia;Lophotrochozoa;Mollusca;Bivalvia;Autobranhia;Pteriomorphia;Pectinida;Pectinoidea;Pectinidae;Mizuhopecten;Mizuhopecten yessoensis

UdeM00000011058 6596 409.5 UdeM00000011058 XP\_045188690.1 64 283  
102 0 14 296 10 292 3.90E-111 409.5 6596 cellular

organisms;Eukaryota;Opisthokonta;Metazoa;Eumetazoa;Bilateria;Protostomia;Spiralia;Lophotrochozoa;Mollusca;Bivalvia;Autobranhia;Heteroconchia;Euherodonta;Imparidentia;Venerida;Veneroidea;Veneridae;Mercenaria;Mercenaria mercenaria

UdeM00000011059 6596 598.6 UdeM00000011059 XP\_045190635.1 64.2 452  
160 1 6 457 8 457 8.90E-168 598.6 6596 cellular

organisms;Eukaryota;Opisthokonta;Metazoa;Eumetazoa;Bilateria;Protostomia;Spiralia;Lophotrochozoa;Mollusca;Bivalvia;Autobranhia;Heteroconchia;Euherodonta;Imparidentia;Venerida;Veneroidea;Veneridae;Mercenaria;Mercenaria mercenaria

UdeM00000011060 29159 958.4 UdeM00000011060 XP\_034329666.1 37.4 1315  
719 13 1 1220 1 1306 8.90E-276 958.4 29159 cellular

organisms;Eukaryota;Opisthokonta;Metazoa;Eumetazoa;Bilateria;Protostomia;Spiralia;Lophotrochozoa;Mollusca;Bivalvia;Autobranhia;Pteriomorphia;Ostreida;Ostreoidea;Ostreidae;Crassostrea;Crassostrea gigas

UdeM00000011061 6596 1434.1 UdeM00000011061 XP\_045189260.1 85.5  
846 110 4 1 843 1 836 0.00E+00 1434.1 6596 cellular

organisms;Eukaryota;Opisthokonta;Metazoa;Eumetazoa;Bilateria;Protostomia;Spiralia;Lophotrochozoa;Mollusca;Bivalvia;Autobranhia;Heteroconchia;Euherodonta;Imparidentia;Venerida;Veneroidea;Veneridae;Mercenaria;Mercenaria mercenaria

terodonta;Imparidentia;Venerida;Veneroidea;Veneridae;Mercenaria;Mercenari  
a mercenaria

|                 |      |        |   |                 |                |      |                      |
|-----------------|------|--------|---|-----------------|----------------|------|----------------------|
| UdeM00000011062 | 6596 | 1442.2 |   | UdeM00000011062 | XP_045189260.1 | 86.4 |                      |
| 837             | 110  | 3      | 1 | 834             | 1              | 836  | 0.00E+00 1442.2 6596 |

cellular

organisms;Eukaryota;Opisthokonta;Metazoa;Eumetazoa;Bilateria;Protostomia;  
Spiralia;Lophotrochozoa;Mollusca;Bivalvia;Autobranchia;Heteroconchia;Euhe  
terodonta;Imparidentia;Venerida;Veneroidea;Veneridae;Mercenaria;Mercenari  
a mercenaria

|                 |      |     |     |                 |                |           |                   |
|-----------------|------|-----|-----|-----------------|----------------|-----------|-------------------|
| UdeM00000011063 | 6596 | 438 |     | UdeM00000011063 | XP_045189260.1 | 88.6      | 255               |
| 27              | 1    | 1   | 253 | 846             | 1100           | 8.50E-120 | 438 6596 cellular |

organisms;Eukaryota;Opisthokonta;Metazoa;Eumetazoa;Bilateria;Protostomia;  
Spiralia;Lophotrochozoa;Mollusca;Bivalvia;Autobranchia;Heteroconchia;Euhe  
terodonta;Imparidentia;Venerida;Veneroidea;Veneridae;Mercenaria;Mercenari  
a mercenaria

|                 |      |       |     |                 |                |           |                     |
|-----------------|------|-------|-----|-----------------|----------------|-----------|---------------------|
| UdeM00000011064 | 6596 | 466.5 |     | UdeM00000011064 | XP_045190938.1 | 43.1      | 573                 |
| 306             | 9    | 1     | 555 | 18              | 588            | 4.80E-128 | 466.5 6596 cellular |

organisms;Eukaryota;Opisthokonta;Metazoa;Eumetazoa;Bilateria;Protostomia;  
Spiralia;Lophotrochozoa;Mollusca;Bivalvia;Autobranchia;Heteroconchia;Euhe  
terodonta;Imparidentia;Venerida;Veneroidea;Veneridae;Mercenaria;Mercenari  
a mercenaria

|                 |      |     |     |                 |                |           |                   |
|-----------------|------|-----|-----|-----------------|----------------|-----------|-------------------|
| UdeM00000011065 | 6596 | 483 |     | UdeM00000011065 | XP_045190938.1 | 43.3      | 587               |
| 313             | 9    | 21  | 589 | 4               | 588            | 5.30E-133 | 483 6596 cellular |

organisms;Eukaryota;Opisthokonta;Metazoa;Eumetazoa;Bilateria;Protostomia;  
Spiralia;Lophotrochozoa;Mollusca;Bivalvia;Autobranchia;Heteroconchia;Euhe  
terodonta;Imparidentia;Venerida;Veneroidea;Veneridae;Mercenaria;Mercenari  
a mercenaria

|                 |      |      |     |                 |                |          |                    |
|-----------------|------|------|-----|-----------------|----------------|----------|--------------------|
| UdeM00000011066 | 6500 | 90.9 |     | UdeM00000011066 | XP_005108556.2 | 38.7     | 137                |
| 79              | 2    | 2    | 134 | 474             | 609            | 1.40E-15 | 90.9 6500 cellular |

organisms;Eukaryota;Opisthokonta;Metazoa;Eumetazoa;Bilateria;Protostomia;  
Spiralia;Lophotrochozoa;Mollusca;Gastropoda;Heterobranchia;Euthyneura;Tec  
tipleura;Aplysiida;Aplysioidea;Aplysiidae;Aplysia;Aplysia californica

|                 |      |       |     |                 |                |          |                     |
|-----------------|------|-------|-----|-----------------|----------------|----------|---------------------|
| UdeM00000011067 | 6596 | 354.4 |     | UdeM00000011067 | XP_045188119.1 | 53.2     | 340                 |
| 154             | 3    | 6     | 345 | 14              | 348            | 2.90E-94 | 354.4 6596 cellular |

organisms;Eukaryota;Opisthokonta;Metazoa;Eumetazoa;Bilateria;Protostomia;  
Spiralia;Lophotrochozoa;Mollusca;Bivalvia;Autobranchia;Heteroconchia;Euhe  
terodonta;Imparidentia;Venerida;Veneroidea;Veneridae;Mercenaria;Mercenari  
a mercenaria

|                 |      |      |    |                 |                |          |                    |
|-----------------|------|------|----|-----------------|----------------|----------|--------------------|
| UdeM00000011069 | 6596 | 57.8 |    | UdeM00000011069 | XP_045189070.1 | 41.4     | 87                 |
| 49              | 2    | 1    | 86 | 1               | 86             | 8.90E-06 | 57.8 6596 cellular |

organisms;Eukaryota;Opisthokonta;Metazoa;Eumetazoa;Bilateria;Protostomia;  
Spiralia;Lophotrochozoa;Mollusca;Bivalvia;Autobranchia;Heteroconchia;Euhe  
terodonta;Imparidentia;Venerida;Veneroidea;Veneridae;Mercenaria;Mercenari  
a mercenaria

|                 |      |       |     |                 |                |           |                     |
|-----------------|------|-------|-----|-----------------|----------------|-----------|---------------------|
| UdeM00000011070 | 6596 | 427.2 |     | UdeM00000011070 | XP_045189679.1 | 71.1      | 301                 |
| 82              | 3    | 1     | 301 | 1               | 296            | 1.80E-116 | 427.2 6596 cellular |

organisms;Eukaryota;Opisthokonta;Metazoa;Eumetazoa;Bilateria;Protostomia;  
Spiralia;Lophotrochozoa;Mollusca;Bivalvia;Autobranchia;Heteroconchia;Euhe  
terodonta;Imparidentia;Venerida;Veneroidea;Veneridae;Mercenaria;Mercenari  
a mercenaria

|                 |      |       |     |                 |                |           |                     |
|-----------------|------|-------|-----|-----------------|----------------|-----------|---------------------|
| UdeM00000011071 | 6596 | 633.3 |     | UdeM00000011071 | XP_045190592.1 | 88.3      | 326                 |
| 38              | 0    | 1     | 326 | 1               | 326            | 1.80E-178 | 633.3 6596 cellular |

organisms;Eukaryota;Opisthokonta;Metazoa;Eumetazoa;Bilateria;Protostomia;  
Spiralia;Lophotrochozoa;Mollusca;Bivalvia;Autobranchia;Heteroconchia;Euhe

terodonta;Imparidentia;Venerida;Veneroidea;Veneridae;Mercenaria;Mercenaria mercenaria

UdeM00000011072 133434 63.9 UdeM00000011072 XP\_022097689.1 26.4  
178 130 1 30 206 46 223 4.30E-07 63.9 133434  
cellular

organisms;Eukaryota;Opisthokonta;Metazoa;Eumetazoa;Bilateria;Deuterostomia;Echinodermata;Eleutherozoa;Asterozoa;Asteroidea;Valvatacea;Valvatida;Acanthasteridae;Acanthaster;Acanthaster planci

UdeM00000011073 6596 413.3 UdeM00000011073 XP\_045188723.1 53 479  
189 7 1 456 1 466 4.00E-112 413.3 6596 cellular

organisms;Eukaryota;Opisthokonta;Metazoa;Eumetazoa;Bilateria;Protostomia;Spiralia;Lophotrochozoa;Mollusca;Bivalvia;Autobranchia;Heteroconchia;Euheterodonta;Imparidentia;Venerida;Veneroidea;Veneridae;Mercenaria;Mercenaria mercenaria

UdeM00000011074 6565 247.7 UdeM00000011074 XP\_022344430.1 52.1 217  
101 2 41 255 17 232 1.60E-62 247.7 6565 cellular

organisms;Eukaryota;Opisthokonta;Metazoa;Eumetazoa;Bilateria;Protostomia;Spiralia;Lophotrochozoa;Mollusca;Bivalvia;Autobranchia;Pteriormorphia;Ostreida;Ostreoidea;Ostreidae;Crassostrea;Crassostrea virginica

UdeM00000011075 6596 578.6 UdeM00000011075 XP\_045189584.1 70.2 419  
118 6 1 415 1 416 6.90E-162 578.6 6596 cellular

organisms;Eukaryota;Opisthokonta;Metazoa;Eumetazoa;Bilateria;Protostomia;Spiralia;Lophotrochozoa;Mollusca;Bivalvia;Autobranchia;Heteroconchia;Euheterodonta;Imparidentia;Venerida;Veneroidea;Veneridae;Mercenaria;Mercenaria mercenaria

UdeM00000011077 6573 945.3 UdeM00000011077 XP\_021366934.1 87.3 518  
64 1 1 516 1 518 3.30E-272 945.3 6573 cellular

organisms;Eukaryota;Opisthokonta;Metazoa;Eumetazoa;Bilateria;Protostomia;Spiralia;Lophotrochozoa;Mollusca;Bivalvia;Autobranchia;Pteriormorphia;Pectinida;Pectinoidea;Pectinidae;Mizuhopecten;Mizuhopecten yessoensis

UdeM00000011078 6579 244.6 UdeM00000011078 XP\_033757454.1 49.6 262  
130 1 1 262 1 260 1.60E-61 244.6 6579 cellular

organisms;Eukaryota;Opisthokonta;Metazoa;Eumetazoa;Bilateria;Protostomia;Spiralia;Lophotrochozoa;Mollusca;Bivalvia;Autobranchia;Pteriormorphia;Pectinida;Pectinoidea;Pectinidae;Pecten;Pecten maximus

UdeM00000011082 6579 144.1 UdeM00000011082 XP\_033744293.1 30.7 323  
204 8 235 543 100 416 5.90E-31 144.1 6579 cellular

organisms;Eukaryota;Opisthokonta;Metazoa;Eumetazoa;Bilateria;Protostomia;Spiralia;Lophotrochozoa;Mollusca;Bivalvia;Autobranchia;Pteriormorphia;Pectinida;Pectinoidea;Pectinidae;Pecten;Pecten maximus

UdeM00000011083 6596 328.2 UdeM00000011083 XP\_045187824.1 41.5 427  
223 5 7 431 4 405 1.60E-86 328.2 6596 cellular

organisms;Eukaryota;Opisthokonta;Metazoa;Eumetazoa;Bilateria;Protostomia;Spiralia;Lophotrochozoa;Mollusca;Bivalvia;Autobranchia;Heteroconchia;Euheterodonta;Imparidentia;Venerida;Veneroidea;Veneridae;Mercenaria;Mercenaria mercenaria

UdeM00000011084 6596 332.4 UdeM00000011084 XP\_045187824.1 51.2 324  
155 2 9 330 6 328 8.50E-88 332.4 6596 cellular

organisms;Eukaryota;Opisthokonta;Metazoa;Eumetazoa;Bilateria;Protostomia;Spiralia;Lophotrochozoa;Mollusca;Bivalvia;Autobranchia;Heteroconchia;Euheterodonta;Imparidentia;Venerida;Veneroidea;Veneridae;Mercenaria;Mercenaria mercenaria

UdeM00000011086 6596 323.2 UdeM00000011086 XP\_045184476.1 40.6 431  
225 7 11 430 1 411 5.20E-85 323.2 6596 cellular



organisms;Eukaryota;Opisthokonta;Metazoa;Eumetazoa;Bilateria;Protostomia;Spiralia;Lophotrochozoa;Mollusca;Bivalvia;Autobranchia;Heteroconchia;Euheterodonta;Imparidentia;Venerida;Veneroidea;Veneridae;Mercenaria;Mercenaria mercenaria

UdeM00000011087 6596 298.9 UdeM00000011087 XP\_045187824.1 41.4 418  
217 6 21 435 6 398 1.10E-77 298.9 6596 cellular

organisms;Eukaryota;Opisthokonta;Metazoa;Eumetazoa;Bilateria;Protostomia;Spiralia;Lophotrochozoa;Mollusca;Bivalvia;Autobranchia;Heteroconchia;Euheterodonta;Imparidentia;Venerida;Veneroidea;Veneridae;Mercenaria;Mercenaria mercenaria

UdeM00000011088 6596 330.5 UdeM00000011088 XP\_045191221.1 40.5 425  
229 5 15 432 8 415 3.20E-87 330.5 6596 cellular

organisms;Eukaryota;Opisthokonta;Metazoa;Eumetazoa;Bilateria;Protostomia;Spiralia;Lophotrochozoa;Mollusca;Bivalvia;Autobranchia;Heteroconchia;Euheterodonta;Imparidentia;Venerida;Veneroidea;Veneridae;Mercenaria;Mercenaria mercenaria

UdeM00000043561 225164 534.3 UdeM00000043561 XP\_009064093.1 37  
710 374 9 127 821 96 747 2.80E-148 534.3 225164  
cellular

organisms;Eukaryota;Opisthokonta;Metazoa;Eumetazoa;Bilateria;Protostomia;Spiralia;Lophotrochozoa;Mollusca;Gastropoda;Patellogastropoda;Lottiidae;Lottia;Lottia gigantea

UdeM00000043562 1735272 68.9 UdeM00000043562 XP\_041348304.1 40  
75 45 0 6 80 43 117 4.00E-09 68.9 1735272  
cellular

organisms;Eukaryota;Opisthokonta;Metazoa;Eumetazoa;Bilateria;Protostomia;Spiralia;Lophotrochozoa;Mollusca;Gastropoda;Neomphalina;Neomphaloidea;Peltospiridae;Gigantopelta;Gigantopelta aegis

UdeM00000043563 29159 323.9 UdeM00000043563 XP\_011442026.2 27.6 856  
546 23 1 806 205 1036 7.30E-85 323.9 29159 cellular

organisms;Eukaryota;Opisthokonta;Metazoa;Eumetazoa;Bilateria;Protostomia;Spiralia;Lophotrochozoa;Mollusca;Bivalvia;Autobranchia;Pteriomorpha;Ostreida;Ostreidae;Crassostrea;Crassostrea gigas

UdeM00000043564 225164 491.5 UdeM00000043564 XP\_009064093.1 34.3  
727 442 13 67 774 38 747 2.00E-135 491.5 225164  
cellular

organisms;Eukaryota;Opisthokonta;Metazoa;Eumetazoa;Bilateria;Protostomia;Spiralia;Lophotrochozoa;Mollusca;Gastropoda;Patellogastropoda;Lottiidae;Lottia;Lottia gigantea

UdeM00000043565 225164 491.9 UdeM00000043565 XP\_009064093.1 34.3  
727 442 13 10 717 38 747 1.40E-135 491.9 225164  
cellular

organisms;Eukaryota;Opisthokonta;Metazoa;Eumetazoa;Bilateria;Protostomia;Spiralia;Lophotrochozoa;Mollusca;Gastropoda;Patellogastropoda;Lottiidae;Lottia;Lottia gigantea

UdeM00000043566 225164 184.1 UdeM00000043566 XP\_009064093.1 37.8  
249 153 2 5 253 187 433 2.70E-43 184.1 225164  
cellular

organisms;Eukaryota;Opisthokonta;Metazoa;Eumetazoa;Bilateria;Protostomia;Spiralia;Lophotrochozoa;Mollusca;Gastropoda;Patellogastropoda;Lottiidae;Lottia;Lottia gigantea

UdeM00000043567 1735272 680.2 UdeM00000043567 XP\_041349173.1 37.7  
884 507 9 97 955 65 929 3.70E-192 680.2 1735272  
cellular

organisms;Eukaryota;Opisthokonta;Metazoa;Eumetazoa;Bilateria;Protostomia;Spiralia;Lophotrochozoa;Mollusca;Gastropoda;Neomphalina;Neomphaloidea;Peltospiridae;Gigantopelta;Gigantopelta aegis

UdeM00000043568 225164 173.3 UdeM00000043568 XP\_009064093.1 37  
254 153 4 44 292 149 400 5.80E-40 173.3 225164  
cellular

organisms;Eukaryota;Opisthokonta;Metazoa;Eumetazoa;Bilateria;Protostomia;Spiralia;Lophotrochozoa;Mollusca;Gastropoda;Patellogastropoda;Lottioidea;Lottiidae;Lottia;Lottia gigantea

UdeM00000043570 6596 385.2 UdeM00000043570 XP\_045165929.1 43.3 605  
288 15 1108 1675 721 1307 4.30E-103 385.2 6596 cellular

organisms;Eukaryota;Opisthokonta;Metazoa;Eumetazoa;Bilateria;Protostomia;Spiralia;Lophotrochozoa;Mollusca;Bivalvia;Autobranchia;Heteroconchia;Euheterodonta;Imparidentia;Venerida;Veneroidea;Veneridae;Mercenaria;Mercenaria mercenaria

UdeM00000043571 6579 691 UdeM00000043571 XP\_033746499.1 56.7 561  
243 0 1 561 2 562 1.20E-195 691 6579 cellular

organisms;Eukaryota;Opisthokonta;Metazoa;Eumetazoa;Bilateria;Protostomia;Spiralia;Lophotrochozoa;Mollusca;Bivalvia;Autobranchia;Pteriormorphia;Pectinida;Pectinoidea;Pectinidae;Pecten;Pecten maximus

UdeM00000043572 225164 1017.3 UdeM00000043572 XP\_009057905.1  
78.6 637 136 0 1 637 1 637 8.50E-294 1017.3  
225164 cellular

organisms;Eukaryota;Opisthokonta;Metazoa;Eumetazoa;Bilateria;Protostomia;Spiralia;Lophotrochozoa;Mollusca;Gastropoda;Patellogastropoda;Lottioidea;Lottiidae;Lottia;Lottia gigantea

UdeM00000043296 6596 293.9 UdeM00000043296 XP\_045182820.1 68.7 211  
43 1 444 631 326 536 6.20E-76 293.9 6596 cellular

organisms;Eukaryota;Opisthokonta;Metazoa;Eumetazoa;Bilateria;Protostomia;Spiralia;Lophotrochozoa;Mollusca;Bivalvia;Autobranchia;Heteroconchia;Euheterodonta;Imparidentia;Venerida;Veneroidea;Veneridae;Mercenaria;Mercenaria mercenaria

UdeM00000043297 6596 795 UdeM00000043297 XP\_045182820.1 70.7 536  
134 1 1 513 1 536 7.30E-227 795 6596 cellular

organisms;Eukaryota;Opisthokonta;Metazoa;Eumetazoa;Bilateria;Protostomia;Spiralia;Lophotrochozoa;Mollusca;Bivalvia;Autobranchia;Heteroconchia;Euheterodonta;Imparidentia;Venerida;Veneroidea;Veneridae;Mercenaria;Mercenaria mercenaria

UdeM00000043298 29159 99.8 UdeM00000043298 XP\_034307807.1 32.8 180  
104 6 176 350 21 188 7.60E-18 99.8 29159 cellular

organisms;Eukaryota;Opisthokonta;Metazoa;Eumetazoa;Bilateria;Protostomia;Spiralia;Lophotrochozoa;Mollusca;Bivalvia;Autobranchia;Pteriormorphia;Ostreida;Ostreioidea;Ostreidae;Crassostrea;Crassostrea gigas

UdeM00000043299 6596 304.7 UdeM00000043299 XP\_045177776.1 33.4 598  
269 9 1 596 405 875 2.70E-79 304.7 6596 cellular

organisms;Eukaryota;Opisthokonta;Metazoa;Eumetazoa;Bilateria;Protostomia;Spiralia;Lophotrochozoa;Mollusca;Bivalvia;Autobranchia;Heteroconchia;Euheterodonta;Imparidentia;Venerida;Veneroidea;Veneridae;Mercenaria;Mercenaria mercenaria

UdeM00000043300 1735272 282.7 UdeM00000043300 XP\_041375509.1 36.1  
462 269 7 46 487 687 1142 8.80E-73 282.7 1735272  
cellular

organisms;Eukaryota;Opisthokonta;Metazoa;Eumetazoa;Bilateria;Protostomia;

Spiralia;Lophotrochozoa;Mollusca;Gastropoda;Neomphalina;Neomphaloidea;Pel  
tospiridae;Gigantopelta;Gigantopelta aegis  
UdeM00000043301 1735272 259.2 UdeM00000043301 XP\_041375509.1 36.6  
421 247 6 7 407 722 1142 8.70E-66 259.2 1735272  
cellular  
organisms;Eukaryota;Opisthokonta;Metazoa;Eumetazoa;Bilateria;Protostomia;  
Spiralia;Lophotrochozoa;Mollusca;Gastropoda;Neomphalina;Neomphaloidea;Pel  
tospiridae;Gigantopelta;Gigantopelta aegis  
UdeM00000043302 6596 62.8 UdeM00000043302 XP\_045200730.1 28.3 120  
76 2 43 154 175 292 4.90E-07 62.8 6596 cellular  
organisms;Eukaryota;Opisthokonta;Metazoa;Eumetazoa;Bilateria;Protostomia;  
Spiralia;Lophotrochozoa;Mollusca;Bivalvia;Autobranchia;Heteroconchia;Euhe  
terodonta;Imparidentia;Venerida;Veneroidea;Veneridae;Mercenaria;Mercenari  
a mercenaria  
UdeM00000043303 6579 737.6 UdeM00000043303 XP\_033731430.1 74.2 457  
118 0 1 457 1 457 9.50E-210 737.6 6579 cellular  
organisms;Eukaryota;Opisthokonta;Metazoa;Eumetazoa;Bilateria;Protostomia;  
Spiralia;Lophotrochozoa;Mollusca;Bivalvia;Autobranchia;Pteriormorphia;Pect  
inida;Pectinoidea;Pectinidae;Pecten;Pecten maximus  
UdeM00000043304 6596 337.4 UdeM00000043304 XP\_045177779.1 32 726  
330 16 1 700 97 684 5.40E-89 337.4 6596 cellular  
organisms;Eukaryota;Opisthokonta;Metazoa;Eumetazoa;Bilateria;Protostomia;  
Spiralia;Lophotrochozoa;Mollusca;Bivalvia;Autobranchia;Heteroconchia;Euhe  
terodonta;Imparidentia;Venerida;Veneroidea;Veneridae;Mercenaria;Mercenari  
a mercenaria  
UdeM00000038865 29159 369.8 UdeM00000038865 XP\_034333379.1 76.9 221  
46 1 3 223 56 271 2.50E-99 369.8 29159 cellular  
organisms;Eukaryota;Opisthokonta;Metazoa;Eumetazoa;Bilateria;Protostomia;  
Spiralia;Lophotrochozoa;Mollusca;Bivalvia;Autobranchia;Pteriormorphia;Ostr  
eida;Ostreoidea;Ostreidae;Crassostrea;Crassostrea gigas  
UdeM00000038866 29159 375.6 UdeM00000038866 XP\_034333379.1 76.5 226  
48 1 1 226 51 271 4.60E-101 375.6 29159 cellular  
organisms;Eukaryota;Opisthokonta;Metazoa;Eumetazoa;Bilateria;Protostomia;  
Spiralia;Lophotrochozoa;Mollusca;Bivalvia;Autobranchia;Pteriormorphia;Ostr  
eida;Ostreoidea;Ostreidae;Crassostrea;Crassostrea gigas  
UdeM00000038867 29159 358.2 UdeM00000038867 XP\_034333379.1 78.4 208  
40 1 7 214 69 271 7.20E-96 358.2 29159 cellular  
organisms;Eukaryota;Opisthokonta;Metazoa;Eumetazoa;Bilateria;Protostomia;  
Spiralia;Lophotrochozoa;Mollusca;Bivalvia;Autobranchia;Pteriormorphia;Ostr  
eida;Ostreoidea;Ostreidae;Crassostrea;Crassostrea gigas  
UdeM00000038869 29159 350.1 UdeM00000038869 XP\_034333379.1 78.3 203  
39 1 1 203 74 271 1.90E-93 350.1 29159 cellular  
organisms;Eukaryota;Opisthokonta;Metazoa;Eumetazoa;Bilateria;Protostomia;  
Spiralia;Lophotrochozoa;Mollusca;Bivalvia;Autobranchia;Pteriormorphia;Ostr  
eida;Ostreoidea;Ostreidae;Crassostrea;Crassostrea gigas  
UdeM00000038868 29159 379.8 UdeM00000038868 XP\_034333379.1 73.4 244  
59 2 47 289 33 271 3.10E-102 379.8 29159 cellular  
organisms;Eukaryota;Opisthokonta;Metazoa;Eumetazoa;Bilateria;Protostomia;  
Spiralia;Lophotrochozoa;Mollusca;Bivalvia;Autobranchia;Pteriormorphia;Ostr  
eida;Ostreoidea;Ostreidae;Crassostrea;Crassostrea gigas  
UdeM00000038870 29159 350.1 UdeM00000038870 XP\_034333379.1 78.3 203  
39 1 1 203 74 271 1.90E-93 350.1 29159 cellular  
organisms;Eukaryota;Opisthokonta;Metazoa;Eumetazoa;Bilateria;Protostomia;

Spiralia;Lophotrochozoa;Mollusca;Bivalvia;Autobranchia;Pteriormorphia;Ostr  
eida;Ostreoidea;Ostreidae;Crassostrea;Crassostrea gigas  
UdeM00000038871 29159 358.2 UdeM00000038871 XP\_034333379.1 78.4 208  
40 1 7 214 69 271 7.20E-96 358.2 29159 cellular  
organisms;Eukaryota;Opisthokonta;Metazoa;Eumetazoa;Bilateria;Protostomia;  
Spiralia;Lophotrochozoa;Mollusca;Bivalvia;Autobranchia;Pteriormorphia;Ostr  
eida;Ostreoidea;Ostreidae;Crassostrea;Crassostrea gigas  
UdeM00000039822 6596 446.8 UdeM00000039822 XP\_045198006.1 59.1 372  
134 6 55 409 34 404 3.00E-122 446.8 6596 cellular  
organisms;Eukaryota;Opisthokonta;Metazoa;Eumetazoa;Bilateria;Protostomia;  
Spiralia;Lophotrochozoa;Mollusca;Bivalvia;Autobranchia;Heteroconchia;Euhe  
terodonta;Imparidentia;Venerida;Veneroidea;Veneridae;Mercenaria;Mercenari  
a mercenaria  
UdeM00000039823 6596 447.6 UdeM00000039823 XP\_045198006.1 59.4 372  
133 6 55 409 34 404 1.70E-122 447.6 6596 cellular  
organisms;Eukaryota;Opisthokonta;Metazoa;Eumetazoa;Bilateria;Protostomia;  
Spiralia;Lophotrochozoa;Mollusca;Bivalvia;Autobranchia;Heteroconchia;Euhe  
terodonta;Imparidentia;Venerida;Veneroidea;Veneridae;Mercenaria;Mercenari  
a mercenaria  
UdeM00000039824 6565 493.4 UdeM00000039824 XP\_022306666.1 76.5 311  
69 3 161 469 22 330 3.10E-136 493.4 6565 cellular  
organisms;Eukaryota;Opisthokonta;Metazoa;Eumetazoa;Bilateria;Protostomia;  
Spiralia;Lophotrochozoa;Mollusca;Bivalvia;Autobranchia;Pteriormorphia;Ostr  
eida;Ostreoidea;Ostreidae;Crassostrea;Crassostrea virginica  
UdeM00000039826 6596 275 UdeM00000039826 XP\_045183658.1 44 359  
197 3 8 362 12 370 1.40E-70 275 6596 cellular  
organisms;Eukaryota;Opisthokonta;Metazoa;Eumetazoa;Bilateria;Protostomia;  
Spiralia;Lophotrochozoa;Mollusca;Bivalvia;Autobranchia;Heteroconchia;Euhe  
terodonta;Imparidentia;Venerida;Veneroidea;Veneridae;Mercenaria;Mercenari  
a mercenaria  
UdeM00000039827 7574 67.4 UdeM00000039827 XP\_013415071.1 50.8 63  
31 0 15 77 539 601 9.80E-09 67.4 7574 cellular  
organisms;Eukaryota;Opisthokonta;Metazoa;Eumetazoa;Bilateria;Protostomia;  
Spiralia;Lophotrochozoa;Brachiopoda;Linguliformea;Lingulata;Lingulida;Lin  
guloidea;Lingulidae;Lingula;Lingula anatina  
UdeM00000039828 6596 1022.7 UdeM00000039828 XP\_045183230.1 76.3  
679 158 2 1 676 1 679 2.20E-295 1022.7 6596  
cellular  
organisms;Eukaryota;Opisthokonta;Metazoa;Eumetazoa;Bilateria;Protostomia;  
Spiralia;Lophotrochozoa;Mollusca;Bivalvia;Autobranchia;Heteroconchia;Euhe  
terodonta;Imparidentia;Venerida;Veneroidea;Veneridae;Mercenaria;Mercenari  
a mercenaria  
UdeM00000039829 6596 481.5 UdeM00000039829 XP\_045184893.1 60 365  
134 3 1 355 5 367 9.30E-133 481.5 6596 cellular  
organisms;Eukaryota;Opisthokonta;Metazoa;Eumetazoa;Bilateria;Protostomia;  
Spiralia;Lophotrochozoa;Mollusca;Bivalvia;Autobranchia;Heteroconchia;Euhe  
terodonta;Imparidentia;Venerida;Veneroidea;Veneridae;Mercenaria;Mercenari  
a mercenaria  
UdeM00000039831 6573 64.3 UdeM00000039831 XP\_021372478.1 80.6 31  
6 0 93 123 97 127 1.20E-07 64.3 6573 cellular  
organisms;Eukaryota;Opisthokonta;Metazoa;Eumetazoa;Bilateria;Protostomia;  
Spiralia;Lophotrochozoa;Mollusca;Bivalvia;Autobranchia;Pteriormorphia;Pect  
inida;Pectinoidea;Pectinidae;Mizuhopecten;Mizuhopecten yessoensis

UdeM00000039832 6105 63.9 UdeM00000039832 XP\_031566262.1 53.8 52  
 23 1 161 212 645 695 3.80E-07 63.9 6105 cellular  
 organisms;Eukaryota;Opisthokonta;Metazoa;Eumetazoa;Cnidaria;Anthozoa;Hexa  
 corallia;Actiniaria;Actiniidae;Actinia;Actinia tenebrosa  
 UdeM00000039833 6596 1534.6 UdeM00000039833 XP\_045183130.1 67.5  
 1364 334 14 1 1262 1 1357 0.00E+00 1534.6 6596  
 cellular  
 organisms;Eukaryota;Opisthokonta;Metazoa;Eumetazoa;Bilateria;Protostomia;  
 Spiralia;Lophotrochozoa;Mollusca;Bivalvia;Autobranchia;Heteroconchia;Euhe  
 terodonta;Imparidentia;Venerida;Veneroidea;Veneridae;Mercenaria;Mercenari  
 a mercenaria  
 UdeM00000039834 6596 804.3 UdeM00000039834 XP\_045183780.1 89.3 430  
 28 2 2 418 3 427 7.40E-230 804.3 6596 cellular  
 organisms;Eukaryota;Opisthokonta;Metazoa;Eumetazoa;Bilateria;Protostomia;  
 Spiralia;Lophotrochozoa;Mollusca;Bivalvia;Autobranchia;Heteroconchia;Euhe  
 terodonta;Imparidentia;Venerida;Veneroidea;Veneridae;Mercenaria;Mercenari  
 a mercenaria  
 UdeM00000039835 6596 716.8 UdeM00000039835 XP\_045183345.1 53.2 744  
 265 11 14 680 3 740 2.50E-203 716.8 6596 cellular  
 organisms;Eukaryota;Opisthokonta;Metazoa;Eumetazoa;Bilateria;Protostomia;  
 Spiralia;Lophotrochozoa;Mollusca;Bivalvia;Autobranchia;Heteroconchia;Euhe  
 terodonta;Imparidentia;Venerida;Veneroidea;Veneridae;Mercenaria;Mercenari  
 a mercenaria  
 UdeM00000039836 6596 335.5 UdeM00000039836 XP\_045158809.1 57.9 297  
 116 2 65 361 1 288 8.40E-89 335.5 6596 cellular  
 organisms;Eukaryota;Opisthokonta;Metazoa;Eumetazoa;Bilateria;Protostomia;  
 Spiralia;Lophotrochozoa;Mollusca;Bivalvia;Autobranchia;Heteroconchia;Euhe  
 terodonta;Imparidentia;Venerida;Veneroidea;Veneridae;Mercenaria;Mercenari  
 a mercenaria  
 UdeM00000039837 6596 335.1 UdeM00000039837 XP\_045158809.1 57.9 297  
 116 2 1 297 1 288 9.00E-89 335.1 6596 cellular  
 organisms;Eukaryota;Opisthokonta;Metazoa;Eumetazoa;Bilateria;Protostomia;  
 Spiralia;Lophotrochozoa;Mollusca;Bivalvia;Autobranchia;Heteroconchia;Euhe  
 terodonta;Imparidentia;Venerida;Veneroidea;Veneridae;Mercenaria;Mercenari  
 a mercenaria  
 UdeM00000039838 6596 807 UdeM00000039838 XP\_045183975.1 53.6 791  
 330 18 30 798 27 802 2.30E-230 807 6596 cellular  
 organisms;Eukaryota;Opisthokonta;Metazoa;Eumetazoa;Bilateria;Protostomia;  
 Spiralia;Lophotrochozoa;Mollusca;Bivalvia;Autobranchia;Heteroconchia;Euhe  
 terodonta;Imparidentia;Venerida;Veneroidea;Veneridae;Mercenaria;Mercenari  
 a mercenaria  
 UdeM00000039839 6596 808.5 UdeM00000039839 XP\_045183975.1 53.3 801  
 334 19 56 834 20 802 8.30E-231 808.5 6596 cellular  
 organisms;Eukaryota;Opisthokonta;Metazoa;Eumetazoa;Bilateria;Protostomia;  
 Spiralia;Lophotrochozoa;Mollusca;Bivalvia;Autobranchia;Heteroconchia;Euhe  
 terodonta;Imparidentia;Venerida;Veneroidea;Veneridae;Mercenaria;Mercenari  
 a mercenaria  
 UdeM00000039840 6596 805.4 UdeM00000039840 XP\_045183975.1 52.8 811  
 343 19 9 797 10 802 6.70E-230 805.4 6596 cellular  
 organisms;Eukaryota;Opisthokonta;Metazoa;Eumetazoa;Bilateria;Protostomia;  
 Spiralia;Lophotrochozoa;Mollusca;Bivalvia;Autobranchia;Heteroconchia;Euhe  
 terodonta;Imparidentia;Venerida;Veneroidea;Veneridae;Mercenaria;Mercenari  
 a mercenaria

UdeM00000039841 6596 729.9 UdeM00000039841 XP\_045183975.1 51.5 777  
 311 23 12 754 27 771 3.40E-207 729.9 6596 cellular  
 organisms;Eukaryota;Opisthokonta;Metazoa;Eumetazoa;Bilateria;Protostomia;  
 Spiralia;Lophotrochozoa;Mollusca;Bivalvia;Autobranchia;Heteroconchia;Euhe  
 terodonta;Imparidentia;Venerida;Veneroidea;Veneridae;Mercenaria;Mercenari  
 a mercenaria  
 UdeM00000039842 6596 852.4 UdeM00000039842 XP\_045183975.1 55.1 908  
 349 21 15 883 13 900 5.00E-244 852.4 6596 cellular  
 organisms;Eukaryota;Opisthokonta;Metazoa;Eumetazoa;Bilateria;Protostomia;  
 Spiralia;Lophotrochozoa;Mollusca;Bivalvia;Autobranchia;Heteroconchia;Euhe  
 terodonta;Imparidentia;Venerida;Veneroidea;Veneridae;Mercenaria;Mercenari  
 a mercenaria  
 UdeM00000039845 6596 788.1 UdeM00000039845 XP\_045184912.1 67.4 654  
 202 4 1 645 1 652 8.40E-225 788.1 6596 cellular  
 organisms;Eukaryota;Opisthokonta;Metazoa;Eumetazoa;Bilateria;Protostomia;  
 Spiralia;Lophotrochozoa;Mollusca;Bivalvia;Autobranchia;Heteroconchia;Euhe  
 terodonta;Imparidentia;Venerida;Veneroidea;Veneridae;Mercenaria;Mercenari  
 a mercenaria  
 UdeM00000039846 6573 367.1 UdeM00000039846 XP\_021347196.1 55.4 327  
 138 3 10 331 389 712 2.40E-98 367.1 6573 cellular  
 organisms;Eukaryota;Opisthokonta;Metazoa;Eumetazoa;Bilateria;Protostomia;  
 Spiralia;Lophotrochozoa;Mollusca;Bivalvia;Autobranchia;Pteriormorphia;Pect  
 inida;Pectinoidea;Pectinidae;Mizuhopecten;Mizuhopecten yessoensis  
 UdeM00000039847 6573 370.9 UdeM00000039847 XP\_021347196.1 55.8 310  
 131 3 24 328 404 712 1.60E-99 370.9 6573 cellular  
 organisms;Eukaryota;Opisthokonta;Metazoa;Eumetazoa;Bilateria;Protostomia;  
 Spiralia;Lophotrochozoa;Mollusca;Bivalvia;Autobranchia;Pteriormorphia;Pect  
 inida;Pectinoidea;Pectinidae;Mizuhopecten;Mizuhopecten yessoensis  
 UdeM00000039849 29159 273.5 UdeM00000039849 XP\_034321132.1 45.4 306  
 145 7 67 372 43 326 4.10E-70 273.5 29159 cellular  
 organisms;Eukaryota;Opisthokonta;Metazoa;Eumetazoa;Bilateria;Protostomia;  
 Spiralia;Lophotrochozoa;Mollusca;Bivalvia;Autobranchia;Pteriormorphia;Ostr  
 eida;Ostreoidea;Ostreidae;Crassostrea;Crassostrea gigas  
 UdeM00000039850 29159 385.2 UdeM00000039850 XP\_034321132.1 55.7 327  
 132 6 84 407 15 331 1.00E-103 385.2 29159 cellular  
 organisms;Eukaryota;Opisthokonta;Metazoa;Eumetazoa;Bilateria;Protostomia;  
 Spiralia;Lophotrochozoa;Mollusca;Bivalvia;Autobranchia;Pteriormorphia;Ostr  
 eida;Ostreoidea;Ostreidae;Crassostrea;Crassostrea gigas  
 UdeM00000039851 6596 115.2 UdeM00000039851 XP\_045184958.1 32.5 252  
 137 11 17 236 71 321 1.20E-22 115.2 6596 cellular  
 organisms;Eukaryota;Opisthokonta;Metazoa;Eumetazoa;Bilateria;Protostomia;  
 Spiralia;Lophotrochozoa;Mollusca;Bivalvia;Autobranchia;Heteroconchia;Euhe  
 terodonta;Imparidentia;Venerida;Veneroidea;Veneridae;Mercenaria;Mercenari  
 a mercenaria  
 UdeM00000039852 29159 451.4 UdeM00000039852 XP\_034321130.1 64 328  
 113 4 6 329 4 330 9.90E-124 451.4 29159 cellular  
 organisms;Eukaryota;Opisthokonta;Metazoa;Eumetazoa;Bilateria;Protostomia;  
 Spiralia;Lophotrochozoa;Mollusca;Bivalvia;Autobranchia;Pteriormorphia;Ostr  
 eida;Ostreoidea;Ostreidae;Crassostrea;Crassostrea gigas  
 UdeM00000039853 6596 72.8 UdeM00000039853 XP\_045184790.1 47.8 69  
 32 2 255 319 304 372 9.00E-10 72.8 6596 cellular  
 organisms;Eukaryota;Opisthokonta;Metazoa;Eumetazoa;Bilateria;Protostomia;  
 Spiralia;Lophotrochozoa;Mollusca;Bivalvia;Autobranchia;Heteroconchia;Euhe

terodonta;Imparidentia;Venerida;Veneroidea;Veneridae;Mercenaria;Mercenari  
 a mercenaria  
 UdeM00000039854 6565 85.5 UdeM00000039854 XP\_022311800.1 34.8 155  
 82 6 83 237 86 221 1.00E-13 85.5 6565 cellular  
 organisms;Eukaryota;Opisthokonta;Metazoa;Eumetazoa;Bilateria;Protostomia;  
 Spiralia;Lophotrochozoa;Mollusca;Bivalvia;Autobranchia;Pteriormorphia;Ostr  
 eida;Ostreoidea;Ostreidae;Crassostrea;Crassostrea virginica  
 UdeM00000039855 6565 128.3 UdeM00000039855 XP\_022311800.1 44.2 138  
 71 3 89 226 90 221 1.30E-26 128.3 6565 cellular  
 organisms;Eukaryota;Opisthokonta;Metazoa;Eumetazoa;Bilateria;Protostomia;  
 Spiralia;Lophotrochozoa;Mollusca;Bivalvia;Autobranchia;Pteriormorphia;Ostr  
 eida;Ostreoidea;Ostreidae;Crassostrea;Crassostrea virginica  
 UdeM00000039856 1735272 292.4 UdeM00000039856 XP\_041355979.1 48.1  
 345 152 7 130 462 138 467 1.10E-75 292.4 1735272  
 cellular  
 organisms;Eukaryota;Opisthokonta;Metazoa;Eumetazoa;Bilateria;Protostomia;  
 Spiralia;Lophotrochozoa;Mollusca;Gastropoda;Neomphalina;Neomphaloidea;Pel  
 tospiridae;Gigantopelta;Gigantopelta aegis  
 UdeM00000039857 1735272 558.9 UdeM00000039857 XP\_041355640.1 61.6  
 422 158 2 28 445 24 445 5.80E-156 558.9 1735272  
 cellular  
 organisms;Eukaryota;Opisthokonta;Metazoa;Eumetazoa;Bilateria;Protostomia;  
 Spiralia;Lophotrochozoa;Mollusca;Gastropoda;Neomphalina;Neomphaloidea;Pel  
 tospiridae;Gigantopelta;Gigantopelta aegis  
 UdeM00000039859 1735272 591.3 UdeM00000039859 XP\_041355640.1 66.3  
 413 136 2 35 444 31 443 1.10E-165 591.3 1735272  
 cellular  
 organisms;Eukaryota;Opisthokonta;Metazoa;Eumetazoa;Bilateria;Protostomia;  
 Spiralia;Lophotrochozoa;Mollusca;Gastropoda;Neomphalina;Neomphaloidea;Pel  
 tospiridae;Gigantopelta;Gigantopelta aegis  
 UdeM00000039860 6596 370.9 UdeM00000039860 XP\_045184549.1 73.1 227  
 61 0 1 227 108 334 1.10E-99 370.9 6596 cellular  
 organisms;Eukaryota;Opisthokonta;Metazoa;Eumetazoa;Bilateria;Protostomia;  
 Spiralia;Lophotrochozoa;Mollusca;Bivalvia;Autobranchia;Heteroconchia;Euhe  
 terodonta;Imparidentia;Venerida;Veneroidea;Veneridae;Mercenaria;Mercenari  
 a mercenaria  
 UdeM00000039861 6596 494.2 UdeM00000039861 XP\_045184549.1 66.9 332  
 109 1 16 346 3 334 1.40E-136 494.2 6596 cellular  
 organisms;Eukaryota;Opisthokonta;Metazoa;Eumetazoa;Bilateria;Protostomia;  
 Spiralia;Lophotrochozoa;Mollusca;Bivalvia;Autobranchia;Heteroconchia;Euhe  
 terodonta;Imparidentia;Venerida;Veneroidea;Veneridae;Mercenaria;Mercenari  
 a mercenaria  
 UdeM00000039862 6596 480.3 UdeM00000039862 XP\_045184549.1 67.1 319  
 104 1 2 319 16 334 1.90E-132 480.3 6596 cellular  
 organisms;Eukaryota;Opisthokonta;Metazoa;Eumetazoa;Bilateria;Protostomia;  
 Spiralia;Lophotrochozoa;Mollusca;Bivalvia;Autobranchia;Heteroconchia;Euhe  
 terodonta;Imparidentia;Venerida;Veneroidea;Veneridae;Mercenaria;Mercenari  
 a mercenaria  
 UdeM00000039863 6565 119 UdeM00000039863 XP\_022306664.1 63.2 87  
 31 1 71 156 238 324 6.10E-24 119 6565 cellular  
 organisms;Eukaryota;Opisthokonta;Metazoa;Eumetazoa;Bilateria;Protostomia;  
 Spiralia;Lophotrochozoa;Mollusca;Bivalvia;Autobranchia;Pteriormorphia;Ostr  
 eida;Ostreoidea;Ostreidae;Crassostrea;Crassostrea virginica

UdeM00000039864 225164 93.6 UdeM00000039864 XP\_009044124.1 30.5  
 285 188 5 94 368 28 312 6.00E-16 93.6 225164  
 cellular  
 organisms;Eukaryota;Opisthokonta;Metazoa;Eumetazoa;Bilateria;Protostomia;  
 Spiralia;Lophotrochozoa;Mollusca;Gastropoda;Patellogastropoda;Lottioidea;  
 Lottiidae;Lottia;Lottia gigantea  
 UdeM00000039865 2607531 111.7 UdeM00000039865 XP\_029639158.1 38  
 171 96 3 3 173 9 169 9.50E-22 111.7 2607531  
 cellular  
 organisms;Eukaryota;Opisthokonta;Metazoa;Eumetazoa;Bilateria;Protostomia;  
 Spiralia;Lophotrochozoa;Mollusca;Cephalopoda;Coleoidea;Octopodiformes;Oct  
 opoda;Incirrata;Octopodidae;Octopus;Octopus sinensis  
 UdeM00000039866 6596 630.6 UdeM00000039866 XP\_045183788.1 59.7 484  
 181 2 1 470 1 484 1.70E-177 630.6 6596 cellular  
 organisms;Eukaryota;Opisthokonta;Metazoa;Eumetazoa;Bilateria;Protostomia;  
 Spiralia;Lophotrochozoa;Mollusca;Bivalvia;Autobranchia;Heteroconchia;Euhe  
 terodonta;Imparidentia;Venerida;Veneroidea;Veneridae;Mercenaria;Mercenari  
 a mercenaria  
 UdeM00000039867 2607531 108.2 UdeM00000039867 XP\_029639158.1 36.3  
 171 99 4 3 173 9 169 1.10E-20 108.2 2607531  
 cellular  
 organisms;Eukaryota;Opisthokonta;Metazoa;Eumetazoa;Bilateria;Protostomia;  
 Spiralia;Lophotrochozoa;Mollusca;Cephalopoda;Coleoidea;Octopodiformes;Oct  
 opoda;Incirrata;Octopodidae;Octopus;Octopus sinensis  
 UdeM00000039868 9447 69.3 UdeM00000039868 XP\_045387570.1 28.2 209  
 136 7 98 296 111 315 1.70E-08 69.3 9447 cellular  
 organisms;Eukaryota;Opisthokonta;Metazoa;Eumetazoa;Bilateria;Deuterostomi  
 a;Chordata;Craniata;Vertebrata;Gnathostomata;Teleostomi;Euteleostomi;Sarc  
 opterygii;Dipnotetrapodomorpha;Tetrapoda;Amniota;Mammalia;Theria;Eutheria  
 ;Boreoeutheria;Euarchontoglires;Primates;Strepsirrhini;Lemuriformes;Lemur  
 idae;Lemur;Lemur catta  
 UdeM00000039869 6596 74.3 UdeM00000039869 XP\_045209738.1 51.3 76  
 33 1 138 209 488 563 2.10E-10 74.3 6596 cellular  
 organisms;Eukaryota;Opisthokonta;Metazoa;Eumetazoa;Bilateria;Protostomia;  
 Spiralia;Lophotrochozoa;Mollusca;Bivalvia;Autobranchia;Heteroconchia;Euhe  
 terodonta;Imparidentia;Venerida;Veneroidea;Veneridae;Mercenaria;Mercenari  
 a mercenaria  
 UdeM00000039871 400727 93.2 UdeM00000039871 XP\_025110168.1 38.2  
 123 65 2 189 305 103 220 6.30E-16 93.2 400727  
 cellular  
 organisms;Eukaryota;Opisthokonta;Metazoa;Eumetazoa;Bilateria;Protostomia;  
 Spiralia;Lophotrochozoa;Mollusca;Gastropoda;Caenogastropoda;Architaeniogl  
 ossa;Ampullarioidea;Ampullariidae;Pomacea;Pomacea canaliculata  
 UdeM00000039872 6596 299.7 UdeM00000039872 XP\_045199130.1 51.7 267  
 129 0 161 427 130 396 6.20E-78 299.7 6596 cellular  
 organisms;Eukaryota;Opisthokonta;Metazoa;Eumetazoa;Bilateria;Protostomia;  
 Spiralia;Lophotrochozoa;Mollusca;Bivalvia;Autobranchia;Heteroconchia;Euhe  
 terodonta;Imparidentia;Venerida;Veneroidea;Veneridae;Mercenaria;Mercenari  
 a mercenaria  
 UdeM00000039874 6596 1078.2 UdeM00000039874 XP\_045184845.1 53.4  
 977 441 7 1 969 1 971 0.00E+00 1078.2 6596  
 cellular  
 organisms;Eukaryota;Opisthokonta;Metazoa;Eumetazoa;Bilateria;Protostomia;  
 Spiralia;Lophotrochozoa;Mollusca;Bivalvia;Autobranchia;Heteroconchia;Euhe



terodonta;Imparidentia;Venerida;Veneroidea;Veneridae;Mercenaria;Mercenaria mercenaria

UdeM00000039875 6579 371.3 UdeM00000039875 XP\_033725273.1 57.2 292  
120 3 62 352 86 373 1.40E-99 371.3 6579 cellular

organisms;Eukaryota;Opisthokonta;Metazoa;Eumetazoa;Bilateria;Protostomia;Spiralia;Lophotrochozoa;Mollusca;Bivalvia;Autobranchia;Pteriormorphia;Pectinida;Pectinoidea;Pectinidae;Pecten;Pecten maximus

UdeM00000039876 7739 98.6 UdeM00000039876 XP\_035690011.1 29.1 247  
145 7 2 231 344 577 1.40E-17 98.6 7739 cellular

organisms;Eukaryota;Opisthokonta;Metazoa;Eumetazoa;Bilateria;Deuterostomia;Chordata;Cephalochordata;Leptocardii;Amphioxiformes;Branchiostomidae;Branchiostoma;Branchiostoma floridae

UdeM00000039878 45264 146 UdeM00000039878 XP\_029214501.2 40.6 155  
88 1 2 152 580 734 9.00E-32 146 45264 cellular

organisms;Eukaryota;Opisthokonta;Metazoa;Eumetazoa;Cnidaria;Anthozoa;Hexacorallia;Scleractinia;Astrocoeniina;Acroporidae;Acropora;Acropora millepora

UdeM00000039877 70779 228 UdeM00000039877 XP\_015749890.1 41.9 279  
147 8 11 274 143 421 2.40E-56 228 70779 cellular

organisms;Eukaryota;Opisthokonta;Metazoa;Eumetazoa;Cnidaria;Anthozoa;Hexacorallia;Scleractinia;Astrocoeniina;Acroporidae;Acropora;Acropora digitifera

UdeM00000039879 6579 376.3 UdeM00000039879 XP\_033725273.1 58.1 296  
119 3 19 313 78 369 3.80E-101 376.3 6579 cellular

organisms;Eukaryota;Opisthokonta;Metazoa;Eumetazoa;Bilateria;Protostomia;Spiralia;Lophotrochozoa;Mollusca;Bivalvia;Autobranchia;Pteriormorphia;Pectinida;Pectinoidea;Pectinidae;Pecten;Pecten maximus

UdeM00000039881 6579 372.9 UdeM00000039881 XP\_033725273.1 57.4 296  
121 3 19 313 78 369 4.20E-100 372.9 6579 cellular

organisms;Eukaryota;Opisthokonta;Metazoa;Eumetazoa;Bilateria;Protostomia;Spiralia;Lophotrochozoa;Mollusca;Bivalvia;Autobranchia;Pteriormorphia;Pectinida;Pectinoidea;Pectinidae;Pecten;Pecten maximus

UdeM00000039880 6579 311.6 UdeM00000039880 XP\_033725273.1 51 296  
112 5 60 326 78 369 1.20E-81 311.6 6579 cellular

organisms;Eukaryota;Opisthokonta;Metazoa;Eumetazoa;Bilateria;Protostomia;Spiralia;Lophotrochozoa;Mollusca;Bivalvia;Autobranchia;Pteriormorphia;Pectinida;Pectinoidea;Pectinidae;Pecten;Pecten maximus

UdeM00000039882 7604 303.5 UdeM00000039882 XP\_033633146.1 41 390  
212 3 262 633 29 418 7.00E-79 303.5 7604 cellular

organisms;Eukaryota;Opisthokonta;Metazoa;Eumetazoa;Bilateria;Deuterostomia;Echinodermata;Eleutherozoa;Asterozoa;Asteroidea;Forcipulatacea;Forcipulatacida;Asteroidea;Asteroidea;Asteroidea;Forcipulatacea;Forcipulatacida;Asteroidea;Asteroidea;Asteroidea

UdeM00000039889 6579 248.1 UdeM00000039889 XP\_033725337.1 55.5 211  
88 2 15 225 29 233 1.20E-62 248.1 6579 cellular

organisms;Eukaryota;Opisthokonta;Metazoa;Eumetazoa;Bilateria;Protostomia;Spiralia;Lophotrochozoa;Mollusca;Bivalvia;Autobranchia;Pteriormorphia;Pectinida;Pectinoidea;Pectinidae;Pecten;Pecten maximus

UdeM00000039890 6579 98.6 UdeM00000039890 XP\_033726025.1 52.8 89  
42 0 2 90 139 227 5.20E-18 98.6 6579 cellular

organisms;Eukaryota;Opisthokonta;Metazoa;Eumetazoa;Bilateria;Protostomia;Spiralia;Lophotrochozoa;Mollusca;Bivalvia;Autobranchia;Pteriormorphia;Pectinida;Pectinoidea;Pectinidae;Pecten;Pecten maximus

UdeM00000039891 29159 134.8 UdeM00000039891 XP\_034307878.1 39.9 183  
107 2 1 181 92 273 2.20E-28 134.8 29159 cellular

organisms;Eukaryota;Opisthokonta;Metazoa;Eumetazoa;Bilateria;Protostomia; Spiralia;Lophotrochozoa;Mollusca;Bivalvia;Autobranchia;Pteriomorpha;Ostr eida;Ostreoidea;Ostreidae;Crassostrea;Crassostrea gigas

UdeM00000039893 1735272 95.9 UdeM00000039893 XP\_041355355.1 31.9  
210 113 7 25 217 31 227 8.10E-17 95.9 1735272  
cellular

organisms;Eukaryota;Opisthokonta;Metazoa;Eumetazoa;Bilateria;Protostomia; Spiralia;Lophotrochozoa;Mollusca;Gastropoda;Neomphalina;Neomphaloidea;Pel tospiridae;Gigantopelta;Gigantopelta aegis

UdeM00000039894 225164 258.5 UdeM00000039894 XP\_009046725.1 57.1  
210 83 3 26 235 24 226 9.60E-66 258.5 225164  
cellular

organisms;Eukaryota;Opisthokonta;Metazoa;Eumetazoa;Bilateria;Protostomia; Spiralia;Lophotrochozoa;Mollusca;Gastropoda;Patellogastropoda;Lottioidea; Lottiidae;Lottia;Lottia gigantea

UdeM00000039895 6596 414.1 UdeM00000039895 XP\_045183644.1 76.8 272  
59 2 37 304 493 764 2.40E-112 414.1 6596 cellular

organisms;Eukaryota;Opisthokonta;Metazoa;Eumetazoa;Bilateria;Protostomia; Spiralia;Lophotrochozoa;Mollusca;Bivalvia;Autobranchia;Heteroconchia;Euhe terodonta;Imparidentia;Venerida;Veneroidea;Veneridae;Mercenaria;Mercenari a mercenaria

UdeM00000039896 6565 922.9 UdeM00000039896 XP\_022303207.1 82.4 534  
94 0 20 553 543 1076 1.90E-265 922.9 6565 cellular

organisms;Eukaryota;Opisthokonta;Metazoa;Eumetazoa;Bilateria;Protostomia; Spiralia;Lophotrochozoa;Mollusca;Bivalvia;Autobranchia;Pteriomorpha;Ostr eida;Ostreoidea;Ostreidae;Crassostrea;Crassostrea virginica

UdeM00000039897 29159 70.9 UdeM00000039897 XP\_034338862.1 25.8 256  
160 7 29 262 78 325 3.00E-09 70.9 29159 cellular

organisms;Eukaryota;Opisthokonta;Metazoa;Eumetazoa;Bilateria;Protostomia; Spiralia;Lophotrochozoa;Mollusca;Bivalvia;Autobranchia;Pteriomorpha;Ostr eida;Ostreoidea;Ostreidae;Crassostrea;Crassostrea gigas

UdeM00000039900 6596 93.6 UdeM00000039900 XP\_045183838.1 35.4 130  
84 0 3 132 8 137 2.40E-16 93.6 6596 cellular

organisms;Eukaryota;Opisthokonta;Metazoa;Eumetazoa;Bilateria;Protostomia; Spiralia;Lophotrochozoa;Mollusca;Bivalvia;Autobranchia;Heteroconchia;Euhe terodonta;Imparidentia;Venerida;Veneroidea;Veneridae;Mercenaria;Mercenari a mercenaria

UdeM00000039901 29159 93.2 UdeM00000039901 XP\_034321851.1 32.2 177  
90 5 21 173 838 1008 3.50E-16 93.2 29159 cellular

organisms;Eukaryota;Opisthokonta;Metazoa;Eumetazoa;Bilateria;Protostomia; Spiralia;Lophotrochozoa;Mollusca;Bivalvia;Autobranchia;Pteriomorpha;Ostr eida;Ostreoidea;Ostreidae;Crassostrea;Crassostrea gigas

UdeM00000039903 29159 95.1 UdeM00000039903 XP\_034321851.1 32.9 158  
80 3 35 192 245 376 1.10E-16 95.1 29159 cellular

organisms;Eukaryota;Opisthokonta;Metazoa;Eumetazoa;Bilateria;Protostomia; Spiralia;Lophotrochozoa;Mollusca;Bivalvia;Autobranchia;Pteriomorpha;Ostr eida;Ostreoidea;Ostreidae;Crassostrea;Crassostrea gigas

UdeM00000039905 29159 90.5 UdeM00000039905 XP\_011444018.3 29.7 185  
110 6 19 202 25 190 6.10E-15 90.5 29159 cellular

organisms;Eukaryota;Opisthokonta;Metazoa;Eumetazoa;Bilateria;Protostomia; Spiralia;Lophotrochozoa;Mollusca;Bivalvia;Autobranchia;Pteriomorpha;Ostr eida;Ostreoidea;Ostreidae;Crassostrea;Crassostrea gigas

UdeM00000039906 1735272 713.4 UdeM00000039906 XP\_041361314.1 79  
415 87 0 1 415 1 415 1.70E-202 713.4 1735272

cellular

organisms;Eukaryota;Opisthokonta;Metazoa;Eumetazoa;Bilateria;Protostomia;Spiralia;Lophotrochozoa;Mollusca;Gastropoda;Neomphalina;Neomphaloidea;Peltospiridae;Gigantopelta;Gigantopelta aegis

UdeM00000039907 6596 951 UdeM00000039907 XP\_045183687.1 84.5 550  
80 1 26 570 30 579 6.70E-274 951 6596 cellular

organisms;Eukaryota;Opisthokonta;Metazoa;Eumetazoa;Bilateria;Protostomia;Spiralia;Lophotrochozoa;Mollusca;Bivalvia;Autobranchia;Heteroconchia;Euherodonta;Imparidentia;Venerida;Veneroidea;Veneridae;Mercenaria;Mercenaria mercenaria

UdeM00000039908 6596 475.3 UdeM00000039908 XP\_045184511.1 67.6 330  
107 0 1 330 1 330 6.20E-131 475.3 6596 cellular

organisms;Eukaryota;Opisthokonta;Metazoa;Eumetazoa;Bilateria;Protostomia;Spiralia;Lophotrochozoa;Mollusca;Bivalvia;Autobranchia;Heteroconchia;Euherodonta;Imparidentia;Venerida;Veneroidea;Veneridae;Mercenaria;Mercenaria mercenaria

UdeM00000039909 6596 481.1 UdeM00000039909 XP\_045184511.1 67.6 330  
107 0 1 330 1 330 1.10E-132 481.1 6596 cellular

organisms;Eukaryota;Opisthokonta;Metazoa;Eumetazoa;Bilateria;Protostomia;Spiralia;Lophotrochozoa;Mollusca;Bivalvia;Autobranchia;Heteroconchia;Euherodonta;Imparidentia;Venerida;Veneroidea;Veneridae;Mercenaria;Mercenaria mercenaria

UdeM00000039910 6596 407.5 UdeM00000039910 XP\_045184511.1 60.1 328  
100 1 1 297 1 328 1.40E-110 407.5 6596 cellular

organisms;Eukaryota;Opisthokonta;Metazoa;Eumetazoa;Bilateria;Protostomia;Spiralia;Lophotrochozoa;Mollusca;Bivalvia;Autobranchia;Heteroconchia;Euherodonta;Imparidentia;Venerida;Veneroidea;Veneridae;Mercenaria;Mercenaria mercenaria

UdeM00000039911 6596 470.3 UdeM00000039911 XP\_045184511.1 66.1 330  
112 0 1 330 1 330 2.00E-129 470.3 6596 cellular

organisms;Eukaryota;Opisthokonta;Metazoa;Eumetazoa;Bilateria;Protostomia;Spiralia;Lophotrochozoa;Mollusca;Bivalvia;Autobranchia;Heteroconchia;Euherodonta;Imparidentia;Venerida;Veneroidea;Veneridae;Mercenaria;Mercenaria mercenaria

UdeM00000039912 6596 494.6 UdeM00000039912 XP\_045184549.1 68.6 334  
104 1 1 333 1 334 1.00E-136 494.6 6596 cellular

organisms;Eukaryota;Opisthokonta;Metazoa;Eumetazoa;Bilateria;Protostomia;Spiralia;Lophotrochozoa;Mollusca;Bivalvia;Autobranchia;Heteroconchia;Euherodonta;Imparidentia;Venerida;Veneroidea;Veneridae;Mercenaria;Mercenaria mercenaria

UdeM00000039913 6596 487.6 UdeM00000039913 XP\_045184549.1 68.3 334  
105 1 1 333 1 334 1.20E-134 487.6 6596 cellular

organisms;Eukaryota;Opisthokonta;Metazoa;Eumetazoa;Bilateria;Protostomia;Spiralia;Lophotrochozoa;Mollusca;Bivalvia;Autobranchia;Heteroconchia;Euherodonta;Imparidentia;Venerida;Veneroidea;Veneridae;Mercenaria;Mercenaria mercenaria

UdeM00000039914 6596 387.9 UdeM00000039914 XP\_045184549.1 56.6 334  
106 2 1 295 1 334 1.20E-104 387.9 6596 cellular

organisms;Eukaryota;Opisthokonta;Metazoa;Eumetazoa;Bilateria;Protostomia;Spiralia;Lophotrochozoa;Mollusca;Bivalvia;Autobranchia;Heteroconchia;Euherodonta;Imparidentia;Venerida;Veneroidea;Veneridae;Mercenaria;Mercenaria mercenaria

UdeM00000039915 6596 284.6 UdeM00000039915 XP\_045199479.1 43.8 388  
192 6 24 390 99 481 1.90E-73 284.6 6596 cellular

organisms;Eukaryota;Opisthokonta;Metazoa;Eumetazoa;Bilateria;Protostomia;Spiralia;Lophotrochozoa;Mollusca;Bivalvia;Autobranchia;Heteroconchia;Euherodonta;Imparidentia;Venerida;Veneroidea;Veneridae;Mercenaria;Mercenaria mercenaria

UdeM00000039916 6596 482.3 UdeM00000039916 XP\_045184549.1 68 334  
106 1 1 333 1 334 5.10E-133 482.3 6596 cellular

organisms;Eukaryota;Opisthokonta;Metazoa;Eumetazoa;Bilateria;Protostomia;Spiralia;Lophotrochozoa;Mollusca;Bivalvia;Autobranchia;Heteroconchia;Euherodonta;Imparidentia;Venerida;Veneroidea;Veneridae;Mercenaria;Mercenaria mercenaria

UdeM00000039917 6596 481.5 UdeM00000039917 XP\_045184549.1 66.5 334  
111 1 1 333 1 334 8.70E-133 481.5 6596 cellular

organisms;Eukaryota;Opisthokonta;Metazoa;Eumetazoa;Bilateria;Protostomia;Spiralia;Lophotrochozoa;Mollusca;Bivalvia;Autobranchia;Heteroconchia;Euherodonta;Imparidentia;Venerida;Veneroidea;Veneridae;Mercenaria;Mercenaria mercenaria

UdeM00000039918 6596 459.1 UdeM00000039918 XP\_045184526.1 65.8 333  
111 2 1 333 1 330 4.60E-126 459.1 6596 cellular

organisms;Eukaryota;Opisthokonta;Metazoa;Eumetazoa;Bilateria;Protostomia;Spiralia;Lophotrochozoa;Mollusca;Bivalvia;Autobranchia;Heteroconchia;Euherodonta;Imparidentia;Venerida;Veneroidea;Veneridae;Mercenaria;Mercenaria mercenaria

UdeM00000039919 6596 487.6 UdeM00000039919 XP\_045184549.1 68 334  
106 1 1 333 1 334 1.20E-134 487.6 6596 cellular

organisms;Eukaryota;Opisthokonta;Metazoa;Eumetazoa;Bilateria;Protostomia;Spiralia;Lophotrochozoa;Mollusca;Bivalvia;Autobranchia;Heteroconchia;Euherodonta;Imparidentia;Venerida;Veneroidea;Veneridae;Mercenaria;Mercenaria mercenaria

UdeM00000039920 6596 531.6 UdeM00000039920 XP\_045208070.1 40.1 633  
362 9 15 636 21 647 1.40E-147 531.6 6596 cellular

organisms;Eukaryota;Opisthokonta;Metazoa;Eumetazoa;Bilateria;Protostomia;Spiralia;Lophotrochozoa;Mollusca;Bivalvia;Autobranchia;Heteroconchia;Euherodonta;Imparidentia;Venerida;Veneroidea;Veneridae;Mercenaria;Mercenaria mercenaria

UdeM00000039921 6596 528.1 UdeM00000039921 XP\_045208070.1 41.3 637  
358 9 24 651 18 647 1.60E-146 528.1 6596 cellular

organisms;Eukaryota;Opisthokonta;Metazoa;Eumetazoa;Bilateria;Protostomia;Spiralia;Lophotrochozoa;Mollusca;Bivalvia;Autobranchia;Heteroconchia;Euherodonta;Imparidentia;Venerida;Veneroidea;Veneridae;Mercenaria;Mercenaria mercenaria

UdeM00000039922 1735272 1386.3 UdeM00000039922 XP\_041372550.1  
56.4 1187 501 9 28 1203 9 1190 0.00E+00 1386.3  
1735272 cellular

organisms;Eukaryota;Opisthokonta;Metazoa;Eumetazoa;Bilateria;Protostomia;Spiralia;Lophotrochozoa;Mollusca;Gastropoda;Neomphalina;Neomphaloidea;Peltospiridae;Gigantopelta;Gigantopelta aegis

UdeM00000039923 7574 202.2 UdeM00000039923 XP\_013413015.1 65.3 150  
51 1 1 150 509 657 4.60E-49 202.2 7574 cellular

organisms;Eukaryota;Opisthokonta;Metazoa;Eumetazoa;Bilateria;Protostomia;Spiralia;Lophotrochozoa;Brachiopoda;Linguliformea;Lingulata;Lingulida;Linguloidea;Lingulidae;Lingula;Lingula anatina

UdeM00000039924 6596 657.5 UdeM00000039924 XP\_045207426.1 54.8 637  
266 9 5 633 8 630 1.70E-185 657.5 6596 cellular

organisms;Eukaryota;Opisthokonta;Metazoa;Eumetazoa;Bilateria;Protostomia;

Spiralia;Lophotrochozoa;Mollusca;Bivalvia;Autobranchia;Heteroconchia;Euherodonta;Imparidentia;Venerida;Veneroidea;Veneridae;Mercenaria;Mercenaria mercenaria

UdeM00000039925 6596 451.8 UdeM00000039925 XP\_045207426.1 53.2 468  
198 8 5 464 8 462 1.00E-123 451.8 6596 cellular

organisms;Eukaryota;Opisthokonta;Metazoa;Eumetazoa;Bilateria;Protostomia;Spiralia;Lophotrochozoa;Mollusca;Bivalvia;Autobranchia;Heteroconchia;Euherodonta;Imparidentia;Venerida;Veneroidea;Veneridae;Mercenaria;Mercenaria mercenaria

UdeM00000039926 6596 829.3 UdeM00000039926 XP\_045207037.1 75.7 540  
131 0 1 540 1 540 3.30E-237 829.3 6596 cellular

organisms;Eukaryota;Opisthokonta;Metazoa;Eumetazoa;Bilateria;Protostomia;Spiralia;Lophotrochozoa;Mollusca;Bivalvia;Autobranchia;Heteroconchia;Euherodonta;Imparidentia;Venerida;Veneroidea;Veneridae;Mercenaria;Mercenaria mercenaria

UdeM00000035795 7668 201.8 UdeM00000035795 XP\_003729577.2 46.8 205  
92 2 9 196 712 916 8.40E-49 201.8 7668 cellular

organisms;Eukaryota;Opisthokonta;Metazoa;Eumetazoa;Bilateria;Deuterostomia;Echinodermata;Eleutherozoa;Echinozoa;Echinoidea;Euechinoidea;Echinacea;Camarodonta;Echinidea;Strongylocentrotidae;Strongylocentrotus;Strongylocentrotus purpuratus

UdeM00000035796 6573 473 UdeM00000035796 XP\_021345838.1 83.3 258  
43 0 22 279 121 378 2.60E-130 473 6573 cellular

organisms;Eukaryota;Opisthokonta;Metazoa;Eumetazoa;Bilateria;Protostomia;Spiralia;Lophotrochozoa;Mollusca;Bivalvia;Autobranchia;Pteriomorphia;Pectinida;Pectinoidea;Pectinidae;Mizuhopecten;Mizuhopecten yessoensis

UdeM00000035797 37653 224.9 UdeM00000035797 XP\_014789154.1 78.4 134  
23 2 1 134 1 128 1.10E-55 224.9 37653 cellular

organisms;Eukaryota;Opisthokonta;Metazoa;Eumetazoa;Bilateria;Protostomia;Spiralia;Lophotrochozoa;Mollusca;Cephalopoda;Coleoidea;Octopodiformes;Octopoda;Incirrata;Octopodidae;Octopus;Octopus bimaculoides

UdeM00000035798 6565 86.3 UdeM00000035798 XP\_022297447.1 28 250  
73 6 1 143 117 366 3.60E-14 86.3 6565 cellular

organisms;Eukaryota;Opisthokonta;Metazoa;Eumetazoa;Bilateria;Protostomia;Spiralia;Lophotrochozoa;Mollusca;Bivalvia;Autobranchia;Pteriomorphia;Ostreida;Ostreoidea;Ostreidae;Crassostrea;Crassostrea virginica

UdeM00000035799 151771 74.3 UdeM00000035799 XP\_028408207.1 39.5  
114 68 1 89 202 168 280 2.00E-10 74.3 151771  
cellular

organisms;Eukaryota;Opisthokonta;Metazoa;Eumetazoa;Cnidaria;Anthozoa;Octocorallia;Alcyonacea;Alcyoniina;Nephtheidae;Dendronephthya;Dendronephthya gigantea

UdeM00000035800 225164 318.9 UdeM00000035800 XP\_009051441.1 88.3  
180 20 1 1 179 1 180 4.00E-84 318.9 225164  
cellular

organisms;Eukaryota;Opisthokonta;Metazoa;Eumetazoa;Bilateria;Protostomia;Spiralia;Lophotrochozoa;Mollusca;Gastropoda;Patellogastropoda;Lottioidae;Lottiidae;Lottia;Lottia gigantea

UdeM00000035801 6579 380.2 UdeM00000035801 XP\_033751567.1 49 433  
200 8 88 516 79 494 4.30E-102 380.2 6579 cellular

organisms;Eukaryota;Opisthokonta;Metazoa;Eumetazoa;Bilateria;Protostomia;Spiralia;Lophotrochozoa;Mollusca;Bivalvia;Autobranchia;Pteriomorphia;Pectinida;Pectinoidea;Pectinidae;Pecten;Pecten maximus

UdeM00000035802 29159 321.2 UdeM00000035802 XP\_034326432.1 53 283  
 132 1 1 282 1 283 1.30E-84 321.2 29159 cellular  
 organisms;Eukaryota;Opisthokonta;Metazoa;Eumetazoa;Bilateria;Protostomia;  
 Spiralia;Lophotrochozoa;Mollusca;Bivalvia;Autobranchia;Pteriomorpha;Ostr  
 eida;Ostreoidea;Ostreidae;Crassostrea;Crassostrea gigas  
 UdeM00000035803 6573 424.9 UdeM00000035803 XP\_021345180.1 71.2 306  
 80 5 11 315 411 709 9.20E-116 424.9 6573 cellular  
 organisms;Eukaryota;Opisthokonta;Metazoa;Eumetazoa;Bilateria;Protostomia;  
 Spiralia;Lophotrochozoa;Mollusca;Bivalvia;Autobranchia;Pteriomorpha;Pect  
 inida;Pectinoidea;Pectinidae;Mizuhopecten;Mizuhopecten yessoensis  
 UdeM00000035804 6596 304.3 UdeM00000035804 XP\_045175852.1 88 166  
 19 1 22 186 215 380 1.10E-79 304.3 6596 cellular  
 organisms;Eukaryota;Opisthokonta;Metazoa;Eumetazoa;Bilateria;Protostomia;  
 Spiralia;Lophotrochozoa;Mollusca;Bivalvia;Autobranchia;Heteroconchia;Euhe  
 terodonta;Imparidentia;Venerida;Veneroidea;Veneridae;Mercenaria;Mercenari  
 a mercenaria  
 UdeM00000035805 6596 182.2 UdeM00000035805 XP\_045175852.1 86.7 105  
 11 1 38 142 79 180 5.20E-43 182.2 6596 cellular  
 organisms;Eukaryota;Opisthokonta;Metazoa;Eumetazoa;Bilateria;Protostomia;  
 Spiralia;Lophotrochozoa;Mollusca;Bivalvia;Autobranchia;Heteroconchia;Euhe  
 terodonta;Imparidentia;Venerida;Veneroidea;Veneridae;Mercenaria;Mercenari  
 a mercenaria  
 UdeM00000035806 1735272 427.9 UdeM00000035806 XP\_041366024.1 63.8  
 329 116 2 6 334 8 333 1.20E-116 427.9 1735272  
 cellular  
 organisms;Eukaryota;Opisthokonta;Metazoa;Eumetazoa;Bilateria;Protostomia;  
 Spiralia;Lophotrochozoa;Mollusca;Gastropoda;Neomphalina;Neomphaloidea;Pel  
 tospiridae;Gigantopelta;Gigantopelta aegis  
 UdeM00000035807 7574 143.3 UdeM00000035807 XP\_013412072.1 33.6 247  
 155 5 1 240 20 264 8.40E-31 143.3 7574 cellular  
 organisms;Eukaryota;Opisthokonta;Metazoa;Eumetazoa;Bilateria;Protostomia;  
 Spiralia;Lophotrochozoa;Brachiopoda;Linguliformea;Lingulata;Lingulida;Lin  
 guloidea;Lingulidae;Lingula;Lingula anatina  
 UdeM00000035808 29159 552 UdeM00000035808 XP\_011439211.1 57.2 449  
 132 1 56 504 40 428 8.00E-154 552 29159 cellular  
 organisms;Eukaryota;Opisthokonta;Metazoa;Eumetazoa;Bilateria;Protostomia;  
 Spiralia;Lophotrochozoa;Mollusca;Bivalvia;Autobranchia;Pteriomorpha;Ostr  
 eida;Ostreoidea;Ostreidae;Crassostrea;Crassostrea gigas  
 UdeM00000035809 6596 323.2 UdeM00000035809 XP\_045174193.1 42 545  
 293 9 1 526 1 541 8.20E-85 323.2 6596 cellular  
 organisms;Eukaryota;Opisthokonta;Metazoa;Eumetazoa;Bilateria;Protostomia;  
 Spiralia;Lophotrochozoa;Mollusca;Bivalvia;Autobranchia;Heteroconchia;Euhe  
 terodonta;Imparidentia;Venerida;Veneroidea;Veneridae;Mercenaria;Mercenari  
 a mercenaria  
 UdeM00000035810 6596 276.9 UdeM00000035810 XP\_045174999.1 82.4 165  
 29 0 1 165 1 165 1.60E-71 276.9 6596 cellular  
 organisms;Eukaryota;Opisthokonta;Metazoa;Eumetazoa;Bilateria;Protostomia;  
 Spiralia;Lophotrochozoa;Mollusca;Bivalvia;Autobranchia;Heteroconchia;Euhe  
 terodonta;Imparidentia;Venerida;Veneroidea;Veneridae;Mercenaria;Mercenari  
 a mercenaria  
 UdeM00000035811 6596 269.2 UdeM00000035811 XP\_045174999.1 78.6 173  
 29 1 1 173 1 165 3.60E-69 269.2 6596 cellular  
 organisms;Eukaryota;Opisthokonta;Metazoa;Eumetazoa;Bilateria;Protostomia;  
 Spiralia;Lophotrochozoa;Mollusca;Bivalvia;Autobranchia;Heteroconchia;Euhe

terodonta;Imparidentia;Venerida;Veneroidea;Veneridae;Mercenaria;Mercenaria mercenaria

|                 |      |        |   |                 |                |      |     |          |        |      |
|-----------------|------|--------|---|-----------------|----------------|------|-----|----------|--------|------|
| UdeM00000035812 | 6596 | 1491.9 |   | UdeM00000035812 | XP_045174733.1 | 83.7 |     |          |        |      |
|                 | 860  | 139    | 1 | 1               | 859            | 1    | 860 | 0.00E+00 | 1491.9 | 6596 |

cellular

organisms;Eukaryota;Opisthokonta;Metazoa;Eumetazoa;Bilateria;Protostomia;Spiralia;Lophotrochozoa;Mollusca;Bivalvia;Autobranchia;Heteroconchia;Euherodonta;Imparidentia;Venerida;Veneroidea;Veneridae;Mercenaria;Mercenaria mercenaria

|                 |         |    |      |                 |                |      |     |          |      |         |
|-----------------|---------|----|------|-----------------|----------------|------|-----|----------|------|---------|
| UdeM00000035814 | 1735272 |    | 89.4 | UdeM00000035814 | XP_041361655.1 | 41.7 |     |          |      |         |
|                 | 96      | 55 | 1    | 6               | 100            | 796  | 891 | 3.20E-15 | 89.4 | 1735272 |

cellular

organisms;Eukaryota;Opisthokonta;Metazoa;Eumetazoa;Bilateria;Protostomia;Spiralia;Lophotrochozoa;Mollusca;Gastropoda;Neomphalina;Neomphaloidea;Peltospiridae;Gigantopelta;Gigantopelta aegis

|                 |      |        |    |                 |                |     |      |          |        |      |
|-----------------|------|--------|----|-----------------|----------------|-----|------|----------|--------|------|
| UdeM00000035816 | 6596 | 1078.2 |    | UdeM00000035816 | XP_045175461.1 | 49  |      |          |        |      |
|                 | 1289 | 591    | 18 | 9               | 1248           | 104 | 1374 | 0.00E+00 | 1078.2 | 6596 |

cellular

organisms;Eukaryota;Opisthokonta;Metazoa;Eumetazoa;Bilateria;Protostomia;Spiralia;Lophotrochozoa;Mollusca;Bivalvia;Autobranchia;Heteroconchia;Euherodonta;Imparidentia;Venerida;Veneroidea;Veneridae;Mercenaria;Mercenaria mercenaria

|                 |      |       |     |                 |                |      |           |       |      |          |
|-----------------|------|-------|-----|-----------------|----------------|------|-----------|-------|------|----------|
| UdeM00000035817 | 6573 | 489.6 |     | UdeM00000035817 | XP_021338906.1 | 32.4 | 1039      |       |      |          |
|                 | 593  | 23    | 236 | 1249            | 105            | 1059 | 1.20E-134 | 489.6 | 6573 | cellular |

organisms;Eukaryota;Opisthokonta;Metazoa;Eumetazoa;Bilateria;Protostomia;Spiralia;Lophotrochozoa;Mollusca;Bivalvia;Autobranchia;Pteriomorphia;Pectinida;Pectinoidea;Pectinidae;Mizuhopecten;Mizuhopecten yessoensis

|                 |      |        |   |                 |                |      |     |          |        |      |
|-----------------|------|--------|---|-----------------|----------------|------|-----|----------|--------|------|
| UdeM00000035818 | 6596 | 1529.2 |   | UdeM00000035818 | XP_045177108.1 | 78.9 |     |          |        |      |
|                 | 1007 | 160    | 5 | 1               | 1005           | 1    | 957 | 0.00E+00 | 1529.2 | 6596 |

cellular

organisms;Eukaryota;Opisthokonta;Metazoa;Eumetazoa;Bilateria;Protostomia;Spiralia;Lophotrochozoa;Mollusca;Bivalvia;Autobranchia;Heteroconchia;Euherodonta;Imparidentia;Venerida;Veneroidea;Veneridae;Mercenaria;Mercenaria mercenaria

|                 |      |       |   |                 |                |      |          |       |      |          |
|-----------------|------|-------|---|-----------------|----------------|------|----------|-------|------|----------|
| UdeM00000035819 | 6596 | 128.6 |   | UdeM00000035819 | XP_045175364.1 | 45.3 | 179      |       |      |          |
|                 | 77   | 7     | 2 | 160             | 16             | 193  | 1.00E-26 | 128.6 | 6596 | cellular |

organisms;Eukaryota;Opisthokonta;Metazoa;Eumetazoa;Bilateria;Protostomia;Spiralia;Lophotrochozoa;Mollusca;Bivalvia;Autobranchia;Heteroconchia;Euherodonta;Imparidentia;Venerida;Veneroidea;Veneridae;Mercenaria;Mercenaria mercenaria

|                 |      |      |    |                 |                |      |          |      |      |          |
|-----------------|------|------|----|-----------------|----------------|------|----------|------|------|----------|
| UdeM00000035820 | 6596 | 1993 |    | UdeM00000035820 | XP_045175364.1 | 59.5 | 1724     |      |      |          |
|                 | 636  | 17   | 11 | 1715            | 222            | 1901 | 0.00E+00 | 1993 | 6596 | cellular |

organisms;Eukaryota;Opisthokonta;Metazoa;Eumetazoa;Bilateria;Protostomia;Spiralia;Lophotrochozoa;Mollusca;Bivalvia;Autobranchia;Heteroconchia;Euherodonta;Imparidentia;Venerida;Veneroidea;Veneridae;Mercenaria;Mercenaria mercenaria

|                 |      |       |    |                 |                |      |          |       |      |          |
|-----------------|------|-------|----|-----------------|----------------|------|----------|-------|------|----------|
| UdeM00000035821 | 6596 | 260.8 |    | UdeM00000035821 | XP_045174591.1 | 56.1 | 221      |       |      |          |
|                 | 94   | 2     | 60 | 278             | 29             | 248  | 2.50E-66 | 260.8 | 6596 | cellular |

organisms;Eukaryota;Opisthokonta;Metazoa;Eumetazoa;Bilateria;Protostomia;Spiralia;Lophotrochozoa;Mollusca;Bivalvia;Autobranchia;Heteroconchia;Euherodonta;Imparidentia;Venerida;Veneroidea;Veneridae;Mercenaria;Mercenaria mercenaria

|                 |      |       |     |                 |                |     |          |       |      |          |
|-----------------|------|-------|-----|-----------------|----------------|-----|----------|-------|------|----------|
| UdeM00000035822 | 6596 | 271.6 |     | UdeM00000035822 | XP_045210738.1 | 38  | 374      |       |      |          |
|                 | 224  | 4     | 284 | 651             | 14             | 385 | 2.80E-69 | 271.6 | 6596 | cellular |

organisms;Eukaryota;Opisthokonta;Metazoa;Eumetazoa;Bilateria;Protostomia;Spiralia;Lophotrochozoa;Mollusca;Bivalvia;Autobranchia;Heteroconchia;Euheterodonta;Imparidentia;Venerida;Veneroidea;Veneridae;Mercenaria;Mercenaria mercenaria

UdeM00000035823 6579 126.7 UdeM00000035823 XP\_033755738.1 48.9 135  
66 1 579 710 5 139 1.20E-25 126.7 6579 cellular

organisms;Eukaryota;Opisthokonta;Metazoa;Eumetazoa;Bilateria;Protostomia;Spiralia;Lophotrochozoa;Mollusca;Bivalvia;Autobranchia;Pteriormorphia;Pectinida;Pectinoidea;Pectinidae;Pecten;Pecten maximus

UdeM00000035824 6579 659.1 UdeM00000035824 XP\_033752286.1 54.5 598  
266 3 17 608 10 607 5.60E-186 659.1 6579 cellular

organisms;Eukaryota;Opisthokonta;Metazoa;Eumetazoa;Bilateria;Protostomia;Spiralia;Lophotrochozoa;Mollusca;Bivalvia;Autobranchia;Pteriormorphia;Pectinida;Pectinoidea;Pectinidae;Pecten;Pecten maximus

UdeM00000035825 6579 729.6 UdeM00000035825 XP\_033751751.1 67.1 560  
183 1 207 766 186 744 4.20E-207 729.6 6579 cellular

organisms;Eukaryota;Opisthokonta;Metazoa;Eumetazoa;Bilateria;Protostomia;Spiralia;Lophotrochozoa;Mollusca;Bivalvia;Autobranchia;Pteriormorphia;Pectinida;Pectinoidea;Pectinidae;Pecten;Pecten maximus

UdeM00000035827 7962 63.2 UdeM00000035827 XP\_042630649.1 30.4 148  
89 4 12 154 396 534 4.20E-07 63.2 7962 cellular

organisms;Eukaryota;Opisthokonta;Metazoa;Eumetazoa;Bilateria;Deuterostomia;Chordata;Craniata;Vertebrata;Gnathostomata;Teleostomi;Euteleostomi;Actinopterygii;Actinopteri;Neopterygii;Teleostei;Osteoglossocephalai;Clupeocephala;Otomorpha;Ostariophysi;Otophysi;Cypriniphysae;Cypriniiformes;Cyprinidae;Cyprininae;Cyprinus;Cyprinus carpio

UdeM00000035830 6596 589.7 UdeM00000035830 XP\_045175481.1 55 520  
202 5 18 532 12 504 3.90E-165 589.7 6596 cellular

organisms;Eukaryota;Opisthokonta;Metazoa;Eumetazoa;Bilateria;Protostomia;Spiralia;Lophotrochozoa;Mollusca;Bivalvia;Autobranchia;Heteroconchia;Euheterodonta;Imparidentia;Venerida;Veneroidea;Veneridae;Mercenaria;Mercenaria mercenaria

UdeM00000035832 6596 542.7 UdeM00000035832 XP\_045175481.1 59 422  
171 2 1 421 35 455 4.10E-151 542.7 6596 cellular

organisms;Eukaryota;Opisthokonta;Metazoa;Eumetazoa;Bilateria;Protostomia;Spiralia;Lophotrochozoa;Mollusca;Bivalvia;Autobranchia;Heteroconchia;Euheterodonta;Imparidentia;Venerida;Veneroidea;Veneridae;Mercenaria;Mercenaria mercenaria

UdeM00000035834 6596 575.1 UdeM00000035834 XP\_045175481.1 59.5 449  
176 3 1 444 35 482 1.00E-160 575.1 6596 cellular

organisms;Eukaryota;Opisthokonta;Metazoa;Eumetazoa;Bilateria;Protostomia;Spiralia;Lophotrochozoa;Mollusca;Bivalvia;Autobranchia;Heteroconchia;Euheterodonta;Imparidentia;Venerida;Veneroidea;Veneridae;Mercenaria;Mercenaria mercenaria

UdeM00000035835 6596 207.2 UdeM00000035835 XP\_045175481.1 71.2 139  
39 1 1 139 35 172 1.50E-50 207.2 6596 cellular

organisms;Eukaryota;Opisthokonta;Metazoa;Eumetazoa;Bilateria;Protostomia;Spiralia;Lophotrochozoa;Mollusca;Bivalvia;Autobranchia;Heteroconchia;Euheterodonta;Imparidentia;Venerida;Veneroidea;Veneridae;Mercenaria;Mercenaria mercenaria

UdeM00000035837 6596 256.1 UdeM00000035837 XP\_045183440.1 52.9 240  
108 3 2 240 145 380 5.40E-65 256.1 6596 cellular

organisms;Eukaryota;Opisthokonta;Metazoa;Eumetazoa;Bilateria;Protostomia;Spiralia;Lophotrochozoa;Mollusca;Bivalvia;Autobranchia;Heteroconchia;Euheterodonta;Imparidentia;Venerida;Veneroidea;Veneridae;Mercenaria;Mercenaria mercenaria



terodonta;Imparidentia;Venerida;Veneroidea;Veneridae;Mercenaria;Mercenaria mercenaria  
 UdeM00000035838 6596 357.1 UdeM00000035838 XP\_045175481.1 51.7 325  
 145 3 2 321 187 504 3.20E-95 357.1 6596 cellular  
 organisms;Eukaryota;Opisthokonta;Metazoa;Eumetazoa;Bilateria;Protostomia;  
 Spiralia;Lophotrochozoa;Mollusca;Bivalvia;Autobranhia;Heteroconchia;Euhe  
 terodonta;Imparidentia;Venerida;Veneroidea;Veneridae;Mercenaria;Mercenari  
 a mercenaria  
 UdeM00000035840 10228 63.5 UdeM00000035840 XP\_002118407.1 26.9 160  
 101 6 270 427 462 607 7.30E-07 63.5 10228 cellular  
 organisms;Eukaryota;Opisthokonta;Metazoa;Eumetazoa;Placozoa;Trichoplacida  
 e;Trichoplax;Trichoplax adhaerens  
 UdeM00000035842 6596 580.1 UdeM00000035842 XP\_045175481.1 60.1 449  
 173 3 1 444 35 482 3.00E-162 580.1 6596 cellular  
 organisms;Eukaryota;Opisthokonta;Metazoa;Eumetazoa;Bilateria;Protostomia;  
 Spiralia;Lophotrochozoa;Mollusca;Bivalvia;Autobranhia;Heteroconchia;Euhe  
 terodonta;Imparidentia;Venerida;Veneroidea;Veneridae;Mercenaria;Mercenari  
 a mercenaria  
 UdeM00000035843 6596 184.1 UdeM00000035843 XP\_045175481.1 70.4 125  
 37 0 22 146 16 140 1.40E-43 184.1 6596 cellular  
 organisms;Eukaryota;Opisthokonta;Metazoa;Eumetazoa;Bilateria;Protostomia;  
 Spiralia;Lophotrochozoa;Mollusca;Bivalvia;Autobranhia;Heteroconchia;Euhe  
 terodonta;Imparidentia;Venerida;Veneroidea;Veneridae;Mercenaria;Mercenari  
 a mercenaria  
 UdeM00000035844 6596 417.5 UdeM00000035844 XP\_045175481.1 53.9 347  
 154 3 7 348 137 482 2.20E-113 417.5 6596 cellular  
 organisms;Eukaryota;Opisthokonta;Metazoa;Eumetazoa;Bilateria;Protostomia;  
 Spiralia;Lophotrochozoa;Mollusca;Bivalvia;Autobranhia;Heteroconchia;Euhe  
 terodonta;Imparidentia;Venerida;Veneroidea;Veneridae;Mercenaria;Mercenari  
 a mercenaria  
 UdeM00000035845 6596 562.4 UdeM00000035845 XP\_045175481.1 57.5 449  
 185 3 1 444 35 482 6.70E-157 562.4 6596 cellular  
 organisms;Eukaryota;Opisthokonta;Metazoa;Eumetazoa;Bilateria;Protostomia;  
 Spiralia;Lophotrochozoa;Mollusca;Bivalvia;Autobranhia;Heteroconchia;Euhe  
 terodonta;Imparidentia;Venerida;Veneroidea;Veneridae;Mercenaria;Mercenari  
 a mercenaria  
 UdeM00000035847 6596 231.5 UdeM00000035847 XP\_045206316.1 52 221  
 105 1 45 264 84 304 1.50E-57 231.5 6596 cellular  
 organisms;Eukaryota;Opisthokonta;Metazoa;Eumetazoa;Bilateria;Protostomia;  
 Spiralia;Lophotrochozoa;Mollusca;Bivalvia;Autobranhia;Heteroconchia;Euhe  
 terodonta;Imparidentia;Venerida;Veneroidea;Veneridae;Mercenaria;Mercenari  
 a mercenaria  
 UdeM00000035848 225164 104.4 UdeM00000035848 XP\_009058199.1 47.8  
 113 52 2 1 113 1 106 9.90E-20 104.4 225164  
 cellular  
 organisms;Eukaryota;Opisthokonta;Metazoa;Eumetazoa;Bilateria;Protostomia;  
 Spiralia;Lophotrochozoa;Mollusca;Gastropoda;Patellogastropoda;Lottiioidea;  
 Lottiidae;Lottia;Lottia gigantea  
 UdeM00000035849 6573 94 UdeM00000035849 XP\_021367843.1 51.2 86  
 40 1 68 153 328 411 1.80E-16 94 6573 cellular  
 organisms;Eukaryota;Opisthokonta;Metazoa;Eumetazoa;Bilateria;Protostomia;  
 Spiralia;Lophotrochozoa;Mollusca;Bivalvia;Autobranhia;Pteriomorphia;Pect  
 inida;Pectinoidea;Pectinidae;Mizuhopecten;Mizuhopecten yessoensis

UdeM00000035850 6579 172.9 UdeM00000035850 XP\_033752673.1 69 113  
 35 0 21 133 540 652 2.70E-40 172.9 6579 cellular  
 organisms;Eukaryota;Opisthokonta;Metazoa;Eumetazoa;Bilateria;Protostomia;  
 Spiralia;Lophotrochozoa;Mollusca;Bivalvia;Autobranchia;Pteriomorphia;Pect  
 inida;Pectinoidea;Pectinidae;Pecten;Pecten maximus  
 UdeM00000035851 8240 94 UdeM00000035851 XP\_042258728.1 29 231  
 67 4 1 134 77 307 1.60E-16 94 8240 cellular  
 organisms;Eukaryota;Opisthokonta;Metazoa;Eumetazoa;Bilateria;Deuterostomi  
 a;Chordata;Craniata;Vertebrata;Gnathostomata;Teleostomi;Euteleostomi;Acti  
 nopterygii;Actinopteri;Neopterygii;Teleostei;Osteoglossocephalai;Clupeoce  
 phala;Euteleosteomorpha;Neoteleostei;Eurypterygia;Ctenosquamata;Acanthomo  
 rphata;Euacanthomorphacea;Percomorphaceae;Pelagiaria;Scombriformes;Scombr  
 idae;Scombrinae;Thunnini;Thunnus;Thunnus maccoyii  
 UdeM00000035852 225164 58.5 UdeM00000035852 XP\_009058200.1 47.8  
 67 35 0 1 67 1 67 3.70E-06 58.5 225164  
 cellular  
 organisms;Eukaryota;Opisthokonta;Metazoa;Eumetazoa;Bilateria;Protostomia;  
 Spiralia;Lophotrochozoa;Mollusca;Gastropoda;Patellogastropoda;Lottioidea;  
 Lottiidae;Lottia;Lottia gigantea  
 UdeM00000035853 6596 584.3 UdeM00000035853 XP\_045175481.1 54.3 501  
 218 4 26 516 16 515 1.80E-163 584.3 6596 cellular  
 organisms;Eukaryota;Opisthokonta;Metazoa;Eumetazoa;Bilateria;Protostomia;  
 Spiralia;Lophotrochozoa;Mollusca;Bivalvia;Autobranchia;Heteroconchia;Euhe  
 terodonta;Imparidentia;Venerida;Veneroidea;Veneridae;Mercenaria;Mercenari  
 a mercenaria  
 UdeM00000035854 6573 73.9 UdeM00000035854 XP\_021365625.1 51.4 70  
 34 0 6 75 57 126 2.40E-10 73.9 6573 cellular  
 organisms;Eukaryota;Opisthokonta;Metazoa;Eumetazoa;Bilateria;Protostomia;  
 Spiralia;Lophotrochozoa;Mollusca;Bivalvia;Autobranchia;Pteriomorphia;Pect  
 inida;Pectinoidea;Pectinidae;Mizuhopecten;Mizuhopecten yessoensis  
 UdeM00000035855 6596 573.5 UdeM00000035855 XP\_045174432.1 61.3 452  
 162 6 1 445 1 446 2.30E-160 573.5 6596 cellular  
 organisms;Eukaryota;Opisthokonta;Metazoa;Eumetazoa;Bilateria;Protostomia;  
 Spiralia;Lophotrochozoa;Mollusca;Bivalvia;Autobranchia;Heteroconchia;Euhe  
 terodonta;Imparidentia;Venerida;Veneroidea;Veneridae;Mercenaria;Mercenari  
 a mercenaria  
 UdeM00000035857 29159 181.8 UdeM00000035857 XP\_011415663.1 60.1 138  
 55 0 2 139 5 142 6.20E-43 181.8 29159 cellular  
 organisms;Eukaryota;Opisthokonta;Metazoa;Eumetazoa;Bilateria;Protostomia;  
 Spiralia;Lophotrochozoa;Mollusca;Bivalvia;Autobranchia;Pteriomorphia;Ostr  
 eida;Ostreoidea;Ostreidae;Crassostrea;Crassostrea gigas  
 UdeM00000035856 29159 174.5 UdeM00000035856 XP\_011415663.1 62.6 131  
 49 0 2 132 5 135 1.90E-40 174.5 29159 cellular  
 organisms;Eukaryota;Opisthokonta;Metazoa;Eumetazoa;Bilateria;Protostomia;  
 Spiralia;Lophotrochozoa;Mollusca;Bivalvia;Autobranchia;Pteriomorphia;Ostr  
 eida;Ostreoidea;Ostreidae;Crassostrea;Crassostrea gigas  
 UdeM00000035858 6573 198 UdeM00000035858 XP\_021350368.1 53.9 191  
 71 3 124 303 101 285 1.80E-47 198 6573 cellular  
 organisms;Eukaryota;Opisthokonta;Metazoa;Eumetazoa;Bilateria;Protostomia;  
 Spiralia;Lophotrochozoa;Mollusca;Bivalvia;Autobranchia;Pteriomorphia;Pect  
 inida;Pectinoidea;Pectinidae;Mizuhopecten;Mizuhopecten yessoensis  
 UdeM00000035860 6596 338.6 UdeM00000035860 XP\_045176648.1 57.5 266  
 107 3 11 271 250 514 7.50E-90 338.6 6596 cellular  
 organisms;Eukaryota;Opisthokonta;Metazoa;Eumetazoa;Bilateria;Protostomia;

Spiralia;Lophotrochozoa;Mollusca;Bivalvia;Autobranchia;Heteroconchia;Euherodonta;Imparidentia;Venerida;Veneroidea;Veneridae;Mercenaria;Mercenaria mercenaria

UdeM00000035859 6596 667.2 UdeM00000035859 XP\_045176648.1 61.9 496  
182 4 19 508 20 514 1.70E-188 667.2 6596 cellular

organisms;Eukaryota;Opisthokonta;Metazoa;Eumetazoa;Bilateria;Protostomia;Spiralia;Lophotrochozoa;Mollusca;Bivalvia;Autobranchia;Heteroconchia;Euherodonta;Imparidentia;Venerida;Veneroidea;Veneridae;Mercenaria;Mercenaria mercenaria

UdeM00000035861 6596 336.3 UdeM00000035861 XP\_045176648.1 66 235  
79 1 19 252 20 254 3.50E-89 336.3 6596 cellular

organisms;Eukaryota;Opisthokonta;Metazoa;Eumetazoa;Bilateria;Protostomia;Spiralia;Lophotrochozoa;Mollusca;Bivalvia;Autobranchia;Heteroconchia;Euherodonta;Imparidentia;Venerida;Veneroidea;Veneridae;Mercenaria;Mercenaria mercenaria

UdeM00000035862 37003 83.6 UdeM00000035862 XP\_017280886.1 36 139  
69 5 22 151 24 151 2.40E-13 83.6 37003 cellular

organisms;Eukaryota;Opisthokonta;Metazoa;Eumetazoa;Bilateria;Deuterostomia;Chordata;Craniata;Vertebrata;Gnathostomata;Teleostomi;Euteleostomi;Actinopterygii;Actinopteri;Neopterygii;Teleostei;Osteoglossocephalai;Clupeocephala;Euteleostei;Neoteleostei;Eurypterygia;Ctenosquamata;Acanthomorphata;Euacanthomorphacea;Percomorphaceae;Ovalentaria;Atherinomorphae;Cypriodontiformes;Aplocheiloidei;Rivulidae;Kryptolebias;Kryptolebias

marmoratus

UdeM00000035863 1735272 358.2 UdeM00000035863 XP\_041367842.1 61.1  
285 106 2 1 280 2 286 9.40E-96 358.2 1735272

cellular

organisms;Eukaryota;Opisthokonta;Metazoa;Eumetazoa;Bilateria;Protostomia;Spiralia;Lophotrochozoa;Mollusca;Gastropoda;Neomphalina;Neomphaloidea;Peltospiridae;Gigantopelta;Gigantopelta aegis

UdeM00000035865 6565 324.7 UdeM00000035865 XP\_022341462.1 46 378  
176 8 131 481 61 437 2.00E-85 324.7 6565 cellular

organisms;Eukaryota;Opisthokonta;Metazoa;Eumetazoa;Bilateria;Protostomia;Spiralia;Lophotrochozoa;Mollusca;Bivalvia;Autobranchia;Pteriomorphia;Ostreida;Ostreoidea;Ostreidae;Crassostrea;Crassostrea virginica

UdeM00000035864 6565 401 UdeM00000035864 XP\_022341462.1 45.8 454  
217 9 131 557 61 512 2.50E-108 401 6565 cellular

organisms;Eukaryota;Opisthokonta;Metazoa;Eumetazoa;Bilateria;Protostomia;Spiralia;Lophotrochozoa;Mollusca;Bivalvia;Autobranchia;Pteriomorphia;Ostreida;Ostreoidea;Ostreidae;Crassostrea;Crassostrea virginica

UdeM00000035866 6596 535.8 UdeM00000035866 XP\_045176645.1 65.7 686  
210 9 12 685 10 682 9.90E-149 535.8 6596 cellular

organisms;Eukaryota;Opisthokonta;Metazoa;Eumetazoa;Bilateria;Protostomia;Spiralia;Lophotrochozoa;Mollusca;Bivalvia;Autobranchia;Heteroconchia;Euherodonta;Imparidentia;Venerida;Veneroidea;Veneridae;Mercenaria;Mercenaria mercenaria

UdeM00000035867 6579 478.8 UdeM00000035867 XP\_033752152.1 64.1 373  
125 2 1 364 7 379 1.20E-131 478.8 6579 cellular

organisms;Eukaryota;Opisthokonta;Metazoa;Eumetazoa;Bilateria;Protostomia;Spiralia;Lophotrochozoa;Mollusca;Bivalvia;Autobranchia;Pteriomorphia;Pectinida;Pectinoidea;Pectinidae;Pecten;Pecten maximus

UdeM00000035868 6579 430.3 UdeM00000035868 XP\_033752155.1 41.5 557  
303 10 10 552 14 561 3.80E-117 430.3 6579 cellular

organisms;Eukaryota;Opisthokonta;Metazoa;Eumetazoa;Bilateria;Protostomia;

Spiralia;Lophotrochozoa;Mollusca;Bivalvia;Autobranchia;Pteriomorphia;Pectinida;Pectinoidea;Pectinidae;Pecten;Pecten maximus

UdeM00000035869 1735272 183 UdeM00000035869 XP\_041366416.1 30.8  
698 397 26 1150 1789 1097 1766 3.40E-42 183 1735272  
cellular

organisms;Eukaryota;Opisthokonta;Metazoa;Eumetazoa;Bilateria;Protostomia;Spiralia;Lophotrochozoa;Mollusca;Gastropoda;Neomphalina;Neomphaloidea;Peltospiridae;Gigantopelta;Gigantopelta aegis

UdeM00000035870 6596 135.6 UdeM00000035870 XP\_045176402.1 57.3 117  
48 1 3 117 13 129 4.20E-29 135.6 6596 cellular

organisms;Eukaryota;Opisthokonta;Metazoa;Eumetazoa;Bilateria;Protostomia;Spiralia;Lophotrochozoa;Mollusca;Bivalvia;Autobranchia;Heteroconchia;Euherodonta;Imparidentia;Venerida;Veneroidea;Veneridae;Mercenaria;Mercenaria mercenaria

UdeM00000035871 7574 288.5 UdeM00000035871 XP\_013414514.1 72.1 183  
51 0 37 219 19 201 7.20E-75 288.5 7574 cellular

organisms;Eukaryota;Opisthokonta;Metazoa;Eumetazoa;Bilateria;Protostomia;Spiralia;Lophotrochozoa;Brachiopoda;Linguliformea;Lingulata;Lingulida;Linguloidea;Lingulidae;Lingula;Lingula anatina

UdeM00000035872 6596 508.1 UdeM00000035872 XP\_045175049.1 66.8 482  
137 6 1 475 3 468 1.70E-140 508.1 6596 cellular

organisms;Eukaryota;Opisthokonta;Metazoa;Eumetazoa;Bilateria;Protostomia;Spiralia;Lophotrochozoa;Mollusca;Bivalvia;Autobranchia;Heteroconchia;Euherodonta;Imparidentia;Venerida;Veneroidea;Veneridae;Mercenaria;Mercenaria mercenaria

UdeM00000035873 6596 504.6 UdeM00000035873 XP\_045175049.1 67.4 469  
131 5 1 462 15 468 1.90E-139 504.6 6596 cellular

organisms;Eukaryota;Opisthokonta;Metazoa;Eumetazoa;Bilateria;Protostomia;Spiralia;Lophotrochozoa;Mollusca;Bivalvia;Autobranchia;Heteroconchia;Euherodonta;Imparidentia;Venerida;Veneroidea;Veneridae;Mercenaria;Mercenaria mercenaria

UdeM00000035874 6573 533.9 UdeM00000035874 XP\_021347864.1 64.2 430  
139 6 1 419 1 426 1.90E-148 533.9 6573 cellular

organisms;Eukaryota;Opisthokonta;Metazoa;Eumetazoa;Bilateria;Protostomia;Spiralia;Lophotrochozoa;Mollusca;Bivalvia;Autobranchia;Pteriomorphia;Pectinida;Pectinoidea;Pectinidae;Mizuhopecten;Mizuhopecten yessoensis

UdeM00000035875 6596 371.7 UdeM00000035875 XP\_045175607.1 46.7 381  
201 2 1 380 31 410 1.20E-99 371.7 6596 cellular

organisms;Eukaryota;Opisthokonta;Metazoa;Eumetazoa;Bilateria;Protostomia;Spiralia;Lophotrochozoa;Mollusca;Bivalvia;Autobranchia;Heteroconchia;Euherodonta;Imparidentia;Venerida;Veneroidea;Veneridae;Mercenaria;Mercenaria mercenaria

UdeM00000035876 6596 506.1 UdeM00000035876 XP\_045176983.1 59.5 417  
145 3 6 420 8 402 4.20E-140 506.1 6596 cellular

organisms;Eukaryota;Opisthokonta;Metazoa;Eumetazoa;Bilateria;Protostomia;Spiralia;Lophotrochozoa;Mollusca;Bivalvia;Autobranchia;Heteroconchia;Euherodonta;Imparidentia;Venerida;Veneroidea;Veneridae;Mercenaria;Mercenaria mercenaria

UdeM00000035877 6596 597 UdeM00000035877 XP\_045176896.1 59.7 472  
183 3 22 490 27 494 2.10E-167 597 6596 cellular

organisms;Eukaryota;Opisthokonta;Metazoa;Eumetazoa;Bilateria;Protostomia;Spiralia;Lophotrochozoa;Mollusca;Bivalvia;Autobranchia;Heteroconchia;Euherodonta;Imparidentia;Venerida;Veneroidea;Veneridae;Mercenaria;Mercenaria mercenaria

UdeM00000035879 1735272 120.2 UdeM00000035879 XP\_041366448.1 45.5  
 156 82 2 13 165 53 208 3.20E-24 120.2 1735272  
 cellular  
 organisms;Eukaryota;Opisthokonta;Metazoa;Eumetazoa;Bilateria;Protostomia;  
 Spiralia;Lophotrochozoa;Mollusca;Gastropoda;Neomphalina;Neomphaloidea;Pel  
 tospiridae;Gigantopelta;Gigantopelta aegis  
 UdeM00000035878 1735272 122.5 UdeM00000035878 XP\_041366448.1 44  
 166 90 2 13 175 53 218 6.30E-25 122.5 1735272  
 cellular  
 organisms;Eukaryota;Opisthokonta;Metazoa;Eumetazoa;Bilateria;Protostomia;  
 Spiralia;Lophotrochozoa;Mollusca;Gastropoda;Neomphalina;Neomphaloidea;Pel  
 tospiridae;Gigantopelta;Gigantopelta aegis  
 UdeM00000035880 6596 629.8 UdeM00000035880 XP\_045175099.1 64.8 512  
 140 6 14 512 129 613 3.10E-177 629.8 6596 cellular  
 organisms;Eukaryota;Opisthokonta;Metazoa;Eumetazoa;Bilateria;Protostomia;  
 Spiralia;Lophotrochozoa;Mollusca;Bivalvia;Autobranchia;Heteroconchia;Euhe  
 terodonta;Imparidentia;Venerida;Veneroidea;Veneridae;Mercenaria;Mercenari  
 a mercenaria  
 UdeM00000035881 6573 167.2 UdeM00000035881 XP\_021345824.1 61.8 131  
 50 0 13 143 20 150 1.70E-38 167.2 6573 cellular  
 organisms;Eukaryota;Opisthokonta;Metazoa;Eumetazoa;Bilateria;Protostomia;  
 Spiralia;Lophotrochozoa;Mollusca;Bivalvia;Autobranchia;Pteriormorphia;Pect  
 inida;Pectinoidea;Pectinidae;Mizuhopecten;Mizuhopecten yessoensis  
 UdeM00000035882 6573 682.9 UdeM00000035882 XP\_021345186.1 73.9 487  
 101 11 1 474 1 474 2.80E-193 682.9 6573 cellular  
 organisms;Eukaryota;Opisthokonta;Metazoa;Eumetazoa;Bilateria;Protostomia;  
 Spiralia;Lophotrochozoa;Mollusca;Bivalvia;Autobranchia;Pteriormorphia;Pect  
 inida;Pectinoidea;Pectinidae;Mizuhopecten;Mizuhopecten yessoensis  
 UdeM00000035883 6596 528.5 UdeM00000035883 XP\_045174607.1 63 465  
 139 9 1 440 1119 1575 8.20E-147 528.5 6596 cellular  
 organisms;Eukaryota;Opisthokonta;Metazoa;Eumetazoa;Bilateria;Protostomia;  
 Spiralia;Lophotrochozoa;Mollusca;Bivalvia;Autobranchia;Heteroconchia;Euhe  
 terodonta;Imparidentia;Venerida;Veneroidea;Veneridae;Mercenaria;Mercenari  
 a mercenaria  
 UdeM00000035884 29159 340.1 UdeM00000035884 XP\_019924538.2 58.3 333  
 109 9 1 320 1195 1510 3.10E-90 340.1 29159 cellular  
 organisms;Eukaryota;Opisthokonta;Metazoa;Eumetazoa;Bilateria;Protostomia;  
 Spiralia;Lophotrochozoa;Mollusca;Bivalvia;Autobranchia;Pteriormorphia;Ostr  
 eida;Ostreoidea;Ostreidae;Crassostrea;Crassostrea gigas  
 UdeM00000035885 29159 392.1 UdeM00000035885 XP\_011433294.2 54.2 426  
 160 12 35 446 1096 1500 9.40E-106 392.1 29159 cellular  
 organisms;Eukaryota;Opisthokonta;Metazoa;Eumetazoa;Bilateria;Protostomia;  
 Spiralia;Lophotrochozoa;Mollusca;Bivalvia;Autobranchia;Pteriormorphia;Ostr  
 eida;Ostreoidea;Ostreidae;Crassostrea;Crassostrea gigas  
 UdeM00000035887 6596 64.7 UdeM00000035887 XP\_045197206.1 35.8 81  
 44 1 4 76 517 597 5.90E-08 64.7 6596 cellular  
 organisms;Eukaryota;Opisthokonta;Metazoa;Eumetazoa;Bilateria;Protostomia;  
 Spiralia;Lophotrochozoa;Mollusca;Bivalvia;Autobranchia;Heteroconchia;Euhe  
 terodonta;Imparidentia;Venerida;Veneroidea;Veneridae;Mercenaria;Mercenari  
 a mercenaria  
 UdeM00000035888 6596 84 UdeM00000035888 XP\_045174607.1 60.3 63  
 25 0 2 64 244 306 6.40E-13 84 6596 cellular  
 organisms;Eukaryota;Opisthokonta;Metazoa;Eumetazoa;Bilateria;Protostomia;  
 Spiralia;Lophotrochozoa;Mollusca;Bivalvia;Autobranchia;Heteroconchia;Euhe

terodonta;Imparidentia;Venerida;Veneroidea;Veneridae;Mercenaria;Mercenari  
 a mercenaria  
 UdeM00000035889 6596 256.1 UdeM00000035889 XP\_045174607.1 56.1 246  
 100 3 1 238 14 259 4.30E-65 256.1 6596 cellular  
 organisms;Eukaryota;Opisthokonta;Metazoa;Eumetazoa;Bilateria;Protostomia;  
 Spiralia;Lophotrochozoa;Mollusca;Bivalvia;Autobranchia;Heteroconchia;Euhe  
 terodonta;Imparidentia;Venerida;Veneroidea;Veneridae;Mercenaria;Mercenari  
 a mercenaria  
 UdeM00000035890 1735272 327 UdeM00000035890 XP\_041367128.1 69.4  
 235 66 2 177 409 5 235 3.50E-86 327 1735272  
 cellular  
 organisms;Eukaryota;Opisthokonta;Metazoa;Eumetazoa;Bilateria;Protostomia;  
 Spiralia;Lophotrochozoa;Mollusca;Gastropoda;Neomphalina;Neomphaloidea;Pel  
 tospiridae;Gigantopelta;Gigantopelta aegis  
 UdeM00000035891 6596 575.5 UdeM00000035891 XP\_045175863.1 67.8 438  
 42 3 1 434 115 457 5.80E-161 575.5 6596 cellular  
 organisms;Eukaryota;Opisthokonta;Metazoa;Eumetazoa;Bilateria;Protostomia;  
 Spiralia;Lophotrochozoa;Mollusca;Bivalvia;Autobranchia;Heteroconchia;Euhe  
 terodonta;Imparidentia;Venerida;Veneroidea;Veneridae;Mercenaria;Mercenari  
 a mercenaria  
 UdeM00000035892 1735272 100.5 UdeM00000035892 XP\_041366756.1 85.2  
 61 9 0 1 61 15 75 8.50E-19 100.5 1735272  
 cellular  
 organisms;Eukaryota;Opisthokonta;Metazoa;Eumetazoa;Bilateria;Protostomia;  
 Spiralia;Lophotrochozoa;Mollusca;Gastropoda;Neomphalina;Neomphaloidea;Pel  
 tospiridae;Gigantopelta;Gigantopelta aegis  
 UdeM00000035893 6596 226.1 UdeM00000035893 XP\_045176984.1 38.1 328  
 186 6 3 328 172 484 1.70E-55 226.1 6596 cellular  
 organisms;Eukaryota;Opisthokonta;Metazoa;Eumetazoa;Bilateria;Protostomia;  
 Spiralia;Lophotrochozoa;Mollusca;Bivalvia;Autobranchia;Heteroconchia;Euhe  
 terodonta;Imparidentia;Venerida;Veneroidea;Veneridae;Mercenaria;Mercenari  
 a mercenaria  
 UdeM00000035894 6573 112.8 UdeM00000035894 XP\_021353103.1 38.4 125  
 76 1 2 126 27 150 3.20E-22 112.8 6573 cellular  
 organisms;Eukaryota;Opisthokonta;Metazoa;Eumetazoa;Bilateria;Protostomia;  
 Spiralia;Lophotrochozoa;Mollusca;Bivalvia;Autobranchia;Pteriomorphia;Pect  
 inida;Pectinoidea;Pectinidae;Mizuhopecten;Mizuhopecten yessoensis  
 UdeM00000035895 225164 453.4 UdeM00000035895 XP\_009044713.1 39.1  
 804 352 15 15 786 549 1246 6.20E-124 453.4 225164  
 cellular  
 organisms;Eukaryota;Opisthokonta;Metazoa;Eumetazoa;Bilateria;Protostomia;  
 Spiralia;Lophotrochozoa;Mollusca;Gastropoda;Patellogastropoda;Lottioidea;  
 Lottiidae;Lottia;Lottia gigantea  
 UdeM00000035896 6596 374.4 UdeM00000035896 XP\_045161997.1 52.4 412  
 156 10 5 395 123 515 2.60E-100 374.4 6596 cellular  
 organisms;Eukaryota;Opisthokonta;Metazoa;Eumetazoa;Bilateria;Protostomia;  
 Spiralia;Lophotrochozoa;Mollusca;Bivalvia;Autobranchia;Heteroconchia;Euhe  
 terodonta;Imparidentia;Venerida;Veneroidea;Veneridae;Mercenaria;Mercenari  
 a mercenaria  
 UdeM00000035897 1735272 151.4 UdeM00000035897 XP\_041377375.1 60.2  
 113 45 0 2 114 6 118 2.10E-33 151.4 1735272  
 cellular  
 organisms;Eukaryota;Opisthokonta;Metazoa;Eumetazoa;Bilateria;Protostomia;

Spiralia; Lophotrochozoa; Mollusca; Gastropoda; Neomphalina; Neomphaloidea; Peltospiridae; Gigantopelta; Gigantopelta aegis

|                 |      |      |                 |                |      |          |
|-----------------|------|------|-----------------|----------------|------|----------|
| UdeM00000035899 | 7962 | 72.8 | UdeM00000035899 | XP_042587992.1 | 37.3 | 83       |
| 52              | 0    | 19   | 101             | 163            | 245  | 1.50E-09 |

72.8 7962 cellular organisms; Eukaryota; Opisthokonta; Metazoa; Eumetazoa; Bilateria; Deuterostomia; Chordata; Craniata; Vertebrata; Gnathostomata; Teleostomi; Euteleostomi; Actinopterygii; Actinopteri; Neopterygii; Teleostei; Osteoglossocephalai; Clupeocephala; Otomorpha; Ostariophysi; Otophysi; Cypriniphysae; Cypriniformes; Cyprinidae; Cyprininae; Cyprinus; Cyprinus carpio

|                 |         |       |                 |                |      |      |
|-----------------|---------|-------|-----------------|----------------|------|------|
| UdeM00000035898 | 1735272 | 111.7 | UdeM00000035898 | XP_041365892.1 | 38.4 |      |
| 138             | 84      | 1     | 13              | 149            | 1599 | 1736 |

4.20E-21 111.7 1735272 cellular organisms; Eukaryota; Opisthokonta; Metazoa; Eumetazoa; Bilateria; Protostomia; Spiralia; Lophotrochozoa; Mollusca; Gastropoda; Neomphalina; Neomphaloidea; Peltospiridae; Gigantopelta; Gigantopelta aegis

|                 |       |       |                 |                |     |          |
|-----------------|-------|-------|-----------------|----------------|-----|----------|
| UdeM00000035900 | 43179 | 154.8 | UdeM00000035900 | XP_040126495.1 | 40  | 200      |
| 108             | 6     | 4     | 196             | 241            | 435 | 1.10E-34 |

154.8 43179 cellular organisms; Eukaryota; Opisthokonta; Metazoa; Eumetazoa; Bilateria; Deuterostomia; Chordata; Craniata; Vertebrata; Gnathostomata; Teleostomi; Euteleostomi; Sarcopterygii; Dipnotetrapodomorpha; Tetrapoda; Amniota; Mammalia; Theria; Eutheria; Boreoeutheria; Euarchontoglires; Glires; Rodentia; Sciuromorpha; Sciuridae; Xerinae; Marmotini; Ictidomys; Ictidomys tridecemlineatus

|                 |      |       |                 |                |      |          |
|-----------------|------|-------|-----------------|----------------|------|----------|
| UdeM00000035901 | 6565 | 281.2 | UdeM00000035901 | XP_022308109.1 | 44.2 | 278      |
| 126             | 2    | 193   | 470             | 518            | 766  | 5.30E-72 |

281.2 6565 cellular organisms; Eukaryota; Opisthokonta; Metazoa; Eumetazoa; Bilateria; Protostomia; Spiralia; Lophotrochozoa; Mollusca; Bivalvia; Autobranchia; Pteriomorpha; Ostreida; Ostreioidea; Ostreidae; Crassostrea; Crassostrea virginica

|                 |      |       |                 |                |     |          |
|-----------------|------|-------|-----------------|----------------|-----|----------|
| UdeM00000035902 | 6565 | 179.9 | UdeM00000035902 | XP_022291128.1 | 54  | 161      |
| 74              | 0    | 135   | 295             | 94             | 254 | 5.20E-42 |

179.9 6565 cellular organisms; Eukaryota; Opisthokonta; Metazoa; Eumetazoa; Bilateria; Protostomia; Spiralia; Lophotrochozoa; Mollusca; Bivalvia; Autobranchia; Pteriomorpha; Ostreida; Ostreioidea; Ostreidae; Crassostrea; Crassostrea virginica

|                 |      |      |                 |                |      |          |
|-----------------|------|------|-----------------|----------------|------|----------|
| UdeM00000035903 | 6579 | 81.6 | UdeM00000035903 | XP_033752950.1 | 39.6 | 111      |
| 66              | 1    | 1    | 111             | 23             | 132  | 1.50E-12 |

81.6 6579 cellular organisms; Eukaryota; Opisthokonta; Metazoa; Eumetazoa; Bilateria; Protostomia; Spiralia; Lophotrochozoa; Mollusca; Bivalvia; Autobranchia; Pteriomorpha; Pectinida; Pectinoidea; Pectinidae; Pecten; Pecten maximus

|                 |      |      |                 |                |      |          |
|-----------------|------|------|-----------------|----------------|------|----------|
| UdeM00000035904 | 6579 | 96.7 | UdeM00000035904 | XP_033752950.1 | 40.2 | 127      |
| 75              | 1    | 9    | 135             | 7              | 132  | 4.90E-17 |

96.7 6579 cellular organisms; Eukaryota; Opisthokonta; Metazoa; Eumetazoa; Bilateria; Protostomia; Spiralia; Lophotrochozoa; Mollusca; Bivalvia; Autobranchia; Pteriomorpha; Pectinida; Pectinoidea; Pectinidae; Pecten; Pecten maximus

|                 |         |       |                 |                |      |     |
|-----------------|---------|-------|-----------------|----------------|------|-----|
| UdeM00000035905 | 2607531 | 109.8 | UdeM00000035905 | XP_029639158.1 | 38.7 |     |
| 155             | 89      | 2     | 19              | 173            | 21   | 169 |

3.60E-21 109.8 2607531 cellular organisms; Eukaryota; Opisthokonta; Metazoa; Eumetazoa; Bilateria; Protostomia; Spiralia; Lophotrochozoa; Mollusca; Cephalopoda; Coleoidea; Octopodiformes; Octopoda; Incirrata; Octopodidae; Octopus; Octopus sinensis

|                 |      |       |                 |                |      |          |
|-----------------|------|-------|-----------------|----------------|------|----------|
| UdeM00000035906 | 6596 | 202.6 | UdeM00000035906 | XP_045174743.1 | 35.4 | 826      |
| 307             | 22   | 2     | 614             | 4              | 815  | 1.50E-48 |

202.6 6596 cellular organisms; Eukaryota; Opisthokonta; Metazoa; Eumetazoa; Bilateria; Protostomia; Spiralia; Lophotrochozoa; Mollusca; Bivalvia; Autobranchia; Heteroconchia; Euheterodonta; Imparidentia; Venerida; Veneroidea; Veneridae; Mercenaria; Mercenaria mercenaria

UdeM00000035907 6596 308.1 UdeM00000035907 XP\_045175505.1 42.8 362  
 205 2 5 365 4 364 1.50E-80 308.1 6596 cellular  
 organisms;Eukaryota;Opisthokonta;Metazoa;Eumetazoa;Bilateria;Protostomia;  
 Spiralia;Lophotrochozoa;Mollusca;Bivalvia;Autobranchia;Heteroconchia;Euhe  
 terodonta;Imparidentia;Venerida;Veneroidea;Veneridae;Mercenaria;Mercenari  
 a mercenaria  
 UdeM00000035908 6596 308.1 UdeM00000035908 XP\_045175505.1 42.8 362  
 205 2 2 362 4 364 1.50E-80 308.1 6596 cellular  
 organisms;Eukaryota;Opisthokonta;Metazoa;Eumetazoa;Bilateria;Protostomia;  
 Spiralia;Lophotrochozoa;Mollusca;Bivalvia;Autobranchia;Heteroconchia;Euhe  
 terodonta;Imparidentia;Venerida;Veneroidea;Veneridae;Mercenaria;Mercenari  
 a mercenaria  
 UdeM00000035909 6596 352.8 UdeM00000035909 XP\_045205546.1 42.6 453  
 247 7 1 444 1 449 6.20E-94 352.8 6596 cellular  
 organisms;Eukaryota;Opisthokonta;Metazoa;Eumetazoa;Bilateria;Protostomia;  
 Spiralia;Lophotrochozoa;Mollusca;Bivalvia;Autobranchia;Heteroconchia;Euhe  
 terodonta;Imparidentia;Venerida;Veneroidea;Veneridae;Mercenaria;Mercenari  
 a mercenaria  
 UdeM00000035910 6596 320.5 UdeM00000035910 XP\_045205546.1 38.5 457  
 268 7 1 447 1 454 7.60E-84 320.5 6596 cellular  
 organisms;Eukaryota;Opisthokonta;Metazoa;Eumetazoa;Bilateria;Protostomia;  
 Spiralia;Lophotrochozoa;Mollusca;Bivalvia;Autobranchia;Heteroconchia;Euhe  
 terodonta;Imparidentia;Venerida;Veneroidea;Veneridae;Mercenaria;Mercenari  
 a mercenaria  
 UdeM00000035912 45264 90.5 UdeM00000035912 XP\_044167563.1 38.2 144  
 80 2 8 151 45 179 6.50E-15 90.5 45264 cellular  
 organisms;Eukaryota;Opisthokonta;Metazoa;Eumetazoa;Cnidaria;Anthozoa;Hexa  
 corallia;Scleractinia;Astrocoeniina;Acroporidae;Acropora;Acropora  
 millepora  
 UdeM00000035913 6565 201.4 UdeM00000035913 XP\_022286573.1 78 118  
 26 0 1 118 1 118 6.20E-49 201.4 6565 cellular  
 organisms;Eukaryota;Opisthokonta;Metazoa;Eumetazoa;Bilateria;Protostomia;  
 Spiralia;Lophotrochozoa;Mollusca;Bivalvia;Autobranchia;Pteriormorphia;Ostr  
 eida;Ostreoidea;Ostreidae;Crassostrea;Crassostrea virginica  
 UdeM00000035914 6596 954.5 UdeM00000035914 XP\_045175495.1 50.9 1183  
 306 12 3 1111 2 983 1.20E-274 954.5 6596 cellular  
 organisms;Eukaryota;Opisthokonta;Metazoa;Eumetazoa;Bilateria;Protostomia;  
 Spiralia;Lophotrochozoa;Mollusca;Bivalvia;Autobranchia;Heteroconchia;Euhe  
 terodonta;Imparidentia;Venerida;Veneroidea;Veneridae;Mercenaria;Mercenari  
 a mercenaria  
 UdeM00000035916 6596 495.4 UdeM00000035916 XP\_045175088.1 75.5 326  
 77 2 1 326 1 323 5.70E-137 495.4 6596 cellular  
 organisms;Eukaryota;Opisthokonta;Metazoa;Eumetazoa;Bilateria;Protostomia;  
 Spiralia;Lophotrochozoa;Mollusca;Bivalvia;Autobranchia;Heteroconchia;Euhe  
 terodonta;Imparidentia;Venerida;Veneroidea;Veneridae;Mercenaria;Mercenari  
 a mercenaria  
 UdeM00000035917 6573 382.1 UdeM00000035917 XP\_021353400.1 36.8 908  
 434 13 41 928 13 800 2.00E-102 382.1 6573 cellular  
 organisms;Eukaryota;Opisthokonta;Metazoa;Eumetazoa;Bilateria;Protostomia;  
 Spiralia;Lophotrochozoa;Mollusca;Bivalvia;Autobranchia;Pteriormorphia;Pect  
 inida;Pectinoidea;Pectinidae;Mizuhopecten;Mizuhopecten yessoensis  
 UdeM00000035918 6596 417.9 UdeM00000035918 XP\_045176491.1 41.6 1017  
 437 19 4 887 3 995 3.20E-113 417.9 6596 cellular  
 organisms;Eukaryota;Opisthokonta;Metazoa;Eumetazoa;Bilateria;Protostomia;



Spiralia;Lophotrochozoa;Mollusca;Bivalvia;Autobranchia;Heteroconchia;Euherodonta;Imparidentia;Venerida;Veneroidea;Veneridae;Mercenaria;Mercenaria mercenaria

UdeM00000035919 29159 990.7 UdeM00000035919 XP\_011438919.2 76 626  
149 1 10 634 8 633 8.40E-286 990.7 29159 cellular

organisms;Eukaryota;Opisthokonta;Metazoa;Eumetazoa;Bilateria;Protostomia;Spiralia;Lophotrochozoa;Mollusca;Bivalvia;Autobranchia;Pteriomorphia;Ostreida;Ostreoidea;Ostreidae;Crassostrea;Crassostrea gigas

UdeM00000035921 6565 333.2 UdeM00000035921 XP\_022339561.1 59.3 270  
104 4 46 315 1308 1571 3.80E-88 333.2 6565 cellular

organisms;Eukaryota;Opisthokonta;Metazoa;Eumetazoa;Bilateria;Protostomia;Spiralia;Lophotrochozoa;Mollusca;Bivalvia;Autobranchia;Pteriomorphia;Ostreida;Ostreoidea;Ostreidae;Crassostrea;Crassostrea virginica

UdeM00000035920 1735272 1557.7 UdeM00000035920 XP\_041349029.1  
52.3 1609 652 28 11 1551 61 1621 0.00E+00 1557.7  
1735272 cellular

organisms;Eukaryota;Opisthokonta;Metazoa;Eumetazoa;Bilateria;Protostomia;Spiralia;Lophotrochozoa;Mollusca;Gastropoda;Neomphalina;Neomphaloidea;Peltospiridae;Gigantopelta;Gigantopelta aegis

UdeM00000035922 6596 1348.2 UdeM00000035922 XP\_045175965.1 57.6  
1282 465 19 11 1270 64 1288 0.00E+00 1348.2 6596  
cellular

organisms;Eukaryota;Opisthokonta;Metazoa;Eumetazoa;Bilateria;Protostomia;Spiralia;Lophotrochozoa;Mollusca;Bivalvia;Autobranchia;Heteroconchia;Euherodonta;Imparidentia;Venerida;Veneroidea;Veneridae;Mercenaria;Mercenaria mercenaria

UdeM00000035923 6596 9778.7 UdeM00000035923 XP\_045174536.1 53.9  
8828 3554 96 6 8413 4493 13222 0.00E+00 9778.7 6596  
cellular

organisms;Eukaryota;Opisthokonta;Metazoa;Eumetazoa;Bilateria;Protostomia;Spiralia;Lophotrochozoa;Mollusca;Bivalvia;Autobranchia;Heteroconchia;Euherodonta;Imparidentia;Venerida;Veneroidea;Veneridae;Mercenaria;Mercenaria mercenaria

UdeM00000035924 6596 576.2 UdeM00000035924 XP\_045174536.1 59 446  
172 6 3 445 4059 4496 3.50E-161 576.2 6596 cellular

organisms;Eukaryota;Opisthokonta;Metazoa;Eumetazoa;Bilateria;Protostomia;Spiralia;Lophotrochozoa;Mollusca;Bivalvia;Autobranchia;Heteroconchia;Euherodonta;Imparidentia;Venerida;Veneroidea;Veneridae;Mercenaria;Mercenaria mercenaria

UdeM00000035925 6596 1931.4 UdeM00000035925 XP\_045174536.1 55.9  
1692 692 21 6 1673 2317 3977 0.00E+00 1931.4 6596  
cellular

organisms;Eukaryota;Opisthokonta;Metazoa;Eumetazoa;Bilateria;Protostomia;Spiralia;Lophotrochozoa;Mollusca;Bivalvia;Autobranchia;Heteroconchia;Euherodonta;Imparidentia;Venerida;Veneroidea;Veneridae;Mercenaria;Mercenaria mercenaria

UdeM00000035926 6596 1750.7 UdeM00000035926 XP\_045174536.1 56.8  
1541 629 19 13 1525 786 2318 0.00E+00 1750.7 6596  
cellular

organisms;Eukaryota;Opisthokonta;Metazoa;Eumetazoa;Bilateria;Protostomia;Spiralia;Lophotrochozoa;Mollusca;Bivalvia;Autobranchia;Heteroconchia;Euherodonta;Imparidentia;Venerida;Veneroidea;Veneridae;Mercenaria;Mercenaria mercenaria

UdeM00000035927 6596 794.3 UdeM00000035927 XP\_045174536.1 51.8 787  
 351 12 6 771 7 786 1.40E-226 794.3 6596 cellular  
 organisms;Eukaryota;Opisthokonta;Metazoa;Eumetazoa;Bilateria;Protostomia;  
 Spiralia;Lophotrochozoa;Mollusca;Bivalvia;Autobranchia;Heteroconchia;Euhe  
 terodonta;Imparidentia;Venerida;Veneroidea;Veneridae;Mercenaria;Mercenari  
 a mercenaria  
 UdeM00000035928 6596 158.7 UdeM00000035928 XP\_045174780.1 53.9 154  
 57 4 158 304 234 380 1.20E-35 158.7 6596 cellular  
 organisms;Eukaryota;Opisthokonta;Metazoa;Eumetazoa;Bilateria;Protostomia;  
 Spiralia;Lophotrochozoa;Mollusca;Bivalvia;Autobranchia;Heteroconchia;Euhe  
 terodonta;Imparidentia;Venerida;Veneroidea;Veneridae;Mercenaria;Mercenari  
 a mercenaria  
 UdeM00000035929 6596 164.9 UdeM00000035929 XP\_045174780.1 55.3 152  
 66 2 198 348 234 384 2.20E-37 164.9 6596 cellular  
 organisms;Eukaryota;Opisthokonta;Metazoa;Eumetazoa;Bilateria;Protostomia;  
 Spiralia;Lophotrochozoa;Mollusca;Bivalvia;Autobranchia;Heteroconchia;Euhe  
 terodonta;Imparidentia;Venerida;Veneroidea;Veneridae;Mercenaria;Mercenari  
 a mercenaria  
 UdeM00000035930 37621 151 UdeM00000035930 XP\_014673981.1 43.1 202  
 75 5 21 185 20 218 1.80E-33 151 37621 cellular  
 organisms;Eukaryota;Opisthokonta;Metazoa;Eumetazoa;Bilateria;Protostomia;  
 Ecdysozoa;Scalidophora;Priapulida;Priapulimorpha;Priapulimorphida;Priapul  
 idae;Priapululus;Priapululus caudatus  
 UdeM00000035931 7668 208.4 UdeM00000035931 XP\_003729577.2 47.4 213  
 101 3 9 218 712 916 9.90E-51 208.4 7668 cellular  
 organisms;Eukaryota;Opisthokonta;Metazoa;Eumetazoa;Bilateria;Deuterostomi  
 a;Echinodermata;Eleutherozoa;Echinozoa;Echinoidea;Euechinoidea;Echinacea;  
 Camarodonta;Echinidea;Strongylocentrotidae;Strongylocentrotus;Strongyloce  
 ntrotus purpuratus  
 UdeM00000035932 6596 119.8 UdeM00000035932 XP\_045177362.1 37.6 181  
 106 1 9 182 242 422 3.80E-24 119.8 6596 cellular  
 organisms;Eukaryota;Opisthokonta;Metazoa;Eumetazoa;Bilateria;Protostomia;  
 Spiralia;Lophotrochozoa;Mollusca;Bivalvia;Autobranchia;Heteroconchia;Euhe  
 terodonta;Imparidentia;Venerida;Veneroidea;Veneridae;Mercenaria;Mercenari  
 a mercenaria  
 UdeM00000035933 6573 251.1 UdeM00000035933 XP\_021364422.1 42 331  
 187 3 32 358 53 382 2.10E-63 251.1 6573 cellular  
 organisms;Eukaryota;Opisthokonta;Metazoa;Eumetazoa;Bilateria;Protostomia;  
 Spiralia;Lophotrochozoa;Mollusca;Bivalvia;Autobranchia;Pteriomorphia;Pect  
 inida;Pectinoidea;Pectinidae;Mizuhopecten;Mizuhopecten yessoensis  
 UdeM00000035934 6565 60.1 UdeM00000035934 XP\_022341905.1 38.3 94  
 55 3 1 92 275 367 1.70E-06 60.1 6565 cellular  
 organisms;Eukaryota;Opisthokonta;Metazoa;Eumetazoa;Bilateria;Protostomia;  
 Spiralia;Lophotrochozoa;Mollusca;Bivalvia;Autobranchia;Pteriomorphia;Ostr  
 eida;Ostreoidea;Ostreidae;Crassostrea;Crassostrea virginica  
 UdeM00000035935 29159 811.2 UdeM00000035935 XP\_034306389.1 64 623  
 221 3 1 622 1 621 9.00E-232 811.2 29159 cellular  
 organisms;Eukaryota;Opisthokonta;Metazoa;Eumetazoa;Bilateria;Protostomia;  
 Spiralia;Lophotrochozoa;Mollusca;Bivalvia;Autobranchia;Pteriomorphia;Ostr  
 eida;Ostreoidea;Ostreidae;Crassostrea;Crassostrea gigas  
 UdeM00000035936 6596 1192.6 UdeM00000035936 XP\_045174862.1 60.7  
 1612 568 13 1 1575 1 1583 0.00E+00 1192.6 6596  
 cellular  
 organisms;Eukaryota;Opisthokonta;Metazoa;Eumetazoa;Bilateria;Protostomia;

Spiralia;Lophotrochozoa;Mollusca;Bivalvia;Autobranchia;Heteroconchia;Euherodonta;Imparidentia;Venerida;Veneroidea;Veneridae;Mercenaria;Mercenaria mercenaria

UdeM00000035937 6596 505.4 UdeM00000035937 XP\_045174861.1 59.5 412  
160 4 1 408 1 409 1.90E-139 505.4 6596 cellular

organisms;Eukaryota;Opisthokonta;Metazoa;Eumetazoa;Bilateria;Protostomia;Spiralia;Lophotrochozoa;Mollusca;Bivalvia;Autobranchia;Heteroconchia;Euherodonta;Imparidentia;Venerida;Veneroidea;Veneridae;Mercenaria;Mercenaria mercenaria

UdeM00000035938 6573 250.8 UdeM00000035938 XP\_021353028.1 59 217  
88 1 15 231 11 226 1.70E-63 250.8 6573 cellular

organisms;Eukaryota;Opisthokonta;Metazoa;Eumetazoa;Bilateria;Protostomia;Spiralia;Lophotrochozoa;Mollusca;Bivalvia;Autobranchia;Pteriomorphia;Pectinida;Pectinoidea;Pectinidae;Mizuhopecten;Mizuhopecten yessoensis

UdeM00000035939 6573 654.4 UdeM00000035939 XP\_021353027.1 34.5 1903  
933 50 66 1915 77 1718 7.10E-184 654.4 6573 cellular

organisms;Eukaryota;Opisthokonta;Metazoa;Eumetazoa;Bilateria;Protostomia;Spiralia;Lophotrochozoa;Mollusca;Bivalvia;Autobranchia;Pteriomorphia;Pectinida;Pectinoidea;Pectinidae;Mizuhopecten;Mizuhopecten yessoensis

UdeM00000035940 6573 211.1 UdeM00000035940 XP\_021353027.1 28.1 1548  
802 48 2 1497 430 1718 1.80E-50 211.1 6573 cellular

organisms;Eukaryota;Opisthokonta;Metazoa;Eumetazoa;Bilateria;Protostomia;Spiralia;Lophotrochozoa;Mollusca;Bivalvia;Autobranchia;Pteriomorphia;Pectinida;Pectinoidea;Pectinidae;Mizuhopecten;Mizuhopecten yessoensis

UdeM00000035941 6596 151 UdeM00000035941 XP\_045176399.1 41.3 300  
123 11 1 286 1 261 2.80E-33 151 6596 cellular

organisms;Eukaryota;Opisthokonta;Metazoa;Eumetazoa;Bilateria;Protostomia;Spiralia;Lophotrochozoa;Mollusca;Bivalvia;Autobranchia;Heteroconchia;Euherodonta;Imparidentia;Venerida;Veneroidea;Veneridae;Mercenaria;Mercenaria mercenaria

UdeM00000035942 6596 721.5 UdeM00000035942 XP\_045176396.1 88.3 412  
47 1 1 411 5 416 6.30E-205 721.5 6596 cellular

organisms;Eukaryota;Opisthokonta;Metazoa;Eumetazoa;Bilateria;Protostomia;Spiralia;Lophotrochozoa;Mollusca;Bivalvia;Autobranchia;Heteroconchia;Euherodonta;Imparidentia;Venerida;Veneroidea;Veneridae;Mercenaria;Mercenaria mercenaria

UdeM00000021766 6596 62 UdeM00000021766 XP\_045207454.1 63 46  
17 0 1 46 11 56 1.10E-06 62 6596 cellular

organisms;Eukaryota;Opisthokonta;Metazoa;Eumetazoa;Bilateria;Protostomia;Spiralia;Lophotrochozoa;Mollusca;Bivalvia;Autobranchia;Heteroconchia;Euherodonta;Imparidentia;Venerida;Veneroidea;Veneridae;Mercenaria;Mercenaria mercenaria

UdeM00000021767 6596 1091.6 UdeM00000021767 XP\_045193712.1 46.1  
1658 763 41 9 1588 18 1623 0.00E+00 1091.6 6596  
cellular

organisms;Eukaryota;Opisthokonta;Metazoa;Eumetazoa;Bilateria;Protostomia;Spiralia;Lophotrochozoa;Mollusca;Bivalvia;Autobranchia;Heteroconchia;Euherodonta;Imparidentia;Venerida;Veneroidea;Veneridae;Mercenaria;Mercenaria mercenaria

UdeM00000021768 6596 464.2 UdeM00000021768 XP\_045193697.1 75 296  
72 2 16 310 237 531 1.40E-127 464.2 6596 cellular

organisms;Eukaryota;Opisthokonta;Metazoa;Eumetazoa;Bilateria;Protostomia;Spiralia;Lophotrochozoa;Mollusca;Bivalvia;Autobranchia;Heteroconchia;Euherodonta;Imparidentia;Venerida;Veneroidea;Veneridae;Mercenaria;Mercenaria mercenaria

terodonta;Imparidentia;Venerida;Veneroidea;Veneridae;Mercenaria;Mercenari  
 a mercenaria  
 UdeM00000021769 6596 462.2 UdeM00000021769 XP\_045193699.1 75.3 292  
 70 2 16 306 237 527 5.20E-127 462.2 6596 cellular  
 organisms;Eukaryota;Opisthokonta;Metazoa;Eumetazoa;Bilateria;Protostomia;  
 Spiralia;Lophotrochozoa;Mollusca;Bivalvia;Autobranhia;Heteroconchia;Euhe  
 terodonta;Imparidentia;Venerida;Veneroidea;Veneridae;Mercenaria;Mercenari  
 a mercenaria  
 UdeM00000021770 6412 79.3 UdeM00000021770 XP\_009030786.1 65.4 52  
 18 0 90 141 24 75 4.30E-127 79.3 6412 cellular  
 organisms;Eukaryota;Opisthokonta;Metazoa;Eumetazoa;Bilateria;Protostomia;  
 Spiralia;Lophotrochozoa;Annelida;Clitellata;Hirudinea;Rhynchobdellida;Glo  
 ssiphoniidae;Helobdella;Helobdella robusta  
 UdeM00000021771 6596 345.9 UdeM00000021771 XP\_045193697.1 66.1 245  
 82 1 7 251 5 248 4.90E-927 345.9 6596 cellular  
 organisms;Eukaryota;Opisthokonta;Metazoa;Eumetazoa;Bilateria;Protostomia;  
 Spiralia;Lophotrochozoa;Mollusca;Bivalvia;Autobranhia;Heteroconchia;Euhe  
 terodonta;Imparidentia;Venerida;Veneroidea;Veneridae;Mercenaria;Mercenari  
 a mercenaria  
 UdeM00000021772 6596 853.2 UdeM00000021772 XP\_045193689.1 70.2 588  
 170 3 1 588 1 583 1.90E-244 853.2 6596 cellular  
 organisms;Eukaryota;Opisthokonta;Metazoa;Eumetazoa;Bilateria;Protostomia;  
 Spiralia;Lophotrochozoa;Mollusca;Bivalvia;Autobranhia;Heteroconchia;Euhe  
 terodonta;Imparidentia;Venerida;Veneroidea;Veneridae;Mercenaria;Mercenari  
 a mercenaria  
 UdeM00000021774 29159 330.9 UdeM00000021774 XP\_011421162.2 43 363  
 202 4 8 367 51 411 2.10E-87 330.9 29159 cellular  
 organisms;Eukaryota;Opisthokonta;Metazoa;Eumetazoa;Bilateria;Protostomia;  
 Spiralia;Lophotrochozoa;Mollusca;Bivalvia;Autobranhia;Pteriomorphia;Ostr  
 eida;Ostreoidea;Ostreidae;Crassostrea;Crassostrea gigas  
 UdeM00000021773 29159 343.2 UdeM00000021773 XP\_011421162.2 42 400  
 225 5 15 409 14 411 4.60E-91 343.2 29159 cellular  
 organisms;Eukaryota;Opisthokonta;Metazoa;Eumetazoa;Bilateria;Protostomia;  
 Spiralia;Lophotrochozoa;Mollusca;Bivalvia;Autobranhia;Pteriomorphia;Ostr  
 eida;Ostreoidea;Ostreidae;Crassostrea;Crassostrea gigas  
 UdeM00000021775 6565 300.8 UdeM00000021775 XP\_022343768.1 39.6 381  
 214 8 2 372 37 411 2.50E-78 300.8 6565 cellular  
 organisms;Eukaryota;Opisthokonta;Metazoa;Eumetazoa;Bilateria;Protostomia;  
 Spiralia;Lophotrochozoa;Mollusca;Bivalvia;Autobranhia;Pteriomorphia;Ostr  
 eida;Ostreoidea;Ostreidae;Crassostrea;Crassostrea virginica  
 UdeM00000021777 37621 100.1 UdeM00000021777 XP\_014673981.1 53.7 95  
 37 1 1 88 76 170 1.50E-18 100.1 37621 cellular  
 organisms;Eukaryota;Opisthokonta;Metazoa;Eumetazoa;Bilateria;Protostomia;  
 Ecdysozoa;Scalidophora;Priapulida;Priapulimorpha;Priapulimorphida;Priapul  
 idae;Priapulid;Priapulid caudatus  
 UdeM00000021778 37621 99 UdeM00000021778 XP\_014672570.1 60.3 73  
 29 0 3 75 47 119 2.80E-18 99 37621 cellular  
 organisms;Eukaryota;Opisthokonta;Metazoa;Eumetazoa;Bilateria;Protostomia;  
 Ecdysozoa;Scalidophora;Priapulida;Priapulimorpha;Priapulimorphida;Priapul  
 idae;Priapulid;Priapulid caudatus  
 UdeM00000021779 37621 121.7 UdeM00000021779 XP\_014672571.1 45 169  
 82 5 1 160 37 203 9.70E-25 121.7 37621 cellular  
 organisms;Eukaryota;Opisthokonta;Metazoa;Eumetazoa;Bilateria;Protostomia;

Ecdysozoa;Scalidophora;Priapulida;Priapulimorpha;Priapulimorphida;Priapulidae;Priapululus;Priapululus caudatus

UdeM00000021780 6596 266.5 UdeM00000021780 XP\_045192373.1 44.6 379  
173 9 25 397 16 363 5.50E-68 266.5 6596 cellular

organisms;Eukaryota;Opisthokonta;Metazoa;Eumetazoa;Bilateria;Protostomia;Spiralia;Lophotrochozoa;Mollusca;Bivalvia;Autobranhia;Heteroconchia;Euherodonta;Imparidentia;Venerida;Veneroidea;Veneridae;Mercenaria;Mercenaria mercenaria

UdeM00000021781 6596 620.2 UdeM00000021781 XP\_045193958.1 71.8 408  
112 2 1 408 1 405 1.90E-174 620.2 6596 cellular

organisms;Eukaryota;Opisthokonta;Metazoa;Eumetazoa;Bilateria;Protostomia;Spiralia;Lophotrochozoa;Mollusca;Bivalvia;Autobranhia;Heteroconchia;Euherodonta;Imparidentia;Venerida;Veneroidea;Veneridae;Mercenaria;Mercenaria mercenaria

UdeM00000021782 6573 617.1 UdeM00000021782 XP\_021364462.1 71 435  
118 5 6 439 4 431 1.80E-173 617.1 6573 cellular

organisms;Eukaryota;Opisthokonta;Metazoa;Eumetazoa;Bilateria;Protostomia;Spiralia;Lophotrochozoa;Mollusca;Bivalvia;Autobranhia;Pteriomorphia;Pectinida;Pectinoidea;Pectinidae;Mizuhopecten;Mizuhopecten yessoensis

UdeM00000021783 6596 204.1 UdeM00000021783 XP\_045193957.1 54.4 355  
139 7 1 336 1 351 2.70E-49 204.1 6596 cellular

organisms;Eukaryota;Opisthokonta;Metazoa;Eumetazoa;Bilateria;Protostomia;Spiralia;Lophotrochozoa;Mollusca;Bivalvia;Autobranhia;Heteroconchia;Euherodonta;Imparidentia;Venerida;Veneroidea;Veneridae;Mercenaria;Mercenaria mercenaria

UdeM00000021784 6596 307.4 UdeM00000021784 XP\_045193953.1 29.1 1113  
646 32 1 1034 1 1049 7.20E-80 307.4 6596 cellular

organisms;Eukaryota;Opisthokonta;Metazoa;Eumetazoa;Bilateria;Protostomia;Spiralia;Lophotrochozoa;Mollusca;Bivalvia;Autobranhia;Heteroconchia;Euherodonta;Imparidentia;Venerida;Veneroidea;Veneridae;Mercenaria;Mercenaria mercenaria

UdeM00000021785 6573 307 UdeM00000021785 XP\_021379227.1 55.1 323  
135 3 1 315 1 321 2.80E-80 307 6573 cellular

organisms;Eukaryota;Opisthokonta;Metazoa;Eumetazoa;Bilateria;Protostomia;Spiralia;Lophotrochozoa;Mollusca;Bivalvia;Autobranhia;Pteriomorphia;Pectinida;Pectinoidea;Pectinidae;Mizuhopecten;Mizuhopecten yessoensis

UdeM00000021787 6596 349.7 UdeM00000021787 XP\_045193311.1 62 316  
106 7 1 308 1 310 4.80E-93 349.7 6596 cellular

organisms;Eukaryota;Opisthokonta;Metazoa;Eumetazoa;Bilateria;Protostomia;Spiralia;Lophotrochozoa;Mollusca;Bivalvia;Autobranhia;Heteroconchia;Euherodonta;Imparidentia;Venerida;Veneroidea;Veneridae;Mercenaria;Mercenaria mercenaria

UdeM00000021788 6596 854.4 UdeM00000021788 XP\_045193314.1 68.7 617  
191 1 1 617 523 1137 9.20E-245 854.4 6596 cellular

organisms;Eukaryota;Opisthokonta;Metazoa;Eumetazoa;Bilateria;Protostomia;Spiralia;Lophotrochozoa;Mollusca;Bivalvia;Autobranhia;Heteroconchia;Euherodonta;Imparidentia;Venerida;Veneroidea;Veneridae;Mercenaria;Mercenaria mercenaria

UdeM00000021789 6596 307.8 UdeM00000021789 XP\_045193315.1 45.5 347  
182 3 19 363 49 390 2.00E-80 307.8 6596 cellular

organisms;Eukaryota;Opisthokonta;Metazoa;Eumetazoa;Bilateria;Protostomia;Spiralia;Lophotrochozoa;Mollusca;Bivalvia;Autobranhia;Heteroconchia;Euherodonta;Imparidentia;Venerida;Veneroidea;Veneridae;Mercenaria;Mercenaria mercenaria

UdeM00000021790 6596 442.2 UdeM00000021790 XP\_045193048.1 67.3 300  
 98 0 29 328 20 319 5.90E-121 442.2 6596 cellular  
 organisms;Eukaryota;Opisthokonta;Metazoa;Eumetazoa;Bilateria;Protostomia;  
 Spiralia;Lophotrochozoa;Mollusca;Bivalvia;Autobranchia;Heteroconchia;Euhe  
 terodonta;Imparidentia;Venerida;Veneroidea;Veneridae;Mercenaria;Mercenari  
 a mercenaria

UdeM00000021791 6596 441.8 UdeM00000021791 XP\_045193048.1 67.3 300  
 98 0 5 304 20 319 7.10E-121 441.8 6596 cellular  
 organisms;Eukaryota;Opisthokonta;Metazoa;Eumetazoa;Bilateria;Protostomia;  
 Spiralia;Lophotrochozoa;Mollusca;Bivalvia;Autobranchia;Heteroconchia;Euhe  
 terodonta;Imparidentia;Venerida;Veneroidea;Veneridae;Mercenaria;Mercenari  
 a mercenaria

UdeM00000021792 6596 801.6 UdeM00000021792 XP\_045192659.1 63.7 678  
 206 10 1 652 1 664 7.50E-229 801.6 6596 cellular  
 organisms;Eukaryota;Opisthokonta;Metazoa;Eumetazoa;Bilateria;Protostomia;  
 Spiralia;Lophotrochozoa;Mollusca;Bivalvia;Autobranchia;Heteroconchia;Euhe  
 terodonta;Imparidentia;Venerida;Veneroidea;Veneridae;Mercenaria;Mercenari  
 a mercenaria

UdeM00000021793 1735272 397.1 UdeM00000021793 XP\_041376023.1 63.2  
 288 106 0 30 317 3 290 2.10E-107 397.1 1735272  
 cellular  
 organisms;Eukaryota;Opisthokonta;Metazoa;Eumetazoa;Bilateria;Protostomia;  
 Spiralia;Lophotrochozoa;Mollusca;Gastropoda;Neomphalina;Neomphaloidea;Pel  
 tospiridae;Gigantopelta;Gigantopelta aegis

UdeM00000021794 6579 1159.4 UdeM00000021794 XP\_033755534.1 72.3  
 834 224 5 2 829 8 840 0.00E+00 1159.4 6579  
 cellular  
 organisms;Eukaryota;Opisthokonta;Metazoa;Eumetazoa;Bilateria;Protostomia;  
 Spiralia;Lophotrochozoa;Mollusca;Bivalvia;Autobranchia;Pteriormorphia;Pect  
 inida;Pectinoidea;Pectinidae;Pecten;Pecten maximus

UdeM00000021796 6596 465.3 UdeM00000021796 XP\_045193447.1 63.5 460  
 133 10 1 438 61 507 8.50E-128 465.3 6596 cellular  
 organisms;Eukaryota;Opisthokonta;Metazoa;Eumetazoa;Bilateria;Protostomia;  
 Spiralia;Lophotrochozoa;Mollusca;Bivalvia;Autobranchia;Heteroconchia;Euhe  
 terodonta;Imparidentia;Venerida;Veneroidea;Veneridae;Mercenaria;Mercenari  
 a mercenaria

UdeM00000021798 6596 401.4 UdeM00000021798 XP\_045193325.1 59.3 504  
 177 11 1 490 1 490 1.70E-108 401.4 6596 cellular  
 organisms;Eukaryota;Opisthokonta;Metazoa;Eumetazoa;Bilateria;Protostomia;  
 Spiralia;Lophotrochozoa;Mollusca;Bivalvia;Autobranchia;Heteroconchia;Euhe  
 terodonta;Imparidentia;Venerida;Veneroidea;Veneridae;Mercenaria;Mercenari  
 a mercenaria

UdeM00000021800 1735272 702.6 UdeM00000021800 XP\_041376430.1 57.8  
 576 230 4 1 566 66 638 4.10E-199 702.6 1735272  
 cellular  
 organisms;Eukaryota;Opisthokonta;Metazoa;Eumetazoa;Bilateria;Protostomia;  
 Spiralia;Lophotrochozoa;Mollusca;Gastropoda;Neomphalina;Neomphaloidea;Pel  
 tospiridae;Gigantopelta;Gigantopelta aegis

UdeM00000021801 1735272 88.2 UdeM00000021801 XP\_041376294.1 54.9  
 91 34 2 1 86 1 89 5.70E-15 88.2 1735272  
 cellular  
 organisms;Eukaryota;Opisthokonta;Metazoa;Eumetazoa;Bilateria;Protostomia;  
 Spiralia;Lophotrochozoa;Mollusca;Gastropoda;Neomphalina;Neomphaloidea;Pel  
 tospiridae;Gigantopelta;Gigantopelta aegis

UdeM00000021802 6579 384.8 UdeM00000021802 XP\_033755211.1 63.2 302  
 93 4 1 288 1 298 9.80E-104 384.8 6579 cellular  
 organisms;Eukaryota;Opisthokonta;Metazoa;Eumetazoa;Bilateria;Protostomia;  
 Spiralia;Lophotrochozoa;Mollusca;Bivalvia;Autobranchia;Pteriomorpha;Pect  
 inida;Pectinoidea;Pectinidae;Pecten;Pecten maximus  
 UdeM00000021803 6565 411 UdeM00000021803 XP\_022344473.1 87.3 229  
 22 3 1 225 1 226 9.80E-112 411 6565 cellular  
 organisms;Eukaryota;Opisthokonta;Metazoa;Eumetazoa;Bilateria;Protostomia;  
 Spiralia;Lophotrochozoa;Mollusca;Bivalvia;Autobranchia;Pteriomorpha;Ostr  
 eida;Ostreoidea;Ostreidae;Crassostrea;Crassostrea virginica  
 UdeM00000021805 7741 277.3 UdeM00000021805 XP\_019619142.1 45.2 389  
 180 8 2 368 41 418 2.80E-71 277.3 7741 cellular  
 organisms;Eukaryota;Opisthokonta;Metazoa;Eumetazoa;Bilateria;Deuterostomi  
 a;Chordata;Cephalochordata;Leptocardii;Amphioxiformes;Branchiostomidae;Br  
 anchiostoma;Branchiostoma belcheri  
 UdeM00000021807 6579 287.3 UdeM00000021807 XP\_033739131.1 66.5 200  
 66 1 1 200 1171 1369 1.50E-74 287.3 6579 cellular  
 organisms;Eukaryota;Opisthokonta;Metazoa;Eumetazoa;Bilateria;Protostomia;  
 Spiralia;Lophotrochozoa;Mollusca;Bivalvia;Autobranchia;Pteriomorpha;Pect  
 inida;Pectinoidea;Pectinidae;Pecten;Pecten maximus  
 UdeM00000021809 6579 217.2 UdeM00000021809 XP\_033744239.1 52.1 213  
 85 4 1 202 188 394 2.10E-53 217.2 6579 cellular  
 organisms;Eukaryota;Opisthokonta;Metazoa;Eumetazoa;Bilateria;Protostomia;  
 Spiralia;Lophotrochozoa;Mollusca;Bivalvia;Autobranchia;Pteriomorpha;Pect  
 inida;Pectinoidea;Pectinidae;Pecten;Pecten maximus  
 UdeM00000021808 6579 326.2 UdeM00000021808 XP\_033744239.1 53.1 311  
 128 5 140 439 91 394 6.50E-86 326.2 6579 cellular  
 organisms;Eukaryota;Opisthokonta;Metazoa;Eumetazoa;Bilateria;Protostomia;  
 Spiralia;Lophotrochozoa;Mollusca;Bivalvia;Autobranchia;Pteriomorpha;Pect  
 inida;Pectinoidea;Pectinidae;Pecten;Pecten maximus  
 UdeM00000021810 6596 792.7 UdeM00000021810 XP\_045193115.1 87.8 433  
 53 0 1 433 1 433 2.30E-226 792.7 6596 cellular  
 organisms;Eukaryota;Opisthokonta;Metazoa;Eumetazoa;Bilateria;Protostomia;  
 Spiralia;Lophotrochozoa;Mollusca;Bivalvia;Autobranchia;Heteroconchia;Euhe  
 terodonta;Imparidentia;Venerida;Veneroidea;Veneridae;Mercenaria;Mercenari  
 a mercenaria  
 UdeM00000021811 6579 636.7 UdeM00000021811 XP\_033754129.1 88.4 346  
 40 0 5 350 8 353 1.70E-179 636.7 6579 cellular  
 organisms;Eukaryota;Opisthokonta;Metazoa;Eumetazoa;Bilateria;Protostomia;  
 Spiralia;Lophotrochozoa;Mollusca;Bivalvia;Autobranchia;Pteriomorpha;Pect  
 inida;Pectinoidea;Pectinidae;Pecten;Pecten maximus  
 UdeM00000021812 6596 422.2 UdeM00000021812 XP\_045193459.1 34.1 677  
 393 10 19 692 3 629 1.30E-114 422.2 6596 cellular  
 organisms;Eukaryota;Opisthokonta;Metazoa;Eumetazoa;Bilateria;Protostomia;  
 Spiralia;Lophotrochozoa;Mollusca;Bivalvia;Autobranchia;Heteroconchia;Euhe  
 terodonta;Imparidentia;Venerida;Veneroidea;Veneridae;Mercenaria;Mercenari  
 a mercenaria  
 UdeM00000021813 6596 421.8 UdeM00000021813 XP\_045193459.1 34.1 677  
 393 10 12 685 3 629 1.70E-114 421.8 6596 cellular  
 organisms;Eukaryota;Opisthokonta;Metazoa;Eumetazoa;Bilateria;Protostomia;  
 Spiralia;Lophotrochozoa;Mollusca;Bivalvia;Autobranchia;Heteroconchia;Euhe  
 terodonta;Imparidentia;Venerida;Veneroidea;Veneridae;Mercenaria;Mercenari  
 a mercenaria

UdeM00000021814 6565 201.8 UdeM00000021814 XP\_022333543.1 43.9 212  
 116 3 2 212 39 248 1.40E-48 201.8 6565 cellular  
 organisms;Eukaryota;Opisthokonta;Metazoa;Eumetazoa;Bilateria;Protostomia;  
 Spiralia;Lophotrochozoa;Mollusca;Bivalvia;Autobranhia;Pteriormorphia;Ostr  
 eida;Ostreoidea;Ostreidae;Crassostrea;Crassostrea virginica  
 UdeM00000021815 6565 201.8 UdeM00000021815 XP\_022333543.1 43.9 212  
 116 3 2 212 39 248 1.30E-48 201.8 6565 cellular  
 organisms;Eukaryota;Opisthokonta;Metazoa;Eumetazoa;Bilateria;Protostomia;  
 Spiralia;Lophotrochozoa;Mollusca;Bivalvia;Autobranhia;Pteriormorphia;Ostr  
 eida;Ostreoidea;Ostreidae;Crassostrea;Crassostrea virginica  
 UdeM00000021816 7668 89 UdeM00000021816 XP\_030838384.1 48.8 82  
 41 1 3 84 14 94 4.20E-15 89 7668 cellular  
 organisms;Eukaryota;Opisthokonta;Metazoa;Eumetazoa;Bilateria;Deuterostomi  
 a;Echinodermata;Eleutherozoa;Echinozoa;Echinoidea;Euechinoidea;Echinacea;  
 Camarodonta;Echinidea;Strongylocentrotidae;Strongylocentrotus;Strongyloce  
 ntrotus purpuratus  
 UdeM00000021817 6565 206.5 UdeM00000021817 XP\_022333543.1 40 260  
 142 5 2 260 39 285 4.30E-50 206.5 6565 cellular  
 organisms;Eukaryota;Opisthokonta;Metazoa;Eumetazoa;Bilateria;Protostomia;  
 Spiralia;Lophotrochozoa;Mollusca;Bivalvia;Autobranhia;Pteriormorphia;Ostr  
 eida;Ostreoidea;Ostreidae;Crassostrea;Crassostrea virginica  
 UdeM00000021818 6565 157.1 UdeM00000021818 XP\_022333543.1 32.8 290  
 152 6 2 291 39 285 3.30E-35 157.1 6565 cellular  
 organisms;Eukaryota;Opisthokonta;Metazoa;Eumetazoa;Bilateria;Protostomia;  
 Spiralia;Lophotrochozoa;Mollusca;Bivalvia;Autobranhia;Pteriormorphia;Ostr  
 eida;Ostreoidea;Ostreidae;Crassostrea;Crassostrea virginica  
 UdeM00000021819 6596 61.6 UdeM00000021819 XP\_045193459.1 30.4 92  
 64 0 13 104 538 629 6.80E-07 61.6 6596 cellular  
 organisms;Eukaryota;Opisthokonta;Metazoa;Eumetazoa;Bilateria;Protostomia;  
 Spiralia;Lophotrochozoa;Mollusca;Bivalvia;Autobranhia;Heteroconchia;Euhe  
 terodonta;Imparidentia;Venerida;Veneroidea;Veneridae;Mercenaria;Mercenari  
 a mercenaria  
 UdeM00000021820 6565 206.5 UdeM00000021820 XP\_022333543.1 40 260  
 142 5 2 260 39 285 4.30E-50 206.5 6565 cellular  
 organisms;Eukaryota;Opisthokonta;Metazoa;Eumetazoa;Bilateria;Protostomia;  
 Spiralia;Lophotrochozoa;Mollusca;Bivalvia;Autobranhia;Pteriormorphia;Ostr  
 eida;Ostreoidea;Ostreidae;Crassostrea;Crassostrea virginica  
 UdeM00000021821 6565 206.5 UdeM00000021821 XP\_022333543.1 40 260  
 142 5 2 260 39 285 4.30E-50 206.5 6565 cellular  
 organisms;Eukaryota;Opisthokonta;Metazoa;Eumetazoa;Bilateria;Protostomia;  
 Spiralia;Lophotrochozoa;Mollusca;Bivalvia;Autobranhia;Pteriormorphia;Ostr  
 eida;Ostreoidea;Ostreidae;Crassostrea;Crassostrea virginica  
 UdeM00000021822 6596 61.6 UdeM00000021822 XP\_045193459.1 30.4 92  
 64 0 25 116 538 629 7.60E-07 61.6 6596 cellular  
 organisms;Eukaryota;Opisthokonta;Metazoa;Eumetazoa;Bilateria;Protostomia;  
 Spiralia;Lophotrochozoa;Mollusca;Bivalvia;Autobranhia;Heteroconchia;Euhe  
 terodonta;Imparidentia;Venerida;Veneroidea;Veneridae;Mercenaria;Mercenari  
 a mercenaria  
 UdeM00000021823 6565 207.2 UdeM00000021823 XP\_022333543.1 38.8 260  
 146 4 2 261 39 285 2.50E-50 207.2 6565 cellular  
 organisms;Eukaryota;Opisthokonta;Metazoa;Eumetazoa;Bilateria;Protostomia;  
 Spiralia;Lophotrochozoa;Mollusca;Bivalvia;Autobranhia;Pteriormorphia;Ostr  
 eida;Ostreoidea;Ostreidae;Crassostrea;Crassostrea virginica



UdeM00000021824 1735272 391.3 UdeM00000021824 XP\_041375753.1 55.4  
 363 161 1 126 487 112 474 1.70E-105 391.3 1735272  
 cellular  
 organisms;Eukaryota;Opisthokonta;Metazoa;Eumetazoa;Bilateria;Protostomia;  
 Spiralia;Lophotrochozoa;Mollusca;Gastropoda;Neomphalina;Neomphaloidea;Pel  
 tospiridae;Gigantopelta;Gigantopelta aegis  
 UdeM00000021825 6565 860.9 UdeM00000021825 XP\_022341406.1 74.4 598  
 133 5 1 581 1 595 9.20E-247 860.9 6565 cellular  
 organisms;Eukaryota;Opisthokonta;Metazoa;Eumetazoa;Bilateria;Protostomia;  
 Spiralia;Lophotrochozoa;Mollusca;Bivalvia;Autobranchia;Pteriormorphia;Ostr  
 eida;Ostreoidea;Ostreidae;Crassostrea;Crassostrea virginica  
 UdeM00000021826 6526 501.5 UdeM00000021826 XP\_013085111.1 84.9 304  
 46 0 54 357 584 887 8.70E-139 501.5 6526 cellular  
 organisms;Eukaryota;Opisthokonta;Metazoa;Eumetazoa;Bilateria;Protostomia;  
 Spiralia;Lophotrochozoa;Mollusca;Gastropoda;Heterobranchia;Euthyneura;Pan  
 pulmonata;Hygrophila;Lymnaeoidea;Planorbidae;Biomphalaria;Biomphalaria  
 glabrata  
 UdeM00000021827 6596 855.5 UdeM00000021827 XP\_045193606.1 70.3 600  
 175 3 33 629 225 824 4.50E-245 855.5 6596 cellular  
 organisms;Eukaryota;Opisthokonta;Metazoa;Eumetazoa;Bilateria;Protostomia;  
 Spiralia;Lophotrochozoa;Mollusca;Bivalvia;Autobranchia;Heteroconchia;Euhe  
 terodonta;Imparidentia;Venerida;Veneroidea;Veneridae;Mercenaria;Mercenari  
 a mercenaria  
 UdeM00000021829 6579 187.2 UdeM00000021829 XP\_033753973.1 36.7 428  
 194 11 1 418 1 361 4.30E-44 187.2 6579 cellular  
 organisms;Eukaryota;Opisthokonta;Metazoa;Eumetazoa;Bilateria;Protostomia;  
 Spiralia;Lophotrochozoa;Mollusca;Bivalvia;Autobranchia;Pteriormorphia;Pect  
 inida;Pectinoidea;Pectinidae;Pecten;Pecten maximus  
 UdeM00000021830 6579 173.3 UdeM00000021830 XP\_033763324.1 37.1 283  
 161 7 241 515 524 797 1.20E-39 173.3 6579 cellular  
 organisms;Eukaryota;Opisthokonta;Metazoa;Eumetazoa;Bilateria;Protostomia;  
 Spiralia;Lophotrochozoa;Mollusca;Bivalvia;Autobranchia;Pteriormorphia;Pect  
 inida;Pectinoidea;Pectinidae;Pecten;Pecten maximus  
 UdeM00000021831 6596 339.7 UdeM00000021831 XP\_045162858.1 51.9 345  
 155 6 12 353 1376 1712 7.50E-90 339.7 6596 cellular  
 organisms;Eukaryota;Opisthokonta;Metazoa;Eumetazoa;Bilateria;Protostomia;  
 Spiralia;Lophotrochozoa;Mollusca;Bivalvia;Autobranchia;Heteroconchia;Euhe  
 terodonta;Imparidentia;Venerida;Veneroidea;Veneridae;Mercenaria;Mercenari  
 a mercenaria  
 UdeM00000021832 50954 474.6 UdeM00000021832 XP\_037357174.1 48.1 499  
 247 5 8 495 5 502 2.10E-130 474.6 50954 cellular  
 organisms;Eukaryota;Opisthokonta;Metazoa;Eumetazoa;Bilateria;Deuterostomi  
 a;Chordata;Craniata;Vertebrata;Gnathostomata;Teleostomi;Euteleostomi;Sarc  
 opterygii;Dipnotetrapodomorpha;Tetrapoda;Amniota;Mammalia;Theria;Eutheria  
 ;Boreoeutheria;Laurasiatheria;Eulipotyphla;Talpidae;Talpa;Talpa  
 occidentalis  
 UdeM00000021833 9913 335.1 UdeM00000021833 XP\_002686314.2 37.9 477  
 282 4 16 482 10 482 1.70E-88 335.1 9913 cellular  
 organisms;Eukaryota;Opisthokonta;Metazoa;Eumetazoa;Bilateria;Deuterostomi  
 a;Chordata;Craniata;Vertebrata;Gnathostomata;Teleostomi;Euteleostomi;Sarc  
 opterygii;Dipnotetrapodomorpha;Tetrapoda;Amniota;Mammalia;Theria;Eutheria  
 ;Boreoeutheria;Laurasiatheria;Artiodactyla;Ruminantia;Pecora;Bovidae;Bovi  
 nae;Bos;Bos taurus

UdeM00000021834 42526 325.5 UdeM00000021834 XP\_036435543.1 38.5 441  
 259 1 16 444 13 453 1.40E-85 325.5 42526 cellular  
 organisms;Eukaryota;Opisthokonta;Metazoa;Eumetazoa;Bilateria;Deuterostomi  
 a;Chordata;Craniata;Vertebrata;Gnathostomata;Teleostomi;Euteleostomi;Acti  
 nopterygii;Actinopteri;Neopterygii;Teleostei;Osteoglossocephalai;Clupeoce  
 phala;Otomorpha;Ostariophysi;Otophysi;Characiphysae;Characiformes;Characo  
 idei;Serrasalminae;Colossoma;Colossoma macropomum  
 UdeM00000021835 6579 525.8 UdeM00000021835 XP\_033755794.1 53.9 521  
 226 4 5 522 53 562 6.70E-146 525.8 6579 cellular  
 organisms;Eukaryota;Opisthokonta;Metazoa;Eumetazoa;Bilateria;Protostomia;  
 Spiralia;Lophotrochozoa;Mollusca;Bivalvia;Autobranhia;Pteriormorphia;Pect  
 inida;Pectinoidea;Pectinidae;Pecten;Pecten maximus  
 UdeM00000021836 29159 102.8 UdeM00000021836 XP\_019928506.2 24.4 360  
 222 9 27 348 306 653 8.90E-19 102.8 29159 cellular  
 organisms;Eukaryota;Opisthokonta;Metazoa;Eumetazoa;Bilateria;Protostomia;  
 Spiralia;Lophotrochozoa;Mollusca;Bivalvia;Autobranhia;Pteriormorphia;Ostr  
 eida;Ostreoidea;Ostreidae;Crassostrea;Crassostrea gigas  
 UdeM00000021837 2015173 73.2 UdeM00000021837 XP\_026826273.1 39.3  
 84 51 0 8 91 458 541 2.00E-10 73.2 2015173  
 cellular  
 organisms;Eukaryota;Opisthokonta;Metazoa;Eumetazoa;Bilateria;Protostomia;  
 Ecdysozoa;Panarthropoda;Arthropoda;Mandibulata;Pancrustacea;Hexapoda;Inse  
 cta;Dicondylia;Pterygota;Neoptera;Endopterygota;Hymenoptera;Apocrita;Acul  
 eata;Formicoidea;Formicidae;Dorylinae;Ooceraea;Ooceraea biroi  
 UdeM00000021840 400727 88.6 UdeM00000021840 XP\_025107703.1 26.1  
 364 229 14 22 362 3213 3559 2.30E-14 88.6 400727  
 cellular  
 organisms;Eukaryota;Opisthokonta;Metazoa;Eumetazoa;Bilateria;Protostomia;  
 Spiralia;Lophotrochozoa;Mollusca;Gastropoda;Caenogastropoda;Architaeniogl  
 ossa;Ampullarioidea;Ampullariidae;Pomacea;Pomacea canaliculata  
 UdeM00000021841 7741 157.1 UdeM00000021841 XP\_019630579.1 39.4 269  
 103 2 1 209 127 395 2.40E-35 157.1 7741 cellular  
 organisms;Eukaryota;Opisthokonta;Metazoa;Eumetazoa;Bilateria;Deuterostomi  
 a;Chordata;Cephalochordata;Leptocardii;Amphioxiformes;Branchiostomidae;Br  
 anchiostoma;Branchiostoma belcheri  
 UdeM00000021842 6573 294.7 UdeM00000021842 XP\_021343443.1 24.4 1545  
 915 61 28 1398 60 1525 6.60E-76 294.7 6573 cellular  
 organisms;Eukaryota;Opisthokonta;Metazoa;Eumetazoa;Bilateria;Protostomia;  
 Spiralia;Lophotrochozoa;Mollusca;Bivalvia;Autobranhia;Pteriormorphia;Pect  
 inida;Pectinoidea;Pectinidae;Mizuhopecten;Mizuhopecten yessoensis  
 UdeM00000021843 6579 109.4 UdeM00000021843 XP\_033753982.1 24.9 357  
 230 8 25 349 298 648 9.50E-21 109.4 6579 cellular  
 organisms;Eukaryota;Opisthokonta;Metazoa;Eumetazoa;Bilateria;Protostomia;  
 Spiralia;Lophotrochozoa;Mollusca;Bivalvia;Autobranhia;Pteriormorphia;Pect  
 inida;Pectinoidea;Pectinidae;Pecten;Pecten maximus  
 UdeM00000021844 7574 134.4 UdeM00000021844 XP\_013382434.1 26.4 375  
 232 7 3 336 99 470 2.80E-28 134.4 7574 cellular  
 organisms;Eukaryota;Opisthokonta;Metazoa;Eumetazoa;Bilateria;Protostomia;  
 Spiralia;Lophotrochozoa;Brachiopoda;Linguliformea;Lingulata;Lingulida;Lin  
 guloidea;Lingulidae;Lingula;Lingula anatina  
 UdeM00000021845 7574 131.7 UdeM00000021845 XP\_013382434.1 26.5 366  
 225 7 1 325 108 470 1.70E-27 131.7 7574 cellular  
 organisms;Eukaryota;Opisthokonta;Metazoa;Eumetazoa;Bilateria;Protostomia;

Spiralia;Lophotrochozoa;Brachiopoda;Linguliformea;Lingulata;Lingulida;Linguloidea;Lingulidae;Lingula;Lingula anatina

UdeM00000021846 6579 177.6 UdeM00000021846 XP\_033753982.1 23.8 924  
563 37 80 905 618 1498 7.90E-41 177.6 6579 cellular  
organisms;Eukaryota;Opisthokonta;Metazoa;Eumetazoa;Bilateria;Protostomia;  
Spiralia;Lophotrochozoa;Mollusca;Bivalvia;Autobranchia;Pteriormorphia;Pectinida;  
Pectinoidea;Pectinidae;Pecten;Pecten maximus

UdeM00000021847 7741 115.5 UdeM00000021847 XP\_019630579.1 35.4 277  
80 5 14 191 107 383 7.30E-23 115.5 7741 cellular  
organisms;Eukaryota;Opisthokonta;Metazoa;Eumetazoa;Bilateria;Deuterostomia;  
Chordata;Cephalochordata;Leptocardii;Amphioxiformes;Branchiostomidae;Branchiostoma;  
Branchiostoma belcheri

UdeM00000021848 7574 94 UdeM00000021848 XP\_013382434.1 25.4 284  
171 6 1 244 108 390 2.90E-16 94 7574 cellular  
organisms;Eukaryota;Opisthokonta;Metazoa;Eumetazoa;Bilateria;Protostomia;  
Spiralia;Lophotrochozoa;Brachiopoda;Linguliformea;Lingulata;Lingulida;Linguloidea;  
Lingulidae;Lingula;Lingula anatina

UdeM00000021849 6579 74.3 UdeM00000021849 XP\_033753982.1 25.6 312  
183 12 1 273 381 682 4.40E-10 74.3 6579 cellular  
organisms;Eukaryota;Opisthokonta;Metazoa;Eumetazoa;Bilateria;Protostomia;  
Spiralia;Lophotrochozoa;Mollusca;Bivalvia;Autobranchia;Pteriormorphia;Pectinida;  
Pectinoidea;Pectinidae;Pecten;Pecten maximus

UdeM00000021851 7719 67.4 UdeM00000021851 XP\_002125537.4 22.3 394  
261 17 12 379 1185 1559 4.90E-08 67.4 7719 cellular  
organisms;Eukaryota;Opisthokonta;Metazoa;Eumetazoa;Bilateria;Deuterostomia;  
Chordata;Tunicata;Ascidiacea;Phlebobranchia;Cionidae;Ciona;Ciona intestinalis

UdeM00000021852 6579 325.5 UdeM00000021852 XP\_033755145.1 53.8 329  
133 5 98 411 108 432 9.90E-86 325.5 6579 cellular  
organisms;Eukaryota;Opisthokonta;Metazoa;Eumetazoa;Bilateria;Protostomia;  
Spiralia;Lophotrochozoa;Mollusca;Bivalvia;Autobranchia;Pteriormorphia;Pectinida;  
Pectinoidea;Pectinidae;Pecten;Pecten maximus

UdeM00000021853 6596 1288.9 UdeM00000021853 XP\_045193504.1 68  
928 286 4 1 928 1 917 0.00E+00 1288.9 6596  
cellular  
organisms;Eukaryota;Opisthokonta;Metazoa;Eumetazoa;Bilateria;Protostomia;  
Spiralia;Lophotrochozoa;Mollusca;Bivalvia;Autobranchia;Heteroconchia;Euheterodonta;  
Imparidentia;Venerida;Veneroidea;Veneridae;Mercenaria;Mercenaria mercenaria

UdeM00000021854 6596 69.7 UdeM00000021854 XP\_045193681.1 48.7 76  
35 2 25 99 8 80 2.40E-09 69.7 6596 cellular  
organisms;Eukaryota;Opisthokonta;Metazoa;Eumetazoa;Bilateria;Protostomia;  
Spiralia;Lophotrochozoa;Mollusca;Bivalvia;Autobranchia;Heteroconchia;Euheterodonta;  
Imparidentia;Venerida;Veneroidea;Veneridae;Mercenaria;Mercenaria mercenaria

UdeM00000021855 6596 391 UdeM00000021855 XP\_045193681.1 42.1 623  
284 15 143 698 82 694 3.40E-105 391 6596 cellular  
organisms;Eukaryota;Opisthokonta;Metazoa;Eumetazoa;Bilateria;Protostomia;  
Spiralia;Lophotrochozoa;Mollusca;Bivalvia;Autobranchia;Heteroconchia;Euheterodonta;  
Imparidentia;Venerida;Veneroidea;Veneridae;Mercenaria;Mercenaria mercenaria

UdeM00000021856 1735272 171 UdeM00000021856 XP\_041375704.1 47.7  
176 89 3 83 256 83 257 2.00E-39 171 1735272  
cellular

organisms;Eukaryota;Opisthokonta;Metazoa;Eumetazoa;Bilateria;Protostomia;Spiralia;Lophotrochozoa;Mollusca;Gastropoda;Neomphalina;Neomphaloidea;Pel tospiridae;Gigantopelta;Gigantopelta aegis

UdeM00000021857 6596 3040 UdeM00000021857 XP\_045195012.1 58.4 2650  
872 19 32 2669 200 2630 0.00E+00 3040 6596 cellular

organisms;Eukaryota;Opisthokonta;Metazoa;Eumetazoa;Bilateria;Protostomia;Spiralia;Lophotrochozoa;Mollusca;Bivalvia;Autobranchia;Heteroconchia;Euhe terodonta;Imparidentia;Venerida;Veneroidea;Veneridae;Mercenaria;Mercenari a mercenaria

UdeM00000021858 6573 216.5 UdeM00000021858 XP\_021379346.1 36.4 379  
228 9 44 417 61 431 6.90E-53 216.5 6573 cellular

organisms;Eukaryota;Opisthokonta;Metazoa;Eumetazoa;Bilateria;Protostomia;Spiralia;Lophotrochozoa;Mollusca;Bivalvia;Autobranchia;Pteriormorphia;Pect inida;Pectinoidea;Pectinidae;Mizuhopecten;Mizuhopecten yessoensis

UdeM00000021859 13397 300.8 UdeM00000021859 XP\_041034175.1 36 547  
323 12 65 608 56 578 4.70E-78 300.8 13397 cellular

organisms;Eukaryota;Opisthokonta;Metazoa;Eumetazoa;Bilateria;Deuterostomi a;Chordata;Craniata;Vertebrata;Gnathostomata;Chondrichthyes;Elasmobranchi i;Selachii;Galeomorphii;Galeoidea;Lamniformes;Alopiidae;Lamninae;Carcharo don;Carcharodon carcharias

UdeM00000021860 6596 342.4 UdeM00000021860 XP\_045194418.1 45.3 435  
223 6 23 451 24 449 8.70E-91 342.4 6596 cellular

organisms;Eukaryota;Opisthokonta;Metazoa;Eumetazoa;Bilateria;Protostomia;Spiralia;Lophotrochozoa;Mollusca;Bivalvia;Autobranchia;Heteroconchia;Euhe terodonta;Imparidentia;Venerida;Veneroidea;Veneridae;Mercenaria;Mercenari a mercenaria

UdeM00000021861 1735272 65.1 UdeM00000021861 XP\_041353177.1 37.3  
83 52 0 1 83 1 83 7.00E-08 65.1 1735272  
cellular

organisms;Eukaryota;Opisthokonta;Metazoa;Eumetazoa;Bilateria;Protostomia;Spiralia;Lophotrochozoa;Mollusca;Gastropoda;Neomphalina;Neomphaloidea;Pel tospiridae;Gigantopelta;Gigantopelta aegis

UdeM00000021862 1735272 94 UdeM00000021862 XP\_041353177.1 43.3  
90 51 0 4 93 137 226 2.80E-16 94 1735272  
cellular

organisms;Eukaryota;Opisthokonta;Metazoa;Eumetazoa;Bilateria;Protostomia;Spiralia;Lophotrochozoa;Mollusca;Gastropoda;Neomphalina;Neomphaloidea;Pel tospiridae;Gigantopelta;Gigantopelta aegis

UdeM00000021863 6579 501.9 UdeM00000021863 XP\_033729593.1 54.2 498  
227 1 466 962 745 1242 1.80E-138 501.9 6579 cellular

organisms;Eukaryota;Opisthokonta;Metazoa;Eumetazoa;Bilateria;Protostomia;Spiralia;Lophotrochozoa;Mollusca;Bivalvia;Autobranchia;Pteriormorphia;Pect inida;Pectinoidea;Pectinidae;Pecten;Pecten maximus

UdeM00000021864 6596 899.4 UdeM00000021864 XP\_045193523.1 61.9 846  
288 14 1 832 1 826 3.70E-258 899.4 6596 cellular

organisms;Eukaryota;Opisthokonta;Metazoa;Eumetazoa;Bilateria;Protostomia;Spiralia;Lophotrochozoa;Mollusca;Bivalvia;Autobranchia;Heteroconchia;Euhe terodonta;Imparidentia;Venerida;Veneroidea;Veneridae;Mercenaria;Mercenari a mercenaria

UdeM00000021867 6596 147.5 UdeM00000021867 XP\_045193524.1 33 364  
175 14 1 306 309 661 3.00E-32 147.5 6596 cellular

organisms;Eukaryota;Opisthokonta;Metazoa;Eumetazoa;Bilateria;Protostomia;Spiralia;Lophotrochozoa;Mollusca;Bivalvia;Autobranchia;Heteroconchia;Euhe

terodonta;Imparidentia;Venerida;Veneroidea;Veneridae;Mercenaria;Mercenari  
 a mercenaria  
 UdeM00000021868 6573 180.3 UdeM00000021868 XP\_021360106.1 33 373  
 216 11 2 356 264 620 5.00E-42 180.3 6573 cellular  
 organisms;Eukaryota;Opisthokonta;Metazoa;Eumetazoa;Bilateria;Protostomia;  
 Spiralia;Lophotrochozoa;Mollusca;Bivalvia;Autobranchia;Pteriomorpha;Pect  
 inida;Pectinoidea;Pectinidae;Mizuhopecten;Mizuhopecten yessoensis  
 UdeM00000021869 6596 133.7 UdeM00000021869 XP\_045193524.1 34.1 232  
 139 7 34 261 759 980 3.50E-28 133.7 6596 cellular  
 organisms;Eukaryota;Opisthokonta;Metazoa;Eumetazoa;Bilateria;Protostomia;  
 Spiralia;Lophotrochozoa;Mollusca;Bivalvia;Autobranchia;Heteroconchia;Euhe  
 terodonta;Imparidentia;Venerida;Veneroidea;Veneridae;Mercenaria;Mercenari  
 a mercenaria  
 UdeM00000021870 6596 936.4 UdeM00000021870 XP\_045192062.1 53.3 1100  
 378 15 158 1252 37 1005 3.80E-269 936.4 6596 cellular  
 organisms;Eukaryota;Opisthokonta;Metazoa;Eumetazoa;Bilateria;Protostomia;  
 Spiralia;Lophotrochozoa;Mollusca;Bivalvia;Autobranchia;Heteroconchia;Euhe  
 terodonta;Imparidentia;Venerida;Veneroidea;Veneridae;Mercenaria;Mercenari  
 a mercenaria  
 UdeM00000021871 6596 235.7 UdeM00000021871 XP\_045192494.1 72.3 148  
 41 0 6 153 430 577 7.40E-59 235.7 6596 cellular  
 organisms;Eukaryota;Opisthokonta;Metazoa;Eumetazoa;Bilateria;Protostomia;  
 Spiralia;Lophotrochozoa;Mollusca;Bivalvia;Autobranchia;Heteroconchia;Euhe  
 terodonta;Imparidentia;Venerida;Veneroidea;Veneridae;Mercenaria;Mercenari  
 a mercenaria  
 UdeM00000021872 6596 316.2 UdeM00000021872 XP\_045192495.1 38.3 566  
 312 10 1 531 29 592 8.30E-83 316.2 6596 cellular  
 organisms;Eukaryota;Opisthokonta;Metazoa;Eumetazoa;Bilateria;Protostomia;  
 Spiralia;Lophotrochozoa;Mollusca;Bivalvia;Autobranchia;Heteroconchia;Euhe  
 terodonta;Imparidentia;Venerida;Veneroidea;Veneridae;Mercenaria;Mercenari  
 a mercenaria  
 UdeM00000021873 6596 406 UdeM00000021873 XP\_045192494.1 57.4 401  
 83 4 1 320 35 428 4.80E-110 406 6596 cellular  
 organisms;Eukaryota;Opisthokonta;Metazoa;Eumetazoa;Bilateria;Protostomia;  
 Spiralia;Lophotrochozoa;Mollusca;Bivalvia;Autobranchia;Heteroconchia;Euhe  
 terodonta;Imparidentia;Venerida;Veneroidea;Veneridae;Mercenaria;Mercenari  
 a mercenaria  
 UdeM00000021874 6573 186.4 UdeM00000021874 XP\_021372212.1 70.4 135  
 40 0 6 140 9 143 2.50E-44 186.4 6573 cellular  
 organisms;Eukaryota;Opisthokonta;Metazoa;Eumetazoa;Bilateria;Protostomia;  
 Spiralia;Lophotrochozoa;Mollusca;Bivalvia;Autobranchia;Pteriomorpha;Pect  
 inida;Pectinoidea;Pectinidae;Mizuhopecten;Mizuhopecten yessoensis  
 UdeM00000021875 6596 541.2 UdeM00000021875 XP\_045192502.1 43.4 696  
 336 13 614 1297 346 995 3.90E-150 541.2 6596 cellular  
 organisms;Eukaryota;Opisthokonta;Metazoa;Eumetazoa;Bilateria;Protostomia;  
 Spiralia;Lophotrochozoa;Mollusca;Bivalvia;Autobranchia;Heteroconchia;Euhe  
 terodonta;Imparidentia;Venerida;Veneroidea;Veneridae;Mercenaria;Mercenari  
 a mercenaria  
 UdeM00000021876 6565 184.1 UdeM00000021876 XP\_022299727.1 42.9 233  
 110 4 1 211 46 277 2.00E-43 184.1 6565 cellular  
 organisms;Eukaryota;Opisthokonta;Metazoa;Eumetazoa;Bilateria;Protostomia;  
 Spiralia;Lophotrochozoa;Mollusca;Bivalvia;Autobranchia;Pteriomorpha;Ostr  
 eida;Ostreoidea;Ostreidae;Crassostrea;Crassostrea virginica

UdeM00000021877 59729 100.5 UdeM00000021877 XP\_002199104.1 49.6 121  
 57 4 1 117 1 121 2.00E-18 100.5 59729 cellular  
 organisms;Eukaryota;Opisthokonta;Metazoa;Eumetazoa;Bilateria;Deuterostomi  
 a;Chordata;Craniata;Vertebrata;Gnathostomata;Teleostomi;Euteleostomi;Sarc  
 opterygii;Dipnotetrapodomorpha;Tetrapoda;Amniota;Sauropsida;Sauria;Archel  
 osauria;Archosauria;Dinosauria;Saurischia;Theropoda;Coelurosauria;Aves;Ne  
 ognathae;Passeriformes;Passeroidea;Estrildidae;Estrildinae;Taeniopygia;Ta  
 eniopygia guttata

UdeM00000021878 6596 143.3 UdeM00000021878 XP\_045192529.1 54.8 126  
 57 0 1 126 175 300 2.40E-31 143.3 6596 cellular  
 organisms;Eukaryota;Opisthokonta;Metazoa;Eumetazoa;Bilateria;Protostomia;  
 Spiralia;Lophotrochozoa;Mollusca;Bivalvia;Autobranchia;Heteroconchia;Euhe  
 terodonta;Imparidentia;Venerida;Veneroidea;Veneridae;Mercenaria;Mercenari  
 a mercenaria

UdeM00000021879 6596 235 UdeM00000021879 XP\_045192957.1 63.6 173  
 63 0 5 177 3 175 7.70E-59 235 6596 cellular  
 organisms;Eukaryota;Opisthokonta;Metazoa;Eumetazoa;Bilateria;Protostomia;  
 Spiralia;Lophotrochozoa;Mollusca;Bivalvia;Autobranchia;Heteroconchia;Euhe  
 terodonta;Imparidentia;Venerida;Veneroidea;Veneridae;Mercenaria;Mercenari  
 a mercenaria

UdeM00000021880 6573 148.3 UdeM00000021880 XP\_021350183.1 100 76  
 0 0 1 76 1 76 4.10E-33 148.3 6573 cellular  
 organisms;Eukaryota;Opisthokonta;Metazoa;Eumetazoa;Bilateria;Protostomia;  
 Spiralia;Lophotrochozoa;Mollusca;Bivalvia;Autobranchia;Pteriormorphia;Pect  
 inida;Pectinoidea;Pectinidae;Mizuhopecten;Mizuhopecten yessoensis

UdeM00000021881 6573 107.1 UdeM00000021881 XP\_021340908.1 53.3 92  
 39 1 2 89 273 364 1.30E-20 107.1 6573 cellular  
 organisms;Eukaryota;Opisthokonta;Metazoa;Eumetazoa;Bilateria;Protostomia;  
 Spiralia;Lophotrochozoa;Mollusca;Bivalvia;Autobranchia;Pteriormorphia;Pect  
 inida;Pectinoidea;Pectinidae;Mizuhopecten;Mizuhopecten yessoensis

UdeM00000021882 6596 258.1 UdeM00000021882 XP\_045193605.1 73.7 167  
 43 1 55 220 211 377 1.10E-65 258.1 6596 cellular  
 organisms;Eukaryota;Opisthokonta;Metazoa;Eumetazoa;Bilateria;Protostomia;  
 Spiralia;Lophotrochozoa;Mollusca;Bivalvia;Autobranchia;Heteroconchia;Euhe  
 terodonta;Imparidentia;Venerida;Veneroidea;Veneridae;Mercenaria;Mercenari  
 a mercenaria

UdeM00000021883 6596 258.1 UdeM00000021883 XP\_045193605.1 73.7 167  
 43 1 26 191 211 377 9.50E-66 258.1 6596 cellular  
 organisms;Eukaryota;Opisthokonta;Metazoa;Eumetazoa;Bilateria;Protostomia;  
 Spiralia;Lophotrochozoa;Mollusca;Bivalvia;Autobranchia;Heteroconchia;Euhe  
 terodonta;Imparidentia;Venerida;Veneroidea;Veneridae;Mercenaria;Mercenari  
 a mercenaria

UdeM00000021884 6596 621.7 UdeM00000021884 XP\_045193606.1 62.4 476  
 178 1 1 475 382 857 7.70E-175 621.7 6596 cellular  
 organisms;Eukaryota;Opisthokonta;Metazoa;Eumetazoa;Bilateria;Protostomia;  
 Spiralia;Lophotrochozoa;Mollusca;Bivalvia;Autobranchia;Heteroconchia;Euhe  
 terodonta;Imparidentia;Venerida;Veneroidea;Veneridae;Mercenaria;Mercenari  
 a mercenaria

UdeM00000021885 6596 1009.6 UdeM00000021885 XP\_045193609.1 62.8  
 806 293 5 36 837 53 855 2.30E-291 1009.6 6596  
 cellular  
 organisms;Eukaryota;Opisthokonta;Metazoa;Eumetazoa;Bilateria;Protostomia;  
 Spiralia;Lophotrochozoa;Mollusca;Bivalvia;Autobranchia;Heteroconchia;Euhe

terodonta;Imparidentia;Venerida;Veneroidea;Veneridae;Mercenaria;Mercenari  
 a mercenaria  
 UdeM00000021886 6579 875.5 UdeM00000021886 XP\_033754374.1 43.9 1087  
 509 14 1 1033 1 1040 7.30E-251 875.5 6579 cellular  
 organisms;Eukaryota;Opisthokonta;Metazoa;Eumetazoa;Bilateria;Protostomia;  
 Spiralia;Lophotrochozoa;Mollusca;Bivalvia;Autobranchia;Pteriormorphia;Pect  
 inida;Pectinoidea;Pectinidae;Pecten;Pecten maximus  
 UdeM00000021887 6596 260.8 UdeM00000021887 XP\_045193726.1 59 222  
 75 3 25 243 30 238 1.90E-66 260.8 6596 cellular  
 organisms;Eukaryota;Opisthokonta;Metazoa;Eumetazoa;Bilateria;Protostomia;  
 Spiralia;Lophotrochozoa;Mollusca;Bivalvia;Autobranchia;Heteroconchia;Euhe  
 terodonta;Imparidentia;Venerida;Veneroidea;Veneridae;Mercenaria;Mercenari  
 a mercenaria  
 UdeM00000021888 6596 260.8 UdeM00000021888 XP\_045193726.1 59 222  
 75 3 18 236 30 238 1.80E-66 260.8 6596 cellular  
 organisms;Eukaryota;Opisthokonta;Metazoa;Eumetazoa;Bilateria;Protostomia;  
 Spiralia;Lophotrochozoa;Mollusca;Bivalvia;Autobranchia;Heteroconchia;Euhe  
 terodonta;Imparidentia;Venerida;Veneroidea;Veneridae;Mercenaria;Mercenari  
 a mercenaria  
 UdeM00000021889 6596 1457.2 UdeM00000021889 XP\_045193726.1 52.9  
 1489 628 19 3 1459 256 1702 0.00E+00 1457.2 6596  
 cellular  
 organisms;Eukaryota;Opisthokonta;Metazoa;Eumetazoa;Bilateria;Protostomia;  
 Spiralia;Lophotrochozoa;Mollusca;Bivalvia;Autobranchia;Heteroconchia;Euhe  
 terodonta;Imparidentia;Venerida;Veneroidea;Veneridae;Mercenaria;Mercenari  
 a mercenaria  
 UdeM00000021890 7741 136.7 UdeM00000021890 XP\_019629334.1 53.8 106  
 49 0 259 364 82 187 1.00E-28 136.7 7741 cellular  
 organisms;Eukaryota;Opisthokonta;Metazoa;Eumetazoa;Bilateria;Deuterostomi  
 a;Chordata;Cephalochordata;Leptocardii;Amphioxiformes;Branchiostomidae;Br  
 anchiostoma;Branchiostoma belcheri  
 UdeM00000021891 6596 2533.8 UdeM00000021891 XP\_045195034.1 32.7  
 5150 2932 90 2 4731 7 5040 0.00E+00 2533.8 6596  
 cellular  
 organisms;Eukaryota;Opisthokonta;Metazoa;Eumetazoa;Bilateria;Protostomia;  
 Spiralia;Lophotrochozoa;Mollusca;Bivalvia;Autobranchia;Heteroconchia;Euhe  
 terodonta;Imparidentia;Venerida;Veneroidea;Veneridae;Mercenaria;Mercenari  
 a mercenaria  
 UdeM00000021892 6596 2606.6 UdeM00000021892 XP\_045216810.1 34.1  
 4926 2943 88 23 4740 8 4840 0.00E+00 2606.6 6596  
 cellular  
 organisms;Eukaryota;Opisthokonta;Metazoa;Eumetazoa;Bilateria;Protostomia;  
 Spiralia;Lophotrochozoa;Mollusca;Bivalvia;Autobranchia;Heteroconchia;Euhe  
 terodonta;Imparidentia;Venerida;Veneroidea;Veneridae;Mercenaria;Mercenari  
 a mercenaria  
 UdeM00000021893 6573 418.7 UdeM00000021893 XP\_021348713.1 55.7 359  
 143 3 1 349 1 353 7.30E-114 418.7 6573 cellular  
 organisms;Eukaryota;Opisthokonta;Metazoa;Eumetazoa;Bilateria;Protostomia;  
 Spiralia;Lophotrochozoa;Mollusca;Bivalvia;Autobranchia;Pteriormorphia;Pect  
 inida;Pectinoidea;Pectinidae;Mizuhopecten;Mizuhopecten yessoensis  
 UdeM00000021894 151771 109.8 UdeM00000021894 XP\_028408207.1 38.9  
 157 95 1 84 240 138 293 5.00E-21 109.8 151771  
 cellular  
 organisms;Eukaryota;Opisthokonta;Metazoa;Eumetazoa;Cnidaria;Anthozoa;Octo

corallia;Alcyonacea;Alcyoniina;Nephtheidae;Dendronephthya;Dendronephthya  
 gigantea  
 UdeM00000021895 6596 2573.9 UdeM00000021895 XP\_045195034.1 36.9  
 4250 2322 63 8 3955 837 5027 0.00E+00 2573.9 6596  
 cellular  
 organisms;Eukaryota;Opisthokonta;Metazoa;Eumetazoa;Bilateria;Protostomia;  
 Spiralia;Lophotrochozoa;Mollusca;Bivalvia;Autobranhia;Heteroconchia;Euhe  
 terodonta;Imparidentia;Venerida;Veneroidea;Veneridae;Mercenaria;Mercenari  
 a mercenaria  
 UdeM00000021897 45264 429.9 UdeM00000021897 XP\_044165143.1 53.9 412  
 167 5 42 451 35 425 4.10E-117 429.9 45264 cellular  
 organisms;Eukaryota;Opisthokonta;Metazoa;Eumetazoa;Cnidaria;Anthozoa;Hexa  
 corallia;Scleractinia;Astrocoeniina;Acroporidae;Acropora;Acropora  
 millepora  
 UdeM00000021898 45264 172.9 UdeM00000021898 XP\_044184031.1 48.7 191  
 88 5 1 185 300 486 3.70E-40 172.9 45264 cellular  
 organisms;Eukaryota;Opisthokonta;Metazoa;Eumetazoa;Cnidaria;Anthozoa;Hexa  
 corallia;Scleractinia;Astrocoeniina;Acroporidae;Acropora;Acropora  
 millepora  
 UdeM00000021899 6596 351.7 UdeM00000021899 XP\_045173625.1 58 307  
 116 3 2 302 49 348 9.50E-94 351.7 6596 cellular  
 organisms;Eukaryota;Opisthokonta;Metazoa;Eumetazoa;Bilateria;Protostomia;  
 Spiralia;Lophotrochozoa;Mollusca;Bivalvia;Autobranhia;Heteroconchia;Euhe  
 terodonta;Imparidentia;Venerida;Veneroidea;Veneridae;Mercenaria;Mercenari  
 a mercenaria  
 UdeM00000021900 6596 334.3 UdeM00000021900 XP\_045173625.1 62.9 259  
 89 2 21 279 97 348 1.40E-88 334.3 6596 cellular  
 organisms;Eukaryota;Opisthokonta;Metazoa;Eumetazoa;Bilateria;Protostomia;  
 Spiralia;Lophotrochozoa;Mollusca;Bivalvia;Autobranhia;Heteroconchia;Euhe  
 terodonta;Imparidentia;Venerida;Veneroidea;Veneridae;Mercenaria;Mercenari  
 a mercenaria  
 UdeM00000021901 6596 2568.5 UdeM00000021901 XP\_045195034.1 34.2  
 4815 2684 90 107 4569 327 5010 0.00E+00 2568.5 6596  
 cellular  
 organisms;Eukaryota;Opisthokonta;Metazoa;Eumetazoa;Bilateria;Protostomia;  
 Spiralia;Lophotrochozoa;Mollusca;Bivalvia;Autobranhia;Heteroconchia;Euhe  
 terodonta;Imparidentia;Venerida;Veneroidea;Veneridae;Mercenaria;Mercenari  
 a mercenaria  
 UdeM00000021902 6596 424.5 UdeM00000021902 XP\_045173625.1 57.2 355  
 139 3 1 349 1 348 1.30E-115 424.5 6596 cellular  
 organisms;Eukaryota;Opisthokonta;Metazoa;Eumetazoa;Bilateria;Protostomia;  
 Spiralia;Lophotrochozoa;Mollusca;Bivalvia;Autobranhia;Heteroconchia;Euhe  
 terodonta;Imparidentia;Venerida;Veneroidea;Veneridae;Mercenaria;Mercenari  
 a mercenaria  
 UdeM00000021903 6596 285.4 UdeM00000021903 XP\_045173625.1 66.5 203  
 67 1 2 204 147 348 5.60E-74 285.4 6596 cellular  
 organisms;Eukaryota;Opisthokonta;Metazoa;Eumetazoa;Bilateria;Protostomia;  
 Spiralia;Lophotrochozoa;Mollusca;Bivalvia;Autobranhia;Heteroconchia;Euhe  
 terodonta;Imparidentia;Venerida;Veneroidea;Veneridae;Mercenaria;Mercenari  
 a mercenaria  
 UdeM00000021904 6596 2581.2 UdeM00000021904 XP\_045195034.1 36.8  
 4256 2315 59 8 3953 837 5027 0.00E+00 2581.2 6596  
 cellular  
 organisms;Eukaryota;Opisthokonta;Metazoa;Eumetazoa;Bilateria;Protostomia;



Spiralia;Lophotrochozoa;Mollusca;Bivalvia;Autobranchia;Heteroconchia;Euherodonta;Imparidentia;Venerida;Veneroidea;Veneridae;Mercenaria;Mercenaria mercenaria

UdeM00000021905 6596 97.4 UdeM00000021905 XP\_045161190.1 21.2 579  
413 15 2 562 216 769 6.00E-17 97.4 6596 cellular

organisms;Eukaryota;Opisthokonta;Metazoa;Eumetazoa;Bilateria;Protostomia;Spiralia;Lophotrochozoa;Mollusca;Bivalvia;Autobranchia;Heteroconchia;Euherodonta;Imparidentia;Venerida;Veneroidea;Veneridae;Mercenaria;Mercenaria mercenaria

UdeM00000021906 6596 426.4 UdeM00000021906 XP\_045173625.1 56.6 355  
141 3 1 349 1 348 3.50E-116 426.4 6596 cellular

organisms;Eukaryota;Opisthokonta;Metazoa;Eumetazoa;Bilateria;Protostomia;Spiralia;Lophotrochozoa;Mollusca;Bivalvia;Autobranchia;Heteroconchia;Euherodonta;Imparidentia;Venerida;Veneroidea;Veneridae;Mercenaria;Mercenaria mercenaria

UdeM00000021908 6565 414.8 UdeM00000021908 XP\_022343412.1 82.9 257  
44 0 386 642 148 404 2.00E-112 414.8 6565 cellular

organisms;Eukaryota;Opisthokonta;Metazoa;Eumetazoa;Bilateria;Protostomia;Spiralia;Lophotrochozoa;Mollusca;Bivalvia;Autobranchia;Pteriomorphia;Ostreida;Ostreoidea;Ostreidae;Crassostrea;Crassostrea virginica

UdeM00000021909 6579 199.9 UdeM00000021909 XP\_033760563.1 67.4 138  
45 0 4 141 2 139 2.20E-48 199.9 6579 cellular

organisms;Eukaryota;Opisthokonta;Metazoa;Eumetazoa;Bilateria;Protostomia;Spiralia;Lophotrochozoa;Mollusca;Bivalvia;Autobranchia;Pteriomorphia;Pectinida;Pectinoidea;Pectinidae;Pecten;Pecten maximus

UdeM00000021910 6596 101.3 UdeM00000021910 XP\_045216186.1 42.5 134  
68 2 1 125 1189 1322 9.40E-19 101.3 6596 cellular

organisms;Eukaryota;Opisthokonta;Metazoa;Eumetazoa;Bilateria;Protostomia;Spiralia;Lophotrochozoa;Mollusca;Bivalvia;Autobranchia;Heteroconchia;Euherodonta;Imparidentia;Venerida;Veneroidea;Veneridae;Mercenaria;Mercenaria mercenaria

UdeM00000021912 1735272 108.6 UdeM00000021912 XP\_041370983.1 60.8  
79 31 0 6 84 12 90 3.90E-21 108.6 1735272

cellular organisms;Eukaryota;Opisthokonta;Metazoa;Eumetazoa;Bilateria;Protostomia;Spiralia;Lophotrochozoa;Mollusca;Gastropoda;Neomphalina;Neomphaloidea;Peltospiridae;Gigantopelta;Gigantopelta aegis

UdeM00000021913 225164 87 UdeM00000021913 XP\_009064721.1 29.3  
150 101 2 25 174 574 718 3.20E-14 87 225164

cellular organisms;Eukaryota;Opisthokonta;Metazoa;Eumetazoa;Bilateria;Protostomia;Spiralia;Lophotrochozoa;Mollusca;Gastropoda;Patellogastropoda;Lottiidae;Lottia;Lottia gigantea

UdeM00000021914 6596 166.4 UdeM00000021914 XP\_045191603.1 64.8 128  
33 2 1 127 1 117 2.40E-38 166.4 6596 cellular

organisms;Eukaryota;Opisthokonta;Metazoa;Eumetazoa;Bilateria;Protostomia;Spiralia;Lophotrochozoa;Mollusca;Bivalvia;Autobranchia;Heteroconchia;Euherodonta;Imparidentia;Venerida;Veneroidea;Veneridae;Mercenaria;Mercenaria mercenaria

UdeM00000021915 6596 969.5 UdeM00000021915 XP\_045193962.1 81.7 584  
105 2 1 582 1 584 1.80E-279 969.5 6596 cellular

organisms;Eukaryota;Opisthokonta;Metazoa;Eumetazoa;Bilateria;Protostomia;Spiralia;Lophotrochozoa;Mollusca;Bivalvia;Autobranchia;Heteroconchia;Euherodonta

terodonta;Imparidentia;Venerida;Veneroidea;Veneridae;Mercenaria;Mercenari  
 a mercenaria  
 UdeM00000021916 6579 572.4 UdeM00000021916 XP\_033755591.1 43.4 1058  
 460 19 1 956 1 1021 1.10E-159 572.4 6579 cellular  
 organisms;Eukaryota;Opisthokonta;Metazoa;Eumetazoa;Bilateria;Protostomia;  
 Spiralia;Lophotrochozoa;Mollusca;Bivalvia;Autobranhia;Pteriormorphia;Pect  
 inida;Pectinoidea;Pectinidae;Pecten;Pecten maximus  
 UdeM00000021917 6596 264.2 UdeM00000021917 XP\_045193374.1 74.2 520  
 108 6 1 498 1 516 3.30E-67 264.2 6596 cellular  
 organisms;Eukaryota;Opisthokonta;Metazoa;Eumetazoa;Bilateria;Protostomia;  
 Spiralia;Lophotrochozoa;Mollusca;Bivalvia;Autobranhia;Heteroconchia;Euhe  
 terodonta;Imparidentia;Venerida;Veneroidea;Veneridae;Mercenaria;Mercenari  
 a mercenaria  
 UdeM00000021918 6596 267.3 UdeM00000021918 XP\_045193374.1 71.2 524  
 121 6 1 502 1 516 4.00E-68 267.3 6596 cellular  
 organisms;Eukaryota;Opisthokonta;Metazoa;Eumetazoa;Bilateria;Protostomia;  
 Spiralia;Lophotrochozoa;Mollusca;Bivalvia;Autobranhia;Heteroconchia;Euhe  
 terodonta;Imparidentia;Venerida;Veneroidea;Veneridae;Mercenaria;Mercenari  
 a mercenaria  
 UdeM00000021919 6596 396.4 UdeM00000021919 XP\_045194987.1 74.4 262  
 61 3 5 260 46 307 2.90E-107 396.4 6596 cellular  
 organisms;Eukaryota;Opisthokonta;Metazoa;Eumetazoa;Bilateria;Protostomia;  
 Spiralia;Lophotrochozoa;Mollusca;Bivalvia;Autobranhia;Heteroconchia;Euhe  
 terodonta;Imparidentia;Venerida;Veneroidea;Veneridae;Mercenaria;Mercenari  
 a mercenaria  
 UdeM00000021920 37653 201.1 UdeM00000021920 XP\_014791100.1 88.7 106  
 12 0 1 106 57 162 1.40E-48 201.1 37653 cellular  
 organisms;Eukaryota;Opisthokonta;Metazoa;Eumetazoa;Bilateria;Protostomia;  
 Spiralia;Lophotrochozoa;Mollusca;Cephalopoda;Coleoidea;Octopodiformes;Oct  
 opoda;Incirrata;Octopodidae;Octopus;Octopus bimaculoides  
 UdeM00000021921 6596 275.4 UdeM00000021921 XP\_045194538.1 76.1 163  
 39 0 10 172 17 179 5.00E-71 275.4 6596 cellular  
 organisms;Eukaryota;Opisthokonta;Metazoa;Eumetazoa;Bilateria;Protostomia;  
 Spiralia;Lophotrochozoa;Mollusca;Bivalvia;Autobranhia;Heteroconchia;Euhe  
 terodonta;Imparidentia;Venerida;Veneroidea;Veneridae;Mercenaria;Mercenari  
 a mercenaria  
 UdeM00000021922 10224 176 UdeM00000021922 XP\_002741671.1 92.6 94  
 7 0 1 94 1 94 2.30E-41 176 10224 cellular  
 organisms;Eukaryota;Opisthokonta;Metazoa;Eumetazoa;Bilateria;Deuterostomi  
 a;Hemichordata;Enteropneusta;Harrimaniidae;Saccoglossus;Saccoglossus  
 kowalevskii  
 UdeM00000021923 10224 176.4 UdeM00000021923 XP\_002741671.1 91.7 96  
 8 0 1 96 1 96 1.70E-41 176.4 10224 cellular  
 organisms;Eukaryota;Opisthokonta;Metazoa;Eumetazoa;Bilateria;Deuterostomi  
 a;Hemichordata;Enteropneusta;Harrimaniidae;Saccoglossus;Saccoglossus  
 kowalevskii  
 UdeM00000021924 10224 173.7 UdeM00000021924 XP\_002741671.1 92.5 93  
 7 0 6 98 2 94 1.20E-40 173.7 10224 cellular  
 organisms;Eukaryota;Opisthokonta;Metazoa;Eumetazoa;Bilateria;Deuterostomi  
 a;Hemichordata;Enteropneusta;Harrimaniidae;Saccoglossus;Saccoglossus  
 kowalevskii  
 UdeM00000021925 6596 541.6 UdeM00000021925 XP\_045193587.1 72.1 362  
 101 0 88 449 127 488 9.60E-151 541.6 6596 cellular  
 organisms;Eukaryota;Opisthokonta;Metazoa;Eumetazoa;Bilateria;Protostomia;

Spiralia;Lophotrochozoa;Mollusca;Bivalvia;Autobranchia;Heteroconchia;Euherodonta;Imparidentia;Venerida;Veneroidea;Veneridae;Mercenaria;Mercenaria mercenaria

UdeM00000021926 6596 496.9 UdeM00000021926 XP\_045194563.1 77.6 308  
69 0 13 320 2 309 1.90E-137 496.9 6596 cellular

organisms;Eukaryota;Opisthokonta;Metazoa;Eumetazoa;Bilateria;Protostomia;Spiralia;Lophotrochozoa;Mollusca;Bivalvia;Autobranchia;Heteroconchia;Euherodonta;Imparidentia;Venerida;Veneroidea;Veneridae;Mercenaria;Mercenaria mercenaria

UdeM00000021927 6596 485.3 UdeM00000021927 XP\_045194563.1 75.6 308  
75 0 13 320 2 309 5.80E-134 485.3 6596 cellular

organisms;Eukaryota;Opisthokonta;Metazoa;Eumetazoa;Bilateria;Protostomia;Spiralia;Lophotrochozoa;Mollusca;Bivalvia;Autobranchia;Heteroconchia;Euherodonta;Imparidentia;Venerida;Veneroidea;Veneridae;Mercenaria;Mercenaria mercenaria

UdeM00000021928 6579 295.8 UdeM00000021928 XP\_033754091.1 61.4 228  
88 0 15 242 92 319 5.00E-77 295.8 6579 cellular

organisms;Eukaryota;Opisthokonta;Metazoa;Eumetazoa;Bilateria;Protostomia;Spiralia;Lophotrochozoa;Mollusca;Bivalvia;Autobranchia;Pteriomorphia;Pectinida;Pectinoidea;Pectinidae;Pecten;Pecten maximus

UdeM00000021929 6573 298.1 UdeM00000021929 XP\_021373529.1 68.3 221  
68 1 11 229 7 227 9.40E-78 298.1 6573 cellular

organisms;Eukaryota;Opisthokonta;Metazoa;Eumetazoa;Bilateria;Protostomia;Spiralia;Lophotrochozoa;Mollusca;Bivalvia;Autobranchia;Pteriomorphia;Pectinida;Pectinoidea;Pectinidae;Mizuhopecten;Mizuhopecten yessoensis

UdeM00000021930 1735272 405.6 UdeM00000021930 XP\_041375392.1 66.8  
271 90 0 6 276 333 603 5.10E-110 405.6 1735272  
cellular

organisms;Eukaryota;Opisthokonta;Metazoa;Eumetazoa;Bilateria;Protostomia;Spiralia;Lophotrochozoa;Mollusca;Gastropoda;Neomphalina;Neomphaloidea;Peltospiridae;Gigantopelta;Gigantopelta aegis

UdeM00000021931 6596 266.5 UdeM00000021931 XP\_045192705.1 29.8 778  
472 23 2 743 11 750 1.00E-67 266.5 6596 cellular

organisms;Eukaryota;Opisthokonta;Metazoa;Eumetazoa;Bilateria;Protostomia;Spiralia;Lophotrochozoa;Mollusca;Bivalvia;Autobranchia;Heteroconchia;Euherodonta;Imparidentia;Venerida;Veneroidea;Veneridae;Mercenaria;Mercenaria mercenaria

UdeM00000021932 29159 273.5 UdeM00000021932 XP\_011417596.2 65.2 210  
64 2 1 202 36 244 2.20E-70 273.5 29159 cellular

organisms;Eukaryota;Opisthokonta;Metazoa;Eumetazoa;Bilateria;Protostomia;Spiralia;Lophotrochozoa;Mollusca;Bivalvia;Autobranchia;Pteriomorphia;Ostreida;Ostreoidea;Ostreidae;Crassostrea;Crassostrea gigas

UdeM00000021933 6596 1048.9 UdeM00000021933 XP\_045192895.1 56  
983 362 15 1 959 1 936 3.90E-303 1048.9 6596  
cellular

organisms;Eukaryota;Opisthokonta;Metazoa;Eumetazoa;Bilateria;Protostomia;Spiralia;Lophotrochozoa;Mollusca;Bivalvia;Autobranchia;Heteroconchia;Euherodonta;Imparidentia;Venerida;Veneroidea;Veneridae;Mercenaria;Mercenaria mercenaria

UdeM00000021934 29159 77.4 UdeM00000021934 XP\_034331441.1 38.7 119  
70 2 1 116 883 1001 1.30E-11 77.4 29159 cellular

organisms;Eukaryota;Opisthokonta;Metazoa;Eumetazoa;Bilateria;Protostomia;Spiralia;Lophotrochozoa;Mollusca;Bivalvia;Autobranchia;Pteriomorphia;Ostreida;Ostreoidea;Ostreidae;Crassostrea;Crassostrea gigas

UdeM00000021936 29159 164.5 UdeM00000021936 XP\_034331441.1 41.9 203  
 112 3 1 198 1 202 1.40E-37 164.5 29159 cellular  
 organisms;Eukaryota;Opisthokonta;Metazoa;Eumetazoa;Bilateria;Protostomia;  
 Spiralia;Lophotrochozoa;Mollusca;Bivalvia;Autobranchia;Pteriomorpha;Ostr  
 eida;Ostreoidea;Ostreidae;Crassostrea;Crassostrea gigas  
 UdeM00000021937 6596 411 UdeM00000021937 XP\_045192648.1 80.7 259  
 47 1 22 277 21 279 1.20E-111 411 6596 cellular  
 organisms;Eukaryota;Opisthokonta;Metazoa;Eumetazoa;Bilateria;Protostomia;  
 Spiralia;Lophotrochozoa;Mollusca;Bivalvia;Autobranchia;Heteroconchia;Euhe  
 terodonta;Imparidentia;Venerida;Veneroidea;Veneridae;Mercenaria;Mercenari  
 a mercenaria  
 UdeM00000021938 6596 290.4 UdeM00000021938 XP\_045192650.1 62.5 216  
 80 1 29 243 38 253 2.10E-75 290.4 6596 cellular  
 organisms;Eukaryota;Opisthokonta;Metazoa;Eumetazoa;Bilateria;Protostomia;  
 Spiralia;Lophotrochozoa;Mollusca;Bivalvia;Autobranchia;Heteroconchia;Euhe  
 terodonta;Imparidentia;Venerida;Veneroidea;Veneridae;Mercenaria;Mercenari  
 a mercenaria  
 UdeM00000021939 6596 298.9 UdeM00000021939 XP\_045192650.1 63.4 216  
 79 0 28 243 38 253 5.90E-78 298.9 6596 cellular  
 organisms;Eukaryota;Opisthokonta;Metazoa;Eumetazoa;Bilateria;Protostomia;  
 Spiralia;Lophotrochozoa;Mollusca;Bivalvia;Autobranchia;Heteroconchia;Euhe  
 terodonta;Imparidentia;Venerida;Veneroidea;Veneridae;Mercenaria;Mercenari  
 a mercenaria  
 UdeM00000021940 1735272 623.6 UdeM00000021940 XP\_041376047.1 56.5  
 618 208 10 6 606 7 580 2.60E-175 623.6 1735272  
 cellular  
 organisms;Eukaryota;Opisthokonta;Metazoa;Eumetazoa;Bilateria;Protostomia;  
 Spiralia;Lophotrochozoa;Mollusca;Gastropoda;Neomphalina;Neomphaloidea;Pel  
 tospiridae;Gigantopelta;Gigantopelta aegis  
 UdeM00000021941 6596 608.2 UdeM00000021941 XP\_045195063.1 43.4 1120  
 504 26 8 1095 54 1075 2.00E-170 608.2 6596 cellular  
 organisms;Eukaryota;Opisthokonta;Metazoa;Eumetazoa;Bilateria;Protostomia;  
 Spiralia;Lophotrochozoa;Mollusca;Bivalvia;Autobranchia;Heteroconchia;Euhe  
 terodonta;Imparidentia;Venerida;Veneroidea;Veneridae;Mercenaria;Mercenari  
 a mercenaria  
 UdeM00000021942 114398 134 UdeM00000021942 XP\_042913023.1 50  
 132 66 0 1 132 123 254 1.90E-28 134 114398  
 cellular  
 organisms;Eukaryota;Opisthokonta;Metazoa;Eumetazoa;Bilateria;Protostomia;  
 Ecdysozoa;Panarthropoda;Arthropoda;Chelicerata;Arachnida;Araneae;Araneomo  
 rphae;Entelegynae;Orbiculariae;Araneoidea;Theridiidae;Parasteatoda;Parast  
 eatoda tepidariorum  
 UdeM00000021942 114398 53.5 UdeM00000021942 XP\_042913023.1 51  
 51 25 0 134 184 543 593 3.30E-04 53.5 114398  
 cellular  
 organisms;Eukaryota;Opisthokonta;Metazoa;Eumetazoa;Bilateria;Protostomia;  
 Ecdysozoa;Panarthropoda;Arthropoda;Chelicerata;Arachnida;Araneae;Araneomo  
 rphae;Entelegynae;Orbiculariae;Araneoidea;Theridiidae;Parasteatoda;Parast  
 eatoda tepidariorum  
 UdeM00000021944 6573 89.4 UdeM00000021944 XP\_021374037.1 74.1 58  
 15 0 81 138 26 83 6.10E-15 89.4 6573 cellular  
 organisms;Eukaryota;Opisthokonta;Metazoa;Eumetazoa;Bilateria;Protostomia;  
 Spiralia;Lophotrochozoa;Mollusca;Bivalvia;Autobranchia;Pteriomorpha;Pect  
 inida;Pectinoidea;Pectinidae;Mizuhopecten;Mizuhopecten yessoensis

UdeM00000021945 1735272 847 UdeM00000021945 XP\_041375757.1 69.4  
 599 180 2 169 764 168 766 1.80E-242 847 1735272  
 cellular  
 organisms;Eukaryota;Opisthokonta;Metazoa;Eumetazoa;Bilateria;Protostomia;  
 Spiralia;Lophotrochozoa;Mollusca;Gastropoda;Neomphalina;Neomphaloidea;Pel  
 tospiridae;Gigantopelta;Gigantopelta aegis  
 UdeM00000021947 6596 192.2 UdeM00000021947 XP\_045193544.1 37.2 376  
 185 10 25 357 47 414 1.10E-45 192.2 6596 cellular  
 organisms;Eukaryota;Opisthokonta;Metazoa;Eumetazoa;Bilateria;Protostomia;  
 Spiralia;Lophotrochozoa;Mollusca;Bivalvia;Autobranchia;Heteroconchia;Euhe  
 terodonta;Imparidentia;Venerida;Veneroidea;Veneridae;Mercenaria;Mercenari  
 a mercenaria  
 UdeM00000021948 6596 469.9 UdeM00000021948 XP\_045191756.1 36.8 1013  
 509 25 12 926 17 996 7.30E-129 469.9 6596 cellular  
 organisms;Eukaryota;Opisthokonta;Metazoa;Eumetazoa;Bilateria;Protostomia;  
 Spiralia;Lophotrochozoa;Mollusca;Bivalvia;Autobranchia;Heteroconchia;Euhe  
 terodonta;Imparidentia;Venerida;Veneroidea;Veneridae;Mercenaria;Mercenari  
 a mercenaria  
 UdeM00000021949 6579 573.5 UdeM00000021949 XP\_033754941.1 74.8 417  
 97 4 1 411 1 415 2.10E-160 573.5 6579 cellular  
 organisms;Eukaryota;Opisthokonta;Metazoa;Eumetazoa;Bilateria;Protostomia;  
 Spiralia;Lophotrochozoa;Mollusca;Bivalvia;Autobranchia;Pteriormorphia;Pect  
 inida;Pectinoidea;Pectinidae;Pecten;Pecten maximus  
 UdeM00000021950 29159 621.3 UdeM00000021950 XP\_034301220.1 55.7 517  
 224 3 10 523 59 573 1.10E-174 621.3 29159 cellular  
 organisms;Eukaryota;Opisthokonta;Metazoa;Eumetazoa;Bilateria;Protostomia;  
 Spiralia;Lophotrochozoa;Mollusca;Bivalvia;Autobranchia;Pteriormorphia;Ostr  
 eida;Ostreoidea;Ostreidae;Crassostrea;Crassostrea gigas  
 UdeM00000021951 225164 171.8 UdeM00000021951 XP\_009062982.1 47.5  
 158 79 1 2 155 365 522 7.10E-40 171.8 225164  
 cellular  
 organisms;Eukaryota;Opisthokonta;Metazoa;Eumetazoa;Bilateria;Protostomia;  
 Spiralia;Lophotrochozoa;Mollusca;Gastropoda;Patellogastropoda;Lottioidea;  
 Lottiidae;Lottia;Lottia gigantea  
 UdeM00000021952 6596 500 UdeM00000021952 XP\_045192150.1 39.6 821  
 401 16 13 788 11 781 5.60E-138 500 6596 cellular  
 organisms;Eukaryota;Opisthokonta;Metazoa;Eumetazoa;Bilateria;Protostomia;  
 Spiralia;Lophotrochozoa;Mollusca;Bivalvia;Autobranchia;Heteroconchia;Euhe  
 terodonta;Imparidentia;Venerida;Veneroidea;Veneridae;Mercenaria;Mercenari  
 a mercenaria  
 UdeM00000021953 400727 264.6 UdeM00000021953 XP\_025115362.1 82.3  
 158 27 1 1 158 1 157 8.00E-68 264.6 400727  
 cellular  
 organisms;Eukaryota;Opisthokonta;Metazoa;Eumetazoa;Bilateria;Protostomia;  
 Spiralia;Lophotrochozoa;Mollusca;Gastropoda;Caenogastropoda;Architaeniogl  
 ossa;Ampullarioidea;Ampullariidae;Pomacea;Pomacea canaliculata  
 UdeM00000021954 6596 425.2 UdeM00000021954 XP\_045192840.1 88.6 229  
 26 0 58 286 148 376 6.40E-116 425.2 6596 cellular  
 organisms;Eukaryota;Opisthokonta;Metazoa;Eumetazoa;Bilateria;Protostomia;  
 Spiralia;Lophotrochozoa;Mollusca;Bivalvia;Autobranchia;Heteroconchia;Euhe  
 terodonta;Imparidentia;Venerida;Veneroidea;Veneridae;Mercenaria;Mercenari  
 a mercenaria  
 UdeM00000021955 6596 344.7 UdeM00000021955 XP\_045192840.1 93.7 174  
 11 0 1 174 203 376 6.70E-92 344.7 6596 cellular

organisms;Eukaryota;Opisthokonta;Metazoa;Eumetazoa;Bilateria;Protostomia;Spiralia;Lophotrochozoa;Mollusca;Bivalvia;Autobranhia;Heteroconchia;Euherodonta;Imparidentia;Venerida;Veneroidea;Veneridae;Mercenaria;Mercenaria mercenaria

UdeM00000021956 6596 555.8 UdeM00000021956 XP\_045192505.1 39.2 817  
175 3 5 821 7 501 9.00E-155 555.8 6596 cellular

organisms;Eukaryota;Opisthokonta;Metazoa;Eumetazoa;Bilateria;Protostomia;Spiralia;Lophotrochozoa;Mollusca;Bivalvia;Autobranhia;Heteroconchia;Euherodonta;Imparidentia;Venerida;Veneroidea;Veneridae;Mercenaria;Mercenaria mercenaria

UdeM00000021957 6596 454.5 UdeM00000021957 XP\_045192506.1 61.6 417  
141 9 1 403 1 412 1.50E-124 454.5 6596 cellular

organisms;Eukaryota;Opisthokonta;Metazoa;Eumetazoa;Bilateria;Protostomia;Spiralia;Lophotrochozoa;Mollusca;Bivalvia;Autobranhia;Heteroconchia;Euherodonta;Imparidentia;Venerida;Veneroidea;Veneridae;Mercenaria;Mercenaria mercenaria

UdeM00000021958 6579 453.8 UdeM00000021958 XP\_033730145.1 60.4 412  
136 9 5 398 60 462 2.30E-124 453.8 6579 cellular

organisms;Eukaryota;Opisthokonta;Metazoa;Eumetazoa;Bilateria;Protostomia;Spiralia;Lophotrochozoa;Mollusca;Bivalvia;Autobranhia;Pteriormorphia;Pectinida;Pectinoidea;Pectinidae;Pecten;Pecten maximus

UdeM00000021959 6596 316.2 UdeM00000021959 XP\_045193840.1 74.3 210  
54 0 1 210 274 483 3.10E-83 316.2 6596 cellular

organisms;Eukaryota;Opisthokonta;Metazoa;Eumetazoa;Bilateria;Protostomia;Spiralia;Lophotrochozoa;Mollusca;Bivalvia;Autobranhia;Heteroconchia;Euherodonta;Imparidentia;Venerida;Veneroidea;Veneridae;Mercenaria;Mercenaria mercenaria

UdeM00000021960 6596 414.5 UdeM00000021960 XP\_045193840.1 75.7 276  
66 1 16 290 12 287 1.30E-112 414.5 6596 cellular

organisms;Eukaryota;Opisthokonta;Metazoa;Eumetazoa;Bilateria;Protostomia;Spiralia;Lophotrochozoa;Mollusca;Bivalvia;Autobranhia;Heteroconchia;Euherodonta;Imparidentia;Venerida;Veneroidea;Veneridae;Mercenaria;Mercenaria mercenaria

UdeM00000021961 6565 135.2 UdeM00000021961 XP\_022287303.1 34.1 185  
97 4 12 172 567 750 8.00E-29 135.2 6565 cellular

organisms;Eukaryota;Opisthokonta;Metazoa;Eumetazoa;Bilateria;Protostomia;Spiralia;Lophotrochozoa;Mollusca;Bivalvia;Autobranhia;Pteriormorphia;Ostreida;Ostreoidea;Ostreidae;Crassostrea;Crassostrea virginica

UdeM00000021962 6596 708.4 UdeM00000021962 XP\_045193843.1 73.1 487  
130 1 5 491 6 491 6.70E-201 708.4 6596 cellular

organisms;Eukaryota;Opisthokonta;Metazoa;Eumetazoa;Bilateria;Protostomia;Spiralia;Lophotrochozoa;Mollusca;Bivalvia;Autobranhia;Heteroconchia;Euherodonta;Imparidentia;Venerida;Veneroidea;Veneridae;Mercenaria;Mercenaria mercenaria

UdeM00000021963 6596 202.6 UdeM00000021963 XP\_045193844.1 68.5 146  
46 0 42 187 104 249 4.40E-49 202.6 6596 cellular

organisms;Eukaryota;Opisthokonta;Metazoa;Eumetazoa;Bilateria;Protostomia;Spiralia;Lophotrochozoa;Mollusca;Bivalvia;Autobranhia;Heteroconchia;Euherodonta;Imparidentia;Venerida;Veneroidea;Veneridae;Mercenaria;Mercenaria mercenaria

UdeM00000021964 225164 305.4 UdeM00000021964 XP\_009052992.1 55.6  
257 113 1 3 258 2 258 6.80E-80 305.4 225164  
cellular

organisms;Eukaryota;Opisthokonta;Metazoa;Eumetazoa;Bilateria;Protostomia;

Spiralia;Lophotrochozoa;Mollusca;Gastropoda;Patellogastropoda;Lottioidea;Lottiidae;Lottia;Lottia gigantea

UdeM00000021965 6579 283.9 UdeM00000021965 XP\_033754383.1 52.9 257  
118 3 1 256 91 345 2.40E-73 283.9 6579 cellular  
organisms;Eukaryota;Opisthokonta;Metazoa;Eumetazoa;Bilateria;Protostomia;  
Spiralia;Lophotrochozoa;Mollusca;Bivalvia;Autobranchia;Pteriormorphia;Pectinida;Pectinoidea;Pectinidae;Pecten;Pecten maximus

UdeM00000021966 6596 193 UdeM00000021966 XP\_045193844.1 60.8 176  
65 2 14 189 78 249 3.50E-46 193 6596 cellular  
organisms;Eukaryota;Opisthokonta;Metazoa;Eumetazoa;Bilateria;Protostomia;  
Spiralia;Lophotrochozoa;Mollusca;Bivalvia;Autobranchia;Heteroconchia;Euheterodonta;Imparidentia;Venerida;Veneroidea;Veneridae;Mercenaria;Mercenaria mercenaria

UdeM00000021967 225164 305.8 UdeM00000021967 XP\_009052992.1 55.9  
256 112 1 5 259 4 259 5.20E-80 305.8 225164  
cellular  
organisms;Eukaryota;Opisthokonta;Metazoa;Eumetazoa;Bilateria;Protostomia;  
Spiralia;Lophotrochozoa;Mollusca;Gastropoda;Patellogastropoda;Lottioidea;Lottiidae;Lottia;Lottia gigantea

UdeM00000021970 225164 115.9 UdeM00000021970 XP\_009051134.1 32.7  
217 127 7 25 238 190 390 7.30E-23 115.9 225164  
cellular  
organisms;Eukaryota;Opisthokonta;Metazoa;Eumetazoa;Bilateria;Protostomia;  
Spiralia;Lophotrochozoa;Mollusca;Gastropoda;Patellogastropoda;Lottioidea;Lottiidae;Lottia;Lottia gigantea

UdeM00000021971 29159 746.9 UdeM00000021971 XP\_034338161.1 62.1 673  
245 6 1 671 1 665 2.30E-212 746.9 29159 cellular  
organisms;Eukaryota;Opisthokonta;Metazoa;Eumetazoa;Bilateria;Protostomia;  
Spiralia;Lophotrochozoa;Mollusca;Bivalvia;Autobranchia;Pteriormorphia;Ostreida;Ostreoidea;Ostreidae;Crassostrea;Crassostrea gigas

UdeM00000021972 6596 159.1 UdeM00000021972 XP\_045170977.1 66 103  
35 0 4 106 361 463 4.20E-36 159.1 6596 cellular  
organisms;Eukaryota;Opisthokonta;Metazoa;Eumetazoa;Bilateria;Protostomia;  
Spiralia;Lophotrochozoa;Mollusca;Bivalvia;Autobranchia;Heteroconchia;Euheterodonta;Imparidentia;Venerida;Veneroidea;Veneridae;Mercenaria;Mercenaria mercenaria

UdeM00000021973 400727 448 UdeM00000021973 XP\_025115101.1 71.2  
302 85 2 1 301 1 301 9.70E-123 448 400727  
cellular  
organisms;Eukaryota;Opisthokonta;Metazoa;Eumetazoa;Bilateria;Protostomia;  
Spiralia;Lophotrochozoa;Mollusca;Gastropoda;Caenogastropoda;Architaenioglossa;Ampullarioidea;Ampullariidae;Pomacea;Pomacea canaliculata

UdeM00000021975 400727 303.9 UdeM00000021975 XP\_025115101.1 75.4  
183 45 0 1 183 119 301 1.40E-79 303.9 400727  
cellular  
organisms;Eukaryota;Opisthokonta;Metazoa;Eumetazoa;Bilateria;Protostomia;  
Spiralia;Lophotrochozoa;Mollusca;Gastropoda;Caenogastropoda;Architaenioglossa;Ampullarioidea;Ampullariidae;Pomacea;Pomacea canaliculata

UdeM00000021974 29159 129.4 UdeM00000021974 XP\_034307341.1 41.2 136  
80 0 11 146 211 346 5.10E-27 129.4 29159 cellular  
organisms;Eukaryota;Opisthokonta;Metazoa;Eumetazoa;Bilateria;Protostomia;  
Spiralia;Lophotrochozoa;Mollusca;Bivalvia;Autobranchia;Pteriormorphia;Ostreida;Ostreoidea;Ostreidae;Crassostrea;Crassostrea gigas

UdeM00000021976 6579 935.6 UdeM00000021976 XP\_033755892.1 80 556  
 111 0 1 556 1 556 2.80E-269 935.6 6579 cellular  
 organisms;Eukaryota;Opisthokonta;Metazoa;Eumetazoa;Bilateria;Protostomia;  
 Spiralia;Lophotrochozoa;Mollusca;Bivalvia;Autobranhia;Pteriormorphia;Pect  
 inida;Pectinoidea;Pectinidae;Pecten;Pecten maximus  
 UdeM00000021977 6596 178.3 UdeM00000021977 XP\_045192174.1 58 143  
 60 0 2 144 277 419 9.70E-42 178.3 6596 cellular  
 organisms;Eukaryota;Opisthokonta;Metazoa;Eumetazoa;Bilateria;Protostomia;  
 Spiralia;Lophotrochozoa;Mollusca;Bivalvia;Autobranhia;Heteroconchia;Euhe  
 terodonta;Imparidentia;Venerida;Veneroidea;Veneridae;Mercenaria;Mercenari  
 a mercenaria  
 UdeM00000021978 6596 179.5 UdeM00000021978 XP\_045192176.1 49 198  
 94 3 7 200 11 205 5.10E-42 179.5 6596 cellular  
 organisms;Eukaryota;Opisthokonta;Metazoa;Eumetazoa;Bilateria;Protostomia;  
 Spiralia;Lophotrochozoa;Mollusca;Bivalvia;Autobranhia;Heteroconchia;Euhe  
 terodonta;Imparidentia;Venerida;Veneroidea;Veneridae;Mercenaria;Mercenari  
 a mercenaria  
 UdeM00000021979 6573 278.9 UdeM00000021979 XP\_021349142.1 63.4 186  
 68 0 1 186 228 413 4.80E-72 278.9 6573 cellular  
 organisms;Eukaryota;Opisthokonta;Metazoa;Eumetazoa;Bilateria;Protostomia;  
 Spiralia;Lophotrochozoa;Mollusca;Bivalvia;Autobranhia;Pteriormorphia;Pect  
 inida;Pectinoidea;Pectinidae;Mizuhopecten;Mizuhopecten yessoensis  
 UdeM00000021980 6579 317.8 UdeM00000021980 XP\_033754640.1 59.2 260  
 105 1 11 269 12 271 1.40E-83 317.8 6579 cellular  
 organisms;Eukaryota;Opisthokonta;Metazoa;Eumetazoa;Bilateria;Protostomia;  
 Spiralia;Lophotrochozoa;Mollusca;Bivalvia;Autobranhia;Pteriormorphia;Pect  
 inida;Pectinoidea;Pectinidae;Pecten;Pecten maximus  
 UdeM00000021981 1735272 152.5 UdeM00000021981 XP\_041375571.1 61.9  
 126 48 0 8 133 6 131 3.70E-34 152.5 1735272  
 cellular  
 organisms;Eukaryota;Opisthokonta;Metazoa;Eumetazoa;Bilateria;Protostomia;  
 Spiralia;Lophotrochozoa;Mollusca;Gastropoda;Neomphalina;Neomphaloidea;Pel  
 tospiridae;Gigantopelta;Gigantopelta aegis  
 UdeM00000021984 6579 587.8 UdeM00000021984 XP\_033755154.1 62.8 487  
 161 7 22 504 19 489 1.30E-164 587.8 6579 cellular  
 organisms;Eukaryota;Opisthokonta;Metazoa;Eumetazoa;Bilateria;Protostomia;  
 Spiralia;Lophotrochozoa;Mollusca;Bivalvia;Autobranhia;Pteriormorphia;Pect  
 inida;Pectinoidea;Pectinidae;Pecten;Pecten maximus  
 UdeM00000021985 6596 415.2 UdeM00000021985 XP\_045193071.1 54 441  
 150 10 3 402 2 430 9.30E-113 415.2 6596 cellular  
 organisms;Eukaryota;Opisthokonta;Metazoa;Eumetazoa;Bilateria;Protostomia;  
 Spiralia;Lophotrochozoa;Mollusca;Bivalvia;Autobranhia;Heteroconchia;Euhe  
 terodonta;Imparidentia;Venerida;Veneroidea;Veneridae;Mercenaria;Mercenari  
 a mercenaria  
 UdeM00000021986 6596 436.4 UdeM00000021986 XP\_045193071.1 54.9 441  
 160 9 3 416 2 430 4.00E-119 436.4 6596 cellular  
 organisms;Eukaryota;Opisthokonta;Metazoa;Eumetazoa;Bilateria;Protostomia;  
 Spiralia;Lophotrochozoa;Mollusca;Bivalvia;Autobranhia;Heteroconchia;Euhe  
 terodonta;Imparidentia;Venerida;Veneroidea;Veneridae;Mercenaria;Mercenari  
 a mercenaria  
 UdeM00000021987 6596 289.7 UdeM00000021987 XP\_045194567.1 70.5 200  
 58 1 1 199 1 200 3.00E-75 289.7 6596 cellular  
 organisms;Eukaryota;Opisthokonta;Metazoa;Eumetazoa;Bilateria;Protostomia;  
 Spiralia;Lophotrochozoa;Mollusca;Bivalvia;Autobranhia;Heteroconchia;Euhe



terodonta;Imparidentia;Venerida;Veneroidea;Veneridae;Mercenaria;Mercenari  
 a mercenaria  
 UdeM00000021988 6596 85.9 UdeM00000021988 XP\_045166798.1 32.7 153  
 91 2 2 147 128 275 5.70E-14 85.9 6596 cellular  
 organisms;Eukaryota;Opisthokonta;Metazoa;Eumetazoa;Bilateria;Protostomia;  
 Spiralia;Lophotrochozoa;Mollusca;Bivalvia;Autobranhia;Heteroconchia;Euhe  
 terodonta;Imparidentia;Venerida;Veneroidea;Veneridae;Mercenaria;Mercenari  
 a mercenaria  
 UdeM00000021989 6596 561.6 UdeM00000021989 XP\_045192738.1 75.4 353  
 81 2 1 348 8 359 7.20E-157 561.6 6596 cellular  
 organisms;Eukaryota;Opisthokonta;Metazoa;Eumetazoa;Bilateria;Protostomia;  
 Spiralia;Lophotrochozoa;Mollusca;Bivalvia;Autobranhia;Heteroconchia;Euhe  
 terodonta;Imparidentia;Venerida;Veneroidea;Veneridae;Mercenaria;Mercenari  
 a mercenaria  
 UdeM00000015786 6596 215.7 UdeM00000015786 XP\_045161545.1 63.6 151  
 55 0 3 153 369 519 4.10E-53 215.7 6596 cellular  
 organisms;Eukaryota;Opisthokonta;Metazoa;Eumetazoa;Bilateria;Protostomia;  
 Spiralia;Lophotrochozoa;Mollusca;Bivalvia;Autobranhia;Heteroconchia;Euhe  
 terodonta;Imparidentia;Venerida;Veneroidea;Veneridae;Mercenaria;Mercenari  
 a mercenaria  
 UdeM00000015787 6596 197.2 UdeM00000015787 XP\_045161545.1 62.8 137  
 51 0 1 137 383 519 1.40E-47 197.2 6596 cellular  
 organisms;Eukaryota;Opisthokonta;Metazoa;Eumetazoa;Bilateria;Protostomia;  
 Spiralia;Lophotrochozoa;Mollusca;Bivalvia;Autobranhia;Heteroconchia;Euhe  
 terodonta;Imparidentia;Venerida;Veneroidea;Veneridae;Mercenaria;Mercenari  
 a mercenaria  
 UdeM00000015791 48498 112.5 UdeM00000015791 XP\_020607139.1 35.9 237  
 125 7 1 230 1 217 1.20E-21 112.5 48498 cellular  
 organisms;Eukaryota;Opisthokonta;Metazoa;Eumetazoa;Cnidaria;Anthozoa;Hexa  
 corallia;Scleractinia;Faviina;Merulinidae;Orbicella;Orbicella faveolata  
 UdeM00000015790 48498 112.5 UdeM00000015790 XP\_020607139.1 35.9 237  
 125 7 1 230 1 217 1.40E-21 112.5 48498 cellular  
 organisms;Eukaryota;Opisthokonta;Metazoa;Eumetazoa;Cnidaria;Anthozoa;Hexa  
 corallia;Scleractinia;Faviina;Merulinidae;Orbicella;Orbicella faveolata  
 UdeM00000015792 6573 639.4 UdeM00000015792 XP\_021343874.1 30.3 1590  
 961 50 4 1512 191 1713 1.20E-179 639.4 6573 cellular  
 organisms;Eukaryota;Opisthokonta;Metazoa;Eumetazoa;Bilateria;Protostomia;  
 Spiralia;Lophotrochozoa;Mollusca;Bivalvia;Autobranhia;Pteriomorphia;Pect  
 inida;Pectinoidea;Pectinidae;Mizuhopecten;Mizuhopecten yessoensis  
 UdeM00000015796 6573 344.4 UdeM00000015796 XP\_021356516.1 38.9 730  
 406 7 10 738 20 710 3.70E-91 344.4 6573 cellular  
 organisms;Eukaryota;Opisthokonta;Metazoa;Eumetazoa;Bilateria;Protostomia;  
 Spiralia;Lophotrochozoa;Mollusca;Bivalvia;Autobranhia;Pteriomorphia;Pect  
 inida;Pectinoidea;Pectinidae;Mizuhopecten;Mizuhopecten yessoensis  
 UdeM00000015797 400727 193 UdeM00000015797 XP\_025083423.1 83.6  
 110 18 0 24 133 26 135 2.50E-46 193 400727  
 cellular  
 organisms;Eukaryota;Opisthokonta;Metazoa;Eumetazoa;Bilateria;Protostomia;  
 Spiralia;Lophotrochozoa;Mollusca;Gastropoda;Caenogastropoda;Architaeniogl  
 ossa;Ampullarioidea;Ampullariidae;Pomacea;Pomacea canaliculata  
 UdeM00000015798 400727 193 UdeM00000015798 XP\_025083423.1 83.6  
 110 18 0 56 165 26 135 3.10E-46 193 400727  
 cellular  
 organisms;Eukaryota;Opisthokonta;Metazoa;Eumetazoa;Bilateria;Protostomia;

Spiralia;Lophotrochozoa;Mollusca;Gastropoda;Caenogastropoda;Architaenioglossa;Ampullarioidea;Ampullariidae;Pomacea;Pomacea canaliculata

|                 |      |       |                 |                |          |           |
|-----------------|------|-------|-----------------|----------------|----------|-----------|
| UdeM00000015799 | 6596 | 377.5 | UdeM00000015799 | XP_045163391.1 | 70.4     | 253       |
| 72              | 2    | 1     | 251             | 1              | 252      | 1.30E-101 |
|                 |      |       | 377.5           | 6596           | cellular |           |

organisms;Eukaryota;Opisthokonta;Metazoa;Eumetazoa;Bilateria;Protostomia;Spiralia;Lophotrochozoa;Mollusca;Bivalvia;Autobranchia;Heteroconchia;Euheterodonta;Imparidentia;Venerida;Veneroidea;Veneridae;Mercenaria;Mercenaria mercenaria

|                 |      |        |                 |                |          |          |
|-----------------|------|--------|-----------------|----------------|----------|----------|
| UdeM00000015800 | 6579 | 1226.5 | UdeM00000015800 | XP_033724626.1 | 61.8     |          |
| 997             | 355  | 13     | 5               | 987            | 29       | 1013     |
|                 |      |        |                 |                |          | 0.00E+00 |
|                 |      |        | 1226.5          | 6579           | cellular |          |

organisms;Eukaryota;Opisthokonta;Metazoa;Eumetazoa;Bilateria;Protostomia;Spiralia;Lophotrochozoa;Mollusca;Bivalvia;Autobranchia;Pteriormorphia;Pectinida;Pectinoidea;Pectinidae;Pecten;Pecten maximus

|                 |      |        |                 |                |          |          |
|-----------------|------|--------|-----------------|----------------|----------|----------|
| UdeM00000015801 | 6579 | 1225.3 | UdeM00000015801 | XP_033724626.1 | 61.9     |          |
| 997             | 357  | 13     | 5               | 990            | 29       | 1013     |
|                 |      |        |                 |                |          | 0.00E+00 |
|                 |      |        | 1225.3          | 6579           | cellular |          |

organisms;Eukaryota;Opisthokonta;Metazoa;Eumetazoa;Bilateria;Protostomia;Spiralia;Lophotrochozoa;Mollusca;Bivalvia;Autobranchia;Pteriormorphia;Pectinida;Pectinoidea;Pectinidae;Pecten;Pecten maximus

|                 |      |       |                 |                |          |          |
|-----------------|------|-------|-----------------|----------------|----------|----------|
| UdeM00000015803 | 6596 | 322.8 | UdeM00000015803 | XP_045162637.1 | 43       | 372      |
| 204             | 4    | 47    | 413             | 25             | 393      | 6.60E-85 |
|                 |      |       | 322.8           | 6596           | cellular |          |

organisms;Eukaryota;Opisthokonta;Metazoa;Eumetazoa;Bilateria;Protostomia;Spiralia;Lophotrochozoa;Mollusca;Bivalvia;Autobranchia;Heteroconchia;Euheterodonta;Imparidentia;Venerida;Veneroidea;Veneridae;Mercenaria;Mercenaria mercenaria

|                 |      |       |                 |                |          |           |
|-----------------|------|-------|-----------------|----------------|----------|-----------|
| UdeM00000015804 | 6596 | 596.7 | UdeM00000015804 | XP_045162637.1 | 44.5     | 686       |
| 372             | 7    | 1     | 678             | 557            | 1241     | 3.80E-167 |
|                 |      |       | 596.7           | 6596           | cellular |           |

organisms;Eukaryota;Opisthokonta;Metazoa;Eumetazoa;Bilateria;Protostomia;Spiralia;Lophotrochozoa;Mollusca;Bivalvia;Autobranchia;Heteroconchia;Euheterodonta;Imparidentia;Venerida;Veneroidea;Veneridae;Mercenaria;Mercenaria mercenaria

|                 |      |        |                 |                |          |          |
|-----------------|------|--------|-----------------|----------------|----------|----------|
| UdeM00000015805 | 6596 | 1143.3 | UdeM00000015805 | XP_045162998.1 | 64.4     |          |
| 919             | 297  | 8      | 23              | 914            | 46       | 961      |
|                 |      |        |                 |                |          | 0.00E+00 |
|                 |      |        | 1143.3          | 6596           | cellular |          |

organisms;Eukaryota;Opisthokonta;Metazoa;Eumetazoa;Bilateria;Protostomia;Spiralia;Lophotrochozoa;Mollusca;Bivalvia;Autobranchia;Heteroconchia;Euheterodonta;Imparidentia;Venerida;Veneroidea;Veneridae;Mercenaria;Mercenaria mercenaria

|                 |      |       |                 |                |          |           |
|-----------------|------|-------|-----------------|----------------|----------|-----------|
| UdeM00000015808 | 6596 | 469.2 | UdeM00000015808 | XP_045161391.1 | 60.5     | 435       |
| 146             | 11   | 1     | 424             | 1              | 420      | 5.70E-129 |
|                 |      |       | 469.2           | 6596           | cellular |           |

organisms;Eukaryota;Opisthokonta;Metazoa;Eumetazoa;Bilateria;Protostomia;Spiralia;Lophotrochozoa;Mollusca;Bivalvia;Autobranchia;Heteroconchia;Euheterodonta;Imparidentia;Venerida;Veneroidea;Veneridae;Mercenaria;Mercenaria mercenaria

|                 |      |      |                 |                |          |          |
|-----------------|------|------|-----------------|----------------|----------|----------|
| UdeM00000015809 | 6579 | 74.7 | UdeM00000015809 | XP_033761099.1 | 24       | 208      |
| 135             | 4    | 211  | 399             | 109            | 312      | 3.00E-10 |
|                 |      |      | 74.7            | 6579           | cellular |          |

organisms;Eukaryota;Opisthokonta;Metazoa;Eumetazoa;Bilateria;Protostomia;Spiralia;Lophotrochozoa;Mollusca;Bivalvia;Autobranchia;Pteriormorphia;Pectinida;Pectinoidea;Pectinidae;Pecten;Pecten maximus

|                 |      |      |                 |                |          |          |
|-----------------|------|------|-----------------|----------------|----------|----------|
| UdeM00000015810 | 7668 | 74.7 | UdeM00000015810 | XP_003729577.2 | 36.8     | 106      |
| 62              | 2    | 306  | 411             | 655            | 755      | 3.10E-10 |
|                 |      |      | 74.7            | 7668           | cellular |          |

organisms;Eukaryota;Opisthokonta;Metazoa;Eumetazoa;Bilateria;Deuterostomia;Echinodermata;Eleutherozoa;Echinozoa;Echinoidea;Euechinoidea;Echinacea;

Camarodonta;Echinidea;Strongylocentrotidae;Strongylocentrotus;Strongylocentrotus purpuratus

UdeM00000015811 6596 760 UdeM00000015811 XP\_045161284.1 65.5 580  
160 4 1 544 1 576 2.10E-216 760 6596 cellular

organisms;Eukaryota;Opisthokonta;Metazoa;Eumetazoa;Bilateria;Protostomia;Spiralia;Lophotrochozoa;Mollusca;Bivalvia;Autobranchia;Heteroconchia;Euherodonta;Imparidentia;Venerida;Veneroidea;Veneridae;Mercenaria;Mercenaria mercenaria

UdeM00000015812 2607531 316.6 UdeM00000015812 XP\_029633457.1 52.1  
288 129 4 2 284 87 370 3.20E-83 316.6 2607531  
cellular

organisms;Eukaryota;Opisthokonta;Metazoa;Eumetazoa;Bilateria;Protostomia;Spiralia;Lophotrochozoa;Mollusca;Cephalopoda;Coleoidea;Octopodiformes;Octopoda;Incirrata;Octopodidae;Octopus;Octopus sinensis

UdeM00000015813 6596 221.5 UdeM00000015813 XP\_045178436.1 40.4 332  
176 5 266 595 7 318 3.00E-54 221.5 6596 cellular

organisms;Eukaryota;Opisthokonta;Metazoa;Eumetazoa;Bilateria;Protostomia;Spiralia;Lophotrochozoa;Mollusca;Bivalvia;Autobranchia;Heteroconchia;Euherodonta;Imparidentia;Venerida;Veneroidea;Veneridae;Mercenaria;Mercenaria mercenaria

UdeM00000015814 6596 1164.1 UdeM00000015814 XP\_045161470.1 64.5  
961 296 10 1 947 54 983 0.00E+00 1164.1 6596  
cellular

organisms;Eukaryota;Opisthokonta;Metazoa;Eumetazoa;Bilateria;Protostomia;Spiralia;Lophotrochozoa;Mollusca;Bivalvia;Autobranchia;Heteroconchia;Euherodonta;Imparidentia;Venerida;Veneroidea;Veneridae;Mercenaria;Mercenaria mercenaria

UdeM00000015815 225164 97.8 UdeM00000015815 XP\_009060134.1 39.2  
176 58 2 25 170 24 180 5.10E-17 97.8 225164  
cellular

organisms;Eukaryota;Opisthokonta;Metazoa;Eumetazoa;Bilateria;Protostomia;Spiralia;Lophotrochozoa;Mollusca;Gastropoda;Patellogastropoda;Lottioidae;Lottiidae;Lottia;Lottia gigantea

UdeM00000015817 6579 696 UdeM00000015817 XP\_033763339.1 64.9 570  
185 9 21 586 257 815 4.00E-197 696 6579 cellular

organisms;Eukaryota;Opisthokonta;Metazoa;Eumetazoa;Bilateria;Protostomia;Spiralia;Lophotrochozoa;Mollusca;Bivalvia;Autobranchia;Pteriomorphia;Pectinida;Pectinoidea;Pectinidae;Pecten;Pecten maximus

UdeM00000015819 6596 473 UdeM00000015819 XP\_045163544.1 44.5 569  
302 4 7 566 9 572 6.70E-130 473 6596 cellular

organisms;Eukaryota;Opisthokonta;Metazoa;Eumetazoa;Bilateria;Protostomia;Spiralia;Lophotrochozoa;Mollusca;Bivalvia;Autobranchia;Heteroconchia;Euherodonta;Imparidentia;Venerida;Veneroidea;Veneridae;Mercenaria;Mercenaria mercenaria

UdeM00000015820 400727 278.1 UdeM00000015820 XP\_025083083.1 58.9  
248 62 1 1 208 1 248 9.30E-72 278.1 400727  
cellular

organisms;Eukaryota;Opisthokonta;Metazoa;Eumetazoa;Bilateria;Protostomia;Spiralia;Lophotrochozoa;Mollusca;Gastropoda;Caenogastropoda;Architaenioglossa;Ampullarioidea;Ampullariidae;Pomacea;Pomacea canaliculata

UdeM00000015821 6596 97.4 UdeM00000015821 XP\_045163724.1 34 159  
97 3 1 158 198 349 1.70E-17 97.4 6596 cellular

organisms;Eukaryota;Opisthokonta;Metazoa;Eumetazoa;Bilateria;Protostomia;Spiralia;Lophotrochozoa;Mollusca;Bivalvia;Autobranchia;Heteroconchia;Euherodonta

terodonta;Imparidentia;Venerida;Veneroidea;Veneridae;Mercenaria;Mercenari  
 a mercenaria  
 UdeM00000015822 6573 291.2 UdeM00000015822 XP\_021370105.1 42.5 346  
 188 8 52 394 52 389 2.00E-75 291.2 6573 cellular  
 organisms;Eukaryota;Opisthokonta;Metazoa;Eumetazoa;Bilateria;Protostomia;  
 Spiralia;Lophotrochozoa;Mollusca;Bivalvia;Autobranhia;Pteriormorphia;Pect  
 inida;Pectinoidea;Pectinidae;Mizuhopecten;Mizuhopecten yessoensis  
 UdeM00000015823 6573 264.2 UdeM00000015823 XP\_021361010.1 78.9 190  
 40 0 1 190 1 190 1.30E-67 264.2 6573 cellular  
 organisms;Eukaryota;Opisthokonta;Metazoa;Eumetazoa;Bilateria;Protostomia;  
 Spiralia;Lophotrochozoa;Mollusca;Bivalvia;Autobranhia;Pteriormorphia;Pect  
 inida;Pectinoidea;Pectinidae;Mizuhopecten;Mizuhopecten yessoensis  
 UdeM00000015824 6573 331.6 UdeM00000015824 XP\_021372526.1 46.9 407  
 203 4 91 484 10 416 1.60E-87 331.6 6573 cellular  
 organisms;Eukaryota;Opisthokonta;Metazoa;Eumetazoa;Bilateria;Protostomia;  
 Spiralia;Lophotrochozoa;Mollusca;Bivalvia;Autobranhia;Pteriormorphia;Pect  
 inida;Pectinoidea;Pectinidae;Mizuhopecten;Mizuhopecten yessoensis  
 UdeM00000015825 6579 977.6 UdeM00000015825 XP\_033763795.1 78.4 616  
 133 0 6 621 152 767 7.20E-282 977.6 6579 cellular  
 organisms;Eukaryota;Opisthokonta;Metazoa;Eumetazoa;Bilateria;Protostomia;  
 Spiralia;Lophotrochozoa;Mollusca;Bivalvia;Autobranhia;Pteriormorphia;Pect  
 inida;Pectinoidea;Pectinidae;Pecten;Pecten maximus  
 UdeM00000015826 6579 78.2 UdeM00000015826 XP\_033761099.1 24.9 213  
 137 4 231 424 109 317 2.90E-11 78.2 6579 cellular  
 organisms;Eukaryota;Opisthokonta;Metazoa;Eumetazoa;Bilateria;Protostomia;  
 Spiralia;Lophotrochozoa;Mollusca;Bivalvia;Autobranhia;Pteriormorphia;Pect  
 inida;Pectinoidea;Pectinidae;Pecten;Pecten maximus  
 UdeM00000015827 6596 83.6 UdeM00000015827 XP\_045162320.1 33 185  
 113 6 104 278 72 255 4.40E-13 83.6 6596 cellular  
 organisms;Eukaryota;Opisthokonta;Metazoa;Eumetazoa;Bilateria;Protostomia;  
 Spiralia;Lophotrochozoa;Mollusca;Bivalvia;Autobranhia;Heteroconchia;Euhe  
 terodonta;Imparidentia;Venerida;Veneroidea;Veneridae;Mercenaria;Mercenari  
 a mercenaria  
 UdeM00000015828 6579 1904.4 UdeM00000015828 XP\_033763581.1 67.8  
 1673 502 11 76 1745 65 1703 0.00E+00 1904.4 6579  
 cellular  
 organisms;Eukaryota;Opisthokonta;Metazoa;Eumetazoa;Bilateria;Protostomia;  
 Spiralia;Lophotrochozoa;Mollusca;Bivalvia;Autobranhia;Pteriormorphia;Pect  
 inida;Pectinoidea;Pectinidae;Pecten;Pecten maximus  
 UdeM00000015829 6579 1904 UdeM00000015829 XP\_033763581.1 67.6 1673  
 502 11 76 1742 65 1703 0.00E+00 1904 6579 cellular  
 organisms;Eukaryota;Opisthokonta;Metazoa;Eumetazoa;Bilateria;Protostomia;  
 Spiralia;Lophotrochozoa;Mollusca;Bivalvia;Autobranhia;Pteriormorphia;Pect  
 inida;Pectinoidea;Pectinidae;Pecten;Pecten maximus  
 UdeM00000015830 6596 677.6 UdeM00000015830 XP\_045205494.1 44.3 846  
 455 9 7 845 31 867 2.20E-191 677.6 6596 cellular  
 organisms;Eukaryota;Opisthokonta;Metazoa;Eumetazoa;Bilateria;Protostomia;  
 Spiralia;Lophotrochozoa;Mollusca;Bivalvia;Autobranhia;Heteroconchia;Euhe  
 terodonta;Imparidentia;Venerida;Veneroidea;Veneridae;Mercenaria;Mercenari  
 a mercenaria  
 UdeM00000015831 6573 190.7 UdeM00000015831 XP\_021367924.1 47.9 234  
 110 6 48 272 14 244 2.60E-45 190.7 6573 cellular  
 organisms;Eukaryota;Opisthokonta;Metazoa;Eumetazoa;Bilateria;Protostomia;

Spiralia; Lophotrochozoa; Mollusca; Bivalvia; Autobranchia; Pteriomorpha; Pectinida; Pectinoidea; Pectinidae; Mizuhopecten; Mizuhopecten yessoensis  
UdeM00000015832 6565 137.1 UdeM00000015832 XP\_022287645.1 49.3 134  
67 1 35 167 494 627 2.20E-29 137.1 6565 cellular  
organisms; Eukaryota; Opisthokonta; Metazoa; Eumetazoa; Bilateria; Protostomia; Spiralia; Lophotrochozoa; Mollusca; Bivalvia; Autobranchia; Pteriomorpha; Ostr  
eida; Ostreidae; Crassostrea; Crassostrea virginica  
UdeM00000015833 37621 216.1 UdeM00000015833 XP\_014672567.1 52.9 174  
82 0 10 183 345 518 4.80E-53 216.1 37621 cellular  
organisms; Eukaryota; Opisthokonta; Metazoa; Eumetazoa; Bilateria; Protostomia; Ecdysozoa; Scalidophora; Priapulida; Priapulimorpha; Priapulimorphida; Priapul  
idae; Priapulus; Priapulus caudatus  
UdeM00000015834 7668 120.2 UdeM00000015834 XP\_011671223.1 48.4 124  
62 2 8 131 10 131 2.60E-24 120.2 7668 cellular  
organisms; Eukaryota; Opisthokonta; Metazoa; Eumetazoa; Bilateria; Deuterostomi  
a; Echinodermata; Eleutherozoa; Echinozoa; Echinoidea; Euechinoidea; Echinacea; Camarodonta; Echinidea; Strongylocentrotidae; Strongylocentrotus; Strongyloce  
ntrotus purpuratus  
UdeM00000015835 6596 87 UdeM00000015835 XP\_045208667.1 31.5 178  
112 5 13 182 146 321 3.10E-14 87 6596 cellular  
organisms; Eukaryota; Opisthokonta; Metazoa; Eumetazoa; Bilateria; Protostomia; Spiralia; Lophotrochozoa; Mollusca; Bivalvia; Autobranchia; Heteroconchia; Eue  
terodonta; Imparidentia; Venerida; Veneroidea; Veneridae; Mercenaria; Mercenari  
a mercenaria  
UdeM00000015836 6596 1085.5 UdeM00000015836 XP\_045162637.1 47.6  
1165 585 13 1 1150 87 1240 0.00E+00 1085.5 6596  
cellular  
organisms; Eukaryota; Opisthokonta; Metazoa; Eumetazoa; Bilateria; Protostomia; Spiralia; Lophotrochozoa; Mollusca; Bivalvia; Autobranchia; Heteroconchia; Eue  
terodonta; Imparidentia; Venerida; Veneroidea; Veneridae; Mercenaria; Mercenari  
a mercenaria  
UdeM00000015839 29159 175.3 UdeM00000015839 XP\_034312908.1 26.1 651  
314 19 5 523 6 621 2.10E-40 175.3 29159 cellular  
organisms; Eukaryota; Opisthokonta; Metazoa; Eumetazoa; Bilateria; Protostomia; Spiralia; Lophotrochozoa; Mollusca; Bivalvia; Autobranchia; Pteriomorpha; Ostr  
eida; Ostreidae; Crassostrea; Crassostrea gigas  
UdeM00000015841 29159 173.7 UdeM00000015841 XP\_034312908.1 26 651  
315 19 5 523 6 621 6.20E-40 173.7 29159 cellular  
organisms; Eukaryota; Opisthokonta; Metazoa; Eumetazoa; Bilateria; Protostomia; Spiralia; Lophotrochozoa; Mollusca; Bivalvia; Autobranchia; Pteriomorpha; Ostr  
eida; Ostreidae; Crassostrea; Crassostrea gigas  
UdeM00000015843 29159 173.7 UdeM00000015843 XP\_034312908.1 26 651  
315 19 5 523 6 621 6.20E-40 173.7 29159 cellular  
organisms; Eukaryota; Opisthokonta; Metazoa; Eumetazoa; Bilateria; Protostomia; Spiralia; Lophotrochozoa; Mollusca; Bivalvia; Autobranchia; Pteriomorpha; Ostr  
eida; Ostreidae; Crassostrea; Crassostrea gigas  
UdeM00000015845 29159 173.7 UdeM00000015845 XP\_034312908.1 26 651  
315 19 5 523 6 621 6.20E-40 173.7 29159 cellular  
organisms; Eukaryota; Opisthokonta; Metazoa; Eumetazoa; Bilateria; Protostomia; Spiralia; Lophotrochozoa; Mollusca; Bivalvia; Autobranchia; Pteriomorpha; Ostr  
eida; Ostreidae; Crassostrea; Crassostrea gigas  
UdeM00000015847 29159 173.7 UdeM00000015847 XP\_034312908.1 26 651  
315 19 5 523 6 621 6.20E-40 173.7 29159 cellular  
organisms; Eukaryota; Opisthokonta; Metazoa; Eumetazoa; Bilateria; Protostomia;

Spiralia; Lophotrochozoa; Mollusca; Bivalvia; Autobranchia; Pteriomorpha; Ostreida; Ostreidae; Crassostrea; Crassostrea gigas  
UdeM00000015849 29159 173.7 UdeM00000015849 XP\_034312908.1 26 651  
315 19 5 523 6 621 6.20E-40 173.7 29159 cellular  
organisms; Eukaryota; Opisthokonta; Metazoa; Eumetazoa; Bilateria; Protostomia; Spiralia; Lophotrochozoa; Mollusca; Bivalvia; Autobranchia; Pteriomorpha; Ostreida; Ostreidae; Crassostrea; Crassostrea gigas  
UdeM00000015850 6941 513.5 UdeM00000015850 XP\_037278662.1 79.4 311  
64 0 4 314 2 312 2.00E-142 513.5 6941 cellular  
organisms; Eukaryota; Opisthokonta; Metazoa; Eumetazoa; Bilateria; Protostomia; Ecdysozoa; Panarthropoda; Arthropoda; Chelicerata; Arachnida; Acari; Parasitiformes; Ixodida; Ixodoidea; Ixodidae; Rhipicephalinae; Rhipicephalus; Boophilus; Rhipicephalus microplus  
UdeM00000015851 6596 277.7 UdeM00000015851 XP\_045161187.1 78 186  
39 1 1 186 1 184 1.10E-71 277.7 6596 cellular  
organisms; Eukaryota; Opisthokonta; Metazoa; Eumetazoa; Bilateria; Protostomia; Spiralia; Lophotrochozoa; Mollusca; Bivalvia; Autobranchia; Heteroconchia; Euheterodonta; Imparidentia; Venerida; Veneroidea; Veneridae; Mercenaria; Mercenaria mercenaria  
UdeM00000015852 6579 1145.6 UdeM00000015852 XP\_033764191.1 53.8  
1473 580 16 1 1432 1 1413 0.00E+00 1145.6 6579  
cellular  
organisms; Eukaryota; Opisthokonta; Metazoa; Eumetazoa; Bilateria; Protostomia; Spiralia; Lophotrochozoa; Mollusca; Bivalvia; Autobranchia; Pteriomorpha; Pectinida; Pectinoidea; Pectinidae; Pecten; Pecten maximus  
UdeM00000015853 6565 418.3 UdeM00000015853 XP\_022339992.1 41 680  
350 14 1 674 1 635 2.00E-113 418.3 6565 cellular  
organisms; Eukaryota; Opisthokonta; Metazoa; Eumetazoa; Bilateria; Protostomia; Spiralia; Lophotrochozoa; Mollusca; Bivalvia; Autobranchia; Pteriomorpha; Ostreida; Ostreidae; Crassostrea; Crassostrea virginica  
UdeM00000015854 6596 430.6 UdeM00000015854 XP\_045163202.1 88.4 232  
27 0 1 232 7 238 1.30E-117 430.6 6596 cellular  
organisms; Eukaryota; Opisthokonta; Metazoa; Eumetazoa; Bilateria; Protostomia; Spiralia; Lophotrochozoa; Mollusca; Bivalvia; Autobranchia; Heteroconchia; Euheterodonta; Imparidentia; Venerida; Veneroidea; Veneridae; Mercenaria; Mercenaria mercenaria  
UdeM00000015855 6579 334.3 UdeM00000015855 XP\_033752268.1 36 481  
303 5 151 629 52 529 3.30E-88 334.3 6579 cellular  
organisms; Eukaryota; Opisthokonta; Metazoa; Eumetazoa; Bilateria; Protostomia; Spiralia; Lophotrochozoa; Mollusca; Bivalvia; Autobranchia; Pteriomorpha; Pectinida; Pectinoidea; Pectinidae; Pecten; Pecten maximus  
UdeM00000015857 1735272 666 UdeM00000015857 XP\_041378475.1 61.1  
522 188 4 1 511 926 1443 3.80E-188 666 1735272  
cellular  
organisms; Eukaryota; Opisthokonta; Metazoa; Eumetazoa; Bilateria; Protostomia; Spiralia; Lophotrochozoa; Mollusca; Gastropoda; Neomphalina; Neomphaloidea; Peltopspiridae; Gigantopelta; Gigantopelta aegis  
UdeM00000015856 1735272 965.3 UdeM00000015856 XP\_041378475.1 46.7  
1067 516 11 282 1330 412 1443 8.00E-278 965.3 1735272  
cellular  
organisms; Eukaryota; Opisthokonta; Metazoa; Eumetazoa; Bilateria; Protostomia; Spiralia; Lophotrochozoa; Mollusca; Gastropoda; Neomphalina; Neomphaloidea; Peltopspiridae; Gigantopelta; Gigantopelta aegis

UdeM00000015858 6573 346.3 UdeM00000015858 XP\_021363493.1 45.2 454  
 236 9 1 447 1 448 5.90E-92 346.3 6573 cellular  
 organisms;Eukaryota;Opisthokonta;Metazoa;Eumetazoa;Bilateria;Protostomia;  
 Spiralia;Lophotrochozoa;Mollusca;Bivalvia;Autobranchia;Pteriomorpha;Pect  
 inida;Pectinoidea;Pectinidae;Mizuhopecten;Mizuhopecten yessoensis  
 UdeM00000015864 6579 469.2 UdeM00000015864 XP\_033731191.1 51.5 443  
 199 4 9 436 16 457 6.20E-129 469.2 6579 cellular  
 organisms;Eukaryota;Opisthokonta;Metazoa;Eumetazoa;Bilateria;Protostomia;  
 Spiralia;Lophotrochozoa;Mollusca;Bivalvia;Autobranchia;Pteriomorpha;Pect  
 inida;Pectinoidea;Pectinidae;Pecten;Pecten maximus  
 UdeM00000015865 6596 75.9 UdeM00000015865 XP\_045161499.1 63.6 55  
 20 0 10 64 472 526 2.30E-11 75.9 6596 cellular  
 organisms;Eukaryota;Opisthokonta;Metazoa;Eumetazoa;Bilateria;Protostomia;  
 Spiralia;Lophotrochozoa;Mollusca;Bivalvia;Autobranchia;Heteroconchia;Euhe  
 terodonta;Imparidentia;Venerida;Veneroidea;Veneridae;Mercenaria;Mercenari  
 a mercenaria  
 UdeM00000015866 6579 617.5 UdeM00000015866 XP\_033731191.1 57.9 492  
 204 2 9 498 16 506 1.60E-173 617.5 6579 cellular  
 organisms;Eukaryota;Opisthokonta;Metazoa;Eumetazoa;Bilateria;Protostomia;  
 Spiralia;Lophotrochozoa;Mollusca;Bivalvia;Autobranchia;Pteriomorpha;Pect  
 inida;Pectinoidea;Pectinidae;Pecten;Pecten maximus  
 UdeM00000015870 6596 643.3 UdeM00000015870 XP\_045161431.1 51.6 684  
 305 8 1 666 1 676 3.60E-181 643.3 6596 cellular  
 organisms;Eukaryota;Opisthokonta;Metazoa;Eumetazoa;Bilateria;Protostomia;  
 Spiralia;Lophotrochozoa;Mollusca;Bivalvia;Autobranchia;Heteroconchia;Euhe  
 terodonta;Imparidentia;Venerida;Veneroidea;Veneridae;Mercenaria;Mercenari  
 a mercenaria  
 UdeM00000015871 6579 869.4 UdeM00000015871 XP\_033760558.1 25.2 2409  
 1594 30 10 2264 441 2794 1.00E-248 869.4 6579 cellular  
 organisms;Eukaryota;Opisthokonta;Metazoa;Eumetazoa;Bilateria;Protostomia;  
 Spiralia;Lophotrochozoa;Mollusca;Bivalvia;Autobranchia;Pteriomorpha;Pect  
 inida;Pectinoidea;Pectinidae;Pecten;Pecten maximus  
 UdeM00000015873 6565 99.4 UdeM00000015873 XP\_022296799.1 54.5 88  
 40 0 3 90 1214 1301 4.60E-18 99.4 6565 cellular  
 organisms;Eukaryota;Opisthokonta;Metazoa;Eumetazoa;Bilateria;Protostomia;  
 Spiralia;Lophotrochozoa;Mollusca;Bivalvia;Autobranchia;Pteriomorpha;Ostr  
 eida;Ostreoidea;Ostreidae;Crassostrea;Crassostrea virginica  
 UdeM00000015874 6596 372.1 UdeM00000015874 XP\_045198124.1 32.7 648  
 433 3 1 646 684 1330 1.50E-99 372.1 6596 cellular  
 organisms;Eukaryota;Opisthokonta;Metazoa;Eumetazoa;Bilateria;Protostomia;  
 Spiralia;Lophotrochozoa;Mollusca;Bivalvia;Autobranchia;Heteroconchia;Euhe  
 terodonta;Imparidentia;Venerida;Veneroidea;Veneridae;Mercenaria;Mercenari  
 a mercenaria  
 UdeM00000015875 6579 136 UdeM00000015875 XP\_033760558.1 22.2 713  
 470 23 418 1072 715 1400 2.90E-28 136 6579 cellular  
 organisms;Eukaryota;Opisthokonta;Metazoa;Eumetazoa;Bilateria;Protostomia;  
 Spiralia;Lophotrochozoa;Mollusca;Bivalvia;Autobranchia;Pteriomorpha;Pect  
 inida;Pectinoidea;Pectinidae;Pecten;Pecten maximus  
 UdeM00000015876 6596 377.9 UdeM00000015876 XP\_045215193.1 56.2 347  
 137 4 1 343 1 336 1.50E-101 377.9 6596 cellular  
 organisms;Eukaryota;Opisthokonta;Metazoa;Eumetazoa;Bilateria;Protostomia;  
 Spiralia;Lophotrochozoa;Mollusca;Bivalvia;Autobranchia;Heteroconchia;Euhe  
 terodonta;Imparidentia;Venerida;Veneroidea;Veneridae;Mercenaria;Mercenari  
 a mercenaria

UdeM00000015877 6945 87 UdeM00000015877 XP\_040065097.1 31.2 170  
 91 4 59 202 85 254 4.50E-14 87 6945 cellular  
 organisms;Eukaryota;Opisthokonta;Metazoa;Eumetazoa;Bilateria;Protostomia;  
 Ecdysozoa;Panarthropoda;Arthropoda;Chelicerata;Arachnida;Acari;Parasitifo  
 rmes;Ixodida;Ixodoidea;Ixodidae;Ixodinae;Ixodes;Ixodes scapularis  
 UdeM00000015878 7604 303.5 UdeM00000015878 XP\_033633146.1 41 390  
 212 3 262 633 29 418 1.10E-78 303.5 7604 cellular  
 organisms;Eukaryota;Opisthokonta;Metazoa;Eumetazoa;Bilateria;Deuterostomi  
 a;Echinodermata;Eleutherozoa;Asterozoa;Asteroidea;Forcipulatacea;Forcipul  
 atida;Asteroidea;Asteroidea;Asterias;Asterias rubens  
 UdeM00000015879 6596 96.7 UdeM00000015879 XP\_045202576.1 58.8 85  
 34 1 1 84 87 171 2.00E-17 96.7 6596 cellular  
 organisms;Eukaryota;Opisthokonta;Metazoa;Eumetazoa;Bilateria;Protostomia;  
 Spiralia;Lophotrochozoa;Mollusca;Bivalvia;Autobranchia;Heteroconchia;Euhe  
 terodonta;Imparidentia;Venerida;Veneroidea;Veneridae;Mercenaria;Mercenari  
 a mercenaria  
 UdeM00000015880 6596 121.3 UdeM00000015880 XP\_045206316.1 54.5 101  
 45 1 2 101 197 297 7.80E-25 121.3 6596 cellular  
 organisms;Eukaryota;Opisthokonta;Metazoa;Eumetazoa;Bilateria;Protostomia;  
 Spiralia;Lophotrochozoa;Mollusca;Bivalvia;Autobranchia;Heteroconchia;Euhe  
 terodonta;Imparidentia;Venerida;Veneroidea;Veneridae;Mercenaria;Mercenari  
 a mercenaria  
 UdeM00000015882 6596 107.5 UdeM00000015882 XP\_045179939.1 44.2 129  
 68 3 10 135 252 379 1.40E-20 107.5 6596 cellular  
 organisms;Eukaryota;Opisthokonta;Metazoa;Eumetazoa;Bilateria;Protostomia;  
 Spiralia;Lophotrochozoa;Mollusca;Bivalvia;Autobranchia;Heteroconchia;Euhe  
 terodonta;Imparidentia;Venerida;Veneroidea;Veneridae;Mercenaria;Mercenari  
 a mercenaria  
 UdeM00000028704 6573 77.4 UdeM00000028704 XP\_021367843.1 46.9 96  
 40 2 53 142 441 531 1.70E-11 77.4 6573 cellular  
 organisms;Eukaryota;Opisthokonta;Metazoa;Eumetazoa;Bilateria;Protostomia;  
 Spiralia;Lophotrochozoa;Mollusca;Bivalvia;Autobranchia;Pteriomorphia;Pect  
 inida;Pectinoidea;Pectinidae;Mizuhopecten;Mizuhopecten yessoensis  
 UdeM00000028705 8175 162.2 UdeM00000028705 XP\_030292627.1 50 148  
 73 1 9 155 11 158 5.60E-37 162.2 8175 cellular  
 organisms;Eukaryota;Opisthokonta;Metazoa;Eumetazoa;Bilateria;Deuterostomi  
 a;Chordata;Craniata;Vertebrata;Gnathostomata;Teleostomi;Euteleostomi;Acti  
 nopterygii;Actinopteri;Neopterygii;Teleostei;Osteoglossocephalai;Clupeoce  
 phala;Euteleostei;Neoteleostei;Eurypterygia;Ctenosquamata;Acanthomo  
 rphata;Euacanthomorphacea;Percomorphaceae;Eupercaria;Spariformes;Sparidae  
 ;Sparus;Sparus aurata  
 UdeM00000028707 2607531 570.9 UdeM00000028707 XP\_029642376.1 52.1  
 591 261 9 29 607 27 607 2.00E-159 570.9 2607531  
 cellular  
 organisms;Eukaryota;Opisthokonta;Metazoa;Eumetazoa;Bilateria;Protostomia;  
 Spiralia;Lophotrochozoa;Mollusca;Cephalopoda;Coleoidea;Octopodiformes;Oct  
 opoda;Incirrata;Octopodidae;Octopus;Octopus sinensis  
 UdeM00000028708 2607531 287.3 UdeM00000028708 XP\_029642376.1 36.1  
 529 261 12 1 517 36 499 4.00E-74 287.3 2607531  
 cellular  
 organisms;Eukaryota;Opisthokonta;Metazoa;Eumetazoa;Bilateria;Protostomia;  
 Spiralia;Lophotrochozoa;Mollusca;Cephalopoda;Coleoidea;Octopodiformes;Oct  
 opoda;Incirrata;Octopodidae;Octopus;Octopus sinensis



UdeM00000028710 6596 245 UdeM00000028710 XP\_045177939.1 37.6 372  
 209 4 6 370 7 362 1.50E-61 245 6596 cellular  
 organisms;Eukaryota;Opisthokonta;Metazoa;Eumetazoa;Bilateria;Protostomia;  
 Spiralia;Lophotrochozoa;Mollusca;Bivalvia;Autobranchia;Heteroconchia;Euhe  
 terodonta;Imparidentia;Venerida;Veneroidea;Veneridae;Mercenaria;Mercenari  
 a mercenaria  
 UdeM00000028709 6596 244.6 UdeM00000028709 XP\_045177939.1 37.6 372  
 209 4 8 372 7 362 2.00E-61 244.6 6596 cellular  
 organisms;Eukaryota;Opisthokonta;Metazoa;Eumetazoa;Bilateria;Protostomia;  
 Spiralia;Lophotrochozoa;Mollusca;Bivalvia;Autobranchia;Heteroconchia;Euhe  
 terodonta;Imparidentia;Venerida;Veneroidea;Veneridae;Mercenaria;Mercenari  
 a mercenaria  
 UdeM00000028711 6596 492.3 UdeM00000028711 XP\_045177715.1 51.7 484  
 214 8 22 493 13 488 7.30E-136 492.3 6596 cellular  
 organisms;Eukaryota;Opisthokonta;Metazoa;Eumetazoa;Bilateria;Protostomia;  
 Spiralia;Lophotrochozoa;Mollusca;Bivalvia;Autobranchia;Heteroconchia;Euhe  
 terodonta;Imparidentia;Venerida;Veneroidea;Veneridae;Mercenaria;Mercenari  
 a mercenaria  
 UdeM00000028712 6596 415.2 UdeM00000028712 XP\_045181889.1 43.6 488  
 265 7 12 495 2 483 1.10E-112 415.2 6596 cellular  
 organisms;Eukaryota;Opisthokonta;Metazoa;Eumetazoa;Bilateria;Protostomia;  
 Spiralia;Lophotrochozoa;Mollusca;Bivalvia;Autobranchia;Heteroconchia;Euhe  
 terodonta;Imparidentia;Venerida;Veneroidea;Veneridae;Mercenaria;Mercenari  
 a mercenaria  
 UdeM00000028713 6596 350.9 UdeM00000028713 XP\_045181889.1 41.3 443  
 236 8 1 439 27 449 2.40E-93 350.9 6596 cellular  
 organisms;Eukaryota;Opisthokonta;Metazoa;Eumetazoa;Bilateria;Protostomia;  
 Spiralia;Lophotrochozoa;Mollusca;Bivalvia;Autobranchia;Heteroconchia;Euhe  
 terodonta;Imparidentia;Venerida;Veneroidea;Veneridae;Mercenaria;Mercenari  
 a mercenaria  
 UdeM00000028714 6573 137.9 UdeM00000028714 XP\_021346145.1 33.7 246  
 148 6 92 332 75 310 2.50E-29 137.9 6573 cellular  
 organisms;Eukaryota;Opisthokonta;Metazoa;Eumetazoa;Bilateria;Protostomia;  
 Spiralia;Lophotrochozoa;Mollusca;Bivalvia;Autobranchia;Pteriomorphia;Pect  
 inida;Pectinoidea;Pectinidae;Mizuhopecten;Mizuhopecten yessoensis  
 UdeM00000028716 6596 352.1 UdeM00000028716 XP\_045181889.1 43.5 423  
 228 8 1 419 27 442 1.00E-93 352.1 6596 cellular  
 organisms;Eukaryota;Opisthokonta;Metazoa;Eumetazoa;Bilateria;Protostomia;  
 Spiralia;Lophotrochozoa;Mollusca;Bivalvia;Autobranchia;Heteroconchia;Euhe  
 terodonta;Imparidentia;Venerida;Veneroidea;Veneridae;Mercenaria;Mercenari  
 a mercenaria  
 UdeM00000028717 6573 141 UdeM00000028717 XP\_021346146.1 31 313  
 183 10 19 313 14 311 2.80E-30 141 6573 cellular  
 organisms;Eukaryota;Opisthokonta;Metazoa;Eumetazoa;Bilateria;Protostomia;  
 Spiralia;Lophotrochozoa;Mollusca;Bivalvia;Autobranchia;Pteriomorphia;Pect  
 inida;Pectinoidea;Pectinidae;Mizuhopecten;Mizuhopecten yessoensis  
 UdeM00000028718 6573 77 UdeM00000028718 XP\_021346145.1 30.8 172  
 98 5 20 176 14 179 2.60E-11 77 6573 cellular  
 organisms;Eukaryota;Opisthokonta;Metazoa;Eumetazoa;Bilateria;Protostomia;  
 Spiralia;Lophotrochozoa;Mollusca;Bivalvia;Autobranchia;Pteriomorphia;Pect  
 inida;Pectinoidea;Pectinidae;Mizuhopecten;Mizuhopecten yessoensis  
 UdeM00000028719 6596 139 UdeM00000028719 XP\_045211120.1 32.2 283  
 152 4 22 301 46 291 9.70E-30 139 6596 cellular  
 organisms;Eukaryota;Opisthokonta;Metazoa;Eumetazoa;Bilateria;Protostomia;

Spiralia;Lophotrochozoa;Mollusca;Bivalvia;Autobranchia;Heteroconchia;Euherodonta;Imparidentia;Venerida;Veneroidea;Veneridae;Mercenaria;Mercenaria mercenaria

UdeM00000028720 6596 141.4 UdeM00000028720 XP\_045211120.1 35 257  
157 5 45 301 44 290 2.00E-30 141.4 6596 cellular

organisms;Eukaryota;Opisthokonta;Metazoa;Eumetazoa;Bilateria;Protostomia;Spiralia;Lophotrochozoa;Mollusca;Bivalvia;Autobranchia;Heteroconchia;Euherodonta;Imparidentia;Venerida;Veneroidea;Veneridae;Mercenaria;Mercenaria mercenaria

UdeM00000028721 6596 152.1 UdeM00000028721 XP\_045211120.1 33.7 306  
170 8 4 298 8 291 1.10E-33 152.1 6596 cellular

organisms;Eukaryota;Opisthokonta;Metazoa;Eumetazoa;Bilateria;Protostomia;Spiralia;Lophotrochozoa;Mollusca;Bivalvia;Autobranchia;Heteroconchia;Euherodonta;Imparidentia;Venerida;Veneroidea;Veneridae;Mercenaria;Mercenaria mercenaria

UdeM00000028722 6596 120.6 UdeM00000028722 XP\_045182702.1 46.8 111  
58 1 110 220 44 153 2.60E-24 120.6 6596 cellular

organisms;Eukaryota;Opisthokonta;Metazoa;Eumetazoa;Bilateria;Protostomia;Spiralia;Lophotrochozoa;Mollusca;Bivalvia;Autobranchia;Heteroconchia;Euherodonta;Imparidentia;Venerida;Veneroidea;Veneridae;Mercenaria;Mercenaria mercenaria

UdeM00000028725 6596 118.6 UdeM00000028725 XP\_045205911.1 43.1 116  
61 1 5 120 529 639 6.00E-24 118.6 6596 cellular

organisms;Eukaryota;Opisthokonta;Metazoa;Eumetazoa;Bilateria;Protostomia;Spiralia;Lophotrochozoa;Mollusca;Bivalvia;Autobranchia;Heteroconchia;Euherodonta;Imparidentia;Venerida;Veneroidea;Veneridae;Mercenaria;Mercenaria mercenaria

UdeM00000028724 6596 117.9 UdeM00000028724 XP\_045205911.1 43.1 116  
61 1 5 120 529 639 1.30E-23 117.9 6596 cellular

organisms;Eukaryota;Opisthokonta;Metazoa;Eumetazoa;Bilateria;Protostomia;Spiralia;Lophotrochozoa;Mollusca;Bivalvia;Autobranchia;Heteroconchia;Euherodonta;Imparidentia;Venerida;Veneroidea;Veneridae;Mercenaria;Mercenaria mercenaria

UdeM00000028726 6596 127.1 UdeM00000028726 XP\_045183007.1 47.9 119  
61 1 12 130 142 259 1.70E-26 127.1 6596 cellular

organisms;Eukaryota;Opisthokonta;Metazoa;Eumetazoa;Bilateria;Protostomia;Spiralia;Lophotrochozoa;Mollusca;Bivalvia;Autobranchia;Heteroconchia;Euherodonta;Imparidentia;Venerida;Veneroidea;Veneridae;Mercenaria;Mercenaria mercenaria

UdeM00000028727 6596 519.2 UdeM00000028727 XP\_045191224.1 86.6 292  
38 1 2 293 4 294 4.10E-144 519.2 6596 cellular

organisms;Eukaryota;Opisthokonta;Metazoa;Eumetazoa;Bilateria;Protostomia;Spiralia;Lophotrochozoa;Mollusca;Bivalvia;Autobranchia;Heteroconchia;Euherodonta;Imparidentia;Venerida;Veneroidea;Veneridae;Mercenaria;Mercenaria mercenaria

UdeM00000028729 29159 314.7 UdeM00000028729 XP\_011422410.1 85.2 182  
27 0 1 182 93 274 7.80E-83 314.7 29159 cellular

organisms;Eukaryota;Opisthokonta;Metazoa;Eumetazoa;Bilateria;Protostomia;Spiralia;Lophotrochozoa;Mollusca;Bivalvia;Autobranchia;Pteriomorphia;Ostreida;Ostreoidea;Ostreidae;Crassostrea;Crassostrea gigas

UdeM00000028728 29159 464.5 UdeM00000028728 XP\_011422410.1 82.1 274  
49 0 1 274 1 274 9.10E-128 464.5 29159 cellular

organisms;Eukaryota;Opisthokonta;Metazoa;Eumetazoa;Bilateria;Protostomia;

Spiralia;Lophotrochozoa;Mollusca;Bivalvia;Autobranchia;Pteriormorphia;Ostr  
eida;Ostreoidea;Ostreidae;Crassostrea;Crassostrea gigas  
UdeM00000028730 6596 307 UdeM00000028730 XP\_045204534.1 35.1 504  
295 7 21 502 6 499 4.60E-80 307 6596 cellular  
organisms;Eukaryota;Opisthokonta;Metazoa;Eumetazoa;Bilateria;Protostomia;  
Spiralia;Lophotrochozoa;Mollusca;Bivalvia;Autobranchia;Heteroconchia;Euhe  
terodonta;Imparidentia;Venerida;Veneroidea;Veneridae;Mercenaria;Mercenari  
a mercenaria  
UdeM00000028731 6565 190.7 UdeM00000028731 XP\_022320997.1 40.4 235  
131 3 50 280 573 802 2.70E-45 190.7 6565 cellular  
organisms;Eukaryota;Opisthokonta;Metazoa;Eumetazoa;Bilateria;Protostomia;  
Spiralia;Lophotrochozoa;Mollusca;Bivalvia;Autobranchia;Pteriormorphia;Ostr  
eida;Ostreoidea;Ostreidae;Crassostrea;Crassostrea virginica  
UdeM00000028732 6596 185.7 UdeM00000028732 XP\_045191293.1 31.6 399  
241 7 29 399 58 452 1.20E-43 185.7 6596 cellular  
organisms;Eukaryota;Opisthokonta;Metazoa;Eumetazoa;Bilateria;Protostomia;  
Spiralia;Lophotrochozoa;Mollusca;Bivalvia;Autobranchia;Heteroconchia;Euhe  
terodonta;Imparidentia;Venerida;Veneroidea;Veneridae;Mercenaria;Mercenari  
a mercenaria  
UdeM00000028733 6579 614 UdeM00000028733 XP\_033732385.1 52.3 516  
235 4 6 514 5 516 1.90E-172 614 6579 cellular  
organisms;Eukaryota;Opisthokonta;Metazoa;Eumetazoa;Bilateria;Protostomia;  
Spiralia;Lophotrochozoa;Mollusca;Bivalvia;Autobranchia;Pteriormorphia;Pect  
inida;Pectinoidea;Pectinidae;Pecten;Pecten maximus  
UdeM00000028734 6596 78.2 UdeM00000028734 XP\_045206250.1 46.4 69  
37 0 2 70 1 69 5.10E-12 78.2 6596 cellular  
organisms;Eukaryota;Opisthokonta;Metazoa;Eumetazoa;Bilateria;Protostomia;  
Spiralia;Lophotrochozoa;Mollusca;Bivalvia;Autobranchia;Heteroconchia;Euhe  
terodonta;Imparidentia;Venerida;Veneroidea;Veneridae;Mercenaria;Mercenari  
a mercenaria  
UdeM00000028735 6596 71.6 UdeM00000028735 XP\_045206250.1 37.2 94  
48 3 20 113 551 633 1.10E-09 71.6 6596 cellular  
organisms;Eukaryota;Opisthokonta;Metazoa;Eumetazoa;Bilateria;Protostomia;  
Spiralia;Lophotrochozoa;Mollusca;Bivalvia;Autobranchia;Heteroconchia;Euhe  
terodonta;Imparidentia;Venerida;Veneroidea;Veneridae;Mercenaria;Mercenari  
a mercenaria  
UdeM00000028736 6596 103.6 UdeM00000028736 XP\_045208367.1 74.6 67  
17 0 1 67 1 67 1.00E-19 103.6 6596 cellular  
organisms;Eukaryota;Opisthokonta;Metazoa;Eumetazoa;Bilateria;Protostomia;  
Spiralia;Lophotrochozoa;Mollusca;Bivalvia;Autobranchia;Heteroconchia;Euhe  
terodonta;Imparidentia;Venerida;Veneroidea;Veneridae;Mercenaria;Mercenari  
a mercenaria  
UdeM00000028737 7906 105.1 UdeM00000028737 XP\_034763505.1 56.2 96  
42 0 1 96 1 96 9.30E-20 105.1 7906 cellular  
organisms;Eukaryota;Opisthokonta;Metazoa;Eumetazoa;Bilateria;Deuterostomi  
a;Chordata;Craniata;Vertebrata;Gnathostomata;Teleostomi;Euteleostomi;Acti  
nopterygii;Actinopteri;Chondrostei;Acipenseriformes;Acipenseroides;Acipen  
seridae;Acipenserinae;Acipenserini;Acipenser;Acipenser ruthenus  
UdeM00000028738 7574 129.8 UdeM00000028738 XP\_013401097.1 46.2 158  
84 1 6 163 544 700 3.30E-27 129.8 7574 cellular  
organisms;Eukaryota;Opisthokonta;Metazoa;Eumetazoa;Bilateria;Protostomia;  
Spiralia;Lophotrochozoa;Brachiopoda;Linguliformea;Lingulata;Lingulida;Lin  
guloidea;Lingulidae;Lingula;Lingula anatina

UdeM00000028746 6579 173.3 UdeM00000028746 XP\_033726291.1 48.9 174  
 65 2 1 150 1 174 2.30E-40 173.3 6579 cellular  
 organisms;Eukaryota;Opisthokonta;Metazoa;Eumetazoa;Bilateria;Protostomia;  
 Spiralia;Lophotrochozoa;Mollusca;Bivalvia;Autobranchia;Pteriomorphia;Pect  
 inida;Pectinoidea;Pectinidae;Pecten;Pecten maximus  
 UdeM00000028747 6596 58.9 UdeM00000028747 XP\_045173453.1 31.9 69  
 47 0 33 101 51 119 4.90E-06 58.9 6596 cellular  
 organisms;Eukaryota;Opisthokonta;Metazoa;Eumetazoa;Bilateria;Protostomia;  
 Spiralia;Lophotrochozoa;Mollusca;Bivalvia;Autobranchia;Heteroconchia;Euhe  
 terodonta;Imparidentia;Venerida;Veneroidea;Veneridae;Mercenaria;Mercenari  
 a mercenaria  
 UdeM00000028748 6596 153.7 UdeM00000028748 XP\_045183440.1 47.9 188  
 87 5 1 182 198 380 4.00E-34 153.7 6596 cellular  
 organisms;Eukaryota;Opisthokonta;Metazoa;Eumetazoa;Bilateria;Protostomia;  
 Spiralia;Lophotrochozoa;Mollusca;Bivalvia;Autobranchia;Heteroconchia;Euhe  
 terodonta;Imparidentia;Venerida;Veneroidea;Veneridae;Mercenaria;Mercenari  
 a mercenaria  
 UdeM00000028749 6596 124.4 UdeM00000028749 XP\_045202346.1 39 159  
 95 1 6 164 16 172 1.50E-25 124.4 6596 cellular  
 organisms;Eukaryota;Opisthokonta;Metazoa;Eumetazoa;Bilateria;Protostomia;  
 Spiralia;Lophotrochozoa;Mollusca;Bivalvia;Autobranchia;Heteroconchia;Euhe  
 terodonta;Imparidentia;Venerida;Veneroidea;Veneridae;Mercenaria;Mercenari  
 a mercenaria  
 UdeM00000028750 1735272 129.4 UdeM00000028750 XP\_041360711.1 34.2  
 199 118 3 2 198 3 190 5.60E-27 129.4 1735272  
 cellular  
 organisms;Eukaryota;Opisthokonta;Metazoa;Eumetazoa;Bilateria;Protostomia;  
 Spiralia;Lophotrochozoa;Mollusca;Gastropoda;Neomphalina;Neomphaloidea;Pel  
 tospiridae;Gigantopelta;Gigantopelta aegis  
 UdeM00000028751 6565 75.5 UdeM00000028751 XP\_022337267.1 51.5 66  
 31 1 1 65 501 566 3.10E-11 75.5 6565 cellular  
 organisms;Eukaryota;Opisthokonta;Metazoa;Eumetazoa;Bilateria;Protostomia;  
 Spiralia;Lophotrochozoa;Mollusca;Bivalvia;Autobranchia;Pteriomorphia;Ostr  
 eida;Ostreoidea;Ostreidae;Crassostrea;Crassostrea virginica  
 UdeM00000028752 29159 104.8 UdeM00000028752 XP\_034312519.1 64.3 84  
 30 0 2 85 228 311 8.50E-20 104.8 29159 cellular  
 organisms;Eukaryota;Opisthokonta;Metazoa;Eumetazoa;Bilateria;Protostomia;  
 Spiralia;Lophotrochozoa;Mollusca;Bivalvia;Autobranchia;Pteriomorphia;Ostr  
 eida;Ostreoidea;Ostreidae;Crassostrea;Crassostrea gigas  
 UdeM00000028753 6596 288.1 UdeM00000028753 XP\_045188817.1 37.1 544  
 269 14 5 536 78 560 2.30E-74 288.1 6596 cellular  
 organisms;Eukaryota;Opisthokonta;Metazoa;Eumetazoa;Bilateria;Protostomia;  
 Spiralia;Lophotrochozoa;Mollusca;Bivalvia;Autobranchia;Heteroconchia;Euhe  
 terodonta;Imparidentia;Venerida;Veneroidea;Veneridae;Mercenaria;Mercenari  
 a mercenaria  
 UdeM00000028754 6596 191 UdeM00000028754 XP\_045208507.1 70.2 124  
 36 1 69 191 12 135 1.40E-45 191 6596 cellular  
 organisms;Eukaryota;Opisthokonta;Metazoa;Eumetazoa;Bilateria;Protostomia;  
 Spiralia;Lophotrochozoa;Mollusca;Bivalvia;Autobranchia;Heteroconchia;Euhe  
 terodonta;Imparidentia;Venerida;Veneroidea;Veneridae;Mercenaria;Mercenari  
 a mercenaria  
 UdeM00000028755 6596 205.7 UdeM00000028755 XP\_045208499.1 65.5 142  
 49 0 2 143 152 293 4.20E-50 205.7 6596 cellular  
 organisms;Eukaryota;Opisthokonta;Metazoa;Eumetazoa;Bilateria;Protostomia;

Spiralia; Lophotrochozoa; Mollusca; Bivalvia; Autobranchia; Heteroconchia; Euheterodonta; Imparidentia; Venerida; Veneroidea; Veneridae; Mercenaria; Mercenaria mercenaria

UdeM00000028756 6596 448 UdeM00000028756 XP\_045208507.1 67.2 317  
73 2 80 395 12 298 1.30E-122 448 6596 cellular  
organisms; Eukaryota; Opisthokonta; Metazoa; Eumetazoa; Bilateria; Protostomia; Spiralia; Lophotrochozoa; Mollusca; Bivalvia; Autobranchia; Heteroconchia; Euheterodonta; Imparidentia; Venerida; Veneroidea; Veneridae; Mercenaria; Mercenaria mercenaria

UdeM00000028757 6596 210.3 UdeM00000028757 XP\_045181714.1 26.3 673  
444 19 12 668 8 644 7.70E-51 210.3 6596 cellular  
organisms; Eukaryota; Opisthokonta; Metazoa; Eumetazoa; Bilateria; Protostomia; Spiralia; Lophotrochozoa; Mollusca; Bivalvia; Autobranchia; Heteroconchia; Euheterodonta; Imparidentia; Venerida; Veneroidea; Veneridae; Mercenaria; Mercenaria mercenaria

UdeM00000028758 6573 587 UdeM00000028758 XP\_021358219.1 79.5 352  
70 2 121 470 16 367 2.10E-164 587 6573 cellular  
organisms; Eukaryota; Opisthokonta; Metazoa; Eumetazoa; Bilateria; Protostomia; Spiralia; Lophotrochozoa; Mollusca; Bivalvia; Autobranchia; Pteriomorphia; Pectinida; Pectinoidea; Pectinidae; Mizuhopecten; Mizuhopecten yessoensis

UdeM00000028759 46514 206.1 UdeM00000028759 XP\_038075930.1 33.4 401  
234 9 132 513 20 406 1.20E-49 206.1 46514 cellular  
organisms; Eukaryota; Opisthokonta; Metazoa; Eumetazoa; Bilateria; Deuterostomia; Echinodermata; Eleutherozoa; Asterozoa; Asteroidea; Valvatacea; Valvatida; Asterinidae; Patiria; Patiria miniata

UdeM00000028760 46514 97.4 UdeM00000028760 XP\_038075930.1 24.3 371  
219 10 50 367 445 806 4.30E-17 97.4 46514 cellular  
organisms; Eukaryota; Opisthokonta; Metazoa; Eumetazoa; Bilateria; Deuterostomia; Echinodermata; Eleutherozoa; Asterozoa; Asteroidea; Valvatacea; Valvatida; Asterinidae; Patiria; Patiria miniata

UdeM00000028762 29159 171 UdeM00000028762 XP\_011452928.2 29.4 412  
268 7 51 441 22 431 3.40E-39 171 29159 cellular  
organisms; Eukaryota; Opisthokonta; Metazoa; Eumetazoa; Bilateria; Protostomia; Spiralia; Lophotrochozoa; Mollusca; Bivalvia; Autobranchia; Pteriomorphia; Ostreida; Ostreoidea; Ostreidae; Crassostrea; Crassostrea gigas

UdeM00000028763 29159 132.1 UdeM00000028763 XP\_034300243.1 50 146  
72 1 11 155 10 155 7.10E-28 132.1 29159 cellular  
organisms; Eukaryota; Opisthokonta; Metazoa; Eumetazoa; Bilateria; Protostomia; Spiralia; Lophotrochozoa; Mollusca; Bivalvia; Autobranchia; Pteriomorphia; Ostreida; Ostreoidea; Ostreidae; Crassostrea; Crassostrea gigas

UdeM00000028764 29159 342.4 UdeM00000028764 XP\_034300244.1 47.7 388  
202 1 9 395 152 539 7.60E-91 342.4 29159 cellular  
organisms; Eukaryota; Opisthokonta; Metazoa; Eumetazoa; Bilateria; Protostomia; Spiralia; Lophotrochozoa; Mollusca; Bivalvia; Autobranchia; Pteriomorphia; Ostreida; Ostreoidea; Ostreidae; Crassostrea; Crassostrea gigas

UdeM00000028765 6579 554.7 UdeM00000028765 XP\_033753228.1 54.4 443  
202 0 9 451 6 448 1.10E-154 554.7 6579 cellular  
organisms; Eukaryota; Opisthokonta; Metazoa; Eumetazoa; Bilateria; Protostomia; Spiralia; Lophotrochozoa; Mollusca; Bivalvia; Autobranchia; Pteriomorphia; Pectinida; Pectinoidea; Pectinidae; Pecten; Pecten maximus

UdeM00000028766 6579 517.7 UdeM00000028766 XP\_033753228.1 52.8 441  
186 1 9 427 6 446 1.40E-143 517.7 6579 cellular  
organisms; Eukaryota; Opisthokonta; Metazoa; Eumetazoa; Bilateria; Protostomia;

Spiralia; Lophotrochozoa; Mollusca; Bivalvia; Autobranchia; Pteriomorpha; Pectinida; Pectinoidea; Pectinidae; Pecten; Pecten maximus

UdeM00000028767 6579 417.5 UdeM00000028767 XP\_033753228.1 45.6 439  
165 2 5 369 6 444 1.70E-113 417.5 6579 cellular  
organisms; Eukaryota; Opisthokonta; Metazoa; Eumetazoa; Bilateria; Protostomia; Spiralia; Lophotrochozoa; Mollusca; Bivalvia; Autobranchia; Pteriomorpha; Pectinida; Pectinoidea; Pectinidae; Pecten; Pecten maximus

UdeM00000028768 6596 334.3 UdeM00000028768 XP\_045198297.1 39.8 731  
318 19 1 715 29 653 3.80E-88 334.3 6596 cellular  
organisms; Eukaryota; Opisthokonta; Metazoa; Eumetazoa; Bilateria; Protostomia; Spiralia; Lophotrochozoa; Mollusca; Bivalvia; Autobranchia; Heteroconchia; Euheterodonta; Imparidentia; Venerida; Veneroidea; Veneridae; Mercenaria; Mercenaria mercenaria

UdeM00000028769 6596 343.2 UdeM00000028769 XP\_045198297.1 41 709  
318 19 1 693 29 653 7.90E-91 343.2 6596 cellular  
organisms; Eukaryota; Opisthokonta; Metazoa; Eumetazoa; Bilateria; Protostomia; Spiralia; Lophotrochozoa; Mollusca; Bivalvia; Autobranchia; Heteroconchia; Euheterodonta; Imparidentia; Venerida; Veneroidea; Veneridae; Mercenaria; Mercenaria mercenaria

UdeM00000028770 6596 325.9 UdeM00000028770 XP\_045198297.1 38.6 753  
318 19 1 737 29 653 1.40E-85 325.9 6596 cellular  
organisms; Eukaryota; Opisthokonta; Metazoa; Eumetazoa; Bilateria; Protostomia; Spiralia; Lophotrochozoa; Mollusca; Bivalvia; Autobranchia; Heteroconchia; Euheterodonta; Imparidentia; Venerida; Veneroidea; Veneridae; Mercenaria; Mercenaria mercenaria

UdeM00000028771 6596 114 UdeM00000028771 XP\_045201245.1 49.2 124  
59 3 1 124 1 120 1.60E-22 114 6596 cellular  
organisms; Eukaryota; Opisthokonta; Metazoa; Eumetazoa; Bilateria; Protostomia; Spiralia; Lophotrochozoa; Mollusca; Bivalvia; Autobranchia; Heteroconchia; Euheterodonta; Imparidentia; Venerida; Veneroidea; Veneridae; Mercenaria; Mercenaria mercenaria

UdeM00000028772 6596 321.6 UdeM00000028772 XP\_045201245.1 48 358  
155 4 3 333 123 476 2.50E-84 321.6 6596 cellular  
organisms; Eukaryota; Opisthokonta; Metazoa; Eumetazoa; Bilateria; Protostomia; Spiralia; Lophotrochozoa; Mollusca; Bivalvia; Autobranchia; Heteroconchia; Euheterodonta; Imparidentia; Venerida; Veneroidea; Veneridae; Mercenaria; Mercenaria mercenaria

UdeM00000028774 1735272 1273.1 UdeM00000028774 XP\_041369336.1  
71.9 840 231 3 1 836 1 839 0.00E+00 1273.1  
1735272 cellular  
organisms; Eukaryota; Opisthokonta; Metazoa; Eumetazoa; Bilateria; Protostomia; Spiralia; Lophotrochozoa; Mollusca; Gastropoda; Neomphalina; Neomphaloidea; Peltospiridae; Gigantopelta; Gigantopelta aegis

UdeM00000028775 6579 276.9 UdeM00000028775 XP\_033764184.1 76.7 172  
40 0 1 172 3 174 1.70E-71 276.9 6579 cellular  
organisms; Eukaryota; Opisthokonta; Metazoa; Eumetazoa; Bilateria; Protostomia; Spiralia; Lophotrochozoa; Mollusca; Bivalvia; Autobranchia; Pteriomorpha; Pectinida; Pectinoidea; Pectinidae; Pecten; Pecten maximus

UdeM00000028776 6596 653.7 UdeM00000028776 XP\_045214758.1 39.4 1237  
463 30 43 1197 124 1155 4.60E-184 653.7 6596 cellular  
organisms; Eukaryota; Opisthokonta; Metazoa; Eumetazoa; Bilateria; Protostomia; Spiralia; Lophotrochozoa; Mollusca; Bivalvia; Autobranchia; Heteroconchia; Euheterodonta; Imparidentia; Venerida; Veneroidea; Veneridae; Mercenaria; Mercenaria mercenaria

UdeM00000028777 6596 1046.6 UdeM00000028777 XP\_045158028.1 37.7  
 1691 943 32 223 1851 133 1775 4.00E-302 1046.6 6596  
 cellular  
 organisms;Eukaryota;Opisthokonta;Metazoa;Eumetazoa;Bilateria;Protostomia;  
 Spiralia;Lophotrochozoa;Mollusca;Bivalvia;Autobranhia;Heteroconchia;Euhe  
 terodonta;Imparidentia;Venerida;Veneroidea;Veneridae;Mercenaria;Mercenari  
 a mercenaria  
 UdeM00000028779 6596 176 UdeM00000028779 XP\_045203537.1 39.6 268  
 142 7 1 265 1 251 6.40E-41 176 6596 cellular  
 organisms;Eukaryota;Opisthokonta;Metazoa;Eumetazoa;Bilateria;Protostomia;  
 Spiralia;Lophotrochozoa;Mollusca;Bivalvia;Autobranhia;Heteroconchia;Euhe  
 terodonta;Imparidentia;Venerida;Veneroidea;Veneridae;Mercenaria;Mercenari  
 a mercenaria  
 UdeM00000028780 6565 761.9 UdeM00000028780 XP\_022325998.1 99.7 376  
 1 0 1 376 1 376 3.80E-217 761.9 6565 cellular  
 organisms;Eukaryota;Opisthokonta;Metazoa;Eumetazoa;Bilateria;Protostomia;  
 Spiralia;Lophotrochozoa;Mollusca;Bivalvia;Autobranhia;Pteriormorphia;Ostr  
 eida;Ostreoidea;Ostreidae;Crassostrea;Crassostrea virginica  
 UdeM00000028781 1735272 60.5 UdeM00000028781 XP\_041356467.1 27  
 152 95 8 16 161 120 261 2.30E-06 60.5 1735272  
 cellular  
 organisms;Eukaryota;Opisthokonta;Metazoa;Eumetazoa;Bilateria;Protostomia;  
 Spiralia;Lophotrochozoa;Mollusca;Gastropoda;Neomphalina;Neomphaloidea;Pel  
 tospiridae;Gigantopelta;Gigantopelta aegis  
 UdeM00000028782 6579 287 UdeM00000028782 XP\_033759215.1 38.4 404  
 243 2 25 425 66 466 4.10E-74 287 6579 cellular  
 organisms;Eukaryota;Opisthokonta;Metazoa;Eumetazoa;Bilateria;Protostomia;  
 Spiralia;Lophotrochozoa;Mollusca;Bivalvia;Autobranhia;Pteriormorphia;Pect  
 inida;Pectinoidea;Pectinidae;Pecten;Pecten maximus  
 UdeM00000028783 6579 265 UdeM00000028783 XP\_033759215.1 36.4 404  
 229 4 74 468 80 464 1.80E-67 265 6579 cellular  
 organisms;Eukaryota;Opisthokonta;Metazoa;Eumetazoa;Bilateria;Protostomia;  
 Spiralia;Lophotrochozoa;Mollusca;Bivalvia;Autobranhia;Pteriormorphia;Pect  
 inida;Pectinoidea;Pectinidae;Pecten;Pecten maximus  
 UdeM00000028784 29159 385.6 UdeM00000028784 XP\_011433241.1 45 538  
 234 11 7 534 18 503 1.00E-103 385.6 29159 cellular  
 organisms;Eukaryota;Opisthokonta;Metazoa;Eumetazoa;Bilateria;Protostomia;  
 Spiralia;Lophotrochozoa;Mollusca;Bivalvia;Autobranhia;Pteriormorphia;Ostr  
 eida;Ostreoidea;Ostreidae;Crassostrea;Crassostrea gigas  
 UdeM00000028785 29159 203 UdeM00000028785 XP\_011413207.2 84.7 118  
 18 0 105 222 29 146 6.40E-49 203 29159 cellular  
 organisms;Eukaryota;Opisthokonta;Metazoa;Eumetazoa;Bilateria;Protostomia;  
 Spiralia;Lophotrochozoa;Mollusca;Bivalvia;Autobranhia;Pteriormorphia;Ostr  
 eida;Ostreoidea;Ostreidae;Crassostrea;Crassostrea gigas  
 UdeM00000028786 6565 133.7 UdeM00000028786 XP\_022299727.1 50.7 134  
 65 1 29 162 145 277 2.50E-28 133.7 6565 cellular  
 organisms;Eukaryota;Opisthokonta;Metazoa;Eumetazoa;Bilateria;Protostomia;  
 Spiralia;Lophotrochozoa;Mollusca;Bivalvia;Autobranhia;Pteriormorphia;Ostr  
 eida;Ostreoidea;Ostreidae;Crassostrea;Crassostrea virginica  
 UdeM00000028787 1735272 240.4 UdeM00000028787 XP\_041369814.1 51.7  
 259 106 6 179 425 268 519 4.30E-60 240.4 1735272  
 cellular  
 organisms;Eukaryota;Opisthokonta;Metazoa;Eumetazoa;Bilateria;Protostomia;

Spiralia;Lophotrochozoa;Mollusca;Gastropoda;Neomphalina;Neomphaloidea;Pel  
tospiridae;Gigantopelta;Gigantopelta aegis  
UdeM00000028788 6579 717.6 UdeM00000028788 XP\_033761397.1 40.1 1265  
575 34 5 1175 962 2137 2.60E-203 717.6 6579 cellular  
organisms;Eukaryota;Opisthokonta;Metazoa;Eumetazoa;Bilateria;Protostomia;  
Spiralia;Lophotrochozoa;Mollusca;Bivalvia;Autobranchia;Pteriormorphia;Pect  
inida;Pectinoidea;Pectinidae;Pecten;Pecten maximus  
UdeM00000028789 6579 506.1 UdeM00000028789 XP\_033732796.1 37.6 755  
412 8 16 737 123 851 7.30E-140 506.1 6579 cellular  
organisms;Eukaryota;Opisthokonta;Metazoa;Eumetazoa;Bilateria;Protostomia;  
Spiralia;Lophotrochozoa;Mollusca;Bivalvia;Autobranchia;Pteriormorphia;Pect  
inida;Pectinoidea;Pectinidae;Pecten;Pecten maximus  
UdeM00000028790 6573 610.1 UdeM00000028790 XP\_021357404.1 55.1 615  
239 7 28 620 161 760 3.50E-171 610.1 6573 cellular  
organisms;Eukaryota;Opisthokonta;Metazoa;Eumetazoa;Bilateria;Protostomia;  
Spiralia;Lophotrochozoa;Mollusca;Bivalvia;Autobranchia;Pteriormorphia;Pect  
inida;Pectinoidea;Pectinidae;Mizuhopecten;Mizuhopecten yessoensis  
UdeM00000004503 29159 156.4 UdeM00000004503 XP\_034317562.1 33.3 243  
152 8 3 238 1526 1765 7.70E-35 156.4 29159 cellular  
organisms;Eukaryota;Opisthokonta;Metazoa;Eumetazoa;Bilateria;Protostomia;  
Spiralia;Lophotrochozoa;Mollusca;Bivalvia;Autobranchia;Pteriormorphia;Ostr  
eida;Ostreidae;Crassostrea;Crassostrea gigas  
UdeM00000004505 6565 104 UdeM00000004505 XP\_022323822.1 27.7 271  
176 10 6 268 1008 1266 4.60E-19 104 6565 cellular  
organisms;Eukaryota;Opisthokonta;Metazoa;Eumetazoa;Bilateria;Protostomia;  
Spiralia;Lophotrochozoa;Mollusca;Bivalvia;Autobranchia;Pteriormorphia;Ostr  
eida;Ostreidae;Crassostrea;Crassostrea virginica  
UdeM00000004507 6596 110.5 UdeM00000004507 XP\_045191674.1 24.6 268  
172 10 16 279 1574 1815 5.20E-21 110.5 6596 cellular  
organisms;Eukaryota;Opisthokonta;Metazoa;Eumetazoa;Bilateria;Protostomia;  
Spiralia;Lophotrochozoa;Mollusca;Bivalvia;Autobranchia;Heteroconchia;Euhe  
terodonta;Imparidentia;Venerida;Veneroidea;Veneridae;Mercenaria;Mercenari  
a mercenaria  
UdeM00000004511 37621 87.8 UdeM00000004511 XP\_014676916.1 30.4 257  
127 6 63 279 7 251 2.40E-14 87.8 37621 cellular  
organisms;Eukaryota;Opisthokonta;Metazoa;Eumetazoa;Bilateria;Protostomia;  
Ecdysozoa;Scalidophora;Priapulida;Priapulimorpha;Priapulimorphida;Priapul  
idae;Priapulul;Priapulul caudatus  
UdeM00000004512 1735272 89 UdeM00000004512 XP\_041364761.1 50.7  
71 35 0 1 71 87 157 7.10E-15 89 1735272  
cellular  
organisms;Eukaryota;Opisthokonta;Metazoa;Eumetazoa;Bilateria;Protostomia;  
Spiralia;Lophotrochozoa;Mollusca;Gastropoda;Neomphalina;Neomphaloidea;Pel  
tospiridae;Gigantopelta;Gigantopelta aegis  
UdeM00000004513 6565 90.5 UdeM00000004513 XP\_022288855.1 41.7 108  
59 4 28 133 983 1088 4.50E-15 90.5 6565 cellular  
organisms;Eukaryota;Opisthokonta;Metazoa;Eumetazoa;Bilateria;Protostomia;  
Spiralia;Lophotrochozoa;Mollusca;Bivalvia;Autobranchia;Pteriormorphia;Ostr  
eida;Ostreidae;Crassostrea;Crassostrea virginica  
UdeM00000004514 6565 119.8 UdeM00000004514 XP\_022325431.1 31.2 231  
141 10 3 231 1060 1274 8.50E-24 119.8 6565 cellular  
organisms;Eukaryota;Opisthokonta;Metazoa;Eumetazoa;Bilateria;Protostomia;  
Spiralia;Lophotrochozoa;Mollusca;Bivalvia;Autobranchia;Pteriormorphia;Ostr  
eida;Ostreidae;Crassostrea;Crassostrea virginica



UdeM00000004516 6565 112.5 UdeM00000004516 XP\_022325431.1 29.4 214  
 136 7 17 230 1134 1332 1.00E-21 112.5 6565 cellular  
 organisms;Eukaryota;Opisthokonta;Metazoa;Eumetazoa;Bilateria;Protostomia;  
 Spiralia;Lophotrochozoa;Mollusca;Bivalvia;Autobranchia;Pteriomorphia;Ostr  
 eida;Ostreoidea;Ostreidae;Crassostrea;Crassostrea virginica  
 UdeM00000004517 6565 130.6 UdeM00000004517 XP\_022322604.1 29.2 260  
 162 8 20 278 531 769 4.70E-27 130.6 6565 cellular  
 organisms;Eukaryota;Opisthokonta;Metazoa;Eumetazoa;Bilateria;Protostomia;  
 Spiralia;Lophotrochozoa;Mollusca;Bivalvia;Autobranchia;Pteriomorphia;Ostr  
 eida;Ostreoidea;Ostreidae;Crassostrea;Crassostrea virginica  
 UdeM00000004519 6596 396 UdeM00000004519 XP\_045166809.1 59.9 302  
 115 4 48 347 16 313 5.20E-107 396 6596 cellular  
 organisms;Eukaryota;Opisthokonta;Metazoa;Eumetazoa;Bilateria;Protostomia;  
 Spiralia;Lophotrochozoa;Mollusca;Bivalvia;Autobranchia;Heteroconchia;Euhe  
 terodonta;Imparidentia;Venerida;Veneroidea;Veneridae;Mercenaria;Mercenari  
 a mercenaria  
 UdeM00000004520 10228 81.6 UdeM00000004520 XP\_002118408.1 33.8 136  
 83 3 33 165 4 135 1.10E-12 81.6 10228 cellular  
 organisms;Eukaryota;Opisthokonta;Metazoa;Eumetazoa;Placozoa;Trichoplacida  
 e;Trichoplax;Trichoplax adhaerens  
 UdeM00000004521 6596 64.3 UdeM00000004521 XP\_045187052.1 64.7 51  
 17 1 3 53 217 266 1.20E-07 64.3 6596 cellular  
 organisms;Eukaryota;Opisthokonta;Metazoa;Eumetazoa;Bilateria;Protostomia;  
 Spiralia;Lophotrochozoa;Mollusca;Bivalvia;Autobranchia;Heteroconchia;Euhe  
 terodonta;Imparidentia;Venerida;Veneroidea;Veneridae;Mercenaria;Mercenari  
 a mercenaria  
 UdeM00000004522 6596 119.8 UdeM00000004522 XP\_045202346.1 38.1 160  
 95 2 6 164 16 172 3.30E-24 119.8 6596 cellular  
 organisms;Eukaryota;Opisthokonta;Metazoa;Eumetazoa;Bilateria;Protostomia;  
 Spiralia;Lophotrochozoa;Mollusca;Bivalvia;Autobranchia;Heteroconchia;Euhe  
 terodonta;Imparidentia;Venerida;Veneroidea;Veneridae;Mercenaria;Mercenari  
 a mercenaria  
 UdeM00000004523 225164 170.2 UdeM00000004523 XP\_009059846.1 62.4  
 117 44 0 1 117 161 277 1.60E-39 170.2 225164  
 cellular  
 organisms;Eukaryota;Opisthokonta;Metazoa;Eumetazoa;Bilateria;Protostomia;  
 Spiralia;Lophotrochozoa;Mollusca;Gastropoda;Patellogastropoda;Lottioidea;  
 Lottiidae;Lottia;Lottia gigantea  
 UdeM00000004524 6596 350.1 UdeM00000004524 XP\_045157577.1 56.1 278  
 121 1 1 278 1 277 2.60E-93 350.1 6596 cellular  
 organisms;Eukaryota;Opisthokonta;Metazoa;Eumetazoa;Bilateria;Protostomia;  
 Spiralia;Lophotrochozoa;Mollusca;Bivalvia;Autobranchia;Heteroconchia;Euhe  
 terodonta;Imparidentia;Venerida;Veneroidea;Veneridae;Mercenaria;Mercenari  
 a mercenaria  
 UdeM00000004526 6579 3387.8 UdeM00000004526 XP\_033744412.1 68.7  
 2621 730 26 18 2578 121 2711 0.00E+00 3387.8 6579  
 cellular  
 organisms;Eukaryota;Opisthokonta;Metazoa;Eumetazoa;Bilateria;Protostomia;  
 Spiralia;Lophotrochozoa;Mollusca;Bivalvia;Autobranchia;Pteriomorphia;Pect  
 inida;Pectinoidea;Pectinidae;Pecten;Pecten maximus  
 UdeM00000004527 37653 63.2 UdeM00000004527 XP\_014769150.1 28.2 213  
 139 6 156 357 162 371 1.40E-06 63.2 37653 cellular  
 organisms;Eukaryota;Opisthokonta;Metazoa;Eumetazoa;Bilateria;Protostomia;

Spiralia;Lophotrochozoa;Mollusca;Cephalopoda;Coleoidea;Octopodiformes;Octopoda;Incirrata;Octopodidae;Octopus;Octopus bimaculoides

UdeM00000004528 1735272 1104 UdeM00000004528 XP\_041349903.1 58.6  
997 336 10 1 991 1 926 0.00E+00 1104 1735272  
cellular

organisms;Eukaryota;Opisthokonta;Metazoa;Eumetazoa;Bilateria;Protostomia;Spiralia;Lophotrochozoa;Mollusca;Gastropoda;Neomphalina;Neomphaloidea;Peltospiridae;Gigantopelta;Gigantopelta aegis

UdeM00000004529 6573 1103.6 UdeM00000004529 XP\_021342964.1 55.2  
1007 396 9 1 986 1 973 0.00E+00 1103.6 6573  
cellular

organisms;Eukaryota;Opisthokonta;Metazoa;Eumetazoa;Bilateria;Protostomia;Spiralia;Lophotrochozoa;Mollusca;Bivalvia;Autobranchia;Pteriormorphia;Pectinida;Pectinoidea;Pectinidae;Mizuhopecten;Mizuhopecten yessoensis

UdeM00000004530 1735272 767.3 UdeM00000004530 XP\_041349903.1 56.7  
676 238 5 19 640 68 742 1.60E-218 767.3 1735272  
cellular

organisms;Eukaryota;Opisthokonta;Metazoa;Eumetazoa;Bilateria;Protostomia;Spiralia;Lophotrochozoa;Mollusca;Gastropoda;Neomphalina;Neomphaloidea;Peltospiridae;Gigantopelta;Gigantopelta aegis

UdeM00000004531 6850 240.7 UdeM00000004531 XP\_022254015.1 66.2 160  
54 0 5 164 640 799 1.30E-60 240.7 6850 cellular

organisms;Eukaryota;Opisthokonta;Metazoa;Eumetazoa;Bilateria;Protostomia;Ecdysozoa;Panarthropoda;Arthropoda;Chelicerata;Merostomata;Xiphosura;Limulidae;Limulus;Limulus polyphemus

UdeM00000004534 45264 77.4 UdeM00000004534 XP\_044164573.1 39 123  
65 3 334 454 31 145 5.20E-11 77.4 45264 cellular

organisms;Eukaryota;Opisthokonta;Metazoa;Eumetazoa;Cnidaria;Anthozoa;Hexacorallia;Scleractinia;Astrocoeniina;Acroporidae;Acropora;Acropora millepora

UdeM00000004537 1735272 102.4 UdeM00000004537 XP\_041372995.1 35.3  
221 116 11 70 270 1196 1409 1.40E-18 102.4 1735272  
cellular

organisms;Eukaryota;Opisthokonta;Metazoa;Eumetazoa;Bilateria;Protostomia;Spiralia;Lophotrochozoa;Mollusca;Gastropoda;Neomphalina;Neomphaloidea;Peltospiridae;Gigantopelta;Gigantopelta aegis

UdeM00000004539 2607531 315.8 UdeM00000004539 XP\_029647338.1 62.6  
238 83 1 1 238 1 232 4.90E-83 315.8 2607531  
cellular

organisms;Eukaryota;Opisthokonta;Metazoa;Eumetazoa;Bilateria;Protostomia;Spiralia;Lophotrochozoa;Mollusca;Cephalopoda;Coleoidea;Octopodiformes;Octopoda;Incirrata;Octopodidae;Octopus;Octopus sinensis

UdeM00000004538 36176 287.7 UdeM00000004538 XP\_043563605.1 55.4 240  
102 1 1 240 1 235 1.40E-74 287.7 36176 cellular

organisms;Eukaryota;Opisthokonta;Metazoa;Eumetazoa;Bilateria;Deuterostomia;Chordata;Craniata;Vertebrata;Gnathostomata;Chondrichthyes;Elasmobranchii;Selachii;Galeomorphii;Galeoidea;Orectolobiformes;Hemiscylliidae;Chiloscyllium;Chiloscyllium plagiosum

UdeM00000004540 40690 129 UdeM00000004540 XP\_034002245.1 40.4 166  
95 1 111 272 62 227 9.50E-27 129 40690 cellular

organisms;Eukaryota;Opisthokonta;Metazoa;Eumetazoa;Bilateria;Deuterostomia;Chordata;Craniata;Vertebrata;Gnathostomata;Teleostomi;Euteleostomi;Actinopterygii;Actinopteri;Neopterygii;Teleostei;Osteoglossocephalai;Clupeocephala;Euteleostei;Neoteleostei;Eurypterygia;Ctenosquamata;Acanthomo

rphata;Euacanthomorpha;Percomorphaceae;Eupercaria;Perciformes;Notothenioidei;Nototheniidae;Trematomus;Trematomus bernacchii

|                 |       |     |     |                 |                |          |                    |
|-----------------|-------|-----|-----|-----------------|----------------|----------|--------------------|
| UdeM00000004541 | 40690 | 129 |     | UdeM00000004541 | XP_034002245.1 | 40.4     | 166                |
| 95              | 1     | 132 | 293 | 62              | 227            | 1.00E-26 | 129 40690 cellular |

organisms;Eukaryota;Opisthokonta;Metazoa;Eumetazoa;Bilateria;Deuterostomia;Chordata;Craniata;Vertebrata;Gnathostomata;Teleostomi;Euteleostomi;Actinopterygii;Actinopteri;Neopterygii;Teleostei;Osteoglossocephalai;Clupeocephala;Euteleosteomorpha;Neoteleostei;Eurypterygia;Ctenosquamata;Acanthomorpha;Euacanthomorpha;Percomorphaceae;Eupercaria;Perciformes;Notothenioidei;Nototheniidae;Trematomus;Trematomus bernacchii

|                 |        |   |   |      |                 |                |                               |
|-----------------|--------|---|---|------|-----------------|----------------|-------------------------------|
| UdeM00000004542 | 134920 |   |   | 64.7 | UdeM00000004542 | XP_037326711.1 | 50                            |
| 56              | 26     | 1 | 1 | 56   | 22              | 75             | 6.20E-08 64.7 134920 cellular |

organisms;Eukaryota;Opisthokonta;Metazoa;Eumetazoa;Bilateria;Deuterostomia;Chordata;Craniata;Vertebrata;Gnathostomata;Teleostomi;Euteleostomi;Actinopterygii;Actinopteri;Neopterygii;Teleostei;Osteoglossocephalai;Clupeocephala;Euteleosteomorpha;Neoteleostei;Eurypterygia;Ctenosquamata;Acanthomorpha;Euacanthomorpha;Percomorphaceae;Eupercaria;Perciformes;Cottioid ei;Gasterosteales;Gasterosteidae;Pungitius;Pungitius pungitius

|                 |      |       |     |                 |                |          |                     |
|-----------------|------|-------|-----|-----------------|----------------|----------|---------------------|
| UdeM00000004543 | 6579 | 183.3 |     | UdeM00000004543 | XP_033745068.1 | 24.8     | 669                 |
| 431             | 20   | 13    | 647 | 26              | 656            | 9.70E-43 | 183.3 6579 cellular |

organisms;Eukaryota;Opisthokonta;Metazoa;Eumetazoa;Bilateria;Protostomia;Spiralia;Lophotrochozoa;Mollusca;Bivalvia;Autobranchia;Pteriormorphia;Pectinida;Pectinoidea;Pectinidae;Pecten;Pecten maximus

|                 |       |       |     |                 |                |          |                      |
|-----------------|-------|-------|-----|-----------------|----------------|----------|----------------------|
| UdeM00000004544 | 46514 | 147.1 |     | UdeM00000004544 | XP_038062328.1 | 34.5     | 258                  |
| 143             | 3     | 22    | 265 | 131             | 376            | 3.10E-32 | 147.1 46514 cellular |

organisms;Eukaryota;Opisthokonta;Metazoa;Eumetazoa;Bilateria;Deuterostomia;Echinodermata;Eleutherozoa;Asterozoa;Asteroidea;Valvatacea;Valvatida;Asterinidae;Patiria;Patiria miniata

|                 |       |       |     |                 |                |          |                      |
|-----------------|-------|-------|-----|-----------------|----------------|----------|----------------------|
| UdeM00000004545 | 45264 | 335.9 |     | UdeM00000004545 | XP_044182736.1 | 38.7     | 499                  |
| 265             | 8     | 2     | 479 | 385             | 863            | 8.50E-89 | 335.9 45264 cellular |

organisms;Eukaryota;Opisthokonta;Metazoa;Eumetazoa;Cnidaria;Anthozoa;Hexacorallia;Scleractinia;Astrocoeniina;Acroporidae;Acropora;Acropora millepora

|                 |      |       |     |                 |                |          |                     |
|-----------------|------|-------|-----|-----------------|----------------|----------|---------------------|
| UdeM00000004546 | 6579 | 250.8 |     | UdeM00000004546 | XP_033739209.1 | 50       | 258                 |
| 113             | 2    | 9     | 261 | 2               | 248            | 2.00E-63 | 250.8 6579 cellular |

organisms;Eukaryota;Opisthokonta;Metazoa;Eumetazoa;Bilateria;Protostomia;Spiralia;Lophotrochozoa;Mollusca;Bivalvia;Autobranchia;Pteriormorphia;Pectinida;Pectinoidea;Pectinidae;Pecten;Pecten maximus

|                 |      |       |     |                 |                |          |                     |
|-----------------|------|-------|-----|-----------------|----------------|----------|---------------------|
| UdeM00000004548 | 6596 | 201.4 |     | UdeM00000004548 | XP_045172484.1 | 23.2     | 654                 |
| 471             | 12   | 14    | 647 | 78              | 720            | 3.40E-48 | 201.4 6596 cellular |

organisms;Eukaryota;Opisthokonta;Metazoa;Eumetazoa;Bilateria;Protostomia;Spiralia;Lophotrochozoa;Mollusca;Bivalvia;Autobranchia;Heteroconchia;Euheterodonta;Imparidentia;Venerida;Veneroidea;Veneridae;Mercenaria;Mercenaria mercenaria

|                 |      |       |     |                 |                |          |                     |
|-----------------|------|-------|-----|-----------------|----------------|----------|---------------------|
| UdeM00000004549 | 6579 | 184.5 |     | UdeM00000004549 | XP_033745068.1 | 24.1     | 659                 |
| 450             | 19   | 13    | 648 | 26              | 657            | 4.40E-43 | 184.5 6579 cellular |

organisms;Eukaryota;Opisthokonta;Metazoa;Eumetazoa;Bilateria;Protostomia;Spiralia;Lophotrochozoa;Mollusca;Bivalvia;Autobranchia;Pteriormorphia;Pectinida;Pectinoidea;Pectinidae;Pecten;Pecten maximus

|                 |      |      |     |                 |                |          |                    |
|-----------------|------|------|-----|-----------------|----------------|----------|--------------------|
| UdeM00000004550 | 6565 | 81.6 |     | UdeM00000004550 | XP_022345462.1 | 29.9     | 167                |
| 96              | 4    | 11   | 160 | 2               | 164            | 2.20E-12 | 81.6 6565 cellular |

organisms;Eukaryota;Opisthokonta;Metazoa;Eumetazoa;Bilateria;Protostomia;

Spiralia;Lophotrochozoa;Mollusca;Bivalvia;Autobranchia;Pteriormorphia;Ostr  
eida;Ostreoidea;Ostreidae;Crassostrea;Crassostrea virginica

UdeM00000004551 310915 107.1 UdeM00000004551 XP\_026776737.1 39.9  
158 84 2 3 160 31 177 3.50E-20 107.1 310915

cellular

organisms;Eukaryota;Opisthokonta;Metazoa;Eumetazoa;Bilateria;Deuterostomi  
a;Chordata;Craniata;Vertebrata;Gnathostomata;Teleostomi;Euteleostomi;Acti  
nopterygii;Actinopteri;Neopterygii;Teleostei;Osteoglossocephalai;Clupeoce  
phala;Otomorpha;Ostariophysi;Otophysi;Characiphysae;Siluriformes;Siluroid  
ei;Pangasiidae;Pangasianodon;Pangasianodon hypophthalmus

UdeM00000004552 310915 107.8 UdeM00000004552 XP\_026776737.1 39.8  
166 88 3 4 169 24 177 2.10E-20 107.8 310915

cellular

organisms;Eukaryota;Opisthokonta;Metazoa;Eumetazoa;Bilateria;Deuterostomi  
a;Chordata;Craniata;Vertebrata;Gnathostomata;Teleostomi;Euteleostomi;Acti  
nopterygii;Actinopteri;Neopterygii;Teleostei;Osteoglossocephalai;Clupeoce  
phala;Otomorpha;Ostariophysi;Otophysi;Characiphysae;Siluriformes;Siluroid  
ei;Pangasiidae;Pangasianodon;Pangasianodon hypophthalmus

UdeM00000004553 7897 108.6 UdeM00000004553 XP\_005986052.1 29.3 287  
166 9 3 265 23 296 1.20E-20 108.6 7897 cellular

organisms;Eukaryota;Opisthokonta;Metazoa;Eumetazoa;Bilateria;Deuterostomi  
a;Chordata;Craniata;Vertebrata;Gnathostomata;Teleostomi;Euteleostomi;Sarc  
opterygii;Coelacanthimorpha;Coelacanthiformes;Coelacanthidae;Latimeria;La  
timeria chalumnae

UdeM00000004554 6596 106.7 UdeM00000004554 XP\_045173873.1 38 192  
104 4 2 183 19 205 4.50E-20 106.7 6596 cellular

organisms;Eukaryota;Opisthokonta;Metazoa;Eumetazoa;Bilateria;Protostomia;  
Spiralia;Lophotrochozoa;Mollusca;Bivalvia;Autobranchia;Heteroconchia;Euhe  
terodonta;Imparidentia;Venerida;Veneroidea;Veneridae;Mercenaria;Mercenari  
a mercenaria

UdeM00000004555 6596 220.3 UdeM00000004555 XP\_045172484.1 24.2 687  
466 15 3 663 66 723 7.20E-54 220.3 6596 cellular

organisms;Eukaryota;Opisthokonta;Metazoa;Eumetazoa;Bilateria;Protostomia;  
Spiralia;Lophotrochozoa;Mollusca;Bivalvia;Autobranchia;Heteroconchia;Euhe  
terodonta;Imparidentia;Venerida;Veneroidea;Veneridae;Mercenaria;Mercenari  
a mercenaria

UdeM00000004556 6105 85.1 UdeM00000004556 XP\_031575325.1 35.2 142  
84 3 14 151 36 173 1.90E-13 85.1 6105 cellular

organisms;Eukaryota;Opisthokonta;Metazoa;Eumetazoa;Cnidaria;Anthozoa;Hexa  
corallia;Actiniaria;Actiniidae;Actinia;Actinia tenebrosa

UdeM00000004557 1735272 78.2 UdeM00000004557 XP\_041378104.1 41.7  
96 56 0 16 111 16 111 7.70E-12 78.2 1735272

cellular

organisms;Eukaryota;Opisthokonta;Metazoa;Eumetazoa;Bilateria;Protostomia;  
Spiralia;Lophotrochozoa;Mollusca;Gastropoda;Neomphalina;Neomphaloidea;Pel  
tospiridae;Gigantopelta;Gigantopelta aegis

UdeM00000004558 310915 86.3 UdeM00000004558 XP\_026776737.1 35.3  
139 79 2 7 145 58 185 5.90E-14 86.3 310915

cellular

organisms;Eukaryota;Opisthokonta;Metazoa;Eumetazoa;Bilateria;Deuterostomi  
a;Chordata;Craniata;Vertebrata;Gnathostomata;Teleostomi;Euteleostomi;Acti  
nopterygii;Actinopteri;Neopterygii;Teleostei;Osteoglossocephalai;Clupeoce  
phala;Otomorpha;Ostariophysi;Otophysi;Characiphysae;Siluriformes;Siluroid  
ei;Pangasiidae;Pangasianodon;Pangasianodon hypophthalmus

UdeM00000004559 8023 109.4 UdeM00000004559 XP\_029489464.1 36 178  
 99 3 1 178 21 183 7.20E-21 109.4 8023 cellular  
 organisms;Eukaryota;Opisthokonta;Metazoa;Eumetazoa;Bilateria;Deuterostomi  
 a;Chordata;Craniata;Vertebrata;Gnathostomata;Teleostomi;Euteleostomi;Acti  
 nopterygii;Actinopteri;Neopterygii;Teleostei;Osteoglossocephalai;Clupeoce  
 phala;Euteleostei;Protacanthopterygii;Salmoniformes;Salmonidae;Salm  
 oninae;Oncorhynchus;Oncorhynchus nerka  
 UdeM00000004560 6573 184.5 UdeM00000004560 XP\_021347516.1 25.8 674  
 451 16 9 660 22 668 4.40E-43 184.5 6573 cellular  
 organisms;Eukaryota;Opisthokonta;Metazoa;Eumetazoa;Bilateria;Protostomia;  
 Spiralia;Lophotrochozoa;Mollusca;Bivalvia;Autobranchia;Pteriormorphia;Pect  
 inida;Pectinoidea;Pectinidae;Mizuhopecten;Mizuhopecten yessoensis  
 UdeM00000004561 6565 73.2 UdeM00000004561 XP\_022287353.1 28.8 153  
 98 3 52 201 121 265 8.60E-10 73.2 6565 cellular  
 organisms;Eukaryota;Opisthokonta;Metazoa;Eumetazoa;Bilateria;Protostomia;  
 Spiralia;Lophotrochozoa;Mollusca;Bivalvia;Autobranchia;Pteriormorphia;Ostr  
 eida;Ostreidae;Crassostrea;Crassostrea virginica  
 UdeM00000004562 6565 72.8 UdeM00000004562 XP\_022287353.1 28.8 153  
 98 3 75 224 121 265 1.20E-09 72.8 6565 cellular  
 organisms;Eukaryota;Opisthokonta;Metazoa;Eumetazoa;Bilateria;Protostomia;  
 Spiralia;Lophotrochozoa;Mollusca;Bivalvia;Autobranchia;Pteriormorphia;Ostr  
 eida;Ostreidae;Crassostrea;Crassostrea virginica  
 UdeM00000004566 7604 96.7 UdeM00000004566 XP\_033633146.1 61.5 65  
 24 1 2 65 128 192 1.30E-17 96.7 7604 cellular  
 organisms;Eukaryota;Opisthokonta;Metazoa;Eumetazoa;Bilateria;Deuterostomi  
 a;Echinodermata;Eleutherozoa;Asterozoa;Asterozoa;Asterozoa;Forcipulatacea;Forcipul  
 atida;Asterozoa;Asterozoa;Asterozoa;Asterozoa;Asterozoa;Asterozoa;Asterozoa  
 UdeM00000004567 7668 163.7 UdeM00000004567 XP\_030841063.1 47.5 183  
 96 0 1 183 291 473 2.30E-37 163.7 7668 cellular  
 organisms;Eukaryota;Opisthokonta;Metazoa;Eumetazoa;Bilateria;Deuterostomi  
 a;Echinodermata;Eleutherozoa;Echinozoa;Echinozoa;Echinozoa;Echinozoa;Echinozoa  
 Camarodonta;Echinidea;Strongylocentrotidae;Strongylocentrotus;Strongyloce  
 ntrotus purpuratus  
 UdeM00000004568 29159 206.1 UdeM00000004568 XP\_011449844.1 23.7 696  
 466 19 6 657 9 683 1.40E-49 206.1 29159 cellular  
 organisms;Eukaryota;Opisthokonta;Metazoa;Eumetazoa;Bilateria;Protostomia;  
 Spiralia;Lophotrochozoa;Mollusca;Bivalvia;Autobranchia;Pteriormorphia;Ostr  
 eida;Ostreidae;Crassostrea;Crassostrea gigas  
 UdeM00000004569 6565 81.3 UdeM00000004569 XP\_022345462.1 29.9 167  
 96 4 17 166 2 164 2.60E-12 81.3 6565 cellular  
 organisms;Eukaryota;Opisthokonta;Metazoa;Eumetazoa;Bilateria;Protostomia;  
 Spiralia;Lophotrochozoa;Mollusca;Bivalvia;Autobranchia;Pteriormorphia;Ostr  
 eida;Ostreidae;Crassostrea;Crassostrea virginica  
 UdeM00000004570 29159 77.8 UdeM00000004570 XP\_011456334.2 37.4 123  
 74 2 15 134 19 141 1.50E-11 77.8 29159 cellular  
 organisms;Eukaryota;Opisthokonta;Metazoa;Eumetazoa;Bilateria;Protostomia;  
 Spiralia;Lophotrochozoa;Mollusca;Bivalvia;Autobranchia;Pteriormorphia;Ostr  
 eida;Ostreidae;Crassostrea;Crassostrea gigas  
 UdeM00000004571 310915 84.3 UdeM00000004571 XP\_026776737.1 36.6  
 131 72 2 11 141 66 185 2.20E-13 84.3 310915  
 cellular  
 organisms;Eukaryota;Opisthokonta;Metazoa;Eumetazoa;Bilateria;Deuterostomi  
 a;Chordata;Craniata;Vertebrata;Gnathostomata;Teleostomi;Euteleostomi;Acti  
 nopterygii;Actinopteri;Neopterygii;Teleostei;Osteoglossocephalai;Clupeoce

phala;Otomorpha;Ostariophysi;Otophysi;Characiphysae;Siluriformes;Siluroid  
 ei;Pangasiidae;Pangasianodon;Pangasianodon hypophthalmus  
 UdeM00000004572 6596 107.1 UdeM00000004572 XP\_045173873.1 38 192  
 104 4 2 183 19 205 3.40E-20 107.1 6596 cellular  
 organisms;Eukaryota;Opisthokonta;Metazoa;Eumetazoa;Bilateria;Protostomia;  
 Spiralia;Lophotrochozoa;Mollusca;Bivalvia;Autobranchia;Heteroconchia;Euhe  
 terodonta;Imparidentia;Venerida;Veneroidea;Veneridae;Mercenaria;Mercenari  
 a mercenaria  
 UdeM00000004573 6596 221.9 UdeM00000004573 XP\_045172484.1 24.2 687  
 466 15 3 663 66 723 2.50E-54 221.9 6596 cellular  
 organisms;Eukaryota;Opisthokonta;Metazoa;Eumetazoa;Bilateria;Protostomia;  
 Spiralia;Lophotrochozoa;Mollusca;Bivalvia;Autobranchia;Heteroconchia;Euhe  
 terodonta;Imparidentia;Venerida;Veneroidea;Veneridae;Mercenaria;Mercenari  
 a mercenaria  
 UdeM00000004574 1735272 424.5 UdeM00000004574 XP\_041347204.1 48.7  
 425 215 3 52 473 90 514 1.80E-115 424.5 1735272  
 cellular  
 organisms;Eukaryota;Opisthokonta;Metazoa;Eumetazoa;Bilateria;Protostomia;  
 Spiralia;Lophotrochozoa;Mollusca;Gastropoda;Neomphalina;Neomphaloidea;Pel  
 tospiridae;Gigantopelta;Gigantopelta aegis  
 UdeM00000004575 1735272 221.9 UdeM00000004575 XP\_041346684.1 30.6  
 468 305 12 108 564 25 483 2.40E-54 221.9 1735272  
 cellular  
 organisms;Eukaryota;Opisthokonta;Metazoa;Eumetazoa;Bilateria;Protostomia;  
 Spiralia;Lophotrochozoa;Mollusca;Gastropoda;Neomphalina;Neomphaloidea;Pel  
 tospiridae;Gigantopelta;Gigantopelta aegis  
 UdeM00000004576 1735272 307.4 UdeM00000004576 XP\_041346684.1 30.4  
 661 419 16 108 738 25 674 5.10E-80 307.4 1735272  
 cellular  
 organisms;Eukaryota;Opisthokonta;Metazoa;Eumetazoa;Bilateria;Protostomia;  
 Spiralia;Lophotrochozoa;Mollusca;Gastropoda;Neomphalina;Neomphaloidea;Pel  
 tospiridae;Gigantopelta;Gigantopelta aegis  
 UdeM00000004577 1735272 424.5 UdeM00000004577 XP\_041347204.1 48.7  
 425 215 3 52 473 90 514 1.80E-115 424.5 1735272  
 cellular  
 organisms;Eukaryota;Opisthokonta;Metazoa;Eumetazoa;Bilateria;Protostomia;  
 Spiralia;Lophotrochozoa;Mollusca;Gastropoda;Neomphalina;Neomphaloidea;Pel  
 tospiridae;Gigantopelta;Gigantopelta aegis  
 UdeM00000004578 310915 81.3 UdeM00000004578 XP\_026776737.1 37.1  
 132 71 3 15 145 65 185 1.90E-12 81.3 310915  
 cellular  
 organisms;Eukaryota;Opisthokonta;Metazoa;Eumetazoa;Bilateria;Deuterostomi  
 a;Chordata;Craniata;Vertebrata;Gnathostomata;Teleostomi;Euteleostomi;Acti  
 nopterygii;Actinopteri;Neopterygii;Teleostei;Osteoglossocephalai;Clupeoce  
 phala;Otomorpha;Ostariophysi;Otophysi;Characiphysae;Siluriformes;Siluroid  
 ei;Pangasiidae;Pangasianodon;Pangasianodon hypophthalmus  
 UdeM00000004579 8208 110.9 UdeM00000004579 XP\_010782164.1 39.4 165  
 85 3 3 167 31 180 2.40E-21 110.9 8208 cellular  
 organisms;Eukaryota;Opisthokonta;Metazoa;Eumetazoa;Bilateria;Deuterostomi  
 a;Chordata;Craniata;Vertebrata;Gnathostomata;Teleostomi;Euteleostomi;Acti  
 nopterygii;Actinopteri;Neopterygii;Teleostei;Osteoglossocephalai;Clupeoce  
 phala;Euteleosteomorpha;Neoteleostei;Eurypterygia;Ctenosquamata;Acanthomo  
 rphata;Euacanthomorphacea;Percomorphaceae;Eupercaria;Perciformes;Notothen  
 ioidei;Nototheniidae;Notothenia;Notothenia coriiceps

UdeM00000004580 8208 103.2 UdeM00000004580 XP\_010782164.1 38.1 155  
 81 3 1 155 41 180 4.70E-19 103.2 8208 cellular  
 organisms;Eukaryota;Opisthokonta;Metazoa;Eumetazoa;Bilateria;Deuterostomi  
 a;Chordata;Craniata;Vertebrata;Gnathostomata;Teleostomi;Euteleostomi;Acti  
 nopterygii;Actinopteri;Neopterygii;Teleostei;Osteoglossocephalai;Clupeoce  
 phala;Euteleostomorpha;Neoteleostei;Eurypterygia;Ctenosquamata;Acanthomo  
 rphata;Euacanthomorphacea;Percomorphaceae;Eupercaria;Perciformes;Notothen  
 ioidei;Nototheniidae;Notothenia;Notothenia coriiceps  
 UdeM00000004581 6596 113.6 UdeM00000004581 XP\_045183615.1 27.7 328  
 208 8 37 342 250 570 5.00E-22 113.6 6596 cellular  
 organisms;Eukaryota;Opisthokonta;Metazoa;Eumetazoa;Bilateria;Protostomia;  
 Spiralia;Lophotrochozoa;Mollusca;Bivalvia;Autobranchia;Heteroconchia;Euhe  
 terodonta;Imparidentia;Venerida;Veneroidea;Veneridae;Mercenaria;Mercenari  
 a mercenaria  
 UdeM00000004582 6596 130.6 UdeM00000004582 XP\_045180001.1 34 206  
 129 3 8 207 9 213 3.10E-27 130.6 6596 cellular  
 organisms;Eukaryota;Opisthokonta;Metazoa;Eumetazoa;Bilateria;Protostomia;  
 Spiralia;Lophotrochozoa;Mollusca;Bivalvia;Autobranchia;Heteroconchia;Euhe  
 terodonta;Imparidentia;Venerida;Veneroidea;Veneridae;Mercenaria;Mercenari  
 a mercenaria  
 UdeM00000004583 6565 73.6 UdeM00000004583 XP\_022345462.1 31.2 170  
 92 4 606 756 1 164 1.50E-09 73.6 6565 cellular  
 organisms;Eukaryota;Opisthokonta;Metazoa;Eumetazoa;Bilateria;Protostomia;  
 Spiralia;Lophotrochozoa;Mollusca;Bivalvia;Autobranchia;Pteriormorphia;Ostr  
 eida;Ostreoidea;Ostreidae;Crassostrea;Crassostrea virginica  
 UdeM00000004584 6596 331.3 UdeM00000004584 XP\_045165913.1 67.4 230  
 67 1 1 230 6 227 1.00E-87 331.3 6596 cellular  
 organisms;Eukaryota;Opisthokonta;Metazoa;Eumetazoa;Bilateria;Protostomia;  
 Spiralia;Lophotrochozoa;Mollusca;Bivalvia;Autobranchia;Heteroconchia;Euhe  
 terodonta;Imparidentia;Venerida;Veneroidea;Veneridae;Mercenaria;Mercenari  
 a mercenaria  
 UdeM00000004585 6596 299.7 UdeM00000004585 XP\_045165847.1 43.2 336  
 187 2 61 392 150 485 5.60E-78 299.7 6596 cellular  
 organisms;Eukaryota;Opisthokonta;Metazoa;Eumetazoa;Bilateria;Protostomia;  
 Spiralia;Lophotrochozoa;Mollusca;Bivalvia;Autobranchia;Heteroconchia;Euhe  
 terodonta;Imparidentia;Venerida;Veneroidea;Veneridae;Mercenaria;Mercenari  
 a mercenaria  
 UdeM00000004586 6596 1617.8 UdeM00000004586 XP\_045166838.1 75.9  
 1050 247 3 35 1083 1 1045 0.00E+00 1617.8 6596  
 cellular  
 organisms;Eukaryota;Opisthokonta;Metazoa;Eumetazoa;Bilateria;Protostomia;  
 Spiralia;Lophotrochozoa;Mollusca;Bivalvia;Autobranchia;Heteroconchia;Euhe  
 terodonta;Imparidentia;Venerida;Veneroidea;Veneridae;Mercenaria;Mercenari  
 a mercenaria  
 UdeM00000004587 48498 105.1 UdeM00000004587 XP\_020602264.1 29.2 260  
 163 6 280 533 5 249 3.20E-19 105.1 48498 cellular  
 organisms;Eukaryota;Opisthokonta;Metazoa;Eumetazoa;Cnidaria;Anthozoa;Hexa  
 corallia;Scleractinia;Faviina;Merulinidae;Orbicella;Orbicella faveolata  
 UdeM00000004588 1735272 76.3 UdeM00000004588 XP\_041374024.1 25.5  
 235 153 7 15 233 575 803 1.10E-10 76.3 1735272  
 cellular  
 organisms;Eukaryota;Opisthokonta;Metazoa;Eumetazoa;Bilateria;Protostomia;  
 Spiralia;Lophotrochozoa;Mollusca;Gastropoda;Neomphalina;Neomphaloidea;Pel  
 tospiridae;Gigantopelta;Gigantopelta aegis

UdeM00000004589 6500 120.6 UdeM00000004589 XP\_005097873.1 44.5 146  
 78 2 6 150 3 146 1.80E-24 120.6 6500 cellular  
 organisms;Eukaryota;Opisthokonta;Metazoa;Eumetazoa;Bilateria;Protostomia;  
 Spiralia;Lophotrochozoa;Mollusca;Gastropoda;Heterobranchia;Euthyneura;Tec  
 tipleura;Aplysiida;Aplysioidea;Aplysiidae;Aplysia;Aplysia californica  
 UdeM00000004590 1735272 87.4 UdeM00000004590 XP\_041350556.1 34  
 150 96 1 1 150 6 152 1.90E-14 87.4 1735272  
 cellular  
 organisms;Eukaryota;Opisthokonta;Metazoa;Eumetazoa;Bilateria;Protostomia;  
 Spiralia;Lophotrochozoa;Mollusca;Gastropoda;Neomphalina;Neomphaloidea;Pel  
 tospiridae;Gigantopelta;Gigantopelta aegis  
 UdeM00000004591 29159 113.2 UdeM00000004591 XP\_034307319.1 45.3 128  
 66 2 20 145 23 148 2.80E-22 113.2 29159 cellular  
 organisms;Eukaryota;Opisthokonta;Metazoa;Eumetazoa;Bilateria;Protostomia;  
 Spiralia;Lophotrochozoa;Mollusca;Bivalvia;Autobranchia;Pteriormorphia;Ostr  
 eida;Ostreoidea;Ostreidae;Crassostrea;Crassostrea gigas  
 UdeM00000004592 4155 147.1 UdeM00000004592 XP\_012833272.1 44.4 180  
 99 1 2 180 136 315 2.20E-32 147.1 4155 cellular  
 organisms;Eukaryota;Viridiplantae;Streptophyta;Streptophytina;Embryophyta  
 ;Tracheophyta;Euphylllophyta;Spermatophyta;Magnoliopsida;Mesangiospermae;e  
 udicotyledons;Gunneridae;Pentapetalae;asterids;lamiids;Lamiales;Phrymacea  
 e;Erythranthe;Erythranthe guttata  
 UdeM00000004593 6596 142.5 UdeM00000004593 XP\_045165138.1 32 278  
 172 5 162 438 229 490 3.50E-30 142.5 6596 cellular  
 organisms;Eukaryota;Opisthokonta;Metazoa;Eumetazoa;Bilateria;Protostomia;  
 Spiralia;Lophotrochozoa;Mollusca;Bivalvia;Autobranchia;Heteroconchia;Euhe  
 terodonta;Imparidentia;Venerida;Veneroidea;Veneridae;Mercenaria;Mercenari  
 a mercenaria  
 UdeM00000004594 6596 142.5 UdeM00000004594 XP\_045165138.1 32 278  
 172 5 162 438 229 490 3.50E-30 142.5 6596 cellular  
 organisms;Eukaryota;Opisthokonta;Metazoa;Eumetazoa;Bilateria;Protostomia;  
 Spiralia;Lophotrochozoa;Mollusca;Bivalvia;Autobranchia;Heteroconchia;Euhe  
 terodonta;Imparidentia;Venerida;Veneroidea;Veneridae;Mercenaria;Mercenari  
 a mercenaria  
 UdeM00000004595 6596 471.5 UdeM00000004595 XP\_045165127.1 61.1 391  
 150 2 1 389 1 391 1.10E-129 471.5 6596 cellular  
 organisms;Eukaryota;Opisthokonta;Metazoa;Eumetazoa;Bilateria;Protostomia;  
 Spiralia;Lophotrochozoa;Mollusca;Bivalvia;Autobranchia;Heteroconchia;Euhe  
 terodonta;Imparidentia;Venerida;Veneroidea;Veneridae;Mercenaria;Mercenari  
 a mercenaria  
 UdeM00000004596 6596 262.3 UdeM00000004596 XP\_045165127.1 39.7 433  
 168 8 1 427 1 346 1.10E-66 262.3 6596 cellular  
 organisms;Eukaryota;Opisthokonta;Metazoa;Eumetazoa;Bilateria;Protostomia;  
 Spiralia;Lophotrochozoa;Mollusca;Bivalvia;Autobranchia;Heteroconchia;Euhe  
 terodonta;Imparidentia;Venerida;Veneroidea;Veneridae;Mercenaria;Mercenari  
 a mercenaria  
 UdeM00000004597 6596 278.9 UdeM00000004597 XP\_045165127.1 46.3 363  
 171 8 1 356 1 346 1.00E-71 278.9 6596 cellular  
 organisms;Eukaryota;Opisthokonta;Metazoa;Eumetazoa;Bilateria;Protostomia;  
 Spiralia;Lophotrochozoa;Mollusca;Bivalvia;Autobranchia;Heteroconchia;Euhe  
 terodonta;Imparidentia;Venerida;Veneroidea;Veneridae;Mercenaria;Mercenari  
 a mercenaria  
 UdeM00000004598 1735272 576.2 UdeM00000004598 XP\_041350404.1 62.8  
 438 160 1 17 454 36 470 3.60E-161 576.2 1735272



cellular  
organisms;Eukaryota;Opisthokonta;Metazoa;Eumetazoa;Bilateria;Protostomia;  
Spiralia;Lophotrochozoa;Mollusca;Gastropoda;Neomphalina;Neomphaloidea;Pel  
tospiridae;Gigantopelta;Gigantopelta aegis

UdeM00000004600 1735272 91.3 UdeM00000004600 XP\_041348569.1 87.8  
49 6 0 12 60 14 62 4.80E-16 91.3 1735272

cellular  
organisms;Eukaryota;Opisthokonta;Metazoa;Eumetazoa;Bilateria;Protostomia;  
Spiralia;Lophotrochozoa;Mollusca;Gastropoda;Neomphalina;Neomphaloidea;Pel  
tospiridae;Gigantopelta;Gigantopelta aegis

UdeM00000004599 1735272 136 UdeM00000004599 XP\_041348569.1 81.5  
81 14 1 12 91 14 94 2.50E-29 136 1735272

cellular  
organisms;Eukaryota;Opisthokonta;Metazoa;Eumetazoa;Bilateria;Protostomia;  
Spiralia;Lophotrochozoa;Mollusca;Gastropoda;Neomphalina;Neomphaloidea;Pel  
tospiridae;Gigantopelta;Gigantopelta aegis

UdeM00000004601 6596 625.9 UdeM00000004601 XP\_045164289.1 82.8 367  
60 1 1 367 16 379 3.20E-176 625.9 6596 cellular

organisms;Eukaryota;Opisthokonta;Metazoa;Eumetazoa;Bilateria;Protostomia;  
Spiralia;Lophotrochozoa;Mollusca;Bivalvia;Autobranchia;Heteroconchia;Euhe  
terodonta;Imparidentia;Venerida;Veneroidea;Veneridae;Mercenaria;Mercenari  
a mercenaria

UdeM00000004602 6596 449.1 UdeM00000004602 XP\_045164891.1 35.7 1311  
575 37 1 1078 1 1276 1.60E-122 449.1 6596 cellular

organisms;Eukaryota;Opisthokonta;Metazoa;Eumetazoa;Bilateria;Protostomia;  
Spiralia;Lophotrochozoa;Mollusca;Bivalvia;Autobranchia;Heteroconchia;Euhe  
terodonta;Imparidentia;Venerida;Veneroidea;Veneridae;Mercenaria;Mercenari  
a mercenaria

UdeM00000004603 1735272 318.9 UdeM00000004603 XP\_041347843.1 72.1  
197 55 0 7 203 7 203 5.00E-84 318.9 1735272

cellular  
organisms;Eukaryota;Opisthokonta;Metazoa;Eumetazoa;Bilateria;Protostomia;  
Spiralia;Lophotrochozoa;Mollusca;Gastropoda;Neomphalina;Neomphaloidea;Pel  
tospiridae;Gigantopelta;Gigantopelta aegis

UdeM00000004604 1735272 258.5 UdeM00000004604 XP\_041347843.1 74.7  
150 38 0 1 150 208 357 5.40E-66 258.5 1735272

cellular  
organisms;Eukaryota;Opisthokonta;Metazoa;Eumetazoa;Bilateria;Protostomia;  
Spiralia;Lophotrochozoa;Mollusca;Gastropoda;Neomphalina;Neomphaloidea;Pel  
tospiridae;Gigantopelta;Gigantopelta aegis

UdeM00000004609 6573 278.9 UdeM00000004609 XP\_021350960.1 77.3 220  
49 1 8 227 2 220 5.90E-72 278.9 6573 cellular

organisms;Eukaryota;Opisthokonta;Metazoa;Eumetazoa;Bilateria;Protostomia;  
Spiralia;Lophotrochozoa;Mollusca;Bivalvia;Autobranchia;Pteriomorphia;Pect  
inida;Pectinoidea;Pectinidae;Mizuhopecten;Mizuhopecten yessoensis

UdeM00000004610 29159 1144.4 UdeM00000004610 XP\_034304784.1 74.9  
777 188 4 5 775 9 784 0.00E+00 1144.4

29159 cellular  
organisms;Eukaryota;Opisthokonta;Metazoa;Eumetazoa;Bilateria;Protostomia;  
Spiralia;Lophotrochozoa;Mollusca;Bivalvia;Autobranchia;Pteriomorphia;Ostr  
eida;Ostreoidea;Ostreidae;Crassostrea;Crassostrea gigas

UdeM00000004611 6596 451.8 UdeM00000004611 XP\_045164658.1 64.6 370  
123 6 15 381 17 381 8.50E-124 451.8 6596 cellular

organisms;Eukaryota;Opisthokonta;Metazoa;Eumetazoa;Bilateria;Protostomia;

Spiralia;Lophotrochozoa;Mollusca;Bivalvia;Autobranhia;Heteroconchia;Euherodonta;Imparidentia;Venerida;Veneroidea;Veneridae;Mercenaria;Mercenaria mercenaria

UdeM00000004612 6573 838.6 UdeM00000004612 XP\_021343974.1 68.6 611  
180 6 1 607 819 1421 5.50E-240 838.6 6573 cellular

organisms;Eukaryota;Opisthokonta;Metazoa;Eumetazoa;Bilateria;Protostomia;Spiralia;Lophotrochozoa;Mollusca;Bivalvia;Autobranhia;Pteriormorphia;Pectinida;Pectinoidea;Pectinidae;Mizuhopecten;Mizuhopecten yessoensis

UdeM00000004613 6579 112.5 UdeM00000004613 XP\_033745996.1 39.9 258  
119 11 1 233 1 247 7.50E-22 112.5 6579 cellular

organisms;Eukaryota;Opisthokonta;Metazoa;Eumetazoa;Bilateria;Protostomia;Spiralia;Lophotrochozoa;Mollusca;Bivalvia;Autobranhia;Pteriormorphia;Pectinida;Pectinoidea;Pectinidae;Pecten;Pecten maximus

UdeM00000004614 6596 456.4 UdeM00000004614 XP\_045164653.1 80.6 273  
53 0 24 296 1249 1521 2.70E-125 456.4 6596 cellular

organisms;Eukaryota;Opisthokonta;Metazoa;Eumetazoa;Bilateria;Protostomia;Spiralia;Lophotrochozoa;Mollusca;Bivalvia;Autobranhia;Heteroconchia;Euherodonta;Imparidentia;Venerida;Veneroidea;Veneridae;Mercenaria;Mercenaria mercenaria

UdeM00000004615 6596 820.1 UdeM00000004615 XP\_045164292.1 58.9 667  
259 4 16 676 21 678 2.10E-234 820.1 6596 cellular

organisms;Eukaryota;Opisthokonta;Metazoa;Eumetazoa;Bilateria;Protostomia;Spiralia;Lophotrochozoa;Mollusca;Bivalvia;Autobranhia;Heteroconchia;Euherodonta;Imparidentia;Venerida;Veneroidea;Veneridae;Mercenaria;Mercenaria mercenaria

UdeM00000004616 6596 530.8 UdeM00000004616 XP\_045173621.1 66.3 377  
127 0 2 378 8 384 1.50E-147 530.8 6596 cellular

organisms;Eukaryota;Opisthokonta;Metazoa;Eumetazoa;Bilateria;Protostomia;Spiralia;Lophotrochozoa;Mollusca;Bivalvia;Autobranhia;Heteroconchia;Euherodonta;Imparidentia;Venerida;Veneroidea;Veneridae;Mercenaria;Mercenaria mercenaria

UdeM00000004617 6579 556.6 UdeM00000004617 XP\_033746357.1 70.4 371  
110 0 86 456 121 491 2.90E-155 556.6 6579 cellular

organisms;Eukaryota;Opisthokonta;Metazoa;Eumetazoa;Bilateria;Protostomia;Spiralia;Lophotrochozoa;Mollusca;Bivalvia;Autobranhia;Pteriormorphia;Pectinida;Pectinoidea;Pectinidae;Pecten;Pecten maximus

UdeM00000004618 133434 144.4 UdeM00000004618 XP\_022094551.1 74.7  
91 23 0 1 91 69 159 7.10E-32 144.4 133434

cellular

organisms;Eukaryota;Opisthokonta;Metazoa;Eumetazoa;Bilateria;Deuterostomia;Echinodermata;Eleutherozoa;Asterozoa;Asteroidea;Valvatacea;Valvatida;Acanthasteridae;Acanthaster;Acanthaster planci

UdeM00000004619 133434 162.5 UdeM00000004619 XP\_022094551.1 72.6  
106 29 0 14 119 54 159 3.30E-37 162.5 133434

cellular

organisms;Eukaryota;Opisthokonta;Metazoa;Eumetazoa;Bilateria;Deuterostomia;Echinodermata;Eleutherozoa;Asterozoa;Asteroidea;Valvatacea;Valvatida;Acanthasteridae;Acanthaster;Acanthaster planci

UdeM00000004620 10228 60.1 UdeM00000004620 XP\_002118407.1 36 100  
55 2 33 131 508 599 2.50E-06 60.1 10228 cellular

organisms;Eukaryota;Opisthokonta;Metazoa;Eumetazoa;Placozoa;Trichoplacidae;Trichoplax;Trichoplax adhaerens

UdeM00000004621 6596 516.5 UdeM00000004621 XP\_045166431.1 55.2 444  
199 0 8 451 15 458 3.30E-143 516.5 6596 cellular

organisms;Eukaryota;Opisthokonta;Metazoa;Eumetazoa;Bilateria;Protostomia;Spiralia;Lophotrochozoa;Mollusca;Bivalvia;Autobranchia;Heteroconchia;Euherodonta;Imparidentia;Venerida;Veneroidea;Veneridae;Mercenaria;Mercenaria mercenaria

UdeM00000004622 6596 274.2 UdeM00000004622 XP\_045166804.1 39.5 352  
210 3 49 397 51 402 2.50E-70 274.2 6596 cellular

organisms;Eukaryota;Opisthokonta;Metazoa;Eumetazoa;Bilateria;Protostomia;Spiralia;Lophotrochozoa;Mollusca;Bivalvia;Autobranchia;Heteroconchia;Euherodonta;Imparidentia;Venerida;Veneroidea;Veneridae;Mercenaria;Mercenaria mercenaria

UdeM00000004623 6596 184.5 UdeM00000004623 XP\_045202545.1 49 202  
77 5 10 186 10 210 1.20E-43 184.5 6596 cellular

organisms;Eukaryota;Opisthokonta;Metazoa;Eumetazoa;Bilateria;Protostomia;Spiralia;Lophotrochozoa;Mollusca;Bivalvia;Autobranchia;Heteroconchia;Euherodonta;Imparidentia;Venerida;Veneroidea;Veneridae;Mercenaria;Mercenaria mercenaria

UdeM00000004624 29159 177.6 UdeM00000004624 XP\_011443561.2 58.2 134  
55 1 32 164 48 181 1.30E-41 177.6 29159 cellular

organisms;Eukaryota;Opisthokonta;Metazoa;Eumetazoa;Bilateria;Protostomia;Spiralia;Lophotrochozoa;Mollusca;Bivalvia;Autobranchia;Pteriomorphia;Ostreida;Ostreoidea;Ostreidae;Crassostrea;Crassostrea gigas

UdeM00000004625 6596 642.5 UdeM00000004625 XP\_045188256.1 52 635  
266 9 1 627 1 604 6.70E-181 642.5 6596 cellular

organisms;Eukaryota;Opisthokonta;Metazoa;Eumetazoa;Bilateria;Protostomia;Spiralia;Lophotrochozoa;Mollusca;Bivalvia;Autobranchia;Heteroconchia;Euherodonta;Imparidentia;Venerida;Veneroidea;Veneridae;Mercenaria;Mercenaria mercenaria

UdeM00000004626 6596 189.1 UdeM00000004626 XP\_045165117.1 37.3 330  
168 7 3 301 2 323 8.60E-45 189.1 6596 cellular

organisms;Eukaryota;Opisthokonta;Metazoa;Eumetazoa;Bilateria;Protostomia;Spiralia;Lophotrochozoa;Mollusca;Bivalvia;Autobranchia;Heteroconchia;Euherodonta;Imparidentia;Venerida;Veneroidea;Veneridae;Mercenaria;Mercenaria mercenaria

UdeM00000004627 6596 280.4 UdeM00000004627 XP\_045166649.1 87.8 147  
18 0 1 147 25 171 1.30E-72 280.4 6596 cellular

organisms;Eukaryota;Opisthokonta;Metazoa;Eumetazoa;Bilateria;Protostomia;Spiralia;Lophotrochozoa;Mollusca;Bivalvia;Autobranchia;Heteroconchia;Euherodonta;Imparidentia;Venerida;Veneroidea;Veneridae;Mercenaria;Mercenaria mercenaria

UdeM00000004630 6579 599 UdeM00000004630 XP\_033744709.1 67.4 783  
204 12 195 936 175 947 1.10E-167 599 6579 cellular

organisms;Eukaryota;Opisthokonta;Metazoa;Eumetazoa;Bilateria;Protostomia;Spiralia;Lophotrochozoa;Mollusca;Bivalvia;Autobranchia;Pteriomorphia;Pectinida;Pectinoidea;Pectinidae;Pecten;Pecten maximus

UdeM00000004631 6579 600.5 UdeM00000004631 XP\_033744709.1 67.5 781  
206 11 195 935 175 947 3.60E-168 600.5 6579 cellular

organisms;Eukaryota;Opisthokonta;Metazoa;Eumetazoa;Bilateria;Protostomia;Spiralia;Lophotrochozoa;Mollusca;Bivalvia;Autobranchia;Pteriomorphia;Pectinida;Pectinoidea;Pectinidae;Pecten;Pecten maximus

UdeM00000004632 6579 787.3 UdeM00000004632 XP\_033746548.1 56.6 693  
279 3 1 693 43 713 1.60E-224 787.3 6579 cellular

organisms;Eukaryota;Opisthokonta;Metazoa;Eumetazoa;Bilateria;Protostomia;Spiralia;Lophotrochozoa;Mollusca;Bivalvia;Autobranchia;Pteriomorphia;Pectinida;Pectinoidea;Pectinidae;Pecten;Pecten maximus

UdeM00000004636 29159 282.7 UdeM00000004636 XP\_011447851.2 35 457  
 278 9 1 447 1381 1828 8.00E-73 282.7 29159 cellular  
 organisms;Eukaryota;Opisthokonta;Metazoa;Eumetazoa;Bilateria;Protostomia;  
 Spiralia;Lophotrochozoa;Mollusca;Bivalvia;Autobranchia;Pteriomorphia;Ostr  
 eida;Ostreoidea;Ostreidae;Crassostrea;Crassostrea gigas  
 UdeM00000004637 29159 776.5 UdeM00000004637 XP\_011447851.2 36.1 1381  
 815 28 32 1388 34 1371 5.50E-221 776.5 29159 cellular  
 organisms;Eukaryota;Opisthokonta;Metazoa;Eumetazoa;Bilateria;Protostomia;  
 Spiralia;Lophotrochozoa;Mollusca;Bivalvia;Autobranchia;Pteriomorphia;Ostr  
 eida;Ostreoidea;Ostreidae;Crassostrea;Crassostrea gigas  
 UdeM00000004639 8040 110.9 UdeM00000004639 XP\_038848786.1 35.4 192  
 124 0 11 202 3 194 1.90E-21 110.9 8040 cellular  
 organisms;Eukaryota;Opisthokonta;Metazoa;Eumetazoa;Bilateria;Deuterostomi  
 a;Chordata;Craniata;Vertebrata;Gnathostomata;Teleostomi;Euteleostomi;Acti  
 nopterygii;Actinopteri;Neopterygii;Teleostei;Osteoglossocephalai;Clupeoce  
 phala;Euteleosteomorpha;Protacanthopterygii;Salmoniformes;Salmonidae;Salm  
 oninae;Salvelinus;Salvelinus namaycush  
 UdeM00000004640 6596 82.8 UdeM00000004640 XP\_045166644.1 30.1 219  
 134 5 2 209 16 226 6.90E-13 82.8 6596 cellular  
 organisms;Eukaryota;Opisthokonta;Metazoa;Eumetazoa;Bilateria;Protostomia;  
 Spiralia;Lophotrochozoa;Mollusca;Bivalvia;Autobranchia;Heteroconchia;Euhe  
 terodonta;Imparidentia;Venerida;Veneroidea;Veneridae;Mercenaria;Mercenari  
 a mercenaria  
 UdeM00000004641 6596 70.1 UdeM00000004641 XP\_045166644.1 29.9 224  
 117 7 2 198 16 226 4.50E-09 70.1 6596 cellular  
 organisms;Eukaryota;Opisthokonta;Metazoa;Eumetazoa;Bilateria;Protostomia;  
 Spiralia;Lophotrochozoa;Mollusca;Bivalvia;Autobranchia;Heteroconchia;Euhe  
 terodonta;Imparidentia;Venerida;Veneroidea;Veneridae;Mercenaria;Mercenari  
 a mercenaria  
 UdeM00000004642 6596 314.3 UdeM00000004642 XP\_045199140.1 53.5 301  
 122 5 10 299 12 305 1.70E-82 314.3 6596 cellular  
 organisms;Eukaryota;Opisthokonta;Metazoa;Eumetazoa;Bilateria;Protostomia;  
 Spiralia;Lophotrochozoa;Mollusca;Bivalvia;Autobranchia;Heteroconchia;Euhe  
 terodonta;Imparidentia;Venerida;Veneroidea;Veneridae;Mercenaria;Mercenari  
 a mercenaria  
 UdeM00000004643 6596 575.9 UdeM00000004643 XP\_045164804.1 77.1 406  
 86 2 1 405 1 400 4.10E-161 575.9 6596 cellular  
 organisms;Eukaryota;Opisthokonta;Metazoa;Eumetazoa;Bilateria;Protostomia;  
 Spiralia;Lophotrochozoa;Mollusca;Bivalvia;Autobranchia;Heteroconchia;Euhe  
 terodonta;Imparidentia;Venerida;Veneroidea;Veneridae;Mercenaria;Mercenari  
 a mercenaria  
 UdeM00000004644 29159 451.8 UdeM00000004644 XP\_034305255.1 74.2 314  
 73 3 1 313 1172 1478 7.00E-124 451.8 29159 cellular  
 organisms;Eukaryota;Opisthokonta;Metazoa;Eumetazoa;Bilateria;Protostomia;  
 Spiralia;Lophotrochozoa;Mollusca;Bivalvia;Autobranchia;Pteriomorphia;Ostr  
 eida;Ostreoidea;Ostreidae;Crassostrea;Crassostrea gigas  
 UdeM00000004645 6579 1604.3 UdeM00000004645 XP\_033746517.1 58.6  
 1489 543 28 41 1486 495 1953 0.00E+00 1604.3 6579  
 cellular  
 organisms;Eukaryota;Opisthokonta;Metazoa;Eumetazoa;Bilateria;Protostomia;  
 Spiralia;Lophotrochozoa;Mollusca;Bivalvia;Autobranchia;Pteriomorphia;Pect  
 inida;Pectinoidea;Pectinidae;Pecten;Pecten maximus  
 UdeM00000004646 1735272 394.4 UdeM00000004646 XP\_041349998.1 50.5  
 400 191 5 23 416 44 442 1.80E-106 394.4 1735272

cellular  
organisms;Eukaryota;Opisthokonta;Metazoa;Eumetazoa;Bilateria;Protostomia;  
Spiralia;Lophotrochozoa;Mollusca;Gastropoda;Neomphalina;Neomphaloidea;Pel  
tospiridae;Gigantopelta;Gigantopelta aegis

UdeM00000004648 225164 190.3 UdeM00000004648 XP\_009064967.1 34.9  
352 193 9 1 325 1 343 4.60E-45 190.3 225164

cellular  
organisms;Eukaryota;Opisthokonta;Metazoa;Eumetazoa;Bilateria;Protostomia;  
Spiralia;Lophotrochozoa;Mollusca;Gastropoda;Patellogastropoda;Lottioidea;  
Lottiidae;Lottia;Lottia gigantea

UdeM00000004649 6573 209.1 UdeM00000004649 XP\_021347638.1 40.6 244  
143 2 18 259 353 596 9.40E-51 209.1 6573 cellular

organisms;Eukaryota;Opisthokonta;Metazoa;Eumetazoa;Bilateria;Protostomia;  
Spiralia;Lophotrochozoa;Mollusca;Bivalvia;Autobranchia;Pteriormorphia;Pect  
inida;Pectinoidea;Pectinidae;Mizuhopecten;Mizuhopecten yessoensis

UdeM00000004650 6596 1016.5 UdeM00000004650 XP\_045167310.1 58.4  
867 351 5 26 886 716 1578 2.00E-293 1016.5 6596

cellular  
organisms;Eukaryota;Opisthokonta;Metazoa;Eumetazoa;Bilateria;Protostomia;  
Spiralia;Lophotrochozoa;Mollusca;Bivalvia;Autobranchia;Heteroconchia;Euhe  
terodonta;Imparidentia;Venerida;Veneroidea;Veneridae;Mercenaria;Mercenari  
a mercenaria

UdeM00000004651 7741 632.5 UdeM00000004651 XP\_019618826.1 58 526  
220 1 20 544 5 530 7.60E-178 632.5 7741 cellular

organisms;Eukaryota;Opisthokonta;Metazoa;Eumetazoa;Bilateria;Deuterostomi  
a;Chordata;Cephalochordata;Leptocardii;Amphioxiformes;Branchiostomidae;Br  
anchiostoma;Branchiostoma belcheri

UdeM00000004652 6596 463.8 UdeM00000004652 XP\_045165611.1 44.4 620  
315 13 35 642 24 625 5.10E-127 463.8 6596 cellular

organisms;Eukaryota;Opisthokonta;Metazoa;Eumetazoa;Bilateria;Protostomia;  
Spiralia;Lophotrochozoa;Mollusca;Bivalvia;Autobranchia;Heteroconchia;Euhe  
terodonta;Imparidentia;Venerida;Veneroidea;Veneridae;Mercenaria;Mercenari  
a mercenaria

UdeM00000004653 6596 659.1 UdeM00000004653 XP\_045164791.1 51.2 648  
303 5 86 724 23 666 6.70E-186 659.1 6596 cellular

organisms;Eukaryota;Opisthokonta;Metazoa;Eumetazoa;Bilateria;Protostomia;  
Spiralia;Lophotrochozoa;Mollusca;Bivalvia;Autobranchia;Heteroconchia;Euhe  
terodonta;Imparidentia;Venerida;Veneroidea;Veneridae;Mercenaria;Mercenari  
a mercenaria

UdeM00000004654 1735272 465.3 UdeM00000004654 XP\_041347609.1 56.7  
381 160 4 76 455 102 478 8.90E-128 465.3 1735272

cellular  
organisms;Eukaryota;Opisthokonta;Metazoa;Eumetazoa;Bilateria;Protostomia;  
Spiralia;Lophotrochozoa;Mollusca;Gastropoda;Neomphalina;Neomphaloidea;Pel  
tospiridae;Gigantopelta;Gigantopelta aegis

UdeM00000004655 6573 609.8 UdeM00000004655 XP\_021362530.1 72.3 505  
135 5 314 814 4 507 5.20E-171 609.8 6573 cellular

organisms;Eukaryota;Opisthokonta;Metazoa;Eumetazoa;Bilateria;Protostomia;  
Spiralia;Lophotrochozoa;Mollusca;Bivalvia;Autobranchia;Pteriormorphia;Pect  
inida;Pectinoidea;Pectinidae;Mizuhopecten;Mizuhopecten yessoensis

UdeM00000004656 6596 2327.4 UdeM00000004656 XP\_045165217.1 73.5  
1680 407 19 1 1659 1 1663 0.00E+00 2327.4 6596

cellular  
organisms;Eukaryota;Opisthokonta;Metazoa;Eumetazoa;Bilateria;Protostomia;

Spiralia;Lophotrochozoa;Mollusca;Bivalvia;Autobranchia;Heteroconchia;Euheterodonta;Imparidentia;Venerida;Veneroidea;Veneridae;Mercenaria;Mercenaria mercenaria

UdeM00000004657 6596 439.1 UdeM00000004657 XP\_045167157.1 38.4 700  
381 11 10 677 3508 4189 1.10E-119 439.1 6596 cellular

organisms;Eukaryota;Opisthokonta;Metazoa;Eumetazoa;Bilateria;Protostomia;Spiralia;Lophotrochozoa;Mollusca;Bivalvia;Autobranchia;Heteroconchia;Euheterodonta;Imparidentia;Venerida;Veneroidea;Veneridae;Mercenaria;Mercenaria mercenaria

UdeM00000004661 6596 82 UdeM00000004661 XP\_045167157.1 31.3 201  
105 6 31 216 4139 4321 1.00E-12 82 6596 cellular

organisms;Eukaryota;Opisthokonta;Metazoa;Eumetazoa;Bilateria;Protostomia;Spiralia;Lophotrochozoa;Mollusca;Bivalvia;Autobranchia;Heteroconchia;Euheterodonta;Imparidentia;Venerida;Veneroidea;Veneridae;Mercenaria;Mercenaria mercenaria

UdeM00000004662 400727 1892.1 UdeM00000004662 XP\_025107755.1  
40.8 3264 1829 49 48 3261 335 3544 0.00E+00 1892.1  
400727 cellular

organisms;Eukaryota;Opisthokonta;Metazoa;Eumetazoa;Bilateria;Protostomia;Spiralia;Lophotrochozoa;Mollusca;Gastropoda;Caenogastropoda;Architaenioglossa;Ampullarioidea;Ampullariidae;Pomacea;Pomacea canaliculata

UdeM00000004663 1735272 131.7 UdeM00000004663 XP\_041346687.1 72.9  
96 26 0 1 96 9 104 4.90E-28 131.7 1735272

cellular  
organisms;Eukaryota;Opisthokonta;Metazoa;Eumetazoa;Bilateria;Protostomia;Spiralia;Lophotrochozoa;Mollusca;Gastropoda;Neomphalina;Neomphaloidea;Peltospiridae;Gigantopelta;Gigantopelta aegis

UdeM00000004664 1735272 138.3 UdeM00000004664 XP\_041346687.1 71.6  
102 29 0 2 103 3 104 5.70E-30 138.3 1735272

cellular  
organisms;Eukaryota;Opisthokonta;Metazoa;Eumetazoa;Bilateria;Protostomia;Spiralia;Lophotrochozoa;Mollusca;Gastropoda;Neomphalina;Neomphaloidea;Peltospiridae;Gigantopelta;Gigantopelta aegis

UdeM00000004665 1735272 299.3 UdeM00000004665 XP\_041348533.1 57.1  
254 109 0 7 260 3 256 5.00E-78 299.3 1735272

cellular  
organisms;Eukaryota;Opisthokonta;Metazoa;Eumetazoa;Bilateria;Protostomia;Spiralia;Lophotrochozoa;Mollusca;Gastropoda;Neomphalina;Neomphaloidea;Peltospiridae;Gigantopelta;Gigantopelta aegis

UdeM00000004666 6596 798.9 UdeM00000004666 XP\_045166392.1 50.6 923  
409 13 12 928 13 894 6.90E-228 798.9 6596 cellular

organisms;Eukaryota;Opisthokonta;Metazoa;Eumetazoa;Bilateria;Protostomia;Spiralia;Lophotrochozoa;Mollusca;Bivalvia;Autobranchia;Heteroconchia;Euheterodonta;Imparidentia;Venerida;Veneroidea;Veneridae;Mercenaria;Mercenaria mercenaria

UdeM00000004667 6596 1444.9 UdeM00000004667 XP\_045165771.1 47.8  
2342 965 50 29 2200 80 2334 0.00E+00 1444.9 6596

cellular  
organisms;Eukaryota;Opisthokonta;Metazoa;Eumetazoa;Bilateria;Protostomia;Spiralia;Lophotrochozoa;Mollusca;Bivalvia;Autobranchia;Heteroconchia;Euheterodonta;Imparidentia;Venerida;Veneroidea;Veneridae;Mercenaria;Mercenaria mercenaria

UdeM00000004668 6596 103.2 UdeM00000004668 XP\_045165771.1 63.8 80  
28 1 1 80 1 79 2.20E-19 103.2 6596 cellular

organisms;Eukaryota;Opisthokonta;Metazoa;Eumetazoa;Bilateria;Protostomia;Spiralia;Lophotrochozoa;Mollusca;Bivalvia;Autobranhia;Heteroconchia;Euheterodonta;Imparidentia;Venerida;Veneroidea;Veneridae;Mercenaria;Mercenaria mercenaria

UdeM00000004669 6573 147.1 UdeM00000004669 XP\_021342346.1 34.4 250  
127 4 3 216 610 858 2.50E-32 147.1 6573 cellular

organisms;Eukaryota;Opisthokonta;Metazoa;Eumetazoa;Bilateria;Protostomia;Spiralia;Lophotrochozoa;Mollusca;Bivalvia;Autobranhia;Pteriormorphia;Pectinida;Pectinoidea;Pectinidae;Mizuhopecten;Mizuhopecten yessoensis

UdeM00000004670 6596 72 UdeM00000004670 XP\_045164598.1 39.9 376  
193 7 1 370 967 1315 1.80E-09 72 6596 cellular

organisms;Eukaryota;Opisthokonta;Metazoa;Eumetazoa;Bilateria;Protostomia;Spiralia;Lophotrochozoa;Mollusca;Bivalvia;Autobranhia;Heteroconchia;Euheterodonta;Imparidentia;Venerida;Veneroidea;Veneridae;Mercenaria;Mercenaria mercenaria

UdeM00000004672 6573 270.8 UdeM00000004672 XP\_021371007.1 40.6 461  
237 12 10 450 12 455 3.40E-69 270.8 6573 cellular

organisms;Eukaryota;Opisthokonta;Metazoa;Eumetazoa;Bilateria;Protostomia;Spiralia;Lophotrochozoa;Mollusca;Bivalvia;Autobranhia;Pteriormorphia;Pectinida;Pectinoidea;Pectinidae;Mizuhopecten;Mizuhopecten yessoensis

UdeM00000004671 6573 270.8 UdeM00000004671 XP\_021371007.1 40.6 461  
237 12 15 455 12 455 3.40E-69 270.8 6573 cellular

organisms;Eukaryota;Opisthokonta;Metazoa;Eumetazoa;Bilateria;Protostomia;Spiralia;Lophotrochozoa;Mollusca;Bivalvia;Autobranhia;Pteriormorphia;Pectinida;Pectinoidea;Pectinidae;Mizuhopecten;Mizuhopecten yessoensis

UdeM00000004673 6579 183 UdeM00000004673 XP\_033744963.1 66.9 127  
42 0 14 140 10 136 2.70E-43 183 6579 cellular

organisms;Eukaryota;Opisthokonta;Metazoa;Eumetazoa;Bilateria;Protostomia;Spiralia;Lophotrochozoa;Mollusca;Bivalvia;Autobranhia;Pteriormorphia;Pectinida;Pectinoidea;Pectinidae;Pecten;Pecten maximus

UdeM00000004674 37653 236.1 UdeM00000004674 XP\_014775660.1 60.8 186  
72 1 5 189 5 190 3.70E-59 236.1 37653 cellular

organisms;Eukaryota;Opisthokonta;Metazoa;Eumetazoa;Bilateria;Protostomia;Spiralia;Lophotrochozoa;Mollusca;Cephalopoda;Coleoidea;Octopodiformes;Octopoda;Incirrata;Octopodidae;Octopus;Octopus bimaculoides

UdeM00000004675 6596 661.4 UdeM00000004675 XP\_045164228.1 56.7 616  
235 11 1 591 58 666 1.10E-186 661.4 6596 cellular

organisms;Eukaryota;Opisthokonta;Metazoa;Eumetazoa;Bilateria;Protostomia;Spiralia;Lophotrochozoa;Mollusca;Bivalvia;Autobranhia;Heteroconchia;Euheterodonta;Imparidentia;Venerida;Veneroidea;Veneridae;Mercenaria;Mercenaria mercenaria

UdeM00000004676 6579 691.4 UdeM00000004676 XP\_033744960.1 69.3 514  
141 6 9 511 167 674 8.70E-196 691.4 6579 cellular

organisms;Eukaryota;Opisthokonta;Metazoa;Eumetazoa;Bilateria;Protostomia;Spiralia;Lophotrochozoa;Mollusca;Bivalvia;Autobranhia;Pteriormorphia;Pectinida;Pectinoidea;Pectinidae;Pecten;Pecten maximus

UdeM00000004677 6579 188 UdeM00000004677 XP\_033744960.1 62.4 165  
55 4 4 166 515 674 1.00E-44 188 6579 cellular

organisms;Eukaryota;Opisthokonta;Metazoa;Eumetazoa;Bilateria;Protostomia;Spiralia;Lophotrochozoa;Mollusca;Bivalvia;Autobranhia;Pteriormorphia;Pectinida;Pectinoidea;Pectinidae;Pecten;Pecten maximus

UdeM00000004678 29159 543.9 UdeM00000004678 XP\_011416243.2 45.5 573  
308 2 9 581 15 583 2.60E-151 543.9 29159 cellular

organisms;Eukaryota;Opisthokonta;Metazoa;Eumetazoa;Bilateria;Protostomia;

Spiralia; Lophotrochozoa; Mollusca; Bivalvia; Autobranchia; Pteriomorphia; Ostr  
eida; Ostreoidea; Ostreidae; Crassostrea; Crassostrea gigas  
UdeM00000004679 6565 585.9 UdeM00000004679 XP\_022302804.1 48.6 570  
289 2 8 577 14 579 6.00E-164 585.9 6565 cellular  
organisms; Eukaryota; Opisthokonta; Metazoa; Eumetazoa; Bilateria; Protostomia;  
Spiralia; Lophotrochozoa; Mollusca; Bivalvia; Autobranchia; Pteriomorphia; Ostr  
eida; Ostreoidea; Ostreidae; Crassostrea; Crassostrea virginica  
UdeM00000004681 46514 87.8 UdeM00000004681 XP\_038045989.1 49.3 69  
35 0 281 349 2096 2164 2.90E-14 87.8 46514 cellular  
organisms; Eukaryota; Opisthokonta; Metazoa; Eumetazoa; Bilateria; Deuterostomi  
a; Echinodermata; Eleutherozoa; Asterozoa; Asteroidea; Valvatacea; Valvatida; As  
terinidae; Patiria; Patiria miniata  
UdeM00000004682 225164 546.6 UdeM00000004682 XP\_009050787.1 36.4  
870 519 16 60 910 147 1001 6.10E-152 546.6 225164  
cellular  
organisms; Eukaryota; Opisthokonta; Metazoa; Eumetazoa; Bilateria; Protostomia;  
Spiralia; Lophotrochozoa; Mollusca; Gastropoda; Patellogastropoda; Lottioidea;  
Lottiidae; Lottia; Lottia gigantea  
UdeM00000004683 6596 71.6 UdeM00000004683 XP\_045164823.1 25.6 203  
128 5 15 214 134 316 1.60E-09 71.6 6596 cellular  
organisms; Eukaryota; Opisthokonta; Metazoa; Eumetazoa; Bilateria; Protostomia;  
Spiralia; Lophotrochozoa; Mollusca; Bivalvia; Autobranchia; Heteroconchia; Eue  
terodonta; Imparidentia; Venerida; Veneroidea; Veneridae; Mercenaria; Mercenari  
a mercenaria  
UdeM00000004685 6596 345.1 UdeM00000004685 XP\_045195959.1 52.4 315  
142 4 1 308 1 314 9.10E-92 345.1 6596 cellular  
organisms; Eukaryota; Opisthokonta; Metazoa; Eumetazoa; Bilateria; Protostomia;  
Spiralia; Lophotrochozoa; Mollusca; Bivalvia; Autobranchia; Heteroconchia; Eue  
terodonta; Imparidentia; Venerida; Veneroidea; Veneridae; Mercenaria; Mercenari  
a mercenaria  
UdeM00000004686 8255 106.3 UdeM00000004686 XP\_019934688.1 51.3 115  
39 3 5 116 2 102 3.80E-20 106.3 8255 cellular  
organisms; Eukaryota; Opisthokonta; Metazoa; Eumetazoa; Bilateria; Deuterostomi  
a; Chordata; Craniata; Vertebrata; Gnathostomata; Teleostomi; Euteleostomi; Acti  
nopterygii; Actinopteri; Neopterygii; Teleostei; Osteoglossocephalai; Clupeoce  
phala; Euteleosteomorpha; Neoteleostei; Eurypterygia; Ctenosquamata; Acanthomo  
rphata; Euacanthomorphacea; Percomorphaceae; Carangaria; Pleuronectiformes; Pl  
euronectoidei; Paralichthyidae; Paralichthys; Paralichthys olivaceus  
UdeM00000004687 8255 106.3 UdeM00000004687 XP\_019934688.1 51.3 115  
39 3 5 116 2 102 3.90E-20 106.3 8255 cellular  
organisms; Eukaryota; Opisthokonta; Metazoa; Eumetazoa; Bilateria; Deuterostomi  
a; Chordata; Craniata; Vertebrata; Gnathostomata; Teleostomi; Euteleostomi; Acti  
nopterygii; Actinopteri; Neopterygii; Teleostei; Osteoglossocephalai; Clupeoce  
phala; Euteleosteomorpha; Neoteleostei; Eurypterygia; Ctenosquamata; Acanthomo  
rphata; Euacanthomorphacea; Percomorphaceae; Carangaria; Pleuronectiformes; Pl  
euronectoidei; Paralichthyidae; Paralichthys; Paralichthys olivaceus  
UdeM00000004688 6579 1488.8 UdeM00000004688 XP\_033759237.1 46.5  
1692 832 19 13 1659 921 2583 0.00E+00 1488.8 6579  
cellular  
organisms; Eukaryota; Opisthokonta; Metazoa; Eumetazoa; Bilateria; Protostomia;  
Spiralia; Lophotrochozoa; Mollusca; Bivalvia; Autobranchia; Pteriomorphia; Pect  
inida; Pectinoidea; Pectinidae; Pecten; Pecten maximus  
UdeM00000004689 6596 321.6 UdeM00000004689 XP\_045166961.1 43.6 424  
230 4 60 479 505 923 1.90E-84 321.6 6596 cellular



organisms;Eukaryota;Opisthokonta;Metazoa;Eumetazoa;Bilateria;Protostomia;Spiralia;Lophotrochozoa;Mollusca;Bivalvia;Autobranhia;Heteroconchia;Euherodonta;Imparidentia;Venerida;Veneroidea;Veneridae;Mercenaria;Mercenaria mercenaria

UdeM00000004690 6596 203.4 UdeM00000004690 XP\_045166961.1 33 397  
219 7 13 371 119 506 5.10E-49 203.4 6596 cellular

organisms;Eukaryota;Opisthokonta;Metazoa;Eumetazoa;Bilateria;Protostomia;Spiralia;Lophotrochozoa;Mollusca;Bivalvia;Autobranhia;Heteroconchia;Euherodonta;Imparidentia;Venerida;Veneroidea;Veneridae;Mercenaria;Mercenaria mercenaria

UdeM00000004693 225164 299.3 UdeM00000004693 XP\_009049857.1 48.3  
294 152 0 13 306 1 294 5.70E-78 299.3 225164  
cellular

organisms;Eukaryota;Opisthokonta;Metazoa;Eumetazoa;Bilateria;Protostomia;Spiralia;Lophotrochozoa;Mollusca;Gastropoda;Patellogastropoda;Lottioidea;Lottiidae;Lottia;Lottia gigantea

UdeM00000004692 225164 298.9 UdeM00000004692 XP\_009049857.1 48.3  
294 152 0 33 326 1 294 8.00E-78 298.9 225164  
cellular

organisms;Eukaryota;Opisthokonta;Metazoa;Eumetazoa;Bilateria;Protostomia;Spiralia;Lophotrochozoa;Mollusca;Gastropoda;Patellogastropoda;Lottioidea;Lottiidae;Lottia;Lottia gigantea

UdeM00000004694 6596 104.4 UdeM00000004694 XP\_045166424.1 61.7 81  
30 1 11 91 12 91 9.30E-20 104.4 6596 cellular

organisms;Eukaryota;Opisthokonta;Metazoa;Eumetazoa;Bilateria;Protostomia;Spiralia;Lophotrochozoa;Mollusca;Bivalvia;Autobranhia;Heteroconchia;Euherodonta;Imparidentia;Venerida;Veneroidea;Veneridae;Mercenaria;Mercenaria mercenaria

UdeM00000004696 6596 117.5 UdeM00000004696 XP\_045166250.1 33.2 235  
124 5 1 202 1 235 2.00E-23 117.5 6596 cellular

organisms;Eukaryota;Opisthokonta;Metazoa;Eumetazoa;Bilateria;Protostomia;Spiralia;Lophotrochozoa;Mollusca;Bivalvia;Autobranhia;Heteroconchia;Euherodonta;Imparidentia;Venerida;Veneroidea;Veneridae;Mercenaria;Mercenaria mercenaria

UdeM00000004697 6596 360.5 UdeM00000004697 XP\_045164296.1 52.8 405  
179 5 6 401 27 428 2.80E-96 360.5 6596 cellular

organisms;Eukaryota;Opisthokonta;Metazoa;Eumetazoa;Bilateria;Protostomia;Spiralia;Lophotrochozoa;Mollusca;Bivalvia;Autobranhia;Heteroconchia;Euherodonta;Imparidentia;Venerida;Veneroidea;Veneridae;Mercenaria;Mercenaria mercenaria

UdeM00000004699 6573 291.2 UdeM00000004699 XP\_021346496.1 33.5 483  
208 4 1 374 213 691 1.90E-75 291.2 6573 cellular

organisms;Eukaryota;Opisthokonta;Metazoa;Eumetazoa;Bilateria;Protostomia;Spiralia;Lophotrochozoa;Mollusca;Bivalvia;Autobranhia;Pteriomorphia;Pectinida;Pectinoidea;Pectinidae;Mizuhopecten;Mizuhopecten yessoensis

UdeM00000004700 6579 183.3 UdeM00000004700 XP\_033739209.1 45.5 211  
84 2 9 199 2 201 8.30E-43 183.3 6579 cellular

organisms;Eukaryota;Opisthokonta;Metazoa;Eumetazoa;Bilateria;Protostomia;Spiralia;Lophotrochozoa;Mollusca;Bivalvia;Autobranhia;Pteriomorphia;Pectinida;Pectinoidea;Pectinidae;Pecten;Pecten maximus

UdeM00000004701 6596 239.6 UdeM00000004701 XP\_045164296.1 38 368  
216 4 21 379 40 404 6.70E-60 239.6 6596 cellular

organisms;Eukaryota;Opisthokonta;Metazoa;Eumetazoa;Bilateria;Protostomia;Spiralia;Lophotrochozoa;Mollusca;Bivalvia;Autobranhia;Heteroconchia;Euherodonta

terodonta;Imparidentia;Venerida;Veneroidea;Veneridae;Mercenaria;Mercenari  
a mercenaria

UdeM00000004702 114398 407.1 UdeM00000004702 XP\_042903861.1 39.4  
574 337 6 1 570 1 567 3.60E-110 407.1 114398  
cellular

organisms;Eukaryota;Opisthokonta;Metazoa;Eumetazoa;Bilateria;Protostomia;  
Ecdysozoa;Panarthropoda;Arthropoda;Chelicerata;Arachnida;Araneae;Araneomo  
rphae;Entelegynae;Orbiculariae;Araneoidea;Theridiidae;Parasteatoda;Parast  
eatoda tepidariorum

UdeM00000004703 114398 419.1 UdeM00000004703 XP\_042903861.1 39.9  
574 334 6 1 570 1 567 9.10E-114 419.1 114398  
cellular

organisms;Eukaryota;Opisthokonta;Metazoa;Eumetazoa;Bilateria;Protostomia;  
Ecdysozoa;Panarthropoda;Arthropoda;Chelicerata;Arachnida;Araneae;Araneomo  
rphae;Entelegynae;Orbiculariae;Araneoidea;Theridiidae;Parasteatoda;Parast  
eatoda tepidariorum

UdeM00000004704 114398 414.8 UdeM00000004704 XP\_042903861.1 39.5  
574 336 6 1 570 1 567 1.70E-112 414.8 114398  
cellular

organisms;Eukaryota;Opisthokonta;Metazoa;Eumetazoa;Bilateria;Protostomia;  
Ecdysozoa;Panarthropoda;Arthropoda;Chelicerata;Arachnida;Araneae;Araneomo  
rphae;Entelegynae;Orbiculariae;Araneoidea;Theridiidae;Parasteatoda;Parast  
eatoda tepidariorum

UdeM00000004705 6596 322.4 UdeM00000004705 XP\_045164296.1 47.2 369  
186 3 35 397 42 407 8.70E-85 322.4 6596 cellular

organisms;Eukaryota;Opisthokonta;Metazoa;Eumetazoa;Bilateria;Protostomia;  
Spiralia;Lophotrochozoa;Mollusca;Bivalvia;Autobranchia;Heteroconchia;Euhe  
terodonta;Imparidentia;Venerida;Veneroidea;Veneridae;Mercenaria;Mercenari  
a mercenaria

UdeM00000004706 6596 322.4 UdeM00000004706 XP\_045164296.1 47.2 369  
186 3 30 392 42 407 8.60E-85 322.4 6596 cellular

organisms;Eukaryota;Opisthokonta;Metazoa;Eumetazoa;Bilateria;Protostomia;  
Spiralia;Lophotrochozoa;Mollusca;Bivalvia;Autobranchia;Heteroconchia;Euhe  
terodonta;Imparidentia;Venerida;Veneroidea;Veneridae;Mercenaria;Mercenari  
a mercenaria

UdeM00000004707 6596 624.8 UdeM00000004707 XP\_045165958.1 74.1 394  
102 0 15 408 12 405 8.00E-176 624.8 6596 cellular

organisms;Eukaryota;Opisthokonta;Metazoa;Eumetazoa;Bilateria;Protostomia;  
Spiralia;Lophotrochozoa;Mollusca;Bivalvia;Autobranchia;Heteroconchia;Euhe  
terodonta;Imparidentia;Venerida;Veneroidea;Veneridae;Mercenaria;Mercenari  
a mercenaria

UdeM00000004708 114398 308.1 UdeM00000004708 XP\_015906392.2 40  
422 246 4 1 420 1 417 1.80E-80 308.1 114398  
cellular

organisms;Eukaryota;Opisthokonta;Metazoa;Eumetazoa;Bilateria;Protostomia;  
Ecdysozoa;Panarthropoda;Arthropoda;Chelicerata;Arachnida;Araneae;Araneomo  
rphae;Entelegynae;Orbiculariae;Araneoidea;Theridiidae;Parasteatoda;Parast  
eatoda tepidariorum

UdeM00000004710 6596 330.5 UdeM00000004710 XP\_045164820.1 50.8 303  
147 2 48 350 87 387 2.60E-87 330.5 6596 cellular

organisms;Eukaryota;Opisthokonta;Metazoa;Eumetazoa;Bilateria;Protostomia;  
Spiralia;Lophotrochozoa;Mollusca;Bivalvia;Autobranchia;Heteroconchia;Euhe  
terodonta;Imparidentia;Venerida;Veneroidea;Veneridae;Mercenaria;Mercenari  
a mercenaria

UdeM00000004711 6596 359 UdeM00000004711 XP\_045164819.1 49 347  
 172 3 48 391 87 431 7.70E-96 359 6596 cellular  
 organisms;Eukaryota;Opisthokonta;Metazoa;Eumetazoa;Bilateria;Protostomia;  
 Spiralia;Lophotrochozoa;Mollusca;Bivalvia;Autobranchia;Heteroconchia;Euhe  
 terodonta;Imparidentia;Venerida;Veneroidea;Veneridae;Mercenaria;Mercenari  
 a mercenaria  
 UdeM00000004713 9244 61.2 UdeM00000004713 XP\_030305950.1 32.3 96  
 61 3 8 102 247 339 2.60E-06 61.2 9244 cellular  
 organisms;Eukaryota;Opisthokonta;Metazoa;Eumetazoa;Bilateria;Deuterostomi  
 a;Chordata;Craniata;Vertebrata;Gnathostomata;Teleostomi;Euteleostomi;Sarc  
 opterygii;Dipnotetrapodomorpha;Tetrapoda;Amniota;Sauropsida;Sauria;Archel  
 osauria;Archosauria;Dinosauria;Saurischia;Theropoda;Coelurosauria;Aves;Ne  
 ognathae;Caprimulgimorphae;Apodiformes;Trochilidae;Calypte;Calypte anna  
 UdeM00000004714 1735272 61.2 UdeM00000004714 XP\_041359548.1 27.3  
 143 91 4 548 682 1031 1168 7.60E-06 61.2 1735272  
 cellular  
 organisms;Eukaryota;Opisthokonta;Metazoa;Eumetazoa;Bilateria;Protostomia;  
 Spiralia;Lophotrochozoa;Mollusca;Gastropoda;Neomphalina;Neomphaloidea;Pel  
 tospiridae;Gigantopelta;Gigantopelta aegis  
 UdeM00000004715 6565 100.5 UdeM00000004715 XP\_022322229.1 46 161  
 67 4 41 195 220 366 2.50E-18 100.5 6565 cellular  
 organisms;Eukaryota;Opisthokonta;Metazoa;Eumetazoa;Bilateria;Protostomia;  
 Spiralia;Lophotrochozoa;Mollusca;Bivalvia;Autobranchia;Pteriormorphia;Ostr  
 eida;Ostreoidea;Ostreidae;Crassostrea;Crassostrea virginica  
 UdeM00000004716 6579 309.3 UdeM00000004716 XP\_033744643.1 53.6 291  
 131 2 1 287 1 291 5.20E-81 309.3 6579 cellular  
 organisms;Eukaryota;Opisthokonta;Metazoa;Eumetazoa;Bilateria;Protostomia;  
 Spiralia;Lophotrochozoa;Mollusca;Bivalvia;Autobranchia;Pteriormorphia;Pect  
 inida;Pectinoidea;Pectinidae;Pecten;Pecten maximus  
 UdeM00000004717 6573 731.1 UdeM00000004717 XP\_021369881.1 51.3 746  
 315 17 11 738 146 861 1.40E-207 731.1 6573 cellular  
 organisms;Eukaryota;Opisthokonta;Metazoa;Eumetazoa;Bilateria;Protostomia;  
 Spiralia;Lophotrochozoa;Mollusca;Bivalvia;Autobranchia;Pteriormorphia;Pect  
 inida;Pectinoidea;Pectinidae;Mizuhopecten;Mizuhopecten yessoensis  
 UdeM00000004718 6596 344 UdeM00000004718 XP\_045164394.1 79.3 213  
 43 1 1 212 1 213 1.40E-91 344 6596 cellular  
 organisms;Eukaryota;Opisthokonta;Metazoa;Eumetazoa;Bilateria;Protostomia;  
 Spiralia;Lophotrochozoa;Mollusca;Bivalvia;Autobranchia;Heteroconchia;Euhe  
 terodonta;Imparidentia;Venerida;Veneroidea;Veneridae;Mercenaria;Mercenari  
 a mercenaria  
 UdeM00000004723 6579 572.4 UdeM00000004723 XP\_033745256.1 55.8 534  
 220 5 39 562 39 566 6.40E-160 572.4 6579 cellular  
 organisms;Eukaryota;Opisthokonta;Metazoa;Eumetazoa;Bilateria;Protostomia;  
 Spiralia;Lophotrochozoa;Mollusca;Bivalvia;Autobranchia;Pteriormorphia;Pect  
 inida;Pectinoidea;Pectinidae;Pecten;Pecten maximus  
 UdeM00000004724 6565 1542.7 UdeM00000004724 XP\_022300312.1 81.5  
 902 167 0 1 902 21 922 0.00E+00 1542.7 6565  
 cellular  
 organisms;Eukaryota;Opisthokonta;Metazoa;Eumetazoa;Bilateria;Protostomia;  
 Spiralia;Lophotrochozoa;Mollusca;Bivalvia;Autobranchia;Pteriormorphia;Ostr  
 eida;Ostreoidea;Ostreidae;Crassostrea;Crassostrea virginica  
 UdeM00000004725 6596 670.2 UdeM00000004725 XP\_045166621.1 65.3 501  
 171 2 9 506 16 516 2.00E-189 670.2 6596 cellular  
 organisms;Eukaryota;Opisthokonta;Metazoa;Eumetazoa;Bilateria;Protostomia;

Spiralia;Lophotrochozoa;Mollusca;Bivalvia;Autobranchia;Heteroconchia;Euherodonta;Imparidentia;Venerida;Veneroidea;Veneridae;Mercenaria;Mercenaria mercenaria

UdeM00000004727 6596 452.2 UdeM00000004727 XP\_045165322.1 78.5 270  
58 0 1 270 36 305 4.60E-124 452.2 6596 cellular

organisms;Eukaryota;Opisthokonta;Metazoa;Eumetazoa;Bilateria;Protostomia;Spiralia;Lophotrochozoa;Mollusca;Bivalvia;Autobranchia;Heteroconchia;Euherodonta;Imparidentia;Venerida;Veneroidea;Veneridae;Mercenaria;Mercenaria mercenaria

UdeM00000004726 6596 507.7 UdeM00000004726 XP\_045165322.1 78.5 303  
65 0 5 307 3 305 1.10E-140 507.7 6596 cellular

organisms;Eukaryota;Opisthokonta;Metazoa;Eumetazoa;Bilateria;Protostomia;Spiralia;Lophotrochozoa;Mollusca;Bivalvia;Autobranchia;Heteroconchia;Euherodonta;Imparidentia;Venerida;Veneroidea;Veneridae;Mercenaria;Mercenaria mercenaria

UdeM00000004728 6579 2848.9 UdeM00000004728 XP\_033746006.1 51.1  
3092 1371 41 14 3053 18 3021 0.00E+00 2848.9 6579  
cellular

organisms;Eukaryota;Opisthokonta;Metazoa;Eumetazoa;Bilateria;Protostomia;Spiralia;Lophotrochozoa;Mollusca;Bivalvia;Autobranchia;Pteriomorpha;Pectinida;Pectinoidea;Pectinidae;Pecten;Pecten maximus

UdeM00000004729 1735272 760.8 UdeM00000004729 XP\_041348334.1 77.2  
482 108 2 1 482 1 480 1.10E-216 760.8 1735272

cellular  
organisms;Eukaryota;Opisthokonta;Metazoa;Eumetazoa;Bilateria;Protostomia;Spiralia;Lophotrochozoa;Mollusca;Gastropoda;Neomphalina;Neomphaloidea;Peltospiridae;Gigantopelta;Gigantopelta aegis

UdeM00000004730 6579 436.4 UdeM00000004730 XP\_033746003.1 58.8 337  
134 2 19 351 28 363 3.40E-119 436.4 6579 cellular

organisms;Eukaryota;Opisthokonta;Metazoa;Eumetazoa;Bilateria;Protostomia;Spiralia;Lophotrochozoa;Mollusca;Bivalvia;Autobranchia;Pteriomorpha;Pectinida;Pectinoidea;Pectinidae;Pecten;Pecten maximus

UdeM00000004731 29159 129 UdeM00000004731 XP\_011424137.2 44.7 141  
71 3 23 160 59 195 5.50E-27 129 29159 cellular

organisms;Eukaryota;Opisthokonta;Metazoa;Eumetazoa;Bilateria;Protostomia;Spiralia;Lophotrochozoa;Mollusca;Bivalvia;Autobranchia;Pteriomorpha;Ostreida;Ostreidae;Crassostrea;Crassostrea gigas

UdeM00000004732 29159 115.5 UdeM00000004732 XP\_011424137.2 40.1 142  
78 3 22 160 59 196 6.20E-23 115.5 29159 cellular

organisms;Eukaryota;Opisthokonta;Metazoa;Eumetazoa;Bilateria;Protostomia;Spiralia;Lophotrochozoa;Mollusca;Bivalvia;Autobranchia;Pteriomorpha;Ostreida;Ostreidae;Crassostrea;Crassostrea gigas

UdeM00000004733 6596 79.3 UdeM00000004733 XP\_045166885.1 39.8 103  
59 1 4 103 8 110 4.70E-12 79.3 6596 cellular

organisms;Eukaryota;Opisthokonta;Metazoa;Eumetazoa;Bilateria;Protostomia;Spiralia;Lophotrochozoa;Mollusca;Bivalvia;Autobranchia;Heteroconchia;Euherodonta;Imparidentia;Venerida;Veneroidea;Veneridae;Mercenaria;Mercenaria mercenaria

UdeM00000004734 29159 113.2 UdeM00000004734 XP\_011424137.2 41.2 136  
73 3 28 160 64 195 3.10E-22 113.2 29159 cellular

organisms;Eukaryota;Opisthokonta;Metazoa;Eumetazoa;Bilateria;Protostomia;Spiralia;Lophotrochozoa;Mollusca;Bivalvia;Autobranchia;Pteriomorpha;Ostreida;Ostreidae;Crassostrea;Crassostrea gigas

UdeM00000004738 1735272 481.5 UdeM00000004738 XP\_041378793.1 51.3  
 466 208 6 3 464 2 452 1.20E-132 481.5 1735272  
 cellular  
 organisms;Eukaryota;Opisthokonta;Metazoa;Eumetazoa;Bilateria;Protostomia;  
 Spiralia;Lophotrochozoa;Mollusca;Gastropoda;Neomphalina;Neomphaloidea;Pel  
 tospiridae;Gigantopelta;Gigantopelta aegis  
 UdeM00000004742 6596 261.5 UdeM00000004742 XP\_045184168.1 60.6 198  
 74 2 1 196 118 313 8.40E-67 261.5 6596 cellular  
 organisms;Eukaryota;Opisthokonta;Metazoa;Eumetazoa;Bilateria;Protostomia;  
 Spiralia;Lophotrochozoa;Mollusca;Bivalvia;Autobranchia;Heteroconchia;Euhe  
 terodonta;Imparidentia;Venerida;Veneroidea;Veneridae;Mercenaria;Mercenari  
 a mercenaria  
 UdeM00000004746 6596 378.6 UdeM00000004746 XP\_045164454.1 89.4 188  
 20 0 10 197 512 699 4.70E-102 378.6 6596 cellular  
 organisms;Eukaryota;Opisthokonta;Metazoa;Eumetazoa;Bilateria;Protostomia;  
 Spiralia;Lophotrochozoa;Mollusca;Bivalvia;Autobranchia;Heteroconchia;Euhe  
 terodonta;Imparidentia;Venerida;Veneroidea;Veneridae;Mercenaria;Mercenari  
 a mercenaria  
 UdeM00000004747 6596 281.2 UdeM00000004747 XP\_045164454.1 87.3 142  
 18 0 10 151 512 653 9.00E-73 281.2 6596 cellular  
 organisms;Eukaryota;Opisthokonta;Metazoa;Eumetazoa;Bilateria;Protostomia;  
 Spiralia;Lophotrochozoa;Mollusca;Bivalvia;Autobranchia;Heteroconchia;Euhe  
 terodonta;Imparidentia;Venerida;Veneroidea;Veneridae;Mercenaria;Mercenari  
 a mercenaria  
 UdeM00000004748 6596 127.9 UdeM00000004748 XP\_045165339.1 68.5 89  
 27 1 1 89 1 88 6.80E-27 127.9 6596 cellular  
 organisms;Eukaryota;Opisthokonta;Metazoa;Eumetazoa;Bilateria;Protostomia;  
 Spiralia;Lophotrochozoa;Mollusca;Bivalvia;Autobranchia;Heteroconchia;Euhe  
 terodonta;Imparidentia;Venerida;Veneroidea;Veneridae;Mercenaria;Mercenari  
 a mercenaria  
 UdeM00000004749 6596 1499.2 UdeM00000004749 XP\_045165335.1 86.3  
 878 118 2 1 876 1 878 0.00E+00 1499.2 6596  
 cellular  
 organisms;Eukaryota;Opisthokonta;Metazoa;Eumetazoa;Bilateria;Protostomia;  
 Spiralia;Lophotrochozoa;Mollusca;Bivalvia;Autobranchia;Heteroconchia;Euhe  
 terodonta;Imparidentia;Venerida;Veneroidea;Veneridae;Mercenaria;Mercenari  
 a mercenaria  
 UdeM00000004750 6579 434.9 UdeM00000004750 XP\_033744388.1 47.2 525  
 249 10 86 595 88 599 1.70E-118 434.9 6579 cellular  
 organisms;Eukaryota;Opisthokonta;Metazoa;Eumetazoa;Bilateria;Protostomia;  
 Spiralia;Lophotrochozoa;Mollusca;Bivalvia;Autobranchia;Pteriomorphia;Pect  
 inida;Pectinoidea;Pectinidae;Pecten;Pecten maximus  
 UdeM00000004751 6596 186.4 UdeM00000004751 XP\_045176098.1 37.7 247  
 151 2 1 247 86 329 5.40E-44 186.4 6596 cellular  
 organisms;Eukaryota;Opisthokonta;Metazoa;Eumetazoa;Bilateria;Protostomia;  
 Spiralia;Lophotrochozoa;Mollusca;Bivalvia;Autobranchia;Heteroconchia;Euhe  
 terodonta;Imparidentia;Venerida;Veneroidea;Veneridae;Mercenaria;Mercenari  
 a mercenaria  
 UdeM00000004752 1735272 183 UdeM00000004752 XP\_041365171.1 34.2  
 333 191 5 136 453 94 413 8.80E-43 183 1735272  
 cellular  
 organisms;Eukaryota;Opisthokonta;Metazoa;Eumetazoa;Bilateria;Protostomia;  
 Spiralia;Lophotrochozoa;Mollusca;Gastropoda;Neomphalina;Neomphaloidea;Pel  
 tospiridae;Gigantopelta;Gigantopelta aegis

UdeM00000004754 6565 120.9 UdeM00000004754 XP\_022303253.1 33.8 151  
 100 0 27 177 25 175 1.60E-24 120.9 6565 cellular  
 organisms;Eukaryota;Opisthokonta;Metazoa;Eumetazoa;Bilateria;Protostomia;  
 Spiralia;Lophotrochozoa;Mollusca;Bivalvia;Autobranchia;Pteriomorphia;Ostr  
 eida;Ostreoidea;Ostreidae;Crassostrea;Crassostrea virginica  
 UdeM00000004755 6573 193.4 UdeM00000004755 XP\_021363409.1 33.7 282  
 186 1 28 309 7 287 6.20E-46 193.4 6573 cellular  
 organisms;Eukaryota;Opisthokonta;Metazoa;Eumetazoa;Bilateria;Protostomia;  
 Spiralia;Lophotrochozoa;Mollusca;Bivalvia;Autobranchia;Pteriomorphia;Pect  
 inida;Pectinoidea;Pectinidae;Mizuhopecten;Mizuhopecten yessoensis  
 UdeM00000004759 6596 104.4 UdeM00000004759 XP\_045206982.1 46.5 99  
 53 0 188 286 86 184 2.50E-19 104.4 6596 cellular  
 organisms;Eukaryota;Opisthokonta;Metazoa;Eumetazoa;Bilateria;Protostomia;  
 Spiralia;Lophotrochozoa;Mollusca;Bivalvia;Autobranchia;Heteroconchia;Euhe  
 terodonta;Imparidentia;Venerida;Veneroidea;Veneridae;Mercenaria;Mercenari  
 a mercenaria  
 UdeM00000004760 1735272 117.1 UdeM00000004760 XP\_041379412.1 38.9  
 162 95 2 15 175 11 169 2.30E-23 117.1 1735272  
 cellular  
 organisms;Eukaryota;Opisthokonta;Metazoa;Eumetazoa;Bilateria;Protostomia;  
 Spiralia;Lophotrochozoa;Mollusca;Gastropoda;Neomphalina;Neomphaloidea;Pel  
 tospiridae;Gigantopelta;Gigantopelta aegis  
 UdeM00000004762 6596 221.1 UdeM00000004762 XP\_045166461.1 56.4 188  
 82 0 308 495 324 511 3.20E-54 221.1 6596 cellular  
 organisms;Eukaryota;Opisthokonta;Metazoa;Eumetazoa;Bilateria;Protostomia;  
 Spiralia;Lophotrochozoa;Mollusca;Bivalvia;Autobranchia;Heteroconchia;Euhe  
 terodonta;Imparidentia;Venerida;Veneroidea;Veneridae;Mercenaria;Mercenari  
 a mercenaria  
 UdeM00000004763 2607531 155.6 UdeM00000004763 XP\_036366756.1 31.5  
 317 203 8 11 322 5 312 1.10E-34 155.6 2607531  
 cellular  
 organisms;Eukaryota;Opisthokonta;Metazoa;Eumetazoa;Bilateria;Protostomia;  
 Spiralia;Lophotrochozoa;Mollusca;Cephalopoda;Coleoidea;Octopodiformes;Oct  
 opoda;Incirrata;Octopodidae;Octopus;Octopus sinensis  
 UdeM00000004764 6579 235.7 UdeM00000004764 XP\_033746521.1 42.9 343  
 159 6 1 330 1 319 8.50E-59 235.7 6579 cellular  
 organisms;Eukaryota;Opisthokonta;Metazoa;Eumetazoa;Bilateria;Protostomia;  
 Spiralia;Lophotrochozoa;Mollusca;Bivalvia;Autobranchia;Pteriomorphia;Pect  
 inida;Pectinoidea;Pectinidae;Pecten;Pecten maximus  
 UdeM00000004765 6596 276.9 UdeM00000004765 XP\_045165510.1 40.8 392  
 216 9 367 747 121 507 7.30E-71 276.9 6596 cellular  
 organisms;Eukaryota;Opisthokonta;Metazoa;Eumetazoa;Bilateria;Protostomia;  
 Spiralia;Lophotrochozoa;Mollusca;Bivalvia;Autobranchia;Heteroconchia;Euhe  
 terodonta;Imparidentia;Venerida;Veneroidea;Veneridae;Mercenaria;Mercenari  
 a mercenaria  
 UdeM00000004766 6579 802.4 UdeM00000004766 XP\_033746543.1 47.7 895  
 433 10 29 916 33 899 6.10E-229 802.4 6579 cellular  
 organisms;Eukaryota;Opisthokonta;Metazoa;Eumetazoa;Bilateria;Protostomia;  
 Spiralia;Lophotrochozoa;Mollusca;Bivalvia;Autobranchia;Pteriomorphia;Pect  
 inida;Pectinoidea;Pectinidae;Pecten;Pecten maximus  
 UdeM00000004767 6596 817.4 UdeM00000004767 XP\_045164400.1 49.9 861  
 395 9 7 846 923 1768 1.70E-233 817.4 6596 cellular  
 organisms;Eukaryota;Opisthokonta;Metazoa;Eumetazoa;Bilateria;Protostomia;  
 Spiralia;Lophotrochozoa;Mollusca;Bivalvia;Autobranchia;Heteroconchia;Euhe

terodonta;Imparidentia;Venerida;Veneroidea;Veneridae;Mercenaria;Mercenari  
 a mercenaria  
 UdeM00000004768 6596 778.5 UdeM00000004768 XP\_045164403.1 64 605  
 213 2 1 604 220 820 6.90E-222 778.5 6596 cellular  
 organisms;Eukaryota;Opisthokonta;Metazoa;Eumetazoa;Bilateria;Protostomia;  
 Spiralia;Lophotrochozoa;Mollusca;Bivalvia;Autobranhia;Heteroconchia;Euhe  
 terodonta;Imparidentia;Venerida;Veneroidea;Veneridae;Mercenaria;Mercenari  
 a mercenaria  
 UdeM00000004769 6596 1694.5 UdeM00000004769 XP\_045164403.1 51.4  
 1781 763 25 1 1706 1 1753 0.00E+00 1694.5 6596  
 cellular  
 organisms;Eukaryota;Opisthokonta;Metazoa;Eumetazoa;Bilateria;Protostomia;  
 Spiralia;Lophotrochozoa;Mollusca;Bivalvia;Autobranhia;Heteroconchia;Euhe  
 terodonta;Imparidentia;Venerida;Veneroidea;Veneridae;Mercenaria;Mercenari  
 a mercenaria  
 UdeM00000004770 6596 920.2 UdeM00000004770 XP\_045166452.1 47 1014  
 512 14 15 1019 12 1009 2.30E-264 920.2 6596 cellular  
 organisms;Eukaryota;Opisthokonta;Metazoa;Eumetazoa;Bilateria;Protostomia;  
 Spiralia;Lophotrochozoa;Mollusca;Bivalvia;Autobranhia;Heteroconchia;Euhe  
 terodonta;Imparidentia;Venerida;Veneroidea;Veneridae;Mercenaria;Mercenari  
 a mercenaria  
 UdeM00000004772 6596 875.2 UdeM00000004772 XP\_045166452.1 46.9 1013  
 513 13 12 1012 10 1009 8.30E-251 875.2 6596 cellular  
 organisms;Eukaryota;Opisthokonta;Metazoa;Eumetazoa;Bilateria;Protostomia;  
 Spiralia;Lophotrochozoa;Mollusca;Bivalvia;Autobranhia;Heteroconchia;Euhe  
 terodonta;Imparidentia;Venerida;Veneroidea;Veneridae;Mercenaria;Mercenari  
 a mercenaria  
 UdeM00000004773 1735272 76.3 UdeM00000004773 XP\_041349287.1 41.8  
 110 49 2 15 117 13 114 3.00E-11 76.3 1735272  
 cellular  
 organisms;Eukaryota;Opisthokonta;Metazoa;Eumetazoa;Bilateria;Protostomia;  
 Spiralia;Lophotrochozoa;Mollusca;Gastropoda;Neomphalina;Neomphaloidea;Pel  
 tospiridae;Gigantopelta;Gigantopelta aegis  
 UdeM00000004774 6596 951 UdeM00000004774 XP\_045166452.1 49.7 1016  
 489 14 2 1006 5 1009 1.20E-273 951 6596 cellular  
 organisms;Eukaryota;Opisthokonta;Metazoa;Eumetazoa;Bilateria;Protostomia;  
 Spiralia;Lophotrochozoa;Mollusca;Bivalvia;Autobranhia;Heteroconchia;Euhe  
 terodonta;Imparidentia;Venerida;Veneroidea;Veneridae;Mercenaria;Mercenari  
 a mercenaria  
 UdeM00000004775 6596 993.8 UdeM00000004775 XP\_045166452.1 51.4 1012  
 471 13 12 1012 10 1011 1.60E-286 993.8 6596 cellular  
 organisms;Eukaryota;Opisthokonta;Metazoa;Eumetazoa;Bilateria;Protostomia;  
 Spiralia;Lophotrochozoa;Mollusca;Bivalvia;Autobranhia;Heteroconchia;Euhe  
 terodonta;Imparidentia;Venerida;Veneroidea;Veneridae;Mercenaria;Mercenari  
 a mercenaria  
 UdeM00000004777 6596 157.9 UdeM00000004777 XP\_045213763.1 38.1 202  
 115 3 13 204 60 261 1.80E-35 157.9 6596 cellular  
 organisms;Eukaryota;Opisthokonta;Metazoa;Eumetazoa;Bilateria;Protostomia;  
 Spiralia;Lophotrochozoa;Mollusca;Bivalvia;Autobranhia;Heteroconchia;Euhe  
 terodonta;Imparidentia;Venerida;Veneroidea;Veneridae;Mercenaria;Mercenari  
 a mercenaria  
 UdeM00000004778 6565 73.2 UdeM00000004778 XP\_022296431.1 47.3 74  
 39 0 1 74 919 992 1.70E-10 73.2 6565 cellular  
 organisms;Eukaryota;Opisthokonta;Metazoa;Eumetazoa;Bilateria;Protostomia;

Spiralia;Lophotrochozoa;Mollusca;Bivalvia;Autobranchia;Pteriormorphia;Ostr  
eida;Ostreoidea;Ostreidae;Crassostrea;Crassostrea virginica  
UdeM00000004779 6596 81.6 UdeM00000004779 XP\_045166452.1 43.3 90  
51 0 1 90 664 753 8.30E-13 81.6 6596 cellular  
organisms;Eukaryota;Opisthokonta;Metazoa;Eumetazoa;Bilateria;Protostomia;  
Spiralia;Lophotrochozoa;Mollusca;Bivalvia;Autobranchia;Heteroconchia;Euhe  
terodonta;Imparidentia;Venerida;Veneroidea;Veneridae;Mercenaria;Mercenari  
a mercenaria  
UdeM00000004781 6596 750 UdeM00000004781 XP\_045165818.1 42.7 976  
535 8 15 980 113 1074 3.90E-213 750 6596 cellular  
organisms;Eukaryota;Opisthokonta;Metazoa;Eumetazoa;Bilateria;Protostomia;  
Spiralia;Lophotrochozoa;Mollusca;Bivalvia;Autobranchia;Heteroconchia;Euhe  
terodonta;Imparidentia;Venerida;Veneroidea;Veneridae;Mercenaria;Mercenari  
a mercenaria  
UdeM00000004782 6596 607.1 UdeM00000004782 XP\_045166451.1 36.3 991  
574 16 13 974 12 974 4.30E-170 607.1 6596 cellular  
organisms;Eukaryota;Opisthokonta;Metazoa;Eumetazoa;Bilateria;Protostomia;  
Spiralia;Lophotrochozoa;Mollusca;Bivalvia;Autobranchia;Heteroconchia;Euhe  
terodonta;Imparidentia;Venerida;Veneroidea;Veneridae;Mercenaria;Mercenari  
a mercenaria  
UdeM00000004783 6596 624.4 UdeM00000004783 XP\_045165818.1 37.9 992  
573 15 10 973 26 1002 2.70E-175 624.4 6596 cellular  
organisms;Eukaryota;Opisthokonta;Metazoa;Eumetazoa;Bilateria;Protostomia;  
Spiralia;Lophotrochozoa;Mollusca;Bivalvia;Autobranchia;Heteroconchia;Euhe  
terodonta;Imparidentia;Venerida;Veneroidea;Veneridae;Mercenaria;Mercenari  
a mercenaria  
UdeM00000004784 6596 630.6 UdeM00000004784 XP\_045166451.1 36.7 1001  
583 16 4 982 3 974 3.60E-177 630.6 6596 cellular  
organisms;Eukaryota;Opisthokonta;Metazoa;Eumetazoa;Bilateria;Protostomia;  
Spiralia;Lophotrochozoa;Mollusca;Bivalvia;Autobranchia;Heteroconchia;Euhe  
terodonta;Imparidentia;Venerida;Veneroidea;Veneridae;Mercenaria;Mercenari  
a mercenaria  
UdeM00000004785 6596 594.3 UdeM00000004785 XP\_045165818.1 37.9 931  
537 13 1 901 82 1001 2.70E-166 594.3 6596 cellular  
organisms;Eukaryota;Opisthokonta;Metazoa;Eumetazoa;Bilateria;Protostomia;  
Spiralia;Lophotrochozoa;Mollusca;Bivalvia;Autobranchia;Heteroconchia;Euhe  
terodonta;Imparidentia;Venerida;Veneroidea;Veneridae;Mercenaria;Mercenari  
a mercenaria  
UdeM00000004786 6596 157.5 UdeM00000004786 XP\_045166449.1 34.2 222  
143 1 3 221 336 557 2.50E-35 157.5 6596 cellular  
organisms;Eukaryota;Opisthokonta;Metazoa;Eumetazoa;Bilateria;Protostomia;  
Spiralia;Lophotrochozoa;Mollusca;Bivalvia;Autobranchia;Heteroconchia;Euhe  
terodonta;Imparidentia;Venerida;Veneroidea;Veneridae;Mercenaria;Mercenari  
a mercenaria  
UdeM00000004787 6596 248.1 UdeM00000004787 XP\_045166449.1 39.9 331  
178 6 1 322 688 1006 2.70E-62 248.1 6596 cellular  
organisms;Eukaryota;Opisthokonta;Metazoa;Eumetazoa;Bilateria;Protostomia;  
Spiralia;Lophotrochozoa;Mollusca;Bivalvia;Autobranchia;Heteroconchia;Euhe  
terodonta;Imparidentia;Venerida;Veneroidea;Veneridae;Mercenaria;Mercenari  
a mercenaria  
UdeM00000004788 6596 665.6 UdeM00000004788 XP\_045165820.1 38.2 1037  
605 15 3 1020 18 1037 1.00E-187 665.6 6596 cellular  
organisms;Eukaryota;Opisthokonta;Metazoa;Eumetazoa;Bilateria;Protostomia;  
Spiralia;Lophotrochozoa;Mollusca;Bivalvia;Autobranchia;Heteroconchia;Euhe



terodonta;Imparidentia;Venerida;Veneroidea;Veneridae;Mercenaria;Mercenaria mercenaria

UdeM00000004789 6596 590.9 UdeM00000004789 XP\_045165820.1 36.9 1026  
588 19 5 980 19 1035 3.00E-165 590.9 6596 cellular

organisms;Eukaryota;Opisthokonta;Metazoa;Eumetazoa;Bilateria;Protostomia;Spiralia;Lophotrochozoa;Mollusca;Bivalvia;Autobranchia;Heteroconchia;Euheterodonta;Imparidentia;Venerida;Veneroidea;Veneridae;Mercenaria;Mercenaria mercenaria

UdeM00000004790 6596 1167.1 UdeM00000004790 XP\_045165814.1 68.4  
865 249 8 1 844 1 862 0.00E+00 1167.1 6596  
cellular

organisms;Eukaryota;Opisthokonta;Metazoa;Eumetazoa;Bilateria;Protostomia;Spiralia;Lophotrochozoa;Mollusca;Bivalvia;Autobranchia;Heteroconchia;Euheterodonta;Imparidentia;Venerida;Veneroidea;Veneridae;Mercenaria;Mercenaria mercenaria

UdeM00000004791 7739 131.7 UdeM00000004791 XP\_035676548.1 43.1 167  
89 2 153 318 291 452 1.70E-27 131.7 7739 cellular

organisms;Eukaryota;Opisthokonta;Metazoa;Eumetazoa;Bilateria;Deuterostomia;Chordata;Cephalochordata;Leptocardii;Amphioxiformes;Branchiostomidae;Branchiostoma;Branchiostoma floridae

UdeM00000004792 6565 303.9 UdeM00000004792 XP\_022296606.1 41.9 391  
196 10 21 389 17 398 3.00E-79 303.9 6565 cellular

organisms;Eukaryota;Opisthokonta;Metazoa;Eumetazoa;Bilateria;Protostomia;Spiralia;Lophotrochozoa;Mollusca;Bivalvia;Autobranchia;Pteriormorphia;Ostreida;Ostreoidea;Ostreidae;Crassostrea;Crassostrea virginica

UdeM00000004794 6596 598.6 UdeM00000004794 XP\_045166451.1 35.6 1023  
603 17 4 1000 3 995 1.50E-167 598.6 6596 cellular

organisms;Eukaryota;Opisthokonta;Metazoa;Eumetazoa;Bilateria;Protostomia;Spiralia;Lophotrochozoa;Mollusca;Bivalvia;Autobranchia;Heteroconchia;Euheterodonta;Imparidentia;Venerida;Veneroidea;Veneridae;Mercenaria;Mercenaria mercenaria

UdeM00000004795 400727 367.9 UdeM00000004795 XP\_025107682.1 63.6  
291 104 1 21 309 47 337 1.40E-98 367.9 400727  
cellular

organisms;Eukaryota;Opisthokonta;Metazoa;Eumetazoa;Bilateria;Protostomia;Spiralia;Lophotrochozoa;Mollusca;Gastropoda;Caenogastropoda;Architaenioglossa;Ampullarioidea;Ampullariidae;Pomacea;Pomacea canaliculata

UdeM00000004796 32473 64.7 UdeM00000004796 XP\_027860025.1 52.7 55  
23 1 25 76 40 94 5.90E-08 64.7 32473 cellular

organisms;Eukaryota;Opisthokonta;Metazoa;Eumetazoa;Bilateria;Deuterostomia;Chordata;Craniata;Vertebrata;Gnathostomata;Teleostomi;Euteleostomi;Actinopterygii;Actinopteri;Neopterygii;Teleostei;Osteoglossocephalai;Clupeocephala;Euteleosteomorpha;Neoteleostei;Eurypterygia;Ctenosquamata;Acanthomorphata;Euacanthomorphacea;Percomorphaceae;Ovalentaria;Atherinomorphae;Cyprinodontiformes;Cyprinodontoides;Poeciliidae;Poeciliinae;Xiphophorus;Xiphophorus couchianus

UdeM00000004797 215358 95.9 UdeM00000004797 XP\_027132200.1 44.1  
111 56 2 2 112 81 185 3.60E-17 95.9 215358  
cellular

organisms;Eukaryota;Opisthokonta;Metazoa;Eumetazoa;Bilateria;Deuterostomia;Chordata;Craniata;Vertebrata;Gnathostomata;Teleostomi;Euteleostomi;Actinopterygii;Actinopteri;Neopterygii;Teleostei;Osteoglossocephalai;Clupeocephala;Euteleosteomorpha;Neoteleostei;Eurypterygia;Ctenosquamata;Acanthomorphata;Euacanthomorphacea;Percomorphaceae;Ovalentaria;Atherinomorphae;Cyprinodontiformes;Cyprinodontoides;Poeciliidae;Poeciliinae;Xiphophorus;Xiphophorus couchianus

rphata;Euacanthomorpha;Percomorphaceae;Eupercaria;Eupercaria incertae sedis;Sciaenidae;Larimichthys;Larimichthys crocea

UdeM00000004798 30732 178.3 UdeM00000004798 XP\_024118320.1 43.3 208  
116 2 14 221 409 614 1.10E-41 178.3 30732 cellular  
organisms;Eukaryota;Opisthokonta;Metazoa;Eumetazoa;Bilateria;Deuterostomia;Chordata;Craniata;Vertebrata;Gnathostomata;Teleostomi;Euteleostomi;Actinopterygii;Actinopteri;Neopterygii;Teleostei;Osteoglossocephalai;Clupeocephala;Euteleostei;Neoteleostei;Eurypterygia;Ctenosquamata;Acanthomorpha;Euacanthomorpha;Percomorphaceae;Ovalentaria;Atherinomorpha;Beloniformes;Adrianichthyoidei;Adrianichthyidae;Oryziinae;Oryzias;Oryzias melastigma

UdeM00000004799 400727 363.6 UdeM00000004799 XP\_025107682.1 60.8  
301 116 1 21 319 47 347 2.70E-97 363.6 400727  
cellular  
organisms;Eukaryota;Opisthokonta;Metazoa;Eumetazoa;Bilateria;Protostomia;Spiralia;Lophotrochozoa;Mollusca;Gastropoda;Caenogastropoda;Architaenioglossa;Ampullarioidea;Ampullariidae;Pomacea;Pomacea canaliculata

UdeM00000004800 29159 213.8 UdeM00000004800 XP\_034317562.1 32.9 359  
225 10 5 361 1419 1763 5.10E-52 213.8 29159 cellular  
organisms;Eukaryota;Opisthokonta;Metazoa;Eumetazoa;Bilateria;Protostomia;Spiralia;Lophotrochozoa;Mollusca;Bivalvia;Autobranchia;Pteriormorphia;Ostreida;Ostreioidea;Ostreidae;Crassostrea;Crassostrea gigas

UdeM00000004801 6596 289.3 UdeM00000004801 XP\_045165877.1 43.1 518  
173 14 173 632 527 980 1.20E-74 289.3 6596 cellular  
organisms;Eukaryota;Opisthokonta;Metazoa;Eumetazoa;Bilateria;Protostomia;Spiralia;Lophotrochozoa;Mollusca;Bivalvia;Autobranchia;Heteroconchia;Euheterodonta;Imparidentia;Venerida;Veneroidea;Veneridae;Mercenaria;Mercenaria mercenaria

UdeM00000004802 6596 582.8 UdeM00000004802 XP\_045165877.1 45.7 828  
326 13 359 1178 269 980 9.80E-163 582.8 6596 cellular  
organisms;Eukaryota;Opisthokonta;Metazoa;Eumetazoa;Bilateria;Protostomia;Spiralia;Lophotrochozoa;Mollusca;Bivalvia;Autobranchia;Heteroconchia;Euheterodonta;Imparidentia;Venerida;Veneroidea;Veneridae;Mercenaria;Mercenaria mercenaria

UdeM00000004803 1735272 459.5 UdeM00000004803 XP\_041347849.1 77.5  
276 57 4 1 275 1 272 3.00E-126 459.5 1735272  
cellular  
organisms;Eukaryota;Opisthokonta;Metazoa;Eumetazoa;Bilateria;Protostomia;Spiralia;Lophotrochozoa;Mollusca;Gastropoda;Neomphalina;Neomphaloidea;Peltospiridae;Gigantopelta;Gigantopelta aegis

UdeM00000004804 29159 275.4 UdeM00000004804 XP\_011436033.1 72.9 177  
48 0 2 178 41 217 5.10E-71 275.4 29159 cellular  
organisms;Eukaryota;Opisthokonta;Metazoa;Eumetazoa;Bilateria;Protostomia;Spiralia;Lophotrochozoa;Mollusca;Bivalvia;Autobranchia;Pteriormorphia;Ostreida;Ostreioidea;Ostreidae;Crassostrea;Crassostrea gigas

UdeM00000004805 6596 370.9 UdeM00000004805 XP\_045184168.1 52.7 317  
139 4 4 313 1 313 1.60E-99 370.9 6596 cellular  
organisms;Eukaryota;Opisthokonta;Metazoa;Eumetazoa;Bilateria;Protostomia;Spiralia;Lophotrochozoa;Mollusca;Bivalvia;Autobranchia;Heteroconchia;Euheterodonta;Imparidentia;Venerida;Veneroidea;Veneridae;Mercenaria;Mercenaria mercenaria

UdeM00000004806 6596 364.8 UdeM00000004806 XP\_045184168.1 55.4 316  
132 5 1 311 2 313 1.10E-97 364.8 6596 cellular  
organisms;Eukaryota;Opisthokonta;Metazoa;Eumetazoa;Bilateria;Protostomia;

Spiralia;Lophotrochozoa;Mollusca;Bivalvia;Autobranchia;Heteroconchia;Euherodonta;Imparidentia;Venerida;Veneroidea;Veneridae;Mercenaria;Mercenaria mercenaria

UdeM00000004807 6596 174.9 UdeM00000004807 XP\_045184168.1 58.4 137  
53 2 1 135 37 171 8.20E-41 174.9 6596 cellular

organisms;Eukaryota;Opisthokonta;Metazoa;Eumetazoa;Bilateria;Protostomia;Spiralia;Lophotrochozoa;Mollusca;Bivalvia;Autobranchia;Heteroconchia;Euherodonta;Imparidentia;Venerida;Veneroidea;Veneridae;Mercenaria;Mercenaria mercenaria

UdeM00000004808 6596 339.3 UdeM00000004808 XP\_045184168.1 52.8 316  
139 5 1 312 3 312 5.10E-90 339.3 6596 cellular

organisms;Eukaryota;Opisthokonta;Metazoa;Eumetazoa;Bilateria;Protostomia;Spiralia;Lophotrochozoa;Mollusca;Bivalvia;Autobranchia;Heteroconchia;Euherodonta;Imparidentia;Venerida;Veneroidea;Veneridae;Mercenaria;Mercenaria mercenaria

UdeM00000004809 6573 593.6 UdeM00000004809 XP\_021371832.1 48.8 1184  
574 12 120 1286 1137 2305 6.10E-166 593.6 6573 cellular

organisms;Eukaryota;Opisthokonta;Metazoa;Eumetazoa;Bilateria;Protostomia;Spiralia;Lophotrochozoa;Mollusca;Bivalvia;Autobranchia;Pteriomorphia;Pectinida;Pectinoidea;Pectinidae;Mizuhopecten;Mizuhopecten yessoensis

UdeM00000004811 400727 104 UdeM00000004811 XP\_025107582.1 41.4  
152 81 2 2 151 196 341 1.80E-19 104 400727

cellular

organisms;Eukaryota;Opisthokonta;Metazoa;Eumetazoa;Bilateria;Protostomia;Spiralia;Lophotrochozoa;Mollusca;Gastropoda;Caenogastropoda;Architaenioglossa;Ampullarioidea;Ampullariidae;Pomacea;Pomacea canaliculata

UdeM00000004812 6579 241.1 UdeM00000004812 XP\_033746657.1 61.1 203  
77 2 1 201 1 203 2.00E-60 241.1 6579 cellular

organisms;Eukaryota;Opisthokonta;Metazoa;Eumetazoa;Bilateria;Protostomia;Spiralia;Lophotrochozoa;Mollusca;Bivalvia;Autobranchia;Pteriomorphia;Pectinida;Pectinoidea;Pectinidae;Pecten;Pecten maximus

UdeM00000004814 6596 515.4 UdeM00000004814 XP\_045164782.1 50.7 588  
236 10 30 578 70 642 9.50E-143 515.4 6596 cellular

organisms;Eukaryota;Opisthokonta;Metazoa;Eumetazoa;Bilateria;Protostomia;Spiralia;Lophotrochozoa;Mollusca;Bivalvia;Autobranchia;Heteroconchia;Euherodonta;Imparidentia;Venerida;Veneroidea;Veneridae;Mercenaria;Mercenaria mercenaria

UdeM00000004813 6596 582.4 UdeM00000004813 XP\_045164782.1 51.2 662  
254 13 1 616 4 642 6.80E-163 582.4 6596 cellular

organisms;Eukaryota;Opisthokonta;Metazoa;Eumetazoa;Bilateria;Protostomia;Spiralia;Lophotrochozoa;Mollusca;Bivalvia;Autobranchia;Heteroconchia;Euherodonta;Imparidentia;Venerida;Veneroidea;Veneridae;Mercenaria;Mercenaria mercenaria

UdeM00000004815 6579 308.5 UdeM00000004815 XP\_033746820.1 62.5 520  
158 11 3 492 2 514 1.60E-80 308.5 6579 cellular

organisms;Eukaryota;Opisthokonta;Metazoa;Eumetazoa;Bilateria;Protostomia;Spiralia;Lophotrochozoa;Mollusca;Bivalvia;Autobranchia;Pteriomorphia;Pectinida;Pectinoidea;Pectinidae;Pecten;Pecten maximus

UdeM00000004816 6526 203.8 UdeM00000004816 XP\_013065297.1 43.5 501  
208 10 11 443 5 498 4.90E-49 203.8 6526 cellular

organisms;Eukaryota;Opisthokonta;Metazoa;Eumetazoa;Bilateria;Protostomia;Spiralia;Lophotrochozoa;Mollusca;Gastropoda;Heterobranchia;Euthyneura;Pantpulmonata;Hygrophila;Lymnaeidae;Planorbidae;Biomphalaria;Biomphalaria glabrata

UdeM00000004817 6596 1416.7 UdeM00000004817 XP\_045166276.1 72.1  
941 251 4 1 936 1 934 0.00E+00 1416.7 6596  
cellular

organisms;Eukaryota;Opisthokonta;Metazoa;Eumetazoa;Bilateria;Protostomia;  
Spiralia;Lophotrochozoa;Mollusca;Bivalvia;Autobranchia;Heteroconchia;Euhe  
terodonta;Imparidentia;Venerida;Veneroidea;Veneridae;Mercenaria;Mercenari  
a mercenaria

UdeM00000004818 6596 834.3 UdeM00000004818 XP\_045166276.1 77.2 521  
114 2 1 517 1 520 8.30E-239 834.3 6596 cellular

organisms;Eukaryota;Opisthokonta;Metazoa;Eumetazoa;Bilateria;Protostomia;  
Spiralia;Lophotrochozoa;Mollusca;Bivalvia;Autobranchia;Heteroconchia;Euhe  
terodonta;Imparidentia;Venerida;Veneroidea;Veneridae;Mercenaria;Mercenari  
a mercenaria

UdeM00000004819 6596 485 UdeM00000004819 XP\_045171318.1 64.8 332  
115 1 3 332 9 340 8.00E-134 485 6596 cellular

organisms;Eukaryota;Opisthokonta;Metazoa;Eumetazoa;Bilateria;Protostomia;  
Spiralia;Lophotrochozoa;Mollusca;Bivalvia;Autobranchia;Heteroconchia;Euhe  
terodonta;Imparidentia;Venerida;Veneroidea;Veneridae;Mercenaria;Mercenari  
a mercenaria

UdeM00000004820 6596 637.5 UdeM00000004820 XP\_045164339.1 63.2 475  
153 6 1 456 1 472 1.30E-179 637.5 6596 cellular

organisms;Eukaryota;Opisthokonta;Metazoa;Eumetazoa;Bilateria;Protostomia;  
Spiralia;Lophotrochozoa;Mollusca;Bivalvia;Autobranchia;Heteroconchia;Euhe  
terodonta;Imparidentia;Venerida;Veneroidea;Veneridae;Mercenaria;Mercenari  
a mercenaria

UdeM00000004821 1735272 1209.1 UdeM00000004821 XP\_041347627.1  
40.3 1770 896 41 2 1723 30 1686 0.00E+00 1209.1  
1735272 cellular

organisms;Eukaryota;Opisthokonta;Metazoa;Eumetazoa;Bilateria;Protostomia;  
Spiralia;Lophotrochozoa;Mollusca;Gastropoda;Neomphalina;Neomphaloidea;Pel  
tospiridae;Gigantopelta;Gigantopelta aegis

UdeM00000004822 6565 412.1 UdeM00000004822 XP\_022297104.1 57.5 527  
186 7 8 508 7 521 9.90E-112 412.1 6565 cellular

organisms;Eukaryota;Opisthokonta;Metazoa;Eumetazoa;Bilateria;Protostomia;  
Spiralia;Lophotrochozoa;Mollusca;Bivalvia;Autobranchia;Pteriomorphia;Ostr  
eida;Ostreoidea;Ostreidae;Crassostrea;Crassostrea virginica

UdeM00000004823 6596 448.7 UdeM00000004823 XP\_045165308.1 38.9 653  
361 11 238 878 15 641 1.70E-122 448.7 6596 cellular

organisms;Eukaryota;Opisthokonta;Metazoa;Eumetazoa;Bilateria;Protostomia;  
Spiralia;Lophotrochozoa;Mollusca;Bivalvia;Autobranchia;Heteroconchia;Euhe  
terodonta;Imparidentia;Venerida;Veneroidea;Veneridae;Mercenaria;Mercenari  
a mercenaria

UdeM00000004824 6565 276.6 UdeM00000004824 XP\_022297553.1 61.4 251  
84 6 11 257 95 336 3.50E-71 276.6 6565 cellular

organisms;Eukaryota;Opisthokonta;Metazoa;Eumetazoa;Bilateria;Protostomia;  
Spiralia;Lophotrochozoa;Mollusca;Bivalvia;Autobranchia;Pteriomorphia;Ostr  
eida;Ostreoidea;Ostreidae;Crassostrea;Crassostrea virginica

UdeM00000004825 6565 294.7 UdeM00000004825 XP\_022297553.1 61.9 260  
84 6 10 266 95 342 1.20E-76 294.7 6565 cellular

organisms;Eukaryota;Opisthokonta;Metazoa;Eumetazoa;Bilateria;Protostomia;  
Spiralia;Lophotrochozoa;Mollusca;Bivalvia;Autobranchia;Pteriomorphia;Ostr  
eida;Ostreoidea;Ostreidae;Crassostrea;Crassostrea virginica

UdeM00000004826 6596 350.5 UdeM00000004826 XP\_045164205.1 56.5 283  
121 1 2 284 43 323 2.00E-93 350.5 6596 cellular

organisms;Eukaryota;Opisthokonta;Metazoa;Eumetazoa;Bilateria;Protostomia;Spiralia;Lophotrochozoa;Mollusca;Bivalvia;Autobranhia;Heteroconchia;Euherodonta;Imparidentia;Venerida;Veneroidea;Veneridae;Mercenaria;Mercenaria mercenaria

|                 |      |        |    |                 |                |      |      |          |        |      |
|-----------------|------|--------|----|-----------------|----------------|------|------|----------|--------|------|
| UdeM00000004827 | 6596 | 1407.1 |    | UdeM00000004827 | XP_045165353.1 | 42.8 |      |          |        |      |
|                 | 2211 | 979    | 44 | 75              | 2057           | 75   | 2227 | 0.00E+00 | 1407.1 | 6596 |

cellular

organisms;Eukaryota;Opisthokonta;Metazoa;Eumetazoa;Bilateria;Protostomia;Spiralia;Lophotrochozoa;Mollusca;Bivalvia;Autobranhia;Heteroconchia;Euherodonta;Imparidentia;Venerida;Veneroidea;Veneridae;Mercenaria;Mercenaria mercenaria

|                 |      |       |    |                 |                |     |          |       |      |          |
|-----------------|------|-------|----|-----------------|----------------|-----|----------|-------|------|----------|
| UdeM00000004828 | 6596 | 153.7 |    | UdeM00000004828 | XP_045165353.1 | 75  | 100      |       |      |          |
|                 | 24   | 1     | 86 | 185             | 75             | 173 | 2.40E-34 | 153.7 | 6596 | cellular |

organisms;Eukaryota;Opisthokonta;Metazoa;Eumetazoa;Bilateria;Protostomia;Spiralia;Lophotrochozoa;Mollusca;Bivalvia;Autobranhia;Heteroconchia;Euherodonta;Imparidentia;Venerida;Veneroidea;Veneridae;Mercenaria;Mercenaria mercenaria

|                 |      |       |    |                 |                |     |          |       |      |          |
|-----------------|------|-------|----|-----------------|----------------|-----|----------|-------|------|----------|
| UdeM00000004829 | 6596 | 300.4 |    | UdeM00000004829 | XP_045166315.1 | 57  | 258      |       |      |          |
|                 | 105  | 4     | 86 | 338             | 42             | 298 | 2.80E-78 | 300.4 | 6596 | cellular |

organisms;Eukaryota;Opisthokonta;Metazoa;Eumetazoa;Bilateria;Protostomia;Spiralia;Lophotrochozoa;Mollusca;Bivalvia;Autobranhia;Heteroconchia;Euherodonta;Imparidentia;Venerida;Veneroidea;Veneridae;Mercenaria;Mercenaria mercenaria

|                 |      |     |    |                 |                |      |          |     |      |          |
|-----------------|------|-----|----|-----------------|----------------|------|----------|-----|------|----------|
| UdeM00000004830 | 6596 | 302 |    | UdeM00000004830 | XP_045166315.1 | 57.4 | 258      |     |      |          |
|                 | 105  | 4   | 86 | 339             | 42             | 298  | 9.70E-79 | 302 | 6596 | cellular |

organisms;Eukaryota;Opisthokonta;Metazoa;Eumetazoa;Bilateria;Protostomia;Spiralia;Lophotrochozoa;Mollusca;Bivalvia;Autobranhia;Heteroconchia;Euherodonta;Imparidentia;Venerida;Veneroidea;Veneridae;Mercenaria;Mercenaria mercenaria

|                 |      |     |   |                 |                |     |           |     |      |          |
|-----------------|------|-----|---|-----------------|----------------|-----|-----------|-----|------|----------|
| UdeM00000004831 | 6596 | 661 |   | UdeM00000004831 | XP_045165314.1 | 74  | 458       |     |      |          |
|                 | 111  | 3   | 1 | 450             | 1              | 458 | 1.10E-186 | 661 | 6596 | cellular |

organisms;Eukaryota;Opisthokonta;Metazoa;Eumetazoa;Bilateria;Protostomia;Spiralia;Lophotrochozoa;Mollusca;Bivalvia;Autobranhia;Heteroconchia;Euherodonta;Imparidentia;Venerida;Veneroidea;Veneridae;Mercenaria;Mercenaria mercenaria

|                 |      |       |    |                 |                |     |           |       |      |          |
|-----------------|------|-------|----|-----------------|----------------|-----|-----------|-------|------|----------|
| UdeM00000004832 | 6596 | 444.5 |    | UdeM00000004832 | XP_045164640.1 | 56  | 409       |       |      |          |
|                 | 175  | 4     | 56 | 462             | 43             | 448 | 1.70E-121 | 444.5 | 6596 | cellular |

organisms;Eukaryota;Opisthokonta;Metazoa;Eumetazoa;Bilateria;Protostomia;Spiralia;Lophotrochozoa;Mollusca;Bivalvia;Autobranhia;Heteroconchia;Euherodonta;Imparidentia;Venerida;Veneroidea;Veneridae;Mercenaria;Mercenaria mercenaria

|                 |      |       |   |                 |                |     |           |       |      |          |
|-----------------|------|-------|---|-----------------|----------------|-----|-----------|-------|------|----------|
| UdeM00000004834 | 6579 | 558.1 |   | UdeM00000004834 | XP_033741441.1 | 68  | 378       |       |      |          |
|                 | 121  | 0     | 1 | 378             | 1              | 378 | 8.40E-156 | 558.1 | 6579 | cellular |

organisms;Eukaryota;Opisthokonta;Metazoa;Eumetazoa;Bilateria;Protostomia;Spiralia;Lophotrochozoa;Mollusca;Bivalvia;Autobranhia;Pteriomorphia;Pectinida;Pectinoidea;Pectinidae;Pecten;Pecten maximus

|                 |      |      |    |                 |                |      |          |      |      |          |
|-----------------|------|------|----|-----------------|----------------|------|----------|------|------|----------|
| UdeM00000004836 | 6596 | 73.2 |    | UdeM00000004836 | XP_045165023.1 | 34.8 | 112      |      |      |          |
|                 | 71   | 1    | 35 | 146             | 69             | 178  | 3.30E-10 | 73.2 | 6596 | cellular |

organisms;Eukaryota;Opisthokonta;Metazoa;Eumetazoa;Bilateria;Protostomia;Spiralia;Lophotrochozoa;Mollusca;Bivalvia;Autobranhia;Heteroconchia;Euherodonta;Imparidentia;Venerida;Veneroidea;Veneridae;Mercenaria;Mercenaria mercenaria

|                 |       |      |    |                 |                |      |          |      |       |          |
|-----------------|-------|------|----|-----------------|----------------|------|----------|------|-------|----------|
| UdeM00000004838 | 29159 | 89.4 |    | UdeM00000004838 | XP_034315725.1 | 69.5 | 59       |      |       |          |
|                 | 18    | 0    | 30 | 88              | 571            | 629  | 2.70E-15 | 89.4 | 29159 | cellular |

organisms;Eukaryota;Opisthokonta;Metazoa;Eumetazoa;Bilateria;Protostomia;Spiralia;Lophotrochozoa;Mollusca;Bivalvia;Autobranchia;Pteriormorphia;Ostreida;Ostreoidea;Ostreidae;Crassostrea;Crassostrea gigas

UdeM00000004840 6565 189.1 UdeM00000004840 XP\_022296139.1 69 116  
36 0 52 167 25 140 1.00E-44 189.1 6565 cellular

organisms;Eukaryota;Opisthokonta;Metazoa;Eumetazoa;Bilateria;Protostomia;Spiralia;Lophotrochozoa;Mollusca;Bivalvia;Autobranchia;Pteriormorphia;Ostreida;Ostreoidea;Ostreidae;Crassostrea;Crassostrea virginica

UdeM00000004841 6565 189.1 UdeM00000004841 XP\_022296138.1 69 116  
36 0 52 167 25 140 1.20E-44 189.1 6565 cellular

organisms;Eukaryota;Opisthokonta;Metazoa;Eumetazoa;Bilateria;Protostomia;Spiralia;Lophotrochozoa;Mollusca;Bivalvia;Autobranchia;Pteriormorphia;Ostreida;Ostreoidea;Ostreidae;Crassostrea;Crassostrea virginica

UdeM00000004842 6596 627.9 UdeM00000004842 XP\_045166489.1 86.4 360  
49 0 1 360 17 376 8.20E-177 627.9 6596 cellular

organisms;Eukaryota;Opisthokonta;Metazoa;Eumetazoa;Bilateria;Protostomia;Spiralia;Lophotrochozoa;Mollusca;Bivalvia;Autobranchia;Heteroconchia;Euheterodonta;Imparidentia;Venerida;Veneroidea;Veneridae;Mercenaria;Mercenaria mercenaria

UdeM00000004843 6596 1129.4 UdeM00000004843 XP\_045164480.1 81.9  
689 123 2 162 849 206 893 0.00E+00 1129.4 6596  
cellular

organisms;Eukaryota;Opisthokonta;Metazoa;Eumetazoa;Bilateria;Protostomia;Spiralia;Lophotrochozoa;Mollusca;Bivalvia;Autobranchia;Heteroconchia;Euheterodonta;Imparidentia;Venerida;Veneroidea;Veneridae;Mercenaria;Mercenaria mercenaria

UdeM00000004844 6596 6434.7 UdeM00000004844 XP\_045164482.1 79.3  
4080 770 7 1 4063 1 4022 0.00E+00 6434.7 6596  
cellular

organisms;Eukaryota;Opisthokonta;Metazoa;Eumetazoa;Bilateria;Protostomia;Spiralia;Lophotrochozoa;Mollusca;Bivalvia;Autobranchia;Heteroconchia;Euheterodonta;Imparidentia;Venerida;Veneroidea;Veneridae;Mercenaria;Mercenaria mercenaria

UdeM00000004845 29159 1384.4 UdeM00000004845 XP\_034306565.1 71.8  
1244 347 2 1 1242 1 1242 0.00E+00 1384.4  
29159 cellular

organisms;Eukaryota;Opisthokonta;Metazoa;Eumetazoa;Bilateria;Protostomia;Spiralia;Lophotrochozoa;Mollusca;Bivalvia;Autobranchia;Pteriormorphia;Ostreida;Ostreoidea;Ostreidae;Crassostrea;Crassostrea gigas

UdeM00000004846 6596 542 UdeM00000004846 XP\_045164092.1 78.4 379  
82 0 1 379 1 379 6.20E-151 542 6596 cellular

organisms;Eukaryota;Opisthokonta;Metazoa;Eumetazoa;Bilateria;Protostomia;Spiralia;Lophotrochozoa;Mollusca;Bivalvia;Autobranchia;Heteroconchia;Euheterodonta;Imparidentia;Venerida;Veneroidea;Veneridae;Mercenaria;Mercenaria mercenaria

UdeM00000004847 6596 1115.9 UdeM00000004847 XP\_045166597.1 37.8  
1671 891 26 90 1721 110 1670 0.00E+00 1115.9 6596  
cellular

organisms;Eukaryota;Opisthokonta;Metazoa;Eumetazoa;Bilateria;Protostomia;Spiralia;Lophotrochozoa;Mollusca;Bivalvia;Autobranchia;Heteroconchia;Euheterodonta;Imparidentia;Venerida;Veneroidea;Veneridae;Mercenaria;Mercenaria mercenaria

UdeM00000004848 6579 563.5 UdeM00000004848 XP\_033745946.1 61.7 621  
220 3 1 604 1 620 3.30E-157 563.5 6579 cellular

organisms;Eukaryota;Opisthokonta;Metazoa;Eumetazoa;Bilateria;Protostomia;Spiralia;Lophotrochozoa;Mollusca;Bivalvia;Autobranchia;Pteriormorphia;Pectinida;Pectinoidea;Pectinidae;Pecten;Pecten maximus

UdeM00000004849 6596 624.8 UdeM00000004849 XP\_045166684.1 87.5 343  
43 0 1 343 1 343 6.60E-176 624.8 6596 cellular

organisms;Eukaryota;Opisthokonta;Metazoa;Eumetazoa;Bilateria;Protostomia;Spiralia;Lophotrochozoa;Mollusca;Bivalvia;Autobranchia;Heteroconchia;Euheterodonta;Imparidentia;Venerida;Veneroidea;Veneridae;Mercenaria;Mercenaria mercenaria

UdeM00000004850 6565 107.1 UdeM00000004850 XP\_022305631.1 48.2 110  
57 0 1 110 18 127 1.70E-20 107.1 6565 cellular

organisms;Eukaryota;Opisthokonta;Metazoa;Eumetazoa;Bilateria;Protostomia;Spiralia;Lophotrochozoa;Mollusca;Bivalvia;Autobranchia;Pteriormorphia;Ostreida;Ostreoidea;Ostreidae;Crassostrea;Crassostrea virginica

UdeM00000004851 6596 433 UdeM00000004851 XP\_045205812.1 63 343  
119 3 14 356 18 352 3.80E-118 433 6596 cellular

organisms;Eukaryota;Opisthokonta;Metazoa;Eumetazoa;Bilateria;Protostomia;Spiralia;Lophotrochozoa;Mollusca;Bivalvia;Autobranchia;Heteroconchia;Euheterodonta;Imparidentia;Venerida;Veneroidea;Veneridae;Mercenaria;Mercenaria mercenaria

UdeM00000004852 6596 407.5 UdeM00000004852 XP\_045205812.1 65.3 314  
101 3 14 327 18 323 1.70E-110 407.5 6596 cellular

organisms;Eukaryota;Opisthokonta;Metazoa;Eumetazoa;Bilateria;Protostomia;Spiralia;Lophotrochozoa;Mollusca;Bivalvia;Autobranchia;Heteroconchia;Euheterodonta;Imparidentia;Venerida;Veneroidea;Veneridae;Mercenaria;Mercenaria mercenaria

UdeM00000004853 6596 575.5 UdeM00000004853 XP\_045203146.1 50.1 577  
284 2 5 581 6 578 7.80E-161 575.5 6596 cellular

organisms;Eukaryota;Opisthokonta;Metazoa;Eumetazoa;Bilateria;Protostomia;Spiralia;Lophotrochozoa;Mollusca;Bivalvia;Autobranchia;Heteroconchia;Euheterodonta;Imparidentia;Venerida;Veneroidea;Veneridae;Mercenaria;Mercenaria mercenaria

UdeM00000004854 6596 348.6 UdeM00000004854 XP\_045203327.1 68.9 283  
57 4 2 253 3 285 6.80E-93 348.6 6596 cellular

organisms;Eukaryota;Opisthokonta;Metazoa;Eumetazoa;Bilateria;Protostomia;Spiralia;Lophotrochozoa;Mollusca;Bivalvia;Autobranchia;Heteroconchia;Euheterodonta;Imparidentia;Venerida;Veneroidea;Veneridae;Mercenaria;Mercenaria mercenaria

UdeM00000004855 6596 614.4 UdeM00000004855 XP\_045203208.1 63.5 455  
160 3 1 455 1 449 1.20E-172 614.4 6596 cellular

organisms;Eukaryota;Opisthokonta;Metazoa;Eumetazoa;Bilateria;Protostomia;Spiralia;Lophotrochozoa;Mollusca;Bivalvia;Autobranchia;Heteroconchia;Euheterodonta;Imparidentia;Venerida;Veneroidea;Veneridae;Mercenaria;Mercenaria mercenaria

UdeM00000004858 158441 112.5 UdeM00000004858 XP\_021960903.1 58.8  
80 33 0 1 80 1 80 2.80E-22 112.5 158441  
cellular

organisms;Eukaryota;Opisthokonta;Metazoa;Eumetazoa;Bilateria;Protostomia;Ecdysozoa;Panarthropoda;Arthropoda;Mandibulata;Pancrustacea;Hexapoda;Collembola;Entomobryomorpha;Isotomoidea;Isotomidae;Proisotominae;Folsomia;Folsomia candida

UdeM00000004859 6596 187.6 UdeM00000004859 XP\_045204692.1 36.8 285  
154 4 14 290 9 275 8.00E-44 187.6 6596 cellular

organisms;Eukaryota;Opisthokonta;Metazoa;Eumetazoa;Bilateria;Protostomia;

Spiralia; Lophotrochozoa; Mollusca; Bivalvia; Autobranchia; Heteroconchia; Euheterodonta; Imparidentia; Venerida; Veneroidea; Veneridae; Mercenaria; Mercenaria mercenaria

UdeM00000004860 6596 529.6 UdeM00000004860 XP\_045204691.1 49.3 737  
291 19 1 686 11 715 5.80E-147 529.6 6596 cellular

organisms; Eukaryota; Opisthokonta; Metazoa; Eumetazoa; Bilateria; Protostomia; Spiralia; Lophotrochozoa; Mollusca; Bivalvia; Autobranchia; Heteroconchia; Euheterodonta; Imparidentia; Venerida; Veneroidea; Veneridae; Mercenaria; Mercenaria mercenaria

UdeM00000004861 6596 161.8 UdeM00000004861 XP\_045203857.1 33.3 351  
191 11 123 446 223 557 2.40E-36 161.8 6596 cellular

organisms; Eukaryota; Opisthokonta; Metazoa; Eumetazoa; Bilateria; Protostomia; Spiralia; Lophotrochozoa; Mollusca; Bivalvia; Autobranchia; Heteroconchia; Euheterodonta; Imparidentia; Venerida; Veneroidea; Veneridae; Mercenaria; Mercenaria mercenaria

UdeM00000004862 6596 147.9 UdeM00000004862 XP\_045206264.1 36.8 269  
157 6 89 353 1710 1969 3.80E-32 147.9 6596 cellular

organisms; Eukaryota; Opisthokonta; Metazoa; Eumetazoa; Bilateria; Protostomia; Spiralia; Lophotrochozoa; Mollusca; Bivalvia; Autobranchia; Heteroconchia; Euheterodonta; Imparidentia; Venerida; Veneroidea; Veneridae; Mercenaria; Mercenaria mercenaria

UdeM00000004863 6596 148.7 UdeM00000004863 XP\_045180995.1 39.5 215  
114 4 132 339 690 895 1.80E-32 148.7 6596 cellular

organisms; Eukaryota; Opisthokonta; Metazoa; Eumetazoa; Bilateria; Protostomia; Spiralia; Lophotrochozoa; Mollusca; Bivalvia; Autobranchia; Heteroconchia; Euheterodonta; Imparidentia; Venerida; Veneroidea; Veneridae; Mercenaria; Mercenaria mercenaria

UdeM00000004865 6565 70.1 UdeM00000004865 XP\_022323704.1 30.9 188  
102 4 33 210 819 988 4.40E-09 70.1 6565 cellular

organisms; Eukaryota; Opisthokonta; Metazoa; Eumetazoa; Bilateria; Protostomia; Spiralia; Lophotrochozoa; Mollusca; Bivalvia; Autobranchia; Pteriomorpha; Ostreida; Ostreoidea; Ostreidae; Crassostrea; Crassostrea virginica

UdeM00000004867 6596 172.2 UdeM00000004867 XP\_045204716.1 41.3 225  
124 4 325 544 234 455 2.00E-39 172.2 6596 cellular

organisms; Eukaryota; Opisthokonta; Metazoa; Eumetazoa; Bilateria; Protostomia; Spiralia; Lophotrochozoa; Mollusca; Bivalvia; Autobranchia; Heteroconchia; Euheterodonta; Imparidentia; Venerida; Veneroidea; Veneridae; Mercenaria; Mercenaria mercenaria

UdeM00000004868 6565 174.5 UdeM00000004868 XP\_022326903.1 39.3 262  
141 4 592 852 288 532 5.90E-40 174.5 6565 cellular

organisms; Eukaryota; Opisthokonta; Metazoa; Eumetazoa; Bilateria; Protostomia; Spiralia; Lophotrochozoa; Mollusca; Bivalvia; Autobranchia; Pteriomorpha; Ostreida; Ostreoidea; Ostreidae; Crassostrea; Crassostrea virginica

UdeM00000004869 6573 173.7 UdeM00000004869 XP\_021352048.1 40.9 235  
117 5 171 391 197 423 4.70E-40 173.7 6573 cellular

organisms; Eukaryota; Opisthokonta; Metazoa; Eumetazoa; Bilateria; Protostomia; Spiralia; Lophotrochozoa; Mollusca; Bivalvia; Autobranchia; Pteriomorpha; Pectinida; Pectinoidea; Pectinidae; Mizuhopecten; Mizuhopecten yessoensis

UdeM00000004871 6596 176.4 UdeM00000004871 XP\_045206264.1 35.6 298  
179 5 545 832 1678 1972 1.50E-40 176.4 6596 cellular

organisms; Eukaryota; Opisthokonta; Metazoa; Eumetazoa; Bilateria; Protostomia; Spiralia; Lophotrochozoa; Mollusca; Bivalvia; Autobranchia; Heteroconchia; Euheterodonta; Imparidentia; Venerida; Veneroidea; Veneridae; Mercenaria; Mercenaria mercenaria



UdeM00000004872 6573 166.4 UdeM00000004872 XP\_021352048.1 31.6 427  
 253 11 561 968 17 423 1.80E-37 166.4 6573 cellular  
 organisms;Eukaryota;Opisthokonta;Metazoa;Eumetazoa;Bilateria;Protostomia;  
 Spiralia;Lophotrochozoa;Mollusca;Bivalvia;Autobranchia;Pteriomorpha;Pect  
 inida;Pectinoidea;Pectinidae;Mizuhopecten;Mizuhopecten yessoensis  
 UdeM00000004873 6596 727.6 UdeM00000004873 XP\_045202954.1 60.4 576  
 220 3 2 569 26 601 1.20E-206 727.6 6596 cellular  
 organisms;Eukaryota;Opisthokonta;Metazoa;Eumetazoa;Bilateria;Protostomia;  
 Spiralia;Lophotrochozoa;Mollusca;Bivalvia;Autobranchia;Heteroconchia;Euhe  
 terodonta;Imparidentia;Venerida;Veneroidea;Veneridae;Mercenaria;Mercenari  
 a mercenaria  
 UdeM00000004874 6596 163.3 UdeM00000004874 XP\_045203033.1 28.6 367  
 238 9 2 346 37 401 8.40E-37 163.3 6596 cellular  
 organisms;Eukaryota;Opisthokonta;Metazoa;Eumetazoa;Bilateria;Protostomia;  
 Spiralia;Lophotrochozoa;Mollusca;Bivalvia;Autobranchia;Heteroconchia;Euhe  
 terodonta;Imparidentia;Venerida;Veneroidea;Veneridae;Mercenaria;Mercenari  
 a mercenaria  
 UdeM00000004876 6596 142.5 UdeM00000004876 XP\_045203033.1 25.5 369  
 192 8 66 354 35 400 2.00E-30 142.5 6596 cellular  
 organisms;Eukaryota;Opisthokonta;Metazoa;Eumetazoa;Bilateria;Protostomia;  
 Spiralia;Lophotrochozoa;Mollusca;Bivalvia;Autobranchia;Heteroconchia;Euhe  
 terodonta;Imparidentia;Venerida;Veneroidea;Veneridae;Mercenaria;Mercenari  
 a mercenaria  
 UdeM00000004877 6596 178.7 UdeM00000004877 XP\_045203032.1 30.2 378  
 217 13 38 382 38 401 2.10E-41 178.7 6596 cellular  
 organisms;Eukaryota;Opisthokonta;Metazoa;Eumetazoa;Bilateria;Protostomia;  
 Spiralia;Lophotrochozoa;Mollusca;Bivalvia;Autobranchia;Heteroconchia;Euhe  
 terodonta;Imparidentia;Venerida;Veneroidea;Veneridae;Mercenaria;Mercenari  
 a mercenaria  
 UdeM00000004878 6596 89 UdeM00000004878 XP\_045203033.1 22.6 340  
 193 9 1 272 64 401 2.60E-14 89 6596 cellular  
 organisms;Eukaryota;Opisthokonta;Metazoa;Eumetazoa;Bilateria;Protostomia;  
 Spiralia;Lophotrochozoa;Mollusca;Bivalvia;Autobranchia;Heteroconchia;Euhe  
 terodonta;Imparidentia;Venerida;Veneroidea;Veneridae;Mercenaria;Mercenari  
 a mercenaria  
 UdeM00000004880 7897 108.2 UdeM00000004880 XP\_014344318.1 38.3 180  
 92 7 46 214 239 410 1.30E-20 108.2 7897 cellular  
 organisms;Eukaryota;Opisthokonta;Metazoa;Eumetazoa;Bilateria;Deuterostomi  
 a;Chordata;Craniata;Vertebrata;Gnathostomata;Teleostomi;Euteleostomi;Sarc  
 opterygii;Coelacanthimorpha;Coelacanthiformes;Coelacanthidae;Latimeria;La  
 timeria chalumnae  
 UdeM00000004881 6596 496.9 UdeM00000004881 XP\_045206502.1 40.9 619  
 344 8 515 1131 656 1254 6.80E-137 496.9 6596 cellular  
 organisms;Eukaryota;Opisthokonta;Metazoa;Eumetazoa;Bilateria;Protostomia;  
 Spiralia;Lophotrochozoa;Mollusca;Bivalvia;Autobranchia;Heteroconchia;Euhe  
 terodonta;Imparidentia;Venerida;Veneroidea;Veneridae;Mercenaria;Mercenari  
 a mercenaria  
 UdeM00000004882 29159 66.2 UdeM00000004882 XP\_034303203.1 51.5 68  
 32 1 110 176 512 579 4.60E-08 66.2 29159 cellular  
 organisms;Eukaryota;Opisthokonta;Metazoa;Eumetazoa;Bilateria;Protostomia;  
 Spiralia;Lophotrochozoa;Mollusca;Bivalvia;Autobranchia;Pteriomorpha;Ostr  
 eida;Ostreoidea;Ostreidae;Crassostrea;Crassostrea gigas  
 UdeM00000004883 6596 114.8 UdeM00000004883 XP\_045203032.1 30.5 266  
 160 9 2 246 38 299 1.80E-22 114.8 6596 cellular

organisms;Eukaryota;Opisthokonta;Metazoa;Eumetazoa;Bilateria;Protostomia;Spiralia;Lophotrochozoa;Mollusca;Bivalvia;Autobranhia;Heteroconchia;Euherodonta;Imparidentia;Venerida;Veneroidea;Veneridae;Mercenaria;Mercenaria mercenaria

UdeM00000004884 6565 69.7 UdeM00000004884 XP\_022317541.1 37.3 102  
57 3 35 130 466 566 8.50E-09 69.7 6565 cellular

organisms;Eukaryota;Opisthokonta;Metazoa;Eumetazoa;Bilateria;Protostomia;Spiralia;Lophotrochozoa;Mollusca;Bivalvia;Autobranhia;Pteriormorphia;Ostreida;Ostreoidea;Ostreidae;Crassostrea;Crassostrea virginica

UdeM00000004887 6596 120.6 UdeM00000004887 XP\_045205920.1 28.1 306  
188 9 24 302 32 332 3.60E-24 120.6 6596 cellular

organisms;Eukaryota;Opisthokonta;Metazoa;Eumetazoa;Bilateria;Protostomia;Spiralia;Lophotrochozoa;Mollusca;Bivalvia;Autobranhia;Heteroconchia;Euherodonta;Imparidentia;Venerida;Veneroidea;Veneridae;Mercenaria;Mercenaria mercenaria

UdeM00000004886 6596 121.3 UdeM00000004886 XP\_045202835.1 28 289  
181 8 24 290 35 318 2.40E-24 121.3 6596 cellular

organisms;Eukaryota;Opisthokonta;Metazoa;Eumetazoa;Bilateria;Protostomia;Spiralia;Lophotrochozoa;Mollusca;Bivalvia;Autobranhia;Heteroconchia;Euherodonta;Imparidentia;Venerida;Veneroidea;Veneridae;Mercenaria;Mercenaria mercenaria

UdeM00000004888 29159 70.5 UdeM00000004888 XP\_034318742.1 42.1 95  
51 4 11 102 273 366 7.10E-09 70.5 29159 cellular

organisms;Eukaryota;Opisthokonta;Metazoa;Eumetazoa;Bilateria;Protostomia;Spiralia;Lophotrochozoa;Mollusca;Bivalvia;Autobranhia;Pteriormorphia;Ostreida;Ostreoidea;Ostreidae;Crassostrea;Crassostrea gigas

UdeM00000004889 6596 124 UdeM00000004889 XP\_045203032.1 29.8 292  
174 10 3 272 4 286 3.30E-25 124 6596 cellular

organisms;Eukaryota;Opisthokonta;Metazoa;Eumetazoa;Bilateria;Protostomia;Spiralia;Lophotrochozoa;Mollusca;Bivalvia;Autobranhia;Heteroconchia;Euherodonta;Imparidentia;Venerida;Veneroidea;Veneridae;Mercenaria;Mercenaria mercenaria

UdeM00000004890 6565 128.3 UdeM00000004890 XP\_022302274.1 44.2 154  
85 1 14 167 127 279 9.50E-27 128.3 6565 cellular

organisms;Eukaryota;Opisthokonta;Metazoa;Eumetazoa;Bilateria;Protostomia;Spiralia;Lophotrochozoa;Mollusca;Bivalvia;Autobranhia;Pteriormorphia;Ostreida;Ostreoidea;Ostreidae;Crassostrea;Crassostrea virginica

UdeM00000004892 400727 61.2 UdeM00000004892 XP\_025108230.1 46.3  
54 28 1 85 137 513 566 1.40E-06 61.2 400727

cellular

organisms;Eukaryota;Opisthokonta;Metazoa;Eumetazoa;Bilateria;Protostomia;Spiralia;Lophotrochozoa;Mollusca;Gastropoda;Caenogastropoda;Architaenioglossa;Ampullarioidea;Ampullariidae;Pomacea;Pomacea canaliculata

UdeM00000004893 29159 67 UdeM00000004893 XP\_034320548.1 31.7 126  
55 4 29 141 387 494 3.50E-08 67 29159 cellular

organisms;Eukaryota;Opisthokonta;Metazoa;Eumetazoa;Bilateria;Protostomia;Spiralia;Lophotrochozoa;Mollusca;Bivalvia;Autobranhia;Pteriormorphia;Ostreida;Ostreoidea;Ostreidae;Crassostrea;Crassostrea gigas

UdeM00000004894 6596 83.2 UdeM00000004894 XP\_045205318.1 42.1 107  
54 4 1 103 1 103 5.80E-13 83.2 6596 cellular

organisms;Eukaryota;Opisthokonta;Metazoa;Eumetazoa;Bilateria;Protostomia;Spiralia;Lophotrochozoa;Mollusca;Bivalvia;Autobranhia;Heteroconchia;Euherodonta;Imparidentia;Venerida;Veneroidea;Veneridae;Mercenaria;Mercenaria mercenaria

UdeM00000004895 6596 117.9 UdeM00000004895 XP\_045203033.1 26.6 248  
 166 5 27 262 157 400 3.50E-23 117.9 6596 cellular  
 organisms;Eukaryota;Opisthokonta;Metazoa;Eumetazoa;Bilateria;Protostomia;  
 Spiralia;Lophotrochozoa;Mollusca;Bivalvia;Autobranchia;Heteroconchia;Euhe  
 terodonta;Imparidentia;Venerida;Veneroidea;Veneridae;Mercenaria;Mercenari  
 a mercenaria  
 UdeM00000004896 7574 90.9 UdeM00000004896 XP\_013415221.1 33 188  
 108 6 41 218 219 398 2.70E-15 90.9 7574 cellular  
 organisms;Eukaryota;Opisthokonta;Metazoa;Eumetazoa;Bilateria;Protostomia;  
 Spiralia;Lophotrochozoa;Brachiopoda;Linguliformea;Lingulata;Lingulida;Lin  
 guloidea;Lingulidae;Lingula;Lingula anatina  
 UdeM00000004897 29159 510.8 UdeM00000004897 XP\_034331610.1 45.7 597  
 307 8 481 1074 446 1028 4.70E-141 510.8 29159 cellular  
 organisms;Eukaryota;Opisthokonta;Metazoa;Eumetazoa;Bilateria;Protostomia;  
 Spiralia;Lophotrochozoa;Mollusca;Bivalvia;Autobranchia;Pteriormorphia;Ostr  
 eida;Ostreoidea;Ostreidae;Crassostrea;Crassostrea gigas  
 UdeM00000004898 6596 463.4 UdeM00000004898 XP\_045206611.1 41.2 594  
 312 7 619 1186 506 1088 8.90E-127 463.4 6596 cellular  
 organisms;Eukaryota;Opisthokonta;Metazoa;Eumetazoa;Bilateria;Protostomia;  
 Spiralia;Lophotrochozoa;Mollusca;Bivalvia;Autobranchia;Heteroconchia;Euhe  
 terodonta;Imparidentia;Venerida;Veneroidea;Veneridae;Mercenaria;Mercenari  
 a mercenaria  
 UdeM00000004899 80427 85.9 UdeM00000004899 XP\_033017792.1 42.3 104  
 54 1 76 173 500 603 5.90E-14 85.9 80427 cellular  
 organisms;Eukaryota;Opisthokonta;Metazoa;Eumetazoa;Bilateria;Deuterostomi  
 a;Chordata;Craniata;Vertebrata;Gnathostomata;Teleostomi;Euteleostomi;Sarc  
 opterygii;Dipnotetrapodomorpha;Tetrapoda;Amniota;Sauropsida;Sauria;Lepido  
 sauria;Squamata;Bifurcata;Unidentata;Episquamata;Laterata;Lacertibaenia;L  
 accertidae;Lacertinae;Lacerta;Lacerta agilis  
 UdeM00000004900 6596 100.9 UdeM00000004900 XP\_045205920.1 31.6 190  
 111 5 33 208 32 216 2.20E-18 100.9 6596 cellular  
 organisms;Eukaryota;Opisthokonta;Metazoa;Eumetazoa;Bilateria;Protostomia;  
 Spiralia;Lophotrochozoa;Mollusca;Bivalvia;Autobranchia;Heteroconchia;Euhe  
 terodonta;Imparidentia;Venerida;Veneroidea;Veneridae;Mercenaria;Mercenari  
 a mercenaria  
 UdeM00000004901 6596 69.3 UdeM00000004901 XP\_045203032.1 35.4 96  
 54 2 2 89 38 133 5.00E-09 69.3 6596 cellular  
 organisms;Eukaryota;Opisthokonta;Metazoa;Eumetazoa;Bilateria;Protostomia;  
 Spiralia;Lophotrochozoa;Mollusca;Bivalvia;Autobranchia;Heteroconchia;Euhe  
 terodonta;Imparidentia;Venerida;Veneroidea;Veneridae;Mercenaria;Mercenari  
 a mercenaria  
 UdeM00000004902 6596 65.5 UdeM00000004902 XP\_045206174.1 43.9 66  
 33 1 23 84 144 209 7.60E-08 65.5 6596 cellular  
 organisms;Eukaryota;Opisthokonta;Metazoa;Eumetazoa;Bilateria;Protostomia;  
 Spiralia;Lophotrochozoa;Mollusca;Bivalvia;Autobranchia;Heteroconchia;Euhe  
 terodonta;Imparidentia;Venerida;Veneroidea;Veneridae;Mercenaria;Mercenari  
 a mercenaria  
 UdeM00000004903 6596 414.8 UdeM00000004903 XP\_045206611.1 35.9 711  
 357 14 507 1197 402 1033 3.60E-112 414.8 6596 cellular  
 organisms;Eukaryota;Opisthokonta;Metazoa;Eumetazoa;Bilateria;Protostomia;  
 Spiralia;Lophotrochozoa;Mollusca;Bivalvia;Autobranchia;Heteroconchia;Euhe  
 terodonta;Imparidentia;Venerida;Veneroidea;Veneridae;Mercenaria;Mercenari  
 a mercenaria

UdeM00000004904 6596 166 UdeM00000004904 XP\_045203033.1 28.4 377  
 228 11 37 382 35 400 1.20E-37 166 6596 cellular  
 organisms;Eukaryota;Opisthokonta;Metazoa;Eumetazoa;Bilateria;Protostomia;  
 Spiralia;Lophotrochozoa;Mollusca;Bivalvia;Autobranchia;Heteroconchia;Euhe  
 terodonta;Imparidentia;Venerida;Veneroidea;Veneridae;Mercenaria;Mercenari  
 a mercenaria

UdeM00000004905 6596 164.9 UdeM00000004905 XP\_045203032.1 28.4 412  
 250 15 3 386 7 401 3.40E-37 164.9 6596 cellular  
 organisms;Eukaryota;Opisthokonta;Metazoa;Eumetazoa;Bilateria;Protostomia;  
 Spiralia;Lophotrochozoa;Mollusca;Bivalvia;Autobranchia;Heteroconchia;Euhe  
 terodonta;Imparidentia;Venerida;Veneroidea;Veneridae;Mercenaria;Mercenari  
 a mercenaria

UdeM00000004906 6596 490 UdeM00000004906 XP\_045205438.1 40.2 630  
 355 8 731 1358 818 1427 1.00E-134 490 6596 cellular  
 organisms;Eukaryota;Opisthokonta;Metazoa;Eumetazoa;Bilateria;Protostomia;  
 Spiralia;Lophotrochozoa;Mollusca;Bivalvia;Autobranchia;Heteroconchia;Euhe  
 terodonta;Imparidentia;Venerida;Veneroidea;Veneridae;Mercenaria;Mercenari  
 a mercenaria

UdeM00000004906 6596 83.6 UdeM00000004906 XP\_045205438.1 24.8 206  
 137 5 69 272 40 229 2.20E-12 83.6 6596 cellular  
 organisms;Eukaryota;Opisthokonta;Metazoa;Eumetazoa;Bilateria;Protostomia;  
 Spiralia;Lophotrochozoa;Mollusca;Bivalvia;Autobranchia;Heteroconchia;Euhe  
 terodonta;Imparidentia;Venerida;Veneroidea;Veneridae;Mercenaria;Mercenari  
 a mercenaria

UdeM00000004907 6565 485.3 UdeM00000004907 XP\_022323662.1 35.6 818  
 511 11 23 837 19 823 1.80E-133 485.3 6565 cellular  
 organisms;Eukaryota;Opisthokonta;Metazoa;Eumetazoa;Bilateria;Protostomia;  
 Spiralia;Lophotrochozoa;Mollusca;Bivalvia;Autobranchia;Pteriormorphia;Ostr  
 eida;Ostreoidea;Ostreidae;Crassostrea;Crassostrea virginica

UdeM00000004908 6565 83.6 UdeM00000004908 XP\_022311907.1 27.4 186  
 114 3 113 277 313 498 7.00E-13 83.6 6565 cellular  
 organisms;Eukaryota;Opisthokonta;Metazoa;Eumetazoa;Bilateria;Protostomia;  
 Spiralia;Lophotrochozoa;Mollusca;Bivalvia;Autobranchia;Pteriormorphia;Ostr  
 eida;Ostreoidea;Ostreidae;Crassostrea;Crassostrea virginica

UdeM00000004909 279965 62 UdeM00000004909 XP\_010173414.1 51.8  
 56 27 0 1 56 36 91 5.40E-07 62 279965  
 cellular  
 organisms;Eukaryota;Opisthokonta;Metazoa;Eumetazoa;Bilateria;Deuterostomi  
 a;Chordata;Craniata;Vertebrata;Gnathostomata;Teleostomi;Euteleostomi;Sarc  
 opterygii;Dipnotetrapodomorpha;Tetrapoda;Amniota;Sauropsida;Sauria;Archel  
 osauria;Archosauria;Dinosauria;Saurischia;Theropoda;Coelurosauria;Aves;Ne  
 ognathae;Caprimulgimorphae;Caprimulgiformes;Caprimulgidae;Antrostomus;Ant  
 rostomus carolinensis

UdeM00000004910 6596 520 UdeM00000004910 XP\_045206502.1 32.1 1314  
 715 35 34 1267 39 1255 8.40E-144 520 6596 cellular  
 organisms;Eukaryota;Opisthokonta;Metazoa;Eumetazoa;Bilateria;Protostomia;  
 Spiralia;Lophotrochozoa;Mollusca;Bivalvia;Autobranchia;Heteroconchia;Euhe  
 terodonta;Imparidentia;Venerida;Veneroidea;Veneridae;Mercenaria;Mercenari  
 a mercenaria

UdeM00000004911 6596 95.9 UdeM00000004911 XP\_045180038.1 28.1 288  
 147 11 2 240 46 322 7.80E-17 95.9 6596 cellular  
 organisms;Eukaryota;Opisthokonta;Metazoa;Eumetazoa;Bilateria;Protostomia;  
 Spiralia;Lophotrochozoa;Mollusca;Bivalvia;Autobranchia;Heteroconchia;Euhe

terodonta;Imparidentia;Venerida;Veneroidea;Veneridae;Mercenaria;Mercenari  
 a mercenaria  
 UdeM00000004912 6596 518.1 UdeM00000004912 XP\_045206502.1 32 1314  
 716 35 34 1267 39 1255 3.20E-143 518.1 6596 cellular  
 organisms;Eukaryota;Opisthokonta;Metazoa;Eumetazoa;Bilateria;Protostomia;  
 Spiralia;Lophotrochozoa;Mollusca;Bivalvia;Autobranhia;Heteroconchia;Euhe  
 terodonta;Imparidentia;Venerida;Veneroidea;Veneridae;Mercenaria;Mercenari  
 a mercenaria  
 UdeM00000004913 6596 521.2 UdeM00000004913 XP\_045206502.1 32 1313  
 717 34 34 1266 39 1255 3.80E-144 521.2 6596 cellular  
 organisms;Eukaryota;Opisthokonta;Metazoa;Eumetazoa;Bilateria;Protostomia;  
 Spiralia;Lophotrochozoa;Mollusca;Bivalvia;Autobranhia;Heteroconchia;Euhe  
 terodonta;Imparidentia;Venerida;Veneroidea;Veneridae;Mercenaria;Mercenari  
 a mercenaria  
 UdeM00000004914 6596 396.7 UdeM00000004914 XP\_045206611.1 41.4 490  
 273 6 1 487 622 1100 4.10E-107 396.7 6596 cellular  
 organisms;Eukaryota;Opisthokonta;Metazoa;Eumetazoa;Bilateria;Protostomia;  
 Spiralia;Lophotrochozoa;Mollusca;Bivalvia;Autobranhia;Heteroconchia;Euhe  
 terodonta;Imparidentia;Venerida;Veneroidea;Veneridae;Mercenaria;Mercenari  
 a mercenaria  
 UdeM00000004915 29159 287.3 UdeM00000004915 XP\_011453364.2 45.5 312  
 164 3 1 311 1 307 2.30E-74 287.3 29159 cellular  
 organisms;Eukaryota;Opisthokonta;Metazoa;Eumetazoa;Bilateria;Protostomia;  
 Spiralia;Lophotrochozoa;Mollusca;Bivalvia;Autobranhia;Pteriormorphia;Ostr  
 eida;Ostreoidea;Ostreidae;Crassostrea;Crassostrea gigas  
 UdeM00000004916 6596 1183.7 UdeM00000004916 XP\_045202771.1 67.1  
 909 283 7 1 898 1 904 0.00E+00 1183.7 6596  
 cellular  
 organisms;Eukaryota;Opisthokonta;Metazoa;Eumetazoa;Bilateria;Protostomia;  
 Spiralia;Lophotrochozoa;Mollusca;Bivalvia;Autobranhia;Heteroconchia;Euhe  
 terodonta;Imparidentia;Venerida;Veneroidea;Veneridae;Mercenaria;Mercenari  
 a mercenaria  
 UdeM00000004918 6596 434.5 UdeM00000004918 XP\_045202771.1 75.1 277  
 69 0 1 277 628 904 1.00E-118 434.5 6596 cellular  
 organisms;Eukaryota;Opisthokonta;Metazoa;Eumetazoa;Bilateria;Protostomia;  
 Spiralia;Lophotrochozoa;Mollusca;Bivalvia;Autobranhia;Heteroconchia;Euhe  
 terodonta;Imparidentia;Venerida;Veneroidea;Veneridae;Mercenaria;Mercenari  
 a mercenaria  
 UdeM00000004917 6579 622.9 UdeM00000004917 XP\_033743453.1 66.3 513  
 163 8 2 507 54 563 3.70E-175 622.9 6579 cellular  
 organisms;Eukaryota;Opisthokonta;Metazoa;Eumetazoa;Bilateria;Protostomia;  
 Spiralia;Lophotrochozoa;Mollusca;Bivalvia;Autobranhia;Pteriormorphia;Pect  
 inida;Pectinoidea;Pectinidae;Pecten;Pecten maximus  
 UdeM00000004919 6596 894 UdeM00000004919 XP\_045202820.1 63.3 697  
 243 6 8 696 176 867 1.30E-256 894 6596 cellular  
 organisms;Eukaryota;Opisthokonta;Metazoa;Eumetazoa;Bilateria;Protostomia;  
 Spiralia;Lophotrochozoa;Mollusca;Bivalvia;Autobranhia;Heteroconchia;Euhe  
 terodonta;Imparidentia;Venerida;Veneroidea;Veneridae;Mercenaria;Mercenari  
 a mercenaria  
 UdeM00000004920 6596 836.6 UdeM00000004920 XP\_045202820.1 62.8 656  
 231 6 8 655 176 826 2.30E-239 836.6 6596 cellular  
 organisms;Eukaryota;Opisthokonta;Metazoa;Eumetazoa;Bilateria;Protostomia;  
 Spiralia;Lophotrochozoa;Mollusca;Bivalvia;Autobranhia;Heteroconchia;Euhe

terodonta;Imparidentia;Venerida;Veneroidea;Veneridae;Mercenaria;Mercenari  
 a mercenaria  
 UdeM00000004921 6596 307 UdeM00000004921 XP\_045206335.1 44.2 346  
 189 3 42 385 45 388 4.70E-80 307 6596 cellular  
 organisms;Eukaryota;Opisthokonta;Metazoa;Eumetazoa;Bilateria;Protostomia;  
 Spiralia;Lophotrochozoa;Mollusca;Bivalvia;Autobranchia;Heteroconchia;Euhe  
 terodonta;Imparidentia;Venerida;Veneroidea;Veneridae;Mercenaria;Mercenari  
 a mercenaria  
 UdeM00000004923 400727 312.4 UdeM00000004923 XP\_025088532.1 94.7  
 169 9 0 3 171 2 170 3.60E-82 312.4 400727  
 cellular  
 organisms;Eukaryota;Opisthokonta;Metazoa;Eumetazoa;Bilateria;Protostomia;  
 Spiralia;Lophotrochozoa;Mollusca;Gastropoda;Caenogastropoda;Architaeniogl  
 ossa;Ampullarioidea;Ampullariidae;Pomacea;Pomacea canaliculata  
 UdeM00000004924 225164 456.8 UdeM00000004924 XP\_009059770.1 69  
 297 89 1 90 383 26 322 3.00E-125 456.8 225164  
 cellular  
 organisms;Eukaryota;Opisthokonta;Metazoa;Eumetazoa;Bilateria;Protostomia;  
 Spiralia;Lophotrochozoa;Mollusca;Gastropoda;Patellogastropoda;Lottioidea;  
 Lottiidae;Lottia;Lottia gigantea  
 UdeM00000004925 7574 184.5 UdeM00000004925 XP\_013412764.1 43.3 210  
 117 1 22 229 37 246 1.50E-43 184.5 7574 cellular  
 organisms;Eukaryota;Opisthokonta;Metazoa;Eumetazoa;Bilateria;Protostomia;  
 Spiralia;Lophotrochozoa;Brachiopoda;Linguliformea;Lingulata;Lingulida;Lin  
 guloidea;Lingulidae;Lingula;Lingula anatina  
 UdeM00000004926 6596 619 UdeM00000004926 XP\_045203250.1 44.1 886  
 460 21 20 889 18 884 1.30E-173 619 6596 cellular  
 organisms;Eukaryota;Opisthokonta;Metazoa;Eumetazoa;Bilateria;Protostomia;  
 Spiralia;Lophotrochozoa;Mollusca;Bivalvia;Autobranchia;Heteroconchia;Euhe  
 terodonta;Imparidentia;Venerida;Veneroidea;Veneridae;Mercenaria;Mercenari  
 a mercenaria  
 UdeM00000004927 6596 619 UdeM00000004927 XP\_045203247.1 42.2 966  
 509 25 20 955 18 964 1.30E-173 619 6596 cellular  
 organisms;Eukaryota;Opisthokonta;Metazoa;Eumetazoa;Bilateria;Protostomia;  
 Spiralia;Lophotrochozoa;Mollusca;Bivalvia;Autobranchia;Heteroconchia;Euhe  
 terodonta;Imparidentia;Venerida;Veneroidea;Veneridae;Mercenaria;Mercenari  
 a mercenaria  
 UdeM00000004928 48498 515 UdeM00000004928 XP\_020629946.1 38.6 772  
 386 13 2 769 1050 1737 2.00E-142 515 48498 cellular  
 organisms;Eukaryota;Opisthokonta;Metazoa;Eumetazoa;Cnidaria;Anthozoa;Hexa  
 corallia;Scleractinia;Faviina;Merulinidae;Orbicella;Orbicella faveolata  
 UdeM00000004929 6579 245.7 UdeM00000004929 XP\_033739209.1 48.8 258  
 116 2 9 261 2 248 6.40E-62 245.7 6579 cellular  
 organisms;Eukaryota;Opisthokonta;Metazoa;Eumetazoa;Bilateria;Protostomia;  
 Spiralia;Lophotrochozoa;Mollusca;Bivalvia;Autobranchia;Pteriormorphia;Pect  
 inida;Pectinoidea;Pectinidae;Pecten;Pecten maximus  
 UdeM00000004930 6596 1328.5 UdeM00000004930 XP\_045203251.1 46  
 1553 693 15 1 1432 1 1529 0.00E+00 1328.5 6596  
 cellular  
 organisms;Eukaryota;Opisthokonta;Metazoa;Eumetazoa;Bilateria;Protostomia;  
 Spiralia;Lophotrochozoa;Mollusca;Bivalvia;Autobranchia;Heteroconchia;Euhe  
 terodonta;Imparidentia;Venerida;Veneroidea;Veneridae;Mercenaria;Mercenari  
 a mercenaria

UdeM00000004935 29159 409.1 UdeM00000004935 XP\_011440861.2 53.3 422  
 186 8 6 422 4 419 7.00E-111 409.1 29159 cellular  
 organisms;Eukaryota;Opisthokonta;Metazoa;Eumetazoa;Bilateria;Protostomia;  
 Spiralia;Lophotrochozoa;Mollusca;Bivalvia;Autobranchia;Pteriomorphia;Ostr  
 eida;Ostreoidea;Ostreidae;Crassostrea;Crassostrea gigas  
 UdeM00000004936 106582 61.6 UdeM00000004936 XP\_004556909.1 27.4  
 179 114 5 1 178 1 164 1.20E-06 61.6 106582  
 cellular  
 organisms;Eukaryota;Opisthokonta;Metazoa;Eumetazoa;Bilateria;Deuterostomi  
 a;Chordata;Craniata;Vertebrata;Gnathostomata;Teleostomi;Euteleostomi;Acti  
 nopterygii;Actinopteri;Neopterygii;Teleostei;Osteoglossocephalai;Clupeoce  
 phala;Euteleosteomorpha;Neoteleostei;Eurypterygia;Ctenosquamata;Acanthomo  
 rphata;Euacanthomorphacea;Percomorphaceae;Ovalentaria;Cichlomorphae;Cichl  
 iformes;Cichlidae;African  
 cichlids;Pseudocrenilabrinae;Haplochromini;Maylandia;Maylandia zebra  
 complex;Maylandia zebra  
 UdeM00000004938 29159 411.8 UdeM00000004938 XP\_011440861.2 53.6 422  
 185 8 3 419 4 419 1.10E-111 411.8 29159 cellular  
 organisms;Eukaryota;Opisthokonta;Metazoa;Eumetazoa;Bilateria;Protostomia;  
 Spiralia;Lophotrochozoa;Mollusca;Bivalvia;Autobranchia;Pteriomorphia;Ostr  
 eida;Ostreoidea;Ostreidae;Crassostrea;Crassostrea gigas  
 UdeM00000004940 6596 122.5 UdeM00000004940 XP\_045204907.1 54.4 114  
 51 1 221 333 277 390 1.10E-24 122.5 6596 cellular  
 organisms;Eukaryota;Opisthokonta;Metazoa;Eumetazoa;Bilateria;Protostomia;  
 Spiralia;Lophotrochozoa;Mollusca;Bivalvia;Autobranchia;Heteroconchia;Euhe  
 terodonta;Imparidentia;Venerida;Veneroidea;Veneridae;Mercenaria;Mercenari  
 a mercenaria  
 UdeM00000004941 6565 196.1 UdeM00000004941 XP\_022325642.1 66.9 148  
 48 1 38 185 26 172 5.40E-47 196.1 6565 cellular  
 organisms;Eukaryota;Opisthokonta;Metazoa;Eumetazoa;Bilateria;Protostomia;  
 Spiralia;Lophotrochozoa;Mollusca;Bivalvia;Autobranchia;Pteriomorphia;Ostr  
 eida;Ostreoidea;Ostreidae;Crassostrea;Crassostrea virginica  
 UdeM00000004942 2607531 306.6 UdeM00000004942 XP\_029657462.1 56  
 277 122 0 92 368 7 283 4.40E-80 306.6 2607531  
 cellular  
 organisms;Eukaryota;Opisthokonta;Metazoa;Eumetazoa;Bilateria;Protostomia;  
 Spiralia;Lophotrochozoa;Mollusca;Cephalopoda;Coleoidea;Octopodiformes;Oct  
 opoda;Incirrata;Octopodidae;Octopus;Octopus sinensis  
 UdeM00000004943 6596 743.4 UdeM00000004943 XP\_045204907.1 59.5 805  
 316 5 7 807 432 1230 3.00E-211 743.4 6596 cellular  
 organisms;Eukaryota;Opisthokonta;Metazoa;Eumetazoa;Bilateria;Protostomia;  
 Spiralia;Lophotrochozoa;Mollusca;Bivalvia;Autobranchia;Heteroconchia;Euhe  
 terodonta;Imparidentia;Venerida;Veneroidea;Veneridae;Mercenaria;Mercenari  
 a mercenaria  
 UdeM00000004944 6579 423.7 UdeM00000004944 XP\_033742434.1 58.2 368  
 152 2 11 376 7 374 2.40E-115 423.7 6579 cellular  
 organisms;Eukaryota;Opisthokonta;Metazoa;Eumetazoa;Bilateria;Protostomia;  
 Spiralia;Lophotrochozoa;Mollusca;Bivalvia;Autobranchia;Pteriomorphia;Pect  
 inida;Pectinoidea;Pectinidae;Pecten;Pecten maximus  
 UdeM00000004945 7574 90.5 UdeM00000004945 XP\_013384015.1 57.3 89  
 37 1 6 94 186 273 1.30E-15 90.5 7574 cellular  
 organisms;Eukaryota;Opisthokonta;Metazoa;Eumetazoa;Bilateria;Protostomia;  
 Spiralia;Lophotrochozoa;Brachiopoda;Linguliformea;Lingulata;Lingulida;Lin  
 guloidea;Lingulidae;Lingula;Lingula anatina

UdeM00000004946 6596 429.9 UdeM00000004946 XP\_045206655.1 57.9 373  
 154 2 1 370 5 377 3.40E-117 429.9 6596 cellular  
 organisms;Eukaryota;Opisthokonta;Metazoa;Eumetazoa;Bilateria;Protostomia;  
 Spiralia;Lophotrochozoa;Mollusca;Bivalvia;Autobranchia;Heteroconchia;Euhe  
 terodonta;Imparidentia;Venerida;Veneroidea;Veneridae;Mercenaria;Mercenari  
 a mercenaria  
 UdeM00000004947 6579 372.5 UdeM00000004947 XP\_033742434.1 67.6 278  
 86 1 1 278 1 274 5.00E-100 372.5 6579 cellular  
 organisms;Eukaryota;Opisthokonta;Metazoa;Eumetazoa;Bilateria;Protostomia;  
 Spiralia;Lophotrochozoa;Mollusca;Bivalvia;Autobranchia;Pteriormorphia;Pect  
 inida;Pectinoidea;Pectinidae;Pecten;Pecten maximus  
 UdeM00000004948 6579 161 UdeM00000004948 XP\_033742434.1 62.6 123  
 46 0 1 123 152 274 1.10E-36 161 6579 cellular  
 organisms;Eukaryota;Opisthokonta;Metazoa;Eumetazoa;Bilateria;Protostomia;  
 Spiralia;Lophotrochozoa;Mollusca;Bivalvia;Autobranchia;Pteriormorphia;Pect  
 inida;Pectinoidea;Pectinidae;Pecten;Pecten maximus  
 UdeM00000004949 6573 136 UdeM00000004949 XP\_021339202.1 89.2 74  
 8 0 1 74 294 367 2.90E-29 136 6573 cellular  
 organisms;Eukaryota;Opisthokonta;Metazoa;Eumetazoa;Bilateria;Protostomia;  
 Spiralia;Lophotrochozoa;Mollusca;Bivalvia;Autobranchia;Pteriormorphia;Pect  
 inida;Pectinoidea;Pectinidae;Mizuhopecten;Mizuhopecten yessoensis  
 UdeM00000004950 6596 1135.9 UdeM00000004950 XP\_045203845.1 75.8  
 748 177 2 19 766 22 765 0.00E+00 1135.9 6596  
 cellular  
 organisms;Eukaryota;Opisthokonta;Metazoa;Eumetazoa;Bilateria;Protostomia;  
 Spiralia;Lophotrochozoa;Mollusca;Bivalvia;Autobranchia;Heteroconchia;Euhe  
 terodonta;Imparidentia;Venerida;Veneroidea;Veneridae;Mercenaria;Mercenari  
 a mercenaria  
 UdeM00000004951 6596 398.7 UdeM00000004951 XP\_045203830.1 41.9 657  
 328 16 2 627 522 1155 1.40E-107 398.7 6596 cellular  
 organisms;Eukaryota;Opisthokonta;Metazoa;Eumetazoa;Bilateria;Protostomia;  
 Spiralia;Lophotrochozoa;Mollusca;Bivalvia;Autobranchia;Heteroconchia;Euhe  
 terodonta;Imparidentia;Venerida;Veneroidea;Veneridae;Mercenaria;Mercenari  
 a mercenaria  
 UdeM00000004952 6596 588.6 UdeM00000004952 XP\_045203830.1 46.6 822  
 375 20 118 900 359 1155 1.40E-164 588.6 6596 cellular  
 organisms;Eukaryota;Opisthokonta;Metazoa;Eumetazoa;Bilateria;Protostomia;  
 Spiralia;Lophotrochozoa;Mollusca;Bivalvia;Autobranchia;Heteroconchia;Euhe  
 terodonta;Imparidentia;Venerida;Veneroidea;Veneridae;Mercenaria;Mercenari  
 a mercenaria  
 UdeM00000004953 6596 368.6 UdeM00000004953 XP\_045203830.1 60.1 328  
 115 6 1 326 1 314 8.50E-99 368.6 6596 cellular  
 organisms;Eukaryota;Opisthokonta;Metazoa;Eumetazoa;Bilateria;Protostomia;  
 Spiralia;Lophotrochozoa;Mollusca;Bivalvia;Autobranchia;Heteroconchia;Euhe  
 terodonta;Imparidentia;Venerida;Veneroidea;Veneridae;Mercenaria;Mercenari  
 a mercenaria  
 UdeM00000004954 6565 371.3 UdeM00000004954 XP\_022326126.1 59.9 332  
 111 6 1 331 1 311 3.40E-99 371.3 6565 cellular  
 organisms;Eukaryota;Opisthokonta;Metazoa;Eumetazoa;Bilateria;Protostomia;  
 Spiralia;Lophotrochozoa;Mollusca;Bivalvia;Autobranchia;Pteriormorphia;Ostr  
 eida;Ostreoidea;Ostreidae;Crassostrea;Crassostrea virginica  
 UdeM00000004955 1735272 171.8 UdeM00000004955 XP\_041358144.1 35.5  
 423 253 6 15 426 378 791 1.90E-39 171.8 1735272  
 cellular



organisms;Eukaryota;Opisthokonta;Metazoa;Eumetazoa;Bilateria;Protostomia;Spiralia;Lophotrochozoa;Mollusca;Gastropoda;Neomphalina;Neomphaloidea;Peltospiridae;Gigantopelta;Gigantopelta aegis  
UdeM00000004956 6596 285.4 UdeM00000004956 XP\_045203477.1 66.8 220  
73 0 1 220 1 220 6.10E-74 285.4 6596 cellular  
organisms;Eukaryota;Opisthokonta;Metazoa;Eumetazoa;Bilateria;Protostomia;Spiralia;Lophotrochozoa;Mollusca;Bivalvia;Autobranchia;Heteroconchia;Euheterodonta;Imparidentia;Venerida;Veneroidea;Veneridae;Mercenaria;Mercenaria mercenaria  
UdeM00000004957 6596 125.2 UdeM00000004957 XP\_045203476.1 72.8 92  
24 1 1 91 1 92 4.40E-26 125.2 6596 cellular  
organisms;Eukaryota;Opisthokonta;Metazoa;Eumetazoa;Bilateria;Protostomia;Spiralia;Lophotrochozoa;Mollusca;Bivalvia;Autobranchia;Heteroconchia;Euheterodonta;Imparidentia;Venerida;Veneroidea;Veneridae;Mercenaria;Mercenaria mercenaria  
UdeM00000004958 6579 576.2 UdeM00000004958 XP\_033743996.1 70.8 390  
114 0 10 399 8 397 3.20E-161 576.2 6579 cellular  
organisms;Eukaryota;Opisthokonta;Metazoa;Eumetazoa;Bilateria;Protostomia;Spiralia;Lophotrochozoa;Mollusca;Bivalvia;Autobranchia;Pteriormorphia;Pectinida;Pectinoidea;Pectinidae;Pecten;Pecten maximus  
UdeM00000004960 6565 287 UdeM00000004960 XP\_022335717.1 36.7 387  
228 8 1735 2118 1196 1568 2.00E-73 287 6565 cellular  
organisms;Eukaryota;Opisthokonta;Metazoa;Eumetazoa;Bilateria;Protostomia;Spiralia;Lophotrochozoa;Mollusca;Bivalvia;Autobranchia;Pteriormorphia;Ostreida;Ostreoidea;Ostreidae;Crassostrea;Crassostrea virginica  
UdeM00000004961 45351 77.8 UdeM00000004961 XP\_032230364.1 52.5 59  
28 0 22 80 589 647 7.10E-12 77.8 45351 cellular  
organisms;Eukaryota;Opisthokonta;Metazoa;Eumetazoa;Cnidaria;Anthozoa;Hexacorallia;Actiniaria;Edwardsiidae;Nematostella;Nematostella vectensis  
UdeM00000004962 2652724 98.2 UdeM00000004962 XP\_020900102.1 35.2  
128 63 4 6 115 58 183 7.20E-18 98.2 2652724  
cellular  
organisms;Eukaryota;Opisthokonta;Metazoa;Eumetazoa;Cnidaria;Anthozoa;Hexacorallia;Actiniaria;Aiptasiidae;Exaiptasia;Exaiptasia diaphana  
UdeM00000004963 6105 95.9 UdeM00000004963 XP\_031552350.1 35.6 118  
67 2 7 115 62 179 3.60E-17 95.9 6105 cellular  
organisms;Eukaryota;Opisthokonta;Metazoa;Eumetazoa;Cnidaria;Anthozoa;Hexacorallia;Actiniaria;Actiniidae;Actinia;Actinia tenebrosa  
UdeM00000004964 2652724 94.4 UdeM00000004964 XP\_020900102.1 34.5  
110 68 3 8 113 138 247 1.00E-16 94.4 2652724  
cellular  
organisms;Eukaryota;Opisthokonta;Metazoa;Eumetazoa;Cnidaria;Anthozoa;Hexacorallia;Actiniaria;Aiptasiidae;Exaiptasia;Exaiptasia diaphana  
UdeM00000004965 2652724 95.1 UdeM00000004965 XP\_020900102.1 36.4  
110 63 4 229 331 138 247 1.80E-16 95.1 2652724  
cellular  
organisms;Eukaryota;Opisthokonta;Metazoa;Eumetazoa;Cnidaria;Anthozoa;Hexacorallia;Actiniaria;Aiptasiidae;Exaiptasia;Exaiptasia diaphana  
UdeM00000004968 45264 96.7 UdeM00000004968 XP\_029198767.2 33.9 124  
77 5 17 136 106 228 2.60E-17 96.7 45264 cellular  
organisms;Eukaryota;Opisthokonta;Metazoa;Eumetazoa;Cnidaria;Anthozoa;Hexacorallia;Scleractinia;Astrocoeniina;Acroporidae;Acropora;Acropora millepora

UdeM00000004969 6565 262.7 UdeM00000004969 XP\_022321940.1 24.8 673  
 489 9 15 676 16 682 1.30E-66 262.7 6565 cellular  
 organisms;Eukaryota;Opisthokonta;Metazoa;Eumetazoa;Bilateria;Protostomia;  
 Spiralia;Lophotrochozoa;Mollusca;Bivalvia;Autobranchia;Pteriomorpha;Ostr  
 eida;Ostreoidea;Ostreidae;Crassostrea;Crassostrea virginica  
 UdeM00000004970 6573 257.3 UdeM00000004970 XP\_021366217.1 25.7 666  
 453 10 14 673 11 640 5.40E-65 257.3 6573 cellular  
 organisms;Eukaryota;Opisthokonta;Metazoa;Eumetazoa;Bilateria;Protostomia;  
 Spiralia;Lophotrochozoa;Mollusca;Bivalvia;Autobranchia;Pteriomorpha;Pect  
 inida;Pectinoidea;Pectinidae;Mizuhopecten;Mizuhopecten yessoensis  
 UdeM00000004971 6596 444.1 UdeM00000004971 XP\_045203480.1 55.8 369  
 158 4 47 412 37 403 1.90E-121 444.1 6596 cellular  
 organisms;Eukaryota;Opisthokonta;Metazoa;Eumetazoa;Bilateria;Protostomia;  
 Spiralia;Lophotrochozoa;Mollusca;Bivalvia;Autobranchia;Heteroconchia;Euhe  
 terodonta;Imparidentia;Venerida;Veneroidea;Veneridae;Mercenaria;Mercenari  
 a mercenaria  
 UdeM00000004972 1735272 156 UdeM00000004972 XP\_041367532.1 34.6  
 231 146 1 143 368 41 271 9.30E-35 156 1735272  
 cellular  
 organisms;Eukaryota;Opisthokonta;Metazoa;Eumetazoa;Bilateria;Protostomia;  
 Spiralia;Lophotrochozoa;Mollusca;Gastropoda;Neomphalina;Neomphaloidea;Pel  
 tospiridae;Gigantopelta;Gigantopelta aegis  
 UdeM00000004973 225164 171.4 UdeM00000004973 XP\_009063605.1 47.8  
 209 93 3 75 268 18 225 1.60E-39 171.4 225164  
 cellular  
 organisms;Eukaryota;Opisthokonta;Metazoa;Eumetazoa;Bilateria;Protostomia;  
 Spiralia;Lophotrochozoa;Mollusca;Gastropoda;Patellogastropoda;Lottioidea;  
 Lottiidae;Lottia;Lottia gigantea  
 UdeM00000004974 2652724 102.4 UdeM00000004974 XP\_020900102.1 39  
 118 56 6 22 125 132 247 4.20E-19 102.4 2652724  
 cellular  
 organisms;Eukaryota;Opisthokonta;Metazoa;Eumetazoa;Cnidaria;Anthozoa;Hexa  
 corallia;Actiniaria;Aiptasiidae;Exaiptasia;Exaiptasia diaphana  
 UdeM00000004975 1735272 171.4 UdeM00000004975 XP\_041367532.1 46.4  
 196 99 1 75 264 57 252 1.60E-39 171.4 1735272  
 cellular  
 organisms;Eukaryota;Opisthokonta;Metazoa;Eumetazoa;Bilateria;Protostomia;  
 Spiralia;Lophotrochozoa;Mollusca;Gastropoda;Neomphalina;Neomphaloidea;Pel  
 tospiridae;Gigantopelta;Gigantopelta aegis  
 UdeM00000004976 225164 171.4 UdeM00000004976 XP\_009063605.1 47.4  
 209 94 3 76 269 18 225 1.60E-39 171.4 225164  
 cellular  
 organisms;Eukaryota;Opisthokonta;Metazoa;Eumetazoa;Bilateria;Protostomia;  
 Spiralia;Lophotrochozoa;Mollusca;Gastropoda;Patellogastropoda;Lottioidea;  
 Lottiidae;Lottia;Lottia gigantea  
 UdeM00000004977 225164 140.2 UdeM00000004977 XP\_009063605.1 44.1  
 177 84 1 11 172 49 225 2.50E-30 140.2 225164  
 cellular  
 organisms;Eukaryota;Opisthokonta;Metazoa;Eumetazoa;Bilateria;Protostomia;  
 Spiralia;Lophotrochozoa;Mollusca;Gastropoda;Patellogastropoda;Lottioidea;  
 Lottiidae;Lottia;Lottia gigantea  
 UdeM00000004978 6526 179.1 UdeM00000004978 XP\_013067082.1 46.8 205  
 94 1 85 274 128 332 7.90E-42 179.1 6526 cellular  
 organisms;Eukaryota;Opisthokonta;Metazoa;Eumetazoa;Bilateria;Protostomia;

Spiralia; Lophotrochozoa; Mollusca; Gastropoda; Heterobranchia; Euthyneura; Panpulmonata; Hygrophila; Lymnaeoidea; Planorbidae; Biomphalaria; Biomphalaria glabrata

UdeM00000004979 6596 493.8 UdeM00000004979 XP\_045203479.1 65.2 368  
127 1 2 369 16 382 1.90E-136 493.8 6596 cellular

organisms; Eukaryota; Opisthokonta; Metazoa; Eumetazoa; Bilateria; Protostomia; Spiralia; Lophotrochozoa; Mollusca; Bivalvia; Autobranchia; Heteroconchia; Euheterodonta; Imparidentia; Venerida; Veneroidea; Veneridae; Mercenaria; Mercenaria mercenaria

UdeM00000004982 6596 81.3 UdeM00000004982 XP\_045210113.1 37.8 98  
60 1 36 133 878 974 1.10E-12 81.3 6596 cellular

organisms; Eukaryota; Opisthokonta; Metazoa; Eumetazoa; Bilateria; Protostomia; Spiralia; Lophotrochozoa; Mollusca; Bivalvia; Autobranchia; Heteroconchia; Euheterodonta; Imparidentia; Venerida; Veneroidea; Veneridae; Mercenaria; Mercenaria mercenaria

UdeM00000004983 6573 250.8 UdeM00000004983 XP\_021356454.1 49.4 261  
119 6 16 270 8 261 2.10E-63 250.8 6573 cellular

organisms; Eukaryota; Opisthokonta; Metazoa; Eumetazoa; Bilateria; Protostomia; Spiralia; Lophotrochozoa; Mollusca; Bivalvia; Autobranchia; Pteriomorphia; Pectinida; Pectinoidea; Pectinidae; Mizuhopecten; Mizuhopecten yessoensis

UdeM00000004984 6596 690.3 UdeM00000004984 XP\_045203230.1 56.7 614  
251 3 12 615 3 611 2.30E-195 690.3 6596 cellular

organisms; Eukaryota; Opisthokonta; Metazoa; Eumetazoa; Bilateria; Protostomia; Spiralia; Lophotrochozoa; Mollusca; Bivalvia; Autobranchia; Heteroconchia; Euheterodonta; Imparidentia; Venerida; Veneroidea; Veneridae; Mercenaria; Mercenaria mercenaria

UdeM00000004985 6596 80.1 UdeM00000004985 XP\_045206126.1 42.5 127  
46 6 32 132 78 203 2.70E-12 80.1 6596 cellular

organisms; Eukaryota; Opisthokonta; Metazoa; Eumetazoa; Bilateria; Protostomia; Spiralia; Lophotrochozoa; Mollusca; Bivalvia; Autobranchia; Heteroconchia; Euheterodonta; Imparidentia; Venerida; Veneroidea; Veneridae; Mercenaria; Mercenaria mercenaria

UdeM00000004986 6596 80.1 UdeM00000004986 XP\_045206126.1 42.5 127  
46 6 29 129 78 203 2.60E-12 80.1 6596 cellular

organisms; Eukaryota; Opisthokonta; Metazoa; Eumetazoa; Bilateria; Protostomia; Spiralia; Lophotrochozoa; Mollusca; Bivalvia; Autobranchia; Heteroconchia; Euheterodonta; Imparidentia; Venerida; Veneroidea; Veneridae; Mercenaria; Mercenaria mercenaria

UdeM00000004987 6579 738.4 UdeM00000004987 XP\_033742077.1 61.8 639  
177 5 102 674 297 934 8.00E-210 738.4 6579 cellular

organisms; Eukaryota; Opisthokonta; Metazoa; Eumetazoa; Bilateria; Protostomia; Spiralia; Lophotrochozoa; Mollusca; Bivalvia; Autobranchia; Pteriomorphia; Pectinida; Pectinoidea; Pectinidae; Pecten; Pecten maximus

UdeM00000004988 29159 252.3 UdeM00000004988 XP\_011418206.1 91 156  
14 0 1 156 1 156 4.10E-64 252.3 29159 cellular

organisms; Eukaryota; Opisthokonta; Metazoa; Eumetazoa; Bilateria; Protostomia; Spiralia; Lophotrochozoa; Mollusca; Bivalvia; Autobranchia; Pteriomorphia; Ostreida; Ostreoidea; Ostreidae; Crassostrea; Crassostrea gigas

UdeM00000004989 6526 166.8 UdeM00000004989 XP\_013075097.1 42.7 199  
97 3 42 228 50 243 3.30E-38 166.8 6526 cellular

organisms; Eukaryota; Opisthokonta; Metazoa; Eumetazoa; Bilateria; Protostomia; Spiralia; Lophotrochozoa; Mollusca; Gastropoda; Heterobranchia; Euthyneura; Panpulmonata; Hygrophila; Lymnaeoidea; Planorbidae; Biomphalaria; Biomphalaria glabrata

UdeM00000004990 7739 58.5 UdeM00000004990 XP\_035660271.1 35.8 81  
 50 2 58 137 167 246 7.60E-06 58.5 7739 cellular  
 organisms;Eukaryota;Opisthokonta;Metazoa;Eumetazoa;Bilateria;Deuterostomi  
 a;Chordata;Cephalochordata;Leptocardii;Amphioxiformes;Branchiostomidae;Br  
 anchiostoma;Branchiostoma floridae

UdeM00000004991 6596 542.7 UdeM00000004991 XP\_045161878.1 47.7 579  
 280 5 10 586 16 573 5.70E-151 542.7 6596 cellular  
 organisms;Eukaryota;Opisthokonta;Metazoa;Eumetazoa;Bilateria;Protostomia;  
 Spiralia;Lophotrochozoa;Mollusca;Bivalvia;Autobranhia;Heteroconchia;Euhe  
 terodonta;Imparidentia;Venerida;Veneroidea;Veneridae;Mercenaria;Mercenari  
 a mercenaria

UdeM00000004992 6596 483.8 UdeM00000004992 XP\_045202941.1 49 567  
 275 9 6 567 10 567 3.10E-133 483.8 6596 cellular  
 organisms;Eukaryota;Opisthokonta;Metazoa;Eumetazoa;Bilateria;Protostomia;  
 Spiralia;Lophotrochozoa;Mollusca;Bivalvia;Autobranhia;Heteroconchia;Euhe  
 terodonta;Imparidentia;Venerida;Veneroidea;Veneridae;Mercenaria;Mercenari  
 a mercenaria

UdeM00000004993 6596 3145.1 UdeM00000004993 XP\_045202941.1 53.4  
 3212 1439 28 11 3202 11 3185 0.00E+00 3145.1 6596  
 cellular  
 organisms;Eukaryota;Opisthokonta;Metazoa;Eumetazoa;Bilateria;Protostomia;  
 Spiralia;Lophotrochozoa;Mollusca;Bivalvia;Autobranhia;Heteroconchia;Euhe  
 terodonta;Imparidentia;Venerida;Veneroidea;Veneridae;Mercenaria;Mercenari  
 a mercenaria

UdeM00000004994 6596 305.8 UdeM00000004994 XP\_045206168.1 32.4 900  
 516 26 11 869 1809 2657 1.70E-79 305.8 6596 cellular  
 organisms;Eukaryota;Opisthokonta;Metazoa;Eumetazoa;Bilateria;Protostomia;  
 Spiralia;Lophotrochozoa;Mollusca;Bivalvia;Autobranhia;Heteroconchia;Euhe  
 terodonta;Imparidentia;Venerida;Veneroidea;Veneridae;Mercenaria;Mercenari  
 a mercenaria

UdeM00000004995 6596 362.8 UdeM00000004995 XP\_045206168.1 32.7 1124  
 637 36 22 1087 1596 2657 1.50E-96 362.8 6596 cellular  
 organisms;Eukaryota;Opisthokonta;Metazoa;Eumetazoa;Bilateria;Protostomia;  
 Spiralia;Lophotrochozoa;Mollusca;Bivalvia;Autobranhia;Heteroconchia;Euhe  
 terodonta;Imparidentia;Venerida;Veneroidea;Veneridae;Mercenaria;Mercenari  
 a mercenaria

UdeM00000004996 6596 351.7 UdeM00000004996 XP\_045203590.1 56 382  
 156 7 1 373 1 379 1.20E-93 351.7 6596 cellular  
 organisms;Eukaryota;Opisthokonta;Metazoa;Eumetazoa;Bilateria;Protostomia;  
 Spiralia;Lophotrochozoa;Mollusca;Bivalvia;Autobranhia;Heteroconchia;Euhe  
 terodonta;Imparidentia;Venerida;Veneroidea;Veneridae;Mercenaria;Mercenari  
 a mercenaria

UdeM00000004997 6596 337.8 UdeM00000004997 XP\_045203590.1 54 465  
 214 0 1 465 394 858 2.20E-89 337.8 6596 cellular  
 organisms;Eukaryota;Opisthokonta;Metazoa;Eumetazoa;Bilateria;Protostomia;  
 Spiralia;Lophotrochozoa;Mollusca;Bivalvia;Autobranhia;Heteroconchia;Euhe  
 terodonta;Imparidentia;Venerida;Veneroidea;Veneridae;Mercenaria;Mercenari  
 a mercenaria

UdeM00000004998 6596 474.9 UdeM00000004998 XP\_045203594.1 48.5 723  
 342 4 1 693 394 1116 2.00E-130 474.9 6596 cellular  
 organisms;Eukaryota;Opisthokonta;Metazoa;Eumetazoa;Bilateria;Protostomia;  
 Spiralia;Lophotrochozoa;Mollusca;Bivalvia;Autobranhia;Heteroconchia;Euhe  
 terodonta;Imparidentia;Venerida;Veneroidea;Veneridae;Mercenaria;Mercenari  
 a mercenaria

UdeM00000004999 6596 89 UdeM00000004999 XP\_045203590.1 57.8 90  
 34 2 42 131 1268 1353 5.00E-15 89 6596 cellular  
 organisms;Eukaryota;Opisthokonta;Metazoa;Eumetazoa;Bilateria;Protostomia;  
 Spiralia;Lophotrochozoa;Mollusca;Bivalvia;Autobranchia;Heteroconchia;Euhe  
 terodonta;Imparidentia;Venerida;Veneroidea;Veneridae;Mercenaria;Mercenari  
 a mercenaria  
 UdeM00000005000 6596 89 UdeM00000005000 XP\_045203590.1 57.8 90  
 34 2 27 116 1268 1353 4.40E-15 89 6596 cellular  
 organisms;Eukaryota;Opisthokonta;Metazoa;Eumetazoa;Bilateria;Protostomia;  
 Spiralia;Lophotrochozoa;Mollusca;Bivalvia;Autobranchia;Heteroconchia;Euhe  
 terodonta;Imparidentia;Venerida;Veneroidea;Veneridae;Mercenaria;Mercenari  
 a mercenaria  
 UdeM00000005002 400727 587.4 UdeM00000005002 XP\_025086244.1 65.6  
 468 161 0 52 519 110 577 2.10E-164 587.4 400727  
 cellular  
 organisms;Eukaryota;Opisthokonta;Metazoa;Eumetazoa;Bilateria;Protostomia;  
 Spiralia;Lophotrochozoa;Mollusca;Gastropoda;Caenogastropoda;Architaeniogl  
 ossa;Ampullarioidea;Ampullariidae;Pomacea;Pomacea canaliculata  
 UdeM00000005003 6596 555.8 UdeM00000005003 XP\_045204134.1 55.5 521  
 218 4 27 547 36 542 6.20E-155 555.8 6596 cellular  
 organisms;Eukaryota;Opisthokonta;Metazoa;Eumetazoa;Bilateria;Protostomia;  
 Spiralia;Lophotrochozoa;Mollusca;Bivalvia;Autobranchia;Heteroconchia;Euhe  
 terodonta;Imparidentia;Venerida;Veneroidea;Veneridae;Mercenaria;Mercenari  
 a mercenaria  
 UdeM00000005005 6596 407.9 UdeM00000005005 XP\_045204136.1 71.4 259  
 72 1 1 259 1 257 9.60E-111 407.9 6596 cellular  
 organisms;Eukaryota;Opisthokonta;Metazoa;Eumetazoa;Bilateria;Protostomia;  
 Spiralia;Lophotrochozoa;Mollusca;Bivalvia;Autobranchia;Heteroconchia;Euhe  
 terodonta;Imparidentia;Venerida;Veneroidea;Veneridae;Mercenaria;Mercenari  
 a mercenaria  
 UdeM00000005004 6596 544.3 UdeM00000005004 XP\_045204136.1 68.6 366  
 111 2 1 366 1 362 1.80E-151 544.3 6596 cellular  
 organisms;Eukaryota;Opisthokonta;Metazoa;Eumetazoa;Bilateria;Protostomia;  
 Spiralia;Lophotrochozoa;Mollusca;Bivalvia;Autobranchia;Heteroconchia;Euhe  
 terodonta;Imparidentia;Venerida;Veneroidea;Veneridae;Mercenaria;Mercenari  
 a mercenaria  
 UdeM00000005008 6500 67.8 UdeM00000005008 XP\_005091170.1 39.4 99  
 54 1 143 235 484 582 2.10E-08 67.8 6500 cellular  
 organisms;Eukaryota;Opisthokonta;Metazoa;Eumetazoa;Bilateria;Protostomia;  
 Spiralia;Lophotrochozoa;Mollusca;Gastropoda;Heterobranchia;Euthyneura;Tec  
 tipleura;Aplysiida;Aplysioidea;Aplysiidae;Aplysia;Aplysia californica  
 UdeM00000005009 400727 70.1 UdeM00000005009 XP\_025085894.1 39.8  
 108 61 1 10 113 54 161 3.10E-09 70.1 400727  
 cellular  
 organisms;Eukaryota;Opisthokonta;Metazoa;Eumetazoa;Bilateria;Protostomia;  
 Spiralia;Lophotrochozoa;Mollusca;Gastropoda;Caenogastropoda;Architaeniogl  
 ossa;Ampullarioidea;Ampullariidae;Pomacea;Pomacea canaliculata  
 UdeM00000005010 400727 70.1 UdeM00000005010 XP\_025085894.1 39.8  
 108 61 1 3 106 54 161 3.00E-09 70.1 400727  
 cellular  
 organisms;Eukaryota;Opisthokonta;Metazoa;Eumetazoa;Bilateria;Protostomia;  
 Spiralia;Lophotrochozoa;Mollusca;Gastropoda;Caenogastropoda;Architaeniogl  
 ossa;Ampullarioidea;Ampullariidae;Pomacea;Pomacea canaliculata

UdeM00000005012 10224 142.9 UdeM00000005012 XP\_006820186.1 50.8 124  
 61 0 3 126 110 233 2.90E-31 142.9 10224 cellular  
 organisms;Eukaryota;Opisthokonta;Metazoa;Eumetazoa;Bilateria;Deuterostomi  
 a;Hemichordata;Enteropneusta;Harrimaniidae;Saccoglossus;Saccoglossus  
 kowalevskii

UdeM00000005013 6596 333.6 UdeM00000005013 XP\_045156248.1 41.3 465  
 225 8 4 448 7 443 4.10E-88 333.6 6596 cellular  
 organisms;Eukaryota;Opisthokonta;Metazoa;Eumetazoa;Bilateria;Protostomia;  
 Spiralia;Lophotrochozoa;Mollusca;Bivalvia;Autobranchia;Heteroconchia;Euhe  
 terodonta;Imparidentia;Venerida;Veneroidea;Veneridae;Mercenaria;Mercenari  
 a mercenaria

UdeM00000005014 225164 246.5 UdeM00000005014 XP\_009065415.1 69  
 168 52 0 23 190 141 308 2.70E-62 246.5 225164  
 cellular  
 organisms;Eukaryota;Opisthokonta;Metazoa;Eumetazoa;Bilateria;Protostomia;  
 Spiralia;Lophotrochozoa;Mollusca;Gastropoda;Patellogastropoda;Lottioidea;  
 Lottiidae;Lottia;Lottia gigantea

UdeM00000005015 225164 246.5 UdeM00000005015 XP\_009065415.1 69  
 168 52 0 19 186 141 308 2.70E-62 246.5 225164  
 cellular  
 organisms;Eukaryota;Opisthokonta;Metazoa;Eumetazoa;Bilateria;Protostomia;  
 Spiralia;Lophotrochozoa;Mollusca;Gastropoda;Patellogastropoda;Lottioidea;  
 Lottiidae;Lottia;Lottia gigantea

UdeM00000005016 6596 157.1 UdeM00000005016 XP\_045204313.1 41.4 181  
 85 1 13 172 12 192 2.10E-35 157.1 6596 cellular  
 organisms;Eukaryota;Opisthokonta;Metazoa;Eumetazoa;Bilateria;Protostomia;  
 Spiralia;Lophotrochozoa;Mollusca;Bivalvia;Autobranchia;Heteroconchia;Euhe  
 terodonta;Imparidentia;Venerida;Veneroidea;Veneridae;Mercenaria;Mercenari  
 a mercenaria

UdeM00000005017 6596 179.9 UdeM00000005017 XP\_045204312.1 44.4 216  
 109 7 5 218 3 209 3.60E-42 179.9 6596 cellular  
 organisms;Eukaryota;Opisthokonta;Metazoa;Eumetazoa;Bilateria;Protostomia;  
 Spiralia;Lophotrochozoa;Mollusca;Bivalvia;Autobranchia;Heteroconchia;Euhe  
 terodonta;Imparidentia;Venerida;Veneroidea;Veneridae;Mercenaria;Mercenari  
 a mercenaria

UdeM00000005018 6596 426.4 UdeM00000005018 XP\_045176288.1 44.7 499  
 268 6 7 499 9 505 5.00E-116 426.4 6596 cellular  
 organisms;Eukaryota;Opisthokonta;Metazoa;Eumetazoa;Bilateria;Protostomia;  
 Spiralia;Lophotrochozoa;Mollusca;Bivalvia;Autobranchia;Heteroconchia;Euhe  
 terodonta;Imparidentia;Venerida;Veneroidea;Veneridae;Mercenaria;Mercenari  
 a mercenaria

UdeM00000005019 6579 478.8 UdeM00000005019 XP\_033743847.1 89.7 263  
 26 1 1 263 1 262 4.50E-132 478.8 6579 cellular  
 organisms;Eukaryota;Opisthokonta;Metazoa;Eumetazoa;Bilateria;Protostomia;  
 Spiralia;Lophotrochozoa;Mollusca;Bivalvia;Autobranchia;Pteriomorphia;Pect  
 inida;Pectinoidea;Pectinidae;Pecten;Pecten maximus

UdeM00000005020 7574 150.2 UdeM00000005020 XP\_013396733.1 41.3 206  
 120 1 96 300 43 248 4.20E-33 150.2 7574 cellular  
 organisms;Eukaryota;Opisthokonta;Metazoa;Eumetazoa;Bilateria;Protostomia;  
 Spiralia;Lophotrochozoa;Brachiopoda;Linguliformea;Lingulata;Lingulida;Lin  
 guloidea;Lingulidae;Lingula;Lingula anatina

UdeM00000005021 1735272 130.6 UdeM00000005021 XP\_041360008.1 74.1  
 81 21 0 5 85 62 142 9.70E-28 130.6 1735272  
 cellular

organisms;Eukaryota;Opisthokonta;Metazoa;Eumetazoa;Bilateria;Protostomia;Spiralia;Lophotrochozoa;Mollusca;Gastropoda;Neomphalina;Neomphaloidea;Peltospiridae;Gigantopelta;Gigantopelta aegis

UdeM00000005022 6596 412.9 UdeM00000005022 XP\_045176288.1 48.1 424  
212 5 6 426 86 504 4.90E-112 412.9 6596 cellular

organisms;Eukaryota;Opisthokonta;Metazoa;Eumetazoa;Bilateria;Protostomia;Spiralia;Lophotrochozoa;Mollusca;Bivalvia;Autobranchia;Heteroconchia;Euherodonta;Imparidentia;Venerida;Veneroidea;Veneridae;Mercenaria;Mercenaria mercenaria

UdeM00000005023 6596 147.5 UdeM00000005023 XP\_045176288.1 54.8 126  
55 2 21 145 380 504 1.30E-32 147.5 6596 cellular

organisms;Eukaryota;Opisthokonta;Metazoa;Eumetazoa;Bilateria;Protostomia;Spiralia;Lophotrochozoa;Mollusca;Bivalvia;Autobranchia;Heteroconchia;Euherodonta;Imparidentia;Venerida;Veneroidea;Veneridae;Mercenaria;Mercenaria mercenaria

UdeM00000005024 6596 411 UdeM00000005024 XP\_045176288.1 47.4 439  
222 6 5 439 71 504 1.90E-111 411 6596 cellular

organisms;Eukaryota;Opisthokonta;Metazoa;Eumetazoa;Bilateria;Protostomia;Spiralia;Lophotrochozoa;Mollusca;Bivalvia;Autobranchia;Heteroconchia;Euherodonta;Imparidentia;Venerida;Veneroidea;Veneridae;Mercenaria;Mercenaria mercenaria

UdeM00000005025 6596 198.4 UdeM00000005025 XP\_045176288.1 38.4 289  
119 2 9 238 89 377 1.10E-47 198.4 6596 cellular

organisms;Eukaryota;Opisthokonta;Metazoa;Eumetazoa;Bilateria;Protostomia;Spiralia;Lophotrochozoa;Mollusca;Bivalvia;Autobranchia;Heteroconchia;Euherodonta;Imparidentia;Venerida;Veneroidea;Veneridae;Mercenaria;Mercenaria mercenaria

UdeM00000005026 90988 180.6 UdeM00000005026 XP\_039529746.1 36.1 310  
181 8 6 306 387 688 4.40E-42 180.6 90988 cellular

organisms;Eukaryota;Opisthokonta;Metazoa;Eumetazoa;Bilateria;Deuterostomia;Chordata;Craniata;Vertebrata;Gnathostomata;Teleostomi;Euteleostomi;Actinopterygii;Actinopteri;Neopterygii;Teleostei;Osteoglossocephalai;Clupeocephala;Otomorpha;Ostariophysi;Otophysi;Cypriniphysae;Cypriniiformes;Cyprinidae;Leuciscidae;Pogonichthyinae;Pimephales;Pimephales promelas

UdeM00000005027 6596 303.9 UdeM00000005027 XP\_045176288.1 39.7 423  
179 5 6 356 86 504 2.70E-79 303.9 6596 cellular

organisms;Eukaryota;Opisthokonta;Metazoa;Eumetazoa;Bilateria;Protostomia;Spiralia;Lophotrochozoa;Mollusca;Bivalvia;Autobranchia;Heteroconchia;Euherodonta;Imparidentia;Venerida;Veneroidea;Veneridae;Mercenaria;Mercenaria mercenaria

UdeM00000005028 1676925 63.9 UdeM00000005028 XP\_023653206.1 46.4  
69 37 0 7 75 27 95 9.90E-08 63.9 1676925  
cellular

organisms;Eukaryota;Opisthokonta;Metazoa;Eumetazoa;Bilateria;Deuterostomia;Chordata;Craniata;Vertebrata;Gnathostomata;Teleostomi;Euteleostomi;Actinopterygii;Actinopteri;Neopterygii;Teleostei;Osteoglossocephalai;Osteoglossocephala;Osteoglossomorpha;Osteoglossiformes;Mormyridae;Paramormyrops;Paramormyrops kingsleyae

UdeM00000005030 6596 117.9 UdeM00000005030 XP\_045174490.1 38.8 183  
43 2 1 114 241 423 8.80E-24 117.9 6596 cellular

organisms;Eukaryota;Opisthokonta;Metazoa;Eumetazoa;Bilateria;Protostomia;Spiralia;Lophotrochozoa;Mollusca;Bivalvia;Autobranchia;Heteroconchia;Euherodonta;Imparidentia;Venerida;Veneroidea;Veneridae;Mercenaria;Mercenaria mercenaria

UdeM00000005029 6596 100.5 UdeM00000005029 XP\_045174490.1 37.4 171  
 38 2 79 180 253 423 2.30E-18 100.5 6596 cellular  
 organisms;Eukaryota;Opisthokonta;Metazoa;Eumetazoa;Bilateria;Protostomia;  
 Spiralia;Lophotrochozoa;Mollusca;Bivalvia;Autobranhia;Heteroconchia;Euhe  
 terodonta;Imparidentia;Venerida;Veneroidea;Veneridae;Mercenaria;Mercenari  
 a mercenaria

UdeM00000005031 6596 386 UdeM00000005031 XP\_045176288.1 47 430  
 214 7 6 432 86 504 6.50E-104 386 6596 cellular  
 organisms;Eukaryota;Opisthokonta;Metazoa;Eumetazoa;Bilateria;Protostomia;  
 Spiralia;Lophotrochozoa;Mollusca;Bivalvia;Autobranhia;Heteroconchia;Euhe  
 terodonta;Imparidentia;Venerida;Veneroidea;Veneridae;Mercenaria;Mercenari  
 a mercenaria

UdeM00000005032 6596 473.4 UdeM00000005032 XP\_045203986.1 55.5 474  
 193 7 4 465 2 469 3.30E-130 473.4 6596 cellular  
 organisms;Eukaryota;Opisthokonta;Metazoa;Eumetazoa;Bilateria;Protostomia;  
 Spiralia;Lophotrochozoa;Mollusca;Bivalvia;Autobranhia;Heteroconchia;Euhe  
 terodonta;Imparidentia;Venerida;Veneroidea;Veneridae;Mercenaria;Mercenari  
 a mercenaria

UdeM00000005033 46514 325.5 UdeM00000005033 XP\_038075667.1 38.4 487  
 249 9 37 488 94 564 1.20E-85 325.5 46514 cellular  
 organisms;Eukaryota;Opisthokonta;Metazoa;Eumetazoa;Bilateria;Deuterostomi  
 a;Echinodermata;Eleutherozoa;Asterozoa;Asteroidea;Valvatacea;Valvatida;As  
 terinidae;Patiria;Patiria miniata

UdeM00000005034 6565 182.6 UdeM00000005034 XP\_022321214.1 58.6 152  
 62 1 2 152 83 234 4.10E-43 182.6 6565 cellular  
 organisms;Eukaryota;Opisthokonta;Metazoa;Eumetazoa;Bilateria;Protostomia;  
 Spiralia;Lophotrochozoa;Mollusca;Bivalvia;Autobranhia;Pteriormorphia;Ostr  
 eida;Ostreoidea;Ostreidae;Crassostrea;Crassostrea virginica

UdeM00000005035 6579 411.8 UdeM00000005035 XP\_033742104.1 64.7 306  
 105 2 1 306 1 303 8.20E-112 411.8 6579 cellular  
 organisms;Eukaryota;Opisthokonta;Metazoa;Eumetazoa;Bilateria;Protostomia;  
 Spiralia;Lophotrochozoa;Mollusca;Bivalvia;Autobranhia;Pteriormorphia;Pect  
 inida;Pectinoidea;Pectinidae;Pecten;Pecten maximus

UdeM00000005036 6565 529.6 UdeM00000005036 XP\_022320314.1 46.6 696  
 364 2 1 696 1 688 6.00E-147 529.6 6565 cellular  
 organisms;Eukaryota;Opisthokonta;Metazoa;Eumetazoa;Bilateria;Protostomia;  
 Spiralia;Lophotrochozoa;Mollusca;Bivalvia;Autobranhia;Pteriormorphia;Ostr  
 eida;Ostreoidea;Ostreidae;Crassostrea;Crassostrea virginica

UdeM00000005037 6596 821.2 UdeM00000005037 XP\_045203989.1 71.1 603  
 173 1 1 603 1 602 8.50E-235 821.2 6596 cellular  
 organisms;Eukaryota;Opisthokonta;Metazoa;Eumetazoa;Bilateria;Protostomia;  
 Spiralia;Lophotrochozoa;Mollusca;Bivalvia;Autobranhia;Heteroconchia;Euhe  
 terodonta;Imparidentia;Venerida;Veneroidea;Veneridae;Mercenaria;Mercenari  
 a mercenaria

UdeM00000005039 6596 351.3 UdeM00000005039 XP\_045181000.1 50.5 663  
 134 11 1 501 947 1577 2.10E-93 351.3 6596 cellular  
 organisms;Eukaryota;Opisthokonta;Metazoa;Eumetazoa;Bilateria;Protostomia;  
 Spiralia;Lophotrochozoa;Mollusca;Bivalvia;Autobranhia;Heteroconchia;Euhe  
 terodonta;Imparidentia;Venerida;Veneroidea;Veneridae;Mercenaria;Mercenari  
 a mercenaria

UdeM00000005040 6565 124.8 UdeM00000005040 XP\_022299727.1 47.8 134  
 69 1 29 162 145 277 1.20E-25 124.8 6565 cellular  
 organisms;Eukaryota;Opisthokonta;Metazoa;Eumetazoa;Bilateria;Protostomia;



Spiralia; Lophotrochozoa; Mollusca; Bivalvia; Autobranchia; Pteriomorphia; Ostr  
eida; Ostreoidae; Ostreidae; Crassostrea; Crassostrea virginica  
UdeM00000005043 8128 114.8 UdeM00000005043 XP\_019210515.1 31.8 198  
127 4 4 195 22 217 1.30E-22 114.8 8128 cellular  
organisms; Eukaryota; Opisthokonta; Metazoa; Eumetazoa; Bilateria; Deuterostomi  
a; Chordata; Craniata; Vertebrata; Gnathostomata; Teleostomi; Euteleostomi; Acti  
nopterygii; Actinopteri; Neopterygii; Teleostei; Osteoglossocephalai; Clupeoce  
phala; Euteleostei; Neoteleostei; Eurypterygia; Ctenosquamata; Acanthomo  
rphata; Euacanthomorpha; Perciformes; Perciformes; Ovalentaria; Cichlomorphae; Cichl  
iformes; Cichlidae; African  
cichlids; Pseudocrenilabrinae; Oreochromini; Oreochromis; Oreochromis  
niloticus  
UdeM00000005044 6565 96.7 UdeM00000005044 XP\_022297447.1 32.4 182  
60 1 218 336 185 366 6.10E-17 96.7 6565 cellular  
organisms; Eukaryota; Opisthokonta; Metazoa; Eumetazoa; Bilateria; Protostomia;  
Spiralia; Lophotrochozoa; Mollusca; Bivalvia; Autobranchia; Pteriomorphia; Ostr  
eida; Ostreoidae; Ostreidae; Crassostrea; Crassostrea virginica  
UdeM00000005045 6596 156 UdeM00000005045 XP\_045182313.1 41.6 221  
112 4 3 207 479 698 1.20E-34 156 6596 cellular  
organisms; Eukaryota; Opisthokonta; Metazoa; Eumetazoa; Bilateria; Protostomia;  
Spiralia; Lophotrochozoa; Mollusca; Bivalvia; Autobranchia; Heteroconchia; Eue  
terodonta; Imparidentia; Venerida; Veneroidea; Veneridae; Mercenaria; Mercenari  
a mercenaria  
UdeM00000005047 115357 285.8 UdeM00000005047 XP\_045482836.1 48.2  
284 143 2 1 284 10 289 6.10E-74 285.8 115357  
cellular  
organisms; Eukaryota; Opisthokonta; Metazoa; Eumetazoa; Bilateria; Protostomia;  
Ecdysozoa; Panarthropoda; Arthropoda; Mandibulata; Pancrustacea; Hexapoda; Inse  
cta; Dicondylia; Pterygota; Neoptera; Endopterygota; Coleoptera; Polyphaga; Cucu  
jiformia; Cucujoidea; Coccinellidae; Coccinellinae; Coccinellini; Harmonia; Har  
monia axyridis  
UdeM00000005049 70779 127.5 UdeM00000005049 XP\_015764363.1 33.8 272  
151 7 4 249 6 274 2.40E-26 127.5 70779 cellular  
organisms; Eukaryota; Opisthokonta; Metazoa; Eumetazoa; Cnidaria; Anthozoa; Hexa  
corallia; Scleractinia; Astrocoeniina; Acroporidae; Acropora; Acropora  
digitifera  
UdeM00000005050 6565 165.2 UdeM00000005050 XP\_022337267.1 29.1 573  
209 14 1 383 1 566 1.60E-37 165.2 6565 cellular  
organisms; Eukaryota; Opisthokonta; Metazoa; Eumetazoa; Bilateria; Protostomia;  
Spiralia; Lophotrochozoa; Mollusca; Bivalvia; Autobranchia; Pteriomorphia; Ostr  
eida; Ostreoidae; Ostreidae; Crassostrea; Crassostrea virginica  
UdeM00000005053 29159 85.1 UdeM00000005053 XP\_034311318.1 23.7 372  
160 10 1 251 256 624 1.40E-13 85.1 29159 cellular  
organisms; Eukaryota; Opisthokonta; Metazoa; Eumetazoa; Bilateria; Protostomia;  
Spiralia; Lophotrochozoa; Mollusca; Bivalvia; Autobranchia; Pteriomorphia; Ostr  
eida; Ostreoidae; Ostreidae; Crassostrea; Crassostrea gigas  
UdeM00000005054 6579 73.9 UdeM00000005054 XP\_033743002.1 44.4 72  
39 1 1 72 313 383 1.20E-10 73.9 6579 cellular  
organisms; Eukaryota; Opisthokonta; Metazoa; Eumetazoa; Bilateria; Protostomia;  
Spiralia; Lophotrochozoa; Mollusca; Bivalvia; Autobranchia; Pteriomorphia; Pect  
inida; Pectinoidea; Pectinidae; Pecten; Pecten maximus  
UdeM00000005056 29159 84.7 UdeM00000005056 XP\_034311318.1 38 142  
60 7 1 117 82 220 8.40E-14 84.7 29159 cellular  
organisms; Eukaryota; Opisthokonta; Metazoa; Eumetazoa; Bilateria; Protostomia;

Spiralia; Lophotrochozoa; Mollusca; Bivalvia; Autobranchia; Pteriomorphia; Ostr  
 eida; Ostreoidae; Ostreidae; Crassostrea; Crassostrea gigas  
 UdeM00000005058 6579 110.2 UdeM00000005058 XP\_033734341.1 40.8 157  
 79 4 3 156 4 149 2.50E-21 110.2 6579 cellular  
 organisms; Eukaryota; Opisthokonta; Metazoa; Eumetazoa; Bilateria; Protostomia;  
 Spiralia; Lophotrochozoa; Mollusca; Bivalvia; Autobranchia; Pteriomorphia; Pect  
 inida; Pectinoidea; Pectinidae; Pecten; Pecten maximus  
 UdeM00000005060 6185 105.5 UdeM00000005060 XP\_012795094.2 44.8 116  
 64 0 1 116 74 189 4.60E-20 105.5 6185 cellular  
 organisms; Eukaryota; Opisthokonta; Metazoa; Eumetazoa; Bilateria; Protostomia;  
 Spiralia; Lophotrochozoa; Platyhelminthes; Trematoda; Digenea; Strigeidida; Sch  
 istosomatoidea; Schistosomatidae; Schistosoma; Schistosoma haematobium  
 UdeM00000005061 7741 494.6 UdeM00000005061 XP\_019618826.1 52.4 477  
 188 2 1 438 47 523 1.30E-136 494.6 7741 cellular  
 organisms; Eukaryota; Opisthokonta; Metazoa; Eumetazoa; Bilateria; Deuterostomi  
 a; Chordata; Cephalochordata; Leptocardii; Amphioxiformes; Branchiostomidae; Br  
 anchiostoma; Branchiostoma belcheri  
 UdeM00000005062 6596 282 UdeM00000005062 XP\_045182316.1 41.1 401  
 192 6 1 400 392 749 1.30E-72 282 6596 cellular  
 organisms; Eukaryota; Opisthokonta; Metazoa; Eumetazoa; Bilateria; Protostomia;  
 Spiralia; Lophotrochozoa; Mollusca; Bivalvia; Autobranchia; Heteroconchia; Eue  
 terodonta; Imparidentia; Venerida; Veneroidea; Veneridae; Mercenaria; Mercenari  
 a mercenaria  
 UdeM00000005070 8407 79 UdeM00000005070 XP\_040214667.1 39.7 121  
 53 4 9 127 6 108 5.00E-12 79 8407 cellular  
 organisms; Eukaryota; Opisthokonta; Metazoa; Eumetazoa; Bilateria; Deuterostomi  
 a; Chordata; Craniata; Vertebrata; Gnathostomata; Teleostomi; Euteleostomi; Sarc  
 opterygii; Dipnotetrapodomorpha; Tetrapoda; Amphibia; Batrachia; Anura; Neobatr  
 achia; Ranoidea; Ranidae; Rana; Rana; Rana temporaria  
 UdeM00000005071 50429 92.4 UdeM00000005071 XP\_022804186.1 29.5 217  
 141 5 11 218 393 606 7.50E-16 92.4 50429 cellular  
 organisms; Eukaryota; Opisthokonta; Metazoa; Eumetazoa; Cnidaria; Anthozoa; Hexa  
 corallia; Scleractinia; Astrocoeniina; Pocilloporidae; Stylophora; Stylophora  
 pistillata  
 UdeM00000005072 7054 85.1 UdeM00000005072 XP\_031356742.1 44 84  
 47 0 23 106 344 427 6.60E-14 85.1 7054 cellular  
 organisms; Eukaryota; Opisthokonta; Metazoa; Eumetazoa; Bilateria; Protostomia;  
 Ecdysozoa; Panarthropoda; Arthropoda; Mandibulata; Pancrustacea; Hexapoda; Inse  
 cta; Dicondylia; Pterygota; Neoptera; Endopterygota; Coleoptera; Polyphaga; Elat  
 eriformia; Elateroidea; Lampyridae; Lampyrinae; Photinus; Photinus pyralis  
 UdeM00000005074 225164 105.9 UdeM00000005074 XP\_009046685.1 69.6  
 69 21 0 27 95 167 235 2.90E-20 105.9 225164  
 cellular  
 organisms; Eukaryota; Opisthokonta; Metazoa; Eumetazoa; Bilateria; Protostomia;  
 Spiralia; Lophotrochozoa; Mollusca; Gastropoda; Patellogastropoda; Lottioidae;  
 Lottiidae; Lottia; Lottia gigantea  
 UdeM00000005076 6596 121.3 UdeM00000005076 XP\_045202346.1 38.8 152  
 89 2 6 156 16 164 1.10E-24 121.3 6596 cellular  
 organisms; Eukaryota; Opisthokonta; Metazoa; Eumetazoa; Bilateria; Protostomia;  
 Spiralia; Lophotrochozoa; Mollusca; Bivalvia; Autobranchia; Heteroconchia; Eue  
 terodonta; Imparidentia; Venerida; Veneroidea; Veneridae; Mercenaria; Mercenari  
 a mercenaria  
 UdeM00000005077 6596 81.6 UdeM00000005077 XP\_045201969.1 39 154  
 80 4 1 146 19 166 1.10E-12 81.6 6596 cellular

organisms;Eukaryota;Opisthokonta;Metazoa;Eumetazoa;Bilateria;Protostomia;Spiralia;Lophotrochozoa;Mollusca;Bivalvia;Autobranchia;Heteroconchia;Euheterodonta;Imparidentia;Venerida;Veneroidea;Veneridae;Mercenaria;Mercenaria mercenaria

UdeM00000005078 6565 67.4 UdeM00000005078 XP\_022346097.1 43.2 95  
47 3 13 102 103 195 1.50E-08 67.4 6565 cellular

organisms;Eukaryota;Opisthokonta;Metazoa;Eumetazoa;Bilateria;Protostomia;Spiralia;Lophotrochozoa;Mollusca;Bivalvia;Autobranchia;Pteriormorphia;Ostreida;Ostreoidea;Ostreidae;Crassostrea;Crassostrea virginica

UdeM00000005079 6596 119.8 UdeM00000005079 XP\_045182316.1 27.4 314  
131 5 293 509 405 718 1.00E-23 119.8 6596 cellular

organisms;Eukaryota;Opisthokonta;Metazoa;Eumetazoa;Bilateria;Protostomia;Spiralia;Lophotrochozoa;Mollusca;Bivalvia;Autobranchia;Heteroconchia;Euheterodonta;Imparidentia;Venerida;Veneroidea;Veneridae;Mercenaria;Mercenaria mercenaria

UdeM00000005081 1415580 651 UdeM00000005081 XP\_030075314.1 52.6  
642 284 4 1 639 1 625 1.60E-183 651 1415580  
cellular

organisms;Eukaryota;Opisthokonta;Metazoa;Eumetazoa;Bilateria;Deuterostomia;Chordata;Craniata;Vertebrata;Gnathostomata;Teleostomi;Euteleostomi;Sarcopterygii;Dipnotetrapodomorpha;Tetrapoda;Amphibia;Gymnophiona;Siphonopidae;Microcaecilia;Microcaecilia unicolor

UdeM00000005083 6565 199.5 UdeM00000005083 XP\_022306954.1 44.3 212  
116 1 1 210 737 948 4.20E-48 199.5 6565 cellular

organisms;Eukaryota;Opisthokonta;Metazoa;Eumetazoa;Bilateria;Protostomia;Spiralia;Lophotrochozoa;Mollusca;Bivalvia;Autobranchia;Pteriormorphia;Ostreida;Ostreoidea;Ostreidae;Crassostrea;Crassostrea virginica

UdeM00000005084 29159 476.9 UdeM00000005084 XP\_034322147.1 67.5 326  
106 0 1 326 374 699 2.10E-131 476.9 29159 cellular

organisms;Eukaryota;Opisthokonta;Metazoa;Eumetazoa;Bilateria;Protostomia;Spiralia;Lophotrochozoa;Mollusca;Bivalvia;Autobranchia;Pteriormorphia;Ostreida;Ostreoidea;Ostreidae;Crassostrea;Crassostrea gigas

UdeM00000005086 29159 137.1 UdeM00000005086 XP\_034315421.1 35.7 258  
107 5 40 242 221 474 3.00E-29 137.1 29159 cellular

organisms;Eukaryota;Opisthokonta;Metazoa;Eumetazoa;Bilateria;Protostomia;Spiralia;Lophotrochozoa;Mollusca;Bivalvia;Autobranchia;Pteriormorphia;Ostreida;Ostreoidea;Ostreidae;Crassostrea;Crassostrea gigas

UdeM00000005087 6596 181.8 UdeM00000005087 XP\_045181000.1 76.1 113  
27 0 2 114 868 980 4.90E-43 181.8 6596 cellular

organisms;Eukaryota;Opisthokonta;Metazoa;Eumetazoa;Bilateria;Protostomia;Spiralia;Lophotrochozoa;Mollusca;Bivalvia;Autobranchia;Heteroconchia;Euheterodonta;Imparidentia;Venerida;Veneroidea;Veneridae;Mercenaria;Mercenaria mercenaria

UdeM00000005088 6596 275.4 UdeM00000005088 XP\_045181000.1 66 350  
105 3 17 366 1148 1483 1.00E-70 275.4 6596 cellular

organisms;Eukaryota;Opisthokonta;Metazoa;Eumetazoa;Bilateria;Protostomia;Spiralia;Lophotrochozoa;Mollusca;Bivalvia;Autobranchia;Heteroconchia;Euheterodonta;Imparidentia;Venerida;Veneroidea;Veneridae;Mercenaria;Mercenaria mercenaria

UdeM00000005089 6596 276.9 UdeM00000005089 XP\_045181000.1 65.1 358  
111 3 2 359 1140 1483 3.50E-71 276.9 6596 cellular

organisms;Eukaryota;Opisthokonta;Metazoa;Eumetazoa;Bilateria;Protostomia;Spiralia;Lophotrochozoa;Mollusca;Bivalvia;Autobranchia;Heteroconchia;Euheterodonta;Imparidentia;Venerida;Veneroidea;Veneridae;Mercenaria;Mercenaria mercenaria

terodonta;Imparidentia;Venerida;Veneroidea;Veneridae;Mercenaria;Mercenari  
 a mercenaria  
 UdeM00000005091 6706 152.5 UdeM00000005091 XP\_042235765.1 44.6 157  
 87 0 1 157 1 157 4.50E-34 152.5 6706 cellular  
 organisms;Eukaryota;Opisthokonta;Metazoa;Eumetazoa;Bilateria;Protostomia;  
 Ecdysozoa;Panarthropoda;Arthropoda;Mandibulata;Pancrustacea;Crustacea;Mul  
 ticrustacea;Malacostraca;Eumalacostraca;Eucarida;Decapoda;Pleocyemata;Ast  
 acidea;Nephropoidea;Nephropidae;Homarus;Homarus americanus  
 UdeM00000005092 6596 69.3 UdeM00000005092 XP\_045183837.1 39.4 104  
 58 2 46 145 239 341 1.00E-08 69.3 6596 cellular  
 organisms;Eukaryota;Opisthokonta;Metazoa;Eumetazoa;Bilateria;Protostomia;  
 Spiralia;Lophotrochozoa;Mollusca;Bivalvia;Autobranchia;Heteroconchia;Euhe  
 terodonta;Imparidentia;Venerida;Veneroidea;Veneridae;Mercenaria;Mercenari  
 a mercenaria  
 UdeM00000005093 6596 69.3 UdeM00000005093 XP\_045183837.1 39.4 104  
 58 2 46 145 239 341 9.40E-09 69.3 6596 cellular  
 organisms;Eukaryota;Opisthokonta;Metazoa;Eumetazoa;Bilateria;Protostomia;  
 Spiralia;Lophotrochozoa;Mollusca;Bivalvia;Autobranchia;Heteroconchia;Euhe  
 terodonta;Imparidentia;Venerida;Veneroidea;Veneridae;Mercenaria;Mercenari  
 a mercenaria  
 UdeM00000005095 6596 69.3 UdeM00000005095 XP\_045183837.1 39.4 104  
 58 2 46 145 239 341 9.30E-09 69.3 6596 cellular  
 organisms;Eukaryota;Opisthokonta;Metazoa;Eumetazoa;Bilateria;Protostomia;  
 Spiralia;Lophotrochozoa;Mollusca;Bivalvia;Autobranchia;Heteroconchia;Euhe  
 terodonta;Imparidentia;Venerida;Veneroidea;Veneridae;Mercenaria;Mercenari  
 a mercenaria  
 UdeM00000005097 6596 70.1 UdeM00000005097 XP\_045183837.1 38.5 104  
 59 2 46 145 239 341 3.50E-09 70.1 6596 cellular  
 organisms;Eukaryota;Opisthokonta;Metazoa;Eumetazoa;Bilateria;Protostomia;  
 Spiralia;Lophotrochozoa;Mollusca;Bivalvia;Autobranchia;Heteroconchia;Euhe  
 terodonta;Imparidentia;Venerida;Veneroidea;Veneridae;Mercenaria;Mercenari  
 a mercenaria  
 UdeM00000041634 6596 330.1 UdeM00000041634 XP\_045190580.1 66.4 232  
 77 1 1 231 12 243 2.30E-87 330.1 6596 cellular  
 organisms;Eukaryota;Opisthokonta;Metazoa;Eumetazoa;Bilateria;Protostomia;  
 Spiralia;Lophotrochozoa;Mollusca;Bivalvia;Autobranchia;Heteroconchia;Euhe  
 terodonta;Imparidentia;Venerida;Veneroidea;Veneridae;Mercenaria;Mercenari  
 a mercenaria  
 UdeM00000041636 6565 256.9 UdeM00000041636 XP\_022340942.1 63 192  
 69 1 1 192 1 190 2.00E-65 256.9 6565 cellular  
 organisms;Eukaryota;Opisthokonta;Metazoa;Eumetazoa;Bilateria;Protostomia;  
 Spiralia;Lophotrochozoa;Mollusca;Bivalvia;Autobranchia;Pteriomorphia;Ostr  
 eida;Ostreoidea;Ostreidae;Crassostrea;Crassostrea virginica  
 UdeM00000041635 6565 256.5 UdeM00000041635 XP\_022340942.1 63 192  
 69 1 4 195 1 190 2.70E-65 256.5 6565 cellular  
 organisms;Eukaryota;Opisthokonta;Metazoa;Eumetazoa;Bilateria;Protostomia;  
 Spiralia;Lophotrochozoa;Mollusca;Bivalvia;Autobranchia;Pteriomorphia;Ostr  
 eida;Ostreoidea;Ostreidae;Crassostrea;Crassostrea virginica  
 UdeM00000041637 6565 476.5 UdeM00000041637 XP\_022340940.1 41 712  
 340 11 6 702 106 752 5.90E-131 476.5 6565 cellular  
 organisms;Eukaryota;Opisthokonta;Metazoa;Eumetazoa;Bilateria;Protostomia;  
 Spiralia;Lophotrochozoa;Mollusca;Bivalvia;Autobranchia;Pteriomorphia;Ostr  
 eida;Ostreoidea;Ostreidae;Crassostrea;Crassostrea virginica

UdeM00000041638 6596 1338.9 UdeM00000041638 XP\_045188649.1 64.2  
 1049 347 8 11 1052 12 1038 0.00E+00 1338.9 6596  
 cellular  
 organisms;Eukaryota;Opisthokonta;Metazoa;Eumetazoa;Bilateria;Protostomia;  
 Spiralia;Lophotrochozoa;Mollusca;Bivalvia;Autobranchia;Heteroconchia;Euhe  
 terodonta;Imparidentia;Venerida;Veneroidea;Veneridae;Mercenaria;Mercenari  
 a mercenaria  
 UdeM00000041639 6565 191.4 UdeM00000041639 XP\_022299727.1 49.2 193  
 98 0 5 197 83 275 1.20E-45 191.4 6565 cellular  
 organisms;Eukaryota;Opisthokonta;Metazoa;Eumetazoa;Bilateria;Protostomia;  
 Spiralia;Lophotrochozoa;Mollusca;Bivalvia;Autobranchia;Pteriormorphia;Ostr  
 eida;Ostreoidea;Ostreidae;Crassostrea;Crassostrea virginica  
 UdeM00000041640 6573 340.1 UdeM00000041640 XP\_021350804.1 74.2 217  
 51 2 5 219 23 236 2.20E-90 340.1 6573 cellular  
 organisms;Eukaryota;Opisthokonta;Metazoa;Eumetazoa;Bilateria;Protostomia;  
 Spiralia;Lophotrochozoa;Mollusca;Bivalvia;Autobranchia;Pteriormorphia;Pect  
 inida;Pectinoidea;Pectinidae;Mizuhopecten;Mizuhopecten yessoensis  
 UdeM00000041641 6596 330.1 UdeM00000041641 XP\_045190426.1 63.4 235  
 86 0 8 242 10 244 2.70E-87 330.1 6596 cellular  
 organisms;Eukaryota;Opisthokonta;Metazoa;Eumetazoa;Bilateria;Protostomia;  
 Spiralia;Lophotrochozoa;Mollusca;Bivalvia;Autobranchia;Heteroconchia;Euhe  
 terodonta;Imparidentia;Venerida;Veneroidea;Veneridae;Mercenaria;Mercenari  
 a mercenaria  
 UdeM00000041642 6596 335.9 UdeM00000041642 XP\_045188497.1 39.5 597  
 284 14 7 574 7 555 1.00E-88 335.9 6596 cellular  
 organisms;Eukaryota;Opisthokonta;Metazoa;Eumetazoa;Bilateria;Protostomia;  
 Spiralia;Lophotrochozoa;Mollusca;Bivalvia;Autobranchia;Heteroconchia;Euhe  
 terodonta;Imparidentia;Venerida;Veneroidea;Veneridae;Mercenaria;Mercenari  
 a mercenaria  
 UdeM00000041643 6596 240 UdeM00000041643 XP\_045188861.1 42.1 337  
 176 7 8 335 5 331 4.70E-60 240 6596 cellular  
 organisms;Eukaryota;Opisthokonta;Metazoa;Eumetazoa;Bilateria;Protostomia;  
 Spiralia;Lophotrochozoa;Mollusca;Bivalvia;Autobranchia;Heteroconchia;Euhe  
 terodonta;Imparidentia;Venerida;Veneroidea;Veneridae;Mercenaria;Mercenari  
 a mercenaria  
 UdeM00000041644 6573 280 UdeM00000041644 XP\_021378504.1 41.4 423  
 222 6 4 407 3 418 5.10E-72 280 6573 cellular  
 organisms;Eukaryota;Opisthokonta;Metazoa;Eumetazoa;Bilateria;Protostomia;  
 Spiralia;Lophotrochozoa;Mollusca;Bivalvia;Autobranchia;Pteriormorphia;Pect  
 inida;Pectinoidea;Pectinidae;Mizuhopecten;Mizuhopecten yessoensis  
 UdeM00000041645 6579 283.1 UdeM00000041645 XP\_033757139.1 41.5 419  
 236 4 4 415 3 419 6.20E-73 283.1 6579 cellular  
 organisms;Eukaryota;Opisthokonta;Metazoa;Eumetazoa;Bilateria;Protostomia;  
 Spiralia;Lophotrochozoa;Mollusca;Bivalvia;Autobranchia;Pteriormorphia;Pect  
 inida;Pectinoidea;Pectinidae;Pecten;Pecten maximus  
 UdeM00000041646 6596 214.5 UdeM00000041646 XP\_045189893.1 52.2 487  
 167 8 1 437 1 471 2.60E-52 214.5 6596 cellular  
 organisms;Eukaryota;Opisthokonta;Metazoa;Eumetazoa;Bilateria;Protostomia;  
 Spiralia;Lophotrochozoa;Mollusca;Bivalvia;Autobranchia;Heteroconchia;Euhe  
 terodonta;Imparidentia;Venerida;Veneroidea;Veneridae;Mercenaria;Mercenari  
 a mercenaria  
 UdeM00000041647 7574 263.1 UdeM00000041647 XP\_013403126.1 66.8 184  
 59 1 1 184 1 182 2.70E-67 263.1 7574 cellular  
 organisms;Eukaryota;Opisthokonta;Metazoa;Eumetazoa;Bilateria;Protostomia;

Spiralia; Lophotrochozoa; Brachiopoda; Linguliformea; Lingulata; Lingulida; Linguloidea; Lingulidae; Lingula; Lingula anatina

UdeM00000041648 7574 226.1 UdeM00000041648 XP\_013403126.1 68.7 150  
45 1 1 150 35 182 3.00E-56 226.1 7574 cellular  
organisms; Eukaryota; Opisthokonta; Metazoa; Eumetazoa; Bilateria; Protostomia; Spiralia; Lophotrochozoa; Brachiopoda; Linguliformea; Lingulata; Lingulida; Linguloidea; Lingulidae; Lingula; Lingula anatina

UdeM00000041649 7574 239.2 UdeM00000041649 XP\_013403126.1 61.7 183  
68 1 47 229 1 181 5.20E-60 239.2 7574 cellular  
organisms; Eukaryota; Opisthokonta; Metazoa; Eumetazoa; Bilateria; Protostomia; Spiralia; Lophotrochozoa; Brachiopoda; Linguliformea; Lingulata; Lingulida; Linguloidea; Lingulidae; Lingula; Lingula anatina

UdeM00000041650 7574 265.8 UdeM00000041650 XP\_013403126.1 65.2 184  
62 1 20 203 1 182 4.70E-68 265.8 7574 cellular  
organisms; Eukaryota; Opisthokonta; Metazoa; Eumetazoa; Bilateria; Protostomia; Spiralia; Lophotrochozoa; Brachiopoda; Linguliformea; Lingulata; Lingulida; Linguloidea; Lingulidae; Lingula; Lingula anatina

UdeM00000041651 6573 845.1 UdeM00000041651 XP\_021371660.1 91.7 447  
33 2 1 446 2 445 4.00E-242 845.1 6573 cellular  
organisms; Eukaryota; Opisthokonta; Metazoa; Eumetazoa; Bilateria; Protostomia; Spiralia; Lophotrochozoa; Mollusca; Bivalvia; Autobranchia; Pteriomorpha; Pectinida; Pectinoidea; Pectinidae; Mizuhopecten; Mizuhopecten yessoensis

UdeM00000041652 6596 843.6 UdeM00000041652 XP\_045190275.1 84.8 488  
63 4 19 498 9 493 1.30E-241 843.6 6596 cellular  
organisms; Eukaryota; Opisthokonta; Metazoa; Eumetazoa; Bilateria; Protostomia; Spiralia; Lophotrochozoa; Mollusca; Bivalvia; Autobranchia; Heteroconchia; Euheterodonta; Imparidentia; Venerida; Veneroidea; Veneridae; Mercenaria; Mercenaria mercenaria

UdeM00000041653 6526 269.2 UdeM00000041653 XP\_013090034.1 52.5 531  
212 5 10 514 29 545 1.10E-68 269.2 6526 cellular  
organisms; Eukaryota; Opisthokonta; Metazoa; Eumetazoa; Bilateria; Protostomia; Spiralia; Lophotrochozoa; Mollusca; Gastropoda; Heterobranchia; Euthyneura; Panpulmonata; Hygrophila; Lymnaeioidea; Planorbidae; Biomphalaria; Biomphalaria glabrata

UdeM00000041655 6596 667.2 UdeM00000041655 XP\_045190267.1 51.3 667  
285 6 8 671 26 655 2.30E-188 667.2 6596 cellular  
organisms; Eukaryota; Opisthokonta; Metazoa; Eumetazoa; Bilateria; Protostomia; Spiralia; Lophotrochozoa; Mollusca; Bivalvia; Autobranchia; Heteroconchia; Euheterodonta; Imparidentia; Venerida; Veneroidea; Veneridae; Mercenaria; Mercenaria mercenaria

UdeM00000041654 6596 673.3 UdeM00000041654 XP\_045190267.1 49.4 711  
320 6 8 715 26 699 3.40E-190 673.3 6596 cellular  
organisms; Eukaryota; Opisthokonta; Metazoa; Eumetazoa; Bilateria; Protostomia; Spiralia; Lophotrochozoa; Mollusca; Bivalvia; Autobranchia; Heteroconchia; Euheterodonta; Imparidentia; Venerida; Veneroidea; Veneridae; Mercenaria; Mercenaria mercenaria

UdeM00000041656 6596 648.3 UdeM00000041656 XP\_045189698.1 49 828  
358 17 3 792 2 803 1.30E-182 648.3 6596 cellular  
organisms; Eukaryota; Opisthokonta; Metazoa; Eumetazoa; Bilateria; Protostomia; Spiralia; Lophotrochozoa; Mollusca; Bivalvia; Autobranchia; Heteroconchia; Euheterodonta; Imparidentia; Venerida; Veneroidea; Veneridae; Mercenaria; Mercenaria mercenaria

UdeM00000041657 6579 573.5 UdeM00000041657 XP\_033757456.1 49.7 878  
380 17 45 888 819 1668 4.90E-160 573.5 6579 cellular

organisms;Eukaryota;Opisthokonta;Metazoa;Eumetazoa;Bilateria;Protostomia;Spiralia;Lophotrochozoa;Mollusca;Bivalvia;Autobranhia;Pteriormorphia;Pectinida;Pectinoidea;Pectinidae;Pecten;Pecten maximus

UdeM00000041658 6573 515.8 UdeM00000041658 XP\_021378649.1 45.8 925  
402 19 21 894 793 1669 1.10E-142 515.8 6573 cellular

organisms;Eukaryota;Opisthokonta;Metazoa;Eumetazoa;Bilateria;Protostomia;Spiralia;Lophotrochozoa;Mollusca;Bivalvia;Autobranhia;Pteriormorphia;Pectinida;Pectinoidea;Pectinidae;Mizuhopecten;Mizuhopecten yessoensis

UdeM00000041659 6596 404.1 UdeM00000041659 XP\_045189699.1 52.5 480  
197 7 63 529 870 1331 2.90E-109 404.1 6596 cellular

organisms;Eukaryota;Opisthokonta;Metazoa;Eumetazoa;Bilateria;Protostomia;Spiralia;Lophotrochozoa;Mollusca;Bivalvia;Autobranhia;Heteroconchia;Euheterodonta;Imparidentia;Venerida;Veneroidea;Veneridae;Mercenaria;Mercenaria mercenaria

UdeM00000041660 6596 394.8 UdeM00000041660 XP\_045189699.1 53.2 459  
189 5 63 513 870 1310 1.70E-106 394.8 6596 cellular

organisms;Eukaryota;Opisthokonta;Metazoa;Eumetazoa;Bilateria;Protostomia;Spiralia;Lophotrochozoa;Mollusca;Bivalvia;Autobranhia;Heteroconchia;Euheterodonta;Imparidentia;Venerida;Veneroidea;Veneridae;Mercenaria;Mercenaria mercenaria

UdeM00000041661 6573 891.7 UdeM00000041661 XP\_021355541.1 73.7 605  
131 8 1 582 1 600 4.90E-256 891.7 6573 cellular

organisms;Eukaryota;Opisthokonta;Metazoa;Eumetazoa;Bilateria;Protostomia;Spiralia;Lophotrochozoa;Mollusca;Bivalvia;Autobranhia;Pteriormorphia;Pectinida;Pectinoidea;Pectinidae;Mizuhopecten;Mizuhopecten yessoensis

UdeM00000041662 6579 339.3 UdeM00000041662 XP\_033731056.1 37.9 512  
281 12 7 490 10 512 7.90E-90 339.3 6579 cellular

organisms;Eukaryota;Opisthokonta;Metazoa;Eumetazoa;Bilateria;Protostomia;Spiralia;Lophotrochozoa;Mollusca;Bivalvia;Autobranhia;Pteriormorphia;Pectinida;Pectinoidea;Pectinidae;Pecten;Pecten maximus

UdeM00000041664 1735272 248.1 UdeM00000041664 XP\_041372088.1 41.7  
321 176 6 12 323 10 328 1.60E-62 248.1 1735272  
cellular

organisms;Eukaryota;Opisthokonta;Metazoa;Eumetazoa;Bilateria;Protostomia;Spiralia;Lophotrochozoa;Mollusca;Gastropoda;Neomphalina;Neomphaloidea;Peltospiridae;Gigantopelta;Gigantopelta aegis

UdeM00000041663 1735272 403.7 UdeM00000041663 XP\_041372088.1 44.2  
498 265 8 12 499 10 504 3.50E-109 403.7 1735272  
cellular

organisms;Eukaryota;Opisthokonta;Metazoa;Eumetazoa;Bilateria;Protostomia;Spiralia;Lophotrochozoa;Mollusca;Gastropoda;Neomphalina;Neomphaloidea;Peltospiridae;Gigantopelta;Gigantopelta aegis

UdeM00000041666 6596 289.3 UdeM00000041666 XP\_045188103.1 60.2 226  
82 4 90 312 54 274 6.00E-75 289.3 6596 cellular

organisms;Eukaryota;Opisthokonta;Metazoa;Eumetazoa;Bilateria;Protostomia;Spiralia;Lophotrochozoa;Mollusca;Bivalvia;Autobranhia;Heteroconchia;Euheterodonta;Imparidentia;Venerida;Veneroidea;Veneridae;Mercenaria;Mercenaria mercenaria

UdeM00000041668 6596 87.8 UdeM00000041668 XP\_045188841.1 52.7 93  
34 3 58 146 928 1014 1.20E-14 87.8 6596 cellular

organisms;Eukaryota;Opisthokonta;Metazoa;Eumetazoa;Bilateria;Protostomia;Spiralia;Lophotrochozoa;Mollusca;Bivalvia;Autobranhia;Heteroconchia;Euheterodonta;Imparidentia;Venerida;Veneroidea;Veneridae;Mercenaria;Mercenaria mercenaria

UdeM00000041669 6596 1351.3 UdeM00000041669 XP\_045188841.1 72.1  
902 243 1 1 893 32 933 0.00E+00 1351.3 6596  
cellular

organisms;Eukaryota;Opisthokonta;Metazoa;Eumetazoa;Bilateria;Protostomia;  
Spiralia;Lophotrochozoa;Mollusca;Bivalvia;Autobranchia;Heteroconchia;Euhe  
terodonta;Imparidentia;Venerida;Veneroidea;Veneridae;Mercenaria;Mercenari  
a mercenaria

UdeM00000041670 1735272 408.3 UdeM00000041670 XP\_041372088.1 47  
445 224 5 31 473 70 504 1.30E-110 408.3 1735272  
cellular

organisms;Eukaryota;Opisthokonta;Metazoa;Eumetazoa;Bilateria;Protostomia;  
Spiralia;Lophotrochozoa;Mollusca;Gastropoda;Neomphalina;Neomphaloidea;Pel  
tospiridae;Gigantopelta;Gigantopelta aegis

UdeM00000041671 6579 148.7 UdeM00000041671 XP\_033757607.1 51.6 153  
70 3 1 151 1 151 7.10E-33 148.7 6579 cellular

organisms;Eukaryota;Opisthokonta;Metazoa;Eumetazoa;Bilateria;Protostomia;  
Spiralia;Lophotrochozoa;Mollusca;Bivalvia;Autobranchia;Pteriormorphia;Pect  
inida;Pectinoidea;Pectinidae;Pecten;Pecten maximus

UdeM00000041672 6573 141 UdeM00000041672 XP\_021347887.1 45.4 152  
80 1 1 152 6 154 1.90E-30 141 6573 cellular

organisms;Eukaryota;Opisthokonta;Metazoa;Eumetazoa;Bilateria;Protostomia;  
Spiralia;Lophotrochozoa;Mollusca;Bivalvia;Autobranchia;Pteriormorphia;Pect  
inida;Pectinoidea;Pectinidae;Mizuhopecten;Mizuhopecten yessoensis

UdeM00000041673 6565 154.5 UdeM00000041673 XP\_022346226.1 64.5 110  
39 0 1 110 382 491 8.30E-35 154.5 6565 cellular

organisms;Eukaryota;Opisthokonta;Metazoa;Eumetazoa;Bilateria;Protostomia;  
Spiralia;Lophotrochozoa;Mollusca;Bivalvia;Autobranchia;Pteriormorphia;Ostr  
eida;Ostreoidea;Ostreidae;Crassostrea;Crassostrea virginica

UdeM00000041674 134920 175.3 UdeM00000041674 XP\_037313809.1 29.6  
385 253 8 2 374 3 381 2.30E-40 175.3 134920  
cellular

organisms;Eukaryota;Opisthokonta;Metazoa;Eumetazoa;Bilateria;Deuterostomi  
a;Chordata;Craniata;Vertebrata;Gnathostomata;Teleostomi;Euteleostomi;Acti  
nopterygii;Actinopteri;Neopterygii;Teleostei;Osteoglossocephalai;Clupeoce  
phala;Euteleosteomorpha;Neoteleostei;Eurypterygia;Ctenosquamata;Acanthomo  
rphata;Euacanthomorphacea;Percomorphaceae;Eupercaria;Perciformes;Cottioid  
ei;Gasterosteales;Gasterosteidae;Pungitius;Pungitius pungitius

UdeM00000041675 40690 82 UdeM00000041675 XP\_034005540.1 40.5 111  
64 1 1 109 1 111 1.70E-12 82 40690 cellular

organisms;Eukaryota;Opisthokonta;Metazoa;Eumetazoa;Bilateria;Deuterostomi  
a;Chordata;Craniata;Vertebrata;Gnathostomata;Teleostomi;Euteleostomi;Acti  
nopterygii;Actinopteri;Neopterygii;Teleostei;Osteoglossocephalai;Clupeoce  
phala;Euteleosteomorpha;Neoteleostei;Eurypterygia;Ctenosquamata;Acanthomo  
rphata;Euacanthomorphacea;Percomorphaceae;Eupercaria;Perciformes;Notothen  
ioidei;Nototheniidae;Trematomus;Trematomus bernacchii

UdeM00000041676 106582 179.1 UdeM00000041676 XP\_024655482.1 31.4  
373 246 5 10 375 11 380 1.50E-41 179.1 106582  
cellular

organisms;Eukaryota;Opisthokonta;Metazoa;Eumetazoa;Bilateria;Deuterostomi  
a;Chordata;Craniata;Vertebrata;Gnathostomata;Teleostomi;Euteleostomi;Acti  
nopterygii;Actinopteri;Neopterygii;Teleostei;Osteoglossocephalai;Clupeoce  
phala;Euteleosteomorpha;Neoteleostei;Eurypterygia;Ctenosquamata;Acanthomo  
rphata;Euacanthomorphacea;Percomorphaceae;Ovalentaria;Cichlomorphae;Cichl  
iformes;Cichlidae;African





organisms;Eukaryota;Opisthokonta;Metazoa;Eumetazoa;Bilateria;Protostomia; Spiralia;Lophotrochozoa;Mollusca;Cephalopoda;Coleoidea;Octopodiformes;Octopoda;Incirrata;Octopodidae;Octopus;Octopus sinensis

UdeM00000017340 29159 99 UdeM00000017340 XP\_034334268.1 60.3 68  
27 0 23 90 195 262 4.50E-18 99 29159 cellular

organisms;Eukaryota;Opisthokonta;Metazoa;Eumetazoa;Bilateria;Protostomia; Spiralia;Lophotrochozoa;Mollusca;Bivalvia;Autobranchia;Pteriormorphia;Ostreida;Ostreoidea;Ostreidae;Crassostrea;Crassostrea gigas

UdeM00000017342 29159 95.9 UdeM00000017342 XP\_034300213.1 50 86  
42 1 7 91 251 336 2.90E-17 95.9 29159 cellular

organisms;Eukaryota;Opisthokonta;Metazoa;Eumetazoa;Bilateria;Protostomia; Spiralia;Lophotrochozoa;Mollusca;Bivalvia;Autobranchia;Pteriormorphia;Ostreida;Ostreoidea;Ostreidae;Crassostrea;Crassostrea gigas

UdeM00000017341 8078 202.6 UdeM00000017341 XP\_035989950.1 54.5 165  
75 0 2 166 14 178 3.90E-49 202.6 8078 cellular

organisms;Eukaryota;Opisthokonta;Metazoa;Eumetazoa;Bilateria;Deuterostomia;Chordata;Craniata;Vertebrata;Gnathostomata;Teleostomi;Euteleostomi;Actinopterygii;Actinopteri;Neopterygii;Teleostei;Osteoglossocephalai;Clupeocephala;Euteleosteomorpha;Neoteleostei;Eurypterygia;Ctenosquamata;Acanthomorphata;Euacanthomorphacea;Percomorphaceae;Ovalentaria;Atherinomorphae;Cypriodontiformes;Cyprinodontoidei;Fundulidae;Fundulus;Fundulus heteroclitus

UdeM00000017343 29159 121.3 UdeM00000017343 XP\_034334268.1 41.7 139  
81 0 1 139 212 350 9.60E-25 121.3 29159 cellular

organisms;Eukaryota;Opisthokonta;Metazoa;Eumetazoa;Bilateria;Protostomia; Spiralia;Lophotrochozoa;Mollusca;Bivalvia;Autobranchia;Pteriormorphia;Ostreida;Ostreoidea;Ostreidae;Crassostrea;Crassostrea gigas

UdeM00000017344 29159 156.8 UdeM00000017344 XP\_034334268.1 46.2 156  
84 0 23 178 195 350 2.60E-35 156.8 29159 cellular

organisms;Eukaryota;Opisthokonta;Metazoa;Eumetazoa;Bilateria;Protostomia; Spiralia;Lophotrochozoa;Mollusca;Bivalvia;Autobranchia;Pteriormorphia;Ostreida;Ostreoidea;Ostreidae;Crassostrea;Crassostrea gigas

UdeM00000017345 181472 136.3 UdeM00000017345 XP\_029975096.1 52.8  
125 59 0 1 125 1 125 2.60E-29 136.3 181472  
cellular

organisms;Eukaryota;Opisthokonta;Metazoa;Eumetazoa;Bilateria;Deuterostomia;Chordata;Craniata;Vertebrata;Gnathostomata;Teleostomi;Euteleostomi;Actinopterygii;Actinopteri;Neopterygii;Teleostei;Osteoglossocephalai;Clupeocephala;Euteleosteomorpha;Neoteleostei;Eurypterygia;Ctenosquamata;Acanthomorphata;Euacanthomorphacea;Percomorphaceae;Ovalentaria;Blenniimorphae;Blenniiformes;Blennioidei;Blenniidae;Salariinae;Salaris;Salaris fasciatus

UdeM00000017346 6596 159.8 UdeM00000017346 XP\_045180808.1 32.3 325  
192 7 81 400 27 328 7.10E-36 159.8 6596 cellular

organisms;Eukaryota;Opisthokonta;Metazoa;Eumetazoa;Bilateria;Protostomia; Spiralia;Lophotrochozoa;Mollusca;Bivalvia;Autobranchia;Heteroconchia;Euheterodonta;Imparidentia;Venerida;Veneroidea;Veneridae;Mercenaria;Mercenaria mercenaria

UdeM00000017347 6596 84.3 UdeM00000017347 XP\_045157957.1 31.4 188  
107 3 48 232 72 240 2.20E-13 84.3 6596 cellular

organisms;Eukaryota;Opisthokonta;Metazoa;Eumetazoa;Bilateria;Protostomia; Spiralia;Lophotrochozoa;Mollusca;Bivalvia;Autobranchia;Heteroconchia;Euheterodonta;Imparidentia;Venerida;Veneroidea;Veneridae;Mercenaria;Mercenaria mercenaria

UdeM00000017348 29159 125.9 UdeM00000017348 XP\_034334268.1 42.4 139  
 80 0 1 139 212 350 3.90E-26 125.9 29159 cellular  
 organisms;Eukaryota;Opisthokonta;Metazoa;Eumetazoa;Bilateria;Protostomia;  
 Spiralia;Lophotrochozoa;Mollusca;Bivalvia;Autobranchia;Pteriormorphia;Ostr  
 eida;Ostreoidea;Ostreidae;Crassostrea;Crassostrea gigas  
 UdeM00000017349 29159 156.4 UdeM00000017349 XP\_034334268.1 46.2 156  
 84 0 23 178 195 350 3.50E-35 156.4 29159 cellular  
 organisms;Eukaryota;Opisthokonta;Metazoa;Eumetazoa;Bilateria;Protostomia;  
 Spiralia;Lophotrochozoa;Mollusca;Bivalvia;Autobranchia;Pteriormorphia;Ostr  
 eida;Ostreoidea;Ostreidae;Crassostrea;Crassostrea gigas  
 UdeM00000017350 37003 127.5 UdeM00000017350 XP\_017289200.1 56.6 113  
 49 0 1 113 17 129 1.10E-26 127.5 37003 cellular  
 organisms;Eukaryota;Opisthokonta;Metazoa;Eumetazoa;Bilateria;Deuterostomi  
 a;Chordata;Craniata;Vertebrata;Gnathostomata;Teleostomi;Euteleostomi;Acti  
 nopterygii;Actinopteri;Neopterygii;Teleostei;Osteoglossocephalai;Clupeoce  
 phala;Euteleosteomorpha;Neoteleostei;Eurypterygia;Ctenosquamata;Acanthomo  
 rphata;Euacanthomorphacea;Percomorphaceae;Ovalentaria;Atherinomorphae;Cyp  
 rinodontiformes;Aplocheiloidei;Rivulidae;Kryptolebias;Kryptolebias  
 marmoratus  
 UdeM00000017351 6596 162.9 UdeM00000017351 XP\_045180808.1 32.6 325  
 191 7 81 400 27 328 8.40E-37 162.9 6596 cellular  
 organisms;Eukaryota;Opisthokonta;Metazoa;Eumetazoa;Bilateria;Protostomia;  
 Spiralia;Lophotrochozoa;Mollusca;Bivalvia;Autobranchia;Heteroconchia;Euhe  
 terodonta;Imparidentia;Venerida;Veneroidea;Veneridae;Mercenaria;Mercenari  
 a mercenaria  
 UdeM00000017352 6596 84.3 UdeM00000017352 XP\_045157957.1 31.4 188  
 107 3 48 232 72 240 2.20E-13 84.3 6596 cellular  
 organisms;Eukaryota;Opisthokonta;Metazoa;Eumetazoa;Bilateria;Protostomia;  
 Spiralia;Lophotrochozoa;Mollusca;Bivalvia;Autobranchia;Heteroconchia;Euhe  
 terodonta;Imparidentia;Venerida;Veneroidea;Veneridae;Mercenaria;Mercenari  
 a mercenaria  
 UdeM00000017353 29159 168.7 UdeM00000017353 XP\_034334268.1 48.1 156  
 81 0 23 178 195 350 6.70E-39 168.7 29159 cellular  
 organisms;Eukaryota;Opisthokonta;Metazoa;Eumetazoa;Bilateria;Protostomia;  
 Spiralia;Lophotrochozoa;Mollusca;Bivalvia;Autobranchia;Pteriormorphia;Ostr  
 eida;Ostreoidea;Ostreidae;Crassostrea;Crassostrea gigas  
 UdeM00000017354 37003 128.6 UdeM00000017354 XP\_017289200.1 57.5 113  
 48 0 1 113 17 129 4.90E-27 128.6 37003 cellular  
 organisms;Eukaryota;Opisthokonta;Metazoa;Eumetazoa;Bilateria;Deuterostomi  
 a;Chordata;Craniata;Vertebrata;Gnathostomata;Teleostomi;Euteleostomi;Acti  
 nopterygii;Actinopteri;Neopterygii;Teleostei;Osteoglossocephalai;Clupeoce  
 phala;Euteleosteomorpha;Neoteleostei;Eurypterygia;Ctenosquamata;Acanthomo  
 rphata;Euacanthomorphacea;Percomorphaceae;Ovalentaria;Atherinomorphae;Cyp  
 rinodontiformes;Aplocheiloidei;Rivulidae;Kryptolebias;Kryptolebias  
 marmoratus  
 UdeM00000017355 6596 164.9 UdeM00000017355 XP\_045180808.1 33.5 325  
 188 8 81 400 27 328 2.20E-37 164.9 6596 cellular  
 organisms;Eukaryota;Opisthokonta;Metazoa;Eumetazoa;Bilateria;Protostomia;  
 Spiralia;Lophotrochozoa;Mollusca;Bivalvia;Autobranchia;Heteroconchia;Euhe  
 terodonta;Imparidentia;Venerida;Veneroidea;Veneridae;Mercenaria;Mercenari  
 a mercenaria  
 UdeM00000017356 6596 75.1 UdeM00000017356 XP\_045157957.1 29.8 161  
 85 3 2 162 3 135 1.00E-10 75.1 6596 cellular  
 organisms;Eukaryota;Opisthokonta;Metazoa;Eumetazoa;Bilateria;Protostomia;

Spiralia;Lophotrochozoa;Mollusca;Bivalvia;Autobranchia;Heteroconchia;Euherodonta;Imparidentia;Venerida;Veneroidea;Veneridae;Mercenaria;Mercenaria mercenaria

UdeM00000040374 1735272 131.7 UdeM00000040374 XP\_041375707.1 40.9  
186 105 4 1 184 1 183 1.10E-27 131.7 1735272  
cellular

organisms;Eukaryota;Opisthokonta;Metazoa;Eumetazoa;Bilateria;Protostomia;Spiralia;Lophotrochozoa;Mollusca;Gastropoda;Neomphalina;Neomphaloidea;Peltospiridae;Gigantopelta;Gigantopelta aegis

UdeM00000040373 6596 464.2 UdeM00000040373 XP\_045215344.1 35.4 746  
398 15 22 720 59 767 3.20E-127 464.2 6596 cellular

organisms;Eukaryota;Opisthokonta;Metazoa;Eumetazoa;Bilateria;Protostomia;Spiralia;Lophotrochozoa;Mollusca;Bivalvia;Autobranchia;Heteroconchia;Euherodonta;Imparidentia;Venerida;Veneroidea;Veneridae;Mercenaria;Mercenaria mercenaria

UdeM00000040375 6596 478 UdeM00000040375 XP\_045215344.1 36.7 779  
399 17 33 776 50 769 2.30E-131 478 6596 cellular

organisms;Eukaryota;Opisthokonta;Metazoa;Eumetazoa;Bilateria;Protostomia;Spiralia;Lophotrochozoa;Mollusca;Bivalvia;Autobranchia;Heteroconchia;Euherodonta;Imparidentia;Venerida;Veneroidea;Veneridae;Mercenaria;Mercenaria mercenaria

UdeM00000040376 29159 334.3 UdeM00000040376 XP\_034326866.1 39.5 618  
239 10 13 577 7 542 5.20E-88 334.3 29159 cellular

organisms;Eukaryota;Opisthokonta;Metazoa;Eumetazoa;Bilateria;Protostomia;Spiralia;Lophotrochozoa;Mollusca;Bivalvia;Autobranchia;Pteriormorphia;Ostreida;Ostreoidea;Ostreidae;Crassostrea;Crassostrea gigas

UdeM00000040377 6596 364.4 UdeM00000040377 XP\_045215139.1 58.6 290  
95 2 1 285 291 560 1.40E-97 364.4 6596 cellular

organisms;Eukaryota;Opisthokonta;Metazoa;Eumetazoa;Bilateria;Protostomia;Spiralia;Lophotrochozoa;Mollusca;Bivalvia;Autobranchia;Heteroconchia;Euherodonta;Imparidentia;Venerida;Veneroidea;Veneridae;Mercenaria;Mercenaria mercenaria

UdeM00000040378 6596 574.3 UdeM00000040378 XP\_045215139.1 55.9 503  
215 4 1 501 560 1057 1.50E-160 574.3 6596 cellular

organisms;Eukaryota;Opisthokonta;Metazoa;Eumetazoa;Bilateria;Protostomia;Spiralia;Lophotrochozoa;Mollusca;Bivalvia;Autobranchia;Heteroconchia;Euherodonta;Imparidentia;Venerida;Veneroidea;Veneridae;Mercenaria;Mercenaria mercenaria

UdeM00000040379 6596 789.3 UdeM00000040379 XP\_045216272.1 56.1 752  
293 9 9 746 430 1158 4.40E-225 789.3 6596 cellular

organisms;Eukaryota;Opisthokonta;Metazoa;Eumetazoa;Bilateria;Protostomia;Spiralia;Lophotrochozoa;Mollusca;Bivalvia;Autobranchia;Heteroconchia;Euherodonta;Imparidentia;Venerida;Veneroidea;Veneridae;Mercenaria;Mercenaria mercenaria

UdeM00000040380 6596 647.5 UdeM00000040380 XP\_045216272.1 76.4 433  
91 3 1 427 1 428 1.20E-182 647.5 6596 cellular

organisms;Eukaryota;Opisthokonta;Metazoa;Eumetazoa;Bilateria;Protostomia;Spiralia;Lophotrochozoa;Mollusca;Bivalvia;Autobranchia;Heteroconchia;Euherodonta;Imparidentia;Venerida;Veneroidea;Veneridae;Mercenaria;Mercenaria mercenaria

UdeM00000040381 29159 582 UdeM00000040381 XP\_011450497.1 60.2 455  
177 4 2 454 1 453 1.40E-162 582 29159 cellular

organisms;Eukaryota;Opisthokonta;Metazoa;Eumetazoa;Bilateria;Protostomia;

Spiralia; Lophotrochozoa; Mollusca; Bivalvia; Autobranchia; Pteriomorpha; Ostr  
eida; Ostreoida; Ostreidae; Crassostrea; Crassostrea gigas  
UdeM00000040382 6526 328.2 UdeM00000040382 XP\_013073365.1 42 490  
225 14 1 482 7 445 1.80E-86 328.2 6526 cellular  
organisms; Eukaryota; Opisthokonta; Metazoa; Eumetazoa; Bilateria; Protostomia;  
Spiralia; Lophotrochozoa; Mollusca; Gastropoda; Heterobranchia; Euthyneura; Pan  
pulmonata; Hygrophila; Lymnaeoida; Planorbidae; Biomphalaria; Biomphalaria  
glabrata  
UdeM00000040383 29159 210.3 UdeM00000040383 XP\_034324494.1 54 202  
92 1 12 212 252 453 2.50E-51 210.3 29159 cellular  
organisms; Eukaryota; Opisthokonta; Metazoa; Eumetazoa; Bilateria; Protostomia;  
Spiralia; Lophotrochozoa; Mollusca; Bivalvia; Autobranchia; Pteriomorpha; Ostr  
eida; Ostreoida; Ostreidae; Crassostrea; Crassostrea gigas  
UdeM00000040384 1735272 226.1 UdeM00000040384 XP\_041370068.1 87.4  
135 15 2 1 135 1 133 2.70E-56 226.1 1735272  
cellular  
organisms; Eukaryota; Opisthokonta; Metazoa; Eumetazoa; Bilateria; Protostomia;  
Spiralia; Lophotrochozoa; Mollusca; Gastropoda; Neomphalina; Neomphaloidea; Pel  
tospiridae; Gigantopelta; Gigantopelta aegis  
UdeM00000040385 2607531 290 UdeM00000040385 XP\_029643651.1 48.2  
305 152 2 15 315 45 347 3.60E-75 290 2607531  
cellular  
organisms; Eukaryota; Opisthokonta; Metazoa; Eumetazoa; Bilateria; Protostomia;  
Spiralia; Lophotrochozoa; Mollusca; Cephalopoda; Coleoidea; Octopodiformes; Oct  
opoda; Incirrata; Octopodidae; Octopus; Octopus sinensis  
UdeM00000040386 6596 737.6 UdeM00000040386 XP\_045156803.1 56.3 620  
267 2 11 630 10 625 1.30E-209 737.6 6596 cellular  
organisms; Eukaryota; Opisthokonta; Metazoa; Eumetazoa; Bilateria; Protostomia;  
Spiralia; Lophotrochozoa; Mollusca; Bivalvia; Autobranchia; Heteroconchia; Eue  
terodonta; Imparidentia; Venerida; Veneroidea; Veneridae; Mercenaria; Mercenari  
a mercenaria  
UdeM00000040387 10224 137.5 UdeM00000040387 XP\_006824639.1 39.6 182  
109 1 3 184 2 182 1.70E-29 137.5 10224 cellular  
organisms; Eukaryota; Opisthokonta; Metazoa; Eumetazoa; Bilateria; Deuterostomi  
a; Hemichordata; Enteropneusta; Harrimaniidae; Saccoglossus; Saccoglossus  
kowalevskii  
UdeM00000040389 6596 604.4 UdeM00000040389 XP\_045156803.1 49.7 579  
282 2 1 570 47 625 1.50E-169 604.4 6596 cellular  
organisms; Eukaryota; Opisthokonta; Metazoa; Eumetazoa; Bilateria; Protostomia;  
Spiralia; Lophotrochozoa; Mollusca; Bivalvia; Autobranchia; Heteroconchia; Eue  
terodonta; Imparidentia; Venerida; Veneroidea; Veneridae; Mercenaria; Mercenari  
a mercenaria  
UdeM00000040392 6579 711.8 UdeM00000040392 XP\_033751084.1 73.4 474  
125 1 1 473 1 474 5.80E-202 711.8 6579 cellular  
organisms; Eukaryota; Opisthokonta; Metazoa; Eumetazoa; Bilateria; Protostomia;  
Spiralia; Lophotrochozoa; Mollusca; Bivalvia; Autobranchia; Pteriomorpha; Pect  
inida; Pectinoidea; Pectinidae; Pecten; Pecten maximus  
UdeM00000040391 6579 1277.3 UdeM00000040391 XP\_033751084.1 63.4  
1057 220 6 1 1056 1 891 0.00E+00 1277.3 6579  
cellular  
organisms; Eukaryota; Opisthokonta; Metazoa; Eumetazoa; Bilateria; Protostomia;  
Spiralia; Lophotrochozoa; Mollusca; Bivalvia; Autobranchia; Pteriomorpha; Pect  
inida; Pectinoidea; Pectinidae; Pecten; Pecten maximus

UdeM00000040393 6596 345.1 UdeM00000040393 XP\_045216231.1 43 426  
 214 6 1 402 143 563 1.20E-91 345.1 6596 cellular  
 organisms;Eukaryota;Opisthokonta;Metazoa;Eumetazoa;Bilateria;Protostomia;  
 Spiralia;Lophotrochozoa;Mollusca;Bivalvia;Autobranchia;Heteroconchia;Euhe  
 terodonta;Imparidentia;Venerida;Veneroidea;Veneridae;Mercenaria;Mercenari  
 a mercenaria

UdeM00000040394 6579 81.3 UdeM00000040394 XP\_033729333.1 47.5 80  
 42 0 1 80 1 80 8.00E-13 81.3 6579 cellular  
 organisms;Eukaryota;Opisthokonta;Metazoa;Eumetazoa;Bilateria;Protostomia;  
 Spiralia;Lophotrochozoa;Mollusca;Bivalvia;Autobranchia;Pteriormorphia;Pect  
 inida;Pectinoidea;Pectinidae;Pecten;Pecten maximus

UdeM00000040395 6596 349.7 UdeM00000040395 XP\_045216230.1 47 419  
 208 6 2 411 152 565 5.00E-93 349.7 6596 cellular  
 organisms;Eukaryota;Opisthokonta;Metazoa;Eumetazoa;Bilateria;Protostomia;  
 Spiralia;Lophotrochozoa;Mollusca;Bivalvia;Autobranchia;Heteroconchia;Euhe  
 terodonta;Imparidentia;Venerida;Veneroidea;Veneridae;Mercenaria;Mercenari  
 a mercenaria

UdeM00000040396 6565 137.9 UdeM00000040396 XP\_022334558.1 50.8 122  
 59 1 18 139 16 136 1.00E-29 137.9 6565 cellular  
 organisms;Eukaryota;Opisthokonta;Metazoa;Eumetazoa;Bilateria;Protostomia;  
 Spiralia;Lophotrochozoa;Mollusca;Bivalvia;Autobranchia;Pteriormorphia;Ostr  
 eida;Ostreoidea;Ostreidae;Crassostrea;Crassostrea virginica

UdeM00000040397 6579 484.2 UdeM00000040397 XP\_033729333.1 44.9 573  
 300 8 1 563 1 567 2.30E-133 484.2 6579 cellular  
 organisms;Eukaryota;Opisthokonta;Metazoa;Eumetazoa;Bilateria;Protostomia;  
 Spiralia;Lophotrochozoa;Mollusca;Bivalvia;Autobranchia;Pteriormorphia;Pect  
 inida;Pectinoidea;Pectinidae;Pecten;Pecten maximus

UdeM00000040398 6596 291.6 UdeM00000040398 XP\_045216139.1 46 398  
 204 8 28 423 441 829 1.70E-75 291.6 6596 cellular  
 organisms;Eukaryota;Opisthokonta;Metazoa;Eumetazoa;Bilateria;Protostomia;  
 Spiralia;Lophotrochozoa;Mollusca;Bivalvia;Autobranchia;Heteroconchia;Euhe  
 terodonta;Imparidentia;Venerida;Veneroidea;Veneridae;Mercenaria;Mercenari  
 a mercenaria

UdeM00000040399 6596 287 UdeM00000040399 XP\_045216139.1 43.4 415  
 207 7 28 440 441 829 4.30E-74 287 6596 cellular  
 organisms;Eukaryota;Opisthokonta;Metazoa;Eumetazoa;Bilateria;Protostomia;  
 Spiralia;Lophotrochozoa;Mollusca;Bivalvia;Autobranchia;Heteroconchia;Euhe  
 terodonta;Imparidentia;Venerida;Veneroidea;Veneridae;Mercenaria;Mercenari  
 a mercenaria

UdeM00000040400 1735272 116.7 UdeM00000040400 XP\_041367923.1 29.4  
 218 120 3 2 185 178 395 3.20E-23 116.7 1735272  
 cellular  
 organisms;Eukaryota;Opisthokonta;Metazoa;Eumetazoa;Bilateria;Protostomia;  
 Spiralia;Lophotrochozoa;Mollusca;Gastropoda;Neomphalina;Neomphaloidea;Pel  
 tospiridae;Gigantopelta;Gigantopelta aegis

UdeM00000040401 29159 278.9 UdeM00000040401 XP\_019926412.2 52 277  
 122 2 1 274 1 269 7.10E-72 278.9 29159 cellular  
 organisms;Eukaryota;Opisthokonta;Metazoa;Eumetazoa;Bilateria;Protostomia;  
 Spiralia;Lophotrochozoa;Mollusca;Bivalvia;Autobranchia;Pteriormorphia;Ostr  
 eida;Ostreoidea;Ostreidae;Crassostrea;Crassostrea gigas

UdeM00000040402 6596 126.7 UdeM00000040402 XP\_045216139.1 35.3 190  
 122 1 12 200 13 202 4.10E-26 126.7 6596 cellular  
 organisms;Eukaryota;Opisthokonta;Metazoa;Eumetazoa;Bilateria;Protostomia;  
 Spiralia;Lophotrochozoa;Mollusca;Bivalvia;Autobranchia;Heteroconchia;Euhe

terodonta;Imparidentia;Venerida;Veneroidea;Veneridae;Mercenaria;Mercenari  
 a mercenaria  
 UdeM00000040403 6596 631.7 UdeM00000040403 XP\_045216139.1 42.8 832  
 401 17 3 787 6 809 1.30E-177 631.7 6596 cellular  
 organisms;Eukaryota;Opisthokonta;Metazoa;Eumetazoa;Bilateria;Protostomia;  
 Spiralia;Lophotrochozoa;Mollusca;Bivalvia;Autobranhia;Heteroconchia;Euhe  
 terodonta;Imparidentia;Venerida;Veneroidea;Veneridae;Mercenaria;Mercenari  
 a mercenaria  
 UdeM00000040404 6596 344 UdeM00000040404 XP\_045156533.1 79.6 211  
 40 2 1 210 1 209 1.40E-91 344 6596 cellular  
 organisms;Eukaryota;Opisthokonta;Metazoa;Eumetazoa;Bilateria;Protostomia;  
 Spiralia;Lophotrochozoa;Mollusca;Bivalvia;Autobranhia;Heteroconchia;Euhe  
 terodonta;Imparidentia;Venerida;Veneroidea;Veneridae;Mercenaria;Mercenari  
 a mercenaria  
 UdeM00000040405 6579 290.8 UdeM00000040405 XP\_033750691.1 66 206  
 68 1 1 206 1 204 1.40E-75 290.8 6579 cellular  
 organisms;Eukaryota;Opisthokonta;Metazoa;Eumetazoa;Bilateria;Protostomia;  
 Spiralia;Lophotrochozoa;Mollusca;Bivalvia;Autobranhia;Pteriormorphia;Pect  
 inida;Pectinoidea;Pectinidae;Pecten;Pecten maximus  
 UdeM00000040406 6596 285 UdeM00000040406 XP\_045156498.1 47.8 391  
 196 5 7 395 6 390 1.40E-73 285 6596 cellular  
 organisms;Eukaryota;Opisthokonta;Metazoa;Eumetazoa;Bilateria;Protostomia;  
 Spiralia;Lophotrochozoa;Mollusca;Bivalvia;Autobranhia;Heteroconchia;Euhe  
 terodonta;Imparidentia;Venerida;Veneroidea;Veneridae;Mercenaria;Mercenari  
 a mercenaria  
 UdeM00000040407 6579 548.9 UdeM00000040407 XP\_033750056.1 54.3 536  
 227 6 9 530 5 536 1.70E-152 548.9 6579 cellular  
 organisms;Eukaryota;Opisthokonta;Metazoa;Eumetazoa;Bilateria;Protostomia;  
 Spiralia;Lophotrochozoa;Mollusca;Bivalvia;Autobranhia;Pteriormorphia;Pect  
 inida;Pectinoidea;Pectinidae;Pecten;Pecten maximus  
 UdeM00000040408 6579 305.1 UdeM00000040408 XP\_033750913.1 34 564  
 317 13 10 531 44 594 1.80E-79 305.1 6579 cellular  
 organisms;Eukaryota;Opisthokonta;Metazoa;Eumetazoa;Bilateria;Protostomia;  
 Spiralia;Lophotrochozoa;Mollusca;Bivalvia;Autobranhia;Pteriormorphia;Pect  
 inida;Pectinoidea;Pectinidae;Pecten;Pecten maximus  
 UdeM00000040409 6596 162.9 UdeM00000040409 XP\_045211755.1 42.9 184  
 102 2 53 236 35 215 5.00E-37 162.9 6596 cellular  
 organisms;Eukaryota;Opisthokonta;Metazoa;Eumetazoa;Bilateria;Protostomia;  
 Spiralia;Lophotrochozoa;Mollusca;Bivalvia;Autobranhia;Heteroconchia;Euhe  
 terodonta;Imparidentia;Venerida;Veneroidea;Veneridae;Mercenaria;Mercenari  
 a mercenaria  
 UdeM00000040410 6596 243.8 UdeM00000040410 XP\_045156453.1 75.2 157  
 34 2 11 164 11 165 1.50E-61 243.8 6596 cellular  
 organisms;Eukaryota;Opisthokonta;Metazoa;Eumetazoa;Bilateria;Protostomia;  
 Spiralia;Lophotrochozoa;Mollusca;Bivalvia;Autobranhia;Heteroconchia;Euhe  
 terodonta;Imparidentia;Venerida;Veneroidea;Veneridae;Mercenaria;Mercenari  
 a mercenaria  
 UdeM00000040411 6500 65.1 UdeM00000040411 XP\_012936192.1 40.7 91  
 51 2 5 93 3 92 1.20E-07 65.1 6500 cellular  
 organisms;Eukaryota;Opisthokonta;Metazoa;Eumetazoa;Bilateria;Protostomia;  
 Spiralia;Lophotrochozoa;Mollusca;Gastropoda;Heterobranhia;Euthyneura;Tec  
 tipleura;Aplysiida;Aplysioidea;Aplysiidae;Aplysia;Aplysia californica  
 UdeM00000040412 6596 200.7 UdeM00000040412 XP\_045209870.1 63.6 151  
 55 0 1 151 1 151 1.40E-48 200.7 6596 cellular





a;Chordata;Craniata;Vertebrata;Gnathostomata;Teleostomi;Euteleostomi;Acti  
 nopterygii;Actinopteri;Neopterygii;Teleostei;Osteoglossocephalai;Clupeoce  
 phala;Otomorpha;Ostariophysi;Otophysi;Cypriniphysae;Cypriniiformes;Cyprino  
 ideii;Cyprinidae;Cyprininae;Carassius;Carassius auratus  
 UdeM00000040422 6565 433 UdeM00000040422 XP\_022332442.1 40.8 910  
 416 19 1 859 1 838 1.00E-117 433 6565 cellular  
 organisms;Eukaryota;Opisthokonta;Metazoa;Eumetazoa;Bilateria;Protostomia;  
 Spiralia;Lophotrochozoa;Mollusca;Bivalvia;Autobranchia;Pteriormorphia;Ostr  
 eida;Ostreoidea;Ostreidae;Crassostrea;Crassostrea virginica  
 UdeM00000040423 6565 372.9 UdeM00000040423 XP\_022326108.1 28.8 874  
 521 17 125 914 5 861 1.20E-99 372.9 6565 cellular  
 organisms;Eukaryota;Opisthokonta;Metazoa;Eumetazoa;Bilateria;Protostomia;  
 Spiralia;Lophotrochozoa;Mollusca;Bivalvia;Autobranchia;Pteriormorphia;Ostr  
 eida;Ostreoidea;Ostreidae;Crassostrea;Crassostrea virginica  
 UdeM00000040424 6596 286.6 UdeM00000040424 XP\_045160385.1 27.3 942  
 546 26 276 1181 335 1173 1.50E-73 286.6 6596 cellular  
 organisms;Eukaryota;Opisthokonta;Metazoa;Eumetazoa;Bilateria;Protostomia;  
 Spiralia;Lophotrochozoa;Mollusca;Bivalvia;Autobranchia;Heteroconchia;Euhe  
 terodonta;Imparidentia;Venerida;Veneroidea;Veneridae;Mercenaria;Mercenari  
 a mercenaria  
 UdeM00000040426 6596 159.5 UdeM00000040426 XP\_045193632.1 26.7 420  
 291 12 2 409 23 437 9.40E-36 159.5 6596 cellular  
 organisms;Eukaryota;Opisthokonta;Metazoa;Eumetazoa;Bilateria;Protostomia;  
 Spiralia;Lophotrochozoa;Mollusca;Bivalvia;Autobranchia;Heteroconchia;Euhe  
 terodonta;Imparidentia;Venerida;Veneroidea;Veneridae;Mercenaria;Mercenari  
 a mercenaria  
 UdeM00000040427 6596 279.6 UdeM00000040427 XP\_045193636.1 45.4 324  
 174 3 3 324 126 448 5.10E-72 279.6 6596 cellular  
 organisms;Eukaryota;Opisthokonta;Metazoa;Eumetazoa;Bilateria;Protostomia;  
 Spiralia;Lophotrochozoa;Mollusca;Bivalvia;Autobranchia;Heteroconchia;Euhe  
 terodonta;Imparidentia;Venerida;Veneroidea;Veneridae;Mercenaria;Mercenari  
 a mercenaria  
 UdeM00000040428 6596 117.1 UdeM00000040428 XP\_045193632.1 53.7 95  
 43 1 158 251 9 103 3.40E-23 117.1 6596 cellular  
 organisms;Eukaryota;Opisthokonta;Metazoa;Eumetazoa;Bilateria;Protostomia;  
 Spiralia;Lophotrochozoa;Mollusca;Bivalvia;Autobranchia;Heteroconchia;Euhe  
 terodonta;Imparidentia;Venerida;Veneroidea;Veneridae;Mercenaria;Mercenari  
 a mercenaria  
 UdeM00000040429 6596 283.9 UdeM00000040429 XP\_045160385.1 26.6 914  
 586 20 276 1180 335 1172 9.90E-73 283.9 6596 cellular  
 organisms;Eukaryota;Opisthokonta;Metazoa;Eumetazoa;Bilateria;Protostomia;  
 Spiralia;Lophotrochozoa;Mollusca;Bivalvia;Autobranchia;Heteroconchia;Euhe  
 terodonta;Imparidentia;Venerida;Veneroidea;Veneridae;Mercenaria;Mercenari  
 a mercenaria  
 UdeM00000040430 6565 402.5 UdeM00000040430 XP\_022325149.1 30.8 829  
 531 13 16 810 45 864 1.30E-108 402.5 6565 cellular  
 organisms;Eukaryota;Opisthokonta;Metazoa;Eumetazoa;Bilateria;Protostomia;  
 Spiralia;Lophotrochozoa;Mollusca;Bivalvia;Autobranchia;Pteriormorphia;Ostr  
 eida;Ostreoidea;Ostreidae;Crassostrea;Crassostrea virginica  
 UdeM00000040432 6596 283.1 UdeM00000040432 XP\_045160385.1 26.8 949  
 542 23 276 1181 335 1173 1.70E-72 283.1 6596 cellular  
 organisms;Eukaryota;Opisthokonta;Metazoa;Eumetazoa;Bilateria;Protostomia;  
 Spiralia;Lophotrochozoa;Mollusca;Bivalvia;Autobranchia;Heteroconchia;Euhe

terodonta;Imparidentia;Venerida;Veneroidea;Veneridae;Mercenaria;Mercenari  
 a mercenaria  
 UdeM00000040434 37621 84 UdeM00000040434 XP\_014672567.1 36.1 108  
 68 1 12 118 411 518 1.60E-13 84 37621 cellular  
 organisms;Eukaryota;Opisthokonta;Metazoa;Eumetazoa;Bilateria;Protostomia;  
 Ecdysozoa;Scalidophora;Priapulida;Priapulimorpha;Priapulimorphida;Priapul  
 idae;Priapulus;Priapulus caudatus  
 UdeM00000040435 6596 805.4 UdeM00000040435 XP\_045215747.1 59.9 618  
 239 2 1 609 9 626 4.80E-230 805.4 6596 cellular  
 organisms;Eukaryota;Opisthokonta;Metazoa;Eumetazoa;Bilateria;Protostomia;  
 Spiralia;Lophotrochozoa;Mollusca;Bivalvia;Autobranchia;Heteroconchia;Euhe  
 terodonta;Imparidentia;Venerida;Veneroidea;Veneridae;Mercenaria;Mercenari  
 a mercenaria  
 UdeM00000040436 6596 808.9 UdeM00000040436 XP\_045215747.1 60.6 627  
 218 4 1 608 9 625 4.40E-231 808.9 6596 cellular  
 organisms;Eukaryota;Opisthokonta;Metazoa;Eumetazoa;Bilateria;Protostomia;  
 Spiralia;Lophotrochozoa;Mollusca;Bivalvia;Autobranchia;Heteroconchia;Euhe  
 terodonta;Imparidentia;Venerida;Veneroidea;Veneridae;Mercenaria;Mercenari  
 a mercenaria  
 UdeM00000040437 6579 147.9 UdeM00000040437 XP\_033749422.1 41.3 196  
 93 2 44 239 4 177 1.70E-32 147.9 6579 cellular  
 organisms;Eukaryota;Opisthokonta;Metazoa;Eumetazoa;Bilateria;Protostomia;  
 Spiralia;Lophotrochozoa;Mollusca;Bivalvia;Autobranchia;Pteriomorpha;Pect  
 inida;Pectinoidea;Pectinidae;Pecten;Pecten maximus  
 UdeM00000040438 1735272 260 UdeM00000040438 XP\_041366332.1 46.4  
 263 141 0 34 296 138 400 3.90E-66 260 1735272  
 cellular  
 organisms;Eukaryota;Opisthokonta;Metazoa;Eumetazoa;Bilateria;Protostomia;  
 Spiralia;Lophotrochozoa;Mollusca;Gastropoda;Neomphalina;Neomphaloidea;Pel  
 tospiridae;Gigantopelta;Gigantopelta aegis  
 UdeM00000040439 6579 573.2 UdeM00000040439 XP\_033749455.1 65 429  
 149 1 17 444 545 973 3.00E-160 573.2 6579 cellular  
 organisms;Eukaryota;Opisthokonta;Metazoa;Eumetazoa;Bilateria;Protostomia;  
 Spiralia;Lophotrochozoa;Mollusca;Bivalvia;Autobranchia;Pteriomorpha;Pect  
 inida;Pectinoidea;Pectinidae;Pecten;Pecten maximus  
 UdeM00000040440 6596 364.8 UdeM00000040440 XP\_045156530.1 65.4 272  
 90 1 17 288 272 539 1.10E-97 364.8 6596 cellular  
 organisms;Eukaryota;Opisthokonta;Metazoa;Eumetazoa;Bilateria;Protostomia;  
 Spiralia;Lophotrochozoa;Mollusca;Bivalvia;Autobranchia;Heteroconchia;Euhe  
 terodonta;Imparidentia;Venerida;Veneroidea;Veneridae;Mercenaria;Mercenari  
 a mercenaria  
 UdeM00000040441 6596 304.3 UdeM00000040441 XP\_045156530.1 67.9 215  
 69 0 1 215 1 215 1.80E-79 304.3 6596 cellular  
 organisms;Eukaryota;Opisthokonta;Metazoa;Eumetazoa;Bilateria;Protostomia;  
 Spiralia;Lophotrochozoa;Mollusca;Bivalvia;Autobranchia;Heteroconchia;Euhe  
 terodonta;Imparidentia;Venerida;Veneroidea;Veneridae;Mercenaria;Mercenari  
 a mercenaria  
 UdeM00000040442 6596 987.6 UdeM00000040442 XP\_045216205.1 69.5 751  
 215 3 1 749 1 739 8.70E-285 987.6 6596 cellular  
 organisms;Eukaryota;Opisthokonta;Metazoa;Eumetazoa;Bilateria;Protostomia;  
 Spiralia;Lophotrochozoa;Mollusca;Bivalvia;Autobranchia;Heteroconchia;Euhe  
 terodonta;Imparidentia;Venerida;Veneroidea;Veneridae;Mercenaria;Mercenari  
 a mercenaria

UdeM00000040443 6596 81.6 UdeM00000040443 XP\_045189906.1 55.3 76  
 34 0 4 79 6 81 6.70E-12 81.6 6596 cellular  
 organisms;Eukaryota;Opisthokonta;Metazoa;Eumetazoa;Bilateria;Protostomia;  
 Spiralia;Lophotrochozoa;Mollusca;Bivalvia;Autobranchia;Heteroconchia;Euhe  
 terodonta;Imparidentia;Venerida;Veneroidea;Veneridae;Mercenaria;Mercenari  
 a mercenaria

UdeM00000040445 225164 62.8 UdeM00000040445 XP\_009048786.1 30.4  
 194 105 4 24 217 4 167 6.40E-07 62.8 225164  
 cellular  
 organisms;Eukaryota;Opisthokonta;Metazoa;Eumetazoa;Bilateria;Protostomia;  
 Spiralia;Lophotrochozoa;Mollusca;Gastropoda;Patellogastropoda;Lottioidea;  
 Lottiidae;Lottia;Lottia gigantea

UdeM00000040446 29159 339 UdeM00000040446 XP\_034324725.1 73.3 524  
 106 3 36 527 68 589 1.10E-89 339 29159 cellular  
 organisms;Eukaryota;Opisthokonta;Metazoa;Eumetazoa;Bilateria;Protostomia;  
 Spiralia;Lophotrochozoa;Mollusca;Bivalvia;Autobranchia;Pteriormorphia;Ostr  
 eida;Ostreoidea;Ostreidae;Crassostrea;Crassostrea gigas

UdeM00000040447 400727 374 UdeM00000040447 XP\_025077220.1 50.7  
 349 171 1 174 522 84 431 3.10E-100 374 400727  
 cellular  
 organisms;Eukaryota;Opisthokonta;Metazoa;Eumetazoa;Bilateria;Protostomia;  
 Spiralia;Lophotrochozoa;Mollusca;Gastropoda;Caenogastropoda;Architaeniogl  
 ossa;Ampullarioidea;Ampullariidae;Pomacea;Pomacea canaliculata

UdeM00000040448 6596 258.1 UdeM00000040448 XP\_045156770.1 65.7 201  
 60 4 66 259 119 317 1.20E-65 258.1 6596 cellular  
 organisms;Eukaryota;Opisthokonta;Metazoa;Eumetazoa;Bilateria;Protostomia;  
 Spiralia;Lophotrochozoa;Mollusca;Bivalvia;Autobranchia;Heteroconchia;Euhe  
 terodonta;Imparidentia;Venerida;Veneroidea;Veneridae;Mercenaria;Mercenari  
 a mercenaria

UdeM00000040449 6596 933.7 UdeM00000040449 XP\_045156770.1 74 742  
 159 10 1 730 324 1043 1.40E-268 933.7 6596 cellular  
 organisms;Eukaryota;Opisthokonta;Metazoa;Eumetazoa;Bilateria;Protostomia;  
 Spiralia;Lophotrochozoa;Mollusca;Bivalvia;Autobranchia;Heteroconchia;Euhe  
 terodonta;Imparidentia;Venerida;Veneroidea;Veneridae;Mercenaria;Mercenari  
 a mercenaria

UdeM00000040450 6596 300.4 UdeM00000040450 XP\_045156668.1 39.9 419  
 232 11 2 414 3 407 3.50E-78 300.4 6596 cellular  
 organisms;Eukaryota;Opisthokonta;Metazoa;Eumetazoa;Bilateria;Protostomia;  
 Spiralia;Lophotrochozoa;Mollusca;Bivalvia;Autobranchia;Heteroconchia;Euhe  
 terodonta;Imparidentia;Venerida;Veneroidea;Veneridae;Mercenaria;Mercenari  
 a mercenaria

UdeM00000040451 50429 123.2 UdeM00000040451 XP\_022785721.1 51.3 113  
 52 1 18 130 494 603 2.40E-25 123.2 50429 cellular  
 organisms;Eukaryota;Opisthokonta;Metazoa;Eumetazoa;Cnidaria;Anthozoa;Hexa  
 corallia;Scleractinia;Astrocoeniina;Pocilloporidae;Stylophora;Stylophora  
 pistillata

UdeM00000040452 37621 83.6 UdeM00000040452 XP\_014677757.1 64.1 64  
 23 0 1 64 371 434 1.10E-13 83.6 37621 cellular  
 organisms;Eukaryota;Opisthokonta;Metazoa;Eumetazoa;Bilateria;Protostomia;  
 Ecdysozoa;Scalidophora;Priapulida;Priapulimorpha;Priapulimorphida;Priapul  
 idae;Priapulid;Priapulid caudatus

UdeM00000040453 29159 63.9 UdeM00000040453 XP\_034329356.1 56.7 67  
 29 0 90 156 115 181 2.10E-07 63.9 29159 cellular  
 organisms;Eukaryota;Opisthokonta;Metazoa;Eumetazoa;Bilateria;Protostomia;

Spiralia;Lophotrochozoa;Mollusca;Bivalvia;Autobranchia;Pteriormorphia;Ostr  
eida;Ostreoidea;Ostreidae;Crassostrea;Crassostrea gigas  
UdeM00000040454 90988 63.5 UdeM00000040454 XP\_039535825.1 61.4 44  
17 0 1 44 111 154 1.30E-07 63.5 90988 cellular  
organisms;Eukaryota;Opisthokonta;Metazoa;Eumetazoa;Bilateria;Deuterostomi  
a;Chordata;Craniata;Vertebrata;Gnathostomata;Teleostomi;Euteleostomi;Acti  
nopterygii;Actinopteri;Neopterygii;Teleostei;Osteoglossocephalai;Clupeoce  
phala;Otomorpha;Ostariophysi;Otophysi;Cypriniphysae;Cypriniiformes;Cyprino  
idei;Leuciscidae;Pogonichthyinae;Pimephales;Pimephales promelas  
UdeM00000040455 6596 267.7 UdeM00000040455 XP\_045216934.1 63.7 193  
70 0 9 201 3 195 1.30E-68 267.7 6596 cellular  
organisms;Eukaryota;Opisthokonta;Metazoa;Eumetazoa;Bilateria;Protostomia;  
Spiralia;Lophotrochozoa;Mollusca;Bivalvia;Autobranchia;Heteroconchia;Euhe  
terodonta;Imparidentia;Venerida;Veneroidea;Veneridae;Mercenaria;Mercenari  
a mercenaria  
UdeM00000040456 6596 1692.2 UdeM00000040456 XP\_045156325.1 70.5  
1256 331 10 1 1222 1 1250 0.00E+00 1692.2 6596  
cellular  
organisms;Eukaryota;Opisthokonta;Metazoa;Eumetazoa;Bilateria;Protostomia;  
Spiralia;Lophotrochozoa;Mollusca;Bivalvia;Autobranchia;Heteroconchia;Euhe  
terodonta;Imparidentia;Venerida;Veneroidea;Veneridae;Mercenaria;Mercenari  
a mercenaria  
UdeM00000040457 6596 3225.6 UdeM00000040457 XP\_045215074.1 56.5  
2669 904 25 5 2655 10 2439 0.00E+00 3225.6 6596  
cellular  
organisms;Eukaryota;Opisthokonta;Metazoa;Eumetazoa;Bilateria;Protostomia;  
Spiralia;Lophotrochozoa;Mollusca;Bivalvia;Autobranchia;Heteroconchia;Euhe  
terodonta;Imparidentia;Venerida;Veneroidea;Veneridae;Mercenaria;Mercenari  
a mercenaria  
UdeM00000040458 6596 448.4 UdeM00000040458 XP\_045215074.1 60.1 363  
136 6 1 357 2439 2798 9.00E-123 448.4 6596 cellular  
organisms;Eukaryota;Opisthokonta;Metazoa;Eumetazoa;Bilateria;Protostomia;  
Spiralia;Lophotrochozoa;Mollusca;Bivalvia;Autobranchia;Heteroconchia;Euhe  
terodonta;Imparidentia;Venerida;Veneroidea;Veneridae;Mercenaria;Mercenari  
a mercenaria  
UdeM00000040459 29159 867.8 UdeM00000040459 XP\_011449090.1 80.7 519  
90 5 1 517 1 511 6.70E-249 867.8 29159 cellular  
organisms;Eukaryota;Opisthokonta;Metazoa;Eumetazoa;Bilateria;Protostomia;  
Spiralia;Lophotrochozoa;Mollusca;Bivalvia;Autobranchia;Pteriormorphia;Ostr  
eida;Ostreoidea;Ostreidae;Crassostrea;Crassostrea gigas  
UdeM00000040460 1735272 1065.1 UdeM00000040460 XP\_041373006.1  
60.9 901 307 8 1 857 21 920 5.30E-308 1065.1  
1735272 cellular  
organisms;Eukaryota;Opisthokonta;Metazoa;Eumetazoa;Bilateria;Protostomia;  
Spiralia;Lophotrochozoa;Mollusca;Gastropoda;Neomphalina;Neomphaloidea;Pel  
tospiridae;Gigantopelta;Gigantopelta aegis  
UdeM00000040461 6596 813.9 UdeM00000040461 XP\_045156557.1 88.1 454  
52 1 146 599 101 552 1.30E-232 813.9 6596 cellular  
organisms;Eukaryota;Opisthokonta;Metazoa;Eumetazoa;Bilateria;Protostomia;  
Spiralia;Lophotrochozoa;Mollusca;Bivalvia;Autobranchia;Heteroconchia;Euhe  
terodonta;Imparidentia;Venerida;Veneroidea;Veneridae;Mercenaria;Mercenari  
a mercenaria  
UdeM00000040462 2607531 956.1 UdeM00000040462 XP\_029648340.1 68.7  
683 180 5 21 687 241 905 2.50E-275 956.1 2607531

cellular  
organisms;Eukaryota;Opisthokonta;Metazoa;Eumetazoa;Bilateria;Protostomia;  
Spiralia;Lophotrochozoa;Mollusca;Cephalopoda;Coleoidea;Octopodiformes;Oct  
opoda;Incirrata;Octopodidae;Octopus;Octopus sinensis  
UdeM00000040463 6573 143.3 UdeM00000040463 XP\_021360524.1 63.8 105  
38 0 1 105 27 131 1.90E-31 143.3 6573 cellular  
organisms;Eukaryota;Opisthokonta;Metazoa;Eumetazoa;Bilateria;Protostomia;  
Spiralia;Lophotrochozoa;Mollusca;Bivalvia;Autobranchia;Pteriormorphia;Pect  
inida;Pectinoidea;Pectinidae;Mizuhopecten;Mizuhopecten yessoensis  
UdeM00000040464 6579 1174.5 UdeM00000040464 XP\_033749377.1 67.1  
870 236 11 1 850 1 840 0.00E+00 1174.5 6579  
cellular  
organisms;Eukaryota;Opisthokonta;Metazoa;Eumetazoa;Bilateria;Protostomia;  
Spiralia;Lophotrochozoa;Mollusca;Bivalvia;Autobranchia;Pteriormorphia;Pect  
inida;Pectinoidea;Pectinidae;Pecten;Pecten maximus  
UdeM00000040465 6596 246.5 UdeM00000040465 XP\_045216404.1 60.7 191  
75 0 8 198 9 199 2.90E-62 246.5 6596 cellular  
organisms;Eukaryota;Opisthokonta;Metazoa;Eumetazoa;Bilateria;Protostomia;  
Spiralia;Lophotrochozoa;Mollusca;Bivalvia;Autobranchia;Heteroconchia;Euhe  
terodonta;Imparidentia;Venerida;Veneroidea;Veneridae;Mercenaria;Mercenari  
a mercenaria  
UdeM00000040466 6596 240.4 UdeM00000040466 XP\_045216404.1 58.8 199  
74 2 8 206 9 199 2.20E-60 240.4 6596 cellular  
organisms;Eukaryota;Opisthokonta;Metazoa;Eumetazoa;Bilateria;Protostomia;  
Spiralia;Lophotrochozoa;Mollusca;Bivalvia;Autobranchia;Heteroconchia;Euhe  
terodonta;Imparidentia;Venerida;Veneroidea;Veneridae;Mercenaria;Mercenari  
a mercenaria  
UdeM00000040467 6596 98.6 UdeM00000040467 XP\_045216405.1 34 206  
101 5 370 541 102 306 2.60E-17 98.6 6596 cellular  
organisms;Eukaryota;Opisthokonta;Metazoa;Eumetazoa;Bilateria;Protostomia;  
Spiralia;Lophotrochozoa;Mollusca;Bivalvia;Autobranchia;Heteroconchia;Euhe  
terodonta;Imparidentia;Venerida;Veneroidea;Veneridae;Mercenaria;Mercenari  
a mercenaria  
UdeM00000040468 6596 536.2 UdeM00000040468 XP\_045216394.1 50.8 549  
219 7 3 502 1 547 4.50E-149 536.2 6596 cellular  
organisms;Eukaryota;Opisthokonta;Metazoa;Eumetazoa;Bilateria;Protostomia;  
Spiralia;Lophotrochozoa;Mollusca;Bivalvia;Autobranchia;Heteroconchia;Euhe  
terodonta;Imparidentia;Venerida;Veneroidea;Veneridae;Mercenaria;Mercenari  
a mercenaria  
UdeM00000040470 6596 174.9 UdeM00000040470 XP\_045215336.1 33.2 473  
253 16 16 451 3 449 2.40E-40 174.9 6596 cellular  
organisms;Eukaryota;Opisthokonta;Metazoa;Eumetazoa;Bilateria;Protostomia;  
Spiralia;Lophotrochozoa;Mollusca;Bivalvia;Autobranchia;Heteroconchia;Euhe  
terodonta;Imparidentia;Venerida;Veneroidea;Veneridae;Mercenaria;Mercenari  
a mercenaria  
UdeM00000040471 29159 222.6 UdeM00000040471 XP\_011442056.1 35.6 464  
220 13 2 449 7 407 1.00E-54 222.6 29159 cellular  
organisms;Eukaryota;Opisthokonta;Metazoa;Eumetazoa;Bilateria;Protostomia;  
Spiralia;Lophotrochozoa;Mollusca;Bivalvia;Autobranchia;Pteriormorphia;Ostr  
eida;Ostreoidea;Ostreidae;Crassostrea;Crassostrea gigas  
UdeM00000040472 6573 60.8 UdeM00000040472 XP\_021377173.1 34.9 86  
55 1 1 86 5 89 2.40E-06 60.8 6573 cellular  
organisms;Eukaryota;Opisthokonta;Metazoa;Eumetazoa;Bilateria;Protostomia;

Spiralia; Lophotrochozoa; Mollusca; Bivalvia; Autobranchia; Pteriomorpha; Pectinida; Pectinoidea; Pectinidae; Mizuhopecten; Mizuhopecten yessoensis  
UdeM00000040474 6573 711.1 UdeM00000040474 XP\_021360545.1 25.1 4451  
2652 140 2 4092 3 4129 8.30E-201 711.1 6573 cellular  
organisms; Eukaryota; Opisthokonta; Metazoa; Eumetazoa; Bilateria; Protostomia; Spiralia; Lophotrochozoa; Mollusca; Bivalvia; Autobranchia; Pteriomorpha; Pectinida; Pectinoidea; Pectinidae; Mizuhopecten; Mizuhopecten yessoensis  
UdeM00000040475 1735272 324.7 UdeM00000040475 XP\_041361384.1 56.3  
270 118 0 13 282 39 308 1.20E-85 324.7 1735272  
cellular  
organisms; Eukaryota; Opisthokonta; Metazoa; Eumetazoa; Bilateria; Protostomia; Spiralia; Lophotrochozoa; Mollusca; Gastropoda; Neomphalina; Neomphaloidea; Peltospiridae; Gigantopelta; Gigantopelta aegis  
UdeM00000040476 6596 502.7 UdeM00000040476 XP\_045166723.1 38.1 776  
337 6 5 645 16 783 7.10E-139 502.7 6596 cellular  
organisms; Eukaryota; Opisthokonta; Metazoa; Eumetazoa; Bilateria; Protostomia; Spiralia; Lophotrochozoa; Mollusca; Bivalvia; Autobranchia; Heteroconchia; Euheterodonta; Imparidentia; Venerida; Veneroidea; Veneridae; Mercenaria; Mercenaria mercenaria  
UdeM00000040478 6573 86.7 UdeM00000040478 XP\_021357585.1 62.7 59  
22 0 4 62 3 61 1.20E-14 86.7 6573 cellular  
organisms; Eukaryota; Opisthokonta; Metazoa; Eumetazoa; Bilateria; Protostomia; Spiralia; Lophotrochozoa; Mollusca; Bivalvia; Autobranchia; Pteriomorpha; Pectinida; Pectinoidea; Pectinidae; Mizuhopecten; Mizuhopecten yessoensis  
UdeM00000040479 6596 668.3 UdeM00000040479 XP\_045166723.1 44.8 779  
416 5 5 780 16 783 1.20E-188 668.3 6596 cellular  
organisms; Eukaryota; Opisthokonta; Metazoa; Eumetazoa; Bilateria; Protostomia; Spiralia; Lophotrochozoa; Mollusca; Bivalvia; Autobranchia; Heteroconchia; Euheterodonta; Imparidentia; Venerida; Veneroidea; Veneridae; Mercenaria; Mercenaria mercenaria  
UdeM00000040480 6596 256.9 UdeM00000040480 XP\_045216161.1 71.9 167  
47 0 1 167 54 220 1.80E-65 256.9 6596 cellular  
organisms; Eukaryota; Opisthokonta; Metazoa; Eumetazoa; Bilateria; Protostomia; Spiralia; Lophotrochozoa; Mollusca; Bivalvia; Autobranchia; Heteroconchia; Euheterodonta; Imparidentia; Venerida; Veneroidea; Veneridae; Mercenaria; Mercenaria mercenaria  
UdeM00000040481 6579 1445.3 UdeM00000040481 XP\_033739131.1 53.9  
1307 585 8 22 1324 78 1370 0.00E+00 1445.3 6579  
cellular  
organisms; Eukaryota; Opisthokonta; Metazoa; Eumetazoa; Bilateria; Protostomia; Spiralia; Lophotrochozoa; Mollusca; Bivalvia; Autobranchia; Pteriomorpha; Pectinida; Pectinoidea; Pectinidae; Pecten; Pecten maximus  
UdeM00000040482 6596 644.4 UdeM00000040482 XP\_045166723.1 44.1 774  
416 6 5 766 16 784 1.80E-181 644.4 6596 cellular  
organisms; Eukaryota; Opisthokonta; Metazoa; Eumetazoa; Bilateria; Protostomia; Spiralia; Lophotrochozoa; Mollusca; Bivalvia; Autobranchia; Heteroconchia; Euheterodonta; Imparidentia; Venerida; Veneroidea; Veneridae; Mercenaria; Mercenaria mercenaria  
UdeM00000040483 72036 226.5 UdeM00000040483 XP\_040576246.1 42.8 271  
120 4 2 237 191 461 3.60E-56 226.5 72036 cellular  
organisms; Eukaryota; Opisthokonta; Metazoa; Eumetazoa; Bilateria; Protostomia; Ecdysozoa; Panarthropoda; Arthropoda; Mandibulata; Pancrustacea; Crustacea; Multicrustacea; Hexanauplia; Copepoda; Neocopepoda; Podoplea; Siphonostomatoida; Caligidae; Lepeophtheirus; Lepeophtheirus salmonis

UdeM00000040484 6596 192.6 UdeM00000040484 XP\_045216161.1 60.5 167  
 40 1 1 141 54 220 3.50E-46 192.6 6596 cellular  
 organisms;Eukaryota;Opisthokonta;Metazoa;Eumetazoa;Bilateria;Protostomia;  
 Spiralia;Lophotrochozoa;Mollusca;Bivalvia;Autobranhia;Heteroconchia;Euhe  
 terodonta;Imparidentia;Venerida;Veneroidea;Veneridae;Mercenaria;Mercenari  
 a mercenaria

UdeM00000040485 7574 205.7 UdeM00000040485 XP\_023932024.1 42.1 297  
 155 9 2 292 205 490 8.80E-50 205.7 7574 cellular  
 organisms;Eukaryota;Opisthokonta;Metazoa;Eumetazoa;Bilateria;Protostomia;  
 Spiralia;Lophotrochozoa;Brachiopoda;Linguliformea;Lingulata;Lingulida;Lin  
 guloidea;Lingulidae;Lingula;Lingula anatina

UdeM00000040486 2652724 129.8 UdeM00000040486 XP\_020911962.1 44.1  
 145 80 1 28 172 152 295 3.80E-27 129.8 2652724  
 cellular  
 organisms;Eukaryota;Opisthokonta;Metazoa;Eumetazoa;Cnidaria;Anthozoa;Hexa  
 corallia;Actiniaria;Aiptasiidae;Exaiptasia;Exaiptasia diaphana

UdeM00000040487 6596 636.3 UdeM00000040487 XP\_045166723.1 43.9 782  
 423 8 5 783 16 784 5.00E-179 636.3 6596 cellular  
 organisms;Eukaryota;Opisthokonta;Metazoa;Eumetazoa;Bilateria;Protostomia;  
 Spiralia;Lophotrochozoa;Mollusca;Bivalvia;Autobranhia;Heteroconchia;Euhe  
 terodonta;Imparidentia;Venerida;Veneroidea;Veneridae;Mercenaria;Mercenari  
 a mercenaria

UdeM00000040488 7668 73.2 UdeM00000040488 XP\_030847066.1 43.5 85  
 44 2 7 89 446 528 2.30E-10 73.2 7668 cellular  
 organisms;Eukaryota;Opisthokonta;Metazoa;Eumetazoa;Bilateria;Deuterostomi  
 a;Echinodermata;Eleutherozoa;Echinozoa;Echinoidea;Euechinoidea;Echinacea;  
 Camarodonta;Echinidea;Strongylocentrotidae;Strongylocentrotus;Strongyloce  
 ntrotus purpuratus

UdeM00000040489 2448451 96.7 UdeM00000040489 XP\_031837757.1 35.5  
 172 80 4 46 203 2 156 3.80E-17 96.7 2448451  
 cellular  
 organisms;Eukaryota;Opisthokonta;Metazoa;Eumetazoa;Bilateria;Protostomia;  
 Ecdysozoa;Panarthropoda;Arthropoda;Mandibulata;Pancrustacea;Hexapoda;Inse  
 cta;Dicondylia;Pterygota;Neoptera;Endopterygota;Hymenoptera;Apocrita;Acul  
 eata;Apoidea;Halictidae;Nomiinae;Nomia;Acunomia;Nomia melanderi

UdeM00000040490 6596 143.7 UdeM00000040490 XP\_045166723.1 51.4 146  
 65 2 5 148 16 157 1.90E-31 143.7 6596 cellular  
 organisms;Eukaryota;Opisthokonta;Metazoa;Eumetazoa;Bilateria;Protostomia;  
 Spiralia;Lophotrochozoa;Mollusca;Bivalvia;Autobranhia;Heteroconchia;Euhe  
 terodonta;Imparidentia;Venerida;Veneroidea;Veneridae;Mercenaria;Mercenari  
 a mercenaria

UdeM00000040491 6596 90.5 UdeM00000040491 XP\_045166723.1 44.5 110  
 59 1 1 108 425 534 1.90E-15 90.5 6596 cellular  
 organisms;Eukaryota;Opisthokonta;Metazoa;Eumetazoa;Bilateria;Protostomia;  
 Spiralia;Lophotrochozoa;Mollusca;Bivalvia;Autobranhia;Heteroconchia;Euhe  
 terodonta;Imparidentia;Venerida;Veneroidea;Veneridae;Mercenaria;Mercenari  
 a mercenaria

UdeM00000040494 6596 163.3 UdeM00000040494 XP\_045166723.1 34.5 316  
 98 6 8 219 19 329 3.60E-37 163.3 6596 cellular  
 organisms;Eukaryota;Opisthokonta;Metazoa;Eumetazoa;Bilateria;Protostomia;  
 Spiralia;Lophotrochozoa;Mollusca;Bivalvia;Autobranhia;Heteroconchia;Euhe  
 terodonta;Imparidentia;Venerida;Veneroidea;Veneridae;Mercenaria;Mercenari  
 a mercenaria

UdeM00000040495 6596 122.1 UdeM00000040495 XP\_045166723.1 50 126  
 62 1 1 126 660 784 5.20E-25 122.1 6596 cellular  
 organisms;Eukaryota;Opisthokonta;Metazoa;Eumetazoa;Bilateria;Protostomia;  
 Spiralia;Lophotrochozoa;Mollusca;Bivalvia;Autobranhia;Heteroconchia;Euhe  
 terodonta;Imparidentia;Venerida;Veneroidea;Veneridae;Mercenaria;Mercenari  
 a mercenaria  
 UdeM00000040496 6596 637.9 UdeM00000040496 XP\_045166723.1 43.9 777  
 417 7 8 776 19 784 1.70E-179 637.9 6596 cellular  
 organisms;Eukaryota;Opisthokonta;Metazoa;Eumetazoa;Bilateria;Protostomia;  
 Spiralia;Lophotrochozoa;Mollusca;Bivalvia;Autobranhia;Heteroconchia;Euhe  
 terodonta;Imparidentia;Venerida;Veneroidea;Veneridae;Mercenaria;Mercenari  
 a mercenaria  
 UdeM00000040497 6596 201.8 UdeM00000040497 XP\_045216161.1 68.4 133  
 42 0 1 133 67 199 5.40E-49 201.8 6596 cellular  
 organisms;Eukaryota;Opisthokonta;Metazoa;Eumetazoa;Bilateria;Protostomia;  
 Spiralia;Lophotrochozoa;Mollusca;Bivalvia;Autobranhia;Heteroconchia;Euhe  
 terodonta;Imparidentia;Venerida;Veneroidea;Veneridae;Mercenaria;Mercenari  
 a mercenaria  
 UdeM00000040498 6579 1437.9 UdeM00000040498 XP\_033739131.1 53.7  
 1307 587 8 22 1324 78 1370 0.00E+00 1437.9 6579  
 cellular  
 organisms;Eukaryota;Opisthokonta;Metazoa;Eumetazoa;Bilateria;Protostomia;  
 Spiralia;Lophotrochozoa;Mollusca;Bivalvia;Autobranhia;Pteriormorphia;Pect  
 inida;Pectinoidea;Pectinidae;Pecten;Pecten maximus  
 UdeM00000040499 29159 107.5 UdeM00000040499 XP\_034312908.1 38.3 154  
 92 2 1 153 472 623 1.60E-20 107.5 29159 cellular  
 organisms;Eukaryota;Opisthokonta;Metazoa;Eumetazoa;Bilateria;Protostomia;  
 Spiralia;Lophotrochozoa;Mollusca;Bivalvia;Autobranhia;Pteriormorphia;Ostr  
 eida;Ostreoidea;Ostreidae;Crassostrea;Crassostrea gigas  
 UdeM00000040500 29159 136.3 UdeM00000040500 XP\_034312908.1 30.5 338  
 179 15 9 328 6 305 7.70E-29 136.3 29159 cellular  
 organisms;Eukaryota;Opisthokonta;Metazoa;Eumetazoa;Bilateria;Protostomia;  
 Spiralia;Lophotrochozoa;Mollusca;Bivalvia;Autobranhia;Pteriormorphia;Ostr  
 eida;Ostreoidea;Ostreidae;Crassostrea;Crassostrea gigas  
 UdeM00000040501 29159 73.6 UdeM00000040501 XP\_034307878.1 32.3 99  
 67 0 1 99 92 190 4.90E-10 73.6 29159 cellular  
 organisms;Eukaryota;Opisthokonta;Metazoa;Eumetazoa;Bilateria;Protostomia;  
 Spiralia;Lophotrochozoa;Mollusca;Bivalvia;Autobranhia;Pteriormorphia;Ostr  
 eida;Ostreoidea;Ostreidae;Crassostrea;Crassostrea gigas  
 UdeM00000040503 6596 99.8 UdeM00000040503 XP\_045166723.1 55.7 97  
 41 1 5 99 16 112 2.60E-18 99.8 6596 cellular  
 organisms;Eukaryota;Opisthokonta;Metazoa;Eumetazoa;Bilateria;Protostomia;  
 Spiralia;Lophotrochozoa;Mollusca;Bivalvia;Autobranhia;Heteroconchia;Euhe  
 terodonta;Imparidentia;Venerida;Veneroidea;Veneridae;Mercenaria;Mercenari  
 a mercenaria  
 UdeM00000040504 6596 172.9 UdeM00000040504 XP\_045166723.1 31.8 359  
 134 2 1 248 425 783 5.00E-40 172.9 6596 cellular  
 organisms;Eukaryota;Opisthokonta;Metazoa;Eumetazoa;Bilateria;Protostomia;  
 Spiralia;Lophotrochozoa;Mollusca;Bivalvia;Autobranhia;Heteroconchia;Euhe  
 terodonta;Imparidentia;Venerida;Veneroidea;Veneridae;Mercenaria;Mercenari  
 a mercenaria  
 UdeM00000040506 6596 171.4 UdeM00000040506 XP\_045216699.1 64.2 120  
 43 0 6 125 15 134 1.20E-39 171.4 6596 cellular  
 organisms;Eukaryota;Opisthokonta;Metazoa;Eumetazoa;Bilateria;Protostomia;



Spiralia;Lophotrochozoa;Mollusca;Bivalvia;Autobranchia;Heteroconchia;Euherodonta;Imparidentia;Venerida;Veneroidea;Veneridae;Mercenaria;Mercenaria mercenaria

UdeM00000040507 6596 703.4 UdeM00000040507 XP\_045166723.1 45.7 781  
410 5 5 782 16 785 3.30E-199 703.4 6596 cellular

organisms;Eukaryota;Opisthokonta;Metazoa;Eumetazoa;Bilateria;Protostomia;Spiralia;Lophotrochozoa;Mollusca;Bivalvia;Autobranchia;Heteroconchia;Euherodonta;Imparidentia;Venerida;Veneroidea;Veneridae;Mercenaria;Mercenaria mercenaria

UdeM00000040508 6596 270 UdeM00000040508 XP\_045216161.1 70.5 176  
52 0 18 193 45 220 2.30E-69 270 6596 cellular

organisms;Eukaryota;Opisthokonta;Metazoa;Eumetazoa;Bilateria;Protostomia;Spiralia;Lophotrochozoa;Mollusca;Bivalvia;Autobranchia;Heteroconchia;Euherodonta;Imparidentia;Venerida;Veneroidea;Veneridae;Mercenaria;Mercenaria mercenaria

UdeM00000040509 6596 287.7 UdeM00000040509 XP\_045215233.1 55.6 277  
83 4 28 301 791 1030 1.70E-74 287.7 6596 cellular

organisms;Eukaryota;Opisthokonta;Metazoa;Eumetazoa;Bilateria;Protostomia;Spiralia;Lophotrochozoa;Mollusca;Bivalvia;Autobranchia;Heteroconchia;Euherodonta;Imparidentia;Venerida;Veneroidea;Veneridae;Mercenaria;Mercenaria mercenaria

UdeM00000040510 6596 189.1 UdeM00000040510 XP\_045215233.1 62.2 143  
54 0 12 154 645 787 5.10E-45 189.1 6596 cellular

organisms;Eukaryota;Opisthokonta;Metazoa;Eumetazoa;Bilateria;Protostomia;Spiralia;Lophotrochozoa;Mollusca;Bivalvia;Autobranchia;Heteroconchia;Euherodonta;Imparidentia;Venerida;Veneroidea;Veneridae;Mercenaria;Mercenaria mercenaria

UdeM00000040511 6596 935.3 UdeM00000040511 XP\_045215233.1 70.1 665  
182 2 1 665 1 648 4.40E-269 935.3 6596 cellular

organisms;Eukaryota;Opisthokonta;Metazoa;Eumetazoa;Bilateria;Protostomia;Spiralia;Lophotrochozoa;Mollusca;Bivalvia;Autobranchia;Heteroconchia;Euherodonta;Imparidentia;Venerida;Veneroidea;Veneridae;Mercenaria;Mercenaria mercenaria

UdeM00000040512 6596 604 UdeM00000040512 XP\_045216609.1 47.8 751  
327 14 15 728 12 734 2.50E-169 604 6596 cellular

organisms;Eukaryota;Opisthokonta;Metazoa;Eumetazoa;Bilateria;Protostomia;Spiralia;Lophotrochozoa;Mollusca;Bivalvia;Autobranchia;Heteroconchia;Euherodonta;Imparidentia;Venerida;Veneroidea;Veneridae;Mercenaria;Mercenaria mercenaria

UdeM00000040513 7962 274.6 UdeM00000040513 XP\_042617353.1 32.8 528  
331 9 122 641 11 522 3.30E-70 274.6 7962 cellular

organisms;Eukaryota;Opisthokonta;Metazoa;Eumetazoa;Bilateria;Deuterostomia;Chordata;Craniata;Vertebrata;Gnathostomata;Teleostomi;Euteleostomi;Actinopterygii;Actinopteri;Neopterygii;Teleostei;Osteoglossocephalai;Clupeocephala;Otomorpha;Ostariophysi;Otophysi;Cypriniphysae;Cypriniformes;Cyprinidae;Cyprininae;Cyprinus;Cyprinus carpio

UdeM00000040514 6565 354.4 UdeM00000040514 XP\_022316307.1 38.1 570  
322 10 1 550 5 563 2.90E-94 354.4 6565 cellular

organisms;Eukaryota;Opisthokonta;Metazoa;Eumetazoa;Bilateria;Protostomia;Spiralia;Lophotrochozoa;Mollusca;Bivalvia;Autobranchia;Pteriomorpha;Ostreida;Ostreoidea;Ostreidae;Crassostrea;Crassostrea virginica

UdeM00000040515 6596 293.1 UdeM00000040515 XP\_045156616.1 58.6 249  
99 3 1 249 1 245 3.30E-76 293.1 6596 cellular

organisms;Eukaryota;Opisthokonta;Metazoa;Eumetazoa;Bilateria;Protostomia;

Spiralia;Lophotrochozoa;Mollusca;Bivalvia;Autobranchia;Heteroconchia;Euherodonta;Imparidentia;Venerida;Veneroidea;Veneridae;Mercenaria;Mercenaria mercenaria

UdeM00000040516 6596 748.4 UdeM00000040516 XP\_045156609.1 48.1 781  
371 10 1 752 1 776 8.80E-213 748.4 6596 cellular

organisms;Eukaryota;Opisthokonta;Metazoa;Eumetazoa;Bilateria;Protostomia;Spiralia;Lophotrochozoa;Mollusca;Bivalvia;Autobranchia;Heteroconchia;Euherodonta;Imparidentia;Venerida;Veneroidea;Veneridae;Mercenaria;Mercenaria mercenaria

UdeM00000040517 6596 747.3 UdeM00000040517 XP\_045156610.1 46.5 808  
395 8 1 800 1 779 2.10E-212 747.3 6596 cellular

organisms;Eukaryota;Opisthokonta;Metazoa;Eumetazoa;Bilateria;Protostomia;Spiralia;Lophotrochozoa;Mollusca;Bivalvia;Autobranchia;Heteroconchia;Euherodonta;Imparidentia;Venerida;Veneroidea;Veneridae;Mercenaria;Mercenaria mercenaria

UdeM00000040518 6596 3155.9 UdeM00000040518 XP\_045216970.1 70.2  
2349 636 21 2 2300 7 2341 0.00E+00 3155.9 6596  
cellular

organisms;Eukaryota;Opisthokonta;Metazoa;Eumetazoa;Bilateria;Protostomia;Spiralia;Lophotrochozoa;Mollusca;Bivalvia;Autobranchia;Heteroconchia;Euherodonta;Imparidentia;Venerida;Veneroidea;Veneridae;Mercenaria;Mercenaria mercenaria

UdeM00000040519 6579 348.6 UdeM00000040519 XP\_033749479.1 57.1 550  
226 8 46 588 56 602 1.60E-92 348.6 6579 cellular

organisms;Eukaryota;Opisthokonta;Metazoa;Eumetazoa;Bilateria;Protostomia;Spiralia;Lophotrochozoa;Mollusca;Bivalvia;Autobranchia;Pteriormorphia;Pectinida;Pectinoidea;Pectinidae;Pecten;Pecten maximus

UdeM00000040520 6596 167.5 UdeM00000040520 XP\_045216699.1 52.3 172  
46 2 1 136 1 172 7.50E-38 167.5 6596 cellular

organisms;Eukaryota;Opisthokonta;Metazoa;Eumetazoa;Bilateria;Protostomia;Spiralia;Lophotrochozoa;Mollusca;Bivalvia;Autobranchia;Heteroconchia;Euherodonta;Imparidentia;Venerida;Veneroidea;Veneridae;Mercenaria;Mercenaria mercenaria

UdeM00000040523 6596 258.5 UdeM00000040523 XP\_045156311.1 62.1 195  
72 1 3 197 5 197 1.80E-65 258.5 6596 cellular

organisms;Eukaryota;Opisthokonta;Metazoa;Eumetazoa;Bilateria;Protostomia;Spiralia;Lophotrochozoa;Mollusca;Bivalvia;Autobranchia;Heteroconchia;Euherodonta;Imparidentia;Venerida;Veneroidea;Veneridae;Mercenaria;Mercenaria mercenaria

UdeM00000040524 6596 201.4 UdeM00000040524 XP\_045215538.1 59.7 159  
62 1 3 161 5 161 8.50E-49 201.4 6596 cellular

organisms;Eukaryota;Opisthokonta;Metazoa;Eumetazoa;Bilateria;Protostomia;Spiralia;Lophotrochozoa;Mollusca;Bivalvia;Autobranchia;Heteroconchia;Euherodonta;Imparidentia;Venerida;Veneroidea;Veneridae;Mercenaria;Mercenaria mercenaria

UdeM00000040525 1735272 185.7 UdeM00000040525 XP\_041376517.1 30.5  
305 207 2 140 439 254 558 1.30E-43 185.7 1735272  
cellular

organisms;Eukaryota;Opisthokonta;Metazoa;Eumetazoa;Bilateria;Protostomia;Spiralia;Lophotrochozoa;Mollusca;Gastropoda;Neomphalina;Neomphaloidea;Peltospiridae;Gigantopelta;Gigantopelta aegis

UdeM00000040526 6596 368.2 UdeM00000040526 XP\_045156419.1 52.9 435  
180 13 9 426 8 434 1.60E-98 368.2 6596 cellular

organisms;Eukaryota;Opisthokonta;Metazoa;Eumetazoa;Bilateria;Protostomia;

Spiralia;Lophotrochozoa;Mollusca;Bivalvia;Autobranchia;Heteroconchia;Euherodonta;Imparidentia;Venerida;Veneroidea;Veneridae;Mercenaria;Mercenaria mercenaria

UdeM00000040527 6596 372.5 UdeM00000040527 XP\_045156419.1 52.9 435  
181 12 9 427 8 434 8.60E-100 372.5 6596 cellular

organisms;Eukaryota;Opisthokonta;Metazoa;Eumetazoa;Bilateria;Protostomia;Spiralia;Lophotrochozoa;Mollusca;Bivalvia;Autobranchia;Heteroconchia;Euherodonta;Imparidentia;Venerida;Veneroidea;Veneridae;Mercenaria;Mercenaria mercenaria

UdeM00000040528 6573 369.4 UdeM00000040528 XP\_021368435.1 51.4 622  
258 9 27 619 2515 3121 9.20E-99 369.4 6573 cellular

organisms;Eukaryota;Opisthokonta;Metazoa;Eumetazoa;Bilateria;Protostomia;Spiralia;Lophotrochozoa;Mollusca;Bivalvia;Autobranchia;Pteriomorphia;Pectinida;Pectinoidea;Pectinidae;Mizuhopecten;Mizuhopecten yessoensis

UdeM00000040529 6596 1041.6 UdeM00000040529 XP\_045215127.1 52.9  
889 391 9 2 869 1757 2638 6.50E-301 1041.6 6596  
cellular

organisms;Eukaryota;Opisthokonta;Metazoa;Eumetazoa;Bilateria;Protostomia;Spiralia;Lophotrochozoa;Mollusca;Bivalvia;Autobranchia;Heteroconchia;Euherodonta;Imparidentia;Venerida;Veneroidea;Veneridae;Mercenaria;Mercenaria mercenaria

UdeM00000040530 6573 482.3 UdeM00000040530 XP\_021368435.1 41.9 534  
305 5 6 538 1113 1642 8.40E-133 482.3 6573 cellular

organisms;Eukaryota;Opisthokonta;Metazoa;Eumetazoa;Bilateria;Protostomia;Spiralia;Lophotrochozoa;Mollusca;Bivalvia;Autobranchia;Pteriomorphia;Pectinida;Pectinoidea;Pectinidae;Mizuhopecten;Mizuhopecten yessoensis

UdeM00000040531 6573 342 UdeM00000040531 XP\_021368435.1 46.6 326  
165 6 1 325 788 1105 8.30E-91 342 6573 cellular

organisms;Eukaryota;Opisthokonta;Metazoa;Eumetazoa;Bilateria;Protostomia;Spiralia;Lophotrochozoa;Mollusca;Bivalvia;Autobranchia;Pteriomorphia;Pectinida;Pectinoidea;Pectinidae;Mizuhopecten;Mizuhopecten yessoensis

UdeM00000040532 6579 439.5 UdeM00000040532 XP\_033749618.1 40.7 570  
289 16 27 579 28 565 6.70E-120 439.5 6579 cellular

organisms;Eukaryota;Opisthokonta;Metazoa;Eumetazoa;Bilateria;Protostomia;Spiralia;Lophotrochozoa;Mollusca;Bivalvia;Autobranchia;Pteriomorphia;Pectinida;Pectinoidea;Pectinidae;Pecten;Pecten maximus

UdeM00000040533 6565 254.6 UdeM00000040533 XP\_022310595.1 49.6 250  
122 2 23 268 52 301 1.60E-64 254.6 6565 cellular

organisms;Eukaryota;Opisthokonta;Metazoa;Eumetazoa;Bilateria;Protostomia;Spiralia;Lophotrochozoa;Mollusca;Bivalvia;Autobranchia;Pteriomorphia;Ostreida;Ostreoidea;Ostreidae;Crassostrea;Crassostrea virginica

UdeM00000040534 6565 248.4 UdeM00000040534 XP\_022343539.1 48.8 250  
124 2 23 268 45 294 1.10E-62 248.4 6565 cellular

organisms;Eukaryota;Opisthokonta;Metazoa;Eumetazoa;Bilateria;Protostomia;Spiralia;Lophotrochozoa;Mollusca;Bivalvia;Autobranchia;Pteriomorphia;Ostreida;Ostreoidea;Ostreidae;Crassostrea;Crassostrea virginica

UdeM00000040536 6565 217.2 UdeM00000040536 XP\_022329081.1 43.5 239  
129 4 5 241 5 239 2.30E-53 217.2 6565 cellular

organisms;Eukaryota;Opisthokonta;Metazoa;Eumetazoa;Bilateria;Protostomia;Spiralia;Lophotrochozoa;Mollusca;Bivalvia;Autobranchia;Pteriomorphia;Ostreida;Ostreoidea;Ostreidae;Crassostrea;Crassostrea virginica

UdeM00000040537 6565 326.6 UdeM00000040537 XP\_022329080.1 60.9 243  
91 2 1 243 3 241 2.60E-86 326.6 6565 cellular

organisms;Eukaryota;Opisthokonta;Metazoa;Eumetazoa;Bilateria;Protostomia;

Spiralia;Lophotrochozoa;Mollusca;Bivalvia;Autobranchia;Pteriomorpha;Ostr  
eida;Ostreoidea;Ostreidae;Crassostrea;Crassostrea virginica  
UdeM00000040538 6579 574.7 UdeM00000040538 XP\_033749156.1 68.9 421  
117 4 22 437 2 413 1.00E-160 574.7 6579 cellular  
organisms;Eukaryota;Opisthokonta;Metazoa;Eumetazoa;Bilateria;Protostomia;  
Spiralia;Lophotrochozoa;Mollusca;Bivalvia;Autobranchia;Pteriomorpha;Pect  
inida;Pectinoidea;Pectinidae;Pecten;Pecten maximus  
UdeM00000040540 6565 182.2 UdeM00000040540 XP\_022310595.1 37.9 256  
149 4 24 274 53 303 1.10E-42 182.2 6565 cellular  
organisms;Eukaryota;Opisthokonta;Metazoa;Eumetazoa;Bilateria;Protostomia;  
Spiralia;Lophotrochozoa;Mollusca;Bivalvia;Autobranchia;Pteriomorpha;Ostr  
eida;Ostreoidea;Ostreidae;Crassostrea;Crassostrea virginica  
UdeM00000040541 6565 397.9 UdeM00000040541 XP\_022343539.1 40.4 547  
300 9 25 558 47 580 2.10E-107 397.9 6565 cellular  
organisms;Eukaryota;Opisthokonta;Metazoa;Eumetazoa;Bilateria;Protostomia;  
Spiralia;Lophotrochozoa;Mollusca;Bivalvia;Autobranchia;Pteriomorpha;Ostr  
eida;Ostreoidea;Ostreidae;Crassostrea;Crassostrea virginica  
UdeM00000040542 6573 881.7 UdeM00000040542 XP\_021377155.1 65.5 647  
221 2 1 647 1 645 5.70E-253 881.7 6573 cellular  
organisms;Eukaryota;Opisthokonta;Metazoa;Eumetazoa;Bilateria;Protostomia;  
Spiralia;Lophotrochozoa;Mollusca;Bivalvia;Autobranchia;Pteriomorpha;Pect  
inida;Pectinoidea;Pectinidae;Mizuhopecten;Mizuhopecten yessoensis  
UdeM00000034724 6565 131 UdeM00000034724 XP\_022310300.1 67.4 86  
20 1 74 159 75 152 1.50E-27 131 6565 cellular  
organisms;Eukaryota;Opisthokonta;Metazoa;Eumetazoa;Bilateria;Protostomia;  
Spiralia;Lophotrochozoa;Mollusca;Bivalvia;Autobranchia;Pteriomorpha;Ostr  
eida;Ostreoidea;Ostreidae;Crassostrea;Crassostrea virginica  
UdeM00000034725 29159 95.9 UdeM00000034725 XP\_034337431.1 56.6 76  
33 0 1 76 1450 1525 2.40E-17 95.9 29159 cellular  
organisms;Eukaryota;Opisthokonta;Metazoa;Eumetazoa;Bilateria;Protostomia;  
Spiralia;Lophotrochozoa;Mollusca;Bivalvia;Autobranchia;Pteriomorpha;Ostr  
eida;Ostreoidea;Ostreidae;Crassostrea;Crassostrea gigas  
UdeM00000034726 6579 263.8 UdeM00000034726 XP\_033755819.1 41.8 371  
184 6 1 351 1127 1485 3.00E-67 263.8 6579 cellular  
organisms;Eukaryota;Opisthokonta;Metazoa;Eumetazoa;Bilateria;Protostomia;  
Spiralia;Lophotrochozoa;Mollusca;Bivalvia;Autobranchia;Pteriomorpha;Pect  
inida;Pectinoidea;Pectinidae;Pecten;Pecten maximus  
UdeM00000034727 6579 89 UdeM00000034727 XP\_033755819.1 30.5 213  
116 6 1 193 1127 1327 8.00E-15 89 6579 cellular  
organisms;Eukaryota;Opisthokonta;Metazoa;Eumetazoa;Bilateria;Protostomia;  
Spiralia;Lophotrochozoa;Mollusca;Bivalvia;Autobranchia;Pteriomorpha;Pect  
inida;Pectinoidea;Pectinidae;Pecten;Pecten maximus  
UdeM00000034728 6565 599 UdeM00000034728 XP\_022320668.1 44.9 762  
340 16 11 724 5 734 8.20E-168 599 6565 cellular  
organisms;Eukaryota;Opisthokonta;Metazoa;Eumetazoa;Bilateria;Protostomia;  
Spiralia;Lophotrochozoa;Mollusca;Bivalvia;Autobranchia;Pteriomorpha;Ostr  
eida;Ostreoidea;Ostreidae;Crassostrea;Crassostrea virginica  
UdeM00000034729 6596 674.5 UdeM00000034729 XP\_045190027.1 44.6 823  
414 8 7 807 76 878 1.80E-190 674.5 6596 cellular  
organisms;Eukaryota;Opisthokonta;Metazoa;Eumetazoa;Bilateria;Protostomia;  
Spiralia;Lophotrochozoa;Mollusca;Bivalvia;Autobranchia;Heteroconchia;Euhe  
terodonta;Imparidentia;Venerida;Veneroidea;Veneridae;Mercenaria;Mercenari  
a mercenaria

UdeM00000034730 6565 92.4 UdeM00000034730 XP\_022327962.1 58.2 79  
 31 1 9 85 639 717 3.00E-16 92.4 6565 cellular  
 organisms;Eukaryota;Opisthokonta;Metazoa;Eumetazoa;Bilateria;Protostomia;  
 Spiralia;Lophotrochozoa;Mollusca;Bivalvia;Autobranchia;Pteriomorpha;Ostr  
 eida;Ostreoidea;Ostreidae;Crassostrea;Crassostrea virginica  
 UdeM00000034731 6596 315.8 UdeM00000034731 XP\_045190029.1 50.3 318  
 152 3 50 365 29 342 7.10E-83 315.8 6596 cellular  
 organisms;Eukaryota;Opisthokonta;Metazoa;Eumetazoa;Bilateria;Protostomia;  
 Spiralia;Lophotrochozoa;Mollusca;Bivalvia;Autobranchia;Heteroconchia;Euhe  
 terodonta;Imparidentia;Venerida;Veneroidea;Veneridae;Mercenaria;Mercenari  
 a mercenaria  
 UdeM00000034732 6596 305.8 UdeM00000034732 XP\_045190029.1 52.5 301  
 137 3 50 348 29 325 7.30E-80 305.8 6596 cellular  
 organisms;Eukaryota;Opisthokonta;Metazoa;Eumetazoa;Bilateria;Protostomia;  
 Spiralia;Lophotrochozoa;Mollusca;Bivalvia;Autobranchia;Heteroconchia;Euhe  
 terodonta;Imparidentia;Venerida;Veneroidea;Veneridae;Mercenaria;Mercenari  
 a mercenaria  
 UdeM00000034733 6573 419.1 UdeM00000034733 XP\_021355618.1 50.6 431  
 193 5 1 412 4 433 6.90E-114 419.1 6573 cellular  
 organisms;Eukaryota;Opisthokonta;Metazoa;Eumetazoa;Bilateria;Protostomia;  
 Spiralia;Lophotrochozoa;Mollusca;Bivalvia;Autobranchia;Pteriomorpha;Pect  
 inida;Pectinoidea;Pectinidae;Mizuhopecten;Mizuhopecten yessoensis  
 UdeM00000034734 29159 221.1 UdeM00000034734 XP\_011456725.1 51.8 218  
 81 5 2 198 12 226 1.30E-54 221.1 29159 cellular  
 organisms;Eukaryota;Opisthokonta;Metazoa;Eumetazoa;Bilateria;Protostomia;  
 Spiralia;Lophotrochozoa;Mollusca;Bivalvia;Autobranchia;Pteriomorpha;Ostr  
 eida;Ostreoidea;Ostreidae;Crassostrea;Crassostrea gigas  
 UdeM00000034735 6596 429.1 UdeM00000034735 XP\_045190533.1 81.2 260  
 49 0 71 330 12 271 5.30E-117 429.1 6596 cellular  
 organisms;Eukaryota;Opisthokonta;Metazoa;Eumetazoa;Bilateria;Protostomia;  
 Spiralia;Lophotrochozoa;Mollusca;Bivalvia;Autobranchia;Heteroconchia;Euhe  
 terodonta;Imparidentia;Venerida;Veneroidea;Veneridae;Mercenaria;Mercenari  
 a mercenaria  
 UdeM00000034736 37653 260.8 UdeM00000034736 XP\_014775290.1 32.1 788  
 372 21 1 641 93 864 4.70E-66 260.8 37653 cellular  
 organisms;Eukaryota;Opisthokonta;Metazoa;Eumetazoa;Bilateria;Protostomia;  
 Spiralia;Lophotrochozoa;Mollusca;Cephalopoda;Coleoidea;Octopodiformes;Oct  
 opoda;Incirrata;Octopodidae;Octopus;Octopus bimaculoides  
 UdeM00000034737 29159 432.6 UdeM00000034737 XP\_034329436.1 30 1282  
 710 48 127 1274 112 1340 1.80E-117 432.6 29159 cellular  
 organisms;Eukaryota;Opisthokonta;Metazoa;Eumetazoa;Bilateria;Protostomia;  
 Spiralia;Lophotrochozoa;Mollusca;Bivalvia;Autobranchia;Pteriomorpha;Ostr  
 eida;Ostreoidea;Ostreidae;Crassostrea;Crassostrea gigas  
 UdeM00000034738 29159 432.6 UdeM00000034738 XP\_034329436.1 30 1282  
 710 48 74 1221 112 1340 1.70E-117 432.6 29159 cellular  
 organisms;Eukaryota;Opisthokonta;Metazoa;Eumetazoa;Bilateria;Protostomia;  
 Spiralia;Lophotrochozoa;Mollusca;Bivalvia;Autobranchia;Pteriomorpha;Ostr  
 eida;Ostreoidea;Ostreidae;Crassostrea;Crassostrea gigas  
 UdeM00000034741 6596 137.5 UdeM00000034741 XP\_045190401.1 42.9 205  
 97 6 31 225 56 250 2.10E-29 137.5 6596 cellular  
 organisms;Eukaryota;Opisthokonta;Metazoa;Eumetazoa;Bilateria;Protostomia;  
 Spiralia;Lophotrochozoa;Mollusca;Bivalvia;Autobranchia;Heteroconchia;Euhe  
 terodonta;Imparidentia;Venerida;Veneroidea;Veneridae;Mercenaria;Mercenari  
 a mercenaria

UdeM00000034743 6596 695.7 UdeM00000034743 XP\_045190401.1 62.7 571  
 197 6 1 561 1 565 5.00E-197 695.7 6596 cellular  
 organisms;Eukaryota;Opisthokonta;Metazoa;Eumetazoa;Bilateria;Protostomia;  
 Spiralia;Lophotrochozoa;Mollusca;Bivalvia;Autobranchia;Heteroconchia;Euhe  
 terodonta;Imparidentia;Venerida;Veneroidea;Veneridae;Mercenaria;Mercenari  
 a mercenaria  
 UdeM00000034744 6596 1157.1 UdeM00000034744 XP\_045189797.1 61.3  
 979 356 5 1 968 1 967 0.00E+00 1157.1 6596  
 cellular  
 organisms;Eukaryota;Opisthokonta;Metazoa;Eumetazoa;Bilateria;Protostomia;  
 Spiralia;Lophotrochozoa;Mollusca;Bivalvia;Autobranchia;Heteroconchia;Euhe  
 terodonta;Imparidentia;Venerida;Veneroidea;Veneridae;Mercenaria;Mercenari  
 a mercenaria  
 UdeM00000034745 6596 409.1 UdeM00000034745 XP\_045189794.1 60.2 364  
 137 4 5 366 964 1321 7.20E-111 409.1 6596 cellular  
 organisms;Eukaryota;Opisthokonta;Metazoa;Eumetazoa;Bilateria;Protostomia;  
 Spiralia;Lophotrochozoa;Mollusca;Bivalvia;Autobranchia;Heteroconchia;Euhe  
 terodonta;Imparidentia;Venerida;Veneroidea;Veneridae;Mercenaria;Mercenari  
 a mercenaria  
 UdeM00000034746 6565 357.8 UdeM00000034746 XP\_022342270.1 64.3 258  
 92 0 3 260 6 263 1.10E-95 357.8 6565 cellular  
 organisms;Eukaryota;Opisthokonta;Metazoa;Eumetazoa;Bilateria;Protostomia;  
 Spiralia;Lophotrochozoa;Mollusca;Bivalvia;Autobranchia;Pteriormorphia;Ostr  
 eida;Ostreoidea;Ostreidae;Crassostrea;Crassostrea virginica  
 UdeM00000034747 6565 475.3 UdeM00000034747 XP\_022339651.1 74 289  
 75 0 1 289 1 289 5.50E-131 475.3 6565 cellular  
 organisms;Eukaryota;Opisthokonta;Metazoa;Eumetazoa;Bilateria;Protostomia;  
 Spiralia;Lophotrochozoa;Mollusca;Bivalvia;Autobranchia;Pteriormorphia;Ostr  
 eida;Ostreoidea;Ostreidae;Crassostrea;Crassostrea virginica  
 UdeM00000034748 6596 352.1 UdeM00000034748 XP\_045188674.1 59 295  
 118 2 1 293 51 344 7.90E-94 352.1 6596 cellular  
 organisms;Eukaryota;Opisthokonta;Metazoa;Eumetazoa;Bilateria;Protostomia;  
 Spiralia;Lophotrochozoa;Mollusca;Bivalvia;Autobranchia;Heteroconchia;Euhe  
 terodonta;Imparidentia;Venerida;Veneroidea;Veneridae;Mercenaria;Mercenari  
 a mercenaria  
 UdeM00000034749 6596 376.7 UdeM00000034749 XP\_045188674.1 57.3 328  
 137 2 5 330 18 344 3.30E-101 376.7 6596 cellular  
 organisms;Eukaryota;Opisthokonta;Metazoa;Eumetazoa;Bilateria;Protostomia;  
 Spiralia;Lophotrochozoa;Mollusca;Bivalvia;Autobranchia;Heteroconchia;Euhe  
 terodonta;Imparidentia;Venerida;Veneroidea;Veneridae;Mercenaria;Mercenari  
 a mercenaria  
 UdeM00000034750 6573 173.7 UdeM00000034750 XP\_021378602.1 55.5 155  
 68 1 7 160 6 160 1.90E-40 173.7 6573 cellular  
 organisms;Eukaryota;Opisthokonta;Metazoa;Eumetazoa;Bilateria;Protostomia;  
 Spiralia;Lophotrochozoa;Mollusca;Bivalvia;Autobranchia;Pteriormorphia;Pect  
 inida;Pectinoidea;Pectinidae;Mizuhopecten;Mizuhopecten yessoensis  
 UdeM00000034752 6596 797.3 UdeM00000034752 XP\_045189307.1 45.3 1021  
 486 16 8 1017 144 1103 2.20E-227 797.3 6596 cellular  
 organisms;Eukaryota;Opisthokonta;Metazoa;Eumetazoa;Bilateria;Protostomia;  
 Spiralia;Lophotrochozoa;Mollusca;Bivalvia;Autobranchia;Heteroconchia;Euhe  
 terodonta;Imparidentia;Venerida;Veneroidea;Veneridae;Mercenaria;Mercenari  
 a mercenaria  
 UdeM00000034753 6573 311.2 UdeM00000034753 XP\_021354732.1 46.2 301  
 153 3 126 424 65 358 2.00E-81 311.2 6573 cellular

organisms;Eukaryota;Opisthokonta;Metazoa;Eumetazoa;Bilateria;Protostomia;  
Spiralia;Lophotrochozoa;Mollusca;Bivalvia;Autobranchia;Pteriomorpha;Pect  
inida;Pectinoidea;Pectinidae;Mizuhopecten;Mizuhopecten yessoensis  
UdeM00000034754 6573 311.2 UdeM00000034754 XP\_021354732.1 46.2 301  
153 3 123 421 65 358 2.00E-81 311.2 6573 cellular  
organisms;Eukaryota;Opisthokonta;Metazoa;Eumetazoa;Bilateria;Protostomia;  
Spiralia;Lophotrochozoa;Mollusca;Bivalvia;Autobranchia;Pteriomorpha;Pect  
inida;Pectinoidea;Pectinidae;Mizuhopecten;Mizuhopecten yessoensis  
UdeM00000034755 6573 311.2 UdeM00000034755 XP\_021354732.1 46.2 301  
153 3 113 411 65 358 1.90E-81 311.2 6573 cellular  
organisms;Eukaryota;Opisthokonta;Metazoa;Eumetazoa;Bilateria;Protostomia;  
Spiralia;Lophotrochozoa;Mollusca;Bivalvia;Autobranchia;Pteriomorpha;Pect  
inida;Pectinoidea;Pectinidae;Mizuhopecten;Mizuhopecten yessoensis  
UdeM00000034756 6579 319.7 UdeM00000034756 XP\_033751112.1 48.4 287  
144 2 69 353 76 360 4.70E-84 319.7 6579 cellular  
organisms;Eukaryota;Opisthokonta;Metazoa;Eumetazoa;Bilateria;Protostomia;  
Spiralia;Lophotrochozoa;Mollusca;Bivalvia;Autobranchia;Pteriomorpha;Pect  
inida;Pectinoidea;Pectinidae;Pecten;Pecten maximus  
UdeM00000034757 1735272 169.9 UdeM00000034757 XP\_041364971.1 38.7  
248 141 5 59 298 83 327 5.30E-39 169.9 1735272  
cellular  
organisms;Eukaryota;Opisthokonta;Metazoa;Eumetazoa;Bilateria;Protostomia;  
Spiralia;Lophotrochozoa;Mollusca;Gastropoda;Neomphalina;Neomphaloidea;Pel  
tospiridae;Gigantopelta;Gigantopelta aegis  
UdeM00000034758 6579 162.9 UdeM00000034758 XP\_033751112.1 35.9 262  
151 6 56 308 76 329 6.40E-37 162.9 6579 cellular  
organisms;Eukaryota;Opisthokonta;Metazoa;Eumetazoa;Bilateria;Protostomia;  
Spiralia;Lophotrochozoa;Mollusca;Bivalvia;Autobranchia;Pteriomorpha;Pect  
inida;Pectinoidea;Pectinidae;Pecten;Pecten maximus  
UdeM00000034759 6565 629.8 UdeM00000034759 XP\_022339935.1 72.2 403  
112 0 1 403 1 403 2.50E-177 629.8 6565 cellular  
organisms;Eukaryota;Opisthokonta;Metazoa;Eumetazoa;Bilateria;Protostomia;  
Spiralia;Lophotrochozoa;Mollusca;Bivalvia;Autobranchia;Pteriomorpha;Ostr  
eida;Ostreidae;Crassostrea;Crassostrea virginica  
UdeM00000034760 29159 118.2 UdeM00000034760 XP\_011439667.2 31.7 306  
157 8 1 304 4 259 1.80E-23 118.2 29159 cellular  
organisms;Eukaryota;Opisthokonta;Metazoa;Eumetazoa;Bilateria;Protostomia;  
Spiralia;Lophotrochozoa;Mollusca;Bivalvia;Autobranchia;Pteriomorpha;Ostr  
eida;Ostreidae;Crassostrea;Crassostrea gigas  
UdeM00000034761 6579 91.7 UdeM00000034761 XP\_033756460.1 29.2 236  
107 5 1 234 17 194 1.70E-15 91.7 6579 cellular  
organisms;Eukaryota;Opisthokonta;Metazoa;Eumetazoa;Bilateria;Protostomia;  
Spiralia;Lophotrochozoa;Mollusca;Bivalvia;Autobranchia;Pteriomorpha;Pect  
inida;Pectinoidea;Pectinidae;Pecten;Pecten maximus  
UdeM00000034762 6596 694.5 UdeM00000034762 XP\_045189169.1 39.9 1918  
872 50 953 2747 3 1763 5.40E-196 694.5 6596 cellular  
organisms;Eukaryota;Opisthokonta;Metazoa;Eumetazoa;Bilateria;Protostomia;  
Spiralia;Lophotrochozoa;Mollusca;Bivalvia;Autobranchia;Heteroconchia;Euhe  
terodonta;Imparidentia;Venerida;Veneroidea;Veneridae;Mercenaria;Mercenari  
a mercenaria  
UdeM00000034763 6596 845.5 UdeM00000034763 XP\_045189720.1 71.8 586  
158 4 1 580 1 585 4.00E-242 845.5 6596 cellular  
organisms;Eukaryota;Opisthokonta;Metazoa;Eumetazoa;Bilateria;Protostomia;  
Spiralia;Lophotrochozoa;Mollusca;Bivalvia;Autobranchia;Heteroconchia;Euhe

terodonta;Imparidentia;Venerida;Veneroidea;Veneridae;Mercenaria;Mercenari  
 a mercenaria  
 UdeM00000034764 6596 407.9 UdeM00000034764 XP\_045189721.1 58.7 329  
 133 3 1 327 1 328 1.20E-110 407.9 6596 cellular  
 organisms;Eukaryota;Opisthokonta;Metazoa;Eumetazoa;Bilateria;Protostomia;  
 Spiralia;Lophotrochozoa;Mollusca;Bivalvia;Autobranchia;Heteroconchia;Euhe  
 terodonta;Imparidentia;Venerida;Veneroidea;Veneridae;Mercenaria;Mercenari  
 a mercenaria  
 UdeM00000034765 6596 267.7 UdeM00000034765 XP\_045215232.1 51.6 285  
 129 5 157 439 206 483 8.30E-68 267.7 6596 cellular  
 organisms;Eukaryota;Opisthokonta;Metazoa;Eumetazoa;Bilateria;Protostomia;  
 Spiralia;Lophotrochozoa;Mollusca;Bivalvia;Autobranchia;Heteroconchia;Euhe  
 terodonta;Imparidentia;Venerida;Veneroidea;Veneridae;Mercenaria;Mercenari  
 a mercenaria  
 UdeM00000034766 6596 102.8 UdeM00000034766 XP\_045208737.1 42.8 159  
 81 6 173 326 320 473 8.90E-19 102.8 6596 cellular  
 organisms;Eukaryota;Opisthokonta;Metazoa;Eumetazoa;Bilateria;Protostomia;  
 Spiralia;Lophotrochozoa;Mollusca;Bivalvia;Autobranchia;Heteroconchia;Euhe  
 terodonta;Imparidentia;Venerida;Veneroidea;Veneridae;Mercenaria;Mercenari  
 a mercenaria  
 UdeM00000034767 6596 171.4 UdeM00000034767 XP\_045208737.1 29.5 492  
 305 18 2 470 41 513 7.00E-39 171.4 6596 cellular  
 organisms;Eukaryota;Opisthokonta;Metazoa;Eumetazoa;Bilateria;Protostomia;  
 Spiralia;Lophotrochozoa;Mollusca;Bivalvia;Autobranchia;Heteroconchia;Euhe  
 terodonta;Imparidentia;Venerida;Veneroidea;Veneridae;Mercenaria;Mercenari  
 a mercenaria  
 UdeM00000034768 6596 167.2 UdeM00000034768 XP\_045208737.1 29.3 492  
 306 18 2 470 41 513 1.30E-37 167.2 6596 cellular  
 organisms;Eukaryota;Opisthokonta;Metazoa;Eumetazoa;Bilateria;Protostomia;  
 Spiralia;Lophotrochozoa;Mollusca;Bivalvia;Autobranchia;Heteroconchia;Euhe  
 terodonta;Imparidentia;Venerida;Veneroidea;Veneridae;Mercenaria;Mercenari  
 a mercenaria  
 UdeM00000034769 6596 112.5 UdeM00000034769 XP\_045208737.1 27.2 482  
 281 20 2 426 41 509 1.50E-21 112.5 6596 cellular  
 organisms;Eukaryota;Opisthokonta;Metazoa;Eumetazoa;Bilateria;Protostomia;  
 Spiralia;Lophotrochozoa;Mollusca;Bivalvia;Autobranchia;Heteroconchia;Euhe  
 terodonta;Imparidentia;Venerida;Veneroidea;Veneridae;Mercenaria;Mercenari  
 a mercenaria  
 UdeM00000034770 6596 146.7 UdeM00000034770 XP\_045208737.1 28.5 505  
 289 20 2 470 41 509 8.10E-32 146.7 6596 cellular  
 organisms;Eukaryota;Opisthokonta;Metazoa;Eumetazoa;Bilateria;Protostomia;  
 Spiralia;Lophotrochozoa;Mollusca;Bivalvia;Autobranchia;Heteroconchia;Euhe  
 terodonta;Imparidentia;Venerida;Veneroidea;Veneridae;Mercenaria;Mercenari  
 a mercenaria  
 UdeM00000034771 7574 109.8 UdeM00000034771 XP\_013388021.1 30.1 329  
 185 10 145 434 227 549 1.00E-20 109.8 7574 cellular  
 organisms;Eukaryota;Opisthokonta;Metazoa;Eumetazoa;Bilateria;Protostomia;  
 Spiralia;Lophotrochozoa;Brachiopoda;Linguliformea;Lingulata;Lingulida;Lin  
 guloidea;Lingulidae;Lingula;Lingula anatina  
 UdeM00000034772 6579 137.9 UdeM00000034772 XP\_033744293.1 29.8 326  
 183 6 135 415 90 414 3.40E-29 137.9 6579 cellular  
 organisms;Eukaryota;Opisthokonta;Metazoa;Eumetazoa;Bilateria;Protostomia;  
 Spiralia;Lophotrochozoa;Mollusca;Bivalvia;Autobranchia;Pteriomorphia;Pect  
 inida;Pectinoidea;Pectinidae;Pecten;Pecten maximus



UdeM00000034775 6579 143.7 UdeM00000034775 XP\_033744293.1 27.2 438  
 244 12 116 506 5 414 7.30E-31 143.7 6579 cellular  
 organisms;Eukaryota;Opisthokonta;Metazoa;Eumetazoa;Bilateria;Protostomia;  
 Spiralia;Lophotrochozoa;Mollusca;Bivalvia;Autobranchia;Pteriomorpha;Pect  
 inida;Pectinoidea;Pectinidae;Pecten;Pecten maximus  
 UdeM00000034776 6579 158.7 UdeM00000034776 XP\_033744293.1 32.2 329  
 202 7 135 446 90 414 2.00E-35 158.7 6579 cellular  
 organisms;Eukaryota;Opisthokonta;Metazoa;Eumetazoa;Bilateria;Protostomia;  
 Spiralia;Lophotrochozoa;Mollusca;Bivalvia;Autobranchia;Pteriomorpha;Pect  
 inida;Pectinoidea;Pectinidae;Pecten;Pecten maximus  
 UdeM00000034777 481459 67 UdeM00000034777 XP\_040016701.1 28.4  
 134 91 3 333 463 360 491 8.00E-08 67 481459  
 cellular  
 organisms;Eukaryota;Opisthokonta;Metazoa;Eumetazoa;Bilateria;Deuterostomi  
 a;Chordata;Craniata;Vertebrata;Gnathostomata;Teleostomi;Euteleostomi;Acti  
 nopterygii;Actinopteri;Neopterygii;Teleostei;Osteoglossocephalai;Clupeoce  
 phala;Euteleosteomorpha;Neoteleostei;Eurypterygia;Ctenosquamata;Acanthomo  
 rphata;Euacanthomorphacea;Percomorphaceae;Eupercaria;Perciformes;Cottioid  
 ei;Gasterosteales;Gasterosteidae;Gasterosteus;Gasterosteus  
 aculeatus;Gasterosteus aculeatus aculeatus  
 UdeM00000034778 7574 74.7 UdeM00000034778 XP\_013416242.1 24.6 293  
 148 8 243 463 184 475 3.80E-10 74.7 7574 cellular  
 organisms;Eukaryota;Opisthokonta;Metazoa;Eumetazoa;Bilateria;Protostomia;  
 Spiralia;Lophotrochozoa;Brachiopoda;Linguliformea;Lingulata;Lingulida;Lin  
 guloidea;Lingulidae;Lingula;Lingula anatina  
 UdeM00000034779 481459 67 UdeM00000034779 XP\_040016701.1 28.4  
 134 91 3 260 390 360 491 6.80E-08 67 481459  
 cellular  
 organisms;Eukaryota;Opisthokonta;Metazoa;Eumetazoa;Bilateria;Deuterostomi  
 a;Chordata;Craniata;Vertebrata;Gnathostomata;Teleostomi;Euteleostomi;Acti  
 nopterygii;Actinopteri;Neopterygii;Teleostei;Osteoglossocephalai;Clupeoce  
 phala;Euteleosteomorpha;Neoteleostei;Eurypterygia;Ctenosquamata;Acanthomo  
 rphata;Euacanthomorphacea;Percomorphaceae;Eupercaria;Perciformes;Cottioid  
 ei;Gasterosteales;Gasterosteidae;Gasterosteus;Gasterosteus  
 aculeatus;Gasterosteus aculeatus aculeatus  
 UdeM00000034780 6596 169.9 UdeM00000034780 XP\_045208737.1 29.4 507  
 286 22 121 591 46 516 1.10E-38 169.9 6596 cellular  
 organisms;Eukaryota;Opisthokonta;Metazoa;Eumetazoa;Bilateria;Protostomia;  
 Spiralia;Lophotrochozoa;Mollusca;Bivalvia;Autobranchia;Heteroconchia;Euhe  
 terodonta;Imparidentia;Venerida;Veneroidea;Veneridae;Mercenaria;Mercenari  
 a mercenaria  
 UdeM00000034781 6596 266.2 UdeM00000034781 XP\_045170871.1 50.2 267  
 121 4 93 356 36 293 6.30E-68 266.2 6596 cellular  
 organisms;Eukaryota;Opisthokonta;Metazoa;Eumetazoa;Bilateria;Protostomia;  
 Spiralia;Lophotrochozoa;Mollusca;Bivalvia;Autobranchia;Heteroconchia;Euhe  
 terodonta;Imparidentia;Venerida;Veneroidea;Veneridae;Mercenaria;Mercenari  
 a mercenaria  
 UdeM00000034782 6579 110.5 UdeM00000034782 XP\_033744347.1 26.8 456  
 267 18 12 412 4 447 5.00E-21 110.5 6579 cellular  
 organisms;Eukaryota;Opisthokonta;Metazoa;Eumetazoa;Bilateria;Protostomia;  
 Spiralia;Lophotrochozoa;Mollusca;Bivalvia;Autobranchia;Pteriomorpha;Pect  
 inida;Pectinoidea;Pectinidae;Pecten;Pecten maximus  
 UdeM00000034783 6596 248.4 UdeM00000034783 XP\_045189601.1 42.1 342  
 188 4 14 345 41 382 1.40E-62 248.4 6596 cellular

organisms;Eukaryota;Opisthokonta;Metazoa;Eumetazoa;Bilateria;Protostomia;Spiralia;Lophotrochozoa;Mollusca;Bivalvia;Autobranhia;Heteroconchia;Euheterodonta;Imparidentia;Venerida;Veneroidea;Veneridae;Mercenaria;Mercenaria mercenaria

UdeM00000034784 6596 564.3 UdeM00000034784 XP\_045190441.1 44.8 643  
333 10 38 669 49 680 2.10E-157 564.3 6596 cellular

organisms;Eukaryota;Opisthokonta;Metazoa;Eumetazoa;Bilateria;Protostomia;Spiralia;Lophotrochozoa;Mollusca;Bivalvia;Autobranhia;Heteroconchia;Euheterodonta;Imparidentia;Venerida;Veneroidea;Veneridae;Mercenaria;Mercenaria mercenaria

UdeM00000034785 6565 694.1 UdeM00000034785 XP\_022343234.1 63.1 518  
187 2 1 518 1 514 1.30E-196 694.1 6565 cellular

organisms;Eukaryota;Opisthokonta;Metazoa;Eumetazoa;Bilateria;Protostomia;Spiralia;Lophotrochozoa;Mollusca;Bivalvia;Autobranhia;Pteriormorphia;Ostreida;Ostreioidea;Ostreidae;Crassostrea;Crassostrea virginica

UdeM00000034786 6565 139.8 UdeM00000034786 XP\_022287659.1 39.9 148  
89 0 14 161 131 278 3.70E-30 139.8 6565 cellular

organisms;Eukaryota;Opisthokonta;Metazoa;Eumetazoa;Bilateria;Protostomia;Spiralia;Lophotrochozoa;Mollusca;Bivalvia;Autobranhia;Pteriormorphia;Ostreida;Ostreioidea;Ostreidae;Crassostrea;Crassostrea virginica

UdeM00000034787 29159 489.6 UdeM00000034787 XP\_034330259.1 39 706  
339 13 5 630 7 700 7.10E-135 489.6 29159 cellular

organisms;Eukaryota;Opisthokonta;Metazoa;Eumetazoa;Bilateria;Protostomia;Spiralia;Lophotrochozoa;Mollusca;Bivalvia;Autobranhia;Pteriormorphia;Ostreida;Ostreioidea;Ostreidae;Crassostrea;Crassostrea gigas

UdeM00000034788 7574 162.2 UdeM00000034788 XP\_023932024.1 37.6 255  
145 6 39 290 224 467 1.10E-36 162.2 7574 cellular

organisms;Eukaryota;Opisthokonta;Metazoa;Eumetazoa;Bilateria;Protostomia;Spiralia;Lophotrochozoa;Brachiopoda;Linguliformea;Lingulata;Lingulida;Linguloidea;Lingulidae;Lingula;Lingula anatina

UdeM00000034789 7574 171.8 UdeM00000034789 XP\_023932024.1 38.3 274  
154 7 2 271 205 467 1.30E-39 171.8 7574 cellular

organisms;Eukaryota;Opisthokonta;Metazoa;Eumetazoa;Bilateria;Protostomia;Spiralia;Lophotrochozoa;Brachiopoda;Linguliformea;Lingulata;Lingulida;Linguloidea;Lingulidae;Lingula;Lingula anatina

UdeM00000034790 6596 189.5 UdeM00000034790 XP\_045183440.1 41.4 239  
95 2 2 198 145 380 6.00E-45 189.5 6596 cellular

organisms;Eukaryota;Opisthokonta;Metazoa;Eumetazoa;Bilateria;Protostomia;Spiralia;Lophotrochozoa;Mollusca;Bivalvia;Autobranhia;Heteroconchia;Euheterodonta;Imparidentia;Venerida;Veneroidea;Veneridae;Mercenaria;Mercenaria mercenaria

UdeM00000034791 6596 67.4 UdeM00000034791 XP\_045202346.1 36.9 103  
61 2 6 107 16 115 1.30E-08 67.4 6596 cellular

organisms;Eukaryota;Opisthokonta;Metazoa;Eumetazoa;Bilateria;Protostomia;Spiralia;Lophotrochozoa;Mollusca;Bivalvia;Autobranhia;Heteroconchia;Euheterodonta;Imparidentia;Venerida;Veneroidea;Veneridae;Mercenaria;Mercenaria mercenaria

UdeM00000034792 6579 175.6 UdeM00000034792 XP\_033741736.1 52.6 171  
79 1 1 169 671 841 5.60E-41 175.6 6579 cellular

organisms;Eukaryota;Opisthokonta;Metazoa;Eumetazoa;Bilateria;Protostomia;Spiralia;Lophotrochozoa;Mollusca;Bivalvia;Autobranhia;Pteriormorphia;Pectinida;Pectinoidea;Pectinidae;Pecten;Pecten maximus

UdeM00000034793 6596 870.9 UdeM00000034793 XP\_045205473.1 46.8 1012  
502 22 47 1041 23 1015 1.70E-249 870.9 6596 cellular

organisms;Eukaryota;Opisthokonta;Metazoa;Eumetazoa;Bilateria;Protostomia;Spiralia;Lophotrochozoa;Mollusca;Bivalvia;Autobranhia;Heteroconchia;Euherodonta;Imparidentia;Venerida;Veneroidea;Veneridae;Mercenaria;Mercenaria mercenaria

UdeM00000034794 6596 335.9 UdeM00000034794 XP\_045190971.1 60 260  
104 0 1 260 1 260 6.00E-89 335.9 6596 cellular

organisms;Eukaryota;Opisthokonta;Metazoa;Eumetazoa;Bilateria;Protostomia;Spiralia;Lophotrochozoa;Mollusca;Bivalvia;Autobranhia;Heteroconchia;Euherodonta;Imparidentia;Venerida;Veneroidea;Veneridae;Mercenaria;Mercenaria mercenaria

UdeM00000034795 37653 229.9 UdeM00000034795 XP\_014777784.1 33.2 497  
271 14 131 606 138 594 8.40E-57 229.9 37653 cellular

organisms;Eukaryota;Opisthokonta;Metazoa;Eumetazoa;Bilateria;Protostomia;Spiralia;Lophotrochozoa;Mollusca;Cephalopoda;Coleoidea;Octopodiformes;Octopoda;Incirrata;Octopodidae;Octopus;Octopus bimaculoides

UdeM00000034796 6596 133.3 UdeM00000034796 XP\_045190602.1 32.3 201  
135 1 314 513 316 516 1.20E-27 133.3 6596 cellular

organisms;Eukaryota;Opisthokonta;Metazoa;Eumetazoa;Bilateria;Protostomia;Spiralia;Lophotrochozoa;Mollusca;Bivalvia;Autobranhia;Heteroconchia;Euherodonta;Imparidentia;Venerida;Veneroidea;Veneridae;Mercenaria;Mercenaria mercenaria

UdeM00000034797 50390 144.4 UdeM00000034797 XP\_028135914.1 46.1 152  
80 2 5 156 208 357 1.20E-31 144.4 50390 cellular

organisms;Eukaryota;Opisthokonta;Metazoa;Eumetazoa;Bilateria;Protostomia;Ecdysozoa;Panarthropoda;Arthropoda;Mandibulata;Pancrustacea;Hexapoda;Insecta;Dicondylia;Pterygota;Neoptera;Endopterygota;Coleoptera;Polyphaga;Cucujiformia;Chrysomeloidea;Chrysomelidae;Galerucinae;Luperini;Diabroticina;Diabroticites;Diabrotica;Diabrotica virgifera;Diabrotica virgifera virgifera

UdeM00000034798 29159 69.3 UdeM00000034798 XP\_034322555.1 32 181  
110 6 1 171 1 178 5.80E-09 69.3 29159 cellular

organisms;Eukaryota;Opisthokonta;Metazoa;Eumetazoa;Bilateria;Protostomia;Spiralia;Lophotrochozoa;Mollusca;Bivalvia;Autobranhia;Pteriormorphia;Ostreida;Ostreoidea;Ostreidae;Crassostrea;Crassostrea gigas

UdeM00000034799 6596 299.3 UdeM00000034799 XP\_045190408.1 55.1 265  
107 3 1 265 5 257 6.10E-78 299.3 6596 cellular

organisms;Eukaryota;Opisthokonta;Metazoa;Eumetazoa;Bilateria;Protostomia;Spiralia;Lophotrochozoa;Mollusca;Bivalvia;Autobranhia;Heteroconchia;Euherodonta;Imparidentia;Venerida;Veneroidea;Veneridae;Mercenaria;Mercenaria mercenaria

UdeM00000034801 6596 276.2 UdeM00000034801 XP\_045190410.1 68 228  
52 8 1 223 1 212 3.90E-71 276.2 6596 cellular

organisms;Eukaryota;Opisthokonta;Metazoa;Eumetazoa;Bilateria;Protostomia;Spiralia;Lophotrochozoa;Mollusca;Bivalvia;Autobranhia;Heteroconchia;Euherodonta;Imparidentia;Venerida;Veneroidea;Veneridae;Mercenaria;Mercenaria mercenaria

UdeM00000034800 6596 346.3 UdeM00000034800 XP\_045190410.1 67 288  
74 8 1 283 1 272 3.70E-92 346.3 6596 cellular

organisms;Eukaryota;Opisthokonta;Metazoa;Eumetazoa;Bilateria;Protostomia;Spiralia;Lophotrochozoa;Mollusca;Bivalvia;Autobranhia;Heteroconchia;Euherodonta;Imparidentia;Venerida;Veneroidea;Veneridae;Mercenaria;Mercenaria mercenaria

UdeM00000034802 6596 303.9 UdeM00000034802 XP\_045190410.1 62.2 275  
90 7 1 273 1 263 2.00E-79 303.9 6596 cellular

organisms;Eukaryota;Opisthokonta;Metazoa;Eumetazoa;Bilateria;Protostomia;Spiralia;Lophotrochozoa;Mollusca;Bivalvia;Autobranchia;Heteroconchia;Euherodonta;Imparidentia;Venerida;Veneroidea;Veneridae;Mercenaria;Mercenaria mercenaria

UdeM00000034803 6596 225.7 UdeM00000034803 XP\_045190002.1 55.6 169  
74 1 34 202 26 193 5.30E-56 225.7 6596 cellular

organisms;Eukaryota;Opisthokonta;Metazoa;Eumetazoa;Bilateria;Protostomia;Spiralia;Lophotrochozoa;Mollusca;Bivalvia;Autobranchia;Heteroconchia;Euherodonta;Imparidentia;Venerida;Veneroidea;Veneridae;Mercenaria;Mercenaria mercenaria

UdeM00000034804 6596 225.3 UdeM00000034804 XP\_045190002.1 55.6 169  
74 1 19 187 26 193 6.40E-56 225.3 6596 cellular

organisms;Eukaryota;Opisthokonta;Metazoa;Eumetazoa;Bilateria;Protostomia;Spiralia;Lophotrochozoa;Mollusca;Bivalvia;Autobranchia;Heteroconchia;Euherodonta;Imparidentia;Venerida;Veneroidea;Veneridae;Mercenaria;Mercenaria mercenaria

UdeM00000034805 6596 276.2 UdeM00000034805 XP\_045190000.1 64.6 195  
67 1 2 196 3 195 3.30E-71 276.2 6596 cellular

organisms;Eukaryota;Opisthokonta;Metazoa;Eumetazoa;Bilateria;Protostomia;Spiralia;Lophotrochozoa;Mollusca;Bivalvia;Autobranchia;Heteroconchia;Euherodonta;Imparidentia;Venerida;Veneroidea;Veneridae;Mercenaria;Mercenaria mercenaria

UdeM00000034806 6596 281.6 UdeM00000034806 XP\_045190012.1 73.4 173  
46 0 13 185 15 187 7.50E-73 281.6 6596 cellular

organisms;Eukaryota;Opisthokonta;Metazoa;Eumetazoa;Bilateria;Protostomia;Spiralia;Lophotrochozoa;Mollusca;Bivalvia;Autobranchia;Heteroconchia;Euherodonta;Imparidentia;Venerida;Veneroidea;Veneridae;Mercenaria;Mercenaria mercenaria

UdeM00000034807 6596 278.9 UdeM00000034807 XP\_045190012.1 72.1 172  
48 0 24 195 15 186 5.10E-72 278.9 6596 cellular

organisms;Eukaryota;Opisthokonta;Metazoa;Eumetazoa;Bilateria;Protostomia;Spiralia;Lophotrochozoa;Mollusca;Bivalvia;Autobranchia;Heteroconchia;Euherodonta;Imparidentia;Venerida;Veneroidea;Veneridae;Mercenaria;Mercenaria mercenaria

UdeM00000034808 6573 369.4 UdeM00000034808 XP\_021348625.1 51 392  
168 5 3 393 6 374 6.10E-99 369.4 6573 cellular

organisms;Eukaryota;Opisthokonta;Metazoa;Eumetazoa;Bilateria;Protostomia;Spiralia;Lophotrochozoa;Mollusca;Bivalvia;Autobranchia;Pteriomorphia;Pectinida;Pectinoidea;Pectinidae;Mizuhopecten;Mizuhopecten yessoensis

UdeM00000034809 6596 577 UdeM00000034809 XP\_045188457.1 59.5 494  
166 4 1 461 1 493 2.10E-161 577 6596 cellular

organisms;Eukaryota;Opisthokonta;Metazoa;Eumetazoa;Bilateria;Protostomia;Spiralia;Lophotrochozoa;Mollusca;Bivalvia;Autobranchia;Heteroconchia;Euherodonta;Imparidentia;Venerida;Veneroidea;Veneridae;Mercenaria;Mercenaria mercenaria

UdeM00000034810 6596 168.7 UdeM00000034810 XP\_045190687.1 29 435  
265 13 5 406 18 441 1.60E-38 168.7 6596 cellular

organisms;Eukaryota;Opisthokonta;Metazoa;Eumetazoa;Bilateria;Protostomia;Spiralia;Lophotrochozoa;Mollusca;Bivalvia;Autobranchia;Heteroconchia;Euherodonta;Imparidentia;Venerida;Veneroidea;Veneridae;Mercenaria;Mercenaria mercenaria

UdeM00000034811 6596 168.7 UdeM00000034811 XP\_045190687.1 29 435  
265 13 22 423 18 441 1.60E-38 168.7 6596 cellular

organisms;Eukaryota;Opisthokonta;Metazoa;Eumetazoa;Bilateria;Protostomia;

Spiralia;Lophotrochozoa;Mollusca;Bivalvia;Autobranchia;Heteroconchia;Euherodonta;Imparidentia;Venerida;Veneroidea;Veneridae;Mercenaria;Mercenaria mercenaria

UdeM00000034812 6596 252.7 UdeM00000034812 XP\_045190059.1 67.2 195  
47 4 2 179 98 292 3.60E-64 252.7 6596 cellular

organisms;Eukaryota;Opisthokonta;Metazoa;Eumetazoa;Bilateria;Protostomia;Spiralia;Lophotrochozoa;Mollusca;Bivalvia;Autobranchia;Heteroconchia;Euherodonta;Imparidentia;Venerida;Veneroidea;Veneridae;Mercenaria;Mercenaria mercenaria

UdeM00000034813 6596 417.5 UdeM00000034813 XP\_045190059.1 70.5 292  
69 4 1 275 1 292 1.30E-113 417.5 6596 cellular

organisms;Eukaryota;Opisthokonta;Metazoa;Eumetazoa;Bilateria;Protostomia;Spiralia;Lophotrochozoa;Mollusca;Bivalvia;Autobranchia;Heteroconchia;Euherodonta;Imparidentia;Venerida;Veneroidea;Veneridae;Mercenaria;Mercenaria mercenaria

UdeM00000034814 6596 256.9 UdeM00000034814 XP\_045190015.1 60.7 191  
75 0 39 229 1 191 2.60E-65 256.9 6596 cellular

organisms;Eukaryota;Opisthokonta;Metazoa;Eumetazoa;Bilateria;Protostomia;Spiralia;Lophotrochozoa;Mollusca;Bivalvia;Autobranchia;Heteroconchia;Euherodonta;Imparidentia;Venerida;Veneroidea;Veneridae;Mercenaria;Mercenaria mercenaria

UdeM00000034815 6596 256.5 UdeM00000034815 XP\_045190015.1 62.4 186  
70 0 39 224 1 186 3.40E-65 256.5 6596 cellular

organisms;Eukaryota;Opisthokonta;Metazoa;Eumetazoa;Bilateria;Protostomia;Spiralia;Lophotrochozoa;Mollusca;Bivalvia;Autobranchia;Heteroconchia;Euherodonta;Imparidentia;Venerida;Veneroidea;Veneridae;Mercenaria;Mercenaria mercenaria

UdeM00000034816 225164 205.7 UdeM00000034816 XP\_009052503.1 58.2  
182 70 2 2 177 4 185 5.80E-50 205.7 225164

cellular

organisms;Eukaryota;Opisthokonta;Metazoa;Eumetazoa;Bilateria;Protostomia;Spiralia;Lophotrochozoa;Mollusca;Gastropoda;Patellogastropoda;Lottiidae;Lottia;Lottia gigantea

UdeM00000034818 8496 178.3 UdeM00000034818 XP\_006267143.1 50.6 164  
81 0 2 165 40 203 8.00E-42 178.3 8496 cellular

organisms;Eukaryota;Opisthokonta;Metazoa;Eumetazoa;Bilateria;Deuterostomia;Chordata;Craniata;Vertebrata;Gnathostomata;Teleostomi;Euteleostomi;Sarcopterygii;Dipnotetrapodomorpha;Tetrapoda;Amniota;Sauropsida;Sauria;Archelosauria;Archosauria;Crocodylia;Alligatoridae;Alligatorinae;Alligator;Alligator mississippiensis

UdeM00000034819 6596 144.1 UdeM00000034819 XP\_045190015.1 46.7 135  
72 0 6 140 4 138 1.50E-31 144.1 6596 cellular

organisms;Eukaryota;Opisthokonta;Metazoa;Eumetazoa;Bilateria;Protostomia;Spiralia;Lophotrochozoa;Mollusca;Bivalvia;Autobranchia;Heteroconchia;Euherodonta;Imparidentia;Venerida;Veneroidea;Veneridae;Mercenaria;Mercenaria mercenaria

UdeM00000034820 6579 277.7 UdeM00000034820 XP\_033762218.1 52.5 240  
112 2 2 241 3 240 1.40E-71 277.7 6579 cellular

organisms;Eukaryota;Opisthokonta;Metazoa;Eumetazoa;Bilateria;Protostomia;Spiralia;Lophotrochozoa;Mollusca;Bivalvia;Autobranchia;Pteriomorpha;Pectinida;Pectinoidea;Pectinidae;Pecten;Pecten maximus

UdeM00000034821 1735272 121.3 UdeM00000034821 XP\_041376276.1 42.8  
152 85 2 3 152 799 950 1.20E-24 121.3 1735272

cellular

organisms;Eukaryota;Opisthokonta;Metazoa;Eumetazoa;Bilateria;Protostomia;Spiralia;Lophotrochozoa;Mollusca;Gastropoda;Neomphalina;Neomphaloidea;Peltospiridae;Gigantopelta;Gigantopelta aegis

UdeM00000034822 1735272 121.3 UdeM00000034822 XP\_041376276.1 42.8  
152 85 2 3 152 799 950 1.20E-24 121.3 1735272  
cellular

organisms;Eukaryota;Opisthokonta;Metazoa;Eumetazoa;Bilateria;Protostomia;Spiralia;Lophotrochozoa;Mollusca;Gastropoda;Neomphalina;Neomphaloidea;Peltospiridae;Gigantopelta;Gigantopelta aegis

UdeM00000034823 6596 114.8 UdeM00000034823 XP\_045191093.1 36.5 192  
101 3 18 189 110 300 1.20E-22 114.8 6596 cellular

organisms;Eukaryota;Opisthokonta;Metazoa;Eumetazoa;Bilateria;Protostomia;Spiralia;Lophotrochozoa;Mollusca;Bivalvia;Autobranchia;Heteroconchia;Euheterodonta;Imparidentia;Venerida;Veneroidea;Veneridae;Mercenaria;Mercenaria mercenaria

UdeM00000034824 6596 119.8 UdeM00000034824 XP\_045191093.1 37.1 197  
103 3 29 205 105 300 4.20E-24 119.8 6596 cellular

organisms;Eukaryota;Opisthokonta;Metazoa;Eumetazoa;Bilateria;Protostomia;Spiralia;Lophotrochozoa;Mollusca;Bivalvia;Autobranchia;Heteroconchia;Euheterodonta;Imparidentia;Venerida;Veneroidea;Veneridae;Mercenaria;Mercenaria mercenaria

UdeM00000034826 29159 372.5 UdeM00000034826 XP\_011442152.2 53.7 724  
263 14 11 717 1 669 1.20E-99 372.5 29159 cellular

organisms;Eukaryota;Opisthokonta;Metazoa;Eumetazoa;Bilateria;Protostomia;Spiralia;Lophotrochozoa;Mollusca;Bivalvia;Autobranchia;Pteriormorphia;Ostreida;Ostreoidea;Ostreidae;Crassostrea;Crassostrea gigas

UdeM00000034827 6596 235.3 UdeM00000034827 XP\_045189837.1 47.3 277  
128 3 1 264 1 272 8.70E-59 235.3 6596 cellular

organisms;Eukaryota;Opisthokonta;Metazoa;Eumetazoa;Bilateria;Protostomia;Spiralia;Lophotrochozoa;Mollusca;Bivalvia;Autobranchia;Heteroconchia;Euheterodonta;Imparidentia;Venerida;Veneroidea;Veneridae;Mercenaria;Mercenaria mercenaria

UdeM00000034828 6579 114.4 UdeM00000034828 XP\_033737743.1 22.3 901  
581 31 34 867 99 947 7.30E-22 114.4 6579 cellular

organisms;Eukaryota;Opisthokonta;Metazoa;Eumetazoa;Bilateria;Protostomia;Spiralia;Lophotrochozoa;Mollusca;Bivalvia;Autobranchia;Pteriormorphia;Pectinida;Pectinoidea;Pectinidae;Pecten;Pecten maximus

UdeM00000034829 6579 100.9 UdeM00000034829 XP\_033737743.1 21.8 912  
603 28 9 861 87 947 8.30E-18 100.9 6579 cellular

organisms;Eukaryota;Opisthokonta;Metazoa;Eumetazoa;Bilateria;Protostomia;Spiralia;Lophotrochozoa;Mollusca;Bivalvia;Autobranchia;Pteriormorphia;Pectinida;Pectinoidea;Pectinidae;Pecten;Pecten maximus

UdeM00000034830 6596 681.8 UdeM00000034830 XP\_045189123.1 58.6 621  
228 9 1 601 1 612 7.90E-193 681.8 6596 cellular

organisms;Eukaryota;Opisthokonta;Metazoa;Eumetazoa;Bilateria;Protostomia;Spiralia;Lophotrochozoa;Mollusca;Bivalvia;Autobranchia;Heteroconchia;Euheterodonta;Imparidentia;Venerida;Veneroidea;Veneridae;Mercenaria;Mercenaria mercenaria

UdeM00000034831 29159 565.1 UdeM00000034831 XP\_011440730.1 54.5 545  
242 4 1 541 1 543 1.10E-157 565.1 29159 cellular

organisms;Eukaryota;Opisthokonta;Metazoa;Eumetazoa;Bilateria;Protostomia;Spiralia;Lophotrochozoa;Mollusca;Bivalvia;Autobranchia;Pteriormorphia;Ostreida;Ostreoidea;Ostreidae;Crassostrea;Crassostrea gigas

UdeM00000034832 1735272 67.4 UdeM00000034832 XP\_041369521.1 39.2  
 120 51 5 26 133 37 146 1.60E-08 67.4 1735272  
 cellular  
 organisms;Eukaryota;Opisthokonta;Metazoa;Eumetazoa;Bilateria;Protostomia;  
 Spiralia;Lophotrochozoa;Mollusca;Gastropoda;Neomphalina;Neomphaloidea;Pel  
 tospiridae;Gigantopelta;Gigantopelta aegis  
 UdeM00000034833 6579 62.8 UdeM00000034833 XP\_033752164.1 29.3 157  
 84 4 64 204 313 458 6.00E-07 62.8 6579 cellular  
 organisms;Eukaryota;Opisthokonta;Metazoa;Eumetazoa;Bilateria;Protostomia;  
 Spiralia;Lophotrochozoa;Mollusca;Bivalvia;Autobranchia;Pteriormorphia;Pect  
 inida;Pectinoidea;Pectinidae;Pecten;Pecten maximus  
 UdeM00000034834 6596 145.6 UdeM00000034834 XP\_045191021.1 33.8 299  
 160 7 14 286 12 298 9.80E-32 145.6 6596 cellular  
 organisms;Eukaryota;Opisthokonta;Metazoa;Eumetazoa;Bilateria;Protostomia;  
 Spiralia;Lophotrochozoa;Mollusca;Bivalvia;Autobranchia;Heteroconchia;Euhe  
 terodonta;Imparidentia;Venerida;Veneroidea;Veneridae;Mercenaria;Mercenari  
 a mercenaria  
 UdeM00000034835 6596 402.1 UdeM00000034835 XP\_045189258.1 51.4 350  
 160 2 24 367 37 382 8.20E-109 402.1 6596 cellular  
 organisms;Eukaryota;Opisthokonta;Metazoa;Eumetazoa;Bilateria;Protostomia;  
 Spiralia;Lophotrochozoa;Mollusca;Bivalvia;Autobranchia;Heteroconchia;Euhe  
 terodonta;Imparidentia;Venerida;Veneroidea;Veneridae;Mercenaria;Mercenari  
 a mercenaria  
 UdeM00000034838 63436 89.7 UdeM00000034838 XP\_043485121.1 32.2 143  
 85 2 135 270 160 297 6.40E-15 89.7 63436 cellular  
 organisms;Eukaryota;Opisthokonta;Metazoa;Eumetazoa;Bilateria;Protostomia;  
 Ecdysozoa;Panarthropoda;Arthropoda;Mandibulata;Pancrustacea;Hexapoda;Inse  
 cta;Dicondylia;Pterygota;Neoptera;Endopterygota;Hymenoptera;Apocrita;Para  
 sitoida;Cynipoidea;Figitidae;Eucoilinae;Leptopilina;Leptopilina  
 heterotoma  
 UdeM00000034839 6596 594.3 UdeM00000034839 XP\_045189258.1 58.4 498  
 195 5 11 498 17 512 1.40E-166 594.3 6596 cellular  
 organisms;Eukaryota;Opisthokonta;Metazoa;Eumetazoa;Bilateria;Protostomia;  
 Spiralia;Lophotrochozoa;Mollusca;Bivalvia;Autobranchia;Heteroconchia;Euhe  
 terodonta;Imparidentia;Venerida;Veneroidea;Veneridae;Mercenaria;Mercenari  
 a mercenaria  
 UdeM00000034841 6596 1336.6 UdeM00000034841 XP\_045189254.1 62.8  
 1244 429 16 3 1220 4 1239 0.00E+00 1336.6 6596  
 cellular  
 organisms;Eukaryota;Opisthokonta;Metazoa;Eumetazoa;Bilateria;Protostomia;  
 Spiralia;Lophotrochozoa;Mollusca;Bivalvia;Autobranchia;Heteroconchia;Euhe  
 terodonta;Imparidentia;Venerida;Veneroidea;Veneridae;Mercenaria;Mercenari  
 a mercenaria  
 UdeM00000034842 6565 504.6 UdeM00000034842 XP\_022288627.1 66.3 335  
 111 1 12 346 3 335 1.00E-139 504.6 6565 cellular  
 organisms;Eukaryota;Opisthokonta;Metazoa;Eumetazoa;Bilateria;Protostomia;  
 Spiralia;Lophotrochozoa;Mollusca;Bivalvia;Autobranchia;Pteriormorphia;Ostr  
 eida;Ostreoidea;Ostreidae;Crassostrea;Crassostrea virginica  
 UdeM00000034843 6579 549.3 UdeM00000034843 XP\_033756633.1 73.2 328  
 85 2 1 326 3 329 3.50E-153 549.3 6579 cellular  
 organisms;Eukaryota;Opisthokonta;Metazoa;Eumetazoa;Bilateria;Protostomia;  
 Spiralia;Lophotrochozoa;Mollusca;Bivalvia;Autobranchia;Pteriormorphia;Pect  
 inida;Pectinoidea;Pectinidae;Pecten;Pecten maximus

UdeM00000034844 1735272 556.2 UdeM00000034844 XP\_041370814.1 44.1  
 667 359 7 11 670 53 712 5.60E-155 556.2 1735272  
 cellular  
 organisms;Eukaryota;Opisthokonta;Metazoa;Eumetazoa;Bilateria;Protostomia;  
 Spiralia;Lophotrochozoa;Mollusca;Gastropoda;Neomphalina;Neomphaloidea;Pel  
 tospiridae;Gigantopelta;Gigantopelta aegis  
 UdeM00000034845 1735272 556.2 UdeM00000034845 XP\_041370814.1 44.1  
 667 359 7 32 691 53 712 5.80E-155 556.2 1735272  
 cellular  
 organisms;Eukaryota;Opisthokonta;Metazoa;Eumetazoa;Bilateria;Protostomia;  
 Spiralia;Lophotrochozoa;Mollusca;Gastropoda;Neomphalina;Neomphaloidea;Pel  
 tospiridae;Gigantopelta;Gigantopelta aegis  
 UdeM00000034846 6596 703.7 UdeM00000034846 XP\_045189002.1 68.2 591  
 173 5 1 589 1 578 1.90E-199 703.7 6596 cellular  
 organisms;Eukaryota;Opisthokonta;Metazoa;Eumetazoa;Bilateria;Protostomia;  
 Spiralia;Lophotrochozoa;Mollusca;Bivalvia;Autobranchia;Heteroconchia;Euhe  
 terodonta;Imparidentia;Venerida;Veneroidea;Veneridae;Mercenaria;Mercenari  
 a mercenaria  
 UdeM00000034847 6596 701.4 UdeM00000034847 XP\_045189002.1 69.1 592  
 167 5 1 590 1 578 9.50E-199 701.4 6596 cellular  
 organisms;Eukaryota;Opisthokonta;Metazoa;Eumetazoa;Bilateria;Protostomia;  
 Spiralia;Lophotrochozoa;Mollusca;Bivalvia;Autobranchia;Heteroconchia;Euhe  
 terodonta;Imparidentia;Venerida;Veneroidea;Veneridae;Mercenaria;Mercenari  
 a mercenaria  
 UdeM00000034849 6579 102.8 UdeM00000034849 XP\_033757273.1 76.1 67  
 16 0 1 67 693 759 2.60E-19 102.8 6579 cellular  
 organisms;Eukaryota;Opisthokonta;Metazoa;Eumetazoa;Bilateria;Protostomia;  
 Spiralia;Lophotrochozoa;Mollusca;Bivalvia;Autobranchia;Pteriomorphia;Pect  
 inida;Pectinoidea;Pectinidae;Pecten;Pecten maximus  
 UdeM00000034850 37653 494.6 UdeM00000034850 XP\_014769753.1 55.8 665  
 279 3 12 674 107 758 2.10E-136 494.6 37653 cellular  
 organisms;Eukaryota;Opisthokonta;Metazoa;Eumetazoa;Bilateria;Protostomia;  
 Spiralia;Lophotrochozoa;Mollusca;Cephalopoda;Coleoidea;Octopodiformes;Oct  
 opoda;Incirrata;Octopodidae;Octopus;Octopus bimaculoides  
 UdeM00000034851 1735272 237.3 UdeM00000034851 XP\_041368732.1 72.7  
 154 42 0 1 154 1 154 1.30E-59 237.3 1735272  
 cellular  
 organisms;Eukaryota;Opisthokonta;Metazoa;Eumetazoa;Bilateria;Protostomia;  
 Spiralia;Lophotrochozoa;Mollusca;Gastropoda;Neomphalina;Neomphaloidea;Pel  
 tospiridae;Gigantopelta;Gigantopelta aegis  
 UdeM00000034852 29159 631.7 UdeM00000034852 XP\_034328603.1 71.2 569  
 154 3 28 593 34 595 9.30E-178 631.7 29159 cellular  
 organisms;Eukaryota;Opisthokonta;Metazoa;Eumetazoa;Bilateria;Protostomia;  
 Spiralia;Lophotrochozoa;Mollusca;Bivalvia;Autobranchia;Pteriomorphia;Ostr  
 eida;Ostreoidea;Ostreidae;Crassostrea;Crassostrea gigas  
 UdeM00000034853 6565 281.6 UdeM00000034853 XP\_022323235.1 67.7 192  
 61 1 538 728 42 233 2.90E-72 281.6 6565 cellular  
 organisms;Eukaryota;Opisthokonta;Metazoa;Eumetazoa;Bilateria;Protostomia;  
 Spiralia;Lophotrochozoa;Mollusca;Bivalvia;Autobranchia;Pteriomorphia;Ostr  
 eida;Ostreoidea;Ostreidae;Crassostrea;Crassostrea virginica  
 UdeM00000034854 6596 68.6 UdeM00000034854 XP\_045189001.1 67.4 46  
 15 0 44 89 1 46 5.60E-09 68.6 6596 cellular  
 organisms;Eukaryota;Opisthokonta;Metazoa;Eumetazoa;Bilateria;Protostomia;  
 Spiralia;Lophotrochozoa;Mollusca;Bivalvia;Autobranchia;Heteroconchia;Euhe



terodonta;Imparidentia;Venerida;Veneroidea;Veneridae;Mercenaria;Mercenari  
 a mercenaria  
 UdeM00000034855 6596 256.5 UdeM00000034855 XP\_045190369.1 43.9 415  
 195 15 251 652 49 438 8.90E-65 256.5 6596 cellular  
 organisms;Eukaryota;Opisthokonta;Metazoa;Eumetazoa;Bilateria;Protostomia;  
 Spiralia;Lophotrochozoa;Mollusca;Bivalvia;Autobranchia;Heteroconchia;Euhe  
 terodonta;Imparidentia;Venerida;Veneroidea;Veneridae;Mercenaria;Mercenari  
 a mercenaria  
 UdeM00000034856 6596 251.9 UdeM00000034856 XP\_045190369.1 44.5 391  
 180 14 6 383 72 438 1.30E-63 251.9 6596 cellular  
 organisms;Eukaryota;Opisthokonta;Metazoa;Eumetazoa;Bilateria;Protostomia;  
 Spiralia;Lophotrochozoa;Mollusca;Bivalvia;Autobranchia;Heteroconchia;Euhe  
 terodonta;Imparidentia;Venerida;Veneroidea;Veneridae;Mercenaria;Mercenari  
 a mercenaria  
 UdeM00000034857 6596 859.4 UdeM00000034857 XP\_045188500.1 59.7 759  
 278 9 32 783 32 769 3.90E-246 859.4 6596 cellular  
 organisms;Eukaryota;Opisthokonta;Metazoa;Eumetazoa;Bilateria;Protostomia;  
 Spiralia;Lophotrochozoa;Mollusca;Bivalvia;Autobranchia;Heteroconchia;Euhe  
 terodonta;Imparidentia;Venerida;Veneroidea;Veneridae;Mercenaria;Mercenari  
 a mercenaria  
 UdeM00000034858 6573 187.6 UdeM00000034858 XP\_021378385.1 43.5 271  
 134 8 2 271 547 799 2.40E-44 187.6 6573 cellular  
 organisms;Eukaryota;Opisthokonta;Metazoa;Eumetazoa;Bilateria;Protostomia;  
 Spiralia;Lophotrochozoa;Mollusca;Bivalvia;Autobranchia;Pteriormorphia;Pect  
 inida;Pectinoidea;Pectinidae;Mizuhopecten;Mizuhopecten yessoensis  
 UdeM00000034859 38626 62 UdeM00000034859 XP\_020833278.1 52.5 59  
 28 0 1 59 1 59 6.60E-07 62 38626 cellular  
 organisms;Eukaryota;Opisthokonta;Metazoa;Eumetazoa;Bilateria;Deuterostomi  
 a;Chordata;Craniata;Vertebrata;Gnathostomata;Teleostomi;Euteleostomi;Sarc  
 opterygii;Dipnotetrapodomorpha;Tetrapoda;Amniota;Mammalia;Theria;Metather  
 ia;Diprotodontia;Phascolarctidae;Phascolarctos;Phascolarctos cinereus  
 UdeM00000034860 6596 307.8 UdeM00000034860 XP\_045171013.1 51.5 303  
 141 3 110 410 103 401 2.20E-80 307.8 6596 cellular  
 organisms;Eukaryota;Opisthokonta;Metazoa;Eumetazoa;Bilateria;Protostomia;  
 Spiralia;Lophotrochozoa;Mollusca;Bivalvia;Autobranchia;Heteroconchia;Euhe  
 terodonta;Imparidentia;Venerida;Veneroidea;Veneridae;Mercenaria;Mercenari  
 a mercenaria  
 UdeM00000034861 6596 915.6 UdeM00000034861 XP\_045158029.1 38.7 1343  
 752 19 8 1322 479 1778 7.30E-263 915.6 6596 cellular  
 organisms;Eukaryota;Opisthokonta;Metazoa;Eumetazoa;Bilateria;Protostomia;  
 Spiralia;Lophotrochozoa;Mollusca;Bivalvia;Autobranchia;Heteroconchia;Euhe  
 terodonta;Imparidentia;Venerida;Veneroidea;Veneridae;Mercenaria;Mercenari  
 a mercenaria  
 UdeM00000034862 6573 582 UdeM00000034862 XP\_021363980.1 63.7 443  
 154 2 1 438 1 441 6.20E-163 582 6573 cellular  
 organisms;Eukaryota;Opisthokonta;Metazoa;Eumetazoa;Bilateria;Protostomia;  
 Spiralia;Lophotrochozoa;Mollusca;Bivalvia;Autobranchia;Pteriormorphia;Pect  
 inida;Pectinoidea;Pectinidae;Mizuhopecten;Mizuhopecten yessoensis  
 UdeM00000034863 29159 950.3 UdeM00000034863 XP\_011451723.2 59.7 846  
 321 9 1 832 29 868 1.70E-273 950.3 29159 cellular  
 organisms;Eukaryota;Opisthokonta;Metazoa;Eumetazoa;Bilateria;Protostomia;  
 Spiralia;Lophotrochozoa;Mollusca;Bivalvia;Autobranchia;Pteriormorphia;Ostr  
 eida;Ostreoidea;Ostreidae;Crassostrea;Crassostrea gigas

UdeM00000034865 6596 256.9 UdeM00000034865 XP\_045188202.1 36.7 711  
 428 5 11 700 454 1163 7.90E-65 256.9 6596 cellular  
 organisms;Eukaryota;Opisthokonta;Metazoa;Eumetazoa;Bilateria;Protostomia;  
 Spiralia;Lophotrochozoa;Mollusca;Bivalvia;Autobranchia;Heteroconchia;Euhe  
 terodonta;Imparidentia;Venerida;Veneroidea;Veneridae;Mercenaria;Mercenari  
 a mercenaria  
 UdeM00000034866 6596 102.4 UdeM00000034866 XP\_045188202.1 39.7 136  
 82 0 35 170 292 427 5.70E-19 102.4 6596 cellular  
 organisms;Eukaryota;Opisthokonta;Metazoa;Eumetazoa;Bilateria;Protostomia;  
 Spiralia;Lophotrochozoa;Mollusca;Bivalvia;Autobranchia;Heteroconchia;Euhe  
 terodonta;Imparidentia;Venerida;Veneroidea;Veneridae;Mercenaria;Mercenari  
 a mercenaria  
 UdeM00000034867 6596 100.1 UdeM00000034867 XP\_045188202.1 32.9 207  
 131 3 54 252 79 285 4.30E-18 100.1 6596 cellular  
 organisms;Eukaryota;Opisthokonta;Metazoa;Eumetazoa;Bilateria;Protostomia;  
 Spiralia;Lophotrochozoa;Mollusca;Bivalvia;Autobranchia;Heteroconchia;Euhe  
 terodonta;Imparidentia;Venerida;Veneroidea;Veneridae;Mercenaria;Mercenari  
 a mercenaria  
 UdeM00000034868 6596 93.2 UdeM00000034868 XP\_045215232.1 27.5 346  
 192 12 4 323 7 319 6.50E-16 93.2 6596 cellular  
 organisms;Eukaryota;Opisthokonta;Metazoa;Eumetazoa;Bilateria;Protostomia;  
 Spiralia;Lophotrochozoa;Mollusca;Bivalvia;Autobranchia;Heteroconchia;Euhe  
 terodonta;Imparidentia;Venerida;Veneroidea;Veneridae;Mercenaria;Mercenari  
 a mercenaria  
 UdeM00000034869 6596 107.1 UdeM00000034869 XP\_045190368.1 45.1 173  
 95 0 212 384 204 376 1.20E-19 107.1 6596 cellular  
 organisms;Eukaryota;Opisthokonta;Metazoa;Eumetazoa;Bilateria;Protostomia;  
 Spiralia;Lophotrochozoa;Mollusca;Bivalvia;Autobranchia;Heteroconchia;Euhe  
 terodonta;Imparidentia;Venerida;Veneroidea;Veneridae;Mercenaria;Mercenari  
 a mercenaria  
 UdeM00000034871 6596 353.2 UdeM00000034871 XP\_045190804.1 82.7 208  
 36 0 9 216 10 217 2.30E-94 353.2 6596 cellular  
 organisms;Eukaryota;Opisthokonta;Metazoa;Eumetazoa;Bilateria;Protostomia;  
 Spiralia;Lophotrochozoa;Mollusca;Bivalvia;Autobranchia;Heteroconchia;Euhe  
 terodonta;Imparidentia;Venerida;Veneroidea;Veneridae;Mercenaria;Mercenari  
 a mercenaria  
 UdeM00000034873 29159 285.8 UdeM00000034873 XP\_034330315.1 93.3 149  
 10 0 1 149 68 216 3.20E-74 285.8 29159 cellular  
 organisms;Eukaryota;Opisthokonta;Metazoa;Eumetazoa;Bilateria;Protostomia;  
 Spiralia;Lophotrochozoa;Mollusca;Bivalvia;Autobranchia;Pteriomorphia;Ostr  
 eida;Ostreoidea;Ostreidae;Crassostrea;Crassostrea gigas  
 UdeM00000034872 6573 379.8 UdeM00000034872 XP\_021359641.1 85.3 211  
 31 0 6 216 19 229 2.30E-102 379.8 6573 cellular  
 organisms;Eukaryota;Opisthokonta;Metazoa;Eumetazoa;Bilateria;Protostomia;  
 Spiralia;Lophotrochozoa;Mollusca;Bivalvia;Autobranchia;Pteriomorphia;Pect  
 inida;Pectinoidea;Pectinidae;Mizuhopecten;Mizuhopecten yessoensis  
 UdeM00000034874 6579 490.3 UdeM00000034874 XP\_033754635.1 66.5 415  
 109 5 9 422 2 387 3.70E-135 490.3 6579 cellular  
 organisms;Eukaryota;Opisthokonta;Metazoa;Eumetazoa;Bilateria;Protostomia;  
 Spiralia;Lophotrochozoa;Mollusca;Bivalvia;Autobranchia;Pteriomorphia;Pect  
 inida;Pectinoidea;Pectinidae;Pecten;Pecten maximus  
 UdeM00000034876 6596 852.4 UdeM00000034876 XP\_045188202.1 51.6 1105  
 506 10 84 1166 110 1207 7.10E-244 852.4 6596 cellular  
 organisms;Eukaryota;Opisthokonta;Metazoa;Eumetazoa;Bilateria;Protostomia;

Spiralia;Lophotrochozoa;Mollusca;Bivalvia;Autobranchia;Heteroconchia;Euherodonta;Imparidentia;Venerida;Veneroidea;Veneridae;Mercenaria;Mercenaria mercenaria

UdeM00000034877 6596 536.2 UdeM00000034877 XP\_045190406.1 42.1 699  
309 10 1 697 8 612 6.30E-149 536.2 6596 cellular

organisms;Eukaryota;Opisthokonta;Metazoa;Eumetazoa;Bilateria;Protostomia;Spiralia;Lophotrochozoa;Mollusca;Bivalvia;Autobranchia;Heteroconchia;Euherodonta;Imparidentia;Venerida;Veneroidea;Veneridae;Mercenaria;Mercenaria mercenaria

UdeM00000034878 6596 448.4 UdeM00000034878 XP\_045188090.1 32.3 1317  
622 49 7 1183 155 1342 2.90E-122 448.4 6596 cellular

organisms;Eukaryota;Opisthokonta;Metazoa;Eumetazoa;Bilateria;Protostomia;Spiralia;Lophotrochozoa;Mollusca;Bivalvia;Autobranchia;Heteroconchia;Euherodonta;Imparidentia;Venerida;Veneroidea;Veneridae;Mercenaria;Mercenaria mercenaria

UdeM00000034879 6596 134.4 UdeM00000034879 XP\_045188090.1 50 162  
68 4 1 162 6 154 1.30E-28 134.4 6596 cellular

organisms;Eukaryota;Opisthokonta;Metazoa;Eumetazoa;Bilateria;Protostomia;Spiralia;Lophotrochozoa;Mollusca;Bivalvia;Autobranchia;Heteroconchia;Euherodonta;Imparidentia;Venerida;Veneroidea;Veneridae;Mercenaria;Mercenaria mercenaria

UdeM00000034880 400727 877.5 UdeM00000034880 XP\_025095725.1 51.7  
936 338 7 38 969 23 848 1.60E-251 877.5 400727

cellular

organisms;Eukaryota;Opisthokonta;Metazoa;Eumetazoa;Bilateria;Protostomia;Spiralia;Lophotrochozoa;Mollusca;Gastropoda;Caenogastropoda;Architaenioglossa;Ampullarioidea;Ampullariidae;Pomacea;Pomacea canaliculata

UdeM00000034881 6596 120.6 UdeM00000034881 XP\_045180427.1 45.5 178  
92 4 12 186 98 273 2.30E-24 120.6 6596 cellular

organisms;Eukaryota;Opisthokonta;Metazoa;Eumetazoa;Bilateria;Protostomia;Spiralia;Lophotrochozoa;Mollusca;Bivalvia;Autobranchia;Heteroconchia;Euherodonta;Imparidentia;Venerida;Veneroidea;Veneridae;Mercenaria;Mercenaria mercenaria

UdeM00000034882 7741 174.9 UdeM00000034882 XP\_019634412.1 51.5 163  
75 2 141 299 682 844 1.60E-40 174.9 7741 cellular

organisms;Eukaryota;Opisthokonta;Metazoa;Eumetazoa;Bilateria;Deuterostomia;Chordata;Cephalochordata;Leptocardii;Amphioxiformes;Branchiostomidae;Branchiostoma;Branchiostoma belcheri

UdeM00000034883 6596 442.2 UdeM00000034883 XP\_045189280.1 37 756  
433 16 340 1087 363 1083 1.90E-120 442.2 6596 cellular

organisms;Eukaryota;Opisthokonta;Metazoa;Eumetazoa;Bilateria;Protostomia;Spiralia;Lophotrochozoa;Mollusca;Bivalvia;Autobranchia;Heteroconchia;Euherodonta;Imparidentia;Venerida;Veneroidea;Veneridae;Mercenaria;Mercenaria mercenaria

UdeM00000034932 6596 355.1 UdeM00000034932 XP\_045202374.1 45.4 463  
197 4 21 428 24 485 1.20E-94 355.1 6596 cellular

organisms;Eukaryota;Opisthokonta;Metazoa;Eumetazoa;Bilateria;Protostomia;Spiralia;Lophotrochozoa;Mollusca;Bivalvia;Autobranchia;Heteroconchia;Euherodonta;Imparidentia;Venerida;Veneroidea;Veneridae;Mercenaria;Mercenaria mercenaria

UdeM00000034937 6573 404.1 UdeM00000034937 XP\_021371940.1 43.5 584  
259 11 1 522 62 636 2.80E-109 404.1 6573 cellular

organisms;Eukaryota;Opisthokonta;Metazoa;Eumetazoa;Bilateria;Protostomia;

Spiralia; Lophotrochozoa; Mollusca; Bivalvia; Autobranchia; Pteriomorpha; Pectinida; Pectinoidea; Pectinidae; Mizuhopecten; Mizuhopecten yessoensis  
UdeM00000034938 6573 414.5 UdeM00000034938 XP\_021371940.1 43 584  
293 10 1 553 62 636 2.20E-112 414.5 6573 cellular  
organisms; Eukaryota; Opisthokonta; Metazoa; Eumetazoa; Bilateria; Protostomia; Spiralia; Lophotrochozoa; Mollusca; Bivalvia; Autobranchia; Pteriomorpha; Pectinida; Pectinoidea; Pectinidae; Mizuhopecten; Mizuhopecten yessoensis  
UdeM00000034939 6573 415.2 UdeM00000034939 XP\_021371940.1 43.2 581  
293 10 1 550 62 636 1.30E-112 415.2 6573 cellular  
organisms; Eukaryota; Opisthokonta; Metazoa; Eumetazoa; Bilateria; Protostomia; Spiralia; Lophotrochozoa; Mollusca; Bivalvia; Autobranchia; Pteriomorpha; Pectinida; Pectinoidea; Pectinidae; Mizuhopecten; Mizuhopecten yessoensis  
UdeM00000034940 6565 107.8 UdeM00000034940 XP\_022342298.1 55.2 87  
39 0 2 88 407 493 7.90E-21 107.8 6565 cellular  
organisms; Eukaryota; Opisthokonta; Metazoa; Eumetazoa; Bilateria; Protostomia; Spiralia; Lophotrochozoa; Mollusca; Bivalvia; Autobranchia; Pteriomorpha; Ostracida; Ostreidae; Crassostrea; Crassostrea virginica  
UdeM00000034941 6565 202.2 UdeM00000034941 XP\_022286598.1 44 273  
116 5 1 247 1 262 8.10E-49 202.2 6565 cellular  
organisms; Eukaryota; Opisthokonta; Metazoa; Eumetazoa; Bilateria; Protostomia; Spiralia; Lophotrochozoa; Mollusca; Bivalvia; Autobranchia; Pteriomorpha; Ostracida; Ostreidae; Crassostrea; Crassostrea virginica  
UdeM00000034944 63155 102.4 UdeM00000034944 XP\_030581324.1 30.2 275  
171 4 1 256 359 631 1.40E-18 102.4 63155 cellular  
organisms; Eukaryota; Opisthokonta; Metazoa; Eumetazoa; Bilateria; Deuterostomia; Chordata; Craniata; Vertebrata; Gnathostomata; Teleostomi; Euteleostomi; Actinopterygii; Actinopteri; Neopterygii; Teleostei; Osteoglossocephalai; Clupeocephala; Euteleostei; Neoteleostei; Eurypterygia; Ctenosquamata; Acanthomorphata; Euacanthomorphacea; Percomorphaceae; Ovalentaria; Cichlomorphae; Cichliformes; Cichlidae; New World  
cichlids; Cichlasomatinae; Heroini; Archocentrus; Archocentrus centrarchus  
UdeM00000034949 6596 245 UdeM00000034949 XP\_045204261.1 39.3 313  
167 7 21 327 12 307 1.40E-61 245 6596 cellular  
organisms; Eukaryota; Opisthokonta; Metazoa; Eumetazoa; Bilateria; Protostomia; Spiralia; Lophotrochozoa; Mollusca; Bivalvia; Autobranchia; Heteroconchia; Euheterodonta; Imparidentia; Venerida; Veneroidea; Veneridae; Mercenaria; Mercenaria mercenaria  
UdeM00000034950 6596 135.6 UdeM00000034950 XP\_045215305.1 24.1 561  
345 21 120 656 118 621 2.40E-28 135.6 6596 cellular  
organisms; Eukaryota; Opisthokonta; Metazoa; Eumetazoa; Bilateria; Protostomia; Spiralia; Lophotrochozoa; Mollusca; Bivalvia; Autobranchia; Heteroconchia; Euheterodonta; Imparidentia; Venerida; Veneroidea; Veneridae; Mercenaria; Mercenaria mercenaria  
UdeM00000034951 6596 361.3 UdeM00000034951 XP\_045197494.1 29.7 913  
554 26 68 952 97 949 3.80E-96 361.3 6596 cellular  
organisms; Eukaryota; Opisthokonta; Metazoa; Eumetazoa; Bilateria; Protostomia; Spiralia; Lophotrochozoa; Mollusca; Bivalvia; Autobranchia; Heteroconchia; Euheterodonta; Imparidentia; Venerida; Veneroidea; Veneridae; Mercenaria; Mercenaria mercenaria  
UdeM00000034952 6579 1334.7 UdeM00000034952 XP\_033756621.1 89.3  
732 71 1 1 732 1 725 0.00E+00 1334.7 6579  
cellular  
organisms; Eukaryota; Opisthokonta; Metazoa; Eumetazoa; Bilateria; Protostomia;

Spiralia;Lophotrochozoa;Mollusca;Bivalvia;Autobranchia;Pteriomorphia;Pectinida;Pectinoidea;Pectinidae;Pecten;Pecten maximus  
UdeM00000034953 6596 837.4 UdeM00000034953 XP\_045190668.1 77.2 553  
125 1 4 556 3 554 1.00E-239 837.4 6596 cellular  
organisms;Eukaryota;Opisthokonta;Metazoa;Eumetazoa;Bilateria;Protostomia;  
Spiralia;Lophotrochozoa;Mollusca;Bivalvia;Autobranchia;Heteroconchia;Euherodonta;Imparidentia;Venerida;Veneroidea;Veneridae;Mercenaria;Mercenaria mercenaria  
UdeM00000034961 6596 178.3 UdeM00000034961 XP\_045189541.1 41.2 240  
124 5 1 225 1 238 1.10E-41 178.3 6596 cellular  
organisms;Eukaryota;Opisthokonta;Metazoa;Eumetazoa;Bilateria;Protostomia;  
Spiralia;Lophotrochozoa;Mollusca;Bivalvia;Autobranchia;Heteroconchia;Euherodonta;Imparidentia;Venerida;Veneroidea;Veneridae;Mercenaria;Mercenaria mercenaria  
UdeM00000034960 6596 446.8 UdeM00000034960 XP\_045189541.1 36.8 721  
304 10 1 691 1 599 5.00E-122 446.8 6596 cellular  
organisms;Eukaryota;Opisthokonta;Metazoa;Eumetazoa;Bilateria;Protostomia;  
Spiralia;Lophotrochozoa;Mollusca;Bivalvia;Autobranchia;Heteroconchia;Euherodonta;Imparidentia;Venerida;Veneroidea;Veneridae;Mercenaria;Mercenaria mercenaria  
UdeM00000034962 6596 343.6 UdeM00000034962 XP\_045188724.1 49.9 343  
145 4 1 323 1 336 2.90E-91 343.6 6596 cellular  
organisms;Eukaryota;Opisthokonta;Metazoa;Eumetazoa;Bilateria;Protostomia;  
Spiralia;Lophotrochozoa;Mollusca;Bivalvia;Autobranchia;Heteroconchia;Euherodonta;Imparidentia;Venerida;Veneroidea;Veneridae;Mercenaria;Mercenaria mercenaria  
UdeM00000034963 1735272 135.2 UdeM00000034963 XP\_041370474.1 40.4  
193 110 2 27 215 33 224 1.00E-28 135.2 1735272  
cellular  
organisms;Eukaryota;Opisthokonta;Metazoa;Eumetazoa;Bilateria;Protostomia;  
Spiralia;Lophotrochozoa;Mollusca;Gastropoda;Neomphalina;Neomphaloidea;Peltospiridae;Gigantopelta;Gigantopelta aegis  
UdeM00000034964 6596 694.1 UdeM00000034964 XP\_045190319.1 71.6 465  
131 1 1 465 1 464 1.30E-196 694.1 6596 cellular  
organisms;Eukaryota;Opisthokonta;Metazoa;Eumetazoa;Bilateria;Protostomia;  
Spiralia;Lophotrochozoa;Mollusca;Bivalvia;Autobranchia;Heteroconchia;Euherodonta;Imparidentia;Venerida;Veneroidea;Veneridae;Mercenaria;Mercenaria mercenaria  
UdeM00000034965 6565 899.8 UdeM00000034965 XP\_022344950.1 55.1 771  
341 5 56 824 69 836 2.50E-258 899.8 6565 cellular  
organisms;Eukaryota;Opisthokonta;Metazoa;Eumetazoa;Bilateria;Protostomia;  
Spiralia;Lophotrochozoa;Mollusca;Bivalvia;Autobranchia;Pteriomorphia;Ostreida;Ostreoidea;Ostreidae;Crassostrea;Crassostrea virginica  
UdeM00000034966 6596 494.6 UdeM00000034966 XP\_045189492.1 54.1 416  
179 5 25 430 24 437 1.40E-136 494.6 6596 cellular  
organisms;Eukaryota;Opisthokonta;Metazoa;Eumetazoa;Bilateria;Protostomia;  
Spiralia;Lophotrochozoa;Mollusca;Bivalvia;Autobranchia;Heteroconchia;Euherodonta;Imparidentia;Venerida;Veneroidea;Veneridae;Mercenaria;Mercenaria mercenaria  
UdeM00000034968 29159 73.9 UdeM00000034968 XP\_034307341.1 38.6 88  
54 0 3 90 5 92 1.70E-10 73.9 29159 cellular  
organisms;Eukaryota;Opisthokonta;Metazoa;Eumetazoa;Bilateria;Protostomia;  
Spiralia;Lophotrochozoa;Mollusca;Bivalvia;Autobranchia;Pteriomorphia;Ostreida;Ostreoidea;Ostreidae;Crassostrea;Crassostrea gigas

UdeM00000034969 29159 92 UdeM00000034969 XP\_034307341.1 39.8 118  
 63 2 9 118 230 347 8.80E-16 92 29159 cellular  
 organisms;Eukaryota;Opisthokonta;Metazoa;Eumetazoa;Bilateria;Protostomia;  
 Spiralia;Lophotrochozoa;Mollusca;Bivalvia;Autobranchia;Pteriomorpha;Ostr  
 eida;Ostreoidea;Ostreidae;Crassostrea;Crassostrea gigas  
 UdeM00000034970 6596 142.1 UdeM00000034970 XP\_045187824.1 49.3 146  
 73 1 8 152 6 151 8.00E-31 142.1 6596 cellular  
 organisms;Eukaryota;Opisthokonta;Metazoa;Eumetazoa;Bilateria;Protostomia;  
 Spiralia;Lophotrochozoa;Mollusca;Bivalvia;Autobranchia;Heteroconchia;Euhe  
 terodonta;Imparidentia;Venerida;Veneroidea;Veneridae;Mercenaria;Mercenari  
 a mercenaria  
 UdeM00000019767 6596 384.8 UdeM00000019767 XP\_045216232.1 60 548  
 97 7 1 434 1 540 1.60E-103 384.8 6596 cellular  
 organisms;Eukaryota;Opisthokonta;Metazoa;Eumetazoa;Bilateria;Protostomia;  
 Spiralia;Lophotrochozoa;Mollusca;Bivalvia;Autobranchia;Heteroconchia;Euhe  
 terodonta;Imparidentia;Venerida;Veneroidea;Veneridae;Mercenaria;Mercenari  
 a mercenaria  
 UdeM00000019768 6596 79.7 UdeM00000019768 XP\_045216232.1 71.9 57  
 12 2 1 57 199 251 4.80E-12 79.7 6596 cellular  
 organisms;Eukaryota;Opisthokonta;Metazoa;Eumetazoa;Bilateria;Protostomia;  
 Spiralia;Lophotrochozoa;Mollusca;Bivalvia;Autobranchia;Heteroconchia;Euhe  
 terodonta;Imparidentia;Venerida;Veneroidea;Veneridae;Mercenaria;Mercenari  
 a mercenaria  
 UdeM00000019770 1735272 2055 UdeM00000019770 XP\_041370836.1 83.8  
 1237 157 8 1 1198 357 1588 0.00E+00 2055 1735272  
 cellular  
 organisms;Eukaryota;Opisthokonta;Metazoa;Eumetazoa;Bilateria;Protostomia;  
 Spiralia;Lophotrochozoa;Mollusca;Gastropoda;Neomphalina;Neomphaloidea;Pel  
 tospiridae;Gigantopelta;Gigantopelta aegis  
 UdeM00000019772 6596 314.7 UdeM00000019772 XP\_045156457.1 39.5 428  
 216 5 17 440 15 403 1.90E-82 314.7 6596 cellular  
 organisms;Eukaryota;Opisthokonta;Metazoa;Eumetazoa;Bilateria;Protostomia;  
 Spiralia;Lophotrochozoa;Mollusca;Bivalvia;Autobranchia;Heteroconchia;Euhe  
 terodonta;Imparidentia;Venerida;Veneroidea;Veneridae;Mercenaria;Mercenari  
 a mercenaria  
 UdeM00000019773 6596 292.7 UdeM00000019773 XP\_045156457.1 38.9 406  
 205 5 1 402 37 403 6.90E-76 292.7 6596 cellular  
 organisms;Eukaryota;Opisthokonta;Metazoa;Eumetazoa;Bilateria;Protostomia;  
 Spiralia;Lophotrochozoa;Mollusca;Bivalvia;Autobranchia;Heteroconchia;Euhe  
 terodonta;Imparidentia;Venerida;Veneroidea;Veneridae;Mercenaria;Mercenari  
 a mercenaria  
 UdeM00000019774 400727 82.4 UdeM00000019774 XP\_025078116.1 56.7  
 60 26 0 22 81 380 439 2.90E-13 82.4 400727  
 cellular  
 organisms;Eukaryota;Opisthokonta;Metazoa;Eumetazoa;Bilateria;Protostomia;  
 Spiralia;Lophotrochozoa;Mollusca;Gastropoda;Caenogastropoda;Architaeniogl  
 ossa;Ampullarioidea;Ampullariidae;Pomacea;Pomacea canaliculata  
 UdeM00000019775 29159 302 UdeM00000019775 XP\_011417333.1 41.1 431  
 217 7 36 464 10 405 1.30E-78 302 29159 cellular  
 organisms;Eukaryota;Opisthokonta;Metazoa;Eumetazoa;Bilateria;Protostomia;  
 Spiralia;Lophotrochozoa;Mollusca;Bivalvia;Autobranchia;Pteriomorpha;Ostr  
 eida;Ostreoidea;Ostreidae;Crassostrea;Crassostrea gigas  
 UdeM00000019776 29159 302 UdeM00000019776 XP\_011417333.1 41.1 431  
 217 7 17 445 10 405 1.30E-78 302 29159 cellular

organisms;Eukaryota;Opisthokonta;Metazoa;Eumetazoa;Bilateria;Protostomia; Spiralia;Lophotrochozoa;Mollusca;Bivalvia;Autobranchia;Pteriormorphia;Ostr eida;Ostreoidea;Ostreidae;Crassostrea;Crassostrea gigas

UdeM00000019777 6596 511.9 UdeM00000019777 XP\_045215666.1 42.9 658  
329 8 25 679 24 637 1.20E-141 511.9 6596 cellular

organisms;Eukaryota;Opisthokonta;Metazoa;Eumetazoa;Bilateria;Protostomia; Spiralia;Lophotrochozoa;Mollusca;Bivalvia;Autobranchia;Heteroconchia;Euhe terodonta;Imparidentia;Venerida;Veneroidea;Veneridae;Mercenaria;Mercenari a mercenaria

UdeM00000019778 6596 379 UdeM00000019778 XP\_045156902.1 46.4 422  
213 6 1 414 6 422 7.60E-102 379 6596 cellular

organisms;Eukaryota;Opisthokonta;Metazoa;Eumetazoa;Bilateria;Protostomia; Spiralia;Lophotrochozoa;Mollusca;Bivalvia;Autobranchia;Heteroconchia;Euhe terodonta;Imparidentia;Venerida;Veneroidea;Veneridae;Mercenaria;Mercenari a mercenaria

UdeM00000019779 6596 289.7 UdeM00000019779 XP\_045156902.1 34.8 474  
244 6 1 466 6 422 6.80E-75 289.7 6596 cellular

organisms;Eukaryota;Opisthokonta;Metazoa;Eumetazoa;Bilateria;Protostomia; Spiralia;Lophotrochozoa;Mollusca;Bivalvia;Autobranchia;Heteroconchia;Euhe terodonta;Imparidentia;Venerida;Veneroidea;Veneridae;Mercenaria;Mercenari a mercenaria

UdeM00000019780 6596 288.9 UdeM00000019780 XP\_045156902.1 35.9 448  
222 4 27 468 460 848 1.20E-74 288.9 6596 cellular

organisms;Eukaryota;Opisthokonta;Metazoa;Eumetazoa;Bilateria;Protostomia; Spiralia;Lophotrochozoa;Mollusca;Bivalvia;Autobranchia;Heteroconchia;Euhe terodonta;Imparidentia;Venerida;Veneroidea;Veneridae;Mercenaria;Mercenari a mercenaria

UdeM00000019781 225164 166.4 UdeM00000019781 XP\_009059696.1 69.4  
134 37 2 1 133 1 131 2.50E-38 166.4 225164  
cellular

organisms;Eukaryota;Opisthokonta;Metazoa;Eumetazoa;Bilateria;Protostomia; Spiralia;Lophotrochozoa;Mollusca;Gastropoda;Patellogastropoda;Lottiioidea; Lottiidae;Lottia;Lottia gigantea

UdeM00000019785 6596 936.8 UdeM00000019785 XP\_045216562.1 81.7 568  
98 1 1 568 1 562 1.30E-269 936.8 6596 cellular

organisms;Eukaryota;Opisthokonta;Metazoa;Eumetazoa;Bilateria;Protostomia; Spiralia;Lophotrochozoa;Mollusca;Bivalvia;Autobranchia;Heteroconchia;Euhe terodonta;Imparidentia;Venerida;Veneroidea;Veneridae;Mercenaria;Mercenari a mercenaria

UdeM00000019786 6596 1084.7 UdeM00000019786 XP\_045160505.1 55.8  
1039 455 4 35 1069 13 1051 0.00E+00 1084.7 6596  
cellular

organisms;Eukaryota;Opisthokonta;Metazoa;Eumetazoa;Bilateria;Protostomia; Spiralia;Lophotrochozoa;Mollusca;Bivalvia;Autobranchia;Heteroconchia;Euhe terodonta;Imparidentia;Venerida;Veneroidea;Veneridae;Mercenaria;Mercenari a mercenaria

UdeM00000019787 6596 58.2 UdeM00000019787 XP\_045216693.1 38.2 76  
46 1 4 79 116 190 6.00E-06 58.2 6596 cellular

organisms;Eukaryota;Opisthokonta;Metazoa;Eumetazoa;Bilateria;Protostomia; Spiralia;Lophotrochozoa;Mollusca;Bivalvia;Autobranchia;Heteroconchia;Euhe terodonta;Imparidentia;Venerida;Veneroidea;Veneridae;Mercenaria;Mercenari a mercenaria

UdeM00000019788 6596 256.5 UdeM00000019788 XP\_045156415.1 44.8 279  
129 5 1 269 1 264 8.00E-65 256.5 6596 cellular

organisms;Eukaryota;Opisthokonta;Metazoa;Eumetazoa;Bilateria;Protostomia; Spiralia;Lophotrochozoa;Mollusca;Bivalvia;Autobranchia;Heteroconchia;Euheterodonta;Imparidentia;Venerida;Veneroidea;Veneridae;Mercenaria;Mercenaria mercenaria

UdeM00000019789 6579 1026.2 UdeM00000019789 XP\_033749200.1 45.4  
1328 640 18 1 1302 822 2090 4.00E-296 1026.2 6579  
cellular

organisms;Eukaryota;Opisthokonta;Metazoa;Eumetazoa;Bilateria;Protostomia; Spiralia;Lophotrochozoa;Mollusca;Bivalvia;Autobranchia;Pteriomorpha;Pectinida;Pectinoidea;Pectinidae;Pecten;Pecten maximus

UdeM00000019790 6579 523.9 UdeM00000019790 XP\_033749200.1 41.1 737  
398 12 4 716 7 731 3.80E-145 523.9 6579 cellular

organisms;Eukaryota;Opisthokonta;Metazoa;Eumetazoa;Bilateria;Protostomia; Spiralia;Lophotrochozoa;Mollusca;Bivalvia;Autobranchia;Pteriomorpha;Pectinida;Pectinoidea;Pectinidae;Pecten;Pecten maximus

UdeM00000019791 6596 230.3 UdeM00000019791 XP\_045216220.1 28.8 666  
330 19 7 619 4 578 6.50E-57 230.3 6596 cellular

organisms;Eukaryota;Opisthokonta;Metazoa;Eumetazoa;Bilateria;Protostomia; Spiralia;Lophotrochozoa;Mollusca;Bivalvia;Autobranchia;Heteroconchia;Euheterodonta;Imparidentia;Venerida;Veneroidea;Veneridae;Mercenaria;Mercenaria mercenaria

UdeM00000019792 6596 95.9 UdeM00000019792 XP\_045216737.1 38.3 149  
43 1 10 109 20 168 3.60E-17 95.9 6596 cellular

organisms;Eukaryota;Opisthokonta;Metazoa;Eumetazoa;Bilateria;Protostomia; Spiralia;Lophotrochozoa;Mollusca;Bivalvia;Autobranchia;Heteroconchia;Euheterodonta;Imparidentia;Venerida;Veneroidea;Veneridae;Mercenaria;Mercenaria mercenaria

UdeM00000019793 6596 372.5 UdeM00000019793 XP\_045216273.1 55.9 340  
141 4 13 345 12 349 6.40E-100 372.5 6596 cellular

organisms;Eukaryota;Opisthokonta;Metazoa;Eumetazoa;Bilateria;Protostomia; Spiralia;Lophotrochozoa;Mollusca;Bivalvia;Autobranchia;Heteroconchia;Euheterodonta;Imparidentia;Venerida;Veneroidea;Veneridae;Mercenaria;Mercenaria mercenaria

UdeM00000019795 29159 204.9 UdeM00000019795 XP\_019926412.2 51.4 212  
84 4 1 205 1 200 9.70E-50 204.9 29159 cellular

organisms;Eukaryota;Opisthokonta;Metazoa;Eumetazoa;Bilateria;Protostomia; Spiralia;Lophotrochozoa;Mollusca;Bivalvia;Autobranchia;Pteriomorpha;Ostreida;Ostreoidea;Ostreidae;Crassostrea;Crassostrea gigas

UdeM00000019796 400727 797 UdeM00000019796 XP\_025077745.1 95.8  
428 17 1 1 427 1 428 1.20E-227 797 400727  
cellular

organisms;Eukaryota;Opisthokonta;Metazoa;Eumetazoa;Bilateria;Protostomia; Spiralia;Lophotrochozoa;Mollusca;Gastropoda;Caenogastropoda;Architaenioglossa;Ampullarioidea;Ampullariidae;Pomacea;Pomacea canaliculata

UdeM00000019797 400727 153.3 UdeM00000019797 XP\_025077746.1 58.1  
117 49 0 1 117 1 117 2.10E-34 153.3 400727  
cellular

organisms;Eukaryota;Opisthokonta;Metazoa;Eumetazoa;Bilateria;Protostomia; Spiralia;Lophotrochozoa;Mollusca;Gastropoda;Caenogastropoda;Architaenioglossa;Ampullarioidea;Ampullariidae;Pomacea;Pomacea canaliculata

UdeM00000019798 6596 1856.3 UdeM00000019798 XP\_045216204.1 89.9  
1111 105 4 1 1107 1 1108 0.00E+00 1856.3 6596  
cellular

organisms;Eukaryota;Opisthokonta;Metazoa;Eumetazoa;Bilateria;Protostomia;



Spiralia;Lophotrochozoa;Mollusca;Bivalvia;Autobranchia;Heteroconchia;Euherodonta;Imparidentia;Venerida;Veneroidea;Veneridae;Mercenaria;Mercenaria mercenaria

UdeM00000019799 1735272 374.4 UdeM00000019799 XP\_041356084.1 35  
609 331 8 45 615 11 592 2.80E-100 374.4 1735272  
cellular

organisms;Eukaryota;Opisthokonta;Metazoa;Eumetazoa;Bilateria;Protostomia;Spiralia;Lophotrochozoa;Mollusca;Gastropoda;Neomphalina;Neomphaloidea;Peltospiridae;Gigantopelta;Gigantopelta aegis

UdeM00000019800 6579 226.5 UdeM00000019800 XP\_033738222.1 39.5 382  
180 8 6 338 11 390 5.90E-56 226.5 6579 cellular

organisms;Eukaryota;Opisthokonta;Metazoa;Eumetazoa;Bilateria;Protostomia;Spiralia;Lophotrochozoa;Mollusca;Bivalvia;Autobranchia;Pteriormorphia;Pectinida;Pectinoidea;Pectinidae;Pecten;Pecten maximus

UdeM00000019801 6596 365.9 UdeM00000019801 XP\_045215829.1 43.1 555  
262 15 6 522 12 550 8.40E-98 365.9 6596 cellular

organisms;Eukaryota;Opisthokonta;Metazoa;Eumetazoa;Bilateria;Protostomia;Spiralia;Lophotrochozoa;Mollusca;Bivalvia;Autobranchia;Heteroconchia;Euherodonta;Imparidentia;Venerida;Veneroidea;Veneridae;Mercenaria;Mercenaria mercenaria

UdeM00000019802 6579 475.7 UdeM00000019802 XP\_033739131.1 41.9 609  
192 3 77 524 762 1369 7.60E-131 475.7 6579 cellular

organisms;Eukaryota;Opisthokonta;Metazoa;Eumetazoa;Bilateria;Protostomia;Spiralia;Lophotrochozoa;Mollusca;Bivalvia;Autobranchia;Pteriormorphia;Pectinida;Pectinoidea;Pectinidae;Pecten;Pecten maximus

UdeM00000019803 6579 270 UdeM00000019803 XP\_033739131.1 63 200  
73 1 1 200 1171 1369 2.40E-69 270 6579 cellular

organisms;Eukaryota;Opisthokonta;Metazoa;Eumetazoa;Bilateria;Protostomia;Spiralia;Lophotrochozoa;Mollusca;Bivalvia;Autobranchia;Pteriormorphia;Pectinida;Pectinoidea;Pectinidae;Pecten;Pecten maximus

UdeM00000019804 6565 263.8 UdeM00000019804 XP\_022330428.1 56 209  
90 2 10 217 7 214 7.90E-67 263.8 6565 cellular

organisms;Eukaryota;Opisthokonta;Metazoa;Eumetazoa;Bilateria;Protostomia;Spiralia;Lophotrochozoa;Mollusca;Bivalvia;Autobranchia;Pteriormorphia;Ostreida;Ostreioidea;Ostreidae;Crassostrea;Crassostrea virginica

UdeM00000019805 1415580 106.3 UdeM00000019805 XP\_030075314.1 76.1  
67 16 0 6 72 559 625 1.70E-20 106.3 1415580

cellular

organisms;Eukaryota;Opisthokonta;Metazoa;Eumetazoa;Bilateria;Deuterostomia;Chordata;Craniata;Vertebrata;Gnathostomata;Teleostomi;Euteleostomi;Sarcopterygii;Dipnotetrapodomorpha;Tetrapoda;Amphibia;Gymnophiona;Siphonopidae;Microcaecilia;Microcaecilia unicolor

UdeM00000019807 7757 295.8 UdeM00000019807 XP\_032835197.1 77.7 193  
42 1 1 193 167 358 6.50E-77 295.8 7757 cellular

organisms;Eukaryota;Opisthokonta;Metazoa;Eumetazoa;Bilateria;Deuterostomia;Chordata;Craniata;Vertebrata;Cyclostomata;Hyperoartia;Petromyzontiformes;Petromyzontidae;Petromyzon;Petromyzon marinus

UdeM00000019806 7757 327.4 UdeM00000019806 XP\_032835197.1 78.7 211  
44 1 2 212 149 358 2.10E-86 327.4 7757 cellular

organisms;Eukaryota;Opisthokonta;Metazoa;Eumetazoa;Bilateria;Deuterostomia;Chordata;Craniata;Vertebrata;Cyclostomata;Hyperoartia;Petromyzontiformes;Petromyzontidae;Petromyzon;Petromyzon marinus

UdeM00000019808 7757 142.5 UdeM00000019808 XP\_032835197.1 77.8 90  
17 1 10 99 55 141 2.90E-31 142.5 7757 cellular

organisms;Eukaryota;Opisthokonta;Metazoa;Eumetazoa;Bilateria;Deuterostomi  
a;Chordata;Craniata;Vertebrata;Cyclostomata;Hyperoartia;Petromyzontiforme  
s;Petromyzontidae;Petromyzon;Petromyzon marinus

UdeM00000019809 6596 236.9 UdeM00000019809 XP\_045216176.1 49.5 218  
107 1 15 232 45 259 3.20E-59 236.9 6596 cellular

organisms;Eukaryota;Opisthokonta;Metazoa;Eumetazoa;Bilateria;Protostomia;  
Spiralia;Lophotrochozoa;Mollusca;Bivalvia;Autobranchia;Heteroconchia;Euhe  
terodonta;Imparidentia;Venerida;Veneroidea;Veneridae;Mercenaria;Mercenari  
a mercenaria

UdeM00000019810 6596 1230.3 UdeM00000019810 XP\_045216496.1 54.5  
1207 474 20 108 1293 61 1213 0.00E+00 1230.3 6596  
cellular

organisms;Eukaryota;Opisthokonta;Metazoa;Eumetazoa;Bilateria;Protostomia;  
Spiralia;Lophotrochozoa;Mollusca;Bivalvia;Autobranchia;Heteroconchia;Euhe  
terodonta;Imparidentia;Venerida;Veneroidea;Veneridae;Mercenaria;Mercenari  
a mercenaria

UdeM00000019811 6596 1254.2 UdeM00000019811 XP\_045216496.1 59.2  
1100 404 12 141 1228 147 1213 0.00E+00 1254.2 6596  
cellular

organisms;Eukaryota;Opisthokonta;Metazoa;Eumetazoa;Bilateria;Protostomia;  
Spiralia;Lophotrochozoa;Mollusca;Bivalvia;Autobranchia;Heteroconchia;Euhe  
terodonta;Imparidentia;Venerida;Veneroidea;Veneridae;Mercenaria;Mercenari  
a mercenaria

UdeM00000019812 6579 1251.5 UdeM00000019812 XP\_033750069.1 59.2  
1115 401 13 216 1297 99 1192 0.00E+00 1251.5 6579  
cellular

organisms;Eukaryota;Opisthokonta;Metazoa;Eumetazoa;Bilateria;Protostomia;  
Spiralia;Lophotrochozoa;Mollusca;Bivalvia;Autobranchia;Pteriomorphia;Pect  
inida;Pectinoidea;Pectinidae;Pecten;Pecten maximus

UdeM00000019813 6579 310.1 UdeM00000019813 XP\_033749465.1 70.5 234  
56 5 32 258 50 277 2.70E-81 310.1 6579 cellular

organisms;Eukaryota;Opisthokonta;Metazoa;Eumetazoa;Bilateria;Protostomia;  
Spiralia;Lophotrochozoa;Mollusca;Bivalvia;Autobranchia;Pteriomorphia;Pect  
inida;Pectinoidea;Pectinidae;Pecten;Pecten maximus

UdeM00000019814 6579 328.2 UdeM00000019814 XP\_033750005.1 44 373  
185 1 8 380 990 1338 1.40E-86 328.2 6579 cellular

organisms;Eukaryota;Opisthokonta;Metazoa;Eumetazoa;Bilateria;Protostomia;  
Spiralia;Lophotrochozoa;Mollusca;Bivalvia;Autobranchia;Pteriomorphia;Pect  
inida;Pectinoidea;Pectinidae;Pecten;Pecten maximus

UdeM00000019815 6579 733.8 UdeM00000019815 XP\_033750005.1 47 805  
399 9 69 866 170 953 2.50E-208 733.8 6579 cellular

organisms;Eukaryota;Opisthokonta;Metazoa;Eumetazoa;Bilateria;Protostomia;  
Spiralia;Lophotrochozoa;Mollusca;Bivalvia;Autobranchia;Pteriomorphia;Pect  
inida;Pectinoidea;Pectinidae;Pecten;Pecten maximus

UdeM00000019817 6579 733.8 UdeM00000019817 XP\_033750005.1 47 805  
399 9 69 866 170 953 2.50E-208 733.8 6579 cellular

organisms;Eukaryota;Opisthokonta;Metazoa;Eumetazoa;Bilateria;Protostomia;  
Spiralia;Lophotrochozoa;Mollusca;Bivalvia;Autobranchia;Pteriomorphia;Pect  
inida;Pectinoidea;Pectinidae;Pecten;Pecten maximus

UdeM00000019816 6579 896.7 UdeM00000019816 XP\_033750005.1 48.6 951  
467 10 12 952 15 953 2.50E-257 896.7 6579 cellular

organisms;Eukaryota;Opisthokonta;Metazoa;Eumetazoa;Bilateria;Protostomia;  
Spiralia;Lophotrochozoa;Mollusca;Bivalvia;Autobranchia;Pteriomorphia;Pect  
inida;Pectinoidea;Pectinidae;Pecten;Pecten maximus

UdeM00000019818 6573 380.2 UdeM00000019818 XP\_021360485.1 68 309  
 90 5 4 312 19 318 4.00E-102 380.2 6573 cellular  
 organisms;Eukaryota;Opisthokonta;Metazoa;Eumetazoa;Bilateria;Protostomia;  
 Spiralia;Lophotrochozoa;Mollusca;Bivalvia;Autobranchia;Pteriormorphia;Pect  
 inida;Pectinoidea;Pectinidae;Mizuhopecten;Mizuhopecten yessoensis  
 UdeM00000019819 6573 85.9 UdeM00000019819 XP\_021360485.1 90.7 43  
 4 0 198 240 523 565 2.20E-13 85.9 6573 cellular  
 organisms;Eukaryota;Opisthokonta;Metazoa;Eumetazoa;Bilateria;Protostomia;  
 Spiralia;Lophotrochozoa;Mollusca;Bivalvia;Autobranchia;Pteriormorphia;Pect  
 inida;Pectinoidea;Pectinidae;Mizuhopecten;Mizuhopecten yessoensis  
 UdeM00000019820 6579 1770.4 UdeM00000019820 XP\_033749179.1 54.2  
 1963 744 26 32 1891 140 2050 0.00E+00 1770.4 6579  
 cellular  
 organisms;Eukaryota;Opisthokonta;Metazoa;Eumetazoa;Bilateria;Protostomia;  
 Spiralia;Lophotrochozoa;Mollusca;Bivalvia;Autobranchia;Pteriormorphia;Pect  
 inida;Pectinoidea;Pectinidae;Pecten;Pecten maximus  
 UdeM00000019821 6579 60.5 UdeM00000019821 XP\_033749179.1 39.8 93  
 53 3 44 135 50 140 2.00E-06 60.5 6579 cellular  
 organisms;Eukaryota;Opisthokonta;Metazoa;Eumetazoa;Bilateria;Protostomia;  
 Spiralia;Lophotrochozoa;Mollusca;Bivalvia;Autobranchia;Pteriormorphia;Pect  
 inida;Pectinoidea;Pectinidae;Pecten;Pecten maximus  
 UdeM00000019822 7741 90.1 UdeM00000019822 XP\_019623626.1 48.3 89  
 46 0 1 89 5 93 1.50E-15 90.1 7741 cellular  
 organisms;Eukaryota;Opisthokonta;Metazoa;Eumetazoa;Bilateria;Deuterostomi  
 a;Chordata;Cephalochordata;Leptocardii;Amphioxiformes;Branchiostomidae;Br  
 anchiostoma;Branchiostoma belcheri  
 UdeM00000019823 225164 218.4 UdeM00000019823 XP\_009054817.1 74.1  
 139 36 0 1 139 1 139 6.10E-54 218.4 225164  
 cellular  
 organisms;Eukaryota;Opisthokonta;Metazoa;Eumetazoa;Bilateria;Protostomia;  
 Spiralia;Lophotrochozoa;Mollusca;Gastropoda;Patellogastropoda;Lottioidea;  
 Lottiidae;Lottia;Lottia gigantea  
 UdeM00000019825 37653 267.3 UdeM00000019825 XP\_014791118.1 67.3 196  
 64 0 3 198 318 513 1.60E-68 267.3 37653 cellular  
 organisms;Eukaryota;Opisthokonta;Metazoa;Eumetazoa;Bilateria;Protostomia;  
 Spiralia;Lophotrochozoa;Mollusca;Cephalopoda;Coleoidea;Octopodiformes;Oct  
 opoda;Incirrata;Octopodidae;Octopus;Octopus bimaculoides  
 UdeM00000019824 7574 579.3 UdeM00000019824 XP\_013413478.1 55.4 529  
 230 2 1 525 1 527 4.90E-162 579.3 7574 cellular  
 organisms;Eukaryota;Opisthokonta;Metazoa;Eumetazoa;Bilateria;Protostomia;  
 Spiralia;Lophotrochozoa;Brachiopoda;Linguliformea;Lingulata;Lingulida;Lin  
 guloidea;Lingulidae;Lingula;Lingula anatina  
 UdeM00000019826 7739 430.6 UdeM00000019826 XP\_035677040.1 66.7 297  
 98 1 8 303 9 305 1.60E-117 430.6 7739 cellular  
 organisms;Eukaryota;Opisthokonta;Metazoa;Eumetazoa;Bilateria;Deuterostomi  
 a;Chordata;Cephalochordata;Leptocardii;Amphioxiformes;Branchiostomidae;Br  
 anchiostoma;Branchiostoma floridae  
 UdeM00000019827 29159 618.2 UdeM00000019827 XP\_034302171.1 62.7 502  
 171 6 3 491 5 503 9.00E-174 618.2 29159 cellular  
 organisms;Eukaryota;Opisthokonta;Metazoa;Eumetazoa;Bilateria;Protostomia;  
 Spiralia;Lophotrochozoa;Mollusca;Bivalvia;Autobranchia;Pteriormorphia;Ostr  
 eida;Ostreoidea;Ostreidae;Crassostrea;Crassostrea gigas  
 UdeM00000019828 6596 1583.9 UdeM00000019828 XP\_045216927.1 74.3  
 1090 213 2 12 1101 77 1099 0.00E+00 1583.9 6596

cellular  
organisms;Eukaryota;Opisthokonta;Metazoa;Eumetazoa;Bilateria;Protostomia;  
Spiralia;Lophotrochozoa;Mollusca;Bivalvia;Autobranchia;Heteroconchia;Euhe  
terodonta;Imparidentia;Venerida;Veneroidea;Veneridae;Mercenaria;Mercenari  
a mercenaria  
UdeM00000019829 6596 279.6 UdeM00000019829 XP\_045216730.1 70.4 189  
56 0 30 218 9 197 3.30E-72 279.6 6596 cellular  
organisms;Eukaryota;Opisthokonta;Metazoa;Eumetazoa;Bilateria;Protostomia;  
Spiralia;Lophotrochozoa;Mollusca;Bivalvia;Autobranchia;Heteroconchia;Euhe  
terodonta;Imparidentia;Venerida;Veneroidea;Veneridae;Mercenaria;Mercenari  
a mercenaria  
UdeM00000019832 6596 169.5 UdeM00000019832 XP\_045156764.1 49.7 177  
89 0 6 182 8 184 1.30E-38 169.5 6596 cellular  
organisms;Eukaryota;Opisthokonta;Metazoa;Eumetazoa;Bilateria;Protostomia;  
Spiralia;Lophotrochozoa;Mollusca;Bivalvia;Autobranchia;Heteroconchia;Euhe  
terodonta;Imparidentia;Venerida;Veneroidea;Veneridae;Mercenaria;Mercenari  
a mercenaria  
UdeM00000019833 6579 146 UdeM00000019833 XP\_033749386.1 88.8 80  
9 0 1 80 1 80 2.10E-32 146 6579 cellular  
organisms;Eukaryota;Opisthokonta;Metazoa;Eumetazoa;Bilateria;Protostomia;  
Spiralia;Lophotrochozoa;Mollusca;Bivalvia;Autobranchia;Pteriormorphia;Pect  
inida;Pectinoidea;Pectinidae;Pecten;Pecten maximus  
UdeM00000019835 1735272 141.7 UdeM00000019835 XP\_041369430.1 51.9  
135 62 1 29 160 33 167 7.90E-31 141.7 1735272  
cellular  
organisms;Eukaryota;Opisthokonta;Metazoa;Eumetazoa;Bilateria;Protostomia;  
Spiralia;Lophotrochozoa;Mollusca;Gastropoda;Neomphalina;Neomphaloidea;Pel  
tospiridae;Gigantopelta;Gigantopelta aegis  
UdeM00000019834 1735272 164.9 UdeM00000019834 XP\_041369430.1 55  
149 64 1 29 174 33 181 1.00E-37 164.9 1735272  
cellular  
organisms;Eukaryota;Opisthokonta;Metazoa;Eumetazoa;Bilateria;Protostomia;  
Spiralia;Lophotrochozoa;Mollusca;Gastropoda;Neomphalina;Neomphaloidea;Pel  
tospiridae;Gigantopelta;Gigantopelta aegis  
UdeM00000019836 1735272 198.7 UdeM00000019836 XP\_041369430.1 55.4  
177 76 1 1 174 214 390 6.00E-48 198.7 1735272  
cellular  
organisms;Eukaryota;Opisthokonta;Metazoa;Eumetazoa;Bilateria;Protostomia;  
Spiralia;Lophotrochozoa;Mollusca;Gastropoda;Neomphalina;Neomphaloidea;Pel  
tospiridae;Gigantopelta;Gigantopelta aegis  
UdeM00000019837 6573 174.5 UdeM00000019837 XP\_021354741.1 58.5 135  
56 0 1 135 239 373 1.00E-40 174.5 6573 cellular  
organisms;Eukaryota;Opisthokonta;Metazoa;Eumetazoa;Bilateria;Protostomia;  
Spiralia;Lophotrochozoa;Mollusca;Bivalvia;Autobranchia;Pteriormorphia;Pect  
inida;Pectinoidea;Pectinidae;Mizuhopecten;Mizuhopecten yessoensis  
UdeM00000019838 400727 203.4 UdeM00000019838 XP\_025077683.1 41.6  
279 122 2 9 287 166 403 4.00E-49 203.4 400727  
cellular  
organisms;Eukaryota;Opisthokonta;Metazoa;Eumetazoa;Bilateria;Protostomia;  
Spiralia;Lophotrochozoa;Mollusca;Gastropoda;Caenogastropoda;Architaeniogl  
ossa;Ampullarioidea;Ampullariidae;Pomacea;Pomacea canaliculata  
UdeM00000019839 6596 371.3 UdeM00000019839 XP\_045170460.1 36.8 585  
311 13 43 586 352 918 2.40E-99 371.3 6596 cellular  
organisms;Eukaryota;Opisthokonta;Metazoa;Eumetazoa;Bilateria;Protostomia;

Spiralia;Lophotrochozoa;Mollusca;Bivalvia;Autobranchia;Heteroconchia;Euherodonta;Imparidentia;Venerida;Veneroidea;Veneridae;Mercenaria;Mercenaria mercenaria

UdeM00000019840 1735272 123.6 UdeM00000019840 XP\_041363316.1 36.1  
191 113 5 1 188 183 367 2.60E-25 123.6 1735272  
cellular

organisms;Eukaryota;Opisthokonta;Metazoa;Eumetazoa;Bilateria;Protostomia;Spiralia;Lophotrochozoa;Mollusca;Gastropoda;Neomphalina;Neomphaloidea;Peltospiridae;Gigantopelta;Gigantopelta aegis

UdeM00000019841 6526 204.5 UdeM00000019841 XP\_013073210.1 39.2 268  
155 4 26 287 100 365 1.80E-49 204.5 6526 cellular

organisms;Eukaryota;Opisthokonta;Metazoa;Eumetazoa;Bilateria;Protostomia;Spiralia;Lophotrochozoa;Mollusca;Gastropoda;Heterobranchia;Euthyneura;Panpulmonata;Hygrophila;Lymnaeidae;Planorbidae;Biomphalaria;Biomphalaria glabrata

UdeM00000019842 1735272 171 UdeM00000019842 XP\_041363316.1 36.7  
259 134 4 145 376 112 367 2.90E-39 171 1735272  
cellular

organisms;Eukaryota;Opisthokonta;Metazoa;Eumetazoa;Bilateria;Protostomia;Spiralia;Lophotrochozoa;Mollusca;Gastropoda;Neomphalina;Neomphaloidea;Peltospiridae;Gigantopelta;Gigantopelta aegis

UdeM00000019843 6526 161.8 UdeM00000019843 XP\_013073210.1 42.3 194  
108 2 113 302 100 293 1.40E-36 161.8 6526 cellular

organisms;Eukaryota;Opisthokonta;Metazoa;Eumetazoa;Bilateria;Protostomia;Spiralia;Lophotrochozoa;Mollusca;Gastropoda;Heterobranchia;Euthyneura;Panpulmonata;Hygrophila;Lymnaeidae;Planorbidae;Biomphalaria;Biomphalaria glabrata

UdeM00000019845 1735272 129 UdeM00000019845 XP\_041363316.1 36.5  
189 115 3 1 188 183 367 6.30E-27 129 1735272  
cellular

organisms;Eukaryota;Opisthokonta;Metazoa;Eumetazoa;Bilateria;Protostomia;Spiralia;Lophotrochozoa;Mollusca;Gastropoda;Neomphalina;Neomphaloidea;Peltospiridae;Gigantopelta;Gigantopelta aegis

UdeM00000019844 6526 210.3 UdeM00000019844 XP\_013073210.1 40.4 267  
153 4 26 287 100 365 3.30E-51 210.3 6526 cellular

organisms;Eukaryota;Opisthokonta;Metazoa;Eumetazoa;Bilateria;Protostomia;Spiralia;Lophotrochozoa;Mollusca;Gastropoda;Heterobranchia;Euthyneura;Panpulmonata;Hygrophila;Lymnaeidae;Planorbidae;Biomphalaria;Biomphalaria glabrata

UdeM00000019846 1735272 163.3 UdeM00000019846 XP\_041363316.1 43.8  
185 101 1 116 300 112 293 5.30E-37 163.3 1735272  
cellular

organisms;Eukaryota;Opisthokonta;Metazoa;Eumetazoa;Bilateria;Protostomia;Spiralia;Lophotrochozoa;Mollusca;Gastropoda;Neomphalina;Neomphaloidea;Peltospiridae;Gigantopelta;Gigantopelta aegis

UdeM00000019848 6526 210.7 UdeM00000019848 XP\_013073210.1 40.4 267  
153 4 26 287 100 365 2.50E-51 210.7 6526 cellular

organisms;Eukaryota;Opisthokonta;Metazoa;Eumetazoa;Bilateria;Protostomia;Spiralia;Lophotrochozoa;Mollusca;Gastropoda;Heterobranchia;Euthyneura;Panpulmonata;Hygrophila;Lymnaeidae;Planorbidae;Biomphalaria;Biomphalaria glabrata

UdeM00000019847 6526 210.7 UdeM00000019847 XP\_013073210.1 40.4 267  
153 4 108 369 100 365 3.20E-51 210.7 6526 cellular

organisms;Eukaryota;Opisthokonta;Metazoa;Eumetazoa;Bilateria;Protostomia;

Spiralia; Lophotrochozoa; Mollusca; Gastropoda; Heterobranchia; Euthyneura; Panpulmonata; Hygrophila; Lymnaeoidea; Planorbidae; Biomphalaria; Biomphalaria glabrata

UdeM00000019849 1735272 166 UdeM00000019849 XP\_041363316.1 33.4  
308 159 7 73 337 53 357 8.50E-38 166 1735272  
cellular

organisms; Eukaryota; Opisthokonta; Metazoa; Eumetazoa; Bilateria; Protostomia; Spiralia; Lophotrochozoa; Mollusca; Gastropoda; Neomphalina; Neomphaloidea; Peltospiridae; Gigantopelta; Gigantopelta aegis

UdeM00000019850 1735272 164.9 UdeM00000019850 XP\_041363316.1 37.4  
246 135 4 73 302 53 295 1.60E-37 164.9 1735272  
cellular

organisms; Eukaryota; Opisthokonta; Metazoa; Eumetazoa; Bilateria; Protostomia; Spiralia; Lophotrochozoa; Mollusca; Gastropoda; Neomphalina; Neomphaloidea; Peltospiridae; Gigantopelta; Gigantopelta aegis

UdeM00000019851 6526 207.6 UdeM00000019851 XP\_013073210.1 40.1 267  
154 4 26 287 100 365 2.10E-50 207.6 6526 cellular

organisms; Eukaryota; Opisthokonta; Metazoa; Eumetazoa; Bilateria; Protostomia; Spiralia; Lophotrochozoa; Mollusca; Gastropoda; Heterobranchia; Euthyneura; Panpulmonata; Hygrophila; Lymnaeoidea; Planorbidae; Biomphalaria; Biomphalaria glabrata

UdeM00000019852 6526 207.6 UdeM00000019852 XP\_013073210.1 40.1 267  
154 4 108 369 100 365 2.70E-50 207.6 6526 cellular

organisms; Eukaryota; Opisthokonta; Metazoa; Eumetazoa; Bilateria; Protostomia; Spiralia; Lophotrochozoa; Mollusca; Gastropoda; Heterobranchia; Euthyneura; Panpulmonata; Hygrophila; Lymnaeoidea; Planorbidae; Biomphalaria; Biomphalaria glabrata

UdeM00000019853 1735272 126.7 UdeM00000019853 XP\_041363316.1 35.4  
189 117 3 1 188 183 367 3.10E-26 126.7 1735272  
cellular

organisms; Eukaryota; Opisthokonta; Metazoa; Eumetazoa; Bilateria; Protostomia; Spiralia; Lophotrochozoa; Mollusca; Gastropoda; Neomphalina; Neomphaloidea; Peltospiridae; Gigantopelta; Gigantopelta aegis

UdeM00000019854 6526 208 UdeM00000019854 XP\_013073210.1 40.8 267  
152 4 26 287 100 365 1.60E-50 208 6526 cellular

organisms; Eukaryota; Opisthokonta; Metazoa; Eumetazoa; Bilateria; Protostomia; Spiralia; Lophotrochozoa; Mollusca; Gastropoda; Heterobranchia; Euthyneura; Panpulmonata; Hygrophila; Lymnaeoidea; Planorbidae; Biomphalaria; Biomphalaria glabrata

UdeM00000019855 6526 195.7 UdeM00000019855 XP\_013073210.1 38.9 262  
156 2 108 365 100 361 1.10E-46 195.7 6526 cellular

organisms; Eukaryota; Opisthokonta; Metazoa; Eumetazoa; Bilateria; Protostomia; Spiralia; Lophotrochozoa; Mollusca; Gastropoda; Heterobranchia; Euthyneura; Panpulmonata; Hygrophila; Lymnaeoidea; Planorbidae; Biomphalaria; Biomphalaria glabrata

UdeM00000019856 37621 83.2 UdeM00000019856 XP\_014679862.1 46.9 81  
43 0 47 127 179 259 3.10E-13 83.2 37621 cellular

organisms; Eukaryota; Opisthokonta; Metazoa; Eumetazoa; Bilateria; Protostomia; Ecdysozoa; Scalidophora; Priapulida; Priapulimorpha; Priapulimorphida; Priapulidae; Priapululus; Priapululus caudatus

UdeM00000019857 6526 114 UdeM00000019857 XP\_013073210.1 38 142  
88 0 98 239 85 226 2.60E-22 114 6526 cellular

organisms; Eukaryota; Opisthokonta; Metazoa; Eumetazoa; Bilateria; Protostomia; Spiralia; Lophotrochozoa; Mollusca; Gastropoda; Heterobranchia; Euthyneura; Pan

pulmonata;Hygrophila;Lymnaeoidae;Planorbidae;Biomphalaria;Biomphalaria  
glabrata  
UdeM00000019858 1735272 124 UdeM00000019858 XP\_041363316.1 36.1  
191 113 5 1 188 183 367 2.00E-25 124 1735272  
cellular  
organisms;Eukaryota;Opisthokonta;Metazoa;Eumetazoa;Bilateria;Protostomia;  
Spiralia;Lophotrochozoa;Mollusca;Gastropoda;Neomphalina;Neomphaloidea;Pel  
tospiridae;Gigantopelta;Gigantopelta aegis  
UdeM00000019859 46514 171 UdeM00000019859 XP\_038062328.1 35.5 299  
158 4 2 276 91 378 2.10E-39 171 46514 cellular  
organisms;Eukaryota;Opisthokonta;Metazoa;Eumetazoa;Bilateria;Deuterostomi  
a;Echinodermata;Eleutherozoa;Asterozoa;Asteroidea;Valvatacea;Valvatida;As  
terinidae;Patiria;Patiria miniata  
UdeM00000019860 6526 197.6 UdeM00000019860 XP\_013073210.1 37.5 277  
169 2 98 370 85 361 2.90E-47 197.6 6526 cellular  
organisms;Eukaryota;Opisthokonta;Metazoa;Eumetazoa;Bilateria;Protostomia;  
Spiralia;Lophotrochozoa;Mollusca;Gastropoda;Heterobranchia;Euthyneura;Pan  
pulmonata;Hygrophila;Lymnaeoidae;Planorbidae;Biomphalaria;Biomphalaria  
glabrata  
UdeM00000019861 6526 206.1 UdeM00000019861 XP\_013073210.1 40.1 267  
154 4 141 402 100 365 8.60E-50 206.1 6526 cellular  
organisms;Eukaryota;Opisthokonta;Metazoa;Eumetazoa;Bilateria;Protostomia;  
Spiralia;Lophotrochozoa;Mollusca;Gastropoda;Heterobranchia;Euthyneura;Pan  
pulmonata;Hygrophila;Lymnaeoidae;Planorbidae;Biomphalaria;Biomphalaria  
glabrata  
UdeM00000019862 46514 171 UdeM00000019862 XP\_038062328.1 35.5 299  
158 4 2 276 91 378 2.10E-39 171 46514 cellular  
organisms;Eukaryota;Opisthokonta;Metazoa;Eumetazoa;Bilateria;Deuterostomi  
a;Echinodermata;Eleutherozoa;Asterozoa;Asteroidea;Valvatacea;Valvatida;As  
terinidae;Patiria;Patiria miniata  
UdeM00000019863 6526 197.6 UdeM00000019863 XP\_013073210.1 37.5 277  
169 2 98 370 85 361 2.90E-47 197.6 6526 cellular  
organisms;Eukaryota;Opisthokonta;Metazoa;Eumetazoa;Bilateria;Protostomia;  
Spiralia;Lophotrochozoa;Mollusca;Gastropoda;Heterobranchia;Euthyneura;Pan  
pulmonata;Hygrophila;Lymnaeoidae;Planorbidae;Biomphalaria;Biomphalaria  
glabrata  
UdeM00000019865 1735272 125.2 UdeM00000019865 XP\_041363316.1 36.6  
191 112 5 1 188 183 367 9.00E-26 125.2 1735272  
cellular  
organisms;Eukaryota;Opisthokonta;Metazoa;Eumetazoa;Bilateria;Protostomia;  
Spiralia;Lophotrochozoa;Mollusca;Gastropoda;Neomphalina;Neomphaloidea;Pel  
tospiridae;Gigantopelta;Gigantopelta aegis  
UdeM00000019864 6526 206.8 UdeM00000019864 XP\_013073210.1 40.4 267  
153 4 26 287 100 365 3.60E-50 206.8 6526 cellular  
organisms;Eukaryota;Opisthokonta;Metazoa;Eumetazoa;Bilateria;Protostomia;  
Spiralia;Lophotrochozoa;Mollusca;Gastropoda;Heterobranchia;Euthyneura;Pan  
pulmonata;Hygrophila;Lymnaeoidae;Planorbidae;Biomphalaria;Biomphalaria  
glabrata  
UdeM00000019866 8049 259.2 UdeM00000019866 XP\_030193753.1 35.9 376  
225 4 134 504 17 381 1.10E-65 259.2 8049 cellular  
organisms;Eukaryota;Opisthokonta;Metazoa;Eumetazoa;Bilateria;Deuterostomi  
a;Chordata;Craniata;Vertebrata;Gnathostomata;Teleostomi;Euteleostomi;Acti  
nopterygii;Actinopteri;Neopterygii;Teleostei;Osteoglossocephalai;Clupeoce  
phala;Euteleosteoromorpha;Neoteleostei;Eurypterygia;Ctenosquamata;Acanthomo

rphata;Paracanthopterygii;Zeiogadaria;Gadariae;Gadiformes;Gadoidei;Gadida  
e;Gadus;Gadus morhua  
UdeM00000019867 46514 171 UdeM00000019867 XP\_038062328.1 35.5 299  
158 4 2 276 91 378 2.10E-39 171 46514 cellular  
organisms;Eukaryota;Opisthokonta;Metazoa;Eumetazoa;Bilateria;Deuterostomi  
a;Echinodermata;Eleutherozoa;Asterozoa;Asteroidea;Valvatacea;Valvatida;As  
terinidae;Patiria;Patiria miniata  
UdeM00000019868 6526 193.4 UdeM00000019868 XP\_013073210.1 36.8 277  
171 2 175 447 85 361 6.50E-46 193.4 6526 cellular  
organisms;Eukaryota;Opisthokonta;Metazoa;Eumetazoa;Bilateria;Protostomia;  
Spiralia;Lophotrochozoa;Mollusca;Gastropoda;Heterobranchia;Euthyneura;Pan  
pulmonata;Hygrophila;Lymnaeioidea;Planorbidae;Biomphalaria;Biomphalaria  
glabrata  
UdeM00000019869 6596 229.6 UdeM00000019869 XP\_045215197.1 49.3 300  
118 11 2 283 7 290 5.20E-57 229.6 6596 cellular  
organisms;Eukaryota;Opisthokonta;Metazoa;Eumetazoa;Bilateria;Protostomia;  
Spiralia;Lophotrochozoa;Mollusca;Bivalvia;Autobranchia;Heteroconchia;Euhe  
terodonta;Imparidentia;Venerida;Veneroidea;Veneridae;Mercenaria;Mercenari  
a mercenaria  
UdeM00000019870 1735272 458 UdeM00000019870 XP\_041367294.1 46.2  
507 270 2 1 505 1 506 1.60E-125 458 1735272  
cellular  
organisms;Eukaryota;Opisthokonta;Metazoa;Eumetazoa;Bilateria;Protostomia;  
Spiralia;Lophotrochozoa;Mollusca;Gastropoda;Neomphalina;Neomphaloidea;Pel  
tospiridae;Gigantopelta;Gigantopelta aegis  
UdeM00000019872 6565 237.3 UdeM00000019872 XP\_022315198.1 58.5 193  
80 0 1 193 316 508 1.70E-59 237.3 6565 cellular  
organisms;Eukaryota;Opisthokonta;Metazoa;Eumetazoa;Bilateria;Protostomia;  
Spiralia;Lophotrochozoa;Mollusca;Bivalvia;Autobranchia;Pteriormorphia;Ostr  
eida;Ostreioidea;Ostreidae;Crassostrea;Crassostrea virginica  
UdeM00000019871 1735272 455.3 UdeM00000019871 XP\_041367294.1 45.6  
507 273 2 1 505 1 506 1.00E-124 455.3 1735272  
cellular  
organisms;Eukaryota;Opisthokonta;Metazoa;Eumetazoa;Bilateria;Protostomia;  
Spiralia;Lophotrochozoa;Mollusca;Gastropoda;Neomphalina;Neomphaloidea;Pel  
tospiridae;Gigantopelta;Gigantopelta aegis  
UdeM00000019873 6565 457.2 UdeM00000019873 XP\_022316649.1 45.8 509  
272 3 1 506 268 775 2.70E-125 457.2 6565 cellular  
organisms;Eukaryota;Opisthokonta;Metazoa;Eumetazoa;Bilateria;Protostomia;  
Spiralia;Lophotrochozoa;Mollusca;Bivalvia;Autobranchia;Pteriormorphia;Ostr  
eida;Ostreioidea;Ostreidae;Crassostrea;Crassostrea virginica  
UdeM00000019874 6573 250 UdeM00000019874 XP\_021345869.1 69.3 163  
50 0 3 165 6 168 3.80E-63 250 6573 cellular  
organisms;Eukaryota;Opisthokonta;Metazoa;Eumetazoa;Bilateria;Protostomia;  
Spiralia;Lophotrochozoa;Mollusca;Bivalvia;Autobranchia;Pteriormorphia;Pect  
inida;Pectinoidea;Pectinidae;Mizuhopecten;Mizuhopecten yessoensis  
UdeM00000019875 29159 241.9 UdeM00000019875 XP\_034323799.1 37.5 357  
212 5 55 408 132 480 1.40E-60 241.9 29159 cellular  
organisms;Eukaryota;Opisthokonta;Metazoa;Eumetazoa;Bilateria;Protostomia;  
Spiralia;Lophotrochozoa;Mollusca;Bivalvia;Autobranchia;Pteriormorphia;Ostr  
eida;Ostreioidea;Ostreidae;Crassostrea;Crassostrea gigas  
UdeM00000019876 6579 770 UdeM00000019876 XP\_033750147.1 73.4 508  
126 5 1 506 1 501 1.90E-219 770 6579 cellular  
organisms;Eukaryota;Opisthokonta;Metazoa;Eumetazoa;Bilateria;Protostomia;



Spiralia; Lophotrochozoa; Mollusca; Bivalvia; Autobranchia; Pteriomorpha; Pectinida; Pectinoidea; Pectinidae; Pecten; Pecten maximus

UdeM00000019877 6579 393.3 UdeM00000019877 XP\_033749962.1 54.2 421  
158 5 60 473 15 407 4.40E-106 393.3 6579 cellular  
organisms; Eukaryota; Opisthokonta; Metazoa; Eumetazoa; Bilateria; Protostomia; Spiralia; Lophotrochozoa; Mollusca; Bivalvia; Autobranchia; Pteriomorpha; Pectinida; Pectinoidea; Pectinidae; Pecten; Pecten maximus

UdeM00000019878 6579 350.1 UdeM00000019878 XP\_033749962.1 51 404  
180 4 60 456 15 407 4.20E-93 350.1 6579 cellular  
organisms; Eukaryota; Opisthokonta; Metazoa; Eumetazoa; Bilateria; Protostomia; Spiralia; Lophotrochozoa; Mollusca; Bivalvia; Autobranchia; Pteriomorpha; Pectinida; Pectinoidea; Pectinidae; Pecten; Pecten maximus

UdeM00000019880 6579 773.1 UdeM00000019880 XP\_033750966.1 73.5 544  
129 9 33 569 40 575 2.80E-220 773.1 6579 cellular  
organisms; Eukaryota; Opisthokonta; Metazoa; Eumetazoa; Bilateria; Protostomia; Spiralia; Lophotrochozoa; Mollusca; Bivalvia; Autobranchia; Pteriomorpha; Pectinida; Pectinoidea; Pectinidae; Pecten; Pecten maximus

UdeM00000019881 6573 574.3 UdeM00000019881 XP\_021359354.1 93.1 288  
20 0 1 288 1 288 8.60E-161 574.3 6573 cellular  
organisms; Eukaryota; Opisthokonta; Metazoa; Eumetazoa; Bilateria; Protostomia; Spiralia; Lophotrochozoa; Mollusca; Bivalvia; Autobranchia; Pteriomorpha; Pectinida; Pectinoidea; Pectinidae; Mizuhopecten; Mizuhopecten yessoensis

UdeM00000019882 7574 196.1 UdeM00000019882 XP\_013389338.1 60.2 166  
66 0 1 166 1 166 5.60E-47 196.1 7574 cellular  
organisms; Eukaryota; Opisthokonta; Metazoa; Eumetazoa; Bilateria; Protostomia; Spiralia; Lophotrochozoa; Brachiopoda; Linguliformea; Lingulata; Lingulida; Linguloidea; Lingulidae; Lingula; Lingula anatina

UdeM00000019883 6579 231.1 UdeM00000019883 XP\_033750284.1 39.6 424  
217 10 1 414 1 395 2.60E-57 231.1 6579 cellular  
organisms; Eukaryota; Opisthokonta; Metazoa; Eumetazoa; Bilateria; Protostomia; Spiralia; Lophotrochozoa; Mollusca; Bivalvia; Autobranchia; Pteriomorpha; Pectinida; Pectinoidea; Pectinidae; Pecten; Pecten maximus

UdeM00000019884 6596 266.9 UdeM00000019884 XP\_045156321.1 41.1 521  
254 16 1 487 1 502 4.90E-68 266.9 6596 cellular  
organisms; Eukaryota; Opisthokonta; Metazoa; Eumetazoa; Bilateria; Protostomia; Spiralia; Lophotrochozoa; Mollusca; Bivalvia; Autobranchia; Heteroconchia; Euheterodonta; Imparidentia; Venerida; Veneroidea; Veneridae; Mercenaria; Mercenaria mercenaria

UdeM00000019886 6596 211.1 UdeM00000019886 XP\_045215117.1 26.5 672  
438 18 1 650 46 683 4.50E-51 211.1 6596 cellular  
organisms; Eukaryota; Opisthokonta; Metazoa; Eumetazoa; Bilateria; Protostomia; Spiralia; Lophotrochozoa; Mollusca; Bivalvia; Autobranchia; Heteroconchia; Euheterodonta; Imparidentia; Venerida; Veneroidea; Veneridae; Mercenaria; Mercenaria mercenaria

UdeM00000019885 6596 258.5 UdeM00000019885 XP\_045215117.1 28 708  
454 18 3 688 10 683 2.60E-65 258.5 6596 cellular  
organisms; Eukaryota; Opisthokonta; Metazoa; Eumetazoa; Bilateria; Protostomia; Spiralia; Lophotrochozoa; Mollusca; Bivalvia; Autobranchia; Heteroconchia; Euheterodonta; Imparidentia; Venerida; Veneroidea; Veneridae; Mercenaria; Mercenaria mercenaria

UdeM00000019887 400727 60.1 UdeM00000019887 XP\_025095192.1 33.6  
143 86 4 16 157 443 577 3.40E-06 60.1 400727  
cellular  
organisms; Eukaryota; Opisthokonta; Metazoa; Eumetazoa; Bilateria; Protostomia;

Spiralia; Lophotrochozoa; Mollusca; Gastropoda; Caenogastropoda; Architaenioglossa; Ampullarioidea; Ampullariidae; Pomacea; Pomacea canaliculata

|                 |      |      |                 |                |          |          |
|-----------------|------|------|-----------------|----------------|----------|----------|
| UdeM00000019888 | 6596 | 99.4 | UdeM00000019888 | XP_045215117.1 | 25.3     | 328      |
| 205             | 11   | 1    | 323             | 46             | 338      | 1.10E-17 |
|                 |      |      | 99.4            | 6596           | cellular |          |

organisms; Eukaryota; Opisthokonta; Metazoa; Eumetazoa; Bilateria; Protostomia; Spiralia; Lophotrochozoa; Mollusca; Bivalvia; Autobranchia; Heteroconchia; Euheterodonta; Imparidentia; Venerida; Veneroidea; Veneridae; Mercenaria; Mercenaria mercenaria

|                 |         |      |                 |                |          |          |
|-----------------|---------|------|-----------------|----------------|----------|----------|
| UdeM00000019890 | 1529436 | 71.2 | UdeM00000019890 | XP_033102160.1 | 54.7     |          |
| 53              | 24      | 0    | 19              | 71             | 101      | 153      |
|                 |         |      |                 |                |          | 2.80E-09 |
|                 |         |      | 71.2            | 1529436        | cellular |          |

organisms; Eukaryota; Opisthokonta; Metazoa; Eumetazoa; Bilateria; Deuterostomia; Echinodermata; Pelmatozoa; Crinoidea; Articulata; Comatulida; Comatulidae; Comatulinae; Anneissia; Anneissia japonica

|                 |      |      |                 |                |          |          |
|-----------------|------|------|-----------------|----------------|----------|----------|
| UdeM00000019891 | 6596 | 91.3 | UdeM00000019891 | XP_045204335.1 | 24.5     | 306      |
| 195             | 9    | 2    | 290             | 16             | 302      | 4.80E-15 |
|                 |      |      | 91.3            | 6596           | cellular |          |

organisms; Eukaryota; Opisthokonta; Metazoa; Eumetazoa; Bilateria; Protostomia; Spiralia; Lophotrochozoa; Mollusca; Bivalvia; Autobranchia; Heteroconchia; Euheterodonta; Imparidentia; Venerida; Veneroidea; Veneridae; Mercenaria; Mercenaria mercenaria

|                 |       |       |                 |                |          |           |
|-----------------|-------|-------|-----------------|----------------|----------|-----------|
| UdeM00000019892 | 29159 | 667.2 | UdeM00000019892 | XP_034305975.1 | 33.3     | 1326      |
| 819             | 25    | 6     | 1310            | 1084           | 2364     | 4.40E-188 |
|                 |       |       | 667.2           | 29159          | cellular |           |

organisms; Eukaryota; Opisthokonta; Metazoa; Eumetazoa; Bilateria; Protostomia; Spiralia; Lophotrochozoa; Mollusca; Bivalvia; Autobranchia; Pteriomorpha; Ostreida; Ostreoidea; Ostreidae; Crassostrea; Crassostrea gigas

|                 |      |       |                 |                |          |          |
|-----------------|------|-------|-----------------|----------------|----------|----------|
| UdeM00000019894 | 6596 | 211.5 | UdeM00000019894 | XP_045156366.1 | 61       | 159      |
| 62              | 0    | 1     | 159             | 1              | 159      | 8.50E-52 |
|                 |      |       | 211.5           | 6596           | cellular |          |

organisms; Eukaryota; Opisthokonta; Metazoa; Eumetazoa; Bilateria; Protostomia; Spiralia; Lophotrochozoa; Mollusca; Bivalvia; Autobranchia; Heteroconchia; Euheterodonta; Imparidentia; Venerida; Veneroidea; Veneridae; Mercenaria; Mercenaria mercenaria

|                 |      |     |                 |                |          |           |
|-----------------|------|-----|-----------------|----------------|----------|-----------|
| UdeM00000019896 | 6596 | 545 | UdeM00000019896 | XP_045156366.1 | 54.5     | 466       |
| 210             | 1    | 29  | 494             | 162            | 625      | 9.50E-152 |
|                 |      |     | 545             | 6596           | cellular |           |

organisms; Eukaryota; Opisthokonta; Metazoa; Eumetazoa; Bilateria; Protostomia; Spiralia; Lophotrochozoa; Mollusca; Bivalvia; Autobranchia; Heteroconchia; Euheterodonta; Imparidentia; Venerida; Veneroidea; Veneridae; Mercenaria; Mercenaria mercenaria

|                 |      |       |                 |                |          |           |
|-----------------|------|-------|-----------------|----------------|----------|-----------|
| UdeM00000019897 | 6596 | 795.8 | UdeM00000019897 | XP_045156366.1 | 59.3     | 627       |
| 253             | 1    | 1     | 627             | 1              | 625      | 3.90E-227 |
|                 |      |       | 795.8           | 6596           | cellular |           |

organisms; Eukaryota; Opisthokonta; Metazoa; Eumetazoa; Bilateria; Protostomia; Spiralia; Lophotrochozoa; Mollusca; Bivalvia; Autobranchia; Heteroconchia; Euheterodonta; Imparidentia; Venerida; Veneroidea; Veneridae; Mercenaria; Mercenaria mercenaria

|                 |      |       |                 |                |          |           |
|-----------------|------|-------|-----------------|----------------|----------|-----------|
| UdeM00000019898 | 6596 | 819.7 | UdeM00000019898 | XP_045156366.1 | 60.7     | 626       |
| 245             | 1    | 1     | 626             | 1              | 625      | 2.50E-234 |
|                 |      |       | 819.7           | 6596           | cellular |           |

organisms; Eukaryota; Opisthokonta; Metazoa; Eumetazoa; Bilateria; Protostomia; Spiralia; Lophotrochozoa; Mollusca; Bivalvia; Autobranchia; Heteroconchia; Euheterodonta; Imparidentia; Venerida; Veneroidea; Veneridae; Mercenaria; Mercenaria mercenaria

|                 |      |       |                 |                |          |           |
|-----------------|------|-------|-----------------|----------------|----------|-----------|
| UdeM00000019899 | 6596 | 487.6 | UdeM00000019899 | XP_045156366.1 | 66.2     | 340       |
| 114             | 1    | 1     | 339             | 286            | 625      | 1.20E-134 |
|                 |      |       | 487.6           | 6596           | cellular |           |

organisms; Eukaryota; Opisthokonta; Metazoa; Eumetazoa; Bilateria; Protostomia; Spiralia; Lophotrochozoa; Mollusca; Bivalvia; Autobranchia; Heteroconchia; Euheterodonta; Imparidentia; Venerida; Veneroidea; Veneridae; Mercenaria; Mercenaria mercenaria

terodonta;Imparidentia;Venerida;Veneroidea;Veneridae;Mercenaria;Mercenari  
 a mercenaria  
 UdeM00000019900 6596 332.4 UdeM00000019900 XP\_045156366.1 54.3 291  
 130 3 1 290 1 289 5.70E-88 332.4 6596 cellular  
 organisms;Eukaryota;Opisthokonta;Metazoa;Eumetazoa;Bilateria;Protostomia;  
 Spiralia;Lophotrochozoa;Mollusca;Bivalvia;Autobranhia;Heteroconchia;Euhe  
 terodonta;Imparidentia;Venerida;Veneroidea;Veneridae;Mercenaria;Mercenari  
 a mercenaria  
 UdeM00000019901 6573 136.3 UdeM00000019901 XP\_021360568.1 37.6 205  
 122 2 4 205 7 208 4.40E-29 136.3 6573 cellular  
 organisms;Eukaryota;Opisthokonta;Metazoa;Eumetazoa;Bilateria;Protostomia;  
 Spiralia;Lophotrochozoa;Mollusca;Bivalvia;Autobranhia;Pteriormorphia;Pect  
 inida;Pectinoidea;Pectinidae;Mizuhopecten;Mizuhopecten yessoensis  
 UdeM00000019902 6579 501.9 UdeM00000019902 XP\_033749388.1 42.1 703  
 331 14 11 645 3 697 1.70E-138 501.9 6579 cellular  
 organisms;Eukaryota;Opisthokonta;Metazoa;Eumetazoa;Bilateria;Protostomia;  
 Spiralia;Lophotrochozoa;Mollusca;Bivalvia;Autobranhia;Pteriormorphia;Pect  
 inida;Pectinoidea;Pectinidae;Pecten;Pecten maximus  
 UdeM00000019904 6596 144.1 UdeM00000019904 XP\_045156596.1 73.2 97  
 25 1 1 97 1 96 1.00E-31 144.1 6596 cellular  
 organisms;Eukaryota;Opisthokonta;Metazoa;Eumetazoa;Bilateria;Protostomia;  
 Spiralia;Lophotrochozoa;Mollusca;Bivalvia;Autobranhia;Heteroconchia;Euhe  
 terodonta;Imparidentia;Venerida;Veneroidea;Veneridae;Mercenaria;Mercenari  
 a mercenaria  
 UdeM00000019905 6596 455.3 UdeM00000019905 XP\_045156593.1 54.8 414  
 164 6 1 413 1 392 8.50E-125 455.3 6596 cellular  
 organisms;Eukaryota;Opisthokonta;Metazoa;Eumetazoa;Bilateria;Protostomia;  
 Spiralia;Lophotrochozoa;Mollusca;Bivalvia;Autobranhia;Heteroconchia;Euhe  
 terodonta;Imparidentia;Venerida;Veneroidea;Veneridae;Mercenaria;Mercenari  
 a mercenaria  
 UdeM00000019906 6596 815.8 UdeM00000019906 XP\_045156594.1 92.3 442  
 34 0 1 442 1 442 2.60E-233 815.8 6596 cellular  
 organisms;Eukaryota;Opisthokonta;Metazoa;Eumetazoa;Bilateria;Protostomia;  
 Spiralia;Lophotrochozoa;Mollusca;Bivalvia;Autobranhia;Heteroconchia;Euhe  
 terodonta;Imparidentia;Venerida;Veneroidea;Veneridae;Mercenaria;Mercenari  
 a mercenaria  
 UdeM00000019907 29159 553.5 UdeM00000019907 XP\_011435747.2 32 993  
 538 17 14 903 309 1267 5.10E-154 553.5 29159 cellular  
 organisms;Eukaryota;Opisthokonta;Metazoa;Eumetazoa;Bilateria;Protostomia;  
 Spiralia;Lophotrochozoa;Mollusca;Bivalvia;Autobranhia;Pteriormorphia;Ostr  
 eida;Ostreoidea;Ostreidae;Crassostrea;Crassostrea gigas  
 UdeM00000019908 6596 154.1 UdeM00000019908 XP\_045197025.1 54.4 125  
 57 0 35 159 173 297 1.70E-34 154.1 6596 cellular  
 organisms;Eukaryota;Opisthokonta;Metazoa;Eumetazoa;Bilateria;Protostomia;  
 Spiralia;Lophotrochozoa;Mollusca;Bivalvia;Autobranhia;Heteroconchia;Euhe  
 terodonta;Imparidentia;Venerida;Veneroidea;Veneridae;Mercenaria;Mercenari  
 a mercenaria  
 UdeM00000019909 6596 318.5 UdeM00000019909 XP\_045215567.1 44.8 348  
 190 2 3 349 5 351 1.10E-83 318.5 6596 cellular  
 organisms;Eukaryota;Opisthokonta;Metazoa;Eumetazoa;Bilateria;Protostomia;  
 Spiralia;Lophotrochozoa;Mollusca;Bivalvia;Autobranhia;Heteroconchia;Euhe  
 terodonta;Imparidentia;Venerida;Veneroidea;Veneridae;Mercenaria;Mercenari  
 a mercenaria

UdeM00000019910 6596 1689.5 UdeM00000019910 XP\_045215964.1 53  
 1600 685 20 10 1575 6 1572 0.00E+00 1689.5 6596  
 cellular  
 organisms;Eukaryota;Opisthokonta;Metazoa;Eumetazoa;Bilateria;Protostomia;  
 Spiralia;Lophotrochozoa;Mollusca;Bivalvia;Autobranhia;Heteroconchia;Euhe  
 terodonta;Imparidentia;Venerida;Veneroidea;Veneridae;Mercenaria;Mercenari  
 a mercenaria  
 UdeM00000019911 6596 1677.9 UdeM00000019911 XP\_045215964.1 53.9  
 1573 668 16 51 1585 19 1572 0.00E+00 1677.9 6596  
 cellular  
 organisms;Eukaryota;Opisthokonta;Metazoa;Eumetazoa;Bilateria;Protostomia;  
 Spiralia;Lophotrochozoa;Mollusca;Bivalvia;Autobranhia;Heteroconchia;Euhe  
 terodonta;Imparidentia;Venerida;Veneroidea;Veneridae;Mercenaria;Mercenari  
 a mercenaria  
 UdeM00000019912 6573 844.3 UdeM00000019912 XP\_021368435.1 35.3 1387  
 736 36 36 1278 480 1849 2.20E-241 844.3 6573 cellular  
 organisms;Eukaryota;Opisthokonta;Metazoa;Eumetazoa;Bilateria;Protostomia;  
 Spiralia;Lophotrochozoa;Mollusca;Bivalvia;Autobranhia;Pteriormorphia;Pect  
 inida;Pectinoidea;Pectinidae;Mizuhopecten;Mizuhopecten yessoensis  
 UdeM00000019913 6565 185.3 UdeM00000019913 XP\_022333198.1 84.1 113  
 18 0 1 113 1 113 4.50E-44 185.3 6565 cellular  
 organisms;Eukaryota;Opisthokonta;Metazoa;Eumetazoa;Bilateria;Protostomia;  
 Spiralia;Lophotrochozoa;Mollusca;Bivalvia;Autobranhia;Pteriormorphia;Ostr  
 eida;Ostreoidea;Ostreidae;Crassostrea;Crassostrea virginica  
 UdeM00000019914 6596 810.8 UdeM00000019914 XP\_045216865.1 76.6 508  
 117 1 1 508 1 506 9.60E-232 810.8 6596 cellular  
 organisms;Eukaryota;Opisthokonta;Metazoa;Eumetazoa;Bilateria;Protostomia;  
 Spiralia;Lophotrochozoa;Mollusca;Bivalvia;Autobranhia;Heteroconchia;Euhe  
 terodonta;Imparidentia;Venerida;Veneroidea;Veneridae;Mercenaria;Mercenari  
 a mercenaria  
 UdeM00000019915 6596 811.2 UdeM00000019915 XP\_045216865.1 76.4 509  
 118 1 1 509 1 507 7.40E-232 811.2 6596 cellular  
 organisms;Eukaryota;Opisthokonta;Metazoa;Eumetazoa;Bilateria;Protostomia;  
 Spiralia;Lophotrochozoa;Mollusca;Bivalvia;Autobranhia;Heteroconchia;Euhe  
 terodonta;Imparidentia;Venerida;Veneroidea;Veneridae;Mercenaria;Mercenari  
 a mercenaria  
 UdeM00000019916 29159 345.1 UdeM00000019916 XP\_011448861.1 72.9 214  
 56 2 1 213 1 213 6.40E-92 345.1 29159 cellular  
 organisms;Eukaryota;Opisthokonta;Metazoa;Eumetazoa;Bilateria;Protostomia;  
 Spiralia;Lophotrochozoa;Mollusca;Bivalvia;Autobranhia;Pteriormorphia;Ostr  
 eida;Ostreoidea;Ostreidae;Crassostrea;Crassostrea gigas  
 UdeM00000019917 6565 146.4 UdeM00000019917 XP\_022302274.1 43.3 178  
 99 2 11 188 127 302 3.80E-32 146.4 6565 cellular  
 organisms;Eukaryota;Opisthokonta;Metazoa;Eumetazoa;Bilateria;Protostomia;  
 Spiralia;Lophotrochozoa;Mollusca;Bivalvia;Autobranhia;Pteriormorphia;Ostr  
 eida;Ostreoidea;Ostreidae;Crassostrea;Crassostrea virginica  
 UdeM00000019918 6596 234.2 UdeM00000019918 XP\_045216199.1 47.3 332  
 114 10 1 306 1 297 2.50E-58 234.2 6596 cellular  
 organisms;Eukaryota;Opisthokonta;Metazoa;Eumetazoa;Bilateria;Protostomia;  
 Spiralia;Lophotrochozoa;Mollusca;Bivalvia;Autobranhia;Heteroconchia;Euhe  
 terodonta;Imparidentia;Venerida;Veneroidea;Veneridae;Mercenaria;Mercenari  
 a mercenaria  
 UdeM00000019919 6596 324.3 UdeM00000019919 XP\_045216199.1 65.7 271  
 58 3 17 286 474 710 1.60E-85 324.3 6596 cellular

organisms;Eukaryota;Opisthokonta;Metazoa;Eumetazoa;Bilateria;Protostomia; Spiralia;Lophotrochozoa;Mollusca;Bivalvia;Autobranchia;Heteroconchia;Euheterodonta;Imparidentia;Venerida;Veneroidea;Veneridae;Mercenaria;Mercenaria mercenaria

UdeM00000019920 1735272 1250 UdeM00000019920 XP\_041365568.1 56.4  
1130 439 13 17 1111 17 1127 0.00E+00 1250 1735272  
cellular

organisms;Eukaryota;Opisthokonta;Metazoa;Eumetazoa;Bilateria;Protostomia; Spiralia;Lophotrochozoa;Mollusca;Gastropoda;Neomphalina;Neomphaloidea;Peltospiridae;Gigantopelta;Gigantopelta aegis

UdeM00000019921 400727 224.9 UdeM00000019921 XP\_025077167.1 61.9  
572 208 3 8 574 6 572 2.50E-55 224.9 400727  
cellular

organisms;Eukaryota;Opisthokonta;Metazoa;Eumetazoa;Bilateria;Protostomia; Spiralia;Lophotrochozoa;Mollusca;Gastropoda;Caenogastropoda;Architaenioglossa;Ampullarioidea;Ampullariidae;Pomacea;Pomacea canaliculata

UdeM00000019922 6579 241.1 UdeM00000019922 XP\_033750653.1 33.1 471  
279 13 344 808 367 807 5.20E-60 241.1 6579 cellular

organisms;Eukaryota;Opisthokonta;Metazoa;Eumetazoa;Bilateria;Protostomia; Spiralia;Lophotrochozoa;Mollusca;Bivalvia;Autobranchia;Pteriormorphia;Pectinida;Pectinoidea;Pectinidae;Pecten;Pecten maximus

UdeM00000019923 6596 238.4 UdeM00000019923 XP\_045172628.1 34.3 440  
249 10 468 902 6 410 3.50E-59 238.4 6596 cellular

organisms;Eukaryota;Opisthokonta;Metazoa;Eumetazoa;Bilateria;Protostomia; Spiralia;Lophotrochozoa;Mollusca;Bivalvia;Autobranchia;Heteroconchia;Euheterodonta;Imparidentia;Venerida;Veneroidea;Veneridae;Mercenaria;Mercenaria mercenaria

UdeM00000019925 6596 2068.5 UdeM00000019925 XP\_045216804.1 64.4  
1571 513 14 25 1560 31 1590 0.00E+00 2068.5 6596  
cellular

organisms;Eukaryota;Opisthokonta;Metazoa;Eumetazoa;Bilateria;Protostomia; Spiralia;Lophotrochozoa;Mollusca;Bivalvia;Autobranchia;Heteroconchia;Euheterodonta;Imparidentia;Venerida;Veneroidea;Veneridae;Mercenaria;Mercenaria mercenaria

UdeM00000019926 6596 2063.5 UdeM00000019926 XP\_045216804.1 62.8  
1578 545 14 18 1565 25 1590 0.00E+00 2063.5 6596  
cellular

organisms;Eukaryota;Opisthokonta;Metazoa;Eumetazoa;Bilateria;Protostomia; Spiralia;Lophotrochozoa;Mollusca;Bivalvia;Autobranchia;Heteroconchia;Euheterodonta;Imparidentia;Venerida;Veneroidea;Veneridae;Mercenaria;Mercenaria mercenaria

UdeM00000019927 6596 2026.9 UdeM00000019927 XP\_045216804.1 63.2  
1548 528 14 10 1527 54 1590 0.00E+00 2026.9 6596  
cellular

organisms;Eukaryota;Opisthokonta;Metazoa;Eumetazoa;Bilateria;Protostomia; Spiralia;Lophotrochozoa;Mollusca;Bivalvia;Autobranchia;Heteroconchia;Euheterodonta;Imparidentia;Venerida;Veneroidea;Veneridae;Mercenaria;Mercenaria mercenaria

UdeM00000019928 7936 90.9 UdeM00000019928 XP\_035253181.1 40.2 174  
64 3 1 134 236 409 1.40E-15 90.9 7936 cellular

organisms;Eukaryota;Opisthokonta;Metazoa;Eumetazoa;Bilateria;Deuterostomia;Chordata;Craniata;Vertebrata;Gnathostomata;Teleostomi;Euteleostomi;Actinopterygii;Actinopteri;Neopterygii;Teleostei;Elopocephalai;Elopocephala;Elopocephala;Anguilliformes;Anguillidae;Anguilla;Anguilla anguilla

UdeM00000019929 48498 84.3 UdeM00000019929 XP\_020610409.1 37.6 125  
 75 1 1 125 474 595 1.30E-13 84.3 48498 cellular  
 organisms;Eukaryota;Opisthokonta;Metazoa;Eumetazoa;Cnidaria;Anthozoa;Hexa  
 corallia;Scleractinia;Faviina;Merulinidae;Orbicella;Orbicella faveolata  
 UdeM00000019930 37621 65.1 UdeM00000019930 XP\_014672567.1 31.5 111  
 70 3 17 127 406 510 7.50E-08 65.1 37621 cellular  
 organisms;Eukaryota;Opisthokonta;Metazoa;Eumetazoa;Bilateria;Protostomia;  
 Ecdysozoa;Scalidophora;Priapulida;Priapulimorpha;Priapulimorphida;Priapul  
 idae;Priapulus;Priapulus caudatus  
 UdeM00000019936 6945 63.5 UdeM00000019936 XP\_042149663.1 25.3 194  
 127 5 5 189 4 188 6.50E-07 63.5 6945 cellular  
 organisms;Eukaryota;Opisthokonta;Metazoa;Eumetazoa;Bilateria;Protostomia;  
 Ecdysozoa;Panarthropoda;Arthropoda;Chelicerata;Arachnida;Acari;Parasitifo  
 rmes;Ixodida;Ixodoidea;Ixodidae;Ixodinae;Ixodes;Ixodes scapularis  
 UdeM00000019939 29159 88.2 UdeM00000019939 XP\_034311319.1 43 114  
 64 1 75 188 179 291 2.80E-14 88.2 29159 cellular  
 organisms;Eukaryota;Opisthokonta;Metazoa;Eumetazoa;Bilateria;Protostomia;  
 Spiralia;Lophotrochozoa;Mollusca;Bivalvia;Autobranchia;Pteriormorphia;Ostr  
 eida;Ostreoidea;Ostreidae;Crassostrea;Crassostrea gigas  
 UdeM00000019940 6596 123.2 UdeM00000019940 XP\_045216799.1 47.1 138  
 71 2 410 547 512 647 1.00E-24 123.2 6596 cellular  
 organisms;Eukaryota;Opisthokonta;Metazoa;Eumetazoa;Bilateria;Protostomia;  
 Spiralia;Lophotrochozoa;Mollusca;Bivalvia;Autobranchia;Heteroconchia;Euhe  
 terodonta;Imparidentia;Venerida;Veneroidea;Veneridae;Mercenaria;Mercenari  
 a mercenaria  
 UdeM00000019942 29159 163.7 UdeM00000019942 XP\_034326553.1 33.3 312  
 188 10 29 327 190 494 4.50E-37 163.7 29159 cellular  
 organisms;Eukaryota;Opisthokonta;Metazoa;Eumetazoa;Bilateria;Protostomia;  
 Spiralia;Lophotrochozoa;Mollusca;Bivalvia;Autobranchia;Pteriormorphia;Ostr  
 eida;Ostreoidea;Ostreidae;Crassostrea;Crassostrea gigas  
 UdeM00000019943 1735272 1193.3 UdeM00000019943 XP\_041366235.1  
 43.3 1574 851 18 1 1559 1 1548 0.00E+00 1193.3  
 1735272 cellular  
 organisms;Eukaryota;Opisthokonta;Metazoa;Eumetazoa;Bilateria;Protostomia;  
 Spiralia;Lophotrochozoa;Mollusca;Gastropoda;Neomphalina;Neomphaloidea;Pel  
 tospiridae;Gigantopelta;Gigantopelta aegis  
 UdeM00000019944 6596 237.3 UdeM00000019944 XP\_045216699.1 66.1 171  
 58 0 1 171 1 171 7.40E-59 237.3 6596 cellular  
 organisms;Eukaryota;Opisthokonta;Metazoa;Eumetazoa;Bilateria;Protostomia;  
 Spiralia;Lophotrochozoa;Mollusca;Bivalvia;Autobranchia;Heteroconchia;Euhe  
 terodonta;Imparidentia;Venerida;Veneroidea;Veneridae;Mercenaria;Mercenari  
 a mercenaria  
 UdeM00000019945 6596 235 UdeM00000019945 XP\_045216699.1 65.5 171  
 54 1 1 166 1 171 3.80E-58 235 6596 cellular  
 organisms;Eukaryota;Opisthokonta;Metazoa;Eumetazoa;Bilateria;Protostomia;  
 Spiralia;Lophotrochozoa;Mollusca;Bivalvia;Autobranchia;Heteroconchia;Euhe  
 terodonta;Imparidentia;Venerida;Veneroidea;Veneridae;Mercenaria;Mercenari  
 a mercenaria  
 UdeM00000019946 6596 241.5 UdeM00000019946 XP\_045216699.1 67.1 173  
 54 1 1 170 1 173 3.80E-60 241.5 6596 cellular  
 organisms;Eukaryota;Opisthokonta;Metazoa;Eumetazoa;Bilateria;Protostomia;  
 Spiralia;Lophotrochozoa;Mollusca;Bivalvia;Autobranchia;Heteroconchia;Euhe  
 terodonta;Imparidentia;Venerida;Veneroidea;Veneridae;Mercenaria;Mercenari  
 a mercenaria

UdeM00000019947 6596 277.3 UdeM00000019947 XP\_045216699.1 79.3 174  
 34 2 1 173 1 173 7.80E-71 277.3 6596 cellular  
 organisms;Eukaryota;Opisthokonta;Metazoa;Eumetazoa;Bilateria;Protostomia;  
 Spiralia;Lophotrochozoa;Mollusca;Bivalvia;Autobranchia;Heteroconchia;Euhe  
 terodonta;Imparidentia;Venerida;Veneroidea;Veneridae;Mercenaria;Mercenari  
 a mercenaria

UdeM00000019947 6596 65.9 UdeM00000019947 XP\_045216699.1 41.5 65  
 38 0 971 1035 818 882 3.60E-07 65.9 6596 cellular  
 organisms;Eukaryota;Opisthokonta;Metazoa;Eumetazoa;Bilateria;Protostomia;  
 Spiralia;Lophotrochozoa;Mollusca;Bivalvia;Autobranchia;Heteroconchia;Euhe  
 terodonta;Imparidentia;Venerida;Veneroidea;Veneridae;Mercenaria;Mercenari  
 a mercenaria

UdeM00000019948 6573 190.7 UdeM00000019948 XP\_021349576.1 41.9 415  
 183 14 1 377 1 395 3.50E-45 190.7 6573 cellular  
 organisms;Eukaryota;Opisthokonta;Metazoa;Eumetazoa;Bilateria;Protostomia;  
 Spiralia;Lophotrochozoa;Mollusca;Bivalvia;Autobranchia;Pteriomorphia;Pect  
 inida;Pectinoidea;Pectinidae;Mizuhopecten;Mizuhopecten yessoensis

UdeM00000019949 6596 272.7 UdeM00000019949 XP\_045160385.1 26.9 922  
 572 23 276 1178 335 1173 2.30E-69 272.7 6596 cellular  
 organisms;Eukaryota;Opisthokonta;Metazoa;Eumetazoa;Bilateria;Protostomia;  
 Spiralia;Lophotrochozoa;Mollusca;Bivalvia;Autobranchia;Heteroconchia;Euhe  
 terodonta;Imparidentia;Venerida;Veneroidea;Veneridae;Mercenaria;Mercenari  
 a mercenaria

UdeM00000019950 6596 460.7 UdeM00000019950 XP\_045215478.1 66.1 354  
 113 4 1 352 7 355 1.70E-126 460.7 6596 cellular  
 organisms;Eukaryota;Opisthokonta;Metazoa;Eumetazoa;Bilateria;Protostomia;  
 Spiralia;Lophotrochozoa;Mollusca;Bivalvia;Autobranchia;Heteroconchia;Euhe  
 terodonta;Imparidentia;Venerida;Veneroidea;Veneridae;Mercenaria;Mercenari  
 a mercenaria

UdeM00000019951 7604 312.8 UdeM00000019951 XP\_033641066.1 55.9 261  
 115 0 4 264 3 263 4.30E-82 312.8 7604 cellular  
 organisms;Eukaryota;Opisthokonta;Metazoa;Eumetazoa;Bilateria;Deuterostomi  
 a;Echinodermata;Eleutherozoa;Asterozoa;Asteroidea;Forcipulatacea;Forcipul  
 atida;Asteroidea;Asteroidea;Asterias;Asterias rubens

UdeM00000019952 225164 119.8 UdeM00000019952 XP\_009058200.1 49.1  
 108 55 0 4 111 108 215 2.20E-24 119.8 225164  
 cellular  
 organisms;Eukaryota;Opisthokonta;Metazoa;Eumetazoa;Bilateria;Protostomia;  
 Spiralia;Lophotrochozoa;Mollusca;Gastropoda;Patellogastropoda;Lottioidea;  
 Lottiidae;Lottia;Lottia gigantea

UdeM00000019953 6579 443 UdeM00000019953 XP\_033752673.1 63.7 325  
 118 0 28 352 328 652 3.60E-121 443 6579 cellular  
 organisms;Eukaryota;Opisthokonta;Metazoa;Eumetazoa;Bilateria;Protostomia;  
 Spiralia;Lophotrochozoa;Mollusca;Bivalvia;Autobranchia;Pteriomorphia;Pect  
 inida;Pectinoidea;Pectinidae;Pecten;Pecten maximus

UdeM00000019954 225164 103.2 UdeM00000019954 XP\_009058199.1 51.4  
 105 44 2 1 105 1 98 2.10E-19 103.2 225164  
 cellular  
 organisms;Eukaryota;Opisthokonta;Metazoa;Eumetazoa;Bilateria;Protostomia;  
 Spiralia;Lophotrochozoa;Mollusca;Gastropoda;Patellogastropoda;Lottioidea;  
 Lottiidae;Lottia;Lottia gigantea

UdeM00000019955 6596 422.2 UdeM00000019955 XP\_045215478.1 60.1 358  
 136 4 1 356 7 359 6.80E-115 422.2 6596 cellular  
 organisms;Eukaryota;Opisthokonta;Metazoa;Eumetazoa;Bilateria;Protostomia;

Spiralia; Lophotrochozoa; Mollusca; Bivalvia; Autobranchia; Heteroconchia; Euheterodonta; Imparidentia; Venerida; Veneroidea; Veneridae; Mercenaria; Mercenaria mercenaria

UdeM00000019956 6596 101.3 UdeM00000019956 XP\_045156684.1 39.7 126  
75 1 37 161 59 184 1.20E-18 101.3 6596 cellular  
organisms; Eukaryota; Opisthokonta; Metazoa; Eumetazoa; Bilateria; Protostomia; Spiralia; Lophotrochozoa; Mollusca; Bivalvia; Autobranchia; Heteroconchia; Euheterodonta; Imparidentia; Venerida; Veneroidea; Veneridae; Mercenaria; Mercenaria mercenaria

UdeM00000019957 6573 99 UdeM00000019957 XP\_021351033.1 49.5 95  
43 1 2 91 50 144 3.40E-18 99 6573 cellular  
organisms; Eukaryota; Opisthokonta; Metazoa; Eumetazoa; Bilateria; Protostomia; Spiralia; Lophotrochozoa; Mollusca; Bivalvia; Autobranchia; Pteriomorphia; Pectinida; Pectinoidea; Pectinidae; Mizuhopecten; Mizuhopecten yessoensis

UdeM00000019958 6596 139.8 UdeM00000019958 XP\_045156684.1 42.8 159  
88 2 113 270 35 191 5.70E-30 139.8 6596 cellular  
organisms; Eukaryota; Opisthokonta; Metazoa; Eumetazoa; Bilateria; Protostomia; Spiralia; Lophotrochozoa; Mollusca; Bivalvia; Autobranchia; Heteroconchia; Euheterodonta; Imparidentia; Venerida; Veneroidea; Veneridae; Mercenaria; Mercenaria mercenaria

UdeM00000019959 7604 113.6 UdeM00000019959 XP\_033641066.1 66.2 80  
27 0 1 80 155 234 1.20E-22 113.6 7604 cellular  
organisms; Eukaryota; Opisthokonta; Metazoa; Eumetazoa; Bilateria; Deuterostomia; Echinodermata; Eleutherozoa; Asterozoa; Asteroidea; Forcipulatacea; Forcipulatacida; Asteriidae; Asterias; Asterias rubens

UdeM00000019960 225164 126.7 UdeM00000019960 XP\_009058200.1 51.9  
108 52 0 4 111 108 215 1.80E-26 126.7 225164  
cellular  
organisms; Eukaryota; Opisthokonta; Metazoa; Eumetazoa; Bilateria; Protostomia; Spiralia; Lophotrochozoa; Mollusca; Gastropoda; Patellogastropoda; Lottioidea; Lottiidae; Lottia; Lottia gigantea

UdeM00000019962 6579 389.8 UdeM00000019962 XP\_033752673.1 52.6 390  
144 6 21 379 273 652 3.90E-105 389.8 6579 cellular  
organisms; Eukaryota; Opisthokonta; Metazoa; Eumetazoa; Bilateria; Protostomia; Spiralia; Lophotrochozoa; Mollusca; Bivalvia; Autobranchia; Pteriomorphia; Pectinida; Pectinoidea; Pectinidae; Pecten; Pecten maximus

UdeM00000019961 6579 524.2 UdeM00000019961 XP\_033752673.1 44.9 690  
304 14 1 652 1 652 2.30E-145 524.2 6579 cellular  
organisms; Eukaryota; Opisthokonta; Metazoa; Eumetazoa; Bilateria; Protostomia; Spiralia; Lophotrochozoa; Mollusca; Bivalvia; Autobranchia; Pteriomorphia; Pectinida; Pectinoidea; Pectinidae; Pecten; Pecten maximus

UdeM00000019964 6596 236.1 UdeM00000019964 XP\_045216173.1 53.6 207  
95 1 28 233 38 244 5.20E-59 236.1 6596 cellular  
organisms; Eukaryota; Opisthokonta; Metazoa; Eumetazoa; Bilateria; Protostomia; Spiralia; Lophotrochozoa; Mollusca; Bivalvia; Autobranchia; Heteroconchia; Euheterodonta; Imparidentia; Venerida; Veneroidea; Veneridae; Mercenaria; Mercenaria mercenaria

UdeM00000019966 52670 82.8 UdeM00000019966 XP\_013874439.1 56.7 60  
26 0 44 103 1714 1773 2.90E-13 82.8 52670 cellular  
organisms; Eukaryota; Opisthokonta; Metazoa; Eumetazoa; Bilateria; Deuterostomia; Chordata; Craniata; Vertebrata; Gnathostomata; Teleostomi; Euteleostomi; Actinopterygii; Actinopteri; Neopterygii; Teleostei; Osteoglossocephalai; Clupeocephala; Euteleostei; Neoteleostei; Eurypterygia; Ctenosquamata; Acanthopterygii; Euacanthopterygii; Percomorphaceae; Ovalentaria; Atherinomorpha; Cyp



rinodontiformes;Aplocheiloidei;Rivulidae;Austrofundulus;Austrofundulus  
 limnaeus  
 UdeM00000019965 52670 82.8 UdeM00000019965 XP\_013874439.1 56.7 60  
 26 0 46 105 1714 1773 3.00E-13 82.8 52670 cellular  
 organisms;Eukaryota;Opisthokonta;Metazoa;Eumetazoa;Bilateria;Deuterostomi  
 a;Chordata;Craniata;Vertebrata;Gnathostomata;Teleostomi;Euteleostomi;Acti  
 nopterygii;Actinopteri;Neopterygii;Teleostei;Osteoglossocephalai;Clupeoce  
 phala;Euteleosteomorpha;Neoteleostei;Eurypterygia;Ctenosquamata;Acanthomo  
 rphata;Euacanthomorphacea;Percomorphaceae;Ovalentaria;Atherinomorphae;Cyp  
 rinodontiformes;Aplocheiloidei;Rivulidae;Austrofundulus;Austrofundulus  
 limnaeus  
 UdeM00000024449 6596 352.4 UdeM00000024449 XP\_045196037.1 76.7 215  
 49 1 1 214 1 215 3.90E-94 352.4 6596 cellular  
 organisms;Eukaryota;Opisthokonta;Metazoa;Eumetazoa;Bilateria;Protostomia;  
 Spiralia;Lophotrochozoa;Mollusca;Bivalvia;Autobranchia;Heteroconchia;Euhe  
 terodonta;Imparidentia;Venerida;Veneroidea;Veneridae;Mercenaria;Mercenari  
 a mercenaria  
 UdeM00000024450 37653 94.4 UdeM00000024450 XP\_014774493.1 41.3 126  
 71 3 8 131 49 173 1.60E-16 94.4 37653 cellular  
 organisms;Eukaryota;Opisthokonta;Metazoa;Eumetazoa;Bilateria;Protostomia;  
 Spiralia;Lophotrochozoa;Mollusca;Cephalopoda;Coleoidea;Octopodiformes;Oct  
 opoda;Incirrata;Octopodidae;Octopus;Octopus bimaculoides  
 UdeM00000024451 37621 132.1 UdeM00000024451 XP\_014677168.1 42.4 172  
 96 3 3 172 8 178 8.40E-28 132.1 37621 cellular  
 organisms;Eukaryota;Opisthokonta;Metazoa;Eumetazoa;Bilateria;Protostomia;  
 Ecdysozoa;Scalidophora;Priapulida;Priapulimorpha;Priapulimorphida;Priapul  
 idae;Priapululus;Priapululus caudatus  
 UdeM00000024452 29159 101.7 UdeM00000024452 XP\_034317111.1 57.3 75  
 32 0 1 75 1 75 4.60E-19 101.7 29159 cellular  
 organisms;Eukaryota;Opisthokonta;Metazoa;Eumetazoa;Bilateria;Protostomia;  
 Spiralia;Lophotrochozoa;Mollusca;Bivalvia;Autobranchia;Pteriormorpha;Ostr  
 eida;Ostreoidea;Ostreidae;Crassostrea;Crassostrea gigas  
 UdeM00000024453 29159 336.7 UdeM00000024453 XP\_034317111.1 48 383  
 188 5 2 376 171 550 3.90E-89 336.7 29159 cellular  
 organisms;Eukaryota;Opisthokonta;Metazoa;Eumetazoa;Bilateria;Protostomia;  
 Spiralia;Lophotrochozoa;Mollusca;Bivalvia;Autobranchia;Pteriormorpha;Ostr  
 eida;Ostreoidea;Ostreidae;Crassostrea;Crassostrea gigas  
 UdeM00000024454 29159 610.5 UdeM00000024454 XP\_034317111.1 42 867  
 485 12 2 858 171 1029 3.20E-171 610.5 29159 cellular  
 organisms;Eukaryota;Opisthokonta;Metazoa;Eumetazoa;Bilateria;Protostomia;  
 Spiralia;Lophotrochozoa;Mollusca;Bivalvia;Autobranchia;Pteriormorpha;Ostr  
 eida;Ostreoidea;Ostreidae;Crassostrea;Crassostrea gigas  
 UdeM00000024455 29159 178.7 UdeM00000024455 XP\_034317111.1 36.2 359  
 221 6 1 355 675 1029 1.30E-41 178.7 29159 cellular  
 organisms;Eukaryota;Opisthokonta;Metazoa;Eumetazoa;Bilateria;Protostomia;  
 Spiralia;Lophotrochozoa;Mollusca;Bivalvia;Autobranchia;Pteriormorpha;Ostr  
 eida;Ostreoidea;Ostreidae;Crassostrea;Crassostrea gigas  
 UdeM00000024456 29159 246.5 UdeM00000024456 XP\_011431940.2 87 138  
 18 0 1 138 1 138 1.80E-61 246.5 29159 cellular  
 organisms;Eukaryota;Opisthokonta;Metazoa;Eumetazoa;Bilateria;Protostomia;  
 Spiralia;Lophotrochozoa;Mollusca;Bivalvia;Autobranchia;Pteriormorpha;Ostr  
 eida;Ostreoidea;Ostreidae;Crassostrea;Crassostrea gigas  
 UdeM00000024457 6596 822 UdeM00000024457 XP\_045196072.1 49.2 850  
 401 13 1 831 1 838 6.80E-235 822 6596 cellular

organisms;Eukaryota;Opisthokonta;Metazoa;Eumetazoa;Bilateria;Protostomia;Spiralia;Lophotrochozoa;Mollusca;Bivalvia;Autobranchia;Heteroconchia;Euheterodonta;Imparidentia;Venerida;Veneroidea;Veneridae;Mercenaria;Mercenaria mercenaria

UdeM00000024458 6596 783.9 UdeM00000024458 XP\_045196733.1 50.8 1174  
454 25 33 1142 148 1261 2.80E-223 783.9 6596 cellular

organisms;Eukaryota;Opisthokonta;Metazoa;Eumetazoa;Bilateria;Protostomia;Spiralia;Lophotrochozoa;Mollusca;Bivalvia;Autobranchia;Heteroconchia;Euheterodonta;Imparidentia;Venerida;Veneroidea;Veneridae;Mercenaria;Mercenaria mercenaria

UdeM00000024459 1735272 66.2 UdeM00000024459 XP\_041353959.1 44.3  
115 44 6 9 121 11 107 4.40E-08 66.2 1735272  
cellular

organisms;Eukaryota;Opisthokonta;Metazoa;Eumetazoa;Bilateria;Protostomia;Spiralia;Lophotrochozoa;Mollusca;Gastropoda;Neomphalina;Neomphaloidea;Peltospiridae;Gigantopelta;Gigantopelta aegis

UdeM00000024460 6579 666 UdeM00000024460 XP\_033741305.1 79.2 443  
76 7 1 436 1 434 3.30E-188 666 6579 cellular

organisms;Eukaryota;Opisthokonta;Metazoa;Eumetazoa;Bilateria;Protostomia;Spiralia;Lophotrochozoa;Mollusca;Bivalvia;Autobranchia;Pteriomorphia;Pectinida;Pectinoidea;Pectinidae;Pecten;Pecten maximus

UdeM00000024461 6579 671 UdeM00000024461 XP\_033741302.1 78.9 446  
82 7 1 443 1 437 1.00E-189 671 6579 cellular

organisms;Eukaryota;Opisthokonta;Metazoa;Eumetazoa;Bilateria;Protostomia;Spiralia;Lophotrochozoa;Mollusca;Bivalvia;Autobranchia;Pteriomorphia;Pectinida;Pectinoidea;Pectinidae;Pecten;Pecten maximus

UdeM00000024462 6596 571.2 UdeM00000024462 XP\_045196015.1 85 341  
48 2 1 339 1 340 8.80E-160 571.2 6596 cellular

organisms;Eukaryota;Opisthokonta;Metazoa;Eumetazoa;Bilateria;Protostomia;Spiralia;Lophotrochozoa;Mollusca;Bivalvia;Autobranchia;Heteroconchia;Euheterodonta;Imparidentia;Venerida;Veneroidea;Veneridae;Mercenaria;Mercenaria mercenaria

UdeM00000024463 6565 270.8 UdeM00000024463 XP\_022294609.1 73.5 162  
43 0 1 162 1 162 1.10E-69 270.8 6565 cellular

organisms;Eukaryota;Opisthokonta;Metazoa;Eumetazoa;Bilateria;Protostomia;Spiralia;Lophotrochozoa;Mollusca;Bivalvia;Autobranchia;Pteriomorphia;Ostreida;Ostreoidea;Ostreidae;Crassostrea;Crassostrea virginica

UdeM00000024464 400727 506.1 UdeM00000024464 XP\_025097195.1 77.6  
312 70 0 11 322 30 341 3.20E-140 506.1 400727  
cellular

organisms;Eukaryota;Opisthokonta;Metazoa;Eumetazoa;Bilateria;Protostomia;Spiralia;Lophotrochozoa;Mollusca;Gastropoda;Caenogastropoda;Architaenioglossa;Ampullarioidea;Ampullariidae;Pomacea;Pomacea canaliculata

UdeM00000024465 6579 485.3 UdeM00000024465 XP\_033740919.1 33.5 1291  
650 30 20 1148 20 1264 2.10E-133 485.3 6579 cellular

organisms;Eukaryota;Opisthokonta;Metazoa;Eumetazoa;Bilateria;Protostomia;Spiralia;Lophotrochozoa;Mollusca;Bivalvia;Autobranchia;Pteriomorphia;Pectinida;Pectinoidea;Pectinidae;Pecten;Pecten maximus

UdeM00000024468 6565 121.3 UdeM00000024468 XP\_022293545.1 51.5 132  
49 4 7 138 4 120 1.30E-24 121.3 6565 cellular

organisms;Eukaryota;Opisthokonta;Metazoa;Eumetazoa;Bilateria;Protostomia;Spiralia;Lophotrochozoa;Mollusca;Bivalvia;Autobranchia;Pteriomorphia;Ostreida;Ostreoidea;Ostreidae;Crassostrea;Crassostrea virginica

UdeM00000024469 400727 118.6 UdeM00000024469 XP\_025099606.1 54.8  
 115 49 2 9 123 5 116 8.00E-24 118.6 400727  
 cellular  
 organisms;Eukaryota;Opisthokonta;Metazoa;Eumetazoa;Bilateria;Protostomia;  
 Spiralia;Lophotrochozoa;Mollusca;Gastropoda;Caenogastropoda;Architaenioglossa;  
 Ampullarioidea;Ampullariidae;Pomacea;Pomacea canaliculata  
 UdeM00000024470 6596 330.1 UdeM00000024470 XP\_045197496.1 70.3 236  
 60 6 1 231 100 330 3.60E-87 330.1 6596 cellular  
 organisms;Eukaryota;Opisthokonta;Metazoa;Eumetazoa;Bilateria;Protostomia;  
 Spiralia;Lophotrochozoa;Mollusca;Bivalvia;Autobranchia;Heteroconchia;Euheterodonta;  
 Imparidentia;Venerida;Veneroidea;Veneridae;Mercenaria;Mercenaria mercenaria  
 UdeM00000024471 6596 147.1 UdeM00000024471 XP\_045197493.1 71.4 98  
 28 0 1 98 1 98 1.40E-32 147.1 6596 cellular  
 organisms;Eukaryota;Opisthokonta;Metazoa;Eumetazoa;Bilateria;Protostomia;  
 Spiralia;Lophotrochozoa;Mollusca;Bivalvia;Autobranchia;Heteroconchia;Euheterodonta;  
 Imparidentia;Venerida;Veneroidea;Veneridae;Mercenaria;Mercenaria mercenaria  
 UdeM00000024472 6596 106.3 UdeM00000024472 XP\_045198072.1 32.2 183  
 117 3 1 180 7 185 4.10E-20 106.3 6596 cellular  
 organisms;Eukaryota;Opisthokonta;Metazoa;Eumetazoa;Bilateria;Protostomia;  
 Spiralia;Lophotrochozoa;Mollusca;Bivalvia;Autobranchia;Heteroconchia;Euheterodonta;  
 Imparidentia;Venerida;Veneroidea;Veneridae;Mercenaria;Mercenaria mercenaria  
 UdeM00000024473 6579 139.8 UdeM00000024473 XP\_033740486.1 38 179  
 104 4 53 227 8 183 5.60E-30 139.8 6579 cellular  
 organisms;Eukaryota;Opisthokonta;Metazoa;Eumetazoa;Bilateria;Protostomia;  
 Spiralia;Lophotrochozoa;Mollusca;Bivalvia;Autobranchia;Pteriomorphia;Pectinida;  
 Pectinoidea;Pectinidae;Pecten;Pecten maximus  
 UdeM00000024474 6596 603.2 UdeM00000024474 XP\_045205819.1 41.9 929  
 456 21 15 875 363 1275 5.70E-169 603.2 6596 cellular  
 organisms;Eukaryota;Opisthokonta;Metazoa;Eumetazoa;Bilateria;Protostomia;  
 Spiralia;Lophotrochozoa;Mollusca;Bivalvia;Autobranchia;Heteroconchia;Euheterodonta;  
 Imparidentia;Venerida;Veneroidea;Veneridae;Mercenaria;Mercenaria mercenaria  
 UdeM00000024475 6596 395.6 UdeM00000024475 XP\_045195433.1 60.6 320  
 123 2 1 317 1 320 6.20E-107 395.6 6596 cellular  
 organisms;Eukaryota;Opisthokonta;Metazoa;Eumetazoa;Bilateria;Protostomia;  
 Spiralia;Lophotrochozoa;Mollusca;Bivalvia;Autobranchia;Heteroconchia;Euheterodonta;  
 Imparidentia;Venerida;Veneroidea;Veneridae;Mercenaria;Mercenaria mercenaria  
 UdeM00000024476 6596 339 UdeM00000024476 XP\_045195256.1 44.5 420  
 204 3 36 427 13 431 9.20E-90 339 6596 cellular  
 organisms;Eukaryota;Opisthokonta;Metazoa;Eumetazoa;Bilateria;Protostomia;  
 Spiralia;Lophotrochozoa;Mollusca;Bivalvia;Autobranchia;Heteroconchia;Euheterodonta;  
 Imparidentia;Venerida;Veneroidea;Veneridae;Mercenaria;Mercenaria mercenaria  
 UdeM00000024477 6579 460.3 UdeM00000024477 XP\_033741294.1 49.6 423  
 206 4 4 423 15 433 2.60E-126 460.3 6579 cellular  
 organisms;Eukaryota;Opisthokonta;Metazoa;Eumetazoa;Bilateria;Protostomia;  
 Spiralia;Lophotrochozoa;Mollusca;Bivalvia;Autobranchia;Pteriomorphia;Pectinida;  
 Pectinoidea;Pectinidae;Pecten;Pecten maximus  
 UdeM00000024478 29159 255.4 UdeM00000024478 XP\_011438196.1 80.9 157  
 29 1 1 157 1 156 4.90E-65 255.4 29159 cellular

organisms;Eukaryota;Opisthokonta;Metazoa;Eumetazoa;Bilateria;Protostomia;  
Spiralia;Lophotrochozoa;Mollusca;Bivalvia;Autobranchia;Pteriomorphia;Ostr  
eida;Ostreoidea;Ostreidae;Crassostrea;Crassostrea gigas  
UdeM00000024481 7739 58.2 UdeM00000024481 XP\_035692614.1 41.5 65  
37 1 1 65 53 116 4.90E-06 58.2 7739 cellular  
organisms;Eukaryota;Opisthokonta;Metazoa;Eumetazoa;Bilateria;Deuterostomi  
a;Chordata;Cephalochordata;Leptocardii;Amphioxiformes;Branchiostomidae;Br  
anchiostoma;Branchiostoma floridae  
UdeM00000024482 7739 62 UdeM00000024482 XP\_035692614.1 42.2 64  
37 0 1 64 53 116 3.30E-07 62 7739 cellular  
organisms;Eukaryota;Opisthokonta;Metazoa;Eumetazoa;Bilateria;Deuterostomi  
a;Chordata;Cephalochordata;Leptocardii;Amphioxiformes;Branchiostomidae;Br  
anchiostoma;Branchiostoma floridae  
UdeM00000024483 7741 59.7 UdeM00000024483 XP\_019631664.1 68.8 32  
10 0 37 68 105 136 2.00E-06 59.7 7741 cellular  
organisms;Eukaryota;Opisthokonta;Metazoa;Eumetazoa;Bilateria;Deuterostomi  
a;Chordata;Cephalochordata;Leptocardii;Amphioxiformes;Branchiostomidae;Br  
anchiostoma;Branchiostoma belcheri  
UdeM00000024484 7741 60.1 UdeM00000024484 XP\_019631664.1 66.7 36  
12 0 70 105 105 140 2.10E-06 60.1 7741 cellular  
organisms;Eukaryota;Opisthokonta;Metazoa;Eumetazoa;Bilateria;Deuterostomi  
a;Chordata;Cephalochordata;Leptocardii;Amphioxiformes;Branchiostomidae;Br  
anchiostoma;Branchiostoma belcheri  
UdeM00000024485 7739 60.8 UdeM00000024485 XP\_035660497.1 67.6 34  
11 0 37 70 44 77 8.40E-07 60.8 7739 cellular  
organisms;Eukaryota;Opisthokonta;Metazoa;Eumetazoa;Bilateria;Deuterostomi  
a;Chordata;Cephalochordata;Leptocardii;Amphioxiformes;Branchiostomidae;Br  
anchiostoma;Branchiostoma floridae  
UdeM00000024486 6579 86.7 UdeM00000024486 XP\_033761495.1 48.2 83  
43 0 7 89 23 105 2.20E-14 86.7 6579 cellular  
organisms;Eukaryota;Opisthokonta;Metazoa;Eumetazoa;Bilateria;Protostomia;  
Spiralia;Lophotrochozoa;Mollusca;Bivalvia;Autobranchia;Pteriomorphia;Pect  
inida;Pectinoidea;Pectinidae;Pecten;Pecten maximus  
UdeM00000024487 6579 127.1 UdeM00000024487 XP\_033739652.1 33.8 284  
150 7 2 264 5 271 3.30E-26 127.1 6579 cellular  
organisms;Eukaryota;Opisthokonta;Metazoa;Eumetazoa;Bilateria;Protostomia;  
Spiralia;Lophotrochozoa;Mollusca;Bivalvia;Autobranchia;Pteriomorphia;Pect  
inida;Pectinoidea;Pectinidae;Pecten;Pecten maximus  
UdeM00000024488 6596 355.5 UdeM00000024488 XP\_045197376.1 54 350  
147 3 77 426 177 512 9.20E-95 355.5 6596 cellular  
organisms;Eukaryota;Opisthokonta;Metazoa;Eumetazoa;Bilateria;Protostomia;  
Spiralia;Lophotrochozoa;Mollusca;Bivalvia;Autobranchia;Heteroconchia;Euhe  
terodonta;Imparidentia;Venerida;Veneroidea;Veneridae;Mercenaria;Mercenari  
a mercenaria  
UdeM00000024489 6596 319.3 UdeM00000024489 XP\_045156247.1 42.5 416  
170 6 2 353 345 755 6.10E-84 319.3 6596 cellular  
organisms;Eukaryota;Opisthokonta;Metazoa;Eumetazoa;Bilateria;Protostomia;  
Spiralia;Lophotrochozoa;Mollusca;Bivalvia;Autobranchia;Heteroconchia;Euhe  
terodonta;Imparidentia;Venerida;Veneroidea;Veneridae;Mercenaria;Mercenari  
a mercenaria  
UdeM00000024490 6579 99 UdeM00000024490 XP\_033736448.1 32.4 179  
90 3 27 176 103 279 1.40E-17 99 6579 cellular  
organisms;Eukaryota;Opisthokonta;Metazoa;Eumetazoa;Bilateria;Protostomia;

Spiralia;Lophotrochozoa;Mollusca;Bivalvia;Autobranchia;Pteriormorphia;Pectinida;Pectinoidea;Pectinidae;Pecten;Pecten maximus

UdeM00000024491 6596 328.6 UdeM00000024491 XP\_045199387.1 31.2 711  
430 16 4 671 3 697 1.90E-86 328.6 6596 cellular  
organisms;Eukaryota;Opisthokonta;Metazoa;Eumetazoa;Bilateria;Protostomia;  
Spiralia;Lophotrochozoa;Mollusca;Bivalvia;Autobranchia;Heteroconchia;Euhe  
terodonta;Imparidentia;Venerida;Veneroidea;Veneridae;Mercenaria;Mercenari  
a mercenaria

UdeM00000024492 6596 228 UdeM00000024492 XP\_045199387.1 30 530  
320 12 6 498 182 697 2.60E-56 228 6596 cellular  
organisms;Eukaryota;Opisthokonta;Metazoa;Eumetazoa;Bilateria;Protostomia;  
Spiralia;Lophotrochozoa;Mollusca;Bivalvia;Autobranchia;Heteroconchia;Euhe  
terodonta;Imparidentia;Venerida;Veneroidea;Veneridae;Mercenaria;Mercenari  
a mercenaria

UdeM00000024495 6596 326.2 UdeM00000024495 XP\_045199387.1 31.9 709  
427 17 4 670 3 697 9.50E-86 326.2 6596 cellular  
organisms;Eukaryota;Opisthokonta;Metazoa;Eumetazoa;Bilateria;Protostomia;  
Spiralia;Lophotrochozoa;Mollusca;Bivalvia;Autobranchia;Heteroconchia;Euhe  
terodonta;Imparidentia;Venerida;Veneroidea;Veneridae;Mercenaria;Mercenari  
a mercenaria

UdeM00000024496 6596 231.5 UdeM00000024496 XP\_045199387.1 34.1 402  
230 8 4 378 3 396 2.00E-57 231.5 6596 cellular  
organisms;Eukaryota;Opisthokonta;Metazoa;Eumetazoa;Bilateria;Protostomia;  
Spiralia;Lophotrochozoa;Mollusca;Bivalvia;Autobranchia;Heteroconchia;Euhe  
terodonta;Imparidentia;Venerida;Veneroidea;Veneridae;Mercenaria;Mercenari  
a mercenaria

UdeM00000024497 6596 335.5 UdeM00000024497 XP\_045199387.1 32.5 710  
420 17 4 669 3 697 1.60E-88 335.5 6596 cellular  
organisms;Eukaryota;Opisthokonta;Metazoa;Eumetazoa;Bilateria;Protostomia;  
Spiralia;Lophotrochozoa;Mollusca;Bivalvia;Autobranchia;Heteroconchia;Euhe  
terodonta;Imparidentia;Venerida;Veneroidea;Veneridae;Mercenaria;Mercenari  
a mercenaria

UdeM00000024498 6596 162.9 UdeM00000024498 XP\_045195464.1 34.8 296  
173 7 51 332 200 489 6.90E-37 162.9 6596 cellular  
organisms;Eukaryota;Opisthokonta;Metazoa;Eumetazoa;Bilateria;Protostomia;  
Spiralia;Lophotrochozoa;Mollusca;Bivalvia;Autobranchia;Heteroconchia;Euhe  
terodonta;Imparidentia;Venerida;Veneroidea;Veneridae;Mercenaria;Mercenari  
a mercenaria

UdeM00000024499 6596 347.1 UdeM00000024499 XP\_045162820.1 37.4 554  
308 16 36 565 39 577 5.00E-92 347.1 6596 cellular  
organisms;Eukaryota;Opisthokonta;Metazoa;Eumetazoa;Bilateria;Protostomia;  
Spiralia;Lophotrochozoa;Mollusca;Bivalvia;Autobranchia;Heteroconchia;Euhe  
terodonta;Imparidentia;Venerida;Veneroidea;Veneridae;Mercenaria;Mercenari  
a mercenaria

UdeM00000024500 6596 401 UdeM00000024500 XP\_045199078.1 38 558  
314 12 14 557 28 567 2.80E-108 401 6596 cellular  
organisms;Eukaryota;Opisthokonta;Metazoa;Eumetazoa;Bilateria;Protostomia;  
Spiralia;Lophotrochozoa;Mollusca;Bivalvia;Autobranchia;Heteroconchia;Euhe  
terodonta;Imparidentia;Venerida;Veneroidea;Veneridae;Mercenaria;Mercenari  
a mercenaria

UdeM00000024501 6596 401 UdeM00000024501 XP\_045199078.1 38 558  
314 12 25 568 28 567 2.90E-108 401 6596 cellular  
organisms;Eukaryota;Opisthokonta;Metazoa;Eumetazoa;Bilateria;Protostomia;  
Spiralia;Lophotrochozoa;Mollusca;Bivalvia;Autobranchia;Heteroconchia;Euhe

terodonta;Imparidentia;Venerida;Veneroidea;Veneridae;Mercenaria;Mercenaria mercenaria

UdeM00000024502 299321 101.7 UdeM00000024502 XP\_028839119.1 49  
98 50 0 4 101 3 100 5.80E-19 101.7 299321  
cellular

organisms;Eukaryota;Opisthokonta;Metazoa;Eumetazoa;Bilateria;Deuterostomia;Chordata;Craniata;Vertebrata;Gnathostomata;Teleostomi;Euteleostomi;Actinopterygii;Actinopteri;Neopterygii;Teleostei;Osteoglossocephalai;Clupeocephala;Otomorpha;Clupei;Clupeiformes;Denticipitoidei;Denticipitidae;Denticeps;Denticeps clupeoides

UdeM00000024503 6579 170.6 UdeM00000024503 XP\_033764274.1 46.3 162  
87 0 1 162 361 522 1.70E-39 170.6 6579 cellular

organisms;Eukaryota;Opisthokonta;Metazoa;Eumetazoa;Bilateria;Protostomia;Spiralia;Lophotrochozoa;Mollusca;Bivalvia;Autobranchia;Pteriormorphia;Pectinida;Pectinoidea;Pectinidae;Pecten;Pecten maximus

UdeM00000024504 6596 321.6 UdeM00000024504 XP\_045195260.1 54.2 347  
142 5 3 341 47 384 1.20E-84 321.6 6596 cellular

organisms;Eukaryota;Opisthokonta;Metazoa;Eumetazoa;Bilateria;Protostomia;Spiralia;Lophotrochozoa;Mollusca;Bivalvia;Autobranchia;Heteroconchia;Euheterodonta;Imparidentia;Venerida;Veneroidea;Veneridae;Mercenaria;Mercenaria mercenaria

UdeM00000024505 6596 432.2 UdeM00000024505 XP\_045195261.1 53.5 445  
193 6 1 435 407 847 8.70E-118 432.2 6596 cellular

organisms;Eukaryota;Opisthokonta;Metazoa;Eumetazoa;Bilateria;Protostomia;Spiralia;Lophotrochozoa;Mollusca;Bivalvia;Autobranchia;Heteroconchia;Euheterodonta;Imparidentia;Venerida;Veneroidea;Veneridae;Mercenaria;Mercenaria mercenaria

UdeM00000024506 6596 586.3 UdeM00000024506 XP\_045189241.1 45.5 660  
339 10 27 670 36 690 5.10E-164 586.3 6596 cellular

organisms;Eukaryota;Opisthokonta;Metazoa;Eumetazoa;Bilateria;Protostomia;Spiralia;Lophotrochozoa;Mollusca;Bivalvia;Autobranchia;Heteroconchia;Euheterodonta;Imparidentia;Venerida;Veneroidea;Veneridae;Mercenaria;Mercenaria mercenaria

UdeM00000024507 6596 677.9 UdeM00000024507 XP\_045189241.1 50.8 653  
309 6 331 973 36 686 1.90E-191 677.9 6596 cellular

organisms;Eukaryota;Opisthokonta;Metazoa;Eumetazoa;Bilateria;Protostomia;Spiralia;Lophotrochozoa;Mollusca;Bivalvia;Autobranchia;Heteroconchia;Euheterodonta;Imparidentia;Venerida;Veneroidea;Veneridae;Mercenaria;Mercenaria mercenaria

UdeM00000024508 6596 685.3 UdeM00000024508 XP\_045189241.1 50.3 658  
319 5 26 676 30 686 8.20E-194 685.3 6596 cellular

organisms;Eukaryota;Opisthokonta;Metazoa;Eumetazoa;Bilateria;Protostomia;Spiralia;Lophotrochozoa;Mollusca;Bivalvia;Autobranchia;Heteroconchia;Euheterodonta;Imparidentia;Venerida;Veneroidea;Veneridae;Mercenaria;Mercenaria mercenaria

UdeM00000024509 1735272 184.9 UdeM00000024509 XP\_041364971.1 37.9  
256 143 3 4 259 37 276 1.40E-43 184.9 1735272

cellular

organisms;Eukaryota;Opisthokonta;Metazoa;Eumetazoa;Bilateria;Protostomia;Spiralia;Lophotrochozoa;Mollusca;Gastropoda;Neomphalina;Neomphaloidea;Peltopspiridae;Gigantopelta;Gigantopelta aegis

UdeM00000024510 37653 237.7 UdeM00000024510 XP\_014778903.1 39.7 290  
173 1 64 353 92 379 2.30E-59 237.7 37653 cellular

organisms;Eukaryota;Opisthokonta;Metazoa;Eumetazoa;Bilateria;Protostomia;

Spiralia;Lophotrochozoa;Mollusca;Cephalopoda;Coleoidea;Octopodiformes;Octopoda;Incirrata;Octopodidae;Octopus;Octopus bimaculoides  
UdeM00000024511 6579 418.3 UdeM00000024511 XP\_033741395.1 71 293  
85 0 78 370 22 314 1.00E-113 418.3 6579 cellular  
organisms;Eukaryota;Opisthokonta;Metazoa;Eumetazoa;Bilateria;Protostomia;  
Spiralia;Lophotrochozoa;Mollusca;Bivalvia;Autobranchia;Pteriormorphia;Pectinida;  
Pectinoidea;Pectinidae;Pecten;Pecten maximus  
UdeM00000024512 1735272 359 UdeM00000024512 XP\_041351835.1 71.5  
246 68 2 1 245 1 245 4.80E-96 359 1735272  
cellular  
organisms;Eukaryota;Opisthokonta;Metazoa;Eumetazoa;Bilateria;Protostomia;  
Spiralia;Lophotrochozoa;Mollusca;Gastropoda;Neomphalina;Neomphaloidea;Pel  
tospiridae;Gigantopelta;Gigantopelta aegis  
UdeM00000024513 6596 334.3 UdeM00000024513 XP\_045197697.1 69.4 245  
74 1 1 245 1 244 1.30E-88 334.3 6596 cellular  
organisms;Eukaryota;Opisthokonta;Metazoa;Eumetazoa;Bilateria;Protostomia;  
Spiralia;Lophotrochozoa;Mollusca;Bivalvia;Autobranchia;Heteroconchia;Euhe  
terodonta;Imparidentia;Venerida;Veneroidea;Veneridae;Mercenaria;Mercenari  
a mercenaria  
UdeM00000024514 6596 497.7 UdeM00000024514 XP\_045196910.1 59.8 388  
152 2 1 386 1 386 1.40E-137 497.7 6596 cellular  
organisms;Eukaryota;Opisthokonta;Metazoa;Eumetazoa;Bilateria;Protostomia;  
Spiralia;Lophotrochozoa;Mollusca;Bivalvia;Autobranchia;Heteroconchia;Euhe  
terodonta;Imparidentia;Venerida;Veneroidea;Veneridae;Mercenaria;Mercenari  
a mercenaria  
UdeM00000024515 29159 93.2 UdeM00000024515 XP\_034331800.1 35.8 176  
113 0 2 177 12 187 3.70E-16 93.2 29159 cellular  
organisms;Eukaryota;Opisthokonta;Metazoa;Eumetazoa;Bilateria;Protostomia;  
Spiralia;Lophotrochozoa;Mollusca;Bivalvia;Autobranchia;Pteriormorphia;Ostr  
eida;Ostreoidea;Ostreidae;Crassostrea;Crassostrea gigas  
UdeM00000024516 6596 188.3 UdeM00000024516 XP\_045198991.1 43.8 274  
132 4 1 267 1 259 1.20E-44 188.3 6596 cellular  
organisms;Eukaryota;Opisthokonta;Metazoa;Eumetazoa;Bilateria;Protostomia;  
Spiralia;Lophotrochozoa;Mollusca;Bivalvia;Autobranchia;Heteroconchia;Euhe  
terodonta;Imparidentia;Venerida;Veneroidea;Veneridae;Mercenaria;Mercenari  
a mercenaria  
UdeM00000024517 29159 81.6 UdeM00000024517 XP\_034310118.1 55.1 69  
31 0 584 652 502 570 4.10E-12 81.6 29159 cellular  
organisms;Eukaryota;Opisthokonta;Metazoa;Eumetazoa;Bilateria;Protostomia;  
Spiralia;Lophotrochozoa;Mollusca;Bivalvia;Autobranchia;Pteriormorphia;Ostr  
eida;Ostreoidea;Ostreidae;Crassostrea;Crassostrea gigas  
UdeM00000024518 29159 111.7 UdeM00000024518 XP\_011428196.1 59.8 117  
44 2 1 114 1 117 6.30E-22 111.7 29159 cellular  
organisms;Eukaryota;Opisthokonta;Metazoa;Eumetazoa;Bilateria;Protostomia;  
Spiralia;Lophotrochozoa;Mollusca;Bivalvia;Autobranchia;Pteriormorphia;Ostr  
eida;Ostreoidea;Ostreidae;Crassostrea;Crassostrea gigas  
UdeM00000024519 225164 166 UdeM00000024519 XP\_009065892.1 74.7  
95 24 0 1 95 1 95 2.40E-38 166 225164  
cellular  
organisms;Eukaryota;Opisthokonta;Metazoa;Eumetazoa;Bilateria;Protostomia;  
Spiralia;Lophotrochozoa;Mollusca;Gastropoda;Patellogastropoda;Lottiioidea;  
Lottiidae;Lottia;Lottia gigantea  
UdeM00000024520 6596 543.9 UdeM00000024520 XP\_045195857.1 80.9 319  
61 0 1 319 1 319 1.40E-151 543.9 6596 cellular

organisms;Eukaryota;Opisthokonta;Metazoa;Eumetazoa;Bilateria;Protostomia;Spiralia;Lophotrochozoa;Mollusca;Bivalvia;Autobranchia;Heteroconchia;Euherodonta;Imparidentia;Venerida;Veneroidea;Veneridae;Mercenaria;Mercenaria mercenaria

UdeM00000024521 6596 107.1 UdeM00000024521 XP\_045196379.1 27.7 577  
332 23 13 526 66 620 8.50E-20 107.1 6596 cellular

organisms;Eukaryota;Opisthokonta;Metazoa;Eumetazoa;Bilateria;Protostomia;Spiralia;Lophotrochozoa;Mollusca;Bivalvia;Autobranchia;Heteroconchia;Euherodonta;Imparidentia;Venerida;Veneroidea;Veneridae;Mercenaria;Mercenaria mercenaria

UdeM00000024522 6596 130.2 UdeM00000024522 XP\_045197001.1 48.8 129  
63 3 1 128 46 172 2.00E-27 130.2 6596 cellular

organisms;Eukaryota;Opisthokonta;Metazoa;Eumetazoa;Bilateria;Protostomia;Spiralia;Lophotrochozoa;Mollusca;Bivalvia;Autobranchia;Heteroconchia;Euherodonta;Imparidentia;Venerida;Veneroidea;Veneridae;Mercenaria;Mercenaria mercenaria

UdeM00000024523 6596 160.6 UdeM00000024523 XP\_045197001.1 46.5 172  
89 2 28 199 35 203 2.10E-36 160.6 6596 cellular

organisms;Eukaryota;Opisthokonta;Metazoa;Eumetazoa;Bilateria;Protostomia;Spiralia;Lophotrochozoa;Mollusca;Bivalvia;Autobranchia;Heteroconchia;Euherodonta;Imparidentia;Venerida;Veneroidea;Veneridae;Mercenaria;Mercenaria mercenaria

UdeM00000024524 7574 151 UdeM00000024524 XP\_013379762.1 53.5 127  
59 0 4 130 222 348 1.10E-33 151 7574 cellular

organisms;Eukaryota;Opisthokonta;Metazoa;Eumetazoa;Bilateria;Protostomia;Spiralia;Lophotrochozoa;Brachiopoda;Linguliformea;Lingulata;Lingulida;Linguloidea;Lingulidae;Lingula;Lingula anatina

UdeM00000024525 6596 161 UdeM00000024525 XP\_045197001.1 48.3 174  
85 3 28 201 35 203 1.80E-36 161 6596 cellular

organisms;Eukaryota;Opisthokonta;Metazoa;Eumetazoa;Bilateria;Protostomia;Spiralia;Lophotrochozoa;Mollusca;Bivalvia;Autobranchia;Heteroconchia;Euherodonta;Imparidentia;Venerida;Veneroidea;Veneridae;Mercenaria;Mercenaria mercenaria

UdeM00000024526 133434 158.7 UdeM00000024526 XP\_022079992.1 49.7  
171 76 3 55 222 46 209 8.80E-36 158.7 133434 cellular

organisms;Eukaryota;Opisthokonta;Metazoa;Eumetazoa;Bilateria;Deuterostomia;Echinodermata;Eleutherozoa;Asterozoa;Asteroidea;Valvatacea;Valvatida;Acanthasteridae;Acanthaster;Acanthaster planci

UdeM00000024527 133434 157.5 UdeM00000024527 XP\_022079992.1 49.1  
171 77 3 30 197 46 209 1.70E-35 157.5 133434 cellular

organisms;Eukaryota;Opisthokonta;Metazoa;Eumetazoa;Bilateria;Deuterostomia;Echinodermata;Eleutherozoa;Asterozoa;Asteroidea;Valvatacea;Valvatida;Acanthasteridae;Acanthaster;Acanthaster planci

UdeM00000024528 7574 90.5 UdeM00000024528 XP\_013410091.1 54.9 82  
35 1 84 165 190 269 2.40E-15 90.5 7574 cellular

organisms;Eukaryota;Opisthokonta;Metazoa;Eumetazoa;Bilateria;Protostomia;Spiralia;Lophotrochozoa;Brachiopoda;Linguliformea;Lingulata;Lingulida;Linguloidea;Lingulidae;Lingula;Lingula anatina

UdeM00000024529 133434 154.1 UdeM00000024529 XP\_022079992.1 46.7  
184 88 3 17 197 31 207 2.00E-34 154.1 133434 cellular

organisms;Eukaryota;Opisthokonta;Metazoa;Eumetazoa;Bilateria;Deuterostomia



a;Echinodermata;Eleutherozoa;Asterozoa;Asteroidea;Valvatacea;Valvatida;Acanthasteridae;Acanthaster;Acanthaster planci

UdeM00000024530 6596 146.4 UdeM00000024530 XP\_045163882.1 47.4 175  
87 4 28 199 30 202 4.20E-32 146.4 6596 cellular  
organisms;Eukaryota;Opisthokonta;Metazoa;Eumetazoa;Bilateria;Protostomia;  
Spiralia;Lophotrochozoa;Mollusca;Bivalvia;Autobranchia;Heteroconchia;Euhe-  
terodonta;Imparidentia;Venerida;Veneroidea;Veneridae;Mercenaria;Mercenari-  
a mercenaria

UdeM00000024531 6526 249.2 UdeM00000024531 XP\_013095077.1 55 209  
90 1 46 250 1 209 5.50E-63 249.2 6526 cellular  
organisms;Eukaryota;Opisthokonta;Metazoa;Eumetazoa;Bilateria;Protostomia;  
Spiralia;Lophotrochozoa;Mollusca;Gastropoda;Heterobranchia;Euthyneura;Pan-  
pulmonata;Hygrophila;Lymnaeoidea;Planorbidae;Biomphalaria;Biomphalaria  
glabrata

UdeM00000024533 6526 193.7 UdeM00000024533 XP\_013074370.1 86.7 113  
15 0 1 113 456 568 1.30E-46 193.7 6526 cellular  
organisms;Eukaryota;Opisthokonta;Metazoa;Eumetazoa;Bilateria;Protostomia;  
Spiralia;Lophotrochozoa;Mollusca;Gastropoda;Heterobranchia;Euthyneura;Pan-  
pulmonata;Hygrophila;Lymnaeoidea;Planorbidae;Biomphalaria;Biomphalaria  
glabrata

UdeM00000024532 6573 231.5 UdeM00000024532 XP\_021360121.1 83.8 142  
22 1 18 159 461 601 7.90E-58 231.5 6573 cellular  
organisms;Eukaryota;Opisthokonta;Metazoa;Eumetazoa;Bilateria;Protostomia;  
Spiralia;Lophotrochozoa;Mollusca;Bivalvia;Autobranchia;Pteriormorphia;Pect-  
inida;Pectinoidea;Pectinidae;Mizuhopecten;Mizuhopecten yessoensis

UdeM00000024535 6579 552.4 UdeM00000024535 XP\_033740152.1 67.4 414  
133 1 1 414 1 412 5.10E-154 552.4 6579 cellular  
organisms;Eukaryota;Opisthokonta;Metazoa;Eumetazoa;Bilateria;Protostomia;  
Spiralia;Lophotrochozoa;Mollusca;Bivalvia;Autobranchia;Pteriormorphia;Pect-  
inida;Pectinoidea;Pectinidae;Pecten;Pecten maximus

UdeM00000024536 6596 104.4 UdeM00000024536 XP\_045160721.1 38.9 149  
81 3 101 246 1 142 2.20E-19 104.4 6596 cellular  
organisms;Eukaryota;Opisthokonta;Metazoa;Eumetazoa;Bilateria;Protostomia;  
Spiralia;Lophotrochozoa;Mollusca;Bivalvia;Autobranchia;Heteroconchia;Euhe-  
terodonta;Imparidentia;Venerida;Veneroidea;Veneridae;Mercenaria;Mercenari-  
a mercenaria

UdeM00000024537 6596 137.9 UdeM00000024537 XP\_045198188.1 26.1 529  
310 14 1 496 1 481 3.50E-29 137.9 6596 cellular  
organisms;Eukaryota;Opisthokonta;Metazoa;Eumetazoa;Bilateria;Protostomia;  
Spiralia;Lophotrochozoa;Mollusca;Bivalvia;Autobranchia;Heteroconchia;Euhe-  
terodonta;Imparidentia;Venerida;Veneroidea;Veneridae;Mercenaria;Mercenari-  
a mercenaria

UdeM00000024538 6596 207.6 UdeM00000024538 XP\_045197463.1 40.3 320  
182 5 21 335 25 340 2.50E-50 207.6 6596 cellular  
organisms;Eukaryota;Opisthokonta;Metazoa;Eumetazoa;Bilateria;Protostomia;  
Spiralia;Lophotrochozoa;Mollusca;Bivalvia;Autobranchia;Heteroconchia;Euhe-  
terodonta;Imparidentia;Venerida;Veneroidea;Veneridae;Mercenaria;Mercenari-  
a mercenaria

UdeM00000024539 6573 189.9 UdeM00000024539 XP\_021365159.1 53.8 158  
71 1 36 191 15 172 4.10E-45 189.9 6573 cellular  
organisms;Eukaryota;Opisthokonta;Metazoa;Eumetazoa;Bilateria;Protostomia;  
Spiralia;Lophotrochozoa;Mollusca;Bivalvia;Autobranchia;Pteriormorphia;Pect-  
inida;Pectinoidea;Pectinidae;Mizuhopecten;Mizuhopecten yessoensis

UdeM00000024540 6565 171 UdeM00000024540 XP\_022291418.1 92.2 90  
 7 0 1 90 1 90 6.90E-40 171 6565 cellular  
 organisms;Eukaryota;Opisthokonta;Metazoa;Eumetazoa;Bilateria;Protostomia;  
 Spiralia;Lophotrochozoa;Mollusca;Bivalvia;Autobranchia;Pteriomorpha;Ostr  
 eida;Ostreoidea;Ostreidae;Crassostrea;Crassostrea virginica  
 UdeM00000024541 6573 606.3 UdeM00000024541 XP\_021354075.1 54.2 620  
 246 8 65 652 98 711 4.60E-170 606.3 6573 cellular  
 organisms;Eukaryota;Opisthokonta;Metazoa;Eumetazoa;Bilateria;Protostomia;  
 Spiralia;Lophotrochozoa;Mollusca;Bivalvia;Autobranchia;Pteriomorpha;Pect  
 inida;Pectinoidea;Pectinidae;Mizuhopecten;Mizuhopecten yessoensis  
 UdeM00000024542 6573 71.6 UdeM00000024542 XP\_021354077.1 54 63  
 27 1 1393 1453 1334 1396 9.10E-09 71.6 6573 cellular  
 organisms;Eukaryota;Opisthokonta;Metazoa;Eumetazoa;Bilateria;Protostomia;  
 Spiralia;Lophotrochozoa;Mollusca;Bivalvia;Autobranchia;Pteriomorpha;Pect  
 inida;Pectinoidea;Pectinidae;Mizuhopecten;Mizuhopecten yessoensis  
 UdeM00000024543 29159 181.4 UdeM00000024543 XP\_019920519.2 39.9 286  
 141 7 1 261 1 280 1.60E-42 181.4 29159 cellular  
 organisms;Eukaryota;Opisthokonta;Metazoa;Eumetazoa;Bilateria;Protostomia;  
 Spiralia;Lophotrochozoa;Mollusca;Bivalvia;Autobranchia;Pteriomorpha;Ostr  
 eida;Ostreoidea;Ostreidae;Crassostrea;Crassostrea gigas  
 UdeM00000024547 1826170 73.6 UdeM00000024547 YP\_009254794.1 21.6  
 365 252 10 3 356 497 838 1.10E-09 73.6 1826170  
 Viruses;Varidnaviria;Bamfordvirae;Nucleocytoviricota;Megaviricetes;  
 Pimascovirales;Marseilleviridae;Marseillevirus;unclassified  
 Marseillevirus;Tokyovirus A1  
 UdeM00000024548 1826170 73.6 UdeM00000024548 YP\_009254794.1 21.6  
 365 252 10 3 356 497 838 1.10E-09 73.6 1826170  
 Viruses;Varidnaviria;Bamfordvirae;Nucleocytoviricota;Megaviricetes;  
 Pimascovirales;Marseilleviridae;Marseillevirus;unclassified  
 Marseillevirus;Tokyovirus A1  
 UdeM00000024550 29159 193.4 UdeM00000024550 XP\_011432372.2 28.1 438  
 292 11 21 449 529 952 6.40E-46 193.4 29159 cellular  
 organisms;Eukaryota;Opisthokonta;Metazoa;Eumetazoa;Bilateria;Protostomia;  
 Spiralia;Lophotrochozoa;Mollusca;Bivalvia;Autobranchia;Pteriomorpha;Ostr  
 eida;Ostreoidea;Ostreidae;Crassostrea;Crassostrea gigas  
 UdeM00000024571 7654 112.1 UdeM00000024571 XP\_041473734.1 42 169  
 79 5 2 151 590 758 9.60E-22 112.1 7654 cellular  
 organisms;Eukaryota;Opisthokonta;Metazoa;Eumetazoa;Bilateria;Deuterostomi  
 a;Echinodermata;Eleutherozoa;Echinozoa;Echinoidea;Euechinoidea;Echinacea;  
 Temnopleuroidea;Toxopneustidae;Lytechinus;Lytechinus variegatus  
 UdeM00000024574 1735272 108.2 UdeM00000024574 XP\_041354665.1 77.1  
 70 14 1 1 70 1 68 4.80E-21 108.2 1735272  
 cellular  
 organisms;Eukaryota;Opisthokonta;Metazoa;Eumetazoa;Bilateria;Protostomia;  
 Spiralia;Lophotrochozoa;Mollusca;Gastropoda;Neomphalina;Neomphaloidea;Pel  
 tospiridae;Gigantopelta;Gigantopelta aegis  
 UdeM00000024575 6596 352.1 UdeM00000024575 XP\_045195322.1 54.5 330  
 143 4 1 327 1 326 7.90E-94 352.1 6596 cellular  
 organisms;Eukaryota;Opisthokonta;Metazoa;Eumetazoa;Bilateria;Protostomia;  
 Spiralia;Lophotrochozoa;Mollusca;Bivalvia;Autobranchia;Heteroconchia;Euhe  
 terodonta;Imparidentia;Venerida;Veneroidea;Veneridae;Mercenaria;Mercenari  
 a mercenaria  
 UdeM00000024577 29159 182.6 UdeM00000024577 XP\_034312908.1 27.3 631  
 381 18 3 568 6 623 1.40E-42 182.6 29159 cellular

organisms;Eukaryota;Opisthokonta;Metazoa;Eumetazoa;Bilateria;Protostomia;Spiralia;Lophotrochozoa;Mollusca;Bivalvia;Autobranchia;Pteriormorphia;Ostreida;Ostreoidea;Ostreidae;Crassostrea;Crassostrea gigas  
UdeM00000024578 29159 182.6 UdeM00000024578 XP\_034312908.1 27.3 631  
381 18 3 568 6 623 1.40E-42 182.6 29159 cellular  
organisms;Eukaryota;Opisthokonta;Metazoa;Eumetazoa;Bilateria;Protostomia;Spiralia;Lophotrochozoa;Mollusca;Bivalvia;Autobranchia;Pteriormorphia;Ostreida;Ostreoidea;Ostreidae;Crassostrea;Crassostrea gigas  
UdeM00000024579 6596 1511.1 UdeM00000024579 XP\_045197785.1 46.8  
1769 855 20 1 1695 4 1760 0.00E+00 1511.1 6596  
cellular  
organisms;Eukaryota;Opisthokonta;Metazoa;Eumetazoa;Bilateria;Protostomia;Spiralia;Lophotrochozoa;Mollusca;Bivalvia;Autobranchia;Heteroconchia;Euheterodonta;Imparidentia;Venerida;Veneroidea;Veneridae;Mercenaria;Mercenaria mercenaria  
UdeM00000024580 6596 286.2 UdeM00000024580 XP\_045197789.1 51.7 302  
140 4 7 306 6 303 5.00E-74 286.2 6596 cellular  
organisms;Eukaryota;Opisthokonta;Metazoa;Eumetazoa;Bilateria;Protostomia;Spiralia;Lophotrochozoa;Mollusca;Bivalvia;Autobranchia;Heteroconchia;Euheterodonta;Imparidentia;Venerida;Veneroidea;Veneridae;Mercenaria;Mercenaria mercenaria  
UdeM00000024581 1735272 714.9 UdeM00000024581 XP\_041354897.1 64.2  
544 188 3 41 583 91 628 8.40E-203 714.9 1735272  
cellular  
organisms;Eukaryota;Opisthokonta;Metazoa;Eumetazoa;Bilateria;Protostomia;Spiralia;Lophotrochozoa;Mollusca;Gastropoda;Neomphalina;Neomphaloidea;Peltospiridae;Gigantopelta;Gigantopelta aegis  
UdeM00000024584 6596 288.5 UdeM00000024584 XP\_045196415.1 66 209  
71 0 9 217 39 247 7.10E-75 288.5 6596 cellular  
organisms;Eukaryota;Opisthokonta;Metazoa;Eumetazoa;Bilateria;Protostomia;Spiralia;Lophotrochozoa;Mollusca;Bivalvia;Autobranchia;Heteroconchia;Euheterodonta;Imparidentia;Venerida;Veneroidea;Veneridae;Mercenaria;Mercenaria mercenaria  
UdeM00000024586 6596 411.8 UdeM00000024586 XP\_045196581.1 58 343  
139 3 3 342 2 342 8.70E-112 411.8 6596 cellular  
organisms;Eukaryota;Opisthokonta;Metazoa;Eumetazoa;Bilateria;Protostomia;Spiralia;Lophotrochozoa;Mollusca;Bivalvia;Autobranchia;Heteroconchia;Euheterodonta;Imparidentia;Venerida;Veneroidea;Veneridae;Mercenaria;Mercenaria mercenaria  
UdeM00000024587 6596 411.8 UdeM00000024587 XP\_045196581.1 58 343  
139 3 27 366 2 342 9.30E-112 411.8 6596 cellular  
organisms;Eukaryota;Opisthokonta;Metazoa;Eumetazoa;Bilateria;Protostomia;Spiralia;Lophotrochozoa;Mollusca;Bivalvia;Autobranchia;Heteroconchia;Euheterodonta;Imparidentia;Venerida;Veneroidea;Veneridae;Mercenaria;Mercenaria mercenaria  
UdeM00000024588 6565 817 UdeM00000024588 XP\_022292858.1 60.9 617  
231 4 5 621 13 619 1.60E-233 817 6565 cellular  
organisms;Eukaryota;Opisthokonta;Metazoa;Eumetazoa;Bilateria;Protostomia;Spiralia;Lophotrochozoa;Mollusca;Bivalvia;Autobranchia;Pteriormorphia;Ostreida;Ostreoidea;Ostreidae;Crassostrea;Crassostrea virginica  
UdeM00000024589 45264 90.1 UdeM00000024589 XP\_044165143.1 43.2 111  
61 2 2 110 367 477 1.90E-15 90.1 45264 cellular  
organisms;Eukaryota;Opisthokonta;Metazoa;Eumetazoa;Cnidaria;Anthozoa;Hexa

corallia;Scleractinia;Astrocoeniina;Acroporidae;Acropora;Acropora  
millepora  
UdeM00000024591 6596 144.1 UdeM00000024591 XP\_045177778.1 31.9 342  
196 7 1 314 405 737 3.20E-31 144.1 6596 cellular  
organisms;Eukaryota;Opisthokonta;Metazoa;Eumetazoa;Bilateria;Protostomia;  
Spiralia;Lophotrochozoa;Mollusca;Bivalvia;Autobranhia;Heteroconchia;Euhe  
terodonta;Imparidentia;Venerida;Veneroidea;Veneridae;Mercenaria;Mercenari  
a mercenaria  
UdeM00000024592 6596 196.8 UdeM00000024592 XP\_045197113.1 30.4 520  
223 14 514 902 377 888 1.20E-46 196.8 6596 cellular  
organisms;Eukaryota;Opisthokonta;Metazoa;Eumetazoa;Bilateria;Protostomia;  
Spiralia;Lophotrochozoa;Mollusca;Bivalvia;Autobranhia;Heteroconchia;Euhe  
terodonta;Imparidentia;Venerida;Veneroidea;Veneridae;Mercenaria;Mercenari  
a mercenaria  
UdeM00000024594 37621 59.3 UdeM00000024594 XP\_014677460.1 65.8 38  
13 0 34 71 293 330 2.30E-06 59.3 37621 cellular  
organisms;Eukaryota;Opisthokonta;Metazoa;Eumetazoa;Bilateria;Protostomia;  
Ecdysozoa;Scalidophora;Priapulida;Priapulimorpha;Priapulimorphida;Priapul  
idae;Priapulul;Priapulul caudatus  
UdeM00000024595 37621 124 UdeM00000024595 XP\_014677462.1 62.2 98  
37 0 1 98 38 135 1.10E-25 124 37621 cellular  
organisms;Eukaryota;Opisthokonta;Metazoa;Eumetazoa;Bilateria;Protostomia;  
Ecdysozoa;Scalidophora;Priapulida;Priapulimorpha;Priapulimorphida;Priapul  
idae;Priapulul;Priapulul caudatus  
UdeM00000024598 6565 219.9 UdeM00000024598 XP\_022290205.1 27.7 614  
286 10 584 1166 101 587 1.70E-53 219.9 6565 cellular  
organisms;Eukaryota;Opisthokonta;Metazoa;Eumetazoa;Bilateria;Protostomia;  
Spiralia;Lophotrochozoa;Mollusca;Bivalvia;Autobranhia;Pteriomorpha;Ostr  
eida;Ostreoidea;Ostreidae;Crassostrea;Crassostrea virginica  
UdeM00000027442 400727 148.7 UdeM00000027442 XP\_025095647.1 51.2  
127 58 1 42 168 5 127 7.00E-33 148.7 400727  
cellular  
organisms;Eukaryota;Opisthokonta;Metazoa;Eumetazoa;Bilateria;Protostomia;  
Spiralia;Lophotrochozoa;Mollusca;Gastropoda;Caenogastropoda;Architaeniogl  
ossa;Ampullarioidea;Ampullariidae;Pomacea;Pomacea canaliculata  
UdeM00000027445 6573 147.9 UdeM00000027445 XP\_021350847.1 59.3 108  
44 0 358 465 297 404 3.30E-32 147.9 6573 cellular  
organisms;Eukaryota;Opisthokonta;Metazoa;Eumetazoa;Bilateria;Protostomia;  
Spiralia;Lophotrochozoa;Mollusca;Bivalvia;Autobranhia;Pteriomorpha;Pect  
inida;Pectinoidea;Pectinidae;Mizuhopecten;Mizuhopecten yessoensis  
UdeM00000027446 7574 298.1 UdeM00000027446 XP\_013397786.1 69.5 200  
61 0 1 200 9 208 8.20E-78 298.1 7574 cellular  
organisms;Eukaryota;Opisthokonta;Metazoa;Eumetazoa;Bilateria;Protostomia;  
Spiralia;Lophotrochozoa;Brachiopoda;Linguliformea;Lingulata;Lingulida;Lin  
guloidea;Lingulidae;Lingula;Lingula anatina  
UdeM00000027447 6565 906 UdeM00000027447 XP\_022287481.1 42.5 1404  
678 39 1536 2905 825 2133 1.30E-259 906 6565 cellular  
organisms;Eukaryota;Opisthokonta;Metazoa;Eumetazoa;Bilateria;Protostomia;  
Spiralia;Lophotrochozoa;Mollusca;Bivalvia;Autobranhia;Pteriomorpha;Ostr  
eida;Ostreoidea;Ostreidae;Crassostrea;Crassostrea virginica  
UdeM00000027447 6565 226.5 UdeM00000027447 XP\_022287481.1 34.8 512  
278 11 1 468 127 626 4.40E-55 226.5 6565 cellular  
organisms;Eukaryota;Opisthokonta;Metazoa;Eumetazoa;Bilateria;Protostomia;

Spiralia;Lophotrochozoa;Mollusca;Bivalvia;Autobranchia;Pteriormorphia;Ostr  
eida;Ostreoidea;Ostreidae;Crassostrea;Crassostrea virginica  
UdeM00000027448 6579 1058.5 UdeM00000027448 XP\_033757322.1 81.8  
665 121 0 1 665 1 665 3.50E-306 1058.5 6579  
cellular

organisms;Eukaryota;Opisthokonta;Metazoa;Eumetazoa;Bilateria;Protostomia;  
Spiralia;Lophotrochozoa;Mollusca;Bivalvia;Autobranchia;Pteriormorphia;Pect  
inida;Pectinoidea;Pectinidae;Pecten;Pecten maximus

UdeM00000027451 29159 729.9 UdeM00000027451 XP\_034303860.1 49.5 753  
330 12 5 732 21 748 3.10E-207 729.9 29159 cellular

organisms;Eukaryota;Opisthokonta;Metazoa;Eumetazoa;Bilateria;Protostomia;  
Spiralia;Lophotrochozoa;Mollusca;Bivalvia;Autobranchia;Pteriormorphia;Ostr  
eida;Ostreoidea;Ostreidae;Crassostrea;Crassostrea gigas

UdeM00000027452 29159 114 UdeM00000027452 XP\_011451530.1 44.1 118  
65 1 70 186 78 195 2.20E-22 114 29159 cellular

organisms;Eukaryota;Opisthokonta;Metazoa;Eumetazoa;Bilateria;Protostomia;  
Spiralia;Lophotrochozoa;Mollusca;Bivalvia;Autobranchia;Pteriormorphia;Ostr  
eida;Ostreoidea;Ostreidae;Crassostrea;Crassostrea gigas

UdeM00000027456 6596 313.2 UdeM00000027456 XP\_045188932.1 37.8 595  
307 16 1 546 218 798 6.70E-82 313.2 6596 cellular

organisms;Eukaryota;Opisthokonta;Metazoa;Eumetazoa;Bilateria;Protostomia;  
Spiralia;Lophotrochozoa;Mollusca;Bivalvia;Autobranchia;Heteroconchia;Euhe  
terodonta;Imparidentia;Venerida;Veneroidea;Veneridae;Mercenaria;Mercenari  
a mercenaria

UdeM00000027457 6596 312.8 UdeM00000027457 XP\_045188932.1 79.5 185  
38 0 4 188 25 209 3.00E-82 312.8 6596 cellular

organisms;Eukaryota;Opisthokonta;Metazoa;Eumetazoa;Bilateria;Protostomia;  
Spiralia;Lophotrochozoa;Mollusca;Bivalvia;Autobranchia;Heteroconchia;Euhe  
terodonta;Imparidentia;Venerida;Veneroidea;Veneridae;Mercenaria;Mercenari  
a mercenaria

UdeM00000027458 6596 380.6 UdeM00000027458 XP\_045188933.1 47.3 429  
194 8 51 472 24 427 3.10E-102 380.6 6596 cellular

organisms;Eukaryota;Opisthokonta;Metazoa;Eumetazoa;Bilateria;Protostomia;  
Spiralia;Lophotrochozoa;Mollusca;Bivalvia;Autobranchia;Heteroconchia;Euhe  
terodonta;Imparidentia;Venerida;Veneroidea;Veneridae;Mercenaria;Mercenari  
a mercenaria

UdeM00000027459 6596 574.7 UdeM00000027459 XP\_045188929.1 61.4 515  
184 9 1 510 48 552 1.20E-160 574.7 6596 cellular

organisms;Eukaryota;Opisthokonta;Metazoa;Eumetazoa;Bilateria;Protostomia;  
Spiralia;Lophotrochozoa;Mollusca;Bivalvia;Autobranchia;Heteroconchia;Euhe  
terodonta;Imparidentia;Venerida;Veneroidea;Veneridae;Mercenaria;Mercenari  
a mercenaria

UdeM00000027460 225164 443 UdeM00000027460 XP\_009064270.1 57.8  
351 141 3 1 347 1 348 3.60E-121 443 225164  
cellular

organisms;Eukaryota;Opisthokonta;Metazoa;Eumetazoa;Bilateria;Protostomia;  
Spiralia;Lophotrochozoa;Mollusca;Gastropoda;Patellogastropoda;Lottioida;  
Lottiidae;Lottia;Lottia gigantea

UdeM00000027461 29159 2290.8 UdeM00000027461 XP\_034330330.1 95.3  
1175 54 1 1 1174 1 1175 0.00E+00 2290.8  
29159 cellular

organisms;Eukaryota;Opisthokonta;Metazoa;Eumetazoa;Bilateria;Protostomia;  
Spiralia;Lophotrochozoa;Mollusca;Bivalvia;Autobranchia;Pteriormorphia;Ostr  
eida;Ostreoidea;Ostreidae;Crassostrea;Crassostrea gigas

UdeM00000027462 6596 498.4 UdeM00000027462 XP\_045188615.1 45.9 486  
 254 7 141 620 2 484 1.30E-137 498.4 6596 cellular  
 organisms;Eukaryota;Opisthokonta;Metazoa;Eumetazoa;Bilateria;Protostomia;  
 Spiralia;Lophotrochozoa;Mollusca;Bivalvia;Autobranchia;Heteroconchia;Euhe  
 terodonta;Imparidentia;Venerida;Veneroidea;Veneridae;Mercenaria;Mercenari  
 a mercenaria  
 UdeM00000027463 6573 404.1 UdeM00000027463 XP\_021341224.1 72.3 289  
 70 4 1 287 1 281 1.70E-109 404.1 6573 cellular  
 organisms;Eukaryota;Opisthokonta;Metazoa;Eumetazoa;Bilateria;Protostomia;  
 Spiralia;Lophotrochozoa;Mollusca;Bivalvia;Autobranchia;Pteriormorphia;Pect  
 inida;Pectinoidea;Pectinidae;Mizuhopecten;Mizuhopecten yessoensis  
 UdeM00000027464 29159 407.1 UdeM00000027464 XP\_011419687.2 48.5 396  
 198 3 66 457 85 478 2.90E-110 407.1 29159 cellular  
 organisms;Eukaryota;Opisthokonta;Metazoa;Eumetazoa;Bilateria;Protostomia;  
 Spiralia;Lophotrochozoa;Mollusca;Bivalvia;Autobranchia;Pteriormorphia;Ostr  
 eida;Ostreoidea;Ostreidae;Crassostrea;Crassostrea gigas  
 UdeM00000027465 29159 416 UdeM00000027465 XP\_011419687.2 49.2 396  
 195 3 66 457 85 478 6.20E-113 416 29159 cellular  
 organisms;Eukaryota;Opisthokonta;Metazoa;Eumetazoa;Bilateria;Protostomia;  
 Spiralia;Lophotrochozoa;Mollusca;Bivalvia;Autobranchia;Pteriormorphia;Ostr  
 eida;Ostreoidea;Ostreidae;Crassostrea;Crassostrea gigas  
 UdeM00000027466 6565 473.8 UdeM00000027466 XP\_022342077.1 70.8 435  
 122 3 1 431 1 434 2.40E-130 473.8 6565 cellular  
 organisms;Eukaryota;Opisthokonta;Metazoa;Eumetazoa;Bilateria;Protostomia;  
 Spiralia;Lophotrochozoa;Mollusca;Bivalvia;Autobranchia;Pteriormorphia;Ostr  
 eida;Ostreoidea;Ostreidae;Crassostrea;Crassostrea virginica  
 UdeM00000027467 6565 478 UdeM00000027467 XP\_022342077.1 70.8 435  
 124 2 1 433 1 434 1.30E-131 478 6565 cellular  
 organisms;Eukaryota;Opisthokonta;Metazoa;Eumetazoa;Bilateria;Protostomia;  
 Spiralia;Lophotrochozoa;Mollusca;Bivalvia;Autobranchia;Pteriormorphia;Ostr  
 eida;Ostreoidea;Ostreidae;Crassostrea;Crassostrea virginica  
 UdeM00000027468 6596 2415.6 UdeM00000027468 XP\_045188155.1 68.3  
 1691 403 10 38 1598 443 2130 0.00E+00 2415.6 6596  
 cellular  
 organisms;Eukaryota;Opisthokonta;Metazoa;Eumetazoa;Bilateria;Protostomia;  
 Spiralia;Lophotrochozoa;Mollusca;Bivalvia;Autobranchia;Heteroconchia;Euhe  
 terodonta;Imparidentia;Venerida;Veneroidea;Veneridae;Mercenaria;Mercenari  
 a mercenaria  
 UdeM00000027469 6596 379.8 UdeM00000027469 XP\_045190999.1 60.7 300  
 86 1 35 302 50 349 3.40E-102 379.8 6596 cellular  
 organisms;Eukaryota;Opisthokonta;Metazoa;Eumetazoa;Bilateria;Protostomia;  
 Spiralia;Lophotrochozoa;Mollusca;Bivalvia;Autobranchia;Heteroconchia;Euhe  
 terodonta;Imparidentia;Venerida;Veneroidea;Veneridae;Mercenaria;Mercenari  
 a mercenaria  
 UdeM00000027471 7719 369.4 UdeM00000027471 XP\_026690485.1 51.2 381  
 167 8 6 383 6 370 5.70E-99 369.4 7719 cellular  
 organisms;Eukaryota;Opisthokonta;Metazoa;Eumetazoa;Bilateria;Deuterostomi  
 a;Chordata;Tunicata;Ascidiacea;Phlebobranchia;Cionidae;Ciona;Ciona  
 intestinalis  
 UdeM00000027472 6500 163.7 UdeM00000027472 XP\_035824485.1 35.5 276  
 157 5 30 290 105 374 3.60E-37 163.7 6500 cellular  
 organisms;Eukaryota;Opisthokonta;Metazoa;Eumetazoa;Bilateria;Protostomia;  
 Spiralia;Lophotrochozoa;Mollusca;Gastropoda;Heterobranchia;Euthyneura;Tec  
 tipleura;Aplysiida;Aplysiioidea;Aplysiidae;Aplysia;Aplysia californica

UdeM00000027473 29159 1028.9 UdeM00000027473 XP\_034322147.1 51.7  
 975 420 5 1 948 3 953 4.20E-297 1028.9  
 29159 cellular  
 organisms;Eukaryota;Opisthokonta;Metazoa;Eumetazoa;Bilateria;Protostomia;  
 Spiralia;Lophotrochozoa;Mollusca;Bivalvia;Autobranchia;Pteriomorpha;Ostr  
 eida;Ostreoidea;Ostreidae;Crassostrea;Crassostrea gigas  
 UdeM00000027474 29159 109.4 UdeM00000027474 XP\_034315421.1 55.7 106  
 42 2 18 119 370 474 3.30E-21 109.4 29159 cellular  
 organisms;Eukaryota;Opisthokonta;Metazoa;Eumetazoa;Bilateria;Protostomia;  
 Spiralia;Lophotrochozoa;Mollusca;Bivalvia;Autobranchia;Pteriomorpha;Ostr  
 eida;Ostreoidea;Ostreidae;Crassostrea;Crassostrea gigas  
 UdeM00000027475 6596 340.5 UdeM00000027475 XP\_045216896.1 52.2 297  
 141 1 27 323 92 387 2.40E-90 340.5 6596 cellular  
 organisms;Eukaryota;Opisthokonta;Metazoa;Eumetazoa;Bilateria;Protostomia;  
 Spiralia;Lophotrochozoa;Mollusca;Bivalvia;Autobranchia;Heteroconchia;Euhe  
 terodonta;Imparidentia;Venerida;Veneroidea;Veneridae;Mercenaria;Mercenari  
 a mercenaria  
 UdeM00000027476 6596 230.3 UdeM00000027476 XP\_045204261.1 41.5 275  
 151 6 57 327 39 307 3.50E-57 230.3 6596 cellular  
 organisms;Eukaryota;Opisthokonta;Metazoa;Eumetazoa;Bilateria;Protostomia;  
 Spiralia;Lophotrochozoa;Mollusca;Bivalvia;Autobranchia;Heteroconchia;Euhe  
 terodonta;Imparidentia;Venerida;Veneroidea;Veneridae;Mercenaria;Mercenari  
 a mercenaria  
 UdeM00000027477 400727 63.2 UdeM00000027477 XP\_025084054.1 41.1  
 73 43 0 1 73 42 114 1.80E-07 63.2 400727  
 cellular  
 organisms;Eukaryota;Opisthokonta;Metazoa;Eumetazoa;Bilateria;Protostomia;  
 Spiralia;Lophotrochozoa;Mollusca;Gastropoda;Caenogastropoda;Architaeniogl  
 ossa;Ampullarioidea;Ampullariidae;Pomacea;Pomacea canaliculata  
 UdeM00000027478 6596 65.1 UdeM00000027478 XP\_045204261.1 46.7 60  
 32 0 6 65 39 98 5.70E-08 65.1 6596 cellular  
 organisms;Eukaryota;Opisthokonta;Metazoa;Eumetazoa;Bilateria;Protostomia;  
 Spiralia;Lophotrochozoa;Mollusca;Bivalvia;Autobranchia;Heteroconchia;Euhe  
 terodonta;Imparidentia;Venerida;Veneroidea;Veneridae;Mercenaria;Mercenari  
 a mercenaria  
 UdeM00000027480 6412 122.5 UdeM00000027480 XP\_009015452.1 46.4 125  
 67 0 1 125 1 125 4.00E-25 122.5 6412 cellular  
 organisms;Eukaryota;Opisthokonta;Metazoa;Eumetazoa;Bilateria;Protostomia;  
 Spiralia;Lophotrochozoa;Annelida;Clitellata;Hirudinea;Rhynchobdellida;Glo  
 ssiphoniidae;Helobdella;Helobdella robusta  
 UdeM00000027481 7054 106.7 UdeM00000027481 XP\_031328250.1 65.8 73  
 25 0 8 80 152 224 1.60E-20 106.7 7054 cellular  
 organisms;Eukaryota;Opisthokonta;Metazoa;Eumetazoa;Bilateria;Protostomia;  
 Ecdysozoa;Panarthropoda;Arthropoda;Mandibulata;Pancrustacea;Hexapoda;Inse  
 cta;Dicondylia;Pterygota;Neoptera;Endopterygota;Coleoptera;Polyphaga;Elat  
 eriformia;Elateroidea;Lampyridae;Lampyrinae;Photinus;Photinus pyralis  
 UdeM00000027482 7719 141.4 UdeM00000027482 XP\_004227365.1 55.3 103  
 46 0 1 103 60 162 6.70E-31 141.4 7719 cellular  
 organisms;Eukaryota;Opisthokonta;Metazoa;Eumetazoa;Bilateria;Deuterostomi  
 a;Chordata;Tunicata;Ascidiacea;Phlebobranchia;Cionidae;Ciona;Ciona  
 intestinalis  
 UdeM00000027483 6573 260.8 UdeM00000027483 XP\_021352111.1 44.8 286  
 154 3 37 318 135 420 2.30E-66 260.8 6573 cellular  
 organisms;Eukaryota;Opisthokonta;Metazoa;Eumetazoa;Bilateria;Protostomia;

Spiralia;Lophotrochozoa;Mollusca;Bivalvia;Autobranchia;Pteriomorpha;Pectinida;Pectinoidea;Pectinidae;Mizuhopecten;Mizuhopecten yessoensis  
UdeM00000027484 6596 220.7 UdeM00000027484 XP\_045202146.1 45.6 239  
115 3 46 271 77 313 2.40E-54 220.7 6596 cellular  
organisms;Eukaryota;Opisthokonta;Metazoa;Eumetazoa;Bilateria;Protostomia;  
Spiralia;Lophotrochozoa;Mollusca;Bivalvia;Autobranchia;Heteroconchia;Euherodonta;Imparidentia;Venerida;Veneroidea;Veneridae;Mercenaria;Mercenaria mercenaria  
UdeM00000027485 7574 109.8 UdeM00000027485 XP\_013418105.1 46.1 102  
53 1 1 102 318 417 2.20E-21 109.8 7574 cellular  
organisms;Eukaryota;Opisthokonta;Metazoa;Eumetazoa;Bilateria;Protostomia;  
Spiralia;Lophotrochozoa;Brachiopoda;Linguliformea;Lingulata;Lingulida;Linguloidea;Lingulidae;Lingula;Lingula anatina  
UdeM00000027486 1735272 156 UdeM00000027486 XP\_041361735.1 34.5  
249 156 5 1 247 83 326 6.30E-35 156 1735272  
cellular  
organisms;Eukaryota;Opisthokonta;Metazoa;Eumetazoa;Bilateria;Protostomia;  
Spiralia;Lophotrochozoa;Mollusca;Gastropoda;Neomphalina;Neomphaloidea;Peltospiridae;Gigantopelta;Gigantopelta aegis  
UdeM00000027488 6596 226.1 UdeM00000027488 XP\_045204261.1 41.1 275  
152 6 57 327 39 307 6.60E-56 226.1 6596 cellular  
organisms;Eukaryota;Opisthokonta;Metazoa;Eumetazoa;Bilateria;Protostomia;  
Spiralia;Lophotrochozoa;Mollusca;Bivalvia;Autobranchia;Heteroconchia;Euherodonta;Imparidentia;Venerida;Veneroidea;Veneridae;Mercenaria;Mercenaria mercenaria  
UdeM00000027489 6596 182.2 UdeM00000027489 XP\_045179870.1 36.7 281  
169 5 53 326 198 476 1.20E-42 182.2 6596 cellular  
organisms;Eukaryota;Opisthokonta;Metazoa;Eumetazoa;Bilateria;Protostomia;  
Spiralia;Lophotrochozoa;Mollusca;Bivalvia;Autobranchia;Heteroconchia;Euherodonta;Imparidentia;Venerida;Veneroidea;Veneridae;Mercenaria;Mercenaria mercenaria  
UdeM00000027490 6573 261.5 UdeM00000027490 XP\_021352111.1 44.1 286  
156 3 366 647 135 420 2.80E-66 261.5 6573 cellular  
organisms;Eukaryota;Opisthokonta;Metazoa;Eumetazoa;Bilateria;Protostomia;  
Spiralia;Lophotrochozoa;Mollusca;Bivalvia;Autobranchia;Pteriomorpha;Pectinida;Pectinoidea;Pectinidae;Mizuhopecten;Mizuhopecten yessoensis  
UdeM00000027492 6573 321.6 UdeM00000027492 XP\_021375058.1 56.8 271  
115 1 42 310 120 390 1.10E-84 321.6 6573 cellular  
organisms;Eukaryota;Opisthokonta;Metazoa;Eumetazoa;Bilateria;Protostomia;  
Spiralia;Lophotrochozoa;Mollusca;Bivalvia;Autobranchia;Pteriomorpha;Pectinida;Pectinoidea;Pectinidae;Mizuhopecten;Mizuhopecten yessoensis  
UdeM00000027493 1735272 140.6 UdeM00000027493 XP\_041361735.1 33.8  
231 128 5 1 221 68 283 2.60E-30 140.6 1735272  
cellular  
organisms;Eukaryota;Opisthokonta;Metazoa;Eumetazoa;Bilateria;Protostomia;  
Spiralia;Lophotrochozoa;Mollusca;Gastropoda;Neomphalina;Neomphaloidea;Peltospiridae;Gigantopelta;Gigantopelta aegis  
UdeM00000027494 1735272 256.9 UdeM00000027494 XP\_041362195.1 39.7  
310 180 5 83 386 62 370 4.10E-65 256.9 1735272  
cellular  
organisms;Eukaryota;Opisthokonta;Metazoa;Eumetazoa;Bilateria;Protostomia;  
Spiralia;Lophotrochozoa;Mollusca;Gastropoda;Neomphalina;Neomphaloidea;Peltospiridae;Gigantopelta;Gigantopelta aegis



UdeM00000027495 6596 112.1 UdeM00000027495 XP\_045204875.1 40.8 130  
 75 2 26 153 309 438 6.50E-22 112.1 6596 cellular  
 organisms;Eukaryota;Opisthokonta;Metazoa;Eumetazoa;Bilateria;Protostomia;  
 Spiralia;Lophotrochozoa;Mollusca;Bivalvia;Autobranchia;Heteroconchia;Euhe  
 terodonta;Imparidentia;Venerida;Veneroidea;Veneridae;Mercenaria;Mercenari  
 a mercenaria

UdeM00000027497 7654 65.5 UdeM00000027497 XP\_041463763.1 41.1 95  
 51 2 5 97 941 1032 4.40E-08 65.5 7654 cellular  
 organisms;Eukaryota;Opisthokonta;Metazoa;Eumetazoa;Bilateria;Deuterostomi  
 a;Echinodermata;Eleutherozoa;Echinozoa;Echinoidea;Euechinoidea;Echinacea;  
 Temnopleuroida;Toxopneustidae;Lytechinus;Lytechinus variegatus

UdeM00000027499 6596 127.1 UdeM00000027499 XP\_045161465.1 27.6 272  
 66 2 37 177 46 317 2.30E-26 127.1 6596 cellular  
 organisms;Eukaryota;Opisthokonta;Metazoa;Eumetazoa;Bilateria;Protostomia;  
 Spiralia;Lophotrochozoa;Mollusca;Bivalvia;Autobranchia;Heteroconchia;Euhe  
 terodonta;Imparidentia;Venerida;Veneroidea;Veneridae;Mercenaria;Mercenari  
 a mercenaria

UdeM00000027501 6596 257.7 UdeM00000027501 XP\_045179599.1 55.7 230  
 96 2 42 265 49 278 1.70E-65 257.7 6596 cellular  
 organisms;Eukaryota;Opisthokonta;Metazoa;Eumetazoa;Bilateria;Protostomia;  
 Spiralia;Lophotrochozoa;Mollusca;Bivalvia;Autobranchia;Heteroconchia;Euhe  
 terodonta;Imparidentia;Venerida;Veneroidea;Veneridae;Mercenaria;Mercenari  
 a mercenaria

UdeM00000027502 1735272 171.8 UdeM00000027502 XP\_041361735.1 34.8  
 264 165 5 1 262 68 326 1.20E-39 171.8 1735272  
 cellular  
 organisms;Eukaryota;Opisthokonta;Metazoa;Eumetazoa;Bilateria;Protostomia;  
 Spiralia;Lophotrochozoa;Mollusca;Gastropoda;Neomphalina;Neomphaloidea;Pel  
 tospiridae;Gigantopelta;Gigantopelta aegis

UdeM00000027503 6596 218 UdeM00000027503 XP\_045202146.1 47.7 216  
 98 3 46 248 77 290 1.50E-53 218 6596 cellular  
 organisms;Eukaryota;Opisthokonta;Metazoa;Eumetazoa;Bilateria;Protostomia;  
 Spiralia;Lophotrochozoa;Mollusca;Bivalvia;Autobranchia;Heteroconchia;Euhe  
 terodonta;Imparidentia;Venerida;Veneroidea;Veneridae;Mercenaria;Mercenari  
 a mercenaria

UdeM00000027504 6526 75.9 UdeM00000027504 XP\_013087788.1 46.8 79  
 34 2 41 119 64 134 4.00E-11 75.9 6526 cellular  
 organisms;Eukaryota;Opisthokonta;Metazoa;Eumetazoa;Bilateria;Protostomia;  
 Spiralia;Lophotrochozoa;Mollusca;Gastropoda;Heterobranchia;Euthyneura;Pan  
 pulmonata;Hygrophila;Lymnaeioidea;Planorbidae;Biomphalaria;Biomphalaria  
 glabrata

UdeM00000027505 6596 240.7 UdeM00000027505 XP\_045216896.1 53.5 200  
 93 0 1 200 188 387 1.60E-60 240.7 6596 cellular  
 organisms;Eukaryota;Opisthokonta;Metazoa;Eumetazoa;Bilateria;Protostomia;  
 Spiralia;Lophotrochozoa;Mollusca;Bivalvia;Autobranchia;Heteroconchia;Euhe  
 terodonta;Imparidentia;Venerida;Veneroidea;Veneridae;Mercenaria;Mercenari  
 a mercenaria

UdeM00000027506 151771 137.1 UdeM00000027506 XP\_028417719.1 37.4  
 179 106 4 7 180 640 817 2.90E-29 137.1 151771  
 cellular  
 organisms;Eukaryota;Opisthokonta;Metazoa;Eumetazoa;Cnidaria;Anthozoa;Octo  
 corallia;Alcyonacea;Alcyoniina;Nephtheidae;Dendronephthya;Dendronephthya  
 gigantea

UdeM00000027507 50429 199.9 UdeM00000027507 XP\_022808032.1 33.3 351  
 223 5 411 751 24 373 1.10E-47 199.9 50429 cellular  
 organisms;Eukaryota;Opisthokonta;Metazoa;Eumetazoa;Cnidaria;Anthozoa;Hexa  
 corallia;Scleractinia;Astrocoeniina;Pocilloporidae;Stylophora;Stylophora  
 pistillata  
 UdeM00000027508 33528 68.6 UdeM00000027508 XP\_043978898.1 39.8 88  
 43 3 8 86 3 89 5.20E-09 68.6 33528 cellular  
 organisms;Eukaryota;Opisthokonta;Metazoa;Eumetazoa;Bilateria;Deuterostomi  
 a;Chordata;Craniata;Vertebrata;Gnathostomata;Teleostomi;Euteleostomi;Acti  
 nopterygii;Actinopteri;Neopterygii;Teleostei;Osteoglossocephalai;Clupeoce  
 phala;Euteleosteomorpha;Neoteleostei;Eurypterygia;Ctenosquamata;Acanthomo  
 rphata;Euacanthomorpha;Percomorphaceae;Ovalentaria;Atherinomorphae;Cyp  
 rinodontiformes;Cyprinodontoidei;Poeciliidae;Poeciliinae;Gambusia;Gambusi  
 a affinis  
 UdeM00000027509 1735272 138.7 UdeM00000027509 XP\_041378212.1 40.7  
 167 91 4 14 175 191 354 7.50E-30 138.7 1735272  
 cellular  
 organisms;Eukaryota;Opisthokonta;Metazoa;Eumetazoa;Bilateria;Protostomia;  
 Spiralia;Lophotrochozoa;Mollusca;Gastropoda;Neomphalina;Neomphaloidea;Pel  
 tospiridae;Gigantopelta;Gigantopelta aegis  
 UdeM00000027510 1735272 118.2 UdeM00000027510 XP\_041369867.1 45.2  
 124 63 3 6 127 286 406 7.50E-24 118.2 1735272  
 cellular  
 organisms;Eukaryota;Opisthokonta;Metazoa;Eumetazoa;Bilateria;Protostomia;  
 Spiralia;Lophotrochozoa;Mollusca;Gastropoda;Neomphalina;Neomphaloidea;Pel  
 tospiridae;Gigantopelta;Gigantopelta aegis  
 UdeM00000027511 29159 129 UdeM00000027511 XP\_034318668.1 40.6 180  
 96 4 232 409 359 529 1.40E-26 129 29159 cellular  
 organisms;Eukaryota;Opisthokonta;Metazoa;Eumetazoa;Bilateria;Protostomia;  
 Spiralia;Lophotrochozoa;Mollusca;Bivalvia;Autobranchia;Pteriomorphia;Ostr  
 eida;Ostreoidea;Ostreidae;Crassostrea;Crassostrea gigas  
 UdeM00000027512 6500 171 UdeM00000027512 XP\_035824485.1 34.2 275  
 160 3 50 309 105 373 2.40E-39 171 6500 cellular  
 organisms;Eukaryota;Opisthokonta;Metazoa;Eumetazoa;Bilateria;Protostomia;  
 Spiralia;Lophotrochozoa;Mollusca;Gastropoda;Heterobranchia;Euthyneura;Tec  
 tipleura;Aplysiida;Aplysioidae;Aplysiidae;Aplysia;Aplysia californica  
 UdeM00000027515 6573 226.1 UdeM00000027515 XP\_021362338.1 61.4 166  
 64 0 1 166 244 409 3.30E-56 226.1 6573 cellular  
 organisms;Eukaryota;Opisthokonta;Metazoa;Eumetazoa;Bilateria;Protostomia;  
 Spiralia;Lophotrochozoa;Mollusca;Bivalvia;Autobranchia;Pteriomorphia;Pect  
 inida;Pectinoidea;Pectinidae;Mizuhopecten;Mizuhopecten yessoensis  
 UdeM00000027518 6596 108.2 UdeM00000027518 XP\_045204875.1 40 130  
 76 2 51 178 309 438 1.10E-20 108.2 6596 cellular  
 organisms;Eukaryota;Opisthokonta;Metazoa;Eumetazoa;Bilateria;Protostomia;  
 Spiralia;Lophotrochozoa;Mollusca;Bivalvia;Autobranchia;Heteroconchia;Euhe  
 terodonta;Imparidentia;Venerida;Veneroidea;Veneridae;Mercenaria;Mercenari  
 a mercenaria  
 UdeM00000027519 6596 329.3 UdeM00000027519 XP\_045161465.1 55.5 272  
 119 2 67 336 46 317 5.60E-87 329.3 6596 cellular  
 organisms;Eukaryota;Opisthokonta;Metazoa;Eumetazoa;Bilateria;Protostomia;  
 Spiralia;Lophotrochozoa;Mollusca;Bivalvia;Autobranchia;Heteroconchia;Euhe  
 terodonta;Imparidentia;Venerida;Veneroidea;Veneridae;Mercenaria;Mercenari  
 a mercenaria

UdeM00000027521 6596 266.5 UdeM00000027521 XP\_045179599.1 57 230  
 93 2 40 263 49 278 3.50E-68 266.5 6596 cellular  
 organisms;Eukaryota;Opisthokonta;Metazoa;Eumetazoa;Bilateria;Protostomia;  
 Spiralia;Lophotrochozoa;Mollusca;Bivalvia;Autobranchia;Heteroconchia;Euhe  
 terodonta;Imparidentia;Venerida;Veneroidea;Veneridae;Mercenaria;Mercenari  
 a mercenaria  
 UdeM00000027522 1735272 172.6 UdeM00000027522 XP\_041361735.1 34.8  
 264 165 5 1 262 68 326 6.90E-40 172.6 1735272  
 cellular  
 organisms;Eukaryota;Opisthokonta;Metazoa;Eumetazoa;Bilateria;Protostomia;  
 Spiralia;Lophotrochozoa;Mollusca;Gastropoda;Neomphalina;Neomphaloidea;Pel  
 tospiridae;Gigantopelta;Gigantopelta aegis  
 UdeM00000027523 6596 199.1 UdeM00000027523 XP\_045202146.1 43.2 250  
 120 6 20 254 71 313 6.90E-48 199.1 6596 cellular  
 organisms;Eukaryota;Opisthokonta;Metazoa;Eumetazoa;Bilateria;Protostomia;  
 Spiralia;Lophotrochozoa;Mollusca;Bivalvia;Autobranchia;Heteroconchia;Euhe  
 terodonta;Imparidentia;Venerida;Veneroidea;Veneridae;Mercenaria;Mercenari  
 a mercenaria  
 UdeM00000027524 6596 140.6 UdeM00000027524 XP\_045202146.1 44.6 175  
 82 3 67 228 141 313 2.60E-30 140.6 6596 cellular  
 organisms;Eukaryota;Opisthokonta;Metazoa;Eumetazoa;Bilateria;Protostomia;  
 Spiralia;Lophotrochozoa;Mollusca;Bivalvia;Autobranchia;Heteroconchia;Euhe  
 terodonta;Imparidentia;Venerida;Veneroidea;Veneridae;Mercenaria;Mercenari  
 a mercenaria  
 UdeM00000027525 6573 261.2 UdeM00000027525 XP\_021352111.1 44.1 286  
 156 2 37 318 135 420 1.80E-66 261.2 6573 cellular  
 organisms;Eukaryota;Opisthokonta;Metazoa;Eumetazoa;Bilateria;Protostomia;  
 Spiralia;Lophotrochozoa;Mollusca;Bivalvia;Autobranchia;Pteriormorphia;Pect  
 inida;Pectinoidea;Pectinidae;Mizuhopecten;Mizuhopecten yessoensis  
 UdeM00000024373 6573 95.9 UdeM00000024373 XP\_021377714.1 40.3 139  
 74 4 20 157 18 148 5.30E-17 95.9 6573 cellular  
 organisms;Eukaryota;Opisthokonta;Metazoa;Eumetazoa;Bilateria;Protostomia;  
 Spiralia;Lophotrochozoa;Mollusca;Bivalvia;Autobranchia;Pteriormorphia;Pect  
 inida;Pectinoidea;Pectinidae;Mizuhopecten;Mizuhopecten yessoensis  
 UdeM00000024374 6500 127.5 UdeM00000024374 NP\_001191663.1 54 113  
 52 0 1 113 54 166 1.20E-26 127.5 6500 cellular  
 organisms;Eukaryota;Opisthokonta;Metazoa;Eumetazoa;Bilateria;Protostomia;  
 Spiralia;Lophotrochozoa;Mollusca;Gastropoda;Heterobranchia;Euthyneura;Tec  
 tipleura;Aplysiida;Aplysioidea;Aplysiidae;Aplysia;Aplysia californica  
 UdeM00000024375 6573 206.1 UdeM00000024375 XP\_021351463.1 38 368  
 196 6 1 343 1 361 7.60E-50 206.1 6573 cellular  
 organisms;Eukaryota;Opisthokonta;Metazoa;Eumetazoa;Bilateria;Protostomia;  
 Spiralia;Lophotrochozoa;Mollusca;Bivalvia;Autobranchia;Pteriormorphia;Pect  
 inida;Pectinoidea;Pectinidae;Mizuhopecten;Mizuhopecten yessoensis  
 UdeM00000024376 6596 656.8 UdeM00000024376 XP\_045199706.1 50.2 634  
 298 9 182 813 239 856 3.70E-185 656.8 6596 cellular  
 organisms;Eukaryota;Opisthokonta;Metazoa;Eumetazoa;Bilateria;Protostomia;  
 Spiralia;Lophotrochozoa;Mollusca;Bivalvia;Autobranchia;Heteroconchia;Euhe  
 terodonta;Imparidentia;Venerida;Veneroidea;Veneridae;Mercenaria;Mercenari  
 a mercenaria  
 UdeM00000024377 6596 137.5 UdeM00000024377 XP\_045199706.1 47.1 140  
 72 1 182 319 239 378 3.00E-29 137.5 6596 cellular  
 organisms;Eukaryota;Opisthokonta;Metazoa;Eumetazoa;Bilateria;Protostomia;  
 Spiralia;Lophotrochozoa;Mollusca;Bivalvia;Autobranchia;Heteroconchia;Euhe

terodonta;Imparidentia;Venerida;Veneroidea;Veneridae;Mercenaria;Mercenari  
 a mercenaria  
 UdeM00000024378 6596 416.8 UdeM00000024378 XP\_045202437.1 45.2 586  
 214 22 97 636 101 625 5.10E-113 416.8 6596 cellular  
 organisms;Eukaryota;Opisthokonta;Metazoa;Eumetazoa;Bilateria;Protostomia;  
 Spiralia;Lophotrochozoa;Mollusca;Bivalvia;Autobranhia;Heteroconchia;Euhe  
 terodonta;Imparidentia;Venerida;Veneroidea;Veneridae;Mercenaria;Mercenari  
 a mercenaria  
 UdeM00000024379 6596 5080.8 UdeM00000024379 XP\_045200889.1 86.9  
 2943 374 4 5 2938 1595 4535 0.00E+00 5080.8 6596  
 cellular  
 organisms;Eukaryota;Opisthokonta;Metazoa;Eumetazoa;Bilateria;Protostomia;  
 Spiralia;Lophotrochozoa;Mollusca;Bivalvia;Autobranhia;Heteroconchia;Euhe  
 terodonta;Imparidentia;Venerida;Veneroidea;Veneridae;Mercenaria;Mercenari  
 a mercenaria  
 UdeM00000024380 6579 638.3 UdeM00000024380 XP\_033759330.1 78.8 391  
 83 0 12 402 1209 1599 7.00E-180 638.3 6579 cellular  
 organisms;Eukaryota;Opisthokonta;Metazoa;Eumetazoa;Bilateria;Protostomia;  
 Spiralia;Lophotrochozoa;Mollusca;Bivalvia;Autobranhia;Pteriormorphia;Pect  
 inida;Pectinoidea;Pectinidae;Pecten;Pecten maximus  
 UdeM00000024381 6596 830.9 UdeM00000024381 XP\_045200889.1 86.2 471  
 65 0 1 471 747 1217 8.30E-238 830.9 6596 cellular  
 organisms;Eukaryota;Opisthokonta;Metazoa;Eumetazoa;Bilateria;Protostomia;  
 Spiralia;Lophotrochozoa;Mollusca;Bivalvia;Autobranhia;Heteroconchia;Euhe  
 terodonta;Imparidentia;Venerida;Veneroidea;Veneridae;Mercenaria;Mercenari  
 a mercenaria  
 UdeM00000024382 6596 1051.6 UdeM00000024382 XP\_045200889.1 81.8  
 617 112 0 101 717 99 715 4.60E-304 1051.6 6596  
 cellular  
 organisms;Eukaryota;Opisthokonta;Metazoa;Eumetazoa;Bilateria;Protostomia;  
 Spiralia;Lophotrochozoa;Mollusca;Bivalvia;Autobranhia;Heteroconchia;Euhe  
 terodonta;Imparidentia;Venerida;Veneroidea;Veneridae;Mercenaria;Mercenari  
 a mercenaria  
 UdeM00000024383 1735272 80.5 UdeM00000024383 XP\_041379274.1 33.6  
 122 79 2 2 122 245 365 1.70E-12 80.5 1735272  
 cellular  
 organisms;Eukaryota;Opisthokonta;Metazoa;Eumetazoa;Bilateria;Protostomia;  
 Spiralia;Lophotrochozoa;Mollusca;Gastropoda;Neomphalina;Neomphaloidea;Pel  
 tospiridae;Gigantopelta;Gigantopelta aegis  
 UdeM00000024384 46514 157.5 UdeM00000024384 XP\_038073561.1 50.7 134  
 66 0 2 135 17 150 1.20E-35 157.5 46514 cellular  
 organisms;Eukaryota;Opisthokonta;Metazoa;Eumetazoa;Bilateria;Deuterostomi  
 a;Echinodermata;Eleutherozoa;Asterozoa;Asteroidea;Valvatacea;Valvatida;As  
 terinidae;Patiria;Patiria miniata  
 UdeM00000024386 6573 186.4 UdeM00000024386 XP\_021349278.1 42.3 274  
 126 6 1 250 71 336 4.60E-44 186.4 6573 cellular  
 organisms;Eukaryota;Opisthokonta;Metazoa;Eumetazoa;Bilateria;Protostomia;  
 Spiralia;Lophotrochozoa;Mollusca;Bivalvia;Autobranhia;Pteriormorphia;Pect  
 inida;Pectinoidea;Pectinidae;Mizuhopecten;Mizuhopecten yessoensis  
 UdeM00000024387 6573 137.5 UdeM00000024387 XP\_021349278.1 35.8 274  
 149 7 20 287 408 660 2.70E-29 137.5 6573 cellular  
 organisms;Eukaryota;Opisthokonta;Metazoa;Eumetazoa;Bilateria;Protostomia;  
 Spiralia;Lophotrochozoa;Mollusca;Bivalvia;Autobranhia;Pteriormorphia;Pect  
 inida;Pectinoidea;Pectinidae;Mizuhopecten;Mizuhopecten yessoensis

UdeM00000024389 10224 141.7 UdeM00000024389 XP\_006813844.1 43.9 164  
 92 0 1 164 128 291 9.60E-31 141.7 10224 cellular  
 organisms;Eukaryota;Opisthokonta;Metazoa;Eumetazoa;Bilateria;Deuterostomi  
 a;Hemichordata;Enteropneusta;Harrimaniidae;Saccoglossus;Saccoglossus  
 kowalevskii

UdeM00000024390 6596 352.4 UdeM00000024390 XP\_045173731.1 55.7 406  
 142 15 47 434 681 1066 8.10E-94 352.4 6596 cellular  
 organisms;Eukaryota;Opisthokonta;Metazoa;Eumetazoa;Bilateria;Protostomia;  
 Spiralia;Lophotrochozoa;Mollusca;Bivalvia;Autobranchia;Heteroconchia;Euhe  
 terodonta;Imparidentia;Venerida;Veneroidea;Veneridae;Mercenaria;Mercenari  
 a mercenaria

UdeM00000024391 6565 310.5 UdeM00000024391 XP\_022339609.1 64.9 239  
 81 2 1648 1884 170 407 1.50E-80 310.5 6565 cellular  
 organisms;Eukaryota;Opisthokonta;Metazoa;Eumetazoa;Bilateria;Protostomia;  
 Spiralia;Lophotrochozoa;Mollusca;Bivalvia;Autobranchia;Pteriormorphia;Ostr  
 eida;Ostreoidea;Ostreidae;Crassostrea;Crassostrea virginica

UdeM00000024392 6596 88.2 UdeM00000024392 XP\_045203699.1 33.9 121  
 79 1 24 143 28 148 1.10E-14 88.2 6596 cellular  
 organisms;Eukaryota;Opisthokonta;Metazoa;Eumetazoa;Bilateria;Protostomia;  
 Spiralia;Lophotrochozoa;Mollusca;Bivalvia;Autobranchia;Heteroconchia;Euhe  
 terodonta;Imparidentia;Venerida;Veneroidea;Veneridae;Mercenaria;Mercenari  
 a mercenaria

UdeM00000024393 6596 289.7 UdeM00000024393 XP\_045157323.1 60.5 220  
 86 1 1 220 1 219 3.90E-75 289.7 6596 cellular  
 organisms;Eukaryota;Opisthokonta;Metazoa;Eumetazoa;Bilateria;Protostomia;  
 Spiralia;Lophotrochozoa;Mollusca;Bivalvia;Autobranchia;Heteroconchia;Euhe  
 terodonta;Imparidentia;Venerida;Veneroidea;Veneridae;Mercenaria;Mercenari  
 a mercenaria

UdeM00000024394 6565 132.9 UdeM00000024394 XP\_022318420.1 46.7 122  
 65 0 909 1030 75 196 3.80E-27 132.9 6565 cellular  
 organisms;Eukaryota;Opisthokonta;Metazoa;Eumetazoa;Bilateria;Protostomia;  
 Spiralia;Lophotrochozoa;Mollusca;Bivalvia;Autobranchia;Pteriormorphia;Ostr  
 eida;Ostreoidea;Ostreidae;Crassostrea;Crassostrea virginica

UdeM00000024395 70779 82.4 UdeM00000024395 XP\_015765573.1 58.3 60  
 25 0 6 65 137 196 2.40E-13 82.4 70779 cellular  
 organisms;Eukaryota;Opisthokonta;Metazoa;Eumetazoa;Cnidaria;Anthozoa;Hexa  
 corallia;Scleractinia;Astrocoeniina;Acroporidae;Acropora;Acropora  
 digitifera

UdeM00000024396 6596 152.1 UdeM00000024396 XP\_045165863.1 50 168  
 48 1 14 145 595 762 5.30E-34 152.1 6596 cellular  
 organisms;Eukaryota;Opisthokonta;Metazoa;Eumetazoa;Bilateria;Protostomia;  
 Spiralia;Lophotrochozoa;Mollusca;Bivalvia;Autobranchia;Heteroconchia;Euhe  
 terodonta;Imparidentia;Venerida;Veneroidea;Veneridae;Mercenaria;Mercenari  
 a mercenaria

UdeM00000024397 7574 133.3 UdeM00000024397 XP\_013400179.1 74.1 81  
 21 0 8 88 7 87 1.60E-28 133.3 7574 cellular  
 organisms;Eukaryota;Opisthokonta;Metazoa;Eumetazoa;Bilateria;Protostomia;  
 Spiralia;Lophotrochozoa;Brachiopoda;Linguliformea;Lingulata;Lingulida;Lin  
 guloidea;Lingulidae;Lingula;Lingula anatina

UdeM00000024398 7574 301.6 UdeM00000024398 XP\_013408166.1 55.7 291  
 85 3 230 520 122 368 2.10E-78 301.6 7574 cellular  
 organisms;Eukaryota;Opisthokonta;Metazoa;Eumetazoa;Bilateria;Protostomia;  
 Spiralia;Lophotrochozoa;Brachiopoda;Linguliformea;Lingulata;Lingulida;Lin  
 guloidea;Lingulidae;Lingula;Lingula anatina

UdeM00000024399 48701 122.5 UdeM00000024399 XP\_014853227.1 66.2 74  
 25 0 1 74 1 74 2.30E-25 122.5 48701 cellular  
 organisms;Eukaryota;Opisthokonta;Metazoa;Eumetazoa;Bilateria;Deuterostomi  
 a;Chordata;Craniata;Vertebrata;Gnathostomata;Teleostomi;Euteleostomi;Acti  
 nopterygii;Actinopteri;Neopterygii;Teleostei;Osteoglossocephalai;Clupeoce  
 phala;Euteleosteomorpha;Neoteleostei;Eurypterygia;Ctenosquamata;Acanthomo  
 rphata;Euacanthomorphacea;Percomorphaceae;Ovalentaria;Atherinomorphae;Cyp  
 rinodontiformes;Cyprinodontoidei;Poeciliidae;Poeciliinae;Poecilia;Poecili  
 a mexicana

UdeM00000024400 6565 89.7 UdeM00000024400 XP\_022312022.1 61.3 62  
 24 0 9 70 109 170 1.80E-15 89.7 6565 cellular  
 organisms;Eukaryota;Opisthokonta;Metazoa;Eumetazoa;Bilateria;Protostomia;  
 Spiralia;Lophotrochozoa;Mollusca;Bivalvia;Autobranchia;Pteriomorpha;Ostr  
 eida;Ostreoidea;Ostreidae;Crassostrea;Crassostrea virginica

UdeM00000024401 1735272 193.4 UdeM00000024401 XP\_041364172.1 31.1  
 563 262 15 8 490 1565 2081 7.00E-46 193.4 1735272  
 cellular  
 organisms;Eukaryota;Opisthokonta;Metazoa;Eumetazoa;Bilateria;Protostomia;  
 Spiralia;Lophotrochozoa;Mollusca;Gastropoda;Neomphalina;Neomphaloidea;Pel  
 tospiridae;Gigantopelta;Gigantopelta aegis

UdeM00000024403 6596 59.3 UdeM00000024403 XP\_045203123.1 46.2 65  
 31 2 1 63 697 759 8.60E-06 59.3 6596 cellular  
 organisms;Eukaryota;Opisthokonta;Metazoa;Eumetazoa;Bilateria;Protostomia;  
 Spiralia;Lophotrochozoa;Mollusca;Bivalvia;Autobranchia;Heteroconchia;Euhe  
 terodonta;Imparidentia;Venerida;Veneroidea;Veneridae;Mercenaria;Mercenari  
 a mercenaria

UdeM00000024405 6596 1107.8 UdeM00000024405 XP\_045190532.1 61.9  
 907 279 5 2 908 613 1452 0.00E+00 1107.8 6596  
 cellular  
 organisms;Eukaryota;Opisthokonta;Metazoa;Eumetazoa;Bilateria;Protostomia;  
 Spiralia;Lophotrochozoa;Mollusca;Bivalvia;Autobranchia;Heteroconchia;Euhe  
 terodonta;Imparidentia;Venerida;Veneroidea;Veneridae;Mercenaria;Mercenari  
 a mercenaria

UdeM00000024407 6596 280.4 UdeM00000024407 XP\_045171947.1 63.9 205  
 74 0 1765 1969 164 368 1.80E-71 280.4 6596 cellular  
 organisms;Eukaryota;Opisthokonta;Metazoa;Eumetazoa;Bilateria;Protostomia;  
 Spiralia;Lophotrochozoa;Mollusca;Bivalvia;Autobranchia;Heteroconchia;Euhe  
 terodonta;Imparidentia;Venerida;Veneroidea;Veneridae;Mercenaria;Mercenari  
 a mercenaria

UdeM00000024408 6596 88.2 UdeM00000024408 XP\_045203699.1 33.9 121  
 79 1 24 143 28 148 1.10E-14 88.2 6596 cellular  
 organisms;Eukaryota;Opisthokonta;Metazoa;Eumetazoa;Bilateria;Protostomia;  
 Spiralia;Lophotrochozoa;Mollusca;Bivalvia;Autobranchia;Heteroconchia;Euhe  
 terodonta;Imparidentia;Venerida;Veneroidea;Veneridae;Mercenaria;Mercenari  
 a mercenaria

UdeM00000024409 6596 273.5 UdeM00000024409 XP\_045157323.1 60.4 212  
 83 1 7 218 9 219 2.90E-70 273.5 6596 cellular  
 organisms;Eukaryota;Opisthokonta;Metazoa;Eumetazoa;Bilateria;Protostomia;  
 Spiralia;Lophotrochozoa;Mollusca;Bivalvia;Autobranchia;Heteroconchia;Euhe  
 terodonta;Imparidentia;Venerida;Veneroidea;Veneridae;Mercenaria;Mercenari  
 a mercenaria

UdeM00000024410 7936 88.2 UdeM00000024410 XP\_035247672.1 29.5 200  
 122 4 4 202 22 203 2.10E-14 88.2 7936 cellular  
 organisms;Eukaryota;Opisthokonta;Metazoa;Eumetazoa;Bilateria;Deuterostomi

a;Chordata;Craniata;Vertebrata;Gnathostomata;Teleostomi;Euteleostomi;Actinopterygii;Actinopteri;Neopterygii;Teleostei;Elopocephalai;Elopocephala;Elopopomorpha;Anguilliformes;Anguillidae;Anguilla;Anguilla anguilla

UdeM00000024413 6596 1126.3 UdeM00000024413 XP\_045190532.1 67.1  
818 268 1 2 819 613 1429 0.00E+00 1126.3 6596

cellular

organisms;Eukaryota;Opisthokonta;Metazoa;Eumetazoa;Bilateria;Protostomia;Spiralia;Lophotrochozoa;Mollusca;Bivalvia;Autobranchia;Heteroconchia;Euheterodonta;Imparidentia;Venerida;Veneroidea;Veneridae;Mercenaria;Mercenaria mercenaria

UdeM00000024415 6596 59.3 UdeM00000024415 XP\_045203123.1 46.2 65  
31 2 1 63 697 759 8.60E-06 59.3 6596 cellular

organisms;Eukaryota;Opisthokonta;Metazoa;Eumetazoa;Bilateria;Protostomia;Spiralia;Lophotrochozoa;Mollusca;Bivalvia;Autobranchia;Heteroconchia;Euheterodonta;Imparidentia;Venerida;Veneroidea;Veneridae;Mercenaria;Mercenaria mercenaria

UdeM00000024417 6596 253.4 UdeM00000024417 XP\_045210760.1 32.1 579  
348 15 8 564 1549 2104 6.60E-64 253.4 6596 cellular

organisms;Eukaryota;Opisthokonta;Metazoa;Eumetazoa;Bilateria;Protostomia;Spiralia;Lophotrochozoa;Mollusca;Bivalvia;Autobranchia;Heteroconchia;Euheterodonta;Imparidentia;Venerida;Veneroidea;Veneridae;Mercenaria;Mercenaria mercenaria

UdeM00000024418 6565 89.7 UdeM00000024418 XP\_022312022.1 61.3 62  
24 0 9 70 109 170 1.80E-15 89.7 6565 cellular

organisms;Eukaryota;Opisthokonta;Metazoa;Eumetazoa;Bilateria;Protostomia;Spiralia;Lophotrochozoa;Mollusca;Bivalvia;Autobranchia;Pteriormorphia;Ostreida;Ostreoidea;Ostreidae;Crassostrea;Crassostrea virginica

UdeM00000024419 6596 164.5 UdeM00000024419 XP\_045174181.1 61 123  
48 0 1 123 1 123 9.10E-38 164.5 6596 cellular

organisms;Eukaryota;Opisthokonta;Metazoa;Eumetazoa;Bilateria;Protostomia;Spiralia;Lophotrochozoa;Mollusca;Bivalvia;Autobranchia;Heteroconchia;Euheterodonta;Imparidentia;Venerida;Veneroidea;Veneridae;Mercenaria;Mercenaria mercenaria

UdeM00000024420 7574 369.8 UdeM00000024420 XP\_013408166.1 54.6 368  
104 2 1 305 1 368 4.00E-99 369.8 7574 cellular

organisms;Eukaryota;Opisthokonta;Metazoa;Eumetazoa;Bilateria;Protostomia;Spiralia;Lophotrochozoa;Brachiopoda;Linguliformea;Lingulata;Lingulida;Linguloidea;Lingulidae;Lingula;Lingula anatina

UdeM00000024421 6596 99.8 UdeM00000024421 XP\_045165863.1 44.9 127  
50 1 2 108 636 762 2.30E-18 99.8 6596 cellular

organisms;Eukaryota;Opisthokonta;Metazoa;Eumetazoa;Bilateria;Protostomia;Spiralia;Lophotrochozoa;Mollusca;Bivalvia;Autobranchia;Heteroconchia;Euheterodonta;Imparidentia;Venerida;Veneroidea;Veneridae;Mercenaria;Mercenaria mercenaria

UdeM00000024422 6565 136.3 UdeM00000024422 XP\_022318420.1 47.2 125  
66 0 22 146 72 196 1.30E-28 136.3 6565 cellular

organisms;Eukaryota;Opisthokonta;Metazoa;Eumetazoa;Bilateria;Protostomia;Spiralia;Lophotrochozoa;Mollusca;Bivalvia;Autobranchia;Pteriormorphia;Ostreida;Ostreoidea;Ostreidae;Crassostrea;Crassostrea virginica

UdeM00000024423 6573 94 UdeM00000024423 XP\_021377146.1 42 119  
57 4 1 119 1604 1710 1.60E-16 94 6573 cellular

organisms;Eukaryota;Opisthokonta;Metazoa;Eumetazoa;Bilateria;Protostomia;Spiralia;Lophotrochozoa;Mollusca;Bivalvia;Autobranchia;Pteriormorphia;Pectinida;Pectinoidea;Pectinidae;Mizuhopecten;Mizuhopecten yessoensis

UdeM00000024424 6573 89.4 UdeM00000024424 XP\_021353057.1 64.5 62  
 22 0 5 66 35 96 2.50E-15 89.4 6573 cellular  
 organisms;Eukaryota;Opisthokonta;Metazoa;Eumetazoa;Bilateria;Protostomia;  
 Spiralia;Lophotrochozoa;Mollusca;Bivalvia;Autobranhia;Pteriomorphia;Pect  
 inida;Pectinoidea;Pectinidae;Mizuhopecten;Mizuhopecten yessoensis  
 UdeM00000024425 37621 194.9 UdeM00000024425 XP\_014679849.1 40.9 230  
 68 3 2 163 394 623 8.10E-47 194.9 37621 cellular  
 organisms;Eukaryota;Opisthokonta;Metazoa;Eumetazoa;Bilateria;Protostomia;  
 Ecdysozoa;Scalidophora;Priapulida;Priapulimorpha;Priapulimorphida;Priapul  
 idae;Priapulus;Priapulus caudatus  
 UdeM00000024427 6573 169.1 UdeM00000024427 XP\_021376553.1 48.4 186  
 89 5 279 460 1 183 1.30E-38 169.1 6573 cellular  
 organisms;Eukaryota;Opisthokonta;Metazoa;Eumetazoa;Bilateria;Protostomia;  
 Spiralia;Lophotrochozoa;Mollusca;Bivalvia;Autobranhia;Pteriomorphia;Pect  
 inida;Pectinoidea;Pectinidae;Mizuhopecten;Mizuhopecten yessoensis  
 UdeM00000024429 6573 71.6 UdeM00000024429 XP\_021358586.1 30.6 134  
 89 2 599 731 116 246 4.60E-09 71.6 6573 cellular  
 organisms;Eukaryota;Opisthokonta;Metazoa;Eumetazoa;Bilateria;Protostomia;  
 Spiralia;Lophotrochozoa;Mollusca;Bivalvia;Autobranhia;Pteriomorphia;Pect  
 inida;Pectinoidea;Pectinidae;Mizuhopecten;Mizuhopecten yessoensis  
 UdeM00000024430 6565 419.5 UdeM00000024430 XP\_022345219.1 50.5 388  
 185 3 1 386 1 383 4.80E-114 419.5 6565 cellular  
 organisms;Eukaryota;Opisthokonta;Metazoa;Eumetazoa;Bilateria;Protostomia;  
 Spiralia;Lophotrochozoa;Mollusca;Bivalvia;Autobranhia;Pteriomorphia;Ostr  
 eida;Ostreoidea;Ostreidae;Crassostrea;Crassostrea virginica  
 UdeM00000024431 7574 132.9 UdeM00000024431 XP\_023933159.1 47.2 144  
 75 1 18 161 238 380 4.00E-28 132.9 7574 cellular  
 organisms;Eukaryota;Opisthokonta;Metazoa;Eumetazoa;Bilateria;Protostomia;  
 Spiralia;Lophotrochozoa;Brachiopoda;Linguliformea;Lingulata;Lingulida;Lin  
 guloidea;Lingulidae;Lingula;Lingula anatina  
 UdeM00000024435 225164 75.1 UdeM00000024435 XP\_009047886.1 45.9  
 98 48 2 1 93 3 100 7.20E-11 75.1 225164  
 cellular  
 organisms;Eukaryota;Opisthokonta;Metazoa;Eumetazoa;Bilateria;Protostomia;  
 Spiralia;Lophotrochozoa;Mollusca;Gastropoda;Patellogastropoda;Lottioidea;  
 Lottiidae;Lottia;Lottia gigantea  
 UdeM00000024436 6573 91.3 UdeM00000024436 XP\_021346237.1 36.7 128  
 78 2 55 181 14 139 1.90E-15 91.3 6573 cellular  
 organisms;Eukaryota;Opisthokonta;Metazoa;Eumetazoa;Bilateria;Protostomia;  
 Spiralia;Lophotrochozoa;Mollusca;Bivalvia;Autobranhia;Pteriomorphia;Pect  
 inida;Pectinoidea;Pectinidae;Mizuhopecten;Mizuhopecten yessoensis  
 UdeM00000024436 6573 68.6 UdeM00000024436 XP\_021346237.1 50.7 67  
 30 1 184 250 634 697 1.30E-08 68.6 6573 cellular  
 organisms;Eukaryota;Opisthokonta;Metazoa;Eumetazoa;Bilateria;Protostomia;  
 Spiralia;Lophotrochozoa;Mollusca;Bivalvia;Autobranhia;Pteriomorphia;Pect  
 inida;Pectinoidea;Pectinidae;Mizuhopecten;Mizuhopecten yessoensis  
 UdeM00000024438 6596 87 UdeM00000024438 XP\_045161687.1 49.5 91  
 42 1 36 122 82 172 1.80E-14 87 6596 cellular  
 organisms;Eukaryota;Opisthokonta;Metazoa;Eumetazoa;Bilateria;Protostomia;  
 Spiralia;Lophotrochozoa;Mollusca;Bivalvia;Autobranhia;Heteroconchia;Euhe  
 terodonta;Imparidentia;Venerida;Veneroidea;Veneridae;Mercenaria;Mercenari  
 a mercenaria  
 UdeM00000024437 6596 84.3 UdeM00000024437 XP\_045161687.1 42.6 129  
 65 3 36 161 82 204 1.60E-13 84.3 6596 cellular



organisms;Eukaryota;Opisthokonta;Metazoa;Eumetazoa;Bilateria;Protostomia;Spiralia;Lophotrochozoa;Mollusca;Bivalvia;Autobranhia;Heteroconchia;Euherodonta;Imparidentia;Venerida;Veneroidea;Veneridae;Mercenaria;Mercenaria mercenaria

UdeM00000024439 6596 169.5 UdeM00000024439 XP\_045212344.1 38.1 252  
110 6 35 246 46 291 5.40E-39 169.5 6596 cellular

organisms;Eukaryota;Opisthokonta;Metazoa;Eumetazoa;Bilateria;Protostomia;Spiralia;Lophotrochozoa;Mollusca;Bivalvia;Autobranhia;Heteroconchia;Euherodonta;Imparidentia;Venerida;Veneroidea;Veneridae;Mercenaria;Mercenaria mercenaria

UdeM00000024440 6596 228 UdeM00000024440 XP\_045193365.1 57.7 182  
75 2 78 257 62 243 1.40E-56 228 6596 cellular

organisms;Eukaryota;Opisthokonta;Metazoa;Eumetazoa;Bilateria;Protostomia;Spiralia;Lophotrochozoa;Mollusca;Bivalvia;Autobranhia;Heteroconchia;Euherodonta;Imparidentia;Venerida;Veneroidea;Veneridae;Mercenaria;Mercenaria mercenaria

UdeM00000024441 6573 226.5 UdeM00000024441 XP\_021349278.1 48.6 288  
112 7 103 364 59 336 5.80E-56 226.5 6573 cellular

organisms;Eukaryota;Opisthokonta;Metazoa;Eumetazoa;Bilateria;Protostomia;Spiralia;Lophotrochozoa;Mollusca;Bivalvia;Autobranhia;Pteriormorphia;Pectinida;Pectinoidea;Pectinidae;Mizuhopecten;Mizuhopecten yessoensis

UdeM00000024442 6596 75.9 UdeM00000024442 XP\_045186033.1 30.4 158  
108 2 165 322 23 178 1.20E-10 75.9 6596 cellular

organisms;Eukaryota;Opisthokonta;Metazoa;Eumetazoa;Bilateria;Protostomia;Spiralia;Lophotrochozoa;Mollusca;Bivalvia;Autobranhia;Heteroconchia;Euherodonta;Imparidentia;Venerida;Veneroidea;Veneridae;Mercenaria;Mercenaria mercenaria

UdeM00000024443 6565 138.7 UdeM00000024443 XP\_022287659.1 40.1 147  
88 0 14 160 131 277 7.70E-30 138.7 6565 cellular

organisms;Eukaryota;Opisthokonta;Metazoa;Eumetazoa;Bilateria;Protostomia;Spiralia;Lophotrochozoa;Mollusca;Bivalvia;Autobranhia;Pteriormorphia;Ostreida;Ostreioidea;Ostreidae;Crassostrea;Crassostrea virginica

UdeM00000024444 29159 487.6 UdeM00000024444 XP\_034330259.1 38.9 704  
338 13 5 628 7 698 2.50E-134 487.6 29159 cellular

organisms;Eukaryota;Opisthokonta;Metazoa;Eumetazoa;Bilateria;Protostomia;Spiralia;Lophotrochozoa;Mollusca;Bivalvia;Autobranhia;Pteriormorphia;Ostreida;Ostreioidea;Ostreidae;Crassostrea;Crassostrea gigas

UdeM00000024445 6596 75.9 UdeM00000024445 XP\_045186033.1 30.4 158  
108 2 165 322 23 178 1.20E-10 75.9 6596 cellular

organisms;Eukaryota;Opisthokonta;Metazoa;Eumetazoa;Bilateria;Protostomia;Spiralia;Lophotrochozoa;Mollusca;Bivalvia;Autobranhia;Heteroconchia;Euherodonta;Imparidentia;Venerida;Veneroidea;Veneridae;Mercenaria;Mercenaria mercenaria

UdeM00000024446 6565 138.7 UdeM00000024446 XP\_022287659.1 40.1 147  
88 0 14 160 131 277 7.70E-30 138.7 6565 cellular

organisms;Eukaryota;Opisthokonta;Metazoa;Eumetazoa;Bilateria;Protostomia;Spiralia;Lophotrochozoa;Mollusca;Bivalvia;Autobranhia;Pteriormorphia;Ostreida;Ostreioidea;Ostreidae;Crassostrea;Crassostrea virginica

UdeM00000024447 29159 488 UdeM00000024447 XP\_034330259.1 38.9 704  
338 13 5 628 7 698 1.90E-134 488 29159 cellular

organisms;Eukaryota;Opisthokonta;Metazoa;Eumetazoa;Bilateria;Protostomia;Spiralia;Lophotrochozoa;Mollusca;Bivalvia;Autobranhia;Pteriormorphia;Ostreida;Ostreioidea;Ostreidae;Crassostrea;Crassostrea gigas

UdeM00000024448 6596 75.9 UdeM00000024448 XP\_045186033.1 30.4 158  
 108 2 165 322 23 178 1.20E-10 75.9 6596 cellular  
 organisms;Eukaryota;Opisthokonta;Metazoa;Eumetazoa;Bilateria;Protostomia;  
 Spiralia;Lophotrochozoa;Mollusca;Bivalvia;Autobranchia;Heteroconchia;Euhe  
 terodonta;Imparidentia;Venerida;Veneroidea;Veneridae;Mercenaria;Mercenari  
 a mercenaria  
 UdeM00000040983 6596 132.9 UdeM00000040983 XP\_045181000.1 70.5 88  
 26 0 30 117 867 954 2.80E-28 132.9 6596 cellular  
 organisms;Eukaryota;Opisthokonta;Metazoa;Eumetazoa;Bilateria;Protostomia;  
 Spiralia;Lophotrochozoa;Mollusca;Bivalvia;Autobranchia;Heteroconchia;Euhe  
 terodonta;Imparidentia;Venerida;Veneroidea;Veneridae;Mercenaria;Mercenari  
 a mercenaria  
 UdeM00000040986 6706 152.5 UdeM00000040986 XP\_042235765.1 44.6 157  
 87 0 1 157 1 157 4.50E-34 152.5 6706 cellular  
 organisms;Eukaryota;Opisthokonta;Metazoa;Eumetazoa;Bilateria;Protostomia;  
 Ecdysozoa;Panarthropoda;Arthropoda;Mandibulata;Pancrustacea;Crustacea;Mul  
 ticrustacea;Malacostraca;Eumalacostraca;Eucarida;Decapoda;Pleocyemata;Ast  
 acidea;Nephropoidea;Nephropidae;Homarus;Homarus americanus  
 UdeM00000040987 6596 185.7 UdeM00000040987 XP\_045182316.1 45.8 227  
 119 3 1 227 392 614 1.00E-43 185.7 6596 cellular  
 organisms;Eukaryota;Opisthokonta;Metazoa;Eumetazoa;Bilateria;Protostomia;  
 Spiralia;Lophotrochozoa;Mollusca;Bivalvia;Autobranchia;Heteroconchia;Euhe  
 terodonta;Imparidentia;Venerida;Veneroidea;Veneridae;Mercenaria;Mercenari  
 a mercenaria  
 UdeM00000040989 218467 96.3 UdeM00000040989 XP\_023212120.1 39.8  
 118 71 0 1 118 16 133 4.40E-17 96.3 218467  
 cellular  
 organisms;Eukaryota;Opisthokonta;Metazoa;Eumetazoa;Bilateria;Protostomia;  
 Ecdysozoa;Panarthropoda;Arthropoda;Chelicerata;Arachnida;Scorpiones;Buthi  
 da;Buthoidea;Buthidae;Centruroides;Centruroides sculpturatus  
 UdeM00000040992 6596 68.9 UdeM00000040992 XP\_045208259.1 50.7 67  
 30 1 8 71 239 305 3.80E-09 68.9 6596 cellular  
 organisms;Eukaryota;Opisthokonta;Metazoa;Eumetazoa;Bilateria;Protostomia;  
 Spiralia;Lophotrochozoa;Mollusca;Bivalvia;Autobranchia;Heteroconchia;Euhe  
 terodonta;Imparidentia;Venerida;Veneroidea;Veneridae;Mercenaria;Mercenari  
 a mercenaria  
 UdeM00000040993 7906 119 UdeM00000040993 XP\_034783435.1 26.8 384  
 248 7 60 414 46 425 1.80E-23 119 7906 cellular  
 organisms;Eukaryota;Opisthokonta;Metazoa;Eumetazoa;Bilateria;Deuterostomi  
 a;Chordata;Craniata;Vertebrata;Gnathostomata;Teleostomi;Euteleostomi;Acti  
 nopterygii;Actinopteri;Chondrostei;Acipenseriformes;Acipenseroides;Acipen  
 seridae;Acipenserinae;Acipenserini;Acipenser;Acipenser ruthenus  
 UdeM00000040994 1735272 148.7 UdeM00000040994 XP\_041349428.1 46.8  
 158 82 2 1 157 76 232 6.40E-33 148.7 1735272  
 cellular  
 organisms;Eukaryota;Opisthokonta;Metazoa;Eumetazoa;Bilateria;Protostomia;  
 Spiralia;Lophotrochozoa;Mollusca;Gastropoda;Neomphalina;Neomphaloidea;Pel  
 tospiridae;Gigantopelta;Gigantopelta aegis  
 UdeM00000040995 50429 67 UdeM00000040995 XP\_022785721.1 39.8 93  
 53 1 14 103 365 457 5.00E-08 67 50429 cellular  
 organisms;Eukaryota;Opisthokonta;Metazoa;Eumetazoa;Cnidaria;Anthozoa;Hexa  
 corallia;Scleractinia;Astrocoeniina;Pocilloporidae;Stylophora;Stylophora  
 pistillata

UdeM00000040996 37621 152.9 UdeM00000040996 XP\_014677757.1 59.1 127  
 50 1 1 125 235 361 2.70E-34 152.9 37621 cellular  
 organisms;Eukaryota;Opisthokonta;Metazoa;Eumetazoa;Bilateria;Protostomia;  
 Ecdysozoa;Scalidophora;Priapulida;Priapulimorpha;Priapulimorphida;Priapul  
 idae;Priapululus;Priapululus caudatus  
 UdeM00000040998 7741 201.4 UdeM00000040998 XP\_019640655.1 49.7 193  
 96 1 65 256 1 193 1.30E-48 201.4 7741 cellular  
 organisms;Eukaryota;Opisthokonta;Metazoa;Eumetazoa;Bilateria;Deuterostomi  
 a;Chordata;Cephalochordata;Leptocardii;Amphioxiformes;Branchiostomidae;Br  
 anchiostoma;Branchiostoma belcheri  
 UdeM00000040999 6596 85.5 UdeM00000040999 XP\_045176798.1 32.4 216  
 116 11 113 323 85 275 1.40E-13 85.5 6596 cellular  
 organisms;Eukaryota;Opisthokonta;Metazoa;Eumetazoa;Bilateria;Protostomia;  
 Spiralia;Lophotrochozoa;Mollusca;Bivalvia;Autobranchia;Heteroconchia;Euhe  
 terodonta;Imparidentia;Venerida;Veneroidea;Veneridae;Mercenaria;Mercenari  
 a mercenaria  
 UdeM00000041000 6596 85.5 UdeM00000041000 XP\_045176798.1 32.4 216  
 116 11 113 323 85 275 1.40E-13 85.5 6596 cellular  
 organisms;Eukaryota;Opisthokonta;Metazoa;Eumetazoa;Bilateria;Protostomia;  
 Spiralia;Lophotrochozoa;Mollusca;Bivalvia;Autobranchia;Heteroconchia;Euhe  
 terodonta;Imparidentia;Venerida;Veneroidea;Veneridae;Mercenaria;Mercenari  
 a mercenaria  
 UdeM00000041001 6596 85.5 UdeM00000041001 XP\_045176798.1 32.4 216  
 116 11 113 323 85 275 1.40E-13 85.5 6596 cellular  
 organisms;Eukaryota;Opisthokonta;Metazoa;Eumetazoa;Bilateria;Protostomia;  
 Spiralia;Lophotrochozoa;Mollusca;Bivalvia;Autobranchia;Heteroconchia;Euhe  
 terodonta;Imparidentia;Venerida;Veneroidea;Veneridae;Mercenaria;Mercenari  
 a mercenaria  
 UdeM00000041002 6596 87.4 UdeM00000041002 XP\_045176798.1 32.5 212  
 121 10 113 323 85 275 3.60E-14 87.4 6596 cellular  
 organisms;Eukaryota;Opisthokonta;Metazoa;Eumetazoa;Bilateria;Protostomia;  
 Spiralia;Lophotrochozoa;Mollusca;Bivalvia;Autobranchia;Heteroconchia;Euhe  
 terodonta;Imparidentia;Venerida;Veneroidea;Veneridae;Mercenaria;Mercenari  
 a mercenaria  
 UdeM00000041003 6596 85.9 UdeM00000041003 XP\_045176798.1 31.6 209  
 125 7 113 321 85 275 1.00E-13 85.9 6596 cellular  
 organisms;Eukaryota;Opisthokonta;Metazoa;Eumetazoa;Bilateria;Protostomia;  
 Spiralia;Lophotrochozoa;Mollusca;Bivalvia;Autobranchia;Heteroconchia;Euhe  
 terodonta;Imparidentia;Venerida;Veneroidea;Veneridae;Mercenaria;Mercenari  
 a mercenaria  
 UdeM00000041005 6596 158.3 UdeM00000041005 XP\_045201204.1 49.7 179  
 83 4 5 176 97 275 1.60E-35 158.3 6596 cellular  
 organisms;Eukaryota;Opisthokonta;Metazoa;Eumetazoa;Bilateria;Protostomia;  
 Spiralia;Lophotrochozoa;Mollusca;Bivalvia;Autobranchia;Heteroconchia;Euhe  
 terodonta;Imparidentia;Venerida;Veneroidea;Veneridae;Mercenaria;Mercenari  
 a mercenaria  
 UdeM00000041006 6579 475.3 UdeM00000041006 XP\_033760941.1 53.3 458  
 211 3 1 457 1 456 9.00E-131 475.3 6579 cellular  
 organisms;Eukaryota;Opisthokonta;Metazoa;Eumetazoa;Bilateria;Protostomia;  
 Spiralia;Lophotrochozoa;Mollusca;Bivalvia;Autobranchia;Pteriomorpha;Pect  
 inida;Pectinoidea;Pectinidae;Pecten;Pecten maximus  
 UdeM00000041007 6573 3867.8 UdeM00000041007 XP\_021373328.1 77.9  
 2493 507 9 1 2452 1 2489 0.00E+00 3867.8 6573  
 cellular

organisms;Eukaryota;Opisthokonta;Metazoa;Eumetazoa;Bilateria;Protostomia;Spiralia;Lophotrochozoa;Mollusca;Bivalvia;Autobranhia;Pteriomorpha;Pectinida;Pectinoidea;Pectinidae;Mizuhopecten;Mizuhopecten yessoensis

UdeM00000041008 6596 1075.1 UdeM00000041008 XP\_045200772.1 72.7  
726 193 2 1 722 1 725 0.00E+00 1075.1 6596  
cellular

organisms;Eukaryota;Opisthokonta;Metazoa;Eumetazoa;Bilateria;Protostomia;Spiralia;Lophotrochozoa;Mollusca;Bivalvia;Autobranhia;Heteroconchia;Euheterodonta;Imparidentia;Venerida;Veneroidea;Veneridae;Mercenaria;Mercenaria mercenaria

UdeM00000041009 29159 508.4 UdeM00000041009 XP\_011431128.1 75.4 338  
83 0 1 338 1 338 6.80E-141 508.4 29159 cellular

organisms;Eukaryota;Opisthokonta;Metazoa;Eumetazoa;Bilateria;Protostomia;Spiralia;Lophotrochozoa;Mollusca;Bivalvia;Autobranhia;Pteriomorpha;Ostreida;Ostreoidea;Ostreidae;Crassostrea;Crassostrea gigas

UdeM00000041010 225164 749.2 UdeM00000041010 XP\_009048401.1 67.7  
517 167 0 6 522 1 517 3.50E-213 749.2 225164  
cellular

organisms;Eukaryota;Opisthokonta;Metazoa;Eumetazoa;Bilateria;Protostomia;Spiralia;Lophotrochozoa;Mollusca;Gastropoda;Patellogastropoda;Lottioidae;Lottiidae;Lottia;Lottia gigantea

UdeM00000041011 6596 203.8 UdeM00000041011 XP\_045191363.1 76.2 130  
31 0 4 133 3 132 1.40E-49 203.8 6596 cellular

organisms;Eukaryota;Opisthokonta;Metazoa;Eumetazoa;Bilateria;Protostomia;Spiralia;Lophotrochozoa;Mollusca;Bivalvia;Autobranhia;Heteroconchia;Euheterodonta;Imparidentia;Venerida;Veneroidea;Veneridae;Mercenaria;Mercenaria mercenaria

UdeM00000041012 259920 68.2 UdeM00000041012 XP\_020388889.1 68.3  
41 13 0 13 53 2 42 5.30E-09 68.2 259920  
cellular

organisms;Eukaryota;Opisthokonta;Metazoa;Eumetazoa;Bilateria;Deuterostomia;Chordata;Craniata;Vertebrata;Gnathostomata;Chondrichthyes;Elasmobranchii;Selachii;Galeomorphii;Galeoidea;Orectolobiformes;Rhincodontidae;Rhincodon;Rhincodon typus

UdeM00000041013 6596 413.3 UdeM00000041013 XP\_045199396.1 41.1 587  
307 8 1 573 146 707 5.00E-112 413.3 6596 cellular

organisms;Eukaryota;Opisthokonta;Metazoa;Eumetazoa;Bilateria;Protostomia;Spiralia;Lophotrochozoa;Mollusca;Bivalvia;Autobranhia;Heteroconchia;Euheterodonta;Imparidentia;Venerida;Veneroidea;Veneridae;Mercenaria;Mercenaria mercenaria

UdeM00000041014 29159 75.5 UdeM00000041014 XP\_034310118.1 39.8 103  
51 2 399 490 468 570 2.60E-10 75.5 29159 cellular

organisms;Eukaryota;Opisthokonta;Metazoa;Eumetazoa;Bilateria;Protostomia;Spiralia;Lophotrochozoa;Mollusca;Bivalvia;Autobranhia;Pteriomorpha;Ostreida;Ostreoidea;Ostreidae;Crassostrea;Crassostrea gigas

UdeM00000041015 6596 292 UdeM00000041015 XP\_045199935.1 33.6 586  
352 13 1 574 1 561 1.70E-75 292 6596 cellular

organisms;Eukaryota;Opisthokonta;Metazoa;Eumetazoa;Bilateria;Protostomia;Spiralia;Lophotrochozoa;Mollusca;Bivalvia;Autobranhia;Heteroconchia;Euheterodonta;Imparidentia;Venerida;Veneroidea;Veneridae;Mercenaria;Mercenaria mercenaria

UdeM00000041016 6596 630.6 UdeM00000041016 XP\_045200596.1 72.4 453  
104 6 5 442 2 448 1.50E-177 630.6 6596 cellular

organisms;Eukaryota;Opisthokonta;Metazoa;Eumetazoa;Bilateria;Protostomia;

Spiralia;Lophotrochozoa;Mollusca;Bivalvia;Autobranchia;Heteroconchia;Euherodonta;Imparidentia;Venerida;Veneroidea;Veneridae;Mercenaria;Mercenaria mercenaria

|                 |      |        |   |                 |                |      |     |          |        |      |
|-----------------|------|--------|---|-----------------|----------------|------|-----|----------|--------|------|
| UdeM00000041017 | 6596 | 1349.7 |   | UdeM00000041017 | XP_045200594.1 | 80.3 |     |          |        |      |
|                 | 813  | 128    | 2 | 1               | 806            | 1    | 788 | 0.00E+00 | 1349.7 | 6596 |

cellular

organisms;Eukaryota;Opisthokonta;Metazoa;Eumetazoa;Bilateria;Protostomia;Spiralia;Lophotrochozoa;Mollusca;Bivalvia;Autobranchia;Heteroconchia;Euherodonta;Imparidentia;Venerida;Veneroidea;Veneridae;Mercenaria;Mercenaria mercenaria

|                 |      |       |   |                 |                |      |           |       |      |          |
|-----------------|------|-------|---|-----------------|----------------|------|-----------|-------|------|----------|
| UdeM00000041018 | 6596 | 416.8 |   | UdeM00000041018 | XP_045200592.1 | 85.7 | 237       |       |      |          |
|                 | 34   | 0     | 1 | 237             | 474            | 710  | 1.90E-113 | 416.8 | 6596 | cellular |

organisms;Eukaryota;Opisthokonta;Metazoa;Eumetazoa;Bilateria;Protostomia;Spiralia;Lophotrochozoa;Mollusca;Bivalvia;Autobranchia;Heteroconchia;Euherodonta;Imparidentia;Venerida;Veneroidea;Veneridae;Mercenaria;Mercenaria mercenaria

|                 |      |      |   |                 |                |      |          |      |      |          |
|-----------------|------|------|---|-----------------|----------------|------|----------|------|------|----------|
| UdeM00000041019 | 6579 | 70.1 |   | UdeM00000041019 | XP_033744278.1 | 55   | 60       |      |      |          |
|                 | 27   | 0    | 1 | 60              | 1189           | 1248 | 1.20E-09 | 70.1 | 6579 | cellular |

organisms;Eukaryota;Opisthokonta;Metazoa;Eumetazoa;Bilateria;Protostomia;Spiralia;Lophotrochozoa;Mollusca;Bivalvia;Autobranchia;Pteriormorphia;Pectinida;Pectinoidea;Pectinidae;Pecten;Pecten maximus

|                 |      |       |    |                 |                |      |          |       |      |          |
|-----------------|------|-------|----|-----------------|----------------|------|----------|-------|------|----------|
| UdeM00000041020 | 6596 | 243.4 |    | UdeM00000041020 | XP_045201015.1 | 73.5 | 170      |       |      |          |
|                 | 36   | 5     | 65 | 230             | 256            | 420  | 4.40E-61 | 243.4 | 6596 | cellular |

organisms;Eukaryota;Opisthokonta;Metazoa;Eumetazoa;Bilateria;Protostomia;Spiralia;Lophotrochozoa;Mollusca;Bivalvia;Autobranchia;Heteroconchia;Euherodonta;Imparidentia;Venerida;Veneroidea;Veneridae;Mercenaria;Mercenaria mercenaria

|                 |      |      |   |                 |                |      |          |      |      |          |
|-----------------|------|------|---|-----------------|----------------|------|----------|------|------|----------|
| UdeM00000041021 | 6596 | 65.9 |   | UdeM00000041021 | XP_045201038.1 | 43.1 | 102      |      |      |          |
|                 | 54   | 3    | 1 | 98              | 160            | 261  | 4.50E-08 | 65.9 | 6596 | cellular |

organisms;Eukaryota;Opisthokonta;Metazoa;Eumetazoa;Bilateria;Protostomia;Spiralia;Lophotrochozoa;Mollusca;Bivalvia;Autobranchia;Heteroconchia;Euherodonta;Imparidentia;Venerida;Veneroidea;Veneridae;Mercenaria;Mercenaria mercenaria

|                 |      |       |    |                 |                |      |          |       |      |          |
|-----------------|------|-------|----|-----------------|----------------|------|----------|-------|------|----------|
| UdeM00000041022 | 6596 | 159.8 |    | UdeM00000041022 | XP_045201032.1 | 64.4 | 149      |       |      |          |
|                 | 46   | 6     | 12 | 154             | 68             | 215  | 3.30E-36 | 159.8 | 6596 | cellular |

organisms;Eukaryota;Opisthokonta;Metazoa;Eumetazoa;Bilateria;Protostomia;Spiralia;Lophotrochozoa;Mollusca;Bivalvia;Autobranchia;Heteroconchia;Euherodonta;Imparidentia;Venerida;Veneroidea;Veneridae;Mercenaria;Mercenaria mercenaria

|                 |      |       |   |                 |                |      |           |       |      |          |
|-----------------|------|-------|---|-----------------|----------------|------|-----------|-------|------|----------|
| UdeM00000036598 | 6596 | 602.8 |   | UdeM00000036598 | XP_045173500.1 | 68.8 | 468       |       |      |          |
|                 | 128  | 14    | 1 | 459             | 1              | 459  | 3.60E-169 | 602.8 | 6596 | cellular |

organisms;Eukaryota;Opisthokonta;Metazoa;Eumetazoa;Bilateria;Protostomia;Spiralia;Lophotrochozoa;Mollusca;Bivalvia;Autobranchia;Heteroconchia;Euherodonta;Imparidentia;Venerida;Veneroidea;Veneridae;Mercenaria;Mercenaria mercenaria

|                 |      |       |   |                 |                |      |          |       |      |          |
|-----------------|------|-------|---|-----------------|----------------|------|----------|-------|------|----------|
| UdeM00000036599 | 6596 | 189.5 |   | UdeM00000036599 | XP_045173500.1 | 61.5 | 169      |       |      |          |
|                 | 59   | 4     | 1 | 167             | 1              | 165  | 3.50E-45 | 189.5 | 6596 | cellular |

organisms;Eukaryota;Opisthokonta;Metazoa;Eumetazoa;Bilateria;Protostomia;Spiralia;Lophotrochozoa;Mollusca;Bivalvia;Autobranchia;Heteroconchia;Euherodonta;Imparidentia;Venerida;Veneroidea;Veneridae;Mercenaria;Mercenaria mercenaria

|                 |      |        |    |                 |                |      |      |          |        |      |
|-----------------|------|--------|----|-----------------|----------------|------|------|----------|--------|------|
| UdeM00000036600 | 6596 | 1856.6 |    | UdeM00000036600 | XP_045171891.1 | 55.5 |      |          |        |      |
|                 | 1626 | 700    | 10 | 24              | 1638           | 18   | 1630 | 0.00E+00 | 1856.6 | 6596 |

cellular

organisms;Eukaryota;Opisthokonta;Metazoa;Eumetazoa;Bilateria;Protostomia;Spiralia;Lophotrochozoa;Mollusca;Bivalvia;Autobranchia;Heteroconchia;Euherodonta;Imparidentia;Venerida;Veneroidea;Veneridae;Mercenaria;Mercenaria mercenaria

|                 |      |        |    |                 |                |      |      |          |        |      |
|-----------------|------|--------|----|-----------------|----------------|------|------|----------|--------|------|
| UdeM00000036601 | 6596 | 1857.4 |    | UdeM00000036601 | XP_045171891.1 | 55.5 |      |          |        |      |
|                 | 1625 | 700    | 10 | 24              | 1637           | 18   | 1630 | 0.00E+00 | 1857.4 | 6596 |

cellular

organisms;Eukaryota;Opisthokonta;Metazoa;Eumetazoa;Bilateria;Protostomia;Spiralia;Lophotrochozoa;Mollusca;Bivalvia;Autobranchia;Heteroconchia;Euherodonta;Imparidentia;Venerida;Veneroidea;Veneridae;Mercenaria;Mercenaria mercenaria

|                 |      |        |   |                 |                |      |      |          |        |      |
|-----------------|------|--------|---|-----------------|----------------|------|------|----------|--------|------|
| UdeM00000036602 | 6596 | 1761.5 |   | UdeM00000036602 | XP_045171891.1 | 57.5 |      |          |        |      |
|                 | 1477 | 608    | 9 | 24              | 1489           | 18   | 1485 | 0.00E+00 | 1761.5 | 6596 |

cellular

organisms;Eukaryota;Opisthokonta;Metazoa;Eumetazoa;Bilateria;Protostomia;Spiralia;Lophotrochozoa;Mollusca;Bivalvia;Autobranchia;Heteroconchia;Euherodonta;Imparidentia;Venerida;Veneroidea;Veneridae;Mercenaria;Mercenaria mercenaria

|                 |         |    |      |                 |                |      |    |          |      |         |
|-----------------|---------|----|------|-----------------|----------------|------|----|----------|------|---------|
| UdeM00000036603 | 1735272 |    | 68.2 | UdeM00000036603 | XP_041378866.1 | 46.7 |    |          |      |         |
|                 | 75      | 35 | 2    | 1               | 75             | 1    | 70 | 6.10E-09 | 68.2 | 1735272 |

cellular

organisms;Eukaryota;Opisthokonta;Metazoa;Eumetazoa;Bilateria;Protostomia;Spiralia;Lophotrochozoa;Mollusca;Gastropoda;Neomphalina;Neomphaloidea;Peltospiridae;Gigantopelta;Gigantopelta aegis

|                 |         |    |      |                 |                |      |    |          |      |         |
|-----------------|---------|----|------|-----------------|----------------|------|----|----------|------|---------|
| UdeM00000036604 | 1735272 |    | 65.5 | UdeM00000036604 | XP_041378866.1 | 57.1 |    |          |      |         |
|                 | 49      | 20 | 1    | 27              | 75             | 23   | 70 | 3.60E-08 | 65.5 | 1735272 |

cellular

organisms;Eukaryota;Opisthokonta;Metazoa;Eumetazoa;Bilateria;Protostomia;Spiralia;Lophotrochozoa;Mollusca;Gastropoda;Neomphalina;Neomphaloidea;Peltospiridae;Gigantopelta;Gigantopelta aegis

|                 |      |     |    |                 |                |      |          |     |      |          |
|-----------------|------|-----|----|-----------------|----------------|------|----------|-----|------|----------|
| UdeM00000036605 | 6596 | 297 |    | UdeM00000036605 | XP_045202427.1 | 32.5 | 717      |     |      |          |
|                 | 438  | 16  | 13 | 695             | 11             | 715  | 6.40E-77 | 297 | 6596 | cellular |

organisms;Eukaryota;Opisthokonta;Metazoa;Eumetazoa;Bilateria;Protostomia;Spiralia;Lophotrochozoa;Mollusca;Bivalvia;Autobranchia;Heteroconchia;Euherodonta;Imparidentia;Venerida;Veneroidea;Veneridae;Mercenaria;Mercenaria mercenaria

|                 |      |       |   |                 |                |      |           |       |      |          |
|-----------------|------|-------|---|-----------------|----------------|------|-----------|-------|------|----------|
| UdeM00000036606 | 6596 | 596.7 |   | UdeM00000036606 | XP_045172794.1 | 56.7 | 529       |       |      |          |
|                 | 214  | 4     | 1 | 524             | 140            | 658  | 3.30E-167 | 596.7 | 6596 | cellular |

organisms;Eukaryota;Opisthokonta;Metazoa;Eumetazoa;Bilateria;Protostomia;Spiralia;Lophotrochozoa;Mollusca;Bivalvia;Autobranchia;Heteroconchia;Euherodonta;Imparidentia;Venerida;Veneroidea;Veneridae;Mercenaria;Mercenaria mercenaria

|                 |      |       |    |                 |                |      |          |       |      |          |
|-----------------|------|-------|----|-----------------|----------------|------|----------|-------|------|----------|
| UdeM00000036607 | 6596 | 197.6 |    | UdeM00000036607 | XP_045172794.1 | 73.4 | 109      |       |      |          |
|                 | 29   | 0     | 46 | 154             | 19             | 127  | 1.20E-47 | 197.6 | 6596 | cellular |

organisms;Eukaryota;Opisthokonta;Metazoa;Eumetazoa;Bilateria;Protostomia;Spiralia;Lophotrochozoa;Mollusca;Bivalvia;Autobranchia;Heteroconchia;Euherodonta;Imparidentia;Venerida;Veneroidea;Veneridae;Mercenaria;Mercenaria mercenaria

|                 |      |       |     |                 |                |      |          |       |      |          |
|-----------------|------|-------|-----|-----------------|----------------|------|----------|-------|------|----------|
| UdeM00000036609 | 6596 | 339.3 |     | UdeM00000036609 | XP_045211867.1 | 46.8 | 357      |       |      |          |
|                 | 170  | 6     | 255 | 603             | 105            | 449  | 9.70E-90 | 339.3 | 6596 | cellular |

organisms;Eukaryota;Opisthokonta;Metazoa;Eumetazoa;Bilateria;Protostomia;Spiralia;Lophotrochozoa;Mollusca;Bivalvia;Autobranchia;Heteroconchia;Euherodonta;Imparidentia;Venerida;Veneroidea;Veneridae;Mercenaria;Mercenaria mercenaria

UdeM00000036610 29159 157.5 UdeM00000036610 XP\_011456886.2 32 306  
 175 6 11 304 445 729 2.60E-35 157.5 29159 cellular  
 organisms;Eukaryota;Opisthokonta;Metazoa;Eumetazoa;Bilateria;Protostomia;  
 Spiralia;Lophotrochozoa;Mollusca;Bivalvia;Autobranchia;Pteriomorphia;Ostr  
 eida;Ostreoidea;Ostreidae;Crassostrea;Crassostrea gigas  
 UdeM00000036612 29159 222.2 UdeM00000036612 XP\_011456886.2 36.5 353  
 191 6 1 341 398 729 9.80E-55 222.2 29159 cellular  
 organisms;Eukaryota;Opisthokonta;Metazoa;Eumetazoa;Bilateria;Protostomia;  
 Spiralia;Lophotrochozoa;Mollusca;Bivalvia;Autobranchia;Pteriomorphia;Ostr  
 eida;Ostreoidea;Ostreidae;Crassostrea;Crassostrea gigas  
 UdeM00000036613 6596 190.3 UdeM00000036613 XP\_045211867.1 40.9 257  
 134 6 60 316 76 314 3.80E-45 190.3 6596 cellular  
 organisms;Eukaryota;Opisthokonta;Metazoa;Eumetazoa;Bilateria;Protostomia;  
 Spiralia;Lophotrochozoa;Mollusca;Bivalvia;Autobranchia;Heteroconchia;Euhe  
 terodonta;Imparidentia;Venerida;Veneroidea;Veneridae;Mercenaria;Mercenari  
 a mercenaria  
 UdeM00000036614 6579 64.3 UdeM00000036614 XP\_033730092.1 40.2 92  
 52 1 1 89 807 898 9.10E-08 64.3 6579 cellular  
 organisms;Eukaryota;Opisthokonta;Metazoa;Eumetazoa;Bilateria;Protostomia;  
 Spiralia;Lophotrochozoa;Mollusca;Bivalvia;Autobranchia;Pteriomorphia;Pect  
 inida;Pectinoidea;Pectinidae;Pecten;Pecten maximus  
 UdeM00000036615 6579 163.7 UdeM00000036615 XP\_033730092.1 28.7 429  
 197 9 1 323 807 1232 4.20E-37 163.7 6579 cellular  
 organisms;Eukaryota;Opisthokonta;Metazoa;Eumetazoa;Bilateria;Protostomia;  
 Spiralia;Lophotrochozoa;Mollusca;Bivalvia;Autobranchia;Pteriomorphia;Pect  
 inida;Pectinoidea;Pectinidae;Pecten;Pecten maximus  
 UdeM00000036616 6565 156.8 UdeM00000036616 XP\_022289689.1 39.5 223  
 128 5 5 224 247 465 3.90E-35 156.8 6565 cellular  
 organisms;Eukaryota;Opisthokonta;Metazoa;Eumetazoa;Bilateria;Protostomia;  
 Spiralia;Lophotrochozoa;Mollusca;Bivalvia;Autobranchia;Pteriomorphia;Ostr  
 eida;Ostreoidea;Ostreidae;Crassostrea;Crassostrea virginica  
 UdeM00000036622 6579 447.2 UdeM00000036622 XP\_033726834.1 37.8 776  
 420 22 12 765 65 799 4.20E-122 447.2 6579 cellular  
 organisms;Eukaryota;Opisthokonta;Metazoa;Eumetazoa;Bilateria;Protostomia;  
 Spiralia;Lophotrochozoa;Mollusca;Bivalvia;Autobranchia;Pteriomorphia;Pect  
 inida;Pectinoidea;Pectinidae;Pecten;Pecten maximus  
 UdeM00000036628 6579 445.7 UdeM00000036628 XP\_033726834.1 37.5 774  
 423 21 61 812 65 799 1.30E-121 445.7 6579 cellular  
 organisms;Eukaryota;Opisthokonta;Metazoa;Eumetazoa;Bilateria;Protostomia;  
 Spiralia;Lophotrochozoa;Mollusca;Bivalvia;Autobranchia;Pteriomorphia;Pect  
 inida;Pectinoidea;Pectinidae;Pecten;Pecten maximus  
 UdeM00000036632 29159 457.2 UdeM00000036632 XP\_011456886.2 36.9 734  
 408 16 54 765 29 729 4.10E-125 457.2 29159 cellular  
 organisms;Eukaryota;Opisthokonta;Metazoa;Eumetazoa;Bilateria;Protostomia;  
 Spiralia;Lophotrochozoa;Mollusca;Bivalvia;Autobranchia;Pteriomorphia;Ostr  
 eida;Ostreoidea;Ostreidae;Crassostrea;Crassostrea gigas  
 UdeM00000036634 29159 218.8 UdeM00000036634 XP\_011456886.2 35.4 353  
 195 5 1 341 398 729 1.10E-53 218.8 29159 cellular  
 organisms;Eukaryota;Opisthokonta;Metazoa;Eumetazoa;Bilateria;Protostomia;  
 Spiralia;Lophotrochozoa;Mollusca;Bivalvia;Autobranchia;Pteriomorphia;Ostr  
 eida;Ostreoidea;Ostreidae;Crassostrea;Crassostrea gigas  
 UdeM00000036635 6596 75.5 UdeM00000036635 XP\_045211867.1 49.3 73  
 35 2 1 72 324 395 3.50E-11 75.5 6596 cellular  
 organisms;Eukaryota;Opisthokonta;Metazoa;Eumetazoa;Bilateria;Protostomia;

Spiralia;Lophotrochozoa;Mollusca;Bivalvia;Autobranchia;Heteroconchia;Euherodonta;Imparidentia;Venerida;Veneroidea;Veneridae;Mercenaria;Mercenaria mercenaria

UdeM00000036636 6579 89 UdeM00000036636 XP\_033726834.1 28.9 322  
139 9 53 307 64 362 1.20E-14 89 6579 cellular

organisms;Eukaryota;Opisthokonta;Metazoa;Eumetazoa;Bilateria;Protostomia;Spiralia;Lophotrochozoa;Mollusca;Bivalvia;Autobranchia;Pteriormorphia;Pectinida;Pectinoidea;Pectinidae;Pecten;Pecten maximus

UdeM00000036637 6573 146.7 UdeM00000036637 XP\_021375654.1 51.8 139  
67 0 5 143 1 139 2.20E-32 146.7 6573 cellular

organisms;Eukaryota;Opisthokonta;Metazoa;Eumetazoa;Bilateria;Protostomia;Spiralia;Lophotrochozoa;Mollusca;Bivalvia;Autobranchia;Pteriormorphia;Pectinida;Pectinoidea;Pectinidae;Mizuhopecten;Mizuhopecten yessoensis

UdeM00000036638 7574 210.3 UdeM00000036638 XP\_023932326.1 47 247  
126 4 6 250 5 248 2.80E-51 210.3 7574 cellular

organisms;Eukaryota;Opisthokonta;Metazoa;Eumetazoa;Bilateria;Protostomia;Spiralia;Lophotrochozoa;Brachiopoda;Linguliformea;Lingulata;Lingulida;Linguloidea;Lingulidae;Lingula;Lingula anatina

UdeM00000036639 7574 123.2 UdeM00000036639 XP\_013381563.1 42 143  
66 4 1 133 250 385 2.90E-25 123.2 7574 cellular

organisms;Eukaryota;Opisthokonta;Metazoa;Eumetazoa;Bilateria;Protostomia;Spiralia;Lophotrochozoa;Brachiopoda;Linguliformea;Lingulata;Lingulida;Linguloidea;Lingulidae;Lingula;Lingula anatina

UdeM00000036640 7574 137.9 UdeM00000036640 XP\_013381563.1 43 149  
83 1 34 182 54 200 1.30E-29 137.9 7574 cellular

organisms;Eukaryota;Opisthokonta;Metazoa;Eumetazoa;Bilateria;Protostomia;Spiralia;Lophotrochozoa;Brachiopoda;Linguliformea;Lingulata;Lingulida;Linguloidea;Lingulidae;Lingula;Lingula anatina

UdeM00000036641 6596 625.2 UdeM00000036641 XP\_045171668.1 86.4 360  
46 2 10 369 57 413 5.40E-176 625.2 6596 cellular

organisms;Eukaryota;Opisthokonta;Metazoa;Eumetazoa;Bilateria;Protostomia;Spiralia;Lophotrochozoa;Mollusca;Bivalvia;Autobranchia;Heteroconchia;Euherodonta;Imparidentia;Venerida;Veneroidea;Veneridae;Mercenaria;Mercenaria mercenaria

UdeM00000036642 6596 583.6 UdeM00000036642 XP\_045173945.1 52.9 664  
217 19 1 607 1 625 3.00E-163 583.6 6596 cellular

organisms;Eukaryota;Opisthokonta;Metazoa;Eumetazoa;Bilateria;Protostomia;Spiralia;Lophotrochozoa;Mollusca;Bivalvia;Autobranchia;Heteroconchia;Euherodonta;Imparidentia;Venerida;Veneroidea;Veneridae;Mercenaria;Mercenaria mercenaria

UdeM00000036643 2607531 207.2 UdeM00000036643 XP\_029635509.1 50.5  
212 101 3 1 211 1 209 2.10E-50 207.2 2607531

cellular

organisms;Eukaryota;Opisthokonta;Metazoa;Eumetazoa;Bilateria;Protostomia;Spiralia;Lophotrochozoa;Mollusca;Cephalopoda;Coleoidea;Octopodiformes;Octopoda;Incirrata;Octopodidae;Octopus;Octopus sinensis

UdeM00000036644 6596 657.5 UdeM00000036644 XP\_045172413.1 70.3 448  
126 2 1 448 1 441 1.20E-185 657.5 6596 cellular

organisms;Eukaryota;Opisthokonta;Metazoa;Eumetazoa;Bilateria;Protostomia;Spiralia;Lophotrochozoa;Mollusca;Bivalvia;Autobranchia;Heteroconchia;Euherodonta;Imparidentia;Venerida;Veneroidea;Veneridae;Mercenaria;Mercenaria mercenaria

UdeM00000036646 7741 76.6 UdeM00000036646 XP\_019625005.1 45.6 90  
47 2 9 98 100 187 3.30E-11 76.6 7741 cellular



organisms;Eukaryota;Opisthokonta;Metazoa;Eumetazoa;Bilateria;Deuterostomia;Chordata;Cephalochordata;Leptocardii;Amphioxiformes;Branchiostomidae;Branchiostoma;Branchiostoma belcheri

UdeM00000036647 6596 260.4 UdeM00000036647 XP\_045173647.1 39.5 301  
175 3 82 380 99 394 3.60E-66 260.4 6596 cellular

organisms;Eukaryota;Opisthokonta;Metazoa;Eumetazoa;Bilateria;Protostomia;Spiralia;Lophotrochozoa;Mollusca;Bivalvia;Autobranhia;Heteroconchia;Euheterodonta;Imparidentia;Venerida;Veneroidea;Veneridae;Mercenaria;Mercenaria mercenaria

UdeM00000036648 6596 263.5 UdeM00000036648 XP\_045173647.1 41.3 312  
167 5 62 371 93 390 4.20E-67 263.5 6596 cellular

organisms;Eukaryota;Opisthokonta;Metazoa;Eumetazoa;Bilateria;Protostomia;Spiralia;Lophotrochozoa;Mollusca;Bivalvia;Autobranhia;Heteroconchia;Euheterodonta;Imparidentia;Venerida;Veneroidea;Veneridae;Mercenaria;Mercenaria mercenaria

UdeM00000036649 6596 247.7 UdeM00000036649 XP\_045173647.1 41.6 286  
158 4 75 356 101 381 2.30E-62 247.7 6596 cellular

organisms;Eukaryota;Opisthokonta;Metazoa;Eumetazoa;Bilateria;Protostomia;Spiralia;Lophotrochozoa;Mollusca;Bivalvia;Autobranhia;Heteroconchia;Euheterodonta;Imparidentia;Venerida;Veneroidea;Veneridae;Mercenaria;Mercenaria mercenaria

UdeM00000036650 2652724 64.7 UdeM00000036650 XP\_020905078.2 39.4  
71 43 0 16 86 19 89 8.80E-08 64.7 2652724

cellular

organisms;Eukaryota;Opisthokonta;Metazoa;Eumetazoa;Cnidaria;Anthozoa;Hexacorallia;Actiniaria;Aiptasiidae;Exaiptasia;Exaiptasia diaphana

UdeM00000036651 29159 131.3 UdeM00000036651 XP\_034313077.1 65 100  
35 0 4 103 158 257 6.90E-28 131.3 29159 cellular

organisms;Eukaryota;Opisthokonta;Metazoa;Eumetazoa;Bilateria;Protostomia;Spiralia;Lophotrochozoa;Mollusca;Bivalvia;Autobranhia;Pteriormorphia;Ostreida;Ostreioidea;Ostreidae;Crassostrea;Crassostrea gigas

UdeM00000036653 6596 358.6 UdeM00000036653 XP\_045173647.1 56.9 288  
123 1 142 428 105 392 1.30E-95 358.6 6596 cellular

organisms;Eukaryota;Opisthokonta;Metazoa;Eumetazoa;Bilateria;Protostomia;Spiralia;Lophotrochozoa;Mollusca;Bivalvia;Autobranhia;Heteroconchia;Euheterodonta;Imparidentia;Venerida;Veneroidea;Veneridae;Mercenaria;Mercenaria mercenaria

UdeM00000036654 6596 339.7 UdeM00000036654 XP\_045173647.1 55.8 278  
122 1 107 383 102 379 4.70E-90 339.7 6596 cellular

organisms;Eukaryota;Opisthokonta;Metazoa;Eumetazoa;Bilateria;Protostomia;Spiralia;Lophotrochozoa;Mollusca;Bivalvia;Autobranhia;Heteroconchia;Euheterodonta;Imparidentia;Venerida;Veneroidea;Veneridae;Mercenaria;Mercenaria mercenaria

UdeM00000036655 6596 346.3 UdeM00000036655 XP\_045173647.1 54.3 289  
131 1 107 394 102 390 5.40E-92 346.3 6596 cellular

organisms;Eukaryota;Opisthokonta;Metazoa;Eumetazoa;Bilateria;Protostomia;Spiralia;Lophotrochozoa;Mollusca;Bivalvia;Autobranhia;Heteroconchia;Euheterodonta;Imparidentia;Venerida;Veneroidea;Veneridae;Mercenaria;Mercenaria mercenaria

UdeM00000036656 7070 239.6 UdeM00000036656 XP\_015838855.1 65.7 178  
59 1 38 215 277 452 3.70E-60 239.6 7070 cellular

organisms;Eukaryota;Opisthokonta;Metazoa;Eumetazoa;Bilateria;Protostomia;Ecdysozoa;Panarthropoda;Arthropoda;Mandibulata;Pan crustacea;Hexapoda;Insecta;Dicondylia;Pterygota;Neoptera;Endopterygota;Coleoptera;Polyphaga;Cuc

jiformia;Tenebrionoidea;Tenebrionidae;Tenebrionidae incertae  
 sedis;Tribolium;Tribolium castaneum  
 UdeM00000036657 6573 227.6 UdeM00000036657 XP\_021362108.1 89.5 114  
 12 0 1 114 1 114 7.80E-57 227.6 6573 cellular  
 organisms;Eukaryota;Opisthokonta;Metazoa;Eumetazoa;Bilateria;Protostomia;  
 Spiralia;Lophotrochozoa;Mollusca;Bivalvia;Autobranhia;Pteriomorpha;Pect  
 inida;Pectinoidea;Pectinidae;Mizuhopecten;Mizuhopecten yessoensis  
 UdeM00000036659 6596 212.6 UdeM00000036659 XP\_045173647.1 54.3 173  
 78 1 1 172 212 384 4.00E-52 212.6 6596 cellular  
 organisms;Eukaryota;Opisthokonta;Metazoa;Eumetazoa;Bilateria;Protostomia;  
 Spiralia;Lophotrochozoa;Mollusca;Bivalvia;Autobranhia;Heteroconchia;Euhe  
 terodonta;Imparidentia;Venerida;Veneroidea;Veneridae;Mercenaria;Mercenari  
 a mercenaria  
 UdeM00000036661 6565 179.5 UdeM00000036661 XP\_022297037.1 58.4 161  
 64 2 5 164 80 238 3.60E-42 179.5 6565 cellular  
 organisms;Eukaryota;Opisthokonta;Metazoa;Eumetazoa;Bilateria;Protostomia;  
 Spiralia;Lophotrochozoa;Mollusca;Bivalvia;Autobranhia;Pteriomorpha;Ostr  
 eida;Ostreoidea;Ostreidae;Crassostrea;Crassostrea virginica  
 UdeM00000036662 6596 350.1 UdeM00000036662 XP\_045173647.1 51.4 329  
 155 3 107 434 102 426 4.20E-93 350.1 6596 cellular  
 organisms;Eukaryota;Opisthokonta;Metazoa;Eumetazoa;Bilateria;Protostomia;  
 Spiralia;Lophotrochozoa;Mollusca;Bivalvia;Autobranhia;Heteroconchia;Euhe  
 terodonta;Imparidentia;Venerida;Veneroidea;Veneridae;Mercenaria;Mercenari  
 a mercenaria  
 UdeM00000036663 6596 271.6 UdeM00000036663 XP\_045173647.1 45.1 304  
 129 3 112 377 102 405 1.80E-69 271.6 6596 cellular  
 organisms;Eukaryota;Opisthokonta;Metazoa;Eumetazoa;Bilateria;Protostomia;  
 Spiralia;Lophotrochozoa;Mollusca;Bivalvia;Autobranhia;Heteroconchia;Euhe  
 terodonta;Imparidentia;Venerida;Veneroidea;Veneridae;Mercenaria;Mercenari  
 a mercenaria  
 UdeM00000036664 6596 341.7 UdeM00000036664 XP\_045173647.1 49.4 326  
 160 2 110 434 105 426 1.60E-90 341.7 6596 cellular  
 organisms;Eukaryota;Opisthokonta;Metazoa;Eumetazoa;Bilateria;Protostomia;  
 Spiralia;Lophotrochozoa;Mollusca;Bivalvia;Autobranhia;Heteroconchia;Euhe  
 terodonta;Imparidentia;Venerida;Veneroidea;Veneridae;Mercenaria;Mercenari  
 a mercenaria  
 UdeM00000036665 6596 355.9 UdeM00000036665 XP\_045173647.1 50.9 326  
 155 3 107 431 102 423 7.20E-95 355.9 6596 cellular  
 organisms;Eukaryota;Opisthokonta;Metazoa;Eumetazoa;Bilateria;Protostomia;  
 Spiralia;Lophotrochozoa;Mollusca;Bivalvia;Autobranhia;Heteroconchia;Euhe  
 terodonta;Imparidentia;Venerida;Veneroidea;Veneridae;Mercenaria;Mercenari  
 a mercenaria  
 UdeM00000036666 6596 351.7 UdeM00000036666 XP\_045173647.1 49.1 344  
 167 3 142 484 102 438 1.60E-93 351.7 6596 cellular  
 organisms;Eukaryota;Opisthokonta;Metazoa;Eumetazoa;Bilateria;Protostomia;  
 Spiralia;Lophotrochozoa;Mollusca;Bivalvia;Autobranhia;Heteroconchia;Euhe  
 terodonta;Imparidentia;Venerida;Veneroidea;Veneridae;Mercenaria;Mercenari  
 a mercenaria  
 UdeM00000036667 6596 663.3 UdeM00000036667 XP\_045171484.1 55.3 577  
 211 9 59 606 69 627 3.00E-187 663.3 6596 cellular  
 organisms;Eukaryota;Opisthokonta;Metazoa;Eumetazoa;Bilateria;Protostomia;  
 Spiralia;Lophotrochozoa;Mollusca;Bivalvia;Autobranhia;Heteroconchia;Euhe  
 terodonta;Imparidentia;Venerida;Veneroidea;Veneridae;Mercenaria;Mercenari  
 a mercenaria

UdeM00000036668 6596 490 UdeM00000036668 XP\_045170767.1 51.7 478  
 208 7 51 511 96 567 3.80E-135 490 6596 cellular  
 organisms;Eukaryota;Opisthokonta;Metazoa;Eumetazoa;Bilateria;Protostomia;  
 Spiralia;Lophotrochozoa;Mollusca;Bivalvia;Autobranchia;Heteroconchia;Euhe  
 terodonta;Imparidentia;Venerida;Veneroidea;Veneridae;Mercenaria;Mercenari  
 a mercenaria  
 UdeM00000036669 7574 287 UdeM00000036669 XP\_013381563.1 43.2 338  
 176 5 65 392 54 385 4.00E-74 287 7574 cellular  
 organisms;Eukaryota;Opisthokonta;Metazoa;Eumetazoa;Bilateria;Protostomia;  
 Spiralia;Lophotrochozoa;Brachiopoda;Linguliformea;Lingulata;Lingulida;Lin  
 guloidea;Lingulidae;Lingula;Lingula anatina  
 UdeM00000036671 6579 547 UdeM00000036671 XP\_033747627.1 72.7 366  
 95 2 5 367 45 408 1.90E-152 547 6579 cellular  
 organisms;Eukaryota;Opisthokonta;Metazoa;Eumetazoa;Bilateria;Protostomia;  
 Spiralia;Lophotrochozoa;Mollusca;Bivalvia;Autobranchia;Pteriormorphia;Pect  
 inida;Pectinoidea;Pectinidae;Pecten;Pecten maximus  
 UdeM00000036672 29159 279.6 UdeM00000036672 XP\_011418078.2 52.1 234  
 111 1 5 237 305 538 3.70E-72 279.6 29159 cellular  
 organisms;Eukaryota;Opisthokonta;Metazoa;Eumetazoa;Bilateria;Protostomia;  
 Spiralia;Lophotrochozoa;Mollusca;Bivalvia;Autobranchia;Pteriormorphia;Ostr  
 eida;Ostreoidea;Ostreidae;Crassostrea;Crassostrea gigas  
 UdeM00000036673 29159 480.7 UdeM00000036673 XP\_011418078.2 68.3 312  
 99 0 1 312 1 312 1.40E-132 480.7 29159 cellular  
 organisms;Eukaryota;Opisthokonta;Metazoa;Eumetazoa;Bilateria;Protostomia;  
 Spiralia;Lophotrochozoa;Mollusca;Bivalvia;Autobranchia;Pteriormorphia;Ostr  
 eida;Ostreoidea;Ostreidae;Crassostrea;Crassostrea gigas  
 UdeM00000036674 6596 565.1 UdeM00000036674 XP\_045171015.1 44.2 686  
 340 11 10 673 33 697 1.20E-157 565.1 6596 cellular  
 organisms;Eukaryota;Opisthokonta;Metazoa;Eumetazoa;Bilateria;Protostomia;  
 Spiralia;Lophotrochozoa;Mollusca;Bivalvia;Autobranchia;Heteroconchia;Euhe  
 terodonta;Imparidentia;Venerida;Veneroidea;Veneridae;Mercenaria;Mercenari  
 a mercenaria  
 UdeM00000036675 6573 373.6 UdeM00000036675 XP\_021348533.1 31.9 643  
 399 7 31 661 1 616 5.50E-100 373.6 6573 cellular  
 organisms;Eukaryota;Opisthokonta;Metazoa;Eumetazoa;Bilateria;Protostomia;  
 Spiralia;Lophotrochozoa;Mollusca;Bivalvia;Autobranchia;Pteriormorphia;Pect  
 inida;Pectinoidea;Pectinidae;Mizuhopecten;Mizuhopecten yessoensis  
 UdeM00000036678 6596 587.8 UdeM00000036678 XP\_045171015.1 44.9 704  
 346 11 3 691 26 702 1.80E-164 587.8 6596 cellular  
 organisms;Eukaryota;Opisthokonta;Metazoa;Eumetazoa;Bilateria;Protostomia;  
 Spiralia;Lophotrochozoa;Mollusca;Bivalvia;Autobranchia;Heteroconchia;Euhe  
 terodonta;Imparidentia;Venerida;Veneroidea;Veneridae;Mercenaria;Mercenari  
 a mercenaria  
 UdeM00000036677 6596 589 UdeM00000036677 XP\_045171015.1 44.5 712  
 353 11 2 698 18 702 8.20E-165 589 6596 cellular  
 organisms;Eukaryota;Opisthokonta;Metazoa;Eumetazoa;Bilateria;Protostomia;  
 Spiralia;Lophotrochozoa;Mollusca;Bivalvia;Autobranchia;Heteroconchia;Euhe  
 terodonta;Imparidentia;Venerida;Veneroidea;Veneridae;Mercenaria;Mercenari  
 a mercenaria  
 UdeM00000036679 6565 429.1 UdeM00000036679 XP\_022314753.1 50.5 487  
 215 9 4 477 6 479 7.40E-117 429.1 6565 cellular  
 organisms;Eukaryota;Opisthokonta;Metazoa;Eumetazoa;Bilateria;Protostomia;  
 Spiralia;Lophotrochozoa;Mollusca;Bivalvia;Autobranchia;Pteriormorphia;Ostr  
 eida;Ostreoidea;Ostreidae;Crassostrea;Crassostrea virginica

UdeM00000036680 6565 435.6 UdeM00000036680 XP\_022344644.1 72.2 270  
 75 0 1 270 1 270 4.70E-119 435.6 6565 cellular  
 organisms;Eukaryota;Opisthokonta;Metazoa;Eumetazoa;Bilateria;Protostomia;  
 Spiralia;Lophotrochozoa;Mollusca;Bivalvia;Autobranchia;Pteriomorphia;Ostr  
 eida;Ostreoidea;Ostreidae;Crassostrea;Crassostrea virginica  
 UdeM00000036681 29159 318.5 UdeM00000036681 XP\_011418078.2 52.6 268  
 121 1 14 275 270 537 8.20E-84 318.5 29159 cellular  
 organisms;Eukaryota;Opisthokonta;Metazoa;Eumetazoa;Bilateria;Protostomia;  
 Spiralia;Lophotrochozoa;Mollusca;Bivalvia;Autobranchia;Pteriomorphia;Ostr  
 eida;Ostreoidea;Ostreidae;Crassostrea;Crassostrea gigas  
 UdeM00000036682 6596 198 UdeM00000036682 XP\_045179742.1 37.4 286  
 173 4 37 319 131 413 1.90E-47 198 6596 cellular  
 organisms;Eukaryota;Opisthokonta;Metazoa;Eumetazoa;Bilateria;Protostomia;  
 Spiralia;Lophotrochozoa;Mollusca;Bivalvia;Autobranchia;Heteroconchia;Euhe  
 terodonta;Imparidentia;Venerida;Veneroidea;Veneridae;Mercenaria;Mercenari  
 a mercenaria  
 UdeM00000036683 6596 198 UdeM00000036683 XP\_045179742.1 37.4 286  
 173 4 122 404 131 413 2.40E-47 198 6596 cellular  
 organisms;Eukaryota;Opisthokonta;Metazoa;Eumetazoa;Bilateria;Protostomia;  
 Spiralia;Lophotrochozoa;Mollusca;Bivalvia;Autobranchia;Heteroconchia;Euhe  
 terodonta;Imparidentia;Venerida;Veneroidea;Veneridae;Mercenaria;Mercenari  
 a mercenaria  
 UdeM00000036684 6596 203.8 UdeM00000036684 XP\_045179742.1 38.5 283  
 168 4 365 644 134 413 6.90E-49 203.8 6596 cellular  
 organisms;Eukaryota;Opisthokonta;Metazoa;Eumetazoa;Bilateria;Protostomia;  
 Spiralia;Lophotrochozoa;Mollusca;Bivalvia;Autobranchia;Heteroconchia;Euhe  
 terodonta;Imparidentia;Venerida;Veneroidea;Veneridae;Mercenaria;Mercenari  
 a mercenaria  
 UdeM00000036686 6565 230.3 UdeM00000036686 XP\_022340634.1 64.2 201  
 69 2 438 636 306 505 6.80E-57 230.3 6565 cellular  
 organisms;Eukaryota;Opisthokonta;Metazoa;Eumetazoa;Bilateria;Protostomia;  
 Spiralia;Lophotrochozoa;Mollusca;Bivalvia;Autobranchia;Pteriomorphia;Ostr  
 eida;Ostreoidea;Ostreidae;Crassostrea;Crassostrea virginica  
 UdeM00000036688 6565 230.3 UdeM00000036688 XP\_022340634.1 64.2 201  
 69 2 258 456 306 505 4.90E-57 230.3 6565 cellular  
 organisms;Eukaryota;Opisthokonta;Metazoa;Eumetazoa;Bilateria;Protostomia;  
 Spiralia;Lophotrochozoa;Mollusca;Bivalvia;Autobranchia;Pteriomorphia;Ostr  
 eida;Ostreoidea;Ostreidae;Crassostrea;Crassostrea virginica  
 UdeM00000036689 6596 211.8 UdeM00000036689 XP\_045173629.1 52 223  
 95 5 4 223 3 216 8.70E-52 211.8 6596 cellular  
 organisms;Eukaryota;Opisthokonta;Metazoa;Eumetazoa;Bilateria;Protostomia;  
 Spiralia;Lophotrochozoa;Mollusca;Bivalvia;Autobranchia;Heteroconchia;Euhe  
 terodonta;Imparidentia;Venerida;Veneroidea;Veneridae;Mercenaria;Mercenari  
 a mercenaria  
 UdeM00000036690 6596 240.7 UdeM00000036690 XP\_045176664.1 30.6 545  
 347 15 44 566 32 567 4.40E-60 240.7 6596 cellular  
 organisms;Eukaryota;Opisthokonta;Metazoa;Eumetazoa;Bilateria;Protostomia;  
 Spiralia;Lophotrochozoa;Mollusca;Bivalvia;Autobranchia;Heteroconchia;Euhe  
 terodonta;Imparidentia;Venerida;Veneroidea;Veneridae;Mercenaria;Mercenari  
 a mercenaria  
 UdeM00000036691 6596 237.7 UdeM00000036691 XP\_045176664.1 30.5 545  
 345 15 44 563 32 567 3.70E-59 237.7 6596 cellular  
 organisms;Eukaryota;Opisthokonta;Metazoa;Eumetazoa;Bilateria;Protostomia;  
 Spiralia;Lophotrochozoa;Mollusca;Bivalvia;Autobranchia;Heteroconchia;Euhe

terodonta;Imparidentia;Venerida;Veneroidea;Veneridae;Mercenaria;Mercenaria mercenaria  
 UdeM00000036692 6526 69.3 UdeM00000036692 XP\_013089678.1 35.4 147  
 81 5 527 672 100 233 2.10E-08 69.3 6526 cellular  
 organisms;Eukaryota;Opisthokonta;Metazoa;Eumetazoa;Bilateria;Protostomia;  
 Spiralia;Lophotrochozoa;Mollusca;Gastropoda;Heterobranchia;Euthyneura;Pan  
 pulmonata;Hygrophila;Lymnaeoidea;Planorbidae;Biomphalaria;Biomphalaria  
 glabrata  
 UdeM00000036693 6596 166.8 UdeM00000036693 XP\_045176664.1 46.9 177  
 88 4 13 185 393 567 2.70E-38 166.8 6596 cellular  
 organisms;Eukaryota;Opisthokonta;Metazoa;Eumetazoa;Bilateria;Protostomia;  
 Spiralia;Lophotrochozoa;Mollusca;Bivalvia;Autobranchia;Heteroconchia;Euhe  
 terodonta;Imparidentia;Venerida;Veneroidea;Veneridae;Mercenaria;Mercenari  
 a mercenaria  
 UdeM00000036694 6526 70.9 UdeM00000036694 XP\_013089678.1 36.1 147  
 80 5 109 254 100 233 2.70E-09 70.9 6526 cellular  
 organisms;Eukaryota;Opisthokonta;Metazoa;Eumetazoa;Bilateria;Protostomia;  
 Spiralia;Lophotrochozoa;Mollusca;Gastropoda;Heterobranchia;Euthyneura;Pan  
 pulmonata;Hygrophila;Lymnaeoidea;Planorbidae;Biomphalaria;Biomphalaria  
 glabrata  
 UdeM00000042212 29159 149.8 UdeM00000042212 XP\_034302097.1 48.8 164  
 78 2 277 440 255 412 8.30E-33 149.8 29159 cellular  
 organisms;Eukaryota;Opisthokonta;Metazoa;Eumetazoa;Bilateria;Protostomia;  
 Spiralia;Lophotrochozoa;Mollusca;Bivalvia;Autobranchia;Pteriormorphia;Ostr  
 eida;Ostreoidea;Ostreidae;Crassostrea;Crassostrea gigas  
 UdeM00000042213 6565 150.2 UdeM00000042213 XP\_022292556.1 44.2 181  
 95 4 36 216 602 776 3.20E-33 150.2 6565 cellular  
 organisms;Eukaryota;Opisthokonta;Metazoa;Eumetazoa;Bilateria;Protostomia;  
 Spiralia;Lophotrochozoa;Mollusca;Bivalvia;Autobranchia;Pteriormorphia;Ostr  
 eida;Ostreoidea;Ostreidae;Crassostrea;Crassostrea virginica  
 UdeM00000042214 6596 201.4 UdeM00000042214 XP\_045206316.1 50.5 208  
 94 3 17 221 59 260 1.20E-48 201.4 6596 cellular  
 organisms;Eukaryota;Opisthokonta;Metazoa;Eumetazoa;Bilateria;Protostomia;  
 Spiralia;Lophotrochozoa;Mollusca;Bivalvia;Autobranchia;Heteroconchia;Euhe  
 terodonta;Imparidentia;Venerida;Veneroidea;Veneridae;Mercenaria;Mercenari  
 a mercenaria  
 UdeM00000042216 6596 112.5 UdeM00000042216 XP\_045202576.1 64 86  
 30 1 1 86 115 199 5.00E-22 112.5 6596 cellular  
 organisms;Eukaryota;Opisthokonta;Metazoa;Eumetazoa;Bilateria;Protostomia;  
 Spiralia;Lophotrochozoa;Mollusca;Bivalvia;Autobranchia;Heteroconchia;Euhe  
 terodonta;Imparidentia;Venerida;Veneroidea;Veneridae;Mercenaria;Mercenari  
 a mercenaria  
 UdeM00000042217 29159 298.1 UdeM00000042217 XP\_011417584.2 74.5 196  
 50 0 139 334 132 327 1.40E-77 298.1 29159 cellular  
 organisms;Eukaryota;Opisthokonta;Metazoa;Eumetazoa;Bilateria;Protostomia;  
 Spiralia;Lophotrochozoa;Mollusca;Bivalvia;Autobranchia;Pteriormorphia;Ostr  
 eida;Ostreoidea;Ostreidae;Crassostrea;Crassostrea gigas  
 UdeM00000042218 29159 298.1 UdeM00000042218 XP\_011417584.2 74.5 196  
 50 0 147 342 132 327 1.40E-77 298.1 29159 cellular  
 organisms;Eukaryota;Opisthokonta;Metazoa;Eumetazoa;Bilateria;Protostomia;  
 Spiralia;Lophotrochozoa;Mollusca;Bivalvia;Autobranchia;Pteriormorphia;Ostr  
 eida;Ostreoidea;Ostreidae;Crassostrea;Crassostrea gigas  
 UdeM00000042221 29159 278.1 UdeM00000042221 XP\_011417584.2 75.3 178  
 44 0 121 298 132 309 1.30E-71 278.1 29159 cellular

organisms;Eukaryota;Opisthokonta;Metazoa;Eumetazoa;Bilateria;Protostomia;Spiralia;Lophotrochozoa;Mollusca;Bivalvia;Autobranchia;Pteriomorpha;Ostreida;Ostreioidea;Ostreidae;Crassostrea;Crassostrea gigas  
UdeM00000042223 6565 121.3 UdeM00000042223 XP\_022334993.1 49.6 123  
60 1 1 121 481 603 8.60E-25 121.3 6565 cellular

organisms;Eukaryota;Opisthokonta;Metazoa;Eumetazoa;Bilateria;Protostomia;Spiralia;Lophotrochozoa;Mollusca;Bivalvia;Autobranchia;Pteriomorpha;Ostreida;Ostreioidea;Ostreidae;Crassostrea;Crassostrea virginica  
UdeM00000042224 6565 87 UdeM00000042224 XP\_022334995.1 40.5 121  
65 3 5 121 30 147 1.80E-14 87 6565 cellular

organisms;Eukaryota;Opisthokonta;Metazoa;Eumetazoa;Bilateria;Protostomia;Spiralia;Lophotrochozoa;Mollusca;Bivalvia;Autobranchia;Pteriomorpha;Ostreida;Ostreioidea;Ostreidae;Crassostrea;Crassostrea virginica  
UdeM00000042225 2652724 260.8 UdeM00000042225 XP\_028515960.1 31.4  
577 287 15 3 477 4 573 3.70E-66 260.8 2652724  
cellular

organisms;Eukaryota;Opisthokonta;Metazoa;Eumetazoa;Cnidaria;Anthozoa;Hexacorallia;Actiniaria;Aiptasiidae;Exaiptasia;Exaiptasia diaphana  
UdeM00000042226 50429 84.3 UdeM00000042226 XP\_022790680.1 50 80  
36 2 3 82 40 115 1.60E-13 84.3 50429 cellular

organisms;Eukaryota;Opisthokonta;Metazoa;Eumetazoa;Cnidaria;Anthozoa;Hexacorallia;Scleractinia;Astrocoeniina;Pocilloporidae;Stylophora;Stylophora pistillata  
UdeM00000042228 6596 135.6 UdeM00000042228 XP\_045202346.1 47.4 154  
73 3 7 154 11 162 5.50E-29 135.6 6596 cellular

organisms;Eukaryota;Opisthokonta;Metazoa;Eumetazoa;Bilateria;Protostomia;Spiralia;Lophotrochozoa;Mollusca;Bivalvia;Autobranchia;Heteroconchia;Euheterodonta;Imparidentia;Venerida;Veneroidea;Veneridae;Mercenaria;Mercenaria mercenaria  
UdeM00000042231 29159 382.9 UdeM00000042231 XP\_011417584.2 71.9 260  
73 0 139 398 132 391 5.20E-103 382.9 29159 cellular

organisms;Eukaryota;Opisthokonta;Metazoa;Eumetazoa;Bilateria;Protostomia;Spiralia;Lophotrochozoa;Mollusca;Bivalvia;Autobranchia;Pteriomorpha;Ostreida;Ostreioidea;Ostreidae;Crassostrea;Crassostrea gigas  
UdeM00000042232 6565 128.3 UdeM00000042232 XP\_022287303.1 35.1 194  
117 4 132 324 509 694 1.90E-26 128.3 6565 cellular

organisms;Eukaryota;Opisthokonta;Metazoa;Eumetazoa;Bilateria;Protostomia;Spiralia;Lophotrochozoa;Mollusca;Bivalvia;Autobranchia;Pteriomorpha;Ostreida;Ostreioidea;Ostreidae;Crassostrea;Crassostrea virginica  
UdeM00000042233 94885 160.2 UdeM00000042233 XP\_034266860.1 52 150  
69 2 1 147 287 436 2.00E-36 160.2 94885 cellular

organisms;Eukaryota;Opisthokonta;Metazoa;Eumetazoa;Bilateria;Deuterostomia;Chordata;Craniata;Vertebrata;Gnathostomata;Teleostomi;Euteleostomi;Sarcopterygii;Dipnotetrapodomorpha;Tetrapoda;Amniota;Sauropsida;Sauria;Lepidosauria;Squamata;Bifurcata;Unidentata;Episquamata;Toxicofera;Serpentes;Colubroidea;Colubridae;Colubrinae;Pantherophis;Pantherophis guttatus  
UdeM00000042234 7048 85.5 UdeM00000042234 XP\_030756762.1 39.7 116  
47 2 1 116 862 954 4.90E-14 85.5 7048 cellular

organisms;Eukaryota;Opisthokonta;Metazoa;Eumetazoa;Bilateria;Protostomia;Ecdysozoa;Panarthropoda;Arthropoda;Mandibulata;Pancrustacea;Hexapoda;Insecta;Dicondylia;Pterygota;Neoptera;Endopterygota;Coleoptera;Polyphaga;Cucujiformia;Curculionoidea;Curculionidae;Dryophthorinae;Sitophilus;Sitophilus oryzae

UdeM00000042235 6565 356.3 UdeM00000042235 XP\_022295767.1 41.1 482  
 270 9 38 509 43 520 6.50E-95 356.3 6565 cellular  
 organisms;Eukaryota;Opisthokonta;Metazoa;Eumetazoa;Bilateria;Protostomia;  
 Spiralia;Lophotrochozoa;Mollusca;Bivalvia;Autobranchia;Pteriomorphia;Ostr  
 eida;Ostreoidea;Ostreidae;Crassostrea;Crassostrea virginica  
 UdeM00000042237 8049 258.8 UdeM00000042237 XP\_030193753.1 35.9 376  
 225 4 134 504 17 381 1.40E-65 258.8 8049 cellular  
 organisms;Eukaryota;Opisthokonta;Metazoa;Eumetazoa;Bilateria;Deuterostomi  
 a;Chordata;Craniata;Vertebrata;Gnathostomata;Teleostomi;Euteleostomi;Acti  
 nopterygii;Actinopteri;Neopterygii;Teleostei;Osteoglossocephalai;Clupeoce  
 phala;Euteleosteomorpha;Neoteleostei;Eurypterygia;Ctenosquamata;Acanthomo  
 rphata;Paracanthopterygii;Zeiogadaria;Gadariae;Gadiformes;Gadoidei;Gadida  
 e;Gadus;Gadus morhua  
 UdeM00000042238 8049 260 UdeM00000042238 XP\_030193753.1 35.9 376  
 225 4 134 504 17 381 6.30E-66 260 8049 cellular  
 organisms;Eukaryota;Opisthokonta;Metazoa;Eumetazoa;Bilateria;Deuterostomi  
 a;Chordata;Craniata;Vertebrata;Gnathostomata;Teleostomi;Euteleostomi;Acti  
 nopterygii;Actinopteri;Neopterygii;Teleostei;Osteoglossocephalai;Clupeoce  
 phala;Euteleosteomorpha;Neoteleostei;Eurypterygia;Ctenosquamata;Acanthomo  
 rphata;Paracanthopterygii;Zeiogadaria;Gadariae;Gadiformes;Gadoidei;Gadida  
 e;Gadus;Gadus morhua  
 UdeM00000042239 29159 93.2 UdeM00000042239 XP\_011423587.2 29.4 289  
 171 10 144 408 17 296 8.20E-16 93.2 29159 cellular  
 organisms;Eukaryota;Opisthokonta;Metazoa;Eumetazoa;Bilateria;Protostomia;  
 Spiralia;Lophotrochozoa;Mollusca;Bivalvia;Autobranchia;Pteriomorphia;Ostr  
 eida;Ostreoidea;Ostreidae;Crassostrea;Crassostrea gigas  
 UdeM00000042240 29159 96.3 UdeM00000042240 XP\_011423589.2 30 227  
 136 7 113 330 63 275 7.90E-17 96.3 29159 cellular  
 organisms;Eukaryota;Opisthokonta;Metazoa;Eumetazoa;Bilateria;Protostomia;  
 Spiralia;Lophotrochozoa;Mollusca;Bivalvia;Autobranchia;Pteriomorphia;Ostr  
 eida;Ostreoidea;Ostreidae;Crassostrea;Crassostrea gigas  
 UdeM00000042241 6573 95.5 UdeM00000042241 XP\_021340236.1 28.7 261  
 138 11 216 433 99 354 1.80E-16 95.5 6573 cellular  
 organisms;Eukaryota;Opisthokonta;Metazoa;Eumetazoa;Bilateria;Protostomia;  
 Spiralia;Lophotrochozoa;Mollusca;Bivalvia;Autobranchia;Pteriomorphia;Pect  
 inida;Pectinoidea;Pectinidae;Mizuhopecten;Mizuhopecten yessoensis  
 UdeM00000042242 6565 101.7 UdeM00000042242 XP\_022338729.1 29.2 291  
 174 9 133 401 7 287 2.30E-18 101.7 6565 cellular  
 organisms;Eukaryota;Opisthokonta;Metazoa;Eumetazoa;Bilateria;Protostomia;  
 Spiralia;Lophotrochozoa;Mollusca;Bivalvia;Autobranchia;Pteriomorphia;Ostr  
 eida;Ostreoidea;Ostreidae;Crassostrea;Crassostrea virginica  
 UdeM00000042244 6573 93.2 UdeM00000042244 XP\_021340356.1 27.9 258  
 146 9 160 379 99 354 7.60E-16 93.2 6573 cellular  
 organisms;Eukaryota;Opisthokonta;Metazoa;Eumetazoa;Bilateria;Protostomia;  
 Spiralia;Lophotrochozoa;Mollusca;Bivalvia;Autobranchia;Pteriomorphia;Pect  
 inida;Pectinoidea;Pectinidae;Mizuhopecten;Mizuhopecten yessoensis  
 UdeM00000042245 48498 63.5 UdeM00000042245 XP\_020605250.1 32.8 128  
 74 5 66 188 302 422 3.20E-07 63.5 48498 cellular  
 organisms;Eukaryota;Opisthokonta;Metazoa;Eumetazoa;Cnidaria;Anthozoa;Hexa  
 corallia;Scleractinia;Faviina;Merulinidae;Orbicella;Orbicella faveolata  
 UdeM00000042246 29159 80.1 UdeM00000042246 XP\_011424333.2 26.1 280  
 175 9 123 388 14 275 6.90E-12 80.1 29159 cellular  
 organisms;Eukaryota;Opisthokonta;Metazoa;Eumetazoa;Bilateria;Protostomia;

Spiralia;Lophotrochozoa;Mollusca;Bivalvia;Autobranchia;Pteriormorphia;Ostr  
 eida;Ostreoidea;Ostreidae;Crassostrea;Crassostrea gigas  
 UdeM00000042247 6579 103.6 UdeM00000042247 XP\_033760168.1 29.8 289  
 182 10 155 427 4 287 6.30E-19 103.6 6579 cellular  
 organisms;Eukaryota;Opisthokonta;Metazoa;Eumetazoa;Bilateria;Protostomia;  
 Spiralia;Lophotrochozoa;Mollusca;Bivalvia;Autobranchia;Pteriormorphia;Pect  
 inida;Pectinoidea;Pectinidae;Pecten;Pecten maximus  
 UdeM00000042249 6087 169.9 UdeM00000042249 XP\_012565456.1 60.6 127  
 48 1 4 128 890 1016 2.20E-39 169.9 6087 cellular  
 organisms;Eukaryota;Opisthokonta;Metazoa;Eumetazoa;Cnidaria;Hydrozoa;Hydr  
 oidolina;Anthoathecata;Aplanulata;Hydridae;Hydra;Hydra vulgaris  
 UdeM00000042250 6945 65.1 UdeM00000042250 XP\_040078187.1 30.8 117  
 80 1 75 190 38 154 2.60E-07 65.1 6945 cellular  
 organisms;Eukaryota;Opisthokonta;Metazoa;Eumetazoa;Bilateria;Protostomia;  
 Ecdysozoa;Panarthropoda;Arthropoda;Chelicerata;Arachnida;Acari;Parasitifo  
 rmes;Ixodida;Ixodoidea;Ixodidae;Ixodinae;Ixodes;Ixodes scapularis  
 UdeM00000042251 29159 97.4 UdeM00000042251 XP\_011423587.2 29.8 228  
 143 6 167 386 76 294 4.10E-17 97.4 29159 cellular  
 organisms;Eukaryota;Opisthokonta;Metazoa;Eumetazoa;Bilateria;Protostomia;  
 Spiralia;Lophotrochozoa;Mollusca;Bivalvia;Autobranchia;Pteriormorphia;Ostr  
 eida;Ostreoidea;Ostreidae;Crassostrea;Crassostrea gigas  
 UdeM00000042252 6596 503.1 UdeM00000042252 XP\_045175062.1 51.5 487  
 234 2 9 494 8 493 4.20E-139 503.1 6596 cellular  
 organisms;Eukaryota;Opisthokonta;Metazoa;Eumetazoa;Bilateria;Protostomia;  
 Spiralia;Lophotrochozoa;Mollusca;Bivalvia;Autobranchia;Heteroconchia;Euhe  
 terodonta;Imparidentia;Venerida;Veneroidea;Veneridae;Mercenaria;Mercenari  
 a mercenaria  
 UdeM00000042253 6596 571.2 UdeM00000042253 XP\_045175062.1 52.8 551  
 257 3 1 550 1 549 1.40E-159 571.2 6596 cellular  
 organisms;Eukaryota;Opisthokonta;Metazoa;Eumetazoa;Bilateria;Protostomia;  
 Spiralia;Lophotrochozoa;Mollusca;Bivalvia;Autobranchia;Heteroconchia;Euhe  
 terodonta;Imparidentia;Venerida;Veneroidea;Veneridae;Mercenaria;Mercenari  
 a mercenaria  
 UdeM00000043216 6596 523.1 UdeM00000043216 XP\_045173349.1 34.7 998  
 602 28 99 1068 69 1044 1.00E-144 523.1 6596 cellular  
 organisms;Eukaryota;Opisthokonta;Metazoa;Eumetazoa;Bilateria;Protostomia;  
 Spiralia;Lophotrochozoa;Mollusca;Bivalvia;Autobranchia;Heteroconchia;Euhe  
 terodonta;Imparidentia;Venerida;Veneroidea;Veneridae;Mercenaria;Mercenari  
 a mercenaria  
 UdeM00000043217 6596 171 UdeM00000043217 XP\_045173349.1 39 241  
 139 5 3 235 182 422 1.80E-39 171 6596 cellular  
 organisms;Eukaryota;Opisthokonta;Metazoa;Eumetazoa;Bilateria;Protostomia;  
 Spiralia;Lophotrochozoa;Mollusca;Bivalvia;Autobranchia;Heteroconchia;Euhe  
 terodonta;Imparidentia;Venerida;Veneroidea;Veneridae;Mercenaria;Mercenari  
 a mercenaria  
 UdeM00000043220 6596 133.3 UdeM00000043220 XP\_045164125.1 54.2 118  
 54 0 1 118 320 437 2.10E-28 133.3 6596 cellular  
 organisms;Eukaryota;Opisthokonta;Metazoa;Eumetazoa;Bilateria;Protostomia;  
 Spiralia;Lophotrochozoa;Mollusca;Bivalvia;Autobranchia;Heteroconchia;Euhe  
 terodonta;Imparidentia;Venerida;Veneroidea;Veneridae;Mercenaria;Mercenari  
 a mercenaria  
 UdeM00000043222 6596 70.5 UdeM00000043222 XP\_045192251.1 44.6 83  
 45 1 74 156 339 420 2.30E-09 70.5 6596 cellular  
 organisms;Eukaryota;Opisthokonta;Metazoa;Eumetazoa;Bilateria;Protostomia;



Spiralia;Lophotrochozoa;Mollusca;Bivalvia;Autobranchia;Heteroconchia;Euherodonta;Imparidentia;Venerida;Veneroidea;Veneridae;Mercenaria;Mercenaria mercenaria

UdeM00000043227 6579 164.9 UdeM00000043227 XP\_033728194.1 32.3 341  
218 5 1 332 282 618 1.90E-37 164.9 6579 cellular

organisms;Eukaryota;Opisthokonta;Metazoa;Eumetazoa;Bilateria;Protostomia;Spiralia;Lophotrochozoa;Mollusca;Bivalvia;Autobranchia;Pteriomorpha;Pectinida;Pectinoidea;Pectinidae;Pecten;Pecten maximus

UdeM00000043228 29159 689.9 UdeM00000043228 XP\_034307112.1 51.9 673  
296 7 1 645 644 1316 3.10E-195 689.9 29159 cellular

organisms;Eukaryota;Opisthokonta;Metazoa;Eumetazoa;Bilateria;Protostomia;Spiralia;Lophotrochozoa;Mollusca;Bivalvia;Autobranchia;Pteriomorpha;Ostreida;Ostreoidea;Ostreidae;Crassostrea;Crassostrea gigas

UdeM00000043229 6565 101.7 UdeM00000043229 XP\_022314409.1 37.9 177  
91 5 1 158 1139 1315 9.00E-19 101.7 6565 cellular

organisms;Eukaryota;Opisthokonta;Metazoa;Eumetazoa;Bilateria;Protostomia;Spiralia;Lophotrochozoa;Mollusca;Bivalvia;Autobranchia;Pteriomorpha;Ostreida;Ostreoidea;Ostreidae;Crassostrea;Crassostrea virginica

UdeM00000043230 1735272 100.1 UdeM00000043230 XP\_041349428.1 38  
158 68 3 1 129 76 232 2.20E-18 100.1 1735272

cellular

organisms;Eukaryota;Opisthokonta;Metazoa;Eumetazoa;Bilateria;Protostomia;Spiralia;Lophotrochozoa;Mollusca;Gastropoda;Neomphalina;Neomphaloidea;Peltopspiridae;Gigantopelta;Gigantopelta aegis

UdeM00000043231 6596 105.1 UdeM00000043231 XP\_045209522.1 41 144  
80 3 3 141 210 353 7.40E-20 105.1 6596 cellular

organisms;Eukaryota;Opisthokonta;Metazoa;Eumetazoa;Bilateria;Protostomia;Spiralia;Lophotrochozoa;Mollusca;Bivalvia;Autobranchia;Heteroconchia;Euherodonta;Imparidentia;Venerida;Veneroidea;Veneridae;Mercenaria;Mercenaria mercenaria

UdeM00000043232 29159 79.7 UdeM00000043232 XP\_034330943.1 65.4 52  
16 1 54 105 131 180 2.50E-12 79.7 29159 cellular

organisms;Eukaryota;Opisthokonta;Metazoa;Eumetazoa;Bilateria;Protostomia;Spiralia;Lophotrochozoa;Mollusca;Bivalvia;Autobranchia;Pteriomorpha;Ostreida;Ostreoidea;Ostreidae;Crassostrea;Crassostrea gigas

UdeM00000043234 6596 263.5 UdeM00000043234 XP\_045173349.1 34.1 501  
303 14 8 494 423 910 6.90E-67 263.5 6596 cellular

organisms;Eukaryota;Opisthokonta;Metazoa;Eumetazoa;Bilateria;Protostomia;Spiralia;Lophotrochozoa;Mollusca;Bivalvia;Autobranchia;Heteroconchia;Euherodonta;Imparidentia;Venerida;Veneroidea;Veneridae;Mercenaria;Mercenaria mercenaria

UdeM00000043236 10228 91.3 UdeM00000043236 XP\_002118406.1 36.8 152  
93 3 1 151 280 429 1.30E-15 91.3 10228 cellular

organisms;Eukaryota;Opisthokonta;Metazoa;Eumetazoa;Placozoa;Trichoplaxidae;Trichoplax;Trichoplax adhaerens

UdeM00000043237 6596 471.9 UdeM00000043237 XP\_045208720.1 31.7 1131  
686 34 51 1132 196 1289 2.40E-129 471.9 6596 cellular

organisms;Eukaryota;Opisthokonta;Metazoa;Eumetazoa;Bilateria;Protostomia;Spiralia;Lophotrochozoa;Mollusca;Bivalvia;Autobranchia;Heteroconchia;Euherodonta;Imparidentia;Venerida;Veneroidea;Veneridae;Mercenaria;Mercenaria mercenaria

UdeM00000043238 29159 196.4 UdeM00000043238 XP\_034313077.1 49.1 216  
51 3 1 157 1 216 2.70E-47 196.4 29159 cellular

organisms;Eukaryota;Opisthokonta;Metazoa;Eumetazoa;Bilateria;Protostomia;

Spiralia;Lophotrochozoa;Mollusca;Bivalvia;Autobranchia;Pteriormorphia;Ostr  
eida;Ostreoidea;Ostreidae;Crassostrea;Crassostrea gigas  
UdeM00000043242 6596 85.9 UdeM00000043242 XP\_045192251.1 53.3 92  
40 2 209 297 328 419 9.60E-14 85.9 6596 cellular  
organisms;Eukaryota;Opisthokonta;Metazoa;Eumetazoa;Bilateria;Protostomia;  
Spiralia;Lophotrochozoa;Mollusca;Bivalvia;Autobranchia;Heteroconchia;Euhe  
terodonta;Imparidentia;Venerida;Veneroidea;Veneridae;Mercenaria;Mercenari  
a mercenaria  
UdeM00000043243 6573 305.8 UdeM00000043243 XP\_021354853.1 47.7 331  
138 3 221 516 157 487 1.00E-79 305.8 6573 cellular  
organisms;Eukaryota;Opisthokonta;Metazoa;Eumetazoa;Bilateria;Protostomia;  
Spiralia;Lophotrochozoa;Mollusca;Bivalvia;Autobranchia;Pteriormorphia;Pect  
inida;Pectinoidea;Pectinidae;Mizuhopecten;Mizuhopecten yessoensis  
UdeM00000043244 6573 383.3 UdeM00000043244 XP\_021372025.1 50.8 376  
177 4 1 371 32 404 3.60E-103 383.3 6573 cellular  
organisms;Eukaryota;Opisthokonta;Metazoa;Eumetazoa;Bilateria;Protostomia;  
Spiralia;Lophotrochozoa;Mollusca;Bivalvia;Autobranchia;Pteriormorphia;Pect  
inida;Pectinoidea;Pectinidae;Mizuhopecten;Mizuhopecten yessoensis  
UdeM00000043709 10228 67.4 UdeM00000043709 XP\_002118408.1 30.1 136  
87 5 71 203 5 135 2.50E-08 67.4 10228 cellular  
organisms;Eukaryota;Opisthokonta;Metazoa;Eumetazoa;Placozoa;Trichoplacida  
e;Trichoplax;Trichoplax adhaerens  
UdeM00000043710 6105 217.2 UdeM00000043710 XP\_031565239.1 60.2 176  
65 2 5 176 12 186 1.60E-53 217.2 6105 cellular  
organisms;Eukaryota;Opisthokonta;Metazoa;Eumetazoa;Cnidaria;Anthozoa;Hexa  
corallia;Actiniaria;Actiniidae;Actinia;Actinia tenebrosa  
UdeM00000043711 6596 200.3 UdeM00000043711 XP\_045162610.1 27.6 713  
408 27 84 737 100 763 1.00E-47 200.3 6596 cellular  
organisms;Eukaryota;Opisthokonta;Metazoa;Eumetazoa;Bilateria;Protostomia;  
Spiralia;Lophotrochozoa;Mollusca;Bivalvia;Autobranchia;Heteroconchia;Euhe  
terodonta;Imparidentia;Venerida;Veneroidea;Veneridae;Mercenaria;Mercenari  
a mercenaria  
UdeM00000035100 6596 60.1 UdeM00000035100 XP\_045186063.1 33.6 113  
65 2 175 278 354 465 5.40E-06 60.1 6596 cellular  
organisms;Eukaryota;Opisthokonta;Metazoa;Eumetazoa;Bilateria;Protostomia;  
Spiralia;Lophotrochozoa;Mollusca;Bivalvia;Autobranchia;Heteroconchia;Euhe  
terodonta;Imparidentia;Venerida;Veneroidea;Veneridae;Mercenaria;Mercenari  
a mercenaria  
UdeM00000035101 6596 66.2 UdeM00000035101 XP\_045177776.1 29.2 120  
81 2 1 118 925 1042 8.70E-08 66.2 6596 cellular  
organisms;Eukaryota;Opisthokonta;Metazoa;Eumetazoa;Bilateria;Protostomia;  
Spiralia;Lophotrochozoa;Mollusca;Bivalvia;Autobranchia;Heteroconchia;Euhe  
terodonta;Imparidentia;Venerida;Veneroidea;Veneridae;Mercenaria;Mercenari  
a mercenaria
